# Supplementary material
Source: PubMed Central journal article supplement (PMC4458727)
Supplement: supp_O114.046391_mcp.O114.046391-4.pdf [file supp_O114.046391_mcp.O114.046391-4.pdf]

▶ NCBI/ BLAST/ blastp suite/ Formatting Results - BF49E19P015

**i** Your search parameters were adjusted to search for a short input sequence.

[Edit and Resubmit](#) [Save Search Strategies](#) ▶ [Formatting options](#) ▶ [Download](#)

### APMAP\_KLLSSETPIEGKDMSFVNDLTVTQDGRK\_Mod

 [How to read this page](#) [Blast report description](#)

**RID** [BF49E19P015](#) (Expires on 01-16 17:06 pm)

**Query ID** |cl|78059  
**Description** None  
**Molecule type** amino acid  
**Query Length** 29

**Database Name** nr  
**Description** All non-redundant GenBank CDS translations+PDB+SwissProt+PIR excluding environmental samples from WGS projects  
**Program** BLASTP 2.2.30+ ▶ [Citation](#)

Other reports: ▶ [Search Summary](#) [[Taxonomy reports](#)] [[Distance tree of results](#)] [[Multiple alignment](#)]

### Graphic Summary

 [Show Conserved Domains](#)

No putative conserved domains have been detected

Distribution of 100 Blast Hits on the Query Sequence 

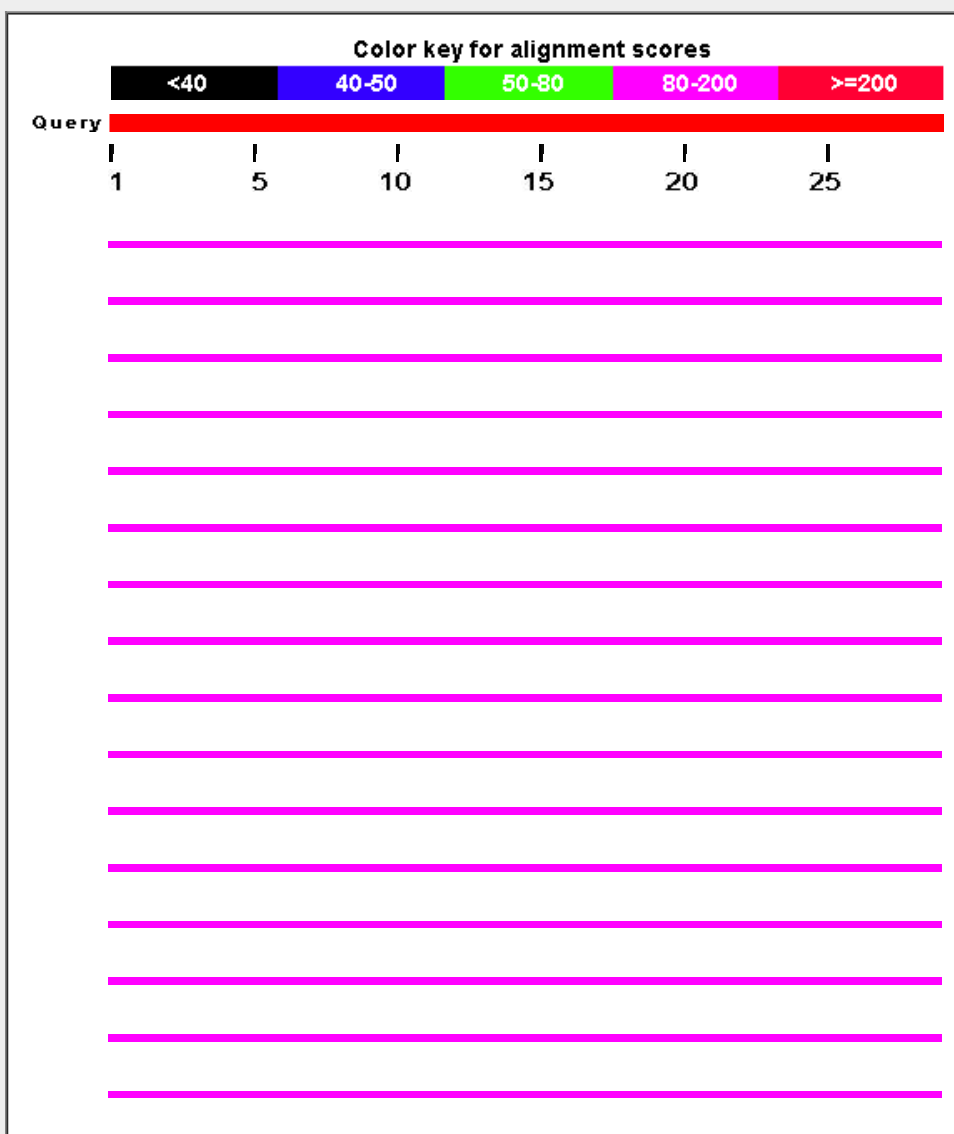

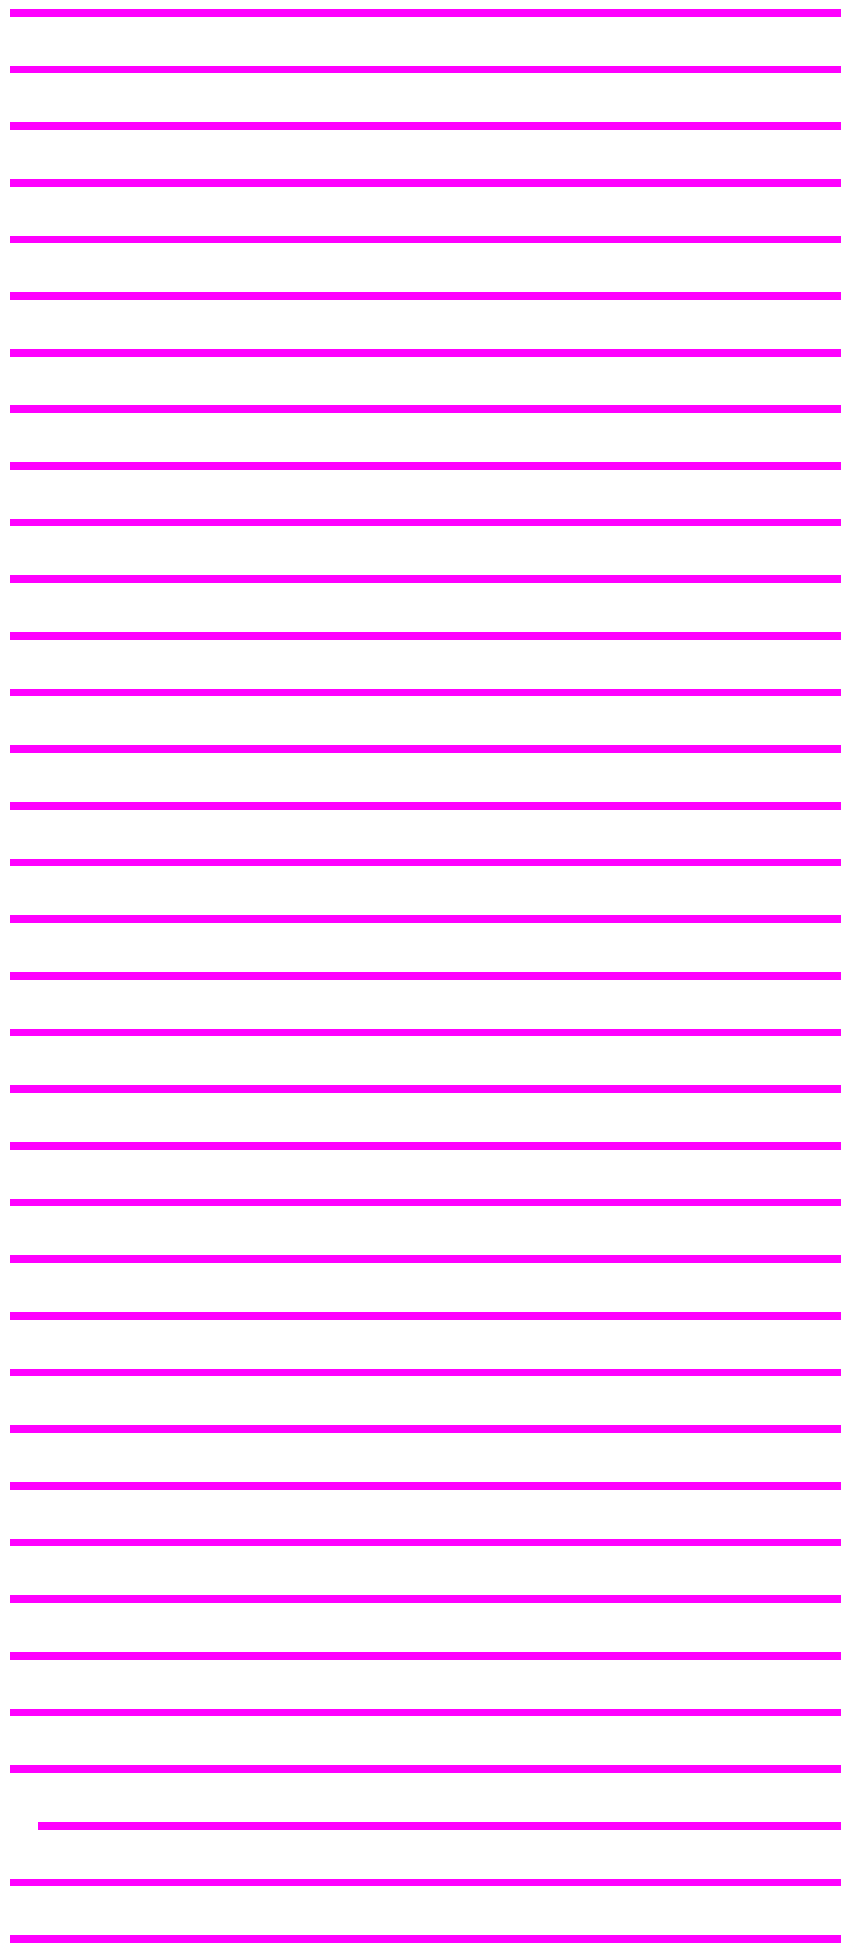

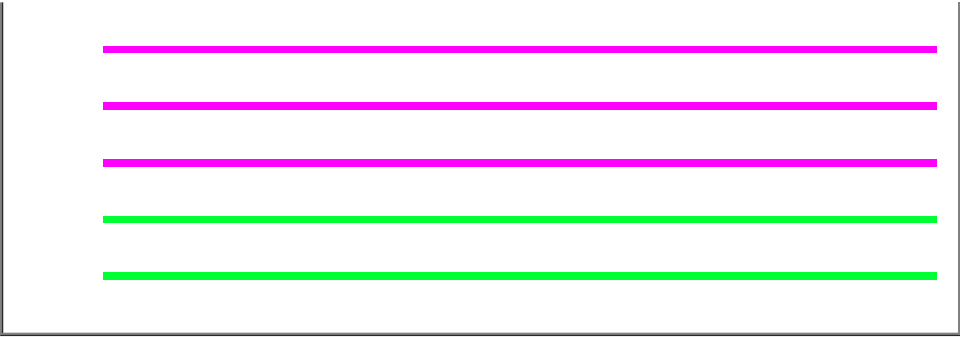

**Descriptions**

**Sequences producing significant alignments:**

Select: [All](#) [None](#) Selected:0

[Alignments](#)
[Download](#)
[GenPept](#)
[Graphics](#)
[Distance tree of results](#)
[Multiple alignment](#)

| Description                                                                   | Max score | Total score | Query cover | E value | Ident | Accession                                   |
|-------------------------------------------------------------------------------|-----------|-------------|-------------|---------|-------|---------------------------------------------|
| <a href="#">unnamed protein product [Homo sapiens]</a>                        | 91.4      | 91.4        | 100%        | 4e-19   | 97%   | <a href="#">gij194378020 BAG63373.1</a>     |
| <a href="#">PREDICTED: adipocyte plasma membrane-associated protein isofo</a> | 91.4      | 91.4        | 100%        | 4e-19   | 97%   | <a href="#">gij530425819 XP_005260820.1</a> |
| <a href="#">C20orf3 [Homo sapiens]</a>                                        | 91.4      | 91.4        | 100%        | 4e-19   | 97%   | <a href="#">gij37183270 AAQ89435.1</a>      |
| <a href="#">chromosome 20 open reading frame 3, isoform CRA_b [Homo sapi</a>  | 91.4      | 91.4        | 100%        | 4e-19   | 97%   | <a href="#">gij119630519 EAX10114.1</a>     |
| <a href="#">adipocyte plasma membrane-associated protein [Homo sapiens]</a>   | 91.4      | 91.4        | 100%        | 4e-19   | 97%   | <a href="#">gij24308201 NP_065392.1</a>     |
| <a href="#">unnamed protein product [Homo sapiens]</a>                        | 91.4      | 91.4        | 100%        | 4e-19   | 97%   | <a href="#">gij158255694 BAF83818.1</a>     |
| <a href="#">BSCv [Homo sapiens]</a>                                           | 91.4      | 91.4        | 100%        | 4e-19   | 97%   | <a href="#">gij9836652 BAB11885.1</a>       |
| <a href="#">PREDICTED: adipocyte plasma membrane-associated protein isofo</a> | 88.9      | 88.9        | 100%        | 3e-18   | 97%   | <a href="#">gij675656498 XP_008994116.1</a> |
| <a href="#">PREDICTED: adipocyte plasma membrane-associated protein isofo</a> | 88.9      | 88.9        | 100%        | 3e-18   | 97%   | <a href="#">gij675656496 XP_008994115.1</a> |
| <a href="#">PREDICTED: adipocyte plasma membrane-associated protein [Gor</a>  | 88.9      | 88.9        | 100%        | 3e-18   | 97%   | <a href="#">gij426391191 XP_004061964.1</a> |
| <a href="#">Protein BSCv [Macaca fascicularis]</a>                            | 88.9      | 88.9        | 100%        | 3e-18   | 97%   | <a href="#">gij355784761 EHH65612.1</a>     |
| <a href="#">PREDICTED: adipocyte plasma membrane-associated protein [Non</a>  | 88.9      | 88.9        | 100%        | 3e-18   | 97%   | <a href="#">gij332258942 XP_003278549.1</a> |
| <a href="#">PREDICTED: adipocyte plasma membrane-associated protein [Pan</a>  | 88.9      | 88.9        | 100%        | 3e-18   | 97%   | <a href="#">gij114681318 XP_514556.2</a>    |
| <a href="#">adipocyte plasma membrane-associated protein [Macaca mulatta]</a> | 88.9      | 88.9        | 100%        | 3e-18   | 97%   | <a href="#">gij388453189 NP_001252979.1</a> |
| <a href="#">PREDICTED: adipocyte plasma membrane-associated protein [Pon</a>  | 88.9      | 88.9        | 100%        | 3e-18   | 97%   | <a href="#">gij686761455 XP_009231655.1</a> |
| <a href="#">PREDICTED: adipocyte plasma membrane-associated protein isofo</a> | 88.9      | 88.9        | 100%        | 3e-18   | 97%   | <a href="#">gij544463778 XP_005568209.1</a> |
| <a href="#">PREDICTED: adipocyte plasma membrane-associated protein isofo</a> | 88.9      | 88.9        | 100%        | 3e-18   | 97%   | <a href="#">gij544463776 XP_005568208.1</a> |
| <a href="#">PREDICTED: adipocyte plasma membrane-associated protein isofo</a> | 88.9      | 88.9        | 100%        | 4e-18   | 97%   | <a href="#">gij544463774 XP_005568207.1</a> |
| <a href="#">PREDICTED: adipocyte plasma membrane-associated protein isofo</a> | 88.9      | 88.9        | 100%        | 4e-18   | 97%   | <a href="#">gij544463772 XP_005568206.1</a> |
| <a href="#">PREDICTED: adipocyte plasma membrane-associated protein [Ory</a>  | 86.7      | 86.7        | 100%        | 2e-17   | 93%   | <a href="#">gij634885477 XP_007952365.1</a> |
| <a href="#">PREDICTED: adipocyte plasma membrane-associated protein [Oto</a>  | 86.7      | 86.7        | 100%        | 2e-17   | 93%   | <a href="#">gij395857507 XP_003801133.1</a> |
| <a href="#">PREDICTED: adipocyte plasma membrane-associated protein [Sair</a> | 86.3      | 86.3        | 100%        | 2e-17   | 93%   | <a href="#">gij403304837 XP_003942992.1</a> |
| <a href="#">PREDICTED: adipocyte plasma membrane-associated protein [Ele</a>  | 86.3      | 86.3        | 100%        | 2e-17   | 93%   | <a href="#">gij585720265 XP_006902530.1</a> |
| <a href="#">PREDICTED: adipocyte plasma membrane-associated protein [Pan</a>  | 85.9      | 85.9        | 100%        | 3e-17   | 93%   | <a href="#">gij591342488 XP_007096642.1</a> |
| <a href="#">PREDICTED: adipocyte plasma membrane-associated protein [Feli</a> | 85.9      | 85.9        | 100%        | 3e-17   | 93%   | <a href="#">gij586981414 XP_006930067.1</a> |
| <a href="#">PREDICTED: adipocyte plasma membrane-associated protein isofo</a> | 85.5      | 85.5        | 100%        | 4e-17   | 93%   | <a href="#">gij724797097 XP_010359957.1</a> |
| <a href="#">PREDICTED: adipocyte plasma membrane-associated protein isofo</a> | 85.5      | 85.5        | 100%        | 5e-17   | 93%   | <a href="#">gij724797100 XP_010359965.1</a> |
| <a href="#">PREDICTED: adipocyte plasma membrane-associated protein isofo</a> | 84.6      | 84.6        | 100%        | 9e-17   | 93%   | <a href="#">gij568918452 XP_006500262.1</a> |

|                                                                                  |      |      |      |       |     |                                             |
|----------------------------------------------------------------------------------|------|------|------|-------|-----|---------------------------------------------|
| <a href="#">PREDICTED: adipocyte plasma membrane-associated protein isofc</a>    | 84.6 | 84.6 | 100% | 9e-17 | 93% | <a href="#">gij568918450 XP_006500261.1</a> |
| <a href="#">PREDICTED: adipocyte plasma membrane-associated protein [Peri</a>    | 84.6 | 84.6 | 100% | 9e-17 | 93% | <a href="#">gij589945824 XP_006985593.1</a> |
| <a href="#">PREDICTED: adipocyte plasma membrane-associated protein [Mici</a>    | 84.6 | 84.6 | 100% | 9e-17 | 93% | <a href="#">gij532057169 XP_005371288.1</a> |
| <a href="#">PREDICTED: adipocyte plasma membrane-associated protein [Mes</a>     | 84.6 | 84.6 | 100% | 9e-17 | 93% | <a href="#">gij524942103 XP_005072608.1</a> |
| <a href="#">adipocyte plasma membrane-associated protein [Mus musculus]</a>      | 84.6 | 84.6 | 100% | 9e-17 | 93% | <a href="#">gij21313668 NP_082253.1</a>     |
| <a href="#">PREDICTED: adipocyte plasma membrane-associated protein [Chr</a>     | 84.2 | 84.2 | 100% | 1e-16 | 90% | <a href="#">gij586460140 XP_006860728.1</a> |
| <a href="#">PREDICTED: adipocyte plasma membrane-associated protein isofc</a>    | 83.8 | 83.8 | 100% | 2e-16 | 93% | <a href="#">gij675792202 XP_008952974.1</a> |
| <a href="#">PREDICTED: adipocyte plasma membrane-associated protein isofc</a>    | 83.8 | 83.8 | 100% | 2e-16 | 93% | <a href="#">gij675792200 XP_008952973.1</a> |
| <a href="#">PREDICTED: adipocyte plasma membrane-associated protein [Tar</a>     | 83.3 | 83.3 | 100% | 3e-16 | 93% | <a href="#">gij640819801 XP_008066807.1</a> |
| <a href="#">PREDICTED: adipocyte plasma membrane-associated protein [Ech</a>     | 83.3 | 83.3 | 100% | 3e-16 | 90% | <a href="#">gij507712042 XP_004717841.1</a> |
| <a href="#">PREDICTED: adipocyte plasma membrane-associated protein isofc</a>    | 82.5 | 82.5 | 100% | 5e-16 | 90% | <a href="#">gij564343542 XP_006235279.1</a> |
| <a href="#">adipocyte plasma membrane-associated protein precursor [Rattus r</a> | 82.5 | 82.5 | 100% | 5e-16 | 90% | <a href="#">gij77735352 NP_001029175.1</a>  |
| <a href="#">Ab2-305 [Rattus norvegicus]</a>                                      | 82.5 | 82.5 | 100% | 5e-16 | 90% | <a href="#">gij33086580 AAP92602.1</a>      |
| <a href="#">PREDICTED: adipocyte plasma membrane-associated protein [Cor</a>     | 82.5 | 82.5 | 100% | 5e-16 | 90% | <a href="#">gij507961028 XP_004687183.1</a> |
| <a href="#">PREDICTED: adipocyte plasma membrane-associated protein isofc</a>    | 82.5 | 82.5 | 100% | 5e-16 | 90% | <a href="#">gij564343538 XP_006235277.1</a> |
| <a href="#">PREDICTED: adipocyte plasma membrane-associated protein [Lip</a>     | 81.7 | 81.7 | 100% | 1e-15 | 90% | <a href="#">gij602732221 XP_007451508.1</a> |
| <a href="#">PREDICTED: adipocyte plasma membrane-associated protein [Bal</a>     | 81.7 | 81.7 | 100% | 1e-15 | 90% | <a href="#">gij594689044 XP_007191923.1</a> |
| <a href="#">PREDICTED: adipocyte plasma membrane-associated protein [Phy</a>     | 81.7 | 81.7 | 100% | 1e-15 | 90% | <a href="#">gij593717611 XP_007105230.1</a> |
| <a href="#">PREDICTED: adipocyte plasma membrane-associated protein [Orc</a>     | 81.7 | 81.7 | 100% | 1e-15 | 90% | <a href="#">gij466012177 XP_004270482.1</a> |
| <a href="#">PREDICTED: adipocyte plasma membrane-associated protein [Nar</a>     | 81.2 | 81.2 | 100% | 1e-15 | 90% | <a href="#">gij674106802 XP_008824690.1</a> |
| <a href="#">PREDICTED: adipocyte plasma membrane-associated protein [Cer</a>     | 80.8 | 80.8 | 96%  | 2e-15 | 89% | <a href="#">gij478535723 XP_004441986.1</a> |
| <a href="#">hypothetical protein PANDA_019520 [Ailuropoda melanoleuca]</a>       | 80.4 | 80.4 | 100% | 3e-15 | 86% | <a href="#">gij281351396 EFB26980.1</a>     |
| <a href="#">PREDICTED: adipocyte plasma membrane-associated protein [Urs</a>     | 80.4 | 80.4 | 100% | 3e-15 | 86% | <a href="#">gij671025584 XP_008703615.1</a> |
| <a href="#">PREDICTED: adipocyte plasma membrane-associated protein-like</a>     | 80.4 | 80.4 | 100% | 3e-15 | 86% | <a href="#">gij301787895 XP_002929365.1</a> |
| <a href="#">PREDICTED: adipocyte plasma membrane-associated protein [Odc</a>     | 80.4 | 80.4 | 100% | 3e-15 | 86% | <a href="#">gij472357692 XP_004398472.1</a> |
| <a href="#">PREDICTED: adipocyte plasma membrane-associated protein [Lep</a>     | 80.4 | 80.4 | 100% | 3e-15 | 86% | <a href="#">gij585179120 XP_006741245.1</a> |
| <a href="#">PREDICTED: adipocyte plasma membrane-associated protein [Gal</a>     | 80.0 | 80.0 | 100% | 3e-15 | 90% | <a href="#">gij667326556 XP_008589917.1</a> |
| <a href="#">PREDICTED: adipocyte plasma membrane-associated protein [Equ</a>     | 80.0 | 80.0 | 100% | 4e-15 | 86% | <a href="#">gij664771366 XP_008504865.1</a> |
| <a href="#">PREDICTED: adipocyte plasma membrane-associated protein isofc</a>    | 80.0 | 80.0 | 100% | 4e-15 | 86% | <a href="#">gij545199803 XP_005604486.1</a> |
| <a href="#">PREDICTED: adipocyte plasma membrane-associated protein isofc</a>    | 80.0 | 80.0 | 100% | 4e-15 | 86% | <a href="#">gij545199801 XP_005604485.1</a> |
| <a href="#">PREDICTED: adipocyte plasma membrane-associated protein [Ory</a>     | 80.0 | 80.0 | 100% | 4e-15 | 86% | <a href="#">gij291410623 XP_002721586.1</a> |
| <a href="#">PREDICTED: adipocyte plasma membrane-associated protein [Icti</a>    | 80.0 | 80.0 | 100% | 4e-15 | 86% | <a href="#">gij532097996 XP_005334647.1</a> |
| <a href="#">PREDICTED: adipocyte plasma membrane-associated protein [Jac</a>     | 78.7 | 78.7 | 100% | 1e-14 | 86% | <a href="#">gij507568935 XP_004668094.1</a> |
| <a href="#">PREDICTED: adipocyte plasma membrane-associated protein [Lox</a>     | 78.7 | 78.7 | 100% | 1e-14 | 86% | <a href="#">gij344279762 XP_003411656.1</a> |
| <a href="#">PREDICTED: adipocyte plasma membrane-associated protein isofc</a>    | 78.7 | 78.7 | 100% | 1e-14 | 86% | <a href="#">gij611981959 XP_007476669.1</a> |
| <a href="#">PREDICTED: adipocyte plasma membrane-associated protein isofc</a>    | 78.7 | 78.7 | 100% | 1e-14 | 86% | <a href="#">gij611981957 XP_001382089.2</a> |
| <a href="#">PREDICTED: adipocyte plasma membrane-associated protein isofc</a>    | 78.3 | 78.3 | 100% | 1e-14 | 90% | <a href="#">gij625192556 XP_007638893.1</a> |
| <a href="#">PREDICTED: adipocyte plasma membrane-associated protein isofc</a>    | 78.3 | 78.3 | 100% | 1e-14 | 90% | <a href="#">gij354475585 XP_003500008.1</a> |
| <a href="#">PREDICTED: adipocyte plasma membrane-associated protein isofc</a>    | 78.3 | 78.3 | 100% | 1e-14 | 90% | <a href="#">gij625266624 XP_007624792.1</a> |
| <a href="#">PREDICTED: adipocyte plasma membrane-associated protein [Bos</a>     | 77.8 | 77.8 | 100% | 2e-14 | 86% | <a href="#">gij555978143 XP_005901017.1</a> |
| <a href="#">Adipocyte plasma membrane-associated protein [Bos mutus]</a>         | 77.8 | 77.8 | 100% | 2e-14 | 86% | <a href="#">gij440901758 ELR52645.1</a>     |
| <a href="#">PREDICTED: adipocyte plasma membrane-associated protein [Bisc</a>    | 77.8 | 77.8 | 100% | 2e-14 | 86% | <a href="#">gij742102975 XP_010834658.1</a> |
| <a href="#">adipocyte plasma membrane-associated protein [Bos taurus]</a>        | 77.8 | 77.8 | 100% | 2e-14 | 86% | <a href="#">gij78369434 NP_001030490.1</a>  |
| <a href="#">PREDICTED: adipocyte plasma membrane-associated protein [Bub</a>     | 77.8 | 77.8 | 100% | 2e-14 | 86% | <a href="#">gij594034111 XP_006041771.1</a> |
| <a href="#">PREDICTED: adipocyte plasma membrane-associated protein [Ovi</a>     | 77.8 | 77.8 | 100% | 2e-14 | 86% | <a href="#">gij426240952 XP_004014356.1</a> |

|                                                                                 |      |      |      |       |     |                                             |
|---------------------------------------------------------------------------------|------|------|------|-------|-----|---------------------------------------------|
| <a href="#">PREDICTED: adipocyte plasma membrane-associated protein [Cap</a>    | 77.8 | 77.8 | 100% | 2e-14 | 86% | <a href="#">gij548489969 XP_005688183.1</a> |
| <a href="#">PREDICTED: adipocyte plasma membrane-associated protein [Pan</a>    | 77.8 | 77.8 | 100% | 2e-14 | 86% | <a href="#">gij556778497 XP_005984319.1</a> |
| <a href="#">PREDICTED: adipocyte plasma membrane-associated protein-like</a>    | 77.4 | 77.4 | 100% | 2e-14 | 86% | <a href="#">gij545890060 XP_005658440.1</a> |
| <a href="#">PREDICTED: adipocyte plasma membrane-associated protein [Sus</a>    | 77.4 | 77.4 | 100% | 3e-14 | 86% | <a href="#">gij350594715 XP_001927122.3</a> |
| <a href="#">PREDICTED: adipocyte plasma membrane-associated protein isofo</a>   | 77.0 | 77.0 | 100% | 4e-14 | 83% | <a href="#">gij511864237 XP_004754143.1</a> |
| <a href="#">PREDICTED: adipocyte plasma membrane-associated protein isofo</a>   | 77.0 | 77.0 | 100% | 4e-14 | 83% | <a href="#">gij511864235 XP_004754142.1</a> |
| <a href="#">PREDICTED: adipocyte plasma membrane-associated protein isofo</a>   | 77.0 | 77.0 | 100% | 4e-14 | 83% | <a href="#">gij511864232 XP_004754141.1</a> |
| <a href="#">PREDICTED: adipocyte plasma membrane-associated protein [Fuk</a>    | 76.1 | 76.1 | 100% | 7e-14 | 83% | <a href="#">gij731219302 XP_010623912.1</a> |
| <a href="#">PREDICTED: adipocyte plasma membrane-associated protein isofo</a>   | 76.1 | 76.1 | 100% | 7e-14 | 83% | <a href="#">gij512880580 XP_004894998.1</a> |
| <a href="#">PREDICTED: adipocyte plasma membrane-associated protein [Chi</a>    | 76.1 | 76.1 | 100% | 7e-14 | 83% | <a href="#">gij533132029 XP_005381039.1</a> |
| <a href="#">PREDICTED: adipocyte plasma membrane-associated protein [Oct</a>    | 76.1 | 76.1 | 100% | 7e-14 | 83% | <a href="#">gij507661814 XP_004635630.1</a> |
| <a href="#">PREDICTED: adipocyte plasma membrane-associated protein [Sor</a>    | 76.1 | 76.1 | 96%  | 7e-14 | 86% | <a href="#">gij505845493 XP_004616227.1</a> |
| <a href="#">PREDICTED: adipocyte plasma membrane-associated protein isofo</a>   | 76.1 | 76.1 | 100% | 7e-14 | 83% | <a href="#">gij512880576 XP_004894997.1</a> |
| <a href="#">PREDICTED: adipocyte plasma membrane-associated protein isofo</a>   | 75.7 | 75.7 | 100% | 1e-13 | 83% | <a href="#">gij562871397 XP_006163663.1</a> |
| <a href="#">PREDICTED: adipocyte plasma membrane-associated protein isofo</a>   | 75.7 | 75.7 | 100% | 1e-13 | 83% | <a href="#">gij562871395 XP_006163662.1</a> |
| <a href="#">Adipocyte plasma membrane-associated protein [Tupaia chinensis]</a> | 75.7 | 75.7 | 100% | 1e-13 | 83% | <a href="#">gij444520420 ELV12972.1</a>     |
| <a href="#">PREDICTED: adipocyte plasma membrane-associated protein [Tric</a>   | 74.9 | 74.9 | 100% | 2e-13 | 83% | <a href="#">gij471377312 XP_004376468.1</a> |
| <a href="#">PREDICTED: adipocyte plasma membrane-associated protein [Cav</a>    | 74.9 | 74.9 | 100% | 2e-13 | 83% | <a href="#">gij348581358 XP_003476444.1</a> |
| <a href="#">PREDICTED: adipocyte plasma membrane-associated protein [Das</a>    | 74.9 | 74.9 | 100% | 2e-13 | 83% | <a href="#">gij488570200 XP_004474706.1</a> |
| <a href="#">Adipocyte plasma membrane-associated protein [Myotis davidii]</a>   | 74.4 | 74.4 | 100% | 3e-13 | 79% | <a href="#">gij432114788 ELK36543.1</a>     |
| <a href="#">PREDICTED: adipocyte plasma membrane-associated protein [Ept</a>    | 74.4 | 74.4 | 100% | 3e-13 | 79% | <a href="#">gij641701525 XP_008139374.1</a> |
| <a href="#">PREDICTED: adipocyte plasma membrane-associated protein [Myc</a>    | 74.4 | 74.4 | 100% | 3e-13 | 79% | <a href="#">gij584069940 XP_006755306.1</a> |
| <a href="#">PREDICTED: adipocyte plasma membrane-associated protein [Myc</a>    | 73.2 | 73.2 | 100% | 7e-13 | 79% | <a href="#">gij554543332 XP_005866279.1</a> |
| <a href="#">PREDICTED: adipocyte plasma membrane-associated protein [Myc</a>    | 73.2 | 73.2 | 100% | 7e-13 | 79% | <a href="#">gij558166297 XP_006098004.1</a> |
| <a href="#">Adipocyte plasma membrane-associated protein [Myotis brandtii]</a>  | 73.2 | 73.2 | 100% | 8e-13 | 79% | <a href="#">gij521026002 EPQ07790.1</a>     |
| <a href="#">PREDICTED: adipocyte plasma membrane-associated protein [Car</a>    | 72.7 | 72.7 | 100% | 1e-12 | 79% | <a href="#">gij345789049 XP_850086.2</a>    |
| <a href="#">PREDICTED: adipocyte plasma membrane-associated protein-like</a>    | 70.2 | 70.2 | 93%  | 5e-12 | 81% | <a href="#">gij620953601 XP_007656154.1</a> |

## Alignments

Download [GenPept](#) [Graphics](#)

Next Previous Descriptions

unnamed protein product [Homo sapiens]

Sequence ID: [gij194378020|dbj|BAG63373.1](#) Length: 289 Number of Matches: 1

Range 1: 183 to 211 [GenPept](#) [Graphics](#)

Next Match Previous Match

| Score          | Expect | Identities | Positives   | Gaps     |
|----------------|--------|------------|-------------|----------|
| 91.4 bits(208) | 4e-19  | 28/29(97%) | 29/29(100%) | 0/29(0%) |

Query 1 KLLLSSETPIEGKDMSFVNDLTVTQDGRK 29  
 KLLLSSETPIEGK+MSFVNDLTVTQDGRK  
 Sbjct 183 KLLLSSETPIEGKNMSFVNDLTVTQDGRK 211

### Related Information

[Gene](#) - associated gene details

Download [GenPept](#) [Graphics](#)

Next Previous Descriptions

PREDICTED: adipocyte plasma membrane-associated protein isoform X1 [Homo sapiens]

Sequence ID: [gij530425819|ref|XP\\_005260820.1](#) Length: 289 Number of Matches: 1

Range 1: 183 to 211 [GenPept](#) [Graphics](#)

Next Match Previous Match

| Score          | Expect | Identities | Positives   | Gaps     |
|----------------|--------|------------|-------------|----------|
| 91.4 bits(208) | 4e-19  | 28/29(97%) | 29/29(100%) | 0/29(0%) |

Query 1 KLLLSSETPIEGKDMSFVNDLTVTQDGRK 29

### Related Information

[Gene](#) - associated gene details

[Map Viewer](#) - aligned genomic context

Sbjct 183 KLLLSSETPIEGK+MSFVNDLTVTQDGRK 211  
 KLLLSSETPIEGKNMSFVNDLTVTQDGRK

[Download](#) [GenPept](#) [Graphics](#) [Next](#) [Previous](#) [Descriptions](#)

C20orf3 [Homo sapiens]

Sequence ID: [gi|37183270|gb|AAQ89435.1|](#) Length: 372 Number of Matches: 1

Range 1: 139 to 167 [GenPept](#) [Graphics](#) [Next Match](#) [Previous Match](#)

| Score          | Expect | Identities | Positives   | Gaps     |
|----------------|--------|------------|-------------|----------|
| 91.4 bits(208) | 4e-19  | 28/29(97%) | 29/29(100%) | 0/29(0%) |

Query 1 KLLLSSETPIEGKMSFVNDLTVTQDGRK 29  
 KLLLSSETPIEGK+MSFVNDLTVTQDGRK  
 Sbjct 139 KLLLSSETPIEGKNMSFVNDLTVTQDGRK 167

**Related Information**

[Gene](#) - associated gene details

[Download](#) [GenPept](#) [Graphics](#) [Next](#) [Previous](#) [Descriptions](#)

chromosome 20 open reading frame 3, isoform CRA\_b [Homo sapiens]

Sequence ID: [gi|119630519|gb|EAX10114.1|](#) Length: 380 Number of Matches: 1

Range 1: 139 to 167 [GenPept](#) [Graphics](#) [Next Match](#) [Previous Match](#)

| Score          | Expect | Identities | Positives   | Gaps     |
|----------------|--------|------------|-------------|----------|
| 91.4 bits(208) | 4e-19  | 28/29(97%) | 29/29(100%) | 0/29(0%) |

Query 1 KLLLSSETPIEGKMSFVNDLTVTQDGRK 29  
 KLLLSSETPIEGK+MSFVNDLTVTQDGRK  
 Sbjct 139 KLLLSSETPIEGKNMSFVNDLTVTQDGRK 167

**Related Information**

[Gene](#) - associated gene details

[Download](#) [GenPept](#) [Graphics](#) [Next](#) [Previous](#) [Descriptions](#)

adipocyte plasma membrane-associated protein [Homo sapiens]

Sequence ID: [gi|24308201|ref|NP\\_065392.1|](#) Length: 416 Number of Matches: 1

[See 4 more title\(s\)](#)

Range 1: 183 to 211 [GenPept](#) [Graphics](#) [Next Match](#) [Previous Match](#)

| Score          | Expect | Identities | Positives   | Gaps     |
|----------------|--------|------------|-------------|----------|
| 91.4 bits(208) | 4e-19  | 28/29(97%) | 29/29(100%) | 0/29(0%) |

Query 1 KLLLSSETPIEGKMSFVNDLTVTQDGRK 29  
 KLLLSSETPIEGK+MSFVNDLTVTQDGRK  
 Sbjct 183 KLLLSSETPIEGKNMSFVNDLTVTQDGRK 211

**Related Information**

[Gene](#) - associated gene details

[UniGene](#) - clustered expressed sequence tags

[Map Viewer](#) - aligned genomic context

[Identical Proteins](#) - Proteins identical to the subject

BLAST is a registered trademark of the National Library of Medicine.

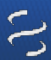

NCBI/ BLAST/ blastp suite/ Formatting Results - B90W5YEY01R

Your search parameters were adjusted to search for a short input sequence.

Edit and Resubmit Save Search Strategies Formatting options Download

YouTube How to read this page Blast report description

APMAP\_KLLSSETPIEGKNMSFVNDLTVTQDGRK\_NonMod

RID B90W5YEY01R (Expires on 01-14 09:31 am)

Query ID Icl|38621
Description None
Molecule type amino acid
Query Length 29

Database Name nr
Description All non-redundant GenBank CDS translations+PDB+SwissProt+PIR excluding environmental samples from WGS projects
Program BLASTP 2.2.30+ Citation

Other reports: Search Summary Taxonomy reports Distance tree of results Multiple alignment

Graphic Summary

Show Conserved Domains

No putative conserved domains have been detected

Distribution of 100 Blast Hits on the Query Sequence

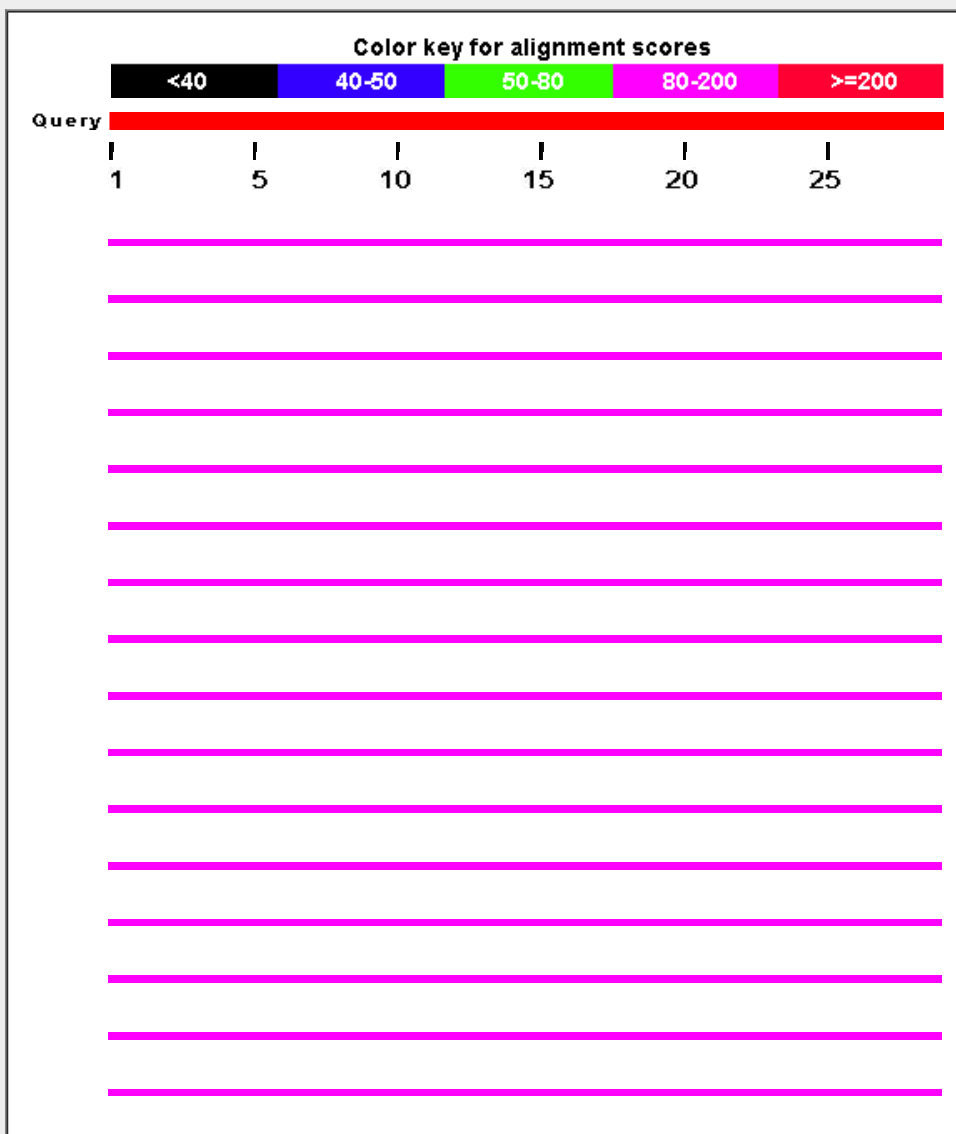

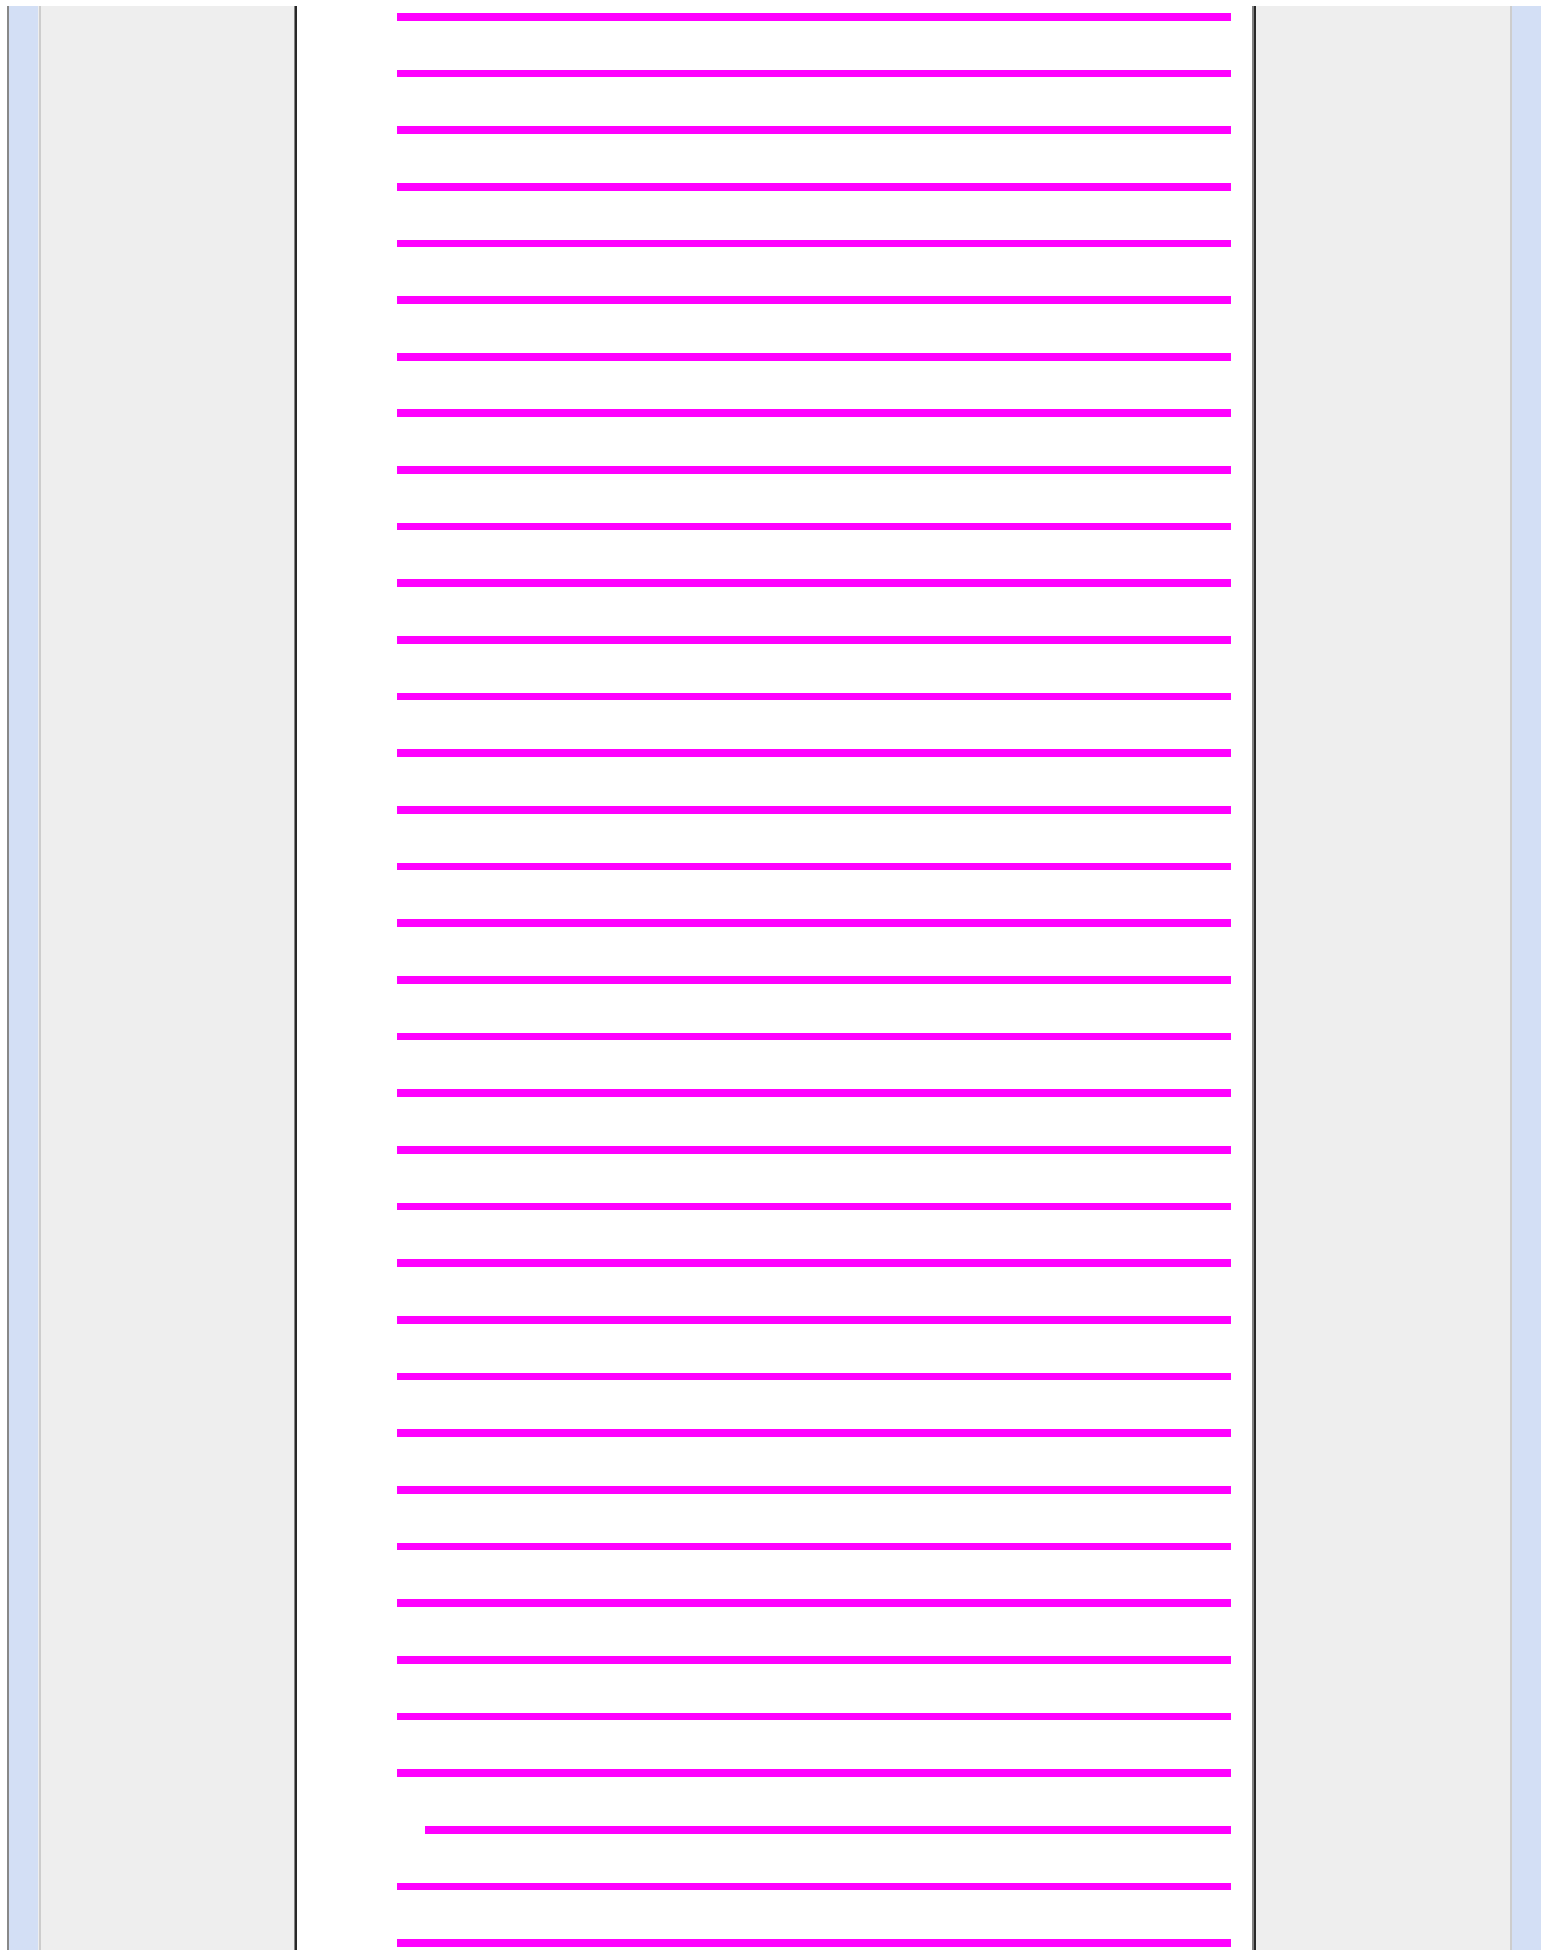



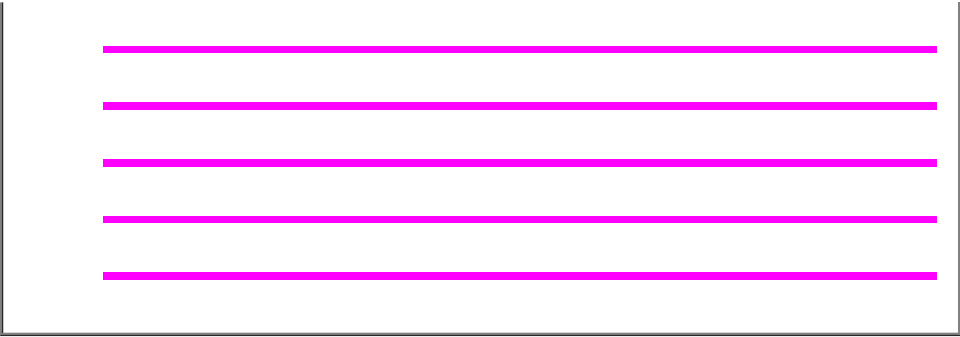

**Descriptions**

**Sequences producing significant alignments:**

Select: [All](#) [None](#) Selected:0

[↑](#) [Alignments](#)
[Download](#)
[GenPept](#)
[Graphics](#)
[Distance tree of results](#)
[Multiple alignment](#)

| Description                                                                                            | Max score | Total score | Query cover | E value | Ident | Accession                                   |
|--------------------------------------------------------------------------------------------------------|-----------|-------------|-------------|---------|-------|---------------------------------------------|
| <a href="#">unnamed protein product [Homo sapiens]</a>                                                 | 94.0      | 94.0        | 100%        | 5e-20   | 100%  | <a href="#">gi 194378020 BAG63373.1</a>     |
| <a href="#">PREDICTED: adipocyte plasma membrane-associated protein isoform C20orf3 [Homo sapiens]</a> | 94.0      | 94.0        | 100%        | 5e-20   | 100%  | <a href="#">gi 530425819 XP_005260820.1</a> |
| <a href="#">chromosome 20 open reading frame 3, isoform CRA_b [Homo sapiens]</a>                       | 94.0      | 94.0        | 100%        | 5e-20   | 100%  | <a href="#">gi 119630519 EAX10114.1</a>     |
| <a href="#">adipocyte plasma membrane-associated protein [Homo sapiens]</a>                            | 94.0      | 94.0        | 100%        | 6e-20   | 100%  | <a href="#">gi 24308201 NP_065392.1</a>     |
| <a href="#">unnamed protein product [Homo sapiens]</a>                                                 | 94.0      | 94.0        | 100%        | 6e-20   | 100%  | <a href="#">gi 158255694 BAF83818.1</a>     |
| <a href="#">BSCv [Homo sapiens]</a>                                                                    | 94.0      | 94.0        | 100%        | 6e-20   | 100%  | <a href="#">gi 9836652 BAB11885.1</a>       |
| <a href="#">PREDICTED: adipocyte plasma membrane-associated protein isoform C20orf3 [Homo sapiens]</a> | 90.1      | 90.1        | 100%        | 1e-18   | 97%   | <a href="#">gi 675656498 XP_008994116.1</a> |
| <a href="#">PREDICTED: adipocyte plasma membrane-associated protein isoform C20orf3 [Homo sapiens]</a> | 90.1      | 90.1        | 100%        | 1e-18   | 97%   | <a href="#">gi 675656496 XP_008994115.1</a> |
| <a href="#">PREDICTED: adipocyte plasma membrane-associated protein [Gorilla gorilla gorilla]</a>      | 90.1      | 90.1        | 100%        | 1e-18   | 97%   | <a href="#">gi 426391191 XP_004061964.1</a> |
| <a href="#">Protein BSCv [Macaca fascicularis]</a>                                                     | 90.1      | 90.1        | 100%        | 1e-18   | 97%   | <a href="#">gi 355784761 EHH65612.1</a>     |
| <a href="#">PREDICTED: adipocyte plasma membrane-associated protein [Non-human primate]</a>            | 90.1      | 90.1        | 100%        | 1e-18   | 97%   | <a href="#">gi 332258942 XP_003278549.1</a> |
| <a href="#">PREDICTED: adipocyte plasma membrane-associated protein [Pan troglodytes]</a>              | 90.1      | 90.1        | 100%        | 1e-18   | 97%   | <a href="#">gi 114681318 XP_514556.2</a>    |
| <a href="#">adipocyte plasma membrane-associated protein [Macaca mulatta]</a>                          | 90.1      | 90.1        | 100%        | 1e-18   | 97%   | <a href="#">gi 388453189 NP_001252979.1</a> |
| <a href="#">PREDICTED: adipocyte plasma membrane-associated protein [Pon</a>                           | 90.1      | 90.1        | 100%        | 1e-18   | 97%   | <a href="#">gi 686761455 XP_009231655.1</a> |
| <a href="#">PREDICTED: adipocyte plasma membrane-associated protein isoform C20orf3 [Homo sapiens]</a> | 90.1      | 90.1        | 100%        | 1e-18   | 97%   | <a href="#">gi 544463778 XP_005568209.1</a> |
| <a href="#">PREDICTED: adipocyte plasma membrane-associated protein isoform C20orf3 [Homo sapiens]</a> | 90.1      | 90.1        | 100%        | 1e-18   | 97%   | <a href="#">gi 544463776 XP_005568208.1</a> |
| <a href="#">PREDICTED: adipocyte plasma membrane-associated protein isoform C20orf3 [Homo sapiens]</a> | 90.1      | 90.1        | 100%        | 1e-18   | 97%   | <a href="#">gi 544463774 XP_005568207.1</a> |
| <a href="#">PREDICTED: adipocyte plasma membrane-associated protein isoform C20orf3 [Homo sapiens]</a> | 90.1      | 90.1        | 100%        | 1e-18   | 97%   | <a href="#">gi 544463772 XP_005568206.1</a> |
| <a href="#">PREDICTED: adipocyte plasma membrane-associated protein [Oryza sativa]</a>                 | 88.0      | 88.0        | 100%        | 6e-18   | 93%   | <a href="#">gi 634885477 XP_007952365.1</a> |
| <a href="#">PREDICTED: adipocyte plasma membrane-associated protein [Oto</a>                           | 88.0      | 88.0        | 100%        | 6e-18   | 93%   | <a href="#">gi 395857507 XP_003801133.1</a> |
| <a href="#">PREDICTED: adipocyte plasma membrane-associated protein [Sair</a>                          | 87.6      | 87.6        | 100%        | 8e-18   | 93%   | <a href="#">gi 403304837 XP_003942992.1</a> |
| <a href="#">PREDICTED: adipocyte plasma membrane-associated protein [Ele</a>                           | 87.6      | 87.6        | 100%        | 9e-18   | 93%   | <a href="#">gi 585720265 XP_006902530.1</a> |
| <a href="#">PREDICTED: adipocyte plasma membrane-associated protein [Pan</a>                           | 87.2      | 87.2        | 100%        | 1e-17   | 93%   | <a href="#">gi 591342488 XP_007096642.1</a> |
| <a href="#">PREDICTED: adipocyte plasma membrane-associated protein [Feli</a>                          | 87.2      | 87.2        | 100%        | 1e-17   | 93%   | <a href="#">gi 586981414 XP_006930067.1</a> |
| <a href="#">PREDICTED: adipocyte plasma membrane-associated protein isoform C20orf3 [Homo sapiens]</a> | 86.7      | 86.7        | 100%        | 2e-17   | 93%   | <a href="#">gi 724797097 XP_010359957.1</a> |
| <a href="#">PREDICTED: adipocyte plasma membrane-associated protein isoform C20orf3 [Homo sapiens]</a> | 86.7      | 86.7        | 100%        | 2e-17   | 93%   | <a href="#">gi 724797100 XP_010359965.1</a> |
| <a href="#">PREDICTED: adipocyte plasma membrane-associated protein isoform C20orf3 [Homo sapiens]</a> | 85.9      | 85.9        | 100%        | 3e-17   | 93%   | <a href="#">gi 568918452 XP_006500262.1</a> |

|                                                                                  |      |      |      |       |     |                                             |
|----------------------------------------------------------------------------------|------|------|------|-------|-----|---------------------------------------------|
| PREDICTED: adipocyte plasma membrane-associated protein isofc                    | 85.9 | 85.9 | 100% | 3e-17 | 93% | <a href="#">gij568918450 XP_006500261.1</a> |
| <a href="#">PREDICTED: adipocyte plasma membrane-associated protein [Peri</a>    | 85.9 | 85.9 | 100% | 3e-17 | 93% | <a href="#">gij589945824 XP_006985593.1</a> |
| <a href="#">PREDICTED: adipocyte plasma membrane-associated protein [Mici</a>    | 85.9 | 85.9 | 100% | 3e-17 | 93% | <a href="#">gij532057169 XP_005371288.1</a> |
| <a href="#">PREDICTED: adipocyte plasma membrane-associated protein [Mes</a>     | 85.9 | 85.9 | 100% | 3e-17 | 93% | <a href="#">gij524942103 XP_005072608.1</a> |
| <a href="#">adipocyte plasma membrane-associated protein [Mus musculus]</a>      | 85.9 | 85.9 | 100% | 3e-17 | 93% | <a href="#">gij21313668 NP_082253.1</a>     |
| <a href="#">PREDICTED: adipocyte plasma membrane-associated protein [Chr</a>     | 85.5 | 85.5 | 100% | 5e-17 | 90% | <a href="#">gij586460140 XP_006860728.1</a> |
| <a href="#">PREDICTED: adipocyte plasma membrane-associated protein isofc</a>    | 85.0 | 85.0 | 100% | 6e-17 | 93% | <a href="#">gij675792202 XP_008952974.1</a> |
| <a href="#">PREDICTED: adipocyte plasma membrane-associated protein isofc</a>    | 85.0 | 85.0 | 100% | 6e-17 | 93% | <a href="#">gij675792200 XP_008952973.1</a> |
| <a href="#">PREDICTED: adipocyte plasma membrane-associated protein [Ech</a>     | 84.6 | 84.6 | 100% | 9e-17 | 90% | <a href="#">gij507712042 XP_004717841.1</a> |
| <a href="#">PREDICTED: adipocyte plasma membrane-associated protein [Tar</a>     | 84.2 | 84.2 | 100% | 1e-16 | 93% | <a href="#">gij640819801 XP_008066807.1</a> |
| <a href="#">PREDICTED: adipocyte plasma membrane-associated protein isofc</a>    | 83.8 | 83.8 | 100% | 2e-16 | 90% | <a href="#">gij564343542 XP_006235279.1</a> |
| <a href="#">adipocyte plasma membrane-associated protein precursor [Rattus r</a> | 83.8 | 83.8 | 100% | 2e-16 | 90% | <a href="#">gij77735352 NP_001029175.1</a>  |
| <a href="#">Ab2-305 [Rattus norvegicus]</a>                                      | 83.8 | 83.8 | 100% | 2e-16 | 90% | <a href="#">gij33086580 AAP92602.1</a>      |
| <a href="#">PREDICTED: adipocyte plasma membrane-associated protein [Cor</a>     | 83.8 | 83.8 | 100% | 2e-16 | 90% | <a href="#">gij507961028 XP_004687183.1</a> |
| <a href="#">PREDICTED: adipocyte plasma membrane-associated protein isofc</a>    | 83.8 | 83.8 | 100% | 2e-16 | 90% | <a href="#">gij564343538 XP_006235277.1</a> |
| <a href="#">PREDICTED: adipocyte plasma membrane-associated protein [Lip</a>     | 82.9 | 82.9 | 100% | 3e-16 | 90% | <a href="#">gij602732221 XP_007451508.1</a> |
| <a href="#">PREDICTED: adipocyte plasma membrane-associated protein [Bal</a>     | 82.9 | 82.9 | 100% | 3e-16 | 90% | <a href="#">gij594689044 XP_007191923.1</a> |
| <a href="#">PREDICTED: adipocyte plasma membrane-associated protein [Phy</a>     | 82.9 | 82.9 | 100% | 3e-16 | 90% | <a href="#">gij593717611 XP_007105230.1</a> |
| <a href="#">PREDICTED: adipocyte plasma membrane-associated protein [Orc</a>     | 82.9 | 82.9 | 100% | 3e-16 | 90% | <a href="#">gij466012177 XP_004270482.1</a> |
| <a href="#">PREDICTED: adipocyte plasma membrane-associated protein [Nar</a>     | 82.5 | 82.5 | 100% | 4e-16 | 90% | <a href="#">gij674106802 XP_008824690.1</a> |
| <a href="#">PREDICTED: adipocyte plasma membrane-associated protein [Cer</a>     | 82.1 | 82.1 | 96%  | 7e-16 | 89% | <a href="#">gij478535723 XP_004441986.1</a> |
| <a href="#">hypothetical protein PANDA_019520 [Ailuropoda melanoleuca]</a>       | 81.7 | 81.7 | 100% | 9e-16 | 86% | <a href="#">gij281351396 EFB26980.1</a>     |
| <a href="#">PREDICTED: adipocyte plasma membrane-associated protein [Urs</a>     | 81.7 | 81.7 | 100% | 9e-16 | 86% | <a href="#">gij671025584 XP_008703615.1</a> |
| <a href="#">PREDICTED: adipocyte plasma membrane-associated protein-like</a>     | 81.7 | 81.7 | 100% | 9e-16 | 86% | <a href="#">gij301787895 XP_002929365.1</a> |
| <a href="#">PREDICTED: adipocyte plasma membrane-associated protein [Odc</a>     | 81.7 | 81.7 | 100% | 9e-16 | 86% | <a href="#">gij472357692 XP_004398472.1</a> |
| <a href="#">PREDICTED: adipocyte plasma membrane-associated protein [Lep</a>     | 81.7 | 81.7 | 100% | 9e-16 | 86% | <a href="#">gij585179120 XP_006741245.1</a> |
| <a href="#">PREDICTED: adipocyte plasma membrane-associated protein [Gal</a>     | 81.2 | 81.2 | 100% | 1e-15 | 90% | <a href="#">gij667326556 XP_008589917.1</a> |
| <a href="#">PREDICTED: adipocyte plasma membrane-associated protein [Equ</a>     | 81.2 | 81.2 | 100% | 1e-15 | 86% | <a href="#">gij664771366 XP_008504865.1</a> |
| <a href="#">PREDICTED: adipocyte plasma membrane-associated protein isofc</a>    | 81.2 | 81.2 | 100% | 1e-15 | 86% | <a href="#">gij545199803 XP_005604486.1</a> |
| <a href="#">PREDICTED: adipocyte plasma membrane-associated protein isofc</a>    | 81.2 | 81.2 | 100% | 1e-15 | 86% | <a href="#">gij545199801 XP_005604485.1</a> |
| <a href="#">PREDICTED: adipocyte plasma membrane-associated protein [Ory</a>     | 81.2 | 81.2 | 100% | 1e-15 | 86% | <a href="#">gij291410623 XP_002721586.1</a> |
| <a href="#">PREDICTED: adipocyte plasma membrane-associated protein [Icti</a>    | 81.2 | 81.2 | 100% | 1e-15 | 86% | <a href="#">gij532097996 XP_005334647.1</a> |
| <a href="#">PREDICTED: adipocyte plasma membrane-associated protein [Jac</a>     | 80.0 | 80.0 | 100% | 3e-15 | 86% | <a href="#">gij507568935 XP_004668094.1</a> |
| <a href="#">PREDICTED: adipocyte plasma membrane-associated protein [Lox</a>     | 80.0 | 80.0 | 100% | 3e-15 | 86% | <a href="#">gij344279762 XP_003411656.1</a> |
| <a href="#">PREDICTED: adipocyte plasma membrane-associated protein isofc</a>    | 80.0 | 80.0 | 100% | 4e-15 | 86% | <a href="#">gij611981959 XP_007476669.1</a> |
| <a href="#">PREDICTED: adipocyte plasma membrane-associated protein isofc</a>    | 80.0 | 80.0 | 100% | 4e-15 | 86% | <a href="#">gij611981957 XP_001382089.2</a> |
| <a href="#">PREDICTED: adipocyte plasma membrane-associated protein isofc</a>    | 79.5 | 79.5 | 100% | 5e-15 | 90% | <a href="#">gij625192556 XP_007638893.1</a> |
| <a href="#">PREDICTED: adipocyte plasma membrane-associated protein isofc</a>    | 79.5 | 79.5 | 100% | 5e-15 | 90% | <a href="#">gij354475585 XP_003500008.1</a> |
| <a href="#">PREDICTED: adipocyte plasma membrane-associated protein isofc</a>    | 79.5 | 79.5 | 100% | 5e-15 | 90% | <a href="#">gij625266624 XP_007624792.1</a> |
| <a href="#">PREDICTED: adipocyte plasma membrane-associated protein [Bos</a>     | 79.1 | 79.1 | 100% | 6e-15 | 86% | <a href="#">gij555978143 XP_005901017.1</a> |
| <a href="#">Adipocyte plasma membrane-associated protein [Bos mutus]</a>         | 79.1 | 79.1 | 100% | 6e-15 | 86% | <a href="#">gij440901758 ELR52645.1</a>     |
| <a href="#">adipocyte plasma membrane-associated protein [Bos taurus]</a>        | 79.1 | 79.1 | 100% | 7e-15 | 86% | <a href="#">gij78369434 NP_001030490.1</a>  |
| <a href="#">PREDICTED: adipocyte plasma membrane-associated protein [Bub</a>     | 79.1 | 79.1 | 100% | 7e-15 | 86% | <a href="#">gij594034111 XP_006041771.1</a> |
| <a href="#">PREDICTED: adipocyte plasma membrane-associated protein [Ovis</a>    | 79.1 | 79.1 | 100% | 7e-15 | 86% | <a href="#">gij426240952 XP_004014356.1</a> |
| <a href="#">PREDICTED: adipocyte plasma membrane-associated protein [Cap</a>     | 79.1 | 79.1 | 100% | 7e-15 | 86% | <a href="#">gij548489969 XP_005688183.1</a> |

|                                                                                 |      |      |      |       |     |                                             |
|---------------------------------------------------------------------------------|------|------|------|-------|-----|---------------------------------------------|
| <a href="#">PREDICTED: adipocyte plasma membrane-associated protein isofo</a>   | 79.1 | 79.1 | 100% | 7e-15 | 86% | <a href="#">gil528973115 XP_005214463.1</a> |
| <a href="#">PREDICTED: adipocyte plasma membrane-associated protein [Pan</a>    | 79.1 | 79.1 | 100% | 7e-15 | 86% | <a href="#">gil556778497 XP_005984319.1</a> |
| <a href="#">PREDICTED: adipocyte plasma membrane-associated protein-like</a>    | 78.7 | 78.7 | 100% | 8e-15 | 86% | <a href="#">gil545890060 XP_005658440.1</a> |
| <a href="#">PREDICTED: adipocyte plasma membrane-associated protein [Sus</a>    | 78.7 | 78.7 | 100% | 9e-15 | 86% | <a href="#">gil350594715 XP_001927122.3</a> |
| <a href="#">PREDICTED: adipocyte plasma membrane-associated protein isofo</a>   | 78.3 | 78.3 | 100% | 1e-14 | 83% | <a href="#">gil511864237 XP_004754143.1</a> |
| <a href="#">PREDICTED: adipocyte plasma membrane-associated protein isofo</a>   | 78.3 | 78.3 | 100% | 1e-14 | 83% | <a href="#">gil511864235 XP_004754142.1</a> |
| <a href="#">PREDICTED: adipocyte plasma membrane-associated protein isofo</a>   | 78.3 | 78.3 | 100% | 1e-14 | 83% | <a href="#">gil511864232 XP_004754141.1</a> |
| <a href="#">PREDICTED: adipocyte plasma membrane-associated protein [Fuk</a>    | 77.4 | 77.4 | 100% | 3e-14 | 83% | <a href="#">gil731219302 XP_010623912.1</a> |
| <a href="#">PREDICTED: adipocyte plasma membrane-associated protein isofo</a>   | 77.4 | 77.4 | 100% | 3e-14 | 83% | <a href="#">gil512880580 XP_004894998.1</a> |
| <a href="#">PREDICTED: adipocyte plasma membrane-associated protein [Chi</a>    | 77.4 | 77.4 | 100% | 3e-14 | 83% | <a href="#">gil533132029 XP_005381039.1</a> |
| <a href="#">PREDICTED: adipocyte plasma membrane-associated protein [Oct</a>    | 77.4 | 77.4 | 100% | 3e-14 | 83% | <a href="#">gil507661814 XP_004635630.1</a> |
| <a href="#">PREDICTED: adipocyte plasma membrane-associated protein [Sor</a>    | 77.4 | 77.4 | 96%  | 3e-14 | 86% | <a href="#">gil505845493 XP_004616227.1</a> |
| <a href="#">PREDICTED: adipocyte plasma membrane-associated protein isofo</a>   | 77.4 | 77.4 | 100% | 3e-14 | 83% | <a href="#">gil512880576 XP_004894997.1</a> |
| <a href="#">PREDICTED: adipocyte plasma membrane-associated protein isofo</a>   | 77.0 | 77.0 | 100% | 3e-14 | 83% | <a href="#">gil562871397 XP_006163663.1</a> |
| <a href="#">PREDICTED: adipocyte plasma membrane-associated protein isofo</a>   | 77.0 | 77.0 | 100% | 4e-14 | 83% | <a href="#">gil562871395 XP_006163662.1</a> |
| <a href="#">Adipocyte plasma membrane-associated protein [Tupaia chinensis]</a> | 77.0 | 77.0 | 100% | 4e-14 | 83% | <a href="#">gil444520420 ELV12972.1</a>     |
| <a href="#">PREDICTED: adipocyte plasma membrane-associated protein [Tric</a>   | 76.1 | 76.1 | 100% | 7e-14 | 83% | <a href="#">gil471377312 XP_004376468.1</a> |
| <a href="#">PREDICTED: adipocyte plasma membrane-associated protein [Cav</a>    | 76.1 | 76.1 | 100% | 7e-14 | 83% | <a href="#">gil348581358 XP_003476444.1</a> |
| <a href="#">PREDICTED: adipocyte plasma membrane-associated protein [Das</a>    | 76.1 | 76.1 | 100% | 7e-14 | 83% | <a href="#">gil488570200 XP_004474706.1</a> |
| <a href="#">Adipocyte plasma membrane-associated protein [Myotis davidii]</a>   | 75.7 | 75.7 | 100% | 1e-13 | 79% | <a href="#">gil432114788 ELK36543.1</a>     |
| <a href="#">PREDICTED: adipocyte plasma membrane-associated protein [Ept</a>    | 75.7 | 75.7 | 100% | 1e-13 | 79% | <a href="#">gil641701525 XP_008139374.1</a> |
| <a href="#">PREDICTED: adipocyte plasma membrane-associated protein [Myc</a>    | 75.7 | 75.7 | 100% | 1e-13 | 79% | <a href="#">gil584069940 XP_006755306.1</a> |
| <a href="#">PREDICTED: adipocyte plasma membrane-associated protein [Myc</a>    | 74.4 | 74.4 | 100% | 3e-13 | 79% | <a href="#">gil554543332 XP_005866279.1</a> |
| <a href="#">PREDICTED: adipocyte plasma membrane-associated protein [Myc</a>    | 74.4 | 74.4 | 100% | 3e-13 | 79% | <a href="#">gil558166297 XP_006098004.1</a> |
| <a href="#">Adipocyte plasma membrane-associated protein [Myotis brandtii]</a>  | 74.4 | 74.4 | 100% | 3e-13 | 79% | <a href="#">gil521026002 EPQ07790.1</a>     |
| <a href="#">PREDICTED: adipocyte plasma membrane-associated protein [Car</a>    | 74.0 | 74.0 | 100% | 4e-13 | 79% | <a href="#">gil345789049 XP_850086.2</a>    |
| <a href="#">PREDICTED: adipocyte plasma membrane-associated protein-like</a>    | 71.5 | 71.5 | 93%  | 2e-12 | 81% | <a href="#">gil620953601 XP_007656154.1</a> |

## Alignments

Download [GenPept](#) [Graphics](#)

Next Previous Descriptions

unnamed protein product [Homo sapiens]

Sequence ID: [gil194378020|dbj|BAG63373.1](#) Length: 289 Number of Matches: 1

Range 1: 183 to 211 [GenPept](#) [Graphics](#)

Next Match Previous Match

| Score          | Expect | Identities  | Positives   | Gaps     |
|----------------|--------|-------------|-------------|----------|
| 94.0 bits(214) | 5e-20  | 29/29(100%) | 29/29(100%) | 0/29(0%) |

Query 1 KLLLSSETPIEGKNMSFVNDLTVTQDGRK 29  
 KLLLSSETPIEGKNMSFVNDLTVTQDGRK  
 Sbjct 183 KLLLSSETPIEGKNMSFVNDLTVTQDGRK 211

### Related Information

[Gene](#) - associated gene details

Download [GenPept](#) [Graphics](#)

Next Previous Descriptions

PREDICTED: adipocyte plasma membrane-associated protein isoform X1 [Homo sapiens]

Sequence ID: [gil530425819|ref|XP\\_005260820.1](#) Length: 289 Number of Matches: 1

Range 1: 183 to 211 [GenPept](#) [Graphics](#)

Next Match Previous Match

| Score          | Expect | Identities  | Positives   | Gaps     |
|----------------|--------|-------------|-------------|----------|
| 94.0 bits(214) | 5e-20  | 29/29(100%) | 29/29(100%) | 0/29(0%) |

Query 1 KLLLSSETPIEGKNMSFVNDLTVTQDGRK 29

### Related Information

[Gene](#) - associated gene details

[Map Viewer](#) - aligned genomic context

Sbjct 183 KLLLSSETPIEGKNMSFVNDLTVTQDGRK 211

[Download](#) [GenPept](#) [Graphics](#)

[▼ Next](#) [▲ Previous](#) [▲ Descriptions](#)

C20orf3 [Homo sapiens]

Sequence ID: [gi|37183270|gb|AAQ89435.1|](#) Length: 372 Number of Matches: 1

Range 1: 139 to 167 [GenPept](#) [Graphics](#)

[▼ Next Match](#) [▲ Previous Match](#)

| Score          | Expect | Identities  | Positives   | Gaps     |
|----------------|--------|-------------|-------------|----------|
| 94.0 bits(214) | 5e-20  | 29/29(100%) | 29/29(100%) | 0/29(0%) |

Query 1 KLLLSSETPIEGKNMSFVNDLTVTQDGRK 29  
 KLLLSSETPIEGKNMSFVNDLTVTQDGRK  
 Sbjct 139 KLLLSSETPIEGKNMSFVNDLTVTQDGRK 167

**Related Information**

[Gene](#) - associated gene details

[Download](#) [GenPept](#) [Graphics](#)

[▼ Next](#) [▲ Previous](#) [▲ Descriptions](#)

chromosome 20 open reading frame 3, isoform CRA\_b [Homo sapiens]

Sequence ID: [gi|119630519|gb|EAX10114.1|](#) Length: 380 Number of Matches: 1

Range 1: 139 to 167 [GenPept](#) [Graphics](#)

[▼ Next Match](#) [▲ Previous Match](#)

| Score          | Expect | Identities  | Positives   | Gaps     |
|----------------|--------|-------------|-------------|----------|
| 94.0 bits(214) | 5e-20  | 29/29(100%) | 29/29(100%) | 0/29(0%) |

Query 1 KLLLSSETPIEGKNMSFVNDLTVTQDGRK 29  
 KLLLSSETPIEGKNMSFVNDLTVTQDGRK  
 Sbjct 139 KLLLSSETPIEGKNMSFVNDLTVTQDGRK 167

**Related Information**

[Gene](#) - associated gene details

[Download](#) [GenPept](#) [Graphics](#)

[▼ Next](#) [▲ Previous](#) [▲ Descriptions](#)

adipocyte plasma membrane-associated protein [Homo sapiens]

Sequence ID: [gi|24308201|ref|NP\\_065392.1|](#) Length: 416 Number of Matches: 1

[▶ See 4 more title\(s\)](#)

Range 1: 183 to 211 [GenPept](#) [Graphics](#)

[▼ Next Match](#) [▲ Previous Match](#)

| Score          | Expect | Identities  | Positives   | Gaps     |
|----------------|--------|-------------|-------------|----------|
| 94.0 bits(214) | 6e-20  | 29/29(100%) | 29/29(100%) | 0/29(0%) |

Query 1 KLLLSSETPIEGKNMSFVNDLTVTQDGRK 29  
 KLLLSSETPIEGKNMSFVNDLTVTQDGRK  
 Sbjct 183 KLLLSSETPIEGKNMSFVNDLTVTQDGRK 211

**Related Information**

[Gene](#) - associated gene details

[UniGene](#) - clustered expressed sequence tags

[Map Viewer](#) - aligned genomic context

[Identical Proteins](#) - Proteins identical to the subject

BLAST is a registered trademark of the National Library of Medicine.

[Copyright](#) | [Disclaimer](#) | [Privacy](#) | [Accessibility](#) | [Contact](#) | [Send feedback](#)

[NCBI](#) | [NLM](#) | [NIH](#) | [DHHS](#)

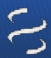

NCBI/ BLAST/ blastp suite/ Formatting Results - BGUJFG2N014

Your search parameters were adjusted to search for a short input sequence.

Edit and Resubmit Save Search Strategies Formatting options Download

YouTube How to read this page Blast report description

APMAP\_RAGPDGTLFVADAYKG\_Mod

RID BGUJFG2N014 (Expires on 01-17 08:33 am)

Query ID lcl|83441
Description None
Molecule type amino acid
Query Length 16

Database Name nr
Description All non-redundant GenBank CDS translations+PDB+SwissProt+PIR excluding environmental samples from WGS projects
Program BLASTP 2.2.30+ Citation

Other reports: Search Summary Taxonomy reports Distance tree of results Multiple alignment

Graphic Summary

Show Conserved Domains

No putative conserved domains have been detected

Distribution of 100 Blast Hits on the Query Sequence

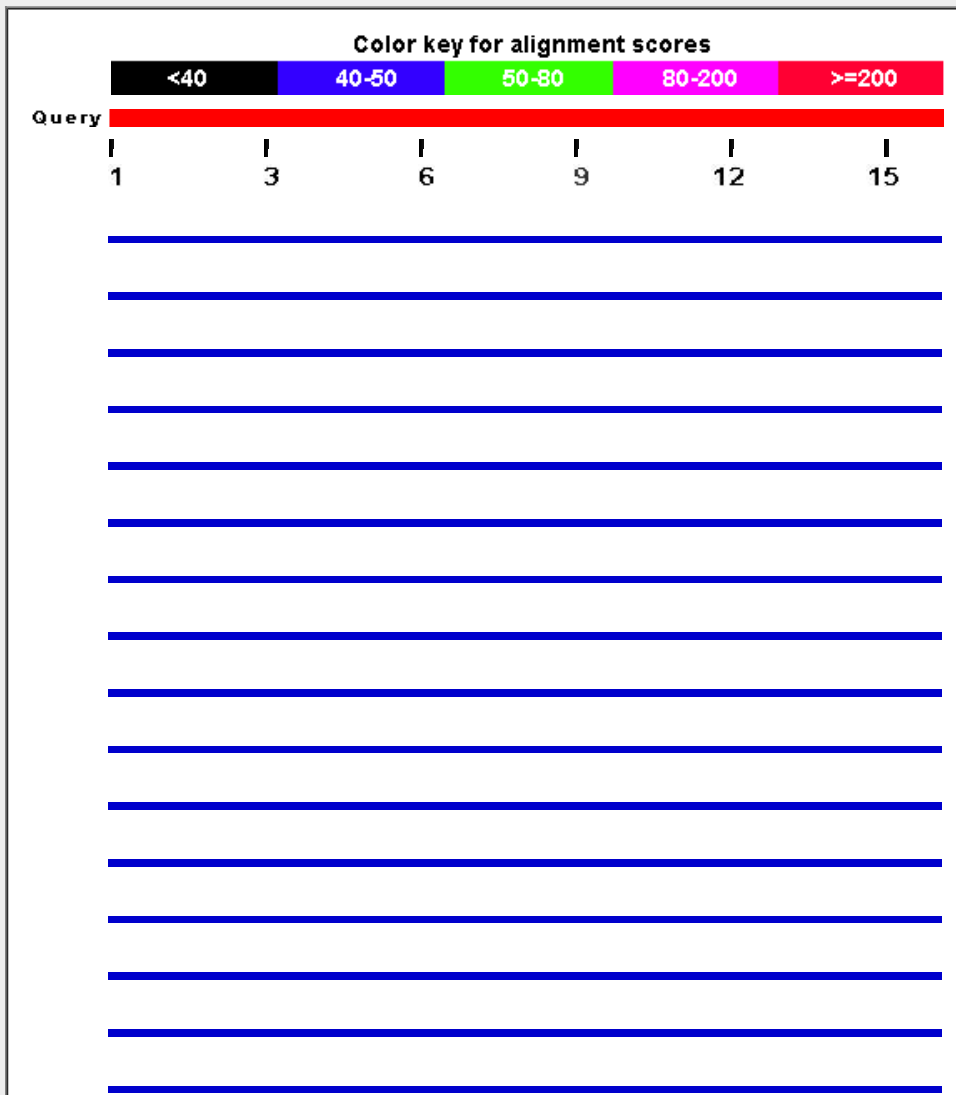

Color key for alignment scores

Table with 5 columns: <40, 40-50, 50-80, 80-200, >=200

Query

1 3 6 9 12 15

The image shows a table with 30 rows. Each row contains a single blue horizontal line, which appears to be a placeholder for data. The table is centered on the page and is flanked by light gray vertical bars on both sides.

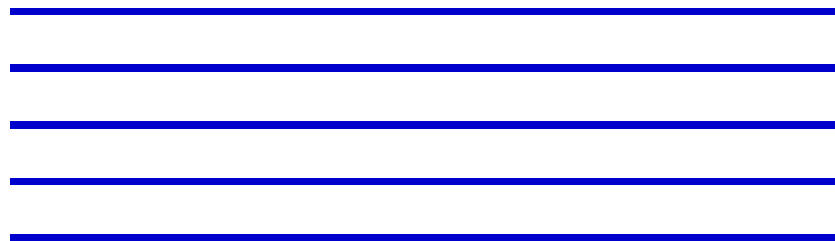

## Descriptions

### Sequences producing significant alignments:

Select: [All](#) [None](#) Selected:0

[Alignments](#)
[Download](#)
[GenPept](#)
[Graphics](#)
[Distance tree of results](#)
[Multiple alignment](#)

| Description                                                                   | Max score | Total score | Query cover | E value | Ident | Accession                                   |
|-------------------------------------------------------------------------------|-----------|-------------|-------------|---------|-------|---------------------------------------------|
| <a href="#">unnamed protein product [Homo sapiens]</a>                        | 49.4      | 49.4        | 100%        | 2e-05   | 94%   | <a href="#">gij194378020 BAG63373.1</a>     |
| <a href="#">PREDICTED: adipocyte plasma membrane-associated protein isofo</a> | 49.4      | 49.4        | 100%        | 2e-05   | 94%   | <a href="#">gij530425819 XP_005260820.1</a> |
| <a href="#">PREDICTED: adipocyte plasma membrane-associated protein isofo</a> | 49.4      | 49.4        | 100%        | 2e-05   | 94%   | <a href="#">gij724797097 XP_010359957.1</a> |
| <a href="#">PREDICTED: adipocyte plasma membrane-associated protein [Gal</a>  | 49.4      | 49.4        | 100%        | 2e-05   | 94%   | <a href="#">gij667326556 XP_008589917.1</a> |
| <a href="#">PREDICTED: adipocyte plasma membrane-associated protein isofo</a> | 49.4      | 49.4        | 100%        | 2e-05   | 94%   | <a href="#">gij511864235 XP_004754142.1</a> |
| <a href="#">PREDICTED: adipocyte plasma membrane-associated protein [Can</a>  | 49.4      | 49.4        | 100%        | 2e-05   | 94%   | <a href="#">gij743752696 XP_010971243.1</a> |
| <a href="#">PREDICTED: adipocyte plasma membrane-associated protein isofo</a> | 49.4      | 49.4        | 100%        | 2e-05   | 94%   | <a href="#">gij724797100 XP_010359965.1</a> |
| <a href="#">PREDICTED: adipocyte plasma membrane-associated protein isofo</a> | 49.4      | 49.4        | 100%        | 2e-05   | 94%   | <a href="#">gij675792202 XP_008952974.1</a> |
| <a href="#">PREDICTED: adipocyte plasma membrane-associated protein isofo</a> | 49.4      | 49.4        | 100%        | 2e-05   | 94%   | <a href="#">gij675656498 XP_008994116.1</a> |
| <a href="#">PREDICTED: adipocyte plasma membrane-associated protein [Vic</a>  | 49.4      | 49.4        | 100%        | 2e-05   | 94%   | <a href="#">gij560992411 XP_006218341.1</a> |
| <a href="#">PREDICTED: adipocyte plasma membrane-associated protein [Can</a>  | 49.4      | 49.4        | 100%        | 2e-05   | 94%   | <a href="#">gij560894296 XP_006173641.1</a> |
| <a href="#">C20orf3 [Homo sapiens]</a>                                        | 49.4      | 49.4        | 100%        | 2e-05   | 94%   | <a href="#">gij37183270 AAQ89435.1</a>      |
| <a href="#">chromosome 20 open reading frame 3, isoform CRA_b [Homo sapi</a>  | 49.4      | 49.4        | 100%        | 2e-05   | 94%   | <a href="#">gij119630519 EAX10114.1</a>     |
| <a href="#">hypothetical protein PANDA_019520 [Ailuropoda melanoleuca]</a>    | 49.4      | 49.4        | 100%        | 2e-05   | 94%   | <a href="#">gij281351396 EFB26980.1</a>     |
| <a href="#">PREDICTED: adipocyte plasma membrane-associated protein [Equ</a>  | 49.4      | 49.4        | 100%        | 2e-05   | 94%   | <a href="#">gij664771366 XP_008504865.1</a> |
| <a href="#">PREDICTED: adipocyte plasma membrane-associated protein [Urs</a>  | 49.4      | 49.4        | 100%        | 2e-05   | 94%   | <a href="#">gij671025584 XP_008703615.1</a> |
| <a href="#">PREDICTED: adipocyte plasma membrane-associated protein [Pan</a>  | 49.4      | 49.4        | 100%        | 2e-05   | 94%   | <a href="#">gij591342488 XP_007096642.1</a> |
| <a href="#">PREDICTED: adipocyte plasma membrane-associated protein isofo</a> | 49.4      | 49.4        | 100%        | 2e-05   | 94%   | <a href="#">gij545199803 XP_005604486.1</a> |
| <a href="#">PREDICTED: adipocyte plasma membrane-associated protein-like</a>  | 49.4      | 49.4        | 100%        | 2e-05   | 94%   | <a href="#">gij301787895 XP_002929365.1</a> |
| <a href="#">PREDICTED: adipocyte plasma membrane-associated protein isofo</a> | 49.4      | 49.4        | 100%        | 2e-05   | 94%   | <a href="#">gij545199801 XP_005604485.1</a> |
| <a href="#">PREDICTED: adipocyte plasma membrane-associated protein [Can</a>  | 49.4      | 49.4        | 100%        | 2e-05   | 94%   | <a href="#">gij744602490 XP_010991040.1</a> |
| <a href="#">PREDICTED: adipocyte plasma membrane-associated protein [Tar</a>  | 49.4      | 49.4        | 100%        | 2e-05   | 94%   | <a href="#">gij640819801 XP_008066807.1</a> |
| <a href="#">PREDICTED: adipocyte plasma membrane-associated protein [Ory</a>  | 49.4      | 49.4        | 100%        | 2e-05   | 94%   | <a href="#">gij291410623 XP_002721586.1</a> |
| <a href="#">PREDICTED: adipocyte plasma membrane-associated protein [Lip</a>  | 49.4      | 49.4        | 100%        | 2e-05   | 94%   | <a href="#">gij602732221 XP_007451508.1</a> |
| <a href="#">PREDICTED: adipocyte plasma membrane-associated protein [Bal</a>  | 49.4      | 49.4        | 100%        | 2e-05   | 94%   | <a href="#">gij594689044 XP_007191923.1</a> |
| <a href="#">PREDICTED: adipocyte plasma membrane-associated protein [Phy</a>  | 49.4      | 49.4        | 100%        | 2e-05   | 94%   | <a href="#">gij593717611 XP_007105230.1</a> |
| <a href="#">PREDICTED: adipocyte plasma membrane-associated protein [Feli</a> | 49.4      | 49.4        | 100%        | 2e-05   | 94%   | <a href="#">gij586981414 XP_006930067.1</a> |
| <a href="#">PREDICTED: adipocyte plasma membrane-associated protein [Icti</a> | 49.4      | 49.4        | 100%        | 2e-05   | 94%   | <a href="#">gij532097996 XP_005334647.1</a> |

|                                                                               |      |      |      |       |     |                                              |
|-------------------------------------------------------------------------------|------|------|------|-------|-----|----------------------------------------------|
| <a href="#">PREDICTED: adipocyte plasma membrane-associated protein isofc</a> | 49.4 | 49.4 | 100% | 2e-05 | 94% | <a href="#">gij511864232 XP_004754141.1</a>  |
| <a href="#">PREDICTED: adipocyte plasma membrane-associated protein [Octi</a> | 49.4 | 49.4 | 100% | 2e-05 | 94% | <a href="#">gij507661814 XP_004635630.1</a>  |
| <a href="#">PREDICTED: adipocyte plasma membrane-associated protein [Sor</a>  | 49.4 | 49.4 | 100% | 2e-05 | 94% | <a href="#">gij505845493 XP_004616227.1</a>  |
| <a href="#">PREDICTED: adipocyte plasma membrane-associated protein [Och</a>  | 49.4 | 49.4 | 100% | 2e-05 | 94% | <a href="#">gij504167518 XP_004593426.1</a>  |
| <a href="#">PREDICTED: adipocyte plasma membrane-associated protein [Cer</a>  | 49.4 | 49.4 | 100% | 2e-05 | 94% | <a href="#">gij478535723 XP_004441986.1</a>  |
| <a href="#">PREDICTED: adipocyte plasma membrane-associated protein [Tric</a> | 49.4 | 49.4 | 100% | 2e-05 | 94% | <a href="#">gij471377312 XP_004376468.1</a>  |
| <a href="#">PREDICTED: adipocyte plasma membrane-associated protein [Orc</a>  | 49.4 | 49.4 | 100% | 2e-05 | 94% | <a href="#">gij466012177 XP_004270482.1</a>  |
| <a href="#">PREDICTED: adipocyte plasma membrane-associated protein [Oto</a>  | 49.4 | 49.4 | 100% | 2e-05 | 94% | <a href="#">gij395857507 XP_003801133.1</a>  |
| <a href="#">PREDICTED: adipocyte plasma membrane-associated protein [Car</a>  | 49.4 | 49.4 | 100% | 2e-05 | 94% | <a href="#">gij345789049 XP_850086.2</a>     |
| <a href="#">PREDICTED: adipocyte plasma membrane-associated protein [Lox</a>  | 49.4 | 49.4 | 100% | 2e-05 | 94% | <a href="#">gij344279762 XP_003411656.1</a>  |
| <a href="#">PREDICTED: adipocyte plasma membrane-associated protein isofc</a> | 49.4 | 49.4 | 100% | 2e-05 | 94% | <a href="#">gij675792200 XP_008952973.1</a>  |
| <a href="#">PREDICTED: adipocyte plasma membrane-associated protein isofc</a> | 49.4 | 49.4 | 100% | 2e-05 | 94% | <a href="#">gij675656496 XP_008994115.1</a>  |
| <a href="#">PREDICTED: adipocyte plasma membrane-associated protein [Gor</a>  | 49.4 | 49.4 | 100% | 2e-05 | 94% | <a href="#">gij426391191 XP_004061964.1</a>  |
| <a href="#">adipocyte plasma membrane-associated protein [Homo sapiens]</a>   | 49.4 | 49.4 | 100% | 2e-05 | 94% | <a href="#">gij24308201 INP_065392.1</a>     |
| <a href="#">Protein BSCv [Macaca fascicularis]</a>                            | 49.4 | 49.4 | 100% | 2e-05 | 94% | <a href="#">gij355784761 EHH65612.1</a>      |
| <a href="#">PREDICTED: adipocyte plasma membrane-associated protein [Non</a>  | 49.4 | 49.4 | 100% | 2e-05 | 94% | <a href="#">gij332258942 XP_003278549.1</a>  |
| <a href="#">unnamed protein product [Homo sapiens]</a>                        | 49.4 | 49.4 | 100% | 2e-05 | 94% | <a href="#">gij158255694 BAF83818.1</a>      |
| <a href="#">adipocyte plasma membrane-associated protein [Macaca mulatta]</a> | 49.4 | 49.4 | 100% | 2e-05 | 94% | <a href="#">gij388453189 INP_001252979.1</a> |
| <a href="#">BSCv [Homo sapiens]</a>                                           | 49.4 | 49.4 | 100% | 2e-05 | 94% | <a href="#">gij9836652 BAB11885.1</a>        |
| <a href="#">PREDICTED: adipocyte plasma membrane-associated protein [Pon</a>  | 49.4 | 49.4 | 100% | 2e-05 | 94% | <a href="#">gij686761455 XP_009231655.1</a>  |
| <a href="#">PREDICTED: adipocyte plasma membrane-associated protein isofc</a> | 49.4 | 49.4 | 100% | 2e-05 | 94% | <a href="#">gij544463778 XP_005568209.1</a>  |
| <a href="#">PREDICTED: adipocyte plasma membrane-associated protein isofc</a> | 49.4 | 49.4 | 100% | 2e-05 | 94% | <a href="#">gij544463776 XP_005568208.1</a>  |
| <a href="#">PREDICTED: adipocyte plasma membrane-associated protein isofc</a> | 49.4 | 49.4 | 100% | 2e-05 | 94% | <a href="#">gij544463774 XP_005568207.1</a>  |
| <a href="#">PREDICTED: adipocyte plasma membrane-associated protein isofc</a> | 49.4 | 49.4 | 100% | 2e-05 | 94% | <a href="#">gij544463772 XP_005568206.1</a>  |
| <a href="#">PREDICTED: adipocyte plasma membrane-associated protein [Bos</a>  | 46.0 | 46.0 | 100% | 2e-04 | 88% | <a href="#">gij555978143 XP_005901017.1</a>  |
| <a href="#">Adipocyte plasma membrane-associated protein [Bos mutus]</a>      | 46.0 | 46.0 | 100% | 2e-04 | 88% | <a href="#">gij440901758 ELR52645.1</a>      |
| <a href="#">PREDICTED: adipocyte plasma membrane-associated protein [Nar</a>  | 46.0 | 46.0 | 100% | 2e-04 | 88% | <a href="#">gij674106802 XP_008824690.1</a>  |
| <a href="#">PREDICTED: adipocyte plasma membrane-associated protein isofc</a> | 46.0 | 46.0 | 100% | 2e-04 | 88% | <a href="#">gij568918452 XP_006500262.1</a>  |
| <a href="#">PREDICTED: adipocyte plasma membrane-associated protein [Bisc</a> | 46.0 | 46.0 | 100% | 2e-04 | 88% | <a href="#">gij742102975 XP_010834658.1</a>  |
| <a href="#">PREDICTED: adipocyte plasma membrane-associated protein [Fuk</a>  | 46.0 | 46.0 | 100% | 2e-04 | 88% | <a href="#">gij731219302 XP_010623912.1</a>  |
| <a href="#">PREDICTED: adipocyte plasma membrane-associated protein isofc</a> | 46.0 | 46.0 | 100% | 2e-04 | 88% | <a href="#">gij625192556 XP_007638893.1</a>  |
| <a href="#">PREDICTED: adipocyte plasma membrane-associated protein isofc</a> | 46.0 | 46.0 | 100% | 2e-04 | 88% | <a href="#">gij568918450 XP_006500261.1</a>  |
| <a href="#">adipocyte plasma membrane-associated protein [Bos taurus]</a>     | 46.0 | 46.0 | 100% | 2e-04 | 88% | <a href="#">gij78369434 INP_001030490.1</a>  |
| <a href="#">PREDICTED: adipocyte plasma membrane-associated protein [Ovi</a>  | 46.0 | 46.0 | 100% | 2e-04 | 88% | <a href="#">gij426240952 XP_004014356.1</a>  |
| <a href="#">PREDICTED: adipocyte plasma membrane-associated protein [Per</a>  | 46.0 | 46.0 | 100% | 2e-04 | 88% | <a href="#">gij589945824 XP_006985593.1</a>  |
| <a href="#">PREDICTED: adipocyte plasma membrane-associated protein [Chi</a>  | 46.0 | 46.0 | 100% | 2e-04 | 88% | <a href="#">gij533132029 XP_005381039.1</a>  |
| <a href="#">PREDICTED: adipocyte plasma membrane-associated protein [Mes</a>  | 46.0 | 46.0 | 100% | 2e-04 | 88% | <a href="#">gij524942103 XP_005072608.1</a>  |
| <a href="#">PREDICTED: adipocyte plasma membrane-associated protein [Cor</a>  | 46.0 | 46.0 | 100% | 2e-04 | 88% | <a href="#">gij507961028 XP_004687183.1</a>  |
| <a href="#">PREDICTED: adipocyte plasma membrane-associated protein [Jac</a>  | 46.0 | 46.0 | 100% | 2e-04 | 88% | <a href="#">gij507568935 XP_004668094.1</a>  |
| <a href="#">PREDICTED: adipocyte plasma membrane-associated protein [Odc</a>  | 46.0 | 46.0 | 100% | 2e-04 | 88% | <a href="#">gij472357692 XP_004398472.1</a>  |
| <a href="#">adipocyte plasma membrane-associated protein [Mus musculus]</a>   | 46.0 | 46.0 | 100% | 2e-04 | 88% | <a href="#">gij21313668 INP_082253.1</a>     |
| <a href="#">PREDICTED: adipocyte plasma membrane-associated protein [Cav</a>  | 46.0 | 46.0 | 100% | 2e-04 | 88% | <a href="#">gij348581358 XP_003476444.1</a>  |
| <a href="#">PREDICTED: adipocyte plasma membrane-associated protein isofc</a> | 46.0 | 46.0 | 100% | 2e-04 | 88% | <a href="#">gij354475585 XP_003500008.1</a>  |
| <a href="#">PREDICTED: adipocyte plasma membrane-associated protein isofc</a> | 46.0 | 46.0 | 100% | 2e-04 | 88% | <a href="#">gij625266624 XP_007624792.1</a>  |
| <a href="#">PREDICTED: adipocyte plasma membrane-associated protein [Eri</a>  | 46.0 | 46.0 | 100% | 2e-04 | 88% | <a href="#">gij617656120 XP_007535679.1</a>  |



|                                                                                  |      |      |      |       |     |                                             |
|----------------------------------------------------------------------------------|------|------|------|-------|-----|---------------------------------------------|
| <a href="#">PREDICTED: adipocyte plasma membrane-associated protein [Lep</a>     | 46.0 | 46.0 | 100% | 2e-04 | 88% | <a href="#">gil585179120 XP_006741245.1</a> |
| <a href="#">PREDICTED: adipocyte plasma membrane-associated protein [Cap</a>     | 46.0 | 46.0 | 100% | 2e-04 | 88% | <a href="#">gil548489969 XP_005688183.1</a> |
| <a href="#">PREDICTED: adipocyte plasma membrane-associated protein [Pan</a>     | 46.0 | 46.0 | 100% | 2e-04 | 88% | <a href="#">gil556778497 XP_005984319.1</a> |
| <a href="#">PREDICTED: adipocyte plasma membrane-associated protein-like</a>     | 44.3 | 44.3 | 100% | 8e-04 | 88% | <a href="#">gil545890060 XP_005658440.1</a> |
| <a href="#">PREDICTED: adipocyte plasma membrane-associated protein [Sus</a>     | 44.3 | 44.3 | 100% | 8e-04 | 88% | <a href="#">gil350594715 XP_001927122.3</a> |
| <a href="#">PREDICTED: adipocyte plasma membrane-associated protein [Noti</a>    | 43.9 | 43.9 | 87%  | 0.001 | 93% | <a href="#">gil736191077 XP_010771427.1</a> |
| <a href="#">PREDICTED: adipocyte plasma membrane-associated protein isofo</a>    | 43.9 | 43.9 | 87%  | 0.001 | 93% | <a href="#">gil658891745 XP_008428753.1</a> |
| <a href="#">PREDICTED: adipocyte plasma membrane-associated protein isofo</a>    | 43.9 | 43.9 | 87%  | 0.001 | 93% | <a href="#">gil658891742 XP_008428752.1</a> |
| <a href="#">PREDICTED: adipocyte plasma membrane-associated protein [Poe</a>     | 43.9 | 43.9 | 87%  | 0.001 | 93% | <a href="#">gil617509077 XP_007542463.1</a> |
| <a href="#">PREDICTED: adipocyte plasma membrane-associated protein-like</a>     | 43.9 | 43.9 | 87%  | 0.001 | 93% | <a href="#">gil551525979 XP_005814467.1</a> |
| <a href="#">PREDICTED: adipocyte plasma membrane-associated protein [Mic</a>     | 43.5 | 43.5 | 100% | 0.002 | 81% | <a href="#">gil532057169 XP_005371288.1</a> |
| <a href="#">PREDICTED: adipocyte plasma membrane-associated protein isofo</a>    | 43.1 | 43.1 | 100% | 0.002 | 88% | <a href="#">gil562871397 XP_006163663.1</a> |
| <a href="#">PREDICTED: adipocyte plasma membrane-associated protein isofo</a>    | 43.1 | 43.1 | 100% | 0.002 | 88% | <a href="#">gil562871395 XP_006163662.1</a> |
| <a href="#">PREDICTED: adipocyte plasma membrane-associated protein [Ory</a>     | 43.1 | 43.1 | 100% | 0.002 | 88% | <a href="#">gil634885477 XP_007952365.1</a> |
| <a href="#">PREDICTED: adipocyte plasma membrane-associated protein [Chr</a>     | 43.1 | 43.1 | 100% | 0.002 | 88% | <a href="#">gil586460140 XP_006860728.1</a> |
| <a href="#">PREDICTED: adipocyte plasma membrane-associated protein [Ele</a>     | 43.1 | 43.1 | 100% | 0.002 | 88% | <a href="#">gil585720265 XP_006902530.1</a> |
| <a href="#">PREDICTED: adipocyte plasma membrane-associated protein [Ech</a>     | 43.1 | 43.1 | 100% | 0.002 | 88% | <a href="#">gil507712042 XP_004717841.1</a> |
| <a href="#">PREDICTED: adipocyte plasma membrane-associated protein [Pan</a>     | 43.1 | 43.1 | 100% | 0.002 | 88% | <a href="#">gil114681318 XP_514556.2</a>    |
| <a href="#">PREDICTED: adipocyte plasma membrane-associated protein isofo</a>    | 42.6 | 42.6 | 100% | 0.003 | 81% | <a href="#">gil564343542 XP_006235279.1</a> |
| <a href="#">PREDICTED: adipocyte plasma membrane-associated protein [Myc</a>     | 42.6 | 42.6 | 100% | 0.003 | 81% | <a href="#">gil554543332 XP_005866279.1</a> |
| <a href="#">adipocyte plasma membrane-associated protein precursor [Rattus r</a> | 42.6 | 42.6 | 100% | 0.003 | 81% | <a href="#">gil77735352 INP_001029175.1</a> |
| <a href="#">PREDICTED: adipocyte plasma membrane-associated protein isofo</a>    | 42.6 | 42.6 | 100% | 0.003 | 81% | <a href="#">gil512880580 XP_004894998.1</a> |
| <a href="#">Ab2-305 [Rattus norvegicus]</a>                                      | 42.6 | 42.6 | 100% | 0.003 | 81% | <a href="#">gil33086580 AAP92602.1</a>      |
| <a href="#">Adipocyte plasma membrane-associated protein [Myotis davidii]</a>    | 42.6 | 42.6 | 100% | 0.003 | 81% | <a href="#">gil432114788 ELK36543.1</a>     |
| <a href="#">PREDICTED: adipocyte plasma membrane-associated protein [Ept</a>     | 42.6 | 42.6 | 100% | 0.003 | 81% | <a href="#">gil641701525 XP_008139374.1</a> |
| <a href="#">PREDICTED: adipocyte plasma membrane-associated protein [Myc</a>     | 42.6 | 42.6 | 100% | 0.003 | 81% | <a href="#">gil584069940 XP_006755306.1</a> |
| <a href="#">PREDICTED: adipocyte plasma membrane-associated protein isofo</a>    | 42.6 | 42.6 | 100% | 0.003 | 81% | <a href="#">gil564343538 XP_006235277.1</a> |

## Alignments

Download GenPept Graphics

Next Previous Descriptions

unnamed protein product [Homo sapiens]

Sequence ID: [gil194378020|dbj|BAG63373.1](#) Length: 289 Number of Matches: 1

Range 1: 156 to 171 GenPept Graphics

Next Match Previous Match

| Score          | Expect | Identities | Positives   | Gaps     |
|----------------|--------|------------|-------------|----------|
| 49.4 bits(109) | 2e-05  | 15/16(94%) | 16/16(100%) | 0/16(0%) |

Query 1 RAGPDGTLFVADAYKG 16  
 RAGP+GTLFVADAYKG  
 Sbjct 156 RAGPNGTLFVADAYKG 171

### Related Information

[Gene](#) - associated gene details

Download GenPept Graphics

Next Previous Descriptions

PREDICTED: adipocyte plasma membrane-associated protein isoform X1 [Homo sapiens]

Sequence ID: [gil530425819|ref|XP\\_005260820.1](#) Length: 289 Number of Matches: 1

Range 1: 156 to 171 GenPept Graphics

Next Match Previous Match

| Score          | Expect | Identities | Positives   | Gaps     |
|----------------|--------|------------|-------------|----------|
| 49.4 bits(109) | 2e-05  | 15/16(94%) | 16/16(100%) | 0/16(0%) |

Query 1 RAGPDGTLFVADAYKG 16

### Related Information

[Gene](#) - associated gene details

[Map Viewer](#) - aligned genomic context

Sbjct 156 RAGP+GTLFVADAYKG  
 RAGPNGTLFVADAYKG 171

[Download](#) [GenPept](#) [Graphics](#) [Next](#) [Previous](#) [Descriptions](#)

PREDICTED: adipocyte plasma membrane-associated protein isoform X1 [Rhinopithecus roxellana]

Sequence ID: [gi|724797097|ref|XP\\_010359957.1|](#) Length: 305 Number of Matches: 1

Range 1: 45 to 60 [GenPept](#) [Graphics](#) [Next Match](#) [Previous Match](#)

| Score          | Expect | Identities | Positives   | Gaps     |
|----------------|--------|------------|-------------|----------|
| 49.4 bits(109) | 2e-05  | 15/16(94%) | 16/16(100%) | 0/16(0%) |

Query 1 RAGPDGTLFVADAYKG 16  
 RAGP+GTLFVADAYKG  
 Sbjct 45 RAGPNGTLFVADAYKG 60

**Related Information**

[Gene](#) - associated gene details  
[Map Viewer](#) - aligned genomic context

[Download](#) [GenPept](#) [Graphics](#) [Next](#) [Previous](#) [Descriptions](#)

PREDICTED: adipocyte plasma membrane-associated protein, partial [Galeopterus variegatus]

Sequence ID: [gi|667326556|ref|XP\\_008589917.1|](#) Length: 345 Number of Matches: 1

Range 1: 85 to 100 [GenPept](#) [Graphics](#) [Next Match](#) [Previous Match](#)

| Score          | Expect | Identities | Positives   | Gaps     |
|----------------|--------|------------|-------------|----------|
| 49.4 bits(109) | 2e-05  | 15/16(94%) | 16/16(100%) | 0/16(0%) |

Query 1 RAGPDGTLFVADAYKG 16  
 RAGP+GTLFVADAYKG  
 Sbjct 85 RAGPNGTLFVADAYKG 100

**Related Information**

[Gene](#) - associated gene details  
[Map Viewer](#) - aligned genomic context

[Download](#) [GenPept](#) [Graphics](#) [Next](#) [Previous](#) [Descriptions](#)

PREDICTED: adipocyte plasma membrane-associated protein isoform X2 [Mustela putorius furo]

Sequence ID: [gi|511864235|ref|XP\\_004754142.1|](#) Length: 370 Number of Matches: 1

[See 1 more title\(s\)](#)

Range 1: 155 to 170 [GenPept](#) [Graphics](#) [Next Match](#) [Previous Match](#)

| Score          | Expect | Identities | Positives   | Gaps     |
|----------------|--------|------------|-------------|----------|
| 49.4 bits(109) | 2e-05  | 15/16(94%) | 16/16(100%) | 0/16(0%) |

Query 1 RAGPDGTLFVADAYKG 16  
 RAGP+GTLFVADAYKG  
 Sbjct 155 RAGPNGTLFVADAYKG 170

**Related Information**

[Gene](#) - associated gene details  
[Map Viewer](#) - aligned genomic context  
[Identical Proteins](#) - Proteins identical to the subject

BLAST is a registered trademark of the National Library of Medicine.

▶ [NCBI/ BLAST/ blastp suite/ Formatting Results - B90WWHWV01R](#)

**i** Your search parameters were adjusted to search for a short input sequence.

[Edit and Resubmit](#) [Save Search Strategies](#) ▶ [Formatting options](#) ▶ [Download](#)

[YouTube](#) [How to read this page](#) [Blast report description](#)

### APMAP\_RAGPNGTLFVADAYKG\_NonMod

**RID** [B90WWHWV01R](#) (Expires on 01-14 09:31 am)

**Query ID** |cl|48851  
**Description** None  
**Molecule type** amino acid  
**Query Length** 16

**Database Name** nr  
**Description** All non-redundant GenBank CDS translations+PDB+SwissProt+PIR excluding environmental samples from WGS projects  
**Program** BLASTP 2.2.30+ ▶ [Citation](#)

Other reports: ▶ [Search Summary](#) [[Taxonomy reports](#)] [[Distance tree of results](#)] [[Multiple alignment](#)]

### **G**raphic Summary

**G** [Show Conserved Domains](#)

No putative conserved domains have been detected

Distribution of 100 Blast Hits on the Query Sequence

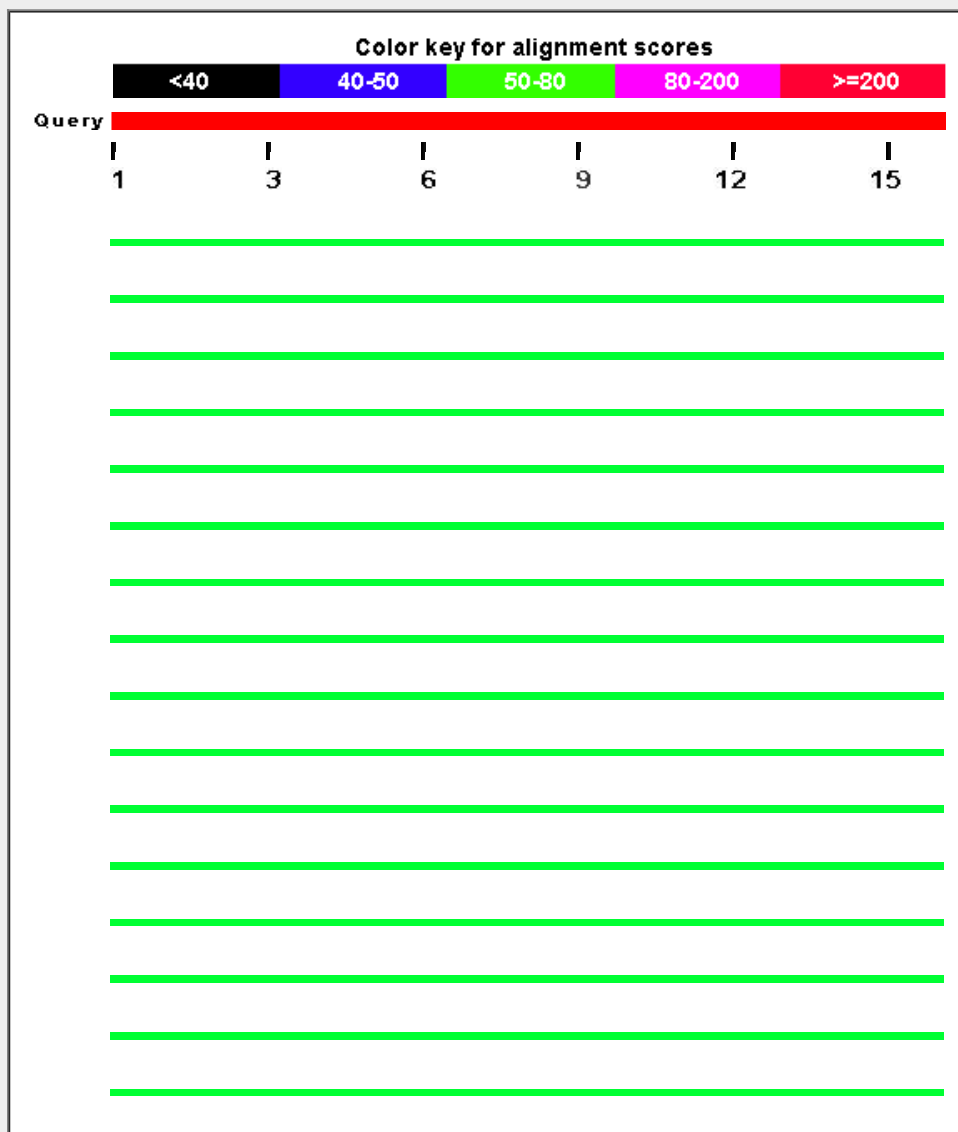

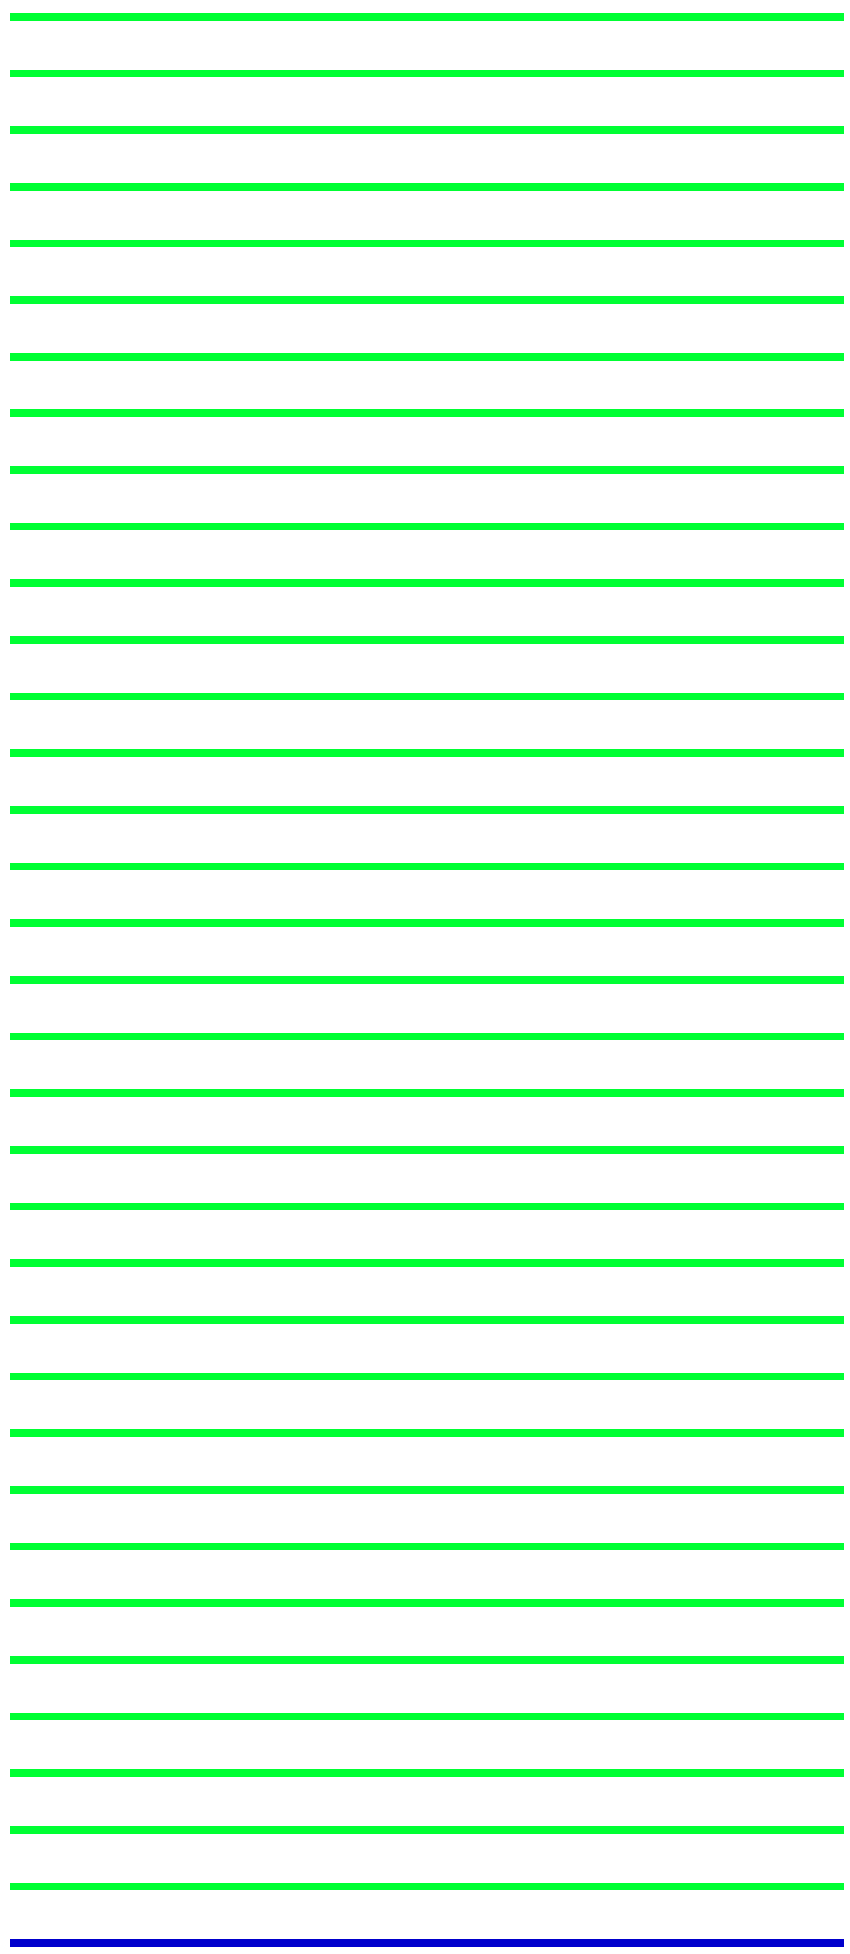

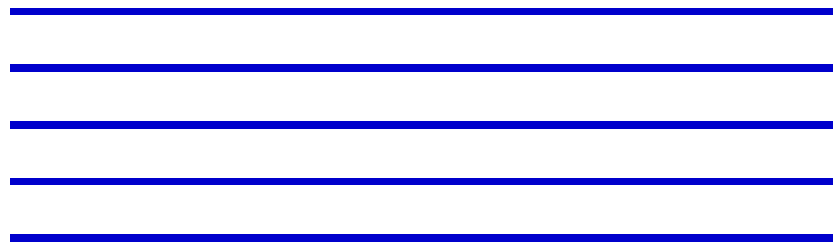

**Descriptions**

**Sequences producing significant alignments:**

Select: [All](#) [None](#) Selected:0

[Alignments](#)
[Download](#)
[GenPept](#)
[Graphics](#)
[Distance tree of results](#)
[Multiple alignment](#)

| Description                                                                   | Max score | Total score | Query cover | E value | Ident | Accession                                   |
|-------------------------------------------------------------------------------|-----------|-------------|-------------|---------|-------|---------------------------------------------|
| <a href="#">unnamed protein product [Homo sapiens]</a>                        | 52.0      | 52.0        | 100%        | 2e-06   | 100%  | <a href="#">gij194378020 BAG63373.1</a>     |
| <a href="#">PREDICTED: adipocyte plasma membrane-associated protein isofo</a> | 52.0      | 52.0        | 100%        | 2e-06   | 100%  | <a href="#">gij530425819 XP_005260820.1</a> |
| <a href="#">PREDICTED: adipocyte plasma membrane-associated protein isofo</a> | 52.0      | 52.0        | 100%        | 2e-06   | 100%  | <a href="#">gij724797097 XP_010359957.1</a> |
| <a href="#">PREDICTED: adipocyte plasma membrane-associated protein [Gal</a>  | 52.0      | 52.0        | 100%        | 2e-06   | 100%  | <a href="#">gij667326556 XP_008589917.1</a> |
| <a href="#">PREDICTED: adipocyte plasma membrane-associated protein isofo</a> | 52.0      | 52.0        | 100%        | 2e-06   | 100%  | <a href="#">gij511864235 XP_004754142.1</a> |
| <a href="#">PREDICTED: adipocyte plasma membrane-associated protein isofo</a> | 52.0      | 52.0        | 100%        | 2e-06   | 100%  | <a href="#">gij724797100 XP_010359965.1</a> |
| <a href="#">PREDICTED: adipocyte plasma membrane-associated protein isofo</a> | 52.0      | 52.0        | 100%        | 2e-06   | 100%  | <a href="#">gij675792202 XP_008952974.1</a> |
| <a href="#">PREDICTED: adipocyte plasma membrane-associated protein isofo</a> | 52.0      | 52.0        | 100%        | 2e-06   | 100%  | <a href="#">gij675656498 XP_008994116.1</a> |
| <a href="#">PREDICTED: adipocyte plasma membrane-associated protein [Vic</a>  | 52.0      | 52.0        | 100%        | 2e-06   | 100%  | <a href="#">gij560992411 XP_006218341.1</a> |
| <a href="#">PREDICTED: adipocyte plasma membrane-associated protein [Can</a>  | 52.0      | 52.0        | 100%        | 2e-06   | 100%  | <a href="#">gij560894296 XP_006173641.1</a> |
| <a href="#">C20orf3 [Homo sapiens]</a>                                        | 52.0      | 52.0        | 100%        | 2e-06   | 100%  | <a href="#">gij37183270 AAQ89435.1</a>      |
| <a href="#">chromosome 20 open reading frame 3, isoform CRA_b [Homo sapi</a>  | 52.0      | 52.0        | 100%        | 2e-06   | 100%  | <a href="#">gij119630519 EAX10114.1</a>     |
| <a href="#">hypothetical protein PANDA_019520 [Ailuropoda melanoleuca]</a>    | 52.0      | 52.0        | 100%        | 2e-06   | 100%  | <a href="#">gij281351396 EFB26980.1</a>     |
| <a href="#">PREDICTED: adipocyte plasma membrane-associated protein [Equ</a>  | 52.0      | 52.0        | 100%        | 2e-06   | 100%  | <a href="#">gij664771366 XP_008504865.1</a> |
| <a href="#">PREDICTED: adipocyte plasma membrane-associated protein [Urs</a>  | 52.0      | 52.0        | 100%        | 2e-06   | 100%  | <a href="#">gij671025584 XP_008703615.1</a> |
| <a href="#">PREDICTED: adipocyte plasma membrane-associated protein [Pan</a>  | 52.0      | 52.0        | 100%        | 2e-06   | 100%  | <a href="#">gij591342488 XP_007096642.1</a> |
| <a href="#">PREDICTED: adipocyte plasma membrane-associated protein isofo</a> | 52.0      | 52.0        | 100%        | 2e-06   | 100%  | <a href="#">gij545199803 XP_005604486.1</a> |
| <a href="#">PREDICTED: adipocyte plasma membrane-associated protein-like</a>  | 52.0      | 52.0        | 100%        | 2e-06   | 100%  | <a href="#">gij301787895 XP_002929365.1</a> |
| <a href="#">PREDICTED: adipocyte plasma membrane-associated protein isofo</a> | 52.0      | 52.0        | 100%        | 2e-06   | 100%  | <a href="#">gij545199801 XP_005604485.1</a> |
| <a href="#">PREDICTED: adipocyte plasma membrane-associated protein [Tar</a>  | 52.0      | 52.0        | 100%        | 2e-06   | 100%  | <a href="#">gij640819801 XP_008066807.1</a> |
| <a href="#">PREDICTED: adipocyte plasma membrane-associated protein [Ory</a>  | 52.0      | 52.0        | 100%        | 2e-06   | 100%  | <a href="#">gij291410623 XP_002721586.1</a> |
| <a href="#">PREDICTED: adipocyte plasma membrane-associated protein [Lip</a>  | 52.0      | 52.0        | 100%        | 2e-06   | 100%  | <a href="#">gij602732221 XP_007451508.1</a> |
| <a href="#">PREDICTED: adipocyte plasma membrane-associated protein [Bal</a>  | 52.0      | 52.0        | 100%        | 2e-06   | 100%  | <a href="#">gij594689044 XP_007191923.1</a> |
| <a href="#">PREDICTED: adipocyte plasma membrane-associated protein [Phy</a>  | 52.0      | 52.0        | 100%        | 2e-06   | 100%  | <a href="#">gij593717611 XP_007105230.1</a> |
| <a href="#">PREDICTED: adipocyte plasma membrane-associated protein [Feli</a> | 52.0      | 52.0        | 100%        | 2e-06   | 100%  | <a href="#">gij586981414 XP_006930067.1</a> |
| <a href="#">PREDICTED: adipocyte plasma membrane-associated protein [Icti</a> | 52.0      | 52.0        | 100%        | 2e-06   | 100%  | <a href="#">gij532097996 XP_005334647.1</a> |
| <a href="#">PREDICTED: adipocyte plasma membrane-associated protein isofo</a> | 52.0      | 52.0        | 100%        | 2e-06   | 100%  | <a href="#">gij511864232 XP_004754141.1</a> |
| <a href="#">PREDICTED: adipocyte plasma membrane-associated protein [Oct</a>  | 52.0      | 52.0        | 100%        | 2e-06   | 100%  | <a href="#">gij507661814 XP_004635630.1</a> |

|                                                                               |      |      |      |       |      |                                             |
|-------------------------------------------------------------------------------|------|------|------|-------|------|---------------------------------------------|
| <a href="#">PREDICTED: adipocyte plasma membrane-associated protein [Sor</a>  | 52.0 | 52.0 | 100% | 2e-06 | 100% | <a href="#">gij505845493 XP_004616227.1</a> |
| <a href="#">PREDICTED: adipocyte plasma membrane-associated protein [Och</a>  | 52.0 | 52.0 | 100% | 2e-06 | 100% | <a href="#">gij504167518 XP_004593426.1</a> |
| <a href="#">PREDICTED: adipocyte plasma membrane-associated protein [Cer</a>  | 52.0 | 52.0 | 100% | 2e-06 | 100% | <a href="#">gij478535723 XP_004441986.1</a> |
| <a href="#">PREDICTED: adipocyte plasma membrane-associated protein [Tric</a> | 52.0 | 52.0 | 100% | 2e-06 | 100% | <a href="#">gij471377312 XP_004376468.1</a> |
| <a href="#">PREDICTED: adipocyte plasma membrane-associated protein [Orc</a>  | 52.0 | 52.0 | 100% | 2e-06 | 100% | <a href="#">gij466012177 XP_004270482.1</a> |
| <a href="#">PREDICTED: adipocyte plasma membrane-associated protein [Oto</a>  | 52.0 | 52.0 | 100% | 2e-06 | 100% | <a href="#">gij395857507 XP_003801133.1</a> |
| <a href="#">PREDICTED: adipocyte plasma membrane-associated protein [Car</a>  | 52.0 | 52.0 | 100% | 2e-06 | 100% | <a href="#">gij345789049 XP_850086.2</a>    |
| <a href="#">PREDICTED: adipocyte plasma membrane-associated protein [Lox</a>  | 52.0 | 52.0 | 100% | 2e-06 | 100% | <a href="#">gij344279762 XP_003411656.1</a> |
| <a href="#">PREDICTED: adipocyte plasma membrane-associated protein isofo</a> | 52.0 | 52.0 | 100% | 2e-06 | 100% | <a href="#">gij675792200 XP_008952973.1</a> |
| <a href="#">PREDICTED: adipocyte plasma membrane-associated protein isofo</a> | 52.0 | 52.0 | 100% | 2e-06 | 100% | <a href="#">gij675656496 XP_008994115.1</a> |
| <a href="#">PREDICTED: adipocyte plasma membrane-associated protein [Gor</a>  | 52.0 | 52.0 | 100% | 2e-06 | 100% | <a href="#">gij426391191 XP_004061964.1</a> |
| <a href="#">adipocyte plasma membrane-associated protein [Homo sapiens]</a>   | 52.0 | 52.0 | 100% | 2e-06 | 100% | <a href="#">gij24308201 NP_065392.1</a>     |
| <a href="#">Protein BSCv [Macaca fascicularis]</a>                            | 52.0 | 52.0 | 100% | 2e-06 | 100% | <a href="#">gij355784761 EHH65612.1</a>     |
| <a href="#">PREDICTED: adipocyte plasma membrane-associated protein [Non</a>  | 52.0 | 52.0 | 100% | 2e-06 | 100% | <a href="#">gij332258942 XP_003278549.1</a> |
| <a href="#">unnamed protein product [Homo sapiens]</a>                        | 52.0 | 52.0 | 100% | 2e-06 | 100% | <a href="#">gij158255694 BAF83818.1</a>     |
| <a href="#">adipocyte plasma membrane-associated protein [Macaca mulatta]</a> | 52.0 | 52.0 | 100% | 2e-06 | 100% | <a href="#">gij388453189 NP_001252979.1</a> |
| <a href="#">BSCv [Homo sapiens]</a>                                           | 52.0 | 52.0 | 100% | 2e-06 | 100% | <a href="#">gij9836652 BAB11885.1</a>       |
| <a href="#">PREDICTED: adipocyte plasma membrane-associated protein [Pon</a>  | 52.0 | 52.0 | 100% | 2e-06 | 100% | <a href="#">gij686761455 XP_009231655.1</a> |
| <a href="#">PREDICTED: adipocyte plasma membrane-associated protein isofo</a> | 52.0 | 52.0 | 100% | 2e-06 | 100% | <a href="#">gij544463778 XP_005568209.1</a> |
| <a href="#">PREDICTED: adipocyte plasma membrane-associated protein isofo</a> | 52.0 | 52.0 | 100% | 2e-06 | 100% | <a href="#">gij544463776 XP_005568208.1</a> |
| <a href="#">PREDICTED: adipocyte plasma membrane-associated protein isofo</a> | 52.0 | 52.0 | 100% | 2e-06 | 100% | <a href="#">gij544463774 XP_005568207.1</a> |
| <a href="#">PREDICTED: adipocyte plasma membrane-associated protein isofo</a> | 52.0 | 52.0 | 100% | 2e-06 | 100% | <a href="#">gij544463772 XP_005568206.1</a> |
| <a href="#">PREDICTED: adipocyte plasma membrane-associated protein [Bos</a>  | 48.6 | 48.6 | 100% | 3e-05 | 94%  | <a href="#">gij555978143 XP_005901017.1</a> |
| <a href="#">Adipocyte plasma membrane-associated protein [Bos mutus]</a>      | 48.6 | 48.6 | 100% | 3e-05 | 94%  | <a href="#">gij440901758 ELR52645.1</a>     |
| <a href="#">PREDICTED: adipocyte plasma membrane-associated protein [Nar</a>  | 48.6 | 48.6 | 100% | 3e-05 | 94%  | <a href="#">gij674106802 XP_008824690.1</a> |
| <a href="#">PREDICTED: adipocyte plasma membrane-associated protein isofo</a> | 48.6 | 48.6 | 100% | 3e-05 | 94%  | <a href="#">gij568918452 XP_006500262.1</a> |
| <a href="#">PREDICTED: adipocyte plasma membrane-associated protein [Fuk</a>  | 48.6 | 48.6 | 100% | 3e-05 | 94%  | <a href="#">gij731219302 XP_010623912.1</a> |
| <a href="#">PREDICTED: adipocyte plasma membrane-associated protein isofo</a> | 48.6 | 48.6 | 100% | 3e-05 | 94%  | <a href="#">gij625192556 XP_007638893.1</a> |
| <a href="#">PREDICTED: adipocyte plasma membrane-associated protein isofo</a> | 48.6 | 48.6 | 100% | 3e-05 | 94%  | <a href="#">gij568918450 XP_006500261.1</a> |
| <a href="#">adipocyte plasma membrane-associated protein [Bos taurus]</a>     | 48.6 | 48.6 | 100% | 3e-05 | 94%  | <a href="#">gij78369434 NP_001030490.1</a>  |
| <a href="#">PREDICTED: adipocyte plasma membrane-associated protein [Ovi</a>  | 48.6 | 48.6 | 100% | 3e-05 | 94%  | <a href="#">gij426240952 XP_004014356.1</a> |
| <a href="#">PREDICTED: adipocyte plasma membrane-associated protein [Peri</a> | 48.6 | 48.6 | 100% | 3e-05 | 94%  | <a href="#">gij589945824 XP_006985593.1</a> |
| <a href="#">PREDICTED: adipocyte plasma membrane-associated protein [Chi</a>  | 48.6 | 48.6 | 100% | 3e-05 | 94%  | <a href="#">gij533132029 XP_005381039.1</a> |
| <a href="#">PREDICTED: adipocyte plasma membrane-associated protein [Mes</a>  | 48.6 | 48.6 | 100% | 3e-05 | 94%  | <a href="#">gij524942103 XP_005072608.1</a> |
| <a href="#">PREDICTED: adipocyte plasma membrane-associated protein [Cor</a>  | 48.6 | 48.6 | 100% | 3e-05 | 94%  | <a href="#">gij507961028 XP_004687183.1</a> |
| <a href="#">PREDICTED: adipocyte plasma membrane-associated protein [Jac</a>  | 48.6 | 48.6 | 100% | 3e-05 | 94%  | <a href="#">gij507568935 XP_004668094.1</a> |
| <a href="#">PREDICTED: adipocyte plasma membrane-associated protein [Odc</a>  | 48.6 | 48.6 | 100% | 3e-05 | 94%  | <a href="#">gij472357692 XP_004398472.1</a> |
| <a href="#">adipocyte plasma membrane-associated protein [Mus musculus]</a>   | 48.6 | 48.6 | 100% | 3e-05 | 94%  | <a href="#">gij21313668 NP_082253.1</a>     |
| <a href="#">PREDICTED: adipocyte plasma membrane-associated protein [Cav</a>  | 48.6 | 48.6 | 100% | 3e-05 | 94%  | <a href="#">gij348581358 XP_003476444.1</a> |
| <a href="#">PREDICTED: adipocyte plasma membrane-associated protein isofo</a> | 48.6 | 48.6 | 100% | 3e-05 | 94%  | <a href="#">gij354475585 XP_003500008.1</a> |
| <a href="#">PREDICTED: adipocyte plasma membrane-associated protein isofo</a> | 48.6 | 48.6 | 100% | 3e-05 | 94%  | <a href="#">gij625266624 XP_007624792.1</a> |
| <a href="#">PREDICTED: adipocyte plasma membrane-associated protein [Erin</a> | 48.6 | 48.6 | 100% | 3e-05 | 94%  | <a href="#">gij617656120 XP_007535679.1</a> |
| <a href="#">PREDICTED: adipocyte plasma membrane-associated protein [Lep</a>  | 48.6 | 48.6 | 100% | 3e-05 | 94%  | <a href="#">gij585179120 XP_006741245.1</a> |
| <a href="#">PREDICTED: adipocyte plasma membrane-associated protein [Cap</a>  | 48.6 | 48.6 | 100% | 3e-05 | 94%  | <a href="#">gij548489969 XP_005688183.1</a> |
| <a href="#">PREDICTED: adipocyte plasma membrane-associated protein isofo</a> | 48.6 | 48.6 | 100% | 3e-05 | 94%  | <a href="#">gij528973115 XP_005214463.1</a> |

|                                                                                  |      |      |      |       |      |                                             |
|----------------------------------------------------------------------------------|------|------|------|-------|------|---------------------------------------------|
| <a href="#">PREDICTED: adipocyte plasma membrane-associated protein [Pan</a>     | 48.6 | 48.6 | 100% | 3e-05 | 94%  | <a href="#">gil556778497 XP_005984319.1</a> |
| <a href="#">PREDICTED: adipocyte plasma membrane-associated protein-like</a>     | 46.9 | 46.9 | 100% | 1e-04 | 94%  | <a href="#">gil545890060 XP_005658440.1</a> |
| <a href="#">PREDICTED: adipocyte plasma membrane-associated protein [Sus</a>     | 46.9 | 46.9 | 100% | 1e-04 | 94%  | <a href="#">gil350594715 XP_001927122.3</a> |
| <a href="#">PREDICTED: adipocyte plasma membrane-associated protein isofo</a>    | 46.4 | 46.4 | 87%  | 1e-04 | 100% | <a href="#">gil658891745 XP_008428753.1</a> |
| <a href="#">PREDICTED: adipocyte plasma membrane-associated protein isofo</a>    | 46.4 | 46.4 | 87%  | 2e-04 | 100% | <a href="#">gil658891742 XP_008428752.1</a> |
| <a href="#">PREDICTED: adipocyte plasma membrane-associated protein [Poe</a>     | 46.4 | 46.4 | 87%  | 2e-04 | 100% | <a href="#">gil617509077 XP_007542463.1</a> |
| <a href="#">PREDICTED: adipocyte plasma membrane-associated protein-like</a>     | 46.4 | 46.4 | 87%  | 2e-04 | 100% | <a href="#">gil551525979 XP_005814467.1</a> |
| <a href="#">PREDICTED: adipocyte plasma membrane-associated protein [Mic</a>     | 46.0 | 46.0 | 100% | 2e-04 | 88%  | <a href="#">gil532057169 XP_005371288.1</a> |
| <a href="#">PREDICTED: adipocyte plasma membrane-associated protein isofo</a>    | 45.6 | 45.6 | 100% | 3e-04 | 94%  | <a href="#">gil562871397 XP_006163663.1</a> |
| <a href="#">PREDICTED: adipocyte plasma membrane-associated protein isofo</a>    | 45.6 | 45.6 | 100% | 3e-04 | 94%  | <a href="#">gil562871395 XP_006163662.1</a> |
| <a href="#">PREDICTED: adipocyte plasma membrane-associated protein [Ory</a>     | 45.6 | 45.6 | 100% | 3e-04 | 94%  | <a href="#">gil634885477 XP_007952365.1</a> |
| <a href="#">PREDICTED: adipocyte plasma membrane-associated protein [Chr</a>     | 45.6 | 45.6 | 100% | 3e-04 | 94%  | <a href="#">gil586460140 XP_006860728.1</a> |
| <a href="#">PREDICTED: adipocyte plasma membrane-associated protein [Ele</a>     | 45.6 | 45.6 | 100% | 3e-04 | 94%  | <a href="#">gil585720265 XP_006902530.1</a> |
| <a href="#">PREDICTED: adipocyte plasma membrane-associated protein [Ech</a>     | 45.6 | 45.6 | 100% | 3e-04 | 94%  | <a href="#">gil507712042 XP_004717841.1</a> |
| <a href="#">PREDICTED: adipocyte plasma membrane-associated protein [Pan</a>     | 45.6 | 45.6 | 100% | 3e-04 | 94%  | <a href="#">gil114681318 XP_514556.2</a>    |
| <a href="#">PREDICTED: adipocyte plasma membrane-associated protein isofo</a>    | 45.2 | 45.2 | 100% | 4e-04 | 88%  | <a href="#">gil564343542 XP_006235279.1</a> |
| <a href="#">PREDICTED: adipocyte plasma membrane-associated protein [Myc</a>     | 45.2 | 45.2 | 100% | 4e-04 | 88%  | <a href="#">gil554543332 XP_005866279.1</a> |
| <a href="#">adipocyte plasma membrane-associated protein precursor [Rattus r</a> | 45.2 | 45.2 | 100% | 4e-04 | 88%  | <a href="#">gil77735352 NP_001029175.1</a>  |
| <a href="#">PREDICTED: adipocyte plasma membrane-associated protein isofo</a>    | 45.2 | 45.2 | 100% | 4e-04 | 88%  | <a href="#">gil512880580 XP_004894998.1</a> |
| <a href="#">Ab2-305 [Rattus norvegicus]</a>                                      | 45.2 | 45.2 | 100% | 4e-04 | 88%  | <a href="#">gil33086580 AAP92602.1</a>      |
| <a href="#">Adipocyte plasma membrane-associated protein [Myotis davidii]</a>    | 45.2 | 45.2 | 100% | 4e-04 | 88%  | <a href="#">gil432114788 ELK36543.1</a>     |
| <a href="#">PREDICTED: adipocyte plasma membrane-associated protein [Ept</a>     | 45.2 | 45.2 | 100% | 4e-04 | 88%  | <a href="#">gil641701525 XP_008139374.1</a> |
| <a href="#">PREDICTED: adipocyte plasma membrane-associated protein [Myc</a>     | 45.2 | 45.2 | 100% | 4e-04 | 88%  | <a href="#">gil584069940 XP_006755306.1</a> |
| <a href="#">PREDICTED: adipocyte plasma membrane-associated protein [Myc</a>     | 45.2 | 45.2 | 100% | 4e-04 | 88%  | <a href="#">gil558166297 XP_006098004.1</a> |
| <a href="#">PREDICTED: adipocyte plasma membrane-associated protein isofo</a>    | 45.2 | 45.2 | 100% | 4e-04 | 88%  | <a href="#">gil512880576 XP_004894997.1</a> |
| <a href="#">PREDICTED: adipocyte plasma membrane-associated protein isofo</a>    | 45.2 | 45.2 | 100% | 4e-04 | 88%  | <a href="#">gil564343538 XP_006235277.1</a> |
| <a href="#">Adipocyte plasma membrane-associated protein [Myotis brandtii]</a>   | 45.2 | 45.2 | 100% | 4e-04 | 88%  | <a href="#">gil521026002 EPQ07790.1</a>     |

## Alignments

Download GenPept Graphics

Next Previous Descriptions

unnamed protein product [Homo sapiens]

Sequence ID: [gil194378020|dbj|BAG63373.1](#) Length: 289 Number of Matches: 1

Range 1: 156 to 171 GenPept Graphics

Next Match Previous Match

| Score          | Expect | Identities  | Positives   | Gaps     |
|----------------|--------|-------------|-------------|----------|
| 52.0 bits(115) | 2e-06  | 16/16(100%) | 16/16(100%) | 0/16(0%) |

Query 1 RAGPNGTLFVADAYKG 16  
 RAGPNGTLFVADAYKG  
 Sbjct 156 RAGPNGTLFVADAYKG 171

### Related Information

[Gene](#) - associated gene details

Download GenPept Graphics

Next Previous Descriptions

PREDICTED: adipocyte plasma membrane-associated protein isoform X1 [Homo sapiens]

Sequence ID: [gil530425819|ref|XP\\_005260820.1](#) Length: 289 Number of Matches: 1

Range 1: 156 to 171 GenPept Graphics

Next Match Previous Match

| Score          | Expect | Identities  | Positives   | Gaps     |
|----------------|--------|-------------|-------------|----------|
| 52.0 bits(115) | 2e-06  | 16/16(100%) | 16/16(100%) | 0/16(0%) |

Query 1 RAGPNGTLFVADAYKG 16

### Related Information

[Gene](#) - associated gene details

[Map Viewer](#) - aligned genomic context

Sbjct 156 RAGPNGTLFVADAYKG 171  
 RAGPNGTLFVADAYKG 171

[Download](#) [GenPept](#) [Graphics](#) [Next](#) [Previous](#) [Descriptions](#)

PREDICTED: adipocyte plasma membrane-associated protein isoform X1 [Rhinopithecus roxellana]

Sequence ID: [gi|724797097|ref|XP\\_010359957.1|](#) Length: 305 Number of Matches: 1

Range 1: 45 to 60 [GenPept](#) [Graphics](#) [Next Match](#) [Previous Match](#)

| Score          | Expect | Identities  | Positives   | Gaps     |
|----------------|--------|-------------|-------------|----------|
| 52.0 bits(115) | 2e-06  | 16/16(100%) | 16/16(100%) | 0/16(0%) |

Query 1 RAGPNGTLFVADAYKG 16  
 RAGPNGTLFVADAYKG  
 Sbjct 45 RAGPNGTLFVADAYKG 60

**Related Information**

[Gene](#) - associated gene details  
[Map Viewer](#) - aligned genomic context

[Download](#) [GenPept](#) [Graphics](#) [Next](#) [Previous](#) [Descriptions](#)

PREDICTED: adipocyte plasma membrane-associated protein, partial [Galeopterus variegatus]

Sequence ID: [gi|667326556|ref|XP\\_008589917.1|](#) Length: 345 Number of Matches: 1

Range 1: 85 to 100 [GenPept](#) [Graphics](#) [Next Match](#) [Previous Match](#)

| Score          | Expect | Identities  | Positives   | Gaps     |
|----------------|--------|-------------|-------------|----------|
| 52.0 bits(115) | 2e-06  | 16/16(100%) | 16/16(100%) | 0/16(0%) |

Query 1 RAGPNGTLFVADAYKG 16  
 RAGPNGTLFVADAYKG  
 Sbjct 85 RAGPNGTLFVADAYKG 100

**Related Information**

[Gene](#) - associated gene details  
[Map Viewer](#) - aligned genomic context

[Download](#) [GenPept](#) [Graphics](#) [Next](#) [Previous](#) [Descriptions](#)

PREDICTED: adipocyte plasma membrane-associated protein isoform X2 [Mustela putorius furo]

Sequence ID: [gi|511864235|ref|XP\\_004754142.1|](#) Length: 370 Number of Matches: 1

[See 1 more title\(s\)](#)

Range 1: 155 to 170 [GenPept](#) [Graphics](#) [Next Match](#) [Previous Match](#)

| Score          | Expect | Identities  | Positives   | Gaps     |
|----------------|--------|-------------|-------------|----------|
| 52.0 bits(115) | 2e-06  | 16/16(100%) | 16/16(100%) | 0/16(0%) |

Query 1 RAGPNGTLFVADAYKG 16  
 RAGPNGTLFVADAYKG  
 Sbjct 155 RAGPNGTLFVADAYKG 170

**Related Information**

[Gene](#) - associated gene details  
[Map Viewer](#) - aligned genomic context  
[Identical Proteins](#) - Proteins identical to the subject

BLAST is a registered trademark of the National Library of Medicine.



NCBI/ BLAST/ blastp suite/ Formatting Results - BGUS5DTZ014

Your search parameters were adjusted to search for a short input sequence.

[Edit and Resubmit](#) [Save Search Strategies](#) [Formatting options](#) [Download](#) [YouTube](#) [How to read this page](#) [Blast report description](#)

ATRN\_KAATCINPLDGSVCERPADHSAKQ\_Mod

RID [BGUS5DTZ014](#) (Expires on 01-17 08:36 am)

Query ID |cl|50873 Database Name nr  
 Description None Description All non-redundant GenBank CDS translations+PDB+SwissProt+PIR excluding environmental samples from WGS projects  
 Molecule type amino acid Program BLASTP 2.2.30+ [Citation](#)  
 Query Length 24

Other reports: [Search Summary](#) [Taxonomy reports](#) [Distance tree of results](#) [Multiple alignment](#)

[New DELTA-BLAST](#) a more sensitive protein-protein search

Graphic Summary

Show Conserved Domains

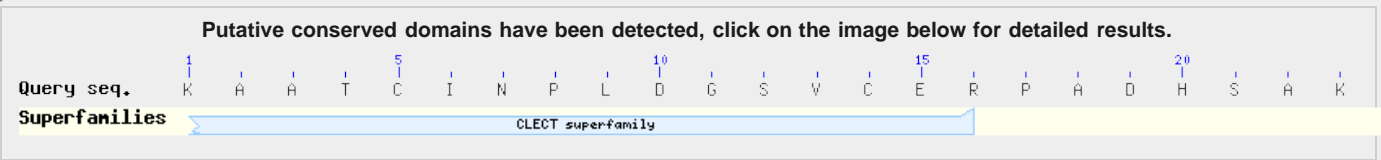

Distribution of 100 Blast Hits on the Query Sequence

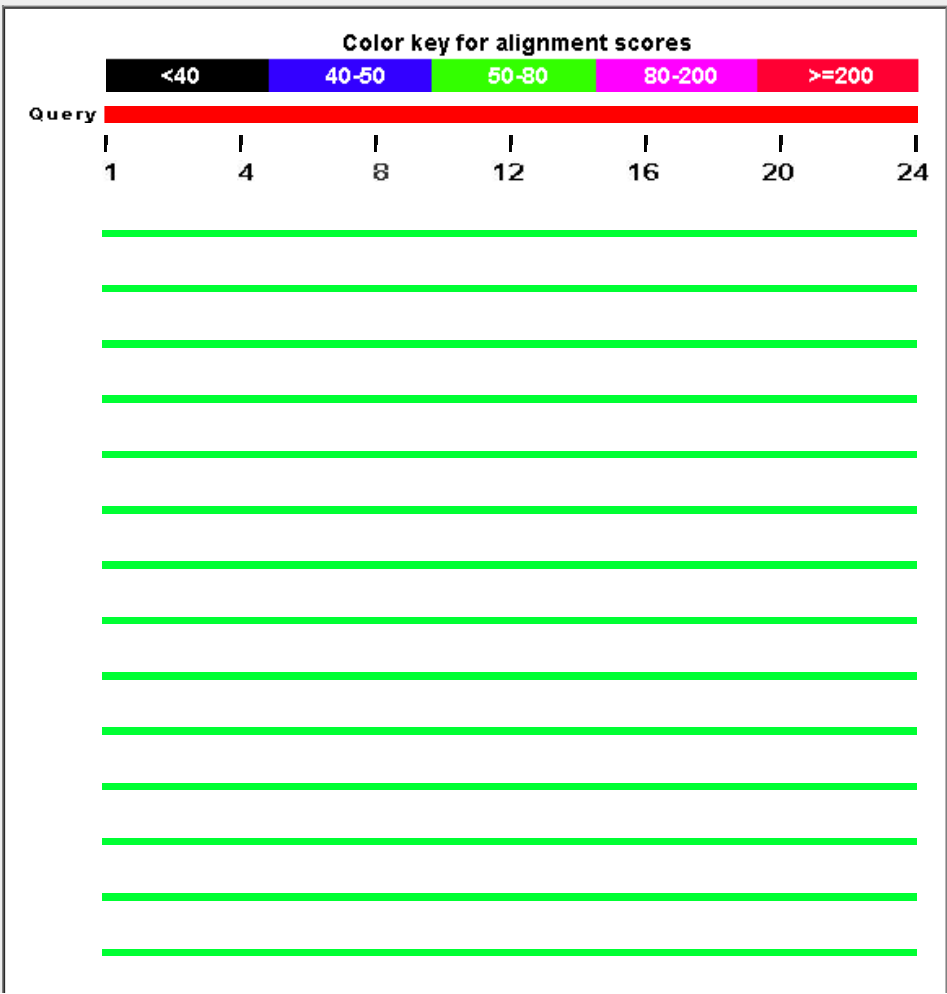

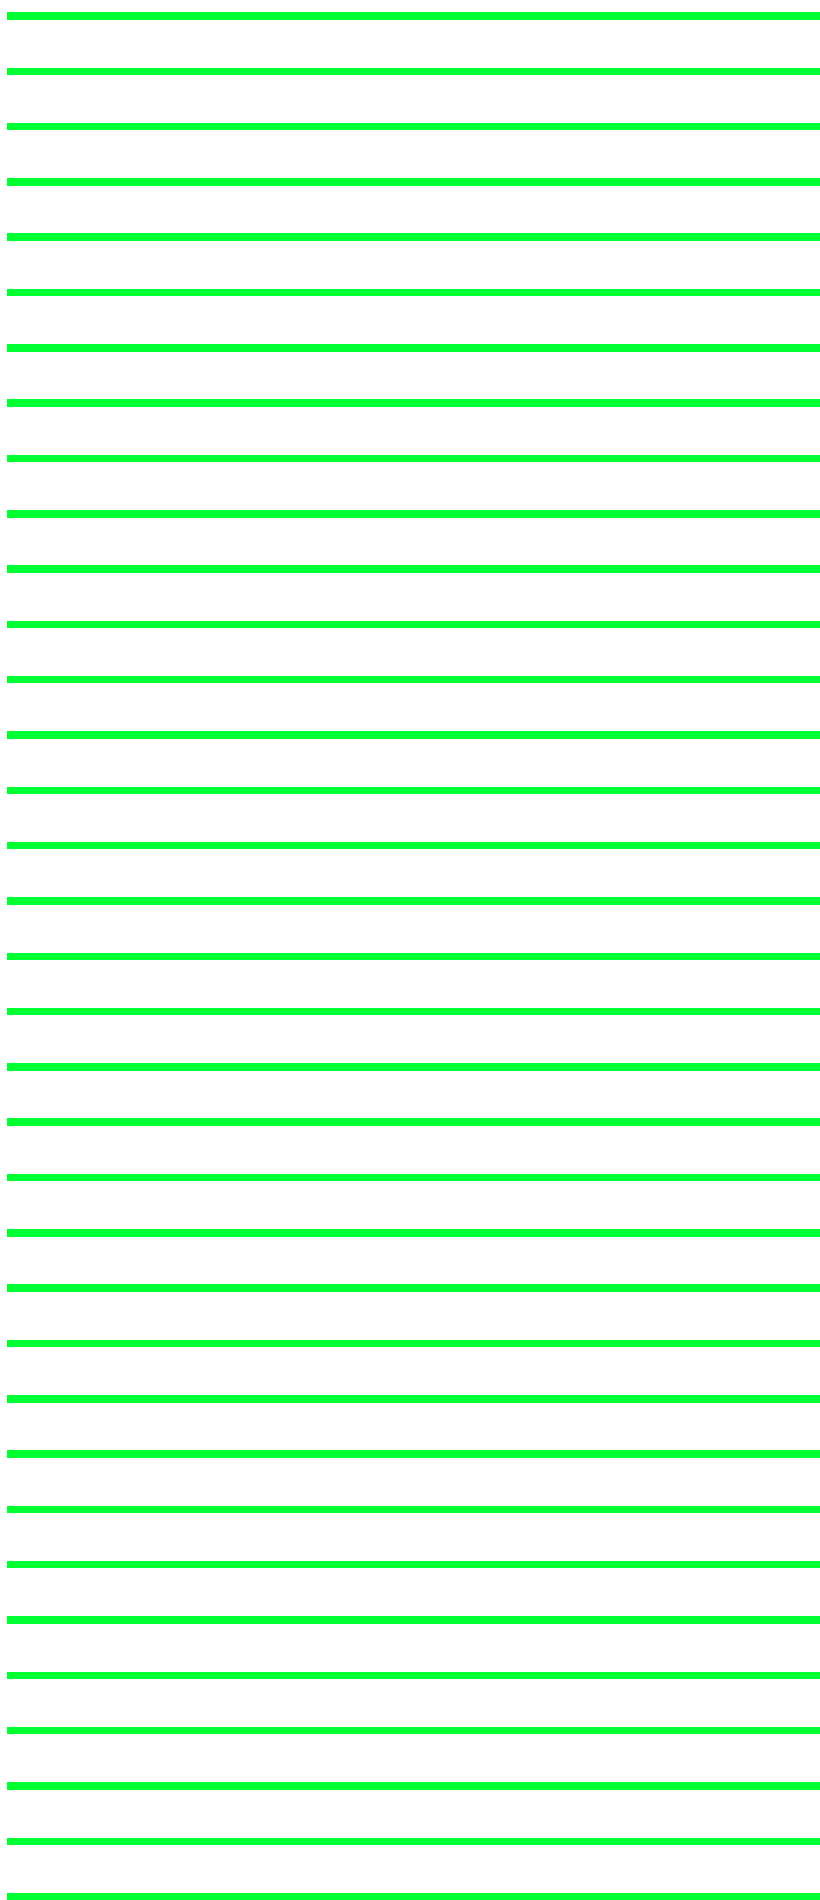

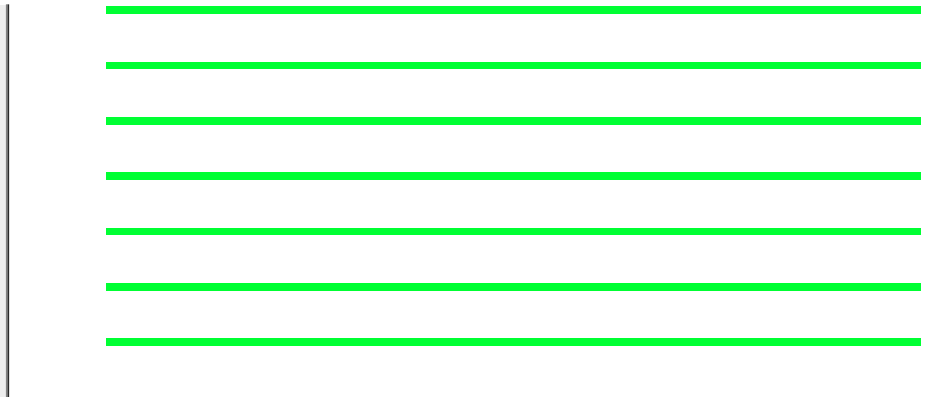

**Descriptions**

**Sequences producing significant alignments:**

Select: [All](#) [None](#) Selected: 0

Alignments [Download](#) [GenPept](#) [Graphics](#) [Distance tree of results](#) [Multiple alignment](#)

| Description                                                                       | Max score | Total score | Query cover | E value | Ident | Accession                                   |
|-----------------------------------------------------------------------------------|-----------|-------------|-------------|---------|-------|---------------------------------------------|
| <a href="#">PREDICTED: attractin-like [Galeopterus variegatus]</a>                | 73.6      | 73.6        | 100%        | 2e-13   | 92%   | <a href="#">gij667345974 XP_008563464.1</a> |
| <a href="#">attractin [Bos taurus]</a>                                            | 73.6      | 73.6        | 100%        | 3e-13   | 92%   | <a href="#">gij190683717 ACE82176.1</a>     |
| <a href="#">Attractin [Tupaia chinensis]</a>                                      | 73.6      | 73.6        | 100%        | 3e-13   | 92%   | <a href="#">gij444519420 ELV12829.1</a>     |
| <a href="#">PREDICTED: attractin-like [Leptonychotes weddellii]</a>               | 73.6      | 73.6        | 100%        | 3e-13   | 92%   | <a href="#">gij585160208 XP_006732353.1</a> |
| <a href="#">PREDICTED: attractin isoform X2 [Papio anubis]</a>                    | 73.6      | 73.6        | 100%        | 3e-13   | 92%   | <a href="#">gij685567345 XP_009214752.1</a> |
| <a href="#">attractin [Canis lupus familiaris]</a>                                | 73.6      | 73.6        | 100%        | 3e-13   | 92%   | <a href="#">gij339892849 AEK21787.1</a>     |
| <a href="#">PREDICTED: attractin-like [Tursiops truncatus]</a>                    | 73.6      | 73.6        | 100%        | 3e-13   | 92%   | <a href="#">gij470629747 XP_004321558.1</a> |
| <a href="#">PREDICTED: attractin-like [Physeter catodon]</a>                      | 73.6      | 73.6        | 100%        | 3e-13   | 92%   | <a href="#">gij593773084 XP_007124834.1</a> |
| <a href="#">PREDICTED: attractin [Pongo abelii]</a>                               | 73.6      | 73.6        | 100%        | 3e-13   | 92%   | <a href="#">gij297706621 XP_002830129.1</a> |
| <a href="#">mKIAA0548 protein [Mus musculus]</a>                                  | 73.6      | 73.6        | 100%        | 3e-13   | 92%   | <a href="#">gij26006173 BAC41429.1</a>      |
| <a href="#">Attractin [Cricetulus griseus]</a>                                    | 73.6      | 73.6        | 100%        | 3e-13   | 92%   | <a href="#">gij344236321 EGV92424.1</a>     |
| <a href="#">attractin isoform 1 preproprotein [Camelus ferus]</a>                 | 73.6      | 73.6        | 100%        | 3e-13   | 92%   | <a href="#">gij528759526 EPY79185.1</a>     |
| <a href="#">PREDICTED: attractin isoform X2 [Cricetulus griseus]</a>              | 73.6      | 73.6        | 100%        | 3e-13   | 92%   | <a href="#">gij625260840 XP_007621856.1</a> |
| <a href="#">PREDICTED: attractin [Equus przewalskii]</a>                          | 73.6      | 73.6        | 100%        | 3e-13   | 92%   | <a href="#">gij664773944 XP_008506219.1</a> |
| <a href="#">PREDICTED: attractin isoform X2 [Homo sapiens]</a>                    | 73.6      | 73.6        | 100%        | 3e-13   | 92%   | <a href="#">gij530426021 XP_005260918.1</a> |
| <a href="#">PREDICTED: attractin isoform X1 [Papio anubis]</a>                    | 73.6      | 73.6        | 100%        | 3e-13   | 92%   | <a href="#">gij685567343 XP_009214751.1</a> |
| <a href="#">PREDICTED: attractin isoform X2 [Saimiri boliviensis boliviensis]</a> | 73.6      | 73.6        | 100%        | 3e-13   | 92%   | <a href="#">gij725600053 XP_010350112.1</a> |
| <a href="#">PREDICTED: attractin isoform X1 [Saimiri boliviensis boliviensis]</a> | 73.6      | 73.6        | 100%        | 3e-13   | 92%   | <a href="#">gij725600051 XP_010350111.1</a> |
| <a href="#">PREDICTED: attractin [Nannospalax galii]</a>                          | 73.6      | 73.6        | 100%        | 3e-13   | 92%   | <a href="#">gij674060132 XP_008836714.1</a> |
| <a href="#">PREDICTED: attractin [Balaenoptera acutorostrata scammoni]</a>        | 73.6      | 73.6        | 100%        | 3e-13   | 92%   | <a href="#">gij594697511 XP_007195912.1</a> |
| <a href="#">PREDICTED: attractin [Tarsius syrichta]</a>                           | 73.6      | 73.6        | 100%        | 3e-13   | 92%   | <a href="#">gij640796924 XP_008054571.1</a> |
| <a href="#">unnamed protein product [Homo sapiens]</a>                            | 73.6      | 73.6        | 100%        | 3e-13   | 92%   | <a href="#">gij194380362 BAG63948.1</a>     |
| <a href="#">attractin isoform 4 [Homo sapiens]</a>                                | 73.6      | 73.6        | 100%        | 3e-13   | 92%   | <a href="#">gij333440461 NP_001193976.1</a> |
| <a href="#">PREDICTED: attractin isoform 2 [Nomascus leucogenys]</a>              | 73.6      | 73.6        | 100%        | 3e-13   | 92%   | <a href="#">gij332257827 XP_003278006.1</a> |
| <a href="#">PREDICTED: attractin isoform 2 [Dasypus novemcinctus]</a>             | 73.6      | 73.6        | 100%        | 3e-13   | 92%   | <a href="#">gij488545593 XP_004464327.1</a> |
| <a href="#">attractin [Cricetulus griseus]</a>                                    | 73.6      | 73.6        | 100%        | 3e-13   | 92%   | <a href="#">gij537146168 ERE69758.1</a>     |
| <a href="#">Attractin [Fukomys damarensis]</a>                                    | 73.6      | 73.6        | 100%        | 3e-13   | 92%   | <a href="#">gij676263950 KFO20529.1</a>     |
| <a href="#">PREDICTED: attractin [Pantholops hodgsonii]</a>                       | 73.6      | 73.6        | 100%        | 3e-13   | 92%   | <a href="#">gij556758951 XP_005974805.1</a> |

|                                                                            |      |      |      |       |     |                                             |
|----------------------------------------------------------------------------|------|------|------|-------|-----|---------------------------------------------|
| <a href="#">PREDICTED: attractin [Sus scrofa]</a>                          | 73.6 | 73.6 | 100% | 3e-13 | 92% | <a href="#">gij545879723 XP_001927324.5</a> |
| <a href="#">PREDICTED: attractin isoform 2 [Ceratotherium simum simum]</a> | 73.6 | 73.6 | 100% | 3e-13 | 92% | <a href="#">gij478519276 XP_004433860.1</a> |
| <a href="#">PREDICTED: attractin isoform X2 [Condylura cristata]</a>       | 73.6 | 73.6 | 100% | 3e-13 | 92% | <a href="#">gij507961710 XP_004687418.1</a> |
| <a href="#">PREDICTED: attractin [Gorilla gorilla gorilla]</a>             | 73.6 | 73.6 | 100% | 3e-13 | 92% | <a href="#">gij426390844 XP_004061806.1</a> |
| <a href="#">PREDICTED: attractin isoform X4 [Pan troglodytes]</a>          | 73.6 | 73.6 | 100% | 3e-13 | 92% | <a href="#">gij694977854 XP_009435012.1</a> |
| <a href="#">PREDICTED: attractin isoform 1 [Nomascus leucogenys]</a>       | 73.6 | 73.6 | 100% | 3e-13 | 92% | <a href="#">gij332257825 XP_003278005.1</a> |
| <a href="#">attractin-2 [Homo sapiens]</a>                                 | 73.6 | 73.6 | 100% | 3e-13 | 92% | <a href="#">gij4093196 AAD03057.1</a>       |
| <a href="#">secreted attractin precursor [Homo sapiens]</a>                | 73.6 | 73.6 | 100% | 3e-13 | 92% | <a href="#">gij8118083 AAF72882.1</a>       |
| <a href="#">unnamed protein product [Homo sapiens]</a>                     | 73.6 | 73.6 | 100% | 3e-13 | 92% | <a href="#">gij158259481 BAF85699.1</a>     |
| <a href="#">attractin isoform 2 preproprotein [Homo sapiens]</a>           | 73.6 | 73.6 | 100% | 3e-13 | 92% | <a href="#">gij21450863 NP_647538.1</a>     |
| <a href="#">Mahogany-like protein [Macaca mulatta]</a>                     | 73.6 | 73.6 | 100% | 3e-13 | 92% | <a href="#">gij355563316 EHH19878.1</a>     |
| <a href="#">attractin [Rattus norvegicus]</a>                              | 73.6 | 73.6 | 100% | 3e-13 | 92% | <a href="#">gij12275312 BAB21018.1</a>      |
| <a href="#">attractin, isoform CRA_a [Rattus norvegicus]</a>               | 73.6 | 73.6 | 100% | 3e-13 | 92% | <a href="#">gij149023319 EDL80213.1</a>     |
| <a href="#">PREDICTED: attractin isoform X1 [Bos taurus]</a>               | 73.6 | 73.6 | 100% | 3e-13 | 92% | <a href="#">gij741947708 XP_005214542.2</a> |
| <a href="#">PREDICTED: attractin isoform X3 [Bubalus bubalis]</a>          | 73.6 | 73.6 | 100% | 3e-13 | 92% | <a href="#">gij594099680 XP_006072965.1</a> |
| <a href="#">PREDICTED: LOW QUALITY PROTEIN: attractin [Pan paniscus]</a>   | 73.6 | 73.6 | 100% | 3e-13 | 92% | <a href="#">gij675763672 XP_008973079.1</a> |
| <a href="#">PREDICTED: attractin isoform X2 [Canis lupus familiaris]</a>   | 73.6 | 73.6 | 100% | 3e-13 | 92% | <a href="#">gij545540090 XP_005634905.1</a> |
| <a href="#">PREDICTED: attractin isoform X3 [Pan troglodytes]</a>          | 73.6 | 73.6 | 100% | 3e-13 | 92% | <a href="#">gij694977852 XP_009435011.1</a> |
| <a href="#">attractin [Sus scrofa]</a>                                     | 73.6 | 73.6 | 100% | 3e-13 | 92% | <a href="#">gij146741346 BAF62328.1</a>     |
| <a href="#">PREDICTED: attractin isoform X1 [Homo sapiens]</a>             | 73.6 | 73.6 | 100% | 3e-13 | 92% | <a href="#">gij530426019 XP_005260917.1</a> |
| <a href="#">PREDICTED: attractin isoform X4 [Macaca fascicularis]</a>      | 73.6 | 73.6 | 100% | 3e-13 | 92% | <a href="#">gij544464516 XP_005568512.1</a> |
| <a href="#">PREDICTED: attractin isoform X5 [Chlorocebus sabaeus]</a>      | 73.6 | 73.6 | 100% | 3e-13 | 92% | <a href="#">gij635021368 XP_008017720.1</a> |
| <a href="#">PREDICTED: attractin isoform X2 [Mustela putorius furo]</a>    | 73.6 | 73.6 | 100% | 3e-13 | 92% | <a href="#">gij511906947 XP_004772933.1</a> |
| <a href="#">Mahogany-like protein [Macaca fascicularis]</a>                | 73.6 | 73.6 | 100% | 3e-13 | 92% | <a href="#">gij355784657 EHH65508.1</a>     |
| <a href="#">PREDICTED: attractin [Panthera tigris altaica]</a>             | 73.6 | 73.6 | 100% | 3e-13 | 92% | <a href="#">gij591291970 XP_007073329.1</a> |
| <a href="#">PREDICTED: attractin isoform X3 [Macaca fascicularis]</a>      | 73.6 | 73.6 | 100% | 3e-13 | 92% | <a href="#">gij544464514 XP_005568511.1</a> |
| <a href="#">PREDICTED: attractin-like [Galeopterus variegatus]</a>         | 73.6 | 73.6 | 100% | 3e-13 | 92% | <a href="#">gij667324076 XP_008589101.1</a> |
| <a href="#">PREDICTED: attractin isoform X4 [Chlorocebus sabaeus]</a>      | 73.6 | 73.6 | 100% | 3e-13 | 92% | <a href="#">gij635021366 XP_008017712.1</a> |
| <a href="#">PREDICTED: attractin [Capra hircus]</a>                        | 73.6 | 73.6 | 100% | 3e-13 | 92% | <a href="#">gij548490191 XP_005688293.1</a> |
| <a href="#">PREDICTED: attractin [Trichechus manatus latirostris]</a>      | 73.6 | 73.6 | 100% | 3e-13 | 92% | <a href="#">gij471400634 XP_004383126.1</a> |
| <a href="#">PREDICTED: attractin [Rhinopithecus roxellana]</a>             | 73.6 | 73.6 | 100% | 3e-13 | 92% | <a href="#">gij724902357 XP_010377335.1</a> |
| <a href="#">PREDICTED: attractin isoform 1 [Dasypus novemcinctus]</a>      | 73.6 | 73.6 | 100% | 3e-13 | 92% | <a href="#">gij488545591 XP_004464326.1</a> |
| <a href="#">PREDICTED: attractin isoform X1 [Cricetulus griseus]</a>       | 73.6 | 73.6 | 100% | 3e-13 | 92% | <a href="#">gij354473756 XP_003499099.1</a> |
| <a href="#">PREDICTED: attractin [Camelus ferus]</a>                       | 73.6 | 73.6 | 100% | 3e-13 | 92% | <a href="#">gij560921992 XP_006187198.1</a> |
| <a href="#">PREDICTED: attractin [Sorex araneus]</a>                       | 73.6 | 73.6 | 100% | 3e-13 | 92% | <a href="#">gij505831534 XP_004611050.1</a> |
| <a href="#">attractin [Cricetulus griseus]</a>                             | 73.6 | 73.6 | 100% | 3e-13 | 92% | <a href="#">gij537146167 ERE69757.1</a>     |
| <a href="#">PREDICTED: attractin [Camelus dromedarius]</a>                 | 73.6 | 73.6 | 100% | 3e-13 | 92% | <a href="#">gij744589171 XP_010986570.1</a> |
| <a href="#">PREDICTED: attractin [Bos mutus]</a>                           | 73.6 | 73.6 | 100% | 3e-13 | 92% | <a href="#">gij555963925 XP_005894036.1</a> |
| <a href="#">PREDICTED: attractin [Ursus maritimus]</a>                     | 73.6 | 73.6 | 100% | 3e-13 | 92% | <a href="#">gij671021680 XP_008701660.1</a> |
| <a href="#">hypothetical protein PANDA_007354 [Ailuropoda melanoleuca]</a> | 73.6 | 73.6 | 100% | 3e-13 | 92% | <a href="#">gij281339872 EFB15456.1</a>     |
| <a href="#">PREDICTED: attractin-like [Ailuropoda melanoleuca]</a>         | 73.6 | 73.6 | 100% | 3e-13 | 92% | <a href="#">gij301766802 XP_002918837.1</a> |
| <a href="#">PREDICTED: attractin [Camelus bactrianus]</a>                  | 73.6 | 73.6 | 100% | 3e-13 | 92% | <a href="#">gij743752427 XP_010971103.1</a> |
| <a href="#">PREDICTED: attractin [Mustela putorius furo]</a>               | 73.6 | 73.6 | 100% | 3e-13 | 92% | <a href="#">gij511947743 XP_004792355.1</a> |
| <a href="#">attractin, isoform CRA_b [Homo sapiens]</a>                    | 73.6 | 73.6 | 100% | 3e-13 | 92% | <a href="#">gij119630936 EAX10531.1</a>     |
| <a href="#">PREDICTED: attractin isoform X3 [Chlorocebus sabaeus]</a>      | 73.6 | 73.6 | 100% | 3e-13 | 92% | <a href="#">gij635021364 XP_008017707.1</a> |
| <a href="#">PREDICTED: attractin [Fukomys damarensis]</a>                  | 73.6 | 73.6 | 100% | 3e-13 | 92% | <a href="#">gij731281216 XP_010609356.1</a> |

|                                                                            |      |      |      |       |     |                                             |
|----------------------------------------------------------------------------|------|------|------|-------|-----|---------------------------------------------|
| <a href="#">PREDICTED: attractin [Ovis aries]</a>                          | 73.6 | 73.6 | 100% | 3e-13 | 92% | <a href="#">gi 426241795 XP_004014773.1</a> |
| <a href="#">PREDICTED: attractin [Peromyscus maniculatus bairdii]</a>      | 73.6 | 73.6 | 100% | 3e-13 | 92% | <a href="#">gi 589943852 XP_006984624.1</a> |
| <a href="#">PREDICTED: attractin [Felis catus]</a>                         | 73.6 | 73.6 | 100% | 3e-13 | 92% | <a href="#">gi 586981105 XP_003983758.2</a> |
| <a href="#">PREDICTED: attractin isoform X2 [Pan troglodytes]</a>          | 73.6 | 73.6 | 100% | 3e-13 | 92% | <a href="#">gi 694977850 XP_009435010.1</a> |
| <a href="#">PREDICTED: attractin isoform X2 [Chlorocebus sabaeus]</a>      | 73.6 | 73.6 | 100% | 3e-13 | 92% | <a href="#">gi 635021362 XP_008017704.1</a> |
| <a href="#">PREDICTED: attractin [Erinaceus europaeus]</a>                 | 73.6 | 73.6 | 100% | 3e-13 | 92% | <a href="#">gi 617558695 XP_007539650.1</a> |
| <a href="#">PREDICTED: attractin [Vicugna pacos]</a>                       | 73.6 | 73.6 | 100% | 3e-13 | 92% | <a href="#">gi 560970220 XP_006207473.1</a> |
| <a href="#">attractin [Bos taurus]</a>                                     | 73.6 | 73.6 | 100% | 3e-13 | 92% | <a href="#">gi 2535660524 ACT32973.1</a>    |
| <a href="#">PREDICTED: attractin isoform X1 [Pteropus alecto]</a>          | 73.6 | 73.6 | 100% | 3e-13 | 92% | <a href="#">gi 586533632 XP_006921705.1</a> |
| <a href="#">attractin [Bos taurus]</a>                                     | 73.6 | 73.6 | 100% | 3e-13 | 92% | <a href="#">gi 27806737 NP_776420.1</a>     |
| <a href="#">PREDICTED: attractin isoform X2 [Bubalus bubalis]</a>          | 73.6 | 73.6 | 100% | 3e-13 | 92% | <a href="#">gi 594099678 XP_006072964.1</a> |
| <a href="#">PREDICTED: attractin isoform X3 [Canis lupus familiaris]</a>   | 73.6 | 73.6 | 100% | 3e-13 | 92% | <a href="#">gi 73991942 XP_534360.2</a>     |
| <a href="#">PREDICTED: attractin isoform 1 [Ceratotherium simum simum]</a> | 73.6 | 73.6 | 100% | 3e-13 | 92% | <a href="#">gi 478519274 XP_004433859.1</a> |
| <a href="#">PREDICTED: attractin [Elephantulus edwardii]</a>               | 73.6 | 73.6 | 100% | 3e-13 | 92% | <a href="#">gi 585689645 XP_006894264.1</a> |
| <a href="#">PREDICTED: attractin [Orycteropus afer afer]</a>               | 73.6 | 73.6 | 100% | 3e-13 | 92% | <a href="#">gi 634830430 XP_007958185.1</a> |
| <a href="#">attractin [Mesocricetus auratus]</a>                           | 73.6 | 73.6 | 100% | 3e-13 | 92% | <a href="#">gi 528078159 NP_001268565.1</a> |
| <a href="#">attractin isoform 1 preproprotein [Homo sapiens]</a>           | 73.6 | 73.6 | 100% | 3e-13 | 92% | <a href="#">gi 21450861 NP_647537.1</a>     |
| <a href="#">PREDICTED: attractin [Macaca mulatta]</a>                      | 73.6 | 73.6 | 100% | 3e-13 | 92% | <a href="#">gi 109092720 XP_001115192.1</a> |
| <a href="#">PREDICTED: attractin isoform X1 [Chlorocebus sabaeus]</a>      | 73.6 | 73.6 | 100% | 3e-13 | 92% | <a href="#">gi 635021360 XP_008017700.1</a> |
| <a href="#">attractin, isoform CRA_b [Mus musculus]</a>                    | 73.6 | 73.6 | 100% | 3e-13 | 92% | <a href="#">gi 148696346 EDL28293.1</a>     |
| <a href="#">PREDICTED: attractin isoform X6 [Chlorocebus sabaeus]</a>      | 73.6 | 73.6 | 100% | 3e-13 | 92% | <a href="#">gi 635021370 XP_008017729.1</a> |
| <a href="#">PREDICTED: attractin isoform X2 [Oryctolagus cuniculus]</a>    | 73.6 | 73.6 | 100% | 3e-13 | 92% | <a href="#">gi 655716500 XP_008254470.1</a> |
| <a href="#">PREDICTED: attractin [Tupaia chinensis]</a>                    | 73.6 | 73.6 | 100% | 3e-13 | 92% | <a href="#">gi 562872246 XP_006164056.1</a> |
| <a href="#">PREDICTED: attractin isoform X2 [Pteropus alecto]</a>          | 73.6 | 73.6 | 100% | 3e-13 | 92% | <a href="#">gi 586533634 XP_006921706.1</a> |
| <a href="#">PREDICTED: attractin isoform X1 [Bubalus bubalis]</a>          | 73.6 | 73.6 | 100% | 3e-13 | 92% | <a href="#">gi 594099676 XP_006072963.1</a> |
| <a href="#">PREDICTED: attractin isoform X1 [Mus musculus]</a>             | 73.6 | 73.6 | 100% | 3e-13 | 92% | <a href="#">gi 568915132 XP_006498669.1</a> |

## Alignments

Download [GenPept](#) [Graphics](#)

[Next](#) [Previous](#) [Descriptions](#)

PREDICTED: attractin-like, partial [Galeopterus variegatus]

Sequence ID: [gi|667345974|ref|XP\\_008563464.1](#) Length: 213 Number of Matches: 1

Range 1: 57 to 80 [GenPept](#) [Graphics](#)

[Next Match](#) [Previous Match](#)

| Score          | Expect | Identities | Positives   | Gaps     |
|----------------|--------|------------|-------------|----------|
| 73.6 bits(166) | 2e-13  | 22/24(92%) | 24/24(100%) | 0/24(0%) |

Query 1 KAATCINPLDGSVCERPADHSAKQ 24  
 KAATCINPL+GSVCERPA+HSAKQ  
 Sbjct 57 KAATCINPLNGSVCERPANHSAKQ 80

### Related Information

[Gene](#) - associated gene details  
[Map Viewer](#) - aligned genomic context

Download [GenPept](#) [Graphics](#)

[Next](#) [Previous](#) [Descriptions](#)

attractin [Bos taurus]

Sequence ID: [gi|190683717|gb|ACE82176.1](#) Length: 670 Number of Matches: 1

Range 1: 146 to 169 [GenPept](#) [Graphics](#)

[Next Match](#) [Previous Match](#)

| Score          | Expect | Identities | Positives   | Gaps     |
|----------------|--------|------------|-------------|----------|
| 73.6 bits(166) | 3e-13  | 22/24(92%) | 24/24(100%) | 0/24(0%) |

Query 1 KAATCINPLDGSVCERPADHSAKQ 24  
 KAATCINPL+GSVCERPA+HSAKQ  
 Sbjct 146 KAATCINPLNGSVCERPANHSAKQ 169

### Related Information

[Gene](#) - associated gene details  
[Map Viewer](#) - aligned genomic context

Download [GenPept](#) [Graphics](#)

▼ Next ▲ Previous ▲ Descriptions

**Attractin [Tupaia chinensis]**

Sequence ID: [gi|444519420|gb|ELV12829.1](#) Length: 860 Number of Matches: 1

**Related Information**

Range 1: 552 to 575 [GenPept](#) [Graphics](#)

▼ Next Match ▲ Previous Match

| Score          | Expect | Identities | Positives   | Gaps     |
|----------------|--------|------------|-------------|----------|
| 73.6 bits(166) | 3e-13  | 22/24(92%) | 24/24(100%) | 0/24(0%) |

Query 1 KAATCINPLDGSVCERPADHSAKQ 24  
 KAATCINPL+GSVCERPA+HSAKQ  
 Sbjct 552 KAATCINPLNGSVCERPANHSAKQ 575

Download [GenPept](#) [Graphics](#)

▼ Next ▲ Previous ▲ Descriptions

**PREDICTED: attractin-like [Leptonychotes weddellii]**

Sequence ID: [gi|585160208|ref|XP\\_006732353.1](#) Length: 899 Number of Matches: 1

**Related Information**

Range 1: 708 to 731 [GenPept](#) [Graphics](#)

▼ Next Match ▲ Previous Match

| Score          | Expect | Identities | Positives   | Gaps     |
|----------------|--------|------------|-------------|----------|
| 73.6 bits(166) | 3e-13  | 22/24(92%) | 24/24(100%) | 0/24(0%) |

Query 1 KAATCINPLDGSVCERPADHSAKQ 24  
 KAATCINPL+GSVCERPA+HSAKQ  
 Sbjct 708 KAATCINPLNGSVCERPANHSAKQ 731

[Gene](#) - associated gene details  
[Map Viewer](#) - aligned genomic context

Download [GenPept](#) [Graphics](#)

▼ Next ▲ Previous ▲ Descriptions

**PREDICTED: attractin isoform X2 [Papio anubis]**

Sequence ID: [gi|685567345|ref|XP\\_009214752.1](#) Length: 989 Number of Matches: 1

**Related Information**

Range 1: 595 to 618 [GenPept](#) [Graphics](#)

▼ Next Match ▲ Previous Match

| Score          | Expect | Identities | Positives   | Gaps     |
|----------------|--------|------------|-------------|----------|
| 73.6 bits(166) | 3e-13  | 22/24(92%) | 24/24(100%) | 0/24(0%) |

Query 1 KAATCINPLDGSVCERPADHSAKQ 24  
 KAATCINPL+GSVCERPA+HSAKQ  
 Sbjct 595 KAATCINPLNGSVCERPANHSAKQ 618

[Gene](#) - associated gene details  
[Map Viewer](#) - aligned genomic context

BLAST is a registered trademark of the National Library of Medicine.

NCBI/ BLAST/ blastp suite/ Formatting Results - B90X7B8Y01R

Your search parameters were adjusted to search for a short input sequence.

[Edit and Resubmit](#) [Save Search Strategies](#) [Formatting options](#) [Download](#)

[YouTube](#) [How to read this page](#) [Blast report description](#)

### ATRN\_KAATCINPLNGSV CERPANHSAKQ\_NonMod

RID [B90X7B8Y01R](#) (Expires on 01-14 09:32 am)  
 Query ID Icl|53405  
 Description None  
 Molecule type amino acid  
 Query Length 24

Database Name nr  
 Description All non-redundant GenBank CDS translations+PDB+SwissProt+PIR excluding environmental samples from WGS projects  
 Program BLASTP 2.2.30+ [Citation](#)

Other reports: [Search Summary](#) [Taxonomy reports](#) [Distance tree of results](#) [Multiple alignment](#)

### Graphic Summary

Show Conserved Domains

Putative conserved domains have been detected, click on the image below for detailed results.

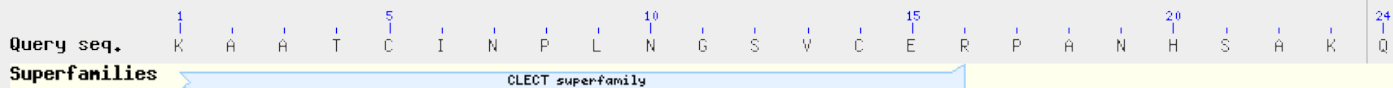

Distribution of 100 Blast Hits on the Query Sequence

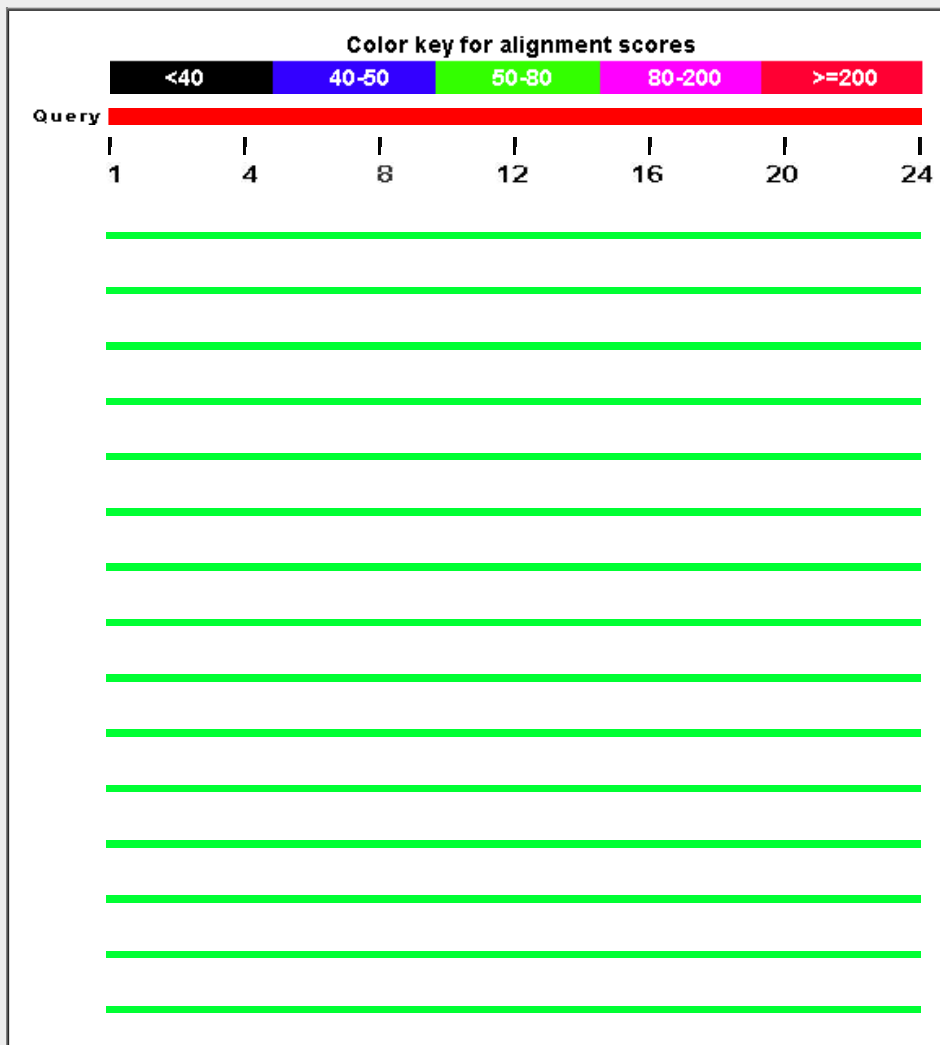

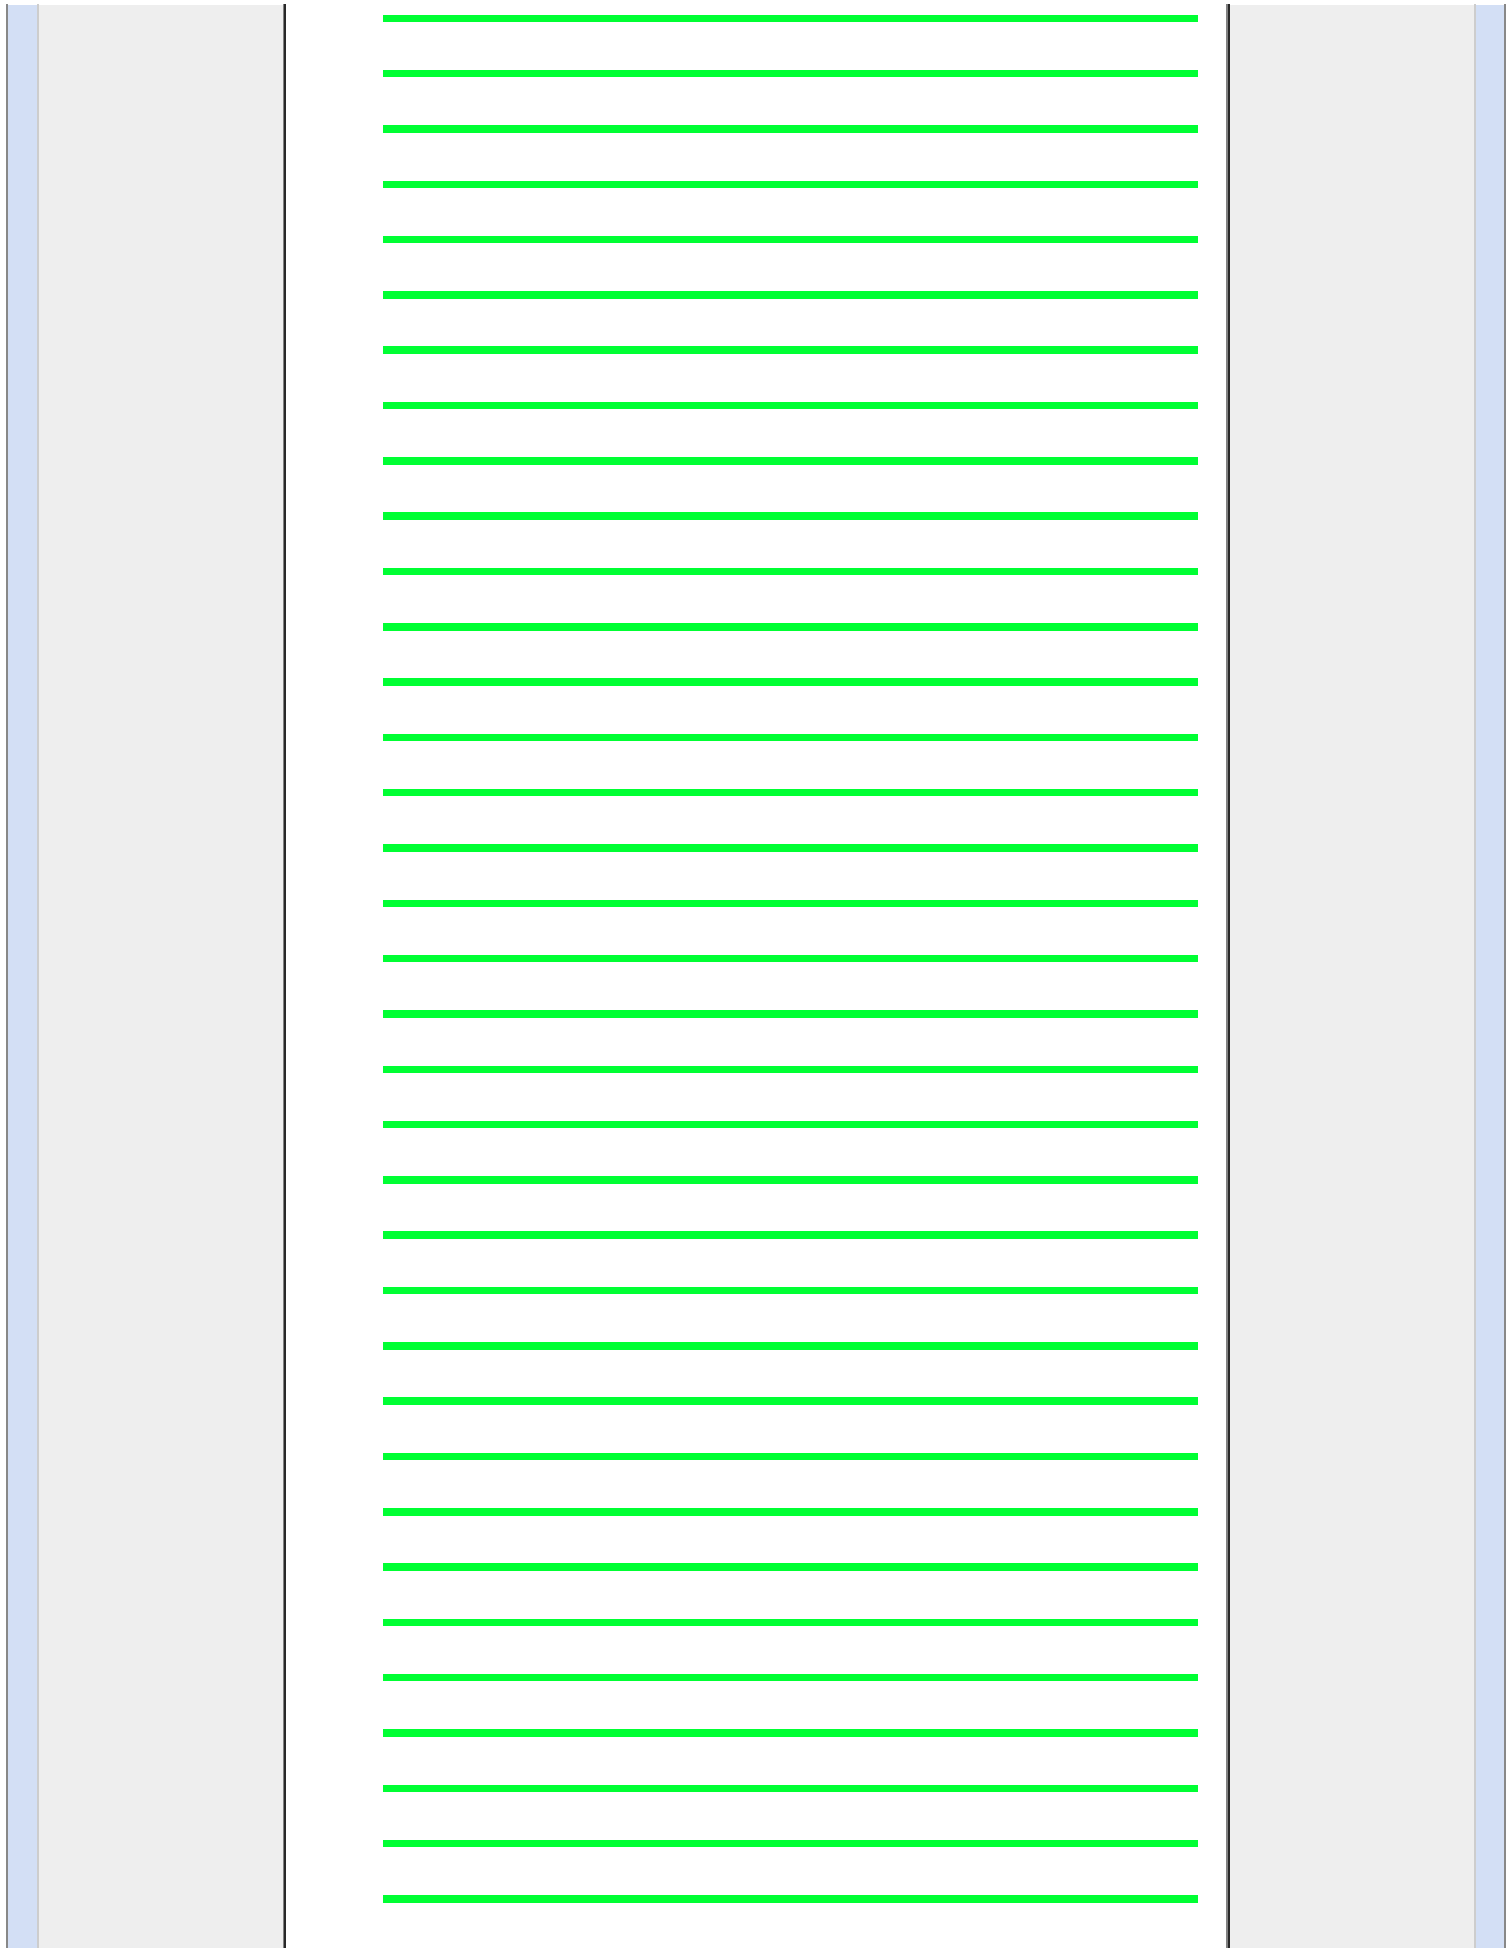



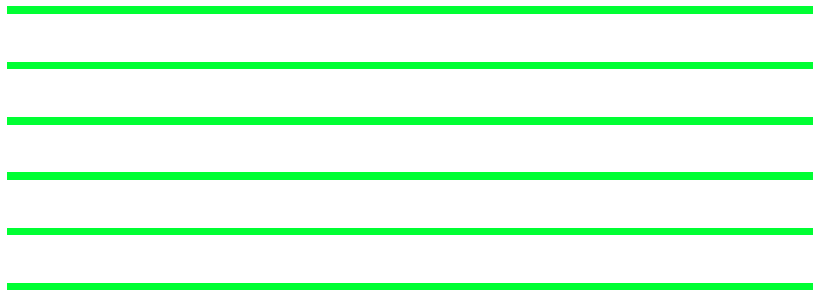

## Descriptions

### Sequences producing significant alignments:

Select: [All](#) [None](#) Selected: 0

| <a href="#">Alignments</a> <a href="#">Download</a> <a href="#">GenPept</a> <a href="#">Graphics</a> <a href="#">Distance tree of results</a> <a href="#">Multiple alignment</a> |           |             |             |         |       |                                             |  |
|----------------------------------------------------------------------------------------------------------------------------------------------------------------------------------|-----------|-------------|-------------|---------|-------|---------------------------------------------|--|
| Description                                                                                                                                                                      | Max score | Total score | Query cover | E value | Ident | Accession                                   |  |
| <a href="#">PREDICTED: attractin-like [Galeopterus variegatus]</a>                                                                                                               | 78.7      | 78.7        | 100%        | 4e-15   | 100%  | <a href="#">gi 667345974 XP_008563464.1</a> |  |
| <a href="#">attractin [Bos taurus]</a>                                                                                                                                           | 78.7      | 78.7        | 100%        | 5e-15   | 100%  | <a href="#">gi 190683717 ACE82176.1</a>     |  |
| <a href="#">Attractin [Tupaia chinensis]</a>                                                                                                                                     | 78.7      | 78.7        | 100%        | 5e-15   | 100%  | <a href="#">gi 444519420 ELV12829.1</a>     |  |
| <a href="#">PREDICTED: attractin-like [Leptonychotes weddellii]</a>                                                                                                              | 78.7      | 78.7        | 100%        | 5e-15   | 100%  | <a href="#">gi 585160208 XP_006732353.1</a> |  |
| <a href="#">PREDICTED: attractin isoform X2 [Papio anubis]</a>                                                                                                                   | 78.7      | 78.7        | 100%        | 6e-15   | 100%  | <a href="#">gi 685567345 XP_009214752.1</a> |  |
| <a href="#">attractin [Canis lupus familiaris]</a>                                                                                                                               | 78.7      | 78.7        | 100%        | 6e-15   | 100%  | <a href="#">gi 339892849 AEK21787.1</a>     |  |
| <a href="#">PREDICTED: attractin-like [Tursiops truncatus]</a>                                                                                                                   | 78.7      | 78.7        | 100%        | 6e-15   | 100%  | <a href="#">gi 470629747 XP_004321558.1</a> |  |
| <a href="#">PREDICTED: attractin-like [Physeter catodon]</a>                                                                                                                     | 78.7      | 78.7        | 100%        | 6e-15   | 100%  | <a href="#">gi 593773084 XP_007124834.1</a> |  |
| <a href="#">PREDICTED: attractin [Pongo abelii]</a>                                                                                                                              | 78.7      | 78.7        | 100%        | 6e-15   | 100%  | <a href="#">gi 297706621 XP_002830129.1</a> |  |
| <a href="#">mKIAA0548 protein [Mus musculus]</a>                                                                                                                                 | 78.7      | 78.7        | 100%        | 6e-15   | 100%  | <a href="#">gi 26006173 BAC41429.1</a>      |  |
| <a href="#">Attractin [Cricetulus griseus]</a>                                                                                                                                   | 78.7      | 78.7        | 100%        | 6e-15   | 100%  | <a href="#">gi 344236321 EGV92424.1</a>     |  |
| <a href="#">attractin isoform 1 preproprotein [Camelus ferus]</a>                                                                                                                | 78.7      | 78.7        | 100%        | 6e-15   | 100%  | <a href="#">gi 528759526 EPY79185.1</a>     |  |
| <a href="#">PREDICTED: attractin isoform X2 [Cricetulus griseus]</a>                                                                                                             | 78.7      | 78.7        | 100%        | 6e-15   | 100%  | <a href="#">gi 625260840 XP_007621856.1</a> |  |
| <a href="#">PREDICTED: attractin [Equus przewalskii]</a>                                                                                                                         | 78.7      | 78.7        | 100%        | 6e-15   | 100%  | <a href="#">gi 664773944 XP_008506219.1</a> |  |
| <a href="#">PREDICTED: attractin isoform X2 [Homo sapiens]</a>                                                                                                                   | 78.7      | 78.7        | 100%        | 6e-15   | 100%  | <a href="#">gi 530426021 XP_005260918.1</a> |  |
| <a href="#">PREDICTED: attractin isoform X1 [Papio anubis]</a>                                                                                                                   | 78.7      | 78.7        | 100%        | 6e-15   | 100%  | <a href="#">gi 685567343 XP_009214751.1</a> |  |
| <a href="#">PREDICTED: attractin isoform X2 [Saimiri boliviensis boliviensis]</a>                                                                                                | 78.7      | 78.7        | 100%        | 6e-15   | 100%  | <a href="#">gi 725600053 XP_010350112.1</a> |  |
| <a href="#">PREDICTED: attractin isoform X1 [Saimiri boliviensis boliviensis]</a>                                                                                                | 78.7      | 78.7        | 100%        | 6e-15   | 100%  | <a href="#">gi 725600051 XP_010350111.1</a> |  |
| <a href="#">PREDICTED: attractin [Nannospalax galii]</a>                                                                                                                         | 78.7      | 78.7        | 100%        | 6e-15   | 100%  | <a href="#">gi 674060132 XP_008836714.1</a> |  |
| <a href="#">PREDICTED: attractin [Balaenoptera acutorostrata scammoni]</a>                                                                                                       | 78.7      | 78.7        | 100%        | 6e-15   | 100%  | <a href="#">gi 594697511 XP_007195912.1</a> |  |
| <a href="#">PREDICTED: attractin [Tarsius syrichta]</a>                                                                                                                          | 78.7      | 78.7        | 100%        | 6e-15   | 100%  | <a href="#">gi 640796924 XP_008054571.1</a> |  |
| <a href="#">unnamed protein product [Homo sapiens]</a>                                                                                                                           | 78.7      | 78.7        | 100%        | 6e-15   | 100%  | <a href="#">gi 194380362 BAG63948.1</a>     |  |
| <a href="#">attractin isoform 4 [Homo sapiens]</a>                                                                                                                               | 78.7      | 78.7        | 100%        | 6e-15   | 100%  | <a href="#">gi 333440461 NP_001193976.1</a> |  |
| <a href="#">PREDICTED: attractin isoform 2 [Nomascus leucogenys]</a>                                                                                                             | 78.7      | 78.7        | 100%        | 6e-15   | 100%  | <a href="#">gi 332257827 XP_003278006.1</a> |  |
| <a href="#">PREDICTED: attractin isoform 2 [Dasypus novemcinctus]</a>                                                                                                            | 78.7      | 78.7        | 100%        | 6e-15   | 100%  | <a href="#">gi 488545593 XP_004464327.1</a> |  |
| <a href="#">attractin [Cricetulus griseus]</a>                                                                                                                                   | 78.7      | 78.7        | 100%        | 6e-15   | 100%  | <a href="#">gi 537146168 ERE69758.1</a>     |  |
| <a href="#">Attractin [Fukomys damarensis]</a>                                                                                                                                   | 78.7      | 78.7        | 100%        | 6e-15   | 100%  | <a href="#">gi 676263950 KFO20529.1</a>     |  |
| <a href="#">PREDICTED: attractin [Pantholops hodgsonii]</a>                                                                                                                      | 78.7      | 78.7        | 100%        | 6e-15   | 100%  | <a href="#">gi 556758951 XP_005974805.1</a> |  |
| <a href="#">PREDICTED: attractin [Sus scrofa]</a>                                                                                                                                | 78.7      | 78.7        | 100%        | 6e-15   | 100%  | <a href="#">gi 545879723 XP_001927324.5</a> |  |

|                                                                            |      |      |      |       |      |                                             |
|----------------------------------------------------------------------------|------|------|------|-------|------|---------------------------------------------|
| <a href="#">PREDICTED: attractin isoform 2 [Ceratotherium simum simum]</a> | 78.7 | 78.7 | 100% | 6e-15 | 100% | <a href="#">gi 478519276 XP_004433860.1</a> |
| <a href="#">PREDICTED: attractin isoform X2 [Condylura cristata]</a>       | 78.7 | 78.7 | 100% | 6e-15 | 100% | <a href="#">gi 507961710 XP_004687418.1</a> |
| <a href="#">PREDICTED: attractin [Gorilla gorilla gorilla]</a>             | 78.7 | 78.7 | 100% | 6e-15 | 100% | <a href="#">gi 426390844 XP_004061806.1</a> |
| <a href="#">PREDICTED: attractin isoform X4 [Pan troglodytes]</a>          | 78.7 | 78.7 | 100% | 6e-15 | 100% | <a href="#">gi 694977854 XP_009435012.1</a> |
| <a href="#">PREDICTED: attractin isoform 1 [Nomascus leucogenys]</a>       | 78.7 | 78.7 | 100% | 6e-15 | 100% | <a href="#">gi 332257825 XP_003278005.1</a> |
| <a href="#">attractin-2 [Homo sapiens]</a>                                 | 78.7 | 78.7 | 100% | 6e-15 | 100% | <a href="#">gi 4093196 AAD03057.1</a>       |
| <a href="#">secreted attractin precursor [Homo sapiens]</a>                | 78.7 | 78.7 | 100% | 6e-15 | 100% | <a href="#">gi 8118083 AAF72882.1</a>       |
| <a href="#">unnamed protein product [Homo sapiens]</a>                     | 78.7 | 78.7 | 100% | 6e-15 | 100% | <a href="#">gi 158259481 BAF85699.1</a>     |
| <a href="#">attractin isoform 2 preproprotein [Homo sapiens]</a>           | 78.7 | 78.7 | 100% | 6e-15 | 100% | <a href="#">gi 21450863 NP_647538.1</a>     |
| <a href="#">Mahogany-like protein [Macaca mulatta]</a>                     | 78.7 | 78.7 | 100% | 6e-15 | 100% | <a href="#">gi 355563316 EHH19878.1</a>     |
| <a href="#">attractin [Rattus norvegicus]</a>                              | 78.7 | 78.7 | 100% | 6e-15 | 100% | <a href="#">gi 12275312 BAB21018.1</a>      |
| <a href="#">attractin isoform CRA_a [Rattus norvegicus]</a>                | 78.7 | 78.7 | 100% | 6e-15 | 100% | <a href="#">gi 149023319 EDL80213.1</a>     |
| <a href="#">PREDICTED: attractin isoform X3 [Bubalus bubalis]</a>          | 78.7 | 78.7 | 100% | 6e-15 | 100% | <a href="#">gi 594099680 XP_006072965.1</a> |
| <a href="#">PREDICTED: LOW QUALITY PROTEIN: attractin [Pan paniscus]</a>   | 78.7 | 78.7 | 100% | 6e-15 | 100% | <a href="#">gi 675763672 XP_008973079.1</a> |
| <a href="#">PREDICTED: attractin isoform X2 [Canis lupus familiaris]</a>   | 78.7 | 78.7 | 100% | 6e-15 | 100% | <a href="#">gi 545540090 XP_005634905.1</a> |
| <a href="#">PREDICTED: attractin isoform X3 [Pan troglodytes]</a>          | 78.7 | 78.7 | 100% | 6e-15 | 100% | <a href="#">gi 694977852 XP_009435011.1</a> |
| <a href="#">attractin [Sus scrofa]</a>                                     | 78.7 | 78.7 | 100% | 6e-15 | 100% | <a href="#">gi 146741346 BAF62328.1</a>     |
| <a href="#">PREDICTED: attractin isoform X1 [Homo sapiens]</a>             | 78.7 | 78.7 | 100% | 6e-15 | 100% | <a href="#">gi 530426019 XP_005260917.1</a> |
| <a href="#">PREDICTED: attractin isoform X4 [Macaca fascicularis]</a>      | 78.7 | 78.7 | 100% | 6e-15 | 100% | <a href="#">gi 544464516 XP_005568512.1</a> |
| <a href="#">PREDICTED: attractin isoform X5 [Chlorocebus sabaues]</a>      | 78.7 | 78.7 | 100% | 6e-15 | 100% | <a href="#">gi 635021368 XP_008017720.1</a> |
| <a href="#">PREDICTED: attractin isoform X2 [Mustela putorius furo]</a>    | 78.7 | 78.7 | 100% | 6e-15 | 100% | <a href="#">gi 511906947 XP_004772933.1</a> |
| <a href="#">Mahogany-like protein [Macaca fascicularis]</a>                | 78.7 | 78.7 | 100% | 6e-15 | 100% | <a href="#">gi 355784657 EHH65508.1</a>     |
| <a href="#">PREDICTED: attractin [Panthera tigris altaica]</a>             | 78.7 | 78.7 | 100% | 6e-15 | 100% | <a href="#">gi 591291970 XP_007073329.1</a> |
| <a href="#">PREDICTED: attractin isoform X3 [Macaca fascicularis]</a>      | 78.7 | 78.7 | 100% | 6e-15 | 100% | <a href="#">gi 544464514 XP_005568511.1</a> |
| <a href="#">PREDICTED: attractin-like [Galeopterus variegatus]</a>         | 78.7 | 78.7 | 100% | 6e-15 | 100% | <a href="#">gi 667324076 XP_008589101.1</a> |
| <a href="#">PREDICTED: attractin isoform X4 [Chlorocebus sabaues]</a>      | 78.7 | 78.7 | 100% | 6e-15 | 100% | <a href="#">gi 635021366 XP_008017712.1</a> |
| <a href="#">PREDICTED: attractin [Capra hircus]</a>                        | 78.7 | 78.7 | 100% | 6e-15 | 100% | <a href="#">gi 548490191 XP_005688293.1</a> |
| <a href="#">PREDICTED: attractin [Trichechus manatus latirostris]</a>      | 78.7 | 78.7 | 100% | 6e-15 | 100% | <a href="#">gi 471400634 XP_004383126.1</a> |
| <a href="#">PREDICTED: attractin [Rhinopithecus roxellana]</a>             | 78.7 | 78.7 | 100% | 6e-15 | 100% | <a href="#">gi 724902357 XP_010377335.1</a> |
| <a href="#">PREDICTED: attractin isoform 1 [Dasyus novemcinctus]</a>       | 78.7 | 78.7 | 100% | 6e-15 | 100% | <a href="#">gi 488545591 XP_004464326.1</a> |
| <a href="#">PREDICTED: attractin isoform X1 [Cricetulus griseus]</a>       | 78.7 | 78.7 | 100% | 6e-15 | 100% | <a href="#">gi 354473756 XP_003499099.1</a> |
| <a href="#">PREDICTED: attractin [Camelus ferus]</a>                       | 78.7 | 78.7 | 100% | 6e-15 | 100% | <a href="#">gi 560921992 XP_006187198.1</a> |
| <a href="#">PREDICTED: attractin [Sorex araneus]</a>                       | 78.7 | 78.7 | 100% | 6e-15 | 100% | <a href="#">gi 505831534 XP_004611050.1</a> |
| <a href="#">attractin [Cricetulus griseus]</a>                             | 78.7 | 78.7 | 100% | 6e-15 | 100% | <a href="#">gi 537146167 ERE69757.1</a>     |
| <a href="#">PREDICTED: attractin [Bos mutus]</a>                           | 78.7 | 78.7 | 100% | 6e-15 | 100% | <a href="#">gi 555963925 XP_005894036.1</a> |
| <a href="#">PREDICTED: attractin [Ursus maritimus]</a>                     | 78.7 | 78.7 | 100% | 6e-15 | 100% | <a href="#">gi 671021680 XP_008701660.1</a> |
| <a href="#">hypothetical protein PANDA_007354 [Ailuropoda melanoleuca]</a> | 78.7 | 78.7 | 100% | 6e-15 | 100% | <a href="#">gi 281339872 EFB15456.1</a>     |
| <a href="#">PREDICTED: attractin-like [Ailuropoda melanoleuca]</a>         | 78.7 | 78.7 | 100% | 6e-15 | 100% | <a href="#">gi 301766802 XP_002918837.1</a> |
| <a href="#">PREDICTED: attractin [Mustela putorius furo]</a>               | 78.7 | 78.7 | 100% | 6e-15 | 100% | <a href="#">gi 511947743 XP_004792355.1</a> |
| <a href="#">attractin isoform CRA_b [Homo sapiens]</a>                     | 78.7 | 78.7 | 100% | 6e-15 | 100% | <a href="#">gi 119630936 EAX10531.1</a>     |
| <a href="#">PREDICTED: attractin isoform X3 [Chlorocebus sabaues]</a>      | 78.7 | 78.7 | 100% | 6e-15 | 100% | <a href="#">gi 635021364 XP_008017707.1</a> |
| <a href="#">PREDICTED: attractin [Fukomys damarensis]</a>                  | 78.7 | 78.7 | 100% | 6e-15 | 100% | <a href="#">gi 731281216 XP_010609356.1</a> |
| <a href="#">PREDICTED: attractin [Ovis aries]</a>                          | 78.7 | 78.7 | 100% | 6e-15 | 100% | <a href="#">gi 426241795 XP_004014773.1</a> |
| <a href="#">PREDICTED: attractin [Peromyscus maniculatus bairdii]</a>      | 78.7 | 78.7 | 100% | 6e-15 | 100% | <a href="#">gi 589943852 XP_006984624.1</a> |
| <a href="#">PREDICTED: attractin [Felis catus]</a>                         | 78.7 | 78.7 | 100% | 6e-15 | 100% | <a href="#">gi 586981105 XP_003983758.2</a> |
| <a href="#">PREDICTED: attractin isoform X2 [Pan troglodytes]</a>          | 78.7 | 78.7 | 100% | 6e-15 | 100% | <a href="#">gi 694977850 XP_009435010.1</a> |

|                                                                            |      |      |      |       |      |                                              |
|----------------------------------------------------------------------------|------|------|------|-------|------|----------------------------------------------|
| <a href="#">PREDICTED: attractin isoform X2 [Chlorocebus sabaeus]</a>      | 78.7 | 78.7 | 100% | 6e-15 | 100% | <a href="#">gi 635021362 XP_008017704.1</a>  |
| <a href="#">PREDICTED: attractin [Erinaceus europaeus]</a>                 | 78.7 | 78.7 | 100% | 6e-15 | 100% | <a href="#">gi 617558695 XP_007539650.1</a>  |
| <a href="#">PREDICTED: attractin [Vicugna pacos]</a>                       | 78.7 | 78.7 | 100% | 6e-15 | 100% | <a href="#">gi 560970220 XP_006207473.1</a>  |
| <a href="#">attractin [Bos taurus]</a>                                     | 78.7 | 78.7 | 100% | 6e-15 | 100% | <a href="#">gi 253560524 ACT32973.1</a>      |
| <a href="#">PREDICTED: attractin isoform X1 [Pteropus alecto]</a>          | 78.7 | 78.7 | 100% | 6e-15 | 100% | <a href="#">gi 586533632 XP_006921705.1</a>  |
| <a href="#">attractin [Bos taurus]</a>                                     | 78.7 | 78.7 | 100% | 6e-15 | 100% | <a href="#">gi 27806737 INP_776420.1</a>     |
| <a href="#">PREDICTED: attractin isoform X2 [Bubalus bubalis]</a>          | 78.7 | 78.7 | 100% | 6e-15 | 100% | <a href="#">gi 594099678 XP_006072964.1</a>  |
| <a href="#">PREDICTED: attractin isoform X3 [Canis lupus familiaris]</a>   | 78.7 | 78.7 | 100% | 6e-15 | 100% | <a href="#">gi 73991942 XP_534360.2</a>      |
| <a href="#">PREDICTED: attractin isoform 1 [Ceratotherium simum simum]</a> | 78.7 | 78.7 | 100% | 6e-15 | 100% | <a href="#">gi 478519274 XP_004433859.1</a>  |
| <a href="#">PREDICTED: attractin [Orcinus orca]</a>                        | 78.7 | 78.7 | 100% | 6e-15 | 100% | <a href="#">gi 466084723 XP_004285351.1</a>  |
| <a href="#">PREDICTED: attractin [Lipotes vexillifer]</a>                  | 78.7 | 78.7 | 100% | 6e-15 | 100% | <a href="#">gi 602710450 XP_007465469.1</a>  |
| <a href="#">PREDICTED: attractin isoform X1 [Condylura cristata]</a>       | 78.7 | 78.7 | 100% | 6e-15 | 100% | <a href="#">gi 507961707 XP_004687417.1</a>  |
| <a href="#">PREDICTED: attractin [Odobenus rosmarus divergens]</a>         | 78.7 | 78.7 | 100% | 6e-15 | 100% | <a href="#">gi 472357214 XP_004398236.1</a>  |
| <a href="#">PREDICTED: attractin isoform X1 [Mustela putorius furo]</a>    | 78.7 | 78.7 | 100% | 6e-15 | 100% | <a href="#">gi 511906945 XP_004772932.1</a>  |
| <a href="#">PREDICTED: attractin [Elephantulus edwardii]</a>               | 78.7 | 78.7 | 100% | 6e-15 | 100% | <a href="#">gi 585689645 XP_006894264.1</a>  |
| <a href="#">PREDICTED: attractin [Orycteropus afer afer]</a>               | 78.7 | 78.7 | 100% | 6e-15 | 100% | <a href="#">gi 634830430 XP_007958185.1</a>  |
| <a href="#">PREDICTED: attractin isoform X3 [Chinchilla lanigera]</a>      | 78.7 | 78.7 | 100% | 6e-15 | 100% | <a href="#">gi 533131617 XP_005380852.1</a>  |
| <a href="#">PREDICTED: attractin-like [Octodon degus]</a>                  | 78.7 | 78.7 | 100% | 6e-15 | 100% | <a href="#">gi 507657234 XP_004634315.1</a>  |
| <a href="#">PREDICTED: attractin isoform X1 [Oryctolagus cuniculus]</a>    | 78.7 | 78.7 | 100% | 6e-15 | 100% | <a href="#">gi 291388868 XP_002710968.1</a>  |
| <a href="#">PREDICTED: attractin [Ochotona princeps]</a>                   | 78.7 | 78.7 | 100% | 6e-15 | 100% | <a href="#">gi 504146589 XP_004585711.1</a>  |
| <a href="#">attractin [Mesocricetus auratus]</a>                           | 78.7 | 78.7 | 100% | 6e-15 | 100% | <a href="#">gi 528078159 INP_001268565.1</a> |
| <a href="#">PREDICTED: attractin [Callithrix jacchus]</a>                  | 78.7 | 78.7 | 100% | 6e-15 | 100% | <a href="#">gi 296200062 XP_002747358.1</a>  |
| <a href="#">Attractin [Mus musculus]</a>                                   | 78.7 | 78.7 | 100% | 6e-15 | 100% | <a href="#">gi 223461387 AAI41055.1</a>      |
| <a href="#">PREDICTED: attractin [Microtus ochrogaster]</a>                | 78.7 | 78.7 | 100% | 6e-15 | 100% | <a href="#">gi 532045699 XP_005365652.1</a>  |
| <a href="#">PREDICTED: attractin isoform X1 [Pan troglodytes]</a>          | 78.7 | 78.7 | 100% | 6e-15 | 100% | <a href="#">gi 332857715 XP_003316827.1</a>  |

## Alignments

Download [GenPept](#) [Graphics](#)

[Next](#) [Previous](#) [Descriptions](#)

PREDICTED: attractin-like, partial [Galeopterus variegatus]

Sequence ID: [gi|667345974|ref|XP\\_008563464.1](#) Length: 213 Number of Matches: 1

Range 1: 57 to 80 [GenPept](#) [Graphics](#)

[Next Match](#) [Previous Match](#)

| Score          | Expect | Identities  | Positives   | Gaps     |
|----------------|--------|-------------|-------------|----------|
| 78.7 bits(178) | 4e-15  | 24/24(100%) | 24/24(100%) | 0/24(0%) |

Query 1 KAATCINPLNGSVCKERPANHSKQ 24  
 Sbjct 57 KAATCINPLNGSVCKERPANHSKQ 80

### Related Information

[Gene](#) - associated gene details  
[Map Viewer](#) - aligned genomic context

Download [GenPept](#) [Graphics](#)

[Next](#) [Previous](#) [Descriptions](#)

attractin [Bos taurus]

Sequence ID: [gi|190683717|gb|ACE82176.1](#) Length: 670 Number of Matches: 1

Range 1: 146 to 169 [GenPept](#) [Graphics](#)

[Next Match](#) [Previous Match](#)

| Score          | Expect | Identities  | Positives   | Gaps     |
|----------------|--------|-------------|-------------|----------|
| 78.7 bits(178) | 5e-15  | 24/24(100%) | 24/24(100%) | 0/24(0%) |

Query 1 KAATCINPLNGSVCKERPANHSKQ 24  
 Sbjct 146 KAATCINPLNGSVCKERPANHSKQ 169

### Related Information

[Gene](#) - associated gene details  
[Map Viewer](#) - aligned genomic context

Download [GenPept](#) [Graphics](#)

[Next](#) [Previous](#) [Descriptions](#)

**Attractin [Tupaia chinensis]**

Sequence ID: [gi|444519420|gb|ELV12829.1](#) Length: 860 Number of Matches: 1

Range 1: 552 to 575 [GenPept](#) [Graphics](#)

[▼ Next Match](#) [▲ Previous Match](#)

| Score          | Expect | Identities  | Positives   | Gaps     |
|----------------|--------|-------------|-------------|----------|
| 78.7 bits(178) | 5e-15  | 24/24(100%) | 24/24(100%) | 0/24(0%) |

Query 1 KAATCINPLNGSVCKERPANHSAKQ 24  
 KAATCINPLNGSVCKERPANHSAKQ  
 Sbjct 552 KAATCINPLNGSVCKERPANHSAKQ 575

**Related Information**

[Download](#) [▼ GenPept](#) [Graphics](#)

[▼ Next](#) [▲ Previous](#) [▲ Descriptions](#)

**PREDICTED: attractin-like [Leptonychotes weddellii]**

Sequence ID: [gi|585160208|ref|XP\\_006732353.1](#) Length: 899 Number of Matches: 1

Range 1: 708 to 731 [GenPept](#) [Graphics](#)

[▼ Next Match](#) [▲ Previous Match](#)

| Score          | Expect | Identities  | Positives   | Gaps     |
|----------------|--------|-------------|-------------|----------|
| 78.7 bits(178) | 5e-15  | 24/24(100%) | 24/24(100%) | 0/24(0%) |

Query 1 KAATCINPLNGSVCKERPANHSAKQ 24  
 KAATCINPLNGSVCKERPANHSAKQ  
 Sbjct 708 KAATCINPLNGSVCKERPANHSAKQ 731

**Related Information**

[Gene](#) - associated gene details  
[Map Viewer](#) - aligned genomic context

[Download](#) [▼ GenPept](#) [Graphics](#)

[▼ Next](#) [▲ Previous](#) [▲ Descriptions](#)

**PREDICTED: attractin isoform X2 [Papio anubis]**

Sequence ID: [gi|685567345|ref|XP\\_009214752.1](#) Length: 989 Number of Matches: 1

Range 1: 595 to 618 [GenPept](#) [Graphics](#)

[▼ Next Match](#) [▲ Previous Match](#)

| Score          | Expect | Identities  | Positives   | Gaps     |
|----------------|--------|-------------|-------------|----------|
| 78.7 bits(178) | 6e-15  | 24/24(100%) | 24/24(100%) | 0/24(0%) |

Query 1 KAATCINPLNGSVCKERPANHSAKQ 24  
 KAATCINPLNGSVCKERPANHSAKQ  
 Sbjct 595 KAATCINPLNGSVCKERPANHSAKQ 618

**Related Information**

[Gene](#) - associated gene details  
[Map Viewer](#) - aligned genomic context

BLAST is a registered trademark of the National Library of Medicine.

NCBI/ BLAST/ blastp suite/ Formatting Results - BH9CXYD014

Your search parameters were adjusted to search for a short input sequence.

[Edit and Resubmit](#) [Save Search Strategies](#) [Formatting options](#) [Download](#)

[YouTube](#) [How to read this page](#) [Blast report description](#)

### ATRN\_KCEDLTTGKHCETCISGFYGDPTNGGKC\_Mod

**RID** [BH9CXYD014](#) (Expires on 01-17 12:46 pm)

**Query ID** |cl|31400 **Database Name** nr

**Description** None **Description** All non-redundant GenBank CDS translations+PDB+SwissProt+PIR excluding environmental samples from WGS projects

**Molecule type** amino acid **Program** BLASTP 2.2.30+ [Citation](#)

**Query Length** 28

Other reports: [Search Summary](#) [\[Taxonomy reports\]](#) [\[Distance tree of results\]](#) [\[Multiple alignment\]](#)

[New](#) DELTA-BLAST a more sensitive protein-protein search

### Graphic Summary

Show Conserved Domains

Putative conserved domains have been detected, click on the image below for detailed results.

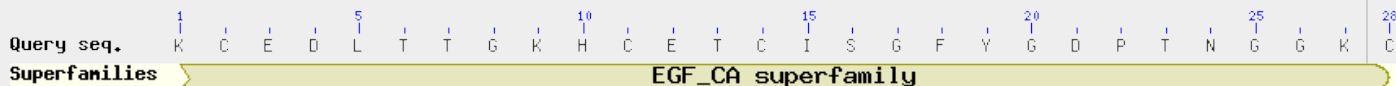

Distribution of 100 Blast Hits on the Query Sequence

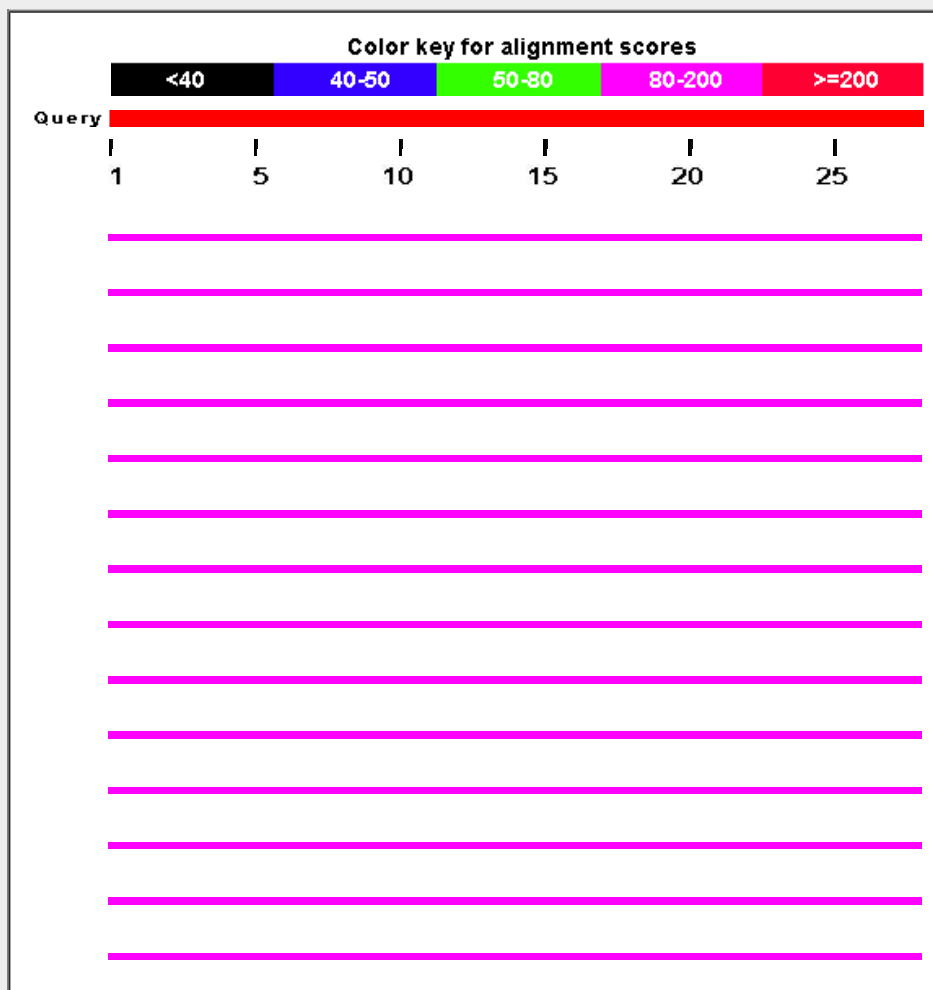

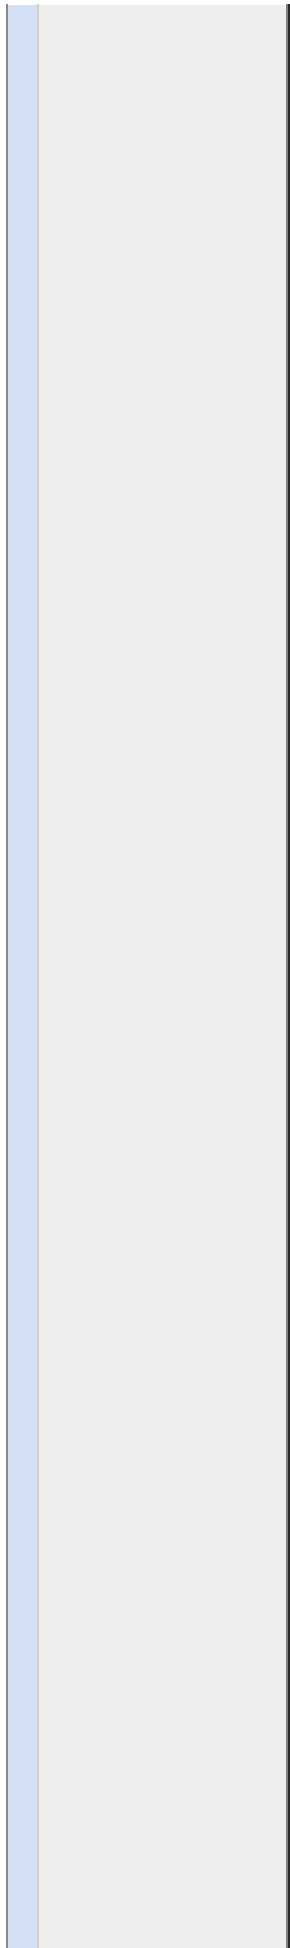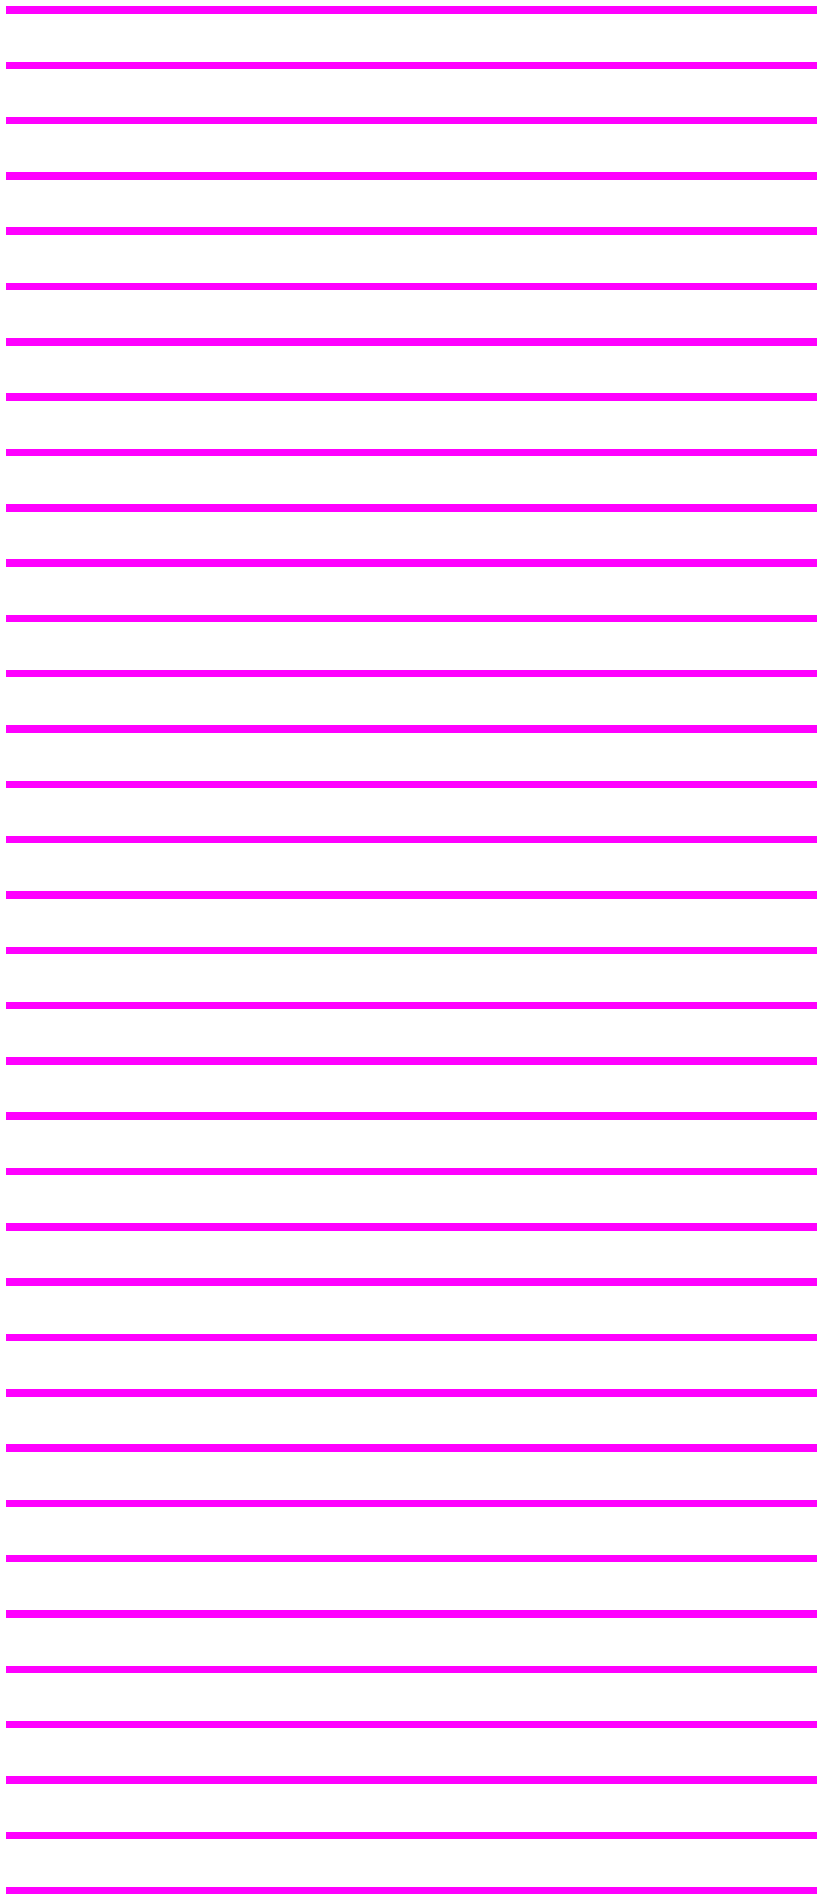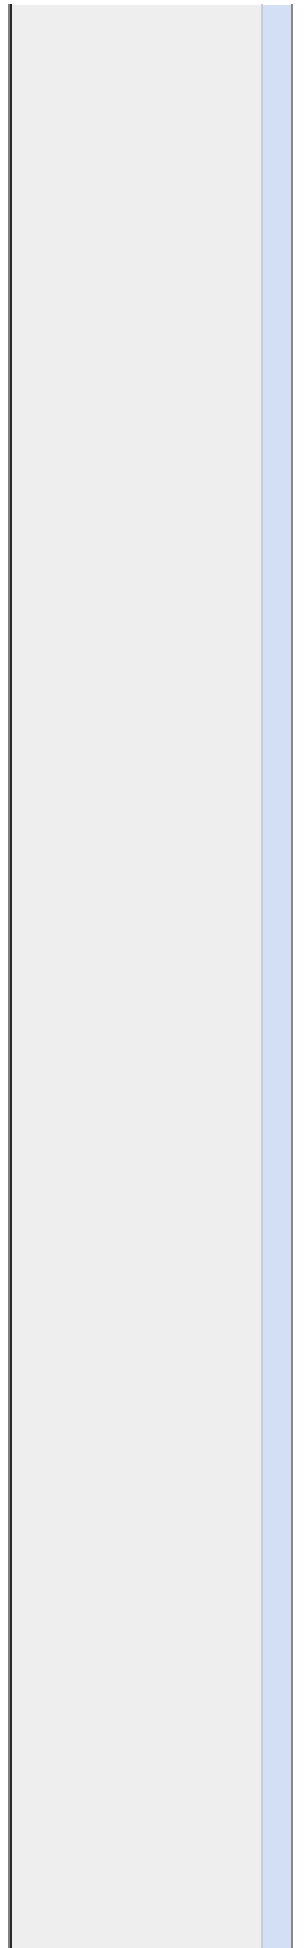

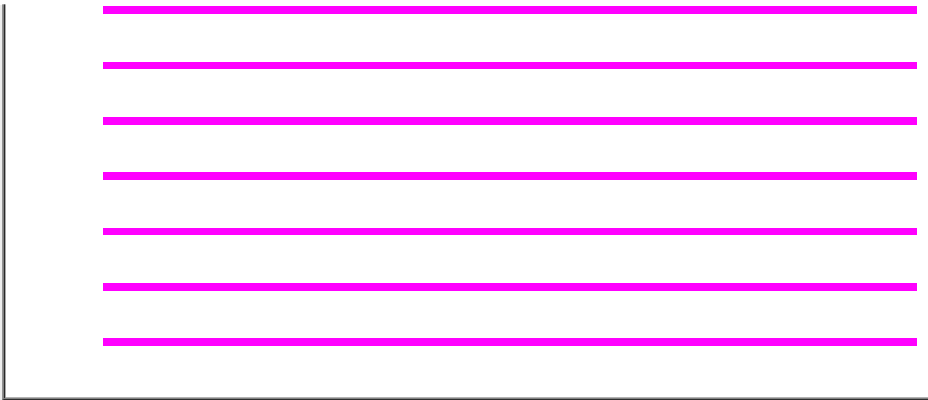

**Descriptions**

**Sequences producing significant alignments:**

Select: [All](#) [None](#) Selected: 0

Alignments [Download](#) [GenPept](#) [Graphics](#) [Distance tree of results](#) [Multiple alignment](#)

| Description                                                                       | Max score | Total score | Query cover | E value | Ident | Accession                                   |
|-----------------------------------------------------------------------------------|-----------|-------------|-------------|---------|-------|---------------------------------------------|
| <a href="#">mKIAA0548 protein [Mus musculus]</a>                                  | 94.8      | 94.8        | 100%        | 3e-20   | 100%  | <a href="#">gi 26006173 BAC41429.1</a>      |
| <a href="#">attractin [Rattus norvegicus]</a>                                     | 94.8      | 94.8        | 100%        | 3e-20   | 100%  | <a href="#">gi 12275312 BAB21018.1</a>      |
| <a href="#">attractin, isoform CRA_a [Rattus norvegicus]</a>                      | 94.8      | 94.8        | 100%        | 3e-20   | 100%  | <a href="#">gi 149023319 EDL80213.1</a>     |
| <a href="#">Attractin [Mus musculus]</a>                                          | 94.8      | 94.8        | 100%        | 3e-20   | 100%  | <a href="#">gi 223461387 AAI41055.1</a>     |
| <a href="#">attractin precursor [Mus musculus]</a>                                | 94.8      | 94.8        | 100%        | 3e-20   | 100%  | <a href="#">gi 87299635 NP_033860.2</a>     |
| <a href="#">attractin [Mus musculus]</a>                                          | 94.8      | 94.8        | 100%        | 3e-20   | 100%  | <a href="#">gi 4585307 AAD25372.1</a>       |
| <a href="#">attractin precursor [Rattus norvegicus]</a>                           | 94.8      | 94.8        | 100%        | 3e-20   | 100%  | <a href="#">gi 13786196 NP_112641.1</a>     |
| <a href="#">attractin, isoform CRA_b [Mus musculus]</a>                           | 94.8      | 94.8        | 100%        | 3e-20   | 100%  | <a href="#">gi 148696346 EDL28293.1</a>     |
| <a href="#">mahogany protein [Mus musculus]</a>                                   | 94.8      | 94.8        | 100%        | 3e-20   | 100%  | <a href="#">gi 4454561 AAD20947.1</a>       |
| <a href="#">PREDICTED: attractin isoform X1 [Mus musculus]</a>                    | 94.8      | 94.8        | 100%        | 3e-20   | 100%  | <a href="#">gi 568915132 XP_006498669.1</a> |
| <a href="#">attractin [Ovis aries]</a>                                            | 92.3      | 92.3        | 100%        | 2e-19   | 96%   | <a href="#">gi 78499351 ABB45710.1</a>      |
| <a href="#">KIAA0548 protein [Homo sapiens]</a>                                   | 92.3      | 92.3        | 100%        | 2e-19   | 96%   | <a href="#">gi 3043620 BAA25474.1</a>       |
| <a href="#">attractin [Bos taurus]</a>                                            | 92.3      | 92.3        | 100%        | 2e-19   | 96%   | <a href="#">gi 190683717 ACE82176.1</a>     |
| <a href="#">Attractin [Tupaia chinensis]</a>                                      | 92.3      | 92.3        | 100%        | 2e-19   | 96%   | <a href="#">gi 444519420 ELV12829.1</a>     |
| <a href="#">PREDICTED: attractin-like [Tursiops truncatus]</a>                    | 92.3      | 92.3        | 100%        | 2e-19   | 96%   | <a href="#">gi 470629747 XP_004321558.1</a> |
| <a href="#">PREDICTED: attractin [Pongo abelii]</a>                               | 92.3      | 92.3        | 100%        | 2e-19   | 96%   | <a href="#">gi 297706621 XP_002830129.1</a> |
| <a href="#">Attractin [Cricetulus griseus]</a>                                    | 92.3      | 92.3        | 100%        | 2e-19   | 96%   | <a href="#">gi 344236321 EGV92424.1</a>     |
| <a href="#">attractin isoform 1 preproprotein [Camelus ferus]</a>                 | 92.3      | 92.3        | 100%        | 2e-19   | 96%   | <a href="#">gi 528759526 EPY79185.1</a>     |
| <a href="#">PREDICTED: attractin isoform X2 [Cricetulus griseus]</a>              | 92.3      | 92.3        | 100%        | 2e-19   | 96%   | <a href="#">gi 625260840 XP_007621856.1</a> |
| <a href="#">PREDICTED: attractin-like [Ictidomys tridecemlineatus]</a>            | 92.3      | 92.3        | 100%        | 2e-19   | 96%   | <a href="#">gi 532069682 XP_005320676.1</a> |
| <a href="#">PREDICTED: attractin [Equus przewalskii]</a>                          | 92.3      | 92.3        | 100%        | 2e-19   | 96%   | <a href="#">gi 664773944 XP_008506219.1</a> |
| <a href="#">PREDICTED: attractin isoform X2 [Homo sapiens]</a>                    | 92.3      | 92.3        | 100%        | 2e-19   | 96%   | <a href="#">gi 530426021 XP_005260918.1</a> |
| <a href="#">PREDICTED: attractin isoform X2 [Saimiri boliviensis boliviensis]</a> | 92.3      | 92.3        | 100%        | 2e-19   | 96%   | <a href="#">gi 725600053 XP_010350112.1</a> |
| <a href="#">PREDICTED: attractin isoform X1 [Saimiri boliviensis boliviensis]</a> | 92.3      | 92.3        | 100%        | 2e-19   | 96%   | <a href="#">gi 725600051 XP_010350111.1</a> |
| <a href="#">PREDICTED: attractin [Nannospalax galii]</a>                          | 92.3      | 92.3        | 100%        | 2e-19   | 96%   | <a href="#">gi 674060132 XP_008836714.1</a> |
| <a href="#">PREDICTED: attractin [Balaenoptera acutorostrata scammoni]</a>        | 92.3      | 92.3        | 100%        | 2e-19   | 96%   | <a href="#">gi 594697511 XP_007195912.1</a> |
| <a href="#">PREDICTED: attractin [Tarsius syrichta]</a>                           | 92.3      | 92.3        | 100%        | 2e-19   | 96%   | <a href="#">gi 640796924 XP_008054571.1</a> |
| <a href="#">unnamed protein product [Homo sapiens]</a>                            | 92.3      | 92.3        | 100%        | 2e-19   | 96%   | <a href="#">gi 194380362 BAG63948.1</a>     |

|                                                                          |      |      |      |       |     |                                             |
|--------------------------------------------------------------------------|------|------|------|-------|-----|---------------------------------------------|
| <a href="#">attractin isoform 4 [Homo sapiens]</a>                       | 92.3 | 92.3 | 100% | 2e-19 | 96% | <a href="#">gij333440461 NP_001193976.1</a> |
| <a href="#">PREDICTED: attractin isoform 2 [Nomascus leucogenys]</a>     | 92.3 | 92.3 | 100% | 2e-19 | 96% | <a href="#">gij332257827 XP_003278006.1</a> |
| <a href="#">attractin [Cricetulus griseus]</a>                           | 92.3 | 92.3 | 100% | 2e-19 | 96% | <a href="#">gij537146168 ERE69758.1</a>     |
| <a href="#">Attractin [Myotis davidii]</a>                               | 92.3 | 92.3 | 100% | 2e-19 | 96% | <a href="#">gij432111133 ELK34519.1</a>     |
| <a href="#">PREDICTED: attractin [Pantholops hodgsonii]</a>              | 92.3 | 92.3 | 100% | 2e-19 | 96% | <a href="#">gij556758951 XP_005974805.1</a> |
| <a href="#">PREDICTED: attractin isoform X2 [Condylyra cristata]</a>     | 92.3 | 92.3 | 100% | 2e-19 | 96% | <a href="#">gij507961710 XP_004687418.1</a> |
| <a href="#">PREDICTED: attractin isoform X4 [Pan troglodytes]</a>        | 92.3 | 92.3 | 100% | 2e-19 | 96% | <a href="#">gij694977854 XP_009435012.1</a> |
| <a href="#">Attractin [Myotis brandtii]</a>                              | 92.3 | 92.3 | 100% | 2e-19 | 96% | <a href="#">gij521031210 EPQ12996.1</a>     |
| <a href="#">PREDICTED: attractin isoform 1 [Nomascus leucogenys]</a>     | 92.3 | 92.3 | 100% | 2e-19 | 96% | <a href="#">gij332257825 XP_003278005.1</a> |
| <a href="#">attractin-2 [Homo sapiens]</a>                               | 92.3 | 92.3 | 100% | 2e-19 | 96% | <a href="#">gij4093196 AAD03057.1</a>       |
| <a href="#">secreted attractin precursor [Homo sapiens]</a>              | 92.3 | 92.3 | 100% | 2e-19 | 96% | <a href="#">gij8118083 AAF72882.1</a>       |
| <a href="#">unnamed protein product [Homo sapiens]</a>                   | 92.3 | 92.3 | 100% | 2e-19 | 96% | <a href="#">gij158259481 BAF85699.1</a>     |
| <a href="#">attractin isoform 2 preproprotein [Homo sapiens]</a>         | 92.3 | 92.3 | 100% | 2e-19 | 96% | <a href="#">gij21450863 NP_647538.1</a>     |
| <a href="#">Mahogany-like protein [Macaca mulatta]</a>                   | 92.3 | 92.3 | 100% | 2e-19 | 96% | <a href="#">gij355563316 EHH19878.1</a>     |
| <a href="#">PREDICTED: attractin isoform X1 [Bos taurus]</a>             | 92.3 | 92.3 | 100% | 2e-19 | 96% | <a href="#">gij741947708 XP_005214542.2</a> |
| <a href="#">PREDICTED: attractin isoform X3 [Bubalus bubalis]</a>        | 92.3 | 92.3 | 100% | 2e-19 | 96% | <a href="#">gij594099680 XP_006072965.1</a> |
| <a href="#">PREDICTED: LOW QUALITY PROTEIN: attractin [Pan paniscus]</a> | 92.3 | 92.3 | 100% | 2e-19 | 96% | <a href="#">gij675763672 XP_008973079.1</a> |
| <a href="#">PREDICTED: attractin isoform X3 [Pan troglodytes]</a>        | 92.3 | 92.3 | 100% | 2e-19 | 96% | <a href="#">gij694977852 XP_009435011.1</a> |
| <a href="#">PREDICTED: attractin isoform X1 [Homo sapiens]</a>           | 92.3 | 92.3 | 100% | 2e-19 | 96% | <a href="#">gij530426019 XP_005260917.1</a> |
| <a href="#">PREDICTED: attractin isoform X4 [Macaca fascicularis]</a>    | 92.3 | 92.3 | 100% | 2e-19 | 96% | <a href="#">gij544464516 XP_005568512.1</a> |
| <a href="#">PREDICTED: attractin isoform X5 [Chlorocebus sabaeus]</a>    | 92.3 | 92.3 | 100% | 2e-19 | 96% | <a href="#">gij635021368 XP_008017720.1</a> |
| <a href="#">Mahogany-like protein [Macaca fascicularis]</a>              | 92.3 | 92.3 | 100% | 2e-19 | 96% | <a href="#">gij355784657 EHH65508.1</a>     |
| <a href="#">PREDICTED: attractin [Myotis davidii]</a>                    | 92.3 | 92.3 | 100% | 2e-19 | 96% | <a href="#">gij584075971 XP_006758187.1</a> |
| <a href="#">PREDICTED: attractin [Myotis brandtii]</a>                   | 92.3 | 92.3 | 100% | 2e-19 | 96% | <a href="#">gij554560893 XP_005874816.1</a> |
| <a href="#">PREDICTED: attractin isoform X3 [Macaca fascicularis]</a>    | 92.3 | 92.3 | 100% | 2e-19 | 96% | <a href="#">gij544464514 XP_005568511.1</a> |
| <a href="#">PREDICTED: attractin-like [Galeopterus variegatus]</a>       | 92.3 | 92.3 | 100% | 2e-19 | 96% | <a href="#">gij667324076 XP_008589101.1</a> |
| <a href="#">PREDICTED: attractin isoform X4 [Chlorocebus sabaeus]</a>    | 92.3 | 92.3 | 100% | 2e-19 | 96% | <a href="#">gij635021366 XP_008017712.1</a> |
| <a href="#">PREDICTED: attractin [Capra hircus]</a>                      | 92.3 | 92.3 | 100% | 2e-19 | 96% | <a href="#">gij548490191 XP_005688293.1</a> |
| <a href="#">PREDICTED: attractin [Rhinopithecus roxellana]</a>           | 92.3 | 92.3 | 100% | 2e-19 | 96% | <a href="#">gij724902357 XP_010377335.1</a> |
| <a href="#">PREDICTED: attractin isoform X1 [Cricetulus griseus]</a>     | 92.3 | 92.3 | 100% | 2e-19 | 96% | <a href="#">gij354473756 XP_003499099.1</a> |
| <a href="#">PREDICTED: attractin [Camelus ferus]</a>                     | 92.3 | 92.3 | 100% | 2e-19 | 96% | <a href="#">gij560921992 XP_006187198.1</a> |
| <a href="#">PREDICTED: attractin [Myotis lucifugus]</a>                  | 92.3 | 92.3 | 100% | 2e-19 | 96% | <a href="#">gij558159591 XP_006096513.1</a> |
| <a href="#">attractin [Cricetulus griseus]</a>                           | 92.3 | 92.3 | 100% | 2e-19 | 96% | <a href="#">gij537146167 ERE69757.1</a>     |
| <a href="#">PREDICTED: attractin [Camelus dromedarius]</a>               | 92.3 | 92.3 | 100% | 2e-19 | 96% | <a href="#">gij744589171 XP_010986570.1</a> |
| <a href="#">PREDICTED: attractin [Bos mutus]</a>                         | 92.3 | 92.3 | 100% | 2e-19 | 96% | <a href="#">gij555963925 XP_005894036.1</a> |
| <a href="#">PREDICTED: attractin [Camelus bactrianus]</a>                | 92.3 | 92.3 | 100% | 2e-19 | 96% | <a href="#">gij743752427 XP_010971103.1</a> |
| <a href="#">attractin, isoform CRA_b [Homo sapiens]</a>                  | 92.3 | 92.3 | 100% | 2e-19 | 96% | <a href="#">gij119630936 EAX10531.1</a>     |
| <a href="#">PREDICTED: attractin isoform X3 [Chlorocebus sabaeus]</a>    | 92.3 | 92.3 | 100% | 2e-19 | 96% | <a href="#">gij635021364 XP_008017707.1</a> |
| <a href="#">PREDICTED: attractin [Ovis aries]</a>                        | 92.3 | 92.3 | 100% | 2e-19 | 96% | <a href="#">gij426241795 XP_004014773.1</a> |
| <a href="#">PREDICTED: attractin [Peromyscus maniculatus bairdii]</a>    | 92.3 | 92.3 | 100% | 2e-19 | 96% | <a href="#">gij589943852 XP_006984624.1</a> |
| <a href="#">PREDICTED: attractin isoform X2 [Pan troglodytes]</a>        | 92.3 | 92.3 | 100% | 2e-19 | 96% | <a href="#">gij694977850 XP_009435010.1</a> |
| <a href="#">PREDICTED: attractin isoform X2 [Chlorocebus sabaeus]</a>    | 92.3 | 92.3 | 100% | 2e-19 | 96% | <a href="#">gij635021362 XP_008017704.1</a> |
| <a href="#">PREDICTED: attractin [Otolemur garnettii]</a>                | 92.3 | 92.3 | 100% | 2e-19 | 96% | <a href="#">gij395830288 XP_003788264.1</a> |
| <a href="#">PREDICTED: attractin [Vicugna pacos]</a>                     | 92.3 | 92.3 | 100% | 2e-19 | 96% | <a href="#">gij560970220 XP_006207473.1</a> |
| <a href="#">PREDICTED: attractin [Echinops telfairi]</a>                 | 92.3 | 92.3 | 100% | 2e-19 | 96% | <a href="#">gij507626122 XP_004697922.1</a> |
| <a href="#">attractin [Bos taurus]</a>                                   | 92.3 | 92.3 | 100% | 2e-19 | 96% | <a href="#">gij253560524 ACT32973.1</a>     |



|                                                                              |      |      |      |       |     |                                              |
|------------------------------------------------------------------------------|------|------|------|-------|-----|----------------------------------------------|
| <a href="#">PREDICTED: attractin isoform X1 [Pteropus alecto]</a>            | 92.3 | 92.3 | 100% | 2e-19 | 96% | <a href="#">gij586533632 XP_006921705.1</a>  |
| <a href="#">PREDICTED: attractin [Eptesicus fuscus]</a>                      | 92.3 | 92.3 | 100% | 2e-19 | 96% | <a href="#">gij641701319 XP_008139256.1</a>  |
| <a href="#">attractin [Bos taurus]</a>                                       | 92.3 | 92.3 | 100% | 2e-19 | 96% | <a href="#">gij27806737 INP_776420.1</a>     |
| <a href="#">PREDICTED: attractin isoform X2 [Bubalus bubalis]</a>            | 92.3 | 92.3 | 100% | 2e-19 | 96% | <a href="#">gij594099678 XP_006072964.1</a>  |
| <a href="#">PREDICTED: attractin [Orcinus orca]</a>                          | 92.3 | 92.3 | 100% | 2e-19 | 96% | <a href="#">gij466084723 XP_004285351.1</a>  |
| <a href="#">PREDICTED: attractin [Lipotes vexillifer]</a>                    | 92.3 | 92.3 | 100% | 2e-19 | 96% | <a href="#">gij602710450 XP_007465469.1</a>  |
| <a href="#">PREDICTED: attractin isoform X1 [Condylura cristata]</a>         | 92.3 | 92.3 | 100% | 2e-19 | 96% | <a href="#">gij507961707 XP_004687417.1</a>  |
| <a href="#">PREDICTED: attractin [Chrysochloris asiatica]</a>                | 92.3 | 92.3 | 100% | 2e-19 | 96% | <a href="#">gij586488825 XP_006874887.1</a>  |
| <a href="#">PREDICTED: attractin [Elephantulus edwardii]</a>                 | 92.3 | 92.3 | 100% | 2e-19 | 96% | <a href="#">gij585689645 XP_006894264.1</a>  |
| <a href="#">PREDICTED: attractin [Orycteropus afer afer]</a>                 | 92.3 | 92.3 | 100% | 2e-19 | 96% | <a href="#">gij634830430 XP_007958185.1</a>  |
| <a href="#">PREDICTED: attractin isoform X1 [Oryctolagus cuniculus]</a>      | 92.3 | 92.3 | 100% | 2e-19 | 96% | <a href="#">gij291388868 XP_002710968.1</a>  |
| <a href="#">PREDICTED: attractin isoform X1 [Ictidomys tridecemlineatus]</a> | 92.3 | 92.3 | 100% | 2e-19 | 96% | <a href="#">gij532069484 XP_005320577.1</a>  |
| <a href="#">PREDICTED: attractin [Ochotona princeps]</a>                     | 92.3 | 92.3 | 100% | 2e-19 | 96% | <a href="#">gij504146589 XP_004585711.1</a>  |
| <a href="#">attractin [Mesocricetus auratus]</a>                             | 92.3 | 92.3 | 100% | 2e-19 | 96% | <a href="#">gij528078159 INP_001268565.1</a> |
| <a href="#">PREDICTED: attractin isoform X3 [Ictidomys tridecemlineatus]</a> | 92.3 | 92.3 | 100% | 2e-19 | 96% | <a href="#">gij532069488 XP_005320579.1</a>  |
| <a href="#">PREDICTED: attractin [Callithrix jacchus]</a>                    | 92.3 | 92.3 | 100% | 2e-19 | 96% | <a href="#">gij296200062 XP_002747358.1</a>  |
| <a href="#">PREDICTED: attractin [Microtus ochrogaster]</a>                  | 92.3 | 92.3 | 100% | 2e-19 | 96% | <a href="#">gij532045699 XP_005365652.1</a>  |
| <a href="#">PREDICTED: attractin isoform X1 [Pan troglodytes]</a>            | 92.3 | 92.3 | 100% | 2e-19 | 96% | <a href="#">gij332857715 XP_003316827.1</a>  |
| <a href="#">membrane attractin precursor [Homo sapiens]</a>                  | 92.3 | 92.3 | 100% | 2e-19 | 96% | <a href="#">gij8118082 AAF72881.1</a>        |
| <a href="#">attractin isoform 1 preproprotein [Homo sapiens]</a>             | 92.3 | 92.3 | 100% | 2e-19 | 96% | <a href="#">gij21450861 INP_647537.1</a>     |
| <a href="#">PREDICTED: attractin isoform X2 [Ictidomys tridecemlineatus]</a> | 92.3 | 92.3 | 100% | 2e-19 | 96% | <a href="#">gij532069486 XP_005320578.1</a>  |
| <a href="#">PREDICTED: attractin [Jaculus jaculus]</a>                       | 92.3 | 92.3 | 100% | 2e-19 | 96% | <a href="#">gij507555530 XP_004661535.1</a>  |
| <a href="#">PREDICTED: attractin isoform X2 [Macaca fascicularis]</a>        | 92.3 | 92.3 | 100% | 2e-19 | 96% | <a href="#">gij544464512 XP_005568510.1</a>  |
| <a href="#">PREDICTED: attractin [Macaca mulatta]</a>                        | 92.3 | 92.3 | 100% | 2e-19 | 96% | <a href="#">gij109092720 XP_001115192.1</a>  |
| <a href="#">PREDICTED: attractin isoform X1 [Chlorocebus sabaeus]</a>        | 92.3 | 92.3 | 100% | 2e-19 | 96% | <a href="#">gij635021360 XP_008017700.1</a>  |
| <a href="#">PREDICTED: attractin isoform X1 [Macaca fascicularis]</a>        | 92.3 | 92.3 | 100% | 2e-19 | 96% | <a href="#">gij544464510 XP_005568509.1</a>  |

## Alignments

Download [GenPept](#) [Graphics](#)

[Next](#) [Previous](#) [Descriptions](#)

### mKIAA0548 protein [Mus musculus]

Sequence ID: [gij26006173|dbj|BAC41429.1](#) Length: 1059 Number of Matches: 1

Range 1: 709 to 736 [GenPept](#) [Graphics](#)

[Next Match](#) [Previous Match](#)

| Score          | Expect | Identities  | Positives   | Gaps     |
|----------------|--------|-------------|-------------|----------|
| 94.8 bits(216) | 3e-20  | 28/28(100%) | 28/28(100%) | 0/28(0%) |

Query 1 KCEDLTTGKHCETCISGFYGDPTNGGKC 28  
 KCEDLTTGKHCETCISGFYGDPTNGGKC  
 Sbjct 709 KCEDLTTGKHCETCISGFYGDPTNGGKC 736

#### Related Information

[Gene](#) - associated gene details

Download [GenPept](#) [Graphics](#)

[Next](#) [Previous](#) [Descriptions](#)

### attractin [Rattus norvegicus]

Sequence ID: [gij12275312|dbj|BAB21018.1](#) Length: 1275 Number of Matches: 1

Range 1: 1082 to 1109 [GenPept](#) [Graphics](#)

[Next Match](#) [Previous Match](#)

| Score          | Expect | Identities  | Positives   | Gaps     |
|----------------|--------|-------------|-------------|----------|
| 94.8 bits(216) | 3e-20  | 28/28(100%) | 28/28(100%) | 0/28(0%) |

Query 1 KCEDLTTGKHCETCISGFYGDPTNGGKC 28  
 KCEDLTTGKHCETCISGFYGDPTNGGKC  
 Sbjct 1082 KCEDLTTGKHCETCISGFYGDPTNGGKC 1109

#### Related Information

[Gene](#) - associated gene details

Download [GenPept](#) [Graphics](#)

▼ Next ▲ Previous ▲ Descriptions

**attractin, isoform CRA\_a [Rattus norvegicus]**

Sequence ID: [gi|149023319|gb|EDL80213.1](#) Length: 1275 Number of Matches: 1

Range 1: 1082 to 1109 [GenPept](#) [Graphics](#)

▼ Next Match ▲ Previous Match

| Score          | Expect | Identities  | Positives   | Gaps     |
|----------------|--------|-------------|-------------|----------|
| 94.8 bits(216) | 3e-20  | 28/28(100%) | 28/28(100%) | 0/28(0%) |

```

Query 1      KCEDLTTGKHCETCISGFYGDPTNGGKC 28
           KCEDLTTGKHCETCISGFYGDPTNGGKC
Sbjct 1082   KCEDLTTGKHCETCISGFYGDPTNGGKC 1109
    
```

**Related Information**

[Gene](#) - associated gene details

Download [GenPept](#) [Graphics](#)

▼ Next ▲ Previous ▲ Descriptions

**Attractin [Mus musculus]**

Sequence ID: [gi|223461387|gb|AAI41055.1](#) Length: 1428 Number of Matches: 1

Range 1: 1078 to 1105 [GenPept](#) [Graphics](#)

▼ Next Match ▲ Previous Match

| Score          | Expect | Identities  | Positives   | Gaps     |
|----------------|--------|-------------|-------------|----------|
| 94.8 bits(216) | 3e-20  | 28/28(100%) | 28/28(100%) | 0/28(0%) |

```

Query 1      KCEDLTTGKHCETCISGFYGDPTNGGKC 28
           KCEDLTTGKHCETCISGFYGDPTNGGKC
Sbjct 1078   KCEDLTTGKHCETCISGFYGDPTNGGKC 1105
    
```

**Related Information**

[Gene](#) - associated gene details

Download [GenPept](#) [Graphics](#)

▼ Next ▲ Previous ▲ Descriptions

**attractin precursor [Mus musculus]**

Sequence ID: [gi|87299635|ref|NP\\_033860.2](#) Length: 1428 Number of Matches: 1

▶ [See 2 more title\(s\)](#)

Range 1: 1078 to 1105 [GenPept](#) [Graphics](#)

▼ Next Match ▲ Previous Match

| Score          | Expect | Identities  | Positives   | Gaps     |
|----------------|--------|-------------|-------------|----------|
| 94.8 bits(216) | 3e-20  | 28/28(100%) | 28/28(100%) | 0/28(0%) |

```

Query 1      KCEDLTTGKHCETCISGFYGDPTNGGKC 28
           KCEDLTTGKHCETCISGFYGDPTNGGKC
Sbjct 1078   KCEDLTTGKHCETCISGFYGDPTNGGKC 1105
    
```

**Related Information**

[Gene](#) - associated gene details

[UniGene](#) - clustered expressed sequence tags

[Map Viewer](#) - aligned genomic context

[Identical Proteins](#) - Proteins identical to the subject

BLAST is a registered trademark of the National Library of Medicine.

NCBI/ BLAST/ blastp suite/ Formatting Results - B90XK6N701R

Your search parameters were adjusted to search for a short input sequence.

Edit and Resubmit Save Search Strategies Formatting options Download

YouTube How to read this page Blast report description

ATRN\_KCENLTTGKHCETCISGFYGDPTNGGKC\_NonMod

RID B90XK6N701R (Expires on 01-14 09:32 am)

Query ID Icl|59450
Description None
Molecule type amino acid
Query Length 28

Database Name nr
Description All non-redundant GenBank CDS translations+PDB+SwissProt+PIR excluding environmental samples from WGS projects
Program BLASTP 2.2.30+ Citation

Other reports: Search Summary [Taxonomy reports] [Distance tree of results] [Multiple alignment]

Graphic Summary

Show Conserved Domains

Putative conserved domains have been detected, click on the image below for detailed results.

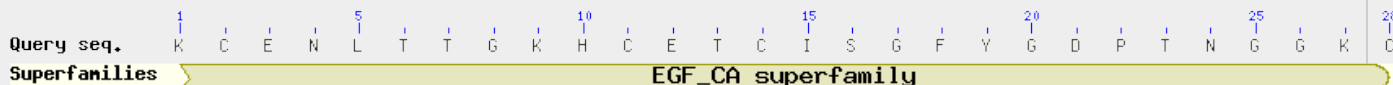

Distribution of 100 Blast Hits on the Query Sequence

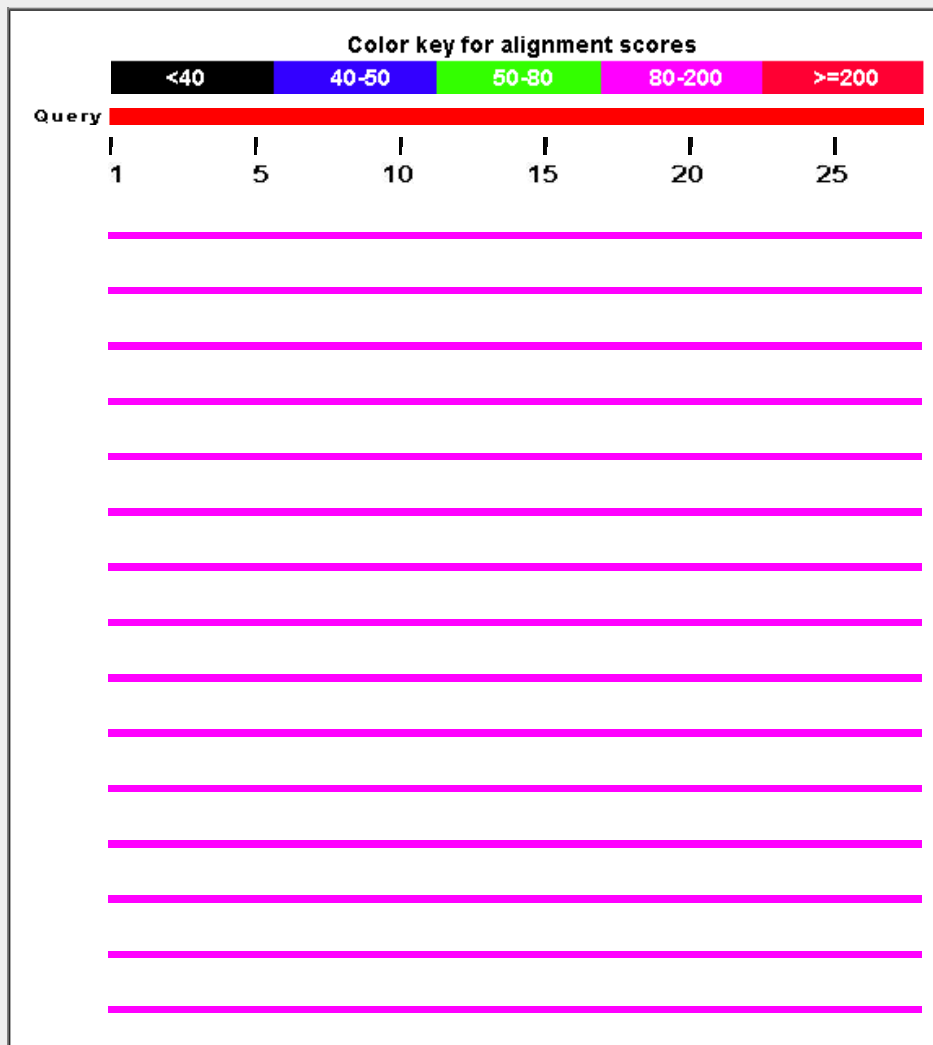

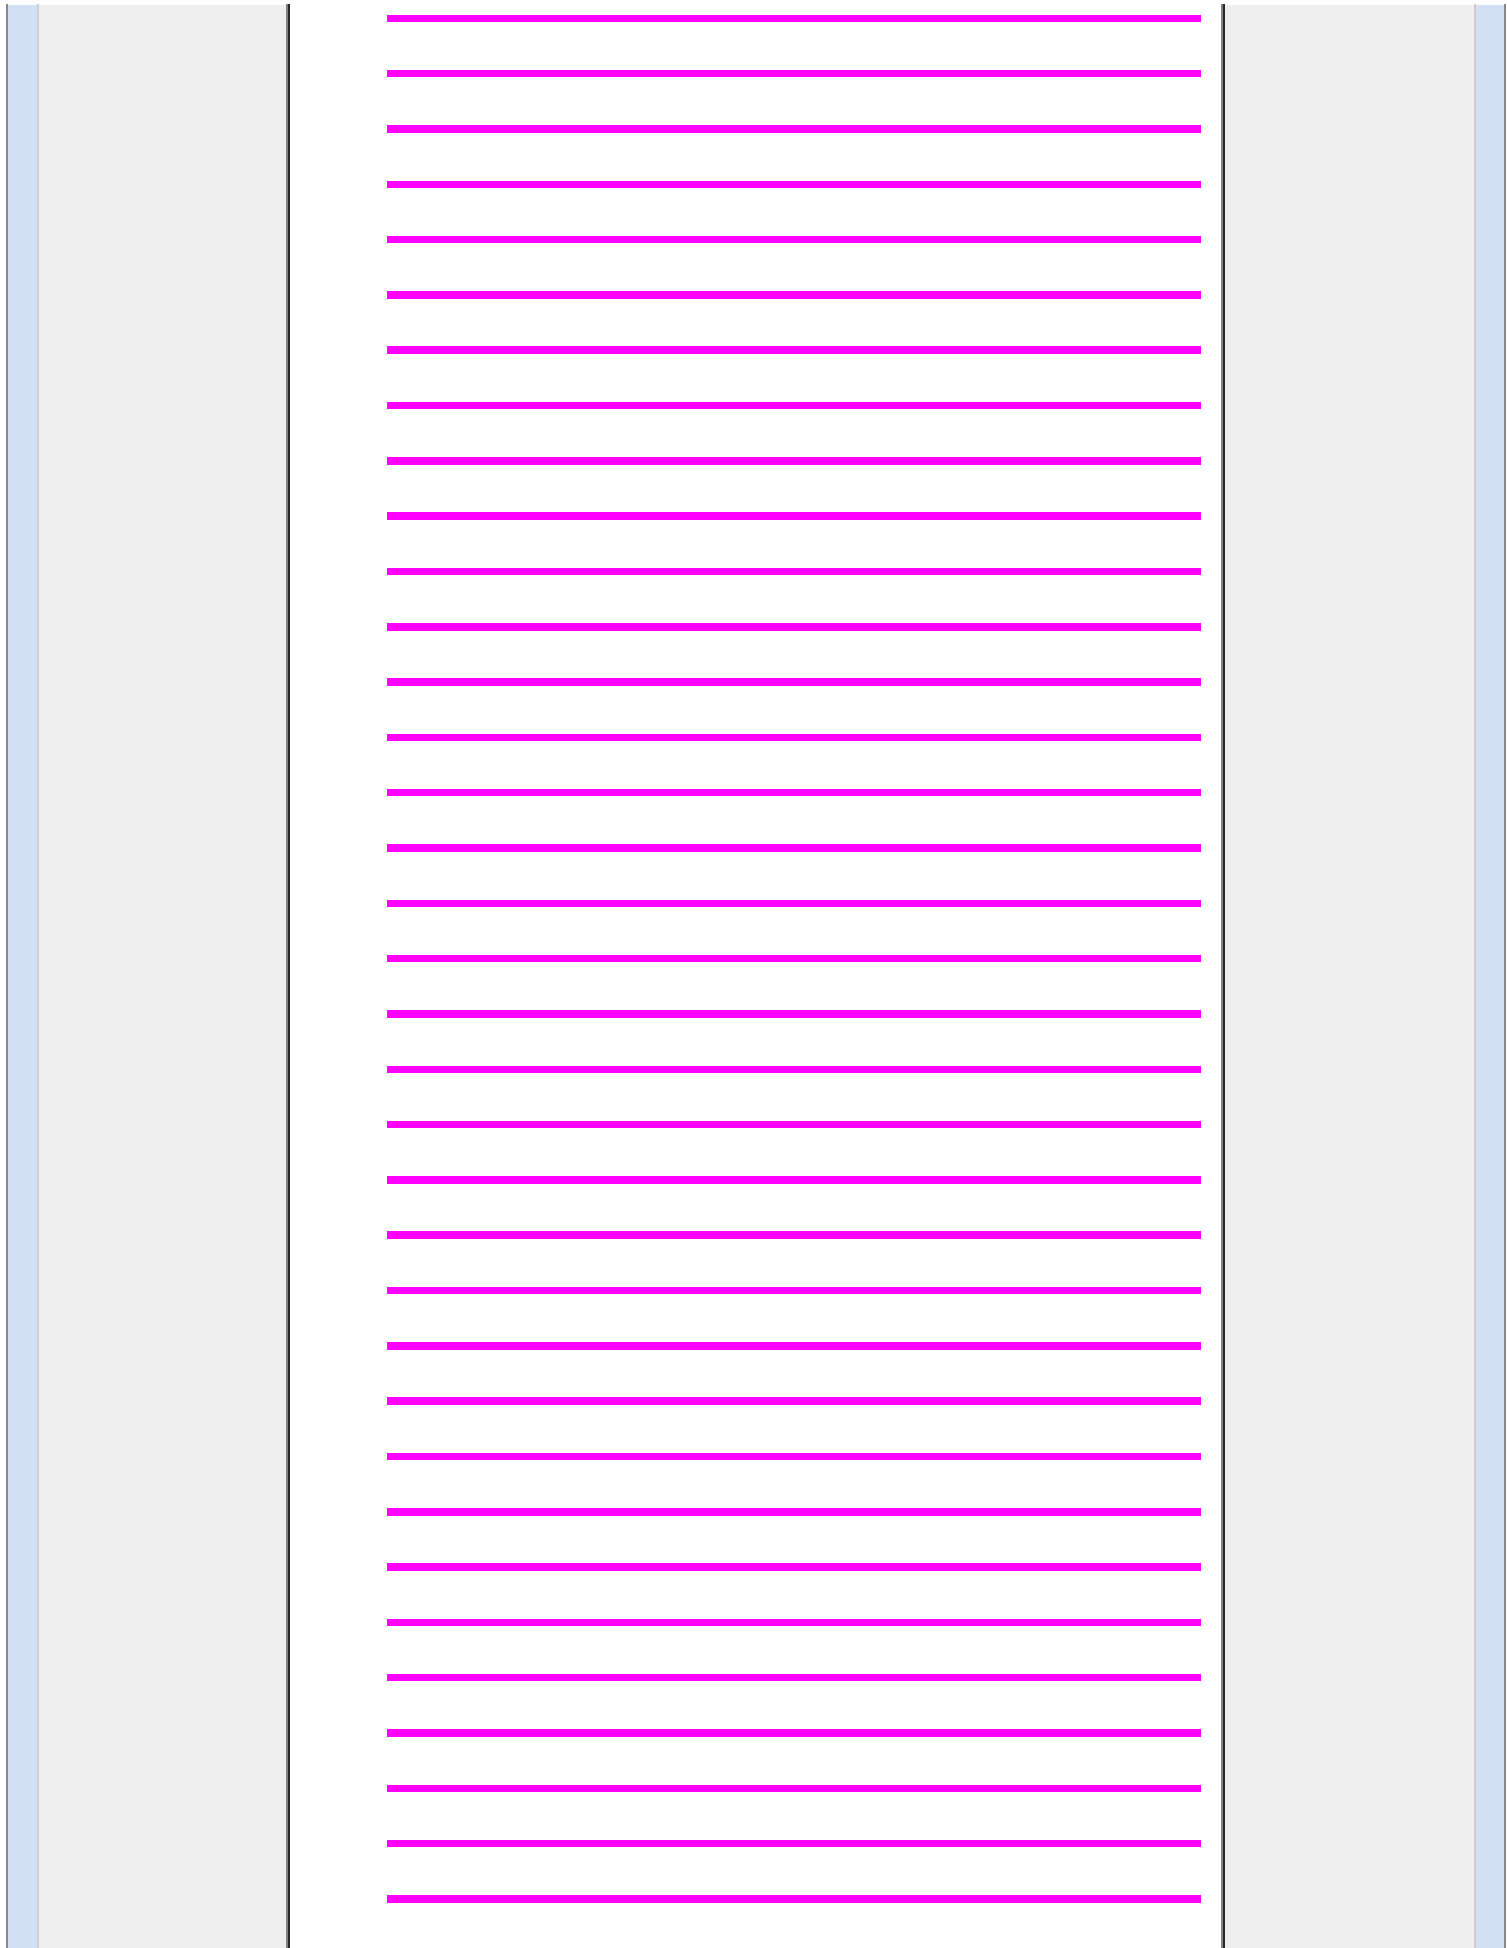

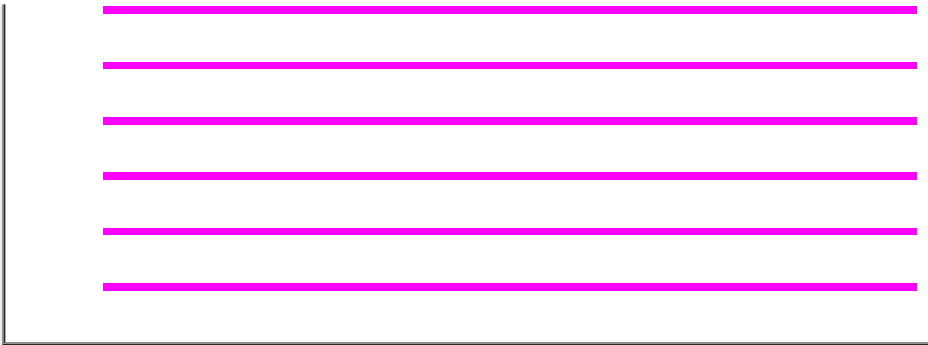

**Descriptions**

**Sequences producing significant alignments:**

Select: [All](#) [None](#) Selected: 0

[Alignments](#)
[Download](#)
[GenPept](#)
[Graphics](#)
[Distance tree of results](#)
[Multiple alignment](#)

| Description                                                                       | Max score | Total score | Query cover | E value | Ident | Accession                                    |
|-----------------------------------------------------------------------------------|-----------|-------------|-------------|---------|-------|----------------------------------------------|
| <a href="#">attractin [Ovis aries]</a>                                            | 94.8      | 94.8        | 100%        | 2e-20   | 100%  | <a href="#">gi 78499351 ABB45710.1</a>       |
| <a href="#">KIAA0548 protein [Homo sapiens]</a>                                   | 94.8      | 94.8        | 100%        | 3e-20   | 100%  | <a href="#">gi 3043620 BAA25474.1</a>        |
| <a href="#">attractin [Bos taurus]</a>                                            | 94.8      | 94.8        | 100%        | 3e-20   | 100%  | <a href="#">gi 190683717 ACE82176.1</a>      |
| <a href="#">Attractin [Tupaia chinensis]</a>                                      | 94.8      | 94.8        | 100%        | 3e-20   | 100%  | <a href="#">gi 444519420 ELV12829.1</a>      |
| <a href="#">PREDICTED: attractin isoform X2 [Papio anubis]</a>                    | 94.8      | 94.8        | 100%        | 3e-20   | 100%  | <a href="#">gi 685567345 XP_009214752.1</a>  |
| <a href="#">PREDICTED: attractin-like [Tursiops truncatus]</a>                    | 94.8      | 94.8        | 100%        | 3e-20   | 100%  | <a href="#">gi 470629747 XP_004321558.1</a>  |
| <a href="#">PREDICTED: attractin [Pongo abelii]</a>                               | 94.8      | 94.8        | 100%        | 3e-20   | 100%  | <a href="#">gi 297706621 XP_002830129.1</a>  |
| <a href="#">Attractin [Cricetulus griseus]</a>                                    | 94.8      | 94.8        | 100%        | 3e-20   | 100%  | <a href="#">gi 344236321 EGV92424.1</a>      |
| <a href="#">attractin isoform 1 preproprotein [Camelus ferus]</a>                 | 94.8      | 94.8        | 100%        | 3e-20   | 100%  | <a href="#">gi 528759526 EPY79185.1</a>      |
| <a href="#">PREDICTED: attractin isoform X2 [Cricetulus griseus]</a>              | 94.8      | 94.8        | 100%        | 3e-20   | 100%  | <a href="#">gi 625260840 XP_007621856.1</a>  |
| <a href="#">PREDICTED: attractin-like [Ictidomys tridecemlineatus]</a>            | 94.8      | 94.8        | 100%        | 3e-20   | 100%  | <a href="#">gi 532069682 XP_005320676.1</a>  |
| <a href="#">PREDICTED: attractin [Equus przewalskii]</a>                          | 94.8      | 94.8        | 100%        | 3e-20   | 100%  | <a href="#">gi 664773944 XP_008506219.1</a>  |
| <a href="#">PREDICTED: attractin isoform X2 [Homo sapiens]</a>                    | 94.8      | 94.8        | 100%        | 3e-20   | 100%  | <a href="#">gi 530426021 XP_005260918.1</a>  |
| <a href="#">PREDICTED: attractin isoform X1 [Papio anubis]</a>                    | 94.8      | 94.8        | 100%        | 3e-20   | 100%  | <a href="#">gi 685567343 XP_009214751.1</a>  |
| <a href="#">PREDICTED: attractin isoform X2 [Saimiri boliviensis boliviensis]</a> | 94.8      | 94.8        | 100%        | 3e-20   | 100%  | <a href="#">gi 725600053 XP_010350112.1</a>  |
| <a href="#">PREDICTED: attractin isoform X1 [Saimiri boliviensis boliviensis]</a> | 94.8      | 94.8        | 100%        | 3e-20   | 100%  | <a href="#">gi 725600051 XP_010350111.1</a>  |
| <a href="#">PREDICTED: attractin [Nannospalax galili]</a>                         | 94.8      | 94.8        | 100%        | 3e-20   | 100%  | <a href="#">gi 674060132 XP_008836714.1</a>  |
| <a href="#">PREDICTED: attractin [Balaenoptera acutorostrata scammoni]</a>        | 94.8      | 94.8        | 100%        | 3e-20   | 100%  | <a href="#">gi 594697511 XP_007195912.1</a>  |
| <a href="#">PREDICTED: attractin [Tarsius syrichta]</a>                           | 94.8      | 94.8        | 100%        | 3e-20   | 100%  | <a href="#">gi 640796924 XP_008054571.1</a>  |
| <a href="#">unnamed protein product [Homo sapiens]</a>                            | 94.8      | 94.8        | 100%        | 3e-20   | 100%  | <a href="#">gi 194380362 BAG63948.1</a>      |
| <a href="#">attractin isoform 4 [Homo sapiens]</a>                                | 94.8      | 94.8        | 100%        | 3e-20   | 100%  | <a href="#">gi 333440461 INP_001193976.1</a> |
| <a href="#">PREDICTED: attractin isoform 2 [Nomascus leucogenys]</a>              | 94.8      | 94.8        | 100%        | 3e-20   | 100%  | <a href="#">gi 332257827 XP_003278006.1</a>  |
| <a href="#">attractin [Cricetulus griseus]</a>                                    | 94.8      | 94.8        | 100%        | 3e-20   | 100%  | <a href="#">gi 537146168 ERE69758.1</a>      |
| <a href="#">Attractin [Myotis davidii]</a>                                        | 94.8      | 94.8        | 100%        | 3e-20   | 100%  | <a href="#">gi 432111133 ELK34519.1</a>      |
| <a href="#">PREDICTED: attractin [Pantholops hodgsonii]</a>                       | 94.8      | 94.8        | 100%        | 3e-20   | 100%  | <a href="#">gi 556758951 XP_005974805.1</a>  |
| <a href="#">PREDICTED: attractin isoform X2 [Condylura cristata]</a>              | 94.8      | 94.8        | 100%        | 3e-20   | 100%  | <a href="#">gi 507961710 XP_004687418.1</a>  |
| <a href="#">PREDICTED: attractin isoform X4 [Pan troglodytes]</a>                 | 94.8      | 94.8        | 100%        | 3e-20   | 100%  | <a href="#">gi 694977854 XP_009435012.1</a>  |
| <a href="#">Attractin [Myotis brandtii]</a>                                       | 94.8      | 94.8        | 100%        | 3e-20   | 100%  | <a href="#">gi 521031210 EPQ12996.1</a>      |
| <a href="#">PREDICTED: attractin isoform 1 [Nomascus leucogenys]</a>              | 94.8      | 94.8        | 100%        | 3e-20   | 100%  | <a href="#">gi 332257825 XP_003278005.1</a>  |

|                                                                              |      |      |      |       |      |                                             |
|------------------------------------------------------------------------------|------|------|------|-------|------|---------------------------------------------|
| <a href="#">attractin-2 [Homo sapiens]</a>                                   | 94.8 | 94.8 | 100% | 3e-20 | 100% | <a href="#">gi 4093196 AAD03057.1</a>       |
| <a href="#">secreted attractin precursor [Homo sapiens]</a>                  | 94.8 | 94.8 | 100% | 3e-20 | 100% | <a href="#">gi 8118083 AAF72882.1</a>       |
| <a href="#">unnamed protein product [Homo sapiens]</a>                       | 94.8 | 94.8 | 100% | 3e-20 | 100% | <a href="#">gi 158259481 BAF85699.1</a>     |
| <a href="#">attractin isoform 2 preproprotein [Homo sapiens]</a>             | 94.8 | 94.8 | 100% | 3e-20 | 100% | <a href="#">gi 21450863 NP_647538.1</a>     |
| <a href="#">Mahogany-like protein [Macaca mulatta]</a>                       | 94.8 | 94.8 | 100% | 3e-20 | 100% | <a href="#">gi 355563316 EHH19878.1</a>     |
| <a href="#">PREDICTED: attractin isoform X3 [Bubalus bubalis]</a>            | 94.8 | 94.8 | 100% | 3e-20 | 100% | <a href="#">gi 594099680 XP_006072965.1</a> |
| <a href="#">PREDICTED: LOW QUALITY PROTEIN: attractin [Pan paniscus]</a>     | 94.8 | 94.8 | 100% | 3e-20 | 100% | <a href="#">gi 675763672 XP_008973079.1</a> |
| <a href="#">PREDICTED: attractin isoform X3 [Pan troglodytes]</a>            | 94.8 | 94.8 | 100% | 3e-20 | 100% | <a href="#">gi 694977852 XP_009435011.1</a> |
| <a href="#">PREDICTED: attractin isoform X1 [Homo sapiens]</a>               | 94.8 | 94.8 | 100% | 3e-20 | 100% | <a href="#">gi 530426019 XP_005260917.1</a> |
| <a href="#">PREDICTED: attractin isoform X4 [Macaca fascicularis]</a>        | 94.8 | 94.8 | 100% | 3e-20 | 100% | <a href="#">gi 544464516 XP_005568512.1</a> |
| <a href="#">PREDICTED: attractin isoform X5 [Chlorocebus sabaeus]</a>        | 94.8 | 94.8 | 100% | 3e-20 | 100% | <a href="#">gi 635021368 XP_008017720.1</a> |
| <a href="#">Mahogany-like protein [Macaca fascicularis]</a>                  | 94.8 | 94.8 | 100% | 3e-20 | 100% | <a href="#">gi 355784657 EHH65508.1</a>     |
| <a href="#">PREDICTED: attractin [Myotis davidii]</a>                        | 94.8 | 94.8 | 100% | 3e-20 | 100% | <a href="#">gi 584075971 XP_006758187.1</a> |
| <a href="#">PREDICTED: attractin [Myotis brandtii]</a>                       | 94.8 | 94.8 | 100% | 3e-20 | 100% | <a href="#">gi 554560893 XP_005874816.1</a> |
| <a href="#">PREDICTED: attractin isoform X3 [Macaca fascicularis]</a>        | 94.8 | 94.8 | 100% | 3e-20 | 100% | <a href="#">gi 544464514 XP_005568511.1</a> |
| <a href="#">PREDICTED: attractin-like [Galeopterus variegatus]</a>           | 94.8 | 94.8 | 100% | 3e-20 | 100% | <a href="#">gi 667324076 XP_008589101.1</a> |
| <a href="#">PREDICTED: attractin isoform X4 [Chlorocebus sabaeus]</a>        | 94.8 | 94.8 | 100% | 3e-20 | 100% | <a href="#">gi 635021366 XP_008017712.1</a> |
| <a href="#">PREDICTED: attractin [Capra hircus]</a>                          | 94.8 | 94.8 | 100% | 3e-20 | 100% | <a href="#">gi 548490191 XP_005688293.1</a> |
| <a href="#">PREDICTED: attractin [Rhinopithecus roxellana]</a>               | 94.8 | 94.8 | 100% | 3e-20 | 100% | <a href="#">gi 724902357 XP_010377335.1</a> |
| <a href="#">PREDICTED: attractin isoform X1 [Cricetulus griseus]</a>         | 94.8 | 94.8 | 100% | 3e-20 | 100% | <a href="#">gi 354473756 XP_003499099.1</a> |
| <a href="#">PREDICTED: attractin [Camelus ferus]</a>                         | 94.8 | 94.8 | 100% | 3e-20 | 100% | <a href="#">gi 560921992 XP_006187198.1</a> |
| <a href="#">PREDICTED: attractin [Myotis lucifugus]</a>                      | 94.8 | 94.8 | 100% | 3e-20 | 100% | <a href="#">gi 558159591 XP_006096513.1</a> |
| <a href="#">attractin [Cricetulus griseus]</a>                               | 94.8 | 94.8 | 100% | 3e-20 | 100% | <a href="#">gi 537146167 ERE69757.1</a>     |
| <a href="#">PREDICTED: attractin [Bos mutus]</a>                             | 94.8 | 94.8 | 100% | 3e-20 | 100% | <a href="#">gi 555963925 XP_005894036.1</a> |
| <a href="#">attractin, isoform CRA_b [Homo sapiens]</a>                      | 94.8 | 94.8 | 100% | 3e-20 | 100% | <a href="#">gi 119630936 EAX10531.1</a>     |
| <a href="#">PREDICTED: attractin isoform X3 [Chlorocebus sabaeus]</a>        | 94.8 | 94.8 | 100% | 3e-20 | 100% | <a href="#">gi 635021364 XP_008017707.1</a> |
| <a href="#">PREDICTED: attractin [Ovis aries]</a>                            | 94.8 | 94.8 | 100% | 3e-20 | 100% | <a href="#">gi 426241795 XP_004014773.1</a> |
| <a href="#">PREDICTED: attractin [Peromyscus maniculatus bairdii]</a>        | 94.8 | 94.8 | 100% | 3e-20 | 100% | <a href="#">gi 589943852 XP_006984624.1</a> |
| <a href="#">PREDICTED: attractin isoform X2 [Pan troglodytes]</a>            | 94.8 | 94.8 | 100% | 3e-20 | 100% | <a href="#">gi 694977850 XP_009435010.1</a> |
| <a href="#">PREDICTED: attractin isoform X2 [Chlorocebus sabaeus]</a>        | 94.8 | 94.8 | 100% | 3e-20 | 100% | <a href="#">gi 635021362 XP_008017704.1</a> |
| <a href="#">PREDICTED: attractin [Otolemur garnettii]</a>                    | 94.8 | 94.8 | 100% | 3e-20 | 100% | <a href="#">gi 395830288 XP_003788264.1</a> |
| <a href="#">PREDICTED: attractin [Vicugna pacos]</a>                         | 94.8 | 94.8 | 100% | 3e-20 | 100% | <a href="#">gi 560970220 XP_006207473.1</a> |
| <a href="#">PREDICTED: attractin [Echinops telfairi]</a>                     | 94.8 | 94.8 | 100% | 3e-20 | 100% | <a href="#">gi 507626122 XP_004697922.1</a> |
| <a href="#">attractin [Bos taurus]</a>                                       | 94.8 | 94.8 | 100% | 3e-20 | 100% | <a href="#">gi 253560524 ACT32973.1</a>     |
| <a href="#">PREDICTED: attractin isoform X1 [Pteropus alecto]</a>            | 94.8 | 94.8 | 100% | 3e-20 | 100% | <a href="#">gi 586533632 XP_006921705.1</a> |
| <a href="#">PREDICTED: attractin [Eptesicus fuscus]</a>                      | 94.8 | 94.8 | 100% | 3e-20 | 100% | <a href="#">gi 641701319 XP_008139256.1</a> |
| <a href="#">attractin [Bos taurus]</a>                                       | 94.8 | 94.8 | 100% | 3e-20 | 100% | <a href="#">gi 27806737 NP_776420.1</a>     |
| <a href="#">PREDICTED: attractin isoform X2 [Bubalus bubalis]</a>            | 94.8 | 94.8 | 100% | 3e-20 | 100% | <a href="#">gi 594099678 XP_006072964.1</a> |
| <a href="#">PREDICTED: attractin [Orcinus orca]</a>                          | 94.8 | 94.8 | 100% | 3e-20 | 100% | <a href="#">gi 466084723 XP_004285351.1</a> |
| <a href="#">PREDICTED: attractin [Lipotes vexillifer]</a>                    | 94.8 | 94.8 | 100% | 3e-20 | 100% | <a href="#">gi 602710450 XP_007465469.1</a> |
| <a href="#">PREDICTED: attractin isoform X1 [Condylura cristata]</a>         | 94.8 | 94.8 | 100% | 3e-20 | 100% | <a href="#">gi 507961707 XP_004687417.1</a> |
| <a href="#">PREDICTED: attractin [Chrysochloris asiatica]</a>                | 94.8 | 94.8 | 100% | 3e-20 | 100% | <a href="#">gi 586488825 XP_006874887.1</a> |
| <a href="#">PREDICTED: attractin [Elephantulus edwardii]</a>                 | 94.8 | 94.8 | 100% | 3e-20 | 100% | <a href="#">gi 585689645 XP_006894264.1</a> |
| <a href="#">PREDICTED: attractin [Orycteropus afer afer]</a>                 | 94.8 | 94.8 | 100% | 3e-20 | 100% | <a href="#">gi 634830430 XP_007958185.1</a> |
| <a href="#">PREDICTED: attractin isoform X1 [Oryctolagus cuniculus]</a>      | 94.8 | 94.8 | 100% | 3e-20 | 100% | <a href="#">gi 291388868 XP_002710968.1</a> |
| <a href="#">PREDICTED: attractin isoform X1 [Ictidomys tridecemlineatus]</a> | 94.8 | 94.8 | 100% | 3e-20 | 100% | <a href="#">gi 532069484 XP_005320577.1</a> |

|                                                                              |      |      |      |       |      |                                             |
|------------------------------------------------------------------------------|------|------|------|-------|------|---------------------------------------------|
| <a href="#">PREDICTED: attractin [Ochotona princeps]</a>                     | 94.8 | 94.8 | 100% | 3e-20 | 100% | <a href="#">gi 504146589 XP_004585711.1</a> |
| <a href="#">attractin [Mesocricetus auratus]</a>                             | 94.8 | 94.8 | 100% | 3e-20 | 100% | <a href="#">gi 528078159 NP_001268565.1</a> |
| <a href="#">PREDICTED: attractin isoform X3 [Ictidomys tridecemlineatus]</a> | 94.8 | 94.8 | 100% | 3e-20 | 100% | <a href="#">gi 532069488 XP_005320579.1</a> |
| <a href="#">PREDICTED: attractin [Callithrix jacchus]</a>                    | 94.8 | 94.8 | 100% | 3e-20 | 100% | <a href="#">gi 296200062 XP_002747358.1</a> |
| <a href="#">PREDICTED: attractin [Microtus ochrogaster]</a>                  | 94.8 | 94.8 | 100% | 3e-20 | 100% | <a href="#">gi 532045699 XP_005365652.1</a> |
| <a href="#">PREDICTED: attractin isoform X1 [Pan troglodytes]</a>            | 94.8 | 94.8 | 100% | 3e-20 | 100% | <a href="#">gi 332857715 XP_003316827.1</a> |
| <a href="#">membrane attractin precursor [Homo sapiens]</a>                  | 94.8 | 94.8 | 100% | 3e-20 | 100% | <a href="#">gi 8118082 AAF72881.1</a>       |
| <a href="#">attractin isoform 1 preproprotein [Homo sapiens]</a>             | 94.8 | 94.8 | 100% | 3e-20 | 100% | <a href="#">gi 21450861 NP_647537.1</a>     |
| <a href="#">PREDICTED: attractin isoform X2 [Ictidomys tridecemlineatus]</a> | 94.8 | 94.8 | 100% | 3e-20 | 100% | <a href="#">gi 532069486 XP_005320578.1</a> |
| <a href="#">PREDICTED: attractin [Jaculus jaculus]</a>                       | 94.8 | 94.8 | 100% | 3e-20 | 100% | <a href="#">gi 507555530 XP_004661535.1</a> |
| <a href="#">PREDICTED: attractin isoform X2 [Macaca fascicularis]</a>        | 94.8 | 94.8 | 100% | 3e-20 | 100% | <a href="#">gi 544464512 XP_005568510.1</a> |
| <a href="#">PREDICTED: attractin [Macaca mulatta]</a>                        | 94.8 | 94.8 | 100% | 3e-20 | 100% | <a href="#">gi 109092720 XP_001115192.1</a> |
| <a href="#">PREDICTED: attractin isoform X1 [Chlorocebus sabaeus]</a>        | 94.8 | 94.8 | 100% | 3e-20 | 100% | <a href="#">gi 635021360 XP_008017700.1</a> |
| <a href="#">PREDICTED: attractin isoform X2 [Bos taurus]</a>                 | 94.8 | 94.8 | 100% | 3e-20 | 100% | <a href="#">gi 528973313 XP_005214542.1</a> |
| <a href="#">PREDICTED: attractin isoform X1 [Macaca fascicularis]</a>        | 94.8 | 94.8 | 100% | 3e-20 | 100% | <a href="#">gi 544464510 XP_005568509.1</a> |
| <a href="#">PREDICTED: attractin isoform X6 [Chlorocebus sabaeus]</a>        | 94.8 | 94.8 | 100% | 3e-20 | 100% | <a href="#">gi 635021370 XP_008017729.1</a> |
| <a href="#">PREDICTED: attractin isoform X2 [Oryctolagus cuniculus]</a>      | 94.8 | 94.8 | 100% | 3e-20 | 100% | <a href="#">gi 655716500 XP_008254470.1</a> |
| <a href="#">PREDICTED: attractin [Tupaia chinensis]</a>                      | 94.8 | 94.8 | 100% | 3e-20 | 100% | <a href="#">gi 562872246 XP_006164056.1</a> |
| <a href="#">PREDICTED: attractin isoform X2 [Pteropus alecto]</a>            | 94.8 | 94.8 | 100% | 3e-20 | 100% | <a href="#">gi 586533634 XP_006921706.1</a> |
| <a href="#">PREDICTED: attractin isoform X1 [Bubalus bubalis]</a>            | 94.8 | 94.8 | 100% | 3e-20 | 100% | <a href="#">gi 594099676 XP_006072963.1</a> |
| <a href="#">PREDICTED: attractin isoform X1 [Bos taurus]</a>                 | 94.8 | 94.8 | 100% | 3e-20 | 100% | <a href="#">gi 528973311 XP_005214541.1</a> |
| <a href="#">mKIAA0548 protein [Mus musculus]</a>                             | 92.3 | 92.3 | 100% | 2e-19 | 96%  | <a href="#">gi 26006173 BAC41429.1</a>      |
| <a href="#">attractin [Rattus norvegicus]</a>                                | 92.3 | 92.3 | 100% | 2e-19 | 96%  | <a href="#">gi 12275312 BAB21018.1</a>      |
| <a href="#">attractin, isoform CRA_a [Rattus norvegicus]</a>                 | 92.3 | 92.3 | 100% | 2e-19 | 96%  | <a href="#">gi 149023319 EDL80213.1</a>     |
| <a href="#">Attractin [Mus musculus]</a>                                     | 92.3 | 92.3 | 100% | 2e-19 | 96%  | <a href="#">gi 223461387 AAI41055.1</a>     |

## Alignments

Download [GenPept](#) [Graphics](#)

Next Previous Descriptions

### attractin [Ovis aries]

Sequence ID: [gi|78499351|gb|ABB45710.1](#) Length: 242 Number of Matches: 1

Range 1: 88 to 115 [GenPept](#) [Graphics](#)

Next Match Previous Match

| Score          | Expect | Identities  | Positives   | Gaps     |
|----------------|--------|-------------|-------------|----------|
| 94.8 bits(216) | 2e-20  | 28/28(100%) | 28/28(100%) | 0/28(0%) |

Query 1 KCENLTTGKHCETCISGFYGDPTNGGKC 28  
 KCENLTTGKHCETCISGFYGDPTNGGKC  
 Sbjct 88 KCENLTTGKHCETCISGFYGDPTNGGKC 115

#### Related Information

[Gene](#) - associated gene details  
[Map Viewer](#) - aligned genomic context

Download [GenPept](#) [Graphics](#)

Next Previous Descriptions

### KIAA0548 protein [Homo sapiens]

Sequence ID: [gi|3043620|dbj|BAA25474.1](#) Length: 452 Number of Matches: 1

Range 1: 102 to 129 [GenPept](#) [Graphics](#)

Next Match Previous Match

| Score          | Expect | Identities  | Positives   | Gaps     |
|----------------|--------|-------------|-------------|----------|
| 94.8 bits(216) | 3e-20  | 28/28(100%) | 28/28(100%) | 0/28(0%) |

Query 1 KCENLTTGKHCETCISGFYGDPTNGGKC 28  
 KCENLTTGKHCETCISGFYGDPTNGGKC  
 Sbjct 102 KCENLTTGKHCETCISGFYGDPTNGGKC 129

#### Related Information

[Gene](#) - associated gene details

Download [GenPept](#) [Graphics](#)

Next Previous Descriptions

**attractin [Bos taurus]**

Sequence ID: [gi|190683717|gb|ACE82176.1](#) Length: 670 Number of Matches: 1

Range 1: 320 to 347 [GenPept](#) [Graphics](#)

▼ Next Match ▲ Previous Match

| Score          | Expect | Identities  | Positives   | Gaps     |
|----------------|--------|-------------|-------------|----------|
| 94.8 bits(216) | 3e-20  | 28/28(100%) | 28/28(100%) | 0/28(0%) |

Query 1 KCENLTTGKHCETCISGFYGDPTNGGKC 28  
 KCENLTTGKHCETCISGFYGDPTNGGKC  
 Sbjct 320 KCENLTTGKHCETCISGFYGDPTNGGKC 347

**Related Information**

[Gene](#) - associated gene details  
[Map Viewer](#) - aligned genomic context

Download ▼ [GenPept](#) [Graphics](#)

▼ Next ▲ Previous ▲ Descriptions

**Attractin [Tupaia chinensis]**

Sequence ID: [gi|444519420|gb|ELV12829.1](#) Length: 860 Number of Matches: 1

Range 1: 648 to 675 [GenPept](#) [Graphics](#)

▼ Next Match ▲ Previous Match

| Score          | Expect | Identities  | Positives   | Gaps     |
|----------------|--------|-------------|-------------|----------|
| 94.8 bits(216) | 3e-20  | 28/28(100%) | 28/28(100%) | 0/28(0%) |

Query 1 KCENLTTGKHCETCISGFYGDPTNGGKC 28  
 KCENLTTGKHCETCISGFYGDPTNGGKC  
 Sbjct 648 KCENLTTGKHCETCISGFYGDPTNGGKC 675

**Related Information**

[Gene](#) - associated gene details  
[Map Viewer](#) - aligned genomic context

Download ▼ [GenPept](#) [Graphics](#)

▼ Next ▲ Previous ▲ Descriptions

**PREDICTED: attractin isoform X2 [Papio anubis]**

Sequence ID: [gi|685567345|ref|XP\\_009214752.1](#) Length: 989 Number of Matches: 1

Range 1: 769 to 796 [GenPept](#) [Graphics](#)

▼ Next Match ▲ Previous Match

| Score          | Expect | Identities  | Positives   | Gaps     |
|----------------|--------|-------------|-------------|----------|
| 94.8 bits(216) | 3e-20  | 28/28(100%) | 28/28(100%) | 0/28(0%) |

Query 1 KCENLTTGKHCETCISGFYGDPTNGGKC 28  
 KCENLTTGKHCETCISGFYGDPTNGGKC  
 Sbjct 769 KCENLTTGKHCETCISGFYGDPTNGGKC 796

**Related Information**

[Gene](#) - associated gene details  
[Map Viewer](#) - aligned genomic context

BLAST is a registered trademark of the National Library of Medicine.



NCBI/ BLAST/ blastp suite/ Formatting Results - BHPXXNG014

**i** Your search parameters were adjusted to search for a short input sequence.

[Edit and Resubmit](#) [Save Search Strategies](#) [▶ Formatting options](#) [▶ Download](#)

[YouTube](#) [How to read this page](#) [Blast report description](#)

**ATRN\_KCIDQSICEKC\_Mod**

RID [BHPXXNG014](#) (Expires on 01-17 13:25 pm)

**Query ID** |cl|96533  
**Description** None  
**Molecule type** amino acid  
**Query Length** 11

**Database Name** nr  
**Description** All non-redundant GenBank CDS translations+PDB+SwissProt+PIR excluding environmental samples from WGS projects  
**Program** BLASTP 2.2.30+ [▶ Citation](#)

Other reports: [▶ Search Summary](#) [\[Taxonomy reports\]](#) [\[Distance tree of results\]](#) [\[Multiple alignment\]](#)

**Graphic Summary**

[Show Conserved Domains](#)

No putative conserved domains have been detected

Distribution of 105 Blast Hits on the Query Sequence

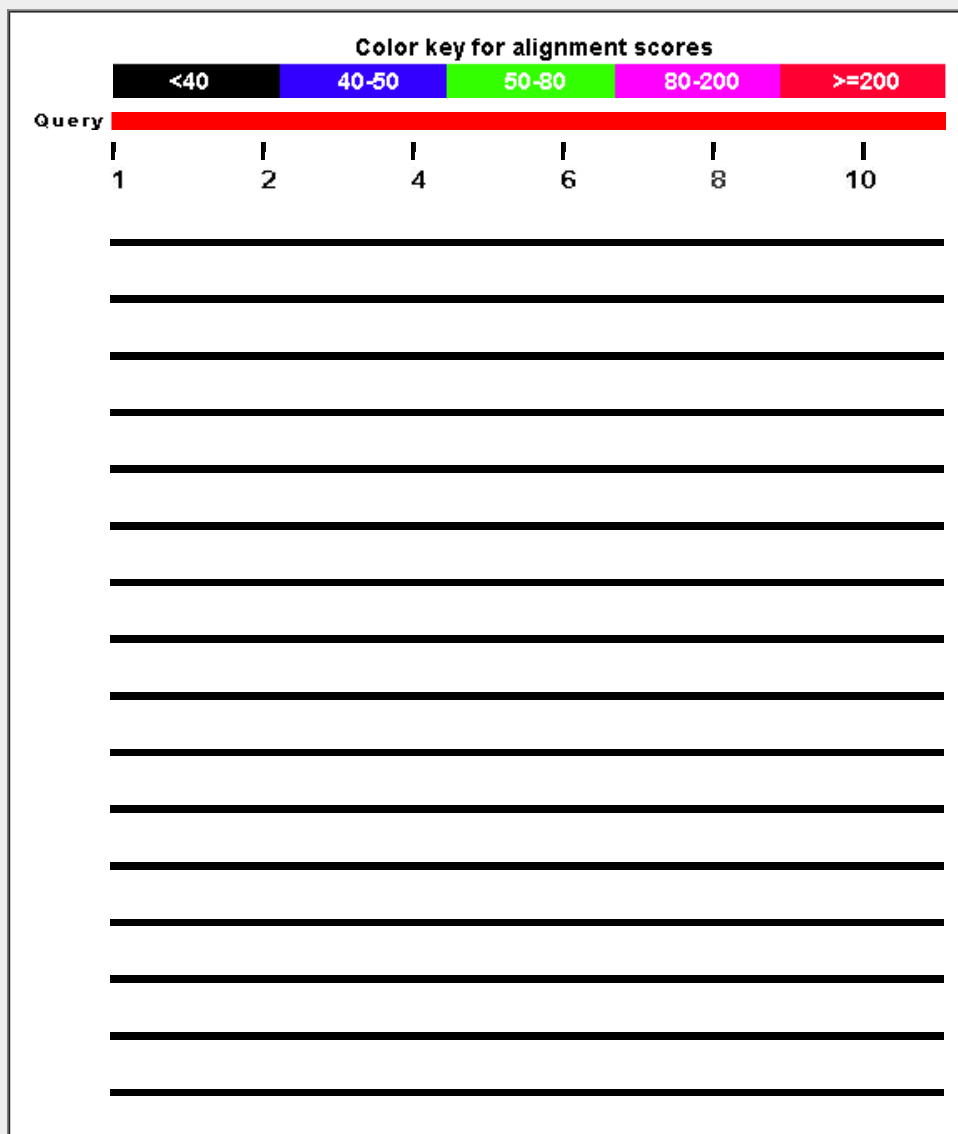

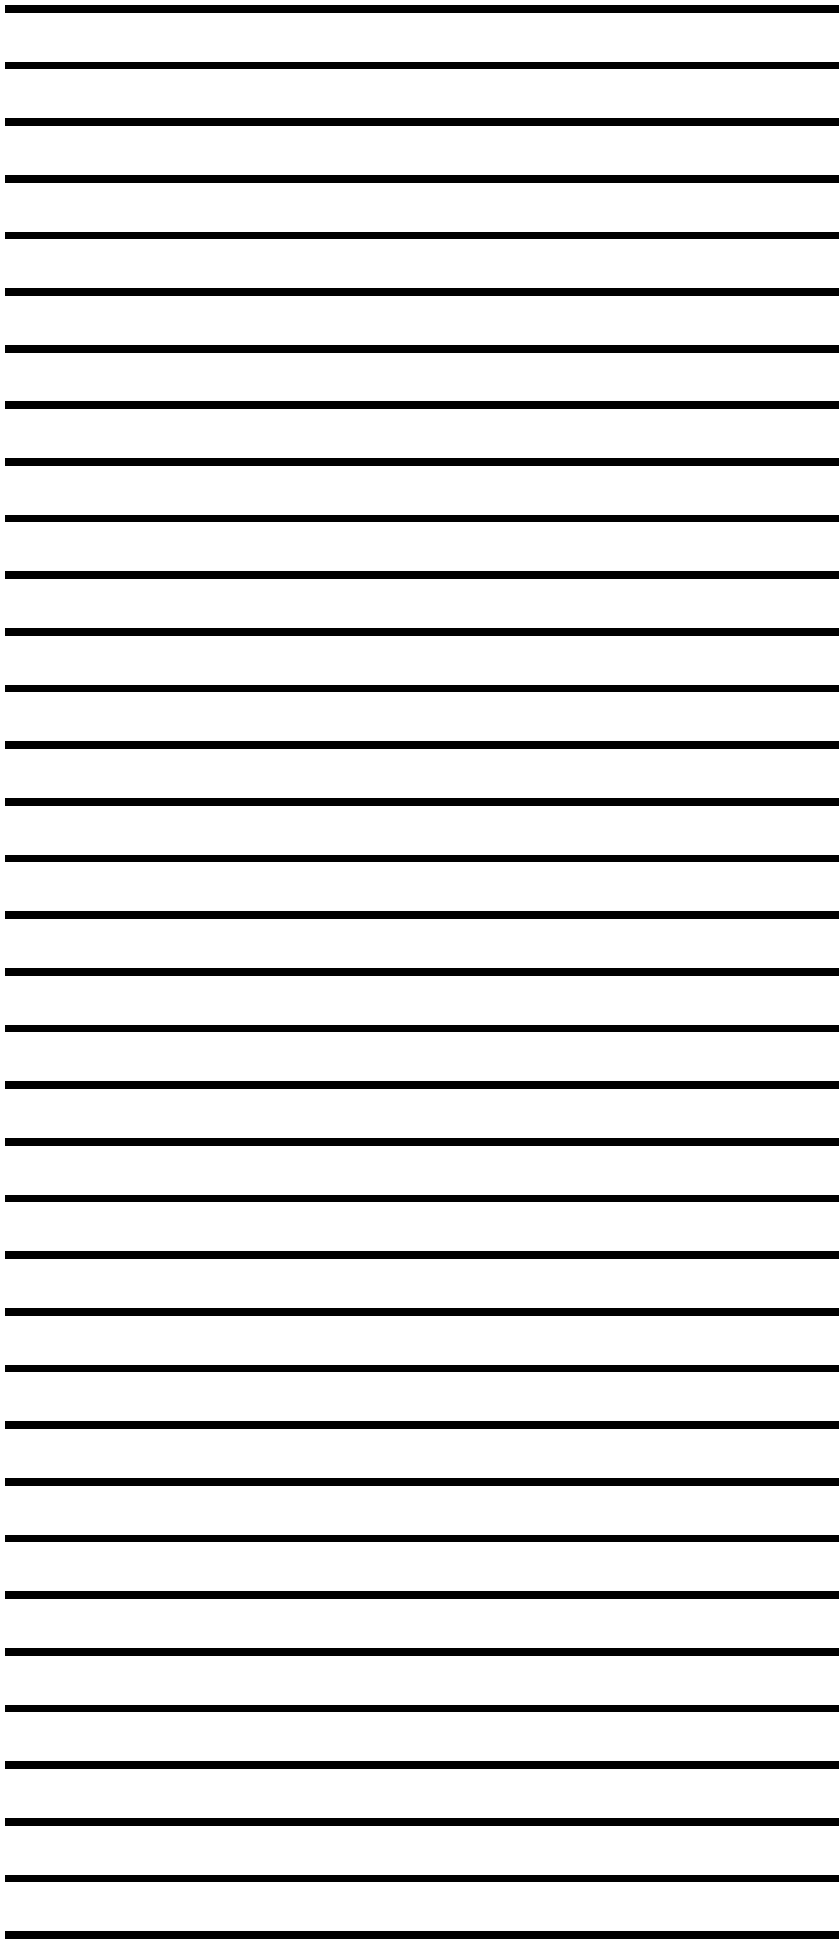

|  |
|--|
|  |
|  |
|  |
|  |
|  |
|  |
|  |
|  |
|  |
|  |
|  |
|  |
|  |
|  |
|  |
|  |
|  |
|  |
|  |
|  |
|  |
|  |
|  |
|  |
|  |
|  |
|  |
|  |
|  |
|  |
|  |
|  |
|  |
|  |
|  |
|  |
|  |
|  |
|  |
|  |
|  |
|  |
|  |
|  |
|  |
|  |

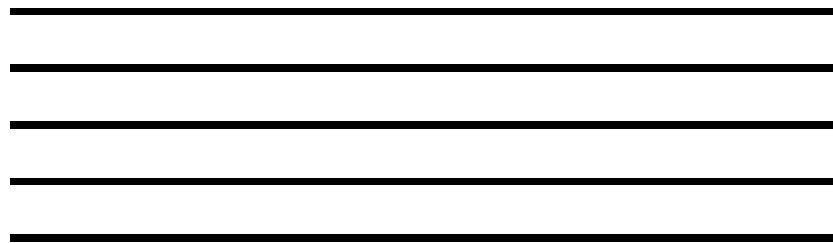

**Descriptions**

**Sequences producing significant alignments:**

Select: [All](#) [None](#) Selected:0

[Alignments](#)
[Download](#)
[GenPept](#)
[Graphics](#)
[Distance tree of results](#)
[Multiple alignment](#)

| Description                                                                       | Max score | Total score | Query cover | E value | Ident | Accession                                   |
|-----------------------------------------------------------------------------------|-----------|-------------|-------------|---------|-------|---------------------------------------------|
| <a href="#">attractin [Ovis aries]</a>                                            | 38.8      | 38.8        | 100%        | 0.029   | 91%   | <a href="#">gij78499351 ABB45710.1</a>      |
| <a href="#">PREDICTED: attractin-like [Leptonychotes weddellii]</a>               | 38.8      | 38.8        | 100%        | 0.030   | 91%   | <a href="#">gij585182065 XP_006742666.1</a> |
| <a href="#">KIAA0548 protein [Homo sapiens]</a>                                   | 38.8      | 38.8        | 100%        | 0.031   | 91%   | <a href="#">gij3043620 BAA25474.1</a>       |
| <a href="#">attractin [Bos taurus]</a>                                            | 38.8      | 38.8        | 100%        | 0.032   | 91%   | <a href="#">gij190683717 ACE82176.1</a>     |
| <a href="#">Attractin [Tupaia chinensis]</a>                                      | 38.8      | 38.8        | 100%        | 0.033   | 91%   | <a href="#">gij444519420 ELV12829.1</a>     |
| <a href="#">PREDICTED: attractin isoform X2 [Papio anubis]</a>                    | 38.8      | 77.6        | 100%        | 0.033   | 91%   | <a href="#">gij685567345 XP_009214752.1</a> |
| <a href="#">attractin [Canis lupus familiaris]</a>                                | 38.8      | 38.8        | 100%        | 0.033   | 91%   | <a href="#">gij339892849 AEK21787.1</a>     |
| <a href="#">PREDICTED: attractin-like [Tursiops truncatus]</a>                    | 38.8      | 38.8        | 100%        | 0.033   | 91%   | <a href="#">gij470629747 XP_004321558.1</a> |
| <a href="#">PREDICTED: attractin-like [Physeter catodon]</a>                      | 38.8      | 38.8        | 100%        | 0.033   | 91%   | <a href="#">gij593773084 XP_007124834.1</a> |
| <a href="#">PREDICTED: attractin [Pongo abelii]</a>                               | 38.8      | 38.8        | 100%        | 0.033   | 91%   | <a href="#">gij297706621 XP_002830129.1</a> |
| <a href="#">attractin isoform 1 preproprotein [Camelus ferus]</a>                 | 38.8      | 38.8        | 100%        | 0.033   | 91%   | <a href="#">gij528759526 EPY79185.1</a>     |
| <a href="#">PREDICTED: attractin-like [Ictidomys tridecemlineatus]</a>            | 38.8      | 38.8        | 100%        | 0.033   | 91%   | <a href="#">gij532069682 XP_005320676.1</a> |
| <a href="#">PREDICTED: attractin isoform X2 [Homo sapiens]</a>                    | 38.8      | 38.8        | 100%        | 0.033   | 91%   | <a href="#">gij530426021 XP_005260918.1</a> |
| <a href="#">PREDICTED: attractin isoform X1 [Papio anubis]</a>                    | 38.8      | 77.6        | 100%        | 0.033   | 91%   | <a href="#">gij685567343 XP_009214751.1</a> |
| <a href="#">PREDICTED: attractin isoform X2 [Saimiri boliviensis boliviensis]</a> | 38.8      | 38.8        | 100%        | 0.033   | 91%   | <a href="#">gij725600053 XP_010350112.1</a> |
| <a href="#">PREDICTED: attractin isoform X1 [Saimiri boliviensis boliviensis]</a> | 38.8      | 38.8        | 100%        | 0.033   | 91%   | <a href="#">gij725600051 XP_010350111.1</a> |
| <a href="#">PREDICTED: attractin [Nannospalax galili]</a>                         | 38.8      | 38.8        | 100%        | 0.033   | 91%   | <a href="#">gij674060132 XP_008836714.1</a> |
| <a href="#">PREDICTED: attractin [Tarsius syrichta]</a>                           | 38.8      | 38.8        | 100%        | 0.033   | 91%   | <a href="#">gij640796924 XP_008054571.1</a> |
| <a href="#">unnamed protein product [Homo sapiens]</a>                            | 38.8      | 38.8        | 100%        | 0.033   | 91%   | <a href="#">gij194380362 BAG63948.1</a>     |
| <a href="#">attractin isoform 4 [Homo sapiens]</a>                                | 38.8      | 38.8        | 100%        | 0.033   | 91%   | <a href="#">gij333440461 NP_001193976.1</a> |
| <a href="#">PREDICTED: attractin isoform 2 [Nomascus leucogenys]</a>              | 38.8      | 38.8        | 100%        | 0.033   | 91%   | <a href="#">gij332257827 XP_003278006.1</a> |
| <a href="#">Attractin [Fukomys damarensis]</a>                                    | 38.8      | 38.8        | 100%        | 0.033   | 91%   | <a href="#">gij676263950 KFO20529.1</a>     |
| <a href="#">Attractin [Myotis davidii]</a>                                        | 38.8      | 58.1        | 100%        | 0.033   | 91%   | <a href="#">gij432111133 ELK34519.1</a>     |
| <a href="#">PREDICTED: attractin [Pantholops hodgsonii]</a>                       | 38.8      | 38.8        | 100%        | 0.033   | 91%   | <a href="#">gij556758951 XP_005974805.1</a> |
| <a href="#">PREDICTED: attractin isoform X4 [Pan troglodytes]</a>                 | 38.8      | 38.8        | 100%        | 0.033   | 91%   | <a href="#">gij694977854 XP_009435012.1</a> |
| <a href="#">Attractin [Myotis brandtii]</a>                                       | 38.8      | 58.1        | 100%        | 0.033   | 91%   | <a href="#">gij521031210 EPQ12996.1</a>     |
| <a href="#">PREDICTED: attractin isoform 1 [Nomascus leucogenys]</a>              | 38.8      | 38.8        | 100%        | 0.033   | 91%   | <a href="#">gij332257825 XP_003278005.1</a> |
| <a href="#">attractin-2 [Homo sapiens]</a>                                        | 38.8      | 38.8        | 100%        | 0.033   | 91%   | <a href="#">gij4093196 AAD03057.1</a>       |

|                                                                            |      |      |      |       |     |                                              |
|----------------------------------------------------------------------------|------|------|------|-------|-----|----------------------------------------------|
| <a href="#">secreted attractin precursor [Homo sapiens]</a>                | 38.8 | 38.8 | 100% | 0.033 | 91% | <a href="#">gij 8118083 AAF72882.1</a>       |
| <a href="#">unnamed protein product [Homo sapiens]</a>                     | 38.8 | 38.8 | 100% | 0.033 | 91% | <a href="#">gij 158259481 BAF85699.1</a>     |
| <a href="#">attractin isoform 2 preproprotein [Homo sapiens]</a>           | 38.8 | 38.8 | 100% | 0.033 | 91% | <a href="#">gij 21450863 INP_647538.1</a>    |
| <a href="#">Mahogany-like protein [Macaca mulatta]</a>                     | 38.8 | 38.8 | 100% | 0.033 | 91% | <a href="#">gij 355563316 EHH19878.1</a>     |
| <a href="#">attractin [Rattus norvegicus]</a>                              | 38.8 | 38.8 | 100% | 0.033 | 91% | <a href="#">gij 12275312 BAB21018.1</a>      |
| <a href="#">attractin, isoform CRA_a [Rattus norvegicus]</a>               | 38.8 | 38.8 | 100% | 0.033 | 91% | <a href="#">gij 149023319 EDL80213.1</a>     |
| <a href="#">PREDICTED: attractin isoform X3 [Bubalus bubalis]</a>          | 38.8 | 38.8 | 100% | 0.033 | 91% | <a href="#">gij 594099680 XP_006072965.1</a> |
| <a href="#">PREDICTED: LOW QUALITY PROTEIN: attractin [Pan paniscus]</a>   | 38.8 | 38.8 | 100% | 0.033 | 91% | <a href="#">gij 675763672 XP_008973079.1</a> |
| <a href="#">PREDICTED: attractin isoform X2 [Canis lupus familiaris]</a>   | 38.8 | 38.8 | 100% | 0.033 | 91% | <a href="#">gij 545540090 XP_005634905.1</a> |
| <a href="#">PREDICTED: attractin isoform X2 [Heterocephalus glaber]</a>    | 38.8 | 38.8 | 100% | 0.033 | 91% | <a href="#">gij 512956910 XP_004840783.1</a> |
| <a href="#">PREDICTED: attractin isoform X2 [Loxodonta africana]</a>       | 38.8 | 38.8 | 100% | 0.033 | 91% | <a href="#">gij 731487307 XP_010589860.1</a> |
| <a href="#">PREDICTED: attractin isoform X3 [Pan troglodytes]</a>          | 38.8 | 38.8 | 100% | 0.033 | 91% | <a href="#">gij 694977852 XP_009435011.1</a> |
| <a href="#">PREDICTED: attractin isoform X1 [Homo sapiens]</a>             | 38.8 | 38.8 | 100% | 0.033 | 91% | <a href="#">gij 530426019 XP_005260917.1</a> |
| <a href="#">PREDICTED: attractin isoform X4 [Macaca fascicularis]</a>      | 38.8 | 38.8 | 100% | 0.033 | 91% | <a href="#">gij 544464516 XP_005568512.1</a> |
| <a href="#">PREDICTED: attractin isoform X5 [Chlorocebus sabaeus]</a>      | 38.8 | 38.8 | 100% | 0.033 | 91% | <a href="#">gij 635021368 XP_008017720.1</a> |
| <a href="#">Mahogany-like protein [Macaca fascicularis]</a>                | 38.8 | 38.8 | 100% | 0.033 | 91% | <a href="#">gij 355784657 EHH65508.1</a>     |
| <a href="#">PREDICTED: attractin [Myotis davidii]</a>                      | 38.8 | 58.1 | 100% | 0.033 | 91% | <a href="#">gij 584075971 XP_006758187.1</a> |
| <a href="#">PREDICTED: attractin [Panthera tigris altaica]</a>             | 38.8 | 38.8 | 100% | 0.033 | 91% | <a href="#">gij 591291970 XP_007073329.1</a> |
| <a href="#">PREDICTED: attractin [Myotis brandtii]</a>                     | 38.8 | 58.1 | 100% | 0.033 | 91% | <a href="#">gij 554560893 XP_005874816.1</a> |
| <a href="#">PREDICTED: attractin isoform X3 [Macaca fascicularis]</a>      | 38.8 | 38.8 | 100% | 0.033 | 91% | <a href="#">gij 544464514 XP_005568511.1</a> |
| <a href="#">PREDICTED: attractin-like [Galeopterus variegatus]</a>         | 38.8 | 38.8 | 100% | 0.033 | 91% | <a href="#">gij 667324076 XP_008589101.1</a> |
| <a href="#">PREDICTED: attractin isoform X4 [Chlorocebus sabaeus]</a>      | 38.8 | 38.8 | 100% | 0.033 | 91% | <a href="#">gij 635021366 XP_008017712.1</a> |
| <a href="#">PREDICTED: attractin [Capra hircus]</a>                        | 38.8 | 38.8 | 100% | 0.033 | 91% | <a href="#">gij 548490191 XP_005688293.1</a> |
| <a href="#">Attractin [Heterocephalus glaber]</a>                          | 38.8 | 38.8 | 100% | 0.033 | 91% | <a href="#">gij 351701383 EHB04302.1</a>     |
| <a href="#">PREDICTED: attractin [Rhinopithecus roxellana]</a>             | 38.8 | 38.8 | 100% | 0.033 | 91% | <a href="#">gij 724902357 XP_010377335.1</a> |
| <a href="#">PREDICTED: attractin [Camelus ferus]</a>                       | 38.8 | 38.8 | 100% | 0.033 | 91% | <a href="#">gij 560921992 XP_006187198.1</a> |
| <a href="#">PREDICTED: attractin [Sorex araneus]</a>                       | 38.8 | 38.8 | 100% | 0.033 | 91% | <a href="#">gij 505831534 XP_004611050.1</a> |
| <a href="#">PREDICTED: attractin [Myotis lucifugus]</a>                    | 38.8 | 58.1 | 100% | 0.033 | 91% | <a href="#">gij 558159591 XP_006096513.1</a> |
| <a href="#">PREDICTED: attractin [Bos mutus]</a>                           | 38.8 | 38.8 | 100% | 0.033 | 91% | <a href="#">gij 555963925 XP_005894036.1</a> |
| <a href="#">PREDICTED: attractin [Ursus maritimus]</a>                     | 38.8 | 38.8 | 100% | 0.033 | 91% | <a href="#">gij 671021680 XP_008701660.1</a> |
| <a href="#">hypothetical protein PANDA_007354 [Ailuropoda melanoleuca]</a> | 38.8 | 38.8 | 100% | 0.033 | 91% | <a href="#">gij 281339872 EFB15456.1</a>     |
| <a href="#">PREDICTED: attractin-like [Ailuropoda melanoleuca]</a>         | 38.8 | 38.8 | 100% | 0.033 | 91% | <a href="#">gij 301766802 XP_002918837.1</a> |
| <a href="#">attractin, isoform CRA_b [Homo sapiens]</a>                    | 38.8 | 38.8 | 100% | 0.033 | 91% | <a href="#">gij 119630936 EAX10531.1</a>     |
| <a href="#">PREDICTED: attractin isoform X3 [Chlorocebus sabaeus]</a>      | 38.8 | 38.8 | 100% | 0.033 | 91% | <a href="#">gij 635021364 XP_008017707.1</a> |
| <a href="#">PREDICTED: attractin [Fukomys damarensis]</a>                  | 38.8 | 38.8 | 100% | 0.033 | 91% | <a href="#">gij 731281216 XP_010609356.1</a> |
| <a href="#">PREDICTED: attractin [Heterocephalus glaber]</a>               | 38.8 | 38.8 | 100% | 0.033 | 91% | <a href="#">gij 512849696 XP_004886859.1</a> |
| <a href="#">PREDICTED: attractin [Ovis aries]</a>                          | 38.8 | 38.8 | 100% | 0.033 | 91% | <a href="#">gij 426241795 XP_004014773.1</a> |
| <a href="#">PREDICTED: attractin [Peromyscus maniculatus bairdii]</a>      | 38.8 | 38.8 | 100% | 0.033 | 91% | <a href="#">gij 589943852 XP_006984624.1</a> |
| <a href="#">PREDICTED: attractin [Felis catus]</a>                         | 38.8 | 38.8 | 100% | 0.033 | 91% | <a href="#">gij 586981105 XP_003983758.2</a> |
| <a href="#">PREDICTED: attractin isoform X2 [Pan troglodytes]</a>          | 38.8 | 38.8 | 100% | 0.033 | 91% | <a href="#">gij 694977850 XP_009435010.1</a> |
| <a href="#">PREDICTED: attractin isoform X2 [Chlorocebus sabaeus]</a>      | 38.8 | 38.8 | 100% | 0.033 | 91% | <a href="#">gij 635021362 XP_008017704.1</a> |
| <a href="#">PREDICTED: attractin [Otolemur garnettii]</a>                  | 38.8 | 38.8 | 100% | 0.033 | 91% | <a href="#">gij 395830288 XP_003788264.1</a> |
| <a href="#">PREDICTED: attractin [Erinaceus europaeus]</a>                 | 38.8 | 38.8 | 100% | 0.033 | 91% | <a href="#">gij 617558695 XP_007539650.1</a> |
| <a href="#">PREDICTED: attractin [Vicugna pacos]</a>                       | 38.8 | 38.8 | 100% | 0.033 | 91% | <a href="#">gij 560970220 XP_006207473.1</a> |
| <a href="#">PREDICTED: attractin [Echinops telfairii]</a>                  | 38.8 | 38.8 | 100% | 0.033 | 91% | <a href="#">gij 507626122 XP_004697922.1</a> |

|                                                                              |      |      |      |       |     |                                             |
|------------------------------------------------------------------------------|------|------|------|-------|-----|---------------------------------------------|
| <a href="#">attractin [Bos taurus]</a>                                       | 38.8 | 38.8 | 100% | 0.033 | 91% | <a href="#">gij253560524 ACT32973.1</a>     |
| <a href="#">PREDICTED: attractin isoform X1 [Pteropus alecto]</a>            | 38.8 | 38.8 | 100% | 0.033 | 91% | <a href="#">gij586533632 XP_006921705.1</a> |
| <a href="#">PREDICTED: attractin [Eptesicus fuscus]</a>                      | 38.8 | 38.8 | 100% | 0.033 | 91% | <a href="#">gij641701319 XP_008139256.1</a> |
| <a href="#">attractin [Bos taurus]</a>                                       | 38.8 | 38.8 | 100% | 0.033 | 91% | <a href="#">gij27806737 NP_776420.1</a>     |
| <a href="#">PREDICTED: attractin isoform X2 [Bubalus bubalis]</a>            | 38.8 | 38.8 | 100% | 0.033 | 91% | <a href="#">gij594099678 XP_006072964.1</a> |
| <a href="#">PREDICTED: attractin isoform X3 [Canis lupus familiaris]</a>     | 38.8 | 38.8 | 100% | 0.033 | 91% | <a href="#">gij73991942 XP_534360.2</a>     |
| <a href="#">PREDICTED: attractin [Orcinus orca]</a>                          | 38.8 | 38.8 | 100% | 0.033 | 91% | <a href="#">gij466084723 XP_004285351.1</a> |
| <a href="#">PREDICTED: attractin [Lipotes vexillifer]</a>                    | 38.8 | 38.8 | 100% | 0.033 | 91% | <a href="#">gij602710450 XP_007465469.1</a> |
| <a href="#">PREDICTED: attractin [Odobenus rosmarus divergens]</a>           | 38.8 | 38.8 | 100% | 0.033 | 91% | <a href="#">gij472357214 XP_004398236.1</a> |
| <a href="#">PREDICTED: attractin [Chrysochloris asiatica]</a>                | 38.8 | 38.8 | 100% | 0.033 | 91% | <a href="#">gij586488825 XP_006874887.1</a> |
| <a href="#">PREDICTED: attractin [Elephantulus edwardii]</a>                 | 38.8 | 38.8 | 100% | 0.033 | 91% | <a href="#">gij585689645 XP_006894264.1</a> |
| <a href="#">PREDICTED: attractin isoform X1 [Heterocephalus glaber]</a>      | 38.8 | 38.8 | 100% | 0.033 | 91% | <a href="#">gij512956908 XP_004840782.1</a> |
| <a href="#">PREDICTED: attractin [Orycteropus afer afer]</a>                 | 38.8 | 38.8 | 100% | 0.033 | 91% | <a href="#">gij634830430 XP_007958185.1</a> |
| <a href="#">PREDICTED: attractin isoform X3 [Chinchilla lanigera]</a>        | 38.8 | 38.8 | 100% | 0.033 | 91% | <a href="#">gij533131617 XP_005380852.1</a> |
| <a href="#">PREDICTED: attractin isoform X1 [Oryctolagus cuniculus]</a>      | 38.8 | 38.8 | 100% | 0.033 | 91% | <a href="#">gij291388868 XP_002710968.1</a> |
| <a href="#">PREDICTED: attractin isoform X1 [Ictidomys tridecemlineatus]</a> | 38.8 | 38.8 | 100% | 0.033 | 91% | <a href="#">gij532069484 XP_005320577.1</a> |
| <a href="#">PREDICTED: attractin [Ochotona princeps]</a>                     | 38.8 | 38.8 | 100% | 0.033 | 91% | <a href="#">gij504146589 XP_004585711.1</a> |
| <a href="#">PREDICTED: attractin isoform X1 [Loxodonta africana]</a>         | 38.8 | 38.8 | 100% | 0.033 | 91% | <a href="#">gij344279766 XP_003411658.1</a> |
| <a href="#">attractin [Mesocricetus auratus]</a>                             | 38.8 | 38.8 | 100% | 0.033 | 91% | <a href="#">gij528078159 NP_001268565.1</a> |
| <a href="#">PREDICTED: attractin isoform X3 [Ictidomys tridecemlineatus]</a> | 38.8 | 38.8 | 100% | 0.033 | 91% | <a href="#">gij532069488 XP_005320579.1</a> |
| <a href="#">PREDICTED: attractin [Callithrix jacchus]</a>                    | 38.8 | 38.8 | 100% | 0.033 | 91% | <a href="#">gij296200062 XP_002747358.1</a> |
| <a href="#">PREDICTED: attractin isoform X1 [Pan troglodytes]</a>            | 38.8 | 38.8 | 100% | 0.033 | 91% | <a href="#">gij332857715 XP_003316827.1</a> |
| <a href="#">PREDICTED: attractin isoform X1 [Chlorocebus sabaeus]</a>        | 38.8 | 38.8 | 100% | 0.033 | 91% | <a href="#">gij635021360 XP_008017700.1</a> |
| <a href="#">PREDICTED: attractin isoform X6 [Chlorocebus sabaeus]</a>        | 38.8 | 38.8 | 100% | 0.033 | 91% | <a href="#">gij635021370 XP_008017729.1</a> |
| <a href="#">PREDICTED: attractin isoform X2 [Oryctolagus cuniculus]</a>      | 38.8 | 38.8 | 100% | 0.033 | 91% | <a href="#">gij655716500 XP_008254470.1</a> |

## Alignments

[Download](#) [GenPept](#) [Graphics](#)

[Next](#) [Previous](#) [Descriptions](#)

attractin [Ovis aries]

Sequence ID: [gij78499351|gb|ABB45710.1](#) Length: 242 Number of Matches: 1

Range 1: 79 to 89 [GenPept](#) [Graphics](#)

[Next Match](#) [Previous Match](#)

| Score         | Expect | Identities | Positives   | Gaps     |
|---------------|--------|------------|-------------|----------|
| 38.8 bits(84) | 0.029  | 10/11(91%) | 11/11(100%) | 0/11(0%) |

Query 1 KCIDQSICEKC 11  
KCI+QSICEKC  
Sbjct 79 KCINQSICEKC 89

### Related Information

[Gene](#) - associated gene details  
[Map Viewer](#) - aligned genomic context

[Download](#) [GenPept](#) [Graphics](#)

[Next](#) [Previous](#) [Descriptions](#)

PREDICTED: attractin-like [Leptonychotes weddellii]

Sequence ID: [gij585182065|ref|XP\\_006742666.1](#) Length: 290 Number of Matches: 1

Range 1: 14 to 24 [GenPept](#) [Graphics](#)

[Next Match](#) [Previous Match](#)

| Score         | Expect | Identities | Positives   | Gaps     |
|---------------|--------|------------|-------------|----------|
| 38.8 bits(84) | 0.030  | 10/11(91%) | 11/11(100%) | 0/11(0%) |

Query 1 KCIDQSICEKC 11  
KCI+QSICEKC  
Sbjct 14 KCINQSICEKC 24

### Related Information

[Gene](#) - associated gene details  
[Map Viewer](#) - aligned genomic context

[Download](#) [GenPept](#) [Graphics](#)

[Next](#) [Previous](#) [Descriptions](#)

**KIAA0548 protein [Homo sapiens]**

Sequence ID: [gij3043620|dbj|BAA25474.1](#) Length: 452 Number of Matches: 1

Range 1: 93 to 103 [GenPept](#) [Graphics](#)

[Next Match](#) [Previous Match](#)

| Score         | Expect | Identities | Positives   | Gaps     |
|---------------|--------|------------|-------------|----------|
| 38.8 bits(84) | 0.031  | 10/11(91%) | 11/11(100%) | 0/11(0%) |

Query 1 KCIDQSICEKC 11  
 KCI+QSICEKC  
 Sbjct 93 KCINQSICEKC 103

**Related Information**

[Gene](#) - associated gene details

[Download](#) [GenPept](#) [Graphics](#)

[Next](#) [Previous](#) [Descriptions](#)

**attractin [Bos taurus]**

Sequence ID: [gij190683717|gb|ACE82176.1](#) Length: 670 Number of Matches: 1

Range 1: 311 to 321 [GenPept](#) [Graphics](#)

[Next Match](#) [Previous Match](#)

| Score         | Expect | Identities | Positives   | Gaps     |
|---------------|--------|------------|-------------|----------|
| 38.8 bits(84) | 0.032  | 10/11(91%) | 11/11(100%) | 0/11(0%) |

Query 1 KCIDQSICEKC 11  
 KCI+QSICEKC  
 Sbjct 311 KCINQSICEKC 321

**Related Information**

[Gene](#) - associated gene details  
[Map Viewer](#) - aligned genomic context

[Download](#) [GenPept](#) [Graphics](#)

[Next](#) [Previous](#) [Descriptions](#)

**Attractin [Tupaia chinensis]**

Sequence ID: [gij444519420|gb|ELV12829.1](#) Length: 860 Number of Matches: 1

Range 1: 639 to 649 [GenPept](#) [Graphics](#)

[Next Match](#) [Previous Match](#)

| Score         | Expect | Identities | Positives   | Gaps     |
|---------------|--------|------------|-------------|----------|
| 38.8 bits(84) | 0.033  | 10/11(91%) | 11/11(100%) | 0/11(0%) |

Query 1 KCIDQSICEKC 11  
 KCI+QSICEKC  
 Sbjct 639 KCINQSICEKC 649

**Related Information**

BLAST is a registered trademark of the National Library of Medicine.

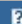

▶ [NCBI/ BLAST/ blastp suite/ Formatting Results - B90YB87G01R](#)

**i** Your search parameters were adjusted to search for a short input sequence.

[Edit and Resubmit](#) [Save Search Strategies](#) [▶ Formatting options](#) [▶ Download](#)

[YouTube](#) [How to read this page](#) [Blast report description](#)

### ATRN\_KCINQSICEKC\_NonMod

**RID** [B90YB87G01R](#) (Expires on 01-14 09:32 am)

**Query ID** |cl|70916  
**Description** None  
**Molecule type** amino acid  
**Query Length** 11

**Database Name** nr  
**Description** All non-redundant GenBank CDS translations+PDB+SwissProt+PIR excluding environmental samples from WGS projects  
**Program** BLASTP 2.2.30+ [▶ Citation](#)

Other reports: [▶ Search Summary](#) [\[Taxonomy reports\]](#) [\[Distance tree of results\]](#) [\[Multiple alignment\]](#)

### **[-]** Graphic Summary

**[-]** [Show Conserved Domains](#)

No putative conserved domains have been detected

Distribution of 113 Blast Hits on the Query Sequence

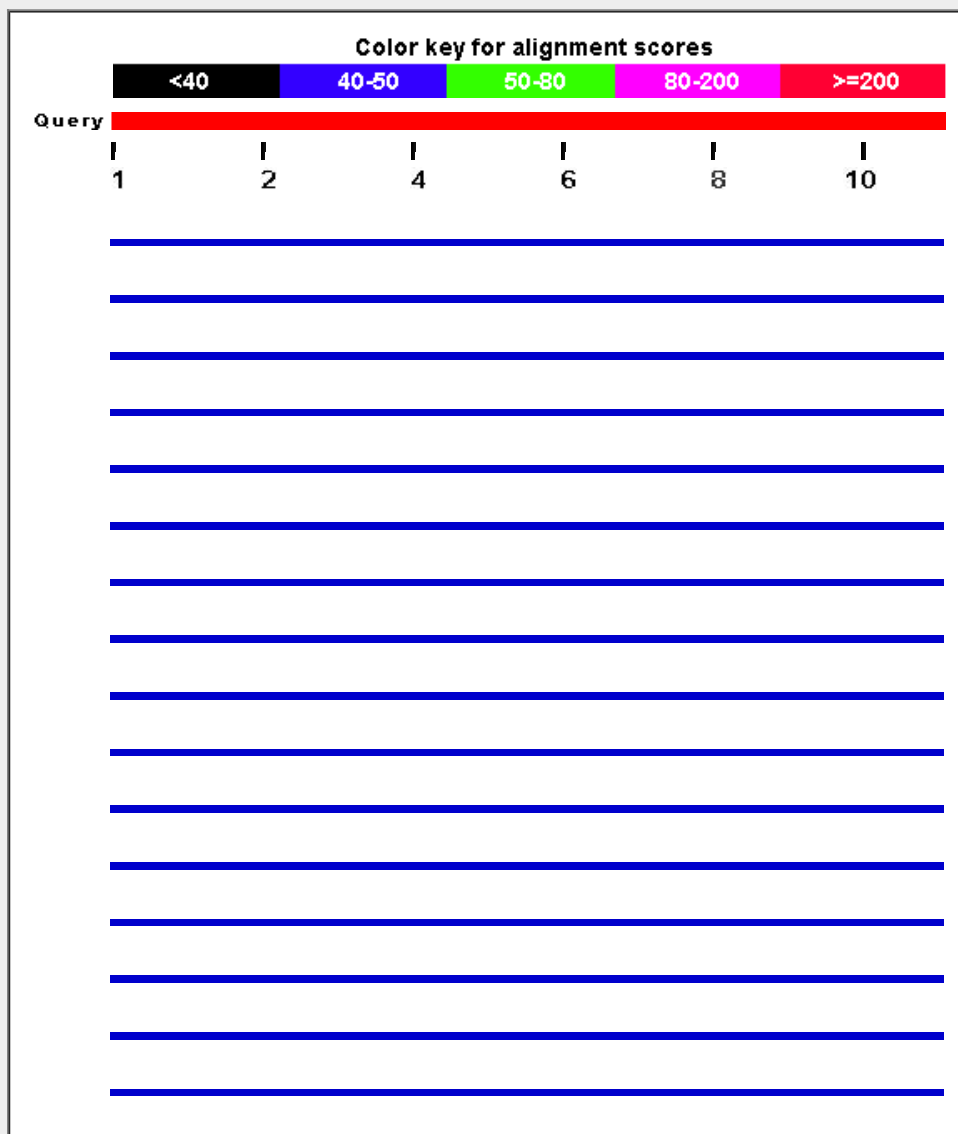

The image shows a table with 30 rows. Each row contains a single blue horizontal line, which appears to be a placeholder for data. The table is centered on the page and is flanked by light blue vertical bars on both sides.



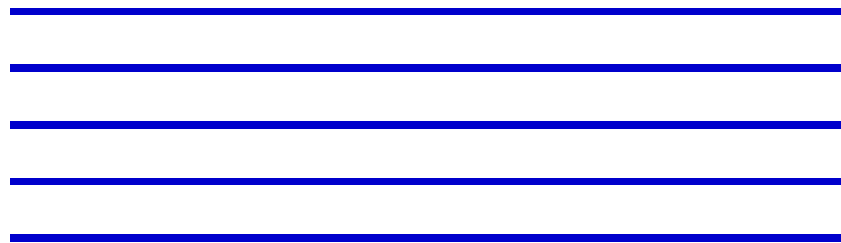

**Descriptions**

**Sequences producing significant alignments:**

Select: [All](#) [None](#) Selected:0

[↑](#) [Alignments](#)
[Download](#)
[GenPept](#)
[Graphics](#)
[Distance tree of results](#)
[Multiple alignment](#)

| Description                                                                       | Max score | Total score | Query cover | E value | Ident | Accession                                   |
|-----------------------------------------------------------------------------------|-----------|-------------|-------------|---------|-------|---------------------------------------------|
| <a href="#">attractin [Ovis aries]</a>                                            | 41.4      | 41.4        | 100%        | 0.004   | 100%  | <a href="#">gij78499351 ABB45710.1</a>      |
| <a href="#">PREDICTED: attractin-like [Leptonychotes weddellii]</a>               | 41.4      | 41.4        | 100%        | 0.004   | 100%  | <a href="#">gij585182065 XP_006742666.1</a> |
| <a href="#">KIAA0548 protein [Homo sapiens]</a>                                   | 41.4      | 41.4        | 100%        | 0.004   | 100%  | <a href="#">gij3043620 BAA25474.1</a>       |
| <a href="#">attractin [Bos taurus]</a>                                            | 41.4      | 41.4        | 100%        | 0.004   | 100%  | <a href="#">gij190683717 ACE82176.1</a>     |
| <a href="#">Attractin [Tupaia chinensis]</a>                                      | 41.4      | 41.4        | 100%        | 0.004   | 100%  | <a href="#">gij444519420 ELV12829.1</a>     |
| <a href="#">PREDICTED: attractin isoform X2 [Papio anubis]</a>                    | 41.4      | 41.4        | 100%        | 0.004   | 100%  | <a href="#">gij685567345 XP_009214752.1</a> |
| <a href="#">attractin [Canis lupus familiaris]</a>                                | 41.4      | 41.4        | 100%        | 0.004   | 100%  | <a href="#">gij339892849 AEK21787.1</a>     |
| <a href="#">PREDICTED: attractin-like [Tursiops truncatus]</a>                    | 41.4      | 41.4        | 100%        | 0.004   | 100%  | <a href="#">gij470629747 XP_004321558.1</a> |
| <a href="#">PREDICTED: attractin-like [Physeter catodon]</a>                      | 41.4      | 41.4        | 100%        | 0.004   | 100%  | <a href="#">gij593773084 XP_007124834.1</a> |
| <a href="#">PREDICTED: attractin [Pongo abelii]</a>                               | 41.4      | 41.4        | 100%        | 0.004   | 100%  | <a href="#">gij297706621 XP_002830129.1</a> |
| <a href="#">attractin isoform 1 preproprotein [Camelus ferus]</a>                 | 41.4      | 41.4        | 100%        | 0.004   | 100%  | <a href="#">gij528759526 EPY79185.1</a>     |
| <a href="#">PREDICTED: attractin-like [Ictidomys tridecemlineatus]</a>            | 41.4      | 62.8        | 100%        | 0.004   | 100%  | <a href="#">gij532069682 XP_005320676.1</a> |
| <a href="#">PREDICTED: attractin isoform X2 [Homo sapiens]</a>                    | 41.4      | 41.4        | 100%        | 0.004   | 100%  | <a href="#">gij530426021 XP_005260918.1</a> |
| <a href="#">PREDICTED: attractin isoform X1 [Papio anubis]</a>                    | 41.4      | 41.4        | 100%        | 0.004   | 100%  | <a href="#">gij685567343 XP_009214751.1</a> |
| <a href="#">PREDICTED: attractin isoform X2 [Saimiri boliviensis boliviensis]</a> | 41.4      | 41.4        | 100%        | 0.004   | 100%  | <a href="#">gij725600053 XP_010350112.1</a> |
| <a href="#">PREDICTED: attractin isoform X1 [Saimiri boliviensis boliviensis]</a> | 41.4      | 41.4        | 100%        | 0.004   | 100%  | <a href="#">gij725600051 XP_010350111.1</a> |
| <a href="#">PREDICTED: attractin [Nannospalax galii]</a>                          | 41.4      | 41.4        | 100%        | 0.004   | 100%  | <a href="#">gij674060132 XP_008836714.1</a> |
| <a href="#">PREDICTED: attractin [Tarsius syrichta]</a>                           | 41.4      | 41.4        | 100%        | 0.004   | 100%  | <a href="#">gij640796924 XP_008054571.1</a> |
| <a href="#">unnamed protein product [Homo sapiens]</a>                            | 41.4      | 41.4        | 100%        | 0.004   | 100%  | <a href="#">gij194380362 BAG63948.1</a>     |
| <a href="#">attractin isoform 4 [Homo sapiens]</a>                                | 41.4      | 41.4        | 100%        | 0.004   | 100%  | <a href="#">gij333440461 NP_001193976.1</a> |
| <a href="#">PREDICTED: attractin isoform 2 [Nomascus leucogenys]</a>              | 41.4      | 41.4        | 100%        | 0.004   | 100%  | <a href="#">gij332257827 XP_003278006.1</a> |
| <a href="#">Attractin [Fukomys damarensis]</a>                                    | 41.4      | 41.4        | 100%        | 0.004   | 100%  | <a href="#">gij676263950 KFO20529.1</a>     |
| <a href="#">Attractin [Myotis davidii]</a>                                        | 41.4      | 63.2        | 100%        | 0.004   | 100%  | <a href="#">gij432111133 ELK34519.1</a>     |
| <a href="#">PREDICTED: attractin [Pantholops hodgsonii]</a>                       | 41.4      | 41.4        | 100%        | 0.004   | 100%  | <a href="#">gij556758951 XP_005974805.1</a> |
| <a href="#">PREDICTED: attractin isoform X4 [Pan troglodytes]</a>                 | 41.4      | 41.4        | 100%        | 0.004   | 100%  | <a href="#">gij694977854 XP_009435012.1</a> |
| <a href="#">Attractin [Myotis brandtii]</a>                                       | 41.4      | 63.2        | 100%        | 0.004   | 100%  | <a href="#">gij521031210 EPQ12996.1</a>     |
| <a href="#">PREDICTED: attractin isoform 1 [Nomascus leucogenys]</a>              | 41.4      | 41.4        | 100%        | 0.004   | 100%  | <a href="#">gij332257825 XP_003278005.1</a> |
| <a href="#">attractin-2 [Homo sapiens]</a>                                        | 41.4      | 41.4        | 100%        | 0.004   | 100%  | <a href="#">gij4093196 AAD03057.1</a>       |

|                                                                            |      |      |      |       |      |                                             |
|----------------------------------------------------------------------------|------|------|------|-------|------|---------------------------------------------|
| <a href="#">secreted attractin precursor [Homo sapiens]</a>                | 41.4 | 41.4 | 100% | 0.004 | 100% | <a href="#">gij8118083 AAF72882.1</a>       |
| <a href="#">unnamed protein product [Homo sapiens]</a>                     | 41.4 | 41.4 | 100% | 0.004 | 100% | <a href="#">gij158259481 BAF85699.1</a>     |
| <a href="#">attractin isoform 2 preproprotein [Homo sapiens]</a>           | 41.4 | 41.4 | 100% | 0.004 | 100% | <a href="#">gij21450863 NP_647538.1</a>     |
| <a href="#">Mahogany-like protein [Macaca mulatta]</a>                     | 41.4 | 41.4 | 100% | 0.004 | 100% | <a href="#">gij355563316 EHH19878.1</a>     |
| <a href="#">attractin [Rattus norvegicus]</a>                              | 41.4 | 41.4 | 100% | 0.004 | 100% | <a href="#">gij12275312 BAB21018.1</a>      |
| <a href="#">attractin, isoform CRA_a [Rattus norvegicus]</a>               | 41.4 | 41.4 | 100% | 0.004 | 100% | <a href="#">gij149023319 EDL80213.1</a>     |
| <a href="#">PREDICTED: attractin isoform X3 [Bubalus bubalis]</a>          | 41.4 | 41.4 | 100% | 0.004 | 100% | <a href="#">gij594099680 XP_006072965.1</a> |
| <a href="#">PREDICTED: LOW QUALITY PROTEIN: attractin [Pan paniscus]</a>   | 41.4 | 41.4 | 100% | 0.004 | 100% | <a href="#">gij675763672 XP_008973079.1</a> |
| <a href="#">PREDICTED: attractin isoform X2 [Canis lupus familiaris]</a>   | 41.4 | 41.4 | 100% | 0.004 | 100% | <a href="#">gij545540090 XP_005634905.1</a> |
| <a href="#">PREDICTED: attractin isoform X2 [Heterocephalus glaber]</a>    | 41.4 | 62.8 | 100% | 0.004 | 100% | <a href="#">gij512956910 XP_004840783.1</a> |
| <a href="#">PREDICTED: attractin isoform X2 [Loxodonta africana]</a>       | 41.4 | 41.4 | 100% | 0.004 | 100% | <a href="#">gij731487307 XP_010589860.1</a> |
| <a href="#">PREDICTED: attractin isoform X3 [Pan troglodytes]</a>          | 41.4 | 41.4 | 100% | 0.004 | 100% | <a href="#">gij694977852 XP_009435011.1</a> |
| <a href="#">PREDICTED: attractin isoform X1 [Homo sapiens]</a>             | 41.4 | 41.4 | 100% | 0.004 | 100% | <a href="#">gij530426019 XP_005260917.1</a> |
| <a href="#">PREDICTED: attractin isoform X4 [Macaca fascicularis]</a>      | 41.4 | 41.4 | 100% | 0.004 | 100% | <a href="#">gij544464516 XP_005568512.1</a> |
| <a href="#">PREDICTED: attractin isoform X5 [Chlorocebus sabaeus]</a>      | 41.4 | 41.4 | 100% | 0.004 | 100% | <a href="#">gij635021368 XP_008017720.1</a> |
| <a href="#">Mahogany-like protein [Macaca fascicularis]</a>                | 41.4 | 41.4 | 100% | 0.004 | 100% | <a href="#">gij355784657 EHH65508.1</a>     |
| <a href="#">PREDICTED: attractin [Myotis davidii]</a>                      | 41.4 | 63.2 | 100% | 0.004 | 100% | <a href="#">gij584075971 XP_006758187.1</a> |
| <a href="#">PREDICTED: attractin [Panthera tigris altaica]</a>             | 41.4 | 41.4 | 100% | 0.004 | 100% | <a href="#">gij591291970 XP_007073329.1</a> |
| <a href="#">PREDICTED: attractin [Myotis brandtii]</a>                     | 41.4 | 63.2 | 100% | 0.004 | 100% | <a href="#">gij554560893 XP_005874816.1</a> |
| <a href="#">PREDICTED: attractin isoform X3 [Macaca fascicularis]</a>      | 41.4 | 41.4 | 100% | 0.004 | 100% | <a href="#">gij544464514 XP_005568511.1</a> |
| <a href="#">PREDICTED: attractin-like [Galeopterus variegatus]</a>         | 41.4 | 41.4 | 100% | 0.004 | 100% | <a href="#">gij667324076 XP_008589101.1</a> |
| <a href="#">PREDICTED: attractin isoform X4 [Chlorocebus sabaeus]</a>      | 41.4 | 41.4 | 100% | 0.004 | 100% | <a href="#">gij635021366 XP_008017712.1</a> |
| <a href="#">PREDICTED: attractin [Capra hircus]</a>                        | 41.4 | 41.4 | 100% | 0.004 | 100% | <a href="#">gij548490191 XP_005688293.1</a> |
| <a href="#">Attractin [Heterocephalus glaber]</a>                          | 41.4 | 62.8 | 100% | 0.004 | 100% | <a href="#">gij351701383 EHB04302.1</a>     |
| <a href="#">PREDICTED: attractin [Rhinopithecus roxellana]</a>             | 41.4 | 41.4 | 100% | 0.004 | 100% | <a href="#">gij724902357 XP_010377335.1</a> |
| <a href="#">PREDICTED: attractin [Camelus ferus]</a>                       | 41.4 | 41.4 | 100% | 0.004 | 100% | <a href="#">gij560921992 XP_006187198.1</a> |
| <a href="#">PREDICTED: attractin [Sorex araneus]</a>                       | 41.4 | 41.4 | 100% | 0.004 | 100% | <a href="#">gij505831534 XP_004611050.1</a> |
| <a href="#">PREDICTED: attractin [Myotis lucifugus]</a>                    | 41.4 | 63.2 | 100% | 0.004 | 100% | <a href="#">gij558159591 XP_006096513.1</a> |
| <a href="#">PREDICTED: attractin [Bos mutus]</a>                           | 41.4 | 41.4 | 100% | 0.004 | 100% | <a href="#">gij555963925 XP_005894036.1</a> |
| <a href="#">PREDICTED: attractin [Ursus maritimus]</a>                     | 41.4 | 41.4 | 100% | 0.004 | 100% | <a href="#">gij671021680 XP_008701660.1</a> |
| <a href="#">hypothetical protein PANDA_007354 [Ailuropoda melanoleuca]</a> | 41.4 | 41.4 | 100% | 0.004 | 100% | <a href="#">gij281339872 EFB15456.1</a>     |
| <a href="#">PREDICTED: attractin-like [Ailuropoda melanoleuca]</a>         | 41.4 | 41.4 | 100% | 0.004 | 100% | <a href="#">gij301766802 XP_002918837.1</a> |
| <a href="#">attractin, isoform CRA_b [Homo sapiens]</a>                    | 41.4 | 41.4 | 100% | 0.004 | 100% | <a href="#">gij119630936 EAX10531.1</a>     |
| <a href="#">PREDICTED: attractin isoform X3 [Chlorocebus sabaeus]</a>      | 41.4 | 41.4 | 100% | 0.004 | 100% | <a href="#">gij635021364 XP_008017707.1</a> |
| <a href="#">PREDICTED: attractin [Fukomys damarensis]</a>                  | 41.4 | 41.4 | 100% | 0.004 | 100% | <a href="#">gij731281216 XP_010609356.1</a> |
| <a href="#">PREDICTED: attractin [Heterocephalus glaber]</a>               | 41.4 | 62.8 | 100% | 0.004 | 100% | <a href="#">gij512849696 XP_004886859.1</a> |
| <a href="#">PREDICTED: attractin [Ovis aries]</a>                          | 41.4 | 41.4 | 100% | 0.004 | 100% | <a href="#">gij426241795 XP_004014773.1</a> |
| <a href="#">PREDICTED: attractin [Peromyscus maniculatus bairdii]</a>      | 41.4 | 41.4 | 100% | 0.004 | 100% | <a href="#">gij589943852 XP_006984624.1</a> |
| <a href="#">PREDICTED: attractin [Felis catus]</a>                         | 41.4 | 41.4 | 100% | 0.004 | 100% | <a href="#">gij586981105 XP_003983758.2</a> |
| <a href="#">PREDICTED: attractin isoform X2 [Pan troglodytes]</a>          | 41.4 | 41.4 | 100% | 0.004 | 100% | <a href="#">gij694977850 XP_009435010.1</a> |
| <a href="#">PREDICTED: attractin isoform X2 [Chlorocebus sabaeus]</a>      | 41.4 | 41.4 | 100% | 0.004 | 100% | <a href="#">gij635021362 XP_008017704.1</a> |
| <a href="#">PREDICTED: attractin [Otolemur garnettii]</a>                  | 41.4 | 41.4 | 100% | 0.004 | 100% | <a href="#">gij395830288 XP_003788264.1</a> |
| <a href="#">PREDICTED: attractin [Erinaceus europaeus]</a>                 | 41.4 | 41.4 | 100% | 0.004 | 100% | <a href="#">gij617558695 XP_007539650.1</a> |
| <a href="#">PREDICTED: attractin [Vicugna pacos]</a>                       | 41.4 | 41.4 | 100% | 0.004 | 100% | <a href="#">gij560970220 XP_006207473.1</a> |
| <a href="#">attractin [Bos taurus]</a>                                     | 41.4 | 41.4 | 100% | 0.004 | 100% | <a href="#">gij253560524 ACT32973.1</a>     |

|                                                                              |      |      |      |       |      |                                             |
|------------------------------------------------------------------------------|------|------|------|-------|------|---------------------------------------------|
| <a href="#">PREDICTED: attractin isoform X1 [Pteropus alecto]</a>            | 41.4 | 41.4 | 100% | 0.004 | 100% | <a href="#">gi 586533632 XP_006921705.1</a> |
| <a href="#">PREDICTED: attractin [Eptesicus fuscus]</a>                      | 41.4 | 41.4 | 100% | 0.004 | 100% | <a href="#">gi 641701319 XP_008139256.1</a> |
| <a href="#">attractin [Bos taurus]</a>                                       | 41.4 | 41.4 | 100% | 0.004 | 100% | <a href="#">gi 27806737 NP_776420.1</a>     |
| <a href="#">PREDICTED: attractin isoform X2 [Bubalus bubalis]</a>            | 41.4 | 41.4 | 100% | 0.004 | 100% | <a href="#">gi 594099678 XP_006072964.1</a> |
| <a href="#">PREDICTED: attractin isoform X3 [Canis lupus familiaris]</a>     | 41.4 | 41.4 | 100% | 0.004 | 100% | <a href="#">gi 73991942 XP_534360.2</a>     |
| <a href="#">PREDICTED: attractin [Orcinus orca]</a>                          | 41.4 | 41.4 | 100% | 0.004 | 100% | <a href="#">gi 466084723 XP_004285351.1</a> |
| <a href="#">PREDICTED: attractin [Lipotes vexillifer]</a>                    | 41.4 | 41.4 | 100% | 0.004 | 100% | <a href="#">gi 602710450 XP_007465469.1</a> |
| <a href="#">PREDICTED: attractin [Odobenus rosmarus divergens]</a>           | 41.4 | 41.4 | 100% | 0.004 | 100% | <a href="#">gi 472357214 XP_004398236.1</a> |
| <a href="#">PREDICTED: attractin [Chrysochloris asiatica]</a>                | 41.4 | 41.4 | 100% | 0.004 | 100% | <a href="#">gi 586488825 XP_006874887.1</a> |
| <a href="#">PREDICTED: attractin [Elephantulus edwardii]</a>                 | 41.4 | 41.4 | 100% | 0.004 | 100% | <a href="#">gi 585689645 XP_006894264.1</a> |
| <a href="#">PREDICTED: attractin isoform X1 [Heterocephalus glaber]</a>      | 41.4 | 62.8 | 100% | 0.004 | 100% | <a href="#">gi 512956908 XP_004840782.1</a> |
| <a href="#">PREDICTED: attractin [Orycteropus afer afer]</a>                 | 41.4 | 41.4 | 100% | 0.004 | 100% | <a href="#">gi 634830430 XP_007958185.1</a> |
| <a href="#">PREDICTED: attractin isoform X3 [Chinchilla lanigera]</a>        | 41.4 | 41.4 | 100% | 0.004 | 100% | <a href="#">gi 533131617 XP_005380852.1</a> |
| <a href="#">PREDICTED: attractin isoform X1 [Oryctolagus cuniculus]</a>      | 41.4 | 41.4 | 100% | 0.004 | 100% | <a href="#">gi 291388868 XP_002710968.1</a> |
| <a href="#">PREDICTED: attractin isoform X1 [Ictidomys tridecemlineatus]</a> | 41.4 | 62.8 | 100% | 0.004 | 100% | <a href="#">gi 532069484 XP_005320577.1</a> |
| <a href="#">PREDICTED: attractin [Ochotona princeps]</a>                     | 41.4 | 41.4 | 100% | 0.004 | 100% | <a href="#">gi 504146589 XP_004585711.1</a> |
| <a href="#">PREDICTED: attractin isoform X1 [Loxodonta africana]</a>         | 41.4 | 41.4 | 100% | 0.004 | 100% | <a href="#">gi 344279766 XP_003411658.1</a> |
| <a href="#">attractin [Mesocricetus auratus]</a>                             | 41.4 | 41.4 | 100% | 0.004 | 100% | <a href="#">gi 528078159 NP_001268565.1</a> |
| <a href="#">PREDICTED: attractin isoform X3 [Ictidomys tridecemlineatus]</a> | 41.4 | 62.8 | 100% | 0.004 | 100% | <a href="#">gi 532069488 XP_005320579.1</a> |
| <a href="#">PREDICTED: attractin [Callithrix jacchus]</a>                    | 41.4 | 41.4 | 100% | 0.004 | 100% | <a href="#">gi 296200062 XP_002747358.1</a> |
| <a href="#">attractin precursor [Mus musculus]</a>                           | 41.4 | 41.4 | 100% | 0.004 | 100% | <a href="#">gi 87299635 NP_033860.2</a>     |
| <a href="#">PREDICTED: attractin isoform X1 [Pan troglodytes]</a>            | 41.4 | 41.4 | 100% | 0.004 | 100% | <a href="#">gi 332857715 XP_003316827.1</a> |
| <a href="#">membrane attractin precursor [Homo sapiens]</a>                  | 41.4 | 41.4 | 100% | 0.004 | 100% | <a href="#">gi 8118082 AAF72881.1</a>       |
| <a href="#">attractin isoform 1 preproprotein [Homo sapiens]</a>             | 41.4 | 41.4 | 100% | 0.004 | 100% | <a href="#">gi 21450861 NP_647537.1</a>     |
| <a href="#">PREDICTED: attractin isoform X2 [Ictidomys tridecemlineatus]</a> | 41.4 | 62.8 | 100% | 0.004 | 100% | <a href="#">gi 532069486 XP_005320578.1</a> |
| <a href="#">PREDICTED: attractin [Jaculus jaculus]</a>                       | 41.4 | 41.4 | 100% | 0.004 | 100% | <a href="#">gi 507555530 XP_004661535.1</a> |
| <a href="#">PREDICTED: attractin isoform X2 [Macaca fascicularis]</a>        | 41.4 | 41.4 | 100% | 0.004 | 100% | <a href="#">gi 544464512 XP_005568510.1</a> |

## Alignments

Download GenPept Graphics

Next Previous Descriptions

attractin [Ovis aries]

Sequence ID: [gi|78499351|gb|ABB45710.1](#) Length: 242 Number of Matches: 1

Range 1: 79 to 89 GenPept Graphics

Next Match Previous Match

| Score         | Expect | Identities  | Positives   | Gaps     |
|---------------|--------|-------------|-------------|----------|
| 41.4 bits(90) | 0.004  | 11/11(100%) | 11/11(100%) | 0/11(0%) |

Query 1 KCINQSICEKC 11  
 KCINQSICEKC  
 Sbjct 79 KCINQSICEKC 89

### Related Information

[Gene](#) - associated gene details  
[Map Viewer](#) - aligned genomic context

Download GenPept Graphics

Next Previous Descriptions

PREDICTED: attractin-like [Leptonychotes weddellii]

Sequence ID: [gi|585182065|ref|XP\\_006742666.1](#) Length: 290 Number of Matches: 1

Range 1: 14 to 24 GenPept Graphics

Next Match Previous Match

| Score         | Expect | Identities  | Positives   | Gaps     |
|---------------|--------|-------------|-------------|----------|
| 41.4 bits(90) | 0.004  | 11/11(100%) | 11/11(100%) | 0/11(0%) |

Query 1 KCINQSICEKC 11

### Related Information

[Gene](#) - associated gene details  
[Map Viewer](#) - aligned genomic context

Sbjct 14 KCINQSICEKC 24

[Download](#) [GenPept](#) [Graphics](#) [Next](#) [Previous](#) [Descriptions](#)

**KIAA0548 protein [Homo sapiens]**

Sequence ID: [gi|3043620|dbj|BAA25474.1](#) Length: 452 Number of Matches: 1

Range 1: 93 to 103 [GenPept](#) [Graphics](#) [Next Match](#) [Previous Match](#)

| Score         | Expect | Identities  | Positives   | Gaps     |
|---------------|--------|-------------|-------------|----------|
| 41.4 bits(90) | 0.004  | 11/11(100%) | 11/11(100%) | 0/11(0%) |

Query 1 KCINQSICEKC 11  
 KCINQSICEKC  
 Sbjct 93 KCINQSICEKC 103

**Related Information**

[Gene](#) - associated gene details

[Download](#) [GenPept](#) [Graphics](#) [Next](#) [Previous](#) [Descriptions](#)

**attractin [Bos taurus]**

Sequence ID: [gi|190683717|gb|ACE82176.1](#) Length: 670 Number of Matches: 1

Range 1: 311 to 321 [GenPept](#) [Graphics](#) [Next Match](#) [Previous Match](#)

| Score         | Expect | Identities  | Positives   | Gaps     |
|---------------|--------|-------------|-------------|----------|
| 41.4 bits(90) | 0.004  | 11/11(100%) | 11/11(100%) | 0/11(0%) |

Query 1 KCINQSICEKC 11  
 KCINQSICEKC  
 Sbjct 311 KCINQSICEKC 321

**Related Information**

[Gene](#) - associated gene details

[Map Viewer](#) - aligned genomic context

[Download](#) [GenPept](#) [Graphics](#) [Next](#) [Previous](#) [Descriptions](#)

**Attractin [Tupaia chinensis]**

Sequence ID: [gi|444519420|gb|ELV12829.1](#) Length: 860 Number of Matches: 1

Range 1: 639 to 649 [GenPept](#) [Graphics](#) [Next Match](#) [Previous Match](#)

| Score         | Expect | Identities  | Positives   | Gaps     |
|---------------|--------|-------------|-------------|----------|
| 41.4 bits(90) | 0.004  | 11/11(100%) | 11/11(100%) | 0/11(0%) |

Query 1 KCINQSICEKC 11  
 KCINQSICEKC  
 Sbjct 639 KCINQSICEKC 649

**Related Information**

BLAST is a registered trademark of the National Library of Medicine.

▶ NCBI/ BLAST/ blastp suite/ Formatting Results - BHBVBBRG014

[Edit and Resubmit](#) [Save Search Strategies](#) ▶ [Formatting options](#) ▶ [Download](#)

[YouTube](#) [How to read this page](#) [Blast report description](#)

## ATRN\_KGPVKMPSQAPTGNFYQPQLDSSMCLEDSRY\_Mod

**RID** [BHBVBBRG014](#) (Expires on 01-17 13:27 pm)

**Query ID** |cl|90002  
**Description** None  
**Molecule type** amino acid  
**Query Length** 32

**Database Name** nr  
**Description** All non-redundant GenBank CDS translations+PDB+SwissProt+PIR excluding environmental samples from WGS projects  
**Program** BLASTP 2.2.30+ ▶ [Citation](#)

Other reports: ▶ [Search Summary](#) [[Taxonomy reports](#)] [[Distance tree of results](#)] [[Multiple alignment](#)]

### Graphic Summary

[Show Conserved Domains](#)

No putative conserved domains have been detected

Distribution of 98 Blast Hits on the Query Sequence

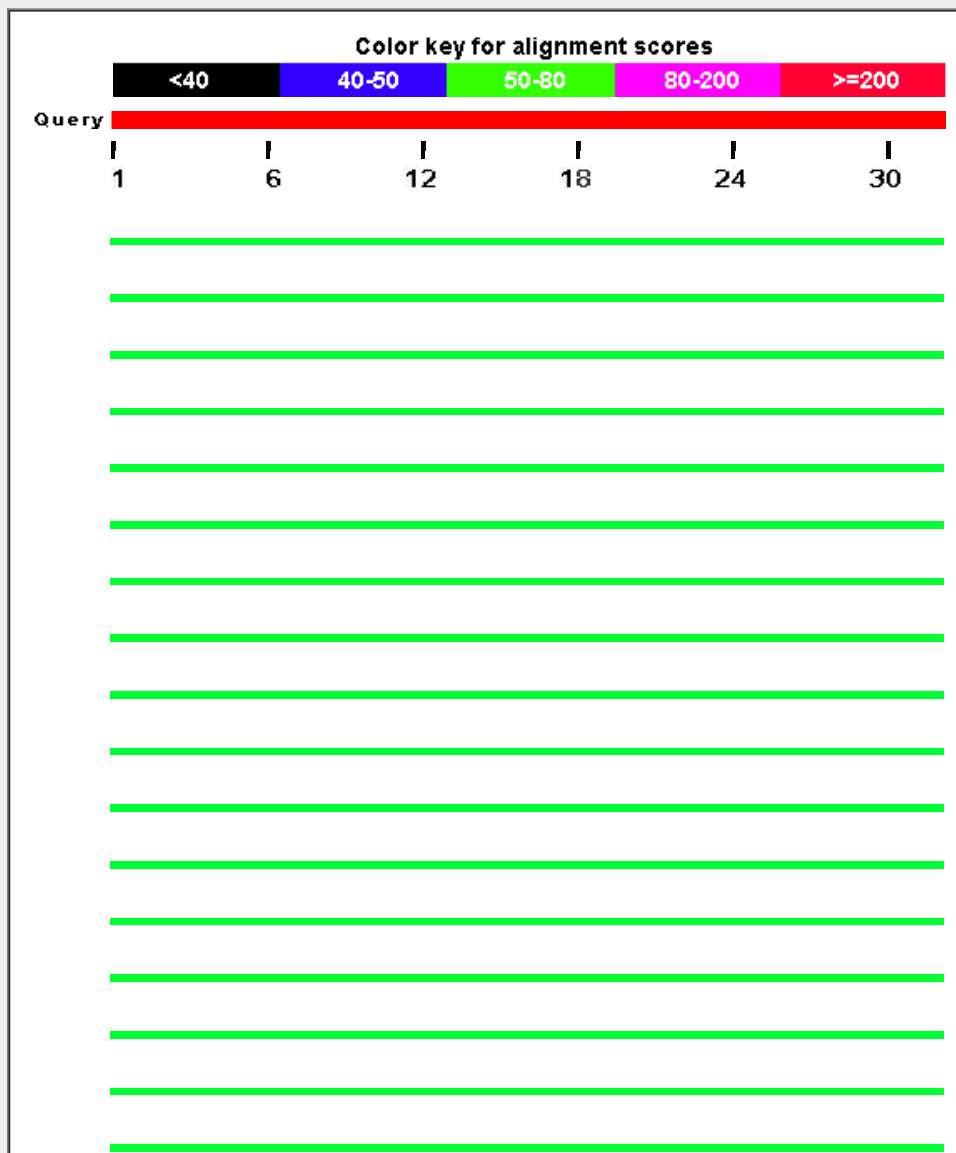

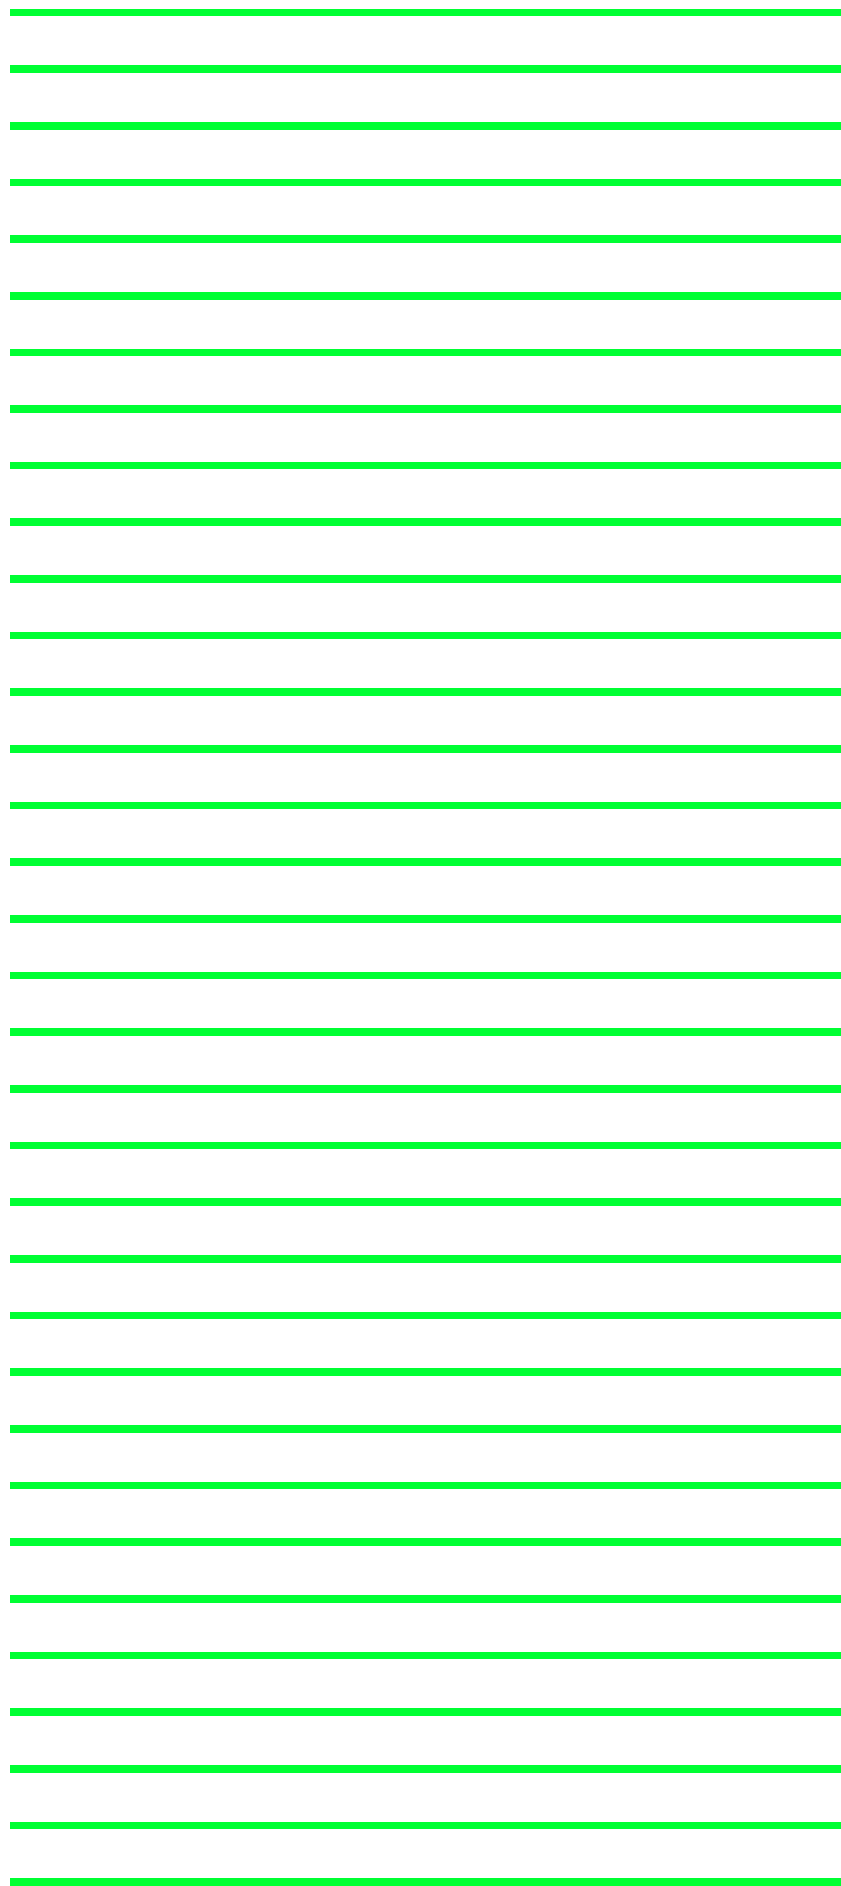

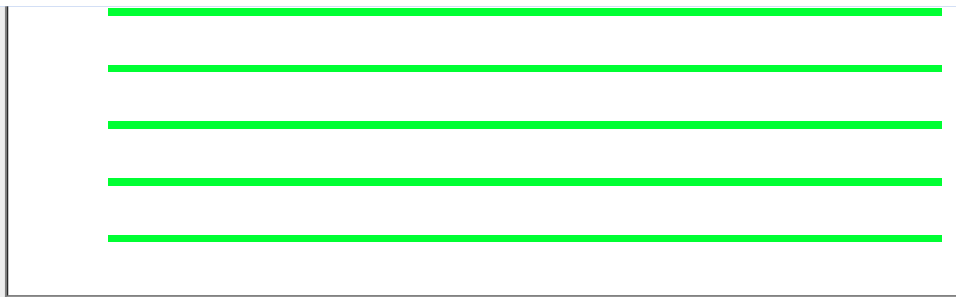

## Descriptions

### Sequences producing significant alignments:

Select: [All](#) [None](#) Selected:0

[↑](#) [Alignments](#)
[Download](#)
[GenPept](#)
[Graphics](#)
[Distance tree of results](#)
[Multiple alignment](#)

| Description                                                           | Max score | Total score | Query cover | E value | Ident | Accession                                   |
|-----------------------------------------------------------------------|-----------|-------------|-------------|---------|-------|---------------------------------------------|
| <a href="#">PREDICTED: attractin-like [Pan paniscus]</a>              | 70.1      | 70.1        | 100%        | 2e-13   | 97%   | <a href="#">gij397513332 XP_003826972.1</a> |
| <a href="#">KIAA0548 protein [Homo sapiens]</a>                       | 70.1      | 70.1        | 100%        | 7e-13   | 97%   | <a href="#">gij3043620 BAA25474.1</a>       |
| <a href="#">PREDICTED: attractin isoform X2 [Papio anubis]</a>        | 70.1      | 70.1        | 100%        | 1e-12   | 97%   | <a href="#">gij685567345 XP_009214752.1</a> |
| <a href="#">PREDICTED: attractin [Pongo abelii]</a>                   | 70.1      | 70.1        | 100%        | 2e-12   | 97%   | <a href="#">gij297706621 XP_002830129.1</a> |
| <a href="#">PREDICTED: attractin isoform X2 [Homo sapiens]</a>        | 70.1      | 70.1        | 100%        | 2e-12   | 97%   | <a href="#">gij530426021 XP_005260918.1</a> |
| <a href="#">PREDICTED: attractin isoform X1 [Papio anubis]</a>        | 70.1      | 70.1        | 100%        | 2e-12   | 97%   | <a href="#">gij685567343 XP_009214751.1</a> |
| <a href="#">PREDICTED: attractin-like [Galeopterus variegatus]</a>    | 67.0      | 67.0        | 100%        | 2e-12   | 94%   | <a href="#">gij667345974 XP_008563464.1</a> |
| <a href="#">unnamed protein product [Homo sapiens]</a>                | 70.1      | 70.1        | 100%        | 2e-12   | 97%   | <a href="#">gij194380362 BAG63948.1</a>     |
| <a href="#">attractin isoform 4 [Homo sapiens]</a>                    | 70.1      | 70.1        | 100%        | 2e-12   | 97%   | <a href="#">gij333440461 NP_001193976.1</a> |
| <a href="#">PREDICTED: attractin isoform 2 [Nomascus leucogenys]</a>  | 70.1      | 70.1        | 100%        | 2e-12   | 97%   | <a href="#">gij332257827 XP_003278006.1</a> |
| <a href="#">PREDICTED: attractin [Gorilla gorilla gorilla]</a>        | 70.1      | 70.1        | 100%        | 2e-12   | 97%   | <a href="#">gij426390844 XP_004061806.1</a> |
| <a href="#">PREDICTED: attractin isoform X4 [Pan troglodytes]</a>     | 70.1      | 70.1        | 100%        | 2e-12   | 97%   | <a href="#">gij694977854 XP_009435012.1</a> |
| <a href="#">PREDICTED: attractin isoform 1 [Nomascus leucogenys]</a>  | 70.1      | 70.1        | 100%        | 2e-12   | 97%   | <a href="#">gij332257825 XP_003278005.1</a> |
| <a href="#">attractin-2 [Homo sapiens]</a>                            | 70.1      | 70.1        | 100%        | 2e-12   | 97%   | <a href="#">gij4093196 AAD03057.1</a>       |
| <a href="#">secreted attractin precursor [Homo sapiens]</a>           | 70.1      | 70.1        | 100%        | 2e-12   | 97%   | <a href="#">gij8118083 AAF72882.1</a>       |
| <a href="#">unnamed protein product [Homo sapiens]</a>                | 70.1      | 70.1        | 100%        | 2e-12   | 97%   | <a href="#">gij158259481 BAF85699.1</a>     |
| <a href="#">attractin isoform 2 preproprotein [Homo sapiens]</a>      | 70.1      | 70.1        | 100%        | 2e-12   | 97%   | <a href="#">gij21450863 NP_647538.1</a>     |
| <a href="#">Mahogany-like protein [Macaca mulatta]</a>                | 70.1      | 70.1        | 100%        | 2e-12   | 97%   | <a href="#">gij355563316 EHH19878.1</a>     |
| <a href="#">PREDICTED: attractin isoform X3 [Pan troglodytes]</a>     | 70.1      | 70.1        | 100%        | 2e-12   | 97%   | <a href="#">gij694977852 XP_009435011.1</a> |
| <a href="#">PREDICTED: attractin isoform X1 [Homo sapiens]</a>        | 70.1      | 70.1        | 100%        | 2e-12   | 97%   | <a href="#">gij530426019 XP_005260917.1</a> |
| <a href="#">PREDICTED: attractin isoform X4 [Macaca fascicularis]</a> | 70.1      | 70.1        | 100%        | 2e-12   | 97%   | <a href="#">gij544464516 XP_005568512.1</a> |
| <a href="#">PREDICTED: attractin isoform X5 [Chlorocebus sabaeus]</a> | 70.1      | 70.1        | 100%        | 2e-12   | 97%   | <a href="#">gij635021368 XP_008017720.1</a> |
| <a href="#">Mahogany-like protein [Macaca fascicularis]</a>           | 70.1      | 70.1        | 100%        | 2e-12   | 97%   | <a href="#">gij355784657 EHH65508.1</a>     |
| <a href="#">PREDICTED: attractin isoform X3 [Macaca fascicularis]</a> | 70.1      | 70.1        | 100%        | 2e-12   | 97%   | <a href="#">gij544464514 XP_005568511.1</a> |
| <a href="#">PREDICTED: attractin isoform X4 [Chlorocebus sabaeus]</a> | 70.1      | 70.1        | 100%        | 2e-12   | 97%   | <a href="#">gij635021366 XP_008017712.1</a> |
| <a href="#">PREDICTED: attractin [Rhinopithecus roxellana]</a>        | 70.1      | 70.1        | 100%        | 2e-12   | 97%   | <a href="#">gij724902357 XP_010377335.1</a> |
| <a href="#">attractin, isoform CRA_b [Homo sapiens]</a>               | 70.1      | 70.1        | 100%        | 2e-12   | 97%   | <a href="#">gij119630936 EAX10531.1</a>     |
| <a href="#">PREDICTED: attractin isoform X3 [Chlorocebus sabaeus]</a> | 70.1      | 70.1        | 100%        | 2e-12   | 97%   | <a href="#">gij635021364 XP_008017707.1</a> |
| <a href="#">PREDICTED: attractin isoform X2 [Pan troglodytes]</a>     | 70.1      | 70.1        | 100%        | 2e-12   | 97%   | <a href="#">gij694977850 XP_009435010.1</a> |

|                                                                                   |      |      |      |       |     |                                             |
|-----------------------------------------------------------------------------------|------|------|------|-------|-----|---------------------------------------------|
| <a href="#">PREDICTED: attractin isoform X2 [Chlorocebus sabaeus]</a>             | 70.1 | 70.1 | 100% | 2e-12 | 97% | <a href="#">gij635021362 XP_008017704.1</a> |
| <a href="#">PREDICTED: attractin [Otolemur garnettii]</a>                         | 70.1 | 70.1 | 100% | 2e-12 | 97% | <a href="#">gij395830288 XP_003788264.1</a> |
| <a href="#">PREDICTED: attractin isoform X1 [Pteropus alecto]</a>                 | 70.1 | 70.1 | 100% | 2e-12 | 97% | <a href="#">gij586533632 XP_006921705.1</a> |
| <a href="#">PREDICTED: attractin [Ochotona princeps]</a>                          | 70.1 | 70.1 | 100% | 2e-12 | 97% | <a href="#">gij504146589 XP_004585711.1</a> |
| <a href="#">PREDICTED: attractin [Callithrix jacchus]</a>                         | 70.1 | 70.1 | 100% | 2e-12 | 97% | <a href="#">gij296200062 XP_002747358.1</a> |
| <a href="#">PREDICTED: attractin isoform X1 [Pan troglodytes]</a>                 | 70.1 | 70.1 | 100% | 2e-12 | 97% | <a href="#">gij332857715 XP_003316827.1</a> |
| <a href="#">membrane attractin precursor [Homo sapiens]</a>                       | 70.1 | 70.1 | 100% | 2e-12 | 97% | <a href="#">gij8118082 AAF72881.1</a>       |
| <a href="#">attractin isoform 1 preproprotein [Homo sapiens]</a>                  | 70.1 | 70.1 | 100% | 2e-12 | 97% | <a href="#">gij21450861 INP_647537.1</a>    |
| <a href="#">PREDICTED: attractin isoform X2 [Macaca fascicularis]</a>             | 70.1 | 70.1 | 100% | 2e-12 | 97% | <a href="#">gij544464512 XP_005568510.1</a> |
| <a href="#">PREDICTED: attractin [Macaca mulatta]</a>                             | 70.1 | 70.1 | 100% | 2e-12 | 97% | <a href="#">gij109092720 XP_001115192.1</a> |
| <a href="#">PREDICTED: attractin isoform X1 [Chlorocebus sabaeus]</a>             | 70.1 | 70.1 | 100% | 2e-12 | 97% | <a href="#">gij635021360 XP_008017700.1</a> |
| <a href="#">PREDICTED: attractin isoform X1 [Macaca fascicularis]</a>             | 70.1 | 70.1 | 100% | 2e-12 | 97% | <a href="#">gij544464510 XP_005568509.1</a> |
| <a href="#">PREDICTED: attractin isoform X6 [Chlorocebus sabaeus]</a>             | 70.1 | 70.1 | 100% | 2e-12 | 97% | <a href="#">gij635021370 XP_008017729.1</a> |
| <a href="#">PREDICTED: attractin isoform X2 [Pteropus alecto]</a>                 | 70.1 | 70.1 | 100% | 2e-12 | 97% | <a href="#">gij586533634 XP_006921706.1</a> |
| <a href="#">PREDICTED: attractin [Lipotes vexillifer]</a>                         | 68.9 | 68.9 | 100% | 4e-12 | 94% | <a href="#">gij602710450 XP_007465469.1</a> |
| <a href="#">attractin [Ovis aries]</a>                                            | 65.5 | 65.5 | 100% | 6e-12 | 91% | <a href="#">gij78499351 ABB45710.1</a>      |
| <a href="#">Attractin [Myotis davidii]</a>                                        | 68.2 | 68.2 | 100% | 7e-12 | 94% | <a href="#">gij432111133 ELK34519.1</a>     |
| <a href="#">PREDICTED: attractin [Myotis davidii]</a>                             | 68.2 | 68.2 | 100% | 8e-12 | 94% | <a href="#">gij584075971 XP_006758187.1</a> |
| <a href="#">PREDICTED: attractin [Tarsius syrichta]</a>                           | 67.8 | 67.8 | 100% | 1e-11 | 94% | <a href="#">gij640796924 XP_008054571.1</a> |
| <a href="#">Attractin [Myotis brandtii]</a>                                       | 67.8 | 67.8 | 100% | 1e-11 | 94% | <a href="#">gij521031210 EPQ12996.1</a>     |
| <a href="#">PREDICTED: attractin [Myotis brandtii]</a>                            | 67.8 | 67.8 | 100% | 1e-11 | 94% | <a href="#">gij554560893 XP_005874816.1</a> |
| <a href="#">PREDICTED: attractin [Myotis lucifugus]</a>                           | 67.8 | 67.8 | 100% | 1e-11 | 94% | <a href="#">gij558159591 XP_006096513.1</a> |
| <a href="#">PREDICTED: attractin [Eptesicus fuscus]</a>                           | 67.8 | 67.8 | 100% | 1e-11 | 94% | <a href="#">gij641701319 XP_008139256.1</a> |
| <a href="#">PREDICTED: attractin-like [Tursiops truncatus]</a>                    | 67.0 | 67.0 | 100% | 2e-11 | 94% | <a href="#">gij470629747 XP_004321558.1</a> |
| <a href="#">PREDICTED: attractin-like [Physeter catodon]</a>                      | 67.0 | 67.0 | 100% | 2e-11 | 94% | <a href="#">gij593773084 XP_007124834.1</a> |
| <a href="#">PREDICTED: attractin [Equus przewalskii]</a>                          | 67.0 | 67.0 | 100% | 2e-11 | 94% | <a href="#">gij664773944 XP_008506219.1</a> |
| <a href="#">PREDICTED: attractin isoform X2 [Saimiri boliviensis boliviensis]</a> | 67.0 | 67.0 | 100% | 2e-11 | 94% | <a href="#">gij725600053 XP_010350112.1</a> |
| <a href="#">PREDICTED: attractin isoform X1 [Saimiri boliviensis boliviensis]</a> | 67.0 | 67.0 | 100% | 2e-11 | 94% | <a href="#">gij725600051 XP_010350111.1</a> |
| <a href="#">PREDICTED: attractin-like [Galeopterus variegatus]</a>                | 67.0 | 67.0 | 100% | 2e-11 | 94% | <a href="#">gij667324076 XP_008589101.1</a> |
| <a href="#">PREDICTED: attractin [Orcinus orca]</a>                               | 67.0 | 67.0 | 100% | 2e-11 | 94% | <a href="#">gij466084723 XP_004285351.1</a> |
| <a href="#">PREDICTED: attractin [Orycteropus afer afer]</a>                      | 67.0 | 67.0 | 100% | 2e-11 | 94% | <a href="#">gij634830430 XP_007958185.1</a> |
| <a href="#">attractin [Bos taurus]</a>                                            | 65.5 | 65.5 | 100% | 5e-11 | 91% | <a href="#">gij190683717 ACE82176.1</a>     |
| <a href="#">PREDICTED: attractin [Jaculus jaculus]</a>                            | 65.9 | 65.9 | 100% | 5e-11 | 91% | <a href="#">gij507555530 XP_004661535.1</a> |
| <a href="#">PREDICTED: attractin isoform X1 [Bos taurus]</a>                      | 65.5 | 65.5 | 100% | 6e-11 | 91% | <a href="#">gij741947708 XP_005214542.2</a> |
| <a href="#">PREDICTED: attractin [Capra hircus]</a>                               | 65.5 | 65.5 | 100% | 6e-11 | 91% | <a href="#">gij548490191 XP_005688293.1</a> |
| <a href="#">PREDICTED: attractin [Bos mutus]</a>                                  | 65.5 | 65.5 | 100% | 6e-11 | 91% | <a href="#">gij555963925 XP_005894036.1</a> |
| <a href="#">PREDICTED: attractin [Ovis aries]</a>                                 | 65.5 | 65.5 | 100% | 7e-11 | 91% | <a href="#">gij426241795 XP_004014773.1</a> |
| <a href="#">attractin [Bos taurus]</a>                                            | 65.5 | 65.5 | 100% | 7e-11 | 91% | <a href="#">gij253560524 ACT32973.1</a>     |
| <a href="#">attractin [Bos taurus]</a>                                            | 65.5 | 65.5 | 100% | 7e-11 | 91% | <a href="#">gij27806737 INP_776420.1</a>    |
| <a href="#">PREDICTED: attractin [Bison bison bison]</a>                          | 65.5 | 65.5 | 100% | 7e-11 | 91% | <a href="#">gij742104093 XP_010834932.1</a> |
| <a href="#">attractin [Canis lupus familiaris]</a>                                | 65.1 | 65.1 | 100% | 8e-11 | 91% | <a href="#">gij339892849 AEK21787.1</a>     |
| <a href="#">PREDICTED: attractin [Balaenoptera acutorostrata scammoni]</a>        | 65.1 | 65.1 | 100% | 8e-11 | 91% | <a href="#">gij594697511 XP_007195912.1</a> |
| <a href="#">PREDICTED: attractin isoform X2 [Canis lupus familiaris]</a>          | 65.1 | 65.1 | 100% | 9e-11 | 91% | <a href="#">gij545540090 XP_005634905.1</a> |
| <a href="#">PREDICTED: attractin [Panthera tigris altaica]</a>                    | 65.1 | 65.1 | 100% | 9e-11 | 91% | <a href="#">gij591291970 XP_007073329.1</a> |
| <a href="#">PREDICTED: attractin [Felis catus]</a>                                | 65.1 | 65.1 | 100% | 9e-11 | 91% | <a href="#">gij586981105 XP_003983758.2</a> |



|                                                                            |      |      |      |       |     |                                             |
|----------------------------------------------------------------------------|------|------|------|-------|-----|---------------------------------------------|
| <a href="#">PREDICTED: attractin isoform X3 [Canis lupus familiaris]</a>   | 65.1 | 65.1 | 100% | 9e-11 | 91% | <a href="#">gil73991942 XP_534360.2</a>     |
| <a href="#">PREDICTED: attractin [Tupaia chinensis]</a>                    | 65.1 | 65.1 | 100% | 9e-11 | 91% | <a href="#">gil562872246 XP_006164056.1</a> |
| <a href="#">PREDICTED: attractin isoform X1 [Canis lupus familiaris]</a>   | 65.1 | 65.1 | 100% | 9e-11 | 91% | <a href="#">gil545540087 XP_005634904.1</a> |
| <a href="#">PREDICTED: attractin isoform X1 [Oryctolagus cuniculus]</a>    | 64.7 | 64.7 | 100% | 1e-10 | 91% | <a href="#">gil291388868 XP_002710968.1</a> |
| <a href="#">PREDICTED: attractin isoform X2 [Oryctolagus cuniculus]</a>    | 64.7 | 64.7 | 100% | 1e-10 | 91% | <a href="#">gil655716500 XP_008254470.1</a> |
| <a href="#">PREDICTED: attractin-like [Leptonychotes weddellii]</a>        | 63.9 | 63.9 | 100% | 2e-10 | 88% | <a href="#">gil585160208 XP_006732353.1</a> |
| <a href="#">attractin isoform 1 preproprotein [Camelus ferus]</a>          | 63.9 | 63.9 | 100% | 2e-10 | 91% | <a href="#">gil528759526 EPY79185.1</a>     |
| <a href="#">PREDICTED: attractin isoform X2 [Mustela putorius furo]</a>    | 63.9 | 63.9 | 100% | 2e-10 | 88% | <a href="#">gil511906947 XP_004772933.1</a> |
| <a href="#">PREDICTED: attractin [Camelus ferus]</a>                       | 63.9 | 63.9 | 100% | 2e-10 | 91% | <a href="#">gil560921992 XP_006187198.1</a> |
| <a href="#">PREDICTED: attractin [Camelus dromedarius]</a>                 | 63.9 | 63.9 | 100% | 2e-10 | 91% | <a href="#">gil744589171 XP_010986570.1</a> |
| <a href="#">PREDICTED: attractin [Camelus bactrianus]</a>                  | 63.9 | 63.9 | 100% | 2e-10 | 91% | <a href="#">gil743752427 XP_010971103.1</a> |
| <a href="#">PREDICTED: attractin [Mustela putorius furo]</a>               | 63.9 | 63.9 | 100% | 2e-10 | 88% | <a href="#">gil511947743 XP_004792355.1</a> |
| <a href="#">PREDICTED: attractin [Vicugna pacos]</a>                       | 63.9 | 63.9 | 100% | 2e-10 | 91% | <a href="#">gil560970220 XP_006207473.1</a> |
| <a href="#">PREDICTED: attractin [Odobenus rosmarus divergens]</a>         | 63.9 | 63.9 | 100% | 2e-10 | 88% | <a href="#">gil472357214 XP_004398236.1</a> |
| <a href="#">PREDICTED: attractin isoform X1 [Mustela putorius furo]</a>    | 63.9 | 63.9 | 100% | 2e-10 | 88% | <a href="#">gil511906945 XP_004772932.1</a> |
| <a href="#">PREDICTED: attractin [Pantholops hodgsonii]</a>                | 63.5 | 63.5 | 100% | 3e-10 | 88% | <a href="#">gil556758951 XP_005974805.1</a> |
| <a href="#">PREDICTED: attractin [Sus scrofa]</a>                          | 63.5 | 63.5 | 100% | 3e-10 | 88% | <a href="#">gil545879723 XP_001927324.5</a> |
| <a href="#">PREDICTED: attractin isoform X3 [Bubalus bubalis]</a>          | 63.5 | 63.5 | 100% | 3e-10 | 88% | <a href="#">gil594099680 XP_006072965.1</a> |
| <a href="#">attractin [Sus scrofa]</a>                                     | 63.5 | 63.5 | 100% | 3e-10 | 88% | <a href="#">gil146741346 BAF62328.1</a>     |
| <a href="#">PREDICTED: attractin isoform X2 [Bubalus bubalis]</a>          | 63.5 | 63.5 | 100% | 3e-10 | 88% | <a href="#">gil594099678 XP_006072964.1</a> |
| <a href="#">PREDICTED: attractin isoform X1 [Bubalus bubalis]</a>          | 63.5 | 63.5 | 100% | 3e-10 | 88% | <a href="#">gil594099676 XP_006072963.1</a> |
| <a href="#">PREDICTED: attractin isoform 2 [Ceratotherium simum simum]</a> | 63.2 | 63.2 | 100% | 4e-10 | 91% | <a href="#">gil478519276 XP_004433860.1</a> |
| <a href="#">PREDICTED: attractin isoform 1 [Ceratotherium simum simum]</a> | 63.2 | 63.2 | 100% | 4e-10 | 91% | <a href="#">gil478519274 XP_004433859.1</a> |
| <a href="#">PREDICTED: attractin [Chrysochloris asiatica]</a>              | 63.2 | 63.2 | 100% | 4e-10 | 88% | <a href="#">gil586488825 XP_006874887.1</a> |

## Alignments

[Download](#) [GenPept](#) [Graphics](#)

[Next](#) [Previous](#) [Descriptions](#)

PREDICTED: attractin-like [Pan paniscus]

Sequence ID: [gil397513332|ref|XP\\_003826972.1](#) Length: 265 Number of Matches: 1

Range 1: 210 to 241 [GenPept](#) [Graphics](#)

[Next Match](#) [Previous Match](#)

| Score          | Expect | Identities | Positives   | Gaps     |
|----------------|--------|------------|-------------|----------|
| 70.1 bits(170) | 2e-13  | 31/32(97%) | 32/32(100%) | 0/32(0%) |

Query 1 KGPVKMPSQAPTGNFYQPQLDSSMCLEDSRY 32  
 KGPVKMPSQAPTGNFYQPQL+SSMCLEDSRY  
 Sbjct 210 KGPVKMPSQAPTGNFYQPQLNSMCLEDSRY 241

### Related Information

[Gene](#) - associated gene details  
[Map Viewer](#) - aligned genomic context

[Download](#) [GenPept](#) [Graphics](#)

[Next](#) [Previous](#) [Descriptions](#)

KIAA0548 protein [Homo sapiens]

Sequence ID: [gil3043620|dbj|BAA25474.1](#) Length: 452 Number of Matches: 1

Range 1: 45 to 76 [GenPept](#) [Graphics](#)

[Next Match](#) [Previous Match](#)

| Score          | Expect | Identities | Positives   | Gaps     |
|----------------|--------|------------|-------------|----------|
| 70.1 bits(170) | 7e-13  | 31/32(97%) | 32/32(100%) | 0/32(0%) |

Query 1 KGPVKMPSQAPTGNFYQPQLDSSMCLEDSRY 32  
 KGPVKMPSQAPTGNFYQPQL+SSMCLEDSRY  
 Sbjct 45 KGPVKMPSQAPTGNFYQPQLNSMCLEDSRY 76

### Related Information

[Gene](#) - associated gene details

[Download](#) [GenPept](#) [Graphics](#)

[Next](#) [Previous](#) [Descriptions](#)

**PREDICTED: attractin isoform X2 [Papio anubis]**

Sequence ID: [gi|685567345|ref|XP\\_009214752.1](#) Length: 989 Number of Matches: 1

Range 1: 712 to 743 [GenPept](#) [Graphics](#)

▼ Next Match ▲ Previous Match

| Score          | Expect | Identities | Positives   | Gaps     |
|----------------|--------|------------|-------------|----------|
| 70.1 bits(170) | 1e-12  | 31/32(97%) | 32/32(100%) | 0/32(0%) |

Query 1 KGPVKMPSQAPTGNFYQPQLLDSSMCLEDSRY 32  
 KGPVKMPSQAPTGNFYQPQLL+SSMCLEDSRY  
 Sbjct 712 KGPVKMPSQAPTGNFYQPQLLDSSMCLEDSRY 743

**Related Information**

[Gene](#) - associated gene details  
[Map Viewer](#) - aligned genomic context

Download ▼ [GenPept](#) [Graphics](#)

▼ Next ▲ Previous ▲ Descriptions

**PREDICTED: attractin, partial [Pongo abelii]**

Sequence ID: [gi|297706621|ref|XP\\_002830129.1](#) Length: 1058 Number of Matches: 1

Range 1: 651 to 682 [GenPept](#) [Graphics](#)

▼ Next Match ▲ Previous Match

| Score          | Expect | Identities | Positives   | Gaps     |
|----------------|--------|------------|-------------|----------|
| 70.1 bits(170) | 2e-12  | 31/32(97%) | 32/32(100%) | 0/32(0%) |

Query 1 KGPVKMPSQAPTGNFYQPQLLDSSMCLEDSRY 32  
 KGPVKMPSQAPTGNFYQPQLL+SSMCLEDSRY  
 Sbjct 651 KGPVKMPSQAPTGNFYQPQLLDSSMCLEDSRY 682

**Related Information**

[Gene](#) - associated gene details  
[Map Viewer](#) - aligned genomic context

Download ▼ [GenPept](#) [Graphics](#)

▼ Next ▲ Previous ▲ Descriptions

**PREDICTED: attractin isoform X2 [Homo sapiens]**

Sequence ID: [gi|530426021|ref|XP\\_005260918.1](#) Length: 1111 Number of Matches: 1

Range 1: 1022 to 1053 [GenPept](#) [Graphics](#)

▼ Next Match ▲ Previous Match

| Score          | Expect | Identities | Positives   | Gaps     |
|----------------|--------|------------|-------------|----------|
| 70.1 bits(170) | 2e-12  | 31/32(97%) | 32/32(100%) | 0/32(0%) |

Query 1 KGPVKMPSQAPTGNFYQPQLLDSSMCLEDSRY 32  
 KGPVKMPSQAPTGNFYQPQLL+SSMCLEDSRY  
 Sbjct 1022 KGPVKMPSQAPTGNFYQPQLLDSSMCLEDSRY 1053

**Related Information**

[Gene](#) - associated gene details  
[Map Viewer](#) - aligned genomic context

BLAST is a registered trademark of the National Library of Medicine.

▶ NCBI/ BLAST/ blastp suite/ Formatting Results - B90YVEXC01R

[Edit and Resubmit](#) [Save Search Strategies](#) ▶ [Formatting options](#) ▶ [Download](#)

[YouTube](#) [How to read this page](#) [Blast report description](#)

### ATRN\_KGPVKMPSQAPTGNFYQPQLLNSSMCLEDSRY\_NonMod

**RID** [B90YVEXC01R](#) (Expires on 01-14 09:32 am)

**Query ID** |cl|78725  
**Description** None  
**Molecule type** amino acid  
**Query Length** 32

**Database Name** nr  
**Description** All non-redundant GenBank CDS translations+PDB+SwissProt+PIR excluding environmental samples from WGS projects  
**Program** BLASTP 2.2.30+ ▶ [Citation](#)

Other reports: ▶ [Search Summary](#) [[Taxonomy reports](#)] [[Distance tree of results](#)] [[Multiple alignment](#)]

### Graphic Summary

[Show Conserved Domains](#)

No putative conserved domains have been detected

Distribution of 100 Blast Hits on the Query Sequence

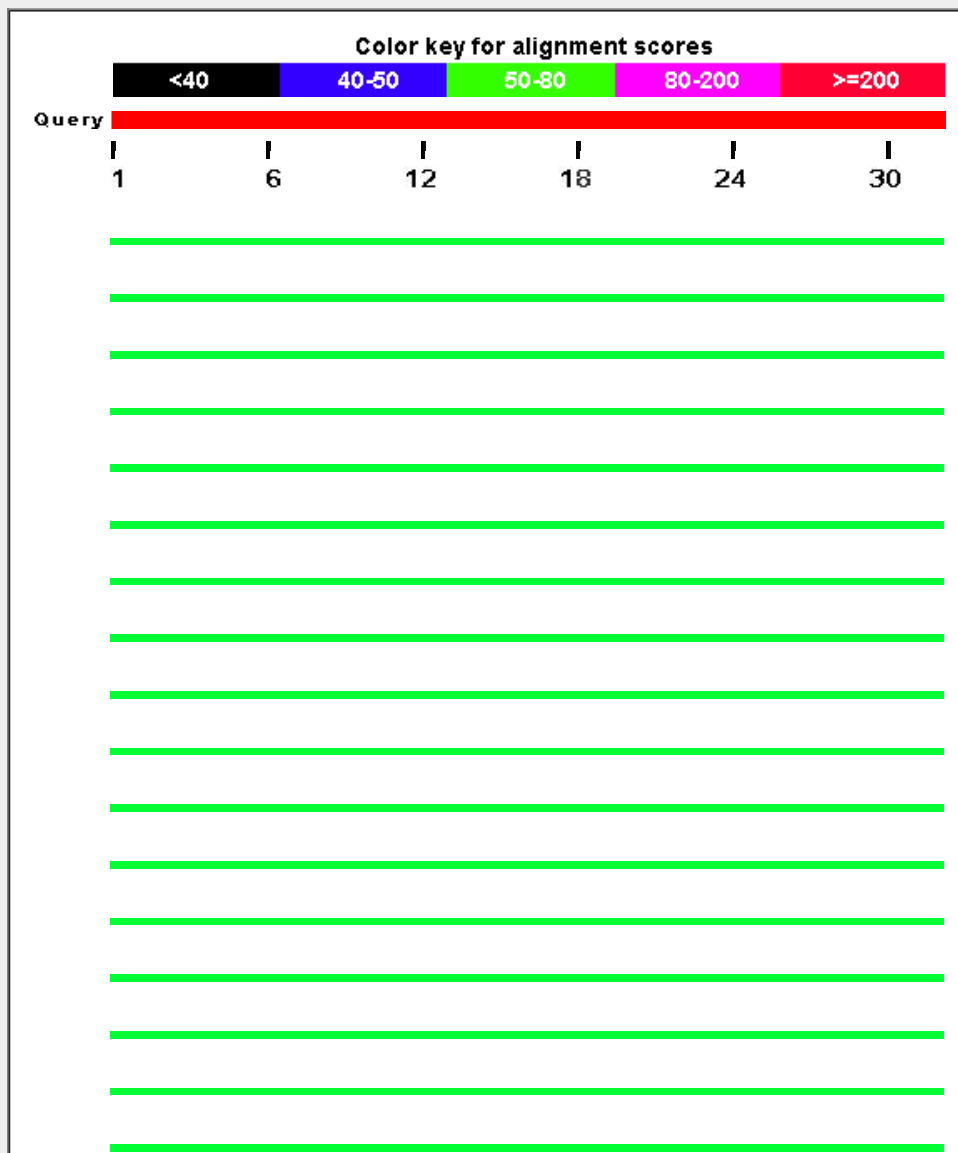

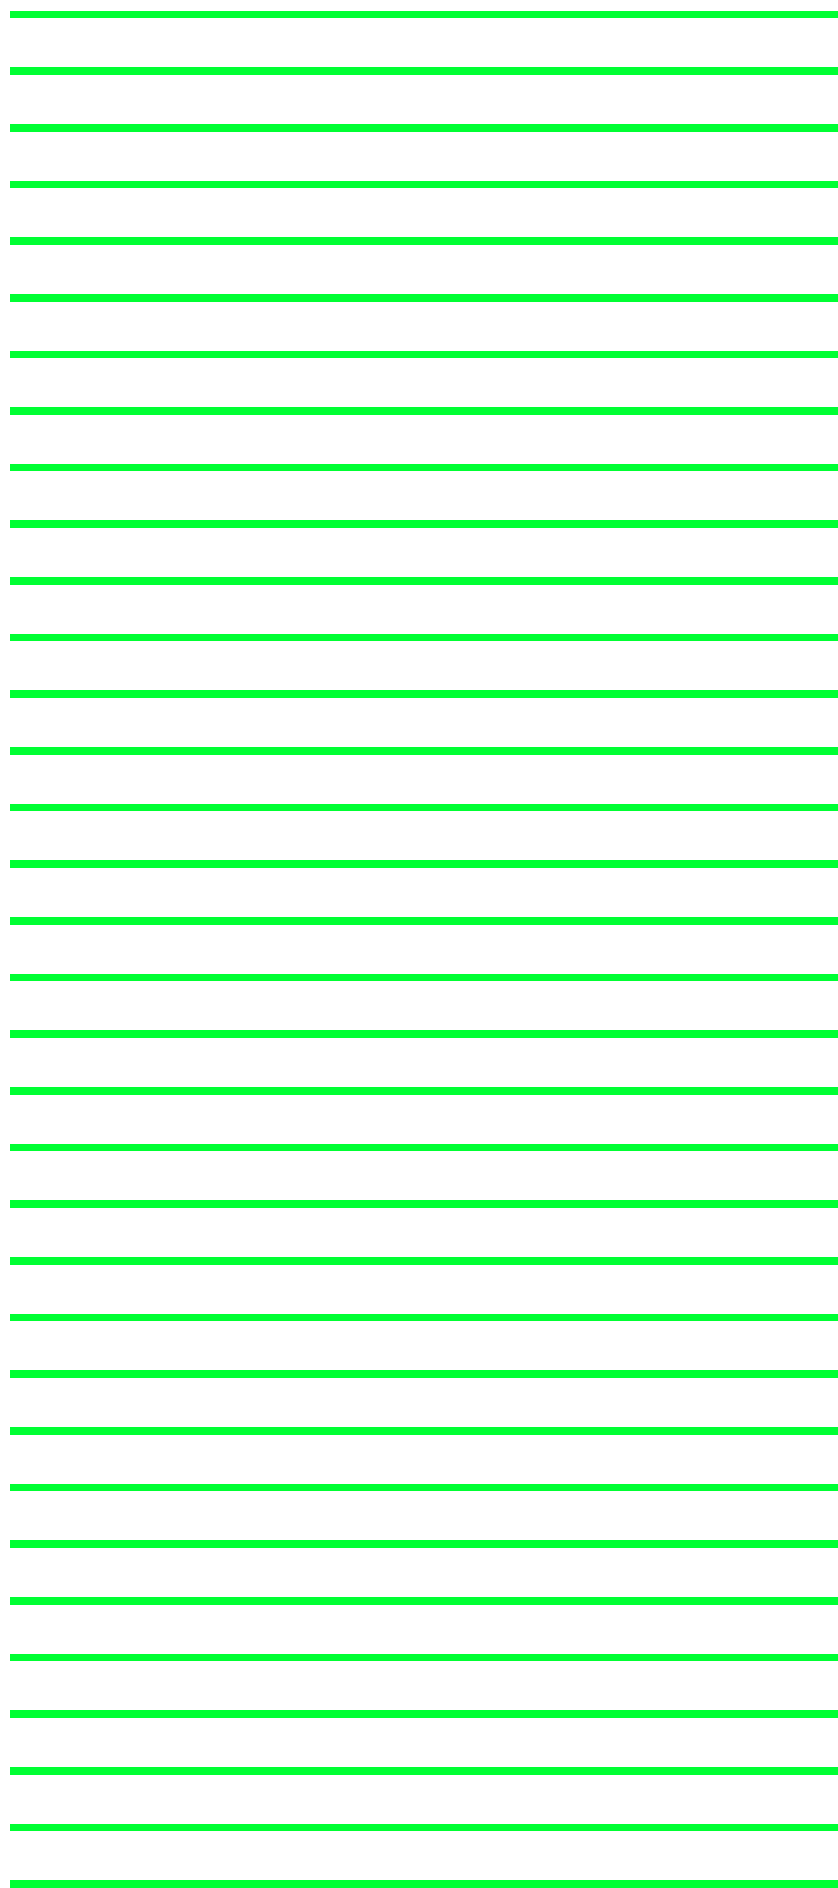

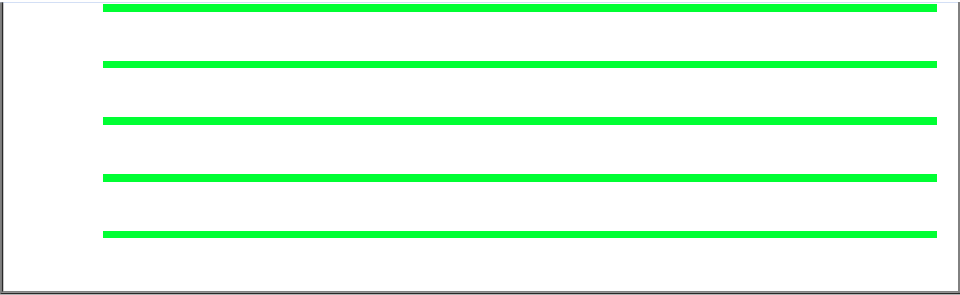

**Descriptions**

**Sequences producing significant alignments:**

Select: [All](#) [None](#) Selected: 0

[↑](#) [Alignments](#)
[Download](#)
[GenPept](#)
[Graphics](#)
[Distance tree of results](#)
[Multiple alignment](#)


| Description                                                           | Max score | Total score | Query cover | E value | Ident | Accession                                   |
|-----------------------------------------------------------------------|-----------|-------------|-------------|---------|-------|---------------------------------------------|
| <a href="#">PREDICTED: attractin-like [Pan paniscus]</a>              | 72.0      | 72.0        | 100%        | 3e-14   | 100%  | <a href="#">gij397513332 XP_003826972.1</a> |
| <a href="#">KIAA0548 protein [Homo sapiens]</a>                       | 72.0      | 72.0        | 100%        | 1e-13   | 100%  | <a href="#">gij3043620 BAA25474.1</a>       |
| <a href="#">PREDICTED: attractin isoform X2 [Papio anubis]</a>        | 72.0      | 72.0        | 100%        | 3e-13   | 100%  | <a href="#">gij685567345 XP_009214752.1</a> |
| <a href="#">PREDICTED: attractin-like [Galeopterus variegatus]</a>    | 68.9      | 68.9        | 100%        | 3e-13   | 97%   | <a href="#">gij667345974 XP_008563464.1</a> |
| <a href="#">PREDICTED: attractin [Pongo abelii]</a>                   | 72.0      | 72.0        | 100%        | 3e-13   | 100%  | <a href="#">gij297706621 XP_002830129.1</a> |
| <a href="#">PREDICTED: attractin isoform X2 [Homo sapiens]</a>        | 72.0      | 72.0        | 100%        | 3e-13   | 100%  | <a href="#">gij530426021 XP_005260918.1</a> |
| <a href="#">PREDICTED: attractin isoform X1 [Papio anubis]</a>        | 72.0      | 72.0        | 100%        | 3e-13   | 100%  | <a href="#">gij685567343 XP_009214751.1</a> |
| <a href="#">unnamed protein product [Homo sapiens]</a>                | 72.0      | 72.0        | 100%        | 3e-13   | 100%  | <a href="#">gij194380362 BAG63948.1</a>     |
| <a href="#">attractin isoform 4 [Homo sapiens]</a>                    | 72.0      | 72.0        | 100%        | 3e-13   | 100%  | <a href="#">gij333440461 NP_001193976.1</a> |
| <a href="#">PREDICTED: attractin isoform 2 [Nomascus leucogenys]</a>  | 72.0      | 72.0        | 100%        | 3e-13   | 100%  | <a href="#">gij332257827 XP_003278006.1</a> |
| <a href="#">PREDICTED: attractin [Gorilla gorilla gorilla]</a>        | 72.0      | 72.0        | 100%        | 3e-13   | 100%  | <a href="#">gij426390844 XP_004061806.1</a> |
| <a href="#">PREDICTED: attractin isoform X4 [Pan troglodytes]</a>     | 72.0      | 72.0        | 100%        | 3e-13   | 100%  | <a href="#">gij694977854 XP_009435012.1</a> |
| <a href="#">PREDICTED: attractin isoform 1 [Nomascus leucogenys]</a>  | 72.0      | 72.0        | 100%        | 3e-13   | 100%  | <a href="#">gij332257825 XP_003278005.1</a> |
| <a href="#">attractin-2 [Homo sapiens]</a>                            | 72.0      | 72.0        | 100%        | 3e-13   | 100%  | <a href="#">gij4093196 AAD03057.1</a>       |
| <a href="#">secreted attractin precursor [Homo sapiens]</a>           | 72.0      | 72.0        | 100%        | 3e-13   | 100%  | <a href="#">gij8118083 AAF72882.1</a>       |
| <a href="#">unnamed protein product [Homo sapiens]</a>                | 72.0      | 72.0        | 100%        | 3e-13   | 100%  | <a href="#">gij158259481 BAF85699.1</a>     |
| <a href="#">attractin isoform 2 preproprotein [Homo sapiens]</a>      | 72.0      | 72.0        | 100%        | 3e-13   | 100%  | <a href="#">gij21450863 NP_647538.1</a>     |
| <a href="#">Mahogany-like protein [Macaca mulatta]</a>                | 72.0      | 72.0        | 100%        | 3e-13   | 100%  | <a href="#">gij355563316 EHH19878.1</a>     |
| <a href="#">PREDICTED: attractin isoform X3 [Pan troglodytes]</a>     | 72.0      | 72.0        | 100%        | 3e-13   | 100%  | <a href="#">gij694977852 XP_009435011.1</a> |
| <a href="#">PREDICTED: attractin isoform X1 [Homo sapiens]</a>        | 72.0      | 72.0        | 100%        | 3e-13   | 100%  | <a href="#">gij530426019 XP_005260917.1</a> |
| <a href="#">PREDICTED: attractin isoform X4 [Macaca fascicularis]</a> | 72.0      | 72.0        | 100%        | 3e-13   | 100%  | <a href="#">gij544464516 XP_005568512.1</a> |
| <a href="#">PREDICTED: attractin isoform X5 [Chlorocebus sabaeus]</a> | 72.0      | 72.0        | 100%        | 3e-13   | 100%  | <a href="#">gij635021368 XP_008017720.1</a> |
| <a href="#">Mahogany-like protein [Macaca fascicularis]</a>           | 72.0      | 72.0        | 100%        | 3e-13   | 100%  | <a href="#">gij355784657 EHH65508.1</a>     |
| <a href="#">PREDICTED: attractin isoform X3 [Macaca fascicularis]</a> | 72.0      | 72.0        | 100%        | 3e-13   | 100%  | <a href="#">gij544464514 XP_005568511.1</a> |
| <a href="#">PREDICTED: attractin isoform X4 [Chlorocebus sabaeus]</a> | 72.0      | 72.0        | 100%        | 3e-13   | 100%  | <a href="#">gij635021366 XP_008017712.1</a> |
| <a href="#">PREDICTED: attractin [Rhinopithecus roxellana]</a>        | 72.0      | 72.0        | 100%        | 3e-13   | 100%  | <a href="#">gij724902357 XP_010377335.1</a> |
| <a href="#">attractin, isoform CRA_b [Homo sapiens]</a>               | 72.0      | 72.0        | 100%        | 3e-13   | 100%  | <a href="#">gij119630936 EAX10531.1</a>     |
| <a href="#">PREDICTED: attractin isoform X3 [Chlorocebus sabaeus]</a> | 72.0      | 72.0        | 100%        | 3e-13   | 100%  | <a href="#">gij635021364 XP_008017707.1</a> |
| <a href="#">PREDICTED: attractin isoform X2 [Pan troglodytes]</a>     | 72.0      | 72.0        | 100%        | 3e-13   | 100%  | <a href="#">gij694977850 XP_009435010.1</a> |

|                                                                                   |      |      |      |       |      |                                             |
|-----------------------------------------------------------------------------------|------|------|------|-------|------|---------------------------------------------|
| <a href="#">PREDICTED: attractin isoform X2 [Chlorocebus sabaeus]</a>             | 72.0 | 72.0 | 100% | 3e-13 | 100% | <a href="#">gij635021362 XP_008017704.1</a> |
| <a href="#">PREDICTED: attractin [Otolemur garnettii]</a>                         | 72.0 | 72.0 | 100% | 3e-13 | 100% | <a href="#">gij395830288 XP_003788264.1</a> |
| <a href="#">PREDICTED: attractin isoform X1 [Pteropus alecto]</a>                 | 72.0 | 72.0 | 100% | 3e-13 | 100% | <a href="#">gij586533632 XP_006921705.1</a> |
| <a href="#">PREDICTED: attractin [Ochotona princeps]</a>                          | 72.0 | 72.0 | 100% | 3e-13 | 100% | <a href="#">gij504146589 XP_004585711.1</a> |
| <a href="#">PREDICTED: attractin [Callithrix jacchus]</a>                         | 72.0 | 72.0 | 100% | 3e-13 | 100% | <a href="#">gij296200062 XP_002747358.1</a> |
| <a href="#">PREDICTED: attractin isoform X1 [Pan troglodytes]</a>                 | 72.0 | 72.0 | 100% | 3e-13 | 100% | <a href="#">gij332857715 XP_003316827.1</a> |
| <a href="#">membrane attractin precursor [Homo sapiens]</a>                       | 72.0 | 72.0 | 100% | 3e-13 | 100% | <a href="#">gij8118082 AAF72881.1</a>       |
| <a href="#">attractin isoform 1 preproprotein [Homo sapiens]</a>                  | 72.0 | 72.0 | 100% | 3e-13 | 100% | <a href="#">gij21450861 NP_647537.1</a>     |
| <a href="#">PREDICTED: attractin isoform X2 [Macaca fascicularis]</a>             | 72.0 | 72.0 | 100% | 3e-13 | 100% | <a href="#">gij544464512 XP_005568510.1</a> |
| <a href="#">PREDICTED: attractin [Macaca mulatta]</a>                             | 72.0 | 72.0 | 100% | 3e-13 | 100% | <a href="#">gij109092720 XP_001115192.1</a> |
| <a href="#">PREDICTED: attractin isoform X1 [Chlorocebus sabaeus]</a>             | 72.0 | 72.0 | 100% | 3e-13 | 100% | <a href="#">gij635021360 XP_008017700.1</a> |
| <a href="#">PREDICTED: attractin isoform X1 [Macaca fascicularis]</a>             | 72.0 | 72.0 | 100% | 3e-13 | 100% | <a href="#">gij544464510 XP_005568509.1</a> |
| <a href="#">PREDICTED: attractin isoform X6 [Chlorocebus sabaeus]</a>             | 72.0 | 72.0 | 100% | 3e-13 | 100% | <a href="#">gij635021370 XP_008017729.1</a> |
| <a href="#">PREDICTED: attractin isoform X2 [Pteropus alecto]</a>                 | 72.0 | 72.0 | 100% | 3e-13 | 100% | <a href="#">gij586533634 XP_006921706.1</a> |
| <a href="#">PREDICTED: attractin [Lipotes vexillifer]</a>                         | 70.9 | 70.9 | 100% | 8e-13 | 97%  | <a href="#">gij602710450 XP_007465469.1</a> |
| <a href="#">attractin [Ovis aries]</a>                                            | 67.4 | 67.4 | 100% | 1e-12 | 94%  | <a href="#">gij78499351 ABB45710.1</a>      |
| <a href="#">Attractin [Myotis davidii]</a>                                        | 70.1 | 70.1 | 100% | 1e-12 | 97%  | <a href="#">gij432111133 ELK34519.1</a>     |
| <a href="#">PREDICTED: attractin [Myotis davidii]</a>                             | 70.1 | 70.1 | 100% | 2e-12 | 97%  | <a href="#">gij584075971 XP_006758187.1</a> |
| <a href="#">PREDICTED: attractin [Tarsius syrichta]</a>                           | 69.7 | 69.7 | 100% | 2e-12 | 97%  | <a href="#">gij640796924 XP_008054571.1</a> |
| <a href="#">Attractin [Myotis brandtii]</a>                                       | 69.7 | 69.7 | 100% | 2e-12 | 97%  | <a href="#">gij521031210 EPQ12996.1</a>     |
| <a href="#">PREDICTED: attractin [Myotis brandtii]</a>                            | 69.7 | 69.7 | 100% | 2e-12 | 97%  | <a href="#">gij554560893 XP_005874816.1</a> |
| <a href="#">PREDICTED: attractin [Myotis lucifugus]</a>                           | 69.7 | 69.7 | 100% | 2e-12 | 97%  | <a href="#">gij558159591 XP_006096513.1</a> |
| <a href="#">PREDICTED: attractin [Eptesicus fuscus]</a>                           | 69.7 | 69.7 | 100% | 2e-12 | 97%  | <a href="#">gij641701319 XP_008139256.1</a> |
| <a href="#">PREDICTED: attractin-like [Tursiops truncatus]</a>                    | 68.9 | 68.9 | 100% | 4e-12 | 97%  | <a href="#">gij470629747 XP_004321558.1</a> |
| <a href="#">PREDICTED: attractin-like [Physeter catodon]</a>                      | 68.9 | 68.9 | 100% | 4e-12 | 97%  | <a href="#">gij593773084 XP_007124834.1</a> |
| <a href="#">PREDICTED: attractin [Equus przewalskii]</a>                          | 68.9 | 68.9 | 100% | 4e-12 | 97%  | <a href="#">gij664773944 XP_008506219.1</a> |
| <a href="#">PREDICTED: attractin isoform X2 [Saimiri boliviensis boliviensis]</a> | 68.9 | 68.9 | 100% | 4e-12 | 97%  | <a href="#">gij725600053 XP_010350112.1</a> |
| <a href="#">PREDICTED: attractin isoform X1 [Saimiri boliviensis boliviensis]</a> | 68.9 | 68.9 | 100% | 4e-12 | 97%  | <a href="#">gij725600051 XP_010350111.1</a> |
| <a href="#">PREDICTED: attractin-like [Galeopterus variegatus]</a>                | 68.9 | 68.9 | 100% | 4e-12 | 97%  | <a href="#">gij667324076 XP_008589101.1</a> |
| <a href="#">PREDICTED: attractin [Orcinus orca]</a>                               | 68.9 | 68.9 | 100% | 4e-12 | 97%  | <a href="#">gij466084723 XP_004285351.1</a> |
| <a href="#">PREDICTED: attractin [Orycteropus afer afer]</a>                      | 68.9 | 68.9 | 100% | 4e-12 | 97%  | <a href="#">gij634830430 XP_007958185.1</a> |
| <a href="#">attractin [Bos taurus]</a>                                            | 67.4 | 67.4 | 100% | 1e-11 | 94%  | <a href="#">gij190683717 ACE82176.1</a>     |
| <a href="#">PREDICTED: attractin [Jaculus jaculus]</a>                            | 67.8 | 67.8 | 100% | 1e-11 | 94%  | <a href="#">gij507555530 XP_004661535.1</a> |
| <a href="#">PREDICTED: attractin [Capra hircus]</a>                               | 67.4 | 67.4 | 100% | 1e-11 | 94%  | <a href="#">gij548490191 XP_005688293.1</a> |
| <a href="#">PREDICTED: attractin [Bos mutus]</a>                                  | 67.4 | 67.4 | 100% | 1e-11 | 94%  | <a href="#">gij555963925 XP_005894036.1</a> |
| <a href="#">PREDICTED: attractin [Ovis aries]</a>                                 | 67.4 | 67.4 | 100% | 1e-11 | 94%  | <a href="#">gij426241795 XP_004014773.1</a> |
| <a href="#">attractin [Bos taurus]</a>                                            | 67.4 | 67.4 | 100% | 1e-11 | 94%  | <a href="#">gij253560524 ACT32973.1</a>     |
| <a href="#">attractin [Bos taurus]</a>                                            | 67.4 | 67.4 | 100% | 1e-11 | 94%  | <a href="#">gij27806737 NP_776420.1</a>     |
| <a href="#">PREDICTED: attractin isoform X2 [Bos taurus]</a>                      | 67.4 | 67.4 | 100% | 1e-11 | 94%  | <a href="#">gij528973313 XP_005214542.1</a> |
| <a href="#">PREDICTED: attractin isoform X1 [Bos taurus]</a>                      | 67.4 | 67.4 | 100% | 1e-11 | 94%  | <a href="#">gij528973311 XP_005214541.1</a> |
| <a href="#">attractin [Canis lupus familiaris]</a>                                | 67.0 | 67.0 | 100% | 2e-11 | 94%  | <a href="#">gij339892849 AEK21787.1</a>     |
| <a href="#">PREDICTED: attractin [Balaenoptera acutorostrata scammoni]</a>        | 67.0 | 67.0 | 100% | 2e-11 | 94%  | <a href="#">gij594697511 XP_007195912.1</a> |
| <a href="#">PREDICTED: attractin isoform X2 [Canis lupus familiaris]</a>          | 67.0 | 67.0 | 100% | 2e-11 | 94%  | <a href="#">gij545540090 XP_005634905.1</a> |
| <a href="#">PREDICTED: attractin [Panthera tigris altaica]</a>                    | 67.0 | 67.0 | 100% | 2e-11 | 94%  | <a href="#">gij591291970 XP_007073329.1</a> |
| <a href="#">PREDICTED: attractin [Felis catus]</a>                                | 67.0 | 67.0 | 100% | 2e-11 | 94%  | <a href="#">gij586981105 XP_003983758.2</a> |

|                                                                            |      |      |      |       |     |                                             |
|----------------------------------------------------------------------------|------|------|------|-------|-----|---------------------------------------------|
| <a href="#">PREDICTED: attractin isoform X3 [Canis lupus familiaris]</a>   | 67.0 | 67.0 | 100% | 2e-11 | 94% | <a href="#">gij73991942 XP_534360.2</a>     |
| <a href="#">PREDICTED: attractin [Tupaia chinensis]</a>                    | 67.0 | 67.0 | 100% | 2e-11 | 94% | <a href="#">gij562872246 XP_006164056.1</a> |
| <a href="#">PREDICTED: attractin isoform X1 [Canis lupus familiaris]</a>   | 67.0 | 67.0 | 100% | 2e-11 | 94% | <a href="#">gij545540087 XP_005634904.1</a> |
| <a href="#">PREDICTED: attractin isoform X1 [Oryctolagus cuniculus]</a>    | 66.6 | 66.6 | 100% | 2e-11 | 94% | <a href="#">gij291388868 XP_002710968.1</a> |
| <a href="#">PREDICTED: attractin isoform X2 [Oryctolagus cuniculus]</a>    | 66.6 | 66.6 | 100% | 3e-11 | 94% | <a href="#">gij655716500 XP_008254470.1</a> |
| <a href="#">PREDICTED: attractin-like [Leptonychotes weddellii]</a>        | 65.9 | 65.9 | 100% | 4e-11 | 91% | <a href="#">gij585160208 XP_006732353.1</a> |
| <a href="#">attractin isoform 1 preproprotein [Camelus ferus]</a>          | 65.9 | 65.9 | 100% | 4e-11 | 94% | <a href="#">gij528759526 EPY79185.1</a>     |
| <a href="#">PREDICTED: attractin isoform X2 [Mustela putorius furo]</a>    | 65.9 | 65.9 | 100% | 4e-11 | 91% | <a href="#">gij511906947 XP_004772933.1</a> |
| <a href="#">PREDICTED: attractin [Camelus ferus]</a>                       | 65.9 | 65.9 | 100% | 5e-11 | 94% | <a href="#">gij560921992 XP_006187198.1</a> |
| <a href="#">PREDICTED: attractin [Mustela putorius furo]</a>               | 65.9 | 65.9 | 100% | 5e-11 | 91% | <a href="#">gij511947743 XP_004792355.1</a> |
| <a href="#">PREDICTED: attractin [Vicugna pacos]</a>                       | 65.9 | 65.9 | 100% | 5e-11 | 94% | <a href="#">gij560970220 XP_006207473.1</a> |
| <a href="#">PREDICTED: attractin [Odobenus rosmarus divergens]</a>         | 65.9 | 65.9 | 100% | 5e-11 | 91% | <a href="#">gij472357214 XP_004398236.1</a> |
| <a href="#">PREDICTED: attractin isoform X1 [Mustela putorius furo]</a>    | 65.9 | 65.9 | 100% | 5e-11 | 91% | <a href="#">gij511906945 XP_004772932.1</a> |
| <a href="#">PREDICTED: attractin [Pantholops hodgsonii]</a>                | 65.5 | 65.5 | 100% | 6e-11 | 91% | <a href="#">gij556758951 XP_005974805.1</a> |
| <a href="#">PREDICTED: attractin [Sus scrofa]</a>                          | 65.5 | 65.5 | 100% | 6e-11 | 91% | <a href="#">gij545879723 XP_001927324.5</a> |
| <a href="#">PREDICTED: attractin isoform X3 [Bubalus bubalis]</a>          | 65.5 | 65.5 | 100% | 6e-11 | 91% | <a href="#">gij594099680 XP_006072965.1</a> |
| <a href="#">attractin [Sus scrofa]</a>                                     | 65.5 | 65.5 | 100% | 6e-11 | 91% | <a href="#">gij146741346 BAF62328.1</a>     |
| <a href="#">PREDICTED: attractin isoform X2 [Bubalus bubalis]</a>          | 65.5 | 65.5 | 100% | 6e-11 | 91% | <a href="#">gij594099678 XP_006072964.1</a> |
| <a href="#">PREDICTED: attractin isoform X1 [Bubalus bubalis]</a>          | 65.5 | 65.5 | 100% | 6e-11 | 91% | <a href="#">gij594099676 XP_006072963.1</a> |
| <a href="#">PREDICTED: attractin isoform 2 [Ceratotherium simum simum]</a> | 65.1 | 65.1 | 100% | 8e-11 | 94% | <a href="#">gij478519276 XP_004433860.1</a> |
| <a href="#">PREDICTED: attractin isoform 1 [Ceratotherium simum simum]</a> | 65.1 | 65.1 | 100% | 8e-11 | 94% | <a href="#">gij478519274 XP_004433859.1</a> |
| <a href="#">PREDICTED: attractin [Chrysochloris asiatica]</a>              | 65.1 | 65.1 | 100% | 9e-11 | 91% | <a href="#">gij586488825 XP_006874887.1</a> |
| <a href="#">Attractin [Cricetulus griseus]</a>                             | 64.7 | 64.7 | 100% | 1e-10 | 88% | <a href="#">gij344236321 EGV92424.1</a>     |
| <a href="#">PREDICTED: attractin isoform X2 [Cricetulus griseus]</a>       | 64.7 | 64.7 | 100% | 1e-10 | 88% | <a href="#">gij625260840 XP_007621856.1</a> |
| <a href="#">PREDICTED: attractin [Nannospalax galili]</a>                  | 64.7 | 64.7 | 100% | 1e-10 | 91% | <a href="#">gij674060132 XP_008836714.1</a> |
| <a href="#">attractin [Cricetulus griseus]</a>                             | 64.7 | 64.7 | 100% | 1e-10 | 88% | <a href="#">gij537146168 ERE69758.1</a>     |

## Alignments

[Download](#) [GenPept](#) [Graphics](#)

[Next](#) [Previous](#) [Descriptions](#)

PREDICTED: attractin-like [Pan paniscus]

Sequence ID: [gij397513332|ref|XP\\_003826972.1](#) Length: 265 Number of Matches: 1

Range 1: 210 to 241 [GenPept](#) [Graphics](#)

[Next Match](#) [Previous Match](#)

| Score          | Expect | Identities  | Positives   | Gaps     |
|----------------|--------|-------------|-------------|----------|
| 72.0 bits(175) | 3e-14  | 32/32(100%) | 32/32(100%) | 0/32(0%) |

Query 1 KGPVKMPSQAPTGNFYQPQLLNSSMCLEDSRY 32  
 KGPVKMPSQAPTGNFYQPQLLNSSMCLEDSRY  
 Sbjct 210 KGPVKMPSQAPTGNFYQPQLLNSSMCLEDSRY 241

### Related Information

[Gene](#) - associated gene details  
[Map Viewer](#) - aligned genomic context

[Download](#) [GenPept](#) [Graphics](#)

[Next](#) [Previous](#) [Descriptions](#)

KIAA0548 protein [Homo sapiens]

Sequence ID: [gij3043620|dbj|BAA25474.1](#) Length: 452 Number of Matches: 1

Range 1: 45 to 76 [GenPept](#) [Graphics](#)

[Next Match](#) [Previous Match](#)

| Score          | Expect | Identities  | Positives   | Gaps     |
|----------------|--------|-------------|-------------|----------|
| 72.0 bits(175) | 1e-13  | 32/32(100%) | 32/32(100%) | 0/32(0%) |

Query 1 KGPVKMPSQAPTGNFYQPQLLNSSMCLEDSRY 32  
 KGPVKMPSQAPTGNFYQPQLLNSSMCLEDSRY  
 Sbjct 45 KGPVKMPSQAPTGNFYQPQLLNSSMCLEDSRY 76

### Related Information

[Gene](#) - associated gene details

Download [GenPept](#) [Graphics](#)

[▼ Next](#) [▲ Previous](#) [▲ Descriptions](#)

PREDICTED: attractin isoform X2 [Papio anubis]

Sequence ID: [gi|685567345|ref|XP\\_009214752.1](#) Length: 989 Number of Matches: 1

Range 1: 712 to 743 [GenPept](#) [Graphics](#)

[▼ Next Match](#) [▲ Previous Match](#)

| Score          | Expect | Identities  | Positives   | Gaps     |
|----------------|--------|-------------|-------------|----------|
| 72.0 bits(175) | 3e-13  | 32/32(100%) | 32/32(100%) | 0/32(0%) |

Query 1 KGPVKMPSQAPTGNFYQPPLLNSMCLDSRY 32  
 KGPVKMPSQA TGNFYQPPLLNSMCLDSRY  
 Sbjct 712 KGPVKMPSQAPTGNFYQPPLLNSMCLDSRY 743

**Related Information**

[Gene](#) - associated gene details  
[Map Viewer](#) - aligned genomic context

Download [GenPept](#) [Graphics](#)

[▼ Next](#) [▲ Previous](#) [▲ Descriptions](#)

PREDICTED: attractin-like, partial [Galeopterus variegatus]

Sequence ID: [gi|667345974|ref|XP\\_008563464.1](#) Length: 213 Number of Matches: 1

Range 1: 174 to 205 [GenPept](#) [Graphics](#)

[▼ Next Match](#) [▲ Previous Match](#)

| Score          | Expect | Identities | Positives  | Gaps     |
|----------------|--------|------------|------------|----------|
| 68.9 bits(167) | 3e-13  | 31/32(97%) | 31/32(96%) | 0/32(0%) |

Query 1 KGPVKMPSQAPTGNFYQPPLLNSMCLDSRY 32  
 KGPVKMPSQA TGNFYQPPLLNSMCLDSRY  
 Sbjct 174 KGPVKMPSQAPTGNFYQPPLLNSMCLDSRY 205

**Related Information**

[Gene](#) - associated gene details  
[Map Viewer](#) - aligned genomic context

Download [GenPept](#) [Graphics](#)

[▼ Next](#) [▲ Previous](#) [▲ Descriptions](#)

PREDICTED: attractin, partial [Pongo abelii]

Sequence ID: [gi|297706621|ref|XP\\_002830129.1](#) Length: 1058 Number of Matches: 1

Range 1: 651 to 682 [GenPept](#) [Graphics](#)

[▼ Next Match](#) [▲ Previous Match](#)

| Score          | Expect | Identities  | Positives   | Gaps     |
|----------------|--------|-------------|-------------|----------|
| 72.0 bits(175) | 3e-13  | 32/32(100%) | 32/32(100%) | 0/32(0%) |

Query 1 KGPVKMPSQAPTGNFYQPPLLNSMCLDSRY 32  
 KGPVKMPSQA TGNFYQPPLLNSMCLDSRY  
 Sbjct 651 KGPVKMPSQAPTGNFYQPPLLNSMCLDSRY 682

**Related Information**

[Gene](#) - associated gene details  
[Map Viewer](#) - aligned genomic context

BLAST is a registered trademark of the National Library of Medicine.



▶ NCBI/ BLAST/ blastp suite/ Formatting Results - BHDT94FP014

**i** Your search parameters were adjusted to search for a short input sequence.

[Edit and Resubmit](#) [Save Search Strategies](#) [▶ Formatting options](#) [▶ Download](#)

[YouTube](#) [How to read this page](#) [Blast report description](#)

## ATRN\_KIDSTGDVTNELRV\_Mod

RID [BHDT94FP014](#) (Expires on 01-17 14:00 pm)

**Query ID** |cl|86384  
**Description** None  
**Molecule type** amino acid  
**Query Length** 14

**Database Name** nr  
**Description** All non-redundant GenBank CDS translations+PDB+SwissProt+PIR excluding environmental samples from WGS projects  
**Program** BLASTP 2.2.30+ [▶ Citation](#)

Other reports: [▶ Search Summary](#) [\[Taxonomy reports\]](#) [\[Distance tree of results\]](#) [\[Multiple alignment\]](#)

### **G** Graphic Summary

[Show Conserved Domains](#)

No putative conserved domains have been detected

Distribution of 100 Blast Hits on the Query Sequence

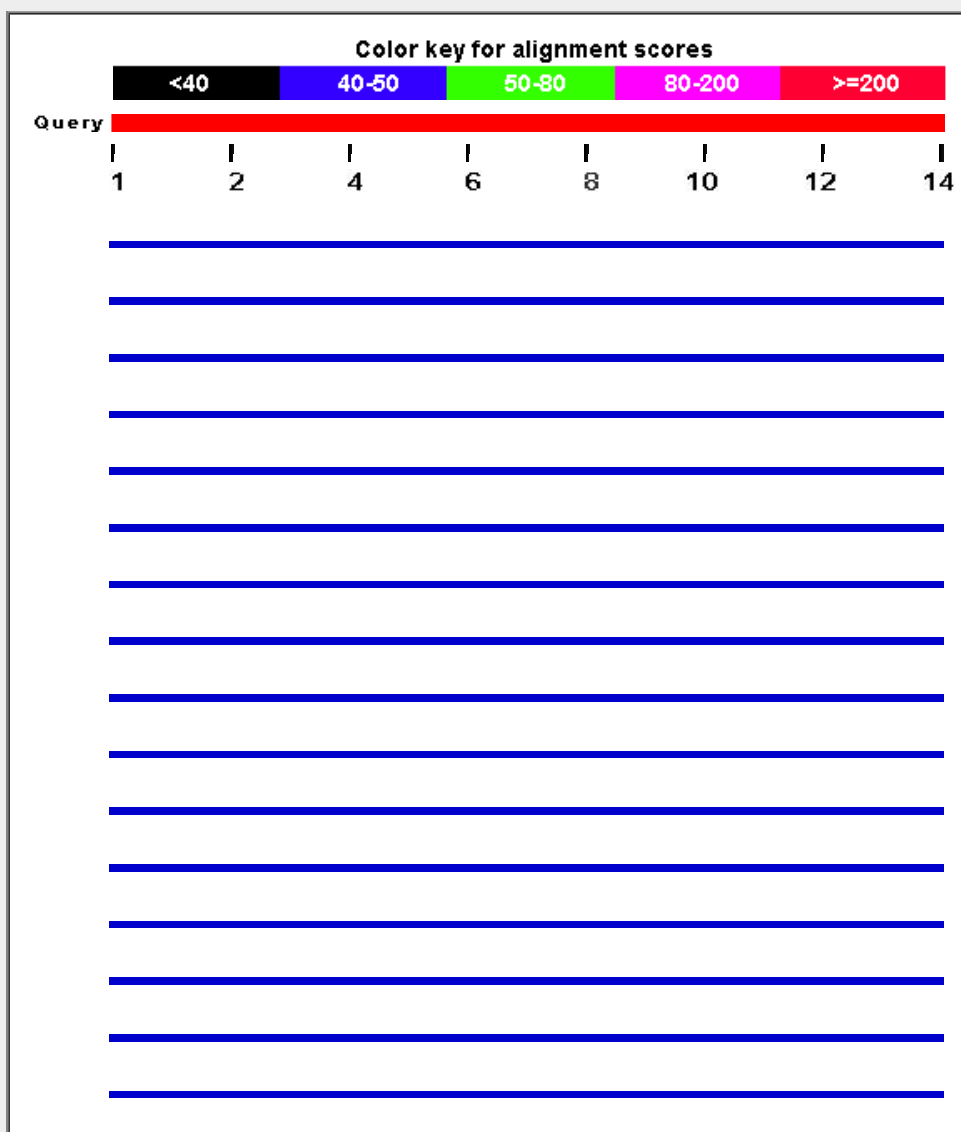

The image shows a table with 30 rows. Each row contains a single blue horizontal line, which appears to be a placeholder for data. The table is centered on the page and is flanked by light gray vertical bars on both sides.

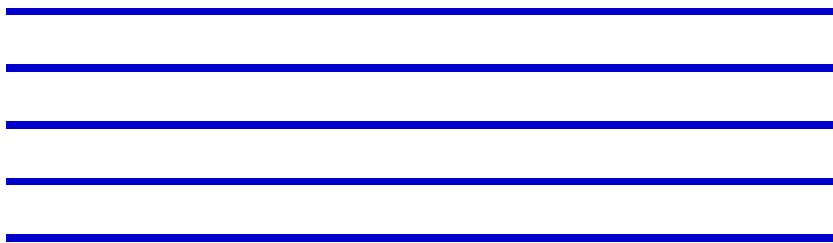

**Descriptions**

**Sequences producing significant alignments:**

Select: [All](#) [None](#) Selected:0

Alignments Download GenPept Graphics Distance tree of results Multiple alignment

| Description                                                                       | Max score | Total score | Query cover | E value | Ident | Accession                                    |
|-----------------------------------------------------------------------------------|-----------|-------------|-------------|---------|-------|----------------------------------------------|
| <a href="#">Attractin [Fukomys damarensis]</a>                                    | 43.9      | 43.9        | 100%        | 0.001   | 93%   | <a href="#">gij 676269096 KFO24512.1</a>     |
| <a href="#">Attractin [Tupaia chinensis]</a>                                      | 43.9      | 43.9        | 100%        | 0.001   | 93%   | <a href="#">gij 444519420 ELV12829.1</a>     |
| <a href="#">PREDICTED: attractin-like [Leptonychotes weddellii]</a>               | 43.9      | 43.9        | 100%        | 0.001   | 93%   | <a href="#">gij 585160208 XP_006732353.1</a> |
| <a href="#">PREDICTED: attractin isoform X2 [Papio anubis]</a>                    | 43.9      | 43.9        | 100%        | 0.001   | 93%   | <a href="#">gij 685567345 XP_009214752.1</a> |
| <a href="#">attractin [Canis lupus familiaris]</a>                                | 43.9      | 43.9        | 100%        | 0.001   | 93%   | <a href="#">gij 339892849 AEK21787.1</a>     |
| <a href="#">PREDICTED: attractin-like [Tursiops truncatus]</a>                    | 43.9      | 43.9        | 100%        | 0.001   | 93%   | <a href="#">gij 470629747 XP_004321558.1</a> |
| <a href="#">PREDICTED: attractin-like [Physeter catodon]</a>                      | 43.9      | 43.9        | 100%        | 0.001   | 93%   | <a href="#">gij 593773084 XP_007124834.1</a> |
| <a href="#">PREDICTED: attractin [Pongo abelii]</a>                               | 43.9      | 43.9        | 100%        | 0.001   | 93%   | <a href="#">gij 297706621 XP_002830129.1</a> |
| <a href="#">mKIAA0548 protein [Mus musculus]</a>                                  | 43.9      | 43.9        | 100%        | 0.001   | 93%   | <a href="#">gij 26006173 BAC41429.1</a>      |
| <a href="#">Attractin [Cricetulus griseus]</a>                                    | 43.9      | 43.9        | 100%        | 0.001   | 93%   | <a href="#">gij 344236321 EGV92424.1</a>     |
| <a href="#">PREDICTED: attractin [Sarcophilus harrisii]</a>                       | 43.9      | 43.9        | 100%        | 0.001   | 93%   | <a href="#">gij 395543190 XP_003773503.1</a> |
| <a href="#">attractin isoform 1 preproprotein [Camelus ferus]</a>                 | 43.9      | 43.9        | 100%        | 0.001   | 93%   | <a href="#">gij 528759526 EPY79185.1</a>     |
| <a href="#">PREDICTED: attractin isoform X2 [Cricetulus griseus]</a>              | 43.9      | 43.9        | 100%        | 0.001   | 93%   | <a href="#">gij 625260840 XP_007621856.1</a> |
| <a href="#">PREDICTED: attractin-like [Ictidomys tridecemlineatus]</a>            | 43.9      | 43.9        | 100%        | 0.001   | 93%   | <a href="#">gij 532069682 XP_005320676.1</a> |
| <a href="#">PREDICTED: attractin [Equus przewalskii]</a>                          | 43.9      | 43.9        | 100%        | 0.001   | 93%   | <a href="#">gij 664773944 XP_008506219.1</a> |
| <a href="#">PREDICTED: attractin isoform X2 [Homo sapiens]</a>                    | 43.9      | 43.9        | 100%        | 0.001   | 93%   | <a href="#">gij 530426021 XP_005260918.1</a> |
| <a href="#">PREDICTED: attractin isoform X1 [Papio anubis]</a>                    | 43.9      | 43.9        | 100%        | 0.001   | 93%   | <a href="#">gij 685567343 XP_009214751.1</a> |
| <a href="#">PREDICTED: attractin isoform X2 [Saimiri boliviensis boliviensis]</a> | 43.9      | 43.9        | 100%        | 0.001   | 93%   | <a href="#">gij 725600053 XP_010350112.1</a> |
| <a href="#">PREDICTED: attractin isoform X1 [Saimiri boliviensis boliviensis]</a> | 43.9      | 43.9        | 100%        | 0.001   | 93%   | <a href="#">gij 725600051 XP_010350111.1</a> |
| <a href="#">PREDICTED: attractin [Nannospalax galili]</a>                         | 43.9      | 43.9        | 100%        | 0.001   | 93%   | <a href="#">gij 674060132 XP_008836714.1</a> |
| <a href="#">PREDICTED: attractin [Balaenoptera acutorostrata scammonii]</a>       | 43.9      | 43.9        | 100%        | 0.001   | 93%   | <a href="#">gij 594697511 XP_007195912.1</a> |
| <a href="#">PREDICTED: attractin [Tarsius syrichta]</a>                           | 43.9      | 43.9        | 100%        | 0.001   | 93%   | <a href="#">gij 640796924 XP_008054571.1</a> |
| <a href="#">unnamed protein product [Homo sapiens]</a>                            | 43.9      | 43.9        | 100%        | 0.001   | 93%   | <a href="#">gij 194380362 BAG63948.1</a>     |
| <a href="#">attractin isoform 4 [Homo sapiens]</a>                                | 43.9      | 43.9        | 100%        | 0.001   | 93%   | <a href="#">gij 333440461 NP_001193976.1</a> |
| <a href="#">PREDICTED: attractin isoform 2 [Nomascus leucogenys]</a>              | 43.9      | 43.9        | 100%        | 0.001   | 93%   | <a href="#">gij 332257827 XP_003278006.1</a> |
| <a href="#">PREDICTED: attractin isoform 2 [Dasypus novemcinctus]</a>             | 43.9      | 43.9        | 100%        | 0.001   | 93%   | <a href="#">gij 488545593 XP_004464327.1</a> |
| <a href="#">attractin [Cricetulus griseus]</a>                                    | 43.9      | 43.9        | 100%        | 0.001   | 93%   | <a href="#">gij 537146168 ERE69758.1</a>     |
| <a href="#">Attractin [Fukomys damarensis]</a>                                    | 43.9      | 43.9        | 100%        | 0.001   | 93%   | <a href="#">gij 676263950 KFO20529.1</a>     |

|                                                                                   |      |      |      |       |     |                                             |
|-----------------------------------------------------------------------------------|------|------|------|-------|-----|---------------------------------------------|
| Attractin [ <i>Myotis davidii</i> ]                                               | 43.9 | 43.9 | 100% | 0.001 | 93% | <a href="#">gij432111133 ELK34519.1</a>     |
| <a href="#">PREDICTED: attractin [<i>Panholops hodgsonii</i>]</a>                 | 43.9 | 43.9 | 100% | 0.001 | 93% | <a href="#">gij556758951 XP_005974805.1</a> |
| <a href="#">PREDICTED: attractin [<i>Sus scrofa</i>]</a>                          | 43.9 | 43.9 | 100% | 0.001 | 93% | <a href="#">gij545879723 XP_001927324.5</a> |
| <a href="#">PREDICTED: attractin isoform 2 [<i>Ceratotherium simum simum</i>]</a> | 43.9 | 43.9 | 100% | 0.001 | 93% | <a href="#">gij478519276 XP_004433860.1</a> |
| <a href="#">PREDICTED: attractin isoform X2 [<i>Condylura cristata</i>]</a>       | 43.9 | 43.9 | 100% | 0.001 | 93% | <a href="#">gij507961710 XP_004687418.1</a> |
| <a href="#">PREDICTED: attractin [<i>Gorilla gorilla gorilla</i>]</a>             | 43.9 | 43.9 | 100% | 0.001 | 93% | <a href="#">gij426390844 XP_004061806.1</a> |
| <a href="#">PREDICTED: attractin isoform X4 [<i>Pan troglodytes</i>]</a>          | 43.9 | 43.9 | 100% | 0.001 | 93% | <a href="#">gij694977854 XP_009435012.1</a> |
| Attractin [ <i>Myotis brandtii</i> ]                                              | 43.9 | 43.9 | 100% | 0.001 | 93% | <a href="#">gij521031210 EPQ12996.1</a>     |
| <a href="#">PREDICTED: attractin isoform 1 [<i>Nomascus leucogenys</i>]</a>       | 43.9 | 43.9 | 100% | 0.001 | 93% | <a href="#">gij332257825 XP_003278005.1</a> |
| <a href="#">secreted attractin precursor [<i>Homo sapiens</i>]</a>                | 43.9 | 43.9 | 100% | 0.001 | 93% | <a href="#">gij8118083 AAF72882.1</a>       |
| <a href="#">unnamed protein product [<i>Homo sapiens</i>]</a>                     | 43.9 | 43.9 | 100% | 0.001 | 93% | <a href="#">gij158259481 BAF85699.1</a>     |
| <a href="#">attractin isoform 2 preproprotein [<i>Homo sapiens</i>]</a>           | 43.9 | 43.9 | 100% | 0.001 | 93% | <a href="#">gij21450863 NP_647538.1</a>     |
| <a href="#">Mahogany-like protein [<i>Macaca mulatta</i>]</a>                     | 43.9 | 43.9 | 100% | 0.001 | 93% | <a href="#">gij355563316 EHH19878.1</a>     |
| <a href="#">attractin [<i>Rattus norvegicus</i>]</a>                              | 43.9 | 43.9 | 100% | 0.001 | 93% | <a href="#">gij12275312 BAB21018.1</a>      |
| <a href="#">attractin, isoform CRA_a [<i>Rattus norvegicus</i>]</a>               | 43.9 | 43.9 | 100% | 0.001 | 93% | <a href="#">gij149023319 EDL80213.1</a>     |
| <a href="#">PREDICTED: attractin isoform X1 [<i>Bos taurus</i>]</a>               | 43.9 | 43.9 | 100% | 0.001 | 93% | <a href="#">gij741947708 XP_005214542.2</a> |
| <a href="#">PREDICTED: attractin isoform X3 [<i>Bubalus bubalis</i>]</a>          | 43.9 | 43.9 | 100% | 0.001 | 93% | <a href="#">gij594099680 XP_006072965.1</a> |
| <a href="#">PREDICTED: LOW QUALITY PROTEIN: attractin [<i>Pan paniscus</i>]</a>   | 43.9 | 43.9 | 100% | 0.001 | 93% | <a href="#">gij675763672 XP_008973079.1</a> |
| <a href="#">PREDICTED: attractin isoform X2 [<i>Canis lupus familiaris</i>]</a>   | 43.9 | 43.9 | 100% | 0.001 | 93% | <a href="#">gij545540090 XP_005634905.1</a> |
| <a href="#">PREDICTED: attractin isoform X2 [<i>Heterocephalus glaber</i>]</a>    | 43.9 | 43.9 | 100% | 0.001 | 93% | <a href="#">gij512956910 XP_004840783.1</a> |
| <a href="#">PREDICTED: attractin isoform X3 [<i>Pan troglodytes</i>]</a>          | 43.9 | 43.9 | 100% | 0.001 | 93% | <a href="#">gij694977852 XP_009435011.1</a> |
| <a href="#">attractin [<i>Sus scrofa</i>]</a>                                     | 43.9 | 43.9 | 100% | 0.001 | 93% | <a href="#">gij146741346 BAF62328.1</a>     |
| <a href="#">PREDICTED: attractin isoform X1 [<i>Homo sapiens</i>]</a>             | 43.9 | 43.9 | 100% | 0.001 | 93% | <a href="#">gij530426019 XP_005260917.1</a> |
| <a href="#">PREDICTED: attractin isoform X4 [<i>Macaca fascicularis</i>]</a>      | 43.9 | 43.9 | 100% | 0.001 | 93% | <a href="#">gij544464516 XP_005568512.1</a> |
| <a href="#">PREDICTED: attractin isoform X5 [<i>Chlorocebus sabaeus</i>]</a>      | 43.9 | 43.9 | 100% | 0.001 | 93% | <a href="#">gij635021368 XP_008017720.1</a> |
| <a href="#">PREDICTED: attractin isoform X2 [<i>Mustela putorius furo</i>]</a>    | 43.9 | 43.9 | 100% | 0.001 | 93% | <a href="#">gij511906947 XP_004772933.1</a> |
| <a href="#">Mahogany-like protein [<i>Macaca fascicularis</i>]</a>                | 43.9 | 43.9 | 100% | 0.001 | 93% | <a href="#">gij355784657 EHH65508.1</a>     |
| <a href="#">PREDICTED: attractin [<i>Myotis davidii</i>]</a>                      | 43.9 | 43.9 | 100% | 0.001 | 93% | <a href="#">gij584075971 XP_006758187.1</a> |
| <a href="#">PREDICTED: attractin [<i>Panthera tigris altaica</i>]</a>             | 43.9 | 43.9 | 100% | 0.001 | 93% | <a href="#">gij591291970 XP_007073329.1</a> |
| <a href="#">PREDICTED: attractin [<i>Myotis brandtii</i>]</a>                     | 43.9 | 43.9 | 100% | 0.001 | 93% | <a href="#">gij554560893 XP_005874816.1</a> |
| <a href="#">PREDICTED: attractin isoform X3 [<i>Macaca fascicularis</i>]</a>      | 43.9 | 43.9 | 100% | 0.001 | 93% | <a href="#">gij544464514 XP_005568511.1</a> |
| <a href="#">PREDICTED: attractin-like [<i>Galeopterus variegatus</i>]</a>         | 43.9 | 43.9 | 100% | 0.001 | 93% | <a href="#">gij667324076 XP_008589101.1</a> |
| <a href="#">PREDICTED: attractin isoform X4 [<i>Chlorocebus sabaeus</i>]</a>      | 43.9 | 43.9 | 100% | 0.001 | 93% | <a href="#">gij635021366 XP_008017712.1</a> |
| <a href="#">PREDICTED: attractin [<i>Capra hircus</i>]</a>                        | 43.9 | 43.9 | 100% | 0.001 | 93% | <a href="#">gij548490191 XP_005688293.1</a> |
| Attractin [ <i>Heterocephalus glaber</i> ]                                        | 43.9 | 43.9 | 100% | 0.001 | 93% | <a href="#">gij351701383 EHB04302.1</a>     |
| <a href="#">PREDICTED: attractin [<i>Rhinopithecus roxellana</i>]</a>             | 43.9 | 43.9 | 100% | 0.001 | 93% | <a href="#">gij724902357 XP_010377335.1</a> |
| <a href="#">PREDICTED: attractin isoform 1 [<i>Dasyurus novemcinctus</i>]</a>     | 43.9 | 43.9 | 100% | 0.001 | 93% | <a href="#">gij488545591 XP_004464326.1</a> |
| <a href="#">PREDICTED: attractin isoform X1 [<i>Cricetulus griseus</i>]</a>       | 43.9 | 43.9 | 100% | 0.001 | 93% | <a href="#">gij354473756 XP_003499099.1</a> |
| <a href="#">PREDICTED: attractin [<i>Camelus ferus</i>]</a>                       | 43.9 | 43.9 | 100% | 0.001 | 93% | <a href="#">gij560921992 XP_006187198.1</a> |
| <a href="#">PREDICTED: attractin [<i>Sorex araneus</i>]</a>                       | 43.9 | 43.9 | 100% | 0.001 | 93% | <a href="#">gij505831534 XP_004611050.1</a> |
| <a href="#">PREDICTED: attractin [<i>Myotis lucifugus</i>]</a>                    | 43.9 | 43.9 | 100% | 0.001 | 93% | <a href="#">gij558159591 XP_006096513.1</a> |
| <a href="#">attractin [<i>Cricetulus griseus</i>]</a>                             | 43.9 | 43.9 | 100% | 0.001 | 93% | <a href="#">gij537146167 ERE69757.1</a>     |
| <a href="#">PREDICTED: attractin [<i>Camelus dromedarius</i>]</a>                 | 43.9 | 43.9 | 100% | 0.001 | 93% | <a href="#">gij744589171 XP_010986570.1</a> |
| <a href="#">PREDICTED: attractin [<i>Bos mutus</i>]</a>                           | 43.9 | 43.9 | 100% | 0.001 | 93% | <a href="#">gij555963925 XP_005894036.1</a> |
| <a href="#">PREDICTED: attractin [<i>Ursus maritimus</i>]</a>                     | 43.9 | 43.9 | 100% | 0.001 | 93% | <a href="#">gij671021680 XP_008701660.1</a> |

|                                                                            |      |      |      |       |     |                                             |
|----------------------------------------------------------------------------|------|------|------|-------|-----|---------------------------------------------|
| <a href="#">hypothetical protein PANDA_007354 [Ailuropoda melanoleuca]</a> | 43.9 | 43.9 | 100% | 0.001 | 93% | <a href="#">gij281339872 EFB15456.1</a>     |
| <a href="#">PREDICTED: attractin-like [Ailuropoda melanoleuca]</a>         | 43.9 | 43.9 | 100% | 0.001 | 93% | <a href="#">gij301766802 XP_002918837.1</a> |
| <a href="#">PREDICTED: attractin [Camelus bactrianus]</a>                  | 43.9 | 43.9 | 100% | 0.001 | 93% | <a href="#">gij743752427 XP_010971103.1</a> |
| <a href="#">PREDICTED: attractin [Mustela putorius furo]</a>               | 43.9 | 43.9 | 100% | 0.001 | 93% | <a href="#">gij511947743 XP_004792355.1</a> |
| <a href="#">attractin, isoform CRA_b [Homo sapiens]</a>                    | 43.9 | 43.9 | 100% | 0.001 | 93% | <a href="#">gij119630936 EAX10531.1</a>     |
| <a href="#">PREDICTED: attractin isoform X3 [Chlorocebus sabaeus]</a>      | 43.9 | 43.9 | 100% | 0.001 | 93% | <a href="#">gij635021364 XP_008017707.1</a> |
| <a href="#">PREDICTED: attractin [Fukomys damarensis]</a>                  | 43.9 | 43.9 | 100% | 0.001 | 93% | <a href="#">gij731281216 XP_010609356.1</a> |
| <a href="#">PREDICTED: attractin [Heterocephalus glaber]</a>               | 43.9 | 43.9 | 100% | 0.001 | 93% | <a href="#">gij512849696 XP_004886859.1</a> |
| <a href="#">PREDICTED: attractin [Ovis aries]</a>                          | 43.9 | 43.9 | 100% | 0.001 | 93% | <a href="#">gij426241795 XP_004014773.1</a> |
| <a href="#">PREDICTED: attractin [Peromyscus maniculatus bairdii]</a>      | 43.9 | 43.9 | 100% | 0.001 | 93% | <a href="#">gij589943852 XP_006984624.1</a> |
| <a href="#">PREDICTED: attractin [Felis catus]</a>                         | 43.9 | 43.9 | 100% | 0.001 | 93% | <a href="#">gij586981105 XP_003983758.2</a> |
| <a href="#">PREDICTED: attractin isoform X2 [Pan troglodytes]</a>          | 43.9 | 43.9 | 100% | 0.001 | 93% | <a href="#">gij694977850 XP_009435010.1</a> |
| <a href="#">PREDICTED: attractin isoform X2 [Chlorocebus sabaeus]</a>      | 43.9 | 43.9 | 100% | 0.001 | 93% | <a href="#">gij635021362 XP_008017704.1</a> |
| <a href="#">PREDICTED: attractin [Otolemur garnettii]</a>                  | 43.9 | 43.9 | 100% | 0.001 | 93% | <a href="#">gij395830288 XP_003788264.1</a> |
| <a href="#">PREDICTED: attractin [Erinaceus europaeus]</a>                 | 43.9 | 43.9 | 100% | 0.001 | 93% | <a href="#">gij617558695 XP_007539650.1</a> |
| <a href="#">PREDICTED: attractin [Vicugna pacos]</a>                       | 43.9 | 43.9 | 100% | 0.001 | 93% | <a href="#">gij560970220 XP_006207473.1</a> |
| <a href="#">PREDICTED: attractin [Echinops telfairi]</a>                   | 43.9 | 43.9 | 100% | 0.001 | 93% | <a href="#">gij507626122 XP_004697922.1</a> |
| <a href="#">attractin [Bos taurus]</a>                                     | 43.9 | 43.9 | 100% | 0.001 | 93% | <a href="#">gij253560524 ACT32973.1</a>     |
| <a href="#">PREDICTED: attractin isoform X1 [Pteropus alecto]</a>          | 43.9 | 43.9 | 100% | 0.001 | 93% | <a href="#">gij586533632 XP_006921705.1</a> |
| <a href="#">PREDICTED: attractin [Eptesicus fuscus]</a>                    | 43.9 | 43.9 | 100% | 0.001 | 93% | <a href="#">gij641701319 XP_008139256.1</a> |
| <a href="#">attractin [Bos taurus]</a>                                     | 43.9 | 43.9 | 100% | 0.001 | 93% | <a href="#">gij27806737 NP_776420.1</a>     |
| <a href="#">PREDICTED: attractin isoform X2 [Bubalus bubalis]</a>          | 43.9 | 43.9 | 100% | 0.001 | 93% | <a href="#">gij594099678 XP_006072964.1</a> |
| <a href="#">PREDICTED: attractin isoform X3 [Canis lupus familiaris]</a>   | 43.9 | 43.9 | 100% | 0.001 | 93% | <a href="#">gij73991942 XP_534360.2</a>     |
| <a href="#">PREDICTED: attractin isoform 1 [Ceratotherium simum simum]</a> | 43.9 | 43.9 | 100% | 0.001 | 93% | <a href="#">gij478519274 XP_004433859.1</a> |
| <a href="#">PREDICTED: attractin [Orcinus orca]</a>                        | 43.9 | 43.9 | 100% | 0.001 | 93% | <a href="#">gij466084723 XP_004285351.1</a> |
| <a href="#">PREDICTED: attractin [Lipotes vexillifer]</a>                  | 43.9 | 43.9 | 100% | 0.001 | 93% | <a href="#">gij602710450 XP_007465469.1</a> |
| <a href="#">PREDICTED: attractin isoform X1 [Condylura cristata]</a>       | 43.9 | 43.9 | 100% | 0.001 | 93% | <a href="#">gij507961707 XP_004687417.1</a> |

**Alignments**

[Download](#) [GenPept](#) [Graphics](#) ▼ Next ▲ Previous ▲ Descriptions

**Attractin [Fukomys damarensis]**  
 Sequence ID: [gij676269096|gb|KFO24512.1](#) Length: 740 Number of Matches: 1

**Related Information**

Range 1: 322 to 335 [GenPept](#) [Graphics](#) ▼ Next Match ▲ Previous Match

| Score         | Expect | Identities | Positives   | Gaps     |
|---------------|--------|------------|-------------|----------|
| 43.9 bits(96) | 0.001  | 13/14(93%) | 14/14(100%) | 0/14(0%) |

Query 1 KIDSTGDTVNELRV 14  
 KIDSTG+VTNELRV  
 Sbjct 322 KIDSTGNVTNELRV 335

[Download](#) [GenPept](#) [Graphics](#) ▼ Next ▲ Previous ▲ Descriptions

**Attractin [Tupaia chinensis]**  
 Sequence ID: [gij444519420|gb|ELV12829.1](#) Length: 860 Number of Matches: 1

**Related Information**

Range 1: 57 to 70 [GenPept](#) [Graphics](#) ▼ Next Match ▲ Previous Match

| Score         | Expect | Identities | Positives   | Gaps     |
|---------------|--------|------------|-------------|----------|
| 43.9 bits(96) | 0.001  | 13/14(93%) | 14/14(100%) | 0/14(0%) |

Query 1 KIDSTGDTVNELRV 14

Sbjct 57 KIDSTG+VTNELRV  
KIDSTGNVTNELRV 70

[Download](#) [GenPept](#) [Graphics](#)

[Next](#) [Previous](#) [Descriptions](#)

**PREDICTED: attractin-like [Leptonychotes weddellii]**

Sequence ID: [gi|585160208|ref|XP\\_006732353.1|](#) Length: 899 Number of Matches: 1

Range 1: 213 to 226 [GenPept](#) [Graphics](#)

[Next Match](#) [Previous Match](#)

| Score         | Expect | Identities | Positives   | Gaps     |
|---------------|--------|------------|-------------|----------|
| 43.9 bits(96) | 0.001  | 13/14(93%) | 14/14(100%) | 0/14(0%) |

Query 1 KIDSTGDTVTELRV 14  
KIDSTG+VTNELRV  
Sbjct 213 KIDSTGNVTNELRV 226

**Related Information**

[Gene](#) - associated gene details  
[Map Viewer](#) - aligned genomic context

[Download](#) [GenPept](#) [Graphics](#)

[Next](#) [Previous](#) [Descriptions](#)

**PREDICTED: attractin isoform X2 [Papio anubis]**

Sequence ID: [gi|685567345|ref|XP\\_009214752.1|](#) Length: 989 Number of Matches: 1

Range 1: 100 to 113 [GenPept](#) [Graphics](#)

[Next Match](#) [Previous Match](#)

| Score         | Expect | Identities | Positives   | Gaps     |
|---------------|--------|------------|-------------|----------|
| 43.9 bits(96) | 0.001  | 13/14(93%) | 14/14(100%) | 0/14(0%) |

Query 1 KIDSTGDTVTELRV 14  
KIDSTG+VTNELRV  
Sbjct 100 KIDSTGNVTNELRV 113

**Related Information**

[Gene](#) - associated gene details  
[Map Viewer](#) - aligned genomic context

[Download](#) [GenPept](#) [Graphics](#)

[Next](#) [Previous](#) [Descriptions](#)

**attractin [Canis lupus familiaris]**

Sequence ID: [gi|339892849|gb|AEK21787.1|](#) Length: 1001 Number of Matches: 1

Range 1: 308 to 321 [GenPept](#) [Graphics](#)

[Next Match](#) [Previous Match](#)

| Score         | Expect | Identities | Positives   | Gaps     |
|---------------|--------|------------|-------------|----------|
| 43.9 bits(96) | 0.001  | 13/14(93%) | 14/14(100%) | 0/14(0%) |

Query 1 KIDSTGDTVTELRV 14  
KIDSTG+VTNELRV  
Sbjct 308 KIDSTGNVTNELRV 321

**Related Information**

[Gene](#) - associated gene details

BLAST is a registered trademark of the National Library of Medicine.



NCBI/ BLAST/ blastp suite/ Formatting Results - B915AFEV01R

Your search parameters were adjusted to search for a short input sequence.

Edit and Resubmit Save Search Strategies Formatting options Download

YouTube How to read this page Blast report description

ATRN\_KIDSTGNVTNELRV\_NonMod

RID B915AFEV01R (Expires on 01-14 09:36 am)

Query ID Icl|144908
Description None
Molecule type amino acid
Query Length 14

Database Name nr
Description All non-redundant GenBank CDS translations+PDB+SwissProt+PIR excluding environmental samples from WGS projects
Program BLASTP 2.2.30+ Citation

Other reports: Search Summary Taxonomy reports Distance tree of results Multiple alignment

Graphic Summary

Show Conserved Domains

No putative conserved domains have been detected

Distribution of 100 Blast Hits on the Query Sequence

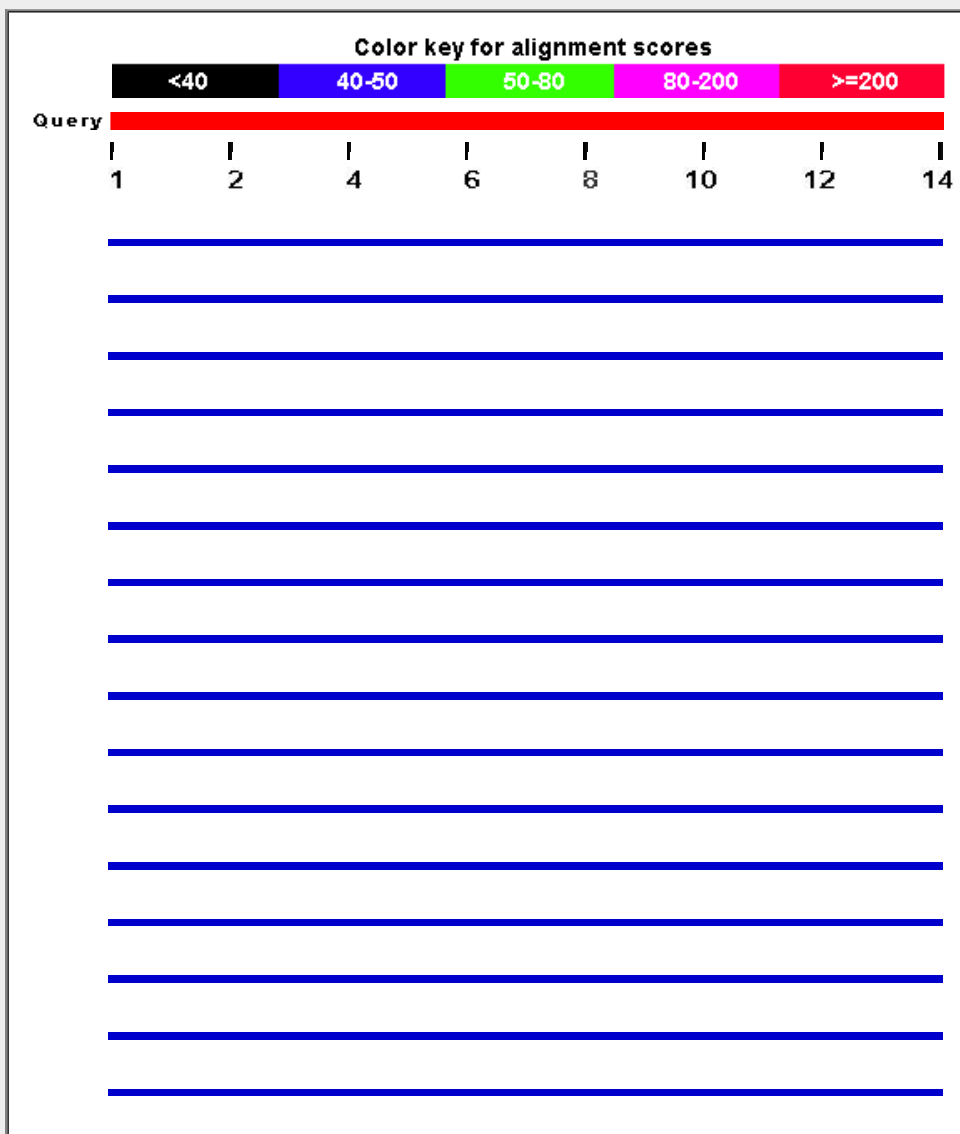

The image shows a table with 30 rows. Each row contains a single blue horizontal line, which is likely a placeholder for a sequence alignment or a data entry. The table is centered on the page and is flanked by light blue vertical bars on both sides.





**Descriptions**

**Sequences producing significant alignments:**

Select: [All](#) [None](#) Selected:0

Alignments Download GenPept Graphics Distance tree of results Multiple alignment

| Description                                                                       | Max score | Total score | Query cover | E value | Ident | Accession                                   |
|-----------------------------------------------------------------------------------|-----------|-------------|-------------|---------|-------|---------------------------------------------|
| <a href="#">Attractin [Fukomys damarensis]</a>                                    | 46.4      | 46.4        | 100%        | 1e-04   | 100%  | <a href="#">gij676269096 KFO24512.1</a>     |
| <a href="#">Attractin [Tupaia chinensis]</a>                                      | 46.4      | 46.4        | 100%        | 1e-04   | 100%  | <a href="#">gij444519420 ELV12829.1</a>     |
| <a href="#">PREDICTED: attractin-like [Leptonychotes weddellii]</a>               | 46.4      | 46.4        | 100%        | 1e-04   | 100%  | <a href="#">gij585160208 XP_006732353.1</a> |
| <a href="#">PREDICTED: attractin isoform X2 [Papio anubis]</a>                    | 46.4      | 46.4        | 100%        | 1e-04   | 100%  | <a href="#">gij685567345 XP_009214752.1</a> |
| <a href="#">attractin [Canis lupus familiaris]</a>                                | 46.4      | 46.4        | 100%        | 1e-04   | 100%  | <a href="#">gij339892849 AEK21787.1</a>     |
| <a href="#">PREDICTED: attractin-like [Tursiops truncatus]</a>                    | 46.4      | 46.4        | 100%        | 1e-04   | 100%  | <a href="#">gij470629747 XP_004321558.1</a> |
| <a href="#">PREDICTED: attractin-like [Physeter catodon]</a>                      | 46.4      | 46.4        | 100%        | 1e-04   | 100%  | <a href="#">gij593773084 XP_007124834.1</a> |
| <a href="#">PREDICTED: attractin [Pongo abelii]</a>                               | 46.4      | 46.4        | 100%        | 1e-04   | 100%  | <a href="#">gij297706621 XP_002830129.1</a> |
| <a href="#">mKIAA0548 protein [Mus musculus]</a>                                  | 46.4      | 46.4        | 100%        | 1e-04   | 100%  | <a href="#">gij26006173 BAC41429.1</a>      |
| <a href="#">Attractin [Cricetulus griseus]</a>                                    | 46.4      | 46.4        | 100%        | 1e-04   | 100%  | <a href="#">gij344236321 EGV92424.1</a>     |
| <a href="#">PREDICTED: attractin [Sarcophilus harrisii]</a>                       | 46.4      | 46.4        | 100%        | 1e-04   | 100%  | <a href="#">gij395543190 XP_003773503.1</a> |
| <a href="#">attractin isoform 1 preproprotein [Camelus ferus]</a>                 | 46.4      | 46.4        | 100%        | 1e-04   | 100%  | <a href="#">gij528759526 EPY79185.1</a>     |
| <a href="#">PREDICTED: attractin isoform X2 [Cricetulus griseus]</a>              | 46.4      | 46.4        | 100%        | 1e-04   | 100%  | <a href="#">gij625260840 XP_007621856.1</a> |
| <a href="#">PREDICTED: attractin-like [Ictidomys tridecemlineatus]</a>            | 46.4      | 46.4        | 100%        | 1e-04   | 100%  | <a href="#">gij532069682 XP_005320676.1</a> |
| <a href="#">PREDICTED: attractin [Equus przewalskii]</a>                          | 46.4      | 46.4        | 100%        | 1e-04   | 100%  | <a href="#">gij664773944 XP_008506219.1</a> |
| <a href="#">PREDICTED: attractin isoform X2 [Homo sapiens]</a>                    | 46.4      | 46.4        | 100%        | 1e-04   | 100%  | <a href="#">gij530426021 XP_005260918.1</a> |
| <a href="#">PREDICTED: attractin isoform X1 [Papio anubis]</a>                    | 46.4      | 46.4        | 100%        | 1e-04   | 100%  | <a href="#">gij685567343 XP_009214751.1</a> |
| <a href="#">PREDICTED: attractin isoform X2 [Saimiri boliviensis boliviensis]</a> | 46.4      | 46.4        | 100%        | 1e-04   | 100%  | <a href="#">gij725600053 XP_010350112.1</a> |
| <a href="#">PREDICTED: attractin isoform X1 [Saimiri boliviensis boliviensis]</a> | 46.4      | 46.4        | 100%        | 1e-04   | 100%  | <a href="#">gij725600051 XP_010350111.1</a> |
| <a href="#">PREDICTED: attractin [Nannospalax galili]</a>                         | 46.4      | 46.4        | 100%        | 1e-04   | 100%  | <a href="#">gij674060132 XP_008836714.1</a> |
| <a href="#">PREDICTED: attractin [Balaenoptera acutorostrata scammoni]</a>        | 46.4      | 46.4        | 100%        | 1e-04   | 100%  | <a href="#">gij594697511 XP_007195912.1</a> |
| <a href="#">PREDICTED: attractin [Tarsius syrichta]</a>                           | 46.4      | 46.4        | 100%        | 1e-04   | 100%  | <a href="#">gij640796924 XP_008054571.1</a> |
| <a href="#">unnamed protein product [Homo sapiens]</a>                            | 46.4      | 46.4        | 100%        | 1e-04   | 100%  | <a href="#">gij194380362 BAG63948.1</a>     |
| <a href="#">attractin isoform 4 [Homo sapiens]</a>                                | 46.4      | 46.4        | 100%        | 1e-04   | 100%  | <a href="#">gij333440461 NP_001193976.1</a> |
| <a href="#">PREDICTED: attractin isoform 2 [Nomascus leucogenys]</a>              | 46.4      | 46.4        | 100%        | 1e-04   | 100%  | <a href="#">gij332257827 XP_003278006.1</a> |
| <a href="#">PREDICTED: attractin isoform 2 [Dasypus novemcinctus]</a>             | 46.4      | 46.4        | 100%        | 1e-04   | 100%  | <a href="#">gij488545593 XP_004464327.1</a> |
| <a href="#">attractin [Cricetulus griseus]</a>                                    | 46.4      | 46.4        | 100%        | 1e-04   | 100%  | <a href="#">gij537146168 ERE69758.1</a>     |
| <a href="#">Attractin [Fukomys damarensis]</a>                                    | 46.4      | 46.4        | 100%        | 1e-04   | 100%  | <a href="#">gij676263950 KFO20529.1</a>     |

|                                                                            |      |      |      |       |      |                                             |
|----------------------------------------------------------------------------|------|------|------|-------|------|---------------------------------------------|
| Attractin [Myotis davidii]                                                 | 46.4 | 46.4 | 100% | 1e-04 | 100% | <a href="#">gij432111133 ELK34519.1</a>     |
| <a href="#">PREDICTED: attractin [Pantholops hodgsonii]</a>                | 46.4 | 46.4 | 100% | 1e-04 | 100% | <a href="#">gij556758951 XP_005974805.1</a> |
| <a href="#">PREDICTED: attractin [Sus scrofa]</a>                          | 46.4 | 46.4 | 100% | 1e-04 | 100% | <a href="#">gij545879723 XP_001927324.5</a> |
| <a href="#">PREDICTED: attractin isoform 2 [Ceratotherium simum simum]</a> | 46.4 | 46.4 | 100% | 1e-04 | 100% | <a href="#">gij478519276 XP_004433860.1</a> |
| <a href="#">PREDICTED: attractin isoform X2 [Condylura cristata]</a>       | 46.4 | 46.4 | 100% | 1e-04 | 100% | <a href="#">gij507961710 XP_004687418.1</a> |
| <a href="#">PREDICTED: attractin [Gorilla gorilla gorilla]</a>             | 46.4 | 46.4 | 100% | 1e-04 | 100% | <a href="#">gij426390844 XP_004061806.1</a> |
| <a href="#">PREDICTED: attractin isoform X4 [Pan troglodytes]</a>          | 46.4 | 46.4 | 100% | 1e-04 | 100% | <a href="#">gij694977854 XP_009435012.1</a> |
| Attractin [Myotis brandtii]                                                | 46.4 | 46.4 | 100% | 1e-04 | 100% | <a href="#">gij521031210 EPQ12996.1</a>     |
| <a href="#">PREDICTED: attractin isoform 1 [Nomascus leucogenys]</a>       | 46.4 | 46.4 | 100% | 1e-04 | 100% | <a href="#">gij332257825 XP_003278005.1</a> |
| <a href="#">secreted attractin precursor [Homo sapiens]</a>                | 46.4 | 46.4 | 100% | 1e-04 | 100% | <a href="#">gij8118083 AAF72882.1</a>       |
| <a href="#">unnamed protein product [Homo sapiens]</a>                     | 46.4 | 46.4 | 100% | 1e-04 | 100% | <a href="#">gij158259481 BAF85699.1</a>     |
| <a href="#">attractin isoform 2 preproprotein [Homo sapiens]</a>           | 46.4 | 46.4 | 100% | 1e-04 | 100% | <a href="#">gij21450863 NP_647538.1</a>     |
| <a href="#">Mahogany-like protein [Macaca mulatta]</a>                     | 46.4 | 46.4 | 100% | 1e-04 | 100% | <a href="#">gij355563316 EHH19878.1</a>     |
| <a href="#">attractin [Rattus norvegicus]</a>                              | 46.4 | 46.4 | 100% | 1e-04 | 100% | <a href="#">gij12275312 BAB21018.1</a>      |
| <a href="#">attractin, isoform CRA_a [Rattus norvegicus]</a>               | 46.4 | 46.4 | 100% | 1e-04 | 100% | <a href="#">gij149023319 EDL80213.1</a>     |
| <a href="#">PREDICTED: attractin isoform X3 [Bubalus bubalis]</a>          | 46.4 | 46.4 | 100% | 1e-04 | 100% | <a href="#">gij594099680 XP_006072965.1</a> |
| <a href="#">PREDICTED: LOW QUALITY PROTEIN: attractin [Pan paniscus]</a>   | 46.4 | 46.4 | 100% | 1e-04 | 100% | <a href="#">gij675763672 XP_008973079.1</a> |
| <a href="#">PREDICTED: attractin isoform X2 [Canis lupus familiaris]</a>   | 46.4 | 46.4 | 100% | 1e-04 | 100% | <a href="#">gij545540090 XP_005634905.1</a> |
| <a href="#">PREDICTED: attractin isoform X2 [Heterocephalus glaber]</a>    | 46.4 | 46.4 | 100% | 1e-04 | 100% | <a href="#">gij512956910 XP_004840783.1</a> |
| <a href="#">PREDICTED: attractin isoform X3 [Pan troglodytes]</a>          | 46.4 | 46.4 | 100% | 1e-04 | 100% | <a href="#">gij694977852 XP_009435011.1</a> |
| <a href="#">attractin [Sus scrofa]</a>                                     | 46.4 | 46.4 | 100% | 1e-04 | 100% | <a href="#">gij146741346 BAF62328.1</a>     |
| <a href="#">PREDICTED: attractin isoform X1 [Homo sapiens]</a>             | 46.4 | 46.4 | 100% | 1e-04 | 100% | <a href="#">gij530426019 XP_005260917.1</a> |
| <a href="#">PREDICTED: attractin isoform X4 [Macaca fascicularis]</a>      | 46.4 | 46.4 | 100% | 1e-04 | 100% | <a href="#">gij544464516 XP_005568512.1</a> |
| <a href="#">PREDICTED: attractin isoform X5 [Chlorocebus sabaeus]</a>      | 46.4 | 46.4 | 100% | 1e-04 | 100% | <a href="#">gij635021368 XP_008017720.1</a> |
| <a href="#">PREDICTED: attractin isoform X2 [Mustela putorius furo]</a>    | 46.4 | 46.4 | 100% | 1e-04 | 100% | <a href="#">gij511906947 XP_004772933.1</a> |
| <a href="#">Mahogany-like protein [Macaca fascicularis]</a>                | 46.4 | 46.4 | 100% | 1e-04 | 100% | <a href="#">gij355784657 EHH65508.1</a>     |
| <a href="#">PREDICTED: attractin [Myotis davidii]</a>                      | 46.4 | 46.4 | 100% | 1e-04 | 100% | <a href="#">gij584075971 XP_006758187.1</a> |
| <a href="#">PREDICTED: attractin [Panthera tigris altaica]</a>             | 46.4 | 46.4 | 100% | 1e-04 | 100% | <a href="#">gij591291970 XP_007073329.1</a> |
| <a href="#">PREDICTED: attractin [Myotis brandtii]</a>                     | 46.4 | 46.4 | 100% | 1e-04 | 100% | <a href="#">gij554560893 XP_005874816.1</a> |
| <a href="#">PREDICTED: attractin isoform X3 [Macaca fascicularis]</a>      | 46.4 | 46.4 | 100% | 1e-04 | 100% | <a href="#">gij544464514 XP_005568511.1</a> |
| <a href="#">PREDICTED: attractin-like [Galeopterus variegatus]</a>         | 46.4 | 46.4 | 100% | 1e-04 | 100% | <a href="#">gij667324076 XP_008589101.1</a> |
| <a href="#">PREDICTED: attractin isoform X4 [Chlorocebus sabaeus]</a>      | 46.4 | 46.4 | 100% | 1e-04 | 100% | <a href="#">gij635021366 XP_008017712.1</a> |
| <a href="#">PREDICTED: attractin [Capra hircus]</a>                        | 46.4 | 46.4 | 100% | 1e-04 | 100% | <a href="#">gij548490191 XP_005688293.1</a> |
| <a href="#">Attractin [Heterocephalus glaber]</a>                          | 46.4 | 46.4 | 100% | 1e-04 | 100% | <a href="#">gij351701383 EHB04302.1</a>     |
| <a href="#">PREDICTED: attractin [Rhinopithecus roxellana]</a>             | 46.4 | 46.4 | 100% | 1e-04 | 100% | <a href="#">gij724902357 XP_010377335.1</a> |
| <a href="#">PREDICTED: attractin isoform 1 [Dasyurus novemcinctus]</a>     | 46.4 | 46.4 | 100% | 1e-04 | 100% | <a href="#">gij488545591 XP_004464326.1</a> |
| <a href="#">PREDICTED: attractin isoform X1 [Cricetulus griseus]</a>       | 46.4 | 46.4 | 100% | 1e-04 | 100% | <a href="#">gij354473756 XP_003499099.1</a> |
| <a href="#">PREDICTED: attractin [Camelus ferus]</a>                       | 46.4 | 46.4 | 100% | 1e-04 | 100% | <a href="#">gij560921992 XP_006187198.1</a> |
| <a href="#">PREDICTED: attractin [Sorex araneus]</a>                       | 46.4 | 46.4 | 100% | 1e-04 | 100% | <a href="#">gij505831534 XP_004611050.1</a> |
| <a href="#">PREDICTED: attractin [Myotis lucifugus]</a>                    | 46.4 | 46.4 | 100% | 1e-04 | 100% | <a href="#">gij558159591 XP_006096513.1</a> |
| <a href="#">attractin [Cricetulus griseus]</a>                             | 46.4 | 46.4 | 100% | 1e-04 | 100% | <a href="#">gij537146167 ERE69757.1</a>     |
| <a href="#">PREDICTED: attractin [Bos mutus]</a>                           | 46.4 | 46.4 | 100% | 1e-04 | 100% | <a href="#">gij555963925 XP_005894036.1</a> |
| <a href="#">PREDICTED: attractin [Ursus maritimus]</a>                     | 46.4 | 46.4 | 100% | 1e-04 | 100% | <a href="#">gij671021680 XP_008701660.1</a> |
| <a href="#">hypothetical protein PANDA_007354 [Ailuropoda melanoleuca]</a> | 46.4 | 46.4 | 100% | 1e-04 | 100% | <a href="#">gij281339872 EFB15456.1</a>     |
| <a href="#">PREDICTED: attractin-like [Ailuropoda melanoleuca]</a>         | 46.4 | 46.4 | 100% | 1e-04 | 100% | <a href="#">gij301766802 XP_002918837.1</a> |

|                                                                            |      |      |      |       |      |                                             |
|----------------------------------------------------------------------------|------|------|------|-------|------|---------------------------------------------|
| <a href="#">PREDICTED: attractin [Mustela putorius furo]</a>               | 46.4 | 46.4 | 100% | 1e-04 | 100% | <a href="#">gil511947743 XP_004792355.1</a> |
| <a href="#">attractin, isoform CRA_b [Homo sapiens]</a>                    | 46.4 | 46.4 | 100% | 1e-04 | 100% | <a href="#">gil119630936 EAX10531.1</a>     |
| <a href="#">PREDICTED: attractin isoform X3 [Chlorocebus sabaeus]</a>      | 46.4 | 46.4 | 100% | 1e-04 | 100% | <a href="#">gil635021364 XP_008017707.1</a> |
| <a href="#">PREDICTED: attractin [Fukomys damarensis]</a>                  | 46.4 | 46.4 | 100% | 1e-04 | 100% | <a href="#">gil731281216 XP_010609356.1</a> |
| <a href="#">PREDICTED: attractin [Heterocephalus glaber]</a>               | 46.4 | 46.4 | 100% | 1e-04 | 100% | <a href="#">gil512849696 XP_004886859.1</a> |
| <a href="#">PREDICTED: attractin [Ovis aries]</a>                          | 46.4 | 46.4 | 100% | 1e-04 | 100% | <a href="#">gil426241795 XP_004014773.1</a> |
| <a href="#">PREDICTED: attractin [Peromyscus maniculatus bairdii]</a>      | 46.4 | 46.4 | 100% | 1e-04 | 100% | <a href="#">gil589943852 XP_006984624.1</a> |
| <a href="#">PREDICTED: attractin [Felis catus]</a>                         | 46.4 | 46.4 | 100% | 1e-04 | 100% | <a href="#">gil586981105 XP_003983758.2</a> |
| <a href="#">PREDICTED: attractin isoform X2 [Pan troglodytes]</a>          | 46.4 | 46.4 | 100% | 1e-04 | 100% | <a href="#">gil694977850 XP_009435010.1</a> |
| <a href="#">PREDICTED: attractin isoform X2 [Chlorocebus sabaeus]</a>      | 46.4 | 46.4 | 100% | 1e-04 | 100% | <a href="#">gil635021362 XP_008017704.1</a> |
| <a href="#">PREDICTED: attractin [Otolemur garnettii]</a>                  | 46.4 | 46.4 | 100% | 1e-04 | 100% | <a href="#">gil395830288 XP_003788264.1</a> |
| <a href="#">PREDICTED: attractin [Erinaceus europaeus]</a>                 | 46.4 | 46.4 | 100% | 1e-04 | 100% | <a href="#">gil617558695 XP_007539650.1</a> |
| <a href="#">PREDICTED: attractin [Vicugna pacos]</a>                       | 46.4 | 46.4 | 100% | 1e-04 | 100% | <a href="#">gil560970220 XP_006207473.1</a> |
| <a href="#">PREDICTED: attractin [Echinops telfairi]</a>                   | 46.4 | 46.4 | 100% | 1e-04 | 100% | <a href="#">gil507626122 XP_004697922.1</a> |
| <a href="#">attractin [Bos taurus]</a>                                     | 46.4 | 46.4 | 100% | 1e-04 | 100% | <a href="#">gil253560524 ACT32973.1</a>     |
| <a href="#">PREDICTED: attractin isoform X1 [Pteropus alecto]</a>          | 46.4 | 46.4 | 100% | 1e-04 | 100% | <a href="#">gil586533632 XP_006921705.1</a> |
| <a href="#">PREDICTED: attractin [Eptesicus fuscus]</a>                    | 46.4 | 46.4 | 100% | 1e-04 | 100% | <a href="#">gil641701319 XP_008139256.1</a> |
| <a href="#">attractin [Bos taurus]</a>                                     | 46.4 | 46.4 | 100% | 1e-04 | 100% | <a href="#">gil27806737 NP_776420.1</a>     |
| <a href="#">PREDICTED: attractin isoform X2 [Bubalus bubalis]</a>          | 46.4 | 46.4 | 100% | 1e-04 | 100% | <a href="#">gil594099678 XP_006072964.1</a> |
| <a href="#">PREDICTED: attractin isoform X3 [Canis lupus familiaris]</a>   | 46.4 | 46.4 | 100% | 1e-04 | 100% | <a href="#">gil73991942 XP_534360.2</a>     |
| <a href="#">PREDICTED: attractin isoform 1 [Ceratotherium simum simum]</a> | 46.4 | 46.4 | 100% | 1e-04 | 100% | <a href="#">gil478519274 XP_004433859.1</a> |
| <a href="#">PREDICTED: attractin [Orcinus orca]</a>                        | 46.4 | 46.4 | 100% | 1e-04 | 100% | <a href="#">gil466084723 XP_004285351.1</a> |
| <a href="#">PREDICTED: attractin [Lipotes vexillifer]</a>                  | 46.4 | 46.4 | 100% | 1e-04 | 100% | <a href="#">gil602710450 XP_007465469.1</a> |
| <a href="#">PREDICTED: attractin isoform X1 [Condylura cristata]</a>       | 46.4 | 46.4 | 100% | 1e-04 | 100% | <a href="#">gil507961707 XP_004687417.1</a> |
| <a href="#">PREDICTED: attractin [Odobenus rosmarus divergens]</a>         | 46.4 | 46.4 | 100% | 1e-04 | 100% | <a href="#">gil472357214 XP_004398236.1</a> |
| <a href="#">PREDICTED: attractin isoform X1 [Mustela putorius furo]</a>    | 46.4 | 46.4 | 100% | 1e-04 | 100% | <a href="#">gil511906945 XP_004772932.1</a> |
| <a href="#">PREDICTED: attractin [Chrysochloris asiatica]</a>              | 46.4 | 46.4 | 100% | 1e-04 | 100% | <a href="#">gil586488825 XP_006874887.1</a> |

## Alignments

Download [GenPept](#) [Graphics](#) ▼ Next ▲ Previous ▲ Descriptions

### Attractin [Fukomys damarensis]

Sequence ID: [gil676269096|gb|KFO24512.1](#) Length: 740 Number of Matches: 1

[Related Information](#)

Range 1: 322 to 335 [GenPept](#) [Graphics](#) ▼ Next Match ▲ Previous Match

| Score          | Expect | Identities  | Positives   | Gaps     |
|----------------|--------|-------------|-------------|----------|
| 46.4 bits(102) | 1e-04  | 14/14(100%) | 14/14(100%) | 0/14(0%) |

Query 1 KIDSTGNVTNELRV 14  
 KIDSTGNVTNELRV  
 Sbjct 322 KIDSTGNVTNELRV 335

Download [GenPept](#) [Graphics](#) ▼ Next ▲ Previous ▲ Descriptions

### Attractin [Tupaia chinensis]

Sequence ID: [gil444519420|gb|ELV12829.1](#) Length: 860 Number of Matches: 1

[Related Information](#)

Range 1: 57 to 70 [GenPept](#) [Graphics](#) ▼ Next Match ▲ Previous Match

| Score          | Expect | Identities  | Positives   | Gaps     |
|----------------|--------|-------------|-------------|----------|
| 46.4 bits(102) | 1e-04  | 14/14(100%) | 14/14(100%) | 0/14(0%) |

Query 1 KIDSTGNVTNELRV 14

Sbjct 57 KIDSTGNVTNELRV  
KIDSTGNVTNELRV 70

[Download](#) [GenPept](#) [Graphics](#)

[▼ Next](#) [▲ Previous](#) [▲ Descriptions](#)

**PREDICTED: attractin-like [Leptonychotes weddellii]**

Sequence ID: [gi|585160208|ref|XP\\_006732353.1](#) Length: 899 Number of Matches: 1

Range 1: 213 to 226 [GenPept](#) [Graphics](#)

[▼ Next Match](#) [▲ Previous Match](#)

| Score          | Expect | Identities  | Positives   | Gaps     |
|----------------|--------|-------------|-------------|----------|
| 46.4 bits(102) | 1e-04  | 14/14(100%) | 14/14(100%) | 0/14(0%) |

Query 1 KIDSTGNVTNELRV 14  
KIDSTGNVTNELRV  
Sbjct 213 KIDSTGNVTNELRV 226

**Related Information**

[Gene](#) - associated gene details  
[Map Viewer](#) - aligned genomic context

[Download](#) [GenPept](#) [Graphics](#)

[▼ Next](#) [▲ Previous](#) [▲ Descriptions](#)

**PREDICTED: attractin isoform X2 [Papio anubis]**

Sequence ID: [gi|685567345|ref|XP\\_009214752.1](#) Length: 989 Number of Matches: 1

Range 1: 100 to 113 [GenPept](#) [Graphics](#)

[▼ Next Match](#) [▲ Previous Match](#)

| Score          | Expect | Identities  | Positives   | Gaps     |
|----------------|--------|-------------|-------------|----------|
| 46.4 bits(102) | 1e-04  | 14/14(100%) | 14/14(100%) | 0/14(0%) |

Query 1 KIDSTGNVTNELRV 14  
KIDSTGNVTNELRV  
Sbjct 100 KIDSTGNVTNELRV 113

**Related Information**

[Gene](#) - associated gene details  
[Map Viewer](#) - aligned genomic context

[Download](#) [GenPept](#) [Graphics](#)

[▼ Next](#) [▲ Previous](#) [▲ Descriptions](#)

**attractin [Canis lupus familiaris]**

Sequence ID: [gi|339892849|gb|AEK21787.1](#) Length: 1001 Number of Matches: 1

Range 1: 308 to 321 [GenPept](#) [Graphics](#)

[▼ Next Match](#) [▲ Previous Match](#)

| Score          | Expect | Identities  | Positives   | Gaps     |
|----------------|--------|-------------|-------------|----------|
| 46.4 bits(102) | 1e-04  | 14/14(100%) | 14/14(100%) | 0/14(0%) |

Query 1 KIDSTGNVTNELRV 14  
KIDSTGNVTNELRV  
Sbjct 308 KIDSTGNVTNELRV 321

**Related Information**

[Gene](#) - associated gene details

BLAST is a registered trademark of the National Library of Medicine.



NCBI/ BLAST/ blastp suite/ Formatting Results - BHF0KAZN015

Your search parameters were adjusted to search for a short input sequence.

Edit and Resubmit Save Search Strategies Formatting options Download

YouTube How to read this page Blast report description

ATRN\_KISDSSDTVECECSENWKG\_Mod

RID BHF0KAZN015 (Expires on 01-17 14:21 pm)

Query ID Icl|95636
Description None
Molecule type amino acid
Query Length 19

Database Name nr
Description All non-redundant GenBank CDS translations+PDB+SwissProt+PIR excluding environmental samples from WGS projects
Program BLASTP 2.2.30+ Citation

Other reports: Search Summary Taxonomy reports Distance tree of results Multiple alignment

Graphic Summary

Show Conserved Domains

No putative conserved domains have been detected

Distribution of 104 Blast Hits on the Query Sequence

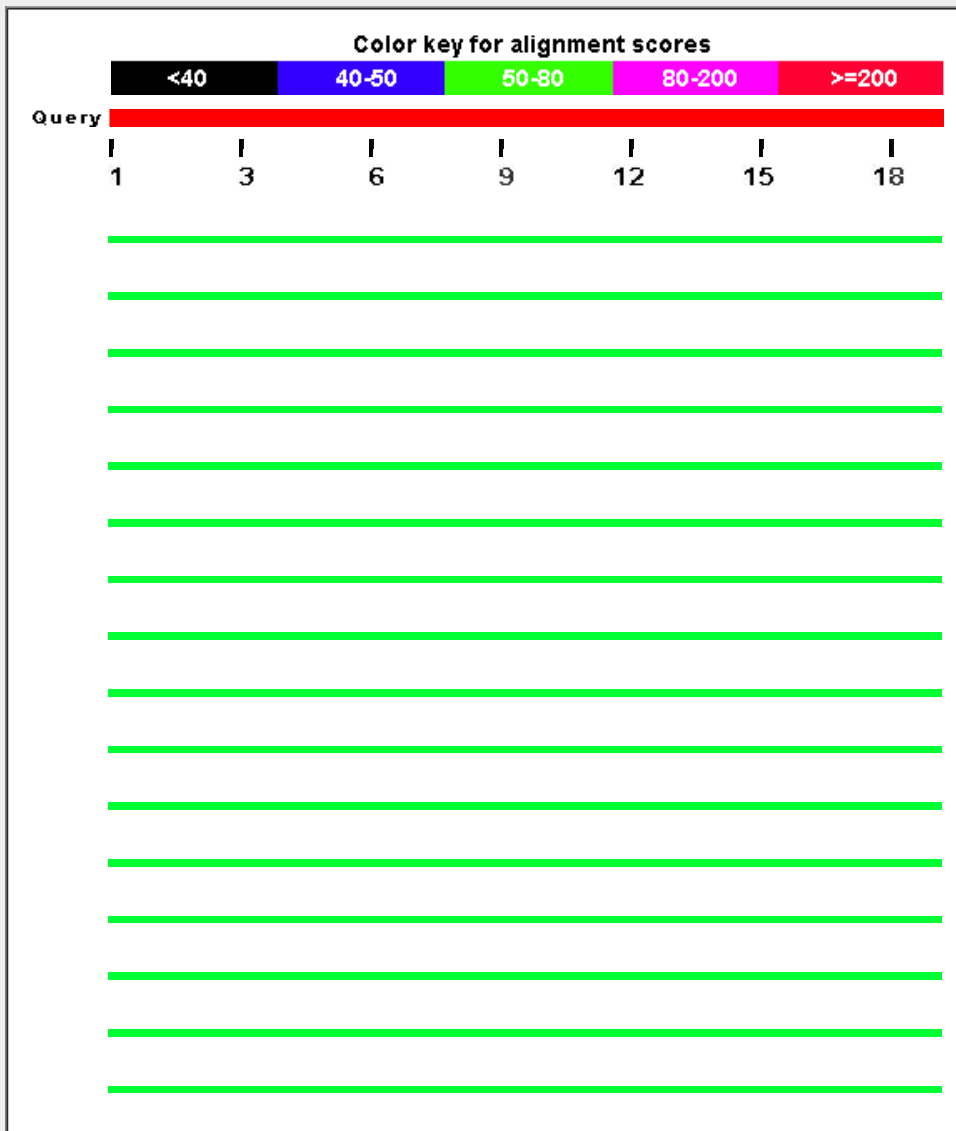

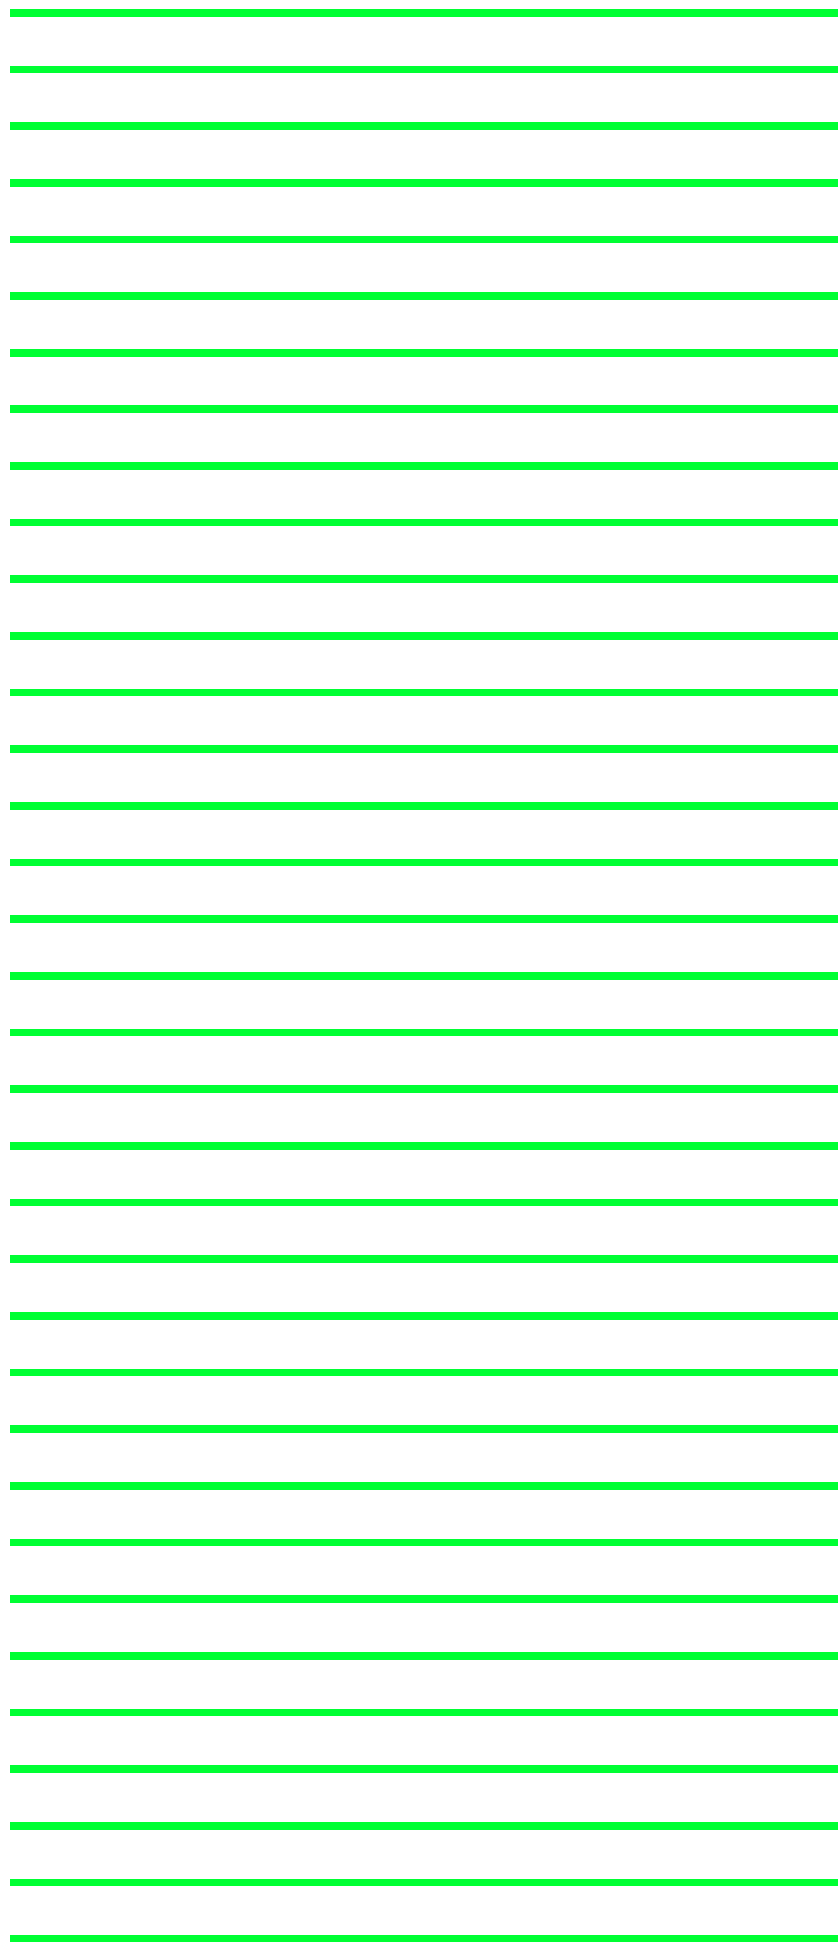

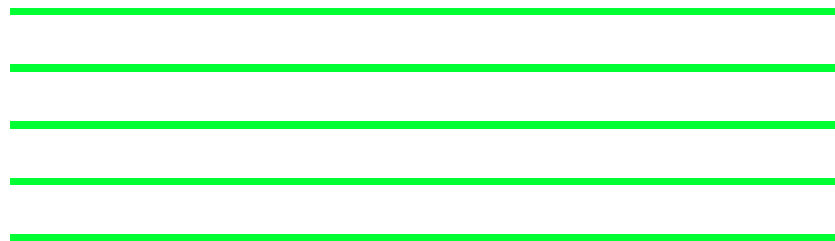

## Descriptions

### Sequences producing significant alignments:

Select: [All](#) [None](#) Selected: 0

| <a href="#">Alignments</a> <a href="#">Download</a> <a href="#">GenPept</a> <a href="#">Graphics</a> <a href="#">Distance tree of results</a> <a href="#">Multiple alignment</a> |           |             |             |         |       |                                             |
|----------------------------------------------------------------------------------------------------------------------------------------------------------------------------------|-----------|-------------|-------------|---------|-------|---------------------------------------------|
| Description                                                                                                                                                                      | Max score | Total score | Query cover | E value | Ident | Accession                                   |
| <a href="#">PREDICTED: attractin isoform X2 [Homo sapiens]</a>                                                                                                                   | 63.0      | 63.0        | 100%        | 7e-10   | 95%   | <a href="#">gil530426021 XP_005260918.1</a> |
| <a href="#">unnamed protein product [Homo sapiens]</a>                                                                                                                           | 63.0      | 63.0        | 100%        | 7e-10   | 95%   | <a href="#">gil194380362 BAG63948.1</a>     |
| <a href="#">attractin isoform 4 [Homo sapiens]</a>                                                                                                                               | 63.0      | 63.0        | 100%        | 7e-10   | 95%   | <a href="#">gil333440461 NP_001193976.1</a> |
| <a href="#">PREDICTED: attractin [Gorilla gorilla gorilla]</a>                                                                                                                   | 63.0      | 63.0        | 100%        | 7e-10   | 95%   | <a href="#">gil426390844 XP_004061806.1</a> |
| <a href="#">PREDICTED: attractin isoform X4 [Pan troglodytes]</a>                                                                                                                | 63.0      | 63.0        | 100%        | 7e-10   | 95%   | <a href="#">gil694977854 XP_009435012.1</a> |
| <a href="#">secreted attractin precursor [Homo sapiens]</a>                                                                                                                      | 63.0      | 63.0        | 100%        | 7e-10   | 95%   | <a href="#">gil8118083 AAF72882.1</a>       |
| <a href="#">unnamed protein product [Homo sapiens]</a>                                                                                                                           | 63.0      | 63.0        | 100%        | 7e-10   | 95%   | <a href="#">gil158259481 BAF85699.1</a>     |
| <a href="#">attractin isoform 2 preproprotein [Homo sapiens]</a>                                                                                                                 | 63.0      | 63.0        | 100%        | 7e-10   | 95%   | <a href="#">gil21450863 NP_647538.1</a>     |
| <a href="#">PREDICTED: LOW QUALITY PROTEIN: attractin [Pan paniscus]</a>                                                                                                         | 63.0      | 63.0        | 100%        | 7e-10   | 95%   | <a href="#">gil675763672 XP_008973079.1</a> |
| <a href="#">PREDICTED: attractin isoform X3 [Pan troglodytes]</a>                                                                                                                | 63.0      | 63.0        | 100%        | 7e-10   | 95%   | <a href="#">gil694977852 XP_009435011.1</a> |
| <a href="#">PREDICTED: attractin isoform X1 [Homo sapiens]</a>                                                                                                                   | 63.0      | 63.0        | 100%        | 7e-10   | 95%   | <a href="#">gil530426019 XP_005260917.1</a> |
| <a href="#">attractin, isoform CRA_b [Homo sapiens]</a>                                                                                                                          | 63.0      | 63.0        | 100%        | 7e-10   | 95%   | <a href="#">gil119630936 EAX10531.1</a>     |
| <a href="#">PREDICTED: attractin isoform X2 [Pan troglodytes]</a>                                                                                                                | 63.0      | 63.0        | 100%        | 7e-10   | 95%   | <a href="#">gil694977850 XP_009435010.1</a> |
| <a href="#">PREDICTED: attractin isoform X1 [Pan troglodytes]</a>                                                                                                                | 63.0      | 63.0        | 100%        | 7e-10   | 95%   | <a href="#">gil332857715 XP_003316827.1</a> |
| <a href="#">membrane attractin precursor [Homo sapiens]</a>                                                                                                                      | 63.0      | 63.0        | 100%        | 7e-10   | 95%   | <a href="#">gil8118082 AAF72881.1</a>       |
| <a href="#">attractin isoform 1 preproprotein [Homo sapiens]</a>                                                                                                                 | 63.0      | 63.0        | 100%        | 7e-10   | 95%   | <a href="#">gil21450861 NP_647537.1</a>     |
| <a href="#">PREDICTED: attractin isoform 2 [Nomascus leucogenys]</a>                                                                                                             | 60.4      | 60.4        | 100%        | 5e-09   | 89%   | <a href="#">gil332257827 XP_003278006.1</a> |
| <a href="#">PREDICTED: attractin isoform 1 [Nomascus leucogenys]</a>                                                                                                             | 60.4      | 60.4        | 100%        | 5e-09   | 89%   | <a href="#">gil332257825 XP_003278005.1</a> |
| <a href="#">attractin-2 [Homo sapiens]</a>                                                                                                                                       | 60.4      | 60.4        | 100%        | 5e-09   | 89%   | <a href="#">gil4093196 AAD03057.1</a>       |
| <a href="#">PREDICTED: attractin isoform X3 [Chinchilla lanigera]</a>                                                                                                            | 60.4      | 60.4        | 100%        | 5e-09   | 89%   | <a href="#">gil533131617 XP_005380852.1</a> |
| <a href="#">PREDICTED: attractin-like [Octodon degus]</a>                                                                                                                        | 60.4      | 60.4        | 100%        | 5e-09   | 89%   | <a href="#">gil507657234 XP_004634315.1</a> |
| <a href="#">PREDICTED: attractin isoform X2 [Chinchilla lanigera]</a>                                                                                                            | 60.4      | 60.4        | 100%        | 5e-09   | 89%   | <a href="#">gil533131615 XP_005380851.1</a> |
| <a href="#">PREDICTED: attractin isoform X1 [Chinchilla lanigera]</a>                                                                                                            | 60.4      | 60.4        | 100%        | 5e-09   | 89%   | <a href="#">gil533131613 XP_005380850.1</a> |
| <a href="#">PREDICTED: attractin isoform X2 [Saimiri boliviensis boliviensis]</a>                                                                                                | 57.9      | 57.9        | 100%        | 4e-08   | 84%   | <a href="#">gil725600053 XP_010350112.1</a> |
| <a href="#">PREDICTED: attractin isoform X1 [Saimiri boliviensis boliviensis]</a>                                                                                                | 57.9      | 57.9        | 100%        | 4e-08   | 84%   | <a href="#">gil725600051 XP_010350111.1</a> |
| <a href="#">Mahogany-like protein [Macaca mulatta]</a>                                                                                                                           | 57.9      | 57.9        | 100%        | 4e-08   | 84%   | <a href="#">gil355563316 EHH19878.1</a>     |
| <a href="#">PREDICTED: attractin isoform X4 [Macaca fascicularis]</a>                                                                                                            | 57.9      | 57.9        | 100%        | 4e-08   | 84%   | <a href="#">gil544464516 XP_005568512.1</a> |
| <a href="#">PREDICTED: attractin isoform X5 [Chlorocebus sabaeus]</a>                                                                                                            | 57.9      | 57.9        | 100%        | 4e-08   | 84%   | <a href="#">gil635021368 XP_008017720.1</a> |

|                                                                                    |      |      |      |       |     |                                             |
|------------------------------------------------------------------------------------|------|------|------|-------|-----|---------------------------------------------|
| Mahogany-like protein [ <i>Macaca fascicularis</i> ]                               | 57.9 | 57.9 | 100% | 4e-08 | 84% | <a href="#">gij355784657 EHH65508.1</a>     |
| <a href="#">PREDICTED: attractin isoform X3 [<i>Macaca fascicularis</i>]</a>       | 57.9 | 57.9 | 100% | 4e-08 | 84% | <a href="#">gij544464514 XP_005568511.1</a> |
| <a href="#">PREDICTED: attractin-like [<i>Galeopterus variegatus</i>]</a>          | 57.9 | 57.9 | 100% | 4e-08 | 84% | <a href="#">gij667324076 XP_008589101.1</a> |
| <a href="#">PREDICTED: attractin isoform X4 [<i>Chlorocebus sabaeus</i>]</a>       | 57.9 | 57.9 | 100% | 4e-08 | 84% | <a href="#">gij635021366 XP_008017712.1</a> |
| <a href="#">PREDICTED: attractin [<i>Rhinopithecus roxellana</i>]</a>              | 57.9 | 57.9 | 100% | 4e-08 | 84% | <a href="#">gij724902357 XP_010377335.1</a> |
| <a href="#">PREDICTED: attractin isoform X3 [<i>Chlorocebus sabaeus</i>]</a>       | 57.9 | 57.9 | 100% | 4e-08 | 84% | <a href="#">gij635021364 XP_008017707.1</a> |
| <a href="#">PREDICTED: attractin isoform X2 [<i>Chlorocebus sabaeus</i>]</a>       | 57.9 | 57.9 | 100% | 4e-08 | 84% | <a href="#">gij635021362 XP_008017704.1</a> |
| <a href="#">PREDICTED: attractin isoform X2 [<i>Macaca fascicularis</i>]</a>       | 57.9 | 57.9 | 100% | 4e-08 | 84% | <a href="#">gij544464512 XP_005568510.1</a> |
| <a href="#">PREDICTED: attractin [<i>Macaca mulatta</i>]</a>                       | 57.9 | 57.9 | 100% | 4e-08 | 84% | <a href="#">gij109092720 XP_001115192.1</a> |
| <a href="#">PREDICTED: attractin isoform X1 [<i>Chlorocebus sabaeus</i>]</a>       | 57.9 | 57.9 | 100% | 4e-08 | 84% | <a href="#">gij635021360 XP_008017700.1</a> |
| <a href="#">PREDICTED: attractin isoform X1 [<i>Macaca fascicularis</i>]</a>       | 57.9 | 57.9 | 100% | 4e-08 | 84% | <a href="#">gij544464510 XP_005568509.1</a> |
| <a href="#">PREDICTED: attractin isoform X6 [<i>Chlorocebus sabaeus</i>]</a>       | 57.9 | 57.9 | 100% | 4e-08 | 84% | <a href="#">gij635021370 XP_008017729.1</a> |
| <a href="#">PREDICTED: attractin-like [<i>Tursiops truncatus</i>]</a>              | 57.5 | 57.5 | 100% | 5e-08 | 84% | <a href="#">gij470629747 XP_004321558.1</a> |
| <a href="#">PREDICTED: attractin-like [<i>Physeter catodon</i>]</a>                | 57.5 | 57.5 | 100% | 5e-08 | 84% | <a href="#">gij593773084 XP_007124834.1</a> |
| <a href="#">PREDICTED: attractin [<i>Panholops hodgsonii</i>]</a>                  | 57.5 | 57.5 | 100% | 5e-08 | 84% | <a href="#">gij556758951 XP_005974805.1</a> |
| <a href="#">PREDICTED: attractin [<i>Sus scrofa</i>]</a>                           | 57.5 | 57.5 | 100% | 5e-08 | 84% | <a href="#">gij545879723 XP_001927324.5</a> |
| <a href="#">PREDICTED: attractin isoform 2 [<i>Ceratotherium simum simum</i>]</a>  | 57.5 | 57.5 | 100% | 5e-08 | 84% | <a href="#">gij478519276 XP_004433860.1</a> |
| <a href="#">PREDICTED: attractin isoform X1 [<i>Bos taurus</i>]</a>                | 57.5 | 57.5 | 100% | 5e-08 | 84% | <a href="#">gij741947708 XP_005214542.2</a> |
| <a href="#">PREDICTED: attractin isoform X3 [<i>Bubalus bubalis</i>]</a>           | 57.5 | 57.5 | 100% | 5e-08 | 84% | <a href="#">gij594099680 XP_006072965.1</a> |
| <a href="#">attractin [<i>Sus scrofa</i>]</a>                                      | 57.5 | 57.5 | 100% | 5e-08 | 84% | <a href="#">gij146741346 BAF62328.1</a>     |
| <a href="#">PREDICTED: attractin [<i>Panthera tigris altaica</i>]</a>              | 57.5 | 57.5 | 100% | 5e-08 | 84% | <a href="#">gij591291970 XP_007073329.1</a> |
| <a href="#">PREDICTED: attractin [<i>Capra hircus</i>]</a>                         | 57.5 | 57.5 | 100% | 5e-08 | 84% | <a href="#">gij548490191 XP_005688293.1</a> |
| <a href="#">PREDICTED: attractin [<i>Bos mutus</i>]</a>                            | 57.5 | 57.5 | 100% | 5e-08 | 84% | <a href="#">gij555963925 XP_005894036.1</a> |
| <a href="#">PREDICTED: attractin [<i>Ovis aries</i>]</a>                           | 57.5 | 57.5 | 100% | 5e-08 | 84% | <a href="#">gij426241795 XP_004014773.1</a> |
| <a href="#">PREDICTED: attractin [<i>Felis catus</i>]</a>                          | 57.5 | 57.5 | 100% | 5e-08 | 84% | <a href="#">gij586981105 XP_003983758.2</a> |
| <a href="#">PREDICTED: attractin [<i>Echinops telfairi</i>]</a>                    | 57.5 | 57.5 | 100% | 5e-08 | 84% | <a href="#">gij507626122 XP_004697922.1</a> |
| <a href="#">attractin [<i>Bos taurus</i>]</a>                                      | 57.5 | 57.5 | 100% | 5e-08 | 84% | <a href="#">gij253560524 ACT32973.1</a>     |
| <a href="#">attractin [<i>Bos taurus</i>]</a>                                      | 57.5 | 57.5 | 100% | 5e-08 | 84% | <a href="#">gij27806737 INP_776420.1</a>    |
| <a href="#">PREDICTED: attractin isoform X2 [<i>Bubalus bubalis</i>]</a>           | 57.5 | 57.5 | 100% | 5e-08 | 84% | <a href="#">gij594099678 XP_006072964.1</a> |
| <a href="#">PREDICTED: attractin isoform 1 [<i>Ceratotherium simum simum</i>]</a>  | 57.5 | 57.5 | 100% | 5e-08 | 84% | <a href="#">gij478519274 XP_004433859.1</a> |
| <a href="#">PREDICTED: attractin [<i>Bison bison bison</i>]</a>                    | 57.5 | 57.5 | 100% | 5e-08 | 84% | <a href="#">gij742104093 XP_010834932.1</a> |
| <a href="#">PREDICTED: attractin isoform X1 [<i>Bubalus bubalis</i>]</a>           | 57.5 | 57.5 | 100% | 5e-08 | 84% | <a href="#">gij594099676 XP_006072963.1</a> |
| <a href="#">PREDICTED: attractin [<i>Tupaia chinensis</i>]</a>                     | 57.1 | 57.1 | 100% | 7e-08 | 84% | <a href="#">gij562872246 XP_006164056.1</a> |
| <a href="#">PREDICTED: LOW QUALITY PROTEIN: attractin [<i>Cavia porcellus</i>]</a> | 56.2 | 56.2 | 100% | 1e-07 | 84% | <a href="#">gij514473642 XP_005008408.1</a> |
| <a href="#">PREDICTED: attractin [<i>Balaenoptera acutorostrata scammoni</i>]</a>  | 54.9 | 54.9 | 100% | 4e-07 | 79% | <a href="#">gij594697511 XP_007195912.1</a> |
| <a href="#">PREDICTED: attractin isoform X2 [<i>Heterocephalus glaber</i>]</a>     | 54.9 | 54.9 | 100% | 4e-07 | 84% | <a href="#">gij512956910 XP_004840783.1</a> |
| <a href="#">PREDICTED: attractin [<i>Trichechus manatus latirostris</i>]</a>       | 54.9 | 54.9 | 100% | 4e-07 | 79% | <a href="#">gij471400634 XP_004383126.1</a> |
| <a href="#">Attractin [<i>Heterocephalus glaber</i>]</a>                           | 54.9 | 54.9 | 100% | 4e-07 | 84% | <a href="#">gij351701383 EHB04302.1</a>     |
| <a href="#">PREDICTED: attractin [<i>Camelus ferus</i>]</a>                        | 54.9 | 54.9 | 100% | 4e-07 | 79% | <a href="#">gij560921992 XP_006187198.1</a> |
| <a href="#">PREDICTED: attractin [<i>Camelus dromedarius</i>]</a>                  | 54.9 | 54.9 | 100% | 4e-07 | 79% | <a href="#">gij744589171 XP_010986570.1</a> |
| <a href="#">PREDICTED: attractin [<i>Camelus bactrianus</i>]</a>                   | 54.9 | 54.9 | 100% | 4e-07 | 79% | <a href="#">gij743752427 XP_010971103.1</a> |
| <a href="#">PREDICTED: attractin [<i>Heterocephalus glaber</i>]</a>                | 54.9 | 54.9 | 100% | 4e-07 | 84% | <a href="#">gij512849696 XP_004886859.1</a> |
| <a href="#">PREDICTED: attractin isoform X1 [<i>Heterocephalus glaber</i>]</a>     | 54.9 | 54.9 | 100% | 4e-07 | 84% | <a href="#">gij512956908 XP_004840782.1</a> |
| <a href="#">PREDICTED: attractin [<i>Callithrix jacchus</i>]</a>                   | 54.9 | 54.9 | 100% | 4e-07 | 79% | <a href="#">gij296200062 XP_002747358.1</a> |
| <a href="#">PREDICTED: attractin [<i>Tarsius syrichta</i>]</a>                     | 54.5 | 54.5 | 100% | 5e-07 | 84% | <a href="#">gij640796924 XP_008054571.1</a> |



|                                                                            |      |      |      |       |     |                                             |
|----------------------------------------------------------------------------|------|------|------|-------|-----|---------------------------------------------|
| <a href="#">PREDICTED: attractin isoform X3 [Cricetulus griseus]</a>       | 54.1 | 74.7 | 94%  | 5e-07 | 88% | <a href="#">gil625288767 XP_007636126.1</a> |
| <a href="#">attractin [Cricetulus griseus]</a>                             | 54.1 | 74.7 | 94%  | 7e-07 | 88% | <a href="#">gil537146168 ERE69758.1</a>     |
| <a href="#">PREDICTED: attractin isoform X1 [Cricetulus griseus]</a>       | 54.1 | 74.7 | 94%  | 7e-07 | 88% | <a href="#">gil354473756 XP_003499099.1</a> |
| <a href="#">attractin [Cricetulus griseus]</a>                             | 54.1 | 74.7 | 94%  | 7e-07 | 88% | <a href="#">gil537146167 ERE69757.1</a>     |
| <a href="#">attractin [Mesocricetus auratus]</a>                           | 54.1 | 54.1 | 89%  | 7e-07 | 88% | <a href="#">gil528078159 NP_001268565.1</a> |
| <a href="#">PREDICTED: attractin [Equus przewalskii]</a>                   | 53.7 | 53.7 | 100% | 1e-06 | 79% | <a href="#">gil664773944 XP_008506219.1</a> |
| <a href="#">Attractin [Myotis brandtii]</a>                                | 53.7 | 53.7 | 100% | 1e-06 | 79% | <a href="#">gil521031210 EPQ12996.1</a>     |
| <a href="#">PREDICTED: attractin [Myotis brandtii]</a>                     | 53.7 | 53.7 | 100% | 1e-06 | 79% | <a href="#">gil554560893 XP_005874816.1</a> |
| <a href="#">PREDICTED: attractin [Myotis lucifugus]</a>                    | 53.7 | 53.7 | 100% | 1e-06 | 79% | <a href="#">gil558159591 XP_006096513.1</a> |
| <a href="#">PREDICTED: attractin isoform X1 [Pteropus alecto]</a>          | 53.7 | 53.7 | 100% | 1e-06 | 79% | <a href="#">gil586533632 XP_006921705.1</a> |
| <a href="#">PREDICTED: attractin [Orcinus orca]</a>                        | 53.7 | 53.7 | 100% | 1e-06 | 79% | <a href="#">gil466084723 XP_004285351.1</a> |
| <a href="#">PREDICTED: attractin isoform X2 [Pteropus alecto]</a>          | 53.7 | 53.7 | 100% | 1e-06 | 79% | <a href="#">gil586533634 XP_006921706.1</a> |
| <a href="#">PREDICTED: attractin isoform X2 [Condylura cristata]</a>       | 53.2 | 53.2 | 100% | 1e-06 | 79% | <a href="#">gil507961710 XP_004687418.1</a> |
| <a href="#">PREDICTED: attractin [Otolemur garnettii]</a>                  | 53.2 | 53.2 | 100% | 1e-06 | 79% | <a href="#">gil395830288 XP_003788264.1</a> |
| <a href="#">PREDICTED: attractin isoform X1 [Condylura cristata]</a>       | 53.2 | 53.2 | 100% | 1e-06 | 79% | <a href="#">gil507961707 XP_004687417.1</a> |
| <a href="#">PREDICTED: LOW QUALITY PROTEIN: attractin [Nannospalax ga]</a> | 52.8 | 52.8 | 100% | 2e-06 | 79% | <a href="#">gil674089498 XP_008852735.1</a> |
| <a href="#">PREDICTED: attractin [Orycteropus afer afer]</a>               | 52.8 | 52.8 | 100% | 2e-06 | 79% | <a href="#">gil634830430 XP_007958185.1</a> |
| <a href="#">PREDICTED: attractin [Vicugna pacos]</a>                       | 52.4 | 52.4 | 100% | 3e-06 | 74% | <a href="#">gil560970220 XP_006207473.1</a> |
| <a href="#">PREDICTED: attractin [Lipotes vexillifer]</a>                  | 52.0 | 52.0 | 100% | 4e-06 | 79% | <a href="#">gil602710450 XP_007465469.1</a> |
| <a href="#">Attractin [Fukomys damarensis]</a>                             | 51.5 | 51.5 | 94%  | 5e-06 | 78% | <a href="#">gil676269096 KFO24512.1</a>     |
| <a href="#">attractin [Rattus norvegicus]</a>                              | 51.5 | 51.5 | 89%  | 5e-06 | 88% | <a href="#">gil12275312 BAB21018.1</a>      |
| <a href="#">attractin isoform CRA_a [Rattus norvegicus]</a>                | 51.5 | 51.5 | 89%  | 5e-06 | 88% | <a href="#">gil149023319 EDL80213.1</a>     |
| <a href="#">PREDICTED: attractin [Microtus ochrogaster]</a>                | 51.5 | 51.5 | 89%  | 5e-06 | 88% | <a href="#">gil532045699 XP_005365652.1</a> |
| <a href="#">PREDICTED: attractin [Jaculus jaculus]</a>                     | 51.5 | 51.5 | 100% | 5e-06 | 74% | <a href="#">gil507555530 XP_004661535.1</a> |
| <a href="#">attractin precursor [Rattus norvegicus]</a>                    | 51.5 | 51.5 | 89%  | 5e-06 | 88% | <a href="#">gil13786196 NP_112641.1</a>     |
| <a href="#">PREDICTED: attractin-like [Leptonychotes weddellii]</a>        | 51.1 | 51.1 | 89%  | 7e-06 | 82% | <a href="#">gil585160208 XP_006732353.1</a> |
| <a href="#">PREDICTED: attractin isoform X2 [Mustela putorius furo]</a>    | 51.1 | 51.1 | 89%  | 7e-06 | 82% | <a href="#">gil511906947 XP_004772933.1</a> |

## Alignments

[Download](#) [GenPept](#) [Graphics](#) ▼ Next ▲ Previous ▲ Descriptions

**PREDICTED: attractin isoform X2 [Homo sapiens]**

Sequence ID: [gil530426021|ref|XP\\_005260918.1](#) Length: 1111 Number of Matches: 1

Range 1: 261 to 279 [GenPept](#) [Graphics](#) ▼ Next Match ▲ Previous Match

| Score          | Expect | Identities | Positives   | Gaps     |
|----------------|--------|------------|-------------|----------|
| 63.0 bits(141) | 7e-10  | 18/19(95%) | 19/19(100%) | 0/19(0%) |

Query 1 KISDSSDTVECECSENWKG 19  
 KIS+SSDTVECECSENWKG  
 Sbjct 261 KISNSSDTVECECSENWKG 279

### Related Information

[Gene](#) - associated gene details  
[Map Viewer](#) - aligned genomic context

[Download](#) [GenPept](#) [Graphics](#) ▼ Next ▲ Previous ▲ Descriptions

**unnamed protein product [Homo sapiens]**

Sequence ID: [gil194380362|dbj|BAG63948.1](#) Length: 1156 Number of Matches: 1

Range 1: 145 to 163 [GenPept](#) [Graphics](#) ▼ Next Match ▲ Previous Match

| Score          | Expect | Identities | Positives   | Gaps     |
|----------------|--------|------------|-------------|----------|
| 63.0 bits(141) | 7e-10  | 18/19(95%) | 19/19(100%) | 0/19(0%) |

Query 1 KISDSSDTVECECSENWKG 19

### Related Information

[Gene](#) - associated gene details

Sbjct 145 KIS+SSDTVECECSENWKG  
 KISNSSDTVECECSENWKG 163

[Download](#) [GenPept](#) [Graphics](#)

[▼ Next](#) [▲ Previous](#) [▲ Descriptions](#)

attractin isoform 4 [Homo sapiens]

Sequence ID: [gi|333440461|ref|NP\\_001193976.1|](#) Length: 1156 Number of Matches: 1

Range 1: 145 to 163 [GenPept](#) [Graphics](#)

[▼ Next Match](#) [▲ Previous Match](#)

| Score          | Expect | Identities | Positives   | Gaps     |
|----------------|--------|------------|-------------|----------|
| 63.0 bits(141) | 7e-10  | 18/19(95%) | 19/19(100%) | 0/19(0%) |

Query 1 KISDSSDTVECECSENWKG 19  
 KIS+SSDTVECECSENWKG  
 Sbjct 145 KISNSSDTVECECSENWKG 163

**Related Information**

- [Gene](#) - associated gene details
- [UniGene](#) - clustered expressed sequence tags
- [Map Viewer](#) - aligned genomic context

[Download](#) [GenPept](#) [Graphics](#)

[▼ Next](#) [▲ Previous](#) [▲ Descriptions](#)

PREDICTED: attractin [Gorilla gorilla gorilla]

Sequence ID: [gi|426390844|ref|XP\\_004061806.1|](#) Length: 1265 Number of Matches: 1

Range 1: 143 to 161 [GenPept](#) [Graphics](#)

[▼ Next Match](#) [▲ Previous Match](#)

| Score          | Expect | Identities | Positives   | Gaps     |
|----------------|--------|------------|-------------|----------|
| 63.0 bits(141) | 7e-10  | 18/19(95%) | 19/19(100%) | 0/19(0%) |

Query 1 KISDSSDTVECECSENWKG 19  
 KIS+SSDTVECECSENWKG  
 Sbjct 143 KISNSSDTVECECSENWKG 161

**Related Information**

- [Gene](#) - associated gene details
- [Map Viewer](#) - aligned genomic context

[Download](#) [GenPept](#) [Graphics](#)

[▼ Next](#) [▲ Previous](#) [▲ Descriptions](#)

PREDICTED: attractin isoform X4 [Pan troglodytes]

Sequence ID: [gi|694977854|ref|XP\\_009435012.1|](#) Length: 1269 Number of Matches: 1

Range 1: 260 to 278 [GenPept](#) [Graphics](#)

[▼ Next Match](#) [▲ Previous Match](#)

| Score          | Expect | Identities | Positives   | Gaps     |
|----------------|--------|------------|-------------|----------|
| 63.0 bits(141) | 7e-10  | 18/19(95%) | 19/19(100%) | 0/19(0%) |

Query 1 KISDSSDTVECECSENWKG 19  
 KIS+SSDTVECECSENWKG  
 Sbjct 260 KISNSSDTVECECSENWKG 278

**Related Information**

- [Gene](#) - associated gene details

BLAST is a registered trademark of the National Library of Medicine.

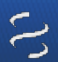

NCBI/ BLAST/ blastp suite/ Formatting Results - B915TPMR01R

Your search parameters were adjusted to search for a short input sequence.

Edit and Resubmit Save Search Strategies Formatting options Download

YouTube How to read this page Blast report description

ATRN\_KISNSSDTVECECSENWKG\_NonMod

RID B915TPMR01R (Expires on 01-14 09:36 am)

Query ID Icl|148046
Description None
Molecule type amino acid
Query Length 19

Database Name nr
Description All non-redundant GenBank CDS translations+PDB+SwissProt+PIR excluding environmental samples from WGS projects
Program BLASTP 2.2.30+ Citation

Other reports: Search Summary Taxonomy reports Distance tree of results Multiple alignment

Graphic Summary

Show Conserved Domains

No putative conserved domains have been detected

Distribution of 110 Blast Hits on the Query Sequence

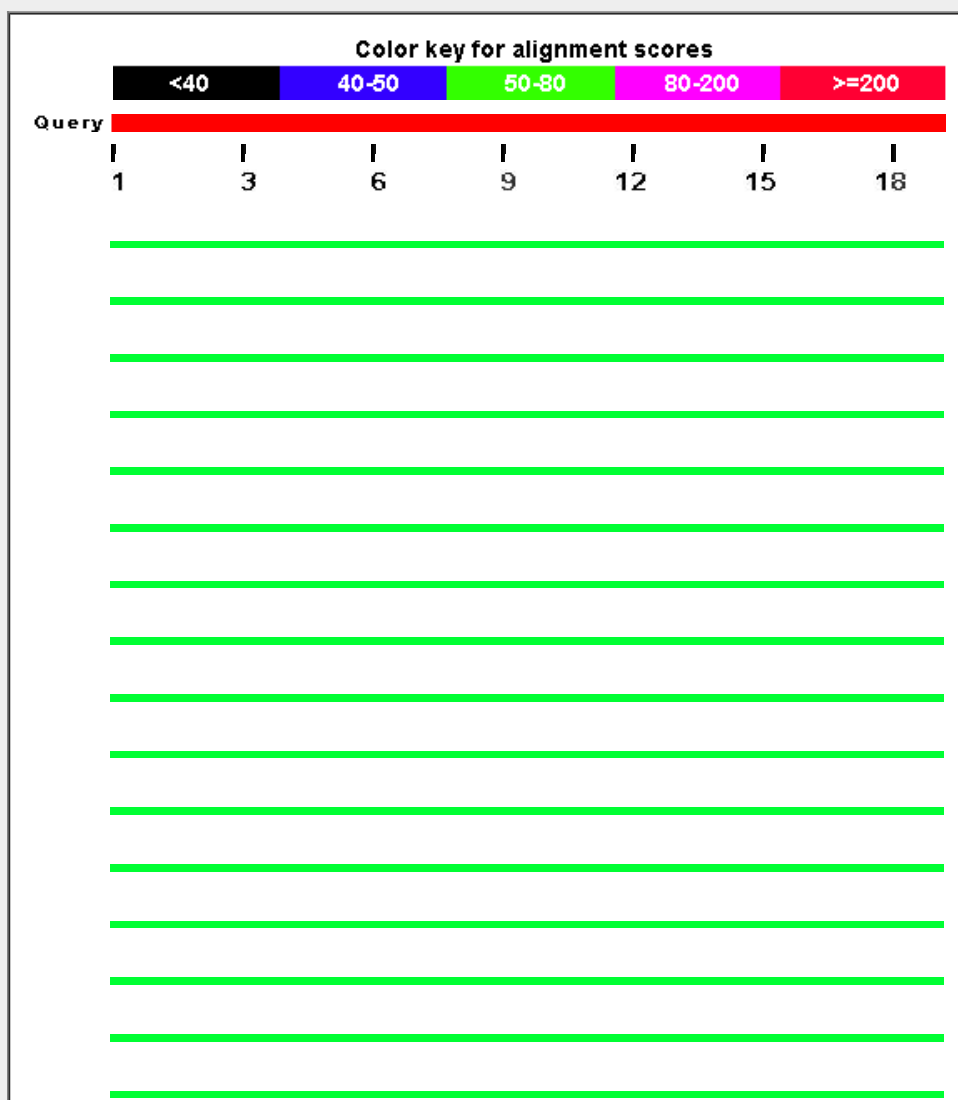

The image shows a table with 30 rows. Each row contains a single, solid green horizontal line. The lines are evenly spaced and extend across most of the width of the table area. The table is flanked by light gray vertical bars on both sides, and a thin blue vertical bar is visible on the far left edge of the page.



## Descriptions

### Sequences producing significant alignments:

Select: [All](#) [None](#) Selected: 0

[Alignments](#)
[Download](#)
[GenPept](#)
[Graphics](#)
[Distance tree of results](#)
[Multiple alignment](#)

| Description                                                                       | Max score | Total score | Query cover | E value | Ident | Accession                                   |
|-----------------------------------------------------------------------------------|-----------|-------------|-------------|---------|-------|---------------------------------------------|
| <a href="#">PREDICTED: attractin isoform X2 [Homo sapiens]</a>                    | 65.5      | 65.5        | 100%        | 9e-11   | 100%  | <a href="#">gi 530426021 XP_005260918.1</a> |
| <a href="#">unnamed protein product [Homo sapiens]</a>                            | 65.5      | 65.5        | 100%        | 9e-11   | 100%  | <a href="#">gi 194380362 BAG63948.1</a>     |
| <a href="#">attractin isoform 4 [Homo sapiens]</a>                                | 65.5      | 65.5        | 100%        | 9e-11   | 100%  | <a href="#">gi 333440461 NP_001193976.1</a> |
| <a href="#">PREDICTED: attractin [Gorilla gorilla gorilla]</a>                    | 65.5      | 65.5        | 100%        | 9e-11   | 100%  | <a href="#">gi 426390844 XP_004061806.1</a> |
| <a href="#">PREDICTED: attractin isoform X4 [Pan troglodytes]</a>                 | 65.5      | 65.5        | 100%        | 9e-11   | 100%  | <a href="#">gi 694977854 XP_009435012.1</a> |
| <a href="#">secreted attractin precursor [Homo sapiens]</a>                       | 65.5      | 65.5        | 100%        | 9e-11   | 100%  | <a href="#">gi 8118083 AAF72882.1</a>       |
| <a href="#">unnamed protein product [Homo sapiens]</a>                            | 65.5      | 65.5        | 100%        | 9e-11   | 100%  | <a href="#">gi 158259481 BAF85699.1</a>     |
| <a href="#">attractin isoform 2 preproprotein [Homo sapiens]</a>                  | 65.5      | 65.5        | 100%        | 9e-11   | 100%  | <a href="#">gi 21450863 NP_647538.1</a>     |
| <a href="#">PREDICTED: LOW QUALITY PROTEIN: attractin [Pan paniscus]</a>          | 65.5      | 65.5        | 100%        | 9e-11   | 100%  | <a href="#">gi 675763672 XP_008973079.1</a> |
| <a href="#">PREDICTED: attractin isoform X3 [Pan troglodytes]</a>                 | 65.5      | 65.5        | 100%        | 9e-11   | 100%  | <a href="#">gi 694977852 XP_009435011.1</a> |
| <a href="#">PREDICTED: attractin isoform X1 [Homo sapiens]</a>                    | 65.5      | 65.5        | 100%        | 9e-11   | 100%  | <a href="#">gi 530426019 XP_005260917.1</a> |
| <a href="#">attractin, isoform CRA_b [Homo sapiens]</a>                           | 65.5      | 65.5        | 100%        | 9e-11   | 100%  | <a href="#">gi 119630936 EAX10531.1</a>     |
| <a href="#">PREDICTED: attractin isoform X2 [Pan troglodytes]</a>                 | 65.5      | 65.5        | 100%        | 9e-11   | 100%  | <a href="#">gi 694977850 XP_009435010.1</a> |
| <a href="#">PREDICTED: attractin isoform X1 [Pan troglodytes]</a>                 | 65.5      | 65.5        | 100%        | 9e-11   | 100%  | <a href="#">gi 332857715 XP_003316827.1</a> |
| <a href="#">membrane attractin precursor [Homo sapiens]</a>                       | 65.5      | 65.5        | 100%        | 9e-11   | 100%  | <a href="#">gi 8118082 AAF72881.1</a>       |
| <a href="#">attractin isoform 1 preproprotein [Homo sapiens]</a>                  | 65.5      | 65.5        | 100%        | 9e-11   | 100%  | <a href="#">gi 21450861 NP_647537.1</a>     |
| <a href="#">PREDICTED: attractin isoform 2 [Nomascus leucogenys]</a>              | 63.0      | 63.0        | 100%        | 6e-10   | 95%   | <a href="#">gi 332257827 XP_003278006.1</a> |
| <a href="#">PREDICTED: attractin isoform 1 [Nomascus leucogenys]</a>              | 63.0      | 63.0        | 100%        | 6e-10   | 95%   | <a href="#">gi 332257825 XP_003278005.1</a> |
| <a href="#">attractin-2 [Homo sapiens]</a>                                        | 63.0      | 63.0        | 100%        | 6e-10   | 95%   | <a href="#">gi 4093196 AAD03057.1</a>       |
| <a href="#">PREDICTED: attractin isoform X3 [Chinchilla lanigera]</a>             | 63.0      | 85.3        | 100%        | 6e-10   | 95%   | <a href="#">gi 533131617 XP_005380852.1</a> |
| <a href="#">PREDICTED: attractin-like [Octodon degus]</a>                         | 63.0      | 63.0        | 100%        | 6e-10   | 95%   | <a href="#">gi 507657234 XP_004634315.1</a> |
| <a href="#">PREDICTED: attractin isoform X2 [Chinchilla lanigera]</a>             | 63.0      | 85.3        | 100%        | 6e-10   | 95%   | <a href="#">gi 533131615 XP_005380851.1</a> |
| <a href="#">PREDICTED: attractin isoform X1 [Chinchilla lanigera]</a>             | 63.0      | 85.3        | 100%        | 6e-10   | 95%   | <a href="#">gi 533131613 XP_005380850.1</a> |
| <a href="#">PREDICTED: attractin isoform X2 [Saimiri boliviensis boliviensis]</a> | 60.4      | 60.4        | 100%        | 5e-09   | 89%   | <a href="#">gi 725600053 XP_010350112.1</a> |
| <a href="#">PREDICTED: attractin isoform X1 [Saimiri boliviensis boliviensis]</a> | 60.4      | 60.4        | 100%        | 5e-09   | 89%   | <a href="#">gi 725600051 XP_010350111.1</a> |
| <a href="#">Mahogany-like protein [Macaca mulatta]</a>                            | 60.4      | 60.4        | 100%        | 5e-09   | 89%   | <a href="#">gi 355563316 EHH19878.1</a>     |
| <a href="#">PREDICTED: attractin isoform X4 [Macaca fascicularis]</a>             | 60.4      | 60.4        | 100%        | 5e-09   | 89%   | <a href="#">gi 544464516 XP_005568512.1</a> |
| <a href="#">PREDICTED: attractin isoform X5 [Chlorocebus sabaues]</a>             | 60.4      | 60.4        | 100%        | 5e-09   | 89%   | <a href="#">gi 635021368 XP_008017720.1</a> |

|                                                                                    |      |      |      |       |     |                                             |
|------------------------------------------------------------------------------------|------|------|------|-------|-----|---------------------------------------------|
| Mahogany-like protein [ <i>Macaca fascicularis</i> ]                               | 60.4 | 60.4 | 100% | 5e-09 | 89% | <a href="#">gij355784657 EHH65508.1</a>     |
| <a href="#">PREDICTED: attractin isoform X3 [<i>Macaca fascicularis</i>]</a>       | 60.4 | 60.4 | 100% | 5e-09 | 89% | <a href="#">gij544464514 XP_005568511.1</a> |
| <a href="#">PREDICTED: attractin-like [<i>Galeopterus variegatus</i>]</a>          | 60.4 | 60.4 | 100% | 5e-09 | 89% | <a href="#">gij667324076 XP_008589101.1</a> |
| <a href="#">PREDICTED: attractin isoform X4 [<i>Chlorocebus sabaeus</i>]</a>       | 60.4 | 60.4 | 100% | 5e-09 | 89% | <a href="#">gij635021366 XP_008017712.1</a> |
| <a href="#">PREDICTED: attractin [<i>Rhinopithecus roxellana</i>]</a>              | 60.4 | 60.4 | 100% | 5e-09 | 89% | <a href="#">gij724902357 XP_010377335.1</a> |
| <a href="#">PREDICTED: attractin isoform X3 [<i>Chlorocebus sabaeus</i>]</a>       | 60.4 | 60.4 | 100% | 5e-09 | 89% | <a href="#">gij635021364 XP_008017707.1</a> |
| <a href="#">PREDICTED: attractin isoform X2 [<i>Chlorocebus sabaeus</i>]</a>       | 60.4 | 60.4 | 100% | 5e-09 | 89% | <a href="#">gij635021362 XP_008017704.1</a> |
| <a href="#">PREDICTED: attractin isoform X2 [<i>Macaca fascicularis</i>]</a>       | 60.4 | 60.4 | 100% | 5e-09 | 89% | <a href="#">gij544464512 XP_005568510.1</a> |
| <a href="#">PREDICTED: attractin [<i>Macaca mulatta</i>]</a>                       | 60.4 | 60.4 | 100% | 5e-09 | 89% | <a href="#">gij109092720 XP_001115192.1</a> |
| <a href="#">PREDICTED: attractin isoform X1 [<i>Chlorocebus sabaeus</i>]</a>       | 60.4 | 60.4 | 100% | 5e-09 | 89% | <a href="#">gij635021360 XP_008017700.1</a> |
| <a href="#">PREDICTED: attractin isoform X1 [<i>Macaca fascicularis</i>]</a>       | 60.4 | 60.4 | 100% | 5e-09 | 89% | <a href="#">gij544464510 XP_005568509.1</a> |
| <a href="#">PREDICTED: attractin isoform X6 [<i>Chlorocebus sabaeus</i>]</a>       | 60.4 | 60.4 | 100% | 5e-09 | 89% | <a href="#">gij635021370 XP_008017729.1</a> |
| <a href="#">PREDICTED: attractin-like [<i>Tursiops truncatus</i>]</a>              | 60.0 | 60.0 | 100% | 6e-09 | 89% | <a href="#">gij470629747 XP_004321558.1</a> |
| <a href="#">PREDICTED: attractin-like [<i>Physeter catodon</i>]</a>                | 60.0 | 60.0 | 100% | 6e-09 | 89% | <a href="#">gij593773084 XP_007124834.1</a> |
| <a href="#">PREDICTED: attractin [<i>Pantholops hodgsonii</i>]</a>                 | 60.0 | 60.0 | 100% | 7e-09 | 89% | <a href="#">gij556758951 XP_005974805.1</a> |
| <a href="#">PREDICTED: attractin [<i>Sus scrofa</i>]</a>                           | 60.0 | 60.0 | 100% | 7e-09 | 89% | <a href="#">gij545879723 XP_001927324.5</a> |
| <a href="#">PREDICTED: attractin isoform 2 [<i>Ceratotherium simum simum</i>]</a>  | 60.0 | 60.0 | 100% | 7e-09 | 89% | <a href="#">gij478519276 XP_004433860.1</a> |
| <a href="#">PREDICTED: attractin isoform X3 [<i>Bubalus bubalis</i>]</a>           | 60.0 | 60.0 | 100% | 7e-09 | 89% | <a href="#">gij594099680 XP_006072965.1</a> |
| <a href="#">attractin [<i>Sus scrofa</i>]</a>                                      | 60.0 | 60.0 | 100% | 7e-09 | 89% | <a href="#">gij146741346 BAF62328.1</a>     |
| <a href="#">PREDICTED: attractin [<i>Panthera tigris altaica</i>]</a>              | 60.0 | 60.0 | 100% | 7e-09 | 89% | <a href="#">gij591291970 XP_007073329.1</a> |
| <a href="#">PREDICTED: attractin [<i>Capra hircus</i>]</a>                         | 60.0 | 60.0 | 100% | 7e-09 | 89% | <a href="#">gij548490191 XP_005688293.1</a> |
| <a href="#">PREDICTED: attractin [<i>Bos mutus</i>]</a>                            | 60.0 | 60.0 | 100% | 7e-09 | 89% | <a href="#">gij555963925 XP_005894036.1</a> |
| <a href="#">PREDICTED: attractin [<i>Ovis aries</i>]</a>                           | 60.0 | 60.0 | 100% | 7e-09 | 89% | <a href="#">gij426241795 XP_004014773.1</a> |
| <a href="#">PREDICTED: attractin [<i>Felis catus</i>]</a>                          | 60.0 | 60.0 | 100% | 7e-09 | 89% | <a href="#">gij586981105 XP_003983758.2</a> |
| <a href="#">PREDICTED: attractin [<i>Echinops telfairi</i>]</a>                    | 60.0 | 60.0 | 100% | 7e-09 | 89% | <a href="#">gij507626122 XP_004697922.1</a> |
| <a href="#">attractin [<i>Bos taurus</i>]</a>                                      | 60.0 | 60.0 | 100% | 7e-09 | 89% | <a href="#">gij253560524 ACT32973.1</a>     |
| <a href="#">attractin [<i>Bos taurus</i>]</a>                                      | 60.0 | 60.0 | 100% | 7e-09 | 89% | <a href="#">gij27806737 INP_776420.1</a>    |
| <a href="#">PREDICTED: attractin isoform X2 [<i>Bubalus bubalis</i>]</a>           | 60.0 | 60.0 | 100% | 7e-09 | 89% | <a href="#">gij594099678 XP_006072964.1</a> |
| <a href="#">PREDICTED: attractin isoform 1 [<i>Ceratotherium simum simum</i>]</a>  | 60.0 | 60.0 | 100% | 7e-09 | 89% | <a href="#">gij478519274 XP_004433859.1</a> |
| <a href="#">PREDICTED: attractin isoform X2 [<i>Bos taurus</i>]</a>                | 60.0 | 60.0 | 100% | 7e-09 | 89% | <a href="#">gij528973313 XP_005214542.1</a> |
| <a href="#">PREDICTED: attractin isoform X1 [<i>Bubalus bubalis</i>]</a>           | 60.0 | 60.0 | 100% | 7e-09 | 89% | <a href="#">gij594099676 XP_006072963.1</a> |
| <a href="#">PREDICTED: attractin isoform X1 [<i>Bos taurus</i>]</a>                | 60.0 | 60.0 | 100% | 7e-09 | 89% | <a href="#">gij528973311 XP_005214541.1</a> |
| <a href="#">PREDICTED: attractin [<i>Tupaia chinensis</i>]</a>                     | 59.6 | 59.6 | 100% | 9e-09 | 89% | <a href="#">gij562872246 XP_006164056.1</a> |
| <a href="#">PREDICTED: LOW QUALITY PROTEIN: attractin [<i>Cavia porcellus</i>]</a> | 58.7 | 58.7 | 100% | 2e-08 | 89% | <a href="#">gij514473642 XP_005008408.1</a> |
| <a href="#">PREDICTED: attractin [<i>Balaenoptera acutorostrata scammoni</i>]</a>  | 57.5 | 57.5 | 100% | 5e-08 | 84% | <a href="#">gij594697511 XP_007195912.1</a> |
| <a href="#">PREDICTED: attractin isoform X2 [<i>Heterocephalus glaber</i>]</a>     | 57.5 | 57.5 | 100% | 5e-08 | 89% | <a href="#">gij512956910 XP_004840783.1</a> |
| <a href="#">PREDICTED: attractin [<i>Trichechus manatus latirostris</i>]</a>       | 57.5 | 57.5 | 100% | 5e-08 | 84% | <a href="#">gij471400634 XP_004383126.1</a> |
| <a href="#">Attractin [<i>Heterocephalus glaber</i>]</a>                           | 57.5 | 57.5 | 100% | 5e-08 | 89% | <a href="#">gij351701383 EHB04302.1</a>     |
| <a href="#">PREDICTED: attractin [<i>Camelus ferus</i>]</a>                        | 57.5 | 57.5 | 100% | 5e-08 | 84% | <a href="#">gij560921992 XP_006187198.1</a> |
| <a href="#">PREDICTED: attractin [<i>Heterocephalus glaber</i>]</a>                | 57.5 | 57.5 | 100% | 5e-08 | 89% | <a href="#">gij512849696 XP_004886859.1</a> |
| <a href="#">PREDICTED: attractin isoform X1 [<i>Heterocephalus glaber</i>]</a>     | 57.5 | 57.5 | 100% | 5e-08 | 89% | <a href="#">gij512956908 XP_004840782.1</a> |
| <a href="#">PREDICTED: attractin [<i>Callithrix jacchus</i>]</a>                   | 57.5 | 57.5 | 100% | 5e-08 | 84% | <a href="#">gij296200062 XP_002747358.1</a> |
| <a href="#">PREDICTED: attractin [<i>Tarsius syrichta</i>]</a>                     | 57.1 | 57.1 | 100% | 7e-08 | 89% | <a href="#">gij640796924 XP_008054571.1</a> |
| <a href="#">PREDICTED: attractin isoform X3 [<i>Cricetulus griseus</i>]</a>        | 56.6 | 79.7 | 94%  | 7e-08 | 94% | <a href="#">gij625288767 XP_007636126.1</a> |
| <a href="#">attractin [<i>Cricetulus griseus</i>]</a>                              | 56.6 | 79.7 | 94%  | 9e-08 | 94% | <a href="#">gij537146168 ERE69758.1</a>     |

|                                                                             |      |      |      |       |     |                                             |
|-----------------------------------------------------------------------------|------|------|------|-------|-----|---------------------------------------------|
| <a href="#">PREDICTED: attractin isoform X1 [Cricetulus griseus]</a>        | 56.6 | 79.7 | 94%  | 9e-08 | 94% | <a href="#">gij354473756 XP_003499099.1</a> |
| <a href="#">attractin [Cricetulus griseus]</a>                              | 56.6 | 79.7 | 94%  | 9e-08 | 94% | <a href="#">gij537146167 ERE69757.1</a>     |
| <a href="#">attractin [Mesocricetus auratus]</a>                            | 56.6 | 56.6 | 89%  | 9e-08 | 94% | <a href="#">gij528078159 NP_001268565.1</a> |
| <a href="#">PREDICTED: attractin [Equus przewalskii]</a>                    | 56.2 | 56.2 | 100% | 1e-07 | 84% | <a href="#">gij664773944 XP_008506219.1</a> |
| <a href="#">Attractin [Myotis brandtii]</a>                                 | 56.2 | 56.2 | 100% | 1e-07 | 84% | <a href="#">gij521031210 EPQ12996.1</a>     |
| <a href="#">PREDICTED: attractin [Myotis brandtii]</a>                      | 56.2 | 56.2 | 100% | 1e-07 | 84% | <a href="#">gij554560893 XP_005874816.1</a> |
| <a href="#">PREDICTED: attractin [Myotis lucifugus]</a>                     | 56.2 | 56.2 | 100% | 1e-07 | 84% | <a href="#">gij558159591 XP_006096513.1</a> |
| <a href="#">PREDICTED: attractin isoform X1 [Pteropus alecto]</a>           | 56.2 | 56.2 | 100% | 1e-07 | 84% | <a href="#">gij586533632 XP_006921705.1</a> |
| <a href="#">PREDICTED: attractin [Orcinus orca]</a>                         | 56.2 | 56.2 | 100% | 1e-07 | 84% | <a href="#">gij466084723 XP_004285351.1</a> |
| <a href="#">PREDICTED: attractin isoform X2 [Pteropus alecto]</a>           | 56.2 | 56.2 | 100% | 1e-07 | 84% | <a href="#">gij586533634 XP_006921706.1</a> |
| <a href="#">PREDICTED: attractin isoform X2 [Condylura cristata]</a>        | 55.8 | 55.8 | 100% | 2e-07 | 84% | <a href="#">gij507961710 XP_004687418.1</a> |
| <a href="#">PREDICTED: attractin [Otolemur garnettii]</a>                   | 55.8 | 55.8 | 100% | 2e-07 | 84% | <a href="#">gij395830288 XP_003788264.1</a> |
| <a href="#">PREDICTED: attractin isoform X1 [Condylura cristata]</a>        | 55.8 | 55.8 | 100% | 2e-07 | 84% | <a href="#">gij507961707 XP_004687417.1</a> |
| <a href="#">PREDICTED: LOW QUALITY PROTEIN: attractin [Nannospalax gal]</a> | 55.4 | 55.4 | 100% | 2e-07 | 84% | <a href="#">gij674089498 XP_008852735.1</a> |
| <a href="#">PREDICTED: attractin [Orycteropus afer afer]</a>                | 55.4 | 55.4 | 100% | 2e-07 | 84% | <a href="#">gij634830430 XP_007958185.1</a> |
| <a href="#">PREDICTED: attractin [Vicugna pacos]</a>                        | 54.9 | 54.9 | 100% | 3e-07 | 79% | <a href="#">gij560970220 XP_006207473.1</a> |
| <a href="#">PREDICTED: attractin [Lipotes vexillifer]</a>                   | 54.5 | 54.5 | 100% | 5e-07 | 84% | <a href="#">gij602710450 XP_007465469.1</a> |
| <a href="#">Attractin [Fukomys damarensis]</a>                              | 54.1 | 54.1 | 94%  | 6e-07 | 83% | <a href="#">gij676269096 KFO24512.1</a>     |
| <a href="#">attractin [Rattus norvegicus]</a>                               | 54.1 | 75.5 | 94%  | 7e-07 | 94% | <a href="#">gij12275312 BAB21018.1</a>      |
| <a href="#">attractin, isoform CRA_a [Rattus norvegicus]</a>                | 54.1 | 75.5 | 94%  | 7e-07 | 94% | <a href="#">gij149023319 EDL80213.1</a>     |
| <a href="#">PREDICTED: attractin [Jaculus jaculus]</a>                      | 54.1 | 54.1 | 100% | 7e-07 | 79% | <a href="#">gij507555530 XP_004661535.1</a> |
| <a href="#">attractin precursor [Rattus norvegicus]</a>                     | 54.1 | 75.5 | 94%  | 7e-07 | 94% | <a href="#">gij13786196 NP_112641.1</a>     |
| <a href="#">PREDICTED: attractin-like [Leptonychotes weddellii]</a>         | 53.7 | 53.7 | 89%  | 9e-07 | 88% | <a href="#">gij585160208 XP_006732353.1</a> |
| <a href="#">PREDICTED: attractin isoform X2 [Mustela putorius furo]</a>     | 53.7 | 53.7 | 89%  | 9e-07 | 88% | <a href="#">gij511906947 XP_004772933.1</a> |
| <a href="#">PREDICTED: attractin [Mustela putorius furo]</a>                | 53.7 | 53.7 | 89%  | 9e-07 | 88% | <a href="#">gij511947743 XP_004792355.1</a> |
| <a href="#">PREDICTED: attractin [Peromyscus maniculatus bairdii]</a>       | 53.7 | 53.7 | 89%  | 9e-07 | 88% | <a href="#">gij589943852 XP_006984624.1</a> |
| <a href="#">PREDICTED: attractin isoform X1 [Mustela putorius furo]</a>     | 53.7 | 53.7 | 89%  | 9e-07 | 88% | <a href="#">gij511906945 XP_004772932.1</a> |

## Alignments

Download [GenPept](#) [Graphics](#) ▼ Next ▲ Previous ▲ Descriptions

**PREDICTED: attractin isoform X2 [Homo sapiens]**

Sequence ID: [gij530426021|ref|XP\\_005260918.1](#) Length: 1111 Number of Matches: 1

Range 1: 261 to 279 [GenPept](#) [Graphics](#) ▼ Next Match ▲ Previous Match

| Score          | Expect | Identities  | Positives   | Gaps     |
|----------------|--------|-------------|-------------|----------|
| 65.5 bits(147) | 9e-11  | 19/19(100%) | 19/19(100%) | 0/19(0%) |

Query 1 KISNSSDTVECECSENWKG 19  
 KISNSSDTVECECSENWKG  
 Sbjct 261 KISNSSDTVECECSENWKG 279

### Related Information

[Gene](#) - associated gene details  
[Map Viewer](#) - aligned genomic context

Download [GenPept](#) [Graphics](#) ▼ Next ▲ Previous ▲ Descriptions

**unnamed protein product [Homo sapiens]**

Sequence ID: [gij194380362|dbj|BAG63948.1](#) Length: 1156 Number of Matches: 1

Range 1: 145 to 163 [GenPept](#) [Graphics](#) ▼ Next Match ▲ Previous Match

| Score          | Expect | Identities  | Positives   | Gaps     |
|----------------|--------|-------------|-------------|----------|
| 65.5 bits(147) | 9e-11  | 19/19(100%) | 19/19(100%) | 0/19(0%) |

Query 1 KISNSSDTVECECSENWKG 19

### Related Information

[Gene](#) - associated gene details

Sbjct 145 KISNSSDTVECECSENWKG 163

[Download](#) [GenPept](#) [Graphics](#) [Next](#) [Previous](#) [Descriptions](#)

attractin isoform 4 [Homo sapiens]

Sequence ID: [gi|333440461|ref|NP\\_001193976.1](#) Length: 1156 Number of Matches: 1

Range 1: 145 to 163 [GenPept](#) [Graphics](#) [Next Match](#) [Previous Match](#)

| Score          | Expect | Identities  | Positives   | Gaps     |
|----------------|--------|-------------|-------------|----------|
| 65.5 bits(147) | 9e-11  | 19/19(100%) | 19/19(100%) | 0/19(0%) |

Query 1 KISNSSDTVECECSENWKG 19  
 KISNSSDTVECECSENWKG  
 Sbjct 145 KISNSSDTVECECSENWKG 163

**Related Information**

[Gene](#) - associated gene details  
[UniGene](#) - clustered expressed sequence tags  
[Map Viewer](#) - aligned genomic context

[Download](#) [GenPept](#) [Graphics](#) [Next](#) [Previous](#) [Descriptions](#)

PREDICTED: attractin [Gorilla gorilla gorilla]

Sequence ID: [gi|426390844|ref|XP\\_004061806.1](#) Length: 1265 Number of Matches: 1

Range 1: 143 to 161 [GenPept](#) [Graphics](#) [Next Match](#) [Previous Match](#)

| Score          | Expect | Identities  | Positives   | Gaps     |
|----------------|--------|-------------|-------------|----------|
| 65.5 bits(147) | 9e-11  | 19/19(100%) | 19/19(100%) | 0/19(0%) |

Query 1 KISNSSDTVECECSENWKG 19  
 KISNSSDTVECECSENWKG  
 Sbjct 143 KISNSSDTVECECSENWKG 161

**Related Information**

[Gene](#) - associated gene details  
[Map Viewer](#) - aligned genomic context

[Download](#) [GenPept](#) [Graphics](#) [Next](#) [Previous](#) [Descriptions](#)

PREDICTED: attractin isoform X4 [Pan troglodytes]

Sequence ID: [gi|694977854|ref|XP\\_009435012.1](#) Length: 1269 Number of Matches: 1

Range 1: 260 to 278 [GenPept](#) [Graphics](#) [Next Match](#) [Previous Match](#)

| Score          | Expect | Identities  | Positives   | Gaps     |
|----------------|--------|-------------|-------------|----------|
| 65.5 bits(147) | 9e-11  | 19/19(100%) | 19/19(100%) | 0/19(0%) |

Query 1 KISNSSDTVECECSENWKG 19  
 KISNSSDTVECECSENWKG  
 Sbjct 260 KISNSSDTVECECSENWKG 278

**Related Information**

[Gene](#) - associated gene details

BLAST is a registered trademark of the National Library of Medicine.



▶ NCBI/ BLAST/ blastp suite/ Formatting Results - BHF3AHKM014

**i** Your search parameters were adjusted to search for a short input sequence.

[Edit and Resubmit](#) | [Save Search Strategies](#) | [▶ Formatting options](#) | [▶ Download](#)

[YouTube](#) [How to read this page](#) | [Blast report description](#)

### ATRN\_KMPSQAPTGNFYQPQLDSSMCLEDSRY\_Mod

**RID** [BHF3AHKM014](#) (Expires on 01-17 14:23 pm)

**Query ID** |cl|91517  
**Description** |None  
**Molecule type** |amino acid  
**Query Length** |28

**Database Name** |nr  
**Description** |All non-redundant GenBank CDS translations+PDB+SwissProt+PIR excluding environmental samples from WGS projects  
**Program** |BLASTP 2.2.30+ [▶ Citation](#)

Other reports: [▶ Search Summary](#) | [\[Taxonomy reports\]](#) | [\[Distance tree of results\]](#) | [\[Multiple alignment\]](#)

### **[-]** Graphic Summary

**[-]** [Show Conserved Domains](#)

No putative conserved domains have been detected

Distribution of 98 Blast Hits on the Query Sequence 

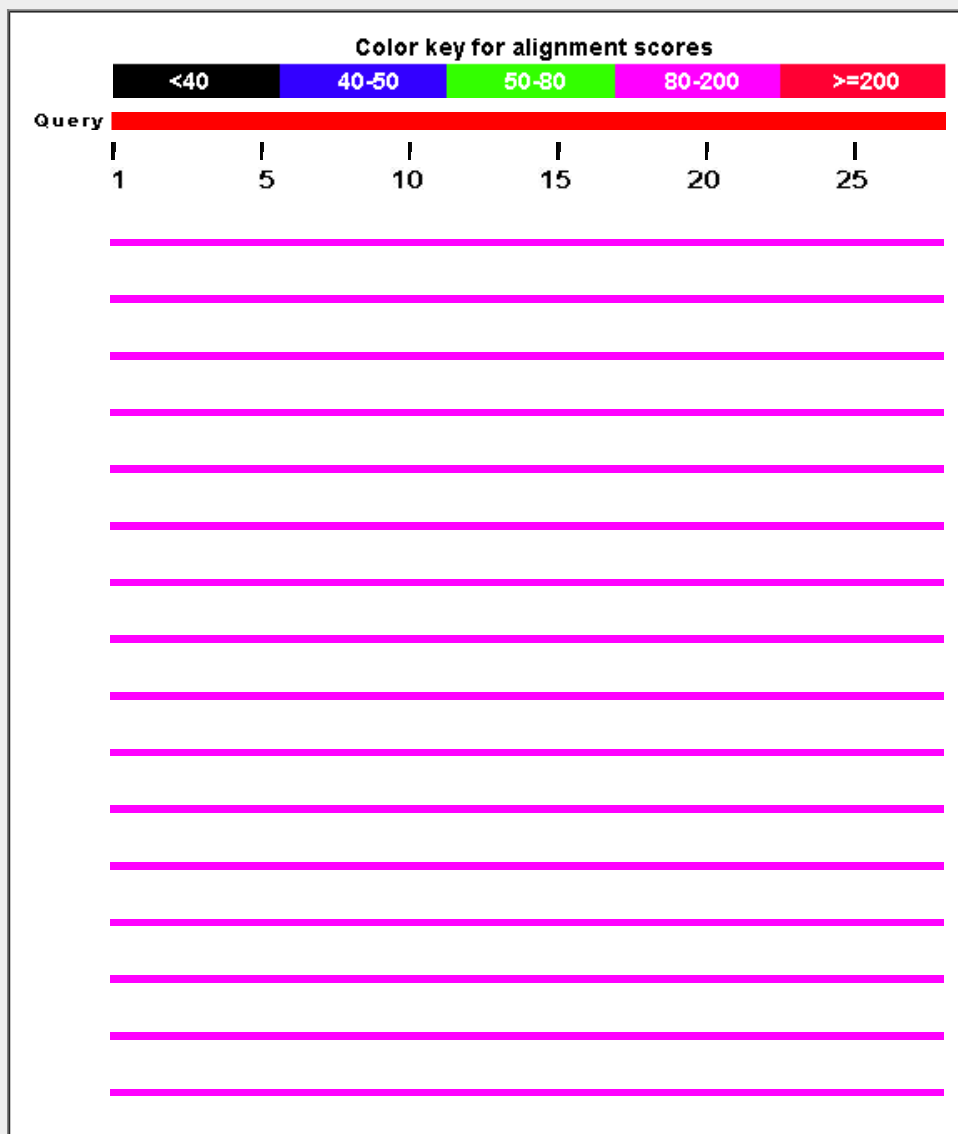

The image shows a table with 28 empty rows and 3 columns. The left and right columns are light gray with a thin blue vertical border on the far left and right edges. The middle column is white with 28 horizontal magenta lines representing rows. No text or data is present within the table cells.

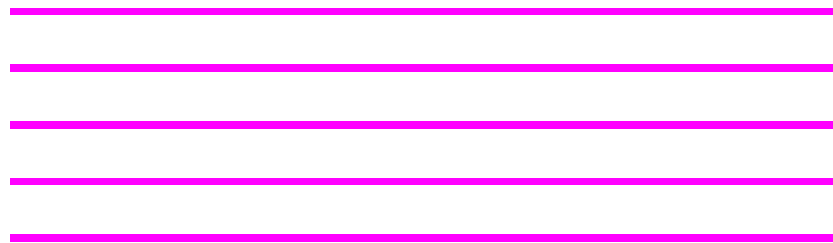

**Descriptions**

**Sequences producing significant alignments:**

Select: [All](#) [None](#) Selected: 0

[↑](#) [Alignments](#)
[Download](#)
[GenPept](#)
[Graphics](#)
[Distance tree of results](#)
[Multiple alignment](#)
⚙

| Description                                                           | Max score | Total score | Query cover | E value | Ident | Accession                                   |
|-----------------------------------------------------------------------|-----------|-------------|-------------|---------|-------|---------------------------------------------|
| <a href="#">PREDICTED: attractin-like [Pan paniscus]</a>              | 94.0      | 94.0        | 100%        | 4e-20   | 96%   | <a href="#">gij397513332 XP_003826972.1</a> |
| <a href="#">KIAA0548 protein [Homo sapiens]</a>                       | 94.0      | 94.0        | 100%        | 5e-20   | 96%   | <a href="#">gij3043620 BAA25474.1</a>       |
| <a href="#">PREDICTED: attractin isoform X2 [Papio anubis]</a>        | 94.0      | 94.0        | 100%        | 6e-20   | 96%   | <a href="#">gij685567345 XP_009214752.1</a> |
| <a href="#">PREDICTED: attractin [Pongo abelii]</a>                   | 94.0      | 94.0        | 100%        | 6e-20   | 96%   | <a href="#">gij297706621 XP_002830129.1</a> |
| <a href="#">PREDICTED: attractin isoform X2 [Homo sapiens]</a>        | 94.0      | 94.0        | 100%        | 6e-20   | 96%   | <a href="#">gij530426021 XP_005260918.1</a> |
| <a href="#">PREDICTED: attractin isoform X1 [Papio anubis]</a>        | 94.0      | 94.0        | 100%        | 6e-20   | 96%   | <a href="#">gij685567343 XP_009214751.1</a> |
| <a href="#">unnamed protein product [Homo sapiens]</a>                | 94.0      | 94.0        | 100%        | 6e-20   | 96%   | <a href="#">gij194380362 BAG63948.1</a>     |
| <a href="#">attractin isoform 4 [Homo sapiens]</a>                    | 94.0      | 94.0        | 100%        | 6e-20   | 96%   | <a href="#">gij333440461 NP_001193976.1</a> |
| <a href="#">PREDICTED: attractin isoform 2 [Nomascus leucogenys]</a>  | 94.0      | 94.0        | 100%        | 6e-20   | 96%   | <a href="#">gij332257827 XP_003278006.1</a> |
| <a href="#">PREDICTED: attractin [Gorilla gorilla gorilla]</a>        | 94.0      | 94.0        | 100%        | 6e-20   | 96%   | <a href="#">gij426390844 XP_004061806.1</a> |
| <a href="#">PREDICTED: attractin isoform X4 [Pan troglodytes]</a>     | 94.0      | 94.0        | 100%        | 6e-20   | 96%   | <a href="#">gij694977854 XP_009435012.1</a> |
| <a href="#">PREDICTED: attractin isoform 1 [Nomascus leucogenys]</a>  | 94.0      | 94.0        | 100%        | 6e-20   | 96%   | <a href="#">gij332257825 XP_003278005.1</a> |
| <a href="#">attractin-2 [Homo sapiens]</a>                            | 94.0      | 94.0        | 100%        | 6e-20   | 96%   | <a href="#">gij4093196 AAD03057.1</a>       |
| <a href="#">secreted attractin precursor [Homo sapiens]</a>           | 94.0      | 94.0        | 100%        | 6e-20   | 96%   | <a href="#">gij8118083 AAF72882.1</a>       |
| <a href="#">unnamed protein product [Homo sapiens]</a>                | 94.0      | 94.0        | 100%        | 6e-20   | 96%   | <a href="#">gij158259481 BAF85699.1</a>     |
| <a href="#">attractin isoform 2 preproprotein [Homo sapiens]</a>      | 94.0      | 94.0        | 100%        | 6e-20   | 96%   | <a href="#">gij21450863 NP_647538.1</a>     |
| <a href="#">Mahogany-like protein [Macaca mulatta]</a>                | 94.0      | 94.0        | 100%        | 6e-20   | 96%   | <a href="#">gij355563316 EHH19878.1</a>     |
| <a href="#">PREDICTED: attractin isoform X3 [Pan troglodytes]</a>     | 94.0      | 94.0        | 100%        | 6e-20   | 96%   | <a href="#">gij694977852 XP_009435011.1</a> |
| <a href="#">PREDICTED: attractin isoform X1 [Homo sapiens]</a>        | 94.0      | 94.0        | 100%        | 6e-20   | 96%   | <a href="#">gij530426019 XP_005260917.1</a> |
| <a href="#">PREDICTED: attractin isoform X4 [Macaca fascicularis]</a> | 94.0      | 94.0        | 100%        | 6e-20   | 96%   | <a href="#">gij544464516 XP_005568512.1</a> |
| <a href="#">PREDICTED: attractin isoform X5 [Chlorocebus sabaeus]</a> | 94.0      | 94.0        | 100%        | 6e-20   | 96%   | <a href="#">gij635021368 XP_008017720.1</a> |
| <a href="#">Mahogany-like protein [Macaca fascicularis]</a>           | 94.0      | 94.0        | 100%        | 6e-20   | 96%   | <a href="#">gij355784657 EHH65508.1</a>     |
| <a href="#">PREDICTED: attractin isoform X3 [Macaca fascicularis]</a> | 94.0      | 94.0        | 100%        | 6e-20   | 96%   | <a href="#">gij544464514 XP_005568511.1</a> |
| <a href="#">PREDICTED: attractin isoform X4 [Chlorocebus sabaeus]</a> | 94.0      | 94.0        | 100%        | 6e-20   | 96%   | <a href="#">gij635021366 XP_008017712.1</a> |
| <a href="#">PREDICTED: attractin [Rhinopithecus roxellana]</a>        | 94.0      | 94.0        | 100%        | 6e-20   | 96%   | <a href="#">gij724902357 XP_010377335.1</a> |
| <a href="#">attractin, isoform CRA_b [Homo sapiens]</a>               | 94.0      | 94.0        | 100%        | 6e-20   | 96%   | <a href="#">gij119630936 EAX10531.1</a>     |
| <a href="#">PREDICTED: attractin isoform X3 [Chlorocebus sabaeus]</a> | 94.0      | 94.0        | 100%        | 6e-20   | 96%   | <a href="#">gij635021364 XP_008017707.1</a> |
| <a href="#">PREDICTED: attractin isoform X2 [Pan troglodytes]</a>     | 94.0      | 94.0        | 100%        | 6e-20   | 96%   | <a href="#">gij694977850 XP_009435010.1</a> |

|                                                                                   |      |      |      |       |     |                                             |
|-----------------------------------------------------------------------------------|------|------|------|-------|-----|---------------------------------------------|
| <a href="#">PREDICTED: attractin isoform X2 [Chlorocebus sabaeus]</a>             | 94.0 | 94.0 | 100% | 6e-20 | 96% | <a href="#">gij635021362 XP_008017704.1</a> |
| <a href="#">PREDICTED: attractin [Otolemur garnettii]</a>                         | 94.0 | 94.0 | 100% | 6e-20 | 96% | <a href="#">gij395830288 XP_003788264.1</a> |
| <a href="#">PREDICTED: attractin isoform X1 [Pteropus alecto]</a>                 | 94.0 | 94.0 | 100% | 6e-20 | 96% | <a href="#">gij586533632 XP_006921705.1</a> |
| <a href="#">PREDICTED: attractin [Ochotona princeps]</a>                          | 94.0 | 94.0 | 100% | 6e-20 | 96% | <a href="#">gij504146589 XP_004585711.1</a> |
| <a href="#">PREDICTED: attractin [Callithrix jacchus]</a>                         | 94.0 | 94.0 | 100% | 6e-20 | 96% | <a href="#">gij296200062 XP_002747358.1</a> |
| <a href="#">PREDICTED: attractin isoform X1 [Pan troglodytes]</a>                 | 94.0 | 94.0 | 100% | 6e-20 | 96% | <a href="#">gij332857715 XP_003316827.1</a> |
| <a href="#">membrane attractin precursor [Homo sapiens]</a>                       | 94.0 | 94.0 | 100% | 6e-20 | 96% | <a href="#">gij8118082 AAF72881.1</a>       |
| <a href="#">attractin isoform 1 preproprotein [Homo sapiens]</a>                  | 94.0 | 94.0 | 100% | 6e-20 | 96% | <a href="#">gij21450861 INP_647537.1</a>    |
| <a href="#">PREDICTED: attractin isoform X2 [Macaca fascicularis]</a>             | 94.0 | 94.0 | 100% | 6e-20 | 96% | <a href="#">gij544464512 XP_005568510.1</a> |
| <a href="#">PREDICTED: attractin [Macaca mulatta]</a>                             | 94.0 | 94.0 | 100% | 6e-20 | 96% | <a href="#">gij109092720 XP_001115192.1</a> |
| <a href="#">PREDICTED: attractin isoform X1 [Chlorocebus sabaeus]</a>             | 94.0 | 94.0 | 100% | 6e-20 | 96% | <a href="#">gij635021360 XP_008017700.1</a> |
| <a href="#">PREDICTED: attractin isoform X1 [Macaca fascicularis]</a>             | 94.0 | 94.0 | 100% | 6e-20 | 96% | <a href="#">gij544464510 XP_005568509.1</a> |
| <a href="#">PREDICTED: attractin isoform X6 [Chlorocebus sabaeus]</a>             | 94.0 | 94.0 | 100% | 6e-20 | 96% | <a href="#">gij635021370 XP_008017729.1</a> |
| <a href="#">PREDICTED: attractin isoform X2 [Pteropus alecto]</a>                 | 94.0 | 94.0 | 100% | 6e-20 | 96% | <a href="#">gij586533634 XP_006921706.1</a> |
| <a href="#">PREDICTED: attractin [Lipotes vexillifer]</a>                         | 91.0 | 91.0 | 100% | 6e-19 | 93% | <a href="#">gij602710450 XP_007465469.1</a> |
| <a href="#">PREDICTED: attractin-like [Galeopterus variegatus]</a>                | 89.7 | 89.7 | 100% | 1e-18 | 93% | <a href="#">gij667345974 XP_008563464.1</a> |
| <a href="#">Attractin [Myotis brandtii]</a>                                       | 90.1 | 90.1 | 100% | 1e-18 | 93% | <a href="#">gij521031210 EPQ12996.1</a>     |
| <a href="#">PREDICTED: attractin [Myotis brandtii]</a>                            | 90.1 | 90.1 | 100% | 1e-18 | 93% | <a href="#">gij554560893 XP_005874816.1</a> |
| <a href="#">PREDICTED: attractin [Myotis lucifugus]</a>                           | 90.1 | 90.1 | 100% | 1e-18 | 93% | <a href="#">gij558159591 XP_006096513.1</a> |
| <a href="#">PREDICTED: attractin [Eptesicus fuscus]</a>                           | 90.1 | 90.1 | 100% | 1e-18 | 93% | <a href="#">gij641701319 XP_008139256.1</a> |
| <a href="#">PREDICTED: attractin isoform X2 [Saimiri boliviensis boliviensis]</a> | 89.7 | 89.7 | 100% | 2e-18 | 93% | <a href="#">gij725600053 XP_010350112.1</a> |
| <a href="#">PREDICTED: attractin isoform X1 [Saimiri boliviensis boliviensis]</a> | 89.7 | 89.7 | 100% | 2e-18 | 93% | <a href="#">gij725600051 XP_010350111.1</a> |
| <a href="#">Attractin [Myotis davidii]</a>                                        | 89.7 | 89.7 | 100% | 2e-18 | 93% | <a href="#">gij432111133 ELK34519.1</a>     |
| <a href="#">PREDICTED: attractin [Myotis davidii]</a>                             | 89.7 | 89.7 | 100% | 2e-18 | 93% | <a href="#">gij584075971 XP_006758187.1</a> |
| <a href="#">PREDICTED: attractin-like [Galeopterus variegatus]</a>                | 89.7 | 89.7 | 100% | 2e-18 | 93% | <a href="#">gij667324076 XP_008589101.1</a> |
| <a href="#">PREDICTED: attractin [Tarsius syrichta]</a>                           | 89.3 | 89.3 | 100% | 2e-18 | 93% | <a href="#">gij640796924 XP_008054571.1</a> |
| <a href="#">PREDICTED: attractin-like [Tursiops truncatus]</a>                    | 87.6 | 87.6 | 100% | 9e-18 | 93% | <a href="#">gij470629747 XP_004321558.1</a> |
| <a href="#">PREDICTED: attractin-like [Physeter catodon]</a>                      | 87.6 | 87.6 | 100% | 9e-18 | 93% | <a href="#">gij593773084 XP_007124834.1</a> |
| <a href="#">PREDICTED: attractin [Equus przewalskii]</a>                          | 87.6 | 87.6 | 100% | 9e-18 | 93% | <a href="#">gij664773944 XP_008506219.1</a> |
| <a href="#">PREDICTED: attractin [Orcinus orca]</a>                               | 87.6 | 87.6 | 100% | 9e-18 | 93% | <a href="#">gij466084723 XP_004285351.1</a> |
| <a href="#">PREDICTED: attractin [Orycteropus afer afer]</a>                      | 87.6 | 87.6 | 100% | 9e-18 | 93% | <a href="#">gij634830430 XP_007958185.1</a> |
| <a href="#">attractin isoform 1 preproprotein [Camelus ferus]</a>                 | 86.7 | 86.7 | 100% | 2e-17 | 90% | <a href="#">gij528759526 EPY79185.1</a>     |
| <a href="#">PREDICTED: attractin [Camelus ferus]</a>                              | 86.7 | 86.7 | 100% | 2e-17 | 90% | <a href="#">gij560921992 XP_006187198.1</a> |
| <a href="#">PREDICTED: attractin [Camelus dromedarius]</a>                        | 86.7 | 86.7 | 100% | 2e-17 | 90% | <a href="#">gij744589171 XP_010986570.1</a> |
| <a href="#">PREDICTED: attractin [Camelus bactrianus]</a>                         | 86.7 | 86.7 | 100% | 2e-17 | 90% | <a href="#">gij743752427 XP_010971103.1</a> |
| <a href="#">PREDICTED: attractin [Vicugna pacos]</a>                              | 86.7 | 86.7 | 100% | 2e-17 | 90% | <a href="#">gij560970220 XP_006207473.1</a> |
| <a href="#">attractin [Ovis aries]</a>                                            | 84.2 | 84.2 | 100% | 9e-17 | 89% | <a href="#">gij78499351 ABB45710.1</a>      |
| <a href="#">attractin [Bos taurus]</a>                                            | 84.2 | 84.2 | 100% | 1e-16 | 89% | <a href="#">gij190683717 ACE82176.1</a>     |
| <a href="#">attractin [Canis lupus familiaris]</a>                                | 84.2 | 84.2 | 100% | 1e-16 | 89% | <a href="#">gij339892849 AEK21787.1</a>     |
| <a href="#">PREDICTED: attractin [Balaenoptera acutorostrata scammoni]</a>        | 84.2 | 84.2 | 100% | 1e-16 | 89% | <a href="#">gij594697511 XP_007195912.1</a> |
| <a href="#">PREDICTED: attractin isoform X1 [Bos taurus]</a>                      | 84.2 | 84.2 | 100% | 1e-16 | 89% | <a href="#">gij741947708 XP_005214542.2</a> |
| <a href="#">PREDICTED: attractin isoform X2 [Canis lupus familiaris]</a>          | 84.2 | 84.2 | 100% | 1e-16 | 89% | <a href="#">gij545540090 XP_005634905.1</a> |
| <a href="#">PREDICTED: attractin [Capra hircus]</a>                               | 84.2 | 84.2 | 100% | 1e-16 | 89% | <a href="#">gij548490191 XP_005688293.1</a> |
| <a href="#">PREDICTED: attractin [Bos mutus]</a>                                  | 84.2 | 84.2 | 100% | 1e-16 | 89% | <a href="#">gij555963925 XP_005894036.1</a> |
| <a href="#">PREDICTED: attractin [Ovis aries]</a>                                 | 84.2 | 84.2 | 100% | 1e-16 | 89% | <a href="#">gij426241795 XP_004014773.1</a> |

|                                                                            |      |      |      |       |     |                                             |
|----------------------------------------------------------------------------|------|------|------|-------|-----|---------------------------------------------|
| <a href="#">attractin [Bos taurus]</a>                                     | 84.2 | 84.2 | 100% | 1e-16 | 89% | <a href="#">gij253560524 ACT32973.1</a>     |
| <a href="#">attractin [Bos taurus]</a>                                     | 84.2 | 84.2 | 100% | 1e-16 | 89% | <a href="#">gij27806737 INP_776420.1</a>    |
| <a href="#">PREDICTED: attractin isoform X3 [Canis lupus familiaris]</a>   | 84.2 | 84.2 | 100% | 1e-16 | 89% | <a href="#">gij73991942 XP_534360.2</a>     |
| <a href="#">PREDICTED: attractin [Bison bison bison]</a>                   | 84.2 | 84.2 | 100% | 1e-16 | 89% | <a href="#">gij742104093 XP_010834932.1</a> |
| <a href="#">PREDICTED: attractin [Tupaia chinensis]</a>                    | 84.2 | 84.2 | 100% | 1e-16 | 89% | <a href="#">gij562872246 XP_006164056.1</a> |
| <a href="#">PREDICTED: attractin isoform X1 [Canis lupus familiaris]</a>   | 84.2 | 84.2 | 100% | 1e-16 | 89% | <a href="#">gij545540087 XP_005634904.1</a> |
| <a href="#">PREDICTED: attractin [Panthera tigris altaica]</a>             | 83.3 | 83.3 | 100% | 3e-16 | 89% | <a href="#">gij591291970 XP_007073329.1</a> |
| <a href="#">PREDICTED: attractin [Felis catus]</a>                         | 83.3 | 83.3 | 100% | 3e-16 | 89% | <a href="#">gij586981105 XP_003983758.2</a> |
| <a href="#">PREDICTED: attractin isoform X1 [Oryctolagus cuniculus]</a>    | 82.9 | 82.9 | 100% | 4e-16 | 89% | <a href="#">gij291388868 XP_002710968.1</a> |
| <a href="#">PREDICTED: attractin isoform X2 [Oryctolagus cuniculus]</a>    | 82.9 | 82.9 | 100% | 4e-16 | 89% | <a href="#">gij655716500 XP_008254470.1</a> |
| <a href="#">PREDICTED: attractin [Jaculus jaculus]</a>                     | 82.5 | 82.5 | 100% | 5e-16 | 89% | <a href="#">gij507555530 XP_004661535.1</a> |
| <a href="#">PREDICTED: attractin isoform X2 [Mustela putorius furo]</a>    | 81.7 | 81.7 | 100% | 1e-15 | 86% | <a href="#">gij511906947 XP_004772933.1</a> |
| <a href="#">PREDICTED: attractin [Mustela putorius furo]</a>               | 81.7 | 81.7 | 100% | 1e-15 | 86% | <a href="#">gij511947743 XP_004792355.1</a> |
| <a href="#">PREDICTED: attractin isoform X1 [Mustela putorius furo]</a>    | 81.7 | 81.7 | 100% | 1e-15 | 86% | <a href="#">gij511906945 XP_004772932.1</a> |
| <a href="#">PREDICTED: attractin [Sus scrofa]</a>                          | 81.2 | 81.2 | 100% | 1e-15 | 86% | <a href="#">gij545879723 XP_001927324.5</a> |
| <a href="#">PREDICTED: attractin isoform 2 [Ceratotherium simum simum]</a> | 81.2 | 81.2 | 100% | 1e-15 | 89% | <a href="#">gij478519276 XP_004433860.1</a> |
| <a href="#">attractin [Sus scrofa]</a>                                     | 81.2 | 81.2 | 100% | 1e-15 | 86% | <a href="#">gij146741346 BAF62328.1</a>     |
| <a href="#">PREDICTED: attractin isoform 1 [Ceratotherium simum simum]</a> | 81.2 | 81.2 | 100% | 1e-15 | 89% | <a href="#">gij478519274 XP_004433859.1</a> |
| <a href="#">PREDICTED: attractin-like [Leptonychotes weddellii]</a>        | 80.8 | 80.8 | 100% | 2e-15 | 86% | <a href="#">gij585160208 XP_006732353.1</a> |
| <a href="#">PREDICTED: attractin [Pantholops hodgsonii]</a>                | 80.8 | 80.8 | 100% | 2e-15 | 86% | <a href="#">gij556758951 XP_005974805.1</a> |
| <a href="#">PREDICTED: attractin isoform X3 [Bubalus bubalis]</a>          | 80.8 | 80.8 | 100% | 2e-15 | 86% | <a href="#">gij594099680 XP_006072965.1</a> |
| <a href="#">PREDICTED: attractin isoform X2 [Bubalus bubalis]</a>          | 80.8 | 80.8 | 100% | 2e-15 | 86% | <a href="#">gij594099678 XP_006072964.1</a> |
| <a href="#">PREDICTED: attractin [Odobenus rosmarus divergens]</a>         | 80.8 | 80.8 | 100% | 2e-15 | 86% | <a href="#">gij472357214 XP_004398236.1</a> |
| <a href="#">PREDICTED: attractin isoform X1 [Bubalus bubalis]</a>          | 80.8 | 80.8 | 100% | 2e-15 | 86% | <a href="#">gij594099676 XP_006072963.1</a> |
| <a href="#">PREDICTED: attractin [Chrysochloris asiatica]</a>              | 80.4 | 80.4 | 100% | 3e-15 | 86% | <a href="#">gij586488825 XP_006874887.1</a> |

## Alignments

[Download](#) [GenPept](#) [Graphics](#)

[Next](#) [Previous](#) [Descriptions](#)

PREDICTED: attractin-like [Pan paniscus]

Sequence ID: [gij397513332|ref|XP\\_003826972.1](#) Length: 265 Number of Matches: 1

Range 1: 214 to 241 [GenPept](#) [Graphics](#)

[Next Match](#) [Previous Match](#)

| Score          | Expect | Identities | Positives   | Gaps     |
|----------------|--------|------------|-------------|----------|
| 94.0 bits(214) | 4e-20  | 27/28(96%) | 28/28(100%) | 0/28(0%) |

Query 1 KMPSQAPTGNFYQPQLLDSSMCLEDSRY 28  
 KMPQAPTGNFYQPQLL+SSMCLEDSRY  
 Sbjct 214 KMPSQAPTGNFYQPQLLNSMCLEDSRY 241

### Related Information

[Gene](#) - associated gene details  
[Map Viewer](#) - aligned genomic context

[Download](#) [GenPept](#) [Graphics](#)

[Next](#) [Previous](#) [Descriptions](#)

KIAA0548 protein [Homo sapiens]

Sequence ID: [gij3043620|dbj|BAA25474.1](#) Length: 452 Number of Matches: 1

Range 1: 49 to 76 [GenPept](#) [Graphics](#)

[Next Match](#) [Previous Match](#)

| Score          | Expect | Identities | Positives   | Gaps     |
|----------------|--------|------------|-------------|----------|
| 94.0 bits(214) | 5e-20  | 27/28(96%) | 28/28(100%) | 0/28(0%) |

Query 1 KMPSQAPTGNFYQPQLLDSSMCLEDSRY 28  
 KMPQAPTGNFYQPQLL+SSMCLEDSRY  
 Sbjct 49 KMPSQAPTGNFYQPQLLNSMCLEDSRY 76

### Related Information

[Gene](#) - associated gene details

[Download](#) [GenPept](#) [Graphics](#)

[Next](#) [Previous](#) [Descriptions](#)

**PREDICTED: attractin isoform X2 [Papio anubis]**

Sequence ID: [gi|685567345|ref|XP\\_009214752.1](#) Length: 989 Number of Matches: 1

Range 1: 716 to 743 [GenPept](#) [Graphics](#)

[Next Match](#) [Previous Match](#)

| Score          | Expect | Identities | Positives   | Gaps     |
|----------------|--------|------------|-------------|----------|
| 94.0 bits(214) | 6e-20  | 27/28(96%) | 28/28(100%) | 0/28(0%) |

Query 1 KMPSQAPTGNFYQPQLLDSSMCLEDSRY 28  
 KMPSQAPTGNFYQPQLL+SSMCLEDSRY  
 Sbjct 716 KMPSQAPTGNFYQPQLLNSSMCLEDSRY 743

**Related Information**

[Gene](#) - associated gene details  
[Map Viewer](#) - aligned genomic context

[Download](#) [GenPept](#) [Graphics](#)

[Next](#) [Previous](#) [Descriptions](#)

**PREDICTED: attractin, partial [Pongo abelii]**

Sequence ID: [gi|297706621|ref|XP\\_002830129.1](#) Length: 1058 Number of Matches: 1

Range 1: 655 to 682 [GenPept](#) [Graphics](#)

[Next Match](#) [Previous Match](#)

| Score          | Expect | Identities | Positives   | Gaps     |
|----------------|--------|------------|-------------|----------|
| 94.0 bits(214) | 6e-20  | 27/28(96%) | 28/28(100%) | 0/28(0%) |

Query 1 KMPSQAPTGNFYQPQLLDSSMCLEDSRY 28  
 KMPSQAPTGNFYQPQLL+SSMCLEDSRY  
 Sbjct 655 KMPSQAPTGNFYQPQLLNSSMCLEDSRY 682

**Related Information**

[Gene](#) - associated gene details  
[Map Viewer](#) - aligned genomic context

[Download](#) [GenPept](#) [Graphics](#)

[Next](#) [Previous](#) [Descriptions](#)

**PREDICTED: attractin isoform X2 [Homo sapiens]**

Sequence ID: [gi|530426021|ref|XP\\_005260918.1](#) Length: 1111 Number of Matches: 1

Range 1: 1026 to 1053 [GenPept](#) [Graphics](#)

[Next Match](#) [Previous Match](#)

| Score          | Expect | Identities | Positives   | Gaps     |
|----------------|--------|------------|-------------|----------|
| 94.0 bits(214) | 6e-20  | 27/28(96%) | 28/28(100%) | 0/28(0%) |

Query 1 KMPSQAPTGNFYQPQLLDSSMCLEDSRY 28  
 KMPSQAPTGNFYQPQLL+SSMCLEDSRY  
 Sbjct 1026 KMPSQAPTGNFYQPQLLNSSMCLEDSRY 1053

**Related Information**

[Gene](#) - associated gene details  
[Map Viewer](#) - aligned genomic context

BLAST is a registered trademark of the National Library of Medicine.

[Copyright](#) | [Disclaimer](#) | [Privacy](#) | [Accessibility](#) | [Contact](#) | [Send feedback](#)

[NCBI](#) | [NLM](#) | [NIH](#) | [DHHS](#)

NCBI/ BLAST/ blastp suite/ Formatting Results - B91Z5M9701R

Your search parameters were adjusted to search for a short input sequence.

[Edit and Resubmit](#) [Save Search Strategies](#) [Formatting options](#) [Download](#)

[YouTube](#) [How to read this page](#) [Blast report description](#)

### ATRN\_KMPSQAPTGNFYQPPLLSSMCLEDSRY\_NonMod

RID [B91Z5M9701R](#) (Expires on 01-14 09:50 am)

Query ID |cl|75302  
 Description None  
 Molecule type amino acid  
 Query Length 28

Database Name nr  
 Description All non-redundant GenBank CDS translations+PDB+SwissProt+PIR excluding environmental samples from WGS projects  
 Program BLASTP 2.2.30+ [Citation](#)

Other reports: [Search Summary](#) [Taxonomy reports](#) [Distance tree of results](#) [Multiple alignment](#)

### Graphic Summary

[Show Conserved Domains](#)

No putative conserved domains have been detected

Distribution of 100 Blast Hits on the Query Sequence



This image shows a large, empty table structure. The table is composed of 30 horizontal rows, each defined by two parallel magenta lines. The table is bounded on the left and right sides by light blue vertical bars. The background of the table area is light gray.





**Descriptions**

**Sequences producing significant alignments:**

Select: [All](#) [None](#) Selected: 0

[↑](#) Alignments 
 [Download](#)
[GenPept](#)
[Graphics](#)
[Distance tree of results](#)
[Multiple alignment](#)

| Description                                                           | Max score | Total score | Query cover | E value | Ident | Accession                                   |
|-----------------------------------------------------------------------|-----------|-------------|-------------|---------|-------|---------------------------------------------|
| <a href="#">PREDICTED: attractin-like [Pan paniscus]</a>              | 96.5      | 96.5        | 100%        | 5e-21   | 100%  | <a href="#">gij397513332 XP_003826972.1</a> |
| <a href="#">KIAA0548 protein [Homo sapiens]</a>                       | 96.5      | 96.5        | 100%        | 7e-21   | 100%  | <a href="#">gij3043620 BAA25474.1</a>       |
| <a href="#">PREDICTED: attractin isoform X2 [Papio anubis]</a>        | 96.5      | 96.5        | 100%        | 8e-21   | 100%  | <a href="#">gij685567345 XP_009214752.1</a> |
| <a href="#">PREDICTED: attractin [Pongo abelii]</a>                   | 96.5      | 96.5        | 100%        | 8e-21   | 100%  | <a href="#">gij297706621 XP_002830129.1</a> |
| <a href="#">PREDICTED: attractin isoform X2 [Homo sapiens]</a>        | 96.5      | 96.5        | 100%        | 8e-21   | 100%  | <a href="#">gij530426021 XP_005260918.1</a> |
| <a href="#">PREDICTED: attractin isoform X1 [Papio anubis]</a>        | 96.5      | 96.5        | 100%        | 8e-21   | 100%  | <a href="#">gij685567343 XP_009214751.1</a> |
| <a href="#">unnamed protein product [Homo sapiens]</a>                | 96.5      | 96.5        | 100%        | 8e-21   | 100%  | <a href="#">gij194380362 BAG63948.1</a>     |
| <a href="#">attractin isoform 4 [Homo sapiens]</a>                    | 96.5      | 96.5        | 100%        | 8e-21   | 100%  | <a href="#">gij333440461 NP_001193976.1</a> |
| <a href="#">PREDICTED: attractin isoform 2 [Nomascus leucogenys]</a>  | 96.5      | 96.5        | 100%        | 8e-21   | 100%  | <a href="#">gij332257827 XP_003278006.1</a> |
| <a href="#">PREDICTED: attractin [Gorilla gorilla gorilla]</a>        | 96.5      | 96.5        | 100%        | 8e-21   | 100%  | <a href="#">gij426390844 XP_004061806.1</a> |
| <a href="#">PREDICTED: attractin isoform X4 [Pan troglodytes]</a>     | 96.5      | 96.5        | 100%        | 8e-21   | 100%  | <a href="#">gij694977854 XP_009435012.1</a> |
| <a href="#">PREDICTED: attractin isoform 1 [Nomascus leucogenys]</a>  | 96.5      | 96.5        | 100%        | 8e-21   | 100%  | <a href="#">gij332257825 XP_003278005.1</a> |
| <a href="#">attractin-2 [Homo sapiens]</a>                            | 96.5      | 96.5        | 100%        | 8e-21   | 100%  | <a href="#">gij4093196 AAD03057.1</a>       |
| <a href="#">secreted attractin precursor [Homo sapiens]</a>           | 96.5      | 96.5        | 100%        | 8e-21   | 100%  | <a href="#">gij8118083 AAF72882.1</a>       |
| <a href="#">unnamed protein product [Homo sapiens]</a>                | 96.5      | 96.5        | 100%        | 8e-21   | 100%  | <a href="#">gij158259481 BAF85699.1</a>     |
| <a href="#">attractin isoform 2 preproprotein [Homo sapiens]</a>      | 96.5      | 96.5        | 100%        | 8e-21   | 100%  | <a href="#">gij21450863 NP_647538.1</a>     |
| <a href="#">Mahogany-like protein [Macaca mulatta]</a>                | 96.5      | 96.5        | 100%        | 8e-21   | 100%  | <a href="#">gij355563316 EHH19878.1</a>     |
| <a href="#">PREDICTED: attractin isoform X3 [Pan troglodytes]</a>     | 96.5      | 96.5        | 100%        | 8e-21   | 100%  | <a href="#">gij694977852 XP_009435011.1</a> |
| <a href="#">PREDICTED: attractin isoform X1 [Homo sapiens]</a>        | 96.5      | 96.5        | 100%        | 8e-21   | 100%  | <a href="#">gij530426019 XP_005260917.1</a> |
| <a href="#">PREDICTED: attractin isoform X4 [Macaca fascicularis]</a> | 96.5      | 96.5        | 100%        | 8e-21   | 100%  | <a href="#">gij544464516 XP_005568512.1</a> |
| <a href="#">PREDICTED: attractin isoform X5 [Chlorocebus sabaeus]</a> | 96.5      | 96.5        | 100%        | 8e-21   | 100%  | <a href="#">gij635021368 XP_008017720.1</a> |
| <a href="#">Mahogany-like protein [Macaca fascicularis]</a>           | 96.5      | 96.5        | 100%        | 8e-21   | 100%  | <a href="#">gij355784657 EHH65508.1</a>     |
| <a href="#">PREDICTED: attractin isoform X3 [Macaca fascicularis]</a> | 96.5      | 96.5        | 100%        | 8e-21   | 100%  | <a href="#">gij544464514 XP_005568511.1</a> |
| <a href="#">PREDICTED: attractin isoform X4 [Chlorocebus sabaeus]</a> | 96.5      | 96.5        | 100%        | 8e-21   | 100%  | <a href="#">gij635021366 XP_008017712.1</a> |
| <a href="#">PREDICTED: attractin [Rhinopithecus roxellana]</a>        | 96.5      | 96.5        | 100%        | 8e-21   | 100%  | <a href="#">gij724902357 XP_010377335.1</a> |
| <a href="#">attractin, isoform CRA_b [Homo sapiens]</a>               | 96.5      | 96.5        | 100%        | 8e-21   | 100%  | <a href="#">gij119630936 EAX10531.1</a>     |
| <a href="#">PREDICTED: attractin isoform X3 [Chlorocebus sabaeus]</a> | 96.5      | 96.5        | 100%        | 8e-21   | 100%  | <a href="#">gij635021364 XP_008017707.1</a> |
| <a href="#">PREDICTED: attractin isoform X2 [Pan troglodytes]</a>     | 96.5      | 96.5        | 100%        | 8e-21   | 100%  | <a href="#">gij694977850 XP_009435010.1</a> |

|                                                                                   |      |      |      |       |      |                                             |
|-----------------------------------------------------------------------------------|------|------|------|-------|------|---------------------------------------------|
| <a href="#">PREDICTED: attractin isoform X2 [Chlorocebus sabaeus]</a>             | 96.5 | 96.5 | 100% | 8e-21 | 100% | <a href="#">gij635021362 XP_008017704.1</a> |
| <a href="#">PREDICTED: attractin [Otolemur garnettii]</a>                         | 96.5 | 96.5 | 100% | 8e-21 | 100% | <a href="#">gij395830288 XP_003788264.1</a> |
| <a href="#">PREDICTED: attractin isoform X1 [Pteropus alecto]</a>                 | 96.5 | 96.5 | 100% | 8e-21 | 100% | <a href="#">gij586533632 XP_006921705.1</a> |
| <a href="#">PREDICTED: attractin [Ochotona princeps]</a>                          | 96.5 | 96.5 | 100% | 8e-21 | 100% | <a href="#">gij504146589 XP_004585711.1</a> |
| <a href="#">PREDICTED: attractin [Callithrix jacchus]</a>                         | 96.5 | 96.5 | 100% | 8e-21 | 100% | <a href="#">gij296200062 XP_002747358.1</a> |
| <a href="#">PREDICTED: attractin isoform X1 [Pan troglodytes]</a>                 | 96.5 | 96.5 | 100% | 8e-21 | 100% | <a href="#">gij332857715 XP_003316827.1</a> |
| <a href="#">membrane attractin precursor [Homo sapiens]</a>                       | 96.5 | 96.5 | 100% | 8e-21 | 100% | <a href="#">gij8118082 AAF72881.1</a>       |
| <a href="#">attractin isoform 1 preproprotein [Homo sapiens]</a>                  | 96.5 | 96.5 | 100% | 8e-21 | 100% | <a href="#">gij21450861 INP_647537.1</a>    |
| <a href="#">PREDICTED: attractin isoform X2 [Macaca fascicularis]</a>             | 96.5 | 96.5 | 100% | 8e-21 | 100% | <a href="#">gij544464512 XP_005568510.1</a> |
| <a href="#">PREDICTED: attractin [Macaca mulatta]</a>                             | 96.5 | 96.5 | 100% | 8e-21 | 100% | <a href="#">gij109092720 XP_001115192.1</a> |
| <a href="#">PREDICTED: attractin isoform X1 [Chlorocebus sabaeus]</a>             | 96.5 | 96.5 | 100% | 8e-21 | 100% | <a href="#">gij635021360 XP_008017700.1</a> |
| <a href="#">PREDICTED: attractin isoform X1 [Macaca fascicularis]</a>             | 96.5 | 96.5 | 100% | 8e-21 | 100% | <a href="#">gij544464510 XP_005568509.1</a> |
| <a href="#">PREDICTED: attractin isoform X6 [Chlorocebus sabaeus]</a>             | 96.5 | 96.5 | 100% | 8e-21 | 100% | <a href="#">gij635021370 XP_008017729.1</a> |
| <a href="#">PREDICTED: attractin isoform X2 [Pteropus alecto]</a>                 | 96.5 | 96.5 | 100% | 8e-21 | 100% | <a href="#">gij586533634 XP_006921706.1</a> |
| <a href="#">PREDICTED: attractin [Lipotes vexillifer]</a>                         | 93.5 | 93.5 | 100% | 8e-20 | 96%  | <a href="#">gij602710450 XP_007465469.1</a> |
| <a href="#">PREDICTED: attractin-like [Galeopterus variegatus]</a>                | 92.3 | 92.3 | 100% | 1e-19 | 96%  | <a href="#">gij667345974 XP_008563464.1</a> |
| <a href="#">Attractin [Myotis brandtii]</a>                                       | 92.7 | 92.7 | 100% | 2e-19 | 96%  | <a href="#">gij521031210 EPQ12996.1</a>     |
| <a href="#">PREDICTED: attractin [Myotis brandtii]</a>                            | 92.7 | 92.7 | 100% | 2e-19 | 96%  | <a href="#">gij554560893 XP_005874816.1</a> |
| <a href="#">PREDICTED: attractin [Myotis lucifugus]</a>                           | 92.7 | 92.7 | 100% | 2e-19 | 96%  | <a href="#">gij558159591 XP_006096513.1</a> |
| <a href="#">PREDICTED: attractin [Eptesicus fuscus]</a>                           | 92.7 | 92.7 | 100% | 2e-19 | 96%  | <a href="#">gij641701319 XP_008139256.1</a> |
| <a href="#">PREDICTED: attractin isoform X2 [Saimiri boliviensis boliviensis]</a> | 92.3 | 92.3 | 100% | 2e-19 | 96%  | <a href="#">gij725600053 XP_010350112.1</a> |
| <a href="#">PREDICTED: attractin isoform X1 [Saimiri boliviensis boliviensis]</a> | 92.3 | 92.3 | 100% | 2e-19 | 96%  | <a href="#">gij725600051 XP_010350111.1</a> |
| <a href="#">Attractin [Myotis davidii]</a>                                        | 92.3 | 92.3 | 100% | 2e-19 | 96%  | <a href="#">gij432111133 ELK34519.1</a>     |
| <a href="#">PREDICTED: attractin [Myotis davidii]</a>                             | 92.3 | 92.3 | 100% | 2e-19 | 96%  | <a href="#">gij584075971 XP_006758187.1</a> |
| <a href="#">PREDICTED: attractin-like [Galeopterus variegatus]</a>                | 92.3 | 92.3 | 100% | 2e-19 | 96%  | <a href="#">gij667324076 XP_008589101.1</a> |
| <a href="#">PREDICTED: attractin [Tarsius syrichta]</a>                           | 91.8 | 91.8 | 100% | 3e-19 | 96%  | <a href="#">gij640796924 XP_008054571.1</a> |
| <a href="#">PREDICTED: attractin-like [Tursiops truncatus]</a>                    | 90.1 | 90.1 | 100% | 1e-18 | 96%  | <a href="#">gij470629747 XP_004321558.1</a> |
| <a href="#">PREDICTED: attractin-like [Physeter catodon]</a>                      | 90.1 | 90.1 | 100% | 1e-18 | 96%  | <a href="#">gij593773084 XP_007124834.1</a> |
| <a href="#">PREDICTED: attractin [Equus przewalskii]</a>                          | 90.1 | 90.1 | 100% | 1e-18 | 96%  | <a href="#">gij664773944 XP_008506219.1</a> |
| <a href="#">PREDICTED: attractin [Orcinus orca]</a>                               | 90.1 | 90.1 | 100% | 1e-18 | 96%  | <a href="#">gij466084723 XP_004285351.1</a> |
| <a href="#">PREDICTED: attractin [Orycteropus afer afer]</a>                      | 90.1 | 90.1 | 100% | 1e-18 | 96%  | <a href="#">gij634830430 XP_007958185.1</a> |
| <a href="#">attractin isoform 1 preproprotein [Camelus ferus]</a>                 | 89.3 | 89.3 | 100% | 2e-18 | 93%  | <a href="#">gij528759526 EPY79185.1</a>     |
| <a href="#">PREDICTED: attractin [Camelus ferus]</a>                              | 89.3 | 89.3 | 100% | 2e-18 | 93%  | <a href="#">gij560921992 XP_006187198.1</a> |
| <a href="#">PREDICTED: attractin [Vicugna pacos]</a>                              | 89.3 | 89.3 | 100% | 2e-18 | 93%  | <a href="#">gij560970220 XP_006207473.1</a> |
| <a href="#">attractin [Ovis aries]</a>                                            | 86.7 | 86.7 | 100% | 1e-17 | 93%  | <a href="#">gij78499351 ABB45710.1</a>      |
| <a href="#">attractin [Bos taurus]</a>                                            | 86.7 | 86.7 | 100% | 2e-17 | 93%  | <a href="#">gij190683717 ACE82176.1</a>     |
| <a href="#">attractin [Canis lupus familiaris]</a>                                | 86.7 | 86.7 | 100% | 2e-17 | 93%  | <a href="#">gij339892849 AEK21787.1</a>     |
| <a href="#">PREDICTED: attractin [Balaenoptera acutorostrata scammoni]</a>        | 86.7 | 86.7 | 100% | 2e-17 | 93%  | <a href="#">gij594697511 XP_007195912.1</a> |
| <a href="#">PREDICTED: attractin isoform X2 [Canis lupus familiaris]</a>          | 86.7 | 86.7 | 100% | 2e-17 | 93%  | <a href="#">gij545540090 XP_005634905.1</a> |
| <a href="#">PREDICTED: attractin [Capra hircus]</a>                               | 86.7 | 86.7 | 100% | 2e-17 | 93%  | <a href="#">gij548490191 XP_005688293.1</a> |
| <a href="#">PREDICTED: attractin [Bos mutus]</a>                                  | 86.7 | 86.7 | 100% | 2e-17 | 93%  | <a href="#">gij555963925 XP_005894036.1</a> |
| <a href="#">PREDICTED: attractin [Ovis aries]</a>                                 | 86.7 | 86.7 | 100% | 2e-17 | 93%  | <a href="#">gij426241795 XP_004014773.1</a> |
| <a href="#">attractin [Bos taurus]</a>                                            | 86.7 | 86.7 | 100% | 2e-17 | 93%  | <a href="#">gij253560524 ACT32973.1</a>     |
| <a href="#">attractin [Bos taurus]</a>                                            | 86.7 | 86.7 | 100% | 2e-17 | 93%  | <a href="#">gij27806737 INP_776420.1</a>    |
| <a href="#">PREDICTED: attractin isoform X3 [Canis lupus familiaris]</a>          | 86.7 | 86.7 | 100% | 2e-17 | 93%  | <a href="#">gij73991942 XP_534360.2</a>     |

|                                                                            |      |      |      |       |     |                                             |
|----------------------------------------------------------------------------|------|------|------|-------|-----|---------------------------------------------|
| <a href="#">PREDICTED: attractin isoform X2 [Bos taurus]</a>               | 86.7 | 86.7 | 100% | 2e-17 | 93% | <a href="#">gil528973313 XP_005214542.1</a> |
| <a href="#">PREDICTED: attractin [Tupaia chinensis]</a>                    | 86.7 | 86.7 | 100% | 2e-17 | 93% | <a href="#">gil562872246 XP_006164056.1</a> |
| <a href="#">PREDICTED: attractin isoform X1 [Canis lupus familiaris]</a>   | 86.7 | 86.7 | 100% | 2e-17 | 93% | <a href="#">gil545540087 XP_005634904.1</a> |
| <a href="#">PREDICTED: attractin isoform X1 [Bos taurus]</a>               | 86.7 | 86.7 | 100% | 2e-17 | 93% | <a href="#">gil528973311 XP_005214541.1</a> |
| <a href="#">PREDICTED: attractin [Panthera tigris altaica]</a>             | 85.9 | 85.9 | 100% | 3e-17 | 93% | <a href="#">gil591291970 XP_007073329.1</a> |
| <a href="#">PREDICTED: attractin [Felis catus]</a>                         | 85.9 | 85.9 | 100% | 3e-17 | 93% | <a href="#">gil586981105 XP_003983758.2</a> |
| <a href="#">PREDICTED: attractin isoform X1 [Oryctolagus cuniculus]</a>    | 85.5 | 85.5 | 100% | 5e-17 | 93% | <a href="#">gil291388868 XP_002710968.1</a> |
| <a href="#">PREDICTED: attractin isoform X2 [Oryctolagus cuniculus]</a>    | 85.5 | 85.5 | 100% | 5e-17 | 93% | <a href="#">gil655716500 XP_008254470.1</a> |
| <a href="#">PREDICTED: attractin [Jaculus jaculus]</a>                     | 85.0 | 85.0 | 100% | 7e-17 | 93% | <a href="#">gil507555530 XP_004661535.1</a> |
| <a href="#">PREDICTED: attractin isoform X2 [Mustela putorius furo]</a>    | 84.2 | 84.2 | 100% | 1e-16 | 89% | <a href="#">gil511906947 XP_004772933.1</a> |
| <a href="#">PREDICTED: attractin [Mustela putorius furo]</a>               | 84.2 | 84.2 | 100% | 1e-16 | 89% | <a href="#">gil511947743 XP_004792355.1</a> |
| <a href="#">PREDICTED: attractin isoform X1 [Mustela putorius furo]</a>    | 84.2 | 84.2 | 100% | 1e-16 | 89% | <a href="#">gil511906945 XP_004772932.1</a> |
| <a href="#">PREDICTED: attractin [Sus scrofa]</a>                          | 83.8 | 83.8 | 100% | 2e-16 | 89% | <a href="#">gil545879723 XP_001927324.5</a> |
| <a href="#">PREDICTED: attractin isoform 2 [Ceratotherium simum simum]</a> | 83.8 | 83.8 | 100% | 2e-16 | 93% | <a href="#">gil478519276 XP_004433860.1</a> |
| <a href="#">attractin [Sus scrofa]</a>                                     | 83.8 | 83.8 | 100% | 2e-16 | 89% | <a href="#">gil146741346 BAF62328.1</a>     |
| <a href="#">PREDICTED: attractin isoform 1 [Ceratotherium simum simum]</a> | 83.8 | 83.8 | 100% | 2e-16 | 93% | <a href="#">gil478519274 XP_004433859.1</a> |
| <a href="#">PREDICTED: attractin-like [Leptonychotes weddellii]</a>        | 83.3 | 83.3 | 100% | 2e-16 | 89% | <a href="#">gil585160208 XP_006732353.1</a> |
| <a href="#">PREDICTED: attractin [Pantholops hodgsonii]</a>                | 83.3 | 83.3 | 100% | 2e-16 | 89% | <a href="#">gil556758951 XP_005974805.1</a> |
| <a href="#">PREDICTED: attractin isoform X3 [Bubalus bubalis]</a>          | 83.3 | 83.3 | 100% | 2e-16 | 89% | <a href="#">gil594099680 XP_006072965.1</a> |
| <a href="#">PREDICTED: attractin isoform X2 [Bubalus bubalis]</a>          | 83.3 | 83.3 | 100% | 3e-16 | 89% | <a href="#">gil594099678 XP_006072964.1</a> |
| <a href="#">PREDICTED: attractin [Odobenus rosmarus divergens]</a>         | 83.3 | 83.3 | 100% | 3e-16 | 89% | <a href="#">gil472357214 XP_004398236.1</a> |
| <a href="#">PREDICTED: attractin isoform X1 [Bubalus bubalis]</a>          | 83.3 | 83.3 | 100% | 3e-16 | 89% | <a href="#">gil594099676 XP_006072963.1</a> |
| <a href="#">PREDICTED: attractin [Chrysochloris asiatica]</a>              | 82.9 | 82.9 | 100% | 3e-16 | 89% | <a href="#">gil586488825 XP_006874887.1</a> |
| <a href="#">PREDICTED: attractin [Nannospalax galili]</a>                  | 82.5 | 82.5 | 100% | 5e-16 | 89% | <a href="#">gil674060132 XP_008836714.1</a> |
| <a href="#">Attractin [Cricetulus griseus]</a>                             | 82.1 | 82.1 | 96%  | 7e-16 | 93% | <a href="#">gil344236321 EGV92424.1</a>     |
| <a href="#">PREDICTED: attractin isoform X2 [Cricetulus griseus]</a>       | 82.1 | 82.1 | 96%  | 7e-16 | 93% | <a href="#">gil625260840 XP_007621856.1</a> |
| <a href="#">attractin [Cricetulus griseus]</a>                             | 82.1 | 82.1 | 96%  | 7e-16 | 93% | <a href="#">gil537146168 ERE69758.1</a>     |

## Alignments

Download [GenPept](#) [Graphics](#)

Next Previous Descriptions

**PREDICTED: attractin-like [Pan paniscus]**

Sequence ID: [gil397513332|ref|XP\\_003826972.1](#) Length: 265 Number of Matches: 1

Range 1: 214 to 241 [GenPept](#) [Graphics](#)

Next Match Previous Match

| Score          | Expect | Identities  | Positives   | Gaps     |
|----------------|--------|-------------|-------------|----------|
| 96.5 bits(220) | 5e-21  | 28/28(100%) | 28/28(100%) | 0/28(0%) |

```
Query 1 KMPSQAPTGNFYQPQLLNSSMCLEDSRY 28
      KMPSQAPTGNFYQPQLLNSSMCLEDSRY
Sbjct 214 KMPSQAPTGNFYQPQLLNSSMCLEDSRY 241
```

### Related Information

[Gene](#) - associated gene details  
[Map Viewer](#) - aligned genomic context

Download [GenPept](#) [Graphics](#)

Next Previous Descriptions

**KIAA0548 protein [Homo sapiens]**

Sequence ID: [gil3043620|dbj|BAA25474.1](#) Length: 452 Number of Matches: 1

Range 1: 49 to 76 [GenPept](#) [Graphics](#)

Next Match Previous Match

| Score          | Expect | Identities  | Positives   | Gaps     |
|----------------|--------|-------------|-------------|----------|
| 96.5 bits(220) | 7e-21  | 28/28(100%) | 28/28(100%) | 0/28(0%) |

```
Query 1 KMPSQAPTGNFYQPQLLNSSMCLEDSRY 28
```

### Related Information

[Gene](#) - associated gene details

Sbjct 49 KMPSQAPTGNFYQPQLLNSSMCLEDSRY 76

[Download](#) [GenPept](#) [Graphics](#)

[Next](#) [Previous](#) [Descriptions](#)

**PREDICTED: attractin isoform X2 [Papio anubis]**

Sequence ID: [gi|685567345|ref|XP\\_009214752.1](#) Length: 989 Number of Matches: 1

Range 1: 716 to 743 [GenPept](#) [Graphics](#)

[Next Match](#) [Previous Match](#)

| Score          | Expect | Identities  | Positives   | Gaps     |
|----------------|--------|-------------|-------------|----------|
| 96.5 bits(220) | 8e-21  | 28/28(100%) | 28/28(100%) | 0/28(0%) |

Query 1 KMPSQAPTGNFYQPQLLNSSMCLEDSRY 28  
 KMPSQAPTGNFYQPQLLNSSMCLEDSRY  
 Sbjct 716 KMPSQAPTGNFYQPQLLNSSMCLEDSRY 743

**Related Information**

[Gene](#) - associated gene details  
[Map Viewer](#) - aligned genomic context

[Download](#) [GenPept](#) [Graphics](#)

[Next](#) [Previous](#) [Descriptions](#)

**PREDICTED: attractin, partial [Pongo abelii]**

Sequence ID: [gi|297706621|ref|XP\\_002830129.1](#) Length: 1058 Number of Matches: 1

Range 1: 655 to 682 [GenPept](#) [Graphics](#)

[Next Match](#) [Previous Match](#)

| Score          | Expect | Identities  | Positives   | Gaps     |
|----------------|--------|-------------|-------------|----------|
| 96.5 bits(220) | 8e-21  | 28/28(100%) | 28/28(100%) | 0/28(0%) |

Query 1 KMPSQAPTGNFYQPQLLNSSMCLEDSRY 28  
 KMPSQAPTGNFYQPQLLNSSMCLEDSRY  
 Sbjct 655 KMPSQAPTGNFYQPQLLNSSMCLEDSRY 682

**Related Information**

[Gene](#) - associated gene details  
[Map Viewer](#) - aligned genomic context

[Download](#) [GenPept](#) [Graphics](#)

[Next](#) [Previous](#) [Descriptions](#)

**PREDICTED: attractin isoform X2 [Homo sapiens]**

Sequence ID: [gi|530426021|ref|XP\\_005260918.1](#) Length: 1111 Number of Matches: 1

Range 1: 1026 to 1053 [GenPept](#) [Graphics](#)

[Next Match](#) [Previous Match](#)

| Score          | Expect | Identities  | Positives   | Gaps     |
|----------------|--------|-------------|-------------|----------|
| 96.5 bits(220) | 8e-21  | 28/28(100%) | 28/28(100%) | 0/28(0%) |

Query 1 KMPSQAPTGNFYQPQLLNSSMCLEDSRY 28  
 KMPSQAPTGNFYQPQLLNSSMCLEDSRY  
 Sbjct 1026 KMPSQAPTGNFYQPQLLNSSMCLEDSRY 1053

**Related Information**

[Gene](#) - associated gene details  
[Map Viewer](#) - aligned genomic context

BLAST is a registered trademark of the National Library of Medicine.

NCBI/ BLAST/ blastp suite/ Formatting Results - BHF5J1Y0014

Your search parameters were adjusted to search for a short input sequence.

[Edit and Resubmit](#) [Save Search Strategies](#) [Formatting options](#) [Download](#)

[YouTube](#) [How to read this page](#) [Blast report description](#)

### ATRN\_RGCSCFSDWQPGCSVPVPADQSFWTRE\_Mod

RID [BHF5J1Y0014](#) (Expires on 01-17 14:24 pm)

Query ID |cl|69569  
 Description None  
 Molecule type amino acid  
 Query Length 28

Database Name nr  
 Description All non-redundant GenBank CDS translations+PDB+SwissProt+PIR excluding environmental samples from WGS projects  
 Program BLASTP 2.2.30+ [Citation](#)

Other reports: [Search Summary](#) [Taxonomy reports](#) [Distance tree of results](#) [Multiple alignment](#)

### Graphic Summary

Show Conserved Domains

No putative conserved domains have been detected

Distribution of 98 Blast Hits on the Query Sequence

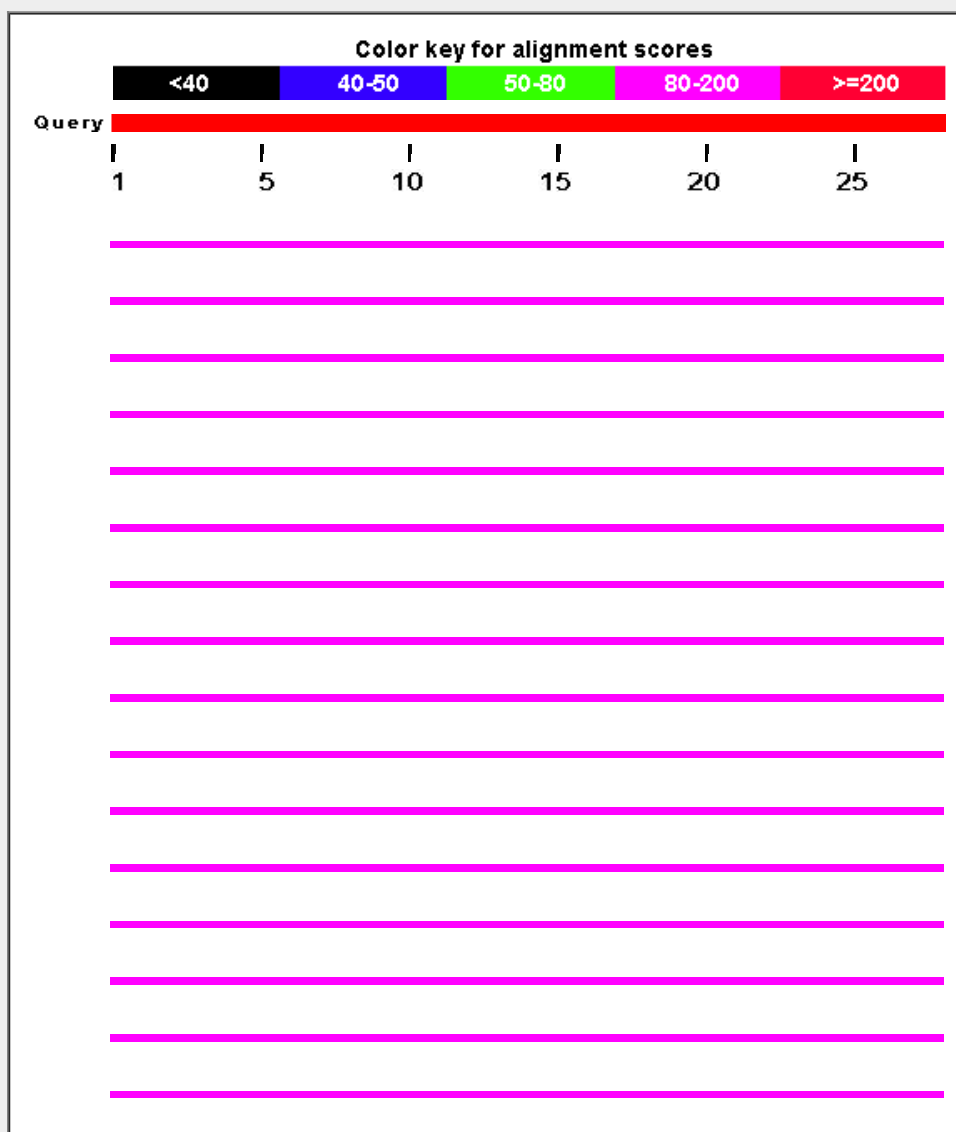

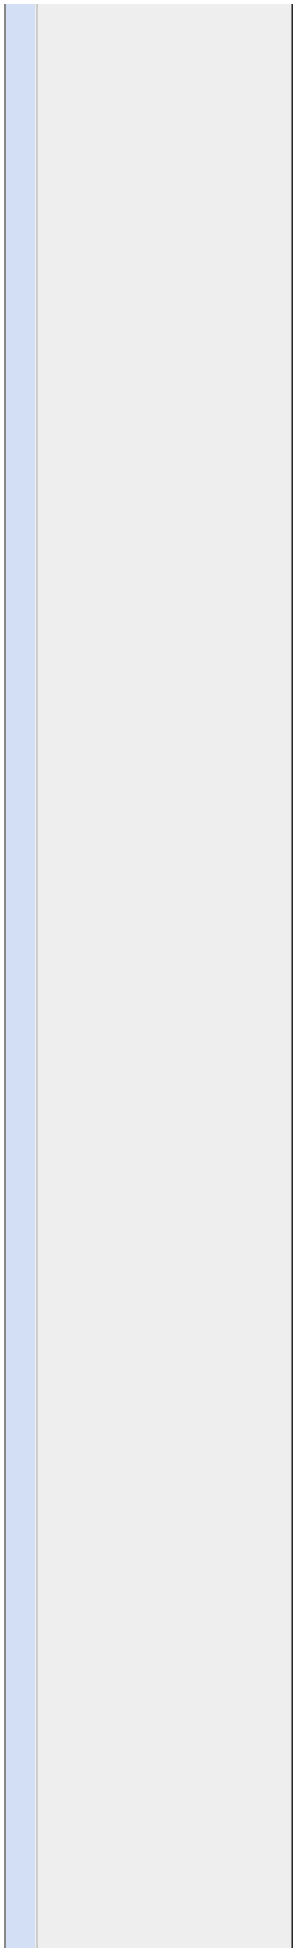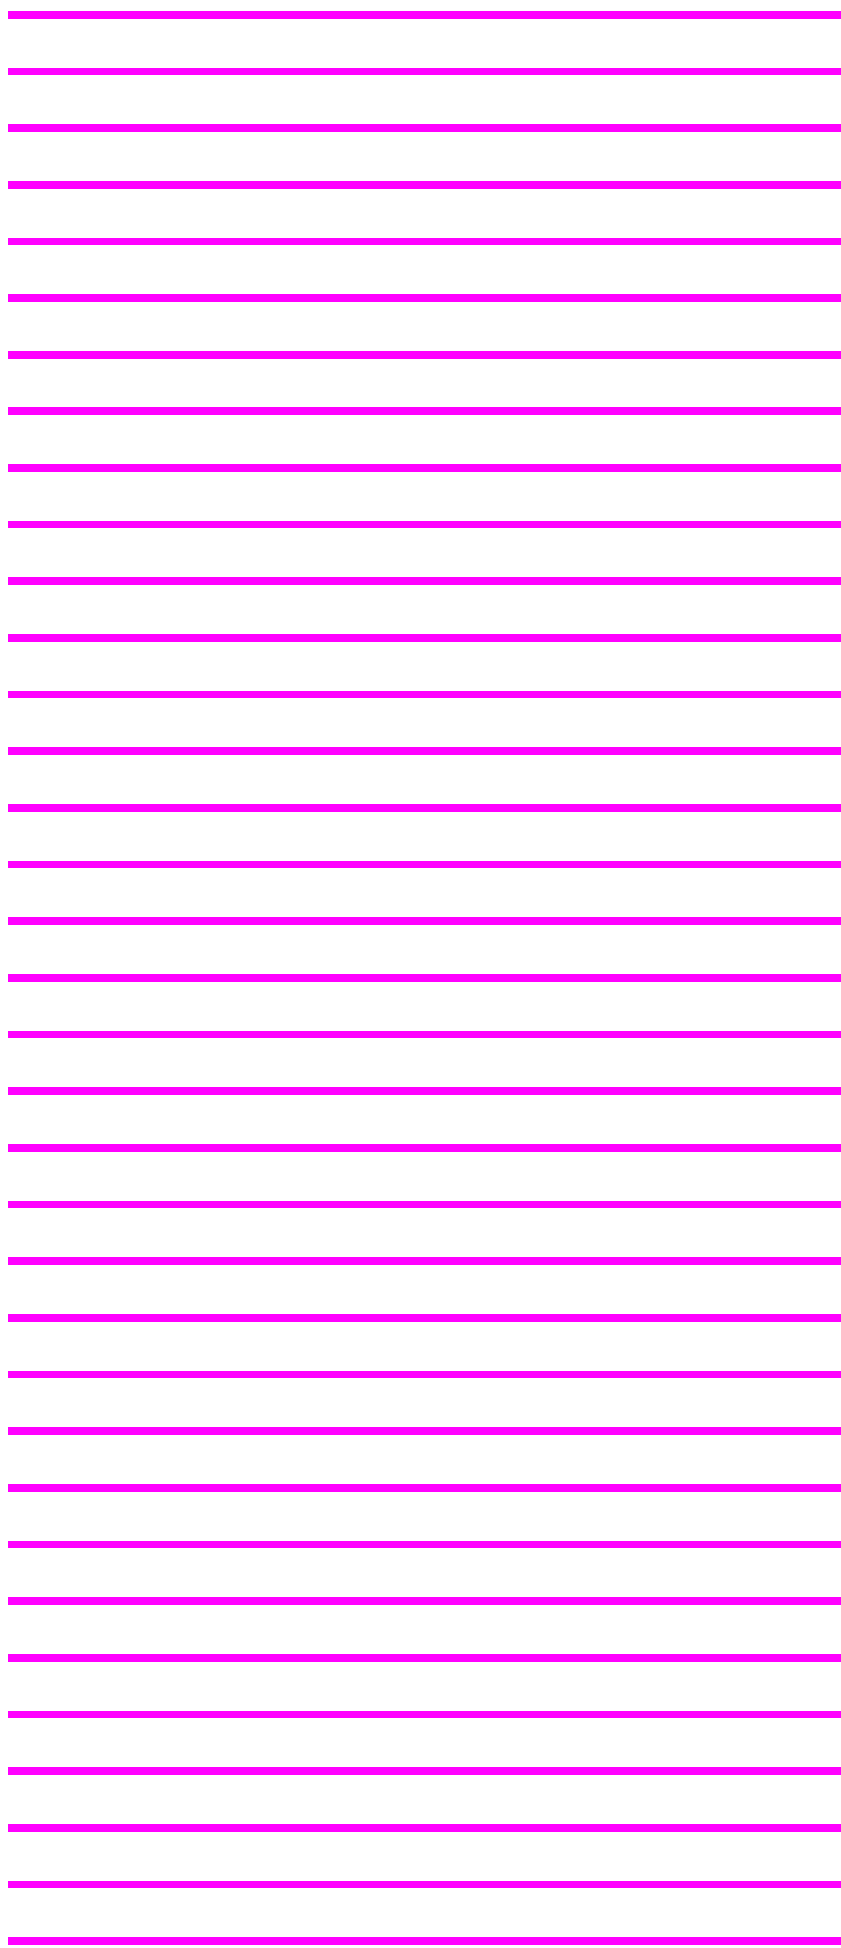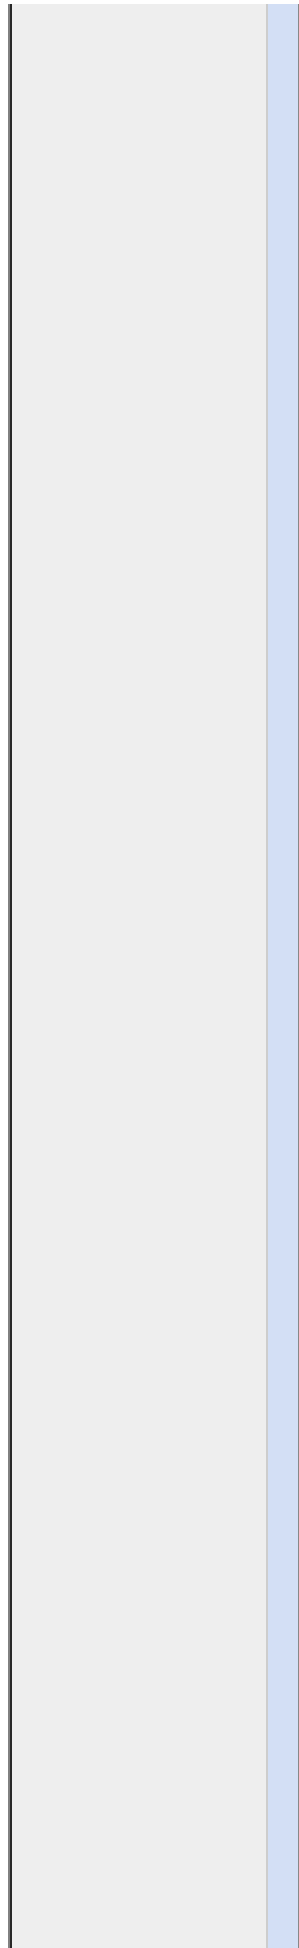



**Descriptions**

**Sequences producing significant alignments:**

Select: [All](#) [None](#) Selected: 0

[↑](#) [Alignments](#)
[Download](#)
[GenPept](#)
[Graphics](#)
[Distance tree of results](#)
[Multiple alignment](#)
⚙

| Description                                                              | Max score | Total score | Query cover | E value | Ident | Accession                                   |
|--------------------------------------------------------------------------|-----------|-------------|-------------|---------|-------|---------------------------------------------|
| <a href="#">PREDICTED: attractin isoform X2 [Homo sapiens]</a>           | 95.2      | 95.2        | 100%        | 2e-20   | 96%   | <a href="#">gij530426021 XP_005260918.1</a> |
| <a href="#">unnamed protein product [Homo sapiens]</a>                   | 95.2      | 95.2        | 100%        | 2e-20   | 96%   | <a href="#">gij194380362 BAG63948.1</a>     |
| <a href="#">attractin isoform 4 [Homo sapiens]</a>                       | 95.2      | 95.2        | 100%        | 2e-20   | 96%   | <a href="#">gij333440461 NP_001193976.1</a> |
| <a href="#">PREDICTED: attractin isoform 2 [Nomascus leucogenys]</a>     | 95.2      | 95.2        | 100%        | 2e-20   | 96%   | <a href="#">gij332257827 XP_003278006.1</a> |
| <a href="#">PREDICTED: attractin [Gorilla gorilla gorilla]</a>           | 95.2      | 95.2        | 100%        | 2e-20   | 96%   | <a href="#">gij426390844 XP_004061806.1</a> |
| <a href="#">PREDICTED: attractin isoform X4 [Pan troglodytes]</a>        | 95.2      | 95.2        | 100%        | 2e-20   | 96%   | <a href="#">gij694977854 XP_009435012.1</a> |
| <a href="#">PREDICTED: attractin isoform 1 [Nomascus leucogenys]</a>     | 95.2      | 95.2        | 100%        | 2e-20   | 96%   | <a href="#">gij332257825 XP_003278005.1</a> |
| <a href="#">attractin-2 [Homo sapiens]</a>                               | 95.2      | 95.2        | 100%        | 2e-20   | 96%   | <a href="#">gij4093196 AAD03057.1</a>       |
| <a href="#">secreted attractin precursor [Homo sapiens]</a>              | 95.2      | 95.2        | 100%        | 2e-20   | 96%   | <a href="#">gij8118083 AAF72882.1</a>       |
| <a href="#">unnamed protein product [Homo sapiens]</a>                   | 95.2      | 95.2        | 100%        | 2e-20   | 96%   | <a href="#">gij158259481 BAF85699.1</a>     |
| <a href="#">attractin isoform 2 preproprotein [Homo sapiens]</a>         | 95.2      | 95.2        | 100%        | 2e-20   | 96%   | <a href="#">gij21450863 NP_647538.1</a>     |
| <a href="#">PREDICTED: LOW QUALITY PROTEIN: attractin [Pan paniscus]</a> | 95.2      | 95.2        | 100%        | 2e-20   | 96%   | <a href="#">gij675763672 XP_008973079.1</a> |
| <a href="#">PREDICTED: attractin isoform X3 [Pan troglodytes]</a>        | 95.2      | 95.2        | 100%        | 2e-20   | 96%   | <a href="#">gij694977852 XP_009435011.1</a> |
| <a href="#">PREDICTED: attractin isoform X1 [Homo sapiens]</a>           | 95.2      | 95.2        | 100%        | 2e-20   | 96%   | <a href="#">gij530426019 XP_005260917.1</a> |
| <a href="#">attractin, isoform CRA_b [Homo sapiens]</a>                  | 95.2      | 95.2        | 100%        | 2e-20   | 96%   | <a href="#">gij119630936 EAX10531.1</a>     |
| <a href="#">PREDICTED: attractin isoform X2 [Pan troglodytes]</a>        | 95.2      | 95.2        | 100%        | 2e-20   | 96%   | <a href="#">gij694977850 XP_009435010.1</a> |
| <a href="#">PREDICTED: attractin isoform X1 [Pan troglodytes]</a>        | 95.2      | 95.2        | 100%        | 2e-20   | 96%   | <a href="#">gij332857715 XP_003316827.1</a> |
| <a href="#">membrane attractin precursor [Homo sapiens]</a>              | 95.2      | 95.2        | 100%        | 2e-20   | 96%   | <a href="#">gij8118082 AAF72881.1</a>       |
| <a href="#">attractin isoform 1 preproprotein [Homo sapiens]</a>         | 95.2      | 95.2        | 100%        | 2e-20   | 96%   | <a href="#">gij21450861 NP_647537.1</a>     |
| <a href="#">PREDICTED: attractin-like [Octodon degus]</a>                | 93.1      | 93.1        | 100%        | 1e-19   | 93%   | <a href="#">gij507657234 XP_004634315.1</a> |
| <a href="#">PREDICTED: attractin-like [Physeter catodon]</a>             | 92.7      | 92.7        | 100%        | 2e-19   | 93%   | <a href="#">gij593773084 XP_007124834.1</a> |
| <a href="#">PREDICTED: attractin [Pantholops hodgsonii]</a>              | 92.7      | 92.7        | 100%        | 2e-19   | 93%   | <a href="#">gij556758951 XP_005974805.1</a> |
| <a href="#">PREDICTED: attractin [Sus scrofa]</a>                        | 92.7      | 92.7        | 100%        | 2e-19   | 93%   | <a href="#">gij545879723 XP_001927324.5</a> |
| <a href="#">PREDICTED: attractin isoform X1 [Bos taurus]</a>             | 92.7      | 92.7        | 100%        | 2e-19   | 93%   | <a href="#">gij741947708 XP_005214542.2</a> |
| <a href="#">PREDICTED: attractin isoform X3 [Bubalus bubalis]</a>        | 92.7      | 92.7        | 100%        | 2e-19   | 93%   | <a href="#">gij594099680 XP_006072965.1</a> |
| <a href="#">attractin [Sus scrofa]</a>                                   | 92.7      | 92.7        | 100%        | 2e-19   | 93%   | <a href="#">gij146741346 BAF62328.1</a>     |
| <a href="#">PREDICTED: attractin [Capra hircus]</a>                      | 92.7      | 92.7        | 100%        | 2e-19   | 93%   | <a href="#">gij548490191 XP_005688293.1</a> |
| <a href="#">PREDICTED: attractin [Bos mutus]</a>                         | 92.7      | 92.7        | 100%        | 2e-19   | 93%   | <a href="#">gij555963925 XP_005894036.1</a> |

|                                                                            |      |      |      |       |     |                                             |
|----------------------------------------------------------------------------|------|------|------|-------|-----|---------------------------------------------|
| PREDICTED: attractin [ <i>Ovis aries</i> ]                                 | 92.7 | 92.7 | 100% | 2e-19 | 93% | <a href="#">gij426241795 XP_004014773.1</a> |
| <a href="#">attractin [<i>Bos taurus</i>]</a>                              | 92.7 | 92.7 | 100% | 2e-19 | 93% | <a href="#">gij253560524 ACT32973.1</a>     |
| <a href="#">attractin [<i>Bos taurus</i>]</a>                              | 92.7 | 92.7 | 100% | 2e-19 | 93% | <a href="#">gij27806737 INP_776420.1</a>    |
| PREDICTED: attractin isoform X2 [ <i>Bubalus bubalis</i> ]                 | 92.7 | 92.7 | 100% | 2e-19 | 93% | <a href="#">gij594099678 XP_006072964.1</a> |
| PREDICTED: attractin isoform X3 [ <i>Chinchilla lanigera</i> ]             | 92.7 | 92.7 | 100% | 2e-19 | 93% | <a href="#">gij533131617 XP_005380852.1</a> |
| PREDICTED: attractin isoform X1 [ <i>Ictidomys tridecemlineatus</i> ]      | 92.7 | 92.7 | 100% | 2e-19 | 93% | <a href="#">gij532069484 XP_005320577.1</a> |
| PREDICTED: attractin isoform X3 [ <i>Ictidomys tridecemlineatus</i> ]      | 92.7 | 92.7 | 100% | 2e-19 | 93% | <a href="#">gij532069488 XP_005320579.1</a> |
| PREDICTED: attractin isoform X2 [ <i>Ictidomys tridecemlineatus</i> ]      | 92.7 | 92.7 | 100% | 2e-19 | 93% | <a href="#">gij532069486 XP_005320578.1</a> |
| PREDICTED: attractin isoform X2 [ <i>Chinchilla lanigera</i> ]             | 92.7 | 92.7 | 100% | 2e-19 | 93% | <a href="#">gij533131615 XP_005380851.1</a> |
| PREDICTED: attractin [ <i>Bison bison bison</i> ]                          | 92.7 | 92.7 | 100% | 2e-19 | 93% | <a href="#">gij742104093 XP_010834932.1</a> |
| PREDICTED: attractin isoform X1 [ <i>Chinchilla lanigera</i> ]             | 92.7 | 92.7 | 100% | 2e-19 | 93% | <a href="#">gij533131613 XP_005380850.1</a> |
| PREDICTED: attractin isoform X1 [ <i>Bubalus bubalis</i> ]                 | 92.7 | 92.7 | 100% | 2e-19 | 93% | <a href="#">gij594099676 XP_006072963.1</a> |
| PREDICTED: attractin isoform X1 [ <i>Pteropus alecto</i> ]                 | 91.8 | 91.8 | 100% | 3e-19 | 93% | <a href="#">gij586533632 XP_006921705.1</a> |
| PREDICTED: attractin isoform X2 [ <i>Pteropus alecto</i> ]                 | 91.8 | 91.8 | 100% | 3e-19 | 93% | <a href="#">gij586533634 XP_006921706.1</a> |
| PREDICTED: attractin [ <i>Equus przewalskii</i> ]                          | 90.6 | 90.6 | 100% | 9e-19 | 89% | <a href="#">gij664773944 XP_008506219.1</a> |
| Mahogany-like protein [ <i>Macaca mulatta</i> ]                            | 90.6 | 90.6 | 100% | 9e-19 | 93% | <a href="#">gij355563316 EHH19878.1</a>     |
| PREDICTED: attractin isoform X4 [ <i>Macaca fascicularis</i> ]             | 90.6 | 90.6 | 100% | 9e-19 | 93% | <a href="#">gij544464516 XP_005568512.1</a> |
| PREDICTED: attractin isoform X5 [ <i>Chlorocebus sabaeus</i> ]             | 90.6 | 90.6 | 100% | 9e-19 | 93% | <a href="#">gij635021368 XP_008017720.1</a> |
| Mahogany-like protein [ <i>Macaca fascicularis</i> ]                       | 90.6 | 90.6 | 100% | 9e-19 | 93% | <a href="#">gij355784657 EHH65508.1</a>     |
| PREDICTED: attractin isoform X3 [ <i>Macaca fascicularis</i> ]             | 90.6 | 90.6 | 100% | 9e-19 | 93% | <a href="#">gij544464514 XP_005568511.1</a> |
| PREDICTED: attractin-like [ <i>Galeopterus variegatus</i> ]                | 90.6 | 90.6 | 100% | 9e-19 | 89% | <a href="#">gij667324076 XP_008589101.1</a> |
| PREDICTED: attractin isoform X4 [ <i>Chlorocebus sabaeus</i> ]             | 90.6 | 90.6 | 100% | 9e-19 | 93% | <a href="#">gij635021366 XP_008017712.1</a> |
| PREDICTED: attractin [ <i>Rhinopithecus roxellana</i> ]                    | 90.6 | 90.6 | 100% | 9e-19 | 93% | <a href="#">gij724902357 XP_010377335.1</a> |
| PREDICTED: attractin isoform X3 [ <i>Chlorocebus sabaeus</i> ]             | 90.6 | 90.6 | 100% | 9e-19 | 93% | <a href="#">gij635021364 XP_008017707.1</a> |
| PREDICTED: attractin isoform X2 [ <i>Chlorocebus sabaeus</i> ]             | 90.6 | 90.6 | 100% | 9e-19 | 93% | <a href="#">gij635021362 XP_008017704.1</a> |
| PREDICTED: attractin [ <i>Otolemur garnettii</i> ]                         | 90.6 | 90.6 | 100% | 9e-19 | 89% | <a href="#">gij395830288 XP_003788264.1</a> |
| PREDICTED: attractin [ <i>Orycteropus afer afer</i> ]                      | 90.6 | 90.6 | 100% | 9e-19 | 89% | <a href="#">gij634830430 XP_007958185.1</a> |
| PREDICTED: attractin isoform X2 [ <i>Macaca fascicularis</i> ]             | 90.6 | 90.6 | 100% | 9e-19 | 93% | <a href="#">gij544464512 XP_005568510.1</a> |
| PREDICTED: attractin [ <i>Macaca mulatta</i> ]                             | 90.6 | 90.6 | 100% | 9e-19 | 93% | <a href="#">gij109092720 XP_001115192.1</a> |
| PREDICTED: attractin isoform X1 [ <i>Chlorocebus sabaeus</i> ]             | 90.6 | 90.6 | 100% | 9e-19 | 93% | <a href="#">gij635021360 XP_008017700.1</a> |
| PREDICTED: attractin isoform X1 [ <i>Macaca fascicularis</i> ]             | 90.6 | 90.6 | 100% | 9e-19 | 93% | <a href="#">gij544464510 XP_005568509.1</a> |
| PREDICTED: attractin isoform X6 [ <i>Chlorocebus sabaeus</i> ]             | 90.6 | 90.6 | 100% | 9e-19 | 93% | <a href="#">gij635021370 XP_008017729.1</a> |
| PREDICTED: attractin [ <i>Tupaia chinensis</i> ]                           | 90.6 | 90.6 | 100% | 9e-19 | 89% | <a href="#">gij562872246 XP_006164056.1</a> |
| PREDICTED: attractin [ <i>Felis catus</i> ]                                | 89.7 | 89.7 | 100% | 2e-18 | 89% | <a href="#">gij586981105 XP_003983758.2</a> |
| PREDICTED: attractin isoform 2 [ <i>Ceratotherium simum simum</i> ]        | 89.3 | 89.3 | 100% | 2e-18 | 89% | <a href="#">gij478519276 XP_004433860.1</a> |
| PREDICTED: attractin isoform 1 [ <i>Ceratotherium simum simum</i> ]        | 89.3 | 89.3 | 100% | 2e-18 | 89% | <a href="#">gij478519274 XP_004433859.1</a> |
| PREDICTED: attractin isoform X2 [ <i>Saimiri boliviensis boliviensis</i> ] | 88.9 | 88.9 | 100% | 3e-18 | 93% | <a href="#">gij725600053 XP_010350112.1</a> |
| PREDICTED: attractin isoform X1 [ <i>Saimiri boliviensis boliviensis</i> ] | 88.9 | 88.9 | 100% | 3e-18 | 93% | <a href="#">gij725600051 XP_010350111.1</a> |
| PREDICTED: attractin-like [ <i>Tursiops truncatus</i> ]                    | 88.4 | 88.4 | 100% | 5e-18 | 89% | <a href="#">gij470629747 XP_004321558.1</a> |
| PREDICTED: attractin [ <i>Camelus dromedarius</i> ]                        | 88.4 | 88.4 | 100% | 5e-18 | 89% | <a href="#">gij744589171 XP_010986570.1</a> |
| PREDICTED: attractin [ <i>Vicugna pacos</i> ]                              | 88.4 | 88.4 | 100% | 5e-18 | 89% | <a href="#">gij560970220 XP_006207473.1</a> |
| PREDICTED: attractin [ <i>Orcinus orca</i> ]                               | 88.4 | 88.4 | 100% | 5e-18 | 89% | <a href="#">gij466084723 XP_004285351.1</a> |
| PREDICTED: attractin [ <i>Lipotes vexillifer</i> ]                         | 88.4 | 88.4 | 100% | 5e-18 | 89% | <a href="#">gij602710450 XP_007465469.1</a> |
| PREDICTED: attractin isoform X2 [ <i>Heterocephalus glaber</i> ]           | 88.0 | 88.0 | 100% | 7e-18 | 89% | <a href="#">gij512956910 XP_004840783.1</a> |
| Attractin [ <i>Heterocephalus glaber</i> ]                                 | 88.0 | 88.0 | 100% | 7e-18 | 89% | <a href="#">gij351701383 EHB04302.1</a>     |



|                                                                             |      |      |      |       |     |                                             |
|-----------------------------------------------------------------------------|------|------|------|-------|-----|---------------------------------------------|
| <a href="#">PREDICTED: attractin [Heterocephalus glaber]</a>                | 88.0 | 88.0 | 100% | 7e-18 | 89% | <a href="#">gil512849696 XP_004886859.1</a> |
| <a href="#">PREDICTED: attractin [Echinops telfairi]</a>                    | 88.0 | 88.0 | 100% | 7e-18 | 86% | <a href="#">gil507626122 XP_004697922.1</a> |
| <a href="#">PREDICTED: attractin [Chrysochloris asiatica]</a>               | 88.0 | 88.0 | 100% | 7e-18 | 86% | <a href="#">gil586488825 XP_006874887.1</a> |
| <a href="#">PREDICTED: attractin isoform X1 [Heterocephalus glaber]</a>     | 88.0 | 88.0 | 100% | 7e-18 | 89% | <a href="#">gil512956908 XP_004840782.1</a> |
| <a href="#">PREDICTED: LOW QUALITY PROTEIN: attractin [Cavia porcellus]</a> | 87.6 | 87.6 | 100% | 9e-18 | 89% | <a href="#">gil514473642 XP_005008408.1</a> |
| <a href="#">PREDICTED: attractin-like [Leptonychotes weddellii]</a>         | 87.2 | 87.2 | 100% | 1e-17 | 86% | <a href="#">gil585160208 XP_006732353.1</a> |
| <a href="#">attractin [Canis lupus familiaris]</a>                          | 87.2 | 87.2 | 100% | 1e-17 | 86% | <a href="#">gil339892849 AEK21787.1</a>     |
| <a href="#">PREDICTED: attractin isoform X2 [Canis lupus familiaris]</a>    | 87.2 | 87.2 | 100% | 1e-17 | 86% | <a href="#">gil545540090 XP_005634905.1</a> |
| <a href="#">PREDICTED: attractin isoform X2 [Mustela putorius furo]</a>     | 87.2 | 87.2 | 100% | 1e-17 | 86% | <a href="#">gil511906947 XP_004772933.1</a> |
| <a href="#">PREDICTED: attractin [Ursus maritimus]</a>                      | 87.2 | 87.2 | 100% | 1e-17 | 86% | <a href="#">gil671021680 XP_008701660.1</a> |
| <a href="#">hypothetical protein PANDA_007354 [Ailuropoda melanoleuca]</a>  | 87.2 | 87.2 | 100% | 1e-17 | 86% | <a href="#">gil281339872 EFB15456.1</a>     |
| <a href="#">PREDICTED: attractin-like [Ailuropoda melanoleuca]</a>          | 87.2 | 87.2 | 100% | 1e-17 | 86% | <a href="#">gil301766802 XP_002918837.1</a> |
| <a href="#">PREDICTED: attractin [Mustela putorius furo]</a>                | 87.2 | 87.2 | 100% | 1e-17 | 86% | <a href="#">gil511947743 XP_004792355.1</a> |
| <a href="#">PREDICTED: attractin isoform X3 [Canis lupus familiaris]</a>    | 87.2 | 87.2 | 100% | 1e-17 | 86% | <a href="#">gil73991942 XP_534360.2</a>     |
| <a href="#">PREDICTED: attractin [Odobenus rosmarus divergens]</a>          | 87.2 | 87.2 | 100% | 1e-17 | 86% | <a href="#">gil472357214 XP_004398236.1</a> |
| <a href="#">PREDICTED: attractin isoform X1 [Mustela putorius furo]</a>     | 87.2 | 87.2 | 100% | 1e-17 | 86% | <a href="#">gil511906945 XP_004772932.1</a> |
| <a href="#">PREDICTED: attractin [Callithrix jacchus]</a>                   | 87.2 | 87.2 | 100% | 1e-17 | 89% | <a href="#">gil296200062 XP_002747358.1</a> |
| <a href="#">PREDICTED: attractin isoform X1 [Canis lupus familiaris]</a>    | 87.2 | 87.2 | 100% | 1e-17 | 86% | <a href="#">gil545540087 XP_005634904.1</a> |
| <a href="#">PREDICTED: attractin [Balaenoptera acutorostrata scammonii]</a> | 86.7 | 86.7 | 100% | 2e-17 | 89% | <a href="#">gil594697511 XP_007195912.1</a> |
| <a href="#">PREDICTED: attractin isoform 2 [Dasypus novemcinctus]</a>       | 86.3 | 86.3 | 100% | 3e-17 | 86% | <a href="#">gil488545593 XP_004464327.1</a> |
| <a href="#">PREDICTED: attractin [Alligator mississippiensis]</a>           | 86.3 | 86.3 | 100% | 3e-17 | 86% | <a href="#">gil564227650 XP_006258288.1</a> |
| <a href="#">PREDICTED: attractin isoform 1 [Dasypus novemcinctus]</a>       | 86.3 | 86.3 | 100% | 3e-17 | 86% | <a href="#">gil488545591 XP_004464326.1</a> |
| <a href="#">PREDICTED: attractin [Tarsius syrichta]</a>                     | 85.5 | 85.5 | 100% | 5e-17 | 86% | <a href="#">gil640796924 XP_008054571.1</a> |
| <a href="#">PREDICTED: attractin [Panthera tigris altaica]</a>              | 85.5 | 85.5 | 100% | 5e-17 | 86% | <a href="#">gil591291970 XP_007073329.1</a> |
| <a href="#">PREDICTED: attractin [Elephantulus edwardii]</a>                | 85.5 | 85.5 | 100% | 5e-17 | 86% | <a href="#">gil585689645 XP_006894264.1</a> |

## Alignments

[Download](#) [GenPept](#) [Graphics](#)

[Next](#) [Previous](#) [Descriptions](#)

PREDICTED: attractin isoform X2 [Homo sapiens]

Sequence ID: [gil530426021|ref|XP\\_005260918.1](#) Length: 1111 Number of Matches: 1

Range 1: 305 to 332 [GenPept](#) [Graphics](#)

[Next Match](#) [Previous Match](#)

| Score          | Expect | Identities | Positives   | Gaps     |
|----------------|--------|------------|-------------|----------|
| 95.2 bits(217) | 2e-20  | 27/28(96%) | 28/28(100%) | 0/28(0%) |

Query 1 RGCSFSDWQGGPGCSVPVPADQSFWTRE 28  
 RGCSFSDWQGGPGCSVPVPA+QSFWTRE  
 Sbjct 305 RGCSFSDWQGGPGCSVPVPANQSFWTRE 332

### Related Information

[Gene](#) - associated gene details  
[Map Viewer](#) - aligned genomic context

[Download](#) [GenPept](#) [Graphics](#)

[Next](#) [Previous](#) [Descriptions](#)

unnamed protein product [Homo sapiens]

Sequence ID: [gil194380362|dbj|BAG63948.1](#) Length: 1156 Number of Matches: 1

Range 1: 189 to 216 [GenPept](#) [Graphics](#)

[Next Match](#) [Previous Match](#)

| Score          | Expect | Identities | Positives   | Gaps     |
|----------------|--------|------------|-------------|----------|
| 95.2 bits(217) | 2e-20  | 27/28(96%) | 28/28(100%) | 0/28(0%) |

Query 1 RGCSFSDWQGGPGCSVPVPADQSFWTRE 28  
 RGCSFSDWQGGPGCSVPVPA+QSFWTRE  
 Sbjct 189 RGCSFSDWQGGPGCSVPVPANQSFWTRE 216

### Related Information

[Gene](#) - associated gene details

[Download](#) [GenPept](#) [Graphics](#)

[Next](#) [Previous](#) [Descriptions](#)

**attractin isoform 4 [Homo sapiens]**

Sequence ID: [gij333440461|ref|NP\\_001193976.1](#) Length: 1156 Number of Matches: 1

Range 1: 189 to 216 [GenPept](#) [Graphics](#)

[Next Match](#) [Previous Match](#)

| Score          | Expect | Identities | Positives   | Gaps     |
|----------------|--------|------------|-------------|----------|
| 95.2 bits(217) | 2e-20  | 27/28(96%) | 28/28(100%) | 0/28(0%) |

```
Query 1 RGCSCFSDWQGGPGCSVPVPADQSFWTRE 28
      RGCSFSDWQGGPGCSVPVPA+QSFWTRE
Sbjct 189 RGCSCFSDWQGGPGCSVPVPANQSFWTRE 216
```

**Related Information**

[Gene](#) - associated gene details  
[UniGene](#) - clustered expressed sequence tags  
[Map Viewer](#) - aligned genomic context

[Download](#) [GenPept](#) [Graphics](#)

[Next](#) [Previous](#) [Descriptions](#)

**PREDICTED: attractin isoform 2 [Nomascus leucogenys]**

Sequence ID: [gij332257827|ref|XP\\_003278006.1](#) Length: 1156 Number of Matches: 1

Range 1: 189 to 216 [GenPept](#) [Graphics](#)

[Next Match](#) [Previous Match](#)

| Score          | Expect | Identities | Positives   | Gaps     |
|----------------|--------|------------|-------------|----------|
| 95.2 bits(217) | 2e-20  | 27/28(96%) | 28/28(100%) | 0/28(0%) |

```
Query 1 RGCSCFSDWQGGPGCSVPVPADQSFWTRE 28
      RGCSFSDWQGGPGCSVPVPA+QSFWTRE
Sbjct 189 RGCSCFSDWQGGPGCSVPVPANQSFWTRE 216
```

**Related Information**

[Gene](#) - associated gene details  
[Map Viewer](#) - aligned genomic context

[Download](#) [GenPept](#) [Graphics](#)

[Next](#) [Previous](#) [Descriptions](#)

**PREDICTED: attractin [Gorilla gorilla gorilla]**

Sequence ID: [gij426390844|ref|XP\\_004061806.1](#) Length: 1265 Number of Matches: 1

Range 1: 187 to 214 [GenPept](#) [Graphics](#)

[Next Match](#) [Previous Match](#)

| Score          | Expect | Identities | Positives   | Gaps     |
|----------------|--------|------------|-------------|----------|
| 95.2 bits(217) | 2e-20  | 27/28(96%) | 28/28(100%) | 0/28(0%) |

```
Query 1 RGCSCFSDWQGGPGCSVPVPADQSFWTRE 28
      RGCSFSDWQGGPGCSVPVPA+QSFWTRE
Sbjct 187 RGCSCFSDWQGGPGCSVPVPANQSFWTRE 214
```

**Related Information**

[Gene](#) - associated gene details  
[Map Viewer](#) - aligned genomic context

BLAST is a registered trademark of the National Library of Medicine.

▶ NCBI/ BLAST/ blastp suite/ Formatting Results - B916RTUM01R

**i** Your search parameters were adjusted to search for a short input sequence.

[Edit and Resubmit](#) | [Save Search Strategies](#) | [▶ Formatting options](#) | [▶ Download](#)

[YouTube](#) [How to read this page](#) | [Blast report description](#)

### ATRN\_RGCSCFSDWQPGCSVPVPANQSFWTRE\_NonMod

**RID** [B916RTUM01R](#) (Expires on 01-14 09:37 am)

**Query ID** |cl|222662  
**Description** None  
**Molecule type** amino acid  
**Query Length** 28

**Database Name** nr  
**Description** All non-redundant GenBank CDS translations+PDB+SwissProt+PIR excluding environmental samples from WGS projects  
**Program** BLASTP 2.2.30+ [▶ Citation](#)

Other reports: [▶ Search Summary](#) | [\[Taxonomy reports\]](#) | [\[Distance tree of results\]](#) | [\[Multiple alignment\]](#)

### **Graphic Summary**

[Show Conserved Domains](#)

No putative conserved domains have been detected

Distribution of 100 Blast Hits on the Query Sequence 



The image shows a table with 30 rows. Each row contains a single horizontal line, likely representing a placeholder for data or a separator. The lines are evenly spaced and extend across most of the width of the table area.



**Descriptions**

**Sequences producing significant alignments:**

Select: [All](#) [None](#) Selected: 0

[↑](#) [Alignments](#)
[Download](#)
[GenPept](#)
[Graphics](#)
[Distance tree of results](#)
[Multiple alignment](#)
⚙

| Description                                                              | Max score | Total score | Query cover | E value | Ident | Accession                                   |
|--------------------------------------------------------------------------|-----------|-------------|-------------|---------|-------|---------------------------------------------|
| <a href="#">PREDICTED: attractin isoform X2 [Homo sapiens]</a>           | 97.8      | 97.8        | 100%        | 3e-21   | 100%  | <a href="#">gi 530426021 XP_005260918.1</a> |
| <a href="#">unnamed protein product [Homo sapiens]</a>                   | 97.8      | 97.8        | 100%        | 3e-21   | 100%  | <a href="#">gi 194380362 BAG63948.1</a>     |
| <a href="#">attractin isoform 4 [Homo sapiens]</a>                       | 97.8      | 97.8        | 100%        | 3e-21   | 100%  | <a href="#">gi 333440461 NP_001193976.1</a> |
| <a href="#">PREDICTED: attractin isoform 2 [Nomascus leucogenys]</a>     | 97.8      | 97.8        | 100%        | 3e-21   | 100%  | <a href="#">gi 332257827 XP_003278006.1</a> |
| <a href="#">PREDICTED: attractin [Gorilla gorilla gorilla]</a>           | 97.8      | 97.8        | 100%        | 3e-21   | 100%  | <a href="#">gi 426390844 XP_004061806.1</a> |
| <a href="#">PREDICTED: attractin isoform X4 [Pan troglodytes]</a>        | 97.8      | 97.8        | 100%        | 3e-21   | 100%  | <a href="#">gi 694977854 XP_009435012.1</a> |
| <a href="#">PREDICTED: attractin isoform 1 [Nomascus leucogenys]</a>     | 97.8      | 97.8        | 100%        | 3e-21   | 100%  | <a href="#">gi 332257825 XP_003278005.1</a> |
| <a href="#">attractin-2 [Homo sapiens]</a>                               | 97.8      | 97.8        | 100%        | 3e-21   | 100%  | <a href="#">gi 4093196 AAD03057.1</a>       |
| <a href="#">secreted attractin precursor [Homo sapiens]</a>              | 97.8      | 97.8        | 100%        | 3e-21   | 100%  | <a href="#">gi 8118083 AAF72882.1</a>       |
| <a href="#">unnamed protein product [Homo sapiens]</a>                   | 97.8      | 97.8        | 100%        | 3e-21   | 100%  | <a href="#">gi 158259481 BAF85699.1</a>     |
| <a href="#">attractin isoform 2 preproprotein [Homo sapiens]</a>         | 97.8      | 97.8        | 100%        | 3e-21   | 100%  | <a href="#">gi 21450863 NP_647538.1</a>     |
| <a href="#">PREDICTED: LOW QUALITY PROTEIN: attractin [Pan paniscus]</a> | 97.8      | 97.8        | 100%        | 3e-21   | 100%  | <a href="#">gi 675763672 XP_008973079.1</a> |
| <a href="#">PREDICTED: attractin isoform X3 [Pan troglodytes]</a>        | 97.8      | 97.8        | 100%        | 3e-21   | 100%  | <a href="#">gi 694977852 XP_009435011.1</a> |
| <a href="#">PREDICTED: attractin isoform X1 [Homo sapiens]</a>           | 97.8      | 97.8        | 100%        | 3e-21   | 100%  | <a href="#">gi 530426019 XP_005260917.1</a> |
| <a href="#">attractin, isoform CRA_b [Homo sapiens]</a>                  | 97.8      | 97.8        | 100%        | 3e-21   | 100%  | <a href="#">gi 119630936 EAX10531.1</a>     |
| <a href="#">PREDICTED: attractin isoform X2 [Pan troglodytes]</a>        | 97.8      | 97.8        | 100%        | 3e-21   | 100%  | <a href="#">gi 694977850 XP_009435010.1</a> |
| <a href="#">PREDICTED: attractin isoform X1 [Pan troglodytes]</a>        | 97.8      | 97.8        | 100%        | 3e-21   | 100%  | <a href="#">gi 332857715 XP_003316827.1</a> |
| <a href="#">membrane attractin precursor [Homo sapiens]</a>              | 97.8      | 97.8        | 100%        | 3e-21   | 100%  | <a href="#">gi 8118082 AAF72881.1</a>       |
| <a href="#">attractin isoform 1 preproprotein [Homo sapiens]</a>         | 97.8      | 97.8        | 100%        | 3e-21   | 100%  | <a href="#">gi 21450861 NP_647537.1</a>     |
| <a href="#">PREDICTED: attractin-like [Octodon degus]</a>                | 95.6      | 95.6        | 100%        | 2e-20   | 96%   | <a href="#">gi 507657234 XP_004634315.1</a> |
| <a href="#">PREDICTED: attractin-like [Physeter catodon]</a>             | 95.2      | 95.2        | 100%        | 2e-20   | 96%   | <a href="#">gi 593773084 XP_007124834.1</a> |
| <a href="#">PREDICTED: attractin [Pantholops hodgsonii]</a>              | 95.2      | 95.2        | 100%        | 2e-20   | 96%   | <a href="#">gi 556758951 XP_005974805.1</a> |
| <a href="#">PREDICTED: attractin [Sus scrofa]</a>                        | 95.2      | 95.2        | 100%        | 2e-20   | 96%   | <a href="#">gi 545879723 XP_001927324.5</a> |
| <a href="#">PREDICTED: attractin isoform X3 [Bubalus bubalis]</a>        | 95.2      | 95.2        | 100%        | 2e-20   | 96%   | <a href="#">gi 594099680 XP_006072965.1</a> |
| <a href="#">attractin [Sus scrofa]</a>                                   | 95.2      | 95.2        | 100%        | 2e-20   | 96%   | <a href="#">gi 146741346 BAF62328.1</a>     |
| <a href="#">PREDICTED: attractin [Capra hircus]</a>                      | 95.2      | 95.2        | 100%        | 2e-20   | 96%   | <a href="#">gi 548490191 XP_005688293.1</a> |
| <a href="#">PREDICTED: attractin [Bos mutus]</a>                         | 95.2      | 95.2        | 100%        | 2e-20   | 96%   | <a href="#">gi 555963925 XP_005894036.1</a> |
| <a href="#">PREDICTED: attractin [Ovis aries]</a>                        | 95.2      | 95.2        | 100%        | 2e-20   | 96%   | <a href="#">gi 426241795 XP_004014773.1</a> |

|                                                                                   |      |      |      |       |     |                                             |
|-----------------------------------------------------------------------------------|------|------|------|-------|-----|---------------------------------------------|
| <a href="#">attractin [Bos taurus]</a>                                            | 95.2 | 95.2 | 100% | 2e-20 | 96% | <a href="#">gij253560524 ACT32973.1</a>     |
| <a href="#">attractin [Bos taurus]</a>                                            | 95.2 | 95.2 | 100% | 2e-20 | 96% | <a href="#">gij27806737 JNP_776420.1</a>    |
| <a href="#">PREDICTED: attractin isoform X2 [Bubalus bubalis]</a>                 | 95.2 | 95.2 | 100% | 2e-20 | 96% | <a href="#">gij594099678 XP_006072964.1</a> |
| <a href="#">PREDICTED: attractin isoform X3 [Chinchilla lanigera]</a>             | 95.2 | 95.2 | 100% | 2e-20 | 96% | <a href="#">gij533131617 XP_005380852.1</a> |
| <a href="#">PREDICTED: attractin isoform X1 [Ictidomys tridecemlineatus]</a>      | 95.2 | 95.2 | 100% | 2e-20 | 96% | <a href="#">gij532069484 XP_005320577.1</a> |
| <a href="#">PREDICTED: attractin isoform X3 [Ictidomys tridecemlineatus]</a>      | 95.2 | 95.2 | 100% | 2e-20 | 96% | <a href="#">gij532069488 XP_005320579.1</a> |
| <a href="#">PREDICTED: attractin isoform X2 [Ictidomys tridecemlineatus]</a>      | 95.2 | 95.2 | 100% | 2e-20 | 96% | <a href="#">gij532069486 XP_005320578.1</a> |
| <a href="#">PREDICTED: attractin isoform X2 [Bos taurus]</a>                      | 95.2 | 95.2 | 100% | 2e-20 | 96% | <a href="#">gij528973313 XP_005214542.1</a> |
| <a href="#">PREDICTED: attractin isoform X2 [Chinchilla lanigera]</a>             | 95.2 | 95.2 | 100% | 2e-20 | 96% | <a href="#">gij533131615 XP_005380851.1</a> |
| <a href="#">PREDICTED: attractin isoform X1 [Chinchilla lanigera]</a>             | 95.2 | 95.2 | 100% | 2e-20 | 96% | <a href="#">gij533131613 XP_005380850.1</a> |
| <a href="#">PREDICTED: attractin isoform X1 [Bubalus bubalis]</a>                 | 95.2 | 95.2 | 100% | 2e-20 | 96% | <a href="#">gij594099676 XP_006072963.1</a> |
| <a href="#">PREDICTED: attractin isoform X1 [Bos taurus]</a>                      | 95.2 | 95.2 | 100% | 2e-20 | 96% | <a href="#">gij528973311 XP_005214541.1</a> |
| <a href="#">PREDICTED: attractin [Equus przewalskii]</a>                          | 93.1 | 93.1 | 100% | 1e-19 | 93% | <a href="#">gij664773944 XP_008506219.1</a> |
| <a href="#">Mahogany-like protein [Macaca mulatta]</a>                            | 93.1 | 93.1 | 100% | 1e-19 | 96% | <a href="#">gij355563316 EHH19878.1</a>     |
| <a href="#">PREDICTED: attractin isoform X4 [Macaca fascicularis]</a>             | 93.1 | 93.1 | 100% | 1e-19 | 96% | <a href="#">gij544464516 XP_005568512.1</a> |
| <a href="#">PREDICTED: attractin isoform X5 [Chlorocebus sabaues]</a>             | 93.1 | 93.1 | 100% | 1e-19 | 96% | <a href="#">gij635021368 XP_008017720.1</a> |
| <a href="#">Mahogany-like protein [Macaca fascicularis]</a>                       | 93.1 | 93.1 | 100% | 1e-19 | 96% | <a href="#">gij355784657 EHH65508.1</a>     |
| <a href="#">PREDICTED: attractin isoform X3 [Macaca fascicularis]</a>             | 93.1 | 93.1 | 100% | 1e-19 | 96% | <a href="#">gij544464514 XP_005568511.1</a> |
| <a href="#">PREDICTED: attractin-like [Galeopterus variegatus]</a>                | 93.1 | 93.1 | 100% | 1e-19 | 93% | <a href="#">gij667324076 XP_008589101.1</a> |
| <a href="#">PREDICTED: attractin isoform X4 [Chlorocebus sabaues]</a>             | 93.1 | 93.1 | 100% | 1e-19 | 96% | <a href="#">gij635021366 XP_008017712.1</a> |
| <a href="#">PREDICTED: attractin [Rhinopithecus roxellana]</a>                    | 93.1 | 93.1 | 100% | 1e-19 | 96% | <a href="#">gij724902357 XP_010377335.1</a> |
| <a href="#">PREDICTED: attractin isoform X3 [Chlorocebus sabaues]</a>             | 93.1 | 93.1 | 100% | 1e-19 | 96% | <a href="#">gij635021364 XP_008017707.1</a> |
| <a href="#">PREDICTED: attractin isoform X2 [Chlorocebus sabaues]</a>             | 93.1 | 93.1 | 100% | 1e-19 | 96% | <a href="#">gij635021362 XP_008017704.1</a> |
| <a href="#">PREDICTED: attractin [Otolemur garnettii]</a>                         | 93.1 | 93.1 | 100% | 1e-19 | 93% | <a href="#">gij395830288 XP_003788264.1</a> |
| <a href="#">PREDICTED: attractin [Orycteropus afer afer]</a>                      | 93.1 | 93.1 | 100% | 1e-19 | 93% | <a href="#">gij634830430 XP_007958185.1</a> |
| <a href="#">PREDICTED: attractin isoform X2 [Macaca fascicularis]</a>             | 93.1 | 93.1 | 100% | 1e-19 | 96% | <a href="#">gij544464512 XP_005568510.1</a> |
| <a href="#">PREDICTED: attractin [Macaca mulatta]</a>                             | 93.1 | 93.1 | 100% | 1e-19 | 96% | <a href="#">gij109092720 XP_001115192.1</a> |
| <a href="#">PREDICTED: attractin isoform X1 [Chlorocebus sabaues]</a>             | 93.1 | 93.1 | 100% | 1e-19 | 96% | <a href="#">gij635021360 XP_008017700.1</a> |
| <a href="#">PREDICTED: attractin isoform X1 [Macaca fascicularis]</a>             | 93.1 | 93.1 | 100% | 1e-19 | 96% | <a href="#">gij544464510 XP_005568509.1</a> |
| <a href="#">PREDICTED: attractin isoform X6 [Chlorocebus sabaues]</a>             | 93.1 | 93.1 | 100% | 1e-19 | 96% | <a href="#">gij635021370 XP_008017729.1</a> |
| <a href="#">PREDICTED: attractin [Tupaia chinensis]</a>                           | 93.1 | 93.1 | 100% | 1e-19 | 93% | <a href="#">gij562872246 XP_006164056.1</a> |
| <a href="#">PREDICTED: attractin [Felis catus]</a>                                | 92.3 | 92.3 | 100% | 2e-19 | 93% | <a href="#">gij586981105 XP_003983758.2</a> |
| <a href="#">PREDICTED: attractin isoform 2 [Ceratotherium simum simum]</a>        | 91.8 | 91.8 | 100% | 3e-19 | 93% | <a href="#">gij478519276 XP_004433860.1</a> |
| <a href="#">PREDICTED: attractin isoform 1 [Ceratotherium simum simum]</a>        | 91.8 | 91.8 | 100% | 3e-19 | 93% | <a href="#">gij478519274 XP_004433859.1</a> |
| <a href="#">PREDICTED: attractin isoform X2 [Saimiri boliviensis boliviensis]</a> | 91.4 | 91.4 | 100% | 4e-19 | 96% | <a href="#">gij725600053 XP_010350112.1</a> |
| <a href="#">PREDICTED: attractin isoform X1 [Saimiri boliviensis boliviensis]</a> | 91.4 | 91.4 | 100% | 4e-19 | 96% | <a href="#">gij725600051 XP_010350111.1</a> |
| <a href="#">PREDICTED: attractin-like [Tursiops truncatus]</a>                    | 91.0 | 91.0 | 100% | 6e-19 | 93% | <a href="#">gij470629747 XP_004321558.1</a> |
| <a href="#">PREDICTED: attractin [Vicugna pacos]</a>                              | 91.0 | 91.0 | 100% | 6e-19 | 93% | <a href="#">gij560970220 XP_006207473.1</a> |
| <a href="#">PREDICTED: attractin [Orcinus orca]</a>                               | 91.0 | 91.0 | 100% | 6e-19 | 93% | <a href="#">gij466084723 XP_004285351.1</a> |
| <a href="#">PREDICTED: attractin [Lipotes vexillifer]</a>                         | 91.0 | 91.0 | 100% | 6e-19 | 93% | <a href="#">gij602710450 XP_007465469.1</a> |
| <a href="#">PREDICTED: attractin isoform X2 [Heterocephalus glaber]</a>           | 90.6 | 90.6 | 100% | 9e-19 | 93% | <a href="#">gij512956910 XP_004840783.1</a> |
| <a href="#">Attractin [Heterocephalus glaber]</a>                                 | 90.6 | 90.6 | 100% | 9e-19 | 93% | <a href="#">gij351701383 EHB04302.1</a>     |
| <a href="#">PREDICTED: attractin [Heterocephalus glaber]</a>                      | 90.6 | 90.6 | 100% | 9e-19 | 93% | <a href="#">gij512849696 XP_004886859.1</a> |
| <a href="#">PREDICTED: attractin [Echinops telfairi]</a>                          | 90.6 | 90.6 | 100% | 9e-19 | 89% | <a href="#">gij507626122 XP_004697922.1</a> |
| <a href="#">PREDICTED: attractin [Chrysochloris asiatica]</a>                     | 90.6 | 90.6 | 100% | 9e-19 | 89% | <a href="#">gij586488825 XP_006874887.1</a> |

|                                                                             |      |      |      |       |     |                                             |
|-----------------------------------------------------------------------------|------|------|------|-------|-----|---------------------------------------------|
| <a href="#">PREDICTED: attractin isoform X1 [Heterocephalus glaber]</a>     | 90.6 | 90.6 | 100% | 9e-19 | 93% | <a href="#">gij512956908 XP_004840782.1</a> |
| <a href="#">PREDICTED: LOW QUALITY PROTEIN: attractin [Cavia porcellus]</a> | 90.1 | 90.1 | 100% | 1e-18 | 93% | <a href="#">gij514473642 XP_005008408.1</a> |
| <a href="#">PREDICTED: attractin-like [Leptonychotes weddellii]</a>         | 89.7 | 89.7 | 100% | 2e-18 | 89% | <a href="#">gij585160208 XP_006732353.1</a> |
| <a href="#">attractin [Canis lupus familiaris]</a>                          | 89.7 | 89.7 | 100% | 2e-18 | 89% | <a href="#">gij339892849 AEK21787.1</a>     |
| <a href="#">PREDICTED: attractin isoform X2 [Canis lupus familiaris]</a>    | 89.7 | 89.7 | 100% | 2e-18 | 89% | <a href="#">gij545540090 XP_005634905.1</a> |
| <a href="#">PREDICTED: attractin isoform X2 [Mustela putorius furo]</a>     | 89.7 | 89.7 | 100% | 2e-18 | 89% | <a href="#">gij511906947 XP_004772933.1</a> |
| <a href="#">PREDICTED: attractin [Ursus maritimus]</a>                      | 89.7 | 89.7 | 100% | 2e-18 | 89% | <a href="#">gij671021680 XP_008701660.1</a> |
| <a href="#">hypothetical protein PANDA_007354 [Ailuropoda melanoleuca]</a>  | 89.7 | 89.7 | 100% | 2e-18 | 89% | <a href="#">gij281339872 EFB15456.1</a>     |
| <a href="#">PREDICTED: attractin-like [Ailuropoda melanoleuca]</a>          | 89.7 | 89.7 | 100% | 2e-18 | 89% | <a href="#">gij301766802 XP_002918837.1</a> |
| <a href="#">PREDICTED: attractin [Mustela putorius furo]</a>                | 89.7 | 89.7 | 100% | 2e-18 | 89% | <a href="#">gij511947743 XP_004792355.1</a> |
| <a href="#">PREDICTED: attractin isoform X3 [Canis lupus familiaris]</a>    | 89.7 | 89.7 | 100% | 2e-18 | 89% | <a href="#">gij73991942 XP_534360.2</a>     |
| <a href="#">PREDICTED: attractin [Odobenus rosmarus divergens]</a>          | 89.7 | 89.7 | 100% | 2e-18 | 89% | <a href="#">gij472357214 XP_004398236.1</a> |
| <a href="#">PREDICTED: attractin isoform X1 [Mustela putorius furo]</a>     | 89.7 | 89.7 | 100% | 2e-18 | 89% | <a href="#">gij511906945 XP_004772932.1</a> |
| <a href="#">PREDICTED: attractin [Callithrix jacchus]</a>                   | 89.7 | 89.7 | 100% | 2e-18 | 93% | <a href="#">gij296200062 XP_002747358.1</a> |
| <a href="#">PREDICTED: attractin isoform X1 [Canis lupus familiaris]</a>    | 89.7 | 89.7 | 100% | 2e-18 | 89% | <a href="#">gij545540087 XP_005634904.1</a> |
| <a href="#">PREDICTED: attractin [Balaenoptera acutorostrata scammonii]</a> | 89.3 | 89.3 | 100% | 2e-18 | 93% | <a href="#">gij594697511 XP_007195912.1</a> |
| <a href="#">PREDICTED: attractin isoform X1 [Pteropus alecto]</a>           | 89.3 | 89.3 | 100% | 2e-18 | 89% | <a href="#">gij586533632 XP_006921705.1</a> |
| <a href="#">PREDICTED: attractin isoform X2 [Pteropus alecto]</a>           | 89.3 | 89.3 | 100% | 2e-18 | 89% | <a href="#">gij586533634 XP_006921706.1</a> |
| <a href="#">PREDICTED: attractin isoform 2 [Dasypus novemcinctus]</a>       | 88.9 | 88.9 | 100% | 3e-18 | 89% | <a href="#">gij488545593 XP_004464327.1</a> |
| <a href="#">PREDICTED: attractin [Alligator mississippiensis]</a>           | 88.9 | 88.9 | 100% | 3e-18 | 89% | <a href="#">gij564227650 XP_006258288.1</a> |
| <a href="#">PREDICTED: attractin isoform 1 [Dasypus novemcinctus]</a>       | 88.9 | 88.9 | 100% | 3e-18 | 89% | <a href="#">gij488545591 XP_004464326.1</a> |
| <a href="#">PREDICTED: attractin [Tarsius syrichta]</a>                     | 88.0 | 88.0 | 100% | 6e-18 | 89% | <a href="#">gij640796924 XP_008054571.1</a> |
| <a href="#">PREDICTED: attractin [Panthera tigris altaica]</a>              | 88.0 | 88.0 | 100% | 6e-18 | 89% | <a href="#">gij591291970 XP_007073329.1</a> |
| <a href="#">PREDICTED: attractin [Elephantulus edwardii]</a>                | 88.0 | 88.0 | 100% | 6e-18 | 89% | <a href="#">gij585689645 XP_006894264.1</a> |
| <a href="#">PREDICTED: attractin [Alligator sinensis]</a>                   | 87.6 | 87.6 | 100% | 9e-18 | 89% | <a href="#">gij557275553 XP_006020974.1</a> |
| <a href="#">attractin [Rattus norvegicus]</a>                               | 87.2 | 87.2 | 100% | 1e-17 | 89% | <a href="#">gij12275312 BAB21018.1</a>      |
| <a href="#">attractin, isoform CRA_a [Rattus norvegicus]</a>                | 87.2 | 87.2 | 100% | 1e-17 | 89% | <a href="#">gij149023319 EDL80213.1</a>     |

## Alignments

Download GenPept Graphics

Next Previous Descriptions

**PREDICTED: attractin isoform X2 [Homo sapiens]**

Sequence ID: [gij530426021|ref|XP\\_005260918.1](#) Length: 1111 Number of Matches: 1

Range 1: 305 to 332 GenPept Graphics

Next Match Previous Match

| Score          | Expect | Identities  | Positives   | Gaps     |
|----------------|--------|-------------|-------------|----------|
| 97.8 bits(223) | 3e-21  | 28/28(100%) | 28/28(100%) | 0/28(0%) |

Query 1 RGCSCFSDWQPGCSVPVPANQSFWTRE 28  
 RGCSCFSDWQPGCSVPVPANQSFWTRE  
 Sbjct 305 RGCSCFSDWQPGCSVPVPANQSFWTRE 332

### Related Information

[Gene](#) - associated gene details  
[Map Viewer](#) - aligned genomic context

Download GenPept Graphics

Next Previous Descriptions

**unnamed protein product [Homo sapiens]**

Sequence ID: [gij194380362|dbj|BAG63948.1](#) Length: 1156 Number of Matches: 1

Range 1: 189 to 216 GenPept Graphics

Next Match Previous Match

| Score          | Expect | Identities  | Positives   | Gaps     |
|----------------|--------|-------------|-------------|----------|
| 97.8 bits(223) | 3e-21  | 28/28(100%) | 28/28(100%) | 0/28(0%) |

Query 1 RGCSCFSDWQPGCSVPVPANQSFWTRE 28

### Related Information

[Gene](#) - associated gene details

Sbjct 189 RGCSFSDWQGGPGCSVPVPANQSFWTRE 216  
 RGCSFSDWQGGPGCSVPVPANQSFWTRE 216

[Download](#) [GenPept](#) [Graphics](#) ▼ Next ▲ Previous ▲ Descriptions

**attractin isoform 4 [Homo sapiens]**

Sequence ID: [gi|333440461|ref|NP\\_001193976.1](#) Length: 1156 Number of Matches: 1

Range 1: 189 to 216 [GenPept](#) [Graphics](#) ▼ Next Match ▲ Previous Match

| Score          | Expect | Identities  | Positives   | Gaps     |
|----------------|--------|-------------|-------------|----------|
| 97.8 bits(223) | 3e-21  | 28/28(100%) | 28/28(100%) | 0/28(0%) |

Query 1 RGCSFSDWQGGPGCSVPVPANQSFWTRE 28  
 RGCSFSDWQGGPGCSVPVPANQSFWTRE  
 Sbjct 189 RGCSFSDWQGGPGCSVPVPANQSFWTRE 216

**Related Information**

- [Gene](#) - associated gene details
- [UniGene](#) - clustered expressed sequence tags
- [Map Viewer](#) - aligned genomic context

[Download](#) [GenPept](#) [Graphics](#) ▼ Next ▲ Previous ▲ Descriptions

**PREDICTED: attractin isoform 2 [Nomascus leucogenys]**

Sequence ID: [gi|332257827|ref|XP\\_003278006.1](#) Length: 1156 Number of Matches: 1

Range 1: 189 to 216 [GenPept](#) [Graphics](#) ▼ Next Match ▲ Previous Match

| Score          | Expect | Identities  | Positives   | Gaps     |
|----------------|--------|-------------|-------------|----------|
| 97.8 bits(223) | 3e-21  | 28/28(100%) | 28/28(100%) | 0/28(0%) |

Query 1 RGCSFSDWQGGPGCSVPVPANQSFWTRE 28  
 RGCSFSDWQGGPGCSVPVPANQSFWTRE  
 Sbjct 189 RGCSFSDWQGGPGCSVPVPANQSFWTRE 216

**Related Information**

- [Gene](#) - associated gene details
- [Map Viewer](#) - aligned genomic context

[Download](#) [GenPept](#) [Graphics](#) ▼ Next ▲ Previous ▲ Descriptions

**PREDICTED: attractin [Gorilla gorilla gorilla]**

Sequence ID: [gi|426390844|ref|XP\\_004061806.1](#) Length: 1265 Number of Matches: 1

Range 1: 187 to 214 [GenPept](#) [Graphics](#) ▼ Next Match ▲ Previous Match

| Score          | Expect | Identities  | Positives   | Gaps     |
|----------------|--------|-------------|-------------|----------|
| 97.8 bits(223) | 3e-21  | 28/28(100%) | 28/28(100%) | 0/28(0%) |

Query 1 RGCSFSDWQGGPGCSVPVPANQSFWTRE 28  
 RGCSFSDWQGGPGCSVPVPANQSFWTRE  
 Sbjct 187 RGCSFSDWQGGPGCSVPVPANQSFWTRE 214

**Related Information**

- [Gene](#) - associated gene details
- [Map Viewer](#) - aligned genomic context

BLAST is a registered trademark of the National Library of Medicine.



▶ NCBI/ BLAST/ blastp suite/ Formatting Results - BHFKSX4K014

**i** Your search parameters were adjusted to search for a short input sequence.

[Edit and Resubmit](#) [Save Search Strategies](#) ▶ [Formatting options](#) ▶ [Download](#)

[YouTube](#) [How to read this page](#) [Blast report description](#)

## ATRN\_RGICDSSDVRG\_Mod

**RID** [BHFKSX4K014](#) (Expires on 01-17 14:32 pm)

**Query ID** |cl|55418  
**Description** None  
**Molecule type** amino acid  
**Query Length** 11

**Database Name** nr  
**Description** All non-redundant GenBank CDS translations+PDB+SwissProt+PIR excluding environmental samples from WGS projects  
**Program** BLASTP 2.2.30+ ▶ [Citation](#)

Other reports: ▶ [Search Summary](#) [[Taxonomy reports](#)] [[Distance tree of results](#)] [[Multiple alignment](#)]

### **Graphic Summary**

[Show Conserved Domains](#)

No putative conserved domains have been detected

Distribution of 100 Blast Hits on the Query Sequence

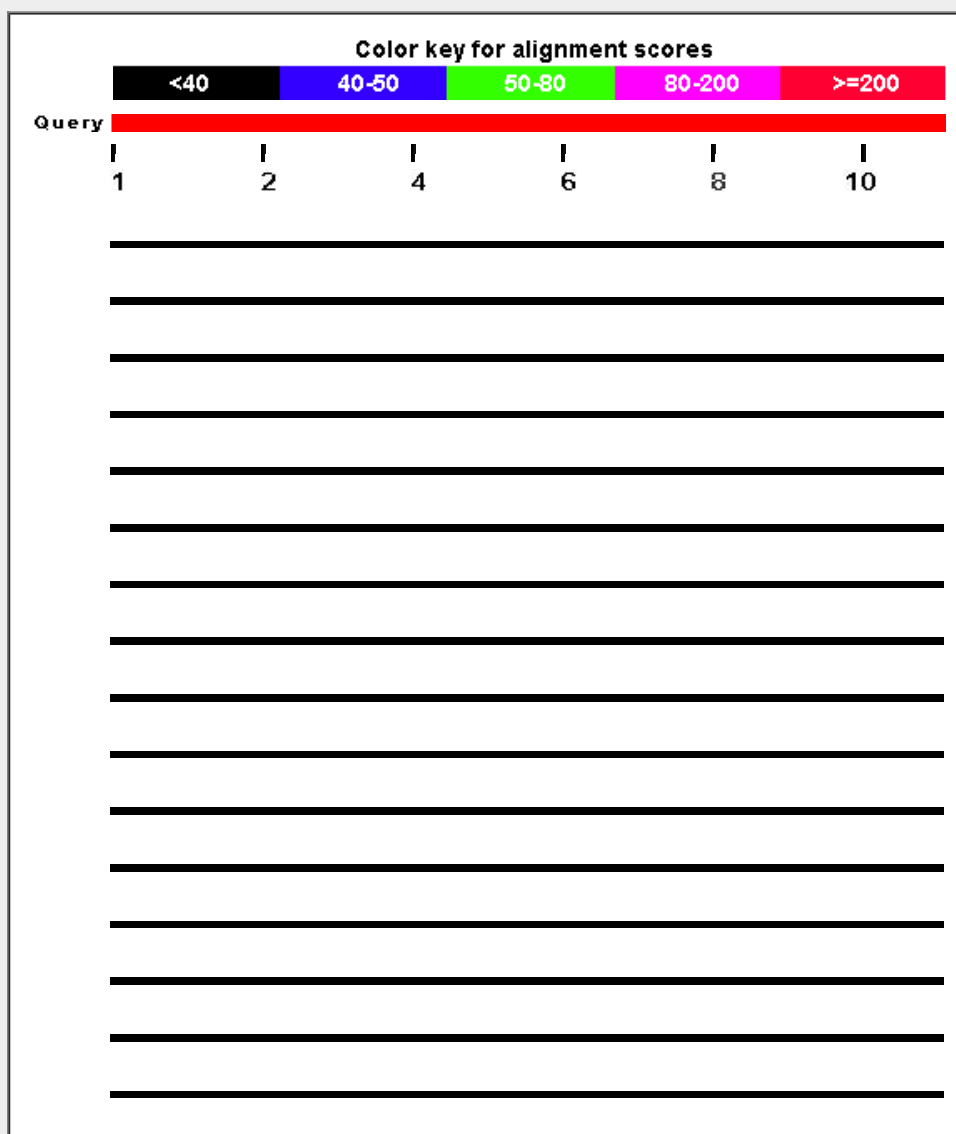

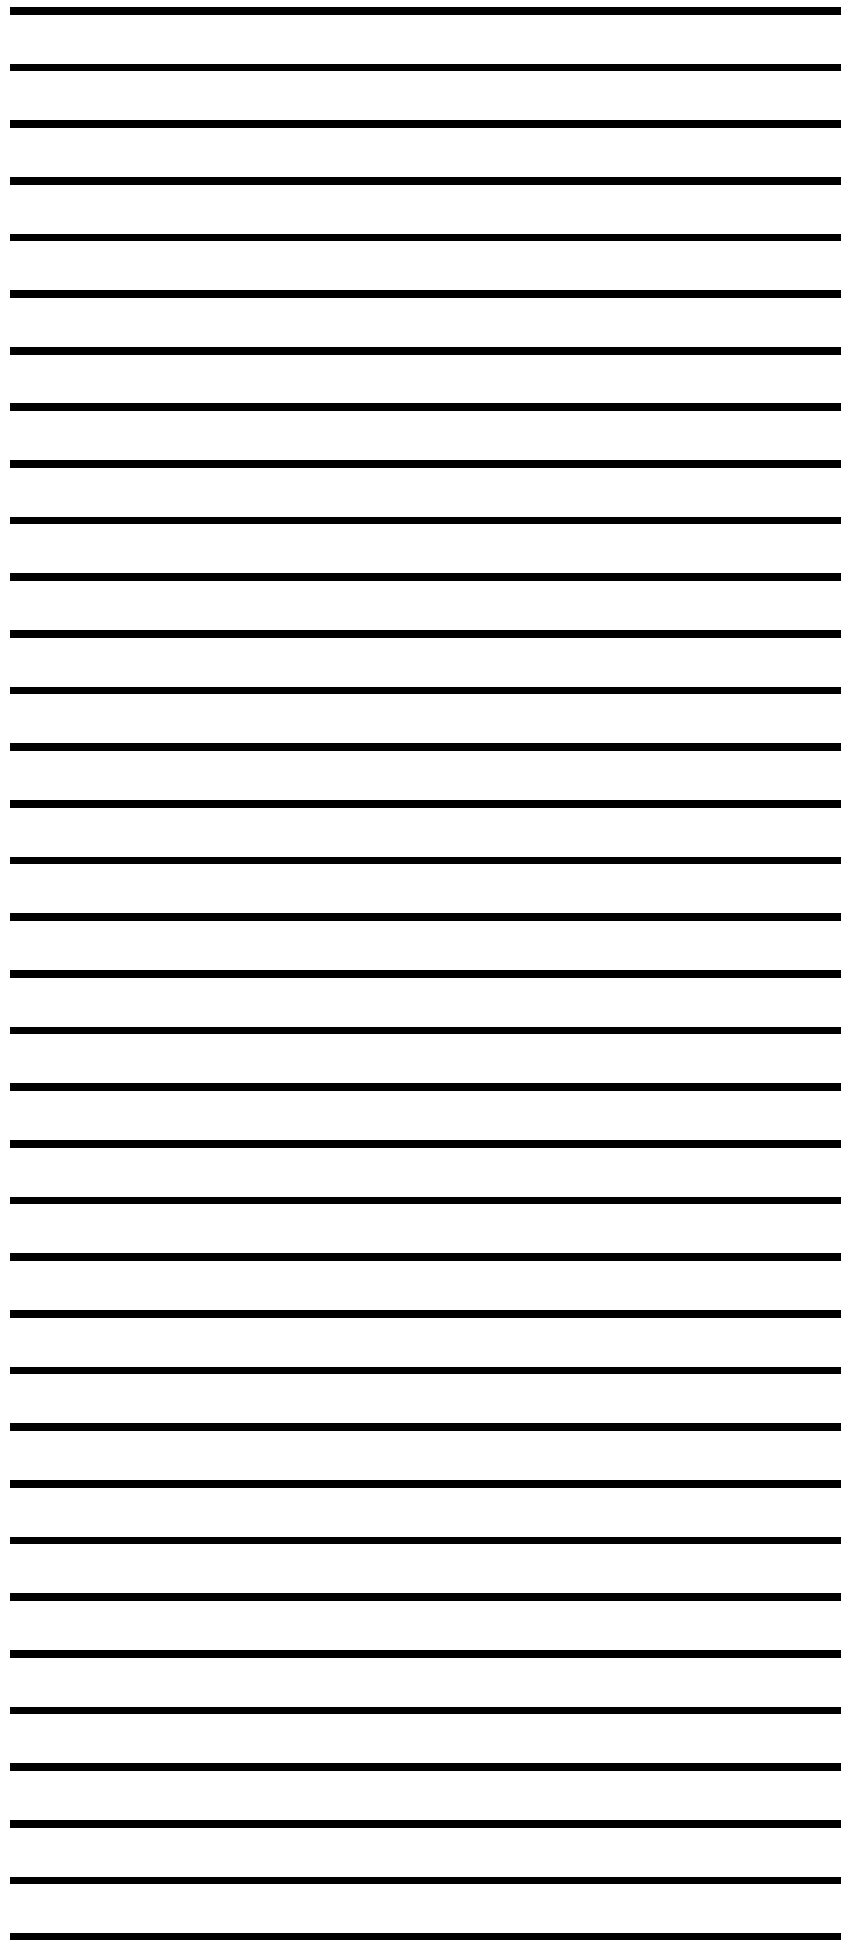

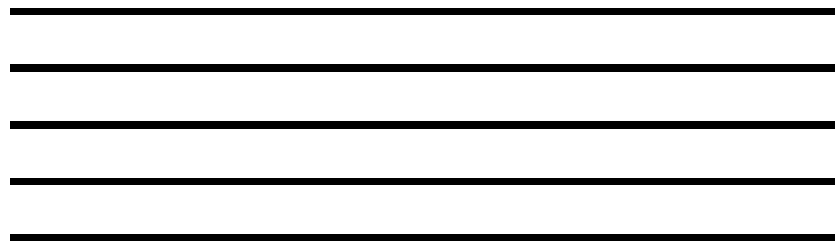

## Descriptions

### Sequences producing significant alignments:

Select: [All](#) [None](#) Selected:0

| <a href="#">Alignments</a> <a href="#">Download</a> <a href="#">GenPept</a> <a href="#">Graphics</a> <a href="#">Distance tree of results</a> <a href="#">Multiple alignment</a> |           |             |             |         |       |                                             |  |
|----------------------------------------------------------------------------------------------------------------------------------------------------------------------------------|-----------|-------------|-------------|---------|-------|---------------------------------------------|--|
| Description                                                                                                                                                                      | Max score | Total score | Query cover | E value | Ident | Accession                                   |  |
| <a href="#">PREDICTED: attractin [Fukomys damarensis]</a>                                                                                                                        | 37.5      | 37.5        | 100%        | 0.088   | 100%  | <a href="#">gij731281216 XP_010609356.1</a> |  |
| <a href="#">Attractin [Fukomys damarensis]</a>                                                                                                                                   | 35.0      | 35.0        | 100%        | 0.60    | 91%   | <a href="#">gij676269096 KFO24512.1</a>     |  |
| <a href="#">PREDICTED: attractin-like [Tursiops truncatus]</a>                                                                                                                   | 35.0      | 35.0        | 100%        | 0.60    | 91%   | <a href="#">gij470629747 XP_004321558.1</a> |  |
| <a href="#">PREDICTED: attractin-like [Physeter catodon]</a>                                                                                                                     | 35.0      | 35.0        | 100%        | 0.60    | 91%   | <a href="#">gij593773084 XP_007124834.1</a> |  |
| <a href="#">PREDICTED: attractin isoform X2 [Homo sapiens]</a>                                                                                                                   | 35.0      | 35.0        | 100%        | 0.60    | 91%   | <a href="#">gij530426021 XP_005260918.1</a> |  |
| <a href="#">PREDICTED: attractin isoform X2 [Saimiri boliviensis boliviensis]</a>                                                                                                | 35.0      | 35.0        | 100%        | 0.60    | 91%   | <a href="#">gij725600053 XP_010350112.1</a> |  |
| <a href="#">PREDICTED: attractin isoform X1 [Saimiri boliviensis boliviensis]</a>                                                                                                | 35.0      | 35.0        | 100%        | 0.61    | 91%   | <a href="#">gij725600051 XP_010350111.1</a> |  |
| <a href="#">PREDICTED: attractin [Balaenoptera acutorostrata scammonii]</a>                                                                                                      | 35.0      | 35.0        | 100%        | 0.61    | 91%   | <a href="#">gij594697511 XP_007195912.1</a> |  |
| <a href="#">PREDICTED: attractin [Tarsius syrichta]</a>                                                                                                                          | 35.0      | 35.0        | 100%        | 0.61    | 91%   | <a href="#">gij640796924 XP_008054571.1</a> |  |
| <a href="#">unnamed protein product [Homo sapiens]</a>                                                                                                                           | 35.0      | 35.0        | 100%        | 0.61    | 91%   | <a href="#">gij194380362 BAG63948.1</a>     |  |
| <a href="#">attractin isoform 4 [Homo sapiens]</a>                                                                                                                               | 35.0      | 35.0        | 100%        | 0.61    | 91%   | <a href="#">gij333440461 NP_001193976.1</a> |  |
| <a href="#">PREDICTED: attractin isoform 2 [Nomascus leucogenys]</a>                                                                                                             | 35.0      | 35.0        | 100%        | 0.61    | 91%   | <a href="#">gij332257827 XP_003278006.1</a> |  |
| <a href="#">PREDICTED: attractin isoform 2 [Dasypus novemcinctus]</a>                                                                                                            | 35.0      | 35.0        | 100%        | 0.61    | 91%   | <a href="#">gij488545593 XP_004464327.1</a> |  |
| <a href="#">Attractin [Myotis davidii]</a>                                                                                                                                       | 35.0      | 35.0        | 100%        | 0.61    | 91%   | <a href="#">gij432111133 ELK34519.1</a>     |  |
| <a href="#">PREDICTED: attractin [Pantholops hodgsonii]</a>                                                                                                                      | 35.0      | 35.0        | 100%        | 0.61    | 91%   | <a href="#">gij556758951 XP_005974805.1</a> |  |
| <a href="#">PREDICTED: attractin [Sus scrofa]</a>                                                                                                                                | 35.0      | 35.0        | 100%        | 0.61    | 91%   | <a href="#">gij545879723 XP_001927324.5</a> |  |
| <a href="#">PREDICTED: attractin [Gorilla gorilla gorilla]</a>                                                                                                                   | 35.0      | 35.0        | 100%        | 0.61    | 91%   | <a href="#">gij426390844 XP_004061806.1</a> |  |
| <a href="#">PREDICTED: attractin isoform X4 [Pan troglodytes]</a>                                                                                                                | 35.0      | 35.0        | 100%        | 0.61    | 91%   | <a href="#">gij694977854 XP_009435012.1</a> |  |
| <a href="#">Attractin [Myotis brandtii]</a>                                                                                                                                      | 35.0      | 35.0        | 100%        | 0.61    | 91%   | <a href="#">gij521031210 EPQ12996.1</a>     |  |
| <a href="#">PREDICTED: attractin isoform 1 [Nomascus leucogenys]</a>                                                                                                             | 35.0      | 35.0        | 100%        | 0.61    | 91%   | <a href="#">gij332257825 XP_003278005.1</a> |  |
| <a href="#">attractin-2 [Homo sapiens]</a>                                                                                                                                       | 35.0      | 35.0        | 100%        | 0.61    | 91%   | <a href="#">gij4093196 AAD03057.1</a>       |  |
| <a href="#">secreted attractin precursor [Homo sapiens]</a>                                                                                                                      | 35.0      | 35.0        | 100%        | 0.61    | 91%   | <a href="#">gij8118083 AAF72882.1</a>       |  |
| <a href="#">unnamed protein product [Homo sapiens]</a>                                                                                                                           | 35.0      | 35.0        | 100%        | 0.61    | 91%   | <a href="#">gij158259481 BAF85699.1</a>     |  |
| <a href="#">attractin isoform 2 preproprotein [Homo sapiens]</a>                                                                                                                 | 35.0      | 35.0        | 100%        | 0.61    | 91%   | <a href="#">gij21450863 NP_647538.1</a>     |  |
| <a href="#">Mahogany-like protein [Macaca mulatta]</a>                                                                                                                           | 35.0      | 35.0        | 100%        | 0.61    | 91%   | <a href="#">gij355563316 EHH19878.1</a>     |  |
| <a href="#">PREDICTED: attractin isoform X1 [Bos taurus]</a>                                                                                                                     | 35.0      | 35.0        | 100%        | 0.61    | 91%   | <a href="#">gij741947708 XP_005214542.2</a> |  |
| <a href="#">PREDICTED: attractin isoform X3 [Bubalus bubalis]</a>                                                                                                                | 35.0      | 35.0        | 100%        | 0.61    | 91%   | <a href="#">gij594099680 XP_006072965.1</a> |  |
| <a href="#">PREDICTED: LOW QUALITY PROTEIN: attractin [Pan paniscus]</a>                                                                                                         | 35.0      | 35.0        | 100%        | 0.61    | 91%   | <a href="#">gij675763672 XP_008973079.1</a> |  |

|                                                                              |      |      |      |      |     |                                             |
|------------------------------------------------------------------------------|------|------|------|------|-----|---------------------------------------------|
| <a href="#">PREDICTED: attractin isoform X2 [Heterocephalus glaber]</a>      | 35.0 | 35.0 | 100% | 0.61 | 91% | <a href="#">gij512956910 XP_004840783.1</a> |
| <a href="#">PREDICTED: attractin isoform X3 [Pan troglodytes]</a>            | 35.0 | 35.0 | 100% | 0.61 | 91% | <a href="#">gij694977852 XP_009435011.1</a> |
| <a href="#">attractin [Sus scrofa]</a>                                       | 35.0 | 35.0 | 100% | 0.61 | 91% | <a href="#">gij146741346 BAF62328.1</a>     |
| <a href="#">PREDICTED: attractin isoform X1 [Homo sapiens]</a>               | 35.0 | 35.0 | 100% | 0.61 | 91% | <a href="#">gij530426019 XP_005260917.1</a> |
| <a href="#">PREDICTED: attractin isoform X4 [Macaca fascicularis]</a>        | 35.0 | 35.0 | 100% | 0.61 | 91% | <a href="#">gij544464516 XP_005568512.1</a> |
| <a href="#">Mahogany-like protein [Macaca fascicularis]</a>                  | 35.0 | 35.0 | 100% | 0.61 | 91% | <a href="#">gij355784657 EHH65508.1</a>     |
| <a href="#">PREDICTED: attractin [Myotis davidii]</a>                        | 35.0 | 35.0 | 100% | 0.61 | 91% | <a href="#">gij584075971 XP_006758187.1</a> |
| <a href="#">PREDICTED: attractin [Panthera tigris altaica]</a>               | 35.0 | 35.0 | 100% | 0.61 | 91% | <a href="#">gij591291970 XP_007073329.1</a> |
| <a href="#">PREDICTED: attractin [Myotis brandtii]</a>                       | 35.0 | 35.0 | 100% | 0.61 | 91% | <a href="#">gij554560893 XP_005874816.1</a> |
| <a href="#">PREDICTED: attractin isoform X3 [Macaca fascicularis]</a>        | 35.0 | 35.0 | 100% | 0.61 | 91% | <a href="#">gij544464514 XP_005568511.1</a> |
| <a href="#">PREDICTED: attractin-like [Galeopterus variegatus]</a>           | 35.0 | 35.0 | 100% | 0.61 | 91% | <a href="#">gij667324076 XP_008589101.1</a> |
| <a href="#">PREDICTED: attractin [Capra hircus]</a>                          | 35.0 | 35.0 | 100% | 0.61 | 91% | <a href="#">gij548490191 XP_005688293.1</a> |
| <a href="#">PREDICTED: attractin [Trichechus manatus latirostris]</a>        | 35.0 | 35.0 | 100% | 0.61 | 91% | <a href="#">gij471400634 XP_004383126.1</a> |
| <a href="#">Attractin [Heterocephalus glaber]</a>                            | 35.0 | 35.0 | 100% | 0.61 | 91% | <a href="#">gij351701383 EHB04302.1</a>     |
| <a href="#">PREDICTED: attractin [Rhinopithecus roxellana]</a>               | 35.0 | 35.0 | 100% | 0.61 | 91% | <a href="#">gij724902357 XP_010377335.1</a> |
| <a href="#">PREDICTED: attractin isoform 1 [Dasypus novemcinctus]</a>        | 35.0 | 35.0 | 100% | 0.61 | 91% | <a href="#">gij488545591 XP_004464326.1</a> |
| <a href="#">PREDICTED: attractin [Camelus ferus]</a>                         | 35.0 | 35.0 | 100% | 0.61 | 91% | <a href="#">gij560921992 XP_006187198.1</a> |
| <a href="#">PREDICTED: attractin [Myotis lucifugus]</a>                      | 35.0 | 35.0 | 100% | 0.61 | 91% | <a href="#">gij558159591 XP_006096513.1</a> |
| <a href="#">PREDICTED: attractin [Camelus dromedarius]</a>                   | 35.0 | 35.0 | 100% | 0.61 | 91% | <a href="#">gij744589171 XP_010986570.1</a> |
| <a href="#">PREDICTED: attractin [Bos mutus]</a>                             | 35.0 | 35.0 | 100% | 0.61 | 91% | <a href="#">gij555963925 XP_005894036.1</a> |
| <a href="#">PREDICTED: attractin [Camelus bactrianus]</a>                    | 35.0 | 35.0 | 100% | 0.61 | 91% | <a href="#">gij743752427 XP_010971103.1</a> |
| <a href="#">attractin, isoform CRA_b [Homo sapiens]</a>                      | 35.0 | 35.0 | 100% | 0.61 | 91% | <a href="#">gij119630936 EAX10531.1</a>     |
| <a href="#">PREDICTED: attractin [Heterocephalus glaber]</a>                 | 35.0 | 35.0 | 100% | 0.61 | 91% | <a href="#">gij512849696 XP_004886859.1</a> |
| <a href="#">PREDICTED: attractin [Ovis aries]</a>                            | 35.0 | 35.0 | 100% | 0.61 | 91% | <a href="#">gij426241795 XP_004014773.1</a> |
| <a href="#">PREDICTED: attractin [Felis catus]</a>                           | 35.0 | 35.0 | 100% | 0.61 | 91% | <a href="#">gij586981105 XP_003983758.2</a> |
| <a href="#">PREDICTED: attractin isoform X2 [Pan troglodytes]</a>            | 35.0 | 35.0 | 100% | 0.61 | 91% | <a href="#">gij694977850 XP_009435010.1</a> |
| <a href="#">PREDICTED: attractin [Otolemur garnettii]</a>                    | 35.0 | 35.0 | 100% | 0.61 | 91% | <a href="#">gij395830288 XP_003788264.1</a> |
| <a href="#">PREDICTED: attractin [Vicugna pacos]</a>                         | 35.0 | 35.0 | 100% | 0.61 | 91% | <a href="#">gij560970220 XP_006207473.1</a> |
| <a href="#">attractin [Bos taurus]</a>                                       | 35.0 | 35.0 | 100% | 0.61 | 91% | <a href="#">gij253560524 ACT32973.1</a>     |
| <a href="#">PREDICTED: attractin [Eptesicus fuscus]</a>                      | 35.0 | 35.0 | 100% | 0.61 | 91% | <a href="#">gij641701319 XP_008139256.1</a> |
| <a href="#">attractin [Bos taurus]</a>                                       | 35.0 | 35.0 | 100% | 0.61 | 91% | <a href="#">gij27806737 NP_776420.1</a>     |
| <a href="#">PREDICTED: attractin isoform X2 [Bubalus bubalis]</a>            | 35.0 | 35.0 | 100% | 0.61 | 91% | <a href="#">gij594099678 XP_006072964.1</a> |
| <a href="#">PREDICTED: attractin [Orcinus orca]</a>                          | 35.0 | 35.0 | 100% | 0.61 | 91% | <a href="#">gij466084723 XP_004285351.1</a> |
| <a href="#">PREDICTED: attractin [Odobenus rosmarus divergens]</a>           | 35.0 | 35.0 | 100% | 0.61 | 91% | <a href="#">gij472357214 XP_004398236.1</a> |
| <a href="#">PREDICTED: attractin [Chrysochloris asiatica]</a>                | 35.0 | 35.0 | 100% | 0.61 | 91% | <a href="#">gij586488825 XP_006874887.1</a> |
| <a href="#">PREDICTED: attractin isoform X1 [Heterocephalus glaber]</a>      | 35.0 | 35.0 | 100% | 0.61 | 91% | <a href="#">gij512956908 XP_004840782.1</a> |
| <a href="#">PREDICTED: attractin-like [Octodon degus]</a>                    | 35.0 | 35.0 | 100% | 0.61 | 91% | <a href="#">gij507657234 XP_004634315.1</a> |
| <a href="#">PREDICTED: attractin isoform X1 [Ictidomys tridecemlineatus]</a> | 35.0 | 35.0 | 100% | 0.61 | 91% | <a href="#">gij532069484 XP_005320577.1</a> |
| <a href="#">PREDICTED: attractin isoform X3 [Ictidomys tridecemlineatus]</a> | 35.0 | 35.0 | 100% | 0.61 | 91% | <a href="#">gij532069488 XP_005320579.1</a> |
| <a href="#">PREDICTED: attractin [Callithrix jacchus]</a>                    | 35.0 | 35.0 | 100% | 0.61 | 91% | <a href="#">gij296200062 XP_002747358.1</a> |
| <a href="#">PREDICTED: attractin isoform X1 [Pan troglodytes]</a>            | 35.0 | 35.0 | 100% | 0.61 | 91% | <a href="#">gij332857715 XP_003316827.1</a> |
| <a href="#">membrane attractin precursor [Homo sapiens]</a>                  | 35.0 | 35.0 | 100% | 0.61 | 91% | <a href="#">gij8118082 AAF72881.1</a>       |
| <a href="#">attractin isoform 1 preproprotein [Homo sapiens]</a>             | 35.0 | 35.0 | 100% | 0.61 | 91% | <a href="#">gij21450861 NP_647537.1</a>     |
| <a href="#">PREDICTED: attractin isoform X2 [Ictidomys tridecemlineatus]</a> | 35.0 | 35.0 | 100% | 0.61 | 91% | <a href="#">gij532069486 XP_005320578.1</a> |
| <a href="#">PREDICTED: attractin [Jaculus jaculus]</a>                       | 35.0 | 35.0 | 100% | 0.61 | 91% | <a href="#">gij507555530 XP_004661535.1</a> |

|                                                                            |      |      |      |      |     |                                             |
|----------------------------------------------------------------------------|------|------|------|------|-----|---------------------------------------------|
| <a href="#">PREDICTED: attractin isoform X2 [Macaca fascicularis]</a>      | 35.0 | 35.0 | 100% | 0.61 | 91% | <a href="#">gil544464512 XP_005568510.1</a> |
| <a href="#">PREDICTED: attractin [Macaca mulatta]</a>                      | 35.0 | 35.0 | 100% | 0.61 | 91% | <a href="#">gil109092720 XP_001115192.1</a> |
| <a href="#">PREDICTED: attractin isoform X1 [Macaca fascicularis]</a>      | 35.0 | 35.0 | 100% | 0.61 | 91% | <a href="#">gil544464510 XP_005568509.1</a> |
| <a href="#">PREDICTED: attractin [Bison bison bison]</a>                   | 35.0 | 35.0 | 100% | 0.61 | 91% | <a href="#">gil742104093 XP_010834932.1</a> |
| <a href="#">PREDICTED: attractin [Tupaia chinensis]</a>                    | 35.0 | 35.0 | 100% | 0.61 | 91% | <a href="#">gil562872246 XP_006164056.1</a> |
| <a href="#">PREDICTED: attractin isoform X1 [Bubalus bubalis]</a>          | 35.0 | 35.0 | 100% | 0.61 | 91% | <a href="#">gil594099676 XP_006072963.1</a> |
| <a href="#">PREDICTED: attractin isoform X5 [Chlorocebus sabaeus]</a>      | 32.9 | 32.9 | 100% | 3.0  | 82% | <a href="#">gil635021368 XP_008017720.1</a> |
| <a href="#">PREDICTED: attractin isoform X4 [Chlorocebus sabaeus]</a>      | 32.9 | 32.9 | 100% | 3.0  | 82% | <a href="#">gil635021366 XP_008017712.1</a> |
| <a href="#">PREDICTED: attractin isoform X3 [Chlorocebus sabaeus]</a>      | 32.9 | 32.9 | 100% | 3.0  | 82% | <a href="#">gil635021364 XP_008017707.1</a> |
| <a href="#">PREDICTED: attractin isoform X2 [Chlorocebus sabaeus]</a>      | 32.9 | 32.9 | 100% | 3.0  | 82% | <a href="#">gil635021362 XP_008017704.1</a> |
| <a href="#">PREDICTED: attractin isoform X1 [Pteropus alecto]</a>          | 32.9 | 32.9 | 100% | 3.0  | 82% | <a href="#">gil586533632 XP_006921705.1</a> |
| <a href="#">PREDICTED: attractin isoform X3 [Chinchilla lanigera]</a>      | 32.9 | 32.9 | 100% | 3.0  | 82% | <a href="#">gil533131617 XP_005380852.1</a> |
| <a href="#">PREDICTED: attractin isoform X1 [Chlorocebus sabaeus]</a>      | 32.9 | 32.9 | 100% | 3.0  | 82% | <a href="#">gil635021360 XP_008017700.1</a> |
| <a href="#">PREDICTED: attractin isoform X2 [Chinchilla lanigera]</a>      | 32.9 | 32.9 | 100% | 3.0  | 82% | <a href="#">gil533131615 XP_005380851.1</a> |
| <a href="#">PREDICTED: attractin isoform X6 [Chlorocebus sabaeus]</a>      | 32.9 | 32.9 | 100% | 3.0  | 82% | <a href="#">gil635021370 XP_008017729.1</a> |
| <a href="#">PREDICTED: attractin isoform X1 [Chinchilla lanigera]</a>      | 32.9 | 32.9 | 100% | 3.0  | 82% | <a href="#">gil533131613 XP_005380850.1</a> |
| <a href="#">PREDICTED: attractin isoform X2 [Pteropus alecto]</a>          | 32.9 | 32.9 | 100% | 3.0  | 82% | <a href="#">gil586533634 XP_006921706.1</a> |
| <a href="#">PREDICTED: attractin-like [Leptonychotes weddellii]</a>        | 32.5 | 32.5 | 100% | 4.1  | 82% | <a href="#">gil585160208 XP_006732353.1</a> |
| <a href="#">PREDICTED: attractin isoform X2 [Mustela putorius furo]</a>    | 32.5 | 32.5 | 100% | 4.1  | 82% | <a href="#">gil511906947 XP_004772933.1</a> |
| <a href="#">PREDICTED: attractin [Ursus maritimus]</a>                     | 32.5 | 32.5 | 100% | 4.1  | 82% | <a href="#">gil671021680 XP_008701660.1</a> |
| <a href="#">hypothetical protein PANDA_007354 [Ailuropoda melanoleuca]</a> | 32.5 | 32.5 | 100% | 4.1  | 82% | <a href="#">gil281339872 EFB15456.1</a>     |
| <a href="#">PREDICTED: attractin-like [Ailuropoda melanoleuca]</a>         | 32.5 | 32.5 | 100% | 4.1  | 82% | <a href="#">gil301766802 XP_002918837.1</a> |
| <a href="#">PREDICTED: attractin [Mustela putorius furo]</a>               | 32.5 | 32.5 | 100% | 4.1  | 82% | <a href="#">gil511947743 XP_004792355.1</a> |
| <a href="#">PREDICTED: attractin [Peromyscus maniculatus bairdii]</a>      | 32.5 | 32.5 | 100% | 4.1  | 82% | <a href="#">gil589943852 XP_006984624.1</a> |
| <a href="#">PREDICTED: attractin isoform X1 [Mustela putorius furo]</a>    | 32.5 | 32.5 | 100% | 4.1  | 82% | <a href="#">gil511906945 XP_004772932.1</a> |
| <a href="#">PREDICTED: attractin [Elephantulus edwardii]</a>               | 32.5 | 32.5 | 100% | 4.1  | 82% | <a href="#">gil585689645 XP_006894264.1</a> |
| <a href="#">attractin [Mesocricetus auratus]</a>                           | 32.5 | 32.5 | 100% | 4.1  | 82% | <a href="#">gil528078159 NP_001268565.1</a> |

## Alignments

Download [GenPept](#) [Graphics](#) ▼ Next ▲ Previous ▲ Descriptions

**PREDICTED: attractin [Fukomys damarensis]**

Sequence ID: [gil731281216|ref|XP\\_010609356.1](#) Length: 1377 Number of Matches: 1

Range 1: 244 to 254 [GenPept](#) [Graphics](#) ▼ Next Match ▲ Previous Match

| Score         | Expect | Identities  | Positives   | Gaps     |
|---------------|--------|-------------|-------------|----------|
| 37.5 bits(81) | 0.088  | 11/11(100%) | 11/11(100%) | 0/11(0%) |

Query 1    RGICDSSDVRG    11  
           RGICDSSDVRG  
 Sbjct 244    RGICDSSDVRG    254

### Related Information

[Gene](#) - associated gene details

Download [GenPept](#) [Graphics](#) ▼ Next ▲ Previous ▲ Descriptions

**Attractin [Fukomys damarensis]**

Sequence ID: [gil676269096|gb|KFO24512.1](#) Length: 740 Number of Matches: 1

Range 1: 208 to 218 [GenPept](#) [Graphics](#) ▼ Next Match ▲ Previous Match

| Score         | Expect | Identities | Positives   | Gaps     |
|---------------|--------|------------|-------------|----------|
| 35.0 bits(75) | 0.60   | 10/11(91%) | 11/11(100%) | 0/11(0%) |

Query 1    RGICDSSDVRG    11

### Related Information

Sbjct 208 RGIC+SSDVRG  
 RGICNSSDVRG 218

[Download](#) [GenPept](#) [Graphics](#)

[Next](#) [Previous](#) [Descriptions](#)

**PREDICTED: attractin-like [Tursiops truncatus]**

Sequence ID: [gi|470629747|ref|XP\\_004321558.1](#) Length: 1003 Number of Matches: 1

Range 1: 127 to 137 [GenPept](#) [Graphics](#)

[Next Match](#) [Previous Match](#)

| Score         | Expect | Identities | Positives   | Gaps     |
|---------------|--------|------------|-------------|----------|
| 35.0 bits(75) | 0.60   | 10/11(91%) | 11/11(100%) | 0/11(0%) |

Query 1 RGICDSSDVRG 11  
 RGIC+SSDVRG  
 Sbjct 127 RGICNSSDVRG 137

**Related Information**

[Gene](#) - associated gene details  
[Map Viewer](#) - aligned genomic context

[Download](#) [GenPept](#) [Graphics](#)

[Next](#) [Previous](#) [Descriptions](#)

**PREDICTED: attractin-like, partial [Physeter catodon]**

Sequence ID: [gi|593773084|ref|XP\\_007124834.1](#) Length: 1035 Number of Matches: 1

Range 1: 159 to 169 [GenPept](#) [Graphics](#)

[Next Match](#) [Previous Match](#)

| Score         | Expect | Identities | Positives   | Gaps     |
|---------------|--------|------------|-------------|----------|
| 35.0 bits(75) | 0.60   | 10/11(91%) | 11/11(100%) | 0/11(0%) |

Query 1 RGICDSSDVRG 11  
 RGIC+SSDVRG  
 Sbjct 159 RGICNSSDVRG 169

**Related Information**

[Gene](#) - associated gene details  
[Map Viewer](#) - aligned genomic context

[Download](#) [GenPept](#) [Graphics](#)

[Next](#) [Previous](#) [Descriptions](#)

**PREDICTED: attractin isoform X2 [Homo sapiens]**

Sequence ID: [gi|530426021|ref|XP\\_005260918.1](#) Length: 1111 Number of Matches: 1

Range 1: 296 to 306 [GenPept](#) [Graphics](#)

[Next Match](#) [Previous Match](#)

| Score         | Expect | Identities | Positives   | Gaps     |
|---------------|--------|------------|-------------|----------|
| 35.0 bits(75) | 0.60   | 10/11(91%) | 11/11(100%) | 0/11(0%) |

Query 1 RGICDSSDVRG 11  
 RGIC+SSDVRG  
 Sbjct 296 RGICNSSDVRG 306

**Related Information**

[Gene](#) - associated gene details  
[Map Viewer](#) - aligned genomic context

BLAST is a registered trademark of the National Library of Medicine.

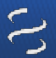

NCBI/ BLAST/ blastp suite/ Formatting Results - B91768AM01R

Your search parameters were adjusted to search for a short input sequence.

Edit and Resubmit Save Search Strategies Formatting options Download

YouTube How to read this page Blast report description

ATRN\_RGICNSSDVRG\_NonMod

RID B91768AM01R (Expires on 01-14 09:37 am)

Query ID Icl|225884
Description None
Molecule type amino acid
Query Length 11

Database Name nr
Description All non-redundant GenBank CDS translations+PDB+SwissProt+PIR excluding environmental samples from WGS projects
Program BLASTP 2.2.30+ Citation

Other reports: Search Summary Taxonomy reports Distance tree of results Multiple alignment

Graphic Summary

Show Conserved Domains

No putative conserved domains have been detected

Distribution of 116 Blast Hits on the Query Sequence

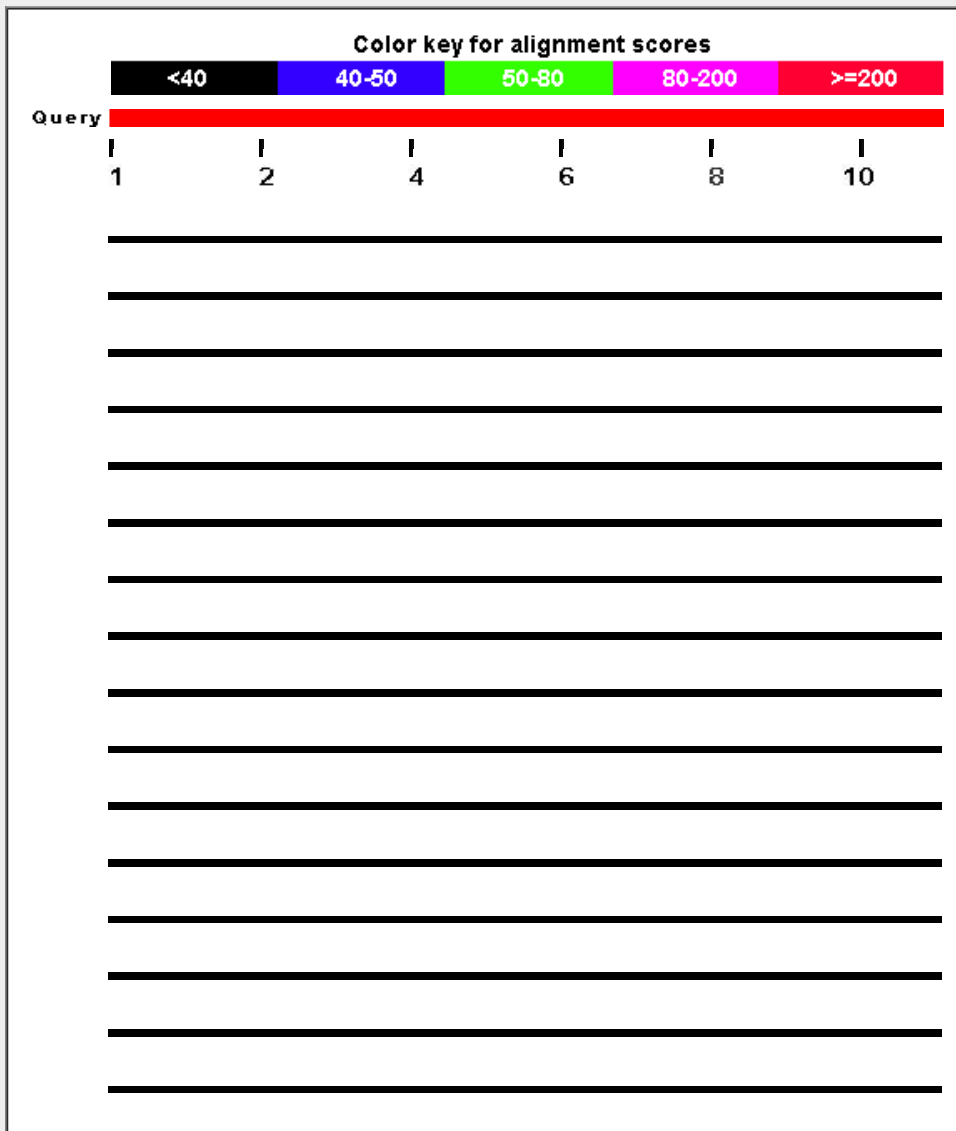

Color key for alignment scores

Table with 5 columns: <40, 40-50, 50-80, 80-200, >=200

Query

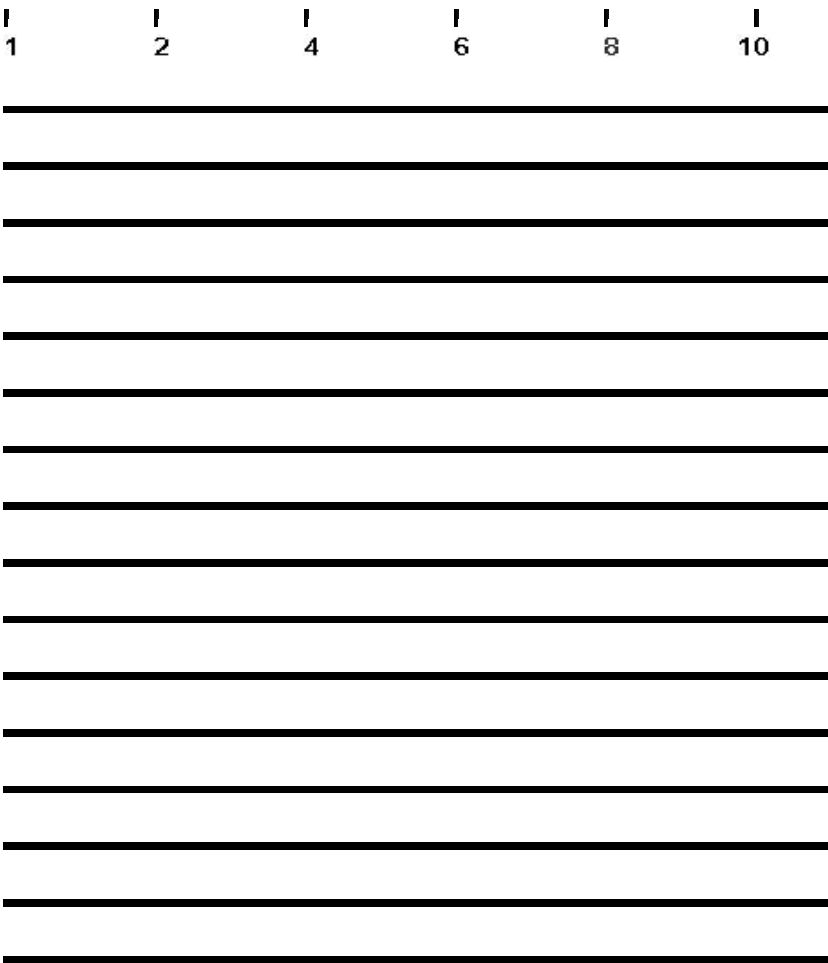

The image displays a table with 30 rows. Each row consists of a single horizontal black line. The table is centered on a white background and is flanked by two vertical light blue bars on the left and right sides. The lines are evenly spaced and extend across most of the width of the central area.





## Descriptions

### Sequences producing significant alignments:

Select: [All](#) [None](#) Selected:0

[Alignments](#)
[Download](#)
[GenPept](#)
[Graphics](#)
[Distance tree of results](#)
[Multiple alignment](#)

| Description                                                                       | Max score | Total score | Query cover | E value | Ident | Accession                                   |
|-----------------------------------------------------------------------------------|-----------|-------------|-------------|---------|-------|---------------------------------------------|
| <a href="#">Attractin [Fukomys damarensis]</a>                                    | 37.5      | 37.5        | 100%        | 0.082   | 100%  | <a href="#">gij676269096 KFO24512.1</a>     |
| <a href="#">PREDICTED: attractin-like [Tursiops truncatus]</a>                    | 37.5      | 37.5        | 100%        | 0.083   | 100%  | <a href="#">gij470629747 XP_004321558.1</a> |
| <a href="#">PREDICTED: attractin-like [Physeter catodon]</a>                      | 37.5      | 37.5        | 100%        | 0.083   | 100%  | <a href="#">gij593773084 XP_007124834.1</a> |
| <a href="#">PREDICTED: attractin isoform X2 [Homo sapiens]</a>                    | 37.5      | 55.6        | 100%        | 0.083   | 100%  | <a href="#">gij530426021 XP_005260918.1</a> |
| <a href="#">PREDICTED: attractin isoform X2 [Saimiri boliviensis boliviensis]</a> | 37.5      | 37.5        | 100%        | 0.083   | 100%  | <a href="#">gij725600053 XP_010350112.1</a> |
| <a href="#">PREDICTED: attractin isoform X1 [Saimiri boliviensis boliviensis]</a> | 37.5      | 37.5        | 100%        | 0.083   | 100%  | <a href="#">gij725600051 XP_010350111.1</a> |
| <a href="#">PREDICTED: attractin [Balaenoptera acutorostrata scammonii]</a>       | 37.5      | 37.5        | 100%        | 0.083   | 100%  | <a href="#">gij594697511 XP_007195912.1</a> |
| <a href="#">PREDICTED: attractin [Tarsius syrichta]</a>                           | 37.5      | 37.5        | 100%        | 0.083   | 100%  | <a href="#">gij640796924 XP_008054571.1</a> |
| <a href="#">unnamed protein product [Homo sapiens]</a>                            | 37.5      | 55.6        | 100%        | 0.083   | 100%  | <a href="#">gij194380362 BAG63948.1</a>     |
| <a href="#">attractin isoform 4 [Homo sapiens]</a>                                | 37.5      | 55.6        | 100%        | 0.083   | 100%  | <a href="#">gij333440461 NP_001193976.1</a> |
| <a href="#">PREDICTED: attractin isoform 2 [Nomascus leucogenys]</a>              | 37.5      | 37.5        | 100%        | 0.083   | 100%  | <a href="#">gij332257827 XP_003278006.1</a> |
| <a href="#">PREDICTED: attractin isoform 2 [Dasypus novemcinctus]</a>             | 37.5      | 37.5        | 100%        | 0.083   | 100%  | <a href="#">gij488545593 XP_004464327.1</a> |
| <a href="#">Attractin [Myotis davidii]</a>                                        | 37.5      | 37.5        | 100%        | 0.083   | 100%  | <a href="#">gij432111133 ELK34519.1</a>     |
| <a href="#">PREDICTED: attractin [Pantholops hodgsonii]</a>                       | 37.5      | 37.5        | 100%        | 0.083   | 100%  | <a href="#">gij556758951 XP_005974805.1</a> |
| <a href="#">PREDICTED: attractin [Sus scrofa]</a>                                 | 37.5      | 37.5        | 100%        | 0.083   | 100%  | <a href="#">gij545879723 XP_001927324.5</a> |
| <a href="#">PREDICTED: attractin [Gorilla gorilla gorilla]</a>                    | 37.5      | 55.6        | 100%        | 0.083   | 100%  | <a href="#">gij426390844 XP_004061806.1</a> |
| <a href="#">PREDICTED: attractin isoform X4 [Pan troglodytes]</a>                 | 37.5      | 55.6        | 100%        | 0.083   | 100%  | <a href="#">gij694977854 XP_009435012.1</a> |
| <a href="#">Attractin [Myotis brandtii]</a>                                       | 37.5      | 37.5        | 100%        | 0.083   | 100%  | <a href="#">gij521031210 EPQ12996.1</a>     |
| <a href="#">PREDICTED: attractin isoform 1 [Nomascus leucogenys]</a>              | 37.5      | 37.5        | 100%        | 0.083   | 100%  | <a href="#">gij332257825 XP_003278005.1</a> |
| <a href="#">attractin-2 [Homo sapiens]</a>                                        | 37.5      | 37.5        | 100%        | 0.083   | 100%  | <a href="#">gij4093196 AAD03057.1</a>       |
| <a href="#">secreted attractin precursor [Homo sapiens]</a>                       | 37.5      | 55.6        | 100%        | 0.083   | 100%  | <a href="#">gij8118083 AAF72882.1</a>       |
| <a href="#">unnamed protein product [Homo sapiens]</a>                            | 37.5      | 55.6        | 100%        | 0.083   | 100%  | <a href="#">gij158259481 BAF85699.1</a>     |
| <a href="#">attractin isoform 2 preproprotein [Homo sapiens]</a>                  | 37.5      | 55.6        | 100%        | 0.083   | 100%  | <a href="#">gij21450863 NP_647538.1</a>     |
| <a href="#">Mahogany-like protein [Macaca mulatta]</a>                            | 37.5      | 37.5        | 100%        | 0.083   | 100%  | <a href="#">gij355563316 EHH19878.1</a>     |
| <a href="#">PREDICTED: attractin isoform X3 [Bubalus bubalis]</a>                 | 37.5      | 37.5        | 100%        | 0.083   | 100%  | <a href="#">gij594099680 XP_006072965.1</a> |
| <a href="#">PREDICTED: LOW QUALITY PROTEIN: attractin [Pan paniscus]</a>          | 37.5      | 55.6        | 100%        | 0.083   | 100%  | <a href="#">gij675763672 XP_008973079.1</a> |
| <a href="#">PREDICTED: attractin isoform X2 [Heterocephalus glaber]</a>           | 37.5      | 37.5        | 100%        | 0.083   | 100%  | <a href="#">gij512956910 XP_004840783.1</a> |
| <a href="#">PREDICTED: attractin isoform X3 [Pan troglodytes]</a>                 | 37.5      | 55.6        | 100%        | 0.083   | 100%  | <a href="#">gij694977852 XP_009435011.1</a> |

|                                                                              |      |      |      |       |      |                                             |
|------------------------------------------------------------------------------|------|------|------|-------|------|---------------------------------------------|
| <a href="#">attractin [Sus scrofa]</a>                                       | 37.5 | 37.5 | 100% | 0.083 | 100% | <a href="#">gij146741346 BAF62328.1</a>     |
| <a href="#">PREDICTED: attractin isoform X1 [Homo sapiens]</a>               | 37.5 | 55.6 | 100% | 0.083 | 100% | <a href="#">gij530426019 XP_005260917.1</a> |
| <a href="#">PREDICTED: attractin isoform X4 [Macaca fascicularis]</a>        | 37.5 | 37.5 | 100% | 0.083 | 100% | <a href="#">gij544464516 XP_005568512.1</a> |
| <a href="#">Mahogany-like protein [Macaca fascicularis]</a>                  | 37.5 | 37.5 | 100% | 0.083 | 100% | <a href="#">gij355784657 EHH65508.1</a>     |
| <a href="#">PREDICTED: attractin [Myotis davidii]</a>                        | 37.5 | 37.5 | 100% | 0.083 | 100% | <a href="#">gij584075971 XP_006758187.1</a> |
| <a href="#">PREDICTED: attractin [Panthera tigris altaica]</a>               | 37.5 | 37.5 | 100% | 0.083 | 100% | <a href="#">gij591291970 XP_007073329.1</a> |
| <a href="#">PREDICTED: attractin [Myotis brandtii]</a>                       | 37.5 | 37.5 | 100% | 0.083 | 100% | <a href="#">gij554560893 XP_005874816.1</a> |
| <a href="#">PREDICTED: attractin isoform X3 [Macaca fascicularis]</a>        | 37.5 | 37.5 | 100% | 0.083 | 100% | <a href="#">gij544464514 XP_005568511.1</a> |
| <a href="#">PREDICTED: attractin-like [Galeopterus variegatus]</a>           | 37.5 | 37.5 | 100% | 0.083 | 100% | <a href="#">gij667324076 XP_008589101.1</a> |
| <a href="#">PREDICTED: attractin [Capra hircus]</a>                          | 37.5 | 37.5 | 100% | 0.083 | 100% | <a href="#">gij548490191 XP_005688293.1</a> |
| <a href="#">PREDICTED: attractin [Trichechus manatus latirostris]</a>        | 37.5 | 37.5 | 100% | 0.083 | 100% | <a href="#">gij471400634 XP_004383126.1</a> |
| <a href="#">Attractin [Heterocephalus glaber]</a>                            | 37.5 | 37.5 | 100% | 0.083 | 100% | <a href="#">gij351701383 EHB04302.1</a>     |
| <a href="#">PREDICTED: attractin [Rhinopithecus roxellana]</a>               | 37.5 | 37.5 | 100% | 0.083 | 100% | <a href="#">gij724902357 XP_010377335.1</a> |
| <a href="#">PREDICTED: attractin isoform 1 [Dasyurus novemcinctus]</a>       | 37.5 | 37.5 | 100% | 0.083 | 100% | <a href="#">gij488545591 XP_004464326.1</a> |
| <a href="#">PREDICTED: attractin [Camelus ferus]</a>                         | 37.5 | 37.5 | 100% | 0.083 | 100% | <a href="#">gij560921992 XP_006187198.1</a> |
| <a href="#">PREDICTED: attractin [Myotis lucifugus]</a>                      | 37.5 | 37.5 | 100% | 0.083 | 100% | <a href="#">gij558159591 XP_006096513.1</a> |
| <a href="#">PREDICTED: attractin [Bos mutus]</a>                             | 37.5 | 37.5 | 100% | 0.083 | 100% | <a href="#">gij555963925 XP_005894036.1</a> |
| <a href="#">attractin, isoform CRA_b [Homo sapiens]</a>                      | 37.5 | 55.6 | 100% | 0.083 | 100% | <a href="#">gij119630936 EAX10531.1</a>     |
| <a href="#">PREDICTED: attractin [Heterocephalus glaber]</a>                 | 37.5 | 37.5 | 100% | 0.083 | 100% | <a href="#">gij512849696 XP_004886859.1</a> |
| <a href="#">PREDICTED: attractin [Ovis aries]</a>                            | 37.5 | 37.5 | 100% | 0.083 | 100% | <a href="#">gij426241795 XP_004014773.1</a> |
| <a href="#">PREDICTED: attractin [Felis catus]</a>                           | 37.5 | 37.5 | 100% | 0.083 | 100% | <a href="#">gij586981105 XP_003983758.2</a> |
| <a href="#">PREDICTED: attractin isoform X2 [Pan troglodytes]</a>            | 37.5 | 55.6 | 100% | 0.083 | 100% | <a href="#">gij694977850 XP_009435010.1</a> |
| <a href="#">PREDICTED: attractin [Otlemur garnettii]</a>                     | 37.5 | 37.5 | 100% | 0.083 | 100% | <a href="#">gij395830288 XP_003788264.1</a> |
| <a href="#">PREDICTED: attractin [Vicugna pacos]</a>                         | 37.5 | 37.5 | 100% | 0.083 | 100% | <a href="#">gij560970220 XP_006207473.1</a> |
| <a href="#">attractin [Bos taurus]</a>                                       | 37.5 | 37.5 | 100% | 0.083 | 100% | <a href="#">gij253560524 ACT32973.1</a>     |
| <a href="#">PREDICTED: attractin [Eptesicus fuscus]</a>                      | 37.5 | 37.5 | 100% | 0.083 | 100% | <a href="#">gij641701319 XP_008139256.1</a> |
| <a href="#">attractin [Bos taurus]</a>                                       | 37.5 | 37.5 | 100% | 0.083 | 100% | <a href="#">gij27806737 INP_776420.1</a>    |
| <a href="#">PREDICTED: attractin isoform X2 [Bubalus bubalis]</a>            | 37.5 | 37.5 | 100% | 0.083 | 100% | <a href="#">gij594099678 XP_006072964.1</a> |
| <a href="#">PREDICTED: attractin [Orcinus orca]</a>                          | 37.5 | 37.5 | 100% | 0.083 | 100% | <a href="#">gij466084723 XP_004285351.1</a> |
| <a href="#">PREDICTED: attractin [Odobenus rosmarus divergens]</a>           | 37.5 | 37.5 | 100% | 0.083 | 100% | <a href="#">gij472357214 XP_004398236.1</a> |
| <a href="#">PREDICTED: attractin [Chrysochloris asiatica]</a>                | 37.5 | 37.5 | 100% | 0.083 | 100% | <a href="#">gij586488825 XP_006874887.1</a> |
| <a href="#">PREDICTED: attractin isoform X1 [Heterocephalus glaber]</a>      | 37.5 | 37.5 | 100% | 0.083 | 100% | <a href="#">gij512956908 XP_004840782.1</a> |
| <a href="#">PREDICTED: attractin-like [Octodon degus]</a>                    | 37.5 | 37.5 | 100% | 0.083 | 100% | <a href="#">gij507657234 XP_004634315.1</a> |
| <a href="#">PREDICTED: attractin isoform X1 [Ictidomys tridecemlineatus]</a> | 37.5 | 37.5 | 100% | 0.083 | 100% | <a href="#">gij532069484 XP_005320577.1</a> |
| <a href="#">PREDICTED: attractin isoform X3 [Ictidomys tridecemlineatus]</a> | 37.5 | 37.5 | 100% | 0.083 | 100% | <a href="#">gij532069488 XP_005320579.1</a> |
| <a href="#">PREDICTED: attractin [Callithrix jacchus]</a>                    | 37.5 | 37.5 | 100% | 0.083 | 100% | <a href="#">gij296200062 XP_002747358.1</a> |
| <a href="#">PREDICTED: attractin isoform X1 [Pan troglodytes]</a>            | 37.5 | 55.6 | 100% | 0.083 | 100% | <a href="#">gij332857715 XP_003316827.1</a> |
| <a href="#">membrane attractin precursor [Homo sapiens]</a>                  | 37.5 | 55.6 | 100% | 0.083 | 100% | <a href="#">gij8118082 AAF72881.1</a>       |
| <a href="#">attractin isoform 1 preproprotein [Homo sapiens]</a>             | 37.5 | 55.6 | 100% | 0.083 | 100% | <a href="#">gij21450861 INP_647537.1</a>    |
| <a href="#">PREDICTED: attractin isoform X2 [Ictidomys tridecemlineatus]</a> | 37.5 | 37.5 | 100% | 0.083 | 100% | <a href="#">gij532069486 XP_005320578.1</a> |
| <a href="#">PREDICTED: attractin [Jaculus jaculus]</a>                       | 37.5 | 37.5 | 100% | 0.083 | 100% | <a href="#">gij507555530 XP_004661535.1</a> |
| <a href="#">PREDICTED: attractin isoform X2 [Macaca fascicularis]</a>        | 37.5 | 37.5 | 100% | 0.083 | 100% | <a href="#">gij544464512 XP_005568510.1</a> |
| <a href="#">PREDICTED: attractin [Macaca mulatta]</a>                        | 37.5 | 37.5 | 100% | 0.083 | 100% | <a href="#">gij109092720 XP_001115192.1</a> |
| <a href="#">PREDICTED: attractin isoform X2 [Bos taurus]</a>                 | 37.5 | 37.5 | 100% | 0.083 | 100% | <a href="#">gij528973313 XP_005214542.1</a> |
| <a href="#">PREDICTED: attractin isoform X1 [Macaca fascicularis]</a>        | 37.5 | 37.5 | 100% | 0.083 | 100% | <a href="#">gij544464510 XP_005568509.1</a> |

|                                                                             |      |      |      |       |      |                                             |
|-----------------------------------------------------------------------------|------|------|------|-------|------|---------------------------------------------|
| <a href="#">PREDICTED: attractin [Tupaia chinensis]</a>                     | 37.5 | 37.5 | 100% | 0.083 | 100% | <a href="#">gil562872246 XP_006164056.1</a> |
| <a href="#">PREDICTED: attractin isoform X1 [Bubalus bubalis]</a>           | 37.5 | 37.5 | 100% | 0.083 | 100% | <a href="#">gil594099676 XP_006072963.1</a> |
| <a href="#">PREDICTED: attractin isoform X1 [Bos taurus]</a>                | 37.5 | 37.5 | 100% | 0.084 | 100% | <a href="#">gil528973311 XP_005214541.1</a> |
| <a href="#">PREDICTED: attractin isoform X5 [Chlorocebus sabaeus]</a>       | 35.4 | 35.4 | 100% | 0.42  | 91%  | <a href="#">gil635021368 XP_008017720.1</a> |
| <a href="#">PREDICTED: attractin isoform X4 [Chlorocebus sabaeus]</a>       | 35.4 | 35.4 | 100% | 0.42  | 91%  | <a href="#">gil635021366 XP_008017712.1</a> |
| <a href="#">PREDICTED: attractin isoform X3 [Chlorocebus sabaeus]</a>       | 35.4 | 35.4 | 100% | 0.42  | 91%  | <a href="#">gil635021364 XP_008017707.1</a> |
| <a href="#">PREDICTED: attractin isoform X2 [Chlorocebus sabaeus]</a>       | 35.4 | 35.4 | 100% | 0.42  | 91%  | <a href="#">gil635021362 XP_008017704.1</a> |
| <a href="#">PREDICTED: attractin isoform X1 [Pteropus alecto]</a>           | 35.4 | 35.4 | 100% | 0.42  | 91%  | <a href="#">gil586533632 XP_006921705.1</a> |
| <a href="#">PREDICTED: attractin isoform X3 [Chinchilla lanigera]</a>       | 35.4 | 35.4 | 100% | 0.42  | 91%  | <a href="#">gil533131617 XP_005380852.1</a> |
| <a href="#">PREDICTED: attractin isoform X1 [Chlorocebus sabaeus]</a>       | 35.4 | 35.4 | 100% | 0.42  | 91%  | <a href="#">gil635021360 XP_008017700.1</a> |
| <a href="#">PREDICTED: attractin isoform X2 [Chinchilla lanigera]</a>       | 35.4 | 35.4 | 100% | 0.42  | 91%  | <a href="#">gil533131615 XP_005380851.1</a> |
| <a href="#">PREDICTED: attractin isoform X6 [Chlorocebus sabaeus]</a>       | 35.4 | 35.4 | 100% | 0.42  | 91%  | <a href="#">gil635021370 XP_008017729.1</a> |
| <a href="#">PREDICTED: attractin isoform X1 [Chinchilla lanigera]</a>       | 35.4 | 35.4 | 100% | 0.42  | 91%  | <a href="#">gil533131613 XP_005380850.1</a> |
| <a href="#">PREDICTED: attractin isoform X2 [Pteropus alecto]</a>           | 35.4 | 35.4 | 100% | 0.42  | 91%  | <a href="#">gil586533634 XP_006921706.1</a> |
| <a href="#">PREDICTED: attractin-like [Leptonychotes weddellii]</a>         | 35.0 | 35.0 | 100% | 0.57  | 91%  | <a href="#">gil585160208 XP_006732353.1</a> |
| <a href="#">PREDICTED: attractin isoform X2 [Mustela putorius furo]</a>     | 35.0 | 35.0 | 100% | 0.58  | 91%  | <a href="#">gil511906947 XP_004772933.1</a> |
| <a href="#">PREDICTED: attractin [Ursus maritimus]</a>                      | 35.0 | 35.0 | 100% | 0.58  | 91%  | <a href="#">gil671021680 XP_008701660.1</a> |
| <a href="#">hypothetical protein PANDA_007354 [Ailuropoda melanoleuca]</a>  | 35.0 | 35.0 | 100% | 0.58  | 91%  | <a href="#">gil281339872 EFB15456.1</a>     |
| <a href="#">PREDICTED: attractin-like [Ailuropoda melanoleuca]</a>          | 35.0 | 35.0 | 100% | 0.58  | 91%  | <a href="#">gil301766802 XP_002918837.1</a> |
| <a href="#">PREDICTED: attractin [Mustela putorius furo]</a>                | 35.0 | 35.0 | 100% | 0.58  | 91%  | <a href="#">gil511947743 XP_004792355.1</a> |
| <a href="#">PREDICTED: attractin [Fukomys damarensis]</a>                   | 35.0 | 35.0 | 100% | 0.58  | 91%  | <a href="#">gil731281216 XP_010609356.1</a> |
| <a href="#">PREDICTED: attractin [Peromyscus maniculatus bairdii]</a>       | 35.0 | 35.0 | 100% | 0.58  | 91%  | <a href="#">gil589943852 XP_006984624.1</a> |
| <a href="#">PREDICTED: attractin isoform X1 [Mustela putorius furo]</a>     | 35.0 | 35.0 | 100% | 0.58  | 91%  | <a href="#">gil511906945 XP_004772932.1</a> |
| <a href="#">PREDICTED: attractin [Elephantulus edwardii]</a>                | 35.0 | 35.0 | 100% | 0.58  | 91%  | <a href="#">gil585689645 XP_006894264.1</a> |
| <a href="#">attractin [Mesocricetus auratus]</a>                            | 35.0 | 35.0 | 100% | 0.58  | 91%  | <a href="#">gil528078159 NP_001268565.1</a> |
| <a href="#">PREDICTED: LOW QUALITY PROTEIN: attractin [Cavia porcellus]</a> | 35.0 | 35.0 | 100% | 0.58  | 91%  | <a href="#">gil514473642 XP_005008408.1</a> |
| <a href="#">PREDICTED: attractin [Lipotes vexillifer]</a>                   | 34.1 | 34.1 | 100% | 1.1   | 91%  | <a href="#">gil602710450 XP_007465469.1</a> |

## Alignments

Download GenPept Graphics

Next Previous Descriptions

Attractin [Fukomys damarensis]

Sequence ID: [gil676269096|gb|KFO24512.1](#) Length: 740 Number of Matches: 1

**Related Information**

Range 1: 208 to 218 GenPept Graphics

Next Match Previous Match

| Score         | Expect | Identities  | Positives   | Gaps     |
|---------------|--------|-------------|-------------|----------|
| 37.5 bits(81) | 0.082  | 11/11(100%) | 11/11(100%) | 0/11(0%) |

Query 1 RGICNSSDVRG 11  
 RGICNSSDVRG  
 Sbjct 208 RGICNSSDVRG 218

Download GenPept Graphics

Next Previous Descriptions

PREDICTED: attractin-like [Tursiops truncatus]

Sequence ID: [gil470629747|ref|XP\\_004321558.1](#) Length: 1003 Number of Matches: 1

**Related Information**

Range 1: 127 to 137 GenPept Graphics

Next Match Previous Match

| Score         | Expect | Identities  | Positives   | Gaps     |
|---------------|--------|-------------|-------------|----------|
| 37.5 bits(81) | 0.083  | 11/11(100%) | 11/11(100%) | 0/11(0%) |

Query 1 RGICNSSDVRG 11

[Gene](#) - associated gene details  
[Map Viewer](#) - aligned genomic context

Sbjct 127 RGICNSSDVVRG 137

[Download](#) [GenPept](#) [Graphics](#)

[Next](#) [Previous](#) [Descriptions](#)

**PREDICTED: attractin-like, partial [Physeter catodon]**

Sequence ID: [gi|593773084|ref|XP\\_007124834.1](#) Length: 1035 Number of Matches: 1

Range 1: 159 to 169 [GenPept](#) [Graphics](#)

[Next Match](#) [Previous Match](#)

| Score         | Expect | Identities  | Positives   | Gaps     |
|---------------|--------|-------------|-------------|----------|
| 37.5 bits(81) | 0.083  | 11/11(100%) | 11/11(100%) | 0/11(0%) |

Query 1 RGICNSSDVVRG 11  
 RGICNSSDVVRG  
 Sbjct 159 RGICNSSDVVRG 169

**Related Information**

[Gene](#) - associated gene details  
[Map Viewer](#) - aligned genomic context

[Download](#) [GenPept](#) [Graphics](#)

Sort by: E value

[Next](#) [Previous](#) [Descriptions](#)

**PREDICTED: attractin isoform X2 [Homo sapiens]**

Sequence ID: [gi|530426021|ref|XP\\_005260918.1](#) Length: 1111 Number of Matches: 2

Range 1: 296 to 306 [GenPept](#) [Graphics](#)

[Next Match](#) [Previous Match](#)

| Score         | Expect | Identities  | Positives   | Gaps     |
|---------------|--------|-------------|-------------|----------|
| 37.5 bits(81) | 0.083  | 11/11(100%) | 11/11(100%) | 0/11(0%) |

Query 1 RGICNSSDVVRG 11  
 RGICNSSDVVRG  
 Sbjct 296 RGICNSSDVVRG 306

**Related Information**

[Gene](#) - associated gene details  
[Map Viewer](#) - aligned genomic context

Range 2: 257 to 267 [GenPept](#) [Graphics](#)

[Next Match](#) [Previous Match](#) [First Match](#)

| Score         | Expect | Identities | Positives | Gaps      |
|---------------|--------|------------|-----------|-----------|
| 18.0 bits(35) | 181692 | 7/11(64%)  | 7/11(63%) | 3/11(27%) |

Query 1 RGIC--NSSD 8  
 RG C NSSD  
 Sbjct 257 RGECKISNSSD 267

[Download](#) [GenPept](#) [Graphics](#)

[Next](#) [Previous](#) [Descriptions](#)

**PREDICTED: attractin isoform X2 [Saimiri boliviensis boliviensis]**

Sequence ID: [gi|725600053|ref|XP\\_010350112.1](#) Length: 1128 Number of Matches: 1

Range 1: 127 to 137 [GenPept](#) [Graphics](#)

[Next Match](#) [Previous Match](#)

| Score         | Expect | Identities  | Positives   | Gaps     |
|---------------|--------|-------------|-------------|----------|
| 37.5 bits(81) | 0.083  | 11/11(100%) | 11/11(100%) | 0/11(0%) |

Query 1 RGICNSSDVVRG 11  
 RGICNSSDVVRG  
 Sbjct 127 RGICNSSDVVRG 137

**Related Information**

[Gene](#) - associated gene details  
[Map Viewer](#) - aligned genomic context

BLAST is a registered trademark of the National Library of Medicine.

NCBI/ BLAST/ blastp suite/ Formatting Results - BHJ2V2AH014

Your search parameters were adjusted to search for a short input sequence.

[Edit and Resubmit](#) [Save Search Strategies](#) [Formatting options](#) [Download](#)

[YouTube](#) [How to read this page](#) [Blast report description](#)

### BCHE\_KYGDPNETQNDSTSWPVFKS\_Mod

RID [BHJ2V2AH014](#) (Expires on 01-17 15:14 pm)

**Query ID** |cl|2924  
**Description** None  
**Molecule type** amino acid  
**Query Length** 20

**Database Name** nr  
**Description** All non-redundant GenBank CDS translations+PDB+SwissProt+PIR excluding environmental samples from WGS projects  
**Program** BLASTP 2.2.30+ [Citation](#)

Other reports: [Search Summary](#) [Taxonomy reports](#) [Distance tree of results](#) [Multiple alignment](#)

### Graphic Summary

Show Conserved Domains

No putative conserved domains have been detected

Distribution of 100 Blast Hits on the Query Sequence

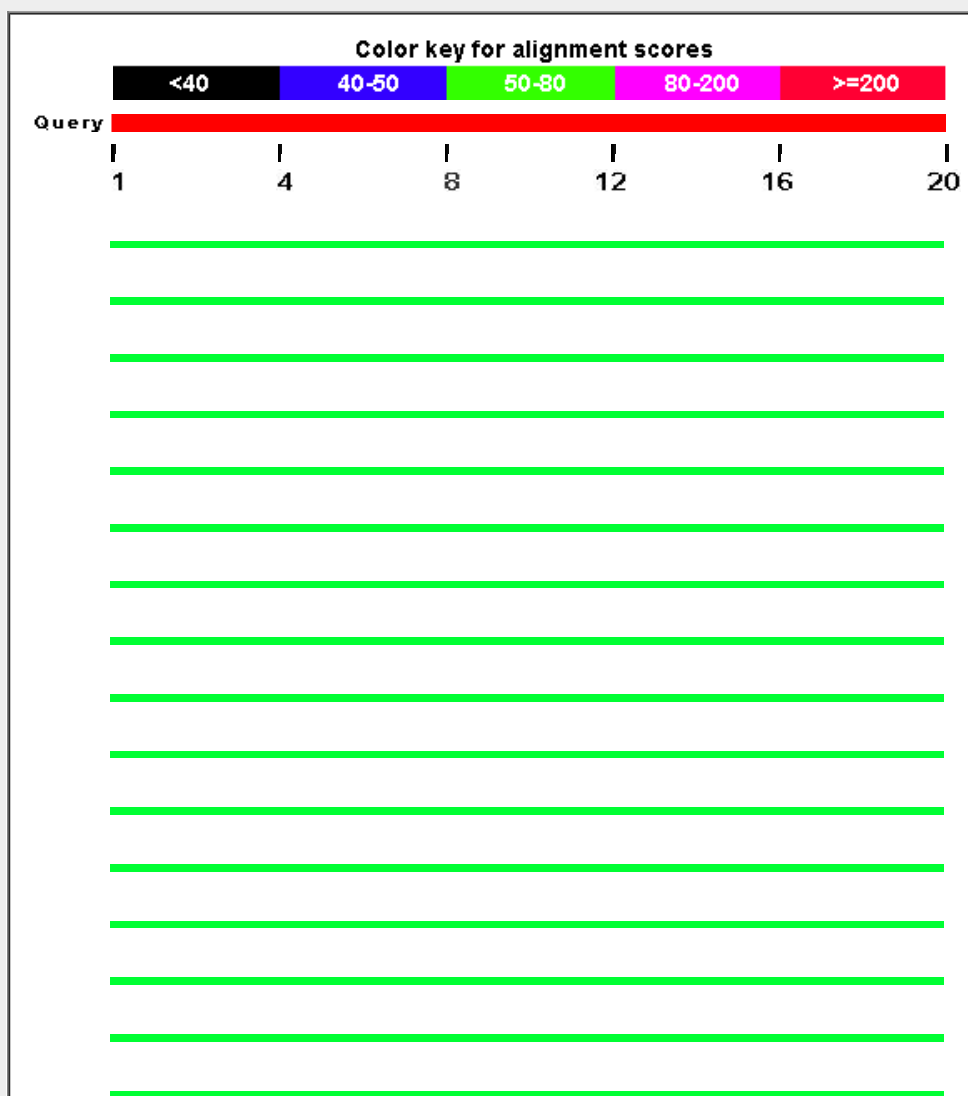

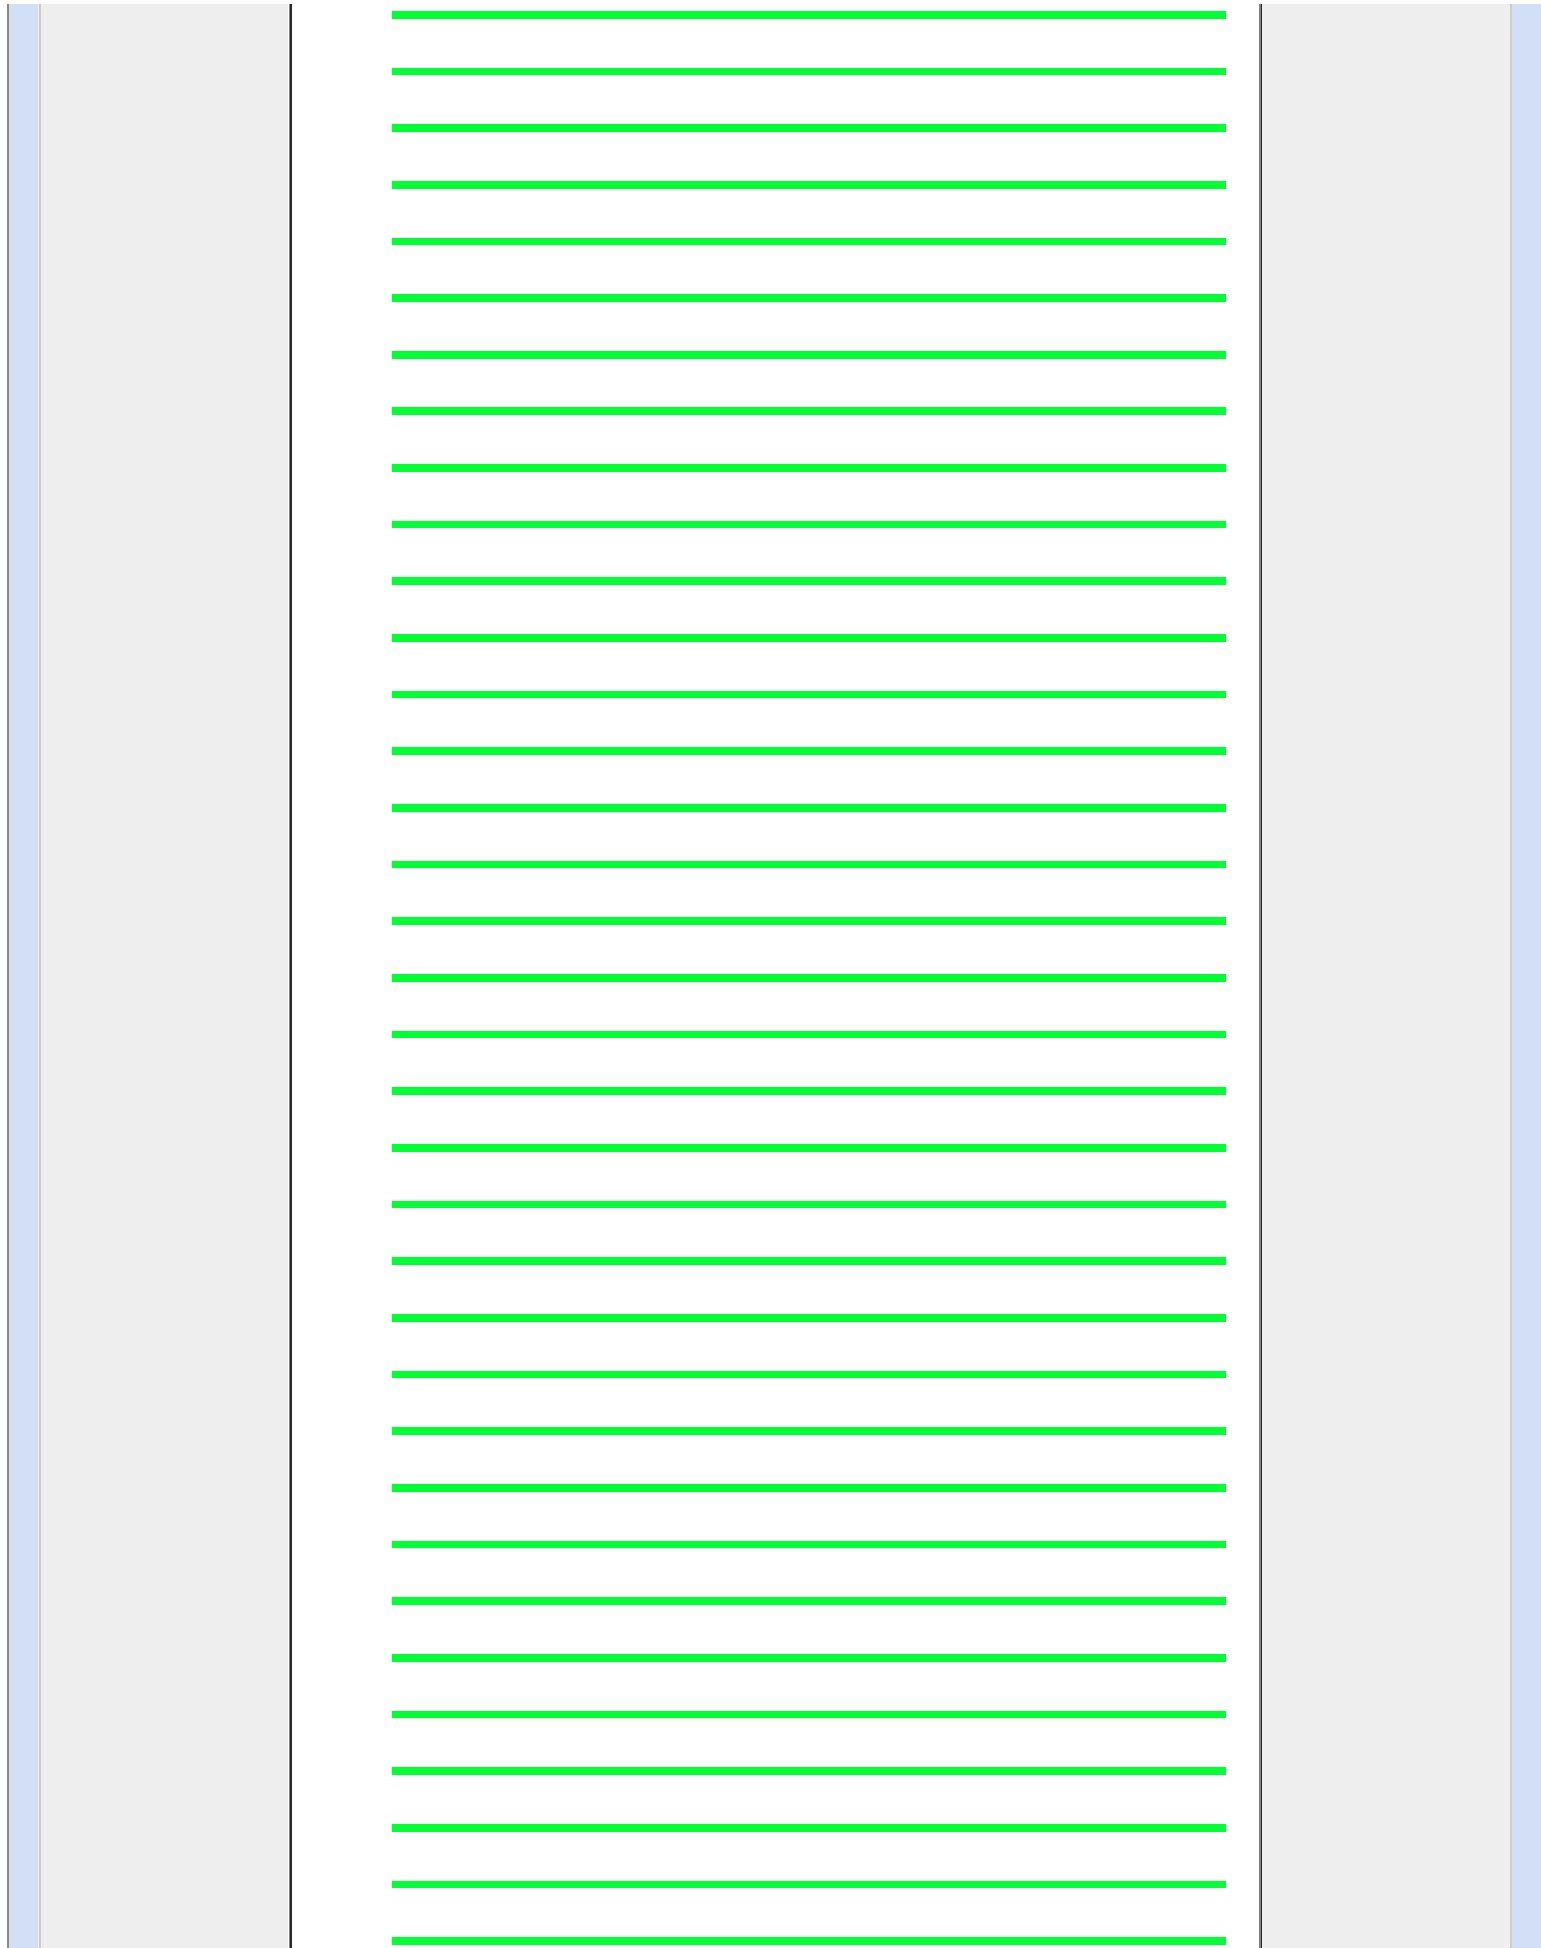

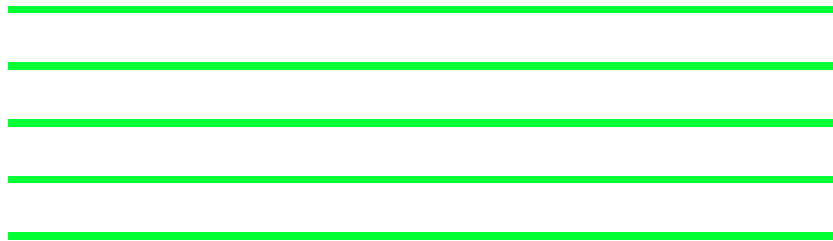

**Descriptions**

**Sequences producing significant alignments:**

Select: [All](#) [None](#) Selected:0

Alignments Download GenPept Graphics Distance tree of results Multiple alignment

| Description                                                                                                                                    | Max score | Total score | Query cover | E value | Ident | Accession                                   |
|------------------------------------------------------------------------------------------------------------------------------------------------|-----------|-------------|-------------|---------|-------|---------------------------------------------|
| <a href="#">Chain A, Crystal Structure Of Fully Glycosylated Human Butyrylcholinesterase [synthetic construct]</a>                             | 63.8      | 63.8        | 100%        | 4e-10   | 90%   | <a href="#">gij393715367 4AQD_A</a>         |
| <a href="#">Chain A, Co-Crystallization Studies Of Full Length Recombinant Butyrylcholinesterase p.Val204Asp splice variant [Homo sapiens]</a> | 63.8      | 63.8        | 100%        | 4e-10   | 90%   | <a href="#">gij388261124 AFK25766.1</a>     |
| <a href="#">Chain A, Co-Crystallization Studies Of Full Length Recombinant Butyrylcholinesterase precursor [Homo sapiens]</a>                  | 63.8      | 63.8        | 100%        | 4e-10   | 90%   | <a href="#">gij328877250 3O9M_A</a>         |
| <a href="#">Chain A, Co-Crystallization Studies Of Full Length Recombinant Butyrylcholinesterase precursor [Homo sapiens]</a>                  | 63.8      | 63.8        | 100%        | 4e-10   | 90%   | <a href="#">gij632795270 AHZ34327.1</a>     |
| <a href="#">Chain A, Co-Crystallization Studies Of Full Length Recombinant Butyrylcholinesterase [synthetic construct]</a>                     | 63.8      | 63.8        | 100%        | 4e-10   | 90%   | <a href="#">gij4557351 NP_000046.1</a>      |
| <a href="#">Chain A, Co-Crystallization Studies Of Full Length Recombinant Butyrylcholinesterase [synthetic construct]</a>                     | 63.8      | 63.8        | 100%        | 4e-10   | 90%   | <a href="#">gij158257558 BAF84752.1</a>     |
| <a href="#">Chain A, Co-Crystallization Studies Of Full Length Recombinant Butyrylcholinesterase [synthetic construct]</a>                     | 63.8      | 63.8        | 100%        | 4e-10   | 90%   | <a href="#">gij260766471 ACX50257.1</a>     |
| <a href="#">Chain A, Co-Crystallization Studies Of Full Length Recombinant Butyrylcholinesterase isoform X1 [Homo sapiens]</a>                 | 63.8      | 63.8        | 100%        | 4e-10   | 90%   | <a href="#">gij530375091 XP_005247742.1</a> |
| <a href="#">Chain A, Co-Crystallization Studies Of Full Length Recombinant Butyrylcholinesterase precursor [Pan troglodytes]</a>               | 60.0      | 60.0        | 100%        | 7e-09   | 85%   | <a href="#">gij343960913 BAK62046.1</a>     |
| <a href="#">Chain A, Co-Crystallization Studies Of Full Length Recombinant Butyrylcholinesterase [Gorilla gorilla gorilla]</a>                 | 60.0      | 60.0        | 100%        | 7e-09   | 85%   | <a href="#">gij426342776 XP_004038010.1</a> |
| <a href="#">Chain A, Co-Crystallization Studies Of Full Length Recombinant Butyrylcholinesterase [Pan paniscus]</a>                            | 60.0      | 60.0        | 100%        | 7e-09   | 85%   | <a href="#">gij397493718 XP_003817746.1</a> |
| <a href="#">Chain A, Co-Crystallization Studies Of Full Length Recombinant Butyrylcholinesterase [Pan troglodytes]</a>                         | 60.0      | 60.0        | 100%        | 7e-09   | 85%   | <a href="#">gij114590210 XP_516857.2</a>    |
| <a href="#">Chain A, Crystal Structure Of Soman-aged Human Butyrylcholinesterase [synthetic construct]</a>                                     | 59.2      | 59.2        | 100%        | 1e-08   | 85%   | <a href="#">gij402550232 4AXB_A</a>         |
| <a href="#">Chain A, Crystal Structure Of Soman-aged Human Butyrylcholinesterase [synthetic construct]</a>                                     | 59.2      | 59.2        | 100%        | 1e-08   | 85%   | <a href="#">gij402550237 4B0O_A</a>         |
| <a href="#">Chain A, Structure Of Human Butyrylcholinesterase Inhibited By Carbamate [synthetic construct]</a>                                 | 59.2      | 59.2        | 100%        | 1e-08   | 85%   | <a href="#">gij340707403 2Y1K_A</a>         |
| <a href="#">Chain A, Aged Form Of Human Butyrylcholinesterase Inhibited By Carbamate [synthetic construct]</a>                                 | 59.2      | 59.2        | 100%        | 1e-08   | 85%   | <a href="#">gij237823652 2WIL_A</a>         |
| <a href="#">Chain A, Aged Form Of Human Butyrylcholinesterase Inhibited By Carbamate [synthetic construct]</a>                                 | 59.2      | 59.2        | 100%        | 1e-08   | 85%   | <a href="#">gij237823648 2WIF_A</a>         |
| <a href="#">Chain A, Nonaged Form Of Human Butyrylcholinesterase Inhibited By Carbamate [synthetic construct]</a>                              | 59.2      | 59.2        | 100%        | 1e-08   | 85%   | <a href="#">gij237823647 2WID_A</a>         |
| <a href="#">Chain A, X-Ray Structure Of Human Butyrylcholinesterase Inhibited By Carbamate [synthetic construct]</a>                           | 57.5      | 57.5        | 100%        | 5e-08   | 85%   | <a href="#">gij326634060 2XQF_A</a>         |
| <a href="#">Chain A, Aged Form Of Human Butyrylcholinesterase Inhibited By Carbamate [synthetic construct]</a>                                 | 57.5      | 57.5        | 100%        | 5e-08   | 85%   | <a href="#">gij258588213 2W5L_A</a>         |
| <a href="#">Chain A, Nonaged Form Of Human Butyrylcholinesterase Inhibited By Carbamate [synthetic construct]</a>                              | 57.5      | 57.5        | 100%        | 5e-08   | 85%   | <a href="#">gij215794636 3DJY_A</a>         |
| <a href="#">Chain A, Crystal Structure Of Human Butyryl Cholinesterase [Homo sapiens]</a>                                                      | 57.5      | 57.5        | 100%        | 5e-08   | 85%   | <a href="#">gij348108591 1P0I_A</a>         |
| <a href="#">Chain A, G117h Mutant Of Human Butyrylcholinesterase In Complex With Carbamate [synthetic construct]</a>                           | 57.5      | 57.5        | 100%        | 5e-08   | 85%   | <a href="#">gij313103512 2XMB_A</a>         |
| <a href="#">Chain A, Crystal Structure Of Recombinant Full Length Human Butyrylcholinesterase [synthetic construct]</a>                        | 57.5      | 57.5        | 100%        | 5e-08   | 85%   | <a href="#">gij158429456 2PM8_A</a>         |
| <a href="#">Chain A, Structure Of Human Butyrylcholinesterase In Complex With Carbamate [synthetic construct]</a>                              | 57.1      | 57.1        | 100%        | 7e-08   | 85%   | <a href="#">gij145579736 2J4C_A</a>         |
| <a href="#">Chain A, Structure Of Human Butyrylcholinesterase [Eptesicus fuscus]</a>                                                           | 56.2      | 56.2        | 100%        | 1e-07   | 85%   | <a href="#">gij641703485 XP_008140478.1</a> |
| <a href="#">Chain A, Structure Of Human Butyrylcholinesterase [Myotis lucifugus]</a>                                                           | 56.2      | 56.2        | 100%        | 1e-07   | 85%   | <a href="#">gij558125651 XP_006088951.1</a> |
| <a href="#">Chain A, Structure Of Human Butyrylcholinesterase [RecName: Full=Cholinesterase; AltName: Full=Acylcholine acylhydrolase]</a>      | 54.9      | 54.9        | 100%        | 4e-07   | 80%   | <a href="#">gij21362409 P81908.1</a>        |

|                                                                                     |      |      |      |       |     |                                             |
|-------------------------------------------------------------------------------------|------|------|------|-------|-----|---------------------------------------------|
| RecName: Full=Cholinesterase; AltName: Full=Acylcholine acylhydri                   | 54.9 | 54.9 | 100% | 4e-07 | 80% | <a href="#">gij116354 P21927.1</a>          |
| <a href="#">PREDICTED: cholinesterase [Oryctolagus cuniculus]</a>                   | 54.9 | 54.9 | 100% | 4e-07 | 80% | <a href="#">gij291400118 XP_002716414.1</a> |
| <a href="#">PREDICTED: cholinesterase [Orcinus orca]</a>                            | 54.9 | 54.9 | 100% | 4e-07 | 80% | <a href="#">gij466076197 XP_004283487.1</a> |
| <a href="#">cholinesterase precursor [Pongo abelii]</a>                             | 54.9 | 54.9 | 100% | 4e-07 | 80% | <a href="#">gij197097436 NP_001127509.1</a> |
| <a href="#">PREDICTED: cholinesterase isoform X1 [Sus scrofa]</a>                   | 54.9 | 54.9 | 100% | 4e-07 | 80% | <a href="#">gij335299867 XP_003358712.1</a> |
| <a href="#">cholinesterase precursor [Bos taurus]</a>                               | 54.9 | 54.9 | 100% | 4e-07 | 80% | <a href="#">gij116004027 NP_001070374.1</a> |
| <a href="#">PREDICTED: cholinesterase [Bison bison bison]</a>                       | 54.9 | 54.9 | 100% | 4e-07 | 80% | <a href="#">gij742123891 XP_010839228.1</a> |
| <a href="#">PREDICTED: cholinesterase [Balaenoptera acutorostrata scammon]</a>      | 54.9 | 54.9 | 100% | 4e-07 | 80% | <a href="#">gij594625950 XP_007197616.1</a> |
| <a href="#">PREDICTED: cholinesterase isoform X1 [Pongo abelii]</a>                 | 54.9 | 54.9 | 100% | 4e-07 | 80% | <a href="#">gij686714306 XP_009237773.1</a> |
| <a href="#">PREDICTED: cholinesterase [Lipotes vexillifer]</a>                      | 54.9 | 54.9 | 100% | 4e-07 | 80% | <a href="#">gij602681974 XP_007446483.1</a> |
| <a href="#">PREDICTED: cholinesterase [Pantholops hodgsonii]</a>                    | 54.9 | 54.9 | 100% | 4e-07 | 80% | <a href="#">gij556779632 XP_005984864.1</a> |
| <a href="#">PREDICTED: cholinesterase [Bos mutus]</a>                               | 54.9 | 54.9 | 100% | 4e-07 | 80% | <a href="#">gij555966690 XP_005895396.1</a> |
| <a href="#">PREDICTED: cholinesterase [Capra hircus]</a>                            | 54.9 | 54.9 | 100% | 4e-07 | 80% | <a href="#">gij548451269 XP_005675420.1</a> |
| <a href="#">PREDICTED: cholinesterase [Ovis aries]</a>                              | 54.9 | 54.9 | 100% | 4e-07 | 80% | <a href="#">gij426218006 XP_004003241.1</a> |
| <a href="#">PREDICTED: cholinesterase-like isoform X1 [Myotis brandtii]</a>         | 53.7 | 53.7 | 100% | 1e-06 | 85% | <a href="#">gij554526033 XP_005857864.1</a> |
| <a href="#">Cholinesterase [Myotis brandtii]</a>                                    | 53.7 | 53.7 | 100% | 1e-06 | 85% | <a href="#">gij521020653 EPQ02441.1</a>     |
| <a href="#">PREDICTED: cholinesterase isoform X2 [Saimiri boliviensis bolivier]</a> | 52.8 | 52.8 | 100% | 2e-06 | 75% | <a href="#">gij725560928 XP_010334003.1</a> |
| <a href="#">PREDICTED: cholinesterase isoform X1 [Saimiri boliviensis bolivier]</a> | 52.8 | 52.8 | 100% | 2e-06 | 75% | <a href="#">gij403265619 XP_003925023.1</a> |
| <a href="#">PREDICTED: LOW QUALITY PROTEIN: cholinesterase [Callithrix j.</a>       | 52.8 | 52.8 | 100% | 2e-06 | 75% | <a href="#">gij675737963 XP_002807699.3</a> |
| <a href="#">PREDICTED: cholinesterase [Ictidomys tridecemlineatus]</a>              | 52.4 | 52.4 | 100% | 3e-06 | 80% | <a href="#">gij532105511 XP_005338342.1</a> |
| <a href="#">PREDICTED: cholinesterase [Nomascus leucogenys]</a>                     | 52.4 | 52.4 | 100% | 3e-06 | 75% | <a href="#">gij332214651 XP_003256448.1</a> |
| <a href="#">hypothetical protein EGK_11933 [Macaca mulatta]</a>                     | 51.5 | 51.5 | 100% | 5e-06 | 75% | <a href="#">gij355559896 EHH16624.1</a>     |
| <a href="#">butyrylcholinesterase precursor [Macaca fascicularis]</a>               | 51.5 | 51.5 | 100% | 5e-06 | 75% | <a href="#">gij290795732 ADD64703.1</a>     |
| <a href="#">cholinesterase precursor [Equus caballus]</a>                           | 51.5 | 51.5 | 100% | 5e-06 | 75% | <a href="#">gij126352540 NP_001075319.1</a> |
| <a href="#">PREDICTED: cholinesterase-like [Elephantulus edwardii]</a>              | 51.5 | 51.5 | 100% | 5e-06 | 75% | <a href="#">gij585675683 XP_006890440.1</a> |
| <a href="#">PREDICTED: cholinesterase [Macaca fascicularis]</a>                     | 51.5 | 51.5 | 100% | 5e-06 | 75% | <a href="#">gij544412493 XP_005546353.1</a> |
| <a href="#">PREDICTED: cholinesterase isoform X1 [Papio anubis]</a>                 | 51.5 | 51.5 | 100% | 5e-06 | 75% | <a href="#">gij402861047 XP_003894921.1</a> |
| <a href="#">PREDICTED: LOW QUALITY PROTEIN: cholinesterase-like [Maca</a>           | 51.5 | 51.5 | 100% | 5e-06 | 75% | <a href="#">gij297286482 XP_002808379.1</a> |
| <a href="#">PREDICTED: cholinesterase isoform X2 [Equus przewalskii]</a>            | 51.5 | 51.5 | 100% | 5e-06 | 75% | <a href="#">gij664725795 XP_008520036.1</a> |
| <a href="#">PREDICTED: cholinesterase isoform X1 [Equus przewalskii]</a>            | 51.5 | 51.5 | 100% | 5e-06 | 75% | <a href="#">gij664725793 XP_008520035.1</a> |
| <a href="#">PREDICTED: cholinesterase isoform X1 [Chlorocebus sabaeus]</a>          | 51.5 | 51.5 | 100% | 5e-06 | 75% | <a href="#">gij635084154 XP_007970394.1</a> |
| <a href="#">PREDICTED: cholinesterase [Ceratotherium simum simum]</a>               | 51.5 | 51.5 | 100% | 5e-06 | 75% | <a href="#">gij478501043 XP_004424836.1</a> |
| <a href="#">PREDICTED: cholinesterase isoform X2 [Camelus dromedarius]</a>          | 51.1 | 51.1 | 100% | 7e-06 | 75% | <a href="#">gij744553709 XP_010974642.1</a> |
| <a href="#">PREDICTED: cholinesterase isoform X1 [Camelus dromedarius]</a>          | 51.1 | 51.1 | 100% | 7e-06 | 75% | <a href="#">gij744553706 XP_010974641.1</a> |
| <a href="#">PREDICTED: cholinesterase isoform X2 [Camelus bactrianus]</a>           | 51.1 | 51.1 | 100% | 7e-06 | 75% | <a href="#">gij743713601 XP_010950371.1</a> |
| <a href="#">PREDICTED: cholinesterase [Vicugna pacos]</a>                           | 51.1 | 51.1 | 100% | 7e-06 | 75% | <a href="#">gij560956860 XP_006200907.1</a> |
| <a href="#">PREDICTED: cholinesterase [Camelus ferus]</a>                           | 51.1 | 51.1 | 100% | 7e-06 | 75% | <a href="#">gij560915255 XP_006183885.1</a> |
| <a href="#">PREDICTED: cholinesterase [Myotis davidii]</a>                          | 50.7 | 50.7 | 90%  | 1e-05 | 83% | <a href="#">gij584083219 XP_006761409.1</a> |
| <a href="#">PREDICTED: cholinesterase [Orycteropus afer afer]</a>                   | 49.8 | 49.8 | 100% | 2e-05 | 75% | <a href="#">gij634870148 XP_007946910.1</a> |
| <a href="#">PREDICTED: cholinesterase [Otolemur garnettii]</a>                      | 49.0 | 49.0 | 100% | 4e-05 | 75% | <a href="#">gij395843862 XP_003794691.1</a> |
| <a href="#">PREDICTED: cholinesterase isoform X1 [Peromyscus maniculatus</a>        | 49.0 | 49.0 | 100% | 4e-05 | 75% | <a href="#">gij589919054 XP_006972718.1</a> |
| <a href="#">PREDICTED: cholinesterase [Tarsius syrichta]</a>                        | 48.6 | 48.6 | 100% | 5e-05 | 70% | <a href="#">gij640826885 XP_008070612.1</a> |
| <a href="#">PREDICTED: cholinesterase-like isoform 1 [Dasypus novemcinctus</a>      | 48.1 | 48.1 | 100% | 7e-05 | 70% | <a href="#">gij488587231 XP_004478943.1</a> |
| <a href="#">PREDICTED: cholinesterase-like [Trichechus manatus latirostris]</a>     | 48.1 | 48.1 | 100% | 7e-05 | 70% | <a href="#">gij471406477 XP_004384938.1</a> |
| RecName: Full=Cholinesterase; AltName: Full=Acylcholine acylhydri                   | 48.1 | 48.1 | 100% | 7e-05 | 70% | <a href="#">gij38502853 O62761.1</a>        |



|                                                                                   |      |      |      |       |     |                                             |
|-----------------------------------------------------------------------------------|------|------|------|-------|-----|---------------------------------------------|
| <a href="#">cholinesterase precursor [Felis catus]</a>                            | 48.1 | 48.1 | 100% | 7e-05 | 70% | <a href="#">gil57163907 NP_001009364.1</a>  |
| <a href="#">PREDICTED: cholinesterase isoform X1 [Loxodonta africana]</a>         | 48.1 | 48.1 | 100% | 7e-05 | 70% | <a href="#">gil731499959 XP_003416305.2</a> |
| <a href="#">PREDICTED: cholinesterase-like [Panthera tigris altaica]</a>          | 48.1 | 48.1 | 100% | 7e-05 | 70% | <a href="#">gil591300304 XP_007077117.1</a> |
| <a href="#">PREDICTED: cholinesterase [Galeopterus variegatus]</a>                | 47.7 | 47.7 | 100% | 1e-04 | 70% | <a href="#">gil667294272 XP_008578862.1</a> |
| <a href="#">PREDICTED: cholinesterase-like [Chrysochloris asiatica]</a>           | 47.7 | 47.7 | 100% | 1e-04 | 70% | <a href="#">gil586462448 XP_006861862.1</a> |
| <a href="#">PREDICTED: cholinesterase-like [Echinops telfairii]</a>               | 47.7 | 47.7 | 100% | 1e-04 | 70% | <a href="#">gil507651638 XP_004704160.1</a> |
| <a href="#">PREDICTED: cholinesterase [Ursus maritimus]</a>                       | 47.3 | 47.3 | 95%  | 1e-04 | 68% | <a href="#">gil670999264 XP_008690527.1</a> |
| <a href="#">PREDICTED: cholinesterase isoform X2 [Heterocephalus glaber]</a>      | 46.9 | 46.9 | 100% | 2e-04 | 75% | <a href="#">gil512824494 XP_004880401.1</a> |
| <a href="#">PREDICTED: cholinesterase isoform X1 [Chinchilla lanigera]</a>        | 46.9 | 46.9 | 100% | 2e-04 | 75% | <a href="#">gil533158554 XP_005393194.1</a> |
| <a href="#">PREDICTED: cholinesterase isoform X1 [Heterocephalus glaber]</a>      | 46.9 | 46.9 | 100% | 2e-04 | 75% | <a href="#">gil512824490 XP_004880400.1</a> |
| <a href="#">PREDICTED: cholinesterase isoform X2 [Cavia porcellus]</a>            | 46.4 | 46.4 | 100% | 3e-04 | 70% | <a href="#">gil514460083 XP_005003514.1</a> |
| <a href="#">PREDICTED: cholinesterase isoform X1 [Cavia porcellus]</a>            | 46.4 | 46.4 | 100% | 3e-04 | 70% | <a href="#">gil348567235 XP_003469406.1</a> |
| <a href="#">PREDICTED: cholinesterase [Rhinopithecus roxellana]</a>               | 46.4 | 46.4 | 100% | 3e-04 | 70% | <a href="#">gil724956944 XP_010353594.1</a> |
| <a href="#">Cholinesterase [Pteropus alecto]</a>                                  | 46.0 | 46.0 | 100% | 4e-04 | 75% | <a href="#">gil431915168 ELK15855.1</a>     |
| <a href="#">PREDICTED: cholinesterase [Microtus ochrogaster]</a>                  | 46.0 | 46.0 | 100% | 4e-04 | 75% | <a href="#">gil531999261 XP_005344165.1</a> |
| <a href="#">PREDICTED: cholinesterase [Pteropus alecto]</a>                       | 46.0 | 46.0 | 100% | 4e-04 | 75% | <a href="#">gil586546267 XP_006908236.1</a> |
| <a href="#">PREDICTED: cholinesterase-like isoform X1 [Mustela putorius furo]</a> | 46.0 | 46.0 | 95%  | 4e-04 | 68% | <a href="#">gil511910148 XP_004774475.1</a> |
| <a href="#">hypothetical protein PANDA_007095 [Ailuropoda melanoleuca]</a>        | 45.6 | 45.6 | 95%  | 5e-04 | 68% | <a href="#">gil281337784 EFB13368.1</a>     |
| <a href="#">PREDICTED: cholinesterase-like [Ailuropoda melanoleuca]</a>           | 45.6 | 45.6 | 95%  | 5e-04 | 68% | <a href="#">gil301766374 XP_002918607.1</a> |
| <a href="#">PREDICTED: cholinesterase [Fukomys damarensis]</a>                    | 44.3 | 44.3 | 100% | 0.001 | 70% | <a href="#">gil731199055 XP_010610068.1</a> |
| <a href="#">Cholinesterase [Fukomys damarensis]</a>                               | 44.3 | 44.3 | 100% | 0.001 | 70% | <a href="#">gil676283600 KFO36750.1</a>     |
| <a href="#">PREDICTED: cholinesterase [Sarcophilus harrisii]</a>                  | 43.9 | 43.9 | 90%  | 0.002 | 67% | <a href="#">gil395528220 XP_003766229.1</a> |
| <a href="#">PREDICTED: cholinesterase [Tupaia chinensis]</a>                      | 43.5 | 43.5 | 100% | 0.002 | 65% | <a href="#">gil562842605 XP_006150360.1</a> |
| <a href="#">PREDICTED: cholinesterase-like [Sorex araneus]</a>                    | 43.1 | 43.1 | 95%  | 0.003 | 68% | <a href="#">gil505845607 XP_004616283.1</a> |
| <a href="#">PREDICTED: cholinesterase [Cricetulus griseus]</a>                    | 43.1 | 43.1 | 100% | 0.003 | 70% | <a href="#">gil354496810 XP_003510518.1</a> |
| <a href="#">PREDICTED: cholinesterase-like [Odobenus rosmarus divergens]</a>      | 43.1 | 43.1 | 90%  | 0.003 | 67% | <a href="#">gil472347065 XP_004393257.1</a> |
| <a href="#">cholinesterase precursor [Mus musculus]</a>                           | 42.6 | 42.6 | 100% | 0.004 | 70% | <a href="#">gil124487350 NP_033868.3</a>    |

## Alignments

Download [GenPept](#) [Graphics](#) ▼ Next ▲ Previous ▲ Descriptions

### Chain A, Crystal Structure Of Fully Glycosylated Human Butyrylcholinesterase

Sequence ID: [gil393715367|pdb|4AQD|A](#) Length: 531 Number of Matches: 1

▶ See 1 more title(s)

Range 1: 478 to 497 [GenPept](#) [Graphics](#) ▼ Next Match ▲ Previous Match

| Score          | Expect | Identities | Positives   | Gaps     |
|----------------|--------|------------|-------------|----------|
| 63.8 bits(143) | 4e-10  | 18/20(90%) | 20/20(100%) | 0/20(0%) |

Query 1 KYGDPNETQNDSTSWPVFKS 20  
 KYG+PNETQN+STSWPVFKS  
 Sbjct 478 KYGNPNETQNNSTSWPVFKS 497

#### Related Information

[Structure](#) - 3D structure displays  
[Identical Proteins](#) - Proteins  
 identical to the subject

Download [GenPept](#) [Graphics](#) ▼ Next ▲ Previous ▲ Descriptions

### monomeric butyrylcholinesterase [synthetic construct]

Sequence ID: [gil388261124|gb|AFK25766.1](#) Length: 557 Number of Matches: 1

Range 1: 504 to 523 [GenPept](#) [Graphics](#) ▼ Next Match ▲ Previous Match

| Score          | Expect | Identities | Positives   | Gaps     |
|----------------|--------|------------|-------------|----------|
| 63.8 bits(143) | 4e-10  | 18/20(90%) | 20/20(100%) | 0/20(0%) |

#### Related Information

Query 1 KYGDPNETQNDSTSWPVFKS 20  
 KYG+PNETQN+STSWPVFKS  
 Sbjct 504 KYGNPNETQNNSTSWPVFKS 523

[Download](#) [GenPept](#) [Graphics](#)

[Next](#) [Previous](#) [Descriptions](#)

Chain A, Co-Crystallization Studies Of Full Length Recombinant Bche With Cocaine Offers Insights Into Cocaine Detoxification

Sequence ID: [gi|328877250|pdb|3O9M|A](#) Length: 574 Number of Matches: 1

[See 1 more title\(s\)](#)

Range 1: 476 to 495 [GenPept](#) [Graphics](#)

[Next Match](#) [Previous Match](#)

| Score          | Expect | Identities | Positives   | Gaps     |
|----------------|--------|------------|-------------|----------|
| 63.8 bits(143) | 4e-10  | 18/20(90%) | 20/20(100%) | 0/20(0%) |

Query 1 KYGDPNETQNDSTSWPVFKS 20  
 KYG+PNETQN+STSWPVFKS  
 Sbjct 476 KYGNPNETQNNSTSWPVFKS 495

**Related Information**

[Structure](#) - 3D structure displays  
[Identical Proteins](#) - Proteins identical to the subject

[Download](#) [GenPept](#) [Graphics](#)

[Next](#) [Previous](#) [Descriptions](#)

butyrylcholinesterase p.Val204Asp splice variant [Homo sapiens]

Sequence ID: [gi|632795270|gb|AHZ34327.1](#) Length: 602 Number of Matches: 1

Range 1: 504 to 523 [GenPept](#) [Graphics](#)

[Next Match](#) [Previous Match](#)

| Score          | Expect | Identities | Positives   | Gaps     |
|----------------|--------|------------|-------------|----------|
| 63.8 bits(143) | 4e-10  | 18/20(90%) | 20/20(100%) | 0/20(0%) |

Query 1 KYGDPNETQNDSTSWPVFKS 20  
 KYG+PNETQN+STSWPVFKS  
 Sbjct 504 KYGNPNETQNNSTSWPVFKS 523

**Related Information**

[Structure](#) - 3D structure displays  
[Identical Proteins](#) - Proteins identical to the subject

[Download](#) [GenPept](#) [Graphics](#)

[Next](#) [Previous](#) [Descriptions](#)

cholinesterase precursor [Homo sapiens]

Sequence ID: [gi|4557351|ref|NP\\_000046.1](#) Length: 602 Number of Matches: 1

[See 10 more title\(s\)](#)

Range 1: 504 to 523 [GenPept](#) [Graphics](#)

[Next Match](#) [Previous Match](#)

| Score          | Expect | Identities | Positives   | Gaps     |
|----------------|--------|------------|-------------|----------|
| 63.8 bits(143) | 4e-10  | 18/20(90%) | 20/20(100%) | 0/20(0%) |

Query 1 KYGDPNETQNDSTSWPVFKS 20  
 KYG+PNETQN+STSWPVFKS  
 Sbjct 504 KYGNPNETQNNSTSWPVFKS 523

**Related Information**

[Gene](#) - associated gene details  
[UniGene](#) - clustered expressed sequence tags  
[Structure](#) - 3D structure displays  
[PubChem BioAssay](#) - bioactivity screening  
[Map Viewer](#) - aligned genomic context  
[Identical Proteins](#) - Proteins identical to the subject

BLAST is a registered trademark of the National Library of Medicine.

▶ NCBI/ BLAST/ blastp suite/ Formatting Results - BHJCM84E014

**i** Your search parameters were adjusted to search for a short input sequence.

[Edit and Resubmit](#) [Save Search Strategies](#) ▶ [Formatting options](#) ▶ [Download](#)

[YouTube](#) [How to read this page](#) [Blast report description](#)

### BCHE\_KYGNPDETQDDSTSWPVFKS\_Mod

RID [BHJCM84E014](#) (Expires on 01-17 15:19 pm)

**Query ID** |cl|37331  
**Description** None  
**Molecule type** amino acid  
**Query Length** 20

**Database Name** nr  
**Description** All non-redundant GenBank CDS translations+PDB+SwissProt+PIR excluding environmental samples from WGS projects  
**Program** BLASTP 2.2.30+ ▶ [Citation](#)

Other reports: ▶ [Search Summary](#) [[Taxonomy reports](#)] [[Distance tree of results](#)] [[Multiple alignment](#)]

### **G**raphic Summary

[Show Conserved Domains](#)

No putative conserved domains have been detected

Distribution of 100 Blast Hits on the Query Sequence

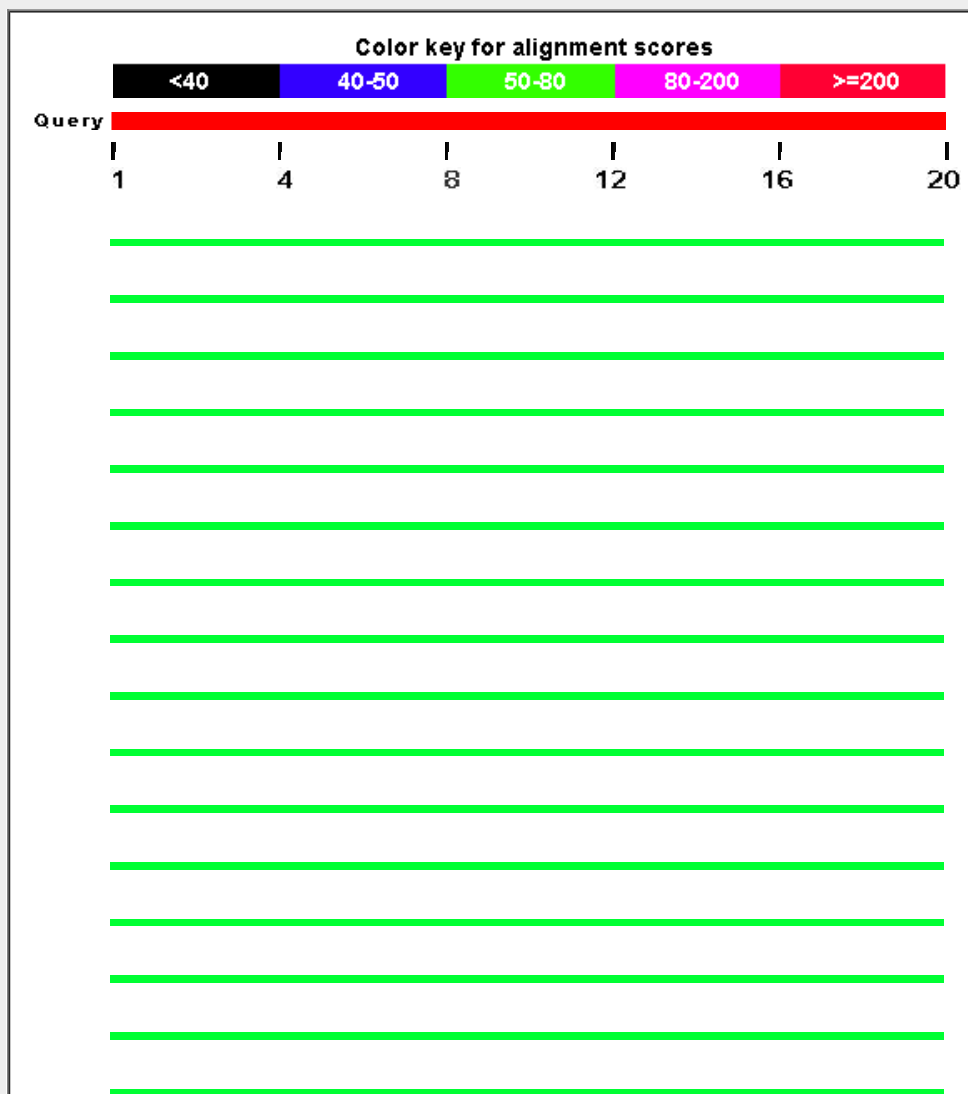

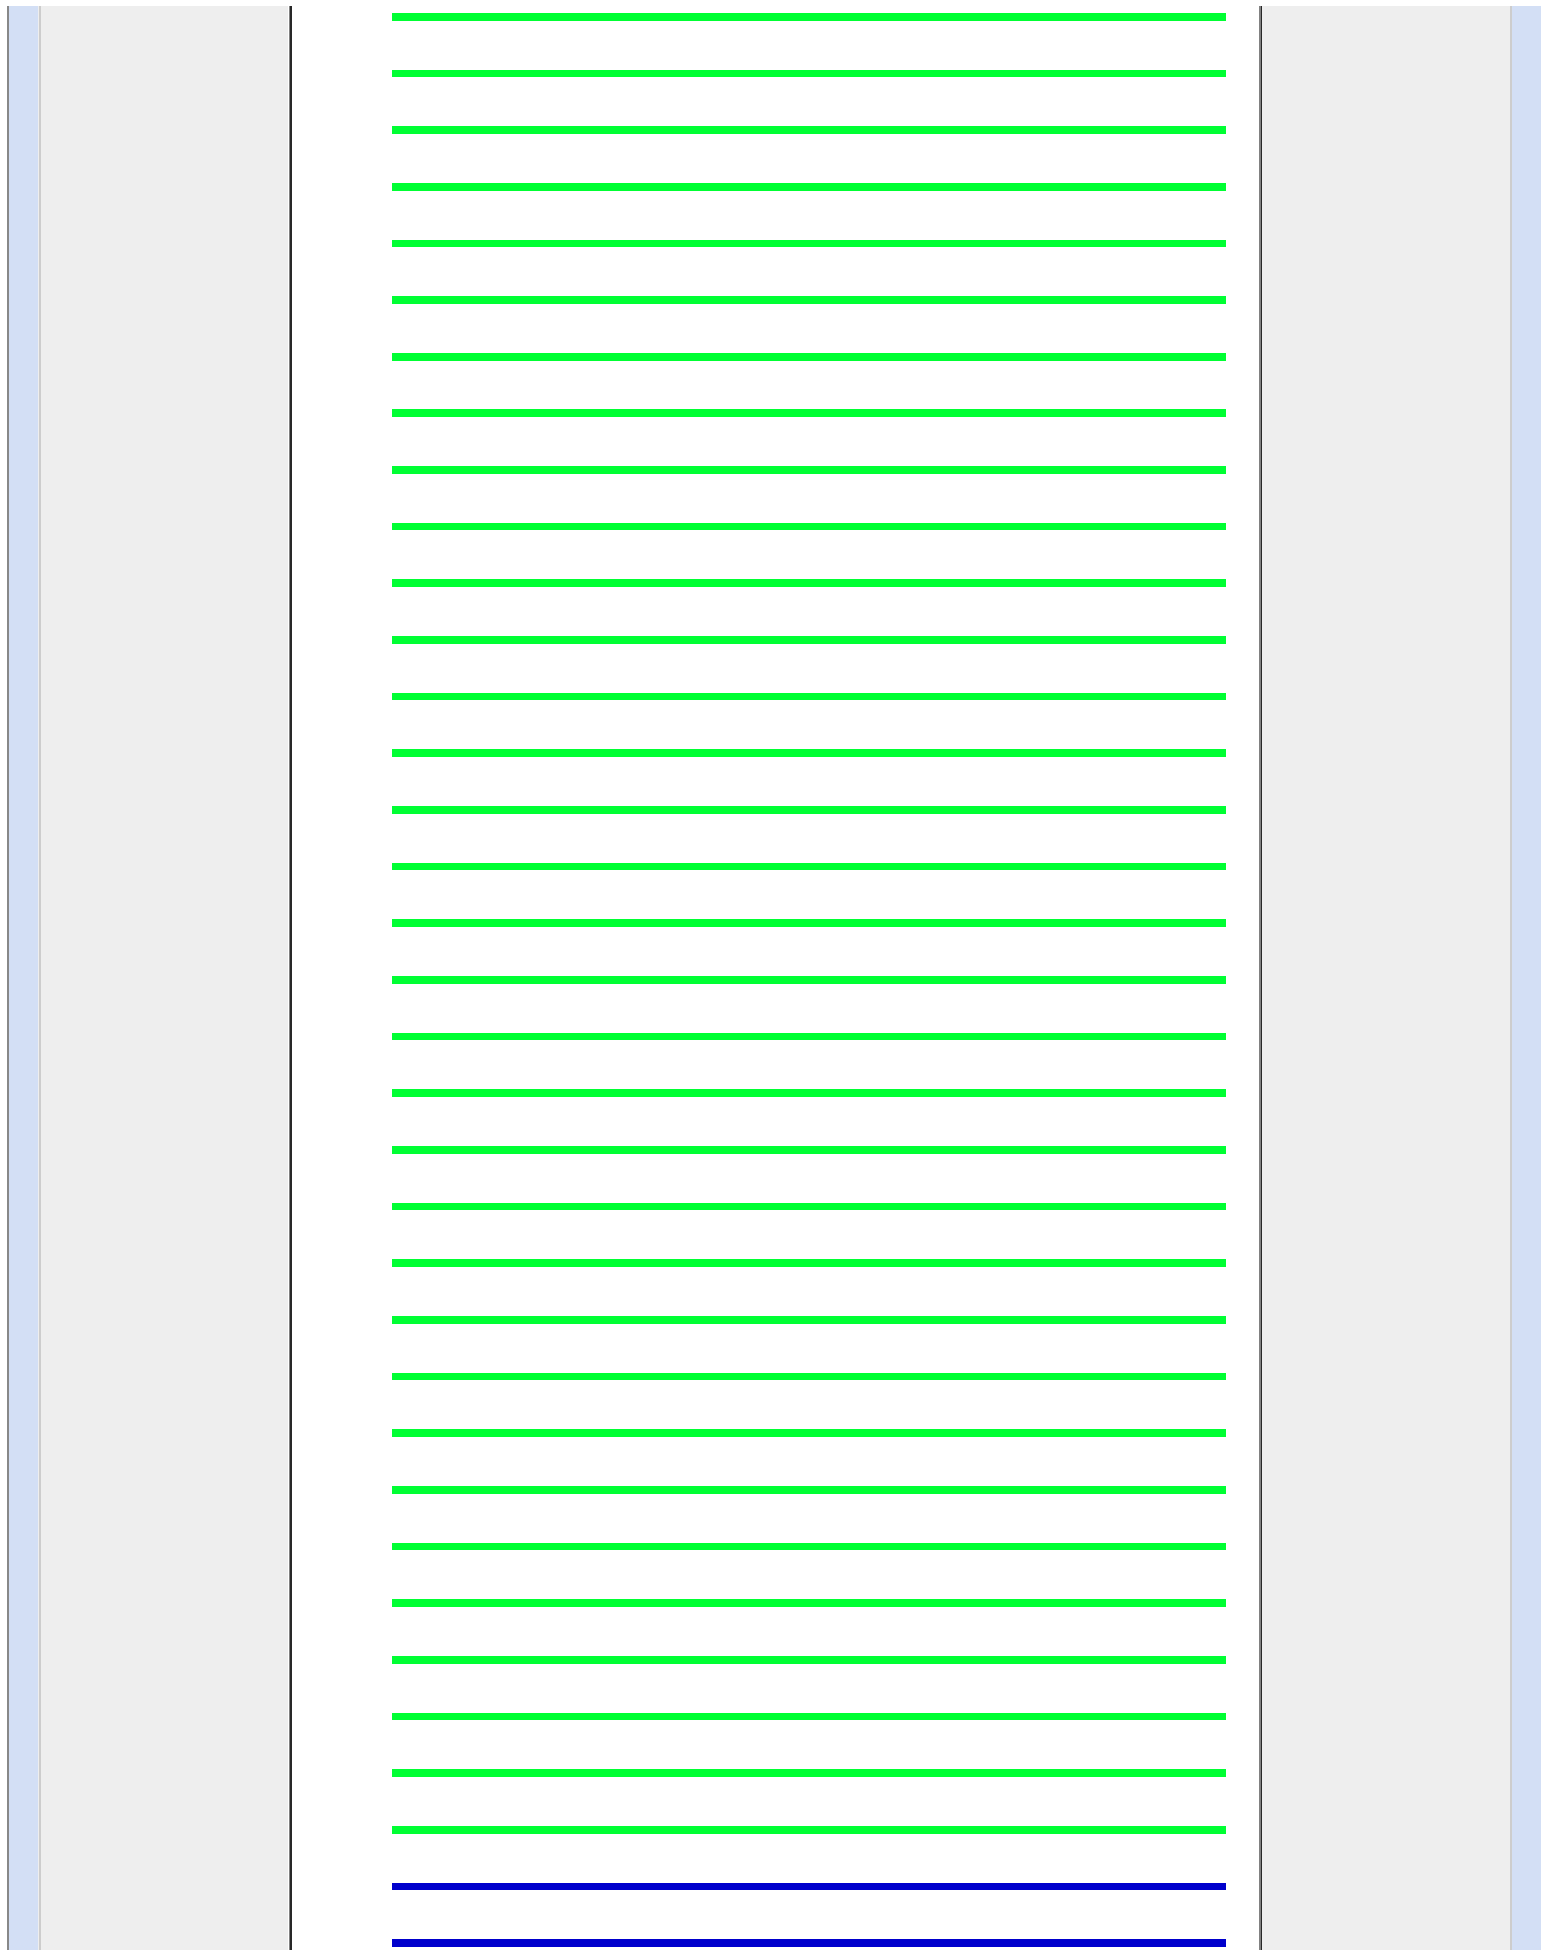

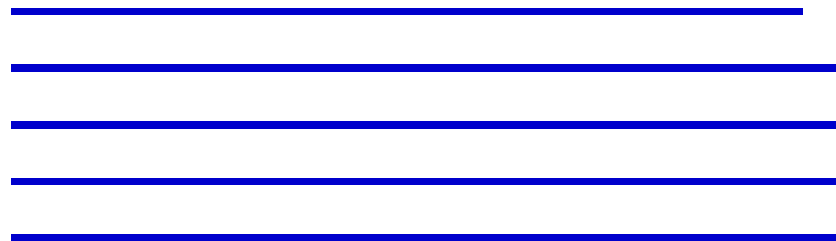

## Descriptions

### Sequences producing significant alignments:

Select: [All](#) [None](#) Selected:0

| <a href="#">Alignments</a> <a href="#">Download</a> <a href="#">GenPept</a> <a href="#">Graphics</a> <a href="#">Distance tree of results</a> <a href="#">Multiple alignment</a> |           |             |             |         |       |                                             |  |
|----------------------------------------------------------------------------------------------------------------------------------------------------------------------------------|-----------|-------------|-------------|---------|-------|---------------------------------------------|--|
| Description                                                                                                                                                                      | Max score | Total score | Query cover | E value | Ident | Accession                                   |  |
| <a href="#">Chain A, Crystal Structure Of Fully Glycosylated Human Butyrylcholinesterase [synthetic construct]</a>                                                               | 61.3      | 61.3        | 100%        | 3e-09   | 85%   | <a href="#">gij393715367 4AQD_A</a>         |  |
| <a href="#">Chain A, Co-Crystallization Studies Of Full Length Recombinant Butyrylcholinesterase p.Val204Asp splice variant [Homo sapiens]</a>                                   | 61.3      | 61.3        | 100%        | 3e-09   | 85%   | <a href="#">gij388261124 AFK25766.1</a>     |  |
| <a href="#">Chain A, Co-Crystallization Studies Of Full Length Recombinant Butyrylcholinesterase precursor [Homo sapiens]</a>                                                    | 61.3      | 61.3        | 100%        | 3e-09   | 85%   | <a href="#">gij328877250 3O9M_A</a>         |  |
| <a href="#">Chain A, Co-Crystallization Studies Of Full Length Recombinant Butyrylcholinesterase precursor [Homo sapiens]</a>                                                    | 61.3      | 61.3        | 100%        | 3e-09   | 85%   | <a href="#">gij632795270 AHZ34327.1</a>     |  |
| <a href="#">Chain A, Co-Crystallization Studies Of Full Length Recombinant Butyrylcholinesterase [synthetic construct]</a>                                                       | 61.3      | 61.3        | 100%        | 3e-09   | 85%   | <a href="#">gij4557351 NP_000046.1</a>      |  |
| <a href="#">Chain A, Co-Crystallization Studies Of Full Length Recombinant Butyrylcholinesterase [synthetic construct]</a>                                                       | 61.3      | 61.3        | 100%        | 3e-09   | 85%   | <a href="#">gij158257558 BAF84752.1</a>     |  |
| <a href="#">Chain A, Co-Crystallization Studies Of Full Length Recombinant Butyrylcholinesterase [synthetic construct]</a>                                                       | 61.3      | 61.3        | 100%        | 3e-09   | 85%   | <a href="#">gij260766471 ACX50257.1</a>     |  |
| <a href="#">Chain A, Co-Crystallization Studies Of Full Length Recombinant Butyrylcholinesterase isoform X1 [Homo sapiens]</a>                                                   | 61.3      | 61.3        | 100%        | 3e-09   | 85%   | <a href="#">gij530375091 XP_005247742.1</a> |  |
| <a href="#">Chain A, Crystal Structure Of Soman-aged Human Butyrylcholinesterase [synthetic construct]</a>                                                                       | 59.6      | 59.6        | 100%        | 1e-08   | 85%   | <a href="#">gij402550232 4AXB_A</a>         |  |
| <a href="#">Chain A, Crystal Structure Of Soman-aged Human Butyrylcholinesterase [synthetic construct]</a>                                                                       | 59.6      | 59.6        | 100%        | 1e-08   | 85%   | <a href="#">gij402550237 4B0O_A</a>         |  |
| <a href="#">Chain A, Structure Of Human Butyrylcholinesterase Inhibited By Cholinesterase Inhibitor [Homo sapiens]</a>                                                           | 59.6      | 59.6        | 100%        | 1e-08   | 85%   | <a href="#">gij340707403 2Y1K_A</a>         |  |
| <a href="#">Chain A, Aged Form Of Human Butyrylcholinesterase Inhibited By Cholinesterase Inhibitor [Homo sapiens]</a>                                                           | 59.6      | 59.6        | 100%        | 1e-08   | 85%   | <a href="#">gij237823652 2WIL_A</a>         |  |
| <a href="#">Chain A, Aged Form Of Human Butyrylcholinesterase Inhibited By Cholinesterase Inhibitor [Homo sapiens]</a>                                                           | 59.6      | 59.6        | 100%        | 1e-08   | 85%   | <a href="#">gij237823648 2WIF_A</a>         |  |
| <a href="#">Chain A, Nonaged Form Of Human Butyrylcholinesterase Inhibited By Cholinesterase Inhibitor [Homo sapiens]</a>                                                        | 59.6      | 59.6        | 100%        | 1e-08   | 85%   | <a href="#">gij237823647 2WID_A</a>         |  |
| <a href="#">Chain A, X-Ray Structure Of Human Butyrylcholinesterase Inhibited By Cholinesterase Inhibitor [Homo sapiens]</a>                                                     | 57.9      | 57.9        | 100%        | 4e-08   | 85%   | <a href="#">gij326634060 2XQF_A</a>         |  |
| <a href="#">Chain A, Aged Form Of Human Butyrylcholinesterase Inhibited By Cholinesterase Inhibitor [Homo sapiens]</a>                                                           | 57.9      | 57.9        | 100%        | 4e-08   | 85%   | <a href="#">gij258588213 2WSL_A</a>         |  |
| <a href="#">Chain A, Nonaged Form Of Human Butyrylcholinesterase Inhibited By Cholinesterase Inhibitor [Homo sapiens]</a>                                                        | 57.9      | 57.9        | 100%        | 4e-08   | 85%   | <a href="#">gij215794636 3DJY_A</a>         |  |
| <a href="#">Chain A, Crystal Structure Of Human Butyryl Cholinesterase [Homo sapiens]</a>                                                                                        | 57.9      | 57.9        | 100%        | 4e-08   | 85%   | <a href="#">gij348108591 1P0I_A</a>         |  |
| <a href="#">Chain A, G117h Mutant Of Human Butyrylcholinesterase In Complex With Cholinesterase Inhibitor [Homo sapiens]</a>                                                     | 57.9      | 57.9        | 100%        | 4e-08   | 85%   | <a href="#">gij313103512 2XMB_A</a>         |  |
| <a href="#">Chain A, Crystal Structure Of Recombinant Full Length Human Butyrylcholinesterase precursor [Pan troglodytes]</a>                                                    | 57.9      | 57.9        | 100%        | 4e-08   | 85%   | <a href="#">gij158429456 2PM8_A</a>         |  |
| <a href="#">Chain A, Structure Of Human Butyrylcholinesterase In Complex With Cholinesterase Inhibitor [Homo sapiens]</a>                                                        | 57.5      | 57.5        | 100%        | 5e-08   | 80%   | <a href="#">gij343960913 BAK62046.1</a>     |  |
| <a href="#">Chain A, Structure Of Human Butyrylcholinesterase In Complex With Cholinesterase Inhibitor [Homo sapiens]</a>                                                        | 57.5      | 57.5        | 100%        | 5e-08   | 85%   | <a href="#">gij145579736 2J4C_A</a>         |  |
| <a href="#">Chain A, Structure Of Human Butyrylcholinesterase In Complex With Cholinesterase Inhibitor [Gorilla gorilla gorilla]</a>                                             | 57.5      | 57.5        | 100%        | 5e-08   | 80%   | <a href="#">gij426342776 XP_004038010.1</a> |  |
| <a href="#">Chain A, Structure Of Human Butyrylcholinesterase In Complex With Cholinesterase Inhibitor [Pan paniscus]</a>                                                        | 57.5      | 57.5        | 100%        | 5e-08   | 80%   | <a href="#">gij397493718 XP_003817746.1</a> |  |
| <a href="#">Chain A, Structure Of Human Butyrylcholinesterase In Complex With Cholinesterase Inhibitor [Pan troglodytes]</a>                                                     | 57.5      | 57.5        | 100%        | 5e-08   | 80%   | <a href="#">gij114590210 XP_516857.2</a>    |  |
| <a href="#">Chain A, Structure Of Human Butyrylcholinesterase In Complex With Cholinesterase Inhibitor [Nomascus leucogenys]</a>                                                 | 54.9      | 54.9        | 100%        | 4e-07   | 80%   | <a href="#">gij332214651 XP_003256448.1</a> |  |
| <a href="#">Chain A, Structure Of Human Butyrylcholinesterase In Complex With Cholinesterase Inhibitor [Eptesicus fuscus]</a>                                                    | 53.7      | 53.7        | 100%        | 1e-06   | 80%   | <a href="#">gij641703485 XP_008140478.1</a> |  |
| <a href="#">Chain A, Structure Of Human Butyrylcholinesterase In Complex With Cholinesterase Inhibitor [Myotis lucifugus]</a>                                                    | 53.7      | 53.7        | 100%        | 1e-06   | 80%   | <a href="#">gij558125651 XP_006088951.1</a> |  |

|                                                                              |      |      |      |       |     |                                             |
|------------------------------------------------------------------------------|------|------|------|-------|-----|---------------------------------------------|
| RecName: Full=Cholinesterase; AltName: Full=Acylcholine acylhydri            | 52.4 | 52.4 | 100% | 3e-06 | 75% | <a href="#">gij21362409 P81908.1</a>        |
| RecName: Full=Cholinesterase; AltName: Full=Acylcholine acylhydri            | 52.4 | 52.4 | 100% | 3e-06 | 75% | <a href="#">gij116354 P21927.1</a>          |
| PREDICTED: cholinesterase [ <i>Oryctolagus cuniculus</i> ]                   | 52.4 | 52.4 | 100% | 3e-06 | 75% | <a href="#">gij291400118 XP_002716414.1</a> |
| PREDICTED: cholinesterase [ <i>Orcinus orca</i> ]                            | 52.4 | 52.4 | 100% | 3e-06 | 75% | <a href="#">gij466076197 XP_004283487.1</a> |
| cholinesterase precursor [ <i>Pongo abelii</i> ]                             | 52.4 | 52.4 | 100% | 3e-06 | 75% | <a href="#">gij197097436 NP_001127509.1</a> |
| PREDICTED: cholinesterase isoform X1 [ <i>Sus scrofa</i> ]                   | 52.4 | 52.4 | 100% | 3e-06 | 75% | <a href="#">gij335299867 XP_003358712.1</a> |
| cholinesterase precursor [ <i>Bos taurus</i> ]                               | 52.4 | 52.4 | 100% | 3e-06 | 75% | <a href="#">gij116004027 NP_001070374.1</a> |
| PREDICTED: cholinesterase [ <i>Bison bison bison</i> ]                       | 52.4 | 52.4 | 100% | 3e-06 | 75% | <a href="#">gij742123891 XP_010839228.1</a> |
| PREDICTED: cholinesterase [ <i>Balaenoptera acutorostrata scammon</i> ]      | 52.4 | 52.4 | 100% | 3e-06 | 75% | <a href="#">gij594625950 XP_007197616.1</a> |
| PREDICTED: cholinesterase isoform X1 [ <i>Pongo abelii</i> ]                 | 52.4 | 52.4 | 100% | 3e-06 | 75% | <a href="#">gij686714306 XP_009237773.1</a> |
| PREDICTED: cholinesterase [ <i>Lipotes vexillifer</i> ]                      | 52.4 | 52.4 | 100% | 3e-06 | 75% | <a href="#">gij602681974 XP_007446483.1</a> |
| PREDICTED: cholinesterase [ <i>Pantholops hodgsonii</i> ]                    | 52.4 | 52.4 | 100% | 3e-06 | 75% | <a href="#">gij556779632 XP_005984864.1</a> |
| PREDICTED: cholinesterase [ <i>Bos mutus</i> ]                               | 52.4 | 52.4 | 100% | 3e-06 | 75% | <a href="#">gij555966690 XP_005895396.1</a> |
| PREDICTED: cholinesterase [ <i>Capra hircus</i> ]                            | 52.4 | 52.4 | 100% | 3e-06 | 75% | <a href="#">gij548451269 XP_005675420.1</a> |
| PREDICTED: cholinesterase [ <i>Ovis aries</i> ]                              | 52.4 | 52.4 | 100% | 3e-06 | 75% | <a href="#">gij426218006 XP_004003241.1</a> |
| PREDICTED: cholinesterase-like isoform X1 [ <i>Myotis brandtii</i> ]         | 50.3 | 50.3 | 100% | 1e-05 | 75% | <a href="#">gij554526033 XP_005857864.1</a> |
| PREDICTED: cholinesterase [ <i>Orycteropus afer afer</i> ]                   | 50.3 | 50.3 | 100% | 1e-05 | 75% | <a href="#">gij634870148 XP_007946910.1</a> |
| PREDICTED: cholinesterase isoform X2 [ <i>Saimiri boliviensis bolivier</i> ] | 50.3 | 50.3 | 100% | 1e-05 | 70% | <a href="#">gij725560928 XP_010334003.1</a> |
| PREDICTED: cholinesterase isoform X1 [ <i>Saimiri boliviensis bolivier</i> ] | 50.3 | 50.3 | 100% | 1e-05 | 70% | <a href="#">gij403265619 XP_003925023.1</a> |
| PREDICTED: LOW QUALITY PROTEIN: cholinesterase [ <i>Callithrix j.</i> ]      | 50.3 | 50.3 | 100% | 1e-05 | 70% | <a href="#">gij675737963 XP_002807699.3</a> |
| Cholinesterase [ <i>Myotis brandtii</i> ]                                    | 50.3 | 50.3 | 100% | 1e-05 | 75% | <a href="#">gij521020653 EPQ02441.1</a>     |
| cholinesterase precursor [ <i>Equus caballus</i> ]                           | 49.8 | 49.8 | 100% | 2e-05 | 75% | <a href="#">gij126352540 NP_001075319.1</a> |
| PREDICTED: cholinesterase-like [ <i>Elephantulus edwardii</i> ]              | 49.8 | 49.8 | 100% | 2e-05 | 75% | <a href="#">gij585675683 XP_006890440.1</a> |
| PREDICTED: cholinesterase [ <i>Ursus maritimus</i> ]                         | 49.8 | 49.8 | 95%  | 2e-05 | 74% | <a href="#">gij670999264 XP_008690527.1</a> |
| PREDICTED: cholinesterase isoform X2 [ <i>Equus przewalskii</i> ]            | 49.8 | 49.8 | 100% | 2e-05 | 75% | <a href="#">gij664725795 XP_008520036.1</a> |
| PREDICTED: cholinesterase isoform X1 [ <i>Equus przewalskii</i> ]            | 49.8 | 49.8 | 100% | 2e-05 | 75% | <a href="#">gij664725793 XP_008520035.1</a> |
| PREDICTED: cholinesterase [ <i>Ceratotherium simum simum</i> ]               | 49.8 | 49.8 | 100% | 2e-05 | 75% | <a href="#">gij478501043 XP_004424836.1</a> |
| hypothetical protein EGK_11933 [ <i>Macaca mulatta</i> ]                     | 49.0 | 49.0 | 100% | 4e-05 | 70% | <a href="#">gij355559896 EHH16624.1</a>     |
| butyrylcholinesterase precursor [ <i>Macaca fascicularis</i> ]               | 49.0 | 49.0 | 100% | 4e-05 | 70% | <a href="#">gij290795732 ADD64703.1</a>     |
| PREDICTED: cholinesterase [ <i>Macaca fascicularis</i> ]                     | 49.0 | 49.0 | 100% | 4e-05 | 70% | <a href="#">gij544412493 XP_005546353.1</a> |
| PREDICTED: cholinesterase isoform X1 [ <i>Papio anubis</i> ]                 | 49.0 | 49.0 | 100% | 4e-05 | 70% | <a href="#">gij402861047 XP_003894921.1</a> |
| PREDICTED: LOW QUALITY PROTEIN: cholinesterase-like [ <i>Maca</i> ]          | 49.0 | 49.0 | 100% | 4e-05 | 70% | <a href="#">gij297286482 XP_002808379.1</a> |
| PREDICTED: cholinesterase [ <i>Ictidomys tridecemlineatus</i> ]              | 49.0 | 49.0 | 100% | 4e-05 | 70% | <a href="#">gij532105511 XP_005338342.1</a> |
| PREDICTED: cholinesterase isoform X1 [ <i>Chlorocebus sabaeus</i> ]          | 49.0 | 49.0 | 100% | 4e-05 | 70% | <a href="#">gij635084154 XP_007970394.1</a> |
| PREDICTED: cholinesterase isoform X2 [ <i>Camelus dromedarius</i> ]          | 48.6 | 48.6 | 100% | 5e-05 | 70% | <a href="#">gij744553709 XP_010974642.1</a> |
| PREDICTED: cholinesterase isoform X1 [ <i>Camelus dromedarius</i> ]          | 48.6 | 48.6 | 100% | 5e-05 | 70% | <a href="#">gij744553706 XP_010974641.1</a> |
| PREDICTED: cholinesterase isoform X2 [ <i>Camelus bactrianus</i> ]           | 48.6 | 48.6 | 100% | 5e-05 | 70% | <a href="#">gij743713601 XP_010950371.1</a> |
| PREDICTED: cholinesterase [ <i>Vicugna pacos</i> ]                           | 48.6 | 48.6 | 100% | 5e-05 | 70% | <a href="#">gij560956860 XP_006200907.1</a> |
| PREDICTED: cholinesterase [ <i>Camelus ferus</i> ]                           | 48.6 | 48.6 | 100% | 5e-05 | 70% | <a href="#">gij560915255 XP_006183885.1</a> |
| PREDICTED: cholinesterase-like isoform X1 [ <i>Mustela putorius furo</i> ]   | 48.6 | 48.6 | 95%  | 5e-05 | 74% | <a href="#">gij511910148 XP_004774475.1</a> |
| hypothetical protein PANDA_007095 [ <i>Ailuropoda melanoleuca</i> ]          | 48.1 | 48.1 | 95%  | 7e-05 | 74% | <a href="#">gij281337784 EFB13368.1</a>     |
| PREDICTED: cholinesterase [ <i>Myotis davidii</i> ]                          | 48.1 | 48.1 | 90%  | 7e-05 | 78% | <a href="#">gij584083219 XP_006761409.1</a> |
| PREDICTED: cholinesterase-like [ <i>Ailuropoda melanoleuca</i> ]             | 48.1 | 48.1 | 95%  | 7e-05 | 74% | <a href="#">gij301766374 XP_002918607.1</a> |
| PREDICTED: cholinesterase [ <i>Fukomys damarensis</i> ]                      | 46.9 | 46.9 | 100% | 2e-04 | 75% | <a href="#">gij731199055 XP_010610068.1</a> |
| Cholinesterase [ <i>Fukomys damarensis</i> ]                                 | 46.9 | 46.9 | 100% | 2e-04 | 75% | <a href="#">gij676283600 KFO36750.1</a>     |

|                                                                                                                                          |      |      |      |       |     |                                             |
|------------------------------------------------------------------------------------------------------------------------------------------|------|------|------|-------|-----|---------------------------------------------|
| <a href="#">PREDICTED: cholinesterase [Tarsius syrichta]</a>                                                                             | 46.9 | 46.9 | 100% | 2e-04 | 70% | <a href="#">gil640826885 XP_008070612.1</a> |
| <a href="#">PREDICTED: cholinesterase [Otolemur garnettii]</a>                                                                           | 46.4 | 46.4 | 100% | 3e-04 | 70% | <a href="#">gil395843862 XP_003794691.1</a> |
| <a href="#">PREDICTED: cholinesterase-like isoform 1 [Dasypus novemcinctus]</a>                                                          | 46.4 | 46.4 | 100% | 3e-04 | 70% | <a href="#">gil488587231 XP_004478943.1</a> |
| <a href="#">PREDICTED: cholinesterase-like [Trichechus manatus latirostris]</a>                                                          | 46.4 | 46.4 | 100% | 3e-04 | 70% | <a href="#">gil471406477 XP_004384938.1</a> |
| <a href="#">PREDICTED: cholinesterase isoform X1 [Loxodonta africana]</a>                                                                | 46.4 | 46.4 | 100% | 3e-04 | 70% | <a href="#">gil731499959 XP_003416305.2</a> |
| <a href="#">PREDICTED: cholinesterase [Galeopterus variegatus]</a>                                                                       | 46.0 | 46.0 | 100% | 4e-04 | 70% | <a href="#">gil667294272 XP_008578862.1</a> |
| <a href="#">PREDICTED: cholinesterase-like [Sorex araneus]</a>                                                                           | 45.6 | 45.6 | 95%  | 5e-04 | 74% | <a href="#">gil505845607 XP_004616283.1</a> |
| <a href="#">RecName: Full=Cholinesterase; AltName: Full=Acylcholine acylhydrolase; EC=3.1.1.8; ChEMBL: CHEMBL1202; UniProtKB: P05131</a> | 45.6 | 45.6 | 100% | 5e-04 | 65% | <a href="#">gil38502853 O62761.1</a>        |
| <a href="#">cholinesterase precursor [Felis catus]</a>                                                                                   | 45.6 | 45.6 | 100% | 5e-04 | 65% | <a href="#">gil57163907 NP_001009364.1</a>  |
| <a href="#">PREDICTED: cholinesterase-like [Panthera tigris altaica]</a>                                                                 | 45.6 | 45.6 | 100% | 5e-04 | 65% | <a href="#">gil591300304 XP_007077117.1</a> |
| <a href="#">PREDICTED: cholinesterase-like [Odobenus rosmarus divergens]</a>                                                             | 45.6 | 45.6 | 90%  | 5e-04 | 72% | <a href="#">gil472347065 XP_004393257.1</a> |
| <a href="#">PREDICTED: cholinesterase [Rhinopithecus roxellana]</a>                                                                      | 45.6 | 45.6 | 100% | 5e-04 | 70% | <a href="#">gil724956944 XP_010353594.1</a> |
| <a href="#">PREDICTED: cholinesterase-like [Chrysochloris asiatica]</a>                                                                  | 45.2 | 45.2 | 100% | 7e-04 | 65% | <a href="#">gil586462448 XP_006861862.1</a> |
| <a href="#">PREDICTED: cholinesterase-like [Echinops telfairi]</a>                                                                       | 45.2 | 45.2 | 100% | 7e-04 | 65% | <a href="#">gil507651638 XP_004704160.1</a> |
| <a href="#">PREDICTED: cholinesterase isoform X2 [Heterocephalus glaber]</a>                                                             | 44.3 | 44.3 | 100% | 0.001 | 70% | <a href="#">gil512824494 XP_004880401.1</a> |
| <a href="#">PREDICTED: cholinesterase isoform X1 [Chinchilla lanigera]</a>                                                               | 44.3 | 44.3 | 100% | 0.001 | 70% | <a href="#">gil533158554 XP_005393194.1</a> |
| <a href="#">PREDICTED: cholinesterase isoform X1 [Heterocephalus glaber]</a>                                                             | 44.3 | 44.3 | 100% | 0.001 | 70% | <a href="#">gil512824490 XP_004880400.1</a> |
| <a href="#">PREDICTED: cholinesterase isoform X2 [Cavia porcellus]</a>                                                                   | 43.9 | 43.9 | 100% | 0.002 | 65% | <a href="#">gil514460083 XP_005003514.1</a> |
| <a href="#">PREDICTED: cholinesterase isoform X1 [Cavia porcellus]</a>                                                                   | 43.9 | 43.9 | 100% | 0.002 | 65% | <a href="#">gil348567235 XP_003469406.1</a> |
| <a href="#">Cholinesterase [Pteropus alecto]</a>                                                                                         | 43.5 | 43.5 | 100% | 0.002 | 70% | <a href="#">gil431915168 ELK15855.1</a>     |
| <a href="#">PREDICTED: cholinesterase [Pteropus alecto]</a>                                                                              | 43.5 | 43.5 | 100% | 0.002 | 70% | <a href="#">gil586546267 XP_006908236.1</a> |
| <a href="#">PREDICTED: cholinesterase [Microtus ochrogaster]</a>                                                                         | 42.6 | 42.6 | 100% | 0.004 | 65% | <a href="#">gil531999261 XP_005344165.1</a> |
| <a href="#">PREDICTED: cholinesterase [Erinaceus europaeus]</a>                                                                          | 42.2 | 42.2 | 100% | 0.006 | 65% | <a href="#">gil617605262 XP_007523705.1</a> |
| <a href="#">PREDICTED: cholinesterase [Canis lupus familiaris]</a>                                                                       | 42.2 | 42.2 | 90%  | 0.006 | 67% | <a href="#">gil74003707 XP_545267.2</a>     |
| <a href="#">PREDICTED: cholinesterase isoform X1 [Peromyscus maniculatus]</a>                                                            | 42.2 | 42.2 | 100% | 0.006 | 65% | <a href="#">gil589919054 XP_006972718.1</a> |
| <a href="#">PREDICTED: cholinesterase-like [Leptonychotes weddellii]</a>                                                                 | 41.8 | 41.8 | 90%  | 0.008 | 67% | <a href="#">gil585150385 XP_006727664.1</a> |
| <a href="#">cholinesterase precursor [Mus musculus]</a>                                                                                  | 41.8 | 41.8 | 100% | 0.008 | 65% | <a href="#">gil124487350 NP_033868.3</a>    |

## Alignments

[Download](#) [GenPept](#) [Graphics](#) ▼ Next ▲ Previous ▲ Descriptions

### Chain A, Crystal Structure Of Fully Glycosylated Human Butyrylcholinesterase

Sequence ID: [gil393715367|pdb|4AQD|A](#) Length: 531 Number of Matches: 1

[▶ See 1 more title\(s\)](#)

Range 1: 478 to 497 [GenPept](#) [Graphics](#) ▼ Next Match ▲ Previous Match

| Score          | Expect | Identities | Positives   | Gaps     |
|----------------|--------|------------|-------------|----------|
| 61.3 bits(137) | 3e-09  | 17/20(85%) | 20/20(100%) | 0/20(0%) |

Query 1 KYGNPDETQDDSTSWPVFKS 20  
 KYGNP+ETQ++STSWPVFKS  
 Sbjct 478 KYGNPNETQNNSTSWPVFKS 497

#### Related Information

[Structure](#) - 3D structure displays  
[Identical Proteins](#) - Proteins  
 identical to the subject

[Download](#) [GenPept](#) [Graphics](#) ▼ Next ▲ Previous ▲ Descriptions

### monomeric butyrylcholinesterase [synthetic construct]

Sequence ID: [gil388261124|gb|AFK25766.1](#) Length: 557 Number of Matches: 1

Range 1: 504 to 523 [GenPept](#) [Graphics](#) ▼ Next Match ▲ Previous Match

| Score          | Expect | Identities | Positives   | Gaps     |
|----------------|--------|------------|-------------|----------|
| 61.3 bits(137) | 3e-09  | 17/20(85%) | 20/20(100%) | 0/20(0%) |

#### Related Information

Query 1 KYGNPDETQDDSTSWPVFKS 20  
 KYGNP+ETQ++STSWPVFKS  
 Sbjct 504 KYGNPNETQNNSTSWPVFKS 523

Download [GenPept](#) [Graphics](#)

[▼ Next](#) [▲ Previous](#) [▲ Descriptions](#)

Chain A, Co-Crystallization Studies Of Full Length Recombinant Bche With Cocaine Offers Insights Into Cocaine Detoxification

Sequence ID: [gi|328877250|pdb|3O9M|A](#) Length: 574 Number of Matches: 1

[▶ See 1 more title\(s\)](#)

Range 1: 476 to 495 [GenPept](#) [Graphics](#)

[▼ Next Match](#) [▲ Previous Match](#)

| Score          | Expect | Identities | Positives   | Gaps     |
|----------------|--------|------------|-------------|----------|
| 61.3 bits(137) | 3e-09  | 17/20(85%) | 20/20(100%) | 0/20(0%) |

Query 1 KYGNPDETQDDSTSWPVFKS 20  
 KYGNP+ETQ++STSWPVFKS  
 Sbjct 476 KYGNPNETQNNSTSWPVFKS 495

**Related Information**

[Structure](#) - 3D structure displays  
[Identical Proteins](#) - Proteins identical to the subject

Download [GenPept](#) [Graphics](#)

[▼ Next](#) [▲ Previous](#) [▲ Descriptions](#)

butyrylcholinesterase p.Val204Asp splice variant [Homo sapiens]

Sequence ID: [gi|632795270|gb|AHZ34327.1|](#) Length: 602 Number of Matches: 1

Range 1: 504 to 523 [GenPept](#) [Graphics](#)

[▼ Next Match](#) [▲ Previous Match](#)

| Score          | Expect | Identities | Positives   | Gaps     |
|----------------|--------|------------|-------------|----------|
| 61.3 bits(137) | 3e-09  | 17/20(85%) | 20/20(100%) | 0/20(0%) |

Query 1 KYGNPDETQDDSTSWPVFKS 20  
 KYGNP+ETQ++STSWPVFKS  
 Sbjct 504 KYGNPNETQNNSTSWPVFKS 523

**Related Information**

[Structure](#) - 3D structure displays  
[Identical Proteins](#) - Proteins identical to the subject

Download [GenPept](#) [Graphics](#)

[▼ Next](#) [▲ Previous](#) [▲ Descriptions](#)

cholinesterase precursor [Homo sapiens]

Sequence ID: [gi|4557351|ref|NP\\_000046.1|](#) Length: 602 Number of Matches: 1

[▶ See 10 more title\(s\)](#)

Range 1: 504 to 523 [GenPept](#) [Graphics](#)

[▼ Next Match](#) [▲ Previous Match](#)

| Score          | Expect | Identities | Positives   | Gaps     |
|----------------|--------|------------|-------------|----------|
| 61.3 bits(137) | 3e-09  | 17/20(85%) | 20/20(100%) | 0/20(0%) |

Query 1 KYGNPDETQDDSTSWPVFKS 20  
 KYGNP+ETQ++STSWPVFKS  
 Sbjct 504 KYGNPNETQNNSTSWPVFKS 523

**Related Information**

[Gene](#) - associated gene details  
[UniGene](#) - clustered expressed sequence tags  
[Structure](#) - 3D structure displays  
[PubChem BioAssay](#) - bioactivity screening  
[Map Viewer](#) - aligned genomic context  
[Identical Proteins](#) - Proteins identical to the subject

BLAST is a registered trademark of the National Library of Medicine.



▶ NCBI/ BLAST/ blastp suite/ Formatting Results - BHJK084D015

**i** Your search parameters were adjusted to search for a short input sequence.

[Edit and Resubmit](#) [Save Search Strategies](#) ▶ [Formatting options](#) ▶ [Download](#)

[YouTube](#) [How to read this page](#) [Blast report description](#)

## BCHE\_KYGNPDETQDNSTSWPVFKS\_Mod

RID [BHJK084D015](#) (Expires on 01-17 15:22 pm)

**Query ID** |cl|50558  
**Description** None  
**Molecule type** amino acid  
**Query Length** 20

**Database Name** nr  
**Description** All non-redundant GenBank CDS translations+PDB+SwissProt+PIR excluding environmental samples from WGS projects  
**Program** BLASTP 2.2.30+ ▶ [Citation](#)

Other reports: ▶ [Search Summary](#) [[Taxonomy reports](#)] [[Distance tree of results](#)] [[Multiple alignment](#)]

### **G** Graphic Summary

**G** [Show Conserved Domains](#)

No putative conserved domains have been detected

Distribution of 100 Blast Hits on the Query Sequence

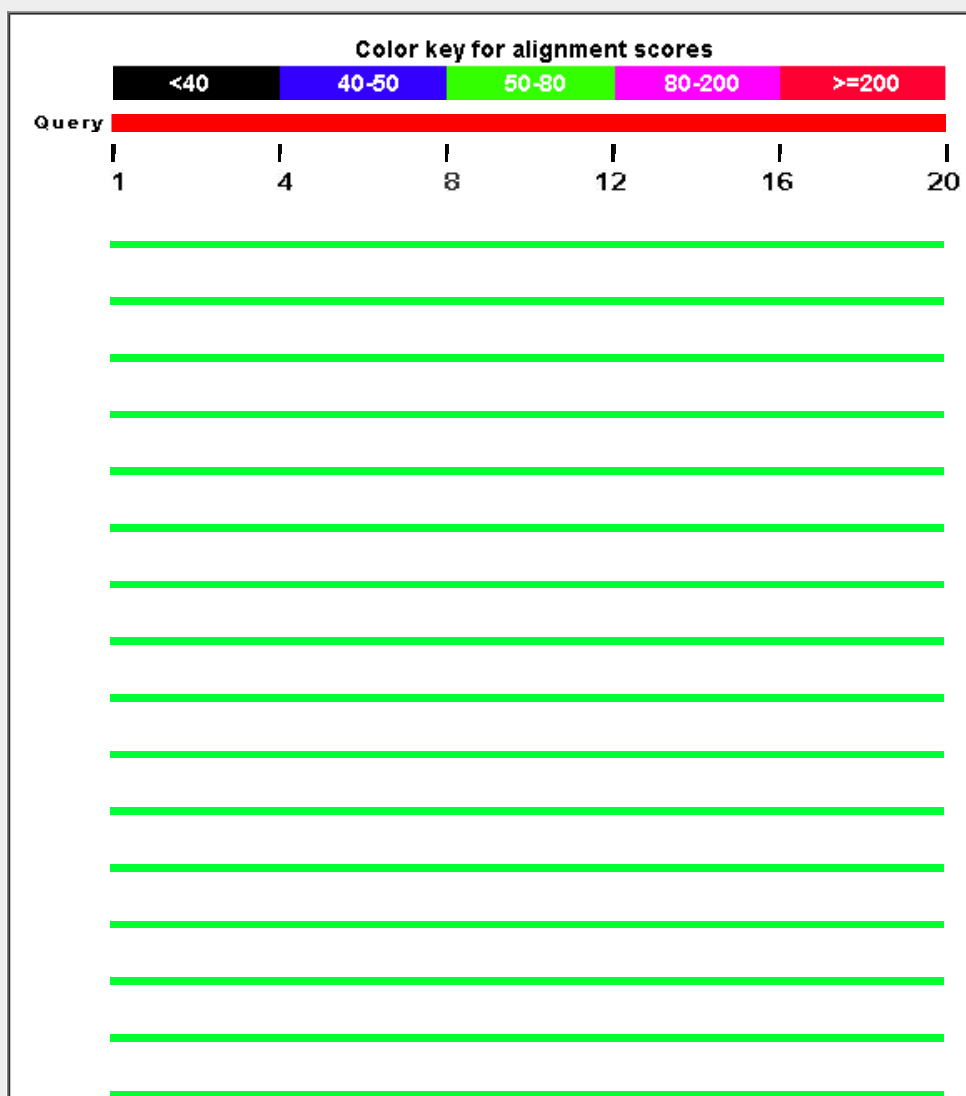

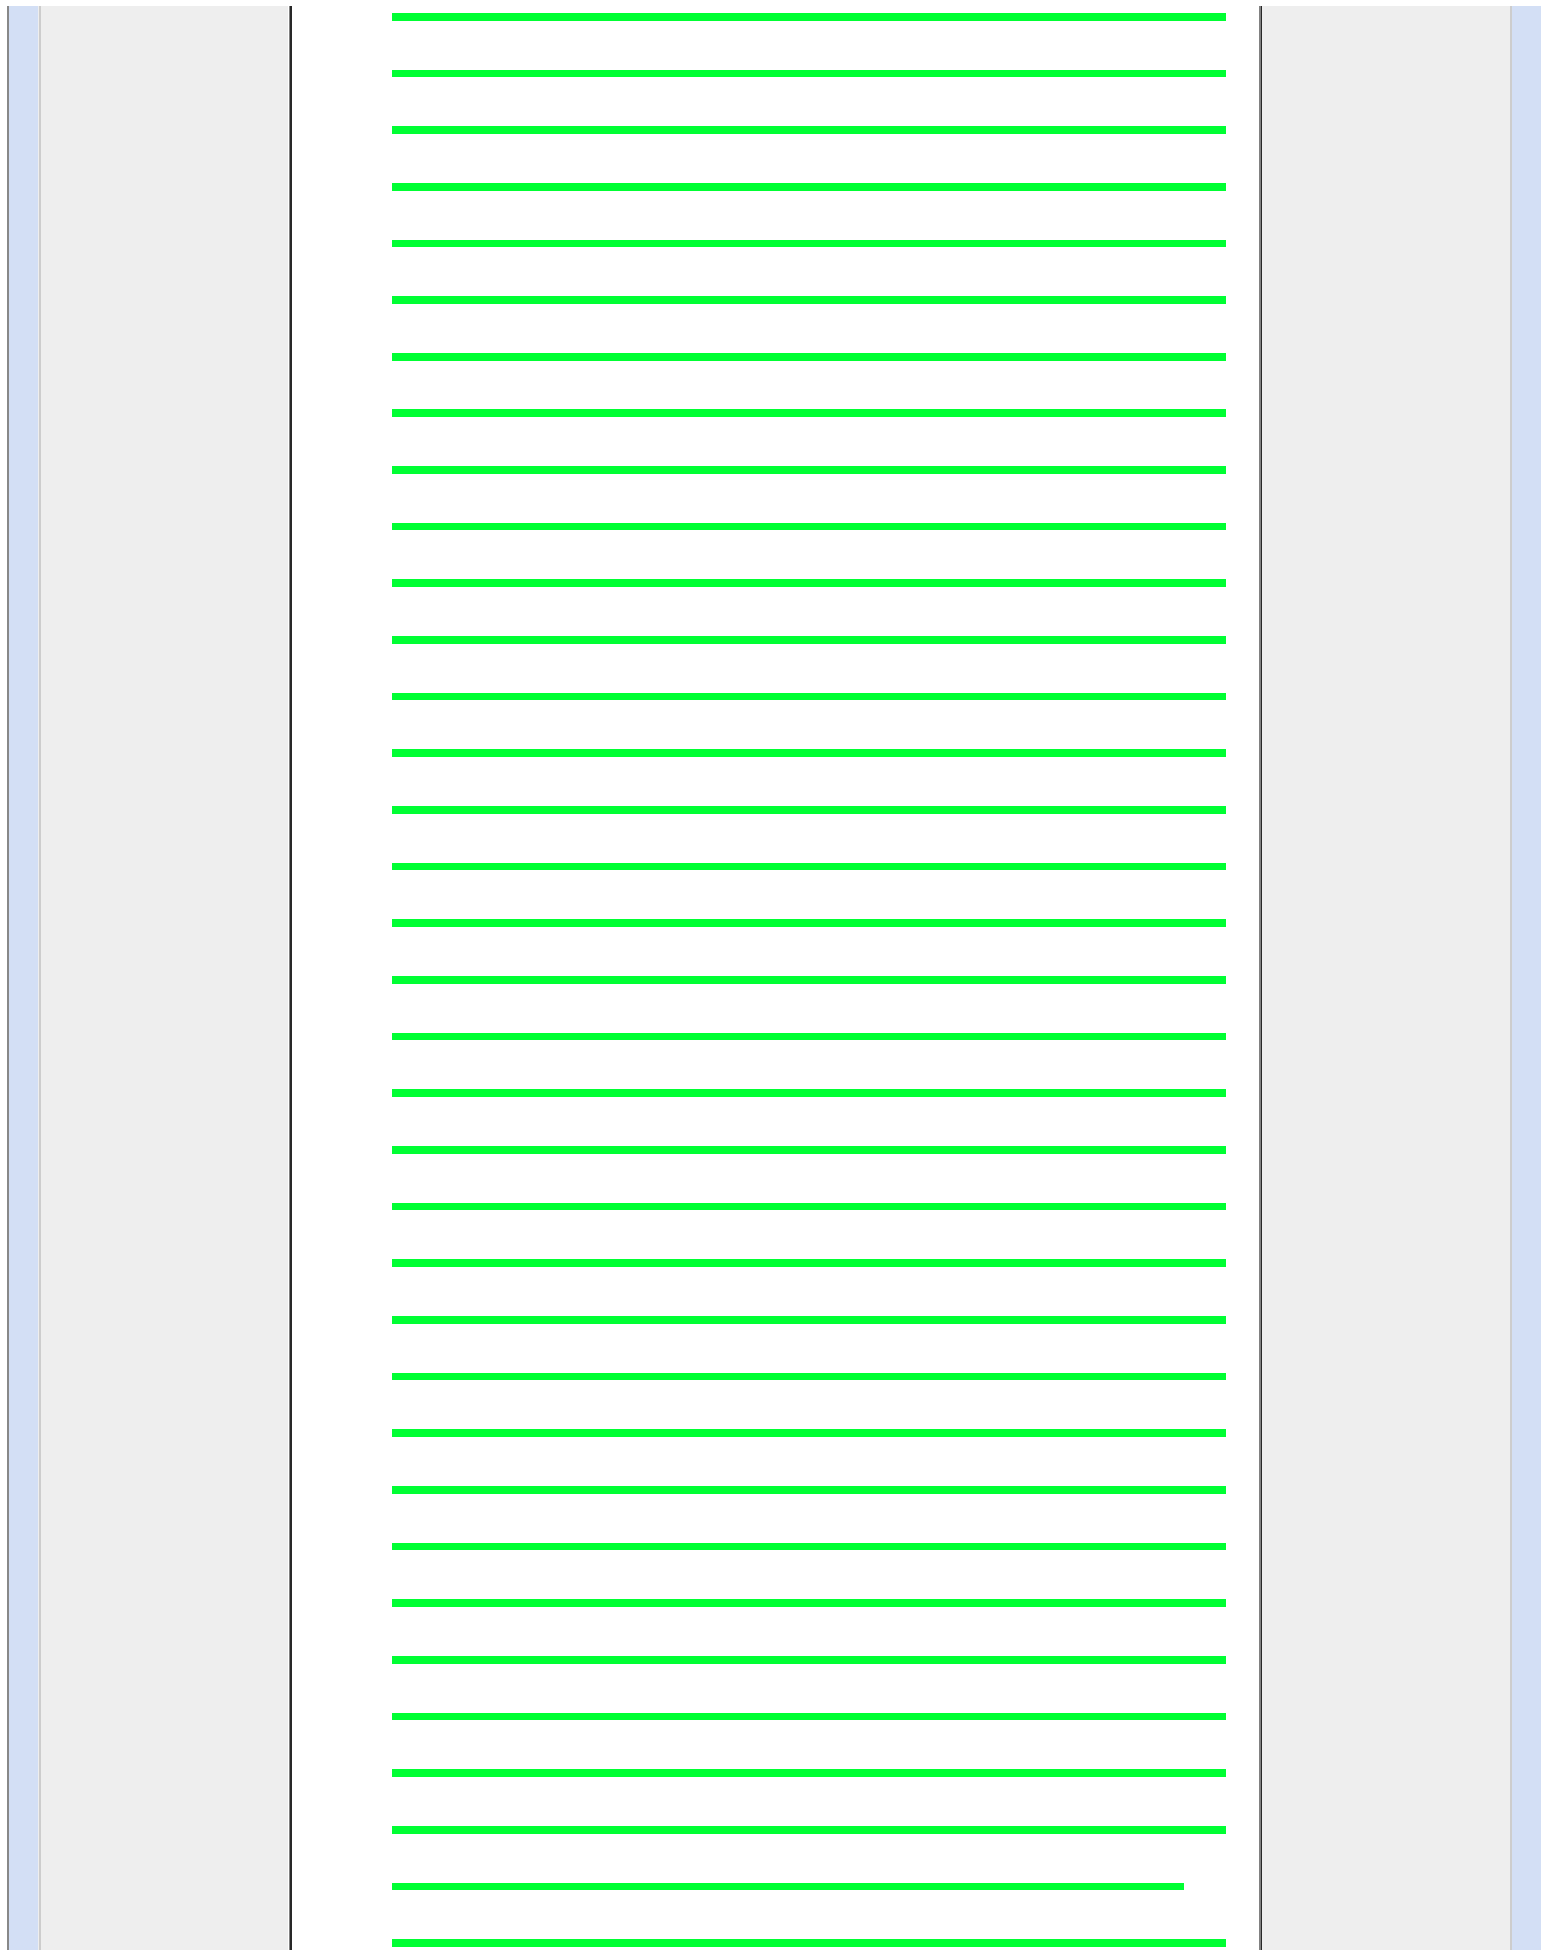



**Descriptions**

**Sequences producing significant alignments:**

Select: [All](#) [None](#) Selected:0

[Alignments](#) [Download](#) [GenPept](#) [Graphics](#) [Distance tree of results](#) [Multiple alignment](#)

| Description                                                                                                                                    | Max score | Total score | Query cover | E value | Ident | Accession                                   |
|------------------------------------------------------------------------------------------------------------------------------------------------|-----------|-------------|-------------|---------|-------|---------------------------------------------|
| <a href="#">Chain A, Crystal Structure Of Fully Glycosylated Human Butyrylcholinesterase [synthetic construct]</a>                             | 63.8      | 63.8        | 100%        | 4e-10   | 90%   | <a href="#">gij393715367 4AQD_A</a>         |
| <a href="#">Chain A, Co-Crystallization Studies Of Full Length Recombinant Butyrylcholinesterase p.Val204Asp splice variant [Homo sapiens]</a> | 63.8      | 63.8        | 100%        | 4e-10   | 90%   | <a href="#">gij388261124 AFK25766.1</a>     |
| <a href="#">Chain A, Crystal Structure Of Soman-aged Human Butyrylcholinesterase Inhibited By Cb</a>                                           | 63.8      | 63.8        | 100%        | 4e-10   | 90%   | <a href="#">gij328877250 3O9M_A</a>         |
| <a href="#">Chain A, Aged Form Of Human Butyrylcholinesterase Inhibited By ]</a>                                                               | 63.8      | 63.8        | 100%        | 4e-10   | 90%   | <a href="#">gij632795270 AHZ34327.1</a>     |
| <a href="#">Chain A, Nonaged Form Of Human Butyrylcholinesterase Inhibited ]</a>                                                               | 63.8      | 63.8        | 100%        | 4e-10   | 90%   | <a href="#">gij4557351 NP_000046.1</a>      |
| <a href="#">Chain A, X-Ray Structure Of Human Butyrylcholinesterase Inhibitec</a>                                                              | 63.8      | 63.8        | 100%        | 4e-10   | 90%   | <a href="#">gij158257558 BAF84752.1</a>     |
| <a href="#">Chain A, Crystal Structure Of Soman-aged Human Butyrylcholinest</a>                                                                | 63.8      | 63.8        | 100%        | 4e-10   | 90%   | <a href="#">gij260766471 ACX50257.1</a>     |
| <a href="#">Chain A, Aged Form Of Human Butyrylcholinesterase Inhibited By ]</a>                                                               | 63.8      | 63.8        | 100%        | 4e-10   | 90%   | <a href="#">gij530375091 XP_005247742.1</a> |
| <a href="#">Chain A, Crystal Structure Of Soman-aged Human Butyrylcholinest</a>                                                                | 62.1      | 62.1        | 100%        | 1e-09   | 90%   | <a href="#">gij402550232 4AXB_A</a>         |
| <a href="#">Chain A, Crystal Structure Of Soman-aged Human Butyrylcholinest</a>                                                                | 62.1      | 62.1        | 100%        | 1e-09   | 90%   | <a href="#">gij402550237 4B0O_A</a>         |
| <a href="#">Chain A, Structure Of Human Butyrylcholinesterase Inhibited By Cb</a>                                                              | 62.1      | 62.1        | 100%        | 1e-09   | 90%   | <a href="#">gij340707403 2Y1K_A</a>         |
| <a href="#">Chain A, Aged Form Of Human Butyrylcholinesterase Inhibited By ]</a>                                                               | 62.1      | 62.1        | 100%        | 1e-09   | 90%   | <a href="#">gij237823652 2WIL_A</a>         |
| <a href="#">Chain A, Aged Form Of Human Butyrylcholinesterase Inhibited By ]</a>                                                               | 62.1      | 62.1        | 100%        | 1e-09   | 90%   | <a href="#">gij237823648 2WIF_A</a>         |
| <a href="#">Chain A, Nonaged Form Of Human Butyrylcholinesterase Inhibited ]</a>                                                               | 62.1      | 62.1        | 100%        | 1e-09   | 90%   | <a href="#">gij237823647 2WID_A</a>         |
| <a href="#">Chain A, X-Ray Structure Of Human Butyrylcholinesterase Inhibitec</a>                                                              | 60.0      | 60.0        | 100%        | 7e-09   | 85%   | <a href="#">gij343960913 BAK62046.1</a>     |
| <a href="#">Chain A, Aged Form Of Human Butyrylcholinesterase Inhibited By ]</a>                                                               | 60.0      | 60.0        | 100%        | 7e-09   | 85%   | <a href="#">gij426342776 XP_004038010.1</a> |
| <a href="#">Chain A, Nonaged Form Of Human Butyrylcholinesterase Inhibited ]</a>                                                               | 60.0      | 60.0        | 100%        | 7e-09   | 85%   | <a href="#">gij397493718 XP_003817746.1</a> |
| <a href="#">Chain A, X-Ray Structure Of Human Butyrylcholinesterase Inhibitec</a>                                                              | 60.0      | 60.0        | 100%        | 7e-09   | 85%   | <a href="#">gij114590210 XP_516857.2</a>    |
| <a href="#">Chain A, Aged Form Of Human Butyrylcholinesterase Inhibited By ]</a>                                                               | 57.5      | 57.5        | 100%        | 5e-08   | 85%   | <a href="#">gij326634060 2XQF_A</a>         |
| <a href="#">Chain A, Nonaged Form Of Human Butyrylcholinesterase Inhibited ]</a>                                                               | 57.5      | 57.5        | 100%        | 5e-08   | 85%   | <a href="#">gij258588213 2WSL_A</a>         |
| <a href="#">Chain A, Crystal Structure Of Human Butyryl Cholinesterase [Homo</a>                                                               | 57.5      | 57.5        | 100%        | 5e-08   | 85%   | <a href="#">gij215794636 3DJY_A</a>         |
| <a href="#">Chain A, G117h Mutant Of Human Butyrylcholinesterase In Comple</a>                                                                 | 57.5      | 57.5        | 100%        | 5e-08   | 85%   | <a href="#">gij348108591 1P0I_A</a>         |
| <a href="#">Chain A, Crystal Structure Of Recombinant Full Length Human Buty</a>                                                               | 57.5      | 57.5        | 100%        | 5e-08   | 85%   | <a href="#">gij313103512 2XMB_A</a>         |
| <a href="#">Chain A, Structure Of Human Butyrylcholinesterase In Complex Wit</a>                                                               | 57.5      | 57.5        | 100%        | 5e-08   | 85%   | <a href="#">gij158429456 2PM8_A</a>         |
| <a href="#">Chain A, Structure Of Human Butyrylcholinesterase In Complex Wit</a>                                                               | 57.5      | 57.5        | 100%        | 5e-08   | 85%   | <a href="#">gij332214651 XP_003256448.1</a> |
| <a href="#">Chain A, Structure Of Human Butyrylcholinesterase In Complex Wit</a>                                                               | 57.1      | 57.1        | 100%        | 7e-08   | 85%   | <a href="#">gij145579736 2J4C_A</a>         |
| <a href="#">Chain A, Structure Of Human Butyrylcholinesterase In Complex Wit</a>                                                               | 55.4      | 55.4        | 100%        | 3e-07   | 80%   | <a href="#">gij641703485 XP_008140478.1</a> |
| <a href="#">Chain A, Structure Of Human Butyrylcholinesterase In Complex Wit</a>                                                               | 55.4      | 55.4        | 100%        | 3e-07   | 80%   | <a href="#">gij558125651 XP_006088951.1</a> |

|                                                                              |      |      |      |       |     |                                             |
|------------------------------------------------------------------------------|------|------|------|-------|-----|---------------------------------------------|
| RecName: Full=Cholinesterase; AltName: Full=Acylcholine acylhydri            | 54.9 | 54.9 | 100% | 4e-07 | 80% | <a href="#">gij21362409 P81908.1</a>        |
| RecName: Full=Cholinesterase; AltName: Full=Acylcholine acylhydri            | 54.9 | 54.9 | 100% | 4e-07 | 80% | <a href="#">gij116354 P21927.1</a>          |
| PREDICTED: cholinesterase [ <i>Oryctolagus cuniculus</i> ]                   | 54.9 | 54.9 | 100% | 4e-07 | 80% | <a href="#">gij291400118 XP_002716414.1</a> |
| PREDICTED: cholinesterase [ <i>Orcinus orca</i> ]                            | 54.9 | 54.9 | 100% | 4e-07 | 80% | <a href="#">gij466076197 XP_004283487.1</a> |
| cholinesterase precursor [ <i>Pongo abelii</i> ]                             | 54.9 | 54.9 | 100% | 4e-07 | 80% | <a href="#">gij197097436 NP_001127509.1</a> |
| PREDICTED: cholinesterase isoform X1 [ <i>Sus scrofa</i> ]                   | 54.9 | 54.9 | 100% | 4e-07 | 80% | <a href="#">gij335299867 XP_003358712.1</a> |
| cholinesterase precursor [ <i>Bos taurus</i> ]                               | 54.9 | 54.9 | 100% | 4e-07 | 80% | <a href="#">gij116004027 NP_001070374.1</a> |
| PREDICTED: cholinesterase [ <i>Bison bison bison</i> ]                       | 54.9 | 54.9 | 100% | 4e-07 | 80% | <a href="#">gij742123891 XP_010839228.1</a> |
| PREDICTED: cholinesterase [ <i>Balaenoptera acutorostrata scammon</i> ]      | 54.9 | 54.9 | 100% | 4e-07 | 80% | <a href="#">gij594625950 XP_007197616.1</a> |
| PREDICTED: cholinesterase isoform X1 [ <i>Pongo abelii</i> ]                 | 54.9 | 54.9 | 100% | 4e-07 | 80% | <a href="#">gij686714306 XP_009237773.1</a> |
| PREDICTED: cholinesterase [ <i>Lipotes vexillifer</i> ]                      | 54.9 | 54.9 | 100% | 4e-07 | 80% | <a href="#">gij602681974 XP_007446483.1</a> |
| PREDICTED: cholinesterase [ <i>Pantholops hodgsonii</i> ]                    | 54.9 | 54.9 | 100% | 4e-07 | 80% | <a href="#">gij556779632 XP_005984864.1</a> |
| PREDICTED: cholinesterase [ <i>Bos mutus</i> ]                               | 54.9 | 54.9 | 100% | 4e-07 | 80% | <a href="#">gij555966690 XP_005895396.1</a> |
| PREDICTED: cholinesterase [ <i>Capra hircus</i> ]                            | 54.9 | 54.9 | 100% | 4e-07 | 80% | <a href="#">gij548451269 XP_005675420.1</a> |
| PREDICTED: cholinesterase [ <i>Ovis aries</i> ]                              | 54.9 | 54.9 | 100% | 4e-07 | 80% | <a href="#">gij426218006 XP_004003241.1</a> |
| PREDICTED: cholinesterase [ <i>Orycteropus afer afer</i> ]                   | 52.8 | 52.8 | 100% | 2e-06 | 80% | <a href="#">gij634870148 XP_007946910.1</a> |
| PREDICTED: cholinesterase isoform X2 [ <i>Saimiri boliviensis bolivier</i> ] | 52.8 | 52.8 | 100% | 2e-06 | 75% | <a href="#">gij725560928 XP_010334003.1</a> |
| PREDICTED: cholinesterase isoform X1 [ <i>Saimiri boliviensis bolivier</i> ] | 52.8 | 52.8 | 100% | 2e-06 | 75% | <a href="#">gij403265619 XP_003925023.1</a> |
| PREDICTED: LOW QUALITY PROTEIN: cholinesterase [ <i>Callithrix j.</i> ]      | 52.8 | 52.8 | 100% | 2e-06 | 75% | <a href="#">gij675737963 XP_002807699.3</a> |
| cholinesterase precursor [ <i>Equus caballus</i> ]                           | 52.4 | 52.4 | 100% | 3e-06 | 80% | <a href="#">gij126352540 NP_001075319.1</a> |
| PREDICTED: cholinesterase-like [ <i>Elephantulus edwardii</i> ]              | 52.4 | 52.4 | 100% | 3e-06 | 80% | <a href="#">gij585675683 XP_006890440.1</a> |
| PREDICTED: cholinesterase [ <i>Ursus maritimus</i> ]                         | 52.4 | 52.4 | 95%  | 3e-06 | 79% | <a href="#">gij670999264 XP_008690527.1</a> |
| PREDICTED: cholinesterase isoform X2 [ <i>Equus przewalskii</i> ]            | 52.4 | 52.4 | 100% | 3e-06 | 80% | <a href="#">gij664725795 XP_008520036.1</a> |
| PREDICTED: cholinesterase isoform X1 [ <i>Equus przewalskii</i> ]            | 52.4 | 52.4 | 100% | 3e-06 | 80% | <a href="#">gij664725793 XP_008520035.1</a> |
| PREDICTED: cholinesterase [ <i>Ceratotherium simum simum</i> ]               | 52.4 | 52.4 | 100% | 3e-06 | 80% | <a href="#">gij478501043 XP_004424836.1</a> |
| PREDICTED: cholinesterase-like isoform X1 [ <i>Myotis brandtii</i> ]         | 52.0 | 52.0 | 100% | 4e-06 | 75% | <a href="#">gij554526033 XP_005857864.1</a> |
| Cholinesterase [ <i>Myotis brandtii</i> ]                                    | 52.0 | 52.0 | 100% | 4e-06 | 75% | <a href="#">gij521020653 EPQ02441.1</a>     |
| hypothetical protein EGK_11933 [ <i>Macaca mulatta</i> ]                     | 51.5 | 51.5 | 100% | 5e-06 | 75% | <a href="#">gij355559896 EHH16624.1</a>     |
| butyrylcholinesterase precursor [ <i>Macaca fascicularis</i> ]               | 51.5 | 51.5 | 100% | 5e-06 | 75% | <a href="#">gij290795732 ADD64703.1</a>     |
| PREDICTED: cholinesterase [ <i>Macaca fascicularis</i> ]                     | 51.5 | 51.5 | 100% | 5e-06 | 75% | <a href="#">gij544412493 XP_005546353.1</a> |
| PREDICTED: cholinesterase isoform X1 [ <i>Papio anubis</i> ]                 | 51.5 | 51.5 | 100% | 5e-06 | 75% | <a href="#">gij402861047 XP_003894921.1</a> |
| PREDICTED: LOW QUALITY PROTEIN: cholinesterase-like [ <i>Maca</i> ]          | 51.5 | 51.5 | 100% | 5e-06 | 75% | <a href="#">gij297286482 XP_002808379.1</a> |
| PREDICTED: cholinesterase [ <i>Ictidomys tridecemlineatus</i> ]              | 51.5 | 51.5 | 100% | 5e-06 | 75% | <a href="#">gij532105511 XP_005338342.1</a> |
| PREDICTED: cholinesterase isoform X1 [ <i>Chlorocebus sabaeus</i> ]          | 51.5 | 51.5 | 100% | 5e-06 | 75% | <a href="#">gij635084154 XP_007970394.1</a> |
| PREDICTED: cholinesterase isoform X2 [ <i>Camelus dromedarius</i> ]          | 51.1 | 51.1 | 100% | 7e-06 | 75% | <a href="#">gij744553709 XP_010974642.1</a> |
| PREDICTED: cholinesterase isoform X1 [ <i>Camelus dromedarius</i> ]          | 51.1 | 51.1 | 100% | 7e-06 | 75% | <a href="#">gij744553706 XP_010974641.1</a> |
| PREDICTED: cholinesterase isoform X2 [ <i>Camelus bactrianus</i> ]           | 51.1 | 51.1 | 100% | 7e-06 | 75% | <a href="#">gij743713601 XP_010950371.1</a> |
| PREDICTED: cholinesterase [ <i>Vicugna pacos</i> ]                           | 51.1 | 51.1 | 100% | 7e-06 | 75% | <a href="#">gij560956860 XP_006200907.1</a> |
| PREDICTED: cholinesterase [ <i>Camelus ferus</i> ]                           | 51.1 | 51.1 | 100% | 7e-06 | 75% | <a href="#">gij560915255 XP_006183885.1</a> |
| PREDICTED: cholinesterase-like isoform X1 [ <i>Mustela putorius furo</i> ]   | 51.1 | 51.1 | 95%  | 7e-06 | 79% | <a href="#">gij511910148 XP_004774475.1</a> |
| hypothetical protein PANDA_007095 [ <i>Ailuropoda melanoleuca</i> ]          | 50.7 | 50.7 | 95%  | 1e-05 | 79% | <a href="#">gij281337784 EFB13368.1</a>     |
| PREDICTED: cholinesterase-like [ <i>Ailuropoda melanoleuca</i> ]             | 50.7 | 50.7 | 95%  | 1e-05 | 79% | <a href="#">gij301766374 XP_002918607.1</a> |
| PREDICTED: cholinesterase [ <i>Myotis davidii</i> ]                          | 49.8 | 49.8 | 90%  | 2e-05 | 78% | <a href="#">gij584083219 XP_006761409.1</a> |
| PREDICTED: cholinesterase [ <i>Fukomys damarensis</i> ]                      | 49.4 | 49.4 | 100% | 3e-05 | 80% | <a href="#">gij731199055 XP_010610068.1</a> |
| Cholinesterase [ <i>Fukomys damarensis</i> ]                                 | 49.4 | 49.4 | 100% | 3e-05 | 80% | <a href="#">gij676283600 KFO36750.1</a>     |

|                                                                                 |      |      |      |       |     |                                             |
|---------------------------------------------------------------------------------|------|------|------|-------|-----|---------------------------------------------|
| <a href="#">PREDICTED: cholinesterase [Tarsius syrichta]</a>                    | 49.4 | 49.4 | 100% | 3e-05 | 75% | <a href="#">gij640826885 XP_008070612.1</a> |
| <a href="#">PREDICTED: cholinesterase [Otolemur garnettii]</a>                  | 49.0 | 49.0 | 100% | 4e-05 | 75% | <a href="#">gij395843862 XP_003794691.1</a> |
| <a href="#">PREDICTED: cholinesterase-like isoform 1 [Dasypus novemcinctus]</a> | 49.0 | 49.0 | 100% | 4e-05 | 75% | <a href="#">gij488587231 XP_004478943.1</a> |
| <a href="#">PREDICTED: cholinesterase-like [Trichechus manatus latirostris]</a> | 49.0 | 49.0 | 100% | 4e-05 | 75% | <a href="#">gij471406477 XP_004384938.1</a> |
| <a href="#">PREDICTED: cholinesterase isoform X1 [Loxodonta africana]</a>       | 49.0 | 49.0 | 100% | 4e-05 | 75% | <a href="#">gij731499959 XP_003416305.2</a> |
| <a href="#">PREDICTED: cholinesterase [Galeopterus variegatus]</a>              | 48.6 | 48.6 | 100% | 5e-05 | 75% | <a href="#">gij667294272 XP_008578862.1</a> |
| RecName: Full=Cholinesterase; AltName: Full=Acylcholine acylhyd                 | 48.1 | 48.1 | 100% | 7e-05 | 70% | <a href="#">gij38502853 O62761.1</a>        |
| <a href="#">cholinesterase precursor [Felis catus]</a>                          | 48.1 | 48.1 | 100% | 7e-05 | 70% | <a href="#">gij57163907 NP_001009364.1</a>  |
| <a href="#">PREDICTED: cholinesterase-like [Panthera tigris altaica]</a>        | 48.1 | 48.1 | 100% | 7e-05 | 70% | <a href="#">gij591300304 XP_007077117.1</a> |
| <a href="#">PREDICTED: cholinesterase-like [Odobenus rosmarus divergens]</a>    | 48.1 | 48.1 | 90%  | 7e-05 | 78% | <a href="#">gij472347065 XP_004393257.1</a> |
| <a href="#">PREDICTED: cholinesterase [Rhinopithecus roxellana]</a>             | 48.1 | 48.1 | 100% | 7e-05 | 75% | <a href="#">gij724956944 XP_010353594.1</a> |
| <a href="#">PREDICTED: cholinesterase-like [Chrysochloris asiatica]</a>         | 47.7 | 47.7 | 100% | 1e-04 | 70% | <a href="#">gij586462448 XP_006861862.1</a> |
| <a href="#">PREDICTED: cholinesterase-like [Echinops telfairi]</a>              | 47.7 | 47.7 | 100% | 1e-04 | 70% | <a href="#">gij507651638 XP_004704160.1</a> |
| <a href="#">PREDICTED: cholinesterase-like [Sorex araneus]</a>                  | 47.3 | 47.3 | 95%  | 1e-04 | 74% | <a href="#">gij505845607 XP_004616283.1</a> |
| <a href="#">PREDICTED: cholinesterase isoform X2 [Heterocephalus glaber]</a>    | 46.9 | 46.9 | 100% | 2e-04 | 75% | <a href="#">gij512824494 XP_004880401.1</a> |
| <a href="#">PREDICTED: cholinesterase isoform X1 [Chinchilla lanigera]</a>      | 46.9 | 46.9 | 100% | 2e-04 | 75% | <a href="#">gij533158554 XP_005393194.1</a> |
| <a href="#">PREDICTED: cholinesterase isoform X1 [Heterocephalus glaber]</a>    | 46.9 | 46.9 | 100% | 2e-04 | 75% | <a href="#">gij512824490 XP_004880400.1</a> |
| <a href="#">PREDICTED: cholinesterase isoform X2 [Cavia porcellus]</a>          | 46.4 | 46.4 | 100% | 3e-04 | 70% | <a href="#">gij514460083 XP_005003514.1</a> |
| <a href="#">PREDICTED: cholinesterase isoform X1 [Cavia porcellus]</a>          | 46.4 | 46.4 | 100% | 3e-04 | 70% | <a href="#">gij348567235 XP_003469406.1</a> |
| <a href="#">Cholinesterase [Pteropus alecto]</a>                                | 45.2 | 45.2 | 100% | 7e-04 | 70% | <a href="#">gij431915168 ELK15855.1</a>     |
| <a href="#">PREDICTED: cholinesterase [Pteropus alecto]</a>                     | 45.2 | 45.2 | 100% | 7e-04 | 70% | <a href="#">gij586546267 XP_006908236.1</a> |
| <a href="#">PREDICTED: cholinesterase [Erinaceus europaeus]</a>                 | 44.8 | 44.8 | 100% | 0.001 | 70% | <a href="#">gij617605262 XP_007523705.1</a> |
| <a href="#">PREDICTED: cholinesterase [Canis lupus familiaris]</a>              | 44.8 | 44.8 | 90%  | 0.001 | 72% | <a href="#">gij74003707 XP_545267.2</a>     |
| <a href="#">PREDICTED: cholinesterase isoform X1 [Peromyscus maniculatus]</a>   | 44.8 | 44.8 | 100% | 0.001 | 70% | <a href="#">gij589919054 XP_006972718.1</a> |
| <a href="#">PREDICTED: cholinesterase-like [Leptonychotes weddellii]</a>        | 44.3 | 44.3 | 90%  | 0.001 | 72% | <a href="#">gij585150385 XP_006727664.1</a> |
| <a href="#">Butyrylcholinesterase [Mus musculus]</a>                            | 44.3 | 44.3 | 100% | 0.001 | 70% | <a href="#">gij71534030 AAH99977.1</a>      |
| <a href="#">cholinesterase precursor [Mus musculus]</a>                         | 44.3 | 44.3 | 100% | 0.001 | 70% | <a href="#">gij124487350 NP_033868.3</a>    |

## Alignments

[Download](#) [GenPept](#) [Graphics](#) [Next](#) [Previous](#) [Descriptions](#)

### Chain A, Crystal Structure Of Fully Glycosylated Human Butyrylcholinesterase

Sequence ID: [gij393715367|pdb|4AQD|A](#) Length: 531 Number of Matches: 1

[See 1 more title\(s\)](#)

Range 1: 478 to 497 [GenPept](#) [Graphics](#) [Next Match](#) [Previous Match](#)

| Score          | Expect | Identities | Positives   | Gaps     |
|----------------|--------|------------|-------------|----------|
| 63.8 bits(143) | 4e-10  | 18/20(90%) | 20/20(100%) | 0/20(0%) |

Query 1 KYGNPDETQDNSTSWPVFKS 20  
 KYGNP+ETQ+NSTSWPVFKS  
 Sbjct 478 KYGNPNETQNNSTSWPVFKS 497

#### Related Information

[Structure](#) - 3D structure displays  
[Identical Proteins](#) - Proteins  
 identical to the subject

[Download](#) [GenPept](#) [Graphics](#) [Next](#) [Previous](#) [Descriptions](#)

### monomeric butyrylcholinesterase [synthetic construct]

Sequence ID: [gij388261124|gb|AFK25766.1](#) Length: 557 Number of Matches: 1

Range 1: 504 to 523 [GenPept](#) [Graphics](#) [Next Match](#) [Previous Match](#)

| Score          | Expect | Identities | Positives   | Gaps     |
|----------------|--------|------------|-------------|----------|
| 63.8 bits(143) | 4e-10  | 18/20(90%) | 20/20(100%) | 0/20(0%) |

#### Related Information

Query 1 KYGNPDETQDNSTSWPVFKS 20  
 Sbjct 504 KYGNP+ETQ+NSTSWPVFKS 523  
 KYGNPNETQNNSTSWPVFKS

[Download](#) [GenPept](#) [Graphics](#)

[Next](#) [Previous](#) [Descriptions](#)

Chain A, Co-Crystallization Studies Of Full Length Recombinant Bche With Cocaine Offers Insights Into Cocaine Detoxification

Sequence ID: [gi|328877250|pdb|3O9M|A](#) Length: 574 Number of Matches: 1

[See 1 more title\(s\)](#)

Range 1: 476 to 495 [GenPept](#) [Graphics](#)

[Next Match](#) [Previous Match](#)

| Score          | Expect | Identities | Positives   | Gaps     |
|----------------|--------|------------|-------------|----------|
| 63.8 bits(143) | 4e-10  | 18/20(90%) | 20/20(100%) | 0/20(0%) |

Query 1 KYGNPDETQDNSTSWPVFKS 20  
 Sbjct 476 KYGNP+ETQ+NSTSWPVFKS 495  
 KYGNPNETQNNSTSWPVFKS

**Related Information**

[Structure](#) - 3D structure displays  
[Identical Proteins](#) - Proteins identical to the subject

[Download](#) [GenPept](#) [Graphics](#)

[Next](#) [Previous](#) [Descriptions](#)

butyrylcholinesterase p.Val204Asp splice variant [Homo sapiens]

Sequence ID: [gi|632795270|gb|AHZ34327.1](#) Length: 602 Number of Matches: 1

Range 1: 504 to 523 [GenPept](#) [Graphics](#)

[Next Match](#) [Previous Match](#)

| Score          | Expect | Identities | Positives   | Gaps     |
|----------------|--------|------------|-------------|----------|
| 63.8 bits(143) | 4e-10  | 18/20(90%) | 20/20(100%) | 0/20(0%) |

Query 1 KYGNPDETQDNSTSWPVFKS 20  
 Sbjct 504 KYGNP+ETQ+NSTSWPVFKS 523  
 KYGNPNETQNNSTSWPVFKS

**Related Information**

[Structure](#) - 3D structure displays  
[Identical Proteins](#) - Proteins identical to the subject

[Download](#) [GenPept](#) [Graphics](#)

[Next](#) [Previous](#) [Descriptions](#)

cholinesterase precursor [Homo sapiens]

Sequence ID: [gi|4557351|ref|NP\\_000046.1](#) Length: 602 Number of Matches: 1

[See 10 more title\(s\)](#)

Range 1: 504 to 523 [GenPept](#) [Graphics](#)

[Next Match](#) [Previous Match](#)

| Score          | Expect | Identities | Positives   | Gaps     |
|----------------|--------|------------|-------------|----------|
| 63.8 bits(143) | 4e-10  | 18/20(90%) | 20/20(100%) | 0/20(0%) |

Query 1 KYGNPDETQDNSTSWPVFKS 20  
 Sbjct 504 KYGNP+ETQ+NSTSWPVFKS 523  
 KYGNPNETQNNSTSWPVFKS

**Related Information**

[Gene](#) - associated gene details  
[UniGene](#) - clustered expressed sequence tags  
[Structure](#) - 3D structure displays  
[PubChem BioAssay](#) - bioactivity screening  
[Map Viewer](#) - aligned genomic context  
[Identical Proteins](#) - Proteins identical to the subject

BLAST is a registered trademark of the National Library of Medicine.

▶ NCBI/ BLAST/ blastp suite/ Formatting Results - BHJKBYJB014

**i** Your search parameters were adjusted to search for a short input sequence.

[Edit and Resubmit](#) [Save Search Strategies](#) ▶ [Formatting options](#) ▶ [Download](#)

[YouTube](#) [How to read this page](#) [Blast report description](#)

### BCHE\_KYGNPDETQNDSTSWPVFKS\_Mod

RID [BHJKBYJB014](#) (Expires on 01-17 15:23 pm)

**Query ID** |cl|60926  
**Description** None  
**Molecule type** amino acid  
**Query Length** 20

**Database Name** nr  
**Description** All non-redundant GenBank CDS translations+PDB+SwissProt+PIR excluding environmental samples from WGS projects  
**Program** BLASTP 2.2.30+ ▶ [Citation](#)

Other reports: ▶ [Search Summary](#) [[Taxonomy reports](#)] [[Distance tree of results](#)] [[Multiple alignment](#)]

### **G** Graphic Summary

[Show Conserved Domains](#)

No putative conserved domains have been detected

Distribution of 100 Blast Hits on the Query Sequence







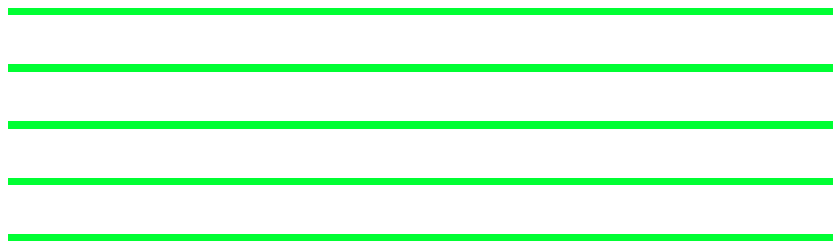

## Descriptions

### Sequences producing significant alignments:

Select: [All](#) [None](#) Selected:0

| <a href="#">Alignments</a> <a href="#">Download</a> <a href="#">GenPept</a> <a href="#">Graphics</a> <a href="#">Distance tree of results</a> <a href="#">Multiple alignment</a> |           |             |             |         |       |                                             |  |
|----------------------------------------------------------------------------------------------------------------------------------------------------------------------------------|-----------|-------------|-------------|---------|-------|---------------------------------------------|--|
| Description                                                                                                                                                                      | Max score | Total score | Query cover | E value | Ident | Accession                                   |  |
| <a href="#">Chain A, Crystal Structure Of Fully Glycosylated Human Butyrylcholinesterase [synthetic construct]</a>                                                               | 63.8      | 63.8        | 100%        | 4e-10   | 90%   | <a href="#">gij393715367 4AQD_A</a>         |  |
| <a href="#">Chain A, Co-Crystallization Studies Of Full Length Recombinant Butyrylcholinesterase p.Val204Asp splice variant [Homo sapiens]</a>                                   | 63.8      | 63.8        | 100%        | 4e-10   | 90%   | <a href="#">gij388261124 AFK25766.1</a>     |  |
| <a href="#">Chain A, Crystal Structure Of Soman-aged Human Butyrylcholinesterase precursor [Homo sapiens]</a>                                                                    | 63.8      | 63.8        | 100%        | 4e-10   | 90%   | <a href="#">gij328877250 3O9M_A</a>         |  |
| <a href="#">Chain A, Crystal Structure Of Soman-aged Human Butyrylcholinesterase precursor [Homo sapiens]</a>                                                                    | 63.8      | 63.8        | 100%        | 4e-10   | 90%   | <a href="#">gij632795270 AHZ34327.1</a>     |  |
| <a href="#">Chain A, Crystal Structure Of Soman-aged Human Butyrylcholinesterase precursor [Homo sapiens]</a>                                                                    | 63.8      | 63.8        | 100%        | 4e-10   | 90%   | <a href="#">gij4557351 NP_000046.1</a>      |  |
| <a href="#">Chain A, Crystal Structure Of Soman-aged Human Butyrylcholinesterase precursor [Homo sapiens]</a>                                                                    | 63.8      | 63.8        | 100%        | 4e-10   | 90%   | <a href="#">gij158257558 BAF84752.1</a>     |  |
| <a href="#">Chain A, Crystal Structure Of Soman-aged Human Butyrylcholinesterase precursor [Homo sapiens]</a>                                                                    | 63.8      | 63.8        | 100%        | 4e-10   | 90%   | <a href="#">gij260766471 ACX50257.1</a>     |  |
| <a href="#">Chain A, Crystal Structure Of Soman-aged Human Butyrylcholinesterase precursor [Homo sapiens]</a>                                                                    | 63.8      | 63.8        | 100%        | 4e-10   | 90%   | <a href="#">gij530375091 XP_005247742.1</a> |  |
| <a href="#">Chain A, Crystal Structure Of Soman-aged Human Butyrylcholinesterase precursor [Homo sapiens]</a>                                                                    | 62.1      | 62.1        | 100%        | 1e-09   | 90%   | <a href="#">gij402550232 4AXB_A</a>         |  |
| <a href="#">Chain A, Crystal Structure Of Soman-aged Human Butyrylcholinesterase precursor [Homo sapiens]</a>                                                                    | 62.1      | 62.1        | 100%        | 1e-09   | 90%   | <a href="#">gij402550237 4B0O_A</a>         |  |
| <a href="#">Chain A, Crystal Structure Of Soman-aged Human Butyrylcholinesterase precursor [Homo sapiens]</a>                                                                    | 62.1      | 62.1        | 100%        | 1e-09   | 90%   | <a href="#">gij340707403 2Y1K_A</a>         |  |
| <a href="#">Chain A, Crystal Structure Of Soman-aged Human Butyrylcholinesterase precursor [Homo sapiens]</a>                                                                    | 62.1      | 62.1        | 100%        | 1e-09   | 90%   | <a href="#">gij237823652 2WIL_A</a>         |  |
| <a href="#">Chain A, Crystal Structure Of Soman-aged Human Butyrylcholinesterase precursor [Homo sapiens]</a>                                                                    | 62.1      | 62.1        | 100%        | 1e-09   | 90%   | <a href="#">gij237823648 2WIF_A</a>         |  |
| <a href="#">Chain A, Crystal Structure Of Soman-aged Human Butyrylcholinesterase precursor [Homo sapiens]</a>                                                                    | 62.1      | 62.1        | 100%        | 1e-09   | 90%   | <a href="#">gij237823647 2WID_A</a>         |  |
| <a href="#">Chain A, Crystal Structure Of Soman-aged Human Butyrylcholinesterase precursor [Homo sapiens]</a>                                                                    | 60.4      | 60.4        | 100%        | 5e-09   | 90%   | <a href="#">gij326634060 2XQF_A</a>         |  |
| <a href="#">Chain A, Crystal Structure Of Soman-aged Human Butyrylcholinesterase precursor [Homo sapiens]</a>                                                                    | 60.4      | 60.4        | 100%        | 5e-09   | 90%   | <a href="#">gij258588213 2WSL_A</a>         |  |
| <a href="#">Chain A, Crystal Structure Of Soman-aged Human Butyrylcholinesterase precursor [Homo sapiens]</a>                                                                    | 60.4      | 60.4        | 100%        | 5e-09   | 90%   | <a href="#">gij215794636 3DJY_A</a>         |  |
| <a href="#">Chain A, Crystal Structure Of Soman-aged Human Butyrylcholinesterase precursor [Homo sapiens]</a>                                                                    | 60.4      | 60.4        | 100%        | 5e-09   | 90%   | <a href="#">gij348108591 1P0I_A</a>         |  |
| <a href="#">Chain A, Crystal Structure Of Soman-aged Human Butyrylcholinesterase precursor [Homo sapiens]</a>                                                                    | 60.4      | 60.4        | 100%        | 5e-09   | 90%   | <a href="#">gij313103512 2XMB_A</a>         |  |
| <a href="#">Chain A, Crystal Structure Of Soman-aged Human Butyrylcholinesterase precursor [Homo sapiens]</a>                                                                    | 60.4      | 60.4        | 100%        | 5e-09   | 90%   | <a href="#">gij158429456 2PM8_A</a>         |  |
| <a href="#">Chain A, Crystal Structure Of Soman-aged Human Butyrylcholinesterase precursor [Homo sapiens]</a>                                                                    | 60.0      | 60.0        | 100%        | 7e-09   | 85%   | <a href="#">gij343960913 BAK62046.1</a>     |  |
| <a href="#">Chain A, Crystal Structure Of Soman-aged Human Butyrylcholinesterase precursor [Homo sapiens]</a>                                                                    | 60.0      | 60.0        | 100%        | 7e-09   | 90%   | <a href="#">gij145579736 2J4C_A</a>         |  |
| <a href="#">Chain A, Crystal Structure Of Soman-aged Human Butyrylcholinesterase precursor [Homo sapiens]</a>                                                                    | 60.0      | 60.0        | 100%        | 7e-09   | 85%   | <a href="#">gij426342776 XP_004038010.1</a> |  |
| <a href="#">Chain A, Crystal Structure Of Soman-aged Human Butyrylcholinesterase precursor [Homo sapiens]</a>                                                                    | 60.0      | 60.0        | 100%        | 7e-09   | 85%   | <a href="#">gij397493718 XP_003817746.1</a> |  |
| <a href="#">Chain A, Crystal Structure Of Soman-aged Human Butyrylcholinesterase precursor [Homo sapiens]</a>                                                                    | 60.0      | 60.0        | 100%        | 7e-09   | 85%   | <a href="#">gij114590210 XP_516857.2</a>    |  |
| <a href="#">Chain A, Crystal Structure Of Soman-aged Human Butyrylcholinesterase precursor [Homo sapiens]</a>                                                                    | 57.5      | 57.5        | 100%        | 5e-08   | 85%   | <a href="#">gij332214651 XP_003256448.1</a> |  |
| <a href="#">Chain A, Crystal Structure Of Soman-aged Human Butyrylcholinesterase precursor [Homo sapiens]</a>                                                                    | 56.2      | 56.2        | 100%        | 1e-07   | 85%   | <a href="#">gij641703485 XP_008140478.1</a> |  |
| <a href="#">Chain A, Crystal Structure Of Soman-aged Human Butyrylcholinesterase precursor [Homo sapiens]</a>                                                                    | 56.2      | 56.2        | 100%        | 1e-07   | 85%   | <a href="#">gij558125651 XP_006088951.1</a> |  |

|                                                                                     |      |      |      |       |     |                                              |
|-------------------------------------------------------------------------------------|------|------|------|-------|-----|----------------------------------------------|
| <a href="#">RecName: Full=Cholinesterase; AltName: Full=Acylcholine acylhydri</a>   | 54.9 | 54.9 | 100% | 4e-07 | 80% | <a href="#">gij 21362409 P81908.1</a>        |
| <a href="#">RecName: Full=Cholinesterase; AltName: Full=Acylcholine acylhydri</a>   | 54.9 | 54.9 | 100% | 4e-07 | 80% | <a href="#">gij 116354 P21927.1</a>          |
| <a href="#">PREDICTED: cholinesterase [Oryctolagus cuniculus]</a>                   | 54.9 | 54.9 | 100% | 4e-07 | 80% | <a href="#">gij 291400118 XP_002716414.1</a> |
| <a href="#">PREDICTED: cholinesterase [Orcinus orca]</a>                            | 54.9 | 54.9 | 100% | 4e-07 | 80% | <a href="#">gij 466076197 XP_004283487.1</a> |
| <a href="#">cholinesterase precursor [Pongo abelii]</a>                             | 54.9 | 54.9 | 100% | 4e-07 | 80% | <a href="#">gij 197097436 NP_001127509.1</a> |
| <a href="#">PREDICTED: cholinesterase isoform X1 [Sus scrofa]</a>                   | 54.9 | 54.9 | 100% | 4e-07 | 80% | <a href="#">gij 335299867 XP_003358712.1</a> |
| <a href="#">cholinesterase precursor [Bos taurus]</a>                               | 54.9 | 54.9 | 100% | 4e-07 | 80% | <a href="#">gij 116004027 NP_001070374.1</a> |
| <a href="#">PREDICTED: cholinesterase [Bison bison bison]</a>                       | 54.9 | 54.9 | 100% | 4e-07 | 80% | <a href="#">gij 742123891 XP_010839228.1</a> |
| <a href="#">PREDICTED: cholinesterase [Balaenoptera acutorostrata scammon]</a>      | 54.9 | 54.9 | 100% | 4e-07 | 80% | <a href="#">gij 594625950 XP_007197616.1</a> |
| <a href="#">PREDICTED: cholinesterase isoform X1 [Pongo abelii]</a>                 | 54.9 | 54.9 | 100% | 4e-07 | 80% | <a href="#">gij 686714306 XP_009237773.1</a> |
| <a href="#">PREDICTED: cholinesterase [Lipotes vexillifer]</a>                      | 54.9 | 54.9 | 100% | 4e-07 | 80% | <a href="#">gij 602681974 XP_007446483.1</a> |
| <a href="#">PREDICTED: cholinesterase [Pantholops hodgsonii]</a>                    | 54.9 | 54.9 | 100% | 4e-07 | 80% | <a href="#">gij 556779632 XP_005984864.1</a> |
| <a href="#">PREDICTED: cholinesterase [Bos mutus]</a>                               | 54.9 | 54.9 | 100% | 4e-07 | 80% | <a href="#">gij 555966690 XP_005895396.1</a> |
| <a href="#">PREDICTED: cholinesterase [Capra hircus]</a>                            | 54.9 | 54.9 | 100% | 4e-07 | 80% | <a href="#">gij 548451269 XP_005675420.1</a> |
| <a href="#">PREDICTED: cholinesterase [Ovis aries]</a>                              | 54.9 | 54.9 | 100% | 4e-07 | 80% | <a href="#">gij 426218006 XP_004003241.1</a> |
| <a href="#">PREDICTED: cholinesterase-like isoform X1 [Myotis brandtii]</a>         | 52.8 | 52.8 | 100% | 2e-06 | 80% | <a href="#">gij 554526033 XP_005857864.1</a> |
| <a href="#">PREDICTED: cholinesterase [Orycteropus afer afer]</a>                   | 52.8 | 52.8 | 100% | 2e-06 | 80% | <a href="#">gij 634870148 XP_007946910.1</a> |
| <a href="#">PREDICTED: cholinesterase isoform X2 [Saimiri boliviensis bolivier]</a> | 52.8 | 52.8 | 100% | 2e-06 | 75% | <a href="#">gij 725560928 XP_010334003.1</a> |
| <a href="#">PREDICTED: cholinesterase isoform X1 [Saimiri boliviensis bolivier]</a> | 52.8 | 52.8 | 100% | 2e-06 | 75% | <a href="#">gij 403265619 XP_003925023.1</a> |
| <a href="#">PREDICTED: LOW QUALITY PROTEIN: cholinesterase [Callithrix j.</a>       | 52.8 | 52.8 | 100% | 2e-06 | 75% | <a href="#">gij 675737963 XP_002807699.3</a> |
| <a href="#">Cholinesterase [Myotis brandtii]</a>                                    | 52.8 | 52.8 | 100% | 2e-06 | 80% | <a href="#">gij 521020653 EPQ02441.1</a>     |
| <a href="#">PREDICTED: cholinesterase [Ursus maritimus]</a>                         | 52.4 | 52.4 | 95%  | 3e-06 | 79% | <a href="#">gij 670999264 XP_008690527.1</a> |
| <a href="#">hypothetical protein EGK_11933 [Macaca mulatta]</a>                     | 51.5 | 51.5 | 100% | 5e-06 | 75% | <a href="#">gij 355559896 EHH16624.1</a>     |
| <a href="#">butyrylcholinesterase precursor [Macaca fascicularis]</a>               | 51.5 | 51.5 | 100% | 5e-06 | 75% | <a href="#">gij 290795732 ADD64703.1</a>     |
| <a href="#">cholinesterase precursor [Equus caballus]</a>                           | 51.5 | 51.5 | 100% | 5e-06 | 75% | <a href="#">gij 126352540 NP_001075319.1</a> |
| <a href="#">PREDICTED: cholinesterase-like [Elephantulus edwardii]</a>              | 51.5 | 51.5 | 100% | 5e-06 | 75% | <a href="#">gij 585675683 XP_006890440.1</a> |
| <a href="#">PREDICTED: cholinesterase [Macaca fascicularis]</a>                     | 51.5 | 51.5 | 100% | 5e-06 | 75% | <a href="#">gij 544412493 XP_005546353.1</a> |
| <a href="#">PREDICTED: cholinesterase isoform X1 [Papio anubis]</a>                 | 51.5 | 51.5 | 100% | 5e-06 | 75% | <a href="#">gij 402861047 XP_003894921.1</a> |
| <a href="#">PREDICTED: LOW QUALITY PROTEIN: cholinesterase-like [Maca</a>           | 51.5 | 51.5 | 100% | 5e-06 | 75% | <a href="#">gij 297286482 XP_002808379.1</a> |
| <a href="#">PREDICTED: cholinesterase [Ictidomys tridecemlineatus]</a>              | 51.5 | 51.5 | 100% | 5e-06 | 75% | <a href="#">gij 532105511 XP_005338342.1</a> |
| <a href="#">PREDICTED: cholinesterase isoform X2 [Equus przewalskii]</a>            | 51.5 | 51.5 | 100% | 5e-06 | 75% | <a href="#">gij 664725795 XP_008520036.1</a> |
| <a href="#">PREDICTED: cholinesterase isoform X1 [Equus przewalskii]</a>            | 51.5 | 51.5 | 100% | 5e-06 | 75% | <a href="#">gij 664725793 XP_008520035.1</a> |
| <a href="#">PREDICTED: cholinesterase isoform X1 [Chlorocebus sabaeus]</a>          | 51.5 | 51.5 | 100% | 5e-06 | 75% | <a href="#">gij 635084154 XP_007970394.1</a> |
| <a href="#">PREDICTED: cholinesterase [Ceratotherium simum simum]</a>               | 51.5 | 51.5 | 100% | 5e-06 | 75% | <a href="#">gij 478501043 XP_004424836.1</a> |
| <a href="#">PREDICTED: cholinesterase isoform X2 [Camelus dromedarius]</a>          | 51.1 | 51.1 | 100% | 7e-06 | 75% | <a href="#">gij 744553709 XP_010974642.1</a> |
| <a href="#">PREDICTED: cholinesterase isoform X1 [Camelus dromedarius]</a>          | 51.1 | 51.1 | 100% | 7e-06 | 75% | <a href="#">gij 744553706 XP_010974641.1</a> |
| <a href="#">PREDICTED: cholinesterase isoform X2 [Camelus bactrianus]</a>           | 51.1 | 51.1 | 100% | 7e-06 | 75% | <a href="#">gij 743713601 XP_010950371.1</a> |
| <a href="#">PREDICTED: cholinesterase [Vicugna pacos]</a>                           | 51.1 | 51.1 | 100% | 7e-06 | 75% | <a href="#">gij 560956860 XP_006200907.1</a> |
| <a href="#">PREDICTED: cholinesterase [Camelus ferus]</a>                           | 51.1 | 51.1 | 100% | 7e-06 | 75% | <a href="#">gij 560915255 XP_006183885.1</a> |
| <a href="#">PREDICTED: cholinesterase-like isoform X1 [Mustela putorius furo]</a>   | 51.1 | 51.1 | 95%  | 7e-06 | 79% | <a href="#">gij 511910148 XP_004774475.1</a> |
| <a href="#">hypothetical protein PANDA_007095 [Ailuropoda melanoleuca]</a>          | 50.7 | 50.7 | 95%  | 1e-05 | 79% | <a href="#">gij 281337784 EFB13368.1</a>     |
| <a href="#">PREDICTED: cholinesterase [Myotis davidii]</a>                          | 50.7 | 50.7 | 90%  | 1e-05 | 83% | <a href="#">gij 584083219 XP_006761409.1</a> |
| <a href="#">PREDICTED: cholinesterase-like [Ailuropoda melanoleuca]</a>             | 50.7 | 50.7 | 95%  | 1e-05 | 79% | <a href="#">gij 301766374 XP_002918607.1</a> |
| <a href="#">PREDICTED: cholinesterase [Fukomys damarensis]</a>                      | 48.6 | 48.6 | 100% | 5e-05 | 75% | <a href="#">gij 731199055 XP_010610068.1</a> |
| <a href="#">Cholinesterase [Fukomys damarensis]</a>                                 | 48.6 | 48.6 | 100% | 5e-05 | 75% | <a href="#">gij 676283600 KFO36750.1</a>     |

|                                                                                                               |      |      |      |       |     |                                             |
|---------------------------------------------------------------------------------------------------------------|------|------|------|-------|-----|---------------------------------------------|
| <a href="#">PREDICTED: cholinesterase [Tarsius syrichta]</a>                                                  | 48.6 | 48.6 | 100% | 5e-05 | 70% | <a href="#">gij640826885 XP_008070612.1</a> |
| <a href="#">PREDICTED: cholinesterase [Otolemur garnettii]</a>                                                | 48.1 | 48.1 | 100% | 7e-05 | 70% | <a href="#">gij395843862 XP_003794691.1</a> |
| <a href="#">PREDICTED: cholinesterase-like [Sorex araneus]</a>                                                | 48.1 | 48.1 | 95%  | 7e-05 | 79% | <a href="#">gij505845607 XP_004616283.1</a> |
| <a href="#">PREDICTED: cholinesterase-like isoform 1 [Dasypus novemcinctus]</a>                               | 48.1 | 48.1 | 100% | 7e-05 | 70% | <a href="#">gij488587231 XP_004478943.1</a> |
| <a href="#">PREDICTED: cholinesterase-like [Trichechus manatus latirostris]</a>                               | 48.1 | 48.1 | 100% | 7e-05 | 70% | <a href="#">gij471406477 XP_004384938.1</a> |
| <a href="#">RecName: Full=Cholinesterase; AltName: Full=Acylcholine acylhydrolase precursor [Felis catus]</a> | 48.1 | 48.1 | 100% | 7e-05 | 70% | <a href="#">gij38502853 O62761.1</a>        |
| <a href="#">PREDICTED: cholinesterase isoform X1 [Loxodonta africana]</a>                                     | 48.1 | 48.1 | 100% | 7e-05 | 70% | <a href="#">gij731499959 XP_003416305.2</a> |
| <a href="#">PREDICTED: cholinesterase-like [Panthera tigris altaica]</a>                                      | 48.1 | 48.1 | 100% | 7e-05 | 70% | <a href="#">gij591300304 XP_007077117.1</a> |
| <a href="#">PREDICTED: cholinesterase-like [Odobenus rosmarus divergens]</a>                                  | 48.1 | 48.1 | 90%  | 7e-05 | 78% | <a href="#">gij472347065 XP_004393257.1</a> |
| <a href="#">PREDICTED: cholinesterase [Rhinopithecus roxellana]</a>                                           | 48.1 | 48.1 | 100% | 7e-05 | 75% | <a href="#">gij724956944 XP_010353594.1</a> |
| <a href="#">PREDICTED: cholinesterase [Galeopterus variegatus]</a>                                            | 47.7 | 47.7 | 100% | 1e-04 | 70% | <a href="#">gij667294272 XP_008578862.1</a> |
| <a href="#">PREDICTED: cholinesterase-like [Chrysochloris asiatica]</a>                                       | 47.7 | 47.7 | 100% | 1e-04 | 70% | <a href="#">gij586462448 XP_006861862.1</a> |
| <a href="#">PREDICTED: cholinesterase-like [Echinops telfairi]</a>                                            | 47.7 | 47.7 | 100% | 1e-04 | 70% | <a href="#">gij507651638 XP_004704160.1</a> |
| <a href="#">PREDICTED: cholinesterase isoform X2 [Heterocephalus glaber]</a>                                  | 46.0 | 46.0 | 100% | 4e-04 | 70% | <a href="#">gij512824494 XP_004880401.1</a> |
| <a href="#">PREDICTED: cholinesterase isoform X1 [Chinchilla lanigera]</a>                                    | 46.0 | 46.0 | 100% | 4e-04 | 70% | <a href="#">gij533158554 XP_005393194.1</a> |
| <a href="#">Cholinesterase [Pteropus alecto]</a>                                                              | 46.0 | 46.0 | 100% | 4e-04 | 75% | <a href="#">gij431915168 ELK15855.1</a>     |
| <a href="#">PREDICTED: cholinesterase isoform X1 [Heterocephalus glaber]</a>                                  | 46.0 | 46.0 | 100% | 4e-04 | 70% | <a href="#">gij512824490 XP_004880400.1</a> |
| <a href="#">PREDICTED: cholinesterase [Pteropus alecto]</a>                                                   | 46.0 | 46.0 | 100% | 4e-04 | 75% | <a href="#">gij586546267 XP_006908236.1</a> |
| <a href="#">PREDICTED: cholinesterase isoform X2 [Cavia porcellus]</a>                                        | 45.6 | 45.6 | 100% | 5e-04 | 65% | <a href="#">gij514460083 XP_005003514.1</a> |
| <a href="#">PREDICTED: cholinesterase isoform X1 [Cavia porcellus]</a>                                        | 45.6 | 45.6 | 100% | 5e-04 | 65% | <a href="#">gij348567235 XP_003469406.1</a> |
| <a href="#">PREDICTED: cholinesterase [Microtus ochrogaster]</a>                                              | 45.2 | 45.2 | 100% | 7e-04 | 70% | <a href="#">gij531999261 XP_005344165.1</a> |
| <a href="#">PREDICTED: cholinesterase [Erinaceus europaeus]</a>                                               | 44.8 | 44.8 | 100% | 0.001 | 70% | <a href="#">gij617605262 XP_007523705.1</a> |
| <a href="#">PREDICTED: cholinesterase [Canis lupus familiaris]</a>                                            | 44.8 | 44.8 | 90%  | 0.001 | 72% | <a href="#">gij74003707 XP_545267.2</a>     |
| <a href="#">PREDICTED: cholinesterase-like [Leptonychotes weddellii]</a>                                      | 44.3 | 44.3 | 90%  | 0.001 | 72% | <a href="#">gij585150385 XP_006727664.1</a> |
| <a href="#">PREDICTED: cholinesterase [Tupaia chinensis]</a>                                                  | 44.3 | 44.3 | 100% | 0.001 | 70% | <a href="#">gij562842605 XP_006150360.1</a> |
| <a href="#">PREDICTED: cholinesterase [Sarcophilus harrisii]</a>                                              | 43.9 | 43.9 | 90%  | 0.002 | 67% | <a href="#">gij395528220 XP_003766229.1</a> |

## Alignments

[Download](#) [GenPept](#) [Graphics](#)

[Next](#) [Previous](#) [Descriptions](#)

### Chain A, Crystal Structure Of Fully Glycosylated Human Butyrylcholinesterase

Sequence ID: [gij393715367|pdb|4AQD|A](#) Length: 531 Number of Matches: 1

[See 1 more title\(s\)](#)

Range 1: 478 to 497 [GenPept](#) [Graphics](#)

[Next Match](#) [Previous Match](#)

| Score          | Expect | Identities | Positives   | Gaps     |
|----------------|--------|------------|-------------|----------|
| 63.8 bits(143) | 4e-10  | 18/20(90%) | 20/20(100%) | 0/20(0%) |

Query 1 KYGNPDETQNDSTSWPVFKS 20  
 KYGNP+ETQN+STSWPVFKS  
 Sbjct 478 KYGNPNETQNNSTSWPVFKS 497

#### Related Information

[Structure](#) - 3D structure displays  
[Identical Proteins](#) - Proteins  
 identical to the subject

[Download](#) [GenPept](#) [Graphics](#)

[Next](#) [Previous](#) [Descriptions](#)

### monomeric butyrylcholinesterase [synthetic construct]

Sequence ID: [gij388261124|gb|AFK25766.1](#) Length: 557 Number of Matches: 1

Range 1: 504 to 523 [GenPept](#) [Graphics](#)

[Next Match](#) [Previous Match](#)

| Score          | Expect | Identities | Positives   | Gaps     |
|----------------|--------|------------|-------------|----------|
| 63.8 bits(143) | 4e-10  | 18/20(90%) | 20/20(100%) | 0/20(0%) |

#### Related Information

Query 1 KYGNPDETQNDSTSWPVFKS 20  
 KYGNP+ETQN+STSWPVFKS  
 Sbjct 504 KYGNPNETQNNSTSWPVFKS 523

[Download](#) [GenPept](#) [Graphics](#)

[Next](#) [Previous](#) [Descriptions](#)

Chain A, Co-Crystallization Studies Of Full Length Recombinant Bche With Cocaine Offers Insights Into Cocaine Detoxification

Sequence ID: [gi|328877250|pdb|3O9M|A](#) Length: 574 Number of Matches: 1

[See 1 more title\(s\)](#)

Range 1: 476 to 495 [GenPept](#) [Graphics](#)

[Next Match](#) [Previous Match](#)

| Score          | Expect | Identities | Positives   | Gaps     |
|----------------|--------|------------|-------------|----------|
| 63.8 bits(143) | 4e-10  | 18/20(90%) | 20/20(100%) | 0/20(0%) |

Query 1 KYGNPDETQNDSTSWPVFKS 20  
 KYGNP+ETQN+STSWPVFKS  
 Sbjct 476 KYGNPNETQNNSTSWPVFKS 495

**Related Information**

[Structure](#) - 3D structure displays  
[Identical Proteins](#) - Proteins identical to the subject

[Download](#) [GenPept](#) [Graphics](#)

[Next](#) [Previous](#) [Descriptions](#)

butyrylcholinesterase p.Val204Asp splice variant [Homo sapiens]

Sequence ID: [gi|632795270|gb|AHZ34327.1](#) Length: 602 Number of Matches: 1

Range 1: 504 to 523 [GenPept](#) [Graphics](#)

[Next Match](#) [Previous Match](#)

| Score          | Expect | Identities | Positives   | Gaps     |
|----------------|--------|------------|-------------|----------|
| 63.8 bits(143) | 4e-10  | 18/20(90%) | 20/20(100%) | 0/20(0%) |

Query 1 KYGNPDETQNDSTSWPVFKS 20  
 KYGNP+ETQN+STSWPVFKS  
 Sbjct 504 KYGNPNETQNNSTSWPVFKS 523

**Related Information**

[Structure](#) - 3D structure displays  
[Identical Proteins](#) - Proteins identical to the subject

[Download](#) [GenPept](#) [Graphics](#)

[Next](#) [Previous](#) [Descriptions](#)

cholinesterase precursor [Homo sapiens]

Sequence ID: [gi|4557351|ref|NP\\_000046.1](#) Length: 602 Number of Matches: 1

[See 10 more title\(s\)](#)

Range 1: 504 to 523 [GenPept](#) [Graphics](#)

[Next Match](#) [Previous Match](#)

| Score          | Expect | Identities | Positives   | Gaps     |
|----------------|--------|------------|-------------|----------|
| 63.8 bits(143) | 4e-10  | 18/20(90%) | 20/20(100%) | 0/20(0%) |

Query 1 KYGNPDETQNDSTSWPVFKS 20  
 KYGNP+ETQN+STSWPVFKS  
 Sbjct 504 KYGNPNETQNNSTSWPVFKS 523

**Related Information**

[Gene](#) - associated gene details  
[UniGene](#) - clustered expressed sequence tags  
[Structure](#) - 3D structure displays  
[PubChem BioAssay](#) - bioactivity screening  
[Map Viewer](#) - aligned genomic context  
[Identical Proteins](#) - Proteins identical to the subject

BLAST is a registered trademark of the National Library of Medicine.

▶ NCBI/ BLAST/ blastp suite/ Formatting Results - BHJAGXXM015

**i** Your search parameters were adjusted to search for a short input sequence.

[Edit and Resubmit](#) [Save Search Strategies](#) ▶ [Formatting options](#) ▶ [Download](#)

[YouTube](#) [How to read this page](#) [Blast report description](#)

## BCHE\_KYGNPDETQNNSTSWPVFKS\_Mod

RID [BHJAGXXM015](#) (Expires on 01-17 15:18 pm)

**Query ID** |cl|58619  
**Description** None  
**Molecule type** amino acid  
**Query Length** 20

**Database Name** nr  
**Description** All non-redundant GenBank CDS translations+PDB+SwissProt+PIR excluding environmental samples from WGS projects  
**Program** BLASTP 2.2.30+ ▶ [Citation](#)

Other reports: ▶ [Search Summary](#) [[Taxonomy reports](#)] [[Distance tree of results](#)] [[Multiple alignment](#)]

### **G** Graphic Summary

[Show Conserved Domains](#)

No putative conserved domains have been detected

Distribution of 100 Blast Hits on the Query Sequence



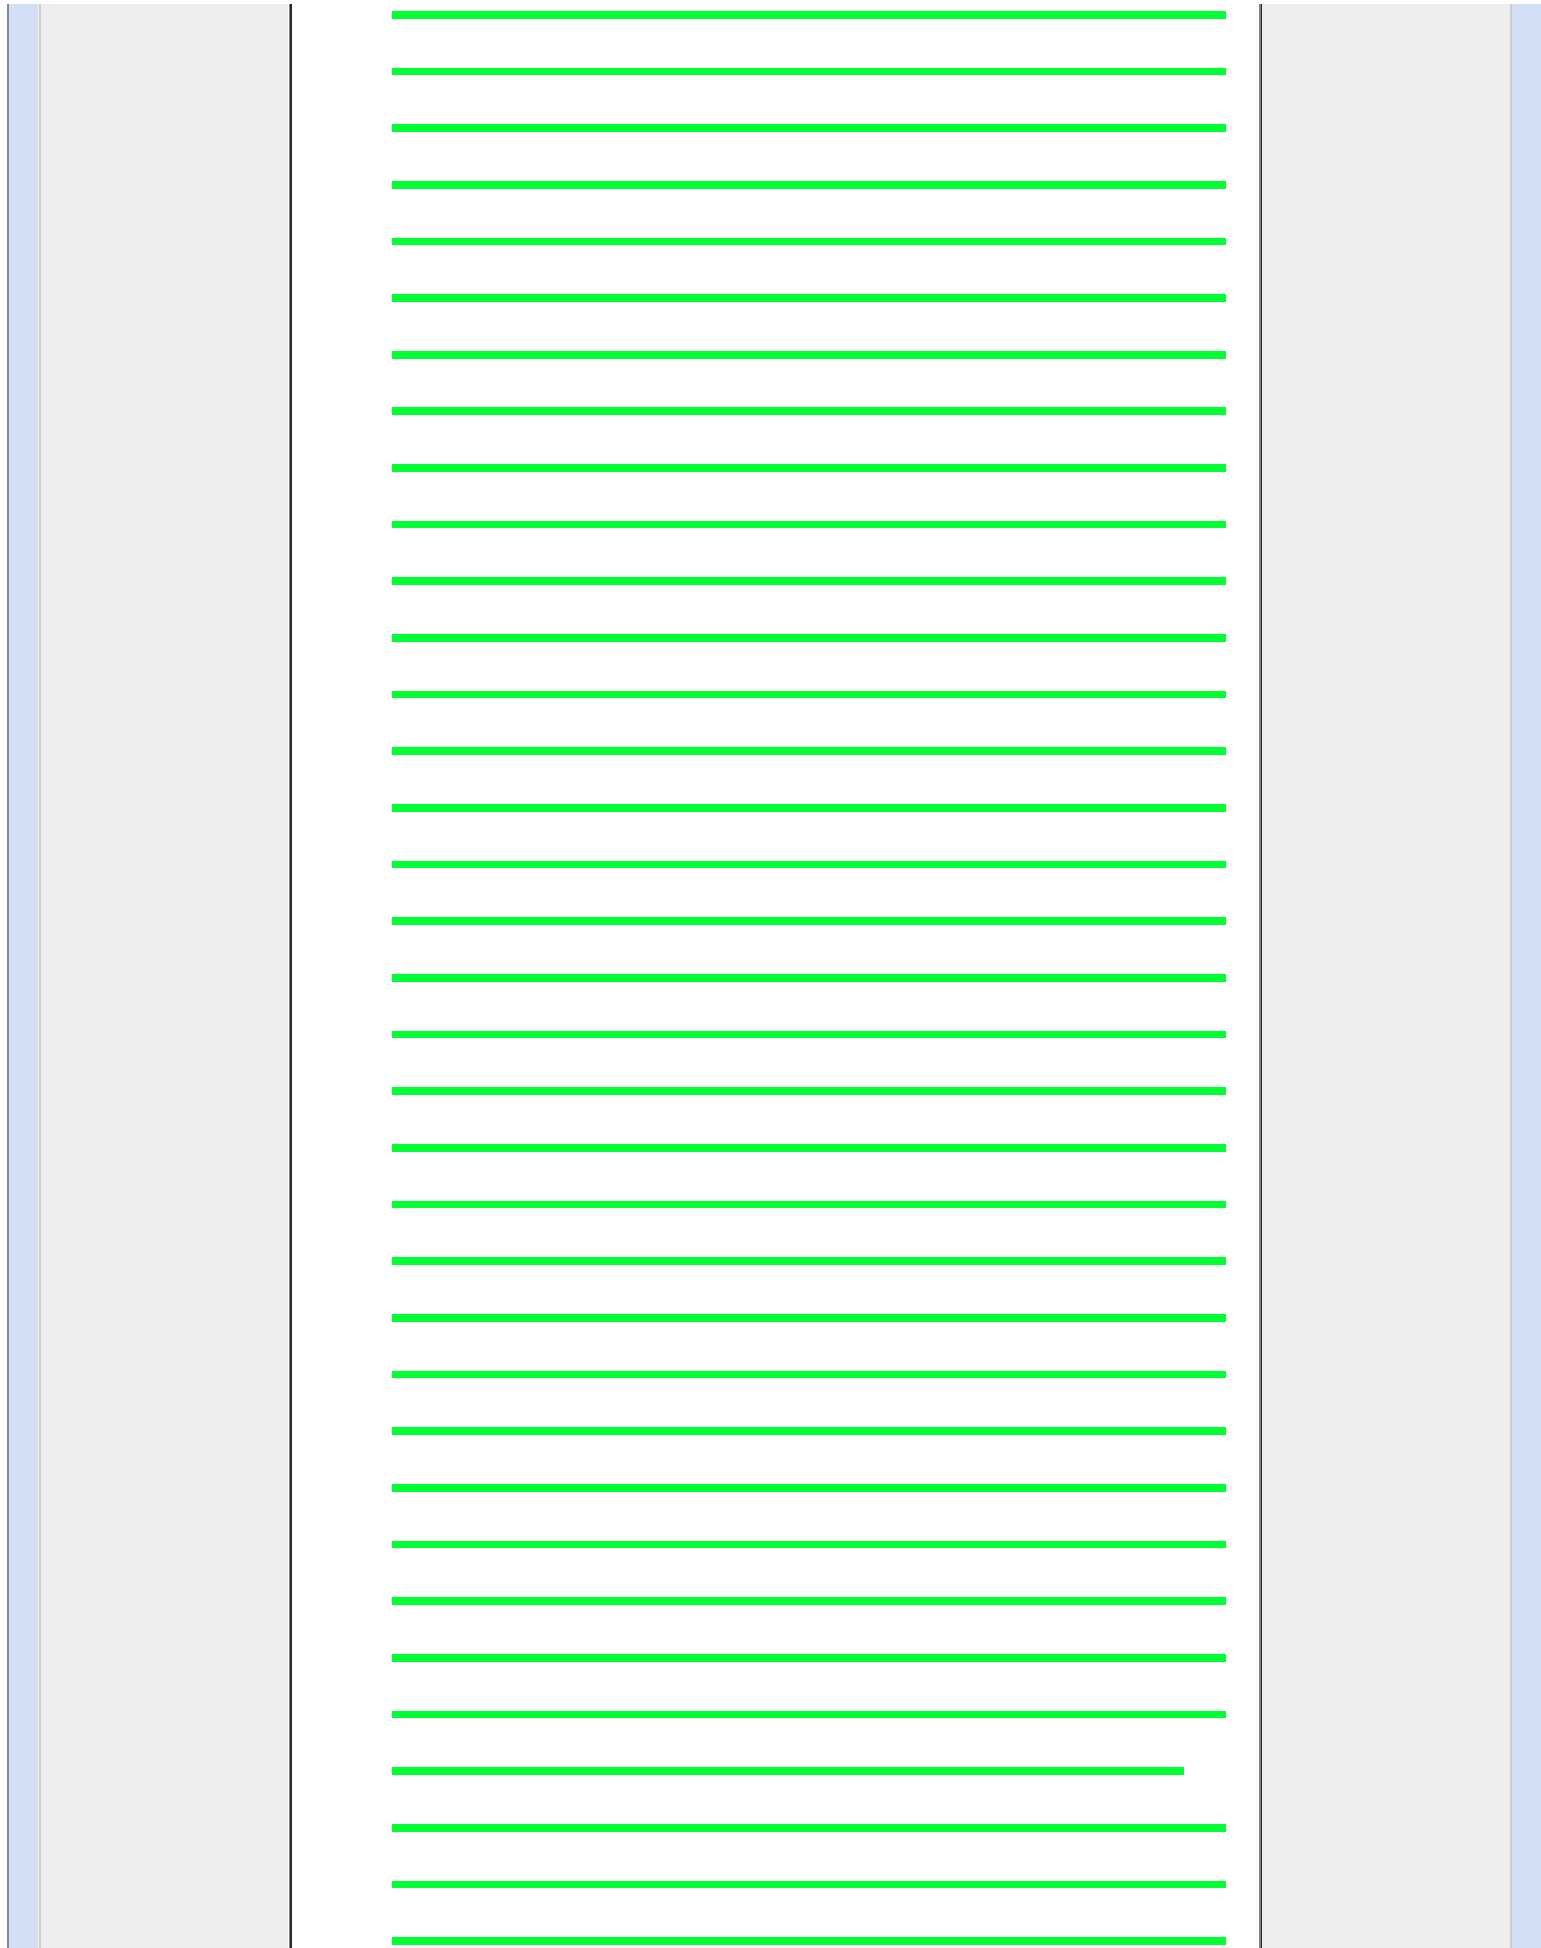



**Descriptions**

**Sequences producing significant alignments:**

Select: [All](#) [None](#) Selected:0

[Alignments](#)
[Download](#)
[GenPept](#)
[Graphics](#)
[Distance tree of results](#)
[Multiple alignment](#)

| Description                                                                                                                                    | Max score | Total score | Query cover | E value | Ident | Accession                                   |
|------------------------------------------------------------------------------------------------------------------------------------------------|-----------|-------------|-------------|---------|-------|---------------------------------------------|
| <a href="#">Chain A, Crystal Structure Of Fully Glycosylated Human Butyrylcholinesterase [synthetic construct]</a>                             | 66.4      | 66.4        | 100%        | 5e-11   | 95%   | <a href="#">gij393715367 4AQD_A</a>         |
| <a href="#">Chain A, Co-Crystallization Studies Of Full Length Recombinant Butyrylcholinesterase p.Val204Asp splice variant [Homo sapiens]</a> | 66.4      | 66.4        | 100%        | 5e-11   | 95%   | <a href="#">gij388261124 AFK25766.1</a>     |
| <a href="#">Chain A, Co-Crystallization Studies Of Full Length Recombinant Butyrylcholinesterase precursor [Homo sapiens]</a>                  | 66.4      | 66.4        | 100%        | 5e-11   | 95%   | <a href="#">gij328877250 3O9M_A</a>         |
| <a href="#">Chain A, Co-Crystallization Studies Of Full Length Recombinant Butyrylcholinesterase [synthetic construct]</a>                     | 66.4      | 66.4        | 100%        | 5e-11   | 95%   | <a href="#">gij632795270 AHZ34327.1</a>     |
| <a href="#">Chain A, Co-Crystallization Studies Of Full Length Recombinant Butyrylcholinesterase [synthetic construct]</a>                     | 66.4      | 66.4        | 100%        | 5e-11   | 95%   | <a href="#">gij4557351 NP_000046.1</a>      |
| <a href="#">Chain A, Co-Crystallization Studies Of Full Length Recombinant Butyrylcholinesterase [synthetic construct]</a>                     | 66.4      | 66.4        | 100%        | 5e-11   | 95%   | <a href="#">gij158257558 BAF84752.1</a>     |
| <a href="#">Chain A, Co-Crystallization Studies Of Full Length Recombinant Butyrylcholinesterase [synthetic construct]</a>                     | 66.4      | 66.4        | 100%        | 5e-11   | 95%   | <a href="#">gij260766471 ACX50257.1</a>     |
| <a href="#">Chain A, Co-Crystallization Studies Of Full Length Recombinant Butyrylcholinesterase isoform X1 [Homo sapiens]</a>                 | 66.4      | 66.4        | 100%        | 5e-11   | 95%   | <a href="#">gij530375091 XP_005247742.1</a> |
| <a href="#">Chain A, Crystal Structure Of Soman-aged Human Butyrylcholinesterase [synthetic construct]</a>                                     | 64.7      | 64.7        | 100%        | 2e-10   | 95%   | <a href="#">gij402550232 4AXB_A</a>         |
| <a href="#">Chain A, Crystal Structure Of Soman-aged Human Butyrylcholinesterase [synthetic construct]</a>                                     | 64.7      | 64.7        | 100%        | 2e-10   | 95%   | <a href="#">gij402550237 4B0O_A</a>         |
| <a href="#">Chain A, Structure Of Human Butyrylcholinesterase Inhibited By Cholinesterase Inhibitor [Homo sapiens]</a>                         | 64.7      | 64.7        | 100%        | 2e-10   | 95%   | <a href="#">gij340707403 2Y1K_A</a>         |
| <a href="#">Chain A, Aged Form Of Human Butyrylcholinesterase Inhibited By Cholinesterase Inhibitor [Homo sapiens]</a>                         | 64.7      | 64.7        | 100%        | 2e-10   | 95%   | <a href="#">gij237823652 2WIL_A</a>         |
| <a href="#">Chain A, Aged Form Of Human Butyrylcholinesterase Inhibited By Cholinesterase Inhibitor [Homo sapiens]</a>                         | 64.7      | 64.7        | 100%        | 2e-10   | 95%   | <a href="#">gij237823648 2WIF_A</a>         |
| <a href="#">Chain A, Nonaged Form Of Human Butyrylcholinesterase Inhibited By Cholinesterase Inhibitor [Homo sapiens]</a>                      | 64.7      | 64.7        | 100%        | 2e-10   | 95%   | <a href="#">gij237823647 2WID_A</a>         |
| <a href="#">Chain A, Nonaged Form Of Human Butyrylcholinesterase Inhibited By Cholinesterase Inhibitor [Pan troglodytes]</a>                   | 62.6      | 62.6        | 100%        | 1e-09   | 90%   | <a href="#">gij343960913 BAK62046.1</a>     |
| <a href="#">Chain A, Nonaged Form Of Human Butyrylcholinesterase Inhibited By Cholinesterase Inhibitor [Gorilla gorilla gorilla]</a>           | 62.6      | 62.6        | 100%        | 1e-09   | 90%   | <a href="#">gij426342776 XP_004038010.1</a> |
| <a href="#">Chain A, Nonaged Form Of Human Butyrylcholinesterase Inhibited By Cholinesterase Inhibitor [Pan paniscus]</a>                      | 62.6      | 62.6        | 100%        | 1e-09   | 90%   | <a href="#">gij397493718 XP_003817746.1</a> |
| <a href="#">Chain A, Nonaged Form Of Human Butyrylcholinesterase Inhibited By Cholinesterase Inhibitor [Pan troglodytes]</a>                   | 62.6      | 62.6        | 100%        | 1e-09   | 90%   | <a href="#">gij114590210 XP_516857.2</a>    |
| <a href="#">Chain A, X-Ray Structure Of Human Butyrylcholinesterase Inhibited By Cholinesterase Inhibitor [Homo sapiens]</a>                   | 60.0      | 60.0        | 100%        | 7e-09   | 90%   | <a href="#">gij326634060 2XQF_A</a>         |
| <a href="#">Chain A, Aged Form Of Human Butyrylcholinesterase Inhibited By Cholinesterase Inhibitor [Homo sapiens]</a>                         | 60.0      | 60.0        | 100%        | 7e-09   | 90%   | <a href="#">gij258588213 2WSL_A</a>         |
| <a href="#">Chain A, Nonaged Form Of Human Butyrylcholinesterase Inhibited By Cholinesterase Inhibitor [Homo sapiens]</a>                      | 60.0      | 60.0        | 100%        | 7e-09   | 90%   | <a href="#">gij215794636 3DJY_A</a>         |
| <a href="#">Chain A, Crystal Structure Of Human Butyryl Cholinesterase [Homo sapiens]</a>                                                      | 60.0      | 60.0        | 100%        | 7e-09   | 90%   | <a href="#">gij348108591 1P0I_A</a>         |
| <a href="#">Chain A, G117h Mutant Of Human Butyrylcholinesterase In Complex With Cholinesterase Inhibitor [Homo sapiens]</a>                   | 60.0      | 60.0        | 100%        | 7e-09   | 90%   | <a href="#">gij313103512 2XMB_A</a>         |
| <a href="#">Chain A, Crystal Structure Of Recombinant Full Length Human Butyrylcholinesterase [Homo sapiens]</a>                               | 60.0      | 60.0        | 100%        | 7e-09   | 90%   | <a href="#">gij158429456 2PM8_A</a>         |
| <a href="#">Chain A, Crystal Structure Of Recombinant Full Length Human Butyrylcholinesterase [Nomascus leucogenys]</a>                        | 60.0      | 60.0        | 100%        | 7e-09   | 90%   | <a href="#">gij332214651 XP_003256448.1</a> |
| <a href="#">Chain A, Structure Of Human Butyrylcholinesterase In Complex With Cholinesterase Inhibitor [Homo sapiens]</a>                      | 59.6      | 59.6        | 100%        | 1e-08   | 90%   | <a href="#">gij145579736 2J4C_A</a>         |
| <a href="#">Chain A, Structure Of Human Butyrylcholinesterase In Complex With Cholinesterase Inhibitor [Eptesicus fuscus]</a>                  | 57.9      | 57.9        | 100%        | 4e-08   | 85%   | <a href="#">gij641703485 XP_008140478.1</a> |
| <a href="#">Chain A, Structure Of Human Butyrylcholinesterase In Complex With Cholinesterase Inhibitor [Myotis lucifugus]</a>                  | 57.9      | 57.9        | 100%        | 4e-08   | 85%   | <a href="#">gij558125651 XP_006088951.1</a> |

|                                                                                     |      |      |      |       |     |                                             |
|-------------------------------------------------------------------------------------|------|------|------|-------|-----|---------------------------------------------|
| <a href="#">RecName: Full=Cholinesterase; AltName: Full=Acylcholine acylhydri</a>   | 57.5 | 57.5 | 100% | 5e-08 | 85% | <a href="#">gij21362409 P81908.1</a>        |
| <a href="#">RecName: Full=Cholinesterase; AltName: Full=Acylcholine acylhydri</a>   | 57.5 | 57.5 | 100% | 5e-08 | 85% | <a href="#">gij116354 P21927.1</a>          |
| <a href="#">PREDICTED: cholinesterase [Oryctolagus cuniculus]</a>                   | 57.5 | 57.5 | 100% | 5e-08 | 85% | <a href="#">gij291400118 XP_002716414.1</a> |
| <a href="#">PREDICTED: cholinesterase [Orcinus orca]</a>                            | 57.5 | 57.5 | 100% | 5e-08 | 85% | <a href="#">gij466076197 XP_004283487.1</a> |
| <a href="#">cholinesterase precursor [Pongo abelii]</a>                             | 57.5 | 57.5 | 100% | 5e-08 | 85% | <a href="#">gij197097436 NP_001127509.1</a> |
| <a href="#">PREDICTED: cholinesterase isoform X1 [Sus scrofa]</a>                   | 57.5 | 57.5 | 100% | 5e-08 | 85% | <a href="#">gij335299867 XP_003358712.1</a> |
| <a href="#">cholinesterase precursor [Bos taurus]</a>                               | 57.5 | 57.5 | 100% | 5e-08 | 85% | <a href="#">gij116004027 NP_001070374.1</a> |
| <a href="#">PREDICTED: cholinesterase [Bison bison bison]</a>                       | 57.5 | 57.5 | 100% | 5e-08 | 85% | <a href="#">gij742123891 XP_010839228.1</a> |
| <a href="#">PREDICTED: cholinesterase [Balaenoptera acutorostrata scammon]</a>      | 57.5 | 57.5 | 100% | 5e-08 | 85% | <a href="#">gij594625950 XP_007197616.1</a> |
| <a href="#">PREDICTED: cholinesterase isoform X1 [Pongo abelii]</a>                 | 57.5 | 57.5 | 100% | 5e-08 | 85% | <a href="#">gij686714306 XP_009237773.1</a> |
| <a href="#">PREDICTED: cholinesterase [Lipotes vexillifer]</a>                      | 57.5 | 57.5 | 100% | 5e-08 | 85% | <a href="#">gij602681974 XP_007446483.1</a> |
| <a href="#">PREDICTED: cholinesterase [Pantholops hodgsonii]</a>                    | 57.5 | 57.5 | 100% | 5e-08 | 85% | <a href="#">gij556779632 XP_005984864.1</a> |
| <a href="#">PREDICTED: cholinesterase [Bos mutus]</a>                               | 57.5 | 57.5 | 100% | 5e-08 | 85% | <a href="#">gij555966690 XP_005895396.1</a> |
| <a href="#">PREDICTED: cholinesterase [Capra hircus]</a>                            | 57.5 | 57.5 | 100% | 5e-08 | 85% | <a href="#">gij548451269 XP_005675420.1</a> |
| <a href="#">PREDICTED: cholinesterase [Ovis aries]</a>                              | 57.5 | 57.5 | 100% | 5e-08 | 85% | <a href="#">gij426218006 XP_004003241.1</a> |
| <a href="#">PREDICTED: cholinesterase [Orycteropus afer afer]</a>                   | 55.4 | 55.4 | 100% | 3e-07 | 85% | <a href="#">gij634870148 XP_007946910.1</a> |
| <a href="#">PREDICTED: cholinesterase isoform X2 [Saimiri boliviensis bolivier]</a> | 55.4 | 55.4 | 100% | 3e-07 | 80% | <a href="#">gij725560928 XP_010334003.1</a> |
| <a href="#">PREDICTED: cholinesterase isoform X1 [Saimiri boliviensis bolivier]</a> | 55.4 | 55.4 | 100% | 3e-07 | 80% | <a href="#">gij403265619 XP_003925023.1</a> |
| <a href="#">PREDICTED: LOW QUALITY PROTEIN: cholinesterase [Callithrix j.</a>       | 55.4 | 55.4 | 100% | 3e-07 | 80% | <a href="#">gij675737963 XP_002807699.3</a> |
| <a href="#">PREDICTED: cholinesterase [Ursus maritimus]</a>                         | 54.9 | 54.9 | 95%  | 4e-07 | 84% | <a href="#">gij670999264 XP_008690527.1</a> |
| <a href="#">PREDICTED: cholinesterase-like isoform X1 [Myotis brandtii]</a>         | 54.5 | 54.5 | 100% | 5e-07 | 80% | <a href="#">gij554526033 XP_005857864.1</a> |
| <a href="#">Cholinesterase [Myotis brandtii]</a>                                    | 54.5 | 54.5 | 100% | 5e-07 | 80% | <a href="#">gij521020653 EPQ02441.1</a>     |
| <a href="#">hypothetical protein EGK_11933 [Macaca mulatta]</a>                     | 54.1 | 54.1 | 100% | 7e-07 | 80% | <a href="#">gij355559896 EHH16624.1</a>     |
| <a href="#">butyrylcholinesterase precursor [Macaca fascicularis]</a>               | 54.1 | 54.1 | 100% | 7e-07 | 80% | <a href="#">gij290795732 ADD64703.1</a>     |
| <a href="#">cholinesterase precursor [Equus caballus]</a>                           | 54.1 | 54.1 | 100% | 7e-07 | 80% | <a href="#">gij126352540 NP_001075319.1</a> |
| <a href="#">PREDICTED: cholinesterase-like [Elephantulus edwardii]</a>              | 54.1 | 54.1 | 100% | 7e-07 | 80% | <a href="#">gij585675683 XP_006890440.1</a> |
| <a href="#">PREDICTED: cholinesterase [Macaca fascicularis]</a>                     | 54.1 | 54.1 | 100% | 7e-07 | 80% | <a href="#">gij544412493 XP_005546353.1</a> |
| <a href="#">PREDICTED: cholinesterase isoform X1 [Papio anubis]</a>                 | 54.1 | 54.1 | 100% | 7e-07 | 80% | <a href="#">gij402861047 XP_003894921.1</a> |
| <a href="#">PREDICTED: LOW QUALITY PROTEIN: cholinesterase-like [Maca</a>           | 54.1 | 54.1 | 100% | 7e-07 | 80% | <a href="#">gij297286482 XP_002808379.1</a> |
| <a href="#">PREDICTED: cholinesterase [Ictidomys tridecemlineatus]</a>              | 54.1 | 54.1 | 100% | 7e-07 | 80% | <a href="#">gij532105511 XP_005338342.1</a> |
| <a href="#">PREDICTED: cholinesterase isoform X2 [Equus przewalskii]</a>            | 54.1 | 54.1 | 100% | 7e-07 | 80% | <a href="#">gij664725795 XP_008520036.1</a> |
| <a href="#">PREDICTED: cholinesterase isoform X1 [Equus przewalskii]</a>            | 54.1 | 54.1 | 100% | 7e-07 | 80% | <a href="#">gij664725793 XP_008520035.1</a> |
| <a href="#">PREDICTED: cholinesterase isoform X1 [Chlorocebus sabaeus]</a>          | 54.1 | 54.1 | 100% | 7e-07 | 80% | <a href="#">gij635084154 XP_007970394.1</a> |
| <a href="#">PREDICTED: cholinesterase [Ceratotherium simum simum]</a>               | 54.1 | 54.1 | 100% | 7e-07 | 80% | <a href="#">gij478501043 XP_004424836.1</a> |
| <a href="#">PREDICTED: cholinesterase isoform X2 [Camelus dromedarius]</a>          | 53.7 | 53.7 | 100% | 1e-06 | 80% | <a href="#">gij744553709 XP_010974642.1</a> |
| <a href="#">PREDICTED: cholinesterase isoform X1 [Camelus dromedarius]</a>          | 53.7 | 53.7 | 100% | 1e-06 | 80% | <a href="#">gij744553706 XP_010974641.1</a> |
| <a href="#">PREDICTED: cholinesterase isoform X2 [Camelus bactrianus]</a>           | 53.7 | 53.7 | 100% | 1e-06 | 80% | <a href="#">gij743713601 XP_010950371.1</a> |
| <a href="#">PREDICTED: cholinesterase [Vicugna pacos]</a>                           | 53.7 | 53.7 | 100% | 1e-06 | 80% | <a href="#">gij560956860 XP_006200907.1</a> |
| <a href="#">PREDICTED: cholinesterase [Camelus ferus]</a>                           | 53.7 | 53.7 | 100% | 1e-06 | 80% | <a href="#">gij560915255 XP_006183885.1</a> |
| <a href="#">PREDICTED: cholinesterase-like isoform X1 [Mustela putorius furo]</a>   | 53.7 | 53.7 | 95%  | 1e-06 | 84% | <a href="#">gij511910148 XP_004774475.1</a> |
| <a href="#">hypothetical protein PANDA_007095 [Ailuropoda melanoleuca]</a>          | 53.2 | 53.2 | 95%  | 1e-06 | 84% | <a href="#">gij281337784 EFB13368.1</a>     |
| <a href="#">PREDICTED: cholinesterase-like [Ailuropoda melanoleuca]</a>             | 53.2 | 53.2 | 95%  | 1e-06 | 84% | <a href="#">gij301766374 XP_002918607.1</a> |
| <a href="#">PREDICTED: cholinesterase [Myotis davidii]</a>                          | 52.4 | 52.4 | 90%  | 3e-06 | 83% | <a href="#">gij584083219 XP_006761409.1</a> |
| <a href="#">PREDICTED: cholinesterase [Fukomys damarensis]</a>                      | 51.1 | 51.1 | 100% | 7e-06 | 80% | <a href="#">gij731199055 XP_010610068.1</a> |
| <a href="#">Cholinesterase [Fukomys damarensis]</a>                                 | 51.1 | 51.1 | 100% | 7e-06 | 80% | <a href="#">gij676283600 KFO36750.1</a>     |



|                                                                                                                      |      |      |      |       |     |                                             |
|----------------------------------------------------------------------------------------------------------------------|------|------|------|-------|-----|---------------------------------------------|
| <a href="#">PREDICTED: cholinesterase [Tarsius syrichta]</a>                                                         | 51.1 | 51.1 | 100% | 7e-06 | 75% | <a href="#">gij640826885 XP_008070612.1</a> |
| <a href="#">PREDICTED: cholinesterase [Otolemur garnettii]</a>                                                       | 50.7 | 50.7 | 100% | 1e-05 | 75% | <a href="#">gij395843862 XP_003794691.1</a> |
| <a href="#">PREDICTED: cholinesterase-like isoform 1 [Dasypus novemcinctus]</a>                                      | 50.7 | 50.7 | 100% | 1e-05 | 75% | <a href="#">gij488587231 XP_004478943.1</a> |
| <a href="#">PREDICTED: cholinesterase-like [Trichechus manatus latirostris]</a>                                      | 50.7 | 50.7 | 100% | 1e-05 | 75% | <a href="#">gij471406477 XP_004384938.1</a> |
| <a href="#">RecName: Full=Cholinesterase; AltName: Full=Acylcholine acylhydrolinesterase precursor [Felis catus]</a> | 50.7 | 50.7 | 100% | 1e-05 | 75% | <a href="#">gij38502853 O62761.1</a>        |
| <a href="#">PREDICTED: cholinesterase isoform X1 [Loxodonta africana]</a>                                            | 50.7 | 50.7 | 100% | 1e-05 | 75% | <a href="#">gij731499959 XP_003416305.2</a> |
| <a href="#">PREDICTED: cholinesterase-like [Panthera tigris altaica]</a>                                             | 50.7 | 50.7 | 100% | 1e-05 | 75% | <a href="#">gij591300304 XP_007077117.1</a> |
| <a href="#">PREDICTED: cholinesterase-like [Odobenus rosmarus divergens]</a>                                         | 50.7 | 50.7 | 90%  | 1e-05 | 83% | <a href="#">gij472347065 XP_004393257.1</a> |
| <a href="#">PREDICTED: cholinesterase [Rhinopithecus roxellana]</a>                                                  | 50.7 | 50.7 | 100% | 1e-05 | 80% | <a href="#">gij724956944 XP_010353594.1</a> |
| <a href="#">PREDICTED: cholinesterase [Galeopterus variegatus]</a>                                                   | 50.3 | 50.3 | 100% | 1e-05 | 75% | <a href="#">gij667294272 XP_008578862.1</a> |
| <a href="#">PREDICTED: cholinesterase-like [Chrysochloris asiatica]</a>                                              | 50.3 | 50.3 | 100% | 1e-05 | 75% | <a href="#">gij586462448 XP_006861862.1</a> |
| <a href="#">PREDICTED: cholinesterase-like [Echinops telfairii]</a>                                                  | 50.3 | 50.3 | 100% | 1e-05 | 75% | <a href="#">gij507651638 XP_004704160.1</a> |
| <a href="#">PREDICTED: cholinesterase-like [Sorex araneus]</a>                                                       | 49.8 | 49.8 | 95%  | 2e-05 | 79% | <a href="#">gij505845607 XP_004616283.1</a> |
| <a href="#">PREDICTED: cholinesterase isoform X2 [Heterocephalus glaber]</a>                                         | 48.6 | 48.6 | 100% | 5e-05 | 75% | <a href="#">gij512824494 XP_004880401.1</a> |
| <a href="#">PREDICTED: cholinesterase isoform X1 [Chinchilla lanigera]</a>                                           | 48.6 | 48.6 | 100% | 5e-05 | 75% | <a href="#">gij533158554 XP_005393194.1</a> |
| <a href="#">PREDICTED: cholinesterase isoform X1 [Heterocephalus glaber]</a>                                         | 48.6 | 48.6 | 100% | 5e-05 | 75% | <a href="#">gij512824490 XP_004880400.1</a> |
| <a href="#">PREDICTED: cholinesterase isoform X2 [Cavia porcellus]</a>                                               | 48.1 | 48.1 | 100% | 7e-05 | 70% | <a href="#">gij514460083 XP_005003514.1</a> |
| <a href="#">PREDICTED: cholinesterase isoform X1 [Cavia porcellus]</a>                                               | 48.1 | 48.1 | 100% | 7e-05 | 70% | <a href="#">gij348567235 XP_003469406.1</a> |
| <a href="#">Cholinesterase [Pteropus alecto]</a>                                                                     | 47.7 | 47.7 | 100% | 1e-04 | 75% | <a href="#">gij431915168 ELK15855.1</a>     |
| <a href="#">PREDICTED: cholinesterase [Pteropus alecto]</a>                                                          | 47.7 | 47.7 | 100% | 1e-04 | 75% | <a href="#">gij586546267 XP_006908236.1</a> |
| <a href="#">PREDICTED: cholinesterase [Erinaceus europaeus]</a>                                                      | 47.3 | 47.3 | 100% | 1e-04 | 75% | <a href="#">gij617605262 XP_007523705.1</a> |
| <a href="#">PREDICTED: cholinesterase [Canis lupus familiaris]</a>                                                   | 47.3 | 47.3 | 90%  | 1e-04 | 78% | <a href="#">gij74003707 XP_545267.2</a>     |
| <a href="#">PREDICTED: cholinesterase-like [Leptonychotes weddellii]</a>                                             | 46.9 | 46.9 | 90%  | 2e-04 | 78% | <a href="#">gij585150385 XP_006727664.1</a> |
| <a href="#">PREDICTED: cholinesterase [Sarcophilus harrisii]</a>                                                     | 46.4 | 46.4 | 90%  | 3e-04 | 72% | <a href="#">gij395528220 XP_003766229.1</a> |
| <a href="#">PREDICTED: cholinesterase isoform X1 [Peromyscus maniculatus]</a>                                        | 46.4 | 46.4 | 100% | 3e-04 | 70% | <a href="#">gij589919054 XP_006972718.1</a> |
| <a href="#">PREDICTED: cholinesterase [Jaculus jaculus]</a>                                                          | 45.2 | 45.2 | 100% | 7e-04 | 70% | <a href="#">gij507536796 XP_004652429.1</a> |

## Alignments

[Download](#) [GenPept](#) [Graphics](#) ▼ Next ▲ Previous ▲ Descriptions

### Chain A, Crystal Structure Of Fully Glycosylated Human Butyrylcholinesterase

Sequence ID: [gij393715367|pdb|4AQD|A](#) Length: 531 Number of Matches: 1

▶ [See 1 more title\(s\)](#)

Range 1: 478 to 497 [GenPept](#) [Graphics](#) ▼ Next Match ▲ Previous Match

| Score          | Expect | Identities | Positives   | Gaps     |
|----------------|--------|------------|-------------|----------|
| 66.4 bits(149) | 5e-11  | 19/20(95%) | 20/20(100%) | 0/20(0%) |

Query 1 KYGNPDETQNNSTSWPVFKS 20  
 KYGNP+ETQNNSTSWPVFKS  
 Sbjct 478 KYGNPNETQNNSTSWPVFKS 497

#### Related Information

[Structure](#) - 3D structure displays  
[Identical Proteins](#) - Proteins  
 identical to the subject

[Download](#) [GenPept](#) [Graphics](#) ▼ Next ▲ Previous ▲ Descriptions

### monomeric butyrylcholinesterase [synthetic construct]

Sequence ID: [gij388261124|gb|AFK25766.1](#) Length: 557 Number of Matches: 1

Range 1: 504 to 523 [GenPept](#) [Graphics](#) ▼ Next Match ▲ Previous Match

| Score          | Expect | Identities | Positives   | Gaps     |
|----------------|--------|------------|-------------|----------|
| 66.4 bits(149) | 5e-11  | 19/20(95%) | 20/20(100%) | 0/20(0%) |

#### Related Information

Query 1 KYGNPDETQNNSTSWPVFKS 20  
 Sbjct 504 KYGNP+ETQNNSTSWPVFKS 523  
 KYGNPNETQNNSTSWPVFKS

Download [GenPept](#) [Graphics](#)

[▼ Next](#) [▲ Previous](#) [▲ Descriptions](#)

Chain A, Co-Crystallization Studies Of Full Length Recombinant Bche With Cocaine Offers Insights Into Cocaine Detoxification

Sequence ID: [gi|328877250|pdb|3O9M|A](#) Length: 574 Number of Matches: 1

[▶ See 1 more title\(s\)](#)

Range 1: 476 to 495 [GenPept](#) [Graphics](#)

[▼ Next Match](#) [▲ Previous Match](#)

| Score          | Expect | Identities | Positives   | Gaps     |
|----------------|--------|------------|-------------|----------|
| 66.4 bits(149) | 5e-11  | 19/20(95%) | 20/20(100%) | 0/20(0%) |

Query 1 KYGNPDETQNNSTSWPVFKS 20  
 Sbjct 476 KYGNPNETQNNSTSWPVFKS 495

**Related Information**

[Structure](#) - 3D structure displays  
[Identical Proteins](#) - Proteins identical to the subject

Download [GenPept](#) [Graphics](#)

[▼ Next](#) [▲ Previous](#) [▲ Descriptions](#)

butyrylcholinesterase p.Val204Asp splice variant [Homo sapiens]

Sequence ID: [gi|632795270|gb|AHZ34327.1|](#) Length: 602 Number of Matches: 1

Range 1: 504 to 523 [GenPept](#) [Graphics](#)

[▼ Next Match](#) [▲ Previous Match](#)

| Score          | Expect | Identities | Positives   | Gaps     |
|----------------|--------|------------|-------------|----------|
| 66.4 bits(149) | 5e-11  | 19/20(95%) | 20/20(100%) | 0/20(0%) |

Query 1 KYGNPDETQNNSTSWPVFKS 20  
 Sbjct 504 KYGNPNETQNNSTSWPVFKS 523

**Related Information**

[Structure](#) - 3D structure displays  
[Identical Proteins](#) - Proteins identical to the subject

Download [GenPept](#) [Graphics](#)

[▼ Next](#) [▲ Previous](#) [▲ Descriptions](#)

cholinesterase precursor [Homo sapiens]

Sequence ID: [gi|4557351|ref|NP\\_000046.1|](#) Length: 602 Number of Matches: 1

[▶ See 10 more title\(s\)](#)

Range 1: 504 to 523 [GenPept](#) [Graphics](#)

[▼ Next Match](#) [▲ Previous Match](#)

| Score          | Expect | Identities | Positives   | Gaps     |
|----------------|--------|------------|-------------|----------|
| 66.4 bits(149) | 5e-11  | 19/20(95%) | 20/20(100%) | 0/20(0%) |

Query 1 KYGNPDETQNNSTSWPVFKS 20  
 Sbjct 504 KYGNPNETQNNSTSWPVFKS 523

**Related Information**

[Gene](#) - associated gene details  
[UniGene](#) - clustered expressed sequence tags  
[Structure](#) - 3D structure displays  
[PubChem BioAssay](#) - bioactivity screening  
[Map Viewer](#) - aligned genomic context  
[Identical Proteins](#) - Proteins identical to the subject

BLAST is a registered trademark of the National Library of Medicine.

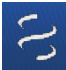

**i** Your search parameters were adjusted to search for a short input sequence.

[Edit and Resubmit](#) [Save Search Strategies](#) ▶ [Formatting options](#) ▶ [Download](#)

[YouTube](#) [How to read this page](#) [Blast report description](#)

### BCHE\_KYGNPNETQDDSTSWPVFKS\_Mod

RID [BHJGKFFG015](#) (Expires on 01-17 15:21 pm)

**Query ID** |cl|56207  
**Description** None  
**Molecule type** amino acid  
**Query Length** 20

**Database Name** nr  
**Description** All non-redundant GenBank CDS translations+PDB+SwissProt+PIR excluding environmental samples from WGS projects  
**Program** BLASTP 2.2.30+ ▶ [Citation](#)

Other reports: ▶ [Search Summary](#) [[Taxonomy reports](#)] [[Distance tree of results](#)] [[Multiple alignment](#)]

### Graphic Summary

[Show Conserved Domains](#)

No putative conserved domains have been detected

Distribution of 100 Blast Hits on the Query Sequence



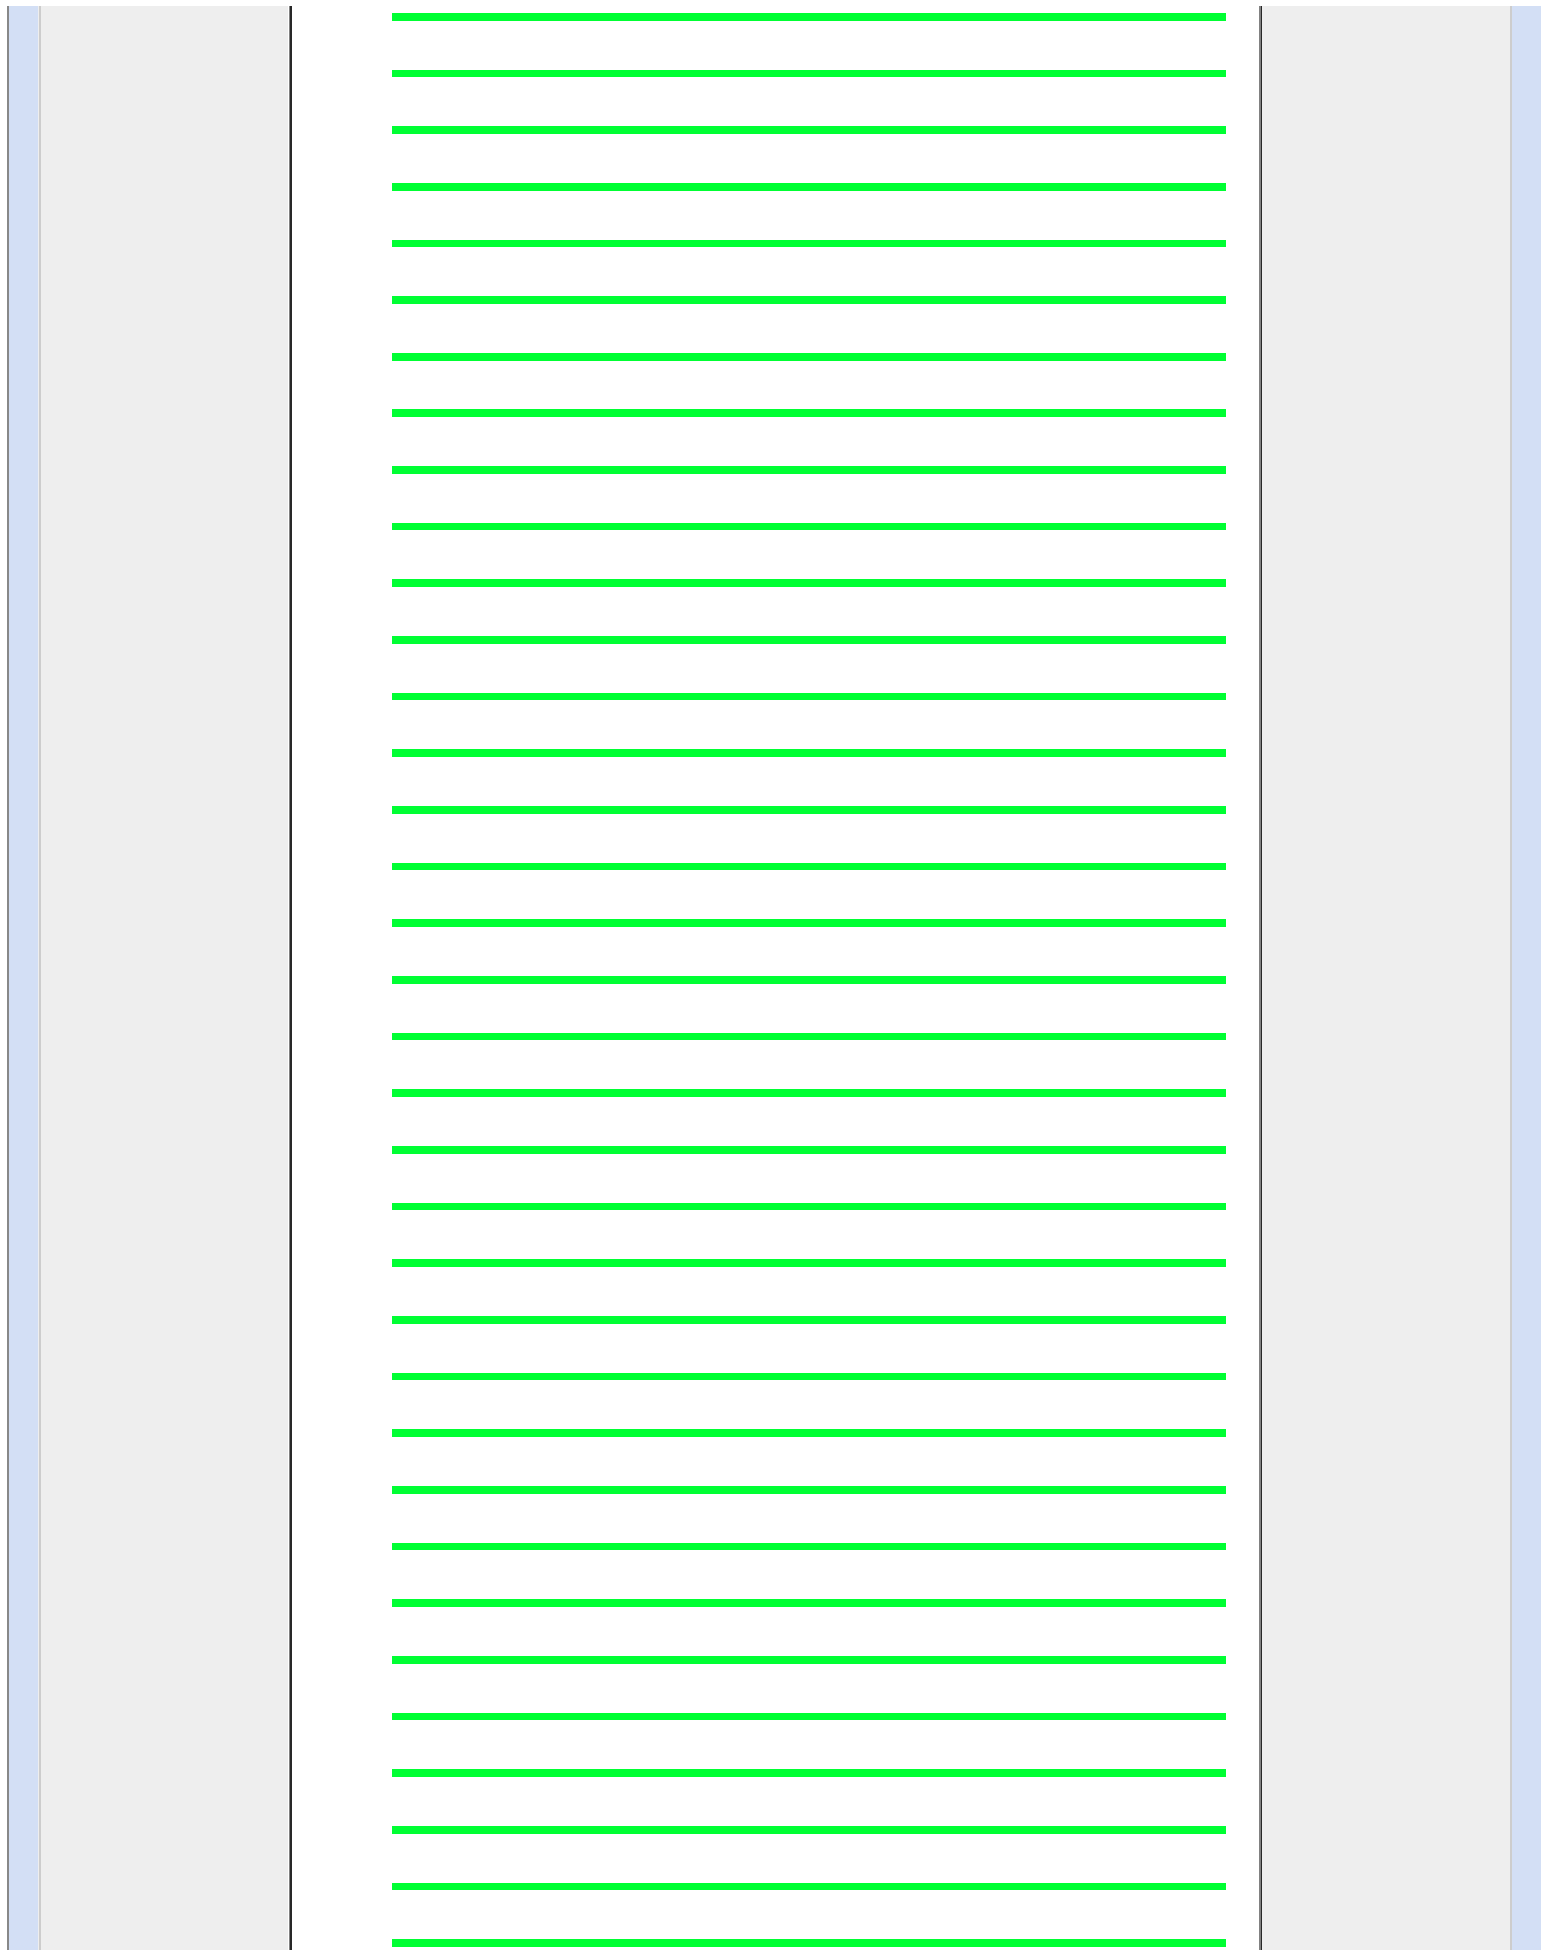



## Descriptions

### Sequences producing significant alignments:

Select: [All](#) [None](#) Selected:0

| <a href="#">Alignments</a> <a href="#">Download</a> <a href="#">GenPept</a> <a href="#">Graphics</a> <a href="#">Distance tree of results</a> <a href="#">Multiple alignment</a> |           |             |             |         |       |                                             |  |
|----------------------------------------------------------------------------------------------------------------------------------------------------------------------------------|-----------|-------------|-------------|---------|-------|---------------------------------------------|--|
| Description                                                                                                                                                                      | Max score | Total score | Query cover | E value | Ident | Accession                                   |  |
| <a href="#">Chain A, Crystal Structure Of Fully Glycosylated Human Butyrylcholinesterase [synthetic construct]</a>                                                               | 63.8      | 63.8        | 100%        | 4e-10   | 90%   | <a href="#">gij393715367 4AQD_A</a>         |  |
| <a href="#">Chain A, Co-Crystallization Studies Of Full Length Recombinant Butyrylcholinesterase p.Val204Asp splice variant [Homo sapiens]</a>                                   | 63.8      | 63.8        | 100%        | 4e-10   | 90%   | <a href="#">gij388261124 AFK25766.1</a>     |  |
| <a href="#">Chain A, Crystal Structure Of Soman-aged Human Butyrylcholinesterase Inhibited By Cb</a>                                                                             | 63.8      | 63.8        | 100%        | 4e-10   | 90%   | <a href="#">gij328877250 3O9M_A</a>         |  |
| <a href="#">Chain A, Aged Form Of Human Butyrylcholinesterase Inhibited By ]</a>                                                                                                 | 63.8      | 63.8        | 100%        | 4e-10   | 90%   | <a href="#">gij632795270 AHZ34327.1</a>     |  |
| <a href="#">Chain A, Nonaged Form Of Human Butyrylcholinesterase Inhibited ]</a>                                                                                                 | 63.8      | 63.8        | 100%        | 4e-10   | 90%   | <a href="#">gij4557351 NP_000046.1</a>      |  |
| <a href="#">Chain A, X-Ray Structure Of Human Butyrylcholinesterase Inhibitec</a>                                                                                                | 63.8      | 63.8        | 100%        | 4e-10   | 90%   | <a href="#">gij158257558 BAF84752.1</a>     |  |
| <a href="#">Chain A, Crystal Structure Of Recombinant Full Length Human Buty</a>                                                                                                 | 63.8      | 63.8        | 100%        | 4e-10   | 90%   | <a href="#">gij260766471 ACX50257.1</a>     |  |
| <a href="#">Chain A, Structure Of Human Butyrylcholinesterase In Complex Wit</a>                                                                                                 | 63.8      | 63.8        | 100%        | 4e-10   | 90%   | <a href="#">gij530375091 XP_005247742.1</a> |  |
| <a href="#">Chain A, G117h Mutant Of Human Butyrylcholinesterase In Comple</a>                                                                                                   | 60.0      | 60.0        | 100%        | 7e-09   | 85%   | <a href="#">gij343960913 BAK62046.1</a>     |  |
| <a href="#">Chain A, Crystal Structure Of Soman-aged Human Butyrylcholinest</a>                                                                                                  | 60.0      | 60.0        | 100%        | 7e-09   | 85%   | <a href="#">gij426342776 XP_004038010.1</a> |  |
| <a href="#">Chain A, Aged Form Of Human Butyrylcholinesterase Inhibited By ]</a>                                                                                                 | 60.0      | 60.0        | 100%        | 7e-09   | 85%   | <a href="#">gij397493718 XP_003817746.1</a> |  |
| <a href="#">Chain A, Nonaged Form Of Human Butyrylcholinesterase Inhibited ]</a>                                                                                                 | 60.0      | 60.0        | 100%        | 7e-09   | 85%   | <a href="#">gij114590210 XP_516857.2</a>    |  |
| <a href="#">Chain A, Crystal Structure Of Soman-aged Human Butyrylcholinest</a>                                                                                                  | 59.2      | 59.2        | 100%        | 1e-08   | 85%   | <a href="#">gij402550232 4AXB_A</a>         |  |
| <a href="#">Chain A, Aged Form Of Human Butyrylcholinesterase Inhibited By ]</a>                                                                                                 | 59.2      | 59.2        | 100%        | 1e-08   | 85%   | <a href="#">gij402550237 4B0O_A</a>         |  |
| <a href="#">Chain A, Nonaged Form Of Human Butyrylcholinesterase Inhibited ]</a>                                                                                                 | 59.2      | 59.2        | 100%        | 1e-08   | 85%   | <a href="#">gij340707403 2Y1K_A</a>         |  |
| <a href="#">Chain A, X-Ray Structure Of Human Butyrylcholinesterase Inhibitec</a>                                                                                                | 59.2      | 59.2        | 100%        | 1e-08   | 85%   | <a href="#">gij237823652 2WIL_A</a>         |  |
| <a href="#">Chain A, Aged Form Of Human Butyrylcholinesterase Inhibited By ]</a>                                                                                                 | 59.2      | 59.2        | 100%        | 1e-08   | 85%   | <a href="#">gij237823648 2WIF_A</a>         |  |
| <a href="#">Chain A, Nonaged Form Of Human Butyrylcholinesterase Inhibited ]</a>                                                                                                 | 59.2      | 59.2        | 100%        | 1e-08   | 85%   | <a href="#">gij237823647 2WID_A</a>         |  |
| <a href="#">Chain A, Crystal Structure Of Human Butyryl Cholinesterase [Homo</a>                                                                                                 | 57.5      | 57.5        | 100%        | 5e-08   | 85%   | <a href="#">gij326634060 2XQF_A</a>         |  |
| <a href="#">Chain A, G117h Mutant Of Human Butyrylcholinesterase In Comple</a>                                                                                                   | 57.5      | 57.5        | 100%        | 5e-08   | 85%   | <a href="#">gij258588213 2WSL_A</a>         |  |
| <a href="#">Chain A, Crystal Structure Of Recombinant Full Length Human Buty</a>                                                                                                 | 57.5      | 57.5        | 100%        | 5e-08   | 85%   | <a href="#">gij215794636 3DJY_A</a>         |  |
| <a href="#">Chain A, Structure Of Human Butyrylcholinesterase In Complex Wit</a>                                                                                                 | 57.5      | 57.5        | 100%        | 5e-08   | 85%   | <a href="#">gij348108591 1P0I_A</a>         |  |
| <a href="#">Chain A, Crystal Structure Of Fully Glycosylated Human Butyrylchol</a>                                                                                               | 57.5      | 57.5        | 100%        | 5e-08   | 85%   | <a href="#">gij313103512 2XMB_A</a>         |  |
| <a href="#">Chain A, Aged Form Of Human Butyrylcholinesterase Inhibited By ]</a>                                                                                                 | 57.5      | 57.5        | 100%        | 5e-08   | 85%   | <a href="#">gij158429456 2PM8_A</a>         |  |
| <a href="#">Chain A, Nonaged Form Of Human Butyrylcholinesterase Inhibited ]</a>                                                                                                 | 57.1      | 57.1        | 100%        | 7e-08   | 85%   | <a href="#">gij145579736 2J4C_A</a>         |  |
| <a href="#">Chain A, Crystal Structure Of Soman-aged Human Butyrylcholinest</a>                                                                                                  | 56.2      | 56.2        | 100%        | 1e-07   | 85%   | <a href="#">gij641703485 XP_008140478.1</a> |  |
| <a href="#">Chain A, Aged Form Of Human Butyrylcholinesterase Inhibited By ]</a>                                                                                                 | 56.2      | 56.2        | 100%        | 1e-07   | 85%   | <a href="#">gij558125651 XP_006088951.1</a> |  |
| <a href="#">Chain A, Nonaged Form Of Human Butyrylcholinesterase Inhibited ]</a>                                                                                                 | 54.9      | 54.9        | 100%        | 4e-07   | 80%   | <a href="#">gij21362409 P81908.1</a>        |  |

|                                                                                     |      |      |      |       |     |                                             |
|-------------------------------------------------------------------------------------|------|------|------|-------|-----|---------------------------------------------|
| RecName: Full=Cholinesterase; AltName: Full=Acylcholine acylhydri                   | 54.9 | 54.9 | 100% | 4e-07 | 80% | <a href="#">gij116354 P21927.1</a>          |
| <a href="#">PREDICTED: cholinesterase [Oryctolagus cuniculus]</a>                   | 54.9 | 54.9 | 100% | 4e-07 | 80% | <a href="#">gij291400118 XP_002716414.1</a> |
| <a href="#">PREDICTED: cholinesterase [Orcinus orca]</a>                            | 54.9 | 54.9 | 100% | 4e-07 | 80% | <a href="#">gij466076197 XP_004283487.1</a> |
| <a href="#">cholinesterase precursor [Pongo abelii]</a>                             | 54.9 | 54.9 | 100% | 4e-07 | 80% | <a href="#">gij197097436 NP_001127509.1</a> |
| <a href="#">PREDICTED: cholinesterase isoform X1 [Sus scrofa]</a>                   | 54.9 | 54.9 | 100% | 4e-07 | 80% | <a href="#">gij335299867 XP_003358712.1</a> |
| <a href="#">cholinesterase precursor [Bos taurus]</a>                               | 54.9 | 54.9 | 100% | 4e-07 | 80% | <a href="#">gij116004027 NP_001070374.1</a> |
| <a href="#">PREDICTED: cholinesterase [Bison bison bison]</a>                       | 54.9 | 54.9 | 100% | 4e-07 | 80% | <a href="#">gij742123891 XP_010839228.1</a> |
| <a href="#">PREDICTED: cholinesterase [Balaenoptera acutorostrata scammon]</a>      | 54.9 | 54.9 | 100% | 4e-07 | 80% | <a href="#">gij594625950 XP_007197616.1</a> |
| <a href="#">PREDICTED: cholinesterase isoform X1 [Pongo abelii]</a>                 | 54.9 | 54.9 | 100% | 4e-07 | 80% | <a href="#">gij686714306 XP_009237773.1</a> |
| <a href="#">PREDICTED: cholinesterase [Lipotes vexillifer]</a>                      | 54.9 | 54.9 | 100% | 4e-07 | 80% | <a href="#">gij602681974 XP_007446483.1</a> |
| <a href="#">PREDICTED: cholinesterase [Pantholops hodgsonii]</a>                    | 54.9 | 54.9 | 100% | 4e-07 | 80% | <a href="#">gij556779632 XP_005984864.1</a> |
| <a href="#">PREDICTED: cholinesterase [Bos mutus]</a>                               | 54.9 | 54.9 | 100% | 4e-07 | 80% | <a href="#">gij555966690 XP_005895396.1</a> |
| <a href="#">PREDICTED: cholinesterase [Capra hircus]</a>                            | 54.9 | 54.9 | 100% | 4e-07 | 80% | <a href="#">gij548451269 XP_005675420.1</a> |
| <a href="#">PREDICTED: cholinesterase [Ovis aries]</a>                              | 54.9 | 54.9 | 100% | 4e-07 | 80% | <a href="#">gij426218006 XP_004003241.1</a> |
| <a href="#">PREDICTED: cholinesterase-like isoform X1 [Myotis brandtii]</a>         | 52.8 | 52.8 | 100% | 2e-06 | 80% | <a href="#">gij554526033 XP_005857864.1</a> |
| <a href="#">PREDICTED: cholinesterase isoform X2 [Saimiri boliviensis bolivier]</a> | 52.8 | 52.8 | 100% | 2e-06 | 75% | <a href="#">gij725560928 XP_010334003.1</a> |
| <a href="#">PREDICTED: cholinesterase isoform X1 [Saimiri boliviensis bolivier]</a> | 52.8 | 52.8 | 100% | 2e-06 | 75% | <a href="#">gij403265619 XP_003925023.1</a> |
| <a href="#">PREDICTED: LOW QUALITY PROTEIN: cholinesterase [Callithrix j.</a>       | 52.8 | 52.8 | 100% | 2e-06 | 75% | <a href="#">gij675737963 XP_002807699.3</a> |
| <a href="#">Cholinesterase [Myotis brandtii]</a>                                    | 52.8 | 52.8 | 100% | 2e-06 | 80% | <a href="#">gij521020653 EPQ02441.1</a>     |
| <a href="#">cholinesterase precursor [Equus caballus]</a>                           | 52.4 | 52.4 | 100% | 3e-06 | 80% | <a href="#">gij126352540 NP_001075319.1</a> |
| <a href="#">PREDICTED: cholinesterase-like [Elephantulus edwardii]</a>              | 52.4 | 52.4 | 100% | 3e-06 | 80% | <a href="#">gij585675683 XP_006890440.1</a> |
| <a href="#">PREDICTED: cholinesterase isoform X2 [Equus przewalskii]</a>            | 52.4 | 52.4 | 100% | 3e-06 | 80% | <a href="#">gij664725795 XP_008520036.1</a> |
| <a href="#">PREDICTED: cholinesterase isoform X1 [Equus przewalskii]</a>            | 52.4 | 52.4 | 100% | 3e-06 | 80% | <a href="#">gij664725793 XP_008520035.1</a> |
| <a href="#">PREDICTED: cholinesterase [Ceratotherium simum simum]</a>               | 52.4 | 52.4 | 100% | 3e-06 | 80% | <a href="#">gij478501043 XP_004424836.1</a> |
| <a href="#">PREDICTED: cholinesterase [Nomascus leucogenys]</a>                     | 52.4 | 52.4 | 100% | 3e-06 | 75% | <a href="#">gij332214651 XP_003256448.1</a> |
| <a href="#">hypothetical protein EGK_11933 [Macaca mulatta]</a>                     | 51.5 | 51.5 | 100% | 5e-06 | 75% | <a href="#">gij355559896 EHH16624.1</a>     |
| <a href="#">butyrylcholinesterase precursor [Macaca fascicularis]</a>               | 51.5 | 51.5 | 100% | 5e-06 | 75% | <a href="#">gij290795732 ADD64703.1</a>     |
| <a href="#">PREDICTED: cholinesterase [Macaca fascicularis]</a>                     | 51.5 | 51.5 | 100% | 5e-06 | 75% | <a href="#">gij544412493 XP_005546353.1</a> |
| <a href="#">PREDICTED: cholinesterase isoform X1 [Papio anubis]</a>                 | 51.5 | 51.5 | 100% | 5e-06 | 75% | <a href="#">gij402861047 XP_003894921.1</a> |
| <a href="#">PREDICTED: LOW QUALITY PROTEIN: cholinesterase-like [Maca</a>           | 51.5 | 51.5 | 100% | 5e-06 | 75% | <a href="#">gij297286482 XP_002808379.1</a> |
| <a href="#">PREDICTED: cholinesterase [Ictidomys tridecemlineatus]</a>              | 51.5 | 51.5 | 100% | 5e-06 | 75% | <a href="#">gij532105511 XP_005338342.1</a> |
| <a href="#">PREDICTED: cholinesterase isoform X1 [Chlorocebus sabaeus]</a>          | 51.5 | 51.5 | 100% | 5e-06 | 75% | <a href="#">gij635084154 XP_007970394.1</a> |
| <a href="#">PREDICTED: cholinesterase isoform X2 [Camelus dromedarius]</a>          | 51.1 | 51.1 | 100% | 7e-06 | 75% | <a href="#">gij744553709 XP_010974642.1</a> |
| <a href="#">PREDICTED: cholinesterase isoform X1 [Camelus dromedarius]</a>          | 51.1 | 51.1 | 100% | 7e-06 | 75% | <a href="#">gij744553706 XP_010974641.1</a> |
| <a href="#">PREDICTED: cholinesterase isoform X2 [Camelus bactrianus]</a>           | 51.1 | 51.1 | 100% | 7e-06 | 75% | <a href="#">gij743713601 XP_010950371.1</a> |
| <a href="#">PREDICTED: cholinesterase [Vicugna pacos]</a>                           | 51.1 | 51.1 | 100% | 7e-06 | 75% | <a href="#">gij560956860 XP_006200907.1</a> |
| <a href="#">PREDICTED: cholinesterase [Camelus ferus]</a>                           | 51.1 | 51.1 | 100% | 7e-06 | 75% | <a href="#">gij560915255 XP_006183885.1</a> |
| <a href="#">PREDICTED: cholinesterase [Myotis davidii]</a>                          | 50.7 | 50.7 | 90%  | 1e-05 | 83% | <a href="#">gij584083219 XP_006761409.1</a> |
| <a href="#">PREDICTED: cholinesterase [Orycteropus afer afer]</a>                   | 49.8 | 49.8 | 100% | 2e-05 | 75% | <a href="#">gij634870148 XP_007946910.1</a> |
| <a href="#">PREDICTED: cholinesterase [Tarsius syrichta]</a>                        | 49.4 | 49.4 | 100% | 3e-05 | 75% | <a href="#">gij640826885 XP_008070612.1</a> |
| <a href="#">PREDICTED: cholinesterase [Otolemur garnettii]</a>                      | 49.0 | 49.0 | 100% | 4e-05 | 75% | <a href="#">gij395843862 XP_003794691.1</a> |
| <a href="#">PREDICTED: cholinesterase-like isoform 1 [Dasypus novemcinctus]</a>     | 49.0 | 49.0 | 100% | 4e-05 | 75% | <a href="#">gij488587231 XP_004478943.1</a> |
| <a href="#">PREDICTED: cholinesterase-like [Trichechus manatus latirostris]</a>     | 49.0 | 49.0 | 100% | 4e-05 | 75% | <a href="#">gij471406477 XP_004384938.1</a> |
| <a href="#">PREDICTED: cholinesterase isoform X1 [Loxodonta africana]</a>           | 49.0 | 49.0 | 100% | 4e-05 | 75% | <a href="#">gij731499959 XP_003416305.2</a> |
| <a href="#">PREDICTED: cholinesterase [Galeopterus variegatus]</a>                  | 48.6 | 48.6 | 100% | 5e-05 | 75% | <a href="#">gij667294272 XP_008578862.1</a> |

|                                                                                   |      |      |      |       |     |                                             |
|-----------------------------------------------------------------------------------|------|------|------|-------|-----|---------------------------------------------|
| <a href="#">RecName: Full=Cholinesterase; AltName: Full=Acylcholine acylhyd</a>   | 48.1 | 48.1 | 100% | 7e-05 | 70% | <a href="#">gij38502853 O62761.1</a>        |
| <a href="#">cholinesterase precursor [Felis catus]</a>                            | 48.1 | 48.1 | 100% | 7e-05 | 70% | <a href="#">gij57163907 INP_001009364.1</a> |
| <a href="#">PREDICTED: cholinesterase-like [Panthera tigris altaica]</a>          | 48.1 | 48.1 | 100% | 7e-05 | 70% | <a href="#">gij591300304 XP_007077117.1</a> |
| <a href="#">PREDICTED: cholinesterase-like [Chrysochloris asiatica]</a>           | 47.7 | 47.7 | 100% | 1e-04 | 70% | <a href="#">gij586462448 XP_006861862.1</a> |
| <a href="#">PREDICTED: cholinesterase-like [Echinops telfairi]</a>                | 47.7 | 47.7 | 100% | 1e-04 | 70% | <a href="#">gij507651638 XP_004704160.1</a> |
| <a href="#">PREDICTED: cholinesterase [Ursus maritimus]</a>                       | 47.3 | 47.3 | 95%  | 1e-04 | 68% | <a href="#">gij670999264 XP_008690527.1</a> |
| <a href="#">PREDICTED: cholinesterase isoform X2 [Heterocephalus glaber]</a>      | 46.9 | 46.9 | 100% | 2e-04 | 75% | <a href="#">gij512824494 XP_004880401.1</a> |
| <a href="#">PREDICTED: cholinesterase isoform X1 [Chinchilla lanigera]</a>        | 46.9 | 46.9 | 100% | 2e-04 | 75% | <a href="#">gij533158554 XP_005393194.1</a> |
| <a href="#">PREDICTED: cholinesterase isoform X1 [Heterocephalus glaber]</a>      | 46.9 | 46.9 | 100% | 2e-04 | 75% | <a href="#">gij512824490 XP_004880400.1</a> |
| <a href="#">PREDICTED: cholinesterase isoform X2 [Cavia porcellus]</a>            | 46.4 | 46.4 | 100% | 3e-04 | 70% | <a href="#">gij514460083 XP_005003514.1</a> |
| <a href="#">PREDICTED: cholinesterase isoform X1 [Cavia porcellus]</a>            | 46.4 | 46.4 | 100% | 3e-04 | 70% | <a href="#">gij348567235 XP_003469406.1</a> |
| <a href="#">PREDICTED: cholinesterase [Rhinopithecus roxellana]</a>               | 46.4 | 46.4 | 100% | 3e-04 | 70% | <a href="#">gij724956944 XP_010353594.1</a> |
| <a href="#">Cholinesterase [Pteropus alecto]</a>                                  | 46.0 | 46.0 | 100% | 4e-04 | 75% | <a href="#">gij431915168 ELK15855.1</a>     |
| <a href="#">PREDICTED: cholinesterase [Pteropus alecto]</a>                       | 46.0 | 46.0 | 100% | 4e-04 | 75% | <a href="#">gij586546267 XP_006908236.1</a> |
| <a href="#">PREDICTED: cholinesterase-like isoform X1 [Mustela putorius furo]</a> | 46.0 | 46.0 | 95%  | 4e-04 | 68% | <a href="#">gij511910148 XP_004774475.1</a> |
| <a href="#">hypothetical protein PANDA_007095 [Ailuropoda melanoleuca]</a>        | 45.6 | 45.6 | 95%  | 5e-04 | 68% | <a href="#">gij281337784 EFB13368.1</a>     |
| <a href="#">PREDICTED: cholinesterase-like [Ailuropoda melanoleuca]</a>           | 45.6 | 45.6 | 95%  | 5e-04 | 68% | <a href="#">gij301766374 XP_002918607.1</a> |
| <a href="#">PREDICTED: cholinesterase [Microtus ochrogaster]</a>                  | 45.2 | 45.2 | 100% | 7e-04 | 70% | <a href="#">gij531999261 XP_005344165.1</a> |
| <a href="#">PREDICTED: cholinesterase isoform X1 [Peromyscus maniculatus]</a>     | 44.8 | 44.8 | 100% | 0.001 | 70% | <a href="#">gij589919054 XP_006972718.1</a> |
| <a href="#">PREDICTED: cholinesterase [Fukomys damarensis]</a>                    | 44.3 | 44.3 | 100% | 0.001 | 70% | <a href="#">gij731199055 XP_010610068.1</a> |
| <a href="#">Butyrylcholinesterase [Mus musculus]</a>                              | 44.3 | 44.3 | 100% | 0.001 | 70% | <a href="#">gij71534030 AAH99977.1</a>      |
| <a href="#">butyrylcholinesterase [Mus musculus]</a>                              | 44.3 | 44.3 | 100% | 0.001 | 70% | <a href="#">gij191580 AAA37328.1</a>        |
| <a href="#">cholinesterase precursor [Mus musculus]</a>                           | 44.3 | 44.3 | 100% | 0.001 | 70% | <a href="#">gij124487350 INP_033868.3</a>   |
| <a href="#">Cholinesterase [Fukomys damarensis]</a>                               | 44.3 | 44.3 | 100% | 0.001 | 70% | <a href="#">gij676283600 KFO36750.1</a>     |
| <a href="#">cholinesterase precursor [Rattus norvegicus]</a>                      | 43.9 | 43.9 | 100% | 0.002 | 70% | <a href="#">gij12621110 INP_075231.1</a>    |
| <a href="#">PREDICTED: cholinesterase [Sarcophilus harrisii]</a>                  | 43.9 | 43.9 | 90%  | 0.002 | 67% | <a href="#">gij395528220 XP_003766229.1</a> |
| <a href="#">PREDICTED: cholinesterase isoform X1 [Rattus norvegicus]</a>          | 43.9 | 43.9 | 100% | 0.002 | 70% | <a href="#">gij672042750 XP_008759334.1</a> |

## Alignments

Download GenPept Graphics

Next Previous Descriptions

### Chain A, Crystal Structure Of Fully Glycosylated Human Butyrylcholinesterase

Sequence ID: [gij393715367|pdb|4AQD|A](#) Length: 531 Number of Matches: 1

See 1 more title(s)

Range 1: 478 to 497 GenPept Graphics

Next Match Previous Match

| Score          | Expect | Identities | Positives   | Gaps     |
|----------------|--------|------------|-------------|----------|
| 63.8 bits(143) | 4e-10  | 18/20(90%) | 20/20(100%) | 0/20(0%) |

Query 1 KYGNPNETQDDSTSWPVFKS 20  
 KYGNPNETQ++STSWPVFKS  
 Sbjct 478 KYGNPNETQNNSTSWPVFKS 497

#### Related Information

[Structure](#) - 3D structure displays  
[Identical Proteins](#) - Proteins  
 identical to the subject

Download GenPept Graphics

Next Previous Descriptions

### monomeric butyrylcholinesterase [synthetic construct]

Sequence ID: [gij388261124|gb|AFK25766.1](#) Length: 557 Number of Matches: 1

Range 1: 504 to 523 GenPept Graphics

Next Match Previous Match

| Score          | Expect | Identities | Positives   | Gaps     |
|----------------|--------|------------|-------------|----------|
| 63.8 bits(143) | 4e-10  | 18/20(90%) | 20/20(100%) | 0/20(0%) |

#### Related Information

Query 1 KYGNPNETQDDSTSWPVFKS 20  
 KYGNPNETQ++STSWPVFKS  
 Sbjct 504 KYGNPNETQNNSTSWPVFKS 523

[Download](#) [GenPept](#) [Graphics](#)

[▼ Next](#) [▲ Previous](#) [▲ Descriptions](#)

Chain A, Co-Crystallization Studies Of Full Length Recombinant Bche With Cocaine Offers Insights Into Cocaine Detoxification

Sequence ID: [gi|328877250|pdb|3O9M|A](#) Length: 574 Number of Matches: 1

[▶ See 1 more title\(s\)](#)

Range 1: 476 to 495 [GenPept](#) [Graphics](#)

[▼ Next Match](#) [▲ Previous Match](#)

| Score          | Expect | Identities | Positives   | Gaps     |
|----------------|--------|------------|-------------|----------|
| 63.8 bits(143) | 4e-10  | 18/20(90%) | 20/20(100%) | 0/20(0%) |

Query 1 KYGNPNETQDDSTSWPVFKS 20  
 KYGNPNETQ++STSWPVFKS  
 Sbjct 476 KYGNPNETQNNSTSWPVFKS 495

**Related Information**

[Structure](#) - 3D structure displays  
[Identical Proteins](#) - Proteins identical to the subject

[Download](#) [GenPept](#) [Graphics](#)

[▼ Next](#) [▲ Previous](#) [▲ Descriptions](#)

butyrylcholinesterase p.Val204Asp splice variant [Homo sapiens]

Sequence ID: [gi|632795270|gb|AHZ34327.1](#) Length: 602 Number of Matches: 1

Range 1: 504 to 523 [GenPept](#) [Graphics](#)

[▼ Next Match](#) [▲ Previous Match](#)

| Score          | Expect | Identities | Positives   | Gaps     |
|----------------|--------|------------|-------------|----------|
| 63.8 bits(143) | 4e-10  | 18/20(90%) | 20/20(100%) | 0/20(0%) |

Query 1 KYGNPNETQDDSTSWPVFKS 20  
 KYGNPNETQ++STSWPVFKS  
 Sbjct 504 KYGNPNETQNNSTSWPVFKS 523

**Related Information**

[Structure](#) - 3D structure displays  
[Identical Proteins](#) - Proteins identical to the subject

[Download](#) [GenPept](#) [Graphics](#)

[▼ Next](#) [▲ Previous](#) [▲ Descriptions](#)

cholinesterase precursor [Homo sapiens]

Sequence ID: [gi|4557351|ref|NP\\_000046.1](#) Length: 602 Number of Matches: 1

[▶ See 10 more title\(s\)](#)

Range 1: 504 to 523 [GenPept](#) [Graphics](#)

[▼ Next Match](#) [▲ Previous Match](#)

| Score          | Expect | Identities | Positives   | Gaps     |
|----------------|--------|------------|-------------|----------|
| 63.8 bits(143) | 4e-10  | 18/20(90%) | 20/20(100%) | 0/20(0%) |

Query 1 KYGNPNETQDDSTSWPVFKS 20  
 KYGNPNETQ++STSWPVFKS  
 Sbjct 504 KYGNPNETQNNSTSWPVFKS 523

**Related Information**

[Gene](#) - associated gene details  
[UniGene](#) - clustered expressed sequence tags  
[Structure](#) - 3D structure displays  
[PubChem BioAssay](#) - bioactivity screening  
[Map Viewer](#) - aligned genomic context  
[Identical Proteins](#) - Proteins identical to the subject

BLAST is a registered trademark of the National Library of Medicine.



▶ NCBI/ BLAST/ blastp suite/ Formatting Results - BHJBM4H015

**i** Your search parameters were adjusted to search for a short input sequence.

[Edit and Resubmit](#) [Save Search Strategies](#) ▶ [Formatting options](#) ▶ [Download](#)

[YouTube](#) [How to read this page](#) [Blast report description](#)

### BCHE\_KYGNPNETQDNSTSWPVFKS\_Mod

RID [BHJBM4H015](#) (Expires on 01-17 15:19 pm)

**Query ID** |cl|3581  
**Description** None  
**Molecule type** amino acid  
**Query Length** 20

**Database Name** nr  
**Description** All non-redundant GenBank CDS translations+PDB+SwissProt+PIR excluding environmental samples from WGS projects  
**Program** BLASTP 2.2.30+ ▶ [Citation](#)

Other reports: ▶ [Search Summary](#) [[Taxonomy reports](#)] [[Distance tree of results](#)] [[Multiple alignment](#)]

### Graphic Summary

[Show Conserved Domains](#)

No putative conserved domains have been detected

Distribution of 100 Blast Hits on the Query Sequence

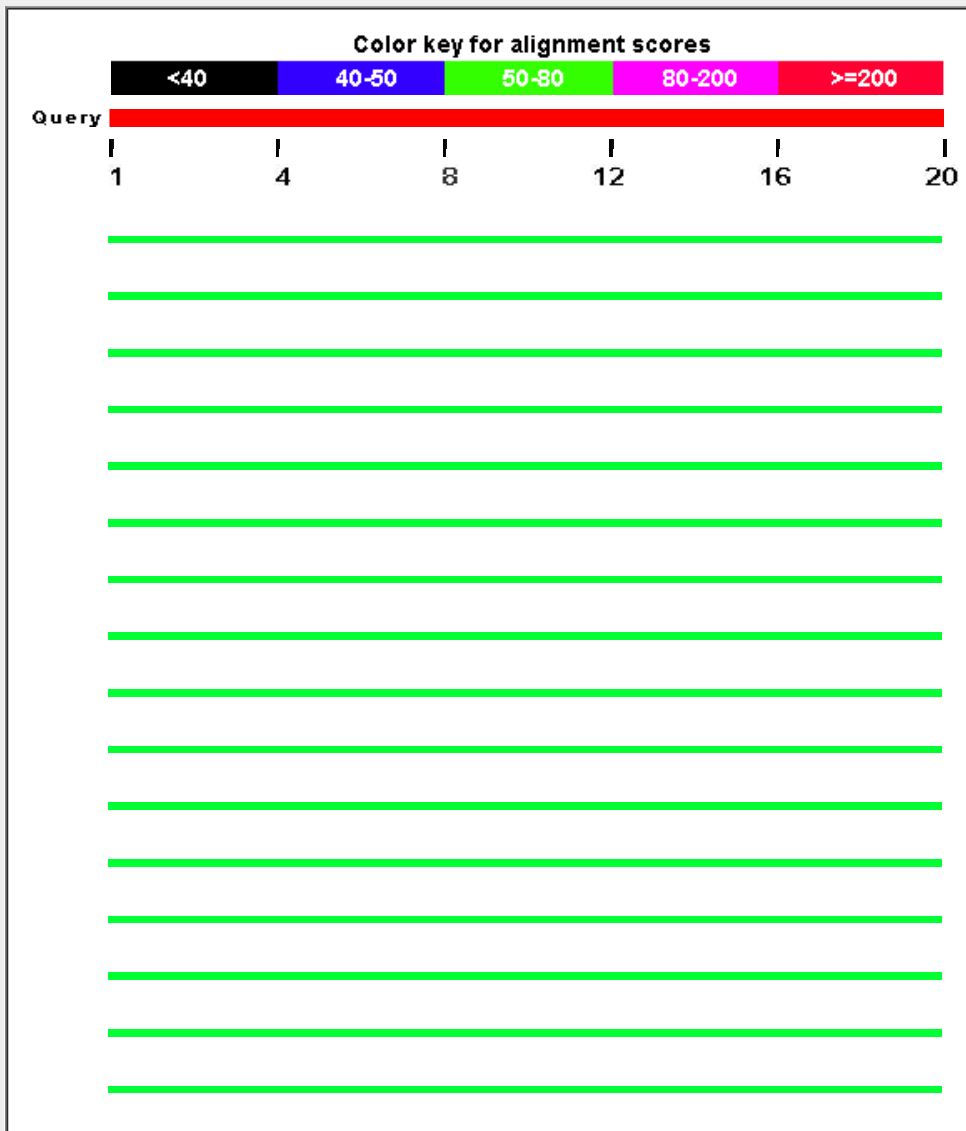



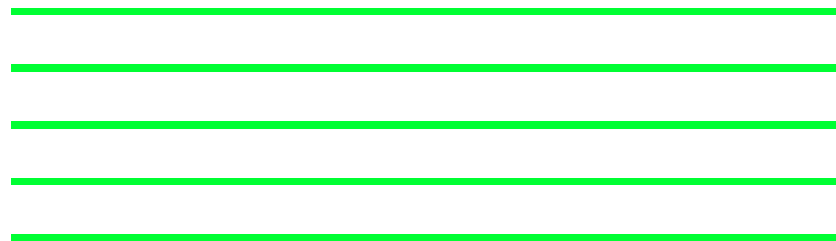

## Descriptions

### Sequences producing significant alignments:

Select: [All](#) [None](#) Selected:0

| <a href="#">Alignments</a> <a href="#">Download</a> <a href="#">GenPept</a> <a href="#">Graphics</a> <a href="#">Distance tree of results</a> <a href="#">Multiple alignment</a> |           |             |             |         |       |                                             |  |
|----------------------------------------------------------------------------------------------------------------------------------------------------------------------------------|-----------|-------------|-------------|---------|-------|---------------------------------------------|--|
| Description                                                                                                                                                                      | Max score | Total score | Query cover | E value | Ident | Accession                                   |  |
| <a href="#">Chain A, Crystal Structure Of Fully Glycosylated Human Butyrylcholinesterase [synthetic construct]</a>                                                               | 66.4      | 66.4        | 100%        | 5e-11   | 95%   | <a href="#">gij393715367 4AQD_A</a>         |  |
| <a href="#">Chain A, Co-Crystallization Studies Of Full Length Recombinant Butyrylcholinesterase p.Val204Asp splice variant [Homo sapiens]</a>                                   | 66.4      | 66.4        | 100%        | 5e-11   | 95%   | <a href="#">gij388261124 AFK25766.1</a>     |  |
| <a href="#">butyrylcholinesterase precursor [Homo sapiens]</a>                                                                                                                   | 66.4      | 66.4        | 100%        | 5e-11   | 95%   | <a href="#">gij328877250 3O9M_A</a>         |  |
| <a href="#">unnamed protein product [Homo sapiens]</a>                                                                                                                           | 66.4      | 66.4        | 100%        | 5e-11   | 95%   | <a href="#">gij632795270 AHZ34327.1</a>     |  |
| <a href="#">butyrylcholinesterase [synthetic construct]</a>                                                                                                                      | 66.4      | 66.4        | 100%        | 5e-11   | 95%   | <a href="#">gij4557351 NP_000046.1</a>      |  |
| <a href="#">PREDICTED: cholinesterase isoform X1 [Homo sapiens]</a>                                                                                                              | 66.4      | 66.4        | 100%        | 5e-11   | 95%   | <a href="#">gij158257558 BAF84752.1</a>     |  |
| <a href="#">butyrylcholinesterase [synthetic construct]</a>                                                                                                                      | 66.4      | 66.4        | 100%        | 5e-11   | 95%   | <a href="#">gij260766471 ACX50257.1</a>     |  |
| <a href="#">cholinesterase precursor [Pan troglodytes]</a>                                                                                                                       | 66.4      | 66.4        | 100%        | 5e-11   | 95%   | <a href="#">gij530375091 XP_005247742.1</a> |  |
| <a href="#">PREDICTED: cholinesterase [Gorilla gorilla gorilla]</a>                                                                                                              | 62.6      | 62.6        | 100%        | 1e-09   | 90%   | <a href="#">gij343960913 BAK62046.1</a>     |  |
| <a href="#">PREDICTED: cholinesterase [Pan paniscus]</a>                                                                                                                         | 62.6      | 62.6        | 100%        | 1e-09   | 90%   | <a href="#">gij426342776 XP_004038010.1</a> |  |
| <a href="#">PREDICTED: cholinesterase [Pan troglodytes]</a>                                                                                                                      | 62.6      | 62.6        | 100%        | 1e-09   | 90%   | <a href="#">gij397493718 XP_003817746.1</a> |  |
| <a href="#">PREDICTED: cholinesterase [Pan troglodytes]</a>                                                                                                                      | 62.6      | 62.6        | 100%        | 1e-09   | 90%   | <a href="#">gij114590210 XP_516857.2</a>    |  |
| <a href="#">Chain A, Crystal Structure Of Soman-aged Human Butyrylcholinesterase [synthetic construct]</a>                                                                       | 61.7      | 61.7        | 100%        | 2e-09   | 90%   | <a href="#">gij402550232 4AXB_A</a>         |  |
| <a href="#">Chain A, Crystal Structure Of Soman-aged Human Butyrylcholinesterase [synthetic construct]</a>                                                                       | 61.7      | 61.7        | 100%        | 2e-09   | 90%   | <a href="#">gij402550237 4B0O_A</a>         |  |
| <a href="#">Chain A, Structure Of Human Butyrylcholinesterase Inhibited By Carbamoylcholine [synthetic construct]</a>                                                            | 61.7      | 61.7        | 100%        | 2e-09   | 90%   | <a href="#">gij340707403 2Y1K_A</a>         |  |
| <a href="#">Chain A, Aged Form Of Human Butyrylcholinesterase Inhibited By Carbamoylcholine [synthetic construct]</a>                                                            | 61.7      | 61.7        | 100%        | 2e-09   | 90%   | <a href="#">gij237823652 2WIL_A</a>         |  |
| <a href="#">Chain A, Aged Form Of Human Butyrylcholinesterase Inhibited By Carbamoylcholine [synthetic construct]</a>                                                            | 61.7      | 61.7        | 100%        | 2e-09   | 90%   | <a href="#">gij237823648 2WIF_A</a>         |  |
| <a href="#">Chain A, Nonaged Form Of Human Butyrylcholinesterase Inhibited By Carbamoylcholine [synthetic construct]</a>                                                         | 61.7      | 61.7        | 100%        | 2e-09   | 90%   | <a href="#">gij237823647 2WID_A</a>         |  |
| <a href="#">PREDICTED: cholinesterase [Eptesicus fuscus]</a>                                                                                                                     | 57.9      | 57.9        | 100%        | 4e-08   | 85%   | <a href="#">gij641703485 XP_008140478.1</a> |  |
| <a href="#">PREDICTED: cholinesterase [Myotis lucifugus]</a>                                                                                                                     | 57.9      | 57.9        | 100%        | 4e-08   | 85%   | <a href="#">gij558125651 XP_006088951.1</a> |  |
| <a href="#">RecName: Full=Cholinesterase; AltName: Full=Acylcholine acylhydrolase [Homo sapiens]</a>                                                                             | 57.5      | 57.5        | 100%        | 5e-08   | 85%   | <a href="#">gij21362409 P81908.1</a>        |  |
| <a href="#">RecName: Full=Cholinesterase; AltName: Full=Acylcholine acylhydrolase [Homo sapiens]</a>                                                                             | 57.5      | 57.5        | 100%        | 5e-08   | 85%   | <a href="#">gij116354 P21927.1</a>          |  |
| <a href="#">PREDICTED: cholinesterase [Oryctolagus cuniculus]</a>                                                                                                                | 57.5      | 57.5        | 100%        | 5e-08   | 85%   | <a href="#">gij291400118 XP_002716414.1</a> |  |
| <a href="#">PREDICTED: cholinesterase [Orcinus orca]</a>                                                                                                                         | 57.5      | 57.5        | 100%        | 5e-08   | 85%   | <a href="#">gij466076197 XP_004283487.1</a> |  |
| <a href="#">cholinesterase precursor [Pongo abelii]</a>                                                                                                                          | 57.5      | 57.5        | 100%        | 5e-08   | 85%   | <a href="#">gij197097436 NP_001127509.1</a> |  |
| <a href="#">PREDICTED: cholinesterase isoform X1 [Sus scrofa]</a>                                                                                                                | 57.5      | 57.5        | 100%        | 5e-08   | 85%   | <a href="#">gij335299867 XP_003358712.1</a> |  |
| <a href="#">cholinesterase precursor [Bos taurus]</a>                                                                                                                            | 57.5      | 57.5        | 100%        | 5e-08   | 85%   | <a href="#">gij116004027 NP_001070374.1</a> |  |
| <a href="#">PREDICTED: cholinesterase [Bison bison bison]</a>                                                                                                                    | 57.5      | 57.5        | 100%        | 5e-08   | 85%   | <a href="#">gij742123891 XP_010839228.1</a> |  |

|                                                                                    |      |      |      |       |     |                                             |
|------------------------------------------------------------------------------------|------|------|------|-------|-----|---------------------------------------------|
| <a href="#">PREDICTED: cholinesterase [Balaenoptera acutorostrata scammon</a>      | 57.5 | 57.5 | 100% | 5e-08 | 85% | <a href="#">gij594625950 XP_007197616.1</a> |
| <a href="#">PREDICTED: cholinesterase isoform X1 [Pongo abelii]</a>                | 57.5 | 57.5 | 100% | 5e-08 | 85% | <a href="#">gij686714306 XP_009237773.1</a> |
| <a href="#">PREDICTED: cholinesterase [Lipotes vexillifer]</a>                     | 57.5 | 57.5 | 100% | 5e-08 | 85% | <a href="#">gij602681974 XP_007446483.1</a> |
| <a href="#">PREDICTED: cholinesterase [Pantholops hodgsonii]</a>                   | 57.5 | 57.5 | 100% | 5e-08 | 85% | <a href="#">gij556779632 XP_005984864.1</a> |
| <a href="#">PREDICTED: cholinesterase [Bos mutus]</a>                              | 57.5 | 57.5 | 100% | 5e-08 | 85% | <a href="#">gij555966690 XP_005895396.1</a> |
| <a href="#">PREDICTED: cholinesterase [Capra hircus]</a>                           | 57.5 | 57.5 | 100% | 5e-08 | 85% | <a href="#">gij548451269 XP_005675420.1</a> |
| <a href="#">PREDICTED: cholinesterase [Ovis aries]</a>                             | 57.5 | 57.5 | 100% | 5e-08 | 85% | <a href="#">gij426218006 XP_004003241.1</a> |
| <a href="#">Chain A, X-Ray Structure Of Human Butyrylcholinesterase Inhibitec</a>  | 57.1 | 57.1 | 100% | 7e-08 | 85% | <a href="#">gij326634060 2XQF_A</a>         |
| <a href="#">Chain A, Aged Form Of Human Butyrylcholinesterase Inhibited By ]</a>   | 57.1 | 57.1 | 100% | 7e-08 | 85% | <a href="#">gij258588213 2WSL_A</a>         |
| <a href="#">Chain A, Nonaged Form Of Human Butyrylcholinesterase Inhibited ]</a>   | 57.1 | 57.1 | 100% | 7e-08 | 85% | <a href="#">gij215794636 3DJY_A</a>         |
| <a href="#">Chain A, Crystal Structure Of Human Butyryl Cholinesterase [Homo</a>   | 57.1 | 57.1 | 100% | 7e-08 | 85% | <a href="#">gij34810859 1POI_A</a>          |
| <a href="#">Chain A, G117h Mutant Of Human Butyrylcholinesterase In Comple</a>     | 57.1 | 57.1 | 100% | 7e-08 | 85% | <a href="#">gij313103512 2XMB_A</a>         |
| <a href="#">Chain A, Crystal Structure Of Recombinant Full Length Human Buty</a>   | 57.1 | 57.1 | 100% | 7e-08 | 85% | <a href="#">gij158429456 2PM8_A</a>         |
| <a href="#">Chain A, Structure Of Human Butyrylcholinesterase In Complex Wit</a>   | 56.6 | 56.6 | 100% | 1e-07 | 85% | <a href="#">gij145579736 2J4C_A</a>         |
| <a href="#">PREDICTED: cholinesterase isoform X2 [Saimiri boliviensis bolivier</a> | 55.4 | 55.4 | 100% | 3e-07 | 80% | <a href="#">gij725560928 XP_010334003.1</a> |
| <a href="#">PREDICTED: cholinesterase isoform X1 [Saimiri boliviensis bolivier</a> | 55.4 | 55.4 | 100% | 3e-07 | 80% | <a href="#">gij403265619 XP_003925023.1</a> |
| <a href="#">PREDICTED: LOW QUALITY PROTEIN: cholinesterase [Callithrix j</a>       | 55.4 | 55.4 | 100% | 3e-07 | 80% | <a href="#">gij675737963 XP_002807699.3</a> |
| <a href="#">cholinesterase precursor [Equus caballus]</a>                          | 54.9 | 54.9 | 100% | 4e-07 | 85% | <a href="#">gij126352540 NP_001075319.1</a> |
| <a href="#">PREDICTED: cholinesterase-like [Elephantulus edwardii]</a>             | 54.9 | 54.9 | 100% | 4e-07 | 85% | <a href="#">gij585675683 XP_006890440.1</a> |
| <a href="#">PREDICTED: cholinesterase isoform X2 [Equus przewalskii]</a>           | 54.9 | 54.9 | 100% | 4e-07 | 85% | <a href="#">gij664725795 XP_008520036.1</a> |
| <a href="#">PREDICTED: cholinesterase isoform X1 [Equus przewalskii]</a>           | 54.9 | 54.9 | 100% | 4e-07 | 85% | <a href="#">gij664725793 XP_008520035.1</a> |
| <a href="#">PREDICTED: cholinesterase [Ceratotherium simum simum]</a>              | 54.9 | 54.9 | 100% | 4e-07 | 85% | <a href="#">gij478501043 XP_004424836.1</a> |
| <a href="#">PREDICTED: cholinesterase [Nomascus leucogenys]</a>                    | 54.9 | 54.9 | 100% | 4e-07 | 80% | <a href="#">gij332214651 XP_003256448.1</a> |
| <a href="#">PREDICTED: cholinesterase-like isoform X1 [Myotis brandtii]</a>        | 54.5 | 54.5 | 100% | 5e-07 | 80% | <a href="#">gij554526033 XP_005857864.1</a> |
| <a href="#">Cholinesterase [Myotis brandtii]</a>                                   | 54.5 | 54.5 | 100% | 5e-07 | 80% | <a href="#">gij521020653 EPQ02441.1</a>     |
| <a href="#">hypothetical protein EGK_11933 [Macaca mulatta]</a>                    | 54.1 | 54.1 | 100% | 7e-07 | 80% | <a href="#">gij355559896 EHH16624.1</a>     |
| <a href="#">butyrylcholinesterase precursor [Macaca fascicularis]</a>              | 54.1 | 54.1 | 100% | 7e-07 | 80% | <a href="#">gij290795732 ADD64703.1</a>     |
| <a href="#">PREDICTED: cholinesterase [Macaca fascicularis]</a>                    | 54.1 | 54.1 | 100% | 7e-07 | 80% | <a href="#">gij544412493 XP_005546353.1</a> |
| <a href="#">PREDICTED: cholinesterase isoform X1 [Papio anubis]</a>                | 54.1 | 54.1 | 100% | 7e-07 | 80% | <a href="#">gij402861047 XP_003894921.1</a> |
| <a href="#">PREDICTED: LOW QUALITY PROTEIN: cholinesterase-like [Maca</a>          | 54.1 | 54.1 | 100% | 7e-07 | 80% | <a href="#">gij297286482 XP_002808379.1</a> |
| <a href="#">PREDICTED: cholinesterase [Ictidomys tridecemlineatus]</a>             | 54.1 | 54.1 | 100% | 7e-07 | 80% | <a href="#">gij532105511 XP_005338342.1</a> |
| <a href="#">PREDICTED: cholinesterase isoform X1 [Chlorocebus sabaeus]</a>         | 54.1 | 54.1 | 100% | 7e-07 | 80% | <a href="#">gij635084154 XP_007970394.1</a> |
| <a href="#">PREDICTED: cholinesterase isoform X2 [Camelus dromedarius]</a>         | 53.7 | 53.7 | 100% | 1e-06 | 80% | <a href="#">gij744553709 XP_010974642.1</a> |
| <a href="#">PREDICTED: cholinesterase isoform X1 [Camelus dromedarius]</a>         | 53.7 | 53.7 | 100% | 1e-06 | 80% | <a href="#">gij744553706 XP_010974641.1</a> |
| <a href="#">PREDICTED: cholinesterase isoform X2 [Camelus bactrianus]</a>          | 53.7 | 53.7 | 100% | 1e-06 | 80% | <a href="#">gij743713601 XP_010950371.1</a> |
| <a href="#">PREDICTED: cholinesterase [Vicugna pacos]</a>                          | 53.7 | 53.7 | 100% | 1e-06 | 80% | <a href="#">gij560956860 XP_006200907.1</a> |
| <a href="#">PREDICTED: cholinesterase [Camelus ferus]</a>                          | 53.7 | 53.7 | 100% | 1e-06 | 80% | <a href="#">gij560915255 XP_006183885.1</a> |
| <a href="#">PREDICTED: cholinesterase [Myotis davidii]</a>                         | 52.4 | 52.4 | 90%  | 3e-06 | 83% | <a href="#">gij584083219 XP_006761409.1</a> |
| <a href="#">PREDICTED: cholinesterase [Orycteropus afer afer]</a>                  | 52.4 | 52.4 | 100% | 3e-06 | 80% | <a href="#">gij634870148 XP_007946910.1</a> |
| <a href="#">PREDICTED: cholinesterase [Tarsius syrichta]</a>                       | 52.0 | 52.0 | 100% | 4e-06 | 80% | <a href="#">gij640826885 XP_008070612.1</a> |
| <a href="#">PREDICTED: cholinesterase [Otolemur garnettii]</a>                     | 51.5 | 51.5 | 100% | 5e-06 | 80% | <a href="#">gij395843862 XP_003794691.1</a> |
| <a href="#">PREDICTED: cholinesterase-like isoform 1 [Dasypus novemcinctus</a>     | 51.5 | 51.5 | 100% | 5e-06 | 80% | <a href="#">gij488587231 XP_004478943.1</a> |
| <a href="#">PREDICTED: cholinesterase-like [Trichechus manatus latirostris]</a>    | 51.5 | 51.5 | 100% | 5e-06 | 80% | <a href="#">gij471406477 XP_004384938.1</a> |
| <a href="#">PREDICTED: cholinesterase isoform X1 [Loxodonta africana]</a>          | 51.5 | 51.5 | 100% | 5e-06 | 80% | <a href="#">gij731499959 XP_003416305.2</a> |
| <a href="#">PREDICTED: cholinesterase [Galeopterus variegatus]</a>                 | 51.1 | 51.1 | 100% | 7e-06 | 80% | <a href="#">gij667294272 XP_008578862.1</a> |

|                                                                                   |      |      |      |       |     |                                             |
|-----------------------------------------------------------------------------------|------|------|------|-------|-----|---------------------------------------------|
| <a href="#">RecName: Full=Cholinesterase; AltName: Full=Acylcholine acylhyd</a>   | 50.7 | 50.7 | 100% | 1e-05 | 75% | <a href="#">gij38502853 O62761.1</a>        |
| <a href="#">cholinesterase precursor [Felis catus]</a>                            | 50.7 | 50.7 | 100% | 1e-05 | 75% | <a href="#">gij57163907 INP_001009364.1</a> |
| <a href="#">PREDICTED: cholinesterase-like [Panthera tigris altaica]</a>          | 50.7 | 50.7 | 100% | 1e-05 | 75% | <a href="#">gij591300304 XP_007077117.1</a> |
| <a href="#">PREDICTED: cholinesterase-like [Chrysochloris asiatica]</a>           | 50.3 | 50.3 | 100% | 1e-05 | 75% | <a href="#">gij586462448 XP_006861862.1</a> |
| <a href="#">PREDICTED: cholinesterase-like [Echinops telfairi]</a>                | 50.3 | 50.3 | 100% | 1e-05 | 75% | <a href="#">gij507651638 XP_004704160.1</a> |
| <a href="#">PREDICTED: cholinesterase [Ursus maritimus]</a>                       | 49.8 | 49.8 | 95%  | 2e-05 | 74% | <a href="#">gij670999264 XP_008690527.1</a> |
| <a href="#">PREDICTED: cholinesterase isoform X2 [Heterocephalus glaber]</a>      | 49.4 | 49.4 | 100% | 3e-05 | 80% | <a href="#">gij512824494 XP_004880401.1</a> |
| <a href="#">PREDICTED: cholinesterase isoform X1 [Chinchilla lanigera]</a>        | 49.4 | 49.4 | 100% | 3e-05 | 80% | <a href="#">gij533158554 XP_005393194.1</a> |
| <a href="#">PREDICTED: cholinesterase isoform X1 [Heterocephalus glaber]</a>      | 49.4 | 49.4 | 100% | 3e-05 | 80% | <a href="#">gij512824490 XP_004880400.1</a> |
| <a href="#">PREDICTED: cholinesterase isoform X2 [Cavia porcellus]</a>            | 49.0 | 49.0 | 100% | 4e-05 | 75% | <a href="#">gij514460083 XP_005003514.1</a> |
| <a href="#">PREDICTED: cholinesterase isoform X1 [Cavia porcellus]</a>            | 49.0 | 49.0 | 100% | 4e-05 | 75% | <a href="#">gij348567235 XP_003469406.1</a> |
| <a href="#">PREDICTED: cholinesterase [Rhinopithecus roxellana]</a>               | 49.0 | 49.0 | 100% | 4e-05 | 75% | <a href="#">gij724956944 XP_010353594.1</a> |
| <a href="#">PREDICTED: cholinesterase-like isoform X1 [Mustela putorius furo]</a> | 48.6 | 48.6 | 95%  | 5e-05 | 74% | <a href="#">gij511910148 XP_004774475.1</a> |
| <a href="#">hypothetical protein PANDA_007095 [Ailuropoda melanoleuca]</a>        | 48.1 | 48.1 | 95%  | 7e-05 | 74% | <a href="#">gij281337784 EFB13368.1</a>     |
| <a href="#">PREDICTED: cholinesterase-like [Ailuropoda melanoleuca]</a>           | 48.1 | 48.1 | 95%  | 7e-05 | 74% | <a href="#">gij301766374 XP_002918607.1</a> |
| <a href="#">Cholinesterase [Pteropus alecto]</a>                                  | 47.7 | 47.7 | 100% | 1e-04 | 75% | <a href="#">gij431915168 ELK15855.1</a>     |
| <a href="#">PREDICTED: cholinesterase [Pteropus alecto]</a>                       | 47.7 | 47.7 | 100% | 1e-04 | 75% | <a href="#">gij586546267 XP_006908236.1</a> |
| <a href="#">PREDICTED: cholinesterase isoform X1 [Peromyscus maniculatus]</a>     | 47.3 | 47.3 | 100% | 1e-04 | 75% | <a href="#">gij589919054 XP_006972718.1</a> |
| <a href="#">PREDICTED: cholinesterase [Fukomys damarensis]</a>                    | 46.9 | 46.9 | 100% | 2e-04 | 75% | <a href="#">gij731199055 XP_010610068.1</a> |
| <a href="#">Butyrylcholinesterase [Mus musculus]</a>                              | 46.9 | 46.9 | 100% | 2e-04 | 75% | <a href="#">gij71534030 AAH99977.1</a>      |
| <a href="#">butyrylcholinesterase [Mus musculus]</a>                              | 46.9 | 46.9 | 100% | 2e-04 | 75% | <a href="#">gij191580 AAA37328.1</a>        |
| <a href="#">cholinesterase precursor [Mus musculus]</a>                           | 46.9 | 46.9 | 100% | 2e-04 | 75% | <a href="#">gij124487350 INP_033868.3</a>   |
| <a href="#">Cholinesterase [Fukomys damarensis]</a>                               | 46.9 | 46.9 | 100% | 2e-04 | 75% | <a href="#">gij676283600 KFO36750.1</a>     |
| <a href="#">cholinesterase precursor [Rattus norvegicus]</a>                      | 46.4 | 46.4 | 100% | 3e-04 | 75% | <a href="#">gij12621110 INP_075231.1</a>    |
| <a href="#">PREDICTED: cholinesterase [Sarcophilus harrisii]</a>                  | 46.4 | 46.4 | 90%  | 3e-04 | 72% | <a href="#">gij395528220 XP_003766229.1</a> |
| <a href="#">PREDICTED: cholinesterase isoform X1 [Rattus norvegicus]</a>          | 46.4 | 46.4 | 100% | 3e-04 | 75% | <a href="#">gij672042750 XP_008759334.1</a> |
| <a href="#">PREDICTED: cholinesterase [Jaculus jaculus]</a>                       | 46.0 | 46.0 | 100% | 4e-04 | 75% | <a href="#">gij507536796 XP_004652429.1</a> |

## Alignments

Download [GenPept](#) [Graphics](#) ▼ Next ▲ Previous ▲ Descriptions

### Chain A, Crystal Structure Of Fully Glycosylated Human Butyrylcholinesterase

Sequence ID: [gij393715367|pdb|4AQD|A](#) Length: 531 Number of Matches: 1

[▶ See 1 more title\(s\)](#)

Range 1: 478 to 497 [GenPept](#) [Graphics](#) ▼ Next Match ▲ Previous Match

| Score          | Expect | Identities | Positives   | Gaps     |
|----------------|--------|------------|-------------|----------|
| 66.4 bits(149) | 5e-11  | 19/20(95%) | 20/20(100%) | 0/20(0%) |

|       |     |                      |     |
|-------|-----|----------------------|-----|
| Query | 1   | KYGNPNETQDNSTSWPVFKS | 20  |
|       |     | KYGNPNETQ+NSTSWPVFKS |     |
| Sbjct | 478 | KYGNPNETQNNSTSWPVFKS | 497 |

#### Related Information

[Structure](#) - 3D structure displays  
[Identical Proteins](#) - Proteins identical to the subject

Download [GenPept](#) [Graphics](#) ▼ Next ▲ Previous ▲ Descriptions

### monomeric butyrylcholinesterase [synthetic construct]

Sequence ID: [gij388261124|gb|AFK25766.1](#) Length: 557 Number of Matches: 1

Range 1: 504 to 523 [GenPept](#) [Graphics](#) ▼ Next Match ▲ Previous Match

| Score          | Expect | Identities | Positives   | Gaps     |
|----------------|--------|------------|-------------|----------|
| 66.4 bits(149) | 5e-11  | 19/20(95%) | 20/20(100%) | 0/20(0%) |

#### Related Information

Query 1 KYGNPNETQDNSTSWPVFKS 20  
 Sbjct 504 KYGNPNETQ+NSTSWPVFKS 523  
 KYGNPNETQNNSTSWPVFKS

[Download](#) [GenPept](#) [Graphics](#)

[Next](#) [Previous](#) [Descriptions](#)

Chain A, Co-Crystallization Studies Of Full Length Recombinant Bche With Cocaine Offers Insights Into Cocaine Detoxification

Sequence ID: [gi|328877250|pdb|3O9M|A](#) Length: 574 Number of Matches: 1

[See 1 more title\(s\)](#)

Range 1: 476 to 495 [GenPept](#) [Graphics](#)

[Next Match](#) [Previous Match](#)

| Score          | Expect | Identities | Positives   | Gaps     |
|----------------|--------|------------|-------------|----------|
| 66.4 bits(149) | 5e-11  | 19/20(95%) | 20/20(100%) | 0/20(0%) |

Query 1 KYGNPNETQDNSTSWPVFKS 20  
 Sbjct 476 KYGNPNETQ+NSTSWPVFKS 495  
 KYGNPNETQNNSTSWPVFKS

**Related Information**

[Structure](#) - 3D structure displays  
[Identical Proteins](#) - Proteins identical to the subject

[Download](#) [GenPept](#) [Graphics](#)

[Next](#) [Previous](#) [Descriptions](#)

butyrylcholinesterase p.Val204Asp splice variant [Homo sapiens]

Sequence ID: [gi|632795270|gb|AHZ34327.1](#) Length: 602 Number of Matches: 1

Range 1: 504 to 523 [GenPept](#) [Graphics](#)

[Next Match](#) [Previous Match](#)

| Score          | Expect | Identities | Positives   | Gaps     |
|----------------|--------|------------|-------------|----------|
| 66.4 bits(149) | 5e-11  | 19/20(95%) | 20/20(100%) | 0/20(0%) |

Query 1 KYGNPNETQDNSTSWPVFKS 20  
 Sbjct 504 KYGNPNETQ+NSTSWPVFKS 523  
 KYGNPNETQNNSTSWPVFKS

**Related Information**

[Structure](#) - 3D structure displays  
[Identical Proteins](#) - Proteins identical to the subject

[Download](#) [GenPept](#) [Graphics](#)

[Next](#) [Previous](#) [Descriptions](#)

cholinesterase precursor [Homo sapiens]

Sequence ID: [gi|4557351|ref|NP\\_000046.1](#) Length: 602 Number of Matches: 1

[See 10 more title\(s\)](#)

Range 1: 504 to 523 [GenPept](#) [Graphics](#)

[Next Match](#) [Previous Match](#)

| Score          | Expect | Identities | Positives   | Gaps     |
|----------------|--------|------------|-------------|----------|
| 66.4 bits(149) | 5e-11  | 19/20(95%) | 20/20(100%) | 0/20(0%) |

Query 1 KYGNPNETQDNSTSWPVFKS 20  
 Sbjct 504 KYGNPNETQ+NSTSWPVFKS 523  
 KYGNPNETQNNSTSWPVFKS

**Related Information**

[Gene](#) - associated gene details  
[UniGene](#) - clustered expressed sequence tags  
[Structure](#) - 3D structure displays  
[PubChem BioAssay](#) - bioactivity screening  
[Map Viewer](#) - aligned genomic context  
[Identical Proteins](#) - Proteins identical to the subject

BLAST is a registered trademark of the National Library of Medicine.

▶ NCBI/ BLAST/ blastp suite/ Formatting Results - B92844B301R

**i** Your search parameters were adjusted to search for a short input sequence.

[Edit and Resubmit](#) [Save Search Strategies](#) ▶ [Formatting options](#) ▶ [Download](#)

[YouTube](#) [How to read this page](#) [Blast report description](#)

## BCHE\_KYGNPNETQNNSTSWPVFKS\_NonMod

**RID** [B92844B301R](#) (Expires on 01-14 09:55 am)

**Query ID** |cl|195965  
**Description** None  
**Molecule type** amino acid  
**Query Length** 20

**Database Name** nr  
**Description** All non-redundant GenBank CDS translations+PDB+SwissProt+PIR excluding environmental samples from WGS projects  
**Program** BLASTP 2.2.30+ ▶ [Citation](#)

Other reports: ▶ [Search Summary](#) [[Taxonomy reports](#)] [[Distance tree of results](#)] [[Multiple alignment](#)]

### **G** Graphic Summary

[Show Conserved Domains](#)

No putative conserved domains have been detected

Distribution of 100 Blast Hits on the Query Sequence



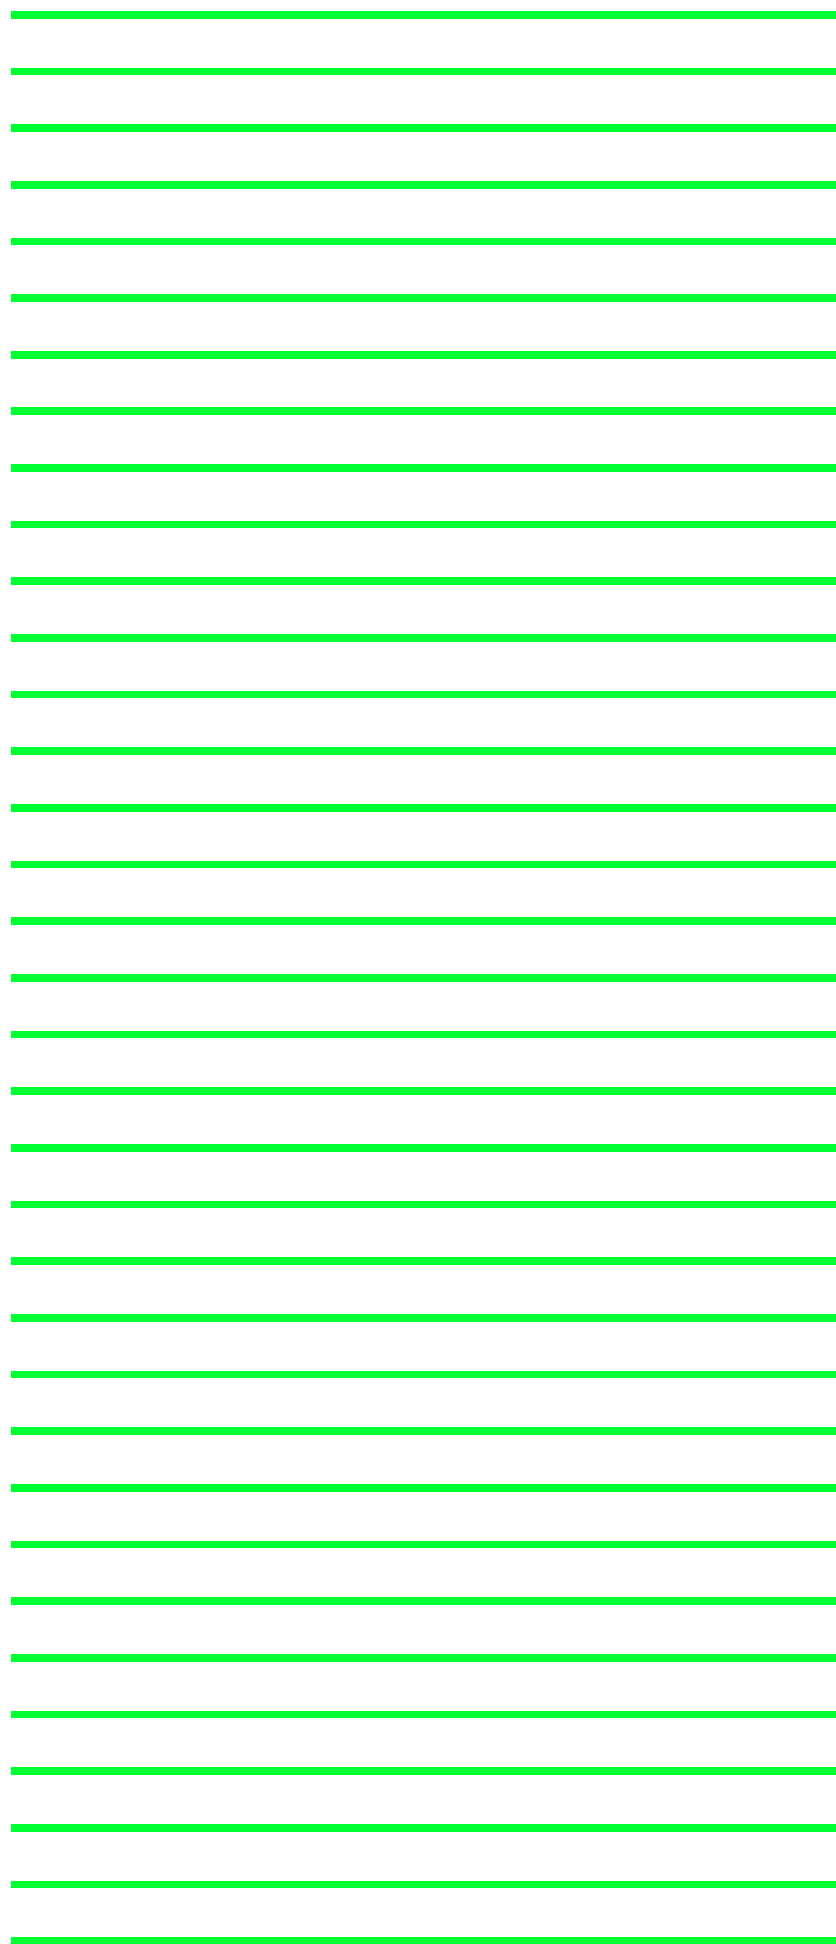



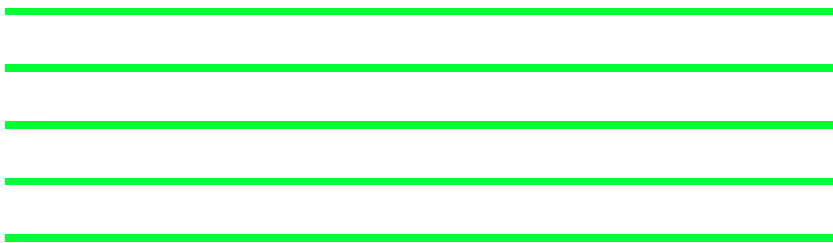

**Descriptions**

**Sequences producing significant alignments:**

Select: [All](#) [None](#) Selected:0

Alignments Download GenPept Graphics Distance tree of results Multiple alignment

| Description                                                                                                                                    | Max score | Total score | Query cover | E value | Ident | Accession                                   |
|------------------------------------------------------------------------------------------------------------------------------------------------|-----------|-------------|-------------|---------|-------|---------------------------------------------|
| <a href="#">Chain A, Crystal Structure Of Fully Glycosylated Human Butyrylcholinesterase [synthetic construct]</a>                             | 68.9      | 68.9        | 100%        | 6e-12   | 100%  | <a href="#">gi 393715367 4AQD_A</a>         |
| <a href="#">Chain A, Co-Crystallization Studies Of Full Length Recombinant Butyrylcholinesterase p.Val204Asp splice variant [Homo sapiens]</a> | 68.9      | 68.9        | 100%        | 6e-12   | 100%  | <a href="#">gi 388261124 AFK25766.1</a>     |
| <a href="#">butyrylcholinesterase precursor [Homo sapiens]</a>                                                                                 | 68.9      | 68.9        | 100%        | 6e-12   | 100%  | <a href="#">gi 328877250 3O9M_A</a>         |
| <a href="#">unnamed protein product [Homo sapiens]</a>                                                                                         | 68.9      | 68.9        | 100%        | 6e-12   | 100%  | <a href="#">gi 632795270 AHZ34327.1</a>     |
| <a href="#">butyrylcholinesterase [synthetic construct]</a>                                                                                    | 68.9      | 68.9        | 100%        | 6e-12   | 100%  | <a href="#">gi 4557351 NP_000046.1</a>      |
| <a href="#">PREDICTED: cholinesterase isoform X1 [Homo sapiens]</a>                                                                            | 68.9      | 68.9        | 100%        | 6e-12   | 100%  | <a href="#">gi 158257558 BAF84752.1</a>     |
| <a href="#">butyrylcholinesterase [synthetic construct]</a>                                                                                    | 68.9      | 68.9        | 100%        | 7e-12   | 100%  | <a href="#">gi 260766471 ACX50257.1</a>     |
| <a href="#">PREDICTED: cholinesterase precursor [Pan troglodytes]</a>                                                                          | 68.9      | 68.9        | 100%        | 7e-12   | 100%  | <a href="#">gi 530375091 XP_005247742.1</a> |
| <a href="#">PREDICTED: cholinesterase [Gorilla gorilla gorilla]</a>                                                                            | 65.1      | 65.1        | 100%        | 1e-10   | 95%   | <a href="#">gi 343960913 BAK62046.1</a>     |
| <a href="#">PREDICTED: cholinesterase [Pan paniscus]</a>                                                                                       | 65.1      | 65.1        | 100%        | 1e-10   | 95%   | <a href="#">gi 426342776 XP_004038010.1</a> |
| <a href="#">PREDICTED: cholinesterase [Pan troglodytes]</a>                                                                                    | 65.1      | 65.1        | 100%        | 1e-10   | 95%   | <a href="#">gi 397493718 XP_003817746.1</a> |
| <a href="#">PREDICTED: cholinesterase [Pan troglodytes]</a>                                                                                    | 65.1      | 65.1        | 100%        | 1e-10   | 95%   | <a href="#">gi 114590210 XP_516857.2</a>    |
| <a href="#">Chain A, Crystal Structure Of Soman-aged Human Butyrylcholinesterase Inhibited By Carbamate</a>                                    | 64.3      | 64.3        | 100%        | 3e-10   | 95%   | <a href="#">gi 402550232 4AXB_A</a>         |
| <a href="#">Chain A, Crystal Structure Of Soman-aged Human Butyrylcholinesterase Inhibited By Carbamate</a>                                    | 64.3      | 64.3        | 100%        | 3e-10   | 95%   | <a href="#">gi 402550237 4B0O_A</a>         |
| <a href="#">Chain A, Structure Of Human Butyrylcholinesterase Inhibited By Carbamate</a>                                                       | 64.3      | 64.3        | 100%        | 3e-10   | 95%   | <a href="#">gi 340707403 2Y1K_A</a>         |
| <a href="#">Chain A, Aged Form Of Human Butyrylcholinesterase Inhibited By Carbamate</a>                                                       | 64.3      | 64.3        | 100%        | 3e-10   | 95%   | <a href="#">gi 237823652 2WIL_A</a>         |
| <a href="#">Chain A, Aged Form Of Human Butyrylcholinesterase Inhibited By Carbamate</a>                                                       | 64.3      | 64.3        | 100%        | 3e-10   | 95%   | <a href="#">gi 237823648 2WIF_A</a>         |
| <a href="#">Chain A, Nonaged Form Of Human Butyrylcholinesterase Inhibited By Carbamate</a>                                                    | 64.3      | 64.3        | 100%        | 3e-10   | 95%   | <a href="#">gi 237823647 2WID_A</a>         |
| <a href="#">PREDICTED: cholinesterase [Eptesicus fuscus]</a>                                                                                   | 60.4      | 60.4        | 100%        | 5e-09   | 90%   | <a href="#">gi 641703485 XP_008140478.1</a> |
| <a href="#">PREDICTED: cholinesterase [Myotis lucifugus]</a>                                                                                   | 60.4      | 60.4        | 100%        | 5e-09   | 90%   | <a href="#">gi 558125651 XP_006088951.1</a> |
| <a href="#">RecName: Full=Cholinesterase; AltName: Full=Acylcholine acylhydrolase</a>                                                          | 60.0      | 60.0        | 100%        | 7e-09   | 90%   | <a href="#">gi 21362409 P81908.1</a>        |
| <a href="#">RecName: Full=Cholinesterase; AltName: Full=Acylcholine acylhydrolase</a>                                                          | 60.0      | 60.0        | 100%        | 7e-09   | 90%   | <a href="#">gi 116354 P21927.1</a>          |
| <a href="#">PREDICTED: cholinesterase [Oryctolagus cuniculus]</a>                                                                              | 60.0      | 60.0        | 100%        | 7e-09   | 90%   | <a href="#">gi 291400118 XP_002716414.1</a> |
| <a href="#">PREDICTED: cholinesterase [Orcinus orca]</a>                                                                                       | 60.0      | 60.0        | 100%        | 7e-09   | 90%   | <a href="#">gi 466076197 XP_004283487.1</a> |
| <a href="#">cholinesterase precursor [Pongo abelii]</a>                                                                                        | 60.0      | 60.0        | 100%        | 7e-09   | 90%   | <a href="#">gi 197097436 NP_001127509.1</a> |
| <a href="#">PREDICTED: cholinesterase isoform X1 [Sus scrofa]</a>                                                                              | 60.0      | 60.0        | 100%        | 7e-09   | 90%   | <a href="#">gi 335299867 XP_003358712.1</a> |
| <a href="#">cholinesterase precursor [Bos taurus]</a>                                                                                          | 60.0      | 60.0        | 100%        | 7e-09   | 90%   | <a href="#">gi 116004027 NP_001070374.1</a> |
| <a href="#">PREDICTED: cholinesterase [Balaenoptera acutorostrata scammon]</a>                                                                 | 60.0      | 60.0        | 100%        | 7e-09   | 90%   | <a href="#">gi 594625950 XP_007197616.1</a> |

|                                                                    |      |      |      |       |     |                                             |
|--------------------------------------------------------------------|------|------|------|-------|-----|---------------------------------------------|
| PREDICTED: cholinesterase isoform X1 [Pongo abelii]                | 60.0 | 60.0 | 100% | 7e-09 | 90% | <a href="#">gij686714306 XP_009237773.1</a> |
| PREDICTED: cholinesterase [Lipotes vexillifer]                     | 60.0 | 60.0 | 100% | 7e-09 | 90% | <a href="#">gij602681974 XP_007446483.1</a> |
| PREDICTED: cholinesterase [Pantholops hodgsonii]                   | 60.0 | 60.0 | 100% | 7e-09 | 90% | <a href="#">gij556779632 XP_005984864.1</a> |
| PREDICTED: cholinesterase [Bos mutus]                              | 60.0 | 60.0 | 100% | 7e-09 | 90% | <a href="#">gij555966690 XP_005895396.1</a> |
| PREDICTED: cholinesterase [Capra hircus]                           | 60.0 | 60.0 | 100% | 7e-09 | 90% | <a href="#">gij548451269 XP_005675420.1</a> |
| PREDICTED: cholinesterase [Ovis aries]                             | 60.0 | 60.0 | 100% | 7e-09 | 90% | <a href="#">gij426218006 XP_004003241.1</a> |
| Chain A, X-Ray Structure Of Human Butyrylcholinesterase Inhibitec  | 59.6 | 59.6 | 100% | 1e-08 | 90% | <a href="#">gij326634060 2XQF_A</a>         |
| Chain A, Aged Form Of Human Butyrylcholinesterase Inhibited By ]   | 59.6 | 59.6 | 100% | 1e-08 | 90% | <a href="#">gij258588213 2W5L_A</a>         |
| Chain A, Nonaged Form Of Human Butyrylcholinesterase Inhibited ]   | 59.6 | 59.6 | 100% | 1e-08 | 90% | <a href="#">gij215794636 3DJY_A</a>         |
| Chain A, Crystal Structure Of Human Butyryl Cholinesterase [Homo   | 59.6 | 59.6 | 100% | 1e-08 | 90% | <a href="#">gij34810859 1P0I_A</a>          |
| Chain A, G117h Mutant Of Human Butyrylcholinesterase In Comple     | 59.6 | 59.6 | 100% | 1e-08 | 90% | <a href="#">gij313103512 2XMB_A</a>         |
| Chain A, Crystal Structure Of Recombinant Full Length Human Buty   | 59.6 | 59.6 | 100% | 1e-08 | 90% | <a href="#">gij158429456 2PM8_A</a>         |
| Chain A, Structure Of Human Butyrylcholinesterase In Complex Wit   | 59.2 | 59.2 | 100% | 1e-08 | 90% | <a href="#">gij145579736 2J4C_A</a>         |
| PREDICTED: cholinesterase isoform X2 [Saimiri boliviensis bolivier | 57.9 | 57.9 | 100% | 4e-08 | 85% | <a href="#">gij725560928 XP_010334003.1</a> |
| PREDICTED: cholinesterase isoform X1 [Saimiri boliviensis bolivier | 57.9 | 57.9 | 100% | 4e-08 | 85% | <a href="#">gij403265619 XP_003925023.1</a> |
| PREDICTED: LOW QUALITY PROTEIN: cholinesterase [Callithrix j       | 57.9 | 57.9 | 100% | 4e-08 | 85% | <a href="#">gij675737963 XP_002807699.3</a> |
| PREDICTED: cholinesterase [Nomascus leucogenys]                    | 57.5 | 57.5 | 100% | 5e-08 | 85% | <a href="#">gij332214651 XP_003256448.1</a> |
| PREDICTED: cholinesterase-like isoform X1 [Myotis brandtii]        | 57.1 | 57.1 | 100% | 7e-08 | 85% | <a href="#">gij554526033 XP_005857864.1</a> |
| Cholinesterase [Myotis brandtii]                                   | 57.1 | 57.1 | 100% | 7e-08 | 85% | <a href="#">gij521020653 EPQ02441.1</a>     |
| hypothetical protein EGK_11933 [Macaca mulatta]                    | 56.6 | 56.6 | 100% | 1e-07 | 85% | <a href="#">gij355559896 EHH16624.1</a>     |
| butyrylcholinesterase precursor [Macaca fascicularis]              | 56.6 | 56.6 | 100% | 1e-07 | 85% | <a href="#">gij290795732 ADD64703.1</a>     |
| cholinesterase precursor [Equus caballus]                          | 56.6 | 56.6 | 100% | 1e-07 | 85% | <a href="#">gij126352540 NP_001075319.1</a> |
| PREDICTED: cholinesterase-like [Elephantulus edwardii]             | 56.6 | 56.6 | 100% | 1e-07 | 85% | <a href="#">gij585675683 XP_006890440.1</a> |
| PREDICTED: cholinesterase [Macaca fascicularis]                    | 56.6 | 56.6 | 100% | 1e-07 | 85% | <a href="#">gij544412493 XP_005546353.1</a> |
| PREDICTED: cholinesterase isoform X1 [Papio anubis]                | 56.6 | 56.6 | 100% | 1e-07 | 85% | <a href="#">gij402861047 XP_003894921.1</a> |
| PREDICTED: LOW QUALITY PROTEIN: cholinesterase-like [Maca          | 56.6 | 56.6 | 100% | 1e-07 | 85% | <a href="#">gij297286482 XP_002808379.1</a> |
| PREDICTED: cholinesterase [Ictidomys tridecemlineatus]             | 56.6 | 56.6 | 100% | 1e-07 | 85% | <a href="#">gij532105511 XP_005338342.1</a> |
| PREDICTED: cholinesterase isoform X2 [Equus przewalskii]           | 56.6 | 56.6 | 100% | 1e-07 | 85% | <a href="#">gij664725795 XP_008520036.1</a> |
| PREDICTED: cholinesterase isoform X1 [Equus przewalskii]           | 56.6 | 56.6 | 100% | 1e-07 | 85% | <a href="#">gij664725793 XP_008520035.1</a> |
| PREDICTED: cholinesterase isoform X1 [Chlorocebus sabaeus]         | 56.6 | 56.6 | 100% | 1e-07 | 85% | <a href="#">gij635084154 XP_007970394.1</a> |
| PREDICTED: cholinesterase [Ceratotherium simum simum]              | 56.6 | 56.6 | 100% | 1e-07 | 85% | <a href="#">gij478501043 XP_004424836.1</a> |
| PREDICTED: cholinesterase [Vicugna pacos]                          | 56.2 | 56.2 | 100% | 1e-07 | 85% | <a href="#">gij560956860 XP_006200907.1</a> |
| PREDICTED: cholinesterase [Camelus ferus]                          | 56.2 | 56.2 | 100% | 1e-07 | 85% | <a href="#">gij560915255 XP_006183885.1</a> |
| PREDICTED: cholinesterase [Myotis davidii]                         | 54.9 | 54.9 | 90%  | 4e-07 | 89% | <a href="#">gij584083219 XP_006761409.1</a> |
| PREDICTED: cholinesterase [Orycteropus afer afer]                  | 54.9 | 54.9 | 100% | 4e-07 | 85% | <a href="#">gij634870148 XP_007946910.1</a> |
| PREDICTED: cholinesterase [Tarsius syrichta]                       | 53.7 | 53.7 | 100% | 1e-06 | 80% | <a href="#">gij640826885 XP_008070612.1</a> |
| PREDICTED: cholinesterase [Otolemur garnettii]                     | 53.2 | 53.2 | 100% | 1e-06 | 80% | <a href="#">gij395843862 XP_003794691.1</a> |
| PREDICTED: cholinesterase-like isoform 1 [Dasypus novemcinctus     | 53.2 | 53.2 | 100% | 1e-06 | 80% | <a href="#">gij488587231 XP_004478943.1</a> |
| PREDICTED: cholinesterase-like [Trichechus manatus latirostris]    | 53.2 | 53.2 | 100% | 1e-06 | 80% | <a href="#">gij471406477 XP_004384938.1</a> |
| RecName: Full=Cholinesterase; AltName: Full=Acylcholine acylhydi   | 53.2 | 53.2 | 100% | 1e-06 | 80% | <a href="#">gij38502853 O62761.1</a>        |
| cholinesterase precursor [Felis catus]                             | 53.2 | 53.2 | 100% | 1e-06 | 80% | <a href="#">gij57163907 NP_001009364.1</a>  |
| PREDICTED: cholinesterase isoform X1 [Loxodonta africana]          | 53.2 | 53.2 | 100% | 1e-06 | 80% | <a href="#">gij731499959 XP_003416305.2</a> |
| PREDICTED: cholinesterase-like [Panthera tigris altaica]           | 53.2 | 53.2 | 100% | 1e-06 | 80% | <a href="#">gij591300304 XP_007077117.1</a> |
| PREDICTED: cholinesterase [Galeopterus variegatus]                 | 52.8 | 52.8 | 100% | 2e-06 | 80% | <a href="#">gij667294272 XP_008578862.1</a> |
| PREDICTED: cholinesterase-like [Chrysochloris asiatica]            | 52.8 | 52.8 | 100% | 2e-06 | 80% | <a href="#">gij586462448 XP_006861862.1</a> |

|                                                                                   |      |      |      |       |     |                                             |
|-----------------------------------------------------------------------------------|------|------|------|-------|-----|---------------------------------------------|
| <a href="#">PREDICTED: cholinesterase-like [Echinops telfairi]</a>                | 52.8 | 52.8 | 100% | 2e-06 | 80% | <a href="#">gij507651638 XP_004704160.1</a> |
| <a href="#">PREDICTED: cholinesterase [Ursus maritimus]</a>                       | 52.4 | 52.4 | 95%  | 3e-06 | 79% | <a href="#">gij670999264 XP_008690527.1</a> |
| <a href="#">PREDICTED: cholinesterase [Rhinopithecus roxellana]</a>               | 51.5 | 51.5 | 100% | 5e-06 | 80% | <a href="#">gij724956944 XP_010353594.1</a> |
| <a href="#">PREDICTED: cholinesterase isoform X2 [Heterocephalus glaber]</a>      | 51.1 | 51.1 | 100% | 7e-06 | 80% | <a href="#">gij512824494 XP_004880401.1</a> |
| <a href="#">PREDICTED: cholinesterase isoform X1 [Chinchilla lanigera]</a>        | 51.1 | 51.1 | 100% | 7e-06 | 80% | <a href="#">gij533158554 XP_005393194.1</a> |
| <a href="#">PREDICTED: cholinesterase isoform X1 [Heterocephalus glaber]</a>      | 51.1 | 51.1 | 100% | 7e-06 | 80% | <a href="#">gij512824490 XP_004880400.1</a> |
| <a href="#">PREDICTED: cholinesterase-like isoform X1 [Mustela putorius furo]</a> | 51.1 | 51.1 | 95%  | 7e-06 | 79% | <a href="#">gij511910148 XP_004774475.1</a> |
| <a href="#">PREDICTED: cholinesterase isoform X2 [Cavia porcellus]</a>            | 50.7 | 50.7 | 100% | 1e-05 | 75% | <a href="#">gij514460083 XP_005003514.1</a> |
| <a href="#">hypothetical protein PANDA_007095 [Ailuropoda melanoleuca]</a>        | 50.7 | 50.7 | 95%  | 1e-05 | 79% | <a href="#">gij281337784 EFB13368.1</a>     |
| <a href="#">PREDICTED: cholinesterase isoform X1 [Cavia porcellus]</a>            | 50.7 | 50.7 | 100% | 1e-05 | 75% | <a href="#">gij348567235 XP_003469406.1</a> |
| <a href="#">PREDICTED: cholinesterase-like [Ailuropoda melanoleuca]</a>           | 50.7 | 50.7 | 95%  | 1e-05 | 79% | <a href="#">gij301766374 XP_002918607.1</a> |
| <a href="#">Cholinesterase [Pteropus alecto]</a>                                  | 50.3 | 50.3 | 100% | 1e-05 | 80% | <a href="#">gij431915168 ELK15855.1</a>     |
| <a href="#">PREDICTED: cholinesterase [Pteropus alecto]</a>                       | 50.3 | 50.3 | 100% | 1e-05 | 80% | <a href="#">gij586546267 XP_006908236.1</a> |
| <a href="#">PREDICTED: cholinesterase [Sarcophilus harrisii]</a>                  | 49.0 | 49.0 | 90%  | 4e-05 | 78% | <a href="#">gij395528220 XP_003766229.1</a> |
| <a href="#">PREDICTED: cholinesterase isoform X1 [Peromyscus maniculatus]</a>     | 49.0 | 49.0 | 100% | 4e-05 | 75% | <a href="#">gij589919054 XP_006972718.1</a> |
| <a href="#">PREDICTED: cholinesterase [Fukomys damarensis]</a>                    | 48.6 | 48.6 | 100% | 5e-05 | 75% | <a href="#">gij731199055 XP_010610068.1</a> |
| <a href="#">Cholinesterase [Fukomys damarensis]</a>                               | 48.6 | 48.6 | 100% | 5e-05 | 75% | <a href="#">gij676283600 KFO36750.1</a>     |
| <a href="#">PREDICTED: cholinesterase-like [Odobenus rosmarus divergens]</a>      | 48.1 | 48.1 | 90%  | 7e-05 | 78% | <a href="#">gij472347065 XP_004393257.1</a> |
| <a href="#">PREDICTED: cholinesterase [Jaculus jaculus]</a>                       | 47.7 | 47.7 | 100% | 9e-05 | 75% | <a href="#">gij507536796 XP_004652429.1</a> |
| <a href="#">PREDICTED: cholinesterase-like [Sorex araneus]</a>                    | 47.3 | 47.3 | 95%  | 1e-04 | 74% | <a href="#">gij505845607 XP_004616283.1</a> |
| <a href="#">PREDICTED: cholinesterase [Cricetulus griseus]</a>                    | 47.3 | 47.3 | 100% | 1e-04 | 75% | <a href="#">gij354496810 XP_003510518.1</a> |
| <a href="#">Butyrylcholinesterase [Mus musculus]</a>                              | 46.9 | 46.9 | 100% | 2e-04 | 75% | <a href="#">gij71534030 AAH99977.1</a>      |
| <a href="#">butyrylcholinesterase [Mus musculus]</a>                              | 46.9 | 46.9 | 100% | 2e-04 | 75% | <a href="#">gij191580 AAA37328.1</a>        |
| <a href="#">cholinesterase precursor [Mus musculus]</a>                           | 46.9 | 46.9 | 100% | 2e-04 | 75% | <a href="#">gij124487350 NP_033868.3</a>    |
| <a href="#">cholinesterase precursor [Rattus norvegicus]</a>                      | 46.4 | 46.4 | 100% | 2e-04 | 75% | <a href="#">gij12621110 NP_075231.1</a>     |
| <a href="#">PREDICTED: cholinesterase isoform X1 [Rattus norvegicus]</a>          | 46.4 | 46.4 | 100% | 2e-04 | 75% | <a href="#">gij672042750 XP_008759334.1</a> |
| <a href="#">PREDICTED: cholinesterase-like [Octodon degus]</a>                    | 45.6 | 45.6 | 100% | 5e-04 | 70% | <a href="#">gij507706867 XP_004646055.1</a> |

## Alignments

[Download](#) [GenPept](#) [Graphics](#) [Next](#) [Previous](#) [Descriptions](#)

### Chain A, Crystal Structure Of Fully Glycosylated Human Butyrylcholinesterase

Sequence ID: [gij393715367|pdb|4AQD|A](#) Length: 531 Number of Matches: 1

[See 1 more title\(s\)](#)

Range 1: 478 to 497 [GenPept](#) [Graphics](#) [Next Match](#) [Previous Match](#)

| Score          | Expect | Identities  | Positives   | Gaps     |
|----------------|--------|-------------|-------------|----------|
| 68.9 bits(155) | 6e-12  | 20/20(100%) | 20/20(100%) | 0/20(0%) |

Query 1 KYGNPNETQNNSTSWPVFKS 20  
 KYGNPNETQNNSTSWPVFKS  
 Sbjct 478 KYGNPNETQNNSTSWPVFKS 497

#### Related Information

[Structure](#) - 3D structure displays  
[Identical Proteins](#) - Proteins  
 identical to the subject

[Download](#) [GenPept](#) [Graphics](#) [Next](#) [Previous](#) [Descriptions](#)

### monomeric butyrylcholinesterase [synthetic construct]

Sequence ID: [gij388261124|gb|AFK25766.1](#) Length: 557 Number of Matches: 1

Range 1: 504 to 523 [GenPept](#) [Graphics](#) [Next Match](#) [Previous Match](#)

| Score          | Expect | Identities  | Positives   | Gaps     |
|----------------|--------|-------------|-------------|----------|
| 68.9 bits(155) | 6e-12  | 20/20(100%) | 20/20(100%) | 0/20(0%) |

#### Related Information

Query 1 KYGNPNETQNNSTSWPVFKS 20  
 Sbjct 504 KYGNPNETQNNSTSWPVFKS 523

[Download](#) [GenPept](#) [Graphics](#)

[▼ Next](#) [▲ Previous](#) [▲ Descriptions](#)

Chain A, Co-Crystallization Studies Of Full Length Recombinant Bche With Cocaine Offers Insights Into Cocaine Detoxification

Sequence ID: [gi|328877250|pdb|3O9M|A](#) Length: 574 Number of Matches: 1

[▶ See 1 more title\(s\)](#)

Range 1: 476 to 495 [GenPept](#) [Graphics](#)

[▼ Next Match](#) [▲ Previous Match](#)

| Score          | Expect | Identities  | Positives   | Gaps     |
|----------------|--------|-------------|-------------|----------|
| 68.9 bits(155) | 6e-12  | 20/20(100%) | 20/20(100%) | 0/20(0%) |

Query 1 KYGNPNETQNNSTSWPVFKS 20  
 Sbjct 476 KYGNPNETQNNSTSWPVFKS 495

**Related Information**

[Structure](#) - 3D structure displays  
[Identical Proteins](#) - Proteins identical to the subject

[Download](#) [GenPept](#) [Graphics](#)

[▼ Next](#) [▲ Previous](#) [▲ Descriptions](#)

butyrylcholinesterase p.Val204Asp splice variant [Homo sapiens]

Sequence ID: [gi|632795270|gb|AHZ34327.1|](#) Length: 602 Number of Matches: 1

Range 1: 504 to 523 [GenPept](#) [Graphics](#)

[▼ Next Match](#) [▲ Previous Match](#)

| Score          | Expect | Identities  | Positives   | Gaps     |
|----------------|--------|-------------|-------------|----------|
| 68.9 bits(155) | 6e-12  | 20/20(100%) | 20/20(100%) | 0/20(0%) |

Query 1 KYGNPNETQNNSTSWPVFKS 20  
 Sbjct 504 KYGNPNETQNNSTSWPVFKS 523

**Related Information**

[Structure](#) - 3D structure displays  
[Identical Proteins](#) - Proteins identical to the subject

[Download](#) [GenPept](#) [Graphics](#)

[▼ Next](#) [▲ Previous](#) [▲ Descriptions](#)

cholinesterase precursor [Homo sapiens]

Sequence ID: [gi|4557351|ref|NP\\_000046.1|](#) Length: 602 Number of Matches: 1

[▶ See 10 more title\(s\)](#)

Range 1: 504 to 523 [GenPept](#) [Graphics](#)

[▼ Next Match](#) [▲ Previous Match](#)

| Score          | Expect | Identities  | Positives   | Gaps     |
|----------------|--------|-------------|-------------|----------|
| 68.9 bits(155) | 6e-12  | 20/20(100%) | 20/20(100%) | 0/20(0%) |

Query 1 KYGNPNETQNNSTSWPVFKS 20  
 Sbjct 504 KYGNPNETQNNSTSWPVFKS 523

**Related Information**

[Gene](#) - associated gene details  
[UniGene](#) - clustered expressed sequence tags  
[Structure](#) - 3D structure displays  
[PubChem BioAssay](#) - bioactivity screening  
[Map Viewer](#) - aligned genomic context  
[Identical Proteins](#) - Proteins identical to the subject

BLAST is a registered trademark of the National Library of Medicine.

▶ NCBI/ BLAST/ blastp suite/ Formatting Results - BHK7FBBM014

**i** Your search parameters were adjusted to search for a short input sequence.

[Edit and Resubmit](#) [Save Search Strategies](#) ▶ [Formatting options](#) ▶ [Download](#)

[YouTube](#) [How to read this page](#) [Blast report description](#)

### BCHE\_RDDYTKAEILSRS\_Mod

RID [BHK7FBBM014](#) (Expires on 01-17 15:33 pm)

**Query ID** |cl|85898  
**Description** None  
**Molecule type** amino acid  
**Query Length** 14

**Database Name** nr  
**Description** All non-redundant GenBank CDS translations+PDB+SwissProt+PIR excluding environmental samples from WGS projects  
**Program** BLASTP 2.2.30+ ▶ [Citation](#)

Other reports: ▶ [Search Summary](#) [[Taxonomy reports](#)] [[Distance tree of results](#)] [[Multiple alignment](#)]

### **G**raphic Summary

[Show Conserved Domains](#)

No putative conserved domains have been detected

Distribution of 100 Blast Hits on the Query Sequence

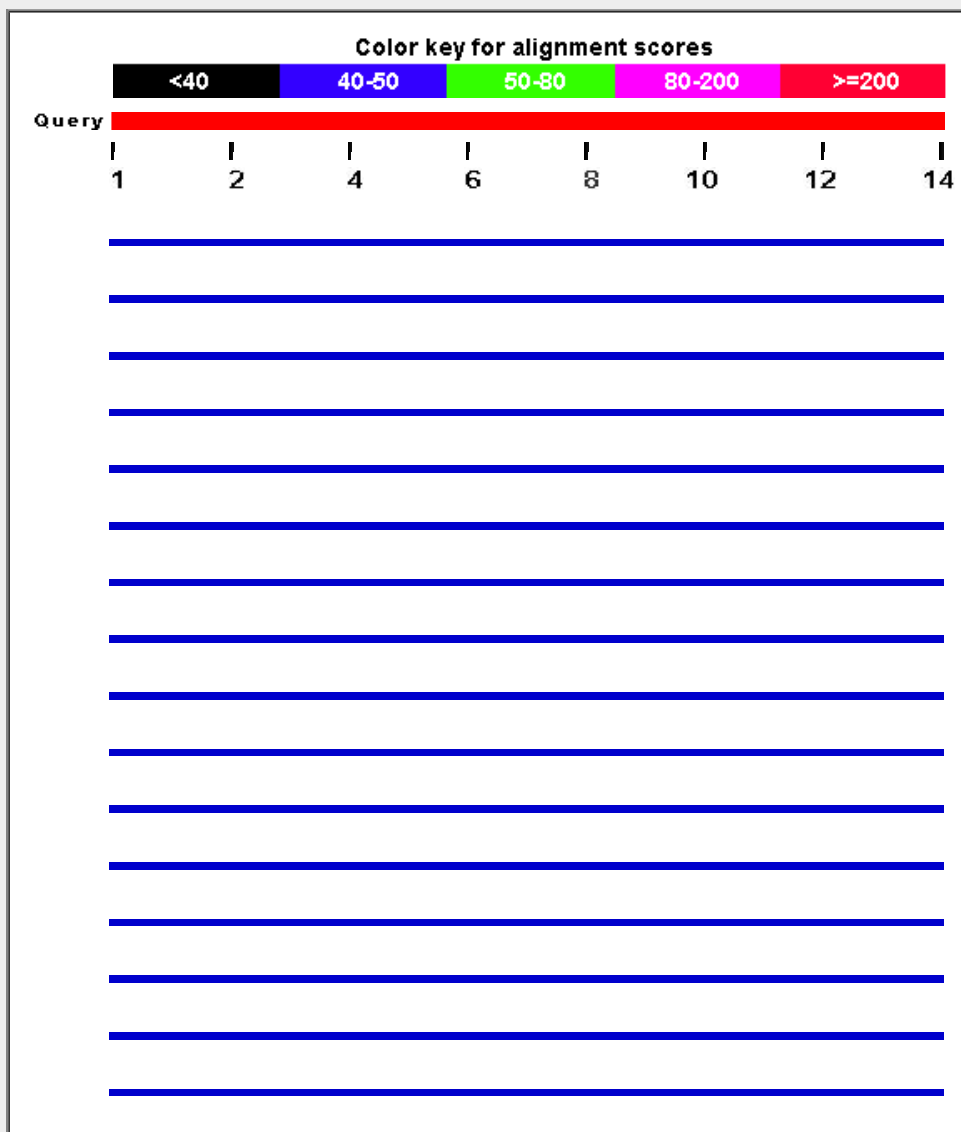

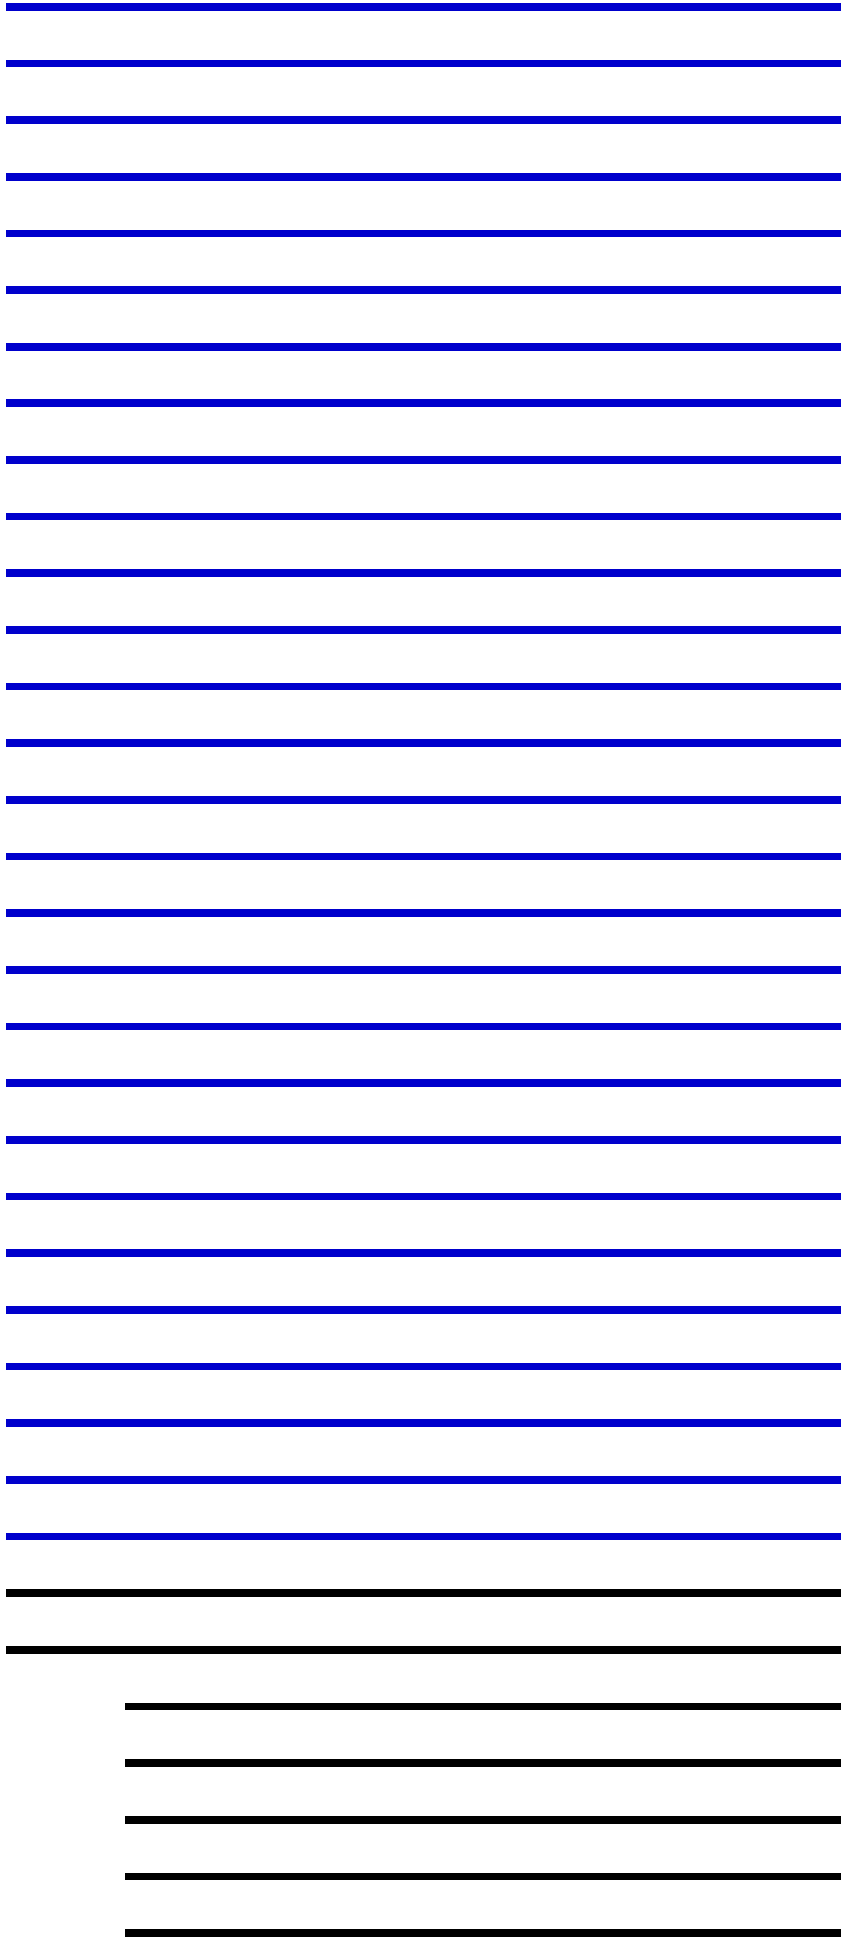

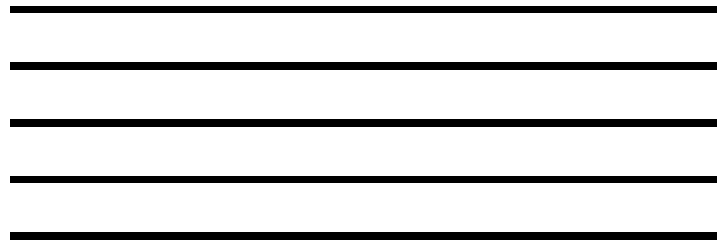

## Descriptions

### Sequences producing significant alignments:

Select: [All](#) [None](#) Selected:0

| <a href="#">↑</a> <a href="#">Alignments</a> <a href="#">Download</a> <a href="#">GenPept</a> <a href="#">Graphics</a> <a href="#">Distance tree of results</a> <a href="#">Multiple alignment</a>  |           |             |             |         |       |                                             |  |
|----------------------------------------------------------------------------------------------------------------------------------------------------------------------------------------------------------------------------------------------------------------------------------------|-----------|-------------|-------------|---------|-------|---------------------------------------------|--|
| Description                                                                                                                                                                                                                                                                            | Max score | Total score | Query cover | E value | Ident | Accession                                   |  |
| <a href="#">cholinesterase precursor [Pan troglodytes]</a>                                                                                                                                                                                                                             | 45.2      | 45.2        | 100%        | 3e-04   | 93%   | <a href="#">gij343960913 BAK62046.1</a>     |  |
| <a href="#">Chain A, Aged Form Of Human Butyrylcholinesterase Inhibited By ]</a>                                                                                                                                                                                                       | 45.2      | 45.2        | 100%        | 3e-04   | 93%   | <a href="#">gij237823652 2WIL_A</a>         |  |
| <a href="#">Chain A, Crystal Structure Of Fully Glycosylated Human Butyrylcho</a>                                                                                                                                                                                                      | 45.2      | 45.2        | 100%        | 3e-04   | 93%   | <a href="#">gij393715367 4AQD_A</a>         |  |
| <a href="#">monomeric butyrylcholinesterase [synthetic construct]</a>                                                                                                                                                                                                                  | 45.2      | 45.2        | 100%        | 3e-04   | 93%   | <a href="#">gij388261124 AFK25766.1</a>     |  |
| <a href="#">Chain A, Co-Crystallization Studies Of Full Length Recombinant Bc</a>                                                                                                                                                                                                      | 45.2      | 45.2        | 100%        | 3e-04   | 93%   | <a href="#">gij328877250 3O9M_A</a>         |  |
| <a href="#">butyrylcholinesterase p.Val204Asp splice variant [Homo sapiens]</a>                                                                                                                                                                                                        | 45.2      | 45.2        | 100%        | 3e-04   | 93%   | <a href="#">gij632795270 AHZ34327.1</a>     |  |
| <a href="#">cholinesterase precursor [Homo sapiens]</a>                                                                                                                                                                                                                                | 45.2      | 45.2        | 100%        | 3e-04   | 93%   | <a href="#">gij4557351 NP_000046.1</a>      |  |
| <a href="#">unnamed protein product [Homo sapiens]</a>                                                                                                                                                                                                                                 | 45.2      | 45.2        | 100%        | 3e-04   | 93%   | <a href="#">gij158257558 BAF84752.1</a>     |  |
| <a href="#">butyrylcholinesterase [synthetic construct]</a>                                                                                                                                                                                                                            | 45.2      | 45.2        | 100%        | 4e-04   | 93%   | <a href="#">gij260766471 ACX50257.1</a>     |  |
| <a href="#">PREDICTED: cholinesterase [Gorilla gorilla gorilla]</a>                                                                                                                                                                                                                    | 45.2      | 45.2        | 100%        | 4e-04   | 93%   | <a href="#">gij426342776 XP_004038010.1</a> |  |
| <a href="#">PREDICTED: cholinesterase [Pan paniscus]</a>                                                                                                                                                                                                                               | 45.2      | 45.2        | 100%        | 4e-04   | 93%   | <a href="#">gij397493718 XP_003817746.1</a> |  |
| <a href="#">PREDICTED: cholinesterase isoform X1 [Homo sapiens]</a>                                                                                                                                                                                                                    | 45.2      | 45.2        | 100%        | 4e-04   | 93%   | <a href="#">gij530375091 XP_005247742.1</a> |  |
| <a href="#">PREDICTED: cholinesterase [Pan troglodytes]</a>                                                                                                                                                                                                                            | 45.2      | 45.2        | 100%        | 4e-04   | 93%   | <a href="#">gij114590210 XP_516857.2</a>    |  |
| <a href="#">Chain A, Crystal Structure Of Soman-aged Human Butyrylcholinest</a>                                                                                                                                                                                                        | 43.5      | 43.5        | 100%        | 0.001   | 93%   | <a href="#">gij402550232 4AXB_A</a>         |  |
| <a href="#">Chain A, X-Ray Structure Of Human Butyrylcholinesterase Inhibitec</a>                                                                                                                                                                                                      | 43.5      | 43.5        | 100%        | 0.001   | 93%   | <a href="#">gij326634060 2XQF_A</a>         |  |
| <a href="#">Chain A, Aged Form Of Human Butyrylcholinesterase Inhibited By ]</a>                                                                                                                                                                                                       | 43.5      | 43.5        | 100%        | 0.001   | 93%   | <a href="#">gij258588213 2WSL_A</a>         |  |
| <a href="#">Chain A, Nonaged Form Of Human Butyrylcholinesterase Inhibited ]</a>                                                                                                                                                                                                       | 43.5      | 43.5        | 100%        | 0.001   | 93%   | <a href="#">gij215794636 3DJY_A</a>         |  |
| <a href="#">Chain A, Crystal Structure Of Human Butyryl Cholinesterase [Homo</a>                                                                                                                                                                                                       | 43.5      | 43.5        | 100%        | 0.001   | 93%   | <a href="#">gij348108591 P0I_A</a>          |  |
| <a href="#">Chain A, Crystal Structure Of Soman-aged Human Butyrylcholinest</a>                                                                                                                                                                                                        | 43.5      | 43.5        | 100%        | 0.001   | 93%   | <a href="#">gij402550237 4B0O_A</a>         |  |
| <a href="#">Chain A, Structure Of Human Butyrylcholinesterase Inhibited By Cb</a>                                                                                                                                                                                                      | 43.5      | 43.5        | 100%        | 0.001   | 93%   | <a href="#">gij340707403 2Y1K_A</a>         |  |
| <a href="#">Chain A, G117h Mutant Of Human Butyrylcholinesterase In Comple</a>                                                                                                                                                                                                         | 43.5      | 43.5        | 100%        | 0.001   | 93%   | <a href="#">gij313103512 2XMB_A</a>         |  |
| <a href="#">Chain A, Aged Form Of Human Butyrylcholinesterase Inhibited By ]</a>                                                                                                                                                                                                       | 43.5      | 43.5        | 100%        | 0.001   | 93%   | <a href="#">gij237823648 2WIF_A</a>         |  |
| <a href="#">Chain A, Nonaged Form Of Human Butyrylcholinesterase Inhibited ]</a>                                                                                                                                                                                                       | 43.5      | 43.5        | 100%        | 0.001   | 93%   | <a href="#">gij237823647 2WID_A</a>         |  |
| <a href="#">Chain A, Structure Of Human Butyrylcholinesterase In Complex Wit</a>                                                                                                                                                                                                       | 43.5      | 43.5        | 100%        | 0.001   | 93%   | <a href="#">gij145579736 2J4C_A</a>         |  |
| <a href="#">Chain A, Crystal Structure Of Recombinant Full Length Human Buty</a>                                                                                                                                                                                                       | 43.5      | 43.5        | 100%        | 0.001   | 93%   | <a href="#">gij158429456 2PM8_A</a>         |  |
| <a href="#">PREDICTED: cholinesterase isoform X3 [Heterocephalus glaber]</a>                                                                                                                                                                                                           | 42.6      | 42.6        | 100%        | 0.002   | 86%   | <a href="#">gij512824498 XP_004880402.1</a> |  |
| <a href="#">PREDICTED: cholinesterase isoform X2 [Heterocephalus glaber]</a>                                                                                                                                                                                                           | 42.6      | 42.6        | 100%        | 0.002   | 86%   | <a href="#">gij512824494 XP_004880401.1</a> |  |
| <a href="#">PREDICTED: cholinesterase isoform X1 [Heterocephalus glaber]</a>                                                                                                                                                                                                           | 42.6      | 42.6        | 100%        | 0.002   | 86%   | <a href="#">gij512824490 XP_004880400.1</a> |  |

|                                                                                            |      |      |      |       |     |                                             |
|--------------------------------------------------------------------------------------------|------|------|------|-------|-----|---------------------------------------------|
| cholinesterase precursor [ <i>Pongo abelii</i> ]                                           | 41.4 | 41.4 | 100% | 0.007 | 86% | <a href="#">gil197097436 NP_001127509.1</a> |
| <a href="#">PREDICTED: cholinesterase isoform X1 [<i>Pongo abelii</i>]</a>                 | 41.4 | 41.4 | 100% | 0.007 | 86% | <a href="#">gil686714306 XP_009237773.1</a> |
| <a href="#">PREDICTED: cholinesterase isoform X2 [<i>Sus scrofa</i>]</a>                   | 40.5 | 40.5 | 100% | 0.012 | 86% | <a href="#">gil545864567 XP_005670020.1</a> |
| <a href="#">PREDICTED: cholinesterase-like isoform X2 [<i>Mustela putorius furo</i>]</a>   | 40.5 | 40.5 | 100% | 0.013 | 86% | <a href="#">gil511910151 XP_004774476.1</a> |
| <a href="#">PREDICTED: cholinesterase [<i>Nestor notabilis</i>]</a>                        | 40.5 | 40.5 | 100% | 0.013 | 86% | <a href="#">gil701300599 XP_010010752.1</a> |
| <a href="#">PREDICTED: cholinesterase [<i>Eptesicus fuscus</i>]</a>                        | 40.5 | 40.5 | 100% | 0.013 | 86% | <a href="#">gil641703485 XP_008140478.1</a> |
| <a href="#">hypothetical protein PANDA_007095 [<i>Ailuropoda melanoleuca</i>]</a>          | 40.5 | 40.5 | 100% | 0.013 | 86% | <a href="#">gil281337784 EFB13368.1</a>     |
| <a href="#">PREDICTED: cholinesterase [<i>Canis lupus familiaris</i>]</a>                  | 40.5 | 40.5 | 100% | 0.013 | 86% | <a href="#">gil74003707 XP_545267.2</a>     |
| <a href="#">PREDICTED: cholinesterase-like [<i>Leptonychotes weddellii</i>]</a>            | 40.5 | 40.5 | 100% | 0.013 | 86% | <a href="#">gil585150385 XP_006727664.1</a> |
| <a href="#">PREDICTED: cholinesterase isoform X1 [<i>Sus scrofa</i>]</a>                   | 40.5 | 40.5 | 100% | 0.013 | 86% | <a href="#">gil335299867 XP_003358712.1</a> |
| <a href="#">PREDICTED: cholinesterase isoform X2 [<i>Saimiri boliviensis bolivier</i>]</a> | 40.5 | 40.5 | 100% | 0.013 | 86% | <a href="#">gil725560928 XP_010334003.1</a> |
| <a href="#">PREDICTED: cholinesterase-like [<i>Odobenus rosmarus divergens</i>]</a>        | 40.5 | 40.5 | 100% | 0.013 | 86% | <a href="#">gil472347065 XP_004393257.1</a> |
| <a href="#">PREDICTED: cholinesterase [<i>Ursus maritimus</i>]</a>                         | 40.5 | 40.5 | 100% | 0.013 | 86% | <a href="#">gil670999264 XP_008690527.1</a> |
| <a href="#">PREDICTED: cholinesterase-like isoform X1 [<i>Mustela putorius furo</i>]</a>   | 40.5 | 40.5 | 100% | 0.013 | 86% | <a href="#">gil511910148 XP_004774475.1</a> |
| <a href="#">PREDICTED: cholinesterase isoform X1 [<i>Saimiri boliviensis bolivier</i>]</a> | 40.5 | 40.5 | 100% | 0.013 | 86% | <a href="#">gil403265619 XP_003925023.1</a> |
| <a href="#">PREDICTED: cholinesterase-like [<i>Ailuropoda melanoleuca</i>]</a>             | 40.5 | 40.5 | 100% | 0.013 | 86% | <a href="#">gil301766374 XP_002918607.1</a> |
| <a href="#">PREDICTED: cholinesterase isoform X2 [<i>Loxodonta africana</i>]</a>           | 38.8 | 38.8 | 100% | 0.045 | 86% | <a href="#">gil731499961 XP_010594355.1</a> |
| <a href="#">PREDICTED: cholinesterase isoform X1 [<i>Loxodonta africana</i>]</a>           | 38.8 | 38.8 | 100% | 0.046 | 86% | <a href="#">gil731499959 XP_003416305.2</a> |
| <a href="#">PREDICTED: cholinesterase [<i>Balearica pavonina gibbericeps</i>]</a>          | 38.4 | 38.4 | 85%  | 0.062 | 92% | <a href="#">gil723546565 XP_010296638.1</a> |
| <a href="#">PREDICTED: cholinesterase [<i>Phaethon lepturus</i>]</a>                       | 38.4 | 38.4 | 85%  | 0.062 | 92% | <a href="#">gil723122346 XP_010287090.1</a> |
| <a href="#">PREDICTED: cholinesterase [<i>Tyto alba</i>]</a>                               | 38.4 | 38.4 | 85%  | 0.062 | 92% | <a href="#">gil701367577 XP_009962519.1</a> |
| <a href="#">PREDICTED: cholinesterase [<i>Gavia stellata</i>]</a>                          | 38.4 | 38.4 | 85%  | 0.062 | 92% | <a href="#">gil698412479 XP_009811650.1</a> |
| <a href="#">PREDICTED: cholinesterase [<i>Cariama cristata</i>]</a>                        | 38.4 | 38.4 | 85%  | 0.062 | 92% | <a href="#">gil698406540 XP_009708153.1</a> |
| <a href="#">PREDICTED: cholinesterase [<i>Phalacrocorax carbo</i>]</a>                     | 38.4 | 38.4 | 85%  | 0.062 | 92% | <a href="#">gil695141055 XP_009513025.1</a> |
| <a href="#">PREDICTED: cholinesterase [<i>Merops nubicus</i>]</a>                          | 38.4 | 38.4 | 85%  | 0.062 | 92% | <a href="#">gil675619693 XP_008937822.1</a> |
| <a href="#">cholinesterase precursor [<i>Camelus ferus</i>]</a>                            | 38.4 | 38.4 | 85%  | 0.062 | 92% | <a href="#">gil528762213 EPY81872.1</a>     |
| <a href="#">PREDICTED: cholinesterase-like [<i>Tursiops truncatus</i>]</a>                 | 38.4 | 38.4 | 85%  | 0.062 | 92% | <a href="#">gil470638951 XP_004324597.1</a> |
| <a href="#">PREDICTED: cholinesterase isoform X2 [<i>Chinchilla lanigera</i>]</a>          | 38.4 | 38.4 | 85%  | 0.062 | 92% | <a href="#">gil533158556 XP_005393195.1</a> |
| <a href="#">PREDICTED: cholinesterase isoform X2 [<i>Struthio camelus australis</i>]</a>   | 38.4 | 38.4 | 85%  | 0.062 | 92% | <a href="#">gil697458921 XP_009666837.1</a> |
| <a href="#">PREDICTED: cholinesterase isoform X4 [<i>Monodelphis domestica</i>]</a>        | 38.4 | 38.4 | 85%  | 0.062 | 92% | <a href="#">gil612048246 XP_007502328.1</a> |
| <a href="#">PREDICTED: cholinesterase isoform X3 [<i>Monodelphis domestica</i>]</a>        | 38.4 | 38.4 | 85%  | 0.062 | 92% | <a href="#">gil612048244 XP_007502327.1</a> |
| <a href="#">PREDICTED: cholinesterase isoform X4 [<i>Pelodiscus sinensis</i>]</a>          | 38.4 | 38.4 | 85%  | 0.062 | 92% | <a href="#">gil558163876 XP_006123483.1</a> |
| <a href="#">PREDICTED: cholinesterase-like [<i>Physeter catodon</i>]</a>                   | 38.4 | 38.4 | 85%  | 0.062 | 92% | <a href="#">gil593755372 XP_007116545.1</a> |
| <a href="#">PREDICTED: cholinesterase isoform X2 [<i>Chlorocebus sabaeus</i>]</a>          | 38.4 | 38.4 | 85%  | 0.063 | 92% | <a href="#">gil635084156 XP_007970395.1</a> |
| <a href="#">PREDICTED: cholinesterase isoform X3 [<i>Equus przewalskii</i>]</a>            | 38.4 | 38.4 | 85%  | 0.063 | 92% | <a href="#">gil664725797 XP_008520037.1</a> |
| <a href="#">PREDICTED: cholinesterase isoform X3 [<i>Pelodiscus sinensis</i>]</a>          | 38.4 | 38.4 | 85%  | 0.063 | 92% | <a href="#">gil558163871 XP_006123482.1</a> |
| <a href="#">PREDICTED: cholinesterase isoform X1 [<i>Monodelphis domestica</i>]</a>        | 38.4 | 38.4 | 85%  | 0.063 | 92% | <a href="#">gil612048240 XP_007502325.1</a> |
| <a href="#">hypothetical protein EGK_11933 [<i>Macaca mulatta</i>]</a>                     | 38.4 | 38.4 | 85%  | 0.063 | 92% | <a href="#">gil355559896 FHH16624.1</a>     |
| <a href="#">PREDICTED: cholinesterase-like isoform X5 [<i>Anas platyrhynchos</i>]</a>      | 38.4 | 38.4 | 85%  | 0.063 | 92% | <a href="#">gil514757148 XP_005022245.1</a> |
| <a href="#">PREDICTED: cholinesterase isoform X2 [<i>Cavia porcellus</i>]</a>              | 38.4 | 38.4 | 85%  | 0.063 | 92% | <a href="#">gil514460083 XP_005003514.1</a> |
| <a href="#">PREDICTED: cholinesterase isoform X3 [<i>Meleagris gallopavo</i>]</a>          | 38.4 | 38.4 | 85%  | 0.063 | 92% | <a href="#">gil733903684 XP_010715271.1</a> |
| <a href="#">RecName: Full=Cholinesterase; AltName: Full=Acylcholine acylhyd</a>            | 38.4 | 38.4 | 85%  | 0.063 | 92% | <a href="#">gil116354 P21927.1</a>          |
| <a href="#">PREDICTED: cholinesterase isoform X2 [<i>Meleagris gallopavo</i>]</a>          | 38.4 | 38.4 | 85%  | 0.063 | 92% | <a href="#">gil733903681 XP_010715270.1</a> |
| <a href="#">PREDICTED: cholinesterase [<i>Erinaceus europaeus</i>]</a>                     | 38.4 | 38.4 | 85%  | 0.063 | 92% | <a href="#">gil617605262 XP_007523705.1</a> |
| <a href="#">PREDICTED: cholinesterase [<i>Tauraco erythrolophus</i>]</a>                   | 38.4 | 38.4 | 85%  | 0.063 | 92% | <a href="#">gil701378853 XP_009987847.1</a> |



|                                                                                   |      |      |     |       |     |                                             |
|-----------------------------------------------------------------------------------|------|------|-----|-------|-----|---------------------------------------------|
| <a href="#">PREDICTED: cholinesterase [Manacus vitellinus]</a>                    | 38.4 | 38.4 | 85% | 0.063 | 92% | <a href="#">gil675428698 XP_008928282.1</a> |
| <a href="#">PREDICTED: cholinesterase [Oryctolagus cuniculus]</a>                 | 38.4 | 38.4 | 85% | 0.063 | 92% | <a href="#">gil291400118 XP_002716414.1</a> |
| <a href="#">PREDICTED: cholinesterase isoform X2 [Camelus dromedarius]</a>        | 38.4 | 38.4 | 85% | 0.063 | 92% | <a href="#">gil744553709 XP_010974642.1</a> |
| <a href="#">PREDICTED: cholinesterase isoform X1 [Camelus dromedarius]</a>        | 38.4 | 38.4 | 85% | 0.063 | 92% | <a href="#">gil744553706 XP_010974641.1</a> |
| <a href="#">PREDICTED: cholinesterase isoform X2 [Camelus bactrianus]</a>         | 38.4 | 38.4 | 85% | 0.063 | 92% | <a href="#">gil743713601 XP_010950371.1</a> |
| <a href="#">PREDICTED: cholinesterase isoform X1 [Struthio camelus australis]</a> | 38.4 | 38.4 | 85% | 0.063 | 92% | <a href="#">gil697458918 XP_009666836.1</a> |
| <a href="#">butyrylcholinesterase precursor [Macaca fascicularis]</a>             | 38.4 | 38.4 | 85% | 0.063 | 92% | <a href="#">gil290795732 ADD64703.1</a>     |
| <a href="#">cholinesterase precursor [Equus caballus]</a>                         | 38.4 | 38.4 | 85% | 0.063 | 92% | <a href="#">gil126352540 NP_001075319.1</a> |
| <a href="#">PREDICTED: cholinesterase-like [Elephantulus edwardii]</a>            | 38.4 | 38.4 | 85% | 0.063 | 92% | <a href="#">gil585675683 XP_006890440.1</a> |
| <a href="#">PREDICTED: cholinesterase [Vicugna pacos]</a>                         | 38.4 | 38.4 | 85% | 0.063 | 92% | <a href="#">gil560956860 XP_006200907.1</a> |
| <a href="#">PREDICTED: cholinesterase [Camelus ferus]</a>                         | 38.4 | 38.4 | 85% | 0.063 | 92% | <a href="#">gil560915255 XP_006183885.1</a> |
| <a href="#">PREDICTED: cholinesterase [Macaca fascicularis]</a>                   | 38.4 | 38.4 | 85% | 0.063 | 92% | <a href="#">gil544412493 XP_005546353.1</a> |
| <a href="#">PREDICTED: cholinesterase isoform X1 [Chinchilla lanigera]</a>        | 38.4 | 38.4 | 85% | 0.063 | 92% | <a href="#">gil533158554 XP_005393194.1</a> |
| <a href="#">PREDICTED: cholinesterase-like [Melopsittacus undulatus]</a>          | 38.4 | 38.4 | 85% | 0.063 | 92% | <a href="#">gil527262631 XP_005149550.1</a> |
| <a href="#">PREDICTED: cholinesterase-like isoform X4 [Anas platyrhynchos]</a>    | 38.4 | 38.4 | 85% | 0.063 | 92% | <a href="#">gil514757144 XP_005022244.1</a> |
| <a href="#">PREDICTED: cholinesterase-like [Trichechus manatus latirostris]</a>   | 38.4 | 38.4 | 85% | 0.063 | 92% | <a href="#">gil471406477 XP_004384938.1</a> |
| <a href="#">PREDICTED: cholinesterase [Orcinus orca]</a>                          | 38.4 | 38.4 | 85% | 0.063 | 92% | <a href="#">gil466076197 XP_004283487.1</a> |
| <a href="#">Cholinesterase [Pteropus alecto]</a>                                  | 38.4 | 38.4 | 85% | 0.063 | 92% | <a href="#">gil431915168 ELK15855.1</a>     |
| <a href="#">PREDICTED: cholinesterase [Sarcophilus harrisii]</a>                  | 38.4 | 38.4 | 85% | 0.063 | 92% | <a href="#">gil395528220 XP_003766229.1</a> |
| <a href="#">PREDICTED: cholinesterase isoform X1 [Cavia porcellus]</a>            | 38.4 | 38.4 | 85% | 0.063 | 92% | <a href="#">gil348567235 XP_003469406.1</a> |
| <a href="#">PREDICTED: LOW QUALITY PROTEIN: cholinesterase-like [Maca</a>         | 38.4 | 38.4 | 85% | 0.063 | 92% | <a href="#">gil297286482 XP_002808379.1</a> |
| <a href="#">PREDICTED: cholinesterase [Ornithorhynchus anatinus]</a>              | 38.4 | 38.4 | 85% | 0.063 | 92% | <a href="#">gil149633332 XP_001505841.1</a> |
| <a href="#">PREDICTED: cholinesterase isoform X1 [Meleagris gallopavo]</a>        | 38.4 | 38.4 | 85% | 0.063 | 92% | <a href="#">gil733903673 XP_010715267.1</a> |
| <a href="#">PREDICTED: cholinesterase [Mesitornis unicolor]</a>                   | 38.4 | 38.4 | 85% | 0.063 | 92% | <a href="#">gil704565301 XP_010183737.1</a> |
| <a href="#">PREDICTED: cholinesterase [Caprimulgus carolinensis]</a>              | 38.4 | 38.4 | 85% | 0.063 | 92% | <a href="#">gil704284800 XP_010173273.1</a> |
| <a href="#">PREDICTED: cholinesterase [Eurypyga helias]</a>                       | 38.4 | 38.4 | 85% | 0.063 | 92% | <a href="#">gil704257918 XP_010150053.1</a> |
| <a href="#">PREDICTED: cholinesterase [Buceros rhinoceros silvestris]</a>         | 38.4 | 38.4 | 85% | 0.063 | 92% | <a href="#">gil704196237 XP_010140664.1</a> |

## Alignments

Download GenPept Graphics

Next Previous Descriptions

cholinesterase precursor [Pan troglodytes]

Sequence ID: [gil343960913|dbj|BAK62046.1](#) Length: 494 Number of Matches: 1

Range 1: 373 to 386 GenPept Graphics

Next Match Previous Match

| Score         | Expect | Identities | Positives   | Gaps     |
|---------------|--------|------------|-------------|----------|
| 45.2 bits(99) | 3e-04  | 13/14(93%) | 14/14(100%) | 0/14(0%) |

Query 1 RDDYTKAEILSRS 14  
RD+YTKAEILSRS  
Sbjct 373 RDNYTKAEILSRS 386

### Related Information

[Gene](#) - associated gene details  
[Map Viewer](#) - aligned genomic context

Download GenPept Graphics

Next Previous Descriptions

Chain A, Aged Form Of Human Butyrylcholinesterase Inhibited By Tabun Analogue Ta5

Sequence ID: [gil237823652|pdb|2WIL|A](#) Length: 529 Number of Matches: 1

[▶ See 1 more title\(s\)](#)

Range 1: 453 to 466 GenPept Graphics

Next Match Previous Match

| Score         | Expect | Identities | Positives   | Gaps     |
|---------------|--------|------------|-------------|----------|
| 45.2 bits(99) | 3e-04  | 13/14(93%) | 14/14(100%) | 0/14(0%) |

### Related Information

[Structure](#) - 3D structure displays  
[Identical Proteins](#) - Proteins identical to the subject

Query 1 RDDYTKAEIILSR\_S 14  
 RD+YTKAEIILSR\_S  
 Sbjct 453 RDNYTKAEIILSR\_S 466

Download [GenPept](#) [Graphics](#)

[▼ Next](#) [▲ Previous](#) [▲ Descriptions](#)

Chain A, Crystal Structure Of Fully Glycosylated Human Butyrylcholinesterase

Sequence ID: [gi|393715367|pdb|4AQD|A](#) Length: 531 Number of Matches: 1

[▶ See 1 more title\(s\)](#)

Range 1: 455 to 468 [GenPept](#) [Graphics](#)

[▼ Next Match](#) [▲ Previous Match](#)

| Score         | Expect | Identities | Positives   | Gaps     |
|---------------|--------|------------|-------------|----------|
| 45.2 bits(99) | 3e-04  | 13/14(93%) | 14/14(100%) | 0/14(0%) |

Query 1 RDDYTKAEIILSR\_S 14  
 RD+YTKAEIILSR\_S  
 Sbjct 455 RDNYTKAEIILSR\_S 468

**Related Information**

[Structure](#) - 3D structure displays  
[Identical Proteins](#) - Proteins  
 identical to the subject

Download [GenPept](#) [Graphics](#)

[▼ Next](#) [▲ Previous](#) [▲ Descriptions](#)

monomeric butyrylcholinesterase [synthetic construct]

Sequence ID: [gi|388261124|gb|AFK25766.1|](#) Length: 557 Number of Matches: 1

Range 1: 481 to 494 [GenPept](#) [Graphics](#)

[▼ Next Match](#) [▲ Previous Match](#)

| Score         | Expect | Identities | Positives   | Gaps     |
|---------------|--------|------------|-------------|----------|
| 45.2 bits(99) | 3e-04  | 13/14(93%) | 14/14(100%) | 0/14(0%) |

Query 1 RDDYTKAEIILSR\_S 14  
 RD+YTKAEIILSR\_S  
 Sbjct 481 RDNYTKAEIILSR\_S 494

**Related Information**

[Structure](#) - 3D structure displays  
[Identical Proteins](#) - Proteins  
 identical to the subject

Download [GenPept](#) [Graphics](#)

[▼ Next](#) [▲ Previous](#) [▲ Descriptions](#)

Chain A, Co-Crystallization Studies Of Full Length Recombinant Bche With Cocaine Offers Insights Into Cocaine Detoxification

Sequence ID: [gi|328877250|pdb|3O9M|A](#) Length: 574 Number of Matches: 1

[▶ See 1 more title\(s\)](#)

Range 1: 453 to 466 [GenPept](#) [Graphics](#)

[▼ Next Match](#) [▲ Previous Match](#)

| Score         | Expect | Identities | Positives   | Gaps     |
|---------------|--------|------------|-------------|----------|
| 45.2 bits(99) | 3e-04  | 13/14(93%) | 14/14(100%) | 0/14(0%) |

Query 1 RDDYTKAEIILSR\_S 14  
 RD+YTKAEIILSR\_S  
 Sbjct 453 RDNYTKAEIILSR\_S 466

**Related Information**

[Structure](#) - 3D structure displays  
[Identical Proteins](#) - Proteins  
 identical to the subject

BLAST is a registered trademark of the National Library of Medicine.

▶ NCBI/ BLAST/ blastp suite/ Formatting Results - B926MR7C01R

**i** Your search parameters were adjusted to search for a short input sequence.

[Edit and Resubmit](#) [Save Search Strategies](#) [▶ Formatting options](#) [▶ Download](#)

[YouTube](#) [How to read this page](#) [Blast report description](#)

**BCHE\_RDNYTKAEILSRS\_NonMod**

**RID** [B926MR7C01R](#) (Expires on 01-14 09:54 am)

|                                 |                                                                                                                                   |
|---------------------------------|-----------------------------------------------------------------------------------------------------------------------------------|
| <b>Query ID</b>  cl 158420      | <b>Database Name</b> nr                                                                                                           |
| <b>Description</b> None         | <b>Description</b> All non-redundant GenBank CDS translations+PDB+SwissProt+PIR excluding environmental samples from WGS projects |
| <b>Molecule type</b> amino acid | <b>Program</b> BLASTP 2.2.30+ <a href="#">▶ Citation</a>                                                                          |
| <b>Query Length</b> 14          |                                                                                                                                   |

Other reports: [▶ Search Summary](#) [\[Taxonomy reports\]](#) [\[Distance tree of results\]](#) [\[Multiple alignment\]](#)

**Graphic Summary**

[Show Conserved Domains](#)

No putative conserved domains have been detected

Distribution of 100 Blast Hits on the Query Sequence

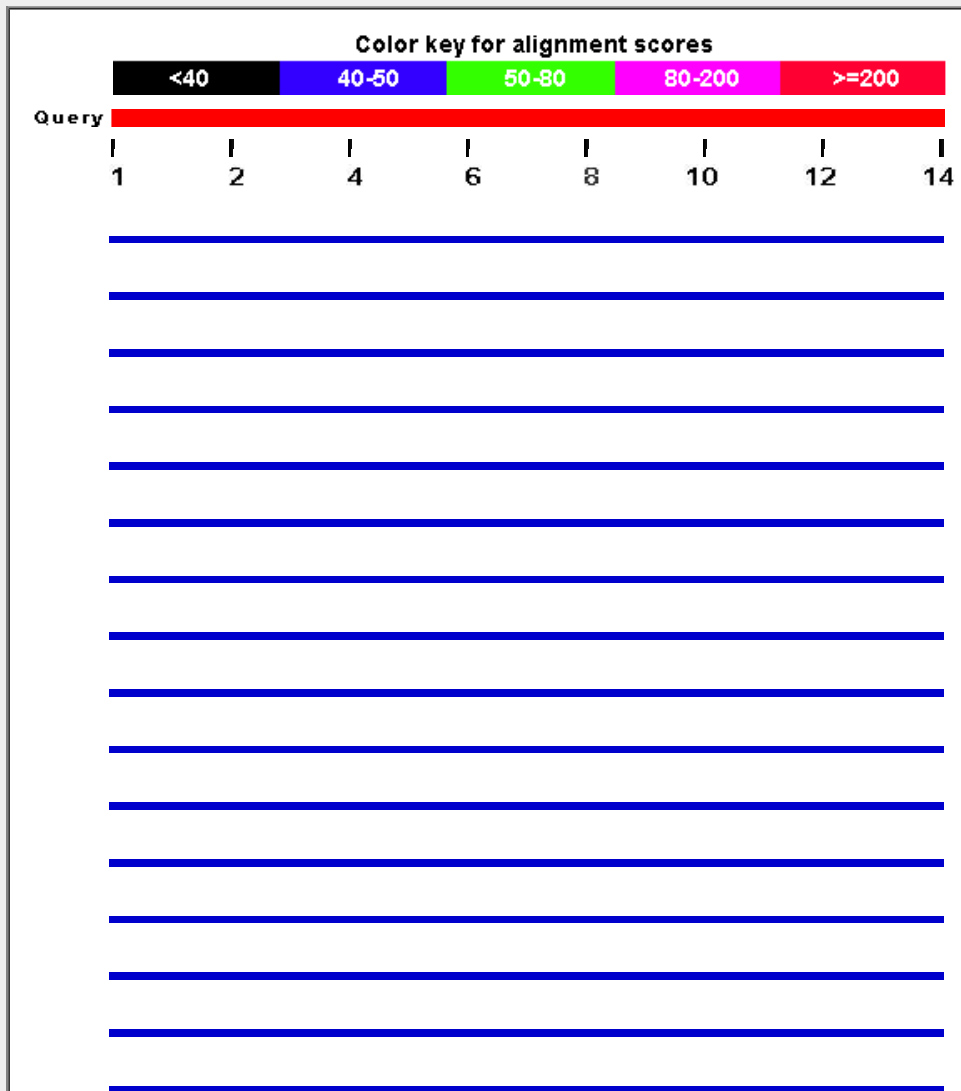

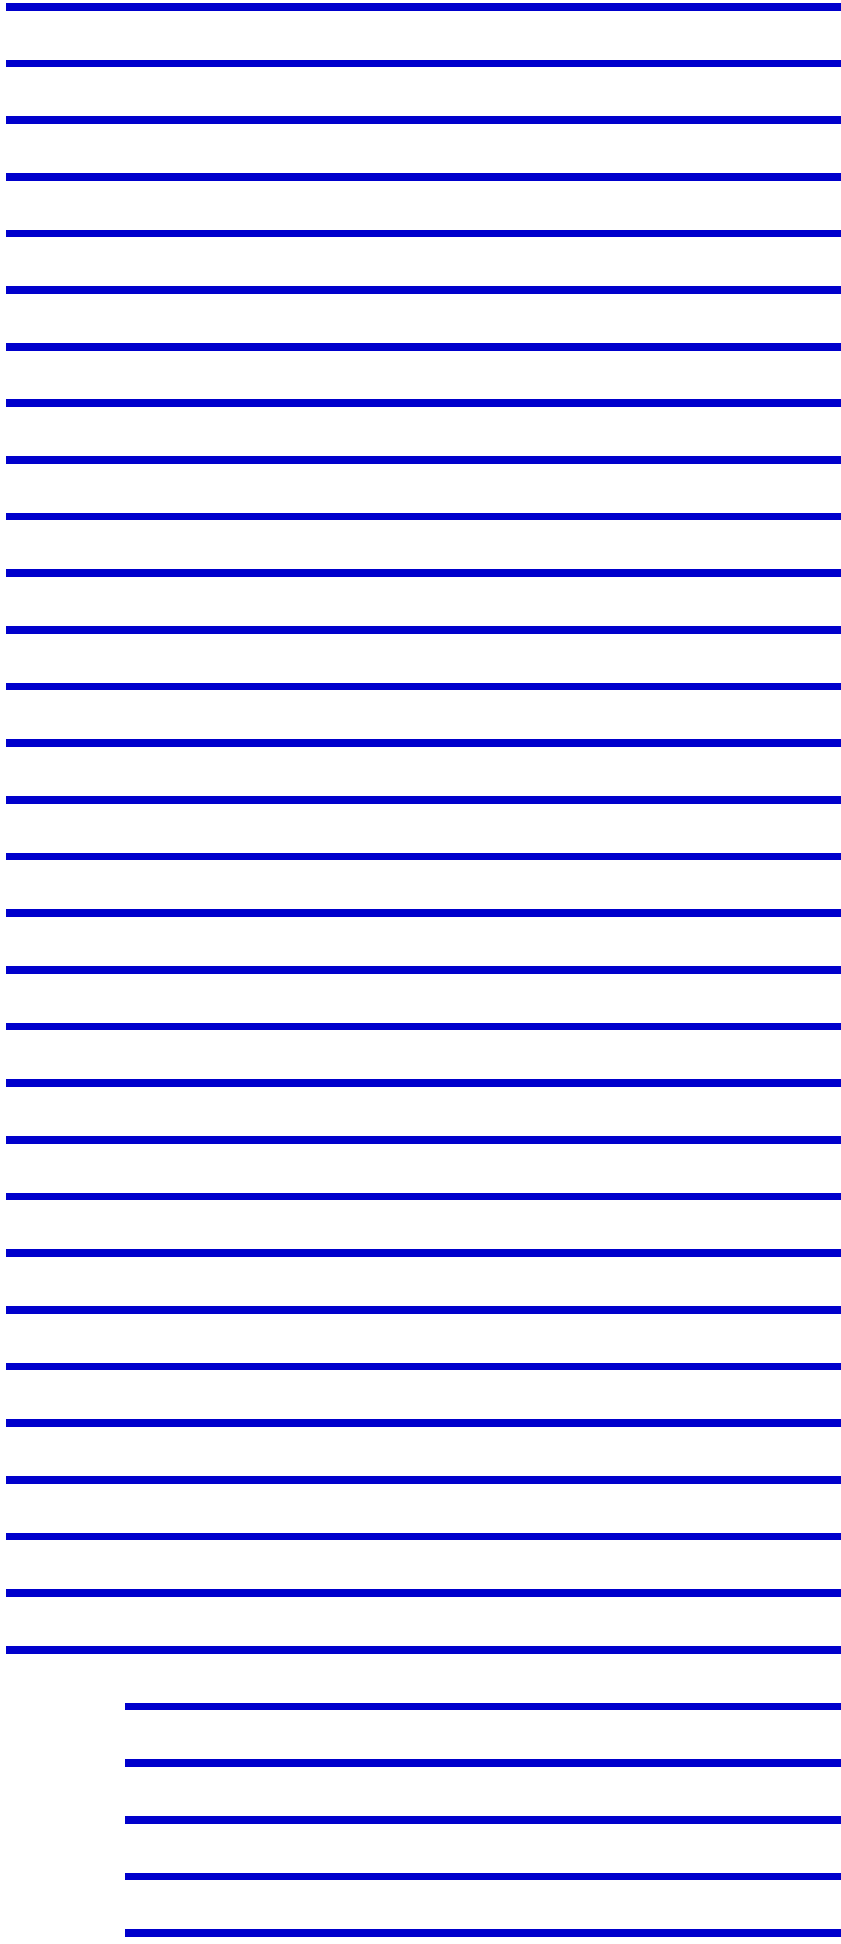

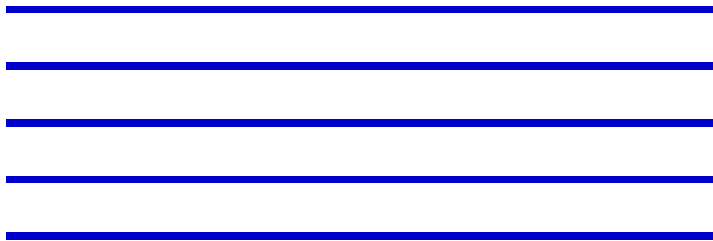

**Descriptions**

**Sequences producing significant alignments:**

Select: [All](#) [None](#) Selected:0

[↑](#) Alignments 
 [Download](#)
[GenPept](#)
[Graphics](#)
[Distance tree of results](#)
[Multiple alignment](#)


| Description                                                                       | Max score | Total score | Query cover | E value | Ident | Accession                                   |
|-----------------------------------------------------------------------------------|-----------|-------------|-------------|---------|-------|---------------------------------------------|
| <a href="#">cholinesterase precursor [Pan troglodytes]</a>                        | 47.7      | 47.7        | 100%        | 5e-05   | 100%  | <a href="#">gij343960913 BAK62046.1</a>     |
| <a href="#">Chain A, Aged Form Of Human Butyrylcholinesterase Inhibited By ]</a>  | 47.7      | 47.7        | 100%        | 5e-05   | 100%  | <a href="#">gij237823652 2WIL_A</a>         |
| <a href="#">Chain A, Crystal Structure Of Fully Glycosylated Human Butyrylcho</a> | 47.7      | 47.7        | 100%        | 5e-05   | 100%  | <a href="#">gij393715367 4AQD_A</a>         |
| <a href="#">monomeric butyrylcholinesterase [synthetic construct]</a>             | 47.7      | 47.7        | 100%        | 5e-05   | 100%  | <a href="#">gij388261124 AFK25766.1</a>     |
| <a href="#">Chain A, Co-Crystallization Studies Of Full Length Recombinant Bc</a> | 47.7      | 47.7        | 100%        | 5e-05   | 100%  | <a href="#">gij328877250 3O9M_A</a>         |
| <a href="#">butyrylcholinesterase p.Val204Asp splice variant [Homo sapiens]</a>   | 47.7      | 47.7        | 100%        | 5e-05   | 100%  | <a href="#">gij632795270 AHZ34327.1</a>     |
| <a href="#">cholinesterase precursor [Homo sapiens]</a>                           | 47.7      | 47.7        | 100%        | 5e-05   | 100%  | <a href="#">gij4557351 NP_000046.1</a>      |
| <a href="#">unnamed protein product [Homo sapiens]</a>                            | 47.7      | 47.7        | 100%        | 5e-05   | 100%  | <a href="#">gij158257558 BAF84752.1</a>     |
| <a href="#">butyrylcholinesterase [synthetic construct]</a>                       | 47.7      | 47.7        | 100%        | 5e-05   | 100%  | <a href="#">gij260766471 ACX50257.1</a>     |
| <a href="#">PREDICTED: cholinesterase [Gorilla gorilla gorilla]</a>               | 47.7      | 47.7        | 100%        | 5e-05   | 100%  | <a href="#">gij426342776 XP_004038010.1</a> |
| <a href="#">PREDICTED: cholinesterase [Pan paniscus]</a>                          | 47.7      | 47.7        | 100%        | 5e-05   | 100%  | <a href="#">gij397493718 XP_003817746.1</a> |
| <a href="#">PREDICTED: cholinesterase isoform X1 [Homo sapiens]</a>               | 47.7      | 47.7        | 100%        | 5e-05   | 100%  | <a href="#">gij530375091 XP_005247742.1</a> |
| <a href="#">PREDICTED: cholinesterase [Pan troglodytes]</a>                       | 47.7      | 47.7        | 100%        | 5e-05   | 100%  | <a href="#">gij114590210 XP_516857.2</a>    |
| <a href="#">PREDICTED: cholinesterase isoform X3 [Heterocephalus glaber]</a>      | 45.2      | 45.2        | 100%        | 3e-04   | 93%   | <a href="#">gij512824498 XP_004880402.1</a> |
| <a href="#">PREDICTED: cholinesterase isoform X2 [Heterocephalus glaber]</a>      | 45.2      | 45.2        | 100%        | 3e-04   | 93%   | <a href="#">gij512824494 XP_004880401.1</a> |
| <a href="#">PREDICTED: cholinesterase isoform X1 [Heterocephalus glaber]</a>      | 45.2      | 45.2        | 100%        | 3e-04   | 93%   | <a href="#">gij512824490 XP_004880400.1</a> |
| <a href="#">cholinesterase precursor [Pongo abelii]</a>                           | 43.9      | 43.9        | 100%        | 9e-04   | 93%   | <a href="#">gij197097436 NP_001127509.1</a> |
| <a href="#">PREDICTED: cholinesterase isoform X1 [Pongo abelii]</a>               | 43.9      | 43.9        | 100%        | 9e-04   | 93%   | <a href="#">gij686714306 XP_009237773.1</a> |
| <a href="#">PREDICTED: cholinesterase isoform X2 [Sus scrofa]</a>                 | 43.1      | 43.1        | 100%        | 0.002   | 93%   | <a href="#">gij545864567 XP_005670020.1</a> |
| <a href="#">Chain A, Crystal Structure Of Soman-aged Human Butyrylcholinest</a>   | 43.1      | 43.1        | 100%        | 0.002   | 93%   | <a href="#">gij402550232 4AXB_A</a>         |
| <a href="#">Chain A, X-Ray Structure Of Human Butyrylcholinesterase Inhibitec</a> | 43.1      | 43.1        | 100%        | 0.002   | 93%   | <a href="#">gij326634060 2XQF_A</a>         |
| <a href="#">Chain A, Aged Form Of Human Butyrylcholinesterase Inhibited By ]</a>  | 43.1      | 43.1        | 100%        | 0.002   | 93%   | <a href="#">gij258588213 2W5L_A</a>         |
| <a href="#">Chain A, Nonaged Form Of Human Butyrylcholinesterase Inhibited ]</a>  | 43.1      | 43.1        | 100%        | 0.002   | 93%   | <a href="#">gij215794636 3DJY_A</a>         |
| <a href="#">Chain A, Crystal Structure Of Human Butyryl Cholinesterase [Homo</a>  | 43.1      | 43.1        | 100%        | 0.002   | 93%   | <a href="#">gij34810859 1POI_A</a>          |
| <a href="#">Chain A, Crystal Structure Of Soman-aged Human Butyrylcholinest</a>   | 43.1      | 43.1        | 100%        | 0.002   | 93%   | <a href="#">gij402550237 4B0O_A</a>         |
| <a href="#">Chain A, Structure Of Human Butyrylcholinesterase Inhibited By Cb</a> | 43.1      | 43.1        | 100%        | 0.002   | 93%   | <a href="#">gij340707403 2Y1K_A</a>         |
| <a href="#">Chain A, G117h Mutant Of Human Butyrylcholinesterase In Comple</a>    | 43.1      | 43.1        | 100%        | 0.002   | 93%   | <a href="#">gij313103512 2XMB_A</a>         |
| <a href="#">Chain A, Aged Form Of Human Butyrylcholinesterase Inhibited By ]</a>  | 43.1      | 43.1        | 100%        | 0.002   | 93%   | <a href="#">gij237823648 2WIF_A</a>         |

|                                                                                    |      |      |      |       |      |                                             |
|------------------------------------------------------------------------------------|------|------|------|-------|------|---------------------------------------------|
| <a href="#">Chain A, Nonaged Form Of Human Butyrylcholinesterase Inhibited I</a>   | 43.1 | 43.1 | 100% | 0.002 | 93%  | <a href="#">gij237823647 2WID_A</a>         |
| <a href="#">Chain A. Structure Of Human Butyrylcholinesterase In Complex Wit</a>   | 43.1 | 43.1 | 100% | 0.002 | 93%  | <a href="#">gij145579736 2J4C_A</a>         |
| <a href="#">PREDICTED: cholinesterase-like isoform X2 [Mustela putorius furo]</a>  | 43.1 | 43.1 | 100% | 0.002 | 93%  | <a href="#">gij511910151 XP_004774476.1</a> |
| <a href="#">Chain A. Crystal Structure Of Recombinant Full Length Human Buty</a>   | 43.1 | 43.1 | 100% | 0.002 | 93%  | <a href="#">gij158429456 2PM8_A</a>         |
| <a href="#">PREDICTED: cholinesterase [Nestor notabilis]</a>                       | 43.1 | 43.1 | 100% | 0.002 | 93%  | <a href="#">gij701300599 XP_010010752.1</a> |
| <a href="#">PREDICTED: cholinesterase [Eptesicus fuscus]</a>                       | 43.1 | 43.1 | 100% | 0.002 | 93%  | <a href="#">gij641703485 XP_008140478.1</a> |
| <a href="#">hypothetical protein PANDA_007095 [Ailuropoda melanoleuca]</a>         | 43.1 | 43.1 | 100% | 0.002 | 93%  | <a href="#">gij281337784 EFB13368.1</a>     |
| <a href="#">PREDICTED: cholinesterase [Canis lupus familiaris]</a>                 | 43.1 | 43.1 | 100% | 0.002 | 93%  | <a href="#">gij74003707 XP_545267.2</a>     |
| <a href="#">PREDICTED: cholinesterase-like [Leptonychotes weddellii]</a>           | 43.1 | 43.1 | 100% | 0.002 | 93%  | <a href="#">gij585150385 XP_006727664.1</a> |
| <a href="#">PREDICTED: cholinesterase isoform X1 [Sus scrofa]</a>                  | 43.1 | 43.1 | 100% | 0.002 | 93%  | <a href="#">gij335299867 XP_003358712.1</a> |
| <a href="#">PREDICTED: cholinesterase isoform X2 [Saimiri boliviensis bolivier</a> | 43.1 | 43.1 | 100% | 0.002 | 93%  | <a href="#">gij725560928 XP_010334003.1</a> |
| <a href="#">PREDICTED: cholinesterase-like [Odobenus rosmarus divergens]</a>       | 43.1 | 43.1 | 100% | 0.002 | 93%  | <a href="#">gij472347065 XP_004393257.1</a> |
| <a href="#">PREDICTED: cholinesterase [Ursus maritimus]</a>                        | 43.1 | 43.1 | 100% | 0.002 | 93%  | <a href="#">gij670999264 XP_008690527.1</a> |
| <a href="#">PREDICTED: cholinesterase-like isoform X1 [Mustela putorius furo]</a>  | 43.1 | 43.1 | 100% | 0.002 | 93%  | <a href="#">gij511910148 XP_004774475.1</a> |
| <a href="#">PREDICTED: cholinesterase isoform X1 [Saimiri boliviensis bolivier</a> | 43.1 | 43.1 | 100% | 0.002 | 93%  | <a href="#">gij403265619 XP_003925023.1</a> |
| <a href="#">PREDICTED: cholinesterase-like [Ailuropoda melanoleuca]</a>            | 43.1 | 43.1 | 100% | 0.002 | 93%  | <a href="#">gij301766374 XP_002918607.1</a> |
| <a href="#">PREDICTED: cholinesterase isoform X2 [Loxodonta africana]</a>          | 41.4 | 41.4 | 100% | 0.006 | 93%  | <a href="#">gij731499961 XP_010594355.1</a> |
| <a href="#">PREDICTED: cholinesterase isoform X1 [Loxodonta africana]</a>          | 41.4 | 41.4 | 100% | 0.006 | 93%  | <a href="#">gij731499959 XP_003416305.2</a> |
| <a href="#">PREDICTED: cholinesterase [Balearica pavonina gibbericeps]</a>         | 40.9 | 40.9 | 85%  | 0.009 | 100% | <a href="#">gij723546565 XP_010296638.1</a> |
| <a href="#">PREDICTED: cholinesterase [Phaethon lepturus]</a>                      | 40.9 | 40.9 | 85%  | 0.009 | 100% | <a href="#">gij723122346 XP_010287090.1</a> |
| <a href="#">PREDICTED: cholinesterase [Tyto alba]</a>                              | 40.9 | 40.9 | 85%  | 0.009 | 100% | <a href="#">gij701367577 XP_009962519.1</a> |
| <a href="#">PREDICTED: cholinesterase [Gavia stellata]</a>                         | 40.9 | 40.9 | 85%  | 0.009 | 100% | <a href="#">gij698412479 XP_009811650.1</a> |
| <a href="#">PREDICTED: cholinesterase [Cariama cristata]</a>                       | 40.9 | 40.9 | 85%  | 0.009 | 100% | <a href="#">gij698406540 XP_009708153.1</a> |
| <a href="#">PREDICTED: cholinesterase [Phalacrocorax carbo]</a>                    | 40.9 | 40.9 | 85%  | 0.009 | 100% | <a href="#">gij695141055 XP_009513025.1</a> |
| <a href="#">PREDICTED: cholinesterase [Merops nubicus]</a>                         | 40.9 | 40.9 | 85%  | 0.009 | 100% | <a href="#">gij675619693 XP_008937822.1</a> |
| <a href="#">cholinesterase precursor [Camelus ferus]</a>                           | 40.9 | 40.9 | 85%  | 0.009 | 100% | <a href="#">gij528762213 EPY81872.1</a>     |
| <a href="#">PREDICTED: cholinesterase-like [Tursiops truncatus]</a>                | 40.9 | 40.9 | 85%  | 0.009 | 100% | <a href="#">gij470638951 XP_004324597.1</a> |
| <a href="#">PREDICTED: cholinesterase isoform X2 [Chinchilla lanigera]</a>         | 40.9 | 40.9 | 85%  | 0.009 | 100% | <a href="#">gij533158556 XP_005393195.1</a> |
| <a href="#">PREDICTED: cholinesterase isoform X2 [Struthio camelus australis]</a>  | 40.9 | 40.9 | 85%  | 0.009 | 100% | <a href="#">gij697458921 XP_009666837.1</a> |
| <a href="#">PREDICTED: cholinesterase isoform X4 [Monodelphis domestica]</a>       | 40.9 | 40.9 | 85%  | 0.009 | 100% | <a href="#">gij612048246 XP_007502328.1</a> |
| <a href="#">PREDICTED: cholinesterase isoform X3 [Monodelphis domestica]</a>       | 40.9 | 40.9 | 85%  | 0.009 | 100% | <a href="#">gij612048244 XP_007502327.1</a> |
| <a href="#">PREDICTED: cholinesterase isoform X4 [Pelodiscus sinensis]</a>         | 40.9 | 40.9 | 85%  | 0.009 | 100% | <a href="#">gij558163876 XP_006123483.1</a> |
| <a href="#">PREDICTED: cholinesterase-like [Physeter catodon]</a>                  | 40.9 | 40.9 | 85%  | 0.009 | 100% | <a href="#">gij593755372 XP_007116545.1</a> |
| <a href="#">PREDICTED: cholinesterase isoform X2 [Chlorocebus sabaeus]</a>         | 40.9 | 40.9 | 85%  | 0.009 | 100% | <a href="#">gij635084156 XP_007970395.1</a> |
| <a href="#">PREDICTED: cholinesterase isoform X3 [Equus przewalskii]</a>           | 40.9 | 40.9 | 85%  | 0.009 | 100% | <a href="#">gij664725797 XP_008520037.1</a> |
| <a href="#">PREDICTED: cholinesterase isoform X3 [Pelodiscus sinensis]</a>         | 40.9 | 40.9 | 85%  | 0.009 | 100% | <a href="#">gij558163871 XP_006123482.1</a> |
| <a href="#">PREDICTED: cholinesterase isoform X1 [Monodelphis domestica]</a>       | 40.9 | 40.9 | 85%  | 0.009 | 100% | <a href="#">gij612048240 XP_007502325.1</a> |
| <a href="#">hypothetical protein EGK_11933 [Macaca mulatta]</a>                    | 40.9 | 40.9 | 85%  | 0.009 | 100% | <a href="#">gij355559896 FHH16624.1</a>     |
| <a href="#">PREDICTED: cholinesterase-like isoform X5 [Anas platyrhynchos]</a>     | 40.9 | 40.9 | 85%  | 0.009 | 100% | <a href="#">gij514757148 XP_005022245.1</a> |
| <a href="#">PREDICTED: cholinesterase isoform X2 [Cavia porcellus]</a>             | 40.9 | 40.9 | 85%  | 0.009 | 100% | <a href="#">gij514460083 XP_005003514.1</a> |
| <a href="#">PREDICTED: cholinesterase isoform X3 [Meleagris gallopavo]</a>         | 40.9 | 40.9 | 85%  | 0.009 | 100% | <a href="#">gij733903684 XP_010715271.1</a> |
| <a href="#">RecName: Full=Cholinesterase; AltName: Full=Acylcholine acylhydrol</a> | 40.9 | 40.9 | 85%  | 0.009 | 100% | <a href="#">gij116354 P21927.1</a>          |
| <a href="#">PREDICTED: cholinesterase isoform X2 [Meleagris gallopavo]</a>         | 40.9 | 40.9 | 85%  | 0.009 | 100% | <a href="#">gij733903681 XP_010715270.1</a> |
| <a href="#">PREDICTED: cholinesterase [Erinaceus europaeus]</a>                    | 40.9 | 40.9 | 85%  | 0.009 | 100% | <a href="#">gij617605262 XP_007523705.1</a> |
| <a href="#">PREDICTED: cholinesterase [Tauraco erythrolophus]</a>                  | 40.9 | 40.9 | 85%  | 0.009 | 100% | <a href="#">gij701378853 XP_009987847.1</a> |

|                                                                                   |      |      |     |       |      |                                             |
|-----------------------------------------------------------------------------------|------|------|-----|-------|------|---------------------------------------------|
| <a href="#">PREDICTED: cholinesterase [Manacus vitellinus]</a>                    | 40.9 | 40.9 | 85% | 0.009 | 100% | <a href="#">gij675428698 XP_008928282.1</a> |
| <a href="#">PREDICTED: cholinesterase [Oryctolagus cuniculus]</a>                 | 40.9 | 40.9 | 85% | 0.009 | 100% | <a href="#">gij291400118 XP_002716414.1</a> |
| <a href="#">PREDICTED: cholinesterase isoform X1 [Struthio camelus australis]</a> | 40.9 | 40.9 | 85% | 0.009 | 100% | <a href="#">gij697458918 XP_009666836.1</a> |
| <a href="#">butyrylcholinesterase precursor [Macaca fascicularis]</a>             | 40.9 | 40.9 | 85% | 0.009 | 100% | <a href="#">gij290795732 ADD64703.1</a>     |
| <a href="#">cholinesterase precursor [Equus caballus]</a>                         | 40.9 | 40.9 | 85% | 0.009 | 100% | <a href="#">gij126352540 NP_001075319.1</a> |
| <a href="#">PREDICTED: cholinesterase-like [Elephantulus edwardii]</a>            | 40.9 | 40.9 | 85% | 0.009 | 100% | <a href="#">gij585675683 XP_006890440.1</a> |
| <a href="#">PREDICTED: cholinesterase [Vicugna pacos]</a>                         | 40.9 | 40.9 | 85% | 0.009 | 100% | <a href="#">gij560956860 XP_006200907.1</a> |
| <a href="#">PREDICTED: cholinesterase [Camelus ferus]</a>                         | 40.9 | 40.9 | 85% | 0.009 | 100% | <a href="#">gij560915255 XP_006183885.1</a> |
| <a href="#">PREDICTED: cholinesterase [Macaca fascicularis]</a>                   | 40.9 | 40.9 | 85% | 0.009 | 100% | <a href="#">gij544412493 XP_005546353.1</a> |
| <a href="#">PREDICTED: cholinesterase isoform X1 [Chinchilla lanigera]</a>        | 40.9 | 40.9 | 85% | 0.009 | 100% | <a href="#">gij533158554 XP_005393194.1</a> |
| <a href="#">PREDICTED: cholinesterase-like [Melopsittacus undulatus]</a>          | 40.9 | 40.9 | 85% | 0.009 | 100% | <a href="#">gij527262631 XP_005149550.1</a> |
| <a href="#">PREDICTED: cholinesterase-like isoform X4 [Anas platyrhynchos]</a>    | 40.9 | 40.9 | 85% | 0.009 | 100% | <a href="#">gij514757144 XP_005022244.1</a> |
| <a href="#">PREDICTED: cholinesterase-like [Trichechus manatus latirostris]</a>   | 40.9 | 40.9 | 85% | 0.009 | 100% | <a href="#">gij471406477 XP_004384938.1</a> |
| <a href="#">PREDICTED: cholinesterase [Orcinus orca]</a>                          | 40.9 | 40.9 | 85% | 0.009 | 100% | <a href="#">gij466076197 XP_004283487.1</a> |
| <a href="#">Cholinesterase [Pteropus alecto]</a>                                  | 40.9 | 40.9 | 85% | 0.009 | 100% | <a href="#">gij431915168 ELK15855.1</a>     |
| <a href="#">PREDICTED: cholinesterase [Sarcophilus harrisii]</a>                  | 40.9 | 40.9 | 85% | 0.009 | 100% | <a href="#">gij395528220 XP_003766229.1</a> |
| <a href="#">PREDICTED: cholinesterase isoform X1 [Cavia porcellus]</a>            | 40.9 | 40.9 | 85% | 0.009 | 100% | <a href="#">gij348567235 XP_003469406.1</a> |
| <a href="#">PREDICTED: LOW QUALITY PROTEIN: cholinesterase-like [Maca</a>         | 40.9 | 40.9 | 85% | 0.009 | 100% | <a href="#">gij297286482 XP_002808379.1</a> |
| <a href="#">PREDICTED: cholinesterase [Ornithorhynchus anatinus]</a>              | 40.9 | 40.9 | 85% | 0.009 | 100% | <a href="#">gij149633332 XP_001505841.1</a> |
| <a href="#">PREDICTED: cholinesterase isoform X1 [Meleagris gallopavo]</a>        | 40.9 | 40.9 | 85% | 0.009 | 100% | <a href="#">gij733903673 XP_010715267.1</a> |
| <a href="#">PREDICTED: cholinesterase [Mesitornis unicolor]</a>                   | 40.9 | 40.9 | 85% | 0.009 | 100% | <a href="#">gij704565301 XP_010183737.1</a> |
| <a href="#">PREDICTED: cholinesterase [Caprimulgus carolinensis]</a>              | 40.9 | 40.9 | 85% | 0.009 | 100% | <a href="#">gij704284800 XP_010173273.1</a> |
| <a href="#">PREDICTED: cholinesterase [Eurypyga helias]</a>                       | 40.9 | 40.9 | 85% | 0.009 | 100% | <a href="#">gij704257918 XP_010150053.1</a> |
| <a href="#">PREDICTED: cholinesterase [Buceros rhinoceros silvestris]</a>         | 40.9 | 40.9 | 85% | 0.009 | 100% | <a href="#">gij704196237 XP_010140664.1</a> |
| <a href="#">PREDICTED: cholinesterase [Opisthocomus hoazin]</a>                   | 40.9 | 40.9 | 85% | 0.009 | 100% | <a href="#">gij700395426 XP_009938300.1</a> |
| <a href="#">PREDICTED: cholinesterase [Haliaeetus albicilla]</a>                  | 40.9 | 40.9 | 85% | 0.009 | 100% | <a href="#">gij700325936 XP_009929114.1</a> |
| <a href="#">PREDICTED: cholinesterase [Charadrius vociferus]</a>                  | 40.9 | 40.9 | 85% | 0.009 | 100% | <a href="#">gij699662024 XP_009882721.1</a> |

## Alignments

Download GenPept Graphics

Next Previous Descriptions

cholinesterase precursor [Pan troglodytes]

Sequence ID: [gij343960913|dbj|BAK62046.1](#) Length: 494 Number of Matches: 1

Range 1: 373 to 386 GenPept Graphics

Next Match Previous Match

| Score          | Expect | Identities  | Positives   | Gaps     |
|----------------|--------|-------------|-------------|----------|
| 47.7 bits(105) | 5e-05  | 14/14(100%) | 14/14(100%) | 0/14(0%) |

Query 1 RDNYTKAEILSRS 14  
RDNYTKAEILSRS  
Sbjct 373 RDNYTKAEILSRS 386

### Related Information

[Gene](#) - associated gene details  
[Map Viewer](#) - aligned genomic context

Download GenPept Graphics

Next Previous Descriptions

Chain A, Aged Form Of Human Butyrylcholinesterase Inhibited By Tabun Analogue Ta5

Sequence ID: [gij237823652|pdb|2WIL|A](#) Length: 529 Number of Matches: 1

[▶ See 1 more title\(s\)](#)

Range 1: 453 to 466 GenPept Graphics

Next Match Previous Match

| Score          | Expect | Identities  | Positives   | Gaps     |
|----------------|--------|-------------|-------------|----------|
| 47.7 bits(105) | 5e-05  | 14/14(100%) | 14/14(100%) | 0/14(0%) |

### Related Information

[Structure](#) - 3D structure displays  
[Identical Proteins](#) - Proteins identical to the subject

Query 1 RDNYTKAEELSR\_S 14  
 Sbjct 453 RDNYTKAEELSR\_S 466

[Download](#) [GenPept](#) [Graphics](#)

[Next](#) [Previous](#) [Descriptions](#)

Chain A, Crystal Structure Of Fully Glycosylated Human Butyrylcholinesterase

Sequence ID: [gi|393715367|pdb|4AQD|A](#) Length: 531 Number of Matches: 1

[See 1 more title\(s\)](#)

Range 1: 455 to 468 [GenPept](#) [Graphics](#)

[Next Match](#) [Previous Match](#)

| Score          | Expect | Identities  | Positives   | Gaps     |
|----------------|--------|-------------|-------------|----------|
| 47.7 bits(105) | 5e-05  | 14/14(100%) | 14/14(100%) | 0/14(0%) |

Query 1 RDNYTKAEELSR\_S 14  
 Sbjct 455 RDNYTKAEELSR\_S 468

**Related Information**

[Structure](#) - 3D structure displays  
[Identical Proteins](#) - Proteins  
 identical to the subject

[Download](#) [GenPept](#) [Graphics](#)

[Next](#) [Previous](#) [Descriptions](#)

monomeric butyrylcholinesterase [synthetic construct]

Sequence ID: [gi|388261124|gb|AFK25766.1|](#) Length: 557 Number of Matches: 1

Range 1: 481 to 494 [GenPept](#) [Graphics](#)

[Next Match](#) [Previous Match](#)

| Score          | Expect | Identities  | Positives   | Gaps     |
|----------------|--------|-------------|-------------|----------|
| 47.7 bits(105) | 5e-05  | 14/14(100%) | 14/14(100%) | 0/14(0%) |

Query 1 RDNYTKAEELSR\_S 14  
 Sbjct 481 RDNYTKAEELSR\_S 494

**Related Information**

[Structure](#) - 3D structure displays  
[Identical Proteins](#) - Proteins  
 identical to the subject

[Download](#) [GenPept](#) [Graphics](#)

[Next](#) [Previous](#) [Descriptions](#)

Chain A, Co-Crystallization Studies Of Full Length Recombinant Bche With Cocaine Offers Insights Into Cocaine Detoxification

Sequence ID: [gi|328877250|pdb|3O9M|A](#) Length: 574 Number of Matches: 1

[See 1 more title\(s\)](#)

Range 1: 453 to 466 [GenPept](#) [Graphics](#)

[Next Match](#) [Previous Match](#)

| Score          | Expect | Identities  | Positives   | Gaps     |
|----------------|--------|-------------|-------------|----------|
| 47.7 bits(105) | 5e-05  | 14/14(100%) | 14/14(100%) | 0/14(0%) |

Query 1 RDNYTKAEELSR\_S 14  
 Sbjct 453 RDNYTKAEELSR\_S 466

**Related Information**

[Structure](#) - 3D structure displays  
[Identical Proteins](#) - Proteins  
 identical to the subject

BLAST is a registered trademark of the National Library of Medicine.



NCBI/ BLAST/ blastp suite/ Formatting Results - BT2YC2WT013

Your search parameters were adjusted to search for a short input sequence.  
[Edit and Resubmit](#) [Save Search Strategies](#) [Formatting options](#) [Download](#) [YouTube](#) [How to read this page](#) [Blast report description](#)

**BTD\_KDVQIIVFPEDGIHGDFTRT\_Mod**

RID [BT2YC2WT013](#) (Expires on 01-20 11:45 am)

|                                 |                                                                                                                                       |
|---------------------------------|---------------------------------------------------------------------------------------------------------------------------------------|
| <b>Query ID</b>  cl 83420       | <b>Database Name</b> nr                                                                                                               |
| <b>Description</b> None         | <b>Description</b> All non-redundant GenBank CDS translations+PDB+SwissProt+PIR+PRF excluding environmental samples from WGS projects |
| <b>Molecule type</b> amino acid | <b>Program</b> BLASTP 2.2.30+ <a href="#">Citation</a>                                                                                |
| <b>Query Length</b> 21          |                                                                                                                                       |

Other reports: [Search Summary](#) [Taxonomy reports](#) [Distance tree of results](#) [Multiple alignment](#)

**New** DELTA-BLAST a more sensitive protein-protein search

**Graphic Summary**

Show Conserved Domains

Putative conserved domains have been detected, click on the image below for detailed results.

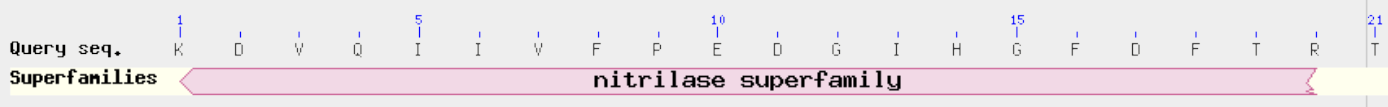

Distribution of 100 Blast Hits on the Query Sequence

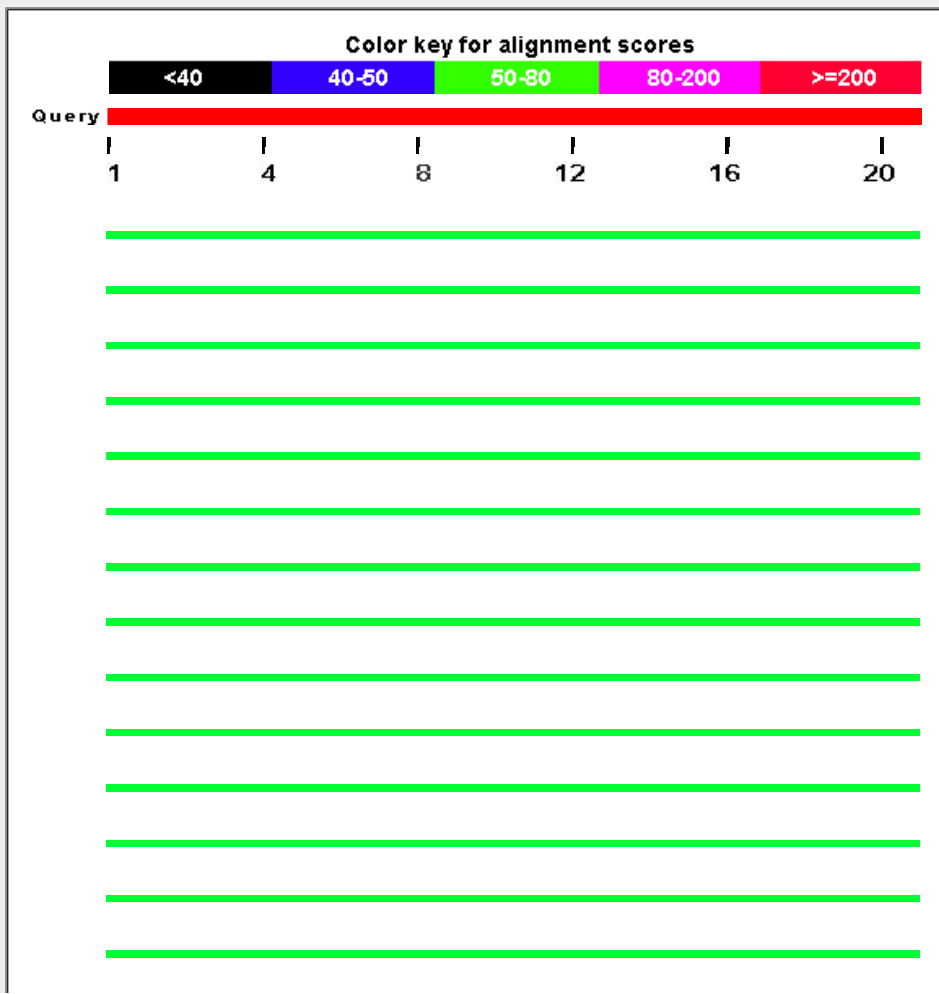

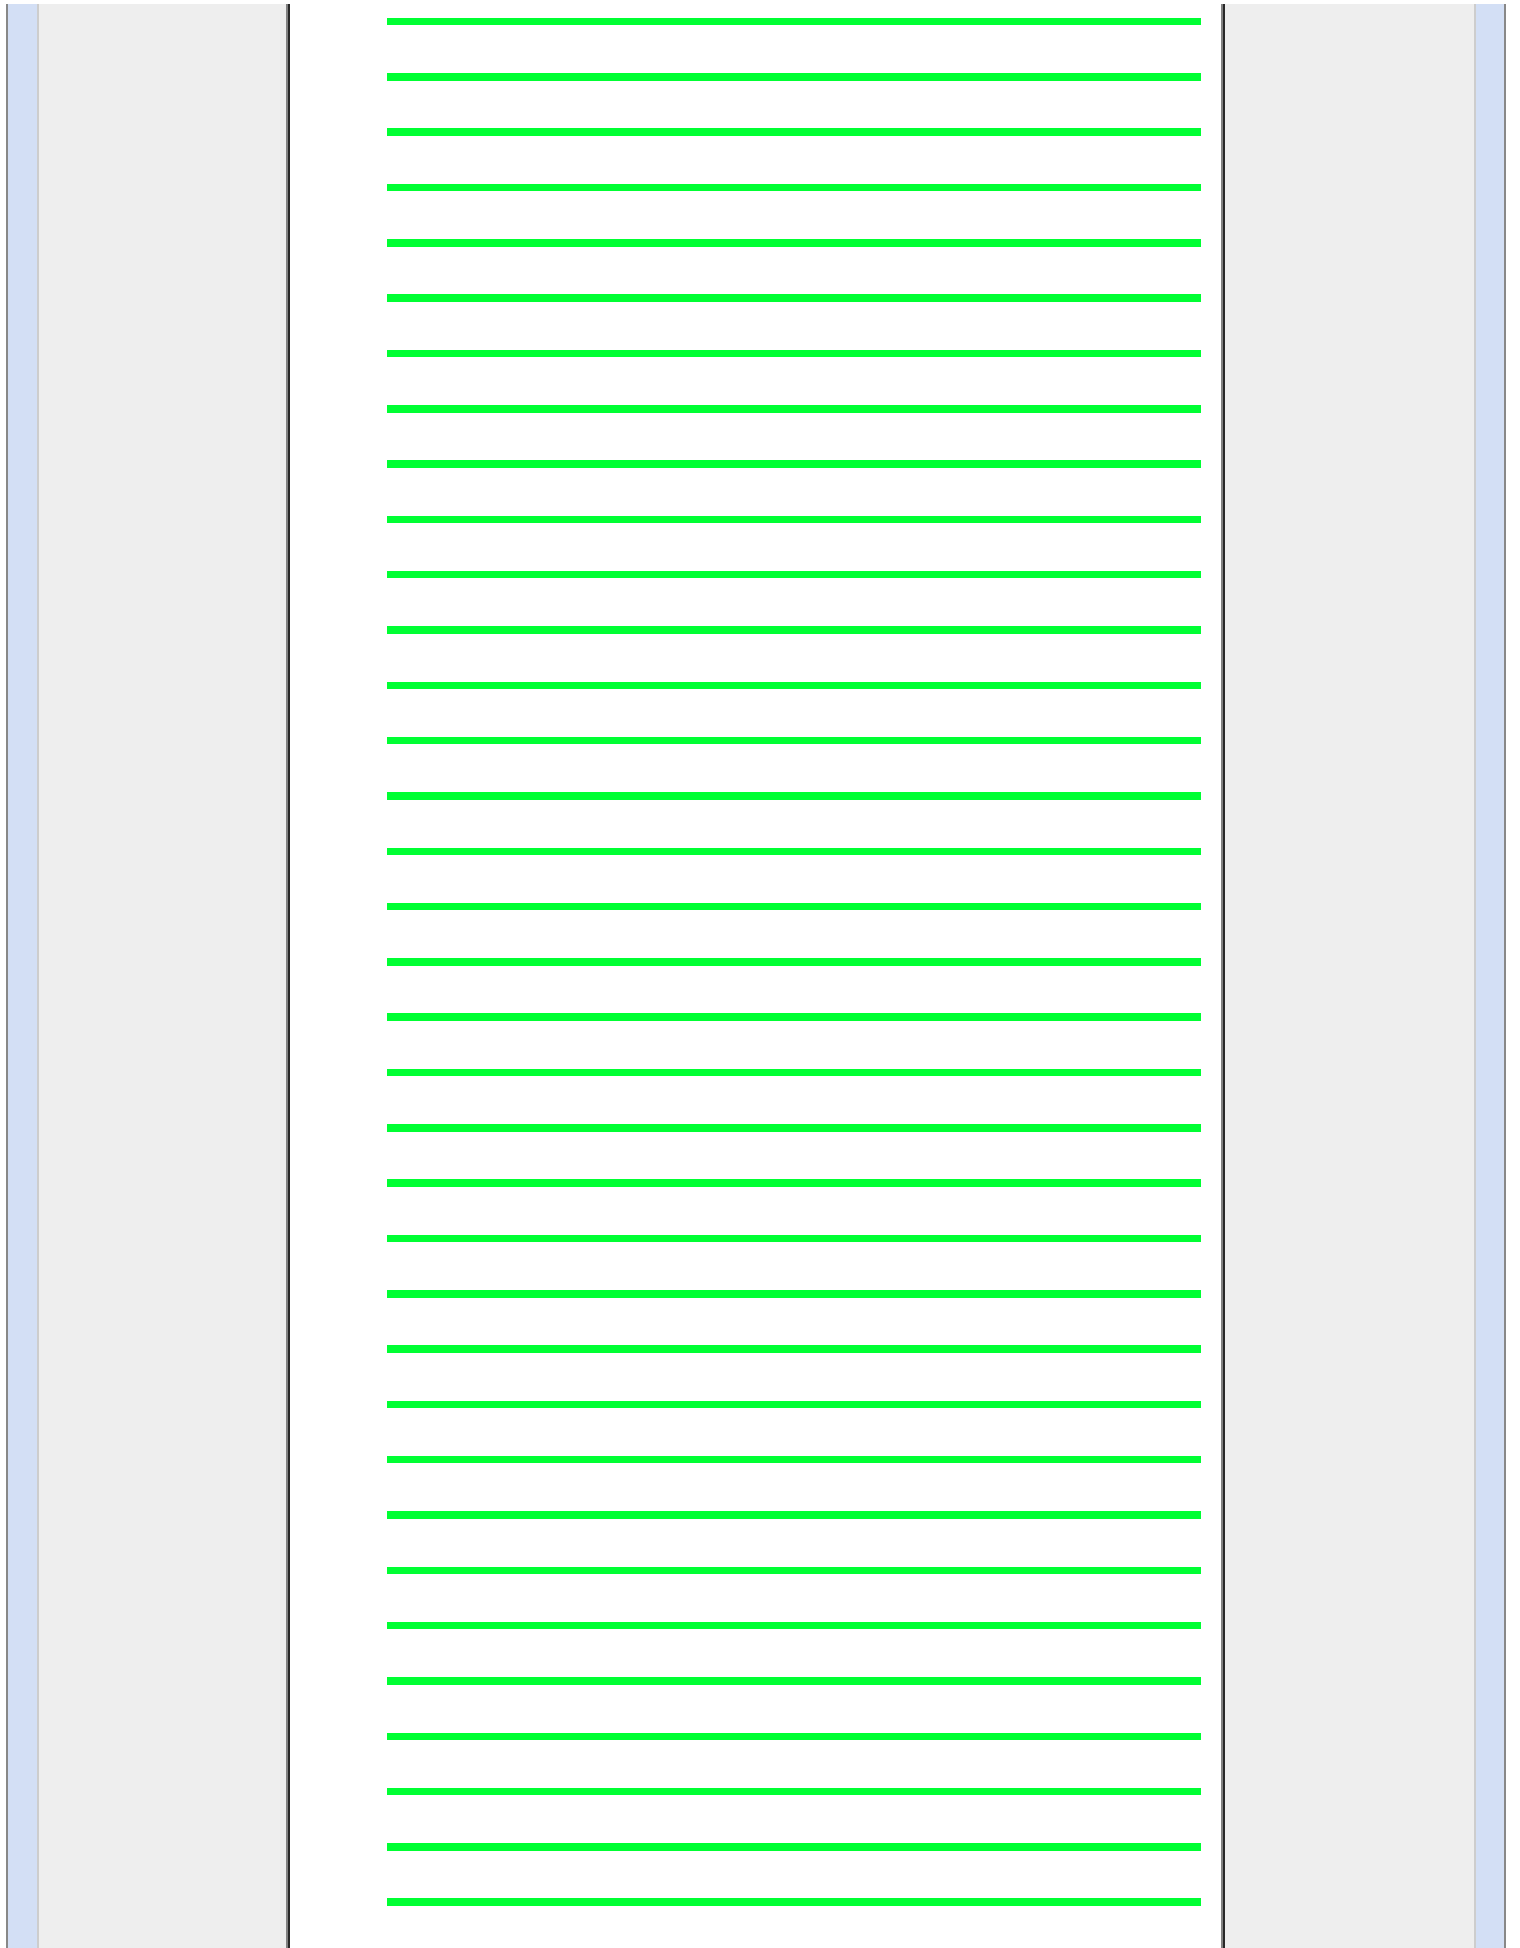

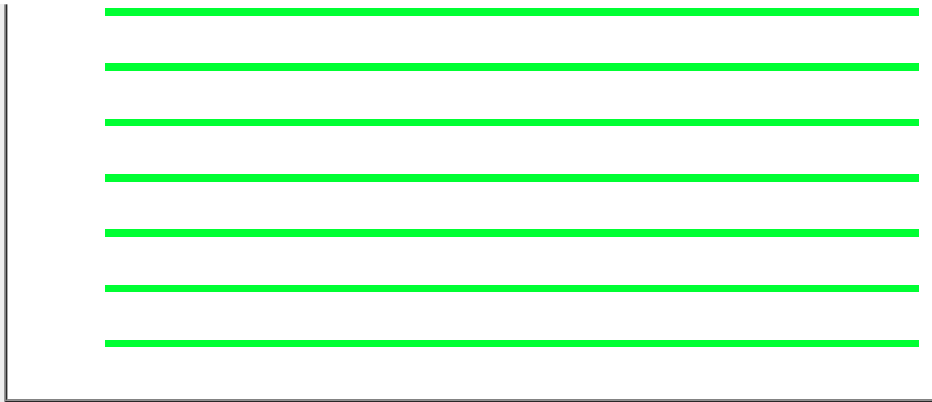

**Descriptions**

**Sequences producing significant alignments:**

Select: [All](#) [None](#) Selected:0

Alignments Download GenPept Graphics Distance tree of results Multiple alignment

| Description                                                                   | Max score | Total score | Query cover | E value | Ident | Accession                                   |
|-------------------------------------------------------------------------------|-----------|-------------|-------------|---------|-------|---------------------------------------------|
| <a href="#">biotinidase, isoform CRA_c [Homo sapiens]</a>                     | 69.8      | 69.8        | 100%        | 3e-12   | 95%   | <a href="#">gij119584660 EAW64256.1</a>     |
| <a href="#">biotinidase isoform 5 [Homo sapiens]</a>                          | 69.8      | 69.8        | 100%        | 3e-12   | 95%   | <a href="#">gij528524488 NP_001268655.1</a> |
| <a href="#">unnamed protein product [Homo sapiens]</a>                        | 69.8      | 69.8        | 100%        | 4e-12   | 95%   | <a href="#">gij221043776 BAH13565.1</a>     |
| <a href="#">biotinidase isoform 4 precursor [Homo sapiens]</a>                | 69.8      | 69.8        | 100%        | 4e-12   | 95%   | <a href="#">gij528524486 NP_001268654.1</a> |
| <a href="#">biotinidase precursor [Pan troglodytes]</a>                       | 69.8      | 69.8        | 100%        | 4e-12   | 95%   | <a href="#">gij697993457 NP_001289363.1</a> |
| <a href="#">PREDICTED: biotinidase isoform 1 [Gorilla gorilla gorilla]</a>    | 69.8      | 69.8        | 100%        | 4e-12   | 95%   | <a href="#">gij426339607 XP_004033737.1</a> |
| <a href="#">PREDICTED: biotinidase isoform X2 [Pan troglodytes]</a>           | 69.8      | 69.8        | 100%        | 4e-12   | 95%   | <a href="#">gij694900420 XP_009443239.1</a> |
| <a href="#">PREDICTED: biotinidase isoform X2 [Pan paniscus]</a>              | 69.8      | 69.8        | 100%        | 4e-12   | 95%   | <a href="#">gij675784344 XP_008949921.1</a> |
| <a href="#">PREDICTED: biotinidase isoform 3 [Gorilla gorilla gorilla]</a>    | 69.8      | 69.8        | 100%        | 4e-12   | 95%   | <a href="#">gij426339611 XP_004033739.1</a> |
| <a href="#">PREDICTED: biotinidase isoform 4 [Gorilla gorilla gorilla]</a>    | 69.8      | 69.8        | 100%        | 4e-12   | 95%   | <a href="#">gij426339613 XP_004033740.1</a> |
| <a href="#">biotinidase isoform 3 [Homo sapiens]</a>                          | 69.8      | 69.8        | 100%        | 4e-12   | 95%   | <a href="#">gij4557373 NP_000051.1</a>      |
| <a href="#">biotinidase isoform 1 [Homo sapiens]</a>                          | 69.8      | 69.8        | 100%        | 4e-12   | 95%   | <a href="#">gij528524481 NP_001268652.1</a> |
| <a href="#">biotinidase isoform 2 [Homo sapiens]</a>                          | 69.8      | 69.8        | 100%        | 4e-12   | 95%   | <a href="#">gij528524483 NP_001268653.1</a> |
| <a href="#">PREDICTED: biotinidase isoform 2 [Gorilla gorilla gorilla]</a>    | 69.8      | 69.8        | 100%        | 4e-12   | 95%   | <a href="#">gij426339609 XP_004033738.1</a> |
| <a href="#">PREDICTED: biotinidase isoform X1 [Pan troglodytes]</a>           | 69.8      | 69.8        | 100%        | 4e-12   | 95%   | <a href="#">gij410036604 XP_003950087.1</a> |
| <a href="#">PREDICTED: biotinidase isoform X1 [Pan paniscus]</a>              | 69.8      | 69.8        | 100%        | 4e-12   | 95%   | <a href="#">gij397511808 XP_003826257.1</a> |
| <a href="#">PREDICTED: biotinidase-like isoform X10 [Chinchilla lanigera]</a> | 65.1      | 65.1        | 100%        | 2e-10   | 90%   | <a href="#">gij533146084 XP_005387502.1</a> |
| <a href="#">unnamed protein product [Macaca fascicularis]</a>                 | 65.1      | 65.1        | 100%        | 2e-10   | 90%   | <a href="#">gij90077268 BAE88314.1</a>      |
| <a href="#">PREDICTED: biotinidase [Oryctolagus cuniculus]</a>                | 65.1      | 65.1        | 100%        | 2e-10   | 90%   | <a href="#">gij655852029 XP_008264256.1</a> |
| <a href="#">PREDICTED: biotinidase [Nannospalax galili]</a>                   | 65.1      | 65.1        | 100%        | 2e-10   | 90%   | <a href="#">gij674081213 XP_008848205.1</a> |
| <a href="#">RecName: Full=Biotinidase; Short=Biotinase; Flags: Precursor</a>  | 65.1      | 65.1        | 100%        | 2e-10   | 90%   | <a href="#">gij150421524 Q8CIF4.2</a>       |
| <a href="#">PREDICTED: biotinidase [Rhinopithecus roxellana]</a>              | 65.1      | 65.1        | 100%        | 2e-10   | 90%   | <a href="#">gij724960396 XP_010354361.1</a> |
| <a href="#">PREDICTED: biotinidase isoform X2 [Ursus maritimus]</a>           | 65.1      | 65.1        | 100%        | 2e-10   | 90%   | <a href="#">gij670981874 XP_008707139.1</a> |
| <a href="#">PREDICTED: biotinidase [Galeopterus variegatus]</a>               | 65.1      | 65.1        | 100%        | 2e-10   | 90%   | <a href="#">gij667288263 XP_008576771.1</a> |
| <a href="#">PREDICTED: biotinidase [Jaculus jaculus]</a>                      | 65.1      | 65.1        | 100%        | 2e-10   | 90%   | <a href="#">gij507555213 XP_004661377.1</a> |
| <a href="#">PREDICTED: biotinidase isoform X2 [Microtus ochrogaster]</a>      | 65.1      | 65.1        | 100%        | 2e-10   | 90%   | <a href="#">gij532009812 XP_005348714.1</a> |
| <a href="#">PREDICTED: biotinidase isoform X2 [Peromyscus maniculatus]</a>    | 65.1      | 65.1        | 100%        | 2e-10   | 90%   | <a href="#">gij589967610 XP_006996306.1</a> |
| <a href="#">PREDICTED: biotinidase-like isoform X5 [Chinchilla lanigera]</a>  | 65.1      | 65.1        | 100%        | 2e-10   | 90%   | <a href="#">gij533146074 XP_005387497.1</a> |

|                                                                                |      |      |      |       |     |                                             |
|--------------------------------------------------------------------------------|------|------|------|-------|-----|---------------------------------------------|
| <a href="#">PREDICTED: biotinidase [Mesocricetus auratus]</a>                  | 65.1 | 65.1 | 100% | 2e-10 | 90% | <a href="#">gij524955500 XP_005077724.1</a> |
| <a href="#">PREDICTED: biotinidase isoform X2 [Chlorocebus sabaeus]</a>        | 65.1 | 65.1 | 100% | 2e-10 | 90% | <a href="#">gij635085523 XP_008007381.1</a> |
| <a href="#">PREDICTED: biotinidase isoform X2 [Physeter catodon]</a>           | 65.1 | 65.1 | 100% | 2e-10 | 90% | <a href="#">gij593711507 XP_007102308.1</a> |
| <a href="#">PREDICTED: biotinidase isoform X4 [Canis lupus familiaris]</a>     | 65.1 | 65.1 | 100% | 2e-10 | 90% | <a href="#">gij545538859 XP_005634450.1</a> |
| <a href="#">PREDICTED: biotinidase isoform X3 [Equus caballus]</a>             | 65.1 | 65.1 | 100% | 2e-10 | 90% | <a href="#">gij545189350 XP_005600979.1</a> |
| <a href="#">PREDICTED: biotinidase isoform X2 [Macaca fascicularis]</a>        | 65.1 | 65.1 | 100% | 2e-10 | 90% | <a href="#">gij544411158 XP_005545768.1</a> |
| <a href="#">PREDICTED: biotinidase isoform X1 [Cavia porcellus]</a>            | 65.1 | 65.1 | 100% | 2e-10 | 90% | <a href="#">gij514481133 XP_003480063.2</a> |
| <a href="#">PREDICTED: biotinidase [Ceratotherium simum simum]</a>             | 65.1 | 65.1 | 100% | 2e-10 | 90% | <a href="#">gij478490156 XP_004419451.1</a> |
| <a href="#">PREDICTED: biotinidase isoform 2 [Odobenus rosmarus diverc</a>     | 65.1 | 65.1 | 100% | 2e-10 | 90% | <a href="#">gij472379495 XP_004409157.1</a> |
| <a href="#">PREDICTED: LOW QUALITY PROTEIN: biotinidase [Tursiops</a>          | 65.1 | 65.1 | 100% | 2e-10 | 90% | <a href="#">gij470628904 XP_004321284.1</a> |
| <a href="#">PREDICTED: biotinidase [Orcinus orca]</a>                          | 65.1 | 65.1 | 100% | 2e-10 | 90% | <a href="#">gij466019817 XP_004271983.1</a> |
| <a href="#">PREDICTED: biotinidase isoform X3 [Saimiri boliviensis bolivie</a> | 65.1 | 65.1 | 100% | 2e-10 | 90% | <a href="#">gij725560828 XP_010333963.1</a> |
| <a href="#">PREDICTED: biotinidase isoform X2 [Papio anubis]</a>               | 65.1 | 65.1 | 100% | 2e-10 | 90% | <a href="#">gij685527526 XP_009200021.1</a> |
| <a href="#">PREDICTED: biotinidase isoform X3 [Pongo abelii]</a>               | 65.1 | 65.1 | 100% | 2e-10 | 90% | <a href="#">gij686713703 XP_009237577.1</a> |
| <a href="#">biotinidase precursor [Mus musculus]</a>                           | 65.1 | 65.1 | 100% | 2e-10 | 90% | <a href="#">gij13384648 NP_079571.1</a>     |
| <a href="#">Biotinidase [Heterocephalus glaber]</a>                            | 65.1 | 65.1 | 100% | 2e-10 | 90% | <a href="#">gij351707565 EHB10484.1</a>     |
| <a href="#">PREDICTED: biotinidase isoform X1 [Ursus maritimus]</a>            | 65.1 | 65.1 | 100% | 2e-10 | 90% | <a href="#">gij670981872 XP_008707130.1</a> |
| <a href="#">PREDICTED: biotinidase [Equus przewalskii]</a>                     | 65.1 | 65.1 | 100% | 2e-10 | 90% | <a href="#">gij664753751 XP_008534346.1</a> |
| <a href="#">PREDICTED: biotinidase isoform X1 [Chlorocebus sabaeus]</a>        | 65.1 | 65.1 | 100% | 2e-10 | 90% | <a href="#">gij635085521 XP_008007380.1</a> |
| <a href="#">PREDICTED: biotinidase isoform X1 [Felis catus]</a>                | 65.1 | 65.1 | 100% | 2e-10 | 90% | <a href="#">gij587000359 XP_003992187.2</a> |
| <a href="#">PREDICTED: biotinidase isoform X2 [Felis catus]</a>                | 65.1 | 65.1 | 100% | 2e-10 | 90% | <a href="#">gij587000357 XP_006936495.1</a> |
| <a href="#">PREDICTED: biotinidase isoform X3 [Leptonychotes weddellii]</a>    | 65.1 | 65.1 | 100% | 2e-10 | 90% | <a href="#">gij585186600 XP_006744787.1</a> |
| <a href="#">PREDICTED: biotinidase isoform X2 [Leptonychotes weddellii]</a>    | 65.1 | 65.1 | 100% | 2e-10 | 90% | <a href="#">gij585186598 XP_006744786.1</a> |
| <a href="#">PREDICTED: biotinidase isoform X3 [Canis lupus familiaris]</a>     | 65.1 | 65.1 | 100% | 2e-10 | 90% | <a href="#">gij545538857 XP_005634449.1</a> |
| <a href="#">PREDICTED: biotinidase isoform X2 [Canis lupus familiaris]</a>     | 65.1 | 65.1 | 100% | 2e-10 | 90% | <a href="#">gij545538855 XP_005634448.1</a> |
| <a href="#">PREDICTED: biotinidase isoform X2 [Equus caballus]</a>             | 65.1 | 65.1 | 100% | 2e-10 | 90% | <a href="#">gij545189348 XP_005600978.1</a> |
| <a href="#">PREDICTED: biotinidase [Mustela putorius furo]</a>                 | 65.1 | 65.1 | 100% | 2e-10 | 90% | <a href="#">gij511908359 XP_004773614.1</a> |
| <a href="#">PREDICTED: biotinidase isoform 1 [Odobenus rosmarus diverc</a>     | 65.1 | 65.1 | 100% | 2e-10 | 90% | <a href="#">gij472379493 XP_004409156.1</a> |
| <a href="#">PREDICTED: biotinidase [Trichechus manatus latirostris]</a>        | 65.1 | 65.1 | 100% | 2e-10 | 90% | <a href="#">gij471407481 XP_004385327.1</a> |
| <a href="#">PREDICTED: biotinidase isoform X2 [Saimiri boliviensis bolivie</a> | 65.1 | 65.1 | 100% | 2e-10 | 90% | <a href="#">gij403265544 XP_003924991.1</a> |
| <a href="#">PREDICTED: biotinidase-like [Ailuropoda melanoleuca]</a>           | 65.1 | 65.1 | 100% | 2e-10 | 90% | <a href="#">gij301759093 XP_002915396.1</a> |
| <a href="#">PREDICTED: biotinidase [Condylura cristata]</a>                    | 65.1 | 65.1 | 100% | 2e-10 | 90% | <a href="#">gij507976256 XP_004692357.1</a> |
| <a href="#">PREDICTED: biotinidase [Fukomys damarensis]</a>                    | 65.1 | 65.1 | 100% | 2e-10 | 90% | <a href="#">gij731285322 XP_010611073.1</a> |
| <a href="#">PREDICTED: biotinidase isoform X2 [Pongo abelii]</a>               | 65.1 | 65.1 | 100% | 2e-10 | 90% | <a href="#">gij686713701 XP_009237576.1</a> |
| <a href="#">PREDICTED: biotinidase isoform X1 [Cricetulus griseus]</a>         | 65.1 | 65.1 | 100% | 2e-10 | 90% | <a href="#">gij354465853 XP_003495391.1</a> |
| <a href="#">PREDICTED: biotinidase [Orycteropus afer afer]</a>                 | 65.1 | 65.1 | 100% | 2e-10 | 90% | <a href="#">gij634822252 XP_007934900.1</a> |
| <a href="#">PREDICTED: biotinidase isoform X1 [Physeter catodon]</a>           | 65.1 | 65.1 | 100% | 2e-10 | 90% | <a href="#">gij593711505 XP_007102307.1</a> |
| <a href="#">PREDICTED: biotinidase-like isoform X1 [Chinchilla lanigera]</a>   | 65.1 | 65.1 | 100% | 2e-10 | 90% | <a href="#">gij533146066 XP_005387493.1</a> |
| <a href="#">PREDICTED: biotinidase isoform X3 [Heterocephalus glaber]</a>      | 65.1 | 65.1 | 100% | 2e-10 | 90% | <a href="#">gij512886961 XP_004896459.1</a> |
| <a href="#">PREDICTED: biotinidase isoform X1 [Leptonychotes weddellii]</a>    | 65.1 | 65.1 | 100% | 2e-10 | 90% | <a href="#">gij585186596 XP_006744785.1</a> |
| <a href="#">PREDICTED: biotinidase isoform X1 [Canis lupus familiaris]</a>     | 65.1 | 65.1 | 100% | 2e-10 | 90% | <a href="#">gij545538853 XP_005634447.1</a> |
| <a href="#">PREDICTED: biotinidase [Otolemur garnettii]</a>                    | 65.1 | 65.1 | 100% | 2e-10 | 90% | <a href="#">gij395816560 XP_003781769.1</a> |
| <a href="#">PREDICTED: biotinidase isoform X1 [Pongo abelii]</a>               | 65.1 | 65.1 | 100% | 2e-10 | 90% | <a href="#">gij395734130 XP_003776360.1</a> |
| <a href="#">hypothetical protein EGM_11114 [Macaca fascicularis]</a>           | 65.1 | 65.1 | 100% | 2e-10 | 90% | <a href="#">gij355747075 EHH51689.1</a>     |
| <a href="#">hypothetical protein EGK_12122 [Macaca mulatta]</a>                | 65.1 | 65.1 | 100% | 2e-10 | 90% | <a href="#">gij355560049 EHH16777.1</a>     |
| <a href="#">PREDICTED: biotinidase isoform X1 [Microtus ochrogaster]</a>       | 65.1 | 65.1 | 100% | 2e-10 | 90% | <a href="#">gij532009810 XP_005348713.1</a> |

|                                                                                 |      |      |      |       |     |                                             |
|---------------------------------------------------------------------------------|------|------|------|-------|-----|---------------------------------------------|
| <a href="#">PREDICTED: biotinidase isoform X1 [Equus caballus]</a>              | 65.1 | 65.1 | 100% | 2e-10 | 90% | <a href="#">gij545189346 XP_005600977.1</a> |
| <a href="#">PREDICTED: biotinidase isoform X2 [Cavia porcellus]</a>             | 65.1 | 65.1 | 100% | 2e-10 | 90% | <a href="#">gij514481131 XP_005008361.1</a> |
| <a href="#">PREDICTED: biotinidase isoform X1 [Saimiri boliviensis bolivie]</a> | 65.1 | 65.1 | 100% | 2e-10 | 90% | <a href="#">gij725560825 XP_010333962.1</a> |
| <a href="#">PREDICTED: biotinidase [Lipotes vexillifer]</a>                     | 65.1 | 65.1 | 100% | 2e-10 | 90% | <a href="#">gij602721076 XP_007470691.1</a> |
| <a href="#">PREDICTED: biotinidase isoform X1 [Heterocephalus glaber]</a>       | 65.1 | 65.1 | 100% | 2e-10 | 90% | <a href="#">gij512886949 XP_004896457.1</a> |
| <a href="#">PREDICTED: biotinidase isoform X1 [Balaenoptera acutorostra]</a>    | 65.1 | 65.1 | 100% | 2e-10 | 90% | <a href="#">gij594624940 XP_007167058.1</a> |
| <a href="#">PREDICTED: biotinidase isoform X1 [Papio anubis]</a>                | 65.1 | 65.1 | 100% | 2e-10 | 90% | <a href="#">gij685527524 XP_009200020.1</a> |
| <a href="#">PREDICTED: biotinidase isoform X1 [Macaca fascicularis]</a>         | 65.1 | 65.1 | 100% | 2e-10 | 90% | <a href="#">gij544411156 XP_005545767.1</a> |
| <a href="#">PREDICTED: biotinidase isoform X3 [Balaenoptera acutorostra]</a>    | 65.1 | 65.1 | 100% | 2e-10 | 90% | <a href="#">gij594624944 XP_007167060.1</a> |
| <a href="#">PREDICTED: biotinidase-like [Octodon degus]</a>                     | 65.1 | 65.1 | 100% | 2e-10 | 90% | <a href="#">gij507646799 XP_004631734.1</a> |
| <a href="#">PREDICTED: biotinidase [Nomascus leucogenys]</a>                    | 63.4 | 63.4 | 90%  | 6e-10 | 95% | <a href="#">gij332232450 XP_003265417.1</a> |
| <a href="#">PREDICTED: biotinidase isoform X2 [Cricetulus griseus]</a>          | 63.4 | 63.4 | 90%  | 6e-10 | 95% | <a href="#">gij625181248 XP_007632389.1</a> |
| <a href="#">PREDICTED: biotinidase isoform X1 [Peromyscus maniculatus]</a>      | 63.4 | 63.4 | 90%  | 6e-10 | 95% | <a href="#">gij589967608 XP_006996305.1</a> |
| <a href="#">PREDICTED: biotinidase isoform X15 [Tupaia chinensis]</a>           | 63.4 | 63.4 | 90%  | 6e-10 | 95% | <a href="#">gij562886680 XP_006170761.1</a> |
| <a href="#">PREDICTED: biotinidase isoform X4 [Tupaia chinensis]</a>            | 63.4 | 63.4 | 90%  | 6e-10 | 95% | <a href="#">gij562886658 XP_006170750.1</a> |
| <a href="#">unnamed protein product [Mus musculus]</a>                          | 63.4 | 63.4 | 90%  | 6e-10 | 95% | <a href="#">gij74183082 BAE22509.1</a>      |
| <a href="#">PREDICTED: biotinidase [Panthera tigris altaica]</a>                | 63.4 | 63.4 | 90%  | 6e-10 | 95% | <a href="#">gij591322659 XP_007087428.1</a> |
| <a href="#">PREDICTED: biotinidase [Macaca mulatta]</a>                         | 63.4 | 63.4 | 90%  | 6e-10 | 95% | <a href="#">gij297286947 XP_001083201.2</a> |
| <a href="#">PREDICTED: biotinidase isoform X3 [Tupaia chinensis]</a>            | 63.4 | 63.4 | 90%  | 6e-10 | 95% | <a href="#">gij562886656 XP_006170749.1</a> |
| <a href="#">Biotinidase [Fukomys damarensis]</a>                                | 63.4 | 63.4 | 90%  | 6e-10 | 95% | <a href="#">gij676263045 KFO19807.1</a>     |
| <a href="#">biotinidase [Cricetulus griseus]</a>                                | 63.4 | 63.4 | 90%  | 6e-10 | 95% | <a href="#">gij537261432 ERE90059.1</a>     |
| <a href="#">PREDICTED: biotinidase isoform X2 [Tupaia chinensis]</a>            | 63.4 | 63.4 | 90%  | 6e-10 | 95% | <a href="#">gij562886654 XP_006170748.1</a> |
| <a href="#">PREDICTED: biotinidase isoform X1 [Tupaia chinensis]</a>            | 63.4 | 63.4 | 90%  | 6e-10 | 95% | <a href="#">gij562886652 XP_006170747.1</a> |
| <a href="#">PREDICTED: biotinidase-like isoform X2 [Sus scrofa]</a>             | 62.1 | 62.1 | 95%  | 2e-09 | 90% | <a href="#">gij545860928 XP_005669335.1</a> |
| <a href="#">PREDICTED: biotinidase-like isoform X1 [Sus scrofa]</a>             | 62.1 | 62.1 | 95%  | 2e-09 | 90% | <a href="#">gij350590965 XP_003483176.1</a> |
| <a href="#">PREDICTED: biotinidase-like isoform X1 [Sus scrofa]</a>             | 62.1 | 62.1 | 95%  | 2e-09 | 90% | <a href="#">gij350590959 XP_003483174.1</a> |

## Alignments

[Download](#) [GenPept](#) [Graphics](#)

[Next](#) [Previous](#) [Descriptions](#)

biotinidase, isoform CRA\_c [Homo sapiens]

Sequence ID: [gij119584660|gb|EAW64256.1](#) Length: 159 Number of Matches: 1

Range 1: 83 to 103 [GenPept](#) [Graphics](#)

[Next Match](#) [Previous Match](#)

| Score          | Expect | Identities | Positives   | Gaps     |
|----------------|--------|------------|-------------|----------|
| 69.8 bits(157) | 3e-12  | 20/21(95%) | 21/21(100%) | 0/21(0%) |

Query 1 KDVQIIVFPEDGIHGDFTRT 21  
 KDVQIIVFPEDGIHGF+TRT  
 Sbjct 83 KDVQIIVFPEDGIHGFNTRT 103

### Related Information

[Gene](#) - associated gene details

[Download](#) [GenPept](#) [Graphics](#)

[Next](#) [Previous](#) [Descriptions](#)

biotinidase isoform 5 [Homo sapiens]

Sequence ID: [gij528524488|ref|NP\\_001268655.1](#) Length: 179 Number of Matches: 1

Range 1: 103 to 123 [GenPept](#) [Graphics](#)

[Next Match](#) [Previous Match](#)

| Score          | Expect | Identities | Positives   | Gaps     |
|----------------|--------|------------|-------------|----------|
| 69.8 bits(157) | 3e-12  | 20/21(95%) | 21/21(100%) | 0/21(0%) |

Query 1 KDVQIIVFPEDGIHGDFTRT 21  
 KDVQIIVFPEDGIHGF+TRT  
 Sbjct 103 KDVQIIVFPEDGIHGFNTRT 123

### Related Information

[Gene](#) - associated gene details

[Map Viewer](#) - aligned genomic context

[Download](#) [GenPept](#) [Graphics](#)

[Next](#) [Previous](#) [Descriptions](#)

unnamed protein product [Homo sapiens]

Sequence ID: [gi|221043776|dbj|BAH13565.1](#) Length: 523 Number of Matches: 1

Range 1: 83 to 103 [GenPept](#) [Graphics](#)

[Next Match](#) [Previous Match](#)

| Score          | Expect | Identities | Positives   | Gaps     |
|----------------|--------|------------|-------------|----------|
| 69.8 bits(157) | 4e-12  | 20/21(95%) | 21/21(100%) | 0/21(0%) |

```
Query 1 KDVQIIVFPEDGIHGFDFTRT 21
        KDVQIIVFPEDGIHGF+FTRT
Sbjct 83 KDVQIIVFPEDGIHGFNFTRT 103
```

**Related Information**

[Gene](#) - associated gene details

[Download](#) [GenPept](#) [Graphics](#)

[Next](#) [Previous](#) [Descriptions](#)

biotinidase isoform 4 precursor [Homo sapiens]

Sequence ID: [gi|528524486|ref|NP\\_001268654.1](#) Length: 523 Number of Matches: 1

[See 3 more title\(s\)](#)

Range 1: 83 to 103 [GenPept](#) [Graphics](#)

[Next Match](#) [Previous Match](#)

| Score          | Expect | Identities | Positives   | Gaps     |
|----------------|--------|------------|-------------|----------|
| 69.8 bits(157) | 4e-12  | 20/21(95%) | 21/21(100%) | 0/21(0%) |

```
Query 1 KDVQIIVFPEDGIHGFDFTRT 21
        KDVQIIVFPEDGIHGF+FTRT
Sbjct 83 KDVQIIVFPEDGIHGFNFTRT 103
```

**Related Information**

[Gene](#) - associated gene details

[Map Viewer](#) - aligned genomic context

[Identical Proteins](#) - Proteins identical to the subject

[Download](#) [GenPept](#) [Graphics](#)

[Next](#) [Previous](#) [Descriptions](#)

biotinidase precursor [Pan troglodytes]

Sequence ID: [gi|697993457|ref|NP\\_001289363.1](#) Length: 523 Number of Matches: 1

[See 1 more title\(s\)](#)

Range 1: 83 to 103 [GenPept](#) [Graphics](#)

[Next Match](#) [Previous Match](#)

| Score          | Expect | Identities | Positives   | Gaps     |
|----------------|--------|------------|-------------|----------|
| 69.8 bits(157) | 4e-12  | 20/21(95%) | 21/21(100%) | 0/21(0%) |

```
Query 1 KDVQIIVFPEDGIHGFDFTRT 21
        KDVQIIVFPEDGIHGF+FTRT
Sbjct 83 KDVQIIVFPEDGIHGFNFTRT 103
```

**Related Information**

[Gene](#) - associated gene details

[Map Viewer](#) - aligned genomic context

[Identical Proteins](#) - Proteins identical to the subject

BLAST is a registered trademark of the National Library of Medicine.

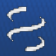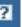

▶ [NCBI/ BLAST/ blastp suite/ Formatting Results - B920AZP301R](#)

**i** Your search parameters were adjusted to search for a short input sequence.

[Edit and Resubmit](#) [Save Search Strategies](#) ▶ [Formatting options](#) ▶ [Download](#)

[YouTube](#) [How to read this page](#) [Blast report description](#)

**BTD\_KDVQIIVFPEDGIHGTFNTRT\_NonMod**

RID [B920AZP301R](#) (Expires on 01-14 09:50 am)

**Query ID** |cl|84488  
**Description** None  
**Molecule type** amino acid  
**Query Length** 21

**Database Name** nr  
**Description** All non-redundant GenBank CDS translations+PDB+SwissProt+PIR excluding environmental samples from WGS projects  
**Program** BLASTP 2.2.30+ ▶ [Citation](#)

Other reports: ▶ [Search Summary](#) [[Taxonomy reports](#)] [[Distance tree of results](#)] [[Multiple alignment](#)]

**Graphic Summary**

**Show Conserved Domains**

Putative conserved domains have been detected, click on the image below for detailed results.

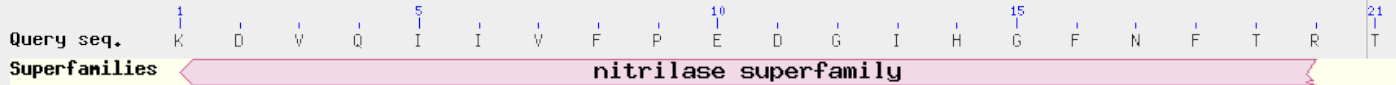

Distribution of 100 Blast Hits on the Query Sequence

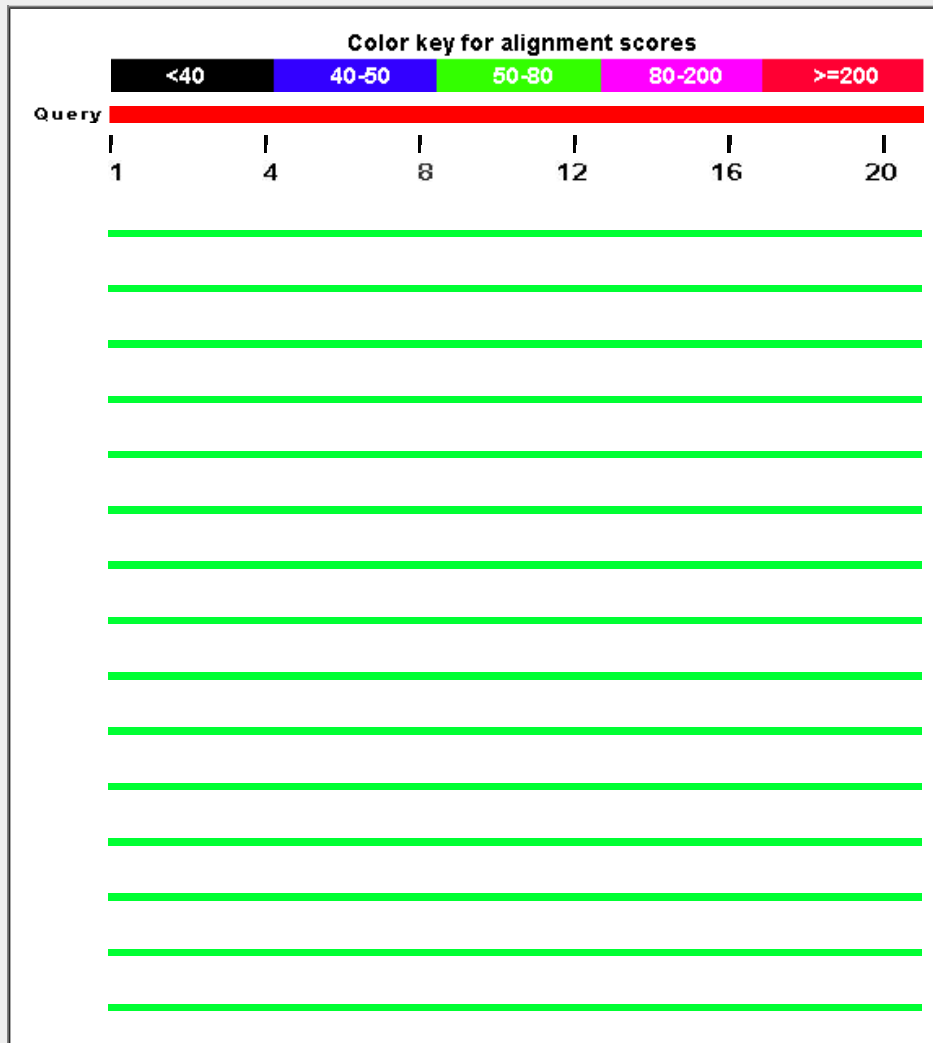

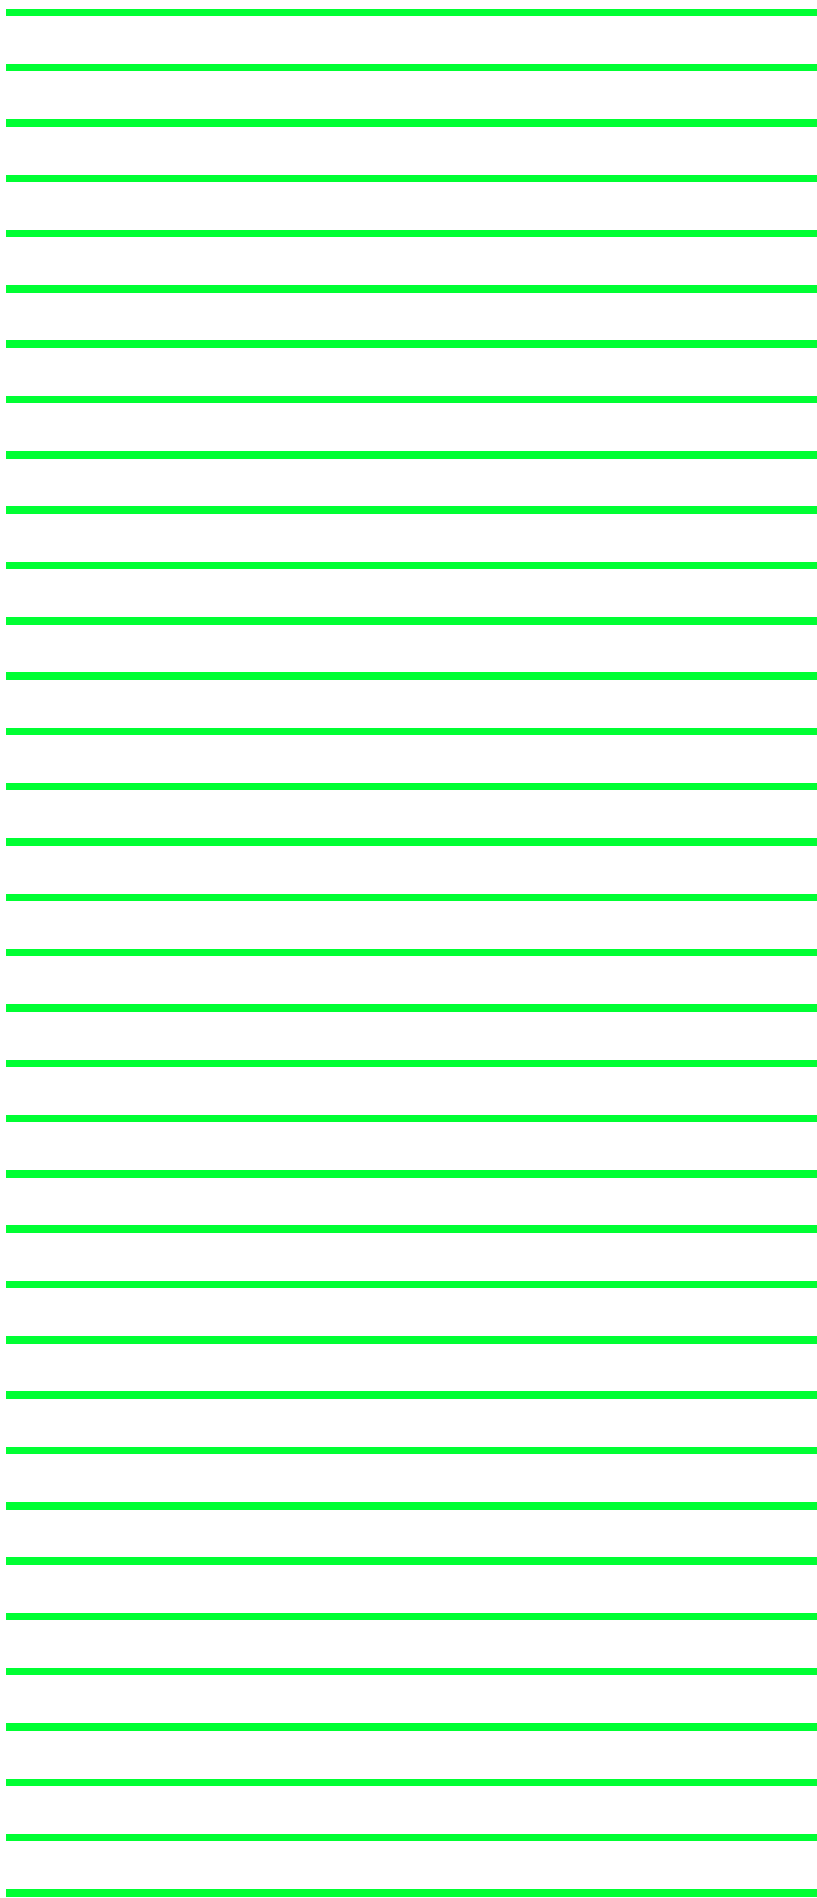



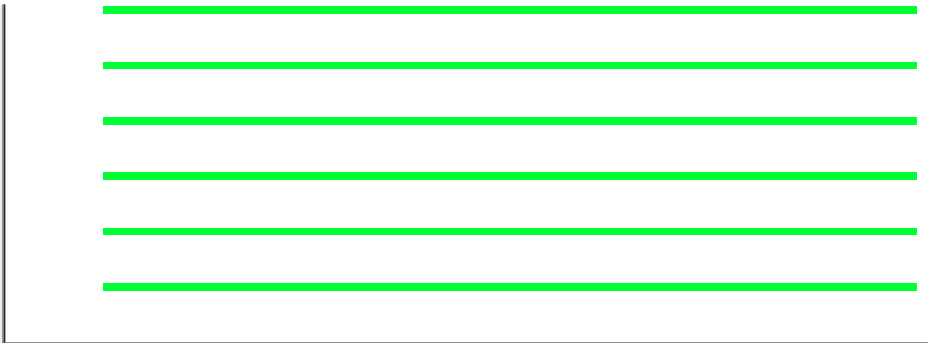

**Descriptions**

**Sequences producing significant alignments:**

Select: [All](#) [None](#) Selected:0

[Alignments](#)
[Download](#)
[GenPept](#)
[Graphics](#)
[Distance tree of results](#)
[Multiple alignment](#)

| Description                                                                                 | Max score | Total score | Query cover | E value | Ident | Accession                                   |
|---------------------------------------------------------------------------------------------|-----------|-------------|-------------|---------|-------|---------------------------------------------|
| <a href="#">biotinidase isoform CRA_c [Homo sapiens]</a>                                    | 72.3      | 72.3        | 100%        | 3e-13   | 100%  | <a href="#">gi 119584660 FAW64256.1</a>     |
| <a href="#">biotinidase isoform 5 [Homo sapiens]</a>                                        | 72.3      | 72.3        | 100%        | 3e-13   | 100%  | <a href="#">gi 528524488 NP_001268655.1</a> |
| <a href="#">unnamed protein product [Homo sapiens]</a>                                      | 72.3      | 72.3        | 100%        | 5e-13   | 100%  | <a href="#">gi 221043776 BAH13565.1</a>     |
| <a href="#">biotinidase isoform 4 precursor [Homo sapiens]</a>                              | 72.3      | 72.3        | 100%        | 5e-13   | 100%  | <a href="#">gi 528524486 NP_001268654.1</a> |
| <a href="#">biotinidase precursor [Pan troglodytes]</a>                                     | 72.3      | 72.3        | 100%        | 5e-13   | 100%  | <a href="#">gi 697993457 NP_001289363.1</a> |
| <a href="#">PREDICTED: biotinidase isoform 1 [Gorilla gorilla gorilla]</a>                  | 72.3      | 72.3        | 100%        | 5e-13   | 100%  | <a href="#">gi 426339607 XP_004033737.1</a> |
| <a href="#">PREDICTED: biotinidase isoform X2 [Pan troglodytes]</a>                         | 72.3      | 72.3        | 100%        | 5e-13   | 100%  | <a href="#">gi 694900420 XP_009443239.1</a> |
| <a href="#">PREDICTED: biotinidase isoform X2 [Pan paniscus]</a>                            | 72.3      | 72.3        | 100%        | 5e-13   | 100%  | <a href="#">gi 675784344 XP_008949921.1</a> |
| <a href="#">PREDICTED: biotinidase isoform 3 [Gorilla gorilla gorilla]</a>                  | 72.3      | 72.3        | 100%        | 5e-13   | 100%  | <a href="#">gi 426339611 XP_004033739.1</a> |
| <a href="#">PREDICTED: biotinidase isoform 4 [Gorilla gorilla gorilla]</a>                  | 72.3      | 72.3        | 100%        | 5e-13   | 100%  | <a href="#">gi 426339613 XP_004033740.1</a> |
| <a href="#">biotinidase isoform 3 [Homo sapiens]</a>                                        | 72.3      | 72.3        | 100%        | 5e-13   | 100%  | <a href="#">gi 4557373 NP_000051.1</a>      |
| <a href="#">biotinidase isoform 1 [Homo sapiens]</a>                                        | 72.3      | 72.3        | 100%        | 5e-13   | 100%  | <a href="#">gi 528524481 NP_001268652.1</a> |
| <a href="#">biotinidase isoform 2 [Homo sapiens]</a>                                        | 72.3      | 72.3        | 100%        | 5e-13   | 100%  | <a href="#">gi 528524483 NP_001268653.1</a> |
| <a href="#">PREDICTED: biotinidase isoform 2 [Gorilla gorilla gorilla]</a>                  | 72.3      | 72.3        | 100%        | 5e-13   | 100%  | <a href="#">gi 426339609 XP_004033738.1</a> |
| <a href="#">PREDICTED: biotinidase isoform X1 [Pan troglodytes]</a>                         | 72.3      | 72.3        | 100%        | 5e-13   | 100%  | <a href="#">gi 410036604 XP_003950087.1</a> |
| <a href="#">PREDICTED: biotinidase isoform X1 [Pan paniscus]</a>                            | 72.3      | 72.3        | 100%        | 5e-13   | 100%  | <a href="#">gi 397511808 XP_003826257.1</a> |
| <a href="#">PREDICTED: biotinidase-like isoform X10 [Chinchilla lanigera]</a>               | 67.7      | 67.7        | 100%        | 2e-11   | 95%   | <a href="#">gi 533146084 XP_005387502.1</a> |
| <a href="#">unnamed protein product [Macaca fascicularis]</a>                               | 67.7      | 67.7        | 100%        | 2e-11   | 95%   | <a href="#">gi 90077268 BAE88314.1</a>      |
| <a href="#">PREDICTED: biotinidase [Oryctolagus cuniculus]</a>                              | 67.7      | 67.7        | 100%        | 2e-11   | 95%   | <a href="#">gi 655852029 XP_008264256.1</a> |
| <a href="#">PREDICTED: biotinidase [Nannospalax galili]</a>                                 | 67.7      | 67.7        | 100%        | 2e-11   | 95%   | <a href="#">gi 674081213 XP_008848205.1</a> |
| <a href="#">RecName: Full=Biotinidase; Short=Biotinase; Flags: Precursor [Mus musculus]</a> | 67.7      | 67.7        | 100%        | 2e-11   | 95%   | <a href="#">gi 150421524 Q8CIF4.2</a>       |
| <a href="#">PREDICTED: biotinidase [Rhinopithecus roxellana]</a>                            | 67.7      | 67.7        | 100%        | 2e-11   | 95%   | <a href="#">gi 724960396 XP_010354361.1</a> |
| <a href="#">PREDICTED: biotinidase isoform X2 [Ursus maritimus]</a>                         | 67.7      | 67.7        | 100%        | 2e-11   | 95%   | <a href="#">gi 670981874 XP_008707139.1</a> |
| <a href="#">PREDICTED: biotinidase [Galeopterus variegatus]</a>                             | 67.7      | 67.7        | 100%        | 2e-11   | 95%   | <a href="#">gi 667288263 XP_008576771.1</a> |
| <a href="#">PREDICTED: biotinidase [Jaculus jaculus]</a>                                    | 67.7      | 67.7        | 100%        | 2e-11   | 95%   | <a href="#">gi 507555213 XP_004661377.1</a> |
| <a href="#">PREDICTED: biotinidase isoform X2 [Microtus ochrogaster]</a>                    | 67.7      | 67.7        | 100%        | 2e-11   | 95%   | <a href="#">gi 532009812 XP_005348714.1</a> |
| <a href="#">PREDICTED: biotinidase isoform X2 [Peromyscus maniculatus bairdii]</a>          | 67.7      | 67.7        | 100%        | 2e-11   | 95%   | <a href="#">gi 589967610 XP_006996306.1</a> |
| <a href="#">PREDICTED: biotinidase-like isoform X5 [Chinchilla lanigera]</a>                | 67.7      | 67.7        | 100%        | 2e-11   | 95%   | <a href="#">gi 533146074 XP_005387497.1</a> |
| <a href="#">PREDICTED: biotinidase [Mesocricetus auratus]</a>                               | 67.7      | 67.7        | 100%        | 2e-11   | 95%   | <a href="#">gi 524955500 XP_005077724.1</a> |

|                                                                                     |      |      |      |       |     |                                             |
|-------------------------------------------------------------------------------------|------|------|------|-------|-----|---------------------------------------------|
| <a href="#">PREDICTED: biotinidase isoform X2 [Chlorocebus sabaeus]</a>             | 67.7 | 67.7 | 100% | 2e-11 | 95% | <a href="#">gij635085523 XP_008007381.1</a> |
| <a href="#">PREDICTED: biotinidase isoform X2 [Physeter catodon]</a>                | 67.7 | 67.7 | 100% | 2e-11 | 95% | <a href="#">gij593711507 XP_007102308.1</a> |
| <a href="#">PREDICTED: biotinidase isoform X4 [Canis lupus familiaris]</a>          | 67.7 | 67.7 | 100% | 2e-11 | 95% | <a href="#">gij545538859 XP_005634450.1</a> |
| <a href="#">PREDICTED: biotinidase isoform X3 [Equus caballus]</a>                  | 67.7 | 67.7 | 100% | 2e-11 | 95% | <a href="#">gij545189350 XP_005600979.1</a> |
| <a href="#">PREDICTED: biotinidase isoform X2 [Macaca fascicularis]</a>             | 67.7 | 67.7 | 100% | 2e-11 | 95% | <a href="#">gij544411158 XP_005545768.1</a> |
| <a href="#">PREDICTED: biotinidase isoform X1 [Cavia porcellus]</a>                 | 67.7 | 67.7 | 100% | 2e-11 | 95% | <a href="#">gij514481133 XP_003480063.2</a> |
| <a href="#">PREDICTED: biotinidase [Ceratotherium simum simum]</a>                  | 67.7 | 67.7 | 100% | 2e-11 | 95% | <a href="#">gij478490156 XP_004419451.1</a> |
| <a href="#">PREDICTED: biotinidase isoform 2 [Odobenus rosmarus divergens]</a>      | 67.7 | 67.7 | 100% | 2e-11 | 95% | <a href="#">gij472379495 XP_004409157.1</a> |
| <a href="#">PREDICTED: LOW QUALITY PROTEIN: biotinidase [Tursiops truncatus]</a>    | 67.7 | 67.7 | 100% | 2e-11 | 95% | <a href="#">gij470628904 XP_004321284.1</a> |
| <a href="#">PREDICTED: biotinidase [Orcinus orca]</a>                               | 67.7 | 67.7 | 100% | 2e-11 | 95% | <a href="#">gij466019817 XP_004271983.1</a> |
| <a href="#">PREDICTED: biotinidase isoform X3 [Saimiri boliviensis boliviensis]</a> | 67.7 | 67.7 | 100% | 2e-11 | 95% | <a href="#">gij725560828 XP_010333963.1</a> |
| <a href="#">PREDICTED: biotinidase isoform X2 [Papio anubis]</a>                    | 67.7 | 67.7 | 100% | 2e-11 | 95% | <a href="#">gij685527526 XP_009200021.1</a> |
| <a href="#">PREDICTED: biotinidase isoform X3 [Pongo abelii]</a>                    | 67.7 | 67.7 | 100% | 2e-11 | 95% | <a href="#">gij686713703 XP_009237577.1</a> |
| <a href="#">biotinidase precursor [Mus musculus]</a>                                | 67.7 | 67.7 | 100% | 2e-11 | 95% | <a href="#">gij13384648 NP_079571.1</a>     |
| <a href="#">Biotinidase [Heterocephalus glaber]</a>                                 | 67.7 | 67.7 | 100% | 2e-11 | 95% | <a href="#">gij351707565 EHB10484.1</a>     |
| <a href="#">PREDICTED: biotinidase isoform X1 [Ursus maritimus]</a>                 | 67.7 | 67.7 | 100% | 2e-11 | 95% | <a href="#">gij670981872 XP_008707130.1</a> |
| <a href="#">PREDICTED: biotinidase [Equus przewalskii]</a>                          | 67.7 | 67.7 | 100% | 2e-11 | 95% | <a href="#">gij664753751 XP_008534346.1</a> |
| <a href="#">PREDICTED: biotinidase isoform X1 [Chlorocebus sabaeus]</a>             | 67.7 | 67.7 | 100% | 2e-11 | 95% | <a href="#">gij635085521 XP_008007380.1</a> |
| <a href="#">PREDICTED: biotinidase isoform X1 [Felis catus]</a>                     | 67.7 | 67.7 | 100% | 2e-11 | 95% | <a href="#">gij587000359 XP_003992187.2</a> |
| <a href="#">PREDICTED: biotinidase isoform X2 [Felis catus]</a>                     | 67.7 | 67.7 | 100% | 2e-11 | 95% | <a href="#">gij587000357 XP_006936495.1</a> |
| <a href="#">PREDICTED: biotinidase isoform X3 [Leptonychotes weddellii]</a>         | 67.7 | 67.7 | 100% | 2e-11 | 95% | <a href="#">gij585186600 XP_006744787.1</a> |
| <a href="#">PREDICTED: biotinidase isoform X2 [Leptonychotes weddellii]</a>         | 67.7 | 67.7 | 100% | 2e-11 | 95% | <a href="#">gij585186598 XP_006744786.1</a> |
| <a href="#">PREDICTED: biotinidase isoform X3 [Canis lupus familiaris]</a>          | 67.7 | 67.7 | 100% | 2e-11 | 95% | <a href="#">gij545538857 XP_005634449.1</a> |
| <a href="#">PREDICTED: biotinidase isoform X2 [Canis lupus familiaris]</a>          | 67.7 | 67.7 | 100% | 2e-11 | 95% | <a href="#">gij545538855 XP_005634448.1</a> |
| <a href="#">PREDICTED: biotinidase isoform X2 [Equus caballus]</a>                  | 67.7 | 67.7 | 100% | 2e-11 | 95% | <a href="#">gij545189348 XP_005600978.1</a> |
| <a href="#">PREDICTED: biotinidase [Mustela putorius furo]</a>                      | 67.7 | 67.7 | 100% | 2e-11 | 95% | <a href="#">gij511908359 XP_004773614.1</a> |
| <a href="#">PREDICTED: biotinidase isoform 1 [Odobenus rosmarus divergens]</a>      | 67.7 | 67.7 | 100% | 2e-11 | 95% | <a href="#">gij472379493 XP_004409156.1</a> |
| <a href="#">PREDICTED: biotinidase [Trichechus manatus latirostris]</a>             | 67.7 | 67.7 | 100% | 2e-11 | 95% | <a href="#">gij471407481 XP_004385327.1</a> |
| <a href="#">PREDICTED: biotinidase isoform X2 [Saimiri boliviensis boliviensis]</a> | 67.7 | 67.7 | 100% | 2e-11 | 95% | <a href="#">gij403265544 XP_003924991.1</a> |
| <a href="#">PREDICTED: biotinidase-like [Ailuropoda melanoleuca]</a>                | 67.7 | 67.7 | 100% | 2e-11 | 95% | <a href="#">gij301759093 XP_002915396.1</a> |
| <a href="#">PREDICTED: biotinidase [Condylura cristata]</a>                         | 67.7 | 67.7 | 100% | 2e-11 | 95% | <a href="#">gij507976256 XP_004692357.1</a> |
| <a href="#">PREDICTED: biotinidase [Fukomys damarensis]</a>                         | 67.7 | 67.7 | 100% | 2e-11 | 95% | <a href="#">gij731285322 XP_010611073.1</a> |
| <a href="#">PREDICTED: biotinidase isoform X2 [Pongo abelii]</a>                    | 67.7 | 67.7 | 100% | 2e-11 | 95% | <a href="#">gij686713701 XP_009237576.1</a> |
| <a href="#">PREDICTED: biotinidase isoform X1 [Cricetulus griseus]</a>              | 67.7 | 67.7 | 100% | 2e-11 | 95% | <a href="#">gij354465853 XP_003495391.1</a> |
| <a href="#">PREDICTED: biotinidase [Orycteropus afer afer]</a>                      | 67.7 | 67.7 | 100% | 2e-11 | 95% | <a href="#">gij634822252 XP_007934900.1</a> |
| <a href="#">PREDICTED: biotinidase isoform X1 [Physeter catodon]</a>                | 67.7 | 67.7 | 100% | 2e-11 | 95% | <a href="#">gij593711505 XP_007102307.1</a> |
| <a href="#">PREDICTED: biotinidase-like isoform X1 [Chinchilla lanigera]</a>        | 67.7 | 67.7 | 100% | 2e-11 | 95% | <a href="#">gij533146066 XP_005387493.1</a> |
| <a href="#">PREDICTED: biotinidase isoform X3 [Heterocephalus glaber]</a>           | 67.7 | 67.7 | 100% | 2e-11 | 95% | <a href="#">gij512886961 XP_004896459.1</a> |
| <a href="#">PREDICTED: biotinidase isoform X1 [Leptonychotes weddellii]</a>         | 67.7 | 67.7 | 100% | 2e-11 | 95% | <a href="#">gij585186596 XP_006744785.1</a> |
| <a href="#">PREDICTED: biotinidase isoform X1 [Canis lupus familiaris]</a>          | 67.7 | 67.7 | 100% | 2e-11 | 95% | <a href="#">gij545538853 XP_005634447.1</a> |
| <a href="#">PREDICTED: biotinidase [Otolemur garnettii]</a>                         | 67.7 | 67.7 | 100% | 2e-11 | 95% | <a href="#">gij395816560 XP_003781769.1</a> |
| <a href="#">PREDICTED: biotinidase isoform X1 [Pongo abelii]</a>                    | 67.7 | 67.7 | 100% | 2e-11 | 95% | <a href="#">gij395734130 XP_003776360.1</a> |
| <a href="#">hypothetical protein EGM_11114 [Macaca fascicularis]</a>                | 67.7 | 67.7 | 100% | 2e-11 | 95% | <a href="#">gij355747075 EHH51689.1</a>     |
| <a href="#">hypothetical protein EGK_12122 [Macaca mulatta]</a>                     | 67.7 | 67.7 | 100% | 2e-11 | 95% | <a href="#">gij355560049 EHH16777.1</a>     |
| <a href="#">PREDICTED: biotinidase isoform X1 [Microtus ochrogaster]</a>            | 67.7 | 67.7 | 100% | 2e-11 | 95% | <a href="#">gij532009810 XP_005348713.1</a> |
| <a href="#">PREDICTED: biotinidase isoform X1 [Equus caballus]</a>                  | 67.7 | 67.7 | 100% | 2e-11 | 95% | <a href="#">gij545189346 XP_005600977.1</a> |

|                                                                     |      |      |      |       |      |                                             |
|---------------------------------------------------------------------|------|------|------|-------|------|---------------------------------------------|
| PREDICTED: biotinidase isoform X2 [Cavia porcellus]                 | 67.7 | 67.7 | 100% | 2e-11 | 95%  | <a href="#">gij514481131 XP_005008361.1</a> |
| PREDICTED: biotinidase isoform X1 [Saimiri boliviensis boliviensis] | 67.7 | 67.7 | 100% | 2e-11 | 95%  | <a href="#">gij725560825 XP_010333962.1</a> |
| PREDICTED: biotinidase [Lipotes vexillifer]                         | 67.7 | 67.7 | 100% | 2e-11 | 95%  | <a href="#">gij602721076 XP_007470691.1</a> |
| PREDICTED: biotinidase isoform X1 [Heterocephalus glaber]           | 67.7 | 67.7 | 100% | 2e-11 | 95%  | <a href="#">gij512886949 XP_004896457.1</a> |
| PREDICTED: biotinidase isoform X1 [Balaenoptera acutorostrata sc    | 67.7 | 67.7 | 100% | 2e-11 | 95%  | <a href="#">gij594624940 XP_007167058.1</a> |
| PREDICTED: biotinidase isoform X1 [Papio anubis]                    | 67.7 | 67.7 | 100% | 2e-11 | 95%  | <a href="#">gij685527524 XP_009200020.1</a> |
| PREDICTED: biotinidase isoform X1 [Macaca fascicularis]             | 67.7 | 67.7 | 100% | 2e-11 | 95%  | <a href="#">gij544411156 XP_005545767.1</a> |
| PREDICTED: biotinidase isoform X3 [Balaenoptera acutorostrata sc    | 67.7 | 67.7 | 100% | 2e-11 | 95%  | <a href="#">gij594624944 XP_007167060.1</a> |
| PREDICTED: biotinidase-like [Octodon degus]                         | 67.7 | 67.7 | 100% | 2e-11 | 95%  | <a href="#">gij507646799 XP_004631734.1</a> |
| PREDICTED: biotinidase [Nomascus leucogenys]                        | 66.0 | 66.0 | 90%  | 7e-11 | 100% | <a href="#">gij332232450 XP_003265417.1</a> |
| PREDICTED: biotinidase isoform X2 [Cricetulus griseus]              | 66.0 | 66.0 | 90%  | 7e-11 | 100% | <a href="#">gij625181248 XP_007632389.1</a> |
| PREDICTED: biotinidase isoform X1 [Peromyscus maniculatus bair      | 66.0 | 66.0 | 90%  | 7e-11 | 100% | <a href="#">gij589967608 XP_006996305.1</a> |
| PREDICTED: biotinidase isoform X15 [Tupaia chinensis]               | 66.0 | 66.0 | 90%  | 8e-11 | 100% | <a href="#">gij562886680 XP_006170761.1</a> |
| PREDICTED: biotinidase isoform X4 [Tupaia chinensis]                | 66.0 | 66.0 | 90%  | 8e-11 | 100% | <a href="#">gij562886658 XP_006170750.1</a> |
| unnamed protein product [Mus musculus]                              | 66.0 | 66.0 | 90%  | 8e-11 | 100% | <a href="#">gij74183082 BAE22509.1</a>      |
| PREDICTED: biotinidase [Panthera tigris altaica]                    | 66.0 | 66.0 | 90%  | 8e-11 | 100% | <a href="#">gij591322659 XP_007087428.1</a> |
| PREDICTED: biotinidase [Macaca mulatta]                             | 66.0 | 66.0 | 90%  | 8e-11 | 100% | <a href="#">gij297286947 XP_001083201.2</a> |
| PREDICTED: biotinidase isoform X3 [Tupaia chinensis]                | 66.0 | 66.0 | 90%  | 8e-11 | 100% | <a href="#">gij562886656 XP_006170749.1</a> |
| Biotinidase [Fukomys damarensis]                                    | 66.0 | 66.0 | 90%  | 8e-11 | 100% | <a href="#">gij676263045 KFO19807.1</a>     |
| biotinidase [Cricetulus griseus]                                    | 66.0 | 66.0 | 90%  | 8e-11 | 100% | <a href="#">gij537261432 ERE90059.1</a>     |
| PREDICTED: biotinidase isoform X2 [Tupaia chinensis]                | 66.0 | 66.0 | 90%  | 8e-11 | 100% | <a href="#">gij562886654 XP_006170748.1</a> |
| PREDICTED: biotinidase isoform X1 [Tupaia chinensis]                | 66.0 | 66.0 | 90%  | 8e-11 | 100% | <a href="#">gij562886652 XP_006170747.1</a> |
| PREDICTED: biotinidase-like isoform X2 [Sus scrofa]                 | 64.7 | 64.7 | 95%  | 2e-10 | 95%  | <a href="#">gij545860928 XP_005669335.1</a> |
| PREDICTED: biotinidase-like isoform X2 [Sus scrofa]                 | 64.7 | 64.7 | 95%  | 2e-10 | 95%  | <a href="#">gij545860909 XP_005669330.1</a> |
| PREDICTED: biotinidase isoform X1 [Myotis davidii]                  | 64.7 | 64.7 | 95%  | 2e-10 | 95%  | <a href="#">gij584051114 XP_006770244.1</a> |

## Alignments

Download [GenPept](#) [Graphics](#)

Next Previous Descriptions

biotinidase, isoform CRA\_c [Homo sapiens]

Sequence ID: [gij119584660|gb|EAW64256.1](#) Length: 159 Number of Matches: 1

Range 1: 83 to 103 [GenPept](#) [Graphics](#)

Next Match Previous Match

| Score          | Expect | Identities  | Positives   | Gaps     |
|----------------|--------|-------------|-------------|----------|
| 72.3 bits(163) | 3e-13  | 21/21(100%) | 21/21(100%) | 0/21(0%) |

Query 1 KDVQIIVFPEDGIHGFnFTRT 21  
 KDVQIIVFPEDGIHGFnFTRT  
 Sbjct 83 KDVQIIVFPEDGIHGFnFTRT 103

### Related Information

[Gene](#) - associated gene details

Download [GenPept](#) [Graphics](#)

Next Previous Descriptions

biotinidase isoform 5 [Homo sapiens]

Sequence ID: [gij528524488|ref|NP\\_001268655.1](#) Length: 179 Number of Matches: 1

Range 1: 103 to 123 [GenPept](#) [Graphics](#)

Next Match Previous Match

| Score          | Expect | Identities  | Positives   | Gaps     |
|----------------|--------|-------------|-------------|----------|
| 72.3 bits(163) | 3e-13  | 21/21(100%) | 21/21(100%) | 0/21(0%) |

Query 1 KDVQIIVFPEDGIHGFnFTRT 21  
 KDVQIIVFPEDGIHGFnFTRT  
 Sbjct 103 KDVQIIVFPEDGIHGFnFTRT 123

### Related Information

[Gene](#) - associated gene details

[Map Viewer](#) - aligned genomic context

Download [GenPept](#) [Graphics](#)

Next Previous Descriptions

unnamed protein product [Homo sapiens]

Sequence ID: [gi|221043776|dbj|BAH13565.1|](#) Length: 523 Number of Matches: 1

Range 1: 83 to 103 [GenPept](#) [Graphics](#)

[▼ Next Match](#) [▲ Previous Match](#)

| Score          | Expect | Identities  | Positives   | Gaps     |
|----------------|--------|-------------|-------------|----------|
| 72.3 bits(163) | 5e-13  | 21/21(100%) | 21/21(100%) | 0/21(0%) |

Query 1 KDVQIIVFPEDGIHGFnFTRT 21  
 KDVQIIVFPEDGIHGFnFTRT  
 Sbjct 83 KDVQIIVFPEDGIHGFnFTRT 103

**Related Information**

[Gene](#) - associated gene details

[Download](#) [▼ GenPept](#) [Graphics](#)

[▼ Next](#) [▲ Previous](#) [▲ Descriptions](#)

biotinidase isoform 4 precursor [Homo sapiens]

Sequence ID: [gi|528524486|ref|NP\\_001268654.1|](#) Length: 523 Number of Matches: 1

[▶ See 3 more title\(s\)](#)

Range 1: 83 to 103 [GenPept](#) [Graphics](#)

[▼ Next Match](#) [▲ Previous Match](#)

| Score          | Expect | Identities  | Positives   | Gaps     |
|----------------|--------|-------------|-------------|----------|
| 72.3 bits(163) | 5e-13  | 21/21(100%) | 21/21(100%) | 0/21(0%) |

Query 1 KDVQIIVFPEDGIHGFnFTRT 21  
 KDVQIIVFPEDGIHGFnFTRT  
 Sbjct 83 KDVQIIVFPEDGIHGFnFTRT 103

**Related Information**

[Gene](#) - associated gene details

[Map Viewer](#) - aligned genomic context

[Identical Proteins](#) - Proteins identical to the subject

[Download](#) [▼ GenPept](#) [Graphics](#)

[▼ Next](#) [▲ Previous](#) [▲ Descriptions](#)

biotinidase precursor [Pan troglodytes]

Sequence ID: [gi|697993457|ref|NP\\_001289363.1|](#) Length: 523 Number of Matches: 1

[▶ See 1 more title\(s\)](#)

Range 1: 83 to 103 [GenPept](#) [Graphics](#)

[▼ Next Match](#) [▲ Previous Match](#)

| Score          | Expect | Identities  | Positives   | Gaps     |
|----------------|--------|-------------|-------------|----------|
| 72.3 bits(163) | 5e-13  | 21/21(100%) | 21/21(100%) | 0/21(0%) |

Query 1 KDVQIIVFPEDGIHGFnFTRT 21  
 KDVQIIVFPEDGIHGFnFTRT  
 Sbjct 83 KDVQIIVFPEDGIHGFnFTRT 103

**Related Information**

[Gene](#) - associated gene details

[Map Viewer](#) - aligned genomic context

[Identical Proteins](#) - Proteins identical to the subject

BLAST is a registered trademark of the National Library of Medicine.

NCBI/ BLAST/ blastp suite/ Formatting Results - BT22RVD013

Your search parameters were adjusted to search for a short input sequence.

[Edit and Resubmit](#) [Save Search Strategies](#) [Formatting options](#) [Download](#) [YouTube](#) [How to read this page](#) [Blast report description](#)

BT22RVD013

RID [BT22RVD013](#) (Expires on 01-20 11:45 am)

Query ID |cl|98063  
 Description None  
 Molecule type amino acid  
 Query Length 23

Database Name nr  
 Description All non-redundant GenBank CDS translations+PDB+SwissProt+PIR+PRF excluding environmental samples from WGS projects  
 Program BLASTP 2.2.30+ [Citation](#)

Other reports: [Search Summary](#) [Taxonomy reports](#) [Distance tree of results](#) [Multiple alignment](#)

Graphic Summary

Show Conserved Domains

No putative conserved domains have been detected

Distribution of 100 Blast Hits on the Query Sequence

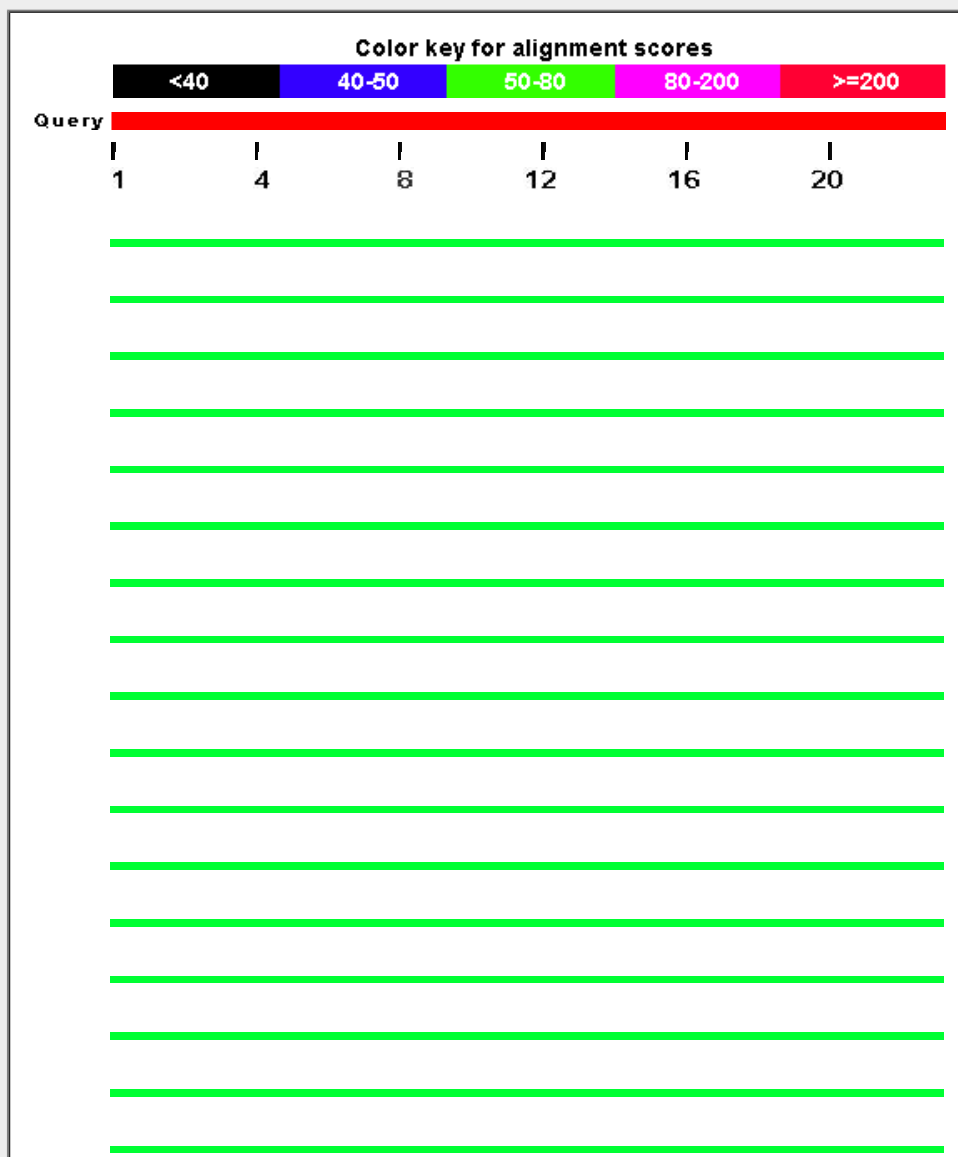

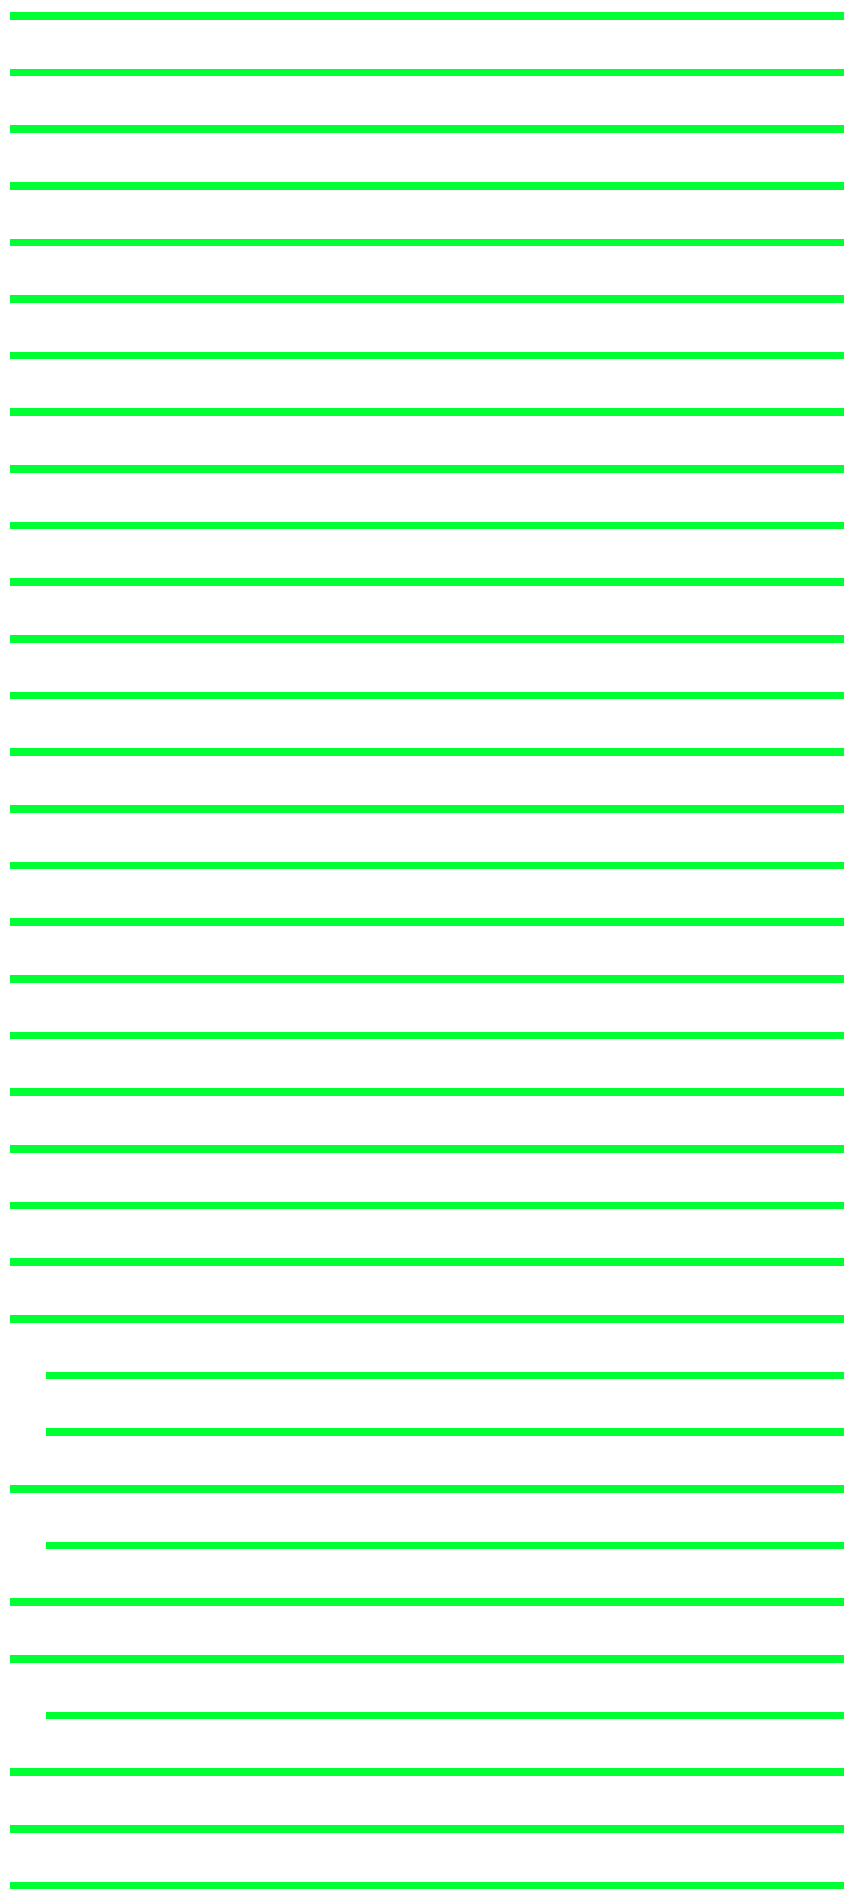

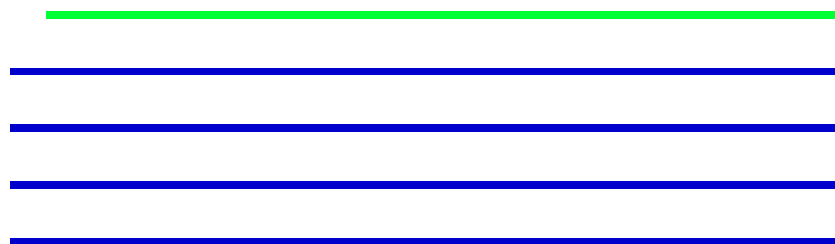

## Descriptions

### Sequences producing significant alignments:

Select: [All](#) [None](#) Selected:0

[Alignments](#)
[Download](#)
[GenPept](#)
[Graphics](#)
[Distance tree of results](#)
[Multiple alignment](#)

| Description                                                                | Max score | Total score | Query cover | E value | Ident | Accession                                   |
|----------------------------------------------------------------------------|-----------|-------------|-------------|---------|-------|---------------------------------------------|
| <a href="#">PREDICTED: biotinidase [Nomascus leucogenys]</a>               | 71.0      | 71.0        | 100%        | 2e-12   | 96%   | <a href="#">gi 332232450 XP_003265417.1</a> |
| <a href="#">unnamed protein product [Macaca fascicularis]</a>              | 71.0      | 71.0        | 100%        | 2e-12   | 96%   | <a href="#">gi 90077268 BAE88314.1</a>      |
| <a href="#">unnamed protein product [Homo sapiens]</a>                     | 71.0      | 71.0        | 100%        | 2e-12   | 96%   | <a href="#">gi 221043776 BAH13565.1</a>     |
| <a href="#">biotinidase isoform 4 precursor [Homo sapiens]</a>             | 71.0      | 71.0        | 100%        | 2e-12   | 96%   | <a href="#">gi 528524486 NP_001268654.1</a> |
| <a href="#">biotinidase precursor [Pan troglodytes]</a>                    | 71.0      | 71.0        | 100%        | 2e-12   | 96%   | <a href="#">gi 697993457 NP_001289363.1</a> |
| <a href="#">PREDICTED: biotinidase isoform X2 [Chlorocebus sabaeus]</a>    | 71.0      | 71.0        | 100%        | 2e-12   | 96%   | <a href="#">gi 635085523 XP_008007381.1</a> |
| <a href="#">PREDICTED: biotinidase isoform X2 [Macaca fascicularis]</a>    | 71.0      | 71.0        | 100%        | 2e-12   | 96%   | <a href="#">gi 544411158 XP_005545768.1</a> |
| <a href="#">PREDICTED: biotinidase isoform X2 [Pan troglodytes]</a>        | 71.0      | 71.0        | 100%        | 2e-12   | 96%   | <a href="#">gi 694900420 XP_009443239.1</a> |
| <a href="#">PREDICTED: biotinidase isoform X2 [Pan paniscus]</a>           | 71.0      | 71.0        | 100%        | 2e-12   | 96%   | <a href="#">gi 675784344 XP_008949921.1</a> |
| <a href="#">PREDICTED: biotinidase isoform X3 [Pongo abelii]</a>           | 71.0      | 71.0        | 100%        | 2e-12   | 96%   | <a href="#">gi 686713703 XP_009237577.1</a> |
| <a href="#">PREDICTED: biotinidase isoform X1 [Chlorocebus sabaeus]</a>    | 71.0      | 71.0        | 100%        | 2e-12   | 96%   | <a href="#">gi 635085521 XP_008007380.1</a> |
| <a href="#">PREDICTED: biotinidase isoform X2 [Pongo abelii]</a>           | 71.0      | 71.0        | 100%        | 2e-12   | 96%   | <a href="#">gi 686713701 XP_009237576.1</a> |
| <a href="#">biotinidase isoform 3 [Homo sapiens]</a>                       | 71.0      | 71.0        | 100%        | 2e-12   | 96%   | <a href="#">gi 4557373 NP_000051.1</a>      |
| <a href="#">biotinidase isoform 1 [Homo sapiens]</a>                       | 71.0      | 71.0        | 100%        | 2e-12   | 96%   | <a href="#">gi 528524481 NP_001268652.1</a> |
| <a href="#">biotinidase isoform 2 [Homo sapiens]</a>                       | 71.0      | 71.0        | 100%        | 2e-12   | 96%   | <a href="#">gi 528524483 NP_001268653.1</a> |
| <a href="#">PREDICTED: biotinidase isoform X1 [Pan troglodytes]</a>        | 71.0      | 71.0        | 100%        | 2e-12   | 96%   | <a href="#">gi 410036604 XP_003950087.1</a> |
| <a href="#">PREDICTED: biotinidase isoform X1 [Pan paniscus]</a>           | 71.0      | 71.0        | 100%        | 2e-12   | 96%   | <a href="#">gi 397511808 XP_003826257.1</a> |
| <a href="#">PREDICTED: biotinidase isoform X1 [Pongo abelii]</a>           | 71.0      | 71.0        | 100%        | 2e-12   | 96%   | <a href="#">gi 395734130 XP_003776360.1</a> |
| <a href="#">hypothetical protein EGM_11114 [Macaca fascicularis]</a>       | 71.0      | 71.0        | 100%        | 2e-12   | 96%   | <a href="#">gi 355747075 EHH51689.1</a>     |
| <a href="#">hypothetical protein EGK_12122 [Macaca mulatta]</a>            | 71.0      | 71.0        | 100%        | 2e-12   | 96%   | <a href="#">gi 355560049 EHH16777.1</a>     |
| <a href="#">PREDICTED: biotinidase [Macaca mulatta]</a>                    | 71.0      | 71.0        | 100%        | 2e-12   | 96%   | <a href="#">gi 297286947 XP_001083201.2</a> |
| <a href="#">PREDICTED: biotinidase isoform X1 [Macaca fascicularis]</a>    | 71.0      | 71.0        | 100%        | 2e-12   | 96%   | <a href="#">gi 544411156 XP_005545767.1</a> |
| <a href="#">PREDICTED: biotinidase isoform 1 [Gorilla gorilla gorilla]</a> | 68.5      | 68.5        | 100%        | 1e-11   | 91%   | <a href="#">gi 426339607 XP_004033737.1</a> |
| <a href="#">PREDICTED: biotinidase isoform 3 [Gorilla gorilla gorilla]</a> | 68.5      | 68.5        | 100%        | 1e-11   | 91%   | <a href="#">gi 426339611 XP_004033739.1</a> |
| <a href="#">PREDICTED: biotinidase isoform 4 [Gorilla gorilla gorilla]</a> | 68.5      | 68.5        | 100%        | 1e-11   | 91%   | <a href="#">gi 426339613 XP_004033740.1</a> |
| <a href="#">PREDICTED: biotinidase isoform 2 [Gorilla gorilla gorilla]</a> | 68.5      | 68.5        | 100%        | 1e-11   | 91%   | <a href="#">gi 426339609 XP_004033738.1</a> |
| <a href="#">PREDICTED: biotinidase [Rhinopithecus roxellana]</a>           | 67.2      | 67.2        | 100%        | 4e-11   | 91%   | <a href="#">gi 724960396 XP_010354361.1</a> |
| <a href="#">PREDICTED: biotinidase isoform X2 [Papio anubis]</a>           | 63.4      | 63.4        | 100%        | 8e-10   | 87%   | <a href="#">gi 685527526 XP_009200021.1</a> |
| <a href="#">PREDICTED: biotinidase isoform X1 [Papio anubis]</a>           | 63.4      | 63.4        | 100%        | 8e-10   | 87%   | <a href="#">gi 685527524 XP_009200020.1</a> |

|                                                                               |      |      |      |       |     |                                             |
|-------------------------------------------------------------------------------|------|------|------|-------|-----|---------------------------------------------|
| <a href="#">PREDICTED: biotinidase isoform X1 [Callithrix jacchus]</a>        | 62.6 | 62.6 | 100% | 1e-09 | 87% | <a href="#">gi 675740028 XP_008982107.1</a> |
| <a href="#">PREDICTED: biotinidase isoform X2 [Callithrix jacchus]</a>        | 62.6 | 62.6 | 100% | 1e-09 | 87% | <a href="#">gi 390476393 XP_002759736.2</a> |
| <a href="#">PREDICTED: biotinidase isoform X4 [Canis lupus familiaris]</a>    | 54.9 | 54.9 | 100% | 5e-07 | 78% | <a href="#">gi 545538859 XP_005634450.1</a> |
| <a href="#">PREDICTED: biotinidase isoform X3 [Canis lupus familiaris]</a>    | 54.9 | 54.9 | 100% | 5e-07 | 78% | <a href="#">gi 545538857 XP_005634449.1</a> |
| <a href="#">PREDICTED: biotinidase isoform X2 [Canis lupus familiaris]</a>    | 54.9 | 54.9 | 100% | 5e-07 | 78% | <a href="#">gi 545538855 XP_005634448.1</a> |
| <a href="#">PREDICTED: biotinidase isoform X1 [Canis lupus familiaris]</a>    | 54.9 | 54.9 | 100% | 5e-07 | 78% | <a href="#">gi 545538853 XP_005634447.1</a> |
| <a href="#">PREDICTED: biotinidase-like [Ictidomys tridecemlineatus]</a>      | 54.5 | 54.5 | 100% | 7e-07 | 78% | <a href="#">gi 532063189 XP_005317469.1</a> |
| <a href="#">PREDICTED: biotinidase isoform 2 [Odobenus rosmarus diverc]</a>   | 54.1 | 54.1 | 100% | 1e-06 | 78% | <a href="#">gi 472379495 XP_004409157.1</a> |
| <a href="#">PREDICTED: biotinidase isoform X3 [Saimiri boliviensis bolivi</a> | 54.1 | 54.1 | 100% | 1e-06 | 78% | <a href="#">gi 725560828 XP_010333963.1</a> |
| <a href="#">PREDICTED: biotinidase isoform 1 [Odobenus rosmarus diverc]</a>   | 54.1 | 54.1 | 100% | 1e-06 | 78% | <a href="#">gi 472379493 XP_004409156.1</a> |
| <a href="#">PREDICTED: biotinidase isoform X2 [Saimiri boliviensis bolivi</a> | 54.1 | 54.1 | 100% | 1e-06 | 78% | <a href="#">gi 403265544 XP_003924991.1</a> |
| <a href="#">PREDICTED: biotinidase isoform X1 [Saimiri boliviensis bolivi</a> | 54.1 | 54.1 | 100% | 1e-06 | 78% | <a href="#">gi 725560825 XP_010333962.1</a> |
| <a href="#">PREDICTED: biotinidase isoform X1 [Felis catus]</a>               | 53.7 | 53.7 | 95%  | 1e-06 | 77% | <a href="#">gi 587000359 XP_003992187.2</a> |
| <a href="#">PREDICTED: biotinidase isoform X2 [Felis catus]</a>               | 53.7 | 53.7 | 95%  | 1e-06 | 77% | <a href="#">gi 587000357 XP_006936495.1</a> |
| <a href="#">PREDICTED: biotinidase [Ceratotherium simum simum]</a>            | 52.0 | 52.0 | 100% | 5e-06 | 74% | <a href="#">gi 478490156 XP_004419451.1</a> |
| <a href="#">PREDICTED: biotinidase [Mesocricetus auratus]</a>                 | 51.5 | 51.5 | 95%  | 7e-06 | 77% | <a href="#">gi 524955500 XP_005077724.1</a> |
| <a href="#">PREDICTED: biotinidase [Vicugna pacos]</a>                        | 51.1 | 51.1 | 100% | 1e-05 | 74% | <a href="#">gi 560965913 XP_006205350.1</a> |
| <a href="#">PREDICTED: biotinidase [Jaculus jaculus]</a>                      | 50.7 | 50.7 | 100% | 1e-05 | 74% | <a href="#">gi 507555213 XP_004661377.1</a> |
| <a href="#">PREDICTED: biotinidase isoform X2 [Microtus ochrogaster]</a>      | 50.3 | 50.3 | 95%  | 2e-05 | 73% | <a href="#">gi 532009812 XP_005348714.1</a> |
| <a href="#">PREDICTED: biotinidase isoform X3 [Leptonychotes weddellii]</a>   | 50.3 | 50.3 | 100% | 2e-05 | 74% | <a href="#">gi 585186600 XP_006744787.1</a> |
| <a href="#">PREDICTED: biotinidase isoform X2 [Leptonychotes weddellii]</a>   | 50.3 | 50.3 | 100% | 2e-05 | 74% | <a href="#">gi 585186598 XP_006744786.1</a> |
| <a href="#">PREDICTED: biotinidase isoform X1 [Leptonychotes weddellii]</a>   | 50.3 | 50.3 | 100% | 2e-05 | 74% | <a href="#">gi 585186596 XP_006744785.1</a> |
| <a href="#">PREDICTED: biotinidase isoform X1 [Microtus ochrogaster]</a>      | 50.3 | 50.3 | 95%  | 2e-05 | 73% | <a href="#">gi 532009810 XP_005348713.1</a> |
| <a href="#">biotinidase [Camelus ferus]</a>                                   | 49.4 | 49.4 | 100% | 3e-05 | 70% | <a href="#">gi 528756912 EPY76571.1</a>     |
| <a href="#">PREDICTED: biotinidase isoform X2 [Camelus dromedarius]</a>       | 49.4 | 49.4 | 100% | 4e-05 | 70% | <a href="#">gi 744591359 XP_010987289.1</a> |
| <a href="#">PREDICTED: biotinidase isoform X2 [Camelus bactrianus]</a>        | 49.4 | 49.4 | 100% | 4e-05 | 70% | <a href="#">gi 743739779 XP_010964344.1</a> |
| <a href="#">PREDICTED: biotinidase [Camelus ferus]</a>                        | 49.4 | 49.4 | 100% | 4e-05 | 70% | <a href="#">gi 560929390 XP_006190847.1</a> |
| <a href="#">PREDICTED: biotinidase isoform X1 [Camelus dromedarius]</a>       | 49.4 | 49.4 | 100% | 4e-05 | 70% | <a href="#">gi 744591356 XP_010987287.1</a> |
| <a href="#">PREDICTED: biotinidase isoform X1 [Camelus bactrianus]</a>        | 49.4 | 49.4 | 100% | 4e-05 | 70% | <a href="#">gi 743739777 XP_010964343.1</a> |
| <a href="#">PREDICTED: biotinidase [Panthera tigris altaica]</a>              | 48.6 | 48.6 | 95%  | 7e-05 | 73% | <a href="#">gi 591322659 XP_007087428.1</a> |
| <a href="#">PREDICTED: biotinidase [Otolemur garnettii]</a>                   | 48.1 | 48.1 | 100% | 9e-05 | 74% | <a href="#">gi 395816560 XP_003781769.1</a> |
| <a href="#">PREDICTED: biotinidase-like isoform X10 [Chinchilla lanigera]</a> | 47.7 | 47.7 | 100% | 1e-04 | 70% | <a href="#">gi 533146084 XP_005387502.1</a> |
| <a href="#">PREDICTED: biotinidase-like isoform X5 [Chinchilla lanigera]</a>  | 47.7 | 47.7 | 100% | 1e-04 | 70% | <a href="#">gi 533146074 XP_005387497.1</a> |
| <a href="#">PREDICTED: biotinidase [Condylura cristata]</a>                   | 47.7 | 47.7 | 95%  | 1e-04 | 73% | <a href="#">gi 507976256 XP_004692357.1</a> |
| <a href="#">PREDICTED: biotinidase-like isoform X1 [Chinchilla lanigera]</a>  | 47.7 | 47.7 | 100% | 1e-04 | 70% | <a href="#">gi 533146066 XP_005387493.1</a> |
| <a href="#">PREDICTED: biotinidase [Trichechus manatus latirostris]</a>       | 47.3 | 47.3 | 100% | 2e-04 | 70% | <a href="#">gi 471407481 XP_004385327.1</a> |
| <a href="#">PREDICTED: biotinidase [Lipotes vexillifer]</a>                   | 47.3 | 47.3 | 100% | 2e-04 | 74% | <a href="#">gi 602721076 XP_007470691.1</a> |
| <a href="#">PREDICTED: biotinidase isoform X1 [Balaenoptera acutorostra]</a>  | 47.3 | 47.3 | 100% | 2e-04 | 74% | <a href="#">gi 594624940 XP_007167058.1</a> |
| <a href="#">PREDICTED: biotinidase isoform X3 [Balaenoptera acutorostra]</a>  | 47.3 | 47.3 | 100% | 2e-04 | 74% | <a href="#">gi 594624944 XP_007167060.1</a> |
| <a href="#">PREDICTED: biotinidase isoform X3 [Equus caballus]</a>            | 46.9 | 46.9 | 95%  | 2e-04 | 73% | <a href="#">gi 545189350 XP_005600979.1</a> |
| <a href="#">PREDICTED: biotinidase [Equus przewalskii]</a>                    | 46.9 | 46.9 | 95%  | 2e-04 | 73% | <a href="#">gi 664753751 XP_008534346.1</a> |
| <a href="#">PREDICTED: biotinidase isoform X2 [Equus caballus]</a>            | 46.9 | 46.9 | 95%  | 2e-04 | 73% | <a href="#">gi 545189348 XP_005600978.1</a> |
| <a href="#">PREDICTED: biotinidase [Mustela putorius furo]</a>                | 46.9 | 46.9 | 100% | 2e-04 | 70% | <a href="#">gi 511908359 XP_004773614.1</a> |
| <a href="#">PREDICTED: biotinidase isoform X1 [Equus caballus]</a>            | 46.9 | 46.9 | 95%  | 2e-04 | 73% | <a href="#">gi 545189346 XP_005600977.1</a> |
| <a href="#">PREDICTED: biotinidase isoform X2 [Ursus maritimus]</a>           | 46.4 | 46.4 | 100% | 3e-04 | 70% | <a href="#">gi 670981874 XP_008707139.1</a> |



|                                                                            |      |      |      |       |     |                                             |
|----------------------------------------------------------------------------|------|------|------|-------|-----|---------------------------------------------|
| <a href="#">PREDICTED: biotinidase isoform X1 [Ursus maritimus]</a>        | 46.4 | 46.4 | 100% | 3e-04 | 70% | <a href="#">gi 670981872 XP_008707130.1</a> |
| <a href="#">PREDICTED: biotinidase [Fukomys damarensis]</a>                | 46.4 | 46.4 | 100% | 3e-04 | 70% | <a href="#">gi 731285322 XP_010611073.1</a> |
| <a href="#">Biotinidase [Fukomys damarensis]</a>                           | 46.4 | 46.4 | 100% | 3e-04 | 70% | <a href="#">gi 676263045 KFO19807.1</a>     |
| <a href="#">PREDICTED: biotinidase isoform X2 [Cricetulus griseus]</a>     | 46.0 | 46.0 | 95%  | 4e-04 | 73% | <a href="#">gi 625181248 XP_007632389.1</a> |
| <a href="#">PREDICTED: biotinidase isoform X1 [Cricetulus griseus]</a>     | 46.0 | 46.0 | 95%  | 4e-04 | 73% | <a href="#">gi 354465853 XP_003495391.1</a> |
| <a href="#">biotinidase [Cricetulus griseus]</a>                           | 46.0 | 46.0 | 95%  | 5e-04 | 73% | <a href="#">gi 537261432 ERE90059.1</a>     |
| <a href="#">PREDICTED: biotinidase [Erinaceus europaeus]</a>               | 45.6 | 45.6 | 95%  | 6e-04 | 68% | <a href="#">gi 617553342 XP_007530134.1</a> |
| <a href="#">PREDICTED: biotinidase [Galeopterus variegatus]</a>            | 45.2 | 45.2 | 100% | 8e-04 | 70% | <a href="#">gi 667288263 XP_008576771.1</a> |
| <a href="#">PREDICTED: LOW QUALITY PROTEIN: biotinidase [Tursiops]</a>     | 44.8 | 44.8 | 100% | 0.001 | 70% | <a href="#">gi 470628904 XP_004321284.1</a> |
| <a href="#">PREDICTED: biotinidase [Orcinus orca]</a>                      | 44.8 | 44.8 | 100% | 0.001 | 70% | <a href="#">gi 466019817 XP_004271983.1</a> |
| <a href="#">PREDICTED: biotinidase isoform X2 [Physeter catodon]</a>       | 44.3 | 44.3 | 100% | 0.002 | 70% | <a href="#">gi 593711507 XP_007102308.1</a> |
| <a href="#">PREDICTED: biotinidase isoform X1 [Physeter catodon]</a>       | 44.3 | 44.3 | 100% | 0.002 | 70% | <a href="#">gi 593711505 XP_007102307.1</a> |
| <a href="#">PREDICTED: biotinidase isoform X1 [Peromyscus maniculatus]</a> | 43.5 | 43.5 | 95%  | 0.003 | 64% | <a href="#">gi 589967608 XP_006996305.1</a> |
| <a href="#">PREDICTED: biotinidase isoform X2 [Peromyscus maniculatus]</a> | 43.5 | 43.5 | 95%  | 0.003 | 64% | <a href="#">gi 589967610 XP_006996306.1</a> |
| <a href="#">PREDICTED: biotinidase-like [Ailuropoda melanoleuca]</a>       | 43.5 | 43.5 | 100% | 0.003 | 70% | <a href="#">gi 301759093 XP_002915396.1</a> |
| <a href="#">hypothetical protein PANDA_003369 [Ailuropoda melanoleuca]</a> | 43.5 | 43.5 | 100% | 0.003 | 70% | <a href="#">gi 281345880 EFB21464.1</a>     |
| <a href="#">PREDICTED: biotinidase isoform X1 [Myotis lucifugus]</a>       | 42.6 | 42.6 | 100% | 0.005 | 70% | <a href="#">gi 558102610 XP_006083737.1</a> |
| <a href="#">PREDICTED: biotinidase isoform X3 [Myotis brandtii]</a>        | 42.6 | 42.6 | 100% | 0.005 | 70% | <a href="#">gi 554537982 XP_005863672.1</a> |
| <a href="#">PREDICTED: biotinidase isoform X2 [Myotis lucifugus]</a>       | 42.6 | 42.6 | 100% | 0.005 | 70% | <a href="#">gi 558102613 XP_006083738.1</a> |
| <a href="#">PREDICTED: biotinidase isoform X2 [Myotis brandtii]</a>        | 42.6 | 42.6 | 100% | 0.005 | 70% | <a href="#">gi 554537986 XP_005863671.1</a> |
| <a href="#">Biotinidase [Myotis brandtii]</a>                              | 42.6 | 42.6 | 100% | 0.006 | 70% | <a href="#">gi 521024341 EPQ06129.1</a>     |
| <a href="#">biotinidase isoform CRA_a [Rattus norvegicus]</a>              | 41.8 | 41.8 | 95%  | 0.010 | 64% | <a href="#">gi 149034168 EDL88938.1</a>     |
| <a href="#">biotinidase isoform CRA_c [Rattus norvegicus]</a>              | 41.8 | 41.8 | 95%  | 0.010 | 64% | <a href="#">gi 149034170 EDL88940.1</a>     |
| <a href="#">biotinidase precursor [Rattus norvegicus]</a>                  | 41.8 | 41.8 | 95%  | 0.010 | 64% | <a href="#">gi 58865670 INP_001012047.1</a> |
| <a href="#">PREDICTED: biotinidase isoform X2 [Rattus norvegicus]</a>      | 41.8 | 41.8 | 95%  | 0.010 | 64% | <a href="#">gi 564387894 XP_006252671.1</a> |
| <a href="#">PREDICTED: biotinidase isoform X1 [Cavia porcellus]</a>        | 41.4 | 41.4 | 100% | 0.014 | 65% | <a href="#">gi 514481133 XP_003480063.2</a> |

## Alignments

Download GenPept Graphics

Next Previous Descriptions

PREDICTED: biotinidase [Nomascus leucogenys]

Sequence ID: [gi|332232450|ref|XP\\_003265417.1](#) Length: 474 Number of Matches: 1

Range 1: 270 to 292 GenPept Graphics

Next Match Previous Match

| Score          | Expect | Identities | Positives   | Gaps     |
|----------------|--------|------------|-------------|----------|
| 71.0 bits(160) | 2e-12  | 22/23(96%) | 23/23(100%) | 0/23(0%) |

Query 1 KNPVGLIGAEDATGETDPSHSKF 23  
 KNPVGLIGAE+ATGETDPSHSKF  
 Sbjct 270 KNPVGLIGAENATGETDPSHSKF 292

### Related Information

[Gene](#) - associated gene details  
[Map Viewer](#) - aligned genomic context

Download GenPept Graphics

Next Previous Descriptions

unnamed protein product [Macaca fascicularis]

Sequence ID: [gi|90077268|dbj|BAE88314.1](#) Length: 493 Number of Matches: 1

Range 1: 323 to 345 GenPept Graphics

Next Match Previous Match

| Score          | Expect | Identities | Positives   | Gaps     |
|----------------|--------|------------|-------------|----------|
| 71.0 bits(160) | 2e-12  | 22/23(96%) | 23/23(100%) | 0/23(0%) |

### Related Information

[Gene](#) - associated gene details

Query 1 KNPVGLIGAEDATGETDPSHSKF 23  
 KNPVGLIGAE+ATGETDPSHSKF  
 Sbjct 323 KNPVGLIGAENATGETDPSHSKF 345

Download [GenPept](#) [Graphics](#)

[▼ Next](#) [▲ Previous](#) [▲ Descriptions](#)

unnamed protein product [Homo sapiens]

Sequence ID: [gi|221043776|dbj|BAH13565.1](#) Length: 523 Number of Matches: 1

Range 1: 319 to 341 [GenPept](#) [Graphics](#)

[▼ Next Match](#) [▲ Previous Match](#)

| Score          | Expect | Identities | Positives   | Gaps     |
|----------------|--------|------------|-------------|----------|
| 71.0 bits(160) | 2e-12  | 22/23(96%) | 23/23(100%) | 0/23(0%) |

Query 1 KNPVGLIGAEDATGETDPSHSKF 23  
 KNPVGLIGAE+ATGETDPSHSKF  
 Sbjct 319 KNPVGLIGAENATGETDPSHSKF 341

**Related Information**

[Gene](#) - associated gene details

Download [GenPept](#) [Graphics](#)

[▼ Next](#) [▲ Previous](#) [▲ Descriptions](#)

biotinidase isoform 4 precursor [Homo sapiens]

Sequence ID: [gi|528524486|ref|NP\\_001268654.1](#) Length: 523 Number of Matches: 1

[▶ See 3 more title\(s\)](#)

Range 1: 319 to 341 [GenPept](#) [Graphics](#)

[▼ Next Match](#) [▲ Previous Match](#)

| Score          | Expect | Identities | Positives   | Gaps     |
|----------------|--------|------------|-------------|----------|
| 71.0 bits(160) | 2e-12  | 22/23(96%) | 23/23(100%) | 0/23(0%) |

Query 1 KNPVGLIGAEDATGETDPSHSKF 23  
 KNPVGLIGAE+ATGETDPSHSKF  
 Sbjct 319 KNPVGLIGAENATGETDPSHSKF 341

**Related Information**

[Gene](#) - associated gene details

[Map Viewer](#) - aligned genomic context

[Identical Proteins](#) - Proteins identical to the subject

Download [GenPept](#) [Graphics](#)

[▼ Next](#) [▲ Previous](#) [▲ Descriptions](#)

biotinidase precursor [Pan troglodytes]

Sequence ID: [gi|697993457|ref|NP\\_001289363.1](#) Length: 523 Number of Matches: 1

[▶ See 1 more title\(s\)](#)

Range 1: 319 to 341 [GenPept](#) [Graphics](#)

[▼ Next Match](#) [▲ Previous Match](#)

| Score          | Expect | Identities | Positives   | Gaps     |
|----------------|--------|------------|-------------|----------|
| 71.0 bits(160) | 2e-12  | 22/23(96%) | 23/23(100%) | 0/23(0%) |

Query 1 KNPVGLIGAEDATGETDPSHSKF 23  
 KNPVGLIGAE+ATGETDPSHSKF  
 Sbjct 319 KNPVGLIGAENATGETDPSHSKF 341

**Related Information**

[Gene](#) - associated gene details

[Map Viewer](#) - aligned genomic context

[Identical Proteins](#) - Proteins identical to the subject

BLAST is a registered trademark of the National Library of Medicine.

NCBI/ BLAST/ blastp suite/ Formatting Results - BT38KVCN013

Your search parameters were adjusted to search for a short input sequence.

[Edit and Resubmit](#) [Save Search Strategies](#) [Formatting options](#) [Download](#) [YouTube](#) [How to read this page](#) [Blast report description](#)

BT38KVCN013

RID [BT38KVCN013](#) (Expires on 01-20 11:50 am)

Query ID [Ic|70574](#) Database Name [nr](#)

Description [None](#) Description [All non-redundant GenBank CDS translations+PDB+SwissProt+PIR+PRF excluding environmental samples from WGS projects](#)

Molecule type [amino acid](#) Program [BLASTP 2.2.30+](#) [Citation](#)

Query Length [26](#)

Other reports: [Search Summary](#) [Taxonomy reports](#) [Distance tree of results](#) [Multiple alignment](#)

Graphic Summary

Show Conserved Domains

No putative conserved domains have been detected

Distribution of 100 Blast Hits on the Query Sequence

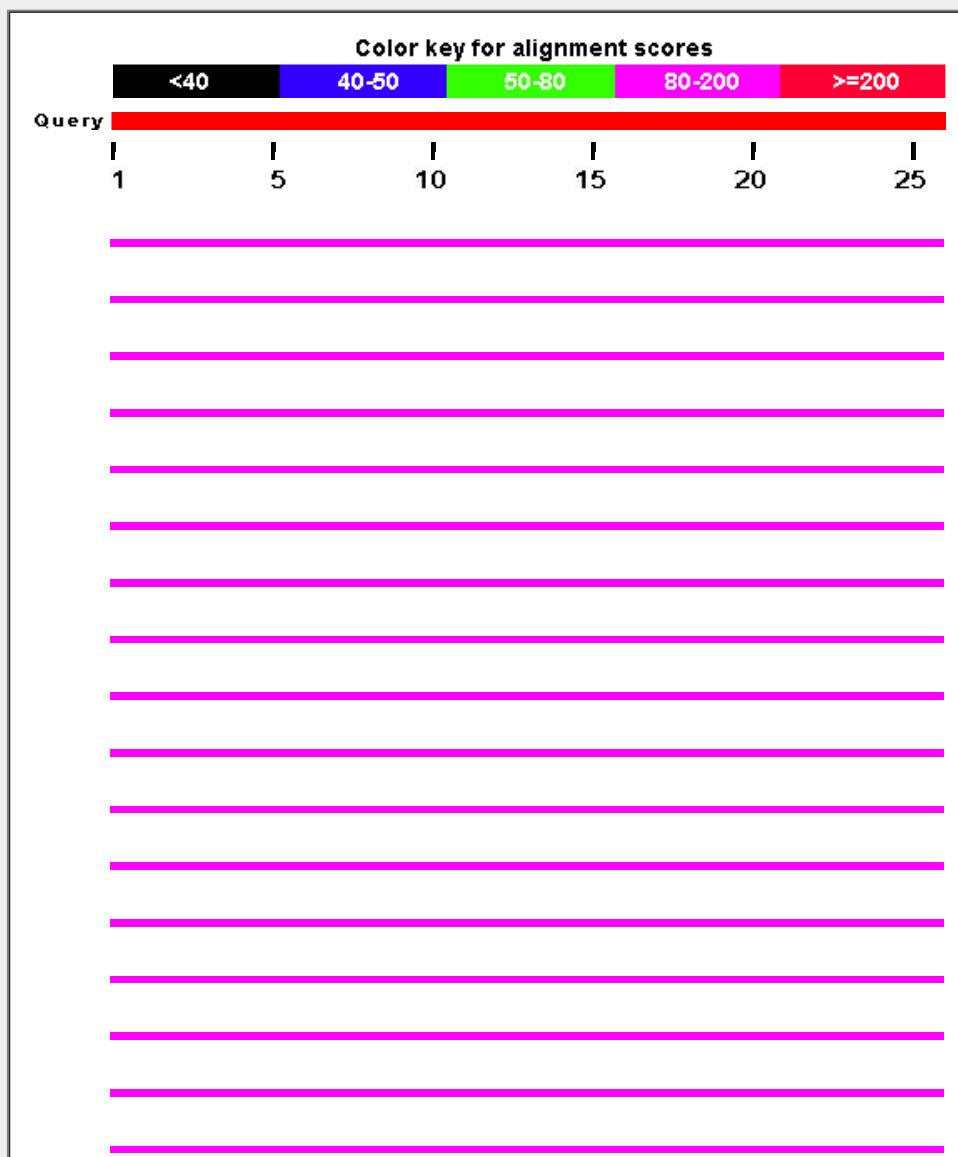

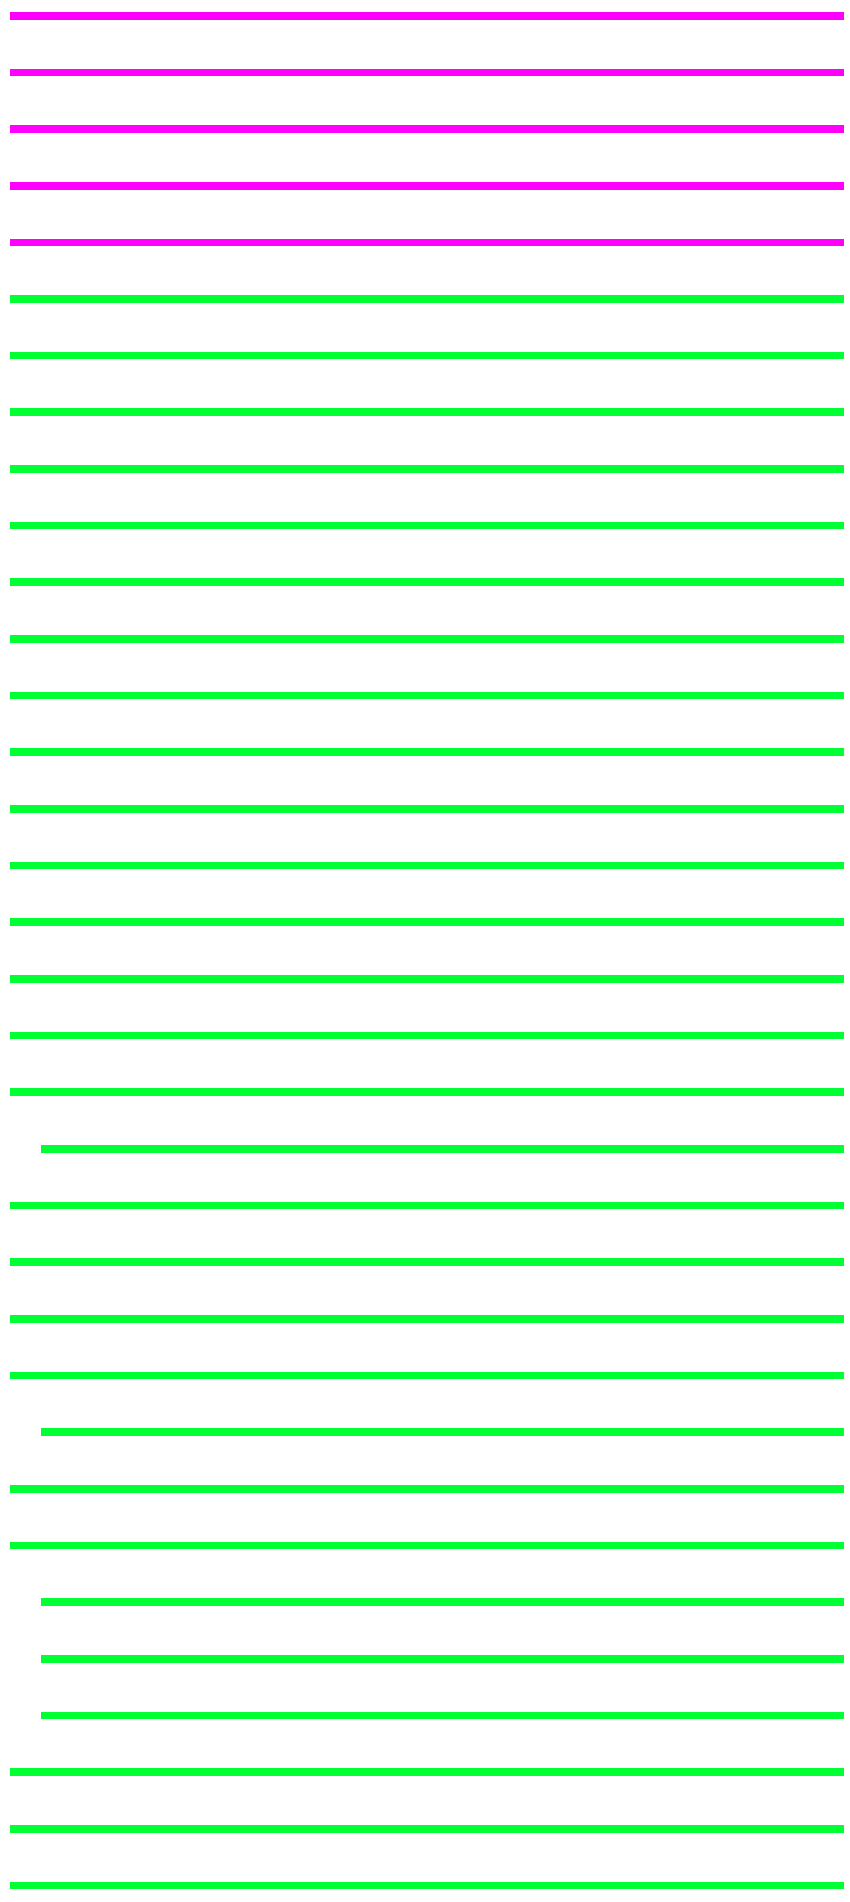

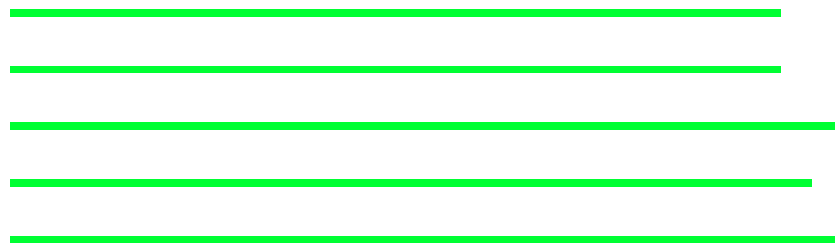

## Descriptions

### Sequences producing significant alignments:

Select: [All](#) [None](#) Selected:0

[Alignments](#)
[Download](#)
[GenPept](#)
[Graphics](#)
[Distance tree of results](#)
[Multiple alignment](#)


| Description                                                                | Max score | Total score | Query cover | E value | Ident | Accession                                   |
|----------------------------------------------------------------------------|-----------|-------------|-------------|---------|-------|---------------------------------------------|
| <a href="#">PREDICTED: biotinidase [Nomascus leucogenys]</a>               | 80.4      | 80.4        | 100%        | 2e-15   | 96%   | <a href="#">gi 332232450 XP_003265417.1</a> |
| <a href="#">unnamed protein product [Macaca fascicularis]</a>              | 80.4      | 80.4        | 100%        | 2e-15   | 96%   | <a href="#">gi 90077268 BAE88314.1</a>      |
| <a href="#">unnamed protein product [Homo sapiens]</a>                     | 80.4      | 80.4        | 100%        | 2e-15   | 96%   | <a href="#">gi 221043776 BAH13565.1</a>     |
| <a href="#">biotinidase isoform 4 precursor [Homo sapiens]</a>             | 80.4      | 80.4        | 100%        | 2e-15   | 96%   | <a href="#">gi 528524486 NP_001268654.1</a> |
| <a href="#">biotinidase precursor [Pan troglodytes]</a>                    | 80.4      | 80.4        | 100%        | 2e-15   | 96%   | <a href="#">gi 697993457 NP_001289363.1</a> |
| <a href="#">PREDICTED: biotinidase isoform X2 [Chlorocebus sabaeus]</a>    | 80.4      | 80.4        | 100%        | 2e-15   | 96%   | <a href="#">gi 635085523 XP_008007381.1</a> |
| <a href="#">PREDICTED: biotinidase isoform X2 [Macaca fascicularis]</a>    | 80.4      | 80.4        | 100%        | 2e-15   | 96%   | <a href="#">gi 544411158 XP_005545768.1</a> |
| <a href="#">PREDICTED: biotinidase isoform X2 [Pan troglodytes]</a>        | 80.4      | 80.4        | 100%        | 2e-15   | 96%   | <a href="#">gi 694900420 XP_009443239.1</a> |
| <a href="#">PREDICTED: biotinidase isoform X2 [Pan paniscus]</a>           | 80.4      | 80.4        | 100%        | 2e-15   | 96%   | <a href="#">gi 675784344 XP_008949921.1</a> |
| <a href="#">PREDICTED: biotinidase isoform X3 [Pongo abelii]</a>           | 80.4      | 80.4        | 100%        | 2e-15   | 96%   | <a href="#">gi 686713703 XP_009237577.1</a> |
| <a href="#">PREDICTED: biotinidase isoform X1 [Chlorocebus sabaeus]</a>    | 80.4      | 80.4        | 100%        | 2e-15   | 96%   | <a href="#">gi 635085521 XP_008007380.1</a> |
| <a href="#">PREDICTED: biotinidase isoform X2 [Pongo abelii]</a>           | 80.4      | 80.4        | 100%        | 2e-15   | 96%   | <a href="#">gi 686713701 XP_009237576.1</a> |
| <a href="#">biotinidase isoform 3 [Homo sapiens]</a>                       | 80.4      | 80.4        | 100%        | 2e-15   | 96%   | <a href="#">gi 4557373 NP_000051.1</a>      |
| <a href="#">biotinidase isoform 1 [Homo sapiens]</a>                       | 80.4      | 80.4        | 100%        | 2e-15   | 96%   | <a href="#">gi 528524481 NP_001268652.1</a> |
| <a href="#">biotinidase isoform 2 [Homo sapiens]</a>                       | 80.4      | 80.4        | 100%        | 2e-15   | 96%   | <a href="#">gi 528524483 NP_001268653.1</a> |
| <a href="#">PREDICTED: biotinidase isoform X1 [Pan troglodytes]</a>        | 80.4      | 80.4        | 100%        | 2e-15   | 96%   | <a href="#">gi 410036604 XP_003950087.1</a> |
| <a href="#">PREDICTED: biotinidase isoform X1 [Pan paniscus]</a>           | 80.4      | 80.4        | 100%        | 2e-15   | 96%   | <a href="#">gi 397511808 XP_003826257.1</a> |
| <a href="#">PREDICTED: biotinidase isoform X1 [Pongo abelii]</a>           | 80.4      | 80.4        | 100%        | 2e-15   | 96%   | <a href="#">gi 395734130 XP_003776360.1</a> |
| <a href="#">hypothetical protein EGM_11114 [Macaca fascicularis]</a>       | 80.4      | 80.4        | 100%        | 2e-15   | 96%   | <a href="#">gi 355747075 EHH51689.1</a>     |
| <a href="#">hypothetical protein EGK_12122 [Macaca mulatta]</a>            | 80.4      | 80.4        | 100%        | 2e-15   | 96%   | <a href="#">gi 355560049 EHH16777.1</a>     |
| <a href="#">PREDICTED: biotinidase [Macaca mulatta]</a>                    | 80.4      | 80.4        | 100%        | 2e-15   | 96%   | <a href="#">gi 297286947 XP_001083201.2</a> |
| <a href="#">PREDICTED: biotinidase isoform X1 [Macaca fascicularis]</a>    | 80.4      | 80.4        | 100%        | 2e-15   | 96%   | <a href="#">gi 544411156 XP_005545767.1</a> |
| <a href="#">PREDICTED: biotinidase isoform 1 [Gorilla gorilla gorilla]</a> | 77.8      | 77.8        | 100%        | 1e-14   | 92%   | <a href="#">gi 426339607 XP_004033737.1</a> |
| <a href="#">PREDICTED: biotinidase isoform 3 [Gorilla gorilla gorilla]</a> | 77.8      | 77.8        | 100%        | 1e-14   | 92%   | <a href="#">gi 426339611 XP_004033739.1</a> |
| <a href="#">PREDICTED: biotinidase isoform 4 [Gorilla gorilla gorilla]</a> | 77.8      | 77.8        | 100%        | 1e-14   | 92%   | <a href="#">gi 426339613 XP_004033740.1</a> |
| <a href="#">PREDICTED: biotinidase isoform 2 [Gorilla gorilla gorilla]</a> | 77.8      | 77.8        | 100%        | 1e-14   | 92%   | <a href="#">gi 426339609 XP_004033738.1</a> |
| <a href="#">PREDICTED: biotinidase [Rhinopithecus roxellana]</a>           | 76.6      | 76.6        | 100%        | 4e-14   | 92%   | <a href="#">gi 724960396 XP_010354361.1</a> |
| <a href="#">PREDICTED: biotinidase isoform X2 [Papio anubis]</a>           | 72.7      | 72.7        | 100%        | 8e-13   | 88%   | <a href="#">gi 685527526 XP_009200021.1</a> |
| <a href="#">PREDICTED: biotinidase isoform X1 [Papio anubis]</a>           | 72.7      | 72.7        | 100%        | 8e-13   | 88%   | <a href="#">gi 685527524 XP_009200020.1</a> |

|                                                                                     |      |      |      |       |     |                                             |
|-------------------------------------------------------------------------------------|------|------|------|-------|-----|---------------------------------------------|
| <a href="#">PREDICTED: biotinidase isoform X1 [Callithrix jacchus]</a>              | 71.9 | 71.9 | 100% | 1e-12 | 88% | <a href="#">gi 675740028 XP_008982107.1</a> |
| <a href="#">PREDICTED: biotinidase isoform X2 [Callithrix jacchus]</a>              | 71.9 | 71.9 | 100% | 1e-12 | 88% | <a href="#">gi 390476393 XP_002759736.2</a> |
| <a href="#">PREDICTED: biotinidase-like [Ictidomys tridecemlineatus]</a>            | 63.8 | 63.8 | 100% | 8e-10 | 81% | <a href="#">gi 532063189 XP_005317469.1</a> |
| <a href="#">PREDICTED: biotinidase isoform X3 [Saimiri boliviensis boliviensis]</a> | 63.4 | 63.4 | 100% | 1e-09 | 81% | <a href="#">gi 725560828 XP_010333963.1</a> |
| <a href="#">PREDICTED: biotinidase isoform X2 [Saimiri boliviensis boliviensis]</a> | 63.4 | 63.4 | 100% | 1e-09 | 81% | <a href="#">gi 403265544 XP_003924991.1</a> |
| <a href="#">PREDICTED: biotinidase isoform X1 [Saimiri boliviensis boliviensis]</a> | 63.4 | 63.4 | 100% | 1e-09 | 81% | <a href="#">gi 725560825 XP_010333962.1</a> |
| <a href="#">PREDICTED: biotinidase [Ceratotherium simum simum]</a>                  | 61.3 | 61.3 | 100% | 6e-09 | 77% | <a href="#">gi 478490156 XP_004419451.1</a> |
| <a href="#">PREDICTED: biotinidase [Vicugna pacos]</a>                              | 60.4 | 60.4 | 100% | 1e-08 | 77% | <a href="#">gi 560965913 XP_006205350.1</a> |
| <a href="#">PREDICTED: biotinidase isoform X2 [Microtus ochrogaster]</a>            | 59.6 | 59.6 | 96%  | 2e-08 | 76% | <a href="#">gi 532009812 XP_005348714.1</a> |
| <a href="#">PREDICTED: biotinidase isoform X4 [Canis lupus familiaris]</a>          | 59.6 | 59.6 | 100% | 2e-08 | 77% | <a href="#">gi 545538859 XP_005634450.1</a> |
| <a href="#">PREDICTED: biotinidase isoform X3 [Canis lupus familiaris]</a>          | 59.6 | 59.6 | 100% | 2e-08 | 77% | <a href="#">gi 545538857 XP_005634449.1</a> |
| <a href="#">PREDICTED: biotinidase isoform X2 [Canis lupus familiaris]</a>          | 59.6 | 59.6 | 100% | 2e-08 | 77% | <a href="#">gi 545538855 XP_005634448.1</a> |
| <a href="#">PREDICTED: biotinidase isoform X1 [Canis lupus familiaris]</a>          | 59.6 | 59.6 | 100% | 2e-08 | 77% | <a href="#">gi 545538853 XP_005634447.1</a> |
| <a href="#">PREDICTED: biotinidase isoform X1 [Microtus ochrogaster]</a>            | 59.6 | 59.6 | 96%  | 2e-08 | 76% | <a href="#">gi 532009810 XP_005348713.1</a> |
| <a href="#">biotinidase [Camelus ferus]</a>                                         | 58.7 | 58.7 | 100% | 4e-08 | 73% | <a href="#">gi 528756912 EPY76571.1</a>     |
| <a href="#">PREDICTED: biotinidase [Camelus ferus]</a>                              | 58.7 | 58.7 | 100% | 4e-08 | 73% | <a href="#">gi 560929390 XP_006190847.1</a> |
| <a href="#">PREDICTED: biotinidase isoform X1 [Felis catus]</a>                     | 58.3 | 58.3 | 96%  | 5e-08 | 76% | <a href="#">gi 587000359 XP_003992187.2</a> |
| <a href="#">PREDICTED: biotinidase isoform X2 [Felis catus]</a>                     | 58.3 | 58.3 | 96%  | 5e-08 | 76% | <a href="#">gi 587000357 XP_006936495.1</a> |
| <a href="#">PREDICTED: biotinidase [Mesocricetus auratus]</a>                       | 57.9 | 57.9 | 96%  | 7e-08 | 76% | <a href="#">gi 524955500 XP_005077724.1</a> |
| <a href="#">PREDICTED: biotinidase [Ootolemur garnettii]</a>                        | 57.5 | 57.5 | 100% | 1e-07 | 77% | <a href="#">gi 395816560 XP_003781769.1</a> |
| <a href="#">PREDICTED: biotinidase-like isoform X10 [Chinchilla lanigera]</a>       | 57.1 | 57.1 | 100% | 1e-07 | 73% | <a href="#">gi 533146084 XP_005387502.1</a> |
| <a href="#">PREDICTED: biotinidase-like isoform X5 [Chinchilla lanigera]</a>        | 57.1 | 57.1 | 100% | 1e-07 | 73% | <a href="#">gi 533146074 XP_005387497.1</a> |
| <a href="#">PREDICTED: biotinidase isoform 2 [Odobenus rosmarus divergens]</a>      | 57.1 | 57.1 | 92%  | 1e-07 | 79% | <a href="#">gi 472379495 XP_004409157.1</a> |
| <a href="#">PREDICTED: biotinidase isoform 1 [Odobenus rosmarus divergens]</a>      | 57.1 | 57.1 | 92%  | 1e-07 | 79% | <a href="#">gi 472379493 XP_004409156.1</a> |
| <a href="#">PREDICTED: biotinidase-like isoform X1 [Chinchilla lanigera]</a>        | 57.1 | 57.1 | 100% | 1e-07 | 73% | <a href="#">gi 533146066 XP_005387493.1</a> |
| <a href="#">PREDICTED: biotinidase [Jaculus jaculus]</a>                            | 56.6 | 56.6 | 96%  | 2e-07 | 76% | <a href="#">gi 507555213 XP_004661377.1</a> |
| <a href="#">PREDICTED: biotinidase [Trichechus manatus latirostris]</a>             | 56.6 | 56.6 | 100% | 2e-07 | 73% | <a href="#">gi 471407481 XP_004385327.1</a> |
| <a href="#">PREDICTED: biotinidase [Lipotes vexillifer]</a>                         | 56.6 | 56.6 | 100% | 2e-07 | 77% | <a href="#">gi 602721076 XP_007470691.1</a> |
| <a href="#">PREDICTED: biotinidase isoform X1 [Balaenoptera acutorostrata]</a>      | 56.6 | 56.6 | 100% | 2e-07 | 77% | <a href="#">gi 594624940 XP_007167058.1</a> |
| <a href="#">PREDICTED: biotinidase isoform X3 [Balaenoptera acutorostrata]</a>      | 56.6 | 56.6 | 100% | 2e-07 | 77% | <a href="#">gi 594624944 XP_007167060.1</a> |
| <a href="#">PREDICTED: biotinidase isoform X3 [Equus caballus]</a>                  | 56.2 | 56.2 | 96%  | 3e-07 | 76% | <a href="#">gi 545189350 XP_005600979.1</a> |
| <a href="#">PREDICTED: biotinidase [Equus przewalskii]</a>                          | 56.2 | 56.2 | 96%  | 3e-07 | 76% | <a href="#">gi 664753751 XP_008534346.1</a> |
| <a href="#">PREDICTED: biotinidase isoform X2 [Equus caballus]</a>                  | 56.2 | 56.2 | 96%  | 3e-07 | 76% | <a href="#">gi 545189348 XP_005600978.1</a> |
| <a href="#">PREDICTED: biotinidase isoform X1 [Equus caballus]</a>                  | 56.2 | 56.2 | 96%  | 3e-07 | 76% | <a href="#">gi 545189346 XP_005600977.1</a> |
| <a href="#">PREDICTED: biotinidase [Fukomys damarensis]</a>                         | 55.8 | 55.8 | 100% | 4e-07 | 73% | <a href="#">gi 731285322 XP_010611073.1</a> |
| <a href="#">Biotinidase [Fukomys damarensis]</a>                                    | 55.8 | 55.8 | 100% | 4e-07 | 73% | <a href="#">gi 676263045 KFO19807.1</a>     |
| <a href="#">PREDICTED: biotinidase isoform X2 [Cricetulus griseus]</a>              | 55.4 | 55.4 | 96%  | 5e-07 | 76% | <a href="#">gi 625181248 XP_007632389.1</a> |
| <a href="#">PREDICTED: biotinidase isoform X1 [Cricetulus griseus]</a>              | 55.4 | 55.4 | 96%  | 5e-07 | 76% | <a href="#">gi 354465853 XP_003495391.1</a> |
| <a href="#">biotinidase [Cricetulus griseus]</a>                                    | 55.4 | 55.4 | 96%  | 5e-07 | 76% | <a href="#">gi 537261432 ERE90059.1</a>     |
| <a href="#">PREDICTED: biotinidase [Erinaceus europaeus]</a>                        | 54.9 | 54.9 | 96%  | 7e-07 | 72% | <a href="#">gi 617553342 XP_007530134.1</a> |
| <a href="#">PREDICTED: biotinidase [Galeopterus variegatus]</a>                     | 54.5 | 54.5 | 100% | 1e-06 | 73% | <a href="#">gi 667288263 XP_008576771.1</a> |
| <a href="#">PREDICTED: LOW QUALITY PROTEIN: biotinidase [Tursiops truncatus]</a>    | 54.1 | 54.1 | 100% | 1e-06 | 73% | <a href="#">gi 470628904 XP_004321284.1</a> |
| <a href="#">PREDICTED: biotinidase [Orcinus orca]</a>                               | 54.1 | 54.1 | 100% | 1e-06 | 73% | <a href="#">gi 466019817 XP_004271983.1</a> |
| <a href="#">PREDICTED: biotinidase isoform X2 [Physeter catodon]</a>                | 53.7 | 53.7 | 100% | 2e-06 | 73% | <a href="#">gi 593711507 XP_007102308.1</a> |
| <a href="#">PREDICTED: biotinidase [Condylura cristata]</a>                         | 53.7 | 53.7 | 92%  | 2e-06 | 75% | <a href="#">gi 507976256 XP_004692357.1</a> |

|                                                                             |      |      |      |       |     |                                             |
|-----------------------------------------------------------------------------|------|------|------|-------|-----|---------------------------------------------|
| <a href="#">PREDICTED: biotinidase isoform X1 [Physeter catodon]</a>        | 53.7 | 53.7 | 100% | 2e-06 | 73% | <a href="#">gi 593711505 XP_007102307.1</a> |
| <a href="#">PREDICTED: biotinidase [Panthera tigris altaica]</a>            | 53.2 | 53.2 | 96%  | 3e-06 | 72% | <a href="#">gi 591322659 XP_007087428.1</a> |
| <a href="#">PREDICTED: biotinidase isoform X3 [Leptonychotes weddellii]</a> | 53.2 | 53.2 | 92%  | 3e-06 | 75% | <a href="#">gi 585186600 XP_006744787.1</a> |
| <a href="#">PREDICTED: biotinidase isoform X2 [Leptonychotes weddellii]</a> | 53.2 | 53.2 | 92%  | 3e-06 | 75% | <a href="#">gi 585186598 XP_006744786.1</a> |
| <a href="#">PREDICTED: biotinidase isoform X1 [Leptonychotes weddellii]</a> | 53.2 | 53.2 | 92%  | 3e-06 | 75% | <a href="#">gi 585186596 XP_006744785.1</a> |
| <a href="#">PREDICTED: biotinidase isoform X1 [Peromyscus maniculatus]</a>  | 52.8 | 52.8 | 96%  | 3e-06 | 68% | <a href="#">gi 589967608 XP_006996305.1</a> |
| <a href="#">PREDICTED: biotinidase isoform X2 [Peromyscus maniculatus]</a>  | 52.8 | 52.8 | 96%  | 4e-06 | 68% | <a href="#">gi 589967610 XP_006996306.1</a> |
| <a href="#">PREDICTED: biotinidase [Nannospalax galili]</a>                 | 50.3 | 50.3 | 100% | 2e-05 | 69% | <a href="#">gi 674081213 XP_008848205.1</a> |
| <a href="#">Biotinidase [Heterocephalus glaber]</a>                         | 49.8 | 49.8 | 100% | 3e-05 | 65% | <a href="#">gi 351707565 EHB10484.1</a>     |
| <a href="#">PREDICTED: biotinidase [Mustela putorius furo]</a>              | 49.8 | 49.8 | 92%  | 3e-05 | 71% | <a href="#">gi 511908359 XP_004773614.1</a> |
| <a href="#">PREDICTED: biotinidase isoform X3 [Heterocephalus glaber]</a>   | 49.8 | 49.8 | 100% | 3e-05 | 65% | <a href="#">gi 512886961 XP_004896459.1</a> |
| <a href="#">PREDICTED: biotinidase isoform X1 [Heterocephalus glaber]</a>   | 49.8 | 49.8 | 100% | 3e-05 | 65% | <a href="#">gi 512886949 XP_004896457.1</a> |
| <a href="#">PREDICTED: biotinidase isoform X2 [Ursus maritimus]</a>         | 49.4 | 49.4 | 92%  | 4e-05 | 71% | <a href="#">gi 670981874 XP_008707139.1</a> |
| <a href="#">PREDICTED: biotinidase isoform X1 [Ursus maritimus]</a>         | 49.4 | 49.4 | 92%  | 4e-05 | 71% | <a href="#">gi 670981872 XP_008707130.1</a> |
| <a href="#">biotinidase isoform CRA_a [Rattus norvegicus]</a>               | 48.6 | 48.6 | 96%  | 8e-05 | 64% | <a href="#">gi 149034168 EDL88938.1</a>     |
| <a href="#">biotinidase isoform CRA_c [Rattus norvegicus]</a>               | 48.6 | 48.6 | 96%  | 8e-05 | 64% | <a href="#">gi 149034170 EDL88940.1</a>     |
| <a href="#">biotinidase precursor [Rattus norvegicus]</a>                   | 48.6 | 48.6 | 96%  | 8e-05 | 64% | <a href="#">gi 58865670 NP_001012047.1</a>  |
| <a href="#">PREDICTED: biotinidase isoform X1 [Myotis lucifugus]</a>        | 48.6 | 48.6 | 96%  | 8e-05 | 72% | <a href="#">gi 558102610 XP_006083737.1</a> |
| <a href="#">PREDICTED: biotinidase isoform X3 [Myotis brandtii]</a>         | 48.6 | 48.6 | 96%  | 8e-05 | 72% | <a href="#">gi 554537982 XP_005863672.1</a> |
| <a href="#">PREDICTED: biotinidase isoform X2 [Myotis lucifugus]</a>        | 48.6 | 48.6 | 96%  | 8e-05 | 72% | <a href="#">gi 558102613 XP_006083738.1</a> |
| <a href="#">PREDICTED: biotinidase isoform X2 [Myotis brandtii]</a>         | 48.6 | 48.6 | 96%  | 8e-05 | 72% | <a href="#">gi 554537986 XP_005863671.1</a> |
| <a href="#">PREDICTED: biotinidase isoform X2 [Rattus norvegicus]</a>       | 48.6 | 48.6 | 96%  | 8e-05 | 64% | <a href="#">gi 564387894 XP_006252671.1</a> |
| <a href="#">Biotinidase [Myotis brandtii]</a>                               | 48.6 | 48.6 | 96%  | 8e-05 | 72% | <a href="#">gi 521024341 EPQ06129.1</a>     |
| <a href="#">PREDICTED: biotinidase-like [Octodon degus]</a>                 | 46.9 | 46.9 | 96%  | 3e-04 | 72% | <a href="#">gi 507646799 XP_004631734.1</a> |
| <a href="#">PREDICTED: biotinidase [Loxodonta africana]</a>                 | 46.4 | 46.4 | 100% | 4e-04 | 65% | <a href="#">gi 731510838 XP_010598778.1</a> |
| <a href="#">PREDICTED: biotinidase-like [Ailuropoda melanoleuca]</a>        | 46.4 | 46.4 | 92%  | 4e-04 | 71% | <a href="#">gi 301759093 XP_002915396.1</a> |

## Alignments

Download [GenPept](#) [Graphics](#)

[Next](#) [Previous](#) [Descriptions](#)

PREDICTED: biotinidase [Nomascus leucogenys]

Sequence ID: [gi|332232450|ref|XP\\_003265417.1](#) Length: 474 Number of Matches: 1

Range 1: 270 to 295 [GenPept](#) [Graphics](#)

[Next Match](#) [Previous Match](#)

| Score          | Expect | Identities | Positives   | Gaps     |
|----------------|--------|------------|-------------|----------|
| 80.4 bits(182) | 2e-15  | 25/26(96%) | 26/26(100%) | 0/26(0%) |

Query 1 KNPVGLIGAEDATGETDPSHSHKFLKI 26  
 KNPVGLIGAE+ATGETDPSHSHKFLKI  
 Sbjct 270 KNPVGLIGAENATGETDPSHSHKFLKI 295

### Related Information

[Gene](#) - associated gene details  
[Map Viewer](#) - aligned genomic context

Download [GenPept](#) [Graphics](#)

[Next](#) [Previous](#) [Descriptions](#)

unnamed protein product [Macaca fascicularis]

Sequence ID: [gi|90077268|dbj|BAE88314.1](#) Length: 493 Number of Matches: 1

Range 1: 323 to 348 [GenPept](#) [Graphics](#)

[Next Match](#) [Previous Match](#)

| Score          | Expect | Identities | Positives   | Gaps     |
|----------------|--------|------------|-------------|----------|
| 80.4 bits(182) | 2e-15  | 25/26(96%) | 26/26(100%) | 0/26(0%) |

### Related Information

[Gene](#) - associated gene details

Query 1 KNPVGLIGAEDATGETDPSHSKFLKI 26  
 KNPVGLIGAE+ATGETDPSHSKFLKI  
 Sbjct 323 KNPVGLIGAENATGETDPSHSKFLKI 348

Download [GenPept](#) [Graphics](#)

[▼ Next](#) [▲ Previous](#) [▲ Descriptions](#)

unnamed protein product [Homo sapiens]

Sequence ID: [gi|221043776|dbj|BAH13565.1](#) Length: 523 Number of Matches: 1

Range 1: 319 to 344 [GenPept](#) [Graphics](#)

[▼ Next Match](#) [▲ Previous Match](#)

| Score          | Expect | Identities | Positives   | Gaps     |
|----------------|--------|------------|-------------|----------|
| 80.4 bits(182) | 2e-15  | 25/26(96%) | 26/26(100%) | 0/26(0%) |

Query 1 KNPVGLIGAEDATGETDPSHSKFLKI 26  
 KNPVGLIGAE+ATGETDPSHSKFLKI  
 Sbjct 319 KNPVGLIGAENATGETDPSHSKFLKI 344

**Related Information**

[Gene](#) - associated gene details

Download [GenPept](#) [Graphics](#)

[▼ Next](#) [▲ Previous](#) [▲ Descriptions](#)

biotinidase isoform 4 precursor [Homo sapiens]

Sequence ID: [gi|528524486|ref|NP\\_001268654.1](#) Length: 523 Number of Matches: 1

[▶ See 3 more title\(s\)](#)

Range 1: 319 to 344 [GenPept](#) [Graphics](#)

[▼ Next Match](#) [▲ Previous Match](#)

| Score          | Expect | Identities | Positives   | Gaps     |
|----------------|--------|------------|-------------|----------|
| 80.4 bits(182) | 2e-15  | 25/26(96%) | 26/26(100%) | 0/26(0%) |

Query 1 KNPVGLIGAEDATGETDPSHSKFLKI 26  
 KNPVGLIGAE+ATGETDPSHSKFLKI  
 Sbjct 319 KNPVGLIGAENATGETDPSHSKFLKI 344

**Related Information**

[Gene](#) - associated gene details

[Map Viewer](#) - aligned genomic context

[Identical Proteins](#) - Proteins identical to the subject

Download [GenPept](#) [Graphics](#)

[▼ Next](#) [▲ Previous](#) [▲ Descriptions](#)

biotinidase precursor [Pan troglodytes]

Sequence ID: [gi|697993457|ref|NP\\_001289363.1](#) Length: 523 Number of Matches: 1

[▶ See 1 more title\(s\)](#)

Range 1: 319 to 344 [GenPept](#) [Graphics](#)

[▼ Next Match](#) [▲ Previous Match](#)

| Score          | Expect | Identities | Positives   | Gaps     |
|----------------|--------|------------|-------------|----------|
| 80.4 bits(182) | 2e-15  | 25/26(96%) | 26/26(100%) | 0/26(0%) |

Query 1 KNPVGLIGAEDATGETDPSHSKFLKI 26  
 KNPVGLIGAE+ATGETDPSHSKFLKI  
 Sbjct 319 KNPVGLIGAENATGETDPSHSKFLKI 344

**Related Information**

[Gene](#) - associated gene details

[Map Viewer](#) - aligned genomic context

[Identical Proteins](#) - Proteins identical to the subject

BLAST is a registered trademark of the National Library of Medicine.



NCBI/ BLAST/ blastp suite/ Formatting Results - B92ORBN201R

Your search parameters were adjusted to search for a short input sequence.

[Edit and Resubmit](#) [Save Search Strategies](#) [Formatting options](#) [Download](#)

[YouTube](#) [How to read this page](#) [Blast report description](#)

### BTB\_KNPVGLIGAENATGETDPSHSKF\_NonMod

RID [B92ORBN201R](#) (Expires on 01-14 09:51 am)

Query ID |cl|88991  
 Description None  
 Molecule type amino acid  
 Query Length 23

Database Name nr  
 Description All non-redundant GenBank CDS translations+PDB+SwissProt+PIR excluding environmental samples from WGS projects  
 Program BLASTP 2.2.30+ [Citation](#)

Other reports: [Search Summary](#) [Taxonomy reports](#) [Distance tree of results](#) [Multiple alignment](#)

### Graphic Summary

[Show Conserved Domains](#)

No putative conserved domains have been detected

Distribution of 100 Blast Hits on the Query Sequence

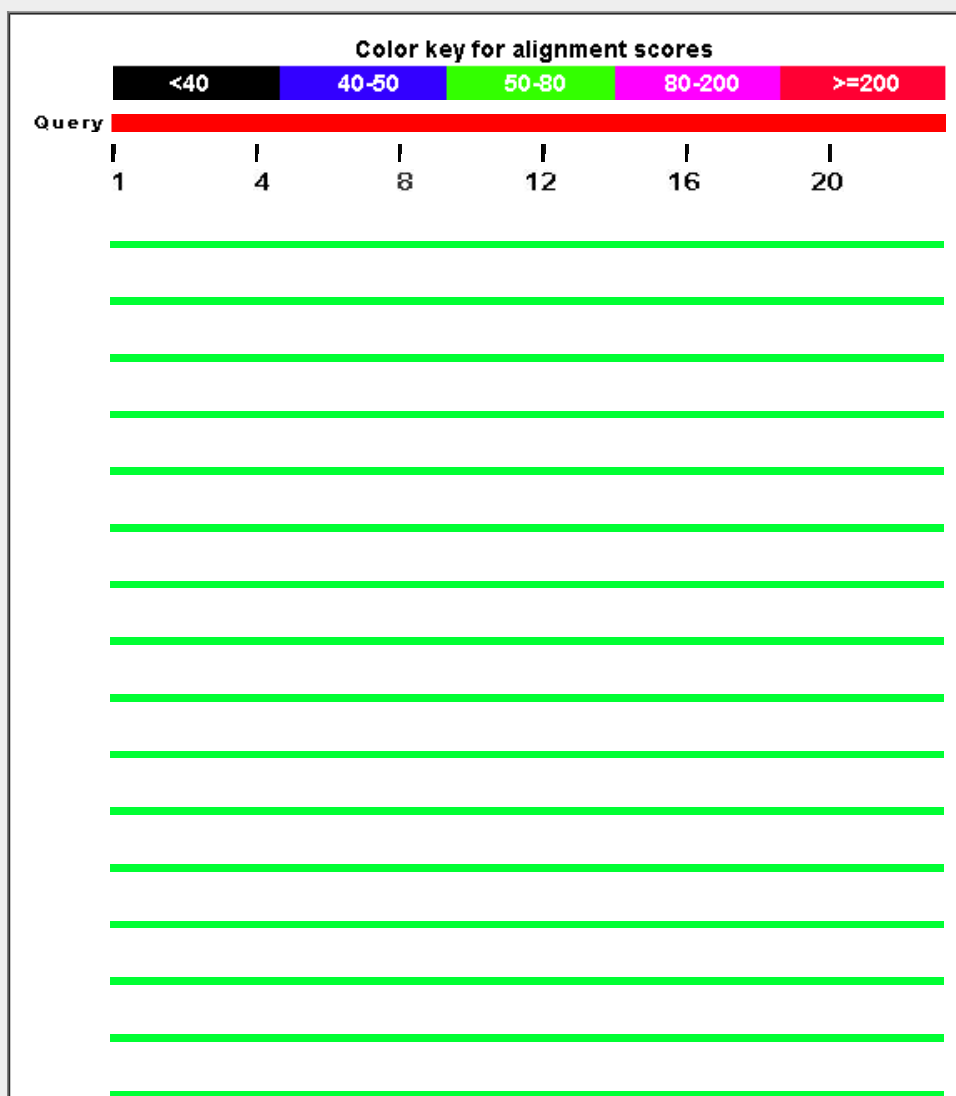

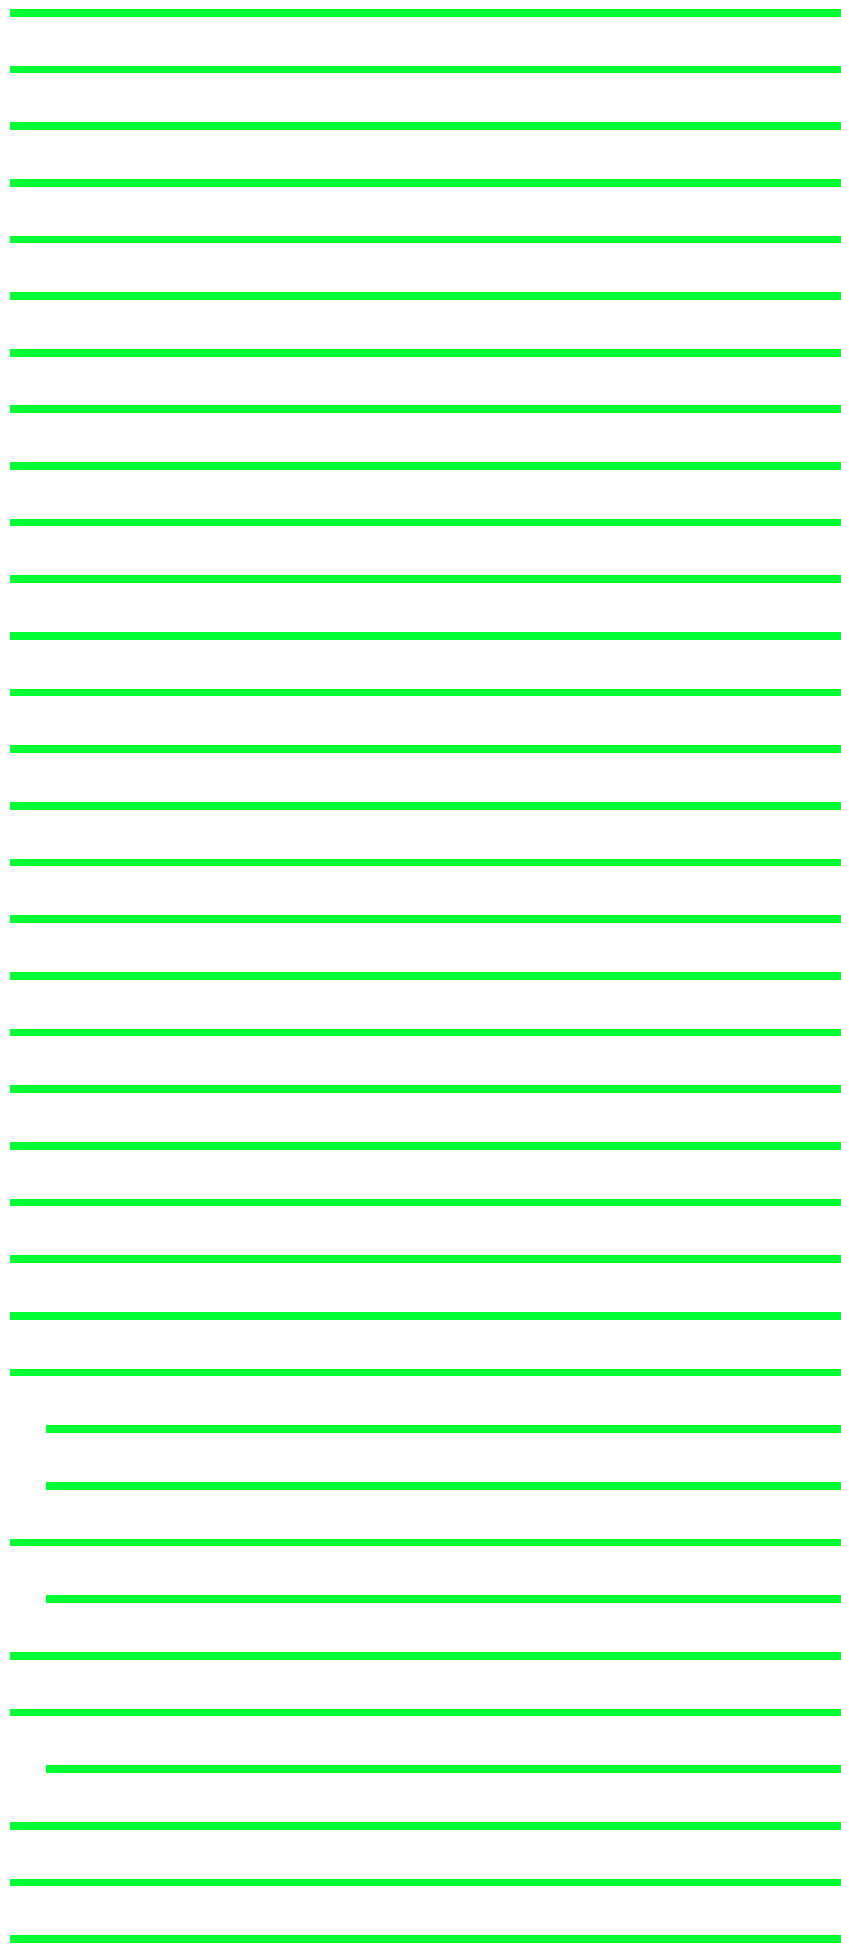

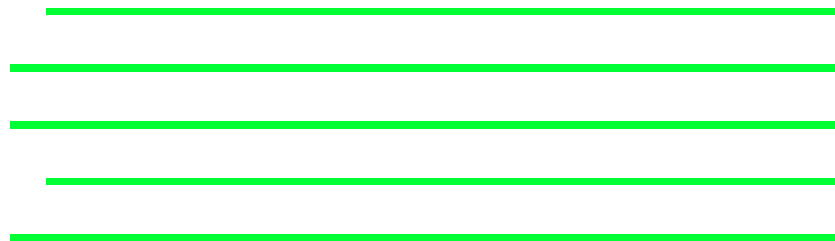

## Descriptions

### Sequences producing significant alignments:

Select: [All](#) [None](#) Selected:0

| <a href="#">Alignments</a> <a href="#">Download</a> <a href="#">GenPept</a> <a href="#">Graphics</a> <a href="#">Distance tree of results</a> <a href="#">Multiple alignment</a> |           |             |             |         |       |                                             |
|----------------------------------------------------------------------------------------------------------------------------------------------------------------------------------|-----------|-------------|-------------|---------|-------|---------------------------------------------|
| Description                                                                                                                                                                      | Max score | Total score | Query cover | E value | Ident | Accession                                   |
| <a href="#">PREDICTED: biotinidase [Nomascus leucogenys]</a>                                                                                                                     | 73.6      | 73.6        | 100%        | 2e-13   | 100%  | <a href="#">gij332232450 XP_003265417.1</a> |
| <a href="#">unnamed protein product [Macaca fascicularis]</a>                                                                                                                    | 73.6      | 73.6        | 100%        | 2e-13   | 100%  | <a href="#">gij90077268 BAE88314.1</a>      |
| <a href="#">unnamed protein product [Homo sapiens]</a>                                                                                                                           | 73.6      | 73.6        | 100%        | 2e-13   | 100%  | <a href="#">gij221043776 BAH13565.1</a>     |
| <a href="#">biotinidase isoform 4 precursor [Homo sapiens]</a>                                                                                                                   | 73.6      | 73.6        | 100%        | 2e-13   | 100%  | <a href="#">gij528524486 NP_001268654.1</a> |
| <a href="#">biotinidase precursor [Pan troglodytes]</a>                                                                                                                          | 73.6      | 73.6        | 100%        | 2e-13   | 100%  | <a href="#">gij697993457 NP_001289363.1</a> |
| <a href="#">PREDICTED: biotinidase isoform X2 [Chlorocebus sabaeus]</a>                                                                                                          | 73.6      | 73.6        | 100%        | 2e-13   | 100%  | <a href="#">gij635085523 XP_008007381.1</a> |
| <a href="#">PREDICTED: biotinidase isoform X2 [Macaca fascicularis]</a>                                                                                                          | 73.6      | 73.6        | 100%        | 2e-13   | 100%  | <a href="#">gij544411158 XP_005545768.1</a> |
| <a href="#">PREDICTED: biotinidase isoform X2 [Pan troglodytes]</a>                                                                                                              | 73.6      | 73.6        | 100%        | 2e-13   | 100%  | <a href="#">gij694900420 XP_009443239.1</a> |
| <a href="#">PREDICTED: biotinidase isoform X2 [Pan paniscus]</a>                                                                                                                 | 73.6      | 73.6        | 100%        | 2e-13   | 100%  | <a href="#">gij675784344 XP_008949921.1</a> |
| <a href="#">PREDICTED: biotinidase isoform X3 [Pongo abelii]</a>                                                                                                                 | 73.6      | 73.6        | 100%        | 2e-13   | 100%  | <a href="#">gij686713703 XP_009237577.1</a> |
| <a href="#">PREDICTED: biotinidase isoform X1 [Chlorocebus sabaeus]</a>                                                                                                          | 73.6      | 73.6        | 100%        | 2e-13   | 100%  | <a href="#">gij635085521 XP_008007380.1</a> |
| <a href="#">PREDICTED: biotinidase isoform X2 [Pongo abelii]</a>                                                                                                                 | 73.6      | 73.6        | 100%        | 2e-13   | 100%  | <a href="#">gij686713701 XP_009237576.1</a> |
| <a href="#">biotinidase isoform 3 [Homo sapiens]</a>                                                                                                                             | 73.6      | 73.6        | 100%        | 2e-13   | 100%  | <a href="#">gij4557373 NP_000051.1</a>      |
| <a href="#">biotinidase isoform 1 [Homo sapiens]</a>                                                                                                                             | 73.6      | 73.6        | 100%        | 2e-13   | 100%  | <a href="#">gij528524481 NP_001268652.1</a> |
| <a href="#">biotinidase isoform 2 [Homo sapiens]</a>                                                                                                                             | 73.6      | 73.6        | 100%        | 2e-13   | 100%  | <a href="#">gij528524483 NP_001268653.1</a> |
| <a href="#">PREDICTED: biotinidase isoform X1 [Pan troglodytes]</a>                                                                                                              | 73.6      | 73.6        | 100%        | 2e-13   | 100%  | <a href="#">gij410036604 XP_003950087.1</a> |
| <a href="#">PREDICTED: biotinidase isoform X1 [Pan paniscus]</a>                                                                                                                 | 73.6      | 73.6        | 100%        | 2e-13   | 100%  | <a href="#">gij397511808 XP_003826257.1</a> |
| <a href="#">PREDICTED: biotinidase isoform X1 [Pongo abelii]</a>                                                                                                                 | 73.6      | 73.6        | 100%        | 2e-13   | 100%  | <a href="#">gij395734130 XP_003776360.1</a> |
| <a href="#">hypothetical protein EGM_11114 [Macaca fascicularis]</a>                                                                                                             | 73.6      | 73.6        | 100%        | 2e-13   | 100%  | <a href="#">gij355747075 EHH51689.1</a>     |
| <a href="#">hypothetical protein EGK_12122 [Macaca mulatta]</a>                                                                                                                  | 73.6      | 73.6        | 100%        | 2e-13   | 100%  | <a href="#">gij355560049 EHH16777.1</a>     |
| <a href="#">PREDICTED: biotinidase [Macaca mulatta]</a>                                                                                                                          | 73.6      | 73.6        | 100%        | 2e-13   | 100%  | <a href="#">gij297286947 XP_001083201.2</a> |
| <a href="#">PREDICTED: biotinidase isoform X1 [Macaca fascicularis]</a>                                                                                                          | 73.6      | 73.6        | 100%        | 2e-13   | 100%  | <a href="#">gij544411156 XP_005545767.1</a> |
| <a href="#">PREDICTED: biotinidase isoform 1 [Gorilla gorilla gorilla]</a>                                                                                                       | 71.0      | 71.0        | 100%        | 2e-12   | 96%   | <a href="#">gij426339607 XP_004033737.1</a> |
| <a href="#">PREDICTED: biotinidase isoform 3 [Gorilla gorilla gorilla]</a>                                                                                                       | 71.0      | 71.0        | 100%        | 2e-12   | 96%   | <a href="#">gij426339611 XP_004033739.1</a> |
| <a href="#">PREDICTED: biotinidase isoform 4 [Gorilla gorilla gorilla]</a>                                                                                                       | 71.0      | 71.0        | 100%        | 2e-12   | 96%   | <a href="#">gij426339613 XP_004033740.1</a> |
| <a href="#">PREDICTED: biotinidase isoform 2 [Gorilla gorilla gorilla]</a>                                                                                                       | 71.0      | 71.0        | 100%        | 2e-12   | 96%   | <a href="#">gij426339609 XP_004033738.1</a> |
| <a href="#">PREDICTED: biotinidase [Rhinopithecus roxellana]</a>                                                                                                                 | 69.8      | 69.8        | 100%        | 5e-12   | 96%   | <a href="#">gij724960396 XP_010354361.1</a> |
| <a href="#">PREDICTED: biotinidase isoform X2 [Papio anubis]</a>                                                                                                                 | 66.0      | 66.0        | 100%        | 1e-10   | 91%   | <a href="#">gij685527526 XP_009200021.1</a> |

|                                                                                     |      |      |      |       |     |                                             |
|-------------------------------------------------------------------------------------|------|------|------|-------|-----|---------------------------------------------|
| <a href="#">PREDICTED: biotinidase isoform X1 [Papio anubis]</a>                    | 66.0 | 66.0 | 100% | 1e-10 | 91% | <a href="#">gij685527524 XP_009200020.1</a> |
| <a href="#">PREDICTED: biotinidase isoform X1 [Callithrix jacchus]</a>              | 65.1 | 65.1 | 100% | 2e-10 | 91% | <a href="#">gij675740028 XP_008982107.1</a> |
| <a href="#">PREDICTED: biotinidase isoform X2 [Callithrix jacchus]</a>              | 65.1 | 65.1 | 100% | 2e-10 | 91% | <a href="#">gij390476393 XP_002759736.2</a> |
| <a href="#">PREDICTED: biotinidase isoform X4 [Canis lupus familiaris]</a>          | 57.5 | 57.5 | 100% | 7e-08 | 83% | <a href="#">gij545538859 XP_005634450.1</a> |
| <a href="#">PREDICTED: biotinidase isoform X3 [Canis lupus familiaris]</a>          | 57.5 | 57.5 | 100% | 7e-08 | 83% | <a href="#">gij545538857 XP_005634449.1</a> |
| <a href="#">PREDICTED: biotinidase isoform X2 [Canis lupus familiaris]</a>          | 57.5 | 57.5 | 100% | 7e-08 | 83% | <a href="#">gij545538855 XP_005634448.1</a> |
| <a href="#">PREDICTED: biotinidase isoform X1 [Canis lupus familiaris]</a>          | 57.5 | 57.5 | 100% | 7e-08 | 83% | <a href="#">gij545538853 XP_005634447.1</a> |
| <a href="#">PREDICTED: biotinidase-like [Ictidomys tridecemlineatus]</a>            | 57.1 | 57.1 | 100% | 1e-07 | 83% | <a href="#">gij532063189 XP_005317469.1</a> |
| <a href="#">PREDICTED: biotinidase isoform 2 [Odobenus rosmarus divergens]</a>      | 56.6 | 56.6 | 100% | 1e-07 | 83% | <a href="#">gij472379495 XP_004409157.1</a> |
| <a href="#">PREDICTED: biotinidase isoform X3 [Saimiri boliviensis boliviensis]</a> | 56.6 | 56.6 | 100% | 1e-07 | 83% | <a href="#">gij725560828 XP_010333963.1</a> |
| <a href="#">PREDICTED: biotinidase isoform 1 [Odobenus rosmarus divergens]</a>      | 56.6 | 56.6 | 100% | 1e-07 | 83% | <a href="#">gij472379493 XP_004409156.1</a> |
| <a href="#">PREDICTED: biotinidase isoform X2 [Saimiri boliviensis boliviensis]</a> | 56.6 | 56.6 | 100% | 1e-07 | 83% | <a href="#">gij403265544 XP_003924991.1</a> |
| <a href="#">PREDICTED: biotinidase isoform X1 [Saimiri boliviensis boliviensis]</a> | 56.6 | 56.6 | 100% | 1e-07 | 83% | <a href="#">gij725560825 XP_010333962.1</a> |
| <a href="#">PREDICTED: biotinidase isoform X1 [Felis catus]</a>                     | 56.2 | 56.2 | 95%  | 2e-07 | 82% | <a href="#">gij587000359 XP_003992187.2</a> |
| <a href="#">PREDICTED: biotinidase isoform X2 [Felis catus]</a>                     | 56.2 | 56.2 | 95%  | 2e-07 | 82% | <a href="#">gij587000357 XP_006936495.1</a> |
| <a href="#">PREDICTED: biotinidase [Ceratotherium simum simum]</a>                  | 54.5 | 54.5 | 100% | 7e-07 | 78% | <a href="#">gij478490156 XP_004419451.1</a> |
| <a href="#">PREDICTED: biotinidase [Mesocricetus auratus]</a>                       | 54.1 | 54.1 | 95%  | 1e-06 | 82% | <a href="#">gij524955500 XP_005077724.1</a> |
| <a href="#">PREDICTED: biotinidase [Jaculus jaculus]</a>                            | 53.2 | 53.2 | 100% | 2e-06 | 78% | <a href="#">gij507555213 XP_004661377.1</a> |
| <a href="#">PREDICTED: biotinidase [Vicugna pacos]</a>                              | 52.8 | 52.8 | 100% | 3e-06 | 74% | <a href="#">gij560965913 XP_006205350.1</a> |
| <a href="#">PREDICTED: biotinidase isoform X2 [Microtus ochrogaster]</a>            | 52.8 | 52.8 | 95%  | 3e-06 | 77% | <a href="#">gij532009812 XP_005348714.1</a> |
| <a href="#">PREDICTED: biotinidase isoform X3 [Leptonychotes weddellii]</a>         | 52.8 | 52.8 | 100% | 3e-06 | 78% | <a href="#">gij585186600 XP_006744787.1</a> |
| <a href="#">PREDICTED: biotinidase isoform X2 [Leptonychotes weddellii]</a>         | 52.8 | 52.8 | 100% | 3e-06 | 78% | <a href="#">gij585186598 XP_006744786.1</a> |
| <a href="#">PREDICTED: biotinidase isoform X1 [Leptonychotes weddellii]</a>         | 52.8 | 52.8 | 100% | 3e-06 | 78% | <a href="#">gij585186596 XP_006744785.1</a> |
| <a href="#">PREDICTED: biotinidase isoform X1 [Microtus ochrogaster]</a>            | 52.8 | 52.8 | 95%  | 3e-06 | 77% | <a href="#">gij532009810 XP_005348713.1</a> |
| <a href="#">biotinidase [Camelus ferus]</a>                                         | 52.0 | 52.0 | 100% | 5e-06 | 74% | <a href="#">gij528756912 EPY76571.1</a>     |
| <a href="#">PREDICTED: biotinidase [Camelus ferus]</a>                              | 52.0 | 52.0 | 100% | 5e-06 | 74% | <a href="#">gij560929390 XP_006190847.1</a> |
| <a href="#">PREDICTED: biotinidase [Panthera tigris altaica]</a>                    | 51.1 | 51.1 | 95%  | 9e-06 | 77% | <a href="#">gij591322659 XP_007087428.1</a> |
| <a href="#">PREDICTED: biotinidase [Otolemur garnettii]</a>                         | 50.7 | 50.7 | 100% | 1e-05 | 78% | <a href="#">gij395816560 XP_003781769.1</a> |
| <a href="#">PREDICTED: biotinidase-like isoform X10 [Chinchilla lanigera]</a>       | 50.3 | 50.3 | 100% | 2e-05 | 74% | <a href="#">gij533146084 XP_005387502.1</a> |
| <a href="#">PREDICTED: biotinidase-like isoform X5 [Chinchilla lanigera]</a>        | 50.3 | 50.3 | 100% | 2e-05 | 74% | <a href="#">gij533146074 XP_005387497.1</a> |
| <a href="#">PREDICTED: biotinidase [Condylura cristata]</a>                         | 50.3 | 50.3 | 95%  | 2e-05 | 77% | <a href="#">gij507976256 XP_004692357.1</a> |
| <a href="#">PREDICTED: biotinidase-like isoform X1 [Chinchilla lanigera]</a>        | 50.3 | 50.3 | 100% | 2e-05 | 74% | <a href="#">gij533146066 XP_005387493.1</a> |
| <a href="#">PREDICTED: biotinidase [Trichechus manatus latirostris]</a>             | 49.8 | 49.8 | 100% | 2e-05 | 74% | <a href="#">gij471407481 XP_004385327.1</a> |
| <a href="#">PREDICTED: biotinidase [Lipotes vexillifer]</a>                         | 49.8 | 49.8 | 100% | 2e-05 | 78% | <a href="#">gij602721076 XP_007470691.1</a> |
| <a href="#">PREDICTED: biotinidase isoform X1 [Balaenoptera acutorostrata sc]</a>   | 49.8 | 49.8 | 100% | 2e-05 | 78% | <a href="#">gij594624940 XP_007167058.1</a> |
| <a href="#">PREDICTED: biotinidase isoform X3 [Balaenoptera acutorostrata sc]</a>   | 49.8 | 49.8 | 100% | 2e-05 | 78% | <a href="#">gij594624944 XP_007167060.1</a> |
| <a href="#">PREDICTED: biotinidase isoform X3 [Equus caballus]</a>                  | 49.4 | 49.4 | 95%  | 3e-05 | 77% | <a href="#">gij545189350 XP_005600979.1</a> |
| <a href="#">PREDICTED: biotinidase [Equus przewalskii]</a>                          | 49.4 | 49.4 | 95%  | 3e-05 | 77% | <a href="#">gij664753751 XP_008534346.1</a> |
| <a href="#">PREDICTED: biotinidase isoform X2 [Equus caballus]</a>                  | 49.4 | 49.4 | 95%  | 3e-05 | 77% | <a href="#">gij545189348 XP_005600978.1</a> |
| <a href="#">PREDICTED: biotinidase [Mustela putorius furo]</a>                      | 49.4 | 49.4 | 100% | 3e-05 | 74% | <a href="#">gij511908359 XP_004773614.1</a> |
| <a href="#">PREDICTED: biotinidase isoform X1 [Equus caballus]</a>                  | 49.4 | 49.4 | 95%  | 3e-05 | 77% | <a href="#">gij545189346 XP_005600977.1</a> |
| <a href="#">PREDICTED: biotinidase isoform X2 [Ursus maritimus]</a>                 | 49.0 | 49.0 | 100% | 5e-05 | 74% | <a href="#">gij670981874 XP_008707139.1</a> |
| <a href="#">PREDICTED: biotinidase isoform X1 [Ursus maritimus]</a>                 | 49.0 | 49.0 | 100% | 5e-05 | 74% | <a href="#">gij670981872 XP_008707130.1</a> |
| <a href="#">PREDICTED: biotinidase [Fukomys damarensis]</a>                         | 49.0 | 49.0 | 100% | 5e-05 | 74% | <a href="#">gij731285322 XP_010611073.1</a> |
| <a href="#">Biotinidase [Fukomys damarensis]</a>                                    | 49.0 | 49.0 | 100% | 5e-05 | 74% | <a href="#">gij676263045 KFO19807.1</a>     |

|                                                                                    |      |      |      |       |     |                                             |
|------------------------------------------------------------------------------------|------|------|------|-------|-----|---------------------------------------------|
| <a href="#">PREDICTED: biotinidase isoform X2 [Cricetulus griseus]</a>             | 48.6 | 48.6 | 95%  | 6e-05 | 77% | <a href="#">gil625181248 XP_007632389.1</a> |
| <a href="#">PREDICTED: biotinidase isoform X1 [Cricetulus griseus]</a>             | 48.6 | 48.6 | 95%  | 6e-05 | 77% | <a href="#">gil354465853 XP_003495391.1</a> |
| <a href="#">biotinidase [Cricetulus griseus]</a>                                   | 48.6 | 48.6 | 95%  | 6e-05 | 77% | <a href="#">gil537261432 ERE90059.1</a>     |
| <a href="#">PREDICTED: biotinidase [Erinaceus europaeus]</a>                       | 48.1 | 48.1 | 95%  | 9e-05 | 73% | <a href="#">gil617553342 XP_007530134.1</a> |
| <a href="#">PREDICTED: biotinidase [Galeopterus variegatus]</a>                    | 47.7 | 47.7 | 100% | 1e-04 | 74% | <a href="#">gil667288263 XP_008576771.1</a> |
| <a href="#">PREDICTED: LOW QUALITY PROTEIN: biotinidase [Tursiops truncatus]</a>   | 47.3 | 47.3 | 100% | 2e-04 | 74% | <a href="#">gil470628904 XP_004321284.1</a> |
| <a href="#">PREDICTED: biotinidase [Orcinus orca]</a>                              | 47.3 | 47.3 | 100% | 2e-04 | 74% | <a href="#">gil466019817 XP_004271983.1</a> |
| <a href="#">PREDICTED: biotinidase isoform X2 [Physeter catodon]</a>               | 46.9 | 46.9 | 100% | 2e-04 | 74% | <a href="#">gil593711507 XP_007102308.1</a> |
| <a href="#">PREDICTED: biotinidase isoform X1 [Physeter catodon]</a>               | 46.9 | 46.9 | 100% | 2e-04 | 74% | <a href="#">gil593711505 XP_007102307.1</a> |
| <a href="#">PREDICTED: biotinidase isoform X1 [Peromyscus maniculatus bairdii]</a> | 46.0 | 46.0 | 95%  | 4e-04 | 68% | <a href="#">gil589967608 XP_006996305.1</a> |
| <a href="#">PREDICTED: biotinidase isoform X2 [Peromyscus maniculatus bairdii]</a> | 46.0 | 46.0 | 95%  | 4e-04 | 68% | <a href="#">gil589967610 XP_006996306.1</a> |
| <a href="#">PREDICTED: biotinidase isoform X1 [Myotis lucifugus]</a>               | 45.2 | 45.2 | 100% | 8e-04 | 74% | <a href="#">gil558102610 XP_006083737.1</a> |
| <a href="#">PREDICTED: biotinidase isoform X3 [Myotis brandtii]</a>                | 45.2 | 45.2 | 100% | 8e-04 | 74% | <a href="#">gil554537982 XP_005863672.1</a> |
| <a href="#">PREDICTED: biotinidase isoform X2 [Myotis lucifugus]</a>               | 45.2 | 45.2 | 100% | 8e-04 | 74% | <a href="#">gil558102613 XP_006083738.1</a> |
| <a href="#">PREDICTED: biotinidase isoform X2 [Myotis brandtii]</a>                | 45.2 | 45.2 | 100% | 8e-04 | 74% | <a href="#">gil554537986 XP_005863671.1</a> |
| <a href="#">Biotinidase [Myotis brandtii]</a>                                      | 45.2 | 45.2 | 100% | 8e-04 | 74% | <a href="#">gil521024341 EPQ06129.1</a>     |
| <a href="#">PREDICTED: biotinidase-like [Ailuropoda melanoleuca]</a>               | 44.8 | 44.8 | 100% | 0.001 | 70% | <a href="#">gil301759093 XP_002915396.1</a> |
| <a href="#">hypothetical protein PANDA_003369 [Ailuropoda melanoleuca]</a>         | 44.8 | 44.8 | 100% | 0.001 | 70% | <a href="#">gil281345880 EFB21464.1</a>     |
| <a href="#">biotinidase, isoform CRA_a [Rattus norvegicus]</a>                     | 44.3 | 44.3 | 95%  | 0.001 | 68% | <a href="#">gil149034168 EDL88938.1</a>     |
| <a href="#">biotinidase, isoform CRA_c [Rattus norvegicus]</a>                     | 44.3 | 44.3 | 95%  | 0.001 | 68% | <a href="#">gil149034170 EDL88940.1</a>     |
| <a href="#">biotinidase precursor [Rattus norvegicus]</a>                          | 44.3 | 44.3 | 95%  | 0.001 | 68% | <a href="#">gil58865670 NP_001012047.1</a>  |
| <a href="#">PREDICTED: biotinidase isoform X2 [Rattus norvegicus]</a>              | 44.3 | 44.3 | 95%  | 0.001 | 68% | <a href="#">gil564387894 XP_006252671.1</a> |
| <a href="#">PREDICTED: biotinidase isoform X1 [Cavia porcellus]</a>                | 43.9 | 43.9 | 100% | 0.002 | 70% | <a href="#">gil514481133 XP_003480063.2</a> |
| <a href="#">PREDICTED: biotinidase isoform X2 [Cavia porcellus]</a>                | 43.9 | 43.9 | 100% | 0.002 | 70% | <a href="#">gil514481131 XP_005008361.1</a> |
| <a href="#">PREDICTED: biotinidase [Nannospalax galili]</a>                        | 43.5 | 43.5 | 100% | 0.003 | 70% | <a href="#">gil674081213 XP_008848205.1</a> |
| <a href="#">Biotinidase [Heterocephalus glaber]</a>                                | 43.1 | 43.1 | 100% | 0.004 | 65% | <a href="#">gil351707565 EHB10484.1</a>     |
| <a href="#">PREDICTED: biotinidase isoform X3 [Heterocephalus glaber]</a>          | 43.1 | 43.1 | 100% | 0.004 | 65% | <a href="#">gil512886961 XP_004896459.1</a> |

## Alignments

Download [GenPept](#) [Graphics](#)

Next Previous Descriptions

**PREDICTED: biotinidase [Nomascus leucogenys]**

Sequence ID: [gil332232450|ref|XP\\_003265417.1](#) Length: 474 Number of Matches: 1

Range 1: 270 to 292 [GenPept](#) [Graphics](#)

Next Match Previous Match

| Score          | Expect | Identities  | Positives   | Gaps     |
|----------------|--------|-------------|-------------|----------|
| 73.6 bits(166) | 2e-13  | 23/23(100%) | 23/23(100%) | 0/23(0%) |

Query 1 KNPVGLIGAENATGETDPHSHKF 23  
 KNPVGLIGAENATGETDPHSHKF  
 Sbjct 270 KNPVGLIGAENATGETDPHSHKF 292

### Related Information

[Gene](#) - associated gene details  
[Map Viewer](#) - aligned genomic context

Download [GenPept](#) [Graphics](#)

Next Previous Descriptions

**unnamed protein product [Macaca fascicularis]**

Sequence ID: [gil90077268|dbj|BAE88314.1](#) Length: 493 Number of Matches: 1

Range 1: 323 to 345 [GenPept](#) [Graphics](#)

Next Match Previous Match

| Score          | Expect | Identities  | Positives   | Gaps     |
|----------------|--------|-------------|-------------|----------|
| 73.6 bits(166) | 2e-13  | 23/23(100%) | 23/23(100%) | 0/23(0%) |

Query 1 KNPVGLIGAENATGETDPHSHKF 23

### Related Information

[Gene](#) - associated gene details

Sbjct 323 KNPVGLIGAENATGETDPSHSKF 345

[Download](#) [GenPept](#) [Graphics](#)

[Next](#) [Previous](#) [Descriptions](#)

unnamed protein product [Homo sapiens]

Sequence ID: [gi|221043776|dbj|BAH13565.1](#) Length: 523 Number of Matches: 1

Range 1: 319 to 341 [GenPept](#) [Graphics](#)

[Next Match](#) [Previous Match](#)

| Score          | Expect | Identities  | Positives   | Gaps     |
|----------------|--------|-------------|-------------|----------|
| 73.6 bits(166) | 2e-13  | 23/23(100%) | 23/23(100%) | 0/23(0%) |

Query 1 KNPVGLIGAENATGETDPSHSKF 23  
 KNPVGLIGAENATGETDPSHSKF  
 Sbjct 319 KNPVGLIGAENATGETDPSHSKF 341

**Related Information**

[Gene](#) - associated gene details

[Download](#) [GenPept](#) [Graphics](#)

[Next](#) [Previous](#) [Descriptions](#)

biotinidase isoform 4 precursor [Homo sapiens]

Sequence ID: [gi|528524486|ref|NP\\_001268654.1](#) Length: 523 Number of Matches: 1

[See 3 more title\(s\)](#)

Range 1: 319 to 341 [GenPept](#) [Graphics](#)

[Next Match](#) [Previous Match](#)

| Score          | Expect | Identities  | Positives   | Gaps     |
|----------------|--------|-------------|-------------|----------|
| 73.6 bits(166) | 2e-13  | 23/23(100%) | 23/23(100%) | 0/23(0%) |

Query 1 KNPVGLIGAENATGETDPSHSKF 23  
 KNPVGLIGAENATGETDPSHSKF  
 Sbjct 319 KNPVGLIGAENATGETDPSHSKF 341

**Related Information**

[Gene](#) - associated gene details

[Map Viewer](#) - aligned genomic context

[Identical Proteins](#) - Proteins identical to the subject

[Download](#) [GenPept](#) [Graphics](#)

[Next](#) [Previous](#) [Descriptions](#)

biotinidase precursor [Pan troglodytes]

Sequence ID: [gi|697993457|ref|NP\\_001289363.1](#) Length: 523 Number of Matches: 1

[See 1 more title\(s\)](#)

Range 1: 319 to 341 [GenPept](#) [Graphics](#)

[Next Match](#) [Previous Match](#)

| Score          | Expect | Identities  | Positives   | Gaps     |
|----------------|--------|-------------|-------------|----------|
| 73.6 bits(166) | 2e-13  | 23/23(100%) | 23/23(100%) | 0/23(0%) |

Query 1 KNPVGLIGAENATGETDPSHSKF 23  
 KNPVGLIGAENATGETDPSHSKF  
 Sbjct 319 KNPVGLIGAENATGETDPSHSKF 341

**Related Information**

[Gene](#) - associated gene details

[Map Viewer](#) - aligned genomic context

[Identical Proteins](#) - Proteins identical to the subject

BLAST is a registered trademark of the National Library of Medicine.

NCBI/ BLAST/ blastp suite/ Formatting Results - B9211R2A01R

Your search parameters were adjusted to search for a short input sequence.

[Edit and Resubmit](#) [Save Search Strategies](#) [Formatting options](#) [Download](#)

[YouTube](#) [How to read this page](#) [Blast report description](#)

**BTD\_KNPVGLIGAENATGETDP SHSKFLKI\_NonMod**

RID [B9211R2A01R](#) (Expires on 01-14 09:51 am)

**Query ID** Icl|105458  
**Description** None  
**Molecule type** amino acid  
**Query Length** 26

**Database Name** nr  
**Description** All non-redundant GenBank CDS translations+PDB+SwissProt+PIR excluding environmental samples from WGS projects  
**Program** BLASTP 2.2.30+ [Citation](#)

Other reports: [Search Summary](#) [Taxonomy reports](#) [Distance tree of results](#) [Multiple alignment](#)

**Graphic Summary**

[Show Conserved Domains](#)

No putative conserved domains have been detected

Distribution of 100 Blast Hits on the Query Sequence

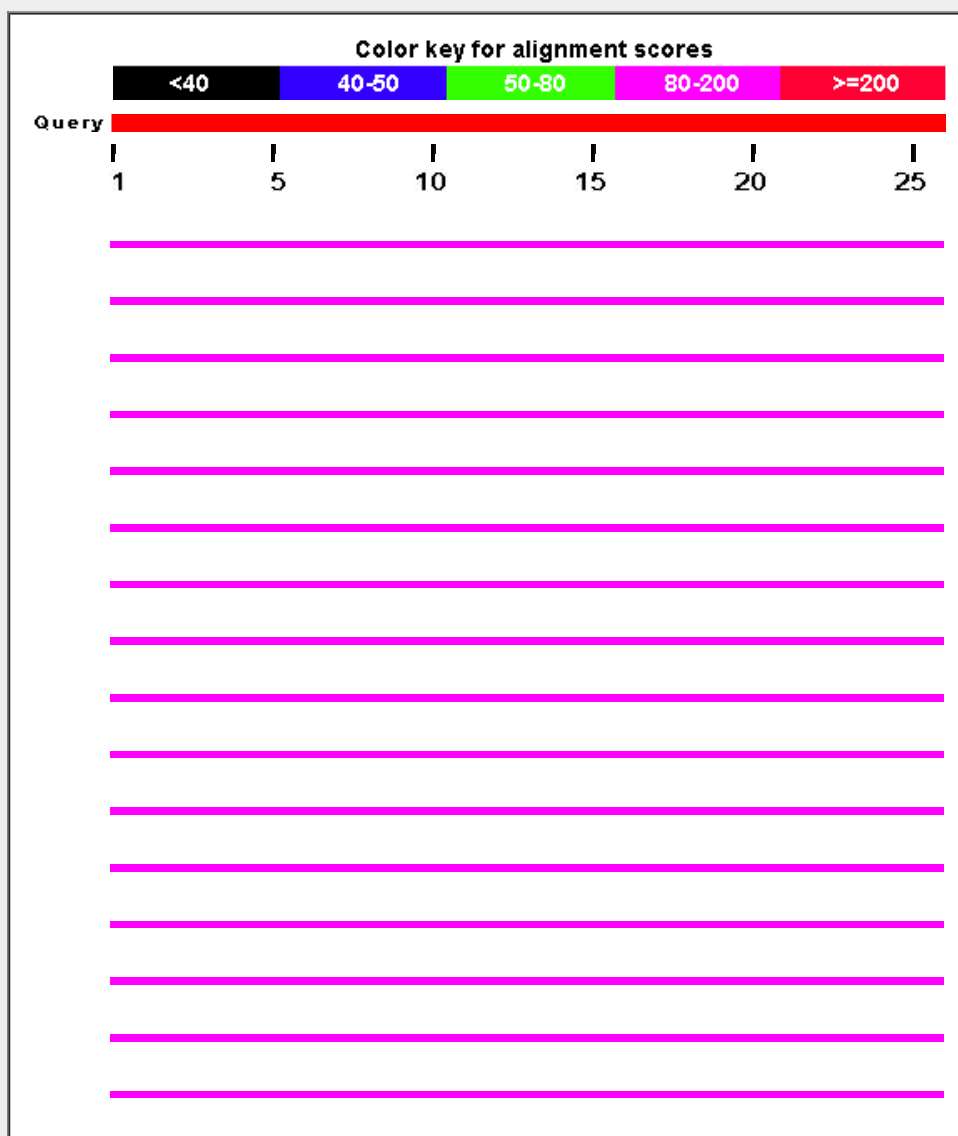

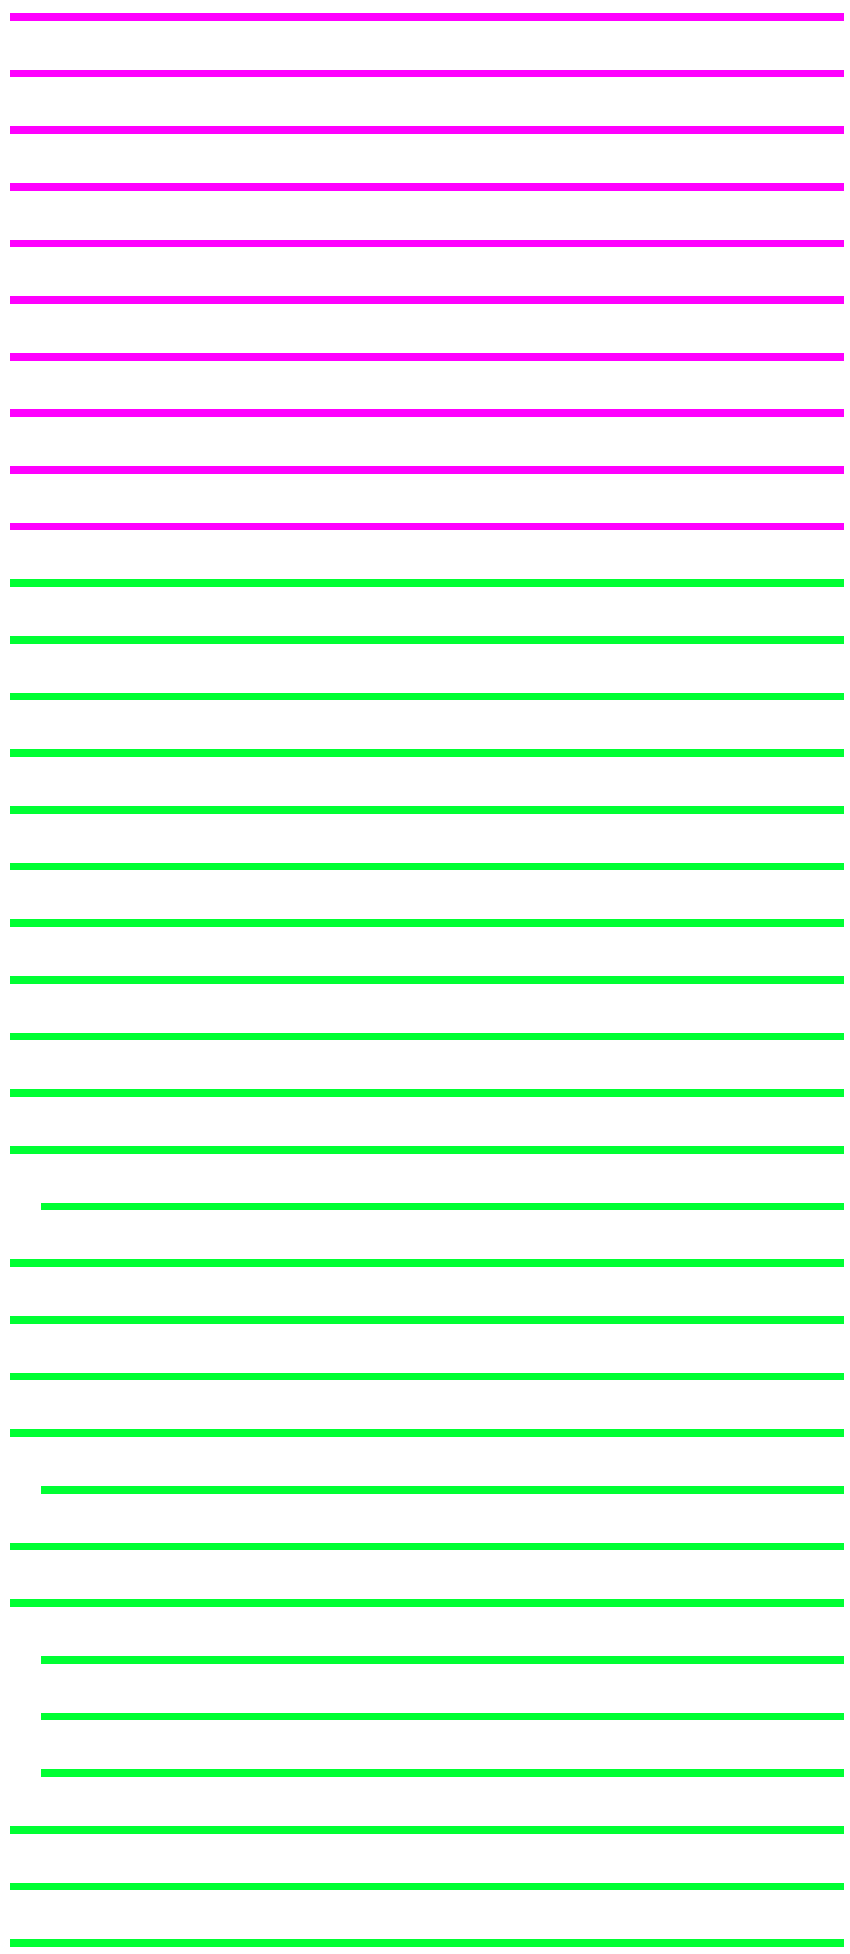



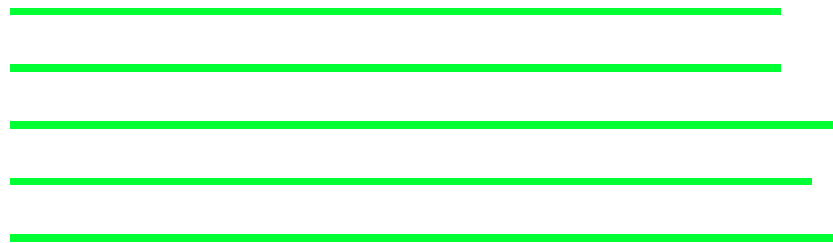

**Descriptions**

**Sequences producing significant alignments:**

Select: [All](#) [None](#) Selected:0

[↑](#) [Alignments](#)
[Download](#)
[GenPept](#)
[Graphics](#)
[Distance tree of results](#)
[Multiple alignment](#)
⚙

| Description                                                                | Max score | Total score | Query cover | E value | Ident | Accession                                   |
|----------------------------------------------------------------------------|-----------|-------------|-------------|---------|-------|---------------------------------------------|
| <a href="#">PREDICTED: biotinidase [Nomascus leucogenys]</a>               | 82.9      | 82.9        | 100%        | 2e-16   | 100%  | <a href="#">gij332232450 XP_003265417.1</a> |
| <a href="#">unnamed protein product [Macaca fascicularis]</a>              | 82.9      | 82.9        | 100%        | 2e-16   | 100%  | <a href="#">gij90077268 BAE88314.1</a>      |
| <a href="#">unnamed protein product [Homo sapiens]</a>                     | 82.9      | 82.9        | 100%        | 2e-16   | 100%  | <a href="#">gij221043776 BAH13565.1</a>     |
| <a href="#">biotinidase isoform 4 precursor [Homo sapiens]</a>             | 82.9      | 82.9        | 100%        | 2e-16   | 100%  | <a href="#">gij528524486 NP_001268654.1</a> |
| <a href="#">biotinidase precursor [Pan troglodytes]</a>                    | 82.9      | 82.9        | 100%        | 2e-16   | 100%  | <a href="#">gij697993457 NP_001289363.1</a> |
| <a href="#">PREDICTED: biotinidase isoform X2 [Chlorocebus sabaeus]</a>    | 82.9      | 82.9        | 100%        | 2e-16   | 100%  | <a href="#">gij635085523 XP_008007381.1</a> |
| <a href="#">PREDICTED: biotinidase isoform X2 [Macaca fascicularis]</a>    | 82.9      | 82.9        | 100%        | 2e-16   | 100%  | <a href="#">gij544411158 XP_005545768.1</a> |
| <a href="#">PREDICTED: biotinidase isoform X2 [Pan troglodytes]</a>        | 82.9      | 82.9        | 100%        | 2e-16   | 100%  | <a href="#">gij694900420 XP_009443239.1</a> |
| <a href="#">PREDICTED: biotinidase isoform X2 [Pan paniscus]</a>           | 82.9      | 82.9        | 100%        | 2e-16   | 100%  | <a href="#">gij675784344 XP_008949921.1</a> |
| <a href="#">PREDICTED: biotinidase isoform X3 [Pongo abelii]</a>           | 82.9      | 82.9        | 100%        | 2e-16   | 100%  | <a href="#">gij686713703 XP_009237577.1</a> |
| <a href="#">PREDICTED: biotinidase isoform X1 [Chlorocebus sabaeus]</a>    | 82.9      | 82.9        | 100%        | 2e-16   | 100%  | <a href="#">gij635085521 XP_008007380.1</a> |
| <a href="#">PREDICTED: biotinidase isoform X2 [Pongo abelii]</a>           | 82.9      | 82.9        | 100%        | 2e-16   | 100%  | <a href="#">gij686713701 XP_009237576.1</a> |
| <a href="#">biotinidase isoform 3 [Homo sapiens]</a>                       | 82.9      | 82.9        | 100%        | 2e-16   | 100%  | <a href="#">gij4557373 NP_000051.1</a>      |
| <a href="#">biotinidase isoform 1 [Homo sapiens]</a>                       | 82.9      | 82.9        | 100%        | 2e-16   | 100%  | <a href="#">gij528524481 NP_001268652.1</a> |
| <a href="#">biotinidase isoform 2 [Homo sapiens]</a>                       | 82.9      | 82.9        | 100%        | 2e-16   | 100%  | <a href="#">gij528524483 NP_001268653.1</a> |
| <a href="#">PREDICTED: biotinidase isoform X1 [Pan troglodytes]</a>        | 82.9      | 82.9        | 100%        | 2e-16   | 100%  | <a href="#">gij410036604 XP_003950087.1</a> |
| <a href="#">PREDICTED: biotinidase isoform X1 [Pan paniscus]</a>           | 82.9      | 82.9        | 100%        | 2e-16   | 100%  | <a href="#">gij397511808 XP_003826257.1</a> |
| <a href="#">PREDICTED: biotinidase isoform X1 [Pongo abelii]</a>           | 82.9      | 82.9        | 100%        | 2e-16   | 100%  | <a href="#">gij395734130 XP_003776360.1</a> |
| <a href="#">hypothetical protein EGM_11114 [Macaca fascicularis]</a>       | 82.9      | 82.9        | 100%        | 2e-16   | 100%  | <a href="#">gij355747075 EHH51689.1</a>     |
| <a href="#">hypothetical protein EGK_12122 [Macaca mulatta]</a>            | 82.9      | 82.9        | 100%        | 2e-16   | 100%  | <a href="#">gij355560049 EHH16777.1</a>     |
| <a href="#">PREDICTED: biotinidase [Macaca mulatta]</a>                    | 82.9      | 82.9        | 100%        | 2e-16   | 100%  | <a href="#">gij297286947 XP_001083201.2</a> |
| <a href="#">PREDICTED: biotinidase isoform X1 [Macaca fascicularis]</a>    | 82.9      | 82.9        | 100%        | 2e-16   | 100%  | <a href="#">gij544411156 XP_005545767.1</a> |
| <a href="#">PREDICTED: biotinidase isoform 1 [Gorilla gorilla gorilla]</a> | 80.4      | 80.4        | 100%        | 2e-15   | 96%   | <a href="#">gij426339607 XP_004033737.1</a> |
| <a href="#">PREDICTED: biotinidase isoform 3 [Gorilla gorilla gorilla]</a> | 80.4      | 80.4        | 100%        | 2e-15   | 96%   | <a href="#">gij426339611 XP_004033739.1</a> |
| <a href="#">PREDICTED: biotinidase isoform 4 [Gorilla gorilla gorilla]</a> | 80.4      | 80.4        | 100%        | 2e-15   | 96%   | <a href="#">gij426339613 XP_004033740.1</a> |
| <a href="#">PREDICTED: biotinidase isoform 2 [Gorilla gorilla gorilla]</a> | 80.4      | 80.4        | 100%        | 2e-15   | 96%   | <a href="#">gij426339609 XP_004033738.1</a> |
| <a href="#">PREDICTED: biotinidase [Rhinopithecus roxellana]</a>           | 79.1      | 79.1        | 100%        | 5e-15   | 96%   | <a href="#">gij724960396 XP_010354361.1</a> |
| <a href="#">PREDICTED: biotinidase isoform X2 [Papio anubis]</a>           | 75.3      | 75.3        | 100%        | 1e-13   | 92%   | <a href="#">gij685527526 XP_009200021.1</a> |

|                                                                              |      |      |      |       |     |                                             |
|------------------------------------------------------------------------------|------|------|------|-------|-----|---------------------------------------------|
| PREDICTED: biotinidase isoform X1 [ <i>Papio anubis</i> ]                    | 75.3 | 75.3 | 100% | 1e-13 | 92% | <a href="#">gij685527524 XP_009200020.1</a> |
| PREDICTED: biotinidase isoform X1 [ <i>Callithrix jacchus</i> ]              | 74.4 | 74.4 | 100% | 2e-13 | 92% | <a href="#">gij675740028 XP_008982107.1</a> |
| PREDICTED: biotinidase isoform X2 [ <i>Callithrix jacchus</i> ]              | 74.4 | 74.4 | 100% | 2e-13 | 92% | <a href="#">gij390476393 XP_002759736.2</a> |
| PREDICTED: biotinidase-like [ <i>Ictidomys tridecemlineatus</i> ]            | 66.4 | 66.4 | 100% | 1e-10 | 85% | <a href="#">gij532063189 XP_005317469.1</a> |
| PREDICTED: biotinidase isoform X3 [ <i>Saimiri boliviensis boliviensis</i> ] | 66.0 | 66.0 | 100% | 1e-10 | 85% | <a href="#">gij725560828 XP_010333963.1</a> |
| PREDICTED: biotinidase isoform X2 [ <i>Saimiri boliviensis boliviensis</i> ] | 66.0 | 66.0 | 100% | 1e-10 | 85% | <a href="#">gij403265544 XP_003924991.1</a> |
| PREDICTED: biotinidase isoform X1 [ <i>Saimiri boliviensis boliviensis</i> ] | 66.0 | 66.0 | 100% | 1e-10 | 85% | <a href="#">gij725560825 XP_010333962.1</a> |
| PREDICTED: biotinidase [ <i>Ceratotherium simum simum</i> ]                  | 63.8 | 63.8 | 100% | 7e-10 | 81% | <a href="#">gij478490156 XP_004419451.1</a> |
| PREDICTED: biotinidase [ <i>Vicugna pacos</i> ]                              | 62.1 | 62.1 | 100% | 3e-09 | 77% | <a href="#">gij560965913 XP_006205350.1</a> |
| PREDICTED: biotinidase isoform X2 [ <i>Microtus ochrogaster</i> ]            | 62.1 | 62.1 | 96%  | 3e-09 | 80% | <a href="#">gij532009812 XP_005348714.1</a> |
| PREDICTED: biotinidase isoform X4 [ <i>Canis lupus familiaris</i> ]          | 62.1 | 62.1 | 100% | 3e-09 | 81% | <a href="#">gij545538859 XP_005634450.1</a> |
| PREDICTED: biotinidase isoform X3 [ <i>Canis lupus familiaris</i> ]          | 62.1 | 62.1 | 100% | 3e-09 | 81% | <a href="#">gij545538857 XP_005634449.1</a> |
| PREDICTED: biotinidase isoform X2 [ <i>Canis lupus familiaris</i> ]          | 62.1 | 62.1 | 100% | 3e-09 | 81% | <a href="#">gij545538855 XP_005634448.1</a> |
| PREDICTED: biotinidase isoform X1 [ <i>Canis lupus familiaris</i> ]          | 62.1 | 62.1 | 100% | 3e-09 | 81% | <a href="#">gij545538853 XP_005634447.1</a> |
| PREDICTED: biotinidase isoform X1 [ <i>Microtus ochrogaster</i> ]            | 62.1 | 62.1 | 96%  | 3e-09 | 80% | <a href="#">gij532009810 XP_005348713.1</a> |
| biotinidase [ <i>Camelus ferus</i> ]                                         | 61.3 | 61.3 | 100% | 5e-09 | 77% | <a href="#">gij528756912 EPY76571.1</a>     |
| PREDICTED: biotinidase [ <i>Camelus ferus</i> ]                              | 61.3 | 61.3 | 100% | 5e-09 | 77% | <a href="#">gij560929390 XP_006190847.1</a> |
| PREDICTED: biotinidase isoform X1 [ <i>Felis catus</i> ]                     | 60.9 | 60.9 | 96%  | 7e-09 | 80% | <a href="#">gij587000359 XP_003992187.2</a> |
| PREDICTED: biotinidase isoform X2 [ <i>Felis catus</i> ]                     | 60.9 | 60.9 | 96%  | 7e-09 | 80% | <a href="#">gij587000357 XP_006936495.1</a> |
| PREDICTED: biotinidase [ <i>Mesocricetus auratus</i> ]                       | 60.4 | 60.4 | 96%  | 1e-08 | 80% | <a href="#">gij524955500 XP_005077724.1</a> |
| PREDICTED: biotinidase [ <i>Otolemur garnettii</i> ]                         | 60.0 | 60.0 | 100% | 1e-08 | 81% | <a href="#">gij395816560 XP_003781769.1</a> |
| PREDICTED: biotinidase-like isoform X10 [ <i>Chinchilla lanigera</i> ]       | 59.6 | 59.6 | 100% | 2e-08 | 77% | <a href="#">gij533146084 XP_005387502.1</a> |
| PREDICTED: biotinidase-like isoform X5 [ <i>Chinchilla lanigera</i> ]        | 59.6 | 59.6 | 100% | 2e-08 | 77% | <a href="#">gij533146074 XP_005387497.1</a> |
| PREDICTED: biotinidase isoform 2 [ <i>Odobenus rosmarus divergens</i> ]      | 59.6 | 59.6 | 92%  | 2e-08 | 83% | <a href="#">gij472379495 XP_004409157.1</a> |
| PREDICTED: biotinidase isoform 1 [ <i>Odobenus rosmarus divergens</i> ]      | 59.6 | 59.6 | 92%  | 2e-08 | 83% | <a href="#">gij472379493 XP_004409156.1</a> |
| PREDICTED: biotinidase-like isoform X1 [ <i>Chinchilla lanigera</i> ]        | 59.6 | 59.6 | 100% | 2e-08 | 77% | <a href="#">gij533146066 XP_005387493.1</a> |
| PREDICTED: biotinidase [ <i>Jaculus jaculus</i> ]                            | 59.2 | 59.2 | 96%  | 3e-08 | 80% | <a href="#">gij507555213 XP_004661377.1</a> |
| PREDICTED: biotinidase [ <i>Trichechus manatus latirostris</i> ]             | 59.2 | 59.2 | 100% | 3e-08 | 77% | <a href="#">gij471407481 XP_004385327.1</a> |
| PREDICTED: biotinidase [ <i>Lipotes vexillifer</i> ]                         | 59.2 | 59.2 | 100% | 3e-08 | 81% | <a href="#">gij602721076 XP_007470691.1</a> |
| PREDICTED: biotinidase isoform X1 [ <i>Balaenoptera acutorostrata sc</i> ]   | 59.2 | 59.2 | 100% | 3e-08 | 81% | <a href="#">gij594624940 XP_007167058.1</a> |
| PREDICTED: biotinidase isoform X3 [ <i>Balaenoptera acutorostrata sc</i> ]   | 59.2 | 59.2 | 100% | 3e-08 | 81% | <a href="#">gij594624944 XP_007167060.1</a> |
| PREDICTED: biotinidase isoform X3 [ <i>Equus caballus</i> ]                  | 58.7 | 58.7 | 96%  | 4e-08 | 80% | <a href="#">gij545189350 XP_005600979.1</a> |
| PREDICTED: biotinidase [ <i>Equus przewalskii</i> ]                          | 58.7 | 58.7 | 96%  | 4e-08 | 80% | <a href="#">gij664753751 XP_008534346.1</a> |
| PREDICTED: biotinidase isoform X2 [ <i>Equus caballus</i> ]                  | 58.7 | 58.7 | 96%  | 4e-08 | 80% | <a href="#">gij545189348 XP_005600978.1</a> |
| PREDICTED: biotinidase isoform X1 [ <i>Equus caballus</i> ]                  | 58.7 | 58.7 | 96%  | 4e-08 | 80% | <a href="#">gij545189346 XP_005600977.1</a> |
| PREDICTED: biotinidase [ <i>Fukomys damarensis</i> ]                         | 58.3 | 58.3 | 100% | 5e-08 | 77% | <a href="#">gij731285322 XP_010611073.1</a> |
| biotinidase [ <i>Fukomys damarensis</i> ]                                    | 58.3 | 58.3 | 100% | 5e-08 | 77% | <a href="#">gij676263045 KFO19807.1</a>     |
| PREDICTED: biotinidase isoform X2 [ <i>Cricetulus griseus</i> ]              | 57.9 | 57.9 | 96%  | 7e-08 | 80% | <a href="#">gij625181248 XP_007632389.1</a> |
| PREDICTED: biotinidase isoform X1 [ <i>Cricetulus griseus</i> ]              | 57.9 | 57.9 | 96%  | 7e-08 | 80% | <a href="#">gij354465853 XP_003495391.1</a> |
| biotinidase [ <i>Cricetulus griseus</i> ]                                    | 57.9 | 57.9 | 96%  | 7e-08 | 80% | <a href="#">gij537261432 ERE90059.1</a>     |
| PREDICTED: biotinidase [ <i>Erinaceus europaeus</i> ]                        | 57.5 | 57.5 | 96%  | 1e-07 | 76% | <a href="#">gij617553342 XP_007530134.1</a> |
| PREDICTED: biotinidase [ <i>Galeopterus variegatus</i> ]                     | 57.1 | 57.1 | 100% | 1e-07 | 77% | <a href="#">gij667288263 XP_008576771.1</a> |
| PREDICTED: LOW QUALITY PROTEIN: biotinidase [ <i>Tursiops trunc</i> ]        | 56.6 | 56.6 | 100% | 2e-07 | 77% | <a href="#">gij470628904 XP_004321284.1</a> |
| PREDICTED: biotinidase [ <i>Orcinus orca</i> ]                               | 56.6 | 56.6 | 100% | 2e-07 | 77% | <a href="#">gij466019817 XP_004271983.1</a> |
| PREDICTED: biotinidase isoform X2 [ <i>Physeter catodon</i> ]                | 56.2 | 56.2 | 100% | 3e-07 | 77% | <a href="#">gij593711507 XP_007102308.1</a> |

|                                                                                 |      |      |      |       |     |                                             |
|---------------------------------------------------------------------------------|------|------|------|-------|-----|---------------------------------------------|
| <a href="#">PREDICTED: biotinidase [Condylura cristata]</a>                     | 56.2 | 56.2 | 92%  | 3e-07 | 79% | <a href="#">gil507976256 XP_004692357.1</a> |
| <a href="#">PREDICTED: biotinidase isoform X1 [Physeter catodon]</a>            | 56.2 | 56.2 | 100% | 3e-07 | 77% | <a href="#">gil593711505 XP_007102307.1</a> |
| <a href="#">PREDICTED: biotinidase [Panthera tigris altaica]</a>                | 55.8 | 55.8 | 96%  | 4e-07 | 76% | <a href="#">gil591322659 XP_007087428.1</a> |
| <a href="#">PREDICTED: biotinidase isoform X3 [Leptonychotes weddellii]</a>     | 55.8 | 55.8 | 92%  | 4e-07 | 79% | <a href="#">gil585186600 XP_006744787.1</a> |
| <a href="#">PREDICTED: biotinidase isoform X2 [Leptonychotes weddellii]</a>     | 55.8 | 55.8 | 92%  | 4e-07 | 79% | <a href="#">gil585186598 XP_006744786.1</a> |
| <a href="#">PREDICTED: biotinidase isoform X1 [Leptonychotes weddellii]</a>     | 55.8 | 55.8 | 92%  | 4e-07 | 79% | <a href="#">gil585186596 XP_006744785.1</a> |
| <a href="#">PREDICTED: biotinidase isoform X1 [Peromyscus maniculatus bair]</a> | 55.4 | 55.4 | 96%  | 5e-07 | 72% | <a href="#">gil589967608 XP_006996305.1</a> |
| <a href="#">PREDICTED: biotinidase isoform X2 [Peromyscus maniculatus bair]</a> | 55.4 | 55.4 | 96%  | 5e-07 | 72% | <a href="#">gil589967610 XP_006996306.1</a> |
| <a href="#">PREDICTED: biotinidase [Nannospalax galii]</a>                      | 52.8 | 52.8 | 100% | 3e-06 | 73% | <a href="#">gil674081213 XP_008848205.1</a> |
| <a href="#">Biotinidase [Heterocephalus glaber]</a>                             | 52.4 | 52.4 | 100% | 5e-06 | 69% | <a href="#">gil351707565 EHB10484.1</a>     |
| <a href="#">PREDICTED: biotinidase [Mustela putorius furo]</a>                  | 52.4 | 52.4 | 92%  | 5e-06 | 75% | <a href="#">gil511908359 XP_004773614.1</a> |
| <a href="#">PREDICTED: biotinidase isoform X3 [Heterocephalus glaber]</a>       | 52.4 | 52.4 | 100% | 5e-06 | 69% | <a href="#">gil512886961 XP_004896459.1</a> |
| <a href="#">PREDICTED: biotinidase isoform X1 [Heterocephalus glaber]</a>       | 52.4 | 52.4 | 100% | 5e-06 | 69% | <a href="#">gil512886949 XP_004896457.1</a> |
| <a href="#">PREDICTED: biotinidase isoform X2 [Ursus maritimus]</a>             | 52.0 | 52.0 | 92%  | 6e-06 | 75% | <a href="#">gil670981874 XP_008707139.1</a> |
| <a href="#">PREDICTED: biotinidase isoform X1 [Ursus maritimus]</a>             | 52.0 | 52.0 | 92%  | 6e-06 | 75% | <a href="#">gil670981872 XP_008707130.1</a> |
| <a href="#">biotinidase isoform CRA_a [Rattus norvegicus]</a>                   | 51.1 | 51.1 | 96%  | 1e-05 | 68% | <a href="#">gil149034168 EDL88938.1</a>     |
| <a href="#">biotinidase isoform CRA_c [Rattus norvegicus]</a>                   | 51.1 | 51.1 | 96%  | 1e-05 | 68% | <a href="#">gil149034170 EDL88940.1</a>     |
| <a href="#">biotinidase precursor [Rattus norvegicus]</a>                       | 51.1 | 51.1 | 96%  | 1e-05 | 68% | <a href="#">gil58865670 NP_001012047.1</a>  |
| <a href="#">PREDICTED: biotinidase isoform X1 [Myotis lucifugus]</a>            | 51.1 | 51.1 | 96%  | 1e-05 | 76% | <a href="#">gil558102610 XP_006083737.1</a> |
| <a href="#">PREDICTED: biotinidase isoform X3 [Myotis brandtii]</a>             | 51.1 | 51.1 | 96%  | 1e-05 | 76% | <a href="#">gil554537982 XP_005863672.1</a> |
| <a href="#">PREDICTED: biotinidase isoform X2 [Myotis lucifugus]</a>            | 51.1 | 51.1 | 96%  | 1e-05 | 76% | <a href="#">gil558102613 XP_006083738.1</a> |
| <a href="#">PREDICTED: biotinidase isoform X2 [Myotis brandtii]</a>             | 51.1 | 51.1 | 96%  | 1e-05 | 76% | <a href="#">gil554537986 XP_005863671.1</a> |
| <a href="#">PREDICTED: biotinidase isoform X2 [Rattus norvegicus]</a>           | 51.1 | 51.1 | 96%  | 1e-05 | 68% | <a href="#">gil564387894 XP_006252671.1</a> |
| <a href="#">Biotinidase [Myotis brandtii]</a>                                   | 51.1 | 51.1 | 96%  | 1e-05 | 76% | <a href="#">gil521024341 EPQ06129.1</a>     |
| <a href="#">PREDICTED: biotinidase-like [Octodon degus]</a>                     | 49.4 | 49.4 | 96%  | 4e-05 | 76% | <a href="#">gil507646799 XP_004631734.1</a> |
| <a href="#">PREDICTED: biotinidase [Loxodonta africana]</a>                     | 49.0 | 49.0 | 100% | 6e-05 | 69% | <a href="#">gil731510838 XP_010598778.1</a> |
| <a href="#">PREDICTED: biotinidase [Orycteropus afer afer]</a>                  | 48.6 | 48.6 | 100% | 8e-05 | 69% | <a href="#">gil634822252 XP_007934900.1</a> |

## Alignments

Download [GenPept](#) [Graphics](#)

[Next](#) [Previous](#) [Descriptions](#)

**PREDICTED: biotinidase [Nomascus leucogenys]**

Sequence ID: [gil332232450|ref|XP\\_003265417.1](#) Length: 474 Number of Matches: 1

Range 1: 270 to 295 [GenPept](#) [Graphics](#)

[Next Match](#) [Previous Match](#)

| Score          | Expect | Identities  | Positives   | Gaps     |
|----------------|--------|-------------|-------------|----------|
| 82.9 bits(188) | 2e-16  | 26/26(100%) | 26/26(100%) | 0/26(0%) |

Query 1 KNPVGLIGAENATGETDPHSHKFLKI 26  
 KNPVGLIGAENATGETDPHSHKFLKI  
 Sbjct 270 KNPVGLIGAENATGETDPHSHKFLKI 295

### Related Information

[Gene](#) - associated gene details  
[Map Viewer](#) - aligned genomic context

Download [GenPept](#) [Graphics](#)

[Next](#) [Previous](#) [Descriptions](#)

**unnamed protein product [Macaca fascicularis]**

Sequence ID: [gil90077268|dbj|BAE88314.1](#) Length: 493 Number of Matches: 1

Range 1: 323 to 348 [GenPept](#) [Graphics](#)

[Next Match](#) [Previous Match](#)

| Score          | Expect | Identities  | Positives   | Gaps     |
|----------------|--------|-------------|-------------|----------|
| 82.9 bits(188) | 2e-16  | 26/26(100%) | 26/26(100%) | 0/26(0%) |

Query 1 KNPVGLIGAENATGETDPHSHKFLKI 26

### Related Information

[Gene](#) - associated gene details

Sbjct 323 KNPVGLIGAENATGETDPSHSHKFLKI 348

Download [GenPept](#) [Graphics](#)

[▼ Next](#) [▲ Previous](#) [▲ Descriptions](#)

unnamed protein product [Homo sapiens]

Sequence ID: [gi|221043776|dbj|BAH13565.1|](#) Length: 523 Number of Matches: 1

Range 1: 319 to 344 [GenPept](#) [Graphics](#)

[▼ Next Match](#) [▲ Previous Match](#)

| Score          | Expect | Identities  | Positives   | Gaps     |
|----------------|--------|-------------|-------------|----------|
| 82.9 bits(188) | 2e-16  | 26/26(100%) | 26/26(100%) | 0/26(0%) |

Query 1 KNPVGLIGAENATGETDPSHSHKFLKI 26  
 KNPVGLIGAENATGETDPSHSHKFLKI  
 Sbjct 319 KNPVGLIGAENATGETDPSHSHKFLKI 344

**Related Information**

[Gene](#) - associated gene details

Download [GenPept](#) [Graphics](#)

[▼ Next](#) [▲ Previous](#) [▲ Descriptions](#)

biotinidase isoform 4 precursor [Homo sapiens]

Sequence ID: [gi|528524486|ref|NP\\_001268654.1|](#) Length: 523 Number of Matches: 1

[▶ See 3 more title\(s\)](#)

Range 1: 319 to 344 [GenPept](#) [Graphics](#)

[▼ Next Match](#) [▲ Previous Match](#)

| Score          | Expect | Identities  | Positives   | Gaps     |
|----------------|--------|-------------|-------------|----------|
| 82.9 bits(188) | 2e-16  | 26/26(100%) | 26/26(100%) | 0/26(0%) |

Query 1 KNPVGLIGAENATGETDPSHSHKFLKI 26  
 KNPVGLIGAENATGETDPSHSHKFLKI  
 Sbjct 319 KNPVGLIGAENATGETDPSHSHKFLKI 344

**Related Information**

[Gene](#) - associated gene details

[Map Viewer](#) - aligned genomic context

[Identical Proteins](#) - Proteins identical to the subject

Download [GenPept](#) [Graphics](#)

[▼ Next](#) [▲ Previous](#) [▲ Descriptions](#)

biotinidase precursor [Pan troglodytes]

Sequence ID: [gi|697993457|ref|NP\\_001289363.1|](#) Length: 523 Number of Matches: 1

[▶ See 1 more title\(s\)](#)

Range 1: 319 to 344 [GenPept](#) [Graphics](#)

[▼ Next Match](#) [▲ Previous Match](#)

| Score          | Expect | Identities  | Positives   | Gaps     |
|----------------|--------|-------------|-------------|----------|
| 82.9 bits(188) | 2e-16  | 26/26(100%) | 26/26(100%) | 0/26(0%) |

Query 1 KNPVGLIGAENATGETDPSHSHKFLKI 26  
 KNPVGLIGAENATGETDPSHSHKFLKI  
 Sbjct 319 KNPVGLIGAENATGETDPSHSHKFLKI 344

**Related Information**

[Gene](#) - associated gene details

[Map Viewer](#) - aligned genomic context

[Identical Proteins](#) - Proteins identical to the subject

BLAST is a registered trademark of the National Library of Medicine.

▶ NCBI/ BLAST/ blastp suite/ Formatting Results - BT3AEDCA013

[Edit and Resubmit](#) [Save Search Strategies](#) ▶ [Formatting options](#) ▶ [Download](#)

[YouTube](#) [How to read this page](#) [Blast report description](#)

## BT3AEDCA013

RID [BT3AEDCA013](#) (Expires on 01-20 11:51 am)

**Query ID** |cl|6932  
**Description** None  
**Molecule type** amino acid  
**Query Length** 33

**Database Name** nr  
**Description** All non-redundant GenBank CDS translations+PDB+SwissProt+PIR+PRF excluding environmental samples from WGS projects  
**Program** BLASTP 2.2.30+ ▶ [Citation](#)

Other reports: ▶ [Search Summary](#) [[Taxonomy reports](#)] [[Distance tree of results](#)] [[Multiple alignment](#)]

### Graphic Summary

[Show Conserved Domains](#)

No putative conserved domains have been detected

Distribution of 100 Blast Hits on the Query Sequence

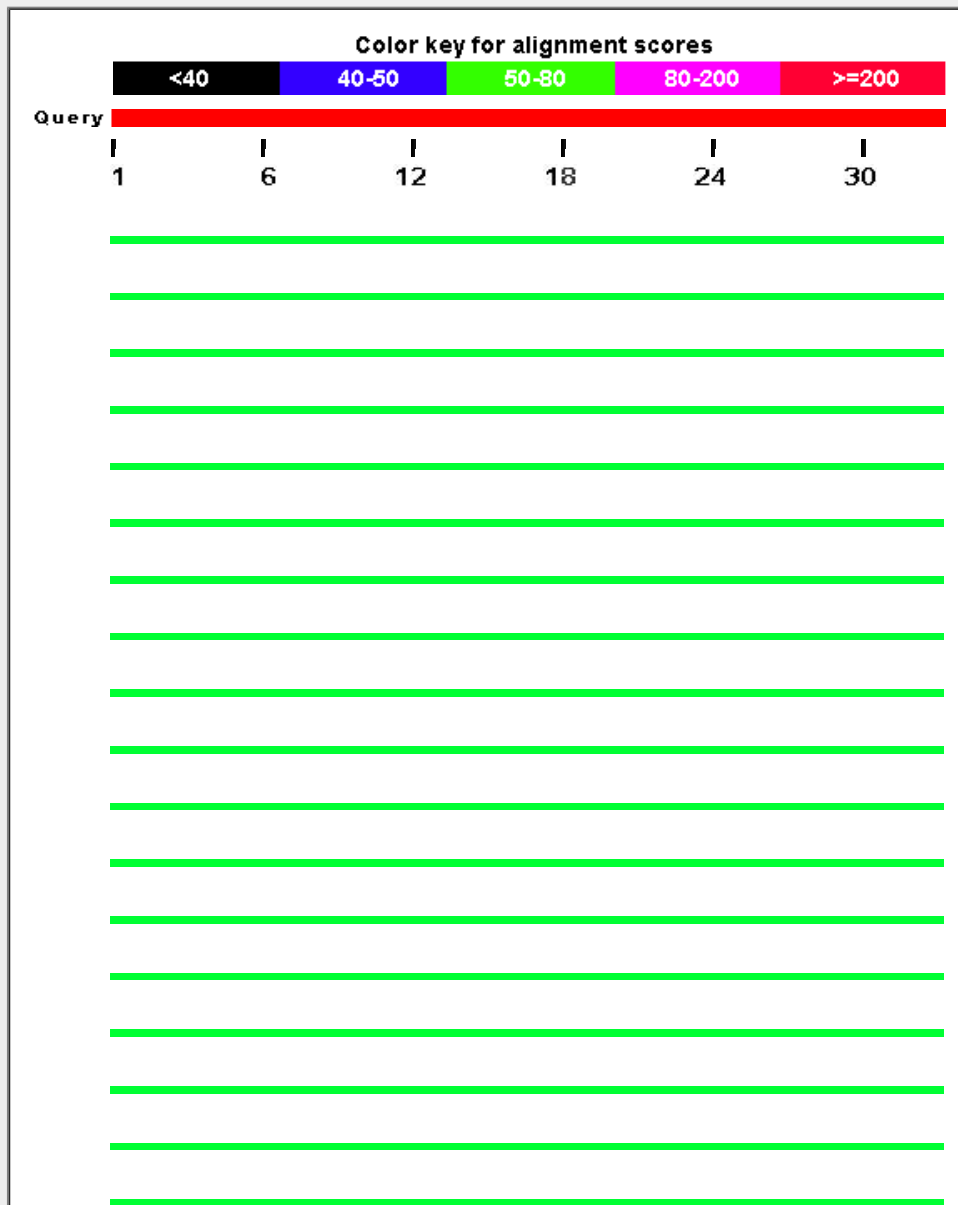

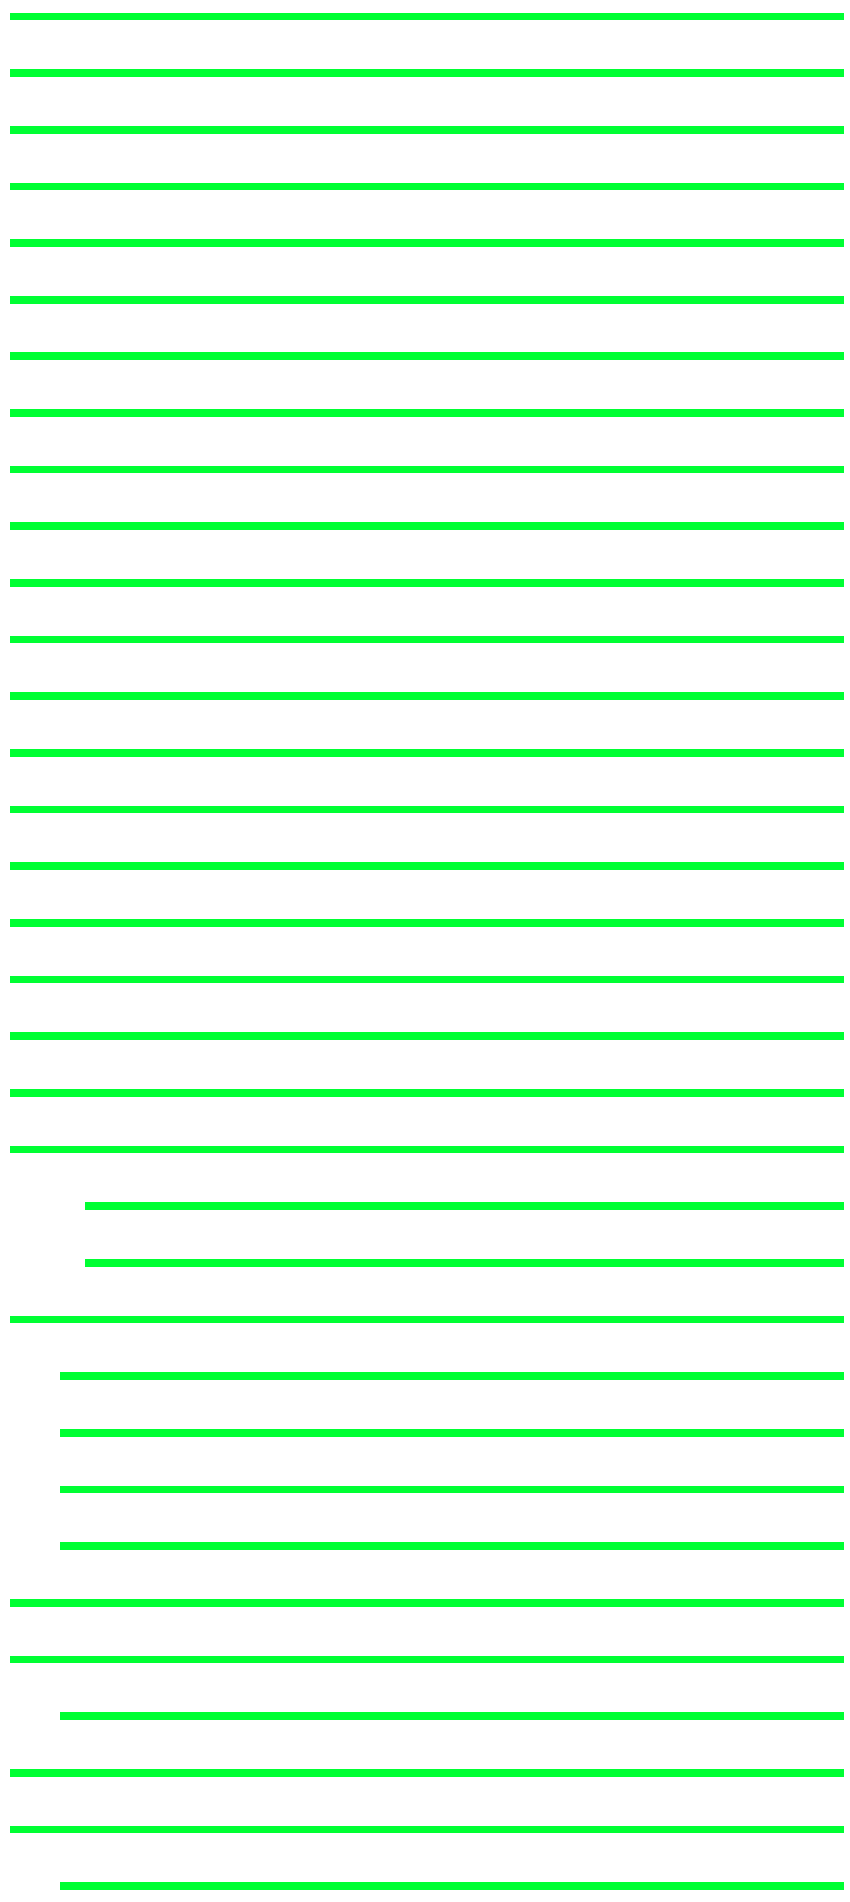

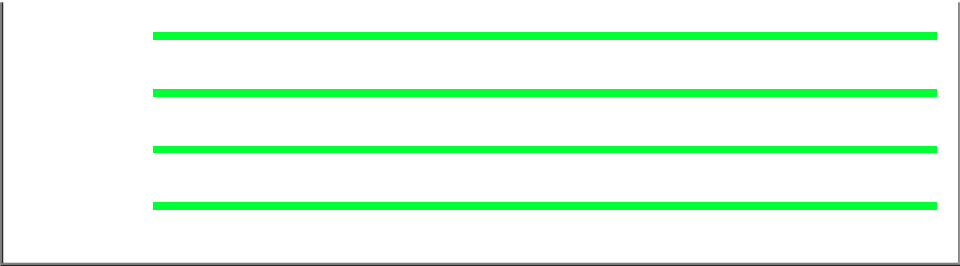

**Descriptions**

**Sequences producing significant alignments:**

Select: [All](#) [None](#) Selected:0

[Alignments](#)
[Download](#)
[GenPept](#)
[Graphics](#)
[Distance tree of results](#)
[Multiple alignment](#)

| Description                                                                | Max score | Total score | Query cover | E value | Ident | Accession                                   |
|----------------------------------------------------------------------------|-----------|-------------|-------------|---------|-------|---------------------------------------------|
| <a href="#">PREDICTED: biotinidase [Nomascus leucogenys]</a>               | 67.4      | 67.4        | 100%        | 8e-12   | 97%   | <a href="#">gi 332232450 XP_003265417.1</a> |
| <a href="#">unnamed protein product [Homo sapiens]</a>                     | 67.4      | 67.4        | 100%        | 8e-12   | 97%   | <a href="#">gi 221043776 BAH13565.1</a>     |
| <a href="#">biotinidase isoform 4 precursor [Homo sapiens]</a>             | 67.4      | 67.4        | 100%        | 8e-12   | 97%   | <a href="#">gi 528524486 NP_001268654.1</a> |
| <a href="#">biotinidase precursor [Pan troglodytes]</a>                    | 67.4      | 67.4        | 100%        | 8e-12   | 97%   | <a href="#">gi 697993457 NP_001289363.1</a> |
| <a href="#">PREDICTED: biotinidase isoform X2 [Pan troglodytes]</a>        | 67.4      | 67.4        | 100%        | 9e-12   | 97%   | <a href="#">gi 694900420 XP_009443239.1</a> |
| <a href="#">PREDICTED: biotinidase isoform X2 [Pan paniscus]</a>           | 67.4      | 67.4        | 100%        | 9e-12   | 97%   | <a href="#">gi 675784344 XP_008949921.1</a> |
| <a href="#">PREDICTED: biotinidase isoform X3 [Pongo abelii]</a>           | 67.4      | 67.4        | 100%        | 9e-12   | 97%   | <a href="#">gi 686713703 XP_009237577.1</a> |
| <a href="#">PREDICTED: biotinidase isoform X2 [Pongo abelii]</a>           | 67.4      | 67.4        | 100%        | 9e-12   | 97%   | <a href="#">gi 686713701 XP_009237576.1</a> |
| <a href="#">biotinidase isoform 3 [Homo sapiens]</a>                       | 67.4      | 67.4        | 100%        | 9e-12   | 97%   | <a href="#">gi 4557373 NP_000051.1</a>      |
| <a href="#">biotinidase isoform 1 [Homo sapiens]</a>                       | 67.4      | 67.4        | 100%        | 9e-12   | 97%   | <a href="#">gi 528524481 NP_001268652.1</a> |
| <a href="#">biotinidase isoform 2 [Homo sapiens]</a>                       | 67.4      | 67.4        | 100%        | 9e-12   | 97%   | <a href="#">gi 528524483 NP_001268653.1</a> |
| <a href="#">PREDICTED: biotinidase isoform X1 [Pan troglodytes]</a>        | 67.4      | 67.4        | 100%        | 9e-12   | 97%   | <a href="#">gi 410036604 XP_003950087.1</a> |
| <a href="#">PREDICTED: biotinidase isoform X1 [Pan paniscus]</a>           | 67.4      | 67.4        | 100%        | 9e-12   | 97%   | <a href="#">gi 397511808 XP_003826257.1</a> |
| <a href="#">PREDICTED: biotinidase isoform X1 [Pongo abelii]</a>           | 67.4      | 67.4        | 100%        | 9e-12   | 97%   | <a href="#">gi 395734130 XP_003776360.1</a> |
| <a href="#">PREDICTED: biotinidase isoform 1 [Gorilla gorilla gorilla]</a> | 67.0      | 67.0        | 100%        | 1e-11   | 94%   | <a href="#">gi 426339607 XP_004033737.1</a> |
| <a href="#">PREDICTED: biotinidase isoform 3 [Gorilla gorilla gorilla]</a> | 67.0      | 67.0        | 100%        | 1e-11   | 94%   | <a href="#">gi 426339611 XP_004033739.1</a> |
| <a href="#">PREDICTED: biotinidase isoform 4 [Gorilla gorilla gorilla]</a> | 67.0      | 67.0        | 100%        | 1e-11   | 94%   | <a href="#">gi 426339613 XP_004033740.1</a> |
| <a href="#">PREDICTED: biotinidase isoform 2 [Gorilla gorilla gorilla]</a> | 67.0      | 67.0        | 100%        | 1e-11   | 94%   | <a href="#">gi 426339609 XP_004033738.1</a> |
| <a href="#">unnamed protein product [Macaca fascicularis]</a>              | 65.9      | 65.9        | 100%        | 3e-11   | 94%   | <a href="#">gi 90077268 BAE88314.1</a>      |
| <a href="#">PREDICTED: biotinidase isoform X2 [Macaca fascicularis]</a>    | 65.9      | 65.9        | 100%        | 3e-11   | 94%   | <a href="#">gi 544411158 XP_005545768.1</a> |
| <a href="#">hypothetical protein EGM_11114 [Macaca fascicularis]</a>       | 65.9      | 65.9        | 100%        | 3e-11   | 94%   | <a href="#">gi 355747075 EHH51689.1</a>     |
| <a href="#">hypothetical protein EGK_12122 [Macaca mulatta]</a>            | 65.9      | 65.9        | 100%        | 3e-11   | 94%   | <a href="#">gi 355560049 EHH16777.1</a>     |
| <a href="#">PREDICTED: biotinidase [Macaca mulatta]</a>                    | 65.9      | 65.9        | 100%        | 3e-11   | 94%   | <a href="#">gi 297286947 XP_001083201.2</a> |
| <a href="#">PREDICTED: biotinidase isoform X1 [Macaca fascicularis]</a>    | 65.9      | 65.9        | 100%        | 3e-11   | 94%   | <a href="#">gi 544411156 XP_005545767.1</a> |
| <a href="#">PREDICTED: biotinidase isoform X2 [Chlorocebus sabaeus]</a>    | 64.3      | 64.3        | 100%        | 1e-10   | 91%   | <a href="#">gi 635085523 XP_008007381.1</a> |
| <a href="#">PREDICTED: biotinidase isoform X1 [Chlorocebus sabaeus]</a>    | 64.3      | 64.3        | 100%        | 1e-10   | 91%   | <a href="#">gi 635085521 XP_008007380.1</a> |
| <a href="#">PREDICTED: biotinidase [Rhinopithecus roxellana]</a>           | 61.6      | 61.6        | 100%        | 9e-10   | 85%   | <a href="#">gi 724960396 XP_010354361.1</a> |
| <a href="#">PREDICTED: biotinidase isoform X2 [Papio anubis]</a>           | 60.5      | 60.5        | 100%        | 2e-09   | 85%   | <a href="#">gi 685527526 XP_009200021.1</a> |
| <a href="#">PREDICTED: biotinidase isoform X1 [Papio anubis]</a>           | 60.5      | 60.5        | 100%        | 3e-09   | 85%   | <a href="#">gi 685527524 XP_009200020.1</a> |
| <a href="#">PREDICTED: biotinidase isoform X4 [Canis lupus familiaris]</a> | 58.5      | 58.5        | 100%        | 1e-08   | 79%   | <a href="#">gi 545538859 XP_005634450.1</a> |

|                                                                               |      |      |      |       |     |                                             |
|-------------------------------------------------------------------------------|------|------|------|-------|-----|---------------------------------------------|
| <a href="#">PREDICTED: biotinidase isoform X3 [Canis lupus familiaris]</a>    | 58.5 | 58.5 | 100% | 1e-08 | 79% | <a href="#">gi 545538857 XP_005634449.1</a> |
| <a href="#">PREDICTED: biotinidase isoform X2 [Canis lupus familiaris]</a>    | 58.5 | 58.5 | 100% | 1e-08 | 79% | <a href="#">gi 545538855 XP_005634448.1</a> |
| <a href="#">PREDICTED: biotinidase isoform X1 [Canis lupus familiaris]</a>    | 58.5 | 58.5 | 100% | 1e-08 | 79% | <a href="#">gi 545538853 XP_005634447.1</a> |
| <a href="#">PREDICTED: biotinidase-like [Ictidomys tridecemlineatus]</a>      | 58.2 | 58.2 | 100% | 1e-08 | 79% | <a href="#">gi 532063189 XP_005317469.1</a> |
| <a href="#">PREDICTED: biotinidase [Ceratotherium simum simum]</a>            | 58.2 | 58.2 | 100% | 2e-08 | 79% | <a href="#">gi 478490156 XP_004419451.1</a> |
| <a href="#">PREDICTED: biotinidase isoform X3 [Equus caballus]</a>            | 56.6 | 56.6 | 100% | 5e-08 | 76% | <a href="#">gi 545189350 XP_005600979.1</a> |
| <a href="#">PREDICTED: biotinidase [Equus przewalskii]</a>                    | 56.6 | 56.6 | 100% | 5e-08 | 76% | <a href="#">gi 664753751 XP_008534346.1</a> |
| <a href="#">PREDICTED: biotinidase isoform X2 [Equus caballus]</a>            | 56.6 | 56.6 | 100% | 5e-08 | 76% | <a href="#">gi 545189348 XP_005600978.1</a> |
| <a href="#">PREDICTED: biotinidase isoform X1 [Equus caballus]</a>            | 56.6 | 56.6 | 100% | 5e-08 | 76% | <a href="#">gi 545189346 XP_005600977.1</a> |
| <a href="#">PREDICTED: biotinidase isoform X1 [Callithrix jacchus]</a>        | 55.8 | 55.8 | 90%  | 1e-07 | 90% | <a href="#">gi 675740028 XP_008982107.1</a> |
| <a href="#">PREDICTED: biotinidase isoform X2 [Callithrix jacchus]</a>        | 55.8 | 55.8 | 90%  | 1e-07 | 90% | <a href="#">gi 390476393 XP_002759736.2</a> |
| <a href="#">PREDICTED: biotinidase [Vicugna pacos]</a>                        | 55.5 | 55.5 | 100% | 1e-07 | 70% | <a href="#">gi 560965913 XP_006205350.1</a> |
| <a href="#">PREDICTED: biotinidase isoform 2 [Odobenus rosmarus diverc]</a>   | 55.5 | 55.5 | 93%  | 1e-07 | 84% | <a href="#">gi 472379495 XP_004409157.1</a> |
| <a href="#">PREDICTED: biotinidase isoform X1 [Felis catus]</a>               | 55.5 | 55.5 | 93%  | 1e-07 | 81% | <a href="#">gi 587000359 XP_003992187.2</a> |
| <a href="#">PREDICTED: biotinidase isoform X2 [Felis catus]</a>               | 55.5 | 55.5 | 93%  | 1e-07 | 81% | <a href="#">gi 587000357 XP_006936495.1</a> |
| <a href="#">PREDICTED: biotinidase isoform 1 [Odobenus rosmarus diverc]</a>   | 55.5 | 55.5 | 93%  | 1e-07 | 84% | <a href="#">gi 472379493 XP_004409156.1</a> |
| <a href="#">PREDICTED: biotinidase [Otolemur garnettii]</a>                   | 55.5 | 55.5 | 100% | 1e-07 | 79% | <a href="#">gi 395816560 XP_003781769.1</a> |
| <a href="#">PREDICTED: biotinidase [Mustela putorius furo]</a>                | 55.1 | 55.1 | 100% | 2e-07 | 73% | <a href="#">gi 511908359 XP_004773614.1</a> |
| <a href="#">PREDICTED: biotinidase [Jaculus jaculus]</a>                      | 54.7 | 54.7 | 93%  | 2e-07 | 81% | <a href="#">gi 507555213 XP_004661377.1</a> |
| <a href="#">PREDICTED: biotinidase isoform X2 [Microtus ochrogaster]</a>      | 54.7 | 54.7 | 100% | 2e-07 | 73% | <a href="#">gi 532009812 XP_005348714.1</a> |
| <a href="#">PREDICTED: biotinidase isoform X1 [Microtus ochrogaster]</a>      | 54.7 | 54.7 | 100% | 3e-07 | 73% | <a href="#">gi 532009810 XP_005348713.1</a> |
| <a href="#">PREDICTED: biotinidase-like isoform X10 [Chinchilla lanigera]</a> | 54.3 | 54.3 | 93%  | 3e-07 | 77% | <a href="#">gi 533146084 XP_005387502.1</a> |
| <a href="#">PREDICTED: biotinidase-like isoform X5 [Chinchilla lanigera]</a>  | 54.3 | 54.3 | 93%  | 3e-07 | 77% | <a href="#">gi 533146074 XP_005387497.1</a> |
| <a href="#">PREDICTED: biotinidase isoform X3 [Leptonychotes weddellii]</a>   | 54.3 | 54.3 | 93%  | 3e-07 | 81% | <a href="#">gi 585186600 XP_006744787.1</a> |
| <a href="#">PREDICTED: biotinidase isoform X2 [Leptonychotes weddellii]</a>   | 54.3 | 54.3 | 93%  | 3e-07 | 81% | <a href="#">gi 585186598 XP_006744786.1</a> |
| <a href="#">PREDICTED: biotinidase-like isoform X1 [Chinchilla lanigera]</a>  | 54.3 | 54.3 | 93%  | 3e-07 | 77% | <a href="#">gi 533146066 XP_005387493.1</a> |
| <a href="#">PREDICTED: biotinidase isoform X1 [Leptonychotes weddellii]</a>   | 54.3 | 54.3 | 93%  | 4e-07 | 81% | <a href="#">gi 585186596 XP_006744785.1</a> |
| <a href="#">biotinidase [Camelus ferus]</a>                                   | 53.5 | 53.5 | 100% | 5e-07 | 67% | <a href="#">gi 528756912 EPY76571.1</a>     |
| <a href="#">PREDICTED: biotinidase [Panthera tigris altaica]</a>              | 53.9 | 53.9 | 93%  | 5e-07 | 77% | <a href="#">gi 591322659 XP_007087428.1</a> |
| <a href="#">PREDICTED: biotinidase [Trichechus manatus latirostris]</a>       | 53.9 | 53.9 | 100% | 5e-07 | 70% | <a href="#">gi 471407481 XP_004385327.1</a> |
| <a href="#">PREDICTED: biotinidase [Fukomys damarensis]</a>                   | 53.9 | 53.9 | 100% | 5e-07 | 73% | <a href="#">gi 731285322 XP_010611073.1</a> |
| <a href="#">PREDICTED: biotinidase [Lipotes vexillifer]</a>                   | 53.9 | 53.9 | 100% | 5e-07 | 76% | <a href="#">gi 602721076 XP_007470691.1</a> |
| <a href="#">PREDICTED: biotinidase isoform X1 [Balaenoptera acutorostra]</a>  | 53.9 | 53.9 | 100% | 5e-07 | 76% | <a href="#">gi 594624940 XP_007167058.1</a> |
| <a href="#">Biotinidase [Fukomys damarensis]</a>                              | 53.9 | 53.9 | 100% | 5e-07 | 73% | <a href="#">gi 676263045 KFO19807.1</a>     |
| <a href="#">PREDICTED: biotinidase isoform X3 [Balaenoptera acutorostra]</a>  | 53.9 | 53.9 | 100% | 5e-07 | 76% | <a href="#">gi 594624944 XP_007167060.1</a> |
| <a href="#">PREDICTED: biotinidase isoform X2 [Camelus dromedarius]</a>       | 53.5 | 53.5 | 100% | 6e-07 | 67% | <a href="#">gi 744591359 XP_010987289.1</a> |
| <a href="#">PREDICTED: biotinidase isoform X2 [Camelus bactrianus]</a>        | 53.5 | 53.5 | 100% | 6e-07 | 67% | <a href="#">gi 743739779 XP_010964344.1</a> |
| <a href="#">PREDICTED: biotinidase isoform X2 [Ursus maritimus]</a>           | 53.5 | 53.5 | 100% | 6e-07 | 73% | <a href="#">gi 670981874 XP_008707139.1</a> |
| <a href="#">PREDICTED: biotinidase [Camelus ferus]</a>                        | 53.5 | 53.5 | 100% | 6e-07 | 67% | <a href="#">gi 560929390 XP_006190847.1</a> |
| <a href="#">PREDICTED: LOW QUALITY PROTEIN: biotinidase [Tursiops]</a>        | 53.5 | 53.5 | 100% | 6e-07 | 73% | <a href="#">gi 470628904 XP_004321284.1</a> |
| <a href="#">PREDICTED: biotinidase [Orcinus orca]</a>                         | 53.5 | 53.5 | 100% | 6e-07 | 73% | <a href="#">gi 466019817 XP_004271983.1</a> |
| <a href="#">PREDICTED: biotinidase isoform X1 [Ursus maritimus]</a>           | 53.5 | 53.5 | 100% | 6e-07 | 73% | <a href="#">gi 670981872 XP_008707130.1</a> |
| <a href="#">PREDICTED: biotinidase isoform X1 [Camelus dromedarius]</a>       | 53.5 | 53.5 | 100% | 7e-07 | 67% | <a href="#">gi 744591356 XP_010987287.1</a> |
| <a href="#">PREDICTED: biotinidase isoform X1 [Camelus bactrianus]</a>        | 53.5 | 53.5 | 100% | 7e-07 | 67% | <a href="#">gi 743739777 XP_010964343.1</a> |
| <a href="#">PREDICTED: biotinidase [Galeopterus variegatus]</a>               | 52.8 | 52.8 | 93%  | 1e-06 | 77% | <a href="#">gi 667288263 XP_008576771.1</a> |



|                                                                            |      |      |      |       |     |                                             |
|----------------------------------------------------------------------------|------|------|------|-------|-----|---------------------------------------------|
| <a href="#">PREDICTED: biotinidase isoform X2 [Cricetulus griseus]</a>     | 52.4 | 52.4 | 93%  | 1e-06 | 77% | <a href="#">gil625181248 XP_007632389.1</a> |
| <a href="#">PREDICTED: biotinidase isoform X2 [Physeter catodon]</a>       | 52.4 | 52.4 | 100% | 2e-06 | 73% | <a href="#">gil593711507 XP_007102308.1</a> |
| <a href="#">PREDICTED: biotinidase isoform X1 [Cricetulus griseus]</a>     | 52.4 | 52.4 | 93%  | 2e-06 | 77% | <a href="#">gil354465853 XP_003495391.1</a> |
| <a href="#">PREDICTED: biotinidase isoform X1 [Physeter catodon]</a>       | 52.4 | 52.4 | 100% | 2e-06 | 73% | <a href="#">gil593711505 XP_007102307.1</a> |
| <a href="#">biotinidase [Cricetulus griseus]</a>                           | 52.4 | 52.4 | 93%  | 2e-06 | 77% | <a href="#">gil537261432 ERE90059.1</a>     |
| <a href="#">PREDICTED: biotinidase-like [Ailuropoda melanoleuca]</a>       | 52.0 | 52.0 | 100% | 2e-06 | 70% | <a href="#">gil301759093 XP_002915396.1</a> |
| <a href="#">hypothetical protein PANDA_003369 [Ailuropoda melanoleuca]</a> | 52.0 | 52.0 | 100% | 2e-06 | 70% | <a href="#">gil281345880 EFB21464.1</a>     |
| <a href="#">PREDICTED: biotinidase isoform X1 [Peromyscus maniculatus]</a> | 51.2 | 51.2 | 100% | 4e-06 | 70% | <a href="#">gil589967608 XP_006996305.1</a> |
| <a href="#">PREDICTED: biotinidase [Nannospalax galii]</a>                 | 51.2 | 51.2 | 100% | 4e-06 | 70% | <a href="#">gil674081213 XP_008848205.1</a> |
| <a href="#">PREDICTED: biotinidase isoform X2 [Peromyscus maniculatus]</a> | 51.2 | 51.2 | 100% | 4e-06 | 70% | <a href="#">gil589967610 XP_006996306.1</a> |
| <a href="#">PREDICTED: biotinidase [Mesocricetus auratus]</a>              | 50.8 | 50.8 | 100% | 6e-06 | 73% | <a href="#">gil524955500 XP_005077724.1</a> |
| <a href="#">Biotinidase [Heterocephalus glaber]</a>                        | 50.4 | 50.4 | 100% | 8e-06 | 67% | <a href="#">gil351707565 EHB10484.1</a>     |
| <a href="#">PREDICTED: biotinidase isoform X3 [Heterocephalus glaber]</a>  | 50.4 | 50.4 | 100% | 8e-06 | 67% | <a href="#">gil512886961 XP_004896459.1</a> |
| <a href="#">PREDICTED: biotinidase isoform X1 [Heterocephalus glaber]</a>  | 50.4 | 50.4 | 100% | 8e-06 | 67% | <a href="#">gil512886949 XP_004896457.1</a> |
| <a href="#">PREDICTED: biotinidase isoform X1 [Cavia porcellus]</a>        | 50.1 | 50.1 | 100% | 1e-05 | 67% | <a href="#">gil514481133 XP_003480063.2</a> |
| <a href="#">PREDICTED: biotinidase isoform X2 [Cavia porcellus]</a>        | 50.1 | 50.1 | 100% | 1e-05 | 67% | <a href="#">gil514481131 XP_005008361.1</a> |
| <a href="#">PREDICTED: biotinidase [Loxodonta africana]</a>                | 49.3 | 49.3 | 100% | 2e-05 | 61% | <a href="#">gil731510838 XP_010598778.1</a> |
| <a href="#">TPA: biotinidase precursor [Bos taurus]</a>                    | 48.9 | 48.9 | 100% | 3e-05 | 67% | <a href="#">gil296490802 DAA32915.1</a>     |
| <a href="#">biotinidase precursor [Bos taurus]</a>                         | 48.9 | 48.9 | 100% | 3e-05 | 67% | <a href="#">gil156121059 NP_001095676.1</a> |
| <a href="#">PREDICTED: biotinidase isoform X1 [Bos taurus]</a>             | 48.9 | 48.9 | 100% | 3e-05 | 67% | <a href="#">gil528938459 XP_005202205.1</a> |
| <a href="#">PREDICTED: biotinidase [Erinaceus europaeus]</a>               | 48.9 | 48.9 | 100% | 3e-05 | 64% | <a href="#">gil617553342 XP_007530134.1</a> |
| <a href="#">biotinidase isoform CRA_a [Rattus norvegicus]</a>              | 48.1 | 48.1 | 100% | 4e-05 | 64% | <a href="#">gil149034168 EDL88938.1</a>     |
| <a href="#">biotinidase isoform CRA_c [Rattus norvegicus]</a>              | 48.1 | 48.1 | 100% | 4e-05 | 64% | <a href="#">gil149034170 EDL88940.1</a>     |
| <a href="#">biotinidase precursor [Rattus norvegicus]</a>                  | 48.1 | 48.1 | 100% | 5e-05 | 64% | <a href="#">gil58865670 NP_001012047.1</a>  |
| <a href="#">PREDICTED: biotinidase [Pteropus alecto]</a>                   | 48.1 | 48.1 | 93%  | 5e-05 | 71% | <a href="#">gil586544408 XP_006907323.1</a> |

## Alignments

[Download](#) [GenPept](#) [Graphics](#)

[Next](#) [Previous](#) [Descriptions](#)

PREDICTED: biotinidase [Nomascus leucogenys]

Sequence ID: [gil332232450|ref|XP\\_003265417.1](#) Length: 474 Number of Matches: 1

Range 1: 260 to 292 [GenPept](#) [Graphics](#)

[Next Match](#) [Previous Match](#)

| Score          | Expect | Identities | Positives   | Gaps     |
|----------------|--------|------------|-------------|----------|
| 67.4 bits(163) | 8e-12  | 32/33(97%) | 33/33(100%) | 0/33(0%) |

Query 1 KSHLIIAQVAKNPVGLIGAEDATGETDPSHSKF 33  
 KSHLIIAQVAKNPVGLIGAE+ATGETDPSHSKF  
 Sbjct 260 KSHLIIAQVAKNPVGLIGAENATGETDPSHSKF 292

### Related Information

[Gene](#) - associated gene details  
[Map Viewer](#) - aligned genomic context

[Download](#) [GenPept](#) [Graphics](#)

[Next](#) [Previous](#) [Descriptions](#)

unnamed protein product [Homo sapiens]

Sequence ID: [gil221043776|dbj|BAH13565.1](#) Length: 523 Number of Matches: 1

Range 1: 309 to 341 [GenPept](#) [Graphics](#)

[Next Match](#) [Previous Match](#)

| Score          | Expect | Identities | Positives   | Gaps     |
|----------------|--------|------------|-------------|----------|
| 67.4 bits(163) | 8e-12  | 32/33(97%) | 33/33(100%) | 0/33(0%) |

Query 1 KSHLIIAQVAKNPVGLIGAEDATGETDPSHSKF 33  
 KSHLIIAQVAKNPVGLIGAE+ATGETDPSHSKF  
 Sbjct 309 KSHLIIAQVAKNPVGLIGAENATGETDPSHSKF 341

### Related Information

[Gene](#) - associated gene details

[Download](#) [GenPept](#) [Graphics](#)

[Next](#) [Previous](#) [Descriptions](#)

biotinidase isoform 4 precursor [Homo sapiens]

Sequence ID: [gi|528524486|ref|NP\\_001268654.1](#) Length: 523 Number of Matches: 1

[See 3 more title\(s\)](#)

Range 1: 309 to 341 [GenPept](#) [Graphics](#)

[Next Match](#) [Previous Match](#)

| Score          | Expect | Identities | Positives   | Gaps     |
|----------------|--------|------------|-------------|----------|
| 67.4 bits(163) | 8e-12  | 32/33(97%) | 33/33(100%) | 0/33(0%) |

Query 1 KSHLIIAQVAKNPVGLIGAEDATGETDPSHSKF 33  
 KSHLIIAQVAKNPVGLIGAE+ATGETDPSHSKF  
 Sbjct 309 KSHLIIAQVAKNPVGLIGAENATGETDPSHSKF 341

**Related Information**

[Gene](#) - associated gene details  
[Map Viewer](#) - aligned genomic context  
[Identical Proteins](#) - Proteins identical to the subject

[Download](#) [GenPept](#) [Graphics](#)

[Next](#) [Previous](#) [Descriptions](#)

biotinidase precursor [Pan troglodytes]

Sequence ID: [gi|697993457|ref|NP\\_001289363.1](#) Length: 523 Number of Matches: 1

[See 1 more title\(s\)](#)

Range 1: 309 to 341 [GenPept](#) [Graphics](#)

[Next Match](#) [Previous Match](#)

| Score          | Expect | Identities | Positives   | Gaps     |
|----------------|--------|------------|-------------|----------|
| 67.4 bits(163) | 8e-12  | 32/33(97%) | 33/33(100%) | 0/33(0%) |

Query 1 KSHLIIAQVAKNPVGLIGAEDATGETDPSHSKF 33  
 KSHLIIAQVAKNPVGLIGAE+ATGETDPSHSKF  
 Sbjct 309 KSHLIIAQVAKNPVGLIGAENATGETDPSHSKF 341

**Related Information**

[Gene](#) - associated gene details  
[Map Viewer](#) - aligned genomic context  
[Identical Proteins](#) - Proteins identical to the subject

[Download](#) [GenPept](#) [Graphics](#)

[Next](#) [Previous](#) [Descriptions](#)

PREDICTED: biotinidase isoform X2 [Pan troglodytes]

Sequence ID: [gi|694900420|ref|XP\\_009443239.1](#) Length: 527 Number of Matches: 1

[See 1 more title\(s\)](#)

Range 1: 313 to 345 [GenPept](#) [Graphics](#)

[Next Match](#) [Previous Match](#)

| Score          | Expect | Identities | Positives   | Gaps     |
|----------------|--------|------------|-------------|----------|
| 67.4 bits(163) | 9e-12  | 32/33(97%) | 33/33(100%) | 0/33(0%) |

Query 1 KSHLIIAQVAKNPVGLIGAEDATGETDPSHSKF 33  
 KSHLIIAQVAKNPVGLIGAE+ATGETDPSHSKF  
 Sbjct 313 KSHLIIAQVAKNPVGLIGAENATGETDPSHSKF 345

**Related Information**

[Gene](#) - associated gene details  
[Identical Proteins](#) - Proteins identical to the subject

BLAST is a registered trademark of the National Library of Medicine.

[Copyright](#) | [Disclaimer](#) | [Privacy](#) | [Accessibility](#) | [Contact](#) | [Send feedback](#)

[NCBI](#) | [NLM](#) | [NIH](#) | [DHHS](#)

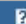

NCBI/ BLAST/ blastp suite/ Formatting Results - BT4XNGRP013

[Edit and Resubmit](#) [Save Search Strategies](#) [Formatting options](#) [Download](#)

[YouTube](#) [How to read this page](#) [Blast report description](#)

### BT4\_KSHLIAQVAKNPVGLIGAEDATGETDPSHSKFLKI\_Mod

RID [BT4XNGRP013](#) (Expires on 01-20 12:18 pm)

Query ID |cl|58007  
Description None  
Molecule type amino acid  
Query Length 36

Database Name nr  
Description All non-redundant GenBank CDS translations+PDB+SwissProt+PIR+PRF excluding environmental samples from WGS projects  
Program BLASTP 2.2.30+ [Citation](#)

Other reports: [Search Summary](#) [\[Taxonomy reports\]](#) [\[Distance tree of results\]](#) [\[Multiple alignment\]](#)

### Graphic Summary

[Show Conserved Domains](#)

No putative conserved domains have been detected

Distribution of 100 Blast Hits on the Query Sequence

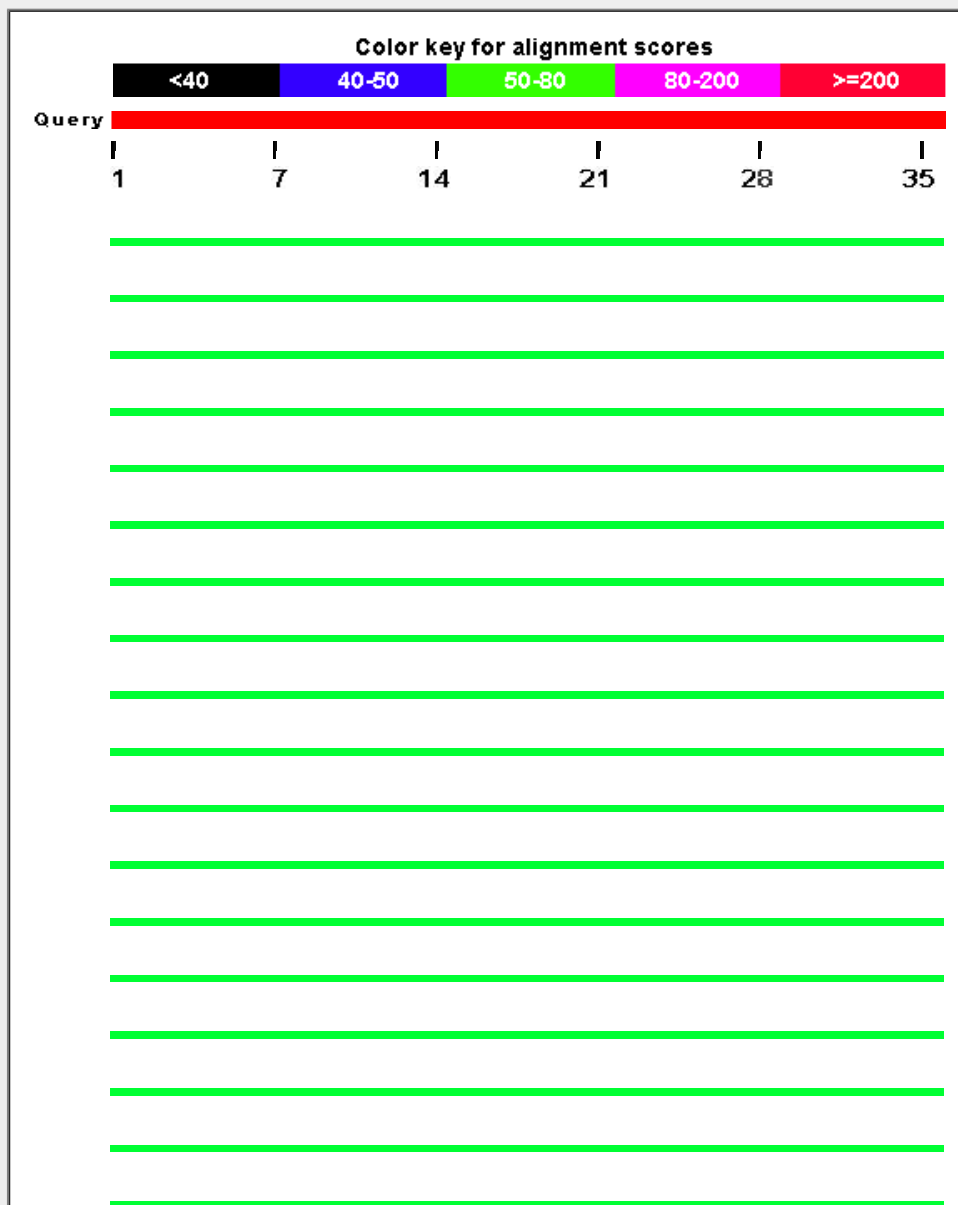

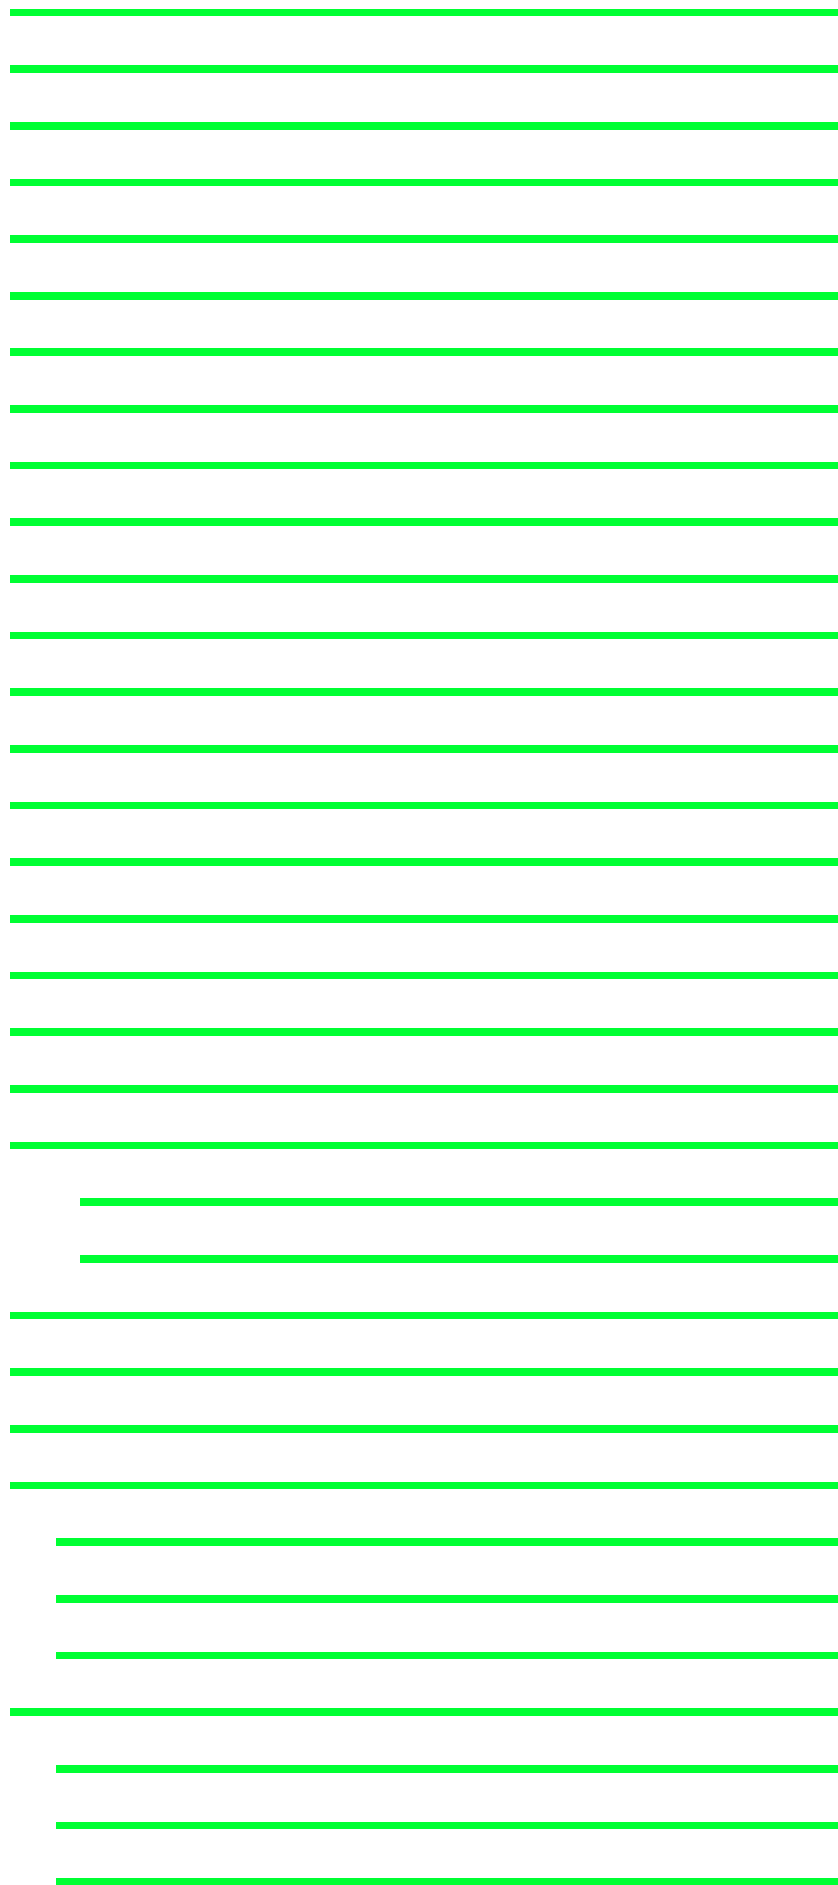

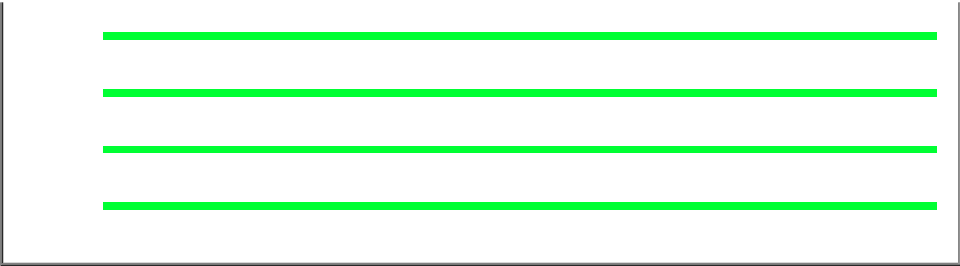

**Descriptions**

**Sequences producing significant alignments:**

Select: [All](#) [None](#) Selected:0

[Alignments](#)
[Download](#)
[GenPept](#)
[Graphics](#)
[Distance tree of results](#)
[Multiple alignment](#)

| Description                                                                | Max score | Total score | Query cover | E value | Ident | Accession                                   |
|----------------------------------------------------------------------------|-----------|-------------|-------------|---------|-------|---------------------------------------------|
| <a href="#">PREDICTED: biotinidase [Nomascus leucogenys]</a>               | 72.4      | 72.4        | 100%        | 1e-13   | 97%   | <a href="#">gi 332232450 XP_003265417.1</a> |
| <a href="#">unnamed protein product [Homo sapiens]</a>                     | 72.4      | 72.4        | 100%        | 2e-13   | 97%   | <a href="#">gi 221043776 BAH13565.1</a>     |
| <a href="#">biotinidase isoform 4 precursor [Homo sapiens]</a>             | 72.4      | 72.4        | 100%        | 2e-13   | 97%   | <a href="#">gi 528524486 NP_001268654.1</a> |
| <a href="#">biotinidase precursor [Pan troglodytes]</a>                    | 72.4      | 72.4        | 100%        | 2e-13   | 97%   | <a href="#">gi 697993457 NP_001289363.1</a> |
| <a href="#">PREDICTED: biotinidase isoform X2 [Pan troglodytes]</a>        | 72.4      | 72.4        | 100%        | 2e-13   | 97%   | <a href="#">gi 694900420 XP_009443239.1</a> |
| <a href="#">PREDICTED: biotinidase isoform X2 [Pan paniscus]</a>           | 72.4      | 72.4        | 100%        | 2e-13   | 97%   | <a href="#">gi 675784344 XP_008949921.1</a> |
| <a href="#">PREDICTED: biotinidase isoform X3 [Pongo abelii]</a>           | 72.4      | 72.4        | 100%        | 2e-13   | 97%   | <a href="#">gi 686713703 XP_009237577.1</a> |
| <a href="#">PREDICTED: biotinidase isoform X2 [Pongo abelii]</a>           | 72.4      | 72.4        | 100%        | 2e-13   | 97%   | <a href="#">gi 686713701 XP_009237576.1</a> |
| <a href="#">biotinidase isoform 3 [Homo sapiens]</a>                       | 72.4      | 72.4        | 100%        | 2e-13   | 97%   | <a href="#">gi 4557373 NP_000051.1</a>      |
| <a href="#">biotinidase isoform 1 [Homo sapiens]</a>                       | 72.4      | 72.4        | 100%        | 2e-13   | 97%   | <a href="#">gi 528524481 NP_001268652.1</a> |
| <a href="#">biotinidase isoform 2 [Homo sapiens]</a>                       | 72.4      | 72.4        | 100%        | 2e-13   | 97%   | <a href="#">gi 528524483 NP_001268653.1</a> |
| <a href="#">PREDICTED: biotinidase isoform X1 [Pan troglodytes]</a>        | 72.4      | 72.4        | 100%        | 2e-13   | 97%   | <a href="#">gi 410036604 XP_003950087.1</a> |
| <a href="#">PREDICTED: biotinidase isoform X1 [Pan paniscus]</a>           | 72.4      | 72.4        | 100%        | 2e-13   | 97%   | <a href="#">gi 397511808 XP_003826257.1</a> |
| <a href="#">PREDICTED: biotinidase isoform X1 [Pongo abelii]</a>           | 72.4      | 72.4        | 100%        | 2e-13   | 97%   | <a href="#">gi 395734130 XP_003776360.1</a> |
| <a href="#">PREDICTED: biotinidase isoform 1 [Gorilla gorilla gorilla]</a> | 72.0      | 72.0        | 100%        | 2e-13   | 94%   | <a href="#">gi 426339607 XP_004033737.1</a> |
| <a href="#">PREDICTED: biotinidase isoform 3 [Gorilla gorilla gorilla]</a> | 72.0      | 72.0        | 100%        | 2e-13   | 94%   | <a href="#">gi 426339611 XP_004033739.1</a> |
| <a href="#">PREDICTED: biotinidase isoform 4 [Gorilla gorilla gorilla]</a> | 72.0      | 72.0        | 100%        | 2e-13   | 94%   | <a href="#">gi 426339613 XP_004033740.1</a> |
| <a href="#">PREDICTED: biotinidase isoform 2 [Gorilla gorilla gorilla]</a> | 72.0      | 72.0        | 100%        | 2e-13   | 94%   | <a href="#">gi 426339609 XP_004033738.1</a> |
| <a href="#">unnamed protein product [Macaca fascicularis]</a>              | 70.9      | 70.9        | 100%        | 5e-13   | 94%   | <a href="#">gi 90077268 BAE88314.1</a>      |
| <a href="#">PREDICTED: biotinidase isoform X2 [Macaca fascicularis]</a>    | 70.9      | 70.9        | 100%        | 6e-13   | 94%   | <a href="#">gi 544411158 XP_005545768.1</a> |
| <a href="#">hypothetical protein EGM_11114 [Macaca fascicularis]</a>       | 70.9      | 70.9        | 100%        | 6e-13   | 94%   | <a href="#">gi 355747075 EHH51689.1</a>     |
| <a href="#">hypothetical protein EGK_12122 [Macaca mulatta]</a>            | 70.9      | 70.9        | 100%        | 6e-13   | 94%   | <a href="#">gi 355560049 EHH16777.1</a>     |
| <a href="#">PREDICTED: biotinidase [Macaca mulatta]</a>                    | 70.9      | 70.9        | 100%        | 6e-13   | 94%   | <a href="#">gi 297286947 XP_001083201.2</a> |
| <a href="#">PREDICTED: biotinidase isoform X1 [Macaca fascicularis]</a>    | 70.9      | 70.9        | 100%        | 6e-13   | 94%   | <a href="#">gi 544411156 XP_005545767.1</a> |
| <a href="#">PREDICTED: biotinidase isoform X2 [Chlorocebus sabaeus]</a>    | 69.3      | 69.3        | 100%        | 2e-12   | 92%   | <a href="#">gi 635085523 XP_008007381.1</a> |
| <a href="#">PREDICTED: biotinidase isoform X1 [Chlorocebus sabaeus]</a>    | 69.3      | 69.3        | 100%        | 2e-12   | 92%   | <a href="#">gi 635085521 XP_008007380.1</a> |
| <a href="#">PREDICTED: biotinidase [Rhinopithecus roxellana]</a>           | 66.6      | 66.6        | 100%        | 2e-11   | 86%   | <a href="#">gi 724960396 XP_010354361.1</a> |
| <a href="#">PREDICTED: biotinidase isoform X2 [Papio anubis]</a>           | 65.5      | 65.5        | 100%        | 5e-11   | 86%   | <a href="#">gi 685527526 XP_009200021.1</a> |
| <a href="#">PREDICTED: biotinidase isoform X1 [Papio anubis]</a>           | 65.5      | 65.5        | 100%        | 5e-11   | 86%   | <a href="#">gi 685527524 XP_009200020.1</a> |
| <a href="#">PREDICTED: biotinidase-like [Ictidomys tridecemlineatus]</a>   | 63.2      | 63.2        | 100%        | 3e-10   | 81%   | <a href="#">gi 532063189 XP_005317469.1</a> |

|                                                                               |      |      |      |       |     |                                             |
|-------------------------------------------------------------------------------|------|------|------|-------|-----|---------------------------------------------|
| <a href="#">PREDICTED: biotinidase [Ceratotherium simum simum]</a>            | 63.2 | 63.2 | 100% | 3e-10 | 81% | <a href="#">gi 478490156 XP_004419451.1</a> |
| <a href="#">PREDICTED: biotinidase isoform X4 [Canis lupus familiaris]</a>    | 62.0 | 62.0 | 100% | 8e-10 | 78% | <a href="#">gi 545538859 XP_005634450.1</a> |
| <a href="#">PREDICTED: biotinidase isoform X3 [Canis lupus familiaris]</a>    | 62.0 | 62.0 | 100% | 8e-10 | 78% | <a href="#">gi 545538857 XP_005634449.1</a> |
| <a href="#">PREDICTED: biotinidase isoform X2 [Canis lupus familiaris]</a>    | 62.0 | 62.0 | 100% | 8e-10 | 78% | <a href="#">gi 545538855 XP_005634448.1</a> |
| <a href="#">PREDICTED: biotinidase isoform X1 [Canis lupus familiaris]</a>    | 62.0 | 62.0 | 100% | 8e-10 | 78% | <a href="#">gi 545538853 XP_005634447.1</a> |
| <a href="#">PREDICTED: biotinidase isoform X3 [Equus caballus]</a>            | 61.6 | 61.6 | 100% | 1e-09 | 78% | <a href="#">gi 545189350 XP_005600979.1</a> |
| <a href="#">PREDICTED: biotinidase [Equus przewalskii]</a>                    | 61.6 | 61.6 | 100% | 1e-09 | 78% | <a href="#">gi 664753751 XP_008534346.1</a> |
| <a href="#">PREDICTED: biotinidase isoform X2 [Equus caballus]</a>            | 61.6 | 61.6 | 100% | 1e-09 | 78% | <a href="#">gi 545189348 XP_005600978.1</a> |
| <a href="#">PREDICTED: biotinidase isoform X1 [Equus caballus]</a>            | 61.6 | 61.6 | 100% | 1e-09 | 78% | <a href="#">gi 545189346 XP_005600977.1</a> |
| <a href="#">PREDICTED: biotinidase isoform X1 [Callithrix jacchus]</a>        | 60.8 | 60.8 | 91%  | 2e-09 | 91% | <a href="#">gi 675740028 XP_008982107.1</a> |
| <a href="#">PREDICTED: biotinidase isoform X2 [Callithrix jacchus]</a>        | 60.8 | 60.8 | 91%  | 2e-09 | 91% | <a href="#">gi 390476393 XP_002759736.2</a> |
| <a href="#">PREDICTED: biotinidase [Vicugna pacos]</a>                        | 60.5 | 60.5 | 100% | 3e-09 | 72% | <a href="#">gi 560965913 XP_006205350.1</a> |
| <a href="#">PREDICTED: biotinidase [Otolemur garnettii]</a>                   | 60.5 | 60.5 | 100% | 3e-09 | 81% | <a href="#">gi 395816560 XP_003781769.1</a> |
| <a href="#">PREDICTED: biotinidase isoform X2 [Microtus ochrogaster]</a>      | 59.7 | 59.7 | 100% | 5e-09 | 75% | <a href="#">gi 532009812 XP_005348714.1</a> |
| <a href="#">PREDICTED: biotinidase isoform X1 [Microtus ochrogaster]</a>      | 59.7 | 59.7 | 100% | 5e-09 | 75% | <a href="#">gi 532009810 XP_005348713.1</a> |
| <a href="#">PREDICTED: biotinidase-like isoform X10 [Chinchilla lanigera]</a> | 59.3 | 59.3 | 94%  | 6e-09 | 79% | <a href="#">gi 533146084 XP_005387502.1</a> |
| <a href="#">PREDICTED: biotinidase-like isoform X5 [Chinchilla lanigera]</a>  | 59.3 | 59.3 | 94%  | 7e-09 | 79% | <a href="#">gi 533146074 XP_005387497.1</a> |
| <a href="#">PREDICTED: biotinidase-like isoform X1 [Chinchilla lanigera]</a>  | 59.3 | 59.3 | 94%  | 7e-09 | 79% | <a href="#">gi 533146066 XP_005387493.1</a> |
| <a href="#">biotinidase [Camelus ferus]</a>                                   | 58.5 | 58.5 | 100% | 9e-09 | 69% | <a href="#">gi 528756912 EPY76571.1</a>     |
| <a href="#">PREDICTED: biotinidase [Jaculus jaculus]</a>                      | 58.9 | 58.9 | 94%  | 9e-09 | 79% | <a href="#">gi 507555213 XP_004661377.1</a> |
| <a href="#">PREDICTED: biotinidase isoform X1 [Felis catus]</a>               | 58.9 | 58.9 | 94%  | 9e-09 | 79% | <a href="#">gi 587000359 XP_003992187.2</a> |
| <a href="#">PREDICTED: biotinidase isoform X2 [Felis catus]</a>               | 58.9 | 58.9 | 94%  | 9e-09 | 79% | <a href="#">gi 587000357 XP_006936495.1</a> |
| <a href="#">PREDICTED: biotinidase [Trichechus manatus latirostris]</a>       | 58.9 | 58.9 | 100% | 9e-09 | 72% | <a href="#">gi 471407481 XP_004385327.1</a> |
| <a href="#">PREDICTED: biotinidase [Fukomys damarensis]</a>                   | 58.9 | 58.9 | 100% | 9e-09 | 75% | <a href="#">gi 731285322 XP_010611073.1</a> |
| <a href="#">PREDICTED: biotinidase [Lipotes vexillifer]</a>                   | 58.9 | 58.9 | 100% | 1e-08 | 78% | <a href="#">gi 602721076 XP_007470691.1</a> |
| <a href="#">PREDICTED: biotinidase isoform X1 [Balaenoptera acutorostra]</a>  | 58.9 | 58.9 | 100% | 1e-08 | 78% | <a href="#">gi 594624940 XP_007167058.1</a> |
| <a href="#">Biotinidase [Fukomys damarensis]</a>                              | 58.9 | 58.9 | 100% | 1e-08 | 75% | <a href="#">gi 676263045 KFO19807.1</a>     |
| <a href="#">PREDICTED: biotinidase isoform X3 [Balaenoptera acutorostra]</a>  | 58.9 | 58.9 | 100% | 1e-08 | 78% | <a href="#">gi 594624944 XP_007167060.1</a> |
| <a href="#">PREDICTED: biotinidase isoform X2 [Camelus dromedarius]</a>       | 58.5 | 58.5 | 100% | 1e-08 | 69% | <a href="#">gi 744591359 XP_010987289.1</a> |
| <a href="#">PREDICTED: biotinidase isoform X2 [Camelus bactrianus]</a>        | 58.5 | 58.5 | 100% | 1e-08 | 69% | <a href="#">gi 743739779 XP_010964344.1</a> |
| <a href="#">PREDICTED: biotinidase [Camelus ferus]</a>                        | 58.5 | 58.5 | 100% | 1e-08 | 69% | <a href="#">gi 560929390 XP_006190847.1</a> |
| <a href="#">PREDICTED: LOW QUALITY PROTEIN: biotinidase [Tursiops]</a>        | 58.5 | 58.5 | 100% | 1e-08 | 75% | <a href="#">gi 470628904 XP_004321284.1</a> |
| <a href="#">PREDICTED: biotinidase [Orcinus orca]</a>                         | 58.5 | 58.5 | 100% | 1e-08 | 75% | <a href="#">gi 466019817 XP_004271983.1</a> |
| <a href="#">PREDICTED: biotinidase isoform X1 [Camelus dromedarius]</a>       | 58.5 | 58.5 | 100% | 1e-08 | 69% | <a href="#">gi 744591356 XP_010987287.1</a> |
| <a href="#">PREDICTED: biotinidase isoform X1 [Camelus bactrianus]</a>        | 58.5 | 58.5 | 100% | 1e-08 | 69% | <a href="#">gi 743739777 XP_010964343.1</a> |
| <a href="#">PREDICTED: biotinidase isoform 2 [Odobenus rosmarus diverc]</a>   | 58.2 | 58.2 | 94%  | 2e-08 | 79% | <a href="#">gi 472379495 XP_004409157.1</a> |
| <a href="#">PREDICTED: biotinidase isoform 1 [Odobenus rosmarus diverc]</a>   | 58.2 | 58.2 | 94%  | 2e-08 | 79% | <a href="#">gi 472379493 XP_004409156.1</a> |
| <a href="#">PREDICTED: biotinidase [Galeopterus variegatus]</a>               | 57.8 | 57.8 | 94%  | 2e-08 | 79% | <a href="#">gi 667288263 XP_008576771.1</a> |
| <a href="#">PREDICTED: biotinidase [Mustela putorius furo]</a>                | 57.8 | 57.8 | 100% | 2e-08 | 69% | <a href="#">gi 511908359 XP_004773614.1</a> |
| <a href="#">PREDICTED: biotinidase isoform X2 [Cricetulus griseus]</a>        | 57.4 | 57.4 | 94%  | 3e-08 | 79% | <a href="#">gi 625181248 XP_007632389.1</a> |
| <a href="#">PREDICTED: biotinidase isoform X2 [Physeter catodon]</a>          | 57.4 | 57.4 | 100% | 3e-08 | 75% | <a href="#">gi 593711507 XP_007102308.1</a> |
| <a href="#">PREDICTED: biotinidase [Panthera tigris altaica]</a>              | 57.4 | 57.4 | 94%  | 3e-08 | 76% | <a href="#">gi 591322659 XP_007087428.1</a> |
| <a href="#">PREDICTED: biotinidase isoform X1 [Cricetulus griseus]</a>        | 57.4 | 57.4 | 94%  | 3e-08 | 79% | <a href="#">gi 354465853 XP_003495391.1</a> |
| <a href="#">PREDICTED: biotinidase isoform X1 [Physeter catodon]</a>          | 57.4 | 57.4 | 100% | 3e-08 | 75% | <a href="#">gi 593711505 XP_007102307.1</a> |
| <a href="#">biotinidase [Cricetulus griseus]</a>                              | 57.4 | 57.4 | 94%  | 3e-08 | 79% | <a href="#">gi 537261432 ERE90059.1</a>     |

|                                                                                     |      |      |      |       |     |                                             |
|-------------------------------------------------------------------------------------|------|------|------|-------|-----|---------------------------------------------|
| <a href="#">PREDICTED: biotinidase isoform X3 [Leptonychotes weddellii]</a>         | 57.0 | 57.0 | 94%  | 4e-08 | 76% | <a href="#">gi 585186600 XP_006744787.1</a> |
| <a href="#">PREDICTED: biotinidase isoform X2 [Leptonychotes weddellii]</a>         | 57.0 | 57.0 | 94%  | 4e-08 | 76% | <a href="#">gi 585186598 XP_006744786.1</a> |
| <a href="#">PREDICTED: biotinidase isoform X1 [Leptonychotes weddellii]</a>         | 57.0 | 57.0 | 94%  | 5e-08 | 76% | <a href="#">gi 585186596 XP_006744785.1</a> |
| <a href="#">PREDICTED: biotinidase isoform X1 [Peromyscus maniculatus]</a>          | 56.2 | 56.2 | 100% | 8e-08 | 72% | <a href="#">gi 589967608 XP_006996305.1</a> |
| <a href="#">PREDICTED: biotinidase [Nannospalax galili]</a>                         | 56.2 | 56.2 | 100% | 8e-08 | 72% | <a href="#">gi 674081213 XP_008848205.1</a> |
| <a href="#">PREDICTED: biotinidase isoform X2 [Ursus maritimus]</a>                 | 56.2 | 56.2 | 100% | 8e-08 | 69% | <a href="#">gi 670981874 XP_008707139.1</a> |
| <a href="#">PREDICTED: biotinidase isoform X2 [Peromyscus maniculatus]</a>          | 56.2 | 56.2 | 100% | 8e-08 | 72% | <a href="#">gi 589967610 XP_006996306.1</a> |
| <a href="#">PREDICTED: biotinidase isoform X1 [Ursus maritimus]</a>                 | 56.2 | 56.2 | 100% | 8e-08 | 69% | <a href="#">gi 670981872 XP_008707130.1</a> |
| <a href="#">Biotinidase [Heterocephalus glaber]</a>                                 | 55.5 | 55.5 | 100% | 2e-07 | 69% | <a href="#">gi 351707565 EHB10484.1</a>     |
| <a href="#">PREDICTED: biotinidase isoform X3 [Heterocephalus glaber]</a>           | 55.5 | 55.5 | 100% | 2e-07 | 69% | <a href="#">gi 512886961 XP_004896459.1</a> |
| <a href="#">PREDICTED: biotinidase isoform X1 [Heterocephalus glaber]</a>           | 55.5 | 55.5 | 100% | 2e-07 | 69% | <a href="#">gi 512886949 XP_004896457.1</a> |
| <a href="#">PREDICTED: biotinidase [Mesocricetus auratus]</a>                       | 54.7 | 54.7 | 100% | 3e-07 | 72% | <a href="#">gi 524955500 XP_005077724.1</a> |
| <a href="#">PREDICTED: biotinidase-like [Ailuropoda melanoleuca]</a>                | 54.7 | 54.7 | 100% | 3e-07 | 67% | <a href="#">gi 301759093 XP_002915396.1</a> |
| <a href="#">hypothetical protein PANDA_003369 [Ailuropoda melanoleuca]</a>          | 54.7 | 54.7 | 100% | 3e-07 | 67% | <a href="#">gi 281345880 EFB21464.1</a>     |
| <a href="#">PREDICTED: biotinidase [Loxodonta africana]</a>                         | 54.3 | 54.3 | 100% | 4e-07 | 64% | <a href="#">gi 731510838 XP_010598778.1</a> |
| <a href="#">PREDICTED: biotinidase [Erinaceus europaeus]</a>                        | 53.9 | 53.9 | 100% | 6e-07 | 67% | <a href="#">gi 617553342 XP_007530134.1</a> |
| <a href="#">biotinidase, isoform CRA_a [Rattus norvegicus]</a>                      | 52.8 | 52.8 | 100% | 1e-06 | 64% | <a href="#">gi 149034168 EDL88938.1</a>     |
| <a href="#">biotinidase, isoform CRA_c [Rattus norvegicus]</a>                      | 52.8 | 52.8 | 100% | 1e-06 | 64% | <a href="#">gi 149034170 EDL88940.1</a>     |
| <a href="#">biotinidase precursor [Rattus norvegicus]</a>                           | 52.8 | 52.8 | 100% | 1e-06 | 64% | <a href="#">gi 58865670 NP_001012047.1</a>  |
| <a href="#">PREDICTED: biotinidase isoform X1 [Cavia porcellus]</a>                 | 52.8 | 52.8 | 100% | 1e-06 | 64% | <a href="#">gi 514481133 XP_003480063.2</a> |
| <a href="#">PREDICTED: biotinidase isoform X2 [Rattus norvegicus]</a>               | 52.8 | 52.8 | 100% | 1e-06 | 64% | <a href="#">gi 564387894 XP_006252671.1</a> |
| <a href="#">PREDICTED: biotinidase isoform X2 [Cavia porcellus]</a>                 | 52.8 | 52.8 | 100% | 1e-06 | 64% | <a href="#">gi 514481131 XP_005008361.1</a> |
| <a href="#">PREDICTED: biotinidase isoform X3 [Saimiri boliviensis boliviensis]</a> | 52.4 | 52.4 | 91%  | 2e-06 | 79% | <a href="#">gi 725560828 XP_010333963.1</a> |
| <a href="#">PREDICTED: biotinidase isoform X2 [Saimiri boliviensis boliviensis]</a> | 52.4 | 52.4 | 91%  | 2e-06 | 79% | <a href="#">gi 403265544 XP_003924991.1</a> |
| <a href="#">PREDICTED: biotinidase isoform X1 [Saimiri boliviensis boliviensis]</a> | 52.4 | 52.4 | 91%  | 2e-06 | 79% | <a href="#">gi 725560825 XP_010333962.1</a> |

## Alignments

[Download](#) [GenPept](#) [Graphics](#)

[Next](#) [Previous](#) [Descriptions](#)

PREDICTED: biotinidase [Nomascus leucogenys]

Sequence ID: [gi|332232450|ref|XP\\_003265417.1](#) Length: 474 Number of Matches: 1

Range 1: 260 to 295 [GenPept](#) [Graphics](#)

[Next Match](#) [Previous Match](#)

| Score          | Expect | Identities | Positives   | Gaps     |
|----------------|--------|------------|-------------|----------|
| 72.4 bits(176) | 1e-13  | 35/36(97%) | 36/36(100%) | 0/36(0%) |

Query 1 KSHLIIAQVAKNPVGLIGAEDATGETDPSHSKFLKI 36  
 KSHLIIAQVAKNPVGLIGAE+ATGETDPSHSKFLKI  
 Sbjct 260 KSHLIIAQVAKNPVGLIGAENATGETDPSHSKFLKI 295

### Related Information

[Gene](#) - associated gene details  
[Map Viewer](#) - aligned genomic context

[Download](#) [GenPept](#) [Graphics](#)

[Next](#) [Previous](#) [Descriptions](#)

unnamed protein product [Homo sapiens]

Sequence ID: [gi|221043776|dbj|BAH13565.1](#) Length: 523 Number of Matches: 1

Range 1: 309 to 344 [GenPept](#) [Graphics](#)

[Next Match](#) [Previous Match](#)

| Score          | Expect | Identities | Positives   | Gaps     |
|----------------|--------|------------|-------------|----------|
| 72.4 bits(176) | 2e-13  | 35/36(97%) | 36/36(100%) | 0/36(0%) |

Query 1 KSHLIIAQVAKNPVGLIGAEDATGETDPSHSKFLKI 36  
 KSHLIIAQVAKNPVGLIGAE+ATGETDPSHSKFLKI  
 Sbjct 309 KSHLIIAQVAKNPVGLIGAENATGETDPSHSKFLKI 344

### Related Information

[Gene](#) - associated gene details

[Download](#) [GenPept](#) [Graphics](#)

[Next](#) [Previous](#) [Descriptions](#)

biotinidase isoform 4 precursor [Homo sapiens]

Sequence ID: [gi|528524486|ref|NP\\_001268654.1](#) Length: 523 Number of Matches: 1

[See 3 more title\(s\)](#)

Range 1: 309 to 344 [GenPept](#) [Graphics](#)

[Next Match](#) [Previous Match](#)

| Score          | Expect | Identities | Positives   | Gaps     |
|----------------|--------|------------|-------------|----------|
| 72.4 bits(176) | 2e-13  | 35/36(97%) | 36/36(100%) | 0/36(0%) |

Query 1 KSHLIIAQVAKNPVGLIGAEDATGETDPSHSKFLKI 36  
 KSHLIIAQVAKNPVGLIGAE+ATGETDPSHSKFLKI  
 Sbjct 309 KSHLIIAQVAKNPVGLIGAENATGETDPSHSKFLKI 344

**Related Information**

[Gene](#) - associated gene details  
[Map Viewer](#) - aligned genomic context  
[Identical Proteins](#) - Proteins identical to the subject

[Download](#) [GenPept](#) [Graphics](#)

[Next](#) [Previous](#) [Descriptions](#)

biotinidase precursor [Pan troglodytes]

Sequence ID: [gi|697993457|ref|NP\\_001289363.1](#) Length: 523 Number of Matches: 1

[See 1 more title\(s\)](#)

Range 1: 309 to 344 [GenPept](#) [Graphics](#)

[Next Match](#) [Previous Match](#)

| Score          | Expect | Identities | Positives   | Gaps     |
|----------------|--------|------------|-------------|----------|
| 72.4 bits(176) | 2e-13  | 35/36(97%) | 36/36(100%) | 0/36(0%) |

Query 1 KSHLIIAQVAKNPVGLIGAEDATGETDPSHSKFLKI 36  
 KSHLIIAQVAKNPVGLIGAE+ATGETDPSHSKFLKI  
 Sbjct 309 KSHLIIAQVAKNPVGLIGAENATGETDPSHSKFLKI 344

**Related Information**

[Gene](#) - associated gene details  
[Map Viewer](#) - aligned genomic context  
[Identical Proteins](#) - Proteins identical to the subject

[Download](#) [GenPept](#) [Graphics](#)

[Next](#) [Previous](#) [Descriptions](#)

PREDICTED: biotinidase isoform X2 [Pan troglodytes]

Sequence ID: [gi|694900420|ref|XP\\_009443239.1](#) Length: 527 Number of Matches: 1

[See 1 more title\(s\)](#)

Range 1: 313 to 348 [GenPept](#) [Graphics](#)

[Next Match](#) [Previous Match](#)

| Score          | Expect | Identities | Positives   | Gaps     |
|----------------|--------|------------|-------------|----------|
| 72.4 bits(176) | 2e-13  | 35/36(97%) | 36/36(100%) | 0/36(0%) |

Query 1 KSHLIIAQVAKNPVGLIGAEDATGETDPSHSKFLKI 36  
 KSHLIIAQVAKNPVGLIGAE+ATGETDPSHSKFLKI  
 Sbjct 313 KSHLIIAQVAKNPVGLIGAENATGETDPSHSKFLKI 348

**Related Information**

[Gene](#) - associated gene details  
[Identical Proteins](#) - Proteins identical to the subject

BLAST is a registered trademark of the National Library of Medicine.





NCBI/ BLAST/ blastp suite/ Formatting Results - B921BCE001R

Edit and Resubmit Save Search Strategies Formatting options Download

YouTube How to read this page Blast report description

BTD\_KSHLIAQVAKNPVGLIGAENATGETDPSHSKF\_NonMod

RID B921BCE001R (Expires on 01-14 09:51 am)

Query ID lcl|111602
Description None
Molecule type amino acid
Query Length 33

Database Name nr
Description All non-redundant GenBank CDS translations+PDB+SwissProt+PIR excluding environmental samples from WGS projects
Program BLASTP 2.2.30+ Citation

Other reports: Search Summary [Taxonomy reports] [Distance tree of results] [Multiple alignment]

Graphic Summary

Show Conserved Domains

No putative conserved domains have been detected

Distribution of 100 Blast Hits on the Query Sequence

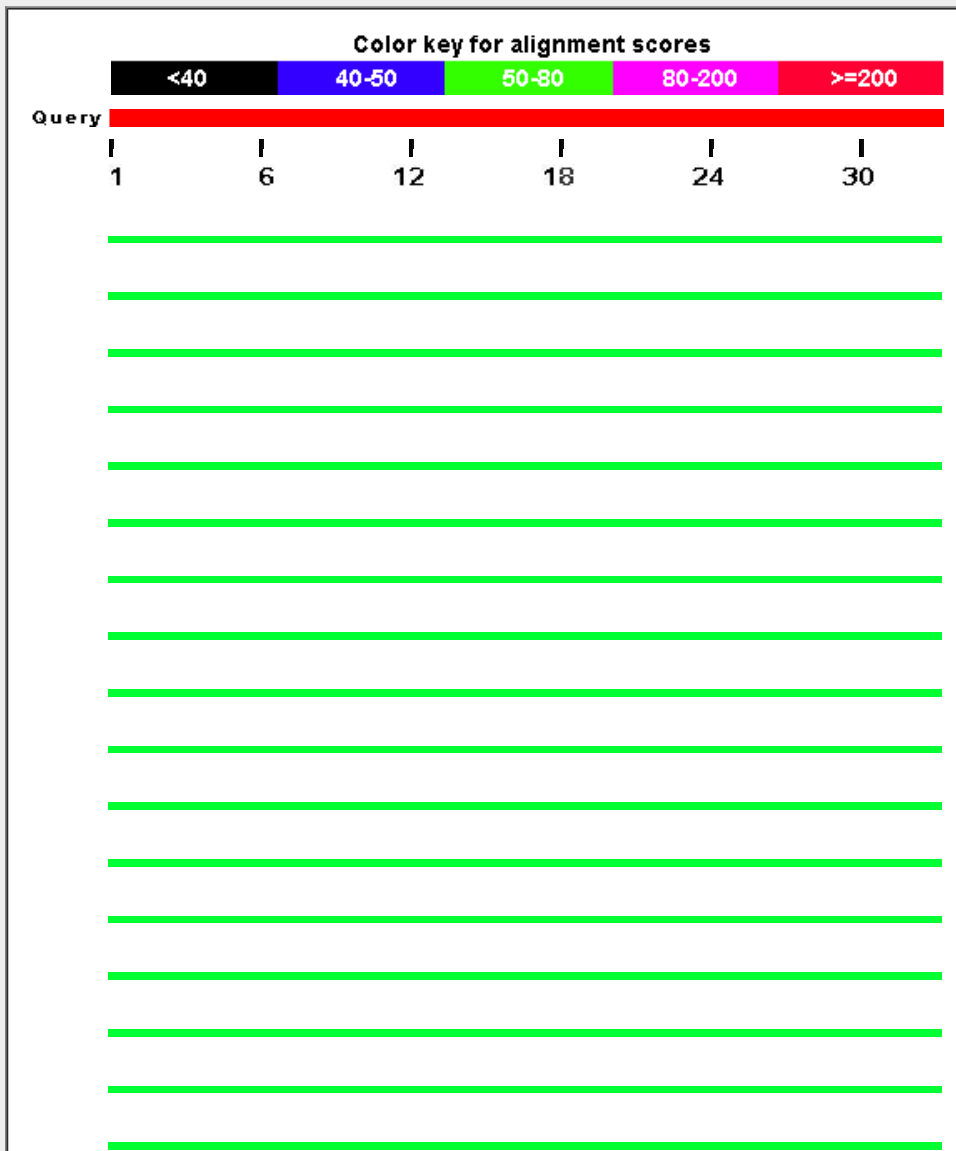

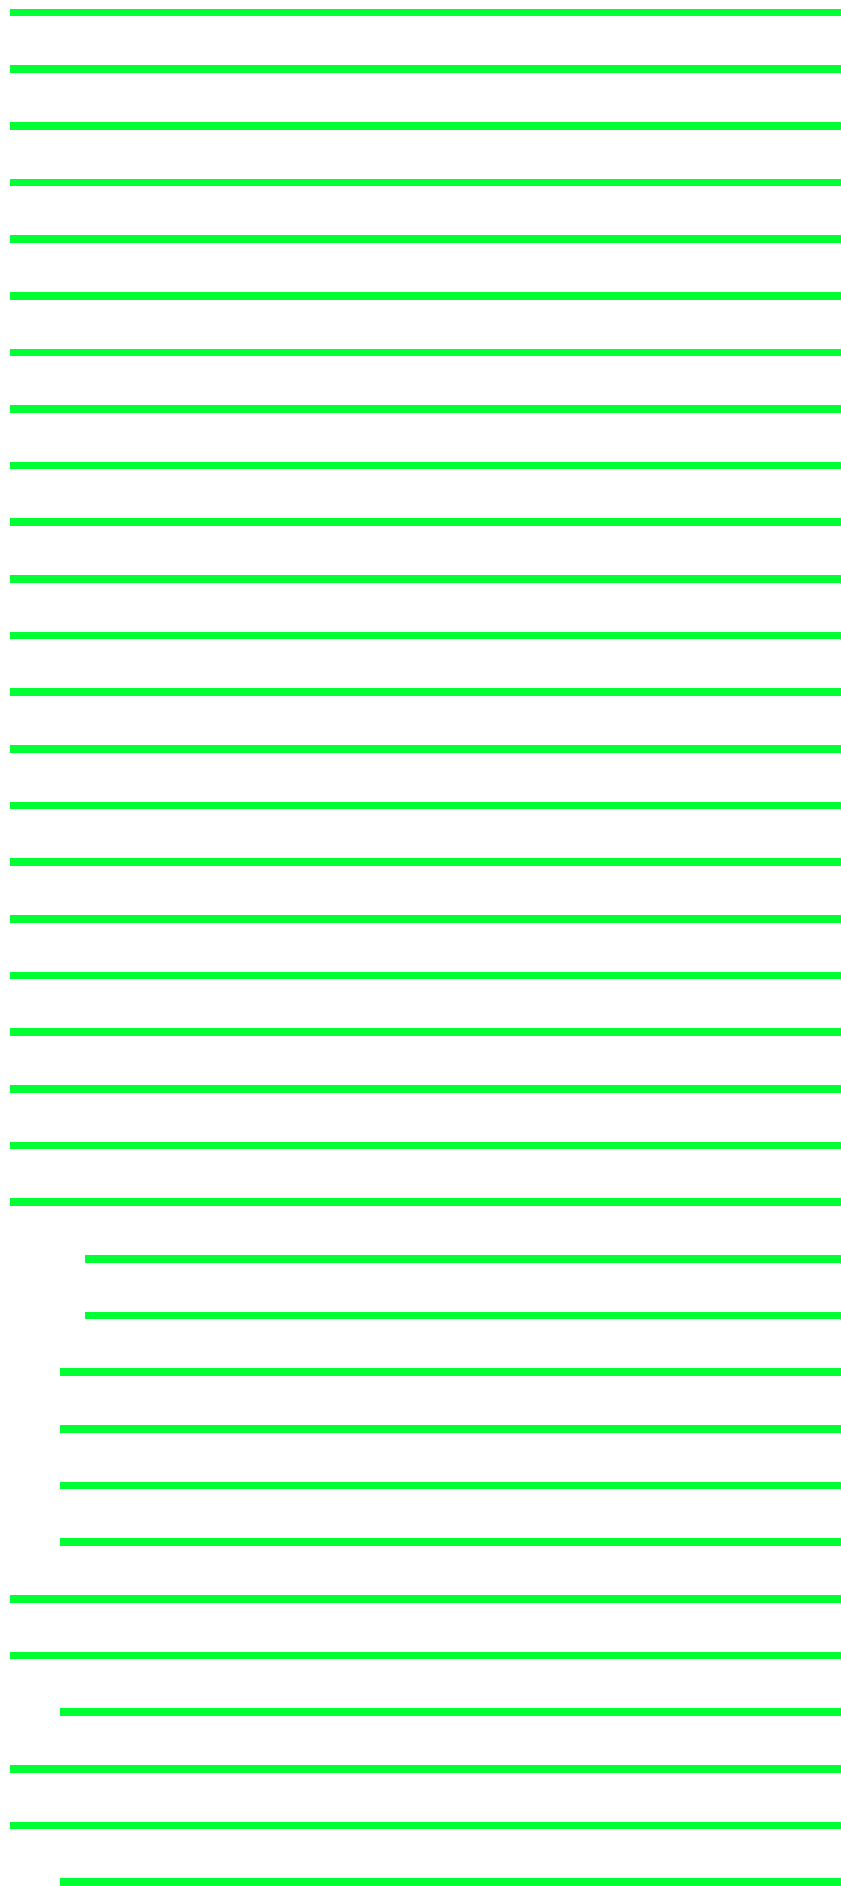

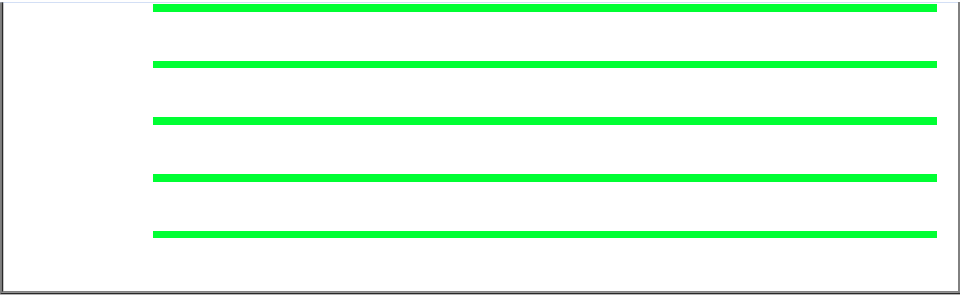

**Descriptions**

**Sequences producing significant alignments:**

Select: [All](#) [None](#) Selected:0

[↑](#) [Alignments](#)
[Download](#)
[GenPept](#)
[Graphics](#)
[Distance tree of results](#)
[Multiple alignment](#)


| Description                                                                | Max score | Total score | Query cover | E value | Ident | Accession                                   |
|----------------------------------------------------------------------------|-----------|-------------|-------------|---------|-------|---------------------------------------------|
| <a href="#">PREDICTED: biotinidase [Nomascus leucogenys]</a>               | 69.3      | 69.3        | 100%        | 1e-12   | 100%  | <a href="#">gij332232450 XP_003265417.1</a> |
| <a href="#">unnamed protein product [Homo sapiens]</a>                     | 69.3      | 69.3        | 100%        | 2e-12   | 100%  | <a href="#">gij221043776 BAH13565.1</a>     |
| <a href="#">biotinidase isoform 4 precursor [Homo sapiens]</a>             | 69.3      | 69.3        | 100%        | 2e-12   | 100%  | <a href="#">gij528524486 NP_001268654.1</a> |
| <a href="#">biotinidase precursor [Pan troglodytes]</a>                    | 69.3      | 69.3        | 100%        | 2e-12   | 100%  | <a href="#">gij697993457 NP_001289363.1</a> |
| <a href="#">PREDICTED: biotinidase isoform X2 [Pan troglodytes]</a>        | 69.3      | 69.3        | 100%        | 2e-12   | 100%  | <a href="#">gij694900420 XP_009443239.1</a> |
| <a href="#">PREDICTED: biotinidase isoform X2 [Pan paniscus]</a>           | 69.3      | 69.3        | 100%        | 2e-12   | 100%  | <a href="#">gij675784344 XP_008949921.1</a> |
| <a href="#">PREDICTED: biotinidase isoform X3 [Pongo abelii]</a>           | 69.3      | 69.3        | 100%        | 2e-12   | 100%  | <a href="#">gij686713703 XP_009237577.1</a> |
| <a href="#">PREDICTED: biotinidase isoform X2 [Pongo abelii]</a>           | 69.3      | 69.3        | 100%        | 2e-12   | 100%  | <a href="#">gij686713701 XP_009237576.1</a> |
| <a href="#">biotinidase isoform 3 [Homo sapiens]</a>                       | 69.3      | 69.3        | 100%        | 2e-12   | 100%  | <a href="#">gij4557373 NP_000051.1</a>      |
| <a href="#">biotinidase isoform 1 [Homo sapiens]</a>                       | 69.3      | 69.3        | 100%        | 2e-12   | 100%  | <a href="#">gij528524481 NP_001268652.1</a> |
| <a href="#">biotinidase isoform 2 [Homo sapiens]</a>                       | 69.3      | 69.3        | 100%        | 2e-12   | 100%  | <a href="#">gij528524483 NP_001268653.1</a> |
| <a href="#">PREDICTED: biotinidase isoform X1 [Pan troglodytes]</a>        | 69.3      | 69.3        | 100%        | 2e-12   | 100%  | <a href="#">gij410036604 XP_003950087.1</a> |
| <a href="#">PREDICTED: biotinidase isoform X1 [Pan paniscus]</a>           | 69.3      | 69.3        | 100%        | 2e-12   | 100%  | <a href="#">gij397511808 XP_003826257.1</a> |
| <a href="#">PREDICTED: biotinidase isoform X1 [Pongo abelii]</a>           | 69.3      | 69.3        | 100%        | 2e-12   | 100%  | <a href="#">gij395734130 XP_003776360.1</a> |
| <a href="#">PREDICTED: biotinidase isoform 1 [Gorilla gorilla gorilla]</a> | 68.9      | 68.9        | 100%        | 2e-12   | 97%   | <a href="#">gij426339607 XP_004033737.1</a> |
| <a href="#">PREDICTED: biotinidase isoform 3 [Gorilla gorilla gorilla]</a> | 68.9      | 68.9        | 100%        | 2e-12   | 97%   | <a href="#">gij426339611 XP_004033739.1</a> |
| <a href="#">PREDICTED: biotinidase isoform 4 [Gorilla gorilla gorilla]</a> | 68.9      | 68.9        | 100%        | 2e-12   | 97%   | <a href="#">gij426339613 XP_004033740.1</a> |
| <a href="#">PREDICTED: biotinidase isoform 2 [Gorilla gorilla gorilla]</a> | 68.9      | 68.9        | 100%        | 2e-12   | 97%   | <a href="#">gij426339609 XP_004033738.1</a> |
| <a href="#">unnamed protein product [Macaca fascicularis]</a>              | 67.8      | 67.8        | 100%        | 5e-12   | 97%   | <a href="#">gij90077268 BAE88314.1</a>      |
| <a href="#">PREDICTED: biotinidase isoform X2 [Macaca fascicularis]</a>    | 67.8      | 67.8        | 100%        | 6e-12   | 97%   | <a href="#">gij544411158 XP_005545768.1</a> |
| <a href="#">hypothetical protein EGM_11114 [Macaca fascicularis]</a>       | 67.8      | 67.8        | 100%        | 6e-12   | 97%   | <a href="#">gij355747075 EHH51689.1</a>     |
| <a href="#">hypothetical protein EGK_12122 [Macaca mulatta]</a>            | 67.8      | 67.8        | 100%        | 6e-12   | 97%   | <a href="#">gij355560049 EHH16777.1</a>     |
| <a href="#">PREDICTED: biotinidase [Macaca mulatta]</a>                    | 67.8      | 67.8        | 100%        | 6e-12   | 97%   | <a href="#">gij297286947 XP_001083201.2</a> |
| <a href="#">PREDICTED: biotinidase isoform X1 [Macaca fascicularis]</a>    | 67.8      | 67.8        | 100%        | 6e-12   | 97%   | <a href="#">gij544411156 XP_005545767.1</a> |
| <a href="#">PREDICTED: biotinidase isoform X2 [Chlorocebus sabaeus]</a>    | 66.2      | 66.2        | 100%        | 2e-11   | 94%   | <a href="#">gij635085523 XP_008007381.1</a> |
| <a href="#">PREDICTED: biotinidase isoform X1 [Chlorocebus sabaeus]</a>    | 66.2      | 66.2        | 100%        | 2e-11   | 94%   | <a href="#">gij635085521 XP_008007380.1</a> |
| <a href="#">PREDICTED: biotinidase [Rhinopithecus roxellana]</a>           | 63.5      | 63.5        | 100%        | 2e-10   | 88%   | <a href="#">gij724960396 XP_010354361.1</a> |
| <a href="#">PREDICTED: biotinidase isoform X2 [Papio anubis]</a>           | 62.4      | 62.4        | 100%        | 5e-10   | 88%   | <a href="#">gij685527526 XP_009200021.1</a> |
| <a href="#">PREDICTED: biotinidase isoform X1 [Papio anubis]</a>           | 62.4      | 62.4        | 100%        | 5e-10   | 88%   | <a href="#">gij685527524 XP_009200020.1</a> |

|                                                                                  |      |      |      |       |     |                                             |
|----------------------------------------------------------------------------------|------|------|------|-------|-----|---------------------------------------------|
| <a href="#">PREDICTED: biotinidase isoform X4 [Canis lupus familiaris]</a>       | 60.5 | 60.5 | 100% | 2e-09 | 82% | <a href="#">gij545538859 XP_005634450.1</a> |
| <a href="#">PREDICTED: biotinidase isoform X3 [Canis lupus familiaris]</a>       | 60.5 | 60.5 | 100% | 2e-09 | 82% | <a href="#">gij545538857 XP_005634449.1</a> |
| <a href="#">PREDICTED: biotinidase isoform X2 [Canis lupus familiaris]</a>       | 60.5 | 60.5 | 100% | 2e-09 | 82% | <a href="#">gij545538855 XP_005634448.1</a> |
| <a href="#">PREDICTED: biotinidase isoform X1 [Canis lupus familiaris]</a>       | 60.5 | 60.5 | 100% | 2e-09 | 82% | <a href="#">gij545538853 XP_005634447.1</a> |
| <a href="#">PREDICTED: biotinidase-like [Ictidomys tridecemlineatus]</a>         | 60.1 | 60.1 | 100% | 3e-09 | 82% | <a href="#">gij532063189 XP_005317469.1</a> |
| <a href="#">PREDICTED: biotinidase [Ceratotherium simum simum]</a>               | 60.1 | 60.1 | 100% | 3e-09 | 82% | <a href="#">gij478490156 XP_004419451.1</a> |
| <a href="#">PREDICTED: biotinidase isoform X3 [Equus caballus]</a>               | 58.5 | 58.5 | 100% | 1e-08 | 79% | <a href="#">gij545189350 XP_005600979.1</a> |
| <a href="#">PREDICTED: biotinidase [Equus przewalskii]</a>                       | 58.5 | 58.5 | 100% | 1e-08 | 79% | <a href="#">gij664753751 XP_008534346.1</a> |
| <a href="#">PREDICTED: biotinidase isoform X2 [Equus caballus]</a>               | 58.5 | 58.5 | 100% | 1e-08 | 79% | <a href="#">gij545189348 XP_005600978.1</a> |
| <a href="#">PREDICTED: biotinidase isoform X1 [Equus caballus]</a>               | 58.5 | 58.5 | 100% | 1e-08 | 79% | <a href="#">gij545189346 XP_005600977.1</a> |
| <a href="#">PREDICTED: biotinidase isoform X1 [Callithrix jacchus]</a>           | 57.8 | 57.8 | 90%  | 2e-08 | 93% | <a href="#">gij675740028 XP_008982107.1</a> |
| <a href="#">PREDICTED: biotinidase isoform X2 [Callithrix jacchus]</a>           | 57.8 | 57.8 | 90%  | 2e-08 | 93% | <a href="#">gij390476393 XP_002759736.2</a> |
| <a href="#">PREDICTED: biotinidase isoform 2 [Odobenus rosmarus divergens]</a>   | 57.4 | 57.4 | 93%  | 3e-08 | 87% | <a href="#">gij472379495 XP_004409157.1</a> |
| <a href="#">PREDICTED: biotinidase isoform X1 [Felis catus]</a>                  | 57.4 | 57.4 | 93%  | 3e-08 | 84% | <a href="#">gij587000359 XP_003992187.2</a> |
| <a href="#">PREDICTED: biotinidase isoform X2 [Felis catus]</a>                  | 57.4 | 57.4 | 93%  | 3e-08 | 84% | <a href="#">gij587000357 XP_006936495.1</a> |
| <a href="#">PREDICTED: biotinidase isoform 1 [Odobenus rosmarus divergens]</a>   | 57.4 | 57.4 | 93%  | 3e-08 | 87% | <a href="#">gij472379493 XP_004409156.1</a> |
| <a href="#">PREDICTED: biotinidase [Otolemur garnettii]</a>                      | 57.4 | 57.4 | 100% | 3e-08 | 82% | <a href="#">gij395816560 XP_003781769.1</a> |
| <a href="#">PREDICTED: biotinidase [Mustela putorius furo]</a>                   | 57.0 | 57.0 | 100% | 4e-08 | 76% | <a href="#">gij511908359 XP_004773614.1</a> |
| <a href="#">PREDICTED: biotinidase [Jaculus jaculus]</a>                         | 56.6 | 56.6 | 93%  | 5e-08 | 84% | <a href="#">gij507555213 XP_004661377.1</a> |
| <a href="#">PREDICTED: biotinidase isoform X2 [Microtus ochrogaster]</a>         | 56.6 | 56.6 | 100% | 5e-08 | 76% | <a href="#">gij532009812 XP_005348714.1</a> |
| <a href="#">PREDICTED: biotinidase isoform X1 [Microtus ochrogaster]</a>         | 56.6 | 56.6 | 100% | 5e-08 | 76% | <a href="#">gij532009810 XP_005348713.1</a> |
| <a href="#">PREDICTED: biotinidase-like isoform X10 [Chinchilla lanigera]</a>    | 56.2 | 56.2 | 93%  | 6e-08 | 81% | <a href="#">gij533146084 XP_005387502.1</a> |
| <a href="#">PREDICTED: biotinidase-like isoform X5 [Chinchilla lanigera]</a>     | 56.2 | 56.2 | 93%  | 7e-08 | 81% | <a href="#">gij533146074 XP_005387497.1</a> |
| <a href="#">PREDICTED: biotinidase isoform X3 [Leptonychotes weddellii]</a>      | 56.2 | 56.2 | 93%  | 7e-08 | 84% | <a href="#">gij585186600 XP_006744787.1</a> |
| <a href="#">PREDICTED: biotinidase isoform X2 [Leptonychotes weddellii]</a>      | 56.2 | 56.2 | 93%  | 7e-08 | 84% | <a href="#">gij585186598 XP_006744786.1</a> |
| <a href="#">PREDICTED: biotinidase-like isoform X1 [Chinchilla lanigera]</a>     | 56.2 | 56.2 | 93%  | 7e-08 | 81% | <a href="#">gij533146066 XP_005387493.1</a> |
| <a href="#">PREDICTED: biotinidase isoform X1 [Leptonychotes weddellii]</a>      | 56.2 | 56.2 | 93%  | 7e-08 | 84% | <a href="#">gij585186596 XP_006744785.1</a> |
| <a href="#">biotinidase [Camelus ferus]</a>                                      | 55.5 | 55.5 | 100% | 9e-08 | 70% | <a href="#">gij528756912 EPY76571.1</a>     |
| <a href="#">PREDICTED: biotinidase [Vicugna pacos]</a>                           | 55.8 | 55.8 | 100% | 9e-08 | 70% | <a href="#">gij560965913 XP_006205350.1</a> |
| <a href="#">PREDICTED: biotinidase [Panthera tigris altaica]</a>                 | 55.8 | 55.8 | 93%  | 9e-08 | 81% | <a href="#">gij591322659 XP_007087428.1</a> |
| <a href="#">PREDICTED: biotinidase [Trichechus manatus latirostris]</a>          | 55.8 | 55.8 | 100% | 9e-08 | 73% | <a href="#">gij471407481 XP_004385327.1</a> |
| <a href="#">PREDICTED: biotinidase [Fukomys damarensis]</a>                      | 55.8 | 55.8 | 100% | 9e-08 | 76% | <a href="#">gij731285322 XP_010611073.1</a> |
| <a href="#">PREDICTED: biotinidase [Lipotes vexillifer]</a>                      | 55.8 | 55.8 | 100% | 1e-07 | 79% | <a href="#">gij602721076 XP_007470691.1</a> |
| <a href="#">PREDICTED: biotinidase isoform X1 [Balaenoptera acutorostrata sc</a> | 55.8 | 55.8 | 100% | 1e-07 | 79% | <a href="#">gij594624940 XP_007167058.1</a> |
| <a href="#">Biotinidase [Fukomys damarensis]</a>                                 | 55.8 | 55.8 | 100% | 1e-07 | 76% | <a href="#">gij676263045 KFO19807.1</a>     |
| <a href="#">PREDICTED: biotinidase isoform X3 [Balaenoptera acutorostrata sc</a> | 55.8 | 55.8 | 100% | 1e-07 | 79% | <a href="#">gij594624944 XP_007167060.1</a> |
| <a href="#">PREDICTED: biotinidase isoform X2 [Ursus maritimus]</a>              | 55.5 | 55.5 | 100% | 1e-07 | 76% | <a href="#">gij670981874 XP_008707139.1</a> |
| <a href="#">PREDICTED: biotinidase [Camelus ferus]</a>                           | 55.5 | 55.5 | 100% | 1e-07 | 70% | <a href="#">gij560929390 XP_006190847.1</a> |
| <a href="#">PREDICTED: LOW QUALITY PROTEIN: biotinidase [Tursiops trunc</a>      | 55.5 | 55.5 | 100% | 1e-07 | 76% | <a href="#">gij470628904 XP_004321284.1</a> |
| <a href="#">PREDICTED: biotinidase [Orcinus orca]</a>                            | 55.5 | 55.5 | 100% | 1e-07 | 76% | <a href="#">gij466019817 XP_004271983.1</a> |
| <a href="#">PREDICTED: biotinidase isoform X1 [Ursus maritimus]</a>              | 55.5 | 55.5 | 100% | 1e-07 | 76% | <a href="#">gij670981872 XP_008707130.1</a> |
| <a href="#">PREDICTED: biotinidase [Galeopterus variegatus]</a>                  | 54.7 | 54.7 | 93%  | 2e-07 | 81% | <a href="#">gij667288263 XP_008576771.1</a> |
| <a href="#">PREDICTED: biotinidase isoform X2 [Cricetulus griseus]</a>           | 54.3 | 54.3 | 93%  | 3e-07 | 81% | <a href="#">gij625181248 XP_007632389.1</a> |
| <a href="#">PREDICTED: biotinidase isoform X2 [Physeter catodon]</a>             | 54.3 | 54.3 | 100% | 3e-07 | 76% | <a href="#">gij593711507 XP_007102308.1</a> |
| <a href="#">PREDICTED: biotinidase isoform X1 [Cricetulus griseus]</a>           | 54.3 | 54.3 | 93%  | 3e-07 | 81% | <a href="#">gij354465853 XP_003495391.1</a> |

|                                                                                 |      |      |      |       |     |                                             |
|---------------------------------------------------------------------------------|------|------|------|-------|-----|---------------------------------------------|
| <a href="#">PREDICTED: biotinidase isoform X1 [Physeter catodon]</a>            | 54.3 | 54.3 | 100% | 3e-07 | 76% | <a href="#">gij593711505 XP_007102307.1</a> |
| <a href="#">biotinidase [Cricetulus griseus]</a>                                | 54.3 | 54.3 | 93%  | 3e-07 | 81% | <a href="#">gij537261432 ERE90059.1</a>     |
| <a href="#">PREDICTED: biotinidase isoform X1 [Peromyscus maniculatus bair]</a> | 53.1 | 53.1 | 100% | 8e-07 | 73% | <a href="#">gij589967608 XP_006996305.1</a> |
| <a href="#">PREDICTED: biotinidase [Nannospalax galili]</a>                     | 53.1 | 53.1 | 100% | 8e-07 | 73% | <a href="#">gij674081213 XP_008848205.1</a> |
| <a href="#">PREDICTED: biotinidase isoform X2 [Peromyscus maniculatus bair]</a> | 53.1 | 53.1 | 100% | 8e-07 | 73% | <a href="#">gij589967610 XP_006996306.1</a> |
| <a href="#">PREDICTED: biotinidase [Mesocricetus auratus]</a>                   | 52.8 | 52.8 | 100% | 1e-06 | 76% | <a href="#">gij524955500 XP_005077724.1</a> |
| <a href="#">Biotinidase [Heterocephalus glaber]</a>                             | 52.4 | 52.4 | 100% | 2e-06 | 70% | <a href="#">gij351707565 EHB10484.1</a>     |
| <a href="#">PREDICTED: biotinidase-like [Ailuropoda melanoleuca]</a>            | 52.4 | 52.4 | 100% | 2e-06 | 70% | <a href="#">gij301759093 XP_002915396.1</a> |
| <a href="#">hypothetical protein PANDA_003369 [Ailuropoda melanoleuca]</a>      | 52.4 | 52.4 | 100% | 2e-06 | 70% | <a href="#">gij281345880 EFP21464.1</a>     |
| <a href="#">PREDICTED: biotinidase isoform X3 [Heterocephalus glaber]</a>       | 52.4 | 52.4 | 100% | 2e-06 | 70% | <a href="#">gij512886961 XP_004896459.1</a> |
| <a href="#">PREDICTED: biotinidase isoform X1 [Heterocephalus glaber]</a>       | 52.4 | 52.4 | 100% | 2e-06 | 70% | <a href="#">gij512886949 XP_004896457.1</a> |
| <a href="#">PREDICTED: biotinidase isoform X1 [Cavia porcellus]</a>             | 52.0 | 52.0 | 100% | 2e-06 | 70% | <a href="#">gij514481133 XP_003480063.2</a> |
| <a href="#">PREDICTED: biotinidase isoform X2 [Cavia porcellus]</a>             | 52.0 | 52.0 | 100% | 2e-06 | 70% | <a href="#">gij514481131 XP_005008361.1</a> |
| <a href="#">PREDICTED: biotinidase [Loxodonta africana]</a>                     | 51.2 | 51.2 | 100% | 4e-06 | 64% | <a href="#">gij731510838 XP_010598778.1</a> |
| <a href="#">TPA: biotinidase precursor [Bos taurus]</a>                         | 50.8 | 50.8 | 100% | 5e-06 | 70% | <a href="#">gij296490802 DAA32915.1</a>     |
| <a href="#">biotinidase precursor [Bos taurus]</a>                              | 50.8 | 50.8 | 100% | 5e-06 | 70% | <a href="#">gij156121059 NP_001095676.1</a> |
| <a href="#">PREDICTED: biotinidase isoform X1 [Bos taurus]</a>                  | 50.8 | 50.8 | 100% | 5e-06 | 70% | <a href="#">gij528938459 XP_005202205.1</a> |
| <a href="#">PREDICTED: biotinidase [Erinaceus europaeus]</a>                    | 50.8 | 50.8 | 100% | 6e-06 | 67% | <a href="#">gij617553342 XP_007530134.1</a> |
| <a href="#">biotinidase isoform CRA_a [Rattus norvegicus]</a>                   | 50.1 | 50.1 | 100% | 8e-06 | 67% | <a href="#">gij149034168 EDL88938.1</a>     |
| <a href="#">biotinidase isoform CRA_c [Rattus norvegicus]</a>                   | 50.1 | 50.1 | 100% | 8e-06 | 67% | <a href="#">gij149034170 EDL88940.1</a>     |
| <a href="#">biotinidase precursor [Rattus norvegicus]</a>                       | 50.1 | 50.1 | 100% | 1e-05 | 67% | <a href="#">gij58865670 NP_001012047.1</a>  |
| <a href="#">PREDICTED: biotinidase [Pteropus alecto]</a>                        | 50.1 | 50.1 | 93%  | 1e-05 | 74% | <a href="#">gij586544408 XP_006907323.1</a> |
| <a href="#">PREDICTED: biotinidase isoform X2 [Capra hircus]</a>                | 50.1 | 50.1 | 100% | 1e-05 | 67% | <a href="#">gij548452663 XP_005675772.1</a> |
| <a href="#">PREDICTED: biotinidase isoform X2 [Rattus norvegicus]</a>           | 50.1 | 50.1 | 100% | 1e-05 | 67% | <a href="#">gij564387894 XP_006252671.1</a> |
| <a href="#">PREDICTED: biotinidase [Ovis aries]</a>                             | 50.1 | 50.1 | 100% | 1e-05 | 67% | <a href="#">gij426219576 XP_004003996.1</a> |
| <a href="#">PREDICTED: biotinidase isoform X1 [Capra hircus]</a>                | 50.1 | 50.1 | 100% | 1e-05 | 67% | <a href="#">gij548452657 XP_005675771.1</a> |

## Alignments

[Download](#) [GenPept](#) [Graphics](#)

[Next](#) [Previous](#) [Descriptions](#)

### PREDICTED: biotinidase [Nomascus leucogenys]

Sequence ID: [gij332232450|ref|XP\\_003265417.1](#) Length: 474 Number of Matches: 1

Range 1: 260 to 292 [GenPept](#) [Graphics](#)

[Next Match](#) [Previous Match](#)

| Score          | Expect | Identities  | Positives   | Gaps     |
|----------------|--------|-------------|-------------|----------|
| 69.3 bits(168) | 1e-12  | 33/33(100%) | 33/33(100%) | 0/33(0%) |

Query 1 KSHLIIAQVAKNPVGLIGAENATGETDP SHSKF 33  
 KSHLIIAQVAKNPVGLIGAENATGETDP SHSKF  
 Sbjct 260 KSHLIIAQVAKNPVGLIGAENATGETDP SHSKF 292

#### Related Information

[Gene](#) - associated gene details  
[Map Viewer](#) - aligned genomic context

[Download](#) [GenPept](#) [Graphics](#)

[Next](#) [Previous](#) [Descriptions](#)

### unnamed protein product [Homo sapiens]

Sequence ID: [gij221043776|dbj|BAH13565.1](#) Length: 523 Number of Matches: 1

Range 1: 309 to 341 [GenPept](#) [Graphics](#)

[Next Match](#) [Previous Match](#)

| Score          | Expect | Identities  | Positives   | Gaps     |
|----------------|--------|-------------|-------------|----------|
| 69.3 bits(168) | 2e-12  | 33/33(100%) | 33/33(100%) | 0/33(0%) |

Query 1 KSHLIIAQVAKNPVGLIGAENATGETDP SHSKF 33  
 KSHLIIAQVAKNPVGLIGAENATGETDP SHSKF  
 Sbjct 309 KSHLIIAQVAKNPVGLIGAENATGETDP SHSKF 341

#### Related Information

[Gene](#) - associated gene details

Download [GenPept](#) [Graphics](#)

[▼ Next](#) [▲ Previous](#) [▲ Descriptions](#)

biotinidase isoform 4 precursor [Homo sapiens]

Sequence ID: [gi|528524486|ref|NP\\_001268654.1|](#) Length: 523 Number of Matches: 1

[▶ See 3 more title\(s\)](#)

Range 1: 309 to 341 [GenPept](#) [Graphics](#)

[▼ Next Match](#) [▲ Previous Match](#)

| Score          | Expect | Identities  | Positives   | Gaps     |
|----------------|--------|-------------|-------------|----------|
| 69.3 bits(168) | 2e-12  | 33/33(100%) | 33/33(100%) | 0/33(0%) |

```

Query 1      KSHLIIAQVAKNPVGLIGAENATGETDPSHSKF 33
          KSHLIIAQVAKNPVGLIGAENATGETDPSHSKF
Sbjct 309    KSHLIIAQVAKNPVGLIGAENATGETDPSHSKF 341
    
```

**Related Information**

[Gene](#) - associated gene details  
[Map Viewer](#) - aligned genomic context  
[Identical Proteins](#) - Proteins identical to the subject

Download [GenPept](#) [Graphics](#)

[▼ Next](#) [▲ Previous](#) [▲ Descriptions](#)

biotinidase precursor [Pan troglodytes]

Sequence ID: [gi|697993457|ref|NP\\_001289363.1|](#) Length: 523 Number of Matches: 1

[▶ See 1 more title\(s\)](#)

Range 1: 309 to 341 [GenPept](#) [Graphics](#)

[▼ Next Match](#) [▲ Previous Match](#)

| Score          | Expect | Identities  | Positives   | Gaps     |
|----------------|--------|-------------|-------------|----------|
| 69.3 bits(168) | 2e-12  | 33/33(100%) | 33/33(100%) | 0/33(0%) |

```

Query 1      KSHLIIAQVAKNPVGLIGAENATGETDPSHSKF 33
          KSHLIIAQVAKNPVGLIGAENATGETDPSHSKF
Sbjct 309    KSHLIIAQVAKNPVGLIGAENATGETDPSHSKF 341
    
```

**Related Information**

[Gene](#) - associated gene details  
[Map Viewer](#) - aligned genomic context  
[Identical Proteins](#) - Proteins identical to the subject

Download [GenPept](#) [Graphics](#)

[▼ Next](#) [▲ Previous](#) [▲ Descriptions](#)

PREDICTED: biotinidase isoform X2 [Pan troglodytes]

Sequence ID: [gi|694900420|ref|XP\\_009443239.1|](#) Length: 527 Number of Matches: 1

[▶ See 1 more title\(s\)](#)

Range 1: 313 to 345 [GenPept](#) [Graphics](#)

[▼ Next Match](#) [▲ Previous Match](#)

| Score          | Expect | Identities  | Positives   | Gaps     |
|----------------|--------|-------------|-------------|----------|
| 69.3 bits(168) | 2e-12  | 33/33(100%) | 33/33(100%) | 0/33(0%) |

```

Query 1      KSHLIIAQVAKNPVGLIGAENATGETDPSHSKF 33
          KSHLIIAQVAKNPVGLIGAENATGETDPSHSKF
Sbjct 313    KSHLIIAQVAKNPVGLIGAENATGETDPSHSKF 345
    
```

**Related Information**

[Gene](#) - associated gene details  
[Identical Proteins](#) - Proteins identical to the subject

BLAST is a registered trademark of the National Library of Medicine.

NCBI/ BLAST/ blastp suite/ Formatting Results - B921P7NN01R

[Edit and Resubmit](#) [Save Search Strategies](#) [Formatting options](#) [Download](#)

[YouTube](#) [How to read this page](#) [Blast report description](#)

### BTD\_KSHLIAQVAKNPVGLIGAENATGETDPSHSKFLKI\_NonMod

**RID** [B921P7NN01R](#) (Expires on 01-14 09:51 am)

**Query ID** |cl|97019  
**Description** None  
**Molecule type** amino acid  
**Query Length** 36

**Database Name** nr  
**Description** All non-redundant GenBank CDS translations+PDB+SwissProt+PIR excluding environmental samples from WGS projects  
**Program** BLASTP 2.2.30+ [Citation](#)

Other reports: [Search Summary](#) [\[Taxonomy reports\]](#) [\[Distance tree of results\]](#) [\[Multiple alignment\]](#)

### Graphic Summary

[Show Conserved Domains](#)

No putative conserved domains have been detected

Distribution of 100 Blast Hits on the Query Sequence

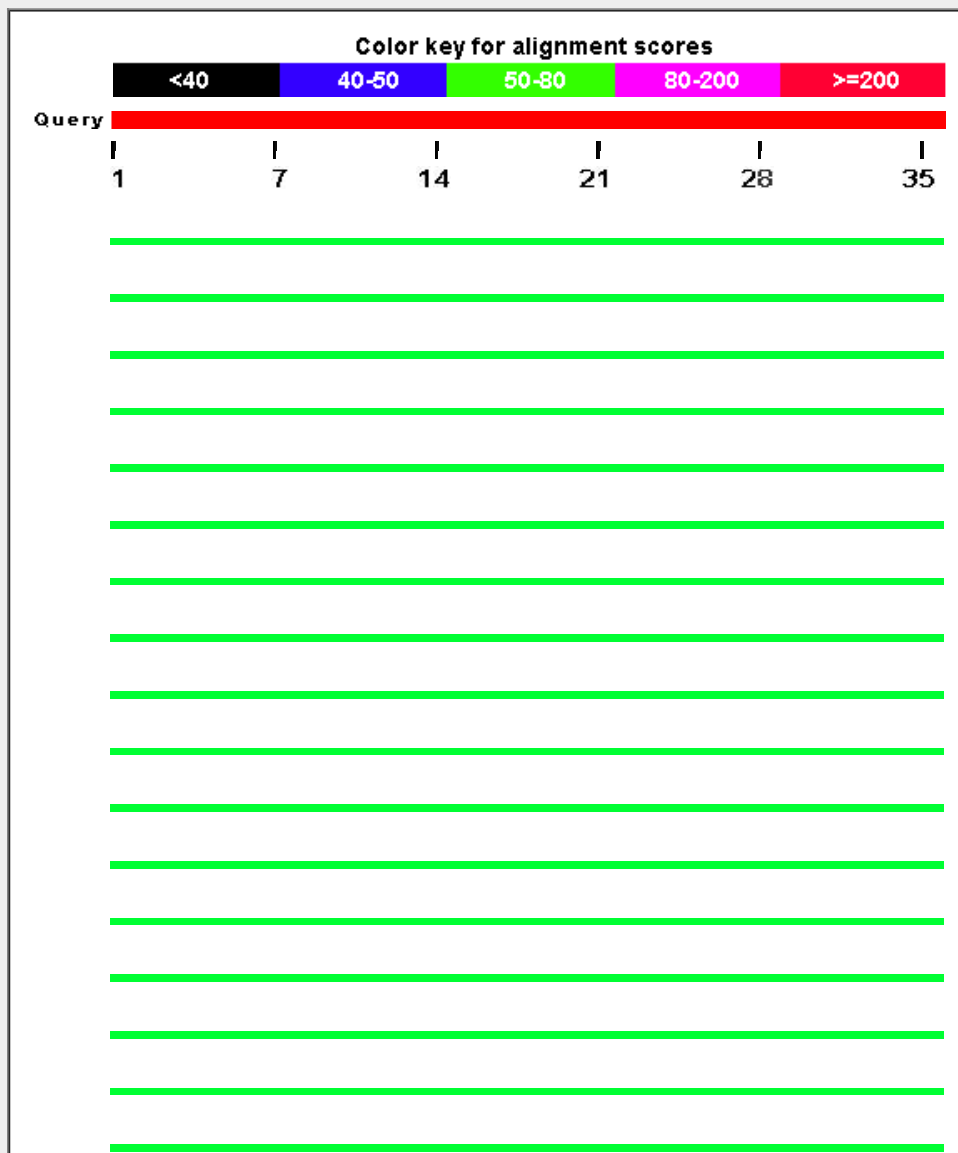

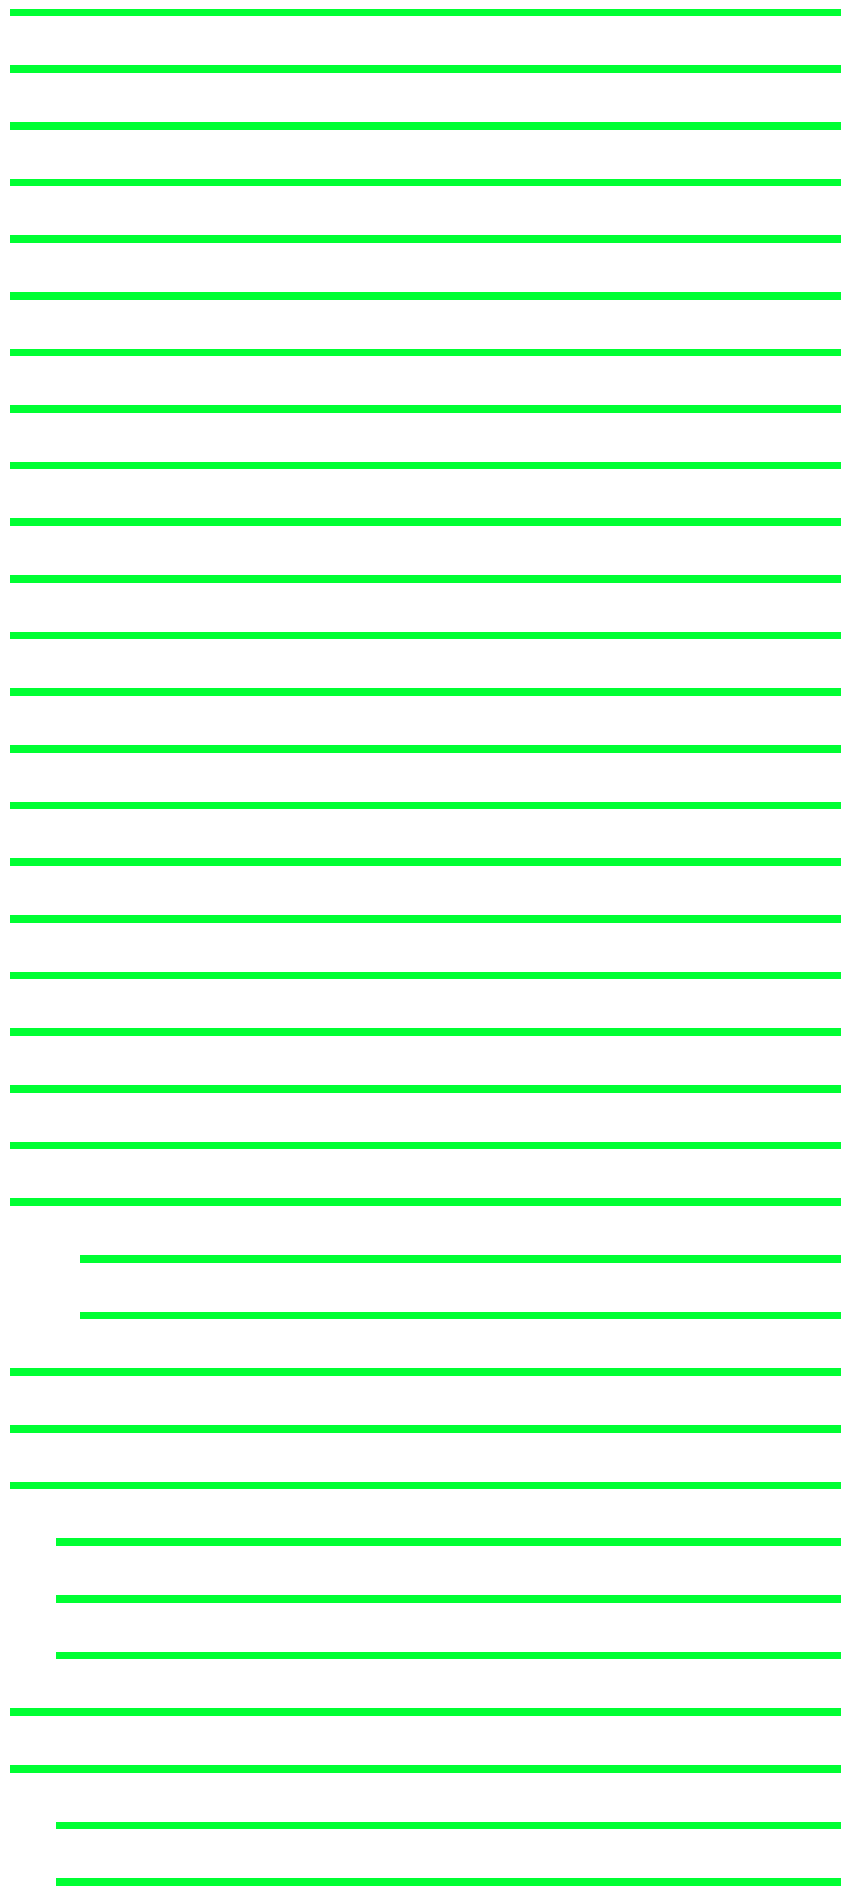



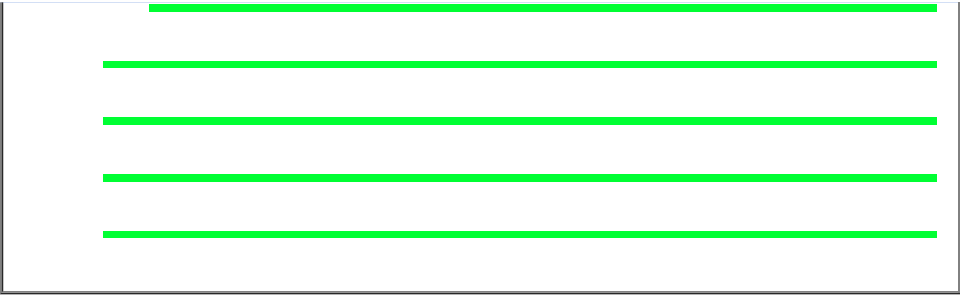

**Descriptions**

**Sequences producing significant alignments:**

Select: [All](#) [None](#) Selected:0

[↑↓ Alignments](#)
[Download](#)
[GenPept](#)
[Graphics](#)
[Distance tree of results](#)
[Multiple alignment](#)

| Description                                                                | Max score | Total score | Query cover | E value | Ident | Accession                                   |
|----------------------------------------------------------------------------|-----------|-------------|-------------|---------|-------|---------------------------------------------|
| <a href="#">PREDICTED: biotinidase [Nomascus leucogenys]</a>               | 74.3      | 74.3        | 100%        | 3e-14   | 100%  | <a href="#">gij332232450 XP_003265417.1</a> |
| <a href="#">unnamed protein product [Homo sapiens]</a>                     | 74.3      | 74.3        | 100%        | 3e-14   | 100%  | <a href="#">gij221043776 BAH13565.1</a>     |
| <a href="#">biotinidase isoform 4 precursor [Homo sapiens]</a>             | 74.3      | 74.3        | 100%        | 3e-14   | 100%  | <a href="#">gij528524486 NP_001268654.1</a> |
| <a href="#">biotinidase precursor [Pan troglodytes]</a>                    | 74.3      | 74.3        | 100%        | 3e-14   | 100%  | <a href="#">gij697993457 NP_001289363.1</a> |
| <a href="#">PREDICTED: biotinidase isoform X2 [Pan troglodytes]</a>        | 74.3      | 74.3        | 100%        | 3e-14   | 100%  | <a href="#">gij694900420 XP_009443239.1</a> |
| <a href="#">PREDICTED: biotinidase isoform X2 [Pan paniscus]</a>           | 74.3      | 74.3        | 100%        | 3e-14   | 100%  | <a href="#">gij675784344 XP_008949921.1</a> |
| <a href="#">PREDICTED: biotinidase isoform X3 [Pongo abelii]</a>           | 74.3      | 74.3        | 100%        | 3e-14   | 100%  | <a href="#">gij686713703 XP_009237577.1</a> |
| <a href="#">PREDICTED: biotinidase isoform X2 [Pongo abelii]</a>           | 74.3      | 74.3        | 100%        | 3e-14   | 100%  | <a href="#">gij686713701 XP_009237576.1</a> |
| <a href="#">biotinidase isoform 3 [Homo sapiens]</a>                       | 74.3      | 74.3        | 100%        | 3e-14   | 100%  | <a href="#">gij4557373 NP_000051.1</a>      |
| <a href="#">biotinidase isoform 1 [Homo sapiens]</a>                       | 74.3      | 74.3        | 100%        | 3e-14   | 100%  | <a href="#">gij528524481 NP_001268652.1</a> |
| <a href="#">biotinidase isoform 2 [Homo sapiens]</a>                       | 74.3      | 74.3        | 100%        | 3e-14   | 100%  | <a href="#">gij528524483 NP_001268653.1</a> |
| <a href="#">PREDICTED: biotinidase isoform X1 [Pan troglodytes]</a>        | 74.3      | 74.3        | 100%        | 3e-14   | 100%  | <a href="#">gij410036604 XP_003950087.1</a> |
| <a href="#">PREDICTED: biotinidase isoform X1 [Pan paniscus]</a>           | 74.3      | 74.3        | 100%        | 3e-14   | 100%  | <a href="#">gij397511808 XP_003826257.1</a> |
| <a href="#">PREDICTED: biotinidase isoform X1 [Pongo abelii]</a>           | 74.3      | 74.3        | 100%        | 3e-14   | 100%  | <a href="#">gij395734130 XP_003776360.1</a> |
| <a href="#">PREDICTED: biotinidase isoform 1 [Gorilla gorilla gorilla]</a> | 73.9      | 73.9        | 100%        | 4e-14   | 97%   | <a href="#">gij426339607 XP_004033737.1</a> |
| <a href="#">PREDICTED: biotinidase isoform 3 [Gorilla gorilla gorilla]</a> | 73.9      | 73.9        | 100%        | 5e-14   | 97%   | <a href="#">gij426339611 XP_004033739.1</a> |
| <a href="#">PREDICTED: biotinidase isoform 4 [Gorilla gorilla gorilla]</a> | 73.9      | 73.9        | 100%        | 5e-14   | 97%   | <a href="#">gij426339613 XP_004033740.1</a> |
| <a href="#">PREDICTED: biotinidase isoform 2 [Gorilla gorilla gorilla]</a> | 73.9      | 73.9        | 100%        | 5e-14   | 97%   | <a href="#">gij426339609 XP_004033738.1</a> |
| <a href="#">unnamed protein product [Macaca fascicularis]</a>              | 72.8      | 72.8        | 100%        | 1e-13   | 97%   | <a href="#">gij90077268 BAE88314.1</a>      |
| <a href="#">PREDICTED: biotinidase isoform X2 [Macaca fascicularis]</a>    | 72.8      | 72.8        | 100%        | 1e-13   | 97%   | <a href="#">gij544411158 XP_005545768.1</a> |
| <a href="#">hypothetical protein EGM_11114 [Macaca fascicularis]</a>       | 72.8      | 72.8        | 100%        | 1e-13   | 97%   | <a href="#">gij355747075 EHH51689.1</a>     |
| <a href="#">hypothetical protein EGK_12122 [Macaca mulatta]</a>            | 72.8      | 72.8        | 100%        | 1e-13   | 97%   | <a href="#">gij355560049 EHH16777.1</a>     |
| <a href="#">PREDICTED: biotinidase [Macaca mulatta]</a>                    | 72.8      | 72.8        | 100%        | 1e-13   | 97%   | <a href="#">gij297286947 XP_001083201.2</a> |
| <a href="#">PREDICTED: biotinidase isoform X1 [Macaca fascicularis]</a>    | 72.8      | 72.8        | 100%        | 1e-13   | 97%   | <a href="#">gij544411156 XP_005545767.1</a> |
| <a href="#">PREDICTED: biotinidase isoform X2 [Chlorocebus sabaeus]</a>    | 71.2      | 71.2        | 100%        | 4e-13   | 94%   | <a href="#">gij635085523 XP_008007381.1</a> |
| <a href="#">PREDICTED: biotinidase isoform X1 [Chlorocebus sabaeus]</a>    | 71.2      | 71.2        | 100%        | 4e-13   | 94%   | <a href="#">gij635085521 XP_008007380.1</a> |
| <a href="#">PREDICTED: biotinidase [Rhinopithecus roxellana]</a>           | 68.6      | 68.6        | 100%        | 4e-12   | 89%   | <a href="#">gij724960396 XP_010354361.1</a> |
| <a href="#">PREDICTED: biotinidase isoform X2 [Papio anubis]</a>           | 67.4      | 67.4        | 100%        | 9e-12   | 89%   | <a href="#">gij685527526 XP_009200021.1</a> |
| <a href="#">PREDICTED: biotinidase isoform X1 [Papio anubis]</a>           | 67.4      | 67.4        | 100%        | 1e-11   | 89%   | <a href="#">gij685527524 XP_009200020.1</a> |

|                                                                                  |      |      |      |       |     |                                              |
|----------------------------------------------------------------------------------|------|------|------|-------|-----|----------------------------------------------|
| <a href="#">PREDICTED: biotinidase-like [Ictidomys tridecemlineatus]</a>         | 65.1 | 65.1 | 100% | 5e-11 | 83% | <a href="#">gil532063189 XP_005317469.1</a>  |
| <a href="#">PREDICTED: biotinidase [Ceratothrium simum simum]</a>                | 65.1 | 65.1 | 100% | 6e-11 | 83% | <a href="#">gil478490156 XP_004419451.1</a>  |
| <a href="#">PREDICTED: biotinidase isoform X4 [Canis lupus familiaris]</a>       | 63.9 | 63.9 | 100% | 2e-10 | 81% | <a href="#">gil545538859 XP_005634450.1</a>  |
| <a href="#">PREDICTED: biotinidase isoform X3 [Canis lupus familiaris]</a>       | 63.9 | 63.9 | 100% | 2e-10 | 81% | <a href="#">gil545538857 XP_005634449.1</a>  |
| <a href="#">PREDICTED: biotinidase isoform X2 [Canis lupus familiaris]</a>       | 63.9 | 63.9 | 100% | 2e-10 | 81% | <a href="#">gil545538855 XP_005634448.1</a>  |
| <a href="#">PREDICTED: biotinidase isoform X1 [Canis lupus familiaris]</a>       | 63.9 | 63.9 | 100% | 2e-10 | 81% | <a href="#">gil545538853 XP_005634447.1</a>  |
| <a href="#">PREDICTED: biotinidase isoform X3 [Equus caballus]</a>               | 63.5 | 63.5 | 100% | 2e-10 | 81% | <a href="#">gil545189350 XP_005600979.1</a>  |
| <a href="#">PREDICTED: biotinidase [Equus przewalskii]</a>                       | 63.5 | 63.5 | 100% | 2e-10 | 81% | <a href="#">gil664753751 XP_008534346.1</a>  |
| <a href="#">PREDICTED: biotinidase isoform X2 [Equus caballus]</a>               | 63.5 | 63.5 | 100% | 2e-10 | 81% | <a href="#">gil545189348 XP_005600978.1</a>  |
| <a href="#">PREDICTED: biotinidase isoform X1 [Equus caballus]</a>               | 63.5 | 63.5 | 100% | 2e-10 | 81% | <a href="#">gil545189346 XP_005600977.1</a>  |
| <a href="#">PREDICTED: biotinidase isoform X1 [Callithrix jacchus]</a>           | 62.8 | 62.8 | 91%  | 4e-10 | 94% | <a href="#">gil675740028 XP_008982107.1</a>  |
| <a href="#">PREDICTED: biotinidase isoform X2 [Callithrix jacchus]</a>           | 62.8 | 62.8 | 91%  | 4e-10 | 94% | <a href="#">gil390476393 XP_002759736.2</a>  |
| <a href="#">PREDICTED: biotinidase [Otolemur garnettii]</a>                      | 62.4 | 62.4 | 100% | 6e-10 | 83% | <a href="#">gil395816560 XP_003781769.1</a>  |
| <a href="#">PREDICTED: biotinidase isoform X2 [Microtus ochrogaster]</a>         | 61.6 | 61.6 | 100% | 1e-09 | 78% | <a href="#">gil532009812 XP_005348714.1</a>  |
| <a href="#">PREDICTED: biotinidase isoform X1 [Microtus ochrogaster]</a>         | 61.6 | 61.6 | 100% | 1e-09 | 78% | <a href="#">gil532009810 XP_005348713.1</a>  |
| <a href="#">PREDICTED: biotinidase-like isoform X10 [Chinchilla lanigera]</a>    | 61.2 | 61.2 | 94%  | 1e-09 | 82% | <a href="#">gil533146084 XP_005387502.1</a>  |
| <a href="#">PREDICTED: biotinidase-like isoform X5 [Chinchilla lanigera]</a>     | 61.2 | 61.2 | 94%  | 1e-09 | 82% | <a href="#">gil533146074 XP_005387497.1</a>  |
| <a href="#">PREDICTED: biotinidase-like isoform X1 [Chinchilla lanigera]</a>     | 61.2 | 61.2 | 94%  | 1e-09 | 82% | <a href="#">gil533146066 XP_005387493.1</a>  |
| <a href="#">biotinidase [Camelus ferus]</a>                                      | 60.5 | 60.5 | 100% | 2e-09 | 72% | <a href="#">gil528756912 EPY76571.1</a>      |
| <a href="#">PREDICTED: biotinidase [Vicugna pacos]</a>                           | 60.8 | 60.8 | 100% | 2e-09 | 72% | <a href="#">gil560965913 XP_006205350.1</a>  |
| <a href="#">PREDICTED: biotinidase [Jaculus jaculus]</a>                         | 60.8 | 60.8 | 94%  | 2e-09 | 82% | <a href="#">gil507555213 XP_004661377.1</a>  |
| <a href="#">PREDICTED: biotinidase isoform X1 [Felis catus]</a>                  | 60.8 | 60.8 | 94%  | 2e-09 | 82% | <a href="#">gil587000359 XP_003992187.2</a>  |
| <a href="#">PREDICTED: biotinidase isoform X2 [Felis catus]</a>                  | 60.8 | 60.8 | 94%  | 2e-09 | 82% | <a href="#">gil587000357 XP_006936495.1</a>  |
| <a href="#">PREDICTED: biotinidase [Trichechus manatus latirostris]</a>          | 60.8 | 60.8 | 100% | 2e-09 | 75% | <a href="#">gil471407481 XP_004385327.1</a>  |
| <a href="#">PREDICTED: biotinidase [Fukomys damarensis]</a>                      | 60.8 | 60.8 | 100% | 2e-09 | 78% | <a href="#">gil731285322 XP_010611073.1</a>  |
| <a href="#">PREDICTED: biotinidase [Lipotes vexillifer]</a>                      | 60.8 | 60.8 | 100% | 2e-09 | 81% | <a href="#">gil602721076 XP_007470691.1</a>  |
| <a href="#">PREDICTED: biotinidase isoform X1 [Balaenoptera acutorostrata sc</a> | 60.8 | 60.8 | 100% | 2e-09 | 81% | <a href="#">gil594624940 XP_007167058.1</a>  |
| <a href="#">Biotinidase [Fukomys damarensis]</a>                                 | 60.8 | 60.8 | 100% | 2e-09 | 78% | <a href="#">gil676263045 KFO19807.1</a>      |
| <a href="#">PREDICTED: biotinidase isoform X3 [Balaenoptera acutorostrata sc</a> | 60.8 | 60.8 | 100% | 2e-09 | 81% | <a href="#">gil594624944 XP_007167060.1</a>  |
| <a href="#">PREDICTED: biotinidase [Camelus ferus]</a>                           | 60.5 | 60.5 | 100% | 3e-09 | 72% | <a href="#">gil560929390 XP_006190847.1</a>  |
| <a href="#">PREDICTED: LOW QUALITY PROTEIN: biotinidase [Tursiops trunc</a>      | 60.5 | 60.5 | 100% | 3e-09 | 78% | <a href="#">gil470628904 XP_004321284.1</a>  |
| <a href="#">PREDICTED: biotinidase [Orcinus orca]</a>                            | 60.5 | 60.5 | 100% | 3e-09 | 78% | <a href="#">gil466019817 XP_004271983.1</a>  |
| <a href="#">PREDICTED: biotinidase isoform 2 [Odobenus rosmarus divergens]</a>   | 60.1 | 60.1 | 94%  | 3e-09 | 82% | <a href="#">gil472379495 XP_004409157.1</a>  |
| <a href="#">PREDICTED: biotinidase isoform 1 [Odobenus rosmarus divergens]</a>   | 60.1 | 60.1 | 94%  | 3e-09 | 82% | <a href="#">gil472379493 XP_004409156.1</a>  |
| <a href="#">PREDICTED: biotinidase [Galeopterus variegatus]</a>                  | 59.7 | 59.7 | 94%  | 5e-09 | 82% | <a href="#">gil667288263 XP_008576771.1</a>  |
| <a href="#">PREDICTED: biotinidase [Mustela putorius furo]</a>                   | 59.7 | 59.7 | 100% | 5e-09 | 72% | <a href="#">gil511908359 XP_004773614.1</a>  |
| <a href="#">PREDICTED: biotinidase isoform X2 [Cricetulus griseus]</a>           | 59.3 | 59.3 | 94%  | 6e-09 | 82% | <a href="#">gil625181248 XP_007632389.1</a>  |
| <a href="#">PREDICTED: biotinidase isoform X2 [Physeter catodon]</a>             | 59.3 | 59.3 | 100% | 6e-09 | 78% | <a href="#">gil5937111507 XP_007102308.1</a> |
| <a href="#">PREDICTED: biotinidase [Panthera tigris altaica]</a>                 | 59.3 | 59.3 | 94%  | 7e-09 | 79% | <a href="#">gil591322659 XP_007087428.1</a>  |
| <a href="#">PREDICTED: biotinidase isoform X1 [Cricetulus griseus]</a>           | 59.3 | 59.3 | 94%  | 7e-09 | 82% | <a href="#">gil354465853 XP_003495391.1</a>  |
| <a href="#">PREDICTED: biotinidase isoform X1 [Physeter catodon]</a>             | 59.3 | 59.3 | 100% | 7e-09 | 78% | <a href="#">gil5937111505 XP_007102307.1</a> |
| <a href="#">biotinidase [Cricetulus griseus]</a>                                 | 59.3 | 59.3 | 94%  | 7e-09 | 82% | <a href="#">gil537261432 ERE90059.1</a>      |
| <a href="#">PREDICTED: biotinidase isoform X3 [Leptonychotes weddellii]</a>      | 58.9 | 58.9 | 94%  | 9e-09 | 79% | <a href="#">gil585186600 XP_006744787.1</a>  |
| <a href="#">PREDICTED: biotinidase isoform X2 [Leptonychotes weddellii]</a>      | 58.9 | 58.9 | 94%  | 9e-09 | 79% | <a href="#">gil585186598 XP_006744786.1</a>  |
| <a href="#">PREDICTED: biotinidase isoform X1 [Leptonychotes weddellii]</a>      | 58.9 | 58.9 | 94%  | 9e-09 | 79% | <a href="#">gil585186596 XP_006744785.1</a>  |

|                                                                                     |      |      |      |       |     |                                             |
|-------------------------------------------------------------------------------------|------|------|------|-------|-----|---------------------------------------------|
| <a href="#">PREDICTED: biotinidase isoform X1 [Peromyscus maniculatus bair</a>      | 58.2 | 58.2 | 100% | 2e-08 | 75% | <a href="#">gij589967608 XP_006996305.1</a> |
| <a href="#">PREDICTED: biotinidase [Nannospalax galii]</a>                          | 58.2 | 58.2 | 100% | 2e-08 | 75% | <a href="#">gij674081213 XP_008848205.1</a> |
| <a href="#">PREDICTED: biotinidase isoform X2 [Ursus maritimus]</a>                 | 58.2 | 58.2 | 100% | 2e-08 | 72% | <a href="#">gij670981874 XP_008707139.1</a> |
| <a href="#">PREDICTED: biotinidase isoform X2 [Peromyscus maniculatus bair</a>      | 58.2 | 58.2 | 100% | 2e-08 | 75% | <a href="#">gij589967610 XP_006996306.1</a> |
| <a href="#">PREDICTED: biotinidase isoform X1 [Ursus maritimus]</a>                 | 58.2 | 58.2 | 100% | 2e-08 | 72% | <a href="#">gij670981872 XP_008707130.1</a> |
| <a href="#">Biotinidase [Heterocephalus glaber]</a>                                 | 57.4 | 57.4 | 100% | 3e-08 | 72% | <a href="#">gij351707565 EHB10484.1</a>     |
| <a href="#">PREDICTED: biotinidase isoform X3 [Heterocephalus glaber]</a>           | 57.4 | 57.4 | 100% | 3e-08 | 72% | <a href="#">gij512886961 XP_004896459.1</a> |
| <a href="#">PREDICTED: biotinidase isoform X1 [Heterocephalus glaber]</a>           | 57.4 | 57.4 | 100% | 3e-08 | 72% | <a href="#">gij512886949 XP_004896457.1</a> |
| <a href="#">PREDICTED: biotinidase [Mesocricetus auratus]</a>                       | 56.6 | 56.6 | 100% | 6e-08 | 75% | <a href="#">gij524955500 XP_005077724.1</a> |
| <a href="#">PREDICTED: biotinidase [Loxodonta africana]</a>                         | 56.2 | 56.2 | 100% | 8e-08 | 67% | <a href="#">gij731510838 XP_010598778.1</a> |
| <a href="#">PREDICTED: biotinidase [Erinaceus europaeus]</a>                        | 55.8 | 55.8 | 100% | 1e-07 | 69% | <a href="#">gij617553342 XP_007530134.1</a> |
| <a href="#">PREDICTED: biotinidase-like [Ailuropoda melanoleuca]</a>                | 55.1 | 55.1 | 100% | 2e-07 | 67% | <a href="#">gij301759093 XP_002915396.1</a> |
| <a href="#">hypothetical protein PANDA_003369 [Ailuropoda melanoleuca]</a>          | 55.1 | 55.1 | 100% | 2e-07 | 67% | <a href="#">gij281345880 EFB21464.1</a>     |
| <a href="#">biotinidase, isoform CRA_a [Rattus norvegicus]</a>                      | 54.7 | 54.7 | 100% | 2e-07 | 67% | <a href="#">gij149034168 EDL88938.1</a>     |
| <a href="#">biotinidase, isoform CRA_c [Rattus norvegicus]</a>                      | 54.7 | 54.7 | 100% | 2e-07 | 67% | <a href="#">gij149034170 EDL88940.1</a>     |
| <a href="#">biotinidase precursor [Rattus norvegicus]</a>                           | 54.7 | 54.7 | 100% | 3e-07 | 67% | <a href="#">gij58865670 NP_001012047.1</a>  |
| <a href="#">PREDICTED: biotinidase isoform X1 [Cavia porcellus]</a>                 | 54.7 | 54.7 | 100% | 3e-07 | 67% | <a href="#">gij514481133 XP_003480063.2</a> |
| <a href="#">PREDICTED: biotinidase isoform X2 [Rattus norvegicus]</a>               | 54.7 | 54.7 | 100% | 3e-07 | 67% | <a href="#">gij564387894 XP_006252671.1</a> |
| <a href="#">PREDICTED: biotinidase isoform X2 [Cavia porcellus]</a>                 | 54.7 | 54.7 | 100% | 3e-07 | 67% | <a href="#">gij514481131 XP_005008361.1</a> |
| <a href="#">PREDICTED: biotinidase isoform X3 [Saimiri boliviensis boliviensis]</a> | 54.3 | 54.3 | 91%  | 4e-07 | 82% | <a href="#">gij725560828 XP_010333963.1</a> |
| <a href="#">PREDICTED: biotinidase isoform X2 [Saimiri boliviensis boliviensis]</a> | 54.3 | 54.3 | 91%  | 4e-07 | 82% | <a href="#">gij403265544 XP_003924991.1</a> |
| <a href="#">PREDICTED: biotinidase isoform X1 [Saimiri boliviensis boliviensis]</a> | 54.3 | 54.3 | 91%  | 4e-07 | 82% | <a href="#">gij725560825 XP_010333962.1</a> |
| <a href="#">PREDICTED: biotinidase isoform X1 [Mus musculus]</a>                    | 53.9 | 53.9 | 100% | 4e-07 | 72% | <a href="#">gij568987712 XP_006519092.1</a> |
| <a href="#">RecName: Full=Biotinidase; Short=Biotinase; Flags: Precursor [Mus</a>   | 53.9 | 53.9 | 100% | 5e-07 | 72% | <a href="#">gij150421524 Q8CIF4.2</a>       |
| <a href="#">unnamed protein product [Mus musculus]</a>                              | 53.9 | 53.9 | 100% | 5e-07 | 72% | <a href="#">gij74183082 BAE22509.1</a>      |
| <a href="#">biotinidase precursor [Mus musculus]</a>                                | 53.9 | 53.9 | 100% | 5e-07 | 72% | <a href="#">gij13384648 NP_079571.1</a>     |

## Alignments

[Download](#) [GenPept](#) [Graphics](#)

[Next](#) [Previous](#) [Descriptions](#)

**PREDICTED: biotinidase [Nomascus leucogenys]**

Sequence ID: [gij332232450|ref|XP\\_003265417.1](#) Length: 474 Number of Matches: 1

Range 1: 260 to 295 [GenPept](#) [Graphics](#)

[Next Match](#) [Previous Match](#)

| Score          | Expect | Identities  | Positives   | Gaps     |
|----------------|--------|-------------|-------------|----------|
| 74.3 bits(181) | 3e-14  | 36/36(100%) | 36/36(100%) | 0/36(0%) |

Query 1 KSHLIIAQVAKNPVGLIGAENATGETDPSHSKFLKI 36  
 KSHLIIAQVAKNPVGLIGAENATGETDPSHSKFLKI  
 Sbjct 260 KSHLIIAQVAKNPVGLIGAENATGETDPSHSKFLKI 295

### Related Information

[Gene](#) - associated gene details  
[Map Viewer](#) - aligned genomic context

[Download](#) [GenPept](#) [Graphics](#)

[Next](#) [Previous](#) [Descriptions](#)

**unnamed protein product [Homo sapiens]**

Sequence ID: [gij221043776|dbj|BAH13565.1](#) Length: 523 Number of Matches: 1

Range 1: 309 to 344 [GenPept](#) [Graphics](#)

[Next Match](#) [Previous Match](#)

| Score          | Expect | Identities  | Positives   | Gaps     |
|----------------|--------|-------------|-------------|----------|
| 74.3 bits(181) | 3e-14  | 36/36(100%) | 36/36(100%) | 0/36(0%) |

Query 1 KSHLIIAQVAKNPVGLIGAENATGETDPSHSKFLKI 36  
 KSHLIIAQVAKNPVGLIGAENATGETDPSHSKFLKI  
 Sbjct 309 KSHLIIAQVAKNPVGLIGAENATGETDPSHSKFLKI 344

### Related Information

[Gene](#) - associated gene details

Download [GenPept](#) [Graphics](#)

[▼ Next](#) [▲ Previous](#) [▲ Descriptions](#)

biotinidase isoform 4 precursor [Homo sapiens]

Sequence ID: [gi|528524486|ref|NP\\_001268654.1|](#) Length: 523 Number of Matches: 1

[▶ See 3 more title\(s\)](#)

Range 1: 309 to 344 [GenPept](#) [Graphics](#)

[▼ Next Match](#) [▲ Previous Match](#)

| Score          | Expect | Identities  | Positives   | Gaps     |
|----------------|--------|-------------|-------------|----------|
| 74.3 bits(181) | 3e-14  | 36/36(100%) | 36/36(100%) | 0/36(0%) |

```

Query 1      KSHLIIAQVAKNPVGLIGAENATGETDPSHSKFLKI 36
          KSHLIIAQVAKNPVGLIGAENATGETDPSHSKFLKI
Sbjct 309    KSHLIIAQVAKNPVGLIGAENATGETDPSHSKFLKI 344
    
```

**Related Information**

[Gene](#) - associated gene details  
[Map Viewer](#) - aligned genomic context  
[Identical Proteins](#) - Proteins identical to the subject

Download [GenPept](#) [Graphics](#)

[▼ Next](#) [▲ Previous](#) [▲ Descriptions](#)

biotinidase precursor [Pan troglodytes]

Sequence ID: [gi|697993457|ref|NP\\_001289363.1|](#) Length: 523 Number of Matches: 1

[▶ See 1 more title\(s\)](#)

Range 1: 309 to 344 [GenPept](#) [Graphics](#)

[▼ Next Match](#) [▲ Previous Match](#)

| Score          | Expect | Identities  | Positives   | Gaps     |
|----------------|--------|-------------|-------------|----------|
| 74.3 bits(181) | 3e-14  | 36/36(100%) | 36/36(100%) | 0/36(0%) |

```

Query 1      KSHLIIAQVAKNPVGLIGAENATGETDPSHSKFLKI 36
          KSHLIIAQVAKNPVGLIGAENATGETDPSHSKFLKI
Sbjct 309    KSHLIIAQVAKNPVGLIGAENATGETDPSHSKFLKI 344
    
```

**Related Information**

[Gene](#) - associated gene details  
[Map Viewer](#) - aligned genomic context  
[Identical Proteins](#) - Proteins identical to the subject

Download [GenPept](#) [Graphics](#)

[▼ Next](#) [▲ Previous](#) [▲ Descriptions](#)

PREDICTED: biotinidase isoform X2 [Pan troglodytes]

Sequence ID: [gi|694900420|ref|XP\\_009443239.1|](#) Length: 527 Number of Matches: 1

[▶ See 1 more title\(s\)](#)

Range 1: 313 to 348 [GenPept](#) [Graphics](#)

[▼ Next Match](#) [▲ Previous Match](#)

| Score          | Expect | Identities  | Positives   | Gaps     |
|----------------|--------|-------------|-------------|----------|
| 74.3 bits(181) | 3e-14  | 36/36(100%) | 36/36(100%) | 0/36(0%) |

```

Query 1      KSHLIIAQVAKNPVGLIGAENATGETDPSHSKFLKI 36
          KSHLIIAQVAKNPVGLIGAENATGETDPSHSKFLKI
Sbjct 313    KSHLIIAQVAKNPVGLIGAENATGETDPSHSKFLKI 348
    
```

**Related Information**

[Gene](#) - associated gene details  
[Identical Proteins](#) - Proteins identical to the subject

BLAST is a registered trademark of the National Library of Medicine.

▶ NCBI/ BLAST/ blastp suite/ Formatting Results - BT4F1XB1013

**i** Your search parameters were adjusted to search for a short input sequence.

[Edit and Resubmit](#) | [Save Search Strategies](#) | [▶ Formatting options](#) | [▶ Download](#)

[YouTube](#) | [How to read this page](#) | [Blast report description](#)

### BT4\_KWNVNAPPTFHSEMMYDDFTLVPVWGKE\_Mod

**RID** [BT4F1XB1013](#) (Expires on 01-20 12:10 pm)

|                                  |                                                                                                                                        |
|----------------------------------|----------------------------------------------------------------------------------------------------------------------------------------|
| <b>Query ID</b>  cl 19040        | <b>Database Name</b>  nr                                                                                                               |
| <b>Description</b>  None         | <b>Description</b>  All non-redundant GenBank CDS translations+PDB+SwissProt+PIR+PRF excluding environmental samples from WGS projects |
| <b>Molecule type</b>  amino acid | <b>Program</b>  BLASTP 2.2.30+ <a href="#">▶ Citation</a>                                                                              |
| <b>Query Length</b>  28          |                                                                                                                                        |

Other reports: [▶ Search Summary](#) [[Taxonomy reports](#)] [[Distance tree of results](#)] [[Multiple alignment](#)]

### Graphic Summary

[Show Conserved Domains](#)

No putative conserved domains have been detected

Distribution of 100 Blast Hits on the Query Sequence 

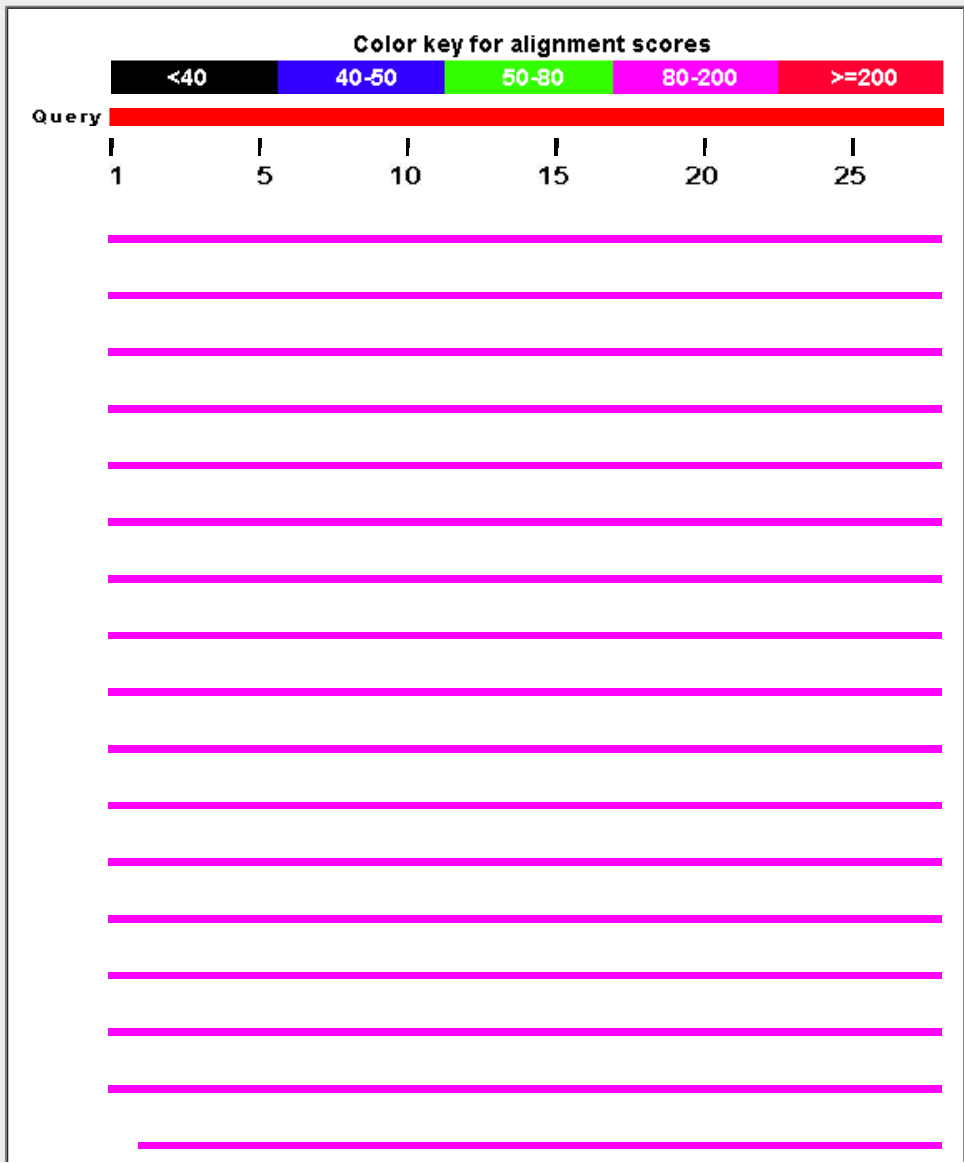

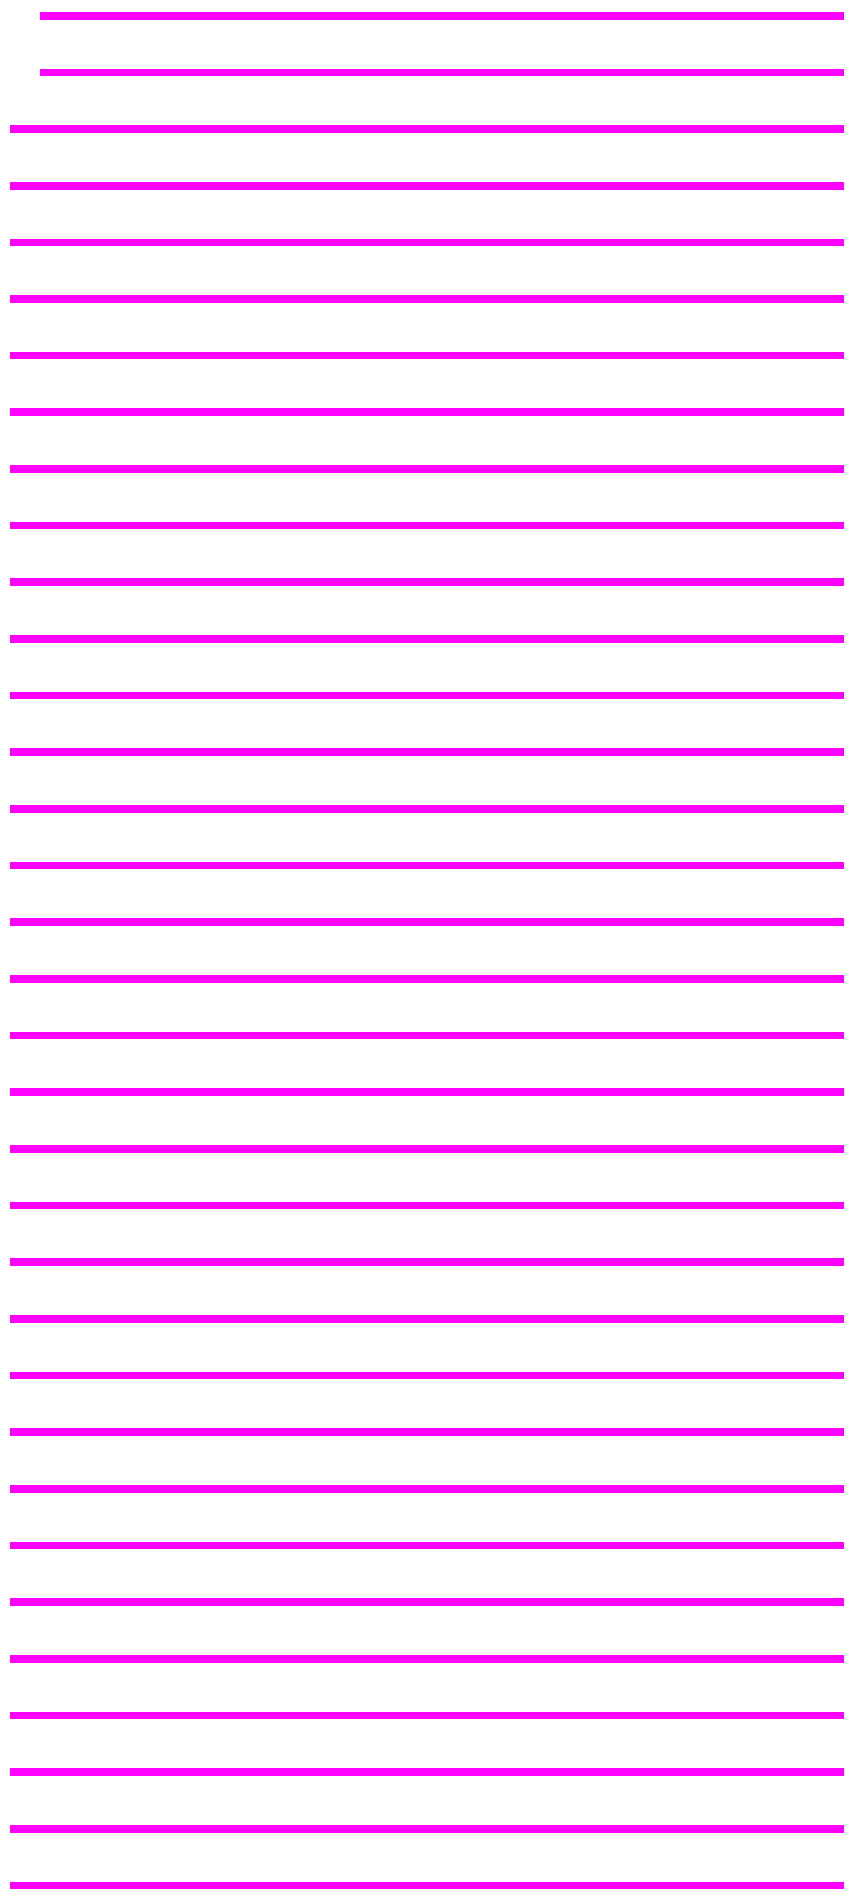

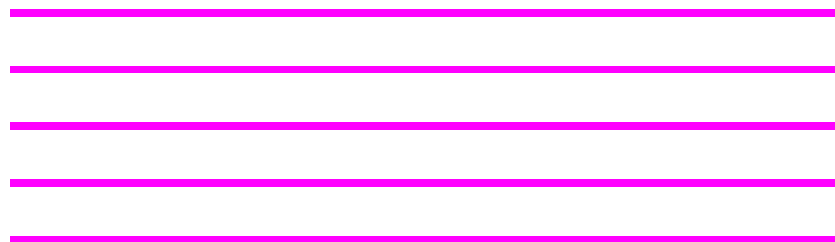

## Descriptions

### Sequences producing significant alignments:

Select: [All](#) [None](#) Selected:0

[Alignments](#)
[Download](#)
[GenPept](#)
[Graphics](#)
[Distance tree of results](#)
[Multiple alignment](#)

| Description                                                                | Max score | Total score | Query cover | E value | Ident | Accession                                   |
|----------------------------------------------------------------------------|-----------|-------------|-------------|---------|-------|---------------------------------------------|
| <a href="#">PREDICTED: biotinidase [Nomascus leucogenys]</a>               | 98.6      | 98.6        | 100%        | 1e-21   | 96%   | <a href="#">gi 332232450 XP_003265417.1</a> |
| <a href="#">unnamed protein product [Homo sapiens]</a>                     | 98.6      | 98.6        | 100%        | 1e-21   | 96%   | <a href="#">gi 221043776 BAH13565.1</a>     |
| <a href="#">biotinidase isoform 4 precursor [Homo sapiens]</a>             | 98.6      | 98.6        | 100%        | 1e-21   | 96%   | <a href="#">gi 528524486 NP_001268654.1</a> |
| <a href="#">biotinidase precursor [Pan troglodytes]</a>                    | 98.6      | 98.6        | 100%        | 1e-21   | 96%   | <a href="#">gi 697993457 NP_001289363.1</a> |
| <a href="#">PREDICTED: biotinidase isoform 1 [Gorilla gorilla gorilla]</a> | 98.6      | 98.6        | 100%        | 1e-21   | 96%   | <a href="#">gi 426339607 XP_004033737.1</a> |
| <a href="#">PREDICTED: biotinidase isoform X2 [Pan troglodytes]</a>        | 98.6      | 98.6        | 100%        | 1e-21   | 96%   | <a href="#">gi 694900420 XP_009443239.1</a> |
| <a href="#">PREDICTED: biotinidase isoform X2 [Pan paniscus]</a>           | 98.6      | 98.6        | 100%        | 1e-21   | 96%   | <a href="#">gi 675784344 XP_008949921.1</a> |
| <a href="#">PREDICTED: biotinidase isoform 3 [Gorilla gorilla gorilla]</a> | 98.6      | 98.6        | 100%        | 1e-21   | 96%   | <a href="#">gi 426339611 XP_004033739.1</a> |
| <a href="#">PREDICTED: biotinidase isoform 4 [Gorilla gorilla gorilla]</a> | 98.6      | 98.6        | 100%        | 1e-21   | 96%   | <a href="#">gi 426339613 XP_004033740.1</a> |
| <a href="#">biotinidase isoform 3 [Homo sapiens]</a>                       | 98.6      | 98.6        | 100%        | 1e-21   | 96%   | <a href="#">gi 4557373 NP_000051.1</a>      |
| <a href="#">biotinidase isoform 1 [Homo sapiens]</a>                       | 98.6      | 98.6        | 100%        | 1e-21   | 96%   | <a href="#">gi 528524481 NP_001268652.1</a> |
| <a href="#">biotinidase isoform 2 [Homo sapiens]</a>                       | 98.6      | 98.6        | 100%        | 1e-21   | 96%   | <a href="#">gi 528524483 NP_001268653.1</a> |
| <a href="#">PREDICTED: biotinidase isoform 2 [Gorilla gorilla gorilla]</a> | 98.6      | 98.6        | 100%        | 1e-21   | 96%   | <a href="#">gi 426339609 XP_004033738.1</a> |
| <a href="#">PREDICTED: biotinidase isoform X1 [Pan troglodytes]</a>        | 98.6      | 98.6        | 100%        | 1e-21   | 96%   | <a href="#">gi 410036604 XP_003950087.1</a> |
| <a href="#">PREDICTED: biotinidase isoform X1 [Pan paniscus]</a>           | 98.6      | 98.6        | 100%        | 1e-21   | 96%   | <a href="#">gi 397511808 XP_003826257.1</a> |
| <a href="#">PREDICTED: biotinidase [Jaculus jaculus]</a>                   | 96.5      | 96.5        | 100%        | 7e-21   | 93%   | <a href="#">gi 507555213 XP_004661377.1</a> |
| <a href="#">PREDICTED: biotinidase isoform X3 [Pongo abelii]</a>           | 95.6      | 95.6        | 96%         | 1e-20   | 96%   | <a href="#">gi 686713703 XP_009237577.1</a> |
| <a href="#">PREDICTED: biotinidase isoform X2 [Pongo abelii]</a>           | 95.6      | 95.6        | 96%         | 1e-20   | 96%   | <a href="#">gi 686713701 XP_009237576.1</a> |
| <a href="#">PREDICTED: biotinidase isoform X1 [Pongo abelii]</a>           | 95.6      | 95.6        | 96%         | 1e-20   | 96%   | <a href="#">gi 395734130 XP_003776360.1</a> |
| <a href="#">PREDICTED: biotinidase isoform X2 [Cricetulus griseus]</a>     | 95.2      | 95.2        | 100%        | 2e-20   | 93%   | <a href="#">gi 625181248 XP_007632389.1</a> |
| <a href="#">PREDICTED: biotinidase isoform X1 [Peromyscus maniculatus]</a> | 95.2      | 95.2        | 100%        | 2e-20   | 93%   | <a href="#">gi 589967608 XP_006996305.1</a> |
| <a href="#">unnamed protein product [Macaca fascicularis]</a>              | 95.2      | 95.2        | 100%        | 2e-20   | 93%   | <a href="#">gi 90077268 BAE88314.1</a>      |
| <a href="#">PREDICTED: biotinidase [Galeopterus variegatus]</a>            | 95.2      | 95.2        | 100%        | 2e-20   | 93%   | <a href="#">gi 667288263 XP_008576771.1</a> |
| <a href="#">PREDICTED: biotinidase isoform X2 [Microtus ochrogaster]</a>   | 95.2      | 95.2        | 100%        | 2e-20   | 93%   | <a href="#">gi 532009812 XP_005348714.1</a> |
| <a href="#">PREDICTED: biotinidase isoform X2 [Peromyscus maniculatus]</a> | 95.2      | 95.2        | 100%        | 2e-20   | 93%   | <a href="#">gi 589967610 XP_006996306.1</a> |
| <a href="#">PREDICTED: biotinidase isoform X2 [Chlorocebus sabaeus]</a>    | 95.2      | 95.2        | 100%        | 2e-20   | 93%   | <a href="#">gi 635085523 XP_008007381.1</a> |
| <a href="#">PREDICTED: biotinidase isoform X2 [Macaca fascicularis]</a>    | 95.2      | 95.2        | 100%        | 2e-20   | 93%   | <a href="#">gi 544411158 XP_005545768.1</a> |
| <a href="#">PREDICTED: biotinidase isoform X2 [Papio anubis]</a>           | 95.2      | 95.2        | 100%        | 2e-20   | 93%   | <a href="#">gi 685527526 XP_009200021.1</a> |
| <a href="#">PREDICTED: biotinidase isoform X1 [Chlorocebus sabaeus]</a>    | 95.2      | 95.2        | 100%        | 2e-20   | 93%   | <a href="#">gi 635085521 XP_008007380.1</a> |

|                                                                              |      |      |      |       |     |                                             |
|------------------------------------------------------------------------------|------|------|------|-------|-----|---------------------------------------------|
| <a href="#">PREDICTED: biotinidase [Mustela putorius furo]</a>               | 95.2 | 95.2 | 100% | 2e-20 | 93% | <a href="#">gi 511908359 XP_004773614.1</a> |
| <a href="#">PREDICTED: biotinidase isoform X1 [Cricetulus griseus]</a>       | 95.2 | 95.2 | 100% | 2e-20 | 93% | <a href="#">gi 354465853 XP_003495391.1</a> |
| <a href="#">PREDICTED: biotinidase [Orycteropus afer afer]</a>               | 95.2 | 95.2 | 100% | 2e-20 | 93% | <a href="#">gi 634822252 XP_007934900.1</a> |
| <a href="#">hypothetical protein EGM_11114 [Macaca fascicularis]</a>         | 95.2 | 95.2 | 100% | 2e-20 | 93% | <a href="#">gi 355747075 EHH51689.1</a>     |
| <a href="#">hypothetical protein EGK_12122 [Macaca mulatta]</a>              | 95.2 | 95.2 | 100% | 2e-20 | 93% | <a href="#">gi 355560049 EHH16777.1</a>     |
| <a href="#">PREDICTED: biotinidase isoform X1 [Microtus ochrogaster]</a>     | 95.2 | 95.2 | 100% | 2e-20 | 93% | <a href="#">gi 532009810 XP_005348713.1</a> |
| <a href="#">PREDICTED: biotinidase [Macaca mulatta]</a>                      | 95.2 | 95.2 | 100% | 2e-20 | 93% | <a href="#">gi 297286947 XP_001083201.2</a> |
| <a href="#">PREDICTED: biotinidase isoform X1 [Papio anubis]</a>             | 95.2 | 95.2 | 100% | 2e-20 | 93% | <a href="#">gi 685527524 XP_009200020.1</a> |
| <a href="#">PREDICTED: biotinidase isoform X1 [Macaca fascicularis]</a>      | 95.2 | 95.2 | 100% | 2e-20 | 93% | <a href="#">gi 544411156 XP_005545767.1</a> |
| <a href="#">biotinidase [Cricetulus griseus]</a>                             | 95.2 | 95.2 | 100% | 2e-20 | 93% | <a href="#">gi 537261432 ERE90059.1</a>     |
| <a href="#">biotinidase isoform CRA_a [Rattus norvegicus]</a>                | 94.8 | 94.8 | 100% | 3e-20 | 93% | <a href="#">gi 149034168 EDL88938.1</a>     |
| <a href="#">biotinidase isoform CRA_c [Rattus norvegicus]</a>                | 94.8 | 94.8 | 100% | 3e-20 | 93% | <a href="#">gi 149034170 EDL88940.1</a>     |
| <a href="#">PREDICTED: biotinidase isoform X2 [Rattus norvegicus]</a>        | 94.8 | 94.8 | 100% | 3e-20 | 93% | <a href="#">gi 564387894 XP_006252671.1</a> |
| <a href="#">PREDICTED: biotinidase [Chrysochloris asiatica]</a>              | 93.1 | 93.1 | 100% | 1e-19 | 89% | <a href="#">gi 586456511 XP_006840071.1</a> |
| <a href="#">PREDICTED: biotinidase-like [Ictidomys tridecemlineatus]</a>     | 92.7 | 92.7 | 100% | 1e-19 | 89% | <a href="#">gi 532063189 XP_005317469.1</a> |
| <a href="#">PREDICTED: biotinidase isoform X4 [Canis lupus familiaris]</a>   | 91.8 | 91.8 | 100% | 3e-19 | 89% | <a href="#">gi 545538859 XP_005634450.1</a> |
| <a href="#">PREDICTED: LOW QUALITY PROTEIN: biotinidase [Tursiops]</a>       | 91.8 | 91.8 | 100% | 3e-19 | 89% | <a href="#">gi 470628904 XP_004321284.1</a> |
| <a href="#">PREDICTED: biotinidase [Orcinus orca]</a>                        | 91.8 | 91.8 | 100% | 3e-19 | 89% | <a href="#">gi 466019817 XP_004271983.1</a> |
| <a href="#">PREDICTED: biotinidase isoform X3 [Canis lupus familiaris]</a>   | 91.8 | 91.8 | 100% | 3e-19 | 89% | <a href="#">gi 545538857 XP_005634449.1</a> |
| <a href="#">PREDICTED: biotinidase isoform X2 [Canis lupus familiaris]</a>   | 91.8 | 91.8 | 100% | 3e-19 | 89% | <a href="#">gi 545538855 XP_005634448.1</a> |
| <a href="#">PREDICTED: biotinidase isoform X1 [Canis lupus familiaris]</a>   | 91.8 | 91.8 | 100% | 3e-19 | 89% | <a href="#">gi 545538853 XP_005634447.1</a> |
| <a href="#">PREDICTED: biotinidase isoform X1 [Mus musculus]</a>             | 91.0 | 91.0 | 100% | 5e-19 | 89% | <a href="#">gi 568987712 XP_006519092.1</a> |
| <a href="#">RecName: Full=Biotinidase; Short=Biotinase; Flags: Precursor</a> | 91.0 | 91.0 | 100% | 6e-19 | 89% | <a href="#">gi 150421524 Q8CIF4.2</a>       |
| <a href="#">PREDICTED: biotinidase [Rhinopithecus roxellana]</a>             | 91.0 | 91.0 | 100% | 6e-19 | 89% | <a href="#">gi 724960396 XP_010354361.1</a> |
| <a href="#">unnamed protein product [Mus musculus]</a>                       | 91.0 | 91.0 | 100% | 6e-19 | 89% | <a href="#">gi 74183082 BAE22509.1</a>      |
| <a href="#">biotinidase precursor [Mus musculus]</a>                         | 91.0 | 91.0 | 100% | 6e-19 | 89% | <a href="#">gi 13384648 NP_079571.1</a>     |
| <a href="#">PREDICTED: biotinidase isoform X2 [Physeter catodon]</a>         | 90.6 | 90.6 | 100% | 8e-19 | 89% | <a href="#">gi 593711507 XP_007102308.1</a> |
| <a href="#">PREDICTED: biotinidase isoform X1 [Physeter catodon]</a>         | 90.6 | 90.6 | 100% | 8e-19 | 89% | <a href="#">gi 593711505 XP_007102307.1</a> |
| <a href="#">PREDICTED: biotinidase [Lipotes vexillifer]</a>                  | 90.6 | 90.6 | 100% | 8e-19 | 89% | <a href="#">gi 602721076 XP_007470691.1</a> |
| <a href="#">PREDICTED: biotinidase isoform X1 [Balaenoptera acutorostra]</a> | 90.6 | 90.6 | 100% | 8e-19 | 89% | <a href="#">gi 594624940 XP_007167058.1</a> |
| <a href="#">PREDICTED: biotinidase isoform X3 [Balaenoptera acutorostra]</a> | 90.6 | 90.6 | 100% | 8e-19 | 89% | <a href="#">gi 594624944 XP_007167060.1</a> |
| <a href="#">PREDICTED: biotinidase isoform X3 [Equus caballus]</a>           | 90.1 | 90.1 | 100% | 1e-18 | 89% | <a href="#">gi 545189350 XP_005600979.1</a> |
| <a href="#">PREDICTED: biotinidase [Equus przewalskii]</a>                   | 90.1 | 180  | 100% | 1e-18 | 89% | <a href="#">gi 664753751 XP_008534346.1</a> |
| <a href="#">PREDICTED: biotinidase isoform X2 [Equus caballus]</a>           | 90.1 | 90.1 | 100% | 1e-18 | 89% | <a href="#">gi 545189348 XP_005600978.1</a> |
| <a href="#">PREDICTED: biotinidase isoform X1 [Equus caballus]</a>           | 90.1 | 90.1 | 100% | 1e-18 | 89% | <a href="#">gi 545189346 XP_005600977.1</a> |
| <a href="#">PREDICTED: biotinidase [Erinaceus europaeus]</a>                 | 89.3 | 89.3 | 96%  | 2e-18 | 89% | <a href="#">gi 617553342 XP_007530134.1</a> |
| <a href="#">PREDICTED: biotinidase [Otolemur garnettii]</a>                  | 88.4 | 88.4 | 96%  | 4e-18 | 89% | <a href="#">gi 395816560 XP_003781769.1</a> |
| <a href="#">PREDICTED: biotinidase [Panthera tigris altaica]</a>             | 88.0 | 88.0 | 100% | 6e-18 | 86% | <a href="#">gi 591322659 XP_007087428.1</a> |
| <a href="#">PREDICTED: biotinidase isoform X1 [Felis catus]</a>              | 88.0 | 88.0 | 100% | 6e-18 | 86% | <a href="#">gi 587000359 XP_003992187.2</a> |
| <a href="#">PREDICTED: biotinidase isoform X2 [Felis catus]</a>              | 88.0 | 88.0 | 100% | 6e-18 | 86% | <a href="#">gi 587000357 XP_006936495.1</a> |
| <a href="#">PREDICTED: biotinidase [Mesocricetus auratus]</a>                | 87.6 | 87.6 | 100% | 8e-18 | 86% | <a href="#">gi 524955500 XP_005077724.1</a> |
| <a href="#">PREDICTED: biotinidase [Nannospalax galili]</a>                  | 86.7 | 86.7 | 100% | 2e-17 | 86% | <a href="#">gi 674081213 XP_008848205.1</a> |
| <a href="#">PREDICTED: biotinidase isoform X2 [Ursus maritimus]</a>          | 86.7 | 86.7 | 92%  | 2e-17 | 92% | <a href="#">gi 670981874 XP_008707139.1</a> |
| <a href="#">PREDICTED: biotinidase isoform 2 [Odobenus rosmarus diverc]</a>  | 86.7 | 86.7 | 96%  | 2e-17 | 89% | <a href="#">gi 472379495 XP_004409157.1</a> |
| <a href="#">PREDICTED: biotinidase isoform X1 [Ursus maritimus]</a>          | 86.7 | 86.7 | 92%  | 2e-17 | 92% | <a href="#">gi 670981872 XP_008707130.1</a> |



|                                                                 |      |      |      |       |     |                                             |
|-----------------------------------------------------------------|------|------|------|-------|-----|---------------------------------------------|
| PREDICTED: biotinidase isoform X3 [Leptonychotes weddellii]     | 86.7 | 86.7 | 96%  | 2e-17 | 89% | <a href="#">gi 585186600 XP_006744787.1</a> |
| PREDICTED: biotinidase isoform X2 [Leptonychotes weddellii]     | 86.7 | 86.7 | 96%  | 2e-17 | 89% | <a href="#">gi 585186598 XP_006744786.1</a> |
| PREDICTED: biotinidase isoform 1 [Odobenus rosmarus diverc]     | 86.7 | 86.7 | 96%  | 2e-17 | 89% | <a href="#">gi 472379493 XP_004409156.1</a> |
| PREDICTED: biotinidase isoform X1 [Leptonychotes weddellii]     | 86.7 | 86.7 | 96%  | 2e-17 | 89% | <a href="#">gi 585186596 XP_006744785.1</a> |
| PREDICTED: biotinidase [Ceratotherium simum simum]              | 86.3 | 86.3 | 100% | 2e-17 | 86% | <a href="#">gi 478490156 XP_004419451.1</a> |
| PREDICTED: biotinidase isoform X3 [Saimiri boliviensis bolivie] | 85.9 | 85.9 | 100% | 3e-17 | 89% | <a href="#">gi 725560828 XP_010333963.1</a> |
| PREDICTED: biotinidase isoform X2 [Saimiri boliviensis bolivie] | 85.9 | 85.9 | 100% | 3e-17 | 89% | <a href="#">gi 403265544 XP_003924991.1</a> |
| PREDICTED: biotinidase isoform X1 [Saimiri boliviensis bolivie] | 85.9 | 85.9 | 100% | 3e-17 | 89% | <a href="#">gi 725560825 XP_010333962.1</a> |
| PREDICTED: biotinidase [Echinops telfairi]                      | 85.5 | 85.5 | 96%  | 4e-17 | 85% | <a href="#">gi 507651259 XP_004704067.1</a> |
| PREDICTED: biotinidase isoform X1 [Callithrix jacchus]          | 82.1 | 82.1 | 100% | 6e-16 | 86% | <a href="#">gi 675740028 XP_008982107.1</a> |
| PREDICTED: biotinidase isoform X2 [Callithrix jacchus]          | 82.1 | 82.1 | 100% | 6e-16 | 86% | <a href="#">gi 390476393 XP_002759736.2</a> |
| Biotinidase [Myotis davidii]                                    | 81.7 | 81.7 | 96%  | 9e-16 | 81% | <a href="#">gi 432092959 ELK25317.1</a>     |
| PREDICTED: biotinidase isoform X1 [Myotis davidii]              | 81.7 | 81.7 | 96%  | 9e-16 | 81% | <a href="#">gi 584051114 XP_006770244.1</a> |
| PREDICTED: biotinidase isoform X1 [Myotis lucifugus]            | 81.7 | 81.7 | 96%  | 9e-16 | 81% | <a href="#">gi 558102610 XP_006083737.1</a> |
| PREDICTED: biotinidase isoform X3 [Myotis brandtii]             | 81.7 | 81.7 | 96%  | 9e-16 | 81% | <a href="#">gi 554537982 XP_005863672.1</a> |
| PREDICTED: biotinidase [Loxodonta africana]                     | 81.7 | 81.7 | 100% | 9e-16 | 79% | <a href="#">gi 731510838 XP_010598778.1</a> |
| PREDICTED: biotinidase isoform X2 [Myotis lucifugus]            | 81.7 | 81.7 | 96%  | 9e-16 | 81% | <a href="#">gi 558102613 XP_006083738.1</a> |
| PREDICTED: biotinidase isoform X2 [Myotis brandtii]             | 81.7 | 81.7 | 96%  | 9e-16 | 81% | <a href="#">gi 554537986 XP_005863671.1</a> |
| Biotinidase [Myotis brandtii]                                   | 81.7 | 81.7 | 96%  | 9e-16 | 81% | <a href="#">gi 521024341 EPQ06129.1</a>     |
| PREDICTED: biotinidase [Trichechus manatus latirostris]         | 80.4 | 80.4 | 100% | 2e-15 | 82% | <a href="#">gi 471407481 XP_004385327.1</a> |
| PREDICTED: biotinidase-like [Ailuropoda melanoleuca]            | 80.0 | 80.0 | 92%  | 3e-15 | 85% | <a href="#">gi 301759093 XP_002915396.1</a> |
| hypothetical protein PANDA_003369 [Ailuropoda melanoleuca]      | 80.0 | 80.0 | 92%  | 3e-15 | 85% | <a href="#">gi 281345880 EFB21464.1</a>     |
| PREDICTED: biotinidase-like [Sus scrofa]                        | 79.5 | 79.5 | 92%  | 4e-15 | 85% | <a href="#">gi 350590963 XP_003132114.3</a> |
| PREDICTED: biotinidase-like isoform X2 [Sus scrofa]             | 79.5 | 79.5 | 92%  | 5e-15 | 85% | <a href="#">gi 545860928 XP_005669335.1</a> |
| PREDICTED: biotinidase-like isoform X2 [Sus scrofa]             | 79.5 | 79.5 | 92%  | 5e-15 | 85% | <a href="#">gi 545860909 XP_005669330.1</a> |

## Alignments

[Download](#) [GenPept](#) [Graphics](#)

[Next](#) [Previous](#) [Descriptions](#)

PREDICTED: biotinidase [Nomascus leucogenys]

Sequence ID: [gi|332232450|ref|XP\\_003265417.1](#) Length: 474 Number of Matches: 1

Range 1: 316 to 343 [GenPept](#) [Graphics](#)

[Next Match](#) [Previous Match](#)

| Score          | Expect | Identities | Positives   | Gaps     |
|----------------|--------|------------|-------------|----------|
| 98.6 bits(225) | 1e-21  | 27/28(96%) | 28/28(100%) | 0/28(0%) |

Query 1 KWNVNAPPTFHSEMMYDDFTLVPVWGKE 28  
 KWNVNAPPTFHSEMMYD+FTLVPVWGKE  
 Sbjct 316 KWNVNAPPTFHSEMMYDNFTLVPVWGKE 343

### Related Information

[Gene](#) - associated gene details  
[Map Viewer](#) - aligned genomic context

[Download](#) [GenPept](#) [Graphics](#)

[Next](#) [Previous](#) [Descriptions](#)

unnamed protein product [Homo sapiens]

Sequence ID: [gi|221043776|dbj|BAH13565.1](#) Length: 523 Number of Matches: 1

Range 1: 365 to 392 [GenPept](#) [Graphics](#)

[Next Match](#) [Previous Match](#)

| Score          | Expect | Identities | Positives   | Gaps     |
|----------------|--------|------------|-------------|----------|
| 98.6 bits(225) | 1e-21  | 27/28(96%) | 28/28(100%) | 0/28(0%) |

Query 1 KWNVNAPPTFHSEMMYDDFTLVPVWGKE 28  
 KWNVNAPPTFHSEMMYD+FTLVPVWGKE  
 Sbjct 365 KWNVNAPPTFHSEMMYDNFTLVPVWGKE 392

### Related Information

[Gene](#) - associated gene details

[Download](#) [GenPept](#) [Graphics](#)

[Next](#) [Previous](#) [Descriptions](#)

biotinidase isoform 4 precursor [Homo sapiens]

Sequence ID: [gi|528524486|ref|NP\\_001268654.1|](#) Length: 523 Number of Matches: 1

[See 3 more title\(s\)](#)

Range 1: 365 to 392 [GenPept](#) [Graphics](#)

[Next Match](#) [Previous Match](#)

| Score          | Expect | Identities | Positives   | Gaps     |
|----------------|--------|------------|-------------|----------|
| 98.6 bits(225) | 1e-21  | 27/28(96%) | 28/28(100%) | 0/28(0%) |

```

Query 1 KWNVNAPPTFHSEMMYDDFTLVPVWGKE 28
        KWNVNAPPTFHSEMMYD+FTLVPVWGKE
Sbjct 365 KWNVNAPPTFHSEMMYDNFTLVPVWGKE 392
    
```

**Related Information**

[Gene](#) - associated gene details  
[Map Viewer](#) - aligned genomic context  
[Identical Proteins](#) - Proteins identical to the subject

[Download](#) [GenPept](#) [Graphics](#)

[Next](#) [Previous](#) [Descriptions](#)

biotinidase precursor [Pan troglodytes]

Sequence ID: [gi|697993457|ref|NP\\_001289363.1|](#) Length: 523 Number of Matches: 1

[See 1 more title\(s\)](#)

Range 1: 365 to 392 [GenPept](#) [Graphics](#)

[Next Match](#) [Previous Match](#)

| Score          | Expect | Identities | Positives   | Gaps     |
|----------------|--------|------------|-------------|----------|
| 98.6 bits(225) | 1e-21  | 27/28(96%) | 28/28(100%) | 0/28(0%) |

```

Query 1 KWNVNAPPTFHSEMMYDDFTLVPVWGKE 28
        KWNVNAPPTFHSEMMYD+FTLVPVWGKE
Sbjct 365 KWNVNAPPTFHSEMMYDNFTLVPVWGKE 392
    
```

**Related Information**

[Gene](#) - associated gene details  
[Map Viewer](#) - aligned genomic context  
[Identical Proteins](#) - Proteins identical to the subject

[Download](#) [GenPept](#) [Graphics](#)

[Next](#) [Previous](#) [Descriptions](#)

PREDICTED: biotinidase isoform 1 [Gorilla gorilla gorilla]

Sequence ID: [gi|426339607|ref|XP\\_004033737.1|](#) Length: 527 Number of Matches: 1

Range 1: 369 to 396 [GenPept](#) [Graphics](#)

[Next Match](#) [Previous Match](#)

| Score          | Expect | Identities | Positives   | Gaps     |
|----------------|--------|------------|-------------|----------|
| 98.6 bits(225) | 1e-21  | 27/28(96%) | 28/28(100%) | 0/28(0%) |

```

Query 1 KWNVNAPPTFHSEMMYDDFTLVPVWGKE 28
        KWNVNAPPTFHSEMMYD+FTLVPVWGKE
Sbjct 369 KWNVNAPPTFHSEMMYDNFTLVPVWGKE 396
    
```

**Related Information**

[Gene](#) - associated gene details  
[Map Viewer](#) - aligned genomic context

BLAST is a registered trademark of the National Library of Medicine.

NCBI/ BLAST/ blastp suite/ Formatting Results - B929UX6F01R

Your search parameters were adjusted to search for a short input sequence.

[Edit and Resubmit](#) [Save Search Strategies](#) [Formatting options](#) [Download](#)

[YouTube](#) [How to read this page](#) [Blast report description](#)

### BTB\_KWNVNAPPTFHSEMMYDNFTLVPVWGKE\_NonMod

RID [B929UX6F01R](#) (Expires on 01-14 09:55 am)

Query ID |cl|189320  
 Description None  
 Molecule type amino acid  
 Query Length 28

Database Name nr  
 Description All non-redundant GenBank CDS translations+PDB+SwissProt+PIR excluding environmental samples from WGS projects  
 Program BLASTP 2.2.30+ [Citation](#)

Other reports: [Search Summary](#) [Taxonomy reports](#) [Distance tree of results](#) [Multiple alignment](#)

### Graphic Summary

[Show Conserved Domains](#)

No putative conserved domains have been detected

Distribution of 100 Blast Hits on the Query Sequence

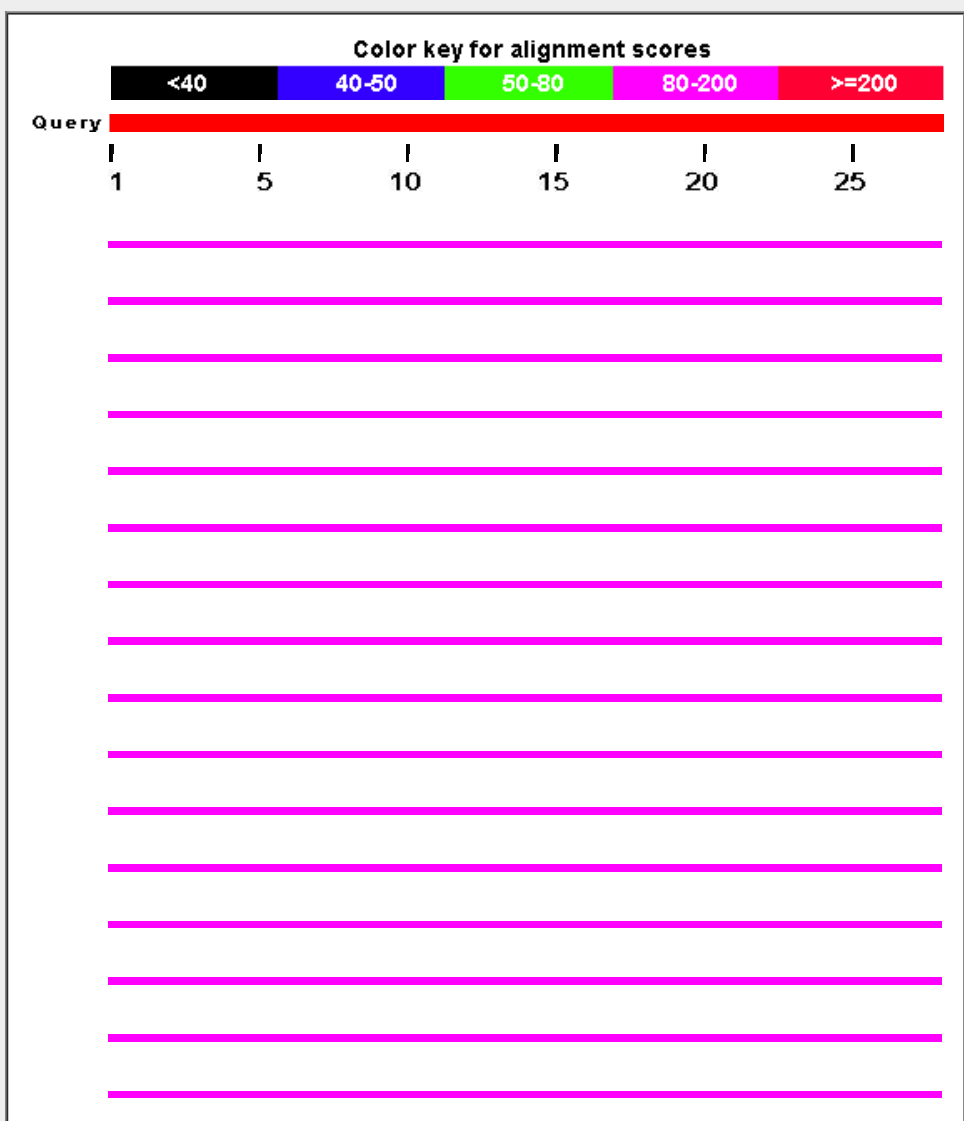

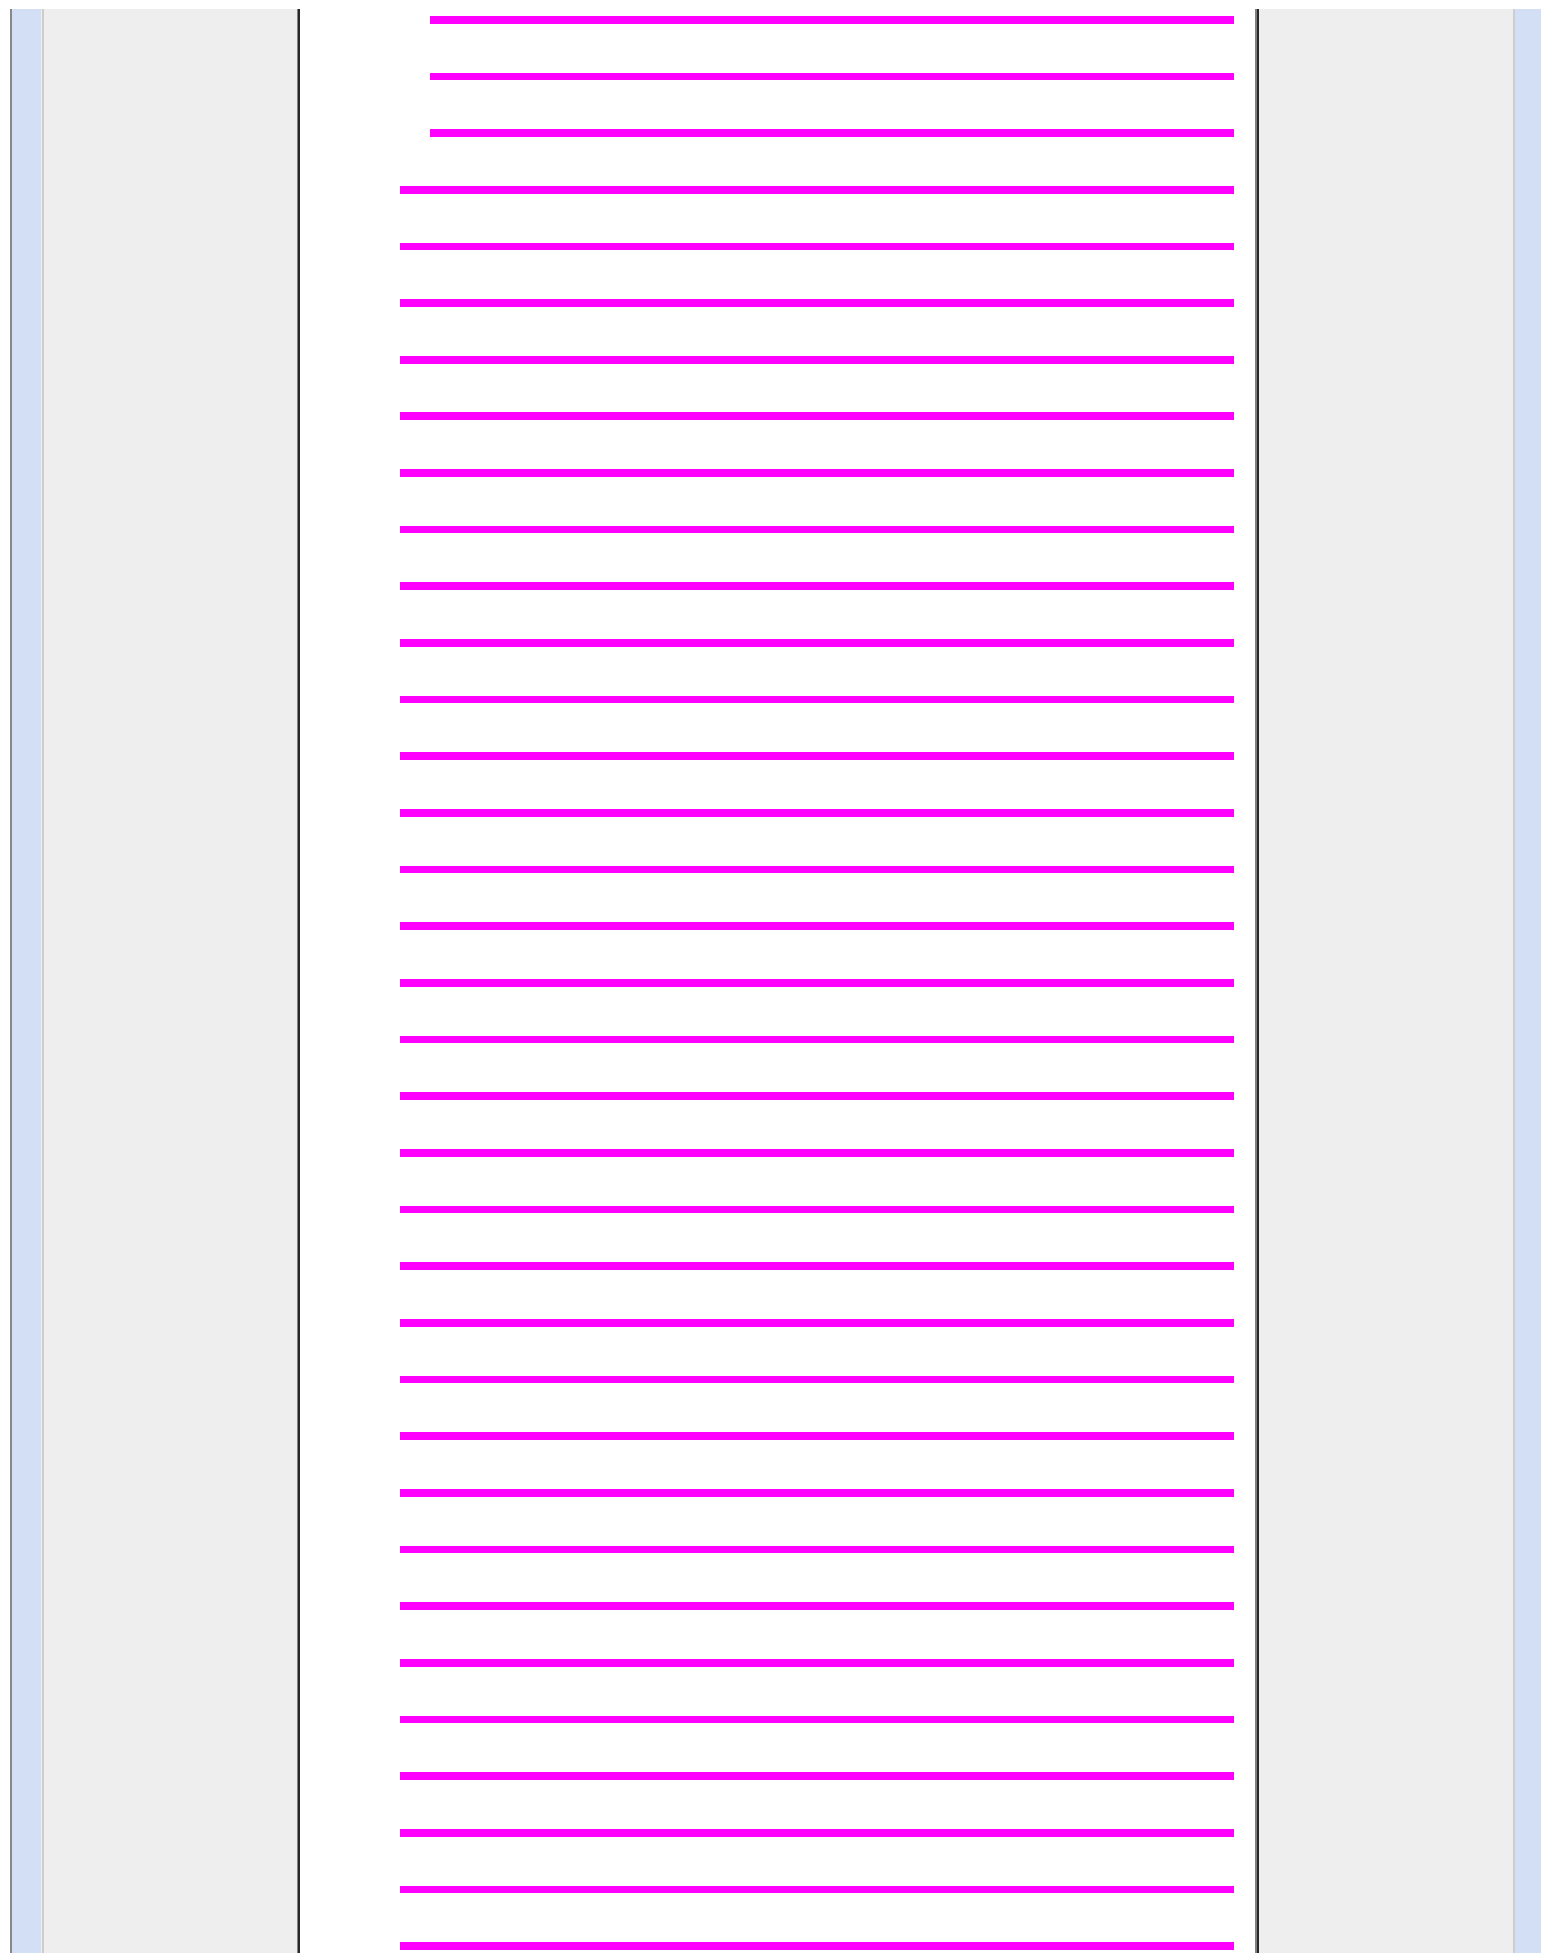



**Descriptions**

**Sequences producing significant alignments:**

Select: [All](#) [None](#) Selected:0

Alignments Download GenPept Graphics Distance tree of results Multiple alignment

| Description                                                                     | Max score | Total score | Query cover | E value | Ident | Accession                                   |
|---------------------------------------------------------------------------------|-----------|-------------|-------------|---------|-------|---------------------------------------------|
| <a href="#">PREDICTED: biotinidase [Nomascus leucogenys]</a>                    | 101       | 101         | 100%        | 2e-22   | 100%  | <a href="#">gij332232450 XP_003265417.1</a> |
| <a href="#">unnamed protein product [Homo sapiens]</a>                          | 101       | 101         | 100%        | 2e-22   | 100%  | <a href="#">gij221043776 BAH13565.1</a>     |
| <a href="#">biotinidase isoform 4 precursor [Homo sapiens]</a>                  | 101       | 101         | 100%        | 2e-22   | 100%  | <a href="#">gij528524486 NP_001268654.1</a> |
| <a href="#">biotinidase precursor [Pan troglodytes]</a>                         | 101       | 101         | 100%        | 2e-22   | 100%  | <a href="#">gij697993457 NP_001289363.1</a> |
| <a href="#">PREDICTED: biotinidase isoform 1 [Gorilla gorilla gorilla]</a>      | 101       | 101         | 100%        | 2e-22   | 100%  | <a href="#">gij426339607 XP_004033737.1</a> |
| <a href="#">PREDICTED: biotinidase isoform X2 [Pan troglodytes]</a>             | 101       | 101         | 100%        | 2e-22   | 100%  | <a href="#">gij694900420 XP_009443239.1</a> |
| <a href="#">PREDICTED: biotinidase isoform X2 [Pan paniscus]</a>                | 101       | 101         | 100%        | 2e-22   | 100%  | <a href="#">gij675784344 XP_008949921.1</a> |
| <a href="#">PREDICTED: biotinidase isoform 3 [Gorilla gorilla gorilla]</a>      | 101       | 101         | 100%        | 2e-22   | 100%  | <a href="#">gij426339611 XP_004033739.1</a> |
| <a href="#">PREDICTED: biotinidase isoform 4 [Gorilla gorilla gorilla]</a>      | 101       | 101         | 100%        | 2e-22   | 100%  | <a href="#">gij426339613 XP_004033740.1</a> |
| <a href="#">biotinidase isoform 3 [Homo sapiens]</a>                            | 101       | 101         | 100%        | 2e-22   | 100%  | <a href="#">gij4557373 NP_000051.1</a>      |
| <a href="#">biotinidase isoform 1 [Homo sapiens]</a>                            | 101       | 101         | 100%        | 2e-22   | 100%  | <a href="#">gij528524481 NP_001268652.1</a> |
| <a href="#">biotinidase isoform 2 [Homo sapiens]</a>                            | 101       | 101         | 100%        | 2e-22   | 100%  | <a href="#">gij528524483 NP_001268653.1</a> |
| <a href="#">PREDICTED: biotinidase isoform 2 [Gorilla gorilla gorilla]</a>      | 101       | 101         | 100%        | 2e-22   | 100%  | <a href="#">gij426339609 XP_004033738.1</a> |
| <a href="#">PREDICTED: biotinidase isoform X1 [Pan troglodytes]</a>             | 101       | 101         | 100%        | 2e-22   | 100%  | <a href="#">gij410036604 XP_003950087.1</a> |
| <a href="#">PREDICTED: biotinidase isoform X1 [Pan paniscus]</a>                | 101       | 101         | 100%        | 2e-22   | 100%  | <a href="#">gij397511808 XP_003826257.1</a> |
| <a href="#">PREDICTED: biotinidase [Jaculus jaculus]</a>                        | 99.0      | 99.0        | 100%        | 9e-22   | 96%   | <a href="#">gij507555213 XP_004661377.1</a> |
| <a href="#">PREDICTED: biotinidase isoform X3 [Pongo abelii]</a>                | 98.2      | 98.2        | 96%         | 2e-21   | 100%  | <a href="#">gij686713703 XP_009237577.1</a> |
| <a href="#">PREDICTED: biotinidase isoform X2 [Pongo abelii]</a>                | 98.2      | 98.2        | 96%         | 2e-21   | 100%  | <a href="#">gij686713701 XP_009237576.1</a> |
| <a href="#">PREDICTED: biotinidase isoform X1 [Pongo abelii]</a>                | 98.2      | 98.2        | 96%         | 2e-21   | 100%  | <a href="#">gij395734130 XP_003776360.1</a> |
| <a href="#">PREDICTED: biotinidase isoform X2 [Cricetulus griseus]</a>          | 97.8      | 97.8        | 100%        | 2e-21   | 96%   | <a href="#">gij625181248 XP_007632389.1</a> |
| <a href="#">PREDICTED: biotinidase isoform X1 [Peromyscus maniculatus bair]</a> | 97.8      | 97.8        | 100%        | 2e-21   | 96%   | <a href="#">gij589967608 XP_006996305.1</a> |
| <a href="#">unnamed protein product [Macaca fascicularis]</a>                   | 97.8      | 97.8        | 100%        | 2e-21   | 96%   | <a href="#">gij90077268 BAE88314.1</a>      |
| <a href="#">PREDICTED: biotinidase [Galeopterus variegatus]</a>                 | 97.8      | 97.8        | 100%        | 2e-21   | 96%   | <a href="#">gij667288263 XP_008576771.1</a> |
| <a href="#">PREDICTED: biotinidase isoform X2 [Microtus ochrogaster]</a>        | 97.8      | 97.8        | 100%        | 2e-21   | 96%   | <a href="#">gij532009812 XP_005348714.1</a> |
| <a href="#">PREDICTED: biotinidase isoform X2 [Peromyscus maniculatus bair]</a> | 97.8      | 97.8        | 100%        | 2e-21   | 96%   | <a href="#">gij589967610 XP_006996306.1</a> |
| <a href="#">PREDICTED: biotinidase isoform X2 [Chlorocebus sabaeus]</a>         | 97.8      | 97.8        | 100%        | 3e-21   | 96%   | <a href="#">gij635085523 XP_008007381.1</a> |
| <a href="#">PREDICTED: biotinidase isoform X2 [Macaca fascicularis]</a>         | 97.8      | 97.8        | 100%        | 3e-21   | 96%   | <a href="#">gij544411158 XP_005545768.1</a> |
| <a href="#">PREDICTED: biotinidase isoform X2 [Papio anubis]</a>                | 97.8      | 97.8        | 100%        | 3e-21   | 96%   | <a href="#">gij685527526 XP_009200021.1</a> |

|                                                                                             |      |      |      |       |     |                                             |
|---------------------------------------------------------------------------------------------|------|------|------|-------|-----|---------------------------------------------|
| <a href="#">PREDICTED: biotinidase isoform X1 [Chlorocebus sabaeus]</a>                     | 97.8 | 97.8 | 100% | 3e-21 | 96% | <a href="#">gij635085521 XP_008007380.1</a> |
| <a href="#">PREDICTED: biotinidase [Mustela putorius furo]</a>                              | 97.8 | 97.8 | 100% | 3e-21 | 96% | <a href="#">gij511908359 XP_004773614.1</a> |
| <a href="#">PREDICTED: biotinidase isoform X1 [Cricetulus griseus]</a>                      | 97.8 | 97.8 | 100% | 3e-21 | 96% | <a href="#">gij354465853 XP_003495391.1</a> |
| <a href="#">PREDICTED: biotinidase [Oryzteropus afer afer]</a>                              | 97.8 | 97.8 | 100% | 3e-21 | 96% | <a href="#">gij634822252 XP_007934900.1</a> |
| <a href="#">hypothetical protein EGM_11114 [Macaca fascicularis]</a>                        | 97.8 | 97.8 | 100% | 3e-21 | 96% | <a href="#">gij355747075 EHH51689.1</a>     |
| <a href="#">hypothetical protein EGK_12122 [Macaca mulatta]</a>                             | 97.8 | 97.8 | 100% | 3e-21 | 96% | <a href="#">gij355560049 EHH16777.1</a>     |
| <a href="#">PREDICTED: biotinidase isoform X1 [Microtus ochrogaster]</a>                    | 97.8 | 97.8 | 100% | 3e-21 | 96% | <a href="#">gij532009810 XP_005348713.1</a> |
| <a href="#">PREDICTED: biotinidase [Macaca mulatta]</a>                                     | 97.8 | 97.8 | 100% | 3e-21 | 96% | <a href="#">gij297286947 XP_001083201.2</a> |
| <a href="#">PREDICTED: biotinidase isoform X1 [Papio anubis]</a>                            | 97.8 | 97.8 | 100% | 3e-21 | 96% | <a href="#">gij685527524 XP_009200020.1</a> |
| <a href="#">PREDICTED: biotinidase isoform X1 [Macaca fascicularis]</a>                     | 97.8 | 97.8 | 100% | 3e-21 | 96% | <a href="#">gij544411156 XP_005545767.1</a> |
| <a href="#">biotinidase [Cricetulus griseus]</a>                                            | 97.8 | 97.8 | 100% | 3e-21 | 96% | <a href="#">gij537261432 ERE90059.1</a>     |
| <a href="#">biotinidase isoform CRA_a [Rattus norvegicus]</a>                               | 97.3 | 97.3 | 100% | 3e-21 | 96% | <a href="#">gij149034168 EDL88938.1</a>     |
| <a href="#">biotinidase isoform CRA_c [Rattus norvegicus]</a>                               | 97.3 | 97.3 | 100% | 3e-21 | 96% | <a href="#">gij149034170 EDL88940.1</a>     |
| <a href="#">biotinidase precursor [Rattus norvegicus]</a>                                   | 97.3 | 97.3 | 100% | 3e-21 | 96% | <a href="#">gij58865670 NP_001012047.1</a>  |
| <a href="#">PREDICTED: biotinidase isoform X2 [Rattus norvegicus]</a>                       | 97.3 | 97.3 | 100% | 4e-21 | 96% | <a href="#">gij564387894 XP_006252671.1</a> |
| <a href="#">PREDICTED: biotinidase [Chrysochloris asiatica]</a>                             | 95.6 | 95.6 | 100% | 1e-20 | 93% | <a href="#">gij586456511 XP_006840071.1</a> |
| <a href="#">PREDICTED: biotinidase-like [Ictidomys tridecemlineatus]</a>                    | 95.2 | 95.2 | 100% | 2e-20 | 93% | <a href="#">gij532063189 XP_005317469.1</a> |
| <a href="#">PREDICTED: biotinidase isoform X4 [Canis lupus familiaris]</a>                  | 94.4 | 94.4 | 100% | 4e-20 | 93% | <a href="#">gij545538859 XP_005634450.1</a> |
| <a href="#">PREDICTED: LOW QUALITY PROTEIN: biotinidase [Tursiops truncatus]</a>            | 94.4 | 94.4 | 100% | 4e-20 | 93% | <a href="#">gij470628904 XP_004321284.1</a> |
| <a href="#">PREDICTED: biotinidase [Orcinus orca]</a>                                       | 94.4 | 94.4 | 100% | 4e-20 | 93% | <a href="#">gij466019817 XP_004271983.1</a> |
| <a href="#">PREDICTED: biotinidase isoform X3 [Canis lupus familiaris]</a>                  | 94.4 | 94.4 | 100% | 4e-20 | 93% | <a href="#">gij545538857 XP_005634449.1</a> |
| <a href="#">PREDICTED: biotinidase isoform X2 [Canis lupus familiaris]</a>                  | 94.4 | 94.4 | 100% | 4e-20 | 93% | <a href="#">gij545538855 XP_005634448.1</a> |
| <a href="#">PREDICTED: biotinidase isoform X1 [Canis lupus familiaris]</a>                  | 94.4 | 94.4 | 100% | 4e-20 | 93% | <a href="#">gij545538853 XP_005634447.1</a> |
| <a href="#">PREDICTED: biotinidase isoform X1 [Mus musculus]</a>                            | 93.5 | 93.5 | 100% | 7e-20 | 93% | <a href="#">gij568987712 XP_006519092.1</a> |
| <a href="#">RecName: Full=Biotinidase; Short=Biotinase; Flags: Precursor [Mus musculus]</a> | 93.5 | 93.5 | 100% | 7e-20 | 93% | <a href="#">gij150421524 Q8CIF4.2</a>       |
| <a href="#">PREDICTED: biotinidase [Rhinopithecus roxellana]</a>                            | 93.5 | 93.5 | 100% | 7e-20 | 93% | <a href="#">gij724960396 XP_010354361.1</a> |
| <a href="#">unnamed protein product [Mus musculus]</a>                                      | 93.5 | 93.5 | 100% | 7e-20 | 93% | <a href="#">gij74183082 BAE22509.1</a>      |
| <a href="#">biotinidase precursor [Mus musculus]</a>                                        | 93.5 | 93.5 | 100% | 7e-20 | 93% | <a href="#">gij13384648 NP_079571.1</a>     |
| <a href="#">PREDICTED: biotinidase isoform X2 [Physeter catodon]</a>                        | 93.1 | 93.1 | 100% | 1e-19 | 93% | <a href="#">gij593711507 XP_007102308.1</a> |
| <a href="#">PREDICTED: biotinidase isoform X1 [Physeter catodon]</a>                        | 93.1 | 93.1 | 100% | 1e-19 | 93% | <a href="#">gij593711505 XP_007102307.1</a> |
| <a href="#">PREDICTED: biotinidase [Lipotes vexillifer]</a>                                 | 93.1 | 93.1 | 100% | 1e-19 | 93% | <a href="#">gij602721076 XP_007470691.1</a> |
| <a href="#">PREDICTED: biotinidase isoform X1 [Balaenoptera acutorostrata scabra]</a>       | 93.1 | 93.1 | 100% | 1e-19 | 93% | <a href="#">gij594624940 XP_007167058.1</a> |
| <a href="#">PREDICTED: biotinidase isoform X3 [Balaenoptera acutorostrata scabra]</a>       | 93.1 | 93.1 | 100% | 1e-19 | 93% | <a href="#">gij594624944 XP_007167060.1</a> |
| <a href="#">PREDICTED: biotinidase isoform X3 [Equus caballus]</a>                          | 92.7 | 92.7 | 100% | 1e-19 | 93% | <a href="#">gij545189350 XP_005600979.1</a> |
| <a href="#">PREDICTED: biotinidase [Equus przewalskii]</a>                                  | 92.7 | 92.7 | 100% | 1e-19 | 93% | <a href="#">gij664753751 XP_008534346.1</a> |
| <a href="#">PREDICTED: biotinidase isoform X2 [Equus caballus]</a>                          | 92.7 | 92.7 | 100% | 1e-19 | 93% | <a href="#">gij545189348 XP_005600978.1</a> |
| <a href="#">PREDICTED: biotinidase isoform X1 [Equus caballus]</a>                          | 92.7 | 92.7 | 100% | 1e-19 | 93% | <a href="#">gij545189346 XP_005600977.1</a> |
| <a href="#">PREDICTED: biotinidase [Erinaceus europaeus]</a>                                | 91.8 | 91.8 | 96%  | 3e-19 | 93% | <a href="#">gij617553342 XP_007530134.1</a> |
| <a href="#">PREDICTED: biotinidase [Otolemur garnettii]</a>                                 | 91.0 | 91.0 | 96%  | 5e-19 | 93% | <a href="#">gij395816560 XP_003781769.1</a> |
| <a href="#">PREDICTED: biotinidase [Panthera tigris altaica]</a>                            | 90.6 | 90.6 | 100% | 8e-19 | 89% | <a href="#">gij591322659 XP_007087428.1</a> |
| <a href="#">PREDICTED: biotinidase isoform X1 [Felis catus]</a>                             | 90.6 | 90.6 | 100% | 8e-19 | 89% | <a href="#">gij587000359 XP_003992187.2</a> |
| <a href="#">PREDICTED: biotinidase isoform X2 [Felis catus]</a>                             | 90.6 | 90.6 | 100% | 8e-19 | 89% | <a href="#">gij587000357 XP_006936495.1</a> |
| <a href="#">PREDICTED: biotinidase [Mesocricetus auratus]</a>                               | 90.1 | 90.1 | 100% | 1e-18 | 89% | <a href="#">gij524955500 XP_005077724.1</a> |
| <a href="#">PREDICTED: biotinidase [Nannospalax galili]</a>                                 | 89.3 | 89.3 | 100% | 2e-18 | 89% | <a href="#">gij674081213 XP_008848205.1</a> |
| <a href="#">PREDICTED: biotinidase isoform X2 [Ursus maritimus]</a>                         | 89.3 | 89.3 | 92%  | 2e-18 | 96% | <a href="#">gij670981874 XP_008707139.1</a> |

|                                                                                     |      |      |      |       |     |                                             |
|-------------------------------------------------------------------------------------|------|------|------|-------|-----|---------------------------------------------|
| <a href="#">PREDICTED: biotinidase isoform X1 [Ursus maritimus]</a>                 | 89.3 | 89.3 | 92%  | 2e-18 | 96% | <a href="#">gil670981872 XP_008707130.1</a> |
| <a href="#">PREDICTED: biotinidase [Ceratotherium simum simum]</a>                  | 88.9 | 88.9 | 100% | 3e-18 | 89% | <a href="#">gil478490156 XP_004419451.1</a> |
| <a href="#">PREDICTED: biotinidase isoform 2 [Odobenus rosmarus divergens]</a>      | 88.4 | 88.4 | 96%  | 4e-18 | 89% | <a href="#">gil472379495 XP_004409157.1</a> |
| <a href="#">PREDICTED: biotinidase isoform X3 [Saimiri boliviensis boliviensis]</a> | 88.4 | 88.4 | 100% | 4e-18 | 93% | <a href="#">gil725560828 XP_010333963.1</a> |
| <a href="#">PREDICTED: biotinidase isoform X3 [Leptonychotes weddellii]</a>         | 88.4 | 88.4 | 96%  | 4e-18 | 89% | <a href="#">gil585186600 XP_006744787.1</a> |
| <a href="#">PREDICTED: biotinidase isoform X2 [Leptonychotes weddellii]</a>         | 88.4 | 88.4 | 96%  | 4e-18 | 89% | <a href="#">gil585186598 XP_006744786.1</a> |
| <a href="#">PREDICTED: biotinidase isoform 1 [Odobenus rosmarus divergens]</a>      | 88.4 | 88.4 | 96%  | 4e-18 | 89% | <a href="#">gil472379493 XP_004409156.1</a> |
| <a href="#">PREDICTED: biotinidase isoform X2 [Saimiri boliviensis boliviensis]</a> | 88.4 | 88.4 | 100% | 4e-18 | 93% | <a href="#">gil403265544 XP_003924991.1</a> |
| <a href="#">PREDICTED: biotinidase isoform X1 [Leptonychotes weddellii]</a>         | 88.4 | 88.4 | 96%  | 4e-18 | 89% | <a href="#">gil585186596 XP_006744785.1</a> |
| <a href="#">PREDICTED: biotinidase isoform X1 [Saimiri boliviensis boliviensis]</a> | 88.4 | 88.4 | 100% | 4e-18 | 93% | <a href="#">gil725560825 XP_010333962.1</a> |
| <a href="#">PREDICTED: biotinidase [Echinops telfairi]</a>                          | 88.0 | 88.0 | 96%  | 6e-18 | 89% | <a href="#">gil507651259 XP_004704067.1</a> |
| <a href="#">PREDICTED: biotinidase isoform X1 [Callithrix jacchus]</a>              | 84.6 | 84.6 | 100% | 8e-17 | 89% | <a href="#">gil675740028 XP_008982107.1</a> |
| <a href="#">PREDICTED: biotinidase isoform X2 [Callithrix jacchus]</a>              | 84.6 | 84.6 | 100% | 8e-17 | 89% | <a href="#">gil390476393 XP_002759736.2</a> |
| <a href="#">Biotinidase [Myotis davidii]</a>                                        | 84.2 | 84.2 | 96%  | 1e-16 | 85% | <a href="#">gil432092959 ELK25317.1</a>     |
| <a href="#">PREDICTED: biotinidase isoform X1 [Myotis davidii]</a>                  | 84.2 | 84.2 | 96%  | 1e-16 | 85% | <a href="#">gil584051114 XP_006770244.1</a> |
| <a href="#">PREDICTED: biotinidase isoform X1 [Myotis lucifugus]</a>                | 84.2 | 84.2 | 96%  | 1e-16 | 85% | <a href="#">gil558102610 XP_006083737.1</a> |
| <a href="#">PREDICTED: biotinidase isoform X3 [Myotis brandtii]</a>                 | 84.2 | 84.2 | 96%  | 1e-16 | 85% | <a href="#">gil554537982 XP_005863672.1</a> |
| <a href="#">PREDICTED: biotinidase [Loxodonta africana]</a>                         | 84.2 | 84.2 | 100% | 1e-16 | 82% | <a href="#">gil731510838 XP_010598778.1</a> |
| <a href="#">PREDICTED: biotinidase isoform X2 [Myotis lucifugus]</a>                | 84.2 | 84.2 | 96%  | 1e-16 | 85% | <a href="#">gil558102613 XP_006083738.1</a> |
| <a href="#">PREDICTED: biotinidase isoform X2 [Myotis brandtii]</a>                 | 84.2 | 84.2 | 96%  | 1e-16 | 85% | <a href="#">gil554537986 XP_005863671.1</a> |
| <a href="#">Biotinidase [Myotis brandtii]</a>                                       | 84.2 | 84.2 | 96%  | 1e-16 | 85% | <a href="#">gil521024341 EPQ06129.1</a>     |
| <a href="#">PREDICTED: biotinidase [Trichechus manatus latirostris]</a>             | 82.9 | 82.9 | 100% | 3e-16 | 86% | <a href="#">gil471407481 XP_004385327.1</a> |
| <a href="#">PREDICTED: biotinidase-like [Ailuropoda melanoleuca]</a>                | 82.5 | 82.5 | 92%  | 4e-16 | 88% | <a href="#">gil301759093 XP_002915396.1</a> |
| <a href="#">hypothetical protein PANDA_003369 [Ailuropoda melanoleuca]</a>          | 82.5 | 82.5 | 92%  | 4e-16 | 88% | <a href="#">gil281345880 EFB21464.1</a>     |
| <a href="#">PREDICTED: biotinidase-like [Sus scrofa]</a>                            | 82.1 | 82.1 | 92%  | 6e-16 | 88% | <a href="#">gil350590963 XP_003132114.3</a> |
| <a href="#">PREDICTED: biotinidase-like isoform X2 [Sus scrofa]</a>                 | 82.1 | 82.1 | 92%  | 6e-16 | 88% | <a href="#">gil545860928 XP_005669335.1</a> |
| <a href="#">PREDICTED: biotinidase-like isoform X2 [Sus scrofa]</a>                 | 82.1 | 82.1 | 92%  | 6e-16 | 88% | <a href="#">gil545860909 XP_005669330.1</a> |

## Alignments

[Download](#) [GenPept](#) [Graphics](#)

[Next](#) [Previous](#) [Descriptions](#)

**PREDICTED: biotinidase [Nomascus leucogenys]**

Sequence ID: [gil332232450|ref|XP\\_003265417.1](#) Length: 474 Number of Matches: 1

Range 1: 316 to 343 [GenPept](#) [Graphics](#)

[Next Match](#) [Previous Match](#)

| Score         | Expect | Identities  | Positives   | Gaps     |
|---------------|--------|-------------|-------------|----------|
| 101 bits(231) | 2e-22  | 28/28(100%) | 28/28(100%) | 0/28(0%) |

Query 1 KWNVNAPPTFHSEMMYDNFTLVPVWGKE 28  
 KWNVNAPPTFHSEMMYDNFTLVPVWGKE  
 Sbjct 316 KWNVNAPPTFHSEMMYDNFTLVPVWGKE 343

### Related Information

[Gene](#) - associated gene details  
[Map Viewer](#) - aligned genomic context

[Download](#) [GenPept](#) [Graphics](#)

[Next](#) [Previous](#) [Descriptions](#)

**unnamed protein product [Homo sapiens]**

Sequence ID: [gil221043776|dbj|BAH13565.1](#) Length: 523 Number of Matches: 1

Range 1: 365 to 392 [GenPept](#) [Graphics](#)

[Next Match](#) [Previous Match](#)

| Score         | Expect | Identities  | Positives   | Gaps     |
|---------------|--------|-------------|-------------|----------|
| 101 bits(231) | 2e-22  | 28/28(100%) | 28/28(100%) | 0/28(0%) |

Query 1 KWNVNAPPTFHSEMMYDNFTLVPVWGKE 28

### Related Information

[Gene](#) - associated gene details

Sbjct 365 KWNVNAPPTFHSEMMYDNFTLVPVWGKE 392

[Download](#) [GenPept](#) [Graphics](#) [Next](#) [Previous](#) [Descriptions](#)

biotinidase isoform 4 precursor [Homo sapiens]

Sequence ID: [gi|528524486|ref|NP\\_001268654.1|](#) Length: 523 Number of Matches: 1

[See 3 more title\(s\)](#)

Range 1: 365 to 392 [GenPept](#) [Graphics](#) [Next Match](#) [Previous Match](#)

| Score         | Expect | Identities  | Positives   | Gaps     |
|---------------|--------|-------------|-------------|----------|
| 101 bits(231) | 2e-22  | 28/28(100%) | 28/28(100%) | 0/28(0%) |

Query 1 KWNVNAPPTFHSEMMYDNFTLVPVWGKE 28  
 KWNVNAPPTFHSEMMYDNFTLVPVWGKE  
 Sbjct 365 KWNVNAPPTFHSEMMYDNFTLVPVWGKE 392

**Related Information**

[Gene](#) - associated gene details  
[Map Viewer](#) - aligned genomic context  
[Identical Proteins](#) - Proteins identical to the subject

[Download](#) [GenPept](#) [Graphics](#) [Next](#) [Previous](#) [Descriptions](#)

biotinidase precursor [Pan troglodytes]

Sequence ID: [gi|697993457|ref|NP\\_001289363.1|](#) Length: 523 Number of Matches: 1

[See 1 more title\(s\)](#)

Range 1: 365 to 392 [GenPept](#) [Graphics](#) [Next Match](#) [Previous Match](#)

| Score         | Expect | Identities  | Positives   | Gaps     |
|---------------|--------|-------------|-------------|----------|
| 101 bits(231) | 2e-22  | 28/28(100%) | 28/28(100%) | 0/28(0%) |

Query 1 KWNVNAPPTFHSEMMYDNFTLVPVWGKE 28  
 KWNVNAPPTFHSEMMYDNFTLVPVWGKE  
 Sbjct 365 KWNVNAPPTFHSEMMYDNFTLVPVWGKE 392

**Related Information**

[Gene](#) - associated gene details  
[Map Viewer](#) - aligned genomic context  
[Identical Proteins](#) - Proteins identical to the subject

[Download](#) [GenPept](#) [Graphics](#) [Next](#) [Previous](#) [Descriptions](#)

PREDICTED: biotinidase isoform 1 [Gorilla gorilla gorilla]

Sequence ID: [gi|426339607|ref|XP\\_004033737.1|](#) Length: 527 Number of Matches: 1

Range 1: 369 to 396 [GenPept](#) [Graphics](#) [Next Match](#) [Previous Match](#)

| Score         | Expect | Identities  | Positives   | Gaps     |
|---------------|--------|-------------|-------------|----------|
| 101 bits(231) | 2e-22  | 28/28(100%) | 28/28(100%) | 0/28(0%) |

Query 1 KWNVNAPPTFHSEMMYDNFTLVPVWGKE 28  
 KWNVNAPPTFHSEMMYDNFTLVPVWGKE  
 Sbjct 369 KWNVNAPPTFHSEMMYDNFTLVPVWGKE 396

**Related Information**

[Gene](#) - associated gene details  
[Map Viewer](#) - aligned genomic context

BLAST is a registered trademark of the National Library of Medicine.





▶ [NCBI/BLAST/blastp suite/Formatting Results - BTF5TH39013](#)

[Edit and Resubmit](#) [Save Search Strategies](#) ▶ [Formatting options](#) ▶ [Download](#)

[YouTube](#) [How to read this page](#) [Blast report description](#)

### C1RL\_KDRQDGEEVLQCMPCVGRPVTPIAQDQTTLGSSRA\_Mod

**RID** [BTF5TH39013](#) (Expires on 01-20 15:13 pm)

**Query ID** |cl|4241  
**Description** None  
**Molecule type** amino acid  
**Query Length** 35

**Database Name** nr  
**Description** All non-redundant GenBank CDS translations+PDB+SwissProt+PIR+PRF excluding environmental samples from WGS projects  
**Program** BLASTP 2.2.30+ ▶ [Citation](#)

Other reports: ▶ [Search Summary](#) [\[Taxonomy reports\]](#) [\[Distance tree of results\]](#) [\[Multiple alignment\]](#)

### Graphic Summary

[Show Conserved Domains](#)

No putative conserved domains have been detected

Distribution of 104 Blast Hits on the Query Sequence

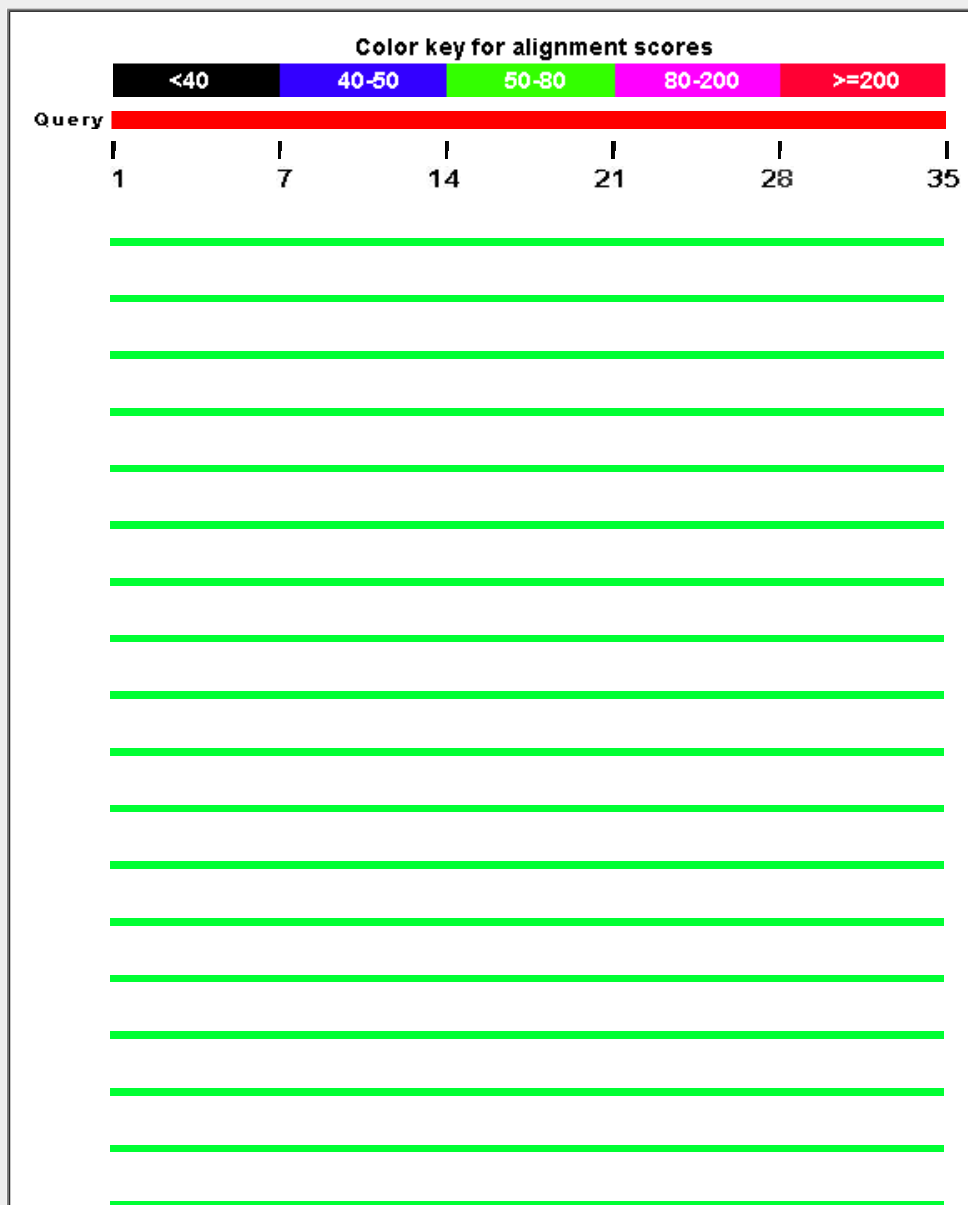

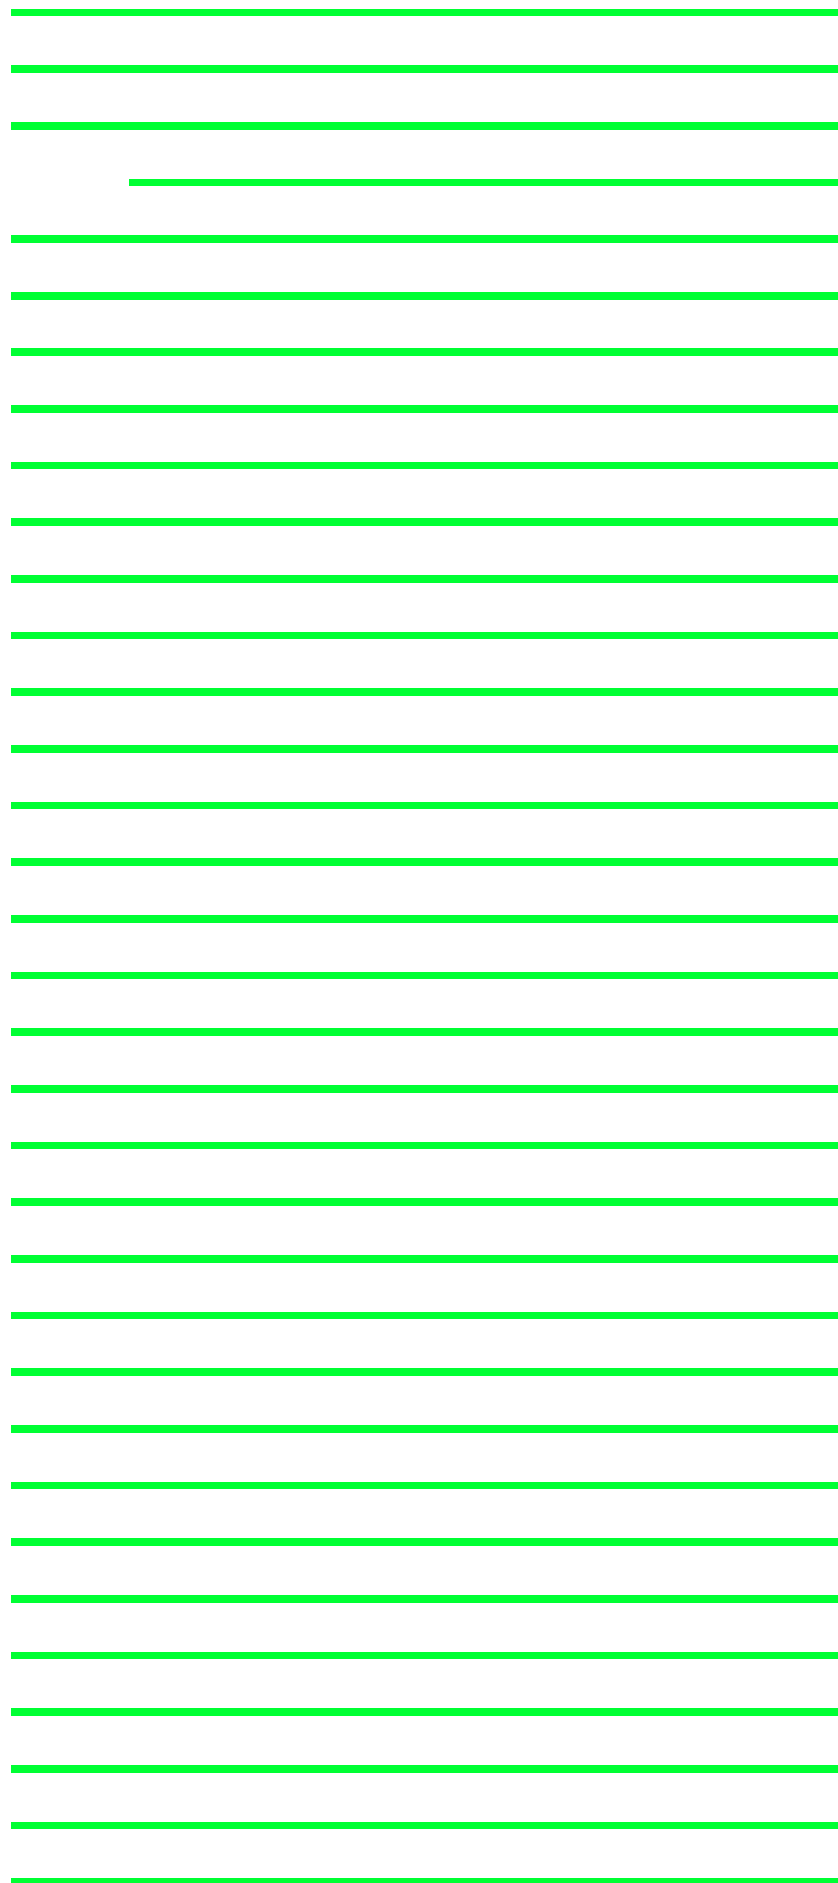

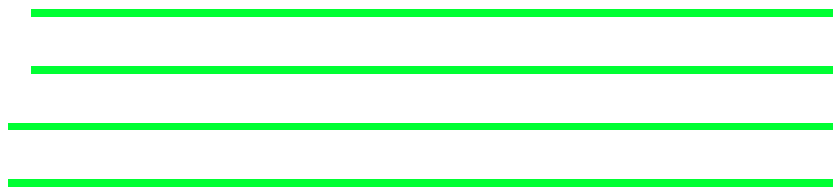

**Descriptions**

**Sequences producing significant alignments:**

Select: [All](#) [None](#) Selected:0

[Alignments](#)
[Download](#)
[GenPept](#)
[Graphics](#)
[Distance tree of results](#)
[Multiple alignment](#)

| Description                                                                                                  | Max score | Total score | Query cover | E value | Ident | Accession                                   |
|--------------------------------------------------------------------------------------------------------------|-----------|-------------|-------------|---------|-------|---------------------------------------------|
| <a href="#">complement C1r subcomponent-like protein isoform 2 precursor</a>                                 | 73.9      | 73.9        | 100%        | 3e-14   | 97%   | <a href="#">gi 663071006 NP_001284569.1</a> |
| <a href="#">PREDICTED: complement C1r subcomponent-like protein isoform 2 precursor</a>                      | 73.9      | 73.9        | 100%        | 3e-14   | 97%   | <a href="#">gi 441670266 XP_004092185.1</a> |
| <a href="#">PREDICTED: complement C1r subcomponent-like protein isoform 2 precursor</a>                      | 73.9      | 73.9        | 100%        | 4e-14   | 97%   | <a href="#">gi 332249352 XP_003273827.1</a> |
| <a href="#">complement C1r subcomponent-like protein isoform 1 precursor</a>                                 | 73.9      | 73.9        | 100%        | 4e-14   | 97%   | <a href="#">gi 289547636 NP_057630.2</a>    |
| <a href="#">PREDICTED: complement C1r subcomponent-like protein isoform 1 precursor</a>                      | 73.9      | 73.9        | 100%        | 4e-14   | 97%   | <a href="#">gi 114643162 XP_001163902.1</a> |
| <a href="#">complement component 1, r subcomponent-like precursor variant</a>                                | 73.9      | 73.9        | 100%        | 4e-14   | 97%   | <a href="#">gi 62897163 BAD96522.1</a>      |
| <a href="#">complement C1r-like proteinase precursor [Homo sapiens]</a>                                      | 73.9      | 73.9        | 100%        | 4e-14   | 97%   | <a href="#">gi 7271475 AAF44349.1</a>       |
| <a href="#">PREDICTED: complement C1r subcomponent-like protein isoform 1 precursor</a>                      | 73.9      | 73.9        | 100%        | 4e-14   | 97%   | <a href="#">gi 441670263 XP_004092184.1</a> |
| <a href="#">PREDICTED: complement C1r subcomponent-like protein isoform 1 precursor</a>                      | 73.9      | 73.9        | 100%        | 4e-14   | 97%   | <a href="#">gi 675757427 XP_008971903.1</a> |
| <a href="#">PREDICTED: complement C1r subcomponent-like protein [Gorilla gorilla]</a>                        | 71.6      | 71.6        | 100%        | 3e-13   | 94%   | <a href="#">gi 426371473 XP_004052671.1</a> |
| <a href="#">unnamed protein product [Homo sapiens]</a>                                                       | 70.9      | 70.9        | 100%        | 4e-13   | 94%   | <a href="#">gi 10436374 BAB14819.1</a>      |
| <a href="#">PREDICTED: complement C1r subcomponent-like protein [Macaca fascicularis]</a>                    | 70.9      | 70.9        | 100%        | 5e-13   | 94%   | <a href="#">gi 544469176 XP_005570609.1</a> |
| <a href="#">PREDICTED: complement C1r subcomponent-like protein isoform 1 precursor</a>                      | 70.9      | 70.9        | 100%        | 5e-13   | 94%   | <a href="#">gi 402884997 XP_003905955.1</a> |
| <a href="#">Complement C1r subcomponent-like protein [Macaca fascicularis]</a>                               | 70.9      | 70.9        | 100%        | 5e-13   | 94%   | <a href="#">gi 355785846 EHH66029.1</a>     |
| <a href="#">PREDICTED: complement C1r subcomponent-like protein isoform 1 precursor</a>                      | 70.9      | 70.9        | 100%        | 5e-13   | 94%   | <a href="#">gi 685570876 XP_009178379.1</a> |
| <a href="#">Complement C1r subcomponent-like protein [Macaca mulatta]</a>                                    | 69.3      | 69.3        | 100%        | 2e-12   | 91%   | <a href="#">gi 355563948 EHH20448.1</a>     |
| <a href="#">PREDICTED: complement C1r subcomponent-like protein [Chlorocebus aureus]</a>                     | 68.6      | 68.6        | 100%        | 3e-12   | 91%   | <a href="#">gi 635063155 XP_007965642.1</a> |
| <a href="#">PREDICTED: complement C1r subcomponent-like protein [Callithrix jacchus]</a>                     | 63.9      | 63.9        | 100%        | 1e-10   | 83%   | <a href="#">gi 675677706 XP_009001758.1</a> |
| <a href="#">PREDICTED: complement C1r subcomponent-like protein [Gallopus bairdii]</a>                       | 62.8      | 62.8        | 100%        | 4e-10   | 80%   | <a href="#">gi 667290276 XP_008577472.1</a> |
| <a href="#">PREDICTED: complement C1r subcomponent-like protein [Otomops schreibersii]</a>                   | 61.6      | 61.6        | 100%        | 1e-09   | 77%   | <a href="#">gi 395847725 XP_003796517.1</a> |
| <a href="#">PREDICTED: complement C1r subcomponent-like protein [Ochrotopon carolinense]</a>                 | 59.3      | 59.3        | 100%        | 6e-09   | 77%   | <a href="#">gi 504173912 XP_004596521.1</a> |
| <a href="#">PREDICTED: LOW QUALITY PROTEIN: complement C1r subcomponent-like protein isoform 1 precursor</a> | 58.5      | 58.5        | 85%         | 7e-09   | 90%   | <a href="#">gi 686739538 XP_009245669.1</a> |
| <a href="#">PREDICTED: complement C1r subcomponent-like protein isoform 1 precursor</a>                      | 57.4      | 57.4        | 100%        | 2e-08   | 74%   | <a href="#">gi 671039595 XP_008681740.1</a> |
| <a href="#">PREDICTED: complement C1r subcomponent-like protein isoform 1 precursor</a>                      | 57.4      | 57.4        | 100%        | 3e-08   | 74%   | <a href="#">gi 671039593 XP_008681739.1</a> |
| <a href="#">PREDICTED: LOW QUALITY PROTEIN: complement C1r subcomponent-like protein isoform 1 precursor</a> | 57.0      | 57.0        | 100%        | 4e-08   | 71%   | <a href="#">gi 532105686 XP_005338428.1</a> |
| <a href="#">C1r-like protein [Mus musculus]</a>                                                              | 56.2      | 56.2        | 100%        | 4e-08   | 69%   | <a href="#">gi 30842778 AAP41416.1</a>      |
| <a href="#">complement C1r subcomponent-like protein precursor [Rattus norvegicus]</a>                       | 56.6      | 56.6        | 100%        | 5e-08   | 71%   | <a href="#">gi 50657416 NP_001002804.1</a>  |
| <a href="#">PREDICTED: LOW QUALITY PROTEIN: complement C1r subcomponent-like protein precursor</a>           | 56.6      | 56.6        | 100%        | 5e-08   | 71%   | <a href="#">gi 674104757 XP_008823575.1</a> |
| <a href="#">complement component 1, r subcomponent-like [Rattus norvegicus]</a>                              | 56.6      | 56.6        | 100%        | 5e-08   | 71%   | <a href="#">gi 149049502 EDM01956.1</a>     |
| <a href="#">C1r-like protein [Mus musculus]</a>                                                              | 56.2      | 56.2        | 100%        | 7e-08   | 69%   | <a href="#">gi 30842780 AAP41417.1</a>      |

|                                                                              |      |      |      |       |     |                                             |
|------------------------------------------------------------------------------|------|------|------|-------|-----|---------------------------------------------|
| <a href="#">complement component 1, r subcomponent-like [Mus musculus</a>    | 56.2 | 56.2 | 100% | 7e-08 | 69% | <a href="#">gi 148667322 EDK99738.1</a>     |
| <a href="#">unnamed protein product [Mus musculus]</a>                       | 56.2 | 56.2 | 100% | 7e-08 | 69% | <a href="#">gi 74225714 BAE21686.1</a>      |
| <a href="#">complement C1r subcomponent-like protein precursor [Mus mu</a>   | 56.2 | 56.2 | 100% | 7e-08 | 69% | <a href="#">gi 269973899 NP_851989.3</a>    |
| <a href="#">PREDICTED: complement C1r subcomponent-like protein [Lep</a>     | 55.5 | 55.5 | 100% | 1e-07 | 71% | <a href="#">gi 585171947 XP_006737937.1</a> |
| <a href="#">PREDICTED: complement C1r subcomponent-like protein [Odc</a>     | 55.5 | 55.5 | 100% | 1e-07 | 71% | <a href="#">gi 472376494 XP_004407682.1</a> |
| <a href="#">PREDICTED: LOW QUALITY PROTEIN: complement C1r subc</a>          | 55.5 | 55.5 | 100% | 1e-07 | 69% | <a href="#">gi 560977345 XP_006210952.1</a> |
| <a href="#">Complement C1r subcomponent-like protein [Tupaia chinensis]</a>  | 55.1 | 55.1 | 100% | 2e-07 | 71% | <a href="#">gi 444510890 ELV09737.1</a>     |
| <a href="#">PREDICTED: complement C1r subcomponent-like protein isofc</a>    | 55.1 | 55.1 | 100% | 2e-07 | 71% | <a href="#">gi 291392803 XP_002712893.1</a> |
| <a href="#">PREDICTED: complement C1r subcomponent-like protein isofc</a>    | 55.1 | 55.1 | 100% | 2e-07 | 71% | <a href="#">gi 655831423 XP_008257993.1</a> |
| <a href="#">PREDICTED: complement C1r subcomponent-like protein isofc</a>    | 54.7 | 54.7 | 100% | 2e-07 | 66% | <a href="#">gi 743695633 XP_010961963.1</a> |
| <a href="#">PREDICTED: LOW QUALITY PROTEIN: complement C1r subc</a>          | 55.1 | 55.1 | 100% | 2e-07 | 71% | <a href="#">gi 562886979 XP_006170901.1</a> |
| <a href="#">PREDICTED: complement C1r subcomponent-like protein isofc</a>    | 54.7 | 54.7 | 100% | 3e-07 | 66% | <a href="#">gi 743695635 XP_010962042.1</a> |
| <a href="#">PREDICTED: LOW QUALITY PROTEIN: complement C1r subc</a>          | 54.7 | 54.7 | 100% | 3e-07 | 66% | <a href="#">gi 560893125 XP_006173072.1</a> |
| <a href="#">PREDICTED: complement C1r subcomponent-like protein isofc</a>    | 54.7 | 54.7 | 100% | 3e-07 | 66% | <a href="#">gi 743695631 XP_010961901.1</a> |
| <a href="#">PREDICTED: LOW QUALITY PROTEIN: complement C1r subc</a>          | 54.7 | 54.7 | 100% | 3e-07 | 71% | <a href="#">gi 507697361 XP_004643633.1</a> |
| <a href="#">complement C1r subcomponent-like protein [Camelus ferus]</a>     | 54.7 | 54.7 | 100% | 3e-07 | 66% | <a href="#">gi 528770117 EPY89776.1</a>     |
| <a href="#">PREDICTED: complement C1r subcomponent-like protein [Elef</a>    | 53.9 | 53.9 | 100% | 5e-07 | 69% | <a href="#">gi 585679250 XP_006891411.1</a> |
| <a href="#">Complement C1r subcomponent-like protein [Cricetulus griseus</a> | 53.5 | 53.5 | 100% | 5e-07 | 71% | <a href="#">gi 344242458 EGV98561.1</a>     |
| <a href="#">PREDICTED: complement C1r subcomponent-like protein isofc</a>    | 53.5 | 53.5 | 100% | 6e-07 | 71% | <a href="#">gi 354467327 XP_003496121.1</a> |
| <a href="#">PREDICTED: complement C1r subcomponent-like protein [Cer</a>     | 53.5 | 53.5 | 100% | 7e-07 | 69% | <a href="#">gi 478529432 XP_004438886.1</a> |
| <a href="#">PREDICTED: complement C1r subcomponent-like protein [Tric</a>    | 53.5 | 53.5 | 100% | 8e-07 | 69% | <a href="#">gi 471411548 XP_004387327.1</a> |
| <a href="#">complement C1r-A subcomponent [Cricetulus griseus]</a>           | 53.5 | 96.3 | 100% | 1e-06 | 71% | <a href="#">gi 537136510 ERE66562.1</a>     |
| <a href="#">PREDICTED: complement C1r subcomponent-like protein isofc</a>    | 52.8 | 52.8 | 97%  | 1e-06 | 71% | <a href="#">gi 533127501 XP_005378915.1</a> |
| <a href="#">PREDICTED: complement C1r subcomponent-like protein isofc</a>    | 52.8 | 52.8 | 97%  | 1e-06 | 71% | <a href="#">gi 533127499 XP_005378914.1</a> |
| <a href="#">PREDICTED: complement component 1, r subcomponent-like [</a>     | 52.4 | 52.4 | 100% | 2e-06 | 66% | <a href="#">gi 586991762 XP_006933531.1</a> |
| <a href="#">PREDICTED: complement C1r-A subcomponent-like [Microtus</a>      | 52.8 | 96.7 | 100% | 2e-06 | 71% | <a href="#">gi 532045173 XP_005365394.1</a> |
| <a href="#">PREDICTED: complement C1r subcomponent-like protein [Car</a>     | 52.0 | 52.0 | 100% | 2e-06 | 63% | <a href="#">gi 744596751 XP_010989121.1</a> |
| <a href="#">hypothetical protein PANDA_011233 [Ailuropoda melanoleuca]</a>   | 52.0 | 52.0 | 100% | 2e-06 | 69% | <a href="#">gi 281338369 EFB13953.1</a>     |
| <a href="#">PREDICTED: LOW QUALITY PROTEIN: complement C1r subc</a>          | 52.0 | 52.0 | 100% | 2e-06 | 69% | <a href="#">gi 524923662 XP_005066080.1</a> |
| <a href="#">PREDICTED: complement C1r subcomponent-like protein [Per</a>     | 51.6 | 51.6 | 100% | 3e-06 | 69% | <a href="#">gi 589959162 XP_006992168.1</a> |
| <a href="#">PREDICTED: complement C1r subcomponent-like protein-like [</a>   | 52.0 | 52.0 | 100% | 3e-06 | 69% | <a href="#">gi 301773698 XP_002922303.1</a> |
| <a href="#">PREDICTED: LOW QUALITY PROTEIN: complement C1r subc</a>          | 51.6 | 51.6 | 100% | 3e-06 | 66% | <a href="#">gi 511894085 XP_004766682.1</a> |
| <a href="#">PREDICTED: complement C1r subcomponent-like protein [Cav</a>     | 51.6 | 51.6 | 100% | 3e-06 | 66% | <a href="#">gi 348554938 XP_003463281.1</a> |
| <a href="#">PREDICTED: complement C1r subcomponent-like protein [Ory</a>     | 51.2 | 51.2 | 100% | 4e-06 | 63% | <a href="#">gi 634837986 XP_007935394.1</a> |
| <a href="#">Complement C1r subcomponent-like protein [Pteropus alecto]</a>   | 51.2 | 51.2 | 100% | 4e-06 | 69% | <a href="#">gi 431905373 ELK10418.1</a>     |
| <a href="#">PREDICTED: complement C1r subcomponent-like protein [Pter</a>    | 51.2 | 51.2 | 100% | 5e-06 | 69% | <a href="#">gi 586563055 XP_006914777.1</a> |
| <a href="#">PREDICTED: complement C1r subcomponent-like protein [Equ</a>     | 50.8 | 50.8 | 100% | 6e-06 | 63% | <a href="#">gi 545219170 XP_005610954.1</a> |
| <a href="#">PREDICTED: complement component 1, r subcomponent-like i</a>     | 49.7 | 49.7 | 100% | 1e-05 | 63% | <a href="#">gi 545546513 XP_005637265.1</a> |
| <a href="#">PREDICTED: complement component 1, r subcomponent-like i</a>     | 49.7 | 49.7 | 100% | 1e-05 | 63% | <a href="#">gi 545546511 XP_005637264.1</a> |
| <a href="#">PREDICTED: complement component 1, r subcomponent-like i</a>     | 49.7 | 49.7 | 100% | 1e-05 | 63% | <a href="#">gi 545546509 XP_005637263.1</a> |
| <a href="#">PREDICTED: LOW QUALITY PROTEIN: complement C1r subc</a>          | 49.7 | 49.7 | 100% | 1e-05 | 63% | <a href="#">gi 591327382 XP_007089640.1</a> |
| <a href="#">PREDICTED: complement component 1, r subcomponent-like i</a>     | 49.7 | 49.7 | 100% | 1e-05 | 63% | <a href="#">gi 545546507 XP_005637262.1</a> |
| <a href="#">PREDICTED: complement C1r subcomponent-like protein [Erin</a>    | 49.7 | 49.7 | 100% | 1e-05 | 63% | <a href="#">gi 617656833 XP_007535922.1</a> |
| <a href="#">PREDICTED: complement component 1, r subcomponent-like i</a>     | 49.7 | 49.7 | 100% | 1e-05 | 63% | <a href="#">gi 345792069 XP_543840.3</a>    |
| <a href="#">PREDICTED: complement C1r subcomponent-like protein isofc</a>    | 48.9 | 48.9 | 100% | 2e-05 | 66% | <a href="#">gi 488554131 XP_004468199.1</a> |

|                                                                            |      |      |      |       |     |                                             |
|----------------------------------------------------------------------------|------|------|------|-------|-----|---------------------------------------------|
| <a href="#">PREDICTED: complement C1r subcomponent-like protein isofo</a>  | 48.9 | 48.9 | 100% | 3e-05 | 66% | <a href="#">gi 488554125 XP_004468197.1</a> |
| <a href="#">PREDICTED: complement C1r subcomponent-like protein [Fuk</a>   | 48.5 | 48.5 | 100% | 3e-05 | 60% | <a href="#">gi 731282854 XP_010610027.1</a> |
| <a href="#">PREDICTED: complement C1r subcomponent-like protein [Cag</a>   | 48.5 | 48.5 | 100% | 3e-05 | 60% | <a href="#">gi 548468413 XP_005681065.1</a> |
| <a href="#">PREDICTED: complement C1r subcomponent-like protein [Tur</a>   | 48.5 | 48.5 | 100% | 4e-05 | 60% | <a href="#">gi 470606249 XP_004314129.1</a> |
| <a href="#">PREDICTED: LOW QUALITY PROTEIN: complement C1r subc</a>        | 48.5 | 48.5 | 100% | 4e-05 | 60% | <a href="#">gi 556724329 XP_005957969.1</a> |
| <a href="#">Complement C1r subcomponent [Fukomys damarensis]</a>           | 48.5 | 89.3 | 100% | 5e-05 | 60% | <a href="#">gi 676263566 KFO20277.1</a>     |
| <a href="#">PREDICTED: complement C1r subcomponent-like protein [Lip</a>   | 48.1 | 48.1 | 100% | 5e-05 | 60% | <a href="#">gi 602718526 XP_007469443.1</a> |
| <a href="#">PREDICTED: complement C1r subcomponent-like protein [Orc</a>   | 48.1 | 48.1 | 100% | 5e-05 | 60% | <a href="#">gi 466055133 XP_004279184.1</a> |
| <a href="#">PREDICTED: complement C1r subcomponent-like protein [Het</a>   | 47.8 | 47.8 | 100% | 7e-05 | 58% | <a href="#">gi 512941192 XP_004909584.1</a> |
| <a href="#">PREDICTED: complement C1r subcomponent-like protein [Myc</a>   | 47.8 | 47.8 | 100% | 7e-05 | 60% | <a href="#">gi 584074754 XP_006757609.1</a> |
| <a href="#">PREDICTED: complement C1r subcomponent-like protein [Myc</a>   | 47.8 | 47.8 | 100% | 7e-05 | 60% | <a href="#">gi 558104592 XP_006084250.1</a> |
| <a href="#">Complement C1r subcomponent-like protein [Bos mutus]</a>       | 47.4 | 47.4 | 100% | 9e-05 | 60% | <a href="#">gi 440891813 ELR45306.1</a>     |
| <a href="#">PREDICTED: complement C1r subcomponent-like protein [Myc</a>   | 47.4 | 47.4 | 100% | 9e-05 | 60% | <a href="#">gi 554558619 XP_005873711.1</a> |
| <a href="#">PREDICTED: complement C1r subcomponent [Heterocephalus</a>     | 47.8 | 92.0 | 100% | 9e-05 | 58% | <a href="#">gi 513016514 XP_004869588.1</a> |
| <a href="#">PREDICTED: LOW QUALITY PROTEIN: complement C1r subc</a>        | 47.4 | 47.4 | 100% | 9e-05 | 60% | <a href="#">gi 555998080 XP_005910755.1</a> |
| <a href="#">PREDICTED: complement C1r subcomponent-like protein [Bal</a>   | 47.4 | 47.4 | 100% | 1e-04 | 60% | <a href="#">gi 594633415 XP_007170182.1</a> |
| <a href="#">PREDICTED: complement C1r subcomponent-like protein [Lox</a>   | 47.4 | 47.4 | 100% | 1e-04 | 60% | <a href="#">gi 731515679 XP_010600946.1</a> |
| <a href="#">PREDICTED: complement C1r subcomponent-like protein [Chr</a>   | 47.0 | 47.0 | 100% | 1e-04 | 63% | <a href="#">gi 586464372 XP_006862815.1</a> |
| <a href="#">PREDICTED: complement component 1, r subcomponent-like [</a>   | 46.6 | 46.6 | 100% | 2e-04 | 60% | <a href="#">gi 545890542 XP_005658603.1</a> |
| <a href="#">PREDICTED: complement C1r subcomponent-like [Nomascus</a>      | 43.1 | 43.1 | 100% | 3e-04 | 46% | <a href="#">gi 332267693 XP_003282816.1</a> |
| <a href="#">PREDICTED: complement C1r subcomponent-like protein [Sair</a>  | 45.4 | 45.4 | 65%  | 3e-04 | 87% | <a href="#">gi 725609801 XP_010331194.1</a> |
| <a href="#">PREDICTED: complement C1r subcomponent-like protein isofo</a>  | 45.8 | 45.8 | 100% | 3e-04 | 57% | <a href="#">gi 741927976 XP_010803881.1</a> |
| <a href="#">TPA: complement component 1, r subcomponent-like [Bos taur</a> | 45.8 | 45.8 | 100% | 3e-04 | 57% | <a href="#">gi 296487145 DAA29258.1</a>     |
| <a href="#">PREDICTED: complement C1r subcomponent-like protein isofo</a>  | 45.8 | 45.8 | 100% | 3e-04 | 57% | <a href="#">gi 741927974 XP_010803880.1</a> |
| <a href="#">complement C1r subcomponent-like protein [Bos taurus]</a>      | 45.8 | 45.8 | 100% | 3e-04 | 57% | <a href="#">gi 300798717 NP_001179084.1</a> |

## Alignments

Download GenPept Graphics

Next Previous Descriptions

complement C1r subcomponent-like protein isoform 2 precursor [Homo sapiens]

Sequence ID: [gi|663071006|ref|NP\\_001284569.1](#) Length: 445 Number of Matches: 1

Range 1: 175 to 209 [GenPept](#) [Graphics](#)

Next Match Previous Match

| Score          | Expect | Identities | Positives   | Gaps     |
|----------------|--------|------------|-------------|----------|
| 73.9 bits(180) | 3e-14  | 34/35(97%) | 35/35(100%) | 0/35(0%) |

Query 1 KDRQDGEVLCMPVCGRPVTPIAQDQTTLGSSRA 35  
 KDRQDGEVLCMPVCGRPVTPIAQ+QTTLGSSRA  
 Sbjct 175 KDRQDGEVLCMPVCGRPVTPIAQNQTTLGSSRA 209

### Related Information

[Gene](#) - associated gene details

Download GenPept Graphics

Next Previous Descriptions

PREDICTED: complement C1r subcomponent-like protein isoform 3 [Nomascus leucogenys]

Sequence ID: [gi|441670266|ref|XP\\_004092185.1](#) Length: 445 Number of Matches: 1

Range 1: 175 to 209 [GenPept](#) [Graphics](#)

Next Match Previous Match

| Score          | Expect | Identities | Positives   | Gaps     |
|----------------|--------|------------|-------------|----------|
| 73.9 bits(180) | 3e-14  | 34/35(97%) | 35/35(100%) | 0/35(0%) |

Query 1 KDRQDGEVLCMPVCGRPVTPIAQDQTTLGSSRA 35  
 KDRQDGEVLCMPVCGRPVTPIAQ+QTTLGSSRA  
 Sbjct 175 KDRQDGEVLCMPVCGRPVTPIAQNQTTLGSSRA 209

### Related Information

[Gene](#) - associated gene details

[Map Viewer](#) - aligned genomic context

[Download](#) [GenPept](#) [Graphics](#)

[Next](#) [Previous](#) [Descriptions](#)

PREDICTED: complement C1r subcomponent-like protein isoform 1 [Nomascus leucogenys]

Sequence ID: [gi|332249352|ref|XP\\_003273827.1|](#) Length: 487 Number of Matches: 1

Range 1: 217 to 251 [GenPept](#) [Graphics](#)

[Next Match](#) [Previous Match](#)

| Score          | Expect | Identities | Positives   | Gaps     |
|----------------|--------|------------|-------------|----------|
| 73.9 bits(180) | 4e-14  | 34/35(97%) | 35/35(100%) | 0/35(0%) |

Query 1 KDRQDGEVLQCMFVCGRPVTPIAQDQTTLGSSRA 35  
 KDRQDGEVLQCMFVCGRPVTPIAQ+QTTLGSSRA  
 Sbjct 217 KDRQDGEVLQCMFVCGRPVTPIAQNTTLGSSRA 251

**Related Information**

[Gene](#) - associated gene details  
[Map Viewer](#) - aligned genomic context

[Download](#) [GenPept](#) [Graphics](#)

[Next](#) [Previous](#) [Descriptions](#)

complement C1r subcomponent-like protein isoform 1 precursor [Homo sapiens]

Sequence ID: [gi|289547636|ref|NP\\_057630.2|](#) Length: 487 Number of Matches: 1

[See 2 more title\(s\)](#)

Range 1: 217 to 251 [GenPept](#) [Graphics](#)

[Next Match](#) [Previous Match](#)

| Score          | Expect | Identities | Positives   | Gaps     |
|----------------|--------|------------|-------------|----------|
| 73.9 bits(180) | 4e-14  | 34/35(97%) | 35/35(100%) | 0/35(0%) |

Query 1 KDRQDGEVLQCMFVCGRPVTPIAQDQTTLGSSRA 35  
 KDRQDGEVLQCMFVCGRPVTPIAQ+QTTLGSSRA  
 Sbjct 217 KDRQDGEVLQCMFVCGRPVTPIAQNTTLGSSRA 251

**Related Information**

[Gene](#) - associated gene details  
[UniGene](#) - clustered expressed sequence tags  
[Map Viewer](#) - aligned genomic context  
[Identical Proteins](#) - Proteins identical to the subject

[Download](#) [GenPept](#) [Graphics](#)

[Next](#) [Previous](#) [Descriptions](#)

PREDICTED: complement C1r subcomponent-like protein isoform X1 [Pan troglodytes]

Sequence ID: [gi|114643162|ref|XP\\_001163902.1|](#) Length: 487 Number of Matches: 1

[See 1 more title\(s\)](#)

Range 1: 217 to 251 [GenPept](#) [Graphics](#)

[Next Match](#) [Previous Match](#)

| Score          | Expect | Identities | Positives   | Gaps     |
|----------------|--------|------------|-------------|----------|
| 73.9 bits(180) | 4e-14  | 34/35(97%) | 35/35(100%) | 0/35(0%) |

Query 1 KDRQDGEVLQCMFVCGRPVTPIAQDQTTLGSSRA 35  
 KDRQDGEVLQCMFVCGRPVTPIAQ+QTTLGSSRA  
 Sbjct 217 KDRQDGEVLQCMFVCGRPVTPIAQNTTLGSSRA 251

**Related Information**

[Gene](#) - associated gene details  
[UniGene](#) - clustered expressed sequence tags  
[Map Viewer](#) - aligned genomic context  
[Identical Proteins](#) - Proteins identical to the subject

BLAST is a registered trademark of the National Library of Medicine.



NCBI/ BLAST/ blastp suite/ Formatting Results - B92A40H101R

[Edit and Resubmit](#) [Save Search Strategies](#) [Formatting options](#) [Download](#)

[YouTube](#) [How to read this page](#) [Blast report description](#)

### C1RL\_KDRQDGEVLQCMPVCGRPVTPIAQNTTLGSSRA\_NonMod

RID [B92A40H101R](#) (Expires on 01-14 09:56 am)

**Query ID** |cl|220454  
**Description** None  
**Molecule type** amino acid  
**Query Length** 35

**Database Name** nr  
**Description** All non-redundant GenBank CDS translations+PDB+SwissProt+PIR excluding environmental samples from WGS projects  
**Program** BLASTP 2.2.30+ [Citation](#)

Other reports: [Search Summary](#) [[Taxonomy reports](#)] [[Distance tree of results](#)] [[Multiple alignment](#)]

### Graphic Summary

[Show Conserved Domains](#)

No putative conserved domains have been detected

Distribution of 104 Blast Hits on the Query Sequence

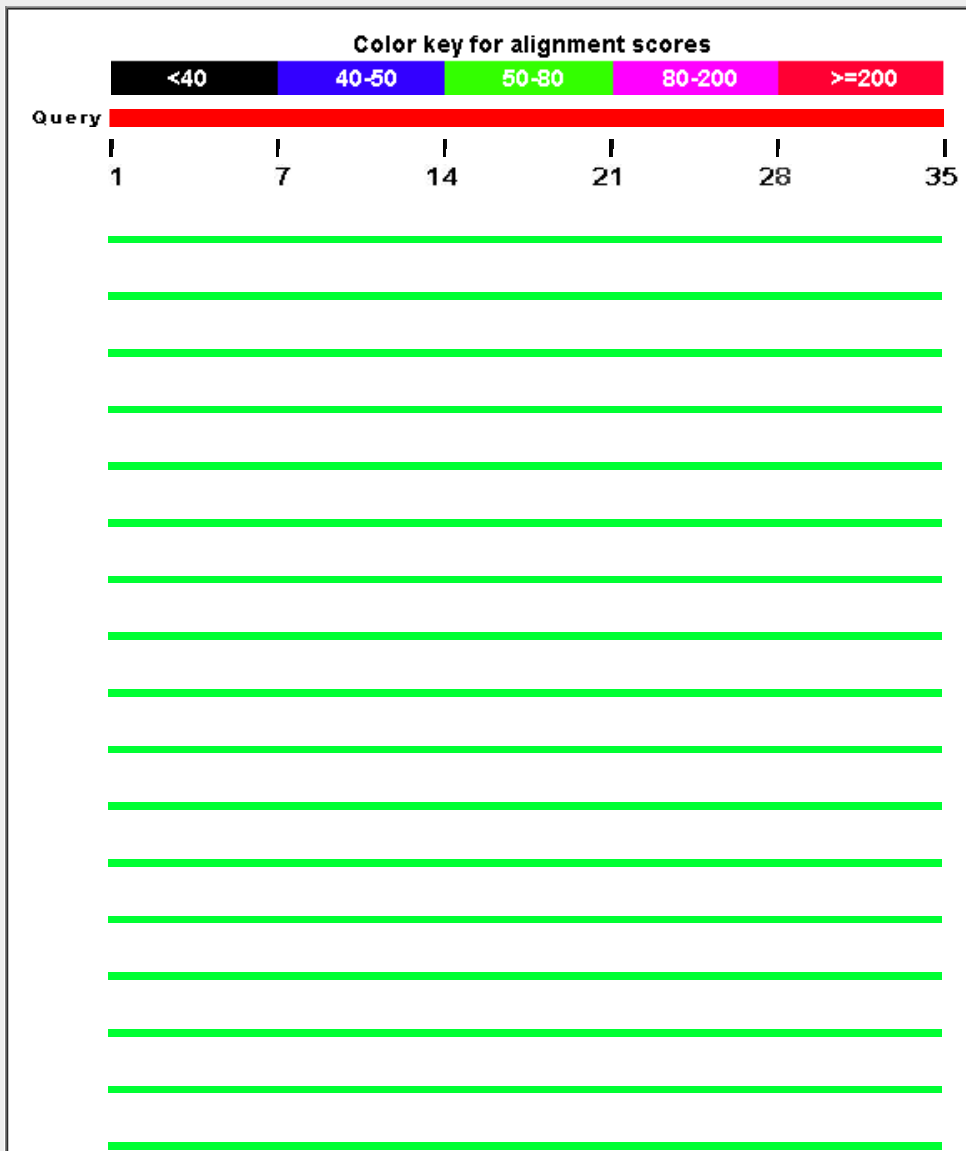

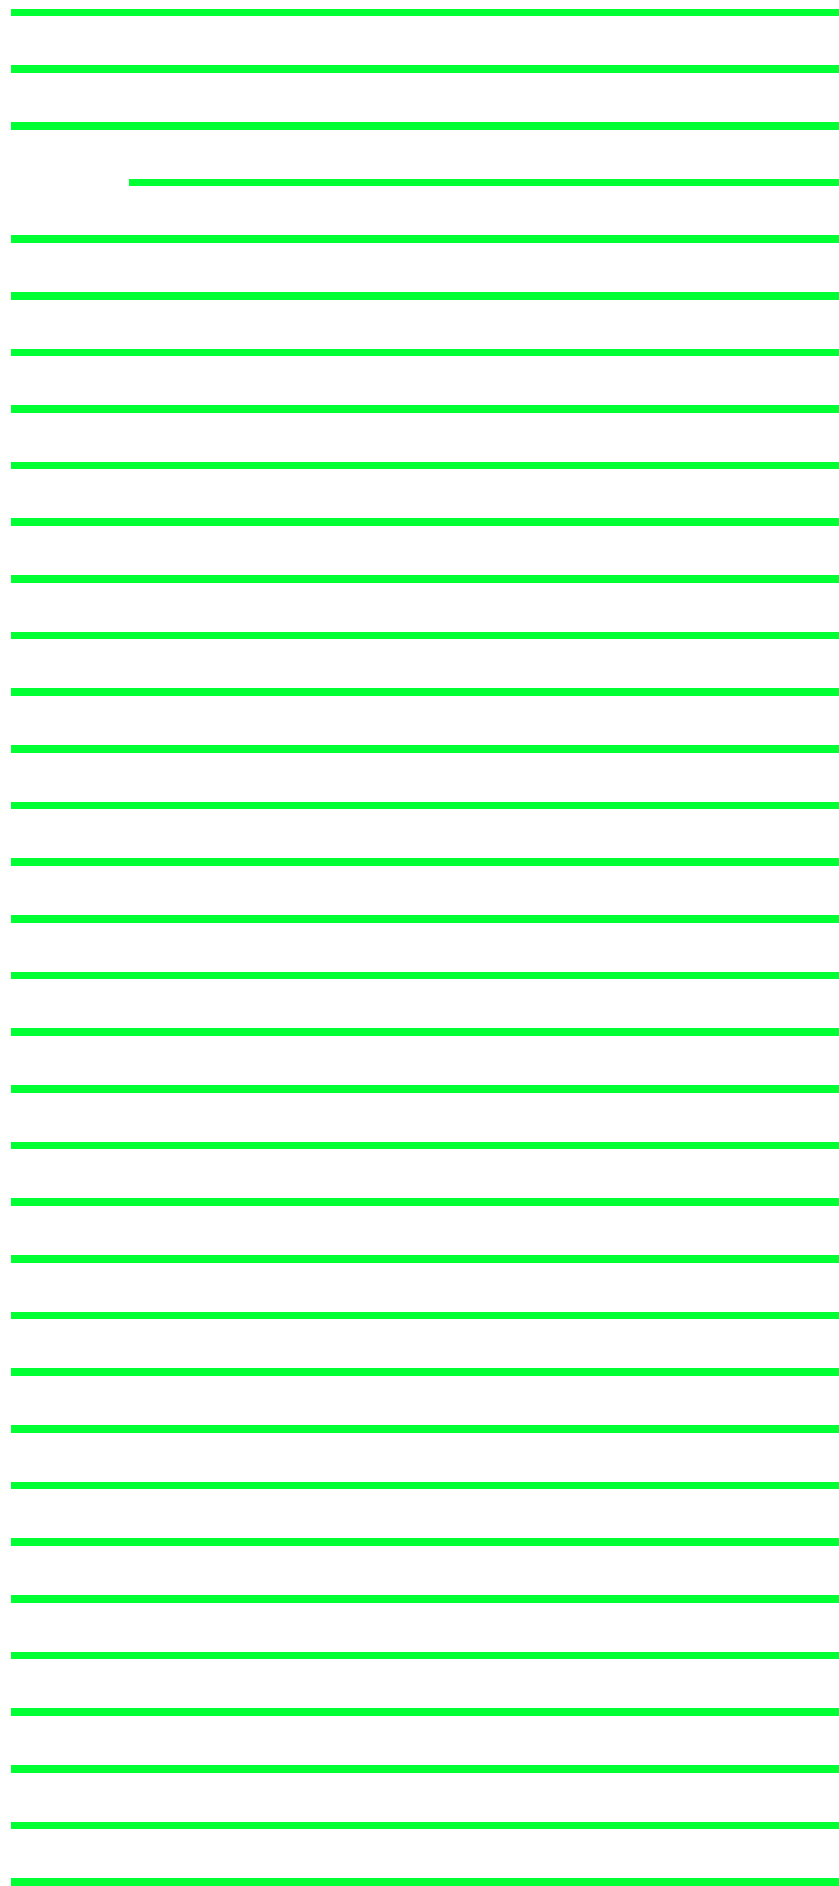



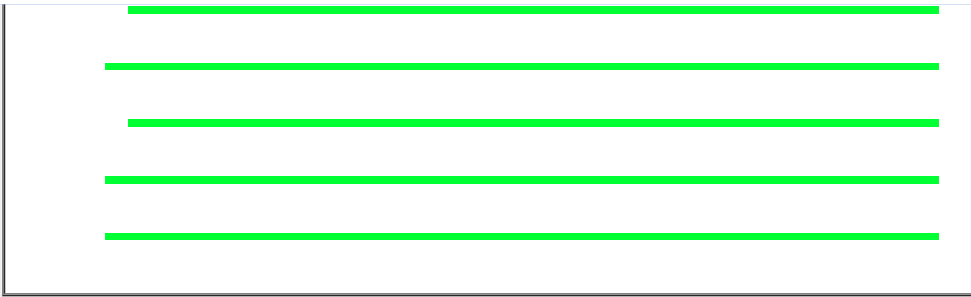

**Descriptions**

**Sequences producing significant alignments:**

Select: [All](#) [None](#) Selected:0

Alignments Download GenPept Graphics Distance tree of results Multiple alignment

| Description                                                                                             | Max score | Total score | Query cover | E value | Ident | Accession                                   |
|---------------------------------------------------------------------------------------------------------|-----------|-------------|-------------|---------|-------|---------------------------------------------|
| <a href="#">complement C1r subcomponent-like protein isoform 2 precursor [Homo sapiens]</a>             | 75.9      | 75.9        | 100%        | 7e-15   | 100%  | <a href="#">gij663071006 NP_001284569.1</a> |
| <a href="#">PREDICTED: complement C1r subcomponent-like protein isoform 2 precursor [Homo sapiens]</a>  | 75.9      | 75.9        | 100%        | 7e-15   | 100%  | <a href="#">gij441670266 XP_004092185.1</a> |
| <a href="#">PREDICTED: complement C1r subcomponent-like protein isoform 1 precursor [Homo sapiens]</a>  | 75.9      | 75.9        | 100%        | 8e-15   | 100%  | <a href="#">gij332249352 XP_003273827.1</a> |
| <a href="#">complement C1r subcomponent-like protein isoform 1 precursor [Homo sapiens]</a>             | 75.9      | 75.9        | 100%        | 8e-15   | 100%  | <a href="#">gij289547636 NP_057630.2</a>    |
| <a href="#">PREDICTED: complement C1r subcomponent-like protein isoform 1 precursor [Homo sapiens]</a>  | 75.9      | 75.9        | 100%        | 8e-15   | 100%  | <a href="#">gij114643162 XP_001163902.1</a> |
| <a href="#">complement component 1, r subcomponent-like precursor variant [Homo sapiens]</a>            | 75.9      | 75.9        | 100%        | 8e-15   | 100%  | <a href="#">gij62897163 BAD96522.1</a>      |
| <a href="#">complement C1r-like proteinase precursor [Homo sapiens]</a>                                 | 75.9      | 75.9        | 100%        | 8e-15   | 100%  | <a href="#">gij7271475 AAF44349.1</a>       |
| <a href="#">PREDICTED: complement C1r subcomponent-like protein isoform 2 precursor [Homo sapiens]</a>  | 75.9      | 75.9        | 100%        | 8e-15   | 100%  | <a href="#">gij441670263 XP_004092184.1</a> |
| <a href="#">PREDICTED: complement C1r subcomponent-like protein isoform 2 precursor [Homo sapiens]</a>  | 75.9      | 75.9        | 100%        | 8e-15   | 100%  | <a href="#">gij675757427 XP_008971903.1</a> |
| <a href="#">PREDICTED: complement C1r subcomponent-like protein [Gorilla gorilla gorilla]</a>           | 73.6      | 73.6        | 100%        | 5e-14   | 97%   | <a href="#">gij426371473 XP_004052671.1</a> |
| <a href="#">unnamed protein product [Homo sapiens]</a>                                                  | 72.8      | 72.8        | 100%        | 8e-14   | 97%   | <a href="#">gij10436374 BAB14819.1</a>      |
| <a href="#">PREDICTED: complement C1r subcomponent-like protein [Macaca mulatta]</a>                    | 72.8      | 72.8        | 100%        | 9e-14   | 97%   | <a href="#">gij544469176 XP_005570609.1</a> |
| <a href="#">PREDICTED: complement C1r subcomponent-like protein isoform 2 precursor [Homo sapiens]</a>  | 72.8      | 72.8        | 100%        | 1e-13   | 97%   | <a href="#">gij402884997 XP_003905955.1</a> |
| <a href="#">Complement C1r subcomponent-like protein [Macaca fascicularis]</a>                          | 72.8      | 72.8        | 100%        | 1e-13   | 97%   | <a href="#">gij355785846 EHH66029.1</a>     |
| <a href="#">PREDICTED: complement C1r subcomponent-like protein isoform 2 precursor [Homo sapiens]</a>  | 72.8      | 72.8        | 100%        | 1e-13   | 97%   | <a href="#">gij685570876 XP_009178379.1</a> |
| <a href="#">Complement C1r subcomponent-like protein [Macaca mulatta]</a>                               | 71.2      | 71.2        | 100%        | 3e-13   | 94%   | <a href="#">gij355563948 EHH20448.1</a>     |
| <a href="#">PREDICTED: complement C1r subcomponent-like protein [Chlorocebus aureus]</a>                | 70.5      | 70.5        | 100%        | 6e-13   | 94%   | <a href="#">gij635063155 XP_007965642.1</a> |
| <a href="#">PREDICTED: complement C1r subcomponent-like protein [Callithrix jacchus]</a>                | 65.9      | 65.9        | 100%        | 3e-11   | 86%   | <a href="#">gij675677706 XP_009001758.1</a> |
| <a href="#">PREDICTED: complement C1r subcomponent-like protein [Galeopterus variegatus]</a>            | 64.7      | 64.7        | 100%        | 7e-11   | 83%   | <a href="#">gij667290276 XP_008577472.1</a> |
| <a href="#">PREDICTED: complement C1r subcomponent-like protein [Otolemur major]</a>                    | 63.5      | 63.5        | 100%        | 2e-10   | 80%   | <a href="#">gij395847725 XP_003796517.1</a> |
| <a href="#">PREDICTED: LOW QUALITY PROTEIN: complement C1r subcomponent-like protein [Homo sapiens]</a> | 60.5      | 60.5        | 85%         | 1e-09   | 93%   | <a href="#">gij686739538 XP_009245669.1</a> |
| <a href="#">PREDICTED: complement C1r subcomponent-like protein isoform 2 precursor [Homo sapiens]</a>  | 59.3      | 59.3        | 100%        | 5e-09   | 77%   | <a href="#">gij671039595 XP_008681740.1</a> |
| <a href="#">PREDICTED: complement C1r subcomponent-like protein isoform 2 precursor [Homo sapiens]</a>  | 59.3      | 59.3        | 100%        | 6e-09   | 77%   | <a href="#">gij671039593 XP_008681739.1</a> |
| <a href="#">C1r-like protein [Mus musculus]</a>                                                         | 58.2      | 58.2        | 100%        | 8e-09   | 71%   | <a href="#">gij30842778 AAP41416.1</a>      |
| <a href="#">PREDICTED: LOW QUALITY PROTEIN: complement C1r subcomponent-like protein [Homo sapiens]</a> | 58.9      | 58.9        | 100%        | 8e-09   | 74%   | <a href="#">gij532105686 XP_005338428.1</a> |
| <a href="#">complement C1r subcomponent-like protein precursor [Rattus norvegicus]</a>                  | 58.5      | 58.5        | 100%        | 1e-08   | 74%   | <a href="#">gij50657416 NP_001002804.1</a>  |
| <a href="#">PREDICTED: LOW QUALITY PROTEIN: complement C1r subcomponent-like protein [Homo sapiens]</a> | 58.5      | 58.5        | 100%        | 1e-08   | 74%   | <a href="#">gij674104757 XP_008823575.1</a> |
| <a href="#">complement component 1, r subcomponent-like [Rattus norvegicus]</a>                         | 58.5      | 58.5        | 100%        | 1e-08   | 74%   | <a href="#">gij149049502 EDM01956.1</a>     |
| <a href="#">C1r-like protein [Mus musculus]</a>                                                         | 58.2      | 58.2        | 100%        | 1e-08   | 71%   | <a href="#">gij30842780 AAP41417.1</a>      |

|                                                                                                                   |      |      |      |       |     |                                             |
|-------------------------------------------------------------------------------------------------------------------|------|------|------|-------|-----|---------------------------------------------|
| <a href="#">complement component 1, r subcomponent-like [Mus musculus]</a>                                        | 58.2 | 58.2 | 100% | 1e-08 | 71% | <a href="#">gij148667322 EDK99738.1</a>     |
| <a href="#">unnamed protein product [Mus musculus]</a>                                                            | 58.2 | 58.2 | 100% | 1e-08 | 71% | <a href="#">gij74225714 BAE21686.1</a>      |
| <a href="#">complement C1r subcomponent-like protein precursor [Mus musculus]</a>                                 | 58.2 | 58.2 | 100% | 1e-08 | 71% | <a href="#">gij269973899 NP_851989.3</a>    |
| <a href="#">PREDICTED: complement C1r subcomponent-like protein [Ochotona]</a>                                    | 57.4 | 57.4 | 100% | 3e-08 | 74% | <a href="#">gij504173912 XP_004596521.1</a> |
| <a href="#">PREDICTED: complement C1r subcomponent-like protein [Leptomys]</a>                                    | 57.4 | 57.4 | 100% | 3e-08 | 74% | <a href="#">gij585171947 XP_006737937.1</a> |
| <a href="#">PREDICTED: complement C1r subcomponent-like protein [Odobenus]</a>                                    | 57.4 | 57.4 | 100% | 3e-08 | 74% | <a href="#">gij472376494 XP_004407682.1</a> |
| <a href="#">Complement C1r subcomponent-like protein [Tupaia chinensis]</a>                                       | 57.0 | 57.0 | 100% | 4e-08 | 74% | <a href="#">gij444510890 ELV09737.1</a>     |
| <a href="#">PREDICTED: LOW QUALITY PROTEIN: complement C1r subcomponent-like protein [Tupaia chinensis]</a>       | 57.0 | 57.0 | 100% | 5e-08 | 74% | <a href="#">gij562886979 XP_006170901.1</a> |
| <a href="#">PREDICTED: complement C1r subcomponent-like protein [Elephantopus]</a>                                | 55.8 | 55.8 | 100% | 9e-08 | 71% | <a href="#">gij585679250 XP_006891411.1</a> |
| <a href="#">Complement C1r subcomponent-like protein [Cricetulus griseus]</a>                                     | 55.5 | 55.5 | 100% | 1e-07 | 74% | <a href="#">gij344242458 EGV98561.1</a>     |
| <a href="#">PREDICTED: complement C1r subcomponent-like protein isoform 1 [Cricetulus griseus]</a>                | 55.5 | 55.5 | 100% | 1e-07 | 74% | <a href="#">gij354467327 XP_003496121.1</a> |
| <a href="#">PREDICTED: LOW QUALITY PROTEIN: complement C1r subcomponent-like protein [Cricetulus griseus]</a>     | 55.5 | 55.5 | 100% | 1e-07 | 71% | <a href="#">gij507697361 XP_004643633.1</a> |
| <a href="#">PREDICTED: complement C1r subcomponent-like protein [Trichechus]</a>                                  | 55.5 | 55.5 | 100% | 2e-07 | 71% | <a href="#">gij471411548 XP_004387327.1</a> |
| <a href="#">complement C1r-A subcomponent [Cricetulus griseus]</a>                                                | 55.5 | 98.6 | 100% | 2e-07 | 74% | <a href="#">gij537136510 ERE66562.1</a>     |
| <a href="#">PREDICTED: complement component 1, r subcomponent-like [Felis concolor]</a>                           | 54.3 | 54.3 | 100% | 3e-07 | 69% | <a href="#">gij586991762 XP_006933531.1</a> |
| <a href="#">PREDICTED: complement C1r-A subcomponent-like [Microtus ochrotus]</a>                                 | 54.7 | 99.0 | 100% | 4e-07 | 74% | <a href="#">gij532045173 XP_005365394.1</a> |
| <a href="#">hypothetical protein PANDA_011233 [Ailuropoda melanoleuca]</a>                                        | 53.9 | 53.9 | 100% | 4e-07 | 71% | <a href="#">gij281338369 EFB13953.1</a>     |
| <a href="#">PREDICTED: LOW QUALITY PROTEIN: complement C1r subcomponent-like protein [Ailuropoda melanoleuca]</a> | 53.9 | 53.9 | 100% | 4e-07 | 71% | <a href="#">gij524923662 XP_005066080.1</a> |
| <a href="#">PREDICTED: LOW QUALITY PROTEIN: complement C1r subcomponent-like protein [Camelus ferus]</a>          | 53.9 | 53.9 | 100% | 5e-07 | 66% | <a href="#">gij560893125 XP_006173072.1</a> |
| <a href="#">complement C1r subcomponent-like protein [Camelus ferus]</a>                                          | 53.9 | 53.9 | 100% | 5e-07 | 66% | <a href="#">gij528770117 EPY89776.1</a>     |
| <a href="#">PREDICTED: complement C1r subcomponent-like protein [Peromyscus]</a>                                  | 53.5 | 53.5 | 100% | 5e-07 | 71% | <a href="#">gij589959162 XP_006992168.1</a> |
| <a href="#">PREDICTED: complement C1r subcomponent-like protein-like [Ailuropoda melanoleuca]</a>                 | 53.9 | 53.9 | 100% | 5e-07 | 71% | <a href="#">gij301773698 XP_002922303.1</a> |
| <a href="#">PREDICTED: complement C1r subcomponent-like protein isoform 1 [Ailuropoda melanoleuca]</a>            | 53.5 | 53.5 | 97%  | 5e-07 | 71% | <a href="#">gij533127501 XP_005378915.1</a> |
| <a href="#">PREDICTED: LOW QUALITY PROTEIN: complement C1r subcomponent-like protein [Ailuropoda melanoleuca]</a> | 53.5 | 53.5 | 100% | 6e-07 | 69% | <a href="#">gij511894085 XP_004766682.1</a> |
| <a href="#">PREDICTED: complement C1r subcomponent-like protein isoform 2 [Ailuropoda melanoleuca]</a>            | 53.5 | 53.5 | 97%  | 6e-07 | 71% | <a href="#">gij533127499 XP_005378914.1</a> |
| <a href="#">PREDICTED: LOW QUALITY PROTEIN: complement C1r subcomponent-like protein [Ailuropoda melanoleuca]</a> | 53.5 | 53.5 | 100% | 6e-07 | 66% | <a href="#">gij560977345 XP_006210952.1</a> |
| <a href="#">PREDICTED: complement C1r subcomponent-like protein isoform 3 [Ailuropoda melanoleuca]</a>            | 53.1 | 53.1 | 100% | 8e-07 | 69% | <a href="#">gij291392803 XP_002712893.1</a> |
| <a href="#">PREDICTED: complement C1r subcomponent-like protein isoform 4 [Ailuropoda melanoleuca]</a>            | 53.1 | 53.1 | 100% | 8e-07 | 69% | <a href="#">gij655831423 XP_008257993.1</a> |
| <a href="#">PREDICTED: complement C1r subcomponent-like protein [Oryzomys]</a>                                    | 53.1 | 53.1 | 100% | 9e-07 | 66% | <a href="#">gij634837986 XP_007935394.1</a> |
| <a href="#">Complement C1r subcomponent-like protein [Pteropus alecto]</a>                                        | 53.1 | 53.1 | 100% | 9e-07 | 71% | <a href="#">gij431905373 ELK10418.1</a>     |
| <a href="#">PREDICTED: complement C1r subcomponent-like protein [Pteropus alecto]</a>                             | 53.1 | 53.1 | 100% | 9e-07 | 71% | <a href="#">gij586563055 XP_006914777.1</a> |
| <a href="#">PREDICTED: complement C1r subcomponent-like protein [Equus caballus]</a>                              | 52.8 | 52.8 | 100% | 1e-06 | 66% | <a href="#">gij664759598 XP_008537368.1</a> |
| <a href="#">PREDICTED: complement C1r subcomponent-like protein [Equus caballus]</a>                              | 52.8 | 52.8 | 100% | 1e-06 | 66% | <a href="#">gij545219170 XP_005610954.1</a> |
| <a href="#">PREDICTED: LOW QUALITY PROTEIN: complement C1r subcomponent-like protein [Equus caballus]</a>         | 51.6 | 51.6 | 100% | 3e-06 | 66% | <a href="#">gij591327382 XP_007089640.1</a> |
| <a href="#">PREDICTED: complement C1r subcomponent-like protein [Ceratopithecus]</a>                              | 51.6 | 51.6 | 100% | 3e-06 | 66% | <a href="#">gij478529432 XP_004438886.1</a> |
| <a href="#">PREDICTED: complement C1r subcomponent-like protein [Tursiops]</a>                                    | 50.4 | 50.4 | 100% | 7e-06 | 63% | <a href="#">gij470606249 XP_004314129.1</a> |
| <a href="#">PREDICTED: complement component 1, r subcomponent-like isoform 1 [Tursiops truncatus]</a>             | 50.1 | 50.1 | 100% | 9e-06 | 63% | <a href="#">gij545546513 XP_005637265.1</a> |
| <a href="#">PREDICTED: complement component 1, r subcomponent-like isoform 2 [Tursiops truncatus]</a>             | 50.1 | 50.1 | 100% | 9e-06 | 63% | <a href="#">gij545546511 XP_005637264.1</a> |
| <a href="#">PREDICTED: complement component 1, r subcomponent-like isoform 3 [Tursiops truncatus]</a>             | 50.1 | 50.1 | 100% | 1e-05 | 63% | <a href="#">gij545546509 XP_005637263.1</a> |
| <a href="#">PREDICTED: complement component 1, r subcomponent-like isoform 4 [Tursiops truncatus]</a>             | 50.1 | 50.1 | 100% | 1e-05 | 63% | <a href="#">gij545546507 XP_005637262.1</a> |
| <a href="#">PREDICTED: complement component 1, r subcomponent-like isoform 5 [Tursiops truncatus]</a>             | 50.1 | 50.1 | 100% | 1e-05 | 63% | <a href="#">gij345792069 XP_543840.3</a>    |
| <a href="#">PREDICTED: complement C1r subcomponent-like protein [Lipotes vexillifer]</a>                          | 50.1 | 50.1 | 100% | 1e-05 | 63% | <a href="#">gij602718526 XP_007469443.1</a> |
| <a href="#">PREDICTED: complement C1r subcomponent-like protein [Orcinus orca]</a>                                | 50.1 | 50.1 | 100% | 1e-05 | 63% | <a href="#">gij466055133 XP_004279184.1</a> |
| <a href="#">PREDICTED: complement C1r subcomponent-like protein isoform 1 [Myotisotis]</a>                        | 49.3 | 49.3 | 100% | 1e-05 | 66% | <a href="#">gij488554131 XP_004468199.1</a> |
| <a href="#">PREDICTED: complement C1r subcomponent-like protein [Myotisotis]</a>                                  | 49.7 | 49.7 | 100% | 1e-05 | 63% | <a href="#">gij584074754 XP_006757609.1</a> |

|                                                                                |      |      |      |       |     |                                             |
|--------------------------------------------------------------------------------|------|------|------|-------|-----|---------------------------------------------|
| <a href="#">PREDICTED: complement C1r subcomponent-like protein [Cavia p</a>   | 49.7 | 49.7 | 100% | 1e-05 | 63% | <a href="#">gil348554938 XP_003463281.1</a> |
| <a href="#">PREDICTED: complement C1r subcomponent-like protein [Myotis l</a>  | 49.7 | 49.7 | 100% | 1e-05 | 63% | <a href="#">gil558104592 XP_006084250.1</a> |
| <a href="#">PREDICTED: complement C1r subcomponent-like protein [Erinace</a>   | 49.7 | 49.7 | 100% | 1e-05 | 63% | <a href="#">gil617656833 XP_007535922.1</a> |
| <a href="#">PREDICTED: complement C1r subcomponent-like protein [Fukomy</a>    | 49.3 | 49.3 | 100% | 1e-05 | 60% | <a href="#">gil731282854 XP_010610027.1</a> |
| <a href="#">PREDICTED: complement C1r subcomponent-like protein isoform 1</a>  | 49.3 | 49.3 | 100% | 2e-05 | 66% | <a href="#">gil488554125 XP_004468197.1</a> |
| <a href="#">PREDICTED: complement C1r subcomponent-like protein [Myotis t</a>  | 49.3 | 49.3 | 100% | 2e-05 | 63% | <a href="#">gil554558619 XP_005873711.1</a> |
| <a href="#">PREDICTED: complement C1r subcomponent-like protein [Balaeno</a>   | 49.3 | 49.3 | 100% | 2e-05 | 63% | <a href="#">gil594633415 XP_007170182.1</a> |
| <a href="#">PREDICTED: complement C1r subcomponent-like protein [Loxodor</a>   | 49.3 | 49.3 | 100% | 2e-05 | 63% | <a href="#">gil731515679 XP_010600946.1</a> |
| <a href="#">PREDICTED: complement C1r subcomponent-like protein [Capra h</a>   | 48.9 | 48.9 | 100% | 2e-05 | 60% | <a href="#">gil548468413 XP_005681065.1</a> |
| <a href="#">Complement C1r subcomponent [Fukomys damarensis]</a>               | 49.3 | 90.5 | 100% | 2e-05 | 60% | <a href="#">gil676263566 KFO20277.1</a>     |
| <a href="#">PREDICTED: LOW QUALITY PROTEIN: complement C1r subcom</a>          | 48.9 | 48.9 | 100% | 3e-05 | 60% | <a href="#">gil556724329 XP_005957969.1</a> |
| <a href="#">PREDICTED: complement C1r subcomponent-like protein [Chrysoc</a>   | 48.9 | 48.9 | 100% | 3e-05 | 66% | <a href="#">gil586464372 XP_006862815.1</a> |
| <a href="#">PREDICTED: complement component 1, r subcomponent-like [Sus</a>    | 48.5 | 48.5 | 100% | 4e-05 | 63% | <a href="#">gil545890542 XP_005658603.1</a> |
| <a href="#">PREDICTED: complement C1r subcomponent-like protein [Saimiri t</a> | 47.4 | 47.4 | 65%  | 5e-05 | 91% | <a href="#">gil725609801 XP_010331194.1</a> |
| <a href="#">Complement C1r subcomponent-like protein [Bos mutus]</a>           | 47.8 | 47.8 | 100% | 6e-05 | 60% | <a href="#">gil440891813 ELR45306.1</a>     |
| <a href="#">PREDICTED: complement C1r subcomponent-like protein [Heteroc</a>   | 47.8 | 47.8 | 100% | 6e-05 | 58% | <a href="#">gil512941192 XP_004909584.1</a> |
| <a href="#">PREDICTED: LOW QUALITY PROTEIN: complement C1r subcom</a>          | 47.8 | 47.8 | 100% | 7e-05 | 60% | <a href="#">gil555998080 XP_005910755.1</a> |
| <a href="#">PREDICTED: complement C1r subcomponent [Heterocephalus glal</a>    | 47.8 | 92.4 | 100% | 9e-05 | 58% | <a href="#">gil513016514 XP_004869588.1</a> |
| <a href="#">PREDICTED: complement C1r subcomponent-like protein [Physete</a>   | 47.4 | 47.4 | 91%  | 9e-05 | 66% | <a href="#">gil593724491 XP_007108376.1</a> |
| <a href="#">PREDICTED: complement C1r subcomponent-like [Nomascus leuc</a>     | 43.9 | 43.9 | 100% | 1e-04 | 46% | <a href="#">gil332267693 XP_003282816.1</a> |
| <a href="#">PREDICTED: complement C1r subcomponent-like protein [Rhinopit</a>  | 46.6 | 46.6 | 65%  | 2e-04 | 91% | <a href="#">gil724942380 XP_010386350.1</a> |
| <a href="#">TPA: complement component 1, r subcomponent-like [Bos taurus]</a>  | 46.2 | 46.2 | 100% | 2e-04 | 57% | <a href="#">gil296487145 DAA29258.1</a>     |
| <a href="#">complement C1r subcomponent-like protein [Bos taurus]</a>          | 46.2 | 46.2 | 100% | 2e-04 | 57% | <a href="#">gil300798717 NP_001179084.1</a> |
| <a href="#">PREDICTED: complement component 1, r subcomponent-like isofo</a>   | 46.2 | 46.2 | 100% | 3e-04 | 57% | <a href="#">gil528950936 XP_005207183.1</a> |
| <a href="#">PREDICTED: complement C1r subcomponent [Trichechus manatus</a>     | 46.2 | 46.2 | 100% | 3e-04 | 49% | <a href="#">gil471411492 XP_004387299.1</a> |
| <a href="#">PREDICTED: complement C1r subcomponent [Chinchilla lanigera]</a>   | 46.2 | 46.2 | 100% | 3e-04 | 49% | <a href="#">gil533127497 XP_005378913.1</a> |

## Alignments

[Download](#) [GenPept](#) [Graphics](#)

[Next](#) [Previous](#) [Descriptions](#)

complement C1r subcomponent-like protein isoform 2 precursor [Homo sapiens]

Sequence ID: [gil663071006|ref|NP\\_001284569.1](#) Length: 445 Number of Matches: 1

Range 1: 175 to 209 [GenPept](#) [Graphics](#)

[Next Match](#) [Previous Match](#)

| Score          | Expect | Identities  | Positives   | Gaps     |
|----------------|--------|-------------|-------------|----------|
| 75.9 bits(185) | 7e-15  | 35/35(100%) | 35/35(100%) | 0/35(0%) |

Query 1 KDRQDGEVLQCMFVCGRPVTPPIAQNQTTLGSSRA 35  
 KDRQDGEVLQCMFVCGRPVTPPIAQNQTTLGSSRA  
 Sbjct 175 KDRQDGEVLQCMFVCGRPVTPPIAQNQTTLGSSRA 209

### Related Information

[Gene](#) - associated gene details

[Download](#) [GenPept](#) [Graphics](#)

[Next](#) [Previous](#) [Descriptions](#)

PREDICTED: complement C1r subcomponent-like protein isoform 3 [Nomascus leucogenys]

Sequence ID: [gil441670266|ref|XP\\_004092185.1](#) Length: 445 Number of Matches: 1

Range 1: 175 to 209 [GenPept](#) [Graphics](#)

[Next Match](#) [Previous Match](#)

| Score          | Expect | Identities  | Positives   | Gaps     |
|----------------|--------|-------------|-------------|----------|
| 75.9 bits(185) | 7e-15  | 35/35(100%) | 35/35(100%) | 0/35(0%) |

Query 1 KDRQDGEVLQCMFVCGRPVTPPIAQNQTTLGSSRA 35  
 KDRQDGEVLQCMFVCGRPVTPPIAQNQTTLGSSRA  
 Sbjct 175 KDRQDGEVLQCMFVCGRPVTPPIAQNQTTLGSSRA 209

### Related Information

[Gene](#) - associated gene details

[Map Viewer](#) - aligned genomic context

Download [GenPept](#) [Graphics](#) ▼ Next ▲ Previous ▲ Descriptions

PREDICTED: complement C1r subcomponent-like protein isoform 1 [Nomascus leucogenys]

Sequence ID: [gi|332249352|ref|XP\\_003273827.1|](#) Length: 487 Number of Matches: 1

Range 1: 217 to 251 [GenPept](#) [Graphics](#) ▼ Next Match ▲ Previous Match

| Score          | Expect | Identities  | Positives   | Gaps     |
|----------------|--------|-------------|-------------|----------|
| 75.9 bits(185) | 8e-15  | 35/35(100%) | 35/35(100%) | 0/35(0%) |

```

Query 1      KDRQDGEEVLQCMFVCGRPVTPPIAQNQTTLGSSRA 35
           KDRQDGEEVLQCMFVCGRPVTPPIAQNQTTLGSSRA
Sbjct 217    KDRQDGEEVLQCMFVCGRPVTPPIAQNQTTLGSSRA 251
    
```

**Related Information**

[Gene](#) - associated gene details  
[Map Viewer](#) - aligned genomic context

Download [GenPept](#) [Graphics](#) ▼ Next ▲ Previous ▲ Descriptions

complement C1r subcomponent-like protein isoform 1 precursor [Homo sapiens]

Sequence ID: [gi|289547636|ref|NP\\_057630.2|](#) Length: 487 Number of Matches: 1

[▶ See 2 more title\(s\)](#)

Range 1: 217 to 251 [GenPept](#) [Graphics](#) ▼ Next Match ▲ Previous Match

| Score          | Expect | Identities  | Positives   | Gaps     |
|----------------|--------|-------------|-------------|----------|
| 75.9 bits(185) | 8e-15  | 35/35(100%) | 35/35(100%) | 0/35(0%) |

```

Query 1      KDRQDGEEVLQCMFVCGRPVTPPIAQNQTTLGSSRA 35
           KDRQDGEEVLQCMFVCGRPVTPPIAQNQTTLGSSRA
Sbjct 217    KDRQDGEEVLQCMFVCGRPVTPPIAQNQTTLGSSRA 251
    
```

**Related Information**

[Gene](#) - associated gene details  
[UniGene](#) - clustered expressed sequence tags  
[Map Viewer](#) - aligned genomic context  
[Identical Proteins](#) - Proteins identical to the subject

Download [GenPept](#) [Graphics](#) ▼ Next ▲ Previous ▲ Descriptions

PREDICTED: complement C1r subcomponent-like protein isoform X1 [Pan troglodytes]

Sequence ID: [gi|114643162|ref|XP\\_001163902.1|](#) Length: 487 Number of Matches: 1

[▶ See 1 more title\(s\)](#)

Range 1: 217 to 251 [GenPept](#) [Graphics](#) ▼ Next Match ▲ Previous Match

| Score          | Expect | Identities  | Positives   | Gaps     |
|----------------|--------|-------------|-------------|----------|
| 75.9 bits(185) | 8e-15  | 35/35(100%) | 35/35(100%) | 0/35(0%) |

```

Query 1      KDRQDGEEVLQCMFVCGRPVTPPIAQNQTTLGSSRA 35
           KDRQDGEEVLQCMFVCGRPVTPPIAQNQTTLGSSRA
Sbjct 217    KDRQDGEEVLQCMFVCGRPVTPPIAQNQTTLGSSRA 251
    
```

**Related Information**

[Gene](#) - associated gene details  
[UniGene](#) - clustered expressed sequence tags  
[Map Viewer](#) - aligned genomic context  
[Identical Proteins](#) - Proteins identical to the subject

BLAST is a registered trademark of the National Library of Medicine.

▶ NCBI/ BLAST/ blastp suite/ Formatting Results - BTF85YDR013

**i** Your search parameters were adjusted to search for a short input sequence.

[Edit and Resubmit](#) [Save Search Strategies](#) ▶ [Formatting options](#) ▶ [Download](#) [YouTube](#) [How to read this page](#) [Blast report description](#)

### C4BPB\_KEWDDTTTECRL\_ModMod

RID [BTF85YDR013](#) (Expires on 01-20 15:15 pm)

**Query ID** |cl|15197  
**Description** None  
**Molecule type** amino acid  
**Query Length** 12

**Database Name** nr  
**Description** All non-redundant GenBank CDS translations+PDB+SwissProt+PIR+PRF excluding environmental samples from WGS projects  
**Program** BLASTP 2.2.30+ ▶ [Citation](#)

Other reports: ▶ [Search Summary](#) [[Taxonomy reports](#)] [[Distance tree of results](#)] [[Related Structures](#)] [[Multiple alignment](#)]

### **[-]** Graphic Summary

**[-]** [Show Conserved Domains](#)

No putative conserved domains have been detected

Distribution of 105 Blast Hits on the Query Sequence [?](#)

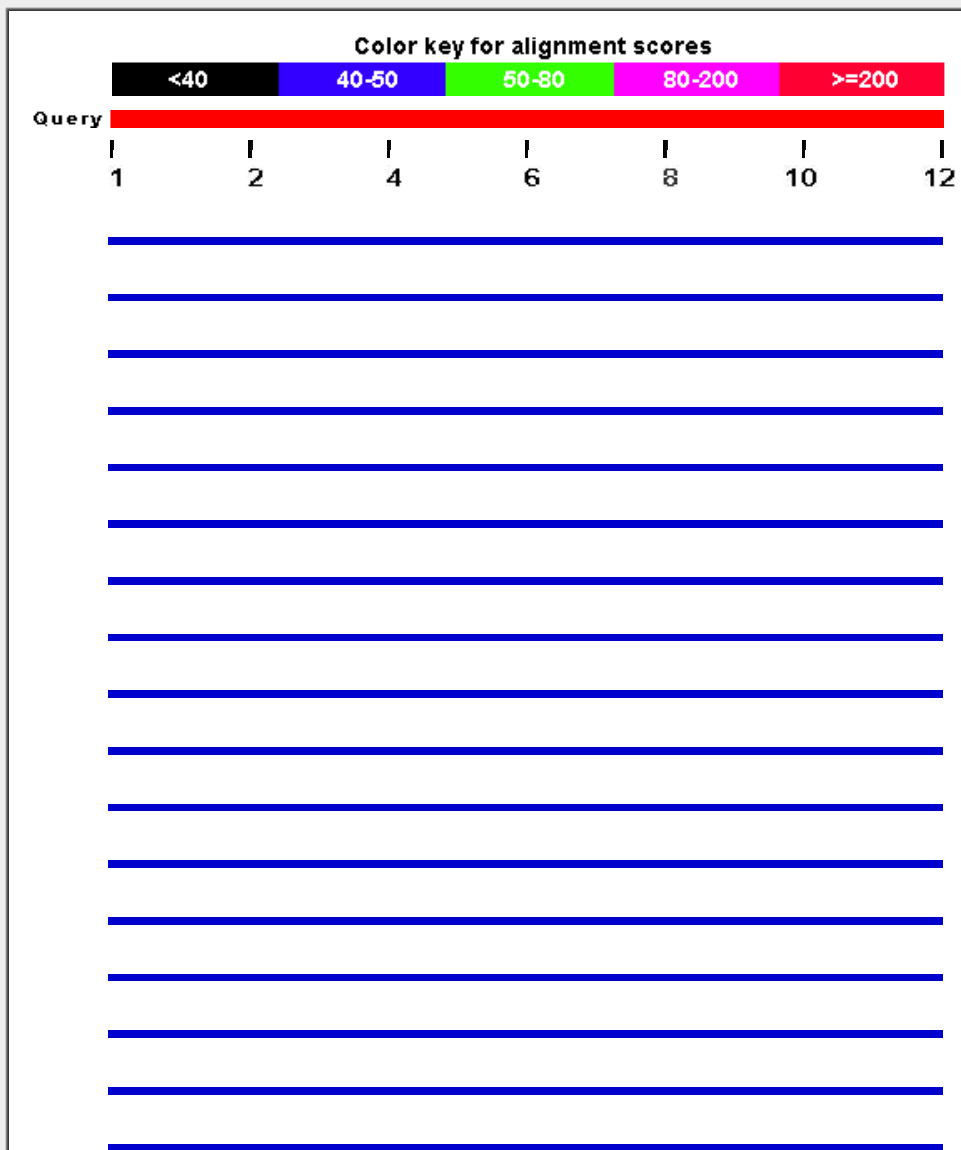

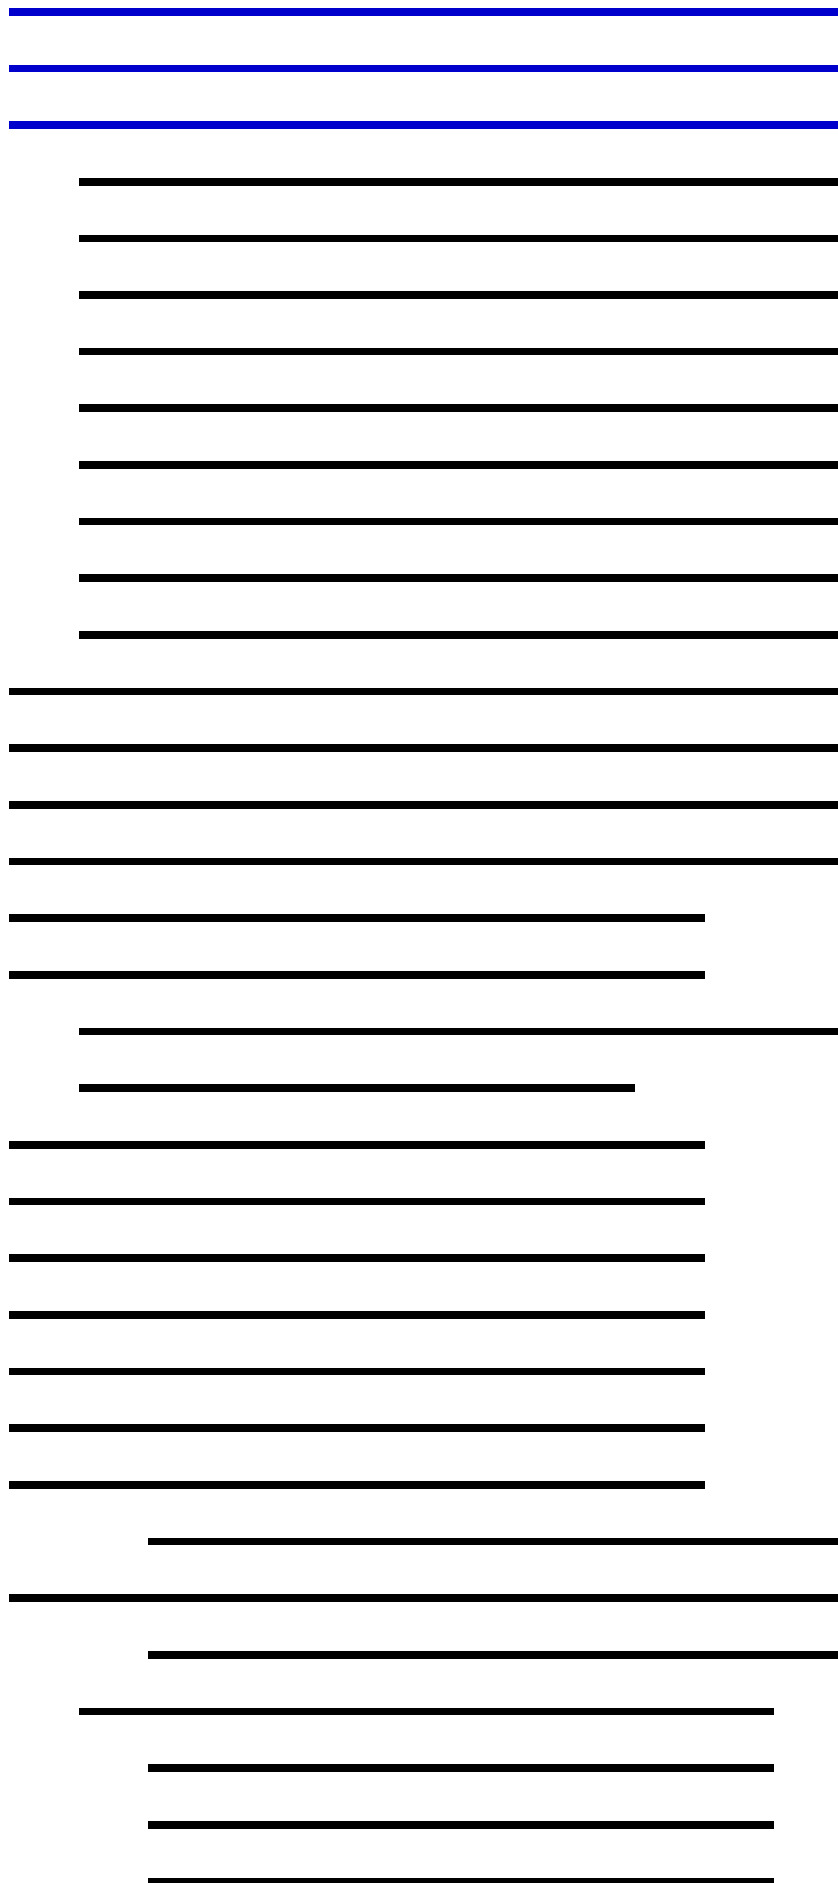

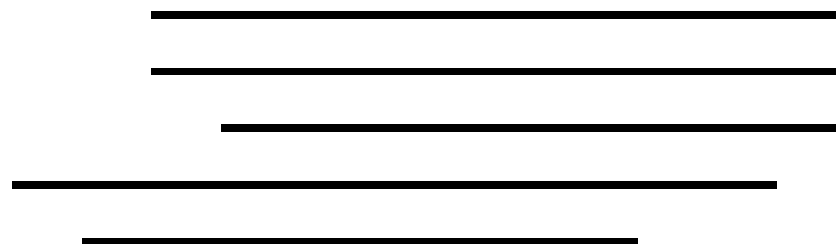

## Descriptions

### Sequences producing significant alignments:

Select: [All](#) [None](#) Selected:0

[Alignments](#)
[Download](#)
[GenPept](#)
[Graphics](#)
[Distance tree of results](#)
[Multiple alignment](#)

| Description                                                                   | Max score | Total score | Query cover | E value | Ident | Accession                                   |
|-------------------------------------------------------------------------------|-----------|-------------|-------------|---------|-------|---------------------------------------------|
| <a href="#">unnamed protein product [Homo sapiens]</a>                        | 42.2      | 42.2        | 100%        | 0.002   | 92%   | <a href="#">gi 194373591 BAG56891.1</a>     |
| <a href="#">PREDICTED: C4b-binding protein beta chain isoform X3 [Pan t</a>   | 42.2      | 42.2        | 100%        | 0.002   | 92%   | <a href="#">gi 694891540 XP_009439669.1</a> |
| <a href="#">PREDICTED: C4b-binding protein beta chain isoform X3 [Pan r</a>   | 42.2      | 42.2        | 100%        | 0.002   | 92%   | <a href="#">gi 675771724 XP_008974762.1</a> |
| <a href="#">PREDICTED: C4b-binding protein beta chain isoform X3 [Homo</a>    | 42.2      | 42.2        | 100%        | 0.002   | 92%   | <a href="#">gi 530366462 XP_005273312.1</a> |
| <a href="#">PREDICTED: C4b-binding protein beta chain isoform X2 [Rhinc</a>   | 42.2      | 42.2        | 100%        | 0.002   | 92%   | <a href="#">gi 724836382 XP_010363947.1</a> |
| <a href="#">PREDICTED: C4b-binding protein beta chain isoform X2 [Pan t</a>   | 42.2      | 42.2        | 100%        | 0.002   | 92%   | <a href="#">gi 694891534 XP_009439665.1</a> |
| <a href="#">PREDICTED: C4b-binding protein beta chain isoform X2 [Papic</a>   | 42.2      | 42.2        | 100%        | 0.002   | 92%   | <a href="#">gi 685519789 XP_009186662.1</a> |
| <a href="#">PREDICTED: C4b-binding protein beta chain isoform X2 [Pan r</a>   | 42.2      | 42.2        | 100%        | 0.002   | 92%   | <a href="#">gi 675771715 XP_008974759.1</a> |
| <a href="#">PREDICTED: C4b-binding protein beta chain isoform X6 [Maca</a>    | 42.2      | 42.2        | 100%        | 0.002   | 92%   | <a href="#">gi 544399939 XP_005540733.1</a> |
| <a href="#">C4b-binding protein beta chain isoform 2 precursor [Homo sapi</a> | 42.2      | 42.2        | 100%        | 0.002   | 92%   | <a href="#">gi 62912462 NP_001017364.1</a>  |
| <a href="#">PREDICTED: C4b-binding protein beta chain isoform X1 [Rhinc</a>   | 42.2      | 42.2        | 100%        | 0.002   | 92%   | <a href="#">gi 724836379 XP_010363946.1</a> |
| <a href="#">C4b-binding protein beta chain isoform 1 precursor [Homo sapi</a> | 42.2      | 42.2        | 100%        | 0.002   | 92%   | <a href="#">gi 4502505 NP_000707.1</a>      |
| <a href="#">PREDICTED: C4b-binding protein beta chain isoform X2 [Maca</a>    | 42.2      | 42.2        | 100%        | 0.002   | 92%   | <a href="#">gi 544399931 XP_005540729.1</a> |
| <a href="#">PREDICTED: C4b-binding protein beta chain isoform X1 [Papic</a>   | 42.2      | 42.2        | 100%        | 0.002   | 92%   | <a href="#">gi 685519785 XP_009186656.1</a> |
| <a href="#">PREDICTED: C4b-binding protein beta chain isoform X1 [Pan r</a>   | 42.2      | 42.2        | 100%        | 0.002   | 92%   | <a href="#">gi 397504761 XP_003822949.1</a> |
| <a href="#">hypothetical protein EGM_01442 [Macaca fascicularis]</a>          | 42.2      | 42.2        | 100%        | 0.002   | 92%   | <a href="#">gi 355745961 EHH50586.1</a>     |
| <a href="#">hypothetical protein EGK_01712 [Macaca mulatta]</a>               | 42.2      | 42.2        | 100%        | 0.002   | 92%   | <a href="#">gi 355558818 EHH15598.1</a>     |
| <a href="#">PREDICTED: C4b-binding protein beta chain isoform X1 [Pan t</a>   | 42.2      | 42.2        | 100%        | 0.002   | 92%   | <a href="#">gi 114572288 XP_001166306.1</a> |
| <a href="#">PREDICTED: c4b-binding protein beta chain isoform 3 [Maca</a>     | 42.2      | 42.2        | 100%        | 0.002   | 92%   | <a href="#">gi 109018561 XP_001083216.1</a> |
| <a href="#">PREDICTED: C4b-binding protein beta chain isoform X1 [Maca</a>    | 42.2      | 42.2        | 100%        | 0.002   | 92%   | <a href="#">gi 544399929 XP_005540728.1</a> |
| <a href="#">PREDICTED: C4b-binding protein beta chain isoform X9 [Chlor</a>   | 39.2      | 39.2        | 91%         | 0.023   | 91%   | <a href="#">gi 635130917 XP_007986833.1</a> |
| <a href="#">PREDICTED: C4b-binding protein beta chain isoform X8 [Chlor</a>   | 39.2      | 39.2        | 91%         | 0.024   | 91%   | <a href="#">gi 635130915 XP_007986832.1</a> |
| <a href="#">PREDICTED: C4b-binding protein beta chain isoform X7 [Chlor</a>   | 39.2      | 39.2        | 91%         | 0.024   | 91%   | <a href="#">gi 635130913 XP_007986831.1</a> |
| <a href="#">PREDICTED: C4b-binding protein beta chain isoform X6 [Chlor</a>   | 39.2      | 39.2        | 91%         | 0.024   | 91%   | <a href="#">gi 635130911 XP_007986830.1</a> |
| <a href="#">PREDICTED: C4b-binding protein beta chain isoform X5 [Chlor</a>   | 39.2      | 39.2        | 91%         | 0.024   | 91%   | <a href="#">gi 635130907 XP_007986828.1</a> |
| <a href="#">PREDICTED: C4b-binding protein beta chain isoform X4 [Chlor</a>   | 39.2      | 39.2        | 91%         | 0.025   | 91%   | <a href="#">gi 635130905 XP_007986827.1</a> |
| <a href="#">PREDICTED: C4b-binding protein beta chain isoform X3 [Chlor</a>   | 39.2      | 39.2        | 91%         | 0.025   | 91%   | <a href="#">gi 635130903 XP_007986826.1</a> |
| <a href="#">PREDICTED: C4b-binding protein beta chain isoform X2 [Chlor</a>   | 39.2      | 39.2        | 91%         | 0.025   | 91%   | <a href="#">gi 635130901 XP_007986825.1</a> |
| <a href="#">PREDICTED: C4b-binding protein beta chain isoform X1 [Chlor</a>   | 39.2      | 39.2        | 91%         | 0.025   | 91%   | <a href="#">gi 635130899 XP_007986823.1</a> |

|                                                                                 |      |      |      |       |      |                                             |
|---------------------------------------------------------------------------------|------|------|------|-------|------|---------------------------------------------|
| <a href="#">PREDICTED: C4b-binding protein beta chain isoform X3 [Pong</a>      | 38.8 | 38.8 | 100% | 0.032 | 83%  | <a href="#">gij686700216 XP_009236698.1</a> |
| <a href="#">PREDICTED: C4b-binding protein beta chain isoform X2 [Pong</a>      | 38.8 | 38.8 | 100% | 0.033 | 83%  | <a href="#">gij686700213 XP_009236694.1</a> |
| <a href="#">PREDICTED: C4b-binding protein beta chain isoform X1 [Pong</a>      | 38.8 | 38.8 | 100% | 0.033 | 83%  | <a href="#">gij297662141 XP_002809574.1</a> |
| <a href="#">PREDICTED: C4b-binding protein beta chain isoform 1 [Nomas</a>      | 38.0 | 38.0 | 100% | 0.064 | 83%  | <a href="#">gij332266848 XP_003282407.1</a> |
| <a href="#">PREDICTED: C4b-binding protein beta chain isoform X2 [Callit</a>    | 35.8 | 35.8 | 83%  | 0.32  | 90%  | <a href="#">gij675749407 XP_008983835.1</a> |
| <a href="#">PREDICTED: C4b-binding protein beta chain isoform X1 [Callit</a>    | 35.8 | 35.8 | 83%  | 0.32  | 90%  | <a href="#">gij296230632 XP_002760794.1</a> |
| <a href="#">PREDICTED: C4b-binding protein beta chain [Cavia porcellus]</a>     | 31.2 | 31.2 | 91%  | 11    | 73%  | <a href="#">gij348577871 XP_003474707.1</a> |
| <a href="#">hypothetical protein [Clostridium sp. CAG:62]</a>                   | 31.2 | 31.2 | 66%  | 11    | 100% | <a href="#">gij548057742 WP_022376409.1</a> |
| <a href="#">PREDICTED: C4b-binding protein beta chain isoform X2 [Saim</a>      | 30.8 | 30.8 | 83%  | 15    | 80%  | <a href="#">gij725574024 XP_010339305.1</a> |
| <a href="#">PREDICTED: C4b-binding protein beta chain isoform X1 [Saim</a>      | 30.8 | 30.8 | 83%  | 15    | 80%  | <a href="#">gij403277664 XP_003930472.1</a> |
| <a href="#">hypothetical protein [Vibrio nigrapulchritudo]</a>                  | 30.3 | 30.3 | 83%  | 18    | 70%  | <a href="#">gij740359636 WP_038195698.1</a> |
| <a href="#">hypothetical protein [Vibrio nigrapulchritudo]</a>                  | 30.3 | 30.3 | 83%  | 19    | 70%  | <a href="#">gij740309755 WP_038147115.1</a> |
| <a href="#">putative Fimh-like protein [Vibrio nigrapulchritudo]</a>            | 30.3 | 30.3 | 83%  | 19    | 70%  | <a href="#">gij550352361 WP_022612127.1</a> |
| <a href="#">putative Fimh-like protein [Vibrio nigrapulchritudo]</a>            | 30.3 | 30.3 | 83%  | 19    | 70%  | <a href="#">gij550281458 WP_022607838.1</a> |
| <a href="#">hypothetical protein VINI7043_08940 [Vibrio nigrapulchritudo A]</a> | 30.3 | 30.3 | 83%  | 19    | 70%  | <a href="#">gij342820393 EGU55216.1</a>     |
| <a href="#">PREDICTED: fibroin heavy chain-like [Callithrix jacchus]</a>        | 29.9 | 93.8 | 83%  | 28    | 83%  | <a href="#">gij675768476 XP_008987859.1</a> |
| <a href="#">PREDICTED: C4b-binding protein beta chain [Nannospalax gal</a>      | 29.5 | 29.5 | 100% | 38    | 75%  | <a href="#">gij674096417 XP_008821570.1</a> |
| <a href="#">PREDICTED: C4b-binding protein beta chain [Ictidomys tridece</a>    | 29.1 | 29.1 | 83%  | 52    | 80%  | <a href="#">gij532087633 XP_005329528.1</a> |
| <a href="#">hypothetical protein TRIUR3_31016 [Triticum urartu]</a>             | 29.1 | 29.1 | 83%  | 54    | 70%  | <a href="#">gij473936676 EMS50150.1</a>     |
| <a href="#">glyoxalase/bleomycin resistance protein/dioxygenase [Enteroc</a>    | 28.6 | 28.6 | 75%  | 61    | 78%  | <a href="#">gij488246961 WP_002318169.1</a> |
| <a href="#">glyoxalase [Enterococcus faecium]</a>                               | 28.6 | 28.6 | 75%  | 65    | 78%  | <a href="#">gij488218002 WP_002289210.1</a> |
| <a href="#">glyoxalase [Enterococcus avium]</a>                                 | 28.6 | 28.6 | 75%  | 65    | 78%  | <a href="#">gij510805076 WP_016179839.1</a> |
| <a href="#">hypothetical protein Csa_5G017790 [Cucumis sativus]</a>             | 28.6 | 28.6 | 83%  | 66    | 82%  | <a href="#">gij700194418 KGN49595.1</a>     |
| <a href="#">PREDICTED: uncharacterized protein LOC101232668 [Cucum</a>          | 28.6 | 28.6 | 83%  | 67    | 82%  | <a href="#">gij449526640 XP_004170321.1</a> |
| <a href="#">Receptor-type tyrosine-protein phosphatase alpha [Crassostrea</a>   | 28.6 | 28.6 | 75%  | 72    | 89%  | <a href="#">gij405963146 EKC28746.1</a>     |
| <a href="#">serine/threonine kinase [Naegleria gruberi strain NEG-M]</a>        | 28.6 | 28.6 | 91%  | 75    | 64%  | <a href="#">gij290996855 XP_002680997.1</a> |
| <a href="#">non-ribosomal peptide synthetase [Myxococcus xanthus]</a>           | 28.6 | 67.2 | 66%  | 76    | 88%  | <a href="#">gij499872920 WP_011553654.1</a> |
| <a href="#">hypothetical protein [Rhizobium leguminosarum]</a>                  | 28.2 | 28.2 | 91%  | 96    | 75%  | <a href="#">gij653792155 WP_027686102.1</a> |
| <a href="#">hypothetical protein [Rhizobium leguminosarum]</a>                  | 28.2 | 28.2 | 91%  | 96    | 75%  | <a href="#">gij502299986 WP_012755944.1</a> |
| <a href="#">hypothetical protein [Rhizobium leguminosarum]</a>                  | 28.2 | 28.2 | 91%  | 96    | 75%  | <a href="#">gij501551999 WP_012556512.1</a> |
| <a href="#">hypothetical protein RLEG3_10980 [Rhizobium leguminosarum]</a>      | 28.2 | 28.2 | 91%  | 96    | 67%  | <a href="#">gij573465435 AHF82317.1</a>     |
| <a href="#">hypothetical protein SCHCODRAFT_104079 [Schizophyllum co</a>        | 28.2 | 28.2 | 83%  | 99    | 80%  | <a href="#">gij302698025 XP_003038691.1</a> |
| <a href="#">xylulokinase [Treponema maltophilum]</a>                            | 28.2 | 28.2 | 83%  | 100   | 67%  | <a href="#">gij513870852 WP_016524615.1</a> |
| <a href="#">xylulokinase [Treponema lecithinolyticum]</a>                       | 28.2 | 28.2 | 83%  | 100   | 67%  | <a href="#">gij545449279 WP_021686299.1</a> |
| <a href="#">hypothetical protein PFICI_04849 [Pestalotiopsis fici W106-1]</a>   | 28.2 | 28.2 | 83%  | 100   | 80%  | <a href="#">gij630015271 XP_007831621.1</a> |
| <a href="#">pleckstrin domain-containing protein [Polysphondylium pallidum]</a> | 28.2 | 28.2 | 75%  | 101   | 73%  | <a href="#">gij281205479 EFA79670.1</a>     |
| <a href="#">cotH protein [Clostridium sp. CAG:230]</a>                          | 28.2 | 28.2 | 100% | 101   | 43%  | <a href="#">gij547728152 WP_022142301.1</a> |
| <a href="#">hypothetical protein [Mycobacterium smegmatis]</a>                  | 27.8 | 27.8 | 58%  | 124   | 100% | <a href="#">gij505111008 WP_015298110.1</a> |
| <a href="#">ECF subfamily RNA polymerase sigma-24 factor [Rhodococcus</a>       | 27.8 | 27.8 | 58%  | 129   | 100% | <a href="#">gij490034641 WP_003937064.1</a> |
| <a href="#">PREDICTED: LOW QUALITY PROTEIN: C4b-binding protein b</a>           | 27.8 | 27.8 | 91%  | 131   | 64%  | <a href="#">gij533120065 XP_005375468.1</a> |
| <a href="#">PREDICTED: uncharacterized protein LOC104565074 [Tinamu</a>         | 27.8 | 27.8 | 58%  | 132   | 100% | <a href="#">gij719742278 XP_010210028.1</a> |
| <a href="#">hypothetical protein [Halococcus thailandensis]</a>                 | 27.8 | 27.8 | 58%  | 134   | 100% | <a href="#">gij495011748 WP_007737760.1</a> |
| <a href="#">hypothetical protein [Escherichia coli]</a>                         | 27.8 | 27.8 | 58%  | 134   | 100% | <a href="#">gij545278327 WP_021565543.1</a> |
| <a href="#">hypothetical protein [Clostridium botulinum]</a>                    | 27.8 | 27.8 | 58%  | 134   | 100% | <a href="#">gij502039998 WP_012704248.1</a> |
| <a href="#">hypothetical protein [Clostridium botulinum]</a>                    | 27.8 | 27.8 | 58%  | 134   | 100% | <a href="#">gij544673624 WP_021106489.1</a> |



|                                                                               |      |      |     |     |      |                                             |
|-------------------------------------------------------------------------------|------|------|-----|-----|------|---------------------------------------------|
| <a href="#">hypothetical protein G647_02930 [Cladophialophora carrionii C</a> | 27.8 | 27.8 | 58% | 135 | 100% | <a href="#">gi 671170064 XP_008725498.1</a> |
| <a href="#">S-layer-related protein [Bacteroidales bacterium CF50]</a>        | 27.8 | 27.8 | 58% | 135 | 100% | <a href="#">gi 553027585 AGY53002.1</a>     |
| <a href="#">usher protein [Enterobacteriaceae bacterium LSJC7]</a>            | 27.8 | 27.8 | 91% | 137 | 73%  | <a href="#">gi 648277699 WP_026058848.1</a> |
| <a href="#">von Willebrand factor A [Chryseobacterium vrystaatense]</a>       | 27.8 | 27.8 | 66% | 138 | 88%  | <a href="#">gi 736746476 WP_034750228.1</a> |
| <a href="#">hypothetical protein LOTGIDRAFT_158683 [Lottia gigantea]</a>      | 27.8 | 27.8 | 83% | 138 | 67%  | <a href="#">gi 676444278 XP_009050377.1</a> |
| <a href="#">alpha-amylase [Rhizobium sp. 2MFCol3.1]</a>                       | 27.8 | 27.8 | 58% | 138 | 100% | <a href="#">gi 648591778 WP_026283529.1</a> |
| <a href="#">benzoate transporter [Saccharophagus degradans]</a>               | 27.8 | 27.8 | 58% | 139 | 100% | <a href="#">gi 499788666 WP_011469400.1</a> |
| <a href="#">hypothetical protein [Fischerella sp. PCC 9339]</a>               | 27.8 | 27.8 | 66% | 139 | 88%  | <a href="#">gi 648362402 WP_026081876.1</a> |
| <a href="#">PREDICTED: C4b-binding protein beta chain [Jaculus jaculus]</a>   | 27.4 | 27.4 | 91% | 179 | 73%  | <a href="#">gi 507559572 XP_004663509.1</a> |
| <a href="#">hypothetical protein [Verrucomicrobia bacterium SCGC AAA16]</a>   | 27.4 | 27.4 | 83% | 181 | 80%  | <a href="#">gi 740295650 WP_038133801.1</a> |
| <a href="#">phosphoserine aminotransferase [Alistipes sp. CAG:435]</a>        | 27.4 | 27.4 | 91% | 182 | 73%  | <a href="#">gi 547921208 WP_022323484.1</a> |
| <a href="#">phosphoserine aminotransferase [Alistipes sp. CAG:514]</a>        | 27.4 | 27.4 | 91% | 182 | 73%  | <a href="#">gi 546330868 WP_021838129.1</a> |
| <a href="#">Xylulokinase [Bacillus licheniformis]</a>                         | 27.4 | 27.4 | 83% | 184 | 75%  | <a href="#">gi 1546887 CAB02315.1</a>       |
| <a href="#">xylulose kinase [Bacillus licheniformis]</a>                      | 27.4 | 27.4 | 83% | 185 | 75%  | <a href="#">gi 737355726 WP_035337931.1</a> |
| <a href="#">xylulose kinase [Bacillus sp. SB47]</a>                           | 27.4 | 27.4 | 83% | 185 | 75%  | <a href="#">gi 651585103 WP_026580281.1</a> |
| <a href="#">xylulose kinase [Bacillus licheniformis]</a>                      | 27.4 | 27.4 | 83% | 185 | 75%  | <a href="#">gi 647500858 WP_025810601.1</a> |
| <a href="#">D-xylulose kinase [Bacillus licheniformis]</a>                    | 27.4 | 27.4 | 83% | 185 | 75%  | <a href="#">gi 499511774 WP_011198414.1</a> |
| <a href="#">xylulose kinase [Bacillus licheniformis S 16]</a>                 | 27.4 | 27.4 | 83% | 185 | 75%  | <a href="#">gi 584582009 EWH21359.1</a>     |
| <a href="#">D-xylulose kinase [Bacillus sp. CPSM8]</a>                        | 27.4 | 27.4 | 83% | 185 | 75%  | <a href="#">gi 564753737 WP_023856989.1</a> |
| <a href="#">MULTISPECIES: D-xylulose kinase [Anoxybacillus]</a>               | 27.4 | 27.4 | 83% | 185 | 75%  | <a href="#">gi 518246519 WP_019416727.1</a> |
| <a href="#">hypothetical protein [Salsuginibacillus kocurii]</a>              | 27.4 | 27.4 | 83% | 185 | 75%  | <a href="#">gi 517752777 WP_018922985.1</a> |
| <a href="#">xylulose kinase XylB [Bacillus licheniformis]</a>                 | 27.4 | 27.4 | 83% | 185 | 75%  | <a href="#">gi 521289100 WP_020453368.1</a> |
| <a href="#">MULTISPECIES: D-xylulose kinase [Bacillus]</a>                    | 27.4 | 27.4 | 83% | 185 | 75%  | <a href="#">gi 489278555 WP_003186220.1</a> |
| <a href="#">Protein F54D5.15, isoform b [Haemonchus contortus]</a>            | 27.4 | 27.4 | 66% | 185 | 88%  | <a href="#">gi 560120563 CDJ94804.1</a>     |
| <a href="#">hypothetical protein [Nocardiosis halotolerans]</a>               | 27.4 | 27.4 | 66% | 186 | 88%  | <a href="#">gi 516140786 WP_017571366.1</a> |
| <a href="#">hypothetical protein [Nocardiosis dassonvillei]</a>               | 27.4 | 27.4 | 66% | 186 | 88%  | <a href="#">gi 502917959 WP_013152935.1</a> |

## Alignments

Error loading alignment ...Try again

BLAST is a registered trademark of the National Library of Medicine.

[Copyright](#) | [Disclaimer](#) | [Privacy](#) | [Accessibility](#) | [Contact](#) | [Send feedback](#)

[NCBI](#) | [NLM](#) | [NIH](#) | [DHHS](#)



NCBI/ BLAST/ blastp suite/ Formatting Results - B92AJCNC01R

Your search parameters were adjusted to search for a short input sequence.

Edit and Resubmit Save Search Strategies Formatting options Download

YouTube How to read this page Blast report description

C4BPB\_KEWDNTTTECRL\_NonMod

RID B92AJCNC01R (Expires on 01-14 09:56 am)

Query ID lcl|225053
Description None
Molecule type amino acid
Query Length 12

Database Name nr
Description All non-redundant GenBank CDS translations+PDB+SwissProt+PIR excluding environmental samples from WGS projects
Program BLASTP 2.2.30+ Citation

Other reports: Search Summary Taxonomy reports Distance tree of results Related Structures Multiple alignment

Graphic Summary

Show Conserved Domains

No putative conserved domains have been detected

Distribution of 103 Blast Hits on the Query Sequence

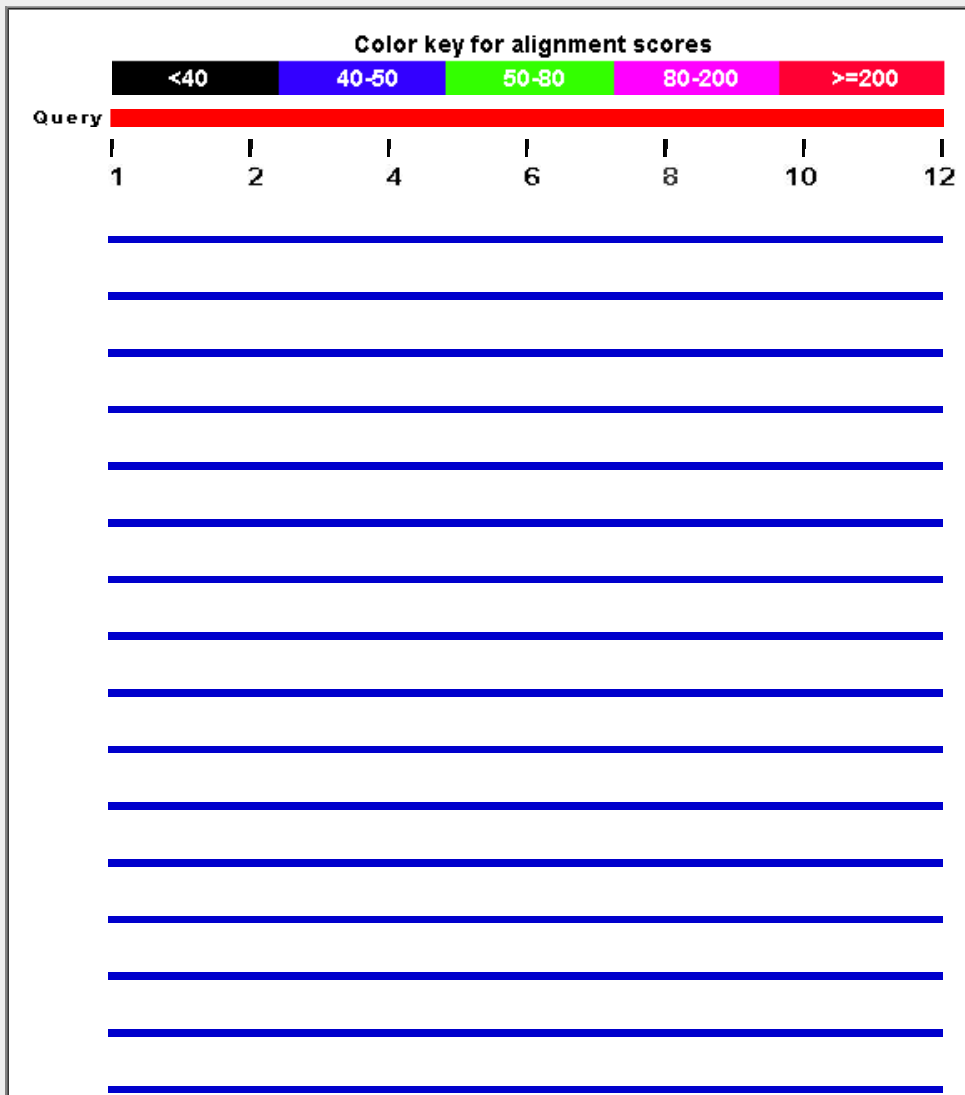

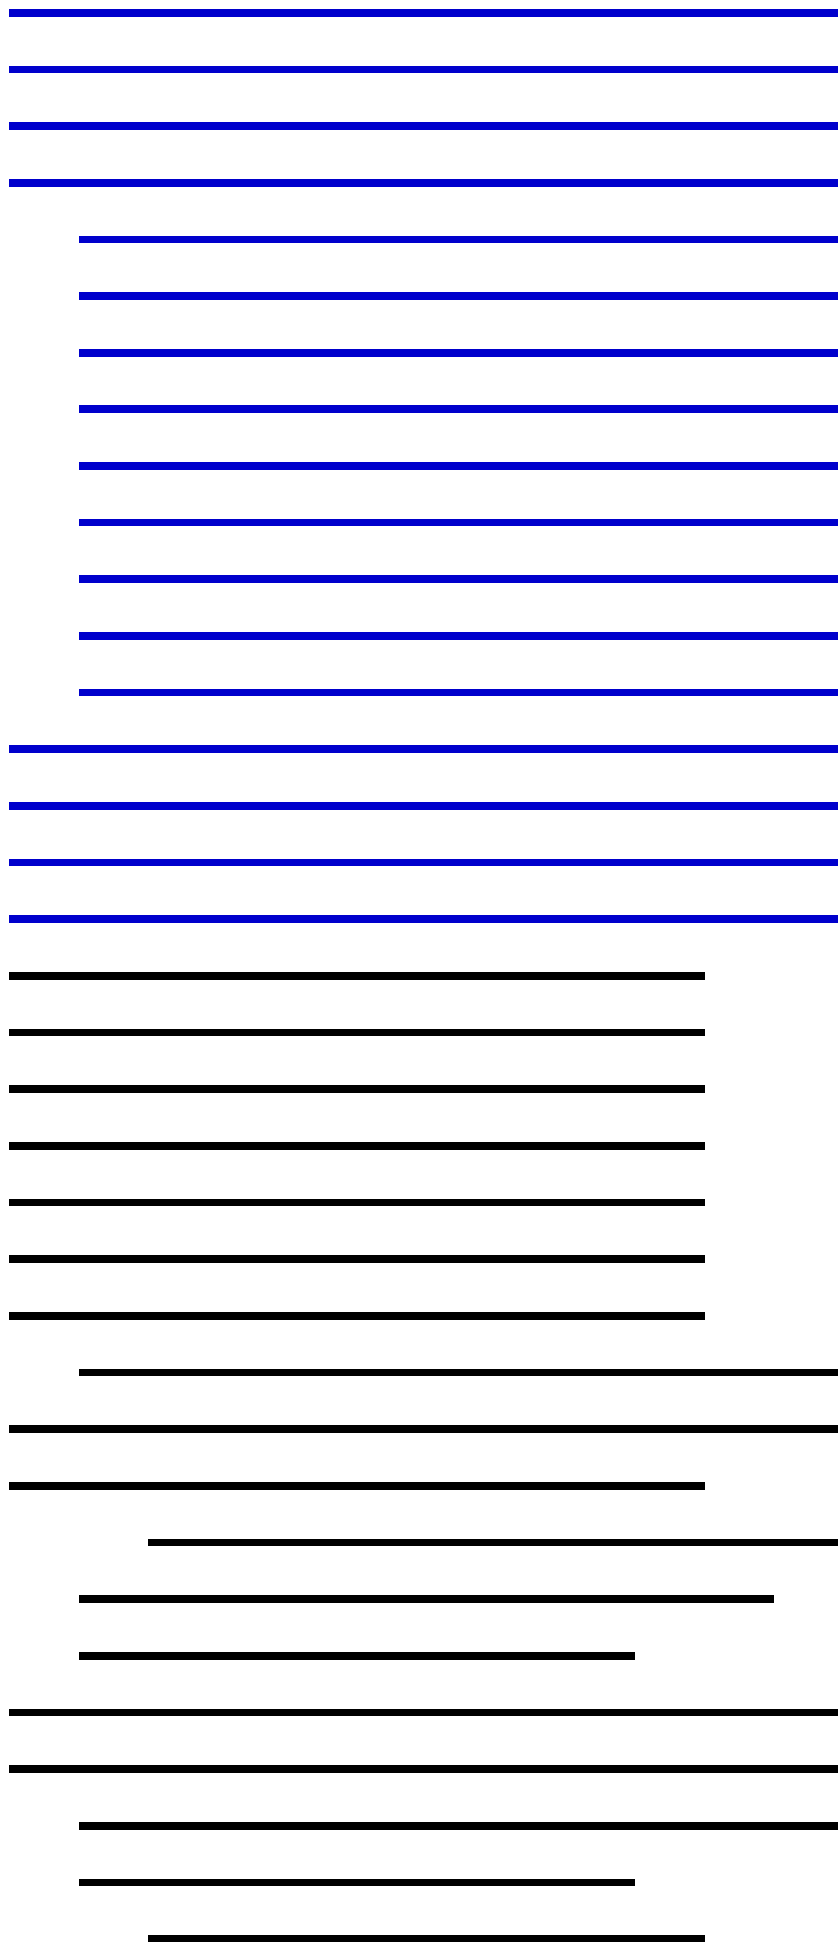

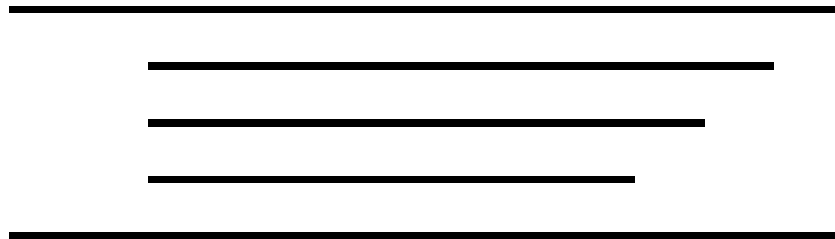

## Descriptions

### Sequences producing significant alignments:

Select: [All](#) [None](#) Selected:0

[↑](#) Alignments 
 [Download](#)
[GenPept](#)
[Graphics](#)
[Distance tree of results](#)
[Multiple alignment](#)

| Description                                                                       | Max score | Total score | Query cover | E value | Ident | Accession                                   |
|-----------------------------------------------------------------------------------|-----------|-------------|-------------|---------|-------|---------------------------------------------|
| <a href="#">unnamed protein product [Homo sapiens]</a>                            | 44.8      | 44.8        | 100%        | 3e-04   | 100%  | <a href="#">gi 194373591 BAG56891.1</a>     |
| <a href="#">PREDICTED: C4b-binding protein beta chain isoform X3 [Pan trogl</a>   | 44.8      | 44.8        | 100%        | 3e-04   | 100%  | <a href="#">gi 694891540 XP_009439669.1</a> |
| <a href="#">PREDICTED: C4b-binding protein beta chain isoform X3 [Pan panis</a>   | 44.8      | 44.8        | 100%        | 3e-04   | 100%  | <a href="#">gi 675771724 XP_008974762.1</a> |
| <a href="#">PREDICTED: C4b-binding protein beta chain isoform X3 [Homo sa</a>     | 44.8      | 44.8        | 100%        | 3e-04   | 100%  | <a href="#">gi 530366462 XP_005273312.1</a> |
| <a href="#">PREDICTED: C4b-binding protein beta chain isoform X2 [Rhinopith</a>   | 44.8      | 44.8        | 100%        | 3e-04   | 100%  | <a href="#">gi 724836382 XP_010363947.1</a> |
| <a href="#">PREDICTED: C4b-binding protein beta chain isoform X2 [Pan trogl</a>   | 44.8      | 44.8        | 100%        | 3e-04   | 100%  | <a href="#">gi 694891534 XP_009439665.1</a> |
| <a href="#">PREDICTED: C4b-binding protein beta chain isoform X2 [Papio an</a>    | 44.8      | 44.8        | 100%        | 3e-04   | 100%  | <a href="#">gi 685519789 XP_009186662.1</a> |
| <a href="#">PREDICTED: C4b-binding protein beta chain isoform X2 [Pan panis</a>   | 44.8      | 44.8        | 100%        | 3e-04   | 100%  | <a href="#">gi 675771715 XP_008974759.1</a> |
| <a href="#">PREDICTED: C4b-binding protein beta chain isoform X6 [Macaca f</a>    | 44.8      | 44.8        | 100%        | 3e-04   | 100%  | <a href="#">gi 544399939 XP_005540733.1</a> |
| <a href="#">C4b-binding protein beta chain isoform 2 precursor [Homo sapiens]</a> | 44.8      | 44.8        | 100%        | 3e-04   | 100%  | <a href="#">gi 62912462 NP_001017364.1</a>  |
| <a href="#">PREDICTED: C4b-binding protein beta chain isoform X1 [Rhinopith</a>   | 44.8      | 44.8        | 100%        | 3e-04   | 100%  | <a href="#">gi 724836379 XP_010363946.1</a> |
| <a href="#">C4b-binding protein beta chain isoform 1 precursor [Homo sapiens]</a> | 44.8      | 44.8        | 100%        | 3e-04   | 100%  | <a href="#">gi 4502505 NP_000707.1</a>      |
| <a href="#">PREDICTED: C4b-binding protein beta chain isoform X2 [Macaca f</a>    | 44.8      | 44.8        | 100%        | 3e-04   | 100%  | <a href="#">gi 544399931 XP_005540729.1</a> |
| <a href="#">PREDICTED: C4b-binding protein beta chain isoform X1 [Papio an</a>    | 44.8      | 44.8        | 100%        | 3e-04   | 100%  | <a href="#">gi 685519785 XP_009186656.1</a> |
| <a href="#">PREDICTED: C4b-binding protein beta chain isoform X1 [Pan panis</a>   | 44.8      | 44.8        | 100%        | 3e-04   | 100%  | <a href="#">gi 397504761 XP_003822949.1</a> |
| <a href="#">hypothetical protein EGM_01442 [Macaca fascicularis]</a>              | 44.8      | 44.8        | 100%        | 3e-04   | 100%  | <a href="#">gi 355745961 EHH50586.1</a>     |
| <a href="#">hypothetical protein EGK_01712 [Macaca mulatta]</a>                   | 44.8      | 44.8        | 100%        | 3e-04   | 100%  | <a href="#">gi 355558818 EHH15598.1</a>     |
| <a href="#">PREDICTED: C4b-binding protein beta chain isoform X1 [Pan trogl</a>   | 44.8      | 44.8        | 100%        | 3e-04   | 100%  | <a href="#">gi 114572288 XP_001166306.1</a> |
| <a href="#">PREDICTED: c4b-binding protein beta chain isoform 3 [Macaca mu</a>    | 44.8      | 44.8        | 100%        | 3e-04   | 100%  | <a href="#">gi 109018561 XP_001083216.1</a> |
| <a href="#">PREDICTED: C4b-binding protein beta chain isoform X1 [Macaca f</a>    | 44.8      | 44.8        | 100%        | 3e-04   | 100%  | <a href="#">gi 544399929 XP_005540728.1</a> |
| <a href="#">PREDICTED: C4b-binding protein beta chain isoform X9 [Chloroce</a>    | 41.8      | 41.8        | 91%         | 0.003   | 100%  | <a href="#">gi 635130917 XP_007986833.1</a> |
| <a href="#">PREDICTED: C4b-binding protein beta chain isoform X8 [Chloroce</a>    | 41.8      | 41.8        | 91%         | 0.003   | 100%  | <a href="#">gi 635130915 XP_007986832.1</a> |
| <a href="#">PREDICTED: C4b-binding protein beta chain isoform X7 [Chloroce</a>    | 41.8      | 41.8        | 91%         | 0.003   | 100%  | <a href="#">gi 635130913 XP_007986831.1</a> |
| <a href="#">PREDICTED: C4b-binding protein beta chain isoform X6 [Chloroce</a>    | 41.8      | 41.8        | 91%         | 0.003   | 100%  | <a href="#">gi 635130911 XP_007986830.1</a> |
| <a href="#">PREDICTED: C4b-binding protein beta chain isoform X5 [Chloroce</a>    | 41.8      | 41.8        | 91%         | 0.003   | 100%  | <a href="#">gi 635130907 XP_007986828.1</a> |
| <a href="#">PREDICTED: C4b-binding protein beta chain isoform X4 [Chloroce</a>    | 41.8      | 41.8        | 91%         | 0.003   | 100%  | <a href="#">gi 635130905 XP_007986827.1</a> |
| <a href="#">PREDICTED: C4b-binding protein beta chain isoform X3 [Chloroce</a>    | 41.8      | 41.8        | 91%         | 0.003   | 100%  | <a href="#">gi 635130903 XP_007986826.1</a> |
| <a href="#">PREDICTED: C4b-binding protein beta chain isoform X2 [Chloroce</a>    | 41.8      | 41.8        | 91%         | 0.003   | 100%  | <a href="#">gi 635130901 XP_007986825.1</a> |

|                                                                                    |      |      |      |       |      |                                             |
|------------------------------------------------------------------------------------|------|------|------|-------|------|---------------------------------------------|
| <a href="#">PREDICTED: C4b-binding protein beta chain isoform X1 [Chlorocet</a>    | 41.8 | 41.8 | 91%  | 0.003 | 100% | <a href="#">gil635130899 XP_007986823.1</a> |
| <a href="#">PREDICTED: C4b-binding protein beta chain isoform X3 [Pongo ab</a>     | 41.4 | 41.4 | 100% | 0.004 | 92%  | <a href="#">gil686700216 XP_009236698.1</a> |
| <a href="#">PREDICTED: C4b-binding protein beta chain isoform X2 [Pongo ab</a>     | 41.4 | 41.4 | 100% | 0.004 | 92%  | <a href="#">gil686700213 XP_009236694.1</a> |
| <a href="#">PREDICTED: C4b-binding protein beta chain isoform X1 [Pongo ab</a>     | 41.4 | 41.4 | 100% | 0.004 | 92%  | <a href="#">gil297662141 XP_002809574.1</a> |
| <a href="#">PREDICTED: C4b-binding protein beta chain isoform 1 [Nomascus</a>      | 40.5 | 40.5 | 100% | 0.009 | 92%  | <a href="#">gil332266848 XP_003282407.1</a> |
| <a href="#">PREDICTED: C4b-binding protein beta chain isoform X2 [Callithrix j</a> | 38.4 | 38.4 | 83%  | 0.044 | 100% | <a href="#">gil675749407 XP_008983835.1</a> |
| <a href="#">PREDICTED: C4b-binding protein beta chain isoform X1 [Callithrix j</a> | 38.4 | 38.4 | 83%  | 0.044 | 100% | <a href="#">gil296230632 XP_002760794.1</a> |
| <a href="#">PREDICTED: C4b-binding protein beta chain isoform X2 [Saimiri bc</a>   | 33.3 | 33.3 | 83%  | 2.1   | 90%  | <a href="#">gil725574024 XP_010339305.1</a> |
| <a href="#">PREDICTED: C4b-binding protein beta chain isoform X1 [Saimiri bc</a>   | 33.3 | 33.3 | 83%  | 2.1   | 90%  | <a href="#">gil403277664 XP_003930472.1</a> |
| <a href="#">putative Fimh-like protein [Vibrio nigripulchritudo]</a>               | 32.9 | 32.9 | 83%  | 2.7   | 80%  | <a href="#">gil550352361 WP_022612127.1</a> |
| <a href="#">putative Fimh-like protein [Vibrio nigripulchritudo]</a>               | 32.9 | 32.9 | 83%  | 2.7   | 80%  | <a href="#">gil550281458 WP_022607838.1</a> |
| <a href="#">hypothetical protein [Vibrio nigripulchritudo]</a>                     | 32.9 | 32.9 | 83%  | 2.7   | 80%  | <a href="#">gil490542018 WP_004407142.1</a> |
| <a href="#">PREDICTED: C4b-binding protein beta chain [Cavia porcellus]</a>        | 30.8 | 30.8 | 91%  | 14    | 73%  | <a href="#">gil348577871 XP_003474707.1</a> |
| <a href="#">PREDICTED: C4b-binding protein beta chain [Nannospalax galili]</a>     | 30.8 | 30.8 | 100% | 14    | 75%  | <a href="#">gil674096417 XP_008821570.1</a> |
| <a href="#">putative Fimh-like protein [Vibrio nigripulchritudo]</a>               | 29.5 | 29.5 | 83%  | 35    | 70%  | <a href="#">gil549773927 WP_022549773.1</a> |
| <a href="#">PREDICTED: fibroin heavy chain-like [Callithrix jacchus]</a>           | 29.1 | 87.8 | 83%  | 49    | 75%  | <a href="#">gil675768476 XP_008987859.1</a> |
| <a href="#">hypothetical protein TRIUR3_31016 [Triticum urartu]</a>                | 28.6 | 28.6 | 83%  | 70    | 70%  | <a href="#">gil473936676 EMS50150.1</a>     |
| <a href="#">hypothetical protein [Clostridium sp. CAG:62]</a>                      | 28.6 | 28.6 | 66%  | 70    | 88%  | <a href="#">gil548057742 WP_022376409.1</a> |
| <a href="#">PREDICTED: C4b-binding protein beta chain isoform X2 [Galeopte</a>     | 28.2 | 28.2 | 100% | 90    | 58%  | <a href="#">gil667314769 XP_008585888.1</a> |
| <a href="#">PREDICTED: C4b-binding protein beta chain isoform X1 [Galeopte</a>     | 28.2 | 28.2 | 100% | 91    | 58%  | <a href="#">gil667314766 XP_008585886.1</a> |
| <a href="#">hypothetical protein HMPREF1541_04550 [Cyphellophora europae</a>       | 28.2 | 28.2 | 91%  | 91    | 73%  | <a href="#">gil671157189 XP_008717117.1</a> |
| <a href="#">ATP-dependent protease ATP-binding subunit HslU [Psychromonas</a>      | 28.2 | 28.2 | 66%  | 94    | 88%  | <a href="#">gil655482811 WP_028864616.1</a> |
| <a href="#">predicted protein [Capsaspora owczaraki ATCC 30864]</a>                | 28.2 | 28.2 | 66%  | 96    | 88%  | <a href="#">gil470297261 XP_004345571.1</a> |
| <a href="#">cotH protein [Clostridium sp. CAG:230]</a>                             | 28.2 | 28.2 | 100% | 96    | 43%  | <a href="#">gil547728152 WP_022142301.1</a> |
| <a href="#">hypothetical protein VOLCADRAFT_95860 [Volvox carteri f. nagarie</a>   | 28.2 | 28.2 | 75%  | 96    | 78%  | <a href="#">gil302846827 XP_002954949.1</a> |
| <a href="#">predicted protein [Capsaspora owczaraki ATCC 30864]</a>                | 28.2 | 28.2 | 66%  | 96    | 88%  | <a href="#">gil470297265 XP_004345572.1</a> |
| <a href="#">MULTISPECIES: hypothetical protein [Mycobacterium]</a>                 | 27.8 | 27.8 | 58%  | 118   | 100% | <a href="#">gil499882067 WP_011562801.1</a> |
| <a href="#">hypothetical protein C922_01705 [Plasmodium inui San Antonio 1]</a>    | 27.8 | 27.8 | 100% | 122   | 67%  | <a href="#">gil672191245 XP_008815530.1</a> |
| <a href="#">putative daunorubicin C-13 ketoreductase [Colletotrichum sublineol</a> | 27.8 | 27.8 | 58%  | 127   | 100% | <a href="#">gil640919754 KDN64268.1</a>     |
| <a href="#">daunorubicin C-13 ketoreductase [Colletotrichum graminicola M1.0]</a>  | 27.8 | 27.8 | 58%  | 127   | 100% | <a href="#">gil310798716 EFQ33609.1</a>     |
| <a href="#">hypothetical protein IX49_03610 [Cellulophaga lytica]</a>              | 27.8 | 27.8 | 66%  | 128   | 88%  | <a href="#">gil682032523 AIM59647.1</a>     |
| <a href="#">LVIVD repeat-containing protein [Cellulophaga geojensis KL-A]</a>      | 27.8 | 27.8 | 66%  | 128   | 88%  | <a href="#">gil584428234 EWH12917.1</a>     |
| <a href="#">hypothetical protein SCHCODRAFT_104079 [Schizophyllum comm</a>         | 27.8 | 27.8 | 83%  | 128   | 80%  | <a href="#">gil302698025 XP_003038691.1</a> |
| <a href="#">hypothetical protein [Enterococcus faecalis]</a>                       | 27.8 | 27.8 | 58%  | 130   | 100% | <a href="#">gil488311279 WP_002380664.1</a> |
| <a href="#">predicted protein [Postia placenta Mad-698-R]</a>                      | 27.8 | 27.8 | 100% | 130   | 75%  | <a href="#">gil242211098 XP_002471389.1</a> |
| <a href="#">envelope glycoprotein [Human immunodeficiency virus 1]</a>             | 27.8 | 27.8 | 58%  | 131   | 100% | <a href="#">gil328550401 AEB22053.1</a>     |
| <a href="#">hypothetical protein KGM_12763 [Danaus plexippus]</a>                  | 27.8 | 27.8 | 75%  | 132   | 78%  | <a href="#">gil357601730 EHJ63136.1</a>     |
| <a href="#">PREDICTED: LOW QUALITY PROTEIN: C4b-binding protein beta</a>           | 27.4 | 27.4 | 91%  | 170   | 64%  | <a href="#">gil533120065 XP_005375468.1</a> |
| <a href="#">PREDICTED: C4b-binding protein beta chain [Jaculus jaculus]</a>        | 27.4 | 27.4 | 91%  | 170   | 73%  | <a href="#">gil507559572 XP_004663509.1</a> |
| <a href="#">PREDICTED: peroxisome biogenesis factor 10 [Echinops telfairi]</a>     | 27.4 | 27.4 | 91%  | 174   | 73%  | <a href="#">gil507657324 XP_004705535.1</a> |
| <a href="#">PREDICTED: uncharacterized protein LOC103849553 [Brassica raj</a>      | 27.4 | 27.4 | 75%  | 176   | 80%  | <a href="#">gil685385017 XP_009124564.1</a> |
| <a href="#">PREDICTED: aminopeptidase Q [Callithrix jacchus]</a>                   | 27.4 | 27.4 | 75%  | 178   | 56%  | <a href="#">gil296193920 XP_002744734.1</a> |
| <a href="#">dynein heavy chain axonemal [Clonorchis sinensis]</a>                  | 27.4 | 27.4 | 66%  | 180   | 88%  | <a href="#">gil358339229 GAA47333.1</a>     |
| <a href="#">hypothetical protein T265_13739 [Opisthorchis viverrini]</a>           | 27.4 | 27.4 | 66%  | 180   | 88%  | <a href="#">gil684386665 XP_009168537.1</a> |
| <a href="#">hypothetical protein DFA_06522 [Dictyostelium fasciculatum]</a>        | 26.9 | 26.9 | 83%  | 189   | 62%  | <a href="#">gil470268001 XP_004362223.1</a> |

|                                                                                    |      |      |      |     |     |                                             |
|------------------------------------------------------------------------------------|------|------|------|-----|-----|---------------------------------------------|
| <a href="#">HNH endonuclease [Deinococcus gobiensis]</a>                           | 26.9 | 26.9 | 75%  | 223 | 78% | <a href="#">gij504499146 WP_014686248.1</a> |
| <a href="#">HNH endonuclease [Deinococcus aquatilis]</a>                           | 26.9 | 26.9 | 75%  | 226 | 78% | <a href="#">gij648607162 WP_026298913.1</a> |
| <a href="#">HNH endonuclease [Deinococcus sp. RL]</a>                              | 26.9 | 26.9 | 75%  | 227 | 78% | <a href="#">gij656341992 KEF34954.1</a>     |
| <a href="#">HNH endonuclease [Deinococcus murrayi]</a>                             | 26.9 | 26.9 | 75%  | 227 | 78% | <a href="#">gij653254237 WP_027459639.1</a> |
| <a href="#">hypothetical protein [Ruminobacter sp. RM87]</a>                       | 26.9 | 26.9 | 66%  | 227 | 88% | <a href="#">gij671608437 WP_031580001.1</a> |
| <a href="#">CG32297-PA [Cryptosporidium hominis TU502]</a>                         | 26.9 | 26.9 | 83%  | 235 | 53% | <a href="#">gij67624775 XP_668670.1</a>     |
| <a href="#">phosphoserine aminotransferase [Alistipes sp. CAG:435]</a>             | 26.9 | 26.9 | 91%  | 235 | 73% | <a href="#">gij547921208 WP_022323484.1</a> |
| <a href="#">phosphoserine aminotransferase [Alistipes sp. CAG:514]</a>             | 26.9 | 26.9 | 91%  | 235 | 73% | <a href="#">gij546330868 WP_021838129.1</a> |
| <a href="#">hypothetical protein [Cryptosporidium parvum Iowa II]</a>              | 26.9 | 26.9 | 83%  | 238 | 53% | <a href="#">gij66359168 XP_626762.1</a>     |
| <a href="#">hypothetical protein DX03_09100 [Stenotrophomonas rhizophila]</a>      | 26.9 | 26.9 | 75%  | 238 | 78% | <a href="#">gij627789612 AHY58828.1</a>     |
| <a href="#">dolichyl-phosphate-mannose--protein mannosyltransferase [Kibdelc</a>   | 26.9 | 26.9 | 66%  | 239 | 88% | <a href="#">gij703217979 WP_033383461.1</a> |
| <a href="#">acyl-CoA synthetase [Nitrosomonas cryotolerans]</a>                    | 26.9 | 26.9 | 75%  | 240 | 64% | <a href="#">gij655011745 WP_028460811.1</a> |
| <a href="#">PREDICTED: bile salt-activated lipase-like [Latimeria chalumnae]</a>   | 26.9 | 26.9 | 75%  | 241 | 78% | <a href="#">gij557007729 XP_006005124.1</a> |
| <a href="#">PREDICTED: LOW QUALITY PROTEIN: NLR family, pyrin domain</a>           | 26.9 | 26.9 | 83%  | 242 | 70% | <a href="#">gij512938701 XP_004921487.1</a> |
| <a href="#">single-stranded DNA-binding protein [Hawaiian green turtle herpesv</a> | 26.9 | 26.9 | 83%  | 242 | 70% | <a href="#">gij53759079 AAU93328.1</a>      |
| <a href="#">NACHT, LRR and PYD domains-containing protein 3 [Heterocephal</a>      | 26.9 | 26.9 | 83%  | 242 | 70% | <a href="#">gij351715200 EHB18119.1</a>     |
| <a href="#">PREDICTED: LOW QUALITY PROTEIN: NLR family, pyrin domain</a>           | 26.9 | 26.9 | 83%  | 242 | 70% | <a href="#">gij513027226 XP_004921286.1</a> |
| <a href="#">F-UL29 protein [Chelonid herpesvirus 5]</a>                            | 26.9 | 26.9 | 83%  | 242 | 70% | <a href="#">gij558852253 AHA93358.1</a>     |
| <a href="#">UL29 [Fibropapilloma-associated turtle herpesvirus]</a>                | 26.9 | 26.9 | 83%  | 242 | 70% | <a href="#">gij52551097 AAU84533.1</a>      |
| <a href="#">single-stranded DNA binding protein [Green turtle herpesvirus]</a>     | 26.9 | 26.9 | 83%  | 242 | 70% | <a href="#">gij34419905 AAQ67362.1</a>      |
| <a href="#">serine/threonine kinase [Naegleria gruberi strain NEG-M]</a>           | 26.9 | 26.9 | 91%  | 243 | 64% | <a href="#">gij290996855 XP_002680997.1</a> |
| <a href="#">hypothetical protein YQE_11666 [Dendroctonus ponderosae]</a>           | 26.9 | 26.9 | 91%  | 243 | 73% | <a href="#">gij478251089 ENN71565.1</a>     |
| <a href="#">hypothetical protein D910_10359 [Dendroctonus ponderosae]</a>          | 26.9 | 26.9 | 91%  | 243 | 73% | <a href="#">gij546683217 ERL93057.1</a>     |
| <a href="#">PREDICTED: 1-phosphatidylinositol 4,5-bisphosphate phosphodies</a>     | 26.9 | 26.9 | 75%  | 244 | 78% | <a href="#">gij700428978 XP_009953149.1</a> |
| <a href="#">PREDICTED: 1-phosphatidylinositol 4,5-bisphosphate phosphodies</a>     | 26.9 | 26.9 | 75%  | 244 | 78% | <a href="#">gij700428976 XP_009953148.1</a> |
| <a href="#">DNA repair protein Rada [Aeromonas media]</a>                          | 26.5 | 26.5 | 100% | 299 | 75% | <a href="#">gij375813447 AFA84952.1</a>     |
| <a href="#">DNA repair protein Rada [Aeromonas salmonicida]</a>                    | 26.5 | 26.5 | 100% | 299 | 75% | <a href="#">gij375813439 AFA84948.1</a>     |

## Alignments

Download GenPept Graphics

Next Previous Descriptions

unnamed protein product [Homo sapiens]

Sequence ID: [gij194373591|dbj|BAG56891.1](#) Length: 218 Number of Matches: 1

Range 1: 57 to 68 GenPept Graphics

Next Match Previous Match

| Score         | Expect | Identities  | Positives   | Gaps     |
|---------------|--------|-------------|-------------|----------|
| 44.8 bits(98) | 3e-04  | 12/12(100%) | 12/12(100%) | 0/12(0%) |

Query 1 KEWDNTTTECRL 12  
 KEWDNTTTECRL  
 Sbjct 57 KEWDNTTTECRL 68

### Related Information

[Gene](#) - associated gene details

Download GenPept Graphics

Next Previous Descriptions

PREDICTED: C4b-binding protein beta chain isoform X3 [Pan troglodytes]

Sequence ID: [gij694891540|ref|XP\\_009439669.1](#) Length: 227 Number of Matches: 1

Range 1: 66 to 77 GenPept Graphics

Next Match Previous Match

| Score         | Expect | Identities  | Positives   | Gaps     |
|---------------|--------|-------------|-------------|----------|
| 44.8 bits(98) | 3e-04  | 12/12(100%) | 12/12(100%) | 0/12(0%) |

Query 1 KEWDNTTTECRL 12

### Related Information

[Gene](#) - associated gene details

Sbjct 66 KEWDNTTECRL 77

[Download](#) [GenPept](#) [Graphics](#)

[Next](#) [Previous](#) [Descriptions](#)

PREDICTED: C4b-binding protein beta chain isoform X3 [Pan paniscus]

Sequence ID: [gi|675771724|ref|XP\\_008974762.1|](#) Length: 227 Number of Matches: 1

Range 1: 66 to 77 [GenPept](#) [Graphics](#)

[Next Match](#) [Previous Match](#)

| Score         | Expect | Identities  | Positives   | Gaps     |
|---------------|--------|-------------|-------------|----------|
| 44.8 bits(98) | 3e-04  | 12/12(100%) | 12/12(100%) | 0/12(0%) |

Query 1 KEWDNTTECRL 12  
 KEWDNTTECRL  
 Sbjct 66 KEWDNTTECRL 77

**Related Information**

[Gene](#) - associated gene details  
[Map Viewer](#) - aligned genomic context

[Download](#) [GenPept](#) [Graphics](#)

[Next](#) [Previous](#) [Descriptions](#)

PREDICTED: C4b-binding protein beta chain isoform X3 [Homo sapiens]

Sequence ID: [gi|530366462|ref|XP\\_005273312.1|](#) Length: 227 Number of Matches: 1

Range 1: 66 to 77 [GenPept](#) [Graphics](#)

[Next Match](#) [Previous Match](#)

| Score         | Expect | Identities  | Positives   | Gaps     |
|---------------|--------|-------------|-------------|----------|
| 44.8 bits(98) | 3e-04  | 12/12(100%) | 12/12(100%) | 0/12(0%) |

Query 1 KEWDNTTECRL 12  
 KEWDNTTECRL  
 Sbjct 66 KEWDNTTECRL 77

**Related Information**

[Gene](#) - associated gene details  
[Map Viewer](#) - aligned genomic context

[Download](#) [GenPept](#) [Graphics](#)

[Next](#) [Previous](#) [Descriptions](#)

PREDICTED: C4b-binding protein beta chain isoform X2 [Rhinopithecus roxellana]

Sequence ID: [gi|724836382|ref|XP\\_010363947.1|](#) Length: 251 Number of Matches: 1

Range 1: 66 to 77 [GenPept](#) [Graphics](#)

[Next Match](#) [Previous Match](#)

| Score         | Expect | Identities  | Positives   | Gaps     |
|---------------|--------|-------------|-------------|----------|
| 44.8 bits(98) | 3e-04  | 12/12(100%) | 12/12(100%) | 0/12(0%) |

Query 1 KEWDNTTECRL 12  
 KEWDNTTECRL  
 Sbjct 66 KEWDNTTECRL 77

**Related Information**

[Gene](#) - associated gene details  
[Map Viewer](#) - aligned genomic context

BLAST is a registered trademark of the National Library of Medicine.

NCBI/ BLAST/ blastp suite/ Formatting Results - BTF8S851016

Your search parameters were adjusted to search for a short input sequence.

[Edit and Resubmit](#) [Save Search Strategies](#) [Formatting options](#) [Download](#) [YouTube](#) [How to read this page](#) [Blast report description](#)

### C4BPB\_KKTLFCDASKE\_Mod

RID [BTF8S851016](#) (Expires on 01-20 15:15 pm)

Query ID |cl|92315  
 Description None  
 Molecule type amino acid  
 Query Length 11

Database Name nr  
 Description All non-redundant GenBank CDS translations+PDB+SwissProt+PIR+PRF excluding environmental samples from WGS projects  
 Program BLASTP 2.2.30+ [Citation](#)

Other reports: [Search Summary](#) [Taxonomy reports](#) [Distance tree of results](#) [Related Structures](#) [Multiple alignment](#)

### Graphic Summary

[Show Conserved Domains](#)

No putative conserved domains have been detected

Distribution of 101 Blast Hits on the Query Sequence

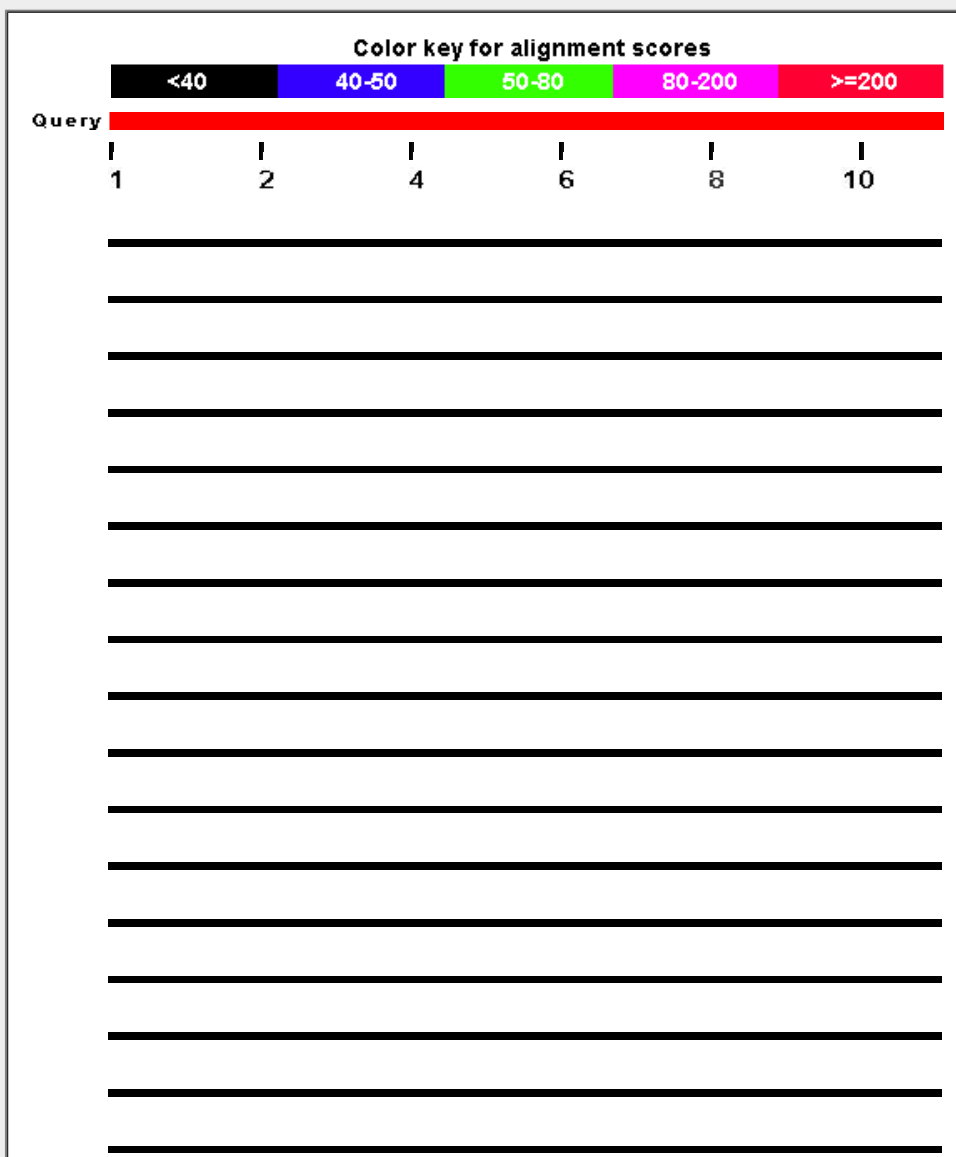



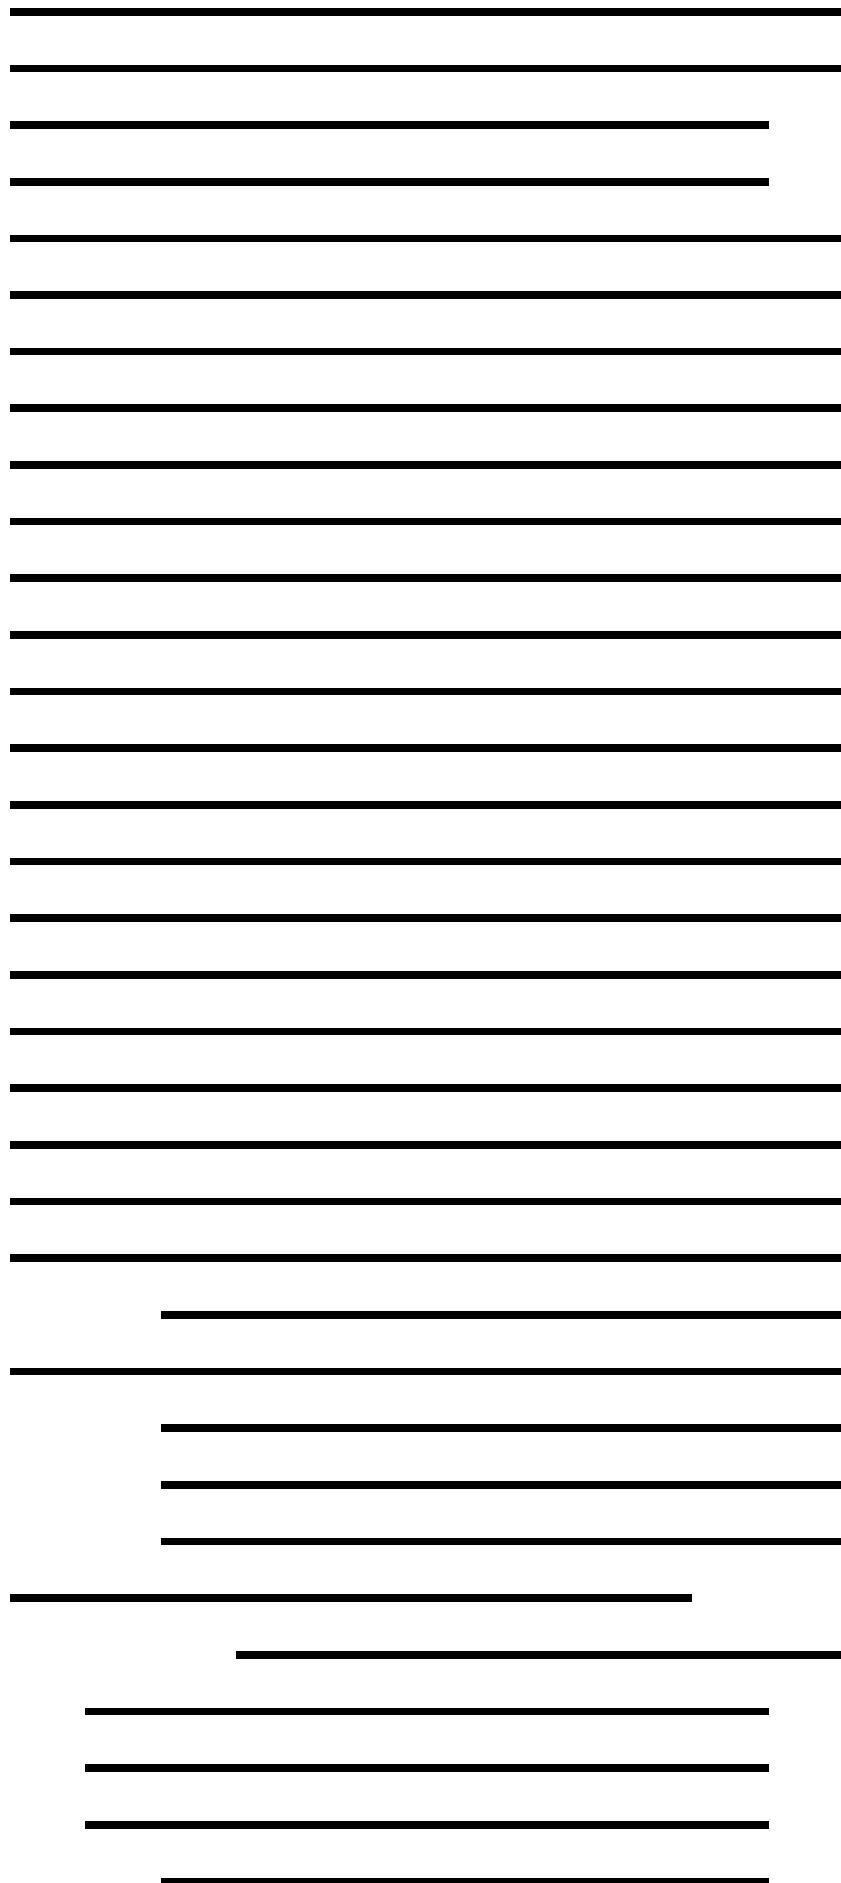

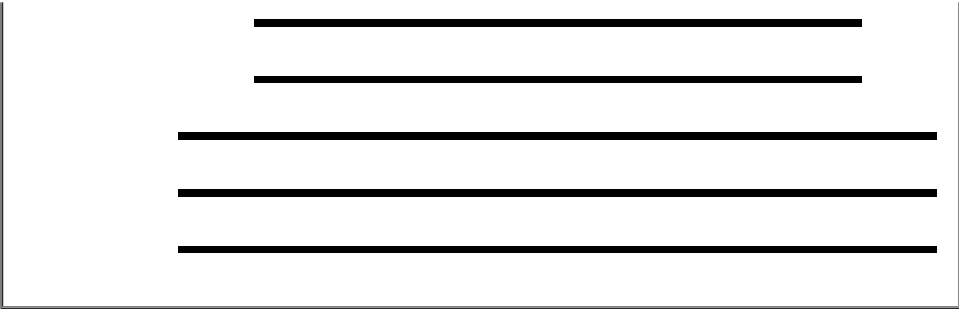

**Descriptions**

**Sequences producing significant alignments:**

Select: [All](#) [None](#) Selected:0

[Alignments](#)
[Download](#)
[GenPept](#)
[Graphics](#)
[Distance tree of results](#)
[Multiple alignment](#)


| Description                                                                   | Max score | Total score | Query cover | E value | Ident | Accession                                   |
|-------------------------------------------------------------------------------|-----------|-------------|-------------|---------|-------|---------------------------------------------|
| <a href="#">PREDICTED: C4b-binding protein beta chain isoform X3 [Pong</a>    | 35.4      | 35.4        | 100%        | 0.39    | 91%   | <a href="#">gi 686700216 XP_009236698.1</a> |
| <a href="#">unnamed protein product [Homo sapiens]</a>                        | 35.4      | 35.4        | 100%        | 0.39    | 91%   | <a href="#">gi 194373591 BAG56891.1</a>     |
| <a href="#">PREDICTED: C4b-binding protein beta chain isoform X3 [Pan t</a>   | 35.4      | 35.4        | 100%        | 0.39    | 91%   | <a href="#">gi 694891540 XP_009439669.1</a> |
| <a href="#">PREDICTED: C4b-binding protein beta chain isoform X3 [Pan r</a>   | 35.4      | 35.4        | 100%        | 0.39    | 91%   | <a href="#">gi 675771724 XP_008974762.1</a> |
| <a href="#">PREDICTED: C4b-binding protein beta chain isoform X3 [Homy</a>    | 35.4      | 35.4        | 100%        | 0.39    | 91%   | <a href="#">gi 530366462 XP_005273312.1</a> |
| <a href="#">PREDICTED: C4b-binding protein beta chain isoform X2 [Rhinc</a>   | 35.4      | 35.4        | 100%        | 0.40    | 91%   | <a href="#">gi 724836382 XP_010363947.1</a> |
| <a href="#">PREDICTED: C4b-binding protein beta chain isoform X2 [Pan t</a>   | 35.4      | 35.4        | 100%        | 0.40    | 91%   | <a href="#">gi 694891534 XP_009439665.1</a> |
| <a href="#">PREDICTED: C4b-binding protein beta chain isoform X2 [Pong</a>    | 35.4      | 35.4        | 100%        | 0.40    | 91%   | <a href="#">gi 686700213 XP_009236694.1</a> |
| <a href="#">PREDICTED: C4b-binding protein beta chain isoform X2 [Pan r</a>   | 35.4      | 35.4        | 100%        | 0.40    | 91%   | <a href="#">gi 675771715 XP_008974759.1</a> |
| <a href="#">C4b-binding protein beta chain isoform 2 precursor [Homo sapi</a> | 35.4      | 35.4        | 100%        | 0.40    | 91%   | <a href="#">gi 62912462 NP_001017364.1</a>  |
| <a href="#">PREDICTED: C4b-binding protein beta chain isoform X1 [Rhinc</a>   | 35.4      | 35.4        | 100%        | 0.40    | 91%   | <a href="#">gi 724836379 XP_010363946.1</a> |
| <a href="#">C4b-binding protein beta chain isoform 1 precursor [Homo sapi</a> | 35.4      | 35.4        | 100%        | 0.40    | 91%   | <a href="#">gi 4502505 NP_000707.1</a>      |
| <a href="#">PREDICTED: C4b-binding protein beta chain isoform X1 [Pan r</a>   | 35.4      | 35.4        | 100%        | 0.40    | 91%   | <a href="#">gi 397504761 XP_003822949.1</a> |
| <a href="#">PREDICTED: C4b-binding protein beta chain isoform 1 [Nomas</a>    | 35.4      | 35.4        | 100%        | 0.40    | 91%   | <a href="#">gi 332266848 XP_003282407.1</a> |
| <a href="#">PREDICTED: C4b-binding protein beta chain isoform X1 [Pong</a>    | 35.4      | 35.4        | 100%        | 0.40    | 91%   | <a href="#">gi 297662141 XP_002809574.1</a> |
| <a href="#">PREDICTED: C4b-binding protein beta chain isoform X1 [Pan t</a>   | 35.4      | 35.4        | 100%        | 0.40    | 91%   | <a href="#">gi 114572288 XP_001166306.1</a> |
| <a href="#">PREDICTED: C4b-binding protein beta chain isoform X2 [Callit</a>  | 35.4      | 35.4        | 100%        | 0.40    | 91%   | <a href="#">gi 675749407 XP_008983835.1</a> |
| <a href="#">PREDICTED: C4b-binding protein beta chain isoform X1 [Callit</a>  | 35.4      | 35.4        | 100%        | 0.40    | 91%   | <a href="#">gi 296230632 XP_002760794.1</a> |
| <a href="#">PREDICTED: LOW QUALITY PROTEIN: C4b-binding protein b</a>         | 35.4      | 35.4        | 100%        | 0.40    | 91%   | <a href="#">gi 471369765 XP_004375397.1</a> |
| <a href="#">PREDICTED: C4b-binding protein beta chain isoform X2 [Saim</a>    | 32.0      | 32.0        | 90%         | 5.2     | 90%   | <a href="#">gi 725574024 XP_010339305.1</a> |
| <a href="#">PREDICTED: C4b-binding protein beta chain isoform X1 [Saim</a>    | 32.0      | 32.0        | 90%         | 5.2     | 90%   | <a href="#">gi 403277664 XP_003930472.1</a> |
| <a href="#">PREDICTED: C4b-binding protein beta chain isoform X2 [Papi</a>    | 31.6      | 31.6        | 100%        | 7.1     | 82%   | <a href="#">gi 685519789 XP_009186662.1</a> |
| <a href="#">PREDICTED: C4b-binding protein beta chain isoform X6 [Maca</a>    | 31.6      | 31.6        | 100%        | 7.1     | 82%   | <a href="#">gi 544399939 XP_005540733.1</a> |
| <a href="#">PREDICTED: C4b-binding protein beta chain isoform X2 [Maca</a>    | 31.6      | 31.6        | 100%        | 7.1     | 82%   | <a href="#">gi 544399931 XP_005540729.1</a> |
| <a href="#">PREDICTED: C4b-binding protein beta chain isoform X1 [Papi</a>    | 31.6      | 31.6        | 100%        | 7.1     | 82%   | <a href="#">gi 685519785 XP_009186656.1</a> |
| <a href="#">hypothetical protein EGM_01442 [Macaca fascicularis]</a>          | 31.6      | 31.6        | 100%        | 7.1     | 82%   | <a href="#">gi 355745961 EHH50586.1</a>     |
| <a href="#">hypothetical protein EGK_01712 [Macaca mulatta]</a>               | 31.6      | 31.6        | 100%        | 7.1     | 82%   | <a href="#">gi 355558818 EHH15598.1</a>     |
| <a href="#">PREDICTED: c4b-binding protein beta chain isoform 3 [Macac</a>    | 31.6      | 31.6        | 100%        | 7.1     | 82%   | <a href="#">gi 109018561 XP_001083216.1</a> |
| <a href="#">PREDICTED: C4b-binding protein beta chain isoform X1 [Maca</a>    | 31.6      | 31.6        | 100%        | 7.2     | 82%   | <a href="#">gi 544399929 XP_005540728.1</a> |

|                                                                                    |      |      |      |    |      |                                             |
|------------------------------------------------------------------------------------|------|------|------|----|------|---------------------------------------------|
| <a href="#">PREDICTED: C4b-binding protein beta chain isoform X9 [Chlor</a>        | 30.8 | 30.8 | 100% | 13 | 82%  | <a href="#">gil635130917 XP_007986833.1</a> |
| <a href="#">PREDICTED: C4b-binding protein beta chain isoform X8 [Chlor</a>        | 30.8 | 30.8 | 100% | 13 | 82%  | <a href="#">gil635130915 XP_007986832.1</a> |
| <a href="#">PREDICTED: C4b-binding protein beta chain isoform X7 [Chlor</a>        | 30.8 | 30.8 | 100% | 13 | 82%  | <a href="#">gil635130913 XP_007986831.1</a> |
| <a href="#">PREDICTED: C4b-binding protein beta chain isoform X6 [Chlor</a>        | 30.8 | 30.8 | 100% | 14 | 82%  | <a href="#">gil635130911 XP_007986830.1</a> |
| <a href="#">PREDICTED: C4b-binding protein beta chain isoform X5 [Chlor</a>        | 30.8 | 30.8 | 100% | 14 | 82%  | <a href="#">gil635130907 XP_007986828.1</a> |
| <a href="#">PREDICTED: C4b-binding protein beta chain isoform X4 [Chlor</a>        | 30.8 | 30.8 | 100% | 14 | 82%  | <a href="#">gil635130905 XP_007986827.1</a> |
| <a href="#">PREDICTED: C4b-binding protein beta chain isoform X3 [Chlor</a>        | 30.8 | 30.8 | 100% | 14 | 82%  | <a href="#">gil635130903 XP_007986826.1</a> |
| <a href="#">PREDICTED: C4b-binding protein beta chain isoform X2 [Chlor</a>        | 30.8 | 30.8 | 100% | 14 | 82%  | <a href="#">gil635130901 XP_007986825.1</a> |
| <a href="#">PREDICTED: C4b-binding protein beta chain isoform X1 [Chlor</a>        | 30.8 | 30.8 | 100% | 14 | 82%  | <a href="#">gil635130899 XP_007986823.1</a> |
| <a href="#">PREDICTED: C4b-binding protein beta chain [Chrysochloris as</a>        | 30.8 | 30.8 | 100% | 14 | 82%  | <a href="#">gil586450676 XP_006834269.1</a> |
| <a href="#">PREDICTED: C4b-binding protein beta chain isoform X2 [Galer</a>        | 29.5 | 29.5 | 100% | 34 | 73%  | <a href="#">gil667314769 XP_008585888.1</a> |
| <a href="#">PREDICTED: C4b-binding protein beta chain [Myotis davidii]</a>         | 29.5 | 29.5 | 81%  | 34 | 89%  | <a href="#">gil584068188 XP_006754475.1</a> |
| <a href="#">PREDICTED: C4b-binding protein beta chain isoform X1 [Galer</a>        | 29.5 | 29.5 | 100% | 35 | 73%  | <a href="#">gil667314766 XP_008585886.1</a> |
| <a href="#">PREDICTED: C4b-binding protein beta chain isoform X2 [Myoti</a>        | 29.5 | 29.5 | 81%  | 35 | 89%  | <a href="#">gil554587742 XP_005885272.1</a> |
| <a href="#">PREDICTED: C4b-binding protein beta chain [Myotis lucifugus]</a>       | 29.5 | 29.5 | 81%  | 35 | 89%  | <a href="#">gil558152655 XP_006094937.1</a> |
| <a href="#">PREDICTED: C4b-binding protein beta chain isoform X1 [Myoti</a>        | 29.5 | 29.5 | 81%  | 35 | 89%  | <a href="#">gil554587740 XP_005885271.1</a> |
| <a href="#">PREDICTED: C4b-binding protein beta chain [Ornithorhynchus</a>         | 29.1 | 29.1 | 81%  | 40 | 89%  | <a href="#">gil620984032 XP_007659774.1</a> |
| <a href="#">hypothetical protein DDB_G0277599 [Dictyostelium discoideur</a>        | 29.1 | 29.1 | 72%  | 46 | 100% | <a href="#">gil66817412 XP_642559.1</a>     |
| <a href="#">PREDICTED: LOW QUALITY PROTEIN: C4b-binding protein b</a>              | 29.1 | 29.1 | 81%  | 47 | 89%  | <a href="#">gil470641603 XP_004325529.1</a> |
| <a href="#">PREDICTED: C4b-binding protein beta chain [Orcinus orca]</a>           | 29.1 | 29.1 | 81%  | 48 | 89%  | <a href="#">gil466071254 XP_004282462.1</a> |
| <a href="#">PREDICTED: LOW QUALITY PROTEIN: C4b-binding protein b</a>              | 29.1 | 29.1 | 81%  | 48 | 89%  | <a href="#">gil594636425 XP_007171607.1</a> |
| <a href="#">hypothetical protein GLOINDRAFT_344233 [Rhizophagus irreg</a>          | 28.6 | 28.6 | 72%  | 62 | 100% | <a href="#">gil552935896 ESA19211.1</a>     |
| <a href="#">hypothetical protein RirG_017690 [Rhizophagus irregularis DA</a>       | 28.6 | 28.6 | 72%  | 67 | 100% | <a href="#">gil595497640 EXX78132.1</a>     |
| <a href="#">hypothetical protein [Pelagibaca bermudensis]</a>                      | 28.6 | 28.6 | 72%  | 68 | 100% | <a href="#">gil495078167 WP_007802992.1</a> |
| <a href="#">type I restriction-modification system [Nonlabens ulvanivorans]</a>    | 28.2 | 28.2 | 90%  | 81 | 90%  | <a href="#">gil674968931 GAK74476.1</a>     |
| <a href="#">PREDICTED: C4b-binding protein beta chain isoform X2 [Tarsi</a>        | 28.2 | 28.2 | 90%  | 89 | 80%  | <a href="#">gil640811969 XP_008062626.1</a> |
| <a href="#">PREDICTED: C4b-binding protein beta chain isoform X1 [Tarsi</a>        | 28.2 | 28.2 | 90%  | 89 | 80%  | <a href="#">gil640811967 XP_008062625.1</a> |
| <a href="#">type I restriction endonuclease EcoprrI subunit M [Streptococcu</a>    | 28.2 | 28.2 | 90%  | 90 | 90%  | <a href="#">gil493309607 WP_006267109.1</a> |
| <a href="#">type I restriction-modification system, M subunit [Clostridium ce</a>  | 28.2 | 28.2 | 90%  | 92 | 90%  | <a href="#">gil491353670 WP_005211592.1</a> |
| <a href="#">type I restriction endonuclease [Methanococcus vannielii]</a>          | 28.2 | 28.2 | 90%  | 92 | 90%  | <a href="#">gil500677016 WP_011971897.1</a> |
| <a href="#">restriction endonuclease EcoR124II subunit M [Streptococcus s</a>      | 28.2 | 28.2 | 90%  | 92 | 90%  | <a href="#">gil726978673 WP_033583435.1</a> |
| <a href="#">type I restriction-modification system, M subunit [Streptococcus</a>   | 28.2 | 28.2 | 90%  | 92 | 90%  | <a href="#">gil565833921 WP_023917515.1</a> |
| <a href="#">type I restriction-modification system DNA methylase [Streptoc</a>     | 28.2 | 28.2 | 90%  | 92 | 90%  | <a href="#">gil490381372 WP_004260888.1</a> |
| <a href="#">restriction endonuclease EcoR124II subunit M [Streptococcus r</a>      | 28.2 | 28.2 | 90%  | 92 | 90%  | <a href="#">gil727224511 WP_033685435.1</a> |
| <a href="#">type I restriction-modification system, M subunit [Streptococcus</a>   | 28.2 | 28.2 | 90%  | 92 | 90%  | <a href="#">gil662336358 KEQ35031.1</a>     |
| <a href="#">type I restriction endonuclease EcoR124II subunit M [Streptoco</a>     | 28.2 | 28.2 | 90%  | 92 | 90%  | <a href="#">gil446069119 WP_000146974.1</a> |
| <a href="#">type I restriction endonuclease EcoR124II subunit M [Streptoco</a>     | 28.2 | 28.2 | 90%  | 92 | 90%  | <a href="#">gil565866706 WP_023948474.1</a> |
| <a href="#">type I restriction endonuclease EcoR124II subunit M [Streptoco</a>     | 28.2 | 28.2 | 90%  | 92 | 90%  | <a href="#">gil527094332 WP_020900754.1</a> |
| <a href="#">type I restriction-modification system, M subunit [Streptococcus</a>   | 28.2 | 28.2 | 90%  | 92 | 90%  | <a href="#">gil497415663 WP_009729861.1</a> |
| <a href="#">type I restriction endonuclease EcoR124II subunit M [Streptoco</a>     | 28.2 | 28.2 | 90%  | 92 | 90%  | <a href="#">gil446069118 WP_000146973.1</a> |
| <a href="#">type I restriction endonuclease EcoR124II subunit M [Streptoco</a>     | 28.2 | 28.2 | 90%  | 92 | 90%  | <a href="#">gil490330481 WP_004219903.1</a> |
| <a href="#">type I restriction-modification system, M subunit [Leptotrichia sp</a> | 28.2 | 28.2 | 90%  | 92 | 90%  | <a href="#">gil545620192 WP_021743778.1</a> |
| <a href="#">Type I restriction-modification system DNA methylase [Streptoc</a>     | 28.2 | 28.2 | 90%  | 92 | 90%  | <a href="#">gil566220061 ETI85613.1</a>     |
| <a href="#">type I restriction enzyme M protein [Streptococcus constellatus]</a>   | 28.2 | 28.2 | 90%  | 92 | 90%  | <a href="#">gil538448218 WP_020997674.1</a> |
| <a href="#">type I restriction-modification system, M subunit [Clostridium sp</a>  | 28.2 | 28.2 | 90%  | 92 | 90%  | <a href="#">gil490136279 WP_004036639.1</a> |

|                                                                                  |      |      |      |     |      |                                             |
|----------------------------------------------------------------------------------|------|------|------|-----|------|---------------------------------------------|
| <a href="#">type I restriction endonuclease EcoR124II subunit M [Gemella f</a>   | 28.2 | 28.2 | 90%  | 92  | 90%  | <a href="#">gi 490383956 WP_004263464.1</a> |
| <a href="#">type I restriction-modification system methyltransferase subunit</a> | 28.2 | 28.2 | 90%  | 92  | 90%  | <a href="#">gi 540781673 GAD44102.1</a>     |
| <a href="#">hypothetical protein VITISV_026155 [Vitis vinifera]</a>              | 27.8 | 27.8 | 81%  | 124 | 90%  | <a href="#">gi 147841644 CAN75317.1</a>     |
| <a href="#">hypothetical protein VITISV_006848 [Vitis vinifera]</a>              | 27.8 | 27.8 | 81%  | 127 | 90%  | <a href="#">gi 147840420 CAN66134.1</a>     |
| <a href="#">hypothetical protein VITISV_026962 [Vitis vinifera]</a>              | 27.8 | 27.8 | 81%  | 127 | 90%  | <a href="#">gi 147853844 CAN83807.1</a>     |
| <a href="#">hypothetical protein VITISV_040550 [Vitis vinifera]</a>              | 27.8 | 47.1 | 81%  | 128 | 90%  | <a href="#">gi 147844291 CAN80038.1</a>     |
| <a href="#">AGE-1 [Caenorhabditis elegans]</a>                                   | 27.8 | 27.8 | 100% | 128 | 75%  | <a href="#">gi 1850329 AAC47459.1</a>       |
| <a href="#">Protein AGE-1 [Caenorhabditis elegans]</a>                           | 27.8 | 27.8 | 100% | 128 | 75%  | <a href="#">gi 392891813 NP_496462.2</a>    |
| <a href="#">hypothetical protein VITISV_031525 [Vitis vinifera]</a>              | 27.8 | 27.8 | 81%  | 129 | 90%  | <a href="#">gi 147791708 CAN64017.1</a>     |
| <a href="#">hypothetical protein VITISV_004551 [Vitis vinifera]</a>              | 27.8 | 27.8 | 81%  | 129 | 90%  | <a href="#">gi 147772713 CAN76071.1</a>     |
| <a href="#">protease [Alkaliflexus imshenetskii]</a>                             | 26.9 | 26.9 | 100% | 228 | 82%  | <a href="#">gi 651362089 WP_026474439.1</a> |
| <a href="#">transcriptional regulator, AraC family [Clostridium hathewayi]</a>   | 26.5 | 26.5 | 81%  | 310 | 89%  | <a href="#">gi 493824527 WP_006771995.1</a> |
| <a href="#">PREDICTED: uncharacterized protein LOC102701146 [Oryza t</a>         | 26.5 | 26.5 | 72%  | 316 | 88%  | <a href="#">gi 573922176 XP_006648673.1</a> |
| <a href="#">xylulose kinase [Borrelia persica]</a>                               | 26.5 | 26.5 | 63%  | 316 | 100% | <a href="#">gi 639480741 WP_024653493.1</a> |
| <a href="#">hypothetical protein [Verrucomicrobia bacterium SCGC AAA02;</a>      | 26.5 | 26.5 | 63%  | 317 | 100% | <a href="#">gi 654808487 WP_028261818.1</a> |
| <a href="#">PREDICTED: dimethylaniline monooxygenase [N-oxide-formin</a>         | 26.5 | 26.5 | 90%  | 318 | 70%  | <a href="#">gi 533169627 XP_005398381.1</a> |
| <a href="#">hypothetical protein [Pseudoalteromonas sp. ECSMB14103]</a>          | 26.1 | 26.1 | 90%  | 348 | 70%  | <a href="#">gi 743520309 WP_039037640.1</a> |
| <a href="#">N-6 DNA Methylase [Helicobacter pylori]</a>                          | 26.1 | 26.1 | 100% | 395 | 71%  | <a href="#">gi 545301951 WP_021581577.1</a> |
| <a href="#">hypothetical protein M514_28437 [Trichuris suis]</a>                 | 26.1 | 26.1 | 63%  | 399 | 100% | <a href="#">gi 669318666 KFD59385.1</a>     |
| <a href="#">type I restriction enzyme M protein [Helicobacter pylori NY40]</a>   | 26.1 | 26.1 | 100% | 399 | 71%  | <a href="#">gi 647551735 BAO98539.1</a>     |
| <a href="#">hypothetical protein [butyrate-producing bacterium SSC/2]</a>        | 26.1 | 26.1 | 72%  | 399 | 88%  | <a href="#">gi 505343629 WP_015530731.1</a> |
| <a href="#">aTP-dependent RNA helicase DDX50 [Firmicutes bacterium C/</a>        | 26.1 | 26.1 | 72%  | 399 | 88%  | <a href="#">gi 548030350 WP_022374198.1</a> |
| <a href="#">uncharacterized protein [Lachnospiraceae bacterium CAG:25]</a>       | 26.1 | 26.1 | 72%  | 399 | 88%  | <a href="#">gi 547473484 WP_022091944.1</a> |
| <a href="#">RNA helicase [Lachnospiraceae bacterium 5_1_63FAA]</a>               | 26.1 | 26.1 | 72%  | 399 | 88%  | <a href="#">gi 496559170 WP_009265245.1</a> |
| <a href="#">MULTISPECIES: RNA helicase [Clostridiales]</a>                       | 26.1 | 26.1 | 72%  | 402 | 88%  | <a href="#">gi 495669709 WP_008394288.1</a> |
| <a href="#">damage-inducible protein CinA [Chryseobacterium gregarium]</a>       | 26.1 | 26.1 | 63%  | 406 | 100% | <a href="#">gi 736757959 WP_034761535.1</a> |

## Alignments

Download GenPept Graphics

Next Previous Descriptions

PREDICTED: C4b-binding protein beta chain isoform X3 [Pongo abelii]

Sequence ID: [gi|686700216|ref|XP\\_009236698.1](#) Length: 202 Number of Matches: 1

Range 1: 48 to 58 GenPept Graphics

Next Match Previous Match

| Score         | Expect | Identities | Positives   | Gaps     |
|---------------|--------|------------|-------------|----------|
| 35.4 bits(76) | 0.39   | 10/11(91%) | 11/11(100%) | 0/11(0%) |

Query 1 KKTLFCASKE 11  
 KKTLFC+ASKE  
 Sbjct 48 KKTLFCNASKE 58

### Related Information

[Gene](#) - associated gene details  
[Map Viewer](#) - aligned genomic context

Download GenPept Graphics

Next Previous Descriptions

unnamed protein product [Homo sapiens]

Sequence ID: [gi|194373591|dbj|BAG56891.1](#) Length: 218 Number of Matches: 1

Range 1: 48 to 58 GenPept Graphics

Next Match Previous Match

| Score         | Expect | Identities | Positives   | Gaps     |
|---------------|--------|------------|-------------|----------|
| 35.4 bits(76) | 0.39   | 10/11(91%) | 11/11(100%) | 0/11(0%) |

### Related Information

[Gene](#) - associated gene details

Query 1 KKTLFCDASKE 11  
 KKTLFC+ASKE  
 Sbjct 48 KKTLFCNASKE 58

[Download](#) [GenPept](#) [Graphics](#)

[Next](#) [Previous](#) [Descriptions](#)

PREDICTED: C4b-binding protein beta chain isoform X3 [Pan troglodytes]

Sequence ID: [gi|694891540|ref|XP\\_009439669.1](#) Length: 227 Number of Matches: 1

Range 1: 57 to 67 [GenPept](#) [Graphics](#)

[Next Match](#) [Previous Match](#)

| Score         | Expect | Identities | Positives   | Gaps     |
|---------------|--------|------------|-------------|----------|
| 35.4 bits(76) | 0.39   | 10/11(91%) | 11/11(100%) | 0/11(0%) |

Query 1 KKTLFCDASKE 11  
 KKTLFC+ASKE  
 Sbjct 57 KKTLFCNASKE 67

**Related Information**

[Gene](#) - associated gene details

[Download](#) [GenPept](#) [Graphics](#)

[Next](#) [Previous](#) [Descriptions](#)

PREDICTED: C4b-binding protein beta chain isoform X3 [Pan paniscus]

Sequence ID: [gi|675771724|ref|XP\\_008974762.1](#) Length: 227 Number of Matches: 1

Range 1: 57 to 67 [GenPept](#) [Graphics](#)

[Next Match](#) [Previous Match](#)

| Score         | Expect | Identities | Positives   | Gaps     |
|---------------|--------|------------|-------------|----------|
| 35.4 bits(76) | 0.39   | 10/11(91%) | 11/11(100%) | 0/11(0%) |

Query 1 KKTLFCDASKE 11  
 KKTLFC+ASKE  
 Sbjct 57 KKTLFCNASKE 67

**Related Information**

[Gene](#) - associated gene details

[Map Viewer](#) - aligned genomic context

[Download](#) [GenPept](#) [Graphics](#)

[Next](#) [Previous](#) [Descriptions](#)

PREDICTED: C4b-binding protein beta chain isoform X3 [Homo sapiens]

Sequence ID: [gi|530366462|ref|XP\\_005273312.1](#) Length: 227 Number of Matches: 1

Range 1: 57 to 67 [GenPept](#) [Graphics](#)

[Next Match](#) [Previous Match](#)

| Score         | Expect | Identities | Positives   | Gaps     |
|---------------|--------|------------|-------------|----------|
| 35.4 bits(76) | 0.39   | 10/11(91%) | 11/11(100%) | 0/11(0%) |

Query 1 KKTLFCDASKE 11  
 KKTLFC+ASKE  
 Sbjct 57 KKTLFCNASKE 67

**Related Information**

[Gene](#) - associated gene details

[Map Viewer](#) - aligned genomic context

BLAST is a registered trademark of the National Library of Medicine.

NCBI/ BLAST/ blastp suite/ Formatting Results - BTFP757B013

Your search parameters were adjusted to search for a short input sequence.

[Edit and Resubmit](#) [Save Search Strategies](#) [Formatting options](#) [Download](#) [YouTube](#) [How to read this page](#) [Blast report description](#)

### C4BPB\_KKTLFCDASKEWDDTTTECRL\_Mod

RID [BTFP757B013](#) (Expires on 01-20 15:22 pm)

Query ID |cl|73178  
 Description None  
 Molecule type amino acid  
 Query Length 21

Database Name nr  
 Description All non-redundant GenBank CDS translations+PDB+SwissProt+PIR+PRF excluding environmental samples from WGS projects  
 Program BLASTP 2.2.30+ [Citation](#)

Other reports: [Search Summary](#) [Taxonomy reports](#) [Distance tree of results](#) [Related Structures](#) [Multiple alignment](#)

### Graphic Summary

[Show Conserved Domains](#)

No putative conserved domains have been detected

Distribution of 101 Blast Hits on the Query Sequence

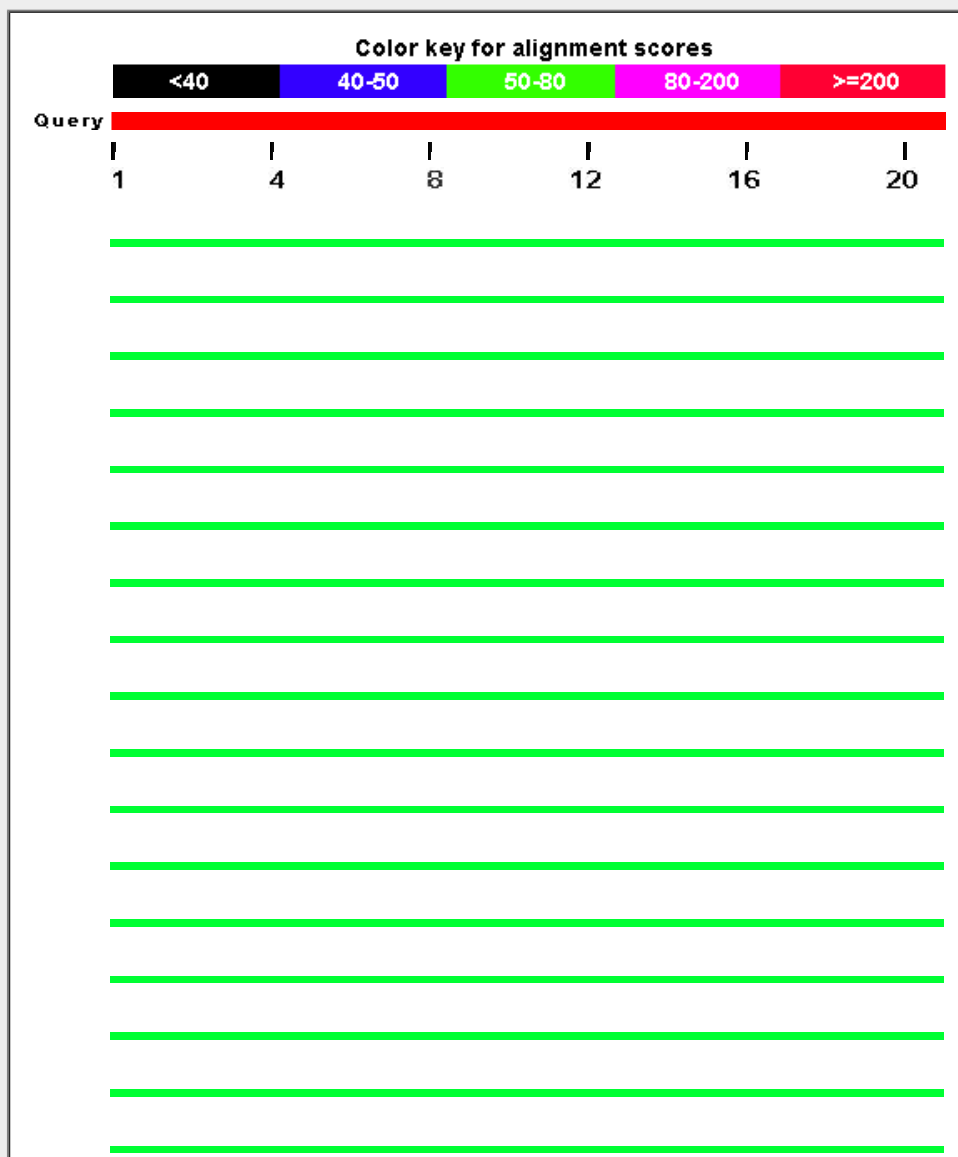

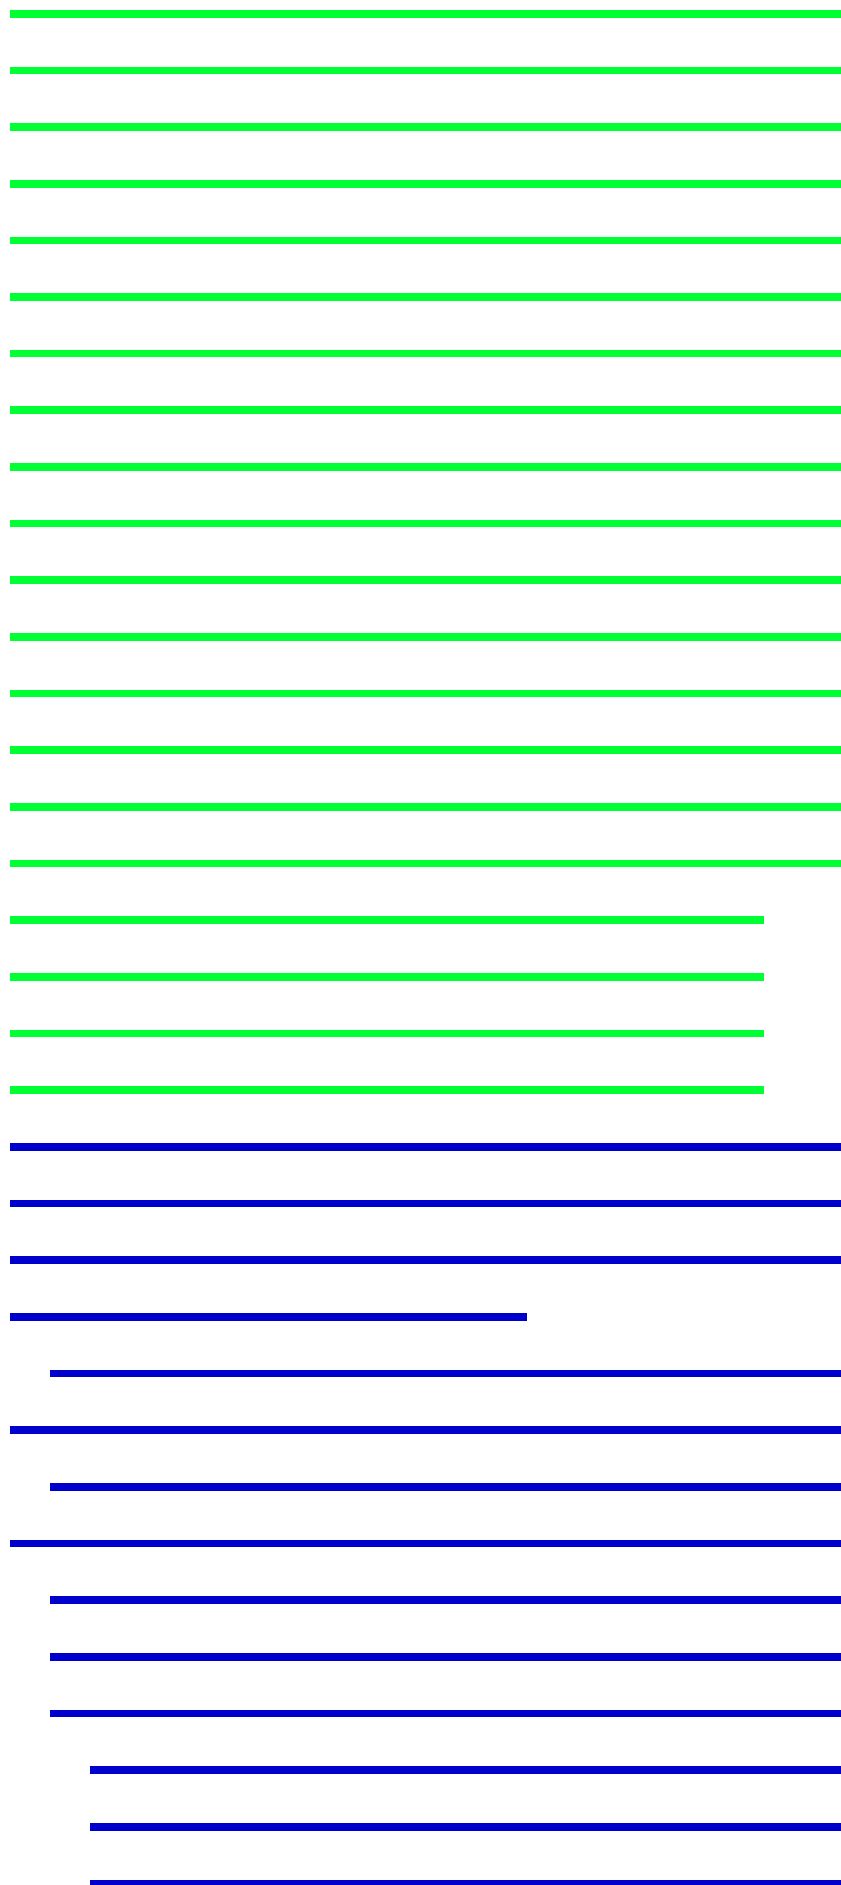

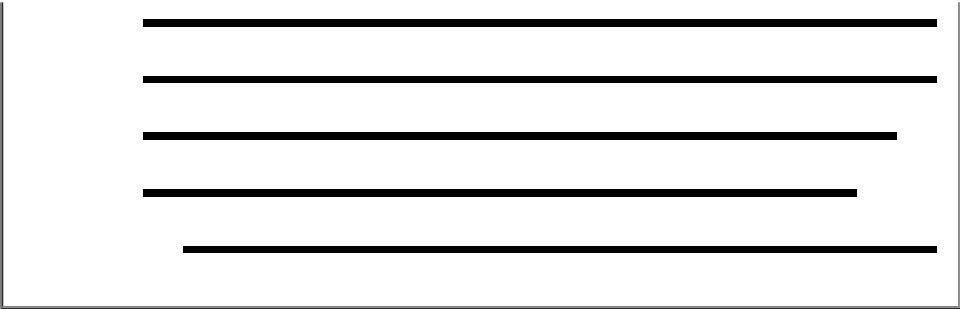

**Descriptions**

**Sequences producing significant alignments:**

Select: [All](#) [None](#) Selected:0

[Alignments](#)
[Download](#)
[GenPept](#)
[Graphics](#)
[Distance tree of results](#)
[Multiple alignment](#)

| Description                                                                   | Max score | Total score | Query cover | E value | Ident | Accession                                   |
|-------------------------------------------------------------------------------|-----------|-------------|-------------|---------|-------|---------------------------------------------|
| <a href="#">unnamed protein product [Homo sapiens]</a>                        | 68.1      | 68.1        | 100%        | 1e-11   | 90%   | <a href="#">gi 194373591 BAG56891.1</a>     |
| <a href="#">PREDICTED: C4b-binding protein beta chain isoform X3 [Pan t</a>   | 68.1      | 68.1        | 100%        | 1e-11   | 90%   | <a href="#">gi 694891540 XP_009439669.1</a> |
| <a href="#">PREDICTED: C4b-binding protein beta chain isoform X3 [Pan r</a>   | 68.1      | 68.1        | 100%        | 1e-11   | 90%   | <a href="#">gi 675771724 XP_008974762.1</a> |
| <a href="#">PREDICTED: C4b-binding protein beta chain isoform X3 [Homo</a>    | 68.1      | 68.1        | 100%        | 1e-11   | 90%   | <a href="#">gi 530366462 XP_005273312.1</a> |
| <a href="#">PREDICTED: C4b-binding protein beta chain isoform X2 [Rhinc</a>   | 68.1      | 68.1        | 100%        | 1e-11   | 90%   | <a href="#">gi 724836382 XP_010363947.1</a> |
| <a href="#">PREDICTED: C4b-binding protein beta chain isoform X2 [Pan t</a>   | 68.1      | 68.1        | 100%        | 1e-11   | 90%   | <a href="#">gi 694891534 XP_009439665.1</a> |
| <a href="#">PREDICTED: C4b-binding protein beta chain isoform X2 [Pan r</a>   | 68.1      | 68.1        | 100%        | 1e-11   | 90%   | <a href="#">gi 675771715 XP_008974759.1</a> |
| <a href="#">C4b-binding protein beta chain isoform 2 precursor [Homo sapi</a> | 68.1      | 68.1        | 100%        | 1e-11   | 90%   | <a href="#">gi 62912462 NP_001017364.1</a>  |
| <a href="#">PREDICTED: C4b-binding protein beta chain isoform X1 [Rhinc</a>   | 68.1      | 68.1        | 100%        | 1e-11   | 90%   | <a href="#">gi 724836379 XP_010363946.1</a> |
| <a href="#">C4b-binding protein beta chain isoform 1 precursor [Homo sapi</a> | 68.1      | 68.1        | 100%        | 1e-11   | 90%   | <a href="#">gi 4502505 NP_000707.1</a>      |
| <a href="#">PREDICTED: C4b-binding protein beta chain isoform X1 [Pan r</a>   | 68.1      | 68.1        | 100%        | 1e-11   | 90%   | <a href="#">gi 397504761 XP_003822949.1</a> |
| <a href="#">PREDICTED: C4b-binding protein beta chain isoform X1 [Pan t</a>   | 68.1      | 68.1        | 100%        | 1e-11   | 90%   | <a href="#">gi 114572288 XP_001166306.1</a> |
| <a href="#">PREDICTED: C4b-binding protein beta chain isoform X3 [Pong</a>    | 64.7      | 64.7        | 100%        | 2e-10   | 86%   | <a href="#">gi 686700216 XP_009236698.1</a> |
| <a href="#">PREDICTED: C4b-binding protein beta chain isoform X2 [Pong</a>    | 64.7      | 64.7        | 100%        | 2e-10   | 86%   | <a href="#">gi 686700213 XP_009236694.1</a> |
| <a href="#">PREDICTED: C4b-binding protein beta chain isoform X1 [Pong</a>    | 64.7      | 64.7        | 100%        | 2e-10   | 86%   | <a href="#">gi 297662141 XP_002809574.1</a> |
| <a href="#">PREDICTED: C4b-binding protein beta chain isoform X2 [Papi</a>    | 64.3      | 64.3        | 100%        | 3e-10   | 86%   | <a href="#">gi 685519789 XP_009186662.1</a> |
| <a href="#">PREDICTED: C4b-binding protein beta chain isoform X6 [Maca</a>    | 64.3      | 64.3        | 100%        | 3e-10   | 86%   | <a href="#">gi 544399939 XP_005540733.1</a> |
| <a href="#">PREDICTED: C4b-binding protein beta chain isoform X2 [Maca</a>    | 64.3      | 64.3        | 100%        | 3e-10   | 86%   | <a href="#">gi 544399931 XP_005540729.1</a> |
| <a href="#">PREDICTED: C4b-binding protein beta chain isoform X1 [Papi</a>    | 64.3      | 64.3        | 100%        | 3e-10   | 86%   | <a href="#">gi 685519785 XP_009186656.1</a> |
| <a href="#">hypothetical protein EGM_01442 [Macaca fascicularis]</a>          | 64.3      | 64.3        | 100%        | 3e-10   | 86%   | <a href="#">gi 355745961 EHH50586.1</a>     |
| <a href="#">hypothetical protein EGK_01712 [Macaca mulatta]</a>               | 64.3      | 64.3        | 100%        | 3e-10   | 86%   | <a href="#">gi 355558818 EHH15598.1</a>     |
| <a href="#">PREDICTED: c4b-binding protein beta chain isoform 3 [Macaca</a>   | 64.3      | 64.3        | 100%        | 3e-10   | 86%   | <a href="#">gi 109018561 XP_001083216.1</a> |
| <a href="#">PREDICTED: C4b-binding protein beta chain isoform X1 [Maca</a>    | 64.3      | 64.3        | 100%        | 3e-10   | 86%   | <a href="#">gi 544399929 XP_005540728.1</a> |
| <a href="#">PREDICTED: C4b-binding protein beta chain isoform 1 [Nomas</a>    | 63.8      | 63.8        | 100%        | 4e-10   | 86%   | <a href="#">gi 332266848 XP_003282407.1</a> |
| <a href="#">PREDICTED: C4b-binding protein beta chain isoform X9 [Chlor</a>   | 63.4      | 63.4        | 100%        | 5e-10   | 86%   | <a href="#">gi 635130917 XP_007986833.1</a> |
| <a href="#">PREDICTED: C4b-binding protein beta chain isoform X8 [Chlor</a>   | 63.4      | 63.4        | 100%        | 5e-10   | 86%   | <a href="#">gi 635130915 XP_007986832.1</a> |
| <a href="#">PREDICTED: C4b-binding protein beta chain isoform X7 [Chlor</a>   | 63.4      | 63.4        | 100%        | 5e-10   | 86%   | <a href="#">gi 635130913 XP_007986831.1</a> |
| <a href="#">PREDICTED: C4b-binding protein beta chain isoform X6 [Chlor</a>   | 63.4      | 63.4        | 100%        | 5e-10   | 86%   | <a href="#">gi 635130911 XP_007986830.1</a> |
| <a href="#">PREDICTED: C4b-binding protein beta chain isoform X5 [Chlor</a>   | 63.4      | 63.4        | 100%        | 5e-10   | 86%   | <a href="#">gi 635130907 XP_007986828.1</a> |



|                                                                              |      |      |      |       |      |                                             |
|------------------------------------------------------------------------------|------|------|------|-------|------|---------------------------------------------|
| <a href="#">PREDICTED: C4b-binding protein beta chain isoform X4 [Chlor</a>  | 63.4 | 63.4 | 100% | 5e-10 | 86%  | <a href="#">gil635130905 XP_007986827.1</a> |
| <a href="#">PREDICTED: C4b-binding protein beta chain isoform X3 [Chlor</a>  | 63.4 | 63.4 | 100% | 5e-10 | 86%  | <a href="#">gil635130903 XP_007986826.1</a> |
| <a href="#">PREDICTED: C4b-binding protein beta chain isoform X2 [Chlor</a>  | 63.4 | 63.4 | 100% | 5e-10 | 86%  | <a href="#">gil635130901 XP_007986825.1</a> |
| <a href="#">PREDICTED: C4b-binding protein beta chain isoform X1 [Chlor</a>  | 63.4 | 63.4 | 100% | 5e-10 | 86%  | <a href="#">gil635130899 XP_007986823.1</a> |
| <a href="#">PREDICTED: C4b-binding protein beta chain isoform X2 [Callit</a> | 61.7 | 61.7 | 90%  | 2e-09 | 89%  | <a href="#">gil675749407 XP_008983835.1</a> |
| <a href="#">PREDICTED: C4b-binding protein beta chain isoform X1 [Callit</a> | 61.7 | 61.7 | 90%  | 2e-09 | 89%  | <a href="#">gil296230632 XP_002760794.1</a> |
| <a href="#">PREDICTED: C4b-binding protein beta chain isoform X2 [Saim</a>   | 56.6 | 56.6 | 90%  | 1e-07 | 84%  | <a href="#">gil725574024 XP_010339305.1</a> |
| <a href="#">PREDICTED: C4b-binding protein beta chain isoform X1 [Saim</a>   | 56.6 | 56.6 | 90%  | 1e-07 | 84%  | <a href="#">gil403277664 XP_003930472.1</a> |
| <a href="#">PREDICTED: C4b-binding protein beta chain isoform X2 [Galer</a>  | 49.0 | 49.0 | 100% | 3e-05 | 67%  | <a href="#">gil667314769 XP_008585888.1</a> |
| <a href="#">PREDICTED: C4b-binding protein beta chain isoform X1 [Galer</a>  | 49.0 | 49.0 | 100% | 4e-05 | 67%  | <a href="#">gil667314766 XP_008585886.1</a> |
| <a href="#">PREDICTED: C4b-binding protein beta chain [Chrysochloris as</a>  | 46.0 | 46.0 | 100% | 4e-04 | 71%  | <a href="#">gil586450676 XP_006834269.1</a> |
| <a href="#">PREDICTED: LOW QUALITY PROTEIN: C4b-binding protein b</a>        | 44.3 | 44.3 | 61%  | 0.001 | 92%  | <a href="#">gil471369765 XP_004375397.1</a> |
| <a href="#">PREDICTED: LOW QUALITY PROTEIN: C4b-binding protein b</a>        | 42.6 | 42.6 | 95%  | 0.004 | 65%  | <a href="#">gil594636425 XP_007171607.1</a> |
| <a href="#">PREDICTED: C4b-binding protein beta chain [Ictidomys tridece</a> | 42.2 | 42.2 | 100% | 0.006 | 67%  | <a href="#">gil532087633 XP_005329528.1</a> |
| <a href="#">PREDICTED: C4b-binding protein beta chain [Nannospalax gal</a>   | 42.2 | 42.2 | 95%  | 0.006 | 71%  | <a href="#">gil674096417 XP_008821570.1</a> |
| <a href="#">PREDICTED: C4b-binding protein beta chain [Cavia porcellus]</a>  | 41.4 | 41.4 | 100% | 0.011 | 62%  | <a href="#">gil348577871 XP_003474707.1</a> |
| <a href="#">PREDICTED: C4b-binding protein beta chain [Sus scrofa]</a>       | 40.9 | 40.9 | 95%  | 0.016 | 60%  | <a href="#">gil311265148 XP_003130503.1</a> |
| <a href="#">PREDICTED: C4b-binding protein beta chain [Otolemur garnett</a>  | 40.5 | 40.5 | 95%  | 0.021 | 65%  | <a href="#">gil395838946 XP_003792365.1</a> |
| <a href="#">PREDICTED: C4b-binding protein beta chain [Orcinus orca]</a>     | 40.1 | 40.1 | 95%  | 0.029 | 60%  | <a href="#">gil466071254 XP_004282462.1</a> |
| <a href="#">PREDICTED: C4b-binding protein beta chain isoform X2 [Myoti</a>  | 40.1 | 40.1 | 90%  | 0.029 | 68%  | <a href="#">gil554587742 XP_005885272.1</a> |
| <a href="#">PREDICTED: C4b-binding protein beta chain [Myotis lucifugus]</a> | 40.1 | 40.1 | 90%  | 0.029 | 68%  | <a href="#">gil558152655 XP_006094937.1</a> |
| <a href="#">PREDICTED: C4b-binding protein beta chain isoform X1 [Myoti</a>  | 40.1 | 40.1 | 90%  | 0.029 | 68%  | <a href="#">gil554587740 XP_005885271.1</a> |
| <a href="#">PREDICTED: C4b-binding protein beta chain isoform X2 [Tarsi</a>  | 39.2 | 39.2 | 95%  | 0.055 | 60%  | <a href="#">gil640811969 XP_008062626.1</a> |
| <a href="#">PREDICTED: C4b-binding protein beta chain isoform X1 [Tarsi</a>  | 39.2 | 39.2 | 95%  | 0.055 | 60%  | <a href="#">gil640811967 XP_008062625.1</a> |
| <a href="#">PREDICTED: C4b-binding protein beta chain [Ceratotherium si</a>  | 38.8 | 38.8 | 90%  | 0.075 | 63%  | <a href="#">gil478501878 XP_004425250.1</a> |
| <a href="#">PREDICTED: LOW QUALITY PROTEIN: C4b-binding protein b</a>        | 38.0 | 38.0 | 85%  | 0.14  | 61%  | <a href="#">gil470641603 XP_004325529.1</a> |
| <a href="#">PREDICTED: C4b-binding protein beta chain [Eptesicus fuscus</a>  | 36.3 | 36.3 | 90%  | 0.48  | 63%  | <a href="#">gil641725104 XP_008152491.1</a> |
| <a href="#">PREDICTED: C4b-binding protein beta chain [Myotis davidii]</a>   | 35.8 | 35.8 | 52%  | 0.65  | 82%  | <a href="#">gil584068188 XP_006754475.1</a> |
| <a href="#">PREDICTED: C4b-binding protein beta chain [Jaculus jaculus]</a>  | 35.8 | 35.8 | 76%  | 0.66  | 69%  | <a href="#">gil507559572 XP_004663509.1</a> |
| <a href="#">PREDICTED: C4b-binding protein beta chain [Elephantulus ed</a>   | 35.4 | 35.4 | 85%  | 0.90  | 61%  | <a href="#">gil585666900 XP_006888062.1</a> |
| <a href="#">PREDICTED: C4b-binding protein beta chain isoform X2 [Came</a>   | 35.0 | 35.0 | 85%  | 1.2   | 56%  | <a href="#">gil743734558 XP_010961541.1</a> |
| <a href="#">PREDICTED: C4b-binding protein beta chain isoform X1 [Came</a>   | 35.0 | 35.0 | 85%  | 1.2   | 56%  | <a href="#">gil743734556 XP_010961540.1</a> |
| <a href="#">PREDICTED: LOW QUALITY PROTEIN: C4b-binding protein b</a>        | 35.0 | 35.0 | 85%  | 1.2   | 56%  | <a href="#">gil560935168 XP_006193413.1</a> |
| <a href="#">PREDICTED: LOW QUALITY PROTEIN: C4b-binding protein b</a>        | 34.6 | 34.6 | 71%  | 1.7   | 67%  | <a href="#">gil533120065 XP_005375468.1</a> |
| <a href="#">PREDICTED: C4b-binding protein beta chain [Mustela putorius</a>  | 34.1 | 34.1 | 95%  | 2.3   | 60%  | <a href="#">gil511871202 XP_004756233.1</a> |
| <a href="#">PREDICTED: C4b-binding protein beta chain [Ornithorhynchus</a>   | 33.7 | 33.7 | 61%  | 2.7   | 77%  | <a href="#">gil620984032 XP_007659774.1</a> |
| <a href="#">PREDICTED: LOW QUALITY PROTEIN: C4b-binding protein b</a>        | 32.5 | 32.5 | 85%  | 8.1   | 56%  | <a href="#">gil560986663 XP_006215518.1</a> |
| <a href="#">Piso0_002582 [Millerozyma farinosa CBS 7064]</a>                 | 32.0 | 32.0 | 71%  | 11    | 67%  | <a href="#">gil448103382 XP_004200022.1</a> |
| <a href="#">conserved putative membrane protein [Melbournevirus]</a>         | 32.0 | 32.0 | 61%  | 11    | 69%  | <a href="#">gil701447374 YP_009094746.1</a> |
| <a href="#">membrane protein [Cannes 8 virus]</a>                            | 32.0 | 32.0 | 61%  | 11    | 69%  | <a href="#">gil539398800 AGV01635.1</a>     |
| <a href="#">polyphosphate kinase [Burkholderia sp. MP-1]</a>                 | 31.6 | 31.6 | 61%  | 15    | 46%  | <a href="#">gil737535990 WP_035509712.1</a> |
| <a href="#">glycogen branching protein [Halotheca sp. PCC 7418]</a>          | 31.6 | 31.6 | 76%  | 16    | 55%  | <a href="#">gil505038850 WP_015225952.1</a> |
| <a href="#">PREDICTED: C4b-binding protein beta chain [Canis lupus fami</a>  | 31.2 | 31.2 | 61%  | 21    | 69%  | <a href="#">gil73960685 XP_851611.1</a>     |
| <a href="#">hypothetical protein [Clostridium sp. CAG:62]</a>                | 31.2 | 31.2 | 38%  | 22    | 100% | <a href="#">gil548057742 WP_022376409.1</a> |
| <a href="#">C4b-binding protein beta chain [Heterocephalus glaber]</a>       | 30.8 | 30.8 | 100% | 29    | 52%  | <a href="#">gil351708103 EHB11022.1</a>     |

|                                                                                  |      |      |      |    |     |                                             |
|----------------------------------------------------------------------------------|------|------|------|----|-----|---------------------------------------------|
| <a href="#">PREDICTED: C4b-binding protein beta chain [Heterocephalus</a>        | 30.8 | 30.8 | 100% | 29 | 52% | <a href="#">gi 512892965 XP_004897416.1</a> |
| <a href="#">PREDICTED: synaptonemal complex protein 2 [Ochotona prin</a>         | 30.8 | 30.8 | 85%  | 30 | 55% | <a href="#">gi 504147512 XP_004586169.1</a> |
| <a href="#">hypothetical protein [Vibrio nigrapulchritudo]</a>                   | 30.3 | 30.3 | 47%  | 39 | 70% | <a href="#">gi 740359636 WP_038195698.1</a> |
| <a href="#">hypothetical protein [Vibrio nigrapulchritudo]</a>                   | 30.3 | 30.3 | 47%  | 39 | 70% | <a href="#">gi 740309755 WP_038147115.1</a> |
| <a href="#">putative Fimh-like protein [Vibrio nigrapulchritudo]</a>             | 30.3 | 30.3 | 47%  | 40 | 70% | <a href="#">gi 550352361 WP_022612127.1</a> |
| <a href="#">putative Fimh-like protein [Vibrio nigrapulchritudo]</a>             | 30.3 | 30.3 | 47%  | 40 | 70% | <a href="#">gi 550281458 WP_022607838.1</a> |
| <a href="#">hypothetical protein VINI7043_08940 [Vibrio nigrapulchritudo A]</a>  | 30.3 | 30.3 | 47%  | 40 | 70% | <a href="#">gi 342820393 EGU55216.1</a>     |
| <a href="#">PREDICTED: C4b-binding protein beta chain [Leptonychotes w</a>       | 30.3 | 30.3 | 57%  | 40 | 67% | <a href="#">gi 585156269 XP_006730462.1</a> |
| <a href="#">transaldolase [Oribacterium sp. P6A1]</a>                            | 29.9 | 29.9 | 66%  | 56 | 64% | <a href="#">gi 738716700 WP_036611113.1</a> |
| <a href="#">transaldolase [Lachnospiraceae bacterium JC7]</a>                    | 29.9 | 29.9 | 66%  | 56 | 64% | <a href="#">gi 571148921 ETP72518.1</a>     |
| <a href="#">PREDICTED: fibroin heavy chain-like [Callithrix jacchus]</a>         | 29.9 | 50.1 | 76%  | 56 | 83% | <a href="#">gi 675768476 XP_008987859.1</a> |
| <a href="#">C4b-binding protein beta chain precursor [Rattus norvegicus]</a>     | 29.9 | 29.9 | 90%  | 56 | 60% | <a href="#">gi 62198215 INP_058691.2</a>    |
| <a href="#">RIFIN [Plasmodium falciparum]</a>                                    | 29.9 | 29.9 | 52%  | 56 | 73% | <a href="#">gi 82394380 ABB72313.1</a>      |
| <a href="#">RIFIN [Plasmodium falciparum]</a>                                    | 29.9 | 29.9 | 52%  | 56 | 73% | <a href="#">gi 82394444 ABB72335.1</a>      |
| <a href="#">hypothetical protein PFBG_00014 [Plasmodium falciparum 7G6]</a>      | 29.9 | 29.9 | 52%  | 56 | 73% | <a href="#">gi 579134248 EUR82669.1</a>     |
| <a href="#">hypothetical protein PFNF135_02825 [Plasmodium falciparum]</a>       | 29.9 | 29.9 | 57%  | 56 | 67% | <a href="#">gi 574981166 ETW42931.1</a>     |
| <a href="#">protoporphyrin IX magnesium-chelatase [Stanieria cyanosphae</a>      | 29.9 | 29.9 | 61%  | 57 | 67% | <a href="#">gi 505006979 WP_015194081.1</a> |
| <a href="#">hypothetical protein [Fimbriimonas ginsengisoli]</a>                 | 29.9 | 29.9 | 42%  | 57 | 89% | <a href="#">gi 740689768 WP_038475057.1</a> |
| <a href="#">glutamate synthase large subunit [Lentisphaera araneosa]</a>         | 29.9 | 29.9 | 52%  | 58 | 64% | <a href="#">gi 494487169 WP_007276642.1</a> |
| <a href="#">hypothetical protein DFA_06522 [Dictyostelium fasciculatum]</a>      | 29.5 | 29.5 | 80%  | 70 | 50% | <a href="#">gi 470268001 XP_004362223.1</a> |
| <a href="#">envelope glycoprotein [Human immunodeficiency virus 1]</a>           | 29.5 | 29.5 | 71%  | 77 | 63% | <a href="#">gi 338224254 AEI88022.1</a>     |
| <a href="#">hypothetical protein [Plasmodium knowlesi strain H]</a>              | 29.5 | 29.5 | 61%  | 77 | 69% | <a href="#">gi 221054814 XP_002258546.1</a> |
| <a href="#">probable subtilisin-like serine protease [Claviceps purpurea 20.</a> | 29.5 | 29.5 | 71%  | 77 | 59% | <a href="#">gi 399164244 CCE34824.1</a>     |
| <a href="#">RecName: Full=C4b-binding protein beta chain; Flags: Precurs</a>     | 29.5 | 29.5 | 90%  | 78 | 60% | <a href="#">gi 2493794 Q63515.1</a>         |
| <a href="#">arginyl-tRNA synthetase [Helicobacter apodemus]</a>                  | 29.5 | 29.5 | 66%  | 78 | 64% | <a href="#">gi 736540679 WP_034555246.1</a> |
| <a href="#">elongation factor Ts [Helicobacter pylori]</a>                       | 29.5 | 29.5 | 71%  | 78 | 67% | <a href="#">gi 445936521 WP_000014376.1</a> |

## Alignments

Download GenPept Graphics

Next Previous Descriptions

unnamed protein product [Homo sapiens]

Sequence ID: [gi|194373591|dbj|BAG56891.1](#) Length: 218 Number of Matches: 1

Range 1: 48 to 68 GenPept Graphics

Next Match Previous Match

| Score          | Expect | Identities | Positives   | Gaps     |
|----------------|--------|------------|-------------|----------|
| 68.1 bits(153) | 1e-11  | 19/21(90%) | 21/21(100%) | 0/21(0%) |

Query 1 KKTLFCDAKEDDTTTECRL 21  
 KKTLFC+ASKEWD+TTTECRL  
 Sbjct 48 KKTLFCNASKEWDNTTTECRL 68

### Related Information

[Gene](#) - associated gene details

Download GenPept Graphics

Next Previous Descriptions

PREDICTED: C4b-binding protein beta chain isoform X3 [Pan troglodytes]

Sequence ID: [gi|694891540|ref|XP\\_009439669.1](#) Length: 227 Number of Matches: 1

Range 1: 57 to 77 GenPept Graphics

Next Match Previous Match

| Score          | Expect | Identities | Positives   | Gaps     |
|----------------|--------|------------|-------------|----------|
| 68.1 bits(153) | 1e-11  | 19/21(90%) | 21/21(100%) | 0/21(0%) |

### Related Information

[Gene](#) - associated gene details

Query 1 KKTLFCDASKEWDDTTTECRL 21  
 KKTLFC+ASKEWD+TTTECRL  
 Sbjct 57 KKTLFCNASKEWDNTTTECRL 77

[Download](#) [GenPept](#) [Graphics](#)

[Next](#) [Previous](#) [Descriptions](#)

PREDICTED: C4b-binding protein beta chain isoform X3 [Pan paniscus]

Sequence ID: [gi|675771724|ref|XP\\_008974762.1|](#) Length: 227 Number of Matches: 1

Range 1: 57 to 77 [GenPept](#) [Graphics](#)

[Next Match](#) [Previous Match](#)

| Score          | Expect | Identities | Positives   | Gaps     |
|----------------|--------|------------|-------------|----------|
| 68.1 bits(153) | 1e-11  | 19/21(90%) | 21/21(100%) | 0/21(0%) |

Query 1 KKTLFCDASKEWDDTTTECRL 21  
 KKTLFC+ASKEWD+TTTECRL  
 Sbjct 57 KKTLFCNASKEWDNTTTECRL 77

**Related Information**

[Gene](#) - associated gene details  
[Map Viewer](#) - aligned genomic context

[Download](#) [GenPept](#) [Graphics](#)

[Next](#) [Previous](#) [Descriptions](#)

PREDICTED: C4b-binding protein beta chain isoform X3 [Homo sapiens]

Sequence ID: [gi|530366462|ref|XP\\_005273312.1|](#) Length: 227 Number of Matches: 1

Range 1: 57 to 77 [GenPept](#) [Graphics](#)

[Next Match](#) [Previous Match](#)

| Score          | Expect | Identities | Positives   | Gaps     |
|----------------|--------|------------|-------------|----------|
| 68.1 bits(153) | 1e-11  | 19/21(90%) | 21/21(100%) | 0/21(0%) |

Query 1 KKTLFCDASKEWDDTTTECRL 21  
 KKTLFC+ASKEWD+TTTECRL  
 Sbjct 57 KKTLFCNASKEWDNTTTECRL 77

**Related Information**

[Gene](#) - associated gene details  
[Map Viewer](#) - aligned genomic context

[Download](#) [GenPept](#) [Graphics](#)

[Next](#) [Previous](#) [Descriptions](#)

PREDICTED: C4b-binding protein beta chain isoform X2 [Rhinopithecus roxellana]

Sequence ID: [gi|724836382|ref|XP\\_010363947.1|](#) Length: 251 Number of Matches: 1

Range 1: 57 to 77 [GenPept](#) [Graphics](#)

[Next Match](#) [Previous Match](#)

| Score          | Expect | Identities | Positives   | Gaps     |
|----------------|--------|------------|-------------|----------|
| 68.1 bits(153) | 1e-11  | 19/21(90%) | 21/21(100%) | 0/21(0%) |

Query 1 KKTLFCDASKEWDDTTTECRL 21  
 KKTLFC+ASKEWD+TTTECRL  
 Sbjct 57 KKTLFCNASKEWDNTTTECRL 77

**Related Information**

[Gene](#) - associated gene details  
[Map Viewer](#) - aligned genomic context

BLAST is a registered trademark of the National Library of Medicine.



NCBI/ BLAST/ blastp suite/ Formatting Results - B92AVCHP01R

Your search parameters were adjusted to search for a short input sequence.

Edit and Resubmit Save Search Strategies Formatting options Download

YouTube How to read this page Blast report description

C4BPB\_KKTLFCNASKE\_NonMod

RID B92AVCHP01R (Expires on 01-14 09:56 am)

Query ID Icl|229493
Description None
Molecule type amino acid
Query Length 11

Database Name nr
Description All non-redundant GenBank CDS translations+PDB+SwissProt+PIR excluding environmental samples from WGS projects
Program BLASTP 2.2.30+ Citation

Other reports: Search Summary Taxonomy reports Distance tree of results Related Structures Multiple alignment

Graphic Summary

Show Conserved Domains

No putative conserved domains have been detected

Distribution of 101 Blast Hits on the Query Sequence



Color key for alignment scores

Table with 5 columns: <40, 40-50, 50-80, 80-200, >=200

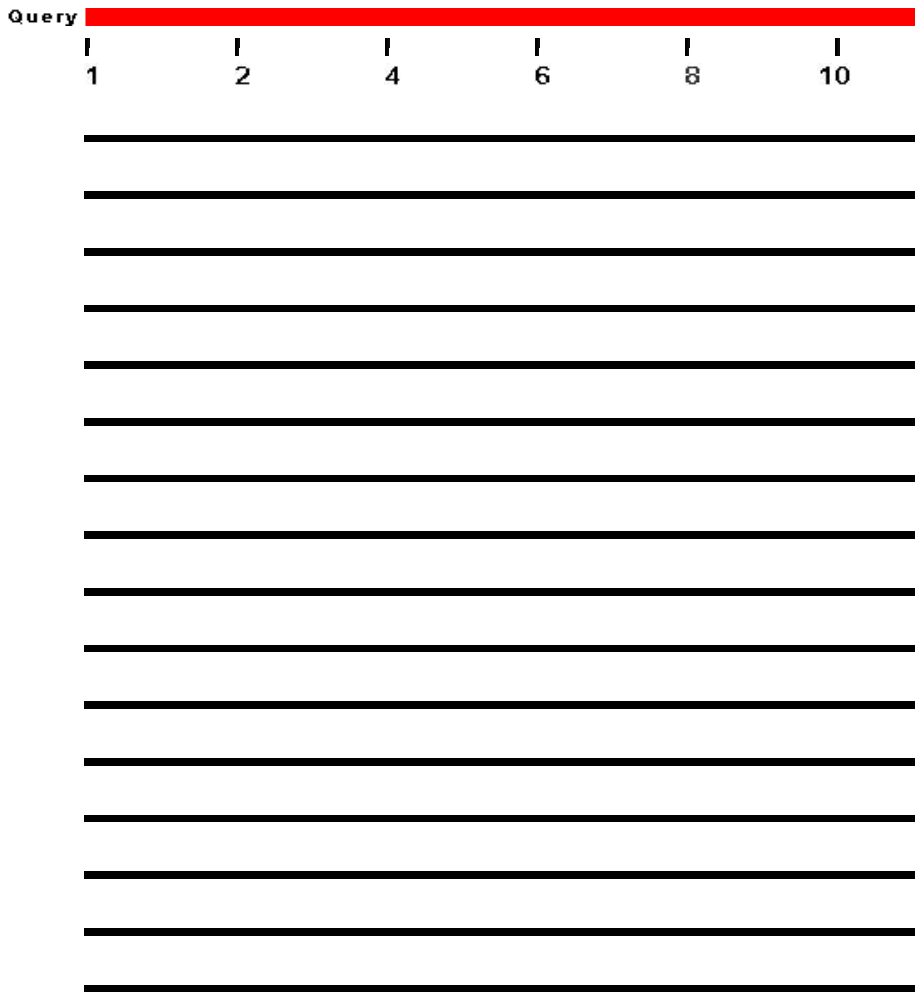

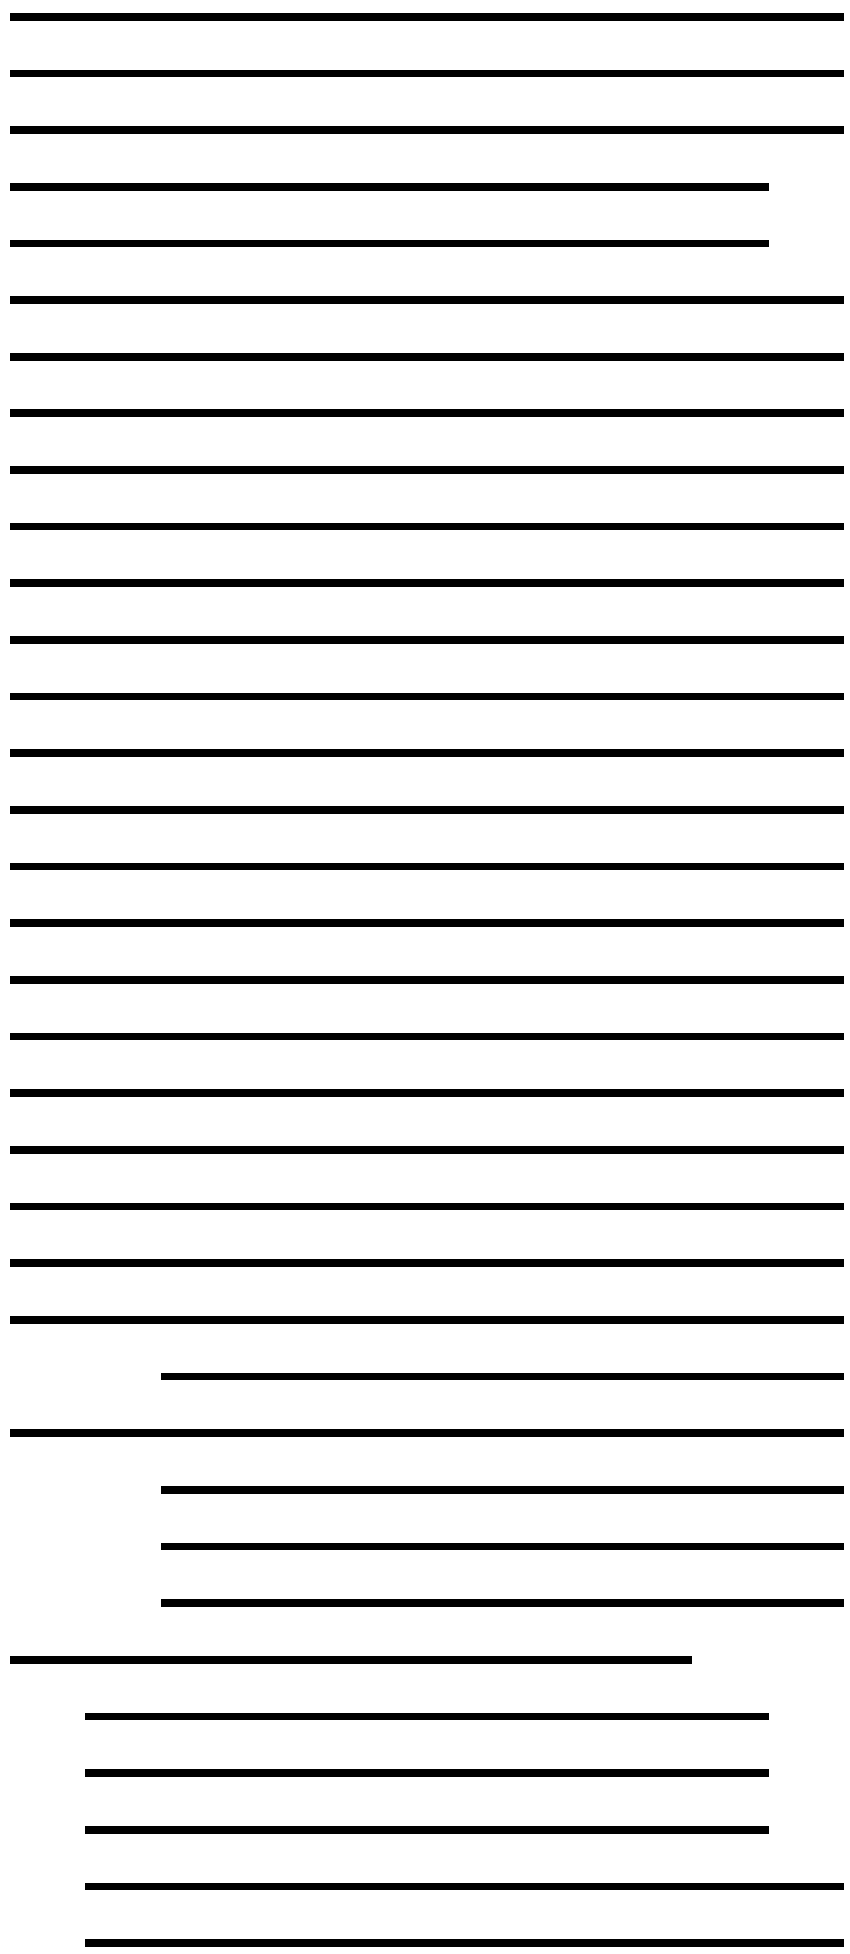

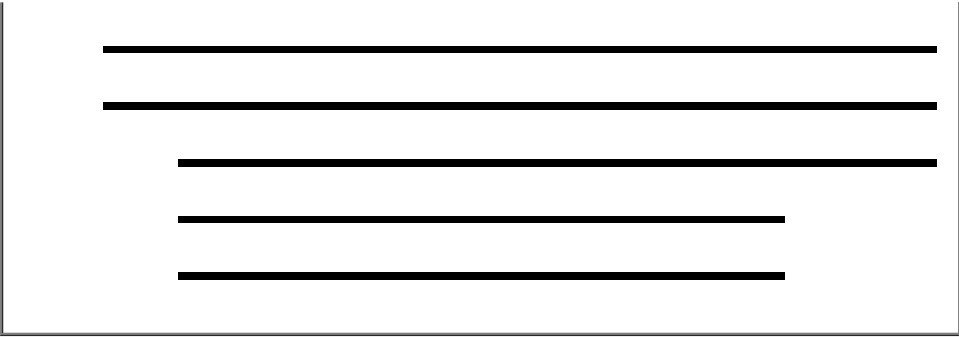

**Descriptions**

**Sequences producing significant alignments:**

Select: [All](#) [None](#) Selected:0

[Alignments](#)
[Download](#)
[GenPept](#)
[Graphics](#)
[Distance tree of results](#)
[Multiple alignment](#)

| Description                                                                                                           | Max score | Total score | Query cover | E value | Ident | Accession                                   |
|-----------------------------------------------------------------------------------------------------------------------|-----------|-------------|-------------|---------|-------|---------------------------------------------|
| <a href="#">PREDICTED: C4b-binding protein beta chain isoform X3 [Pongo ab unnamed protein product [Homo sapiens]</a> | 38.0      | 38.0        | 100%        | 0.052   | 100%  | <a href="#">gil686700216 XP_009236698.1</a> |
| <a href="#">PREDICTED: C4b-binding protein beta chain isoform X3 [Pan troglodytes]</a>                                | 38.0      | 38.0        | 100%        | 0.052   | 100%  | <a href="#">gil194373591 BAG56891.1</a>     |
| <a href="#">PREDICTED: C4b-binding protein beta chain isoform X3 [Pan troglodytes]</a>                                | 38.0      | 38.0        | 100%        | 0.053   | 100%  | <a href="#">gil694891540 XP_009439669.1</a> |
| <a href="#">PREDICTED: C4b-binding protein beta chain isoform X3 [Pan paniscus]</a>                                   | 38.0      | 38.0        | 100%        | 0.053   | 100%  | <a href="#">gil675771724 XP_008974762.1</a> |
| <a href="#">PREDICTED: C4b-binding protein beta chain isoform X3 [Homo sapiens]</a>                                   | 38.0      | 38.0        | 100%        | 0.053   | 100%  | <a href="#">gil530366462 XP_005273312.1</a> |
| <a href="#">PREDICTED: C4b-binding protein beta chain isoform X2 [Rhinopithecus]</a>                                  | 38.0      | 38.0        | 100%        | 0.054   | 100%  | <a href="#">gil724836382 XP_010363947.1</a> |
| <a href="#">PREDICTED: C4b-binding protein beta chain isoform X2 [Pan troglodytes]</a>                                | 38.0      | 38.0        | 100%        | 0.054   | 100%  | <a href="#">gil694891534 XP_009439665.1</a> |
| <a href="#">PREDICTED: C4b-binding protein beta chain isoform X2 [Pongo abelii]</a>                                   | 38.0      | 38.0        | 100%        | 0.054   | 100%  | <a href="#">gil686700213 XP_009236694.1</a> |
| <a href="#">PREDICTED: C4b-binding protein beta chain isoform X2 [Pan paniscus]</a>                                   | 38.0      | 38.0        | 100%        | 0.054   | 100%  | <a href="#">gil675771715 XP_008974759.1</a> |
| <a href="#">C4b-binding protein beta chain isoform 2 precursor [Homo sapiens]</a>                                     | 38.0      | 38.0        | 100%        | 0.054   | 100%  | <a href="#">gil62912462 NP_001017364.1</a>  |
| <a href="#">PREDICTED: C4b-binding protein beta chain isoform X1 [Rhinopithecus]</a>                                  | 38.0      | 38.0        | 100%        | 0.054   | 100%  | <a href="#">gil724836379 XP_010363946.1</a> |
| <a href="#">C4b-binding protein beta chain isoform 1 precursor [Homo sapiens]</a>                                     | 38.0      | 38.0        | 100%        | 0.054   | 100%  | <a href="#">gil4502505 NP_000707.1</a>      |
| <a href="#">PREDICTED: C4b-binding protein beta chain isoform X1 [Pan paniscus]</a>                                   | 38.0      | 38.0        | 100%        | 0.054   | 100%  | <a href="#">gil397504761 XP_003822949.1</a> |
| <a href="#">PREDICTED: C4b-binding protein beta chain isoform 1 [Nomascus]</a>                                        | 38.0      | 38.0        | 100%        | 0.054   | 100%  | <a href="#">gil332266848 XP_003282407.1</a> |
| <a href="#">PREDICTED: C4b-binding protein beta chain isoform X1 [Pongo abelii]</a>                                   | 38.0      | 38.0        | 100%        | 0.054   | 100%  | <a href="#">gil297662141 XP_002809574.1</a> |
| <a href="#">PREDICTED: C4b-binding protein beta chain isoform X1 [Pan troglodytes]</a>                                | 38.0      | 38.0        | 100%        | 0.054   | 100%  | <a href="#">gil114572288 XP_001166306.1</a> |
| <a href="#">PREDICTED: C4b-binding protein beta chain isoform X2 [Callithrix jacchus]</a>                             | 38.0      | 38.0        | 100%        | 0.054   | 100%  | <a href="#">gil675749407 XP_008983835.1</a> |
| <a href="#">PREDICTED: C4b-binding protein beta chain isoform X1 [Callithrix jacchus]</a>                             | 38.0      | 38.0        | 100%        | 0.054   | 100%  | <a href="#">gil296230632 XP_002760794.1</a> |
| <a href="#">PREDICTED: LOW QUALITY PROTEIN: C4b-binding protein beta chain isoform X2 [Saimiri boliviensis]</a>       | 38.0      | 38.0        | 100%        | 0.054   | 100%  | <a href="#">gil471369765 XP_004375397.1</a> |
| <a href="#">PREDICTED: C4b-binding protein beta chain isoform X2 [Saimiri boliviensis]</a>                            | 34.6      | 34.6        | 90%         | 0.72    | 100%  | <a href="#">gil725574024 XP_010339305.1</a> |
| <a href="#">PREDICTED: C4b-binding protein beta chain isoform X1 [Saimiri boliviensis]</a>                            | 34.6      | 34.6        | 90%         | 0.72    | 100%  | <a href="#">gil403277664 XP_003930472.1</a> |
| <a href="#">PREDICTED: C4b-binding protein beta chain isoform X2 [Papio anubis]</a>                                   | 34.1      | 34.1        | 100%        | 0.99    | 91%   | <a href="#">gil685519789 XP_009186662.1</a> |
| <a href="#">PREDICTED: C4b-binding protein beta chain isoform X6 [Macaca fascicularis]</a>                            | 34.1      | 34.1        | 100%        | 0.99    | 91%   | <a href="#">gil544399939 XP_005540733.1</a> |
| <a href="#">PREDICTED: C4b-binding protein beta chain isoform X2 [Macaca fascicularis]</a>                            | 34.1      | 34.1        | 100%        | 1.00    | 91%   | <a href="#">gil544399931 XP_005540729.1</a> |
| <a href="#">PREDICTED: C4b-binding protein beta chain isoform X1 [Papio anubis]</a>                                   | 34.1      | 34.1        | 100%        | 1.00    | 91%   | <a href="#">gil685519785 XP_009186656.1</a> |
| <a href="#">hypothetical protein EGM_01442 [Macaca fascicularis]</a>                                                  | 34.1      | 34.1        | 100%        | 1.00    | 91%   | <a href="#">gil355745961 EHH50586.1</a>     |
| <a href="#">hypothetical protein EGK_01712 [Macaca mulatta]</a>                                                       | 34.1      | 34.1        | 100%        | 1.00    | 91%   | <a href="#">gil355558818 EHH15598.1</a>     |
| <a href="#">PREDICTED: c4b-binding protein beta chain isoform 3 [Macaca mulatta]</a>                                  | 34.1      | 34.1        | 100%        | 1.00    | 91%   | <a href="#">gil109018561 XP_001083216.1</a> |

|                                                                                       |      |      |      |     |      |                                              |
|---------------------------------------------------------------------------------------|------|------|------|-----|------|----------------------------------------------|
| <a href="#">PREDICTED: C4b-binding protein beta chain isoform X1 [Macaca f...</a>     | 34.1 | 34.1 | 100% | 1.0 | 91%  | <a href="#">gij544399929 XP_005540728.1</a>  |
| <a href="#">PREDICTED: C4b-binding protein beta chain isoform X9 [Chloroce...</a>     | 33.3 | 33.3 | 100% | 1.8 | 91%  | <a href="#">gij635130917 XP_007986833.1</a>  |
| <a href="#">PREDICTED: C4b-binding protein beta chain isoform X8 [Chloroce...</a>     | 33.3 | 33.3 | 100% | 1.9 | 91%  | <a href="#">gij635130915 XP_007986832.1</a>  |
| <a href="#">PREDICTED: C4b-binding protein beta chain isoform X7 [Chloroce...</a>     | 33.3 | 33.3 | 100% | 1.9 | 91%  | <a href="#">gij635130913 XP_007986831.1</a>  |
| <a href="#">PREDICTED: C4b-binding protein beta chain isoform X6 [Chloroce...</a>     | 33.3 | 33.3 | 100% | 1.9 | 91%  | <a href="#">gij635130911 XP_007986830.1</a>  |
| <a href="#">PREDICTED: C4b-binding protein beta chain isoform X5 [Chloroce...</a>     | 33.3 | 33.3 | 100% | 1.9 | 91%  | <a href="#">gij635130907 XP_007986828.1</a>  |
| <a href="#">PREDICTED: C4b-binding protein beta chain isoform X4 [Chloroce...</a>     | 33.3 | 33.3 | 100% | 1.9 | 91%  | <a href="#">gij635130905 XP_007986827.1</a>  |
| <a href="#">PREDICTED: C4b-binding protein beta chain isoform X3 [Chloroce...</a>     | 33.3 | 33.3 | 100% | 1.9 | 91%  | <a href="#">gij635130903 XP_007986826.1</a>  |
| <a href="#">PREDICTED: C4b-binding protein beta chain isoform X2 [Chloroce...</a>     | 33.3 | 33.3 | 100% | 1.9 | 91%  | <a href="#">gij635130901 XP_007986825.1</a>  |
| <a href="#">PREDICTED: C4b-binding protein beta chain isoform X1 [Chloroce...</a>     | 33.3 | 33.3 | 100% | 1.9 | 91%  | <a href="#">gij635130899 XP_007986823.1</a>  |
| <a href="#">PREDICTED: C4b-binding protein beta chain [Chrysochloris asiatic...</a>   | 33.3 | 33.3 | 100% | 1.9 | 91%  | <a href="#">gij586450676 XP_006834269.1</a>  |
| <a href="#">PREDICTED: C4b-binding protein beta chain isoform X2 [Galeopte...</a>     | 32.0 | 32.0 | 100% | 4.8 | 82%  | <a href="#">gij667314769 XP_008585888.1</a>  |
| <a href="#">PREDICTED: C4b-binding protein beta chain [Myotis davidii]</a>            | 32.0 | 32.0 | 81%  | 4.8 | 100% | <a href="#">gij584068188 XP_006754475.1</a>  |
| <a href="#">PREDICTED: C4b-binding protein beta chain isoform X1 [Galeopte...</a>     | 32.0 | 32.0 | 100% | 4.9 | 82%  | <a href="#">gij667314766 XP_008585886.1</a>  |
| <a href="#">PREDICTED: C4b-binding protein beta chain isoform X2 [Myotis br...</a>    | 32.0 | 32.0 | 81%  | 4.9 | 100% | <a href="#">gij554587742 XP_005885272.1</a>  |
| <a href="#">PREDICTED: C4b-binding protein beta chain [Myotis lucifugus]</a>          | 32.0 | 32.0 | 81%  | 4.9 | 100% | <a href="#">gij558152655 XP_006094937.1</a>  |
| <a href="#">PREDICTED: C4b-binding protein beta chain isoform X1 [Myotis br...</a>    | 32.0 | 32.0 | 81%  | 4.9 | 100% | <a href="#">gij554587740 XP_005885271.1</a>  |
| <a href="#">PREDICTED: C4b-binding protein beta chain [Ornithorhynchus ana...</a>     | 31.6 | 31.6 | 81%  | 5.4 | 100% | <a href="#">gij620984032 XP_007659774.1</a>  |
| <a href="#">PREDICTED: LOW QUALITY PROTEIN: C4b-binding protein beta c...</a>         | 31.6 | 31.6 | 81%  | 6.7 | 100% | <a href="#">gij470641603 XP_004325529.1</a>  |
| <a href="#">PREDICTED: C4b-binding protein beta chain [Orcinus orca]</a>              | 31.6 | 31.6 | 81%  | 6.8 | 100% | <a href="#">gij466071254 XP_004282462.1</a>  |
| <a href="#">PREDICTED: LOW QUALITY PROTEIN: C4b-binding protein beta c...</a>         | 31.6 | 31.6 | 81%  | 6.8 | 100% | <a href="#">gij594636425 XP_007171607.1</a>  |
| <a href="#">PREDICTED: C4b-binding protein beta chain isoform X2 [Tarsius s...</a>    | 30.8 | 30.8 | 90%  | 13  | 90%  | <a href="#">gij640811969 XP_008062626.1</a>  |
| <a href="#">PREDICTED: C4b-binding protein beta chain isoform X1 [Tarsius s...</a>    | 30.8 | 30.8 | 90%  | 13  | 90%  | <a href="#">gij640811967 XP_008062625.1</a>  |
| <a href="#">AGE-1 [Caenorhabditis elegans]</a>                                        | 30.3 | 30.3 | 100% | 19  | 83%  | <a href="#">gij1850329 AAC47459.1</a>        |
| <a href="#">Protein AGE-1 [Caenorhabditis elegans]</a>                                | 30.3 | 30.3 | 100% | 19  | 83%  | <a href="#">gij392891813 JNP_496462.2</a>    |
| <a href="#">PREDICTED: dimethylaniline monooxygenase [N-oxide-forming] 5-</a>         | 29.1 | 29.1 | 90%  | 47  | 80%  | <a href="#">gij533169627 XP_005398381.1</a>  |
| <a href="#">PREDICTED: C4b-binding protein beta chain [Mustela putorius furo</a>      | 28.6 | 28.6 | 72%  | 62  | 100% | <a href="#">gij511871202 XP_004756233.1</a>  |
| <a href="#">PREDICTED: C4b-binding protein beta chain [Ceratotherium simur...</a>     | 28.6 | 28.6 | 72%  | 62  | 100% | <a href="#">gij478501878 XP_004425250.1</a>  |
| <a href="#">PREDICTED: C4b-binding protein beta chain [Sus scrofa]</a>                | 28.2 | 28.2 | 90%  | 84  | 80%  | <a href="#">gij311265148 XP_003130503.1</a>  |
| <a href="#">PREDICTED: LOW QUALITY PROTEIN: C4b-binding protein beta c...</a>         | 28.2 | 28.2 | 81%  | 85  | 89%  | <a href="#">gij560935168 XP_006193413.1</a>  |
| <a href="#">PREDICTED: ubiquitin carboxyl-terminal hydrolase 16-like [Ciona ir...</a> | 28.2 | 28.2 | 100% | 88  | 73%  | <a href="#">gij699248632 XP_002128614.3</a>  |
| <a href="#">hypothetical protein [Lactobacillus sp. ASF360]</a>                       | 28.2 | 28.2 | 90%  | 89  | 90%  | <a href="#">gij490145848 WIP_004046179.1</a> |
| <a href="#">PREDICTED: C4b-binding protein beta chain [Canis lupus familiaris</a>     | 27.4 | 27.4 | 81%  | 157 | 89%  | <a href="#">gij73960685 XP_851611.1</a>      |
| <a href="#">PREDICTED: C4b-binding protein beta chain [Eptesicus fuscus]</a>          | 27.4 | 27.4 | 81%  | 157 | 89%  | <a href="#">gij641725104 XP_008152491.1</a>  |
| <a href="#">PREDICTED: C4b-binding protein beta chain [Otolemur garnettii]</a>        | 27.4 | 27.4 | 90%  | 157 | 80%  | <a href="#">gij395838946 XP_003792365.1</a>  |
| <a href="#">PREDICTED: golgin subfamily A member 4-like [Merops nubicus]</a>          | 27.4 | 27.4 | 100% | 160 | 73%  | <a href="#">gij675629007 XP_008942969.1</a>  |
| <a href="#">Inhibitor of growth protein 3 [Camponotus floridanus]</a>                 | 27.4 | 27.4 | 81%  | 161 | 89%  | <a href="#">gij307175393 EFN65410.1</a>      |
| <a href="#">hypothetical protein DDB_G0277599 [Dictyostelium discoideum AX...</a>     | 26.5 | 26.5 | 72%  | 285 | 88%  | <a href="#">gij66817412 XP_642559.1</a>      |
| <a href="#">PREDICTED: C4b-binding protein beta chain [Elephantulus edward...</a>     | 26.5 | 26.5 | 72%  | 291 | 88%  | <a href="#">gij585666900 XP_006888062.1</a>  |
| <a href="#">PREDICTED: C4b-binding protein beta chain [Leptonychotes wedd...</a>      | 26.5 | 26.5 | 90%  | 292 | 80%  | <a href="#">gij585156269 XP_006730462.1</a>  |
| <a href="#">tyrosyl-tRNA synthetase [Onion yellows phytoplasma]</a>                   | 26.5 | 46.7 | 90%  | 299 | 70%  | <a href="#">gij499474180 WIP_011160820.1</a> |
| <a href="#">hypothetical protein JAAARDRAFT_162852 [Jaapia argillacea MUC...</a>      | 26.5 | 26.5 | 63%  | 304 | 100% | <a href="#">gij646387489 KDQ52424.1</a>      |
| <a href="#">translation initiation factor eIF-3b [Gloeophyllum trabeum ATCC 11...</a> | 26.5 | 26.5 | 63%  | 304 | 100% | <a href="#">gij630343543 XP_007861072.1</a>  |
| <a href="#">leucine rich repeat family protein [Stylonychia lemnae]</a>               | 26.5 | 26.5 | 72%  | 306 | 88%  | <a href="#">gij678318019 CDW85492.1</a>      |
| <a href="#">hypothetical protein [Neisseria sicca]</a>                                | 26.1 | 26.1 | 63%  | 310 | 100% | <a href="#">gij489858884 WIP_003762538.1</a> |

|                                                                                            |      |      |     |     |      |                                             |
|--------------------------------------------------------------------------------------------|------|------|-----|-----|------|---------------------------------------------|
| <a href="#">hypothetical protein [Neisseria sicca]</a>                                     | 26.1 | 26.1 | 63% | 310 | 100% | <a href="#">gi 489858305 WP_003761962.1</a> |
| <a href="#">hypothetical protein [Prevotella nigrescens]</a>                               | 25.7 | 25.7 | 63% | 335 | 100% | <a href="#">gi 490496588 WP_004362758.1</a> |
| <a href="#">hypothetical protein GLOINDRAFT_344233 [Rhizophagus irregulari]</a>            | 26.1 | 26.1 | 72% | 382 | 88%  | <a href="#">gi 552935896 ESA19211.1</a>     |
| <a href="#">hypothetical protein [Prevotella disiens]</a>                                  | 25.7 | 25.7 | 63% | 395 | 100% | <a href="#">gi 545429973 WP_021668265.1</a> |
| <a href="#">hypothetical protein RirG_017690 [Rhizophagus irregularis DAOM 1]</a>          | 26.1 | 26.1 | 72% | 408 | 88%  | <a href="#">gi 595497640 EXX78132.1</a>     |
| <a href="#">hypothetical protein [Asaia astilbes]</a>                                      | 26.1 | 26.1 | 72% | 409 | 88%  | <a href="#">gi 647534967 WP_025824557.1</a> |
| <a href="#">hypothetical protein [Pelagibaca bermudensis]</a>                              | 26.1 | 26.1 | 72% | 409 | 88%  | <a href="#">gi 495078167 WP_007802992.1</a> |
| <a href="#">CBN-NDG-4 protein [Caenorhabditis brenneri]</a>                                | 26.1 | 26.1 | 63% | 412 | 100% | <a href="#">gi 341896364 EGT52299.1</a>     |
| <a href="#">Protein NDG-4, isoform b [Caenorhabditis elegans]</a>                          | 26.1 | 26.1 | 63% | 412 | 100% | <a href="#">gi 71987048 NP_001022619.1</a>  |
| <a href="#">Protein NDG-4, isoform a [Caenorhabditis elegans]</a>                          | 26.1 | 26.1 | 63% | 412 | 100% | <a href="#">gi 71987043 NP_001022618.1</a>  |
| <a href="#">Piso0_005440 [Milleromyza farinosa CBS 7064]</a>                               | 26.1 | 26.1 | 72% | 417 | 88%  | <a href="#">gi 448081536 XP_004194913.1</a> |
| <a href="#">type I restriction-modification system [Nonlabens ulvanivorans]</a>            | 25.7 | 25.7 | 90% | 506 | 80%  | <a href="#">gi 674968931 GAK74476.1</a>     |
| <a href="#">Zn-dependent hydrolase [Helicobacter bilis]</a>                                | 25.7 | 25.7 | 90% | 536 | 70%  | <a href="#">gi 696176423 KGL20850.1</a>     |
| <a href="#">DNA helicase [Microscilla marina]</a>                                          | 25.7 | 25.7 | 72% | 540 | 88%  | <a href="#">gi 488785593 WP_002698000.1</a> |
| <a href="#">PREDICTED: uncharacterized protein LOC101261934 isoform X2 [!]</a>             | 25.7 | 25.7 | 72% | 540 | 88%  | <a href="#">gi 723716780 XP_010323989.1</a> |
| <a href="#">PREDICTED: uncharacterized protein LOC101261934 isoform X1 [!]</a>             | 25.7 | 25.7 | 72% | 541 | 88%  | <a href="#">gi 723716777 XP_010323988.1</a> |
| <a href="#">PREDICTED: uncharacterized protein LOC102585817 [Solanum tuberosum]</a>        | 25.7 | 25.7 | 72% | 541 | 88%  | <a href="#">gi 565403988 XP_006367433.1</a> |
| <a href="#">type I restriction endonuclease EcoprfI subunit M [Streptococcus coelicus]</a> | 25.7 | 25.7 | 90% | 548 | 80%  | <a href="#">gi 493309607 WP_006267109.1</a> |
| <a href="#">Zn-dependent hydrolase [Helicobacter bilis]</a>                                | 25.7 | 25.7 | 90% | 552 | 70%  | <a href="#">gi 696181945 KGL25316.1</a>     |
| <a href="#">hypothetical protein [Helicobacter bilis]</a>                                  | 25.7 | 25.7 | 90% | 552 | 70%  | <a href="#">gi 490187295 WP_004085896.1</a> |
| <a href="#">Zn-dependent hydrolase [Helicobacter bilis]</a>                                | 25.7 | 25.7 | 90% | 552 | 70%  | <a href="#">gi 491359440 WP_005217358.1</a> |
| <a href="#">Zn-dependent hydrolase [Helicobacter trogonum]</a>                             | 25.7 | 25.7 | 90% | 553 | 70%  | <a href="#">gi 696191037 KGL33027.1</a>     |
| <a href="#">Zn-dependent hydrolase [Helicobacter trogonum]</a>                             | 25.7 | 25.7 | 90% | 553 | 70%  | <a href="#">gi 696189091 KGL31686.1</a>     |
| <a href="#">type I restriction-modification system, M subunit [Clostridium celatum]</a>    | 25.7 | 25.7 | 90% | 557 | 80%  | <a href="#">gi 491353670 WP_005211592.1</a> |
| <a href="#">type I restriction endonuclease [Methanococcus vannielii]</a>                  | 25.7 | 25.7 | 90% | 557 | 80%  | <a href="#">gi 500677016 WP_011971897.1</a> |
| <a href="#">restriction endonuclease EcoR124II subunit M [Streptococcus sp. S1]</a>        | 25.7 | 25.7 | 90% | 557 | 80%  | <a href="#">gi 726978673 WP_033583435.1</a> |
| <a href="#">type I restriction-modification system, M subunit [Streptococcus parvulus]</a> | 25.7 | 25.7 | 90% | 557 | 80%  | <a href="#">gi 565833921 WP_023917515.1</a> |

## Alignments

Download [GenPept](#) [Graphics](#)

Next Previous Descriptions

PREDICTED: C4b-binding protein beta chain isoform X3 [Pongo abelii]

Sequence ID: [gi|686700216|ref|XP\\_009236698.1](#) Length: 202 Number of Matches: 1

Range 1: 48 to 58 [GenPept](#) [Graphics](#)

Next Match Previous Match

| Score         | Expect | Identities  | Positives   | Gaps     |
|---------------|--------|-------------|-------------|----------|
| 38.0 bits(82) | 0.052  | 11/11(100%) | 11/11(100%) | 0/11(0%) |

```
Query 1  KKTLFCNASKE 11
        KKTLFCNASKE
Sbjct 48  KKTLFCNASKE 58
```

### Related Information

[Gene](#) - associated gene details  
[Map Viewer](#) - aligned genomic context

Download [GenPept](#) [Graphics](#)

Next Previous Descriptions

unnamed protein product [Homo sapiens]

Sequence ID: [gi|194373591|dbj|BAG56891.1](#) Length: 218 Number of Matches: 1

Range 1: 48 to 58 [GenPept](#) [Graphics](#)

Next Match Previous Match

| Score         | Expect | Identities  | Positives   | Gaps     |
|---------------|--------|-------------|-------------|----------|
| 38.0 bits(82) | 0.052  | 11/11(100%) | 11/11(100%) | 0/11(0%) |

```
Query 1  KKTLFCNASKE 11
```

### Related Information

[Gene](#) - associated gene details



Sbjct 48 KKTLFCNASKE 58

[Download](#) [GenPept](#) [Graphics](#)

[Next](#) [Previous](#) [Descriptions](#)

PREDICTED: C4b-binding protein beta chain isoform X3 [Pan troglodytes]

Sequence ID: [gi|694891540|ref|XP\\_009439669.1|](#) Length: 227 Number of Matches: 1

Range 1: 57 to 67 [GenPept](#) [Graphics](#)

[Next Match](#) [Previous Match](#)

| Score         | Expect | Identities  | Positives   | Gaps     |
|---------------|--------|-------------|-------------|----------|
| 38.0 bits(82) | 0.053  | 11/11(100%) | 11/11(100%) | 0/11(0%) |

Query 1 KKTLFCNASKE 11  
 KKTLFCNASKE  
 Sbjct 57 KKTLFCNASKE 67

**Related Information**

[Gene](#) - associated gene details

[Download](#) [GenPept](#) [Graphics](#)

[Next](#) [Previous](#) [Descriptions](#)

PREDICTED: C4b-binding protein beta chain isoform X3 [Pan paniscus]

Sequence ID: [gi|675771724|ref|XP\\_008974762.1|](#) Length: 227 Number of Matches: 1

Range 1: 57 to 67 [GenPept](#) [Graphics](#)

[Next Match](#) [Previous Match](#)

| Score         | Expect | Identities  | Positives   | Gaps     |
|---------------|--------|-------------|-------------|----------|
| 38.0 bits(82) | 0.053  | 11/11(100%) | 11/11(100%) | 0/11(0%) |

Query 1 KKTLFCNASKE 11  
 KKTLFCNASKE  
 Sbjct 57 KKTLFCNASKE 67

**Related Information**

[Gene](#) - associated gene details

[Map Viewer](#) - aligned genomic context

[Download](#) [GenPept](#) [Graphics](#)

[Next](#) [Previous](#) [Descriptions](#)

PREDICTED: C4b-binding protein beta chain isoform X3 [Homo sapiens]

Sequence ID: [gi|530366462|ref|XP\\_005273312.1|](#) Length: 227 Number of Matches: 1

Range 1: 57 to 67 [GenPept](#) [Graphics](#)

[Next Match](#) [Previous Match](#)

| Score         | Expect | Identities  | Positives   | Gaps     |
|---------------|--------|-------------|-------------|----------|
| 38.0 bits(82) | 0.053  | 11/11(100%) | 11/11(100%) | 0/11(0%) |

Query 1 KKTLFCNASKE 11  
 KKTLFCNASKE  
 Sbjct 57 KKTLFCNASKE 67

**Related Information**

[Gene](#) - associated gene details

[Map Viewer](#) - aligned genomic context

BLAST is a registered trademark of the National Library of Medicine.

NCBI/ BLAST/ blastp suite/ Formatting Results - BTF9GKPT013

Your search parameters were adjusted to search for a short input sequence.

[Edit and Resubmit](#) [Save Search Strategies](#) [Formatting options](#) [Download](#) [YouTube](#) [How to read this page](#) [Blast report description](#)

### C4BPB\_KKTLFCNASKEWDDTTTECRL\_Mod

RID [BTF9GKPT013](#) (Expires on 01-20 15:15 pm)

Query ID |cl|30152  
 Description None  
 Molecule type amino acid  
 Query Length 21

Database Name nr  
 Description All non-redundant GenBank CDS translations+PDB+SwissProt+PIR+PRF excluding environmental samples from WGS projects  
 Program BLASTP 2.2.30+ [Citation](#)

Other reports: [Search Summary](#) [Taxonomy reports](#) [Distance tree of results](#) [Related Structures](#) [Multiple alignment](#)

### Graphic Summary

[Show Conserved Domains](#)

No putative conserved domains have been detected

Distribution of 100 Blast Hits on the Query Sequence



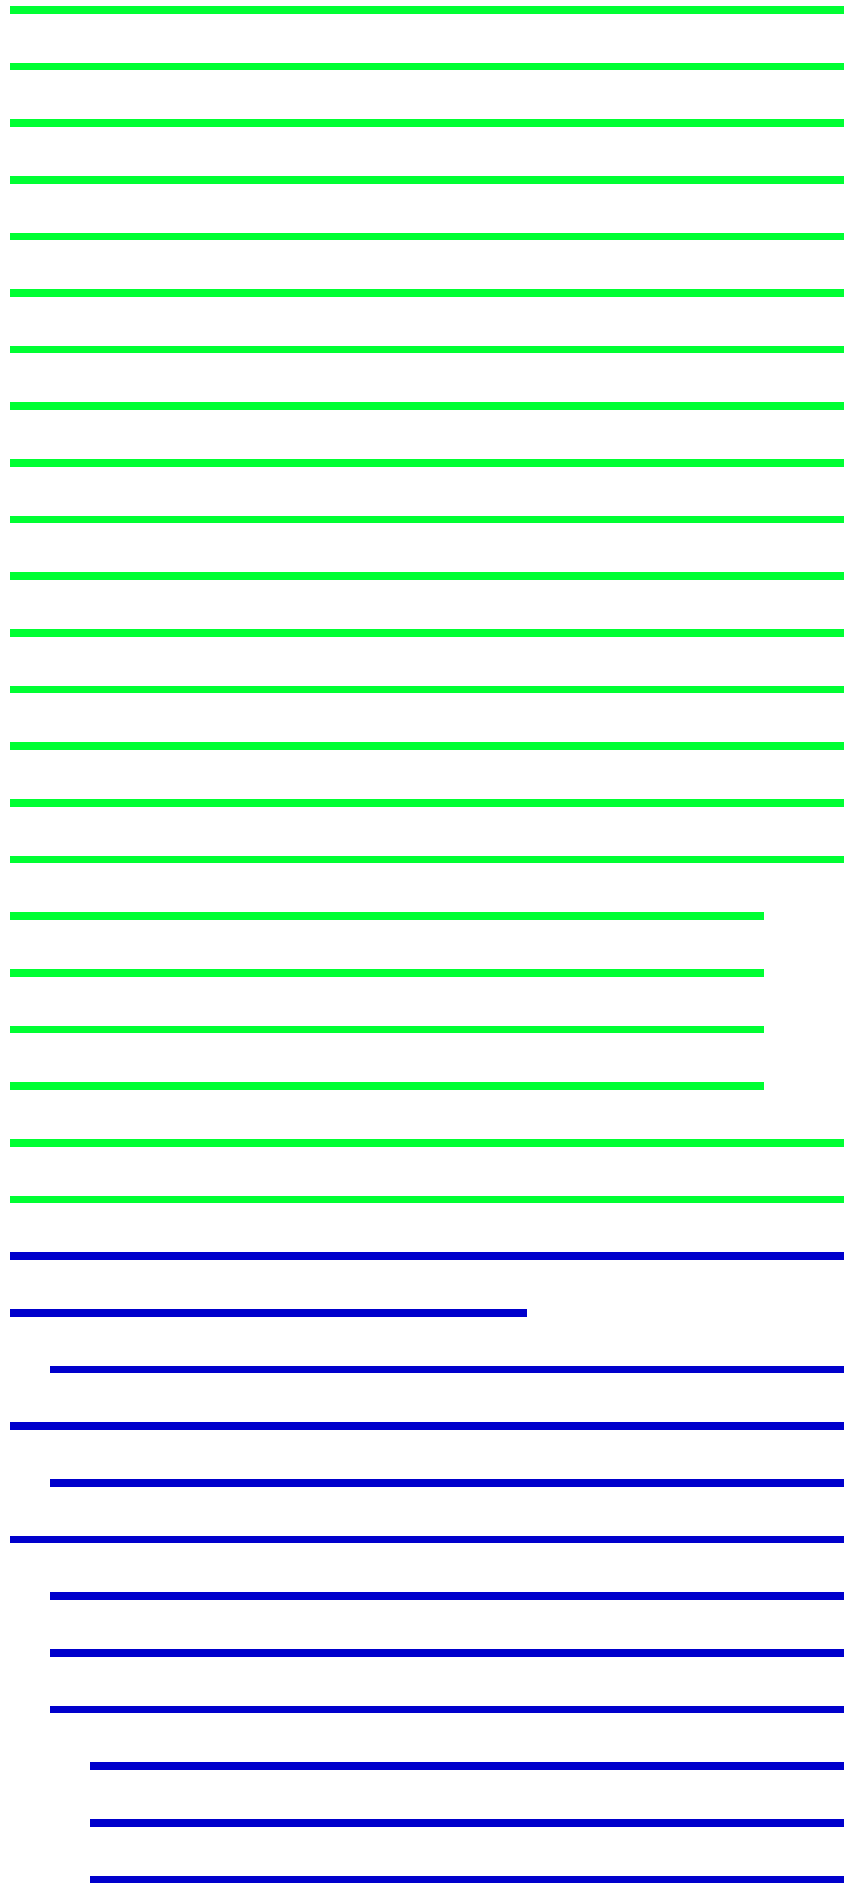

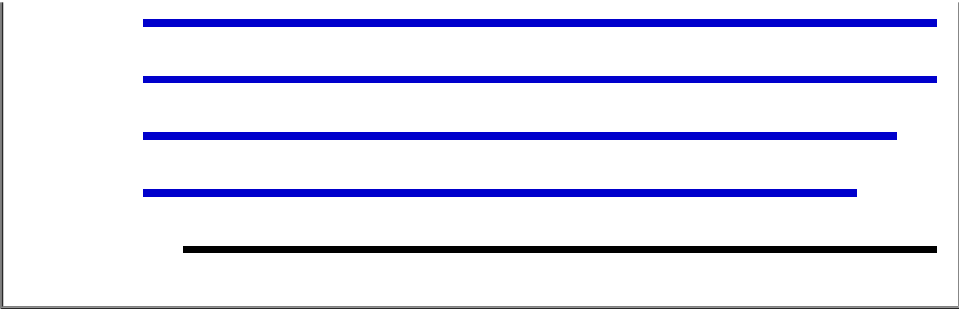

**Descriptions**

**Sequences producing significant alignments:**

Select: [All](#) [None](#) Selected:0

[Alignments](#)
[Download](#)
[GenPept](#)
[Graphics](#)
[Distance tree of results](#)
[Multiple alignment](#)
⚙

| Description                                                                   | Max score | Total score | Query cover | E value | Ident | Accession                                   |
|-------------------------------------------------------------------------------|-----------|-------------|-------------|---------|-------|---------------------------------------------|
| <a href="#">unnamed protein product [Homo sapiens]</a>                        | 70.6      | 70.6        | 100%        | 2e-12   | 95%   | <a href="#">gi 194373591 BAG56891.1</a>     |
| <a href="#">PREDICTED: C4b-binding protein beta chain isoform X3 [Pan t</a>   | 70.6      | 70.6        | 100%        | 2e-12   | 95%   | <a href="#">gi 694891540 XP_009439669.1</a> |
| <a href="#">PREDICTED: C4b-binding protein beta chain isoform X3 [Pan r</a>   | 70.6      | 70.6        | 100%        | 2e-12   | 95%   | <a href="#">gi 675771724 XP_008974762.1</a> |
| <a href="#">PREDICTED: C4b-binding protein beta chain isoform X3 [Homo</a>    | 70.6      | 70.6        | 100%        | 2e-12   | 95%   | <a href="#">gi 530366462 XP_005273312.1</a> |
| <a href="#">PREDICTED: C4b-binding protein beta chain isoform X2 [Rhinc</a>   | 70.6      | 70.6        | 100%        | 2e-12   | 95%   | <a href="#">gi 724836382 XP_010363947.1</a> |
| <a href="#">PREDICTED: C4b-binding protein beta chain isoform X2 [Pan t</a>   | 70.6      | 70.6        | 100%        | 2e-12   | 95%   | <a href="#">gi 694891534 XP_009439665.1</a> |
| <a href="#">PREDICTED: C4b-binding protein beta chain isoform X2 [Pan r</a>   | 70.6      | 70.6        | 100%        | 2e-12   | 95%   | <a href="#">gi 675771715 XP_008974759.1</a> |
| <a href="#">C4b-binding protein beta chain isoform 2 precursor [Homo sapi</a> | 70.6      | 70.6        | 100%        | 2e-12   | 95%   | <a href="#">gi 62912462 NP_001017364.1</a>  |
| <a href="#">PREDICTED: C4b-binding protein beta chain isoform X1 [Rhinc</a>   | 70.6      | 70.6        | 100%        | 2e-12   | 95%   | <a href="#">gi 724836379 XP_010363946.1</a> |
| <a href="#">C4b-binding protein beta chain isoform 1 precursor [Homo sapi</a> | 70.6      | 70.6        | 100%        | 2e-12   | 95%   | <a href="#">gi 4502505 NP_000707.1</a>      |
| <a href="#">PREDICTED: C4b-binding protein beta chain isoform X1 [Pan r</a>   | 70.6      | 70.6        | 100%        | 2e-12   | 95%   | <a href="#">gi 397504761 XP_003822949.1</a> |
| <a href="#">PREDICTED: C4b-binding protein beta chain isoform X1 [Pan t</a>   | 70.6      | 70.6        | 100%        | 2e-12   | 95%   | <a href="#">gi 114572288 XP_001166306.1</a> |
| <a href="#">PREDICTED: C4b-binding protein beta chain isoform X3 [Pong</a>    | 67.2      | 67.2        | 100%        | 2e-11   | 90%   | <a href="#">gi 686700216 XP_009236698.1</a> |
| <a href="#">PREDICTED: C4b-binding protein beta chain isoform X2 [Pong</a>    | 67.2      | 67.2        | 100%        | 2e-11   | 90%   | <a href="#">gi 686700213 XP_009236694.1</a> |
| <a href="#">PREDICTED: C4b-binding protein beta chain isoform X1 [Pong</a>    | 67.2      | 67.2        | 100%        | 2e-11   | 90%   | <a href="#">gi 297662141 XP_002809574.1</a> |
| <a href="#">PREDICTED: C4b-binding protein beta chain isoform X2 [Papi</a>    | 66.8      | 66.8        | 100%        | 3e-11   | 90%   | <a href="#">gi 685519789 XP_009186662.1</a> |
| <a href="#">PREDICTED: C4b-binding protein beta chain isoform X6 [Maca</a>    | 66.8      | 66.8        | 100%        | 3e-11   | 90%   | <a href="#">gi 544399939 XP_005540733.1</a> |
| <a href="#">PREDICTED: C4b-binding protein beta chain isoform X2 [Maca</a>    | 66.8      | 66.8        | 100%        | 3e-11   | 90%   | <a href="#">gi 544399931 XP_005540729.1</a> |
| <a href="#">PREDICTED: C4b-binding protein beta chain isoform X1 [Papi</a>    | 66.8      | 66.8        | 100%        | 3e-11   | 90%   | <a href="#">gi 685519785 XP_009186656.1</a> |
| <a href="#">hypothetical protein EGM_01442 [Macaca fascicularis]</a>          | 66.8      | 66.8        | 100%        | 3e-11   | 90%   | <a href="#">gi 355745961 EHH50586.1</a>     |
| <a href="#">hypothetical protein EGK_01712 [Macaca mulatta]</a>               | 66.8      | 66.8        | 100%        | 3e-11   | 90%   | <a href="#">gi 355558818 EHH15598.1</a>     |
| <a href="#">PREDICTED: c4b-binding protein beta chain isoform 3 [Macaca</a>   | 66.8      | 66.8        | 100%        | 3e-11   | 90%   | <a href="#">gi 109018561 XP_001083216.1</a> |
| <a href="#">PREDICTED: C4b-binding protein beta chain isoform X1 [Maca</a>    | 66.8      | 66.8        | 100%        | 4e-11   | 90%   | <a href="#">gi 544399929 XP_005540728.1</a> |
| <a href="#">PREDICTED: C4b-binding protein beta chain isoform 1 [Nomas</a>    | 66.4      | 66.4        | 100%        | 5e-11   | 90%   | <a href="#">gi 332266848 XP_003282407.1</a> |
| <a href="#">PREDICTED: C4b-binding protein beta chain isoform X9 [Chlor</a>   | 66.0      | 66.0        | 100%        | 6e-11   | 90%   | <a href="#">gi 635130917 XP_007986833.1</a> |
| <a href="#">PREDICTED: C4b-binding protein beta chain isoform X8 [Chlor</a>   | 66.0      | 66.0        | 100%        | 7e-11   | 90%   | <a href="#">gi 635130915 XP_007986832.1</a> |
| <a href="#">PREDICTED: C4b-binding protein beta chain isoform X7 [Chlor</a>   | 66.0      | 66.0        | 100%        | 7e-11   | 90%   | <a href="#">gi 635130913 XP_007986831.1</a> |
| <a href="#">PREDICTED: C4b-binding protein beta chain isoform X6 [Chlor</a>   | 66.0      | 66.0        | 100%        | 7e-11   | 90%   | <a href="#">gi 635130911 XP_007986830.1</a> |
| <a href="#">PREDICTED: C4b-binding protein beta chain isoform X5 [Chlor</a>   | 66.0      | 66.0        | 100%        | 7e-11   | 90%   | <a href="#">gi 635130907 XP_007986828.1</a> |

|                                                                              |      |      |      |       |      |                                             |
|------------------------------------------------------------------------------|------|------|------|-------|------|---------------------------------------------|
| <a href="#">PREDICTED: C4b-binding protein beta chain isoform X4 [Chlor</a>  | 66.0 | 66.0 | 100% | 7e-11 | 90%  | <a href="#">gil635130905 XP_007986827.1</a> |
| <a href="#">PREDICTED: C4b-binding protein beta chain isoform X3 [Chlor</a>  | 66.0 | 66.0 | 100% | 7e-11 | 90%  | <a href="#">gil635130903 XP_007986826.1</a> |
| <a href="#">PREDICTED: C4b-binding protein beta chain isoform X2 [Chlor</a>  | 66.0 | 66.0 | 100% | 7e-11 | 90%  | <a href="#">gil635130901 XP_007986825.1</a> |
| <a href="#">PREDICTED: C4b-binding protein beta chain isoform X1 [Chlor</a>  | 66.0 | 66.0 | 100% | 7e-11 | 90%  | <a href="#">gil635130899 XP_007986823.1</a> |
| <a href="#">PREDICTED: C4b-binding protein beta chain isoform X2 [Callit</a> | 64.3 | 64.3 | 90%  | 3e-10 | 95%  | <a href="#">gil675749407 XP_008983835.1</a> |
| <a href="#">PREDICTED: C4b-binding protein beta chain isoform X1 [Callit</a> | 64.3 | 64.3 | 90%  | 3e-10 | 95%  | <a href="#">gil296230632 XP_002760794.1</a> |
| <a href="#">PREDICTED: C4b-binding protein beta chain isoform X2 [Saim</a>   | 59.2 | 59.2 | 90%  | 1e-08 | 89%  | <a href="#">gil725574024 XP_010339305.1</a> |
| <a href="#">PREDICTED: C4b-binding protein beta chain isoform X1 [Saim</a>   | 59.2 | 59.2 | 90%  | 1e-08 | 89%  | <a href="#">gil403277664 XP_003930472.1</a> |
| <a href="#">PREDICTED: C4b-binding protein beta chain isoform X2 [Galer</a>  | 51.5 | 51.5 | 100% | 5e-06 | 71%  | <a href="#">gil667314769 XP_008585888.1</a> |
| <a href="#">PREDICTED: C4b-binding protein beta chain isoform X1 [Galer</a>  | 51.5 | 51.5 | 100% | 5e-06 | 71%  | <a href="#">gil667314766 XP_008585886.1</a> |
| <a href="#">PREDICTED: C4b-binding protein beta chain [Chrysochloris as</a>  | 48.6 | 48.6 | 100% | 5e-05 | 76%  | <a href="#">gil586450676 XP_006834269.1</a> |
| <a href="#">PREDICTED: LOW QUALITY PROTEIN: C4b-binding protein b</a>        | 46.9 | 46.9 | 61%  | 2e-04 | 100% | <a href="#">gil471369765 XP_004375397.1</a> |
| <a href="#">PREDICTED: LOW QUALITY PROTEIN: C4b-binding protein b</a>        | 45.2 | 45.2 | 95%  | 7e-04 | 70%  | <a href="#">gil594636425 XP_007171607.1</a> |
| <a href="#">PREDICTED: C4b-binding protein beta chain [Ictidomys tridece</a> | 44.8 | 44.8 | 100% | 0.001 | 71%  | <a href="#">gil532087633 XP_005329528.1</a> |
| <a href="#">PREDICTED: C4b-binding protein beta chain [Nannospalax gal</a>   | 44.8 | 44.8 | 95%  | 0.001 | 76%  | <a href="#">gil674096417 XP_008821570.1</a> |
| <a href="#">PREDICTED: C4b-binding protein beta chain [Cavia porcellus]</a>  | 43.9 | 43.9 | 100% | 0.002 | 67%  | <a href="#">gil348577871 XP_003474707.1</a> |
| <a href="#">PREDICTED: C4b-binding protein beta chain [Sus scrofa]</a>       | 43.5 | 43.5 | 95%  | 0.002 | 65%  | <a href="#">gil311265148 XP_003130503.1</a> |
| <a href="#">PREDICTED: C4b-binding protein beta chain [Otolemur garnett</a>  | 43.1 | 43.1 | 95%  | 0.003 | 70%  | <a href="#">gil395838946 XP_003792365.1</a> |
| <a href="#">PREDICTED: C4b-binding protein beta chain [Orcinus orca]</a>     | 42.6 | 42.6 | 95%  | 0.004 | 65%  | <a href="#">gil466071254 XP_004282462.1</a> |
| <a href="#">PREDICTED: C4b-binding protein beta chain isoform X2 [Myoti</a>  | 42.6 | 42.6 | 90%  | 0.004 | 74%  | <a href="#">gil554587742 XP_005885272.1</a> |
| <a href="#">PREDICTED: C4b-binding protein beta chain [Myotis lucifugus]</a> | 42.6 | 42.6 | 90%  | 0.004 | 74%  | <a href="#">gil558152655 XP_006094937.1</a> |
| <a href="#">PREDICTED: C4b-binding protein beta chain isoform X1 [Myoti</a>  | 42.6 | 42.6 | 90%  | 0.004 | 74%  | <a href="#">gil554587740 XP_005885271.1</a> |
| <a href="#">PREDICTED: C4b-binding protein beta chain isoform X2 [Tarsi</a>  | 41.8 | 41.8 | 95%  | 0.008 | 65%  | <a href="#">gil640811969 XP_008062626.1</a> |
| <a href="#">PREDICTED: C4b-binding protein beta chain isoform X1 [Tarsi</a>  | 41.8 | 41.8 | 95%  | 0.008 | 65%  | <a href="#">gil640811967 XP_008062625.1</a> |
| <a href="#">PREDICTED: C4b-binding protein beta chain [Ceratotherium si</a>  | 41.4 | 41.4 | 90%  | 0.011 | 68%  | <a href="#">gil478501878 XP_004425250.1</a> |
| <a href="#">PREDICTED: LOW QUALITY PROTEIN: C4b-binding protein b</a>        | 40.5 | 40.5 | 85%  | 0.021 | 67%  | <a href="#">gil470641603 XP_004325529.1</a> |
| <a href="#">PREDICTED: C4b-binding protein beta chain [Eptesicus fuscus</a>  | 38.8 | 38.8 | 90%  | 0.075 | 68%  | <a href="#">gil641725104 XP_008152491.1</a> |
| <a href="#">PREDICTED: C4b-binding protein beta chain [Myotis davidii]</a>   | 38.4 | 38.4 | 52%  | 0.100 | 91%  | <a href="#">gil584068188 XP_006754475.1</a> |
| <a href="#">PREDICTED: C4b-binding protein beta chain [Jaculus jaculus]</a>  | 38.4 | 38.4 | 76%  | 0.10  | 75%  | <a href="#">gil507559572 XP_004663509.1</a> |
| <a href="#">PREDICTED: C4b-binding protein beta chain [Elephantulus ed</a>   | 38.0 | 38.0 | 85%  | 0.14  | 67%  | <a href="#">gil585666900 XP_006888062.1</a> |
| <a href="#">PREDICTED: C4b-binding protein beta chain isoform X2 [Came</a>   | 37.5 | 37.5 | 85%  | 0.19  | 61%  | <a href="#">gil743734558 XP_010961541.1</a> |
| <a href="#">PREDICTED: C4b-binding protein beta chain isoform X1 [Came</a>   | 37.5 | 37.5 | 85%  | 0.19  | 61%  | <a href="#">gil743734556 XP_010961540.1</a> |
| <a href="#">PREDICTED: LOW QUALITY PROTEIN: C4b-binding protein b</a>        | 37.5 | 37.5 | 85%  | 0.19  | 61%  | <a href="#">gil560935168 XP_006193413.1</a> |
| <a href="#">PREDICTED: C4b-binding protein beta chain [Mustela putorius</a>  | 36.7 | 36.7 | 95%  | 0.35  | 65%  | <a href="#">gil511871202 XP_004756233.1</a> |
| <a href="#">PREDICTED: C4b-binding protein beta chain [Ornithorhynchus</a>   | 36.3 | 36.3 | 61%  | 0.39  | 85%  | <a href="#">gil620984032 XP_007659774.1</a> |
| <a href="#">PREDICTED: LOW QUALITY PROTEIN: C4b-binding protein b</a>        | 34.1 | 34.1 | 85%  | 2.3   | 56%  | <a href="#">gil560986663 XP_006215518.1</a> |
| <a href="#">PREDICTED: C4b-binding protein beta chain [Canis lupus fami</a>  | 33.7 | 33.7 | 61%  | 3.1   | 77%  | <a href="#">gil73960685 XP_851611.1</a>     |
| <a href="#">C4b-binding protein beta chain [Heterocephalus glaber]</a>       | 33.3 | 33.3 | 100% | 4.3   | 57%  | <a href="#">gil351708103 EHB11022.1</a>     |
| <a href="#">PREDICTED: C4b-binding protein beta chain [Heterocephalus</a>    | 33.3 | 33.3 | 100% | 4.3   | 57%  | <a href="#">gil512892965 XP_004897416.1</a> |
| <a href="#">PREDICTED: C4b-binding protein beta chain [Leptonychotes w</a>   | 32.9 | 32.9 | 57%  | 5.9   | 75%  | <a href="#">gil585156269 XP_006730462.1</a> |
| <a href="#">envelope glycoprotein [Human immunodeficiency virus 1]</a>       | 32.0 | 32.0 | 71%  | 11    | 69%  | <a href="#">gil338224254 AEI88022.1</a>     |
| <a href="#">PREDICTED: LOW QUALITY PROTEIN: C4b-binding protein b</a>        | 32.0 | 32.0 | 71%  | 11    | 60%  | <a href="#">gil533120065 XP_005375468.1</a> |
| <a href="#">PREDICTED: C4b-binding protein beta chain [Pteropus alecto]</a>  | 31.6 | 31.6 | 95%  | 15    | 55%  | <a href="#">gil586536223 XP_006922979.1</a> |
| <a href="#">C4b-binding protein beta chain [Pteropus alecto]</a>             | 31.6 | 31.6 | 95%  | 15    | 55%  | <a href="#">gil431892854 ELK03282.1</a>     |
| <a href="#">glycogen branching protein [Halotheca sp. PCC 7418]</a>          | 31.6 | 31.6 | 76%  | 16    | 55%  | <a href="#">gil505038850 WP_015225952.1</a> |

|                                                                                 |      |      |     |    |      |                                             |
|---------------------------------------------------------------------------------|------|------|-----|----|------|---------------------------------------------|
| <a href="#">envelope glycoprotein [Human immunodeficiency virus 1]</a>          | 31.2 | 31.2 | 61% | 20 | 61%  | <a href="#">gi 345128523 AEN75212.1</a>     |
| <a href="#">hypothetical protein PFNF135_02825 [Plasmodium falciparum]</a>      | 31.2 | 31.2 | 57% | 21 | 67%  | <a href="#">gi 574981166 ETW42931.1</a>     |
| <a href="#">hypothetical protein [Clostridium sp. CAG:62]</a>                   | 31.2 | 31.2 | 38% | 22 | 100% | <a href="#">gi 548057742 WP_022376409.1</a> |
| <a href="#">envelope glycoprotein [Human immunodeficiency virus 1]</a>          | 30.8 | 30.8 | 52% | 29 | 75%  | <a href="#">gi 30908538 AAP37305.1</a>      |
| <a href="#">PREDICTED: C4b-binding protein beta chain isoform X2 [Felis</a>     | 30.8 | 30.8 | 95% | 29 | 55%  | <a href="#">gi 587018341 XP_006942889.1</a> |
| <a href="#">hypothetical protein PANDA_018755 [Ailuropoda melanoleuca]</a>      | 30.8 | 30.8 | 80% | 29 | 59%  | <a href="#">gi 281337925 EFB13509.1</a>     |
| <a href="#">PREDICTED: C4b-binding protein beta chain [Ursus maritimus]</a>     | 30.8 | 30.8 | 80% | 29 | 59%  | <a href="#">gi 670984389 XP_008683289.1</a> |
| <a href="#">PREDICTED: c4b-binding protein beta chain-like [Ailuropoda m</a>    | 30.8 | 30.8 | 80% | 29 | 59%  | <a href="#">gi 301786617 XP_002928722.1</a> |
| <a href="#">PREDICTED: C4b-binding protein beta chain isoform X1 [Felis</a>     | 30.8 | 30.8 | 95% | 29 | 55%  | <a href="#">gi 410986395 XP_003999496.1</a> |
| <a href="#">PREDICTED: complement C1r subcomponent [Stegastes partit</a>        | 30.8 | 30.8 | 66% | 30 | 63%  | <a href="#">gi 657546451 XP_008278409.1</a> |
| <a href="#">hypothetical protein [Vibrio nigrapulchritudo]</a>                  | 30.3 | 30.3 | 47% | 39 | 70%  | <a href="#">gi 740359636 WP_038195698.1</a> |
| <a href="#">hypothetical protein PFTANZ_02364 [Plasmodium falciparum T</a>      | 30.3 | 30.3 | 52% | 39 | 73%  | <a href="#">gi 574974832 ETW36946.1</a>     |
| <a href="#">hypothetical protein [Vibrio nigrapulchritudo]</a>                  | 30.3 | 30.3 | 47% | 39 | 70%  | <a href="#">gi 740309755 WP_038147115.1</a> |
| <a href="#">putative Fimh-like protein [Vibrio nigrapulchritudo]</a>            | 30.3 | 30.3 | 47% | 40 | 70%  | <a href="#">gi 550352361 WP_022612127.1</a> |
| <a href="#">putative Fimh-like protein [Vibrio nigrapulchritudo]</a>            | 30.3 | 30.3 | 47% | 40 | 70%  | <a href="#">gi 550281458 WP_022607838.1</a> |
| <a href="#">hypothetical protein VINI7043_08940 [Vibrio nigrapulchritudo A]</a> | 30.3 | 30.3 | 47% | 40 | 70%  | <a href="#">gi 342820393 EGU55216.1</a>     |
| <a href="#">envelope glycoprotein [Human immunodeficiency virus 1]</a>          | 30.3 | 30.3 | 57% | 40 | 56%  | <a href="#">gi 163637312 ABY27456.1</a>     |
| <a href="#">envelope glycoprotein [Human immunodeficiency virus 1]</a>          | 30.3 | 30.3 | 57% | 40 | 56%  | <a href="#">gi 163637310 ABY27455.1</a>     |
| <a href="#">envelope glycoprotein [Human immunodeficiency virus 1]</a>          | 30.3 | 30.3 | 57% | 40 | 56%  | <a href="#">gi 163637307 ABY27454.1</a>     |
| <a href="#">envelope glycoprotein [Human immunodeficiency virus 1]</a>          | 30.3 | 30.3 | 57% | 40 | 56%  | <a href="#">gi 163637305 ABY27453.1</a>     |
| <a href="#">envelope glycoprotein [Human immunodeficiency virus 1]</a>          | 30.3 | 30.3 | 57% | 40 | 56%  | <a href="#">gi 163637303 ABY27452.1</a>     |
| <a href="#">hypothetical protein PFFCH_03778 [Plasmodium falciparum FC</a>      | 30.3 | 30.3 | 52% | 40 | 73%  | <a href="#">gi 574965586 ETW28803.1</a>     |
| <a href="#">hypothetical protein PFFVO_01913 [Plasmodium falciparum Vi</a>      | 30.3 | 30.3 | 52% | 40 | 73%  | <a href="#">gi 574751318 ETW19338.1</a>     |
| <a href="#">AGE-1 [Caenorhabditis elegans]</a>                                  | 30.3 | 30.3 | 52% | 41 | 83%  | <a href="#">gi 1850329 AAC47459.1</a>       |
| <a href="#">Protein AGE-1 [Caenorhabditis elegans]</a>                          | 30.3 | 30.3 | 52% | 41 | 83%  | <a href="#">gi 392891813 NP_496462.2</a>    |
| <a href="#">hypothetical protein [Bacillus coagulans]</a>                       | 29.9 | 29.9 | 57% | 54 | 75%  | <a href="#">gi 737205332 WP_035190263.1</a> |

## Alignments

Download GenPept Graphics

Next Previous Descriptions

unnamed protein product [Homo sapiens]

Sequence ID: [gi|194373591|dbj|BAG56891.1](#) Length: 218 Number of Matches: 1

Range 1: 48 to 68 GenPept Graphics

Next Match Previous Match

| Score          | Expect | Identities | Positives   | Gaps     |
|----------------|--------|------------|-------------|----------|
| 70.6 bits(159) | 2e-12  | 20/21(95%) | 21/21(100%) | 0/21(0%) |

Query 1 KKTLFCNASKEWDDTTTECRL 21  
 KKTLFCNASKEW+TTTECRL  
 Sbjct 48 KKTLFCNASKEWDNTTTECRL 68

### Related Information

[Gene](#) - associated gene details

Download GenPept Graphics

Next Previous Descriptions

PREDICTED: C4b-binding protein beta chain isoform X3 [Pan troglodytes]

Sequence ID: [gi|694891540|ref|XP\\_009439669.1](#) Length: 227 Number of Matches: 1

Range 1: 57 to 77 GenPept Graphics

Next Match Previous Match

| Score          | Expect | Identities | Positives   | Gaps     |
|----------------|--------|------------|-------------|----------|
| 70.6 bits(159) | 2e-12  | 20/21(95%) | 21/21(100%) | 0/21(0%) |

### Related Information

[Gene](#) - associated gene details

Query 1 KKTLFCNASKEWDDTTTECRL 21  
 KKTLFCNASKEWD+TTTECRL  
 Sbjct 57 KKTLFCNASKEWDNTTTECRL 77

[Download](#) [GenPept](#) [Graphics](#)

[Next](#) [Previous](#) [Descriptions](#)

PREDICTED: C4b-binding protein beta chain isoform X3 [Pan paniscus]

Sequence ID: [gi|675771724|ref|XP\\_008974762.1|](#) Length: 227 Number of Matches: 1

Range 1: 57 to 77 [GenPept](#) [Graphics](#)

[Next Match](#) [Previous Match](#)

| Score          | Expect | Identities | Positives   | Gaps     |
|----------------|--------|------------|-------------|----------|
| 70.6 bits(159) | 2e-12  | 20/21(95%) | 21/21(100%) | 0/21(0%) |

Query 1 KKTLFCNASKEWDDTTTECRL 21  
 KKTLFCNASKEWD+TTTECRL  
 Sbjct 57 KKTLFCNASKEWDNTTTECRL 77

**Related Information**

[Gene](#) - associated gene details  
[Map Viewer](#) - aligned genomic context

[Download](#) [GenPept](#) [Graphics](#)

[Next](#) [Previous](#) [Descriptions](#)

PREDICTED: C4b-binding protein beta chain isoform X3 [Homo sapiens]

Sequence ID: [gi|530366462|ref|XP\\_005273312.1|](#) Length: 227 Number of Matches: 1

Range 1: 57 to 77 [GenPept](#) [Graphics](#)

[Next Match](#) [Previous Match](#)

| Score          | Expect | Identities | Positives   | Gaps     |
|----------------|--------|------------|-------------|----------|
| 70.6 bits(159) | 2e-12  | 20/21(95%) | 21/21(100%) | 0/21(0%) |

Query 1 KKTLFCNASKEWDDTTTECRL 21  
 KKTLFCNASKEWD+TTTECRL  
 Sbjct 57 KKTLFCNASKEWDNTTTECRL 77

**Related Information**

[Gene](#) - associated gene details  
[Map Viewer](#) - aligned genomic context

[Download](#) [GenPept](#) [Graphics](#)

[Next](#) [Previous](#) [Descriptions](#)

PREDICTED: C4b-binding protein beta chain isoform X2 [Rhinopithecus roxellana]

Sequence ID: [gi|724836382|ref|XP\\_010363947.1|](#) Length: 251 Number of Matches: 1

Range 1: 57 to 77 [GenPept](#) [Graphics](#)

[Next Match](#) [Previous Match](#)

| Score          | Expect | Identities | Positives   | Gaps     |
|----------------|--------|------------|-------------|----------|
| 70.6 bits(159) | 2e-12  | 20/21(95%) | 21/21(100%) | 0/21(0%) |

Query 1 KKTLFCNASKEWDDTTTECRL 21  
 KKTLFCNASKEWD+TTTECRL  
 Sbjct 57 KKTLFCNASKEWDNTTTECRL 77

**Related Information**

[Gene](#) - associated gene details  
[Map Viewer](#) - aligned genomic context

BLAST is a registered trademark of the National Library of Medicine.

▶ NCBI/ BLAST/ blastp suite/ Formatting Results - B92B7UGG01R

**i** Your search parameters were adjusted to search for a short input sequence.

[Edit and Resubmit](#) [Save Search Strategies](#) ▶ [Formatting options](#) ▶ [Download](#)

[YouTube](#) [How to read this page](#) [Blast report description](#)

### C4BPB\_KKTLFCNASKEWDNTTECRL\_NonMod

**RID** [B92B7UGG01R](#) (Expires on 01-14 09:56 am)

**Query ID** lcl|234110  
**Description** None  
**Molecule type** amino acid  
**Query Length** 21

**Database Name** nr  
**Description** All non-redundant GenBank CDS translations+PDB+SwissProt+PIR excluding environmental samples from WGS projects  
**Program** BLASTP 2.2.30+ ▶ [Citation](#)

Other reports: ▶ [Search Summary](#) [[Taxonomy reports](#)] [[Distance tree of results](#)] [[Related Structures](#)] [[Multiple alignment](#)]

### **G**raphic Summary

[Show Conserved Domains](#)

No putative conserved domains have been detected

Distribution of 100 Blast Hits on the Query Sequence

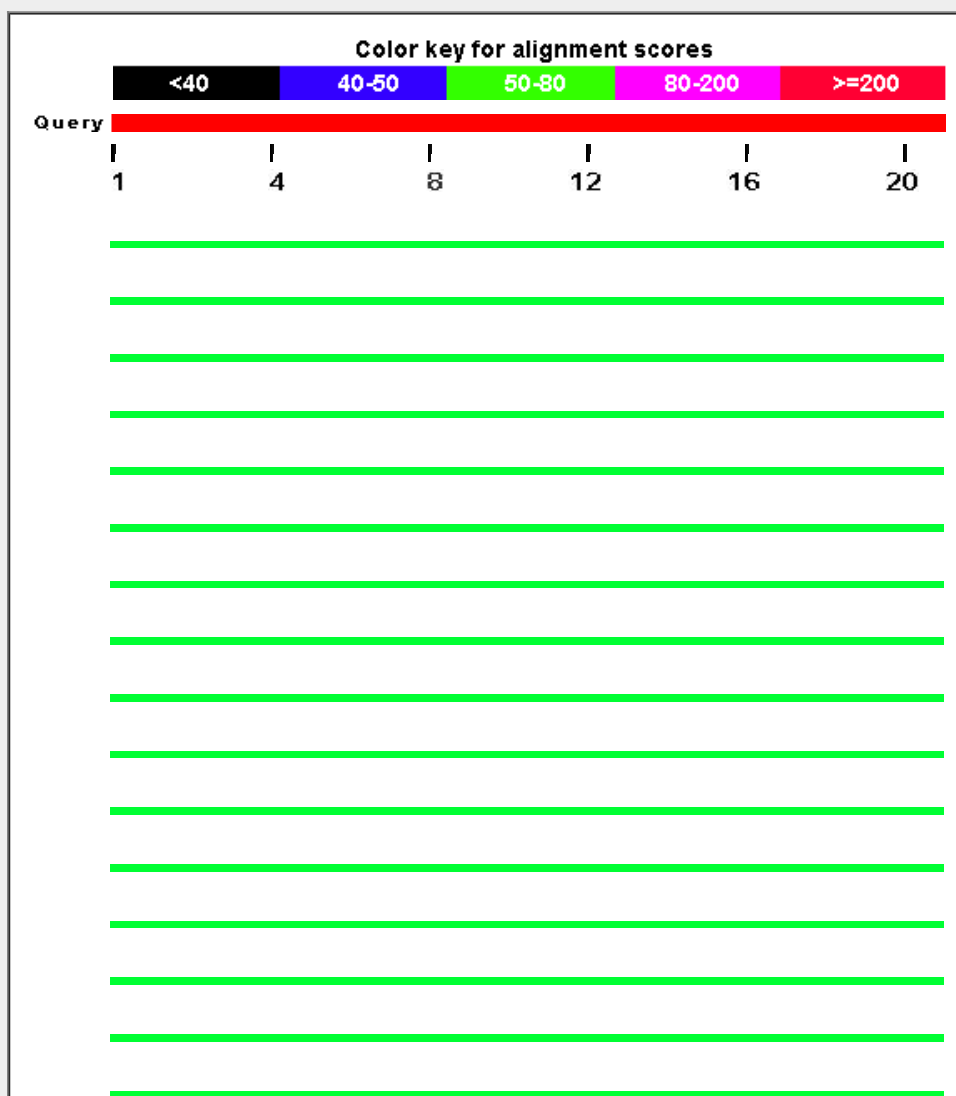



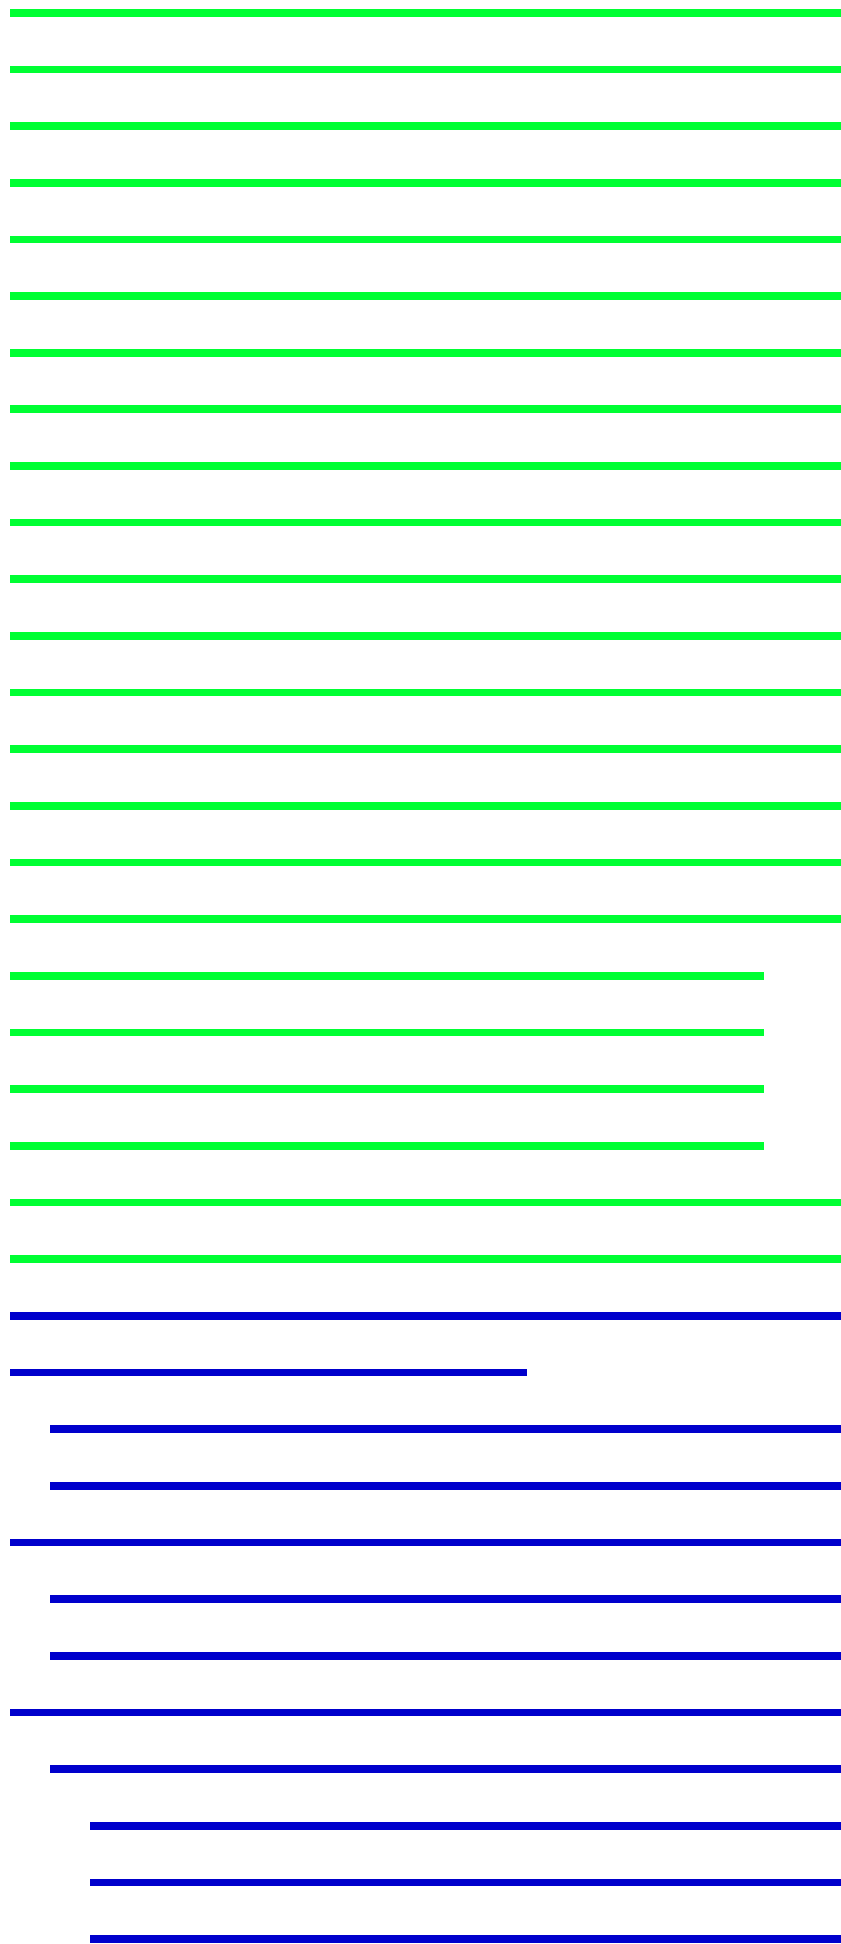

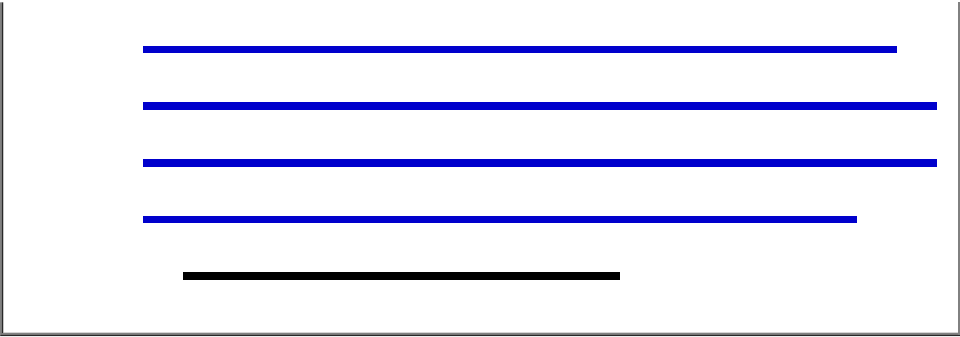

**Descriptions**

**Sequences producing significant alignments:**

Select: [All](#) [None](#) Selected:0

[↑](#) Alignments 
 [Download](#)
[GenPept](#)
[Graphics](#)
[Distance tree of results](#)
[Multiple alignment](#)
⚙

| Description                                                                       | Max score | Total score | Query cover | E value | Ident | Accession                                   |
|-----------------------------------------------------------------------------------|-----------|-------------|-------------|---------|-------|---------------------------------------------|
| <a href="#">unnamed protein product [Homo sapiens]</a>                            | 73.2      | 73.2        | 100%        | 2e-13   | 100%  | <a href="#">gij194373591 BAG56891.1</a>     |
| <a href="#">PREDICTED: C4b-binding protein beta chain isoform X3 [Pan trogl</a>   | 73.2      | 73.2        | 100%        | 2e-13   | 100%  | <a href="#">gij694891540 XP_009439669.1</a> |
| <a href="#">PREDICTED: C4b-binding protein beta chain isoform X3 [Pan panis</a>   | 73.2      | 73.2        | 100%        | 2e-13   | 100%  | <a href="#">gij675771724 XP_008974762.1</a> |
| <a href="#">PREDICTED: C4b-binding protein beta chain isoform X3 [Homo sa</a>     | 73.2      | 73.2        | 100%        | 2e-13   | 100%  | <a href="#">gij530366462 XP_005273312.1</a> |
| <a href="#">PREDICTED: C4b-binding protein beta chain isoform X2 [Rhinopith</a>   | 73.2      | 73.2        | 100%        | 2e-13   | 100%  | <a href="#">gij724836382 XP_010363947.1</a> |
| <a href="#">PREDICTED: C4b-binding protein beta chain isoform X2 [Pan trogl</a>   | 73.2      | 73.2        | 100%        | 2e-13   | 100%  | <a href="#">gij694891534 XP_009439665.1</a> |
| <a href="#">PREDICTED: C4b-binding protein beta chain isoform X2 [Pan panis</a>   | 73.2      | 73.2        | 100%        | 2e-13   | 100%  | <a href="#">gij675771715 XP_008974759.1</a> |
| <a href="#">C4b-binding protein beta chain isoform 2 precursor [Homo sapiens]</a> | 73.2      | 73.2        | 100%        | 2e-13   | 100%  | <a href="#">gij62912462 NP_001017364.1</a>  |
| <a href="#">PREDICTED: C4b-binding protein beta chain isoform X1 [Rhinopith</a>   | 73.2      | 73.2        | 100%        | 2e-13   | 100%  | <a href="#">gij724836379 XP_010363946.1</a> |
| <a href="#">C4b-binding protein beta chain isoform 1 precursor [Homo sapiens]</a> | 73.2      | 73.2        | 100%        | 2e-13   | 100%  | <a href="#">gij4502505 NP_000707.1</a>      |
| <a href="#">PREDICTED: C4b-binding protein beta chain isoform X1 [Pan panis</a>   | 73.2      | 73.2        | 100%        | 2e-13   | 100%  | <a href="#">gij397504761 XP_003822949.1</a> |
| <a href="#">PREDICTED: C4b-binding protein beta chain isoform X1 [Pan trogl</a>   | 73.2      | 73.2        | 100%        | 2e-13   | 100%  | <a href="#">gij114572288 XP_001166306.1</a> |
| <a href="#">PREDICTED: C4b-binding protein beta chain isoform X3 [Pongo ab</a>    | 69.8      | 69.8        | 100%        | 3e-12   | 95%   | <a href="#">gij686700216 XP_009236698.1</a> |
| <a href="#">PREDICTED: C4b-binding protein beta chain isoform X2 [Pongo ab</a>    | 69.8      | 69.8        | 100%        | 3e-12   | 95%   | <a href="#">gij686700213 XP_009236694.1</a> |
| <a href="#">PREDICTED: C4b-binding protein beta chain isoform X1 [Pongo ab</a>    | 69.8      | 69.8        | 100%        | 3e-12   | 95%   | <a href="#">gij297662141 XP_002809574.1</a> |
| <a href="#">PREDICTED: C4b-binding protein beta chain isoform X2 [Papio an</a>    | 69.4      | 69.4        | 100%        | 4e-12   | 95%   | <a href="#">gij685519789 XP_009186662.1</a> |
| <a href="#">PREDICTED: C4b-binding protein beta chain isoform X6 [Macaca f</a>    | 69.4      | 69.4        | 100%        | 4e-12   | 95%   | <a href="#">gij544399939 XP_005540733.1</a> |
| <a href="#">PREDICTED: C4b-binding protein beta chain isoform X2 [Macaca f</a>    | 69.4      | 69.4        | 100%        | 4e-12   | 95%   | <a href="#">gij544399931 XP_005540729.1</a> |
| <a href="#">PREDICTED: C4b-binding protein beta chain isoform X1 [Papio an</a>    | 69.4      | 69.4        | 100%        | 4e-12   | 95%   | <a href="#">gij685519785 XP_009186656.1</a> |
| <a href="#">hypothetical protein EGM_01442 [Macaca fascicularis]</a>              | 69.4      | 69.4        | 100%        | 4e-12   | 95%   | <a href="#">gij355745961 EHH50586.1</a>     |
| <a href="#">hypothetical protein EGK_01712 [Macaca mulatta]</a>                   | 69.4      | 69.4        | 100%        | 4e-12   | 95%   | <a href="#">gij355558818 EHH15598.1</a>     |
| <a href="#">PREDICTED: c4b-binding protein beta chain isoform 3 [Macaca mu</a>    | 69.4      | 69.4        | 100%        | 4e-12   | 95%   | <a href="#">gij109018561 XP_001083216.1</a> |
| <a href="#">PREDICTED: C4b-binding protein beta chain isoform X1 [Macaca f</a>    | 69.4      | 69.4        | 100%        | 5e-12   | 95%   | <a href="#">gij544399929 XP_005540728.1</a> |
| <a href="#">PREDICTED: C4b-binding protein beta chain isoform 1 [Nomascus</a>     | 68.9      | 68.9        | 100%        | 6e-12   | 95%   | <a href="#">gij332266848 XP_003282407.1</a> |
| <a href="#">PREDICTED: C4b-binding protein beta chain isoform X9 [Chloroce</a>    | 68.5      | 68.5        | 100%        | 8e-12   | 95%   | <a href="#">gij635130917 XP_007986833.1</a> |
| <a href="#">PREDICTED: C4b-binding protein beta chain isoform X8 [Chloroce</a>    | 68.5      | 68.5        | 100%        | 9e-12   | 95%   | <a href="#">gij635130915 XP_007986832.1</a> |
| <a href="#">PREDICTED: C4b-binding protein beta chain isoform X7 [Chloroce</a>    | 68.5      | 68.5        | 100%        | 9e-12   | 95%   | <a href="#">gij635130913 XP_007986831.1</a> |
| <a href="#">PREDICTED: C4b-binding protein beta chain isoform X6 [Chloroce</a>    | 68.5      | 68.5        | 100%        | 9e-12   | 95%   | <a href="#">gij635130911 XP_007986830.1</a> |

|                                                                                    |      |      |      |       |      |                                             |
|------------------------------------------------------------------------------------|------|------|------|-------|------|---------------------------------------------|
| <a href="#">PREDICTED: C4b-binding protein beta chain isoform X5 [Chloroce</a>     | 68.5 | 68.5 | 100% | 9e-12 | 95%  | <a href="#">gij635130907 XP_007986828.1</a> |
| <a href="#">PREDICTED: C4b-binding protein beta chain isoform X4 [Chloroce</a>     | 68.5 | 68.5 | 100% | 9e-12 | 95%  | <a href="#">gij635130905 XP_007986827.1</a> |
| <a href="#">PREDICTED: C4b-binding protein beta chain isoform X3 [Chloroce</a>     | 68.5 | 68.5 | 100% | 9e-12 | 95%  | <a href="#">gij635130903 XP_007986826.1</a> |
| <a href="#">PREDICTED: C4b-binding protein beta chain isoform X2 [Chloroce</a>     | 68.5 | 68.5 | 100% | 9e-12 | 95%  | <a href="#">gij635130901 XP_007986825.1</a> |
| <a href="#">PREDICTED: C4b-binding protein beta chain isoform X1 [Chloroce</a>     | 68.5 | 68.5 | 100% | 9e-12 | 95%  | <a href="#">gij635130899 XP_007986823.1</a> |
| <a href="#">PREDICTED: C4b-binding protein beta chain isoform X2 [Callithrix j</a> | 66.8 | 66.8 | 90%  | 3e-11 | 100% | <a href="#">gij675749407 XP_008983835.1</a> |
| <a href="#">PREDICTED: C4b-binding protein beta chain isoform X1 [Callithrix j</a> | 66.8 | 66.8 | 90%  | 3e-11 | 100% | <a href="#">gij296230632 XP_002760794.1</a> |
| <a href="#">PREDICTED: C4b-binding protein beta chain isoform X2 [Saimiri bc</a>   | 61.7 | 61.7 | 90%  | 2e-09 | 95%  | <a href="#">gij725574024 XP_010339305.1</a> |
| <a href="#">PREDICTED: C4b-binding protein beta chain isoform X1 [Saimiri bc</a>   | 61.7 | 61.7 | 90%  | 2e-09 | 95%  | <a href="#">gij403277664 XP_003930472.1</a> |
| <a href="#">PREDICTED: C4b-binding protein beta chain isoform X2 [Galeopte</a>     | 53.2 | 53.2 | 100% | 1e-06 | 71%  | <a href="#">gij667314769 XP_008585888.1</a> |
| <a href="#">PREDICTED: C4b-binding protein beta chain isoform X1 [Galeopte</a>     | 53.2 | 53.2 | 100% | 1e-06 | 71%  | <a href="#">gij667314766 XP_008585886.1</a> |
| <a href="#">PREDICTED: C4b-binding protein beta chain [Chrysochloris asiatic</a>   | 48.1 | 48.1 | 100% | 7e-05 | 76%  | <a href="#">gij586450676 XP_006834269.1</a> |
| <a href="#">PREDICTED: LOW QUALITY PROTEIN: C4b-binding protein beta</a>           | 46.9 | 46.9 | 61%  | 2e-04 | 100% | <a href="#">gij471369765 XP_004375397.1</a> |
| <a href="#">PREDICTED: C4b-binding protein beta chain [Nannospalax gallii]</a>     | 45.6 | 45.6 | 95%  | 5e-04 | 75%  | <a href="#">gij674096417 XP_008821570.1</a> |
| <a href="#">PREDICTED: LOW QUALITY PROTEIN: C4b-binding protein beta</a>           | 44.8 | 44.8 | 95%  | 9e-04 | 70%  | <a href="#">gij594636425 XP_007171607.1</a> |
| <a href="#">PREDICTED: C4b-binding protein beta chain [Cavia porcellus]</a>        | 43.5 | 43.5 | 100% | 0.002 | 67%  | <a href="#">gij348577871 XP_003474707.1</a> |
| <a href="#">PREDICTED: C4b-binding protein beta chain [Sus scrofa]</a>             | 43.1 | 43.1 | 95%  | 0.003 | 65%  | <a href="#">gij311265148 XP_003130503.1</a> |
| <a href="#">PREDICTED: C4b-binding protein beta chain [Otolemur garnettii]</a>     | 42.6 | 42.6 | 95%  | 0.004 | 70%  | <a href="#">gij395838946 XP_003792365.1</a> |
| <a href="#">PREDICTED: C4b-binding protein beta chain [Ictidomys tridecemlin</a>   | 42.2 | 42.2 | 100% | 0.006 | 67%  | <a href="#">gij532087633 XP_005329528.1</a> |
| <a href="#">PREDICTED: C4b-binding protein beta chain [Orcinus orca]</a>           | 42.2 | 42.2 | 95%  | 0.006 | 65%  | <a href="#">gij466071254 XP_004282462.1</a> |
| <a href="#">PREDICTED: C4b-binding protein beta chain isoform X2 [Myotis br</a>    | 42.2 | 42.2 | 90%  | 0.006 | 74%  | <a href="#">gij554587742 XP_005885272.1</a> |
| <a href="#">PREDICTED: C4b-binding protein beta chain [Myotis lucifugus]</a>       | 42.2 | 42.2 | 90%  | 0.006 | 74%  | <a href="#">gij558152655 XP_006094937.1</a> |
| <a href="#">PREDICTED: C4b-binding protein beta chain isoform X1 [Myotis br</a>    | 42.2 | 42.2 | 90%  | 0.006 | 74%  | <a href="#">gij554587740 XP_005885271.1</a> |
| <a href="#">PREDICTED: C4b-binding protein beta chain [Ceratotherium simur</a>     | 41.4 | 41.4 | 90%  | 0.011 | 68%  | <a href="#">gij478501878 XP_004425250.1</a> |
| <a href="#">PREDICTED: C4b-binding protein beta chain isoform X2 [Tarsius s</a>    | 41.4 | 41.4 | 95%  | 0.011 | 65%  | <a href="#">gij640811969 XP_008062626.1</a> |
| <a href="#">PREDICTED: C4b-binding protein beta chain isoform X1 [Tarsius s</a>    | 41.4 | 41.4 | 95%  | 0.011 | 65%  | <a href="#">gij640811967 XP_008062625.1</a> |
| <a href="#">PREDICTED: LOW QUALITY PROTEIN: C4b-binding protein beta</a>           | 40.1 | 40.1 | 85%  | 0.027 | 67%  | <a href="#">gij470641603 XP_004325529.1</a> |
| <a href="#">PREDICTED: C4b-binding protein beta chain [Myotis davidii]</a>         | 38.4 | 38.4 | 52%  | 0.095 | 91%  | <a href="#">gij584068188 XP_006754475.1</a> |
| <a href="#">PREDICTED: C4b-binding protein beta chain [Eptesicus fuscus]</a>       | 38.4 | 38.4 | 90%  | 0.097 | 68%  | <a href="#">gij641725104 XP_008152491.1</a> |
| <a href="#">PREDICTED: C4b-binding protein beta chain [Jaculus jaculus]</a>        | 38.4 | 38.4 | 76%  | 0.097 | 75%  | <a href="#">gij507559572 XP_004663509.1</a> |
| <a href="#">PREDICTED: C4b-binding protein beta chain [Elephantulus edward</a>     | 37.5 | 37.5 | 85%  | 0.18  | 67%  | <a href="#">gij585666900 XP_006888062.1</a> |
| <a href="#">PREDICTED: LOW QUALITY PROTEIN: C4b-binding protein beta</a>           | 37.1 | 37.1 | 85%  | 0.25  | 61%  | <a href="#">gij560935168 XP_006193413.1</a> |
| <a href="#">PREDICTED: C4b-binding protein beta chain [Ornithorhynchus ana</a>     | 36.3 | 36.3 | 61%  | 0.37  | 85%  | <a href="#">gij620984032 XP_007659774.1</a> |
| <a href="#">PREDICTED: C4b-binding protein beta chain [Mustela putorius furo</a>   | 36.3 | 36.3 | 95%  | 0.46  | 65%  | <a href="#">gij511871202 XP_004756233.1</a> |
| <a href="#">PREDICTED: C4b-binding protein beta chain [Canis lupus familiaris</a>  | 33.7 | 33.7 | 61%  | 3.0   | 77%  | <a href="#">gij73960685 XP_851611.1</a>     |
| <a href="#">PREDICTED: LOW QUALITY PROTEIN: C4b-binding protein beta</a>           | 33.7 | 33.7 | 85%  | 3.0   | 56%  | <a href="#">gij560986663 XP_006215518.1</a> |
| <a href="#">PREDICTED: C4b-binding protein beta chain isoform X2 [Felis catu</a>   | 33.3 | 33.3 | 95%  | 4.1   | 60%  | <a href="#">gij587018341 XP_006942889.1</a> |
| <a href="#">PREDICTED: C4b-binding protein beta chain isoform X1 [Felis catu</a>   | 33.3 | 33.3 | 95%  | 4.1   | 60%  | <a href="#">gij410986395 XP_003999496.1</a> |
| <a href="#">putative Fimh-like protein [Vibrio nigrifulchritudo]</a>               | 32.9 | 32.9 | 47%  | 5.4   | 80%  | <a href="#">gij550352361 WP_022612127.1</a> |
| <a href="#">putative Fimh-like protein [Vibrio nigrifulchritudo]</a>               | 32.9 | 32.9 | 47%  | 5.4   | 80%  | <a href="#">gij550281458 WP_022607838.1</a> |
| <a href="#">hypothetical protein [Vibrio nigrifulchritudo]</a>                     | 32.9 | 32.9 | 47%  | 5.4   | 80%  | <a href="#">gij490542018 WP_004407142.1</a> |
| <a href="#">C4b-binding protein beta chain [Heterocephalus glaber]</a>             | 32.9 | 32.9 | 100% | 5.6   | 57%  | <a href="#">gij351708103 EHB11022.1</a>     |
| <a href="#">PREDICTED: C4b-binding protein beta chain [Leptonychotes wedd</a>      | 32.9 | 32.9 | 57%  | 5.6   | 75%  | <a href="#">gij585156269 XP_006730462.1</a> |
| <a href="#">PREDICTED: C4b-binding protein beta chain [Heterocephalus glab</a>     | 32.9 | 32.9 | 100% | 5.6   | 57%  | <a href="#">gij512892965 XP_004897416.1</a> |
| <a href="#">PREDICTED: C4b-binding protein beta chain [Pteropus alecto]</a>        | 32.9 | 32.9 | 95%  | 5.6   | 55%  | <a href="#">gij586536223 XP_006922979.1</a> |

|                                                                                   |      |      |      |     |     |                                             |
|-----------------------------------------------------------------------------------|------|------|------|-----|-----|---------------------------------------------|
| <a href="#">C4b-binding protein beta chain [Pteropus alecto]</a>                  | 32.9 | 32.9 | 95%  | 5.6 | 55% | <a href="#">gil431892854 ELK03282.1</a>     |
| <a href="#">hypothetical protein [Plasmodium knowlesi strain H]</a>               | 32.0 | 32.0 | 61%  | 10  | 75% | <a href="#">gil221054814 XP_002258546.1</a> |
| <a href="#">hypothetical protein PFNF135_02825 [Plasmodium falciparum NF1:</a>    | 32.0 | 32.0 | 66%  | 11  | 63% | <a href="#">gil574981166 ETW42931.1</a>     |
| <a href="#">arginyl-tRNA synthetase [Helicobacter apodemus]</a>                   | 32.0 | 32.0 | 66%  | 11  | 71% | <a href="#">gil696169675 KGL15468.1</a>     |
| <b>PREDICTED: LOW QUALITY PROTEIN: C4b-binding protein beta</b>                   | 31.6 | 31.6 | 71%  | 14  | 60% | <a href="#">gil533120065 XP_005375468.1</a> |
| <a href="#">DNA repair protein RadA [Osedax symbiont Rs2]</a>                     | 31.6 | 31.6 | 76%  | 15  | 69% | <a href="#">gil520769936 WP_020286673.1</a> |
| <a href="#">DNA repair protein RadA [Osedax symbiont Rs1]</a>                     | 31.6 | 31.6 | 76%  | 15  | 69% | <a href="#">gil518641042 WP_019811142.1</a> |
| <a href="#">envelope glycoprotein [Human immunodeficiency virus 1]</a>            | 31.2 | 31.2 | 52%  | 19  | 75% | <a href="#">gil84873457 ABC67785.1</a>      |
| <b>PREDICTED: C4b-binding protein beta chain [Loxodonta africana]</b>             | 31.2 | 31.2 | 100% | 20  | 57% | <a href="#">gil731475974 XP_010588717.1</a> |
| <a href="#">conserved putative membrane protein [Melbournevirus]</a>              | 31.2 | 31.2 | 61%  | 20  | 62% | <a href="#">gil701447374 YP_009094746.1</a> |
| <a href="#">membrane protein [Cannes 8 virus]</a>                                 | 31.2 | 31.2 | 61%  | 20  | 62% | <a href="#">gil539398800 AGV01635.1</a>     |
| <a href="#">hypothetical protein [Treponema bryantii]</a>                         | 31.2 | 31.2 | 71%  | 20  | 60% | <a href="#">gil551312583 WP_022932465.1</a> |
| <a href="#">envelope protein [Human immunodeficiency virus 1]</a>                 | 30.8 | 30.8 | 52%  | 26  | 75% | <a href="#">gil515020035 AGO65073.1</a>     |
| <a href="#">envelope glycoprotein [Human immunodeficiency virus 1]</a>            | 30.8 | 30.8 | 47%  | 26  | 82% | <a href="#">gil24079811 AAN46022.1</a>      |
| <a href="#">envelope glycoprotein [Human immunodeficiency virus 1]</a>            | 30.8 | 30.8 | 47%  | 28  | 82% | <a href="#">gil42494103 AAS17398.1</a>      |
| <b>PREDICTED: complement C1r subcomponent [Stegastes partitus]</b>                | 30.8 | 30.8 | 66%  | 29  | 63% | <a href="#">gil657546451 XP_008278409.1</a> |
| <a href="#">von Willebrand factor D and EGF domain-containing protein [Crass:</a> | 30.8 | 30.8 | 66%  | 29  | 71% | <a href="#">gil405969928 EKC34871.1</a>     |
| <a href="#">hypothetical protein PFTANZ_02364 [Plasmodium falciparum Tanz:</a>    | 30.3 | 30.3 | 52%  | 37  | 73% | <a href="#">gil574974832 ETW36946.1</a>     |
| <a href="#">hypothetical protein C922_01705 [Plasmodium inui San Antonio 1]</a>   | 30.3 | 30.3 | 61%  | 38  | 69% | <a href="#">gil672191245 XP_008815530.1</a> |
| <a href="#">hypothetical protein PANDA_018755 [Ailuropoda melanoleuca]</a>        | 30.3 | 30.3 | 80%  | 38  | 59% | <a href="#">gil281337925 EFB13509.1</a>     |
| <b>PREDICTED: C4b-binding protein beta chain [Ursus maritimus]</b>                | 30.3 | 30.3 | 80%  | 38  | 59% | <a href="#">gil670984389 XP_008683289.1</a> |
| <a href="#">hypothetical protein PFFCH_03778 [Plasmodium falciparum FCH/4:</a>    | 30.3 | 30.3 | 52%  | 38  | 73% | <a href="#">gil574965586 ETW28803.1</a>     |
| <b>PREDICTED: c4b-binding protein beta chain-like [Ailuropoda melan</b>           | 30.3 | 30.3 | 80%  | 38  | 59% | <a href="#">gil301786617 XP_002928722.1</a> |
| <a href="#">hypothetical protein PFFVO_01913 [Plasmodium falciparum Vietna:</a>   | 30.3 | 30.3 | 52%  | 38  | 73% | <a href="#">gil574751318 ETW19338.1</a>     |
| <a href="#">proteinase inhibitor [Bacillus vallismortis]</a>                      | 30.3 | 30.3 | 66%  | 39  | 60% | <a href="#">gil498017254 WP_010331410.1</a> |
| <a href="#">DNA repair protein RadA [Avibacterium paragallinarum]</a>             | 30.3 | 30.3 | 76%  | 39  | 69% | <a href="#">gil516416332 WP_017805730.1</a> |
| <a href="#">AGE-1 [Caenorhabditis elegans]</a>                                    | 30.3 | 30.3 | 52%  | 39  | 83% | <a href="#">gil1850329 AAC47459.1</a>       |

## Alignments

Download [GenPept](#) [Graphics](#)

Next Previous Descriptions

unnamed protein product [Homo sapiens]

Sequence ID: [gil194373591|dbj|BAG56891.1](#) Length: 218 Number of Matches: 1

Range 1: 48 to 68 [GenPept](#) [Graphics](#)

Next Match Previous Match

| Score          | Expect | Identities  | Positives   | Gaps     |
|----------------|--------|-------------|-------------|----------|
| 73.2 bits(165) | 2e-13  | 21/21(100%) | 21/21(100%) | 0/21(0%) |

```
Query 1  KKTLFCNASKEWDNTTTECRL 21
        KKTLFCNASKEWDNTTTECRL
Sbjct 48  KKTLFCNASKEWDNTTTECRL 68
```

### Related Information

[Gene](#) - associated gene details

Download [GenPept](#) [Graphics](#)

Next Previous Descriptions

**PREDICTED: C4b-binding protein beta chain isoform X3 [Pan troglodytes]**

Sequence ID: [gil694891540|ref|XP\\_009439669.1](#) Length: 227 Number of Matches: 1

Range 1: 57 to 77 [GenPept](#) [Graphics](#)

Next Match Previous Match

| Score          | Expect | Identities  | Positives   | Gaps     |
|----------------|--------|-------------|-------------|----------|
| 73.2 bits(165) | 2e-13  | 21/21(100%) | 21/21(100%) | 0/21(0%) |

```
Query 1  KKTLFCNASKEWDNTTTECRL 21
```

### Related Information

[Gene](#) - associated gene details

Sbjct 57 KKTLFCNASKEDNTTTECRL 77

[Download](#) [GenPept](#) [Graphics](#)

[Next](#) [Previous](#) [Descriptions](#)

**PREDICTED: C4b-binding protein beta chain isoform X3 [Pan paniscus]**

Sequence ID: [gi|675771724|ref|XP\\_008974762.1|](#) Length: 227 Number of Matches: 1

Range 1: 57 to 77 [GenPept](#) [Graphics](#)

[Next Match](#) [Previous Match](#)

| Score          | Expect | Identities  | Positives   | Gaps     |
|----------------|--------|-------------|-------------|----------|
| 73.2 bits(165) | 2e-13  | 21/21(100%) | 21/21(100%) | 0/21(0%) |

Query 1 KKTLFCNASKEDNTTTECRL 21  
 KKTLFCNASKEDNTTTECRL  
 Sbjct 57 KKTLFCNASKEDNTTTECRL 77

**Related Information**

[Gene](#) - associated gene details  
[Map Viewer](#) - aligned genomic context

[Download](#) [GenPept](#) [Graphics](#)

[Next](#) [Previous](#) [Descriptions](#)

**PREDICTED: C4b-binding protein beta chain isoform X3 [Homo sapiens]**

Sequence ID: [gi|530366462|ref|XP\\_005273312.1|](#) Length: 227 Number of Matches: 1

Range 1: 57 to 77 [GenPept](#) [Graphics](#)

[Next Match](#) [Previous Match](#)

| Score          | Expect | Identities  | Positives   | Gaps     |
|----------------|--------|-------------|-------------|----------|
| 73.2 bits(165) | 2e-13  | 21/21(100%) | 21/21(100%) | 0/21(0%) |

Query 1 KKTLFCNASKEDNTTTECRL 21  
 KKTLFCNASKEDNTTTECRL  
 Sbjct 57 KKTLFCNASKEDNTTTECRL 77

**Related Information**

[Gene](#) - associated gene details  
[Map Viewer](#) - aligned genomic context

[Download](#) [GenPept](#) [Graphics](#)

[Next](#) [Previous](#) [Descriptions](#)

**PREDICTED: C4b-binding protein beta chain isoform X2 [Rhinopithecus roxellana]**

Sequence ID: [gi|724836382|ref|XP\\_010363947.1|](#) Length: 251 Number of Matches: 1

Range 1: 57 to 77 [GenPept](#) [Graphics](#)

[Next Match](#) [Previous Match](#)

| Score          | Expect | Identities  | Positives   | Gaps     |
|----------------|--------|-------------|-------------|----------|
| 73.2 bits(165) | 2e-13  | 21/21(100%) | 21/21(100%) | 0/21(0%) |

Query 1 KKTLFCNASKEDNTTTECRL 21  
 KKTLFCNASKEDNTTTECRL  
 Sbjct 57 KKTLFCNASKEDNTTTECRL 77

**Related Information**

[Gene](#) - associated gene details  
[Map Viewer](#) - aligned genomic context

BLAST is a registered trademark of the National Library of Medicine.

▶ NCBI/ BLAST/ blastp suite/ Formatting Results - BTFTXDBG016

**i** Your search parameters were adjusted to search for a short input sequence.

[Edit and Resubmit](#) [Save Search Strategies](#) ▶ [Formatting options](#) ▶ [Download](#) [YouTube](#) [How to read this page](#) [Blast report description](#)

### C4BPB\_KTLFCDASKEWDDTTTECRL\_Mod

RID [BTFTXDBG016](#) (Expires on 01-20 15:24 pm)

**Query ID** lcl|30962  
**Description** None  
**Molecule type** amino acid  
**Query Length** 20

**Database Name** nr  
**Description** All non-redundant GenBank CDS translations+PDB+SwissProt+PIR+PRF excluding environmental samples from WGS projects  
**Program** BLASTP 2.2.30+ ▶ [Citation](#)

Other reports: ▶ [Search Summary](#) [[Taxonomy reports](#)] [[Distance tree of results](#)] [[Related Structures](#)] [[Multiple alignment](#)]

### Graphic Summary

[Show Conserved Domains](#)

No putative conserved domains have been detected

Distribution of 101 Blast Hits on the Query Sequence

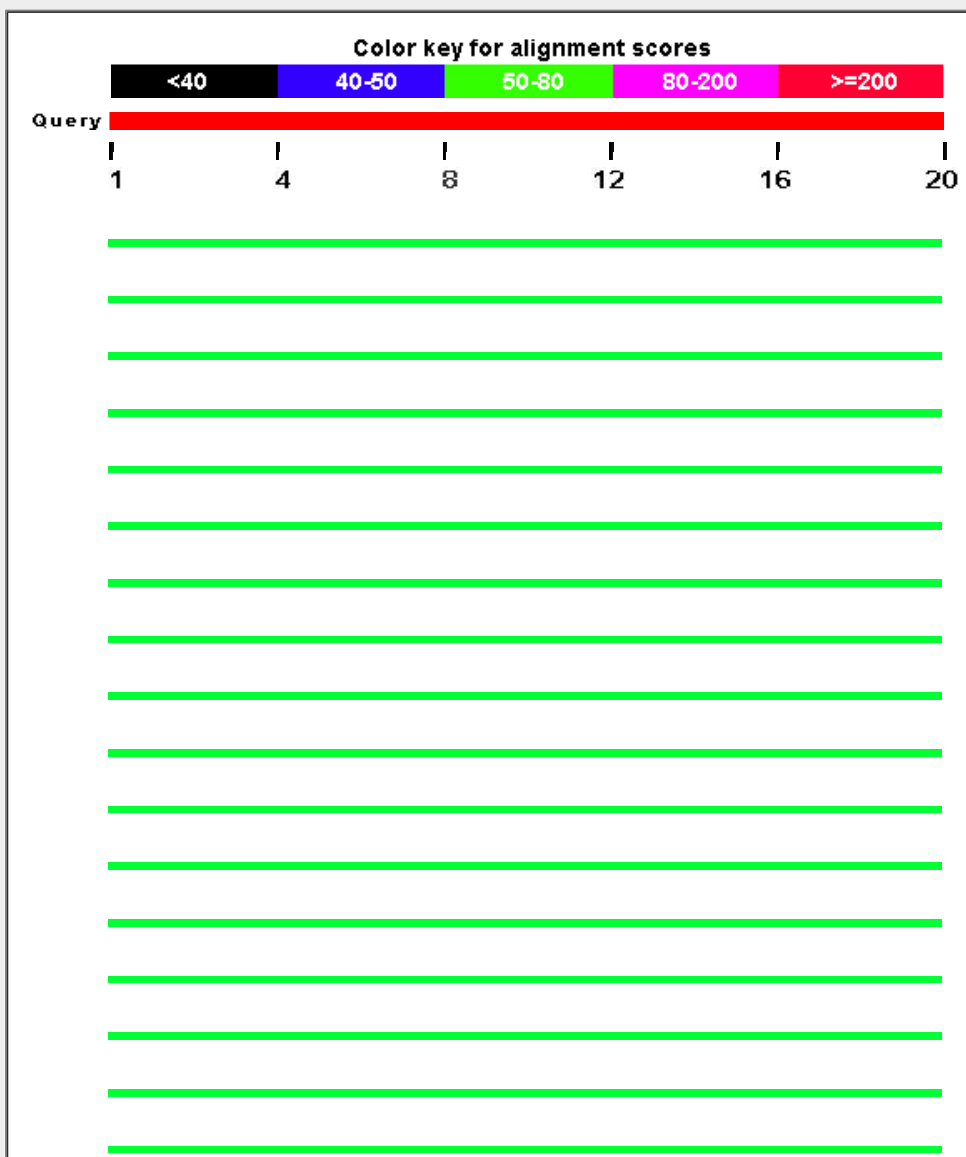

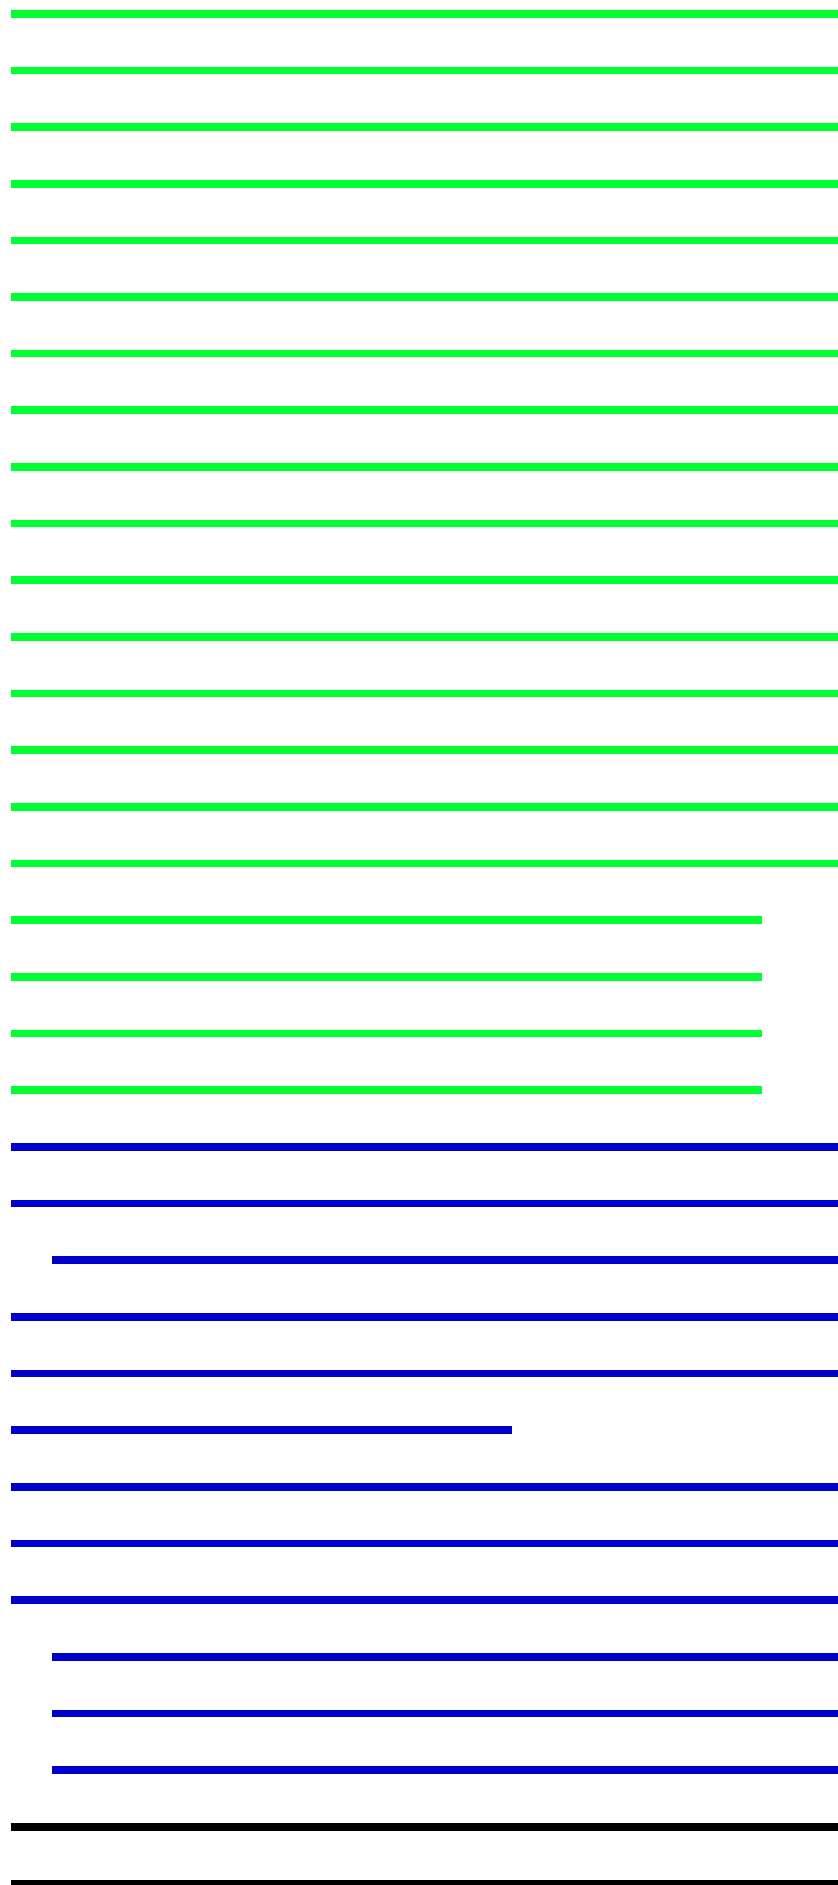

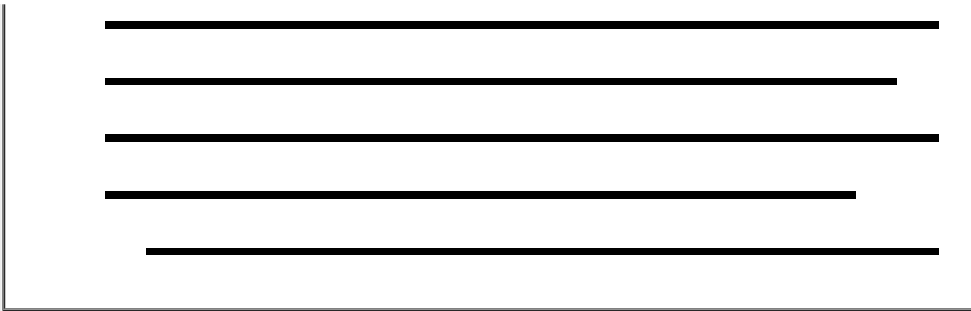

**Descriptions**

**Sequences producing significant alignments:**

Select: [All](#) [None](#) Selected:0

[Alignments](#)
[Download](#)
[GenPept](#)
[Graphics](#)
[Distance tree of results](#)
[Multiple alignment](#)

| Description                                                                   | Max score | Total score | Query cover | E value | Ident | Accession                                   |
|-------------------------------------------------------------------------------|-----------|-------------|-------------|---------|-------|---------------------------------------------|
| <a href="#">unnamed protein product [Homo sapiens]</a>                        | 65.1      | 65.1        | 100%        | 1e-10   | 90%   | <a href="#">gi 194373591 BAG56891.1</a>     |
| <a href="#">PREDICTED: C4b-binding protein beta chain isoform X3 [Pan t</a>   | 65.1      | 65.1        | 100%        | 1e-10   | 90%   | <a href="#">gi 694891540 XP_009439669.1</a> |
| <a href="#">PREDICTED: C4b-binding protein beta chain isoform X3 [Pan r</a>   | 65.1      | 65.1        | 100%        | 1e-10   | 90%   | <a href="#">gi 675771724 XP_008974762.1</a> |
| <a href="#">PREDICTED: C4b-binding protein beta chain isoform X3 [Homo</a>    | 65.1      | 65.1        | 100%        | 1e-10   | 90%   | <a href="#">gi 530366462 XP_005273312.1</a> |
| <a href="#">PREDICTED: C4b-binding protein beta chain isoform X2 [Rhinc</a>   | 65.1      | 65.1        | 100%        | 1e-10   | 90%   | <a href="#">gi 724836382 XP_010363947.1</a> |
| <a href="#">PREDICTED: C4b-binding protein beta chain isoform X2 [Pan t</a>   | 65.1      | 65.1        | 100%        | 1e-10   | 90%   | <a href="#">gi 694891534 XP_009439665.1</a> |
| <a href="#">PREDICTED: C4b-binding protein beta chain isoform X2 [Pan r</a>   | 65.1      | 65.1        | 100%        | 1e-10   | 90%   | <a href="#">gi 675771715 XP_008974759.1</a> |
| <a href="#">C4b-binding protein beta chain isoform 2 precursor [Homo sapi</a> | 65.1      | 65.1        | 100%        | 1e-10   | 90%   | <a href="#">gi 62912462 NP_001017364.1</a>  |
| <a href="#">PREDICTED: C4b-binding protein beta chain isoform X1 [Rhinc</a>   | 65.1      | 65.1        | 100%        | 1e-10   | 90%   | <a href="#">gi 724836379 XP_010363946.1</a> |
| <a href="#">C4b-binding protein beta chain isoform 1 precursor [Homo sapi</a> | 65.1      | 65.1        | 100%        | 1e-10   | 90%   | <a href="#">gi 4502505 NP_000707.1</a>      |
| <a href="#">PREDICTED: C4b-binding protein beta chain isoform X1 [Pan r</a>   | 65.1      | 65.1        | 100%        | 1e-10   | 90%   | <a href="#">gi 397504761 XP_003822949.1</a> |
| <a href="#">PREDICTED: C4b-binding protein beta chain isoform X1 [Pan t</a>   | 65.1      | 65.1        | 100%        | 1e-10   | 90%   | <a href="#">gi 114572288 XP_001166306.1</a> |
| <a href="#">PREDICTED: C4b-binding protein beta chain isoform X3 [Pong</a>    | 61.7      | 61.7        | 100%        | 2e-09   | 85%   | <a href="#">gi 686700216 XP_009236698.1</a> |
| <a href="#">PREDICTED: C4b-binding protein beta chain isoform X2 [Pong</a>    | 61.7      | 61.7        | 100%        | 2e-09   | 85%   | <a href="#">gi 686700213 XP_009236694.1</a> |
| <a href="#">PREDICTED: C4b-binding protein beta chain isoform X1 [Pong</a>    | 61.7      | 61.7        | 100%        | 2e-09   | 85%   | <a href="#">gi 297662141 XP_002809574.1</a> |
| <a href="#">PREDICTED: C4b-binding protein beta chain isoform X2 [Papi</a>    | 61.3      | 61.3        | 100%        | 2e-09   | 85%   | <a href="#">gi 685519789 XP_009186662.1</a> |
| <a href="#">PREDICTED: C4b-binding protein beta chain isoform X6 [Maca</a>    | 61.3      | 61.3        | 100%        | 2e-09   | 85%   | <a href="#">gi 544399939 XP_005540733.1</a> |
| <a href="#">PREDICTED: C4b-binding protein beta chain isoform X2 [Maca</a>    | 61.3      | 61.3        | 100%        | 2e-09   | 85%   | <a href="#">gi 544399931 XP_005540729.1</a> |
| <a href="#">PREDICTED: C4b-binding protein beta chain isoform X1 [Papi</a>    | 61.3      | 61.3        | 100%        | 2e-09   | 85%   | <a href="#">gi 685519785 XP_009186656.1</a> |
| <a href="#">hypothetical protein EGM_01442 [Macaca fascicularis]</a>          | 61.3      | 61.3        | 100%        | 2e-09   | 85%   | <a href="#">gi 355745961 EHH50586.1</a>     |
| <a href="#">hypothetical protein EGK_01712 [Macaca mulatta]</a>               | 61.3      | 61.3        | 100%        | 2e-09   | 85%   | <a href="#">gi 355558818 EHH15598.1</a>     |
| <a href="#">PREDICTED: c4b-binding protein beta chain isoform 3 [Macaca</a>   | 61.3      | 61.3        | 100%        | 2e-09   | 85%   | <a href="#">gi 109018561 XP_001083216.1</a> |
| <a href="#">PREDICTED: C4b-binding protein beta chain isoform X1 [Maca</a>    | 61.3      | 61.3        | 100%        | 2e-09   | 85%   | <a href="#">gi 544399929 XP_005540728.1</a> |
| <a href="#">PREDICTED: C4b-binding protein beta chain isoform 1 [Nomas</a>    | 60.9      | 60.9        | 100%        | 3e-09   | 85%   | <a href="#">gi 332266848 XP_003282407.1</a> |
| <a href="#">PREDICTED: C4b-binding protein beta chain isoform X9 [Chlor</a>   | 60.4      | 60.4        | 100%        | 4e-09   | 85%   | <a href="#">gi 635130917 XP_007986833.1</a> |
| <a href="#">PREDICTED: C4b-binding protein beta chain isoform X8 [Chlor</a>   | 60.4      | 60.4        | 100%        | 5e-09   | 85%   | <a href="#">gi 635130915 XP_007986832.1</a> |
| <a href="#">PREDICTED: C4b-binding protein beta chain isoform X7 [Chlor</a>   | 60.4      | 60.4        | 100%        | 5e-09   | 85%   | <a href="#">gi 635130913 XP_007986831.1</a> |
| <a href="#">PREDICTED: C4b-binding protein beta chain isoform X6 [Chlor</a>   | 60.4      | 60.4        | 100%        | 5e-09   | 85%   | <a href="#">gi 635130911 XP_007986830.1</a> |
| <a href="#">PREDICTED: C4b-binding protein beta chain isoform X5 [Chlor</a>   | 60.4      | 60.4        | 100%        | 5e-09   | 85%   | <a href="#">gi 635130907 XP_007986828.1</a> |



|                                                                              |      |      |      |       |      |                                             |
|------------------------------------------------------------------------------|------|------|------|-------|------|---------------------------------------------|
| <a href="#">PREDICTED: C4b-binding protein beta chain isoform X4 [Chlor</a>  | 60.4 | 60.4 | 100% | 5e-09 | 85%  | <a href="#">gil635130905 XP_007986827.1</a> |
| <a href="#">PREDICTED: C4b-binding protein beta chain isoform X3 [Chlor</a>  | 60.4 | 60.4 | 100% | 5e-09 | 85%  | <a href="#">gil635130903 XP_007986826.1</a> |
| <a href="#">PREDICTED: C4b-binding protein beta chain isoform X2 [Chlor</a>  | 60.4 | 60.4 | 100% | 5e-09 | 85%  | <a href="#">gil635130901 XP_007986825.1</a> |
| <a href="#">PREDICTED: C4b-binding protein beta chain isoform X1 [Chlor</a>  | 60.4 | 60.4 | 100% | 5e-09 | 85%  | <a href="#">gil635130899 XP_007986823.1</a> |
| <a href="#">PREDICTED: C4b-binding protein beta chain isoform X2 [Callit</a> | 58.7 | 58.7 | 90%  | 2e-08 | 89%  | <a href="#">gil675749407 XP_008983835.1</a> |
| <a href="#">PREDICTED: C4b-binding protein beta chain isoform X1 [Callit</a> | 58.7 | 58.7 | 90%  | 2e-08 | 89%  | <a href="#">gil296230632 XP_002760794.1</a> |
| <a href="#">PREDICTED: C4b-binding protein beta chain isoform X2 [Saim</a>   | 53.7 | 53.7 | 90%  | 9e-07 | 83%  | <a href="#">gil725574024 XP_010339305.1</a> |
| <a href="#">PREDICTED: C4b-binding protein beta chain isoform X1 [Saim</a>   | 53.7 | 53.7 | 90%  | 9e-07 | 83%  | <a href="#">gil403277664 XP_003930472.1</a> |
| <a href="#">PREDICTED: C4b-binding protein beta chain isoform X2 [Galer</a>  | 46.0 | 46.0 | 100% | 3e-04 | 65%  | <a href="#">gil667314769 XP_008585888.1</a> |
| <a href="#">PREDICTED: C4b-binding protein beta chain isoform X1 [Galer</a>  | 46.0 | 46.0 | 100% | 3e-04 | 65%  | <a href="#">gil667314766 XP_008585886.1</a> |
| <a href="#">PREDICTED: C4b-binding protein beta chain [Chrysochloris as</a>  | 44.8 | 44.8 | 95%  | 9e-04 | 74%  | <a href="#">gil586450676 XP_006834269.1</a> |
| <a href="#">PREDICTED: LOW QUALITY PROTEIN: C4b-binding protein b</a>        | 42.6 | 42.6 | 100% | 0.004 | 65%  | <a href="#">gil594636425 XP_007171607.1</a> |
| <a href="#">PREDICTED: C4b-binding protein beta chain [Nannospalax gal</a>   | 42.2 | 42.2 | 100% | 0.006 | 71%  | <a href="#">gil674096417 XP_008821570.1</a> |
| <a href="#">PREDICTED: LOW QUALITY PROTEIN: C4b-binding protein b</a>        | 41.4 | 41.4 | 60%  | 0.011 | 92%  | <a href="#">gil471369765 XP_004375397.1</a> |
| <a href="#">PREDICTED: C4b-binding protein beta chain [Sus scrofa]</a>       | 40.9 | 40.9 | 100% | 0.015 | 60%  | <a href="#">gil311265148 XP_003130503.1</a> |
| <a href="#">PREDICTED: C4b-binding protein beta chain [Otolemur garnett</a>  | 40.5 | 40.5 | 100% | 0.020 | 65%  | <a href="#">gil395838946 XP_003792365.1</a> |
| <a href="#">PREDICTED: C4b-binding protein beta chain [Orcinus orca]</a>     | 40.1 | 40.1 | 100% | 0.027 | 60%  | <a href="#">gil466071254 XP_004282462.1</a> |
| <a href="#">PREDICTED: C4b-binding protein beta chain isoform X2 [Myoti</a>  | 40.1 | 40.1 | 95%  | 0.027 | 68%  | <a href="#">gil554587742 XP_005885272.1</a> |
| <a href="#">PREDICTED: C4b-binding protein beta chain [Myotis lucifugus]</a> | 40.1 | 40.1 | 95%  | 0.027 | 68%  | <a href="#">gil558152655 XP_006094937.1</a> |
| <a href="#">PREDICTED: C4b-binding protein beta chain isoform X1 [Myoti</a>  | 40.1 | 40.1 | 95%  | 0.027 | 68%  | <a href="#">gil554587740 XP_005885271.1</a> |
| <a href="#">PREDICTED: C4b-binding protein beta chain [Ictidomys tridece</a> | 39.2 | 39.2 | 100% | 0.051 | 65%  | <a href="#">gil532087633 XP_005329528.1</a> |
| <a href="#">PREDICTED: C4b-binding protein beta chain isoform X2 [Tarsi</a>  | 39.2 | 39.2 | 100% | 0.051 | 60%  | <a href="#">gil640811969 XP_008062626.1</a> |
| <a href="#">PREDICTED: C4b-binding protein beta chain isoform X1 [Tarsi</a>  | 39.2 | 39.2 | 100% | 0.051 | 60%  | <a href="#">gil640811967 XP_008062625.1</a> |
| <a href="#">PREDICTED: C4b-binding protein beta chain [Ceratotherium si</a>  | 38.8 | 38.8 | 95%  | 0.070 | 63%  | <a href="#">gil478501878 XP_004425250.1</a> |
| <a href="#">PREDICTED: C4b-binding protein beta chain [Cavia porcellus]</a>  | 38.4 | 38.4 | 100% | 0.095 | 60%  | <a href="#">gil348577871 XP_003474707.1</a> |
| <a href="#">PREDICTED: LOW QUALITY PROTEIN: C4b-binding protein b</a>        | 38.0 | 38.0 | 90%  | 0.13  | 61%  | <a href="#">gil470641603 XP_004325529.1</a> |
| <a href="#">PREDICTED: C4b-binding protein beta chain [Eptesicus fuscus</a>  | 36.3 | 36.3 | 95%  | 0.46  | 63%  | <a href="#">gil641725104 XP_008152491.1</a> |
| <a href="#">PREDICTED: C4b-binding protein beta chain [Myotis davidii]</a>   | 35.8 | 35.8 | 55%  | 0.61  | 82%  | <a href="#">gil584068188 XP_006754475.1</a> |
| <a href="#">PREDICTED: C4b-binding protein beta chain [Jaculus jaculus]</a>  | 35.8 | 35.8 | 80%  | 0.62  | 69%  | <a href="#">gil507559572 XP_004663509.1</a> |
| <a href="#">PREDICTED: C4b-binding protein beta chain [Elephantulus ed</a>   | 35.4 | 35.4 | 90%  | 0.84  | 61%  | <a href="#">gil585666900 XP_006888062.1</a> |
| <a href="#">PREDICTED: C4b-binding protein beta chain isoform X2 [Came</a>   | 35.0 | 35.0 | 90%  | 1.2   | 56%  | <a href="#">gil743734558 XP_010961541.1</a> |
| <a href="#">PREDICTED: C4b-binding protein beta chain isoform X1 [Came</a>   | 35.0 | 35.0 | 90%  | 1.2   | 56%  | <a href="#">gil743734556 XP_010961540.1</a> |
| <a href="#">PREDICTED: LOW QUALITY PROTEIN: C4b-binding protein b</a>        | 35.0 | 35.0 | 90%  | 1.2   | 56%  | <a href="#">gil560935168 XP_006193413.1</a> |
| <a href="#">PREDICTED: LOW QUALITY PROTEIN: C4b-binding protein b</a>        | 34.6 | 34.6 | 75%  | 1.6   | 67%  | <a href="#">gil533120065 XP_005375468.1</a> |
| <a href="#">PREDICTED: C4b-binding protein beta chain [Mustela putorius</a>  | 34.1 | 34.1 | 100% | 2.2   | 60%  | <a href="#">gil511871202 XP_004756233.1</a> |
| <a href="#">PREDICTED: LOW QUALITY PROTEIN: C4b-binding protein b</a>        | 32.5 | 32.5 | 90%  | 7.5   | 56%  | <a href="#">gil560986663 XP_006215518.1</a> |
| <a href="#">Piso0_002582 [Millerozyma farinosa CBS 7064]</a>                 | 32.0 | 32.0 | 75%  | 10    | 67%  | <a href="#">gil448103382 XP_004200022.1</a> |
| <a href="#">conserved putative membrane protein [Melbournevirus]</a>         | 32.0 | 32.0 | 65%  | 11    | 69%  | <a href="#">gil701447374 YP_009094746.1</a> |
| <a href="#">membrane protein [Cannes 8 virus]</a>                            | 32.0 | 32.0 | 65%  | 11    | 69%  | <a href="#">gil539398800 AGV01635.1</a>     |
| <a href="#">polyphosphate kinase [Burkholderia sp. MP-1]</a>                 | 31.6 | 31.6 | 65%  | 14    | 46%  | <a href="#">gil737535990 WP_035509712.1</a> |
| <a href="#">hypothetical protein [Clostridium sp. CAG:62]</a>                | 31.2 | 31.2 | 40%  | 20    | 100% | <a href="#">gil548057742 WP_022376409.1</a> |
| <a href="#">PREDICTED: C4b-binding protein beta chain [Ornithorhynchus</a>   | 30.8 | 30.8 | 60%  | 24    | 75%  | <a href="#">gil620984032 XP_007659774.1</a> |
| <a href="#">hypothetical protein [Vibrio nigrifulchritudo]</a>               | 30.3 | 30.3 | 50%  | 35    | 70%  | <a href="#">gil740359636 WP_038195698.1</a> |
| <a href="#">hypothetical protein [Vibrio nigrifulchritudo]</a>               | 30.3 | 30.3 | 50%  | 35    | 70%  | <a href="#">gil740309755 WP_038147115.1</a> |
| <a href="#">putative Fimh-like protein [Vibrio nigrifulchritudo]</a>         | 30.3 | 30.3 | 50%  | 36    | 70%  | <a href="#">gil550352361 WP_022612127.1</a> |

|                                                                                   |      |      |     |    |      |                                             |
|-----------------------------------------------------------------------------------|------|------|-----|----|------|---------------------------------------------|
| <a href="#">putative Fimh-like protein [Vibrio nigrripulchritudo]</a>             | 30.3 | 30.3 | 50% | 36 | 70%  | <a href="#">gi 550281458 WP_022607838.1</a> |
| <a href="#">hypothetical protein VINI7043_08940 [Vibrio nigrripulchritudo A1]</a> | 30.3 | 30.3 | 50% | 36 | 70%  | <a href="#">gi 342820393 EGU55216.1</a>     |
| <a href="#">PREDICTED: C4b-binding protein beta chain [Leptonychotes w]</a>       | 30.3 | 30.3 | 60% | 37 | 67%  | <a href="#">gi 585156269 XP_006730462.1</a> |
| <a href="#">transaldolase [Oribacterium sp. P6A1]</a>                             | 29.9 | 29.9 | 70% | 50 | 64%  | <a href="#">gi 738716700 WP_036611113.1</a> |
| <a href="#">transaldolase [Lachnospiraceae bacterium JC7]</a>                     | 29.9 | 29.9 | 70% | 50 | 64%  | <a href="#">gi 571148921 ETP72518.1</a>     |
| <a href="#">PREDICTED: fibroin heavy chain-like [Callithrix jacchus]</a>          | 29.9 | 50.1 | 80% | 51 | 83%  | <a href="#">gi 675768476 XP_008987859.1</a> |
| <a href="#">RIFIN [Plasmodium falciparum]</a>                                     | 29.9 | 29.9 | 55% | 51 | 73%  | <a href="#">gi 82394380 ABB72313.1</a>      |
| <a href="#">RIFIN [Plasmodium falciparum]</a>                                     | 29.9 | 29.9 | 55% | 51 | 73%  | <a href="#">gi 82394444 ABB72335.1</a>      |
| <a href="#">hypothetical protein PFBG_00014 [Plasmodium falciparum 7Gf]</a>       | 29.9 | 29.9 | 55% | 51 | 73%  | <a href="#">gi 579134248 EUR82669.1</a>     |
| <a href="#">hypothetical protein PFNF135_02825 [Plasmodium falciparum]</a>        | 29.9 | 29.9 | 60% | 51 | 67%  | <a href="#">gi 574981166 ETW42931.1</a>     |
| <a href="#">protoporphyrin IX magnesium-chelatase [Stanieria cyanosphae]</a>      | 29.9 | 29.9 | 65% | 52 | 67%  | <a href="#">gi 505006979 WP_015194081.1</a> |
| <a href="#">hypothetical protein [Fimbriimonas ginsengisoli]</a>                  | 29.9 | 29.9 | 45% | 52 | 89%  | <a href="#">gi 740689768 WP_038475057.1</a> |
| <a href="#">glutamate synthase large subunit [Lentisphaera araneosa]</a>          | 29.9 | 29.9 | 55% | 53 | 64%  | <a href="#">gi 494487169 WP_007276642.1</a> |
| <a href="#">hypothetical protein DFA_06522 [Dictyostelium fasciculatum]</a>       | 29.5 | 29.5 | 85% | 62 | 50%  | <a href="#">gi 470268001 XP_004362223.1</a> |
| <a href="#">hypothetical protein [Plasmodium knowlesi strain H]</a>               | 29.5 | 29.5 | 65% | 69 | 69%  | <a href="#">gi 221054814 XP_002258546.1</a> |
| <a href="#">probable subtilisin-like serine protease [Claviceps purpurea 20.</a>  | 29.5 | 29.5 | 75% | 70 | 59%  | <a href="#">gi 399164244 CCE34824.1</a>     |
| <a href="#">C4b-binding protein beta chain [Heterocephalus glaber]</a>            | 29.5 | 29.5 | 80% | 70 | 56%  | <a href="#">gi 351708103 EHB11022.1</a>     |
| <a href="#">PREDICTED: C4b-binding protein beta chain [Heterocephalus s</a>       | 29.5 | 29.5 | 80% | 70 | 56%  | <a href="#">gi 512892965 XP_004897416.1</a> |
| <a href="#">arginyl-tRNA synthetase [Helicobacter apodemus]</a>                   | 29.5 | 29.5 | 70% | 71 | 64%  | <a href="#">gi 736540679 WP_034555246.1</a> |
| <a href="#">elongation factor Ts [Helicobacter pylori]</a>                        | 29.5 | 29.5 | 75% | 71 | 67%  | <a href="#">gi 445936521 WP_000014376.1</a> |
| <a href="#">hypothetical protein [Streptomyces scabrisporus]</a>                  | 29.5 | 29.5 | 60% | 71 | 58%  | <a href="#">gi 522040969 WP_020552178.1</a> |
| <a href="#">ABC transporter substrate-binding protein [Blautia hydrogenotr</a>    | 29.5 | 29.5 | 70% | 71 | 48%  | <a href="#">gi 492755713 WP_005951864.1</a> |
| <a href="#">putative uncharacterized protein [Blautia hydrogenotrophica CA</a>    | 29.5 | 29.5 | 70% | 71 | 48%  | <a href="#">gi 546358788 WP_021845827.1</a> |
| <a href="#">probable subtilisin-like serine protease [Claviceps purpurea 20.</a>  | 29.5 | 29.5 | 75% | 72 | 59%  | <a href="#">gi 399166615 CCE32598.1</a>     |
| <a href="#">hypothetical protein PFTANZ_02364 [Plasmodium falciparum T</a>        | 29.1 | 29.1 | 55% | 94 | 73%  | <a href="#">gi 574974832 ETW36946.1</a>     |
| <a href="#">hypothetical protein DDB_G0277599 [Dictyostelium discoideur</a>       | 29.1 | 29.1 | 40% | 96 | 100% | <a href="#">gi 66817412 XP_642559.1</a>     |

## Alignments

Download GenPept Graphics

Next Previous Descriptions

unnamed protein product [Homo sapiens]

Sequence ID: [gi|194373591|dbj|BAG56891.1](#) Length: 218 Number of Matches: 1

Range 1: 49 to 68 GenPept Graphics

Next Match Previous Match

| Score          | Expect | Identities | Positives   | Gaps     |
|----------------|--------|------------|-------------|----------|
| 65.1 bits(146) | 1e-10  | 18/20(90%) | 20/20(100%) | 0/20(0%) |

Query 1 KTLFCDASKEWDDTTTECRL 20  
 KTLFC+ASKEWD+TTTECRL  
 Sbjct 49 KTLFCNASKEWDNTTECRL 68

### Related Information

[Gene](#) - associated gene details

Download GenPept Graphics

Next Previous Descriptions

PREDICTED: C4b-binding protein beta chain isoform X3 [Pan troglodytes]

Sequence ID: [gi|694891540|ref|XP\\_009439669.1](#) Length: 227 Number of Matches: 1

Range 1: 58 to 77 GenPept Graphics

Next Match Previous Match

| Score          | Expect | Identities | Positives   | Gaps     |
|----------------|--------|------------|-------------|----------|
| 65.1 bits(146) | 1e-10  | 18/20(90%) | 20/20(100%) | 0/20(0%) |

### Related Information

[Gene](#) - associated gene details

Query 1 KTLFCDASKEWDDTTTECRL 20  
 KTLFC+ASKEWD+TTTECRL  
 Sbjct 58 KTLFCNASKEWDNTTTECRL 77

[Download](#) [GenPept](#) [Graphics](#)

[Next](#) [Previous](#) [Descriptions](#)

PREDICTED: C4b-binding protein beta chain isoform X3 [Pan paniscus]

Sequence ID: [gi|675771724|ref|XP\\_008974762.1|](#) Length: 227 Number of Matches: 1

Range 1: 58 to 77 [GenPept](#) [Graphics](#)

[Next Match](#) [Previous Match](#)

| Score          | Expect | Identities | Positives   | Gaps     |
|----------------|--------|------------|-------------|----------|
| 65.1 bits(146) | 1e-10  | 18/20(90%) | 20/20(100%) | 0/20(0%) |

Query 1 KTLFCDASKEWDDTTTECRL 20  
 KTLFC+ASKEWD+TTTECRL  
 Sbjct 58 KTLFCNASKEWDNTTTECRL 77

**Related Information**

[Gene](#) - associated gene details  
[Map Viewer](#) - aligned genomic context

[Download](#) [GenPept](#) [Graphics](#)

[Next](#) [Previous](#) [Descriptions](#)

PREDICTED: C4b-binding protein beta chain isoform X3 [Homo sapiens]

Sequence ID: [gi|530366462|ref|XP\\_005273312.1|](#) Length: 227 Number of Matches: 1

Range 1: 58 to 77 [GenPept](#) [Graphics](#)

[Next Match](#) [Previous Match](#)

| Score          | Expect | Identities | Positives   | Gaps     |
|----------------|--------|------------|-------------|----------|
| 65.1 bits(146) | 1e-10  | 18/20(90%) | 20/20(100%) | 0/20(0%) |

Query 1 KTLFCDASKEWDDTTTECRL 20  
 KTLFC+ASKEWD+TTTECRL  
 Sbjct 58 KTLFCNASKEWDNTTTECRL 77

**Related Information**

[Gene](#) - associated gene details  
[Map Viewer](#) - aligned genomic context

[Download](#) [GenPept](#) [Graphics](#)

[Next](#) [Previous](#) [Descriptions](#)

PREDICTED: C4b-binding protein beta chain isoform X2 [Rhinopithecus roxellana]

Sequence ID: [gi|724836382|ref|XP\\_010363947.1|](#) Length: 251 Number of Matches: 1

Range 1: 58 to 77 [GenPept](#) [Graphics](#)

[Next Match](#) [Previous Match](#)

| Score          | Expect | Identities | Positives   | Gaps     |
|----------------|--------|------------|-------------|----------|
| 65.1 bits(146) | 1e-10  | 18/20(90%) | 20/20(100%) | 0/20(0%) |

Query 1 KTLFCDASKEWDDTTTECRL 20  
 KTLFC+ASKEWD+TTTECRL  
 Sbjct 58 KTLFCNASKEWDNTTTECRL 77

**Related Information**

[Gene](#) - associated gene details  
[Map Viewer](#) - aligned genomic context

BLAST is a registered trademark of the National Library of Medicine.

NCBI/ BLAST/ blastp suite/ Formatting Results - BTFREM8E013

Your search parameters were adjusted to search for a short input sequence.

[Edit and Resubmit](#) [Save Search Strategies](#) [Formatting options](#) [Download](#) [YouTube](#) [How to read this page](#) [Blast report description](#)

C4BPB\_KTLFCNASKEWDDTTTECRL\_Mod

RID [BTFREM8E013](#) (Expires on 01-20 15:23 pm)

Query ID |cl|30044 Database Name nr  
 Description None Description All non-redundant GenBank CDS translations+PDB+SwissProt+PIR+PRF excluding environmental samples from WGS projects  
 Molecule type amino acid Program BLASTP 2.2.30+ [Citation](#)  
 Query Length 20

Other reports: [Search Summary](#) [Taxonomy reports](#) [Distance tree of results](#) [Related Structures](#) [Multiple alignment](#)

Graphic Summary

Show Conserved Domains

No putative conserved domains have been detected

Distribution of 100 Blast Hits on the Query Sequence



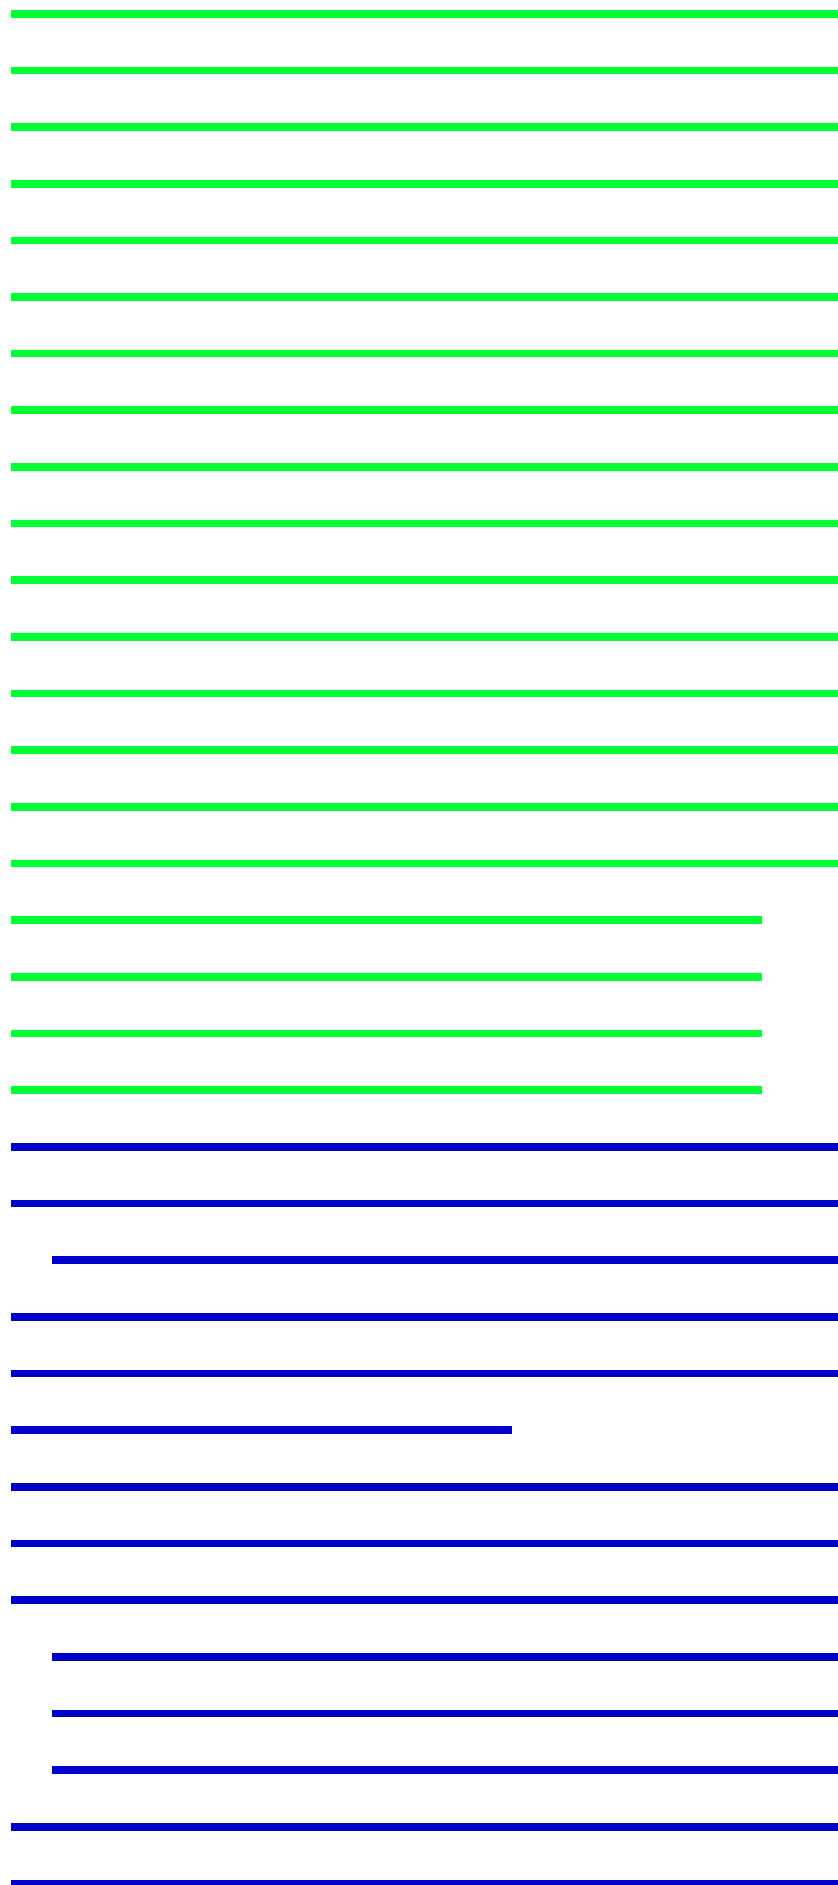

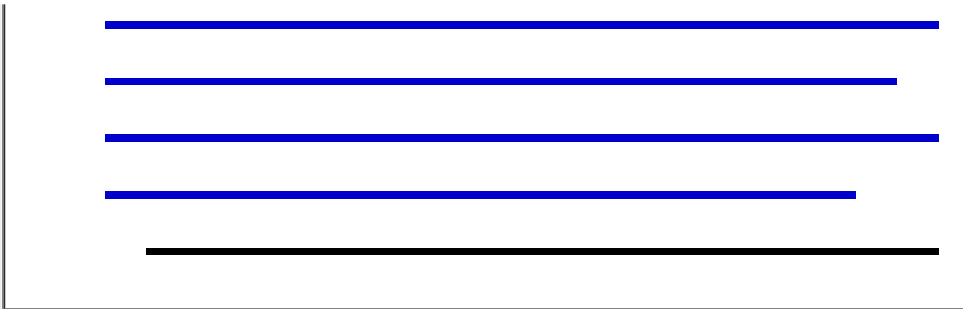

**Descriptions**

**Sequences producing significant alignments:**

Select: [All](#) [None](#) Selected:0

[Alignments](#)
[Download](#)
[GenPept](#)
[Graphics](#)
[Distance tree of results](#)
[Multiple alignment](#)

| Description                                                                   | Max score | Total score | Query cover | E value | Ident | Accession                                   |
|-------------------------------------------------------------------------------|-----------|-------------|-------------|---------|-------|---------------------------------------------|
| <a href="#">unnamed protein product [Homo sapiens]</a>                        | 67.7      | 67.7        | 100%        | 1e-11   | 95%   | <a href="#">gi 194373591 BAG56891.1</a>     |
| <a href="#">PREDICTED: C4b-binding protein beta chain isoform X3 [Pan t</a>   | 67.7      | 67.7        | 100%        | 1e-11   | 95%   | <a href="#">gi 694891540 XP_009439669.1</a> |
| <a href="#">PREDICTED: C4b-binding protein beta chain isoform X3 [Pan r</a>   | 67.7      | 67.7        | 100%        | 1e-11   | 95%   | <a href="#">gi 675771724 XP_008974762.1</a> |
| <a href="#">PREDICTED: C4b-binding protein beta chain isoform X3 [Homo</a>    | 67.7      | 67.7        | 100%        | 1e-11   | 95%   | <a href="#">gi 530366462 XP_005273312.1</a> |
| <a href="#">PREDICTED: C4b-binding protein beta chain isoform X2 [Rhinc</a>   | 67.7      | 67.7        | 100%        | 2e-11   | 95%   | <a href="#">gi 724836382 XP_010363947.1</a> |
| <a href="#">PREDICTED: C4b-binding protein beta chain isoform X2 [Pan t</a>   | 67.7      | 67.7        | 100%        | 2e-11   | 95%   | <a href="#">gi 694891534 XP_009439665.1</a> |
| <a href="#">PREDICTED: C4b-binding protein beta chain isoform X2 [Pan r</a>   | 67.7      | 67.7        | 100%        | 2e-11   | 95%   | <a href="#">gi 675771715 XP_008974759.1</a> |
| <a href="#">C4b-binding protein beta chain isoform 2 precursor [Homo sapi</a> | 67.7      | 67.7        | 100%        | 2e-11   | 95%   | <a href="#">gi 62912462 NP_001017364.1</a>  |
| <a href="#">PREDICTED: C4b-binding protein beta chain isoform X1 [Rhinc</a>   | 67.7      | 67.7        | 100%        | 2e-11   | 95%   | <a href="#">gi 724836379 XP_010363946.1</a> |
| <a href="#">C4b-binding protein beta chain isoform 1 precursor [Homo sapi</a> | 67.7      | 67.7        | 100%        | 2e-11   | 95%   | <a href="#">gi 4502505 NP_000707.1</a>      |
| <a href="#">PREDICTED: C4b-binding protein beta chain isoform X1 [Pan r</a>   | 67.7      | 67.7        | 100%        | 2e-11   | 95%   | <a href="#">gi 397504761 XP_003822949.1</a> |
| <a href="#">PREDICTED: C4b-binding protein beta chain isoform X1 [Pan t</a>   | 67.7      | 67.7        | 100%        | 2e-11   | 95%   | <a href="#">gi 114572288 XP_001166306.1</a> |
| <a href="#">PREDICTED: C4b-binding protein beta chain isoform X3 [Pong</a>    | 64.3      | 64.3        | 100%        | 2e-10   | 90%   | <a href="#">gi 686700216 XP_009236698.1</a> |
| <a href="#">PREDICTED: C4b-binding protein beta chain isoform X2 [Pong</a>    | 64.3      | 64.3        | 100%        | 2e-10   | 90%   | <a href="#">gi 686700213 XP_009236694.1</a> |
| <a href="#">PREDICTED: C4b-binding protein beta chain isoform X1 [Pong</a>    | 64.3      | 64.3        | 100%        | 2e-10   | 90%   | <a href="#">gi 297662141 XP_002809574.1</a> |
| <a href="#">PREDICTED: C4b-binding protein beta chain isoform X2 [Papi</a>    | 63.8      | 63.8        | 100%        | 3e-10   | 90%   | <a href="#">gi 685519789 XP_009186662.1</a> |
| <a href="#">PREDICTED: C4b-binding protein beta chain isoform X6 [Maca</a>    | 63.8      | 63.8        | 100%        | 3e-10   | 90%   | <a href="#">gi 544399939 XP_005540733.1</a> |
| <a href="#">PREDICTED: C4b-binding protein beta chain isoform X2 [Maca</a>    | 63.8      | 63.8        | 100%        | 3e-10   | 90%   | <a href="#">gi 544399931 XP_005540729.1</a> |
| <a href="#">PREDICTED: C4b-binding protein beta chain isoform X1 [Papi</a>    | 63.8      | 63.8        | 100%        | 3e-10   | 90%   | <a href="#">gi 685519785 XP_009186656.1</a> |
| <a href="#">hypothetical protein EGM_01442 [Macaca fascicularis]</a>          | 63.8      | 63.8        | 100%        | 3e-10   | 90%   | <a href="#">gi 355745961 EHH50586.1</a>     |
| <a href="#">hypothetical protein EGK_01712 [Macaca mulatta]</a>               | 63.8      | 63.8        | 100%        | 3e-10   | 90%   | <a href="#">gi 355558818 EHH15598.1</a>     |
| <a href="#">PREDICTED: c4b-binding protein beta chain isoform 3 [Macaca</a>   | 63.8      | 63.8        | 100%        | 3e-10   | 90%   | <a href="#">gi 109018561 XP_001083216.1</a> |
| <a href="#">PREDICTED: C4b-binding protein beta chain isoform X1 [Maca</a>    | 63.8      | 63.8        | 100%        | 3e-10   | 90%   | <a href="#">gi 544399929 XP_005540728.1</a> |
| <a href="#">PREDICTED: C4b-binding protein beta chain isoform 1 [Nomas</a>    | 63.4      | 63.4        | 100%        | 4e-10   | 90%   | <a href="#">gi 332266848 XP_003282407.1</a> |
| <a href="#">PREDICTED: C4b-binding protein beta chain isoform X9 [Chlor</a>   | 63.0      | 63.0        | 100%        | 6e-10   | 90%   | <a href="#">gi 635130917 XP_007986833.1</a> |
| <a href="#">PREDICTED: C4b-binding protein beta chain isoform X8 [Chlor</a>   | 63.0      | 63.0        | 100%        | 6e-10   | 90%   | <a href="#">gi 635130915 XP_007986832.1</a> |
| <a href="#">PREDICTED: C4b-binding protein beta chain isoform X7 [Chlor</a>   | 63.0      | 63.0        | 100%        | 6e-10   | 90%   | <a href="#">gi 635130913 XP_007986831.1</a> |
| <a href="#">PREDICTED: C4b-binding protein beta chain isoform X6 [Chlor</a>   | 63.0      | 63.0        | 100%        | 6e-10   | 90%   | <a href="#">gi 635130911 XP_007986830.1</a> |
| <a href="#">PREDICTED: C4b-binding protein beta chain isoform X5 [Chlor</a>   | 63.0      | 63.0        | 100%        | 6e-10   | 90%   | <a href="#">gi 635130907 XP_007986828.1</a> |

|                                                                              |      |      |      |       |      |                                             |
|------------------------------------------------------------------------------|------|------|------|-------|------|---------------------------------------------|
| <a href="#">PREDICTED: C4b-binding protein beta chain isoform X4 [Chlor</a>  | 63.0 | 63.0 | 100% | 6e-10 | 90%  | <a href="#">gil635130905 XP_007986827.1</a> |
| <a href="#">PREDICTED: C4b-binding protein beta chain isoform X3 [Chlor</a>  | 63.0 | 63.0 | 100% | 7e-10 | 90%  | <a href="#">gil635130903 XP_007986826.1</a> |
| <a href="#">PREDICTED: C4b-binding protein beta chain isoform X2 [Chlor</a>  | 63.0 | 63.0 | 100% | 7e-10 | 90%  | <a href="#">gil635130901 XP_007986825.1</a> |
| <a href="#">PREDICTED: C4b-binding protein beta chain isoform X1 [Chlor</a>  | 63.0 | 63.0 | 100% | 7e-10 | 90%  | <a href="#">gil635130899 XP_007986823.1</a> |
| <a href="#">PREDICTED: C4b-binding protein beta chain isoform X2 [Callit</a> | 61.3 | 61.3 | 90%  | 2e-09 | 94%  | <a href="#">gil675749407 XP_008983835.1</a> |
| <a href="#">PREDICTED: C4b-binding protein beta chain isoform X1 [Callit</a> | 61.3 | 61.3 | 90%  | 2e-09 | 94%  | <a href="#">gil296230632 XP_002760794.1</a> |
| <a href="#">PREDICTED: C4b-binding protein beta chain isoform X2 [Saim</a>   | 56.2 | 56.2 | 90%  | 1e-07 | 89%  | <a href="#">gil725574024 XP_010339305.1</a> |
| <a href="#">PREDICTED: C4b-binding protein beta chain isoform X1 [Saim</a>   | 56.2 | 56.2 | 90%  | 1e-07 | 89%  | <a href="#">gil403277664 XP_003930472.1</a> |
| <a href="#">PREDICTED: C4b-binding protein beta chain isoform X2 [Galer</a>  | 48.6 | 48.6 | 100% | 4e-05 | 70%  | <a href="#">gil667314769 XP_008585888.1</a> |
| <a href="#">PREDICTED: C4b-binding protein beta chain isoform X1 [Galer</a>  | 48.6 | 48.6 | 100% | 5e-05 | 70%  | <a href="#">gil667314766 XP_008585886.1</a> |
| <a href="#">PREDICTED: C4b-binding protein beta chain [Chrysochloris as</a>  | 47.3 | 47.3 | 95%  | 1e-04 | 79%  | <a href="#">gil586450676 XP_006834269.1</a> |
| <a href="#">PREDICTED: LOW QUALITY PROTEIN: C4b-binding protein b</a>        | 45.2 | 45.2 | 100% | 6e-04 | 70%  | <a href="#">gil594636425 XP_007171607.1</a> |
| <a href="#">PREDICTED: C4b-binding protein beta chain [Nannospalax gal</a>   | 44.8 | 44.8 | 100% | 8e-04 | 76%  | <a href="#">gil674096417 XP_008821570.1</a> |
| <a href="#">PREDICTED: LOW QUALITY PROTEIN: C4b-binding protein b</a>        | 43.9 | 43.9 | 60%  | 0.002 | 100% | <a href="#">gil471369765 XP_004375397.1</a> |
| <a href="#">PREDICTED: C4b-binding protein beta chain [Sus scrofa]</a>       | 43.5 | 43.5 | 100% | 0.002 | 65%  | <a href="#">gil311265148 XP_003130503.1</a> |
| <a href="#">PREDICTED: C4b-binding protein beta chain [Otolemur garnett</a>  | 43.1 | 43.1 | 100% | 0.003 | 70%  | <a href="#">gil395838946 XP_003792365.1</a> |
| <a href="#">PREDICTED: C4b-binding protein beta chain [Orcinus orca]</a>     | 42.6 | 42.6 | 100% | 0.004 | 65%  | <a href="#">gil466071254 XP_004282462.1</a> |
| <a href="#">PREDICTED: C4b-binding protein beta chain isoform X2 [Myoti</a>  | 42.6 | 42.6 | 95%  | 0.004 | 74%  | <a href="#">gil554587742 XP_005885272.1</a> |
| <a href="#">PREDICTED: C4b-binding protein beta chain [Myotis lucifugus]</a> | 42.6 | 42.6 | 95%  | 0.004 | 74%  | <a href="#">gil558152655 XP_006094937.1</a> |
| <a href="#">PREDICTED: C4b-binding protein beta chain isoform X1 [Myoti</a>  | 42.6 | 42.6 | 95%  | 0.004 | 74%  | <a href="#">gil554587740 XP_005885271.1</a> |
| <a href="#">PREDICTED: C4b-binding protein beta chain [Ictidomys tridece</a> | 41.8 | 41.8 | 100% | 0.008 | 70%  | <a href="#">gil532087633 XP_005329528.1</a> |
| <a href="#">PREDICTED: C4b-binding protein beta chain isoform X2 [Tarsi</a>  | 41.8 | 41.8 | 100% | 0.008 | 65%  | <a href="#">gil640811969 XP_008062626.1</a> |
| <a href="#">PREDICTED: C4b-binding protein beta chain isoform X1 [Tarsi</a>  | 41.8 | 41.8 | 100% | 0.008 | 65%  | <a href="#">gil640811967 XP_008062625.1</a> |
| <a href="#">PREDICTED: C4b-binding protein beta chain [Ceratotherium si</a>  | 41.4 | 41.4 | 95%  | 0.011 | 68%  | <a href="#">gil478501878 XP_004425250.1</a> |
| <a href="#">PREDICTED: C4b-binding protein beta chain [Cavia porcellus]</a>  | 40.9 | 40.9 | 100% | 0.014 | 65%  | <a href="#">gil348577871 XP_003474707.1</a> |
| <a href="#">PREDICTED: LOW QUALITY PROTEIN: C4b-binding protein b</a>        | 40.5 | 40.5 | 90%  | 0.020 | 67%  | <a href="#">gil470641603 XP_004325529.1</a> |
| <a href="#">PREDICTED: C4b-binding protein beta chain [Eptesicus fuscus</a>  | 38.8 | 38.8 | 95%  | 0.070 | 68%  | <a href="#">gil641725104 XP_008152491.1</a> |
| <a href="#">PREDICTED: C4b-binding protein beta chain [Myotis davidii]</a>   | 38.4 | 38.4 | 55%  | 0.094 | 91%  | <a href="#">gil584068188 XP_006754475.1</a> |
| <a href="#">PREDICTED: C4b-binding protein beta chain [Jaculus jaculus]</a>  | 38.4 | 38.4 | 80%  | 0.096 | 75%  | <a href="#">gil507559572 XP_004663509.1</a> |
| <a href="#">PREDICTED: C4b-binding protein beta chain [Elephantulus ed</a>   | 38.0 | 38.0 | 90%  | 0.13  | 67%  | <a href="#">gil585666900 XP_006888062.1</a> |
| <a href="#">PREDICTED: C4b-binding protein beta chain isoform X2 [Came</a>   | 37.5 | 37.5 | 90%  | 0.18  | 61%  | <a href="#">gil743734558 XP_010961541.1</a> |
| <a href="#">PREDICTED: C4b-binding protein beta chain isoform X1 [Came</a>   | 37.5 | 37.5 | 90%  | 0.18  | 61%  | <a href="#">gil743734556 XP_010961540.1</a> |
| <a href="#">PREDICTED: LOW QUALITY PROTEIN: C4b-binding protein b</a>        | 37.5 | 37.5 | 90%  | 0.18  | 61%  | <a href="#">gil560935168 XP_006193413.1</a> |
| <a href="#">PREDICTED: C4b-binding protein beta chain [Mustela putorius</a>  | 36.7 | 36.7 | 100% | 0.33  | 65%  | <a href="#">gil511871202 XP_004756233.1</a> |
| <a href="#">PREDICTED: LOW QUALITY PROTEIN: C4b-binding protein b</a>        | 34.1 | 34.1 | 90%  | 2.2   | 56%  | <a href="#">gil560986663 XP_006215518.1</a> |
| <a href="#">PREDICTED: C4b-binding protein beta chain [Ornithorhynchus</a>   | 33.3 | 33.3 | 60%  | 3.5   | 83%  | <a href="#">gil620984032 XP_007659774.1</a> |
| <a href="#">PREDICTED: C4b-binding protein beta chain [Leptonychotes w</a>   | 32.9 | 32.9 | 60%  | 5.5   | 75%  | <a href="#">gil585156269 XP_006730462.1</a> |
| <a href="#">C4b-binding protein beta chain [Heterocephalus glaber]</a>       | 32.0 | 32.0 | 80%  | 10    | 63%  | <a href="#">gil351708103 EHB11022.1</a>     |
| <a href="#">PREDICTED: LOW QUALITY PROTEIN: C4b-binding protein b</a>        | 32.0 | 32.0 | 75%  | 10    | 60%  | <a href="#">gil533120065 XP_005375468.1</a> |
| <a href="#">PREDICTED: C4b-binding protein beta chain [Heterocephalus s</a>  | 32.0 | 32.0 | 80%  | 10    | 63%  | <a href="#">gil512892965 XP_004897416.1</a> |
| <a href="#">PREDICTED: C4b-binding protein beta chain [Pteropus alecto]</a>  | 31.6 | 31.6 | 100% | 14    | 55%  | <a href="#">gil586536223 XP_006922979.1</a> |
| <a href="#">C4b-binding protein beta chain [Pteropus alecto]</a>             | 31.6 | 31.6 | 100% | 14    | 55%  | <a href="#">gil431892854 ELK03282.1</a>     |
| <a href="#">envelope glycoprotein [Human immunodeficiency virus 1]</a>       | 31.2 | 31.2 | 65%  | 18    | 61%  | <a href="#">gil345128523 AEN75212.1</a>     |
| <a href="#">hypothetical protein PFNF135_02825 [Plasmodium falciparum]</a>   | 31.2 | 31.2 | 60%  | 20    | 67%  | <a href="#">gil574981166 ETW42931.1</a>     |
| <a href="#">hypothetical protein [Clostridium sp. CAG:62]</a>                | 31.2 | 31.2 | 40%  | 20    | 100% | <a href="#">gil548057742 WP_022376409.1</a> |

|                                                                                 |      |      |      |    |     |                                             |
|---------------------------------------------------------------------------------|------|------|------|----|-----|---------------------------------------------|
| <a href="#">envelope glycoprotein [Human immunodeficiency virus 1]</a>          | 30.8 | 30.8 | 55%  | 26 | 75% | <a href="#">gi 338224254 AEI88022.1</a>     |
| <a href="#">envelope glycoprotein [Human immunodeficiency virus 1]</a>          | 30.8 | 30.8 | 55%  | 26 | 75% | <a href="#">gi 30908538 AAP37305.1</a>      |
| <a href="#">PREDICTED: C4b-binding protein beta chain isoform X2 [Felis</a>     | 30.8 | 30.8 | 100% | 27 | 55% | <a href="#">gi 587018341 XP_006942889.1</a> |
| <a href="#">hypothetical protein PANDA_018755 [Ailuropoda melanoleuca]</a>      | 30.8 | 30.8 | 85%  | 27 | 59% | <a href="#">gi 281337925 EFB13509.1</a>     |
| <a href="#">PREDICTED: C4b-binding protein beta chain [Canis lupus fami</a>     | 30.8 | 30.8 | 60%  | 27 | 75% | <a href="#">gi 73960685 XP_851611.1</a>     |
| <a href="#">PREDICTED: C4b-binding protein beta chain [Ursus maritimus]</a>     | 30.8 | 30.8 | 85%  | 27 | 59% | <a href="#">gi 670984389 XP_008683289.1</a> |
| <a href="#">PREDICTED: c4b-binding protein beta chain-like [Ailuropoda m</a>    | 30.8 | 30.8 | 85%  | 27 | 59% | <a href="#">gi 301786617 XP_002928722.1</a> |
| <a href="#">PREDICTED: C4b-binding protein beta chain isoform X1 [Felis</a>     | 30.8 | 30.8 | 100% | 27 | 55% | <a href="#">gi 410986395 XP_003999496.1</a> |
| <a href="#">PREDICTED: complement C1r subcomponent [Stegastes partii</a>        | 30.8 | 30.8 | 70%  | 28 | 63% | <a href="#">gi 657546451 XP_008278409.1</a> |
| <a href="#">hypothetical protein [Vibrio nigrapulchritudo]</a>                  | 30.3 | 30.3 | 50%  | 35 | 70% | <a href="#">gi 740359636 WP_038195698.1</a> |
| <a href="#">hypothetical protein PFTANZ_02364 [Plasmodium falciparum T</a>      | 30.3 | 30.3 | 55%  | 35 | 73% | <a href="#">gi 574974832 ETW36946.1</a>     |
| <a href="#">hypothetical protein [Vibrio nigrapulchritudo]</a>                  | 30.3 | 30.3 | 50%  | 35 | 70% | <a href="#">gi 740309755 WP_038147115.1</a> |
| <a href="#">putative Fimh-like protein [Vibrio nigrapulchritudo]</a>            | 30.3 | 30.3 | 50%  | 36 | 70% | <a href="#">gi 550352361 WP_022612127.1</a> |
| <a href="#">putative Fimh-like protein [Vibrio nigrapulchritudo]</a>            | 30.3 | 30.3 | 50%  | 36 | 70% | <a href="#">gi 550281458 WP_022607838.1</a> |
| <a href="#">hypothetical protein VINI7043_08940 [Vibrio nigrapulchritudo A]</a> | 30.3 | 30.3 | 50%  | 36 | 70% | <a href="#">gi 342820393 EGU55216.1</a>     |
| <a href="#">envelope glycoprotein [Human immunodeficiency virus 1]</a>          | 30.3 | 30.3 | 60%  | 36 | 56% | <a href="#">gi 163637312 ABY27456.1</a>     |
| <a href="#">envelope glycoprotein [Human immunodeficiency virus 1]</a>          | 30.3 | 30.3 | 60%  | 36 | 56% | <a href="#">gi 163637310 ABY27455.1</a>     |
| <a href="#">envelope glycoprotein [Human immunodeficiency virus 1]</a>          | 30.3 | 30.3 | 60%  | 36 | 56% | <a href="#">gi 163637307 ABY27454.1</a>     |
| <a href="#">envelope glycoprotein [Human immunodeficiency virus 1]</a>          | 30.3 | 30.3 | 60%  | 36 | 56% | <a href="#">gi 163637305 ABY27453.1</a>     |
| <a href="#">envelope glycoprotein [Human immunodeficiency virus 1]</a>          | 30.3 | 30.3 | 60%  | 36 | 56% | <a href="#">gi 163637303 ABY27452.1</a>     |
| <a href="#">hypothetical protein PFFCH_03778 [Plasmodium falciparum FC</a>      | 30.3 | 30.3 | 55%  | 37 | 73% | <a href="#">gi 574965586 ETW28803.1</a>     |
| <a href="#">hypothetical protein PFFVO_01913 [Plasmodium falciparum Vi</a>      | 30.3 | 30.3 | 55%  | 37 | 73% | <a href="#">gi 574751318 ETW19338.1</a>     |
| <a href="#">hypothetical protein [Bacillus coagulans]</a>                       | 29.9 | 29.9 | 60%  | 48 | 75% | <a href="#">gi 737205332 WP_035190263.1</a> |
| <a href="#">hypothetical protein [Bacillus coagulans]</a>                       | 29.9 | 29.9 | 60%  | 49 | 75% | <a href="#">gi 651961719 WP_026684018.1</a> |
| <a href="#">hypothetical protein [Bacillus coagulans]</a>                       | 29.9 | 29.9 | 60%  | 49 | 75% | <a href="#">gi 503862578 WP_014096572.1</a> |
| <a href="#">PREDICTED: fibroin heavy chain-like [Callithrix jacchus]</a>        | 29.9 | 29.9 | 50%  | 51 | 83% | <a href="#">gi 675768476 XP_008987859.1</a> |

## Alignments

Download GenPept Graphics

Next Previous Descriptions

unnamed protein product [Homo sapiens]

Sequence ID: [gi|194373591|dbj|BAG56891.1](#) Length: 218 Number of Matches: 1

Range 1: 49 to 68 GenPept Graphics

Next Match Previous Match

| Score          | Expect | Identities | Positives   | Gaps     |
|----------------|--------|------------|-------------|----------|
| 67.7 bits(152) | 1e-11  | 19/20(95%) | 20/20(100%) | 0/20(0%) |

Query 1 KTLFCNASKEWDDTTTECRL 20  
 KTLFCNASKEW+TTTECRL  
 Sbjct 49 KTLFCNASKEWDNTTECRL 68

### Related Information

[Gene](#) - associated gene details

Download GenPept Graphics

Next Previous Descriptions

PREDICTED: C4b-binding protein beta chain isoform X3 [Pan troglodytes]

Sequence ID: [gi|694891540|ref|XP\\_009439669.1](#) Length: 227 Number of Matches: 1

Range 1: 58 to 77 GenPept Graphics

Next Match Previous Match

| Score          | Expect | Identities | Positives   | Gaps     |
|----------------|--------|------------|-------------|----------|
| 67.7 bits(152) | 1e-11  | 19/20(95%) | 20/20(100%) | 0/20(0%) |

### Related Information

[Gene](#) - associated gene details



Query 1 KTLFCNASKEWDDTTTECRL 20  
 KTLFCNASKEWD+TTTECRL  
 Sbjct 58 KTLFCNASKEWDNTTTECRL 77

[Download](#) [GenPept](#) [Graphics](#)

[Next](#) [Previous](#) [Descriptions](#)

PREDICTED: C4b-binding protein beta chain isoform X3 [Pan paniscus]

Sequence ID: [gi|675771724|ref|XP\\_008974762.1|](#) Length: 227 Number of Matches: 1

Range 1: 58 to 77 [GenPept](#) [Graphics](#)

[Next Match](#) [Previous Match](#)

| Score          | Expect | Identities | Positives   | Gaps     |
|----------------|--------|------------|-------------|----------|
| 67.7 bits(152) | 1e-11  | 19/20(95%) | 20/20(100%) | 0/20(0%) |

Query 1 KTLFCNASKEWDDTTTECRL 20  
 KTLFCNASKEWD+TTTECRL  
 Sbjct 58 KTLFCNASKEWDNTTTECRL 77

**Related Information**

[Gene](#) - associated gene details  
[Map Viewer](#) - aligned genomic context

[Download](#) [GenPept](#) [Graphics](#)

[Next](#) [Previous](#) [Descriptions](#)

PREDICTED: C4b-binding protein beta chain isoform X3 [Homo sapiens]

Sequence ID: [gi|530366462|ref|XP\\_005273312.1|](#) Length: 227 Number of Matches: 1

Range 1: 58 to 77 [GenPept](#) [Graphics](#)

[Next Match](#) [Previous Match](#)

| Score          | Expect | Identities | Positives   | Gaps     |
|----------------|--------|------------|-------------|----------|
| 67.7 bits(152) | 1e-11  | 19/20(95%) | 20/20(100%) | 0/20(0%) |

Query 1 KTLFCNASKEWDDTTTECRL 20  
 KTLFCNASKEWD+TTTECRL  
 Sbjct 58 KTLFCNASKEWDNTTTECRL 77

**Related Information**

[Gene](#) - associated gene details  
[Map Viewer](#) - aligned genomic context

[Download](#) [GenPept](#) [Graphics](#)

[Next](#) [Previous](#) [Descriptions](#)

PREDICTED: C4b-binding protein beta chain isoform X2 [Rhinopithecus roxellana]

Sequence ID: [gi|724836382|ref|XP\\_010363947.1|](#) Length: 251 Number of Matches: 1

Range 1: 58 to 77 [GenPept](#) [Graphics](#)

[Next Match](#) [Previous Match](#)

| Score          | Expect | Identities | Positives   | Gaps     |
|----------------|--------|------------|-------------|----------|
| 67.7 bits(152) | 2e-11  | 19/20(95%) | 20/20(100%) | 0/20(0%) |

Query 1 KTLFCNASKEWDDTTTECRL 20  
 KTLFCNASKEWD+TTTECRL  
 Sbjct 58 KTLFCNASKEWDNTTTECRL 77

**Related Information**

[Gene](#) - associated gene details  
[Map Viewer](#) - aligned genomic context

BLAST is a registered trademark of the National Library of Medicine.

NCBI/ BLAST/ blastp suite/ Formatting Results - B92HDF4V01R

Your search parameters were adjusted to search for a short input sequence.

[Edit and Resubmit](#) [Save Search Strategies](#) [Formatting options](#) [Download](#)

[YouTube](#) [How to read this page](#) [Blast report description](#)

### C4BPB\_KTLFCNASKEWDNTTTECRL\_NonMod

RID [B92HDF4V01R](#) (Expires on 01-14 09:59 am)

Query ID |cl|304229  
 Description None  
 Molecule type amino acid  
 Query Length 20

Database Name nr  
 Description All non-redundant GenBank CDS translations+PDB+SwissProt+PIR excluding environmental samples from WGS projects  
 Program BLASTP 2.2.30+ [Citation](#)

Other reports: [Search Summary](#) [Taxonomy reports](#) [Distance tree of results](#) [Related Structures](#) [Multiple alignment](#)

### Graphic Summary

Show Conserved Domains

No putative conserved domains have been detected

Distribution of 100 Blast Hits on the Query Sequence

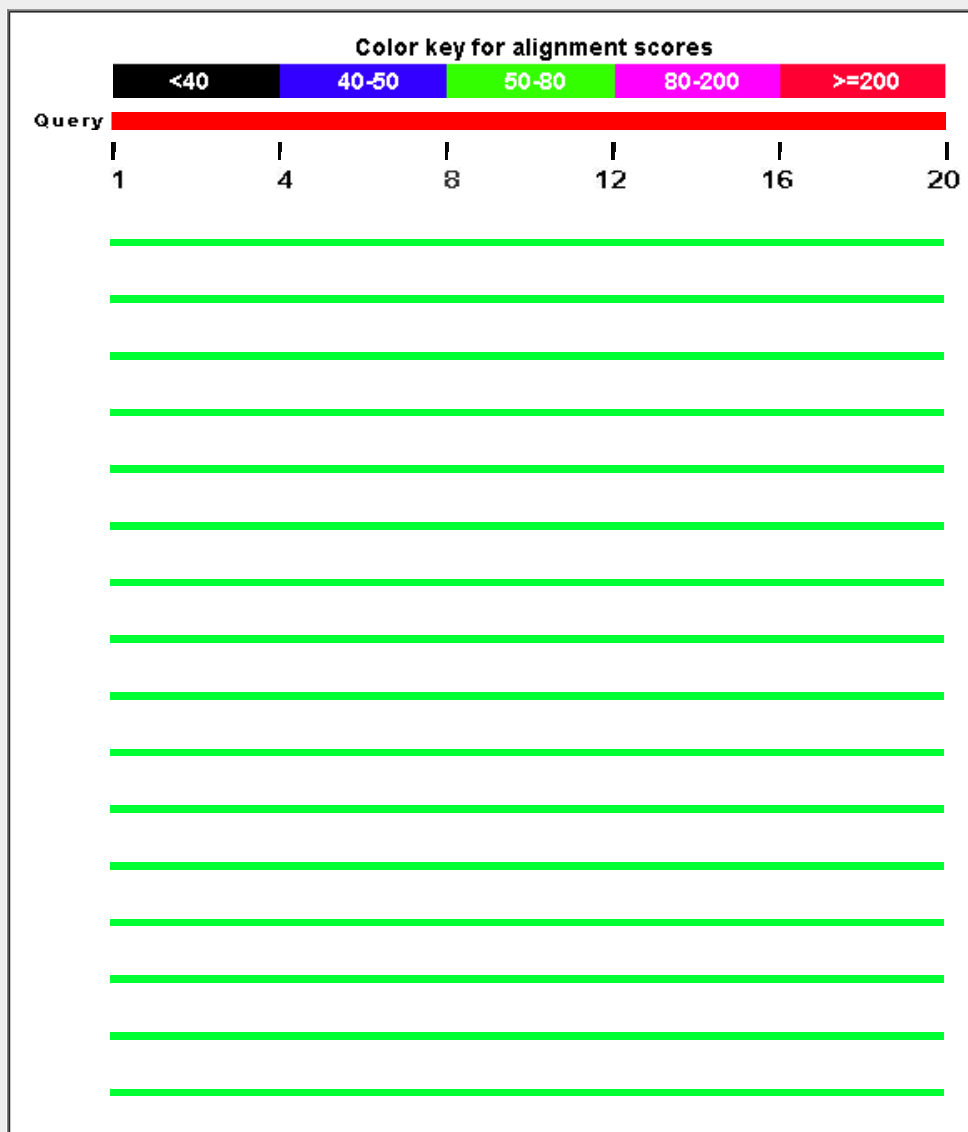

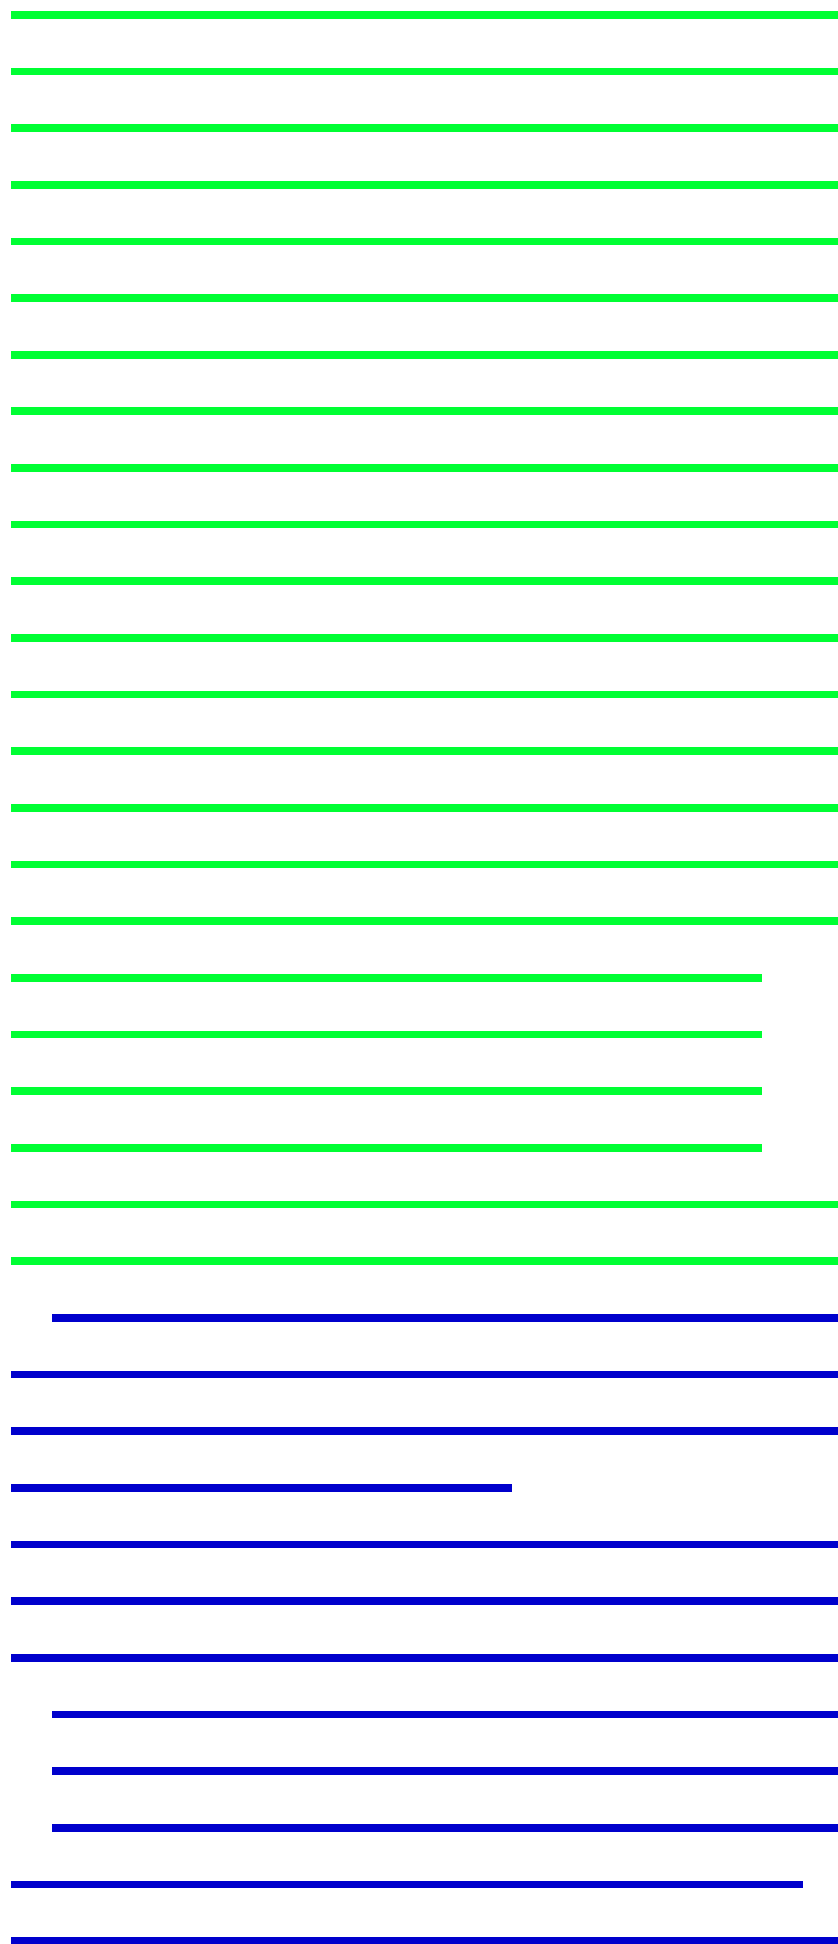

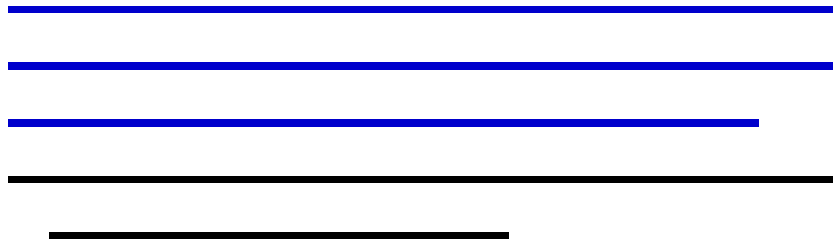

**Descriptions**

**Sequences producing significant alignments:**

Select: [All](#) [None](#) Selected:0

[Alignments](#)
[Download](#)
[GenPept](#)
[Graphics](#)
[Distance tree of results](#)
[Multiple alignment](#)

| Description                                                                                | Max score | Total score | Query cover | E value | Ident | Accession                                   |
|--------------------------------------------------------------------------------------------|-----------|-------------|-------------|---------|-------|---------------------------------------------|
| <a href="#">unnamed protein product [Homo sapiens]</a>                                     | 70.2      | 70.2        | 100%        | 2e-12   | 100%  | <a href="#">gi 194373591 BAG56891.1</a>     |
| <a href="#">PREDICTED: C4b-binding protein beta chain isoform X3 [Pan troglodytes]</a>     | 70.2      | 70.2        | 100%        | 2e-12   | 100%  | <a href="#">gi 694891540 XP_009439669.1</a> |
| <a href="#">PREDICTED: C4b-binding protein beta chain isoform X3 [Pan paniscus]</a>        | 70.2      | 70.2        | 100%        | 2e-12   | 100%  | <a href="#">gi 675771724 XP_008974762.1</a> |
| <a href="#">PREDICTED: C4b-binding protein beta chain isoform X3 [Homo sapiens]</a>        | 70.2      | 70.2        | 100%        | 2e-12   | 100%  | <a href="#">gi 530366462 XP_005273312.1</a> |
| <a href="#">PREDICTED: C4b-binding protein beta chain isoform X2 [Rhinopithecus]</a>       | 70.2      | 70.2        | 100%        | 2e-12   | 100%  | <a href="#">gi 724836382 XP_010363947.1</a> |
| <a href="#">PREDICTED: C4b-binding protein beta chain isoform X2 [Pan troglodytes]</a>     | 70.2      | 70.2        | 100%        | 2e-12   | 100%  | <a href="#">gi 694891534 XP_009439665.1</a> |
| <a href="#">PREDICTED: C4b-binding protein beta chain isoform X2 [Pan paniscus]</a>        | 70.2      | 70.2        | 100%        | 2e-12   | 100%  | <a href="#">gi 675771715 XP_008974759.1</a> |
| <a href="#">C4b-binding protein beta chain isoform 2 precursor [Homo sapiens]</a>          | 70.2      | 70.2        | 100%        | 2e-12   | 100%  | <a href="#">gi 62912462 INP_001017364.1</a> |
| <a href="#">PREDICTED: C4b-binding protein beta chain isoform X1 [Rhinopithecus]</a>       | 70.2      | 70.2        | 100%        | 2e-12   | 100%  | <a href="#">gi 724836379 XP_010363946.1</a> |
| <a href="#">C4b-binding protein beta chain isoform 1 precursor [Homo sapiens]</a>          | 70.2      | 70.2        | 100%        | 2e-12   | 100%  | <a href="#">gi 4502505 INP_000707.1</a>     |
| <a href="#">PREDICTED: C4b-binding protein beta chain isoform X1 [Pan paniscus]</a>        | 70.2      | 70.2        | 100%        | 2e-12   | 100%  | <a href="#">gi 397504761 XP_003822949.1</a> |
| <a href="#">PREDICTED: C4b-binding protein beta chain isoform X1 [Pan troglodytes]</a>     | 70.2      | 70.2        | 100%        | 2e-12   | 100%  | <a href="#">gi 114572288 XP_001166306.1</a> |
| <a href="#">PREDICTED: C4b-binding protein beta chain isoform X3 [Pongo abelii]</a>        | 66.8      | 66.8        | 100%        | 3e-11   | 95%   | <a href="#">gi 686700216 XP_009236698.1</a> |
| <a href="#">PREDICTED: C4b-binding protein beta chain isoform X2 [Pongo abelii]</a>        | 66.8      | 66.8        | 100%        | 3e-11   | 95%   | <a href="#">gi 686700213 XP_009236694.1</a> |
| <a href="#">PREDICTED: C4b-binding protein beta chain isoform X1 [Pongo abelii]</a>        | 66.8      | 66.8        | 100%        | 3e-11   | 95%   | <a href="#">gi 297662141 XP_002809574.1</a> |
| <a href="#">PREDICTED: C4b-binding protein beta chain isoform X2 [Papio annectans]</a>     | 66.4      | 66.4        | 100%        | 4e-11   | 95%   | <a href="#">gi 685519789 XP_009186662.1</a> |
| <a href="#">PREDICTED: C4b-binding protein beta chain isoform X6 [Macaca fascicularis]</a> | 66.4      | 66.4        | 100%        | 4e-11   | 95%   | <a href="#">gi 544399939 XP_005540733.1</a> |
| <a href="#">PREDICTED: C4b-binding protein beta chain isoform X2 [Macaca fascicularis]</a> | 66.4      | 66.4        | 100%        | 4e-11   | 95%   | <a href="#">gi 544399931 XP_005540729.1</a> |
| <a href="#">PREDICTED: C4b-binding protein beta chain isoform X1 [Papio annectans]</a>     | 66.4      | 66.4        | 100%        | 4e-11   | 95%   | <a href="#">gi 685519785 XP_009186656.1</a> |
| <a href="#">hypothetical protein EGM_01442 [Macaca fascicularis]</a>                       | 66.4      | 66.4        | 100%        | 4e-11   | 95%   | <a href="#">gi 355745961 EHH50586.1</a>     |
| <a href="#">hypothetical protein EGK_01712 [Macaca mulatta]</a>                            | 66.4      | 66.4        | 100%        | 4e-11   | 95%   | <a href="#">gi 355558818 EHH15598.1</a>     |
| <a href="#">PREDICTED: c4b-binding protein beta chain isoform 3 [Macaca mulatta]</a>       | 66.4      | 66.4        | 100%        | 4e-11   | 95%   | <a href="#">gi 109018561 XP_001083216.1</a> |
| <a href="#">PREDICTED: C4b-binding protein beta chain isoform X1 [Macaca fascicularis]</a> | 66.4      | 66.4        | 100%        | 4e-11   | 95%   | <a href="#">gi 544399929 XP_005540728.1</a> |
| <a href="#">PREDICTED: C4b-binding protein beta chain isoform 1 [Nomascus leucogenus]</a>  | 66.0      | 66.0        | 100%        | 6e-11   | 95%   | <a href="#">gi 332266848 XP_003282407.1</a> |
| <a href="#">PREDICTED: C4b-binding protein beta chain isoform X9 [Chlorocebus]</a>         | 65.5      | 65.5        | 100%        | 7e-11   | 95%   | <a href="#">gi 635130917 XP_007986833.1</a> |
| <a href="#">PREDICTED: C4b-binding protein beta chain isoform X8 [Chlorocebus]</a>         | 65.5      | 65.5        | 100%        | 8e-11   | 95%   | <a href="#">gi 635130915 XP_007986832.1</a> |
| <a href="#">PREDICTED: C4b-binding protein beta chain isoform X7 [Chlorocebus]</a>         | 65.5      | 65.5        | 100%        | 8e-11   | 95%   | <a href="#">gi 635130913 XP_007986831.1</a> |
| <a href="#">PREDICTED: C4b-binding protein beta chain isoform X6 [Chlorocebus]</a>         | 65.5      | 65.5        | 100%        | 8e-11   | 95%   | <a href="#">gi 635130911 XP_007986830.1</a> |

|                                                                                    |      |      |      |       |      |                                             |
|------------------------------------------------------------------------------------|------|------|------|-------|------|---------------------------------------------|
| <a href="#">PREDICTED: C4b-binding protein beta chain isoform X5 [Chloroce</a>     | 65.5 | 65.5 | 100% | 8e-11 | 95%  | <a href="#">gij635130907 XP_007986828.1</a> |
| <a href="#">PREDICTED: C4b-binding protein beta chain isoform X4 [Chloroce</a>     | 65.5 | 65.5 | 100% | 8e-11 | 95%  | <a href="#">gij635130905 XP_007986827.1</a> |
| <a href="#">PREDICTED: C4b-binding protein beta chain isoform X3 [Chloroce</a>     | 65.5 | 65.5 | 100% | 8e-11 | 95%  | <a href="#">gij635130903 XP_007986826.1</a> |
| <a href="#">PREDICTED: C4b-binding protein beta chain isoform X2 [Chloroce</a>     | 65.5 | 65.5 | 100% | 8e-11 | 95%  | <a href="#">gij635130901 XP_007986825.1</a> |
| <a href="#">PREDICTED: C4b-binding protein beta chain isoform X1 [Chloroce</a>     | 65.5 | 65.5 | 100% | 8e-11 | 95%  | <a href="#">gij635130899 XP_007986823.1</a> |
| <a href="#">PREDICTED: C4b-binding protein beta chain isoform X2 [Callithrix j</a> | 63.8 | 63.8 | 90%  | 3e-10 | 100% | <a href="#">gij675749407 XP_008983835.1</a> |
| <a href="#">PREDICTED: C4b-binding protein beta chain isoform X1 [Callithrix j</a> | 63.8 | 63.8 | 90%  | 3e-10 | 100% | <a href="#">gij296230632 XP_002760794.1</a> |
| <a href="#">PREDICTED: C4b-binding protein beta chain isoform X2 [Saimiri bc</a>   | 58.7 | 58.7 | 90%  | 2e-08 | 94%  | <a href="#">gij725574024 XP_010339305.1</a> |
| <a href="#">PREDICTED: C4b-binding protein beta chain isoform X1 [Saimiri bc</a>   | 58.7 | 58.7 | 90%  | 2e-08 | 94%  | <a href="#">gij403277664 XP_003930472.1</a> |
| <a href="#">PREDICTED: C4b-binding protein beta chain isoform X2 [Galeopte</a>     | 50.3 | 50.3 | 100% | 1e-05 | 70%  | <a href="#">gij667314769 XP_008585888.1</a> |
| <a href="#">PREDICTED: C4b-binding protein beta chain isoform X1 [Galeopte</a>     | 50.3 | 50.3 | 100% | 1e-05 | 70%  | <a href="#">gij667314766 XP_008585886.1</a> |
| <a href="#">PREDICTED: C4b-binding protein beta chain [Chrysochloris asiatic</a>   | 46.9 | 46.9 | 95%  | 2e-04 | 79%  | <a href="#">gij586450676 XP_006834269.1</a> |
| <a href="#">PREDICTED: C4b-binding protein beta chain [Nannospalax gallii]</a>     | 45.6 | 45.6 | 100% | 4e-04 | 75%  | <a href="#">gij674096417 XP_008821570.1</a> |
| <a href="#">PREDICTED: LOW QUALITY PROTEIN: C4b-binding protein beta</a>           | 44.8 | 44.8 | 100% | 8e-04 | 70%  | <a href="#">gij594636425 XP_007171607.1</a> |
| <a href="#">PREDICTED: LOW QUALITY PROTEIN: C4b-binding protein beta</a>           | 43.9 | 43.9 | 60%  | 0.002 | 100% | <a href="#">gij471369765 XP_004375397.1</a> |
| <a href="#">PREDICTED: C4b-binding protein beta chain [Sus scrofa]</a>             | 43.1 | 43.1 | 100% | 0.003 | 65%  | <a href="#">gij311265148 XP_003130503.1</a> |
| <a href="#">PREDICTED: C4b-binding protein beta chain [Otolemur garnettii]</a>     | 42.6 | 42.6 | 100% | 0.004 | 70%  | <a href="#">gij395838946 XP_003792365.1</a> |
| <a href="#">PREDICTED: C4b-binding protein beta chain [Orcinus orca]</a>           | 42.2 | 42.2 | 100% | 0.005 | 65%  | <a href="#">gij466071254 XP_004282462.1</a> |
| <a href="#">PREDICTED: C4b-binding protein beta chain isoform X2 [Myotis br</a>    | 42.2 | 42.2 | 95%  | 0.005 | 74%  | <a href="#">gij554587742 XP_005885272.1</a> |
| <a href="#">PREDICTED: C4b-binding protein beta chain [Myotis lucifugus]</a>       | 42.2 | 42.2 | 95%  | 0.005 | 74%  | <a href="#">gij558152655 XP_006094937.1</a> |
| <a href="#">PREDICTED: C4b-binding protein beta chain isoform X1 [Myotis br</a>    | 42.2 | 42.2 | 95%  | 0.005 | 74%  | <a href="#">gij554587740 XP_005885271.1</a> |
| <a href="#">PREDICTED: C4b-binding protein beta chain [Ceratotherium simurr</a>    | 41.4 | 41.4 | 95%  | 0.010 | 68%  | <a href="#">gij478501878 XP_004425250.1</a> |
| <a href="#">PREDICTED: C4b-binding protein beta chain isoform X2 [Tarsius s)</a>   | 41.4 | 41.4 | 100% | 0.010 | 65%  | <a href="#">gij640811969 XP_008062626.1</a> |
| <a href="#">PREDICTED: C4b-binding protein beta chain isoform X1 [Tarsius s)</a>   | 41.4 | 41.4 | 100% | 0.010 | 65%  | <a href="#">gij640811967 XP_008062625.1</a> |
| <a href="#">PREDICTED: C4b-binding protein beta chain [Cavia porcellus]</a>        | 40.5 | 40.5 | 100% | 0.019 | 65%  | <a href="#">gij348577871 XP_003474707.1</a> |
| <a href="#">PREDICTED: LOW QUALITY PROTEIN: C4b-binding protein beta</a>           | 40.1 | 40.1 | 90%  | 0.026 | 67%  | <a href="#">gij470641603 XP_004325529.1</a> |
| <a href="#">PREDICTED: C4b-binding protein beta chain [Ictidomys tridecemlin</a>   | 39.2 | 39.2 | 100% | 0.048 | 65%  | <a href="#">gij532087633 XP_005329528.1</a> |
| <a href="#">PREDICTED: C4b-binding protein beta chain [Myotis davidii]</a>         | 38.4 | 38.4 | 55%  | 0.089 | 91%  | <a href="#">gij584068188 XP_006754475.1</a> |
| <a href="#">PREDICTED: C4b-binding protein beta chain [Eptesicus fuscus]</a>       | 38.4 | 38.4 | 95%  | 0.091 | 68%  | <a href="#">gij641725104 XP_008152491.1</a> |
| <a href="#">PREDICTED: C4b-binding protein beta chain [Jaculus jaculus]</a>        | 38.4 | 38.4 | 80%  | 0.091 | 75%  | <a href="#">gij507559572 XP_004663509.1</a> |
| <a href="#">PREDICTED: C4b-binding protein beta chain [Elephantulus edward</a>     | 37.5 | 37.5 | 90%  | 0.17  | 67%  | <a href="#">gij585666900 XP_006888062.1</a> |
| <a href="#">PREDICTED: LOW QUALITY PROTEIN: C4b-binding protein beta</a>           | 37.1 | 37.1 | 90%  | 0.23  | 61%  | <a href="#">gij560935168 XP_006193413.1</a> |
| <a href="#">PREDICTED: C4b-binding protein beta chain [Mustela putorius furo</a>   | 36.3 | 36.3 | 100% | 0.43  | 65%  | <a href="#">gij511871202 XP_004756233.1</a> |
| <a href="#">PREDICTED: LOW QUALITY PROTEIN: C4b-binding protein beta</a>           | 33.7 | 33.7 | 90%  | 2.8   | 56%  | <a href="#">gij560986663 XP_006215518.1</a> |
| <a href="#">PREDICTED: C4b-binding protein beta chain [Ornithorhynchus ana</a>     | 33.3 | 33.3 | 60%  | 3.3   | 83%  | <a href="#">gij620984032 XP_007659774.1</a> |
| <a href="#">PREDICTED: C4b-binding protein beta chain isoform X2 [Felis catu</a>   | 33.3 | 33.3 | 100% | 3.8   | 60%  | <a href="#">gij587018341 XP_006942889.1</a> |
| <a href="#">PREDICTED: C4b-binding protein beta chain isoform X1 [Felis catu</a>   | 33.3 | 33.3 | 100% | 3.8   | 60%  | <a href="#">gij410986395 XP_003999496.1</a> |
| <a href="#">putative Fimh-like protein [Vibrio nigripulchritudo]</a>               | 32.9 | 32.9 | 50%  | 5.0   | 80%  | <a href="#">gij550352361 WP_022612127.1</a> |
| <a href="#">putative Fimh-like protein [Vibrio nigripulchritudo]</a>               | 32.9 | 32.9 | 50%  | 5.0   | 80%  | <a href="#">gij550281458 WP_022607838.1</a> |
| <a href="#">hypothetical protein [Vibrio nigripulchritudo]</a>                     | 32.9 | 32.9 | 50%  | 5.0   | 80%  | <a href="#">gij490542018 WP_004407142.1</a> |
| <a href="#">PREDICTED: C4b-binding protein beta chain [Leptonychotes wedd</a>      | 32.9 | 32.9 | 60%  | 5.2   | 75%  | <a href="#">gij585156269 XP_006730462.1</a> |
| <a href="#">PREDICTED: C4b-binding protein beta chain [Pteropus alecto]</a>        | 32.9 | 32.9 | 100% | 5.2   | 55%  | <a href="#">gij586536223 XP_006922979.1</a> |
| <a href="#">C4b-binding protein beta chain [Pteropus alecto]</a>                   | 32.9 | 32.9 | 100% | 5.2   | 55%  | <a href="#">gij431892854 ELK03282.1</a>     |
| <a href="#">hypothetical protein [Plasmodium knowlesi strain H]</a>                | 32.0 | 32.0 | 65%  | 9.6   | 75%  | <a href="#">gij221054814 XP_002258546.1</a> |
| <a href="#">hypothetical protein PFNF135_02825 [Plasmodium falciparum NF1</a>      | 32.0 | 32.0 | 70%  | 9.9   | 63%  | <a href="#">gij574981166 ETW42931.1</a>     |

|                                                                                   |      |      |     |     |     |                                             |
|-----------------------------------------------------------------------------------|------|------|-----|-----|-----|---------------------------------------------|
| <a href="#">arginyl-tRNA synthetase [Helicobacter apodemus]</a>                   | 32.0 | 32.0 | 70% | 9.9 | 71% | <a href="#">gil696169675 KGL15468.1</a>     |
| <a href="#">C4b-binding protein beta chain [Heterocephalus glaber]</a>            | 31.6 | 31.6 | 80% | 13  | 63% | <a href="#">gil351708103 EHB11022.1</a>     |
| <a href="#">PREDICTED: LOW QUALITY PROTEIN: C4b-binding protein beta</a>          | 31.6 | 31.6 | 75% | 13  | 60% | <a href="#">gil533120065 XP_005375468.1</a> |
| <a href="#">PREDICTED: C4b-binding protein beta chain [Heterocephalus glab</a>    | 31.6 | 31.6 | 80% | 13  | 63% | <a href="#">gil512892965 XP_004897416.1</a> |
| <a href="#">DNA repair protein RadA [Osedax symbiont Rs2]</a>                     | 31.6 | 31.6 | 80% | 14  | 69% | <a href="#">gil520769936 WP_020286673.1</a> |
| <a href="#">DNA repair protein RadA [Osedax symbiont Rs1]</a>                     | 31.6 | 31.6 | 80% | 14  | 69% | <a href="#">gil518641042 WP_019811142.1</a> |
| <a href="#">envelope glycoprotein [Human immunodeficiency virus 1]</a>            | 31.2 | 31.2 | 55% | 17  | 75% | <a href="#">gil84873457 ABC67785.1</a>      |
| <a href="#">conserved putative membrane protein [Melbournevirus]</a>              | 31.2 | 31.2 | 65% | 19  | 62% | <a href="#">gil701447374 YP_009094746.1</a> |
| <a href="#">membrane protein [Cannes 8 virus]</a>                                 | 31.2 | 31.2 | 65% | 19  | 62% | <a href="#">gil539398800 AGV01635.1</a>     |
| <a href="#">hypothetical protein [Treponema bryantii]</a>                         | 31.2 | 31.2 | 75% | 19  | 60% | <a href="#">gil551312583 WP_022932465.1</a> |
| <a href="#">envelope protein [Human immunodeficiency virus 1]</a>                 | 30.8 | 30.8 | 55% | 24  | 75% | <a href="#">gil515020035 AGO65073.1</a>     |
| <a href="#">envelope glycoprotein [Human immunodeficiency virus 1]</a>            | 30.8 | 30.8 | 50% | 24  | 82% | <a href="#">gil24079811 AAN46022.1</a>      |
| <a href="#">PREDICTED: C4b-binding protein beta chain [Canis lupus familiaris</a> | 30.8 | 30.8 | 60% | 25  | 75% | <a href="#">gil73960685 XP_851611.1</a>     |
| <a href="#">envelope glycoprotein [Human immunodeficiency virus 1]</a>            | 30.8 | 30.8 | 50% | 25  | 82% | <a href="#">gil42494103 AAS17398.1</a>      |
| <a href="#">PREDICTED: complement C1r subcomponent [Stegastes partitus]</a>       | 30.8 | 30.8 | 70% | 26  | 63% | <a href="#">gil657546451 XP_008278409.1</a> |
| <a href="#">von Willebrand factor D and EGF domain-containing protein [Crass</a>  | 30.8 | 30.8 | 70% | 26  | 71% | <a href="#">gil405969928 EKC34871.1</a>     |
| <a href="#">hypothetical protein PFTANZ_02364 [Plasmodium falciparum Tanz</a>     | 30.3 | 30.3 | 55% | 33  | 73% | <a href="#">gil574974832 ETW36946.1</a>     |
| <a href="#">hypothetical protein C922_01705 [Plasmodium inui San Antonio 1]</a>   | 30.3 | 30.3 | 65% | 34  | 69% | <a href="#">gil672191245 XP_008815530.1</a> |
| <a href="#">hypothetical protein PANDA_018755 [Ailurogoda melanoleuca]</a>        | 30.3 | 30.3 | 85% | 35  | 59% | <a href="#">gil281337925 EFB13509.1</a>     |
| <a href="#">PREDICTED: C4b-binding protein beta chain [Ursus maritimus]</a>       | 30.3 | 30.3 | 85% | 35  | 59% | <a href="#">gil670984389 XP_008683289.1</a> |
| <a href="#">hypothetical protein PFFCH_03778 [Plasmodium falciparum FCH/4</a>     | 30.3 | 30.3 | 55% | 35  | 73% | <a href="#">gil574965586 ETW28803.1</a>     |
| <a href="#">PREDICTED: c4b-binding protein beta chain-like [Ailurogoda melan</a>  | 30.3 | 30.3 | 85% | 35  | 59% | <a href="#">gil301786617 XP_002928722.1</a> |
| <a href="#">hypothetical protein PFFVO_01913 [Plasmodium falciparum Vietna</a>    | 30.3 | 30.3 | 55% | 35  | 73% | <a href="#">gil574751318 ETW19338.1</a>     |
| <a href="#">DNA repair protein RadA [Avibacterium paragallinarum]</a>             | 30.3 | 30.3 | 80% | 35  | 69% | <a href="#">gil516416332 WP_017805730.1</a> |
| <a href="#">hypothetical protein [Bacillus coagulans]</a>                         | 29.9 | 29.9 | 60% | 47  | 75% | <a href="#">gil651961719 WP_026684018.1</a> |
| <a href="#">hypothetical protein [Bacillus coagulans]</a>                         | 29.9 | 29.9 | 60% | 47  | 75% | <a href="#">gil503862578 WP_014096572.1</a> |
| <a href="#">envelope glycoprotein [Human immunodeficiency virus 1]</a>            | 29.9 | 29.9 | 50% | 47  | 82% | <a href="#">gil323406966 ADX63958.1</a>     |

## Alignments

Download GenPept Graphics

Next Previous Descriptions

unnamed protein product [Homo sapiens]

Sequence ID: [gil194373591|dbj|BAG56891.1](#) Length: 218 Number of Matches: 1

Range 1: 49 to 68 GenPept Graphics

Next Match Previous Match

| Score          | Expect | Identities  | Positives   | Gaps     |
|----------------|--------|-------------|-------------|----------|
| 70.2 bits(158) | 2e-12  | 20/20(100%) | 20/20(100%) | 0/20(0%) |

```
Query 1 KTLFCNASKEWDNTTTECRL 20
      KTLFCNASKEWDNTTTECRL
Sbjct 49 KTLFCNASKEWDNTTTECRL 68
```

### Related Information

[Gene](#) - associated gene details

Download GenPept Graphics

Next Previous Descriptions

PREDICTED: C4b-binding protein beta chain isoform X3 [Pan troglodytes]

Sequence ID: [gil694891540|ref|XP\\_009439669.1](#) Length: 227 Number of Matches: 1

Range 1: 58 to 77 GenPept Graphics

Next Match Previous Match

| Score          | Expect | Identities  | Positives   | Gaps     |
|----------------|--------|-------------|-------------|----------|
| 70.2 bits(158) | 2e-12  | 20/20(100%) | 20/20(100%) | 0/20(0%) |

```
Query 1 KTLFCNASKEWDNTTTECRL 20
```

### Related Information

[Gene](#) - associated gene details

Sbjct 58 KTLFCNASKEWDNTTTECRL 77

[Download](#) [GenPept](#) [Graphics](#) [Next](#) [Previous](#) [Descriptions](#)

**PREDICTED: C4b-binding protein beta chain isoform X3 [Pan paniscus]**

Sequence ID: [gi|675771724|ref|XP\\_008974762.1|](#) Length: 227 Number of Matches: 1

Range 1: 58 to 77 [GenPept](#) [Graphics](#) [Next Match](#) [Previous Match](#)

| Score          | Expect | Identities  | Positives   | Gaps     |
|----------------|--------|-------------|-------------|----------|
| 70.2 bits(158) | 2e-12  | 20/20(100%) | 20/20(100%) | 0/20(0%) |

Query 1 KTLFCNASKEWDNTTTECRL 20  
 KTLFCNASKEWDNTTTECRL  
 Sbjct 58 KTLFCNASKEWDNTTTECRL 77

**Related Information**

[Gene](#) - associated gene details  
[Map Viewer](#) - aligned genomic context

[Download](#) [GenPept](#) [Graphics](#) [Next](#) [Previous](#) [Descriptions](#)

**PREDICTED: C4b-binding protein beta chain isoform X3 [Homo sapiens]**

Sequence ID: [gi|530366462|ref|XP\\_005273312.1|](#) Length: 227 Number of Matches: 1

Range 1: 58 to 77 [GenPept](#) [Graphics](#) [Next Match](#) [Previous Match](#)

| Score          | Expect | Identities  | Positives   | Gaps     |
|----------------|--------|-------------|-------------|----------|
| 70.2 bits(158) | 2e-12  | 20/20(100%) | 20/20(100%) | 0/20(0%) |

Query 1 KTLFCNASKEWDNTTTECRL 20  
 KTLFCNASKEWDNTTTECRL  
 Sbjct 58 KTLFCNASKEWDNTTTECRL 77

**Related Information**

[Gene](#) - associated gene details  
[Map Viewer](#) - aligned genomic context

[Download](#) [GenPept](#) [Graphics](#) [Next](#) [Previous](#) [Descriptions](#)

**PREDICTED: C4b-binding protein beta chain isoform X2 [Rhinopithecus roxellana]**

Sequence ID: [gi|724836382|ref|XP\\_010363947.1|](#) Length: 251 Number of Matches: 1

Range 1: 58 to 77 [GenPept](#) [Graphics](#) [Next Match](#) [Previous Match](#)

| Score          | Expect | Identities  | Positives   | Gaps     |
|----------------|--------|-------------|-------------|----------|
| 70.2 bits(158) | 2e-12  | 20/20(100%) | 20/20(100%) | 0/20(0%) |

Query 1 KTLFCNASKEWDNTTTECRL 20  
 KTLFCNASKEWDNTTTECRL  
 Sbjct 58 KTLFCNASKEWDNTTTECRL 77

**Related Information**

[Gene](#) - associated gene details  
[Map Viewer](#) - aligned genomic context

BLAST is a registered trademark of the National Library of Medicine.

▶ NCBI/ BLAST/ blastp suite/ Formatting Results - BTFUBAAD013

**i** Your search parameters were adjusted to search for a short input sequence.

[Edit and Resubmit](#) [Save Search Strategies](#) ▶ [Formatting options](#) ▶ [Download](#) [YouTube](#) [How to read this page](#) [Blast report description](#)

### C4BPB\_RLGHCPDPVLVDGEFSSSGPVDVSDKI\_Mod

RID [BTFUBAAD013](#) (Expires on 01-20 15:24 pm)

**Query ID** |cl|91775  
**Description** None  
**Molecule type** amino acid  
**Query Length** 27

**Database Name** nr  
**Description** All non-redundant GenBank CDS translations+PDB+SwissProt+PIR+PRF excluding environmental samples from WGS projects  
**Program** BLASTP 2.2.30+ ▶ [Citation](#)

Other reports: ▶ [Search Summary](#) [[Taxonomy reports](#)] [[Distance tree of results](#)] [[Multiple alignment](#)]

### **Graphic Summary**

[Show Conserved Domains](#)

No putative conserved domains have been detected

Distribution of 108 Blast Hits on the Query Sequence

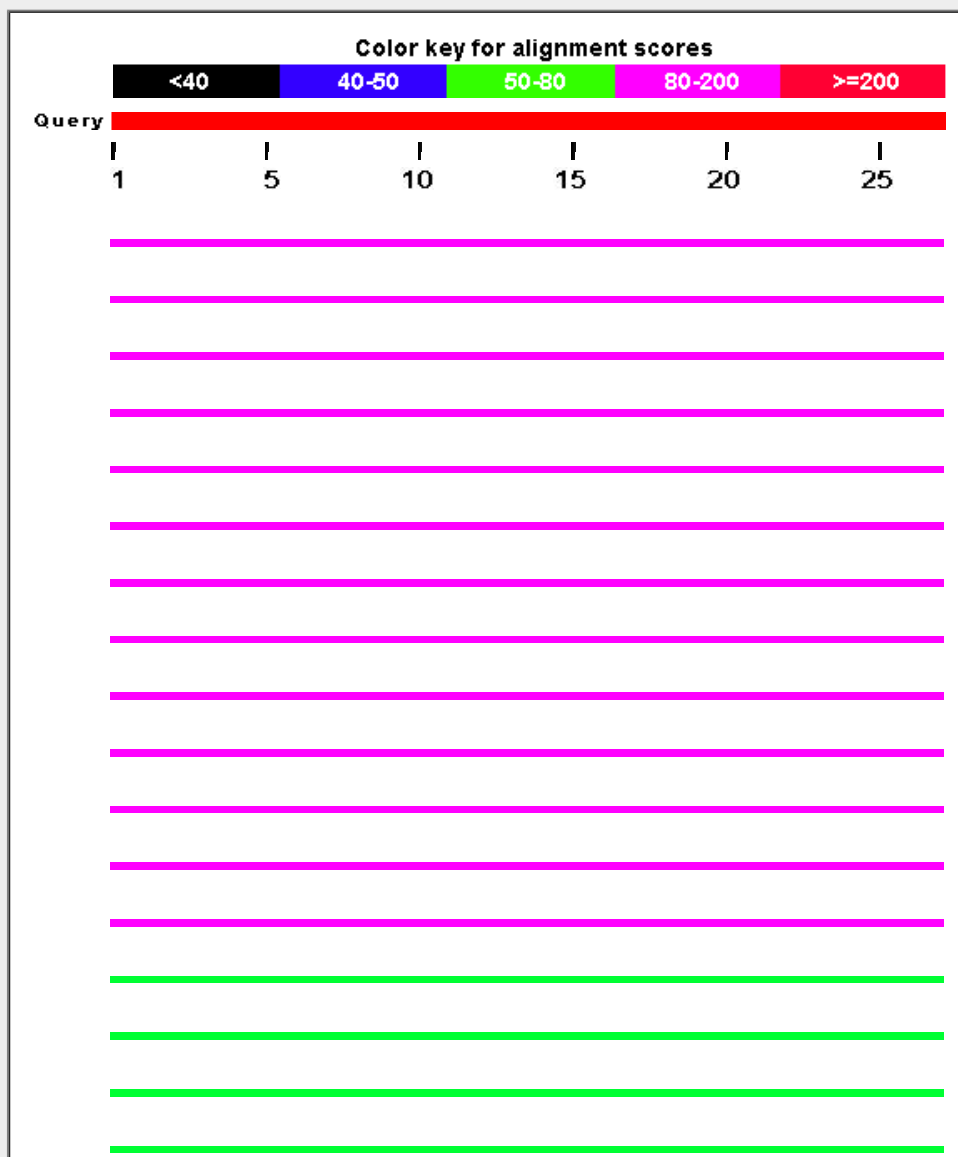



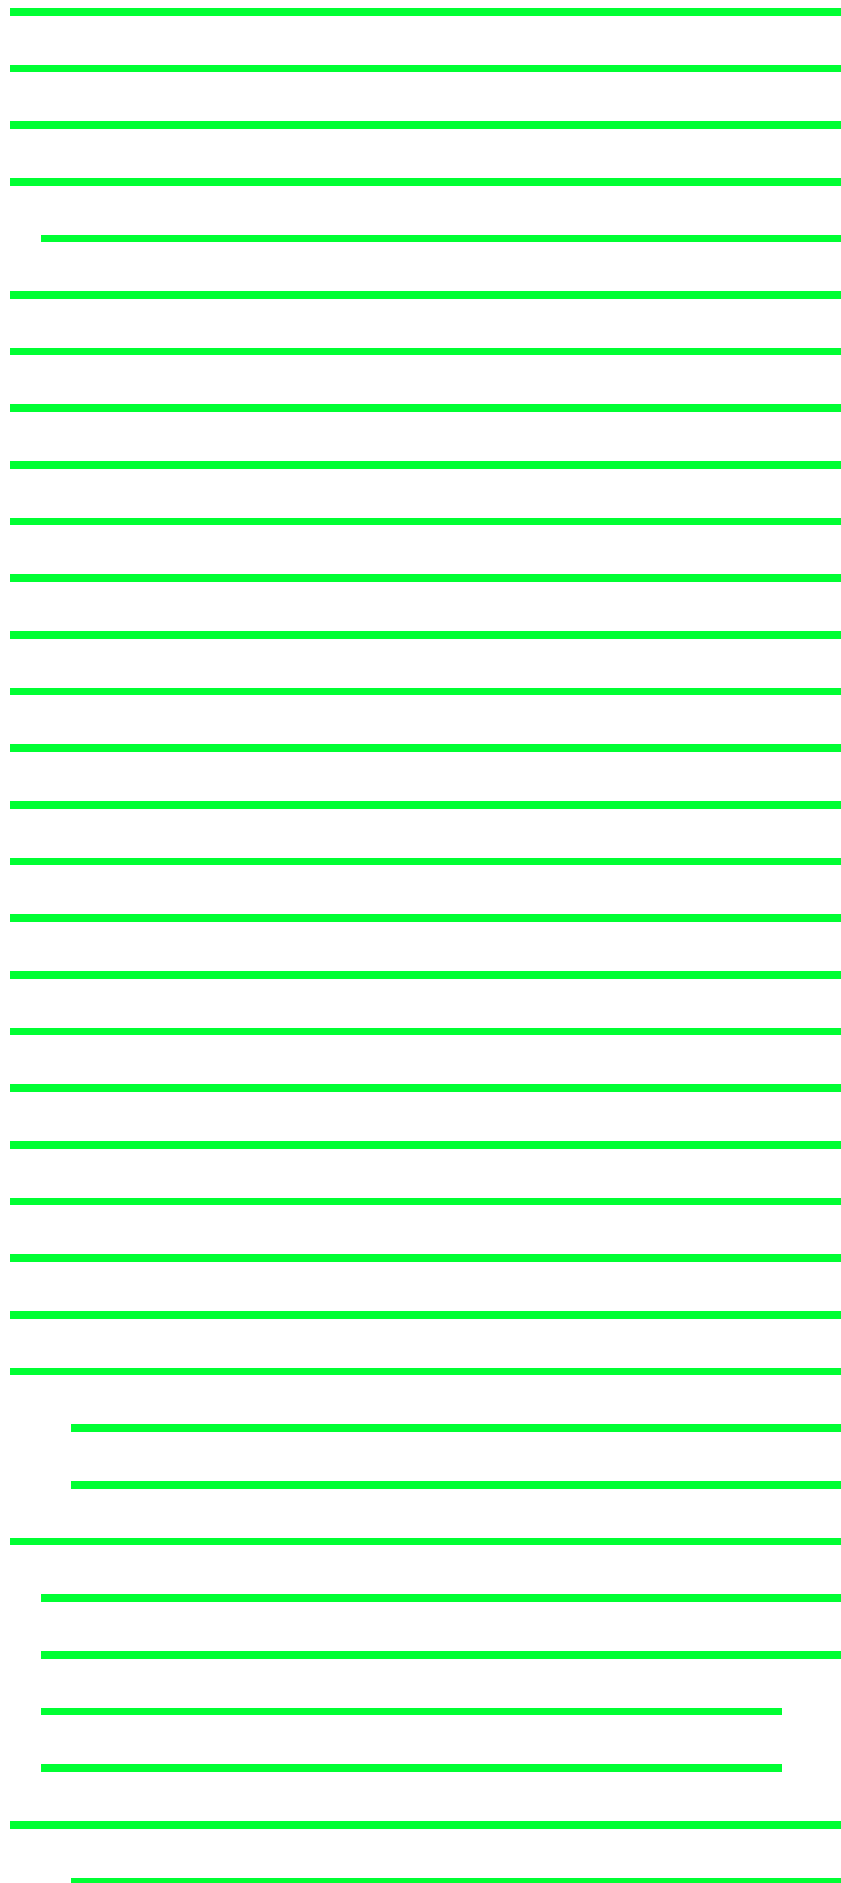

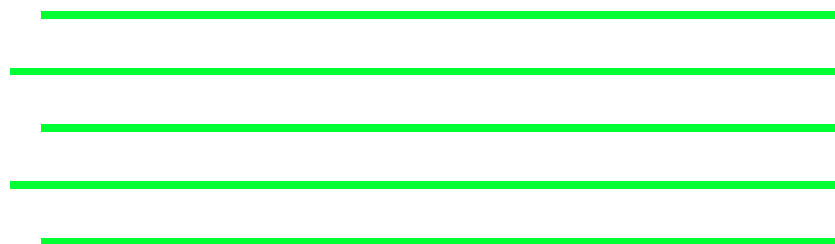

## Descriptions

### Sequences producing significant alignments:

Select: [All](#) [None](#) Selected:0

[Alignments](#)
[Download](#)
[GenPept](#)
[Graphics](#)
[Distance tree of results](#)
[Multiple alignment](#)

| Description                                                                   | Max score | Total score | Query cover | E value | Ident | Accession                                   |
|-------------------------------------------------------------------------------|-----------|-------------|-------------|---------|-------|---------------------------------------------|
| <a href="#">PREDICTED: C4b-binding protein beta chain isoform X3 [Pong</a>    | 82.5      | 82.5        | 100%        | 3e-16   | 93%   | <a href="#">gi 686700216 XP_009236698.1</a> |
| <a href="#">unnamed protein product [Homo sapiens]</a>                        | 82.5      | 82.5        | 100%        | 3e-16   | 93%   | <a href="#">gi 194373591 BAG56891.1</a>     |
| <a href="#">PREDICTED: C4b-binding protein beta chain isoform X3 [Pan t</a>   | 82.5      | 82.5        | 100%        | 3e-16   | 93%   | <a href="#">gi 694891540 XP_009439669.1</a> |
| <a href="#">PREDICTED: C4b-binding protein beta chain isoform X3 [Pan r</a>   | 82.5      | 82.5        | 100%        | 3e-16   | 93%   | <a href="#">gi 675771724 XP_008974762.1</a> |
| <a href="#">PREDICTED: C4b-binding protein beta chain isoform X3 [Homy</a>    | 82.5      | 82.5        | 100%        | 3e-16   | 93%   | <a href="#">gi 530366462 XP_005273312.1</a> |
| <a href="#">PREDICTED: C4b-binding protein beta chain isoform X2 [Pan t</a>   | 82.5      | 103         | 100%        | 3e-16   | 93%   | <a href="#">gi 694891534 XP_009439665.1</a> |
| <a href="#">PREDICTED: C4b-binding protein beta chain isoform X2 [Pong</a>    | 82.5      | 82.5        | 100%        | 3e-16   | 93%   | <a href="#">gi 686700213 XP_009236694.1</a> |
| <a href="#">PREDICTED: C4b-binding protein beta chain isoform X2 [Pan r</a>   | 82.5      | 103         | 100%        | 3e-16   | 93%   | <a href="#">gi 675771715 XP_008974759.1</a> |
| <a href="#">C4b-binding protein beta chain isoform 2 precursor [Homo sapi</a> | 82.5      | 103         | 100%        | 3e-16   | 93%   | <a href="#">gi 62912462 NP_001017364.1</a>  |
| <a href="#">C4b-binding protein beta chain isoform 1 precursor [Homo sapi</a> | 82.5      | 103         | 100%        | 3e-16   | 93%   | <a href="#">gi 4502505 NP_000707.1</a>      |
| <a href="#">PREDICTED: C4b-binding protein beta chain isoform X1 [Pan r</a>   | 82.5      | 103         | 100%        | 3e-16   | 93%   | <a href="#">gi 397504761 XP_003822949.1</a> |
| <a href="#">PREDICTED: C4b-binding protein beta chain isoform X1 [Pong</a>    | 82.5      | 82.5        | 100%        | 3e-16   | 93%   | <a href="#">gi 297662141 XP_002809574.1</a> |
| <a href="#">PREDICTED: C4b-binding protein beta chain isoform X1 [Pan t</a>   | 82.5      | 103         | 100%        | 3e-16   | 93%   | <a href="#">gi 114572288 XP_001166306.1</a> |
| <a href="#">PREDICTED: C4b-binding protein beta chain isoform X2 [Papi</a>    | 80.0      | 80.0        | 100%        | 2e-15   | 89%   | <a href="#">gi 685519789 XP_009186662.1</a> |
| <a href="#">PREDICTED: C4b-binding protein beta chain isoform X1 [Papi</a>    | 80.0      | 80.0        | 100%        | 2e-15   | 89%   | <a href="#">gi 685519785 XP_009186656.1</a> |
| <a href="#">PREDICTED: C4b-binding protein beta chain isoform X2 [Tarsi</a>   | 77.8      | 77.8        | 100%        | 1e-14   | 85%   | <a href="#">gi 640811969 XP_008062626.1</a> |
| <a href="#">PREDICTED: C4b-binding protein beta chain isoform X1 [Tarsi</a>   | 77.8      | 77.8        | 100%        | 1e-14   | 85%   | <a href="#">gi 640811967 XP_008062625.1</a> |
| <a href="#">PREDICTED: C4b-binding protein beta chain isoform X6 [Maca</a>    | 76.1      | 76.1        | 100%        | 5e-14   | 85%   | <a href="#">gi 544399939 XP_005540733.1</a> |
| <a href="#">PREDICTED: C4b-binding protein beta chain isoform X2 [Maca</a>    | 76.1      | 76.1        | 100%        | 5e-14   | 85%   | <a href="#">gi 544399931 XP_005540729.1</a> |
| <a href="#">hypothetical protein EGM_01442 [Macaca fascicularis]</a>          | 76.1      | 76.1        | 100%        | 5e-14   | 85%   | <a href="#">gi 355745961 EHH50586.1</a>     |
| <a href="#">hypothetical protein EGK_01712 [Macaca mulatta]</a>               | 76.1      | 76.1        | 100%        | 5e-14   | 85%   | <a href="#">gi 355558818 EHH15598.1</a>     |
| <a href="#">PREDICTED: C4b-binding protein beta chain isoform 1 [Nomas</a>    | 76.1      | 76.1        | 96%         | 5e-14   | 88%   | <a href="#">gi 332266848 XP_003282407.1</a> |
| <a href="#">PREDICTED: c4b-binding protein beta chain isoform 3 [Maca</a>     | 76.1      | 76.1        | 100%        | 5e-14   | 85%   | <a href="#">gi 109018561 XP_001083216.1</a> |
| <a href="#">PREDICTED: C4b-binding protein beta chain isoform X1 [Maca</a>    | 76.1      | 76.1        | 100%        | 5e-14   | 85%   | <a href="#">gi 544399929 XP_005540728.1</a> |
| <a href="#">PREDICTED: C4b-binding protein beta chain isoform X2 [Rhinc</a>   | 72.3      | 72.3        | 100%        | 1e-12   | 81%   | <a href="#">gi 724836382 XP_010363947.1</a> |
| <a href="#">PREDICTED: C4b-binding protein beta chain isoform X1 [Rhinc</a>   | 72.3      | 72.3        | 100%        | 1e-12   | 81%   | <a href="#">gi 724836379 XP_010363946.1</a> |
| <a href="#">PREDICTED: C4b-binding protein beta chain isoform X2 [Gale</a>    | 71.5      | 71.5        | 100%        | 2e-12   | 81%   | <a href="#">gi 667314769 XP_008585888.1</a> |
| <a href="#">PREDICTED: C4b-binding protein beta chain isoform X1 [Gale</a>    | 71.5      | 71.5        | 100%        | 2e-12   | 81%   | <a href="#">gi 667314766 XP_008585886.1</a> |
| <a href="#">PREDICTED: C4b-binding protein beta chain isoform X9 [Chlor</a>   | 71.0      | 71.0        | 100%        | 2e-12   | 81%   | <a href="#">gi 635130917 XP_007986833.1</a> |

|                                                                               |      |      |      |       |     |                                             |
|-------------------------------------------------------------------------------|------|------|------|-------|-----|---------------------------------------------|
| <a href="#">PREDICTED: C4b-binding protein beta chain isoform X8 [Chlor</a>   | 71.0 | 71.0 | 100% | 3e-12 | 81% | <a href="#">gil635130915 XP_007986832.1</a> |
| <a href="#">PREDICTED: C4b-binding protein beta chain isoform X7 [Chlor</a>   | 71.0 | 71.0 | 100% | 3e-12 | 81% | <a href="#">gil635130913 XP_007986831.1</a> |
| <a href="#">PREDICTED: C4b-binding protein beta chain [Nannospalax gal</a>    | 71.0 | 71.0 | 100% | 3e-12 | 81% | <a href="#">gil674096417 XP_008821570.1</a> |
| <a href="#">PREDICTED: C4b-binding protein beta chain isoform X6 [Chlor</a>   | 71.0 | 71.0 | 100% | 3e-12 | 81% | <a href="#">gil635130911 XP_007986830.1</a> |
| <a href="#">PREDICTED: C4b-binding protein beta chain isoform X5 [Chlor</a>   | 71.0 | 71.0 | 100% | 3e-12 | 81% | <a href="#">gil635130907 XP_007986828.1</a> |
| <a href="#">PREDICTED: C4b-binding protein beta chain isoform X4 [Chlor</a>   | 71.0 | 71.0 | 100% | 3e-12 | 81% | <a href="#">gil635130905 XP_007986827.1</a> |
| <a href="#">PREDICTED: C4b-binding protein beta chain isoform X3 [Chlor</a>   | 71.0 | 71.0 | 100% | 3e-12 | 81% | <a href="#">gil635130903 XP_007986826.1</a> |
| <a href="#">PREDICTED: C4b-binding protein beta chain isoform X2 [Chlor</a>   | 71.0 | 71.0 | 100% | 3e-12 | 81% | <a href="#">gil635130901 XP_007986825.1</a> |
| <a href="#">PREDICTED: C4b-binding protein beta chain isoform X1 [Chlor</a>   | 71.0 | 71.0 | 100% | 3e-12 | 81% | <a href="#">gil635130899 XP_007986823.1</a> |
| <a href="#">C4b-binding protein beta chain [Heterocephalus glaber]</a>        | 68.9 | 68.9 | 100% | 1e-11 | 81% | <a href="#">gil351708103 EHB11022.1</a>     |
| <a href="#">PREDICTED: C4b-binding protein beta chain [Cavia porcellus]</a>   | 68.9 | 68.9 | 100% | 1e-11 | 81% | <a href="#">gil348577871 XP_003474707.1</a> |
| <a href="#">PREDICTED: C4b-binding protein beta chain [Heterocephalus</a>     | 68.9 | 68.9 | 100% | 1e-11 | 81% | <a href="#">gil512892965 XP_004897416.1</a> |
| <a href="#">PREDICTED: C4b-binding protein beta chain [Ursus maritimus]</a>   | 68.5 | 68.5 | 100% | 2e-11 | 85% | <a href="#">gil670984389 XP_008683289.1</a> |
| <a href="#">PREDICTED: C4b-binding protein beta chain isoform X2 [Equu</a>    | 67.7 | 67.7 | 92%  | 3e-11 | 84% | <a href="#">gil664745777 XP_008530230.1</a> |
| <a href="#">PREDICTED: C4b-binding protein beta chain isoform X1 [Equu</a>    | 67.7 | 67.7 | 92%  | 3e-11 | 84% | <a href="#">gil664745775 XP_008530229.1</a> |
| <a href="#">PREDICTED: LOW QUALITY PROTEIN: C4b-binding protein b</a>         | 66.4 | 66.4 | 100% | 1e-10 | 78% | <a href="#">gil533120065 XP_005375468.1</a> |
| <a href="#">PREDICTED: C4b-binding protein beta chain isoform X2 [Callit</a>  | 66.4 | 66.4 | 96%  | 1e-10 | 85% | <a href="#">gil675749407 XP_008983835.1</a> |
| <a href="#">PREDICTED: C4b-binding protein beta chain isoform X1 [Callit</a>  | 66.4 | 66.4 | 96%  | 1e-10 | 85% | <a href="#">gil296230632 XP_002760794.1</a> |
| <a href="#">C4b-binding protein beta chain [Fukomys damarensis]</a>           | 66.4 | 66.4 | 88%  | 1e-10 | 88% | <a href="#">gil676262835 KFO19654.1</a>     |
| <a href="#">PREDICTED: C4b-binding protein beta chain [Fukomys damar</a>      | 66.4 | 66.4 | 88%  | 1e-10 | 88% | <a href="#">gil731286435 XP_010611521.1</a> |
| <a href="#">PREDICTED: C4b-binding protein beta chain [Mustela putorius</a>   | 66.0 | 66.0 | 100% | 1e-10 | 81% | <a href="#">gil511871202 XP_004756233.1</a> |
| <a href="#">PREDICTED: LOW QUALITY PROTEIN: complement compon</a>             | 65.1 | 65.1 | 92%  | 2e-10 | 84% | <a href="#">gil545215409 XP_005615108.1</a> |
| <a href="#">PREDICTED: C4b-binding protein beta chain [Loxodonta africa</a>   | 65.1 | 65.1 | 96%  | 3e-10 | 77% | <a href="#">gil731475974 XP_010588717.1</a> |
| <a href="#">hypothetical protein PANDA_018755 [Ailuropoda melanoleuca]</a>    | 63.4 | 63.4 | 100% | 1e-09 | 81% | <a href="#">gil281337925 EFB13509.1</a>     |
| <a href="#">PREDICTED: C4b-binding protein beta chain isoform X2 [Pantf</a>   | 63.4 | 63.4 | 96%  | 1e-09 | 81% | <a href="#">gil591341473 XP_007096179.1</a> |
| <a href="#">PREDICTED: c4b-binding protein beta chain-like [Ailuropoda m</a>  | 63.4 | 63.4 | 100% | 1e-09 | 81% | <a href="#">gil301786617 XP_002928722.1</a> |
| <a href="#">PREDICTED: C4b-binding protein beta chain isoform X1 [Pantf</a>   | 63.4 | 63.4 | 96%  | 1e-09 | 81% | <a href="#">gil591341471 XP_007096178.1</a> |
| <a href="#">PREDICTED: C4b-binding protein beta chain [Pteropus alecto]</a>   | 63.4 | 63.4 | 96%  | 1e-09 | 79% | <a href="#">gil586536223 XP_006922979.1</a> |
| <a href="#">C4b-binding protein beta chain [Pteropus alecto]</a>              | 63.4 | 63.4 | 96%  | 1e-09 | 79% | <a href="#">gil431892854 ELK03282.1</a>     |
| <a href="#">PREDICTED: C4b-binding protein beta chain isoform X2 [Saim</a>    | 63.0 | 63.0 | 96%  | 1e-09 | 81% | <a href="#">gil725574024 XP_010339305.1</a> |
| <a href="#">PREDICTED: C4b-binding protein beta chain isoform X1 [Saim</a>    | 63.0 | 63.0 | 96%  | 1e-09 | 81% | <a href="#">gil403277664 XP_003930472.1</a> |
| <a href="#">PREDICTED: C4b-binding protein beta chain [Otolemur garnett</a>   | 63.0 | 63.0 | 100% | 1e-09 | 70% | <a href="#">gil395838946 XP_003792365.1</a> |
| <a href="#">PREDICTED: LOW QUALITY PROTEIN: C4b-binding protein b</a>         | 61.7 | 61.7 | 100% | 4e-09 | 74% | <a href="#">gil594636425 XP_007171607.1</a> |
| <a href="#">PREDICTED: C4b-binding protein beta chain isoform X2 [Felis</a>   | 60.9 | 81.9 | 96%  | 7e-09 | 77% | <a href="#">gil587018341 XP_006942889.1</a> |
| <a href="#">PREDICTED: C4b-binding protein beta chain isoform X1 [Felis</a>   | 60.9 | 81.9 | 96%  | 7e-09 | 77% | <a href="#">gil410986395 XP_003999496.1</a> |
| <a href="#">PREDICTED: C4b-binding protein beta chain [Orycteropus afer</a>   | 60.0 | 60.0 | 92%  | 1e-08 | 80% | <a href="#">gil634826787 XP_007951309.1</a> |
| <a href="#">PREDICTED: C4b-binding protein beta chain [Leptonychotes w</a>    | 60.0 | 60.0 | 100% | 1e-08 | 81% | <a href="#">gil585156269 XP_006730462.1</a> |
| <a href="#">PREDICTED: C4b-binding protein beta chain [Orcinus orca]</a>      | 59.6 | 59.6 | 92%  | 2e-08 | 76% | <a href="#">gil466071254 XP_004282462.1</a> |
| <a href="#">PREDICTED: LOW QUALITY PROTEIN: C4b-binding protein b</a>         | 59.2 | 59.2 | 96%  | 3e-08 | 81% | <a href="#">gil471369765 XP_004375397.1</a> |
| <a href="#">PREDICTED: C4b-binding protein beta chain [Ictidomys tridece</a>  | 58.7 | 58.7 | 100% | 4e-08 | 67% | <a href="#">gil532087633 XP_005329528.1</a> |
| <a href="#">PREDICTED: C4b-binding protein beta chain [Ceratotherium si</a>   | 57.5 | 57.5 | 100% | 1e-07 | 70% | <a href="#">gil478501878 XP_004425250.1</a> |
| <a href="#">PREDICTED: LOW QUALITY PROTEIN: C4b-binding protein b</a>         | 56.2 | 56.2 | 88%  | 3e-07 | 75% | <a href="#">gil470641603 XP_004325529.1</a> |
| <a href="#">PREDICTED: C4b-binding protein beta chain [Odobenus rosm</a>      | 56.2 | 56.2 | 100% | 3e-07 | 78% | <a href="#">gil472392625 XP_004415587.1</a> |
| <a href="#">PREDICTED: C4b-binding protein beta chain [Echinops telfairi]</a> | 55.4 | 55.4 | 96%  | 5e-07 | 73% | <a href="#">gil507635442 XP_004700185.1</a> |
| <a href="#">PREDICTED: C4b-binding protein beta chain [Erinaceus europ</a>    | 54.9 | 54.9 | 85%  | 7e-07 | 74% | <a href="#">gil617638324 XP_007531172.1</a> |

|                                                                                |      |      |      |       |     |                                             |
|--------------------------------------------------------------------------------|------|------|------|-------|-----|---------------------------------------------|
| <a href="#">PREDICTED: C4b-binding protein beta chain [Chrysochloris as</a>    | 54.9 | 54.9 | 100% | 7e-07 | 70% | <a href="#">gi 586450676 XP_006834269.1</a> |
| <a href="#">C4b-binding protein beta chain precursor [Rattus norvegicus]</a>   | 54.5 | 54.5 | 96%  | 1e-06 | 69% | <a href="#">gi 62198215 NP_058691.2</a>     |
| <a href="#">RecName: Full=C4b-binding protein beta chain: Flags: Precurs</a>   | 54.5 | 54.5 | 96%  | 1e-06 | 69% | <a href="#">gi 2493794 Q63515.1</a>         |
| <a href="#">PREDICTED: C4b-binding protein beta chain [Jaculus jaculus]</a>    | 54.5 | 54.5 | 100% | 1e-06 | 70% | <a href="#">gi 507559572 XP_004663509.1</a> |
| <a href="#">PREDICTED: C4b-binding protein beta chain [Lipotes vexillifer]</a> | 53.2 | 53.2 | 85%  | 2e-06 | 74% | <a href="#">gi 602721258 XP_007470782.1</a> |
| <a href="#">PREDICTED: C4b-binding protein beta chain [Physeter catodo</a>     | 53.2 | 53.2 | 85%  | 2e-06 | 74% | <a href="#">gi 593718317 XP_007105536.1</a> |
| <a href="#">PREDICTED: C4b-binding protein beta chain [Octodon degus]</a>      | 52.8 | 52.8 | 96%  | 3e-06 | 73% | <a href="#">gi 507688352 XP_004641253.1</a> |
| <a href="#">PREDICTED: C4b-binding protein beta chain [Sus scrofa]</a>         | 50.3 | 50.3 | 100% | 2e-05 | 67% | <a href="#">gi 311265148 XP_003130503.1</a> |
| <a href="#">PREDICTED: C4b-binding protein beta chain [Canis lupus fami</a>    | 49.8 | 49.8 | 96%  | 3e-05 | 68% | <a href="#">gi 73960685 XP_851611.1</a>     |
| <a href="#">PREDICTED: C4b-binding protein beta chain isoform X2 [Micro</a>    | 49.8 | 49.8 | 100% | 3e-05 | 67% | <a href="#">gi 532009098 XP_005348366.1</a> |
| <a href="#">PREDICTED: C4b-binding protein beta chain isoform X1 [Micro</a>    | 49.8 | 49.8 | 100% | 3e-05 | 67% | <a href="#">gi 532009096 XP_005348365.1</a> |
| <a href="#">PREDICTED: C4b-binding protein beta chain [Peromyscus mar</a>      | 47.3 | 47.3 | 100% | 2e-04 | 63% | <a href="#">gi 589966374 XP_006995716.1</a> |
| <a href="#">PREDICTED: C4b-binding protein beta chain isoform X3 [Capr</a>     | 46.4 | 46.4 | 85%  | 4e-04 | 70% | <a href="#">gi 548497748 XP_005690484.1</a> |
| <a href="#">C4b-binding protein beta chain precursor [Bos taurus]</a>          | 46.4 | 46.4 | 85%  | 4e-04 | 70% | <a href="#">gi 99028955 NP_776678.2</a>     |
| <a href="#">RecName: Full=C4b-binding protein beta chain: Flags: Precurs</a>   | 46.4 | 46.4 | 85%  | 4e-04 | 70% | <a href="#">gi 2493793 Q28066.1</a>         |
| <a href="#">PREDICTED: C4b-binding protein beta chain isoform X1 [Bos t</a>    | 46.4 | 46.4 | 85%  | 4e-04 | 70% | <a href="#">gi 528979094 XP_005216707.1</a> |
| <a href="#">PREDICTED: C4b-binding protein beta chain [Pantholops hodg</a>     | 46.4 | 46.4 | 85%  | 4e-04 | 70% | <a href="#">gi 556742954 XP_005966995.1</a> |
| <a href="#">PREDICTED: C4b-binding protein beta chain isoform X1 [Capr</a>     | 46.4 | 46.4 | 85%  | 4e-04 | 70% | <a href="#">gi 548497744 XP_005690482.1</a> |
| <a href="#">complement component 4 binding protein, beta [Ovis aries]</a>      | 46.4 | 46.4 | 85%  | 4e-04 | 70% | <a href="#">gi 444733674 CCQ71779.1</a>     |
| <a href="#">PREDICTED: C4b-binding protein beta chain [Cricetulus griseu</a>   | 45.6 | 45.6 | 96%  | 7e-04 | 62% | <a href="#">gi 625186859 XP_007614708.1</a> |
| <a href="#">6-phosphofructo-2-kinase/fructose-2,6-biphosphatase 2 [Cricet</a>  | 45.6 | 45.6 | 96%  | 8e-04 | 62% | <a href="#">gi 344244855 EGW00959.1</a>     |
| <a href="#">6-phosphofructo-2-kinase/fructose-2, 6-biphosphatase 2 isoforr</a> | 45.6 | 45.6 | 96%  | 8e-04 | 62% | <a href="#">gi 537167880 ERE73717.1</a>     |
| <a href="#">6-phosphofructo-2-kinase/fructose-2, 6-biphosphatase 2 isoforr</a> | 45.6 | 45.6 | 96%  | 8e-04 | 62% | <a href="#">gi 537167879 ERE73716.1</a>     |
| <a href="#">PREDICTED: C4b-binding protein beta chain [Tupaia chinensis</a>    | 43.9 | 43.9 | 96%  | 0.003 | 65% | <a href="#">gi 562862067 XP_006159349.1</a> |
| <a href="#">6-phosphofructo-2-kinase/fructose-2,6-biphosphatase 2 [Tupai</a>   | 43.9 | 43.9 | 96%  | 0.003 | 65% | <a href="#">gi 444706417 ELW47759.1</a>     |
| <a href="#">PREDICTED: C4b-binding protein beta chain [Mesocricetus au</a>     | 43.5 | 43.5 | 92%  | 0.003 | 64% | <a href="#">gi 524960013 XP_005079950.1</a> |

## Alignments

Download GenPept Graphics

Next Previous Descriptions

PREDICTED: C4b-binding protein beta chain isoform X3 [Pongo abelii]

Sequence ID: [gi|686700216|ref|XP\\_009236698.1|](#) Length: 202 Number of Matches: 1

Range 1: 67 to 93 GenPept Graphics

Next Match Previous Match

| Score          | Expect | Identities | Positives   | Gaps     |
|----------------|--------|------------|-------------|----------|
| 82.5 bits(187) | 3e-16  | 25/27(93%) | 27/27(100%) | 0/27(0%) |

Query 1 RLGHCDDPVLVDGEFSSSGPVDVSDKI 27  
 RLGHCDDPVLV+GEFSSSGPVDVSDKI  
 Sbjct 67 RLGHCDDPVLVNGEFSSSGPVDVSDKI 93

### Related Information

[Gene](#) - associated gene details  
[Map Viewer](#) - aligned genomic context

Download GenPept Graphics

Next Previous Descriptions

unnamed protein product [Homo sapiens]

Sequence ID: [gi|194373591|dbj|BAG56891.1|](#) Length: 218 Number of Matches: 1

Range 1: 67 to 93 GenPept Graphics

Next Match Previous Match

| Score          | Expect | Identities | Positives   | Gaps     |
|----------------|--------|------------|-------------|----------|
| 82.5 bits(187) | 3e-16  | 25/27(93%) | 27/27(100%) | 0/27(0%) |

### Related Information

[Gene](#) - associated gene details

Query 1 RLGHCDDPVLVDGEFSSSGPVDVSDKI 27  
 RLGHCDDPVLV+GEFSSSGPV+VSDKI  
 Sbjct 67 RLGHCDDPVLVNGEFSSSGPVNVSDKI 93

[Download](#) [GenPept](#) [Graphics](#)

[Next](#) [Previous](#) [Descriptions](#)

PREDICTED: C4b-binding protein beta chain isoform X3 [Pan troglodytes]

Sequence ID: [gi|694891540|ref|XP\\_009439669.1|](#) Length: 227 Number of Matches: 1

Range 1: 76 to 102 [GenPept](#) [Graphics](#)

[Next Match](#) [Previous Match](#)

| Score          | Expect | Identities | Positives   | Gaps     |
|----------------|--------|------------|-------------|----------|
| 82.5 bits(187) | 3e-16  | 25/27(93%) | 27/27(100%) | 0/27(0%) |

Query 1 RLGHCDDPVLVDGEFSSSGPVDVSDKI 27  
 RLGHCDDPVLV+GEFSSSGPV+VSDKI  
 Sbjct 76 RLGHCDDPVLVNGEFSSSGPVNVSDKI 102

**Related Information**

[Gene](#) - associated gene details

[Download](#) [GenPept](#) [Graphics](#)

[Next](#) [Previous](#) [Descriptions](#)

PREDICTED: C4b-binding protein beta chain isoform X3 [Pan paniscus]

Sequence ID: [gi|675771724|ref|XP\\_008974762.1|](#) Length: 227 Number of Matches: 1

Range 1: 76 to 102 [GenPept](#) [Graphics](#)

[Next Match](#) [Previous Match](#)

| Score          | Expect | Identities | Positives   | Gaps     |
|----------------|--------|------------|-------------|----------|
| 82.5 bits(187) | 3e-16  | 25/27(93%) | 27/27(100%) | 0/27(0%) |

Query 1 RLGHCDDPVLVDGEFSSSGPVDVSDKI 27  
 RLGHCDDPVLV+GEFSSSGPV+VSDKI  
 Sbjct 76 RLGHCDDPVLVNGEFSSSGPVNVSDKI 102

**Related Information**

[Gene](#) - associated gene details

[Map Viewer](#) - aligned genomic context

[Download](#) [GenPept](#) [Graphics](#)

[Next](#) [Previous](#) [Descriptions](#)

PREDICTED: C4b-binding protein beta chain isoform X3 [Homo sapiens]

Sequence ID: [gi|530366462|ref|XP\\_005273312.1|](#) Length: 227 Number of Matches: 1

Range 1: 76 to 102 [GenPept](#) [Graphics](#)

[Next Match](#) [Previous Match](#)

| Score          | Expect | Identities | Positives   | Gaps     |
|----------------|--------|------------|-------------|----------|
| 82.5 bits(187) | 3e-16  | 25/27(93%) | 27/27(100%) | 0/27(0%) |

Query 1 RLGHCDDPVLVDGEFSSSGPVDVSDKI 27  
 RLGHCDDPVLV+GEFSSSGPV+VSDKI  
 Sbjct 76 RLGHCDDPVLVNGEFSSSGPVNVSDKI 102

**Related Information**

[Gene](#) - associated gene details

[Map Viewer](#) - aligned genomic context

BLAST is a registered trademark of the National Library of Medicine.

NCBI/ BLAST/ blastp suite/ Formatting Results - BTFUYYP013

Your search parameters were adjusted to search for a short input sequence.

[Edit and Resubmit](#) [Save Search Strategies](#) [Formatting options](#) [Download](#) [YouTube](#) [How to read this page](#) [Blast report description](#)

C4BPB\_RLGHCPDPVLVNGEFSSSGPVDVSDKI\_Mod

RID [BTFUYYP013](#) (Expires on 01-20 15:25 pm)

Query ID |cl|91292 Database Name nr

Description None Description All non-redundant GenBank CDS translations+PDB+SwissProt+PIR+PRF excluding environmental samples from WGS projects

Molecule type amino acid Program BLASTP 2.2.30+ [Citation](#)

Query Length 27

Other reports: [Search Summary](#) [Taxonomy reports](#) [Distance tree of results](#) [Multiple alignment](#)

Graphic Summary

Show Conserved Domains

No putative conserved domains have been detected

Distribution of 101 Blast Hits on the Query Sequence

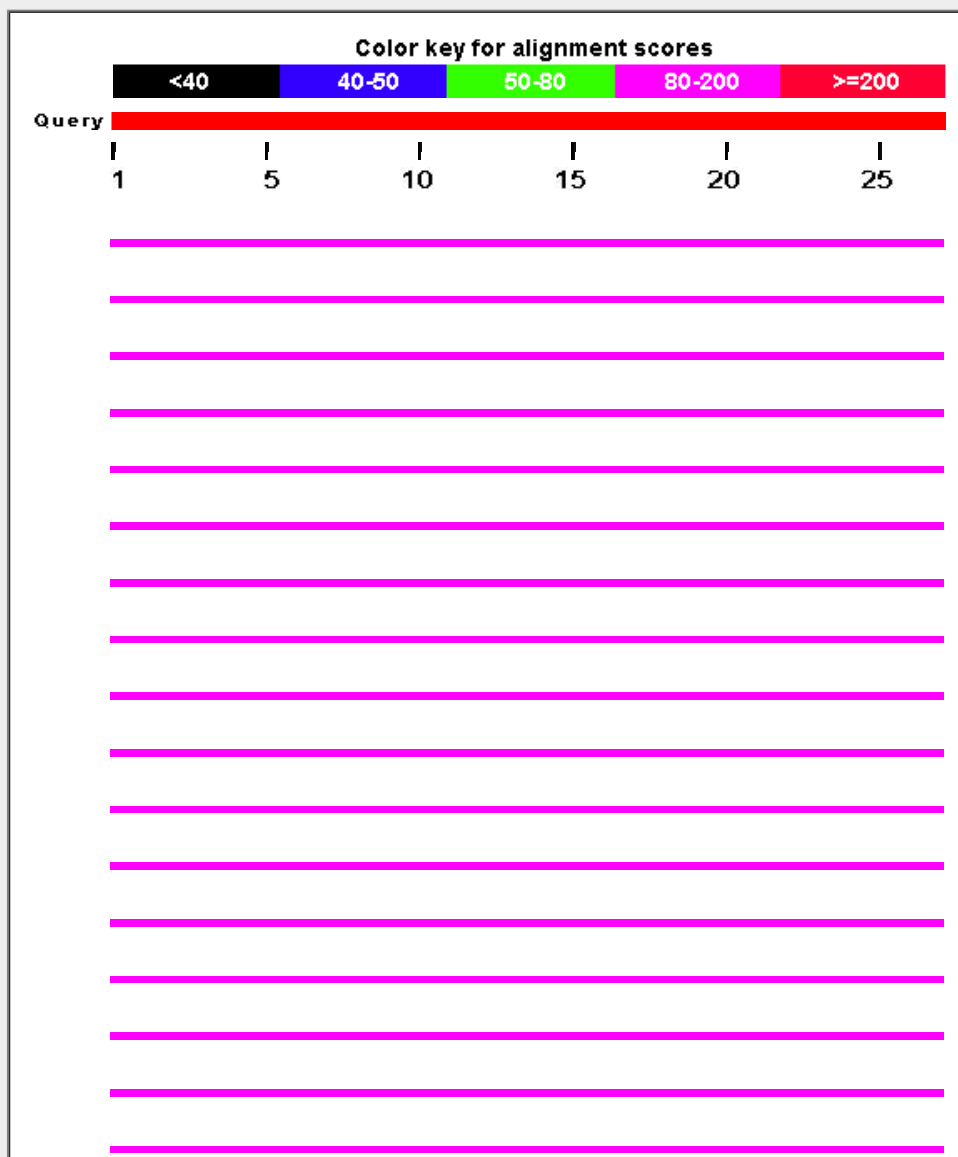

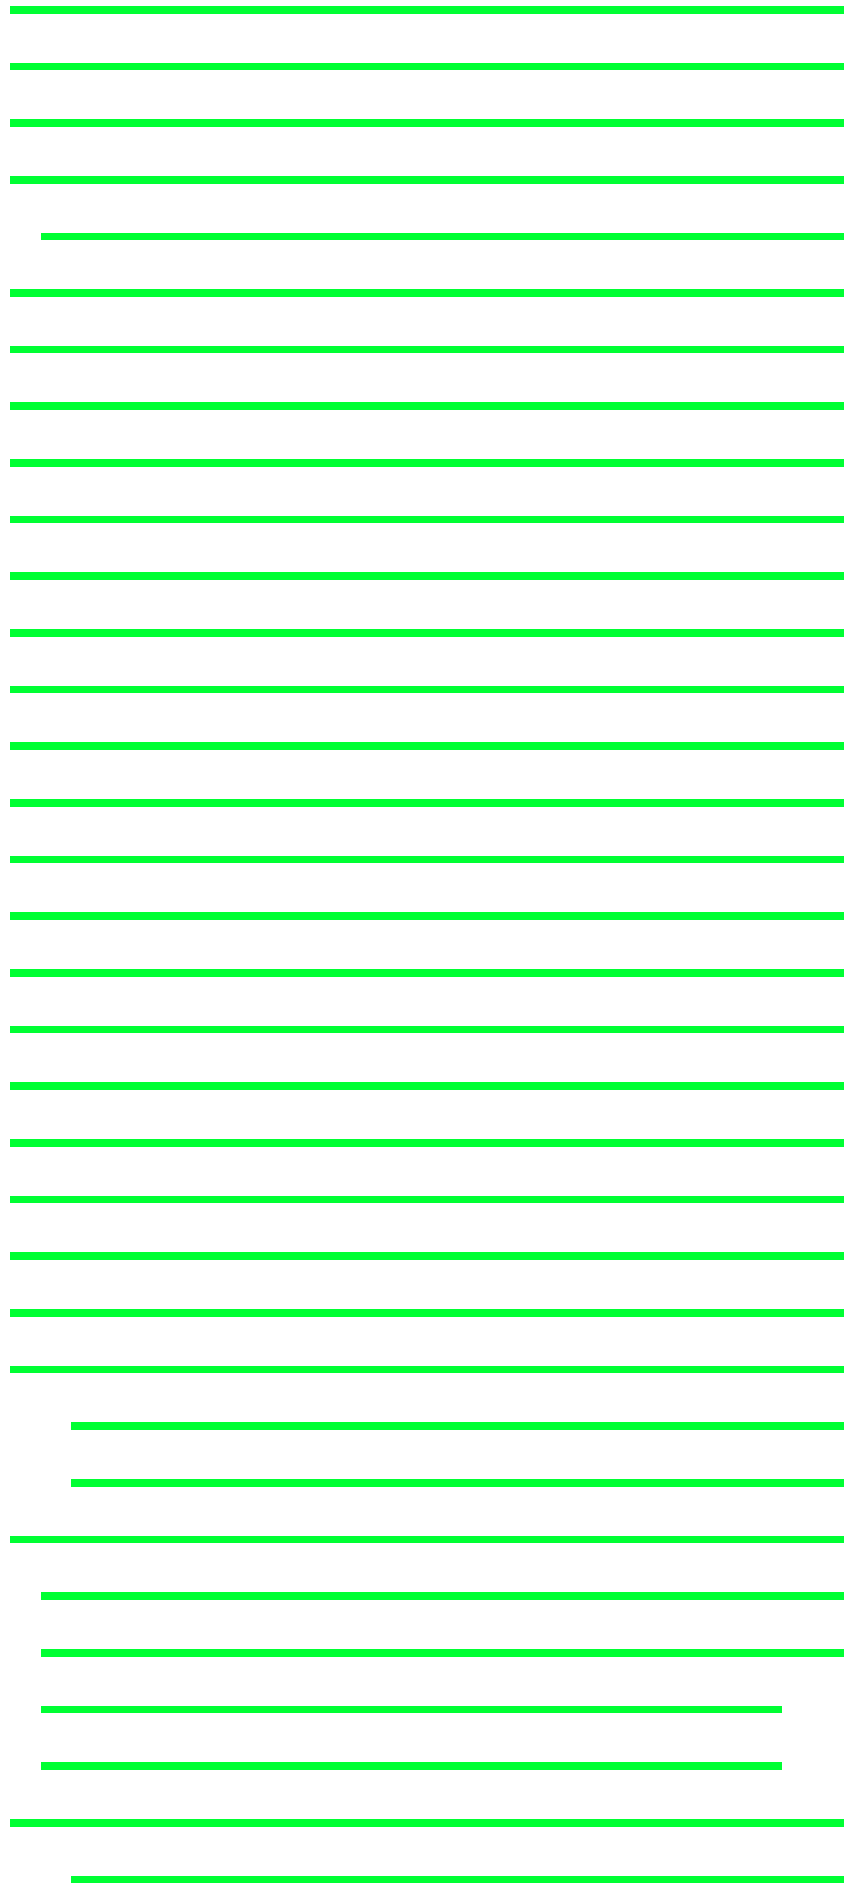

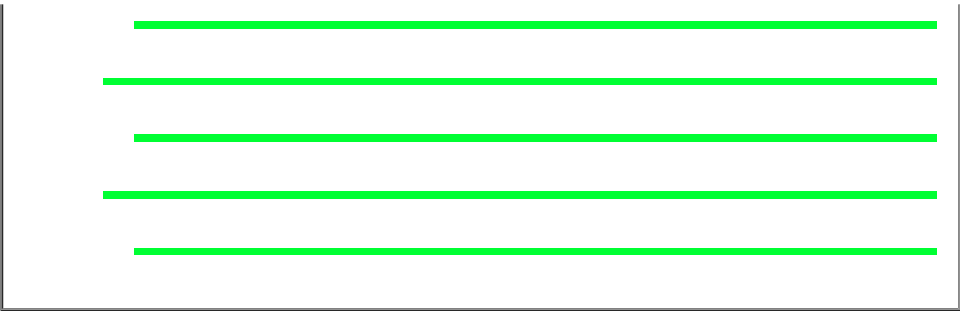

**Descriptions**

**Sequences producing significant alignments:**

Select: [All](#) [None](#) Selected:0

[Alignments](#)
[Download](#)
[GenPept](#)
[Graphics](#)
[Distance tree of results](#)
[Multiple alignment](#)
⚙

| Description                                                                   | Max score | Total score | Query cover | E value | Ident | Accession                                   |
|-------------------------------------------------------------------------------|-----------|-------------|-------------|---------|-------|---------------------------------------------|
| <a href="#">PREDICTED: C4b-binding protein beta chain isoform X3 [Pong</a>    | 85.0      | 85.0        | 100%        | 4e-17   | 96%   | <a href="#">gi 686700216 XP_009236698.1</a> |
| <a href="#">unnamed protein product [Homo sapiens]</a>                        | 85.0      | 85.0        | 100%        | 4e-17   | 96%   | <a href="#">gi 194373591 BAG56891.1</a>     |
| <a href="#">PREDICTED: C4b-binding protein beta chain isoform X3 [Pan t</a>   | 85.0      | 85.0        | 100%        | 4e-17   | 96%   | <a href="#">gi 694891540 XP_009439669.1</a> |
| <a href="#">PREDICTED: C4b-binding protein beta chain isoform X3 [Pan r</a>   | 85.0      | 85.0        | 100%        | 4e-17   | 96%   | <a href="#">gi 675771724 XP_008974762.1</a> |
| <a href="#">PREDICTED: C4b-binding protein beta chain isoform X3 [Homy</a>    | 85.0      | 85.0        | 100%        | 4e-17   | 96%   | <a href="#">gi 530366462 XP_005273312.1</a> |
| <a href="#">PREDICTED: C4b-binding protein beta chain isoform X2 [Pan t</a>   | 85.0      | 85.0        | 100%        | 4e-17   | 96%   | <a href="#">gi 694891534 XP_009439665.1</a> |
| <a href="#">PREDICTED: C4b-binding protein beta chain isoform X2 [Pong</a>    | 85.0      | 85.0        | 100%        | 4e-17   | 96%   | <a href="#">gi 686700213 XP_009236694.1</a> |
| <a href="#">PREDICTED: C4b-binding protein beta chain isoform X2 [Pan r</a>   | 85.0      | 85.0        | 100%        | 4e-17   | 96%   | <a href="#">gi 675771715 XP_008974759.1</a> |
| <a href="#">C4b-binding protein beta chain isoform 2 precursor [Homo sapi</a> | 85.0      | 85.0        | 100%        | 4e-17   | 96%   | <a href="#">gi 62912462 NP_001017364.1</a>  |
| <a href="#">C4b-binding protein beta chain isoform 1 precursor [Homo sapi</a> | 85.0      | 85.0        | 100%        | 4e-17   | 96%   | <a href="#">gi 4502505 NP_000707.1</a>      |
| <a href="#">PREDICTED: C4b-binding protein beta chain isoform X1 [Pan r</a>   | 85.0      | 85.0        | 100%        | 4e-17   | 96%   | <a href="#">gi 397504761 XP_003822949.1</a> |
| <a href="#">PREDICTED: C4b-binding protein beta chain isoform X1 [Pong</a>    | 85.0      | 85.0        | 100%        | 4e-17   | 96%   | <a href="#">gi 297662141 XP_002809574.1</a> |
| <a href="#">PREDICTED: C4b-binding protein beta chain isoform X1 [Pan t</a>   | 85.0      | 85.0        | 100%        | 4e-17   | 96%   | <a href="#">gi 114572288 XP_001166306.1</a> |
| <a href="#">PREDICTED: C4b-binding protein beta chain isoform X2 [Papi</a>    | 82.5      | 82.5        | 100%        | 3e-16   | 93%   | <a href="#">gi 685519789 XP_009186662.1</a> |
| <a href="#">PREDICTED: C4b-binding protein beta chain isoform X1 [Papi</a>    | 82.5      | 82.5        | 100%        | 3e-16   | 93%   | <a href="#">gi 685519785 XP_009186656.1</a> |
| <a href="#">PREDICTED: C4b-binding protein beta chain isoform X2 [Tarsi</a>   | 80.4      | 80.4        | 100%        | 2e-15   | 89%   | <a href="#">gi 640811969 XP_008062626.1</a> |
| <a href="#">PREDICTED: C4b-binding protein beta chain isoform X1 [Tarsi</a>   | 80.4      | 80.4        | 100%        | 2e-15   | 89%   | <a href="#">gi 640811967 XP_008062625.1</a> |
| <a href="#">PREDICTED: C4b-binding protein beta chain isoform X6 [Maca</a>    | 78.7      | 78.7        | 100%        | 7e-15   | 89%   | <a href="#">gi 544399939 XP_005540733.1</a> |
| <a href="#">PREDICTED: C4b-binding protein beta chain isoform X2 [Maca</a>    | 78.7      | 78.7        | 100%        | 7e-15   | 89%   | <a href="#">gi 544399931 XP_005540729.1</a> |
| <a href="#">hypothetical protein EGM_01442 [Macaca fascicularis]</a>          | 78.7      | 78.7        | 100%        | 7e-15   | 89%   | <a href="#">gi 355745961 EHH50586.1</a>     |
| <a href="#">hypothetical protein EGK_01712 [Macaca mulatta]</a>               | 78.7      | 78.7        | 100%        | 7e-15   | 89%   | <a href="#">gi 355558818 EHH15598.1</a>     |
| <a href="#">PREDICTED: C4b-binding protein beta chain isoform 1 [Nomas</a>    | 78.7      | 78.7        | 96%         | 7e-15   | 92%   | <a href="#">gi 332266848 XP_003282407.1</a> |
| <a href="#">PREDICTED: c4b-binding protein beta chain isoform 3 [Maca</a>     | 78.7      | 78.7        | 100%        | 7e-15   | 89%   | <a href="#">gi 109018561 XP_001083216.1</a> |
| <a href="#">PREDICTED: C4b-binding protein beta chain isoform X1 [Maca</a>    | 78.7      | 78.7        | 100%        | 7e-15   | 89%   | <a href="#">gi 544399929 XP_005540728.1</a> |
| <a href="#">PREDICTED: C4b-binding protein beta chain isoform X2 [Rhinc</a>   | 74.9      | 74.9        | 100%        | 1e-13   | 85%   | <a href="#">gi 724836382 XP_010363947.1</a> |
| <a href="#">PREDICTED: C4b-binding protein beta chain isoform X1 [Rhinc</a>   | 74.9      | 74.9        | 100%        | 1e-13   | 85%   | <a href="#">gi 724836379 XP_010363946.1</a> |
| <a href="#">PREDICTED: C4b-binding protein beta chain isoform X2 [Gale</a>    | 74.0      | 74.0        | 100%        | 2e-13   | 85%   | <a href="#">gi 667314769 XP_008585888.1</a> |
| <a href="#">PREDICTED: C4b-binding protein beta chain isoform X1 [Gale</a>    | 74.0      | 74.0        | 100%        | 3e-13   | 85%   | <a href="#">gi 667314766 XP_008585886.1</a> |
| <a href="#">PREDICTED: C4b-binding protein beta chain isoform X9 [Chlor</a>   | 73.6      | 73.6        | 100%        | 3e-13   | 85%   | <a href="#">gi 635130917 XP_007986833.1</a> |



|                                                                               |      |      |      |       |     |                                             |
|-------------------------------------------------------------------------------|------|------|------|-------|-----|---------------------------------------------|
| <a href="#">PREDICTED: C4b-binding protein beta chain isoform X8 [Chlor</a>   | 73.6 | 73.6 | 100% | 4e-13 | 85% | <a href="#">gil635130915 XP_007986832.1</a> |
| <a href="#">PREDICTED: C4b-binding protein beta chain isoform X7 [Chlor</a>   | 73.6 | 73.6 | 100% | 4e-13 | 85% | <a href="#">gil635130913 XP_007986831.1</a> |
| <a href="#">PREDICTED: C4b-binding protein beta chain [Nannospalax gal</a>    | 73.6 | 73.6 | 100% | 4e-13 | 85% | <a href="#">gil674096417 XP_008821570.1</a> |
| <a href="#">PREDICTED: C4b-binding protein beta chain isoform X6 [Chlor</a>   | 73.6 | 73.6 | 100% | 4e-13 | 85% | <a href="#">gil635130911 XP_007986830.1</a> |
| <a href="#">PREDICTED: C4b-binding protein beta chain isoform X5 [Chlor</a>   | 73.6 | 73.6 | 100% | 4e-13 | 85% | <a href="#">gil635130907 XP_007986828.1</a> |
| <a href="#">PREDICTED: C4b-binding protein beta chain isoform X4 [Chlor</a>   | 73.6 | 73.6 | 100% | 4e-13 | 85% | <a href="#">gil635130905 XP_007986827.1</a> |
| <a href="#">PREDICTED: C4b-binding protein beta chain isoform X3 [Chlor</a>   | 73.6 | 73.6 | 100% | 4e-13 | 85% | <a href="#">gil635130903 XP_007986826.1</a> |
| <a href="#">PREDICTED: C4b-binding protein beta chain isoform X2 [Chlor</a>   | 73.6 | 73.6 | 100% | 4e-13 | 85% | <a href="#">gil635130901 XP_007986825.1</a> |
| <a href="#">PREDICTED: C4b-binding protein beta chain isoform X1 [Chlor</a>   | 73.6 | 73.6 | 100% | 4e-13 | 85% | <a href="#">gil635130899 XP_007986823.1</a> |
| <a href="#">C4b-binding protein beta chain [Heterocephalus glaber]</a>        | 71.5 | 71.5 | 100% | 2e-12 | 85% | <a href="#">gil351708103 EHB11022.1</a>     |
| <a href="#">PREDICTED: C4b-binding protein beta chain [Cavia porcellus]</a>   | 71.5 | 71.5 | 100% | 2e-12 | 85% | <a href="#">gil348577871 XP_003474707.1</a> |
| <a href="#">PREDICTED: C4b-binding protein beta chain [Heterocephalus</a>     | 71.5 | 71.5 | 100% | 2e-12 | 85% | <a href="#">gil512892965 XP_004897416.1</a> |
| <a href="#">PREDICTED: C4b-binding protein beta chain [Ursus maritimus]</a>   | 71.0 | 71.0 | 100% | 3e-12 | 89% | <a href="#">gil670984389 XP_008683289.1</a> |
| <a href="#">PREDICTED: C4b-binding protein beta chain isoform X2 [Equu</a>    | 70.2 | 70.2 | 92%  | 5e-12 | 88% | <a href="#">gil664745777 XP_008530230.1</a> |
| <a href="#">PREDICTED: C4b-binding protein beta chain isoform X1 [Equu</a>    | 70.2 | 70.2 | 92%  | 5e-12 | 88% | <a href="#">gil664745775 XP_008530229.1</a> |
| <a href="#">PREDICTED: LOW QUALITY PROTEIN: C4b-binding protein b</a>         | 68.9 | 68.9 | 100% | 1e-11 | 81% | <a href="#">gil533120065 XP_005375468.1</a> |
| <a href="#">PREDICTED: C4b-binding protein beta chain isoform X2 [Callit</a>  | 68.9 | 68.9 | 96%  | 1e-11 | 88% | <a href="#">gil675749407 XP_008983835.1</a> |
| <a href="#">PREDICTED: C4b-binding protein beta chain isoform X1 [Callit</a>  | 68.9 | 68.9 | 96%  | 1e-11 | 88% | <a href="#">gil296230632 XP_002760794.1</a> |
| <a href="#">C4b-binding protein beta chain [Fukomys damarensis]</a>           | 68.9 | 68.9 | 88%  | 1e-11 | 92% | <a href="#">gil676262835 KFO19654.1</a>     |
| <a href="#">PREDICTED: C4b-binding protein beta chain [Fukomys damar</a>      | 68.9 | 68.9 | 88%  | 1e-11 | 92% | <a href="#">gil731286435 XP_010611521.1</a> |
| <a href="#">PREDICTED: C4b-binding protein beta chain [Mustela putorius</a>   | 68.5 | 68.5 | 100% | 2e-11 | 85% | <a href="#">gil511871202 XP_004756233.1</a> |
| <a href="#">PREDICTED: LOW QUALITY PROTEIN: complement compon</a>             | 67.7 | 67.7 | 92%  | 3e-11 | 88% | <a href="#">gil545215409 XP_005615108.1</a> |
| <a href="#">PREDICTED: C4b-binding protein beta chain [Loxodonta africa</a>   | 67.7 | 88.7 | 96%  | 4e-11 | 81% | <a href="#">gil731475974 XP_010588717.1</a> |
| <a href="#">hypothetical protein PANDA_018755 [Ailuropoda melanoleuca]</a>    | 66.0 | 66.0 | 100% | 1e-10 | 85% | <a href="#">gil281337925 EFB13509.1</a>     |
| <a href="#">PREDICTED: C4b-binding protein beta chain isoform X2 [Pant</a>    | 66.0 | 66.0 | 96%  | 1e-10 | 85% | <a href="#">gil591341473 XP_007096179.1</a> |
| <a href="#">PREDICTED: c4b-binding protein beta chain-like [Ailuropoda m</a>  | 66.0 | 66.0 | 100% | 1e-10 | 85% | <a href="#">gil301786617 XP_002928722.1</a> |
| <a href="#">PREDICTED: C4b-binding protein beta chain isoform X1 [Pant</a>    | 66.0 | 66.0 | 96%  | 1e-10 | 85% | <a href="#">gil591341471 XP_007096178.1</a> |
| <a href="#">PREDICTED: C4b-binding protein beta chain [Pteropus alecto]</a>   | 66.0 | 66.0 | 96%  | 1e-10 | 82% | <a href="#">gil586536223 XP_006922979.1</a> |
| <a href="#">C4b-binding protein beta chain [Pteropus alecto]</a>              | 66.0 | 66.0 | 96%  | 1e-10 | 82% | <a href="#">gil431892854 ELK03282.1</a>     |
| <a href="#">PREDICTED: C4b-binding protein beta chain isoform X2 [Saim</a>    | 65.5 | 65.5 | 96%  | 2e-10 | 85% | <a href="#">gil725574024 XP_010339305.1</a> |
| <a href="#">PREDICTED: C4b-binding protein beta chain isoform X1 [Saim</a>    | 65.5 | 65.5 | 96%  | 2e-10 | 85% | <a href="#">gil403277664 XP_003930472.1</a> |
| <a href="#">PREDICTED: C4b-binding protein beta chain [Otolemur garnett</a>   | 65.5 | 65.5 | 100% | 2e-10 | 74% | <a href="#">gil395838946 XP_003792365.1</a> |
| <a href="#">PREDICTED: LOW QUALITY PROTEIN: C4b-binding protein b</a>         | 64.3 | 64.3 | 100% | 5e-10 | 78% | <a href="#">gil594636425 XP_007171607.1</a> |
| <a href="#">PREDICTED: C4b-binding protein beta chain isoform X2 [Felis</a>   | 63.4 | 63.4 | 96%  | 1e-09 | 81% | <a href="#">gil587018341 XP_006942889.1</a> |
| <a href="#">PREDICTED: C4b-binding protein beta chain isoform X1 [Felis</a>   | 63.4 | 63.4 | 96%  | 1e-09 | 81% | <a href="#">gil410986395 XP_003999496.1</a> |
| <a href="#">PREDICTED: C4b-binding protein beta chain [Orycteropus afer</a>   | 62.6 | 62.6 | 92%  | 2e-09 | 84% | <a href="#">gil634826787 XP_007951309.1</a> |
| <a href="#">PREDICTED: C4b-binding protein beta chain [Leptonychotes w</a>    | 62.6 | 62.6 | 100% | 2e-09 | 85% | <a href="#">gil585156269 XP_006730462.1</a> |
| <a href="#">PREDICTED: C4b-binding protein beta chain [Orcinus orca]</a>      | 62.1 | 62.1 | 92%  | 3e-09 | 80% | <a href="#">gil466071254 XP_004282462.1</a> |
| <a href="#">PREDICTED: C4b-binding protein beta chain [Ictidomys tridece</a>  | 61.3 | 61.3 | 100% | 5e-09 | 70% | <a href="#">gil532087633 XP_005329528.1</a> |
| <a href="#">PREDICTED: LOW QUALITY PROTEIN: C4b-binding protein b</a>         | 60.9 | 60.9 | 96%  | 7e-09 | 81% | <a href="#">gil471369765 XP_004375397.1</a> |
| <a href="#">PREDICTED: C4b-binding protein beta chain [Ceratotherium si</a>   | 60.0 | 60.0 | 100% | 1e-08 | 74% | <a href="#">gil478501878 XP_004425250.1</a> |
| <a href="#">PREDICTED: LOW QUALITY PROTEIN: C4b-binding protein b</a>         | 58.7 | 58.7 | 88%  | 4e-08 | 79% | <a href="#">gil470641603 XP_004325529.1</a> |
| <a href="#">PREDICTED: C4b-binding protein beta chain [Odobenus rosm</a>      | 58.7 | 58.7 | 100% | 4e-08 | 81% | <a href="#">gil472392625 XP_004415587.1</a> |
| <a href="#">PREDICTED: C4b-binding protein beta chain [Echinops telfairi]</a> | 57.9 | 57.9 | 96%  | 7e-08 | 77% | <a href="#">gil507635442 XP_004700185.1</a> |
| <a href="#">PREDICTED: C4b-binding protein beta chain [Erinaceus europ</a>    | 57.5 | 57.5 | 85%  | 1e-07 | 78% | <a href="#">gil617638324 XP_007531172.1</a> |

|                                                                                |      |      |      |       |     |                                             |
|--------------------------------------------------------------------------------|------|------|------|-------|-----|---------------------------------------------|
| <a href="#">PREDICTED: C4b-binding protein beta chain [Chrysochloris as</a>    | 57.5 | 57.5 | 100% | 1e-07 | 74% | <a href="#">gi 586450676 XP_006834269.1</a> |
| <a href="#">C4b-binding protein beta chain precursor [Rattus norvegicus]</a>   | 57.1 | 57.1 | 96%  | 1e-07 | 73% | <a href="#">gi 62198215 NP_058691.2</a>     |
| <a href="#">RecName: Full=C4b-binding protein beta chain: Flags: Precurs</a>   | 57.1 | 57.1 | 96%  | 1e-07 | 73% | <a href="#">gi 2493794 Q63515.1</a>         |
| <a href="#">PREDICTED: C4b-binding protein beta chain [Jaculus jaculus]</a>    | 57.1 | 57.1 | 100% | 1e-07 | 74% | <a href="#">gi 507559572 XP_004663509.1</a> |
| <a href="#">PREDICTED: C4b-binding protein beta chain [Lipotes vexillifer]</a> | 55.8 | 55.8 | 85%  | 3e-07 | 78% | <a href="#">gi 602721258 XP_007470782.1</a> |
| <a href="#">PREDICTED: C4b-binding protein beta chain [Physeter catodo</a>     | 55.8 | 55.8 | 85%  | 3e-07 | 78% | <a href="#">gi 593718317 XP_007105536.1</a> |
| <a href="#">PREDICTED: C4b-binding protein beta chain [Octodon degus]</a>      | 55.4 | 55.4 | 96%  | 5e-07 | 77% | <a href="#">gi 507688352 XP_004641253.1</a> |
| <a href="#">PREDICTED: C4b-binding protein beta chain [Sus scrofa]</a>         | 52.8 | 52.8 | 100% | 3e-06 | 70% | <a href="#">gi 311265148 XP_003130503.1</a> |
| <a href="#">PREDICTED: C4b-binding protein beta chain [Canis lupus fami</a>    | 52.4 | 52.4 | 96%  | 5e-06 | 71% | <a href="#">gi 73960685 XP_851611.1</a>     |
| <a href="#">PREDICTED: C4b-binding protein beta chain isoform X2 [Micro</a>    | 52.4 | 52.4 | 100% | 5e-06 | 70% | <a href="#">gi 532009098 XP_005348366.1</a> |
| <a href="#">PREDICTED: C4b-binding protein beta chain isoform X1 [Micro</a>    | 52.4 | 52.4 | 100% | 5e-06 | 70% | <a href="#">gi 532009096 XP_005348365.1</a> |
| <a href="#">PREDICTED: C4b-binding protein beta chain [Peromyscus mar</a>      | 49.8 | 49.8 | 100% | 3e-05 | 67% | <a href="#">gi 589966374 XP_006995716.1</a> |
| <a href="#">PREDICTED: C4b-binding protein beta chain [Cricetulus griseu</a>   | 48.1 | 48.1 | 96%  | 1e-04 | 65% | <a href="#">gi 625186859 XP_007614708.1</a> |
| <a href="#">6-phosphofructo-2-kinase/fructose-2,6-biphosphatase 2 [Criceti</a> | 48.1 | 48.1 | 96%  | 1e-04 | 65% | <a href="#">gi 344244855 EGW00959.1</a>     |
| <a href="#">6-phosphofructo-2-kinase/fructose-2,6-biphosphatase 2 isoforr</a>  | 48.1 | 48.1 | 96%  | 1e-04 | 65% | <a href="#">gi 537167880 ERE73717.1</a>     |
| <a href="#">6-phosphofructo-2-kinase/fructose-2,6-biphosphatase 2 isoforr</a>  | 48.1 | 48.1 | 96%  | 1e-04 | 65% | <a href="#">gi 537167879 ERE73716.1</a>     |
| <a href="#">PREDICTED: C4b-binding protein beta chain isoform X3 [Capr:</a>    | 47.7 | 47.7 | 85%  | 1e-04 | 70% | <a href="#">gi 548497748 XP_005690484.1</a> |
| <a href="#">C4b-binding protein beta chain precursor [Bos taurus]</a>          | 47.7 | 47.7 | 85%  | 1e-04 | 70% | <a href="#">gi 99028955 NP_776678.2</a>     |
| <a href="#">RecName: Full=C4b-binding protein beta chain: Flags: Precurs</a>   | 47.7 | 47.7 | 85%  | 1e-04 | 70% | <a href="#">gi 2493793 Q28066.1</a>         |
| <a href="#">PREDICTED: C4b-binding protein beta chain isoform X1 [Bos t</a>    | 47.7 | 47.7 | 85%  | 1e-04 | 70% | <a href="#">gi 528979094 XP_005216707.1</a> |
| <a href="#">PREDICTED: C4b-binding protein beta chain [Pantholops hodg</a>     | 47.7 | 47.7 | 85%  | 1e-04 | 70% | <a href="#">gi 556742954 XP_005966995.1</a> |
| <a href="#">PREDICTED: C4b-binding protein beta chain isoform X1 [Capr:</a>    | 47.7 | 47.7 | 85%  | 1e-04 | 70% | <a href="#">gi 548497744 XP_005690482.1</a> |
| <a href="#">complement component 4 binding protein, beta [Ovis aries]</a>      | 47.7 | 47.7 | 85%  | 1e-04 | 70% | <a href="#">gi 444733674 CCQ71779.1</a>     |
| <a href="#">PREDICTED: C4b-binding protein beta chain [Tupaia chinensis</a>    | 46.4 | 46.4 | 96%  | 4e-04 | 69% | <a href="#">gi 562862067 XP_006159349.1</a> |
| <a href="#">6-phosphofructo-2-kinase/fructose-2,6-biphosphatase 2 [Tupai:</a>  | 46.4 | 46.4 | 96%  | 4e-04 | 69% | <a href="#">gi 444706417 ELW47759.1</a>     |
| <a href="#">PREDICTED: C4b-binding protein beta chain [Mesocricetus au</a>     | 46.0 | 46.0 | 92%  | 5e-04 | 68% | <a href="#">gi 524960013 XP_005079950.1</a> |

## Alignments

Download GenPept Graphics

Next Previous Descriptions

PREDICTED: C4b-binding protein beta chain isoform X3 [Pongo abelii]

Sequence ID: [gi|686700216|ref|XP\\_009236698.1|](#) Length: 202 Number of Matches: 1

Range 1: 67 to 93 GenPept Graphics

Next Match Previous Match

| Score          | Expect | Identities | Positives   | Gaps     |
|----------------|--------|------------|-------------|----------|
| 85.0 bits(193) | 4e-17  | 26/27(96%) | 27/27(100%) | 0/27(0%) |

Query 1 RLGHCDDPVLVNGEFSSSGPVDVSDKI 27  
 RLGHCDDPVLVNGEFSSSGPVDVSDKI  
 Sbjct 67 RLGHCDDPVLVNGEFSSSGPVDVSDKI 93

### Related Information

[Gene](#) - associated gene details  
[Map Viewer](#) - aligned genomic context

Download GenPept Graphics

Next Previous Descriptions

unnamed protein product [Homo sapiens]

Sequence ID: [gi|194373591|dbj|BAG56891.1|](#) Length: 218 Number of Matches: 1

Range 1: 67 to 93 GenPept Graphics

Next Match Previous Match

| Score          | Expect | Identities | Positives   | Gaps     |
|----------------|--------|------------|-------------|----------|
| 85.0 bits(193) | 4e-17  | 26/27(96%) | 27/27(100%) | 0/27(0%) |

### Related Information

[Gene](#) - associated gene details

Query 1 RLGHCPDPVLVNGEFSSSGPVDVSDKI 27  
 RLGHCPDPVLVNGEFSSSGPV+VSDKI  
 Sbjct 67 RLGHCPDPVLVNGEFSSSGPVNVSDKI 93

[Download](#) [GenPept](#) [Graphics](#)

[Next](#) [Previous](#) [Descriptions](#)

PREDICTED: C4b-binding protein beta chain isoform X3 [Pan troglodytes]

Sequence ID: [gi|694891540|ref|XP\\_009439669.1|](#) Length: 227 Number of Matches: 1

Range 1: 76 to 102 [GenPept](#) [Graphics](#)

[Next Match](#) [Previous Match](#)

| Score          | Expect | Identities | Positives   | Gaps     |
|----------------|--------|------------|-------------|----------|
| 85.0 bits(193) | 4e-17  | 26/27(96%) | 27/27(100%) | 0/27(0%) |

Query 1 RLGHCPDPVLVNGEFSSSGPVDVSDKI 27  
 RLGHCPDPVLVNGEFSSSGPV+VSDKI  
 Sbjct 76 RLGHCPDPVLVNGEFSSSGPVNVSDKI 102

**Related Information**

[Gene](#) - associated gene details

[Download](#) [GenPept](#) [Graphics](#)

[Next](#) [Previous](#) [Descriptions](#)

PREDICTED: C4b-binding protein beta chain isoform X3 [Pan paniscus]

Sequence ID: [gi|675771724|ref|XP\\_008974762.1|](#) Length: 227 Number of Matches: 1

Range 1: 76 to 102 [GenPept](#) [Graphics](#)

[Next Match](#) [Previous Match](#)

| Score          | Expect | Identities | Positives   | Gaps     |
|----------------|--------|------------|-------------|----------|
| 85.0 bits(193) | 4e-17  | 26/27(96%) | 27/27(100%) | 0/27(0%) |

Query 1 RLGHCPDPVLVNGEFSSSGPVDVSDKI 27  
 RLGHCPDPVLVNGEFSSSGPV+VSDKI  
 Sbjct 76 RLGHCPDPVLVNGEFSSSGPVNVSDKI 102

**Related Information**

[Gene](#) - associated gene details

[Map Viewer](#) - aligned genomic context

[Download](#) [GenPept](#) [Graphics](#)

[Next](#) [Previous](#) [Descriptions](#)

PREDICTED: C4b-binding protein beta chain isoform X3 [Homo sapiens]

Sequence ID: [gi|530366462|ref|XP\\_005273312.1|](#) Length: 227 Number of Matches: 1

Range 1: 76 to 102 [GenPept](#) [Graphics](#)

[Next Match](#) [Previous Match](#)

| Score          | Expect | Identities | Positives   | Gaps     |
|----------------|--------|------------|-------------|----------|
| 85.0 bits(193) | 4e-17  | 26/27(96%) | 27/27(100%) | 0/27(0%) |

Query 1 RLGHCPDPVLVNGEFSSSGPVDVSDKI 27  
 RLGHCPDPVLVNGEFSSSGPV+VSDKI  
 Sbjct 76 RLGHCPDPVLVNGEFSSSGPVNVSDKI 102

**Related Information**

[Gene](#) - associated gene details

[Map Viewer](#) - aligned genomic context

BLAST is a registered trademark of the National Library of Medicine.

▶ NCBI/ BLAST/ blastp suite/ Formatting Results - B92C29JM01R

**i** Your search parameters were adjusted to search for a short input sequence.

[Edit and Resubmit](#) [Save Search Strategies](#) [▶ Formatting options](#) [▶ Download](#)

**C4BPB\_RLGHCPDPVLVNGEFSSSGPVNVSDKI\_NonMod**

[YouTube](#) [How to read this page](#) [Blast report description](#)

**RID** [B92C29JM01R](#) (Expires on 01-14 09:57 am)

**Query ID** |cl|242114 **Database Name** nr

**Description** None **Description** All non-redundant GenBank CDS translations+PDB+SwissProt+PIR excluding environmental samples from WGS projects

**Molecule type** amino acid **Program** BLASTP 2.2.30+ [▶ Citation](#)

**Query Length** 27

Other reports: [▶ Search Summary](#) [\[Taxonomy reports\]](#) [\[Distance tree of results\]](#) [\[Multiple alignment\]](#)

**Graphic Summary**

[Show Conserved Domains](#)

No putative conserved domains have been detected

Distribution of 101 Blast Hits on the Query Sequence

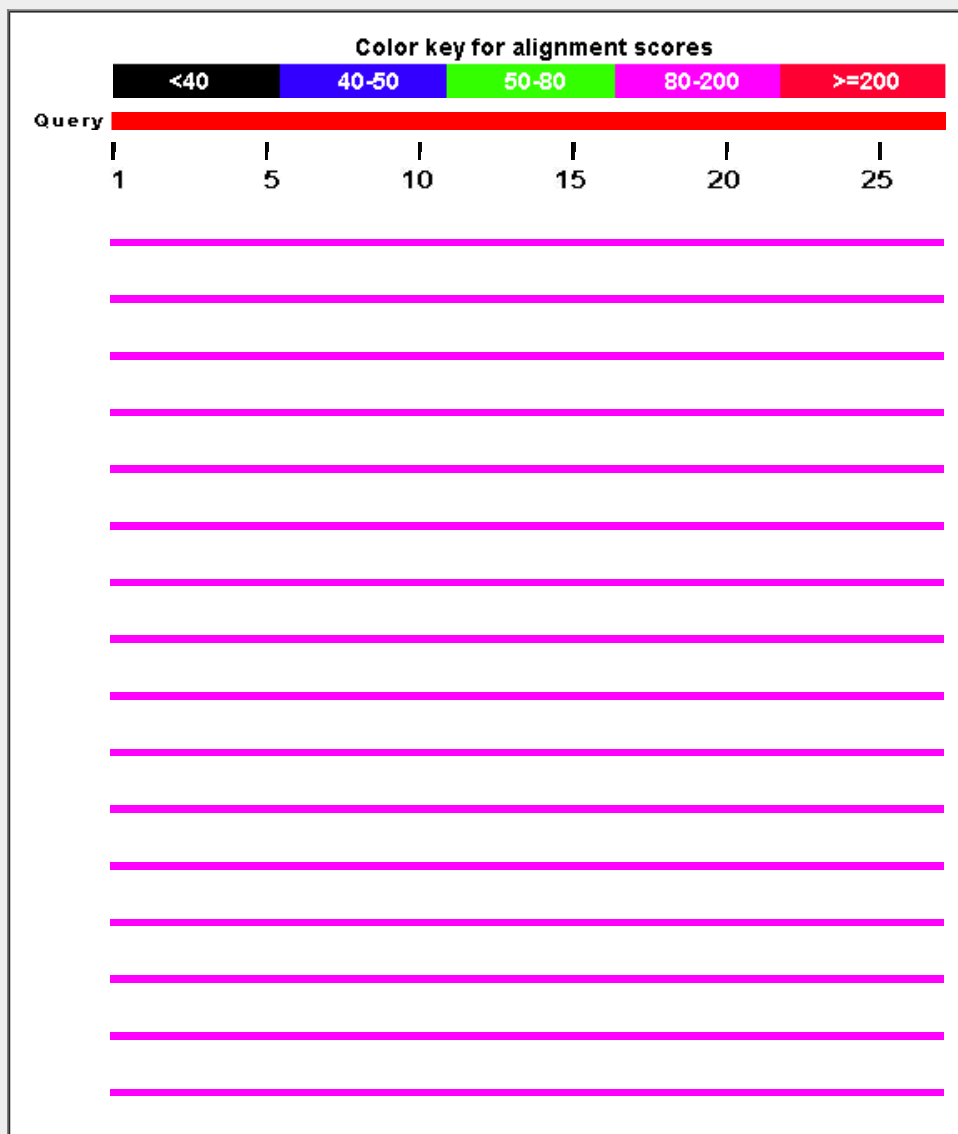

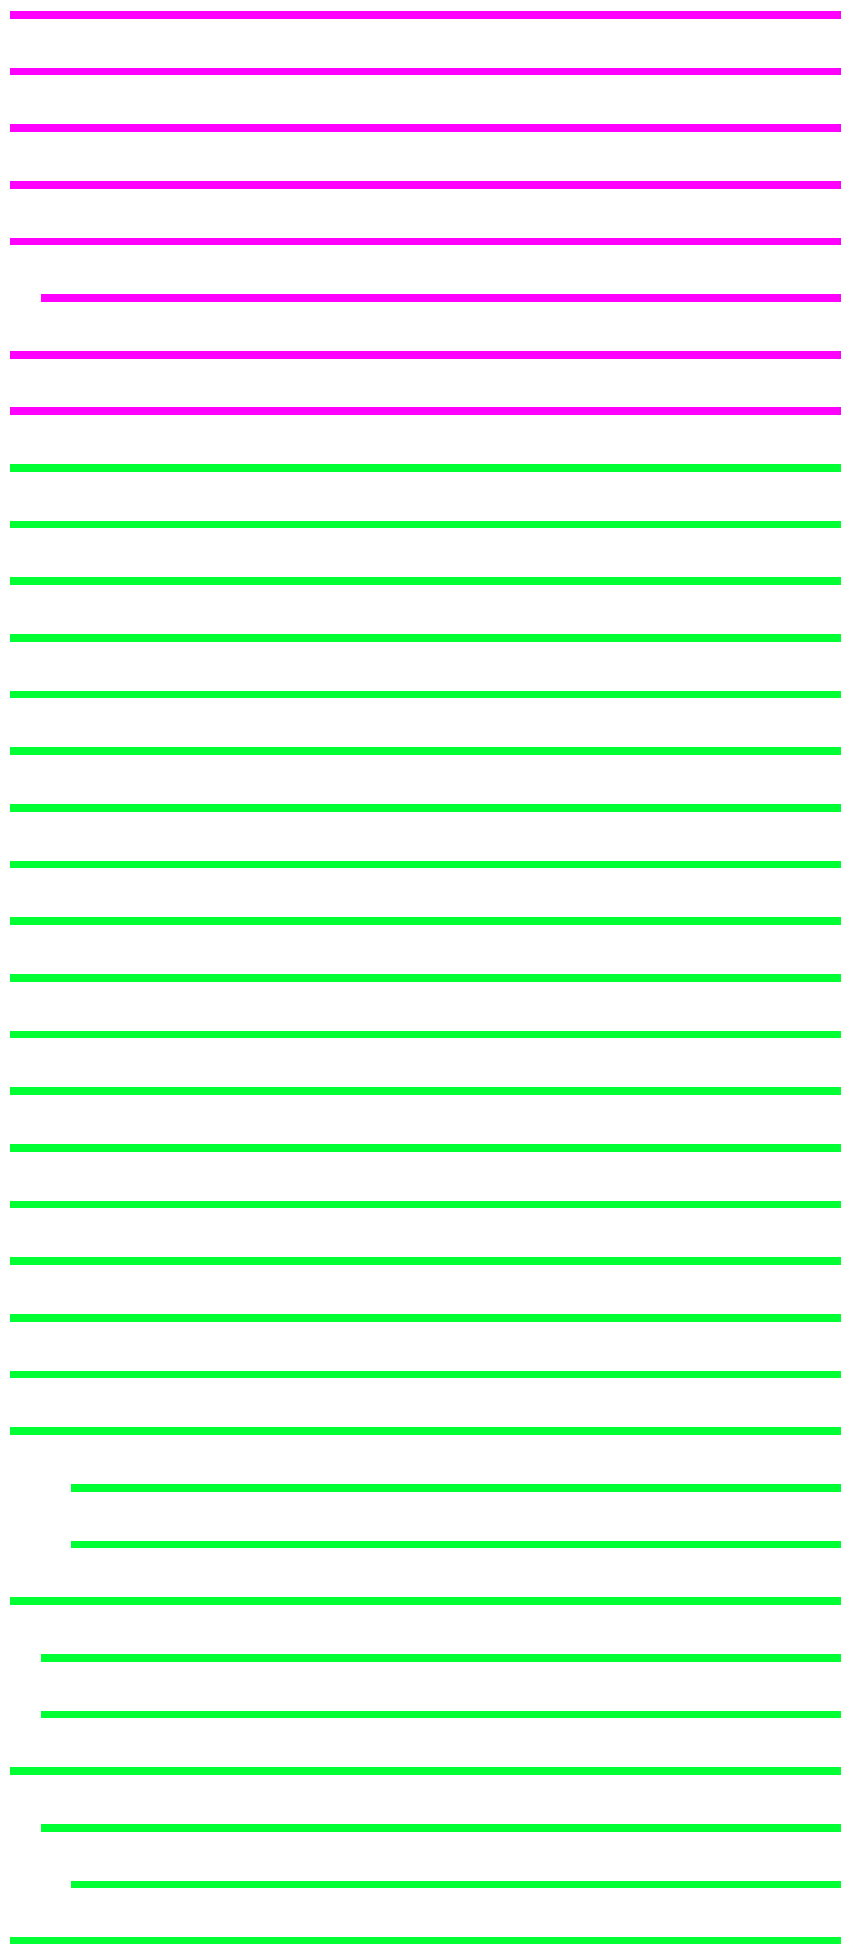

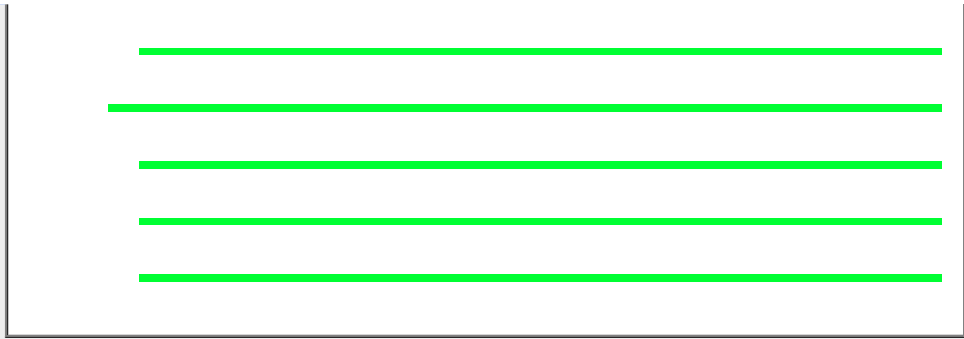

**Descriptions**

**Sequences producing significant alignments:**

Select: [All](#) [None](#) Selected:0

[↑](#) Alignments 
 [Download](#)
[GenPept](#)
[Graphics](#)
[Distance tree of results](#)
[Multiple alignment](#)
⚙

| Description                                                                                                           | Max score | Total score | Query cover | E value | Ident | Accession                                   |
|-----------------------------------------------------------------------------------------------------------------------|-----------|-------------|-------------|---------|-------|---------------------------------------------|
| <a href="#">PREDICTED: C4b-binding protein beta chain isoform X3 [Pongo ab unnamed protein product [Homo sapiens]</a> | 87.6      | 87.6        | 100%        | 5e-18   | 100%  | <a href="#">gi 686700216 XP_009236698.1</a> |
| <a href="#">PREDICTED: C4b-binding protein beta chain isoform X3 [Pan troglodytes]</a>                                | 87.6      | 87.6        | 100%        | 5e-18   | 100%  | <a href="#">gi 194373591 BAG56891.1</a>     |
| <a href="#">PREDICTED: C4b-binding protein beta chain isoform X3 [Pan troglodytes]</a>                                | 87.6      | 87.6        | 100%        | 5e-18   | 100%  | <a href="#">gi 694891540 XP_009439669.1</a> |
| <a href="#">PREDICTED: C4b-binding protein beta chain isoform X3 [Pan paniscus]</a>                                   | 87.6      | 87.6        | 100%        | 5e-18   | 100%  | <a href="#">gi 675771724 XP_008974762.1</a> |
| <a href="#">PREDICTED: C4b-binding protein beta chain isoform X3 [Homo sapiens]</a>                                   | 87.6      | 87.6        | 100%        | 5e-18   | 100%  | <a href="#">gi 530366462 XP_005273312.1</a> |
| <a href="#">PREDICTED: C4b-binding protein beta chain isoform X2 [Pan troglodytes]</a>                                | 87.6      | 87.6        | 100%        | 5e-18   | 100%  | <a href="#">gi 694891534 XP_009439665.1</a> |
| <a href="#">PREDICTED: C4b-binding protein beta chain isoform X2 [Pongo abelii]</a>                                   | 87.6      | 87.6        | 100%        | 5e-18   | 100%  | <a href="#">gi 686700213 XP_009236694.1</a> |
| <a href="#">PREDICTED: C4b-binding protein beta chain isoform X2 [Pan paniscus]</a>                                   | 87.6      | 87.6        | 100%        | 5e-18   | 100%  | <a href="#">gi 675771715 XP_008974759.1</a> |
| <a href="#">C4b-binding protein beta chain isoform 2 precursor [Homo sapiens]</a>                                     | 87.6      | 87.6        | 100%        | 5e-18   | 100%  | <a href="#">gi 62912462 NP_001017364.1</a>  |
| <a href="#">C4b-binding protein beta chain isoform 1 precursor [Homo sapiens]</a>                                     | 87.6      | 87.6        | 100%        | 5e-18   | 100%  | <a href="#">gi 4502505 NP_000707.1</a>      |
| <a href="#">PREDICTED: C4b-binding protein beta chain isoform X1 [Pan paniscus]</a>                                   | 87.6      | 87.6        | 100%        | 5e-18   | 100%  | <a href="#">gi 397504761 XP_003822949.1</a> |
| <a href="#">PREDICTED: C4b-binding protein beta chain isoform X1 [Pongo abelii]</a>                                   | 87.6      | 87.6        | 100%        | 5e-18   | 100%  | <a href="#">gi 297662141 XP_002809574.1</a> |
| <a href="#">PREDICTED: C4b-binding protein beta chain isoform X1 [Pan troglodytes]</a>                                | 87.6      | 87.6        | 100%        | 5e-18   | 100%  | <a href="#">gi 114572288 XP_001166306.1</a> |
| <a href="#">PREDICTED: C4b-binding protein beta chain isoform X2 [Papio anops]</a>                                    | 85.0      | 85.0        | 100%        | 4e-17   | 96%   | <a href="#">gi 685519789 XP_009186662.1</a> |
| <a href="#">PREDICTED: C4b-binding protein beta chain isoform X1 [Papio anops]</a>                                    | 85.0      | 85.0        | 100%        | 4e-17   | 96%   | <a href="#">gi 685519785 XP_009186656.1</a> |
| <a href="#">PREDICTED: C4b-binding protein beta chain isoform X2 [Tarsius syrrhaptes]</a>                             | 82.9      | 82.9        | 100%        | 2e-16   | 93%   | <a href="#">gi 640811969 XP_008062626.1</a> |
| <a href="#">PREDICTED: C4b-binding protein beta chain isoform X1 [Tarsius syrrhaptes]</a>                             | 82.9      | 82.9        | 100%        | 2e-16   | 93%   | <a href="#">gi 640811967 XP_008062625.1</a> |
| <a href="#">PREDICTED: C4b-binding protein beta chain isoform X6 [Macaca fascicularis]</a>                            | 81.2      | 81.2        | 100%        | 8e-16   | 93%   | <a href="#">gi 544399939 XP_005540733.1</a> |
| <a href="#">PREDICTED: C4b-binding protein beta chain isoform X2 [Macaca fascicularis]</a>                            | 81.2      | 81.2        | 100%        | 8e-16   | 93%   | <a href="#">gi 544399931 XP_005540729.1</a> |
| <a href="#">hypothetical protein EGM_01442 [Macaca fascicularis]</a>                                                  | 81.2      | 81.2        | 100%        | 8e-16   | 93%   | <a href="#">gi 355745961 EHH50586.1</a>     |
| <a href="#">hypothetical protein EGK_01712 [Macaca mulatta]</a>                                                       | 81.2      | 81.2        | 100%        | 8e-16   | 93%   | <a href="#">gi 355558818 EHH15598.1</a>     |
| <a href="#">PREDICTED: C4b-binding protein beta chain isoform 1 [Nomascus leucogenus]</a>                             | 81.2      | 81.2        | 96%         | 8e-16   | 96%   | <a href="#">gi 332266848 XP_003282407.1</a> |
| <a href="#">PREDICTED: c4b-binding protein beta chain isoform 3 [Macaca mulatta]</a>                                  | 81.2      | 81.2        | 100%        | 8e-16   | 93%   | <a href="#">gi 109018561 XP_001083216.1</a> |
| <a href="#">PREDICTED: C4b-binding protein beta chain isoform X1 [Macaca fascicularis]</a>                            | 81.2      | 81.2        | 100%        | 9e-16   | 93%   | <a href="#">gi 544399929 XP_005540728.1</a> |
| <a href="#">PREDICTED: C4b-binding protein beta chain isoform X2 [Rhinopithecus]</a>                                  | 77.4      | 77.4        | 100%        | 2e-14   | 89%   | <a href="#">gi 724836382 XP_010363947.1</a> |
| <a href="#">PREDICTED: C4b-binding protein beta chain isoform X1 [Rhinopithecus]</a>                                  | 77.4      | 77.4        | 100%        | 2e-14   | 89%   | <a href="#">gi 724836379 XP_010363946.1</a> |
| <a href="#">PREDICTED: C4b-binding protein beta chain isoform X2 [Galeopterus]</a>                                    | 76.6      | 76.6        | 100%        | 3e-14   | 89%   | <a href="#">gi 667314769 XP_008585888.1</a> |
| <a href="#">PREDICTED: C4b-binding protein beta chain isoform X1 [Galeopterus]</a>                                    | 76.6      | 76.6        | 100%        | 3e-14   | 89%   | <a href="#">gi 667314766 XP_008585886.1</a> |

|                                                                                    |      |      |      |       |     |                                             |
|------------------------------------------------------------------------------------|------|------|------|-------|-----|---------------------------------------------|
| <a href="#">PREDICTED: C4b-binding protein beta chain isoform X9 [Chloroce</a>     | 76.1 | 76.1 | 100% | 4e-14 | 89% | <a href="#">gij635130917 XP_007986833.1</a> |
| <a href="#">PREDICTED: C4b-binding protein beta chain isoform X8 [Chloroce</a>     | 76.1 | 76.1 | 100% | 5e-14 | 89% | <a href="#">gij635130915 XP_007986832.1</a> |
| <a href="#">PREDICTED: C4b-binding protein beta chain isoform X7 [Chloroce</a>     | 76.1 | 76.1 | 100% | 5e-14 | 89% | <a href="#">gij635130913 XP_007986831.1</a> |
| <a href="#">PREDICTED: C4b-binding protein beta chain [Nannospalax gallii]</a>     | 76.1 | 76.1 | 100% | 5e-14 | 89% | <a href="#">gij674096417 XP_008821570.1</a> |
| <a href="#">PREDICTED: C4b-binding protein beta chain isoform X6 [Chloroce</a>     | 76.1 | 76.1 | 100% | 5e-14 | 89% | <a href="#">gij635130911 XP_007986830.1</a> |
| <a href="#">PREDICTED: C4b-binding protein beta chain isoform X5 [Chloroce</a>     | 76.1 | 76.1 | 100% | 5e-14 | 89% | <a href="#">gij635130907 XP_007986828.1</a> |
| <a href="#">PREDICTED: C4b-binding protein beta chain isoform X4 [Chloroce</a>     | 76.1 | 76.1 | 100% | 5e-14 | 89% | <a href="#">gij635130905 XP_007986827.1</a> |
| <a href="#">PREDICTED: C4b-binding protein beta chain isoform X3 [Chloroce</a>     | 76.1 | 76.1 | 100% | 5e-14 | 89% | <a href="#">gij635130903 XP_007986826.1</a> |
| <a href="#">PREDICTED: C4b-binding protein beta chain isoform X2 [Chloroce</a>     | 76.1 | 76.1 | 100% | 5e-14 | 89% | <a href="#">gij635130901 XP_007986825.1</a> |
| <a href="#">PREDICTED: C4b-binding protein beta chain isoform X1 [Chloroce</a>     | 76.1 | 76.1 | 100% | 5e-14 | 89% | <a href="#">gij635130899 XP_007986823.1</a> |
| <a href="#">C4b-binding protein beta chain [Heterocephalus glaber]</a>             | 74.0 | 74.0 | 100% | 2e-13 | 89% | <a href="#">gij351708103 EHB11022.1</a>     |
| <a href="#">PREDICTED: C4b-binding protein beta chain [Cavia porcellus]</a>        | 74.0 | 74.0 | 100% | 2e-13 | 89% | <a href="#">gij348577871 XP_003474707.1</a> |
| <a href="#">PREDICTED: C4b-binding protein beta chain [Heterocephalus glab</a>     | 74.0 | 74.0 | 100% | 2e-13 | 89% | <a href="#">gij512892965 XP_004897416.1</a> |
| <a href="#">PREDICTED: C4b-binding protein beta chain [Ursus maritimus]</a>        | 73.6 | 73.6 | 100% | 3e-13 | 93% | <a href="#">gij670984389 XP_008683289.1</a> |
| <a href="#">PREDICTED: C4b-binding protein beta chain isoform X2 [Equus pr</a>     | 72.7 | 72.7 | 92%  | 6e-13 | 92% | <a href="#">gij664745777 XP_008530230.1</a> |
| <a href="#">PREDICTED: C4b-binding protein beta chain isoform X1 [Equus pr</a>     | 72.7 | 72.7 | 92%  | 6e-13 | 92% | <a href="#">gij664745775 XP_008530229.1</a> |
| <a href="#">PREDICTED: LOW QUALITY PROTEIN: C4b-binding protein beta</a>           | 71.5 | 71.5 | 100% | 2e-12 | 85% | <a href="#">gij533120065 XP_005375468.1</a> |
| <a href="#">PREDICTED: C4b-binding protein beta chain isoform X2 [Callithrix j</a> | 71.5 | 71.5 | 96%  | 2e-12 | 92% | <a href="#">gij675749407 XP_008983835.1</a> |
| <a href="#">PREDICTED: C4b-binding protein beta chain isoform X1 [Callithrix j</a> | 71.5 | 71.5 | 96%  | 2e-12 | 92% | <a href="#">gij296230632 XP_002760794.1</a> |
| <a href="#">PREDICTED: C4b-binding protein beta chain [Mustela putorius furo</a>   | 71.0 | 71.0 | 100% | 3e-12 | 89% | <a href="#">gij511871202 XP_004756233.1</a> |
| <a href="#">PREDICTED: C4b-binding protein beta chain [Loxodonta africana]</a>     | 70.2 | 91.2 | 96%  | 5e-12 | 85% | <a href="#">gij731475974 XP_010588717.1</a> |
| <a href="#">PREDICTED: LOW QUALITY PROTEIN: complement component 4</a>             | 69.4 | 69.4 | 92%  | 9e-12 | 88% | <a href="#">gij545215409 XP_005615108.1</a> |
| <a href="#">hypothetical protein PANDA_018755 [Ailuropoda melanoleuca]</a>         | 68.5 | 68.5 | 100% | 2e-11 | 89% | <a href="#">gij281337925 EFB13509.1</a>     |
| <a href="#">PREDICTED: C4b-binding protein beta chain isoform X2 [Panthera</a>     | 68.5 | 68.5 | 96%  | 2e-11 | 88% | <a href="#">gij591341473 XP_007096179.1</a> |
| <a href="#">PREDICTED: c4b-binding protein beta chain-like [Ailuropoda melan</a>   | 68.5 | 68.5 | 100% | 2e-11 | 89% | <a href="#">gij301786617 XP_002928722.1</a> |
| <a href="#">PREDICTED: C4b-binding protein beta chain isoform X1 [Panthera</a>     | 68.5 | 68.5 | 96%  | 2e-11 | 88% | <a href="#">gij591341471 XP_007096178.1</a> |
| <a href="#">PREDICTED: C4b-binding protein beta chain [Pteropus alecto]</a>        | 68.5 | 68.5 | 96%  | 2e-11 | 86% | <a href="#">gij586536223 XP_006922979.1</a> |
| <a href="#">C4b-binding protein beta chain [Pteropus alecto]</a>                   | 68.5 | 68.5 | 96%  | 2e-11 | 86% | <a href="#">gij431892854 ELK03282.1</a>     |
| <a href="#">PREDICTED: C4b-binding protein beta chain isoform X2 [Saimiri bc</a>   | 68.1 | 68.1 | 96%  | 3e-11 | 88% | <a href="#">gij725574024 XP_010339305.1</a> |
| <a href="#">PREDICTED: C4b-binding protein beta chain isoform X1 [Saimiri bc</a>   | 68.1 | 68.1 | 96%  | 3e-11 | 88% | <a href="#">gij403277664 XP_003930472.1</a> |
| <a href="#">PREDICTED: C4b-binding protein beta chain [Otolemur garnettii]</a>     | 68.1 | 68.1 | 100% | 3e-11 | 78% | <a href="#">gij395838946 XP_003792365.1</a> |
| <a href="#">PREDICTED: LOW QUALITY PROTEIN: C4b-binding protein beta</a>           | 66.8 | 66.8 | 100% | 7e-11 | 81% | <a href="#">gij594636425 XP_007171607.1</a> |
| <a href="#">C4b-binding protein beta chain [Fukomys damarensis]</a>                | 66.4 | 66.4 | 88%  | 1e-10 | 88% | <a href="#">gij676262835 KFO19654.1</a>     |
| <a href="#">PREDICTED: C4b-binding protein beta chain [Fukomys damarensis</a>      | 66.4 | 66.4 | 88%  | 1e-10 | 88% | <a href="#">gij731286435 XP_010611521.1</a> |
| <a href="#">PREDICTED: C4b-binding protein beta chain isoform X2 [Felis catu</a>   | 66.0 | 66.0 | 96%  | 1e-10 | 85% | <a href="#">gij587018341 XP_006942889.1</a> |
| <a href="#">PREDICTED: C4b-binding protein beta chain isoform X1 [Felis catu</a>   | 66.0 | 66.0 | 96%  | 1e-10 | 85% | <a href="#">gij410986395 XP_003999496.1</a> |
| <a href="#">PREDICTED: C4b-binding protein beta chain [Orcinus orca]</a>           | 64.7 | 64.7 | 92%  | 4e-10 | 84% | <a href="#">gij466071254 XP_004282462.1</a> |
| <a href="#">PREDICTED: C4b-binding protein beta chain [Orycteropus afer afer</a>   | 64.3 | 64.3 | 92%  | 5e-10 | 84% | <a href="#">gij634826787 XP_007951309.1</a> |
| <a href="#">PREDICTED: C4b-binding protein beta chain [Leptonychotes wedd</a>      | 64.3 | 64.3 | 100% | 5e-10 | 85% | <a href="#">gij585156269 XP_006730462.1</a> |
| <a href="#">PREDICTED: C4b-binding protein beta chain [Ictidomys tridecemlin</a>   | 63.8 | 63.8 | 100% | 7e-10 | 73% | <a href="#">gij532087633 XP_005329528.1</a> |
| <a href="#">PREDICTED: LOW QUALITY PROTEIN: C4b-binding protein beta</a>           | 62.1 | 62.1 | 96%  | 3e-09 | 81% | <a href="#">gij471369765 XP_004375397.1</a> |
| <a href="#">PREDICTED: C4b-binding protein beta chain [Ceratotherium simur</a>     | 61.7 | 61.7 | 100% | 4e-09 | 74% | <a href="#">gij478501878 XP_004425250.1</a> |
| <a href="#">PREDICTED: LOW QUALITY PROTEIN: C4b-binding protein beta</a>           | 61.3 | 61.3 | 88%  | 5e-09 | 83% | <a href="#">gij470641603 XP_004325529.1</a> |
| <a href="#">PREDICTED: C4b-binding protein beta chain [Odobenus rosmarus</a>       | 60.4 | 60.4 | 100% | 1e-08 | 81% | <a href="#">gij472392625 XP_004415587.1</a> |
| <a href="#">PREDICTED: C4b-binding protein beta chain [Chrysochloris asiatic</a>   | 60.0 | 60.0 | 100% | 1e-08 | 78% | <a href="#">gij586450676 XP_006834269.1</a> |

|                                                                                    |      |      |      |       |     |                                             |
|------------------------------------------------------------------------------------|------|------|------|-------|-----|---------------------------------------------|
| <a href="#">C4b-binding protein beta chain precursor [Rattus norvegicus]</a>       | 59.6 | 59.6 | 96%  | 2e-08 | 77% | <a href="#">gil62198215 NP_058691.2</a>     |
| <a href="#">RecName: Full=C4b-binding protein beta chain; Flags: Precursor [F</a>  | 59.6 | 59.6 | 96%  | 2e-08 | 77% | <a href="#">gil2493794 Q63515.1</a>         |
| <a href="#">PREDICTED: C4b-binding protein beta chain [Jaculus jaculus]</a>        | 59.6 | 59.6 | 100% | 2e-08 | 78% | <a href="#">gil507559572 XP_004663509.1</a> |
| <a href="#">PREDICTED: C4b-binding protein beta chain [Echinops telfairi]</a>      | 59.6 | 59.6 | 96%  | 2e-08 | 77% | <a href="#">gil507635442 XP_004700185.1</a> |
| <a href="#">PREDICTED: C4b-binding protein beta chain [Erinaceus europaeus]</a>    | 59.2 | 59.2 | 85%  | 3e-08 | 78% | <a href="#">gil617638324 XP_007531172.1</a> |
| <a href="#">PREDICTED: C4b-binding protein beta chain [Lipotes vexillifer]</a>     | 58.3 | 58.3 | 85%  | 5e-08 | 83% | <a href="#">gil602721258 XP_007470782.1</a> |
| <a href="#">PREDICTED: C4b-binding protein beta chain [Physeter catodon]</a>       | 58.3 | 58.3 | 85%  | 5e-08 | 83% | <a href="#">gil593718317 XP_007105536.1</a> |
| <a href="#">PREDICTED: C4b-binding protein beta chain [Octodon degus]</a>          | 57.9 | 57.9 | 96%  | 7e-08 | 81% | <a href="#">gil507688352 XP_004641253.1</a> |
| <a href="#">PREDICTED: C4b-binding protein beta chain [Sus scrofa]</a>             | 55.4 | 55.4 | 100% | 5e-07 | 74% | <a href="#">gil311265148 XP_003130503.1</a> |
| <a href="#">PREDICTED: C4b-binding protein beta chain [Canis lupus familiaris]</a> | 54.9 | 54.9 | 96%  | 7e-07 | 75% | <a href="#">gil73960685 XP_851611.1</a>     |
| <a href="#">PREDICTED: C4b-binding protein beta chain isoform X2 [Microtus c</a>   | 54.9 | 54.9 | 100% | 7e-07 | 74% | <a href="#">gil532009098 XP_005348366.1</a> |
| <a href="#">PREDICTED: C4b-binding protein beta chain isoform X1 [Microtus c</a>   | 54.9 | 54.9 | 100% | 7e-07 | 74% | <a href="#">gil532009096 XP_005348365.1</a> |
| <a href="#">PREDICTED: C4b-binding protein beta chain [Peromyscus manicul</a>      | 52.4 | 52.4 | 100% | 4e-06 | 70% | <a href="#">gil589966374 XP_006995716.1</a> |
| <a href="#">PREDICTED: C4b-binding protein beta chain [Cricetulus griseus]</a>     | 50.7 | 50.7 | 96%  | 2e-05 | 69% | <a href="#">gil625186859 XP_007614708.1</a> |
| <a href="#">6-phosphofructo-2-kinase/fructose-2,6-biphosphatase 2 [Cricetulus</a>  | 50.7 | 50.7 | 96%  | 2e-05 | 69% | <a href="#">gil344244855 EGW00959.1</a>     |
| <a href="#">6-phosphofructo-2-kinase/fructose-2,6-biphosphatase 2 isoform 3  </a>  | 50.7 | 50.7 | 96%  | 2e-05 | 69% | <a href="#">gil537167880 ERE73717.1</a>     |
| <a href="#">6-phosphofructo-2-kinase/fructose-2,6-biphosphatase 2 isoform 2  </a>  | 50.7 | 50.7 | 96%  | 2e-05 | 69% | <a href="#">gil537167879 ERE73716.1</a>     |
| <a href="#">PREDICTED: C4b-binding protein beta chain isoform X3 [Capra hir</a>    | 50.3 | 50.3 | 85%  | 2e-05 | 74% | <a href="#">gil548497748 XP_005690484.1</a> |
| <a href="#">C4b-binding protein beta chain precursor [Bos taurus]</a>              | 50.3 | 50.3 | 85%  | 2e-05 | 74% | <a href="#">gil99028955 NP_776678.2</a>     |
| <a href="#">RecName: Full=C4b-binding protein beta chain; Flags: Precursor [E</a>  | 50.3 | 50.3 | 85%  | 2e-05 | 74% | <a href="#">gil2493793 Q28066.1</a>         |
| <a href="#">PREDICTED: C4b-binding protein beta chain isoform X3 [Bos tauru</a>    | 50.3 | 50.3 | 85%  | 2e-05 | 74% | <a href="#">gil528979094 XP_005216707.1</a> |
| <a href="#">PREDICTED: C4b-binding protein beta chain isoform X2 [Bos tauru</a>    | 50.3 | 50.3 | 85%  | 2e-05 | 74% | <a href="#">gil528979092 XP_005216706.1</a> |
| <a href="#">PREDICTED: C4b-binding protein beta chain [Pantholops hodgsoni</a>     | 50.3 | 50.3 | 85%  | 2e-05 | 74% | <a href="#">gil556742954 XP_005966995.1</a> |
| <a href="#">PREDICTED: C4b-binding protein beta chain isoform X1 [Capra hir</a>    | 50.3 | 50.3 | 85%  | 2e-05 | 74% | <a href="#">gil548497744 XP_005690482.1</a> |
| <a href="#">complement component 4 binding protein, beta [Ovis aries]</a>          | 50.3 | 50.3 | 85%  | 2e-05 | 74% | <a href="#">gil444733674 CCQ71779.1</a>     |
| <a href="#">PREDICTED: C4b-binding protein beta chain isoform X1 [Bos tauru</a>    | 50.3 | 50.3 | 85%  | 2e-05 | 74% | <a href="#">gil528979090 XP_005216705.1</a> |
| <a href="#">PREDICTED: C4b-binding protein beta chain [Mesocricetus auratus</a>    | 48.6 | 48.6 | 92%  | 7e-05 | 72% | <a href="#">gil524960013 XP_005079950.1</a> |

## Alignments

Download GenPept Graphics

Next Previous Descriptions

PREDICTED: C4b-binding protein beta chain isoform X3 [Pongo abelii]

Sequence ID: [gil686700216|ref|XP\\_009236698.1](#) Length: 202 Number of Matches: 1

Range 1: 67 to 93 GenPept Graphics

Next Match Previous Match

| Score          | Expect | Identities  | Positives   | Gaps     |
|----------------|--------|-------------|-------------|----------|
| 87.6 bits(199) | 5e-18  | 27/27(100%) | 27/27(100%) | 0/27(0%) |

Query 1 RLGHCDDPVLVNGEFSSSGPVNVSDKI 27  
 RLGHCDDPVLVNGEFSSSGPVNVSDKI  
 Sbjct 67 RLGHCDDPVLVNGEFSSSGPVNVSDKI 93

### Related Information

[Gene](#) - associated gene details  
[Map Viewer](#) - aligned genomic context

Download GenPept Graphics

Next Previous Descriptions

unnamed protein product [Homo sapiens]

Sequence ID: [gil194373591|dbj|BAG56891.1](#) Length: 218 Number of Matches: 1

Range 1: 67 to 93 GenPept Graphics

Next Match Previous Match

| Score          | Expect | Identities  | Positives   | Gaps     |
|----------------|--------|-------------|-------------|----------|
| 87.6 bits(199) | 5e-18  | 27/27(100%) | 27/27(100%) | 0/27(0%) |

Query 1 RLGHCDDPVLVNGEFSSSGPVNVSDKI 27

### Related Information

[Gene](#) - associated gene details



Sbjct 67 RLGHCDDPVLVNGEFSSSGPVNVSDKI 93

[Download](#) [GenPept](#) [Graphics](#)

[Next](#) [Previous](#) [Descriptions](#)

PREDICTED: C4b-binding protein beta chain isoform X3 [Pan troglodytes]

Sequence ID: [gi|694891540|ref|XP\\_009439669.1](#) Length: 227 Number of Matches: 1

Range 1: 76 to 102 [GenPept](#) [Graphics](#)

[Next Match](#) [Previous Match](#)

| Score          | Expect | Identities  | Positives   | Gaps     |
|----------------|--------|-------------|-------------|----------|
| 87.6 bits(199) | 5e-18  | 27/27(100%) | 27/27(100%) | 0/27(0%) |

Query 1 RLGHCDDPVLVNGEFSSSGPVNVSDKI 27  
 RLGHCDDPVLVNGEFSSSGPVNVSDKI  
 Sbjct 76 RLGHCDDPVLVNGEFSSSGPVNVSDKI 102

**Related Information**

[Gene](#) - associated gene details

[Download](#) [GenPept](#) [Graphics](#)

[Next](#) [Previous](#) [Descriptions](#)

PREDICTED: C4b-binding protein beta chain isoform X3 [Pan paniscus]

Sequence ID: [gi|675771724|ref|XP\\_008974762.1](#) Length: 227 Number of Matches: 1

Range 1: 76 to 102 [GenPept](#) [Graphics](#)

[Next Match](#) [Previous Match](#)

| Score          | Expect | Identities  | Positives   | Gaps     |
|----------------|--------|-------------|-------------|----------|
| 87.6 bits(199) | 5e-18  | 27/27(100%) | 27/27(100%) | 0/27(0%) |

Query 1 RLGHCDDPVLVNGEFSSSGPVNVSDKI 27  
 RLGHCDDPVLVNGEFSSSGPVNVSDKI  
 Sbjct 76 RLGHCDDPVLVNGEFSSSGPVNVSDKI 102

**Related Information**

[Gene](#) - associated gene details

[Map Viewer](#) - aligned genomic context

[Download](#) [GenPept](#) [Graphics](#)

[Next](#) [Previous](#) [Descriptions](#)

PREDICTED: C4b-binding protein beta chain isoform X3 [Homo sapiens]

Sequence ID: [gi|530366462|ref|XP\\_005273312.1](#) Length: 227 Number of Matches: 1

Range 1: 76 to 102 [GenPept](#) [Graphics](#)

[Next Match](#) [Previous Match](#)

| Score          | Expect | Identities  | Positives   | Gaps     |
|----------------|--------|-------------|-------------|----------|
| 87.6 bits(199) | 5e-18  | 27/27(100%) | 27/27(100%) | 0/27(0%) |

Query 1 RLGHCDDPVLVNGEFSSSGPVNVSDKI 27  
 RLGHCDDPVLVNGEFSSSGPVNVSDKI  
 Sbjct 76 RLGHCDDPVLVNGEFSSSGPVNVSDKI 102

**Related Information**

[Gene](#) - associated gene details

[Map Viewer](#) - aligned genomic context

BLAST is a registered trademark of the National Library of Medicine.

NCBI/ BLAST/ blastp suite/ Formatting Results - BTFX2FSH016

Your search parameters were adjusted to search for a short input sequence.

[Edit and Resubmit](#) [Save Search Strategies](#) [Formatting options](#) [Download](#) [YouTube](#) [How to read this page](#) [Blast report description](#)

CD44\_KAFDSTLPTMAQMEKA\_Mod

RID [BTFX2FSH016](#) (Expires on 01-20 15:26 pm)

Query ID |cl|86069  
 Description None  
 Molecule type amino acid  
 Query Length 16

Database Name nr  
 Description All non-redundant GenBank CDS translations+PDB+SwissProt+PIR+PRF excluding environmental samples from WGS projects  
 Program BLASTP 2.2.30+ [Citation](#)

Other reports: [Search Summary](#) [Taxonomy reports](#) [Distance tree of results](#) [Multiple alignment](#)

Graphic Summary

[Show Conserved Domains](#)

No putative conserved domains have been detected

Distribution of 100 Blast Hits on the Query Sequence

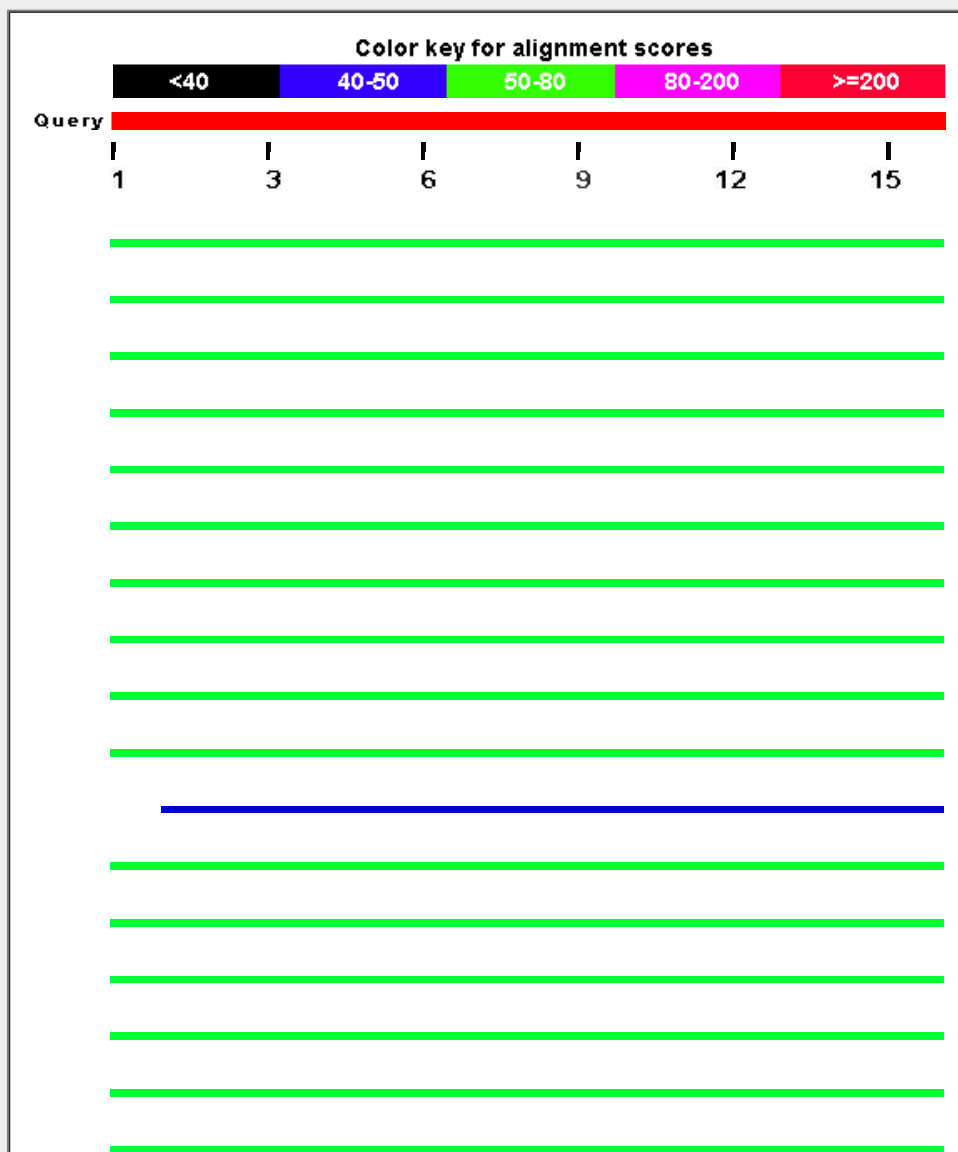

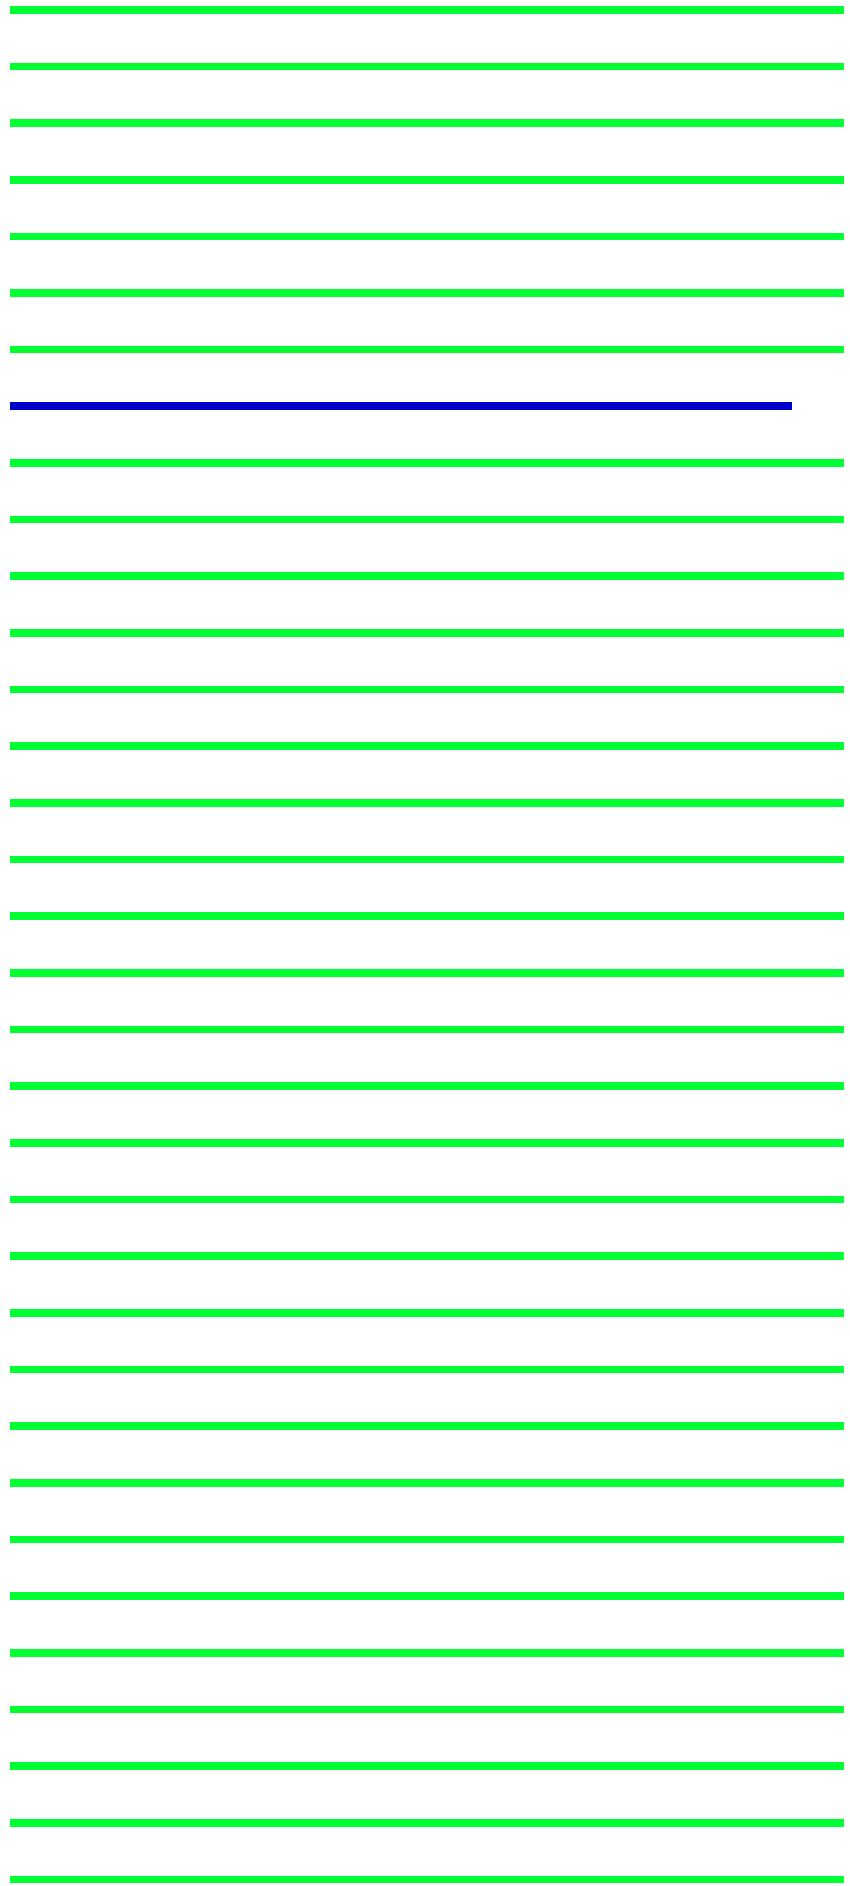

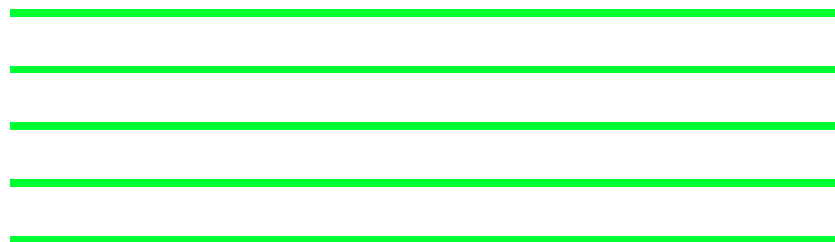

## Descriptions

### Sequences producing significant alignments:

Select: [All](#) [None](#) Selected:0

[Alignments](#)
[Download](#)
[GenPept](#)
[Graphics](#)
[Distance tree of results](#)
[Multiple alignment](#)

| Description                                                                  | Max score | Total score | Query cover | E value | Ident | Accession                                   |
|------------------------------------------------------------------------------|-----------|-------------|-------------|---------|-------|---------------------------------------------|
| <a href="#">CD44 protein [Homo sapiens]</a>                                  | 52.4      | 52.4        | 100%        | 7e-07   | 94%   | <a href="#">gi 30353933 AAH52287.1</a>      |
| <a href="#">PREDICTED: LOW QUALITY PROTEIN: CD44 antigen-like [Pr</a>        | 52.4      | 52.4        | 100%        | 8e-07   | 94%   | <a href="#">gi 686774195 XP_009235328.1</a> |
| <a href="#">unnamed protein product [Macaca fascicularis]</a>                | 52.4      | 52.4        | 100%        | 1e-06   | 94%   | <a href="#">gi 90076134 BAE87747.1</a>      |
| <a href="#">PREDICTED: CD44 antigen-like [Gorilla gorilla gorilla]</a>       | 52.4      | 52.4        | 100%        | 1e-06   | 94%   | <a href="#">gi 426367956 XP_004050985.1</a> |
| <a href="#">PREDICTED: CD44 antigen isoform X7 [Orycteropus afer afer]</a>   | 52.4      | 52.4        | 100%        | 1e-06   | 94%   | <a href="#">gi 634854877 XP_007941453.1</a> |
| <a href="#">PREDICTED: CD44 antigen isoform X7 [Pan paniscus]</a>            | 52.4      | 52.4        | 100%        | 1e-06   | 94%   | <a href="#">gi 675794911 XP_008954098.1</a> |
| <a href="#">PREDICTED: CD44 antigen isoform X20 [Callithrix jacchus]</a>     | 52.4      | 52.4        | 100%        | 1e-06   | 94%   | <a href="#">gi 675699631 XP_009006179.1</a> |
| <a href="#">CD44 antigen isoform 5 precursor [Homo sapiens]</a>              | 52.4      | 52.4        | 100%        | 1e-06   | 94%   | <a href="#">gi 48255943 NP_001001392.1</a>  |
| <a href="#">PREDICTED: CD44 antigen isoform X15 [Pan troglodytes]</a>        | 52.4      | 52.4        | 100%        | 1e-06   | 94%   | <a href="#">gi 332836157 XP_003313029.1</a> |
| <a href="#">PREDICTED: CD44 antigen isoform 8 [Nomascus leucogenys]</a>      | 52.4      | 52.4        | 100%        | 1e-06   | 94%   | <a href="#">gi 332210732 XP_003254465.1</a> |
| <a href="#">85 kda glioma membrane protein/CD44 homolog [Homo sapien</a>     | 49.4      | 49.4        | 93%         | 1e-06   | 93%   | <a href="#">gi 998625 AAB32708.1</a>        |
| <a href="#">Chain A, High-resolution Crystal Structure Of The Human Cd44</a> | 52.4      | 52.4        | 100%        | 1e-06   | 94%   | <a href="#">gi 685425709 4PZ3_A</a>         |
| <a href="#">Chain A, High-resolution Crystal Structure Of The Human Cd44</a> | 52.4      | 52.4        | 100%        | 1e-06   | 94%   | <a href="#">gi 685425712 4PZ4_A</a>         |
| <a href="#">Chain A, Solution Structure Of The Hyaluronan Binding Domair</a> | 52.4      | 52.4        | 100%        | 1e-06   | 94%   | <a href="#">gi 47168555 1POZ_A</a>          |
| <a href="#">Chain A, Hyaluronan-Binding Domain Of Cd44 In Its Ligand-Bo</a>  | 52.4      | 52.4        | 100%        | 1e-06   | 94%   | <a href="#">gi 119390067 2I83_A</a>         |
| <a href="#">Hermes antigen gp90 homing receptor precursor [Homo sapien</a>   | 52.4      | 52.4        | 100%        | 2e-06   | 94%   | <a href="#">gi 186661 AAA36138.1</a>        |
| <a href="#">PREDICTED: CD44 antigen isoform X5 [Pan paniscus]</a>            | 52.4      | 52.4        | 100%        | 2e-06   | 94%   | <a href="#">gi 675794908 XP_008954097.1</a> |
| <a href="#">CD44 antigen isoform 8 precursor [Homo sapiens]</a>              | 52.4      | 52.4        | 100%        | 2e-06   | 94%   | <a href="#">gi 321400142 NP_001189486.1</a> |
| <a href="#">unnamed protein product [Homo sapiens]</a>                       | 52.4      | 52.4        | 100%        | 2e-06   | 94%   | <a href="#">gi 194387514 BAG60121.1</a>     |
| <a href="#">CD44 antigen isoform 7 precursor [Homo sapiens]</a>              | 52.4      | 52.4        | 100%        | 2e-06   | 94%   | <a href="#">gi 321400140 NP_001189485.1</a> |
| <a href="#">PREDICTED: CD44 antigen isoform X18 [Macaca fascicularis]</a>    | 52.4      | 52.4        | 100%        | 2e-06   | 94%   | <a href="#">gi 544486523 XP_005578264.1</a> |
| <a href="#">PREDICTED: CD44 antigen isoform 6 [Nomascus leucogenys]</a>      | 52.4      | 52.4        | 100%        | 2e-06   | 94%   | <a href="#">gi 332210728 XP_003254463.1</a> |
| <a href="#">PREDICTED: CD44 antigen isoform X6 [Orycteropus afer afer]</a>   | 52.4      | 52.4        | 100%        | 2e-06   | 94%   | <a href="#">gi 634854874 XP_007941452.1</a> |
| <a href="#">unnamed protein product [Macaca fascicularis]</a>                | 52.4      | 52.4        | 100%        | 2e-06   | 94%   | <a href="#">gi 90077486 BAE88423.1</a>      |
| <a href="#">CD44 molecule [Homo sapiens]</a>                                 | 49.8      | 49.8        | 93%         | 2e-06   | 93%   | <a href="#">gi 228008043 BAH57528.1</a>     |
| <a href="#">PREDICTED: CD44 antigen isoform X14 [Rhinopithecus roxellae]</a> | 52.4      | 52.4        | 100%        | 2e-06   | 94%   | <a href="#">gi 724966856 XP_010356691.1</a> |
| <a href="#">PREDICTED: CD44 antigen isoform X4 [Pan paniscus]</a>            | 52.4      | 52.4        | 100%        | 2e-06   | 94%   | <a href="#">gi 675794906 XP_008954096.1</a> |
| <a href="#">PREDICTED: CD44 antigen isoform X19 [Chlorocebus sabaueu</a>     | 52.4      | 52.4        | 100%        | 2e-06   | 94%   | <a href="#">gi 635014254 XP_008000349.1</a> |
| <a href="#">CDw44 antigen precursor [Homo sapiens]</a>                       | 52.4      | 52.4        | 100%        | 2e-06   | 94%   | <a href="#">gi 180197 AAA35674.1</a>        |

|                                                                                 |      |      |      |       |     |                                             |
|---------------------------------------------------------------------------------|------|------|------|-------|-----|---------------------------------------------|
| <a href="#">CD44 antigen [Homo sapiens]</a>                                     | 52.4 | 52.4 | 100% | 2e-06 | 94% | <a href="#">gi 21429241 AAM50041.1</a>      |
| <a href="#">CD44 antigen isoform 4 precursor [Homo sapiens]</a>                 | 52.4 | 52.4 | 100% | 2e-06 | 94% | <a href="#">gi 48255941 NP_001001391.1</a>  |
| <a href="#">cell adhesion molecule [Homo sapiens]</a>                           | 52.4 | 52.4 | 100% | 2e-06 | 94% | <a href="#">gi 180130 AAA51950.1</a>        |
| <a href="#">cell surface glycoprotein CD44 [Homo sapiens]</a>                   | 52.4 | 52.4 | 100% | 2e-06 | 94% | <a href="#">gi 1101786 AAA82949.1</a>       |
| <a href="#">PREDICTED: CD44 antigen isoform X17 [Macaca fascicularis]</a>       | 52.4 | 52.4 | 100% | 2e-06 | 94% | <a href="#">gi 544486521 XP_005578263.1</a> |
| <a href="#">PREDICTED: CD44 antigen isoform X5 [Papio anubis]</a>               | 52.4 | 52.4 | 100% | 2e-06 | 94% | <a href="#">gi 402893830 XP_003910087.1</a> |
| <a href="#">PREDICTED: CD44 antigen isoform 2 [Nomascus leucogenys]</a>         | 52.4 | 52.4 | 100% | 2e-06 | 94% | <a href="#">gi 332210720 XP_003254459.1</a> |
| <a href="#">unnamed protein product [Homo sapiens]</a>                          | 52.4 | 52.4 | 100% | 2e-06 | 94% | <a href="#">gi 158261871 BAF83113.1</a>     |
| <a href="#">PREDICTED: CD44 antigen isoform X14 [Pan troglodytes]</a>           | 52.4 | 52.4 | 100% | 2e-06 | 94% | <a href="#">gi 114637008 XP_001152726.1</a> |
| <a href="#">hypothetical protein [Homo sapiens]</a>                             | 52.4 | 52.4 | 100% | 2e-06 | 94% | <a href="#">gi 30268334 CAD89965.1</a>      |
| <a href="#">PREDICTED: CD44 antigen isoform X8 [Saimiri boliviensis boli]</a>   | 52.4 | 52.4 | 100% | 2e-06 | 94% | <a href="#">gi 725549291 XP_010331704.1</a> |
| <a href="#">PREDICTED: CD44 antigen isoform X16 [Callithrix jacchus]</a>        | 52.4 | 52.4 | 100% | 2e-06 | 94% | <a href="#">gi 675699620 XP_009006176.1</a> |
| <a href="#">CD44 antigen [synthetic construct]</a>                              | 52.4 | 52.4 | 100% | 2e-06 | 94% | <a href="#">gi 60830199 AAX36916.1</a>      |
| <a href="#">CD44 antigen [synthetic construct]</a>                              | 52.4 | 52.4 | 100% | 2e-06 | 94% | <a href="#">gi 60654139 AAX29762.1</a>      |
| <a href="#">RecName: Full=CD44 antigen; AltName: Full=Extracellular mat</a>     | 52.4 | 52.4 | 100% | 2e-06 | 94% | <a href="#">gi 116004 P14745.1</a>          |
| <a href="#">CD44 protein [Callithrix jacchus]</a>                               | 52.4 | 52.4 | 100% | 2e-06 | 94% | <a href="#">gi 148749357 ABR09546.1</a>     |
| <a href="#">PREDICTED: CD44 antigen isoform X11 [Ursus maritimus]</a>           | 52.4 | 52.4 | 100% | 2e-06 | 94% | <a href="#">gi 670988033 XP_008685036.1</a> |
| <a href="#">PREDICTED: CD44 antigen isoform X5 [Orycteropus afer afer]</a>      | 52.4 | 52.4 | 100% | 2e-06 | 94% | <a href="#">gi 634854870 XP_007941451.1</a> |
| <a href="#">PREDICTED: CD44 antigen [Odobenus rosmarus divergens]</a>           | 52.4 | 52.4 | 100% | 2e-06 | 94% | <a href="#">gi 472373321 XP_004406132.1</a> |
| <a href="#">CD44R5 [Homo sapiens]</a>                                           | 52.4 | 52.4 | 100% | 2e-06 | 94% | <a href="#">gi 435700 AAB27919.1</a>        |
| <a href="#">CD44 antigen (Indian blood group), isoform CRA_i [Homo sapiens]</a> | 52.4 | 52.4 | 100% | 2e-06 | 94% | <a href="#">gi 119588560 EAW68154.1</a>     |
| <a href="#">PREDICTED: CD44 antigen isoform X13 [Homo sapiens]</a>              | 52.4 | 52.4 | 100% | 2e-06 | 94% | <a href="#">gi 578820976 XP_006718453.1</a> |
| <a href="#">PREDICTED: CD44 antigen isoform X10 [Ursus maritimus]</a>           | 52.4 | 52.4 | 100% | 2e-06 | 94% | <a href="#">gi 670988031 XP_008685035.1</a> |
| <a href="#">PREDICTED: CD44 antigen isoform X13 [Pan troglodytes]</a>           | 52.4 | 52.4 | 100% | 2e-06 | 94% | <a href="#">gi 694944091 XP_009458500.1</a> |
| <a href="#">PREDICTED: CD44 antigen isoform X13 [Rhinopithecus roxellae]</a>    | 52.4 | 52.4 | 100% | 2e-06 | 94% | <a href="#">gi 724966854 XP_010356690.1</a> |
| <a href="#">CD44R4 [Homo sapiens]</a>                                           | 52.4 | 52.4 | 100% | 2e-06 | 94% | <a href="#">gi 7705157 AAB27918.2</a>       |
| <a href="#">CD44 antigen (Indian blood group), isoform CRA_b [Homo sapiens]</a> | 52.4 | 52.4 | 100% | 2e-06 | 94% | <a href="#">gi 119588551 EAW68145.1</a>     |
| <a href="#">PREDICTED: CD44 antigen isoform X15 [Callithrix jacchus]</a>        | 52.4 | 52.4 | 100% | 2e-06 | 94% | <a href="#">gi 675699617 XP_009006175.1</a> |
| <a href="#">PREDICTED: CD44 antigen isoform X18 [Chlorocebus sabaueus]</a>      | 52.4 | 52.4 | 100% | 2e-06 | 94% | <a href="#">gi 635014252 XP_008000344.1</a> |
| <a href="#">PREDICTED: CD44 antigen isoform X16 [Macaca fascicularis]</a>       | 52.4 | 52.4 | 100% | 2e-06 | 94% | <a href="#">gi 544486519 XP_005578262.1</a> |
| <a href="#">PREDICTED: CD44 antigen isoform 5 [Nomascus leucogenys]</a>         | 52.4 | 52.4 | 100% | 2e-06 | 94% | <a href="#">gi 332210726 XP_003254462.1</a> |
| <a href="#">CD44 antigen isoform 6 precursor [Homo sapiens]</a>                 | 52.4 | 52.4 | 100% | 2e-06 | 94% | <a href="#">gi 321400138 NP_001189484.1</a> |
| <a href="#">PREDICTED: CD44 antigen isoform X12 [Pan troglodytes]</a>           | 52.4 | 52.4 | 100% | 2e-06 | 94% | <a href="#">gi 114637002 XP_001151845.1</a> |
| <a href="#">PREDICTED: CD44 antigen isoform X14 [Callithrix jacchus]</a>        | 52.4 | 52.4 | 100% | 2e-06 | 94% | <a href="#">gi 675699613 XP_009006174.1</a> |
| <a href="#">PREDICTED: CD44 antigen isoform X4 [Orycteropus afer afer]</a>      | 52.4 | 52.4 | 100% | 2e-06 | 94% | <a href="#">gi 634854867 XP_007941450.1</a> |
| <a href="#">PREDICTED: CD44 antigen isoform X3 [Papio anubis]</a>               | 52.4 | 52.4 | 100% | 2e-06 | 94% | <a href="#">gi 685586972 XP_009184576.1</a> |
| <a href="#">PREDICTED: CD44 antigen isoform X9 [Ursus maritimus]</a>            | 52.4 | 52.4 | 100% | 2e-06 | 94% | <a href="#">gi 670988029 XP_008685034.1</a> |
| <a href="#">PREDICTED: CD44 antigen isoform X12 [Rhinopithecus roxellae]</a>    | 52.4 | 52.4 | 100% | 2e-06 | 94% | <a href="#">gi 724966852 XP_010356689.1</a> |
| <a href="#">PREDICTED: CD44 antigen isoform X2 [Papio anubis]</a>               | 52.4 | 52.4 | 100% | 2e-06 | 94% | <a href="#">gi 685586970 XP_009184575.1</a> |
| <a href="#">PREDICTED: CD44 antigen isoform X3 [Pan paniscus]</a>               | 52.4 | 52.4 | 100% | 2e-06 | 94% | <a href="#">gi 675794904 XP_008954095.1</a> |
| <a href="#">PREDICTED: CD44 antigen isoform X11 [Rhinopithecus roxellae]</a>    | 52.4 | 52.4 | 100% | 2e-06 | 94% | <a href="#">gi 724966850 XP_010356688.1</a> |
| <a href="#">PREDICTED: CD44 antigen isoform X2 [Pan paniscus]</a>               | 52.4 | 52.4 | 100% | 2e-06 | 94% | <a href="#">gi 675794902 XP_008954093.1</a> |
| <a href="#">PREDICTED: CD44 antigen isoform X17 [Chlorocebus sabaueus]</a>      | 52.4 | 52.4 | 100% | 2e-06 | 94% | <a href="#">gi 635014250 XP_008000338.1</a> |
| <a href="#">CD44 antigen precursor [Pongo abelii]</a>                           | 52.4 | 52.4 | 100% | 2e-06 | 94% | <a href="#">gi 197101303 NP_001125856.1</a> |
| <a href="#">CD44E (epithelial form) [Homo sapiens]</a>                          | 52.4 | 52.4 | 100% | 2e-06 | 94% | <a href="#">gi 29801 CAA38951.1</a>         |

|                                                                               |      |      |      |       |     |                                             |
|-------------------------------------------------------------------------------|------|------|------|-------|-----|---------------------------------------------|
| <a href="#">PREDICTED: CD44 antigen isoform X1 [Papio anubis]</a>             | 52.4 | 52.4 | 100% | 2e-06 | 94% | <a href="#">gij402893828 XP_003910086.1</a> |
| <a href="#">PREDICTED: CD44 antigen isoform 1 [Nomascus leucogenys]</a>       | 52.4 | 52.4 | 100% | 2e-06 | 94% | <a href="#">gij332210718 XP_003254458.1</a> |
| <a href="#">PREDICTED: CD44 antigen isoform X11 [Pan troglodytes]</a>         | 52.4 | 52.4 | 100% | 2e-06 | 94% | <a href="#">gij114636992 XP_001152795.1</a> |
| <a href="#">PREDICTED: CD44 antigen isoform 10 [Macaca mulatta]</a>           | 52.4 | 52.4 | 100% | 2e-06 | 94% | <a href="#">gij109106774 XP_001115390.1</a> |
| <a href="#">CD44 antigen isoform 3 precursor [Homo sapiens]</a>               | 52.4 | 52.4 | 100% | 2e-06 | 94% | <a href="#">gij48255939 NP_001001390.1</a>  |
| <a href="#">PREDICTED: CD44 antigen isoform X13 [Callithrix jacchus]</a>      | 52.4 | 52.4 | 100% | 2e-06 | 94% | <a href="#">gij675699609 XP_009006173.1</a> |
| <a href="#">PREDICTED: CD44 antigen isoform X7 [Saimiri boliviensis boli]</a> | 52.4 | 52.4 | 100% | 2e-06 | 94% | <a href="#">gij725549289 XP_010331699.1</a> |
| <a href="#">PREDICTED: CD44 antigen isoform X3 [Orycteropus afer afer]</a>    | 52.4 | 52.4 | 100% | 2e-06 | 94% | <a href="#">gij634854864 XP_007941449.1</a> |
| <a href="#">PREDICTED: CD44 antigen isoform X12 [Callithrix jacchus]</a>      | 52.4 | 52.4 | 100% | 2e-06 | 94% | <a href="#">gij675699603 XP_009006172.1</a> |
| <a href="#">PREDICTED: CD44 antigen isoform X8 [Ursus maritimus]</a>          | 52.4 | 52.4 | 100% | 2e-06 | 94% | <a href="#">gij670988027 XP_008685033.1</a> |
| <a href="#">PREDICTED: CD44 antigen isoform X11 [Callithrix jacchus]</a>      | 52.4 | 52.4 | 100% | 2e-06 | 94% | <a href="#">gij675699599 XP_009006171.1</a> |
| <a href="#">PREDICTED: CD44 antigen isoform X10 [Pan troglodytes]</a>         | 52.4 | 52.4 | 100% | 2e-06 | 94% | <a href="#">gij694944087 XP_009458498.1</a> |
| <a href="#">PREDICTED: CD44 antigen isoform X10 [Homo sapiens]</a>            | 52.4 | 52.4 | 100% | 2e-06 | 94% | <a href="#">gij530396022 XP_005253297.1</a> |
| <a href="#">PREDICTED: CD44 antigen isoform X1 [Pan paniscus]</a>             | 52.4 | 52.4 | 100% | 2e-06 | 94% | <a href="#">gij675794900 XP_008954092.1</a> |
| <a href="#">PREDICTED: CD44 antigen isoform X10 [Callithrix jacchus]</a>      | 52.4 | 52.4 | 100% | 2e-06 | 94% | <a href="#">gij675699596 XP_009006170.1</a> |
| <a href="#">PREDICTED: CD44 antigen isoform X14 [Macaca fascicularis]</a>     | 52.4 | 52.4 | 100% | 2e-06 | 94% | <a href="#">gij544486515 XP_005578260.1</a> |
| <a href="#">PREDICTED: CD44 antigen isoform X6 [Saimiri boliviensis boli]</a> | 52.4 | 52.4 | 100% | 2e-06 | 94% | <a href="#">gij725549287 XP_010331696.1</a> |
| <a href="#">PREDICTED: CD44 antigen isoform X10 [Rhinopithecus roxellae]</a>  | 52.4 | 52.4 | 100% | 2e-06 | 94% | <a href="#">gij724966848 XP_010356687.1</a> |
| <a href="#">PREDICTED: CD44 antigen isoform X13 [Macaca fascicularis]</a>     | 52.4 | 52.4 | 100% | 2e-06 | 94% | <a href="#">gij544486513 XP_005578259.1</a> |
| <a href="#">PREDICTED: CD44 antigen isoform X7 [Ursus maritimus]</a>          | 52.4 | 52.4 | 100% | 2e-06 | 94% | <a href="#">gij670988025 XP_008685032.1</a> |
| <a href="#">PREDICTED: CD44 antigen isoform X6 [Ursus maritimus]</a>          | 52.4 | 52.4 | 100% | 2e-06 | 94% | <a href="#">gij670988023 XP_008685031.1</a> |
| <a href="#">PREDICTED: CD44 antigen isoform X5 [Saimiri boliviensis boli]</a> | 52.4 | 52.4 | 100% | 2e-06 | 94% | <a href="#">gij725549285 XP_010331692.1</a> |
| <a href="#">PREDICTED: CD44 antigen isoform X9 [Homo sapiens]</a>             | 52.4 | 52.4 | 100% | 2e-06 | 94% | <a href="#">gij530396020 XP_005253296.1</a> |
| <a href="#">PREDICTED: CD44 antigen isoform X9 [Callithrix jacchus]</a>       | 52.4 | 52.4 | 100% | 2e-06 | 94% | <a href="#">gij675699592 XP_009006169.1</a> |
| <a href="#">PREDICTED: CD44 antigen isoform X16 [Chlorocebus sabaeus]</a>     | 52.4 | 52.4 | 100% | 2e-06 | 94% | <a href="#">gij635014248 XP_008000329.1</a> |
| <a href="#">PREDICTED: CD44 antigen isoform X9 [Rhinopithecus roxellar]</a>   | 52.4 | 52.4 | 100% | 2e-06 | 94% | <a href="#">gij724966846 XP_010356686.1</a> |

## Alignments

Download ▼ [GenPept](#) [Graphics](#)

▼ Next ▲ Previous ▲ Descriptions

CD44 protein [Homo sapiens]

Sequence ID: [gij30353933|gb|AAH52287.1](#) Length: 80 Number of Matches: 1

Range 1: 54 to 69 [GenPept](#) [Graphics](#)

▼ Next Match ▲ Previous Match

| Score          | Expect | Identities | Positives   | Gaps     |
|----------------|--------|------------|-------------|----------|
| 52.4 bits(116) | 7e-07  | 15/16(94%) | 16/16(100%) | 0/16(0%) |

Query 1 KAFDSTLPTMAQMEKA 16  
KAF+STLPTMAQMEKA  
Sbjct 54 KAFNSTLPTMAQMEKA 69

### Related Information

[Gene](#) - associated gene details

Download ▼ [GenPept](#) [Graphics](#)

▼ Next ▲ Previous ▲ Descriptions

PREDICTED: LOW QUALITY PROTEIN: CD44 antigen-like, partial [Pongo abelii]

Sequence ID: [gij686774195|ref|XP\\_009235328.1](#) Length: 91 Number of Matches: 1

Range 1: 31 to 46 [GenPept](#) [Graphics](#)

▼ Next Match ▲ Previous Match

| Score          | Expect | Identities | Positives   | Gaps     |
|----------------|--------|------------|-------------|----------|
| 52.4 bits(116) | 8e-07  | 15/16(94%) | 16/16(100%) | 0/16(0%) |

### Related Information

[Gene](#) - associated gene details

[Map Viewer](#) - aligned genomic context

Query 1 KAFDSTLPTMAQMEKA 16  
 KAF+STLPTMAQMEKA  
 Sbjct 31 KAFNSTLPTMAQMEKA 46

[Download](#) [GenPept](#) [Graphics](#)

[Next](#) [Previous](#) [Descriptions](#)

unnamed protein product [Macaca fascicularis]

Sequence ID: [gi|90076134|dbj|BAE87747.1](#) Length: 114 Number of Matches: 1

[See 1 more title\(s\)](#)

Range 1: 54 to 69 [GenPept](#) [Graphics](#)

[Next Match](#) [Previous Match](#)

| Score          | Expect | Identities | Positives   | Gaps     |
|----------------|--------|------------|-------------|----------|
| 52.4 bits(116) | 1e-06  | 15/16(94%) | 16/16(100%) | 0/16(0%) |

Query 1 KAFDSTLPTMAQMEKA 16  
 KAF+STLPTMAQMEKA  
 Sbjct 54 KAFNSTLPTMAQMEKA 69

**Related Information**

[Gene](#) - associated gene details  
[Identical Proteins](#) - Proteins identical to the subject

[Download](#) [GenPept](#) [Graphics](#)

[Next](#) [Previous](#) [Descriptions](#)

PREDICTED: CD44 antigen-like [Gorilla gorilla gorilla]

Sequence ID: [gi|426367956|ref|XP\\_004050985.1](#) Length: 132 Number of Matches: 1

Range 1: 54 to 69 [GenPept](#) [Graphics](#)

[Next Match](#) [Previous Match](#)

| Score          | Expect | Identities | Positives   | Gaps     |
|----------------|--------|------------|-------------|----------|
| 52.4 bits(116) | 1e-06  | 15/16(94%) | 16/16(100%) | 0/16(0%) |

Query 1 KAFDSTLPTMAQMEKA 16  
 KAF+STLPTMAQMEKA  
 Sbjct 54 KAFNSTLPTMAQMEKA 69

**Related Information**

[Gene](#) - associated gene details  
[Map Viewer](#) - aligned genomic context

[Download](#) [GenPept](#) [Graphics](#)

[Next](#) [Previous](#) [Descriptions](#)

PREDICTED: CD44 antigen isoform X7 [Orycteropus afer afer]

Sequence ID: [gi|634854877|ref|XP\\_007941453.1](#) Length: 138 Number of Matches: 1

Range 1: 54 to 69 [GenPept](#) [Graphics](#)

[Next Match](#) [Previous Match](#)

| Score          | Expect | Identities | Positives   | Gaps     |
|----------------|--------|------------|-------------|----------|
| 52.4 bits(116) | 1e-06  | 15/16(94%) | 16/16(100%) | 0/16(0%) |

Query 1 KAFDSTLPTMAQMEKA 16  
 KAF+STLPTMAQMEKA  
 Sbjct 54 KAFNSTLPTMAQMEKA 69

**Related Information**

[Gene](#) - associated gene details  
[Map Viewer](#) - aligned genomic context

BLAST is a registered trademark of the National Library of Medicine.

▶ NCBI/ BLAST/ blastp suite/ Formatting Results - B92JYCA501R

**i** Your search parameters were adjusted to search for a short input sequence.

[Edit and Resubmit](#) [Save Search Strategies](#) ▶ [Formatting options](#) ▶ [Download](#)

[YouTube](#) [How to read this page](#) [Blast report description](#)

### CD44\_KAFNSTLPTMAQMEKA\_NonMod

RID [B92JYCA501R](#) (Expires on 01-14 10:00 am)

**Query ID** |cl|320990  
**Description** None  
**Molecule type** amino acid  
**Query Length** 16

**Database Name** nr  
**Description** All non-redundant GenBank CDS translations+PDB+SwissProt+PIR excluding environmental samples from WGS projects  
**Program** BLASTP 2.2.30+ ▶ [Citation](#)

Other reports: ▶ [Search Summary](#) [[Taxonomy reports](#)] [[Distance tree of results](#)] [[Multiple alignment](#)]

### **G**raphic Summary

[Show Conserved Domains](#)

No putative conserved domains have been detected

Distribution of 100 Blast Hits on the Query Sequence

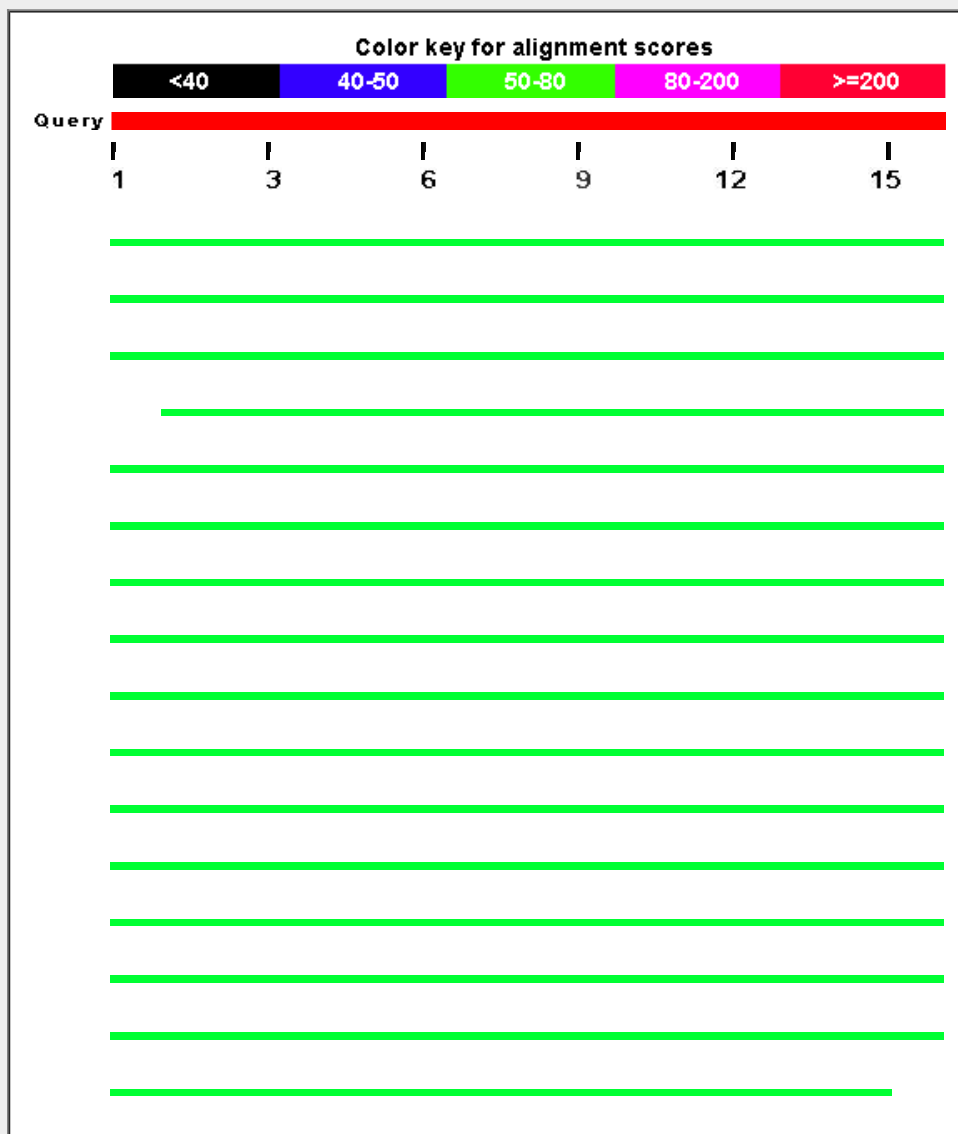



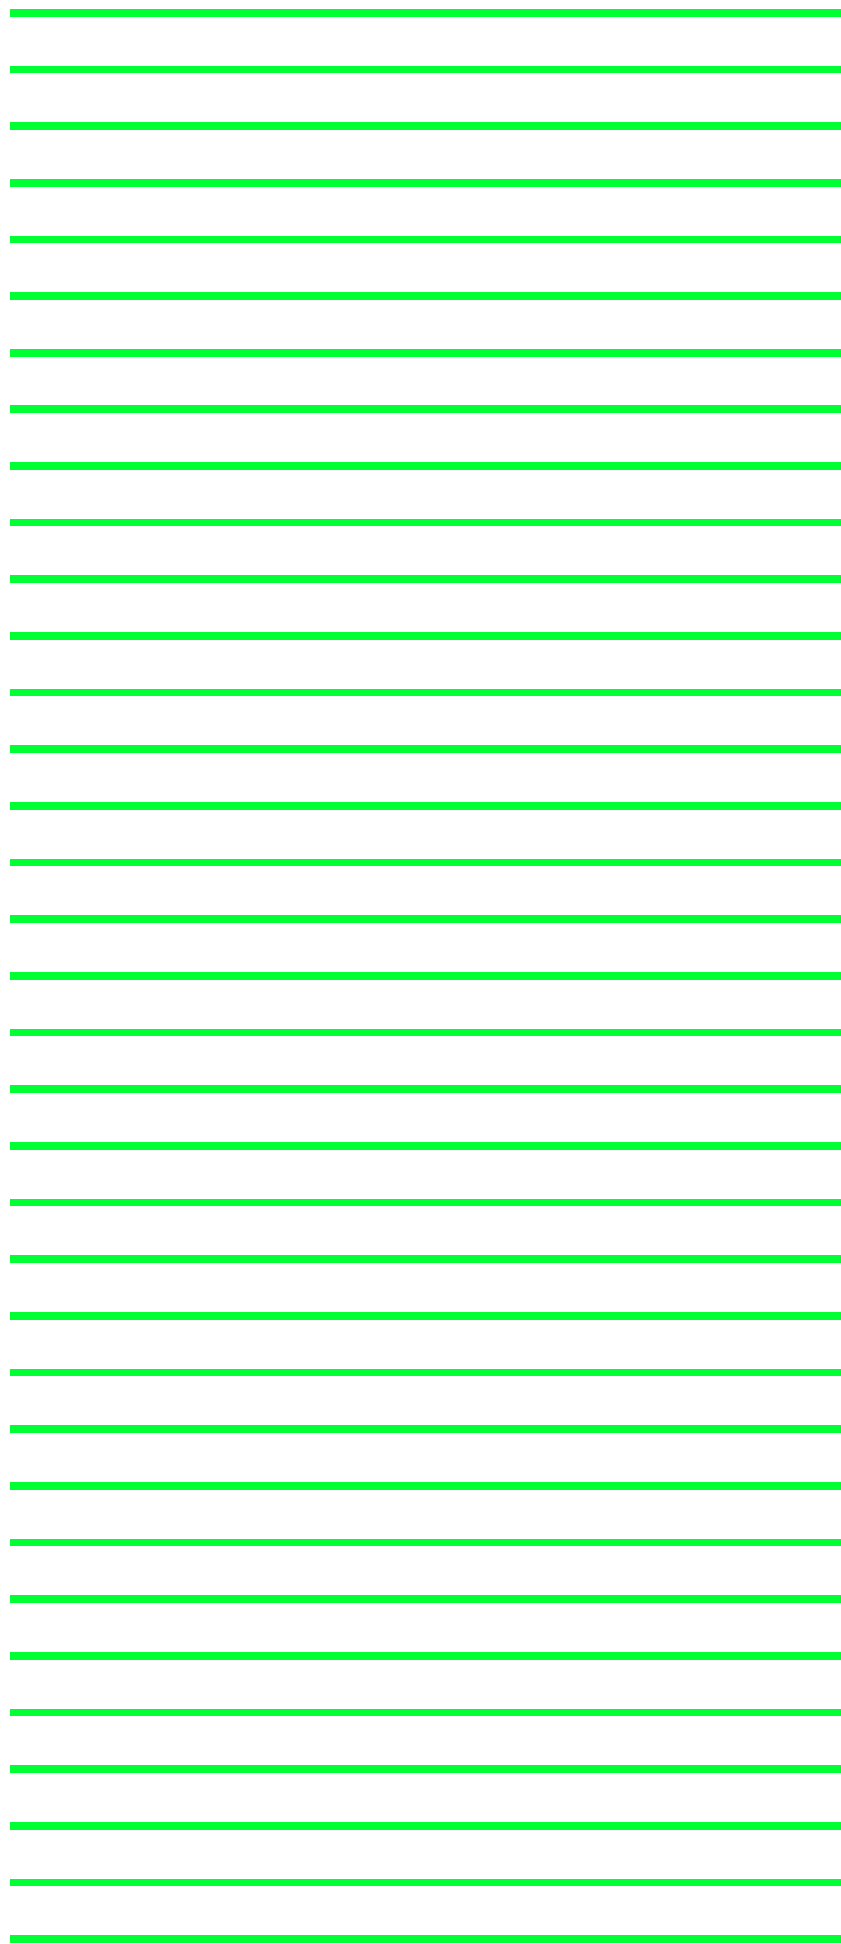

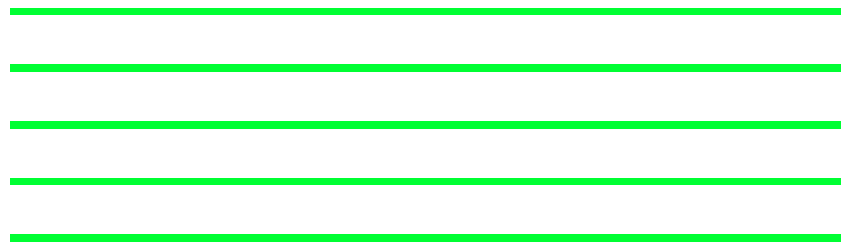

**Descriptions**

**Sequences producing significant alignments:**

Select: [All](#) [None](#) Selected:0

[↑](#) [Alignments](#)
[Download](#)
[GenPept](#)
[Graphics](#)
[Distance tree of results](#)
[Multiple alignment](#)
⚙

| Description                                                                     | Max score | Total score | Query cover | E value | Ident | Accession                                   |
|---------------------------------------------------------------------------------|-----------|-------------|-------------|---------|-------|---------------------------------------------|
| <a href="#">CD44 protein [Homo sapiens]</a>                                     | 54.9      | 54.9        | 100%        | 9e-08   | 100%  | <a href="#">gi 30353933 AAH52287.1</a>      |
| <a href="#">PREDICTED: LOW QUALITY PROTEIN: CD44 antigen-like [Pongo</a>        | 54.9      | 54.9        | 100%        | 1e-07   | 100%  | <a href="#">gi 686774195 XP_009235328.1</a> |
| <a href="#">unnamed protein product [Macaca fascicularis]</a>                   | 54.9      | 54.9        | 100%        | 1e-07   | 100%  | <a href="#">gi 90076134 BAE87747.1</a>      |
| <a href="#">85 kda glioma membrane protein/CD44 homolog [Homo sapiens]</a>      | 52.0      | 52.0        | 93%         | 1e-07   | 100%  | <a href="#">gi 998625 AAB32708.1</a>        |
| <a href="#">PREDICTED: CD44 antigen-like [Gorilla gorilla gorilla]</a>          | 54.9      | 54.9        | 100%        | 1e-07   | 100%  | <a href="#">gi 426367956 XP_004050985.1</a> |
| <a href="#">PREDICTED: CD44 antigen isoform X7 [Orycteropus afer afer]</a>      | 54.9      | 54.9        | 100%        | 1e-07   | 100%  | <a href="#">gi 634854877 XP_007941453.1</a> |
| <a href="#">PREDICTED: CD44 antigen isoform X7 [Pan paniscus]</a>               | 54.9      | 54.9        | 100%        | 1e-07   | 100%  | <a href="#">gi 675794911 XP_008954098.1</a> |
| <a href="#">PREDICTED: CD44 antigen isoform X20 [Callithrix jacchus]</a>        | 54.9      | 54.9        | 100%        | 1e-07   | 100%  | <a href="#">gi 675699631 XP_009006179.1</a> |
| <a href="#">CD44 antigen isoform 5 precursor [Homo sapiens]</a>                 | 54.9      | 54.9        | 100%        | 1e-07   | 100%  | <a href="#">gi 48255943 NP_001001392.1</a>  |
| <a href="#">PREDICTED: CD44 antigen isoform X15 [Pan troglodytes]</a>           | 54.9      | 54.9        | 100%        | 1e-07   | 100%  | <a href="#">gi 332836157 XP_003313029.1</a> |
| <a href="#">PREDICTED: CD44 antigen isoform 8 [Nomascus leucogenys]</a>         | 54.9      | 54.9        | 100%        | 1e-07   | 100%  | <a href="#">gi 332210732 XP_003254465.1</a> |
| <a href="#">Chain A, High-resolution Crystal Structure Of The Human Cd44 Hy</a> | 54.9      | 54.9        | 100%        | 2e-07   | 100%  | <a href="#">gi 685425709 4PZ3_A</a>         |
| <a href="#">Chain A, High-resolution Crystal Structure Of The Human Cd44 Hy</a> | 54.9      | 54.9        | 100%        | 2e-07   | 100%  | <a href="#">gi 685425712 4PZ4_A</a>         |
| <a href="#">Chain A, Solution Structure Of The Hyaluronan Binding Domain Of</a> | 54.9      | 54.9        | 100%        | 2e-07   | 100%  | <a href="#">gi 47168555 1POZ_A</a>          |
| <a href="#">Chain A, Hyaluronan-Binding Domain Of Cd44 In Its Ligand-Bound</a>  | 54.9      | 54.9        | 100%        | 2e-07   | 100%  | <a href="#">gi 119390067 2I83_A</a>         |
| <a href="#">CD44 molecule [Homo sapiens]</a>                                    | 52.4      | 52.4        | 93%         | 2e-07   | 100%  | <a href="#">gi 228008043 BAH57528.1</a>     |
| <a href="#">Hermes antigen gp90 homing receptor precursor [Homo sapiens]</a>    | 54.9      | 54.9        | 100%        | 2e-07   | 100%  | <a href="#">gi 186661 AAA36138.1</a>        |
| <a href="#">PREDICTED: CD44 antigen isoform X5 [Pan paniscus]</a>               | 54.9      | 54.9        | 100%        | 2e-07   | 100%  | <a href="#">gi 675794908 XP_008954097.1</a> |
| <a href="#">CD44 antigen isoform 8 precursor [Homo sapiens]</a>                 | 54.9      | 54.9        | 100%        | 2e-07   | 100%  | <a href="#">gi 321400142 NP_001189486.1</a> |
| <a href="#">unnamed protein product [Homo sapiens]</a>                          | 54.9      | 54.9        | 100%        | 2e-07   | 100%  | <a href="#">gi 194387514 BAG60121.1</a>     |
| <a href="#">CD44 antigen isoform 7 precursor [Homo sapiens]</a>                 | 54.9      | 54.9        | 100%        | 2e-07   | 100%  | <a href="#">gi 321400140 NP_001189485.1</a> |
| <a href="#">PREDICTED: CD44 antigen isoform X18 [Macaca fascicularis]</a>       | 54.9      | 54.9        | 100%        | 2e-07   | 100%  | <a href="#">gi 544486523 XP_005578264.1</a> |
| <a href="#">PREDICTED: CD44 antigen isoform 6 [Nomascus leucogenys]</a>         | 54.9      | 54.9        | 100%        | 2e-07   | 100%  | <a href="#">gi 332210728 XP_003254463.1</a> |
| <a href="#">PREDICTED: CD44 antigen isoform X6 [Orycteropus afer afer]</a>      | 54.9      | 54.9        | 100%        | 2e-07   | 100%  | <a href="#">gi 634854874 XP_007941452.1</a> |
| <a href="#">unnamed protein product [Macaca fascicularis]</a>                   | 54.9      | 54.9        | 100%        | 2e-07   | 100%  | <a href="#">gi 90077486 BAE88423.1</a>      |
| <a href="#">PREDICTED: CD44 antigen isoform X14 [Rhinopithecus roxellana]</a>   | 54.9      | 54.9        | 100%        | 2e-07   | 100%  | <a href="#">gi 724966856 XP_010356691.1</a> |
| <a href="#">PREDICTED: CD44 antigen isoform X4 [Pan paniscus]</a>               | 54.9      | 54.9        | 100%        | 2e-07   | 100%  | <a href="#">gi 675794906 XP_008954096.1</a> |
| <a href="#">PREDICTED: CD44 antigen isoform X19 [Chlorocebus sabaues]</a>       | 54.9      | 54.9        | 100%        | 2e-07   | 100%  | <a href="#">gi 635014254 XP_008000349.1</a> |

|                                                                                      |      |      |      |       |      |                                             |
|--------------------------------------------------------------------------------------|------|------|------|-------|------|---------------------------------------------|
| <a href="#">CDw44 antigen precursor [Homo sapiens]</a>                               | 54.9 | 54.9 | 100% | 2e-07 | 100% | <a href="#">gij180197 AAA35674.1</a>        |
| <a href="#">CD44 antigen [Homo sapiens]</a>                                          | 54.9 | 54.9 | 100% | 2e-07 | 100% | <a href="#">gij21429241 AAM50041.1</a>      |
| <a href="#">CD44 antigen isoform 4 precursor [Homo sapiens]</a>                      | 54.9 | 54.9 | 100% | 2e-07 | 100% | <a href="#">gij48255941 NP_001001391.1</a>  |
| <a href="#">cell adhesion molecule [Homo sapiens]</a>                                | 54.9 | 54.9 | 100% | 2e-07 | 100% | <a href="#">gij180130 AAA51950.1</a>        |
| <a href="#">cell surface glycoprotein CD44 [Homo sapiens]</a>                        | 54.9 | 54.9 | 100% | 2e-07 | 100% | <a href="#">gij1101786 AAA82949.1</a>       |
| <a href="#">PREDICTED: CD44 antigen isoform X17 [Macaca fascicularis]</a>            | 54.9 | 54.9 | 100% | 2e-07 | 100% | <a href="#">gij544486521 XP_005578263.1</a> |
| <a href="#">PREDICTED: CD44 antigen isoform X5 [Papio anubis]</a>                    | 54.9 | 54.9 | 100% | 2e-07 | 100% | <a href="#">gij402893830 XP_003910087.1</a> |
| <a href="#">PREDICTED: CD44 antigen isoform 2 [Nomascus leucogenys]</a>              | 54.9 | 54.9 | 100% | 2e-07 | 100% | <a href="#">gij332210720 XP_003254459.1</a> |
| <a href="#">unnamed protein product [Homo sapiens]</a>                               | 54.9 | 54.9 | 100% | 2e-07 | 100% | <a href="#">gij158261871 BAF83113.1</a>     |
| <a href="#">PREDICTED: CD44 antigen isoform X14 [Pan troglodytes]</a>                | 54.9 | 54.9 | 100% | 2e-07 | 100% | <a href="#">gij114637008 XP_001152726.1</a> |
| <a href="#">hypothetical protein [Homo sapiens]</a>                                  | 54.9 | 54.9 | 100% | 2e-07 | 100% | <a href="#">gij30268334 CAD89965.1</a>      |
| <a href="#">PREDICTED: CD44 antigen isoform X8 [Saimiri boliviensis boliviensis]</a> | 54.9 | 54.9 | 100% | 2e-07 | 100% | <a href="#">gij725549291 XP_010331704.1</a> |
| <a href="#">PREDICTED: CD44 antigen isoform X16 [Callithrix jacchus]</a>             | 54.9 | 54.9 | 100% | 2e-07 | 100% | <a href="#">gij675699620 XP_009006176.1</a> |
| <a href="#">CD44 antigen [synthetic construct]</a>                                   | 54.9 | 54.9 | 100% | 2e-07 | 100% | <a href="#">gij60830199 AAX36916.1</a>      |
| <a href="#">CD44 antigen [synthetic construct]</a>                                   | 54.9 | 54.9 | 100% | 2e-07 | 100% | <a href="#">gij60654139 AAX29762.1</a>      |
| <a href="#">RecName: Full=CD44 antigen; AltName: Full=Extracellular matrix re</a>    | 54.9 | 54.9 | 100% | 2e-07 | 100% | <a href="#">gij116004 P14745.1</a>          |
| <a href="#">CD44 protein [Callithrix jacchus]</a>                                    | 54.9 | 54.9 | 100% | 2e-07 | 100% | <a href="#">gij148749357 ABR09546.1</a>     |
| <a href="#">PREDICTED: CD44 antigen isoform X11 [Ursus maritimus]</a>                | 54.9 | 54.9 | 100% | 2e-07 | 100% | <a href="#">gij670988033 XP_008685036.1</a> |
| <a href="#">PREDICTED: CD44 antigen isoform X5 [Orycteropus afer afer]</a>           | 54.9 | 54.9 | 100% | 2e-07 | 100% | <a href="#">gij634854870 XP_007941451.1</a> |
| <a href="#">PREDICTED: CD44 antigen [Odobenus rosmarus divergens]</a>                | 54.9 | 54.9 | 100% | 2e-07 | 100% | <a href="#">gij472373321 XP_004406132.1</a> |
| <a href="#">CD44R5 [Homo sapiens]</a>                                                | 54.9 | 54.9 | 100% | 2e-07 | 100% | <a href="#">gij435700 AAB27919.1</a>        |
| <a href="#">CD44 antigen (Indian blood group), isoform CRA_i [Homo sapiens]</a>      | 54.9 | 54.9 | 100% | 2e-07 | 100% | <a href="#">gij119588560 EAW68154.1</a>     |
| <a href="#">PREDICTED: CD44 antigen isoform X13 [Homo sapiens]</a>                   | 54.9 | 54.9 | 100% | 2e-07 | 100% | <a href="#">gij578820976 XP_006718453.1</a> |
| <a href="#">PREDICTED: CD44 antigen isoform X10 [Ursus maritimus]</a>                | 54.9 | 54.9 | 100% | 2e-07 | 100% | <a href="#">gij670988031 XP_008685035.1</a> |
| <a href="#">PREDICTED: CD44 antigen isoform X13 [Pan troglodytes]</a>                | 54.9 | 54.9 | 100% | 2e-07 | 100% | <a href="#">gij694944091 XP_009458500.1</a> |
| <a href="#">PREDICTED: CD44 antigen isoform X13 [Rhinopithecus roxellana]</a>        | 54.9 | 54.9 | 100% | 2e-07 | 100% | <a href="#">gij724966854 XP_010356690.1</a> |
| <a href="#">CD44R4 [Homo sapiens]</a>                                                | 54.9 | 54.9 | 100% | 2e-07 | 100% | <a href="#">gij7705157 AAB27918.2</a>       |
| <a href="#">CD44 antigen (Indian blood group), isoform CRA_b [Homo sapiens]</a>      | 54.9 | 54.9 | 100% | 2e-07 | 100% | <a href="#">gij119588551 EAW68145.1</a>     |
| <a href="#">PREDICTED: CD44 antigen isoform X15 [Callithrix jacchus]</a>             | 54.9 | 54.9 | 100% | 2e-07 | 100% | <a href="#">gij675699617 XP_009006175.1</a> |
| <a href="#">PREDICTED: CD44 antigen isoform X18 [Chlorocebus sabaesus]</a>           | 54.9 | 54.9 | 100% | 2e-07 | 100% | <a href="#">gij635014252 XP_008000344.1</a> |
| <a href="#">PREDICTED: CD44 antigen isoform X16 [Macaca fascicularis]</a>            | 54.9 | 54.9 | 100% | 2e-07 | 100% | <a href="#">gij544486519 XP_005578262.1</a> |
| <a href="#">PREDICTED: CD44 antigen isoform 5 [Nomascus leucogenys]</a>              | 54.9 | 54.9 | 100% | 2e-07 | 100% | <a href="#">gij332210726 XP_003254462.1</a> |
| <a href="#">CD44 antigen isoform 6 precursor [Homo sapiens]</a>                      | 54.9 | 54.9 | 100% | 2e-07 | 100% | <a href="#">gij321400138 NP_001189484.1</a> |
| <a href="#">PREDICTED: CD44 antigen isoform X12 [Pan troglodytes]</a>                | 54.9 | 54.9 | 100% | 2e-07 | 100% | <a href="#">gij114637002 XP_001151845.1</a> |
| <a href="#">PREDICTED: CD44 antigen isoform X14 [Callithrix jacchus]</a>             | 54.9 | 54.9 | 100% | 2e-07 | 100% | <a href="#">gij675699613 XP_009006174.1</a> |
| <a href="#">PREDICTED: CD44 antigen isoform X4 [Orycteropus afer afer]</a>           | 54.9 | 54.9 | 100% | 2e-07 | 100% | <a href="#">gij634854867 XP_007941450.1</a> |
| <a href="#">PREDICTED: CD44 antigen isoform X3 [Papio anubis]</a>                    | 54.9 | 54.9 | 100% | 2e-07 | 100% | <a href="#">gij685586972 XP_009184576.1</a> |
| <a href="#">PREDICTED: CD44 antigen isoform X9 [Ursus maritimus]</a>                 | 54.9 | 54.9 | 100% | 2e-07 | 100% | <a href="#">gij670988029 XP_008685034.1</a> |
| <a href="#">PREDICTED: CD44 antigen isoform X12 [Rhinopithecus roxellana]</a>        | 54.9 | 54.9 | 100% | 2e-07 | 100% | <a href="#">gij724966852 XP_010356689.1</a> |
| <a href="#">PREDICTED: CD44 antigen isoform X2 [Papio anubis]</a>                    | 54.9 | 54.9 | 100% | 2e-07 | 100% | <a href="#">gij685586970 XP_009184575.1</a> |
| <a href="#">PREDICTED: CD44 antigen isoform X3 [Pan paniscus]</a>                    | 54.9 | 54.9 | 100% | 2e-07 | 100% | <a href="#">gij675794904 XP_008954095.1</a> |
| <a href="#">PREDICTED: CD44 antigen isoform X11 [Rhinopithecus roxellana]</a>        | 54.9 | 54.9 | 100% | 2e-07 | 100% | <a href="#">gij724966850 XP_010356688.1</a> |
| <a href="#">PREDICTED: CD44 antigen isoform X2 [Pan paniscus]</a>                    | 54.9 | 54.9 | 100% | 2e-07 | 100% | <a href="#">gij675794902 XP_008954093.1</a> |
| <a href="#">PREDICTED: CD44 antigen isoform X17 [Chlorocebus sabaesus]</a>           | 54.9 | 54.9 | 100% | 2e-07 | 100% | <a href="#">gij635014250 XP_008000338.1</a> |
| <a href="#">CD44 antigen precursor [Pongo abelii]</a>                                | 54.9 | 54.9 | 100% | 2e-07 | 100% | <a href="#">gij197101303 NP_001125856.1</a> |

|                                                                                      |      |      |      |       |      |                                             |
|--------------------------------------------------------------------------------------|------|------|------|-------|------|---------------------------------------------|
| <a href="#">CD44E (epithelial form) [Homo sapiens]</a>                               | 54.9 | 54.9 | 100% | 2e-07 | 100% | <a href="#">gil29801 CAA38951.1</a>         |
| <a href="#">PREDICTED: CD44 antigen isoform X1 [Papio anubis]</a>                    | 54.9 | 54.9 | 100% | 2e-07 | 100% | <a href="#">gil402893828 XP_003910086.1</a> |
| <a href="#">PREDICTED: CD44 antigen isoform 1 [Nomascus leucogenys]</a>              | 54.9 | 54.9 | 100% | 2e-07 | 100% | <a href="#">gil332210718 XP_003254458.1</a> |
| <a href="#">PREDICTED: CD44 antigen isoform X11 [Pan troglodytes]</a>                | 54.9 | 54.9 | 100% | 2e-07 | 100% | <a href="#">gil114636992 XP_001152795.1</a> |
| <a href="#">PREDICTED: CD44 antigen isoform 10 [Macaca mulatta]</a>                  | 54.9 | 54.9 | 100% | 2e-07 | 100% | <a href="#">gil109106774 XP_001115390.1</a> |
| <a href="#">CD44 antigen isoform 3 precursor [Homo sapiens]</a>                      | 54.9 | 54.9 | 100% | 2e-07 | 100% | <a href="#">gil48255939 NP_001001390.1</a>  |
| <a href="#">PREDICTED: CD44 antigen isoform X13 [Callithrix jacchus]</a>             | 54.9 | 54.9 | 100% | 2e-07 | 100% | <a href="#">gil675699609 XP_009006173.1</a> |
| <a href="#">PREDICTED: CD44 antigen isoform X7 [Saimiri boliviensis boliviensis]</a> | 54.9 | 54.9 | 100% | 2e-07 | 100% | <a href="#">gil725549289 XP_010331699.1</a> |
| <a href="#">PREDICTED: CD44 antigen isoform X3 [Orycteropus afer afer]</a>           | 54.9 | 54.9 | 100% | 2e-07 | 100% | <a href="#">gil634854864 XP_007941449.1</a> |
| <a href="#">PREDICTED: CD44 antigen isoform X12 [Callithrix jacchus]</a>             | 54.9 | 54.9 | 100% | 2e-07 | 100% | <a href="#">gil675699603 XP_009006172.1</a> |
| <a href="#">PREDICTED: CD44 antigen isoform X8 [Ursus maritimus]</a>                 | 54.9 | 54.9 | 100% | 2e-07 | 100% | <a href="#">gil670988027 XP_008685033.1</a> |
| <a href="#">PREDICTED: CD44 antigen isoform X11 [Callithrix jacchus]</a>             | 54.9 | 54.9 | 100% | 2e-07 | 100% | <a href="#">gil675699599 XP_009006171.1</a> |
| <a href="#">PREDICTED: CD44 antigen isoform X10 [Pan troglodytes]</a>                | 54.9 | 54.9 | 100% | 2e-07 | 100% | <a href="#">gil694944087 XP_009458498.1</a> |
| <a href="#">PREDICTED: CD44 antigen isoform X10 [Homo sapiens]</a>                   | 54.9 | 54.9 | 100% | 2e-07 | 100% | <a href="#">gil530396022 XP_005253297.1</a> |
| <a href="#">PREDICTED: CD44 antigen isoform X1 [Pan paniscus]</a>                    | 54.9 | 54.9 | 100% | 2e-07 | 100% | <a href="#">gil675794900 XP_008954092.1</a> |
| <a href="#">PREDICTED: CD44 antigen isoform X10 [Callithrix jacchus]</a>             | 54.9 | 54.9 | 100% | 2e-07 | 100% | <a href="#">gil675699596 XP_009006170.1</a> |
| <a href="#">PREDICTED: CD44 antigen isoform X14 [Macaca fascicularis]</a>            | 54.9 | 54.9 | 100% | 2e-07 | 100% | <a href="#">gil544486515 XP_005578260.1</a> |
| <a href="#">PREDICTED: CD44 antigen isoform X6 [Saimiri boliviensis boliviensis]</a> | 54.9 | 54.9 | 100% | 2e-07 | 100% | <a href="#">gil725549287 XP_010331696.1</a> |
| <a href="#">PREDICTED: CD44 antigen isoform X10 [Rhinopithecus roxellana]</a>        | 54.9 | 54.9 | 100% | 2e-07 | 100% | <a href="#">gil724966848 XP_010356687.1</a> |
| <a href="#">PREDICTED: CD44 antigen isoform X13 [Macaca fascicularis]</a>            | 54.9 | 54.9 | 100% | 2e-07 | 100% | <a href="#">gil544486513 XP_005578259.1</a> |
| <a href="#">PREDICTED: CD44 antigen isoform X7 [Ursus maritimus]</a>                 | 54.9 | 54.9 | 100% | 2e-07 | 100% | <a href="#">gil670988025 XP_008685032.1</a> |
| <a href="#">PREDICTED: CD44 antigen isoform X6 [Ursus maritimus]</a>                 | 54.9 | 54.9 | 100% | 2e-07 | 100% | <a href="#">gil670988023 XP_008685031.1</a> |
| <a href="#">PREDICTED: CD44 antigen isoform X5 [Saimiri boliviensis boliviensis]</a> | 54.9 | 54.9 | 100% | 2e-07 | 100% | <a href="#">gil725549285 XP_010331692.1</a> |
| <a href="#">PREDICTED: CD44 antigen isoform X9 [Homo sapiens]</a>                    | 54.9 | 54.9 | 100% | 2e-07 | 100% | <a href="#">gil530396020 XP_005253296.1</a> |
| <a href="#">PREDICTED: CD44 antigen isoform X9 [Callithrix jacchus]</a>              | 54.9 | 54.9 | 100% | 2e-07 | 100% | <a href="#">gil675699592 XP_009006169.1</a> |
| <a href="#">PREDICTED: CD44 antigen isoform X16 [Chlorocebus sabaeus]</a>            | 54.9 | 54.9 | 100% | 2e-07 | 100% | <a href="#">gil635014248 XP_008000329.1</a> |
| <a href="#">PREDICTED: CD44 antigen isoform X9 [Rhinopithecus roxellana]</a>         | 54.9 | 54.9 | 100% | 2e-07 | 100% | <a href="#">gil724966846 XP_010356686.1</a> |

## Alignments

Download GenPept Graphics

Next Previous Descriptions

CD44 protein [Homo sapiens]

Sequence ID: [gil30353933|gb|AAH52287.1](#) Length: 80 Number of Matches: 1

Range 1: 54 to 69 GenPept Graphics

Next Match Previous Match

| Score          | Expect | Identities  | Positives   | Gaps     |
|----------------|--------|-------------|-------------|----------|
| 54.9 bits(122) | 9e-08  | 16/16(100%) | 16/16(100%) | 0/16(0%) |

Query 1 KAFNSTLPTMAQMEKA 16  
 KAFNSTLPTMAQMEKA  
 Sbjct 54 KAFNSTLPTMAQMEKA 69

### Related Information

[Gene](#) - associated gene details

Download GenPept Graphics

Next Previous Descriptions

PREDICTED: LOW QUALITY PROTEIN: CD44 antigen-like, partial [Pongo abelii]

Sequence ID: [gil686774195|ref|XP\\_009235328.1](#) Length: 91 Number of Matches: 1

Range 1: 31 to 46 GenPept Graphics

Next Match Previous Match

| Score          | Expect | Identities  | Positives   | Gaps     |
|----------------|--------|-------------|-------------|----------|
| 54.9 bits(122) | 1e-07  | 16/16(100%) | 16/16(100%) | 0/16(0%) |

Query 1 KAFNSTLPTMAQMEKA 16

### Related Information

[Gene](#) - associated gene details

[Map Viewer](#) - aligned genomic context

Sbjct 31 KAFNSTLPTMAQMEKA 46

[Download](#) [GenPept](#) [Graphics](#)

[Next](#) [Previous](#) [Descriptions](#)

unnamed protein product [Macaca fascicularis]

Sequence ID: [gi|90076134|dbj|BAE87747.1](#) Length: 114 Number of Matches: 1

[See 1 more title\(s\)](#)

Range 1: 54 to 69 [GenPept](#) [Graphics](#)

[Next Match](#) [Previous Match](#)

| Score          | Expect | Identities  | Positives   | Gaps     |
|----------------|--------|-------------|-------------|----------|
| 54.9 bits(122) | 1e-07  | 16/16(100%) | 16/16(100%) | 0/16(0%) |

Query 1 KAFNSTLPTMAQMEKA 16  
 KAFNSTLPTMAQMEKA  
 Sbjct 54 KAFNSTLPTMAQMEKA 69

**Related Information**

[Gene](#) - associated gene details  
[Identical Proteins](#) - Proteins identical to the subject

[Download](#) [GenPept](#) [Graphics](#)

[Next](#) [Previous](#) [Descriptions](#)

85 kda glioma membrane protein/CD44 homolog [Homo sapiens]

Sequence ID: [gi|998625|gb|AAB32708.1](#) Length: 25 Number of Matches: 1

Range 1: 1 to 15 [GenPept](#) [Graphics](#)

[Next Match](#) [Previous Match](#)

| Score          | Expect | Identities  | Positives   | Gaps     |
|----------------|--------|-------------|-------------|----------|
| 52.0 bits(115) | 1e-07  | 15/15(100%) | 15/15(100%) | 0/15(0%) |

Query 2 AFNSTLPTMAQMEKA 16  
 AFNSTLPTMAQMEKA  
 Sbjct 1 AFNSTLPTMAQMEKA 15

**Related Information**

[Gene](#) - associated gene details

[Download](#) [GenPept](#) [Graphics](#)

[Next](#) [Previous](#) [Descriptions](#)

PREDICTED: CD44 antigen-like [Gorilla gorilla gorilla]

Sequence ID: [gi|426367956|ref|XP\\_004050985.1](#) Length: 132 Number of Matches: 1

Range 1: 54 to 69 [GenPept](#) [Graphics](#)

[Next Match](#) [Previous Match](#)

| Score          | Expect | Identities  | Positives   | Gaps     |
|----------------|--------|-------------|-------------|----------|
| 54.9 bits(122) | 1e-07  | 16/16(100%) | 16/16(100%) | 0/16(0%) |

Query 1 KAFNSTLPTMAQMEKA 16  
 KAFNSTLPTMAQMEKA  
 Sbjct 54 KAFNSTLPTMAQMEKA 69

**Related Information**

[Gene](#) - associated gene details  
[Map Viewer](#) - aligned genomic context

BLAST is a registered trademark of the National Library of Medicine.

[Copyright](#) | [Disclaimer](#) | [Privacy](#) | [Accessibility](#) | [Contact](#) | [Send feedback](#)

[NCBI](#) | [NLM](#) | [NIH](#) | [DHHS](#)

NCBI/ BLAST/ blastp suite/ Formatting Results - BTG0M0SN013

Your search parameters were adjusted to search for a short input sequence.

[Edit and Resubmit](#) [Save Search Strategies](#) [Formatting options](#) [Download](#) [YouTube](#) [How to read this page](#) [Blast report description](#)

### CDH5\_REVYPWYDLTVEAKE\_Mod

RID [BTG0M0SN013](#) (Expires on 01-20 15:28 pm)

Query ID |cl|1316  
Description None  
Molecule type amino acid  
Query Length 15

Database Name nr  
Description All non-redundant GenBank CDS translations+PDB+SwissProt+PIR+PRF excluding environmental samples from WGS projects  
Program BLASTP 2.2.30+ [Citation](#)

Other reports: [Search Summary](#) [Taxonomy reports](#) [Distance tree of results](#) [Related Structures](#) [Multiple alignment](#)

### Graphic Summary

[Show Conserved Domains](#)

No putative conserved domains have been detected

Distribution of 102 Blast Hits on the Query Sequence

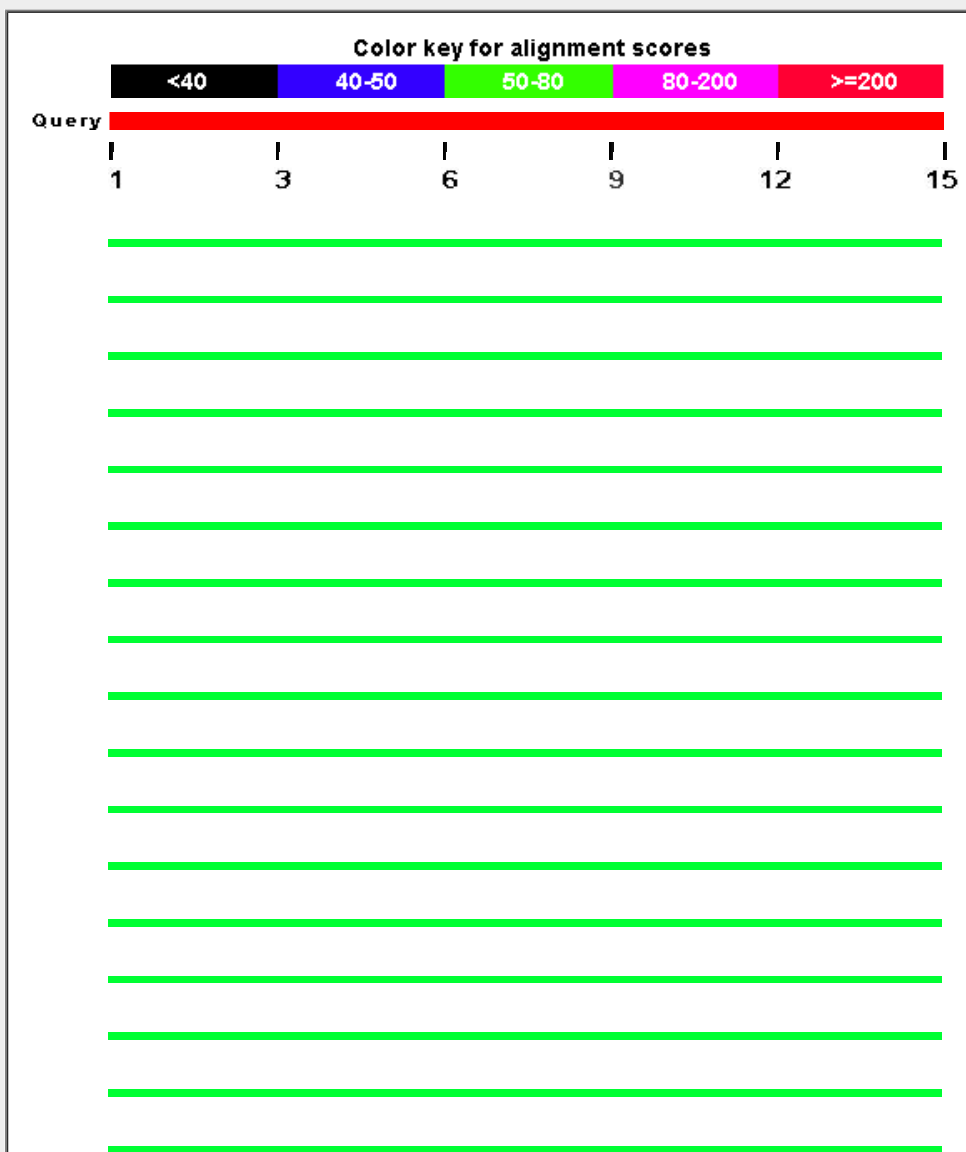

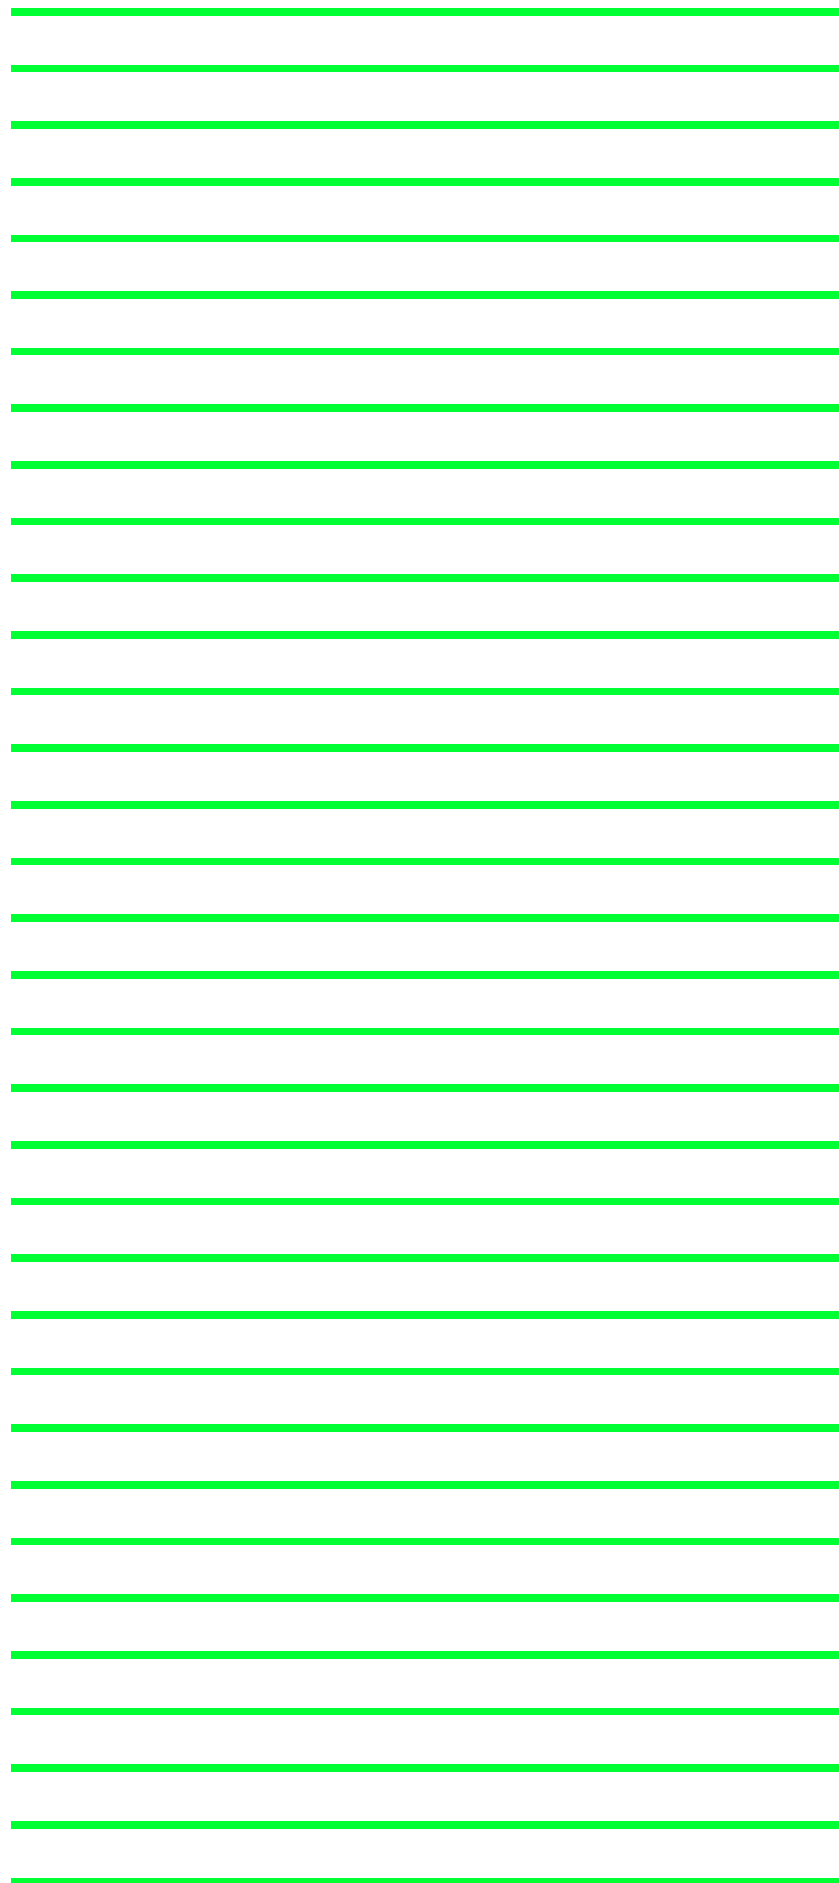

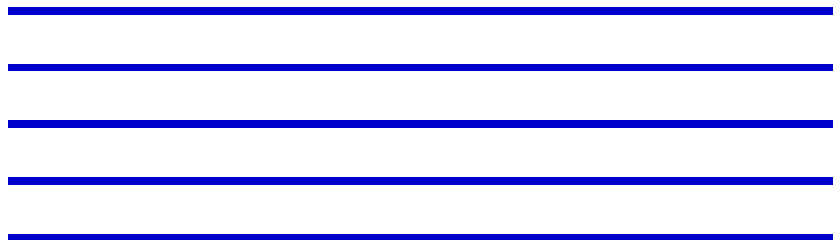

**Descriptions**

**Sequences producing significant alignments:**

Select: [All](#) [None](#) Selected:0

[Alignments](#)
[Download](#)
[GenPept](#)
[Graphics](#)
[Distance tree of results](#)
[Multiple alignment](#)

| Description                                                             | Max score | Total score | Query cover | E value | Ident | Accession                                   |
|-------------------------------------------------------------------------|-----------|-------------|-------------|---------|-------|---------------------------------------------|
| <a href="#">unnamed protein product [Homo sapiens]</a>                  | 52.4      | 52.4        | 100%        | 1e-06   | 93%   | <a href="#">gi 194390586 BAG62052.1</a>     |
| <a href="#">TPA: cadherin-5 precursor [Bos taurus]</a>                  | 52.4      | 52.4        | 100%        | 1e-06   | 93%   | <a href="#">gi 296477907 DAA20022.1</a>     |
| <a href="#">Cadherin-5 [Tupaia chinensis]</a>                           | 52.4      | 52.4        | 100%        | 1e-06   | 93%   | <a href="#">gi 444715905 ELW56766.1</a>     |
| <a href="#">PREDICTED: cadherin-5 isoform X1 [Pongo abelii]</a>         | 52.4      | 52.4        | 100%        | 1e-06   | 93%   | <a href="#">gi 686750801 XP_009249057.1</a> |
| <a href="#">PREDICTED: cadherin-5 [Tupaia chinensis]</a>                | 52.4      | 52.4        | 100%        | 1e-06   | 93%   | <a href="#">gi 562854134 XP_006155681.1</a> |
| <a href="#">unnamed protein product [Homo sapiens]</a>                  | 52.4      | 52.4        | 100%        | 1e-06   | 93%   | <a href="#">gi 194390842 BAG62180.1</a>     |
| <a href="#">PREDICTED: cadherin-5 [Macaca mulatta]</a>                  | 52.4      | 52.4        | 100%        | 1e-06   | 93%   | <a href="#">gi 297284162 XP_002802558.1</a> |
| <a href="#">PREDICTED: cadherin-5 [Ovis aries]</a>                      | 52.4      | 52.4        | 100%        | 1e-06   | 93%   | <a href="#">gi 426242469 XP_004015095.1</a> |
| <a href="#">PREDICTED: cadherin-5 [Camelus dromedarius]</a>             | 52.4      | 52.4        | 100%        | 2e-06   | 93%   | <a href="#">gi 744581321 XP_010983993.1</a> |
| <a href="#">PREDICTED: LOW QUALITY PROTEIN: cadherin-5 [Felis catu</a>  | 52.4      | 52.4        | 100%        | 2e-06   | 93%   | <a href="#">gi 587014936 XP_006941627.1</a> |
| <a href="#">cadherin-5 [Homo sapiens]</a>                               | 52.4      | 52.4        | 100%        | 2e-06   | 93%   | <a href="#">gi 29593 CAA42468.1</a>         |
| <a href="#">PREDICTED: LOW QUALITY PROTEIN: cadherin-5 [Vicugna r</a>   | 52.4      | 52.4        | 100%        | 2e-06   | 93%   | <a href="#">gi 560962576 XP_006203720.1</a> |
| <a href="#">PREDICTED: cadherin-5 [Camelus ferus]</a>                   | 52.4      | 52.4        | 100%        | 2e-06   | 93%   | <a href="#">gi 560908802 XP_006180715.1</a> |
| <a href="#">VE cadherin [Sus scrofa]</a>                                | 52.4      | 52.4        | 100%        | 2e-06   | 93%   | <a href="#">gi 18146997 BAB82983.1</a>      |
| <a href="#">cadherin-5 precursor [Sus scrofa]</a>                       | 52.4      | 52.4        | 100%        | 2e-06   | 93%   | <a href="#">gi 48976065 NP_001001649.2</a>  |
| <a href="#">PREDICTED: cadherin-5 isoform X1 [Bubalus bubalis]</a>      | 52.4      | 52.4        | 100%        | 2e-06   | 93%   | <a href="#">gi 594098001 XP_006072178.1</a> |
| <a href="#">PREDICTED: cadherin-5 [Pantholops hodgsonii]</a>            | 52.4      | 52.4        | 100%        | 2e-06   | 93%   | <a href="#">gi 556727010 XP_005959261.1</a> |
| <a href="#">PREDICTED: cadherin-5 isoform X2 [Capra hircus]</a>         | 52.4      | 52.4        | 100%        | 2e-06   | 93%   | <a href="#">gi 548503374 XP_005692159.1</a> |
| <a href="#">PREDICTED: cadherin-5 [Bos mutus]</a>                       | 52.4      | 52.4        | 100%        | 2e-06   | 93%   | <a href="#">gi 555969230 XP_005896642.1</a> |
| <a href="#">cadherin-5 precursor [Bos taurus]</a>                       | 52.4      | 52.4        | 100%        | 2e-06   | 93%   | <a href="#">gi 48675381 NP_001001601.1</a>  |
| <a href="#">PREDICTED: cadherin-5 [Rhinopithecus roxellana]</a>         | 52.4      | 52.4        | 100%        | 2e-06   | 93%   | <a href="#">gi 724956739 XP_010353493.1</a> |
| <a href="#">cadherin-5 preproprotein [Homo sapiens]</a>                 | 52.4      | 52.4        | 100%        | 2e-06   | 93%   | <a href="#">gi 166362713 NP_001786.2</a>    |
| <a href="#">PREDICTED: cadherin-5 isoform X1 [Capra hircus]</a>         | 52.4      | 52.4        | 100%        | 2e-06   | 93%   | <a href="#">gi 548503369 XP_005692158.1</a> |
| <a href="#">PREDICTED: cadherin-5 [Gorilla gorilla gorilla]</a>         | 52.4      | 52.4        | 100%        | 2e-06   | 93%   | <a href="#">gi 426382415 XP_004057800.1</a> |
| <a href="#">VE-cadherin [Homo sapiens]</a>                              | 52.4      | 52.4        | 100%        | 2e-06   | 93%   | <a href="#">gi 599834 CAA56306.1</a>        |
| <a href="#">PREDICTED: cadherin-5 [Pan troglodytes]</a>                 | 52.4      | 52.4        | 100%        | 2e-06   | 93%   | <a href="#">gi 332846093 XP_523383.3</a>    |
| <a href="#">PREDICTED: cadherin-5 isoform X2 [Pongo abelii]</a>         | 52.4      | 52.4        | 100%        | 2e-06   | 93%   | <a href="#">gi 686750804 XP_009249058.1</a> |
| <a href="#">PREDICTED: cadherin-5 [Saimiri boliviensis boliviensis]</a> | 52.4      | 52.4        | 100%        | 2e-06   | 93%   | <a href="#">gi 725587922 XP_010345034.1</a> |
| <a href="#">PREDICTED: cadherin-5 [Callithrix jacchus]</a>              | 52.4      | 52.4        | 100%        | 2e-06   | 93%   | <a href="#">gi 675751676 XP_008984237.1</a> |



|                                                                             |      |      |      |       |     |                                             |
|-----------------------------------------------------------------------------|------|------|------|-------|-----|---------------------------------------------|
| <a href="#">PREDICTED: cadherin-5 [Chlorocebus sabaeus]</a>                 | 52.4 | 52.4 | 100% | 2e-06 | 93% | <a href="#">gi 635032884 XP_007991751.1</a> |
| <a href="#">PREDICTED: cadherin-5 [Papio anubis]</a>                        | 52.4 | 52.4 | 100% | 2e-06 | 93% | <a href="#">gi 402908616 XP_003917032.1</a> |
| <a href="#">PREDICTED: cadherin-5 isoform 3 [Macaca mulatta]</a>            | 52.4 | 52.4 | 100% | 2e-06 | 93% | <a href="#">gi 109128804 XP_001082641.1</a> |
| <a href="#">cadherin-5 precursor [Camelus ferus]</a>                        | 52.4 | 52.4 | 100% | 2e-06 | 93% | <a href="#">gi 528764579 EPY84238.1</a>     |
| <a href="#">PREDICTED: LOW QUALITY PROTEIN: cadherin-5 [Camelus]</a>        | 52.4 | 52.4 | 100% | 2e-06 | 93% | <a href="#">gi 743733051 XP_010960727.1</a> |
| <a href="#">PREDICTED: cadherin-5 [Bison bison bison]</a>                   | 52.4 | 52.4 | 100% | 2e-06 | 93% | <a href="#">gi 742168920 XP_010849432.1</a> |
| <a href="#">PREDICTED: cadherin-5 [Nomascus leucogenys]</a>                 | 52.4 | 52.4 | 100% | 2e-06 | 93% | <a href="#">gi 441597734 XP_003263044.2</a> |
| <a href="#">cadherin 5, type 2 preproprotein variant [Homo sapiens]</a>     | 52.4 | 52.4 | 100% | 2e-06 | 93% | <a href="#">gi 62089402 BAD93145.1</a>      |
| <a href="#">PREDICTED: cadherin-5 [Panthera tigris altaica]</a>             | 52.4 | 52.4 | 100% | 2e-06 | 93% | <a href="#">gi 591329126 XP_007090445.1</a> |
| <a href="#">cadherin-5 [Mustela putorius furo]</a>                          | 50.3 | 50.3 | 100% | 7e-06 | 87% | <a href="#">gi 226875148 ACO88922.1</a>     |
| <a href="#">PREDICTED: cadherin-5-like [Leptonychotes weddellii]</a>        | 50.3 | 50.3 | 100% | 8e-06 | 87% | <a href="#">gi 585197558 XP_006749826.1</a> |
| <a href="#">PREDICTED: cadherin-5 [Sarcophilus harrisii]</a>                | 50.3 | 69.6 | 100% | 8e-06 | 87% | <a href="#">gi 395508265 XP_003758433.1</a> |
| <a href="#">PREDICTED: cadherin-5 [Canis lupus familiaris]</a>              | 50.3 | 50.3 | 100% | 8e-06 | 87% | <a href="#">gi 73957557 XP_546894.2</a>     |
| <a href="#">PREDICTED: LOW QUALITY PROTEIN: cadherin-5 [Ursus ma]</a>       | 50.3 | 50.3 | 100% | 8e-06 | 87% | <a href="#">gi 671019829 XP_008700743.1</a> |
| <a href="#">PREDICTED: cadherin-5-like [Ailuropoda melanoleuca]</a>         | 50.3 | 50.3 | 100% | 8e-06 | 87% | <a href="#">gi 301766044 XP_002918443.1</a> |
| <a href="#">PREDICTED: cadherin-5 [Equus caballus]</a>                      | 50.3 | 50.3 | 100% | 8e-06 | 87% | <a href="#">gi 194208672 XP_001495945.2</a> |
| <a href="#">PREDICTED: cadherin-5 [Mustela putorius furo]</a>               | 50.3 | 50.3 | 100% | 8e-06 | 87% | <a href="#">gi 511839697 XP_004744358.1</a> |
| <a href="#">PREDICTED: cadherin-5 [Erinaceus europaeus]</a>                 | 50.3 | 50.3 | 100% | 8e-06 | 87% | <a href="#">gi 617578262 XP_007517858.1</a> |
| <a href="#">PREDICTED: cadherin-5 [Odobenus rosmarus divergens]</a>         | 50.3 | 50.3 | 100% | 8e-06 | 87% | <a href="#">gi 472347531 XP_004393487.1</a> |
| <a href="#">PREDICTED: cadherin-5 [Equus przewalskii]</a>                   | 50.3 | 50.3 | 100% | 8e-06 | 87% | <a href="#">gi 664707002 XP_008507790.1</a> |
| <a href="#">PREDICTED: cadherin-5 [Trichechus manatus latirostris]</a>      | 50.3 | 50.3 | 100% | 8e-06 | 87% | <a href="#">gi 471362314 XP_004371717.1</a> |
| <a href="#">PREDICTED: cadherin-5 [Chrysochloris asiatica]</a>              | 50.3 | 50.3 | 100% | 8e-06 | 87% | <a href="#">gi 586466154 XP_006863694.1</a> |
| <a href="#">PREDICTED: cadherin-5 [Sorex araneus]</a>                       | 49.0 | 49.0 | 100% | 2e-05 | 87% | <a href="#">gi 505770491 XP_004600986.1</a> |
| <a href="#">PREDICTED: cadherin-5 [Condylura cristata]</a>                  | 49.0 | 49.0 | 100% | 2e-05 | 87% | <a href="#">gi 507970985 XP_004690559.1</a> |
| <a href="#">PREDICTED: cadherin-5 [Pteropus alecto]</a>                     | 48.6 | 48.6 | 100% | 3e-05 | 87% | <a href="#">gi 586549436 XP_006909789.1</a> |
| <a href="#">PREDICTED: cadherin-5 [Orycteropus afer afer]</a>               | 48.6 | 48.6 | 100% | 3e-05 | 87% | <a href="#">gi 634846452 XP_007938408.1</a> |
| <a href="#">PREDICTED: cadherin-5 [Tarsius syrichta]</a>                    | 48.6 | 48.6 | 100% | 3e-05 | 87% | <a href="#">gi 640786228 XP_008048850.1</a> |
| <a href="#">PREDICTED: cadherin-5 [Oryctolagus cuniculus]</a>               | 48.1 | 48.1 | 100% | 4e-05 | 87% | <a href="#">gi 655787380 XP_008255604.1</a> |
| <a href="#">PREDICTED: cadherin-5 [Ictidomys tridecemlineatus]</a>          | 48.1 | 48.1 | 100% | 4e-05 | 87% | <a href="#">gi 532064908 XP_005318316.1</a> |
| <a href="#">PREDICTED: cadherin-5 isoform X1 [Monodelphis domestica]</a>    | 48.1 | 67.4 | 100% | 4e-05 | 80% | <a href="#">gi 611983494 XP_007477155.1</a> |
| <a href="#">PREDICTED: cadherin-5 isoform X2 [Fukomys damarensis]</a>       | 46.9 | 46.9 | 100% | 1e-04 | 80% | <a href="#">gi 731283855 XP_010610445.1</a> |
| <a href="#">PREDICTED: cadherin-5 isoform X1 [Fukomys damarensis]</a>       | 46.9 | 46.9 | 100% | 1e-04 | 80% | <a href="#">gi 731283852 XP_010610444.1</a> |
| <a href="#">PREDICTED: cadherin-5 [Chinchilla lanigera]</a>                 | 46.9 | 46.9 | 100% | 1e-04 | 80% | <a href="#">gi 533148306 XP_005388518.1</a> |
| <a href="#">PREDICTED: cadherin-5 [Ceratotherium simum simum]</a>           | 46.9 | 46.9 | 100% | 1e-04 | 80% | <a href="#">gi 478514976 XP_004431736.1</a> |
| <a href="#">PREDICTED: cadherin-5 [Jaculus jaculus]</a>                     | 46.9 | 46.9 | 100% | 1e-04 | 80% | <a href="#">gi 507559632 XP_004663539.1</a> |
| <a href="#">Cadherin-5 [Fukomys damarensis]</a>                             | 46.9 | 46.9 | 100% | 1e-04 | 80% | <a href="#">gi 676263212 KFO1995.1</a>      |
| <a href="#">PREDICTED: cadherin-5 [Orcinus orca]</a>                        | 46.4 | 46.4 | 100% | 2e-04 | 87% | <a href="#">gi 466063942 XP_004280947.1</a> |
| <a href="#">PREDICTED: cadherin-5 [Lipotes vexillifer]</a>                  | 46.4 | 46.4 | 100% | 2e-04 | 87% | <a href="#">gi 602690374 XP_007457381.1</a> |
| <a href="#">PREDICTED: cadherin-5 isoform X1 [Balaenoptera acutorostra]</a> | 46.4 | 46.4 | 100% | 2e-04 | 87% | <a href="#">gi 594627004 XP_007198115.1</a> |
| <a href="#">PREDICTED: cadherin-5 [Physeter catodon]</a>                    | 46.4 | 46.4 | 100% | 2e-04 | 87% | <a href="#">gi 593728968 XP_007110305.1</a> |
| <a href="#">PREDICTED: LOW QUALITY PROTEIN: cadherin-5 [Tursiops]</a>       | 46.4 | 46.4 | 100% | 2e-04 | 87% | <a href="#">gi 470599892 XP_004312079.1</a> |
| <a href="#">PREDICTED: cadherin-5 [Dasypus novemcinctus]</a>                | 46.0 | 46.0 | 100% | 2e-04 | 80% | <a href="#">gi 488538668 XP_004460971.1</a> |
| <a href="#">PREDICTED: cadherin-5 [Otolemur garnettii]</a>                  | 46.0 | 46.0 | 100% | 2e-04 | 80% | <a href="#">gi 395853972 XP_003799472.1</a> |
| <a href="#">PREDICTED: cadherin-5 [Eptesicus fuscus]</a>                    | 45.6 | 45.6 | 100% | 3e-04 | 87% | <a href="#">gi 641699668 XP_008138341.1</a> |
| <a href="#">PREDICTED: cadherin-5-like [Myotis lucifugus]</a>               | 45.6 | 45.6 | 100% | 3e-04 | 87% | <a href="#">gi 558214330 XP_006108333.1</a> |

|                                                                                |      |      |      |       |     |                                             |
|--------------------------------------------------------------------------------|------|------|------|-------|-----|---------------------------------------------|
| <a href="#">PREDICTED: cadherin-5 [Echinops telfairi]</a>                      | 45.6 | 45.6 | 100% | 3e-04 | 80% | <a href="#">gi 507654772 XP_004704918.1</a> |
| <a href="#">Cadherin-5 [Myotis davidii]</a>                                    | 45.6 | 45.6 | 100% | 3e-04 | 87% | <a href="#">gi 432093659 ELK25641.1</a>     |
| <a href="#">PREDICTED: cadherin-5 [Myotis brandtii]</a>                        | 45.6 | 45.6 | 100% | 3e-04 | 87% | <a href="#">gi 554564388 XP_005876511.1</a> |
| <a href="#">PREDICTED: LOW QUALITY PROTEIN: cadherin-5 [Myotis da]</a>         | 45.6 | 45.6 | 100% | 3e-04 | 87% | <a href="#">gi 584050367 XP_006769887.1</a> |
| <a href="#">PREDICTED: cadherin-5 [Ochotona princeps]</a>                      | 42.6 | 42.6 | 100% | 0.003 | 80% | <a href="#">gi 504143531 XP_004584199.1</a> |
| <a href="#">PREDICTED: cadherin-5 [Cavia porcellus]</a>                        | 41.4 | 41.4 | 100% | 0.007 | 73% | <a href="#">gi 348572421 XP_003471991.1</a> |
| <a href="#">PREDICTED: cadherin-5 [Nannospalax galili]</a>                     | 41.4 | 41.4 | 100% | 0.007 | 73% | <a href="#">gi 674058723 XP_008835942.1</a> |
| <a href="#">PREDICTED: cadherin-5 isoform X2 [Heterocephalus glaber]</a>       | 41.4 | 41.4 | 100% | 0.007 | 73% | <a href="#">gi 512961812 XP_004843169.1</a> |
| <a href="#">PREDICTED: cadherin-5 isoform X1 [Heterocephalus glaber]</a>       | 41.4 | 41.4 | 100% | 0.007 | 73% | <a href="#">gi 512961810 XP_004843168.1</a> |
| <a href="#">PREDICTED: cadherin-5 [Heterocephalus glaber]</a>                  | 41.4 | 41.4 | 100% | 0.007 | 73% | <a href="#">gi 512867808 XP_004891539.1</a> |
| <a href="#">Cadherin-5 [Heterocephalus glaber]</a>                             | 41.4 | 41.4 | 100% | 0.007 | 73% | <a href="#">gi 351704405 EHB07324.1</a>     |
| <a href="#">cadherin:ISOTYPE=VE [Mus musculus]</a>                             | 40.5 | 40.5 | 100% | 0.014 | 73% | <a href="#">gi 1588293 2208309A</a>         |
| <a href="#">unnamed protein product [Mus musculus]</a>                         | 40.5 | 40.5 | 100% | 0.014 | 73% | <a href="#">gi 74198375 BAE39672.1</a>      |
| <a href="#">cadherin-5 precursor [Mus musculus]</a>                            | 40.5 | 40.5 | 100% | 0.014 | 73% | <a href="#">gi 38490561 NP_033998.2</a>     |
| <a href="#">PREDICTED: cadherin-5 [Octodon degus]</a>                          | 39.7 | 39.7 | 100% | 0.027 | 73% | <a href="#">gi 507624164 XP_004626098.1</a> |
| <a href="#">PREDICTED: cadherin-5 [Peromyscus maniculatus bairdii]</a>         | 39.2 | 39.2 | 100% | 0.037 | 73% | <a href="#">gi 589931486 XP_006978546.1</a> |
| <a href="#">Cadherin-5 [Cricetulus griseus]</a>                                | 37.1 | 37.1 | 100% | 0.18  | 67% | <a href="#">gi 344242493 EGV98596.1</a>     |
| <a href="#">PREDICTED: cadherin-5 isoform X2 [Cricetulus griseus]</a>          | 37.1 | 37.1 | 100% | 0.18  | 67% | <a href="#">gi 625281830 XP_007632574.1</a> |
| <a href="#">PREDICTED: cadherin-5 isoform X1 [Cricetulus griseus]</a>          | 37.1 | 37.1 | 100% | 0.18  | 67% | <a href="#">gi 354475023 XP_003499729.1</a> |
| <a href="#">peptidase M24 [Halalkalicoccus jeotgali]</a>                       | 35.4 | 35.4 | 100% | 0.62  | 73% | <a href="#">gi 495693044 WP_008417623.1</a> |
| <a href="#">cadherin-5 [Rattus norvegicus]</a>                                 | 35.0 | 35.0 | 100% | 0.88  | 67% | <a href="#">gi 157817743 NP_001100877.1</a> |
| <a href="#">PREDICTED: cadherin-5 [Microtus ochrogaster]</a>                   | 35.0 | 35.0 | 100% | 0.88  | 67% | <a href="#">gi 532002685 XP_005345597.1</a> |
| <a href="#">PREDICTED: cadherin-5 [Mesocricetus auratus]</a>                   | 35.0 | 35.0 | 100% | 0.88  | 67% | <a href="#">gi 524957484 XP_005078704.1</a> |
| <a href="#">hypothetical protein [Bifidobacterium biavatii]</a>                | 33.7 | 33.7 | 80%  | 2.3   | 69% | <a href="#">gi 705395722 WP_033493886.1</a> |
| <a href="#">histidine kinase [Actinokineospora sp. EG49]</a>                   | 32.9 | 32.9 | 80%  | 4.0   | 77% | <a href="#">gi 737297371 WP_035280438.1</a> |
| <a href="#">ATP-binding region, ATPase-like protein [Actinokineospora sp.]</a> | 32.9 | 32.9 | 80%  | 4.0   | 77% | <a href="#">gi 583003441 EWC62912.1</a>     |

## Alignments

Download v [GenPept](#) [Graphics](#) v Next ^ Previous ^ Descriptions

unnamed protein product [Homo sapiens]

Sequence ID: [gi|194390586|dbj|BAG62052.1](#) Length: 525 Number of Matches: 1

Range 1: 176 to 190 [GenPept](#) [Graphics](#) v Next Match ^ Previous Match

| Score          | Expect | Identities | Positives   | Gaps     |
|----------------|--------|------------|-------------|----------|
| 52.4 bits(116) | 1e-06  | 14/15(93%) | 15/15(100%) | 0/15(0%) |

Query 1 REVYPWYDLTVEAKE 15  
 REVYPWY+LIVEAKE  
 Sbjct 176 REVYPWYNLTVEAKE 190

### Related Information

[Gene](#) - associated gene details

Download v [GenPept](#) [Graphics](#) v Next ^ Previous ^ Descriptions

TPA: cadherin-5 precursor [Bos taurus]

Sequence ID: [gi|296477907|tpg|DAA20022.1](#) Length: 618 Number of Matches: 1

Range 1: 434 to 448 [GenPept](#) [Graphics](#) v Next Match ^ Previous Match

| Score          | Expect | Identities | Positives   | Gaps     |
|----------------|--------|------------|-------------|----------|
| 52.4 bits(116) | 1e-06  | 14/15(93%) | 15/15(100%) | 0/15(0%) |

### Related Information

[Gene](#) - associated gene details

Query 1 REVYPPWYDLTVEAKE 15  
 REVYPPWY+LTVEAKE  
 Sbjct 434 REVYPPWYDLTVEAKE 448

Download [GenPept](#) [Graphics](#)

[▼ Next](#) [▲ Previous](#) [▲ Descriptions](#)

**Cadherin-5 [Tupaia chinensis]**

Sequence ID: [gi|444715905|gb|ELW56766.1](#) Length: 684 Number of Matches: 1

Range 1: 489 to 503 [GenPept](#) [Graphics](#)

[▼ Next Match](#) [▲ Previous Match](#)

| Score          | Expect | Identities | Positives   | Gaps     |
|----------------|--------|------------|-------------|----------|
| 52.4 bits(116) | 1e-06  | 14/15(93%) | 15/15(100%) | 0/15(0%) |

Query 1 REVYPPWYDLTVEAKE 15  
 REVYPPWY+LTVEAKE  
 Sbjct 489 REVYPPWYDLTVEAKE 503

**Related Information**

Download [GenPept](#) [Graphics](#)

[▼ Next](#) [▲ Previous](#) [▲ Descriptions](#)

**PREDICTED: cadherin-5 isoform X1 [Pongo abelii]**

Sequence ID: [gi|686750801|ref|XP\\_009249057.1](#) Length: 706 Number of Matches: 1

Range 1: 435 to 449 [GenPept](#) [Graphics](#)

[▼ Next Match](#) [▲ Previous Match](#)

| Score          | Expect | Identities | Positives   | Gaps     |
|----------------|--------|------------|-------------|----------|
| 52.4 bits(116) | 1e-06  | 14/15(93%) | 15/15(100%) | 0/15(0%) |

Query 1 REVYPPWYDLTVEAKE 15  
 REVYPPWY+LTVEAKE  
 Sbjct 435 REVYPPWYDLTVEAKE 449

**Related Information**

[Gene](#) - associated gene details  
[Map Viewer](#) - aligned genomic context

Download [GenPept](#) [Graphics](#)

[▼ Next](#) [▲ Previous](#) [▲ Descriptions](#)

**PREDICTED: cadherin-5 [Tupaia chinensis]**

Sequence ID: [gi|562854134|ref|XP\\_006155681.1](#) Length: 715 Number of Matches: 1

Range 1: 432 to 446 [GenPept](#) [Graphics](#)

[▼ Next Match](#) [▲ Previous Match](#)

| Score          | Expect | Identities | Positives   | Gaps     |
|----------------|--------|------------|-------------|----------|
| 52.4 bits(116) | 1e-06  | 14/15(93%) | 15/15(100%) | 0/15(0%) |

Query 1 REVYPPWYDLTVEAKE 15  
 REVYPPWY+LTVEAKE  
 Sbjct 432 REVYPPWYDLTVEAKE 446

**Related Information**

[Gene](#) - associated gene details

BLAST is a registered trademark of the National Library of Medicine.



NCBI/ BLAST/ blastp suite/ Formatting Results - B92K89GF01R

Your search parameters were adjusted to search for a short input sequence.

Edit and Resubmit Save Search Strategies Formatting options Download

YouTube How to read this page Blast report description

CDH5\_REVYPWYNLTVEAKE\_NonMod

RID B92K89GF01R (Expires on 01-14 10:00 am)

Query ID lcl|324617
Description None
Molecule type amino acid
Query Length 15

Database Name nr
Description All non-redundant GenBank CDS translations+PDB+SwissProt+PIR excluding environmental samples from WGS projects
Program BLASTP 2.2.30+ Citation

Other reports: Search Summary Taxonomy reports Distance tree of results Multiple alignment

Graphic Summary

Show Conserved Domains

No putative conserved domains have been detected

Distribution of 100 Blast Hits on the Query Sequence

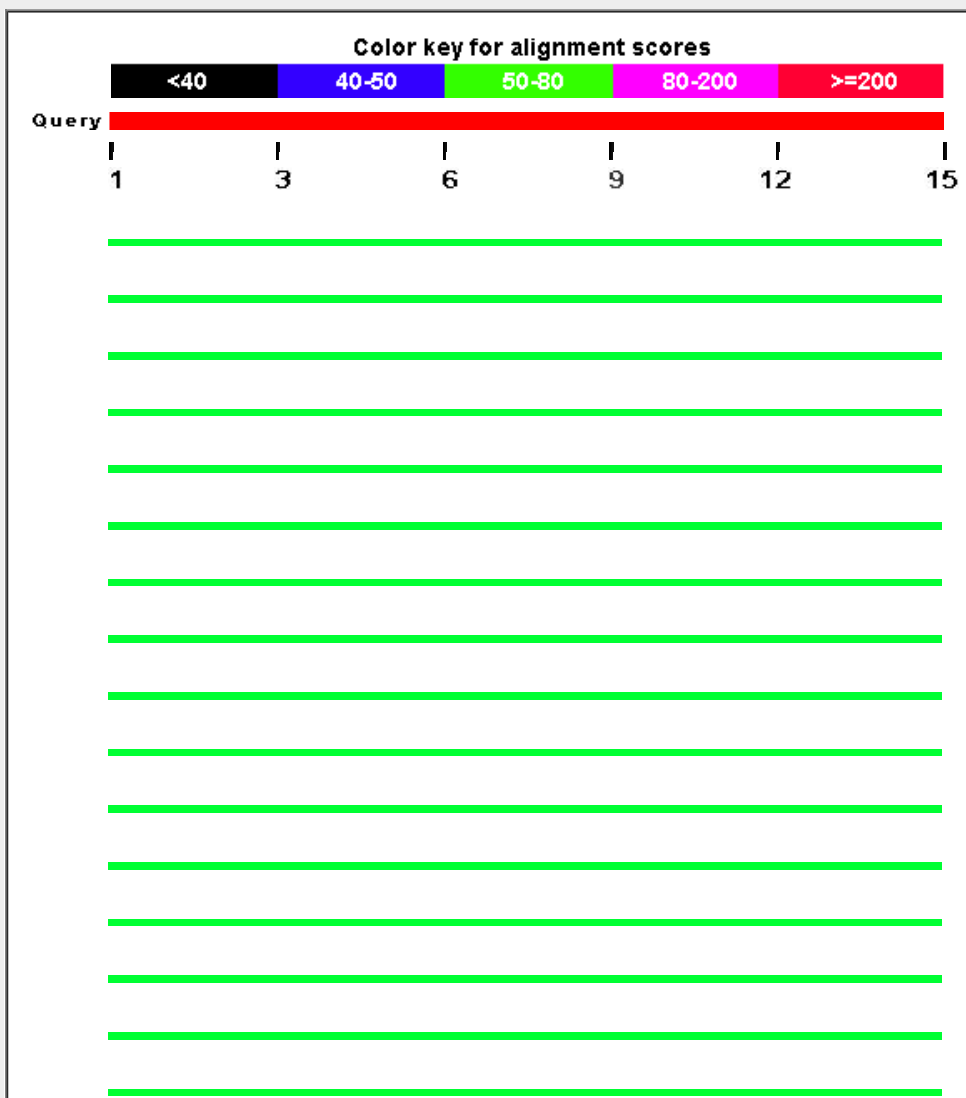

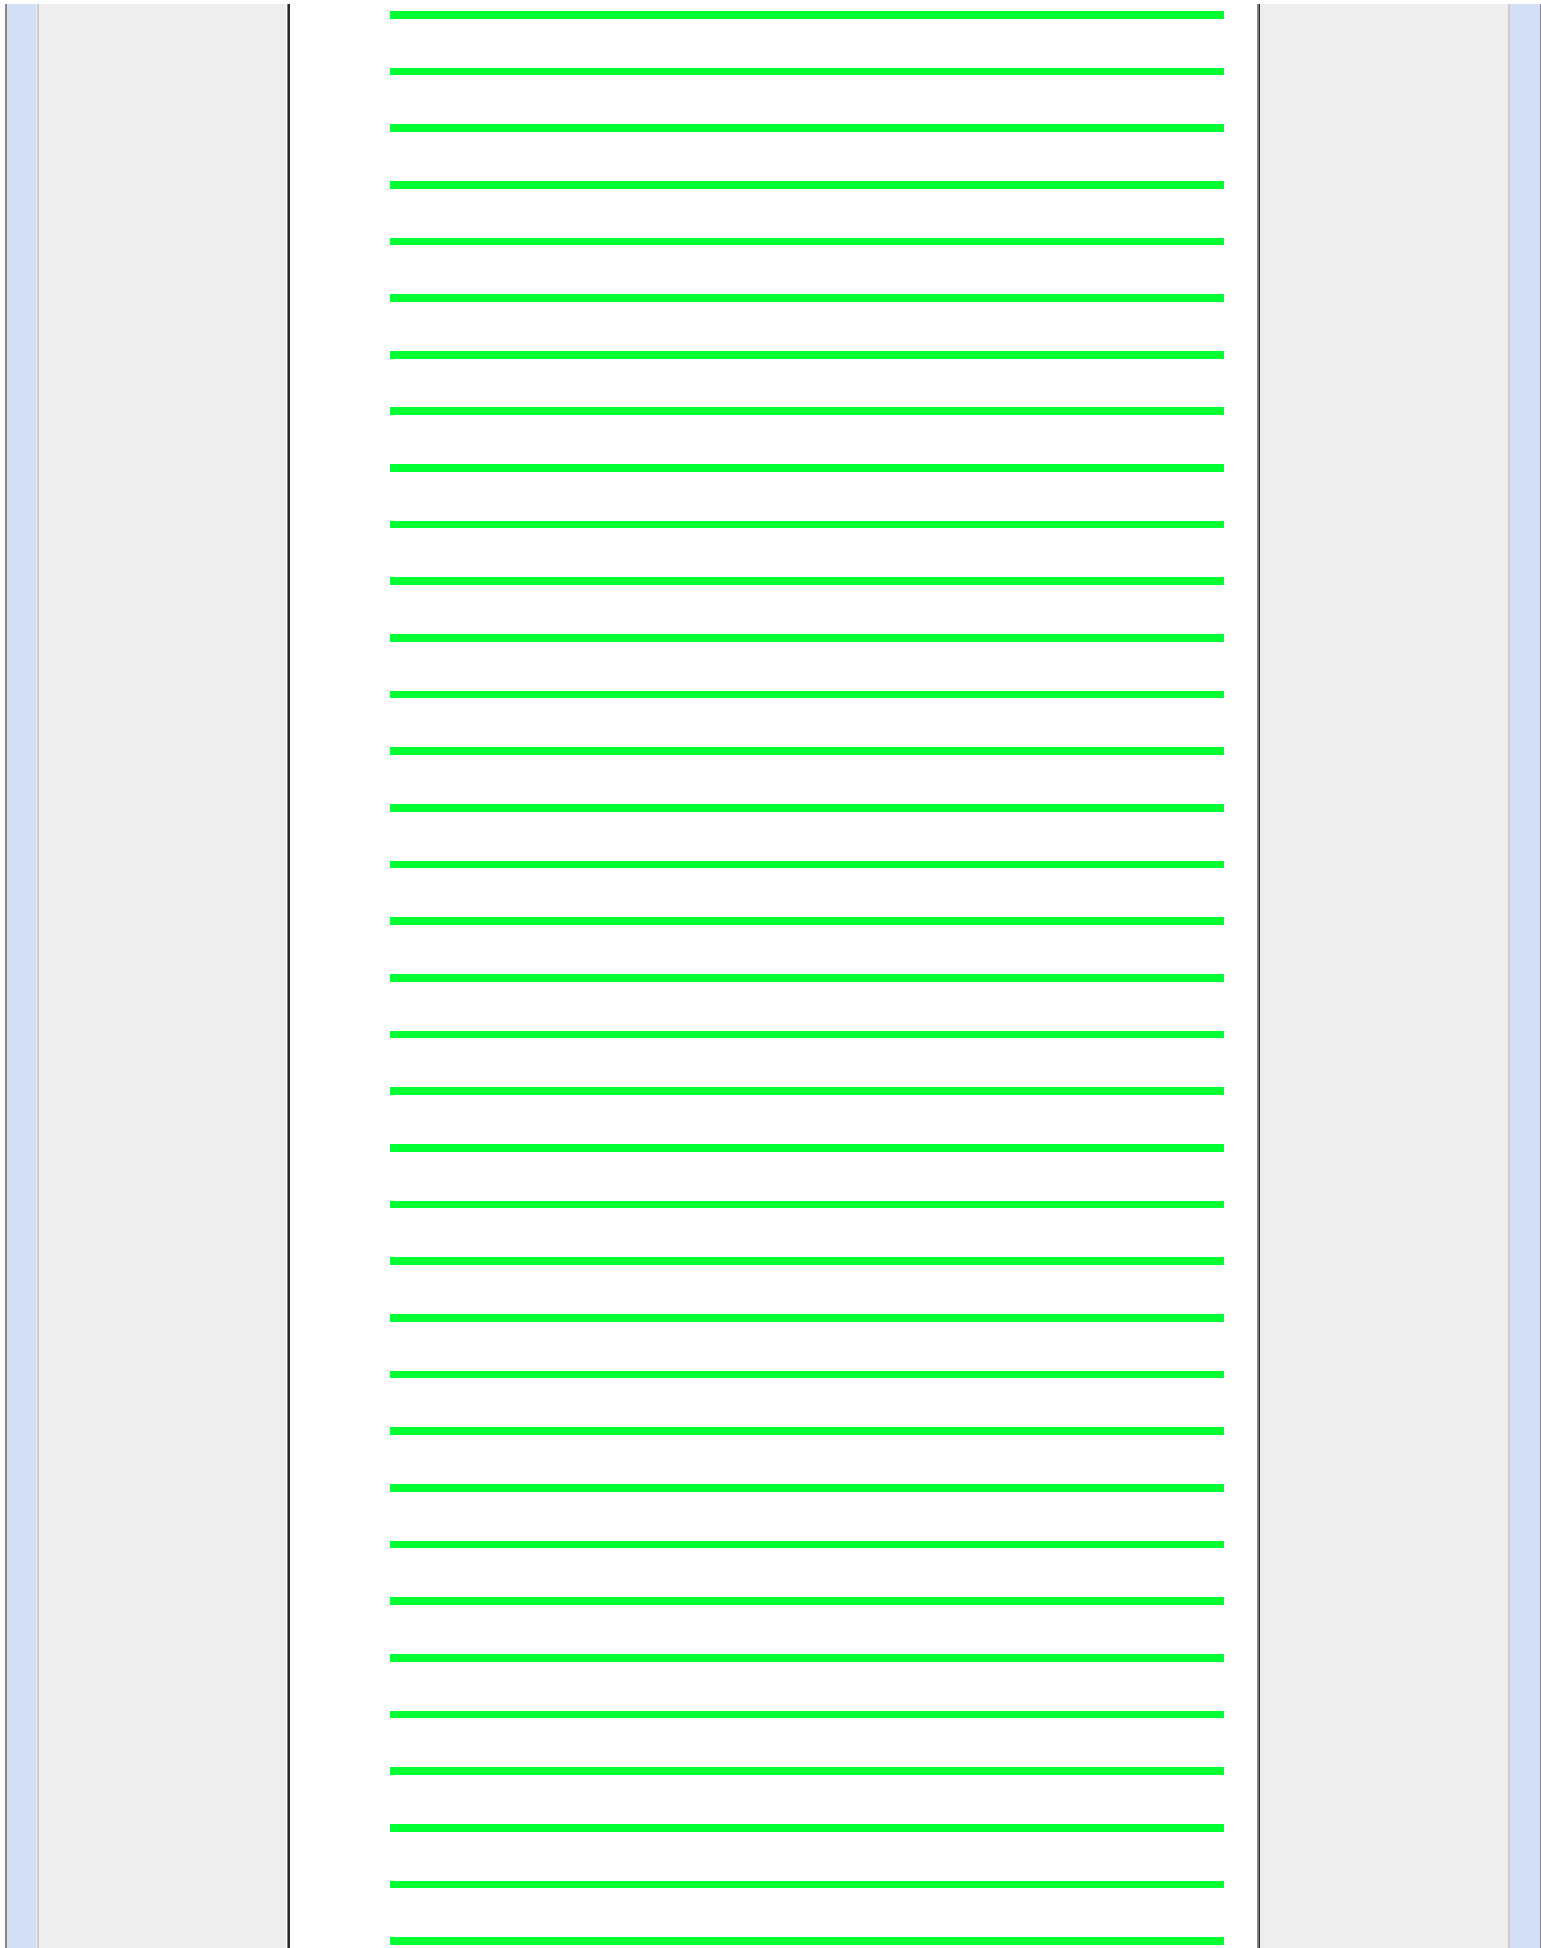

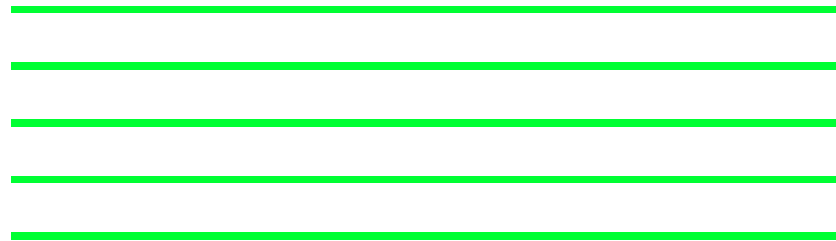

## Descriptions

### Sequences producing significant alignments:

Select: [All](#) [None](#) Selected:0

| <a href="#">Alignments</a> <a href="#">Download</a> <a href="#">GenPept</a> <a href="#">Graphics</a> <a href="#">Distance tree of results</a> <a href="#">Multiple alignment</a> |           |             |             |         |       |                                             |  |
|----------------------------------------------------------------------------------------------------------------------------------------------------------------------------------|-----------|-------------|-------------|---------|-------|---------------------------------------------|--|
| Description                                                                                                                                                                      | Max score | Total score | Query cover | E value | Ident | Accession                                   |  |
| <a href="#">unnamed protein product [Homo sapiens]</a>                                                                                                                           | 54.9      | 54.9        | 100%        | 2e-07   | 100%  | <a href="#">gij194390586 BAG62052.1</a>     |  |
| <a href="#">TPA: cadherin-5 precursor [Bos taurus]</a>                                                                                                                           | 54.9      | 54.9        | 100%        | 2e-07   | 100%  | <a href="#">gij296477907 DAA20022.1</a>     |  |
| <a href="#">Cadherin-5 [Tupaia chinensis]</a>                                                                                                                                    | 54.9      | 54.9        | 100%        | 2e-07   | 100%  | <a href="#">gij444715905 ELW56766.1</a>     |  |
| <a href="#">PREDICTED: cadherin-5 isoform X1 [Pongo abelii]</a>                                                                                                                  | 54.9      | 54.9        | 100%        | 2e-07   | 100%  | <a href="#">gij686750801 XP_009249057.1</a> |  |
| <a href="#">PREDICTED: cadherin-5 [Tupaia chinensis]</a>                                                                                                                         | 54.9      | 54.9        | 100%        | 2e-07   | 100%  | <a href="#">gij562854134 XP_006155681.1</a> |  |
| <a href="#">unnamed protein product [Homo sapiens]</a>                                                                                                                           | 54.9      | 54.9        | 100%        | 2e-07   | 100%  | <a href="#">gij194390842 BAG62180.1</a>     |  |
| <a href="#">PREDICTED: cadherin-5 [Macaca mulatta]</a>                                                                                                                           | 54.9      | 54.9        | 100%        | 2e-07   | 100%  | <a href="#">gij297284162 XP_002802558.1</a> |  |
| <a href="#">PREDICTED: cadherin-5 [Ovis aries]</a>                                                                                                                               | 54.9      | 54.9        | 100%        | 2e-07   | 100%  | <a href="#">gij426242469 XP_004015095.1</a> |  |
| <a href="#">PREDICTED: LOW QUALITY PROTEIN: cadherin-5 [Felis catus]</a>                                                                                                         | 54.9      | 54.9        | 100%        | 2e-07   | 100%  | <a href="#">gij587014936 XP_006941627.1</a> |  |
| <a href="#">cadherin-5 [Homo sapiens]</a>                                                                                                                                        | 54.9      | 54.9        | 100%        | 2e-07   | 100%  | <a href="#">gij29593 CAA42468.1</a>         |  |
| <a href="#">PREDICTED: LOW QUALITY PROTEIN: cadherin-5 [Vicugna paco]</a>                                                                                                        | 54.9      | 54.9        | 100%        | 2e-07   | 100%  | <a href="#">gij560962576 XP_006203720.1</a> |  |
| <a href="#">PREDICTED: cadherin-5 [Camelus ferus]</a>                                                                                                                            | 54.9      | 54.9        | 100%        | 2e-07   | 100%  | <a href="#">gij560908802 XP_006180715.1</a> |  |
| <a href="#">VE cadherin [Sus scrofa]</a>                                                                                                                                         | 54.9      | 54.9        | 100%        | 2e-07   | 100%  | <a href="#">gij18146997 BAB82983.1</a>      |  |
| <a href="#">cadherin-5 precursor [Sus scrofa]</a>                                                                                                                                | 54.9      | 54.9        | 100%        | 2e-07   | 100%  | <a href="#">gij48976065 NP_001001649.2</a>  |  |
| <a href="#">PREDICTED: cadherin-5 isoform X1 [Bubalus bubalis]</a>                                                                                                               | 54.9      | 54.9        | 100%        | 2e-07   | 100%  | <a href="#">gij594098001 XP_006072178.1</a> |  |
| <a href="#">PREDICTED: cadherin-5 [Pantholops hodgsonii]</a>                                                                                                                     | 54.9      | 54.9        | 100%        | 2e-07   | 100%  | <a href="#">gij556727010 XP_005959261.1</a> |  |
| <a href="#">PREDICTED: cadherin-5 isoform X2 [Capra hircus]</a>                                                                                                                  | 54.9      | 54.9        | 100%        | 2e-07   | 100%  | <a href="#">gij548503374 XP_005692159.1</a> |  |
| <a href="#">PREDICTED: cadherin-5 [Bos mutus]</a>                                                                                                                                | 54.9      | 54.9        | 100%        | 2e-07   | 100%  | <a href="#">gij555969230 XP_005896642.1</a> |  |
| <a href="#">cadherin-5 precursor [Bos taurus]</a>                                                                                                                                | 54.9      | 54.9        | 100%        | 2e-07   | 100%  | <a href="#">gij48675381 NP_001001601.1</a>  |  |
| <a href="#">PREDICTED: cadherin-5 [Rhinopithecus roxellana]</a>                                                                                                                  | 54.9      | 54.9        | 100%        | 2e-07   | 100%  | <a href="#">gij724956739 XP_010353493.1</a> |  |
| <a href="#">cadherin-5 preproprotein [Homo sapiens]</a>                                                                                                                          | 54.9      | 54.9        | 100%        | 2e-07   | 100%  | <a href="#">gij166362713 NP_001786.2</a>    |  |
| <a href="#">PREDICTED: cadherin-5 isoform X1 [Capra hircus]</a>                                                                                                                  | 54.9      | 54.9        | 100%        | 2e-07   | 100%  | <a href="#">gij548503369 XP_005692158.1</a> |  |
| <a href="#">PREDICTED: cadherin-5 [Gorilla gorilla gorilla]</a>                                                                                                                  | 54.9      | 54.9        | 100%        | 2e-07   | 100%  | <a href="#">gij426382415 XP_004057800.1</a> |  |
| <a href="#">VE-cadherin [Homo sapiens]</a>                                                                                                                                       | 54.9      | 54.9        | 100%        | 2e-07   | 100%  | <a href="#">gij599834 CAA56306.1</a>        |  |
| <a href="#">PREDICTED: cadherin-5 [Pan troglodytes]</a>                                                                                                                          | 54.9      | 54.9        | 100%        | 2e-07   | 100%  | <a href="#">gij332846093 XP_523383.3</a>    |  |
| <a href="#">PREDICTED: cadherin-5 isoform X2 [Pongo abelii]</a>                                                                                                                  | 54.9      | 54.9        | 100%        | 2e-07   | 100%  | <a href="#">gij686750804 XP_009249058.1</a> |  |
| <a href="#">PREDICTED: cadherin-5 [Saimiri boliviensis boliviensis]</a>                                                                                                          | 54.9      | 54.9        | 100%        | 2e-07   | 100%  | <a href="#">gij725587922 XP_010345034.1</a> |  |
| <a href="#">PREDICTED: cadherin-5 [Callithrix jacchus]</a>                                                                                                                       | 54.9      | 54.9        | 100%        | 2e-07   | 100%  | <a href="#">gij675751676 XP_008984237.1</a> |  |

|                                                                                  |      |      |      |       |      |                                             |
|----------------------------------------------------------------------------------|------|------|------|-------|------|---------------------------------------------|
| <a href="#">PREDICTED: cadherin-5 [Chlorocebus sabaeus]</a>                      | 54.9 | 54.9 | 100% | 2e-07 | 100% | <a href="#">gij635032884 XP_007991751.1</a> |
| <a href="#">PREDICTED: cadherin-5 [Papio anubis]</a>                             | 54.9 | 54.9 | 100% | 2e-07 | 100% | <a href="#">gij402908616 XP_003917032.1</a> |
| <a href="#">PREDICTED: cadherin-5 isoform 3 [Macaca mulatta]</a>                 | 54.9 | 54.9 | 100% | 2e-07 | 100% | <a href="#">gij109128804 XP_001082641.1</a> |
| <a href="#">cadherin-5 precursor [Camelus ferus]</a>                             | 54.9 | 54.9 | 100% | 2e-07 | 100% | <a href="#">gij528764579 EPY84238.1</a>     |
| <a href="#">PREDICTED: cadherin-5 [Nomascus leucogenys]</a>                      | 54.9 | 54.9 | 100% | 2e-07 | 100% | <a href="#">gij441597734 XP_003263044.2</a> |
| <a href="#">cadherin 5, type 2 preproprotein variant [Homo sapiens]</a>          | 54.9 | 54.9 | 100% | 2e-07 | 100% | <a href="#">gij62089402 BAD93145.1</a>      |
| <a href="#">PREDICTED: cadherin-5 [Panthera tigris altaica]</a>                  | 54.9 | 54.9 | 100% | 2e-07 | 100% | <a href="#">gij591329126 XP_007090445.1</a> |
| <a href="#">cadherin-5 [Mustela putorius furo]</a>                               | 52.8 | 52.8 | 100% | 9e-07 | 93%  | <a href="#">gij226875148 ACO88922.1</a>     |
| <a href="#">PREDICTED: cadherin-5-like [Leptonychotes weddellii]</a>             | 52.8 | 52.8 | 100% | 1e-06 | 93%  | <a href="#">gij585197558 XP_006749826.1</a> |
| <a href="#">PREDICTED: cadherin-5 [Sarcophilus harrisii]</a>                     | 52.8 | 52.8 | 100% | 1e-06 | 93%  | <a href="#">gij395508265 XP_003758433.1</a> |
| <a href="#">PREDICTED: cadherin-5 [Canis lupus familiaris]</a>                   | 52.8 | 52.8 | 100% | 1e-06 | 93%  | <a href="#">gij73957557 XP_546894.2</a>     |
| <a href="#">PREDICTED: LOW QUALITY PROTEIN: cadherin-5 [Ursus maritimus]</a>     | 52.8 | 52.8 | 100% | 1e-06 | 93%  | <a href="#">gij671019829 XP_008700743.1</a> |
| <a href="#">PREDICTED: cadherin-5-like [Ailuropoda melanoleuca]</a>              | 52.8 | 52.8 | 100% | 1e-06 | 93%  | <a href="#">gij301766044 XP_002918443.1</a> |
| <a href="#">PREDICTED: cadherin-5 [Equus caballus]</a>                           | 52.8 | 52.8 | 100% | 1e-06 | 93%  | <a href="#">gij194208672 XP_001495945.2</a> |
| <a href="#">PREDICTED: cadherin-5 [Mustela putorius furo]</a>                    | 52.8 | 52.8 | 100% | 1e-06 | 93%  | <a href="#">gij511839697 XP_004744358.1</a> |
| <a href="#">PREDICTED: cadherin-5 [Erinaceus europaeus]</a>                      | 52.8 | 52.8 | 100% | 1e-06 | 93%  | <a href="#">gij617578262 XP_007517858.1</a> |
| <a href="#">PREDICTED: cadherin-5 [Odobenus rosmarus divergens]</a>              | 52.8 | 52.8 | 100% | 1e-06 | 93%  | <a href="#">gij472347531 XP_004393487.1</a> |
| <a href="#">PREDICTED: cadherin-5 [Equus przewalskii]</a>                        | 52.8 | 52.8 | 100% | 1e-06 | 93%  | <a href="#">gij664707002 XP_008507790.1</a> |
| <a href="#">PREDICTED: cadherin-5 [Trichechus manatus latirostris]</a>           | 52.8 | 52.8 | 100% | 1e-06 | 93%  | <a href="#">gij471362314 XP_004371717.1</a> |
| <a href="#">PREDICTED: cadherin-5 [Chrysochloris asiatica]</a>                   | 52.8 | 52.8 | 100% | 1e-06 | 93%  | <a href="#">gij586466154 XP_006863694.1</a> |
| <a href="#">PREDICTED: cadherin-5 [Sorex araneus]</a>                            | 51.5 | 51.5 | 100% | 3e-06 | 93%  | <a href="#">gij505770491 XP_004600986.1</a> |
| <a href="#">PREDICTED: cadherin-5 [Condylura cristata]</a>                       | 51.5 | 51.5 | 100% | 3e-06 | 93%  | <a href="#">gij507970985 XP_004690559.1</a> |
| <a href="#">PREDICTED: cadherin-5 [Pteropus alecto]</a>                          | 51.1 | 51.1 | 100% | 4e-06 | 93%  | <a href="#">gij586549436 XP_006909789.1</a> |
| <a href="#">PREDICTED: cadherin-5 [Orycteropus afer afer]</a>                    | 51.1 | 51.1 | 100% | 4e-06 | 93%  | <a href="#">gij634846452 XP_007938408.1</a> |
| <a href="#">PREDICTED: cadherin-5 [Tarsius syrichta]</a>                         | 51.1 | 51.1 | 100% | 4e-06 | 93%  | <a href="#">gij640786228 XP_008048850.1</a> |
| <a href="#">PREDICTED: cadherin-5 [Oryctolagus cuniculus]</a>                    | 50.7 | 50.7 | 100% | 5e-06 | 93%  | <a href="#">gij655787380 XP_008255604.1</a> |
| <a href="#">PREDICTED: cadherin-5 [Ictidomys tridecemlineatus]</a>               | 50.7 | 50.7 | 100% | 5e-06 | 93%  | <a href="#">gij532064908 XP_005318316.1</a> |
| <a href="#">PREDICTED: cadherin-5 isoform X1 [Monodelphis domestica]</a>         | 50.7 | 50.7 | 100% | 5e-06 | 87%  | <a href="#">gij611983494 XP_007477155.1</a> |
| <a href="#">PREDICTED: cadherin-5 isoform X2 [Fukomys damarensis]</a>            | 49.4 | 49.4 | 100% | 1e-05 | 87%  | <a href="#">gij731283855 XP_010610445.1</a> |
| <a href="#">PREDICTED: cadherin-5 isoform X1 [Fukomys damarensis]</a>            | 49.4 | 49.4 | 100% | 1e-05 | 87%  | <a href="#">gij731283852 XP_010610444.1</a> |
| <a href="#">PREDICTED: cadherin-5 [Chinchilla lanigera]</a>                      | 49.4 | 49.4 | 100% | 1e-05 | 87%  | <a href="#">gij533148306 XP_005388518.1</a> |
| <a href="#">PREDICTED: cadherin-5 [Ceratotherium simum simum]</a>                | 49.4 | 49.4 | 100% | 1e-05 | 87%  | <a href="#">gij478514976 XP_004431736.1</a> |
| <a href="#">PREDICTED: cadherin-5 [Jaculus jaculus]</a>                          | 49.4 | 49.4 | 100% | 1e-05 | 87%  | <a href="#">gij507559632 XP_004663539.1</a> |
| <a href="#">Cadherin-5 [Fukomys damarensis]</a>                                  | 49.4 | 49.4 | 100% | 1e-05 | 87%  | <a href="#">gij676263212 KFO19951.1</a>     |
| <a href="#">PREDICTED: cadherin-5 [Orcinus orca]</a>                             | 49.0 | 49.0 | 100% | 2e-05 | 93%  | <a href="#">gij466063942 XP_004280947.1</a> |
| <a href="#">PREDICTED: cadherin-5 [Lipotes vexillifer]</a>                       | 49.0 | 49.0 | 100% | 2e-05 | 93%  | <a href="#">gij602690374 XP_007457381.1</a> |
| <a href="#">PREDICTED: cadherin-5 isoform X1 [Balaenoptera acutorostrata sc]</a> | 49.0 | 49.0 | 100% | 2e-05 | 93%  | <a href="#">gij594627004 XP_007198115.1</a> |
| <a href="#">PREDICTED: cadherin-5 [Physeter catodon]</a>                         | 49.0 | 49.0 | 100% | 2e-05 | 93%  | <a href="#">gij593728968 XP_007110305.1</a> |
| <a href="#">PREDICTED: LOW QUALITY PROTEIN: cadherin-5 [Tursiops truncatus]</a>  | 49.0 | 49.0 | 100% | 2e-05 | 93%  | <a href="#">gij470599892 XP_004312079.1</a> |
| <a href="#">PREDICTED: cadherin-5 [Dasypus novemcinctus]</a>                     | 48.6 | 48.6 | 100% | 3e-05 | 87%  | <a href="#">gij488538668 XP_004460971.1</a> |
| <a href="#">PREDICTED: cadherin-5 [Otolemur garnettii]</a>                       | 48.6 | 48.6 | 100% | 3e-05 | 87%  | <a href="#">gij395853972 XP_003799472.1</a> |
| <a href="#">PREDICTED: cadherin-5 [Eptesicus fuscus]</a>                         | 48.1 | 48.1 | 100% | 4e-05 | 93%  | <a href="#">gij641699668 XP_008138341.1</a> |
| <a href="#">PREDICTED: cadherin-5-like [Myotis lucifugus]</a>                    | 48.1 | 48.1 | 100% | 4e-05 | 93%  | <a href="#">gij558214330 XP_006108333.1</a> |
| <a href="#">PREDICTED: cadherin-5 [Echinops telfairi]</a>                        | 48.1 | 48.1 | 100% | 4e-05 | 87%  | <a href="#">gij507654772 XP_004704918.1</a> |
| <a href="#">Cadherin-5 [Myotis davidii]</a>                                      | 48.1 | 48.1 | 100% | 4e-05 | 93%  | <a href="#">gij432093659 ELK25641.1</a>     |

|                                                                                    |      |      |      |       |     |                                              |
|------------------------------------------------------------------------------------|------|------|------|-------|-----|----------------------------------------------|
| <a href="#">PREDICTED: cadherin-5 [Myotis brandtii]</a>                            | 48.1 | 48.1 | 100% | 4e-05 | 93% | <a href="#">gil554564388 XP_005876511.1</a>  |
| <a href="#">PREDICTED: LOW QUALITY PROTEIN: cadherin-5 [Myotis davidii]</a>        | 48.1 | 48.1 | 100% | 4e-05 | 93% | <a href="#">gil584050367 XP_006769887.1</a>  |
| <a href="#">PREDICTED: cadherin-5 [Ochotona princeps]</a>                          | 45.2 | 45.2 | 100% | 4e-04 | 87% | <a href="#">gil504143531 XP_004584199.1</a>  |
| <a href="#">PREDICTED: cadherin-5 [Cavia porcellus]</a>                            | 43.9 | 43.9 | 100% | 0.001 | 80% | <a href="#">gil348572421 XP_003471991.1</a>  |
| <a href="#">PREDICTED: cadherin-5 [Nannospalax galii]</a>                          | 43.9 | 43.9 | 100% | 0.001 | 80% | <a href="#">gil674058723 XP_008835942.1</a>  |
| <a href="#">PREDICTED: cadherin-5 isoform X2 [Heterocephalus glaber]</a>           | 43.9 | 43.9 | 100% | 0.001 | 80% | <a href="#">gil512961812 XP_004843169.1</a>  |
| <a href="#">PREDICTED: cadherin-5 isoform X1 [Heterocephalus glaber]</a>           | 43.9 | 43.9 | 100% | 0.001 | 80% | <a href="#">gil512961810 XP_004843168.1</a>  |
| <a href="#">PREDICTED: cadherin-5 [Heterocephalus glaber]</a>                      | 43.9 | 43.9 | 100% | 0.001 | 80% | <a href="#">gil512867808 XP_004891539.1</a>  |
| <a href="#">Cadherin-5 [Heterocephalus glaber]</a>                                 | 43.9 | 43.9 | 100% | 0.001 | 80% | <a href="#">gil351704405 EHB07324.1</a>      |
| <a href="#">cadherin:ISOTYPE=VE [Mus musculus]</a>                                 | 43.1 | 43.1 | 100% | 0.002 | 80% | <a href="#">gil1588293 2208309A</a>          |
| <a href="#">unnamed protein product [Mus musculus]</a>                             | 43.1 | 43.1 | 100% | 0.002 | 80% | <a href="#">gil74198375 BAE39672.1</a>       |
| <a href="#">cadherin-5 precursor [Mus musculus]</a>                                | 43.1 | 43.1 | 100% | 0.002 | 80% | <a href="#">gil38490561 JNP_033998.2</a>     |
| <a href="#">PREDICTED: cadherin-5 [Octodon degus]</a>                              | 42.2 | 42.2 | 100% | 0.004 | 80% | <a href="#">gil507624164 XP_004626098.1</a>  |
| <a href="#">PREDICTED: cadherin-5 [Peromyscus maniculatus bairdii]</a>             | 41.8 | 41.8 | 100% | 0.005 | 80% | <a href="#">gil589931486 XP_006978546.1</a>  |
| <a href="#">Cadherin-5 [Cricetulus griseus]</a>                                    | 39.7 | 39.7 | 100% | 0.026 | 73% | <a href="#">gil344242493 EGV98596.1</a>      |
| <a href="#">PREDICTED: cadherin-5 isoform X2 [Cricetulus griseus]</a>              | 39.7 | 39.7 | 100% | 0.026 | 73% | <a href="#">gil625281830 XP_007632574.1</a>  |
| <a href="#">PREDICTED: cadherin-5 isoform X1 [Cricetulus griseus]</a>              | 39.7 | 39.7 | 100% | 0.026 | 73% | <a href="#">gil354475023 XP_003499729.1</a>  |
| <a href="#">cadherin-5 [Rattus norvegicus]</a>                                     | 37.5 | 37.5 | 100% | 0.13  | 73% | <a href="#">gil157817743 JNP_001100877.1</a> |
| <a href="#">PREDICTED: cadherin-5 [Microtus ochrogaster]</a>                       | 37.5 | 37.5 | 100% | 0.13  | 73% | <a href="#">gil532002685 XP_005345597.1</a>  |
| <a href="#">PREDICTED: cadherin-5 [Mesocricetus auratus]</a>                       | 37.5 | 37.5 | 100% | 0.13  | 73% | <a href="#">gil524957484 XP_005078704.1</a>  |
| <a href="#">unnamed protein product [Mus musculus]</a>                             | 33.3 | 33.3 | 100% | 2.8   | 73% | <a href="#">gil74203863 BAE28530.1</a>       |
| <a href="#">mCG130451 [Mus musculus]</a>                                           | 33.3 | 33.3 | 100% | 2.9   | 73% | <a href="#">gil148707891 EDL39838.1</a>      |
| <a href="#">Cadherin 19, type 2 [Mus musculus]</a>                                 | 33.3 | 33.3 | 100% | 2.9   | 73% | <a href="#">gil187957174 AAI57928.1</a>      |
| <a href="#">cadherin-19 precursor [Mus musculus]</a>                               | 33.3 | 33.3 | 100% | 2.9   | 73% | <a href="#">gil124487065 JNP_001074855.1</a> |
| <a href="#">PREDICTED: cadherin-19 [Loxodonta africana]</a>                        | 33.3 | 33.3 | 100% | 2.9   | 73% | <a href="#">gil344268920 XP_003406304.1</a>  |
| <a href="#">ATP-binding region, ATPase-like protein [Actinokineospora sp. EG4]</a> | 32.9 | 32.9 | 80%  | 3.8   | 77% | <a href="#">gil583003441 EWC62912.1</a>      |
| <a href="#">peptidase M24 [Halalkalicoccus jeotgali]</a>                           | 32.9 | 32.9 | 100% | 3.9   | 67% | <a href="#">gil495693044 WP_008417623.1</a>  |

## Alignments

[Download](#) [GenPept](#) [Graphics](#) ▼ Next ▲ Previous ▲ Descriptions

unnamed protein product [Homo sapiens]  
 Sequence ID: [gil194390586|dbj|BAG62052.1](#) Length: 525 Number of Matches: 1

Range 1: 176 to 190 [GenPept](#) [Graphics](#) ▼ Next Match ▲ Previous Match

| Score          | Expect | Identities  | Positives   | Gaps     |
|----------------|--------|-------------|-------------|----------|
| 54.9 bits(122) | 2e-07  | 15/15(100%) | 15/15(100%) | 0/15(0%) |

Query 1 REVYPWYNLTVEAKE 15  
 Sbjct 176 REVYPWYNLTVEAKE 190

**Related Information**  
[Gene](#) - associated gene details

[Download](#) [GenPept](#) [Graphics](#) ▼ Next ▲ Previous ▲ Descriptions

TPA: cadherin-5 precursor [Bos taurus]  
 Sequence ID: [gil296477907|tpg|DAA20022.1](#) Length: 618 Number of Matches: 1

Range 1: 434 to 448 [GenPept](#) [Graphics](#) ▼ Next Match ▲ Previous Match

| Score          | Expect | Identities  | Positives   | Gaps     |
|----------------|--------|-------------|-------------|----------|
| 54.9 bits(122) | 2e-07  | 15/15(100%) | 15/15(100%) | 0/15(0%) |

Query 1 REVYPWYNLTVEAKE 15

**Related Information**  
[Gene](#) - associated gene details



Sbjct 434 REVYPWYNLTVEAKE  
 REVYPWYNLTVEAKE 448

[Download](#) [GenPept](#) [Graphics](#)

[Next](#) [Previous](#) [Descriptions](#)

**Cadherin-5 [Tupaia chinensis]**

Sequence ID: [gi|444715905|gb|ELW56766.1|](#) Length: 684 Number of Matches: 1

Range 1: 489 to 503 [GenPept](#) [Graphics](#)

[Next Match](#) [Previous Match](#)

| Score          | Expect | Identities  | Positives   | Gaps     |
|----------------|--------|-------------|-------------|----------|
| 54.9 bits(122) | 2e-07  | 15/15(100%) | 15/15(100%) | 0/15(0%) |

Query 1 REVYPWYNLTVEAKE 15  
 REVYPWYNLTVEAKE  
 Sbjct 489 REVYPWYNLTVEAKE 503

**Related Information**

[Download](#) [GenPept](#) [Graphics](#)

[Next](#) [Previous](#) [Descriptions](#)

**PREDICTED: cadherin-5 isoform X1 [Pongo abelii]**

Sequence ID: [gi|686750801|ref|XP\\_009249057.1|](#) Length: 706 Number of Matches: 1

Range 1: 435 to 449 [GenPept](#) [Graphics](#)

[Next Match](#) [Previous Match](#)

| Score          | Expect | Identities  | Positives   | Gaps     |
|----------------|--------|-------------|-------------|----------|
| 54.9 bits(122) | 2e-07  | 15/15(100%) | 15/15(100%) | 0/15(0%) |

Query 1 REVYPWYNLTVEAKE 15  
 REVYPWYNLTVEAKE  
 Sbjct 435 REVYPWYNLTVEAKE 449

**Related Information**

[Gene](#) - associated gene details  
[Map Viewer](#) - aligned genomic context

[Download](#) [GenPept](#) [Graphics](#)

[Next](#) [Previous](#) [Descriptions](#)

**PREDICTED: cadherin-5 [Tupaia chinensis]**

Sequence ID: [gi|562854134|ref|XP\\_006155681.1|](#) Length: 715 Number of Matches: 1

Range 1: 432 to 446 [GenPept](#) [Graphics](#)

[Next Match](#) [Previous Match](#)

| Score          | Expect | Identities  | Positives   | Gaps     |
|----------------|--------|-------------|-------------|----------|
| 54.9 bits(122) | 2e-07  | 15/15(100%) | 15/15(100%) | 0/15(0%) |

Query 1 REVYPWYNLTVEAKE 15  
 REVYPWYNLTVEAKE  
 Sbjct 432 REVYPWYNLTVEAKE 446

**Related Information**

[Gene](#) - associated gene details

BLAST is a registered trademark of the National Library of Medicine.

▶ NCBI/ BLAST/ blastp suite/ Formatting Results - BTGOZY8T013

**i** Your search parameters were adjusted to search for a short input sequence.

[Edit and Resubmit](#) [Save Search Strategies](#) ▶ [Formatting options](#) ▶ [Download](#) [YouTube](#) [How to read this page](#) [Blast report description](#)

**CDHR5\_RVEEDTKVDSTVIPETQLQAEDRD\_Mod**

|                      |                                                         |                      |                                                                                                                    |
|----------------------|---------------------------------------------------------|----------------------|--------------------------------------------------------------------------------------------------------------------|
| <b>RID</b>           | <a href="#">BTGOZY8T013</a> (Expires on 01-20 15:28 pm) | <b>Database Name</b> | nr                                                                                                                 |
| <b>Query ID</b>      | lcl 29927                                               | <b>Description</b>   | All non-redundant GenBank CDS translations+PDB+SwissProt+PIR+PRF excluding environmental samples from WGS projects |
| <b>Description</b>   | None                                                    | <b>Program</b>       | BLASTP 2.2.30+ ▶ <a href="#">Citation</a>                                                                          |
| <b>Molecule type</b> | amino acid                                              |                      |                                                                                                                    |
| <b>Query Length</b>  | 24                                                      |                      |                                                                                                                    |

Other reports: ▶ [Search Summary](#) [[Taxonomy reports](#)] [[Distance tree of results](#)] [[Multiple alignment](#)]

**Graphic Summary**

[Show Conserved Domains](#)

No putative conserved domains have been detected

Distribution of 105 Blast Hits on the Query Sequence [?](#)

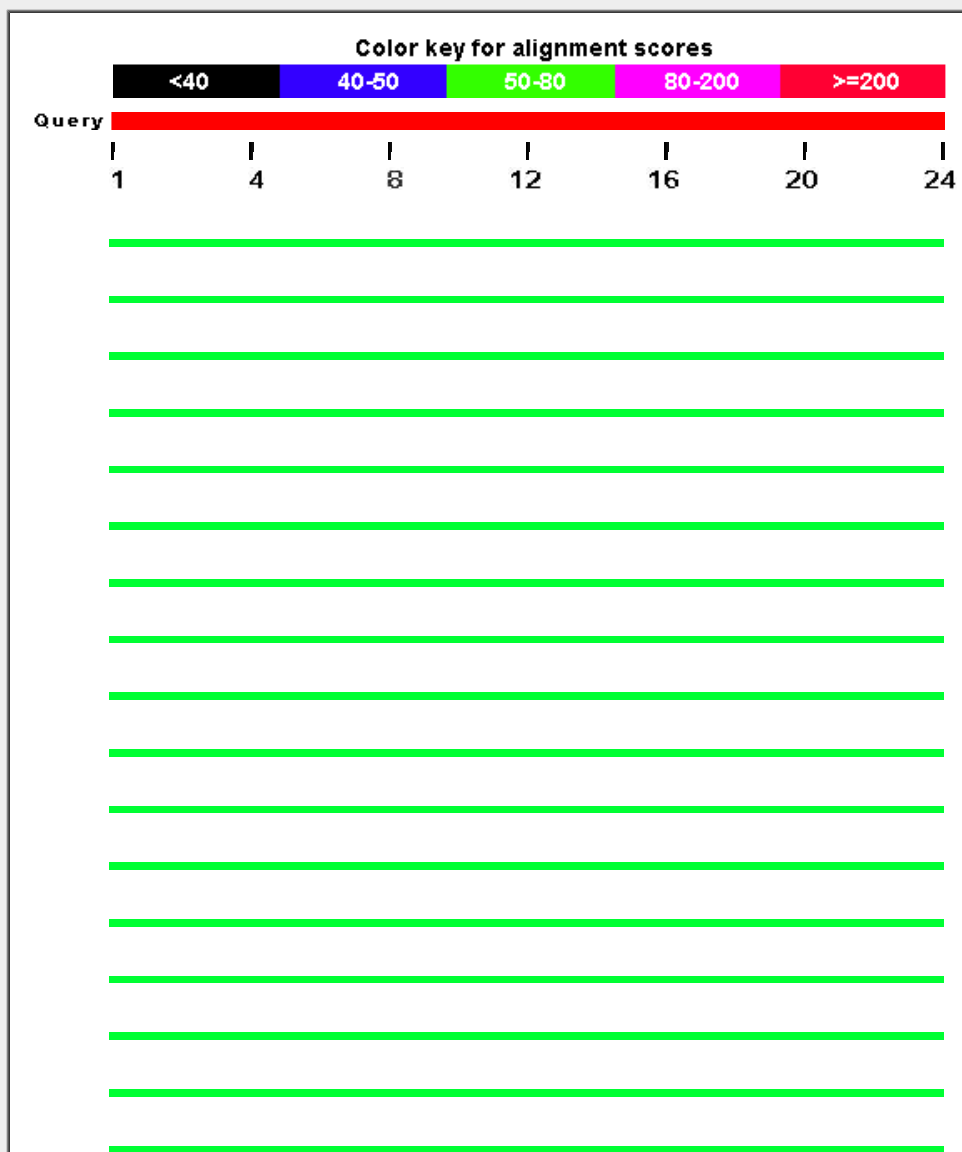

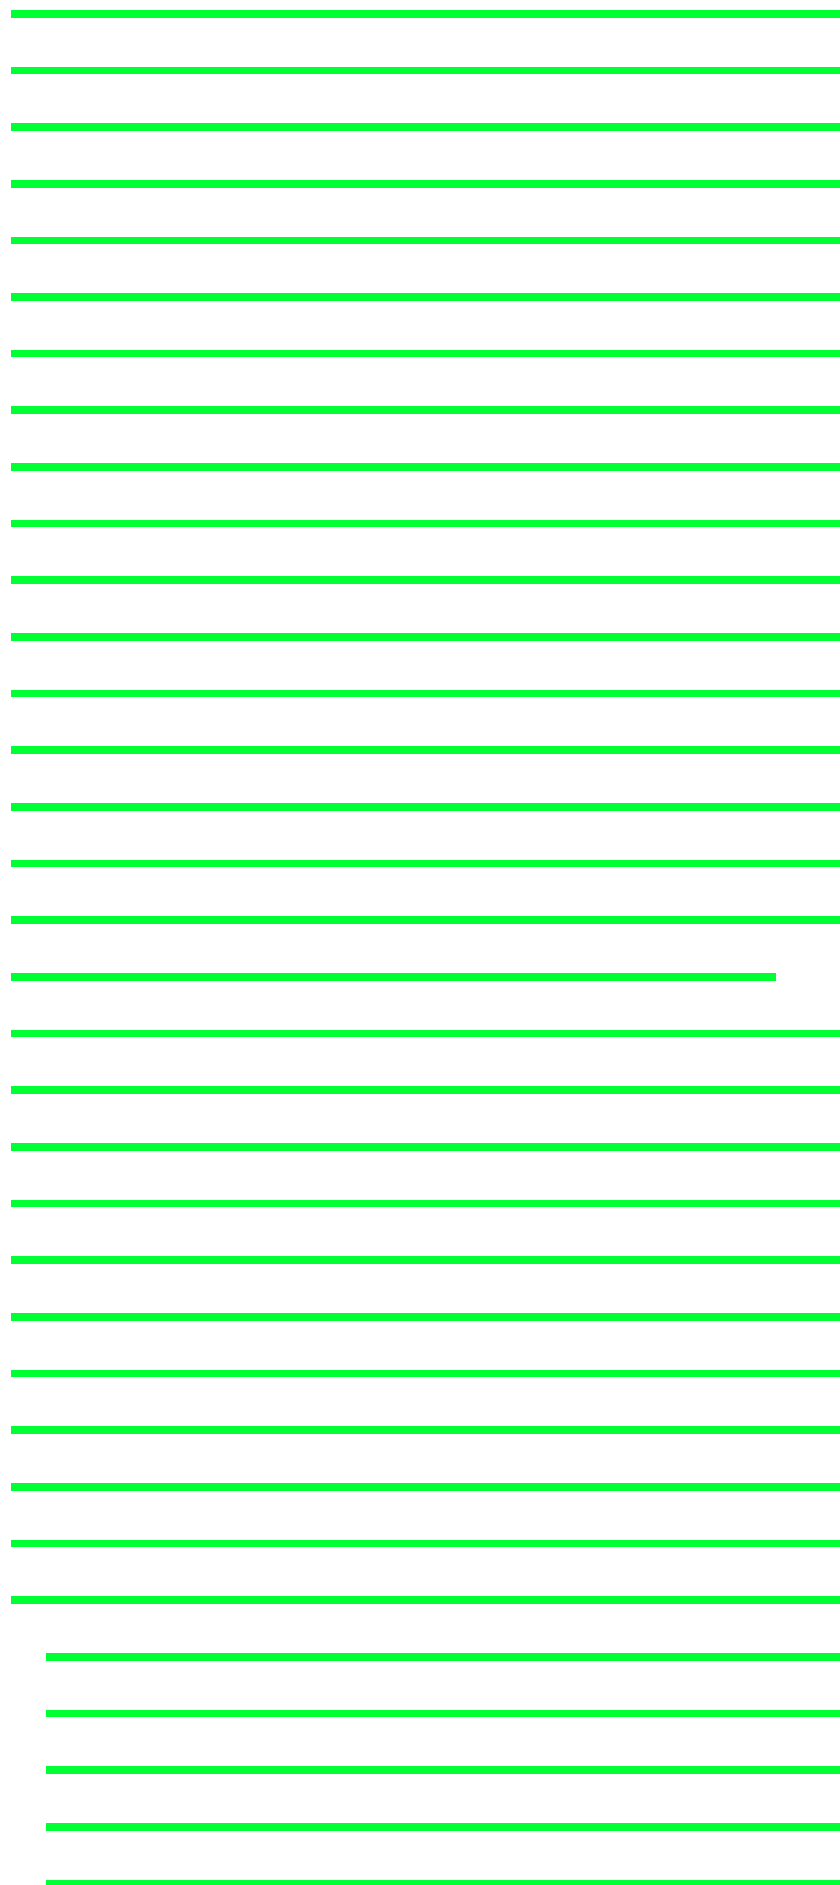

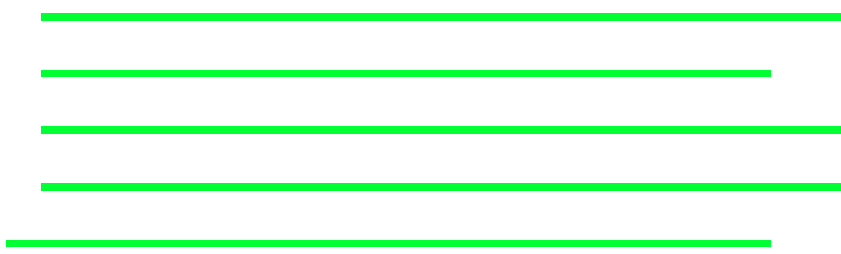

**Descriptions**

**Sequences producing significant alignments:**

Select: [All](#) [None](#) Selected:0

[Alignments](#)
[Download](#)
[GenPept](#)
[Graphics](#)
[Distance tree of results](#)
[Multiple alignment](#)


| Description                                                                   | Max score | Total score | Query cover | E value | Ident | Accession                                   |
|-------------------------------------------------------------------------------|-----------|-------------|-------------|---------|-------|---------------------------------------------|
| <a href="#">mucin and cadherin-like, isoform CRA_f [Homo sapiens]</a>         | 77.0      | 77.0        | 100%        | 2e-14   | 96%   | <a href="#">gi 119622771 EAX02366.1</a>     |
| <a href="#">MUCDHL-ALT [Homo sapiens]</a>                                     | 77.0      | 77.0        | 100%        | 2e-14   | 96%   | <a href="#">gi 10334769 AAG16730.1</a>      |
| <a href="#">MUCDHL-ALT [Homo sapiens]</a>                                     | 77.0      | 77.0        | 100%        | 2e-14   | 96%   | <a href="#">gi 10334772 AAG16732.1</a>      |
| <a href="#">mucin and cadherin-like, isoform CRA_d [Homo sapiens]</a>         | 77.0      | 77.0        | 100%        | 2e-14   | 96%   | <a href="#">gi 119622769 EAX02364.1</a>     |
| <a href="#">PREDICTED: cadherin-related family member 5 isoform X4 [Hc</a>    | 77.0      | 77.0        | 100%        | 2e-14   | 96%   | <a href="#">gi 578839861 XP_005253047.2</a> |
| <a href="#">unnamed protein product [Homo sapiens]</a>                        | 77.0      | 77.0        | 100%        | 2e-14   | 96%   | <a href="#">gi 194374995 BAG62610.1</a>     |
| <a href="#">cadherin-related family member 5 isoform 3 precursor [Homo s;</a> | 77.0      | 77.0        | 100%        | 2e-14   | 96%   | <a href="#">gi 110618250 NP_112554.2</a>    |
| <a href="#">unnamed protein product [Homo sapiens]</a>                        | 77.0      | 77.0        | 100%        | 2e-14   | 96%   | <a href="#">gi 7020438 BAA91130.1</a>       |
| <a href="#">PREDICTED: cadherin-related family member 5 [Gorilla gorilla</a>  | 77.0      | 77.0        | 100%        | 2e-14   | 96%   | <a href="#">gi 426366755 XP_004050412.1</a> |
| <a href="#">mucin and cadherin-like, isoform CRA_c [Homo sapiens]</a>         | 77.0      | 77.0        | 100%        | 2e-14   | 96%   | <a href="#">gi 119622768 EAX02363.1</a>     |
| <a href="#">PREDICTED: cadherin-related family member 5 isoform X3 [Hc</a>    | 77.0      | 77.0        | 100%        | 2e-14   | 96%   | <a href="#">gi 578839859 XP_005253046.2</a> |
| <a href="#">PREDICTED: cadherin-related family member 5 isoform X2 [Hc</a>    | 77.0      | 77.0        | 100%        | 2e-14   | 96%   | <a href="#">gi 578839857 XP_005253045.2</a> |
| <a href="#">PREDICTED: cadherin-related family member 5 isoform X1 [Hc</a>    | 77.0      | 77.0        | 100%        | 2e-14   | 96%   | <a href="#">gi 578839855 XP_005253044.2</a> |
| <a href="#">PREDICTED: cadherin-related family member 5 isoform X1 [Hc</a>    | 77.0      | 77.0        | 100%        | 2e-14   | 96%   | <a href="#">gi 578820616 XP_006718316.1</a> |
| <a href="#">PREDICTED: LOW QUALITY PROTEIN: cadherin-related fami</a>         | 77.0      | 77.0        | 100%        | 2e-14   | 96%   | <a href="#">gi 397468758 XP_003806038.1</a> |
| <a href="#">cadherin-related family member 5 isoform 4 precursor [Homo s;</a> | 77.0      | 77.0        | 100%        | 2e-14   | 96%   | <a href="#">gi 285002199 NP_001165439.1</a> |
| <a href="#">MUCDHL [Homo sapiens]</a>                                         | 77.0      | 77.0        | 100%        | 2e-14   | 96%   | <a href="#">gi 37181861 AAQ88734.1</a>      |
| <a href="#">mu-protocadherin [Homo sapiens]</a>                               | 77.0      | 77.0        | 100%        | 2e-14   | 96%   | <a href="#">gi 11245187 AAG33495.1</a>      |
| <a href="#">MUCDHL-FL [Homo sapiens]</a>                                      | 77.0      | 77.0        | 100%        | 2e-14   | 96%   | <a href="#">gi 10334770 AAG16731.1</a>      |
| <a href="#">MUCDHL-FL [Homo sapiens]</a>                                      | 77.0      | 77.0        | 100%        | 2e-14   | 96%   | <a href="#">gi 10334774 AAG16733.1</a>      |
| <a href="#">RecName: Full=Cadherin-related family member 5; AltName: F</a>    | 77.0      | 77.0        | 100%        | 2e-14   | 96%   | <a href="#">gi 296439399 Q9HBB8.3</a>       |
| <a href="#">mucin and cadherin-like, isoform CRA_b [Homo sapiens]</a>         | 77.0      | 77.0        | 100%        | 2e-14   | 96%   | <a href="#">gi 119622767 EAX02362.1</a>     |
| <a href="#">cadherin-related family member 5 isoform 1 precursor [Homo s;</a> | 77.0      | 77.0        | 100%        | 2e-14   | 96%   | <a href="#">gi 110618248 NP_068743.2</a>    |
| <a href="#">PREDICTED: cadherin-related family member 5 isoform X6 [Cf</a>    | 70.6      | 70.6        | 100%        | 3e-12   | 88%   | <a href="#">gi 635011025 XP_007988108.1</a> |
| <a href="#">PREDICTED: cadherin-related family member 5 isoform X5 [Pa</a>    | 70.6      | 70.6        | 100%        | 3e-12   | 88%   | <a href="#">gi 685584291 XP_009183489.1</a> |
| <a href="#">PREDICTED: cadherin-related family member 5 isoform X4 [Pa</a>    | 70.6      | 70.6        | 100%        | 3e-12   | 88%   | <a href="#">gi 685584289 XP_009183488.1</a> |
| <a href="#">PREDICTED: cadherin-related family member 5 isoform X5 [Cf</a>    | 70.6      | 70.6        | 100%        | 3e-12   | 88%   | <a href="#">gi 635011023 XP_007987388.1</a> |
| <a href="#">PREDICTED: cadherin-related family member 5 isoform X3 [Pa</a>    | 70.6      | 70.6        | 100%        | 3e-12   | 88%   | <a href="#">gi 685584287 XP_009183487.1</a> |
| <a href="#">PREDICTED: cadherin-related family member 5 isoform X4 [Cf</a>    | 70.6      | 70.6        | 100%        | 3e-12   | 88%   | <a href="#">gi 635011021 XP_007986645.1</a> |

|                                                                               |      |      |      |       |     |                                             |
|-------------------------------------------------------------------------------|------|------|------|-------|-----|---------------------------------------------|
| <a href="#">PREDICTED: cadherin-related family member 5 isoform X2 [Pa</a>    | 70.6 | 70.6 | 100% | 3e-12 | 88% | <a href="#">gi 685584285 XP_009183486.1</a> |
| <a href="#">PREDICTED: cadherin-related family member 5 isoform X1 [Pa</a>    | 70.6 | 70.6 | 100% | 3e-12 | 88% | <a href="#">gi 685584283 XP_009183484.1</a> |
| <a href="#">PREDICTED: cadherin-related family member 5 isoform X3 [Cf</a>    | 70.6 | 70.6 | 100% | 3e-12 | 88% | <a href="#">gi 635011019 XP_007986020.1</a> |
| <a href="#">PREDICTED: cadherin-related family member 5 isoform X2 [Cf</a>    | 70.6 | 70.6 | 100% | 3e-12 | 88% | <a href="#">gi 635011017 XP_007985338.1</a> |
| <a href="#">PREDICTED: cadherin-related family member 5 isoform X1 [Cf</a>    | 70.6 | 70.6 | 100% | 3e-12 | 88% | <a href="#">gi 635011015 XP_007984693.1</a> |
| <a href="#">PREDICTED: LOW QUALITY PROTEIN: cadherin-related fami</a>         | 70.2 | 70.2 | 91%  | 4e-12 | 95% | <a href="#">gi 441665990 XP_003281373.2</a> |
| <a href="#">PREDICTED: cadherin-related family member 5 isoform X5 [Rf</a>    | 68.5 | 68.5 | 100% | 2e-11 | 83% | <a href="#">gi 724796233 XP_010387931.1</a> |
| <a href="#">PREDICTED: cadherin-related family member 5 isoform X4 [Rf</a>    | 68.5 | 68.5 | 100% | 2e-11 | 83% | <a href="#">gi 724796230 XP_010387851.1</a> |
| <a href="#">PREDICTED: cadherin-related family member 5 isoform X3 [Rf</a>    | 68.5 | 68.5 | 100% | 2e-11 | 83% | <a href="#">gi 724796227 XP_010387784.1</a> |
| <a href="#">PREDICTED: cadherin-related family member 5 isoform X2 [Rf</a>    | 68.5 | 68.5 | 100% | 2e-11 | 83% | <a href="#">gi 724796224 XP_010387726.1</a> |
| <a href="#">PREDICTED: cadherin-related family member 5 isoform X1 [Rf</a>    | 68.5 | 68.5 | 100% | 2e-11 | 83% | <a href="#">gi 724796221 XP_010387653.1</a> |
| <a href="#">PREDICTED: cadherin-related family member 5 isoform X5 [Mf</a>    | 65.5 | 65.5 | 100% | 2e-10 | 83% | <a href="#">gi 544483429 XP_005576826.1</a> |
| <a href="#">PREDICTED: cadherin-related family member 5 isoform 2 [Mac</a>    | 65.5 | 65.5 | 100% | 2e-10 | 83% | <a href="#">gi 109104860 XP_001086363.1</a> |
| <a href="#">PREDICTED: cadherin-related family member 5 isoform X4 [Mf</a>    | 65.5 | 65.5 | 100% | 2e-10 | 83% | <a href="#">gi 544483427 XP_005576825.1</a> |
| <a href="#">PREDICTED: cadherin-related family member 5 isoform X3 [Mf</a>    | 65.5 | 65.5 | 100% | 2e-10 | 83% | <a href="#">gi 544483425 XP_005576824.1</a> |
| <a href="#">PREDICTED: cadherin-related family member 5 isoform 1 [Mac</a>    | 65.5 | 65.5 | 100% | 2e-10 | 83% | <a href="#">gi 297267104 XP_001086239.2</a> |
| <a href="#">PREDICTED: cadherin-related family member 5 isoform X1 [Mf</a>    | 65.5 | 65.5 | 100% | 2e-10 | 83% | <a href="#">gi 544483421 XP_005576822.1</a> |
| <a href="#">PREDICTED: cadherin-related family member 5-like [Galeopter</a>   | 62.1 | 62.1 | 95%  | 2e-09 | 83% | <a href="#">gi 667346400 XP_008563564.1</a> |
| <a href="#">PREDICTED: cadherin-related family member 5 [Ictidomys trid</a>   | 58.3 | 58.3 | 95%  | 5e-08 | 78% | <a href="#">gi 532114016 XP_005341679.1</a> |
| <a href="#">PREDICTED: cadherin-related family member 5 [Otolemur garr</a>    | 57.5 | 57.5 | 95%  | 9e-08 | 78% | <a href="#">gi 395861133 XP_003802848.1</a> |
| <a href="#">PREDICTED: cadherin-related family member 5 isoform X2 [Sa</a>    | 54.9 | 54.9 | 95%  | 6e-07 | 78% | <a href="#">gi 725605770 XP_010329489.1</a> |
| <a href="#">PREDICTED: cadherin-related family member 5 isoform X1 [Sa</a>    | 54.9 | 54.9 | 95%  | 6e-07 | 78% | <a href="#">gi 725605768 XP_010329488.1</a> |
| <a href="#">PREDICTED: cadherin-related family member 5 isoform X3 [Sa</a>    | 54.9 | 54.9 | 95%  | 6e-07 | 78% | <a href="#">gi 403305644 XP_003943368.1</a> |
| <a href="#">PREDICTED: cadherin-related family member 5 [Tupaia chiner</a>    | 54.5 | 54.5 | 87%  | 8e-07 | 81% | <a href="#">gi 562873172 XP_006164495.1</a> |
| <a href="#">PREDICTED: cadherin-related family member 5 isoform X2 [Su</a>    | 54.1 | 54.1 | 95%  | 1e-06 | 74% | <a href="#">gi 545805609 XP_005652842.1</a> |
| <a href="#">PREDICTED: cadherin-related family member 5 isoform X1 [Su</a>    | 54.1 | 54.1 | 95%  | 1e-06 | 74% | <a href="#">gi 545805606 XP_005652841.1</a> |
| <a href="#">PREDICTED: cadherin-related family member 5 [Ceratotheriurr</a>   | 53.7 | 53.7 | 91%  | 2e-06 | 68% | <a href="#">gi 478534060 XP_004441167.1</a> |
| <a href="#">PREDICTED: cadherin-related family member 5 [Galeopterus v</a>    | 52.8 | 52.8 | 87%  | 3e-06 | 76% | <a href="#">gi 667327847 XP_008590353.1</a> |
| <a href="#">PREDICTED: cadherin-related family member 5 isoform X2 [Mf</a>    | 52.4 | 52.4 | 83%  | 4e-06 | 80% | <a href="#">gi 544483423 XP_005576823.1</a> |
| <a href="#">PREDICTED: cadherin-related family member 5 [Equus przew</a>      | 52.0 | 52.0 | 91%  | 5e-06 | 73% | <a href="#">gi 664777361 XP_008507976.1</a> |
| <a href="#">PREDICTED: cadherin-related family member 5 [Equus caballu</a>    | 52.0 | 52.0 | 91%  | 6e-06 | 73% | <a href="#">gi 545182188 XP_005598543.1</a> |
| <a href="#">PREDICTED: cadherin-related family member 5 [Callithrix jacq</a>  | 50.7 | 50.7 | 95%  | 2e-05 | 74% | <a href="#">gi 675704132 XP_009007036.1</a> |
| <a href="#">PREDICTED: LOW QUALITY PROTEIN: cadherin-related fami</a>         | 50.3 | 50.3 | 87%  | 2e-05 | 71% | <a href="#">gi 504181561 XP_004600071.1</a> |
| <a href="#">PREDICTED: cadherin-related family member 5 [Ursus maritim</a>    | 50.3 | 50.3 | 87%  | 2e-05 | 67% | <a href="#">gi 671014096 XP_008697888.1</a> |
| <a href="#">PREDICTED: cadherin-related family member 5 [Chrysochloris</a>    | 50.3 | 50.3 | 87%  | 2e-05 | 76% | <a href="#">gi 586493238 XP_006877066.1</a> |
| <a href="#">Mucin and cadherin-like protein [Pteropus alecto]</a>             | 49.8 | 49.8 | 95%  | 3e-05 | 62% | <a href="#">gi 431910097 ELK13170.1</a>     |
| <a href="#">PREDICTED: cadherin-related family member 5 [Pteropus alec</a>    | 49.8 | 49.8 | 95%  | 3e-05 | 62% | <a href="#">gi 586552614 XP_006911325.1</a> |
| <a href="#">PREDICTED: cadherin-related family member 5 [Lipotes vexillif</a> | 49.8 | 49.8 | 91%  | 3e-05 | 73% | <a href="#">gi 602711484 XP_007465981.1</a> |
| <a href="#">mucin and cadherin like. isoform CRA_b [Mus musculus]</a>         | 49.0 | 70.8 | 100% | 5e-05 | 74% | <a href="#">gi 148686086 EDL18033.1</a>     |
| <a href="#">PREDICTED: cadherin-related family member 5 [Jaculus jaculu</a>   | 49.0 | 49.0 | 95%  | 5e-05 | 70% | <a href="#">gi 507539897 XP_004653954.1</a> |
| <a href="#">cadherin-related family member 5 isoform 2 precursor [Mus mu</a>  | 49.0 | 70.8 | 100% | 5e-05 | 74% | <a href="#">gi 21312502 NP_082345.1</a>     |
| <a href="#">PREDICTED: cadherin-related family member 5 isoform X1 [Mu</a>    | 49.0 | 70.8 | 100% | 5e-05 | 74% | <a href="#">gi 568952506 XP_006536323.1</a> |
| <a href="#">cadherin-related family member 5 isoform 1 precursor [Mus mu</a>  | 49.0 | 70.8 | 100% | 5e-05 | 74% | <a href="#">gi 167004347 NP_001107794.1</a> |
| <a href="#">RecName: Full=Cadherin-related family member 5; AltName: F</a>    | 49.0 | 70.8 | 100% | 5e-05 | 74% | <a href="#">gi 45477152 Q8VHF2.1</a>        |
| <a href="#">PREDICTED: cadherin-related family member 5 isoform X2 [Ca</a>    | 47.7 | 47.7 | 87%  | 1e-04 | 67% | <a href="#">gi 744621423 XP_010997521.1</a> |

|                                                                             |      |      |     |       |     |                                             |
|-----------------------------------------------------------------------------|------|------|-----|-------|-----|---------------------------------------------|
| <a href="#">PREDICTED: cadherin-related family member 5 isoform X5 [Ca</a>  | 47.7 | 47.7 | 87% | 1e-04 | 67% | <a href="#">gi 743697761 XP_010954426.1</a> |
| <a href="#">PREDICTED: cadherin-related family member 5 isoform X4 [Ca</a>  | 47.7 | 47.7 | 87% | 1e-04 | 67% | <a href="#">gi 743697759 XP_010954420.1</a> |
| <a href="#">PREDICTED: cadherin-related family member 5 isoform X3 [Ca</a>  | 47.7 | 47.7 | 87% | 1e-04 | 67% | <a href="#">gi 743697757 XP_010954413.1</a> |
| <a href="#">PREDICTED: cadherin-related family member 5 [Camelus feru</a>   | 47.7 | 47.7 | 87% | 1e-04 | 67% | <a href="#">gi 560909593 XP_006181104.1</a> |
| <a href="#">PREDICTED: cadherin-related family member 5 [Vicugna paco</a>   | 47.7 | 47.7 | 87% | 1e-04 | 67% | <a href="#">gi 560994295 XP_006219255.1</a> |
| <a href="#">PREDICTED: cadherin-related family member 5 isoform X1 [Ca</a>  | 47.7 | 47.7 | 87% | 1e-04 | 67% | <a href="#">gi 744621420 XP_010997520.1</a> |
| <a href="#">PREDICTED: cadherin-related family member 5 isoform X2 [Ca</a>  | 47.7 | 47.7 | 87% | 1e-04 | 67% | <a href="#">gi 743697755 XP_010954403.1</a> |
| <a href="#">PREDICTED: cadherin-related family member 5 isoform X1 [Ca</a>  | 47.7 | 47.7 | 87% | 1e-04 | 67% | <a href="#">gi 743697753 XP_010954393.1</a> |
| <a href="#">PREDICTED: LOW QUALITY PROTEIN: cadherin-related fami</a>       | 47.7 | 47.7 | 87% | 1e-04 | 71% | <a href="#">gi 471415885 XP_004389467.1</a> |
| <a href="#">cadherin-related family member 5 precursor [Camelus ferus]</a>  | 47.7 | 47.7 | 87% | 1e-04 | 67% | <a href="#">gi 528764226 EPY83885.1</a>     |
| <a href="#">PREDICTED: cadherin-related family member 5 [Loxodonta afr</a>  | 47.7 | 47.7 | 87% | 1e-04 | 71% | <a href="#">gi 344309231 XP_003423280.1</a> |
| <a href="#">PREDICTED: cadherin-related family member 5 [Leptonychote</a>   | 47.3 | 47.3 | 87% | 2e-04 | 71% | <a href="#">gi 585180394 XP_006741861.1</a> |
| <a href="#">PREDICTED: cadherin-related family member 5 [Orcinus orca]</a>  | 47.3 | 47.3 | 91% | 2e-04 | 68% | <a href="#">gi 466050257 XP_004278199.1</a> |
| <a href="#">PREDICTED: cadherin-related family member 5 [Echinops telfa</a> | 46.9 | 46.9 | 87% | 3e-04 | 71% | <a href="#">gi 507709657 XP_004717252.1</a> |
| <a href="#">PREDICTED: cadherin-related family member 5 [Cavia porcell</a>  | 46.4 | 46.4 | 95% | 4e-04 | 70% | <a href="#">gi 514443851 XP_003461333.2</a> |
| <a href="#">PREDICTED: cadherin-related family member 5 [Orycteropus a</a>  | 46.0 | 46.0 | 95% | 5e-04 | 65% | <a href="#">gi 634871909 XP_007947550.1</a> |
| <a href="#">PREDICTED: cadherin-related family member 5 isoform X4 [Cf</a>  | 45.6 | 45.6 | 95% | 7e-04 | 65% | <a href="#">gi 533177179 XP_005401888.1</a> |
| <a href="#">PREDICTED: cadherin-related family member 5 isoform X3 [Cf</a>  | 45.6 | 45.6 | 95% | 7e-04 | 65% | <a href="#">gi 533177177 XP_005401887.1</a> |
| <a href="#">PREDICTED: cadherin-related family member 5 isoform X2 [Cf</a>  | 45.6 | 45.6 | 95% | 7e-04 | 65% | <a href="#">gi 533177175 XP_005401886.1</a> |
| <a href="#">PREDICTED: cadherin-related family member 5 [Physeter cato</a>  | 45.6 | 45.6 | 95% | 7e-04 | 65% | <a href="#">gi 593725286 XP_007108751.1</a> |
| <a href="#">PREDICTED: cadherin-related family member 5 isoform X1 [Cf</a>  | 45.6 | 45.6 | 95% | 7e-04 | 65% | <a href="#">gi 533177173 XP_005401885.1</a> |
| <a href="#">PREDICTED: cadherin-related family member 5 isoform X2 [Bu</a>  | 45.2 | 45.2 | 95% | 0.001 | 61% | <a href="#">gi 594042619 XP_006045841.1</a> |
| <a href="#">PREDICTED: cadherin-related family member 5 [Octodon degu</a>   | 45.2 | 45.2 | 95% | 0.001 | 70% | <a href="#">gi 507671995 XP_004638095.1</a> |
| <a href="#">PREDICTED: cadherin-related family member 5 [Bison bison bi</a> | 45.2 | 45.2 | 95% | 0.001 | 61% | <a href="#">gi 742077964 XP_010835550.1</a> |
| <a href="#">PREDICTED: cadherin-related family member 5 [Odobenus ros</a>   | 45.2 | 45.2 | 79% | 0.001 | 68% | <a href="#">gi 472368599 XP_004403824.1</a> |
| <a href="#">Cadherin-related family member 5 [Bos mutus]</a>                | 45.2 | 45.2 | 95% | 0.001 | 61% | <a href="#">gi 440906581 ELR56829.1</a>     |

## Alignments

Download GenPept Graphics

Next Previous Descriptions

mucin and cadherin-like, isoform CRA\_f [Homo sapiens]

Sequence ID: [gi|119622771|gb|EAX02366.1](#) Length: 485 Number of Matches: 1

Range 1: 132 to 155 GenPept Graphics

Next Match Previous Match

| Score          | Expect | Identities | Positives   | Gaps     |
|----------------|--------|------------|-------------|----------|
| 77.0 bits(174) | 2e-14  | 23/24(96%) | 24/24(100%) | 0/24(0%) |

Query 1 RVEEDTKVDSTVIPETQLQAEDRD 24  
 RVEEDTKV+STVIPETQLQAEDRD  
 Sbjct 132 RVEEDTKVNSTVIPETQLQAEDRD 155

### Related Information

[Gene](#) - associated gene details

Download GenPept Graphics

Next Previous Descriptions

MUCDHL-ALT [Homo sapiens]

Sequence ID: [gi|10334769|gb|AAG16730.1](#) Length: 487 Number of Matches: 1

Range 1: 132 to 155 GenPept Graphics

Next Match Previous Match

| Score          | Expect | Identities | Positives   | Gaps     |
|----------------|--------|------------|-------------|----------|
| 77.0 bits(174) | 2e-14  | 23/24(96%) | 24/24(100%) | 0/24(0%) |

### Related Information

[Gene](#) - associated gene details

Query 1 RVEEDTKVDSTVIPETQLQAEDRD 24  
 RVEEDTKV+STVIPETQLQAEDRD  
 Sbjct 132 RVEEDTKVNSTVIPETQLQAEDRD 155

[Download](#) [GenPept](#) [Graphics](#)

[Next](#) [Previous](#) [Descriptions](#)

MUCDHL-ALT [Homo sapiens]

Sequence ID: [gi|10334772|gb|AAG16732.1|AF258675\\_1](#) Length: 487 Number of Matches: 1

Range 1: 132 to 155 [GenPept](#) [Graphics](#)

[Next Match](#) [Previous Match](#)

| Score          | Expect | Identities | Positives   | Gaps     |
|----------------|--------|------------|-------------|----------|
| 77.0 bits(174) | 2e-14  | 23/24(96%) | 24/24(100%) | 0/24(0%) |

Query 1 RVEEDTKVDSTVIPETQLQAEDRD 24  
 RVEEDTKV+STVIPETQLQAEDRD  
 Sbjct 132 RVEEDTKVNSTVIPETQLQAEDRD 155

**Related Information**

[Gene](#) - associated gene details

[Download](#) [GenPept](#) [Graphics](#)

[Next](#) [Previous](#) [Descriptions](#)

mucin and cadherin-like, isoform CRA\_d, partial [Homo sapiens]

Sequence ID: [gi|119622769|gb|EAX02364.1](#) Length: 493 Number of Matches: 1

Range 1: 132 to 155 [GenPept](#) [Graphics](#)

[Next Match](#) [Previous Match](#)

| Score          | Expect | Identities | Positives   | Gaps     |
|----------------|--------|------------|-------------|----------|
| 77.0 bits(174) | 2e-14  | 23/24(96%) | 24/24(100%) | 0/24(0%) |

Query 1 RVEEDTKVDSTVIPETQLQAEDRD 24  
 RVEEDTKV+STVIPETQLQAEDRD  
 Sbjct 132 RVEEDTKVNSTVIPETQLQAEDRD 155

**Related Information**

[Gene](#) - associated gene details

[Download](#) [GenPept](#) [Graphics](#)

[Next](#) [Previous](#) [Descriptions](#)

PREDICTED: cadherin-related family member 5 isoform X4 [Homo sapiens]

Sequence ID: [gi|578839861|ref|XP\\_005253047.2](#) Length: 551 Number of Matches: 1

Range 1: 132 to 155 [GenPept](#) [Graphics](#)

[Next Match](#) [Previous Match](#)

| Score          | Expect | Identities | Positives   | Gaps     |
|----------------|--------|------------|-------------|----------|
| 77.0 bits(174) | 2e-14  | 23/24(96%) | 24/24(100%) | 0/24(0%) |

Query 1 RVEEDTKVDSTVIPETQLQAEDRD 24  
 RVEEDTKV+STVIPETQLQAEDRD  
 Sbjct 132 RVEEDTKVNSTVIPETQLQAEDRD 155

**Related Information**

[Gene](#) - associated gene details

BLAST is a registered trademark of the National Library of Medicine.



NCBI/ BLAST/ blastp suite/ Formatting Results - B92KKENH01R

Your search parameters were adjusted to search for a short input sequence.

Edit and Resubmit Save Search Strategies Formatting options Download

YouTube How to read this page Blast report description

CDHR5\_RVEEDTKVNSTVIPETQLQAEDRD\_NonMod

RID B92KKENH01R (Expires on 01-14 10:01 am)

Query ID Icl|328478
Description None
Molecule type amino acid
Query Length 24

Database Name nr
Description All non-redundant GenBank CDS translations+PDB+SwissProt+PIR excluding environmental samples from WGS projects
Program BLASTP 2.2.30+ Citation

Other reports: Search Summary Taxonomy reports Distance tree of results Multiple alignment

Graphic Summary

Show Conserved Domains

No putative conserved domains have been detected

Distribution of 106 Blast Hits on the Query Sequence

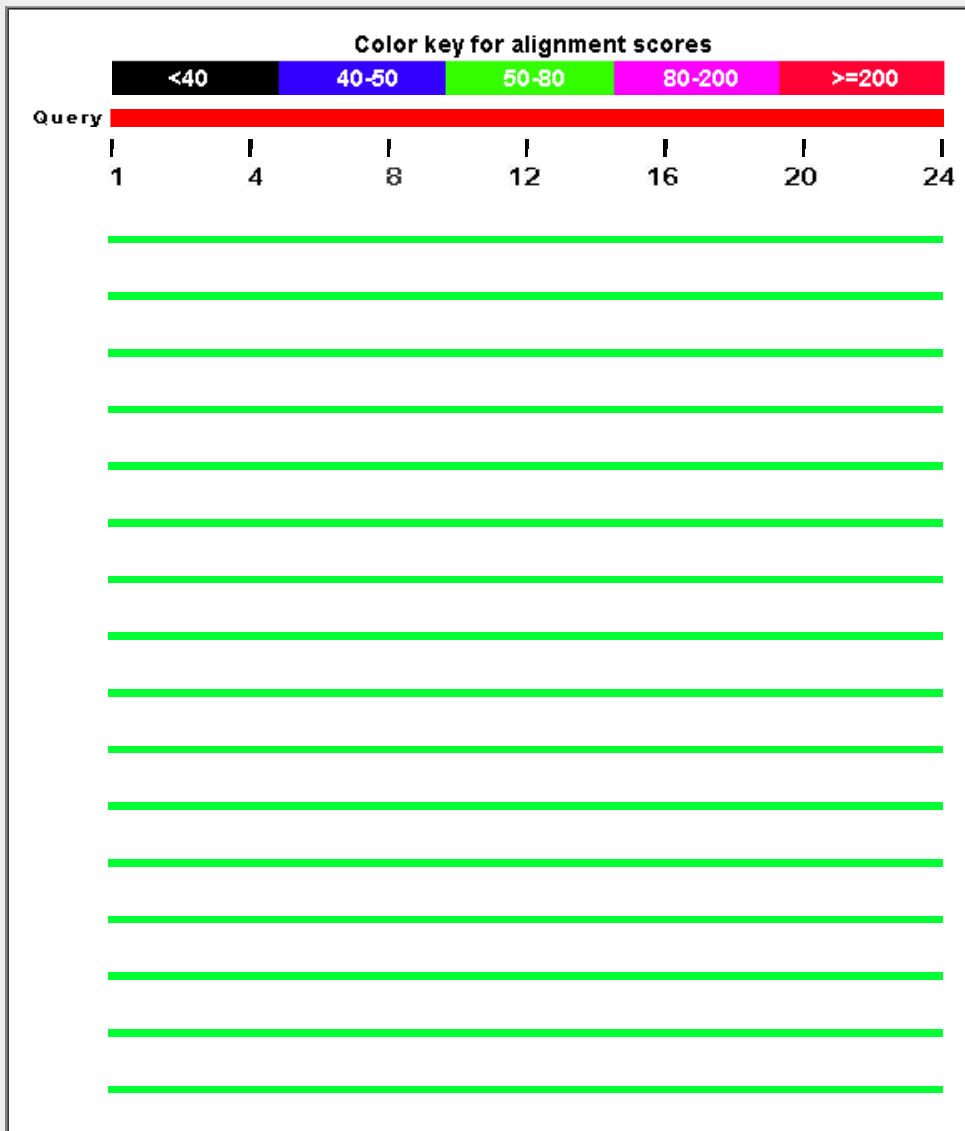



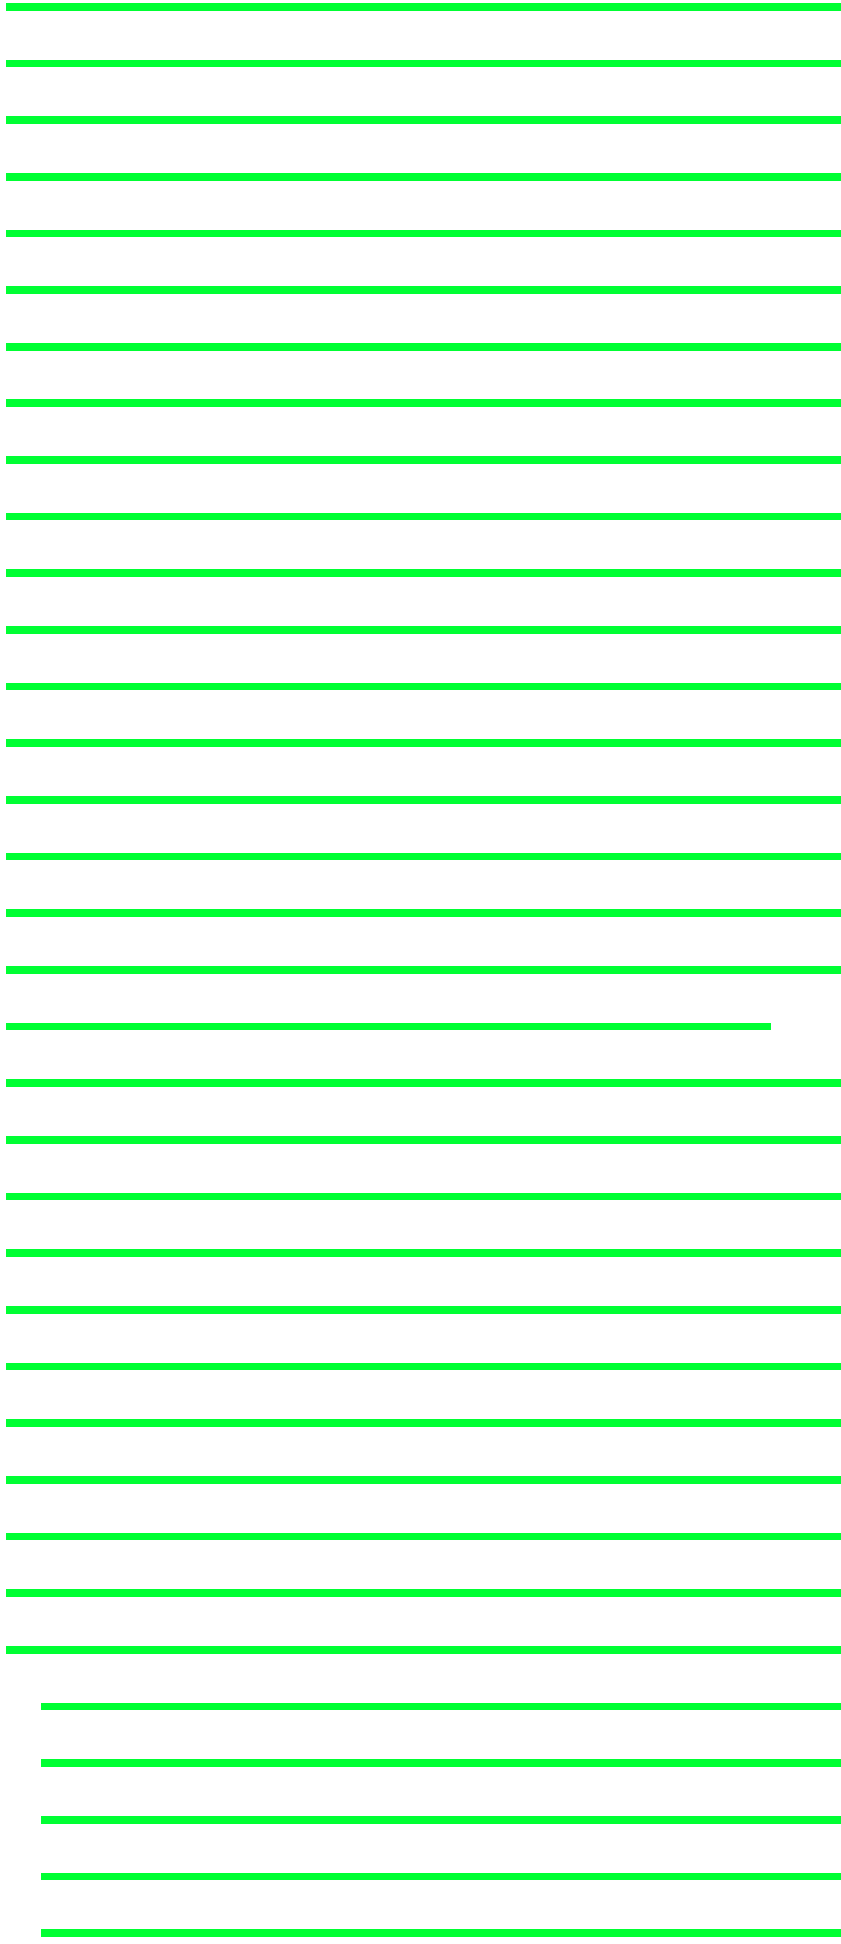

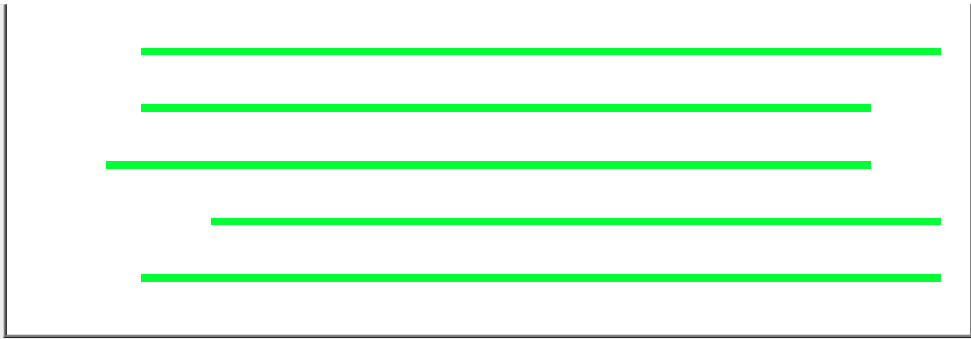

**Descriptions**

**Sequences producing significant alignments:**

Select: [All](#) [None](#) Selected:0

Alignments Download GenPept Graphics Distance tree of results Multiple alignment

| Description                                                                                                                         | Max score | Total score | Query cover | E value | Ident | Accession                                    |
|-------------------------------------------------------------------------------------------------------------------------------------|-----------|-------------|-------------|---------|-------|----------------------------------------------|
| <a href="#">mucin and cadherin-like, isoform CRA_f [Homo sapiens]</a>                                                               | 79.5      | 79.5        | 100%        | 3e-15   | 100%  | <a href="#">gij119622771 EAX02366.1</a>      |
| <a href="#">MUCDHL-ALT [Homo sapiens]</a>                                                                                           | 79.5      | 79.5        | 100%        | 3e-15   | 100%  | <a href="#">gij10334769 AAG16730.1</a>       |
| <a href="#">MUCDHL-ALT [Homo sapiens]</a>                                                                                           | 79.5      | 79.5        | 100%        | 3e-15   | 100%  | <a href="#">gij10334772 AAG16732.1</a>       |
| <a href="#">mucin and cadherin-like, isoform CRA_d [Homo sapiens]</a>                                                               | 79.5      | 79.5        | 100%        | 3e-15   | 100%  | <a href="#">gij119622769 EAX02364.1</a>      |
| <a href="#">PREDICTED: cadherin-related family member 5 isoform X4 [Homo sapiens]</a>                                               | 79.5      | 79.5        | 100%        | 3e-15   | 100%  | <a href="#">gij1578839861 XP_005253047.2</a> |
| <a href="#">unnamed protein product [Homo sapiens]</a>                                                                              | 79.5      | 79.5        | 100%        | 3e-15   | 100%  | <a href="#">gij194374995 BAG62610.1</a>      |
| <a href="#">cadherin-related family member 5 isoform 3 precursor [Homo sapiens]</a>                                                 | 79.5      | 79.5        | 100%        | 3e-15   | 100%  | <a href="#">gij110618250 NP_112554.2</a>     |
| <a href="#">unnamed protein product [Homo sapiens]</a>                                                                              | 79.5      | 79.5        | 100%        | 3e-15   | 100%  | <a href="#">gij7020438 BAA91130.1</a>        |
| <a href="#">PREDICTED: cadherin-related family member 5 [Gorilla gorilla gorilla]</a>                                               | 79.5      | 79.5        | 100%        | 3e-15   | 100%  | <a href="#">gij426366755 XP_004050412.1</a>  |
| <a href="#">mucin and cadherin-like, isoform CRA_c [Homo sapiens]</a>                                                               | 79.5      | 79.5        | 100%        | 3e-15   | 100%  | <a href="#">gij119622768 EAX02363.1</a>      |
| <a href="#">PREDICTED: cadherin-related family member 5 isoform X3 [Homo sapiens]</a>                                               | 79.5      | 79.5        | 100%        | 3e-15   | 100%  | <a href="#">gij1578839859 XP_005253046.2</a> |
| <a href="#">PREDICTED: cadherin-related family member 5 isoform X2 [Homo sapiens]</a>                                               | 79.5      | 79.5        | 100%        | 3e-15   | 100%  | <a href="#">gij1578839857 XP_005253045.2</a> |
| <a href="#">PREDICTED: cadherin-related family member 5 isoform X1 [Homo sapiens]</a>                                               | 79.5      | 79.5        | 100%        | 3e-15   | 100%  | <a href="#">gij1578839855 XP_005253044.2</a> |
| <a href="#">PREDICTED: cadherin-related family member 5 isoform X1 [Homo sapiens]</a>                                               | 79.5      | 79.5        | 100%        | 3e-15   | 100%  | <a href="#">gij1578820616 XP_006718316.1</a> |
| <a href="#">PREDICTED: LOW QUALITY PROTEIN: cadherin-related family member 5 [Homo sapiens]</a>                                     | 79.5      | 79.5        | 100%        | 3e-15   | 100%  | <a href="#">gij397468758 XP_003806038.1</a>  |
| <a href="#">cadherin-related family member 5 isoform 4 precursor [Homo sapiens]</a>                                                 | 79.5      | 79.5        | 100%        | 3e-15   | 100%  | <a href="#">gij1285002199 NP_001165439.1</a> |
| <a href="#">MUCDHL [Homo sapiens]</a>                                                                                               | 79.5      | 79.5        | 100%        | 3e-15   | 100%  | <a href="#">gij37181861 AAQ88734.1</a>       |
| <a href="#">mu-protocadherin [Homo sapiens]</a>                                                                                     | 79.5      | 79.5        | 100%        | 3e-15   | 100%  | <a href="#">gij11245187 AAG33495.1</a>       |
| <a href="#">MUCDHL-FL [Homo sapiens]</a>                                                                                            | 79.5      | 79.5        | 100%        | 3e-15   | 100%  | <a href="#">gij10334770 AAG16731.1</a>       |
| <a href="#">MUCDHL-FL [Homo sapiens]</a>                                                                                            | 79.5      | 79.5        | 100%        | 3e-15   | 100%  | <a href="#">gij10334774 AAG16733.1</a>       |
| <a href="#">RecName: Full=Cadherin-related family member 5; AltName: Full=mucin and cadherin-like, isoform CRA_b [Homo sapiens]</a> | 79.5      | 79.5        | 100%        | 3e-15   | 100%  | <a href="#">gij119622767 EAX02362.1</a>      |
| <a href="#">cadherin-related family member 5 isoform 1 precursor [Homo sapiens]</a>                                                 | 79.5      | 79.5        | 100%        | 3e-15   | 100%  | <a href="#">gij110618248 NP_068743.2</a>     |
| <a href="#">PREDICTED: cadherin-related family member 5 isoform X6 [Chlorocebus sabaeus]</a>                                        | 73.2      | 73.2        | 100%        | 4e-13   | 92%   | <a href="#">gij635011025 XP_007988108.1</a>  |
| <a href="#">PREDICTED: cadherin-related family member 5 isoform X5 [Papio anubis]</a>                                               | 73.2      | 73.2        | 100%        | 4e-13   | 92%   | <a href="#">gij685584291 XP_009183489.1</a>  |
| <a href="#">PREDICTED: cadherin-related family member 5 isoform X4 [Papio anubis]</a>                                               | 73.2      | 73.2        | 100%        | 4e-13   | 92%   | <a href="#">gij685584289 XP_009183488.1</a>  |
| <a href="#">PREDICTED: cadherin-related family member 5 isoform X5 [Chlorocebus sabaeus]</a>                                        | 73.2      | 73.2        | 100%        | 4e-13   | 92%   | <a href="#">gij635011023 XP_007987388.1</a>  |
| <a href="#">PREDICTED: cadherin-related family member 5 isoform X3 [Papio anubis]</a>                                               | 73.2      | 73.2        | 100%        | 4e-13   | 92%   | <a href="#">gij685584287 XP_009183487.1</a>  |

|                                                                                  |      |      |      |       |      |                                              |
|----------------------------------------------------------------------------------|------|------|------|-------|------|----------------------------------------------|
| <a href="#">PREDICTED: cadherin-related family member 5 isoform X4 [Chloro</a>   | 73.2 | 73.2 | 100% | 4e-13 | 92%  | <a href="#">gij635011021 XP_007986645.1</a>  |
| <a href="#">PREDICTED: cadherin-related family member 5 isoform X2 [Papio</a>    | 73.2 | 73.2 | 100% | 4e-13 | 92%  | <a href="#">gij685584285 XP_009183486.1</a>  |
| <a href="#">PREDICTED: cadherin-related family member 5 isoform X1 [Papio</a>    | 73.2 | 73.2 | 100% | 4e-13 | 92%  | <a href="#">gij685584283 XP_009183484.1</a>  |
| <a href="#">PREDICTED: cadherin-related family member 5 isoform X3 [Chloro</a>   | 73.2 | 73.2 | 100% | 4e-13 | 92%  | <a href="#">gij635011019 XP_007986020.1</a>  |
| <a href="#">PREDICTED: cadherin-related family member 5 isoform X2 [Chloro</a>   | 73.2 | 73.2 | 100% | 4e-13 | 92%  | <a href="#">gij635011017 XP_007985338.1</a>  |
| <a href="#">PREDICTED: cadherin-related family member 5 isoform X1 [Chloro</a>   | 73.2 | 73.2 | 100% | 4e-13 | 92%  | <a href="#">gij635011015 XP_007984693.1</a>  |
| <a href="#">PREDICTED: LOW QUALITY PROTEIN: cadherin-related family m</a>        | 72.7 | 72.7 | 91%  | 6e-13 | 100% | <a href="#">gij441665990 XP_003281373.2</a>  |
| <a href="#">PREDICTED: cadherin-related family member 5 isoform X5 [Rhinor</a>   | 71.0 | 71.0 | 100% | 2e-12 | 88%  | <a href="#">gij724796233 XP_010387931.1</a>  |
| <a href="#">PREDICTED: cadherin-related family member 5 isoform X4 [Rhinor</a>   | 71.0 | 71.0 | 100% | 2e-12 | 88%  | <a href="#">gij724796230 XP_010387851.1</a>  |
| <a href="#">PREDICTED: cadherin-related family member 5 isoform X3 [Rhinor</a>   | 71.0 | 71.0 | 100% | 2e-12 | 88%  | <a href="#">gij724796227 XP_010387784.1</a>  |
| <a href="#">PREDICTED: cadherin-related family member 5 isoform X2 [Rhinor</a>   | 71.0 | 71.0 | 100% | 2e-12 | 88%  | <a href="#">gij724796224 XP_010387726.1</a>  |
| <a href="#">PREDICTED: cadherin-related family member 5 isoform X1 [Rhinor</a>   | 71.0 | 71.0 | 100% | 2e-12 | 88%  | <a href="#">gij724796221 XP_010387653.1</a>  |
| <a href="#">PREDICTED: cadherin-related family member 5 isoform X5 [Macac</a>    | 68.1 | 68.1 | 100% | 2e-11 | 88%  | <a href="#">gij544483429 XP_005576826.1</a>  |
| <a href="#">PREDICTED: cadherin-related family member 5 isoform 2 [Macaca</a>    | 68.1 | 68.1 | 100% | 2e-11 | 88%  | <a href="#">gij109104860 XP_001086363.1</a>  |
| <a href="#">PREDICTED: cadherin-related family member 5 isoform X4 [Macac</a>    | 68.1 | 68.1 | 100% | 2e-11 | 88%  | <a href="#">gij544483427 XP_005576825.1</a>  |
| <a href="#">PREDICTED: cadherin-related family member 5 isoform X3 [Macac</a>    | 68.1 | 68.1 | 100% | 2e-11 | 88%  | <a href="#">gij544483425 XP_005576824.1</a>  |
| <a href="#">PREDICTED: cadherin-related family member 5 isoform 1 [Macaca</a>    | 68.1 | 68.1 | 100% | 2e-11 | 88%  | <a href="#">gij297267104 XP_001086239.2</a>  |
| <a href="#">PREDICTED: cadherin-related family member 5 isoform X1 [Macac</a>    | 68.1 | 68.1 | 100% | 2e-11 | 88%  | <a href="#">gij544483421 XP_005576822.1</a>  |
| <a href="#">PREDICTED: cadherin-related family member 5-like [Galeopterus v</a>  | 64.7 | 64.7 | 95%  | 3e-10 | 87%  | <a href="#">gij667346400 XP_008563564.1</a>  |
| <a href="#">PREDICTED: cadherin-related family member 5 [Ictidomys tridacen</a>  | 60.9 | 60.9 | 95%  | 6e-09 | 83%  | <a href="#">gij532114016 XP_005341679.1</a>  |
| <a href="#">PREDICTED: cadherin-related family member 5 [Otolemur garnettii</a>  | 60.0 | 60.0 | 95%  | 1e-08 | 83%  | <a href="#">gij395861133 XP_003802848.1</a>  |
| <a href="#">PREDICTED: cadherin-related family member 5 isoform X2 [Saimiri</a>  | 56.6 | 56.6 | 95%  | 2e-07 | 78%  | <a href="#">gij725605770 XP_010329489.1</a>  |
| <a href="#">PREDICTED: cadherin-related family member 5 isoform X1 [Saimiri</a>  | 56.6 | 56.6 | 95%  | 2e-07 | 78%  | <a href="#">gij725605768 XP_010329488.1</a>  |
| <a href="#">PREDICTED: cadherin-related family member 5 isoform X3 [Saimiri</a>  | 56.6 | 56.6 | 95%  | 2e-07 | 78%  | <a href="#">gij403305644 XP_003943368.1</a>  |
| <a href="#">PREDICTED: cadherin-related family member 5 [Tupaia chinensis]</a>   | 56.2 | 56.2 | 87%  | 2e-07 | 81%  | <a href="#">gij562873172 XP_006164495.1</a>  |
| <a href="#">PREDICTED: cadherin-related family member 5 [Ceratotherium sir</a>   | 56.2 | 56.2 | 91%  | 2e-07 | 72%  | <a href="#">gij478534060 XP_004441167.1</a>  |
| <a href="#">PREDICTED: cadherin-related family member 5 [Galeopterus varie</a>   | 55.4 | 55.4 | 87%  | 4e-07 | 81%  | <a href="#">gij667327847 XP_008590353.1</a>  |
| <a href="#">PREDICTED: cadherin-related family member 5 isoform X2 [Sus sc</a>   | 55.4 | 55.4 | 95%  | 4e-07 | 74%  | <a href="#">gij545805609 XP_005652842.1</a>  |
| <a href="#">PREDICTED: cadherin-related family member 5 isoform X1 [Sus sc</a>   | 55.4 | 55.4 | 95%  | 4e-07 | 74%  | <a href="#">gij545805606 XP_005652841.1</a>  |
| <a href="#">PREDICTED: cadherin-related family member 5 isoform X2 [Macac</a>    | 54.9 | 54.9 | 83%  | 6e-07 | 85%  | <a href="#">gij544483423 XP_005576823.1</a>  |
| <a href="#">PREDICTED: cadherin-related family member 5 [Equus przewalskii</a>   | 54.5 | 54.5 | 91%  | 7e-07 | 77%  | <a href="#">gij664777361 XP_008507976.1</a>  |
| <a href="#">PREDICTED: cadherin-related family member 5 [Equus caballus]</a>     | 54.5 | 54.5 | 91%  | 8e-07 | 77%  | <a href="#">gij545182188 XP_005598543.1</a>  |
| <a href="#">PREDICTED: cadherin-related family member 5 [Ursus maritimus]</a>    | 52.8 | 52.8 | 87%  | 3e-06 | 71%  | <a href="#">gij671014096 XP_008697888.1</a>  |
| <a href="#">PREDICTED: cadherin-related family member 5 [Chrysochloris asi</a>   | 52.8 | 52.8 | 87%  | 3e-06 | 81%  | <a href="#">gij586493238 XP_006877066.1</a>  |
| <a href="#">Mucin and cadherin-like protein [Pteropus alecto]</a>                | 52.4 | 52.4 | 95%  | 4e-06 | 65%  | <a href="#">gij431910097 ELK13170.1</a>      |
| <a href="#">PREDICTED: cadherin-related family member 5 [Pteropus alecto]</a>    | 52.4 | 52.4 | 95%  | 4e-06 | 65%  | <a href="#">gij586552614 XP_006911325.1</a>  |
| <a href="#">PREDICTED: cadherin-related family member 5 [Callithrix jacchus]</a> | 52.0 | 52.0 | 95%  | 6e-06 | 74%  | <a href="#">gij675704132 XP_009007036.1</a>  |
| <a href="#">mucin and cadherin like isoform CRA_b [Mus musculus]</a>             | 51.5 | 73.4 | 100% | 7e-06 | 78%  | <a href="#">gij148686086 FDL18033.1</a>      |
| <a href="#">PREDICTED: cadherin-related family member 5 [Jaculus jaculus]</a>    | 51.5 | 51.5 | 95%  | 8e-06 | 74%  | <a href="#">gij507539897 XP_004653954.1</a>  |
| <a href="#">cadherin-related family member 5 isoform 2 precursor [Mus muscul</a> | 51.5 | 73.4 | 100% | 8e-06 | 78%  | <a href="#">gij21312502 INP_082345.1</a>     |
| <a href="#">PREDICTED: cadherin-related family member 5 isoform X1 [Mus m</a>    | 51.5 | 73.4 | 100% | 8e-06 | 78%  | <a href="#">gij568952506 XP_006536323.1</a>  |
| <a href="#">cadherin-related family member 5 isoform 1 precursor [Mus muscul</a> | 51.5 | 73.4 | 100% | 8e-06 | 78%  | <a href="#">gij167004347 INP_001107794.1</a> |
| <a href="#">RecName: Full=Cadherin-related family member 5; AltName: Full=!</a>  | 51.5 | 73.4 | 100% | 8e-06 | 78%  | <a href="#">gij45477152 Q8VHF2.1</a>         |
| <a href="#">PREDICTED: cadherin-related family member 5 [Camelus ferus]</a>      | 50.3 | 50.3 | 87%  | 2e-05 | 71%  | <a href="#">gij560909593 XP_006181104.1</a>  |
| <a href="#">PREDICTED: cadherin-related family member 5 [Vicugna pacos]</a>      | 50.3 | 50.3 | 87%  | 2e-05 | 71%  | <a href="#">gij560994295 XP_006219255.1</a>  |

|                                                                                  |      |      |      |       |     |                                             |
|----------------------------------------------------------------------------------|------|------|------|-------|-----|---------------------------------------------|
| <a href="#">PREDICTED: LOW QUALITY PROTEIN: cadherin-related family m</a>        | 50.3 | 50.3 | 87%  | 2e-05 | 76% | <a href="#">gil471415885 XP_004389467.1</a> |
| <a href="#">cadherin-related family member 5 precursor [Camelus ferus]</a>       | 50.3 | 50.3 | 87%  | 2e-05 | 71% | <a href="#">gil528764226 EPY83885.1</a>     |
| <a href="#">PREDICTED: cadherin-related family member 5 [Loxodonta african</a>   | 50.3 | 50.3 | 87%  | 2e-05 | 76% | <a href="#">gil344309231 XP_003423280.1</a> |
| <a href="#">PREDICTED: cadherin-related family member 5 [Leptonychotes we</a>    | 49.8 | 49.8 | 87%  | 3e-05 | 76% | <a href="#">gil585180394 XP_006741861.1</a> |
| <a href="#">PREDICTED: cadherin-related family member 5 [Orcinus orca]</a>       | 49.8 | 49.8 | 91%  | 3e-05 | 73% | <a href="#">gil466050257 XP_004278199.1</a> |
| <a href="#">PREDICTED: cadherin-related family member 5 [Echinops telfairi]</a>  | 49.4 | 49.4 | 87%  | 4e-05 | 76% | <a href="#">gil507709657 XP_004717252.1</a> |
| <a href="#">PREDICTED: cadherin-related family member 5 [Cavia porcellus]</a>    | 49.0 | 49.0 | 95%  | 5e-05 | 74% | <a href="#">gil514443851 XP_003461333.2</a> |
| <a href="#">PREDICTED: cadherin-related family member 5 isoform X4 [Chinc</a>    | 48.1 | 48.1 | 95%  | 9e-05 | 70% | <a href="#">gil533177179 XP_005401888.1</a> |
| <a href="#">PREDICTED: cadherin-related family member 5 isoform X3 [Chinc</a>    | 48.1 | 48.1 | 95%  | 1e-04 | 70% | <a href="#">gil533177177 XP_005401887.1</a> |
| <a href="#">PREDICTED: cadherin-related family member 5 isoform X2 [Chinc</a>    | 48.1 | 48.1 | 95%  | 1e-04 | 70% | <a href="#">gil533177175 XP_005401886.1</a> |
| <a href="#">PREDICTED: cadherin-related family member 5 [Physeter catodon]</a>   | 48.1 | 48.1 | 95%  | 1e-04 | 70% | <a href="#">gil593725286 XP_007108751.1</a> |
| <a href="#">PREDICTED: cadherin-related family member 5 isoform X1 [Chinc</a>    | 48.1 | 48.1 | 95%  | 1e-04 | 70% | <a href="#">gil533177173 XP_005401885.1</a> |
| <a href="#">PREDICTED: cadherin-related family member 5 isoform X2 [Bubal</a>    | 47.7 | 47.7 | 95%  | 1e-04 | 65% | <a href="#">gil594042619 XP_006045841.1</a> |
| <a href="#">PREDICTED: cadherin-related family member 5 [Octodon degus]</a>      | 47.7 | 47.7 | 95%  | 1e-04 | 74% | <a href="#">gil507671995 XP_004638095.1</a> |
| <a href="#">PREDICTED: LOW QUALITY PROTEIN: cadherin-related family m</a>        | 47.7 | 47.7 | 87%  | 1e-04 | 67% | <a href="#">gil504181561 XP_004600071.1</a> |
| <a href="#">PREDICTED: cadherin-related family member 5 [Orycteropus afer</a>    | 47.7 | 47.7 | 95%  | 1e-04 | 65% | <a href="#">gil634871909 XP_007947550.1</a> |
| <a href="#">PREDICTED: cadherin-related family member 5 [Odobenus rosma</a>      | 47.7 | 47.7 | 79%  | 1e-04 | 74% | <a href="#">gil472368599 XP_004403824.1</a> |
| <a href="#">Cadherin-related family member 5 [Bos mutus]</a>                     | 47.7 | 47.7 | 95%  | 1e-04 | 65% | <a href="#">gil440906581 ELR56829.1</a>     |
| <a href="#">TPA: mucin and cadherin-like [Bos taurus]</a>                        | 47.7 | 47.7 | 95%  | 1e-04 | 65% | <a href="#">gil296471403 DAA13518.1</a>     |
| <a href="#">PREDICTED: LOW QUALITY PROTEIN: cadherin-related family m</a>        | 47.7 | 47.7 | 87%  | 1e-04 | 67% | <a href="#">gil301788244 XP_002929539.1</a> |
| <a href="#">PREDICTED: LOW QUALITY PROTEIN: cadherin-related family m</a>        | 47.7 | 47.7 | 95%  | 1e-04 | 65% | <a href="#">gil555966244 XP_005895175.1</a> |
| <a href="#">PREDICTED: cadherin-related family member 5 isoform X1 [Bubal</a>    | 47.7 | 47.7 | 95%  | 1e-04 | 65% | <a href="#">gil594042617 XP_006045840.1</a> |
| <a href="#">cadherin-related family member 5 precursor [Bos taurus]</a>          | 47.7 | 47.7 | 95%  | 1e-04 | 65% | <a href="#">gil157074164 NP_001096796.1</a> |
| <a href="#">PREDICTED: cadherin-related family member 5 [Lipotes vexillifer]</a> | 47.3 | 47.3 | 91%  | 2e-04 | 68% | <a href="#">gil602711484 XP_007465981.1</a> |
| <a href="#">mucin and cadherin like, isoform CRA_c [Mus musculus]</a>            | 46.9 | 68.7 | 100% | 2e-04 | 80% | <a href="#">gil148686087 FDL18034.1</a>     |
| <a href="#">PREDICTED: cadherin-related family member 5 [Balaenoptera acu</a>    | 46.0 | 46.0 | 91%  | 5e-04 | 68% | <a href="#">gil594635661 XP_007171249.1</a> |
| <a href="#">PREDICTED: cadherin-related family member 5 [Ovis aries]</a>         | 45.2 | 45.2 | 95%  | 9e-04 | 61% | <a href="#">gil426252672 XP_004020028.1</a> |

## Alignments

Download [GenPept](#) [Graphics](#) ▼ Next ▲ Previous ▲ Descriptions

mucin and cadherin-like, isoform CRA\_f [Homo sapiens]

Sequence ID: [gil119622771|gb|EAX02366.1](#) Length: 485 Number of Matches: 1

Range 1: 132 to 155 [GenPept](#) [Graphics](#) ▼ Next Match ▲ Previous Match

| Score          | Expect | Identities  | Positives   | Gaps     |
|----------------|--------|-------------|-------------|----------|
| 79.5 bits(180) | 3e-15  | 24/24(100%) | 24/24(100%) | 0/24(0%) |

Query 1 RVEEDTKVNSTVIPETQLQAEDRD 24  
 RVEEDTKVNSTVIPETQLQAEDRD  
 Sbjct 132 RVEEDTKVNSTVIPETQLQAEDRD 155

### Related Information

[Gene](#) - associated gene details

Download [GenPept](#) [Graphics](#) ▼ Next ▲ Previous ▲ Descriptions

MUCDHL-ALT [Homo sapiens]

Sequence ID: [gil10334769|gb|AAG16730.1](#) Length: 487 Number of Matches: 1

Range 1: 132 to 155 [GenPept](#) [Graphics](#) ▼ Next Match ▲ Previous Match

| Score          | Expect | Identities  | Positives   | Gaps     |
|----------------|--------|-------------|-------------|----------|
| 79.5 bits(180) | 3e-15  | 24/24(100%) | 24/24(100%) | 0/24(0%) |

Query 1 RVEEDTKVNSTVIPETQLQAEDRD 24

### Related Information

[Gene](#) - associated gene details

Sbjct 132 RVEEDTKVNSTVIPETQLQAEDRD 155

[Download](#) [GenPept](#) [Graphics](#) [Next](#) [Previous](#) [Descriptions](#)

MUCDHL-ALT [Homo sapiens]

Sequence ID: [gi|10334772|gb|AAG16732.1|AF258675\\_1](#) Length: 487 Number of Matches: 1

Range 1: 132 to 155 [GenPept](#) [Graphics](#) [Next Match](#) [Previous Match](#)

| Score          | Expect | Identities  | Positives   | Gaps     |
|----------------|--------|-------------|-------------|----------|
| 79.5 bits(180) | 3e-15  | 24/24(100%) | 24/24(100%) | 0/24(0%) |

Query 1 RVEEDTKVNSTVIPETQLQAEDRD 24  
 RVEEDTKVNSTVIPETQLQAEDRD  
 Sbjct 132 RVEEDTKVNSTVIPETQLQAEDRD 155

**Related Information**  
[Gene](#) - associated gene details

[Download](#) [GenPept](#) [Graphics](#) [Next](#) [Previous](#) [Descriptions](#)

mucin and cadherin-like, isoform CRA\_d, partial [Homo sapiens]

Sequence ID: [gi|119622769|gb|EAX02364.1](#) Length: 493 Number of Matches: 1

Range 1: 132 to 155 [GenPept](#) [Graphics](#) [Next Match](#) [Previous Match](#)

| Score          | Expect | Identities  | Positives   | Gaps     |
|----------------|--------|-------------|-------------|----------|
| 79.5 bits(180) | 3e-15  | 24/24(100%) | 24/24(100%) | 0/24(0%) |

Query 1 RVEEDTKVNSTVIPETQLQAEDRD 24  
 RVEEDTKVNSTVIPETQLQAEDRD  
 Sbjct 132 RVEEDTKVNSTVIPETQLQAEDRD 155

**Related Information**  
[Gene](#) - associated gene details

[Download](#) [GenPept](#) [Graphics](#) [Next](#) [Previous](#) [Descriptions](#)

PREDICTED: cadherin-related family member 5 isoform X4 [Homo sapiens]

Sequence ID: [gi|578839861|ref|XP\\_005253047.2](#) Length: 551 Number of Matches: 1

Range 1: 132 to 155 [GenPept](#) [Graphics](#) [Next Match](#) [Previous Match](#)

| Score          | Expect | Identities  | Positives   | Gaps     |
|----------------|--------|-------------|-------------|----------|
| 79.5 bits(180) | 3e-15  | 24/24(100%) | 24/24(100%) | 0/24(0%) |

Query 1 RVEEDTKVNSTVIPETQLQAEDRD 24  
 RVEEDTKVNSTVIPETQLQAEDRD  
 Sbjct 132 RVEEDTKVNSTVIPETQLQAEDRD 155

**Related Information**  
[Gene](#) - associated gene details

BLAST is a registered trademark of the National Library of Medicine.

NCBI/ BLAST/ blastp suite/ Formatting Results - BTG1CZ7M016

Your search parameters were adjusted to search for a short input sequence.

[Edit and Resubmit](#) [Save Search Strategies](#) [Formatting options](#) [Download](#) [YouTube](#) [How to read this page](#) [Blast report description](#)

### CFHR3\_KLGYNADTSILSFQAVCRE\_Mod

RID [BTG1CZ7M016](#) (Expires on 01-20 15:28 pm)

Query ID |cl|39824  
 Description None  
 Molecule type amino acid  
 Query Length 19

Database Name nr  
 Description All non-redundant GenBank CDS translations+PDB+SwissProt+PIR+PRF excluding environmental samples from WGS projects  
 Program BLASTP 2.2.30+ [Citation](#)

Other reports: [Search Summary](#) [Taxonomy reports](#) [Distance tree of results](#) [Related Structures](#) [Multiple alignment](#)

### Graphic Summary

[Show Conserved Domains](#)

No putative conserved domains have been detected

Distribution of 100 Blast Hits on the Query Sequence

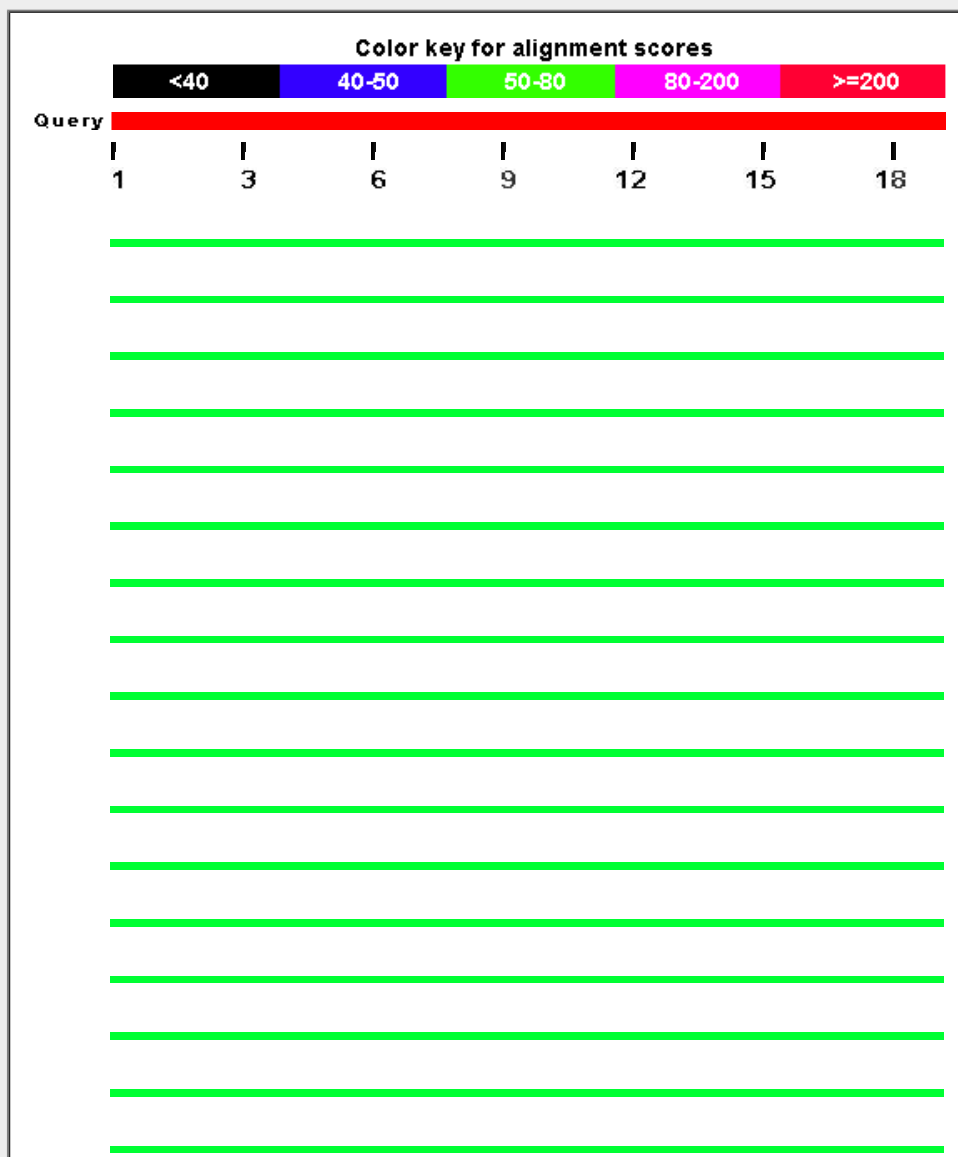

[Redacted text block]

[Redacted text line]

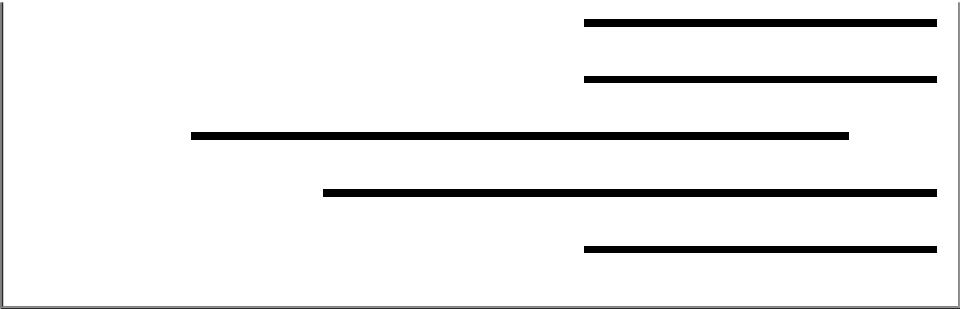

**Descriptions**

**Sequences producing significant alignments:**

Select: [All](#) [None](#) Selected:0

[Alignments](#)
[Download](#)
[GenPept](#)
[Graphics](#)
[Distance tree of results](#)
[Multiple alignment](#)
⚙

| Description                                                                    | Max score | Total score | Query cover | E value | Ident | Accession                                   |
|--------------------------------------------------------------------------------|-----------|-------------|-------------|---------|-------|---------------------------------------------|
| <a href="#">PREDICTED: complement factor H-related protein 3-like [Pan t</a>   | 60.9      | 60.9        | 100%        | 1e-09   | 95%   | <a href="#">gi 694890843 XP_009438422.1</a> |
| <a href="#">complement factor H-related protein 3 isoform 2 precursor [Hor</a> | 60.9      | 60.9        | 100%        | 3e-09   | 95%   | <a href="#">gi 262231791 NP_001160096.1</a> |
| <a href="#">complement factor H-related protein 3 isoform 1 precursor [Hor</a> | 60.9      | 60.9        | 100%        | 3e-09   | 95%   | <a href="#">gi 54792787 NP_066303.2</a>     |
| <a href="#">PREDICTED: complement factor H-related protein 4 isoform Xf</a>    | 60.9      | 60.9        | 100%        | 3e-09   | 95%   | <a href="#">gi 686700699 XP_009238037.1</a> |
| <a href="#">PREDICTED: complement factor H-related protein 4 [Gorilla go</a>   | 60.9      | 60.9        | 100%        | 3e-09   | 95%   | <a href="#">gi 426333125 XP_004028135.1</a> |
| <a href="#">FHR-3: complement Factor H-related Protein 3 [Homo sapiens]</a>    | 60.9      | 60.9        | 100%        | 3e-09   | 95%   | <a href="#">gi 30870 CAA48639.1</a>         |
| <a href="#">PREDICTED: complement factor H-related protein 4 isoform Xf</a>    | 60.9      | 60.9        | 100%        | 3e-09   | 95%   | <a href="#">gi 686700697 XP_009238034.1</a> |
| <a href="#">PREDICTED: complement factor H-related protein 4 isoform X1</a>    | 60.9      | 60.9        | 100%        | 3e-09   | 95%   | <a href="#">gi 297662444 XP_002809716.1</a> |
| <a href="#">complement factor H-related protein 4 [Homo sapiens]</a>           | 58.3      | 58.3        | 100%        | 2e-08   | 89%   | <a href="#">gi 1524058 CAA66980.1</a>       |
| <a href="#">complement factor H-related protein 4 isoform 3 precursor [Hor</a> | 58.3      | 58.3        | 100%        | 2e-08   | 89%   | <a href="#">gi 117320518 NP_006675.2</a>    |
| <a href="#">PREDICTED: complement factor H-related protein 4 isoform Xf</a>    | 58.3      | 58.3        | 100%        | 2e-08   | 89%   | <a href="#">gi 578800460 XP_006711196.1</a> |
| <a href="#">PREDICTED: complement factor H-related protein 4 isoform Xf</a>    | 58.3      | 58.3        | 100%        | 2e-08   | 89%   | <a href="#">gi 578800458 XP_006711195.1</a> |
| <a href="#">PREDICTED: complement factor H-related protein 4 isoform Xf</a>    | 58.3      | 58.3        | 100%        | 2e-08   | 89%   | <a href="#">gi 578800456 XP_006711194.1</a> |
| <a href="#">PREDICTED: complement factor H-related protein 4 isoform Xf</a>    | 58.3      | 58.3        | 100%        | 2e-08   | 89%   | <a href="#">gi 578800454 XP_006711193.1</a> |
| <a href="#">PREDICTED: complement factor H-related protein 4 isoform Xf</a>    | 58.3      | 58.3        | 100%        | 2e-08   | 89%   | <a href="#">gi 578800452 XP_006711192.1</a> |
| <a href="#">PREDICTED: complement factor H-related protein 4 isoform X1</a>    | 58.3      | 58.3        | 100%        | 2e-08   | 89%   | <a href="#">gi 578800450 XP_006711191.1</a> |
| <a href="#">complement factor H-related protein 4 isoform 2 precursor [Hor</a> | 58.3      | 58.3        | 100%        | 2e-08   | 89%   | <a href="#">gi 320089550 NP_001188480.1</a> |
| <a href="#">unnamed protein product [Homo sapiens]</a>                         | 58.3      | 58.3        | 100%        | 2e-08   | 89%   | <a href="#">gi 158258941 BAF85441.1</a>     |
| <a href="#">complement factor H-related protein 4 isoform 1 precursor [Hor</a> | 58.3      | 58.3        | 100%        | 2e-08   | 89%   | <a href="#">gi 320089548 NP_001188479.1</a> |
| <a href="#">complement factor H-related 4, isoform CRA_a [Homo sapiens]</a>    | 58.3      | 58.3        | 100%        | 2e-08   | 89%   | <a href="#">gi 119611671 EAW91265.1</a>     |
| <a href="#">complement factor H-related protein 4A precursor [Homo sapie</a>   | 58.3      | 58.3        | 100%        | 2e-08   | 89%   | <a href="#">gi 60417192 CAG26679.2</a>      |
| <a href="#">hypothetical protein EGK_01829 [Macaca mulatta]</a>                | 56.6      | 56.6        | 100%        | 8e-08   | 89%   | <a href="#">gi 355558923 EHH15703.1</a>     |
| <a href="#">hypothetical protein EGM_21015 [Macaca fascicularis]</a>           | 56.6      | 56.6        | 100%        | 8e-08   | 89%   | <a href="#">gi 355767342 EHH62602.1</a>     |
| <a href="#">PREDICTED: complement factor H-related protein 4 [Rhinopith</a>    | 56.6      | 56.6        | 100%        | 9e-08   | 89%   | <a href="#">gi 724956788 XP_010353520.1</a> |
| <a href="#">PREDICTED: complement factor H-related protein 4 isoform X1</a>    | 56.6      | 56.6        | 100%        | 9e-08   | 89%   | <a href="#">gi 685520468 XP_009189240.1</a> |
| <a href="#">PREDICTED: complement factor H-related protein 4 isoform Xf</a>    | 50.7      | 50.7        | 100%        | 9e-06   | 84%   | <a href="#">gi 635131791 XP_007987278.1</a> |
| <a href="#">PREDICTED: complement factor H-related protein 4 isoform X1</a>    | 50.7      | 50.7        | 100%        | 9e-06   | 84%   | <a href="#">gi 635131789 XP_007987277.1</a> |
| <a href="#">PREDICTED: complement factor H-related protein 4 isoform Xf</a>    | 50.7      | 50.7        | 100%        | 1e-05   | 84%   | <a href="#">gi 635131793 XP_007987280.1</a> |
| <a href="#">PREDICTED: complement factor H-related protein 4-like [Galec</a>   | 42.6      | 42.6        | 100%        | 0.004   | 68%   | <a href="#">gi 667317955 XP_008586983.1</a> |



|                                                                               |      |      |     |     |      |                                             |
|-------------------------------------------------------------------------------|------|------|-----|-----|------|---------------------------------------------|
| <a href="#">PREDICTED: LOW QUALITY PROTEIN: complement factor H-</a>          | 35.0 | 35.0 | 89% | 1.1 | 65%  | <a href="#">gi 395863185 XP_003803783.1</a> |
| <a href="#">hypothetical protein F775_03153 [Aegilops tauschii]</a>           | 31.2 | 31.2 | 52% | 18  | 90%  | <a href="#">gi 475509050 EMT05155.1</a>     |
| <a href="#">6-phosphogluconolactonase [Listeria grayi]</a>                    | 30.8 | 30.8 | 68% | 25  | 71%  | <a href="#">gi 738150575 WP_036107982.1</a> |
| <a href="#">hypothetical protein [Listeria grayi]</a>                         | 30.8 | 30.8 | 68% | 25  | 71%  | <a href="#">gi 489854279 WP_003757946.1</a> |
| <a href="#">aminotransferase DegT [Legionella fairfieldensis]</a>             | 30.8 | 30.8 | 73% | 25  | 71%  | <a href="#">gi 737954707 WP_035918220.1</a> |
| <a href="#">putative ABC transport system [Corynebacterium casei LMG S-</a>   | 30.8 | 30.8 | 68% | 25  | 63%  | <a href="#">gi 582017243 AHI20589.1</a>     |
| <a href="#">ABC transporter. ATPase and permease components [Coryneb</a>      | 30.8 | 30.8 | 68% | 25  | 63%  | <a href="#">gi 493876585 WP_006822974.1</a> |
| <a href="#">hypothetical protein A370_03188 [Clostridium sp. Maddingley A</a> | 30.8 | 30.8 | 73% | 26  | 71%  | <a href="#">gi 410599826 EKQ54365.1</a>     |
| <a href="#">hypothetical protein [Oryza sativa Japonica Group]</a>            | 30.3 | 30.3 | 52% | 30  | 90%  | <a href="#">gi 51535724 BAD37741.1</a>      |
| <a href="#">hypothetical protein [Neisseria sicca]</a>                        | 30.3 | 30.3 | 78% | 34  | 67%  | <a href="#">gi 489862389 WP_003766012.1</a> |
| <a href="#">hypothetical protein [Photobacterium halotolerans]</a>            | 30.3 | 30.3 | 63% | 35  | 75%  | <a href="#">gi 652998808 WP_027251054.1</a> |
| <a href="#">PREDICTED: complement factor H-like [Otolemur garnettii]</a>      | 30.3 | 30.3 | 89% | 35  | 65%  | <a href="#">gi 395839039 XP_003792410.1</a> |
| <a href="#">hypothetical protein [Flectobacillus major]</a>                   | 30.3 | 30.3 | 57% | 35  | 82%  | <a href="#">gi 652618855 WP_026994381.1</a> |
| <a href="#">PREDICTED: DNA-binding protein inhibitor ID-2 [Tursiops trunc</a> | 29.9 | 29.9 | 57% | 45  | 82%  | <a href="#">gi 470595421 XP_004310676.1</a> |
| <a href="#">PREDICTED: DNA-binding protein inhibitor ID-2 [Orcinus orca]</a>  | 29.9 | 29.9 | 57% | 45  | 82%  | <a href="#">gi 466034088 XP_004274954.1</a> |
| <a href="#">PREDICTED: DNA-binding protein inhibitor ID-2 [Ornithorhynch</a>  | 29.9 | 29.9 | 57% | 45  | 82%  | <a href="#">gi 149448519 XP_001509293.1</a> |
| <a href="#">aminotransferase DegT [Vibrio tasmaniensis]</a>                   | 29.9 | 29.9 | 73% | 47  | 64%  | <a href="#">gi 515669795 WP_017102395.1</a> |
| <a href="#">aminotransferase DegT [Vibrio tasmaniensis]</a>                   | 29.9 | 29.9 | 73% | 47  | 64%  | <a href="#">gi 515667578 WP_017100178.1</a> |
| <a href="#">aminotransferase DegT [Vibrio tasmaniensis]</a>                   | 29.9 | 29.9 | 73% | 47  | 64%  | <a href="#">gi 515664772 WP_017097372.1</a> |
| <a href="#">hypothetical protein [Methylobacterium sp. 77]</a>                | 29.9 | 29.9 | 47% | 48  | 89%  | <a href="#">gi 518747471 WP_019905760.1</a> |
| <a href="#">putative uncharacterized protein [Eubacterium eligens CAG:72]</a> | 29.5 | 29.5 | 42% | 63  | 100% | <a href="#">gi 547480816 WP_022098743.1</a> |
| <a href="#">DNA mismatch repair protein MutT [Eubacterium eligens]</a>        | 29.5 | 29.5 | 42% | 63  | 100% | <a href="#">gi 502246835 WP_012740632.1</a> |
| <a href="#">PREDICTED: complement factor H-related protein 4-like [Eptes</a>  | 29.5 | 29.5 | 42% | 63  | 100% | <a href="#">gi 641732931 XP_008156854.1</a> |
| <a href="#">dethiobiotin synthetase [Selenomonas ruminantium]</a>             | 29.5 | 29.5 | 42% | 64  | 100% | <a href="#">gi 739504320 WP_037364005.1</a> |
| <a href="#">PREDICTED: complement factor H-related protein 3-like [Eptes</a>  | 29.5 | 29.5 | 78% | 64  | 73%  | <a href="#">gi 641736903 XP_008159089.1</a> |
| <a href="#">phage minor capsid protein 2 [Eggerthella sp. CAG:1427]</a>       | 29.5 | 29.5 | 73% | 64  | 64%  | <a href="#">gi 546864462 WP_021899188.1</a> |
| <a href="#">PREDICTED: complement factor H-related protein 3-like [Myoti</a>  | 29.5 | 29.5 | 42% | 65  | 100% | <a href="#">gi 554549152 XP_005869111.1</a> |
| <a href="#">Complement factor H [Myotis brandtii]</a>                         | 29.5 | 29.5 | 42% | 65  | 100% | <a href="#">gi 521027702 EPQ09490.1</a>     |
| <a href="#">hypothetical protein HELRODRAFT_182568 [Helobdella robust</a>     | 29.5 | 29.5 | 73% | 65  | 71%  | <a href="#">gi 675891122 XP_009031063.1</a> |
| <a href="#">hypothetical protein PFL1_04598 [Pseudozyma flocculosa PF-1</a>   | 29.5 | 29.5 | 73% | 66  | 64%  | <a href="#">gi 630967814 XP_007880315.1</a> |
| <a href="#">DEHA2D09988p [Debaryomyces hansenii CBS767]</a>                   | 29.5 | 29.5 | 52% | 66  | 80%  | <a href="#">gi 294656603 XP_002770293.1</a> |
| <a href="#">hypothetical protein [Pseudomonas fluorescens]</a>                | 29.1 | 29.1 | 52% | 82  | 80%  | <a href="#">gi 734952209 WP_034151885.1</a> |
| <a href="#">hypothetical protein [Helicobacter pametensis]</a>                | 29.1 | 29.1 | 68% | 85  | 65%  | <a href="#">gi 736571822 WP_034583474.1</a> |
| <a href="#">chemotaxis protein CheY [Helicobacter rodentium]</a>              | 29.1 | 29.1 | 52% | 88  | 80%  | <a href="#">gi 652549882 WP_026943532.1</a> |
| <a href="#">hypothetical protein ACD_50C00316G0007 [uncultured bacteri</a>    | 29.1 | 29.1 | 52% | 88  | 80%  | <a href="#">gi 406929036 EKD64720.1</a>     |
| <a href="#">PREDICTED: complement factor H-related protein 2 [Panthera</a>    | 29.1 | 29.1 | 73% | 88  | 64%  | <a href="#">gi 591341448 XP_007096167.1</a> |
| <a href="#">PREDICTED: complement factor H-related protein 2 [Felis catu</a>  | 29.1 | 29.1 | 73% | 88  | 64%  | <a href="#">gi 410986188 XP_003999394.1</a> |
| <a href="#">hypothetical protein DDB_G0278071 [Dictyostelium discoideur</a>   | 29.1 | 29.1 | 63% | 89  | 75%  | <a href="#">gi 111226698 XP_642103.2</a>    |
| <a href="#">hypothetical protein GGTG_03117 [Gaeumannomyces graminis</a>      | 29.1 | 29.1 | 42% | 90  | 100% | <a href="#">gi 685400597 XP_009219159.1</a> |
| <a href="#">alanyl-tRNA synthetase [alpha proteobacterium SCGC AAA28C</a>     | 29.1 | 29.1 | 57% | 90  | 71%  | <a href="#">gi 516596938 WP_017971961.1</a> |
| <a href="#">transcript cleavage factor [Parachlamydia acanthamoebae]</a>      | 29.1 | 29.1 | 52% | 90  | 80%  | <a href="#">gi 738856889 WP_036745875.1</a> |
| <a href="#">transcript cleavage factor [Parachlamydia acanthamoebae]</a>      | 29.1 | 29.1 | 52% | 90  | 80%  | <a href="#">gi 503690232 WP_013924308.1</a> |
| <a href="#">hypothetical protein pah_c005o031 [Parachlamydia acanthamo</a>    | 29.1 | 29.1 | 52% | 90  | 80%  | <a href="#">gi 281500219 EFB42500.1</a>     |
| <a href="#">CRISPR-associated protein Cas9 [Copro bacter sp. 177]</a>         | 29.1 | 29.1 | 73% | 91  | 71%  | <a href="#">gi 733789567 KHM44152.1</a>     |
| <a href="#">PREDICTED: myosin-IIIa-like [Xiphophorus maculatus]</a>           | 29.1 | 29.1 | 63% | 91  | 75%  | <a href="#">gi 551508520 XP_005805789.1</a> |

|                                                                                |      |      |     |     |      |                                             |
|--------------------------------------------------------------------------------|------|------|-----|-----|------|---------------------------------------------|
| <a href="#">hypothetical protein [Bradyrhizobium elkanii]</a>                  | 28.6 | 28.6 | 42% | 122 | 100% | <a href="#">gi 654711331 WP_028169225.1</a> |
| <a href="#">endonuclease [Chryseobacterium sp. CTM]</a>                        | 28.6 | 28.6 | 57% | 123 | 75%  | <a href="#">gi 736677382 WP_034683764.1</a> |
| <a href="#">hypothetical protein CNE04810 [Cryptococcus neoformans var.</a>    | 28.6 | 28.6 | 52% | 123 | 90%  | <a href="#">gi 58267682 XP_570997.1</a>     |
| <a href="#">hypothetical protein [Peptococcaceae bacterium BIC-A1/1_c8]</a>    | 28.6 | 28.6 | 68% | 123 | 71%  | <a href="#">gi 734899322 WP_034132529.1</a> |
| <a href="#">Mob1/phocein family protein [Cryptosporidium muris RN66]</a>       | 28.6 | 28.6 | 68% | 123 | 77%  | <a href="#">gi 209878001 XP_002140442.1</a> |
| <a href="#">hypothetical protein CNBE4810 [Cryptococcus neoformans var.</a>    | 28.6 | 28.6 | 52% | 124 | 90%  | <a href="#">gi 134112465 XP_775208.1</a>    |
| <a href="#">PREDICTED: E3 ubiquitin-protein ligase TRIM39-like [Stegaste</a>   | 28.6 | 28.6 | 68% | 124 | 69%  | <a href="#">gi 657574654 XP_008291043.1</a> |
| <a href="#">chemotaxis protein [Mesorhizobium sp. WSM4349]</a>                 | 28.6 | 28.6 | 42% | 124 | 100% | <a href="#">gi 517265644 WP_018454462.1</a> |
| <a href="#">AMP-binding enzyme family protein [Neisseria cinerea]</a>          | 28.6 | 28.6 | 84% | 124 | 57%  | <a href="#">gi 489773904 WP_003677803.1</a> |
| <a href="#">AMP-binding enzyme family protein [Neisseria lactamica]</a>        | 28.6 | 28.6 | 84% | 124 | 57%  | <a href="#">gi 518102455 WP_019272663.1</a> |
| <a href="#">hypothetical protein AURDEDRAFT_109663 [Auricularia delica</a>     | 28.6 | 28.6 | 47% | 125 | 89%  | <a href="#">gi 598009353 XP_007336597.1</a> |
| <a href="#">hypothetical protein H072_8051 [Dactylellina haptotyla CBS 20</a>  | 28.6 | 28.6 | 63% | 125 | 64%  | <a href="#">gi 526196835 EPS38168.1</a>     |
| <a href="#">hemagglutinin domain containing protein [Acanthamoeba castel</a>   | 28.6 | 28.6 | 47% | 125 | 89%  | <a href="#">gi 470404656 XP_004335814.1</a> |
| <a href="#">peptidase S8/S53 family [Eubacterium sp. CAG:161]</a>              | 28.6 | 28.6 | 68% | 125 | 69%  | <a href="#">gi 547212177 WP_021952779.1</a> |
| <a href="#">type III secretion chaperone, CesT family [Succinatimonas hipp</a> | 28.2 | 28.2 | 68% | 165 | 62%  | <a href="#">gi 496435125 WP_009143972.1</a> |
| <a href="#">hypothetical protein [Salmonella enterica]</a>                     | 28.2 | 28.2 | 57% | 169 | 82%  | <a href="#">gi 446682240 WP_000759586.1</a> |
| <a href="#">PREDICTED: charged multivesicular body protein 4c [Pantholo</a>    | 28.2 | 28.2 | 47% | 169 | 89%  | <a href="#">gi 556774019 XP_005982153.1</a> |
| <a href="#">MULTISPECIES: UDP pyrophosphate phosphatase [Thauera]</a>          | 28.2 | 28.2 | 94% | 169 | 44%  | <a href="#">gi 490450797 WP_004321679.1</a> |
| <a href="#">UDP pyrophosphate phosphatase [Thauera terpenica]</a>              | 28.2 | 28.2 | 94% | 169 | 44%  | <a href="#">gi 544832433 WP_021248217.1</a> |
| <a href="#">undecaprenyl pyrophosphate phosphatase [Thauera phenylace</a>      | 28.2 | 28.2 | 94% | 169 | 44%  | <a href="#">gi 490512323 WP_004377930.1</a> |
| <a href="#">undecaprenyl pyrophosphate phosphatase [Thauera linaloolent</a>    | 28.2 | 28.2 | 94% | 169 | 44%  | <a href="#">gi 490474503 WP_004344932.1</a> |
| <a href="#">MULTISPECIES: undecaprenyl pyrophosphate phosphatase [T</a>        | 28.2 | 28.2 | 94% | 169 | 44%  | <a href="#">gi 489022592 WP_002933072.1</a> |
| <a href="#">undecaprenyl pyrophosphate phosphatase [Thauera sp. 63]</a>        | 28.2 | 28.2 | 94% | 169 | 44%  | <a href="#">gi 490419422 WP_004291725.1</a> |
| <a href="#">putative aldose 1-epimerase [Epulopiscium sp. 'N.t. morphotyp</a>  | 28.2 | 28.2 | 57% | 170 | 75%  | <a href="#">gi 497854140 WP_010168296.1</a> |
| <a href="#">FAD-dependent oxidoreductase [Leptospirillum ferrooxidans]</a>     | 28.2 | 28.2 | 57% | 170 | 73%  | <a href="#">gi 504262420 WP_014449522.1</a> |
| <a href="#">ATPase [Salmonella enterica]</a>                                   | 28.2 | 28.2 | 57% | 170 | 82%  | <a href="#">gi 566075054 WP_023994444.1</a> |

## Alignments

[Download](#) [GenPept](#) [Graphics](#)

[Next](#) [Previous](#) [Descriptions](#)

PREDICTED: complement factor H-related protein 3-like, partial [Pan troglodytes]

Sequence ID: [gi|694890843|ref|XP\\_009438422.1|](#) Length: 78 Number of Matches: 1

Range 1: 53 to 71 [GenPept](#) [Graphics](#)

[Next Match](#) [Previous Match](#)

| Score          | Expect | Identities | Positives   | Gaps     |
|----------------|--------|------------|-------------|----------|
| 60.9 bits(136) | 1e-09  | 18/19(95%) | 19/19(100%) | 0/19(0%) |

Query 1 KLGYNADTSILSFQAVCRE 19  
 KLGYN+TSILSFQAVCRE  
 Sbjct 53 KLGYNANTSILSFQAVCRE 71

### Related Information

[Gene](#) - associated gene details

[Download](#) [GenPept](#) [Graphics](#)

[Next](#) [Previous](#) [Descriptions](#)

complement factor H-related protein 3 isoform 2 precursor [Homo sapiens]

Sequence ID: [gi|262231791|ref|NP\\_001160096.1|](#) Length: 269 Number of Matches: 1

[See 1 more title\(s\)](#)

Range 1: 242 to 260 [GenPept](#) [Graphics](#)

[Next Match](#) [Previous Match](#)

| Score          | Expect | Identities | Positives   | Gaps     |
|----------------|--------|------------|-------------|----------|
| 60.9 bits(136) | 3e-09  | 18/19(95%) | 19/19(100%) | 0/19(0%) |

### Related Information

[Gene](#) - associated gene details

[Map Viewer](#) - aligned genomic

Query 1 KLGYNADTSILSFQAVCRE 19  
 KLGYN+TSILSFQAVCRE  
 Sbjct 242 KLGYNANTSILSFQAVCRE 260

context  
[Identical Proteins](#) - Proteins  
 identical to the subject

[Download](#) [GenPept](#) [Graphics](#)

[Next](#) [Previous](#) [Descriptions](#)

complement factor H-related protein 3 isoform 1 precursor [Homo sapiens]

Sequence ID: [gi|54792787|ref|NP\\_066303.2|](#) Length: 330 Number of Matches: 1

[See 5 more title\(s\)](#)

Range 1: 303 to 321 [GenPept](#) [Graphics](#)

[Next Match](#) [Previous Match](#)

| Score          | Expect | Identities | Positives   | Gaps     |
|----------------|--------|------------|-------------|----------|
| 60.9 bits(136) | 3e-09  | 18/19(95%) | 19/19(100%) | 0/19(0%) |

Query 1 KLGYNADTSILSFQAVCRE 19  
 KLGYN+TSILSFQAVCRE  
 Sbjct 303 KLGYNANTSILSFQAVCRE 321

**Related Information**

[Gene](#) - associated gene details  
[UniGene](#) - clustered expressed sequence tags  
[Map Viewer](#) - aligned genomic context  
[Identical Proteins](#) - Proteins identical to the subject

[Download](#) [GenPept](#) [Graphics](#)

[Next](#) [Previous](#) [Descriptions](#)

PREDICTED: complement factor H-related protein 4 isoform X3 [Pongo abelii]

Sequence ID: [gi|686700699|ref|XP\\_009238037.1|](#) Length: 331 Number of Matches: 1

Range 1: 304 to 322 [GenPept](#) [Graphics](#)

[Next Match](#) [Previous Match](#)

| Score          | Expect | Identities | Positives   | Gaps     |
|----------------|--------|------------|-------------|----------|
| 60.9 bits(136) | 3e-09  | 18/19(95%) | 19/19(100%) | 0/19(0%) |

Query 1 KLGYNADTSILSFQAVCRE 19  
 KLGYN+TSILSFQAVCRE  
 Sbjct 304 KLGYNANTSILSFQAVCRE 322

**Related Information**

[Gene](#) - associated gene details  
[Map Viewer](#) - aligned genomic context

[Download](#) [GenPept](#) [Graphics](#)

[Next](#) [Previous](#) [Descriptions](#)

PREDICTED: complement factor H-related protein 4 [Gorilla gorilla gorilla]

Sequence ID: [gi|426333125|ref|XP\\_004028135.1|](#) Length: 331 Number of Matches: 1

Range 1: 304 to 322 [GenPept](#) [Graphics](#)

[Next Match](#) [Previous Match](#)

| Score          | Expect | Identities | Positives   | Gaps     |
|----------------|--------|------------|-------------|----------|
| 60.9 bits(136) | 3e-09  | 18/19(95%) | 19/19(100%) | 0/19(0%) |

Query 1 KLGYNADTSILSFQAVCRE 19  
 KLGYN+TSILSFQAVCRE  
 Sbjct 304 KLGYNANTSILSFQAVCRE 322

**Related Information**

[Gene](#) - associated gene details  
[Map Viewer](#) - aligned genomic context



NCBI/ BLAST/ blastp suite/ Formatting Results - B92KVY2D01R

Your search parameters were adjusted to search for a short input sequence.

Edit and Resubmit Save Search Strategies Formatting options Download

YouTube How to read this page Blast report description

CFHR3\_KLGYNANTSILSFQAVCRE\_NonMod

RID B92KVY2D01R (Expires on 01-14 10:01 am)

Query ID lcl|256154
Description None
Molecule type amino acid
Query Length 19

Database Name nr
Description All non-redundant GenBank CDS translations+PDB+SwissProt+PIR excluding environmental samples from WGS projects
Program BLASTP 2.2.30+ Citation

Other reports: Search Summary Taxonomy reports Distance tree of results Related Structures Multiple alignment

Graphic Summary

Show Conserved Domains

No putative conserved domains have been detected

Distribution of 100 Blast Hits on the Query Sequence



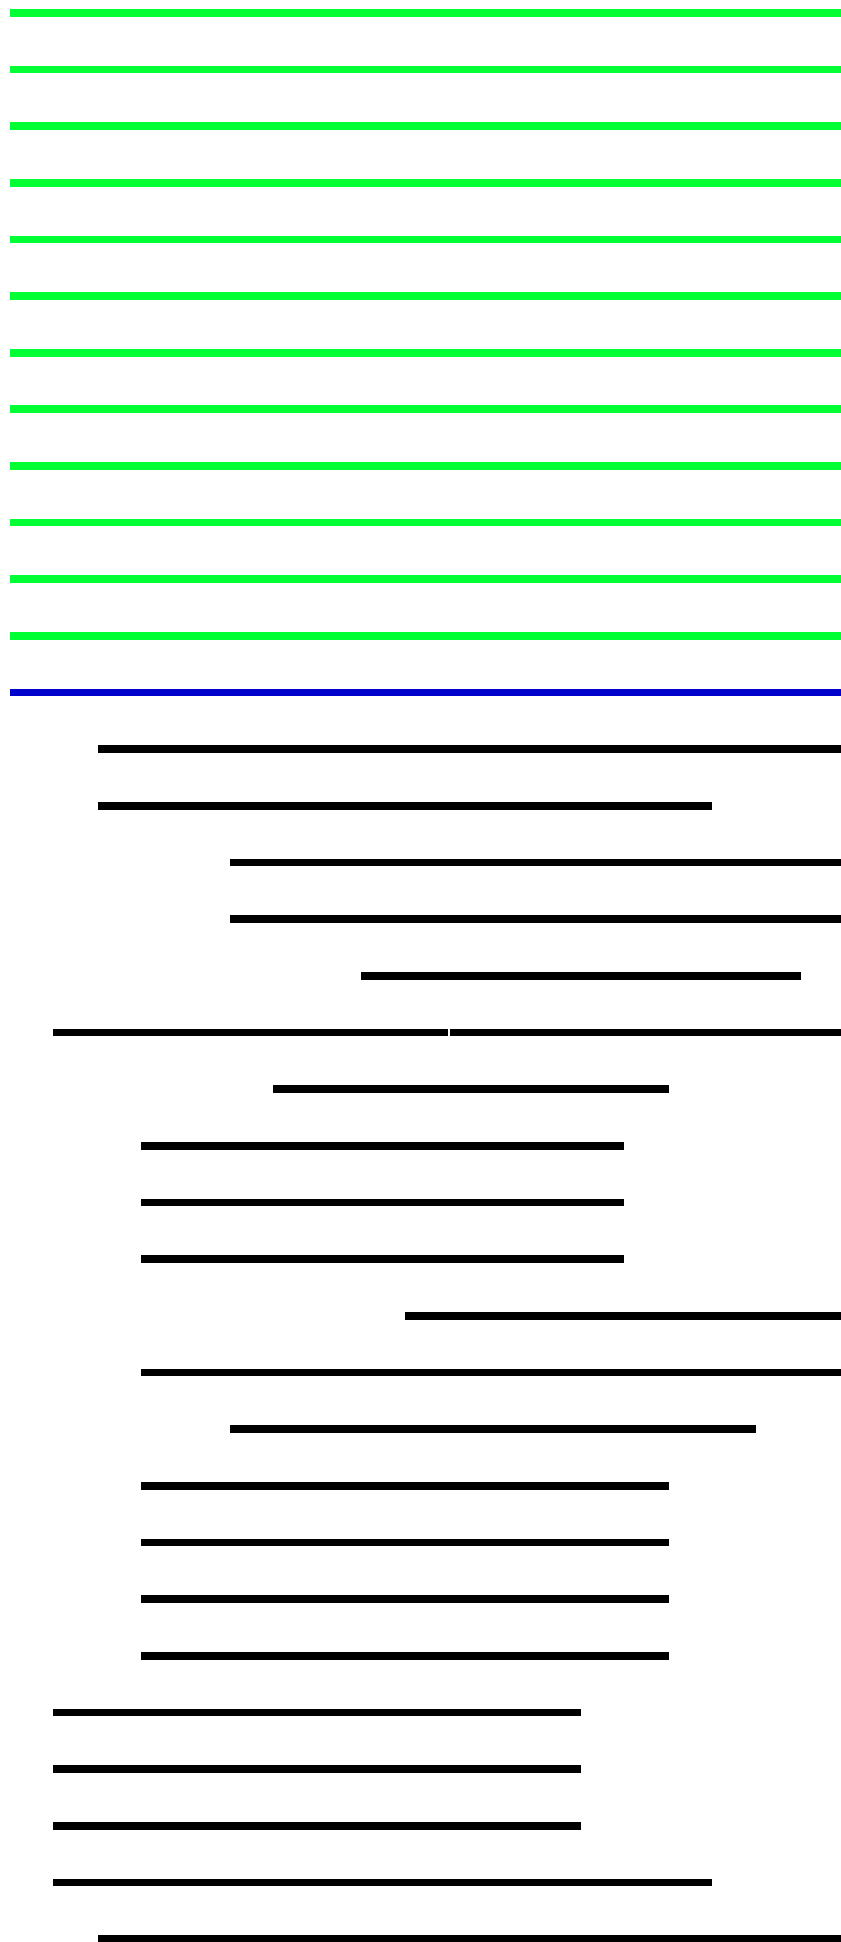

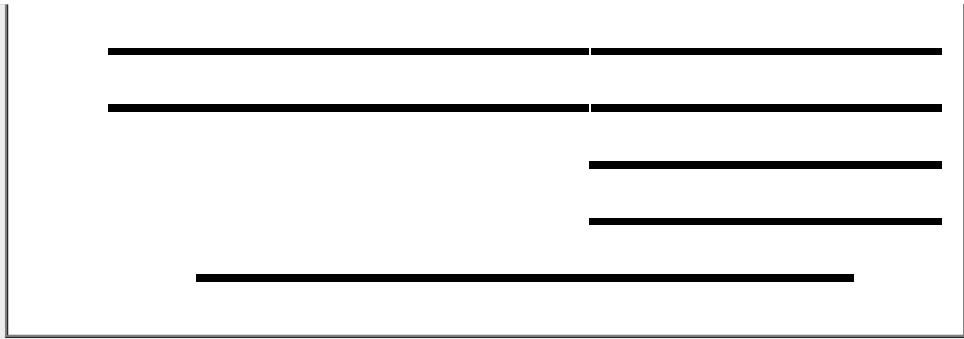

**Descriptions**

**Sequences producing significant alignments:**

Select: [All](#) [None](#) Selected:0

[Alignments](#)
[Download](#)
[GenPept](#)
[Graphics](#)
[Distance tree of results](#)
[Multiple alignment](#)

| Description                                                                                   | Max score | Total score | Query cover | E value | Ident | Accession                                   |
|-----------------------------------------------------------------------------------------------|-----------|-------------|-------------|---------|-------|---------------------------------------------|
| <a href="#">PREDICTED: complement factor H-related protein 3-like [Pan troglodytes]</a>       | 63.4      | 63.4        | 100%        | 1e-10   | 100%  | <a href="#">gi 694890843 XP_009438422.1</a> |
| <a href="#">complement factor H-related protein 3 isoform 2 precursor [Homo sapiens]</a>      | 63.4      | 63.4        | 100%        | 4e-10   | 100%  | <a href="#">gi 262231791 NP_001160096.1</a> |
| <a href="#">complement factor H-related protein 3 isoform 1 precursor [Homo sapiens]</a>      | 63.4      | 63.4        | 100%        | 4e-10   | 100%  | <a href="#">gi 54792787 NP_066303.2</a>     |
| <a href="#">PREDICTED: complement factor H-related protein 4 isoform X3 [Pongo abelii]</a>    | 63.4      | 63.4        | 100%        | 4e-10   | 100%  | <a href="#">gi 686700699 XP_009238037.1</a> |
| <a href="#">PREDICTED: complement factor H-related protein 4 [Gorilla gorilla]</a>            | 63.4      | 63.4        | 100%        | 4e-10   | 100%  | <a href="#">gi 426333125 XP_004028135.1</a> |
| <a href="#">FHR-3: complement Factor H-related Protein 3 [Homo sapiens]</a>                   | 63.4      | 63.4        | 100%        | 4e-10   | 100%  | <a href="#">gi 30870 CAA48639.1</a>         |
| <a href="#">PREDICTED: complement factor H-related protein 4 isoform X2 [Pongo abelii]</a>    | 63.4      | 63.4        | 100%        | 4e-10   | 100%  | <a href="#">gi 686700697 XP_009238034.1</a> |
| <a href="#">PREDICTED: complement factor H-related protein 4 isoform X1 [Pongo abelii]</a>    | 63.4      | 63.4        | 100%        | 4e-10   | 100%  | <a href="#">gi 297662444 XP_002809716.1</a> |
| <a href="#">complement factor H-related protein 4 [Homo sapiens]</a>                          | 60.9      | 60.9        | 100%        | 3e-09   | 95%   | <a href="#">gi 1524058 CAA66980.1</a>       |
| <a href="#">complement factor H-related protein 4 isoform 3 precursor [Homo sapiens]</a>      | 60.9      | 60.9        | 100%        | 3e-09   | 95%   | <a href="#">gi 117320518 NP_006675.2</a>    |
| <a href="#">PREDICTED: complement factor H-related protein 4 isoform X6 [Homo sapiens]</a>    | 60.9      | 60.9        | 100%        | 3e-09   | 95%   | <a href="#">gi 578800460 XP_006711196.1</a> |
| <a href="#">PREDICTED: complement factor H-related protein 4 isoform X5 [Homo sapiens]</a>    | 60.9      | 60.9        | 100%        | 3e-09   | 95%   | <a href="#">gi 578800458 XP_006711195.1</a> |
| <a href="#">PREDICTED: complement factor H-related protein 4 isoform X4 [Homo sapiens]</a>    | 60.9      | 60.9        | 100%        | 3e-09   | 95%   | <a href="#">gi 578800456 XP_006711194.1</a> |
| <a href="#">PREDICTED: complement factor H-related protein 4 isoform X3 [Homo sapiens]</a>    | 60.9      | 60.9        | 100%        | 3e-09   | 95%   | <a href="#">gi 578800454 XP_006711193.1</a> |
| <a href="#">PREDICTED: complement factor H-related protein 4 isoform X2 [Homo sapiens]</a>    | 60.9      | 60.9        | 100%        | 3e-09   | 95%   | <a href="#">gi 578800452 XP_006711192.1</a> |
| <a href="#">PREDICTED: complement factor H-related protein 4 isoform X1 [Homo sapiens]</a>    | 60.9      | 60.9        | 100%        | 3e-09   | 95%   | <a href="#">gi 578800450 XP_006711191.1</a> |
| <a href="#">complement factor H-related protein 4 isoform 2 precursor [Homo sapiens]</a>      | 60.9      | 60.9        | 100%        | 3e-09   | 95%   | <a href="#">gi 320089550 NP_001188480.1</a> |
| <a href="#">unnamed protein product [Homo sapiens]</a>                                        | 60.9      | 60.9        | 100%        | 3e-09   | 95%   | <a href="#">gi 158258941 BAF85441.1</a>     |
| <a href="#">complement factor H-related protein 4 isoform 1 precursor [Homo sapiens]</a>      | 60.9      | 60.9        | 100%        | 3e-09   | 95%   | <a href="#">gi 320089548 NP_001188479.1</a> |
| <a href="#">complement factor H-related 4, isoform CRA_a [Homo sapiens]</a>                   | 60.9      | 60.9        | 100%        | 3e-09   | 95%   | <a href="#">gi 119611671 EAW91265.1</a>     |
| <a href="#">complement factor H-related protein 4A precursor [Homo sapiens]</a>               | 60.9      | 60.9        | 100%        | 3e-09   | 95%   | <a href="#">gi 60417192 CAG26679.2</a>      |
| <a href="#">hypothetical protein EGK_01829 [Macaca mulatta]</a>                               | 59.2      | 59.2        | 100%        | 1e-08   | 95%   | <a href="#">gi 355558923 EHH15703.1</a>     |
| <a href="#">hypothetical protein EGM_21015 [Macaca fascicularis]</a>                          | 59.2      | 59.2        | 100%        | 1e-08   | 95%   | <a href="#">gi 355767342 EHH62602.1</a>     |
| <a href="#">PREDICTED: complement factor H-related protein 4 [Rhinopithecus]</a>              | 59.2      | 59.2        | 100%        | 1e-08   | 95%   | <a href="#">gi 724956788 XP_010353520.1</a> |
| <a href="#">PREDICTED: complement factor H-related protein 4 isoform X1 [Pan troglodytes]</a> | 59.2      | 59.2        | 100%        | 1e-08   | 95%   | <a href="#">gi 685520468 XP_009189240.1</a> |
| <a href="#">PREDICTED: complement factor H-related protein 4 isoform X2 [Chimpanzee]</a>      | 53.2      | 53.2        | 100%        | 1e-06   | 89%   | <a href="#">gi 635131791 XP_007987278.1</a> |
| <a href="#">PREDICTED: complement factor H-related protein 4 isoform X1 [Chimpanzee]</a>      | 53.2      | 53.2        | 100%        | 1e-06   | 89%   | <a href="#">gi 635131789 XP_007987277.1</a> |
| <a href="#">PREDICTED: complement factor H-related protein 4 isoform X3 [Chimpanzee]</a>      | 53.2      | 53.2        | 100%        | 1e-06   | 89%   | <a href="#">gi 635131793 XP_007987280.1</a> |

|                                                                      |      |      |      |       |      |                                             |
|----------------------------------------------------------------------|------|------|------|-------|------|---------------------------------------------|
| PREDICTED: complement factor H-related protein 4-like [Galeoscolecus | 45.2 | 45.2 | 100% | 5e-04 | 74%  | <a href="#">gij667317955 XP_008586983.1</a> |
| PREDICTED: LOW QUALITY PROTEIN: complement factor H-related          | 34.6 | 34.6 | 89%  | 1.4   | 65%  | <a href="#">gij395863185 XP_003803783.1</a> |
| hypothetical protein [Clostridium sp. Maddingley MBC34-26]           | 33.3 | 33.3 | 73%  | 3.8   | 79%  | <a href="#">gij495699764 WP_008424343.1</a> |
| PREDICTED: complement factor H-related protein 2 [Panthera tigris    | 31.6 | 31.6 | 73%  | 12    | 71%  | <a href="#">gij591341448 XP_007096167.1</a> |
| PREDICTED: complement factor H-related protein 2 [Felis catus]       | 31.6 | 31.6 | 73%  | 12    | 71%  | <a href="#">gij410986188 XP_003999394.1</a> |
| hypothetical protein F775_03153 [Aegilops tauschii]                  | 31.2 | 31.2 | 52%  | 17    | 90%  | <a href="#">gij475509050 EMT05155.1</a>     |
| hemagglutinin domain containing protein [Acanthamoeba castellanii    | 31.2 | 31.2 | 47%  | 18    | 100% | <a href="#">gij470404656 XP_004335814.1</a> |
| PREDICTED: charged multivesicular body protein 4c [Pantholops h      | 30.8 | 30.8 | 47%  | 23    | 100% | <a href="#">gij556774019 XP_005982153.1</a> |
| TonB-dependent receptor [Sphingobacterium antarcticus 4BY]           | 30.8 | 30.8 | 57%  | 24    | 91%  | <a href="#">gij662330546 KEQ29330.1</a>     |
| TonB-dependent receptor [Pedobacter heparinus]                       | 30.8 | 30.8 | 57%  | 24    | 91%  | <a href="#">gij502416040 WP_012780400.1</a> |
| TonB-dependent receptor [Pedobacter sp. BAL39]                       | 30.8 | 30.8 | 57%  | 24    | 91%  | <a href="#">gij495515274 WP_008239919.1</a> |
| hypothetical protein [Oryza sativa Japonica Group]                   | 30.3 | 30.3 | 52%  | 29    | 90%  | <a href="#">gij51535724 BAD37741.1</a>      |
| hypothetical protein HELRODRAFT_166585 [Helobdella robusta]          | 30.3 | 30.3 | 84%  | 31    | 57%  | <a href="#">gij675849010 XP_009010065.1</a> |
| PREDICTED: charged multivesicular body protein 7-like [Larimichth    | 30.3 | 30.3 | 63%  | 32    | 75%  | <a href="#">gij734645724 XP_010751967.1</a> |
| aminotransferase [Chlamydia trachomatis]                             | 29.9 | 29.9 | 63%  | 45    | 75%  | <a href="#">gij499644114 WP_011324848.1</a> |
| aminotransferase [Chlamydia trachomatis]                             | 29.9 | 29.9 | 63%  | 45    | 75%  | <a href="#">gij497559140 WP_009873324.1</a> |
| aminotransferase [Chlamydia trachomatis]                             | 29.9 | 29.9 | 63%  | 45    | 75%  | <a href="#">gij497558693 WP_009872877.1</a> |
| aminotransferase [Chlamydia trachomatis]                             | 29.9 | 29.9 | 63%  | 45    | 75%  | <a href="#">gij497557913 WP_009872097.1</a> |
| cysteine sulfinate desulfinate [Vibrio coralliilyticus]              | 29.9 | 29.9 | 63%  | 45    | 75%  | <a href="#">gij694160560 AIS53989.1</a>     |
| cysteine sulfinate desulfinate [Vibrio sp. B183]                     | 29.9 | 29.9 | 63%  | 45    | 75%  | <a href="#">gij672867461 KF10261.1</a>      |
| cysteine sulfinate desulfinate [Vibrio coralliilyticus]              | 29.9 | 29.9 | 63%  | 45    | 75%  | <a href="#">gij494015608 WP_006957963.1</a> |
| Tripeptide permease tppB, putative [Perkinsus marinus ATCC 5098      | 29.9 | 29.9 | 78%  | 45    | 67%  | <a href="#">gij294893760 XP_002774633.1</a> |
| PREDICTED: complement factor H-like [Otolemur garnettii]             | 29.9 | 29.9 | 89%  | 45    | 65%  | <a href="#">gij395839039 XP_003792410.1</a> |
| hypothetical protein [Methylobacterium sp. 77]                       | 29.9 | 29.9 | 47%  | 45    | 89%  | <a href="#">gij518747471 WP_019905760.1</a> |
| alpha-2-macroglobulin family N-terminal region [Microscilla marina]  | 29.9 | 29.9 | 57%  | 46    | 82%  | <a href="#">gij488781502 WP_002693909.1</a> |
| putative uncharacterized protein [Eubacterium eligens CAG:72]        | 29.5 | 29.5 | 42%  | 59    | 100% | <a href="#">gij547480816 WP_022098743.1</a> |
| DNA mismatch repair protein MutT [Eubacterium eligens]               | 29.5 | 29.5 | 42%  | 59    | 100% | <a href="#">gij502246835 WP_012740632.1</a> |
| PREDICTED: complement factor H-related protein 4-like [Eptesicus     | 29.5 | 29.5 | 42%  | 60    | 100% | <a href="#">gij641732931 XP_008156854.1</a> |
| dethiobiotin synthetase [Selenomonas ruminantium]                    | 29.5 | 29.5 | 42%  | 60    | 100% | <a href="#">gij652371003 WP_026767006.1</a> |
| PREDICTED: complement factor H-related protein 3-like [Eptesicus     | 29.5 | 29.5 | 78%  | 61    | 73%  | <a href="#">gij641736903 XP_008159089.1</a> |
| hypothetical protein CAPTEDRAFT_110011 [Capitella teleta]            | 29.5 | 29.5 | 73%  | 61    | 54%  | <a href="#">gij443710050 ELU04431.1</a>     |
| PREDICTED: complement factor H-related protein 3-like [Myotis br     | 29.5 | 29.5 | 42%  | 61    | 100% | <a href="#">gij554549152 XP_005869111.1</a> |
| Complement factor H [Myotis brandtii]                                | 29.5 | 29.5 | 42%  | 62    | 100% | <a href="#">gij521027702 EPQ09490.1</a>     |
| hypothetical protein [Clostridium hydrogeniformans]                  | 29.5 | 29.5 | 68%  | 63    | 59%  | <a href="#">gij653621594 WP_027631917.1</a> |
| DEHA2D09988p [Debaryomyces hansenii CBS767]                          | 29.5 | 29.5 | 52%  | 63    | 80%  | <a href="#">gij294656603 XP_002770293.1</a> |
| hypothetical protein [Acinetobacter sp. NIPH 973]                    | 29.1 | 29.1 | 57%  | 82    | 82%  | <a href="#">gij490837251 WP_004699327.1</a> |
| hypothetical protein ACD_50C00316G0007 [uncultured bacterium]        | 29.1 | 29.1 | 52%  | 84    | 80%  | <a href="#">gij406929036 EKD64720.1</a>     |
| hypothetical protein Ecym_7413 [Ereothecium cymbalariae DBVP         | 29.1 | 29.1 | 57%  | 85    | 82%  | <a href="#">gij363755680 XP_003648055.1</a> |
| hypothetical protein NEMVEDRAFT_v1g224817 [Nematostella vect         | 29.1 | 29.1 | 84%  | 85    | 53%  | <a href="#">gij156603150 XP_001618784.1</a> |
| RNA pseudouridylate synthase domain-containing protein 2 [Zooter     | 29.1 | 29.1 | 63%  | 85    | 75%  | <a href="#">gij646721122 KDR22592.1</a>     |
| hypothetical protein GGTG_03117 [Gaeumannomyces graminis var         | 29.1 | 29.1 | 42%  | 85    | 100% | <a href="#">gij685400597 XP_009219159.1</a> |
| hypothetical protein HELRODRAFT_108261 [Helobdella robusta]          | 29.1 | 29.1 | 89%  | 85    | 65%  | <a href="#">gij675887632 XP_009029318.1</a> |
| LORF2 [synthetic construct]                                          | 29.1 | 29.1 | 68%  | 86    | 62%  | <a href="#">gij237626215 ACR02738.1</a>     |
| LORF2 [Gallid herpesvirus 2]                                         | 29.1 | 29.1 | 68%  | 86    | 62%  | <a href="#">gij392497295 AFM74559.1</a>     |
| orf-1 [Gallid herpesvirus 2]                                         | 29.1 | 29.1 | 68%  | 86    | 62%  | <a href="#">gij632856 AAB30933.1</a>        |

|                                                                                |      |      |     |     |     |                                             |
|--------------------------------------------------------------------------------|------|------|-----|-----|-----|---------------------------------------------|
| <a href="#">v-lipase [synthetic construct]</a>                                 | 29.1 | 29.1 | 68% | 86  | 62% | <a href="#">gil237626170 ACR02693.1</a>     |
| <a href="#">lipase [Gallid herpesvirus 2]</a>                                  | 29.1 | 29.1 | 68% | 86  | 62% | <a href="#">gil125745049 YP_001033926.1</a> |
| <a href="#">lipase [Gallid herpesvirus 2]</a>                                  | 29.1 | 29.1 | 68% | 86  | 62% | <a href="#">gil392497294 AFM74558.1</a>     |
| <a href="#">membrane protein [Bacillus cereus]</a>                             | 28.6 | 28.6 | 73% | 115 | 69% | <a href="#">gil446377531 WP_000455386.1</a> |
| <a href="#">serine proteinase isoform 11 [Sistrurus catenatus edwardsi]</a>    | 28.6 | 28.6 | 73% | 116 | 71% | <a href="#">gil109254958 ABG26977.1</a>     |
| <a href="#">hypothetical protein [Flavobacteriaceae bacterium S85]</a>         | 28.6 | 28.6 | 73% | 116 | 58% | <a href="#">gil657688926 WP_029489377.1</a> |
| <a href="#">putative 8-amino-7-oxonanoate synthase [Bacteroides fragilis 3</a> | 28.6 | 28.6 | 78% | 117 | 67% | <a href="#">gil313134892 EFR52252.1</a>     |
| <a href="#">MULTISPECIES: 8-amino-7-oxonanoate synthase [Bacteroides]</a>      | 28.6 | 28.6 | 78% | 117 | 67% | <a href="#">gil547279488 WP_022013034.1</a> |
| <a href="#">8-amino-7-oxonanoate synthase [Bacteroides fragilis]</a>           | 28.6 | 28.6 | 78% | 117 | 67% | <a href="#">gil492356497 WP_005819256.1</a> |
| <a href="#">MULTISPECIES: 8-amino-7-oxonanoate synthase [Bacteroides]</a>      | 28.6 | 28.6 | 78% | 117 | 67% | <a href="#">gil496043771 WP_008768278.1</a> |
| <a href="#">8-amino-7-oxonanoate synthase [Bacteroides fragilis]</a>           | 28.6 | 28.6 | 78% | 117 | 67% | <a href="#">gil695484637 WP_032575181.1</a> |
| <a href="#">8-amino-7-oxonanoate synthase [Bacteroides fragilis]</a>           | 28.6 | 28.6 | 78% | 117 | 67% | <a href="#">gil695430276 WP_032561108.1</a> |
| <a href="#">8-amino-7-oxonanoate synthase [Bacteroides fragilis]</a>           | 28.6 | 28.6 | 78% | 117 | 67% | <a href="#">gil695481996 WP_032573987.1</a> |
| <a href="#">8-amino-7-oxonanoate synthase [Bacteroides fragilis]</a>           | 28.6 | 28.6 | 78% | 117 | 67% | <a href="#">gil695552986 WP_032598057.1</a> |
| <a href="#">8-amino-7-oxonanoate synthase [Bacteroides fragilis]</a>           | 28.6 | 28.6 | 78% | 117 | 67% | <a href="#">gil695447183 WP_032564620.1</a> |
| <a href="#">8-amino-7-oxonanoate synthase [Bacteroides fragilis]</a>           | 28.6 | 28.6 | 78% | 117 | 67% | <a href="#">gil695518014 WP_032589697.1</a> |
| <a href="#">8-amino-7-oxonanoate synthase [Bacteroides fragilis]</a>           | 28.6 | 28.6 | 78% | 117 | 67% | <a href="#">gil695399375 WP_032556467.1</a> |
| <a href="#">8-amino-7-oxonanoate synthase [Bacteroides fragilis]</a>           | 28.6 | 28.6 | 78% | 117 | 67% | <a href="#">gil695545142 WP_032596772.1</a> |
| <a href="#">8-amino-7-oxonanoate synthase [Bacteroides fragilis]</a>           | 28.6 | 28.6 | 78% | 117 | 67% | <a href="#">gil695486286 WP_032576022.1</a> |
| <a href="#">8-amino-7-oxonanoate synthase [Bacteroides fragilis]</a>           | 28.6 | 28.6 | 78% | 117 | 67% | <a href="#">gil695331358 WP_032529385.1</a> |
| <a href="#">8-amino-7-oxonanoate synthase [Bacteroides fragilis]</a>           | 28.6 | 28.6 | 78% | 117 | 67% | <a href="#">gil695336295 WP_032533939.1</a> |
| <a href="#">MULTISPECIES: 8-amino-7-oxonanoate synthase [Bacteroides]</a>      | 28.6 | 28.6 | 78% | 117 | 67% | <a href="#">gil547946592 WP_022347591.1</a> |
| <a href="#">8-amino-7-oxonanoate synthase [Bacteroides fragilis]</a>           | 28.6 | 28.6 | 78% | 117 | 67% | <a href="#">gil499301826 WP_010992601.1</a> |
| <a href="#">8-amino-7-oxonanoate synthase [Bacteroides fragilis]</a>           | 28.6 | 28.6 | 78% | 117 | 67% | <a href="#">gil499515854 WP_011202494.1</a> |
| <a href="#">8-amino-7-oxonanoate synthase [Bacteroides fragilis]</a>           | 28.6 | 28.6 | 78% | 117 | 67% | <a href="#">gil492345939 WP_005816880.1</a> |
| <a href="#">8-amino-7-oxonanoate synthase [Bacteroides sp. 2_1_56FAA]</a>      | 28.6 | 28.6 | 78% | 117 | 67% | <a href="#">gil496601943 WP_009291977.1</a> |
| <a href="#">8-amino-7-oxonanoate synthase [Bacteroides fragilis]</a>           | 28.6 | 28.6 | 78% | 117 | 67% | <a href="#">gil504064609 WP_014298603.1</a> |

## Alignments

Download GenPept Graphics

Next Previous Descriptions

PREDICTED: complement factor H-related protein 3-like, partial [Pan troglodytes]

Sequence ID: [gil694890843|ref|XP\\_009438422.1](#) Length: 78 Number of Matches: 1

Range 1: 53 to 71 GenPept Graphics

Next Match Previous Match

| Score          | Expect | Identities  | Positives   | Gaps     |
|----------------|--------|-------------|-------------|----------|
| 63.4 bits(142) | 1e-10  | 19/19(100%) | 19/19(100%) | 0/19(0%) |

Query 1 KLGYNANTSILSFQAVCRE 19  
 KLGYNANTSILSFQAVCRE  
 Sbjct 53 KLGYNANTSILSFQAVCRE 71

### Related Information

[Gene](#) - associated gene details

Download GenPept Graphics

Next Previous Descriptions

complement factor H-related protein 3 isoform 2 precursor [Homo sapiens]

Sequence ID: [gil262231791|ref|NP\\_001160096.1](#) Length: 269 Number of Matches: 1

[▶ See 1 more title\(s\)](#)

Range 1: 242 to 260 GenPept Graphics

Next Match Previous Match

| Score          | Expect | Identities  | Positives   | Gaps     |
|----------------|--------|-------------|-------------|----------|
| 63.4 bits(142) | 4e-10  | 19/19(100%) | 19/19(100%) | 0/19(0%) |

### Related Information

[Gene](#) - associated gene details  
[Map Viewer](#) - aligned genomic context



Query 1 KLGYNANTSILSFQAVCRE 19  
 Sbjct 242 KLGYNANTSILSFQAVCRE 260

[Identical Proteins](#) - Proteins identical to the subject

Download [GenPept](#) [Graphics](#)

[▼ Next](#) [▲ Previous](#) [▲ Descriptions](#)

complement factor H-related protein 3 isoform 1 precursor [Homo sapiens]

Sequence ID: [gi|54792787|ref|NP\\_066303.2|](#) Length: 330 Number of Matches: 1

[▶ See 5 more title\(s\)](#)

Range 1: 303 to 321 [GenPept](#) [Graphics](#)

[▼ Next Match](#) [▲ Previous Match](#)

| Score          | Expect | Identities  | Positives   | Gaps     |
|----------------|--------|-------------|-------------|----------|
| 63.4 bits(142) | 4e-10  | 19/19(100%) | 19/19(100%) | 0/19(0%) |

Query 1 KLGYNANTSILSFQAVCRE 19  
 Sbjct 303 KLGYNANTSILSFQAVCRE 321

**Related Information**

[Gene](#) - associated gene details  
[UniGene](#) - clustered expressed sequence tags  
[Map Viewer](#) - aligned genomic context  
[Identical Proteins](#) - Proteins identical to the subject

Download [GenPept](#) [Graphics](#)

[▼ Next](#) [▲ Previous](#) [▲ Descriptions](#)

PREDICTED: complement factor H-related protein 4 isoform X3 [Pongo abelii]

Sequence ID: [gi|686700699|ref|XP\\_009238037.1|](#) Length: 331 Number of Matches: 1

Range 1: 304 to 322 [GenPept](#) [Graphics](#)

[▼ Next Match](#) [▲ Previous Match](#)

| Score          | Expect | Identities  | Positives   | Gaps     |
|----------------|--------|-------------|-------------|----------|
| 63.4 bits(142) | 4e-10  | 19/19(100%) | 19/19(100%) | 0/19(0%) |

Query 1 KLGYNANTSILSFQAVCRE 19  
 Sbjct 304 KLGYNANTSILSFQAVCRE 322

**Related Information**

[Gene](#) - associated gene details  
[Map Viewer](#) - aligned genomic context

Download [GenPept](#) [Graphics](#)

[▼ Next](#) [▲ Previous](#) [▲ Descriptions](#)

PREDICTED: complement factor H-related protein 4 [Gorilla gorilla gorilla]

Sequence ID: [gi|426333125|ref|XP\\_004028135.1|](#) Length: 331 Number of Matches: 1

Range 1: 304 to 322 [GenPept](#) [Graphics](#)

[▼ Next Match](#) [▲ Previous Match](#)

| Score          | Expect | Identities  | Positives   | Gaps     |
|----------------|--------|-------------|-------------|----------|
| 63.4 bits(142) | 4e-10  | 19/19(100%) | 19/19(100%) | 0/19(0%) |

Query 1 KLGYNANTSILSFQAVCRE 19  
 Sbjct 304 KLGYNANTSILSFQAVCRE 322

**Related Information**

[Gene](#) - associated gene details  
[Map Viewer](#) - aligned genomic context

BLAST is a registered trademark of the National Library of Medicine.

▶ NCBI/ BLAST/ blastp suite/ Formatting Results - BTG1S5YX013

**i** Your search parameters were adjusted to search for a short input sequence.

[Edit and Resubmit](#) [Save Search Strategies](#) ▶ [Formatting options](#) ▶ [Download](#) [YouTube](#) [How to read this page](#) [Blast report description](#)

### CFHR4\_KLGYNADTSVLSFQAVCRE\_Mod

RID [BTG1S5YX013](#) (Expires on 01-20 15:28 pm)

**Query ID** |cl|41843  
**Description** None  
**Molecule type** amino acid  
**Query Length** 19

**Database Name** nr  
**Description** All non-redundant GenBank CDS translations+PDB+SwissProt+PIR+PRF excluding environmental samples from WGS projects  
**Program** BLASTP 2.2.30+ ▶ [Citation](#)

Other reports: ▶ [Search Summary](#) [[Taxonomy reports](#)] [[Distance tree of results](#)] [[Related Structures](#)] [[Multiple alignment](#)]

### **Graphic Summary**

[Show Conserved Domains](#)

No putative conserved domains have been detected

Distribution of 101 Blast Hits on the Query Sequence



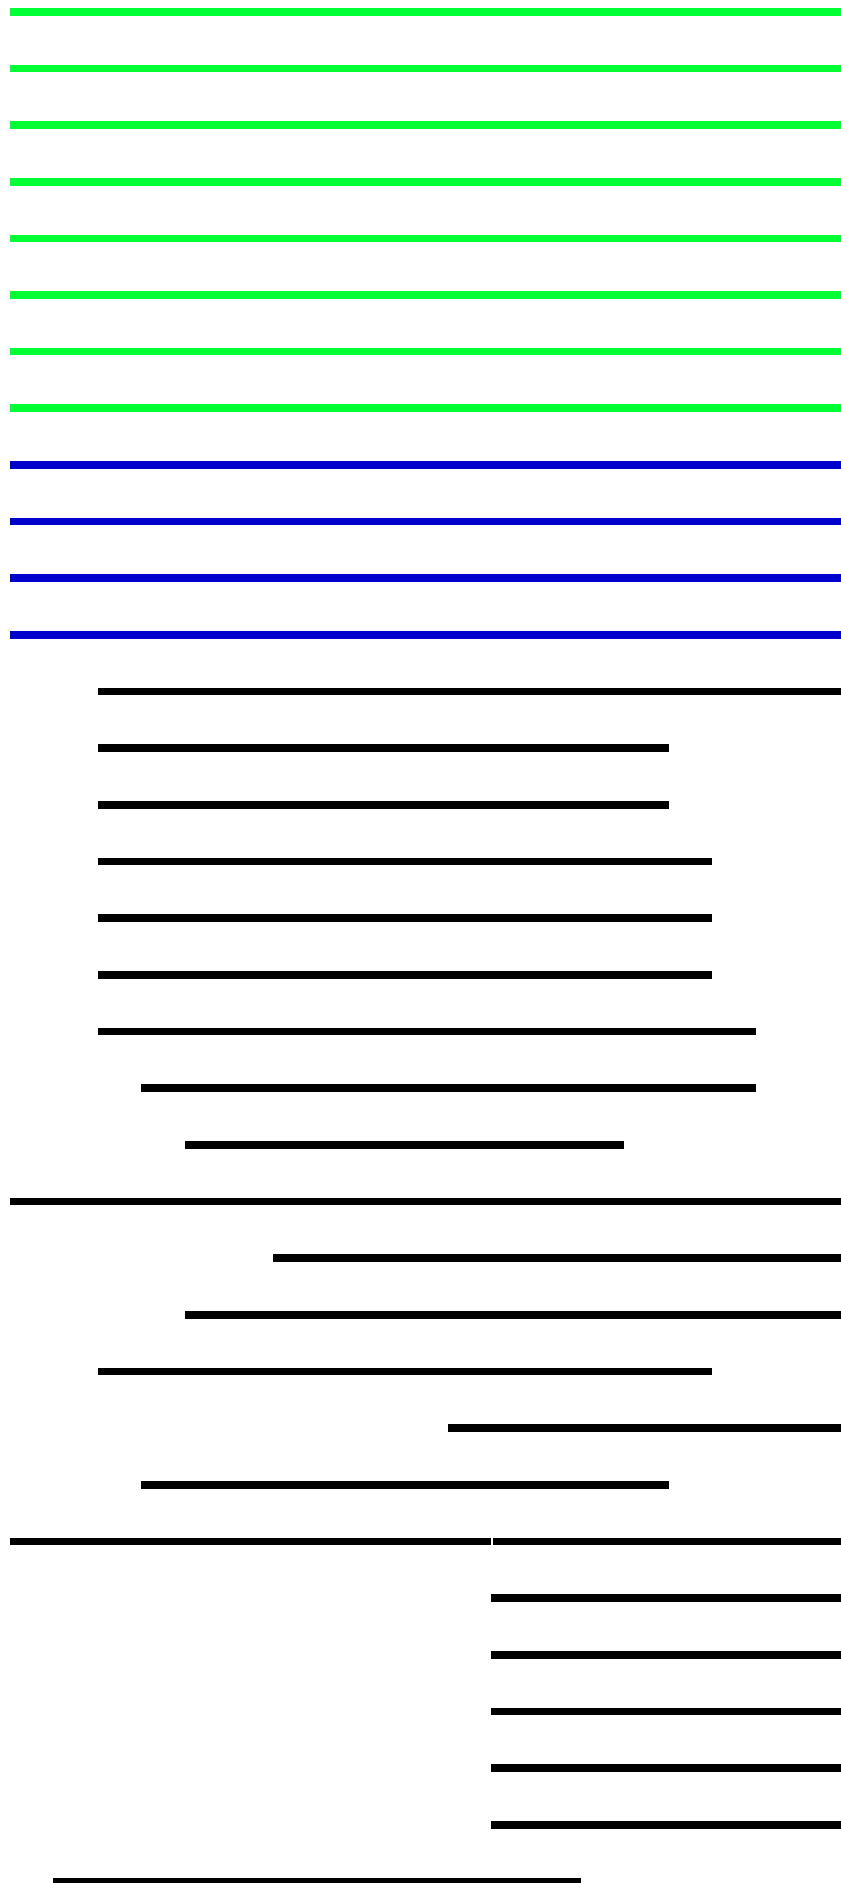

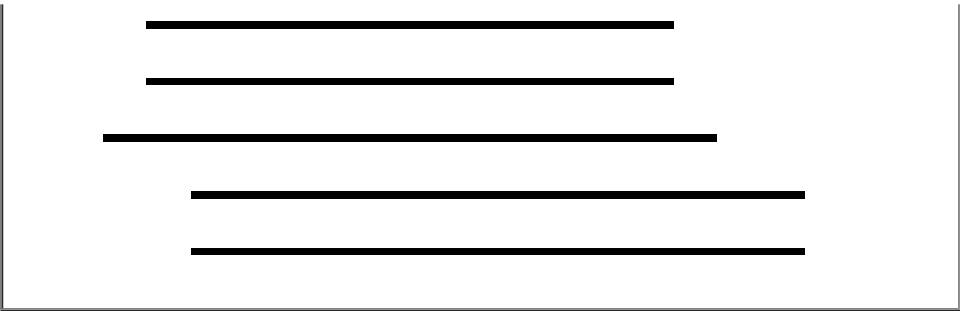

**Descriptions**

**Sequences producing significant alignments:**

Select: [All](#) [None](#) Selected:0

Alignments Download GenPept Graphics Distance tree of results Multiple alignment

| Description                                                                              | Max score | Total score | Query cover | E value | Ident | Accession                                   |
|------------------------------------------------------------------------------------------|-----------|-------------|-------------|---------|-------|---------------------------------------------|
| <a href="#">complement factor H-related protein 4 [Homo sapiens]</a>                     | 60.4      | 60.4        | 100%        | 4e-09   | 95%   | <a href="#">gi 1524058 CAA66980.1</a>       |
| <a href="#">complement factor H-related protein 4 isoform 3 precursor [Homo sapiens]</a> | 60.4      | 60.4        | 100%        | 4e-09   | 95%   | <a href="#">gi 117320518 NP_006675.2</a>    |
| <a href="#">PREDICTED: complement factor H-related protein 4 isoform Xf</a>              | 60.4      | 60.4        | 100%        | 5e-09   | 95%   | <a href="#">gi 578800460 XP_006711196.1</a> |
| <a href="#">PREDICTED: complement factor H-related protein 4 isoform Xf</a>              | 60.4      | 60.4        | 100%        | 5e-09   | 95%   | <a href="#">gi 578800458 XP_006711195.1</a> |
| <a href="#">PREDICTED: complement factor H-related protein 4 isoform Xf</a>              | 60.4      | 60.4        | 100%        | 5e-09   | 95%   | <a href="#">gi 578800456 XP_006711194.1</a> |
| <a href="#">PREDICTED: complement factor H-related protein 4 isoform Xf</a>              | 60.4      | 60.4        | 100%        | 5e-09   | 95%   | <a href="#">gi 578800454 XP_006711193.1</a> |
| <a href="#">PREDICTED: complement factor H-related protein 4 isoform Xf</a>              | 60.4      | 60.4        | 100%        | 5e-09   | 95%   | <a href="#">gi 578800452 XP_006711192.1</a> |
| <a href="#">PREDICTED: complement factor H-related protein 4 isoform X1</a>              | 60.4      | 60.4        | 100%        | 5e-09   | 95%   | <a href="#">gi 578800450 XP_006711191.1</a> |
| <a href="#">complement factor H-related protein 4 isoform 2 precursor [Homo sapiens]</a> | 60.4      | 60.4        | 100%        | 5e-09   | 95%   | <a href="#">gi 320089550 NP_001188480.1</a> |
| <a href="#">unnamed protein product [Homo sapiens]</a>                                   | 60.4      | 60.4        | 100%        | 5e-09   | 95%   | <a href="#">gi 158258941 BAF85441.1</a>     |
| <a href="#">complement factor H-related protein 4 isoform 1 precursor [Homo sapiens]</a> | 60.4      | 60.4        | 100%        | 5e-09   | 95%   | <a href="#">gi 320089548 NP_001188479.1</a> |
| <a href="#">complement factor H-related 4, isoform CRA_a [Homo sapiens]</a>              | 60.4      | 60.4        | 100%        | 5e-09   | 95%   | <a href="#">gi 119611671 EAW91265.1</a>     |
| <a href="#">complement factor H-related protein 4A precursor [Homo sapiens]</a>          | 60.4      | 60.4        | 100%        | 5e-09   | 95%   | <a href="#">gi 60417192 CAG26679.2</a>      |
| <a href="#">PREDICTED: complement factor H-related protein 3-like [Pan troglodytes]</a>  | 58.3      | 58.3        | 100%        | 8e-09   | 89%   | <a href="#">gi 694890843 XP_009438422.1</a> |
| <a href="#">complement factor H-related protein 3 isoform 2 precursor [Homo sapiens]</a> | 58.3      | 58.3        | 100%        | 2e-08   | 89%   | <a href="#">gi 262231791 NP_001160096.1</a> |
| <a href="#">complement factor H-related protein 3 isoform 1 precursor [Homo sapiens]</a> | 58.3      | 58.3        | 100%        | 2e-08   | 89%   | <a href="#">gi 54792787 NP_066303.2</a>     |
| <a href="#">PREDICTED: complement factor H-related protein 4 isoform Xf</a>              | 58.3      | 58.3        | 100%        | 2e-08   | 89%   | <a href="#">gi 686700699 XP_009238037.1</a> |
| <a href="#">PREDICTED: complement factor H-related protein 4 [Gorilla gorilla]</a>       | 58.3      | 58.3        | 100%        | 2e-08   | 89%   | <a href="#">gi 426333125 XP_004028135.1</a> |
| <a href="#">FHR-3; complement Factor H-related Protein 3 [Homo sapiens]</a>              | 58.3      | 58.3        | 100%        | 2e-08   | 89%   | <a href="#">gi 30870 CAA48639.1</a>         |
| <a href="#">PREDICTED: complement factor H-related protein 4 isoform Xf</a>              | 58.3      | 58.3        | 100%        | 2e-08   | 89%   | <a href="#">gi 686700697 XP_009238034.1</a> |
| <a href="#">PREDICTED: complement factor H-related protein 4 isoform X1</a>              | 58.3      | 58.3        | 100%        | 2e-08   | 89%   | <a href="#">gi 297662444 XP_002809716.1</a> |
| <a href="#">hypothetical protein EGK_01829 [Macaca mulatta]</a>                          | 54.1      | 54.1        | 100%        | 6e-07   | 84%   | <a href="#">gi 355558923 EHH15703.1</a>     |
| <a href="#">hypothetical protein EGM_21015 [Macaca fascicularis]</a>                     | 54.1      | 54.1        | 100%        | 6e-07   | 84%   | <a href="#">gi 355767342 EHH62602.1</a>     |
| <a href="#">PREDICTED: complement factor H-related protein 4 [Rhinopithecus]</a>         | 54.1      | 54.1        | 100%        | 7e-07   | 84%   | <a href="#">gi 724956788 XP_010353520.1</a> |
| <a href="#">PREDICTED: complement factor H-related protein 4 isoform X1</a>              | 54.1      | 54.1        | 100%        | 7e-07   | 84%   | <a href="#">gi 685520468 XP_009189240.1</a> |
| <a href="#">PREDICTED: complement factor H-related protein 4 isoform Xf</a>              | 48.1      | 48.1        | 100%        | 7e-05   | 79%   | <a href="#">gi 635131791 XP_007987278.1</a> |
| <a href="#">PREDICTED: complement factor H-related protein 4 isoform X1</a>              | 48.1      | 48.1        | 100%        | 7e-05   | 79%   | <a href="#">gi 635131789 XP_007987277.1</a> |
| <a href="#">PREDICTED: complement factor H-related protein 4 isoform Xf</a>              | 48.1      | 48.1        | 100%        | 7e-05   | 79%   | <a href="#">gi 635131793 XP_007987280.1</a> |
| <a href="#">PREDICTED: complement factor H-related protein 4-like [Galera</a>            | 42.6      | 42.6        | 100%        | 0.004   | 68%   | <a href="#">gi 667317955 XP_008586983.1</a> |

|                                                                                   |      |      |      |      |      |                                             |
|-----------------------------------------------------------------------------------|------|------|------|------|------|---------------------------------------------|
| <a href="#">PREDICTED: LOW QUALITY PROTEIN: complement factor H-</a>              | 37.1 | 37.1 | 89%  | 0.24 | 71%  | <a href="#">gi 395863185 XP_003803783.1</a> |
| <a href="#">putative ABC transport system [Corynebacterium casei LMG S-</a>       | 32.9 | 32.9 | 68%  | 5.4  | 69%  | <a href="#">gi 582017243 AH120589.1</a>     |
| <a href="#">ABC transporter, ATPase and permease components [Coryneb</a>          | 32.9 | 32.9 | 68%  | 5.4  | 69%  | <a href="#">gi 493876585 WP_006822974.1</a> |
| <a href="#">aminotransferase DegT [Vibrio tasmaniensis]</a>                       | 32.0 | 32.0 | 73%  | 9.8  | 71%  | <a href="#">gi 515669795 WP_017102395.1</a> |
| <a href="#">aminotransferase DegT [Vibrio tasmaniensis]</a>                       | 32.0 | 32.0 | 73%  | 9.8  | 71%  | <a href="#">gi 515667578 WP_017100178.1</a> |
| <a href="#">aminotransferase DegT [Vibrio tasmaniensis]</a>                       | 32.0 | 32.0 | 73%  | 9.8  | 71%  | <a href="#">gi 515664772 WP_017097372.1</a> |
| <a href="#">PREDICTED: complement factor H-related protein 3-like [Eptes</a>      | 31.6 | 31.6 | 78%  | 13   | 80%  | <a href="#">gi 641736903 XP_008159089.1</a> |
| <a href="#">hypothetical protein PFL1_04598 [Pseudozyma flocculosa PF-1</a>       | 31.6 | 31.6 | 73%  | 14   | 71%  | <a href="#">gi 630967814 XP_007880315.1</a> |
| <a href="#">hypothetical protein [Pseudomonas fluorescens]</a>                    | 31.2 | 31.2 | 52%  | 16   | 90%  | <a href="#">gi 734952209 WP_034151885.1</a> |
| <a href="#">transglutaminase [Rhodobacteraceae bacterium PD-2]</a>                | 30.8 | 30.8 | 100% | 25   | 46%  | <a href="#">gi 564608082 WP_023849349.1</a> |
| <a href="#">PREDICTED: E3 ubiquitin-protein ligase TRIM39-like [Stegaste</a>      | 30.8 | 30.8 | 68%  | 25   | 75%  | <a href="#">gi 657574654 XP_008291043.1</a> |
| <a href="#">hypothetical protein [Neisseria sicca]</a>                            | 30.3 | 30.3 | 78%  | 34   | 67%  | <a href="#">gi 489862389 WP_003766012.1</a> |
| <a href="#">aminotransferase DegT [Dechloromonas agitata]</a>                     | 30.3 | 30.3 | 73%  | 34   | 71%  | <a href="#">gi 653253558 WP_027458964.1</a> |
| <a href="#">hypothetical protein [Methylobacterium sp. 77]</a>                    | 29.9 | 29.9 | 47%  | 48   | 89%  | <a href="#">gi 518747471 WP_019905760.1</a> |
| <a href="#">SwmA-cell surface protein required for swimming motility [Syne</a>    | 29.9 | 29.9 | 63%  | 48   | 75%  | <a href="#">gi 499439499 WP_011126963.1</a> |
| <a href="#">putative uncharacterized protein [Eubacterium eligens CAG:72]</a>     | 29.5 | 29.5 | 42%  | 63   | 100% | <a href="#">gi 547480816 WP_022098743.1</a> |
| <a href="#">DNA mismatch repair protein MutT [ [Eubacterium eligens]</a>          | 29.5 | 29.5 | 42%  | 63   | 100% | <a href="#">gi 502246835 WP_012740632.1</a> |
| <a href="#">PREDICTED: complement factor H-related protein 4-like [Eptes</a>      | 29.5 | 29.5 | 42%  | 63   | 100% | <a href="#">gi 641732931 XP_008156854.1</a> |
| <a href="#">dethiobiotin synthetase [Selenomonas ruminantium]</a>                 | 29.5 | 29.5 | 42%  | 64   | 100% | <a href="#">gi 739504320 WP_037364005.1</a> |
| <a href="#">PREDICTED: complement factor H-related protein 3-like [Myoti</a>      | 29.5 | 29.5 | 42%  | 65   | 100% | <a href="#">gi 554549152 XP_005869111.1</a> |
| <a href="#">Complement factor H [Myotis brandtii]</a>                             | 29.5 | 29.5 | 42%  | 65   | 100% | <a href="#">gi 521027702 EPQ09490.1</a>     |
| <a href="#">cysteine sulfinate desulfinate [Vibrio coralliilyticus]</a>           | 29.5 | 29.5 | 63%  | 65   | 75%  | <a href="#">gi 740724577 WP_038509863.1</a> |
| <a href="#">cysteine sulfinate desulfinate [Vibrio sp. B183]</a>                  | 29.5 | 29.5 | 63%  | 65   | 75%  | <a href="#">gi 740326507 WP_038163522.1</a> |
| <a href="#">cysteine sulfinate desulfinate [Vibrio coralliilyticus]</a>           | 29.5 | 29.5 | 63%  | 65   | 75%  | <a href="#">gi 494015608 WP_006957963.1</a> |
| <a href="#">tyrosinase [Lyngbya aestuarii]</a>                                    | 29.5 | 29.5 | 73%  | 65   | 73%  | <a href="#">gi 553732390 WP_023067053.1</a> |
| <a href="#">aminotransferase DegT [Campylobacter curvus]</a>                      | 29.1 | 29.1 | 73%  | 89   | 64%  | <a href="#">gi 500772039 WP_011992428.1</a> |
| <a href="#">hypothetical protein HELRODRAFT_182568 [Helobdella robust</a>         | 29.1 | 29.1 | 73%  | 89   | 71%  | <a href="#">gi 675891122 XP_009031063.1</a> |
| <a href="#">PREDICTED: immunoglobulin superfamily member 5-like [Steg</a>         | 29.1 | 29.1 | 68%  | 90   | 52%  | <a href="#">gi 657552971 XP_008280877.1</a> |
| <a href="#">invasin [Pantoea sp. PSNIH1]</a>                                      | 29.1 | 29.1 | 57%  | 90   | 82%  | <a href="#">gi 723258150 AIX52171.1</a>     |
| <a href="#">PREDICTED: complement factor H-like [Otolemur garnettii]</a>          | 29.1 | 29.1 | 89%  | 90   | 65%  | <a href="#">gi 395839039 XP_003792410.1</a> |
| <a href="#">Uncharacterized ABC transporter ATP-binding protein y4gM [M</a>       | 29.1 | 29.1 | 68%  | 90   | 69%  | <a href="#">gi 685109776 CDX63100.1</a>     |
| <a href="#">ABC transporter ATP-binding protein [Mesorhizobium sp. WSM</a>        | 29.1 | 29.1 | 68%  | 90   | 69%  | <a href="#">gi 738306835 WP_036259860.1</a> |
| <a href="#">Uncharacterized ABC transporter ATP-binding protein y4gM [M</a>       | 29.1 | 29.1 | 68%  | 90   | 69%  | <a href="#">gi 685117947 CDX27594.1</a>     |
| <a href="#">Uncharacterized ABC transporter ATP-binding protein y4gM [M</a>       | 29.1 | 29.1 | 68%  | 90   | 69%  | <a href="#">gi 685098267 CDX37427.1</a>     |
| <a href="#">hypothetical protein [Flexithrix dorotheae]</a>                       | 29.1 | 29.1 | 78%  | 91   | 55%  | <a href="#">gi 522018255 WP_020529526.1</a> |
| <a href="#">D-lactate dehydrogenase [Oceanimonas sp. GK1]</a>                     | 28.6 | 28.6 | 68%  | 123  | 67%  | <a href="#">gi 504056525 WP_014290519.1</a> |
| <a href="#">polyketide synthase [Burkholderia thailandensis]</a>                  | 28.6 | 28.6 | 52%  | 123  | 90%  | <a href="#">gi 497586475 WP_009900659.1</a> |
| <a href="#">hypothetical protein [Burkholderia thailandensis]</a>                 | 28.6 | 28.6 | 52%  | 123  | 90%  | <a href="#">gi 740922590 WP_038707751.1</a> |
| <a href="#">1,2-diacylglycerol 3-glucosyltransferase [Lactobacillus fabiferme</a> | 28.6 | 28.6 | 57%  | 123  | 82%  | <a href="#">gi 639445784 WP_024624314.1</a> |
| <a href="#">cysteine sulfinate desulfinate [Vibrio ichthyenteri]</a>              | 28.6 | 28.6 | 63%  | 124  | 75%  | <a href="#">gi 745638899 KIE20425.1</a>     |
| <a href="#">cysteine sulfinate desulfinate [Vibrio sinaloensis]</a>               | 28.6 | 28.6 | 63%  | 124  | 75%  | <a href="#">gi 741156892 KHT49024.1</a>     |
| <a href="#">cysteine sulfinate desulfinate [Vibrio sinaloensis]</a>               | 28.6 | 28.6 | 63%  | 124  | 75%  | <a href="#">gi 741153139 KHT45358.1</a>     |
| <a href="#">cysteine sulfinate desulfinate [Vibrio sp. N384]</a>                  | 28.6 | 28.6 | 63%  | 124  | 75%  | <a href="#">gi 740302209 WP_038139625.1</a> |
| <a href="#">cysteine sulfinate desulfinate [Vibrio variabilis]</a>                | 28.6 | 28.6 | 63%  | 124  | 75%  | <a href="#">gi 740380775 WP_038215628.1</a> |
| <a href="#">cysteine sulfinate desulfinate [Vibrio sinaloensis]</a>               | 28.6 | 28.6 | 63%  | 124  | 75%  | <a href="#">gi 740354451 WP_038190786.1</a> |

|                                                                                     |      |      |     |     |     |                                             |
|-------------------------------------------------------------------------------------|------|------|-----|-----|-----|---------------------------------------------|
| <a href="#">cysteine sulfinatase desulfinate [Vibrio sp. 16]</a>                    | 28.6 | 28.6 | 63% | 124 | 75% | <a href="#">gi 491616019 WP_005473574.1</a> |
| <a href="#">hypothetical protein F775_03153 [Aegilops tauschii]</a>                 | 28.6 | 28.6 | 52% | 124 | 80% | <a href="#">gi 475509050 EMT05155.1</a>     |
| <a href="#">Transcription factor kayak [Trichuris trichiura]</a>                    | 28.6 | 28.6 | 68% | 124 | 71% | <a href="#">gi 669223612 CDW55099.1</a>     |
| <a href="#">hypothetical protein CPXG_00120 [Cyanophage P-RSM6]</a>                 | 28.6 | 48.4 | 63% | 126 | 75% | <a href="#">gi 472341641 YP_007675157.1</a> |
| <a href="#">polyketide synthase [Burkholderia thailandensis]</a>                    | 28.6 | 28.6 | 52% | 126 | 90% | <a href="#">gi 497583450 WP_009897634.1</a> |
| <a href="#">polyketide synthase [Burkholderia thailandensis]</a>                    | 28.6 | 28.6 | 52% | 126 | 90% | <a href="#">gi 499720622 WP_011401356.1</a> |
| <a href="#">beta-ketoacyl-acyl-carrier-protein synthase II [Burkholderia thail]</a> | 28.6 | 28.6 | 52% | 126 | 90% | <a href="#">gi 695926079 AIT23281.1</a>     |
| <a href="#">beta-ketoacyl-acyl-carrier-protein synthase II [Burkholderia thail]</a> | 28.6 | 28.6 | 52% | 126 | 90% | <a href="#">gi 695183164 AIS98946.1</a>     |
| <a href="#">beta-ketoacyl-acyl-carrier-protein synthase II [Burkholderia thail]</a> | 28.6 | 28.6 | 52% | 126 | 90% | <a href="#">gi 685784685 AIP65843.1</a>     |
| <a href="#">beta-ketoacyl-acyl-carrier-protein synthase II [Burkholderia thail]</a> | 28.6 | 28.6 | 52% | 126 | 90% | <a href="#">gi 655542764 AIC91228.1</a>     |
| <a href="#">beta-ketoacyl-acyl-carrier-protein synthase II [Burkholderia thail]</a> | 28.6 | 28.6 | 52% | 126 | 90% | <a href="#">gi 584110125 AHI81736.1</a>     |
| <a href="#">beta-ketoacyl-acyl-carrier-protein synthase II [Burkholderia thail]</a> | 28.6 | 28.6 | 52% | 126 | 90% | <a href="#">gi 584096752 AHI68319.1</a>     |
| <a href="#">hypothetical protein AW09_003464 [Candidatus Accumulibacte]</a>         | 28.2 | 28.2 | 73% | 163 | 67% | <a href="#">gi 668676831 KFB71395.1</a>     |
| <a href="#">hypothetical protein MELLADRAFT_113382 [Melampsora larici]</a>          | 28.2 | 28.2 | 63% | 167 | 75% | <a href="#">gi 599427138 XP_007418119.1</a> |
| <a href="#">hypothetical protein [Salmonella enterica]</a>                          | 28.2 | 28.2 | 57% | 169 | 82% | <a href="#">gi 446682240 WP_000759586.1</a> |
| <a href="#">ATPase [Salmonella enterica]</a>                                        | 28.2 | 28.2 | 57% | 170 | 82% | <a href="#">gi 566075054 WP_023994444.1</a> |
| <a href="#">hypothetical protein [Enterobacter cloacae]</a>                         | 28.2 | 28.2 | 57% | 170 | 82% | <a href="#">gi 556453881 WP_023313998.1</a> |
| <a href="#">cobQ/CobB/MinD/ParA nucleotide binding domain protein [Esc]</a>         | 28.2 | 28.2 | 57% | 170 | 82% | <a href="#">gi 487682790 WP_001767473.1</a> |
| <a href="#">ATPase [Salmonella enterica]</a>                                        | 28.2 | 28.2 | 57% | 170 | 82% | <a href="#">gi 446682239 WP_000759585.1</a> |
| <a href="#">ATPase [Enterobacter aerogenes]</a>                                     | 28.2 | 28.2 | 57% | 170 | 82% | <a href="#">gi 505807971 WP_015705723.1</a> |
| <a href="#">hypothetical protein [Roseburia inulinivorans]</a>                      | 28.2 | 28.2 | 52% | 170 | 90% | <a href="#">gi 495160822 WP_007885623.1</a> |
| <a href="#">6-phosphogluconolactonase [Listeria grayi]</a>                          | 28.2 | 28.2 | 68% | 170 | 64% | <a href="#">gi 738150575 WP_036107982.1</a> |
| <a href="#">hypothetical protein [Listeria grayi]</a>                               | 28.2 | 28.2 | 68% | 170 | 64% | <a href="#">gi 489854279 WP_003757946.1</a> |
| <a href="#">cytochrome b [Amazona versicolor]</a>                                   | 28.2 | 28.2 | 78% | 171 | 61% | <a href="#">gi 37574968 AAQ93411.1</a>      |
| <a href="#">ATPase [Salmonella enterica subsp. enterica serovar Cerro FS]</a>       | 28.2 | 28.2 | 57% | 171 | 82% | <a href="#">gi 627373969 KCU91242.1</a>     |
| <a href="#">ATPase domain protein [Escherichia coli 908675]</a>                     | 28.2 | 28.2 | 57% | 171 | 82% | <a href="#">gi 553697628 ESE13481.1</a>     |

## Alignments

Download GenPept Graphics

Next Previous Descriptions

complement factor H-related protein 4 [Homo sapiens]

Sequence ID: [gi|1524058|emb|CAA66980.1](#) Length: 331 Number of Matches: 1

See 2 more title(s)

Range 1: 304 to 322 GenPept Graphics

Next Match Previous Match

| Score          | Expect | Identities | Positives   | Gaps     |
|----------------|--------|------------|-------------|----------|
| 60.4 bits(135) | 4e-09  | 18/19(95%) | 19/19(100%) | 0/19(0%) |

Query 1 KLGYNADTSVLSFQAVCRE 19  
 KLGYN+TSVLSFQAVCRE  
 Sbjct 304 KLGYNANTSVLSFQAVCRE 322

### Related Information

[Gene](#) - associated gene details  
[Identical Proteins](#) - Proteins identical to the subject

Download GenPept Graphics

Next Previous Descriptions

complement factor H-related protein 4 isoform 3 precursor [Homo sapiens]

Sequence ID: [gi|117320518|ref|NP\\_006675.2](#) Length: 331 Number of Matches: 1

See 1 more title(s)

Range 1: 304 to 322 GenPept Graphics

Next Match Previous Match

### Related Information

[Gene](#) - associated gene details

| Score          | Expect | Identities | Positives   | Gaps     |
|----------------|--------|------------|-------------|----------|
| 60.4 bits(135) | 4e-09  | 18/19(95%) | 19/19(100%) | 0/19(0%) |

Query 1 KLGYNADTSVLSFQAVCRE 19  
 KLGYN+TSVLSFQAVCRE  
 Sbjct 304 KLGYNANTSVLSFQAVCRE 322

[Map Viewer](#) - aligned genomic context

[Identical Proteins](#) - Proteins identical to the subject

Download [GenPept](#) [Graphics](#)

[Next](#) [Previous](#) [Descriptions](#)

PREDICTED: complement factor H-related protein 4 isoform X6 [Homo sapiens]

Sequence ID: [gi|578800460|ref|XP\\_006711196.1|](#) Length: 519 Number of Matches: 1

Range 1: 492 to 510 [GenPept](#) [Graphics](#)

[Next Match](#) [Previous Match](#)

| Score          | Expect | Identities | Positives   | Gaps     |
|----------------|--------|------------|-------------|----------|
| 60.4 bits(135) | 5e-09  | 18/19(95%) | 19/19(100%) | 0/19(0%) |

Query 1 KLGYNADTSVLSFQAVCRE 19  
 KLGYN+TSVLSFQAVCRE  
 Sbjct 492 KLGYNANTSVLSFQAVCRE 510

**Related Information**

[Gene](#) - associated gene details

Download [GenPept](#) [Graphics](#)

[Next](#) [Previous](#) [Descriptions](#)

PREDICTED: complement factor H-related protein 4 isoform X5 [Homo sapiens]

Sequence ID: [gi|578800458|ref|XP\\_006711195.1|](#) Length: 523 Number of Matches: 1

Range 1: 496 to 514 [GenPept](#) [Graphics](#)

[Next Match](#) [Previous Match](#)

| Score          | Expect | Identities | Positives   | Gaps     |
|----------------|--------|------------|-------------|----------|
| 60.4 bits(135) | 5e-09  | 18/19(95%) | 19/19(100%) | 0/19(0%) |

Query 1 KLGYNADTSVLSFQAVCRE 19  
 KLGYN+TSVLSFQAVCRE  
 Sbjct 496 KLGYNANTSVLSFQAVCRE 514

**Related Information**

[Gene](#) - associated gene details

Download [GenPept](#) [Graphics](#)

[Next](#) [Previous](#) [Descriptions](#)

PREDICTED: complement factor H-related protein 4 isoform X4 [Homo sapiens]

Sequence ID: [gi|578800456|ref|XP\\_006711194.1|](#) Length: 533 Number of Matches: 1

Range 1: 506 to 524 [GenPept](#) [Graphics](#)

[Next Match](#) [Previous Match](#)

| Score          | Expect | Identities | Positives   | Gaps     |
|----------------|--------|------------|-------------|----------|
| 60.4 bits(135) | 5e-09  | 18/19(95%) | 19/19(100%) | 0/19(0%) |

Query 1 KLGYNADTSVLSFQAVCRE 19  
 KLGYN+TSVLSFQAVCRE  
 Sbjct 506 KLGYNANTSVLSFQAVCRE 524

**Related Information**

[Gene](#) - associated gene details

BLAST is a registered trademark of the National Library of Medicine.



NCBI/ BLAST/ blastp suite/ Formatting Results - B92M7GCE01R

Your search parameters were adjusted to search for a short input sequence.

Edit and Resubmit Save Search Strategies Formatting options Download

YouTube How to read this page Blast report description

CFHR4\_KLGYNANTSVLSFQAVCRE\_NonMod

RID B92M7GCE01R (Expires on 01-14 10:01 am)

Query ID Icl|339182
Description None
Molecule type amino acid
Query Length 19

Database Name nr
Description All non-redundant GenBank CDS translations+PDB+SwissProt+PIR excluding environmental samples from WGS projects
Program BLASTP 2.2.30+ Citation

Other reports: Search Summary Taxonomy reports Distance tree of results Related Structures Multiple alignment

Graphic Summary

Show Conserved Domains

No putative conserved domains have been detected

Distribution of 102 Blast Hits on the Query Sequence





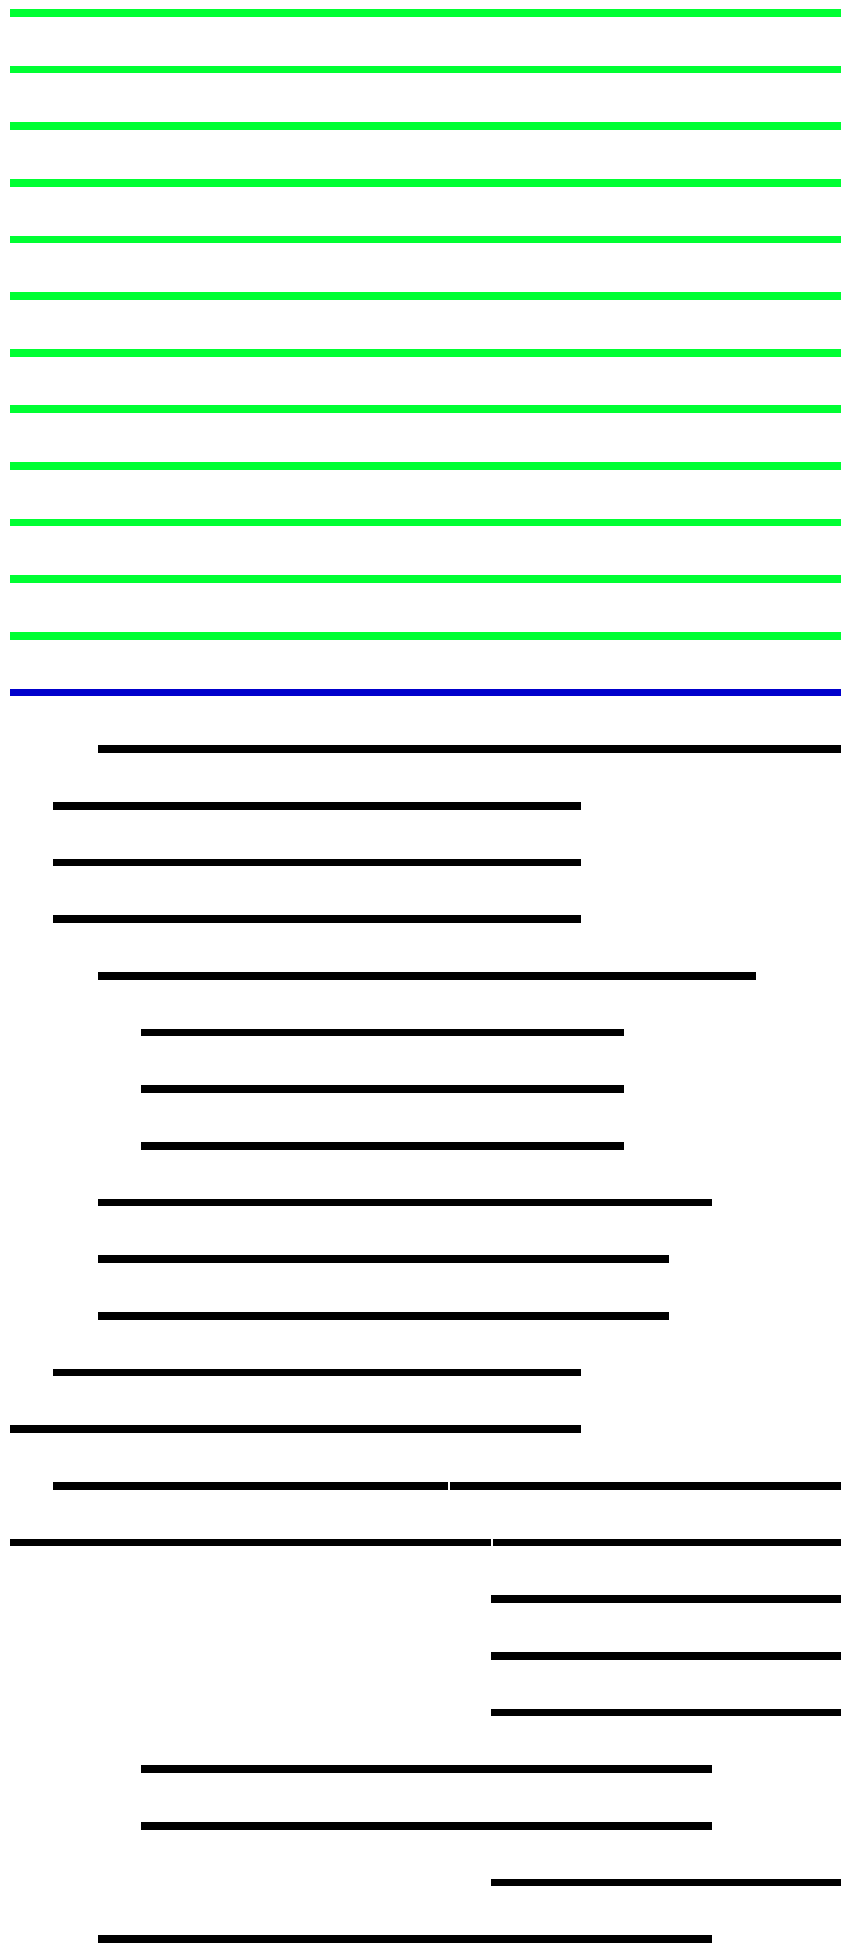

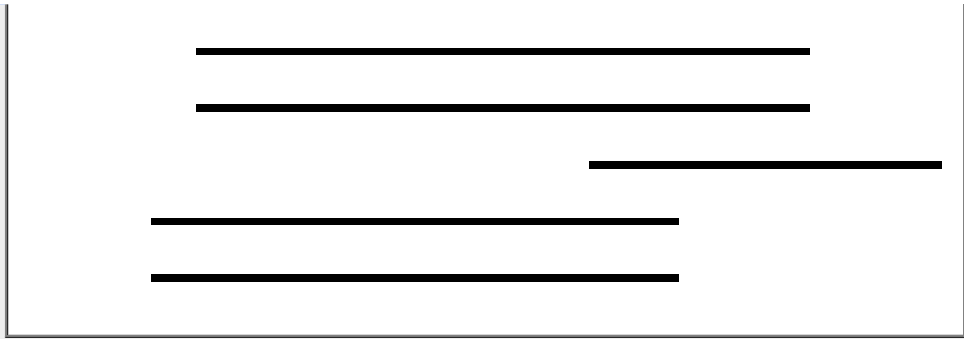

**Descriptions**

**Sequences producing significant alignments:**

Select: [All](#) [None](#) Selected:0

[Alignments](#)
[Download](#)
[GenPept](#)
[Graphics](#)
[Distance tree of results](#)
[Multiple alignment](#)


| Description                                                                        | Max score | Total score | Query cover | E value | Ident | Accession                                   |
|------------------------------------------------------------------------------------|-----------|-------------|-------------|---------|-------|---------------------------------------------|
| <a href="#">complement factor H-related protein 4 [Homo sapiens]</a>               | 63.0      | 63.0        | 100%        | 5e-10   | 100%  | <a href="#">gij1524058 CAA66980.1</a>       |
| <a href="#">complement factor H-related protein 4 isoform 3 precursor [Homo s:</a> | 63.0      | 63.0        | 100%        | 5e-10   | 100%  | <a href="#">gij117320518 NP_006675.2</a>    |
| <a href="#">PREDICTED: complement factor H-related protein 4 isoform X6 [Hc</a>    | 63.0      | 63.0        | 100%        | 6e-10   | 100%  | <a href="#">gij578800460 XP_006711196.1</a> |
| <a href="#">PREDICTED: complement factor H-related protein 4 isoform X5 [Hc</a>    | 63.0      | 63.0        | 100%        | 6e-10   | 100%  | <a href="#">gij578800458 XP_006711195.1</a> |
| <a href="#">PREDICTED: complement factor H-related protein 4 isoform X4 [Hc</a>    | 63.0      | 63.0        | 100%        | 6e-10   | 100%  | <a href="#">gij578800456 XP_006711194.1</a> |
| <a href="#">PREDICTED: complement factor H-related protein 4 isoform X3 [Hc</a>    | 63.0      | 63.0        | 100%        | 6e-10   | 100%  | <a href="#">gij578800454 XP_006711193.1</a> |
| <a href="#">PREDICTED: complement factor H-related protein 4 isoform X2 [Hc</a>    | 63.0      | 63.0        | 100%        | 6e-10   | 100%  | <a href="#">gij578800452 XP_006711192.1</a> |
| <a href="#">PREDICTED: complement factor H-related protein 4 isoform X1 [Hc</a>    | 63.0      | 63.0        | 100%        | 6e-10   | 100%  | <a href="#">gij578800450 XP_006711191.1</a> |
| <a href="#">complement factor H-related protein 4 isoform 2 precursor [Homo s:</a> | 63.0      | 63.0        | 100%        | 6e-10   | 100%  | <a href="#">gij320089550 NP_001188480.1</a> |
| <a href="#">unnamed protein product [Homo sapiens]</a>                             | 63.0      | 63.0        | 100%        | 6e-10   | 100%  | <a href="#">gij158258941 BAF85441.1</a>     |
| <a href="#">complement factor H-related protein 4 isoform 1 precursor [Homo s:</a> | 63.0      | 63.0        | 100%        | 6e-10   | 100%  | <a href="#">gij320089548 NP_001188479.1</a> |
| <a href="#">complement factor H-related 4, isoform CRA_a [Homo sapiens]</a>        | 63.0      | 63.0        | 100%        | 6e-10   | 100%  | <a href="#">gij119611671 EAW91265.1</a>     |
| <a href="#">complement factor H-related protein 4A precursor [Homo sapiens]</a>    | 63.0      | 63.0        | 100%        | 6e-10   | 100%  | <a href="#">gij60417192 CAG26679.2</a>      |
| <a href="#">PREDICTED: complement factor H-related protein 3-like [Pan trogl</a>   | 60.9      | 60.9        | 100%        | 1e-09   | 95%   | <a href="#">gij694890843 XP_009438422.1</a> |
| <a href="#">complement factor H-related protein 3 isoform 2 precursor [Homo s:</a> | 60.9      | 60.9        | 100%        | 3e-09   | 95%   | <a href="#">gij262231791 NP_001160096.1</a> |
| <a href="#">complement factor H-related protein 3 isoform 1 precursor [Homo s:</a> | 60.9      | 60.9        | 100%        | 3e-09   | 95%   | <a href="#">gij54792787 NP_066303.2</a>     |
| <a href="#">PREDICTED: complement factor H-related protein 4 isoform X3 [Pc</a>    | 60.9      | 60.9        | 100%        | 3e-09   | 95%   | <a href="#">gij686700699 XP_009238037.1</a> |
| <a href="#">PREDICTED: complement factor H-related protein 4 [Gorilla gorilla</a>  | 60.9      | 60.9        | 100%        | 3e-09   | 95%   | <a href="#">gij426333125 XP_004028135.1</a> |
| <a href="#">FHR-3: complement Factor H-related Protein 3 [Homo sapiens]</a>        | 60.9      | 60.9        | 100%        | 3e-09   | 95%   | <a href="#">gij30870 CAA48639.1</a>         |
| <a href="#">PREDICTED: complement factor H-related protein 4 isoform X2 [Pc</a>    | 60.9      | 60.9        | 100%        | 3e-09   | 95%   | <a href="#">gij686700697 XP_009238034.1</a> |
| <a href="#">PREDICTED: complement factor H-related protein 4 isoform X1 [Pc</a>    | 60.9      | 60.9        | 100%        | 3e-09   | 95%   | <a href="#">gij297662444 XP_002809716.1</a> |
| <a href="#">hypothetical protein EGK_01829 [Macaca mulatta]</a>                    | 56.6      | 56.6        | 100%        | 8e-08   | 89%   | <a href="#">gij355558923 EHH15703.1</a>     |
| <a href="#">hypothetical protein EGM_21015 [Macaca fascicularis]</a>               | 56.6      | 56.6        | 100%        | 8e-08   | 89%   | <a href="#">gij355767342 EHH62602.1</a>     |
| <a href="#">PREDICTED: complement factor H-related protein 4 [Rhinopithecus</a>    | 56.6      | 56.6        | 100%        | 9e-08   | 89%   | <a href="#">gij724956788 XP_010353520.1</a> |
| <a href="#">PREDICTED: complement factor H-related protein 4 isoform X1 [Pa</a>    | 56.6      | 56.6        | 100%        | 9e-08   | 89%   | <a href="#">gij685520468 XP_009189240.1</a> |
| <a href="#">PREDICTED: complement factor H-related protein 4 isoform X2 [Ct</a>    | 50.7      | 50.7        | 100%        | 9e-06   | 84%   | <a href="#">gij635131791 XP_007987278.1</a> |
| <a href="#">PREDICTED: complement factor H-related protein 4 isoform X1 [Ct</a>    | 50.7      | 50.7        | 100%        | 9e-06   | 84%   | <a href="#">gij635131789 XP_007987277.1</a> |
| <a href="#">PREDICTED: complement factor H-related protein 4 isoform X3 [Ct</a>    | 50.7      | 50.7        | 100%        | 9e-06   | 84%   | <a href="#">gij635131793 XP_007987280.1</a> |

|                                                                                     |      |      |      |       |      |                                             |
|-------------------------------------------------------------------------------------|------|------|------|-------|------|---------------------------------------------|
| PREDICTED: complement factor H-related protein 4-like [Galeosiphon                  | 45.2 | 45.2 | 100% | 5e-04 | 74%  | <a href="#">gij667317955 XP_008586983.1</a> |
| PREDICTED: LOW QUALITY PROTEIN: complement factor H-related                         | 36.7 | 36.7 | 89%  | 0.31  | 71%  | <a href="#">gij395863185 XP_003803783.1</a> |
| <a href="#">cysteine sulfinate desulfinate [Vibrio coralliilyticus]</a>             | 32.0 | 32.0 | 63%  | 9.3   | 83%  | <a href="#">gij694160560 AIS53989.1</a>     |
| <a href="#">cysteine sulfinate desulfinate [Vibrio sp. B183]</a>                    | 32.0 | 32.0 | 63%  | 9.3   | 83%  | <a href="#">gij672867461 KFI10261.1</a>     |
| <a href="#">cysteine sulfinate desulfinate [Vibrio coralliilyticus]</a>             | 32.0 | 32.0 | 63%  | 9.3   | 83%  | <a href="#">gij494015608 WP_006957963.1</a> |
| PREDICTED: complement factor H-related protein 3-like [Eptesicus                    | 31.6 | 31.6 | 78%  | 12    | 80%  | <a href="#">gij641736903 XP_008159089.1</a> |
| <a href="#">TonB-dependent receptor [Sphingobacterium antarcticus 4BY]</a>          | 30.8 | 30.8 | 57%  | 24    | 91%  | <a href="#">gij662330546 KEQ29330.1</a>     |
| <a href="#">TonB-dependent receptor [Pedobacter heparinus]</a>                      | 30.8 | 30.8 | 57%  | 24    | 91%  | <a href="#">gij502416040 WP_012780400.1</a> |
| <a href="#">TonB-dependent receptor [Pedobacter sp. BAL39]</a>                      | 30.8 | 30.8 | 57%  | 24    | 91%  | <a href="#">gij495515274 WP_008239919.1</a> |
| <a href="#">hypothetical protein [Clostridium sp. Maddingley MBC34-26]</a>          | 30.8 | 30.8 | 73%  | 24    | 71%  | <a href="#">gij495699764 WP_008424343.1</a> |
| <a href="#">putative ABC transport system [Corynebacterium casei LMG S-192]</a>     | 30.3 | 30.3 | 68%  | 33    | 63%  | <a href="#">gij582017243 AHI20589.1</a>     |
| <a href="#">ABC transporter, ATPase and permease components [Corynebacte</a>        | 30.3 | 30.3 | 68%  | 33    | 63%  | <a href="#">gij493876585 WP_006822974.1</a> |
| <a href="#">hypothetical protein CPXG_00120 [Cyanophage P-RSM6]</a>                 | 30.3 | 72.3 | 63%  | 33    | 75%  | <a href="#">gij472341641 YP_007675157.1</a> |
| <a href="#">hypothetical protein [Streptococcus merionis]</a>                       | 29.9 | 29.9 | 68%  | 45    | 77%  | <a href="#">gij517185092 WP_018373910.1</a> |
| <a href="#">hypothetical protein [Methylobacterium sp. 77]</a>                      | 29.9 | 29.9 | 47%  | 45    | 89%  | <a href="#">gij518747471 WP_019905760.1</a> |
| <a href="#">alpha-2-macroglobulin family N-terminal region [Microscilla marina]</a> | 29.9 | 29.9 | 57%  | 46    | 82%  | <a href="#">gij488781502 WP_002693909.1</a> |
| <a href="#">putative uncharacterized protein [Eubacterium eligens CAG.72]</a>       | 29.5 | 29.5 | 42%  | 59    | 100% | <a href="#">gij547480816 WP_022098743.1</a> |
| <a href="#">DNA mismatch repair protein MutT [Eubacterium eligens]</a>              | 29.5 | 29.5 | 42%  | 59    | 100% | <a href="#">gij502246835 WP_012740632.1</a> |
| PREDICTED: complement factor H-related protein 4-like [Eptesicus                    | 29.5 | 29.5 | 42%  | 60    | 100% | <a href="#">gij641732931 XP_008156854.1</a> |
| <a href="#">dethiobiotin synthetase [Selenomonas ruminantium]</a>                   | 29.5 | 29.5 | 42%  | 60    | 100% | <a href="#">gij652371003 WP_026767006.1</a> |
| <a href="#">uracil-DNA glycosylase [Azorhizobium doebereinaerae]</a>                | 29.5 | 29.5 | 68%  | 60    | 63%  | <a href="#">gij655960432 WP_029003187.1</a> |
| <a href="#">uracil-DNA glycosylase, family 4 [Afipia felis]</a>                     | 29.5 | 29.5 | 68%  | 60    | 63%  | <a href="#">gij488803136 WP_002715542.1</a> |
| PREDICTED: complement factor H-related protein 3-like [Myotis br                    | 29.5 | 29.5 | 42%  | 61    | 100% | <a href="#">gij554549152 XP_005869111.1</a> |
| <a href="#">aminotransferase DegT [Vibrio tasmaniensis]</a>                         | 29.5 | 29.5 | 73%  | 61    | 64%  | <a href="#">gij515669795 WP_017102395.1</a> |
| <a href="#">aminotransferase DegT [Vibrio tasmaniensis]</a>                         | 29.5 | 29.5 | 73%  | 61    | 64%  | <a href="#">gij515667578 WP_017100178.1</a> |
| <a href="#">aminotransferase DegT [Vibrio tasmaniensis]</a>                         | 29.5 | 29.5 | 73%  | 61    | 64%  | <a href="#">gij515664772 WP_017097372.1</a> |
| <a href="#">Complement factor H [Myotis brandtii]</a>                               | 29.5 | 29.5 | 42%  | 62    | 100% | <a href="#">gij521027702 EPQ09490.1</a>     |
| <a href="#">cysteine sulfinate desulfinate [Vibrio navarrensis]</a>                 | 29.5 | 29.5 | 63%  | 62    | 75%  | <a href="#">gij694876636 KGGK20568.1</a>    |
| <a href="#">cysteine sulfinate desulfinate [Vibrio navarrensis]</a>                 | 29.5 | 29.5 | 63%  | 62    | 75%  | <a href="#">gij694864623 KGGK09043.1</a>    |
| <a href="#">cysteine sulfinate desulfinate [Vibrio parahaemolyticus]</a>            | 29.5 | 29.5 | 63%  | 62    | 75%  | <a href="#">gij646482819 WP_025541596.1</a> |
| <a href="#">Ser/Thr protein phosphatase [Alcanivorax dieselolei]</a>                | 29.5 | 29.5 | 57%  | 62    | 73%  | <a href="#">gij504808478 WP_014995580.1</a> |
| PREDICTED: complement factor H-related protein 2 [Panthera tigris                   | 29.1 | 29.1 | 73%  | 84    | 64%  | <a href="#">gij591341448 XP_007096167.1</a> |
| PREDICTED: complement factor H-related protein 2 [Felis catus]                      | 29.1 | 29.1 | 73%  | 84    | 64%  | <a href="#">gij410986188 XP_003999394.1</a> |
| <a href="#">cysteine sulfinate desulfinate [Vibrio coralliilyticus]</a>             | 29.1 | 29.1 | 63%  | 85    | 75%  | <a href="#">gij703567374 AIW19751.1</a>     |
| <a href="#">cysteine sulfinate desulfinate [Vibrio coralliilyticus]</a>             | 29.1 | 29.1 | 63%  | 85    | 75%  | <a href="#">gij545088181 WP_021457971.1</a> |
| <a href="#">cysteine sulfinate desulfinate [Vibrio coralliilyticus]</a>             | 29.1 | 29.1 | 63%  | 85    | 75%  | <a href="#">gij518104313 WP_019274521.1</a> |
| <a href="#">ABC transporter, permease/ATP-binding protein [Acholeplasma ocu</a>     | 29.1 | 29.1 | 68%  | 85    | 69%  | <a href="#">gij644984528 CDR31023.1</a>     |
| <a href="#">hypothetical protein PFL1_04598 [Pseudozyma flocculosa PF-1]</a>        | 29.1 | 29.1 | 73%  | 86    | 64%  | <a href="#">gij630967814 XP_007880315.1</a> |
| <a href="#">hypothetical protein [Pseudomonas fluorescens]</a>                      | 28.6 | 28.6 | 52%  | 108   | 80%  | <a href="#">gij734952209 WP_034151885.1</a> |
| <a href="#">hypothetical protein WIVsmall_58 [Mycobacterium phage WIVsmall]</a>     | 28.6 | 28.6 | 52%  | 113   | 80%  | <a href="#">gij509141068 YP_008059959.1</a> |
| <a href="#">hypothetical protein MFLO_02598 [Listeriaceae bacterium FSL_S10</a>     | 28.6 | 28.6 | 84%  | 114   | 57%  | <a href="#">gij577772450 EUJ33408.1</a>     |
| <a href="#">hypothetical protein [Escherichia coli]</a>                             | 28.6 | 28.6 | 52%  | 115   | 80%  | <a href="#">gij693132514 WP_032276586.1</a> |
| <a href="#">polyketide cyclase [Cupriavidus metallidurans]</a>                      | 28.6 | 28.6 | 73%  | 116   | 64%  | <a href="#">gij658504234 WP_029700341.1</a> |
| <a href="#">polyketide cyclase [Cupriavidus metallidurans]</a>                      | 28.6 | 28.6 | 73%  | 117   | 64%  | <a href="#">gij657065825 WP_029307857.1</a> |
| <a href="#">activator of HSP90 ATPase [Cupriavidus metallidurans]</a>               | 28.6 | 28.6 | 73%  | 117   | 64%  | <a href="#">gij499835793 WP_011516527.1</a> |

|                                                                                             |      |      |     |     |     |                                             |
|---------------------------------------------------------------------------------------------|------|------|-----|-----|-----|---------------------------------------------|
| <a href="#">hypothetical protein [Cupriavidus sp. HMR-1]</a>                                | 28.6 | 28.6 | 73% | 117 | 64% | <a href="#">gij495927146 WP_008651725.1</a> |
| <a href="#">hypothetical protein [Corynebacterium massiliense]</a>                          | 28.6 | 28.6 | 73% | 117 | 71% | <a href="#">gij652660992 WP_027018828.1</a> |
| <a href="#">hypothetical protein [Pseudomonas fluorescens]</a>                              | 28.6 | 28.6 | 52% | 117 | 80% | <a href="#">gij502153488 WP_012721608.1</a> |
| <a href="#">hypothetical protein [Serratia sp. M24T3]</a>                                   | 28.6 | 28.6 | 52% | 117 | 80% | <a href="#">gij497320983 WP_009635196.1</a> |
| <a href="#">hypothetical protein [Enterobacter cloacae]</a>                                 | 28.6 | 28.6 | 52% | 117 | 80% | <a href="#">gij695711419 WP_032643881.1</a> |
| <a href="#">hypothetical protein [Enterobacter cloacae]</a>                                 | 28.6 | 28.6 | 52% | 117 | 80% | <a href="#">gij527039551 WP_020885375.1</a> |
| <a href="#">hypothetical protein F775_03153 [Aegilops tauschii]</a>                         | 28.6 | 28.6 | 52% | 117 | 80% | <a href="#">gij475509050 EMT05155.1</a>     |
| <a href="#">PREDICTED: complement factor H-like [Otolemur garnettii]</a>                    | 28.6 | 28.6 | 89% | 118 | 65% | <a href="#">gij395839039 XP_003792410.1</a> |
| <a href="#">LORF2 [synthetic construct]</a>                                                 | 28.6 | 28.6 | 68% | 118 | 62% | <a href="#">gij237626215 ACR02738.1</a>     |
| <a href="#">LORF2 [Gallid herpesvirus 2]</a>                                                | 28.6 | 28.6 | 68% | 118 | 62% | <a href="#">gij392497295 AFM74559.1</a>     |
| <a href="#">orf-1 [Gallid herpesvirus 2]</a>                                                | 28.6 | 28.6 | 68% | 118 | 62% | <a href="#">gij632856 AAB30933.1</a>        |
| <a href="#">v-lipase [synthetic construct]</a>                                              | 28.6 | 28.6 | 68% | 118 | 62% | <a href="#">gij237626170 ACR02693.1</a>     |
| <a href="#">lipase [Gallid herpesvirus 2]</a>                                               | 28.6 | 28.6 | 68% | 118 | 62% | <a href="#">gij125745049 YP_001033926.1</a> |
| <a href="#">lipase [Gallid herpesvirus 2]</a>                                               | 28.6 | 28.6 | 68% | 118 | 62% | <a href="#">gij392497294 AFM74558.1</a>     |
| <a href="#">hemagglutinin domain containing protein [Acanthamoeba castellanii]</a>          | 28.6 | 28.6 | 47% | 119 | 89% | <a href="#">gij470404656 XP_004335814.1</a> |
| <a href="#">TonB-dependent receptor [Asticcacaulis excentricus]</a>                         | 28.6 | 28.6 | 68% | 119 | 71% | <a href="#">gij503244073 WP_013478734.1</a> |
| <a href="#">serine/threonine kinase [Acanthamoeba castellanii str. Neff]</a>                | 28.6 | 28.6 | 78% | 119 | 73% | <a href="#">gij470395773 XP_004335110.1</a> |
| <a href="#">polyketide synthase [Burkholderia thailandensis]</a>                            | 28.6 | 28.6 | 52% | 120 | 90% | <a href="#">gij497583450 WP_009897634.1</a> |
| <a href="#">polyketide synthase [Burkholderia thailandensis]</a>                            | 28.6 | 28.6 | 52% | 120 | 90% | <a href="#">gij499720622 WP_011401356.1</a> |
| <a href="#">beta-ketoacyl-acyl-carrier-protein synthase II [Burkholderia thailandensis]</a> | 28.6 | 28.6 | 52% | 120 | 90% | <a href="#">gij695926079 AIT23281.1</a>     |
| <a href="#">beta-ketoacyl-acyl-carrier-protein synthase II [Burkholderia thailandensis]</a> | 28.6 | 28.6 | 52% | 120 | 90% | <a href="#">gij695183164 AIS98946.1</a>     |
| <a href="#">beta-ketoacyl-acyl-carrier-protein synthase II [Burkholderia thailandensis]</a> | 28.6 | 28.6 | 52% | 120 | 90% | <a href="#">gij685784685 AIP65843.1</a>     |
| <a href="#">beta-ketoacyl-acyl-carrier-protein synthase II [Burkholderia thailandensis]</a> | 28.6 | 28.6 | 52% | 120 | 90% | <a href="#">gij655542764 AIC91228.1</a>     |
| <a href="#">beta-ketoacyl-acyl-carrier-protein synthase II [Burkholderia thailandensis]</a> | 28.6 | 28.6 | 52% | 120 | 90% | <a href="#">gij584110125 AHI81736.1</a>     |
| <a href="#">beta-ketoacyl-acyl-carrier-protein synthase II [Burkholderia thailandensis]</a> | 28.6 | 28.6 | 52% | 120 | 90% | <a href="#">gij584096752 AHI68319.1</a>     |
| <a href="#">hypothetical protein [Psychrobacter lutiphocae]</a>                             | 28.2 | 28.2 | 68% | 158 | 69% | <a href="#">gij518502112 WP_019672319.1</a> |
| <a href="#">hypothetical protein [Salmonella enterica]</a>                                  | 28.2 | 28.2 | 57% | 160 | 82% | <a href="#">gij446682240 WP_000759586.1</a> |

## Alignments

Download GenPept Graphics

Next Previous Descriptions

complement factor H-related protein 4 [Homo sapiens]

Sequence ID: [gij1524058|emb|CAA66980.1](#) Length: 331 Number of Matches: 1

[▶ See 2 more title\(s\)](#)

Range 1: 304 to 322 GenPept Graphics

Next Match Previous Match

| Score          | Expect | Identities  | Positives   | Gaps     |
|----------------|--------|-------------|-------------|----------|
| 63.0 bits(141) | 5e-10  | 19/19(100%) | 19/19(100%) | 0/19(0%) |

Query 1 KLGYNANTSVLSFQAVCRE 19  
 KLGYNANTSVLSFQAVCRE  
 Sbjct 304 KLGYNANTSVLSFQAVCRE 322

### Related Information

[Gene](#) - associated gene details  
[Identical Proteins](#) - Proteins identical to the subject

Download GenPept Graphics

Next Previous Descriptions

complement factor H-related protein 4 isoform 3 precursor [Homo sapiens]

Sequence ID: [gij117320518|ref|NP\\_006675.2](#) Length: 331 Number of Matches: 1

[▶ See 1 more title\(s\)](#)

Range 1: 304 to 322 GenPept Graphics

Next Match Previous Match

| Score | Expect | Identities | Positives | Gaps |
|-------|--------|------------|-----------|------|
|-------|--------|------------|-----------|------|

### Related Information

[Gene](#) - associated gene details  
[Map Viewer](#) - aligned genomic

63.0 bits(141)      5e-10      19/19(100%)      19/19(100%)      0/19(0%)

Query 1      KLGYNANTSVLSFQAVCRE      19  
 KLGYNANTSVLSFQAVCRE  
 Sbjct 304      KLGYNANTSVLSFQAVCRE      322

context  
[Identical Proteins](#) - Proteins  
 identical to the subject

Download [GenPept](#) [Graphics](#)

[Next](#) [Previous](#) [Descriptions](#)

PREDICTED: complement factor H-related protein 4 isoform X6 [Homo sapiens]

Sequence ID: [gi|578800460|ref|XP\\_006711196.1|](#) Length: 519 Number of Matches: 1

Range 1: 492 to 510 [GenPept](#) [Graphics](#) [Next Match](#) [Previous Match](#)

| Score          | Expect | Identities  | Positives   | Gaps     |
|----------------|--------|-------------|-------------|----------|
| 63.0 bits(141) | 6e-10  | 19/19(100%) | 19/19(100%) | 0/19(0%) |

Query 1      KLGYNANTSVLSFQAVCRE      19  
 KLGYNANTSVLSFQAVCRE  
 Sbjct 492      KLGYNANTSVLSFQAVCRE      510

**Related Information**

[Gene](#) - associated gene details

Download [GenPept](#) [Graphics](#)

[Next](#) [Previous](#) [Descriptions](#)

PREDICTED: complement factor H-related protein 4 isoform X5 [Homo sapiens]

Sequence ID: [gi|578800458|ref|XP\\_006711195.1|](#) Length: 523 Number of Matches: 1

Range 1: 496 to 514 [GenPept](#) [Graphics](#) [Next Match](#) [Previous Match](#)

| Score          | Expect | Identities  | Positives   | Gaps     |
|----------------|--------|-------------|-------------|----------|
| 63.0 bits(141) | 6e-10  | 19/19(100%) | 19/19(100%) | 0/19(0%) |

Query 1      KLGYNANTSVLSFQAVCRE      19  
 KLGYNANTSVLSFQAVCRE  
 Sbjct 496      KLGYNANTSVLSFQAVCRE      514

**Related Information**

[Gene](#) - associated gene details

Download [GenPept](#) [Graphics](#)

[Next](#) [Previous](#) [Descriptions](#)

PREDICTED: complement factor H-related protein 4 isoform X4 [Homo sapiens]

Sequence ID: [gi|578800456|ref|XP\\_006711194.1|](#) Length: 533 Number of Matches: 1

Range 1: 506 to 524 [GenPept](#) [Graphics](#) [Next Match](#) [Previous Match](#)

| Score          | Expect | Identities  | Positives   | Gaps     |
|----------------|--------|-------------|-------------|----------|
| 63.0 bits(141) | 6e-10  | 19/19(100%) | 19/19(100%) | 0/19(0%) |

Query 1      KLGYNANTSVLSFQAVCRE      19  
 KLGYNANTSVLSFQAVCRE  
 Sbjct 506      KLGYNANTSVLSFQAVCRE      524

**Related Information**

[Gene](#) - associated gene details

BLAST is a registered trademark of the National Library of Medicine.

NCBI/ BLAST/ blastp suite/ Formatting Results - BTG1ZVB7016

Your search parameters were adjusted to search for a short input sequence.

[Edit and Resubmit](#) [Save Search Strategies](#) [Formatting options](#) [Download](#) [YouTube](#) [How to read this page](#) [Blast report description](#)

CFHR5\_REQFCPPPPQIPNAQDMTTTVNYQDGEKV\_Mod

RID [BTG1ZVB7016](#) (Expires on 01-20 15:28 pm)

Query ID |cl|15590  
 Description None  
 Molecule type amino acid  
 Query Length 29

Database Name nr  
 Description All non-redundant GenBank CDS translations+PDB+SwissProt+PIR+PRF excluding environmental samples from WGS projects  
 Program BLASTP 2.2.30+ [Citation](#)

Other reports: [Search Summary](#) [Taxonomy reports](#) [Distance tree of results](#) [Multiple alignment](#)

Graphic Summary

Show Conserved Domains

No putative conserved domains have been detected

Distribution of 150 Blast Hits on the Query Sequence

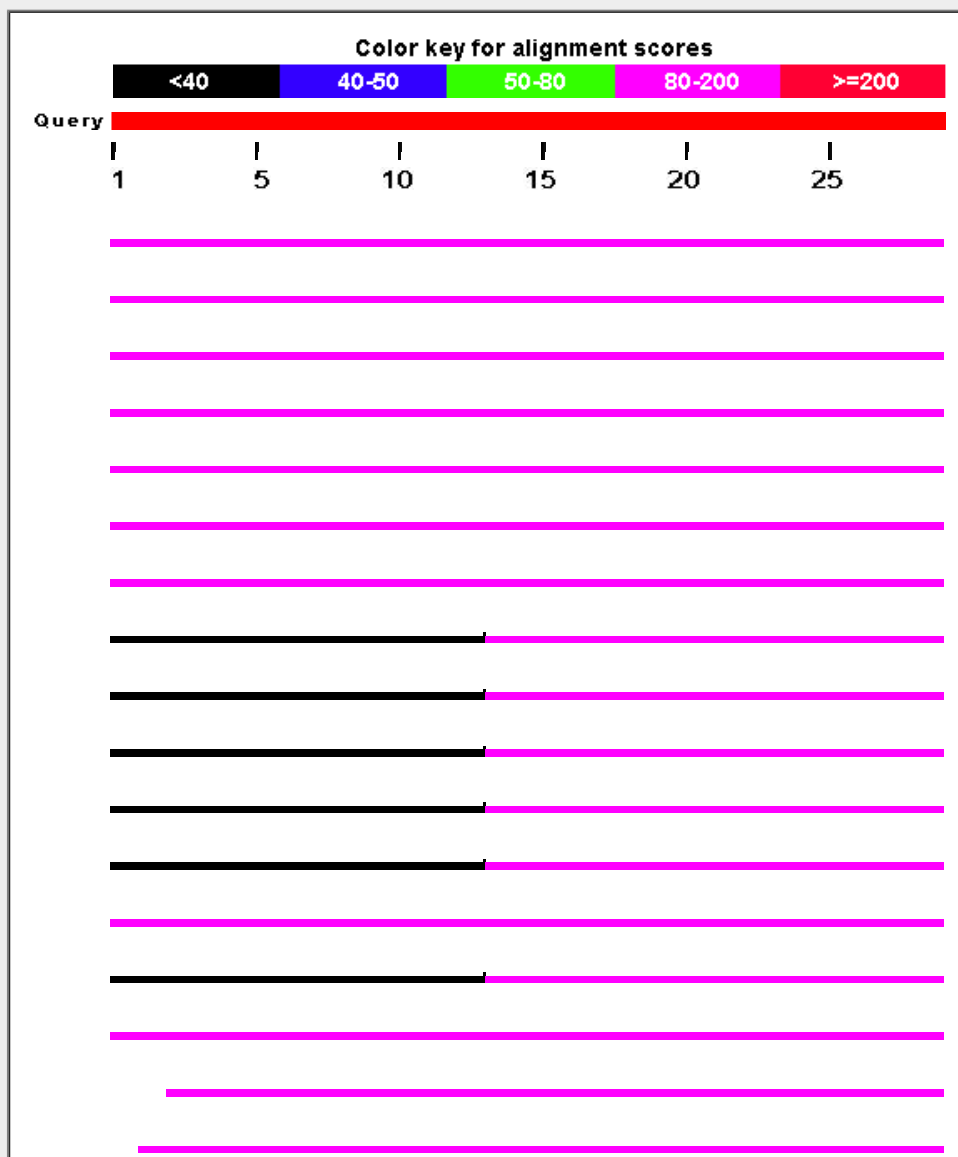

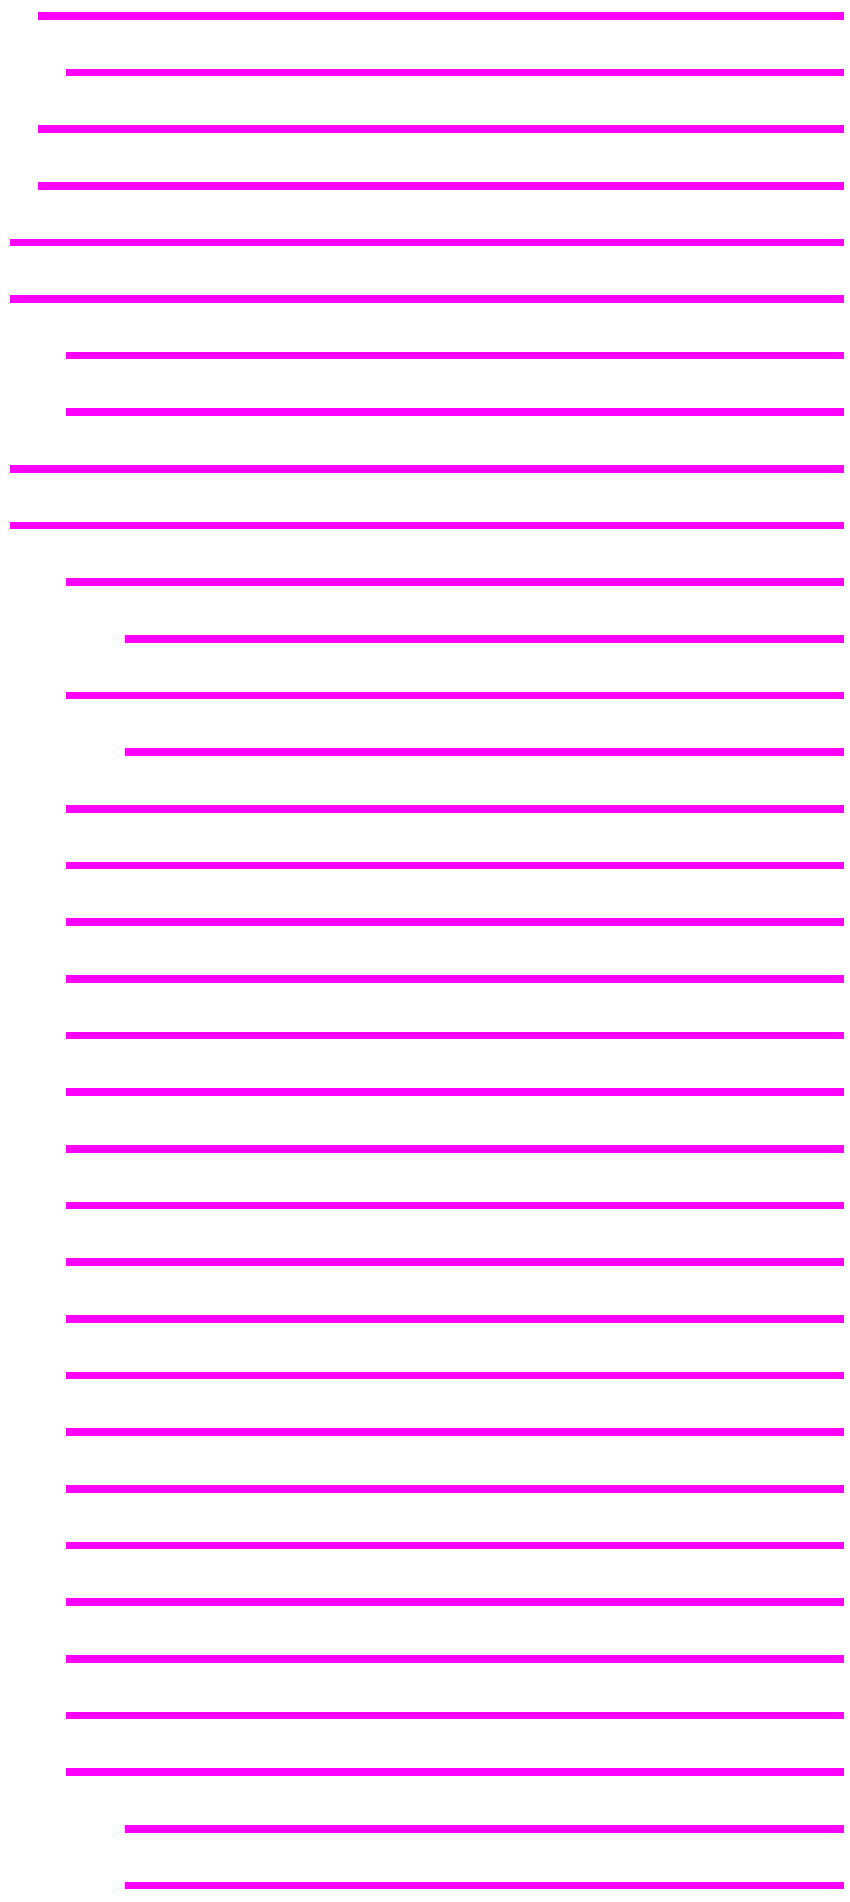

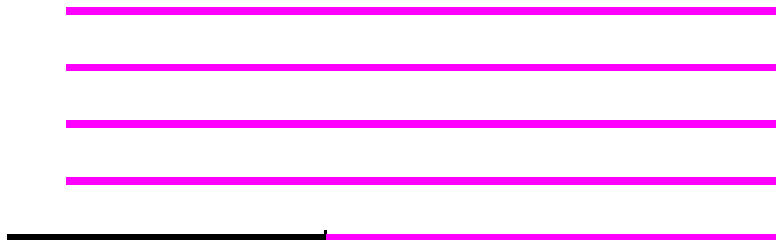

**Descriptions**

**Sequences producing significant alignments:**

Select: [All](#) [None](#) Selected:0

[Alignments](#)
[Download](#)
[GenPept](#)
[Graphics](#)
[Distance tree of results](#)
[Multiple alignment](#)
⚙

| Description                                                                                     | Max score | Total score | Query cover | E value | Ident | Accession                                   |
|-------------------------------------------------------------------------------------------------|-----------|-------------|-------------|---------|-------|---------------------------------------------|
| <a href="#">CFHR5 protein [Homo sapiens]</a>                                                    | 98.2      | 118         | 100%        | 2e-21   | 97%   | <a href="#">gi 116283370 AAH26282.1</a>     |
| <a href="#">PREDICTED: complement factor H-related protein 5 isoform X2 [Homo sapiens]</a>      | 98.2      | 139         | 100%        | 2e-21   | 97%   | <a href="#">gi 694890880 XP_009438538.1</a> |
| <a href="#">unnamed protein product [Homo sapiens]</a>                                          | 98.2      | 118         | 100%        | 2e-21   | 97%   | <a href="#">gi 189054216 BAG36736.1</a>     |
| <a href="#">PREDICTED: complement factor H-related protein 5 [Gorilla gorilla]</a>              | 98.2      | 118         | 100%        | 2e-21   | 97%   | <a href="#">gi 426333131 XP_004028138.1</a> |
| <a href="#">complement factor H-related protein 5 precursor [Homo sapiens]</a>                  | 98.2      | 118         | 100%        | 2e-21   | 97%   | <a href="#">gi 13540563 NP_110414.1</a>     |
| <a href="#">PREDICTED: complement factor H-related protein 5 [Pan paniscus]</a>                 | 98.2      | 139         | 100%        | 2e-21   | 97%   | <a href="#">gi 397505136 XP_003823129.1</a> |
| <a href="#">PREDICTED: complement factor H-related protein 5 isoform X1 [Homo sapiens]</a>      | 98.2      | 139         | 100%        | 2e-21   | 97%   | <a href="#">gi 332811564 XP_514078.3</a>    |
| <a href="#">PREDICTED: complement factor H-related protein 5 [Rhinopithecus roosevelti]</a>     | 94.8      | 117         | 100%        | 3e-20   | 96%   | <a href="#">gi 724966978 XP_010356756.1</a> |
| <a href="#">PREDICTED: complement factor H-related protein 5-like isoform X1 [Homo sapiens]</a> | 94.8      | 117         | 100%        | 3e-20   | 96%   | <a href="#">gi 544399121 XP_005540361.1</a> |
| <a href="#">PREDICTED: complement factor H-related protein 5 [Chlorocebus aethiops]</a>         | 94.8      | 117         | 100%        | 3e-20   | 96%   | <a href="#">gi 635131776 XP_007987271.1</a> |
| <a href="#">PREDICTED: complement factor H-related protein 5-like isoform X1 [Homo sapiens]</a> | 94.8      | 117         | 100%        | 3e-20   | 96%   | <a href="#">gi 544399119 XP_005540360.1</a> |
| <a href="#">PREDICTED: complement factor H-related protein 5 [Papio anubis]</a>                 | 94.8      | 117         | 100%        | 3e-20   | 96%   | <a href="#">gi 402857751 XP_003893408.1</a> |
| <a href="#">PREDICTED: complement factor H-related protein 5 isoform 1 [Homo sapiens]</a>       | 93.5      | 93.5        | 100%        | 9e-20   | 93%   | <a href="#">gi 332230725 XP_003264546.1</a> |
| <a href="#">hypothetical protein EGM_01566 [Macaca fascicularis]</a>                            | 91.4      | 113         | 100%        | 5e-19   | 93%   | <a href="#">gi 355746073 EHH50698.1</a>     |
| <a href="#">PREDICTED: complement factor H [Ursus maritimus]</a>                                | 87.6      | 87.6        | 100%        | 1e-17   | 90%   | <a href="#">gi 671013917 XP_008697795.1</a> |
| <a href="#">PREDICTED: complement factor H-like [Equus przewalskii]</a>                         | 86.7      | 111         | 93%         | 2e-17   | 93%   | <a href="#">gi 664780060 XP_008509345.1</a> |
| <a href="#">PREDICTED: complement factor H-related protein 5 isoform X2 [Homo sapiens]</a>      | 86.7      | 86.7        | 96%         | 2e-17   | 89%   | <a href="#">gi 675747013 XP_008983384.1</a> |
| <a href="#">PREDICTED: complement factor H-related protein 5 isoform X2 [Homo sapiens]</a>      | 86.7      | 86.7        | 96%         | 2e-17   | 89%   | <a href="#">gi 403294474 XP_003938210.1</a> |
| <a href="#">PREDICTED: complement factor H [Equus caballus]</a>                                 | 86.7      | 111         | 93%         | 2e-17   | 93%   | <a href="#">gi 545210836 XP_005608148.1</a> |
| <a href="#">PREDICTED: complement factor H isoform X3 [Saimiri boliviensis]</a>                 | 86.7      | 155         | 96%         | 2e-17   | 89%   | <a href="#">gi 725592697 XP_010347049.1</a> |
| <a href="#">PREDICTED: complement factor H isoform X4 [Callithrix jacchus]</a>                  | 86.7      | 175         | 96%         | 2e-17   | 89%   | <a href="#">gi 675747020 XP_008983387.1</a> |
| <a href="#">Complement factor H-related protein 5 [Tupaia chinensis]</a>                        | 86.3      | 86.3        | 100%        | 2e-17   | 84%   | <a href="#">gi 444515052 ELV10720.1</a>     |
| <a href="#">PREDICTED: complement factor H-related protein 5-like [Tupaia chinensis]</a>        | 86.3      | 167         | 100%        | 3e-17   | 84%   | <a href="#">gi 562882019 XP_006168581.1</a> |
| <a href="#">PREDICTED: complement factor H-like [Tupaia chinensis]</a>                          | 84.6      | 84.6        | 93%         | 3e-17   | 93%   | <a href="#">gi 562888444 XP_006171583.1</a> |
| <a href="#">PREDICTED: complement factor H-like [Tupaia chinensis]</a>                          | 84.6      | 84.6        | 93%         | 3e-17   | 93%   | <a href="#">gi 562879073 XP_006167236.1</a> |
| <a href="#">hypothetical protein PANDA_019683 [Ailuropoda melanoleuca]</a>                      | 85.9      | 85.9        | 100%        | 4e-17   | 90%   | <a href="#">gi 281343750 EFB19334.1</a>     |
| <a href="#">PREDICTED: complement factor H-like [Ailuropoda melanoleuca]</a>                    | 85.9      | 85.9        | 100%        | 4e-17   | 90%   | <a href="#">gi 301788162 XP_002929497.1</a> |
| <a href="#">Complement factor H [Tupaia chinensis]</a>                                          | 84.6      | 106         | 93%         | 1e-16   | 93%   | <a href="#">gi 444727587 ELW68070.1</a>     |
| <a href="#">PREDICTED: complement factor H-like [Ailuropoda melanoleuca]</a>                    | 84.6      | 84.6        | 86%         | 1e-16   | 96%   | <a href="#">gi 301761648 XP_002916246.1</a> |



|                                                                               |      |      |      |       |     |                                             |
|-------------------------------------------------------------------------------|------|------|------|-------|-----|---------------------------------------------|
| <a href="#">PREDICTED: complement factor H-like [Tupaia chinensis]</a>        | 84.6 | 106  | 93%  | 1e-16 | 93% | <a href="#">gil562833386 XP_006146097.1</a> |
| <a href="#">PREDICTED: LOW QUALITY PROTEIN: complement factor H-</a>          | 84.6 | 84.6 | 86%  | 1e-16 | 96% | <a href="#">gil670979575 XP_008695918.1</a> |
| <a href="#">PREDICTED: complement factor H-like isoform X3 [Tupaia chir</a>   | 84.6 | 84.6 | 93%  | 1e-16 | 93% | <a href="#">gil562853709 XP_006155484.1</a> |
| <a href="#">PREDICTED: complement factor H-like isoform X2 [Tupaia chir</a>   | 84.6 | 84.6 | 93%  | 1e-16 | 93% | <a href="#">gil562853707 XP_006155483.1</a> |
| <a href="#">PREDICTED: complement factor H-like isoform X1 [Tupaia chir</a>   | 84.6 | 84.6 | 93%  | 1e-16 | 93% | <a href="#">gil562853705 XP_006155482.1</a> |
| <a href="#">Complement factor H [Tupaia chinensis]</a>                        | 84.6 | 84.6 | 93%  | 1e-16 | 93% | <a href="#">gil444717040 ELW57876.1</a>     |
| <a href="#">PREDICTED: complement factor H isoform X2 [Equus caballus</a>     | 84.2 | 109  | 93%  | 2e-16 | 89% | <a href="#">gil545210671 XP_005608090.1</a> |
| <a href="#">PREDICTED: complement factor H isoform X1 [Equus caballus</a>     | 84.2 | 109  | 93%  | 2e-16 | 89% | <a href="#">gil338722817 XP_001491754.3</a> |
| <a href="#">PREDICTED: complement factor H [Galeopterus variegatus]</a>       | 82.5 | 108  | 93%  | 6e-16 | 93% | <a href="#">gil667324753 XP_008589310.1</a> |
| <a href="#">PREDICTED: complement factor H-like [Leptonychotes weddel</a>     | 81.7 | 81.7 | 93%  | 1e-15 | 89% | <a href="#">gil585151741 XP_006728299.1</a> |
| <a href="#">PREDICTED: complement factor H-like isoform X5 [Mustela pu</a>    | 81.7 | 81.7 | 93%  | 1e-15 | 89% | <a href="#">gil511939033 XP_004788345.1</a> |
| <a href="#">PREDICTED: complement factor H-like isoform X5 [Mustela pu</a>    | 81.7 | 81.7 | 93%  | 1e-15 | 89% | <a href="#">gil511872177 XP_004756532.1</a> |
| <a href="#">PREDICTED: complement factor H-like isoform X4 [Mustela pu</a>    | 81.7 | 81.7 | 93%  | 1e-15 | 89% | <a href="#">gil511939031 XP_004788344.1</a> |
| <a href="#">PREDICTED: complement factor H-like isoform X4 [Mustela pu</a>    | 81.7 | 81.7 | 93%  | 1e-15 | 89% | <a href="#">gil511872174 XP_004756531.1</a> |
| <a href="#">PREDICTED: complement factor H-like isoform X3 [Mustela pu</a>    | 81.7 | 81.7 | 93%  | 1e-15 | 89% | <a href="#">gil511939029 XP_004788343.1</a> |
| <a href="#">PREDICTED: complement factor H-like isoform X3 [Mustela pu</a>    | 81.7 | 81.7 | 93%  | 1e-15 | 89% | <a href="#">gil511872171 XP_004756530.1</a> |
| <a href="#">PREDICTED: complement factor H-like isoform X2 [Mustela pu</a>    | 81.7 | 81.7 | 93%  | 1e-15 | 89% | <a href="#">gil511939027 XP_004788342.1</a> |
| <a href="#">PREDICTED: complement factor H-like isoform X2 [Mustela pu</a>    | 81.7 | 81.7 | 93%  | 1e-15 | 89% | <a href="#">gil511872168 XP_004756529.1</a> |
| <a href="#">PREDICTED: complement factor H-like isoform X1 [Mustela pu</a>    | 81.7 | 81.7 | 93%  | 1e-15 | 89% | <a href="#">gil511939025 XP_004788341.1</a> |
| <a href="#">PREDICTED: complement factor H-like isoform X1 [Mustela pu</a>    | 81.7 | 81.7 | 93%  | 1e-15 | 89% | <a href="#">gil511872165 XP_004756528.1</a> |
| <a href="#">PREDICTED: complement factor H-related protein 5-like isoform</a> | 80.8 | 80.8 | 86%  | 2e-15 | 92% | <a href="#">gil511872183 XP_004756534.1</a> |
| <a href="#">PREDICTED: complement factor H-related protein 5-like isoform</a> | 80.8 | 80.8 | 86%  | 2e-15 | 92% | <a href="#">gil511872180 XP_004756533.1</a> |
| <a href="#">PREDICTED: complement factor H-related protein 5 [Ochotona</a>    | 80.8 | 105  | 86%  | 2e-15 | 92% | <a href="#">gil504132482 XP_004578857.1</a> |
| <a href="#">PREDICTED: complement factor H isoform X7 [Oryctolagus cu</a>     | 80.8 | 105  | 86%  | 2e-15 | 92% | <a href="#">gil655861296 XP_008266941.1</a> |
| <a href="#">factor H [Ovis aries]</a>                                         | 80.8 | 80.8 | 86%  | 2e-15 | 92% | <a href="#">gil294991863 ADF57191.1</a>     |
| <a href="#">PREDICTED: complement factor H-like [Mustela putorius furo]</a>   | 80.8 | 80.8 | 86%  | 2e-15 | 92% | <a href="#">gil511872156 XP_004756526.1</a> |
| <a href="#">PREDICTED: LOW QUALITY PROTEIN: complement factor H-</a>          | 80.4 | 106  | 93%  | 3e-15 | 92% | <a href="#">gil488582023 XP_004476425.1</a> |
| <a href="#">PREDICTED: LOW QUALITY PROTEIN: complement factor H</a>           | 80.4 | 80.4 | 93%  | 3e-15 | 85% | <a href="#">gil488582009 XP_004485294.1</a> |
| <a href="#">complement factor H precursor [Sus scrofa]</a>                    | 80.0 | 80.0 | 86%  | 4e-15 | 92% | <a href="#">gil47523636 NP_999446.1</a>     |
| <a href="#">PREDICTED: complement factor H-related protein 5 [Echinops</a>    | 79.5 | 79.5 | 86%  | 5e-15 | 92% | <a href="#">gil507633996 XP_004699836.1</a> |
| <a href="#">PREDICTED: complement factor H-like [Ictidomys tridecemline</a>   | 79.5 | 79.5 | 89%  | 6e-15 | 88% | <a href="#">gil532099560 XP_005335418.1</a> |
| <a href="#">PREDICTED: complement factor H [Jaculus jaculus]</a>              | 79.1 | 79.1 | 89%  | 8e-15 | 88% | <a href="#">gil507551420 XP_004659511.1</a> |
| <a href="#">PREDICTED: complement factor H-like [Odobenus rosmarus di</a>     | 78.7 | 103  | 100% | 1e-14 | 83% | <a href="#">gil472346387 XP_004392923.1</a> |
| <a href="#">PREDICTED: LOW QUALITY PROTEIN: complement factor H-</a>          | 78.7 | 101  | 93%  | 1e-14 | 85% | <a href="#">gil591334492 XP_007092940.1</a> |
| <a href="#">PREDICTED: complement factor H-related protein 5 isoform X1</a>   | 78.3 | 100  | 96%  | 1e-14 | 86% | <a href="#">gil545504211 XP_005622354.1</a> |
| <a href="#">PREDICTED: complement factor H-related protein 5 isoform X2</a>   | 78.3 | 100  | 96%  | 1e-14 | 86% | <a href="#">gil359319938 XP_547381.3</a>    |
| <a href="#">PREDICTED: complement factor H-like isoform X2 [Equus prze</a>    | 78.3 | 105  | 93%  | 2e-14 | 85% | <a href="#">gil664733497 XP_008523962.1</a> |
| <a href="#">PREDICTED: complement factor H-like isoform X1 [Equus prze</a>    | 78.3 | 105  | 93%  | 2e-14 | 85% | <a href="#">gil664733495 XP_008523961.1</a> |
| <a href="#">PREDICTED: complement factor H-like [Equus caballus]</a>          | 78.3 | 105  | 93%  | 2e-14 | 85% | <a href="#">gil545210838 XP_005608149.1</a> |
| <a href="#">PREDICTED: complement factor H-related protein 5 isoform X2</a>   | 77.8 | 100  | 93%  | 2e-14 | 85% | <a href="#">gil594082716 XP_006064951.1</a> |
| <a href="#">PREDICTED: complement factor H-related protein 5 [Pantholor</a>   | 77.8 | 99.3 | 93%  | 2e-14 | 85% | <a href="#">gil556769080 XP_005979750.1</a> |
| <a href="#">PREDICTED: complement factor H-related protein 5 isoform X2</a>   | 77.8 | 99.3 | 93%  | 2e-14 | 85% | <a href="#">gil548499622 XP_005691107.1</a> |
| <a href="#">PREDICTED: LOW QUALITY PROTEIN: complement factor H-</a>          | 77.8 | 77.8 | 93%  | 2e-14 | 85% | <a href="#">gil426240147 XP_004013975.1</a> |
| <a href="#">PREDICTED: complement factor H-related protein 5 isoform X2</a>   | 77.8 | 100  | 93%  | 2e-14 | 85% | <a href="#">gil594082714 XP_006064950.1</a> |
| <a href="#">PREDICTED: complement factor H-related protein 5 isoform X2</a>   | 77.8 | 99.3 | 93%  | 2e-14 | 85% | <a href="#">gil548499620 XP_005691106.1</a> |

|                                                                                             |      |      |      |       |     |                                             |
|---------------------------------------------------------------------------------------------|------|------|------|-------|-----|---------------------------------------------|
| <a href="#">PREDICTED: complement factor H-related protein 5 isoform X1</a>                 | 77.8 | 100  | 93%  | 2e-14 | 85% | <a href="#">gij594082712 XP_006064949.1</a> |
| <a href="#">PREDICTED: complement factor H-related protein 5 isoform X1</a>                 | 77.8 | 99.3 | 93%  | 2e-14 | 85% | <a href="#">gij548499618 XP_005691105.1</a> |
| <a href="#">PREDICTED: complement factor H isoform X2 [Equus przewalskii]</a>               | 77.4 | 103  | 93%  | 3e-14 | 88% | <a href="#">gij664733501 XP_008523965.1</a> |
| <a href="#">PREDICTED: complement factor H isoform X1 [Equus przewalskii]</a>               | 77.4 | 103  | 93%  | 3e-14 | 88% | <a href="#">gij664733499 XP_008523964.1</a> |
| <a href="#">PREDICTED: complement factor H-related protein 4 [Erinaceus europaeus]</a>      | 77.4 | 98.4 | 100% | 3e-14 | 78% | <a href="#">gij617559171 XP_007539820.1</a> |
| <a href="#">PREDICTED: complement factor H-like [Otolemur garnettii]</a>                    | 77.4 | 77.4 | 93%  | 3e-14 | 89% | <a href="#">gij395862888 XP_003803652.1</a> |
| <a href="#">PREDICTED: complement factor H-like [Sarcophilus harrisii]</a>                  | 77.0 | 77.0 | 86%  | 4e-14 | 88% | <a href="#">gij395537227 XP_003770605.1</a> |
| <a href="#">PREDICTED: complement factor H-like [Elephantulus edwardii]</a>                 | 77.0 | 77.0 | 86%  | 4e-14 | 88% | <a href="#">gij585682096 XP_006892182.1</a> |
| <a href="#">PREDICTED: complement factor H-like [Bos taurus]</a>                            | 76.6 | 76.6 | 86%  | 5e-14 | 88% | <a href="#">gij741909329 XP_010798105.1</a> |
| <a href="#">hypothetical protein M91_20038 [Bos mutus]</a>                                  | 76.6 | 76.6 | 86%  | 5e-14 | 88% | <a href="#">gij440903747 ELR54366.1</a>     |
| <a href="#">PREDICTED: complement factor H-like [Felis catus]</a>                           | 76.1 | 99.3 | 93%  | 6e-14 | 85% | <a href="#">gij587022555 XP_006944335.1</a> |
| <a href="#">PREDICTED: complement factor H isoform X8 [Bos taurus]</a>                      | 76.6 | 76.6 | 86%  | 6e-14 | 88% | <a href="#">gij741953647 XP_010811369.1</a> |
| <a href="#">PREDICTED: complement factor H isoform X7 [Bos taurus]</a>                      | 76.6 | 76.6 | 86%  | 6e-14 | 88% | <a href="#">gij741953645 XP_010811368.1</a> |
| <a href="#">PREDICTED: complement factor H isoform X6 [Bos taurus]</a>                      | 76.6 | 76.6 | 86%  | 6e-14 | 88% | <a href="#">gij528979321 XP_002693921.3</a> |
| <a href="#">PREDICTED: complement factor H-like [Bos mutus]</a>                             | 76.6 | 76.6 | 86%  | 6e-14 | 88% | <a href="#">gij555973258 XP_005898627.1</a> |
| <a href="#">PREDICTED: LOW QUALITY PROTEIN: complement factor H</a>                         | 76.6 | 76.6 | 86%  | 6e-14 | 88% | <a href="#">gij741953665 XP_010811375.1</a> |
| <a href="#">PREDICTED: LOW QUALITY PROTEIN: complement factor H</a>                         | 76.6 | 76.6 | 86%  | 6e-14 | 88% | <a href="#">gij741891379 XP_010821343.1</a> |
| <a href="#">PREDICTED: complement factor H isoform X5 [Bos taurus]</a>                      | 76.6 | 76.6 | 86%  | 6e-14 | 88% | <a href="#">gij741953642 XP_010811367.1</a> |
| <a href="#">PREDICTED: complement factor H-related protein 5 isoform X4</a>                 | 76.6 | 76.6 | 86%  | 6e-14 | 88% | <a href="#">gij528979319 XP_005216787.1</a> |
| <a href="#">TPA: complement factor H-like [Bos taurus]</a>                                  | 76.6 | 76.6 | 86%  | 6e-14 | 88% | <a href="#">gij296479358 DAA21473.1</a>     |
| <a href="#">TPA: complement factor H-like [Bos taurus]</a>                                  | 76.6 | 76.6 | 86%  | 6e-14 | 88% | <a href="#">gij296479412 DAA21527.1</a>     |
| <a href="#">PREDICTED: LOW QUALITY PROTEIN: complement factor H</a>                         | 76.6 | 76.6 | 86%  | 6e-14 | 88% | <a href="#">gij742179883 XP_010852545.1</a> |
| <a href="#">PREDICTED: LOW QUALITY PROTEIN: complement factor H</a>                         | 76.6 | 76.6 | 86%  | 6e-14 | 88% | <a href="#">gij426240233 XP_004014017.1</a> |
| <a href="#">PREDICTED: complement factor H-like [Felis catus]</a>                           | 76.1 | 99.3 | 93%  | 6e-14 | 85% | <a href="#">gij587022553 XP_006944334.1</a> |
| <a href="#">hypothetical protein EGK_01830 [Macaca mulatta]</a>                             | 76.1 | 76.1 | 93%  | 8e-14 | 81% | <a href="#">gij355558924 EHH15704.1</a>     |
| <a href="#">PREDICTED: complement factor H-related protein 5 [Nannospiza melanocorypha]</a> | 75.7 | 98.0 | 96%  | 1e-13 | 88% | <a href="#">gij674047442 XP_008829796.1</a> |

## Alignments

Download  [GenPept](#) [Graphics](#) Sort by: E value ▼ Next ▲ Previous ▲ Descriptions

CFHR5 protein, partial [Homo sapiens]

Sequence ID: [gij116283370|gb|AAH26282.1](#) Length: 434 Number of Matches: 2

Range 1: 385 to 413 [GenPept](#) [Graphics](#) ▼ Next Match ▲ Previous Match

| Score          | Expect | Identities | Positives   | Gaps     |
|----------------|--------|------------|-------------|----------|
| 98.2 bits(224) | 2e-21  | 28/29(97%) | 29/29(100%) | 0/29(0%) |

```
Query 1   REQFCPPPPQIPNAQDMTTTVNYQDGEKV 29
          REQFCPPPPQIPNAQ+MTTTVNYQDGEKV
Sbjct 385 REQFCPPPPQIPNAQNMTTTVNYQDGEKV 413
```

Range 2: 208 to 216 [GenPept](#) [Graphics](#) ▼ Next Match ▲ Previous Match ▲ First Match

| Score         | Expect | Identities | Positives | Gaps    |
|---------------|--------|------------|-----------|---------|
| 20.6 bits(41) | 198530 | 6/9(67%)   | 6/9(66%)  | 0/9(0%) |

```
Query 5   CPPPPQIPN 13
          C PPPQ N
Sbjct 208  CGPPPQLSN 216
```

### Related Information

[Gene](#) - associated gene details

Download  [GenPept](#) [Graphics](#) Sort by: E value ▼ Next ▲ Previous ▲ Descriptions

**PREDICTED: complement factor H-related protein 5 isoform X2 [Pan troglodytes]**

Sequence ID: [gi|694890880|ref|XP\\_009438538.1](#) Length: 565 Number of Matches: 3

Range 1: 381 to 409 [GenPept](#) [Graphics](#) ▼ Next Match ▲ Previous Match

| Score          | Expect | Identities | Positives   | Gaps     |
|----------------|--------|------------|-------------|----------|
| 98.2 bits(224) | 2e-21  | 28/29(97%) | 29/29(100%) | 0/29(0%) |

Query 1 REQFCPPPPQIPNAQDMTTTVNYQDGEKV 29  
 REQFCPPPPQIPNAQ+MTTTVNYQDGEKV  
 Sbjct 381 REQFCPPPPQIPNAQNMTTTVNYQDGEKV 409

Range 2: 204 to 212 [GenPept](#) [Graphics](#) ▼ Next Match ▲ Previous Match ▲ First Match

| Score         | Expect | Identities | Positives | Gaps    |
|---------------|--------|------------|-----------|---------|
| 20.6 bits(41) | 199550 | 6/9(67%)   | 6/9(66%)  | 0/9(0%) |

Query 5 CPPPPQIPN 13  
 C PPPQ N  
 Sbjct 204 CGPPPQLSN 212

Range 3: 444 to 472 [GenPept](#) [Graphics](#) ▼ Next Match ▲ Previous Match ▲ First Match

| Score         | Expect | Identities | Positives  | Gaps       |
|---------------|--------|------------|------------|------------|
| 20.6 bits(41) | 199550 | 11/30(37%) | 12/30(40%) | 11/30(36%) |

Query 4 FCPPPPQIPNAQDMT-----TTVNY 23  
 +C PPP I N D T TV Y  
 Sbjct 444 YCGPPPSISNG-DTTSFPLSVYPPGSTVTY 472

[Download](#) [GenPept](#) [Graphics](#) Sort by: E value ▼ Next ▲ Previous ▲ Descriptions

**unnamed protein product [Homo sapiens]**

Sequence ID: [gi|189054216|dbj|BAG36736.1](#) Length: 569 Number of Matches: 2

Range 1: 385 to 413 [GenPept](#) [Graphics](#) ▼ Next Match ▲ Previous Match

| Score          | Expect | Identities | Positives   | Gaps     |
|----------------|--------|------------|-------------|----------|
| 98.2 bits(224) | 2e-21  | 28/29(97%) | 29/29(100%) | 0/29(0%) |

Query 1 REQFCPPPPQIPNAQDMTTTVNYQDGEKV 29  
 REQFCPPPPQIPNAQ+MTTTVNYQDGEKV  
 Sbjct 385 REQFCPPPPQIPNAQNMTTTVNYQDGEKV 413

Range 2: 208 to 216 [GenPept](#) [Graphics](#) ▼ Next Match ▲ Previous Match ▲ First Match

| Score         | Expect | Identities | Positives | Gaps    |
|---------------|--------|------------|-----------|---------|
| 20.6 bits(41) | 199574 | 6/9(67%)   | 6/9(66%)  | 0/9(0%) |

Query 5 CPPPPQIPN 13  
 C PPPQ N  
 Sbjct 208 CGPPPQLSN 216

[Download](#) [GenPept](#) [Graphics](#) Sort by: E value ▼ Next ▲ Previous ▲ Descriptions

**PREDICTED: complement factor H-related protein 5 [Gorilla gorilla gorilla]**

Sequence ID: [gi|426333131|ref|XP\\_004028138.1](#) Length: 569 Number of Matches: 2

Range 1: 385 to 413 [GenPept](#) [Graphics](#) ▼ Next Match ▲ Previous Match

| Score          | Expect | Identities | Positives   | Gaps     |
|----------------|--------|------------|-------------|----------|
| 98.2 bits(224) | 2e-21  | 28/29(97%) | 29/29(100%) | 0/29(0%) |

Query 1 REQFCPPPPQIPNAQDMTTTVNYQDGEKV 29  
 REQFCPPPPQIPNAQ+MTTTVNYQDGEKV  
 Sbjct 385 REQFCPPPPQIPNAQNMTTTVNYQDGEKV 413

Range 2: 208 to 216 [GenPept](#) [Graphics](#) ▼ Next Match ▲ Previous Match ▲ First Match

| Score         | Expect | Identities | Positives | Gaps    |
|---------------|--------|------------|-----------|---------|
| 20.6 bits(41) | 199574 | 6/9(67%)   | 6/9(66%)  | 0/9(0%) |

Query 5 CPPPPQIPN 13  
 C PPPQ N  
 Sbjct 208 CGPPPQLSN 216

[Download](#) [GenPept](#) [Graphics](#) Sort by: E value ▼ Next ▲ Previous ▲ Descriptions

**complement factor H-related protein 5 precursor [Homo sapiens]**

Sequence ID: [gi|13540563|ref|NP\\_110414.1](#) Length: 569 Number of Matches: 2

**Related Information**

[Gene](#) - associated gene details

**Related Information**

[Gene](#) - associated gene details

**Related Information**

[Gene](#) - associated gene details

[Map Viewer](#) - aligned genomic context

[▶ See 6 more title\(s\)](#)

**Range 1: 385 to 413** [GenPept](#) [Graphics](#)

[▼ Next Match](#) [▲ Previous Match](#)

| Score          | Expect | Identities | Positives   | Gaps     |
|----------------|--------|------------|-------------|----------|
| 98.2 bits(224) | 2e-21  | 28/29(97%) | 29/29(100%) | 0/29(0%) |

Query 1 REQFCPPPPQIPNAQDMTTTVNYQDGEKV 29  
 REQFCPPPPQIPNAQ+MTTTVNYQDGEKV  
 Sbjct 385 REQFCPPPPQIPNAQNMTTTVNYQDGEKV 413

**Range 2: 208 to 216** [GenPept](#) [Graphics](#)

[▼ Next Match](#) [▲ Previous Match](#) [▲ First Match](#)

| Score         | Expect | Identities | Positives | Gaps    |
|---------------|--------|------------|-----------|---------|
| 20.6 bits(41) | 199574 | 6/9(67%)   | 6/9(66%)  | 0/9(0%) |

Query 5 CPPPPQIPN 13  
 C PPPQ N  
 Sbjct 208 CGPPPQLSN 216

**Related Information**

- [Gene](#) - associated gene details
- [UniGene](#) - clustered expressed sequence tags
- [Map Viewer](#) - aligned genomic context
- [Identical Proteins](#) - Proteins identical to the subject

BLAST is a registered trademark of the National Library of Medicine.

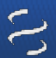

NCBI/ BLAST/ blastp suite/ Formatting Results - B92PDFE501R

Your search parameters were adjusted to search for a short input sequence.

Edit and Resubmit Save Search Strategies Formatting options Download

CFHR5\_REQFCPPPPQIPNAQNMTTTTVNYQDGEKV\_NonMod

YouTube How to read this page Blast report description

RID B92PDFE501R (Expires on 01-14 10:02 am)

Query ID lcl|278651
Description None
Molecule type amino acid
Query Length 29

Database Name nr
Description All non-redundant GenBank CDS translations+PDB+SwissProt+PIF excluding environmental samples from WGS projects
Program BLASTP 2.2.30+ Citation

Other reports: Search Summary Taxonomy reports Distance tree of results Multiple alignment

Graphic Summary

Show Conserved Domains

No putative conserved domains have been detected

Distribution of 155 Blast Hits on the Query Sequence

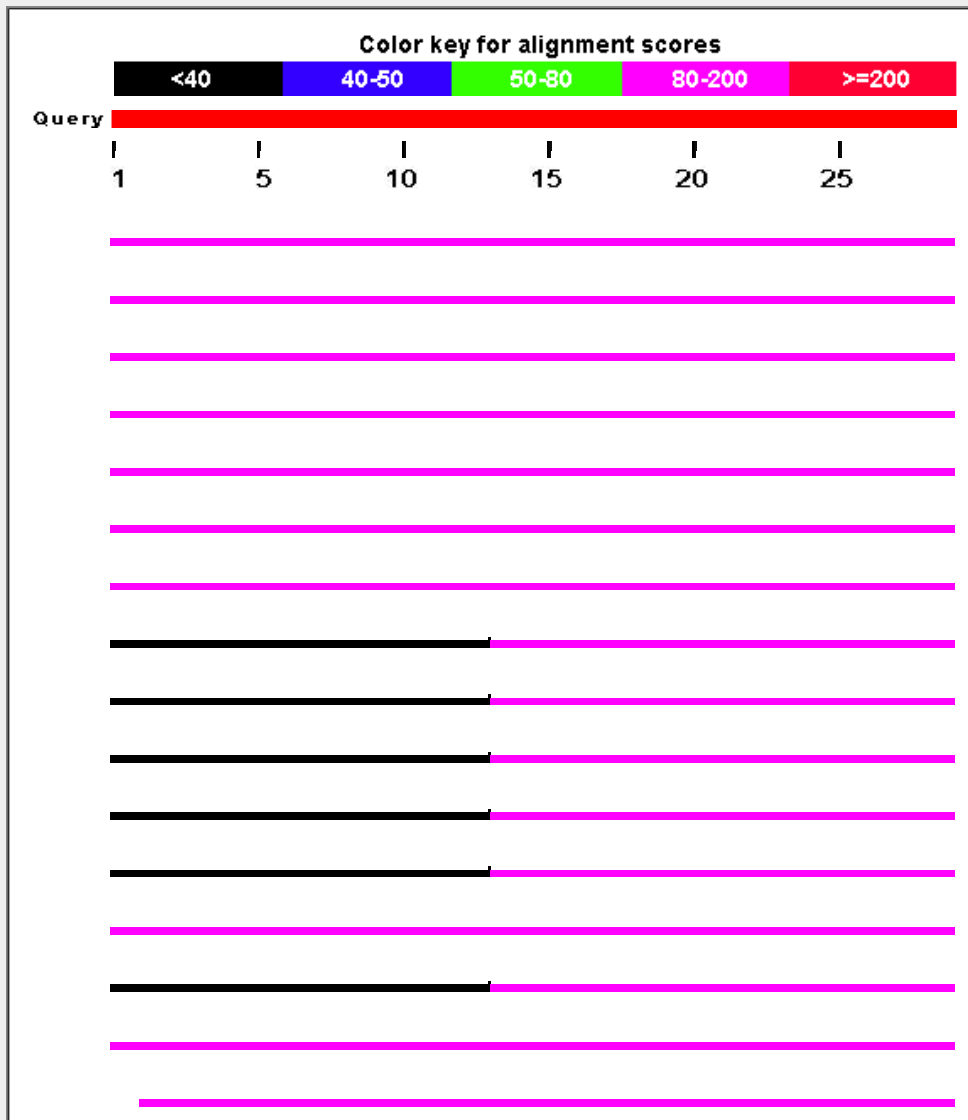

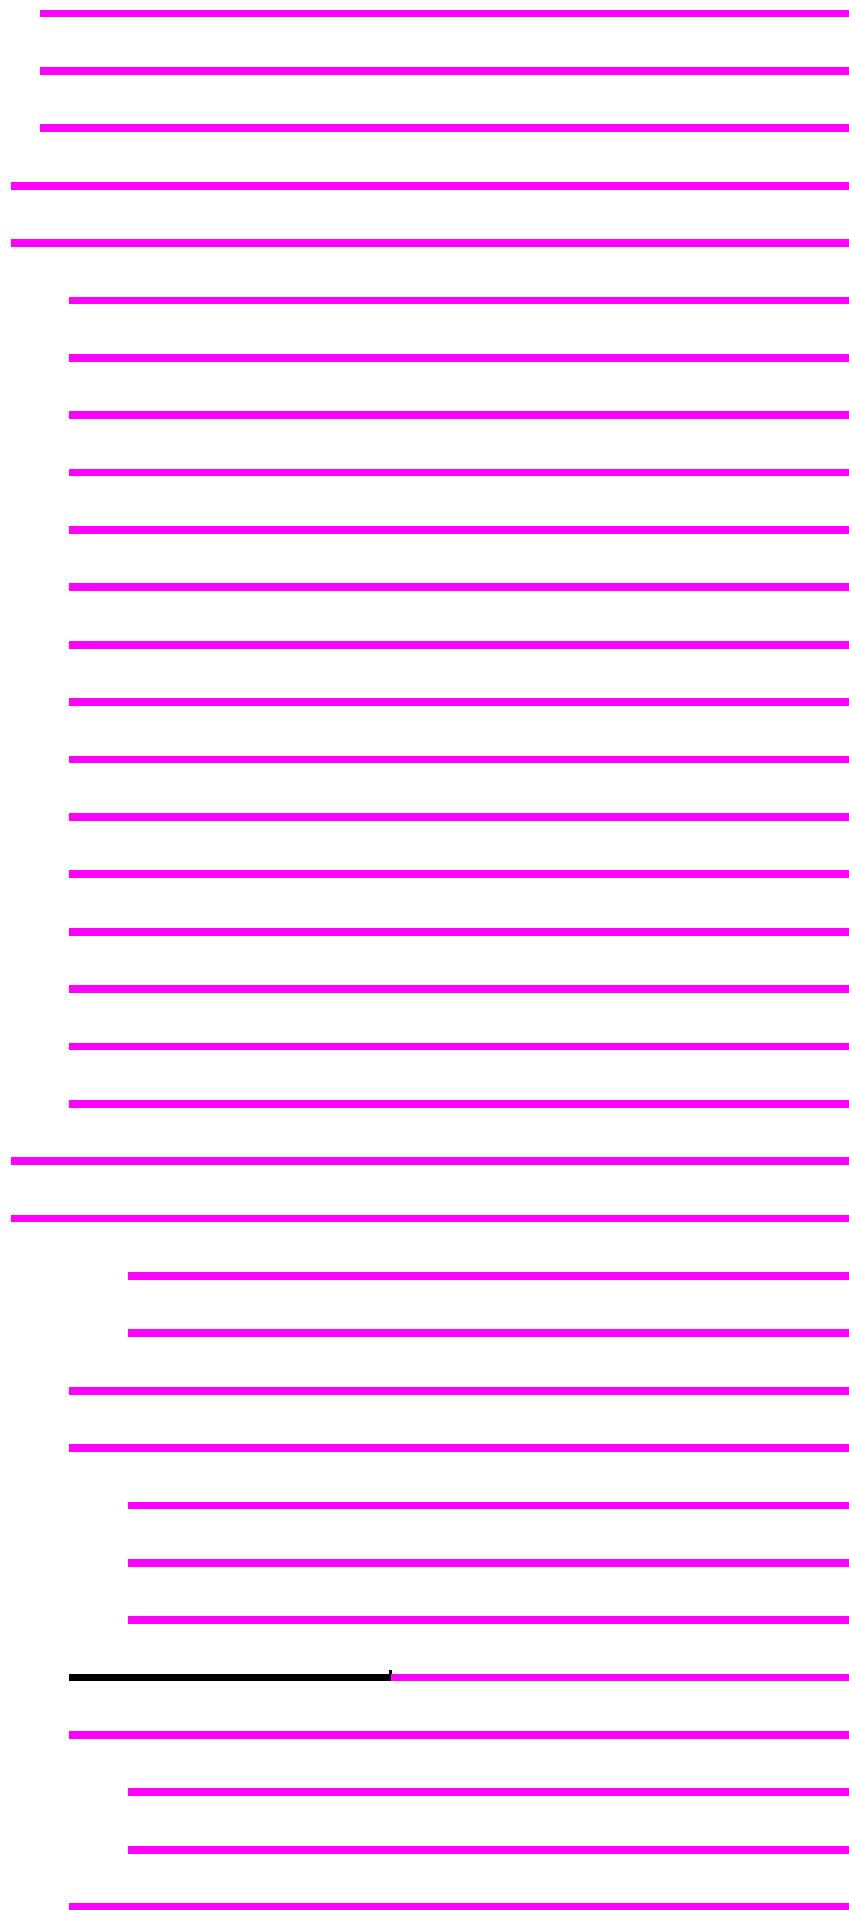

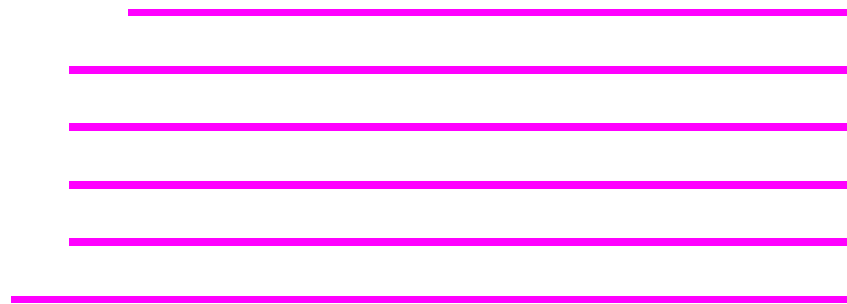

**Descriptions**

**Sequences producing significant alignments:**

Select: [All](#) [None](#) Selected:0

[↑↓ Alignments](#) [Download](#) [GenPept](#) [Graphics](#) [Distance tree of results](#) [Multiple alignment](#)

| Description                                       | Max score | Total score | Query cover | E value | Ident | Accession                                   |
|---------------------------------------------------|-----------|-------------|-------------|---------|-------|---------------------------------------------|
| <a href="#">CFHR5 protein [Homo sapiens]</a>      | 100       | 121         | 100%        | 3e-22   | 100%  | <a href="#">gij116283370 AAH26282.1</a>     |
| <a href="#">PREDICTED: complement factor t</a>    | 100       | 121         | 100%        | 3e-22   | 100%  | <a href="#">gij694890880 XP_009438538.1</a> |
| <a href="#">unnamed protein product [Homo s</a>   | 100       | 121         | 100%        | 3e-22   | 100%  | <a href="#">gij189054216 BAG36736.1</a>     |
| <a href="#">PREDICTED: complement factor t</a>    | 100       | 121         | 100%        | 3e-22   | 100%  | <a href="#">gij426333131 XP_004028138.1</a> |
| <a href="#">complement factor H-related prote</a> | 100       | 121         | 100%        | 3e-22   | 100%  | <a href="#">gij13540563 NP_110414.1</a>     |
| <a href="#">PREDICTED: complement factor t</a>    | 100       | 121         | 100%        | 3e-22   | 100%  | <a href="#">gij397505136 XP_003823129.1</a> |
| <a href="#">PREDICTED: complement factor t</a>    | 100       | 121         | 100%        | 3e-22   | 100%  | <a href="#">gij332811564 XP_514078.3</a>    |
| <a href="#">PREDICTED: complement factor t</a>    | 97.3      | 119         | 100%        | 4e-21   | 100%  | <a href="#">gij724966978 XP_010356756.1</a> |
| <a href="#">PREDICTED: complement factor t</a>    | 97.3      | 119         | 100%        | 4e-21   | 100%  | <a href="#">gij544399121 XP_005540361.1</a> |
| <a href="#">PREDICTED: complement factor t</a>    | 97.3      | 119         | 100%        | 4e-21   | 100%  | <a href="#">gij635131776 XP_007987271.1</a> |
| <a href="#">PREDICTED: complement factor t</a>    | 97.3      | 119         | 100%        | 4e-21   | 100%  | <a href="#">gij544399119 XP_005540360.1</a> |
| <a href="#">PREDICTED: complement factor t</a>    | 97.3      | 119         | 100%        | 4e-21   | 100%  | <a href="#">gij402857751 XP_003893408.1</a> |
| <a href="#">PREDICTED: complement factor t</a>    | 96.1      | 96.1        | 100%        | 1e-20   | 97%   | <a href="#">gij332230725 XP_003264546.1</a> |
| <a href="#">hypothetical protein EGM_01566 [</a>  | 94.0      | 116         | 100%        | 6e-20   | 96%   | <a href="#">gij355746073 EHH50698.1</a>     |
| <a href="#">PREDICTED: complement factor t</a>    | 90.1      | 90.1        | 100%        | 1e-18   | 93%   | <a href="#">gij671013917 XP_008697795.1</a> |
| <a href="#">PREDICTED: complement factor t</a>    | 89.3      | 89.3        | 96%         | 2e-18   | 93%   | <a href="#">gij675747013 XP_008983384.1</a> |
| <a href="#">PREDICTED: complement factor t</a>    | 89.3      | 89.3        | 96%         | 2e-18   | 93%   | <a href="#">gij403294474 XP_003938210.1</a> |
| <a href="#">PREDICTED: complement factor t</a>    | 89.3      | 160         | 96%         | 3e-18   | 93%   | <a href="#">gij725592697 XP_010347049.1</a> |
| <a href="#">PREDICTED: complement factor t</a>    | 89.3      | 180         | 96%         | 3e-18   | 93%   | <a href="#">gij675747020 XP_008983387.1</a> |
| <a href="#">hypothetical protein PANDA_0196</a>   | 88.4      | 88.4        | 100%        | 5e-18   | 93%   | <a href="#">gij281343750 EFB19334.1</a>     |
| <a href="#">PREDICTED: complement factor t</a>    | 88.4      | 88.4        | 100%        | 5e-18   | 93%   | <a href="#">gij301788162 XP_002929497.1</a> |
| <a href="#">PREDICTED: complement factor t</a>    | 86.7      | 111         | 93%         | 2e-17   | 93%   | <a href="#">gij545210671 XP_005608090.1</a> |
| <a href="#">PREDICTED: complement factor t</a>    | 86.7      | 111         | 93%         | 2e-17   | 93%   | <a href="#">gij338722817 XP_001491754.3</a> |
| <a href="#">PREDICTED: complement factor t</a>    | 84.2      | 109         | 93%         | 1e-16   | 89%   | <a href="#">gij664780060 XP_008509345.1</a> |

|                                                   |      |      |      |       |     |                                             |
|---------------------------------------------------|------|------|------|-------|-----|---------------------------------------------|
| <a href="#">PREDICTED: complement factor 1</a>    | 84.2 | 84.2 | 93%  | 1e-16 | 93% | <a href="#">gi 585151741 XP_006728299.1</a> |
| <a href="#">PREDICTED: complement factor 1</a>    | 84.2 | 84.2 | 93%  | 1e-16 | 93% | <a href="#">gi 511939033 XP_004788345.1</a> |
| <a href="#">PREDICTED: complement factor 1</a>    | 84.2 | 84.2 | 93%  | 1e-16 | 93% | <a href="#">gi 511872177 XP_004756532.1</a> |
| <a href="#">PREDICTED: complement factor 1</a>    | 84.2 | 84.2 | 93%  | 1e-16 | 93% | <a href="#">gi 511939031 XP_004788344.1</a> |
| <a href="#">PREDICTED: complement factor 1</a>    | 84.2 | 84.2 | 93%  | 1e-16 | 93% | <a href="#">gi 511872174 XP_004756531.1</a> |
| <a href="#">PREDICTED: complement factor 1</a>    | 84.2 | 84.2 | 93%  | 1e-16 | 93% | <a href="#">gi 511939029 XP_004788343.1</a> |
| <a href="#">PREDICTED: complement factor 1</a>    | 84.2 | 84.2 | 93%  | 1e-16 | 93% | <a href="#">gi 511872171 XP_004756530.1</a> |
| <a href="#">PREDICTED: complement factor 1</a>    | 84.2 | 84.2 | 93%  | 1e-16 | 93% | <a href="#">gi 511939027 XP_004788342.1</a> |
| <a href="#">PREDICTED: complement factor 1</a>    | 84.2 | 84.2 | 93%  | 1e-16 | 93% | <a href="#">gi 511872168 XP_004756529.1</a> |
| <a href="#">PREDICTED: complement factor 1</a>    | 84.2 | 84.2 | 93%  | 1e-16 | 93% | <a href="#">gi 511939025 XP_004788341.1</a> |
| <a href="#">PREDICTED: complement factor 1</a>    | 84.2 | 84.2 | 93%  | 1e-16 | 93% | <a href="#">gi 511872165 XP_004756528.1</a> |
| <a href="#">PREDICTED: complement factor 1</a>    | 84.2 | 109  | 93%  | 1e-16 | 89% | <a href="#">gi 545210836 XP_005608148.1</a> |
| <a href="#">Complement factor H-related prote</a> | 83.8 | 83.8 | 100% | 2e-16 | 81% | <a href="#">gi 444515052 ELV10720.1</a>     |
| <a href="#">PREDICTED: complement factor 1</a>    | 83.8 | 162  | 100% | 2e-16 | 81% | <a href="#">gi 562882019 XP_006168581.1</a> |
| <a href="#">PREDICTED: complement factor 1</a>    | 83.3 | 83.3 | 86%  | 2e-16 | 96% | <a href="#">gi 511872183 XP_004756534.1</a> |
| <a href="#">PREDICTED: complement factor 1</a>    | 83.3 | 83.3 | 86%  | 2e-16 | 96% | <a href="#">gi 511872180 XP_004756533.1</a> |
| <a href="#">PREDICTED: complement factor 1</a>    | 82.1 | 82.1 | 93%  | 2e-16 | 89% | <a href="#">gi 562888444 XP_006171583.1</a> |
| <a href="#">PREDICTED: complement factor 1</a>    | 82.1 | 82.1 | 93%  | 2e-16 | 89% | <a href="#">gi 562879073 XP_006167236.1</a> |
| <a href="#">PREDICTED: complement factor 1</a>    | 83.3 | 108  | 86%  | 3e-16 | 96% | <a href="#">gi 504132482 XP_004578857.1</a> |
| <a href="#">PREDICTED: complement factor 1</a>    | 83.3 | 108  | 86%  | 3e-16 | 96% | <a href="#">gi 655861296 XP_008266941.1</a> |
| <a href="#">PREDICTED: complement factor 1</a>    | 83.3 | 83.3 | 86%  | 3e-16 | 96% | <a href="#">gi 511872156 XP_004756526.1</a> |
| <a href="#">PREDICTED: LOW QUALITY PR</a>         | 82.9 | 108  | 93%  | 4e-16 | 96% | <a href="#">gi 488582023 XP_004476425.1</a> |
| <a href="#">Complement factor H [Tupaia chir</a>  | 82.1 | 103  | 93%  | 7e-16 | 89% | <a href="#">gi 444727587 ELW68070.1</a>     |
| <a href="#">PREDICTED: complement factor 1</a>    | 82.1 | 82.1 | 86%  | 7e-16 | 96% | <a href="#">gi 507633996 XP_004699836.1</a> |
| <a href="#">PREDICTED: complement factor 1</a>    | 82.1 | 82.1 | 86%  | 7e-16 | 92% | <a href="#">gi 301761648 XP_002916246.1</a> |
| <a href="#">PREDICTED: complement factor 1</a>    | 82.1 | 103  | 93%  | 7e-16 | 89% | <a href="#">gi 562833386 XP_006146097.1</a> |
| <a href="#">PREDICTED: LOW QUALITY PR</a>         | 82.1 | 82.1 | 86%  | 7e-16 | 92% | <a href="#">gi 670979575 XP_008695918.1</a> |
| <a href="#">PREDICTED: complement factor 1</a>    | 82.1 | 82.1 | 93%  | 7e-16 | 89% | <a href="#">gi 562853709 XP_006155484.1</a> |
| <a href="#">PREDICTED: complement factor 1</a>    | 82.1 | 82.1 | 93%  | 8e-16 | 89% | <a href="#">gi 562853707 XP_006155483.1</a> |
| <a href="#">PREDICTED: complement factor 1</a>    | 82.1 | 82.1 | 93%  | 8e-16 | 89% | <a href="#">gi 562853705 XP_006155482.1</a> |
| <a href="#">Complement factor H [Tupaia chir</a>  | 82.1 | 82.1 | 93%  | 8e-16 | 89% | <a href="#">gi 444717040 ELW57876.1</a>     |
| <a href="#">PREDICTED: complement factor 1</a>    | 81.2 | 105  | 100% | 1e-15 | 86% | <a href="#">gi 472346387 XP_004392923.1</a> |
| <a href="#">PREDICTED: LOW QUALITY PR</a>         | 81.2 | 104  | 93%  | 1e-15 | 89% | <a href="#">gi 591334492 XP_007092940.1</a> |
| <a href="#">PREDICTED: complement factor 1</a>    | 80.8 | 102  | 96%  | 2e-15 | 89% | <a href="#">gi 545504211 XP_005622354.1</a> |
| <a href="#">PREDICTED: complement factor 1</a>    | 80.8 | 102  | 96%  | 2e-15 | 89% | <a href="#">gi 359319938 XP_547381.3</a>    |
| <a href="#">PREDICTED: complement factor 1</a>    | 80.4 | 101  | 93%  | 3e-15 | 89% | <a href="#">gi 594082716 XP_006064951.1</a> |
| <a href="#">PREDICTED: complement factor 1</a>    | 80.4 | 100  | 93%  | 3e-15 | 89% | <a href="#">gi 556769080 XP_005979750.1</a> |
| <a href="#">PREDICTED: complement factor 1</a>    | 80.4 | 101  | 93%  | 3e-15 | 89% | <a href="#">gi 548499622 XP_005691107.1</a> |
| <a href="#">PREDICTED: LOW QUALITY PR</a>         | 80.4 | 80.4 | 93%  | 3e-15 | 89% | <a href="#">gi 426240147 XP_004013975.1</a> |
| <a href="#">PREDICTED: complement factor 1</a>    | 80.4 | 101  | 93%  | 3e-15 | 89% | <a href="#">gi 594082714 XP_006064950.1</a> |
| <a href="#">PREDICTED: complement factor 1</a>    | 80.4 | 101  | 93%  | 3e-15 | 89% | <a href="#">gi 548499620 XP_005691106.1</a> |



|                                                   |      |      |     |       |     |                                             |
|---------------------------------------------------|------|------|-----|-------|-----|---------------------------------------------|
| <a href="#">PREDICTED: complement factor t</a>    | 80.4 | 101  | 93% | 3e-15 | 89% | <a href="#">gi 594082712 XP_006064949.1</a> |
| <a href="#">PREDICTED: complement factor t</a>    | 80.4 | 101  | 93% | 3e-15 | 89% | <a href="#">gi 548499618 XP_005691105.1</a> |
| <a href="#">PREDICTED: complement factor t</a>    | 80.0 | 106  | 93% | 4e-15 | 89% | <a href="#">gi 667324753 XP_008589310.1</a> |
| <a href="#">PREDICTED: complement factor t</a>    | 80.0 | 80.0 | 93% | 4e-15 | 93% | <a href="#">gi 395862888 XP_003803652.1</a> |
| <a href="#">hypothetical protein EGK_01830 [I</a> | 78.7 | 78.7 | 93% | 1e-14 | 85% | <a href="#">gi 355558924 EHH15704.1</a>     |
| <a href="#">PREDICTED: complement factor t</a>    | 78.3 | 100  | 96% | 1e-14 | 92% | <a href="#">gi 674047442 XP_008829796.1</a> |
| <a href="#">PREDICTED: complement factor t</a>    | 78.3 | 100  | 93% | 1e-14 | 92% | <a href="#">gi 555970510 XP_005897276.1</a> |
| <a href="#">PREDICTED: complement factor t</a>    | 78.3 | 99.7 | 93% | 1e-14 | 92% | <a href="#">gi 528981178 XP_003587159.2</a> |
| <a href="#">PREDICTED: complement factor t</a>    | 78.3 | 100  | 93% | 1e-14 | 92% | <a href="#">gi 528917598 XP_003583321.2</a> |
| <a href="#">PREDICTED: complement factor t</a>    | 78.3 | 99.7 | 93% | 1e-14 | 92% | <a href="#">gi 528981176 XP_005217472.1</a> |
| <a href="#">PREDICTED: complement factor t</a>    | 78.3 | 100  | 93% | 1e-14 | 92% | <a href="#">gi 528917596 XP_005192693.1</a> |
| <a href="#">hypothetical protein M91_03590 [E</a> | 78.3 | 100  | 93% | 1e-14 | 92% | <a href="#">gi 440904871 ELR55328.1</a>     |
| <a href="#">PREDICTED: complement factor t</a>    | 78.3 | 78.3 | 93% | 2e-14 | 85% | <a href="#">gi 402857760 XP_003893412.1</a> |
| <a href="#">PREDICTED: complement factor t</a>    | 78.3 | 78.3 | 93% | 2e-14 | 81% | <a href="#">gi 488582015 XP_004476421.1</a> |
| <a href="#">factor H [Ovis aries]</a>             | 78.3 | 78.3 | 86% | 2e-14 | 88% | <a href="#">gi 294991863 ADF57191.1</a>     |
| <a href="#">PREDICTED: complement factor t</a>    | 78.3 | 78.3 | 93% | 2e-14 | 85% | <a href="#">gi 544399111 XP_005540356.1</a> |
| <a href="#">PREDICTED: complement factor t</a>    | 78.3 | 78.3 | 93% | 2e-14 | 85% | <a href="#">gi 544399109 XP_005540355.1</a> |
| <a href="#">hypothetical protein EGM_01567 [I</a> | 78.3 | 78.3 | 93% | 2e-14 | 85% | <a href="#">gi 355746074 EHH50699.1</a>     |
| <a href="#">PREDICTED: complement factor t</a>    | 78.3 | 78.3 | 93% | 2e-14 | 85% | <a href="#">gi 544399107 XP_005540354.1</a> |
| <a href="#">PREDICTED: complement factor t</a>    | 78.3 | 78.3 | 93% | 2e-14 | 85% | <a href="#">gi 109019000 XP_001111875.1</a> |
| <a href="#">PREDICTED: complement factor t</a>    | 77.4 | 100  | 93% | 2e-14 | 85% | <a href="#">gi 587022555 XP_006944335.1</a> |
| <a href="#">PREDICTED: LOW QUALITY PR(</a>        | 77.8 | 77.8 | 93% | 2e-14 | 81% | <a href="#">gi 488582009 XP_004485294.1</a> |
| <a href="#">PREDICTED: complement factor t</a>    | 77.4 | 100  | 93% | 2e-14 | 85% | <a href="#">gi 587022553 XP_006944334.1</a> |
| <a href="#">PREDICTED: complement factor t</a>    | 77.4 | 98.4 | 93% | 3e-14 | 85% | <a href="#">gi 594625544 XP_007167345.1</a> |

NCBI/ BLAST/ blastp suite/ Formatting Results - BTG6MF7J016

Your search parameters were adjusted to search for a short input sequence.

[Edit and Resubmit](#) [Save Search Strategies](#) [Formatting options](#) [Download](#) [YouTube](#) [How to read this page](#) [Blast report description](#)

CFI\_KFLNDGTCTAEGKF\_Mod

RID [BTG6MF7J016](#) (Expires on 01-20 15:31 pm)

Query ID |cl|57140 Database Name nr

Description None Description All non-redundant GenBank CDS translations+PDB+SwissProt+PIR+PRF excluding environmental samples from WGS projects

Molecule type amino acid Program BLASTP 2.2.30+ [Citation](#)

Query Length 14

Other reports: [Search Summary](#) [Taxonomy reports](#) [Distance tree of results](#) [Multiple alignment](#)

Graphic Summary

Show Conserved Domains

No putative conserved domains have been detected

Distribution of 105 Blast Hits on the Query Sequence

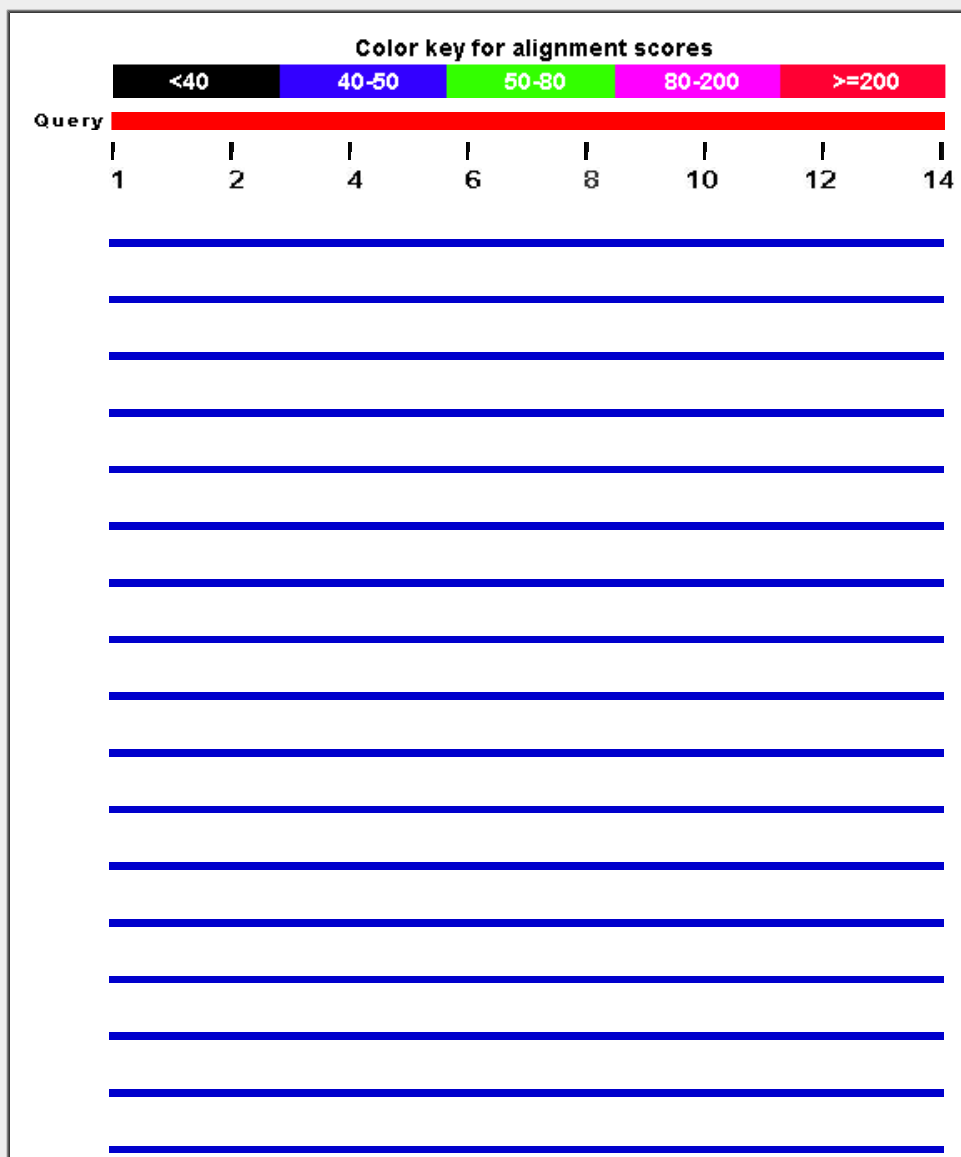



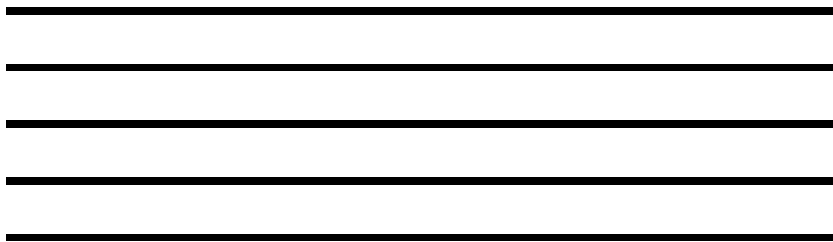

**Descriptions**

**Sequences producing significant alignments:**

Select: [All](#) [None](#) Selected:0

[Alignments](#)
[Download](#)
[GenPept](#)
[Graphics](#)
[Distance tree of results](#)
[Multiple alignment](#)

| Description                                                                   | Max score | Total score | Query cover | E value | Ident | Accession                                   |
|-------------------------------------------------------------------------------|-----------|-------------|-------------|---------|-------|---------------------------------------------|
| <a href="#">PREDICTED: complement factor I-like [Gorilla gorilla gorilla]</a> | 45.2      | 45.2        | 100%        | 3e-04   | 93%   | <a href="#">gi 426345243 XP_004040330.1</a> |
| <a href="#">unnamed protein product [Homo sapiens]</a>                        | 45.2      | 45.2        | 100%        | 3e-04   | 93%   | <a href="#">gi 1335055 CAA68417.1</a>       |
| <a href="#">CFI protein [Homo sapiens]</a>                                    | 45.2      | 45.2        | 100%        | 3e-04   | 93%   | <a href="#">gi 18089117 AAH20718.1</a>      |
| <a href="#">complement factor I, isoform CRA_a [Homo sapiens]</a>             | 45.2      | 45.2        | 100%        | 3e-04   | 93%   | <a href="#">gi 119626655 EAX06250.1</a>     |
| <a href="#">PREDICTED: complement factor I isoform X6 [Pan troglodytes]</a>   | 45.2      | 45.2        | 100%        | 3e-04   | 93%   | <a href="#">gi 694908492 XP_009446407.1</a> |
| <a href="#">PREDICTED: complement factor I isoform X6 [Pan paniscus]</a>      | 45.2      | 45.2        | 100%        | 3e-04   | 93%   | <a href="#">gi 675793799 XP_008953634.1</a> |
| <a href="#">PREDICTED: complement factor I isoform X5 [Pan troglodytes]</a>   | 45.2      | 45.2        | 100%        | 3e-04   | 93%   | <a href="#">gi 694908490 XP_009446406.1</a> |
| <a href="#">PREDICTED: complement factor I isoform X5 [Pan paniscus]</a>      | 45.2      | 45.2        | 100%        | 3e-04   | 93%   | <a href="#">gi 675793797 XP_008953633.1</a> |
| <a href="#">PREDICTED: complement factor I isoform X4 [Homo sapiens]</a>      | 45.2      | 45.2        | 100%        | 3e-04   | 93%   | <a href="#">gi 578809103 XP_006714273.1</a> |
| <a href="#">Chain A, Human Complement Factor I [Homo sapiens]</a>             | 45.2      | 45.2        | 100%        | 3e-04   | 93%   | <a href="#">gi 339961198 2XRC_A</a>         |
| <a href="#">PREDICTED: complement factor I isoform X4 [Pan troglodytes]</a>   | 45.2      | 45.2        | 100%        | 3e-04   | 93%   | <a href="#">gi 694908488 XP_009446405.1</a> |
| <a href="#">PREDICTED: complement factor I isoform X4 [Pan paniscus]</a>      | 45.2      | 45.2        | 100%        | 3e-04   | 93%   | <a href="#">gi 675793795 XP_008953632.1</a> |
| <a href="#">PREDICTED: complement factor I isoform X2 [Homo sapiens]</a>      | 45.2      | 45.2        | 100%        | 3e-04   | 93%   | <a href="#">gi 530377647 XP_005263033.1</a> |
| <a href="#">PREDICTED: complement factor I isoform X2 [Saimiri boliviens]</a> | 45.2      | 45.2        | 100%        | 3e-04   | 93%   | <a href="#">gi 725571753 XP_010338379.1</a> |
| <a href="#">PREDICTED: complement factor I [Callithrix jacchus]</a>           | 45.2      | 45.2        | 100%        | 3e-04   | 93%   | <a href="#">gi 675648222 XP_002745538.3</a> |
| <a href="#">PREDICTED: complement factor I [Nomascus leucogenys]</a>          | 45.2      | 45.2        | 100%        | 3e-04   | 93%   | <a href="#">gi 332240463 XP_003269405.1</a> |
| <a href="#">prepro-C3b/C4B inactivator [Homo sapiens]</a>                     | 45.2      | 45.2        | 100%        | 3e-04   | 93%   | <a href="#">gi 182607 AAA52455.1</a>        |
| <a href="#">complement factor I preproprotein [Homo sapiens]</a>              | 45.2      | 45.2        | 100%        | 3e-04   | 93%   | <a href="#">gi 119392081 NP_000195.2</a>    |
| <a href="#">complement factor I precursor [Pongo abelii]</a>                  | 45.2      | 45.2        | 100%        | 3e-04   | 93%   | <a href="#">gi 197098986 NP_001127624.1</a> |
| <a href="#">PREDICTED: complement factor I isoform X3 [Pan paniscus]</a>      | 45.2      | 45.2        | 100%        | 3e-04   | 93%   | <a href="#">gi 397519838 XP_003830060.1</a> |
| <a href="#">RecName: Full=Complement factor I; AltName: Full=C3B/C4B i</a>    | 45.2      | 45.2        | 100%        | 3e-04   | 93%   | <a href="#">gi 317373341 P05156.2</a>       |
| <a href="#">unnamed protein product [Homo sapiens]</a>                        | 45.2      | 45.2        | 100%        | 3e-04   | 93%   | <a href="#">gi 158254682 BAF83314.1</a>     |
| <a href="#">PREDICTED: complement factor I isoform X3 [Pan troglodytes]</a>   | 45.2      | 45.2        | 100%        | 3e-04   | 93%   | <a href="#">gi 114595644 XP_526653.2</a>    |
| <a href="#">PREDICTED: complement factor I [Callithrix jacchus]</a>           | 45.2      | 45.2        | 100%        | 3e-04   | 93%   | <a href="#">gi 675752511 XP_008984405.1</a> |
| <a href="#">PREDICTED: complement factor I isoform X2 [Nannospalax ga</a>     | 45.2      | 45.2        | 100%        | 3e-04   | 93%   | <a href="#">gi 674034950 XP_008841698.1</a> |
| <a href="#">PREDICTED: complement factor I isoform X2 [Pan troglodytes]</a>   | 45.2      | 45.2        | 100%        | 3e-04   | 93%   | <a href="#">gi 694908485 XP_009446404.1</a> |
| <a href="#">PREDICTED: complement factor I isoform X2 [Pan paniscus]</a>      | 45.2      | 45.2        | 100%        | 3e-04   | 93%   | <a href="#">gi 675793792 XP_008953631.1</a> |
| <a href="#">PREDICTED: complement factor I isoform X1 [Nannospalax ga</a>     | 45.2      | 45.2        | 100%        | 3e-04   | 93%   | <a href="#">gi 674034948 XP_008841690.1</a> |
| <a href="#">PREDICTED: complement factor I isoform X3 [Homo sapiens]</a>      | 45.2      | 45.2        | 100%        | 3e-04   | 93%   | <a href="#">gi 578809101 XP_006714272.1</a> |

|                                                                               |      |      |      |       |     |                                             |
|-------------------------------------------------------------------------------|------|------|------|-------|-----|---------------------------------------------|
| <a href="#">unnamed protein product [Homo sapiens]</a>                        | 45.2 | 45.2 | 100% | 3e-04 | 93% | <a href="#">gi 194387702 BAG61264.1</a>     |
| <a href="#">PREDICTED: complement factor I isoform X1 [Homo sapiens]</a>      | 45.2 | 45.2 | 100% | 3e-04 | 93% | <a href="#">gi 530377645 XP_005263032.1</a> |
| <a href="#">PREDICTED: complement factor I isoform X1 [Pan paniscus]</a>      | 45.2 | 45.2 | 100% | 3e-04 | 93% | <a href="#">gi 397519840 XP_003830061.1</a> |
| <a href="#">PREDICTED: complement factor I isoform X1 [Pan troglodytes]</a>   | 45.2 | 45.2 | 100% | 3e-04 | 93% | <a href="#">gi 332820084 XP_003310493.1</a> |
| <a href="#">PREDICTED: complement factor I isoform X1 [Saimiri boliviens]</a> | 45.2 | 45.2 | 100% | 4e-04 | 93% | <a href="#">gi 725571751 XP_010338378.1</a> |
| <a href="#">PREDICTED: complement factor I isoform X2 [Equus przewalsi]</a>   | 41.4 | 41.4 | 100% | 0.006 | 86% | <a href="#">gi 664769275 XP_008542181.1</a> |
| <a href="#">PREDICTED: complement factor I isoform X1 [Equus przewalsi]</a>   | 41.4 | 41.4 | 100% | 0.006 | 86% | <a href="#">gi 664769273 XP_008542180.1</a> |
| <a href="#">PREDICTED: complement factor I isoform X2 [Equus caballus]</a>    | 41.4 | 41.4 | 100% | 0.007 | 86% | <a href="#">gi 545210264 XP_005607952.1</a> |
| <a href="#">PREDICTED: complement factor I isoform X1 [Equus caballus]</a>    | 41.4 | 41.4 | 100% | 0.007 | 86% | <a href="#">gi 545210262 XP_005607951.1</a> |
| <a href="#">PREDICTED: complement factor I isoform X5 [Canis lupus fam]</a>   | 40.9 | 60.2 | 100% | 0.009 | 86% | <a href="#">gi 545552244 XP_005639326.1</a> |
| <a href="#">PREDICTED: complement factor I isoform X3 [Canis lupus fami]</a>  | 40.9 | 60.2 | 100% | 0.009 | 86% | <a href="#">gi 74002140 XP_863506.1</a>     |
| <a href="#">PREDICTED: complement factor I isoform X4 [Canis lupus fam]</a>   | 40.9 | 60.2 | 100% | 0.009 | 86% | <a href="#">gi 545552242 XP_005639325.1</a> |
| <a href="#">PREDICTED: complement factor I [Otolemur garnettii]</a>           | 40.5 | 40.5 | 100% | 0.012 | 86% | <a href="#">gi 395851346 XP_003798222.1</a> |
| <a href="#">Complement factor I [Fukomys damarensis]</a>                      | 40.5 | 40.5 | 100% | 0.012 | 86% | <a href="#">gi 676270629 KFO25832.1</a>     |
| <a href="#">Complement factor I [Heterocephalus glaber]</a>                   | 40.5 | 40.5 | 100% | 0.013 | 86% | <a href="#">gi 351696416 EHA99334.1</a>     |
| <a href="#">PREDICTED: complement factor I isoform X2 [Fukomys damar]</a>     | 40.5 | 40.5 | 100% | 0.013 | 86% | <a href="#">gi 731254237 XP_010639824.1</a> |
| <a href="#">PREDICTED: complement factor I isoform X2 [Heterocephalus]</a>    | 40.5 | 40.5 | 100% | 0.013 | 86% | <a href="#">gi 512818622 XP_004878889.1</a> |
| <a href="#">PREDICTED: complement factor I isoform X1 [Fukomys damar]</a>     | 40.5 | 40.5 | 100% | 0.013 | 86% | <a href="#">gi 731254235 XP_010639823.1</a> |
| <a href="#">PREDICTED: complement factor I isoform X1 [Heterocephalus]</a>    | 40.5 | 40.5 | 100% | 0.013 | 86% | <a href="#">gi 512818618 XP_004878888.1</a> |
| <a href="#">PREDICTED: complement factor I [Rhinopithecus roxellana]</a>      | 40.1 | 40.1 | 100% | 0.017 | 86% | <a href="#">gi 724946291 XP_010387365.1</a> |
| <a href="#">PREDICTED: complement factor I [Papio anubis]</a>                 | 40.1 | 40.1 | 100% | 0.017 | 86% | <a href="#">gi 685542561 XP_009205631.1</a> |
| <a href="#">PREDICTED: complement factor I isoform X2 [Ictidomys tridece]</a> | 39.7 | 39.7 | 100% | 0.024 | 86% | <a href="#">gi 532088899 XP_005330149.1</a> |
| <a href="#">PREDICTED: complement factor I isoform X1 [Ictidomys tridece]</a> | 39.7 | 39.7 | 100% | 0.024 | 86% | <a href="#">gi 532088897 XP_005330148.1</a> |
| <a href="#">PREDICTED: complement factor I [Ceratotherium simum simur]</a>    | 38.4 | 38.4 | 100% | 0.063 | 86% | <a href="#">gi 478504685 XP_004426641.1</a> |
| <a href="#">PREDICTED: complement factor I isoform X2 [Cavia porcellus]</a>   | 38.0 | 38.0 | 100% | 0.087 | 79% | <a href="#">gi 514457647 XP_005002957.1</a> |
| <a href="#">PREDICTED: complement factor I isoform X1 [Cavia porcellus]</a>   | 38.0 | 38.0 | 100% | 0.087 | 79% | <a href="#">gi 514457649 XP_003468099.2</a> |
| <a href="#">PREDICTED: LOW QUALITY PROTEIN: complement factor I [I]</a>       | 37.5 | 37.5 | 100% | 0.12  | 79% | <a href="#">gi 585149528 XP_006727262.1</a> |
| <a href="#">PREDICTED: complement factor I [Octodon degus]</a>                | 37.5 | 56.8 | 100% | 0.12  | 79% | <a href="#">gi 507626946 XP_004626817.1</a> |
| <a href="#">PREDICTED: complement factor I isoform X2 [Oryctolagus cun]</a>   | 37.5 | 37.5 | 100% | 0.12  | 79% | <a href="#">gi 655856777 XP_008265709.1</a> |
| <a href="#">PREDICTED: complement factor I isoform X1 [Oryctolagus cun]</a>   | 37.5 | 37.5 | 100% | 0.12  | 79% | <a href="#">gi 655856775 XP_002717177.2</a> |
| <a href="#">PREDICTED: complement factor I [Ochotona princeps]</a>            | 37.1 | 37.1 | 100% | 0.16  | 79% | <a href="#">gi 504169976 XP_004594584.1</a> |
| <a href="#">PREDICTED: complement factor I [Tarsius syrichta]</a>             | 37.1 | 37.1 | 100% | 0.16  | 86% | <a href="#">gi 640813983 XP_008063707.1</a> |
| <a href="#">PREDICTED: complement factor I [Loxodonta africana]</a>           | 37.1 | 37.1 | 100% | 0.16  | 79% | <a href="#">gi 731479219 XP_010588889.1</a> |
| <a href="#">PREDICTED: complement factor I isoform X6 [Panthera tigris a]</a> | 36.7 | 36.7 | 100% | 0.22  | 79% | <a href="#">gi 591346160 XP_007098330.1</a> |
| <a href="#">PREDICTED: complement factor I isoform X2 [Chlorocebus sat]</a>   | 36.7 | 36.7 | 100% | 0.23  | 79% | <a href="#">gi 635044269 XP_007997719.1</a> |
| <a href="#">PREDICTED: complement factor I isoform X1 [Chlorocebus sat]</a>   | 36.7 | 36.7 | 100% | 0.23  | 79% | <a href="#">gi 635044267 XP_007997718.1</a> |
| <a href="#">PREDICTED: complement factor I [Orycteropus afer afer]</a>        | 36.7 | 36.7 | 100% | 0.23  | 79% | <a href="#">gi 634848033 XP_007938975.1</a> |
| <a href="#">PREDICTED: complement factor I isoform X5 [Panthera tigris a]</a> | 36.7 | 36.7 | 100% | 0.23  | 79% | <a href="#">gi 591346158 XP_007098329.1</a> |
| <a href="#">PREDICTED: complement factor I isoform X4 [Panthera tigris a]</a> | 36.7 | 36.7 | 100% | 0.23  | 79% | <a href="#">gi 591346156 XP_007098328.1</a> |
| <a href="#">PREDICTED: complement factor I isoform X2 [Panthera tigris a]</a> | 36.7 | 36.7 | 100% | 0.23  | 79% | <a href="#">gi 591346152 XP_007098326.1</a> |
| <a href="#">PREDICTED: complement factor I isoform X1 [Panthera tigris a]</a> | 36.7 | 36.7 | 100% | 0.23  | 79% | <a href="#">gi 591346150 XP_007098325.1</a> |
| <a href="#">PREDICTED: complement factor I-like [Macaca mulatta]</a>          | 36.3 | 36.3 | 100% | 0.30  | 79% | <a href="#">gi 297293220 XP_001087512.2</a> |
| <a href="#">uncharacterized protein LOC101866929 precursor [Macaca fas]</a>   | 36.3 | 36.3 | 100% | 0.31  | 79% | <a href="#">gi 548961885 NP_001271714.1</a> |
| <a href="#">hypothetical protein EGK_16010 [Macaca mulatta]</a>               | 36.3 | 36.3 | 100% | 0.31  | 79% | <a href="#">gi 355687535 EHH26119.1</a>     |
| <a href="#">complement factor I-like protein [Cricetulus griseus]</a>         | 35.4 | 35.4 | 100% | 0.58  | 79% | <a href="#">gi 537261801 ERE90152.1</a>     |

|                                                                                                                        |      |      |      |      |      |                                             |
|------------------------------------------------------------------------------------------------------------------------|------|------|------|------|------|---------------------------------------------|
| <a href="#">PREDICTED: complement factor I [Cricetulus griseus]</a>                                                    | 35.4 | 35.4 | 100% | 0.59 | 79%  | <a href="#">gi 625241505 XP_007611983.1</a> |
| <a href="#">PREDICTED: complement factor I [Cricetulus griseus]</a>                                                    | 35.4 | 35.4 | 100% | 0.59 | 79%  | <a href="#">gi 625222421 XP_007651009.1</a> |
| <a href="#">PREDICTED: LOW QUALITY PROTEIN: complement factor I [complement factor I precursor [Rattus norvegicus]</a> | 35.0 | 35.0 | 100% | 0.80 | 79%  | <a href="#">gi 472383864 XP_004411307.1</a> |
| <a href="#">PREDICTED: LOW QUALITY PROTEIN: complement factor I [complement factor I precursor [Rattus norvegicus]</a> | 34.6 | 34.6 | 100% | 1.1  | 79%  | <a href="#">gi 13162353 NP_077071.1</a>     |
| <a href="#">PREDICTED: LOW QUALITY PROTEIN: complement factor I [complement factor I precursor [Rattus norvegicus]</a> | 34.6 | 34.6 | 100% | 1.1  | 79%  | <a href="#">gi 586984171 XP_006930977.1</a> |
| <a href="#">PREDICTED: complement factor I isoform X1 [Rattus norvegicus]</a>                                          | 34.6 | 34.6 | 100% | 1.1  | 79%  | <a href="#">gi 672044321 XP_008759748.1</a> |
| <a href="#">PREDICTED: complement factor I [Jaculus jaculus]</a>                                                       | 34.1 | 34.1 | 100% | 1.5  | 71%  | <a href="#">gi 507549735 XP_004658680.1</a> |
| <a href="#">PREDICTED: complement factor I [Trichechus manatus latirostris]</a>                                        | 33.3 | 33.3 | 100% | 2.8  | 71%  | <a href="#">gi 471391575 XP_004380312.1</a> |
| <a href="#">PREDICTED: complement factor I [Mesocricetus auratus]</a>                                                  | 32.5 | 32.5 | 100% | 5.3  | 79%  | <a href="#">gi 524965961 XP_005082885.1</a> |
| <a href="#">PREDICTED: complement factor I [Mustela putorius furo]</a>                                                 | 32.0 | 32.0 | 100% | 7.1  | 71%  | <a href="#">gi 511847748 XP_004748251.1</a> |
| <a href="#">PREDICTED: complement factor I [Mustela putorius furo]</a>                                                 | 32.0 | 32.0 | 100% | 7.2  | 71%  | <a href="#">gi 511991360 XP_004813365.1</a> |
| <a href="#">PREDICTED: complement factor I isoform X4 [Mus musculus]</a>                                               | 32.0 | 32.0 | 100% | 7.2  | 71%  | <a href="#">gi 568921717 XP_006501026.1</a> |
| <a href="#">PREDICTED: complement factor I isoform X3 [Mus musculus]</a>                                               | 32.0 | 32.0 | 100% | 7.2  | 71%  | <a href="#">gi 568921715 XP_006501025.1</a> |
| <a href="#">PREDICTED: complement factor I isoform X2 [Mus musculus]</a>                                               | 32.0 | 32.0 | 100% | 7.2  | 71%  | <a href="#">gi 568921713 XP_006501024.1</a> |
| <a href="#">complement factor I precursor [Mus musculus]</a>                                                           | 32.0 | 32.0 | 100% | 7.2  | 71%  | <a href="#">gi 110347406 NP_031712.2</a>    |
| <a href="#">PREDICTED: LOW QUALITY PROTEIN: complement factor I [complement factor I precursor [Mus musculus]</a>      | 31.2 | 50.5 | 100% | 13   | 71%  | <a href="#">gi 533186455 XP_005406244.1</a> |
| <a href="#">PREDICTED: complement factor I [Chrysochloris asiatica]</a>                                                | 30.8 | 30.8 | 100% | 18   | 71%  | <a href="#">gi 586477731 XP_006869402.1</a> |
| <a href="#">PREDICTED: complement factor I [Sarcophilus harrisii]</a>                                                  | 30.3 | 30.3 | 100% | 25   | 64%  | <a href="#">gi 395542057 XP_003772951.1</a> |
| <a href="#">hypothetical protein C404_13575 [Ralstonia sp. AU12-08]</a>                                                | 29.9 | 29.9 | 71%  | 34   | 91%  | <a href="#">gi 528186626 EPX97543.1</a>     |
| <a href="#">hypothetical protein [Ralstonia sp. AU12-08]</a>                                                           | 29.9 | 29.9 | 71%  | 34   | 91%  | <a href="#">gi 739147048 WP_037011702.1</a> |
| <a href="#">hypothetical protein [Ralstonia sp. UNC404CL21Col]</a>                                                     | 29.9 | 29.9 | 71%  | 34   | 91%  | <a href="#">gi 653774958 WP_027680912.1</a> |
| <a href="#">hypothetical protein [Ralstonia pickettii]</a>                                                             | 29.9 | 29.9 | 71%  | 34   | 91%  | <a href="#">gi 640543007 WP_024975163.1</a> |
| <a href="#">PREDICTED: complement factor I [Peromyscus maniculatus bairdii]</a>                                        | 29.9 | 29.9 | 100% | 34   | 71%  | <a href="#">gi 589914217 XP_006970447.1</a> |
| <a href="#">Putative disease resistance protein RXW24L [Aegilops tauschii]</a>                                         | 29.5 | 29.5 | 57%  | 46   | 100% | <a href="#">gi 475506332 EMT04834.1</a>     |
| <a href="#">molecular chaperone DnaJ [Desulfovibrio putealis]</a>                                                      | 29.1 | 29.1 | 85%  | 61   | 83%  | <a href="#">gi 652937116 WP_027190715.1</a> |
| <a href="#">PREDICTED: complement factor I [Myotis davidii]</a>                                                        | 29.1 | 29.1 | 100% | 62   | 71%  | <a href="#">gi 584046382 XP_006767995.1</a> |

## Alignments

Download GenPept Graphics

Next Previous Descriptions

PREDICTED: complement factor I-like, partial [Gorilla gorilla gorilla]

Sequence ID: [gi|426345243|ref|XP\\_004040330.1|](#) Length: 309 Number of Matches: 1

Range 1: 99 to 112 GenPept Graphics

Next Match Previous Match

| Score         | Expect | Identities | Positives   | Gaps     |
|---------------|--------|------------|-------------|----------|
| 45.2 bits(99) | 3e-04  | 13/14(93%) | 14/14(100%) | 0/14(0%) |

Query 1 KFLNDGTCTAEGKF 14  
KFLN+GTCTAEGKF  
Sbjct 99 KFLNNGTCTAEGKF 112

### Related Information

[Gene](#) - associated gene details  
[Map Viewer](#) - aligned genomic context

Download GenPept Graphics

Next Previous Descriptions

unnamed protein product [Homo sapiens]

Sequence ID: [gi|1335055|emb|CAA68417.1|](#) Length: 321 Number of Matches: 1

Range 1: 81 to 94 GenPept Graphics

Next Match Previous Match

| Score         | Expect | Identities | Positives   | Gaps     |
|---------------|--------|------------|-------------|----------|
| 45.2 bits(99) | 3e-04  | 13/14(93%) | 14/14(100%) | 0/14(0%) |

### Related Information

[Gene](#) - associated gene details

Query 1 KFLNDGTCTAEGKF 14  
 KFLN+GTCTAEGKF  
 Sbjct 81 KFLNNGTCTAEGKF 94

Download [GenPept](#) [Graphics](#)

[▼ Next](#) [▲ Previous](#) [▲ Descriptions](#)

CFI protein [Homo sapiens]

Sequence ID: [gi|18089117|gb|AAH20718.1](#) Length: 377 Number of Matches: 1

[▶ See 1 more title\(s\)](#)

Range 1: 99 to 112 [GenPept](#) [Graphics](#)

[▼ Next Match](#) [▲ Previous Match](#)

| Score         | Expect | Identities | Positives   | Gaps     |
|---------------|--------|------------|-------------|----------|
| 45.2 bits(99) | 3e-04  | 13/14(93%) | 14/14(100%) | 0/14(0%) |

Query 1 KFLNDGTCTAEGKF 14  
 KFLN+GTCTAEGKF  
 Sbjct 99 KFLNNGTCTAEGKF 112

**Related Information**

[Gene](#) - associated gene details  
[Identical Proteins](#) - Proteins identical to the subject

Download [GenPept](#) [Graphics](#)

[▼ Next](#) [▲ Previous](#) [▲ Descriptions](#)

complement factor I, isoform CRA\_a, partial [Homo sapiens]

Sequence ID: [gi|119626655|gb|EAX06250.1](#) Length: 378 Number of Matches: 1

Range 1: 99 to 112 [GenPept](#) [Graphics](#)

[▼ Next Match](#) [▲ Previous Match](#)

| Score         | Expect | Identities | Positives   | Gaps     |
|---------------|--------|------------|-------------|----------|
| 45.2 bits(99) | 3e-04  | 13/14(93%) | 14/14(100%) | 0/14(0%) |

Query 1 KFLNDGTCTAEGKF 14  
 KFLN+GTCTAEGKF  
 Sbjct 99 KFLNNGTCTAEGKF 112

**Related Information**

[Gene](#) - associated gene details

Download [GenPept](#) [Graphics](#)

[▼ Next](#) [▲ Previous](#) [▲ Descriptions](#)

PREDICTED: complement factor I isoform X6 [Pan troglodytes]

Sequence ID: [gi|694908492|ref|XP\\_009446407.1](#) Length: 516 Number of Matches: 1

Range 1: 99 to 112 [GenPept](#) [Graphics](#)

[▼ Next Match](#) [▲ Previous Match](#)

| Score         | Expect | Identities | Positives   | Gaps     |
|---------------|--------|------------|-------------|----------|
| 45.2 bits(99) | 3e-04  | 13/14(93%) | 14/14(100%) | 0/14(0%) |

Query 1 KFLNDGTCTAEGKF 14  
 KFLN+GTCTAEGKF  
 Sbjct 99 KFLNNGTCTAEGKF 112

**Related Information**

[Gene](#) - associated gene details

BLAST is a registered trademark of the National Library of Medicine.

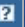

NCBI/ BLAST/ blastp suite/ Formatting Results - BTG7JCWX013

Your search parameters were adjusted to search for a short input sequence.

[Edit and Resubmit](#) [Save Search Strategies](#) [Formatting options](#) [Download](#)

[YouTube](#) [How to read this page](#) [Blast report description](#)

CFI\_KFLNDGTCTAEGKFSVSLKH\_Mod

RID [BTG7JCWX013](#) (Expires on 01-20 15:31 pm)

Query ID |cl|81263  
Description None  
Molecule type amino acid  
Query Length 20

Database Name nr  
Description All non-redundant GenBank CDS translations+PDB+SwissProt+PIR+PRF excluding environmental samples from WGS projects  
Program BLASTP 2.2.30+ [Citation](#)

Other reports: [Search Summary](#) [Taxonomy reports](#) [Distance tree of results](#) [Multiple alignment](#)

Graphic Summary

[Show Conserved Domains](#)

No putative conserved domains have been detected

Distribution of 100 Blast Hits on the Query Sequence

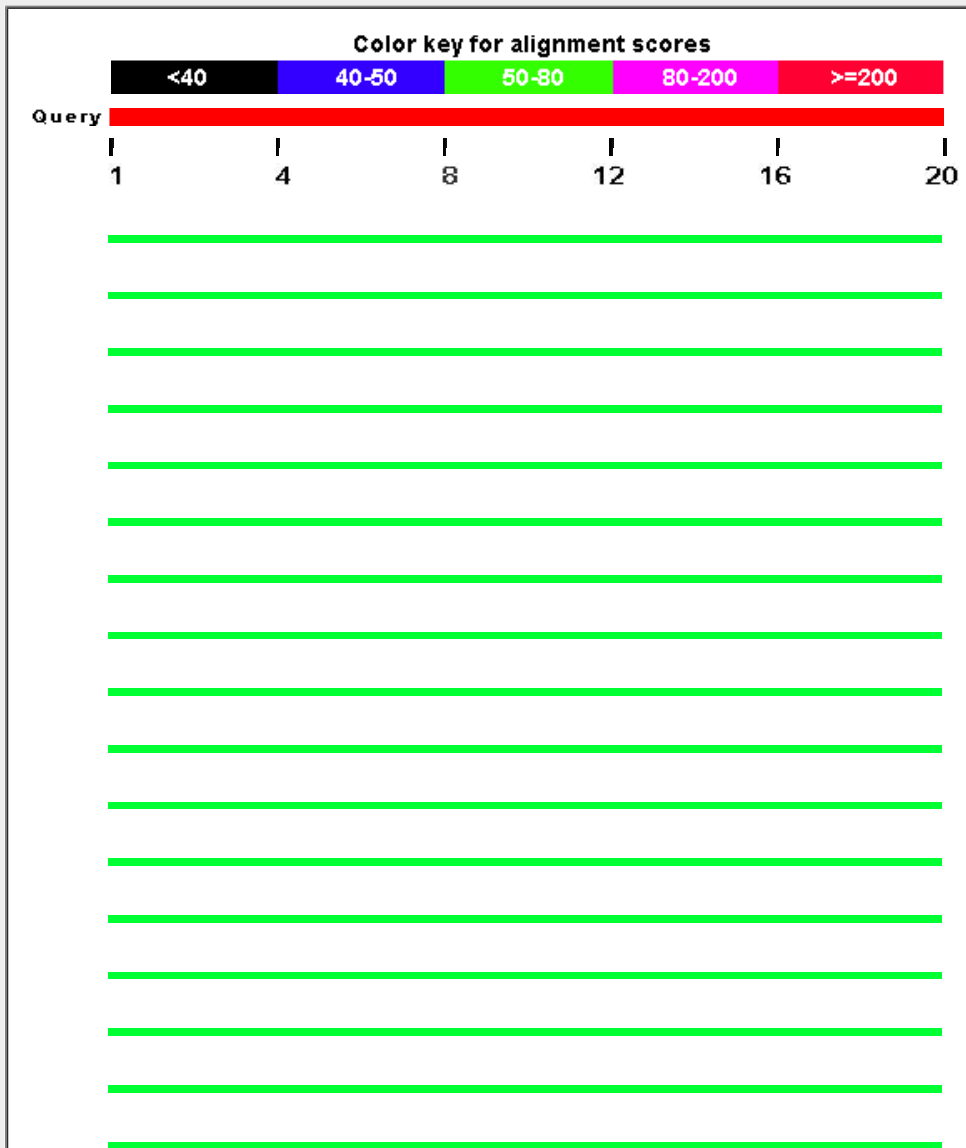



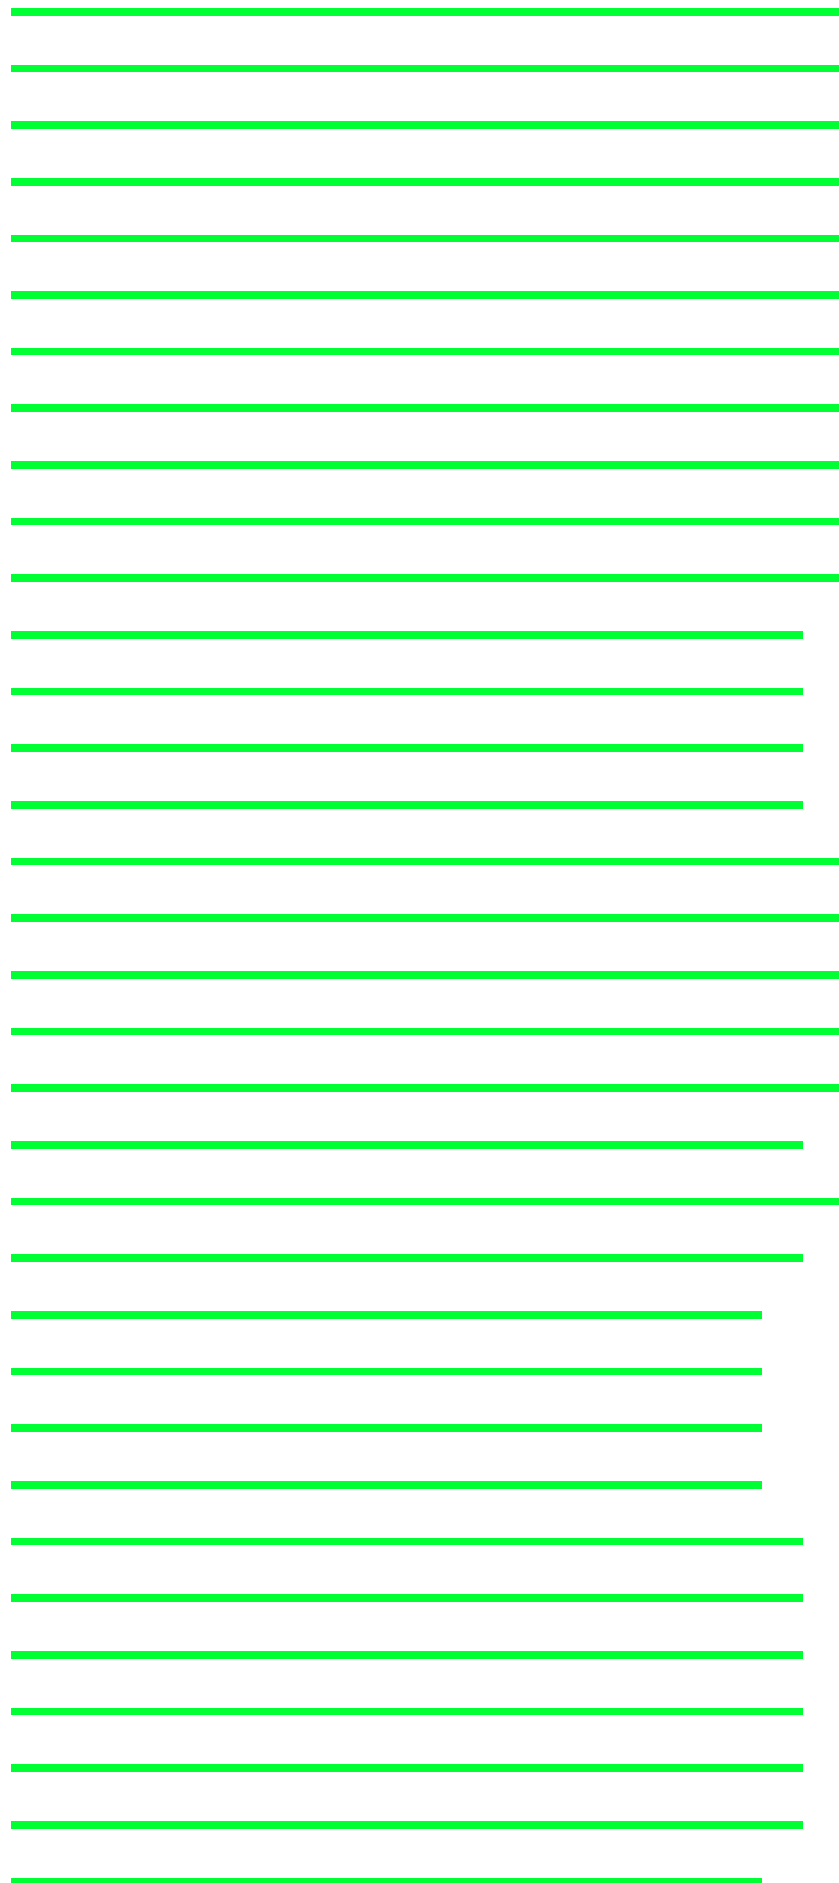

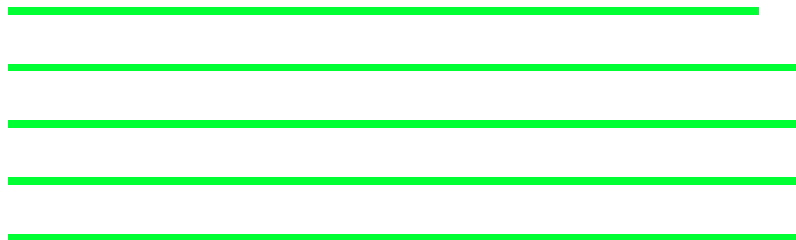

**Descriptions**

**Sequences producing significant alignments:**

Select: [All](#) [None](#) Selected:0

[Alignments](#)
[Download](#)
[GenPept](#)
[Graphics](#)
[Distance tree of results](#)
[Multiple alignment](#)


| Description                                                                   | Max score | Total score | Query cover | E value | Ident | Accession                                   |
|-------------------------------------------------------------------------------|-----------|-------------|-------------|---------|-------|---------------------------------------------|
| <a href="#">PREDICTED: complement factor I-like [Gorilla gorilla gorilla]</a> | 63.0      | 63.0        | 100%        | 6e-10   | 95%   | <a href="#">gi 426345243 XP_004040330.1</a> |
| <a href="#">unnamed protein product [Homo sapiens]</a>                        | 63.0      | 63.0        | 100%        | 7e-10   | 95%   | <a href="#">gi 1335055 CAA68417.1</a>       |
| <a href="#">CFI protein [Homo sapiens]</a>                                    | 63.0      | 63.0        | 100%        | 7e-10   | 95%   | <a href="#">gi 18089117 AAH20718.1</a>      |
| <a href="#">complement factor I, isoform CRA_a [Homo sapiens]</a>             | 63.0      | 63.0        | 100%        | 7e-10   | 95%   | <a href="#">gi 119626655 EAX06250.1</a>     |
| <a href="#">PREDICTED: complement factor I isoform X6 [Pan troglodytes]</a>   | 63.0      | 63.0        | 100%        | 7e-10   | 95%   | <a href="#">gi 694908492 XP_009446407.1</a> |
| <a href="#">PREDICTED: complement factor I isoform X6 [Pan paniscus]</a>      | 63.0      | 63.0        | 100%        | 7e-10   | 95%   | <a href="#">gi 675793799 XP_008953634.1</a> |
| <a href="#">PREDICTED: complement factor I isoform X5 [Pan troglodytes]</a>   | 63.0      | 63.0        | 100%        | 7e-10   | 95%   | <a href="#">gi 694908490 XP_009446406.1</a> |
| <a href="#">PREDICTED: complement factor I isoform X5 [Pan paniscus]</a>      | 63.0      | 63.0        | 100%        | 7e-10   | 95%   | <a href="#">gi 675793797 XP_008953633.1</a> |
| <a href="#">PREDICTED: complement factor I isoform X4 [Homo sapiens]</a>      | 63.0      | 63.0        | 100%        | 7e-10   | 95%   | <a href="#">gi 578809103 XP_006714273.1</a> |
| <a href="#">Chain A, Human Complement Factor I [Homo sapiens]</a>             | 63.0      | 63.0        | 100%        | 7e-10   | 95%   | <a href="#">gi 339961198 2XRC_A</a>         |
| <a href="#">PREDICTED: complement factor I isoform X4 [Pan troglodytes]</a>   | 63.0      | 63.0        | 100%        | 7e-10   | 95%   | <a href="#">gi 694908488 XP_009446405.1</a> |
| <a href="#">PREDICTED: complement factor I isoform X4 [Pan paniscus]</a>      | 63.0      | 63.0        | 100%        | 7e-10   | 95%   | <a href="#">gi 675793795 XP_008953632.1</a> |
| <a href="#">PREDICTED: complement factor I isoform X2 [Homo sapiens]</a>      | 63.0      | 63.0        | 100%        | 7e-10   | 95%   | <a href="#">gi 530377647 XP_005263033.1</a> |
| <a href="#">PREDICTED: complement factor I [Nomascus leucogenys]</a>          | 63.0      | 63.0        | 100%        | 7e-10   | 95%   | <a href="#">gi 332240463 XP_003269405.1</a> |
| <a href="#">prepro-C3b/C4B inactivator [Homo sapiens]</a>                     | 63.0      | 63.0        | 100%        | 7e-10   | 95%   | <a href="#">gi 182607 AAA52455.1</a>        |
| <a href="#">complement factor I preproprotein [Homo sapiens]</a>              | 63.0      | 63.0        | 100%        | 7e-10   | 95%   | <a href="#">gi 119392081 NP_000195.2</a>    |
| <a href="#">complement factor I precursor [Pongo abelii]</a>                  | 63.0      | 63.0        | 100%        | 7e-10   | 95%   | <a href="#">gi 197098986 NP_001127624.1</a> |
| <a href="#">PREDICTED: complement factor I isoform X3 [Pan paniscus]</a>      | 63.0      | 63.0        | 100%        | 7e-10   | 95%   | <a href="#">gi 397519838 XP_003830060.1</a> |
| <a href="#">RecName: Full=Complement factor I; AltName: Full=C3B/C4B i</a>    | 63.0      | 63.0        | 100%        | 7e-10   | 95%   | <a href="#">gi 317373341 P05156.2</a>       |
| <a href="#">unnamed protein product [Homo sapiens]</a>                        | 63.0      | 63.0        | 100%        | 7e-10   | 95%   | <a href="#">gi 158254682 BAF83314.1</a>     |
| <a href="#">PREDICTED: complement factor I isoform X3 [Pan troglodytes]</a>   | 63.0      | 63.0        | 100%        | 7e-10   | 95%   | <a href="#">gi 114595644 XP_526653.2</a>    |
| <a href="#">PREDICTED: complement factor I isoform X2 [Pan troglodytes]</a>   | 63.0      | 63.0        | 100%        | 7e-10   | 95%   | <a href="#">gi 694908485 XP_009446404.1</a> |
| <a href="#">PREDICTED: complement factor I isoform X2 [Pan paniscus]</a>      | 63.0      | 63.0        | 100%        | 7e-10   | 95%   | <a href="#">gi 675793792 XP_008953631.1</a> |
| <a href="#">PREDICTED: complement factor I isoform X3 [Homo sapiens]</a>      | 63.0      | 63.0        | 100%        | 7e-10   | 95%   | <a href="#">gi 578809101 XP_006714272.1</a> |
| <a href="#">unnamed protein product [Homo sapiens]</a>                        | 63.0      | 63.0        | 100%        | 7e-10   | 95%   | <a href="#">gi 194387702 BAG61264.1</a>     |
| <a href="#">PREDICTED: complement factor I isoform X1 [Homo sapiens]</a>      | 63.0      | 63.0        | 100%        | 7e-10   | 95%   | <a href="#">gi 530377645 XP_005263032.1</a> |
| <a href="#">PREDICTED: complement factor I isoform X1 [Pan paniscus]</a>      | 63.0      | 63.0        | 100%        | 7e-10   | 95%   | <a href="#">gi 397519840 XP_003830061.1</a> |
| <a href="#">PREDICTED: complement factor I isoform X1 [Pan troglodytes]</a>   | 63.0      | 63.0        | 100%        | 7e-10   | 95%   | <a href="#">gi 332820084 XP_003310493.1</a> |
| <a href="#">PREDICTED: complement factor I isoform X2 [Saimiri boliviens</a>  | 59.2      | 59.2        | 95%         | 1e-08   | 95%   | <a href="#">gi 725571753 XP_010338379.1</a> |

|                                                                                          |      |      |      |       |     |                                             |
|------------------------------------------------------------------------------------------|------|------|------|-------|-----|---------------------------------------------|
| <a href="#">PREDICTED: complement factor I [Callithrix jacchus]</a>                      | 59.2 | 59.2 | 95%  | 1e-08 | 95% | <a href="#">gi 675648222 XP_002745538.3</a> |
| <a href="#">PREDICTED: complement factor I [Callithrix jacchus]</a>                      | 59.2 | 59.2 | 95%  | 1e-08 | 95% | <a href="#">gi 675752511 XP_008984405.1</a> |
| <a href="#">PREDICTED: complement factor I isoform X1 [Saimiri boliviens]</a>            | 59.2 | 59.2 | 95%  | 1e-08 | 95% | <a href="#">gi 725571751 XP_010338378.1</a> |
| <a href="#">PREDICTED: complement factor I [Papio anubis]</a>                            | 57.9 | 57.9 | 100% | 4e-08 | 90% | <a href="#">gi 685542561 XP_009205631.1</a> |
| <a href="#">PREDICTED: complement factor I isoform X2 [Chlorocebus sat]</a>              | 54.5 | 54.5 | 100% | 5e-07 | 85% | <a href="#">gi 635044269 XP_007997719.1</a> |
| <a href="#">PREDICTED: complement factor I isoform X1 [Chlorocebus sat]</a>              | 54.5 | 54.5 | 100% | 5e-07 | 85% | <a href="#">gi 635044267 XP_007997718.1</a> |
| <a href="#">PREDICTED: complement factor I-like [Macaca mulatta]</a>                     | 54.1 | 54.1 | 100% | 7e-07 | 85% | <a href="#">gi 297293220 XP_001087512.2</a> |
| <a href="#">uncharacterized protein LOC101866929 precursor [Macaca fas]</a>              | 54.1 | 54.1 | 100% | 7e-07 | 85% | <a href="#">gi 548961885 NP_001271714.1</a> |
| <a href="#">PREDICTED: complement factor I [Rhinopithecus roxellana]</a>                 | 54.1 | 54.1 | 95%  | 7e-07 | 89% | <a href="#">gi 724946291 XP_010387365.1</a> |
| <a href="#">hypothetical protein EGK_16010 [Macaca mulatta]</a>                          | 54.1 | 54.1 | 100% | 7e-07 | 85% | <a href="#">gi 355687535 EHH26119.1</a>     |
| <a href="#">PREDICTED: complement factor I [Ceratotherium simum simur]</a>               | 52.4 | 52.4 | 95%  | 3e-06 | 89% | <a href="#">gi 478504685 XP_004426641.1</a> |
| <a href="#">PREDICTED: complement factor I [Otolemur garnettii]</a>                      | 51.5 | 51.5 | 90%  | 5e-06 | 89% | <a href="#">gi 395851346 XP_003798222.1</a> |
| <a href="#">Complement factor I [Heterocephalus glaber]</a>                              | 51.5 | 51.5 | 90%  | 5e-06 | 89% | <a href="#">gi 351696416 EHA99334.1</a>     |
| <a href="#">PREDICTED: complement factor I isoform X2 [Heterocephalus]</a>               | 51.5 | 51.5 | 90%  | 5e-06 | 89% | <a href="#">gi 512818622 XP_004878889.1</a> |
| <a href="#">PREDICTED: complement factor I isoform X1 [Heterocephalus]</a>               | 51.5 | 51.5 | 90%  | 5e-06 | 89% | <a href="#">gi 512818618 XP_004878888.1</a> |
| <a href="#">PREDICTED: complement factor I isoform X2 [Equus przewals]</a>               | 51.1 | 51.1 | 95%  | 7e-06 | 84% | <a href="#">gi 664769275 XP_008542181.1</a> |
| <a href="#">PREDICTED: complement factor I isoform X1 [Equus przewals]</a>               | 51.1 | 51.1 | 95%  | 7e-06 | 84% | <a href="#">gi 664769273 XP_008542180.1</a> |
| <a href="#">PREDICTED: complement factor I [Tarsius syrichta]</a>                        | 51.1 | 51.1 | 95%  | 7e-06 | 89% | <a href="#">gi 640813983 XP_008063707.1</a> |
| <a href="#">PREDICTED: complement factor I isoform X2 [Equus caballus]</a>               | 51.1 | 51.1 | 95%  | 7e-06 | 84% | <a href="#">gi 545210264 XP_005607952.1</a> |
| <a href="#">PREDICTED: complement factor I isoform X1 [Equus caballus]</a>               | 51.1 | 51.1 | 95%  | 7e-06 | 84% | <a href="#">gi 545210262 XP_005607951.1</a> |
| <a href="#">PREDICTED: complement factor I isoform X6 [Panthera tigris a]</a>            | 50.7 | 50.7 | 95%  | 1e-05 | 84% | <a href="#">gi 591346160 XP_007098330.1</a> |
| <a href="#">PREDICTED: complement factor I isoform X2 [Nannospalax ga]</a>               | 50.7 | 50.7 | 90%  | 1e-05 | 89% | <a href="#">gi 674034950 XP_008841698.1</a> |
| <a href="#">PREDICTED: complement factor I isoform X1 [Nannospalax ga]</a>               | 50.7 | 50.7 | 90%  | 1e-05 | 89% | <a href="#">gi 674034948 XP_008841690.1</a> |
| <a href="#">PREDICTED: complement factor I isoform X5 [Panthera tigris a]</a>            | 50.7 | 50.7 | 95%  | 1e-05 | 84% | <a href="#">gi 591346158 XP_007098329.1</a> |
| <a href="#">PREDICTED: complement factor I isoform X4 [Panthera tigris a]</a>            | 50.7 | 50.7 | 95%  | 1e-05 | 84% | <a href="#">gi 591346156 XP_007098328.1</a> |
| <a href="#">PREDICTED: complement factor I isoform X2 [Panthera tigris a]</a>            | 50.7 | 50.7 | 95%  | 1e-05 | 84% | <a href="#">gi 591346152 XP_007098326.1</a> |
| <a href="#">PREDICTED: complement factor I isoform X1 [Panthera tigris a]</a>            | 50.7 | 50.7 | 95%  | 1e-05 | 84% | <a href="#">gi 591346150 XP_007098325.1</a> |
| <a href="#">PREDICTED: complement factor I isoform X5 [Canis lupus fam]</a>              | 49.8 | 49.8 | 90%  | 2e-05 | 83% | <a href="#">gi 545552244 XP_005639326.1</a> |
| <a href="#">PREDICTED: complement factor I isoform X3 [Canis lupus fami]</a>             | 49.8 | 49.8 | 90%  | 2e-05 | 83% | <a href="#">gi 74002140 XP_863506.1</a>     |
| <a href="#">PREDICTED: complement factor I isoform X4 [Canis lupus fam]</a>              | 49.8 | 49.8 | 90%  | 2e-05 | 83% | <a href="#">gi 545552242 XP_005639325.1</a> |
| <a href="#">PREDICTED: complement factor I isoform X2 [Oryctolagus cun]</a>              | 49.0 | 49.0 | 95%  | 4e-05 | 79% | <a href="#">gi 655856777 XP_008265709.1</a> |
| <a href="#">PREDICTED: complement factor I isoform X1 [Oryctolagus cun]</a>              | 49.0 | 49.0 | 95%  | 4e-05 | 79% | <a href="#">gi 655856775 XP_002717177.2</a> |
| <a href="#">Complement factor I [Fukomys damarensis]</a>                                 | 48.6 | 48.6 | 85%  | 5e-05 | 88% | <a href="#">gi 676270629 KFO25832.1</a>     |
| <a href="#">PREDICTED: complement factor I isoform X2 [Ictidomys tridece]</a>            | 48.6 | 48.6 | 90%  | 5e-05 | 83% | <a href="#">gi 532088899 XP_005330149.1</a> |
| <a href="#">PREDICTED: complement factor I isoform X1 [Ictidomys tridece]</a>            | 48.6 | 48.6 | 90%  | 5e-05 | 83% | <a href="#">gi 532088897 XP_005330148.1</a> |
| <a href="#">PREDICTED: complement factor I isoform X2 [Fukomys damar]</a>                | 48.6 | 48.6 | 85%  | 5e-05 | 88% | <a href="#">gi 731254237 XP_010639824.1</a> |
| <a href="#">PREDICTED: LOW QUALITY PROTEIN: complement factor I [Fukomys damar]</a>      | 48.6 | 48.6 | 95%  | 5e-05 | 84% | <a href="#">gi 586984171 XP_006930977.1</a> |
| <a href="#">PREDICTED: complement factor I isoform X1 [Fukomys damar]</a>                | 48.6 | 48.6 | 85%  | 5e-05 | 88% | <a href="#">gi 731254235 XP_010639823.1</a> |
| <a href="#">PREDICTED: LOW QUALITY PROTEIN: complement factor I [Fukomys damar]</a>      | 48.1 | 48.1 | 95%  | 7e-05 | 79% | <a href="#">gi 585149528 XP_006727262.1</a> |
| <a href="#">PREDICTED: complement factor I [Octodon degus]</a>                           | 46.0 | 46.0 | 90%  | 4e-04 | 78% | <a href="#">gi 507626946 XP_004626817.1</a> |
| <a href="#">PREDICTED: complement factor I [Loxodonta africana]</a>                      | 46.0 | 46.0 | 90%  | 4e-04 | 78% | <a href="#">gi 731479219 XP_010588889.1</a> |
| <a href="#">PREDICTED: LOW QUALITY PROTEIN: complement factor I [Loxodonta africana]</a> | 45.6 | 45.6 | 95%  | 5e-04 | 79% | <a href="#">gi 472383864 XP_004411307.1</a> |
| <a href="#">PREDICTED: complement factor I [Orycteropus afer afer]</a>                   | 45.6 | 45.6 | 95%  | 5e-04 | 79% | <a href="#">gi 634848033 XP_007938975.1</a> |
| <a href="#">PREDICTED: complement factor I [Chrysochloris asiatica]</a>                  | 44.8 | 44.8 | 95%  | 0.001 | 79% | <a href="#">gi 586477731 XP_006869402.1</a> |
| <a href="#">PREDICTED: complement factor I [Ochotona princeps]</a>                       | 43.9 | 43.9 | 90%  | 0.002 | 78% | <a href="#">gi 504169976 XP_004594584.1</a> |

|                                                                                    |      |      |      |       |     |                                             |
|------------------------------------------------------------------------------------|------|------|------|-------|-----|---------------------------------------------|
| <a href="#">complement factor I-like protein [Cricetulus griseus]</a>              | 43.9 | 43.9 | 90%  | 0.002 | 78% | <a href="#">gi 537261801 ERE90152.1</a>     |
| <a href="#">PREDICTED: complement factor I [Cricetulus griseus]</a>                | 43.9 | 43.9 | 90%  | 0.002 | 78% | <a href="#">gi 625241505 XP_007611983.1</a> |
| <a href="#">PREDICTED: complement factor I [Cricetulus griseus]</a>                | 43.9 | 43.9 | 90%  | 0.002 | 78% | <a href="#">gi 625222421 XP_007651009.1</a> |
| <a href="#">complement factor I precursor [Rattus norvegicus]</a>                  | 43.1 | 43.1 | 90%  | 0.003 | 78% | <a href="#">gi 13162353 NP_077071.1</a>     |
| <a href="#">PREDICTED: complement factor I isoform X1 [Rattus norvegicus]</a>      | 43.1 | 43.1 | 90%  | 0.003 | 78% | <a href="#">gi 672044321 XP_008759748.1</a> |
| <a href="#">PREDICTED: complement factor I [Jaculus jaculus]</a>                   | 42.6 | 42.6 | 90%  | 0.004 | 72% | <a href="#">gi 507549735 XP_004658680.1</a> |
| <a href="#">PREDICTED: complement factor I [Myotis davidii]</a>                    | 42.2 | 42.2 | 100% | 0.006 | 70% | <a href="#">gi 584046382 XP_006767995.1</a> |
| <a href="#">PREDICTED: complement factor I [Trichechus manatus latirostris]</a>    | 41.4 | 41.4 | 85%  | 0.012 | 76% | <a href="#">gi 471391575 XP_004380312.1</a> |
| <a href="#">PREDICTED: complement factor I isoform X2 [Cavia porcellus]</a>        | 40.9 | 40.9 | 90%  | 0.016 | 72% | <a href="#">gi 514457647 XP_005002957.1</a> |
| <a href="#">PREDICTED: complement factor I isoform X1 [Cavia porcellus]</a>        | 40.9 | 40.9 | 90%  | 0.016 | 72% | <a href="#">gi 514457649 XP_003468099.2</a> |
| <a href="#">PREDICTED: complement factor I [Mesocricetus auratus]</a>              | 40.9 | 40.9 | 90%  | 0.016 | 78% | <a href="#">gi 524965961 XP_005082885.1</a> |
| <a href="#">complement factor I precursor [Camelus ferus]</a>                      | 40.5 | 40.5 | 95%  | 0.021 | 74% | <a href="#">gi 528758403 EPY78062.1</a>     |
| <a href="#">PREDICTED: complement factor I isoform X2 [Camelus dromedarius]</a>    | 40.5 | 40.5 | 95%  | 0.022 | 74% | <a href="#">gi 744567503 XP_010979382.1</a> |
| <a href="#">PREDICTED: complement factor I isoform X2 [Camelus bactria]</a>        | 40.5 | 40.5 | 95%  | 0.022 | 74% | <a href="#">gi 743716645 XP_010951976.1</a> |
| <a href="#">PREDICTED: complement factor I isoform X1 [Camelus dromedarius]</a>    | 40.5 | 40.5 | 95%  | 0.022 | 74% | <a href="#">gi 744567500 XP_010979381.1</a> |
| <a href="#">PREDICTED: complement factor I isoform X1 [Camelus bactria]</a>        | 40.5 | 40.5 | 95%  | 0.022 | 74% | <a href="#">gi 743716643 XP_010951975.1</a> |
| <a href="#">PREDICTED: complement factor I isoform X4 [Mus musculus]</a>           | 40.5 | 40.5 | 90%  | 0.022 | 72% | <a href="#">gi 568921717 XP_006501026.1</a> |
| <a href="#">PREDICTED: complement factor I isoform X3 [Mus musculus]</a>           | 40.5 | 40.5 | 90%  | 0.022 | 72% | <a href="#">gi 568921715 XP_006501025.1</a> |
| <a href="#">PREDICTED: complement factor I isoform X2 [Mus musculus]</a>           | 40.5 | 40.5 | 90%  | 0.022 | 72% | <a href="#">gi 568921713 XP_006501024.1</a> |
| <a href="#">complement factor I precursor [Mus musculus]</a>                       | 40.5 | 40.5 | 90%  | 0.022 | 72% | <a href="#">gi 110347406 NP_031712.2</a>    |
| <a href="#">PREDICTED: LOW QUALITY PROTEIN: complement factor I [Mus musculus]</a> | 40.5 | 40.5 | 95%  | 0.022 | 74% | <a href="#">gi 560925633 XP_006188998.1</a> |
| <a href="#">PREDICTED: LOW QUALITY PROTEIN: complement factor I [Mus musculus]</a> | 40.5 | 40.5 | 95%  | 0.022 | 74% | <a href="#">gi 560979761 XP_006212132.1</a> |
| <a href="#">PREDICTED: LOW QUALITY PROTEIN: complement factor I [Mus musculus]</a> | 39.7 | 39.7 | 90%  | 0.040 | 72% | <a href="#">gi 533186455 XP_005406244.1</a> |
| <a href="#">PREDICTED: complement factor I [Mustela putorius furo]</a>             | 38.8 | 38.8 | 95%  | 0.075 | 68% | <a href="#">gi 511847748 XP_004748251.1</a> |
| <a href="#">PREDICTED: complement factor I [Mustela putorius furo]</a>             | 38.8 | 38.8 | 95%  | 0.075 | 68% | <a href="#">gi 511991360 XP_004813365.1</a> |
| <a href="#">PREDICTED: complement factor I isoform X2 [Myotis brandtii]</a>        | 38.8 | 38.8 | 100% | 0.075 | 65% | <a href="#">gi 554556058 XP_005872468.1</a> |

## Alignments

[Download](#) [GenPept](#) [Graphics](#)

[Next](#) [Previous](#) [Descriptions](#)

PREDICTED: complement factor I-like, partial [Gorilla gorilla gorilla]

Sequence ID: [gi|426345243|ref|XP\\_004040330.1|](#) Length: 309 Number of Matches: 1

Range 1: 99 to 118 [GenPept](#) [Graphics](#)

[Next Match](#) [Previous Match](#)

| Score          | Expect | Identities | Positives   | Gaps     |
|----------------|--------|------------|-------------|----------|
| 63.0 bits(141) | 6e-10  | 19/20(95%) | 20/20(100%) | 0/20(0%) |

Query 1 KFLNDGTCTAEGKFSVSLKH 20  
KFLN+GTCTAEGKFSVSLKH  
Sbjct 99 KFLNNGTCTAEGKFSVSLKH 118

### Related Information

[Gene](#) - associated gene details  
[Map Viewer](#) - aligned genomic context

[Download](#) [GenPept](#) [Graphics](#)

[Next](#) [Previous](#) [Descriptions](#)

unnamed protein product [Homo sapiens]

Sequence ID: [gi|1335055|emb|CAA68417.1|](#) Length: 321 Number of Matches: 1

Range 1: 81 to 100 [GenPept](#) [Graphics](#)

[Next Match](#) [Previous Match](#)

| Score          | Expect | Identities | Positives   | Gaps     |
|----------------|--------|------------|-------------|----------|
| 63.0 bits(141) | 7e-10  | 19/20(95%) | 20/20(100%) | 0/20(0%) |

### Related Information

[Gene](#) - associated gene details

Query 1 KFLNDGTCTAEGKFSVSLKH 20  
 KFLN+GTCTAEGKFSVSLKH  
 Sbjct 81 KFLNNGTCTAEGKFSVSLKH 100

Download [GenPept](#) [Graphics](#)

[▼ Next](#) [▲ Previous](#) [▲ Descriptions](#)

CFI protein [Homo sapiens]

Sequence ID: [gi|18089117|gb|AAH20718.1](#) Length: 377 Number of Matches: 1

[▶ See 1 more title\(s\)](#)

Range 1: 99 to 118 [GenPept](#) [Graphics](#)

[▼ Next Match](#) [▲ Previous Match](#)

| Score          | Expect | Identities | Positives   | Gaps     |
|----------------|--------|------------|-------------|----------|
| 63.0 bits(141) | 7e-10  | 19/20(95%) | 20/20(100%) | 0/20(0%) |

Query 1 KFLNDGTCTAEGKFSVSLKH 20  
 KFLN+GTCTAEGKFSVSLKH  
 Sbjct 99 KFLNNGTCTAEGKFSVSLKH 118

**Related Information**

[Gene](#) - associated gene details  
[Identical Proteins](#) - Proteins identical to the subject

Download [GenPept](#) [Graphics](#)

[▼ Next](#) [▲ Previous](#) [▲ Descriptions](#)

complement factor I, isoform CRA\_a, partial [Homo sapiens]

Sequence ID: [gi|119626655|gb|EAX06250.1](#) Length: 378 Number of Matches: 1

Range 1: 99 to 118 [GenPept](#) [Graphics](#)

[▼ Next Match](#) [▲ Previous Match](#)

| Score          | Expect | Identities | Positives   | Gaps     |
|----------------|--------|------------|-------------|----------|
| 63.0 bits(141) | 7e-10  | 19/20(95%) | 20/20(100%) | 0/20(0%) |

Query 1 KFLNDGTCTAEGKFSVSLKH 20  
 KFLN+GTCTAEGKFSVSLKH  
 Sbjct 99 KFLNNGTCTAEGKFSVSLKH 118

**Related Information**

[Gene](#) - associated gene details

Download [GenPept](#) [Graphics](#)

[▼ Next](#) [▲ Previous](#) [▲ Descriptions](#)

PREDICTED: complement factor I isoform X6 [Pan troglodytes]

Sequence ID: [gi|694908492|ref|XP\\_009446407.1](#) Length: 516 Number of Matches: 1

Range 1: 99 to 118 [GenPept](#) [Graphics](#)

[▼ Next Match](#) [▲ Previous Match](#)

| Score          | Expect | Identities | Positives   | Gaps     |
|----------------|--------|------------|-------------|----------|
| 63.0 bits(141) | 7e-10  | 19/20(95%) | 20/20(100%) | 0/20(0%) |

Query 1 KFLNDGTCTAEGKFSVSLKH 20  
 KFLN+GTCTAEGKFSVSLKH  
 Sbjct 99 KFLNNGTCTAEGKFSVSLKH 118

**Related Information**

[Gene](#) - associated gene details

BLAST is a registered trademark of the National Library of Medicine.



NCBI/ BLAST/ blastp suite/ Formatting Results - B93R6MBC01R

Your search parameters were adjusted to search for a short input sequence.

Edit and Resubmit Save Search Strategies Formatting options Download

YouTube How to read this page Blast report description

CFI\_KFLNNGTCTAEGKF\_NonMod

RID B93R6MBC01R (Expires on 01-14 10:20 am)

Query ID Icl|301892
Description None
Molecule type amino acid
Query Length 14

Database Name nr
Description All non-redundant GenBank CDS translations+PDB+SwissProt+PIR excluding environmental samples from WGS projects
Program BLASTP 2.2.30+ Citation

Other reports: Search Summary Taxonomy reports Distance tree of results Multiple alignment

Graphic Summary

Show Conserved Domains

No putative conserved domains have been detected

Distribution of 100 Blast Hits on the Query Sequence

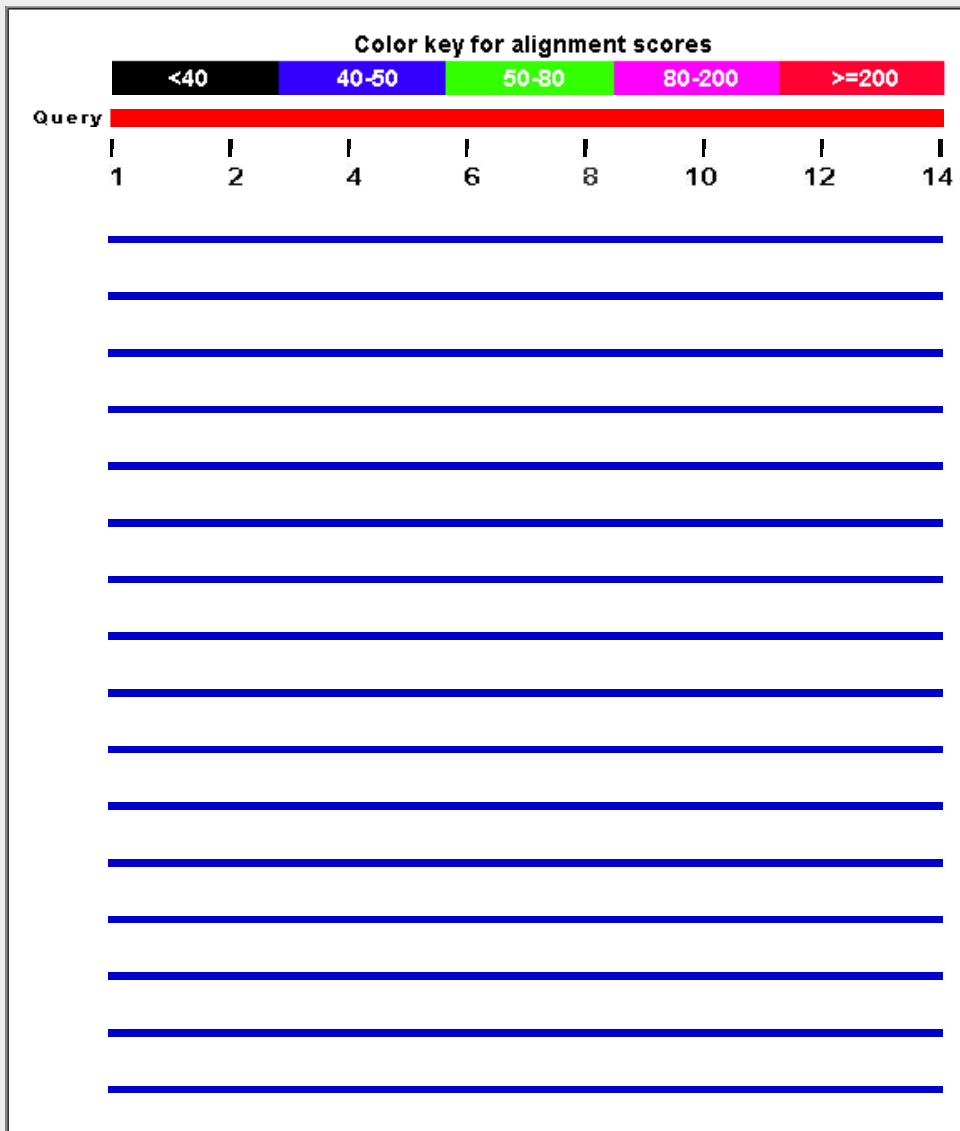

Color key for alignment scores

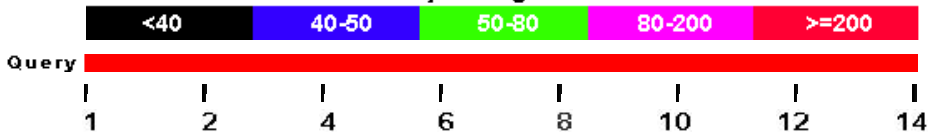

The image shows a table with 30 rows. Each row contains a single blue horizontal line, which appears to be a placeholder for data. The table is centered on the page and is flanked by light gray vertical bars on both sides.



**Descriptions**

**Sequences producing significant alignments:**

Select: [All](#) [None](#) Selected:0

Alignments Download GenPept Graphics Distance tree of results Multiple alignment

| Description                                                                                 | Max score | Total score | Query cover | E value | Ident | Accession                                   |
|---------------------------------------------------------------------------------------------|-----------|-------------|-------------|---------|-------|---------------------------------------------|
| <a href="#">PREDICTED: complement factor I-like [Gorilla gorilla gorilla]</a>               | 47.7      | 47.7        | 100%        | 4e-05   | 100%  | <a href="#">gil426345243 XP_004040330.1</a> |
| <a href="#">unnamed protein product [Homo sapiens]</a>                                      | 47.7      | 47.7        | 100%        | 4e-05   | 100%  | <a href="#">gil1335055 CAA68417.1</a>       |
| <a href="#">CFI protein [Homo sapiens]</a>                                                  | 47.7      | 47.7        | 100%        | 4e-05   | 100%  | <a href="#">gil18089117 AAH20718.1</a>      |
| <a href="#">complement factor I, isoform CRA_a [Homo sapiens]</a>                           | 47.7      | 47.7        | 100%        | 4e-05   | 100%  | <a href="#">gil119626655 EAX06250.1</a>     |
| <a href="#">PREDICTED: complement factor I isoform X6 [Pan troglodytes]</a>                 | 47.7      | 47.7        | 100%        | 5e-05   | 100%  | <a href="#">gil694908492 XP_009446407.1</a> |
| <a href="#">PREDICTED: complement factor I isoform X6 [Pan paniscus]</a>                    | 47.7      | 47.7        | 100%        | 5e-05   | 100%  | <a href="#">gil675793799 XP_008953634.1</a> |
| <a href="#">PREDICTED: complement factor I isoform X5 [Pan troglodytes]</a>                 | 47.7      | 47.7        | 100%        | 5e-05   | 100%  | <a href="#">gil694908490 XP_009446406.1</a> |
| <a href="#">PREDICTED: complement factor I isoform X5 [Pan paniscus]</a>                    | 47.7      | 47.7        | 100%        | 5e-05   | 100%  | <a href="#">gil675793797 XP_008953633.1</a> |
| <a href="#">PREDICTED: complement factor I isoform X4 [Homo sapiens]</a>                    | 47.7      | 47.7        | 100%        | 5e-05   | 100%  | <a href="#">gil578809103 XP_006714273.1</a> |
| <a href="#">Chain A, Human Complement Factor I [Homo sapiens]</a>                           | 47.7      | 47.7        | 100%        | 5e-05   | 100%  | <a href="#">gil339961198 2XRC_A</a>         |
| <a href="#">PREDICTED: complement factor I isoform X4 [Pan troglodytes]</a>                 | 47.7      | 47.7        | 100%        | 5e-05   | 100%  | <a href="#">gil694908488 XP_009446405.1</a> |
| <a href="#">PREDICTED: complement factor I isoform X4 [Pan paniscus]</a>                    | 47.7      | 47.7        | 100%        | 5e-05   | 100%  | <a href="#">gil675793795 XP_008953632.1</a> |
| <a href="#">PREDICTED: complement factor I isoform X2 [Homo sapiens]</a>                    | 47.7      | 47.7        | 100%        | 5e-05   | 100%  | <a href="#">gil530377647 XP_005263033.1</a> |
| <a href="#">PREDICTED: complement factor I isoform X2 [Saimiri boliviensis boliviensis]</a> | 47.7      | 47.7        | 100%        | 5e-05   | 100%  | <a href="#">gil725571753 XP_010338379.1</a> |
| <a href="#">PREDICTED: complement factor I [Callithrix jacchus]</a>                         | 47.7      | 47.7        | 100%        | 5e-05   | 100%  | <a href="#">gil675648222 XP_002745538.3</a> |
| <a href="#">PREDICTED: complement factor I [Nomascus leucogenys]</a>                        | 47.7      | 47.7        | 100%        | 5e-05   | 100%  | <a href="#">gil332240463 XP_003269405.1</a> |
| <a href="#">prepro-C3b/C4B inactivator [Homo sapiens]</a>                                   | 47.7      | 47.7        | 100%        | 5e-05   | 100%  | <a href="#">gil182607 AAA52455.1</a>        |
| <a href="#">complement factor I preproprotein [Homo sapiens]</a>                            | 47.7      | 47.7        | 100%        | 5e-05   | 100%  | <a href="#">gil119392081 NP_000195.2</a>    |
| <a href="#">complement factor I precursor [Pongo abelii]</a>                                | 47.7      | 47.7        | 100%        | 5e-05   | 100%  | <a href="#">gil197098986 NP_001127624.1</a> |
| <a href="#">PREDICTED: complement factor I isoform X3 [Pan paniscus]</a>                    | 47.7      | 47.7        | 100%        | 5e-05   | 100%  | <a href="#">gil397519838 XP_003830060.1</a> |
| <a href="#">RecName: Full=Complement factor I; AltName: Full=C3B/C4B inact</a>              | 47.7      | 47.7        | 100%        | 5e-05   | 100%  | <a href="#">gil317373341 P05156.2</a>       |
| <a href="#">unnamed protein product [Homo sapiens]</a>                                      | 47.7      | 47.7        | 100%        | 5e-05   | 100%  | <a href="#">gil158254682 BAF83314.1</a>     |
| <a href="#">PREDICTED: complement factor I isoform X3 [Pan troglodytes]</a>                 | 47.7      | 47.7        | 100%        | 5e-05   | 100%  | <a href="#">gil114595644 XP_526653.2</a>    |
| <a href="#">PREDICTED: complement factor I [Callithrix jacchus]</a>                         | 47.7      | 47.7        | 100%        | 5e-05   | 100%  | <a href="#">gil675752511 XP_008984405.1</a> |
| <a href="#">PREDICTED: complement factor I isoform X2 [Nannospalax galii]</a>               | 47.7      | 47.7        | 100%        | 5e-05   | 100%  | <a href="#">gil674034950 XP_008841698.1</a> |
| <a href="#">PREDICTED: complement factor I isoform X2 [Pan troglodytes]</a>                 | 47.7      | 47.7        | 100%        | 5e-05   | 100%  | <a href="#">gil694908485 XP_009446404.1</a> |
| <a href="#">PREDICTED: complement factor I isoform X2 [Pan paniscus]</a>                    | 47.7      | 47.7        | 100%        | 5e-05   | 100%  | <a href="#">gil675793792 XP_008953631.1</a> |
| <a href="#">PREDICTED: complement factor I isoform X1 [Nannospalax galii]</a>               | 47.7      | 47.7        | 100%        | 5e-05   | 100%  | <a href="#">gil674034948 XP_008841690.1</a> |



|                                                                                             |      |      |      |       |      |                                             |
|---------------------------------------------------------------------------------------------|------|------|------|-------|------|---------------------------------------------|
| <a href="#">PREDICTED: complement factor I isoform X3 [Homo sapiens]</a>                    | 47.7 | 47.7 | 100% | 5e-05 | 100% | <a href="#">gij578809101 XP_006714272.1</a> |
| <a href="#">unnamed protein product [Homo sapiens]</a>                                      | 47.7 | 47.7 | 100% | 5e-05 | 100% | <a href="#">gij194387702 BAG61264.1</a>     |
| <a href="#">PREDICTED: complement factor I isoform X1 [Homo sapiens]</a>                    | 47.7 | 47.7 | 100% | 5e-05 | 100% | <a href="#">gij530377645 XP_005263032.1</a> |
| <a href="#">PREDICTED: complement factor I isoform X1 [Pan paniscus]</a>                    | 47.7 | 47.7 | 100% | 5e-05 | 100% | <a href="#">gij397519840 XP_003830061.1</a> |
| <a href="#">PREDICTED: complement factor I isoform X1 [Pan troglodytes]</a>                 | 47.7 | 47.7 | 100% | 5e-05 | 100% | <a href="#">gij332820084 XP_003310493.1</a> |
| <a href="#">PREDICTED: complement factor I isoform X1 [Saimiri boliviensis boliviensis]</a> | 47.7 | 47.7 | 100% | 5e-05 | 100% | <a href="#">gij725571751 XP_010338378.1</a> |
| <a href="#">PREDICTED: complement factor I isoform X2 [Equus przewalskii]</a>               | 43.9 | 43.9 | 100% | 8e-04 | 93%  | <a href="#">gij664769275 XP_008542181.1</a> |
| <a href="#">PREDICTED: complement factor I isoform X1 [Equus przewalskii]</a>               | 43.9 | 43.9 | 100% | 9e-04 | 93%  | <a href="#">gij664769273 XP_008542180.1</a> |
| <a href="#">PREDICTED: complement factor I isoform X2 [Equus caballus]</a>                  | 43.9 | 43.9 | 100% | 9e-04 | 93%  | <a href="#">gij545210264 XP_005607952.1</a> |
| <a href="#">PREDICTED: complement factor I isoform X1 [Equus caballus]</a>                  | 43.9 | 43.9 | 100% | 9e-04 | 93%  | <a href="#">gij545210262 XP_005607951.1</a> |
| <a href="#">PREDICTED: complement factor I isoform X5 [Canis lupus familiaris]</a>          | 43.5 | 43.5 | 100% | 0.001 | 93%  | <a href="#">gij545552244 XP_005639326.1</a> |
| <a href="#">PREDICTED: complement factor I isoform X3 [Canis lupus familiaris]</a>          | 43.5 | 43.5 | 100% | 0.001 | 93%  | <a href="#">gij74002140 XP_863506.1</a>     |
| <a href="#">PREDICTED: complement factor I isoform X4 [Canis lupus familiaris]</a>          | 43.5 | 43.5 | 100% | 0.001 | 93%  | <a href="#">gij545552242 XP_005639325.1</a> |
| <a href="#">PREDICTED: complement factor I [Otolemur garnettii]</a>                         | 43.1 | 43.1 | 100% | 0.002 | 93%  | <a href="#">gij395851346 XP_003798222.1</a> |
| <a href="#">Complement factor I [Fukomys damarensis]</a>                                    | 43.1 | 43.1 | 100% | 0.002 | 93%  | <a href="#">gij676270629 KFO25832.1</a>     |
| <a href="#">Complement factor I [Heterocephalus glaber]</a>                                 | 43.1 | 43.1 | 100% | 0.002 | 93%  | <a href="#">gij351696416 EHA99334.1</a>     |
| <a href="#">PREDICTED: complement factor I isoform X2 [Fukomys damarensis]</a>              | 43.1 | 43.1 | 100% | 0.002 | 93%  | <a href="#">gij731254237 XP_010639824.1</a> |
| <a href="#">PREDICTED: complement factor I isoform X2 [Heterocephalus glaber]</a>           | 43.1 | 43.1 | 100% | 0.002 | 93%  | <a href="#">gij512818622 XP_004878889.1</a> |
| <a href="#">PREDICTED: complement factor I isoform X1 [Fukomys damarensis]</a>              | 43.1 | 43.1 | 100% | 0.002 | 93%  | <a href="#">gij731254235 XP_010639823.1</a> |
| <a href="#">PREDICTED: complement factor I isoform X1 [Heterocephalus glaber]</a>           | 43.1 | 43.1 | 100% | 0.002 | 93%  | <a href="#">gij512818618 XP_004878888.1</a> |
| <a href="#">PREDICTED: complement factor I [Rhinopithecus roxellana]</a>                    | 42.6 | 42.6 | 100% | 0.002 | 93%  | <a href="#">gij724946291 XP_010387365.1</a> |
| <a href="#">PREDICTED: complement factor I [Papio anubis]</a>                               | 42.6 | 42.6 | 100% | 0.002 | 93%  | <a href="#">gij685542561 XP_009205631.1</a> |
| <a href="#">PREDICTED: complement factor I isoform X2 [Ictidomys tridecemliris]</a>         | 42.2 | 42.2 | 100% | 0.003 | 93%  | <a href="#">gij532088899 XP_005330149.1</a> |
| <a href="#">PREDICTED: complement factor I isoform X1 [Ictidomys tridecemliris]</a>         | 42.2 | 42.2 | 100% | 0.003 | 93%  | <a href="#">gij532088897 XP_005330148.1</a> |
| <a href="#">PREDICTED: complement factor I isoform X2 [Cavia porcellus]</a>                 | 40.5 | 40.5 | 100% | 0.012 | 86%  | <a href="#">gij514457647 XP_005002957.1</a> |
| <a href="#">PREDICTED: complement factor I isoform X1 [Cavia porcellus]</a>                 | 40.5 | 40.5 | 100% | 0.012 | 86%  | <a href="#">gij514457649 XP_003468099.2</a> |
| <a href="#">PREDICTED: LOW QUALITY PROTEIN: complement factor I [Leptomys dalrymplei]</a>   | 40.1 | 40.1 | 100% | 0.016 | 86%  | <a href="#">gij585149528 XP_006727262.1</a> |
| <a href="#">PREDICTED: complement factor I [Octodon degus]</a>                              | 40.1 | 40.1 | 100% | 0.016 | 86%  | <a href="#">gij507626946 XP_004626817.1</a> |
| <a href="#">PREDICTED: complement factor I isoform X2 [Oryctolagus cuniculus]</a>           | 40.1 | 40.1 | 100% | 0.016 | 86%  | <a href="#">gij655856777 XP_008265709.1</a> |
| <a href="#">PREDICTED: complement factor I [Ceratotherium simum simum]</a>                  | 40.1 | 40.1 | 100% | 0.016 | 86%  | <a href="#">gij478504685 XP_004426641.1</a> |
| <a href="#">PREDICTED: complement factor I isoform X1 [Oryctolagus cuniculus]</a>           | 40.1 | 40.1 | 100% | 0.016 | 86%  | <a href="#">gij655856775 XP_002717177.2</a> |
| <a href="#">PREDICTED: complement factor I [Ochotona princeps]</a>                          | 39.7 | 39.7 | 100% | 0.023 | 86%  | <a href="#">gij504169976 XP_004594584.1</a> |
| <a href="#">PREDICTED: complement factor I [Loxodonta africana]</a>                         | 39.7 | 39.7 | 100% | 0.023 | 86%  | <a href="#">gij731479219 XP_010588889.1</a> |
| <a href="#">PREDICTED: complement factor I isoform X6 [Panthera tigris altaica]</a>         | 39.2 | 39.2 | 100% | 0.031 | 86%  | <a href="#">gij591346160 XP_007098330.1</a> |
| <a href="#">PREDICTED: complement factor I isoform X2 [Chlorocebus sabaeus]</a>             | 39.2 | 39.2 | 100% | 0.031 | 86%  | <a href="#">gij635044269 XP_007997719.1</a> |
| <a href="#">PREDICTED: complement factor I isoform X1 [Chlorocebus sabaeus]</a>             | 39.2 | 39.2 | 100% | 0.031 | 86%  | <a href="#">gij635044267 XP_007997718.1</a> |
| <a href="#">PREDICTED: complement factor I [Orycteropus afer afer]</a>                      | 39.2 | 39.2 | 100% | 0.031 | 86%  | <a href="#">gij634848033 XP_007938975.1</a> |
| <a href="#">PREDICTED: complement factor I isoform X5 [Panthera tigris altaica]</a>         | 39.2 | 39.2 | 100% | 0.031 | 86%  | <a href="#">gij591346158 XP_007098329.1</a> |
| <a href="#">PREDICTED: complement factor I isoform X4 [Panthera tigris altaica]</a>         | 39.2 | 39.2 | 100% | 0.031 | 86%  | <a href="#">gij591346156 XP_007098328.1</a> |
| <a href="#">PREDICTED: complement factor I isoform X2 [Panthera tigris altaica]</a>         | 39.2 | 39.2 | 100% | 0.031 | 86%  | <a href="#">gij591346152 XP_007098326.1</a> |
| <a href="#">PREDICTED: complement factor I isoform X1 [Panthera tigris altaica]</a>         | 39.2 | 39.2 | 100% | 0.031 | 86%  | <a href="#">gij591346150 XP_007098325.1</a> |
| <a href="#">PREDICTED: complement factor I-like [Macaca mulatta]</a>                        | 38.8 | 38.8 | 100% | 0.042 | 86%  | <a href="#">gij297293220 XP_001087512.2</a> |
| <a href="#">uncharacterized protein LOC101866929 precursor [Macaca fascicularis]</a>        | 38.8 | 38.8 | 100% | 0.043 | 86%  | <a href="#">gij548961885 NP_001271714.1</a> |
| <a href="#">PREDICTED: complement factor I [Tarsius syrichta]</a>                           | 38.8 | 38.8 | 100% | 0.043 | 86%  | <a href="#">gij640813983 XP_008063707.1</a> |
| <a href="#">hypothetical protein EGK_16010 [Macaca mulatta]</a>                             | 38.8 | 38.8 | 100% | 0.043 | 86%  | <a href="#">gij355687535 EHH26119.1</a>     |

|                                                                                 |      |      |      |       |      |                                             |
|---------------------------------------------------------------------------------|------|------|------|-------|------|---------------------------------------------|
| <a href="#">complement factor I-like protein [Cricetulus griseus]</a>           | 38.0 | 38.0 | 100% | 0.082 | 86%  | <a href="#">gil537261801 ERE90152.1</a>     |
| <a href="#">PREDICTED: complement factor I [Cricetulus griseus]</a>             | 38.0 | 38.0 | 100% | 0.082 | 86%  | <a href="#">gil625241505 XP_007611983.1</a> |
| <a href="#">PREDICTED: complement factor I [Cricetulus griseus]</a>             | 38.0 | 38.0 | 100% | 0.082 | 86%  | <a href="#">gil625222421 XP_007651009.1</a> |
| <a href="#">complement factor I precursor [Rattus norvegicus]</a>               | 37.1 | 37.1 | 100% | 0.16  | 86%  | <a href="#">gil13162353 NP_077071.1</a>     |
| <a href="#">PREDICTED: complement factor I isoform X1 [Rattus norvegicus]</a>   | 37.1 | 37.1 | 100% | 0.16  | 86%  | <a href="#">gil672044321 XP_008759748.1</a> |
| <a href="#">PREDICTED: LOW QUALITY PROTEIN: complement factor I [Odo]</a>       | 36.7 | 36.7 | 100% | 0.21  | 79%  | <a href="#">gil472383864 XP_004411307.1</a> |
| <a href="#">PREDICTED: LOW QUALITY PROTEIN: complement factor I [Felis]</a>     | 36.3 | 36.3 | 100% | 0.29  | 79%  | <a href="#">gil586984171 XP_006930977.1</a> |
| <a href="#">PREDICTED: complement factor I [Trichechus manatus latirostris]</a> | 35.8 | 35.8 | 100% | 0.41  | 79%  | <a href="#">gil471391575 XP_004380312.1</a> |
| <a href="#">PREDICTED: complement factor I isoform X4 [Mus musculus]</a>        | 34.6 | 34.6 | 100% | 1.0   | 79%  | <a href="#">gil568921717 XP_006501026.1</a> |
| <a href="#">PREDICTED: complement factor I isoform X3 [Mus musculus]</a>        | 34.6 | 34.6 | 100% | 1.0   | 79%  | <a href="#">gil568921715 XP_006501025.1</a> |
| <a href="#">PREDICTED: complement factor I isoform X2 [Mus musculus]</a>        | 34.6 | 34.6 | 100% | 1.0   | 79%  | <a href="#">gil568921713 XP_006501024.1</a> |
| <a href="#">complement factor I precursor [Mus musculus]</a>                    | 34.6 | 34.6 | 100% | 1.0   | 79%  | <a href="#">gil110347406 NP_031712.2</a>    |
| <a href="#">PREDICTED: complement factor I [Mesocricetus auratus]</a>           | 34.1 | 34.1 | 100% | 1.4   | 79%  | <a href="#">gil524965961 XP_005082885.1</a> |
| <a href="#">PREDICTED: complement factor I [Mustela putorius furo]</a>          | 33.7 | 33.7 | 100% | 1.9   | 71%  | <a href="#">gil511847748 XP_004748251.1</a> |
| <a href="#">PREDICTED: complement factor I [Mustela putorius furo]</a>          | 33.7 | 33.7 | 100% | 2.0   | 71%  | <a href="#">gil511991360 XP_004813365.1</a> |
| <a href="#">PREDICTED: LOW QUALITY PROTEIN: complement factor I [Chin</a>       | 33.7 | 33.7 | 100% | 2.0   | 79%  | <a href="#">gil533186455 XP_005406244.1</a> |
| <a href="#">PREDICTED: complement factor I [Chrysochloris asiatica]</a>         | 33.3 | 33.3 | 100% | 2.7   | 79%  | <a href="#">gil586477731 XP_006869402.1</a> |
| <a href="#">PREDICTED: complement factor I [Sarcophilus harrisii]</a>           | 32.9 | 32.9 | 100% | 3.6   | 71%  | <a href="#">gil395542057 XP_003772951.1</a> |
| <a href="#">PREDICTED: complement factor I [Peromyscus maniculatus bairdii]</a> | 32.5 | 32.5 | 100% | 5.0   | 79%  | <a href="#">gil589914217 XP_006970447.1</a> |
| <a href="#">PREDICTED: complement factor I [Jaculus jaculus]</a>                | 31.6 | 31.6 | 100% | 9.3   | 64%  | <a href="#">gil507549735 XP_004658680.1</a> |
| <a href="#">complement factor I [Mus musculus]</a>                              | 31.2 | 31.2 | 100% | 13    | 71%  | <a href="#">gil1322034 AAB00438.1</a>       |
| <a href="#">PREDICTED: complement factor I [Myotis davidii]</a>                 | 30.8 | 30.8 | 100% | 17    | 71%  | <a href="#">gil584046382 XP_006767995.1</a> |
| <a href="#">PREDICTED: complement factor I [Eptesicus fuscus]</a>               | 30.8 | 30.8 | 100% | 17    | 71%  | <a href="#">gil641717977 XP_008148531.1</a> |
| <a href="#">molecular chaperone DnaJ [Desulfovibrio putealis]</a>               | 29.9 | 29.9 | 85%  | 31    | 83%  | <a href="#">gil652937116 WP_027190715.1</a> |
| <a href="#">hypothetical protein PI87_11065 [Ralstonia sp. A12]</a>             | 29.9 | 29.9 | 71%  | 32    | 91%  | <a href="#">gil733381272 KHK56250.1</a>     |
| <a href="#">PREDICTED: complement factor I isoform X4 [Monodelphis domes</a>    | 29.5 | 29.5 | 57%  | 43    | 100% | <a href="#">gil612030135 XP_007496055.1</a> |
| <a href="#">PREDICTED: complement factor I isoform X3 [Monodelphis domes</a>    | 29.5 | 29.5 | 57%  | 43    | 100% | <a href="#">gil612030133 XP_007496054.1</a> |

## Alignments

Download [GenPept](#) [Graphics](#)

[Next](#) [Previous](#) [Descriptions](#)

PREDICTED: complement factor I-like, partial [Gorilla gorilla gorilla]

Sequence ID: [gil426345243|ref|XP\\_004040330.1](#) Length: 309 Number of Matches: 1

Range 1: 99 to 112 [GenPept](#) [Graphics](#)

[Next Match](#) [Previous Match](#)

| Score          | Expect | Identities  | Positives   | Gaps     |
|----------------|--------|-------------|-------------|----------|
| 47.7 bits(105) | 4e-05  | 14/14(100%) | 14/14(100%) | 0/14(0%) |

Query 1 KFLNNGTCTAEGKF 14  
KFLNNGTCTAEGKF  
Sbjct 99 KFLNNGTCTAEGKF 112

### Related Information

[Gene](#) - associated gene details  
[Map Viewer](#) - aligned genomic context

Download [GenPept](#) [Graphics](#)

[Next](#) [Previous](#) [Descriptions](#)

unnamed protein product [Homo sapiens]

Sequence ID: [gil1335055|emb|CAA68417.1](#) Length: 321 Number of Matches: 1

Range 1: 81 to 94 [GenPept](#) [Graphics](#)

[Next Match](#) [Previous Match](#)

| Score          | Expect | Identities  | Positives   | Gaps     |
|----------------|--------|-------------|-------------|----------|
| 47.7 bits(105) | 4e-05  | 14/14(100%) | 14/14(100%) | 0/14(0%) |

Query 1 KFLNNGTCTAEGKF 14

### Related Information

[Gene](#) - associated gene details

Sbjct 81 KFLNNGTCTAEGKF 94

[Download](#) [GenPept](#) [Graphics](#)

[▼ Next](#) [▲ Previous](#) [▲ Descriptions](#)

CFI protein [Homo sapiens]

Sequence ID: [gi|18089117|gb|AAH20718.1](#) Length: 377 Number of Matches: 1

[▶ See 1 more title\(s\)](#)

Range 1: 99 to 112 [GenPept](#) [Graphics](#)

[▼ Next Match](#) [▲ Previous Match](#)

| Score          | Expect | Identities  | Positives   | Gaps     |
|----------------|--------|-------------|-------------|----------|
| 47.7 bits(105) | 4e-05  | 14/14(100%) | 14/14(100%) | 0/14(0%) |

Query 1 KFLNNGTCTAEGKF 14  
KFLNNGTCTAEGKF  
Sbjct 99 KFLNNGTCTAEGKF 112

**Related Information**

[Gene](#) - associated gene details  
[Identical Proteins](#) - Proteins identical to the subject

[Download](#) [GenPept](#) [Graphics](#)

[▼ Next](#) [▲ Previous](#) [▲ Descriptions](#)

complement factor I, isoform CRA\_a, partial [Homo sapiens]

Sequence ID: [gi|119626655|gb|EAX06250.1](#) Length: 378 Number of Matches: 1

Range 1: 99 to 112 [GenPept](#) [Graphics](#)

[▼ Next Match](#) [▲ Previous Match](#)

| Score          | Expect | Identities  | Positives   | Gaps     |
|----------------|--------|-------------|-------------|----------|
| 47.7 bits(105) | 4e-05  | 14/14(100%) | 14/14(100%) | 0/14(0%) |

Query 1 KFLNNGTCTAEGKF 14  
KFLNNGTCTAEGKF  
Sbjct 99 KFLNNGTCTAEGKF 112

**Related Information**

[Gene](#) - associated gene details

[Download](#) [GenPept](#) [Graphics](#)

[▼ Next](#) [▲ Previous](#) [▲ Descriptions](#)

PREDICTED: complement factor I isoform X6 [Pan troglodytes]

Sequence ID: [gi|694908492|ref|XP\\_009446407.1](#) Length: 516 Number of Matches: 1

Range 1: 99 to 112 [GenPept](#) [Graphics](#)

[▼ Next Match](#) [▲ Previous Match](#)

| Score          | Expect | Identities  | Positives   | Gaps     |
|----------------|--------|-------------|-------------|----------|
| 47.7 bits(105) | 5e-05  | 14/14(100%) | 14/14(100%) | 0/14(0%) |

Query 1 KFLNNGTCTAEGKF 14  
KFLNNGTCTAEGKF  
Sbjct 99 KFLNNGTCTAEGKF 112

**Related Information**

[Gene](#) - associated gene details

BLAST is a registered trademark of the National Library of Medicine.

[Copyright](#) | [Disclaimer](#) | [Privacy](#) | [Accessibility](#) | [Contact](#) | [Send feedback](#)

[NCBI](#) | [NLM](#) | [NIH](#) | [DHHS](#)

▶ NCBI/ BLAST/ blastp suite/ Formatting Results - B93Y75X901R

**i** Your search parameters were adjusted to search for a short input sequence.

[Edit and Resubmit](#) [Save Search Strategies](#) ▶ [Formatting options](#) ▶ [Download](#)

[YouTube](#) [How to read this page](#) [Blast report description](#)

### CFI\_KFLNNGTCTAEGKFSVSLKH\_NonMod

RID [B93Y75X901R](#) (Expires on 01-14 10:23 am)

**Query ID** |cl|26369  
**Description** None  
**Molecule type** amino acid  
**Query Length** 20

**Database Name** nr  
**Description** All non-redundant GenBank CDS translations+PDB+SwissProt+PIR excluding environmental samples from WGS projects  
**Program** BLASTP 2.2.30+ ▶ [Citation](#)

Other reports: ▶ [Search Summary](#) [[Taxonomy reports](#)] [[Distance tree of results](#)] [[Multiple alignment](#)]

### **G**raphic Summary

[Show Conserved Domains](#)

No putative conserved domains have been detected

Distribution of 100 Blast Hits on the Query Sequence

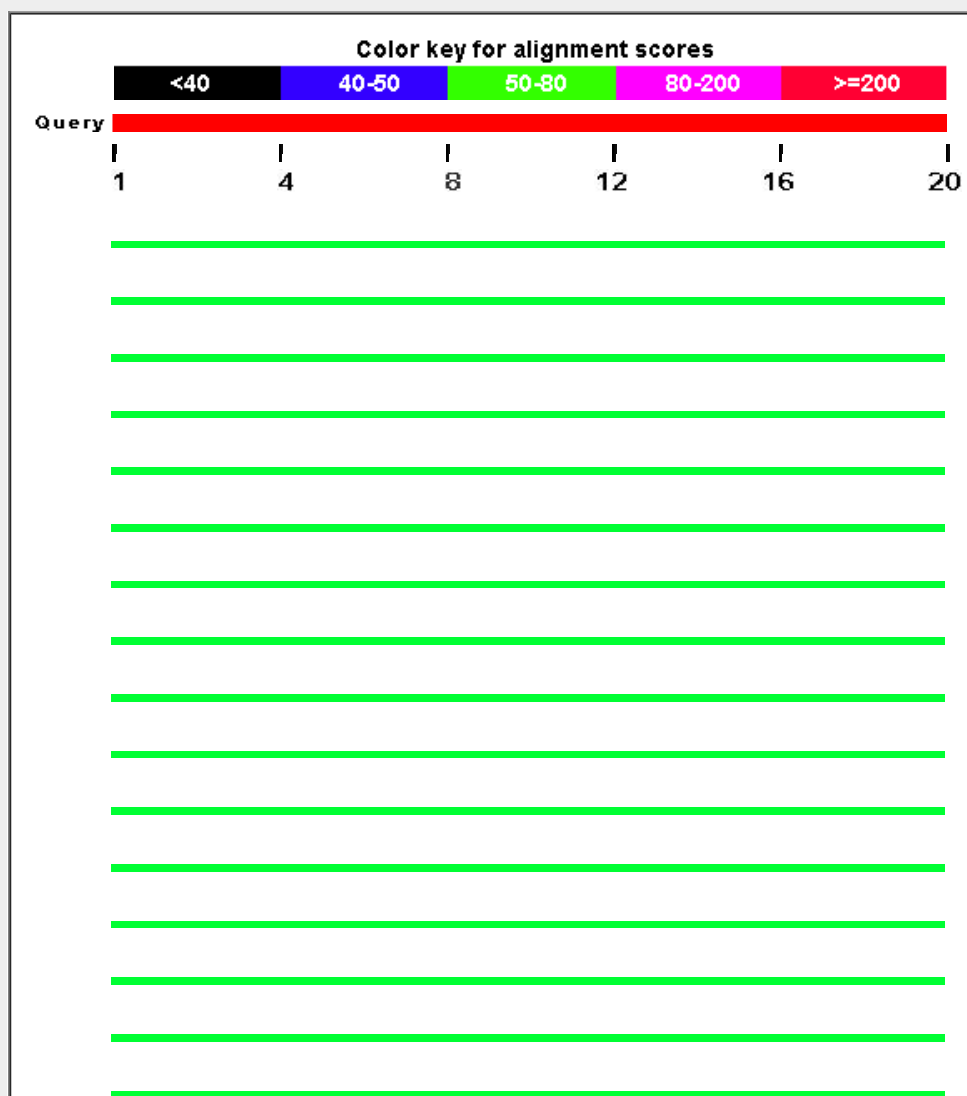

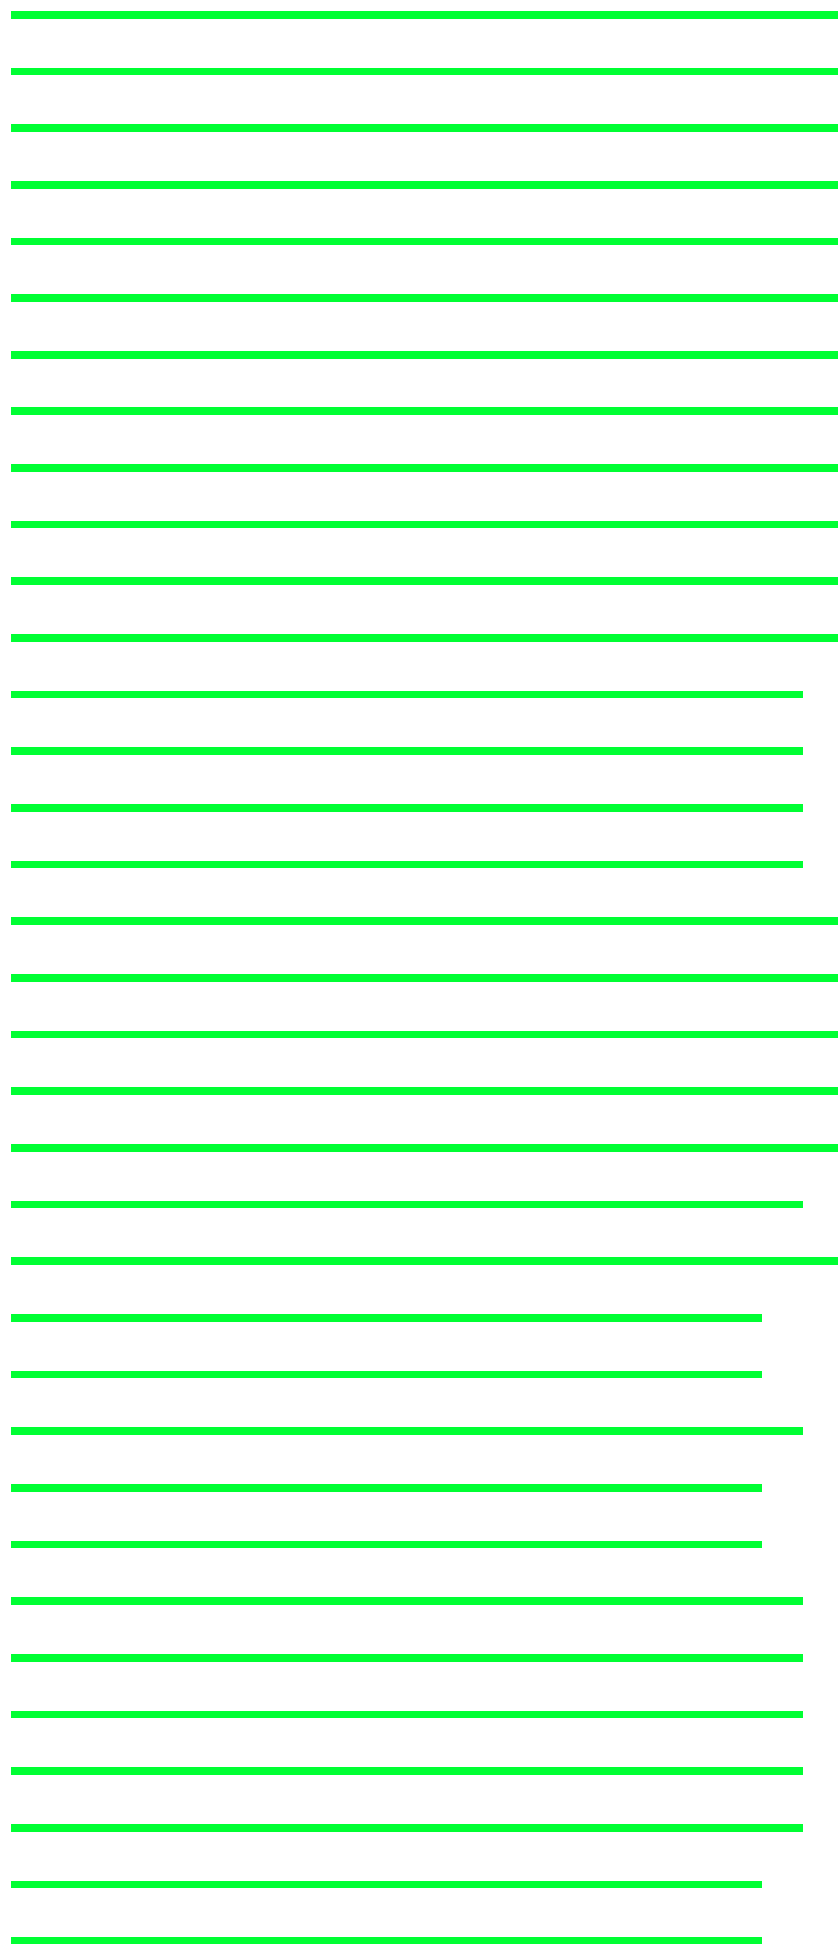

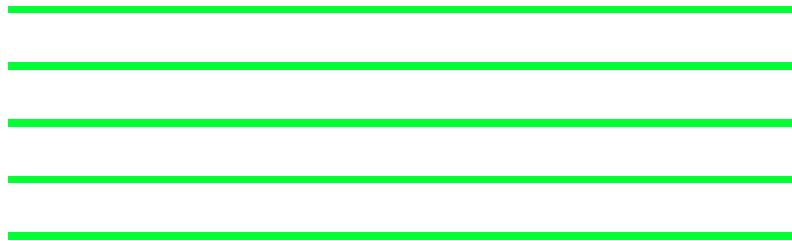

**Descriptions**

**Sequences producing significant alignments:**

Select: [All](#) [None](#) Selected:0

Alignments Download GenPept Graphics Distance tree of results Multiple alignment

| Description                                                                    | Max score | Total score | Query cover | E value | Ident | Accession                                   |
|--------------------------------------------------------------------------------|-----------|-------------|-------------|---------|-------|---------------------------------------------|
| <a href="#">PREDICTED: complement factor I-like [Gorilla gorilla gorilla]</a>  | 65.5      | 65.5        | 100%        | 8e-11   | 100%  | <a href="#">gij426345243 XP_004040330.1</a> |
| <a href="#">unnamed protein product [Homo sapiens]</a>                         | 65.5      | 65.5        | 100%        | 8e-11   | 100%  | <a href="#">gij1335055 CAA68417.1</a>       |
| <a href="#">CFI protein [Homo sapiens]</a>                                     | 65.5      | 65.5        | 100%        | 9e-11   | 100%  | <a href="#">gij18089117 AAH20718.1</a>      |
| <a href="#">complement factor I, isoform CRA_a [Homo sapiens]</a>              | 65.5      | 65.5        | 100%        | 9e-11   | 100%  | <a href="#">gij119626655 EAX06250.1</a>     |
| <a href="#">PREDICTED: complement factor I isoform X6 [Pan troglodytes]</a>    | 65.5      | 65.5        | 100%        | 9e-11   | 100%  | <a href="#">gij694908492 XP_009446407.1</a> |
| <a href="#">PREDICTED: complement factor I isoform X6 [Pan paniscus]</a>       | 65.5      | 65.5        | 100%        | 9e-11   | 100%  | <a href="#">gij675793799 XP_008953634.1</a> |
| <a href="#">PREDICTED: complement factor I isoform X5 [Pan troglodytes]</a>    | 65.5      | 65.5        | 100%        | 9e-11   | 100%  | <a href="#">gij694908490 XP_009446406.1</a> |
| <a href="#">PREDICTED: complement factor I isoform X5 [Pan paniscus]</a>       | 65.5      | 65.5        | 100%        | 9e-11   | 100%  | <a href="#">gij675793797 XP_008953633.1</a> |
| <a href="#">PREDICTED: complement factor I isoform X4 [Homo sapiens]</a>       | 65.5      | 65.5        | 100%        | 9e-11   | 100%  | <a href="#">gij578809103 XP_006714273.1</a> |
| <a href="#">Chain A, Human Complement Factor I [Homo sapiens]</a>              | 65.5      | 65.5        | 100%        | 9e-11   | 100%  | <a href="#">gij339961198 2XRC_A</a>         |
| <a href="#">PREDICTED: complement factor I isoform X4 [Pan troglodytes]</a>    | 65.5      | 65.5        | 100%        | 9e-11   | 100%  | <a href="#">gij694908488 XP_009446405.1</a> |
| <a href="#">PREDICTED: complement factor I isoform X4 [Pan paniscus]</a>       | 65.5      | 65.5        | 100%        | 9e-11   | 100%  | <a href="#">gij675793795 XP_008953632.1</a> |
| <a href="#">PREDICTED: complement factor I isoform X2 [Homo sapiens]</a>       | 65.5      | 65.5        | 100%        | 9e-11   | 100%  | <a href="#">gij530377647 XP_005263033.1</a> |
| <a href="#">PREDICTED: complement factor I [Nomascus leucogenys]</a>           | 65.5      | 65.5        | 100%        | 9e-11   | 100%  | <a href="#">gij332240463 XP_003269405.1</a> |
| <a href="#">prepro-C3b/C4B inactivator [Homo sapiens]</a>                      | 65.5      | 65.5        | 100%        | 9e-11   | 100%  | <a href="#">gij182607 AAA52455.1</a>        |
| <a href="#">complement factor I preproprotein [Homo sapiens]</a>               | 65.5      | 65.5        | 100%        | 9e-11   | 100%  | <a href="#">gij119392081 NP_000195.2</a>    |
| <a href="#">complement factor I precursor [Pongo abelii]</a>                   | 65.5      | 65.5        | 100%        | 9e-11   | 100%  | <a href="#">gij197098986 NP_001127624.1</a> |
| <a href="#">PREDICTED: complement factor I isoform X3 [Pan paniscus]</a>       | 65.5      | 65.5        | 100%        | 9e-11   | 100%  | <a href="#">gij397519838 XP_003830060.1</a> |
| <a href="#">RecName: Full=Complement factor I; AltName: Full=C3B/C4B inact</a> | 65.5      | 65.5        | 100%        | 9e-11   | 100%  | <a href="#">gij317373341 P05156.2</a>       |
| <a href="#">unnamed protein product [Homo sapiens]</a>                         | 65.5      | 65.5        | 100%        | 9e-11   | 100%  | <a href="#">gij158254682 BAF83314.1</a>     |
| <a href="#">PREDICTED: complement factor I isoform X3 [Pan troglodytes]</a>    | 65.5      | 65.5        | 100%        | 9e-11   | 100%  | <a href="#">gij114595644 XP_526653.2</a>    |
| <a href="#">PREDICTED: complement factor I isoform X2 [Pan troglodytes]</a>    | 65.5      | 65.5        | 100%        | 9e-11   | 100%  | <a href="#">gij694908485 XP_009446404.1</a> |
| <a href="#">PREDICTED: complement factor I isoform X2 [Pan paniscus]</a>       | 65.5      | 65.5        | 100%        | 9e-11   | 100%  | <a href="#">gij675793792 XP_008953631.1</a> |
| <a href="#">PREDICTED: complement factor I isoform X3 [Homo sapiens]</a>       | 65.5      | 65.5        | 100%        | 9e-11   | 100%  | <a href="#">gij578809101 XP_006714272.1</a> |
| <a href="#">unnamed protein product [Homo sapiens]</a>                         | 65.5      | 65.5        | 100%        | 9e-11   | 100%  | <a href="#">gij194387702 BAG61264.1</a>     |
| <a href="#">PREDICTED: complement factor I isoform X1 [Homo sapiens]</a>       | 65.5      | 65.5        | 100%        | 9e-11   | 100%  | <a href="#">gij530377645 XP_005263032.1</a> |
| <a href="#">PREDICTED: complement factor I isoform X1 [Pan paniscus]</a>       | 65.5      | 65.5        | 100%        | 9e-11   | 100%  | <a href="#">gij397519840 XP_003830061.1</a> |
| <a href="#">PREDICTED: complement factor I isoform X1 [Pan troglodytes]</a>    | 65.5      | 65.5        | 100%        | 9e-11   | 100%  | <a href="#">gij332820084 XP_003310493.1</a> |

|                                                                                    |      |      |      |       |      |                                             |
|------------------------------------------------------------------------------------|------|------|------|-------|------|---------------------------------------------|
| <a href="#">PREDICTED: complement factor I isoform X2 [Saimiri boliviensis bc]</a> | 61.7 | 61.7 | 95%  | 2e-09 | 100% | <a href="#">gij725571753 XP_010338379.1</a> |
| <a href="#">PREDICTED: complement factor I [Callithrix jacchus]</a>                | 61.7 | 61.7 | 95%  | 2e-09 | 100% | <a href="#">gij675648222 XP_002745538.3</a> |
| <a href="#">PREDICTED: complement factor I [Callithrix jacchus]</a>                | 61.7 | 61.7 | 95%  | 2e-09 | 100% | <a href="#">gij675752511 XP_008984405.1</a> |
| <a href="#">PREDICTED: complement factor I isoform X1 [Saimiri boliviensis bc]</a> | 61.7 | 61.7 | 95%  | 2e-09 | 100% | <a href="#">gij725571751 XP_010338378.1</a> |
| <a href="#">PREDICTED: complement factor I [Papio anubis]</a>                      | 60.4 | 60.4 | 100% | 5e-09 | 95%  | <a href="#">gij685542561 XP_009205631.1</a> |
| <a href="#">PREDICTED: complement factor I isoform X2 [Chlorocebus sabaeu]</a>     | 57.1 | 57.1 | 100% | 7e-08 | 90%  | <a href="#">gij635044269 XP_007997719.1</a> |
| <a href="#">PREDICTED: complement factor I isoform X1 [Chlorocebus sabaeu]</a>     | 57.1 | 57.1 | 100% | 7e-08 | 90%  | <a href="#">gij635044267 XP_007997718.1</a> |
| <a href="#">PREDICTED: complement factor I-like [Macaca mulatta]</a>               | 56.6 | 56.6 | 100% | 9e-08 | 90%  | <a href="#">gij297293220 XP_001087512.2</a> |
| <a href="#">uncharacterized protein LOC101866929 precursor [Macaca fascicul]</a>   | 56.6 | 56.6 | 100% | 1e-07 | 90%  | <a href="#">gij548961885 NP_001271714.1</a> |
| <a href="#">PREDICTED: complement factor I [Rhinopithecus roxellana]</a>           | 56.6 | 56.6 | 95%  | 1e-07 | 95%  | <a href="#">gij724946291 XP_010387365.1</a> |
| <a href="#">hypothetical protein EGK_16010 [Macaca mulatta]</a>                    | 56.6 | 56.6 | 100% | 1e-07 | 90%  | <a href="#">gij355687535 EHH26119.1</a>     |
| <a href="#">PREDICTED: complement factor I [Otolemur garnettii]</a>                | 54.1 | 54.1 | 90%  | 7e-07 | 94%  | <a href="#">gij395851346 XP_003798222.1</a> |
| <a href="#">Complement factor I [Heterocephalus glaber]</a>                        | 54.1 | 54.1 | 90%  | 7e-07 | 94%  | <a href="#">gij351696416 EHA99334.1</a>     |
| <a href="#">PREDICTED: complement factor I [Ceratotherium simum simum]</a>         | 54.1 | 54.1 | 95%  | 7e-07 | 89%  | <a href="#">gij478504685 XP_004426641.1</a> |
| <a href="#">PREDICTED: complement factor I isoform X2 [Heterocephalus glab]</a>    | 54.1 | 54.1 | 90%  | 7e-07 | 94%  | <a href="#">gij512818622 XP_004878889.1</a> |
| <a href="#">PREDICTED: complement factor I isoform X1 [Heterocephalus glab]</a>    | 54.1 | 54.1 | 90%  | 7e-07 | 94%  | <a href="#">gij512818618 XP_004878888.1</a> |
| <a href="#">PREDICTED: complement factor I isoform X2 [Equus przewalskii]</a>      | 53.7 | 53.7 | 95%  | 9e-07 | 89%  | <a href="#">gij664769275 XP_008542181.1</a> |
| <a href="#">PREDICTED: complement factor I isoform X1 [Equus przewalskii]</a>      | 53.7 | 53.7 | 95%  | 9e-07 | 89%  | <a href="#">gij664769273 XP_008542180.1</a> |
| <a href="#">PREDICTED: complement factor I isoform X2 [Equus caballus]</a>         | 53.7 | 53.7 | 95%  | 1e-06 | 89%  | <a href="#">gij545210264 XP_005607952.1</a> |
| <a href="#">PREDICTED: complement factor I isoform X1 [Equus caballus]</a>         | 53.7 | 53.7 | 95%  | 1e-06 | 89%  | <a href="#">gij545210262 XP_005607951.1</a> |
| <a href="#">PREDICTED: complement factor I isoform X6 [Panthera tigris altaic]</a> | 53.2 | 53.2 | 95%  | 1e-06 | 89%  | <a href="#">gij591346160 XP_007098330.1</a> |
| <a href="#">PREDICTED: complement factor I isoform X2 [Nannospalax galili]</a>     | 53.2 | 53.2 | 90%  | 1e-06 | 94%  | <a href="#">gij674034950 XP_008841698.1</a> |
| <a href="#">PREDICTED: complement factor I isoform X1 [Nannospalax galili]</a>     | 53.2 | 53.2 | 90%  | 1e-06 | 94%  | <a href="#">gij674034948 XP_008841690.1</a> |
| <a href="#">PREDICTED: complement factor I isoform X5 [Panthera tigris altaic]</a> | 53.2 | 53.2 | 95%  | 1e-06 | 89%  | <a href="#">gij591346158 XP_007098329.1</a> |
| <a href="#">PREDICTED: complement factor I isoform X4 [Panthera tigris altaic]</a> | 53.2 | 53.2 | 95%  | 1e-06 | 89%  | <a href="#">gij591346156 XP_007098328.1</a> |
| <a href="#">PREDICTED: complement factor I isoform X2 [Panthera tigris altaic]</a> | 53.2 | 53.2 | 95%  | 1e-06 | 89%  | <a href="#">gij591346152 XP_007098326.1</a> |
| <a href="#">PREDICTED: complement factor I isoform X1 [Panthera tigris altaic]</a> | 53.2 | 53.2 | 95%  | 1e-06 | 89%  | <a href="#">gij591346150 XP_007098325.1</a> |
| <a href="#">PREDICTED: complement factor I [Tarsius syrichta]</a>                  | 52.8 | 52.8 | 95%  | 2e-06 | 89%  | <a href="#">gij640813983 XP_008063707.1</a> |
| <a href="#">PREDICTED: complement factor I isoform X5 [Canis lupus familiaris]</a> | 52.4 | 52.4 | 90%  | 3e-06 | 89%  | <a href="#">gij545552244 XP_005639326.1</a> |
| <a href="#">PREDICTED: complement factor I isoform X3 [Canis lupus familiaris]</a> | 52.4 | 52.4 | 90%  | 3e-06 | 89%  | <a href="#">gij74002140 XP_863506.1</a>     |
| <a href="#">PREDICTED: complement factor I isoform X4 [Canis lupus familiaris]</a> | 52.4 | 52.4 | 90%  | 3e-06 | 89%  | <a href="#">gij545552242 XP_005639325.1</a> |
| <a href="#">PREDICTED: complement factor I isoform X2 [Oryctolagus cuniculu]</a>   | 51.5 | 51.5 | 95%  | 5e-06 | 84%  | <a href="#">gij655856777 XP_008265709.1</a> |
| <a href="#">PREDICTED: complement factor I isoform X1 [Oryctolagus cuniculu]</a>   | 51.5 | 51.5 | 95%  | 5e-06 | 84%  | <a href="#">gij655856775 XP_002717177.2</a> |
| <a href="#">Complement factor I [Fukomys damarensis]</a>                           | 51.1 | 51.1 | 85%  | 7e-06 | 94%  | <a href="#">gij676270629 KFO25832.1</a>     |
| <a href="#">PREDICTED: complement factor I isoform X2 [Ictidomys tridecemlir]</a>  | 51.1 | 51.1 | 90%  | 7e-06 | 89%  | <a href="#">gij532088899 XP_005330149.1</a> |
| <a href="#">PREDICTED: complement factor I isoform X1 [Ictidomys tridecemlir]</a>  | 51.1 | 51.1 | 90%  | 7e-06 | 89%  | <a href="#">gij532088897 XP_005330148.1</a> |
| <a href="#">PREDICTED: complement factor I isoform X2 [Fukomys damarensis]</a>     | 51.1 | 51.1 | 85%  | 7e-06 | 94%  | <a href="#">gij731254237 XP_010639824.1</a> |
| <a href="#">PREDICTED: complement factor I isoform X1 [Fukomys damarensis]</a>     | 51.1 | 51.1 | 85%  | 7e-06 | 94%  | <a href="#">gij731254235 XP_010639823.1</a> |
| <a href="#">PREDICTED: LOW QUALITY PROTEIN: complement factor I [Lept]</a>         | 50.7 | 50.7 | 95%  | 1e-05 | 84%  | <a href="#">gij585149528 XP_006727262.1</a> |
| <a href="#">PREDICTED: LOW QUALITY PROTEIN: complement factor I [Felis]</a>        | 50.3 | 50.3 | 95%  | 1e-05 | 84%  | <a href="#">gij586984171 XP_006930977.1</a> |
| <a href="#">PREDICTED: complement factor I [Octodon degus]</a>                     | 48.6 | 48.6 | 90%  | 5e-05 | 83%  | <a href="#">gij507626946 XP_004626817.1</a> |
| <a href="#">PREDICTED: complement factor I [Loxodonta africana]</a>                | 48.6 | 48.6 | 90%  | 5e-05 | 83%  | <a href="#">gij731479219 XP_010588889.1</a> |
| <a href="#">PREDICTED: complement factor I [Orycteropus afer afer]</a>             | 48.1 | 48.1 | 95%  | 7e-05 | 84%  | <a href="#">gij634848033 XP_007938975.1</a> |
| <a href="#">PREDICTED: LOW QUALITY PROTEIN: complement factor I [Odo]</a>          | 47.3 | 47.3 | 95%  | 1e-04 | 79%  | <a href="#">gij472383864 XP_004411307.1</a> |
| <a href="#">PREDICTED: complement factor I [Chrysochloris asiatica]</a>            | 47.3 | 47.3 | 95%  | 1e-04 | 84%  | <a href="#">gij586477731 XP_006869402.1</a> |

|                                                                                 |      |      |      |       |     |                                             |
|---------------------------------------------------------------------------------|------|------|------|-------|-----|---------------------------------------------|
| <a href="#">PREDICTED: complement factor I [Ochotona princeps]</a>              | 46.4 | 46.4 | 90%  | 2e-04 | 83% | <a href="#">gil504169976 XP_004594584.1</a> |
| <a href="#">complement factor I-like protein [Cricetulus griseus]</a>           | 46.4 | 46.4 | 90%  | 2e-04 | 83% | <a href="#">gil537261801 ERE90152.1</a>     |
| <a href="#">PREDICTED: complement factor I [Cricetulus griseus]</a>             | 46.4 | 46.4 | 90%  | 2e-04 | 83% | <a href="#">gil625241505 XP_007611983.1</a> |
| <a href="#">PREDICTED: complement factor I [Cricetulus griseus]</a>             | 46.4 | 46.4 | 90%  | 2e-04 | 83% | <a href="#">gil625222421 XP_007651009.1</a> |
| <a href="#">complement factor I precursor [Rattus norvegicus]</a>               | 45.6 | 45.6 | 90%  | 5e-04 | 83% | <a href="#">gil13162353 NP_077071.1</a>     |
| <a href="#">PREDICTED: complement factor I isoform X1 [Rattus norvegicus]</a>   | 45.6 | 45.6 | 90%  | 5e-04 | 83% | <a href="#">gil672044321 XP_008759748.1</a> |
| <a href="#">PREDICTED: complement factor I [Myotis davidii]</a>                 | 43.9 | 43.9 | 100% | 0.002 | 70% | <a href="#">gil584046382 XP_006767995.1</a> |
| <a href="#">PREDICTED: complement factor I [Trichechus manatus latirostris]</a> | 43.9 | 43.9 | 85%  | 0.002 | 82% | <a href="#">gil471391575 XP_004380312.1</a> |
| <a href="#">PREDICTED: complement factor I isoform X2 [Cavia porcellus]</a>     | 43.5 | 43.5 | 90%  | 0.002 | 78% | <a href="#">gil514457647 XP_005002957.1</a> |
| <a href="#">PREDICTED: complement factor I isoform X1 [Cavia porcellus]</a>     | 43.5 | 43.5 | 90%  | 0.002 | 78% | <a href="#">gil514457649 XP_003468099.2</a> |
| <a href="#">PREDICTED: complement factor I isoform X4 [Mus musculus]</a>        | 43.1 | 43.1 | 90%  | 0.003 | 78% | <a href="#">gil568921717 XP_006501026.1</a> |
| <a href="#">PREDICTED: complement factor I isoform X3 [Mus musculus]</a>        | 43.1 | 43.1 | 90%  | 0.003 | 78% | <a href="#">gil568921715 XP_006501025.1</a> |
| <a href="#">PREDICTED: complement factor I isoform X2 [Mus musculus]</a>        | 43.1 | 43.1 | 90%  | 0.003 | 78% | <a href="#">gil568921713 XP_006501024.1</a> |
| <a href="#">complement factor I precursor [Mus musculus]</a>                    | 43.1 | 43.1 | 90%  | 0.003 | 78% | <a href="#">gil110347406 NP_031712.2</a>    |
| <a href="#">PREDICTED: complement factor I [Mesocricetus auratus]</a>           | 42.6 | 42.6 | 90%  | 0.004 | 78% | <a href="#">gil524965961 XP_005082885.1</a> |
| <a href="#">complement factor I precursor [Camelus ferus]</a>                   | 42.2 | 42.2 | 95%  | 0.006 | 74% | <a href="#">gil528758403 EPY78062.1</a>     |
| <a href="#">PREDICTED: LOW QUALITY PROTEIN: complement factor I [Chin</a>       | 42.2 | 42.2 | 90%  | 0.006 | 78% | <a href="#">gil533186455 XP_005406244.1</a> |
| <a href="#">PREDICTED: LOW QUALITY PROTEIN: complement factor I [Cam</a>        | 42.2 | 42.2 | 95%  | 0.006 | 74% | <a href="#">gil560925633 XP_006188998.1</a> |
| <a href="#">PREDICTED: LOW QUALITY PROTEIN: complement factor I [Vic</a>        | 42.2 | 42.2 | 95%  | 0.006 | 74% | <a href="#">gil560979761 XP_006212132.1</a> |
| <a href="#">PREDICTED: complement factor I [Peromyscus maniculatus bairdii</a>  | 40.9 | 40.9 | 90%  | 0.015 | 78% | <a href="#">gil589914217 XP_006970447.1</a> |
| <a href="#">PREDICTED: complement factor I [Mustela putorius furo]</a>          | 40.5 | 40.5 | 95%  | 0.020 | 68% | <a href="#">gil511847748 XP_004748251.1</a> |
| <a href="#">PREDICTED: complement factor I [Mustela putorius furo]</a>          | 40.5 | 40.5 | 95%  | 0.020 | 68% | <a href="#">gil511991360 XP_004813365.1</a> |
| <a href="#">PREDICTED: complement factor I isoform X2 [Myotis brandtii]</a>     | 40.5 | 40.5 | 100% | 0.021 | 65% | <a href="#">gil554556058 XP_005872468.1</a> |
| <a href="#">PREDICTED: complement factor I [Pantholops hodgsonii]</a>           | 40.5 | 40.5 | 90%  | 0.021 | 72% | <a href="#">gil556750321 XP_005970578.1</a> |
| <a href="#">PREDICTED: complement factor I isoform X2 [Capra hircus]</a>        | 40.5 | 40.5 | 90%  | 0.021 | 72% | <a href="#">gil548469406 XP_005681373.1</a> |
| <a href="#">PREDICTED: complement factor I isoform X1 [Capra hircus]</a>        | 40.5 | 40.5 | 90%  | 0.021 | 72% | <a href="#">gil548469399 XP_005681372.1</a> |
| <a href="#">PREDICTED: complement factor I [Ovis aries]</a>                     | 40.5 | 40.5 | 90%  | 0.021 | 72% | <a href="#">gil426231287 XP_004009671.1</a> |

## Alignments

Download [GenPept](#) [Graphics](#)

Next Previous Descriptions

PREDICTED: complement factor I-like, partial [Gorilla gorilla gorilla]

Sequence ID: [gil426345243|ref|XP\\_004040330.1](#) Length: 309 Number of Matches: 1

Range 1: 99 to 118 [GenPept](#) [Graphics](#)

Next Match Previous Match

| Score          | Expect | Identities  | Positives   | Gaps     |
|----------------|--------|-------------|-------------|----------|
| 65.5 bits(147) | 8e-11  | 20/20(100%) | 20/20(100%) | 0/20(0%) |

Query 1 KFLNNGTCTAEGKFSVSLKH 20  
 KFLNNGTCTAEGKFSVSLKH  
 Sbjct 99 KFLNNGTCTAEGKFSVSLKH 118

### Related Information

[Gene](#) - associated gene details  
[Map Viewer](#) - aligned genomic context

Download [GenPept](#) [Graphics](#)

Next Previous Descriptions

unnamed protein product [Homo sapiens]

Sequence ID: [gil1335055|emb|CAA68417.1](#) Length: 321 Number of Matches: 1

Range 1: 81 to 100 [GenPept](#) [Graphics](#)

Next Match Previous Match

| Score          | Expect | Identities  | Positives   | Gaps     |
|----------------|--------|-------------|-------------|----------|
| 65.5 bits(147) | 8e-11  | 20/20(100%) | 20/20(100%) | 0/20(0%) |

Query 1 KFLNNGTCTAEGKFSVSLKH 20

### Related Information

[Gene](#) - associated gene details



Sbjct 81 KFLNNGTCTAEGKFSVSLKH 100

[Download](#) [GenPept](#) [Graphics](#)

[Next](#) [Previous](#) [Descriptions](#)

CFI protein [Homo sapiens]

Sequence ID: [gi|18089117|gb|AAH20718.1](#) Length: 377 Number of Matches: 1

[See 1 more title\(s\)](#)

Range 1: 99 to 118 [GenPept](#) [Graphics](#)

[Next Match](#) [Previous Match](#)

| Score          | Expect | Identities  | Positives   | Gaps     |
|----------------|--------|-------------|-------------|----------|
| 65.5 bits(147) | 9e-11  | 20/20(100%) | 20/20(100%) | 0/20(0%) |

Query 1 KFLNNGTCTAEGKFSVSLKH 20  
 KFLNNGTCTAEGKFSVSLKH  
 Sbjct 99 KFLNNGTCTAEGKFSVSLKH 118

**Related Information**

[Gene](#) - associated gene details  
[Identical Proteins](#) - Proteins identical to the subject

[Download](#) [GenPept](#) [Graphics](#)

[Next](#) [Previous](#) [Descriptions](#)

complement factor I, isoform CRA\_a, partial [Homo sapiens]

Sequence ID: [gi|119626655|gb|EAX06250.1](#) Length: 378 Number of Matches: 1

Range 1: 99 to 118 [GenPept](#) [Graphics](#)

[Next Match](#) [Previous Match](#)

| Score          | Expect | Identities  | Positives   | Gaps     |
|----------------|--------|-------------|-------------|----------|
| 65.5 bits(147) | 9e-11  | 20/20(100%) | 20/20(100%) | 0/20(0%) |

Query 1 KFLNNGTCTAEGKFSVSLKH 20  
 KFLNNGTCTAEGKFSVSLKH  
 Sbjct 99 KFLNNGTCTAEGKFSVSLKH 118

**Related Information**

[Gene](#) - associated gene details

[Download](#) [GenPept](#) [Graphics](#)

[Next](#) [Previous](#) [Descriptions](#)

PREDICTED: complement factor I isoform X6 [Pan troglodytes]

Sequence ID: [gi|694908492|ref|XP\\_009446407.1](#) Length: 516 Number of Matches: 1

Range 1: 99 to 118 [GenPept](#) [Graphics](#)

[Next Match](#) [Previous Match](#)

| Score          | Expect | Identities  | Positives   | Gaps     |
|----------------|--------|-------------|-------------|----------|
| 65.5 bits(147) | 9e-11  | 20/20(100%) | 20/20(100%) | 0/20(0%) |

Query 1 KFLNNGTCTAEGKFSVSLKH 20  
 KFLNNGTCTAEGKFSVSLKH  
 Sbjct 99 KFLNNGTCTAEGKFSVSLKH 118

**Related Information**

[Gene](#) - associated gene details

BLAST is a registered trademark of the National Library of Medicine.

▶ NCBI/ BLAST/ blastp suite/ Formatting Results - BTG7XKUN013

**i** Your search parameters were adjusted to search for a short input sequence.

[Edit and Resubmit](#) [Save Search Strategies](#) ▶ [Formatting options](#) ▶ [Download](#) [YouTube](#) [How to read this page](#) [Blast report description](#)

### CFI\_KLISDCSKFYGNRF\_Mod

RID [BTG7XKUN013](#) (Expires on 01-20 15:31 pm)

**Query ID** |cl|97559  
**Description** None  
**Molecule type** amino acid  
**Query Length** 14

**Database Name** nr  
**Description** All non-redundant GenBank CDS translations+PDB+SwissProt+PIR+PRF excluding environmental samples from WGS projects  
**Program** BLASTP 2.2.30+ ▶ [Citation](#)

Other reports: ▶ [Search Summary](#) [[Taxonomy reports](#)] [[Distance tree of results](#)] [[Related Structures](#)] [[Multiple alignment](#)]

### **[-]** Graphic Summary

**[-]** [Show Conserved Domains](#)

No putative conserved domains have been detected

Distribution of 100 Blast Hits on the Query Sequence [?](#)

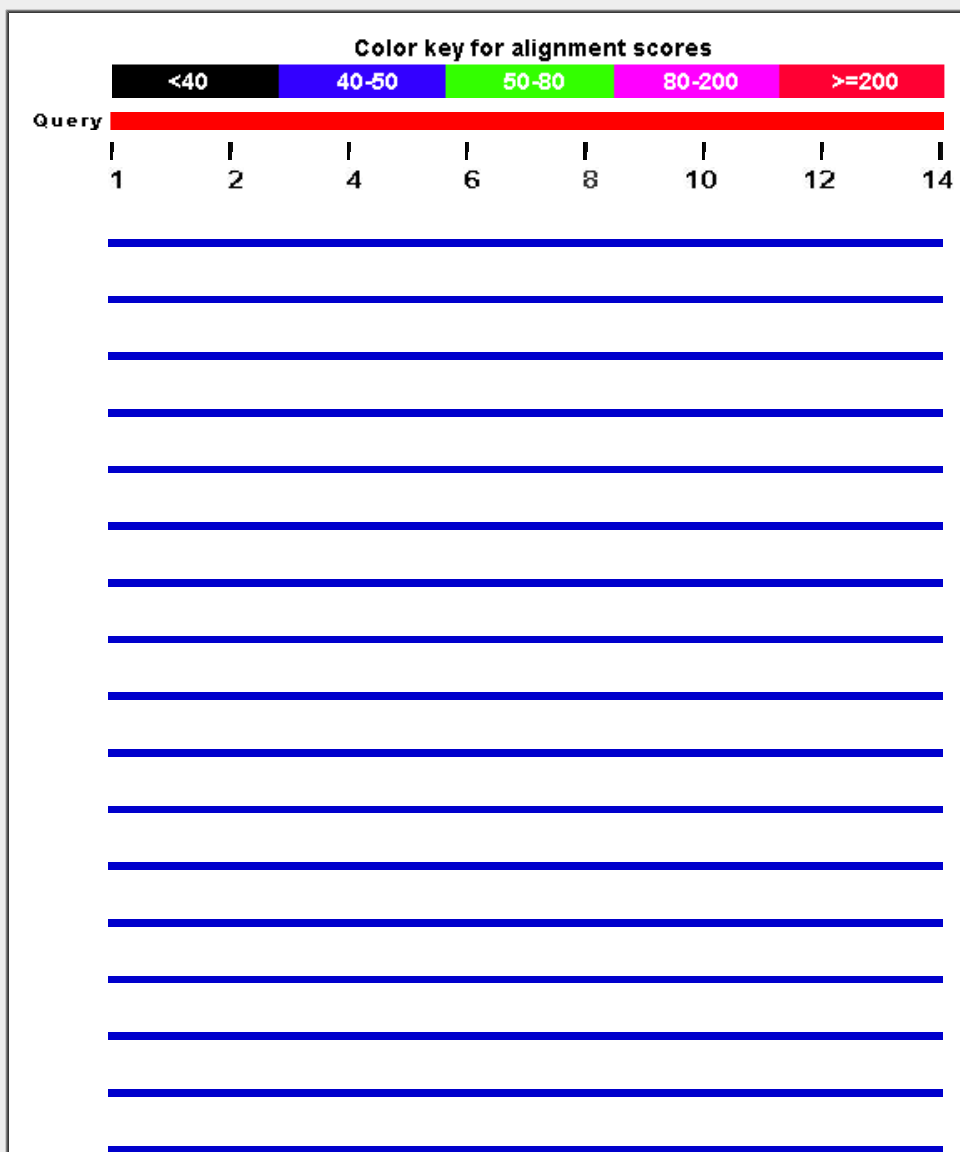



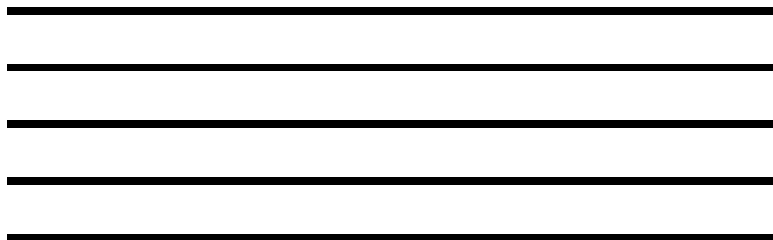

**Descriptions**

**Sequences producing significant alignments:**

Select: [All](#) [None](#) Selected:0

[Alignments](#)
[Download](#)
[GenPept](#)
[Graphics](#)
[Distance tree of results](#)
[Multiple alignment](#)

| Description                                                                   | Max score | Total score | Query cover | E value | Ident | Accession                                   |
|-------------------------------------------------------------------------------|-----------|-------------|-------------|---------|-------|---------------------------------------------|
| <a href="#">complement factor I light chain [Homo sapiens]</a>                | 46.9      | 46.9        | 100%        | 8e-05   | 93%   | <a href="#">gi 224798 1202205A</a>          |
| <a href="#">PREDICTED: complement factor I-like [Macaca mulatta]</a>          | 46.9      | 46.9        | 100%        | 8e-05   | 93%   | <a href="#">gi 297293864 XP_002804336.1</a> |
| <a href="#">unnamed protein product [Homo sapiens]</a>                        | 46.9      | 46.9        | 100%        | 8e-05   | 93%   | <a href="#">gi 1335056 CAA68418.1</a>       |
| <a href="#">PREDICTED: complement factor I-like [Gorilla gorilla gorilla]</a> | 46.9      | 46.9        | 100%        | 9e-05   | 93%   | <a href="#">gi 426345227 XP_004040322.1</a> |
| <a href="#">PREDICTED: complement factor I-like [Macaca fascicularis]</a>     | 46.9      | 46.9        | 100%        | 9e-05   | 93%   | <a href="#">gi 544524397 XP_005595214.1</a> |
| <a href="#">PREDICTED: complement factor I isoform X3 [Chlorocebus sat]</a>   | 46.9      | 46.9        | 100%        | 9e-05   | 93%   | <a href="#">gi 635044271 XP_007997720.1</a> |
| <a href="#">complement factor I [Pongo abelii]</a>                            | 46.9      | 46.9        | 100%        | 9e-05   | 93%   | <a href="#">gi 207080120 NP_001128776.1</a> |
| <a href="#">PREDICTED: complement factor I isoform X6 [Pan troglodytes]</a>   | 46.9      | 46.9        | 100%        | 9e-05   | 93%   | <a href="#">gi 694908492 XP_009446407.1</a> |
| <a href="#">PREDICTED: complement factor I isoform X6 [Pan paniscus]</a>      | 46.9      | 46.9        | 100%        | 9e-05   | 93%   | <a href="#">gi 675793799 XP_008953634.1</a> |
| <a href="#">uncharacterized protein LOC101866929 precursor [Macaca fas]</a>   | 46.9      | 46.9        | 100%        | 9e-05   | 93%   | <a href="#">gi 548961885 NP_001271714.1</a> |
| <a href="#">PREDICTED: complement factor I isoform X5 [Pan troglodytes]</a>   | 46.9      | 46.9        | 100%        | 9e-05   | 93%   | <a href="#">gi 694908490 XP_009446406.1</a> |
| <a href="#">PREDICTED: complement factor I isoform X5 [Pan paniscus]</a>      | 46.9      | 46.9        | 100%        | 9e-05   | 93%   | <a href="#">gi 675793797 XP_008953633.1</a> |
| <a href="#">PREDICTED: complement factor I isoform X4 [Homo sapiens]</a>      | 46.9      | 46.9        | 100%        | 9e-05   | 93%   | <a href="#">gi 578809103 XP_006714273.1</a> |
| <a href="#">Chain A, Human Complement Factor I [Homo sapiens]</a>             | 46.9      | 46.9        | 100%        | 9e-05   | 93%   | <a href="#">gi 339961198 2XRC_A</a>         |
| <a href="#">PREDICTED: complement factor I isoform X4 [Pan troglodytes]</a>   | 46.9      | 46.9        | 100%        | 9e-05   | 93%   | <a href="#">gi 694908488 XP_009446405.1</a> |
| <a href="#">PREDICTED: complement factor I isoform X4 [Pan paniscus]</a>      | 46.9      | 46.9        | 100%        | 9e-05   | 93%   | <a href="#">gi 675793795 XP_008953632.1</a> |
| <a href="#">PREDICTED: complement factor I isoform X2 [Chlorocebus sat]</a>   | 46.9      | 46.9        | 100%        | 9e-05   | 93%   | <a href="#">gi 635044269 XP_007997719.1</a> |
| <a href="#">PREDICTED: complement factor I isoform X2 [Homo sapiens]</a>      | 46.9      | 46.9        | 100%        | 9e-05   | 93%   | <a href="#">gi 530377647 XP_005263033.1</a> |
| <a href="#">PREDICTED: complement factor I isoform X2 [Saimiri boliviens]</a> | 46.9      | 46.9        | 100%        | 9e-05   | 93%   | <a href="#">gi 725571753 XP_010338379.1</a> |
| <a href="#">PREDICTED: complement factor I [Callithrix jacchus]</a>           | 46.9      | 46.9        | 100%        | 9e-05   | 93%   | <a href="#">gi 675648222 XP_002745538.3</a> |
| <a href="#">PREDICTED: complement factor I [Nomascus leucogenys]</a>          | 46.9      | 46.9        | 100%        | 9e-05   | 93%   | <a href="#">gi 332240463 XP_003269405.1</a> |
| <a href="#">PREDICTED: complement factor I [Rhinopithecus roxellana]</a>      | 46.9      | 46.9        | 100%        | 9e-05   | 93%   | <a href="#">gi 724946291 XP_010387365.1</a> |
| <a href="#">PREDICTED: complement factor I isoform X1 [Chlorocebus sat]</a>   | 46.9      | 46.9        | 100%        | 9e-05   | 93%   | <a href="#">gi 635044267 XP_007997718.1</a> |
| <a href="#">prepro-C3b/C4B inactivator [Homo sapiens]</a>                     | 46.9      | 46.9        | 100%        | 9e-05   | 93%   | <a href="#">gi 182607 AAA52455.1</a>        |
| <a href="#">complement factor I preproprotein [Homo sapiens]</a>              | 46.9      | 46.9        | 100%        | 9e-05   | 93%   | <a href="#">gi 119392081 NP_000195.2</a>    |
| <a href="#">complement factor I precursor [Pongo abelii]</a>                  | 46.9      | 46.9        | 100%        | 9e-05   | 93%   | <a href="#">gi 197098986 NP_001127624.1</a> |
| <a href="#">PREDICTED: complement factor I isoform X3 [Pan paniscus]</a>      | 46.9      | 46.9        | 100%        | 9e-05   | 93%   | <a href="#">gi 397519838 XP_003830060.1</a> |
| <a href="#">RecName: Full=Complement factor I; AltName: Full=C3B/C4B i</a>    | 46.9      | 46.9        | 100%        | 9e-05   | 93%   | <a href="#">gi 317373341 P05156.2</a>       |
| <a href="#">unnamed protein product [Homo sapiens]</a>                        | 46.9      | 46.9        | 100%        | 9e-05   | 93%   | <a href="#">gi 158254682 BAF83314.1</a>     |

|                                                                               |      |      |      |       |     |                                             |
|-------------------------------------------------------------------------------|------|------|------|-------|-----|---------------------------------------------|
| <a href="#">PREDICTED: complement factor I isoform X3 [Pan troglodytes]</a>   | 46.9 | 46.9 | 100% | 9e-05 | 93% | <a href="#">gi 114595644 XP_526653.2</a>    |
| <a href="#">PREDICTED: complement factor I [Callithrix jacchus]</a>           | 46.9 | 46.9 | 100% | 9e-05 | 93% | <a href="#">gi 675752511 XP_008984405.1</a> |
| <a href="#">PREDICTED: complement factor I isoform X2 [Pan troglodytes]</a>   | 46.9 | 46.9 | 100% | 9e-05 | 93% | <a href="#">gi 694908485 XP_009446404.1</a> |
| <a href="#">PREDICTED: complement factor I isoform X2 [Pan paniscus]</a>      | 46.9 | 46.9 | 100% | 9e-05 | 93% | <a href="#">gi 675793792 XP_008953631.1</a> |
| <a href="#">PREDICTED: complement factor I isoform X3 [Homo sapiens]</a>      | 46.9 | 46.9 | 100% | 9e-05 | 93% | <a href="#">gi 578809101 XP_006714272.1</a> |
| <a href="#">unnamed protein product [Homo sapiens]</a>                        | 46.9 | 46.9 | 100% | 9e-05 | 93% | <a href="#">gi 194387702 BAG61264.1</a>     |
| <a href="#">PREDICTED: complement factor I isoform X1 [Homo sapiens]</a>      | 46.9 | 46.9 | 100% | 9e-05 | 93% | <a href="#">gi 530377645 XP_005263032.1</a> |
| <a href="#">PREDICTED: complement factor I isoform X1 [Pan paniscus]</a>      | 46.9 | 46.9 | 100% | 9e-05 | 93% | <a href="#">gi 397519840 XP_003830061.1</a> |
| <a href="#">hypothetical protein EGK_16010 [Macaca mulatta]</a>               | 46.9 | 46.9 | 100% | 9e-05 | 93% | <a href="#">gi 355687535 EHH26119.1</a>     |
| <a href="#">PREDICTED: complement factor I isoform X1 [Pan troglodytes]</a>   | 46.9 | 46.9 | 100% | 9e-05 | 93% | <a href="#">gi 332820084 XP_003310493.1</a> |
| <a href="#">PREDICTED: complement factor I [Papio anubis]</a>                 | 46.9 | 46.9 | 100% | 9e-05 | 93% | <a href="#">gi 685542561 XP_009205631.1</a> |
| <a href="#">PREDICTED: complement factor I isoform X1 [Saimiri boliviens]</a> | 46.9 | 46.9 | 100% | 9e-05 | 93% | <a href="#">gi 725571751 XP_010338378.1</a> |
| <a href="#">PREDICTED: complement factor I isoform X1 [Pongo abelii]</a>      | 43.5 | 43.5 | 100% | 0.001 | 86% | <a href="#">gi 686716760 XP_009238531.1</a> |
| <a href="#">PREDICTED: complement factor I-like [Neolamprologus brichai]</a>  | 37.5 | 37.5 | 92%  | 0.12  | 77% | <a href="#">gi 584028791 XP_006808922.1</a> |
| <a href="#">PREDICTED: complement factor I isoform X4 [Monodelphis do]</a>    | 37.1 | 37.1 | 100% | 0.16  | 71% | <a href="#">gi 612030135 XP_007496055.1</a> |
| <a href="#">PREDICTED: complement factor I isoform X3 [Monodelphis do]</a>    | 37.1 | 37.1 | 100% | 0.16  | 71% | <a href="#">gi 612030133 XP_007496054.1</a> |
| <a href="#">PREDICTED: complement factor I isoform X2 [Monodelphis do]</a>    | 37.1 | 37.1 | 100% | 0.16  | 71% | <a href="#">gi 612030131 XP_007496053.1</a> |
| <a href="#">PREDICTED: complement factor I isoform X1 [Monodelphis do]</a>    | 37.1 | 37.1 | 100% | 0.16  | 71% | <a href="#">gi 612030129 XP_007496052.1</a> |
| <a href="#">PREDICTED: complement factor I [Sus scrofa]</a>                   | 37.1 | 37.1 | 92%  | 0.16  | 85% | <a href="#">gi 545846437 XP_005656603.1</a> |
| <a href="#">PREDICTED: complement factor I [Microtus ochrogaster]</a>         | 37.1 | 37.1 | 100% | 0.16  | 71% | <a href="#">gi 532029058 XP_005357485.1</a> |
| <a href="#">PREDICTED: complement factor I [Dasypus novemcinctus]</a>         | 36.7 | 36.7 | 100% | 0.22  | 71% | <a href="#">gi 488581726 XP_004476284.1</a> |
| <a href="#">PREDICTED: complement factor I isoform X2 [Oryctolagus cun]</a>   | 36.7 | 36.7 | 92%  | 0.23  | 77% | <a href="#">gi 655856777 XP_008265709.1</a> |
| <a href="#">PREDICTED: complement factor I isoform X1 [Oryctolagus cun]</a>   | 36.7 | 36.7 | 92%  | 0.23  | 77% | <a href="#">gi 655856775 XP_002717177.2</a> |
| <a href="#">PREDICTED: complement factor I-like [Galeopterus variegatus]</a>  | 35.8 | 35.8 | 92%  | 0.42  | 77% | <a href="#">gi 667268997 XP_008570201.1</a> |
| <a href="#">PREDICTED: complement factor I-like [Oreochromis niloticus]</a>   | 35.8 | 35.8 | 92%  | 0.43  | 77% | <a href="#">gi 542244580 XP_005459189.1</a> |
| <a href="#">PREDICTED: complement factor I [Tarsius syrichta]</a>             | 35.4 | 35.4 | 92%  | 0.58  | 77% | <a href="#">gi 640813983 XP_008063707.1</a> |
| <a href="#">PREDICTED: complement factor I [Otolemur garnettii]</a>           | 35.0 | 35.0 | 92%  | 0.80  | 77% | <a href="#">gi 395851346 XP_003798222.1</a> |
| <a href="#">PREDICTED: complement factor I [Chrysochloris asiatica]</a>       | 35.0 | 35.0 | 92%  | 0.80  | 69% | <a href="#">gi 586477731 XP_006869402.1</a> |
| <a href="#">PREDICTED: complement factor I [Sarcophilus harrisii]</a>         | 34.1 | 34.1 | 92%  | 1.5   | 69% | <a href="#">gi 395542057 XP_003772951.1</a> |
| <a href="#">complement factor I precursor [Camelus ferus]</a>                 | 33.3 | 33.3 | 92%  | 2.8   | 69% | <a href="#">gi 528758403 EPY78062.1</a>     |
| <a href="#">PREDICTED: complement factor I-like [Maylandia zebra]</a>         | 33.3 | 33.3 | 92%  | 2.8   | 69% | <a href="#">gi 499048737 XP_004574910.1</a> |
| <a href="#">PREDICTED: complement factor I-like [Pundamilia nyererei]</a>     | 33.3 | 33.3 | 92%  | 2.8   | 69% | <a href="#">gi 548538438 XP_005752638.1</a> |
| <a href="#">PREDICTED: complement factor I isoform X2 [Camelus drome]</a>     | 33.3 | 33.3 | 92%  | 2.8   | 69% | <a href="#">gi 744567503 XP_010979382.1</a> |
| <a href="#">PREDICTED: complement factor I isoform X2 [Camelus bactria]</a>   | 33.3 | 33.3 | 92%  | 2.8   | 69% | <a href="#">gi 743716645 XP_010951976.1</a> |
| <a href="#">PREDICTED: complement factor I-like [Haplochromis burtoni]</a>    | 33.3 | 33.3 | 92%  | 2.8   | 69% | <a href="#">gi 554881320 XP_005950423.1</a> |
| <a href="#">PREDICTED: complement factor I isoform X1 [Camelus drome]</a>     | 33.3 | 33.3 | 92%  | 2.8   | 69% | <a href="#">gi 744567500 XP_010979381.1</a> |
| <a href="#">PREDICTED: complement factor I isoform X1 [Camelus bactria]</a>   | 33.3 | 33.3 | 92%  | 2.8   | 69% | <a href="#">gi 743716643 XP_010951975.1</a> |
| <a href="#">PREDICTED: LOW QUALITY PROTEIN: complement factor I [i</a>        | 33.3 | 33.3 | 92%  | 2.8   | 69% | <a href="#">gi 560925633 XP_006188998.1</a> |
| <a href="#">PREDICTED: LOW QUALITY PROTEIN: complement factor I [i</a>        | 33.3 | 33.3 | 92%  | 2.8   | 69% | <a href="#">gi 560979761 XP_006212132.1</a> |
| <a href="#">PREDICTED: complement factor I-like [Equus przewalskii]</a>       | 32.9 | 32.9 | 92%  | 3.7   | 69% | <a href="#">gi 664780387 XP_008509513.1</a> |
| <a href="#">PREDICTED: complement factor I [Jaculus jaculus]</a>              | 32.9 | 32.9 | 92%  | 3.8   | 69% | <a href="#">gi 507549735 XP_004658680.1</a> |
| <a href="#">PREDICTED: complement factor I isoform X2 [Equus caballus]</a>    | 32.9 | 32.9 | 92%  | 3.9   | 69% | <a href="#">gi 545210264 XP_005607952.1</a> |
| <a href="#">PREDICTED: complement factor I isoform X1 [Equus caballus]</a>    | 32.9 | 32.9 | 92%  | 3.9   | 69% | <a href="#">gi 545210262 XP_005607951.1</a> |
| <a href="#">PREDICTED: complement factor I [Trichechus manatus latirost</a>   | 32.5 | 32.5 | 100% | 5.3   | 64% | <a href="#">gi 471391575 XP_004380312.1</a> |
| <a href="#">PREDICTED: complement factor I [Ornithorhynchus anatinus]</a>     | 31.6 | 31.6 | 92%  | 9.8   | 62% | <a href="#">gi 620978285 XP_007668373.1</a> |

|                                                                              |      |      |      |     |     |                                             |
|------------------------------------------------------------------------------|------|------|------|-----|-----|---------------------------------------------|
| <a href="#">PREDICTED: complement factor I isoform X2 [Ictidomys tridece</a> | 31.6 | 31.6 | 92%  | 9.8 | 69% | <a href="#">gi 532088899 XP_005330149.1</a> |
| <a href="#">PREDICTED: complement factor I isoform X1 [Ictidomys tridece</a> | 31.6 | 31.6 | 92%  | 9.8 | 69% | <a href="#">gi 532088897 XP_005330148.1</a> |
| <a href="#">Complement factor I [Fukomys damarensis]</a>                     | 31.2 | 31.2 | 92%  | 13  | 69% | <a href="#">gi 676270629 KFO25832.1</a>     |
| <a href="#">Complement factor I [Heterocephalus glaber]</a>                  | 31.2 | 31.2 | 92%  | 13  | 69% | <a href="#">gi 351696416 EHA99334.1</a>     |
| <a href="#">complement factor I-like protein [Cricetulus griseus]</a>        | 31.2 | 31.2 | 100% | 13  | 64% | <a href="#">gi 537261801 ERE90152.1</a>     |
| <a href="#">PREDICTED: complement factor I [Ceratotherium simum simur</a>    | 31.2 | 31.2 | 92%  | 13  | 62% | <a href="#">gi 478504685 XP_004426641.1</a> |
| <a href="#">PREDICTED: complement factor I isoform X2 [Fukomys damar</a>     | 31.2 | 31.2 | 92%  | 13  | 69% | <a href="#">gi 731254237 XP_010639824.1</a> |
| <a href="#">PREDICTED: complement factor I isoform X2 [Heterocephalus</a>    | 31.2 | 31.2 | 92%  | 13  | 69% | <a href="#">gi 512818622 XP_004878889.1</a> |
| <a href="#">PREDICTED: complement factor I isoform X1 [Fukomys damar</a>     | 31.2 | 31.2 | 92%  | 13  | 69% | <a href="#">gi 731254235 XP_010639823.1</a> |
| <a href="#">PREDICTED: complement factor I isoform X2 [Cavia porcellus]</a>  | 31.2 | 31.2 | 92%  | 13  | 69% | <a href="#">gi 514457647 XP_005002957.1</a> |
| <a href="#">PREDICTED: complement factor I isoform X1 [Heterocephalus</a>    | 31.2 | 31.2 | 92%  | 13  | 69% | <a href="#">gi 512818618 XP_004878888.1</a> |
| <a href="#">PREDICTED: complement factor I isoform X1 [Cavia porcellus]</a>  | 31.2 | 31.2 | 92%  | 13  | 69% | <a href="#">gi 514457649 XP_003468099.2</a> |
| <a href="#">PREDICTED: complement factor I [Cricetulus griseus]</a>          | 31.2 | 31.2 | 100% | 13  | 64% | <a href="#">gi 625241505 XP_007611983.1</a> |
| <a href="#">PREDICTED: complement factor I [Cricetulus griseus]</a>          | 31.2 | 31.2 | 100% | 13  | 64% | <a href="#">gi 625222421 XP_007651009.1</a> |
| <a href="#">PREDICTED: complement factor I [Tursiops truncatus]</a>          | 30.8 | 30.8 | 92%  | 18  | 62% | <a href="#">gi 470636247 XP_004323514.1</a> |
| <a href="#">PREDICTED: complement factor I [Ochotona princeps]</a>           | 30.8 | 30.8 | 92%  | 18  | 62% | <a href="#">gi 504169976 XP_004594584.1</a> |
| <a href="#">PREDICTED: LOW QUALITY PROTEIN: complement factor I [i</a>       | 30.8 | 30.8 | 92%  | 18  | 69% | <a href="#">gi 533186455 XP_005406244.1</a> |
| <a href="#">PREDICTED: LOW QUALITY PROTEIN: complement factor I [i</a>       | 30.8 | 30.8 | 92%  | 18  | 62% | <a href="#">gi 466008566 XP_004269732.1</a> |
| <a href="#">PREDICTED: GTPase IMAP family member 7-like [Danio rerio]</a>    | 30.3 | 30.3 | 100% | 23  | 71% | <a href="#">gi 688540502 XP_009293412.1</a> |
| <a href="#">phosphonate C-P lyase system protein PhnK [Rhizobium legurr</a>  | 30.3 | 30.3 | 78%  | 24  | 82% | <a href="#">gi 739199265 WP_037062723.1</a> |
| <a href="#">PREDICTED: GTPase IMAP family member 8-like [Danio rerio]</a>    | 30.3 | 30.3 | 100% | 25  | 71% | <a href="#">gi 688540491 XP_009292350.1</a> |
| <a href="#">PREDICTED: complement factor I isoform X5 [Canis lupus fam</a>   | 29.9 | 29.9 | 100% | 34  | 64% | <a href="#">gi 545552244 XP_005639326.1</a> |
| <a href="#">PREDICTED: complement factor I isoform X3 [Canis lupus fami</a>  | 29.9 | 29.9 | 100% | 34  | 64% | <a href="#">gi 74002140 XP_863506.1</a>     |
| <a href="#">PREDICTED: complement factor I isoform X4 [Canis lupus fam</a>   | 29.9 | 29.9 | 100% | 34  | 64% | <a href="#">gi 545552242 XP_005639325.1</a> |
| <a href="#">PREDICTED: probable cysteine proteinase At3g19400 [Malus r</a>   | 29.5 | 29.5 | 78%  | 42  | 56% | <a href="#">gi 658064694 XP_008368290.1</a> |
| <a href="#">hypothetical protein [Gallibacterium anatis]</a>                 | 29.5 | 29.5 | 64%  | 44  | 89% | <a href="#">gi 517156972 WP_018345790.1</a> |

## Alignments

Download [GenPept](#) [Graphics](#)

[Next](#) [Previous](#) [Descriptions](#)

complement factor I light chain

Sequence ID: [gi|224798|prf|1202205A](#) Length: 200 Number of Matches: 1

Range 1: 108 to 121 [GenPept](#) [Graphics](#)

[Next Match](#) [Previous Match](#)

### Related Information

| Score          | Expect | Identities | Positives   | Gaps     |
|----------------|--------|------------|-------------|----------|
| 46.9 bits(103) | 8e-05  | 13/14(93%) | 14/14(100%) | 0/14(0%) |

Query 1 KLISDCSKFYGNRF 14  
 KLIS+CSKFYGNRF  
 Sbjct 108 KLISNCSKFYGNRF 121

Download [GenPept](#) [Graphics](#)

[Next](#) [Previous](#) [Descriptions](#)

PREDICTED: complement factor I-like, partial [Macaca mulatta]

Sequence ID: [gi|297293864|ref|XP\\_002804336.1](#) Length: 214 Number of Matches: 1

Range 1: 121 to 134 [GenPept](#) [Graphics](#)

[Next Match](#) [Previous Match](#)

### Related Information

| Score          | Expect | Identities | Positives   | Gaps     |
|----------------|--------|------------|-------------|----------|
| 46.9 bits(103) | 8e-05  | 13/14(93%) | 14/14(100%) | 0/14(0%) |

[Gene](#) - associated gene details  
[UniGene](#) - clustered expressed sequence tags

Query 1 KLISDCSKFYGNRF 14  
 KLIS+CSKFYGNRF  
 Sbjct 121 KLISNCSKFYGNRF 134

[Map Viewer](#) - aligned genomic context

Download [GenPept](#) [Graphics](#)

[Next](#) [Previous](#) [Descriptions](#)

unnamed protein product [Homo sapiens]

Sequence ID: [gi|1335056|emb|CAA68418.1|](#) Length: 244 Number of Matches: 1

Range 1: 151 to 164 [GenPept](#) [Graphics](#)

[Next Match](#) [Previous Match](#)

| Score          | Expect | Identities | Positives   | Gaps     |
|----------------|--------|------------|-------------|----------|
| 46.9 bits(103) | 8e-05  | 13/14(93%) | 14/14(100%) | 0/14(0%) |

Query 1 KLISDCSKFYGNRF 14  
 KLIS+CSKFYGNRF  
 Sbjct 151 KLISNCSKFYGNRF 164

**Related Information**

[Gene](#) - associated gene details

Download [GenPept](#) [Graphics](#)

[Next](#) [Previous](#) [Descriptions](#)

PREDICTED: complement factor I-like, partial [Gorilla gorilla gorilla]

Sequence ID: [gi|426345227|ref|XP\\_004040322.1|](#) Length: 281 Number of Matches: 1

Range 1: 188 to 201 [GenPept](#) [Graphics](#)

[Next Match](#) [Previous Match](#)

| Score          | Expect | Identities | Positives   | Gaps     |
|----------------|--------|------------|-------------|----------|
| 46.9 bits(103) | 9e-05  | 13/14(93%) | 14/14(100%) | 0/14(0%) |

Query 1 KLISDCSKFYGNRF 14  
 KLIS+CSKFYGNRF  
 Sbjct 188 KLISNCSKFYGNRF 201

**Related Information**

[Gene](#) - associated gene details

[Map Viewer](#) - aligned genomic context

Download [GenPept](#) [Graphics](#)

[Next](#) [Previous](#) [Descriptions](#)

PREDICTED: complement factor I-like, partial [Macaca fascicularis]

Sequence ID: [gi|544524397|ref|XP\\_005595214.1|](#) Length: 314 Number of Matches: 1

Range 1: 221 to 234 [GenPept](#) [Graphics](#)

[Next Match](#) [Previous Match](#)

| Score          | Expect | Identities | Positives   | Gaps     |
|----------------|--------|------------|-------------|----------|
| 46.9 bits(103) | 9e-05  | 13/14(93%) | 14/14(100%) | 0/14(0%) |

Query 1 KLISDCSKFYGNRF 14  
 KLIS+CSKFYGNRF  
 Sbjct 221 KLISNCSKFYGNRF 234

**Related Information**

[Gene](#) - associated gene details

BLAST is a registered trademark of the National Library of Medicine.

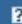

▶ NCBI/ BLAST/ blastp suite/ Formatting Results - B94H58KR01R

**i** Your search parameters were adjusted to search for a short input sequence.

[Edit and Resubmit](#) [Save Search Strategies](#) ▶ [Formatting options](#) ▶ [Download](#)

[YouTube](#) [How to read this page](#) [Blast report description](#)

### CFI\_KLISNCSKFYGNRF\_NonMod

RID [B94H58KR01R](#) (Expires on 01-14 10:33 am)

**Query ID** |cl|237167  
**Description** None  
**Molecule type** amino acid  
**Query Length** 14

**Database Name** nr  
**Description** All non-redundant GenBank CDS translations+PDB+SwissProt+PIR excluding environmental samples from WGS projects  
**Program** BLASTP 2.2.30+ ▶ [Citation](#)

Other reports: ▶ [Search Summary](#) [[Taxonomy reports](#)] [[Distance tree of results](#)] [[Related Structures](#)] [[Multiple alignment](#)]

### **G**raphic Summary

**G** [Show Conserved Domains](#)

No putative conserved domains have been detected

Distribution of 100 Blast Hits on the Query Sequence





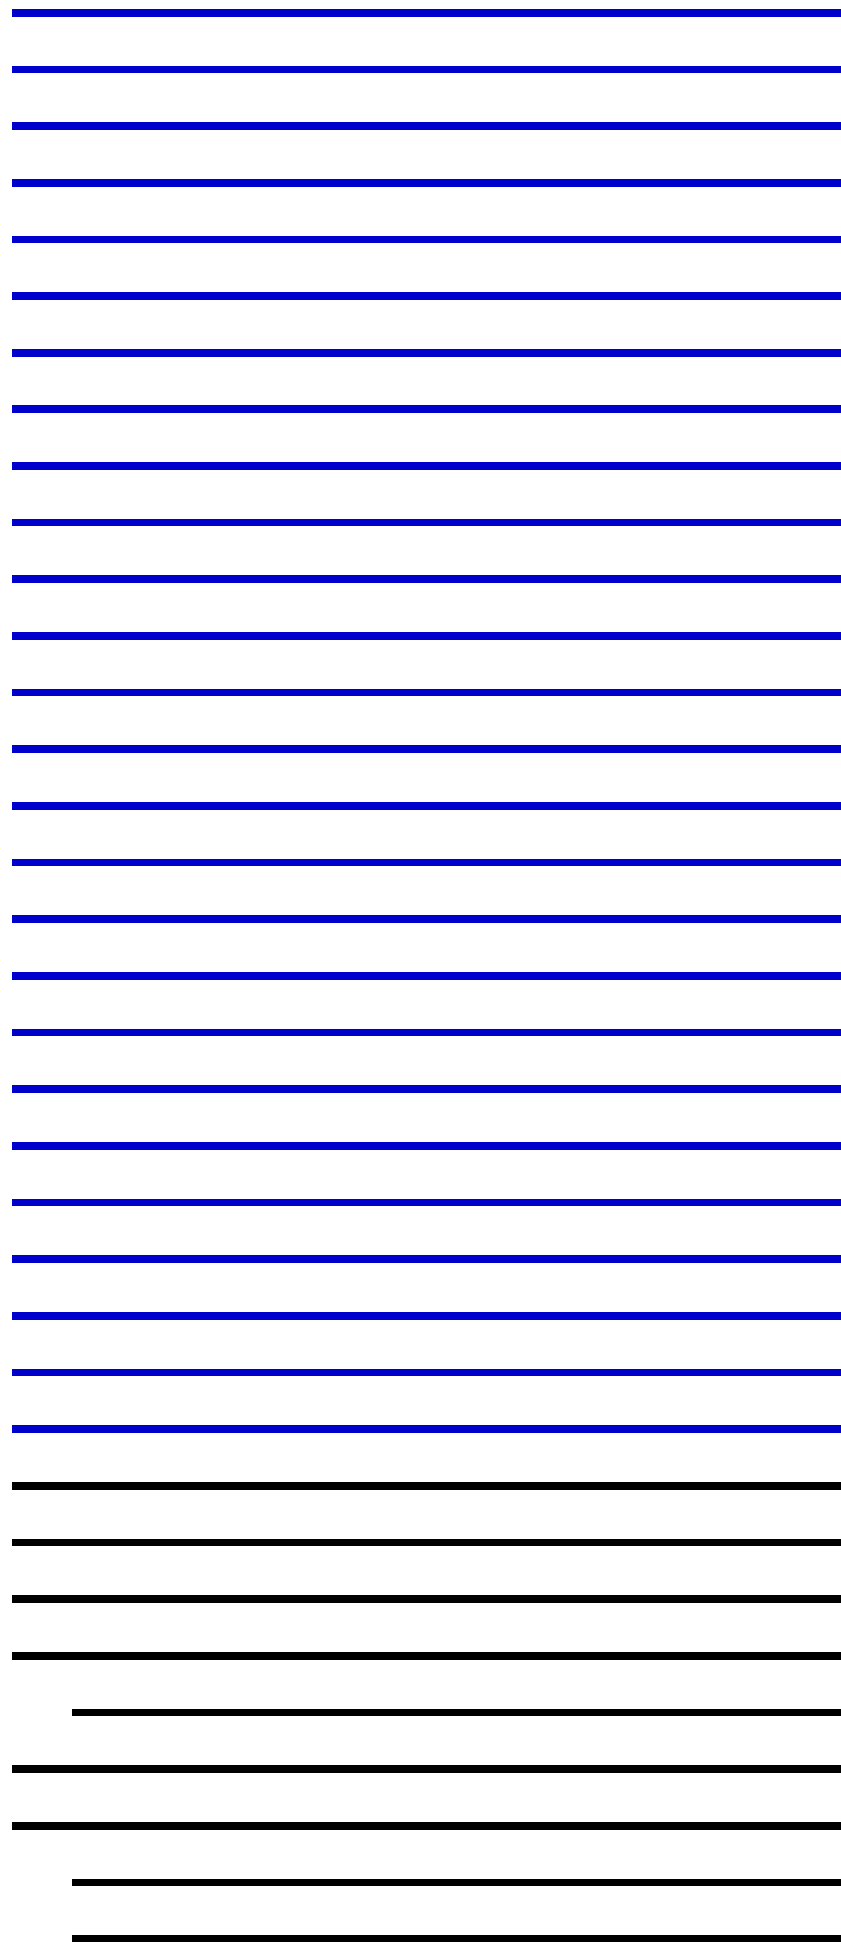

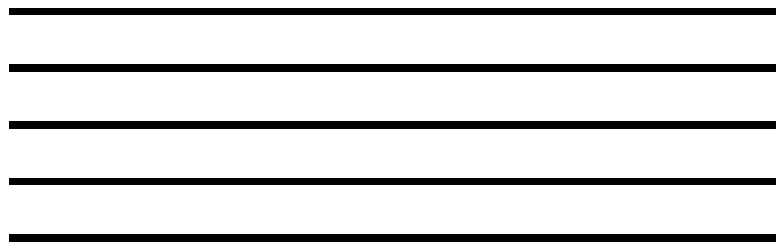

**Descriptions**

**Sequences producing significant alignments:**

Select: [All](#) [None](#) Selected:0

[Alignments](#)
[Download](#)
[GenPept](#)
[Graphics](#)
[Distance tree of results](#)
[Multiple alignment](#)

| Description                                                                        | Max score | Total score | Query cover | E value | Ident | Accession                                   |
|------------------------------------------------------------------------------------|-----------|-------------|-------------|---------|-------|---------------------------------------------|
| <a href="#">complement factor I light chain [Homo sapiens]</a>                     | 49.4      | 49.4        | 100%        | 1e-05   | 100%  | <a href="#">gij224798 1202205A</a>          |
| <a href="#">PREDICTED: complement factor I-like [Macaca mulatta]</a>               | 49.4      | 49.4        | 100%        | 1e-05   | 100%  | <a href="#">gij297293864 XP_002804336.1</a> |
| <a href="#">unnamed protein product [Homo sapiens]</a>                             | 49.4      | 49.4        | 100%        | 1e-05   | 100%  | <a href="#">gij1335056 CAA68418.1</a>       |
| <a href="#">PREDICTED: complement factor I-like [Gorilla gorilla gorilla]</a>      | 49.4      | 49.4        | 100%        | 1e-05   | 100%  | <a href="#">gij426345227 XP_004040322.1</a> |
| <a href="#">PREDICTED: complement factor I-like [Macaca fascicularis]</a>          | 49.4      | 49.4        | 100%        | 1e-05   | 100%  | <a href="#">gij544524397 XP_005595214.1</a> |
| <a href="#">PREDICTED: complement factor I isoform X3 [Chlorocebus sabaeu]</a>     | 49.4      | 49.4        | 100%        | 1e-05   | 100%  | <a href="#">gij635044271 XP_007997720.1</a> |
| <a href="#">complement factor I [Pongo abelii]</a>                                 | 49.4      | 49.4        | 100%        | 1e-05   | 100%  | <a href="#">gij207080120 NP_001128776.1</a> |
| <a href="#">PREDICTED: complement factor I isoform X6 [Pan troglodytes]</a>        | 49.4      | 49.4        | 100%        | 1e-05   | 100%  | <a href="#">gij694908492 XP_009446407.1</a> |
| <a href="#">PREDICTED: complement factor I isoform X6 [Pan paniscus]</a>           | 49.4      | 49.4        | 100%        | 1e-05   | 100%  | <a href="#">gij675793799 XP_008953634.1</a> |
| <a href="#">uncharacterized protein LOC101866929 precursor [Macaca fascicul]</a>   | 49.4      | 49.4        | 100%        | 1e-05   | 100%  | <a href="#">gij548961885 NP_001271714.1</a> |
| <a href="#">PREDICTED: complement factor I isoform X5 [Pan troglodytes]</a>        | 49.4      | 49.4        | 100%        | 1e-05   | 100%  | <a href="#">gij694908490 XP_009446406.1</a> |
| <a href="#">PREDICTED: complement factor I isoform X5 [Pan paniscus]</a>           | 49.4      | 49.4        | 100%        | 1e-05   | 100%  | <a href="#">gij675793797 XP_008953633.1</a> |
| <a href="#">PREDICTED: complement factor I isoform X4 [Homo sapiens]</a>           | 49.4      | 49.4        | 100%        | 1e-05   | 100%  | <a href="#">gij578809103 XP_006714273.1</a> |
| <a href="#">Chain A, Human Complement Factor I [Homo sapiens]</a>                  | 49.4      | 49.4        | 100%        | 1e-05   | 100%  | <a href="#">gij339961198 2XRC_A</a>         |
| <a href="#">PREDICTED: complement factor I isoform X4 [Pan troglodytes]</a>        | 49.4      | 49.4        | 100%        | 1e-05   | 100%  | <a href="#">gij694908488 XP_009446405.1</a> |
| <a href="#">PREDICTED: complement factor I isoform X4 [Pan paniscus]</a>           | 49.4      | 49.4        | 100%        | 1e-05   | 100%  | <a href="#">gij675793795 XP_008953632.1</a> |
| <a href="#">PREDICTED: complement factor I isoform X2 [Chlorocebus sabaeu]</a>     | 49.4      | 49.4        | 100%        | 1e-05   | 100%  | <a href="#">gij635044269 XP_007997719.1</a> |
| <a href="#">PREDICTED: complement factor I isoform X2 [Homo sapiens]</a>           | 49.4      | 49.4        | 100%        | 1e-05   | 100%  | <a href="#">gij530377647 XP_005263033.1</a> |
| <a href="#">PREDICTED: complement factor I isoform X2 [Saimiri boliviensis br]</a> | 49.4      | 49.4        | 100%        | 1e-05   | 100%  | <a href="#">gij725571753 XP_010338379.1</a> |
| <a href="#">PREDICTED: complement factor I [Callithrix jacchus]</a>                | 49.4      | 49.4        | 100%        | 1e-05   | 100%  | <a href="#">gij675648222 XP_002745538.3</a> |
| <a href="#">PREDICTED: complement factor I [Nomascus leucogenys]</a>               | 49.4      | 49.4        | 100%        | 1e-05   | 100%  | <a href="#">gij332240463 XP_003269405.1</a> |
| <a href="#">PREDICTED: complement factor I [Rhinopithecus roxellana]</a>           | 49.4      | 49.4        | 100%        | 1e-05   | 100%  | <a href="#">gij724946291 XP_010387365.1</a> |
| <a href="#">PREDICTED: complement factor I isoform X1 [Chlorocebus sabaeu]</a>     | 49.4      | 49.4        | 100%        | 1e-05   | 100%  | <a href="#">gij635044267 XP_007997718.1</a> |
| <a href="#">prepro-C3b/C4B inactivator [Homo sapiens]</a>                          | 49.4      | 49.4        | 100%        | 1e-05   | 100%  | <a href="#">gij182607 AAA52455.1</a>        |
| <a href="#">complement factor I preproprotein [Homo sapiens]</a>                   | 49.4      | 49.4        | 100%        | 1e-05   | 100%  | <a href="#">gij119392081 NP_000195.2</a>    |
| <a href="#">complement factor I precursor [Pongo abelii]</a>                       | 49.4      | 49.4        | 100%        | 1e-05   | 100%  | <a href="#">gij197098986 NP_001127624.1</a> |
| <a href="#">PREDICTED: complement factor I isoform X3 [Pan paniscus]</a>           | 49.4      | 49.4        | 100%        | 1e-05   | 100%  | <a href="#">gij397519838 XP_003830060.1</a> |
| <a href="#">RecName: Full=Complement factor I; AltName: Full=C3B/C4B inact</a>     | 49.4      | 49.4        | 100%        | 1e-05   | 100%  | <a href="#">gij317373341 P05156.2</a>       |

|                                                                                             |      |      |      |       |      |                                             |
|---------------------------------------------------------------------------------------------|------|------|------|-------|------|---------------------------------------------|
| unnamed protein product [Homo sapiens]                                                      | 49.4 | 49.4 | 100% | 1e-05 | 100% | <a href="#">gij158254682 BAF83314.1</a>     |
| <a href="#">PREDICTED: complement factor I isoform X3 [Pan troglodytes]</a>                 | 49.4 | 49.4 | 100% | 1e-05 | 100% | <a href="#">gij114595644 XP_526653.2</a>    |
| <a href="#">PREDICTED: complement factor I [Callithrix jacchus]</a>                         | 49.4 | 49.4 | 100% | 1e-05 | 100% | <a href="#">gij675752511 XP_008984405.1</a> |
| <a href="#">PREDICTED: complement factor I isoform X2 [Pan troglodytes]</a>                 | 49.4 | 49.4 | 100% | 1e-05 | 100% | <a href="#">gij694908485 XP_009446404.1</a> |
| <a href="#">PREDICTED: complement factor I isoform X2 [Pan paniscus]</a>                    | 49.4 | 49.4 | 100% | 1e-05 | 100% | <a href="#">gij675793792 XP_008953631.1</a> |
| <a href="#">PREDICTED: complement factor I isoform X3 [Homo sapiens]</a>                    | 49.4 | 49.4 | 100% | 1e-05 | 100% | <a href="#">gij578809101 XP_006714272.1</a> |
| unnamed protein product [Homo sapiens]                                                      | 49.4 | 49.4 | 100% | 1e-05 | 100% | <a href="#">gij194387702 BAG61264.1</a>     |
| <a href="#">PREDICTED: complement factor I isoform X1 [Homo sapiens]</a>                    | 49.4 | 49.4 | 100% | 1e-05 | 100% | <a href="#">gij530377645 XP_005263032.1</a> |
| <a href="#">PREDICTED: complement factor I isoform X1 [Pan paniscus]</a>                    | 49.4 | 49.4 | 100% | 1e-05 | 100% | <a href="#">gij397519840 XP_003830061.1</a> |
| hypothetical protein EGK_16010 [Macaca mulatta]                                             | 49.4 | 49.4 | 100% | 1e-05 | 100% | <a href="#">gij355687535 EHH26119.1</a>     |
| <a href="#">PREDICTED: complement factor I isoform X1 [Pan troglodytes]</a>                 | 49.4 | 49.4 | 100% | 1e-05 | 100% | <a href="#">gij332820084 XP_003310493.1</a> |
| <a href="#">PREDICTED: complement factor I [Papio anubis]</a>                               | 49.4 | 49.4 | 100% | 1e-05 | 100% | <a href="#">gij685542561 XP_009205631.1</a> |
| <a href="#">PREDICTED: complement factor I isoform X1 [Saimiri boliviensis boliviensis]</a> | 49.4 | 49.4 | 100% | 1e-05 | 100% | <a href="#">gij725571751 XP_010338378.1</a> |
| <a href="#">PREDICTED: complement factor I isoform X1 [Pongo abelii]</a>                    | 46.0 | 46.0 | 100% | 2e-04 | 93%  | <a href="#">gij686716760 XP_009238531.1</a> |
| <a href="#">PREDICTED: complement factor I isoform X4 [Monodelphis domestica]</a>           | 39.7 | 39.7 | 100% | 0.023 | 79%  | <a href="#">gij612030135 XP_007496055.1</a> |
| <a href="#">PREDICTED: complement factor I isoform X3 [Monodelphis domestica]</a>           | 39.7 | 39.7 | 100% | 0.023 | 79%  | <a href="#">gij612030133 XP_007496054.1</a> |
| <a href="#">PREDICTED: complement factor I isoform X2 [Monodelphis domestica]</a>           | 39.7 | 39.7 | 100% | 0.023 | 79%  | <a href="#">gij612030131 XP_007496053.1</a> |
| <a href="#">PREDICTED: complement factor I isoform X1 [Monodelphis domestica]</a>           | 39.7 | 39.7 | 100% | 0.023 | 79%  | <a href="#">gij612030129 XP_007496052.1</a> |
| <a href="#">PREDICTED: complement factor I [Sus scrofa]</a>                                 | 39.7 | 39.7 | 92%  | 0.023 | 92%  | <a href="#">gij545846437 XP_005656603.1</a> |
| <a href="#">PREDICTED: complement factor I [Microtus ochrogaster]</a>                       | 39.7 | 39.7 | 100% | 0.023 | 79%  | <a href="#">gij532029058 XP_005357485.1</a> |
| <a href="#">PREDICTED: complement factor I [Dasyurus novemcinctus]</a>                      | 39.2 | 39.2 | 100% | 0.031 | 79%  | <a href="#">gij488581726 XP_004476284.1</a> |
| <a href="#">PREDICTED: complement factor I isoform X2 [Oryctolagus cuniculus]</a>           | 39.2 | 39.2 | 92%  | 0.031 | 85%  | <a href="#">gij655856777 XP_008265709.1</a> |
| <a href="#">PREDICTED: complement factor I isoform X1 [Oryctolagus cuniculus]</a>           | 39.2 | 39.2 | 92%  | 0.031 | 85%  | <a href="#">gij655856775 XP_002717177.2</a> |
| <a href="#">PREDICTED: complement factor I-like [Galeopterus variegatus]</a>                | 38.4 | 38.4 | 92%  | 0.059 | 85%  | <a href="#">gij667268997 XP_008570201.1</a> |
| <a href="#">PREDICTED: complement factor I [Tarsius syrichta]</a>                           | 38.0 | 38.0 | 92%  | 0.082 | 85%  | <a href="#">gij640813983 XP_008063707.1</a> |
| <a href="#">PREDICTED: complement factor I [Otolemur garnettii]</a>                         | 37.5 | 37.5 | 92%  | 0.11  | 85%  | <a href="#">gij395851346 XP_003798222.1</a> |
| <a href="#">PREDICTED: complement factor I [Chrysochloris asiatica]</a>                     | 37.5 | 37.5 | 92%  | 0.11  | 77%  | <a href="#">gij586477731 XP_006869402.1</a> |
| <a href="#">PREDICTED: complement factor I [Sarcophilus harrisii]</a>                       | 36.7 | 36.7 | 92%  | 0.21  | 77%  | <a href="#">gij395542057 XP_003772951.1</a> |
| complement factor I precursor [Camelus ferus]                                               | 35.8 | 35.8 | 92%  | 0.40  | 77%  | <a href="#">gij528758403 EPY78062.1</a>     |
| <a href="#">PREDICTED: complement factor I-like [Maylandia zebra]</a>                       | 35.8 | 35.8 | 92%  | 0.40  | 77%  | <a href="#">gij499048737 XP_004574910.1</a> |
| <a href="#">PREDICTED: complement factor I-like [Pundamilia nyererei]</a>                   | 35.8 | 35.8 | 92%  | 0.40  | 77%  | <a href="#">gij548538438 XP_005752638.1</a> |
| <a href="#">PREDICTED: complement factor I-like [Haplochromis burtoni]</a>                  | 35.8 | 35.8 | 92%  | 0.40  | 77%  | <a href="#">gij554881320 XP_005950423.1</a> |
| <a href="#">PREDICTED: LOW QUALITY PROTEIN: complement factor I [Camelus ferus]</a>         | 35.8 | 35.8 | 92%  | 0.41  | 77%  | <a href="#">gij560925633 XP_006188998.1</a> |
| <a href="#">PREDICTED: LOW QUALITY PROTEIN: complement factor I [Vicugna vicugna]</a>       | 35.8 | 35.8 | 92%  | 0.41  | 77%  | <a href="#">gij560979761 XP_006212132.1</a> |
| <a href="#">PREDICTED: complement factor I-like [Equus przewalskii]</a>                     | 35.4 | 35.4 | 92%  | 0.52  | 77%  | <a href="#">gij664780387 XP_008509513.1</a> |
| <a href="#">PREDICTED: complement factor I [Jaculus jaculus]</a>                            | 35.4 | 35.4 | 92%  | 0.55  | 77%  | <a href="#">gij507549735 XP_004658680.1</a> |
| <a href="#">PREDICTED: complement factor I isoform X2 [Equus caballus]</a>                  | 35.4 | 35.4 | 92%  | 0.56  | 77%  | <a href="#">gij545210264 XP_005607952.1</a> |
| <a href="#">PREDICTED: complement factor I isoform X1 [Equus caballus]</a>                  | 35.4 | 35.4 | 92%  | 0.56  | 77%  | <a href="#">gij545210262 XP_005607951.1</a> |
| <a href="#">PREDICTED: complement factor I-like [Neolamprologus brichardi]</a>              | 35.0 | 35.0 | 92%  | 0.76  | 69%  | <a href="#">gij584028791 XP_006808922.1</a> |
| <a href="#">PREDICTED: complement factor I [Trichechus manatus latirostris]</a>             | 35.0 | 35.0 | 100% | 0.76  | 71%  | <a href="#">gij471391575 XP_004380312.1</a> |
| <a href="#">PREDICTED: complement factor I [Ornithorhynchus anatinus]</a>                   | 34.1 | 34.1 | 92%  | 1.4   | 69%  | <a href="#">gij620978285 XP_007668373.1</a> |
| <a href="#">PREDICTED: complement factor I isoform X2 [Ictidomys tridecemliris]</a>         | 34.1 | 34.1 | 92%  | 1.4   | 77%  | <a href="#">gij532088899 XP_005330149.1</a> |
| <a href="#">PREDICTED: complement factor I isoform X1 [Ictidomys tridecemliris]</a>         | 34.1 | 34.1 | 92%  | 1.4   | 77%  | <a href="#">gij532088897 XP_005330148.1</a> |
| Complement factor I [Fukomys damarensis]                                                    | 33.7 | 33.7 | 92%  | 1.9   | 77%  | <a href="#">gij676270629 KFO25832.1</a>     |
| Complement factor I [Heterocephalus glaber]                                                 | 33.7 | 33.7 | 92%  | 1.9   | 77%  | <a href="#">gij351696416 EHA99334.1</a>     |

|                                                                                  |      |      |      |     |     |                                             |
|----------------------------------------------------------------------------------|------|------|------|-----|-----|---------------------------------------------|
| <a href="#">complement factor I-like protein [Cricetulus griseus]</a>            | 33.7 | 33.7 | 100% | 2.0 | 71% | <a href="#">gil537261801 ERE90152.1</a>     |
| <a href="#">PREDICTED: complement factor I isoform X2 [Fukomys damarensi]</a>    | 33.7 | 33.7 | 92%  | 2.0 | 77% | <a href="#">gil731254237 XP_010639824.1</a> |
| <a href="#">PREDICTED: complement factor I isoform X2 [Heterocephalus glab]</a>  | 33.7 | 33.7 | 92%  | 2.0 | 77% | <a href="#">gil512818622 XP_004878889.1</a> |
| <a href="#">PREDICTED: complement factor I isoform X1 [Fukomys damarensi]</a>    | 33.7 | 33.7 | 92%  | 2.0 | 77% | <a href="#">gil731254235 XP_010639823.1</a> |
| <a href="#">PREDICTED: complement factor I isoform X2 [Cavia porcellus]</a>      | 33.7 | 33.7 | 92%  | 2.0 | 77% | <a href="#">gil514457647 XP_005002957.1</a> |
| <a href="#">PREDICTED: complement factor I isoform X1 [Heterocephalus glab]</a>  | 33.7 | 33.7 | 92%  | 2.0 | 77% | <a href="#">gil512818618 XP_004878888.1</a> |
| <a href="#">PREDICTED: complement factor I isoform X1 [Cavia porcellus]</a>      | 33.7 | 33.7 | 92%  | 2.0 | 77% | <a href="#">gil514457649 XP_003468099.2</a> |
| <a href="#">PREDICTED: complement factor I [Cricetulus griseus]</a>              | 33.7 | 33.7 | 100% | 2.0 | 71% | <a href="#">gil625241505 XP_007611983.1</a> |
| <a href="#">PREDICTED: complement factor I [Cricetulus griseus]</a>              | 33.7 | 33.7 | 100% | 2.0 | 71% | <a href="#">gil625222421 XP_007651009.1</a> |
| <a href="#">PREDICTED: complement factor I [Tursiops truncatus]</a>              | 33.3 | 33.3 | 92%  | 2.7 | 69% | <a href="#">gil470636247 XP_004323514.1</a> |
| <a href="#">PREDICTED: complement factor I [Ochotona princeps]</a>               | 33.3 | 33.3 | 92%  | 2.7 | 69% | <a href="#">gil504169976 XP_004594584.1</a> |
| <a href="#">PREDICTED: LOW QUALITY PROTEIN: complement factor I [Chin</a>        | 33.3 | 33.3 | 92%  | 2.7 | 77% | <a href="#">gil533186455 XP_005406244.1</a> |
| <a href="#">PREDICTED: LOW QUALITY PROTEIN: complement factor I [Orci</a>        | 33.3 | 33.3 | 92%  | 2.7 | 69% | <a href="#">gil466008566 XP_004269732.1</a> |
| <a href="#">PREDICTED: complement factor I-like [Oreochromis niloticus]</a>      | 33.3 | 33.3 | 92%  | 2.7 | 69% | <a href="#">gil542244580 XP_005459189.1</a> |
| <a href="#">PREDICTED: complement factor I isoform X5 [Canis lupus familiari</a> | 32.5 | 32.5 | 100% | 5.0 | 71% | <a href="#">gil545552244 XP_005639326.1</a> |
| <a href="#">PREDICTED: complement factor I isoformX3 [Canis lupus familiaris</a> | 32.5 | 32.5 | 100% | 5.0 | 71% | <a href="#">gil74002140 XP_863506.1</a>     |
| <a href="#">PREDICTED: complement factor I isoform X4 [Canis lupus familiari</a> | 32.5 | 32.5 | 100% | 5.0 | 71% | <a href="#">gil545552242 XP_005639325.1</a> |
| <a href="#">exopolyphosphatase [Nocardia sp. BMG111209]</a>                      | 31.6 | 31.6 | 85%  | 9.3 | 75% | <a href="#">gil518775104 WP_019932393.1</a> |
| <a href="#">exopolyphosphatase [Nocardia seriolae]</a>                           | 31.6 | 31.6 | 85%  | 9.3 | 75% | <a href="#">gil696554125 WP_033086320.1</a> |
| <a href="#">exopolyphosphatase [Nocardia brasiliensis]</a>                       | 31.6 | 31.6 | 85%  | 9.3 | 75% | <a href="#">gil659845710 WP_029893267.1</a> |
| <a href="#">hypothetical protein NBRGN_070_00400 [Nocardia brasiliensis NBI</a>  | 31.6 | 31.6 | 85%  | 9.3 | 75% | <a href="#">gil635329373 GAJ84235.1</a>     |
| <a href="#">exopolyphosphatase [Nocardia brasiliensis]</a>                       | 31.6 | 31.6 | 85%  | 9.3 | 75% | <a href="#">gil504801689 WP_014988791.1</a> |
| <a href="#">exopolyphosphatase [Nocardia rhamnosiphila]</a>                      | 31.6 | 31.6 | 85%  | 9.3 | 75% | <a href="#">gil663748912 WP_030524745.1</a> |
| <a href="#">hypothetical protein [Nocardioideaceae bacterium Broad-1]</a>        | 31.6 | 31.6 | 85%  | 9.3 | 75% | <a href="#">gil495631501 WP_008356080.1</a> |
| <a href="#">exopolyphosphatase [Mycobacterium sp. UM_RHS]</a>                    | 31.6 | 31.6 | 85%  | 9.3 | 75% | <a href="#">gil639002452 WP_024453128.1</a> |
| <a href="#">hypothetical protein BN977_01842 [Mycobacterium cosmeticum]</a>      | 31.6 | 31.6 | 85%  | 9.3 | 75% | <a href="#">gil597305418 CDO07043.1</a>     |
| <a href="#">hypothetical protein [Rhodococcus rhodnii]</a>                       | 31.6 | 31.6 | 85%  | 9.3 | 75% | <a href="#">gil498798498 WP_010839056.1</a> |

## Alignments

Download [GenPept](#) [Graphics](#)

[Next](#) [Previous](#) [Descriptions](#)

complement factor I light chain

Sequence ID: [gil224798|prf|1202205A](#) Length: 200 Number of Matches: 1

### Related Information

Range 1: 108 to 121 [GenPept](#) [Graphics](#)

[Next Match](#) [Previous Match](#)

| Score          | Expect | Identities  | Positives   | Gaps     |
|----------------|--------|-------------|-------------|----------|
| 49.4 bits(109) | 1e-05  | 14/14(100%) | 14/14(100%) | 0/14(0%) |

```
Query 1   KLISNCSKIFYGNRF 14
          KLISNCSKIFYGNRF
Sbjct 108 KLISNCSKIFYGNRF 121
```

Download [GenPept](#) [Graphics](#)

[Next](#) [Previous](#) [Descriptions](#)

PREDICTED: complement factor I-like, partial [Macaca mulatta]

Sequence ID: [gil297293864|ref|XP\\_002804336.1](#) Length: 214 Number of Matches: 1

### Related Information

Range 1: 121 to 134 [GenPept](#) [Graphics](#)

[Next Match](#) [Previous Match](#)

| Score          | Expect | Identities  | Positives   | Gaps     |
|----------------|--------|-------------|-------------|----------|
| 49.4 bits(109) | 1e-05  | 14/14(100%) | 14/14(100%) | 0/14(0%) |

```
Query 1   KLISNCSKIFYGNRF 14
```

[Gene](#) - associated gene details  
[UniGene](#) - clustered expressed sequence tags  
[Map Viewer](#) - aligned genomic

Sbjct 121 KLISNCSKFGNRF 134

context

[Download](#) [GenPept](#) [Graphics](#)

[Next](#) [Previous](#) [Descriptions](#)

unnamed protein product [Homo sapiens]

Sequence ID: [gi|1335056|emb|CAA68418.1](#) Length: 244 Number of Matches: 1

Range 1: 151 to 164 [GenPept](#) [Graphics](#)

[Next Match](#) [Previous Match](#)

| Score          | Expect | Identities  | Positives   | Gaps     |
|----------------|--------|-------------|-------------|----------|
| 49.4 bits(109) | 1e-05  | 14/14(100%) | 14/14(100%) | 0/14(0%) |

Query 1 KLISNCSKFGNRF 14  
 KLISNCSKFGNRF  
 Sbjct 151 KLISNCSKFGNRF 164

**Related Information**

[Gene](#) - associated gene details

[Download](#) [GenPept](#) [Graphics](#)

[Next](#) [Previous](#) [Descriptions](#)

PREDICTED: complement factor I-like, partial [Gorilla gorilla gorilla]

Sequence ID: [gi|426345227|ref|XP\\_004040322.1](#) Length: 281 Number of Matches: 1

Range 1: 188 to 201 [GenPept](#) [Graphics](#)

[Next Match](#) [Previous Match](#)

| Score          | Expect | Identities  | Positives   | Gaps     |
|----------------|--------|-------------|-------------|----------|
| 49.4 bits(109) | 1e-05  | 14/14(100%) | 14/14(100%) | 0/14(0%) |

Query 1 KLISNCSKFGNRF 14  
 KLISNCSKFGNRF  
 Sbjct 188 KLISNCSKFGNRF 201

**Related Information**

[Gene](#) - associated gene details

[Map Viewer](#) - aligned genomic context

[Download](#) [GenPept](#) [Graphics](#)

[Next](#) [Previous](#) [Descriptions](#)

PREDICTED: complement factor I-like, partial [Macaca fascicularis]

Sequence ID: [gi|544524397|ref|XP\\_005595214.1](#) Length: 314 Number of Matches: 1

Range 1: 221 to 234 [GenPept](#) [Graphics](#)

[Next Match](#) [Previous Match](#)

| Score          | Expect | Identities  | Positives   | Gaps     |
|----------------|--------|-------------|-------------|----------|
| 49.4 bits(109) | 1e-05  | 14/14(100%) | 14/14(100%) | 0/14(0%) |

Query 1 KLISNCSKFGNRF 14  
 KLISNCSKFGNRF  
 Sbjct 221 KLISNCSKFGNRF 234

**Related Information**

[Gene](#) - associated gene details

BLAST is a registered trademark of the National Library of Medicine.

NCBI/ BLAST/ blastp suite/ Formatting Results - BTG89JV9016

Your search parameters were adjusted to search for a short input sequence.

[Edit and Resubmit](#) [Save Search Strategies](#) [Formatting options](#) [Download](#) [YouTube](#) [How to read this page](#) [Blast report description](#)

CFI\_KLPYQCPKDGTAVCATNRR\_Mod

RID [BTG89JV9016](#) (Expires on 01-20 15:32 pm)

Query ID |cl|16661 Database Name nr  
 Description None Description All non-redundant GenBank CDS translations+PDB+SwissProt+PIR+PRF excluding environmental samples from WGS projects  
 Molecule type amino acid Program BLASTP 2.2.30+ [Citation](#)  
 Query Length 19

Other reports: [Search Summary](#) [Taxonomy reports](#) [Distance tree of results](#) [Multiple alignment](#)

[New DELTA-BLAST](#) a more sensitive protein-protein search

Graphic Summary

Show Conserved Domains

Putative conserved domains have been detected, click on the image below for detailed results.

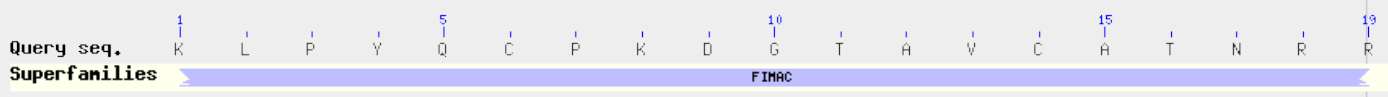

Distribution of 100 Blast Hits on the Query Sequence

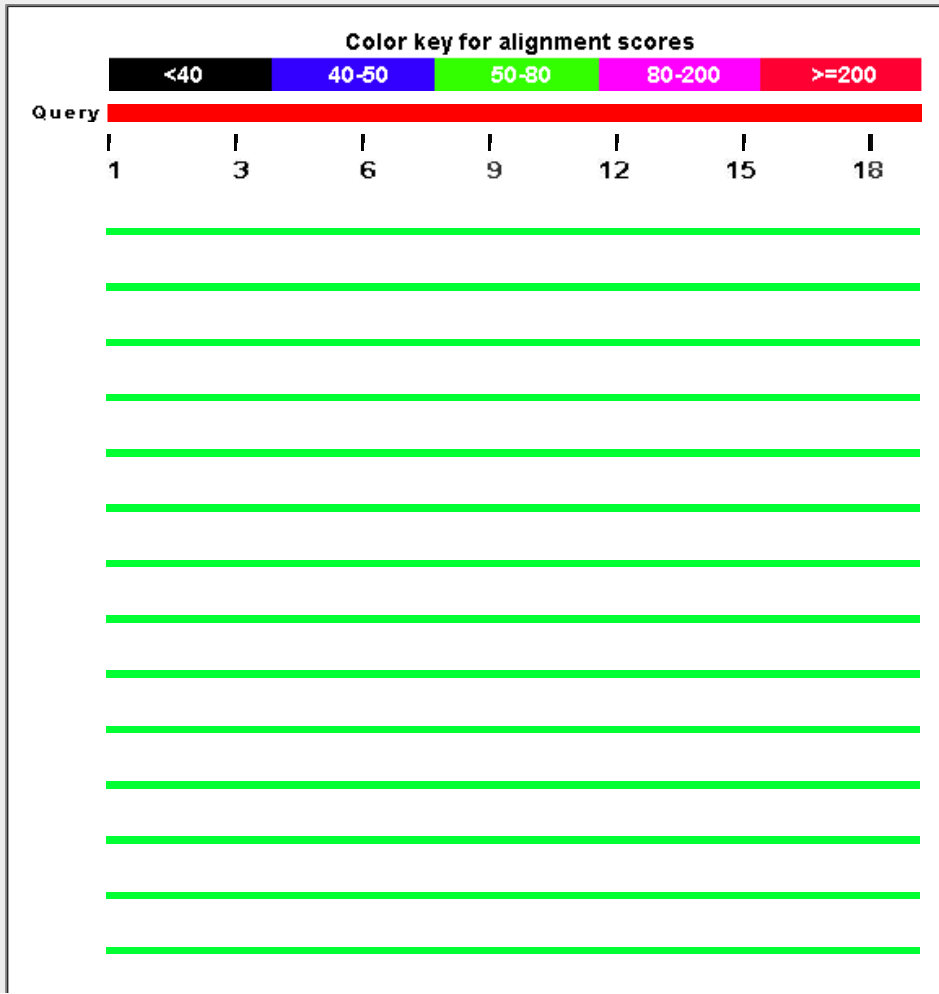

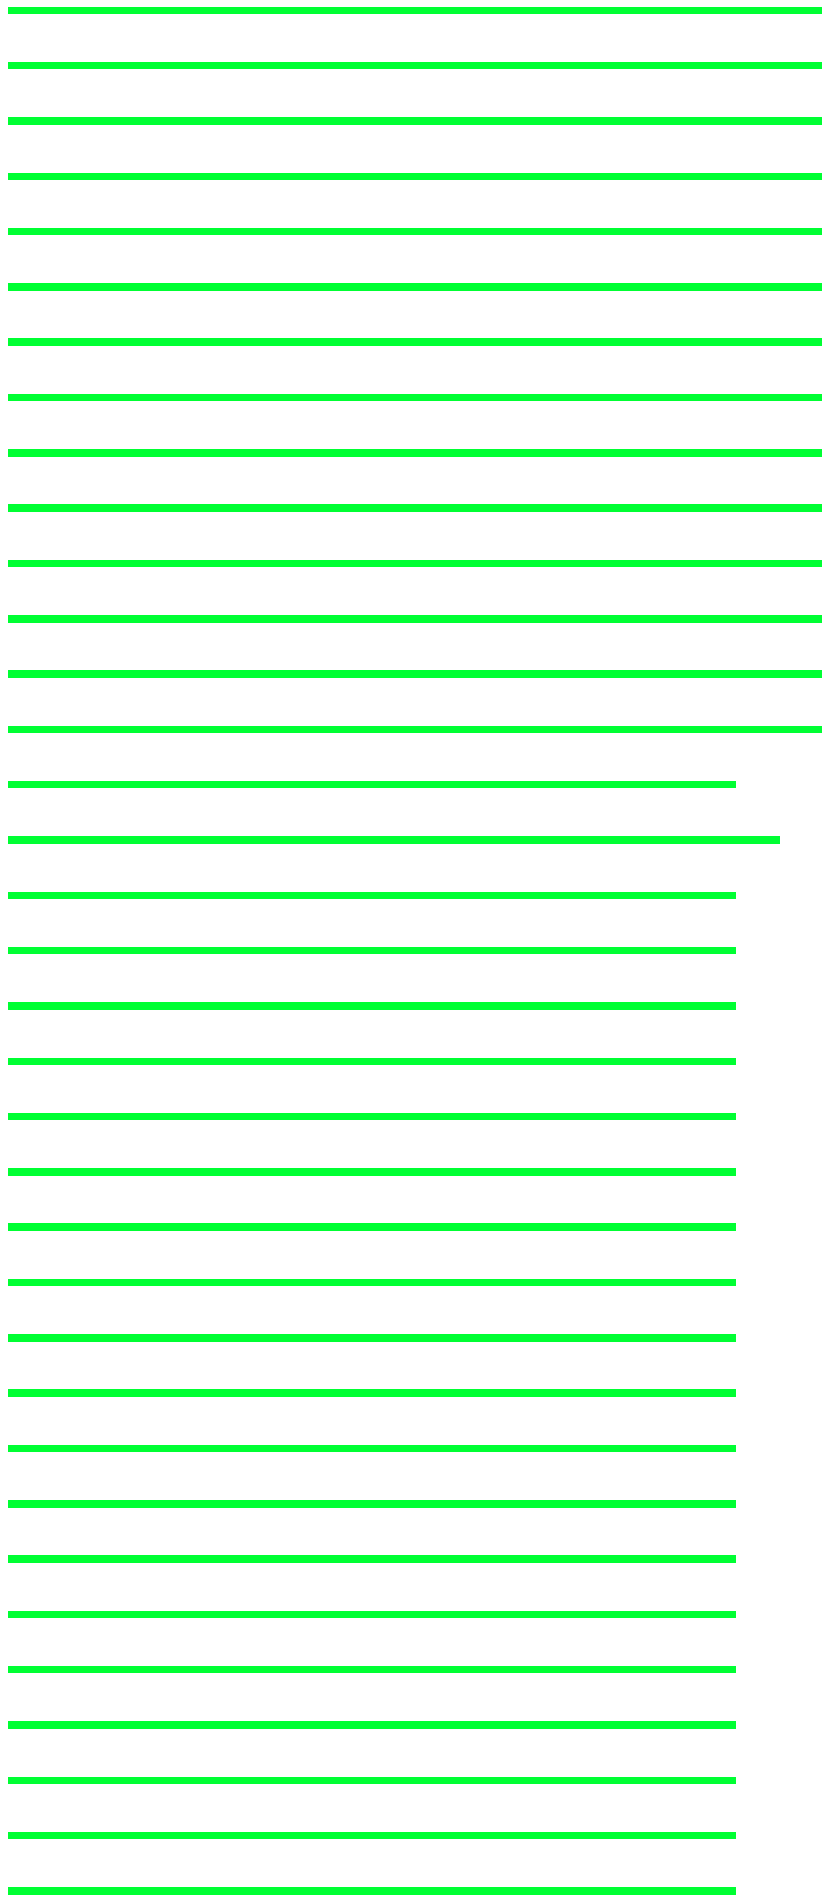

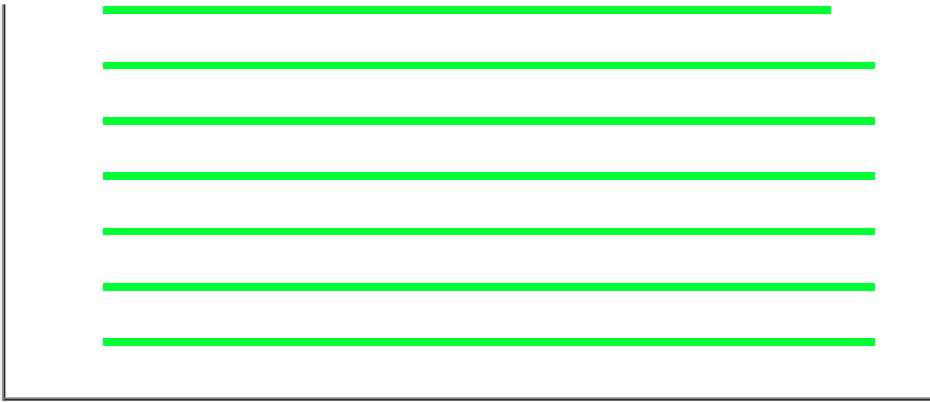

**Descriptions**

**Sequences producing significant alignments:**

Select: [All](#) [None](#) Selected:0

[Alignments](#)
[Download](#)
[GenPept](#)
[Graphics](#)
[Distance tree of results](#)
[Multiple alignment](#)

| Description                                                                   | Max score | Total score | Query cover | E value | Ident | Accession                                   |
|-------------------------------------------------------------------------------|-----------|-------------|-------------|---------|-------|---------------------------------------------|
| <a href="#">PREDICTED: complement factor I-like [Gorilla gorilla gorilla]</a> | 62.6      | 62.6        | 100%        | 8e-10   | 95%   | <a href="#">gij426345243 XP_004040330.1</a> |
| <a href="#">unnamed protein product [Homo sapiens]</a>                        | 62.6      | 62.6        | 100%        | 8e-10   | 95%   | <a href="#">gij1335055 CAA68417.1</a>       |
| <a href="#">CFI protein [Homo sapiens]</a>                                    | 62.6      | 62.6        | 100%        | 8e-10   | 95%   | <a href="#">gij18089117 AAH20718.1</a>      |
| <a href="#">complement factor I, isoform CRA_a [Homo sapiens]</a>             | 62.6      | 62.6        | 100%        | 8e-10   | 95%   | <a href="#">gij119626655 EAX06250.1</a>     |
| <a href="#">PREDICTED: complement factor I isoform X6 [Pan troglodytes]</a>   | 62.6      | 62.6        | 100%        | 9e-10   | 95%   | <a href="#">gij694908492 XP_009446407.1</a> |
| <a href="#">PREDICTED: complement factor I isoform X6 [Pan paniscus]</a>      | 62.6      | 62.6        | 100%        | 9e-10   | 95%   | <a href="#">gij675793799 XP_008953634.1</a> |
| <a href="#">PREDICTED: complement factor I isoform X5 [Pan troglodytes]</a>   | 62.6      | 62.6        | 100%        | 9e-10   | 95%   | <a href="#">gij694908490 XP_009446406.1</a> |
| <a href="#">PREDICTED: complement factor I isoform X5 [Pan paniscus]</a>      | 62.6      | 62.6        | 100%        | 9e-10   | 95%   | <a href="#">gij675793797 XP_008953633.1</a> |
| <a href="#">PREDICTED: complement factor I isoform X4 [Homo sapiens]</a>      | 62.6      | 62.6        | 100%        | 9e-10   | 95%   | <a href="#">gij578809103 XP_006714273.1</a> |
| <a href="#">Chain A, Human Complement Factor I [Homo sapiens]</a>             | 62.6      | 62.6        | 100%        | 9e-10   | 95%   | <a href="#">gij339961198 2XRC_A</a>         |
| <a href="#">PREDICTED: complement factor I isoform X4 [Pan troglodytes]</a>   | 62.6      | 62.6        | 100%        | 9e-10   | 95%   | <a href="#">gij694908488 XP_009446405.1</a> |
| <a href="#">PREDICTED: complement factor I isoform X4 [Pan paniscus]</a>      | 62.6      | 62.6        | 100%        | 9e-10   | 95%   | <a href="#">gij675793795 XP_008953632.1</a> |
| <a href="#">PREDICTED: complement factor I isoform X2 [Homo sapiens]</a>      | 62.6      | 62.6        | 100%        | 9e-10   | 95%   | <a href="#">gij530377647 XP_005263033.1</a> |
| <a href="#">PREDICTED: complement factor I isoform X2 [Saimiri boliviens]</a> | 62.6      | 62.6        | 100%        | 9e-10   | 95%   | <a href="#">gij725571753 XP_010338379.1</a> |
| <a href="#">prepro-C3b/C4B inactivator [Homo sapiens]</a>                     | 62.6      | 62.6        | 100%        | 9e-10   | 95%   | <a href="#">gij182607 AAA52455.1</a>        |
| <a href="#">complement factor I preproprotein [Homo sapiens]</a>              | 62.6      | 62.6        | 100%        | 9e-10   | 95%   | <a href="#">gij119392081 NP_000195.2</a>    |
| <a href="#">PREDICTED: complement factor I isoform X3 [Pan paniscus]</a>      | 62.6      | 62.6        | 100%        | 9e-10   | 95%   | <a href="#">gij397519838 XP_003830060.1</a> |
| <a href="#">RecName: Full=Complement factor I; AltName: Full=C3B/C4B i</a>    | 62.6      | 62.6        | 100%        | 9e-10   | 95%   | <a href="#">gij317373341 P05156.2</a>       |
| <a href="#">unnamed protein product [Homo sapiens]</a>                        | 62.6      | 62.6        | 100%        | 9e-10   | 95%   | <a href="#">gij158254682 BAF83314.1</a>     |
| <a href="#">PREDICTED: complement factor I isoform X3 [Pan troglodytes]</a>   | 62.6      | 62.6        | 100%        | 9e-10   | 95%   | <a href="#">gij114595644 XP_526653.2</a>    |
| <a href="#">PREDICTED: complement factor I isoform X2 [Pan troglodytes]</a>   | 62.6      | 62.6        | 100%        | 9e-10   | 95%   | <a href="#">gij694908485 XP_009446404.1</a> |
| <a href="#">PREDICTED: complement factor I isoform X2 [Pan paniscus]</a>      | 62.6      | 62.6        | 100%        | 9e-10   | 95%   | <a href="#">gij675793792 XP_008953631.1</a> |
| <a href="#">PREDICTED: complement factor I isoform X3 [Homo sapiens]</a>      | 62.6      | 62.6        | 100%        | 9e-10   | 95%   | <a href="#">gij578809101 XP_006714272.1</a> |
| <a href="#">unnamed protein product [Homo sapiens]</a>                        | 62.6      | 62.6        | 100%        | 9e-10   | 95%   | <a href="#">gij194387702 BAG61264.1</a>     |
| <a href="#">PREDICTED: complement factor I isoform X1 [Homo sapiens]</a>      | 62.6      | 62.6        | 100%        | 9e-10   | 95%   | <a href="#">gij530377645 XP_005263032.1</a> |
| <a href="#">PREDICTED: complement factor I isoform X1 [Pan paniscus]</a>      | 62.6      | 62.6        | 100%        | 9e-10   | 95%   | <a href="#">gij397519840 XP_003830061.1</a> |
| <a href="#">PREDICTED: complement factor I isoform X1 [Pan troglodytes]</a>   | 62.6      | 62.6        | 100%        | 9e-10   | 95%   | <a href="#">gij332820084 XP_003310493.1</a> |
| <a href="#">PREDICTED: complement factor I isoform X1 [Saimiri boliviens]</a> | 62.6      | 62.6        | 100%        | 9e-10   | 95%   | <a href="#">gij725571751 XP_010338378.1</a> |



|                                                                               |      |      |     |       |     |                                             |
|-------------------------------------------------------------------------------|------|------|-----|-------|-----|---------------------------------------------|
| <a href="#">PREDICTED: complement factor I [Nomascus leucogenys]</a>          | 55.8 | 55.8 | 89% | 2e-07 | 94% | <a href="#">gil332240463 XP_003269405.1</a> |
| <a href="#">PREDICTED: complement factor I [Ficedula albicollis]</a>          | 53.7 | 53.7 | 94% | 9e-07 | 83% | <a href="#">gil524994367 XP_005044998.1</a> |
| <a href="#">Complement factor I [Fukomys damarensis]</a>                      | 53.2 | 53.2 | 89% | 1e-06 | 88% | <a href="#">gil676270629 KFO25832.1</a>     |
| <a href="#">PREDICTED: complement factor I [Condylura cristata]</a>           | 53.2 | 53.2 | 89% | 1e-06 | 88% | <a href="#">gil507959121 XP_004686530.1</a> |
| <a href="#">PREDICTED: complement factor I [Echinops telfairi]</a>            | 53.2 | 53.2 | 89% | 1e-06 | 88% | <a href="#">gil507649004 XP_004703515.1</a> |
| <a href="#">PREDICTED: complement factor I [Tinamus guttatus]</a>             | 53.2 | 53.2 | 89% | 1e-06 | 88% | <a href="#">gil719780359 XP_010222070.1</a> |
| <a href="#">PREDICTED: complement factor I isoform X5 [Canis lupus fam]</a>   | 53.2 | 53.2 | 89% | 1e-06 | 88% | <a href="#">gil545552244 XP_005639326.1</a> |
| <a href="#">PREDICTED: complement factor I isoform X3 [Canis lupus fami]</a>  | 53.2 | 53.2 | 89% | 1e-06 | 88% | <a href="#">gil74002140 XP_863506.1</a>     |
| <a href="#">PREDICTED: complement factor I isoform X4 [Canis lupus fam]</a>   | 53.2 | 53.2 | 89% | 1e-06 | 88% | <a href="#">gil545552242 XP_005639325.1</a> |
| <a href="#">PREDICTED: complement factor I isoform X2 [Oryctolagus cun]</a>   | 53.2 | 53.2 | 89% | 1e-06 | 88% | <a href="#">gil655856777 XP_008265709.1</a> |
| <a href="#">PREDICTED: complement factor I isoform X2 [Fukomys damar]</a>     | 53.2 | 53.2 | 89% | 1e-06 | 88% | <a href="#">gil731254237 XP_010639824.1</a> |
| <a href="#">PREDICTED: complement factor I isoform X1 [Oryctolagus cun]</a>   | 53.2 | 53.2 | 89% | 1e-06 | 88% | <a href="#">gil655856775 XP_002717177.2</a> |
| <a href="#">PREDICTED: complement factor I isoform X1 [Fukomys damar]</a>     | 53.2 | 53.2 | 89% | 1e-06 | 88% | <a href="#">gil731254235 XP_010639823.1</a> |
| <a href="#">complement factor I precursor [Pongo abelii]</a>                  | 52.8 | 52.8 | 89% | 2e-06 | 88% | <a href="#">gil197098986 NP_001127624.1</a> |
| <a href="#">PREDICTED: complement factor I-like [Macaca mulatta]</a>          | 52.4 | 52.4 | 89% | 2e-06 | 88% | <a href="#">gil297293220 XP_001087512.2</a> |
| <a href="#">uncharacterized protein LOC101866929 precursor [Macaca fas]</a>   | 52.4 | 52.4 | 89% | 2e-06 | 88% | <a href="#">gil548961885 NP_001271714.1</a> |
| <a href="#">PREDICTED: complement factor I isoform X2 [Chlorocebus sat]</a>   | 52.4 | 52.4 | 89% | 2e-06 | 88% | <a href="#">gil635044269 XP_007997719.1</a> |
| <a href="#">PREDICTED: complement factor I [Rhinopithecus roxellana]</a>      | 52.4 | 52.4 | 89% | 2e-06 | 88% | <a href="#">gil724946291 XP_010387365.1</a> |
| <a href="#">PREDICTED: complement factor I isoform X1 [Chlorocebus sat]</a>   | 52.4 | 52.4 | 89% | 2e-06 | 88% | <a href="#">gil635044267 XP_007997718.1</a> |
| <a href="#">hypothetical protein EGK_16010 [Macaca mulatta]</a>               | 52.4 | 52.4 | 89% | 2e-06 | 88% | <a href="#">gil355687535 EHH26119.1</a>     |
| <a href="#">PREDICTED: complement factor I [Peromyscus maniculatus br]</a>    | 52.4 | 52.4 | 89% | 2e-06 | 88% | <a href="#">gil589914217 XP_006970447.1</a> |
| <a href="#">PREDICTED: complement factor I [Papio anubis]</a>                 | 52.4 | 52.4 | 89% | 2e-06 | 88% | <a href="#">gil685542561 XP_009205631.1</a> |
| <a href="#">PREDICTED: complement factor I [Jaculus jaculus]</a>              | 51.5 | 51.5 | 94% | 5e-06 | 78% | <a href="#">gil507549735 XP_004658680.1</a> |
| <a href="#">Complement factor I [Mesitornis unicolor]</a>                     | 51.1 | 51.1 | 94% | 7e-06 | 78% | <a href="#">gil677422619 KFO25952.1</a>     |
| <a href="#">Complement factor I [Pelecanus crispus]</a>                       | 51.1 | 51.1 | 94% | 7e-06 | 78% | <a href="#">gil677463622 KFO53036.1</a>     |
| <a href="#">PREDICTED: complement factor I [Mesitornis unicolor]</a>          | 51.1 | 51.1 | 94% | 7e-06 | 78% | <a href="#">gil704589946 XP_010191226.1</a> |
| <a href="#">PREDICTED: complement factor I [Apaloderma vittatum]</a>          | 51.1 | 51.1 | 94% | 7e-06 | 78% | <a href="#">gil699601233 XP_009870076.1</a> |
| <a href="#">PREDICTED: complement factor I [Pelecanus crispus]</a>            | 51.1 | 51.1 | 94% | 7e-06 | 78% | <a href="#">gil694656827 XP_009484259.1</a> |
| <a href="#">PREDICTED: complement factor I-like [Galeopterus variegatus]</a>  | 50.7 | 50.7 | 89% | 7e-06 | 82% | <a href="#">gil667263801 XP_008568412.1</a> |
| <a href="#">Complement factor I [Tyto alba]</a>                               | 50.7 | 50.7 | 89% | 9e-06 | 82% | <a href="#">gil678173194 KFV41190.1</a>     |
| <a href="#">Complement factor I [Egretta garzetta]</a>                        | 50.7 | 50.7 | 89% | 9e-06 | 82% | <a href="#">gil676815514 KFP11425.1</a>     |
| <a href="#">Complement factor I [Struthio camelus australis]</a>              | 50.7 | 50.7 | 89% | 9e-06 | 82% | <a href="#">gil678208918 KFV75898.1</a>     |
| <a href="#">Complement factor I [Heterocephalus glaber]</a>                   | 50.7 | 50.7 | 89% | 9e-06 | 82% | <a href="#">gil351696416 EHA99334.1</a>     |
| <a href="#">PREDICTED: complement factor I isoform X2 [Ictidomys tridece]</a> | 50.7 | 50.7 | 89% | 9e-06 | 82% | <a href="#">gil532088899 XP_005330149.1</a> |
| <a href="#">PREDICTED: complement factor I isoform X1 [Ictidomys tridece]</a> | 50.7 | 50.7 | 89% | 9e-06 | 82% | <a href="#">gil532088897 XP_005330148.1</a> |
| <a href="#">PREDICTED: complement factor I [Struthio camelus australis]</a>   | 50.7 | 50.7 | 89% | 9e-06 | 82% | <a href="#">gil697440491 XP_009663701.1</a> |
| <a href="#">PREDICTED: complement factor I [Tyto alba]</a>                    | 50.7 | 50.7 | 89% | 9e-06 | 82% | <a href="#">gil701416164 XP_009972365.1</a> |
| <a href="#">PREDICTED: complement factor I [Orycteropus afer afer]</a>        | 50.7 | 50.7 | 89% | 9e-06 | 82% | <a href="#">gil634848033 XP_007938975.1</a> |
| <a href="#">PREDICTED: complement factor I [Egretta garzetta]</a>             | 50.7 | 50.7 | 89% | 9e-06 | 82% | <a href="#">gil697822212 XP_009647488.1</a> |
| <a href="#">PREDICTED: complement factor I isoform X2 [Heterocephalus]</a>    | 50.7 | 50.7 | 89% | 9e-06 | 82% | <a href="#">gil512818622 XP_004878889.1</a> |
| <a href="#">PREDICTED: complement factor I [Loxodonta africana]</a>           | 50.7 | 50.7 | 89% | 9e-06 | 82% | <a href="#">gil731479219 XP_010588889.1</a> |
| <a href="#">PREDICTED: LOW QUALITY PROTEIN: complement factor I [I]</a>       | 50.7 | 50.7 | 89% | 9e-06 | 82% | <a href="#">gil586984171 XP_006930977.1</a> |
| <a href="#">PREDICTED: complement factor I [Sus scrofa]</a>                   | 50.7 | 50.7 | 89% | 9e-06 | 82% | <a href="#">gil545846437 XP_005656603.1</a> |
| <a href="#">PREDICTED: complement factor I isoform X1 [Heterocephalus]</a>    | 50.7 | 50.7 | 89% | 9e-06 | 82% | <a href="#">gil512818618 XP_004878888.1</a> |
| <a href="#">PREDICTED: complement factor I [Trichechus manatus latirost]</a>  | 50.7 | 50.7 | 89% | 9e-06 | 82% | <a href="#">gil471391575 XP_004380312.1</a> |
| <a href="#">PREDICTED: complement factor I isoform X2 [Equus przewalsi]</a>   | 50.3 | 50.3 | 89% | 1e-05 | 82% | <a href="#">gil664769275 XP_008542181.1</a> |

|                                                                                         |      |      |     |       |     |                                             |
|-----------------------------------------------------------------------------------------|------|------|-----|-------|-----|---------------------------------------------|
| <a href="#">PREDICTED: complement factor I isoform X1 [Equus przewalsi]</a>             | 50.3 | 50.3 | 89% | 1e-05 | 82% | <a href="#">gij664769273 XP_008542180.1</a> |
| <a href="#">PREDICTED: complement factor I [Mustela putorius furo]</a>                  | 50.3 | 50.3 | 89% | 1e-05 | 82% | <a href="#">gij511847748 XP_004748251.1</a> |
| <a href="#">PREDICTED: complement factor I [Myotis davidii]</a>                         | 50.3 | 50.3 | 89% | 1e-05 | 82% | <a href="#">gij584046382 XP_006767995.1</a> |
| <a href="#">PREDICTED: complement factor I [Pteropus alecto]</a>                        | 50.3 | 50.3 | 89% | 1e-05 | 82% | <a href="#">gij586528110 XP_006918978.1</a> |
| <a href="#">PREDICTED: complement factor I isoform X2 [Nannospalax ga]</a>              | 50.3 | 50.3 | 89% | 1e-05 | 82% | <a href="#">gij674034950 XP_008841698.1</a> |
| <a href="#">PREDICTED: complement factor I isoform X1 [Nannospalax ga]</a>              | 50.3 | 50.3 | 89% | 1e-05 | 82% | <a href="#">gij674034948 XP_008841690.1</a> |
| <a href="#">PREDICTED: complement factor I [Mustela putorius furo]</a>                  | 50.3 | 50.3 | 89% | 1e-05 | 82% | <a href="#">gij511991360 XP_004813365.1</a> |
| <a href="#">complement factor I precursor [Rattus norvegicus]</a>                       | 50.3 | 50.3 | 89% | 1e-05 | 88% | <a href="#">gij13162353 NP_077071.1</a>     |
| <a href="#">PREDICTED: complement factor I isoform X2 [Myotis brandtii]</a>             | 50.3 | 50.3 | 89% | 1e-05 | 82% | <a href="#">gij554556058 XP_005872468.1</a> |
| <a href="#">PREDICTED: complement factor I [Myotis lucifugus]</a>                       | 50.3 | 50.3 | 89% | 1e-05 | 82% | <a href="#">gij558181756 XP_006101433.1</a> |
| <a href="#">PREDICTED: complement factor I isoform X1 [Myotis brandtii]</a>             | 50.3 | 50.3 | 89% | 1e-05 | 82% | <a href="#">gij554556056 XP_005872467.1</a> |
| <a href="#">PREDICTED: complement factor I isoform X2 [Equus caballus]</a>              | 50.3 | 50.3 | 89% | 1e-05 | 82% | <a href="#">gij545210264 XP_005607952.1</a> |
| <a href="#">Complement factor I [Pteropus alecto]</a>                                   | 50.3 | 50.3 | 89% | 1e-05 | 82% | <a href="#">gij431897147 ELK06409.1</a>     |
| <a href="#">PREDICTED: complement factor I isoform X1 [Equus caballus]</a>              | 50.3 | 50.3 | 89% | 1e-05 | 82% | <a href="#">gij545210262 XP_005607951.1</a> |
| <a href="#">Complement factor I [Myotis brandtii]</a>                                   | 50.3 | 50.3 | 89% | 1e-05 | 82% | <a href="#">gij521029771 EPQ11558.1</a>     |
| <a href="#">PREDICTED: complement factor I isoform X1 [Rattus norvegicus]</a>           | 50.3 | 50.3 | 89% | 1e-05 | 88% | <a href="#">gij672044321 XP_008759748.1</a> |
| <a href="#">PREDICTED: complement factor I-like [Python bivittatus]</a>                 | 49.8 | 49.8 | 89% | 2e-05 | 82% | <a href="#">gij602663653 XP_007437454.1</a> |
| <a href="#">PREDICTED: LOW QUALITY PROTEIN: complement factor I [Ochotona princeps]</a> | 49.8 | 49.8 | 89% | 2e-05 | 82% | <a href="#">gij472383864 XP_004411307.1</a> |
| <a href="#">PREDICTED: complement factor I [Ochotona princeps]</a>                      | 49.8 | 49.8 | 89% | 2e-05 | 82% | <a href="#">gij504169976 XP_004594584.1</a> |
| <a href="#">PREDICTED: LOW QUALITY PROTEIN: complement factor I [Ochotona princeps]</a> | 49.8 | 49.8 | 89% | 2e-05 | 82% | <a href="#">gij533186455 XP_005406244.1</a> |
| <a href="#">PREDICTED: complement factor I [Otolemur garnettii]</a>                     | 49.4 | 49.4 | 89% | 2e-05 | 82% | <a href="#">gij395851346 XP_003798222.1</a> |
| <a href="#">PREDICTED: complement factor I [Callithrix jacchus]</a>                     | 49.4 | 49.4 | 89% | 2e-05 | 82% | <a href="#">gij675648222 XP_002745538.3</a> |
| <a href="#">PREDICTED: complement factor I [Callithrix jacchus]</a>                     | 49.4 | 49.4 | 89% | 2e-05 | 82% | <a href="#">gij675752511 XP_008984405.1</a> |
| <a href="#">PREDICTED: complement factor I [Tarsius syrichta]</a>                       | 49.0 | 49.0 | 84% | 3e-05 | 88% | <a href="#">gij640813983 XP_008063707.1</a> |
| <a href="#">PREDICTED: complement factor I [Eptesicus fuscus]</a>                       | 48.6 | 48.6 | 89% | 5e-05 | 82% | <a href="#">gij641717977 XP_008148531.1</a> |
| <a href="#">PREDICTED: complement factor I [Ceratotherium simum simur]</a>              | 48.6 | 48.6 | 89% | 5e-05 | 82% | <a href="#">gij478504685 XP_004426641.1</a> |

## Alignments

Download v [GenPept](#) [Graphics](#)

v Next ▲ Previous ▲ Descriptions

PREDICTED: complement factor I-like, partial [Gorilla gorilla gorilla]

Sequence ID: [gij426345243|ref|XP\\_004040330.1](#) Length: 309 Number of Matches: 1

Range 1: 62 to 80 [GenPept](#) [Graphics](#)

v Next Match ▲ Previous Match

| Score          | Expect | Identities | Positives   | Gaps     |
|----------------|--------|------------|-------------|----------|
| 62.6 bits(140) | 8e-10  | 18/19(95%) | 19/19(100%) | 0/19(0%) |

Query 1 KLPYQCPKDGTAVCATNRR 19  
 KLPYQCPK+GTAVCATNRR  
 Sbjct 62 KLPYQCPKNGTAVCATNRR 80

### Related Information

[Gene](#) - associated gene details  
[Map Viewer](#) - aligned genomic context

Download v [GenPept](#) [Graphics](#)

v Next ▲ Previous ▲ Descriptions

unnamed protein product [Homo sapiens]

Sequence ID: [gij1335055|emb|CAA68417.1](#) Length: 321 Number of Matches: 1

Range 1: 44 to 62 [GenPept](#) [Graphics](#)

v Next Match ▲ Previous Match

| Score          | Expect | Identities | Positives   | Gaps     |
|----------------|--------|------------|-------------|----------|
| 62.6 bits(140) | 8e-10  | 18/19(95%) | 19/19(100%) | 0/19(0%) |

Query 1 KLPYQCPKDGTAVCATNRR 19  
 KLPYQCPK+GTAVCATNRR  
 Sbjct 44 KLPYQCPKNGTAVCATNRR 62

### Related Information

[Gene](#) - associated gene details

Download [GenPept](#) [Graphics](#)

[▼ Next](#) [▲ Previous](#) [▲ Descriptions](#)

CFI protein [Homo sapiens]

Sequence ID: [gi|18089117|gb|AAH20718.1](#) Length: 377 Number of Matches: 1

[▶ See 1 more title\(s\)](#)

Range 1: 62 to 80 [GenPept](#) [Graphics](#)

[▼ Next Match](#) [▲ Previous Match](#)

| Score          | Expect | Identities | Positives   | Gaps     |
|----------------|--------|------------|-------------|----------|
| 62.6 bits(140) | 8e-10  | 18/19(95%) | 19/19(100%) | 0/19(0%) |

Query 1 KLPYQCPKDGTAVCATNRR 19  
 KLPYQCPK+GTAVCATNRR  
 Sbjct 62 KLPYQCPKNGTAVCATNRR 80

**Related Information**

[Gene](#) - associated gene details  
[Identical Proteins](#) - Proteins identical to the subject

Download [GenPept](#) [Graphics](#)

[▼ Next](#) [▲ Previous](#) [▲ Descriptions](#)

complement factor I, isoform CRA\_a, partial [Homo sapiens]

Sequence ID: [gi|119626655|gb|EAX06250.1](#) Length: 378 Number of Matches: 1

Range 1: 62 to 80 [GenPept](#) [Graphics](#)

[▼ Next Match](#) [▲ Previous Match](#)

| Score          | Expect | Identities | Positives   | Gaps     |
|----------------|--------|------------|-------------|----------|
| 62.6 bits(140) | 8e-10  | 18/19(95%) | 19/19(100%) | 0/19(0%) |

Query 1 KLPYQCPKDGTAVCATNRR 19  
 KLPYQCPK+GTAVCATNRR  
 Sbjct 62 KLPYQCPKNGTAVCATNRR 80

**Related Information**

[Gene](#) - associated gene details

Download [GenPept](#) [Graphics](#)

[▼ Next](#) [▲ Previous](#) [▲ Descriptions](#)

PREDICTED: complement factor I isoform X6 [Pan troglodytes]

Sequence ID: [gi|694908492|ref|XP\\_009446407.1](#) Length: 516 Number of Matches: 1

Range 1: 62 to 80 [GenPept](#) [Graphics](#)

[▼ Next Match](#) [▲ Previous Match](#)

| Score          | Expect | Identities | Positives   | Gaps     |
|----------------|--------|------------|-------------|----------|
| 62.6 bits(140) | 9e-10  | 18/19(95%) | 19/19(100%) | 0/19(0%) |

Query 1 KLPYQCPKDGTAVCATNRR 19  
 KLPYQCPK+GTAVCATNRR  
 Sbjct 62 KLPYQCPKNGTAVCATNRR 80

**Related Information**

[Gene](#) - associated gene details

BLAST is a registered trademark of the National Library of Medicine.

NCBI/ BLAST/ blastp suite/ Formatting Results - B93SHEYNO1R

**Your search parameters were adjusted to search for a short input sequence.**

[Edit and Resubmit](#) [Save Search Strategies](#) [Formatting options](#) [Download](#)

**CFI\_KLPYQCPKNGTAVCATNRR\_NonMod**

[YouTube](#) [How to read this page](#) [Blast report description](#)

**RID** [B93SHEYNO1R](#) (Expires on 01-14 10:20 am)

**Query ID** lcl|313553 **Database Name** nr

**Description** None **Description** All non-redundant GenBank CDS translations+PDB+SwissProt+PIR excluding environmental samples from WGS projects

**Molecule type** amino acid **Program** BLASTP 2.2.30+ [Citation](#)

**Query Length** 19

Other reports: [Search Summary](#) [\[Taxonomy reports\]](#) [\[Distance tree of results\]](#) [\[Multiple alignment\]](#)

**Graphic Summary**

[Show Conserved Domains](#)

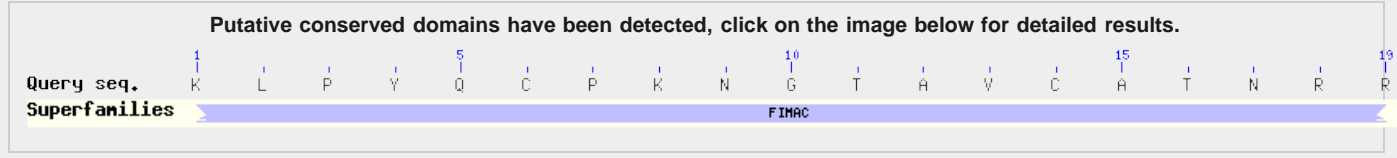

Distribution of 100 Blast Hits on the Query Sequence

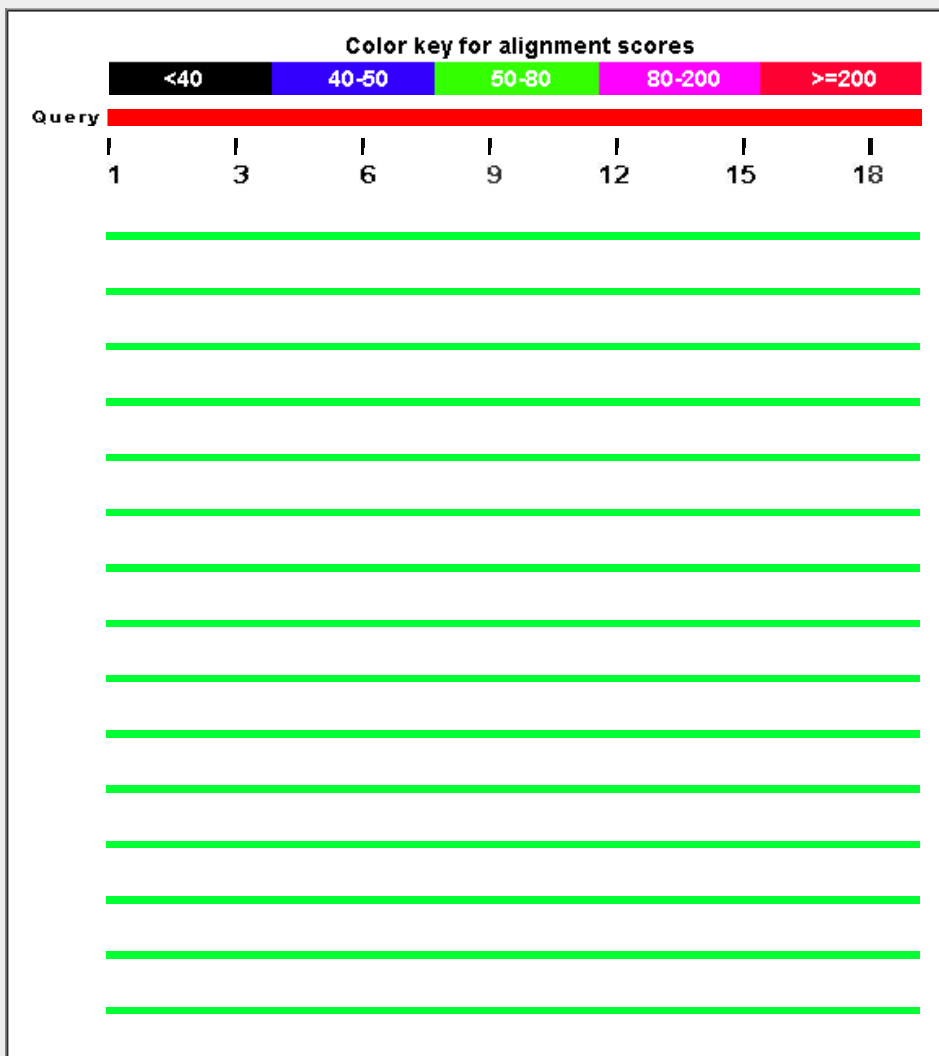

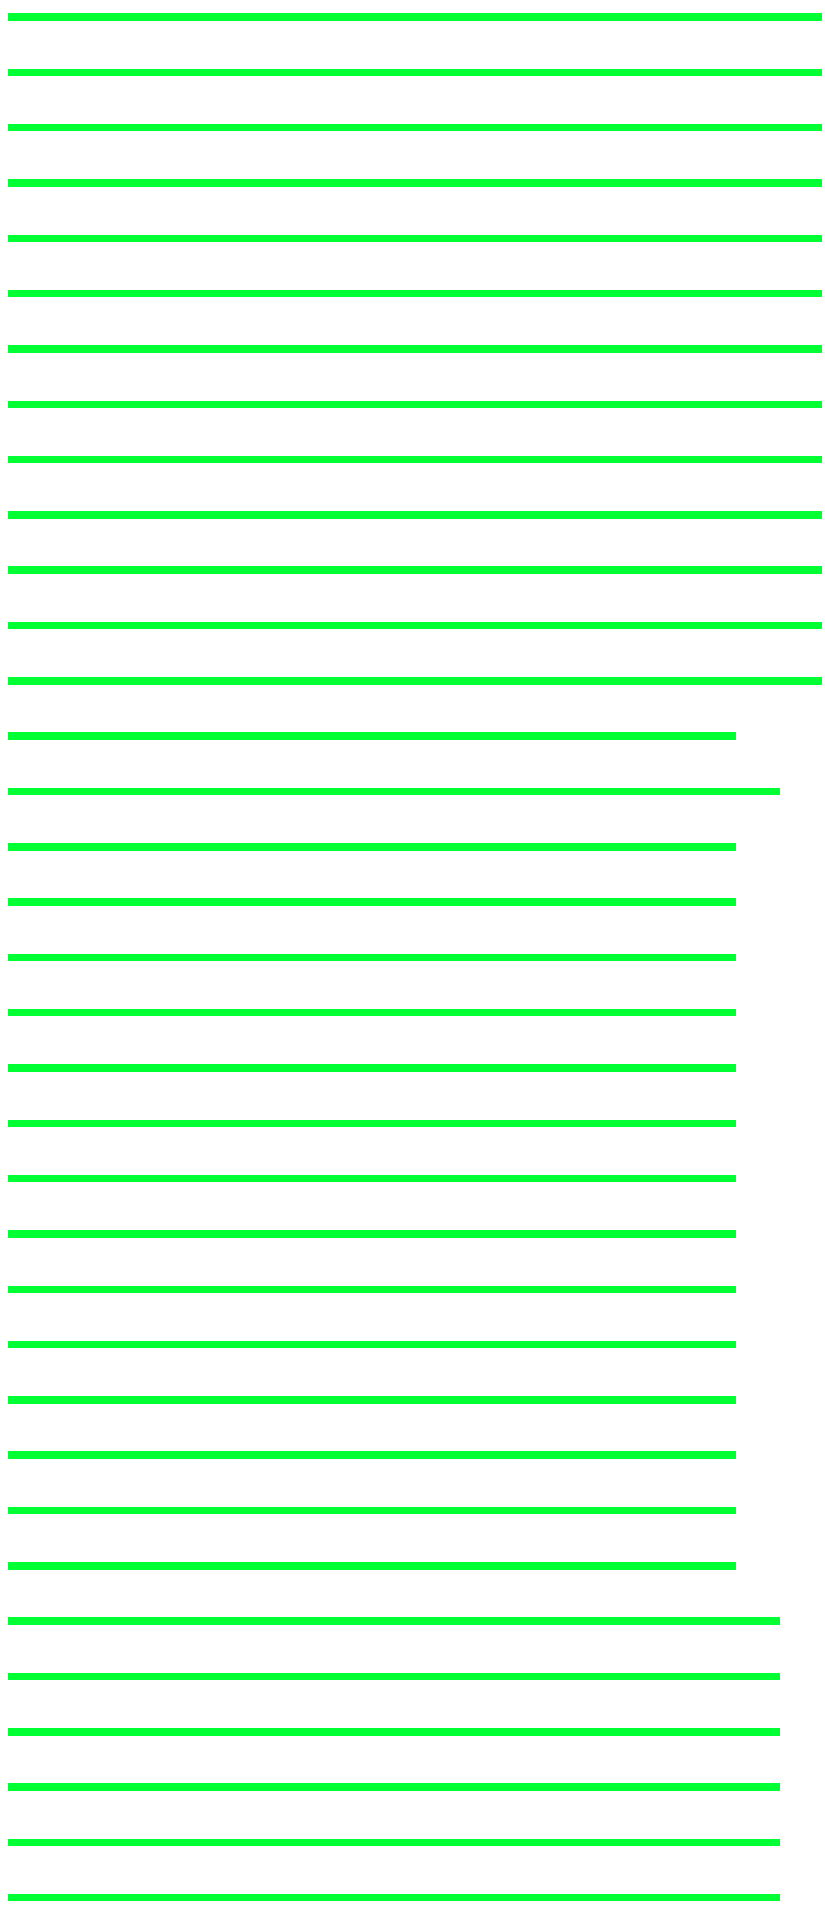

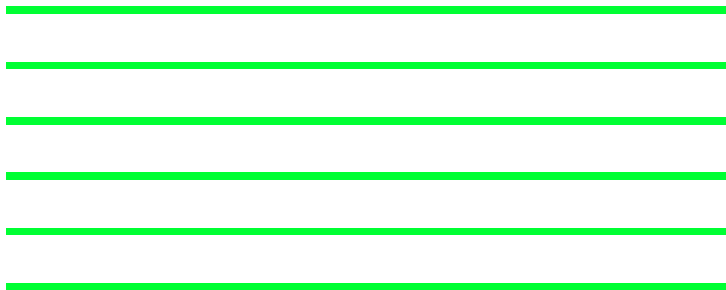

**Descriptions**

**Sequences producing significant alignments:**

Select: [All](#) [None](#) Selected:0

[Alignments](#)
[Download](#)
[GenPept](#)
[Graphics](#)
[Distance tree of results](#)
[Multiple alignment](#)

| Description                                                                                         | Max score | Total score | Query cover | E value | Ident | Accession                                   |
|-----------------------------------------------------------------------------------------------------|-----------|-------------|-------------|---------|-------|---------------------------------------------|
| <a href="#">PREDICTED: complement factor I-like [Gorilla gorilla gorilla]</a>                       | 65.1      | 65.1        | 100%        | 1e-10   | 100%  | <a href="#">gi 426345243 XP_004040330.1</a> |
| <a href="#">unnamed protein product [Homo sapiens]</a>                                              | 65.1      | 65.1        | 100%        | 1e-10   | 100%  | <a href="#">gi 1335055 CAA68417.1</a>       |
| <a href="#">CFI protein [Homo sapiens]</a>                                                          | 65.1      | 65.1        | 100%        | 1e-10   | 100%  | <a href="#">gi 18089117 AAH20718.1</a>      |
| <a href="#">complement factor I, isoform CRA_a [Homo sapiens]</a>                                   | 65.1      | 65.1        | 100%        | 1e-10   | 100%  | <a href="#">gi 119626655 EAX06250.1</a>     |
| <a href="#">PREDICTED: complement factor I isoform X6 [Pan troglodytes]</a>                         | 65.1      | 65.1        | 100%        | 1e-10   | 100%  | <a href="#">gi 694908492 XP_009446407.1</a> |
| <a href="#">PREDICTED: complement factor I isoform X6 [Pan paniscus]</a>                            | 65.1      | 65.1        | 100%        | 1e-10   | 100%  | <a href="#">gi 675793799 XP_008953634.1</a> |
| <a href="#">PREDICTED: complement factor I isoform X5 [Pan troglodytes]</a>                         | 65.1      | 65.1        | 100%        | 1e-10   | 100%  | <a href="#">gi 694908490 XP_009446406.1</a> |
| <a href="#">PREDICTED: complement factor I isoform X5 [Pan paniscus]</a>                            | 65.1      | 65.1        | 100%        | 1e-10   | 100%  | <a href="#">gi 675793797 XP_008953633.1</a> |
| <a href="#">PREDICTED: complement factor I isoform X4 [Homo sapiens]</a>                            | 65.1      | 65.1        | 100%        | 1e-10   | 100%  | <a href="#">gi 578809103 XP_006714273.1</a> |
| <a href="#">Chain A, Human Complement Factor I [Homo sapiens]</a>                                   | 65.1      | 65.1        | 100%        | 1e-10   | 100%  | <a href="#">gi 339961198 2XRC_A</a>         |
| <a href="#">PREDICTED: complement factor I isoform X4 [Pan troglodytes]</a>                         | 65.1      | 65.1        | 100%        | 1e-10   | 100%  | <a href="#">gi 694908488 XP_009446405.1</a> |
| <a href="#">PREDICTED: complement factor I isoform X4 [Pan paniscus]</a>                            | 65.1      | 65.1        | 100%        | 1e-10   | 100%  | <a href="#">gi 675793795 XP_008953632.1</a> |
| <a href="#">PREDICTED: complement factor I isoform X2 [Homo sapiens]</a>                            | 65.1      | 65.1        | 100%        | 1e-10   | 100%  | <a href="#">gi 530377647 XP_005263033.1</a> |
| <a href="#">PREDICTED: complement factor I isoform X2 [Saimiri boliviensis boliviensis]</a>         | 65.1      | 65.1        | 100%        | 1e-10   | 100%  | <a href="#">gi 725571753 XP_010338379.1</a> |
| <a href="#">prepro-C3b/C4B inactivator [Homo sapiens]</a>                                           | 65.1      | 65.1        | 100%        | 1e-10   | 100%  | <a href="#">gi 182607 AAA52455.1</a>        |
| <a href="#">complement factor I preproprotein [Homo sapiens]</a>                                    | 65.1      | 65.1        | 100%        | 1e-10   | 100%  | <a href="#">gi 119392081 NP_000195.2</a>    |
| <a href="#">PREDICTED: complement factor I isoform X3 [Pan paniscus]</a>                            | 65.1      | 65.1        | 100%        | 1e-10   | 100%  | <a href="#">gi 397519838 XP_003830060.1</a> |
| <a href="#">RecName: Full=Complement factor I; AltName: Full=C3B/C4B inactivator [Homo sapiens]</a> | 65.1      | 65.1        | 100%        | 1e-10   | 100%  | <a href="#">gi 317373341 P05156.2</a>       |
| <a href="#">unnamed protein product [Homo sapiens]</a>                                              | 65.1      | 65.1        | 100%        | 1e-10   | 100%  | <a href="#">gi 158254682 BAF83314.1</a>     |
| <a href="#">PREDICTED: complement factor I isoform X3 [Pan troglodytes]</a>                         | 65.1      | 65.1        | 100%        | 1e-10   | 100%  | <a href="#">gi 114595644 XP_526653.2</a>    |
| <a href="#">PREDICTED: complement factor I isoform X2 [Pan troglodytes]</a>                         | 65.1      | 65.1        | 100%        | 1e-10   | 100%  | <a href="#">gi 694908485 XP_009446404.1</a> |
| <a href="#">PREDICTED: complement factor I isoform X2 [Pan paniscus]</a>                            | 65.1      | 65.1        | 100%        | 1e-10   | 100%  | <a href="#">gi 675793792 XP_008953631.1</a> |
| <a href="#">PREDICTED: complement factor I isoform X3 [Homo sapiens]</a>                            | 65.1      | 65.1        | 100%        | 1e-10   | 100%  | <a href="#">gi 578809101 XP_006714272.1</a> |
| <a href="#">unnamed protein product [Homo sapiens]</a>                                              | 65.1      | 65.1        | 100%        | 1e-10   | 100%  | <a href="#">gi 194387702 BAG61264.1</a>     |
| <a href="#">PREDICTED: complement factor I isoform X1 [Homo sapiens]</a>                            | 65.1      | 65.1        | 100%        | 1e-10   | 100%  | <a href="#">gi 530377645 XP_005263032.1</a> |
| <a href="#">PREDICTED: complement factor I isoform X1 [Pan paniscus]</a>                            | 65.1      | 65.1        | 100%        | 1e-10   | 100%  | <a href="#">gi 397519840 XP_003830061.1</a> |
| <a href="#">PREDICTED: complement factor I isoform X1 [Pan troglodytes]</a>                         | 65.1      | 65.1        | 100%        | 1e-10   | 100%  | <a href="#">gi 332820084 XP_003310493.1</a> |
| <a href="#">PREDICTED: complement factor I isoform X1 [Saimiri boliviensis boliviensis]</a>         | 65.1      | 65.1        | 100%        | 1e-10   | 100%  | <a href="#">gi 725571751 XP_010338378.1</a> |
| <a href="#">PREDICTED: complement factor I [Nomascus leucogenys]</a>                                | 58.3      | 58.3        | 89%         | 2e-08   | 100%  | <a href="#">gi 332240463 XP_003269405.1</a> |

|                                                                                  |      |      |     |       |     |                                             |
|----------------------------------------------------------------------------------|------|------|-----|-------|-----|---------------------------------------------|
| <a href="#">PREDICTED: complement factor I [Ficedula albicollis]</a>             | 56.2 | 56.2 | 94% | 1e-07 | 89% | <a href="#">gii524994367 XP_005044998.1</a> |
| <a href="#">PREDICTED: complement factor I [Condylura cristata]</a>              | 55.8 | 55.8 | 89% | 2e-07 | 94% | <a href="#">gii507959121 XP_004686530.1</a> |
| <a href="#">PREDICTED: complement factor I [Echinops telfairii]</a>              | 55.8 | 55.8 | 89% | 2e-07 | 94% | <a href="#">gii507649004 XP_004703515.1</a> |
| <a href="#">PREDICTED: complement factor I [Tinamus guttatus]</a>                | 55.8 | 55.8 | 89% | 2e-07 | 94% | <a href="#">gii719780359 XP_010222070.1</a> |
| <a href="#">PREDICTED: complement factor I isoform X2 [Oryctolagus cunicul</a>   | 55.8 | 55.8 | 89% | 2e-07 | 94% | <a href="#">gii655856777 XP_008265709.1</a> |
| <a href="#">PREDICTED: complement factor I isoform X1 [Oryctolagus cunicul</a>   | 55.8 | 55.8 | 89% | 2e-07 | 94% | <a href="#">gii655856775 XP_002717177.2</a> |
| <a href="#">complement factor I precursor [Pongo abelii]</a>                     | 55.4 | 55.4 | 89% | 2e-07 | 94% | <a href="#">gii197098986 NP_001127624.1</a> |
| <a href="#">PREDICTED: complement factor I-like [Macaca mulatta]</a>             | 54.9 | 54.9 | 89% | 3e-07 | 94% | <a href="#">gii297293220 XP_001087512.2</a> |
| <a href="#">uncharacterized protein LOC101866929 precursor [Macaca fascicul</a>  | 54.9 | 54.9 | 89% | 3e-07 | 94% | <a href="#">gii548961885 NP_001271714.1</a> |
| <a href="#">PREDICTED: complement factor I isoform X2 [Chlorocebus sabaue</a>    | 54.9 | 54.9 | 89% | 3e-07 | 94% | <a href="#">gii635044269 XP_007997719.1</a> |
| <a href="#">PREDICTED: complement factor I [Rhinopithecus roxellana]</a>         | 54.9 | 54.9 | 89% | 3e-07 | 94% | <a href="#">gii724946291 XP_010387365.1</a> |
| <a href="#">PREDICTED: complement factor I isoform X1 [Chlorocebus sabaue</a>    | 54.9 | 54.9 | 89% | 3e-07 | 94% | <a href="#">gii635044267 XP_007997718.1</a> |
| <a href="#">hypothetical protein EGK_16010 [Macaca mulatta]</a>                  | 54.9 | 54.9 | 89% | 3e-07 | 94% | <a href="#">gii355687535 EHH26119.1</a>     |
| <a href="#">PREDICTED: complement factor I [Peromyscus maniculatus bairdii</a>   | 54.9 | 54.9 | 89% | 3e-07 | 94% | <a href="#">gii589914217 XP_006970447.1</a> |
| <a href="#">PREDICTED: complement factor I [Papio anubis]</a>                    | 54.9 | 54.9 | 89% | 3e-07 | 94% | <a href="#">gii685542561 XP_009205631.1</a> |
| <a href="#">PREDICTED: complement factor I [Jaculus jaculus]</a>                 | 54.1 | 54.1 | 94% | 6e-07 | 83% | <a href="#">gii507549735 XP_004658680.1</a> |
| <a href="#">Complement factor I [Mesitornis unicolor]</a>                        | 53.7 | 53.7 | 94% | 9e-07 | 83% | <a href="#">gii677422619 KFQ25952.1</a>     |
| <a href="#">Complement factor I [Pelecanus crispus]</a>                          | 53.7 | 53.7 | 94% | 9e-07 | 83% | <a href="#">gii677463622 KFQ53036.1</a>     |
| <a href="#">PREDICTED: complement factor I [Mesitornis unicolor]</a>             | 53.7 | 53.7 | 94% | 9e-07 | 83% | <a href="#">gii704589946 XP_010191226.1</a> |
| <a href="#">PREDICTED: complement factor I [Apaloderma vittatum]</a>             | 53.7 | 53.7 | 94% | 9e-07 | 83% | <a href="#">gii699601233 XP_009870076.1</a> |
| <a href="#">PREDICTED: complement factor I [Pelecanus crispus]</a>               | 53.7 | 53.7 | 94% | 9e-07 | 83% | <a href="#">gii694656827 XP_009484259.1</a> |
| <a href="#">PREDICTED: complement factor I-like [Galeopterus variegatus]</a>     | 53.2 | 53.2 | 89% | 9e-07 | 88% | <a href="#">gii667263801 XP_008568412.1</a> |
| <a href="#">Complement factor I [Tyto alba]</a>                                  | 53.2 | 53.2 | 89% | 1e-06 | 88% | <a href="#">gii678173194 KFV41190.1</a>     |
| <a href="#">Complement factor I [Egretta garzetta]</a>                           | 53.2 | 53.2 | 89% | 1e-06 | 88% | <a href="#">gii676815514 KFP11425.1</a>     |
| <a href="#">Complement factor I [Struthio camelus australis]</a>                 | 53.2 | 53.2 | 89% | 1e-06 | 88% | <a href="#">gii678208918 KFV75898.1</a>     |
| <a href="#">Complement factor I [Heterocephalus glaber]</a>                      | 53.2 | 53.2 | 89% | 1e-06 | 88% | <a href="#">gii351696416 EHA99334.1</a>     |
| <a href="#">PREDICTED: complement factor I isoform X2 [Ictidomys tridecemlii</a> | 53.2 | 53.2 | 89% | 1e-06 | 88% | <a href="#">gii532088899 XP_005330149.1</a> |
| <a href="#">PREDICTED: complement factor I isoform X1 [Ictidomys tridecemlii</a> | 53.2 | 53.2 | 89% | 1e-06 | 88% | <a href="#">gii532088897 XP_005330148.1</a> |
| <a href="#">PREDICTED: complement factor I [Struthio camelus australis]</a>      | 53.2 | 53.2 | 89% | 1e-06 | 88% | <a href="#">gii697440491 XP_009663701.1</a> |
| <a href="#">PREDICTED: complement factor I [Tyto alba]</a>                       | 53.2 | 53.2 | 89% | 1e-06 | 88% | <a href="#">gii701416164 XP_009972365.1</a> |
| <a href="#">PREDICTED: complement factor I [Orycteropus afer afer]</a>           | 53.2 | 53.2 | 89% | 1e-06 | 88% | <a href="#">gii634848033 XP_007938975.1</a> |
| <a href="#">PREDICTED: complement factor I [Egretta garzetta]</a>                | 53.2 | 53.2 | 89% | 1e-06 | 88% | <a href="#">gii697822212 XP_009647488.1</a> |
| <a href="#">PREDICTED: complement factor I isoform X2 [Heterocephalus glab</a>   | 53.2 | 53.2 | 89% | 1e-06 | 88% | <a href="#">gii512818622 XP_004878889.1</a> |
| <a href="#">PREDICTED: complement factor I [Loxodonta africana]</a>              | 53.2 | 53.2 | 89% | 1e-06 | 88% | <a href="#">gii731479219 XP_010588889.1</a> |
| <a href="#">PREDICTED: LOW QUALITY PROTEIN: complement factor I [Felis</a>       | 53.2 | 53.2 | 89% | 1e-06 | 88% | <a href="#">gii586984171 XP_006930977.1</a> |
| <a href="#">PREDICTED: complement factor I [Sus scrofa]</a>                      | 53.2 | 53.2 | 89% | 1e-06 | 88% | <a href="#">gii545846437 XP_005656603.1</a> |
| <a href="#">PREDICTED: complement factor I isoform X1 [Heterocephalus glab</a>   | 53.2 | 53.2 | 89% | 1e-06 | 88% | <a href="#">gii512818618 XP_004878888.1</a> |
| <a href="#">PREDICTED: complement factor I [Trichechus manatus latirostris]</a>  | 53.2 | 53.2 | 89% | 1e-06 | 88% | <a href="#">gii471391575 XP_004380312.1</a> |
| <a href="#">PREDICTED: complement factor I isoform X2 [Equus przewalskii]</a>    | 52.8 | 52.8 | 89% | 2e-06 | 88% | <a href="#">gii664769275 XP_008542181.1</a> |
| <a href="#">PREDICTED: complement factor I isoform X1 [Equus przewalskii]</a>    | 52.8 | 52.8 | 89% | 2e-06 | 88% | <a href="#">gii664769273 XP_008542180.1</a> |
| <a href="#">PREDICTED: complement factor I [Mustela putorius furo]</a>           | 52.8 | 52.8 | 89% | 2e-06 | 88% | <a href="#">gii511847748 XP_004748251.1</a> |
| <a href="#">PREDICTED: complement factor I [Myotis davidii]</a>                  | 52.8 | 52.8 | 89% | 2e-06 | 88% | <a href="#">gii584046382 XP_006767995.1</a> |
| <a href="#">PREDICTED: complement factor I [Pteropus alecto]</a>                 | 52.8 | 52.8 | 89% | 2e-06 | 88% | <a href="#">gii586528110 XP_006918978.1</a> |
| <a href="#">PREDICTED: complement factor I isoform X2 [Nannospalax galilii]</a>  | 52.8 | 52.8 | 89% | 2e-06 | 88% | <a href="#">gii674034950 XP_008841698.1</a> |
| <a href="#">PREDICTED: complement factor I isoform X1 [Nannospalax galilii]</a>  | 52.8 | 52.8 | 89% | 2e-06 | 88% | <a href="#">gii674034948 XP_008841690.1</a> |
| <a href="#">PREDICTED: complement factor I [Mustela putorius furo]</a>           | 52.8 | 52.8 | 89% | 2e-06 | 88% | <a href="#">gii511991360 XP_004813365.1</a> |

|                                                                                    |      |      |      |       |     |                                             |
|------------------------------------------------------------------------------------|------|------|------|-------|-----|---------------------------------------------|
| <a href="#">PREDICTED: complement factor I isoform X2 [Myotis brandtii]</a>        | 52.8 | 52.8 | 89%  | 2e-06 | 88% | <a href="#">gi 554556058 XP_005872468.1</a> |
| <a href="#">PREDICTED: complement factor I [Myotis lucifugus]</a>                  | 52.8 | 52.8 | 89%  | 2e-06 | 88% | <a href="#">gi 558181756 XP_006101433.1</a> |
| <a href="#">PREDICTED: complement factor I isoform X1 [Myotis brandtii]</a>        | 52.8 | 52.8 | 89%  | 2e-06 | 88% | <a href="#">gi 554556056 XP_005872467.1</a> |
| <a href="#">PREDICTED: complement factor I isoform X2 [Equus caballus]</a>         | 52.8 | 52.8 | 89%  | 2e-06 | 88% | <a href="#">gi 545210264 XP_005607952.1</a> |
| <a href="#">Complement factor I [Pteropus alecto]</a>                              | 52.8 | 52.8 | 89%  | 2e-06 | 88% | <a href="#">gi 431897147 ELK06409.1</a>     |
| <a href="#">PREDICTED: complement factor I isoform X1 [Equus caballus]</a>         | 52.8 | 52.8 | 89%  | 2e-06 | 88% | <a href="#">gi 545210262 XP_005607951.1</a> |
| <a href="#">Complement factor I [Myotis brandtii]</a>                              | 52.8 | 52.8 | 89%  | 2e-06 | 88% | <a href="#">gi 521029771 EPQ11558.1</a>     |
| <a href="#">PREDICTED: complement factor I-like [Python bivittatus]</a>            | 52.4 | 52.4 | 89%  | 2e-06 | 88% | <a href="#">gi 602663653 XP_007437454.1</a> |
| <a href="#">PREDICTED: LOW QUALITY PROTEIN: complement factor I [Qdo]</a>          | 52.4 | 52.4 | 89%  | 2e-06 | 88% | <a href="#">gi 472383864 XP_004411307.1</a> |
| <a href="#">PREDICTED: complement factor I [Ochotona princeps]</a>                 | 52.4 | 52.4 | 89%  | 2e-06 | 88% | <a href="#">gi 504169976 XP_004594584.1</a> |
| <a href="#">PREDICTED: LOW QUALITY PROTEIN: complement factor I [Chin]</a>         | 52.4 | 52.4 | 89%  | 2e-06 | 88% | <a href="#">gi 533186455 XP_005406244.1</a> |
| <a href="#">PREDICTED: complement factor I [Otolemur garnettii]</a>                | 52.0 | 52.0 | 89%  | 3e-06 | 88% | <a href="#">gi 395851346 XP_003798222.1</a> |
| <a href="#">PREDICTED: complement factor I [Callithrix jacchus]</a>                | 52.0 | 52.0 | 89%  | 3e-06 | 88% | <a href="#">gi 675648222 XP_002745538.3</a> |
| <a href="#">PREDICTED: complement factor I [Callithrix jacchus]</a>                | 52.0 | 52.0 | 89%  | 3e-06 | 88% | <a href="#">gi 675752511 XP_008984405.1</a> |
| <a href="#">PREDICTED: complement factor I [Tarsius syrichta]</a>                  | 51.5 | 51.5 | 84%  | 4e-06 | 94% | <a href="#">gi 640813983 XP_008063707.1</a> |
| <a href="#">PREDICTED: complement factor I [Eptesicus fuscus]</a>                  | 51.1 | 51.1 | 89%  | 6e-06 | 88% | <a href="#">gi 641717977 XP_008148531.1</a> |
| <a href="#">PREDICTED: complement factor I [Ceratottherium simum simum]</a>        | 51.1 | 51.1 | 89%  | 6e-06 | 88% | <a href="#">gi 478504685 XP_004426641.1</a> |
| <a href="#">PREDICTED: complement factor I [Erinaceus europaeus]</a>               | 51.1 | 51.1 | 100% | 6e-06 | 80% | <a href="#">gi 617652869 XP_007534556.1</a> |
| <a href="#">Complement factor I [Fukomys damarensis]</a>                           | 50.7 | 50.7 | 89%  | 9e-06 | 82% | <a href="#">gi 676270629 KFO25832.1</a>     |
| <a href="#">hypothetical protein PANDA_019552 [Ailuropoda melanoleuca]</a>         | 50.7 | 50.7 | 89%  | 9e-06 | 88% | <a href="#">gi 281338891 EFB14475.1</a>     |
| <a href="#">PREDICTED: complement factor I [Octodon degus]</a>                     | 50.7 | 50.7 | 89%  | 9e-06 | 82% | <a href="#">gi 507626946 XP_004626817.1</a> |
| <a href="#">PREDICTED: complement factor I isoform X5 [Canis lupus familiaris]</a> | 50.7 | 50.7 | 89%  | 9e-06 | 82% | <a href="#">gi 545552244 XP_005639326.1</a> |
| <a href="#">PREDICTED: complement factor I isoform X3 [Canis lupus familiaris]</a> | 50.7 | 50.7 | 89%  | 9e-06 | 82% | <a href="#">gi 74002140 XP_863506.1</a>     |
| <a href="#">PREDICTED: complement factor I isoform X4 [Canis lupus familiaris]</a> | 50.7 | 50.7 | 89%  | 9e-06 | 82% | <a href="#">gi 545552242 XP_005639325.1</a> |
| <a href="#">PREDICTED: complement factor I isoform X2 [Fukomys damarensis]</a>     | 50.7 | 50.7 | 89%  | 9e-06 | 82% | <a href="#">gi 731254237 XP_010639824.1</a> |

## Alignments

[Download](#) [GenPept](#) [Graphics](#)

[Next](#) [Previous](#) [Descriptions](#)

PREDICTED: complement factor I-like, partial [Gorilla gorilla gorilla]

Sequence ID: [gi|426345243|ref|XP\\_004040330.1](#) Length: 309 Number of Matches: 1

Range 1: 62 to 80 [GenPept](#) [Graphics](#)

[Next Match](#) [Previous Match](#)

| Score          | Expect | Identities  | Positives   | Gaps     |
|----------------|--------|-------------|-------------|----------|
| 65.1 bits(146) | 1e-10  | 19/19(100%) | 19/19(100%) | 0/19(0%) |

Query 1 KLPYQCPKNGTAVCATNRR 19  
 Sbjct 62 KLPYQCPKNGTAVCATNRR 80

### Related Information

[Gene](#) - associated gene details  
[Map Viewer](#) - aligned genomic context

[Download](#) [GenPept](#) [Graphics](#)

[Next](#) [Previous](#) [Descriptions](#)

unnamed protein product [Homo sapiens]

Sequence ID: [gi|1335055|emb|CAA68417.1](#) Length: 321 Number of Matches: 1

Range 1: 44 to 62 [GenPept](#) [Graphics](#)

[Next Match](#) [Previous Match](#)

| Score          | Expect | Identities  | Positives   | Gaps     |
|----------------|--------|-------------|-------------|----------|
| 65.1 bits(146) | 1e-10  | 19/19(100%) | 19/19(100%) | 0/19(0%) |

Query 1 KLPYQCPKNGTAVCATNRR 19  
 Sbjct 44 KLPYQCPKNGTAVCATNRR 62

### Related Information

[Gene](#) - associated gene details

[Download](#) [GenPept](#) [Graphics](#)

[Next](#) [Previous](#) [Descriptions](#)



**CFI protein [Homo sapiens]**

Sequence ID: [gi|18089117|gb|AAH20718.1](#) Length: 377 Number of Matches: 1

[▶ See 1 more title\(s\)](#)

Range 1: 62 to 80 [GenPept](#) [Graphics](#)

▼ Next Match ▲ Previous Match

| Score          | Expect | Identities  | Positives   | Gaps     |
|----------------|--------|-------------|-------------|----------|
| 65.1 bits(146) | 1e-10  | 19/19(100%) | 19/19(100%) | 0/19(0%) |

Query 1 KLPYQCPKNGTAVCATNRR 19  
 KLPYQCPKNGTAVCATNRR  
 Sbjct 62 KLPYQCPKNGTAVCATNRR 80

**Related Information**

[Gene](#) - associated gene details  
[Identical Proteins](#) - Proteins identical to the subject

Download [GenPept](#) [Graphics](#)

▼ Next ▲ Previous ▲ Descriptions

**complement factor I, isoform CRA\_a, partial [Homo sapiens]**

Sequence ID: [gi|119626655|gb|EAX06250.1](#) Length: 378 Number of Matches: 1

Range 1: 62 to 80 [GenPept](#) [Graphics](#)

▼ Next Match ▲ Previous Match

| Score          | Expect | Identities  | Positives   | Gaps     |
|----------------|--------|-------------|-------------|----------|
| 65.1 bits(146) | 1e-10  | 19/19(100%) | 19/19(100%) | 0/19(0%) |

Query 1 KLPYQCPKNGTAVCATNRR 19  
 KLPYQCPKNGTAVCATNRR  
 Sbjct 62 KLPYQCPKNGTAVCATNRR 80

**Related Information**

[Gene](#) - associated gene details

Download [GenPept](#) [Graphics](#)

▼ Next ▲ Previous ▲ Descriptions

**PREDICTED: complement factor I isoform X6 [Pan troglodytes]**

Sequence ID: [gi|694908492|ref|XP\\_009446407.1](#) Length: 516 Number of Matches: 1

Range 1: 62 to 80 [GenPept](#) [Graphics](#)

▼ Next Match ▲ Previous Match

| Score          | Expect | Identities  | Positives   | Gaps     |
|----------------|--------|-------------|-------------|----------|
| 65.1 bits(146) | 1e-10  | 19/19(100%) | 19/19(100%) | 0/19(0%) |

Query 1 KLPYQCPKNGTAVCATNRR 19  
 KLPYQCPKNGTAVCATNRR  
 Sbjct 62 KLPYQCPKNGTAVCATNRR 80

**Related Information**

[Gene](#) - associated gene details

BLAST is a registered trademark of the National Library of Medicine.

▶ NCBI/ BLAST/ blastp suite/ Formatting Results - BTG8KRX5013

**i** Your search parameters were adjusted to search for a short input sequence.  
[Edit and Resubmit](#) [Save Search Strategies](#) ▶ [Formatting options](#) ▶ [Download](#) [YouTube](#) [How to read this page](#) [Blast report description](#)

**CFI\_KLSIDSTECLHVHCRG\_Mod**

RID [BTG8KRX5013](#) (Expires on 01-20 15:32 pm)

|                                 |                                                                                                                                       |
|---------------------------------|---------------------------------------------------------------------------------------------------------------------------------------|
| <b>Query ID</b>  cl 41510       | <b>Database Name</b> nr                                                                                                               |
| <b>Description</b> None         | <b>Description</b> All non-redundant GenBank CDS translations+PDB+SwissProt+PIR+PRF excluding environmental samples from WGS projects |
| <b>Molecule type</b> amino acid | <b>Program</b> BLASTP 2.2.30+ ▶ <a href="#">Citation</a>                                                                              |
| <b>Query Length</b> 19          |                                                                                                                                       |

Other reports: ▶ [Search Summary](#) [[Taxonomy reports](#)] [[Distance tree of results](#)] [[Multiple alignment](#)]

**Graphic Summary**

[Show Conserved Domains](#)

No putative conserved domains have been detected

Distribution of 100 Blast Hits on the Query Sequence

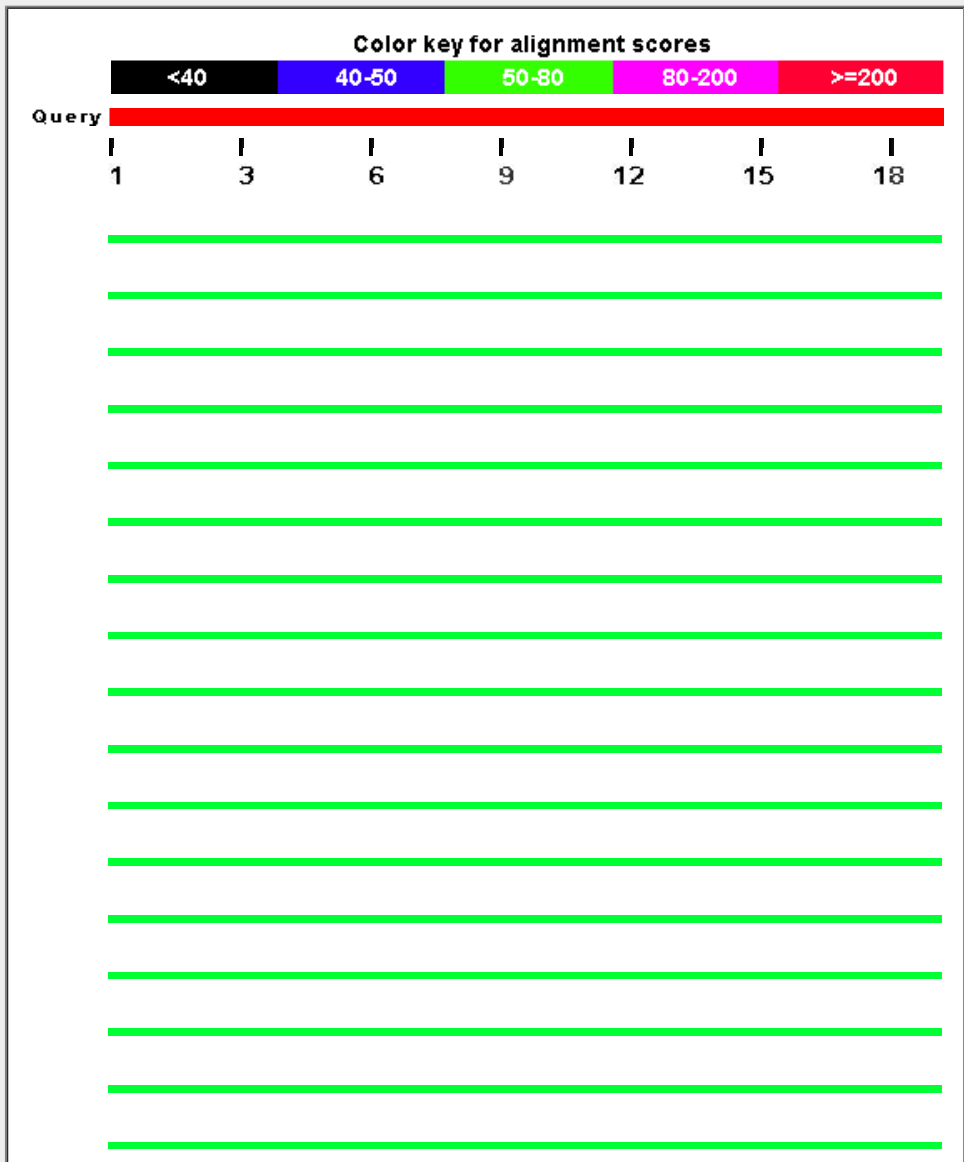

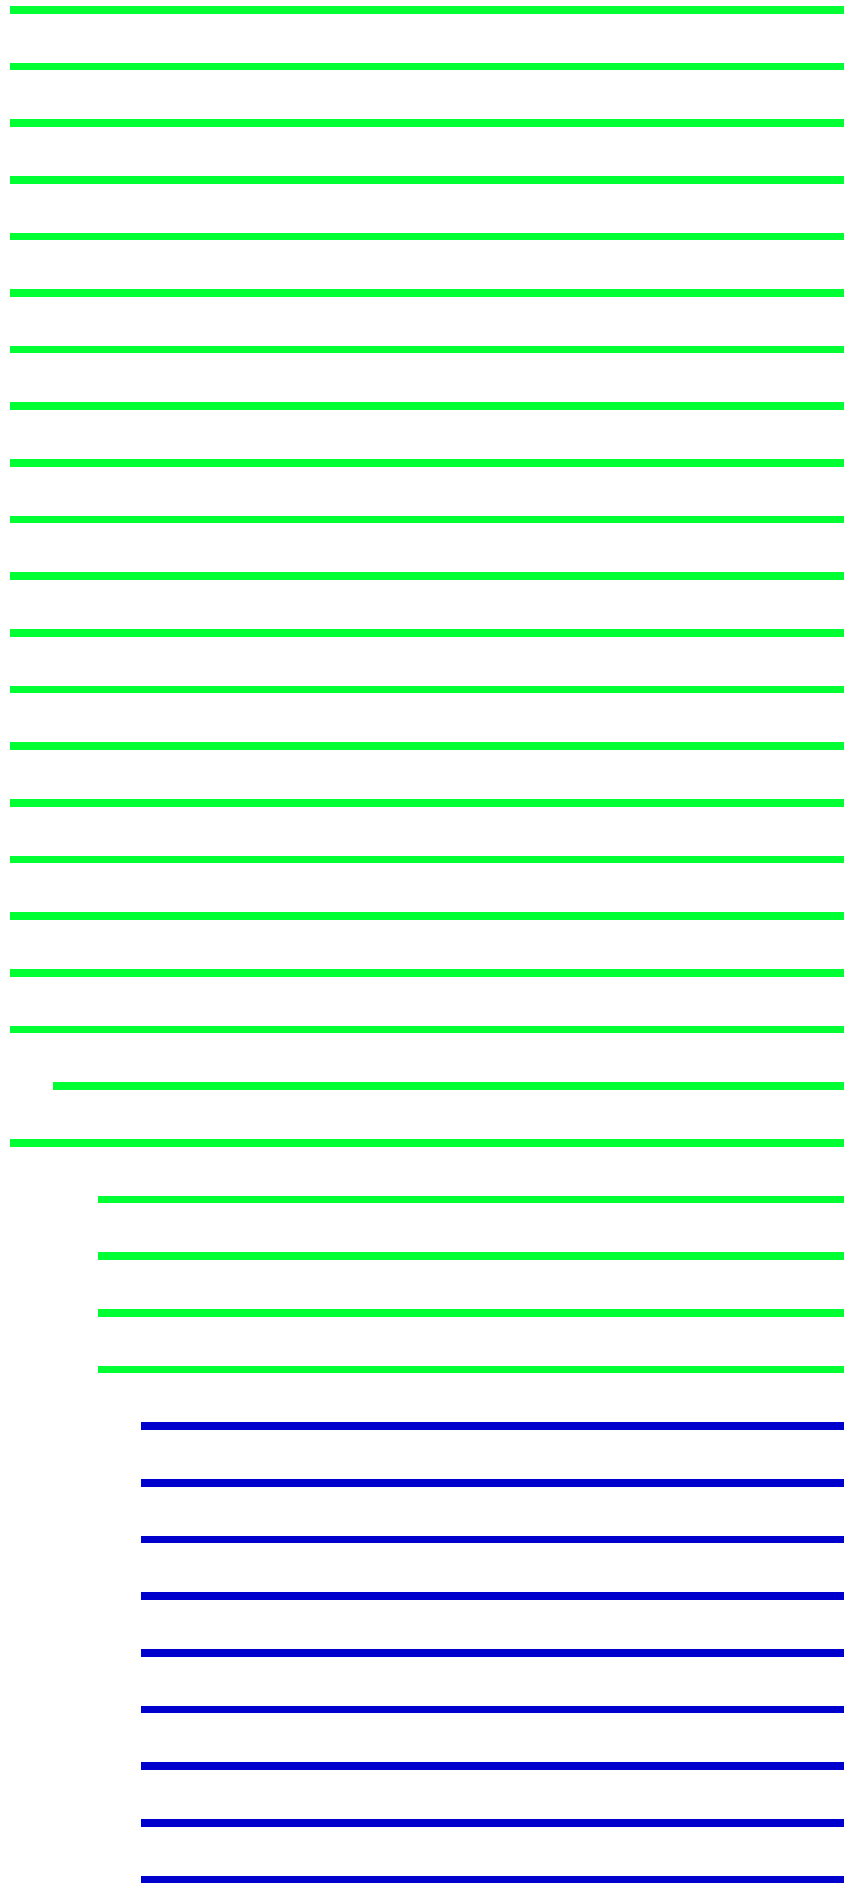

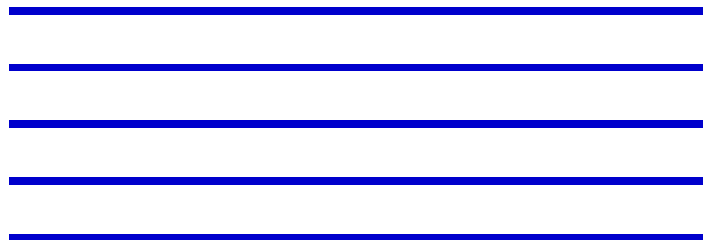

**Descriptions**

**Sequences producing significant alignments:**

Select: [All](#) [None](#) Selected:0

[Alignments](#)
[Download](#)
[GenPept](#)
[Graphics](#)
[Distance tree of results](#)
[Multiple alignment](#)


| Description                                                                   | Max score | Total score | Query cover | E value | Ident | Accession                                   |
|-------------------------------------------------------------------------------|-----------|-------------|-------------|---------|-------|---------------------------------------------|
| <a href="#">PREDICTED: complement factor I-like [Gorilla gorilla gorilla]</a> | 61.7      | 61.7        | 100%        | 2e-09   | 95%   | <a href="#">gi 426345243 XP_004040330.1</a> |
| <a href="#">unnamed protein product [Homo sapiens]</a>                        | 61.7      | 61.7        | 100%        | 2e-09   | 95%   | <a href="#">gi 1335055 CAA68417.1</a>       |
| <a href="#">CFI protein [Homo sapiens]</a>                                    | 61.7      | 61.7        | 100%        | 2e-09   | 95%   | <a href="#">gi 18089117 AAH20718.1</a>      |
| <a href="#">complement factor I, isoform CRA_a [Homo sapiens]</a>             | 61.7      | 61.7        | 100%        | 2e-09   | 95%   | <a href="#">gi 119626655 EAX06250.1</a>     |
| <a href="#">PREDICTED: complement factor I-like [Macaca mulatta]</a>          | 61.7      | 61.7        | 100%        | 2e-09   | 95%   | <a href="#">gi 297293220 XP_001087512.2</a> |
| <a href="#">PREDICTED: complement factor I isoform X3 [Chlorocebus sat]</a>   | 61.7      | 61.7        | 100%        | 2e-09   | 95%   | <a href="#">gi 635044271 XP_007997720.1</a> |
| <a href="#">PREDICTED: complement factor I isoform X6 [Pan troglodytes]</a>   | 61.7      | 61.7        | 100%        | 2e-09   | 95%   | <a href="#">gi 694908492 XP_009446407.1</a> |
| <a href="#">PREDICTED: complement factor I isoform X6 [Pan paniscus]</a>      | 61.7      | 61.7        | 100%        | 2e-09   | 95%   | <a href="#">gi 675793799 XP_008953634.1</a> |
| <a href="#">uncharacterized protein LOC101866929 precursor [Macaca fas]</a>   | 61.7      | 61.7        | 100%        | 2e-09   | 95%   | <a href="#">gi 548961885 NP_001271714.1</a> |
| <a href="#">PREDICTED: complement factor I isoform X5 [Pan troglodytes]</a>   | 61.7      | 61.7        | 100%        | 2e-09   | 95%   | <a href="#">gi 694908490 XP_009446406.1</a> |
| <a href="#">PREDICTED: complement factor I isoform X5 [Pan paniscus]</a>      | 61.7      | 61.7        | 100%        | 2e-09   | 95%   | <a href="#">gi 675793797 XP_008953633.1</a> |
| <a href="#">PREDICTED: complement factor I isoform X4 [Homo sapiens]</a>      | 61.7      | 61.7        | 100%        | 2e-09   | 95%   | <a href="#">gi 578809103 XP_006714273.1</a> |
| <a href="#">Chain A, Human Complement Factor I [Homo sapiens]</a>             | 61.7      | 61.7        | 100%        | 2e-09   | 95%   | <a href="#">gi 339961198 2XRC_A</a>         |
| <a href="#">PREDICTED: complement factor I isoform X4 [Pan troglodytes]</a>   | 61.7      | 61.7        | 100%        | 2e-09   | 95%   | <a href="#">gi 694908488 XP_009446405.1</a> |
| <a href="#">PREDICTED: complement factor I isoform X4 [Pan paniscus]</a>      | 61.7      | 61.7        | 100%        | 2e-09   | 95%   | <a href="#">gi 675793795 XP_008953632.1</a> |
| <a href="#">PREDICTED: complement factor I isoform X2 [Chlorocebus sat]</a>   | 61.7      | 61.7        | 100%        | 2e-09   | 95%   | <a href="#">gi 635044269 XP_007997719.1</a> |
| <a href="#">PREDICTED: complement factor I isoform X2 [Homo sapiens]</a>      | 61.7      | 61.7        | 100%        | 2e-09   | 95%   | <a href="#">gi 530377647 XP_005263033.1</a> |
| <a href="#">PREDICTED: complement factor I [Nomascus leucogenys]</a>          | 61.7      | 61.7        | 100%        | 2e-09   | 95%   | <a href="#">gi 332240463 XP_003269405.1</a> |
| <a href="#">PREDICTED: complement factor I isoform X1 [Chlorocebus sat]</a>   | 61.7      | 61.7        | 100%        | 2e-09   | 95%   | <a href="#">gi 635044267 XP_007997718.1</a> |
| <a href="#">prepro-C3b/C4B inactivator [Homo sapiens]</a>                     | 61.7      | 61.7        | 100%        | 2e-09   | 95%   | <a href="#">gi 182607 AAA52455.1</a>        |
| <a href="#">complement factor I preproprotein [Homo sapiens]</a>              | 61.7      | 61.7        | 100%        | 2e-09   | 95%   | <a href="#">gi 119392081 NP_000195.2</a>    |
| <a href="#">PREDICTED: complement factor I isoform X3 [Pan paniscus]</a>      | 61.7      | 61.7        | 100%        | 2e-09   | 95%   | <a href="#">gi 397519838 XP_003830060.1</a> |
| <a href="#">RecName: Full=Complement factor I; AltName: Full=C3B/C4B i</a>    | 61.7      | 61.7        | 100%        | 2e-09   | 95%   | <a href="#">gi 317373341 P05156.2</a>       |
| <a href="#">unnamed protein product [Homo sapiens]</a>                        | 61.7      | 61.7        | 100%        | 2e-09   | 95%   | <a href="#">gi 158254682 BAF83314.1</a>     |
| <a href="#">PREDICTED: complement factor I isoform X3 [Pan troglodytes]</a>   | 61.7      | 61.7        | 100%        | 2e-09   | 95%   | <a href="#">gi 114595644 XP_526653.2</a>    |
| <a href="#">PREDICTED: complement factor I isoform X2 [Pan troglodytes]</a>   | 61.7      | 61.7        | 100%        | 2e-09   | 95%   | <a href="#">gi 694908485 XP_009446404.1</a> |
| <a href="#">PREDICTED: complement factor I isoform X2 [Pan paniscus]</a>      | 61.7      | 61.7        | 100%        | 2e-09   | 95%   | <a href="#">gi 675793792 XP_008953631.1</a> |
| <a href="#">PREDICTED: complement factor I isoform X3 [Homo sapiens]</a>      | 61.7      | 61.7        | 100%        | 2e-09   | 95%   | <a href="#">gi 578809101 XP_006714272.1</a> |
| <a href="#">unnamed protein product [Homo sapiens]</a>                        | 61.7      | 61.7        | 100%        | 2e-09   | 95%   | <a href="#">gi 194387702 BAG61264.1</a>     |

|                                                                               |      |      |      |       |     |                                             |
|-------------------------------------------------------------------------------|------|------|------|-------|-----|---------------------------------------------|
| <a href="#">PREDICTED: complement factor I isoform X1 [Homo sapiens]</a>      | 61.7 | 61.7 | 100% | 2e-09 | 95% | <a href="#">gi 530377645 XP_005263032.1</a> |
| <a href="#">PREDICTED: complement factor I isoform X1 [Pan paniscus]</a>      | 61.7 | 61.7 | 100% | 2e-09 | 95% | <a href="#">gi 397519840 XP_003830061.1</a> |
| <a href="#">hypothetical protein EGK_16010 [Macaca mulatta]</a>               | 61.7 | 61.7 | 100% | 2e-09 | 95% | <a href="#">gi 355687535 EHH26119.1</a>     |
| <a href="#">PREDICTED: complement factor I isoform X1 [Pan troglodytes]</a>   | 61.7 | 61.7 | 100% | 2e-09 | 95% | <a href="#">gi 332820084 XP_003310493.1</a> |
| <a href="#">PREDICTED: complement factor I isoform X1 [Pongo abelii]</a>      | 59.2 | 59.2 | 100% | 1e-08 | 89% | <a href="#">gi 686716760 XP_009238531.1</a> |
| <a href="#">complement factor I [Pongo abelii]</a>                            | 59.2 | 59.2 | 100% | 1e-08 | 89% | <a href="#">gi 207080120 NP_001128776.1</a> |
| <a href="#">complement factor I precursor [Pongo abelii]</a>                  | 59.2 | 59.2 | 100% | 1e-08 | 89% | <a href="#">gi 197098986 NP_001127624.1</a> |
| <a href="#">PREDICTED: complement factor I [Rhinopithecus roxellana]</a>      | 56.2 | 56.2 | 94%  | 1e-07 | 94% | <a href="#">gi 724946291 XP_010387365.1</a> |
| <a href="#">PREDICTED: complement factor I [Papio anubis]</a>                 | 54.1 | 54.1 | 100% | 7e-07 | 89% | <a href="#">gi 685542561 XP_009205631.1</a> |
| <a href="#">PREDICTED: complement factor I isoform X2 [Saimiri boliviens]</a> | 50.7 | 50.7 | 89%  | 9e-06 | 82% | <a href="#">gi 725571753 XP_010338379.1</a> |
| <a href="#">PREDICTED: complement factor I [Callithrix jacchus]</a>           | 50.7 | 50.7 | 89%  | 9e-06 | 82% | <a href="#">gi 675648222 XP_002745538.3</a> |
| <a href="#">PREDICTED: complement factor I [Callithrix jacchus]</a>           | 50.7 | 50.7 | 89%  | 9e-06 | 82% | <a href="#">gi 675752511 XP_008984405.1</a> |
| <a href="#">PREDICTED: complement factor I isoform X1 [Saimiri boliviens]</a> | 50.7 | 50.7 | 89%  | 9e-06 | 82% | <a href="#">gi 725571751 XP_010338378.1</a> |
| <a href="#">PREDICTED: LOW QUALITY PROTEIN: complement factor I [</a>         | 48.1 | 48.1 | 84%  | 6e-05 | 88% | <a href="#">gi 586984171 XP_006930977.1</a> |
| <a href="#">PREDICTED: LOW QUALITY PROTEIN: complement factor I [</a>         | 48.1 | 48.1 | 84%  | 6e-05 | 88% | <a href="#">gi 602703733 XP_007463290.1</a> |
| <a href="#">PREDICTED: complement factor I isoform X2 [Camelus dromer</a>     | 46.0 | 46.0 | 84%  | 3e-04 | 81% | <a href="#">gi 744567503 XP_010979382.1</a> |
| <a href="#">PREDICTED: complement factor I isoform X1 [Camelus dromer</a>     | 46.0 | 46.0 | 84%  | 3e-04 | 81% | <a href="#">gi 744567500 XP_010979381.1</a> |
| <a href="#">PREDICTED: LOW QUALITY PROTEIN: complement factor I [</a>         | 46.0 | 46.0 | 84%  | 3e-04 | 81% | <a href="#">gi 560979761 XP_006212132.1</a> |
| <a href="#">PREDICTED: complement factor I isoform X6 [Panthera tigris a</a>  | 45.6 | 45.6 | 84%  | 4e-04 | 81% | <a href="#">gi 591346160 XP_007098330.1</a> |
| <a href="#">PREDICTED: complement factor I isoform X5 [Panthera tigris a</a>  | 45.6 | 45.6 | 84%  | 4e-04 | 81% | <a href="#">gi 591346158 XP_007098329.1</a> |
| <a href="#">PREDICTED: complement factor I isoform X4 [Panthera tigris a</a>  | 45.6 | 45.6 | 84%  | 4e-04 | 81% | <a href="#">gi 591346156 XP_007098328.1</a> |
| <a href="#">PREDICTED: complement factor I isoform X2 [Panthera tigris a</a>  | 45.6 | 45.6 | 84%  | 4e-04 | 81% | <a href="#">gi 591346152 XP_007098326.1</a> |
| <a href="#">PREDICTED: complement factor I isoform X1 [Panthera tigris a</a>  | 45.6 | 45.6 | 84%  | 4e-04 | 81% | <a href="#">gi 591346150 XP_007098325.1</a> |
| <a href="#">complement factor I precursor [Camelus ferus]</a>                 | 45.2 | 45.2 | 84%  | 6e-04 | 81% | <a href="#">gi 528758403 EPY78062.1</a>     |
| <a href="#">PREDICTED: complement factor I isoform X2 [Camelus bactria</a>    | 45.2 | 45.2 | 84%  | 6e-04 | 81% | <a href="#">gi 743716645 XP_010951976.1</a> |
| <a href="#">PREDICTED: complement factor I isoform X1 [Camelus bactria</a>    | 45.2 | 45.2 | 84%  | 6e-04 | 81% | <a href="#">gi 743716643 XP_010951975.1</a> |
| <a href="#">PREDICTED: LOW QUALITY PROTEIN: complement factor I [i</a>        | 45.2 | 45.2 | 84%  | 6e-04 | 81% | <a href="#">gi 560925633 XP_006188998.1</a> |
| <a href="#">PREDICTED: complement factor I [Mesocricetus auratus]</a>         | 44.8 | 44.8 | 84%  | 8e-04 | 81% | <a href="#">gi 524965961 XP_005082885.1</a> |
| <a href="#">PREDICTED: complement factor I [Tursiops truncatus]</a>           | 44.3 | 44.3 | 68%  | 0.001 | 92% | <a href="#">gi 470636247 XP_004323514.1</a> |
| <a href="#">PREDICTED: LOW QUALITY PROTEIN: complement factor I [i</a>        | 44.3 | 44.3 | 68%  | 0.001 | 92% | <a href="#">gi 466008566 XP_004269732.1</a> |
| <a href="#">PREDICTED: complement factor I [Physeter catodon]</a>             | 44.3 | 44.3 | 68%  | 0.001 | 92% | <a href="#">gi 593719134 XP_007105924.1</a> |
| <a href="#">PREDICTED: complement factor I [Loxodonta africana]</a>           | 43.9 | 43.9 | 78%  | 0.002 | 80% | <a href="#">gi 731479219 XP_010588889.1</a> |
| <a href="#">hypothetical protein PANDA_019552 [Ailuropoda melanoleuca]</a>    | 43.5 | 43.5 | 84%  | 0.002 | 75% | <a href="#">gi 281338891 EFB14475.1</a>     |
| <a href="#">PREDICTED: complement factor I-like [Ailuropoda melanoleuc</a>    | 43.5 | 43.5 | 84%  | 0.002 | 75% | <a href="#">gi 301787939 XP_002929384.1</a> |
| <a href="#">PREDICTED: complement factor I [Ursus maritimus]</a>              | 43.5 | 43.5 | 84%  | 0.002 | 75% | <a href="#">gi 670993394 XP_008687645.1</a> |
| <a href="#">complement factor I-like protein [Cricetulus griseus]</a>         | 42.6 | 42.6 | 84%  | 0.004 | 81% | <a href="#">gi 537261801 ERE90152.1</a>     |
| <a href="#">PREDICTED: complement factor I [Cricetulus griseus]</a>           | 42.6 | 42.6 | 84%  | 0.004 | 81% | <a href="#">gi 625241505 XP_007611983.1</a> |
| <a href="#">PREDICTED: complement factor I [Cricetulus griseus]</a>           | 42.6 | 42.6 | 84%  | 0.004 | 81% | <a href="#">gi 625222421 XP_007651009.1</a> |
| <a href="#">PREDICTED: LOW QUALITY PROTEIN: complement factor I [i</a>        | 42.2 | 42.2 | 84%  | 0.006 | 75% | <a href="#">gi 533186455 XP_005406244.1</a> |
| <a href="#">PREDICTED: LOW QUALITY PROTEIN: complement factor I [i</a>        | 41.8 | 41.8 | 84%  | 0.008 | 75% | <a href="#">gi 585149528 XP_006727262.1</a> |
| <a href="#">Complement factor I [Tupaia chinensis]</a>                        | 41.8 | 41.8 | 78%  | 0.008 | 80% | <a href="#">gi 444524072 ELV13709.1</a>     |
| <a href="#">PREDICTED: complement factor I [Tupaia chinensis]</a>             | 41.8 | 41.8 | 78%  | 0.008 | 80% | <a href="#">gi 562868474 XP_006162305.1</a> |
| <a href="#">complement factor I [Mus musculus]</a>                            | 41.4 | 41.4 | 84%  | 0.010 | 75% | <a href="#">gi 4926957 AAD32965.1</a>       |
| <a href="#">complement component factor i [Mus musculus]</a>                  | 41.4 | 41.4 | 84%  | 0.011 | 75% | <a href="#">gi 148680281 EDL12228.1</a>     |
| <a href="#">PREDICTED: complement factor I [Qchotona princeps]</a>            | 41.4 | 41.4 | 84%  | 0.011 | 75% | <a href="#">gi 504169976 XP_004594584.1</a> |

|                                                                               |      |      |     |       |     |                                             |
|-------------------------------------------------------------------------------|------|------|-----|-------|-----|---------------------------------------------|
| <a href="#">PREDICTED: complement factor I isoform X4 [Mus musculus]</a>      | 41.4 | 41.4 | 84% | 0.011 | 75% | <a href="#">gi 568921717 XP_006501026.1</a> |
| <a href="#">PREDICTED: complement factor I isoform X3 [Mus musculus]</a>      | 41.4 | 41.4 | 84% | 0.011 | 75% | <a href="#">gi 568921715 XP_006501025.1</a> |
| <a href="#">PREDICTED: complement factor I isoform X2 [Mus musculus]</a>      | 41.4 | 41.4 | 84% | 0.011 | 75% | <a href="#">gi 568921713 XP_006501024.1</a> |
| <a href="#">complement factor I [Mus musculus]</a>                            | 41.4 | 41.4 | 84% | 0.011 | 75% | <a href="#">gi 1322034 AAB00438.1</a>       |
| <a href="#">complement factor I precursor [Mus musculus]</a>                  | 41.4 | 41.4 | 84% | 0.011 | 75% | <a href="#">gi 110347406 NP_031712.2</a>    |
| <a href="#">PREDICTED: complement factor I isoform X2 [Ictidomys tridece]</a> | 40.9 | 40.9 | 84% | 0.015 | 75% | <a href="#">gi 532088899 XP_005330149.1</a> |
| <a href="#">PREDICTED: complement factor I isoform X1 [Ictidomys tridece]</a> | 40.9 | 40.9 | 84% | 0.015 | 75% | <a href="#">gi 532088897 XP_005330148.1</a> |
| <a href="#">PREDICTED: complement factor I [Balaenoptera acutorostrata]</a>   | 40.9 | 40.9 | 63% | 0.015 | 92% | <a href="#">gi 594687284 XP_007191087.1</a> |
| <a href="#">PREDICTED: complement factor I [Trichechus manatus latirost]</a>  | 40.5 | 40.5 | 78% | 0.020 | 80% | <a href="#">gi 471391575 XP_004380312.1</a> |
| <a href="#">PREDICTED: complement factor I [Otolemur garnettii]</a>           | 40.1 | 40.1 | 68% | 0.027 | 85% | <a href="#">gi 395851346 XP_003798222.1</a> |
| <a href="#">PREDICTED: complement factor I [Sus scrofa]</a>                   | 39.7 | 39.7 | 68% | 0.038 | 85% | <a href="#">gi 545846437 XP_005656603.1</a> |
| <a href="#">PREDICTED: complement factor I [Orycteropus afer afer]</a>        | 39.2 | 39.2 | 68% | 0.051 | 77% | <a href="#">gi 634848033 XP_007938975.1</a> |
| <a href="#">PREDICTED: complement factor I [Erinaceus europaeus]</a>          | 38.0 | 38.0 | 73% | 0.13  | 79% | <a href="#">gi 617652869 XP_007534556.1</a> |
| <a href="#">PREDICTED: complement factor I [Peromyscus maniculatus be]</a>    | 37.1 | 37.1 | 84% | 0.24  | 69% | <a href="#">gi 589914217 XP_006970447.1</a> |
| <a href="#">PREDICTED: complement factor I [Mustela putorius furo]</a>        | 36.7 | 36.7 | 73% | 0.33  | 71% | <a href="#">gi 511847748 XP_004748251.1</a> |
| <a href="#">PREDICTED: complement factor I [Mustela putorius furo]</a>        | 36.7 | 36.7 | 73% | 0.33  | 71% | <a href="#">gi 511991360 XP_004813365.1</a> |
| <a href="#">Complement factor I [Fukomys damarensis]</a>                      | 36.3 | 36.3 | 84% | 0.45  | 69% | <a href="#">gi 676270629 KFO25832.1</a>     |
| <a href="#">Complement factor I [Heterocephalus glaber]</a>                   | 36.3 | 36.3 | 84% | 0.45  | 69% | <a href="#">gi 351696416 EHA99334.1</a>     |
| <a href="#">PREDICTED: complement factor I [Tarsius syrichta]</a>             | 36.3 | 36.3 | 63% | 0.45  | 83% | <a href="#">gi 640813983 XP_008063707.1</a> |
| <a href="#">PREDICTED: complement factor I isoform X2 [Fukomys damar]</a>     | 36.3 | 36.3 | 84% | 0.45  | 69% | <a href="#">gi 731254237 XP_010639824.1</a> |
| <a href="#">PREDICTED: complement factor I isoform X2 [Heterocephalus]</a>    | 36.3 | 36.3 | 84% | 0.45  | 69% | <a href="#">gi 512818622 XP_004878889.1</a> |
| <a href="#">PREDICTED: complement factor I isoform X1 [Fukomys damar]</a>     | 36.3 | 36.3 | 84% | 0.45  | 69% | <a href="#">gi 731254235 XP_010639823.1</a> |
| <a href="#">PREDICTED: complement factor I isoform X1 [Heterocephalus]</a>    | 36.3 | 36.3 | 84% | 0.45  | 69% | <a href="#">gi 512818618 XP_004878888.1</a> |
| <a href="#">PREDICTED: complement factor I [Echinops telfairi]</a>            | 35.8 | 35.8 | 68% | 0.62  | 69% | <a href="#">gi 507649004 XP_004703515.1</a> |
| <a href="#">complement factor I precursor [Rattus norvegicus]</a>             | 35.4 | 35.4 | 68% | 0.84  | 77% | <a href="#">gi 13162353 NP_077071.1</a>     |
| <a href="#">PREDICTED: complement factor I isoform X1 [Rattus norvegici]</a>  | 35.4 | 35.4 | 68% | 0.85  | 77% | <a href="#">gi 672044321 XP_008759748.1</a> |

## Alignments

Download GenPept Graphics

Next Previous Descriptions

PREDICTED: complement factor I-like, partial [Gorilla gorilla gorilla]

Sequence ID: [gi|426345243|ref|XP\\_004040330.1|](#) Length: 309 Number of Matches: 1

Range 1: 170 to 188 GenPept Graphics

Next Match Previous Match

| Score          | Expect | Identities | Positives   | Gaps     |
|----------------|--------|------------|-------------|----------|
| 61.7 bits(138) | 2e-09  | 18/19(95%) | 19/19(100%) | 0/19(0%) |

Query 1 KLSDSLSDSTECLHVHCRG 19  
 KLSDSLSDSTECLHVHCRG  
 Sbjct 170 KLSDSLSDSTECLHVHCRG 188

### Related Information

[Gene](#) - associated gene details  
[Map Viewer](#) - aligned genomic context

Download GenPept Graphics

Next Previous Descriptions

unnamed protein product [Homo sapiens]

Sequence ID: [gi|1335055|emb|CAA68417.1|](#) Length: 321 Number of Matches: 1

Range 1: 152 to 170 GenPept Graphics

Next Match Previous Match

| Score          | Expect | Identities | Positives   | Gaps     |
|----------------|--------|------------|-------------|----------|
| 61.7 bits(138) | 2e-09  | 18/19(95%) | 19/19(100%) | 0/19(0%) |

### Related Information

[Gene](#) - associated gene details

Query 1 KLSDLSIDSTECLHVHCRG 19  
 KLSLDLSI+STECLHVHCRG  
 Sbjct 152 KLSDLSINSTECLHVHCRG 170

Download [GenPept](#) [Graphics](#)

[▼ Next](#) [▲ Previous](#) [▲ Descriptions](#)

CFI protein [Homo sapiens]

Sequence ID: [gi|18089117|gb|AAH20718.1](#) Length: 377 Number of Matches: 1

[▶ See 1 more title\(s\)](#)

Range 1: 170 to 188 [GenPept](#) [Graphics](#)

[▼ Next Match](#) [▲ Previous Match](#)

| Score          | Expect | Identities | Positives   | Gaps     |
|----------------|--------|------------|-------------|----------|
| 61.7 bits(138) | 2e-09  | 18/19(95%) | 19/19(100%) | 0/19(0%) |

Query 1 KLSDLSIDSTECLHVHCRG 19  
 KLSLDLSI+STECLHVHCRG  
 Sbjct 170 KLSDLSINSTECLHVHCRG 188

**Related Information**

[Gene](#) - associated gene details  
[Identical Proteins](#) - Proteins identical to the subject

Download [GenPept](#) [Graphics](#)

[▼ Next](#) [▲ Previous](#) [▲ Descriptions](#)

complement factor I, isoform CRA\_a, partial [Homo sapiens]

Sequence ID: [gi|119626655|gb|EAX06250.1](#) Length: 378 Number of Matches: 1

Range 1: 170 to 188 [GenPept](#) [Graphics](#)

[▼ Next Match](#) [▲ Previous Match](#)

| Score          | Expect | Identities | Positives   | Gaps     |
|----------------|--------|------------|-------------|----------|
| 61.7 bits(138) | 2e-09  | 18/19(95%) | 19/19(100%) | 0/19(0%) |

Query 1 KLSDLSIDSTECLHVHCRG 19  
 KLSLDLSI+STECLHVHCRG  
 Sbjct 170 KLSDLSINSTECLHVHCRG 188

**Related Information**

[Gene](#) - associated gene details

Download [GenPept](#) [Graphics](#)

[▼ Next](#) [▲ Previous](#) [▲ Descriptions](#)

PREDICTED: complement factor I-like [Macaca mulatta]

Sequence ID: [gi|297293220|ref|XP\\_001087512.2](#) Length: 428 Number of Matches: 1

Range 1: 169 to 187 [GenPept](#) [Graphics](#)

[▼ Next Match](#) [▲ Previous Match](#)

| Score          | Expect | Identities | Positives   | Gaps     |
|----------------|--------|------------|-------------|----------|
| 61.7 bits(138) | 2e-09  | 18/19(95%) | 19/19(100%) | 0/19(0%) |

Query 1 KLSDLSIDSTECLHVHCRG 19  
 KLSLDLSI+STECLHVHCRG  
 Sbjct 169 KLSDLSINSTECLHVHCRG 187

**Related Information**

[Gene](#) - associated gene details  
[UniGene](#) - clustered expressed sequence tags  
[Map Viewer](#) - aligned genomic context

BLAST is a registered trademark of the National Library of Medicine.

▶ NCBI/ BLAST/ blastp suite/ Formatting Results - B93SX4T901R

**i** Your search parameters were adjusted to search for a short input sequence.

[Edit and Resubmit](#) [Save Search Strategies](#) ▶ [Formatting options](#) ▶ [Download](#)

[YouTube](#) [How to read this page](#) [Blast report description](#)

**CFI\_KLSLDLSINSTECLHVHCRG\_NonMod**

**RID** [B93SX4T901R](#) (Expires on 01-14 10:21 am)

**Query ID** lcl|317045  
**Description** None  
**Molecule type** amino acid  
**Query Length** 19

**Database Name** nr  
**Description** All non-redundant GenBank CDS translations+PDB+SwissProt+PIR excluding environmental samples from WGS projects  
**Program** BLASTP 2.2.30+ ▶ [Citation](#)

Other reports: ▶ [Search Summary](#) [[Taxonomy reports](#)] [[Distance tree of results](#)] [[Multiple alignment](#)]

**Graphic Summary**

[Show Conserved Domains](#)

No putative conserved domains have been detected

Distribution of 100 Blast Hits on the Query Sequence

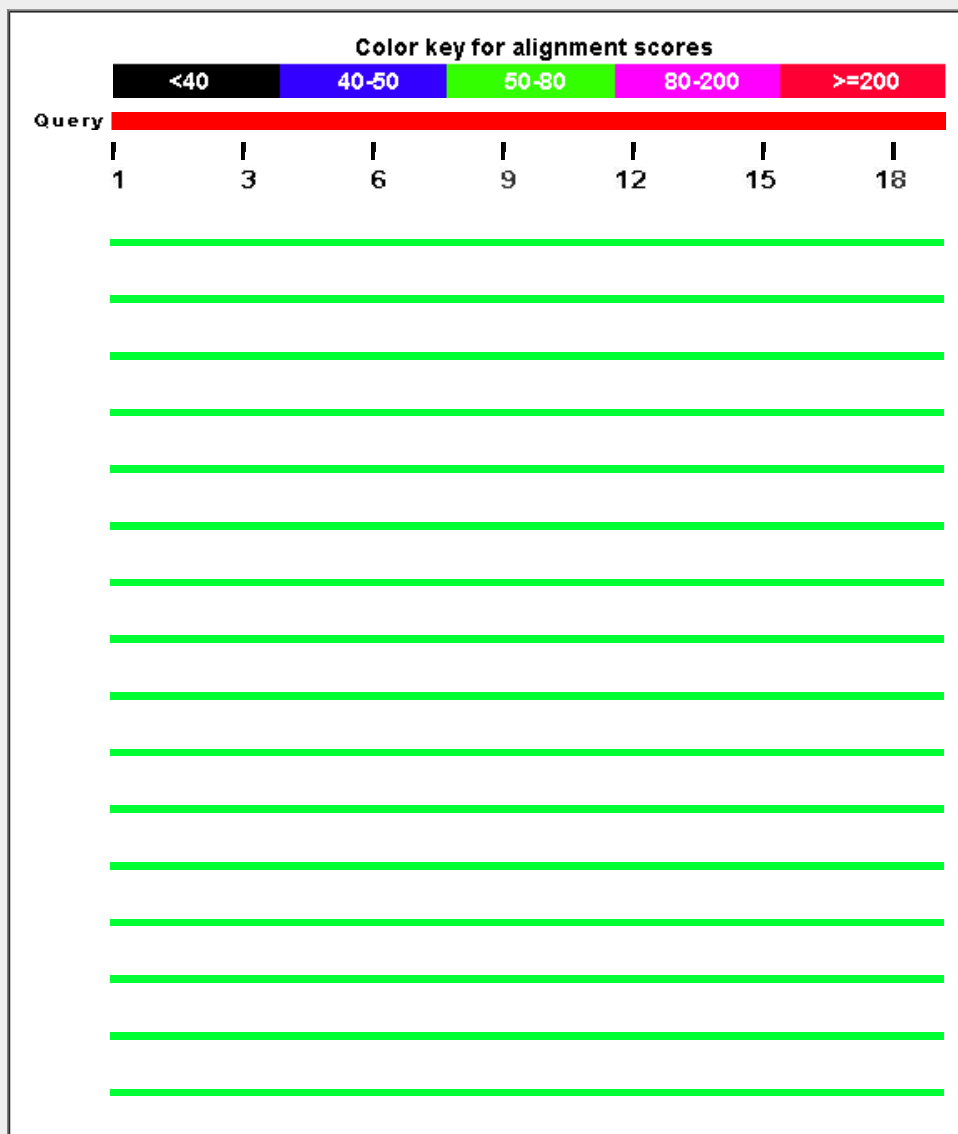



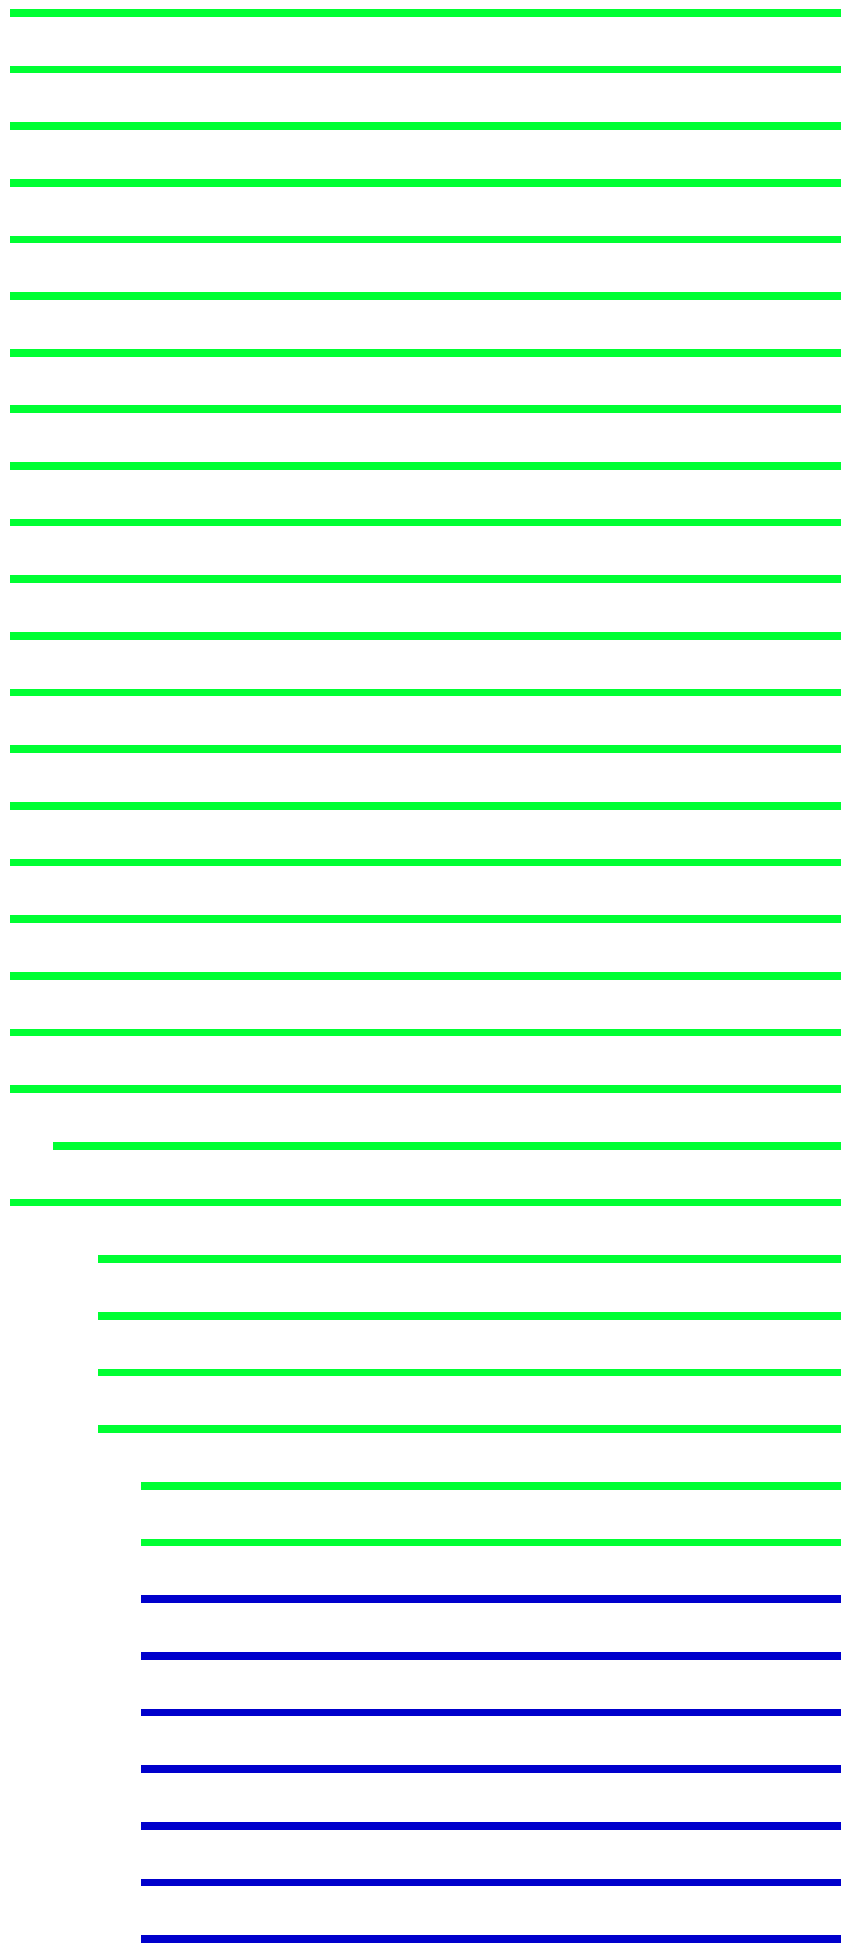

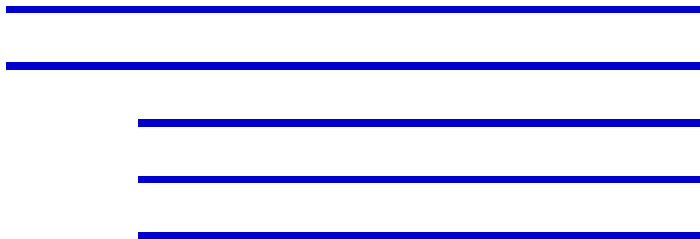

**Descriptions**

**Sequences producing significant alignments:**

Select: [All](#) [None](#) Selected:0

[↑](#) [Alignments](#)
[Download](#)
[GenPept](#)
[Graphics](#)
[Distance tree of results](#)
[Multiple alignment](#)
⚙

| Description                                                                     | Max score | Total score | Query cover | E value | Ident | Accession                                   |
|---------------------------------------------------------------------------------|-----------|-------------|-------------|---------|-------|---------------------------------------------|
| <a href="#">PREDICTED: complement factor I-like [Gorilla gorilla gorilla]</a>   | 64.3      | 64.3        | 100%        | 2e-10   | 100%  | <a href="#">gil426345243 XP_004040330.1</a> |
| <a href="#">unnamed protein product [Homo sapiens]</a>                          | 64.3      | 64.3        | 100%        | 2e-10   | 100%  | <a href="#">gil1335055 CAA68417.1</a>       |
| <a href="#">CFI protein [Homo sapiens]</a>                                      | 64.3      | 64.3        | 100%        | 2e-10   | 100%  | <a href="#">gil18089117 AAH20718.1</a>      |
| <a href="#">complement factor I, isoform CRA_a [Homo sapiens]</a>               | 64.3      | 64.3        | 100%        | 2e-10   | 100%  | <a href="#">gil119626655 EAX06250.1</a>     |
| <a href="#">PREDICTED: complement factor I-like [Macaca mulatta]</a>            | 64.3      | 64.3        | 100%        | 2e-10   | 100%  | <a href="#">gil297293220 XP_001087512.2</a> |
| <a href="#">PREDICTED: complement factor I isoform X3 [Chlorocebus sabaeu]</a>  | 64.3      | 64.3        | 100%        | 2e-10   | 100%  | <a href="#">gil635044271 XP_007997720.1</a> |
| <a href="#">PREDICTED: complement factor I isoform X6 [Pan troglodytes]</a>     | 64.3      | 64.3        | 100%        | 2e-10   | 100%  | <a href="#">gil694908492 XP_009446407.1</a> |
| <a href="#">PREDICTED: complement factor I isoform X6 [Pan paniscus]</a>        | 64.3      | 64.3        | 100%        | 2e-10   | 100%  | <a href="#">gil675793799 XP_008953634.1</a> |
| <a href="#">uncharacterized protein LOC101866929 precursor [Macaca fascicu]</a> | 64.3      | 64.3        | 100%        | 2e-10   | 100%  | <a href="#">gil548961885 NP_001271714.1</a> |
| <a href="#">PREDICTED: complement factor I isoform X5 [Pan troglodytes]</a>     | 64.3      | 64.3        | 100%        | 2e-10   | 100%  | <a href="#">gil694908490 XP_009446406.1</a> |
| <a href="#">PREDICTED: complement factor I isoform X5 [Pan paniscus]</a>        | 64.3      | 64.3        | 100%        | 2e-10   | 100%  | <a href="#">gil675793797 XP_008953633.1</a> |
| <a href="#">PREDICTED: complement factor I isoform X4 [Homo sapiens]</a>        | 64.3      | 64.3        | 100%        | 2e-10   | 100%  | <a href="#">gil578809103 XP_006714273.1</a> |
| <a href="#">Chain A, Human Complement Factor I [Homo sapiens]</a>               | 64.3      | 64.3        | 100%        | 2e-10   | 100%  | <a href="#">gil339961198 2XRC_A</a>         |
| <a href="#">PREDICTED: complement factor I isoform X4 [Pan troglodytes]</a>     | 64.3      | 64.3        | 100%        | 2e-10   | 100%  | <a href="#">gil694908488 XP_009446405.1</a> |
| <a href="#">PREDICTED: complement factor I isoform X4 [Pan paniscus]</a>        | 64.3      | 64.3        | 100%        | 2e-10   | 100%  | <a href="#">gil675793795 XP_008953632.1</a> |
| <a href="#">PREDICTED: complement factor I isoform X2 [Chlorocebus sabaeu]</a>  | 64.3      | 64.3        | 100%        | 2e-10   | 100%  | <a href="#">gil635044269 XP_007997719.1</a> |
| <a href="#">PREDICTED: complement factor I isoform X2 [Homo sapiens]</a>        | 64.3      | 64.3        | 100%        | 2e-10   | 100%  | <a href="#">gil530377647 XP_005263033.1</a> |
| <a href="#">PREDICTED: complement factor I [Nomascus leucogenys]</a>            | 64.3      | 64.3        | 100%        | 2e-10   | 100%  | <a href="#">gil332240463 XP_003269405.1</a> |
| <a href="#">PREDICTED: complement factor I isoform X1 [Chlorocebus sabaeu]</a>  | 64.3      | 64.3        | 100%        | 2e-10   | 100%  | <a href="#">gil635044267 XP_007997718.1</a> |
| <a href="#">prepro-C3b/C4B inactivator [Homo sapiens]</a>                       | 64.3      | 64.3        | 100%        | 2e-10   | 100%  | <a href="#">gil182607 AAA52455.1</a>        |
| <a href="#">complement factor I preproprotein [Homo sapiens]</a>                | 64.3      | 64.3        | 100%        | 2e-10   | 100%  | <a href="#">gil119392081 NP_000195.2</a>    |
| <a href="#">PREDICTED: complement factor I isoform X3 [Pan paniscus]</a>        | 64.3      | 64.3        | 100%        | 2e-10   | 100%  | <a href="#">gil397519838 XP_003830060.1</a> |
| <a href="#">RecName: Full=Complement factor I; AltName: Full=C3B/C4B inact</a>  | 64.3      | 64.3        | 100%        | 2e-10   | 100%  | <a href="#">gil317373341 P05156.2</a>       |
| <a href="#">unnamed protein product [Homo sapiens]</a>                          | 64.3      | 64.3        | 100%        | 2e-10   | 100%  | <a href="#">gil158254682 BAF83314.1</a>     |
| <a href="#">PREDICTED: complement factor I isoform X3 [Pan troglodytes]</a>     | 64.3      | 64.3        | 100%        | 2e-10   | 100%  | <a href="#">gil114595644 XP_526653.2</a>    |
| <a href="#">PREDICTED: complement factor I isoform X2 [Pan troglodytes]</a>     | 64.3      | 64.3        | 100%        | 2e-10   | 100%  | <a href="#">gil694908485 XP_009446404.1</a> |
| <a href="#">PREDICTED: complement factor I isoform X2 [Pan paniscus]</a>        | 64.3      | 64.3        | 100%        | 2e-10   | 100%  | <a href="#">gil675793792 XP_008953631.1</a> |
| <a href="#">PREDICTED: complement factor I isoform X3 [Homo sapiens]</a>        | 64.3      | 64.3        | 100%        | 2e-10   | 100%  | <a href="#">gil578809101 XP_006714272.1</a> |

|                                                                                    |      |      |      |       |      |                                             |
|------------------------------------------------------------------------------------|------|------|------|-------|------|---------------------------------------------|
| unnamed protein product [Homo sapiens]                                             | 64.3 | 64.3 | 100% | 2e-10 | 100% | <a href="#">gij194387702 BAG61264.1</a>     |
| <a href="#">PREDICTED: complement factor I isoform X1 [Homo sapiens]</a>           | 64.3 | 64.3 | 100% | 2e-10 | 100% | <a href="#">gij530377645 XP_005263032.1</a> |
| <a href="#">PREDICTED: complement factor I isoform X1 [Pan paniscus]</a>           | 64.3 | 64.3 | 100% | 2e-10 | 100% | <a href="#">gij397519840 XP_003830061.1</a> |
| <a href="#">hypothetical protein EGK_16010 [Macaca mulatta]</a>                    | 64.3 | 64.3 | 100% | 2e-10 | 100% | <a href="#">gij355687535 EHH26119.1</a>     |
| <a href="#">PREDICTED: complement factor I isoform X1 [Pan troglodytes]</a>        | 64.3 | 64.3 | 100% | 2e-10 | 100% | <a href="#">gij332820084 XP_003310493.1</a> |
| <a href="#">PREDICTED: complement factor I isoform X1 [Pongo abelii]</a>           | 61.7 | 61.7 | 100% | 2e-09 | 95%  | <a href="#">gij686716760 XP_009238531.1</a> |
| <a href="#">complement factor I [Pongo abelii]</a>                                 | 61.7 | 61.7 | 100% | 2e-09 | 95%  | <a href="#">gij207080120 NP_001128776.1</a> |
| <a href="#">complement factor I precursor [Pongo abelii]</a>                       | 61.7 | 61.7 | 100% | 2e-09 | 95%  | <a href="#">gij197098986 NP_001127624.1</a> |
| <a href="#">PREDICTED: complement factor I [Rhinopithecus roxellana]</a>           | 57.9 | 57.9 | 94%  | 3e-08 | 94%  | <a href="#">gij724946291 XP_010387365.1</a> |
| <a href="#">PREDICTED: complement factor I [Papio anubis]</a>                      | 55.4 | 55.4 | 100% | 2e-07 | 89%  | <a href="#">gij685542561 XP_009205631.1</a> |
| <a href="#">PREDICTED: complement factor I isoform X2 [Saimiri boliviensis br]</a> | 53.2 | 53.2 | 89%  | 1e-06 | 88%  | <a href="#">gij725571753 XP_010338379.1</a> |
| <a href="#">PREDICTED: complement factor I [Callithrix jacchus]</a>                | 53.2 | 53.2 | 89%  | 1e-06 | 88%  | <a href="#">gij675648222 XP_002745538.3</a> |
| <a href="#">PREDICTED: complement factor I [Callithrix jacchus]</a>                | 53.2 | 53.2 | 89%  | 1e-06 | 88%  | <a href="#">gij675752511 XP_008984405.1</a> |
| <a href="#">PREDICTED: complement factor I isoform X1 [Saimiri boliviensis br]</a> | 53.2 | 53.2 | 89%  | 1e-06 | 88%  | <a href="#">gij725571751 XP_010338378.1</a> |
| <a href="#">PREDICTED: LOW QUALITY PROTEIN: complement factor I [Felis]</a>        | 50.7 | 50.7 | 84%  | 9e-06 | 94%  | <a href="#">gij586984171 XP_006930977.1</a> |
| <a href="#">PREDICTED: LOW QUALITY PROTEIN: complement factor I [Lipo]</a>         | 50.7 | 50.7 | 84%  | 9e-06 | 94%  | <a href="#">gij602703733 XP_007463290.1</a> |
| <a href="#">PREDICTED: LOW QUALITY PROTEIN: complement factor I [Vicun]</a>        | 48.6 | 48.6 | 84%  | 4e-05 | 88%  | <a href="#">gij560979761 XP_006212132.1</a> |
| <a href="#">PREDICTED: complement factor I isoform X6 [Panthera tigris altaic]</a> | 48.1 | 48.1 | 84%  | 6e-05 | 88%  | <a href="#">gij591346160 XP_007098330.1</a> |
| <a href="#">PREDICTED: complement factor I isoform X5 [Panthera tigris altaic]</a> | 48.1 | 48.1 | 84%  | 6e-05 | 88%  | <a href="#">gij591346158 XP_007098329.1</a> |
| <a href="#">PREDICTED: complement factor I isoform X4 [Panthera tigris altaic]</a> | 48.1 | 48.1 | 84%  | 6e-05 | 88%  | <a href="#">gij591346156 XP_007098328.1</a> |
| <a href="#">PREDICTED: complement factor I isoform X2 [Panthera tigris altaic]</a> | 48.1 | 48.1 | 84%  | 6e-05 | 88%  | <a href="#">gij591346152 XP_007098326.1</a> |
| <a href="#">PREDICTED: complement factor I isoform X1 [Panthera tigris altaic]</a> | 48.1 | 48.1 | 84%  | 6e-05 | 88%  | <a href="#">gij591346150 XP_007098325.1</a> |
| <a href="#">complement factor I precursor [Camelus ferus]</a>                      | 47.7 | 47.7 | 84%  | 8e-05 | 88%  | <a href="#">gij528758403 EPY78062.1</a>     |
| <a href="#">PREDICTED: LOW QUALITY PROTEIN: complement factor I [Cam]</a>          | 47.7 | 47.7 | 84%  | 8e-05 | 88%  | <a href="#">gij560925633 XP_006188998.1</a> |
| <a href="#">PREDICTED: complement factor I [Mesocricetus auratus]</a>              | 47.3 | 47.3 | 84%  | 1e-04 | 88%  | <a href="#">gij524965961 XP_005082885.1</a> |
| <a href="#">PREDICTED: complement factor I [Tursiops truncatus]</a>                | 46.9 | 46.9 | 68%  | 2e-04 | 100% | <a href="#">gij470636247 XP_004323514.1</a> |
| <a href="#">PREDICTED: LOW QUALITY PROTEIN: complement factor I [Orca]</a>         | 46.9 | 46.9 | 68%  | 2e-04 | 100% | <a href="#">gij466008566 XP_004269732.1</a> |
| <a href="#">PREDICTED: complement factor I [Physeter catodon]</a>                  | 46.9 | 46.9 | 68%  | 2e-04 | 100% | <a href="#">gij593719134 XP_007105924.1</a> |
| <a href="#">PREDICTED: complement factor I [Loxodonta africana]</a>                | 46.4 | 46.4 | 78%  | 2e-04 | 87%  | <a href="#">gij731479219 XP_010588889.1</a> |
| <a href="#">hypothetical protein PANDA_019552 [Ailuropoda melanoleuca]</a>         | 46.0 | 46.0 | 84%  | 3e-04 | 81%  | <a href="#">gij281338891 EFB14475.1</a>     |
| <a href="#">PREDICTED: complement factor I-like [Ailuropoda melanoleuca]</a>       | 46.0 | 46.0 | 84%  | 3e-04 | 81%  | <a href="#">gij301787939 XP_002929384.1</a> |
| <a href="#">PREDICTED: complement factor I [Ursus maritimus]</a>                   | 46.0 | 46.0 | 84%  | 3e-04 | 81%  | <a href="#">gij670993394 XP_008687645.1</a> |
| <a href="#">complement factor I-like protein [Cricetulus griseus]</a>              | 45.2 | 45.2 | 84%  | 6e-04 | 88%  | <a href="#">gij537261801 ERE90152.1</a>     |
| <a href="#">PREDICTED: complement factor I [Cricetulus griseus]</a>                | 45.2 | 45.2 | 84%  | 6e-04 | 88%  | <a href="#">gij625241505 XP_007611983.1</a> |
| <a href="#">PREDICTED: complement factor I [Cricetulus griseus]</a>                | 45.2 | 45.2 | 84%  | 6e-04 | 88%  | <a href="#">gij625222421 XP_007651009.1</a> |
| <a href="#">PREDICTED: LOW QUALITY PROTEIN: complement factor I [Chin]</a>         | 44.8 | 44.8 | 84%  | 8e-04 | 81%  | <a href="#">gij533186455 XP_005406244.1</a> |
| <a href="#">PREDICTED: LOW QUALITY PROTEIN: complement factor I [Lept]</a>         | 44.3 | 44.3 | 84%  | 0.001 | 81%  | <a href="#">gij585149528 XP_006727262.1</a> |
| <a href="#">Complement factor I [Tupaia chinensis]</a>                             | 44.3 | 44.3 | 78%  | 0.001 | 87%  | <a href="#">gij444524072 ELV13709.1</a>     |
| <a href="#">PREDICTED: complement factor I [Tupaia chinensis]</a>                  | 44.3 | 44.3 | 78%  | 0.001 | 87%  | <a href="#">gij562868474 XP_006162305.1</a> |
| <a href="#">complement factor I [Mus musculus]</a>                                 | 43.9 | 43.9 | 84%  | 0.001 | 81%  | <a href="#">gij4926957 AAD32965.1</a>       |
| <a href="#">complement component factor i [Mus musculus]</a>                       | 43.9 | 43.9 | 84%  | 0.002 | 81%  | <a href="#">gij148680281 EDL12228.1</a>     |
| <a href="#">PREDICTED: complement factor I [Ochotona princeps]</a>                 | 43.9 | 43.9 | 84%  | 0.002 | 81%  | <a href="#">gij504169976 XP_004594584.1</a> |
| <a href="#">PREDICTED: complement factor I isoform X4 [Mus musculus]</a>           | 43.9 | 43.9 | 84%  | 0.002 | 81%  | <a href="#">gij568921717 XP_006501026.1</a> |
| <a href="#">PREDICTED: complement factor I isoform X3 [Mus musculus]</a>           | 43.9 | 43.9 | 84%  | 0.002 | 81%  | <a href="#">gij568921715 XP_006501025.1</a> |
| <a href="#">PREDICTED: complement factor I isoform X2 [Mus musculus]</a>           | 43.9 | 43.9 | 84%  | 0.002 | 81%  | <a href="#">gij568921713 XP_006501024.1</a> |

|                                                                                   |      |      |     |       |      |                                             |
|-----------------------------------------------------------------------------------|------|------|-----|-------|------|---------------------------------------------|
| <a href="#">complement factor I [Mus musculus]</a>                                | 43.9 | 43.9 | 84% | 0.002 | 81%  | <a href="#">gil1322034 AAB00438.1</a>       |
| <a href="#">complement factor I precursor [Mus musculus]</a>                      | 43.9 | 43.9 | 84% | 0.002 | 81%  | <a href="#">gil110347406 NP_031712.2</a>    |
| <a href="#">PREDICTED: complement factor I isoform X2 [Ictidomys tridecemlir]</a> | 43.5 | 43.5 | 84% | 0.002 | 81%  | <a href="#">gil532088899 XP_005330149.1</a> |
| <a href="#">PREDICTED: complement factor I isoform X1 [Ictidomys tridecemlir]</a> | 43.5 | 43.5 | 84% | 0.002 | 81%  | <a href="#">gil532088897 XP_005330148.1</a> |
| <a href="#">PREDICTED: complement factor I [Balaenoptera acutorostrata scar]</a>  | 43.5 | 43.5 | 63% | 0.002 | 100% | <a href="#">gil594687284 XP_007191087.1</a> |
| <a href="#">PREDICTED: complement factor I [Trichechus manatus latirostris]</a>   | 43.1 | 43.1 | 78% | 0.003 | 87%  | <a href="#">gil471391575 XP_004380312.1</a> |
| <a href="#">PREDICTED: complement factor I [Otolemur garnettii]</a>               | 42.6 | 42.6 | 68% | 0.004 | 92%  | <a href="#">gil395851346 XP_003798222.1</a> |
| <a href="#">PREDICTED: complement factor I [Sus scrofa]</a>                       | 42.2 | 42.2 | 68% | 0.005 | 92%  | <a href="#">gil545846437 XP_005656603.1</a> |
| <a href="#">PREDICTED: complement factor I [Orycteropus afer afer]</a>            | 41.8 | 41.8 | 68% | 0.007 | 85%  | <a href="#">gil634848033 XP_007938975.1</a> |
| <a href="#">PREDICTED: complement factor I [Peromyscus maniculatus bairdii]</a>   | 39.7 | 39.7 | 84% | 0.036 | 75%  | <a href="#">gil589914217 XP_006970447.1</a> |
| <a href="#">PREDICTED: complement factor I [Mustela putorius furo]</a>            | 39.2 | 39.2 | 73% | 0.048 | 79%  | <a href="#">gil511847748 XP_004748251.1</a> |
| <a href="#">PREDICTED: complement factor I [Mustela putorius furo]</a>            | 39.2 | 39.2 | 73% | 0.049 | 79%  | <a href="#">gil511991360 XP_004813365.1</a> |
| <a href="#">Complement factor I [Fukomys damarensis]</a>                          | 38.8 | 38.8 | 84% | 0.066 | 75%  | <a href="#">gil676270629 KFO25832.1</a>     |
| <a href="#">Complement factor I [Heterocephalus glaber]</a>                       | 38.8 | 38.8 | 84% | 0.067 | 75%  | <a href="#">gil351696416 EHA99334.1</a>     |
| <a href="#">PREDICTED: complement factor I [Tarsius syrichta]</a>                 | 38.8 | 38.8 | 63% | 0.067 | 92%  | <a href="#">gil640813983 XP_008063707.1</a> |
| <a href="#">PREDICTED: complement factor I isoform X2 [Fukomys damarensis]</a>    | 38.8 | 38.8 | 84% | 0.067 | 75%  | <a href="#">gil731254237 XP_010639824.1</a> |
| <a href="#">PREDICTED: complement factor I isoform X2 [Heterocephalus glab]</a>   | 38.8 | 38.8 | 84% | 0.067 | 75%  | <a href="#">gil512818622 XP_004878889.1</a> |
| <a href="#">PREDICTED: complement factor I isoform X1 [Fukomys damarensis]</a>    | 38.8 | 38.8 | 84% | 0.067 | 75%  | <a href="#">gil731254235 XP_010639823.1</a> |
| <a href="#">PREDICTED: complement factor I isoform X1 [Heterocephalus glab]</a>   | 38.8 | 38.8 | 84% | 0.067 | 75%  | <a href="#">gil512818618 XP_004878888.1</a> |
| <a href="#">PREDICTED: complement factor I [Echinops telfairi]</a>                | 38.4 | 38.4 | 68% | 0.091 | 77%  | <a href="#">gil507649004 XP_004703515.1</a> |
| <a href="#">complement factor I precursor [Rattus norvegicus]</a>                 | 38.0 | 38.0 | 68% | 0.12  | 85%  | <a href="#">gil13162353 NP_077071.1</a>     |
| <a href="#">PREDICTED: complement factor I isoform X1 [Rattus norvegicus]</a>     | 38.0 | 38.0 | 68% | 0.13  | 85%  | <a href="#">gil672044321 XP_008759748.1</a> |
| <a href="#">PREDICTED: complement factor I [Dasypus novemcinctus]</a>             | 37.5 | 37.5 | 84% | 0.17  | 69%  | <a href="#">gil488581726 XP_004476284.1</a> |
| <a href="#">PREDICTED: complement factor I [Chrysochloris asiatica]</a>           | 37.5 | 37.5 | 68% | 0.17  | 77%  | <a href="#">gil586477731 XP_006869402.1</a> |
| <a href="#">PREDICTED: complement factor I [Bubalus bubalis]</a>                  | 37.1 | 37.1 | 84% | 0.23  | 75%  | <a href="#">gil594056114 XP_006052270.1</a> |
| <a href="#">PREDICTED: complement factor I [Pantholops hodgsonii]</a>             | 37.1 | 37.1 | 84% | 0.23  | 75%  | <a href="#">gil556750321 XP_005970578.1</a> |
| <a href="#">PREDICTED: complement factor I isoform X2 [Capra hircus]</a>          | 37.1 | 37.1 | 84% | 0.23  | 75%  | <a href="#">gil548469406 XP_005681373.1</a> |

## Alignments

Download [GenPept](#) [Graphics](#)

Next Previous Descriptions

PREDICTED: complement factor I-like, partial [Gorilla gorilla gorilla]

Sequence ID: [gil426345243|ref|XP\\_004040330.1](#) Length: 309 Number of Matches: 1

Range 1: 170 to 188 [GenPept](#) [Graphics](#)

Next Match Previous Match

| Score          | Expect | Identities  | Positives   | Gaps     |
|----------------|--------|-------------|-------------|----------|
| 64.3 bits(144) | 2e-10  | 19/19(100%) | 19/19(100%) | 0/19(0%) |

Query 1 KLSDLSINSTECLHVHCRG 19  
 Sbjct 170 KLSDLSINSTECLHVHCRG 188

### Related Information

[Gene](#) - associated gene details  
[Map Viewer](#) - aligned genomic context

Download [GenPept](#) [Graphics](#)

Next Previous Descriptions

unnamed protein product [Homo sapiens]

Sequence ID: [gil1335055|emb|CAA68417.1](#) Length: 321 Number of Matches: 1

Range 1: 152 to 170 [GenPept](#) [Graphics](#)

Next Match Previous Match

| Score          | Expect | Identities  | Positives   | Gaps     |
|----------------|--------|-------------|-------------|----------|
| 64.3 bits(144) | 2e-10  | 19/19(100%) | 19/19(100%) | 0/19(0%) |

Query 1 KLSDLSINSTECLHVHCRG 19

### Related Information

[Gene](#) - associated gene details

Sbjct 152 KLSDLSINSTECLHVHCRG 170

[Download](#) [GenPept](#) [Graphics](#) [Next](#) [Previous](#) [Descriptions](#)

CFI protein [Homo sapiens]

Sequence ID: [gi|18089117|gb|AAH20718.1](#) Length: 377 Number of Matches: 1

[See 1 more title\(s\)](#)

Range 1: 170 to 188 [GenPept](#) [Graphics](#) [Next Match](#) [Previous Match](#)

| Score          | Expect | Identities  | Positives   | Gaps     |
|----------------|--------|-------------|-------------|----------|
| 64.3 bits(144) | 2e-10  | 19/19(100%) | 19/19(100%) | 0/19(0%) |

Query 1 KLSDLSINSTECLHVHCRG 19  
 KLSDLSINSTECLHVHCRG  
 Sbjct 170 KLSDLSINSTECLHVHCRG 188

**Related Information**

[Gene](#) - associated gene details  
[Identical Proteins](#) - Proteins identical to the subject

[Download](#) [GenPept](#) [Graphics](#) [Next](#) [Previous](#) [Descriptions](#)

complement factor I, isoform CRA\_a, partial [Homo sapiens]

Sequence ID: [gi|119626655|gb|EAX06250.1](#) Length: 378 Number of Matches: 1

Range 1: 170 to 188 [GenPept](#) [Graphics](#) [Next Match](#) [Previous Match](#)

| Score          | Expect | Identities  | Positives   | Gaps     |
|----------------|--------|-------------|-------------|----------|
| 64.3 bits(144) | 2e-10  | 19/19(100%) | 19/19(100%) | 0/19(0%) |

Query 1 KLSDLSINSTECLHVHCRG 19  
 KLSDLSINSTECLHVHCRG  
 Sbjct 170 KLSDLSINSTECLHVHCRG 188

**Related Information**

[Gene](#) - associated gene details

[Download](#) [GenPept](#) [Graphics](#) [Next](#) [Previous](#) [Descriptions](#)

PREDICTED: complement factor I-like [Macaca mulatta]

Sequence ID: [gi|297293220|ref|XP\\_001087512.2](#) Length: 428 Number of Matches: 1

Range 1: 169 to 187 [GenPept](#) [Graphics](#) [Next Match](#) [Previous Match](#)

| Score          | Expect | Identities  | Positives   | Gaps     |
|----------------|--------|-------------|-------------|----------|
| 64.3 bits(144) | 2e-10  | 19/19(100%) | 19/19(100%) | 0/19(0%) |

Query 1 KLSDLSINSTECLHVHCRG 19  
 KLSDLSINSTECLHVHCRG  
 Sbjct 169 KLSDLSINSTECLHVHCRG 187

**Related Information**

[Gene](#) - associated gene details  
[UniGene](#) - clustered expressed sequence tags  
[Map Viewer](#) - aligned genomic context

BLAST is a registered trademark of the National Library of Medicine.

NCBI/ BLAST/ blastp suite/ Formatting Results - BTG9AZV9013

Your search parameters were adjusted to search for a short input sequence.

Edit and Resubmit Save Search Strategies Formatting options Download

YouTube How to read this page Blast report description

CFI\_RSIPACVPWSPYLFQPDDTCIVSGWGRE\_Mod

RID BTG9AZV9013 (Expires on 01-20 15:32 pm)

Query ID Icl|73802
Description None
Molecule type amino acid
Query Length 28

Database Name nr
Description All non-redundant GenBank CDS translations+PDB+SwissProt+PIR+PRF excluding environmental samples from WGS projects
Program BLASTP 2.2.30+ Citation

Other reports: Search Summary [Taxonomy reports] [Distance tree of results] [Multiple alignment]

New DELTA-BLAST a more sensitive protein protein search

Graphic Summary

Show Conserved Domains

Putative conserved domains have been detected, click on the image below for detailed results.

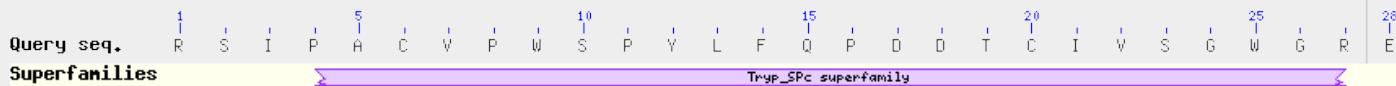

Distribution of 100 Blast Hits on the Query Sequence

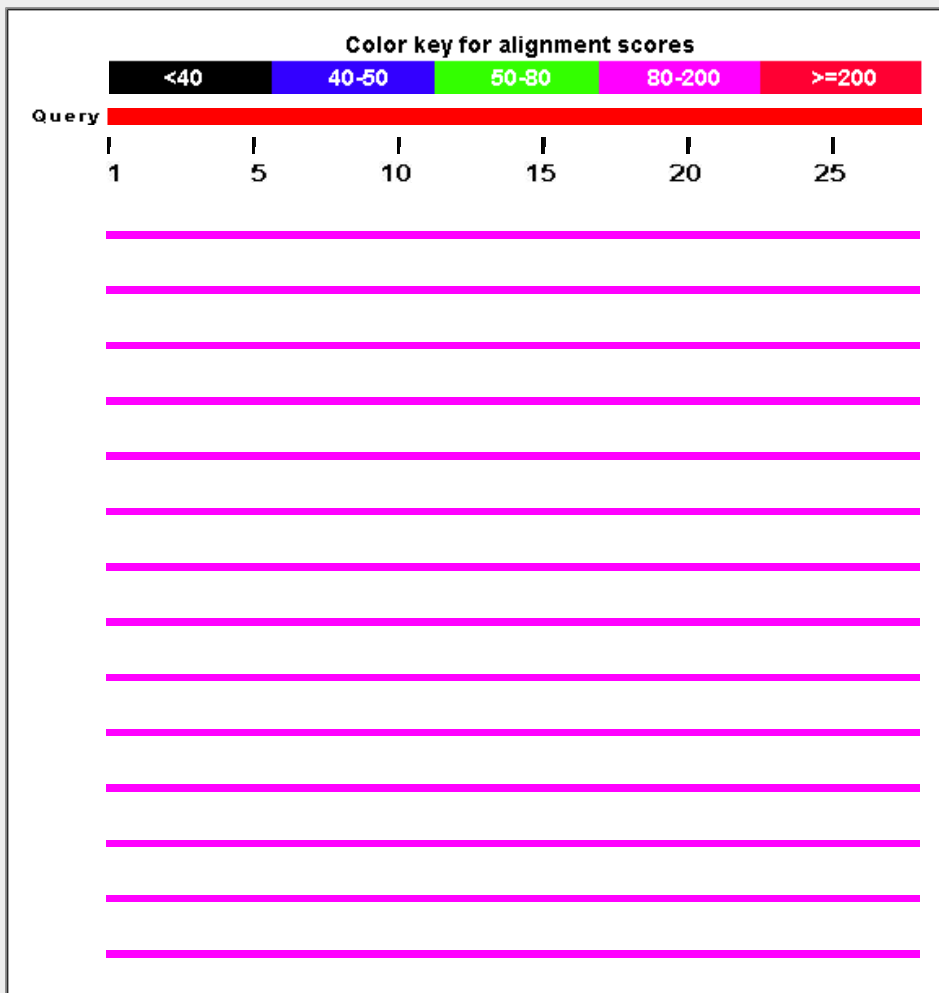

Horizontal lines representing a list or table.

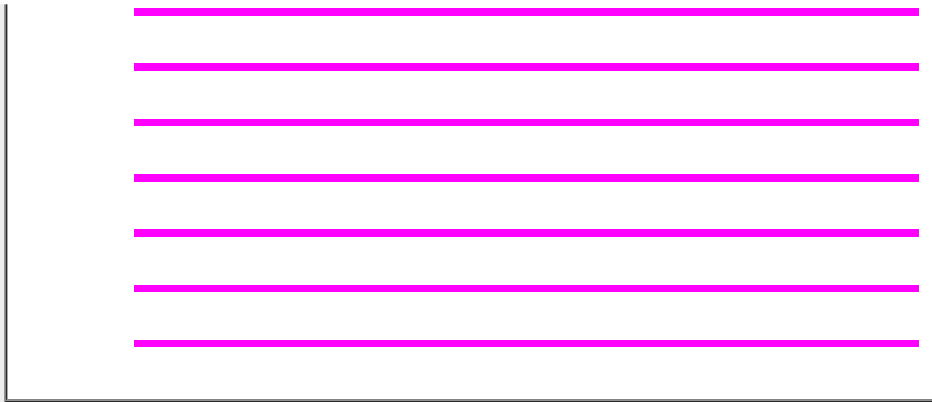

**Descriptions**

**Sequences producing significant alignments:**

Select: [All](#) [None](#) Selected:0

Alignments Download GenPept Graphics Distance tree of results Multiple alignment

| Description                                                                   | Max score | Total score | Query cover | E value | Ident | Accession                                   |
|-------------------------------------------------------------------------------|-----------|-------------|-------------|---------|-------|---------------------------------------------|
| <a href="#">PREDICTED: complement factor I-like [Macaca fascicularis]</a>     | 96.5      | 96.5        | 100%        | 6e-21   | 96%   | <a href="#">gij544524397 XP_005595214.1</a> |
| <a href="#">complement factor I light chain [Homo sapiens]</a>                | 96.1      | 96.1        | 100%        | 6e-21   | 96%   | <a href="#">gij224798 1202205A</a>          |
| <a href="#">PREDICTED: complement factor I isoform X3 [Chlorocebus sat]</a>   | 96.5      | 96.5        | 100%        | 7e-21   | 96%   | <a href="#">gij635044271 XP_007997720.1</a> |
| <a href="#">uncharacterized protein LOC101866929 precursor [Macaca fas</a>    | 96.5      | 96.5        | 100%        | 7e-21   | 96%   | <a href="#">gij548961885 NP_001271714.1</a> |
| <a href="#">PREDICTED: complement factor I isoform X2 [Chlorocebus sat]</a>   | 96.5      | 96.5        | 100%        | 7e-21   | 96%   | <a href="#">gij635044269 XP_007997719.1</a> |
| <a href="#">unnamed protein product [Homo sapiens]</a>                        | 96.1      | 96.1        | 100%        | 7e-21   | 96%   | <a href="#">gij1335056 CAA68418.1</a>       |
| <a href="#">PREDICTED: complement factor I isoform X1 [Chlorocebus sat]</a>   | 96.5      | 96.5        | 100%        | 7e-21   | 96%   | <a href="#">gij635044267 XP_007997718.1</a> |
| <a href="#">hypothetical protein EGK_16010 [Macaca mulatta]</a>               | 96.5      | 96.5        | 100%        | 7e-21   | 96%   | <a href="#">gij355687535 EHH26119.1</a>     |
| <a href="#">PREDICTED: complement factor I [Papio anubis]</a>                 | 96.5      | 96.5        | 100%        | 7e-21   | 96%   | <a href="#">gij685542561 XP_009205631.1</a> |
| <a href="#">PREDICTED: complement factor I isoform X1 [Pongo abelii]</a>      | 96.1      | 96.1        | 100%        | 1e-20   | 96%   | <a href="#">gij686716760 XP_009238531.1</a> |
| <a href="#">complement factor I [Pongo abelii]</a>                            | 96.1      | 96.1        | 100%        | 1e-20   | 96%   | <a href="#">gij207080120 NP_001128776.1</a> |
| <a href="#">PREDICTED: complement factor I isoform X4 [Homo sapiens]</a>      | 96.1      | 96.1        | 100%        | 1e-20   | 96%   | <a href="#">gij578809103 XP_006714273.1</a> |
| <a href="#">Chain A, Human Complement Factor I [Homo sapiens]</a>             | 96.1      | 96.1        | 100%        | 1e-20   | 96%   | <a href="#">gij339961198 2XRC_A</a>         |
| <a href="#">PREDICTED: complement factor I isoform X2 [Homo sapiens]</a>      | 96.1      | 96.1        | 100%        | 1e-20   | 96%   | <a href="#">gij530377647 XP_005263033.1</a> |
| <a href="#">PREDICTED: complement factor I [Nomascus leucogenys]</a>          | 96.1      | 96.1        | 100%        | 1e-20   | 96%   | <a href="#">gij332240463 XP_003269405.1</a> |
| <a href="#">prepro-C3b/C4B inactivator [Homo sapiens]</a>                     | 96.1      | 96.1        | 100%        | 1e-20   | 96%   | <a href="#">gij182607 AAA52455.1</a>        |
| <a href="#">complement factor I preproprotein [Homo sapiens]</a>              | 96.1      | 96.1        | 100%        | 1e-20   | 96%   | <a href="#">gij119392081 NP_000195.2</a>    |
| <a href="#">complement factor I precursor [Pongo abelii]</a>                  | 96.1      | 96.1        | 100%        | 1e-20   | 96%   | <a href="#">gij197098986 NP_001127624.1</a> |
| <a href="#">RecName: Full=Complement factor I; AltName: Full=C3B/C4B i</a>    | 96.1      | 96.1        | 100%        | 1e-20   | 96%   | <a href="#">gij317373341 P05156.2</a>       |
| <a href="#">unnamed protein product [Homo sapiens]</a>                        | 96.1      | 96.1        | 100%        | 1e-20   | 96%   | <a href="#">gij158254682 BAF83314.1</a>     |
| <a href="#">PREDICTED: complement factor I isoform X3 [Homo sapiens]</a>      | 96.1      | 96.1        | 100%        | 1e-20   | 96%   | <a href="#">gij578809101 XP_006714272.1</a> |
| <a href="#">unnamed protein product [Homo sapiens]</a>                        | 96.1      | 96.1        | 100%        | 1e-20   | 96%   | <a href="#">gij194387702 BAG61264.1</a>     |
| <a href="#">PREDICTED: complement factor I isoform X1 [Homo sapiens]</a>      | 96.1      | 96.1        | 100%        | 1e-20   | 96%   | <a href="#">gij530377645 XP_005263032.1</a> |
| <a href="#">PREDICTED: complement factor I-like [Gorilla gorilla gorilla]</a> | 94.0      | 94.0        | 100%        | 4e-20   | 93%   | <a href="#">gij426345227 XP_004040322.1</a> |
| <a href="#">PREDICTED: complement factor I isoform X6 [Pan troglodytes]</a>   | 94.0      | 94.0        | 100%        | 5e-20   | 93%   | <a href="#">gij694908492 XP_009446407.1</a> |
| <a href="#">PREDICTED: complement factor I isoform X6 [Pan paniscus]</a>      | 94.0      | 94.0        | 100%        | 5e-20   | 93%   | <a href="#">gij675793799 XP_008953634.1</a> |
| <a href="#">PREDICTED: complement factor I isoform X5 [Pan troglodytes]</a>   | 94.0      | 94.0        | 100%        | 5e-20   | 93%   | <a href="#">gij694908490 XP_009446406.1</a> |
| <a href="#">PREDICTED: complement factor I isoform X5 [Pan paniscus]</a>      | 94.0      | 94.0        | 100%        | 5e-20   | 93%   | <a href="#">gij675793797 XP_008953633.1</a> |



|                                                                                        |      |      |      |       |     |                                             |
|----------------------------------------------------------------------------------------|------|------|------|-------|-----|---------------------------------------------|
| <a href="#">PREDICTED: complement factor I isoform X4 [Pan troglodytes]</a>            | 94.0 | 94.0 | 100% | 6e-20 | 93% | <a href="#">gij694908488 XP_009446405.1</a> |
| <a href="#">PREDICTED: complement factor I isoform X4 [Pan paniscus]</a>               | 94.0 | 94.0 | 100% | 6e-20 | 93% | <a href="#">gij675793795 XP_008953632.1</a> |
| <a href="#">PREDICTED: complement factor I isoform X3 [Pan paniscus]</a>               | 94.0 | 94.0 | 100% | 6e-20 | 93% | <a href="#">gij397519838 XP_003830060.1</a> |
| <a href="#">PREDICTED: complement factor I isoform X3 [Pan troglodytes]</a>            | 94.0 | 94.0 | 100% | 6e-20 | 93% | <a href="#">gij114595644 XP_526653.2</a>    |
| <a href="#">PREDICTED: complement factor I isoform X2 [Pan troglodytes]</a>            | 94.0 | 94.0 | 100% | 6e-20 | 93% | <a href="#">gij694908485 XP_009446404.1</a> |
| <a href="#">PREDICTED: complement factor I isoform X2 [Pan paniscus]</a>               | 94.0 | 94.0 | 100% | 6e-20 | 93% | <a href="#">gij675793792 XP_008953631.1</a> |
| <a href="#">PREDICTED: complement factor I isoform X1 [Pan paniscus]</a>               | 94.0 | 94.0 | 100% | 6e-20 | 93% | <a href="#">gij397519840 XP_003830061.1</a> |
| <a href="#">PREDICTED: complement factor I isoform X1 [Pan troglodytes]</a>            | 94.0 | 94.0 | 100% | 6e-20 | 93% | <a href="#">gij332820084 XP_003310493.1</a> |
| <a href="#">PREDICTED: complement factor I [Dasypus novemcinctus]</a>                  | 90.6 | 90.6 | 96%  | 8e-19 | 96% | <a href="#">gij488581726 XP_004476284.1</a> |
| <a href="#">PREDICTED: complement factor I isoform X2 [Saimiri boliviens]</a>          | 90.1 | 90.1 | 96%  | 1e-18 | 93% | <a href="#">gij725571753 XP_010338379.1</a> |
| <a href="#">PREDICTED: complement factor I [Callithrix jacchus]</a>                    | 90.1 | 90.1 | 96%  | 1e-18 | 93% | <a href="#">gij675648222 XP_002745538.3</a> |
| <a href="#">PREDICTED: complement factor I [Callithrix jacchus]</a>                    | 90.1 | 90.1 | 96%  | 1e-18 | 93% | <a href="#">gij675752511 XP_008984405.1</a> |
| <a href="#">PREDICTED: complement factor I isoform X1 [Saimiri boliviens]</a>          | 90.1 | 90.1 | 96%  | 1e-18 | 93% | <a href="#">gij725571751 XP_010338378.1</a> |
| <a href="#">PREDICTED: complement factor I [Chrysochloris asiatica]</a>                | 90.1 | 90.1 | 96%  | 1e-18 | 93% | <a href="#">gij586477731 XP_006869402.1</a> |
| <a href="#">PREDICTED: complement factor I-like [Galeopterus variegatus]</a>           | 88.4 | 88.4 | 96%  | 4e-18 | 93% | <a href="#">gij667268997 XP_008570201.1</a> |
| <a href="#">PREDICTED: complement factor I [Loxodonta africana]</a>                    | 88.4 | 88.4 | 96%  | 4e-18 | 93% | <a href="#">gij731479219 XP_010588889.1</a> |
| <a href="#">complement factor I precursor [Bos taurus]</a>                             | 88.4 | 88.4 | 96%  | 4e-18 | 93% | <a href="#">gij84000165 NP_001033185.1</a>  |
| <a href="#">PREDICTED: complement factor I [Bos mutus]</a>                             | 88.4 | 88.4 | 96%  | 4e-18 | 93% | <a href="#">gij555968512 XP_005896291.1</a> |
| <a href="#">TPA: complement factor I [Bos taurus]</a>                                  | 88.4 | 88.4 | 96%  | 4e-18 | 93% | <a href="#">gij296486756 DAA28869.1</a>     |
| <a href="#">PREDICTED: complement factor I [Physeter catodon]</a>                      | 88.4 | 88.4 | 96%  | 4e-18 | 93% | <a href="#">gij593719134 XP_007105924.1</a> |
| <a href="#">PREDICTED: complement factor I [Rhinopithecus roxellana]</a>               | 87.6 | 87.6 | 96%  | 8e-18 | 93% | <a href="#">gij724946291 XP_010387365.1</a> |
| <a href="#">PREDICTED: complement factor I [Pteropus alecto]</a>                       | 87.2 | 87.2 | 96%  | 1e-17 | 89% | <a href="#">gij586528110 XP_006918978.1</a> |
| <a href="#">Complement factor I [Pteropus alecto]</a>                                  | 87.2 | 87.2 | 96%  | 1e-17 | 89% | <a href="#">gij431897147 ELK06409.1</a>     |
| <a href="#">PREDICTED: complement factor I [Elephantulus edwardii]</a>                 | 85.9 | 85.9 | 96%  | 3e-17 | 89% | <a href="#">gij585642072 XP_006881212.1</a> |
| <a href="#">PREDICTED: complement factor I [Tursiops truncatus]</a>                    | 85.9 | 85.9 | 96%  | 3e-17 | 89% | <a href="#">gij470636247 XP_004323514.1</a> |
| <a href="#">PREDICTED: LOW QUALITY PROTEIN: complement factor I [I]</a>                | 85.9 | 85.9 | 96%  | 3e-17 | 89% | <a href="#">gij602703733 XP_007463290.1</a> |
| <a href="#">PREDICTED: complement factor I [Balaenoptera acutorostrata]</a>            | 85.9 | 85.9 | 96%  | 3e-17 | 89% | <a href="#">gij594687284 XP_007191087.1</a> |
| <a href="#">PREDICTED: LOW QUALITY PROTEIN: complement factor I [I]</a>                | 85.9 | 85.9 | 96%  | 3e-17 | 89% | <a href="#">gij466008566 XP_004269732.1</a> |
| <a href="#">PREDICTED: complement factor I [Trichechus manatus latirost]</a>           | 85.9 | 85.9 | 96%  | 3e-17 | 89% | <a href="#">gij471391575 XP_004380312.1</a> |
| <a href="#">Complement factor I [Fukomys damarensis]</a>                               | 85.0 | 85.0 | 96%  | 6e-17 | 89% | <a href="#">gij676270629 KFO25832.1</a>     |
| <a href="#">Complement factor I [Heterocephalus glaber]</a>                            | 85.0 | 85.0 | 96%  | 6e-17 | 89% | <a href="#">gij351696416 EHA99334.1</a>     |
| <a href="#">PREDICTED: complement factor I [Octodon degus]</a>                         | 85.0 | 85.0 | 96%  | 6e-17 | 89% | <a href="#">gij507626946 XP_004626817.1</a> |
| <a href="#">PREDICTED: complement factor I isoform X2 [Fukomys damar]</a>              | 85.0 | 85.0 | 96%  | 6e-17 | 89% | <a href="#">gij731254237 XP_010639824.1</a> |
| <a href="#">PREDICTED: complement factor I isoform X2 [Heterocephalus]</a>             | 85.0 | 85.0 | 96%  | 6e-17 | 89% | <a href="#">gij512818622 XP_004878889.1</a> |
| <a href="#">PREDICTED: complement factor I isoform X1 [Fukomys damar]</a>              | 85.0 | 85.0 | 96%  | 6e-17 | 89% | <a href="#">gij731254235 XP_010639823.1</a> |
| <a href="#">PREDICTED: complement factor I isoform X1 [Heterocephalus]</a>             | 85.0 | 85.0 | 96%  | 6e-17 | 89% | <a href="#">gij512818618 XP_004878888.1</a> |
| <a href="#">PREDICTED: complement factor I isoform X2 [Ictidomys tridecemlineatus]</a> | 84.6 | 84.6 | 96%  | 9e-17 | 93% | <a href="#">gij532088899 XP_005330149.1</a> |
| <a href="#">PREDICTED: complement factor I isoform X1 [Ictidomys tridecemlineatus]</a> | 84.6 | 84.6 | 96%  | 9e-17 | 93% | <a href="#">gij532088897 XP_005330148.1</a> |
| <a href="#">PREDICTED: LOW QUALITY PROTEIN: complement factor I [I]</a>                | 84.6 | 84.6 | 96%  | 9e-17 | 89% | <a href="#">gij533186455 XP_005406244.1</a> |
| <a href="#">PREDICTED: complement factor I [Erinaceus europaeus]</a>                   | 84.6 | 84.6 | 96%  | 9e-17 | 89% | <a href="#">gij617652869 XP_007534556.1</a> |
| <a href="#">PREDICTED: LOW QUALITY PROTEIN: complement factor I [I]</a>                | 84.2 | 84.2 | 96%  | 1e-16 | 89% | <a href="#">gij585149528 XP_006727262.1</a> |
| <a href="#">PREDICTED: complement factor I [Orycteropus afer afer]</a>                 | 84.2 | 84.2 | 96%  | 1e-16 | 89% | <a href="#">gij634848033 XP_007938975.1</a> |
| <a href="#">PREDICTED: complement factor I isoform X2 [Camelus dromedarius]</a>        | 83.8 | 83.8 | 96%  | 2e-16 | 85% | <a href="#">gij744567503 XP_010979382.1</a> |
| <a href="#">PREDICTED: complement factor I isoform X2 [Camelus bactria]</a>            | 83.8 | 83.8 | 96%  | 2e-16 | 85% | <a href="#">gij743716645 XP_010951976.1</a> |
| <a href="#">PREDICTED: complement factor I isoform X1 [Camelus dromedarius]</a>        | 83.8 | 83.8 | 96%  | 2e-16 | 85% | <a href="#">gij744567500 XP_010979381.1</a> |
| <a href="#">PREDICTED: complement factor I isoform X1 [Camelus bactria]</a>            | 83.8 | 83.8 | 96%  | 2e-16 | 85% | <a href="#">gij743716643 XP_010951975.1</a> |

|                                                                                            |      |      |     |       |     |                                             |
|--------------------------------------------------------------------------------------------|------|------|-----|-------|-----|---------------------------------------------|
| <a href="#">complement factor I-like protein [Cricetulus griseus]</a>                      | 83.8 | 83.8 | 96% | 2e-16 | 85% | <a href="#">gij537261801 ERE90152.1</a>     |
| <a href="#">PREDICTED: complement factor I [Bubalus bubalis]</a>                           | 83.8 | 83.8 | 96% | 2e-16 | 85% | <a href="#">gij594056114 XP_006052270.1</a> |
| <a href="#">PREDICTED: complement factor I [Pantholops hodgsonii]</a>                      | 83.8 | 83.8 | 96% | 2e-16 | 85% | <a href="#">gij556750321 XP_005970578.1</a> |
| <a href="#">PREDICTED: complement factor I isoform X2 [Capra hircus]</a>                   | 83.8 | 83.8 | 96% | 2e-16 | 85% | <a href="#">gij548469406 XP_005681373.1</a> |
| <a href="#">PREDICTED: complement factor I isoform X1 [Capra hircus]</a>                   | 83.8 | 83.8 | 96% | 2e-16 | 85% | <a href="#">gij548469399 XP_005681372.1</a> |
| <a href="#">PREDICTED: complement factor I [Ovis aries]</a>                                | 83.8 | 83.8 | 96% | 2e-16 | 85% | <a href="#">gij426231287 XP_004009671.1</a> |
| <a href="#">PREDICTED: complement factor I [Cricetulus griseus]</a>                        | 83.8 | 83.8 | 96% | 2e-16 | 85% | <a href="#">gij625241505 XP_007611983.1</a> |
| <a href="#">PREDICTED: complement factor I [Cricetulus griseus]</a>                        | 83.8 | 83.8 | 96% | 2e-16 | 85% | <a href="#">gij625222421 XP_007651009.1</a> |
| <a href="#">PREDICTED: complement factor I [Mesocricetus auratus]</a>                      | 83.8 | 83.8 | 96% | 2e-16 | 85% | <a href="#">gij524965961 XP_005082885.1</a> |
| <a href="#">PREDICTED: LOW QUALITY PROTEIN: complement factor I [Mesocricetus auratus]</a> | 83.8 | 83.8 | 96% | 2e-16 | 85% | <a href="#">gij560925633 XP_006188998.1</a> |
| <a href="#">PREDICTED: LOW QUALITY PROTEIN: complement factor I [Mesocricetus auratus]</a> | 83.8 | 83.8 | 96% | 2e-16 | 85% | <a href="#">gij560979761 XP_006212132.1</a> |
| <a href="#">PREDICTED: complement factor I [Jaculus jaculus]</a>                           | 83.3 | 83.3 | 96% | 2e-16 | 89% | <a href="#">gij507549735 XP_004658680.1</a> |
| <a href="#">complement factor I [Rattus norvegicus]</a>                                    | 82.5 | 82.5 | 96% | 4e-16 | 85% | <a href="#">gij149025945 EDL82188.1</a>     |
| <a href="#">PREDICTED: complement factor I isoform X6 [Panthera tigris a]</a>              | 82.5 | 82.5 | 96% | 5e-16 | 85% | <a href="#">gij591346160 XP_007098330.1</a> |
| <a href="#">PREDICTED: complement factor I isoform X5 [Panthera tigris a]</a>              | 82.5 | 82.5 | 96% | 5e-16 | 85% | <a href="#">gij591346158 XP_007098329.1</a> |
| <a href="#">PREDICTED: complement factor I isoform X4 [Panthera tigris a]</a>              | 82.5 | 82.5 | 96% | 5e-16 | 85% | <a href="#">gij591346156 XP_007098328.1</a> |
| <a href="#">complement factor I precursor [Rattus norvegicus]</a>                          | 82.5 | 82.5 | 96% | 5e-16 | 85% | <a href="#">gij13162353 NP_077071.1</a>     |
| <a href="#">PREDICTED: complement factor I isoform X2 [Panthera tigris a]</a>              | 82.5 | 82.5 | 96% | 5e-16 | 85% | <a href="#">gij591346152 XP_007098326.1</a> |
| <a href="#">PREDICTED: complement factor I isoform X1 [Panthera tigris a]</a>              | 82.5 | 82.5 | 96% | 5e-16 | 85% | <a href="#">gij591346150 XP_007098325.1</a> |
| <a href="#">PREDICTED: LOW QUALITY PROTEIN: complement factor I [Panthera tigris a]</a>    | 82.5 | 82.5 | 96% | 5e-16 | 85% | <a href="#">gij586984171 XP_006930977.1</a> |
| <a href="#">PREDICTED: complement factor I isoform X2 [Cavia porcellus]</a>                | 82.5 | 82.5 | 96% | 5e-16 | 89% | <a href="#">gij514457647 XP_005002957.1</a> |
| <a href="#">PREDICTED: complement factor I isoform X1 [Cavia porcellus]</a>                | 82.5 | 82.5 | 96% | 5e-16 | 89% | <a href="#">gij514457649 XP_003468099.2</a> |
| <a href="#">PREDICTED: complement factor I isoform X1 [Rattus norvegicus]</a>              | 82.5 | 82.5 | 96% | 5e-16 | 85% | <a href="#">gij672044321 XP_008759748.1</a> |
| <a href="#">PREDICTED: complement factor I-like [Equus przewalskii]</a>                    | 82.1 | 82.1 | 96% | 5e-16 | 85% | <a href="#">gij664780387 XP_008509513.1</a> |
| <a href="#">PREDICTED: complement factor I isoform X2 [Equus caballus]</a>                 | 82.1 | 82.1 | 96% | 7e-16 | 85% | <a href="#">gij545210264 XP_005607952.1</a> |
| <a href="#">PREDICTED: complement factor I isoform X1 [Equus caballus]</a>                 | 82.1 | 82.1 | 96% | 7e-16 | 85% | <a href="#">gij545210262 XP_005607951.1</a> |

BLAST is a registered trademark of the National Library of Medicine.

NCBI/ BLAST/ blastp suite/ Formatting Results - B93T8V5W01R

**Your search parameters were adjusted to search for a short input sequence.**

[Edit and Resubmit](#) [Save Search Strategies](#) [Formatting options](#) [Download](#)

**CFI\_RSIPACVPWSPYLFQPNDCIVSGWGRE\_NonMod**

[YouTube](#) [How to read this page](#) [Blast report description](#)

**RID** [B93T8V5W01R](#) (Expires on 01-14 10:21 am)

**Query ID** lcl|319133 **Database Name** nr

**Description** None **Description** All non-redundant GenBank CDS translations+PDB+SwissProt+PIR excluding environmental samples from WGS projects

**Molecule type** amino acid **Program** BLASTP 2.2.30+ [Citation](#)

**Query Length** 28

Other reports: [Search Summary](#) [\[Taxonomy reports\]](#) [\[Distance tree of results\]](#) [\[Multiple alignment\]](#)

**Graphic Summary**

[Show Conserved Domains](#)

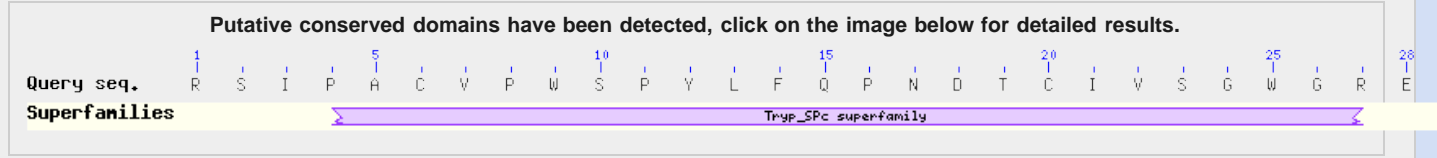

Distribution of 100 Blast Hits on the Query Sequence

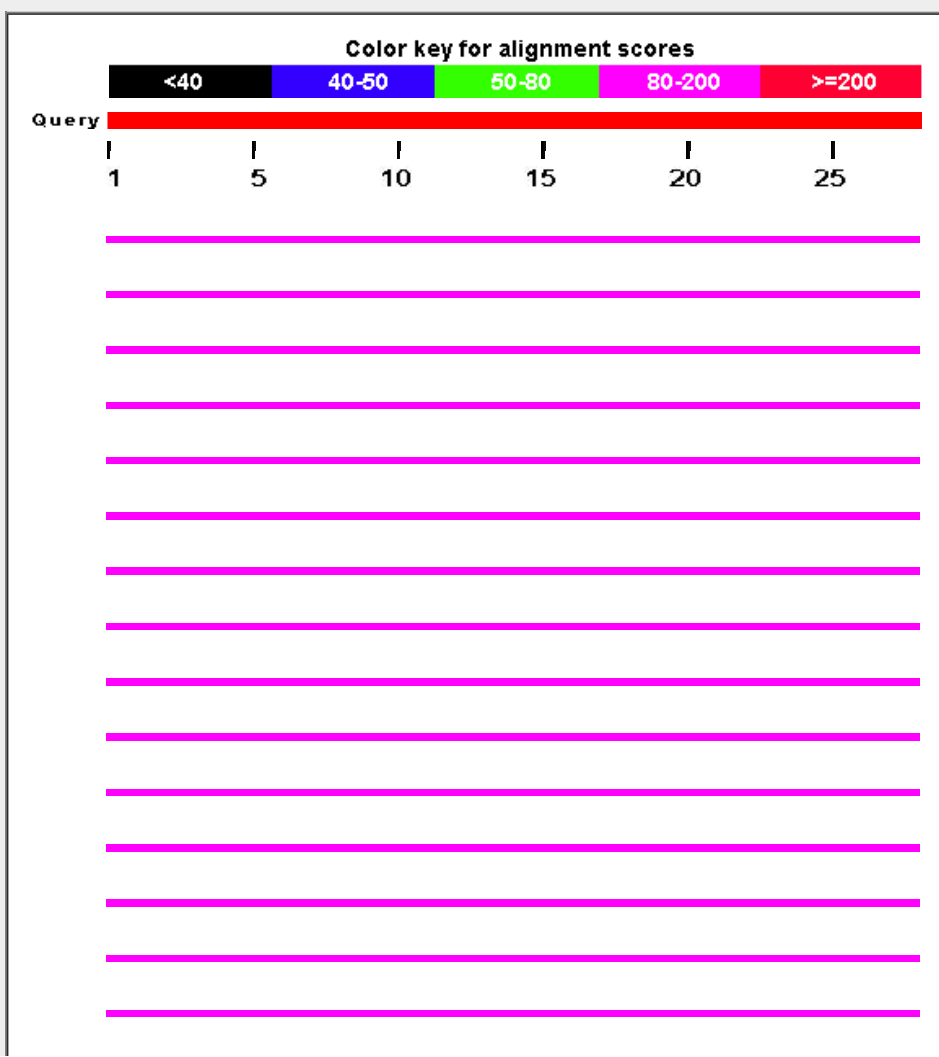

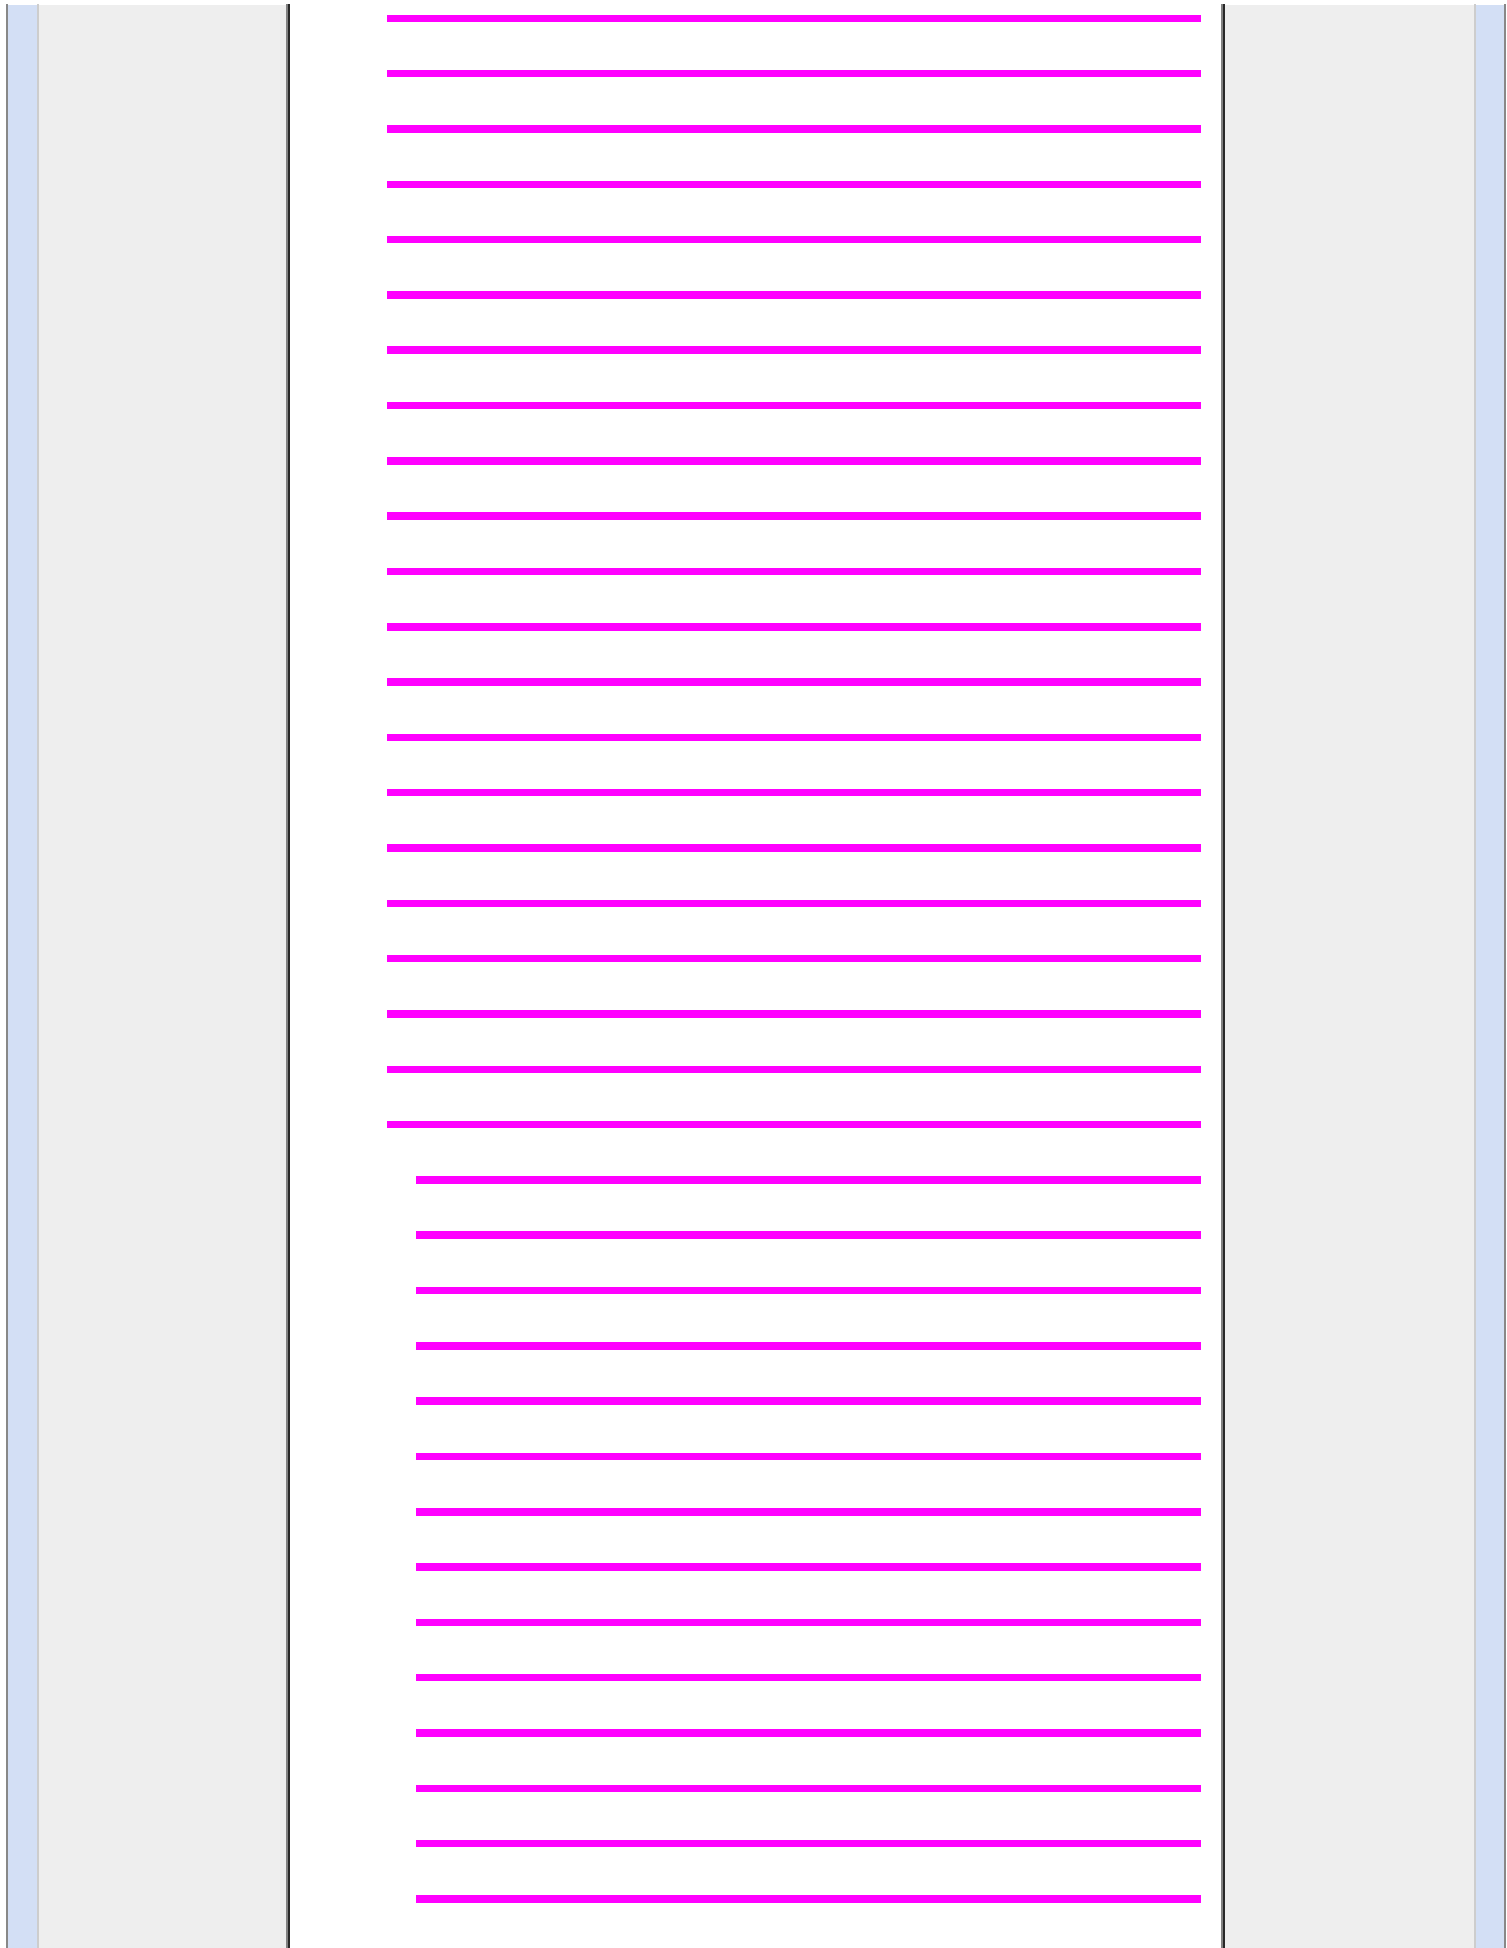

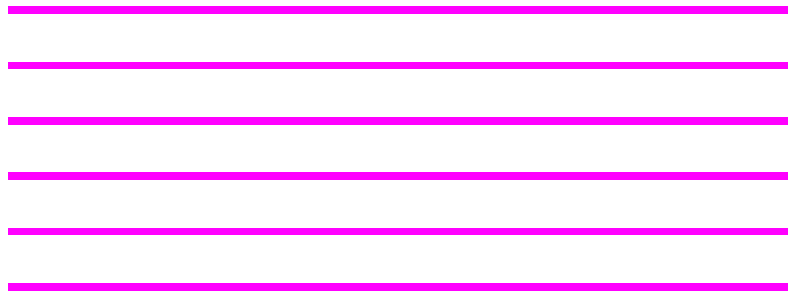

**Descriptions**

**Sequences producing significant alignments:**

Select: [All](#) [None](#) Selected:0

Alignments Download GenPept Graphics Distance tree of results Multiple alignment

| Description                                                                    | Max score | Total score | Query cover | E value | Ident | Accession                                    |
|--------------------------------------------------------------------------------|-----------|-------------|-------------|---------|-------|----------------------------------------------|
| <a href="#">complement factor I light chain [Homo sapiens]</a>                 | 98.6      | 98.6        | 100%        | 8e-22   | 100%  | <a href="#">gi 224798 1202205A</a>           |
| <a href="#">unnamed protein product [Homo sapiens]</a>                         | 98.6      | 98.6        | 100%        | 9e-22   | 100%  | <a href="#">gi 1335056 CAA68418.1</a>        |
| <a href="#">PREDICTED: complement factor I isoform X1 [Pongo abelii]</a>       | 98.6      | 98.6        | 100%        | 1e-21   | 100%  | <a href="#">gi 686716760 XP_009238531.1</a>  |
| <a href="#">complement factor I [Pongo abelii]</a>                             | 98.6      | 98.6        | 100%        | 1e-21   | 100%  | <a href="#">gi 207080120 INP_001128776.1</a> |
| <a href="#">PREDICTED: complement factor I isoform X4 [Homo sapiens]</a>       | 98.6      | 98.6        | 100%        | 1e-21   | 100%  | <a href="#">gi 578809103 XP_006714273.1</a>  |
| <a href="#">Chain A, Human Complement Factor I [Homo sapiens]</a>              | 98.6      | 98.6        | 100%        | 1e-21   | 100%  | <a href="#">gi 339961198 2XRC_A</a>          |
| <a href="#">PREDICTED: complement factor I isoform X2 [Homo sapiens]</a>       | 98.6      | 98.6        | 100%        | 1e-21   | 100%  | <a href="#">gi 530377647 XP_005263033.1</a>  |
| <a href="#">PREDICTED: complement factor I [Nomascus leucogenys]</a>           | 98.6      | 98.6        | 100%        | 1e-21   | 100%  | <a href="#">gi 332240463 XP_003269405.1</a>  |
| <a href="#">prepro-C3b/C4B inactivator [Homo sapiens]</a>                      | 98.6      | 98.6        | 100%        | 1e-21   | 100%  | <a href="#">gi 182607 AAA52455.1</a>         |
| <a href="#">complement factor I preproprotein [Homo sapiens]</a>               | 98.6      | 98.6        | 100%        | 1e-21   | 100%  | <a href="#">gi 119392081 INP_000195.2</a>    |
| <a href="#">complement factor I precursor [Pongo abelii]</a>                   | 98.6      | 98.6        | 100%        | 1e-21   | 100%  | <a href="#">gi 197098986 INP_001127624.1</a> |
| <a href="#">RecName: Full=Complement factor I; AltName: Full=C3B/C4B inact</a> | 98.6      | 98.6        | 100%        | 1e-21   | 100%  | <a href="#">gi 317373341 P05156.2</a>        |
| <a href="#">unnamed protein product [Homo sapiens]</a>                         | 98.6      | 98.6        | 100%        | 1e-21   | 100%  | <a href="#">gi 158254682 BAF83314.1</a>      |
| <a href="#">PREDICTED: complement factor I isoform X3 [Homo sapiens]</a>       | 98.6      | 98.6        | 100%        | 1e-21   | 100%  | <a href="#">gi 578809101 XP_006714272.1</a>  |
| <a href="#">unnamed protein product [Homo sapiens]</a>                         | 98.6      | 98.6        | 100%        | 1e-21   | 100%  | <a href="#">gi 194387702 BAG61264.1</a>      |
| <a href="#">PREDICTED: complement factor I isoform X1 [Homo sapiens]</a>       | 98.6      | 98.6        | 100%        | 1e-21   | 100%  | <a href="#">gi 530377645 XP_005263032.1</a>  |
| <a href="#">PREDICTED: complement factor I-like [Gorilla gorilla gorilla]</a>  | 96.5      | 96.5        | 100%        | 5e-21   | 96%   | <a href="#">gi 426345227 XP_004040322.1</a>  |
| <a href="#">PREDICTED: complement factor I isoform X6 [Pan troglodytes]</a>    | 96.5      | 96.5        | 100%        | 7e-21   | 96%   | <a href="#">gi 694908492 XP_009446407.1</a>  |
| <a href="#">PREDICTED: complement factor I isoform X6 [Pan paniscus]</a>       | 96.5      | 96.5        | 100%        | 7e-21   | 96%   | <a href="#">gi 675793799 XP_008953634.1</a>  |
| <a href="#">PREDICTED: complement factor I isoform X5 [Pan troglodytes]</a>    | 96.5      | 96.5        | 100%        | 7e-21   | 96%   | <a href="#">gi 694908490 XP_009446406.1</a>  |
| <a href="#">PREDICTED: complement factor I isoform X5 [Pan paniscus]</a>       | 96.5      | 96.5        | 100%        | 7e-21   | 96%   | <a href="#">gi 675793797 XP_008953633.1</a>  |
| <a href="#">PREDICTED: complement factor I isoform X4 [Pan troglodytes]</a>    | 96.5      | 96.5        | 100%        | 7e-21   | 96%   | <a href="#">gi 694908488 XP_009446405.1</a>  |
| <a href="#">PREDICTED: complement factor I isoform X4 [Pan paniscus]</a>       | 96.5      | 96.5        | 100%        | 7e-21   | 96%   | <a href="#">gi 675793795 XP_008953632.1</a>  |
| <a href="#">PREDICTED: complement factor I isoform X3 [Pan paniscus]</a>       | 96.5      | 96.5        | 100%        | 7e-21   | 96%   | <a href="#">gi 397519838 XP_003830060.1</a>  |
| <a href="#">PREDICTED: complement factor I isoform X3 [Pan troglodytes]</a>    | 96.5      | 96.5        | 100%        | 7e-21   | 96%   | <a href="#">gi 114595644 XP_526653.2</a>     |
| <a href="#">PREDICTED: complement factor I isoform X2 [Pan troglodytes]</a>    | 96.5      | 96.5        | 100%        | 7e-21   | 96%   | <a href="#">gi 694908485 XP_009446404.1</a>  |
| <a href="#">PREDICTED: complement factor I isoform X2 [Pan paniscus]</a>       | 96.5      | 96.5        | 100%        | 7e-21   | 96%   | <a href="#">gi 675793792 XP_008953631.1</a>  |
| <a href="#">PREDICTED: complement factor I isoform X1 [Pan paniscus]</a>       | 96.5      | 96.5        | 100%        | 7e-21   | 96%   | <a href="#">gi 397519840 XP_003830061.1</a>  |
| <a href="#">PREDICTED: complement factor I isoform X1 [Pan troglodytes]</a>    | 96.5      | 96.5        | 100%        | 7e-21   | 96%   | <a href="#">gi 332820084 XP_003310493.1</a>  |

|                                                                                    |      |      |      |       |     |                                             |
|------------------------------------------------------------------------------------|------|------|------|-------|-----|---------------------------------------------|
| <a href="#">PREDICTED: complement factor I-like [Macaca fascicularis]</a>          | 94.0 | 94.0 | 100% | 4e-20 | 93% | <a href="#">gij544524397 XP_005595214.1</a> |
| <a href="#">PREDICTED: complement factor I isoform X3 [Chlorocebus sabaueu]</a>    | 94.0 | 94.0 | 100% | 5e-20 | 93% | <a href="#">gij635044271 XP_007997720.1</a> |
| <a href="#">uncharacterized protein LOC101866929 precursor [Macaca fascicul]</a>   | 94.0 | 94.0 | 100% | 5e-20 | 93% | <a href="#">gij548961885 NP_001271714.1</a> |
| <a href="#">PREDICTED: complement factor I isoform X2 [Chlorocebus sabaueu]</a>    | 94.0 | 94.0 | 100% | 5e-20 | 93% | <a href="#">gij635044269 XP_007997719.1</a> |
| <a href="#">PREDICTED: complement factor I isoform X1 [Chlorocebus sabaueu]</a>    | 94.0 | 94.0 | 100% | 5e-20 | 93% | <a href="#">gij635044267 XP_007997718.1</a> |
| <a href="#">hypothetical protein EGK_16010 [Macaca mulatta]</a>                    | 94.0 | 94.0 | 100% | 5e-20 | 93% | <a href="#">gij355687535 EHH26119.1</a>     |
| <a href="#">PREDICTED: complement factor I [Papio anubis]</a>                      | 94.0 | 94.0 | 100% | 5e-20 | 93% | <a href="#">gij685542561 XP_009205631.1</a> |
| <a href="#">PREDICTED: complement factor I isoform X2 [Saimiri boliviensis br]</a> | 92.7 | 92.7 | 96%  | 1e-19 | 96% | <a href="#">gij725571753 XP_010338379.1</a> |
| <a href="#">PREDICTED: complement factor I [Callithrix jacchus]</a>                | 92.7 | 92.7 | 96%  | 1e-19 | 96% | <a href="#">gij675648222 XP_002745538.3</a> |
| <a href="#">PREDICTED: complement factor I [Callithrix jacchus]</a>                | 92.7 | 92.7 | 96%  | 1e-19 | 96% | <a href="#">gij675752511 XP_008984405.1</a> |
| <a href="#">PREDICTED: complement factor I isoform X1 [Saimiri boliviensis br]</a> | 92.7 | 92.7 | 96%  | 1e-19 | 96% | <a href="#">gij725571751 XP_010338378.1</a> |
| <a href="#">PREDICTED: complement factor I [Chrysochloris asiatica]</a>            | 92.7 | 92.7 | 96%  | 1e-19 | 96% | <a href="#">gij586477731 XP_006869402.1</a> |
| <a href="#">PREDICTED: complement factor I-like [Galeopterus variegatus]</a>       | 91.0 | 91.0 | 96%  | 5e-19 | 96% | <a href="#">gij667268997 XP_008570201.1</a> |
| <a href="#">PREDICTED: complement factor I [Loxodonta africana]</a>                | 91.0 | 91.0 | 96%  | 6e-19 | 96% | <a href="#">gij731479219 XP_010588889.1</a> |
| <a href="#">complement factor I precursor [Bos taurus]</a>                         | 91.0 | 91.0 | 96%  | 6e-19 | 96% | <a href="#">gij84000165 NP_001033185.1</a>  |
| <a href="#">PREDICTED: complement factor I [Bos mutus]</a>                         | 91.0 | 91.0 | 96%  | 6e-19 | 96% | <a href="#">gij555968512 XP_005896291.1</a> |
| <a href="#">TPA: complement factor I [Bos taurus]</a>                              | 91.0 | 91.0 | 96%  | 6e-19 | 96% | <a href="#">gij296486756 DAA28869.1</a>     |
| <a href="#">PREDICTED: complement factor I [Physeter catodon]</a>                  | 91.0 | 91.0 | 96%  | 6e-19 | 96% | <a href="#">gij593719134 XP_007105924.1</a> |
| <a href="#">PREDICTED: complement factor I [Dasypus novemcinctus]</a>              | 90.6 | 90.6 | 96%  | 8e-19 | 96% | <a href="#">gij488581726 XP_004476284.1</a> |
| <a href="#">PREDICTED: complement factor I [Pteropus alecto]</a>                   | 89.7 | 89.7 | 96%  | 2e-18 | 93% | <a href="#">gij586528110 XP_006918978.1</a> |
| <a href="#">Complement factor I [Pteropus alecto]</a>                              | 89.7 | 89.7 | 96%  | 2e-18 | 93% | <a href="#">gij431897147 ELK06409.1</a>     |
| <a href="#">PREDICTED: complement factor I [Elephantulus edwardii]</a>             | 88.4 | 88.4 | 96%  | 4e-18 | 93% | <a href="#">gij585642072 XP_006881212.1</a> |
| <a href="#">PREDICTED: complement factor I [Tursiops truncatus]</a>                | 88.4 | 88.4 | 96%  | 4e-18 | 93% | <a href="#">gij470636247 XP_004323514.1</a> |
| <a href="#">PREDICTED: LOW QUALITY PROTEIN: complement factor I [Lipo]</a>         | 88.4 | 88.4 | 96%  | 4e-18 | 93% | <a href="#">gij602703733 XP_007463290.1</a> |
| <a href="#">PREDICTED: complement factor I [Balaenoptera acutorostrata scar]</a>   | 88.4 | 88.4 | 96%  | 4e-18 | 93% | <a href="#">gij594687284 XP_007191087.1</a> |
| <a href="#">PREDICTED: LOW QUALITY PROTEIN: complement factor I [Orca]</a>         | 88.4 | 88.4 | 96%  | 4e-18 | 93% | <a href="#">gij466008566 XP_004269732.1</a> |
| <a href="#">PREDICTED: complement factor I [Trichechus manatus latirostris]</a>    | 88.4 | 88.4 | 96%  | 4e-18 | 93% | <a href="#">gij471391575 XP_004380312.1</a> |
| <a href="#">PREDICTED: complement factor I [Erinaceus europaeus]</a>               | 87.2 | 87.2 | 96%  | 1e-17 | 93% | <a href="#">gij617652869 XP_007534556.1</a> |
| <a href="#">PREDICTED: LOW QUALITY PROTEIN: complement factor I [Lept]</a>         | 86.7 | 86.7 | 96%  | 2e-17 | 93% | <a href="#">gij585149528 XP_006727262.1</a> |
| <a href="#">PREDICTED: complement factor I [Orycteropus afer afer]</a>             | 86.7 | 86.7 | 96%  | 2e-17 | 93% | <a href="#">gij634848033 XP_007938975.1</a> |
| <a href="#">Complement factor I [Fukomys damarensis]</a>                           | 86.3 | 86.3 | 96%  | 2e-17 | 89% | <a href="#">gij676270629 KFO25832.1</a>     |
| <a href="#">Complement factor I [Heterocephalus glaber]</a>                        | 86.3 | 86.3 | 96%  | 2e-17 | 89% | <a href="#">gij351696416 EHA99334.1</a>     |
| <a href="#">PREDICTED: complement factor I [Octodon degus]</a>                     | 86.3 | 86.3 | 96%  | 2e-17 | 89% | <a href="#">gij507626946 XP_004626817.1</a> |
| <a href="#">complement factor I-like protein [Cricetulus griseus]</a>              | 86.3 | 86.3 | 96%  | 2e-17 | 89% | <a href="#">gij537261801 ERE90152.1</a>     |
| <a href="#">PREDICTED: complement factor I isoform X2 [Fukomys damarensi]</a>      | 86.3 | 86.3 | 96%  | 2e-17 | 89% | <a href="#">gij731254237 XP_010639824.1</a> |
| <a href="#">PREDICTED: complement factor I isoform X2 [Heterocephalus glab]</a>    | 86.3 | 86.3 | 96%  | 2e-17 | 89% | <a href="#">gij512818622 XP_004878889.1</a> |
| <a href="#">PREDICTED: complement factor I [Bubalus bubalis]</a>                   | 86.3 | 86.3 | 96%  | 2e-17 | 89% | <a href="#">gij594056114 XP_006052270.1</a> |
| <a href="#">PREDICTED: complement factor I [Pantholops hodgsonii]</a>              | 86.3 | 86.3 | 96%  | 2e-17 | 89% | <a href="#">gij556750321 XP_005970578.1</a> |
| <a href="#">PREDICTED: complement factor I isoform X2 [Capra hircus]</a>           | 86.3 | 86.3 | 96%  | 2e-17 | 89% | <a href="#">gij548469406 XP_005681373.1</a> |
| <a href="#">PREDICTED: complement factor I isoform X1 [Capra hircus]</a>           | 86.3 | 86.3 | 96%  | 2e-17 | 89% | <a href="#">gij548469399 XP_005681372.1</a> |
| <a href="#">PREDICTED: complement factor I [Ovis aries]</a>                        | 86.3 | 86.3 | 96%  | 2e-17 | 89% | <a href="#">gij426231287 XP_004009671.1</a> |
| <a href="#">PREDICTED: complement factor I isoform X1 [Fukomys damarensi]</a>      | 86.3 | 86.3 | 96%  | 2e-17 | 89% | <a href="#">gij731254235 XP_010639823.1</a> |
| <a href="#">PREDICTED: complement factor I isoform X1 [Heterocephalus glab]</a>    | 86.3 | 86.3 | 96%  | 2e-17 | 89% | <a href="#">gij512818618 XP_004878888.1</a> |
| <a href="#">PREDICTED: complement factor I [Cricetulus griseus]</a>                | 86.3 | 86.3 | 96%  | 2e-17 | 89% | <a href="#">gij625241505 XP_007611983.1</a> |
| <a href="#">PREDICTED: complement factor I [Cricetulus griseus]</a>                | 86.3 | 86.3 | 96%  | 2e-17 | 89% | <a href="#">gij625222421 XP_007651009.1</a> |
| <a href="#">PREDICTED: complement factor I [Mesocricetus auratus]</a>              | 86.3 | 86.3 | 96%  | 2e-17 | 89% | <a href="#">gij524965961 XP_005082885.1</a> |

|                                                                                   |      |      |     |       |     |                                             |
|-----------------------------------------------------------------------------------|------|------|-----|-------|-----|---------------------------------------------|
| <a href="#">PREDICTED: LOW QUALITY PROTEIN: complement factor I [Cam</a>          | 86.3 | 86.3 | 96% | 2e-17 | 89% | <a href="#">gij560925633 XP_006188998.1</a> |
| <a href="#">PREDICTED: LOW QUALITY PROTEIN: complement factor I [Vic</a>          | 86.3 | 86.3 | 96% | 2e-17 | 89% | <a href="#">gij560979761 XP_006212132.1</a> |
| <a href="#">PREDICTED: complement factor I isoform X2 [Ictidomys tridecemli</a>   | 85.9 | 85.9 | 96% | 3e-17 | 93% | <a href="#">gij532088899 XP_005330149.1</a> |
| <a href="#">PREDICTED: complement factor I isoform X1 [Ictidomys tridecemli</a>   | 85.9 | 85.9 | 96% | 3e-17 | 93% | <a href="#">gij532088897 XP_005330148.1</a> |
| <a href="#">PREDICTED: LOW QUALITY PROTEIN: complement factor I [Chin</a>         | 85.9 | 85.9 | 96% | 3e-17 | 89% | <a href="#">gij533186455 XP_005406244.1</a> |
| <a href="#">complement factor I [Rattus norvegicus]</a>                           | 85.0 | 85.0 | 96% | 5e-17 | 89% | <a href="#">gij149025945 EDL82188.1</a>     |
| <a href="#">PREDICTED: complement factor I isoform X6 [Panthera tigris altaic</a> | 85.0 | 85.0 | 96% | 6e-17 | 89% | <a href="#">gij591346160 XP_007098330.1</a> |
| <a href="#">PREDICTED: complement factor I [Rhinopithecus roxellana]</a>          | 85.0 | 85.0 | 96% | 6e-17 | 89% | <a href="#">gij724946291 XP_010387365.1</a> |
| <a href="#">PREDICTED: complement factor I isoform X5 [Panthera tigris altaic</a> | 85.0 | 85.0 | 96% | 6e-17 | 89% | <a href="#">gij591346158 XP_007098329.1</a> |
| <a href="#">PREDICTED: complement factor I isoform X4 [Panthera tigris altaic</a> | 85.0 | 85.0 | 96% | 6e-17 | 89% | <a href="#">gij591346156 XP_007098328.1</a> |
| <a href="#">complement factor I precursor [Rattus norvegicus]</a>                 | 85.0 | 85.0 | 96% | 6e-17 | 89% | <a href="#">gij13162353 NP_077071.1</a>     |
| <a href="#">PREDICTED: complement factor I isoform X2 [Panthera tigris altaic</a> | 85.0 | 85.0 | 96% | 6e-17 | 89% | <a href="#">gij591346152 XP_007098326.1</a> |
| <a href="#">PREDICTED: complement factor I isoform X1 [Panthera tigris altaic</a> | 85.0 | 85.0 | 96% | 6e-17 | 89% | <a href="#">gij591346150 XP_007098325.1</a> |
| <a href="#">PREDICTED: LOW QUALITY PROTEIN: complement factor I [Felis</a>        | 85.0 | 85.0 | 96% | 6e-17 | 89% | <a href="#">gij586984171 XP_006930977.1</a> |
| <a href="#">PREDICTED: complement factor I isoform X1 [Rattus norvegicus]</a>     | 85.0 | 85.0 | 96% | 6e-17 | 89% | <a href="#">gij672044321 XP_008759748.1</a> |
| <a href="#">PREDICTED: complement factor I-like [Equus przewalskii]</a>           | 84.6 | 84.6 | 96% | 7e-17 | 89% | <a href="#">gij664780387 XP_008509513.1</a> |
| <a href="#">PREDICTED: complement factor I [Jaculus jaculus]</a>                  | 84.6 | 84.6 | 96% | 8e-17 | 89% | <a href="#">gij507549735 XP_004658680.1</a> |
| <a href="#">PREDICTED: complement factor I isoform X2 [Equus caballus]</a>        | 84.6 | 84.6 | 96% | 8e-17 | 89% | <a href="#">gij545210264 XP_005607952.1</a> |
| <a href="#">PREDICTED: complement factor I isoform X1 [Equus caballus]</a>        | 84.6 | 84.6 | 96% | 9e-17 | 89% | <a href="#">gij545210262 XP_005607951.1</a> |
| <a href="#">PREDICTED: complement factor I [Mustela putorius furo]</a>            | 84.2 | 84.2 | 96% | 1e-16 | 89% | <a href="#">gij511847748 XP_004748251.1</a> |
| <a href="#">PREDICTED: LOW QUALITY PROTEIN: complement factor I [Odo</a>          | 84.2 | 84.2 | 96% | 1e-16 | 89% | <a href="#">gij472383864 XP_004411307.1</a> |
| <a href="#">PREDICTED: complement factor I [Mustela putorius furo]</a>            | 84.2 | 84.2 | 96% | 1e-16 | 89% | <a href="#">gij511991360 XP_004813365.1</a> |
| <a href="#">PREDICTED: complement factor I [Peromyscus maniculatus bairdii</a>    | 83.8 | 83.8 | 96% | 2e-16 | 85% | <a href="#">gij589914217 XP_006970447.1</a> |
| <a href="#">PREDICTED: complement factor I [Ceratotherium simum simum]</a>        | 83.8 | 83.8 | 96% | 2e-16 | 93% | <a href="#">gij478504685 XP_004426641.1</a> |
| <a href="#">PREDICTED: complement factor I isoform X2 [Cavia porcellus]</a>       | 83.8 | 83.8 | 96% | 2e-16 | 89% | <a href="#">gij514457647 XP_005002957.1</a> |

## Alignments

Download [GenPept](#) [Graphics](#)

[Next](#) [Previous](#) [Descriptions](#)

complement factor I light chain

Sequence ID: [gij224798|prf||1202205A](#) Length: 200 Number of Matches: 1

### Related Information

Range 1: 66 to 93 [GenPept](#) [Graphics](#)

[Next Match](#) [Previous Match](#)

| Score          | Expect | Identities  | Positives   | Gaps     |
|----------------|--------|-------------|-------------|----------|
| 98.6 bits(225) | 8e-22  | 28/28(100%) | 28/28(100%) | 0/28(0%) |

Query 1 RSIPACVPWSPYLFQPNDDTCIVSGWGRE 28  
 Sbjct 66 RSIPACVPWSPYLFQPNDDTCIVSGWGRE 93

Download [GenPept](#) [Graphics](#)

[Next](#) [Previous](#) [Descriptions](#)

unnamed protein product [Homo sapiens]

Sequence ID: [gij1335056|emb|CAA68418.1](#) Length: 244 Number of Matches: 1

### Related Information

[Gene](#) - associated gene details

Range 1: 109 to 136 [GenPept](#) [Graphics](#)

[Next Match](#) [Previous Match](#)

| Score          | Expect | Identities  | Positives   | Gaps     |
|----------------|--------|-------------|-------------|----------|
| 98.6 bits(225) | 9e-22  | 28/28(100%) | 28/28(100%) | 0/28(0%) |

Query 1 RSIPACVPWSPYLFQPNDDTCIVSGWGRE 28  
 Sbjct 109 RSIPACVPWSPYLFQPNDDTCIVSGWGRE 136

Download [GenPept](#) [Graphics](#)

[Next](#) [Previous](#) [Descriptions](#)

**PREDICTED: complement factor I isoform X1 [Pongo abelii]**

Sequence ID: [gi|686716760|ref|XP\\_009238531.1](#) Length: 446 Number of Matches: 1

Range 1: 311 to 338 [GenPept](#) [Graphics](#)

▼ Next Match ▲ Previous Match

| Score          | Expect | Identities  | Positives   | Gaps     |
|----------------|--------|-------------|-------------|----------|
| 98.6 bits(225) | 1e-21  | 28/28(100%) | 28/28(100%) | 0/28(0%) |

Query 1 RSIPACVPWSPYLFQPNDTCIVSGWGRE 28  
 RSIPACVPWSPYLFQPNDTCIVSGWGRE  
 Sbjct 311 RSIPACVPWSPYLFQPNDTCIVSGWGRE 338

**Related Information**

[Gene](#) - associated gene details  
[Map Viewer](#) - aligned genomic context

Download ▼ [GenPept](#) [Graphics](#)

▼ Next ▲ Previous ▲ Descriptions

**complement factor I [Pongo abelii]**

Sequence ID: [gi|207080120|ref|NP\\_001128776.1](#) Length: 446 Number of Matches: 1

▶ [See 1 more title\(s\)](#)

Range 1: 311 to 338 [GenPept](#) [Graphics](#)

▼ Next Match ▲ Previous Match

| Score          | Expect | Identities  | Positives   | Gaps     |
|----------------|--------|-------------|-------------|----------|
| 98.6 bits(225) | 1e-21  | 28/28(100%) | 28/28(100%) | 0/28(0%) |

Query 1 RSIPACVPWSPYLFQPNDTCIVSGWGRE 28  
 RSIPACVPWSPYLFQPNDTCIVSGWGRE  
 Sbjct 311 RSIPACVPWSPYLFQPNDTCIVSGWGRE 338

**Related Information**

[Gene](#) - associated gene details  
[Map Viewer](#) - aligned genomic context  
[Identical Proteins](#) - Proteins identical to the subject

Download ▼ [GenPept](#) [Graphics](#)

▼ Next ▲ Previous ▲ Descriptions

**PREDICTED: complement factor I isoform X4 [Homo sapiens]**

Sequence ID: [gi|578809103|ref|XP\\_006714273.1](#) Length: 531 Number of Matches: 1

Range 1: 456 to 483 [GenPept](#) [Graphics](#)

▼ Next Match ▲ Previous Match

| Score          | Expect | Identities  | Positives   | Gaps     |
|----------------|--------|-------------|-------------|----------|
| 98.6 bits(225) | 1e-21  | 28/28(100%) | 28/28(100%) | 0/28(0%) |

Query 1 RSIPACVPWSPYLFQPNDTCIVSGWGRE 28  
 RSIPACVPWSPYLFQPNDTCIVSGWGRE  
 Sbjct 456 RSIPACVPWSPYLFQPNDTCIVSGWGRE 483

**Related Information**

[Gene](#) - associated gene details

BLAST is a registered trademark of the National Library of Medicine.





NCBI/ BLAST/ blastp suite/ Formatting Results - BTGBDV8F016

Your search parameters were adjusted to search for a short input sequence.

Edit and Resubmit Save Search Strategies Formatting options Download YouTube How to read this page Blast report description

CNDP1\_RLVPHMDVSAVEKQ\_Mod

RID BTGBDV8F016 (Expires on 01-20 15:33 pm)

Query ID Icl|29627
Description None
Molecule type amino acid
Query Length 14

Database Name nr
Description All non-redundant GenBank CDS translations+PDB+SwissProt+PIR+PRF excluding environmental samples from WGS projects
Program BLASTP 2.2.30+ Citation

Other reports: Search Summary Taxonomy reports Distance tree of results Multiple alignment

Graphic Summary

Show Conserved Domains

No putative conserved domains have been detected

Distribution of 100 Blast Hits on the Query Sequence

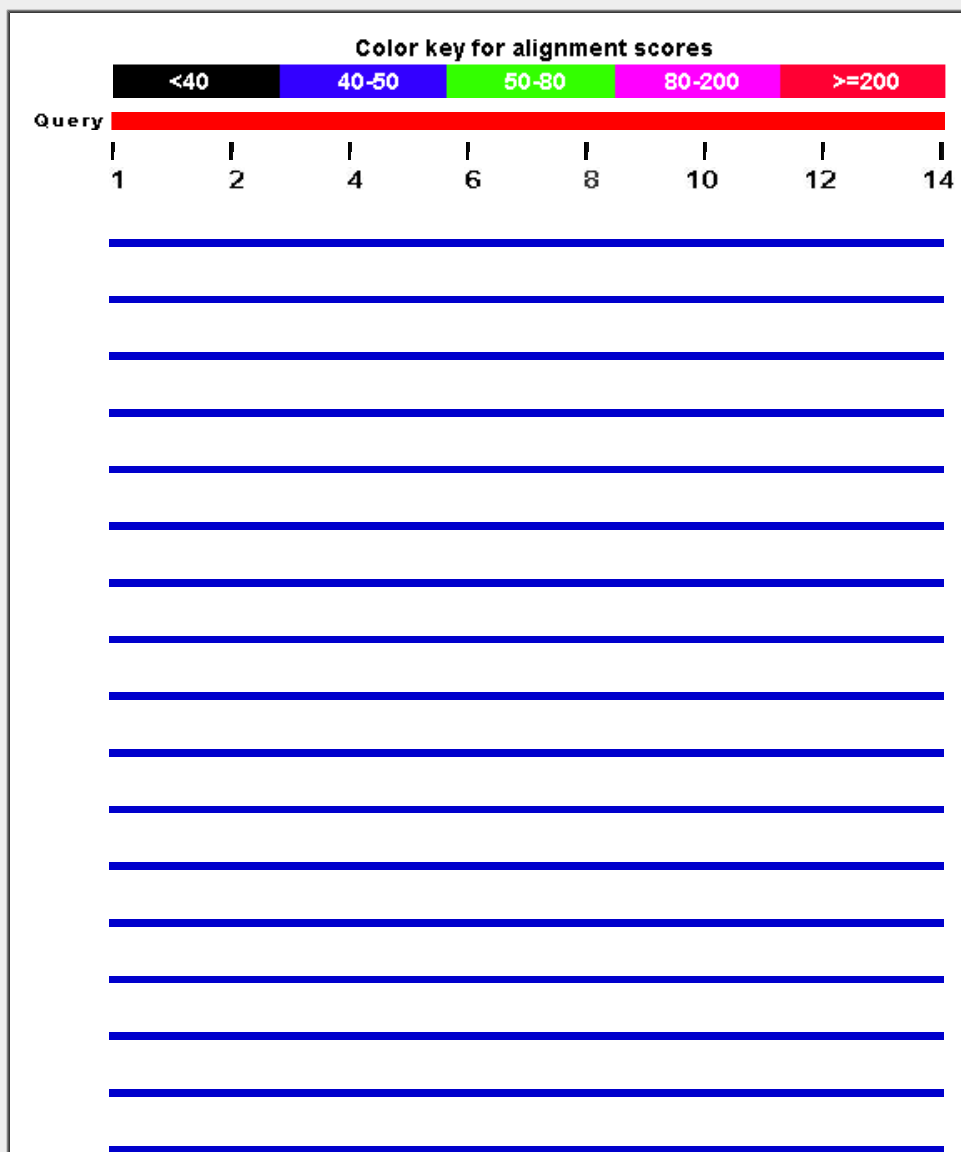

The image shows a table with 30 rows. Each row contains a single blue horizontal line, which is likely a placeholder for a sequence alignment or a data entry. The lines are evenly spaced and extend across most of the width of the table area.

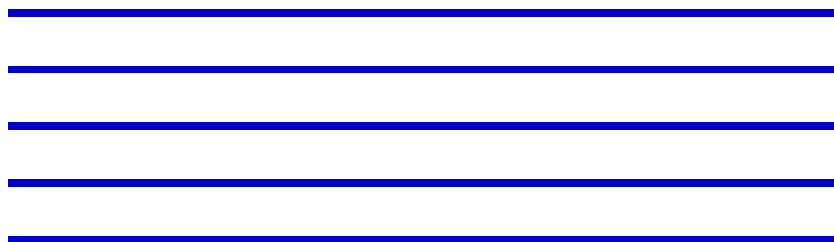

## Descriptions

### Sequences producing significant alignments:

Select: [All](#) [None](#) Selected: 0

[Alignments](#)
[Download](#)
[GenPept](#)
[Graphics](#)
[Distance tree of results](#)
[Multiple alignment](#)

| Description                                                                       | Max score | Total score | Query cover | E value | Ident | Accession                                   |
|-----------------------------------------------------------------------------------|-----------|-------------|-------------|---------|-------|---------------------------------------------|
| <a href="#">carnosine dipeptidase 1 (metallopeptidase M20 family), isoform</a>    | 46.0      | 46.0        | 100%        | 2e-04   | 93%   | <a href="#">gi 119586964 EAW66560.1</a>     |
| <a href="#">carnosine dipeptidase 1 (metallopeptidase M20 family), isoform</a>    | 46.0      | 46.0        | 100%        | 2e-04   | 93%   | <a href="#">gi 119586963 EAW66559.1</a>     |
| <a href="#">Chain A, Crystal Structure Of Human Carnosine Dipeptidase 1</a>       | 46.0      | 46.0        | 100%        | 2e-04   | 93%   | <a href="#">gi 197107410 3DLJ_A</a>         |
| <a href="#">unnamed protein product [Homo sapiens]</a>                            | 46.0      | 46.0        | 100%        | 2e-04   | 93%   | <a href="#">gi 194383442 BAG64692.1</a>     |
| <a href="#">beta-Ala-His dipeptidase precursor [Homo sapiens]</a>                 | 46.0      | 46.0        | 100%        | 2e-04   | 93%   | <a href="#">gi 21071039 NP_116038.4</a>     |
| <a href="#">RecName: Full=Beta-Ala-His dipeptidase; AltName: Full=CNDF</a>        | 46.0      | 46.0        | 100%        | 2e-04   | 93%   | <a href="#">gi 317373563 Q96KN2.4</a>       |
| <a href="#">unnamed protein product [Homo sapiens]</a>                            | 46.0      | 46.0        | 100%        | 2e-04   | 93%   | <a href="#">gi 158260855 BAF82605.1</a>     |
| <a href="#">Carnosine dipeptidase 1 (metallopeptidase M20 family) [Homo</a>       | 46.0      | 46.0        | 100%        | 2e-04   | 93%   | <a href="#">gi 83759081 AAI10296.1</a>      |
| <a href="#">Carnosine dipeptidase 1 (metallopeptidase M20 family) [Homo</a>       | 46.0      | 46.0        | 100%        | 2e-04   | 93%   | <a href="#">gi 109658940 AAI17123.1</a>     |
| <a href="#">glutamate carboxypeptidase-like protein 2 [Homo sapiens]</a>          | 46.0      | 46.0        | 100%        | 2e-04   | 93%   | <a href="#">gi 16555792 CAD10388.1</a>      |
| <a href="#">PREDICTED: beta-Ala-His dipeptidase isoform X4 [Mustela put</a>       | 44.3      | 44.3        | 100%        | 7e-04   | 93%   | <a href="#">gi 511959771 XP_004798117.1</a> |
| <a href="#">PREDICTED: beta-Ala-His dipeptidase isoform X2 [Mustela put</a>       | 44.3      | 44.3        | 100%        | 7e-04   | 93%   | <a href="#">gi 511842482 XP_004745710.1</a> |
| <a href="#">PREDICTED: beta-Ala-His dipeptidase isoform X3 [Mustela put</a>       | 44.3      | 44.3        | 100%        | 7e-04   | 93%   | <a href="#">gi 511959769 XP_004798116.1</a> |
| <a href="#">PREDICTED: beta-Ala-His dipeptidase isoform X1 [Mustela put</a>       | 44.3      | 44.3        | 100%        | 7e-04   | 93%   | <a href="#">gi 511842480 XP_004745709.1</a> |
| <a href="#">PREDICTED: beta-Ala-His dipeptidase isoform X1 [Mustela put</a>       | 44.3      | 44.3        | 100%        | 7e-04   | 93%   | <a href="#">gi 511959765 XP_004798114.1</a> |
| <a href="#">PREDICTED: beta-Ala-His dipeptidase isoform X2 [Fukomys d:</a>        | 43.1      | 43.1        | 100%        | 0.002   | 86%   | <a href="#">gi 731191032 XP_010608870.1</a> |
| <a href="#">PREDICTED: beta-Ala-His dipeptidase isoform X1 [Fukomys d:</a>        | 43.1      | 43.1        | 100%        | 0.002   | 86%   | <a href="#">gi 731191030 XP_010608813.1</a> |
| <a href="#">Beta-Ala-His dipeptidase [Fukomys damarensis]</a>                     | 43.1      | 43.1        | 100%        | 0.002   | 86%   | <a href="#">gi 676287801 KFO38436.1</a>     |
| <a href="#">PREDICTED: beta-Ala-His dipeptidase-like [Gorilla gorilla gorill:</a> | 42.6      | 42.6        | 100%        | 0.002   | 86%   | <a href="#">gi 426386236 XP_004059596.1</a> |
| <a href="#">beta-Ala-His dipeptidase [Pongo abelii]</a>                           | 42.6      | 42.6        | 100%        | 0.002   | 86%   | <a href="#">gi 197100618 NP_001125793.1</a> |
| <a href="#">PREDICTED: beta-Ala-His dipeptidase isoform X4 [Callithrix jar</a>    | 42.6      | 42.6        | 100%        | 0.002   | 86%   | <a href="#">gi 675718012 XP_008978248.1</a> |
| <a href="#">PREDICTED: beta-Ala-His dipeptidase isoform X2 [Oryctolagus</a>       | 42.6      | 42.6        | 100%        | 0.002   | 86%   | <a href="#">gi 655836920 XP_008259692.1</a> |
| <a href="#">PREDICTED: LOW QUALITY PROTEIN: beta-Ala-His dipeptid:</a>            | 42.6      | 42.6        | 100%        | 0.002   | 86%   | <a href="#">gi 507684395 XP_004640269.1</a> |
| <a href="#">PREDICTED: cytosolic non-specific dipeptidase isoform X4 [Pa</a>      | 42.6      | 42.6        | 100%        | 0.002   | 86%   | <a href="#">gi 675787003 XP_008950931.1</a> |
| <a href="#">PREDICTED: beta-Ala-His dipeptidase isoform X6 [Pan troglod</a>       | 42.6      | 42.6        | 100%        | 0.002   | 86%   | <a href="#">gi 694971841 XP_009432466.1</a> |
| <a href="#">PREDICTED: beta-Ala-His dipeptidase isoform X3 [Callithrix jar</a>    | 42.6      | 42.6        | 100%        | 0.002   | 86%   | <a href="#">gi 390474059 XP_002757384.2</a> |
| <a href="#">PREDICTED: beta-Ala-His dipeptidase isoform X2 [Callithrix jar</a>    | 42.6      | 42.6        | 100%        | 0.002   | 86%   | <a href="#">gi 675718001 XP_008978246.1</a> |
| <a href="#">PREDICTED: beta-Ala-His dipeptidase [Rhinopithecus roxellan</a>       | 42.6      | 42.6        | 100%        | 0.002   | 86%   | <a href="#">gi 724961646 XP_010355009.1</a> |
| <a href="#">PREDICTED: beta-Ala-His dipeptidase isoform X1 [Oryctolagus</a>       | 42.6      | 42.6        | 100%        | 0.002   | 86%   | <a href="#">gi 655836917 XP_008259691.1</a> |

|                                                                                |      |      |      |       |     |                                             |
|--------------------------------------------------------------------------------|------|------|------|-------|-----|---------------------------------------------|
| <a href="#">PREDICTED: beta-Ala-His dipeptidase isoform X2 [Macaca fas</a>     | 42.6 | 42.6 | 100% | 0.002 | 86% | <a href="#">gij544505241 XP_005586497.1</a> |
| <a href="#">PREDICTED: beta-Ala-His dipeptidase [Papio anubis]</a>             | 42.6 | 42.6 | 100% | 0.002 | 86% | <a href="#">gij402903362 XP_003914537.1</a> |
| <a href="#">Beta-Ala-His dipeptidase [Macaca mulatta]</a>                      | 42.6 | 42.6 | 100% | 0.002 | 86% | <a href="#">gij355702017 EHH29370.1</a>     |
| <a href="#">PREDICTED: beta-Ala-His dipeptidase isoform 1 [Nomascus le</a>     | 42.6 | 42.6 | 100% | 0.002 | 86% | <a href="#">gij332230419 XP_003264388.1</a> |
| <a href="#">PREDICTED: hypothetical protein LOC695195 isoform 2 [Maca</a>      | 42.6 | 42.6 | 100% | 0.002 | 86% | <a href="#">gij109122502 XP_001085457.1</a> |
| <a href="#">PREDICTED: hypothetical protein LOC695195 isoform 1 [Maca</a>      | 42.6 | 42.6 | 100% | 0.002 | 86% | <a href="#">gij297275497 XP_001085348.2</a> |
| <a href="#">PREDICTED: cytosolic non-specific dipeptidase isoform X3 [Pa</a>   | 42.6 | 42.6 | 100% | 0.002 | 86% | <a href="#">gij397514119 XP_003827346.1</a> |
| <a href="#">PREDICTED: beta-Ala-His dipeptidase isoform X5 [Pan troglod</a>    | 42.6 | 42.6 | 100% | 0.002 | 86% | <a href="#">gij114673583 XP_001136945.1</a> |
| <a href="#">PREDICTED: beta-Ala-His dipeptidase isoform X4 [Pan troglod</a>    | 42.6 | 42.6 | 100% | 0.002 | 86% | <a href="#">gij694971838 XP_009432465.1</a> |
| <a href="#">PREDICTED: beta-Ala-His dipeptidase [Chlorocebus sabaeus]</a>      | 42.6 | 42.6 | 100% | 0.002 | 86% | <a href="#">gij635098010 XP_008011959.1</a> |
| <a href="#">PREDICTED: beta-Ala-His dipeptidase isoform X1 [Macaca fas</a>     | 42.6 | 42.6 | 100% | 0.002 | 86% | <a href="#">gij544505239 XP_005586496.1</a> |
| <a href="#">PREDICTED: beta-Ala-His dipeptidase [Saimiri boliviensis boliv</a> | 42.6 | 42.6 | 100% | 0.002 | 86% | <a href="#">gij725563408 XP_010335022.1</a> |
| <a href="#">PREDICTED: beta-Ala-His dipeptidase isoform X1 [Callithrix jar</a> | 42.6 | 42.6 | 100% | 0.002 | 86% | <a href="#">gij675717997 XP_008978245.1</a> |
| <a href="#">PREDICTED: beta-Ala-His dipeptidase isoform X3 [Pan troglod</a>    | 42.6 | 42.6 | 100% | 0.002 | 86% | <a href="#">gij694971836 XP_009432464.1</a> |
| <a href="#">PREDICTED: cytosolic non-specific dipeptidase isoform X2 [Pa</a>   | 42.6 | 42.6 | 100% | 0.002 | 86% | <a href="#">gij675787000 XP_008950929.1</a> |
| <a href="#">PREDICTED: beta-Ala-His dipeptidase isoform X2 [Pan troglod</a>    | 42.6 | 42.6 | 100% | 0.002 | 86% | <a href="#">gij694971834 XP_009432463.1</a> |
| <a href="#">PREDICTED: cytosolic non-specific dipeptidase isoform X1 [Pa</a>   | 42.6 | 42.6 | 100% | 0.002 | 86% | <a href="#">gij675786998 XP_008950928.1</a> |
| <a href="#">PREDICTED: beta-Ala-His dipeptidase isoform X1 [Pan troglod</a>    | 42.6 | 42.6 | 100% | 0.002 | 86% | <a href="#">gij694971832 XP_009432462.1</a> |
| <a href="#">PREDICTED: beta-Ala-His dipeptidase isoform 2 [Dasyopus nov</a>    | 41.8 | 41.8 | 100% | 0.005 | 86% | <a href="#">gij488587738 XP_004479187.1</a> |
| <a href="#">PREDICTED: beta-Ala-His dipeptidase isoform 1 [Dasyopus nov</a>    | 41.8 | 41.8 | 100% | 0.005 | 86% | <a href="#">gij488587736 XP_004479186.1</a> |
| <a href="#">PREDICTED: beta-Ala-His dipeptidase isoform X7 [Heteroceph</a>     | 41.4 | 41.4 | 100% | 0.006 | 86% | <a href="#">gij513000966 XP_004862006.1</a> |
| <a href="#">PREDICTED: beta-Ala-His dipeptidase isoform X6 [Heteroceph</a>     | 41.4 | 41.4 | 100% | 0.006 | 86% | <a href="#">gij512861920 XP_004890014.1</a> |
| <a href="#">PREDICTED: beta-Ala-His dipeptidase isoform X4 [Heteroceph</a>     | 41.4 | 41.4 | 100% | 0.006 | 86% | <a href="#">gij513000960 XP_004862003.1</a> |
| <a href="#">PREDICTED: beta-Ala-His dipeptidase isoform X4 [Heteroceph</a>     | 41.4 | 41.4 | 100% | 0.006 | 86% | <a href="#">gij512861913 XP_004890012.1</a> |
| <a href="#">PREDICTED: beta-Ala-His dipeptidase isoform X3 [Heteroceph</a>     | 41.4 | 41.4 | 100% | 0.006 | 86% | <a href="#">gij513000958 XP_004862002.1</a> |
| <a href="#">PREDICTED: beta-Ala-His dipeptidase isoform X3 [Heteroceph</a>     | 41.4 | 41.4 | 100% | 0.006 | 86% | <a href="#">gij512861909 XP_004890011.1</a> |
| <a href="#">PREDICTED: beta-Ala-His dipeptidase isoform X2 [Heteroceph</a>     | 41.4 | 41.4 | 100% | 0.007 | 86% | <a href="#">gij513000956 XP_004862001.1</a> |
| <a href="#">PREDICTED: beta-Ala-His dipeptidase isoform X1 [Heteroceph</a>     | 41.4 | 41.4 | 100% | 0.007 | 86% | <a href="#">gij513000954 XP_004862000.1</a> |
| <a href="#">PREDICTED: beta-Ala-His dipeptidase isoform X2 [Heteroceph</a>     | 41.4 | 41.4 | 100% | 0.007 | 86% | <a href="#">gij512861905 XP_004890010.1</a> |
| <a href="#">PREDICTED: beta-Ala-His dipeptidase isoform X1 [Heteroceph</a>     | 41.4 | 41.4 | 100% | 0.007 | 86% | <a href="#">gij512861902 XP_004890009.1</a> |
| <a href="#">PREDICTED: beta-Ala-His dipeptidase [Ochotona princeps]</a>        | 41.4 | 41.4 | 100% | 0.007 | 86% | <a href="#">gij504134362 XP_004579710.1</a> |
| <a href="#">Beta-Ala-His dipeptidase [Heterocephalus glaber]</a>               | 41.4 | 41.4 | 100% | 0.007 | 86% | <a href="#">gij351703454 EHB06373.1</a>     |
| <a href="#">PREDICTED: beta-Ala-His dipeptidase [Condylura cristata]</a>       | 40.5 | 40.5 | 100% | 0.013 | 79% | <a href="#">gij507952033 XP_004684097.1</a> |
| <a href="#">PREDICTED: beta-Ala-His dipeptidase [Orycteropus afer afer]</a>    | 39.7 | 39.7 | 100% | 0.023 | 79% | <a href="#">gij634881439 XP_007950930.1</a> |
| <a href="#">PREDICTED: beta-Ala-His dipeptidase [Ornithorhynchus anatr</a>     | 39.7 | 39.7 | 100% | 0.024 | 79% | <a href="#">gij620952581 XP_007671072.1</a> |
| <a href="#">PREDICTED: beta-Ala-His dipeptidase isoform X3 [Sus scrofa]</a>    | 39.2 | 39.2 | 100% | 0.032 | 79% | <a href="#">gij545801834 XP_005659878.1</a> |
| <a href="#">PREDICTED: beta-Ala-His dipeptidase [Physeter catodon]</a>         | 39.2 | 39.2 | 100% | 0.033 | 79% | <a href="#">gij593754813 XP_007116282.1</a> |
| <a href="#">PREDICTED: beta-Ala-His dipeptidase isoform X4 [Chinchilla l</a>   | 39.2 | 39.2 | 100% | 0.033 | 79% | <a href="#">gij533114973 XP_005373141.1</a> |
| <a href="#">PREDICTED: beta-Ala-His dipeptidase isoform X4 [Balaenopte</a>     | 39.2 | 39.2 | 100% | 0.033 | 79% | <a href="#">gij594639072 XP_007172817.1</a> |
| <a href="#">PREDICTED: beta-Ala-His dipeptidase isoform X2 [Balaenopte</a>     | 39.2 | 39.2 | 100% | 0.033 | 79% | <a href="#">gij594639068 XP_007172815.1</a> |
| <a href="#">carosine dipeptidase 1 (metallopeptidase M20 family) [Sus scr</a>  | 39.2 | 39.2 | 100% | 0.033 | 79% | <a href="#">gij594140552 NP_001277253.1</a> |
| <a href="#">PREDICTED: beta-Ala-His dipeptidase isoform X3 [Chinchilla l</a>   | 39.2 | 39.2 | 100% | 0.033 | 79% | <a href="#">gij533114971 XP_005373140.1</a> |
| <a href="#">PREDICTED: beta-Ala-His dipeptidase [Orcinus orca]</a>             | 39.2 | 39.2 | 100% | 0.033 | 79% | <a href="#">gij466059455 XP_004280059.1</a> |
| <a href="#">PREDICTED: beta-Ala-His dipeptidase [Tupaia chinensis]</a>         | 39.2 | 39.2 | 100% | 0.033 | 79% | <a href="#">gij562881153 XP_006168179.1</a> |
| <a href="#">PREDICTED: beta-Ala-His dipeptidase isoform X2 [Chinchilla l</a>   | 39.2 | 39.2 | 100% | 0.033 | 79% | <a href="#">gij533114969 XP_005373139.1</a> |

|                                                                                 |      |      |      |       |     |                                             |
|---------------------------------------------------------------------------------|------|------|------|-------|-----|---------------------------------------------|
| <a href="#">PREDICTED: beta-Ala-His dipeptidase isoform X1 [Chinchilla l...</a> | 39.2 | 39.2 | 100% | 0.033 | 79% | <a href="#">gi 533114967 XP_005373138.1</a> |
| <a href="#">PREDICTED: LOW QUALITY PROTEIN: beta-Ala-His dipeptid...</a>        | 39.2 | 39.2 | 100% | 0.033 | 79% | <a href="#">gi 602728599 XP_007449731.1</a> |
| <a href="#">PREDICTED: beta-Ala-His dipeptidase isoform X1 [Balaenopt...</a>    | 39.2 | 39.2 | 100% | 0.033 | 79% | <a href="#">gi 594639066 XP_007172814.1</a> |
| <a href="#">PREDICTED: beta-Ala-His dipeptidase [Otolemur garnettii]</a>        | 39.2 | 39.2 | 100% | 0.033 | 79% | <a href="#">gi 395830795 XP_003788502.1</a> |
| <a href="#">PREDICTED: beta-Ala-His dipeptidase [Erinaceus europaeus]</a>       | 39.2 | 39.2 | 100% | 0.033 | 79% | <a href="#">gi 617592053 XP_007520644.1</a> |
| <a href="#">Zinc finger protein 407 [Tupaia chinensis]</a>                      | 39.2 | 39.2 | 100% | 0.034 | 79% | <a href="#">gi 444515465 ELV10904.1</a>     |
| <a href="#">beta-Ala-His dipeptidase-like protein [Cricetulus griseus]</a>      | 38.8 | 38.8 | 100% | 0.044 | 79% | <a href="#">gi 537229377 ERE83812.1</a>     |
| <a href="#">Beta-Ala-His dipeptidase [Cricetulus griseus]</a>                   | 38.8 | 38.8 | 100% | 0.045 | 79% | <a href="#">gi 344256459 EGW12563.1</a>     |
| <a href="#">PREDICTED: beta-Ala-His dipeptidase [Loxodonta africana]</a>        | 38.8 | 38.8 | 100% | 0.045 | 79% | <a href="#">gi 731460034 XP_010584989.1</a> |
| <a href="#">PREDICTED: beta-Ala-His dipeptidase [Nannospalax galii]</a>         | 38.8 | 38.8 | 100% | 0.045 | 79% | <a href="#">gi 674082518 XP_008848916.1</a> |
| <a href="#">PREDICTED: beta-Ala-His dipeptidase [Eptesicus fuscus]</a>          | 38.8 | 38.8 | 100% | 0.045 | 79% | <a href="#">gi 641694915 XP_008158650.1</a> |
| <a href="#">PREDICTED: beta-Ala-His dipeptidase [Elephantulus edwardii]</a>     | 38.8 | 38.8 | 100% | 0.045 | 79% | <a href="#">gi 585700922 XP_006897297.1</a> |
| <a href="#">PREDICTED: beta-Ala-His dipeptidase isoform X1 [Cricetulus c...</a> | 38.8 | 38.8 | 100% | 0.045 | 79% | <a href="#">gi 625218554 XP_003510704.2</a> |
| <a href="#">PREDICTED: beta-Ala-His dipeptidase isoform X2 [Cricetulus c...</a> | 38.8 | 38.8 | 100% | 0.045 | 79% | <a href="#">gi 625242672 XP_007612561.1</a> |
| <a href="#">PREDICTED: beta-Ala-His dipeptidase [Tarsius syrichta]</a>          | 38.8 | 38.8 | 100% | 0.045 | 79% | <a href="#">gi 640832941 XP_008072129.1</a> |
| <a href="#">PREDICTED: LOW QUALITY PROTEIN: beta-Ala-His dipeptid...</a>        | 38.8 | 38.8 | 100% | 0.045 | 79% | <a href="#">gi 524922064 XP_005065294.1</a> |
| <a href="#">PREDICTED: LOW QUALITY PROTEIN: beta-Ala-His dipeptid...</a>        | 38.8 | 38.8 | 100% | 0.045 | 79% | <a href="#">gi 532026811 XP_005356384.1</a> |
| <a href="#">PREDICTED: beta-Ala-His dipeptidase [Trichechus manatus la...</a>   | 38.8 | 38.8 | 100% | 0.045 | 79% | <a href="#">gi 471411632 XP_004387369.1</a> |
| <a href="#">hypothetical protein PANDA_013728 [Ailuropoda melanoleuca]</a>      | 38.4 | 38.4 | 100% | 0.062 | 79% | <a href="#">gi 281349002 EFB24586.1</a>     |
| <a href="#">PREDICTED: beta-Ala-His dipeptidase isoform X2 [Canis lupus...</a>  | 38.4 | 38.4 | 100% | 0.062 | 79% | <a href="#">gi 545485033 XP_005615365.1</a> |
| <a href="#">PREDICTED: beta-Ala-His dipeptidase isoform 2 [Ceratotheriu...</a>  | 38.4 | 38.4 | 100% | 0.062 | 79% | <a href="#">gi 478496719 XP_004422698.1</a> |
| <a href="#">PREDICTED: beta-Ala-His dipeptidase [Felis catus]</a>               | 38.4 | 38.4 | 100% | 0.062 | 79% | <a href="#">gi 587007722 XP_006939039.1</a> |
| <a href="#">PREDICTED: beta-Ala-His dipeptidase isoform X2 [Myotis bran...</a>  | 38.4 | 38.4 | 100% | 0.062 | 79% | <a href="#">gi 554533774 XP_005861635.1</a> |
| <a href="#">PREDICTED: beta-Ala-His dipeptidase [Odobenus rosmarus di...</a>    | 38.4 | 38.4 | 100% | 0.062 | 79% | <a href="#">gi 472393864 XP_004416194.1</a> |
| <a href="#">PREDICTED: beta-Ala-His dipeptidase [Panthera tigris altaica]</a>   | 38.4 | 38.4 | 100% | 0.062 | 79% | <a href="#">gi 591316978 XP_007084799.1</a> |
| <a href="#">PREDICTED: beta-Ala-His dipeptidase isoform X2 [Camelus br...</a>   | 38.4 | 38.4 | 100% | 0.062 | 79% | <a href="#">gi 743700606 XP_010970079.1</a> |

## Alignments

[Download](#) [GenPept](#) [Graphics](#) [Next](#) [Previous](#) [Descriptions](#)

carosine dipeptidase 1 (metallopeptidase M20 family), isoform CRA\_b [Homo sapiens]

Sequence ID: [gi|119586964|gb|EAW66560.1](#) Length: 310 Number of Matches: 1

[See 1 more title\(s\)](#)

Range 1: 179 to 192 [GenPept](#) [Graphics](#)

[Next Match](#) [Previous Match](#)

| Score          | Expect | Identities | Positives   | Gaps     |
|----------------|--------|------------|-------------|----------|
| 46.0 bits(101) | 2e-04  | 13/14(93%) | 14/14(100%) | 0/14(0%) |

Query 1 RLVPHMDVSAVEKQ 14  
 RLVPHM+VSAVEKQ  
 Sbjct 179 RLVPHMNVSAVEKQ 192

### Related Information

[Gene](#) - associated gene details  
[Identical Proteins](#) - Proteins identical to the subject

[Download](#) [GenPept](#) [Graphics](#) [Next](#) [Previous](#) [Descriptions](#)

carosine dipeptidase 1 (metallopeptidase M20 family), isoform CRA\_a [Homo sapiens]

Sequence ID: [gi|119586963|gb|EAW66559.1](#) Length: 423 Number of Matches: 1

Range 1: 292 to 305 [GenPept](#) [Graphics](#)

[Next Match](#) [Previous Match](#)

| Score          | Expect | Identities | Positives   | Gaps     |
|----------------|--------|------------|-------------|----------|
| 46.0 bits(101) | 2e-04  | 13/14(93%) | 14/14(100%) | 0/14(0%) |

### Related Information

[Gene](#) - associated gene details

Query 1 RLVPHMDVSAVEKQ 14  
 RLVPHM+VSAVEKQ  
 Sbjct 292 RLVPHMNVSAVEKQ 305

[Download](#) [GenPept](#) [Graphics](#)

[▼ Next](#) [▲ Previous](#) [▲ Descriptions](#)

Chain A, Crystal Structure Of Human Carnosine Dipeptidase 1

Sequence ID: [gi|197107410|pdb|3DLJ|A](#) Length: 485 Number of Matches: 1

[▶ See 1 more title\(s\)](#)

Range 1: 354 to 367 [GenPept](#) [Graphics](#)

[▼ Next Match](#) [▲ Previous Match](#)

| Score          | Expect | Identities | Positives   | Gaps     |
|----------------|--------|------------|-------------|----------|
| 46.0 bits(101) | 2e-04  | 13/14(93%) | 14/14(100%) | 0/14(0%) |

Query 1 RLVPHMDVSAVEKQ 14  
 RLVPHM+VSAVEKQ  
 Sbjct 354 RLVPHMNVSAVEKQ 367

**Related Information**

[Structure](#) - 3D structure displays  
[Identical Proteins](#) - Proteins  
 identical to the subject

[Download](#) [GenPept](#) [Graphics](#)

[▼ Next](#) [▲ Previous](#) [▲ Descriptions](#)

unnamed protein product [Homo sapiens]

Sequence ID: [gi|194383442|dbj|BAG64692.1](#) Length: 493 Number of Matches: 1

Range 1: 362 to 375 [GenPept](#) [Graphics](#)

[▼ Next Match](#) [▲ Previous Match](#)

| Score          | Expect | Identities | Positives   | Gaps     |
|----------------|--------|------------|-------------|----------|
| 46.0 bits(101) | 2e-04  | 13/14(93%) | 14/14(100%) | 0/14(0%) |

Query 1 RLVPHMDVSAVEKQ 14  
 RLVPHM+VSAVEKQ  
 Sbjct 362 RLVPHMNVSAVEKQ 375

**Related Information**

[Gene](#) - associated gene details

[Download](#) [GenPept](#) [Graphics](#)

[▼ Next](#) [▲ Previous](#) [▲ Descriptions](#)

beta-Ala-His dipeptidase precursor [Homo sapiens]

Sequence ID: [gi|21071039|ref|NP\\_116038.4](#) Length: 507 Number of Matches: 1

[▶ See 4 more title\(s\)](#)

Range 1: 376 to 389 [GenPept](#) [Graphics](#)

[▼ Next Match](#) [▲ Previous Match](#)

| Score          | Expect | Identities | Positives   | Gaps     |
|----------------|--------|------------|-------------|----------|
| 46.0 bits(101) | 2e-04  | 13/14(93%) | 14/14(100%) | 0/14(0%) |

Query 1 RLVPHMDVSAVEKQ 14  
 RLVPHM+VSAVEKQ  
 Sbjct 376 RLVPHMNVSAVEKQ 389

**Related Information**

[Gene](#) - associated gene details  
[UniGene](#) - clustered expressed  
 sequence tags  
[Map Viewer](#) - aligned genomic  
 context  
[Identical Proteins](#) - Proteins  
 identical to the subject

BLAST is a registered trademark of the National Library of Medicine.



NCBI/ BLAST/ blastp suite/ Formatting Results - B94FHW7801R

Your search parameters were adjusted to search for a short input sequence.

Edit and Resubmit Save Search Strategies Formatting options Download

YouTube How to read this page Blast report description

CNDP1\_RLVPHMNVSAVEKQ\_NonMod

RID B94FHW7801R (Expires on 01-14 10:33 am)

Query ID Icl|221108
Description None
Molecule type amino acid
Query Length 14

Database Name nr
Description All non-redundant GenBank CDS translations+PDB+SwissProt+PIR excluding environmental samples from WGS projects
Program BLASTP 2.2.30+ Citation

Other reports: Search Summary Taxonomy reports Distance tree of results Multiple alignment

Graphic Summary

Show Conserved Domains

No putative conserved domains have been detected

Distribution of 100 Blast Hits on the Query Sequence



The image shows a table with 30 rows. Each row contains a single blue horizontal line, which is likely a placeholder for a sequence alignment or a data entry. The table is centered on the page and is flanked by light gray vertical bars on both sides.





**Descriptions**

**Sequences producing significant alignments:**

Select: [All](#) [None](#) Selected:0

[↑](#) [Alignments](#)
[Download](#)
[GenPept](#)
[Graphics](#)
[Distance tree of results](#)
[Multiple alignment](#)


| Description                                                                                | Max score | Total score | Query cover | E value | Ident | Accession                                   |
|--------------------------------------------------------------------------------------------|-----------|-------------|-------------|---------|-------|---------------------------------------------|
| <a href="#">carnosine dipeptidase 1 (metallopeptidase M20 family), isoform CR</a>          | 48.6      | 48.6        | 100%        | 2e-05   | 100%  | <a href="#">gij119586964 EAW66560.1</a>     |
| <a href="#">carnosine dipeptidase 1 (metallopeptidase M20 family), isoform CR</a>          | 48.6      | 48.6        | 100%        | 2e-05   | 100%  | <a href="#">gij119586963 EAW66559.1</a>     |
| <a href="#">Chain A, Crystal Structure Of Human Carnosine Dipeptidase 1 [Homo sapiens]</a> | 48.6      | 48.6        | 100%        | 2e-05   | 100%  | <a href="#">gij197107410 3DLJ_A</a>         |
| <a href="#">unnamed protein product [Homo sapiens]</a>                                     | 48.6      | 48.6        | 100%        | 2e-05   | 100%  | <a href="#">gij194383442 BAG64692.1</a>     |
| <a href="#">beta-Ala-His dipeptidase precursor [Homo sapiens]</a>                          | 48.6      | 48.6        | 100%        | 2e-05   | 100%  | <a href="#">gij21071039 NP_116038.4</a>     |
| <a href="#">RecName: Full=Beta-Ala-His dipeptidase; AltName: Full=CNDP dip</a>             | 48.6      | 48.6        | 100%        | 2e-05   | 100%  | <a href="#">gij317373563 Q96KN2.4</a>       |
| <a href="#">unnamed protein product [Homo sapiens]</a>                                     | 48.6      | 48.6        | 100%        | 2e-05   | 100%  | <a href="#">gij158260855 BAF82605.1</a>     |
| <a href="#">Carnosine dipeptidase 1 (metallopeptidase M20 family) [Homo sapiens]</a>       | 48.6      | 48.6        | 100%        | 2e-05   | 100%  | <a href="#">gij83759081 AAI10296.1</a>      |
| <a href="#">Carnosine dipeptidase 1 (metallopeptidase M20 family) [Homo sapiens]</a>       | 48.6      | 48.6        | 100%        | 2e-05   | 100%  | <a href="#">gij109658940 AAI17123.1</a>     |
| <a href="#">glutamate carboxypeptidase-like protein 2 [Homo sapiens]</a>                   | 48.6      | 48.6        | 100%        | 2e-05   | 100%  | <a href="#">gij16555792 CAD10388.1</a>      |
| <a href="#">PREDICTED: beta-Ala-His dipeptidase isoform X2 [Fukomys dama]</a>              | 45.6      | 45.6        | 100%        | 2e-04   | 93%   | <a href="#">gij731191032 XP_010608870.1</a> |
| <a href="#">PREDICTED: beta-Ala-His dipeptidase isoform X1 [Fukomys dama]</a>              | 45.6      | 45.6        | 100%        | 2e-04   | 93%   | <a href="#">gij731191030 XP_010608813.1</a> |
| <a href="#">Beta-Ala-His dipeptidase [Fukomys damarensis]</a>                              | 45.6      | 45.6        | 100%        | 2e-04   | 93%   | <a href="#">gij676287801 KFO38436.1</a>     |
| <a href="#">PREDICTED: beta-Ala-His dipeptidase-like [Gorilla gorilla gorilla]</a>         | 45.2      | 45.2        | 100%        | 3e-04   | 93%   | <a href="#">gij426386236 XP_004059596.1</a> |
| <a href="#">beta-Ala-His dipeptidase [Pongo abelii]</a>                                    | 45.2      | 45.2        | 100%        | 3e-04   | 93%   | <a href="#">gij197100618 NP_001125793.1</a> |
| <a href="#">PREDICTED: beta-Ala-His dipeptidase isoform X4 [Callithrix jacchus]</a>        | 45.2      | 45.2        | 100%        | 3e-04   | 93%   | <a href="#">gij675718012 XP_008978248.1</a> |
| <a href="#">PREDICTED: beta-Ala-His dipeptidase isoform X2 [Oryctolagus cuniculus]</a>     | 45.2      | 45.2        | 100%        | 3e-04   | 93%   | <a href="#">gij655836920 XP_008259692.1</a> |
| <a href="#">PREDICTED: LOW QUALITY PROTEIN: beta-Ala-His dipeptidase [Pan troglodytes]</a> | 45.2      | 45.2        | 100%        | 3e-04   | 93%   | <a href="#">gij507684395 XP_004640269.1</a> |
| <a href="#">PREDICTED: cytosolic non-specific dipeptidase isoform X4 [Pan troglodytes]</a> | 45.2      | 45.2        | 100%        | 3e-04   | 93%   | <a href="#">gij675787003 XP_008950931.1</a> |
| <a href="#">PREDICTED: beta-Ala-His dipeptidase isoform X6 [Pan troglodytes]</a>           | 45.2      | 45.2        | 100%        | 3e-04   | 93%   | <a href="#">gij694971841 XP_009432466.1</a> |
| <a href="#">PREDICTED: beta-Ala-His dipeptidase isoform X3 [Callithrix jacchus]</a>        | 45.2      | 45.2        | 100%        | 3e-04   | 93%   | <a href="#">gij390474059 XP_002757384.2</a> |
| <a href="#">PREDICTED: beta-Ala-His dipeptidase isoform X2 [Callithrix jacchus]</a>        | 45.2      | 45.2        | 100%        | 3e-04   | 93%   | <a href="#">gij675718001 XP_008978246.1</a> |
| <a href="#">PREDICTED: beta-Ala-His dipeptidase [Rhinopithecus roxellana]</a>              | 45.2      | 45.2        | 100%        | 3e-04   | 93%   | <a href="#">gij724961646 XP_010355009.1</a> |
| <a href="#">PREDICTED: beta-Ala-His dipeptidase isoform X1 [Oryctolagus cuniculus]</a>     | 45.2      | 45.2        | 100%        | 3e-04   | 93%   | <a href="#">gij655836917 XP_008259691.1</a> |
| <a href="#">PREDICTED: beta-Ala-His dipeptidase isoform X2 [Macaca fascicularis]</a>       | 45.2      | 45.2        | 100%        | 3e-04   | 93%   | <a href="#">gij544505241 XP_005586497.1</a> |
| <a href="#">PREDICTED: beta-Ala-His dipeptidase [Papio anubis]</a>                         | 45.2      | 45.2        | 100%        | 3e-04   | 93%   | <a href="#">gij402903362 XP_003914537.1</a> |
| <a href="#">Beta-Ala-His dipeptidase [Macaca mulatta]</a>                                  | 45.2      | 45.2        | 100%        | 3e-04   | 93%   | <a href="#">gij355702017 EHH29370.1</a>     |
| <a href="#">PREDICTED: beta-Ala-His dipeptidase isoform 1 [Nomascus leucogenus]</a>        | 45.2      | 45.2        | 100%        | 3e-04   | 93%   | <a href="#">gij332230419 XP_003264388.1</a> |

|                                                                                    |      |      |      |       |     |                                             |
|------------------------------------------------------------------------------------|------|------|------|-------|-----|---------------------------------------------|
| <a href="#">PREDICTED: hypothetical protein LOC695195 isoform 2 [Macaca n</a>      | 45.2 | 45.2 | 100% | 3e-04 | 93% | <a href="#">gij109122502 XP_001085457.1</a> |
| <a href="#">PREDICTED: hypothetical protein LOC695195 isoform 1 [Macaca n</a>      | 45.2 | 45.2 | 100% | 3e-04 | 93% | <a href="#">gij297275497 XP_001085348.2</a> |
| <a href="#">PREDICTED: cytosolic non-specific dipeptidase isoform X3 [Pan p</a>    | 45.2 | 45.2 | 100% | 3e-04 | 93% | <a href="#">gij397514119 XP_003827346.1</a> |
| <a href="#">PREDICTED: beta-Ala-His dipeptidase isoform X5 [Pan troglodytes</a>    | 45.2 | 45.2 | 100% | 3e-04 | 93% | <a href="#">gij114673583 XP_001136945.1</a> |
| <a href="#">PREDICTED: beta-Ala-His dipeptidase isoform X4 [Pan troglodytes</a>    | 45.2 | 45.2 | 100% | 3e-04 | 93% | <a href="#">gij694971838 XP_009432465.1</a> |
| <a href="#">PREDICTED: beta-Ala-His dipeptidase [Chlorocebus sabaeus]</a>          | 45.2 | 45.2 | 100% | 3e-04 | 93% | <a href="#">gij635098010 XP_008011959.1</a> |
| <a href="#">PREDICTED: beta-Ala-His dipeptidase isoform X1 [Macaca fascicu</a>     | 45.2 | 45.2 | 100% | 3e-04 | 93% | <a href="#">gij544505239 XP_005586496.1</a> |
| <a href="#">PREDICTED: beta-Ala-His dipeptidase [Saimiri boliviensis boliviens</a> | 45.2 | 45.2 | 100% | 3e-04 | 93% | <a href="#">gij725563408 XP_010335022.1</a> |
| <a href="#">PREDICTED: beta-Ala-His dipeptidase isoform X1 [Callithrix jacchu</a>  | 45.2 | 45.2 | 100% | 3e-04 | 93% | <a href="#">gij675717997 XP_008978245.1</a> |
| <a href="#">PREDICTED: beta-Ala-His dipeptidase isoform X3 [Pan troglodytes</a>    | 45.2 | 45.2 | 100% | 3e-04 | 93% | <a href="#">gij694971836 XP_009432464.1</a> |
| <a href="#">PREDICTED: cytosolic non-specific dipeptidase isoform X2 [Pan p</a>    | 45.2 | 45.2 | 100% | 3e-04 | 93% | <a href="#">gij675787000 XP_008950929.1</a> |
| <a href="#">PREDICTED: beta-Ala-His dipeptidase isoform X2 [Pan troglodytes</a>    | 45.2 | 45.2 | 100% | 3e-04 | 93% | <a href="#">gij694971834 XP_009432463.1</a> |
| <a href="#">PREDICTED: cytosolic non-specific dipeptidase isoform X1 [Pan p</a>    | 45.2 | 45.2 | 100% | 3e-04 | 93% | <a href="#">gij675786998 XP_008950928.1</a> |
| <a href="#">PREDICTED: beta-Ala-His dipeptidase isoform X1 [Pan troglodytes</a>    | 45.2 | 45.2 | 100% | 3e-04 | 93% | <a href="#">gij694971832 XP_009432462.1</a> |
| <a href="#">PREDICTED: beta-Ala-His dipeptidase isoform X7 [Heterocephalus</a>     | 43.9 | 43.9 | 100% | 9e-04 | 93% | <a href="#">gij513000966 XP_004862006.1</a> |
| <a href="#">PREDICTED: beta-Ala-His dipeptidase isoform X6 [Heterocephalus</a>     | 43.9 | 43.9 | 100% | 9e-04 | 93% | <a href="#">gij512861920 XP_004890014.1</a> |
| <a href="#">PREDICTED: beta-Ala-His dipeptidase isoform X4 [Heterocephalus</a>     | 43.9 | 43.9 | 100% | 9e-04 | 93% | <a href="#">gij513000960 XP_004862003.1</a> |
| <a href="#">PREDICTED: beta-Ala-His dipeptidase isoform X4 [Heterocephalus</a>     | 43.9 | 43.9 | 100% | 9e-04 | 93% | <a href="#">gij512861913 XP_004890012.1</a> |
| <a href="#">PREDICTED: beta-Ala-His dipeptidase isoform X3 [Heterocephalus</a>     | 43.9 | 43.9 | 100% | 9e-04 | 93% | <a href="#">gij513000958 XP_004862002.1</a> |
| <a href="#">PREDICTED: beta-Ala-His dipeptidase isoform X3 [Heterocephalus</a>     | 43.9 | 43.9 | 100% | 9e-04 | 93% | <a href="#">gij512861909 XP_004890011.1</a> |
| <a href="#">PREDICTED: beta-Ala-His dipeptidase isoform X2 [Heterocephalus</a>     | 43.9 | 43.9 | 100% | 9e-04 | 93% | <a href="#">gij513000956 XP_004862001.1</a> |
| <a href="#">PREDICTED: beta-Ala-His dipeptidase isoform X1 [Heterocephalus</a>     | 43.9 | 43.9 | 100% | 9e-04 | 93% | <a href="#">gij513000954 XP_004862000.1</a> |
| <a href="#">PREDICTED: beta-Ala-His dipeptidase isoform X2 [Heterocephalus</a>     | 43.9 | 43.9 | 100% | 9e-04 | 93% | <a href="#">gij512861905 XP_004890010.1</a> |
| <a href="#">PREDICTED: beta-Ala-His dipeptidase isoform X1 [Heterocephalus</a>     | 43.9 | 43.9 | 100% | 9e-04 | 93% | <a href="#">gij512861902 XP_004890009.1</a> |
| <a href="#">PREDICTED: beta-Ala-His dipeptidase [Ochotona princeps]</a>            | 43.9 | 43.9 | 100% | 9e-04 | 93% | <a href="#">gij504134362 XP_004579710.1</a> |
| <a href="#">Beta-Ala-His dipeptidase [Heterocephalus glaber]</a>                   | 43.9 | 43.9 | 100% | 9e-04 | 93% | <a href="#">gij351703454 EHB06373.1</a>     |
| <a href="#">PREDICTED: beta-Ala-His dipeptidase [Condylura cristata]</a>           | 43.1 | 43.1 | 100% | 0.002 | 86% | <a href="#">gij507952033 XP_004684097.1</a> |
| <a href="#">PREDICTED: beta-Ala-His dipeptidase [Orycteropus afer afer]</a>        | 42.2 | 42.2 | 100% | 0.003 | 86% | <a href="#">gij634881439 XP_007950930.1</a> |
| <a href="#">PREDICTED: beta-Ala-His dipeptidase isoform X3 [Sus scrofa]</a>        | 41.8 | 41.8 | 100% | 0.004 | 86% | <a href="#">gij545801834 XP_005659878.1</a> |
| <a href="#">PREDICTED: beta-Ala-His dipeptidase isoform X4 [Mustela putoriu</a>    | 41.8 | 41.8 | 100% | 0.004 | 86% | <a href="#">gij511959771 XP_004798117.1</a> |
| <a href="#">PREDICTED: beta-Ala-His dipeptidase [Physeter catodon]</a>             | 41.8 | 41.8 | 100% | 0.004 | 86% | <a href="#">gij593754813 XP_007116282.1</a> |
| <a href="#">PREDICTED: beta-Ala-His dipeptidase isoform X4 [Chinchilla lanig</a>   | 41.8 | 41.8 | 100% | 0.004 | 86% | <a href="#">gij533114973 XP_005373141.1</a> |
| <a href="#">PREDICTED: beta-Ala-His dipeptidase isoform X4 [Balaenoptera a</a>     | 41.8 | 41.8 | 100% | 0.004 | 86% | <a href="#">gij594639072 XP_007172817.1</a> |
| <a href="#">PREDICTED: beta-Ala-His dipeptidase isoform X2 [Balaenoptera a</a>     | 41.8 | 41.8 | 100% | 0.004 | 86% | <a href="#">gij594639068 XP_007172815.1</a> |
| <a href="#">carosine dipeptidase 1 (metallopeptidase M20 family) [Sus scrofa]</a>  | 41.8 | 41.8 | 100% | 0.004 | 86% | <a href="#">gij594140552 NP_001277253.1</a> |
| <a href="#">PREDICTED: beta-Ala-His dipeptidase isoform X3 [Chinchilla lanig</a>   | 41.8 | 41.8 | 100% | 0.004 | 86% | <a href="#">gij533114971 XP_005373140.1</a> |
| <a href="#">PREDICTED: beta-Ala-His dipeptidase isoform X2 [Mustela putoriu</a>    | 41.8 | 41.8 | 100% | 0.004 | 86% | <a href="#">gij511842482 XP_004745710.1</a> |
| <a href="#">PREDICTED: beta-Ala-His dipeptidase [Orcinus orca]</a>                 | 41.8 | 41.8 | 100% | 0.004 | 86% | <a href="#">gij466059455 XP_004280059.1</a> |
| <a href="#">PREDICTED: beta-Ala-His dipeptidase [Tupaia chinensis]</a>             | 41.8 | 41.8 | 100% | 0.004 | 86% | <a href="#">gij562881153 XP_006168179.1</a> |
| <a href="#">PREDICTED: beta-Ala-His dipeptidase isoform X2 [Chinchilla lanig</a>   | 41.8 | 41.8 | 100% | 0.004 | 86% | <a href="#">gij533114969 XP_005373139.1</a> |
| <a href="#">PREDICTED: beta-Ala-His dipeptidase isoform X1 [Chinchilla lanig</a>   | 41.8 | 41.8 | 100% | 0.004 | 86% | <a href="#">gij533114967 XP_005373138.1</a> |
| <a href="#">PREDICTED: beta-Ala-His dipeptidase isoform X3 [Mustela putoriu</a>    | 41.8 | 41.8 | 100% | 0.004 | 86% | <a href="#">gij511959769 XP_004798116.1</a> |
| <a href="#">PREDICTED: beta-Ala-His dipeptidase isoform X1 [Mustela putoriu</a>    | 41.8 | 41.8 | 100% | 0.004 | 86% | <a href="#">gij511842480 XP_004745709.1</a> |
| <a href="#">PREDICTED: LOW QUALITY PROTEIN: beta-Ala-His dipeptidase  </a>         | 41.8 | 41.8 | 100% | 0.004 | 86% | <a href="#">gij602728599 XP_007449731.1</a> |
| <a href="#">PREDICTED: beta-Ala-His dipeptidase isoform X1 [Balaenoptera a</a>     | 41.8 | 41.8 | 100% | 0.004 | 86% | <a href="#">gij594639066 XP_007172814.1</a> |

|                                                                                     |      |      |      |       |     |                                             |
|-------------------------------------------------------------------------------------|------|------|------|-------|-----|---------------------------------------------|
| <a href="#">PREDICTED: beta-Ala-His dipeptidase isoform X1 [Mustela putorius]</a>   | 41.8 | 41.8 | 100% | 0.004 | 86% | <a href="#">gil511959765 XP_004798114.1</a> |
| <a href="#">PREDICTED: beta-Ala-His dipeptidase [Otolemur garnettii]</a>            | 41.8 | 41.8 | 100% | 0.004 | 86% | <a href="#">gil395830795 XP_003788502.1</a> |
| <a href="#">PREDICTED: beta-Ala-His dipeptidase [Erinaceus europaeus]</a>           | 41.8 | 41.8 | 100% | 0.005 | 86% | <a href="#">gil617592053 XP_007520644.1</a> |
| <a href="#">Zinc finger protein 407 [Tupaia chinensis]</a>                          | 41.8 | 41.8 | 100% | 0.005 | 86% | <a href="#">gil444515465 ELV10904.1</a>     |
| <a href="#">beta-Ala-His dipeptidase-like protein [Cricetulus griseus]</a>          | 41.4 | 41.4 | 100% | 0.006 | 86% | <a href="#">gil537229377 ERE83812.1</a>     |
| <a href="#">Beta-Ala-His dipeptidase [Cricetulus griseus]</a>                       | 41.4 | 41.4 | 100% | 0.006 | 86% | <a href="#">gil344256459 EGW12563.1</a>     |
| <a href="#">PREDICTED: beta-Ala-His dipeptidase [Loxodonta africana]</a>            | 41.4 | 41.4 | 100% | 0.006 | 86% | <a href="#">gil731460034 XP_010584989.1</a> |
| <a href="#">PREDICTED: beta-Ala-His dipeptidase [Nannospalax galii]</a>             | 41.4 | 41.4 | 100% | 0.006 | 86% | <a href="#">gil674082518 XP_008848916.1</a> |
| <a href="#">PREDICTED: beta-Ala-His dipeptidase [Eptesicus fuscus]</a>              | 41.4 | 41.4 | 100% | 0.006 | 86% | <a href="#">gil641694915 XP_008158650.1</a> |
| <a href="#">PREDICTED: beta-Ala-His dipeptidase [Elephantulus edwardii]</a>         | 41.4 | 41.4 | 100% | 0.006 | 86% | <a href="#">gil585700922 XP_006897297.1</a> |
| <a href="#">PREDICTED: beta-Ala-His dipeptidase isoform X1 [Cricetulus griseus]</a> | 41.4 | 41.4 | 100% | 0.006 | 86% | <a href="#">gil625218554 XP_003510704.2</a> |
| <a href="#">PREDICTED: beta-Ala-His dipeptidase isoform X2 [Cricetulus griseus]</a> | 41.4 | 41.4 | 100% | 0.006 | 86% | <a href="#">gil625242672 XP_007612561.1</a> |
| <a href="#">PREDICTED: beta-Ala-His dipeptidase [Tarsius syrichta]</a>              | 41.4 | 41.4 | 100% | 0.006 | 86% | <a href="#">gil640832941 XP_008072129.1</a> |
| <a href="#">PREDICTED: LOW QUALITY PROTEIN: beta-Ala-His dipeptidase</a>            | 41.4 | 41.4 | 100% | 0.006 | 86% | <a href="#">gil524922064 XP_005065294.1</a> |
| <a href="#">PREDICTED: LOW QUALITY PROTEIN: beta-Ala-His dipeptidase</a>            | 41.4 | 41.4 | 100% | 0.006 | 86% | <a href="#">gil532026811 XP_005356384.1</a> |
| <a href="#">PREDICTED: beta-Ala-His dipeptidase [Trichechus manatus latiros]</a>    | 41.4 | 41.4 | 100% | 0.006 | 86% | <a href="#">gil471411632 XP_004387369.1</a> |
| <a href="#">hypothetical protein PANDA_013728 [Ailuropoda melanoleuca]</a>          | 40.9 | 40.9 | 100% | 0.008 | 86% | <a href="#">gil281349002 EFB24586.1</a>     |
| <a href="#">PREDICTED: beta-Ala-His dipeptidase isoform X2 [Canis lupus far]</a>    | 40.9 | 40.9 | 100% | 0.008 | 86% | <a href="#">gil545485033 XP_005615365.1</a> |
| <a href="#">PREDICTED: beta-Ala-His dipeptidase isoform 2 [Ceratotherium sir]</a>   | 40.9 | 40.9 | 100% | 0.008 | 86% | <a href="#">gil478496719 XP_004422698.1</a> |
| <a href="#">PREDICTED: beta-Ala-His dipeptidase [Felis catus]</a>                   | 40.9 | 40.9 | 100% | 0.009 | 86% | <a href="#">gil587007722 XP_006939039.1</a> |
| <a href="#">PREDICTED: beta-Ala-His dipeptidase isoform X2 [Myotis brandtii]</a>    | 40.9 | 40.9 | 100% | 0.009 | 86% | <a href="#">gil554533774 XP_005861635.1</a> |
| <a href="#">PREDICTED: beta-Ala-His dipeptidase [Odobenus rosmarus diverg]</a>      | 40.9 | 40.9 | 100% | 0.009 | 86% | <a href="#">gil472393864 XP_004416194.1</a> |
| <a href="#">PREDICTED: beta-Ala-His dipeptidase [Panthera tigris altaica]</a>       | 40.9 | 40.9 | 100% | 0.009 | 86% | <a href="#">gil591316978 XP_007084799.1</a> |
| <a href="#">PREDICTED: beta-Ala-His dipeptidase [Vicugna pacos]</a>                 | 40.9 | 40.9 | 100% | 0.009 | 86% | <a href="#">gil560982102 XP_006213282.1</a> |
| <a href="#">PREDICTED: beta-Ala-His dipeptidase [Camelus ferus]</a>                 | 40.9 | 40.9 | 100% | 0.009 | 86% | <a href="#">gil560923439 XP_006187914.1</a> |
| <a href="#">PREDICTED: beta-Ala-His dipeptidase isoform X1 [Canis lupus far]</a>    | 40.9 | 40.9 | 100% | 0.009 | 86% | <a href="#">gil545485031 XP_005615364.1</a> |
| <a href="#">PREDICTED: beta-Ala-His dipeptidase isoform 1 [Ceratotherium sir]</a>   | 40.9 | 40.9 | 100% | 0.009 | 86% | <a href="#">gil478496717 XP_004422697.1</a> |

## Alignments

Download GenPept Graphics

Next Previous Descriptions

carnosine dipeptidase 1 (metallopeptidase M20 family), isoform CRA\_b [Homo sapiens]

Sequence ID: [gil119586964|gb|EAW66560.1](#) Length: 310 Number of Matches: 1

See 1 more title(s)

Range 1: 179 to 192 GenPept Graphics

Next Match Previous Match

| Score          | Expect | Identities  | Positives   | Gaps     |
|----------------|--------|-------------|-------------|----------|
| 48.6 bits(107) | 2e-05  | 14/14(100%) | 14/14(100%) | 0/14(0%) |

Query 1 RLVPHMNVSAVEKQ 14  
 RLVPHMNVSAVEKQ  
 Sbjct 179 RLVPHMNVSAVEKQ 192

### Related Information

[Gene](#) - associated gene details  
[Identical Proteins](#) - Proteins identical to the subject

Download GenPept Graphics

Next Previous Descriptions

carnosine dipeptidase 1 (metallopeptidase M20 family), isoform CRA\_a [Homo sapiens]

Sequence ID: [gil119586963|gb|EAW66559.1](#) Length: 423 Number of Matches: 1

Range 1: 292 to 305 GenPept Graphics

Next Match Previous Match

| Score          | Expect | Identities  | Positives   | Gaps     |
|----------------|--------|-------------|-------------|----------|
| 48.6 bits(107) | 2e-05  | 14/14(100%) | 14/14(100%) | 0/14(0%) |

### Related Information

[Gene](#) - associated gene details

Query 1 RLVPHMNVSAREKQ 14  
 Sbjct 292 RLVPHMNVSAREKQ 305

[Download](#) [GenPept](#) [Graphics](#)

[Next](#) [Previous](#) [Descriptions](#)

Chain A, Crystal Structure Of Human Carnosine Dipeptidase 1

Sequence ID: [gi|197107410|pdb|3DLJ|A](#) Length: 485 Number of Matches: 1

[See 1 more title\(s\)](#)

Range 1: 354 to 367 [GenPept](#) [Graphics](#)

[Next Match](#) [Previous Match](#)

| Score          | Expect | Identities  | Positives   | Gaps     |
|----------------|--------|-------------|-------------|----------|
| 48.6 bits(107) | 2e-05  | 14/14(100%) | 14/14(100%) | 0/14(0%) |

Query 1 RLVPHMNVSAREKQ 14  
 Sbjct 354 RLVPHMNVSAREKQ 367

**Related Information**

[Structure](#) - 3D structure displays  
[Identical Proteins](#) - Proteins identical to the subject

[Download](#) [GenPept](#) [Graphics](#)

[Next](#) [Previous](#) [Descriptions](#)

unnamed protein product [Homo sapiens]

Sequence ID: [gi|194383442|dbj|BAG64692.1|](#) Length: 493 Number of Matches: 1

Range 1: 362 to 375 [GenPept](#) [Graphics](#)

[Next Match](#) [Previous Match](#)

| Score          | Expect | Identities  | Positives   | Gaps     |
|----------------|--------|-------------|-------------|----------|
| 48.6 bits(107) | 2e-05  | 14/14(100%) | 14/14(100%) | 0/14(0%) |

Query 1 RLVPHMNVSAREKQ 14  
 Sbjct 362 RLVPHMNVSAREKQ 375

**Related Information**

[Gene](#) - associated gene details

[Download](#) [GenPept](#) [Graphics](#)

[Next](#) [Previous](#) [Descriptions](#)

beta-Ala-His dipeptidase precursor [Homo sapiens]

Sequence ID: [gi|21071039|ref|NP\\_116038.4|](#) Length: 507 Number of Matches: 1

[See 4 more title\(s\)](#)

Range 1: 376 to 389 [GenPept](#) [Graphics](#)

[Next Match](#) [Previous Match](#)

| Score          | Expect | Identities  | Positives   | Gaps     |
|----------------|--------|-------------|-------------|----------|
| 48.6 bits(107) | 2e-05  | 14/14(100%) | 14/14(100%) | 0/14(0%) |

Query 1 RLVPHMNVSAREKQ 14  
 Sbjct 376 RLVPHMNVSAREKQ 389

**Related Information**

[Gene](#) - associated gene details  
[UniGene](#) - clustered expressed sequence tags  
[Map Viewer](#) - aligned genomic context  
[Identical Proteins](#) - Proteins identical to the subject

BLAST is a registered trademark of the National Library of Medicine.

NCBI/ BLAST/ blastp suite/ Formatting Results - BTGCJ3C8016

Your search parameters were adjusted to search for a short input sequence.

[Edit and Resubmit](#) [Save Search Strategies](#) [Formatting options](#) [Download](#) [YouTube](#) [How to read this page](#) [Blast report description](#)

CPB2\_KKKQVHFFVDASDNDVKA\_Mod

RID [BTGCJ3C8016](#) (Expires on 01-20 15:34 pm)

Query ID |cl|22070  
 Description None  
 Molecule type amino acid  
 Query Length 19

Database Name nr  
 Description All non-redundant GenBank CDS translations+PDB+SwissProt+PIR+PRF excluding environmental samples from WGS projects  
 Program BLASTP 2.2.30+ [Citation](#)

Other reports: [Search Summary](#) [Taxonomy reports](#) [Distance tree of results](#) [Multiple alignment](#)

Graphic Summary

Show Conserved Domains

No putative conserved domains have been detected

Distribution of 100 Blast Hits on the Query Sequence



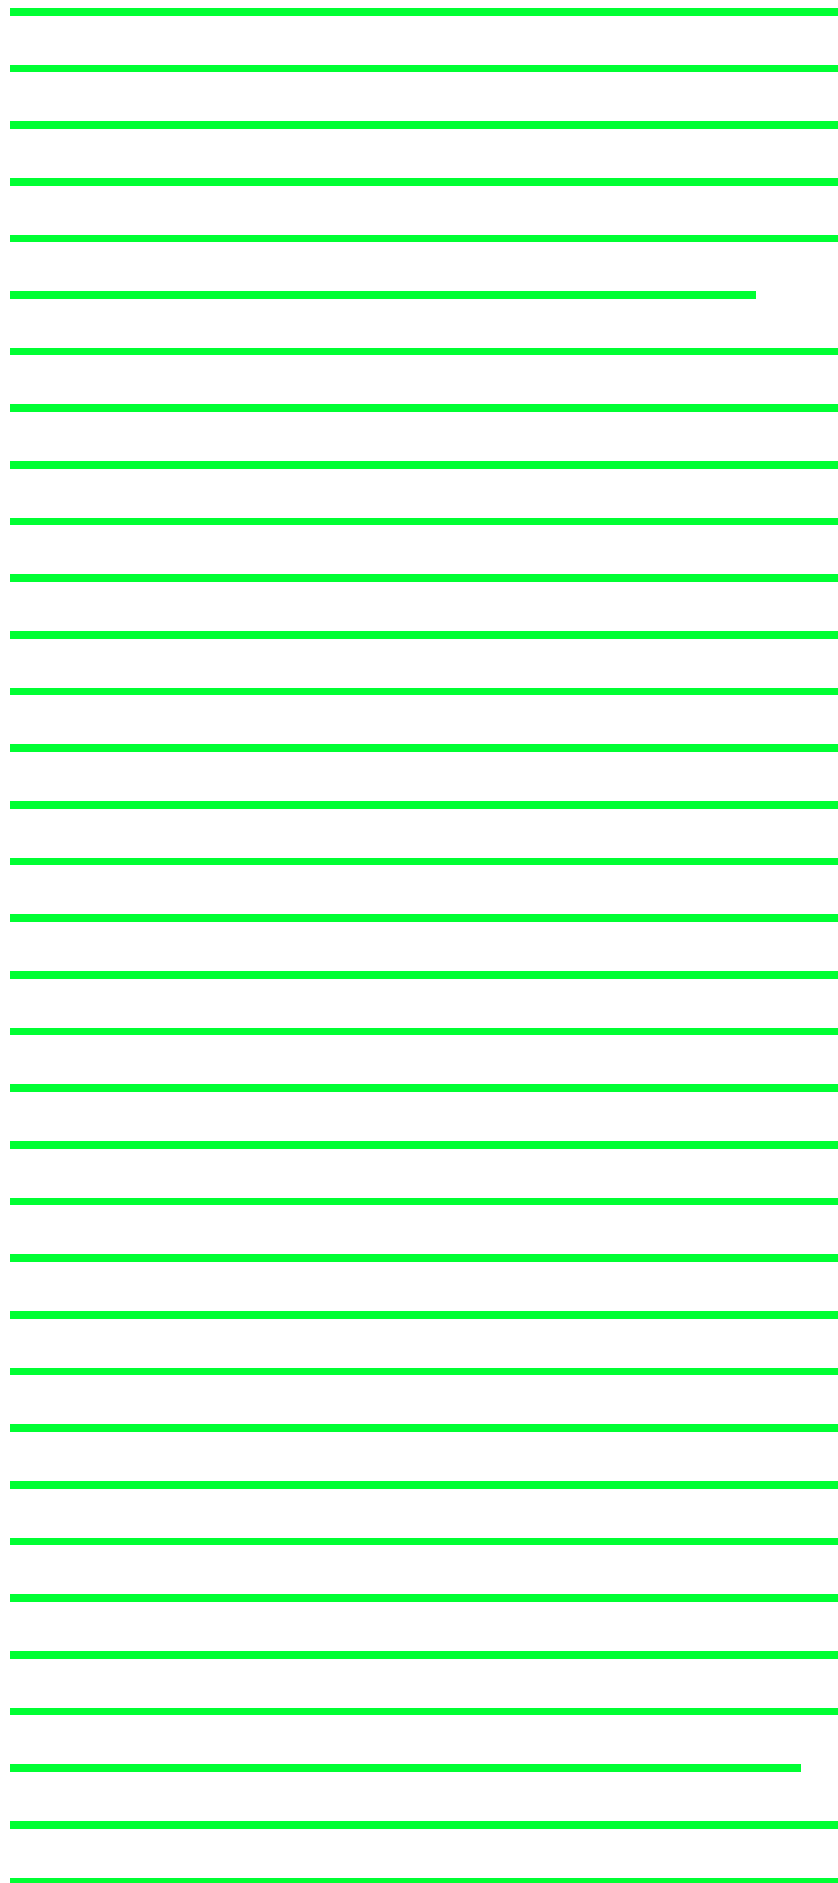



## Descriptions

### Sequences producing significant alignments:

Select: [All](#) [None](#) Selected:0

[Alignments](#)
[Download](#)
[GenPept](#)
[Graphics](#)
[Distance tree of results](#)
[Multiple alignment](#)

| Description                                                                     | Max score | Total score | Query cover | E value | Ident | Accession                                   |
|---------------------------------------------------------------------------------|-----------|-------------|-------------|---------|-------|---------------------------------------------|
| <a href="#">PREDICTED: carboxypeptidase B2 isoform X3 [Homo sapiens]</a>        | 60.4      | 60.4        | 100%        | 4e-09   | 95%   | <a href="#">gi 530402101 XP_005266316.1</a> |
| <a href="#">carboxypeptidase B-like protein [Homo sapiens]</a>                  | 60.4      | 60.4        | 100%        | 4e-09   | 95%   | <a href="#">gi 6855464 BAA90475.1</a>       |
| <a href="#">carboxypeptidase B2 (plasma, carboxypeptidase U), isoform C</a>     | 60.4      | 60.4        | 100%        | 4e-09   | 95%   | <a href="#">gi 119629159 EAX08754.1</a>     |
| <a href="#">carboxypeptidase B2 isoform 2 preproprotein [Homo sapiens]</a>      | 60.4      | 60.4        | 100%        | 4e-09   | 95%   | <a href="#">gi 513126877 NP_001265470.1</a> |
| <a href="#">PREDICTED: carboxypeptidase B2 isoform X2 [Pongo abelii]</a>        | 60.4      | 60.4        | 100%        | 4e-09   | 95%   | <a href="#">gi 686743701 XP_009246910.1</a> |
| <a href="#">Chain A, Pro-carboxypeptidase U In Complex With 5-(3-aminoc</a>     | 60.4      | 60.4        | 100%        | 4e-09   | 95%   | <a href="#">gi 672886543 4P10_A</a>         |
| <a href="#">PREDICTED: carboxypeptidase B2 isoform X2 [Homo sapiens]</a>        | 60.4      | 60.4        | 100%        | 4e-09   | 95%   | <a href="#">gi 530402099 XP_005266315.1</a> |
| <a href="#">prepro-plasma carboxypeptidase B [Homo sapiens]</a>                 | 60.4      | 60.4        | 100%        | 4e-09   | 95%   | <a href="#">gi 189687 AAA60042.1</a>        |
| <a href="#">PREDICTED: carboxypeptidase B2 [Gorilla gorilla gorilla]</a>        | 60.4      | 60.4        | 100%        | 4e-09   | 95%   | <a href="#">gi 426375394 XP_004054526.1</a> |
| <a href="#">Carboxypeptidase B2 (plasma) [Homo sapiens]</a>                     | 60.4      | 60.4        | 100%        | 4e-09   | 95%   | <a href="#">gi 13937897 AAH07057.1</a>      |
| <a href="#">carboxypeptidase B2 isoform 1 preproprotein [Homo sapiens]</a>      | 60.4      | 60.4        | 100%        | 4e-09   | 95%   | <a href="#">gi 513126885 NP_001863.3</a>    |
| <a href="#">carboxypeptidase B2 (plasma) [synthetic construct]</a>              | 60.4      | 60.4        | 100%        | 4e-09   | 95%   | <a href="#">gi 157927966 ABW03279.1</a>     |
| <a href="#">carboxypeptidase B2 (plasma, carboxypeptidase U) [synthetic c</a>   | 60.4      | 60.4        | 100%        | 4e-09   | 95%   | <a href="#">gi 124126823 ABM92184.1</a>     |
| <a href="#">PREDICTED: carboxypeptidase B2 [Pan troglodytes]</a>                | 60.4      | 60.4        | 100%        | 4e-09   | 95%   | <a href="#">gi 114651557 XP_509667.2</a>    |
| <a href="#">Chain A, Crystal Structure Of Thrombin-Activatable Fibrinolysis</a> | 60.4      | 60.4        | 100%        | 4e-09   | 95%   | <a href="#">gi 193506809 3D66_A</a>         |
| <a href="#">Homo sapiens carboxypeptidase B2 (plasma, carboxypeptidase</a>      | 60.4      | 60.4        | 100%        | 4e-09   | 95%   | <a href="#">gi 30584819 AAP36662.1</a>      |
| <a href="#">PREDICTED: carboxypeptidase B2 isoform X1 [Pongo abelii]</a>        | 60.4      | 60.4        | 100%        | 4e-09   | 95%   | <a href="#">gi 297694016 XP_002824293.1</a> |
| <a href="#">Chain A, Crystal Structure Of A T325i/t329i/h333y/h335q Mutar</a>   | 60.4      | 60.4        | 100%        | 4e-09   | 95%   | <a href="#">gi 253722661 3D68_A</a>         |
| <a href="#">PREDICTED: carboxypeptidase B2 isoform X1 [Homo sapiens]</a>        | 60.4      | 60.4        | 100%        | 4e-09   | 95%   | <a href="#">gi 530402097 XP_005266314.1</a> |
| <a href="#">PREDICTED: carboxypeptidase B2 isoform X1 [Rhinopithecus</a>        | 57.9      | 57.9        | 100%        | 3e-08   | 89%   | <a href="#">gi 724966280 XP_010356389.1</a> |
| <a href="#">PREDICTED: carboxypeptidase B2 [Papio anubis]</a>                   | 57.9      | 57.9        | 100%        | 3e-08   | 89%   | <a href="#">gi 402901940 XP_003913891.1</a> |
| <a href="#">PREDICTED: carboxypeptidase B2 [Nomascus leucogenys]</a>            | 57.1      | 57.1        | 100%        | 6e-08   | 89%   | <a href="#">gi 332241864 XP_003270104.1</a> |
| <a href="#">PREDICTED: carboxypeptidase B2 [Callithrix jacchus]</a>             | 54.9      | 54.9        | 89%         | 3e-07   | 94%   | <a href="#">gi 390457680 XP_002742737.2</a> |
| <a href="#">PREDICTED: carboxypeptidase B2 [Chlorocebus sabaeus]</a>            | 54.5      | 54.5        | 100%        | 5e-07   | 84%   | <a href="#">gi 635025444 XP_007958527.1</a> |
| <a href="#">PREDICTED: carboxypeptidase B2-like [Peromyscus manicula</a>        | 54.1      | 54.1        | 100%        | 5e-07   | 84%   | <a href="#">gi 589996660 XP_006998803.1</a> |
| <a href="#">PREDICTED: carboxypeptidase B2 isoform X2 [Cricetulus grise</a>     | 54.1      | 54.1        | 100%        | 6e-07   | 84%   | <a href="#">gi 625193824 XP_007639419.1</a> |
| <a href="#">PREDICTED: carboxypeptidase B2 isoform X4 [Cricetulus grise</a>     | 54.1      | 54.1        | 100%        | 6e-07   | 84%   | <a href="#">gi 625271974 XP_007627553.1</a> |
| <a href="#">PREDICTED: carboxypeptidase B2 [Peromyscus maniculatus t</a>        | 54.1      | 54.1        | 100%        | 6e-07   | 84%   | <a href="#">gi 589957698 XP_006991448.1</a> |
| <a href="#">Carboxypeptidase B2 (plasma) [Mus musculus]</a>                     | 54.1      | 54.1        | 100%        | 6e-07   | 84%   | <a href="#">gi 59808067 AAH89577.1</a>      |

|                                                                                    |      |      |      |       |     |                                             |
|------------------------------------------------------------------------------------|------|------|------|-------|-----|---------------------------------------------|
| <a href="#">carboxypeptidase U [Mus musculus]</a>                                  | 54.1 | 54.1 | 100% | 6e-07 | 84% | <a href="#">gil6003652 AAF00528.1</a>       |
| <a href="#">PREDICTED: carboxypeptidase B2 [Mesocricetus auratus]</a>              | 54.1 | 54.1 | 100% | 6e-07 | 84% | <a href="#">gil524935646 XP_005071018.1</a> |
| <a href="#">carboxypeptidase B2 precursor [Mus musculus]</a>                       | 54.1 | 54.1 | 100% | 6e-07 | 84% | <a href="#">gil31982712 NP_062749.2</a>     |
| <a href="#">PREDICTED: carboxypeptidase B2 isoform X1 [Cricetulus griseus]</a>     | 54.1 | 54.1 | 100% | 6e-07 | 84% | <a href="#">gil354476626 XP_003500525.1</a> |
| <a href="#">PREDICTED: carboxypeptidase B2 isoform X3 [Cricetulus griseus]</a>     | 54.1 | 54.1 | 100% | 6e-07 | 84% | <a href="#">gil625271972 XP_007627552.1</a> |
| <a href="#">zinc finger CCCH domain-containing protein 13 [Cricetulus griseus]</a> | 54.1 | 54.1 | 100% | 7e-07 | 84% | <a href="#">gil537241932 ERE87338.1</a>     |
| <a href="#">Carboxypeptidase B2 [Fukomys damarensis]</a>                           | 52.4 | 52.4 | 100% | 2e-06 | 84% | <a href="#">gil676273139 KFO27861.1</a>     |
| <a href="#">PREDICTED: carboxypeptidase B2 isoform X2 [Camelus dromedarius]</a>    | 52.4 | 52.4 | 100% | 2e-06 | 84% | <a href="#">gil744566815 XP_010979147.1</a> |
| <a href="#">PREDICTED: carboxypeptidase B2 isoform X2 [Camelus bactrianus]</a>     | 52.4 | 52.4 | 100% | 2e-06 | 84% | <a href="#">gil743712317 XP_010949694.1</a> |
| <a href="#">PREDICTED: carboxypeptidase B2 isoform X2 [Macaca fascicularis]</a>    | 52.4 | 52.4 | 100% | 2e-06 | 84% | <a href="#">gil544503644 XP_005585858.1</a> |
| <a href="#">PREDICTED: carboxypeptidase B2 isoform X3 [Chinchilla lanigera]</a>    | 52.4 | 52.4 | 100% | 2e-06 | 84% | <a href="#">gil533192699 XP_005409155.1</a> |
| <a href="#">PREDICTED: carboxypeptidase B2 isoform X2 [Chinchilla lanigera]</a>    | 52.4 | 52.4 | 100% | 2e-06 | 84% | <a href="#">gil533192697 XP_005409154.1</a> |
| <a href="#">PREDICTED: carboxypeptidase B2 [Otolemur garnettii]</a>                | 52.4 | 52.4 | 100% | 2e-06 | 84% | <a href="#">gil395835377 XP_003790657.1</a> |
| <a href="#">PREDICTED: carboxypeptidase B2 isoform X1 [Camelus dromedarius]</a>    | 52.4 | 52.4 | 100% | 2e-06 | 84% | <a href="#">gil744566812 XP_010979146.1</a> |
| <a href="#">PREDICTED: carboxypeptidase B2 [Canis lupus familiaris]</a>            | 52.4 | 52.4 | 100% | 2e-06 | 84% | <a href="#">gil73989292 XP_851154.1</a>     |
| <a href="#">PREDICTED: carboxypeptidase B2 [Vicugna pacos]</a>                     | 52.4 | 52.4 | 100% | 2e-06 | 84% | <a href="#">gil560974364 XP_006209502.1</a> |
| <a href="#">PREDICTED: carboxypeptidase B2 [Camelus ferus]</a>                     | 52.4 | 52.4 | 100% | 2e-06 | 84% | <a href="#">gil560922422 XP_006187410.1</a> |
| <a href="#">PREDICTED: carboxypeptidase B2 isoform X1 [Macaca fascicularis]</a>    | 52.4 | 52.4 | 100% | 2e-06 | 84% | <a href="#">gil544503642 XP_005585857.1</a> |
| <a href="#">PREDICTED: carboxypeptidase B2 isoform X1 [Chinchilla lanigera]</a>    | 52.4 | 52.4 | 100% | 2e-06 | 84% | <a href="#">gil533192695 XP_005409153.1</a> |
| <a href="#">PREDICTED: carboxypeptidase B2 [Saimiri boliviensis bolivianus]</a>    | 52.4 | 52.4 | 94%  | 2e-06 | 89% | <a href="#">gil403286234 XP_003934405.1</a> |
| <a href="#">Carboxypeptidase B2 [Macaca mulatta]</a>                               | 52.4 | 52.4 | 100% | 2e-06 | 84% | <a href="#">gil355700980 EHH29001.1</a>     |
| <a href="#">PREDICTED: carboxypeptidase B2 isoform X2 [Fukomys damarensis]</a>     | 52.4 | 52.4 | 100% | 2e-06 | 84% | <a href="#">gil731244313 XP_010635336.1</a> |
| <a href="#">PREDICTED: carboxypeptidase B2 [Felis catus]</a>                       | 52.4 | 52.4 | 100% | 2e-06 | 84% | <a href="#">gil586973570 XP_006927367.1</a> |
| <a href="#">PREDICTED: carboxypeptidase B2 isoform X1 [Fukomys damarensis]</a>     | 52.4 | 52.4 | 100% | 2e-06 | 84% | <a href="#">gil731244311 XP_010635335.1</a> |
| <a href="#">PREDICTED: carboxypeptidase B2 [Panthera tigris altaica]</a>           | 52.4 | 52.4 | 100% | 2e-06 | 84% | <a href="#">gil591318467 XP_007085493.1</a> |
| <a href="#">plastin-2 isoform 16 [Camelus ferus]</a>                               | 52.4 | 52.4 | 100% | 3e-06 | 84% | <a href="#">gil528759255 EPY78914.1</a>     |
| <a href="#">carboxypeptidase B2 (plasma), isoform CRA_b [Rattus norvegicus]</a>    | 51.5 | 51.5 | 100% | 4e-06 | 79% | <a href="#">gil149049966 EDM02290.1</a>     |
| <a href="#">carboxypeptidase B2 (plasma), isoform CRA_a [Rattus norvegicus]</a>    | 51.5 | 51.5 | 100% | 5e-06 | 79% | <a href="#">gil149049965 EDM02289.1</a>     |
| <a href="#">Cpb2 protein [Rattus norvegicus]</a>                                   | 51.5 | 51.5 | 100% | 5e-06 | 79% | <a href="#">gil60688161 AAH91133.1</a>      |
| <a href="#">carboxypeptidase B2 precursor [Rattus norvegicus]</a>                  | 51.5 | 51.5 | 100% | 5e-06 | 79% | <a href="#">gil16758414 NP_446069.1</a>     |
| <a href="#">PREDICTED: carboxypeptidase B2 [Tupaia chinensis]</a>                  | 51.5 | 51.5 | 100% | 5e-06 | 79% | <a href="#">gil562871068 XP_006163508.1</a> |
| <a href="#">PREDICTED: carboxypeptidase B2 [Equus caballus]</a>                    | 51.1 | 51.1 | 100% | 6e-06 | 84% | <a href="#">gil545190694 XP_005601424.1</a> |
| <a href="#">PREDICTED: carboxypeptidase B2 [Microtus ochrogaster]</a>              | 50.3 | 50.3 | 100% | 1e-05 | 79% | <a href="#">gil532025304 XP_005355675.1</a> |
| <a href="#">PREDICTED: carboxypeptidase B2 isoform 1 [Macaca mulatta]</a>          | 49.8 | 49.8 | 94%  | 2e-05 | 83% | <a href="#">gil109120669 XP_001097310.1</a> |
| <a href="#">Carboxypeptidase B2 [Macaca fascicularis]</a>                          | 49.8 | 49.8 | 94%  | 2e-05 | 83% | <a href="#">gil355754683 EHH58584.1</a>     |
| <a href="#">PREDICTED: carboxypeptidase B2 isoform 3 [Macaca mulatta]</a>          | 49.8 | 49.8 | 94%  | 2e-05 | 83% | <a href="#">gil109120665 XP_001097608.1</a> |
| <a href="#">PREDICTED: carboxypeptidase B2 [Cavia porcellus]</a>                   | 49.8 | 49.8 | 100% | 2e-05 | 79% | <a href="#">gil348583190 XP_003477356.1</a> |
| <a href="#">PREDICTED: carboxypeptidase B2 [Balaenoptera acutorostrata]</a>        | 49.4 | 49.4 | 100% | 2e-05 | 79% | <a href="#">gil594678268 XP_007186896.1</a> |
| <a href="#">PREDICTED: carboxypeptidase B2 [Octodon degus]</a>                     | 49.0 | 49.0 | 100% | 3e-05 | 79% | <a href="#">gil507684606 XP_004640321.1</a> |
| <a href="#">PREDICTED: carboxypeptidase B2 isoform X2 [Heterocephalus glaber]</a>  | 48.6 | 48.6 | 100% | 4e-05 | 79% | <a href="#">gil512921202 XP_004904434.1</a> |
| <a href="#">PREDICTED: carboxypeptidase B2 isoform X2 [Heterocephalus glaber]</a>  | 48.6 | 48.6 | 100% | 4e-05 | 79% | <a href="#">gil512964055 XP_004844264.1</a> |
| <a href="#">PREDICTED: carboxypeptidase B2 isoform X1 [Heterocephalus glaber]</a>  | 48.6 | 48.6 | 100% | 4e-05 | 79% | <a href="#">gil512921198 XP_004904433.1</a> |
| <a href="#">PREDICTED: carboxypeptidase B2 isoform X1 [Heterocephalus glaber]</a>  | 48.6 | 48.6 | 100% | 4e-05 | 79% | <a href="#">gil512964053 XP_004844263.1</a> |
| <a href="#">PREDICTED: carboxypeptidase B2 [Tursiops truncatus]</a>                | 47.7 | 47.7 | 100% | 8e-05 | 79% | <a href="#">gil470653285 XP_004329533.1</a> |
| <a href="#">PREDICTED: carboxypeptidase B2 isoform X2 [Lipotes vexillifer]</a>     | 47.7 | 47.7 | 100% | 8e-05 | 79% | <a href="#">gil602712571 XP_007466515.1</a> |



|                                                                                 |      |      |      |       |     |                                             |
|---------------------------------------------------------------------------------|------|------|------|-------|-----|---------------------------------------------|
| <a href="#">PREDICTED: carboxypeptidase B2 [Physeter catodon]</a>               | 47.7 | 47.7 | 100% | 8e-05 | 79% | <a href="#">gij593749228 XP_007129852.1</a> |
| <a href="#">PREDICTED: carboxypeptidase B2 isoform X1 [Lipotes vexillifera]</a> | 47.7 | 47.7 | 100% | 9e-05 | 79% | <a href="#">gij602712569 XP_007466514.1</a> |
| <a href="#">PREDICTED: carboxypeptidase B2 [Orcinus orca]</a>                   | 47.7 | 47.7 | 100% | 9e-05 | 79% | <a href="#">gij466032575 XP_004274629.1</a> |
| <a href="#">PREDICTED: carboxypeptidase B2 [Ochotona princeps]</a>              | 46.9 | 46.9 | 100% | 2e-04 | 79% | <a href="#">gij504128560 XP_004577530.1</a> |
| <a href="#">PREDICTED: carboxypeptidase B2 [Nannospalax galii]</a>              | 46.4 | 46.4 | 100% | 2e-04 | 74% | <a href="#">gij674098370 XP_008822615.1</a> |
| <a href="#">PREDICTED: carboxypeptidase B2 [Ceratotherium simum simu]</a>       | 46.4 | 46.4 | 94%  | 2e-04 | 78% | <a href="#">gij478518956 XP_004433702.1</a> |
| <a href="#">PREDICTED: carboxypeptidase B2 [Ictidomys tridecemlineatus]</a>     | 46.4 | 46.4 | 94%  | 2e-04 | 78% | <a href="#">gij532113245 XP_005341304.1</a> |
| <a href="#">PREDICTED: carboxypeptidase B2 isoform X2 [Pteropus alectr]</a>     | 46.0 | 46.0 | 100% | 3e-04 | 74% | <a href="#">gij586560565 XP_006913553.1</a> |
| <a href="#">PREDICTED: carboxypeptidase B2 isoform X1 [Pteropus alectr]</a>     | 46.0 | 46.0 | 100% | 3e-04 | 74% | <a href="#">gij586560563 XP_006913552.1</a> |
| <a href="#">PREDICTED: carboxypeptidase B2 [Odobenus rosmarus diver]</a>        | 45.2 | 45.2 | 100% | 6e-04 | 74% | <a href="#">gij472378433 XP_004408637.1</a> |
| <a href="#">PREDICTED: carboxypeptidase B2 [Sus scrofa]</a>                     | 44.8 | 44.8 | 94%  | 8e-04 | 78% | <a href="#">gij194040626 XP_001929181.1</a> |
| <a href="#">PREDICTED: carboxypeptidase B2 [Leptonychotes weddellii]</a>        | 44.8 | 44.8 | 100% | 8e-04 | 74% | <a href="#">gij585191930 XP_006747204.1</a> |
| <a href="#">PREDICTED: carboxypeptidase B2 [Elephantulus edwardii]</a>          | 44.3 | 44.3 | 100% | 0.001 | 74% | <a href="#">gij585654497 XP_006884668.1</a> |
| <a href="#">PREDICTED: carboxypeptidase B2 [Erinaceus europaeus]</a>            | 43.9 | 43.9 | 100% | 0.002 | 74% | <a href="#">gij617593818 XP_007521293.1</a> |
| <a href="#">PREDICTED: carboxypeptidase B2 [Anolis carolinensis]</a>            | 43.9 | 43.9 | 100% | 0.002 | 68% | <a href="#">gij327260978 XP_003215309.1</a> |
| <a href="#">PREDICTED: carboxypeptidase B2 isoform X2 [Bos mutus]</a>           | 43.5 | 43.5 | 84%  | 0.002 | 81% | <a href="#">gij555969567 XP_005896807.1</a> |
| <a href="#">Chain A, Crystal Structure Of Thrombin Activatable Fibrinolysis</a> | 43.5 | 43.5 | 84%  | 0.002 | 81% | <a href="#">gij194368809 3DGV_A</a>         |
| <a href="#">hypothetical protein PANDA_002961 [Ailuropoda melanoleuca]</a>      | 43.5 | 43.5 | 100% | 0.002 | 68% | <a href="#">gij281349951 EFB25535.1</a>     |
| <a href="#">PREDICTED: carboxypeptidase B2 [Jaculus jaculus]</a>                | 43.5 | 43.5 | 89%  | 0.002 | 76% | <a href="#">gij507564474 XP_004665908.1</a> |
| <a href="#">PREDICTED: carboxypeptidase B2 isoform X1 [Bison bison bis</a>      | 43.5 | 43.5 | 84%  | 0.002 | 81% | <a href="#">gij742181236 XP_010852934.1</a> |
| <a href="#">carboxypeptidase B2 precursor [Bos taurus]</a>                      | 43.5 | 43.5 | 84%  | 0.002 | 81% | <a href="#">gij114050845 NP_001039462.1</a> |
| <a href="#">PREDICTED: carboxypeptidase B2 [Capra hircus]</a>                   | 43.5 | 43.5 | 84%  | 0.002 | 81% | <a href="#">gij548487919 XP_005687494.1</a> |
| <a href="#">PREDICTED: carboxypeptidase B2 [Ovis aries]</a>                     | 43.5 | 43.5 | 84%  | 0.002 | 81% | <a href="#">gij426236307 XP_004012111.1</a> |
| <a href="#">PREDICTED: carboxypeptidase B2-like [Ailuropoda melanoleur]</a>     | 43.5 | 43.5 | 100% | 0.002 | 68% | <a href="#">gij301758334 XP_002915018.1</a> |
| <a href="#">PREDICTED: carboxypeptidase B2 [Ursus maritimus]</a>                | 43.5 | 43.5 | 100% | 0.002 | 68% | <a href="#">gij671028730 XP_008705148.1</a> |
| <a href="#">PREDICTED: carboxypeptidase B2 [Chrysemys picta bellii]</a>         | 43.1 | 43.1 | 100% | 0.003 | 63% | <a href="#">gij641751137 XP_008166719.1</a> |

BLAST is a registered trademark of the National Library of Medicine.



NCBI/ BLAST/ blastp suite/ Formatting Results - B94MHV3301R

Your search parameters were adjusted to search for a short input sequence.

Edit and Resubmit Save Search Strategies Formatting options Download

YouTube How to read this page Blast report description

CPB2\_KKKQVHFFVNASDVDNVKA\_NonMod

RID B94MHV3301R (Expires on 01-14 10:35 am)

Query ID Icl|131897
Description None
Molecule type amino acid
Query Length 19

Database Name nr
Description All non-redundant GenBank CDS translations+PDB+SwissProt+PIR excluding environmental samples from WGS projects
Program BLASTP 2.2.30+ Citation

Other reports: Search Summary Taxonomy reports Distance tree of results Multiple alignment

Graphic Summary

Show Conserved Domains

No putative conserved domains have been detected

Distribution of 100 Blast Hits on the Query Sequence

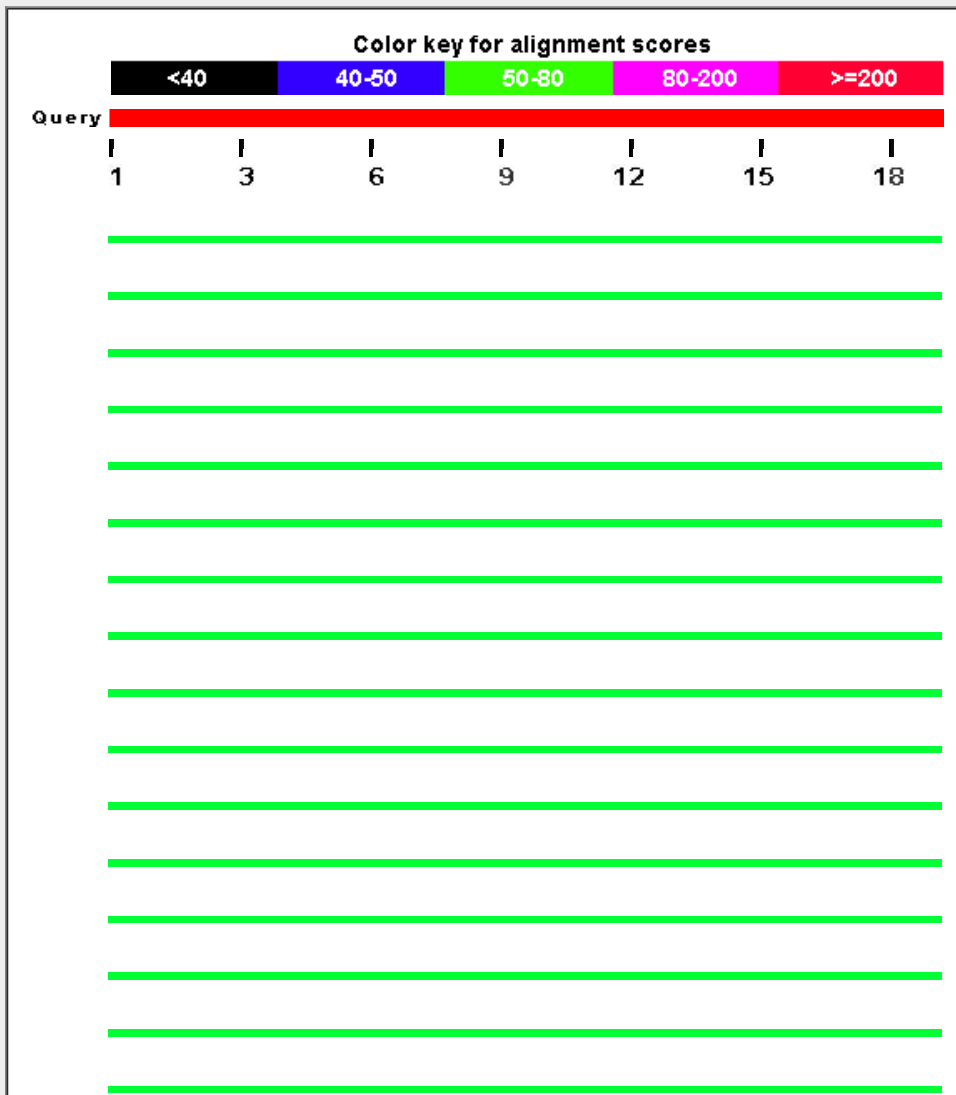

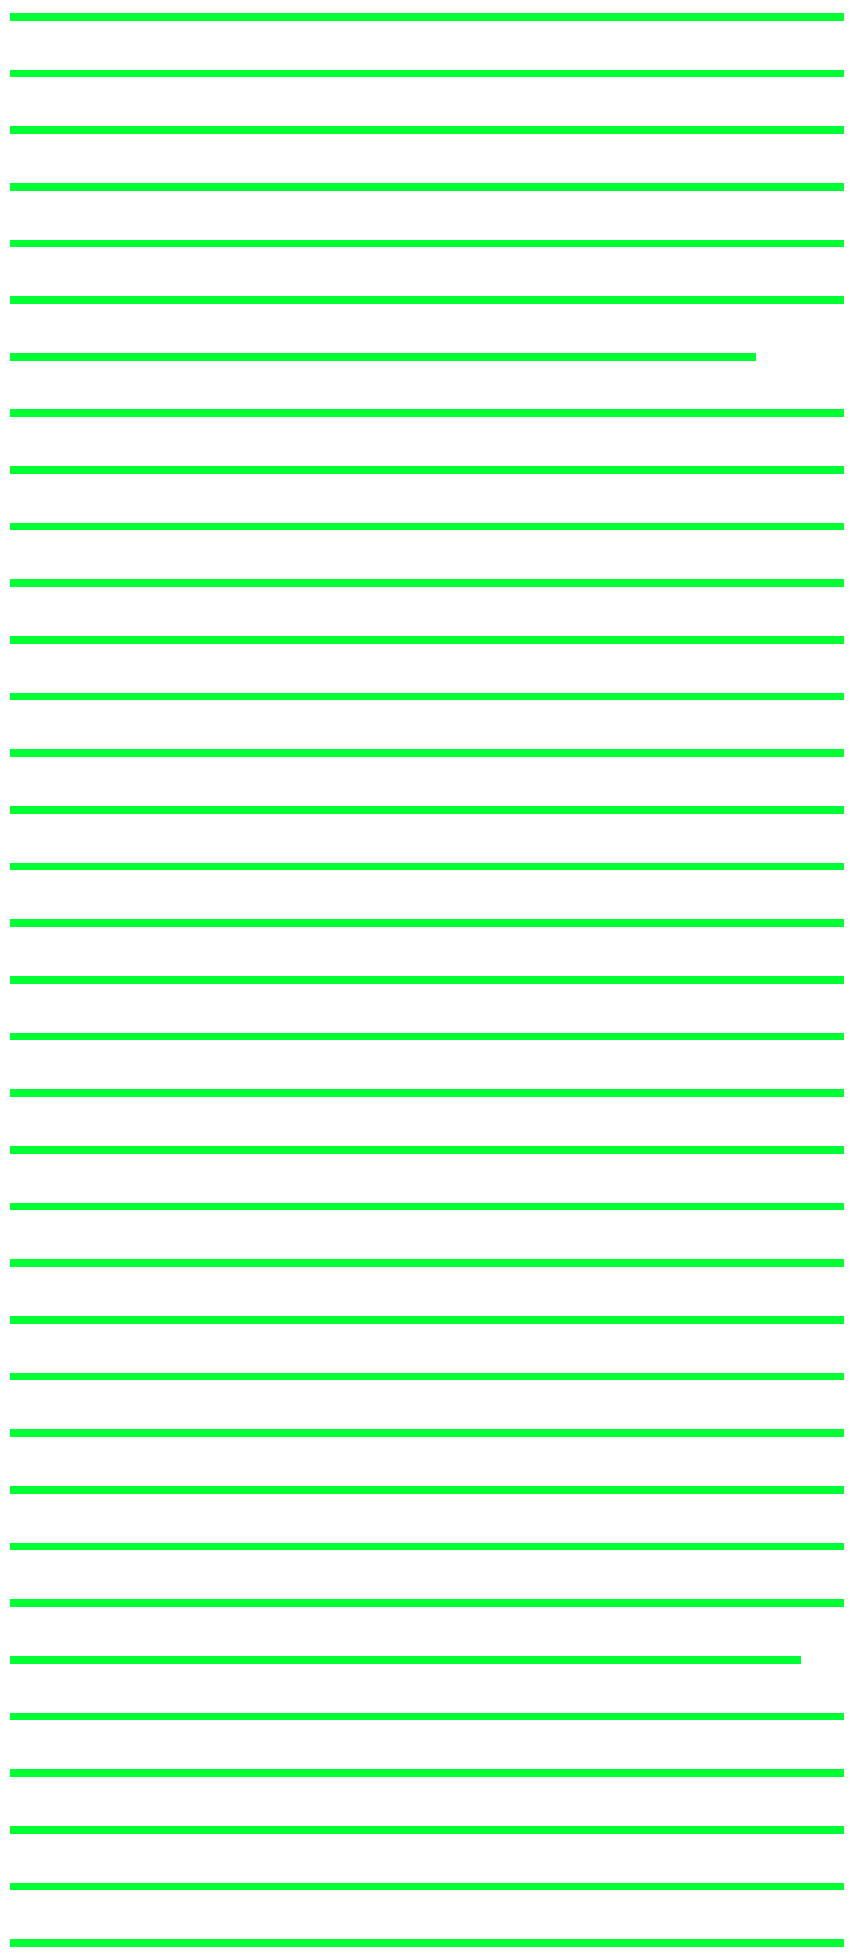

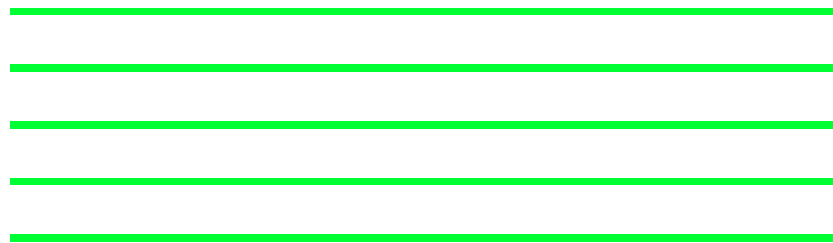

**Descriptions**

**Sequences producing significant alignments:**

Select: [All](#) [None](#) Selected:0

[↑](#) [Alignments](#)
[Download](#)
[GenPept](#)
[Graphics](#)
[Distance tree of results](#)
[Multiple alignment](#)

| Description                                                                          | Max score | Total score | Query cover | E value | Ident | Accession                                   |
|--------------------------------------------------------------------------------------|-----------|-------------|-------------|---------|-------|---------------------------------------------|
| <a href="#">PREDICTED: carboxypeptidase B2 isoform X3 [Homo sapiens]</a>             | 63.0      | 63.0        | 100%        | 5e-10   | 100%  | <a href="#">gij530402101 XP_005266316.1</a> |
| <a href="#">carboxypeptidase B-like protein [Homo sapiens]</a>                       | 63.0      | 63.0        | 100%        | 6e-10   | 100%  | <a href="#">gij6855464 BAA90475.1</a>       |
| <a href="#">carboxypeptidase B2 (plasma, carboxypeptidase U), isoform CRA_</a>       | 63.0      | 63.0        | 100%        | 6e-10   | 100%  | <a href="#">gij119629159 EAX08754.1</a>     |
| <a href="#">carboxypeptidase B2 isoform 2 preproprotein [Homo sapiens]</a>           | 63.0      | 63.0        | 100%        | 6e-10   | 100%  | <a href="#">gij513126877 NP_001265470.1</a> |
| <a href="#">PREDICTED: carboxypeptidase B2 isoform X2 [Pongo abelii]</a>             | 63.0      | 63.0        | 100%        | 6e-10   | 100%  | <a href="#">gij686743701 XP_009246910.1</a> |
| <a href="#">Chain A, Pro-carboxypeptidase U In Complex With 5-(3-aminopropyl)</a>    | 63.0      | 63.0        | 100%        | 6e-10   | 100%  | <a href="#">gij672886543 4P10_A</a>         |
| <a href="#">PREDICTED: carboxypeptidase B2 isoform X2 [Homo sapiens]</a>             | 63.0      | 63.0        | 100%        | 6e-10   | 100%  | <a href="#">gij530402099 XP_005266315.1</a> |
| <a href="#">prepro-plasma carboxypeptidase B [Homo sapiens]</a>                      | 63.0      | 63.0        | 100%        | 6e-10   | 100%  | <a href="#">gij189687 AAA60042.1</a>        |
| <a href="#">PREDICTED: carboxypeptidase B2 [Gorilla gorilla gorilla]</a>             | 63.0      | 63.0        | 100%        | 6e-10   | 100%  | <a href="#">gij426375394 XP_004054526.1</a> |
| <a href="#">Carboxypeptidase B2 (plasma) [Homo sapiens]</a>                          | 63.0      | 63.0        | 100%        | 6e-10   | 100%  | <a href="#">gij13937897 JAH07057.1</a>      |
| <a href="#">carboxypeptidase B2 isoform 1 preproprotein [Homo sapiens]</a>           | 63.0      | 63.0        | 100%        | 6e-10   | 100%  | <a href="#">gij513126885 NP_001863.3</a>    |
| <a href="#">carboxypeptidase B2 (plasma) [synthetic construct]</a>                   | 63.0      | 63.0        | 100%        | 6e-10   | 100%  | <a href="#">gij157927966 ABW03279.1</a>     |
| <a href="#">carboxypeptidase B2 (plasma, carboxypeptidase U) [synthetic cons</a>     | 63.0      | 63.0        | 100%        | 6e-10   | 100%  | <a href="#">gij124126823 ABM92184.1</a>     |
| <a href="#">PREDICTED: carboxypeptidase B2 [Pan troglodytes]</a>                     | 63.0      | 63.0        | 100%        | 6e-10   | 100%  | <a href="#">gij114651557 XP_509667.2</a>    |
| <a href="#">Chain A, Crystal Structure Of Thrombin-Activatable Fibrinolysis Inhi</a> | 63.0      | 63.0        | 100%        | 6e-10   | 100%  | <a href="#">gij193506809 3D66_A</a>         |
| <a href="#">Homo sapiens carboxypeptidase B2 (plasma, carboxypeptidase U)</a>        | 63.0      | 63.0        | 100%        | 6e-10   | 100%  | <a href="#">gij30584819 AAP36662.1</a>      |
| <a href="#">PREDICTED: carboxypeptidase B2 isoform X1 [Pongo abelii]</a>             | 63.0      | 63.0        | 100%        | 6e-10   | 100%  | <a href="#">gij297694016 XP_002824293.1</a> |
| <a href="#">Chain A, Crystal Structure Of A T325i/t329i/h333y/h335q Mutant Of</a>    | 63.0      | 63.0        | 100%        | 6e-10   | 100%  | <a href="#">gij253722661 3D68_A</a>         |
| <a href="#">PREDICTED: carboxypeptidase B2 isoform X1 [Homo sapiens]</a>             | 63.0      | 63.0        | 100%        | 6e-10   | 100%  | <a href="#">gij530402097 XP_005266314.1</a> |
| <a href="#">PREDICTED: carboxypeptidase B2 isoform X1 [Rhinopithecus roxe</a>        | 60.4      | 60.4        | 100%        | 4e-09   | 95%   | <a href="#">gij724966280 XP_010356389.1</a> |
| <a href="#">PREDICTED: carboxypeptidase B2 [Papio anubis]</a>                        | 60.4      | 60.4        | 100%        | 4e-09   | 95%   | <a href="#">gij402901940 XP_003913891.1</a> |
| <a href="#">PREDICTED: carboxypeptidase B2 [Nomascus leucogenys]</a>                 | 59.6      | 59.6        | 100%        | 8e-09   | 95%   | <a href="#">gij332241864 XP_003270104.1</a> |
| <a href="#">PREDICTED: carboxypeptidase B2 [Callithrix jacchus]</a>                  | 57.5      | 57.5        | 89%         | 4e-08   | 100%  | <a href="#">gij390457680 XP_002742737.2</a> |
| <a href="#">PREDICTED: carboxypeptidase B2 [Chlorocebus sabaeus]</a>                 | 57.1      | 57.1        | 100%        | 6e-08   | 89%   | <a href="#">gij635025444 XP_007958527.1</a> |
| <a href="#">PREDICTED: carboxypeptidase B2-like [Peromyscus maniculatus t</a>        | 56.6      | 56.6        | 100%        | 7e-08   | 89%   | <a href="#">gij589996660 XP_006998803.1</a> |
| <a href="#">PREDICTED: carboxypeptidase B2 isoform X2 [Cricetulus griseus]</a>       | 56.6      | 56.6        | 100%        | 8e-08   | 89%   | <a href="#">gij625193824 XP_007639419.1</a> |
| <a href="#">PREDICTED: carboxypeptidase B2 isoform X4 [Cricetulus griseus]</a>       | 56.6      | 56.6        | 100%        | 8e-08   | 89%   | <a href="#">gij625271974 XP_007627553.1</a> |
| <a href="#">PREDICTED: carboxypeptidase B2 [Peromyscus maniculatus baird</a>         | 56.6      | 56.6        | 100%        | 8e-08   | 89%   | <a href="#">gij589957698 XP_006991448.1</a> |

|                                                                                        |      |      |      |       |     |                                             |
|----------------------------------------------------------------------------------------|------|------|------|-------|-----|---------------------------------------------|
| Carboxypeptidase B2 (plasma) [Mus musculus]                                            | 56.6 | 56.6 | 100% | 8e-08 | 89% | <a href="#">gij59808067 AAH89577.1</a>      |
| <a href="#">carboxypeptidase U [Mus musculus]</a>                                      | 56.6 | 56.6 | 100% | 8e-08 | 89% | <a href="#">gij6003652 AAF00528.1</a>       |
| <a href="#">PREDICTED: carboxypeptidase B2 [Mesocricetus auratus]</a>                  | 56.6 | 56.6 | 100% | 8e-08 | 89% | <a href="#">gij524935646 XP_005071018.1</a> |
| <a href="#">carboxypeptidase B2 precursor [Mus musculus]</a>                           | 56.6 | 56.6 | 100% | 8e-08 | 89% | <a href="#">gij31982712 NP_062749.2</a>     |
| <a href="#">PREDICTED: carboxypeptidase B2 isoform X1 [Cricetulus griseus]</a>         | 56.6 | 56.6 | 100% | 8e-08 | 89% | <a href="#">gij354476626 XP_003500525.1</a> |
| <a href="#">PREDICTED: carboxypeptidase B2 isoform X3 [Cricetulus griseus]</a>         | 56.6 | 56.6 | 100% | 8e-08 | 89% | <a href="#">gij625271972 XP_007627552.1</a> |
| <a href="#">zinc finger CCCH domain-containing protein 13 [Cricetulus griseus]</a>     | 56.6 | 56.6 | 100% | 9e-08 | 89% | <a href="#">gij537241932 ERE87338.1</a>     |
| <a href="#">Carboxypeptidase B2 [Fukomys damarensis]</a>                               | 54.9 | 54.9 | 100% | 3e-07 | 89% | <a href="#">gij676273139 KFO27861.1</a>     |
| <a href="#">PREDICTED: carboxypeptidase B2 isoform X2 [Macaca fascicularis]</a>        | 54.9 | 54.9 | 100% | 3e-07 | 89% | <a href="#">gij544503644 XP_005585858.1</a> |
| <a href="#">PREDICTED: carboxypeptidase B2 isoform X3 [Chinchilla lanigera]</a>        | 54.9 | 54.9 | 100% | 3e-07 | 89% | <a href="#">gij533192699 XP_005409155.1</a> |
| <a href="#">PREDICTED: carboxypeptidase B2 isoform X2 [Chinchilla lanigera]</a>        | 54.9 | 54.9 | 100% | 3e-07 | 89% | <a href="#">gij533192697 XP_005409154.1</a> |
| <a href="#">PREDICTED: carboxypeptidase B2 [Otolemur garnettii]</a>                    | 54.9 | 54.9 | 100% | 3e-07 | 89% | <a href="#">gij395835377 XP_003790657.1</a> |
| <a href="#">PREDICTED: carboxypeptidase B2 [Canis lupus familiaris]</a>                | 54.9 | 54.9 | 100% | 3e-07 | 89% | <a href="#">gij73989292 XP_851154.1</a>     |
| <a href="#">PREDICTED: carboxypeptidase B2 [Vicugna pacos]</a>                         | 54.9 | 54.9 | 100% | 3e-07 | 89% | <a href="#">gij560974364 XP_006209502.1</a> |
| <a href="#">PREDICTED: carboxypeptidase B2 [Camelus ferus]</a>                         | 54.9 | 54.9 | 100% | 3e-07 | 89% | <a href="#">gij560922422 XP_006187410.1</a> |
| <a href="#">PREDICTED: carboxypeptidase B2 isoform X1 [Macaca fascicularis]</a>        | 54.9 | 54.9 | 100% | 3e-07 | 89% | <a href="#">gij544503642 XP_005585857.1</a> |
| <a href="#">PREDICTED: carboxypeptidase B2 isoform X1 [Chinchilla lanigera]</a>        | 54.9 | 54.9 | 100% | 3e-07 | 89% | <a href="#">gij533192695 XP_005409153.1</a> |
| <a href="#">PREDICTED: carboxypeptidase B2 [Saimiri boliviensis boliviensis]</a>       | 54.9 | 54.9 | 94%  | 3e-07 | 94% | <a href="#">gij403286234 XP_003934405.1</a> |
| <a href="#">Carboxypeptidase B2 [Macaca mulatta]</a>                                   | 54.9 | 54.9 | 100% | 3e-07 | 89% | <a href="#">gij355700980 EHH29001.1</a>     |
| <a href="#">PREDICTED: carboxypeptidase B2 isoform X2 [Fukomys damarensis]</a>         | 54.9 | 54.9 | 100% | 3e-07 | 89% | <a href="#">gij731244313 XP_010635336.1</a> |
| <a href="#">PREDICTED: carboxypeptidase B2 [Felis catus]</a>                           | 54.9 | 54.9 | 100% | 3e-07 | 89% | <a href="#">gij586973570 XP_006927367.1</a> |
| <a href="#">PREDICTED: carboxypeptidase B2 isoform X1 [Fukomys damarensis]</a>         | 54.9 | 54.9 | 100% | 3e-07 | 89% | <a href="#">gij731244311 XP_010635335.1</a> |
| <a href="#">PREDICTED: carboxypeptidase B2 [Panthera tigris altaica]</a>               | 54.9 | 54.9 | 100% | 3e-07 | 89% | <a href="#">gij591318467 XP_007085493.1</a> |
| <a href="#">plastin-2 isoform 16 [Camelus ferus]</a>                                   | 54.9 | 54.9 | 100% | 3e-07 | 89% | <a href="#">gij528759255 EPY78914.1</a>     |
| <a href="#">carboxypeptidase B2 (plasma), isoform CRA_b [Rattus norvegicus]</a>        | 54.1 | 54.1 | 100% | 6e-07 | 84% | <a href="#">gij149049966 EDM02290.1</a>     |
| <a href="#">carboxypeptidase B2 (plasma), isoform CRA_a [Rattus norvegicus]</a>        | 54.1 | 54.1 | 100% | 6e-07 | 84% | <a href="#">gij149049965 EDM02289.1</a>     |
| <a href="#">Cpb2 protein [Rattus norvegicus]</a>                                       | 54.1 | 54.1 | 100% | 6e-07 | 84% | <a href="#">gij60688161 AAH91133.1</a>      |
| <a href="#">carboxypeptidase B2 precursor [Rattus norvegicus]</a>                      | 54.1 | 54.1 | 100% | 6e-07 | 84% | <a href="#">gij16758414 NP_446069.1</a>     |
| <a href="#">PREDICTED: carboxypeptidase B2 [Tupaia chinensis]</a>                      | 54.1 | 54.1 | 100% | 6e-07 | 84% | <a href="#">gij562871068 XP_006163508.1</a> |
| <a href="#">PREDICTED: carboxypeptidase B2 [Equus caballus]</a>                        | 53.7 | 53.7 | 100% | 8e-07 | 89% | <a href="#">gij545190694 XP_005601424.1</a> |
| <a href="#">PREDICTED: carboxypeptidase B2 [Microtus ochrogaster]</a>                  | 52.8 | 52.8 | 100% | 2e-06 | 84% | <a href="#">gij532025304 XP_005355675.1</a> |
| <a href="#">PREDICTED: carboxypeptidase B2 isoform 1 [Macaca mulatta]</a>              | 52.4 | 52.4 | 94%  | 2e-06 | 89% | <a href="#">gij109120669 XP_001097310.1</a> |
| <a href="#">Carboxypeptidase B2 [Macaca fascicularis]</a>                              | 52.4 | 52.4 | 94%  | 2e-06 | 89% | <a href="#">gij355754683 EHH58584.1</a>     |
| <a href="#">PREDICTED: carboxypeptidase B2 isoform 3 [Macaca mulatta]</a>              | 52.4 | 52.4 | 94%  | 2e-06 | 89% | <a href="#">gij109120665 XP_001097608.1</a> |
| <a href="#">PREDICTED: carboxypeptidase B2 [Cavia porcellus]</a>                       | 52.4 | 52.4 | 100% | 2e-06 | 84% | <a href="#">gij348583190 XP_003477356.1</a> |
| <a href="#">PREDICTED: carboxypeptidase B2 [Balaenoptera acutorostrata scabra]</a>     | 52.0 | 52.0 | 100% | 3e-06 | 84% | <a href="#">gij594678268 XP_007186896.1</a> |
| <a href="#">PREDICTED: carboxypeptidase B2 [Octodon degus]</a>                         | 51.5 | 51.5 | 100% | 4e-06 | 84% | <a href="#">gij507684606 XP_004640321.1</a> |
| <a href="#">PREDICTED: carboxypeptidase B2 isoform X2 [Heterocephalus glaberrimus]</a> | 51.1 | 51.1 | 100% | 6e-06 | 84% | <a href="#">gij512921202 XP_004904434.1</a> |
| <a href="#">PREDICTED: carboxypeptidase B2 isoform X2 [Heterocephalus glaberrimus]</a> | 51.1 | 51.1 | 100% | 6e-06 | 84% | <a href="#">gij512964055 XP_004844264.1</a> |
| <a href="#">PREDICTED: carboxypeptidase B2 isoform X1 [Heterocephalus glaberrimus]</a> | 51.1 | 51.1 | 100% | 6e-06 | 84% | <a href="#">gij512921198 XP_004904433.1</a> |
| <a href="#">PREDICTED: carboxypeptidase B2 isoform X1 [Heterocephalus glaberrimus]</a> | 51.1 | 51.1 | 100% | 6e-06 | 84% | <a href="#">gij512964053 XP_004844263.1</a> |
| <a href="#">PREDICTED: carboxypeptidase B2 [Tursiops truncatus]</a>                    | 50.3 | 50.3 | 100% | 1e-05 | 84% | <a href="#">gij470653285 XP_004329533.1</a> |
| <a href="#">PREDICTED: carboxypeptidase B2 isoform X2 [Lipotes vexillifer]</a>         | 50.3 | 50.3 | 100% | 1e-05 | 84% | <a href="#">gij602712571 XP_007466515.1</a> |
| <a href="#">PREDICTED: carboxypeptidase B2 [Physeter catodon]</a>                      | 50.3 | 50.3 | 100% | 1e-05 | 84% | <a href="#">gij593749228 XP_007129852.1</a> |
| <a href="#">PREDICTED: carboxypeptidase B2 isoform X1 [Lipotes vexillifer]</a>         | 50.3 | 50.3 | 100% | 1e-05 | 84% | <a href="#">gij602712569 XP_007466514.1</a> |

|                                                                                      |      |      |      |       |     |                                             |
|--------------------------------------------------------------------------------------|------|------|------|-------|-----|---------------------------------------------|
| <a href="#">PREDICTED: carboxypeptidase B2 [Orcinus orca]</a>                        | 50.3 | 50.3 | 100% | 1e-05 | 84% | <a href="#">gil466032575 XP_004274629.1</a> |
| <a href="#">PREDICTED: carboxypeptidase B2 [Ochotona princeps]</a>                   | 49.4 | 49.4 | 100% | 2e-05 | 84% | <a href="#">gil504128560 XP_004577530.1</a> |
| <a href="#">PREDICTED: carboxypeptidase B2 [Nannospalax galii]</a>                   | 49.0 | 49.0 | 100% | 3e-05 | 79% | <a href="#">gil674098370 XP_008822615.1</a> |
| <a href="#">PREDICTED: carboxypeptidase B2 [Ceratherium simum simum]</a>             | 49.0 | 49.0 | 94%  | 3e-05 | 83% | <a href="#">gil478518956 XP_004433702.1</a> |
| <a href="#">PREDICTED: carboxypeptidase B2 [Ictidomys tridecemlineatus]</a>          | 49.0 | 49.0 | 94%  | 3e-05 | 83% | <a href="#">gil532113245 XP_005341304.1</a> |
| <a href="#">PREDICTED: carboxypeptidase B2 isoform X2 [Pteropus alecto]</a>          | 48.6 | 48.6 | 100% | 4e-05 | 79% | <a href="#">gil586560565 XP_006913553.1</a> |
| <a href="#">PREDICTED: carboxypeptidase B2 isoform X1 [Pteropus alecto]</a>          | 48.6 | 48.6 | 100% | 4e-05 | 79% | <a href="#">gil586560563 XP_006913552.1</a> |
| <a href="#">PREDICTED: carboxypeptidase B2 [Odobenus rosmarus divergens]</a>         | 47.7 | 47.7 | 100% | 8e-05 | 79% | <a href="#">gil472378433 XP_004408637.1</a> |
| <a href="#">PREDICTED: carboxypeptidase B2 [Sus scrofa]</a>                          | 47.3 | 47.3 | 94%  | 1e-04 | 83% | <a href="#">gil194040626 XP_001929181.1</a> |
| <a href="#">PREDICTED: carboxypeptidase B2 [Elephantulus edwardii]</a>               | 46.9 | 46.9 | 100% | 2e-04 | 79% | <a href="#">gil585654497 XP_006884668.1</a> |
| <a href="#">PREDICTED: carboxypeptidase B2 [Erinaceus europaeus]</a>                 | 46.4 | 46.4 | 100% | 2e-04 | 79% | <a href="#">gil617593818 XP_007521293.1</a> |
| <a href="#">PREDICTED: carboxypeptidase B2 [Leptonychotes weddellii]</a>             | 46.4 | 46.4 | 100% | 2e-04 | 74% | <a href="#">gil585191930 XP_006747204.1</a> |
| <a href="#">PREDICTED: carboxypeptidase B2 [Anolis carolinensis]</a>                 | 46.4 | 46.4 | 100% | 2e-04 | 74% | <a href="#">gil327260978 XP_003215309.1</a> |
| <a href="#">PREDICTED: carboxypeptidase B2 isoform X2 [Bos mutus]</a>                | 46.0 | 46.0 | 84%  | 3e-04 | 88% | <a href="#">gil555969567 XP_005896807.1</a> |
| <a href="#">Chain A, Crystal Structure Of Thrombin Activatable Fibrinolysis Inhi</a> | 46.0 | 46.0 | 84%  | 3e-04 | 88% | <a href="#">gil194368809 3DGV_A</a>         |
| <a href="#">hypothetical protein PANDA_002961 [Ailuropoda melanoleuca]</a>           | 46.0 | 46.0 | 100% | 3e-04 | 74% | <a href="#">gil281349951 EFB25535.1</a>     |
| <a href="#">PREDICTED: carboxypeptidase B2 [Jaculus jaculus]</a>                     | 46.0 | 46.0 | 89%  | 3e-04 | 82% | <a href="#">gil507564474 XP_004665908.1</a> |
| <a href="#">carboxypeptidase B2 precursor [Bos taurus]</a>                           | 46.0 | 46.0 | 84%  | 3e-04 | 88% | <a href="#">gil114050845 NP_001039462.1</a> |
| <a href="#">PREDICTED: carboxypeptidase B2 [Capra hircus]</a>                        | 46.0 | 46.0 | 84%  | 3e-04 | 88% | <a href="#">gil548487919 XP_005687494.1</a> |
| <a href="#">PREDICTED: carboxypeptidase B2 [Ovis aries]</a>                          | 46.0 | 46.0 | 84%  | 3e-04 | 88% | <a href="#">gil426236307 XP_004012111.1</a> |
| <a href="#">PREDICTED: carboxypeptidase B2-like [Ailuropoda melanoleuca]</a>         | 46.0 | 46.0 | 100% | 3e-04 | 74% | <a href="#">gil301758334 XP_002915018.1</a> |
| <a href="#">PREDICTED: carboxypeptidase B2 [Ursus maritimus]</a>                     | 46.0 | 46.0 | 100% | 3e-04 | 74% | <a href="#">gil671028730 XP_008705148.1</a> |
| <a href="#">PREDICTED: carboxypeptidase B2 [Chrysemys picta bellii]</a>              | 45.6 | 45.6 | 100% | 4e-04 | 68% | <a href="#">gil641751137 XP_008166719.1</a> |
| <a href="#">PREDICTED: carboxypeptidase B2 [Pelodiscus sinensis]</a>                 | 45.6 | 45.6 | 100% | 4e-04 | 68% | <a href="#">gil558138783 XP_006118064.1</a> |
| <a href="#">PREDICTED: carboxypeptidase B2-like [Trichechus manatus latiro]</a>      | 44.8 | 44.8 | 100% | 8e-04 | 79% | <a href="#">gil471377782 XP_004376698.1</a> |
| <a href="#">PREDICTED: carboxypeptidase B2-like [Trichechus manatus latiro]</a>      | 44.8 | 44.8 | 100% | 8e-04 | 79% | <a href="#">gil471377780 XP_004376697.1</a> |
| <a href="#">PREDICTED: carboxypeptidase B2 [Condylura cristata]</a>                  | 44.8 | 44.8 | 84%  | 8e-04 | 83% | <a href="#">gil507939327 XP_004680202.1</a> |

## Alignments

Download [GenPept](#) [Graphics](#) ▼ Next ▲ Previous ▲ Descriptions

**PREDICTED: carboxypeptidase B2 isoform X3 [Homo sapiens]**  
 Sequence ID: [gil530402101|ref|XP\\_005266316.1](#) Length: 226 Number of Matches: 1

Range 1: 83 to 101 [GenPept](#) [Graphics](#) ▼ Next Match ▲ Previous Match

| Score          | Expect | Identities  | Positives   | Gaps     |
|----------------|--------|-------------|-------------|----------|
| 63.0 bits(141) | 5e-10  | 19/19(100%) | 19/19(100%) | 0/19(0%) |

Query 1 KKKQVHFFVNASDVDNVKA 19  
 KKKQVHFFVNASDVDNVKA  
 Sbjct 83 KKKQVHFFVNASDVDNVKA 101

**Related Information**  
[Gene](#) - associated gene details

Download [GenPept](#) [Graphics](#) ▼ Next ▲ Previous ▲ Descriptions

**carboxypeptidase B-like protein [Homo sapiens]**  
 Sequence ID: [gil6855464|dbj|BAA90475.1](#) Length: 360 Number of Matches: 1

Range 1: 64 to 82 [GenPept](#) [Graphics](#) ▼ Next Match ▲ Previous Match

| Score          | Expect | Identities  | Positives   | Gaps     |
|----------------|--------|-------------|-------------|----------|
| 63.0 bits(141) | 6e-10  | 19/19(100%) | 19/19(100%) | 0/19(0%) |

Query 1 KKKQVHFFVNASDVDNVKA 19

**Related Information**  
[Gene](#) - associated gene details

Sbjct 64 KKKQVHFFVNASDVDNVKA 82

[Download](#) [GenPept](#) [Graphics](#) [Next](#) [Previous](#) [Descriptions](#)

carboxypeptidase B2 (plasma, carboxypeptidase U), isoform CRA\_a [Homo sapiens]

Sequence ID: [gi|119629159|gb|EAX08754.1](#) Length: 360 Number of Matches: 1

Range 1: 64 to 82 [GenPept](#) [Graphics](#) [Next Match](#) [Previous Match](#)

| Score          | Expect | Identities  | Positives   | Gaps     |
|----------------|--------|-------------|-------------|----------|
| 63.0 bits(141) | 6e-10  | 19/19(100%) | 19/19(100%) | 0/19(0%) |

Query 1 KKKQVHFFVNASDVDNVKA 19  
 KKKQVHFFVNASDVDNVKA  
 Sbjct 64 KKKQVHFFVNASDVDNVKA 82

**Related Information**

[Gene](#) - associated gene details

[Download](#) [GenPept](#) [Graphics](#) [Next](#) [Previous](#) [Descriptions](#)

carboxypeptidase B2 isoform 2 preproprotein [Homo sapiens]

Sequence ID: [gi|513126877|ref|NP\\_001265470.1](#) Length: 386 Number of Matches: 1

Range 1: 64 to 82 [GenPept](#) [Graphics](#) [Next Match](#) [Previous Match](#)

| Score          | Expect | Identities  | Positives   | Gaps     |
|----------------|--------|-------------|-------------|----------|
| 63.0 bits(141) | 6e-10  | 19/19(100%) | 19/19(100%) | 0/19(0%) |

Query 1 KKKQVHFFVNASDVDNVKA 19  
 KKKQVHFFVNASDVDNVKA  
 Sbjct 64 KKKQVHFFVNASDVDNVKA 82

**Related Information**

[Gene](#) - associated gene details

[Map Viewer](#) - aligned genomic context

[Download](#) [GenPept](#) [Graphics](#) [Next](#) [Previous](#) [Descriptions](#)

PREDICTED: carboxypeptidase B2 isoform X2 [Pongo abelii]

Sequence ID: [gi|686743701|ref|XP\\_009246910.1](#) Length: 387 Number of Matches: 1

Range 1: 64 to 82 [GenPept](#) [Graphics](#) [Next Match](#) [Previous Match](#)

| Score          | Expect | Identities  | Positives   | Gaps     |
|----------------|--------|-------------|-------------|----------|
| 63.0 bits(141) | 6e-10  | 19/19(100%) | 19/19(100%) | 0/19(0%) |

Query 1 KKKQVHFFVNASDVDNVKA 19  
 KKKQVHFFVNASDVDNVKA  
 Sbjct 64 KKKQVHFFVNASDVDNVKA 82

**Related Information**

[Gene](#) - associated gene details

[Map Viewer](#) - aligned genomic context

BLAST is a registered trademark of the National Library of Medicine.

▶ NCBI/ BLAST/ blastp suite/ Formatting Results - BTGDXY3F016

**i** Your search parameters were adjusted to search for a short input sequence.

[Edit and Resubmit](#) [Save Search Strategies](#) ▶ [Formatting options](#) ▶ [Download](#) [YouTube](#) [How to read this page](#) [Blast report description](#)

### CPB2\_KKQVHFFVDASDVDNVKA\_Mod

RID [BTGDXY3F016](#) (Expires on 01-20 15:35 pm)

**Query ID** |cl|47924  
**Description** None  
**Molecule type** amino acid  
**Query Length** 18

**Database Name** nr  
**Description** All non-redundant GenBank CDS translations+PDB+SwissProt+PIR+PRF excluding environmental samples from WGS projects  
**Program** BLASTP 2.2.30+ ▶ [Citation](#)

Other reports: ▶ [Search Summary](#) [[Taxonomy reports](#)] [[Distance tree of results](#)] [[Multiple alignment](#)]

### **[-]** Graphic Summary

**[-]** [Show Conserved Domains](#)

No putative conserved domains have been detected

Distribution of 100 Blast Hits on the Query Sequence [?](#)

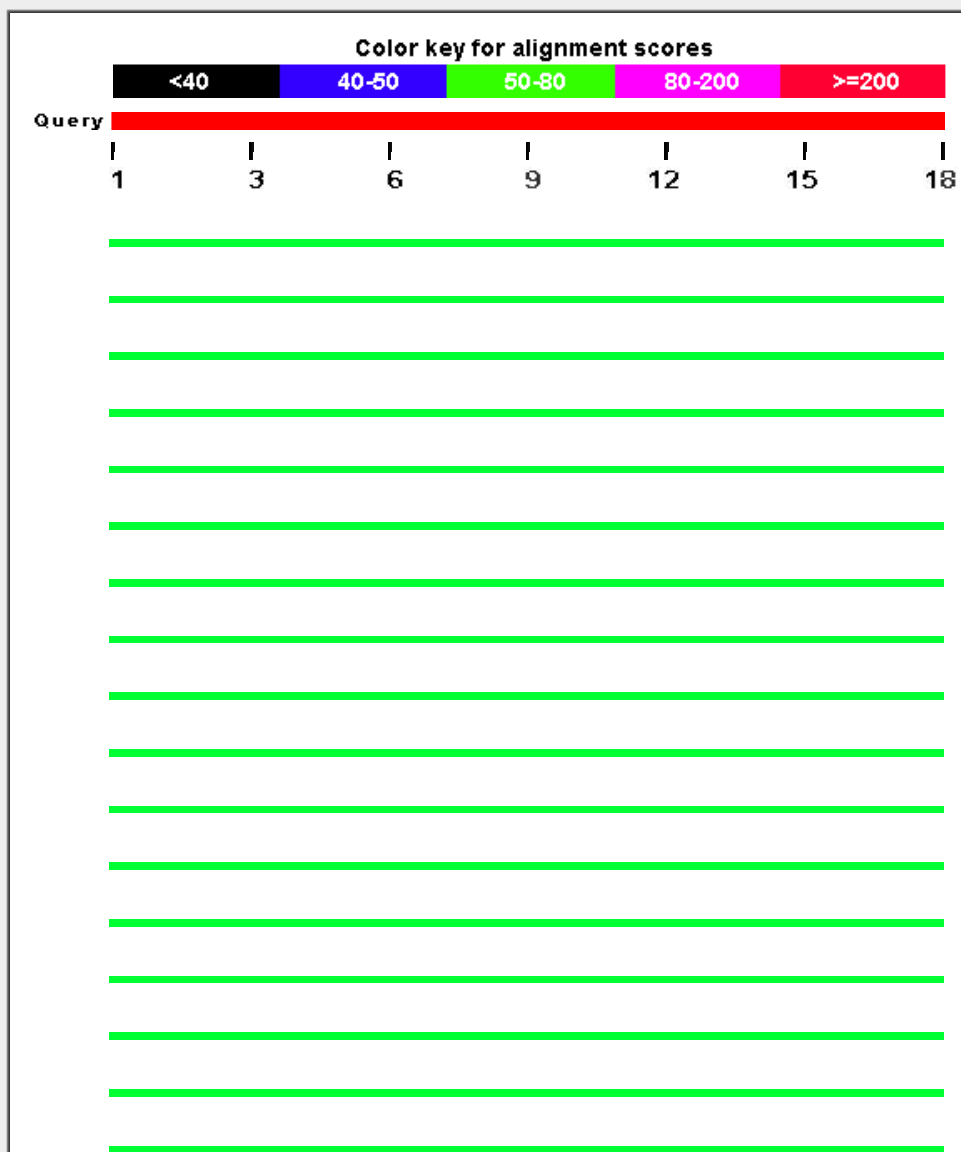



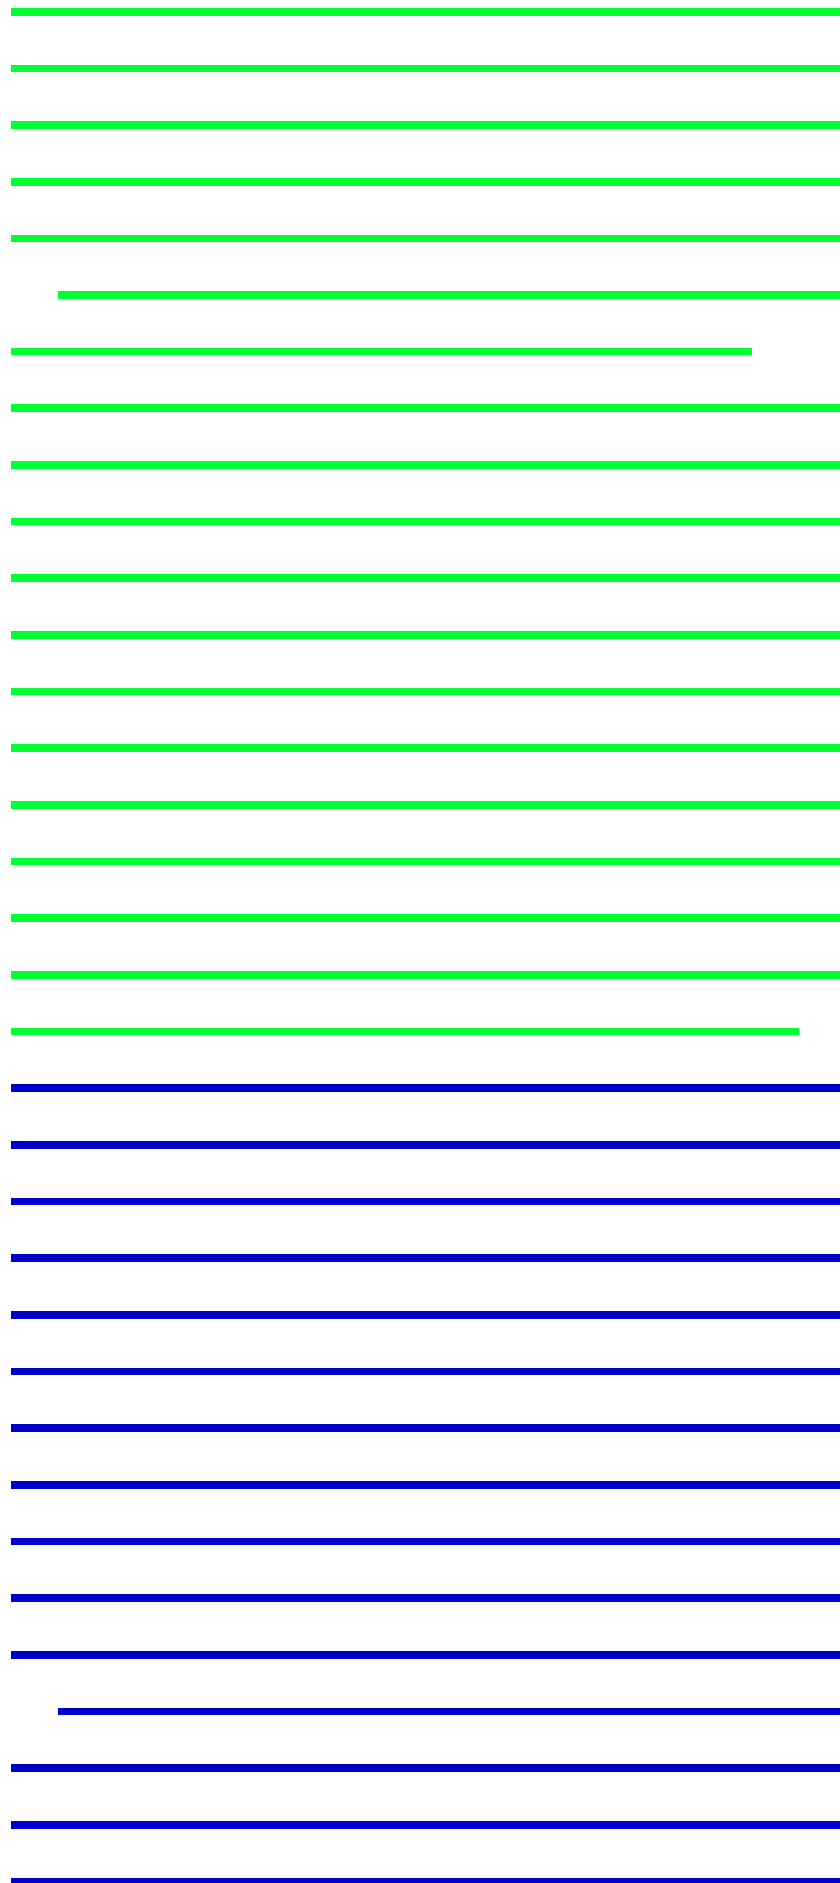

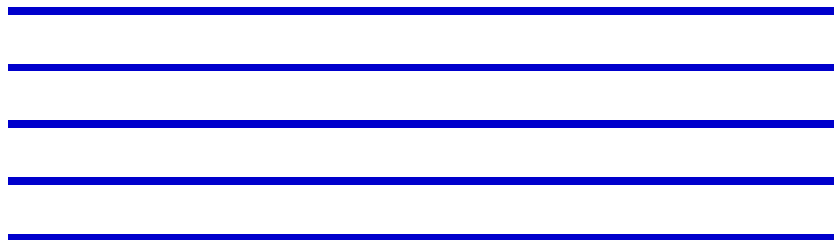

## Descriptions

### Sequences producing significant alignments:

Select: [All](#) [None](#) Selected:0

[Alignments](#)
[Download](#)
[GenPept](#)
[Graphics](#)
[Distance tree of results](#)
[Multiple alignment](#)


| Description                                                                     | Max score | Total score | Query cover | E value | Ident | Accession                                   |
|---------------------------------------------------------------------------------|-----------|-------------|-------------|---------|-------|---------------------------------------------|
| <a href="#">PREDICTED: carboxypeptidase B2 isoform X3 [Homo sapiens]</a>        | 57.5      | 57.5        | 100%        | 3e-08   | 94%   | <a href="#">gi 530402101 XP_005266316.1</a> |
| <a href="#">carboxypeptidase B-like protein [Homo sapiens]</a>                  | 57.5      | 57.5        | 100%        | 4e-08   | 94%   | <a href="#">gi 6855464 BAA90475.1</a>       |
| <a href="#">carboxypeptidase B2 (plasma, carboxypeptidase U), isoform C</a>     | 57.5      | 57.5        | 100%        | 4e-08   | 94%   | <a href="#">gi 119629159 EAX08754.1</a>     |
| <a href="#">carboxypeptidase B2 isoform 2 preproprotein [Homo sapiens]</a>      | 57.5      | 57.5        | 100%        | 4e-08   | 94%   | <a href="#">gi 513126877 NP_001265470.1</a> |
| <a href="#">PREDICTED: carboxypeptidase B2 isoform X2 [Pongo abelii]</a>        | 57.5      | 57.5        | 100%        | 4e-08   | 94%   | <a href="#">gi 686743701 XP_009246910.1</a> |
| <a href="#">Chain A, Pro-carboxypeptidase U In Complex With 5-(3-aminoc</a>     | 57.5      | 57.5        | 100%        | 4e-08   | 94%   | <a href="#">gi 672886543 4P10_A</a>         |
| <a href="#">PREDICTED: carboxypeptidase B2 isoform X2 [Homo sapiens]</a>        | 57.5      | 57.5        | 100%        | 4e-08   | 94%   | <a href="#">gi 530402099 XP_005266315.1</a> |
| <a href="#">prepro-plasma carboxypeptidase B [Homo sapiens]</a>                 | 57.5      | 57.5        | 100%        | 4e-08   | 94%   | <a href="#">gi 189687 AAA60042.1</a>        |
| <a href="#">PREDICTED: carboxypeptidase B2 [Gorilla gorilla gorilla]</a>        | 57.5      | 57.5        | 100%        | 4e-08   | 94%   | <a href="#">gi 426375394 XP_004054526.1</a> |
| <a href="#">Carboxypeptidase B2 (plasma) [Homo sapiens]</a>                     | 57.5      | 57.5        | 100%        | 4e-08   | 94%   | <a href="#">gi 13937897 AAH07057.1</a>      |
| <a href="#">carboxypeptidase B2 isoform 1 preproprotein [Homo sapiens]</a>      | 57.5      | 57.5        | 100%        | 4e-08   | 94%   | <a href="#">gi 513126885 NP_001863.3</a>    |
| <a href="#">carboxypeptidase B2 (plasma) [synthetic construct]</a>              | 57.5      | 57.5        | 100%        | 4e-08   | 94%   | <a href="#">gi 157927966 ABW03279.1</a>     |
| <a href="#">carboxypeptidase B2 (plasma, carboxypeptidase U) [synthetic c</a>   | 57.5      | 57.5        | 100%        | 4e-08   | 94%   | <a href="#">gi 124126823 ABM92184.1</a>     |
| <a href="#">PREDICTED: carboxypeptidase B2 [Pan troglodytes]</a>                | 57.5      | 57.5        | 100%        | 4e-08   | 94%   | <a href="#">gi 114651557 XP_509667.2</a>    |
| <a href="#">Chain A, Crystal Structure Of Thrombin-Activatable Fibrinolysis</a> | 57.5      | 57.5        | 100%        | 4e-08   | 94%   | <a href="#">gi 193506809 3D66_A</a>         |
| <a href="#">Homo sapiens carboxypeptidase B2 (plasma, carboxypeptidase</a>      | 57.5      | 57.5        | 100%        | 4e-08   | 94%   | <a href="#">gi 30584819 AAP36662.1</a>      |
| <a href="#">PREDICTED: carboxypeptidase B2 isoform X1 [Pongo abelii]</a>        | 57.5      | 57.5        | 100%        | 4e-08   | 94%   | <a href="#">gi 297694016 XP_002824293.1</a> |
| <a href="#">Chain A, Crystal Structure Of A T325i/t329i/h333y/h335q Mutar</a>   | 57.5      | 57.5        | 100%        | 4e-08   | 94%   | <a href="#">gi 253722661 3D68_A</a>         |
| <a href="#">PREDICTED: carboxypeptidase B2 isoform X1 [Homo sapiens]</a>        | 57.5      | 57.5        | 100%        | 4e-08   | 94%   | <a href="#">gi 530402097 XP_005266314.1</a> |
| <a href="#">PREDICTED: carboxypeptidase B2 isoform X1 [Rhinopithecus</a>        | 54.9      | 54.9        | 100%        | 3e-07   | 89%   | <a href="#">gi 724966280 XP_010356389.1</a> |
| <a href="#">PREDICTED: carboxypeptidase B2 [Papio anubis]</a>                   | 54.9      | 54.9        | 100%        | 3e-07   | 89%   | <a href="#">gi 402901940 XP_003913891.1</a> |
| <a href="#">PREDICTED: carboxypeptidase B2 [Nomascus leucogenys]</a>            | 54.1      | 54.1        | 100%        | 6e-07   | 89%   | <a href="#">gi 332241864 XP_003270104.1</a> |
| <a href="#">PREDICTED: carboxypeptidase B2 [Chlorocebus sabaeus]</a>            | 52.0      | 52.0        | 94%         | 3e-06   | 88%   | <a href="#">gi 635025444 XP_007958527.1</a> |
| <a href="#">PREDICTED: carboxypeptidase B2 [Callithrix jacchus]</a>             | 52.0      | 52.0        | 88%         | 3e-06   | 94%   | <a href="#">gi 390457680 XP_002742737.2</a> |
| <a href="#">PREDICTED: carboxypeptidase B2-like [Peromyscus manicula</a>        | 51.1      | 51.1        | 100%        | 5e-06   | 83%   | <a href="#">gi 589996660 XP_006998803.1</a> |
| <a href="#">PREDICTED: carboxypeptidase B2 isoform X2 [Cricetulus grise</a>     | 51.1      | 51.1        | 100%        | 6e-06   | 83%   | <a href="#">gi 625193824 XP_007639419.1</a> |
| <a href="#">PREDICTED: carboxypeptidase B2 isoform X4 [Cricetulus grise</a>     | 51.1      | 51.1        | 100%        | 6e-06   | 83%   | <a href="#">gi 625271974 XP_007627553.1</a> |
| <a href="#">PREDICTED: carboxypeptidase B2 [Peromyscus maniculatus t</a>        | 51.1      | 51.1        | 100%        | 6e-06   | 83%   | <a href="#">gi 589957698 XP_006991448.1</a> |
| <a href="#">Carboxypeptidase B2 (plasma) [Mus musculus]</a>                     | 51.1      | 51.1        | 100%        | 6e-06   | 83%   | <a href="#">gi 59808067 AAH89577.1</a>      |

|                                                                                    |      |      |      |       |     |                                             |
|------------------------------------------------------------------------------------|------|------|------|-------|-----|---------------------------------------------|
| <a href="#">carboxypeptidase U [Mus musculus]</a>                                  | 51.1 | 51.1 | 100% | 6e-06 | 83% | <a href="#">gi 6003652 AAF00528.1</a>       |
| <a href="#">PREDICTED: carboxypeptidase B2 [Mesocricetus auratus]</a>              | 51.1 | 51.1 | 100% | 6e-06 | 83% | <a href="#">gi 524935646 XP_005071018.1</a> |
| <a href="#">carboxypeptidase B2 precursor [Mus musculus]</a>                       | 51.1 | 51.1 | 100% | 6e-06 | 83% | <a href="#">gi 31982712 NP_062749.2</a>     |
| <a href="#">PREDICTED: carboxypeptidase B2 isoform X1 [Cricetulus griseus]</a>     | 51.1 | 51.1 | 100% | 6e-06 | 83% | <a href="#">gi 354476626 XP_003500525.1</a> |
| <a href="#">PREDICTED: carboxypeptidase B2 isoform X3 [Cricetulus griseus]</a>     | 51.1 | 51.1 | 100% | 6e-06 | 83% | <a href="#">gi 625271972 XP_007627552.1</a> |
| <a href="#">zinc finger CCCH domain-containing protein 13 [Cricetulus griseus]</a> | 51.1 | 51.1 | 100% | 6e-06 | 83% | <a href="#">gi 537241932 ERE87338.1</a>     |
| <a href="#">PREDICTED: carboxypeptidase B2 [Saimiri boliviensis boliviensis]</a>   | 50.7 | 50.7 | 94%  | 8e-06 | 89% | <a href="#">gi 403286234 XP_003934405.1</a> |
| <a href="#">Carboxypeptidase B2 [Fukomys damarensis]</a>                           | 49.4 | 49.4 | 100% | 2e-05 | 83% | <a href="#">gi 676273139 KFO27861.1</a>     |
| <a href="#">PREDICTED: carboxypeptidase B2 isoform X2 [Camelus dromedarius]</a>    | 49.4 | 49.4 | 100% | 2e-05 | 83% | <a href="#">gi 744566815 XP_010979147.1</a> |
| <a href="#">PREDICTED: carboxypeptidase B2 isoform X2 [Camelus bactrianus]</a>     | 49.4 | 49.4 | 100% | 2e-05 | 83% | <a href="#">gi 743712317 XP_010949694.1</a> |
| <a href="#">PREDICTED: carboxypeptidase B2 isoform X2 [Macaca fascicularis]</a>    | 49.4 | 49.4 | 100% | 2e-05 | 83% | <a href="#">gi 544503644 XP_005585858.1</a> |
| <a href="#">PREDICTED: carboxypeptidase B2 isoform X3 [Chinchilla lanigera]</a>    | 49.4 | 49.4 | 100% | 2e-05 | 83% | <a href="#">gi 533192699 XP_005409155.1</a> |
| <a href="#">PREDICTED: carboxypeptidase B2 isoform X2 [Chinchilla lanigera]</a>    | 49.4 | 49.4 | 100% | 2e-05 | 83% | <a href="#">gi 533192697 XP_005409154.1</a> |
| <a href="#">PREDICTED: carboxypeptidase B2 [Otolemur garnettii]</a>                | 49.4 | 49.4 | 100% | 2e-05 | 83% | <a href="#">gi 395835377 XP_003790657.1</a> |
| <a href="#">PREDICTED: carboxypeptidase B2 isoform X1 [Camelus dromedarius]</a>    | 49.4 | 49.4 | 100% | 2e-05 | 83% | <a href="#">gi 744566812 XP_010979146.1</a> |
| <a href="#">PREDICTED: carboxypeptidase B2 [Canis lupus familiaris]</a>            | 49.4 | 49.4 | 100% | 2e-05 | 83% | <a href="#">gi 73989292 XP_851154.1</a>     |
| <a href="#">PREDICTED: carboxypeptidase B2 [Vicugna pacos]</a>                     | 49.4 | 49.4 | 100% | 2e-05 | 83% | <a href="#">gi 560974364 XP_006209502.1</a> |
| <a href="#">PREDICTED: carboxypeptidase B2 [Camelus ferus]</a>                     | 49.4 | 49.4 | 100% | 2e-05 | 83% | <a href="#">gi 560922422 XP_006187410.1</a> |
| <a href="#">PREDICTED: carboxypeptidase B2 [Equus caballus]</a>                    | 49.4 | 49.4 | 94%  | 2e-05 | 88% | <a href="#">gi 545190694 XP_005601424.1</a> |
| <a href="#">PREDICTED: carboxypeptidase B2 isoform X1 [Macaca fascicularis]</a>    | 49.4 | 49.4 | 100% | 2e-05 | 83% | <a href="#">gi 544503642 XP_005585857.1</a> |
| <a href="#">PREDICTED: carboxypeptidase B2 isoform X1 [Chinchilla lanigera]</a>    | 49.4 | 49.4 | 100% | 2e-05 | 83% | <a href="#">gi 533192695 XP_005409153.1</a> |
| <a href="#">Carboxypeptidase B2 [Macaca mulatta]</a>                               | 49.4 | 49.4 | 100% | 2e-05 | 83% | <a href="#">gi 355700980 EHH29001.1</a>     |
| <a href="#">PREDICTED: carboxypeptidase B2 isoform X2 [Fukomys damarensis]</a>     | 49.4 | 49.4 | 100% | 2e-05 | 83% | <a href="#">gi 731244313 XP_010635336.1</a> |
| <a href="#">PREDICTED: carboxypeptidase B2 [Felis catus]</a>                       | 49.4 | 49.4 | 100% | 2e-05 | 83% | <a href="#">gi 586973570 XP_006927367.1</a> |
| <a href="#">PREDICTED: carboxypeptidase B2 isoform X1 [Fukomys damarensis]</a>     | 49.4 | 49.4 | 100% | 2e-05 | 83% | <a href="#">gi 731244311 XP_010635335.1</a> |
| <a href="#">PREDICTED: carboxypeptidase B2 [Panthera tigris altaica]</a>           | 49.4 | 49.4 | 100% | 2e-05 | 83% | <a href="#">gi 591318467 XP_007085493.1</a> |
| <a href="#">plastin-2 isoform 16 [Camelus ferus]</a>                               | 49.4 | 49.4 | 100% | 2e-05 | 83% | <a href="#">gi 528759255 EPY78914.1</a>     |
| <a href="#">carboxypeptidase B2 (plasma), isoform CRA_b [Rattus norvegicus]</a>    | 48.6 | 48.6 | 100% | 4e-05 | 78% | <a href="#">gi 149049966 EDM02290.1</a>     |
| <a href="#">carboxypeptidase B2 (plasma), isoform CRA_a [Rattus norvegicus]</a>    | 48.6 | 48.6 | 100% | 4e-05 | 78% | <a href="#">gi 149049965 EDM02289.1</a>     |
| <a href="#">Cpb2 protein [Rattus norvegicus]</a>                                   | 48.6 | 48.6 | 100% | 4e-05 | 78% | <a href="#">gi 60688161 AAH91133.1</a>      |
| <a href="#">carboxypeptidase B2 precursor [Rattus norvegicus]</a>                  | 48.6 | 48.6 | 100% | 4e-05 | 78% | <a href="#">gi 16758414 NP_446069.1</a>     |
| <a href="#">PREDICTED: carboxypeptidase B2 [Tupaia chinensis]</a>                  | 48.6 | 48.6 | 100% | 4e-05 | 78% | <a href="#">gi 562871068 XP_006163508.1</a> |
| <a href="#">PREDICTED: carboxypeptidase B2 [Microtus ochrogaster]</a>              | 47.3 | 47.3 | 100% | 1e-04 | 78% | <a href="#">gi 532025304 XP_005355675.1</a> |
| <a href="#">PREDICTED: carboxypeptidase B2 isoform 1 [Macaca mulatta]</a>          | 46.9 | 46.9 | 94%  | 1e-04 | 82% | <a href="#">gi 109120669 XP_001097310.1</a> |
| <a href="#">Carboxypeptidase B2 [Macaca fascicularis]</a>                          | 46.9 | 46.9 | 94%  | 1e-04 | 82% | <a href="#">gi 355754683 EHH58584.1</a>     |
| <a href="#">PREDICTED: carboxypeptidase B2 isoform 3 [Macaca mulatta]</a>          | 46.9 | 46.9 | 94%  | 1e-04 | 82% | <a href="#">gi 109120665 XP_001097608.1</a> |
| <a href="#">PREDICTED: carboxypeptidase B2 [Cavia porcellus]</a>                   | 46.9 | 46.9 | 100% | 1e-04 | 78% | <a href="#">gi 348583190 XP_003477356.1</a> |
| <a href="#">PREDICTED: carboxypeptidase B2 [Tursiops truncatus]</a>                | 46.4 | 46.4 | 94%  | 2e-04 | 82% | <a href="#">gi 470653285 XP_004329533.1</a> |
| <a href="#">PREDICTED: carboxypeptidase B2 isoform X2 [Lipotes vexillifer]</a>     | 46.4 | 46.4 | 94%  | 2e-04 | 82% | <a href="#">gi 602712571 XP_007466515.1</a> |
| <a href="#">PREDICTED: carboxypeptidase B2 [Physeter catodon]</a>                  | 46.4 | 46.4 | 94%  | 2e-04 | 82% | <a href="#">gi 593749228 XP_007129852.1</a> |
| <a href="#">PREDICTED: carboxypeptidase B2 isoform X1 [Lipotes vexillifer]</a>     | 46.4 | 46.4 | 94%  | 2e-04 | 82% | <a href="#">gi 602712569 XP_007466514.1</a> |
| <a href="#">PREDICTED: carboxypeptidase B2 [Balaenoptera acutorostrata]</a>        | 46.4 | 46.4 | 94%  | 2e-04 | 82% | <a href="#">gi 594678268 XP_007186896.1</a> |
| <a href="#">PREDICTED: carboxypeptidase B2 [Ochotona princeps]</a>                 | 46.4 | 46.4 | 94%  | 2e-04 | 82% | <a href="#">gi 504128560 XP_004577530.1</a> |
| <a href="#">PREDICTED: carboxypeptidase B2 [Orcinus orca]</a>                      | 46.4 | 46.4 | 94%  | 2e-04 | 82% | <a href="#">gi 466032575 XP_004274629.1</a> |
| <a href="#">PREDICTED: carboxypeptidase B2 [Octodon degus]</a>                     | 46.0 | 46.0 | 100% | 3e-04 | 78% | <a href="#">gi 507684606 XP_004640321.1</a> |

|                                                                                 |      |      |      |       |     |                                             |
|---------------------------------------------------------------------------------|------|------|------|-------|-----|---------------------------------------------|
| <a href="#">PREDICTED: carboxypeptidase B2 isoform X2 [Heterocephalu</a>        | 45.6 | 45.6 | 100% | 4e-04 | 78% | <a href="#">gi 512921202 XP_004904434.1</a> |
| <a href="#">PREDICTED: carboxypeptidase B2 isoform X2 [Heterocephalu</a>        | 45.6 | 45.6 | 100% | 4e-04 | 78% | <a href="#">gi 512964055 XP_004844264.1</a> |
| <a href="#">PREDICTED: carboxypeptidase B2 isoform X1 [Heterocephalu</a>        | 45.6 | 45.6 | 100% | 4e-04 | 78% | <a href="#">gi 512921198 XP_004904433.1</a> |
| <a href="#">PREDICTED: carboxypeptidase B2 isoform X1 [Heterocephalu</a>        | 45.6 | 45.6 | 100% | 4e-04 | 78% | <a href="#">gi 512964053 XP_004844263.1</a> |
| <a href="#">PREDICTED: carboxypeptidase B2 [Odobenus rosmarus diver</a>         | 44.8 | 44.8 | 100% | 7e-04 | 75% | <a href="#">gi 472378433 XP_004408637.1</a> |
| <a href="#">PREDICTED: carboxypeptidase B2 [Leptonychotes weddellii]</a>        | 44.3 | 44.3 | 100% | 0.001 | 75% | <a href="#">gi 585191930 XP_006747204.1</a> |
| <a href="#">PREDICTED: carboxypeptidase B2 [Ictidomys tridecemlineatus</a>      | 43.9 | 43.9 | 88%  | 0.001 | 81% | <a href="#">gi 532113245 XP_005341304.1</a> |
| <a href="#">PREDICTED: carboxypeptidase B2 isoform X2 [Bos mutus]</a>           | 43.5 | 43.5 | 88%  | 0.002 | 81% | <a href="#">gi 555969567 XP_005896807.1</a> |
| <a href="#">Chain A. Crystal Structure Of Thrombin Activatable Fibrinolysis</a> | 43.5 | 43.5 | 88%  | 0.002 | 81% | <a href="#">gi 194368809 3DGV_A</a>         |
| <a href="#">PREDICTED: carboxypeptidase B2 [Nannospalax galii]</a>              | 43.5 | 43.5 | 100% | 0.002 | 72% | <a href="#">gi 674098370 XP_008822615.1</a> |
| <a href="#">PREDICTED: carboxypeptidase B2 [Ceratotherium simum simu</a>        | 43.5 | 43.5 | 94%  | 0.002 | 76% | <a href="#">gi 478518956 XP_004433702.1</a> |
| <a href="#">PREDICTED: carboxypeptidase B2 isoform X1 [Bison bison bis</a>      | 43.5 | 43.5 | 88%  | 0.002 | 81% | <a href="#">gi 742181236 XP_010852934.1</a> |
| <a href="#">carboxypeptidase B2 precursor [Bos taurus]</a>                      | 43.5 | 43.5 | 88%  | 0.002 | 81% | <a href="#">gi 114050845 NP_001039462.1</a> |
| <a href="#">PREDICTED: carboxypeptidase B2 [Capra hircus]</a>                   | 43.5 | 43.5 | 88%  | 0.002 | 81% | <a href="#">gi 548487919 XP_005687494.1</a> |
| <a href="#">PREDICTED: carboxypeptidase B2 [Ovis aries]</a>                     | 43.5 | 43.5 | 88%  | 0.002 | 81% | <a href="#">gi 426236307 XP_004012111.1</a> |
| <a href="#">PREDICTED: carboxypeptidase B2 isoform X2 [Pteropus alectr</a>      | 43.1 | 43.1 | 100% | 0.003 | 72% | <a href="#">gi 586560565 XP_006913553.1</a> |
| <a href="#">hypothetical protein PANDA_002961 [Ailuropoda melanoleuca]</a>      | 43.1 | 43.1 | 100% | 0.003 | 70% | <a href="#">gi 281349951 EFB25535.1</a>     |
| <a href="#">PREDICTED: carboxypeptidase B2 isoform X1 [Pteropus alectr</a>      | 43.1 | 43.1 | 100% | 0.003 | 72% | <a href="#">gi 586560563 XP_006913552.1</a> |
| <a href="#">PREDICTED: carboxypeptidase B2-like [Ailuropoda melanoleu</a>       | 43.1 | 43.1 | 100% | 0.003 | 70% | <a href="#">gi 301758334 XP_002915018.1</a> |
| <a href="#">PREDICTED: carboxypeptidase B2 [Ursus maritimus]</a>                | 43.1 | 43.1 | 100% | 0.003 | 70% | <a href="#">gi 671028730 XP_008705148.1</a> |
| <a href="#">PREDICTED: carboxypeptidase B2 [Condylura cristata]</a>             | 42.2 | 42.2 | 88%  | 0.005 | 78% | <a href="#">gi 507939327 XP_004680202.1</a> |
| <a href="#">PREDICTED: carboxypeptidase B2 [Sus scrofa]</a>                     | 41.8 | 41.8 | 94%  | 0.007 | 76% | <a href="#">gi 194040626 XP_001929181.1</a> |
| <a href="#">Carboxypeptidase B2 [Ophiophagus hannah]</a>                        | 41.4 | 41.4 | 94%  | 0.009 | 71% | <a href="#">gi 565306861 ETE61379.1</a>     |
| <a href="#">PREDICTED: carboxypeptidase B2 [Elephantulus edwardii]</a>          | 41.4 | 41.4 | 100% | 0.010 | 72% | <a href="#">gi 585654497 XP_006884668.1</a> |
| <a href="#">PREDICTED: carboxypeptidase B2 [Anolis carolinensis]</a>            | 41.4 | 41.4 | 94%  | 0.010 | 71% | <a href="#">gi 327260978 XP_003215309.1</a> |
| <a href="#">PREDICTED: carboxypeptidase B2 [Erinaceus europaeus]</a>            | 40.9 | 40.9 | 94%  | 0.013 | 76% | <a href="#">gi 617593818 XP_007521293.1</a> |

## Alignments

Download GenPept Graphics

Next Previous Descriptions

PREDICTED: carboxypeptidase B2 isoform X3 [Homo sapiens]

Sequence ID: [gi|530402101|ref|XP\\_005266316.1|](#) Length: 226 Number of Matches: 1

Range 1: 84 to 101 GenPept Graphics

Next Match Previous Match

| Score          | Expect | Identities | Positives   | Gaps     |
|----------------|--------|------------|-------------|----------|
| 57.5 bits(128) | 3e-08  | 17/18(94%) | 18/18(100%) | 0/18(0%) |

Query 1 KKQVHFFVDASDNDVKA 18  
 KKQVHFFV+ASDNDVKA  
 Sbjct 84 KKQVHFFVNASDNDVKA 101

### Related Information

[Gene](#) - associated gene details

Download GenPept Graphics

Next Previous Descriptions

carboxypeptidase B-like protein [Homo sapiens]

Sequence ID: [gi|6855464|dbj|BAA90475.1|](#) Length: 360 Number of Matches: 1

Range 1: 65 to 82 GenPept Graphics

Next Match Previous Match

| Score          | Expect | Identities | Positives   | Gaps     |
|----------------|--------|------------|-------------|----------|
| 57.5 bits(128) | 4e-08  | 17/18(94%) | 18/18(100%) | 0/18(0%) |

### Related Information

[Gene](#) - associated gene details

Query 1 KKQVHFFVDASDVNDVKA 18  
 KKQVHFFV+ASDVNDVKA  
 Sbjct 65 KKQVHFFVNASDVNDVKA 82

[Download](#) [GenPept](#) [Graphics](#)

[Next](#) [Previous](#) [Descriptions](#)

carboxypeptidase B2 (plasma, carboxypeptidase U), isoform CRA\_a [Homo sapiens]

Sequence ID: [gi|119629159|gb|EAX08754.1](#) Length: 360 Number of Matches: 1

Range 1: 65 to 82 [GenPept](#) [Graphics](#)

[Next Match](#) [Previous Match](#)

| Score          | Expect | Identities | Positives   | Gaps     |
|----------------|--------|------------|-------------|----------|
| 57.5 bits(128) | 4e-08  | 17/18(94%) | 18/18(100%) | 0/18(0%) |

Query 1 KKQVHFFVDASDVNDVKA 18  
 KKQVHFFV+ASDVNDVKA  
 Sbjct 65 KKQVHFFVNASDVNDVKA 82

**Related Information**

[Gene](#) - associated gene details

[Download](#) [GenPept](#) [Graphics](#)

[Next](#) [Previous](#) [Descriptions](#)

carboxypeptidase B2 isoform 2 preproprotein [Homo sapiens]

Sequence ID: [gi|513126877|ref|NP\\_001265470.1](#) Length: 386 Number of Matches: 1

Range 1: 65 to 82 [GenPept](#) [Graphics](#)

[Next Match](#) [Previous Match](#)

| Score          | Expect | Identities | Positives   | Gaps     |
|----------------|--------|------------|-------------|----------|
| 57.5 bits(128) | 4e-08  | 17/18(94%) | 18/18(100%) | 0/18(0%) |

Query 1 KKQVHFFVDASDVNDVKA 18  
 KKQVHFFV+ASDVNDVKA  
 Sbjct 65 KKQVHFFVNASDVNDVKA 82

**Related Information**

[Gene](#) - associated gene details

[Map Viewer](#) - aligned genomic context

[Download](#) [GenPept](#) [Graphics](#)

[Next](#) [Previous](#) [Descriptions](#)

PREDICTED: carboxypeptidase B2 isoform X2 [Pongo abelii]

Sequence ID: [gi|686743701|ref|XP\\_009246910.1](#) Length: 387 Number of Matches: 1

Range 1: 65 to 82 [GenPept](#) [Graphics](#)

[Next Match](#) [Previous Match](#)

| Score          | Expect | Identities | Positives   | Gaps     |
|----------------|--------|------------|-------------|----------|
| 57.5 bits(128) | 4e-08  | 17/18(94%) | 18/18(100%) | 0/18(0%) |

Query 1 KKQVHFFVDASDVNDVKA 18  
 KKQVHFFV+ASDVNDVKA  
 Sbjct 65 KKQVHFFVNASDVNDVKA 82

**Related Information**

[Gene](#) - associated gene details

[Map Viewer](#) - aligned genomic context

BLAST is a registered trademark of the National Library of Medicine.

▶ NCBI/ BLAST/ blastp suite/ Formatting Results - B94GRTUF01R

**i** Your search parameters were adjusted to search for a short input sequence.

[Edit and Resubmit](#) [Save Search Strategies](#) [▶ Formatting options](#) [▶ Download](#)

[YouTube](#) [How to read this page](#) [Blast report description](#)

### CPB2\_KKQVHFFVNASDVNDVKA\_NonMod

**RID** [B94GRTUF01R](#) (Expires on 01-14 10:33 am)

**Query ID** lcl|231962  
**Description** None  
**Molecule type** amino acid  
**Query Length** 18

**Database Name** nr  
**Description** All non-redundant GenBank CDS translations+PDB+SwissProt+PIR excluding environmental samples from WGS projects  
**Program** BLASTP 2.2.30+ [▶ Citation](#)

Other reports: [▶ Search Summary](#) [\[Taxonomy reports\]](#) [\[Distance tree of results\]](#) [\[Multiple alignment\]](#)

### **[-]** Graphic Summary

**[-]** [Show Conserved Domains](#)

No putative conserved domains have been detected

Distribution of 100 Blast Hits on the Query Sequence

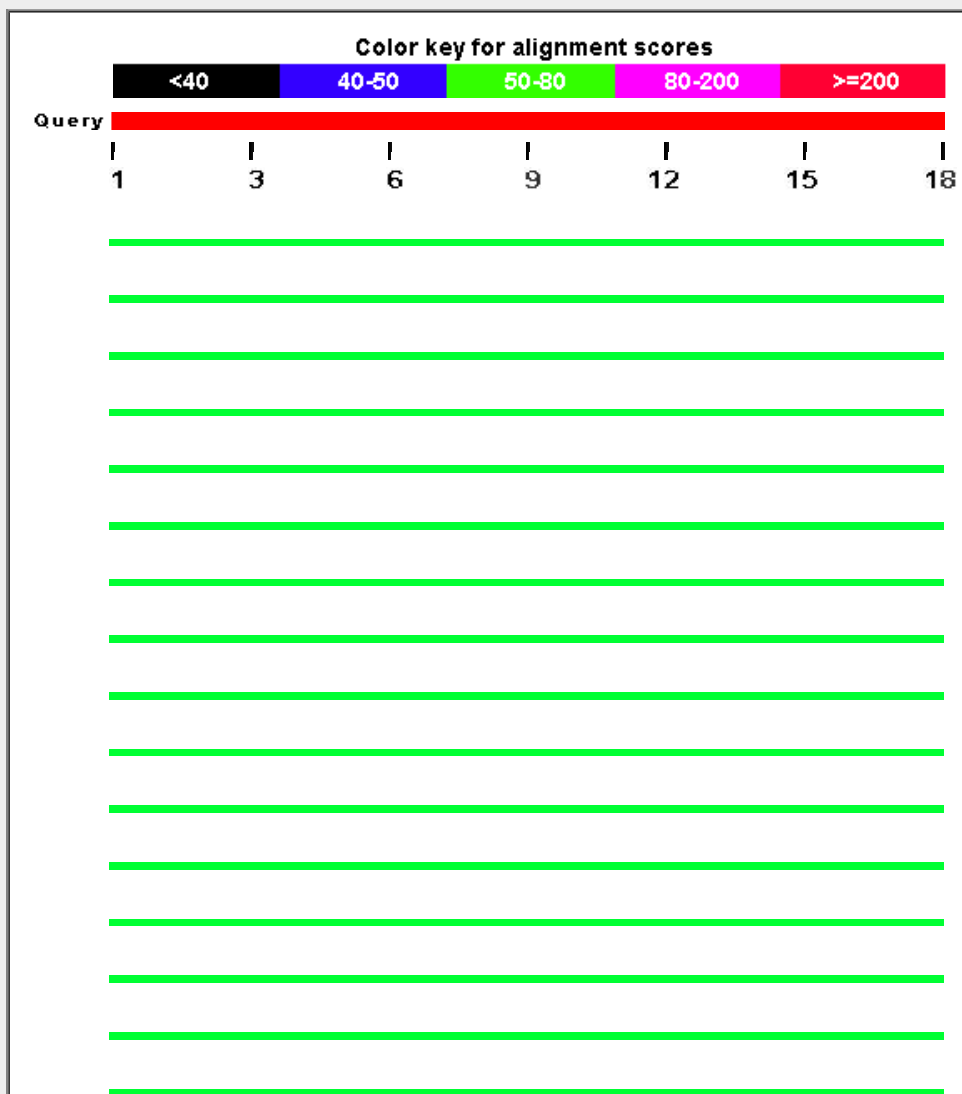

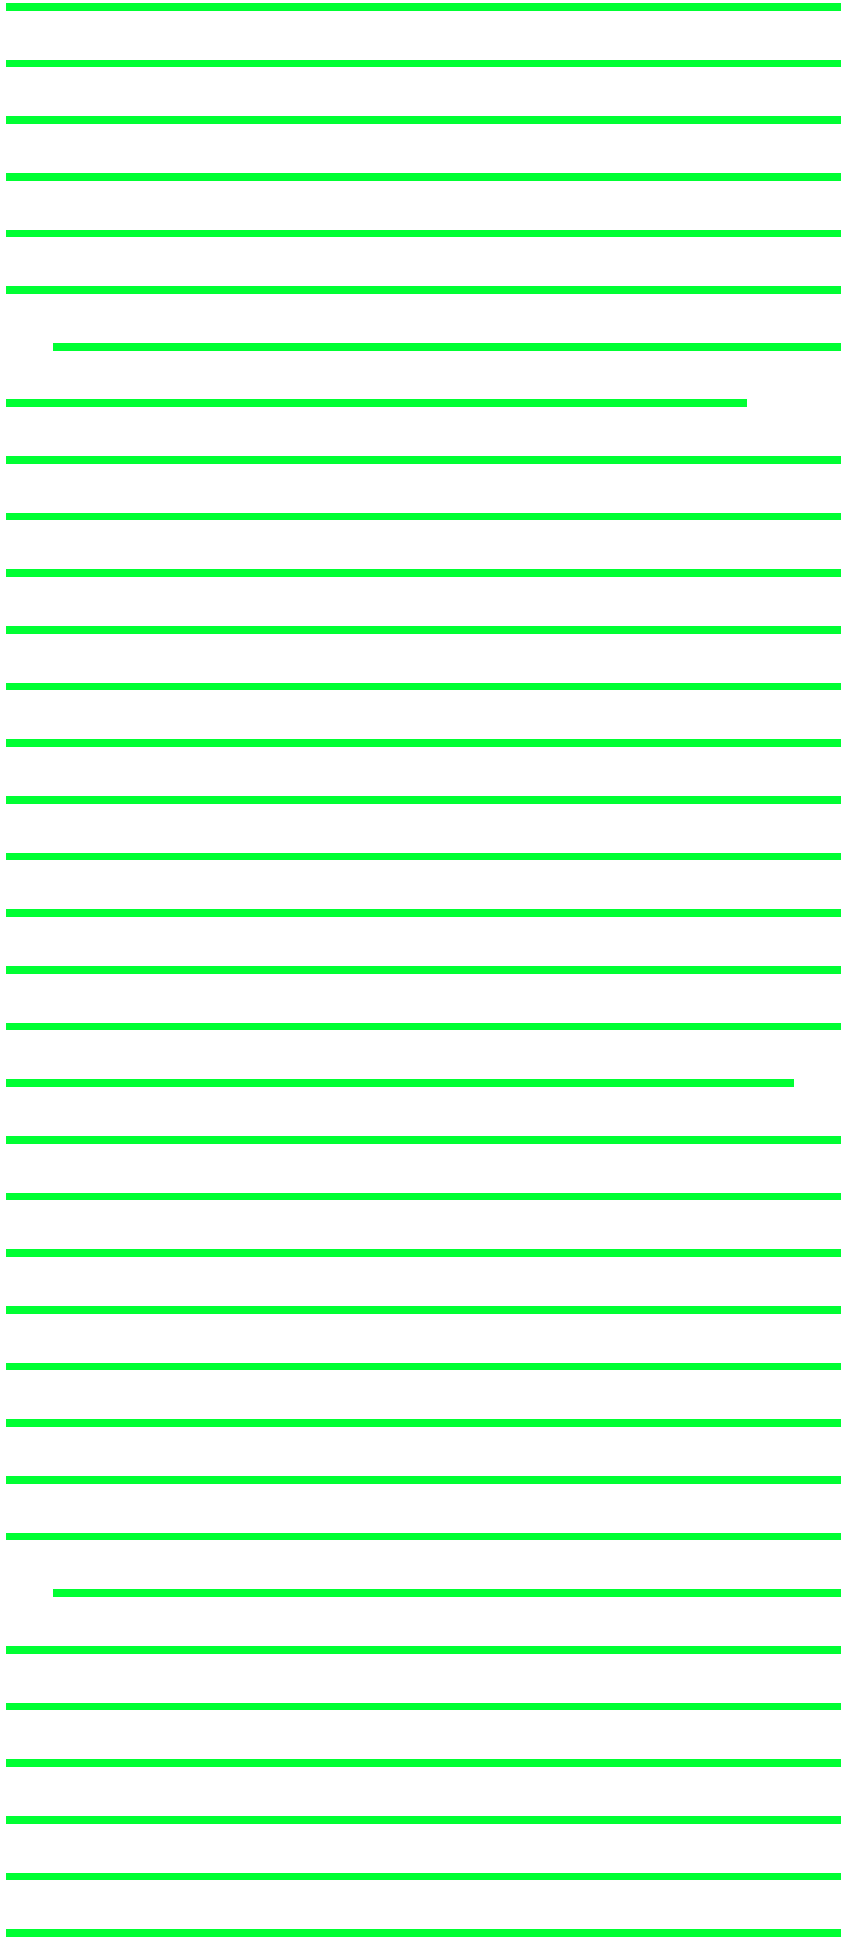

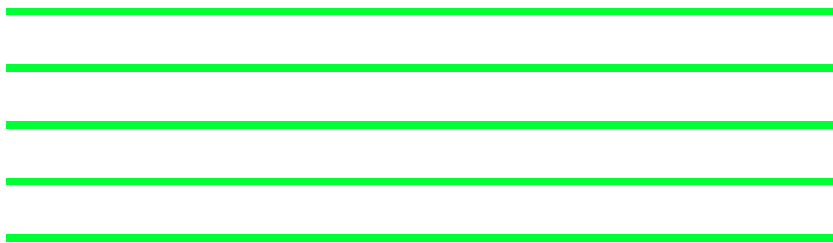

**Descriptions**

**Sequences producing significant alignments:**

Select: [All](#) [None](#) Selected:0

[↑](#) [Alignments](#)
[Download](#)
[GenPept](#)
[Graphics](#)
[Distance tree of results](#)
[Multiple alignment](#)
⚙

| Description                                                                          | Max score | Total score | Query cover | E value | Ident | Accession                                   |
|--------------------------------------------------------------------------------------|-----------|-------------|-------------|---------|-------|---------------------------------------------|
| <a href="#">PREDICTED: carboxypeptidase B2 isoform X3 [Homo sapiens]</a>             | 60.0      | 60.0        | 100%        | 4e-09   | 100%  | <a href="#">gij530402101 XP_005266316.1</a> |
| <a href="#">carboxypeptidase B-like protein [Homo sapiens]</a>                       | 60.0      | 60.0        | 100%        | 5e-09   | 100%  | <a href="#">gij6855464 BAA90475.1</a>       |
| <a href="#">carboxypeptidase B2 (plasma, carboxypeptidase U), isoform CRA_</a>       | 60.0      | 60.0        | 100%        | 5e-09   | 100%  | <a href="#">gij119629159 EAX08754.1</a>     |
| <a href="#">carboxypeptidase B2 isoform 2 preproprotein [Homo sapiens]</a>           | 60.0      | 60.0        | 100%        | 5e-09   | 100%  | <a href="#">gij513126877 NP_001265470.1</a> |
| <a href="#">PREDICTED: carboxypeptidase B2 isoform X2 [Pongo abelii]</a>             | 60.0      | 60.0        | 100%        | 5e-09   | 100%  | <a href="#">gij686743701 XP_009246910.1</a> |
| <a href="#">Chain A, Pro-carboxypeptidase U In Complex With 5-(3-aminopropyl)</a>    | 60.0      | 60.0        | 100%        | 5e-09   | 100%  | <a href="#">gij672886543 4P10_A</a>         |
| <a href="#">PREDICTED: carboxypeptidase B2 isoform X2 [Homo sapiens]</a>             | 60.0      | 60.0        | 100%        | 5e-09   | 100%  | <a href="#">gij530402099 XP_005266315.1</a> |
| <a href="#">prepro-plasma carboxypeptidase B [Homo sapiens]</a>                      | 60.0      | 60.0        | 100%        | 5e-09   | 100%  | <a href="#">gij189687 AAA60042.1</a>        |
| <a href="#">PREDICTED: carboxypeptidase B2 [Gorilla gorilla gorilla]</a>             | 60.0      | 60.0        | 100%        | 5e-09   | 100%  | <a href="#">gij426375394 XP_004054526.1</a> |
| <a href="#">Carboxypeptidase B2 (plasma) [Homo sapiens]</a>                          | 60.0      | 60.0        | 100%        | 5e-09   | 100%  | <a href="#">gij13937897 JAH07057.1</a>      |
| <a href="#">carboxypeptidase B2 isoform 1 preproprotein [Homo sapiens]</a>           | 60.0      | 60.0        | 100%        | 5e-09   | 100%  | <a href="#">gij513126885 NP_001863.3</a>    |
| <a href="#">carboxypeptidase B2 (plasma) [synthetic construct]</a>                   | 60.0      | 60.0        | 100%        | 5e-09   | 100%  | <a href="#">gij157927966 ABW03279.1</a>     |
| <a href="#">carboxypeptidase B2 (plasma, carboxypeptidase U) [synthetic cons</a>     | 60.0      | 60.0        | 100%        | 5e-09   | 100%  | <a href="#">gij124126823 ABM92184.1</a>     |
| <a href="#">PREDICTED: carboxypeptidase B2 [Pan troglodytes]</a>                     | 60.0      | 60.0        | 100%        | 5e-09   | 100%  | <a href="#">gij114651557 XP_509667.2</a>    |
| <a href="#">Chain A, Crystal Structure Of Thrombin-Activatable Fibrinolysis Inhi</a> | 60.0      | 60.0        | 100%        | 5e-09   | 100%  | <a href="#">gij193506809 3D66_A</a>         |
| <a href="#">Homo sapiens carboxypeptidase B2 (plasma, carboxypeptidase U)</a>        | 60.0      | 60.0        | 100%        | 5e-09   | 100%  | <a href="#">gij30584819 AAP36662.1</a>      |
| <a href="#">PREDICTED: carboxypeptidase B2 isoform X1 [Pongo abelii]</a>             | 60.0      | 60.0        | 100%        | 5e-09   | 100%  | <a href="#">gij297694016 XP_002824293.1</a> |
| <a href="#">Chain A, Crystal Structure Of A T325i/t329i/h333y/h335q Mutant Of</a>    | 60.0      | 60.0        | 100%        | 5e-09   | 100%  | <a href="#">gij253722661 3D68_A</a>         |
| <a href="#">PREDICTED: carboxypeptidase B2 isoform X1 [Homo sapiens]</a>             | 60.0      | 60.0        | 100%        | 5e-09   | 100%  | <a href="#">gij530402097 XP_005266314.1</a> |
| <a href="#">PREDICTED: carboxypeptidase B2 isoform X1 [Rhinopithecus roxe</a>        | 57.5      | 57.5        | 100%        | 4e-08   | 94%   | <a href="#">gij724966280 XP_010356389.1</a> |
| <a href="#">PREDICTED: carboxypeptidase B2 [Papio anubis]</a>                        | 57.5      | 57.5        | 100%        | 4e-08   | 94%   | <a href="#">gij402901940 XP_003913891.1</a> |
| <a href="#">PREDICTED: carboxypeptidase B2 [Nomascus leucogenys]</a>                 | 56.6      | 56.6        | 100%        | 7e-08   | 94%   | <a href="#">gij332241864 XP_003270104.1</a> |
| <a href="#">PREDICTED: carboxypeptidase B2 [Chlorocebus sabaeus]</a>                 | 54.5      | 54.5        | 94%         | 4e-07   | 94%   | <a href="#">gij635025444 XP_007958527.1</a> |
| <a href="#">PREDICTED: carboxypeptidase B2 [Callithrix jacchus]</a>                  | 54.5      | 54.5        | 88%         | 4e-07   | 100%  | <a href="#">gij390457680 XP_002742737.2</a> |
| <a href="#">PREDICTED: carboxypeptidase B2-like [Peromyscus maniculatus t</a>        | 53.7      | 53.7        | 100%        | 6e-07   | 89%   | <a href="#">gij589996660 XP_006998803.1</a> |
| <a href="#">PREDICTED: carboxypeptidase B2 isoform X2 [Cricetulus griseus]</a>       | 53.7      | 53.7        | 100%        | 7e-07   | 89%   | <a href="#">gij625193824 XP_007639419.1</a> |
| <a href="#">PREDICTED: carboxypeptidase B2 isoform X4 [Cricetulus griseus]</a>       | 53.7      | 53.7        | 100%        | 7e-07   | 89%   | <a href="#">gij625271974 XP_007627553.1</a> |
| <a href="#">PREDICTED: carboxypeptidase B2 [Peromyscus maniculatus baird</a>         | 53.7      | 53.7        | 100%        | 7e-07   | 89%   | <a href="#">gij589957698 XP_006991448.1</a> |



|                                                                                    |      |      |      |       |     |                                             |
|------------------------------------------------------------------------------------|------|------|------|-------|-----|---------------------------------------------|
| <a href="#">Carboxypeptidase B2 (plasma) [Mus musculus]</a>                        | 53.7 | 53.7 | 100% | 7e-07 | 89% | <a href="#">gij59808067 AAH89577.1</a>      |
| <a href="#">carboxypeptidase U [Mus musculus]</a>                                  | 53.7 | 53.7 | 100% | 7e-07 | 89% | <a href="#">gij6003652 AAF00528.1</a>       |
| <a href="#">PREDICTED: carboxypeptidase B2 [Mesocricetus auratus]</a>              | 53.7 | 53.7 | 100% | 7e-07 | 89% | <a href="#">gij524935646 XP_005071018.1</a> |
| <a href="#">carboxypeptidase B2 precursor [Mus musculus]</a>                       | 53.7 | 53.7 | 100% | 7e-07 | 89% | <a href="#">gij31982712 NP_062749.2</a>     |
| <a href="#">PREDICTED: carboxypeptidase B2 isoform X1 [Cricetulus griseus]</a>     | 53.7 | 53.7 | 100% | 7e-07 | 89% | <a href="#">gij354476626 XP_003500525.1</a> |
| <a href="#">PREDICTED: carboxypeptidase B2 isoform X3 [Cricetulus griseus]</a>     | 53.7 | 53.7 | 100% | 7e-07 | 89% | <a href="#">gij625271972 XP_007627552.1</a> |
| <a href="#">zinc finger CCCH domain-containing protein 13 [Cricetulus griseus]</a> | 53.7 | 53.7 | 100% | 8e-07 | 89% | <a href="#">gij537241932 ERE87338.1</a>     |
| <a href="#">PREDICTED: carboxypeptidase B2 [Saimiri boliviensis boliviensis]</a>   | 53.2 | 53.2 | 94%  | 1e-06 | 94% | <a href="#">gij403286234 XP_003934405.1</a> |
| <a href="#">Carboxypeptidase B2 [Fukomys damarensis]</a>                           | 52.0 | 52.0 | 100% | 3e-06 | 89% | <a href="#">gij676273139 KFO27861.1</a>     |
| <a href="#">PREDICTED: carboxypeptidase B2 isoform X2 [Macaca fascicularis]</a>    | 52.0 | 52.0 | 100% | 3e-06 | 89% | <a href="#">gij544503644 XP_005585858.1</a> |
| <a href="#">PREDICTED: carboxypeptidase B2 isoform X3 [Chinchilla lanigera]</a>    | 52.0 | 52.0 | 100% | 3e-06 | 89% | <a href="#">gij533192699 XP_005409155.1</a> |
| <a href="#">PREDICTED: carboxypeptidase B2 isoform X2 [Chinchilla lanigera]</a>    | 52.0 | 52.0 | 100% | 3e-06 | 89% | <a href="#">gij533192697 XP_005409154.1</a> |
| <a href="#">PREDICTED: carboxypeptidase B2 [Otolemur garnettii]</a>                | 52.0 | 52.0 | 100% | 3e-06 | 89% | <a href="#">gij395835377 XP_003790657.1</a> |
| <a href="#">PREDICTED: carboxypeptidase B2 [Canis lupus familiaris]</a>            | 52.0 | 52.0 | 100% | 3e-06 | 89% | <a href="#">gij73989292 XP_851154.1</a>     |
| <a href="#">PREDICTED: carboxypeptidase B2 [Vicugna pacos]</a>                     | 52.0 | 52.0 | 100% | 3e-06 | 89% | <a href="#">gij560974364 XP_006209502.1</a> |
| <a href="#">PREDICTED: carboxypeptidase B2 [Camelus ferus]</a>                     | 52.0 | 52.0 | 100% | 3e-06 | 89% | <a href="#">gij560922422 XP_006187410.1</a> |
| <a href="#">PREDICTED: carboxypeptidase B2 [Equus caballus]</a>                    | 52.0 | 52.0 | 94%  | 3e-06 | 94% | <a href="#">gij545190694 XP_005601424.1</a> |
| <a href="#">PREDICTED: carboxypeptidase B2 isoform X1 [Macaca fascicularis]</a>    | 52.0 | 52.0 | 100% | 3e-06 | 89% | <a href="#">gij544503642 XP_005585857.1</a> |
| <a href="#">PREDICTED: carboxypeptidase B2 isoform X1 [Chinchilla lanigera]</a>    | 52.0 | 52.0 | 100% | 3e-06 | 89% | <a href="#">gij533192695 XP_005409153.1</a> |
| <a href="#">Carboxypeptidase B2 [Macaca mulatta]</a>                               | 52.0 | 52.0 | 100% | 3e-06 | 89% | <a href="#">gij355700980 EHH29001.1</a>     |
| <a href="#">PREDICTED: carboxypeptidase B2 isoform X2 [Fukomys damarensis]</a>     | 52.0 | 52.0 | 100% | 3e-06 | 89% | <a href="#">gij731244313 XP_010635336.1</a> |
| <a href="#">PREDICTED: carboxypeptidase B2 [Felis catus]</a>                       | 52.0 | 52.0 | 100% | 3e-06 | 89% | <a href="#">gij586973570 XP_006927367.1</a> |
| <a href="#">PREDICTED: carboxypeptidase B2 isoform X1 [Fukomys damarensis]</a>     | 52.0 | 52.0 | 100% | 3e-06 | 89% | <a href="#">gij731244311 XP_010635335.1</a> |
| <a href="#">PREDICTED: carboxypeptidase B2 [Panthera tigris altaica]</a>           | 52.0 | 52.0 | 100% | 3e-06 | 89% | <a href="#">gij591318467 XP_007085493.1</a> |
| <a href="#">plastin-2 isoform 16 [Camelus ferus]</a>                               | 52.0 | 52.0 | 100% | 3e-06 | 89% | <a href="#">gij528759255 EPY78914.1</a>     |
| <a href="#">carboxypeptidase B2 (plasma), isoform CRA_b [Rattus norvegicus]</a>    | 51.1 | 51.1 | 100% | 5e-06 | 83% | <a href="#">gij149049966 EDM02290.1</a>     |
| <a href="#">carboxypeptidase B2 (plasma), isoform CRA_a [Rattus norvegicus]</a>    | 51.1 | 51.1 | 100% | 5e-06 | 83% | <a href="#">gij149049965 EDM02289.1</a>     |
| <a href="#">Cpb2 protein [Rattus norvegicus]</a>                                   | 51.1 | 51.1 | 100% | 5e-06 | 83% | <a href="#">gij60688161 AAH91133.1</a>      |
| <a href="#">carboxypeptidase B2 precursor [Rattus norvegicus]</a>                  | 51.1 | 51.1 | 100% | 5e-06 | 83% | <a href="#">gij16758414 NP_446069.1</a>     |
| <a href="#">PREDICTED: carboxypeptidase B2 [Tupaia chinensis]</a>                  | 51.1 | 51.1 | 100% | 5e-06 | 83% | <a href="#">gij562871068 XP_006163508.1</a> |
| <a href="#">PREDICTED: carboxypeptidase B2 [Microtus ochrogaster]</a>              | 49.8 | 49.8 | 100% | 1e-05 | 83% | <a href="#">gij532025304 XP_005355675.1</a> |
| <a href="#">PREDICTED: carboxypeptidase B2 isoform 1 [Macaca mulatta]</a>          | 49.4 | 49.4 | 94%  | 2e-05 | 88% | <a href="#">gij109120669 XP_001097310.1</a> |
| <a href="#">Carboxypeptidase B2 [Macaca fascicularis]</a>                          | 49.4 | 49.4 | 94%  | 2e-05 | 88% | <a href="#">gij355754683 EHH58584.1</a>     |
| <a href="#">PREDICTED: carboxypeptidase B2 isoform 3 [Macaca mulatta]</a>          | 49.4 | 49.4 | 94%  | 2e-05 | 88% | <a href="#">gij109120665 XP_001097608.1</a> |
| <a href="#">PREDICTED: carboxypeptidase B2 [Cavia porcellus]</a>                   | 49.4 | 49.4 | 100% | 2e-05 | 83% | <a href="#">gij348583190 XP_003477356.1</a> |
| <a href="#">PREDICTED: carboxypeptidase B2 [Tursiops truncatus]</a>                | 49.0 | 49.0 | 94%  | 3e-05 | 88% | <a href="#">gij470653285 XP_004329533.1</a> |
| <a href="#">PREDICTED: carboxypeptidase B2 isoform X2 [Lipotes vexillifer]</a>     | 49.0 | 49.0 | 94%  | 3e-05 | 88% | <a href="#">gij602712571 XP_007466515.1</a> |
| <a href="#">PREDICTED: carboxypeptidase B2 [Physeter catodon]</a>                  | 49.0 | 49.0 | 94%  | 3e-05 | 88% | <a href="#">gij593749228 XP_007129852.1</a> |
| <a href="#">PREDICTED: carboxypeptidase B2 isoform X1 [Lipotes vexillifer]</a>     | 49.0 | 49.0 | 94%  | 3e-05 | 88% | <a href="#">gij602712569 XP_007466514.1</a> |
| <a href="#">PREDICTED: carboxypeptidase B2 [Balaenoptera acutorostrata sciens]</a> | 49.0 | 49.0 | 94%  | 3e-05 | 88% | <a href="#">gij594678268 XP_007186896.1</a> |
| <a href="#">PREDICTED: carboxypeptidase B2 [Ochotona princeps]</a>                 | 49.0 | 49.0 | 94%  | 3e-05 | 88% | <a href="#">gij504128560 XP_004577530.1</a> |
| <a href="#">PREDICTED: carboxypeptidase B2 [Orcinus orca]</a>                      | 49.0 | 49.0 | 94%  | 3e-05 | 88% | <a href="#">gij466032575 XP_004274629.1</a> |
| <a href="#">PREDICTED: carboxypeptidase B2 [Octodon degus]</a>                     | 48.6 | 48.6 | 100% | 4e-05 | 83% | <a href="#">gij507684606 XP_004640321.1</a> |
| <a href="#">PREDICTED: carboxypeptidase B2 isoform X2 [Heterocephalus glaber]</a>  | 48.1 | 48.1 | 100% | 5e-05 | 83% | <a href="#">gij512921202 XP_004904434.1</a> |
| <a href="#">PREDICTED: carboxypeptidase B2 isoform X2 [Heterocephalus glaber]</a>  | 48.1 | 48.1 | 100% | 5e-05 | 83% | <a href="#">gij512964055 XP_004844264.1</a> |

|                                                                                      |      |      |      |       |     |                                             |
|--------------------------------------------------------------------------------------|------|------|------|-------|-----|---------------------------------------------|
| <a href="#">PREDICTED: carboxypeptidase B2 isoform X1 [Heterocephalus gla</a>        | 48.1 | 48.1 | 100% | 5e-05 | 83% | <a href="#">gil512921198 XP_004904433.1</a> |
| <a href="#">PREDICTED: carboxypeptidase B2 isoform X1 [Heterocephalus gla</a>        | 48.1 | 48.1 | 100% | 5e-05 | 83% | <a href="#">gil512964053 XP_004844263.1</a> |
| <a href="#">PREDICTED: carboxypeptidase B2 [Odobenus rosmarus divergens</a>          | 47.3 | 47.3 | 100% | 1e-04 | 80% | <a href="#">gil472378433 XP_004408637.1</a> |
| <a href="#">PREDICTED: carboxypeptidase B2 [Ictidomys tridecemlineatus]</a>          | 46.4 | 46.4 | 88%  | 2e-04 | 88% | <a href="#">gil532113245 XP_005341304.1</a> |
| <a href="#">PREDICTED: carboxypeptidase B2 isoform X2 [Bos mutus]</a>                | 46.0 | 46.0 | 88%  | 3e-04 | 88% | <a href="#">gil555969567 XP_005896807.1</a> |
| <a href="#">Chain A, Crystal Structure Of Thrombin Activatable Fibrinolysis Inhi</a> | 46.0 | 46.0 | 88%  | 3e-04 | 88% | <a href="#">gil194368809 3DGV_A</a>         |
| <a href="#">PREDICTED: carboxypeptidase B2 [Nannospalax galilii]</a>                 | 46.0 | 46.0 | 100% | 3e-04 | 78% | <a href="#">gil674098370 XP_008822615.1</a> |
| <a href="#">PREDICTED: carboxypeptidase B2 [Ceratotherium simum simum]</a>           | 46.0 | 46.0 | 94%  | 3e-04 | 82% | <a href="#">gil478518956 XP_004433702.1</a> |
| <a href="#">carboxypeptidase B2 precursor [Bos taurus]</a>                           | 46.0 | 46.0 | 88%  | 3e-04 | 88% | <a href="#">gil114050845 NP_001039462.1</a> |
| <a href="#">PREDICTED: carboxypeptidase B2 [Leptonychotes weddellii]</a>             | 46.0 | 46.0 | 100% | 3e-04 | 75% | <a href="#">gil585191930 XP_006747204.1</a> |
| <a href="#">PREDICTED: carboxypeptidase B2 [Capra hircus]</a>                        | 46.0 | 46.0 | 88%  | 3e-04 | 88% | <a href="#">gil548487919 XP_005687494.1</a> |
| <a href="#">PREDICTED: carboxypeptidase B2 [Ovis aries]</a>                          | 46.0 | 46.0 | 88%  | 3e-04 | 88% | <a href="#">gil426236307 XP_004012111.1</a> |
| <a href="#">PREDICTED: carboxypeptidase B2 isoform X2 [Pteropus alecto]</a>          | 45.6 | 45.6 | 100% | 4e-04 | 78% | <a href="#">gil586560565 XP_006913553.1</a> |
| <a href="#">hypothetical protein PANDA_002961 [Ailuropoda melanoleuca]</a>           | 45.6 | 45.6 | 100% | 4e-04 | 75% | <a href="#">gil281349951 EFB25535.1</a>     |
| <a href="#">PREDICTED: carboxypeptidase B2 isoform X1 [Pteropus alecto]</a>          | 45.6 | 45.6 | 100% | 4e-04 | 78% | <a href="#">gil586560563 XP_006913552.1</a> |
| <a href="#">PREDICTED: carboxypeptidase B2-like [Ailuropoda melanoleuca]</a>         | 45.6 | 45.6 | 100% | 4e-04 | 75% | <a href="#">gil301758334 XP_002915018.1</a> |
| <a href="#">PREDICTED: carboxypeptidase B2 [Ursus maritimus]</a>                     | 45.6 | 45.6 | 100% | 4e-04 | 75% | <a href="#">gil671028730 XP_008705148.1</a> |
| <a href="#">PREDICTED: carboxypeptidase B2 [Condylura cristata]</a>                  | 44.8 | 44.8 | 88%  | 7e-04 | 83% | <a href="#">gil507939327 XP_004680202.1</a> |
| <a href="#">PREDICTED: carboxypeptidase B2 [Sus scrofa]</a>                          | 44.3 | 44.3 | 94%  | 0.001 | 82% | <a href="#">gil194040626 XP_001929181.1</a> |
| <a href="#">Carboxypeptidase B2 [Ophiophagus hannah]</a>                             | 43.9 | 43.9 | 94%  | 0.001 | 76% | <a href="#">gil565306861 ETE61379.1</a>     |
| <a href="#">PREDICTED: carboxypeptidase B2 [Elephantulus edwardii]</a>               | 43.9 | 43.9 | 100% | 0.001 | 78% | <a href="#">gil585654497 XP_006884668.1</a> |
| <a href="#">PREDICTED: carboxypeptidase B2 [Anolis carolinensis]</a>                 | 43.9 | 43.9 | 94%  | 0.001 | 76% | <a href="#">gil327260978 XP_003215309.1</a> |
| <a href="#">PREDICTED: carboxypeptidase B2 [Erinaceus europaeus]</a>                 | 43.5 | 43.5 | 94%  | 0.002 | 82% | <a href="#">gil617593818 XP_007521293.1</a> |
| <a href="#">PREDICTED: carboxypeptidase B2 isoform X2 [Galeopterus varieg;</a>       | 43.1 | 43.1 | 88%  | 0.003 | 81% | <a href="#">gil667276404 XP_008572661.1</a> |
| <a href="#">PREDICTED: carboxypeptidase B2 isoform X1 [Galeopterus varieg;</a>       | 43.1 | 43.1 | 88%  | 0.003 | 81% | <a href="#">gil667276401 XP_008572660.1</a> |
| <a href="#">PREDICTED: carboxypeptidase B2 [Chrysemys picta bellii]</a>              | 43.1 | 43.1 | 94%  | 0.003 | 71% | <a href="#">gil641751137 XP_008166719.1</a> |
| <a href="#">PREDICTED: carboxypeptidase B2 [Jaculus jaculus]</a>                     | 43.1 | 43.1 | 88%  | 0.003 | 81% | <a href="#">gil507564474 XP_004665908.1</a> |

## Alignments

[Download](#) [GenPept](#) [Graphics](#) ▼ Next ▲ Previous ▲ Descriptions

**PREDICTED: carboxypeptidase B2 isoform X3 [Homo sapiens]**  
 Sequence ID: [gil530402101|ref|XP\\_005266316.1](#) Length: 226 Number of Matches: 1

Range 1: 84 to 101 [GenPept](#) [Graphics](#) ▼ Next Match ▲ Previous Match

| Score          | Expect | Identities  | Positives   | Gaps     |
|----------------|--------|-------------|-------------|----------|
| 60.0 bits(134) | 4e-09  | 18/18(100%) | 18/18(100%) | 0/18(0%) |

```
Query 1   KKQVHFFVNASDNDVKA 18
          KKQVHFFVNASDNDVKA
Sbjct 84   KKQVHFFVNASDNDVKA 101
```

**Related Information**  
[Gene](#) - associated gene details

[Download](#) [GenPept](#) [Graphics](#) ▼ Next ▲ Previous ▲ Descriptions

**carboxypeptidase B-like protein [Homo sapiens]**  
 Sequence ID: [gil6855464|dbj|BAA90475.1](#) Length: 360 Number of Matches: 1

Range 1: 65 to 82 [GenPept](#) [Graphics](#) ▼ Next Match ▲ Previous Match

| Score          | Expect | Identities  | Positives   | Gaps     |
|----------------|--------|-------------|-------------|----------|
| 60.0 bits(134) | 5e-09  | 18/18(100%) | 18/18(100%) | 0/18(0%) |

```
Query 1   KKQVHFFVNASDNDVKA 18
```

**Related Information**  
[Gene](#) - associated gene details

Sbjct 65 KKQVHFFVNASDVDNVKA 82

[Download](#) [GenPept](#) [Graphics](#)

[Next](#) [Previous](#) [Descriptions](#)

carboxypeptidase B2 (plasma, carboxypeptidase U), isoform CRA\_a [Homo sapiens]

Sequence ID: [gi|119629159|gb|EAX08754.1](#) Length: 360 Number of Matches: 1

Range 1: 65 to 82 [GenPept](#) [Graphics](#)

[Next Match](#) [Previous Match](#)

| Score          | Expect | Identities  | Positives   | Gaps     |
|----------------|--------|-------------|-------------|----------|
| 60.0 bits(134) | 5e-09  | 18/18(100%) | 18/18(100%) | 0/18(0%) |

Query 1 KKQVHFFVNASDVDNVKA 18  
 KKQVHFFVNASDVDNVKA  
 Sbjct 65 KKQVHFFVNASDVDNVKA 82

**Related Information**

[Gene](#) - associated gene details

[Download](#) [GenPept](#) [Graphics](#)

[Next](#) [Previous](#) [Descriptions](#)

carboxypeptidase B2 isoform 2 preproprotein [Homo sapiens]

Sequence ID: [gi|513126877|ref|NP\\_001265470.1](#) Length: 386 Number of Matches: 1

Range 1: 65 to 82 [GenPept](#) [Graphics](#)

[Next Match](#) [Previous Match](#)

| Score          | Expect | Identities  | Positives   | Gaps     |
|----------------|--------|-------------|-------------|----------|
| 60.0 bits(134) | 5e-09  | 18/18(100%) | 18/18(100%) | 0/18(0%) |

Query 1 KKQVHFFVNASDVDNVKA 18  
 KKQVHFFVNASDVDNVKA  
 Sbjct 65 KKQVHFFVNASDVDNVKA 82

**Related Information**

[Gene](#) - associated gene details

[Map Viewer](#) - aligned genomic context

[Download](#) [GenPept](#) [Graphics](#)

[Next](#) [Previous](#) [Descriptions](#)

PREDICTED: carboxypeptidase B2 isoform X2 [Pongo abelii]

Sequence ID: [gi|686743701|ref|XP\\_009246910.1](#) Length: 387 Number of Matches: 1

Range 1: 65 to 82 [GenPept](#) [Graphics](#)

[Next Match](#) [Previous Match](#)

| Score          | Expect | Identities  | Positives   | Gaps     |
|----------------|--------|-------------|-------------|----------|
| 60.0 bits(134) | 5e-09  | 18/18(100%) | 18/18(100%) | 0/18(0%) |

Query 1 KKQVHFFVNASDVDNVKA 18  
 KKQVHFFVNASDVDNVKA  
 Sbjct 65 KKQVHFFVNASDVDNVKA 82

**Related Information**

[Gene](#) - associated gene details

[Map Viewer](#) - aligned genomic context

BLAST is a registered trademark of the National Library of Medicine.

NCBI/ BLAST/ blastp suite/ Formatting Results - BTGWP217016

Your search parameters were adjusted to search for a short input sequence.

[Edit and Resubmit](#) [Save Search Strategies](#) [Formatting options](#) [Download](#) [YouTube](#) [How to read this page](#) [Blast report description](#)

CPB2\_KQVHFFVDASDNDVKA\_Mod

RID [BTGWP217016](#) (Expires on 01-20 15:43 pm)

Query ID |cl|20348  
 Description None  
 Molecule type amino acid  
 Query Length 17

Database Name nr  
 Description All non-redundant GenBank CDS translations+PDB+SwissProt+PIR+PRF excluding environmental samples from WGS projects  
 Program BLASTP 2.2.30+ [Citation](#)

Other reports: [Search Summary](#) [Taxonomy reports](#) [Distance tree of results](#) [Multiple alignment](#)

Graphic Summary

Show Conserved Domains

No putative conserved domains have been detected

Distribution of 100 Blast Hits on the Query Sequence

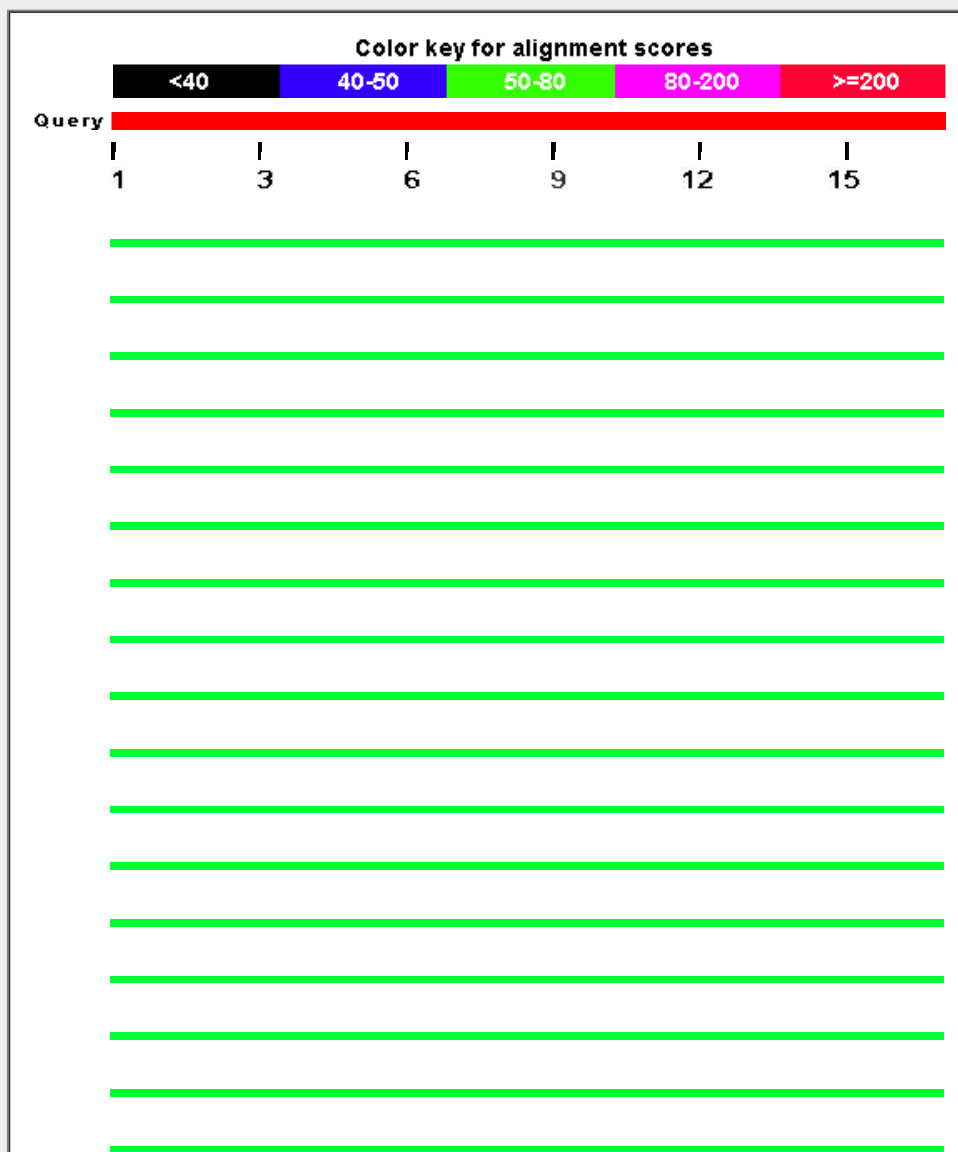

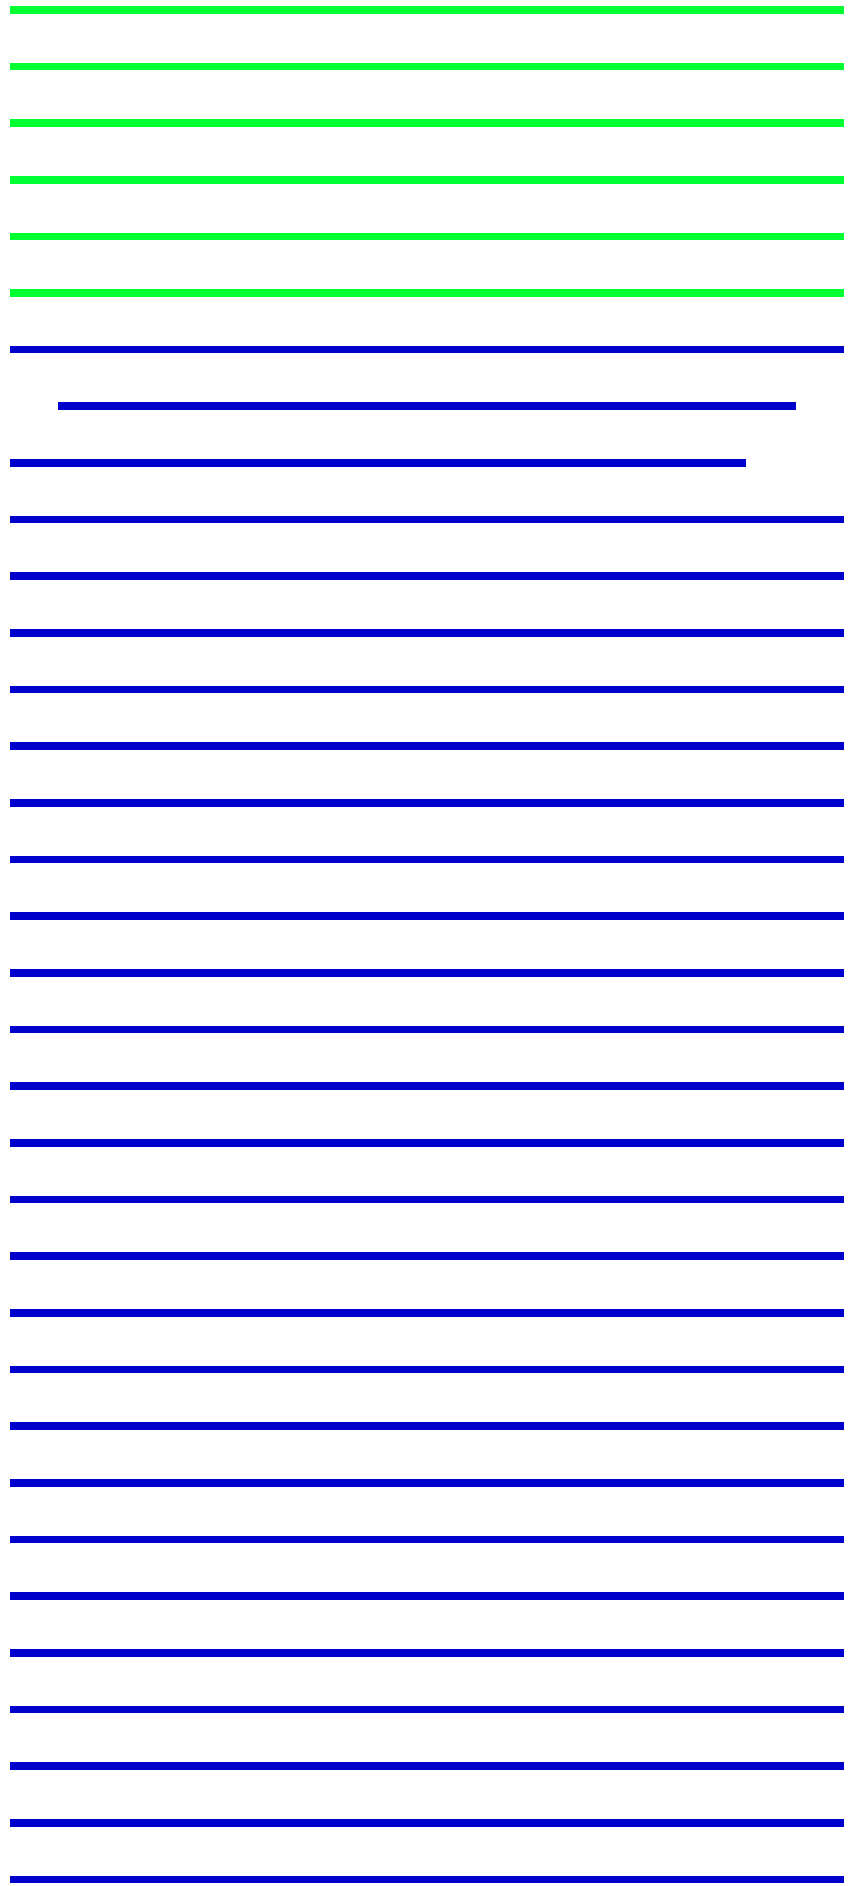

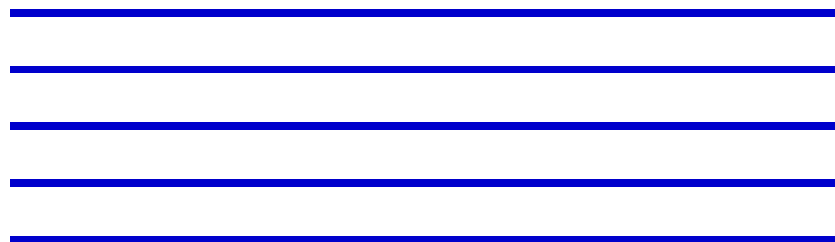

## Descriptions

### Sequences producing significant alignments:

Select: [All](#) [None](#) Selected:0

[Alignments](#)
[Download](#)
[GenPept](#)
[Graphics](#)
[Distance tree of results](#)
[Multiple alignment](#)


| Description                                                                     | Max score | Total score | Query cover | E value | Ident | Accession                                   |
|---------------------------------------------------------------------------------|-----------|-------------|-------------|---------|-------|---------------------------------------------|
| <a href="#">PREDICTED: carboxypeptidase B2 isoform X3 [Homo sapiens]</a>        | 54.5      | 54.5        | 100%        | 3e-07   | 94%   | <a href="#">gi 530402101 XP_005266316.1</a> |
| <a href="#">carboxypeptidase B-like protein [Homo sapiens]</a>                  | 54.5      | 54.5        | 100%        | 3e-07   | 94%   | <a href="#">gi 6855464 BAA90475.1</a>       |
| <a href="#">carboxypeptidase B2 (plasma, carboxypeptidase U), isoform C</a>     | 54.5      | 54.5        | 100%        | 3e-07   | 94%   | <a href="#">gi 119629159 EAX08754.1</a>     |
| <a href="#">carboxypeptidase B2 isoform 2 preproprotein [Homo sapiens]</a>      | 54.5      | 54.5        | 100%        | 3e-07   | 94%   | <a href="#">gi 513126877 NP_001265470.1</a> |
| <a href="#">PREDICTED: carboxypeptidase B2 isoform X2 [Pongo abelii]</a>        | 54.5      | 54.5        | 100%        | 3e-07   | 94%   | <a href="#">gi 686743701 XP_009246910.1</a> |
| <a href="#">Chain A, Pro-carboxypeptidase U In Complex With 5-(3-aminoc</a>     | 54.5      | 54.5        | 100%        | 4e-07   | 94%   | <a href="#">gi 672886543 4P10_A</a>         |
| <a href="#">PREDICTED: carboxypeptidase B2 isoform X2 [Homo sapiens]</a>        | 54.5      | 54.5        | 100%        | 4e-07   | 94%   | <a href="#">gi 530402099 XP_005266315.1</a> |
| <a href="#">prepro-plasma carboxypeptidase B [Homo sapiens]</a>                 | 54.5      | 54.5        | 100%        | 4e-07   | 94%   | <a href="#">gi 189687 AAA60042.1</a>        |
| <a href="#">PREDICTED: carboxypeptidase B2 [Gorilla gorilla gorilla]</a>        | 54.5      | 54.5        | 100%        | 4e-07   | 94%   | <a href="#">gi 426375394 XP_004054526.1</a> |
| <a href="#">Carboxypeptidase B2 (plasma) [Homo sapiens]</a>                     | 54.5      | 54.5        | 100%        | 4e-07   | 94%   | <a href="#">gi 13937897 AAH07057.1</a>      |
| <a href="#">carboxypeptidase B2 isoform 1 preproprotein [Homo sapiens]</a>      | 54.5      | 54.5        | 100%        | 4e-07   | 94%   | <a href="#">gi 513126885 NP_001863.3</a>    |
| <a href="#">carboxypeptidase B2 (plasma) [synthetic construct]</a>              | 54.5      | 54.5        | 100%        | 4e-07   | 94%   | <a href="#">gi 157927966 ABW03279.1</a>     |
| <a href="#">carboxypeptidase B2 (plasma, carboxypeptidase U) [synthetic c</a>   | 54.5      | 54.5        | 100%        | 4e-07   | 94%   | <a href="#">gi 124126823 ABM92184.1</a>     |
| <a href="#">PREDICTED: carboxypeptidase B2 [Pan troglodytes]</a>                | 54.5      | 54.5        | 100%        | 4e-07   | 94%   | <a href="#">gi 114651557 XP_509667.2</a>    |
| <a href="#">Chain A, Crystal Structure Of Thrombin-Activatable Fibrinolysis</a> | 54.5      | 54.5        | 100%        | 4e-07   | 94%   | <a href="#">gi 193506809 3D66_A</a>         |
| <a href="#">Homo sapiens carboxypeptidase B2 (plasma, carboxypeptidase</a>      | 54.5      | 54.5        | 100%        | 4e-07   | 94%   | <a href="#">gi 30584819 AAP36662.1</a>      |
| <a href="#">PREDICTED: carboxypeptidase B2 isoform X1 [Pongo abelii]</a>        | 54.5      | 54.5        | 100%        | 4e-07   | 94%   | <a href="#">gi 297694016 XP_002824293.1</a> |
| <a href="#">Chain A, Crystal Structure Of A T325i/t329i/h333y/h335q Mutar</a>   | 54.5      | 54.5        | 100%        | 4e-07   | 94%   | <a href="#">gi 253722661 3D68_A</a>         |
| <a href="#">PREDICTED: carboxypeptidase B2 isoform X1 [Homo sapiens]</a>        | 54.5      | 54.5        | 100%        | 4e-07   | 94%   | <a href="#">gi 530402097 XP_005266314.1</a> |
| <a href="#">PREDICTED: carboxypeptidase B2 isoform X1 [Rhinopithecus</a>        | 52.0      | 52.0        | 100%        | 3e-06   | 88%   | <a href="#">gi 724966280 XP_010356389.1</a> |
| <a href="#">PREDICTED: carboxypeptidase B2 [Chlorocebus sabaeus]</a>            | 52.0      | 52.0        | 100%        | 3e-06   | 88%   | <a href="#">gi 635025444 XP_007958527.1</a> |
| <a href="#">PREDICTED: carboxypeptidase B2 [Papio anubis]</a>                   | 52.0      | 52.0        | 100%        | 3e-06   | 88%   | <a href="#">gi 402901940 XP_003913891.1</a> |
| <a href="#">PREDICTED: carboxypeptidase B2 [Nomascus leucogenys]</a>            | 51.1      | 51.1        | 100%        | 5e-06   | 88%   | <a href="#">gi 332241864 XP_003270104.1</a> |
| <a href="#">PREDICTED: carboxypeptidase B2 [Equus caballus]</a>                 | 49.4      | 49.4        | 100%        | 2e-05   | 88%   | <a href="#">gi 545190694 XP_005601424.1</a> |
| <a href="#">PREDICTED: carboxypeptidase B2 [Saimiri boliviensis bolivien</a>    | 49.0      | 49.0        | 88%         | 3e-05   | 93%   | <a href="#">gi 403286234 XP_003934405.1</a> |
| <a href="#">PREDICTED: carboxypeptidase B2 [Callithrix jacchus]</a>             | 49.0      | 49.0        | 88%         | 3e-05   | 93%   | <a href="#">gi 390457680 XP_002742737.2</a> |
| <a href="#">PREDICTED: carboxypeptidase B2-like [Peromyscus manicula</a>        | 48.1      | 48.1        | 100%        | 4e-05   | 82%   | <a href="#">gi 589996660 XP_006998803.1</a> |
| <a href="#">PREDICTED: carboxypeptidase B2 isoform X2 [Cricetulus grise</a>     | 48.1      | 48.1        | 100%        | 5e-05   | 82%   | <a href="#">gi 625193824 XP_007639419.1</a> |
| <a href="#">PREDICTED: carboxypeptidase B2 isoform X4 [Cricetulus grise</a>     | 48.1      | 48.1        | 100%        | 5e-05   | 82%   | <a href="#">gi 625271974 XP_007627553.1</a> |

|                                                                                 |      |      |      |       |     |                                             |
|---------------------------------------------------------------------------------|------|------|------|-------|-----|---------------------------------------------|
| <a href="#">PREDICTED: carboxypeptidase B2 [Peromyscus maniculatus t</a>        | 48.1 | 48.1 | 100% | 5e-05 | 82% | <a href="#">gi 589957698 XP_006991448.1</a> |
| <a href="#">Carboxypeptidase B2 (plasma) [Mus musculus]</a>                     | 48.1 | 48.1 | 100% | 5e-05 | 82% | <a href="#">gi 59808067 AAH89577.1</a>      |
| <a href="#">carboxypeptidase U [Mus musculus]</a>                               | 48.1 | 48.1 | 100% | 5e-05 | 82% | <a href="#">gi 6003652 AAF00528.1</a>       |
| <a href="#">PREDICTED: carboxypeptidase B2 [Mesocricetus auratus]</a>           | 48.1 | 48.1 | 100% | 5e-05 | 82% | <a href="#">gi 524935646 XP_005071018.1</a> |
| <a href="#">carboxypeptidase B2 precursor [Mus musculus]</a>                    | 48.1 | 48.1 | 100% | 5e-05 | 82% | <a href="#">gi 31982712 INP_062749.2</a>    |
| <a href="#">PREDICTED: carboxypeptidase B2 isoform X1 [Cricetulus grise</a>     | 48.1 | 48.1 | 100% | 5e-05 | 82% | <a href="#">gi 354476626 XP_003500525.1</a> |
| <a href="#">PREDICTED: carboxypeptidase B2 isoform X3 [Cricetulus grise</a>     | 48.1 | 48.1 | 100% | 5e-05 | 82% | <a href="#">gi 625271972 XP_007627552.1</a> |
| <a href="#">zinc finger CCCH domain-containing protein 13 [Cricetulus grise</a> | 48.1 | 48.1 | 100% | 5e-05 | 82% | <a href="#">gi 537241932 ERE87338.1</a>     |
| <a href="#">PREDICTED: carboxypeptidase B2 [Tursiops truncatus]</a>             | 46.4 | 46.4 | 100% | 2e-04 | 82% | <a href="#">gi 470653285 XP_004329533.1</a> |
| <a href="#">Carboxypeptidase B2 [Fukomys damarensis]</a>                        | 46.4 | 46.4 | 100% | 2e-04 | 82% | <a href="#">gi 676273139 KFO27861.1</a>     |
| <a href="#">PREDICTED: carboxypeptidase B2 isoform X2 [Camelus drom</a>         | 46.4 | 46.4 | 100% | 2e-04 | 82% | <a href="#">gi 744566815 XP_010979147.1</a> |
| <a href="#">PREDICTED: carboxypeptidase B2 isoform X2 [Camelus bactri</a>       | 46.4 | 46.4 | 100% | 2e-04 | 82% | <a href="#">gi 743712317 XP_010949694.1</a> |
| <a href="#">PREDICTED: carboxypeptidase B2 isoform X2 [Lipotes vexillif</a>     | 46.4 | 46.4 | 100% | 2e-04 | 82% | <a href="#">gi 602712571 XP_007466515.1</a> |
| <a href="#">PREDICTED: carboxypeptidase B2 isoform X2 [Macaca fascicu</a>       | 46.4 | 46.4 | 100% | 2e-04 | 82% | <a href="#">gi 544503644 XP_005585858.1</a> |
| <a href="#">PREDICTED: carboxypeptidase B2 isoform X3 [Chinchilla lanig</a>     | 46.4 | 46.4 | 100% | 2e-04 | 82% | <a href="#">gi 533192699 XP_005409155.1</a> |
| <a href="#">PREDICTED: carboxypeptidase B2 [Physeter catodon]</a>               | 46.4 | 46.4 | 100% | 2e-04 | 82% | <a href="#">gi 593749228 XP_007129852.1</a> |
| <a href="#">PREDICTED: carboxypeptidase B2 isoform X2 [Chinchilla lanig</a>     | 46.4 | 46.4 | 100% | 2e-04 | 82% | <a href="#">gi 533192697 XP_005409154.1</a> |
| <a href="#">PREDICTED: carboxypeptidase B2 [Otolemur garnettii]</a>             | 46.4 | 46.4 | 100% | 2e-04 | 82% | <a href="#">gi 395835377 XP_003790657.1</a> |
| <a href="#">PREDICTED: carboxypeptidase B2 isoform X1 [Camelus drom</a>         | 46.4 | 46.4 | 100% | 2e-04 | 82% | <a href="#">gi 744566812 XP_010979146.1</a> |
| <a href="#">PREDICTED: carboxypeptidase B2 [Canis lupus familiaris]</a>         | 46.4 | 46.4 | 100% | 2e-04 | 82% | <a href="#">gi 73989292 XP_851154.1</a>     |
| <a href="#">PREDICTED: carboxypeptidase B2 isoform X1 [Lipotes vexillif</a>     | 46.4 | 46.4 | 100% | 2e-04 | 82% | <a href="#">gi 602712569 XP_007466514.1</a> |
| <a href="#">PREDICTED: carboxypeptidase B2 [Balaenoptera acutorostrat</a>       | 46.4 | 46.4 | 100% | 2e-04 | 82% | <a href="#">gi 594678268 XP_007186896.1</a> |
| <a href="#">PREDICTED: carboxypeptidase B2 [Vicugna pacos]</a>                  | 46.4 | 46.4 | 100% | 2e-04 | 82% | <a href="#">gi 560974364 XP_006209502.1</a> |
| <a href="#">PREDICTED: carboxypeptidase B2 [Camelus ferus]</a>                  | 46.4 | 46.4 | 100% | 2e-04 | 82% | <a href="#">gi 560922422 XP_006187410.1</a> |
| <a href="#">PREDICTED: carboxypeptidase B2 isoform X1 [Macaca fascicu</a>       | 46.4 | 46.4 | 100% | 2e-04 | 82% | <a href="#">gi 544503642 XP_005585857.1</a> |
| <a href="#">PREDICTED: carboxypeptidase B2 isoform X1 [Chinchilla lanig</a>     | 46.4 | 46.4 | 100% | 2e-04 | 82% | <a href="#">gi 533192695 XP_005409153.1</a> |
| <a href="#">PREDICTED: carboxypeptidase B2 [Ochotona princeps]</a>              | 46.4 | 46.4 | 100% | 2e-04 | 82% | <a href="#">gi 504128560 XP_004577530.1</a> |
| <a href="#">PREDICTED: carboxypeptidase B2 [Orcinus orca]</a>                   | 46.4 | 46.4 | 100% | 2e-04 | 82% | <a href="#">gi 466032575 XP_004274629.1</a> |
| <a href="#">Carboxypeptidase B2 [Macaca mulatta]</a>                            | 46.4 | 46.4 | 100% | 2e-04 | 82% | <a href="#">gi 355700980 EHH29001.1</a>     |
| <a href="#">PREDICTED: carboxypeptidase B2 isoform X2 [Fukomys dame</a>         | 46.4 | 46.4 | 100% | 2e-04 | 82% | <a href="#">gi 731244313 XP_010635336.1</a> |
| <a href="#">PREDICTED: carboxypeptidase B2 [Felis catus]</a>                    | 46.4 | 46.4 | 100% | 2e-04 | 82% | <a href="#">gi 586973570 XP_006927367.1</a> |
| <a href="#">PREDICTED: carboxypeptidase B2 isoform X1 [Fukomys dame</a>         | 46.4 | 46.4 | 100% | 2e-04 | 82% | <a href="#">gi 731244311 XP_010635335.1</a> |
| <a href="#">PREDICTED: carboxypeptidase B2 [Panthera tigris altaica]</a>        | 46.4 | 46.4 | 100% | 2e-04 | 82% | <a href="#">gi 591318467 XP_007085493.1</a> |
| <a href="#">plastin-2 isoform 16 [Camelus ferus]</a>                            | 46.4 | 46.4 | 100% | 2e-04 | 82% | <a href="#">gi 528759255 EPY78914.1</a>     |
| <a href="#">PREDICTED: carboxypeptidase B2 [Tupaia chinensis]</a>               | 46.0 | 46.0 | 94%  | 3e-04 | 81% | <a href="#">gi 562871068 XP_006163508.1</a> |
| <a href="#">carboxypeptidase B2 (plasma), isoform CRA_b [Rattus norvegi</a>     | 45.6 | 45.6 | 100% | 3e-04 | 76% | <a href="#">gi 149049966 EDM02290.1</a>     |
| <a href="#">carboxypeptidase B2 (plasma), isoform CRA_a [Rattus norvegi</a>     | 45.6 | 45.6 | 100% | 3e-04 | 76% | <a href="#">gi 149049965 EDM02289.1</a>     |
| <a href="#">Cpb2 protein [Rattus norvegicus]</a>                                | 45.6 | 45.6 | 100% | 3e-04 | 76% | <a href="#">gi 60688161 AAH91133.1</a>      |
| <a href="#">carboxypeptidase B2 precursor [Rattus norvegicus]</a>               | 45.6 | 45.6 | 100% | 3e-04 | 76% | <a href="#">gi 16758414 INP_446069.1</a>    |
| <a href="#">PREDICTED: carboxypeptidase B2 [Microtus ochrogaster]</a>           | 44.3 | 44.3 | 100% | 0.001 | 76% | <a href="#">gi 532025304 XP_005355675.1</a> |
| <a href="#">PREDICTED: carboxypeptidase B2 isoform 1 [Macaca mulatta]</a>       | 43.9 | 43.9 | 94%  | 0.001 | 81% | <a href="#">gi 109120669 XP_001097310.1</a> |
| <a href="#">PREDICTED: carboxypeptidase B2 [Ictidomys tridecemlineatus</a>      | 43.9 | 43.9 | 94%  | 0.001 | 81% | <a href="#">gi 532113245 XP_005341304.1</a> |
| <a href="#">Carboxypeptidase B2 [Macaca fascicularis]</a>                       | 43.9 | 43.9 | 94%  | 0.001 | 81% | <a href="#">gi 355754683 EHH58584.1</a>     |
| <a href="#">PREDICTED: carboxypeptidase B2 isoform 3 [Macaca mulatta]</a>       | 43.9 | 43.9 | 94%  | 0.001 | 81% | <a href="#">gi 109120665 XP_001097608.1</a> |
| <a href="#">PREDICTED: carboxypeptidase B2 [Cavia porcellus]</a>                | 43.9 | 43.9 | 100% | 0.001 | 76% | <a href="#">gi 348583190 XP_003477356.1</a> |

|                                                                                 |      |      |      |       |     |                                             |
|---------------------------------------------------------------------------------|------|------|------|-------|-----|---------------------------------------------|
| <a href="#">PREDICTED: carboxypeptidase B2 isoform X2 [Bos mutus]</a>           | 43.5 | 43.5 | 94%  | 0.002 | 81% | <a href="#">gi 555969567 XP_005896807.1</a> |
| <a href="#">Chain A. Crystal Structure Of Thrombin Activatable Fibrinolysis</a> | 43.5 | 43.5 | 94%  | 0.002 | 81% | <a href="#">gi 194368809 3DGV_A</a>         |
| <a href="#">PREDICTED: carboxypeptidase B2 isoform X1 [Bison bison bis</a>      | 43.5 | 43.5 | 94%  | 0.002 | 81% | <a href="#">gi 742181236 XP_010852934.1</a> |
| <a href="#">carboxypeptidase B2 precursor [Bos taurus]</a>                      | 43.5 | 43.5 | 94%  | 0.002 | 81% | <a href="#">gi 114050845 NP_001039462.1</a> |
| <a href="#">PREDICTED: carboxypeptidase B2 [Capra hircus]</a>                   | 43.5 | 43.5 | 94%  | 0.002 | 81% | <a href="#">gi 548487919 XP_005687494.1</a> |
| <a href="#">PREDICTED: carboxypeptidase B2 [Odobenus rosmarus diver</a>         | 43.5 | 43.5 | 100% | 0.002 | 76% | <a href="#">gi 472378433 XP_004408637.1</a> |
| <a href="#">PREDICTED: carboxypeptidase B2 [Ovis aries]</a>                     | 43.5 | 43.5 | 94%  | 0.002 | 81% | <a href="#">gi 426236307 XP_004012111.1</a> |
| <a href="#">PREDICTED: carboxypeptidase B2 [Leptonychotes weddellii]</a>        | 43.1 | 43.1 | 100% | 0.002 | 76% | <a href="#">gi 585191930 XP_006747204.1</a> |
| <a href="#">PREDICTED: carboxypeptidase B2 [Octodon degus]</a>                  | 43.1 | 43.1 | 100% | 0.002 | 76% | <a href="#">gi 507684606 XP_004640321.1</a> |
| <a href="#">PREDICTED: carboxypeptidase B2 isoform X2 [Heterocephalu</a>        | 42.6 | 42.6 | 100% | 0.003 | 76% | <a href="#">gi 512921202 XP_004904434.1</a> |
| <a href="#">PREDICTED: carboxypeptidase B2 isoform X2 [Heterocephalu</a>        | 42.6 | 42.6 | 100% | 0.003 | 76% | <a href="#">gi 512964055 XP_004844264.1</a> |
| <a href="#">PREDICTED: carboxypeptidase B2 isoform X1 [Heterocephalu</a>        | 42.6 | 42.6 | 100% | 0.003 | 76% | <a href="#">gi 512921198 XP_004904433.1</a> |
| <a href="#">PREDICTED: carboxypeptidase B2 isoform X1 [Heterocephalu</a>        | 42.6 | 42.6 | 100% | 0.003 | 76% | <a href="#">gi 512964053 XP_004844263.1</a> |
| <a href="#">PREDICTED: carboxypeptidase B2 [Condylura cristata]</a>             | 42.2 | 42.2 | 94%  | 0.005 | 78% | <a href="#">gi 507939327 XP_004680202.1</a> |
| <a href="#">hypothetical protein PANDA_002961 [Ailuropoda melanoleuca]</a>      | 41.8 | 41.8 | 100% | 0.006 | 71% | <a href="#">gi 281349951 EFB25535.1</a>     |
| <a href="#">PREDICTED: carboxypeptidase B2-like [Ailuropoda melanoleu</a>       | 41.8 | 41.8 | 100% | 0.006 | 71% | <a href="#">gi 301758334 XP_002915018.1</a> |
| <a href="#">PREDICTED: carboxypeptidase B2 [Ursus maritimus]</a>                | 41.8 | 41.8 | 100% | 0.006 | 71% | <a href="#">gi 671028730 XP_008705148.1</a> |
| <a href="#">Carboxypeptidase B2 [Ophiophagus hannah]</a>                        | 41.4 | 41.4 | 100% | 0.008 | 71% | <a href="#">gi 565306861 ETE61379.1</a>     |
| <a href="#">PREDICTED: carboxypeptidase B2 [Anolis carolinensis]</a>            | 41.4 | 41.4 | 100% | 0.009 | 71% | <a href="#">gi 327260978 XP_003215309.1</a> |
| <a href="#">PREDICTED: carboxypeptidase B2 [Erinaceus europaeus]</a>            | 40.9 | 40.9 | 100% | 0.012 | 76% | <a href="#">gi 617593818 XP_007521293.1</a> |
| <a href="#">PREDICTED: carboxypeptidase B2 [Ceratotherium simu</a>              | 40.9 | 40.9 | 88%  | 0.012 | 80% | <a href="#">gi 478518956 XP_004433702.1</a> |
| <a href="#">PREDICTED: carboxypeptidase B2 isoform X2 [Galeopterus va</a>       | 40.5 | 40.5 | 94%  | 0.016 | 75% | <a href="#">gi 667276404 XP_008572661.1</a> |
| <a href="#">PREDICTED: carboxypeptidase B2 [Nannospalax galiiji]</a>            | 40.5 | 40.5 | 100% | 0.017 | 71% | <a href="#">gi 674098370 XP_008822615.1</a> |
| <a href="#">PREDICTED: carboxypeptidase B2 isoform X1 [Galeopterus va</a>       | 40.5 | 40.5 | 94%  | 0.017 | 75% | <a href="#">gi 667276401 XP_008572660.1</a> |
| <a href="#">PREDICTED: carboxypeptidase B2 [Chrysemys picta bellii]</a>         | 40.5 | 40.5 | 100% | 0.017 | 65% | <a href="#">gi 641751137 XP_008166719.1</a> |
| <a href="#">PREDICTED: carboxypeptidase B2 [Oryctolagus cuniculus]</a>          | 40.5 | 40.5 | 100% | 0.017 | 74% | <a href="#">gi 655832146 XP_008258213.1</a> |

## Alignments

Download GenPept Graphics

Next Previous Descriptions

PREDICTED: carboxypeptidase B2 isoform X3 [Homo sapiens]

Sequence ID: [gi|530402101|ref|XP\\_005266316.1|](#) Length: 226 Number of Matches: 1

Range 1: 85 to 101 GenPept Graphics

Next Match Previous Match

| Score          | Expect | Identities | Positives   | Gaps     |
|----------------|--------|------------|-------------|----------|
| 54.5 bits(121) | 3e-07  | 16/17(94%) | 17/17(100%) | 0/17(0%) |

Query 1 KQVHFFVDASDNDVKA 17  
KQVHFFV+ASDNDVKA  
Sbjct 85 KQVHFFVNASDNDVKA 101

### Related Information

[Gene](#) - associated gene details

Download GenPept Graphics

Next Previous Descriptions

carboxypeptidase B-like protein [Homo sapiens]

Sequence ID: [gi|6855464|dbj|BAA90475.1|](#) Length: 360 Number of Matches: 1

Range 1: 66 to 82 GenPept Graphics

Next Match Previous Match

| Score          | Expect | Identities | Positives   | Gaps     |
|----------------|--------|------------|-------------|----------|
| 54.5 bits(121) | 3e-07  | 16/17(94%) | 17/17(100%) | 0/17(0%) |

### Related Information

[Gene](#) - associated gene details



Query 1 KQVHFFVDASDNDVKA 17  
 KQVHFFV+ASDNDVKA  
 Sbjct 66 KQVHFFVNASDNDVKA 82

[Download](#) [GenPept](#) [Graphics](#)

[Next](#) [Previous](#) [Descriptions](#)

carboxypeptidase B2 (plasma, carboxypeptidase U), isoform CRA\_a [Homo sapiens]

Sequence ID: [gi|119629159|gb|EAX08754.1](#) Length: 360 Number of Matches: 1

Range 1: 66 to 82 [GenPept](#) [Graphics](#)

[Next Match](#) [Previous Match](#)

| Score          | Expect | Identities | Positives   | Gaps     |
|----------------|--------|------------|-------------|----------|
| 54.5 bits(121) | 3e-07  | 16/17(94%) | 17/17(100%) | 0/17(0%) |

Query 1 KQVHFFVDASDNDVKA 17  
 KQVHFFV+ASDNDVKA  
 Sbjct 66 KQVHFFVNASDNDVKA 82

**Related Information**

[Gene](#) - associated gene details

[Download](#) [GenPept](#) [Graphics](#)

[Next](#) [Previous](#) [Descriptions](#)

carboxypeptidase B2 isoform 2 preproprotein [Homo sapiens]

Sequence ID: [gi|513126877|ref|NP\\_001265470.1](#) Length: 386 Number of Matches: 1

Range 1: 66 to 82 [GenPept](#) [Graphics](#)

[Next Match](#) [Previous Match](#)

| Score          | Expect | Identities | Positives   | Gaps     |
|----------------|--------|------------|-------------|----------|
| 54.5 bits(121) | 3e-07  | 16/17(94%) | 17/17(100%) | 0/17(0%) |

Query 1 KQVHFFVDASDNDVKA 17  
 KQVHFFV+ASDNDVKA  
 Sbjct 66 KQVHFFVNASDNDVKA 82

**Related Information**

[Gene](#) - associated gene details

[Map Viewer](#) - aligned genomic context

[Download](#) [GenPept](#) [Graphics](#)

[Next](#) [Previous](#) [Descriptions](#)

PREDICTED: carboxypeptidase B2 isoform X2 [Pongo abelii]

Sequence ID: [gi|686743701|ref|XP\\_009246910.1](#) Length: 387 Number of Matches: 1

Range 1: 66 to 82 [GenPept](#) [Graphics](#)

[Next Match](#) [Previous Match](#)

| Score          | Expect | Identities | Positives   | Gaps     |
|----------------|--------|------------|-------------|----------|
| 54.5 bits(121) | 3e-07  | 16/17(94%) | 17/17(100%) | 0/17(0%) |

Query 1 KQVHFFVDASDNDVKA 17  
 KQVHFFV+ASDNDVKA  
 Sbjct 66 KQVHFFVNASDNDVKA 82

**Related Information**

[Gene](#) - associated gene details

[Map Viewer](#) - aligned genomic context

BLAST is a registered trademark of the National Library of Medicine.

▶ NCBI/ BLAST/ blastp suite/ Formatting Results - B94HAJG001R

**i** Your search parameters were adjusted to search for a short input sequence.

[Edit and Resubmit](#) [Save Search Strategies](#) ▶ [Formatting options](#) ▶ [Download](#)

[YouTube](#) [How to read this page](#) [Blast report description](#)

**CPB2\_KQVHFFVNASDVDNVKA\_NonMod**

**RID** [B94HAJG001R](#) (Expires on 01-14 10:34 am)

**Query ID** lcl|239111  
**Description** None  
**Molecule type** amino acid  
**Query Length** 17

**Database Name** nr  
**Description** All non-redundant GenBank CDS translations+PDB+SwissProt+PIR excluding environmental samples from WGS projects  
**Program** BLASTP 2.2.30+ ▶ [Citation](#)

Other reports: ▶ [Search Summary](#) [[Taxonomy reports](#)] [[Distance tree of results](#)] [[Multiple alignment](#)]

**Graphic Summary**

[Show Conserved Domains](#)

No putative conserved domains have been detected

Distribution of 100 Blast Hits on the Query Sequence

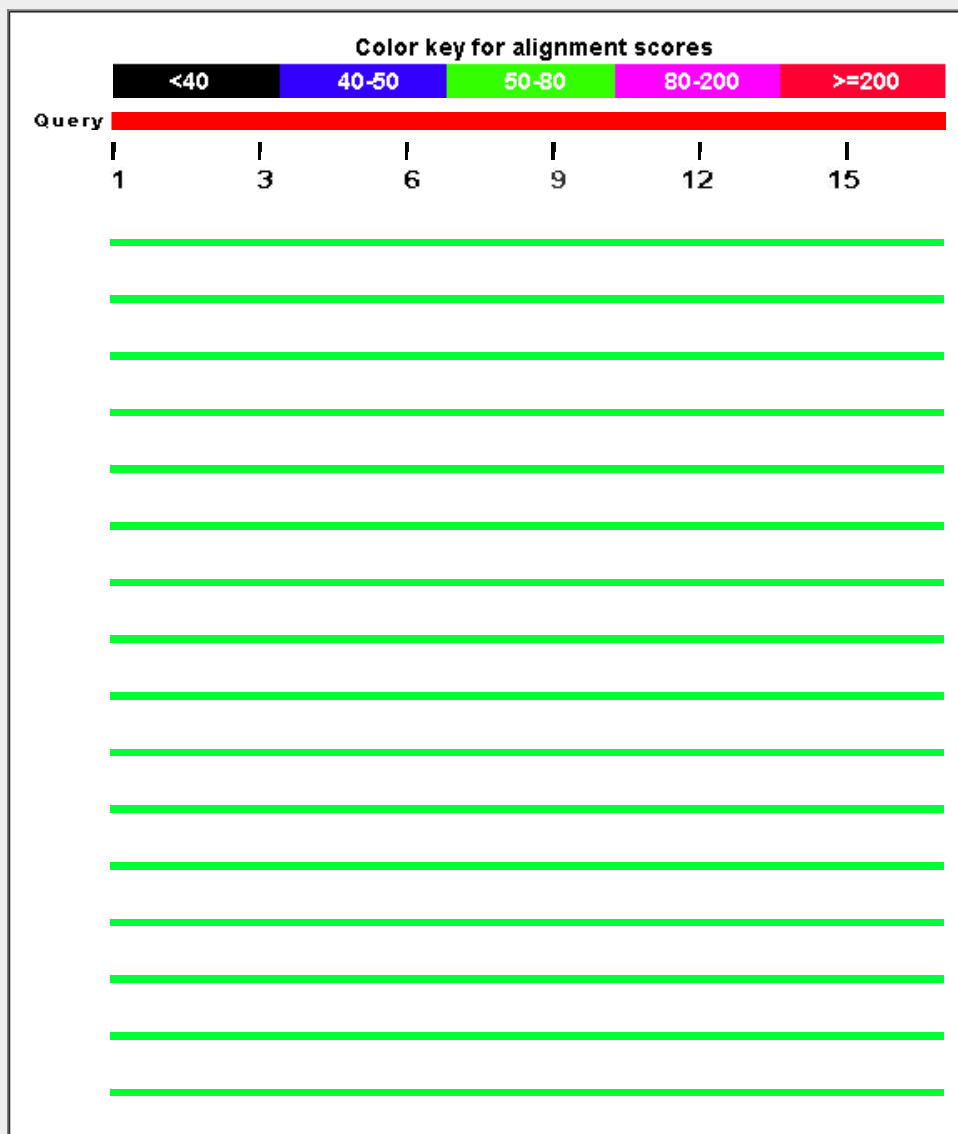

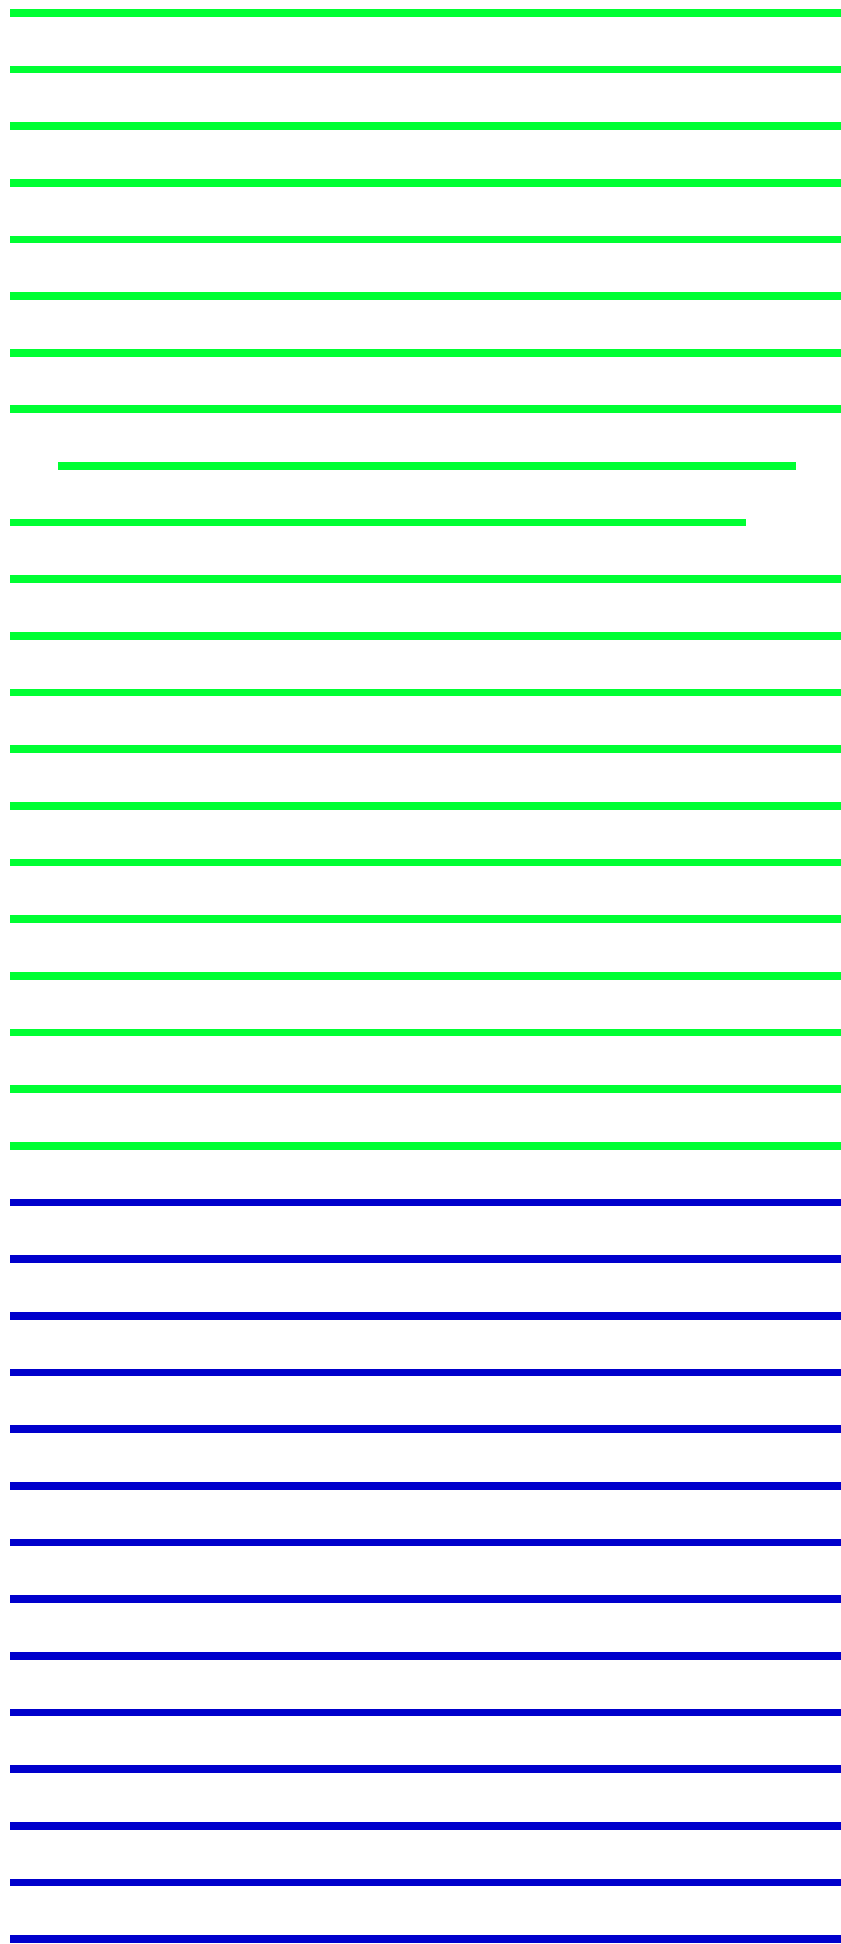



## Descriptions

### Sequences producing significant alignments:

Select: [All](#) [None](#) Selected:0

| <a href="#">↑</a> <a href="#">Alignments</a> <a href="#">Download</a> <a href="#">GenPept</a> <a href="#">Graphics</a> <a href="#">Distance tree of results</a> <a href="#">Multiple alignment</a>  |           |             |             |         |       |                                             |  |
|----------------------------------------------------------------------------------------------------------------------------------------------------------------------------------------------------------------------------------------------------------------------------------------|-----------|-------------|-------------|---------|-------|---------------------------------------------|--|
| Description                                                                                                                                                                                                                                                                            | Max score | Total score | Query cover | E value | Ident | Accession                                   |  |
| <a href="#">PREDICTED: carboxypeptidase B2 isoform X3 [Homo sapiens]</a>                                                                                                                                                                                                               | 57.1      | 57.1        | 100%        | 4e-08   | 100%  | <a href="#">gij530402101 XP_005266316.1</a> |  |
| <a href="#">carboxypeptidase B-like protein [Homo sapiens]</a>                                                                                                                                                                                                                         | 57.1      | 57.1        | 100%        | 4e-08   | 100%  | <a href="#">gij6855464 BAA90475.1</a>       |  |
| <a href="#">carboxypeptidase B2 (plasma, carboxypeptidase U), isoform CRA_</a>                                                                                                                                                                                                         | 57.1      | 57.1        | 100%        | 4e-08   | 100%  | <a href="#">gij119629159 EAX08754.1</a>     |  |
| <a href="#">carboxypeptidase B2 isoform 2 preproprotein [Homo sapiens]</a>                                                                                                                                                                                                             | 57.1      | 57.1        | 100%        | 5e-08   | 100%  | <a href="#">gij513126877 NP_001265470.1</a> |  |
| <a href="#">PREDICTED: carboxypeptidase B2 isoform X2 [Pongo abelii]</a>                                                                                                                                                                                                               | 57.1      | 57.1        | 100%        | 5e-08   | 100%  | <a href="#">gij686743701 XP_009246910.1</a> |  |
| <a href="#">Chain A, Pro-carboxypeptidase U In Complex With 5-(3-aminopropyl)-</a>                                                                                                                                                                                                     | 57.1      | 57.1        | 100%        | 5e-08   | 100%  | <a href="#">gij672886543 4P10_A</a>         |  |
| <a href="#">PREDICTED: carboxypeptidase B2 isoform X2 [Homo sapiens]</a>                                                                                                                                                                                                               | 57.1      | 57.1        | 100%        | 5e-08   | 100%  | <a href="#">gij530402099 XP_005266315.1</a> |  |
| <a href="#">prepro-plasma carboxypeptidase B [Homo sapiens]</a>                                                                                                                                                                                                                        | 57.1      | 57.1        | 100%        | 5e-08   | 100%  | <a href="#">gij189687 AAA60042.1</a>        |  |
| <a href="#">PREDICTED: carboxypeptidase B2 [Gorilla gorilla gorilla]</a>                                                                                                                                                                                                               | 57.1      | 57.1        | 100%        | 5e-08   | 100%  | <a href="#">gij426375394 XP_004054526.1</a> |  |
| <a href="#">Carboxypeptidase B2 (plasma) [Homo sapiens]</a>                                                                                                                                                                                                                            | 57.1      | 57.1        | 100%        | 5e-08   | 100%  | <a href="#">gij13937897 JAH07057.1</a>      |  |
| <a href="#">carboxypeptidase B2 isoform 1 preproprotein [Homo sapiens]</a>                                                                                                                                                                                                             | 57.1      | 57.1        | 100%        | 5e-08   | 100%  | <a href="#">gij513126885 NP_001863.3</a>    |  |
| <a href="#">carboxypeptidase B2 (plasma) [synthetic construct]</a>                                                                                                                                                                                                                     | 57.1      | 57.1        | 100%        | 5e-08   | 100%  | <a href="#">gij157927966 ABW03279.1</a>     |  |
| <a href="#">carboxypeptidase B2 (plasma, carboxypeptidase U) [synthetic cons</a>                                                                                                                                                                                                       | 57.1      | 57.1        | 100%        | 5e-08   | 100%  | <a href="#">gij124126823 ABM92184.1</a>     |  |
| <a href="#">PREDICTED: carboxypeptidase B2 [Pan troglodytes]</a>                                                                                                                                                                                                                       | 57.1      | 57.1        | 100%        | 5e-08   | 100%  | <a href="#">gij114651557 XP_509667.2</a>    |  |
| <a href="#">Chain A, Crystal Structure Of Thrombin-Activatable Fibrinolysis Inhi</a>                                                                                                                                                                                                   | 57.1      | 57.1        | 100%        | 5e-08   | 100%  | <a href="#">gij193506809 3D66_A</a>         |  |
| <a href="#">Homo sapiens carboxypeptidase B2 (plasma, carboxypeptidase U)</a>                                                                                                                                                                                                          | 57.1      | 57.1        | 100%        | 5e-08   | 100%  | <a href="#">gij30584819 AAP36662.1</a>      |  |
| <a href="#">PREDICTED: carboxypeptidase B2 isoform X1 [Pongo abelii]</a>                                                                                                                                                                                                               | 57.1      | 57.1        | 100%        | 5e-08   | 100%  | <a href="#">gij297694016 XP_002824293.1</a> |  |
| <a href="#">Chain A, Crystal Structure Of A T325i/t329i/h333y/h335q Mutant Of</a>                                                                                                                                                                                                      | 57.1      | 57.1        | 100%        | 5e-08   | 100%  | <a href="#">gij253722661 3D68_A</a>         |  |
| <a href="#">PREDICTED: carboxypeptidase B2 isoform X1 [Homo sapiens]</a>                                                                                                                                                                                                               | 57.1      | 57.1        | 100%        | 5e-08   | 100%  | <a href="#">gij530402097 XP_005266314.1</a> |  |
| <a href="#">PREDICTED: carboxypeptidase B2 isoform X1 [Rhinopithecus roxe</a>                                                                                                                                                                                                          | 54.5      | 54.5        | 100%        | 3e-07   | 94%   | <a href="#">gij724966280 XP_010356389.1</a> |  |
| <a href="#">PREDICTED: carboxypeptidase B2 [Chlorocebus sabaues]</a>                                                                                                                                                                                                                   | 54.5      | 54.5        | 100%        | 3e-07   | 94%   | <a href="#">gij635025444 XP_007958527.1</a> |  |
| <a href="#">PREDICTED: carboxypeptidase B2 [Papio anubis]</a>                                                                                                                                                                                                                          | 54.5      | 54.5        | 100%        | 3e-07   | 94%   | <a href="#">gij402901940 XP_003913891.1</a> |  |
| <a href="#">PREDICTED: carboxypeptidase B2 [Nomascus leucogenys]</a>                                                                                                                                                                                                                   | 53.7      | 53.7        | 100%        | 7e-07   | 94%   | <a href="#">gij332241864 XP_003270104.1</a> |  |
| <a href="#">PREDICTED: carboxypeptidase B2 [Equus caballus]</a>                                                                                                                                                                                                                        | 52.0      | 52.0        | 100%        | 2e-06   | 94%   | <a href="#">gij545190694 XP_005601424.1</a> |  |
| <a href="#">PREDICTED: carboxypeptidase B2 [Saimiri boliviensis boliviensis]</a>                                                                                                                                                                                                       | 51.5      | 51.5        | 88%         | 3e-06   | 100%  | <a href="#">gij403286234 XP_003934405.1</a> |  |
| <a href="#">PREDICTED: carboxypeptidase B2 [Callithrix jacchus]</a>                                                                                                                                                                                                                    | 51.5      | 51.5        | 88%         | 3e-06   | 100%  | <a href="#">gij390457680 XP_002742737.2</a> |  |
| <a href="#">PREDICTED: carboxypeptidase B2-like [Peromyscus maniculatus t</a>                                                                                                                                                                                                          | 50.7      | 50.7        | 100%        | 5e-06   | 88%   | <a href="#">gij589996660 XP_006998803.1</a> |  |
| <a href="#">PREDICTED: carboxypeptidase B2 isoform X2 [Cricetulus griseus]</a>                                                                                                                                                                                                         | 50.7      | 50.7        | 100%        | 6e-06   | 88%   | <a href="#">gij625193824 XP_007639419.1</a> |  |

|                                                                                      |      |      |      |       |     |                                             |
|--------------------------------------------------------------------------------------|------|------|------|-------|-----|---------------------------------------------|
| <a href="#">PREDICTED: carboxypeptidase B2 isoform X4 [Cricetulus griseus]</a>       | 50.7 | 50.7 | 100% | 6e-06 | 88% | <a href="#">gij625271974 XP_007627553.1</a> |
| <a href="#">PREDICTED: carboxypeptidase B2 [Peromyscus maniculatus baird]</a>        | 50.7 | 50.7 | 100% | 7e-06 | 88% | <a href="#">gij589957698 XP_006991448.1</a> |
| <a href="#">Carboxypeptidase B2 (plasma) [Mus musculus]</a>                          | 50.7 | 50.7 | 100% | 7e-06 | 88% | <a href="#">gij59808067 AAH89577.1</a>      |
| <a href="#">carboxypeptidase U [Mus musculus]</a>                                    | 50.7 | 50.7 | 100% | 7e-06 | 88% | <a href="#">gij6003652 AAF00528.1</a>       |
| <a href="#">PREDICTED: carboxypeptidase B2 [Mesocricetus auratus]</a>                | 50.7 | 50.7 | 100% | 7e-06 | 88% | <a href="#">gij524935646 XP_005071018.1</a> |
| <a href="#">carboxypeptidase B2 precursor [Mus musculus]</a>                         | 50.7 | 50.7 | 100% | 7e-06 | 88% | <a href="#">gij31982712 INP_062749.2</a>    |
| <a href="#">PREDICTED: carboxypeptidase B2 isoform X1 [Cricetulus griseus]</a>       | 50.7 | 50.7 | 100% | 7e-06 | 88% | <a href="#">gij354476626 XP_003500525.1</a> |
| <a href="#">PREDICTED: carboxypeptidase B2 isoform X3 [Cricetulus griseus]</a>       | 50.7 | 50.7 | 100% | 7e-06 | 88% | <a href="#">gij625271972 XP_007627552.1</a> |
| <a href="#">zinc finger CCCH domain-containing protein 13 [Cricetulus griseus]</a>   | 50.7 | 50.7 | 100% | 7e-06 | 88% | <a href="#">gij537241932 ERE87338.1</a>     |
| <a href="#">PREDICTED: carboxypeptidase B2 [Tursiops truncatus]</a>                  | 49.0 | 49.0 | 100% | 2e-05 | 88% | <a href="#">gij470653285 XP_004329533.1</a> |
| <a href="#">Carboxypeptidase B2 [Fukomys damarensis]</a>                             | 49.0 | 49.0 | 100% | 2e-05 | 88% | <a href="#">gij676273139 KFO27861.1</a>     |
| <a href="#">PREDICTED: carboxypeptidase B2 isoform X2 [Lipotes vexillifer]</a>       | 49.0 | 49.0 | 100% | 2e-05 | 88% | <a href="#">gij602712571 XP_007466515.1</a> |
| <a href="#">PREDICTED: carboxypeptidase B2 isoform X2 [Macaca fascicularis]</a>      | 49.0 | 49.0 | 100% | 2e-05 | 88% | <a href="#">gij544503644 XP_005585858.1</a> |
| <a href="#">PREDICTED: carboxypeptidase B2 isoform X3 [Chinchilla lanigera]</a>      | 49.0 | 49.0 | 100% | 2e-05 | 88% | <a href="#">gij533192699 XP_005409155.1</a> |
| <a href="#">PREDICTED: carboxypeptidase B2 [Physeter catodon]</a>                    | 49.0 | 49.0 | 100% | 2e-05 | 88% | <a href="#">gij593749228 XP_007129852.1</a> |
| <a href="#">PREDICTED: carboxypeptidase B2 isoform X2 [Chinchilla lanigera]</a>      | 49.0 | 49.0 | 100% | 2e-05 | 88% | <a href="#">gij533192697 XP_005409154.1</a> |
| <a href="#">PREDICTED: carboxypeptidase B2 [Otolemur garnettii]</a>                  | 49.0 | 49.0 | 100% | 2e-05 | 88% | <a href="#">gij395835377 XP_003790657.1</a> |
| <a href="#">PREDICTED: carboxypeptidase B2 [Canis lupus familiaris]</a>              | 49.0 | 49.0 | 100% | 2e-05 | 88% | <a href="#">gij73989292 XP_851154.1</a>     |
| <a href="#">PREDICTED: carboxypeptidase B2 isoform X1 [Lipotes vexillifer]</a>       | 49.0 | 49.0 | 100% | 2e-05 | 88% | <a href="#">gij602712569 XP_007466514.1</a> |
| <a href="#">PREDICTED: carboxypeptidase B2 [Balaenoptera acutorostrata sci]</a>      | 49.0 | 49.0 | 100% | 2e-05 | 88% | <a href="#">gij594678268 XP_007186896.1</a> |
| <a href="#">PREDICTED: carboxypeptidase B2 [Vicugna pacos]</a>                       | 49.0 | 49.0 | 100% | 2e-05 | 88% | <a href="#">gij560974364 XP_006209502.1</a> |
| <a href="#">PREDICTED: carboxypeptidase B2 [Camelus ferus]</a>                       | 49.0 | 49.0 | 100% | 2e-05 | 88% | <a href="#">gij560922422 XP_006187410.1</a> |
| <a href="#">PREDICTED: carboxypeptidase B2 isoform X1 [Macaca fascicularis]</a>      | 49.0 | 49.0 | 100% | 2e-05 | 88% | <a href="#">gij544503642 XP_005585857.1</a> |
| <a href="#">PREDICTED: carboxypeptidase B2 isoform X1 [Chinchilla lanigera]</a>      | 49.0 | 49.0 | 100% | 2e-05 | 88% | <a href="#">gij533192695 XP_005409153.1</a> |
| <a href="#">PREDICTED: carboxypeptidase B2 [Ochotona princeps]</a>                   | 49.0 | 49.0 | 100% | 2e-05 | 88% | <a href="#">gij504128560 XP_004577530.1</a> |
| <a href="#">PREDICTED: carboxypeptidase B2 [Orcinus orca]</a>                        | 49.0 | 49.0 | 100% | 2e-05 | 88% | <a href="#">gij466032575 XP_004274629.1</a> |
| <a href="#">Carboxypeptidase B2 [Macaca mulatta]</a>                                 | 49.0 | 49.0 | 100% | 2e-05 | 88% | <a href="#">gij355700980 EHH29001.1</a>     |
| <a href="#">PREDICTED: carboxypeptidase B2 isoform X2 [Fukomys damarensis]</a>       | 49.0 | 49.0 | 100% | 2e-05 | 88% | <a href="#">gij731244313 XP_010635336.1</a> |
| <a href="#">PREDICTED: carboxypeptidase B2 [Felis catus]</a>                         | 49.0 | 49.0 | 100% | 2e-05 | 88% | <a href="#">gij586973570 XP_006927367.1</a> |
| <a href="#">PREDICTED: carboxypeptidase B2 isoform X1 [Fukomys damarensis]</a>       | 49.0 | 49.0 | 100% | 2e-05 | 88% | <a href="#">gij731244311 XP_010635335.1</a> |
| <a href="#">PREDICTED: carboxypeptidase B2 [Panthera tigris altaica]</a>             | 49.0 | 49.0 | 100% | 3e-05 | 88% | <a href="#">gij591318467 XP_007085493.1</a> |
| <a href="#">plastin-2 isoform 16 [Camelus ferus]</a>                                 | 49.0 | 49.0 | 100% | 3e-05 | 88% | <a href="#">gij528759255 EPY78914.1</a>     |
| <a href="#">PREDICTED: carboxypeptidase B2 [Tupaia chinensis]</a>                    | 48.6 | 48.6 | 94%  | 3e-05 | 88% | <a href="#">gij562871068 XP_006163508.1</a> |
| <a href="#">carboxypeptidase B2 (plasma), isoform CRA_b [Rattus norvegicus]</a>      | 48.1 | 48.1 | 100% | 5e-05 | 82% | <a href="#">gij149049966 EDM02290.1</a>     |
| <a href="#">carboxypeptidase B2 (plasma), isoform CRA_a [Rattus norvegicus]</a>      | 48.1 | 48.1 | 100% | 5e-05 | 82% | <a href="#">gij149049965 EDM02289.1</a>     |
| <a href="#">Cpb2 protein [Rattus norvegicus]</a>                                     | 48.1 | 48.1 | 100% | 5e-05 | 82% | <a href="#">gij60688161 AAH91133.1</a>      |
| <a href="#">carboxypeptidase B2 precursor [Rattus norvegicus]</a>                    | 48.1 | 48.1 | 100% | 5e-05 | 82% | <a href="#">gij16758414 INP_446069.1</a>    |
| <a href="#">PREDICTED: carboxypeptidase B2 [Microtus ochrogaster]</a>                | 46.9 | 46.9 | 100% | 1e-04 | 82% | <a href="#">gij532025304 XP_005355675.1</a> |
| <a href="#">PREDICTED: carboxypeptidase B2 isoform 1 [Macaca mulatta]</a>            | 46.4 | 46.4 | 94%  | 2e-04 | 88% | <a href="#">gij109120669 XP_001097310.1</a> |
| <a href="#">PREDICTED: carboxypeptidase B2 [Ictidomys tridecemlineatus]</a>          | 46.4 | 46.4 | 94%  | 2e-04 | 88% | <a href="#">gij532113245 XP_005341304.1</a> |
| <a href="#">Carboxypeptidase B2 [Macaca fascicularis]</a>                            | 46.4 | 46.4 | 94%  | 2e-04 | 88% | <a href="#">gij355754683 EHH58584.1</a>     |
| <a href="#">PREDICTED: carboxypeptidase B2 isoform 3 [Macaca mulatta]</a>            | 46.4 | 46.4 | 94%  | 2e-04 | 88% | <a href="#">gij109120665 XP_001097608.1</a> |
| <a href="#">PREDICTED: carboxypeptidase B2 [Cavia porcellus]</a>                     | 46.4 | 46.4 | 100% | 2e-04 | 82% | <a href="#">gij348583190 XP_003477356.1</a> |
| <a href="#">PREDICTED: carboxypeptidase B2 isoform X2 [Bos mutus]</a>                | 46.0 | 46.0 | 94%  | 2e-04 | 88% | <a href="#">gij555969567 XP_005896807.1</a> |
| <a href="#">Chain A, Crystal Structure Of Thrombin Activatable Fibrinolysis Inhi</a> | 46.0 | 46.0 | 94%  | 2e-04 | 88% | <a href="#">gij194368809 3DGV_A</a>         |

|                                                                                |      |      |      |       |     |                                             |
|--------------------------------------------------------------------------------|------|------|------|-------|-----|---------------------------------------------|
| <a href="#">carboxypeptidase B2 precursor [Bos taurus]</a>                     | 46.0 | 46.0 | 94%  | 2e-04 | 88% | <a href="#">gil114050845 NP_001039462.1</a> |
| <a href="#">PREDICTED: carboxypeptidase B2 [Capra hircus]</a>                  | 46.0 | 46.0 | 94%  | 2e-04 | 88% | <a href="#">gil548487919 XP_005687494.1</a> |
| <a href="#">PREDICTED: carboxypeptidase B2 [Odobenus rosmarus divergens]</a>   | 46.0 | 46.0 | 100% | 2e-04 | 82% | <a href="#">gil472378433 XP_004408637.1</a> |
| <a href="#">PREDICTED: carboxypeptidase B2 [Ovis aries]</a>                    | 46.0 | 46.0 | 94%  | 2e-04 | 88% | <a href="#">gil426236307 XP_004012111.1</a> |
| <a href="#">PREDICTED: carboxypeptidase B2 [Octodon degus]</a>                 | 45.6 | 45.6 | 100% | 3e-04 | 82% | <a href="#">gil507684606 XP_004640321.1</a> |
| <a href="#">PREDICTED: carboxypeptidase B2 isoform X2 [Heterocephalus gla]</a> | 45.2 | 45.2 | 100% | 5e-04 | 82% | <a href="#">gil512921202 XP_004904434.1</a> |
| <a href="#">PREDICTED: carboxypeptidase B2 isoform X2 [Heterocephalus gla]</a> | 45.2 | 45.2 | 100% | 5e-04 | 82% | <a href="#">gil512964055 XP_004844264.1</a> |
| <a href="#">PREDICTED: carboxypeptidase B2 isoform X1 [Heterocephalus gla]</a> | 45.2 | 45.2 | 100% | 5e-04 | 82% | <a href="#">gil512921198 XP_004904433.1</a> |
| <a href="#">PREDICTED: carboxypeptidase B2 isoform X1 [Heterocephalus gla]</a> | 45.2 | 45.2 | 100% | 5e-04 | 82% | <a href="#">gil512964053 XP_004844263.1</a> |
| <a href="#">PREDICTED: carboxypeptidase B2 [Leptonychotes weddellii]</a>       | 44.8 | 44.8 | 100% | 6e-04 | 76% | <a href="#">gil585191930 XP_006747204.1</a> |
| <a href="#">PREDICTED: carboxypeptidase B2 [Condylura cristata]</a>            | 44.8 | 44.8 | 94%  | 6e-04 | 83% | <a href="#">gil507939327 XP_004680202.1</a> |
| <a href="#">hypothetical protein PANDA_002961 [Ailuropoda melanoleuca]</a>     | 44.3 | 44.3 | 100% | 9e-04 | 76% | <a href="#">gil281349951 EFB25535.1</a>     |
| <a href="#">PREDICTED: carboxypeptidase B2-like [Ailuropoda melanoleuca]</a>   | 44.3 | 44.3 | 100% | 9e-04 | 76% | <a href="#">gil301758334 XP_002915018.1</a> |
| <a href="#">PREDICTED: carboxypeptidase B2 [Ursus maritimus]</a>               | 44.3 | 44.3 | 100% | 9e-04 | 76% | <a href="#">gil671028730 XP_008705148.1</a> |
| <a href="#">Carboxypeptidase B2 [Ophiophagus hannah]</a>                       | 43.9 | 43.9 | 100% | 0.001 | 76% | <a href="#">gil565306861 ETE61379.1</a>     |
| <a href="#">PREDICTED: carboxypeptidase B2 [Anolis carolinensis]</a>           | 43.9 | 43.9 | 100% | 0.001 | 76% | <a href="#">gil327260978 XP_003215309.1</a> |
| <a href="#">PREDICTED: carboxypeptidase B2 [Erinaceus europaeus]</a>           | 43.5 | 43.5 | 100% | 0.002 | 82% | <a href="#">gil617593818 XP_007521293.1</a> |
| <a href="#">PREDICTED: carboxypeptidase B2 [Ceratotherium simum simum]</a>     | 43.5 | 43.5 | 88%  | 0.002 | 87% | <a href="#">gil478518956 XP_004433702.1</a> |
| <a href="#">PREDICTED: carboxypeptidase B2 isoform X2 [Galeopterus varieg:</a> | 43.1 | 43.1 | 94%  | 0.002 | 81% | <a href="#">gil667276404 XP_008572661.1</a> |
| <a href="#">PREDICTED: carboxypeptidase B2 [Nannospalax galii]</a>             | 43.1 | 43.1 | 100% | 0.002 | 76% | <a href="#">gil674098370 XP_008822615.1</a> |
| <a href="#">PREDICTED: carboxypeptidase B2 isoform X1 [Galeopterus varieg:</a> | 43.1 | 43.1 | 94%  | 0.002 | 81% | <a href="#">gil667276401 XP_008572660.1</a> |
| <a href="#">PREDICTED: carboxypeptidase B2 [Chrysemys picta bellii]</a>        | 43.1 | 43.1 | 100% | 0.002 | 71% | <a href="#">gil641751137 XP_008166719.1</a> |
| <a href="#">PREDICTED: carboxypeptidase B2 [Oryctolagus cuniculus]</a>         | 43.1 | 43.1 | 100% | 0.002 | 79% | <a href="#">gil655832146 XP_008258213.1</a> |
| <a href="#">PREDICTED: carboxypeptidase B2 [Pelodiscus sinensis]</a>           | 43.1 | 43.1 | 100% | 0.002 | 71% | <a href="#">gil558138783 XP_006118064.1</a> |
| <a href="#">PREDICTED: carboxypeptidase B2 isoform X2 [Pteropus alecto]</a>    | 42.6 | 42.6 | 100% | 0.003 | 76% | <a href="#">gil586560565 XP_006913553.1</a> |
| <a href="#">PREDICTED: carboxypeptidase B2 isoform X1 [Pteropus alecto]</a>    | 42.6 | 42.6 | 100% | 0.003 | 76% | <a href="#">gil586560563 XP_006913552.1</a> |
| <a href="#">PREDICTED: carboxypeptidase B2 [Bubalus bubalis]</a>               | 42.2 | 42.2 | 94%  | 0.004 | 81% | <a href="#">gil594098932 XP_006072612.1</a> |

## Alignments

Download GenPept Graphics

Next Previous Descriptions

PREDICTED: carboxypeptidase B2 isoform X3 [Homo sapiens]

Sequence ID: [gil530402101|ref|XP\\_005266316.1](#) Length: 226 Number of Matches: 1

Range 1: 85 to 101 GenPept Graphics

Next Match Previous Match

| Score          | Expect | Identities  | Positives   | Gaps     |
|----------------|--------|-------------|-------------|----------|
| 57.1 bits(127) | 4e-08  | 17/17(100%) | 17/17(100%) | 0/17(0%) |

Query 1 KQVHFFVNASDVDNVKA 17  
 KQVHFFVNASDVDNVKA  
 Sbjct 85 KQVHFFVNASDVDNVKA 101

### Related Information

[Gene](#) - associated gene details

Download GenPept Graphics

Next Previous Descriptions

carboxypeptidase B-like protein [Homo sapiens]

Sequence ID: [gil6855464|dbj|BAA90475.1](#) Length: 360 Number of Matches: 1

Range 1: 66 to 82 GenPept Graphics

Next Match Previous Match

| Score          | Expect | Identities  | Positives   | Gaps     |
|----------------|--------|-------------|-------------|----------|
| 57.1 bits(127) | 4e-08  | 17/17(100%) | 17/17(100%) | 0/17(0%) |

Query 1 KQVHFFVNASDVDNVKA 17

### Related Information

[Gene](#) - associated gene details

Sbjct 66 KQVHFFVNASDVDNVKA 82

[Download](#) [GenPept](#) [Graphics](#) [Next](#) [Previous](#) [Descriptions](#)

carboxypeptidase B2 (plasma, carboxypeptidase U), isoform CRA\_a [Homo sapiens]

Sequence ID: [gi|119629159|gb|EAX08754.1](#) Length: 360 Number of Matches: 1

Range 1: 66 to 82 [GenPept](#) [Graphics](#) [Next Match](#) [Previous Match](#)

| Score          | Expect | Identities  | Positives   | Gaps     |
|----------------|--------|-------------|-------------|----------|
| 57.1 bits(127) | 4e-08  | 17/17(100%) | 17/17(100%) | 0/17(0%) |

Query 1 KQVHFFVNASDVDNVKA 17  
 KQVHFFVNASDVDNVKA  
 Sbjct 66 KQVHFFVNASDVDNVKA 82

**Related Information**

[Gene](#) - associated gene details

[Download](#) [GenPept](#) [Graphics](#) [Next](#) [Previous](#) [Descriptions](#)

carboxypeptidase B2 isoform 2 preproprotein [Homo sapiens]

Sequence ID: [gi|513126877|ref|NP\\_001265470.1](#) Length: 386 Number of Matches: 1

Range 1: 66 to 82 [GenPept](#) [Graphics](#) [Next Match](#) [Previous Match](#)

| Score          | Expect | Identities  | Positives   | Gaps     |
|----------------|--------|-------------|-------------|----------|
| 57.1 bits(127) | 5e-08  | 17/17(100%) | 17/17(100%) | 0/17(0%) |

Query 1 KQVHFFVNASDVDNVKA 17  
 KQVHFFVNASDVDNVKA  
 Sbjct 66 KQVHFFVNASDVDNVKA 82

**Related Information**

[Gene](#) - associated gene details

[Map Viewer](#) - aligned genomic context

[Download](#) [GenPept](#) [Graphics](#) [Next](#) [Previous](#) [Descriptions](#)

PREDICTED: carboxypeptidase B2 isoform X2 [Pongo abelii]

Sequence ID: [gi|686743701|ref|XP\\_009246910.1](#) Length: 387 Number of Matches: 1

Range 1: 66 to 82 [GenPept](#) [Graphics](#) [Next Match](#) [Previous Match](#)

| Score          | Expect | Identities  | Positives   | Gaps     |
|----------------|--------|-------------|-------------|----------|
| 57.1 bits(127) | 5e-08  | 17/17(100%) | 17/17(100%) | 0/17(0%) |

Query 1 KQVHFFVNASDVDNVKA 17  
 KQVHFFVNASDVDNVKA  
 Sbjct 66 KQVHFFVNASDVDNVKA 82

**Related Information**

[Gene](#) - associated gene details

[Map Viewer](#) - aligned genomic context

BLAST is a registered trademark of the National Library of Medicine.

▶ [NCBI/ BLAST/ blastp suite/ Formatting Results - BTGXY5C6013](#)

**i** Your search parameters were adjusted to search for a short input sequence.

[Edit and Resubmit](#) | [Save Search Strategies](#) | [▶ Formatting options](#) | [▶ Download](#)

[YouTube](#) | [How to read this page](#) | [Blast report description](#)

**CRISP3\_RDSCKASCDCSNSIY\_Mod**

**RID** [BTGXY5C6013](#) (Expires on 01-20 15:43 pm)

**Query ID** |cl|74444  
**Description** |None  
**Molecule type** |amino acid  
**Query Length** |15

**Database Name** |nr  
**Description** |All non-redundant GenBank CDS translations+PDB+SwissProt+PIR+PRF excluding environmental samples from WGS projects  
**Program** |BLASTP 2.2.30+ [▶ Citation](#)

Other reports: [▶ Search Summary](#) | [\[Taxonomy reports\]](#) | [\[Distance tree of results\]](#) | [\[Related Structures\]](#) | [\[Multiple alignment\]](#)

**Graphic Summary**

[Show Conserved Domains](#)

No putative conserved domains have been detected

Distribution of 100 Blast Hits on the Query Sequence 

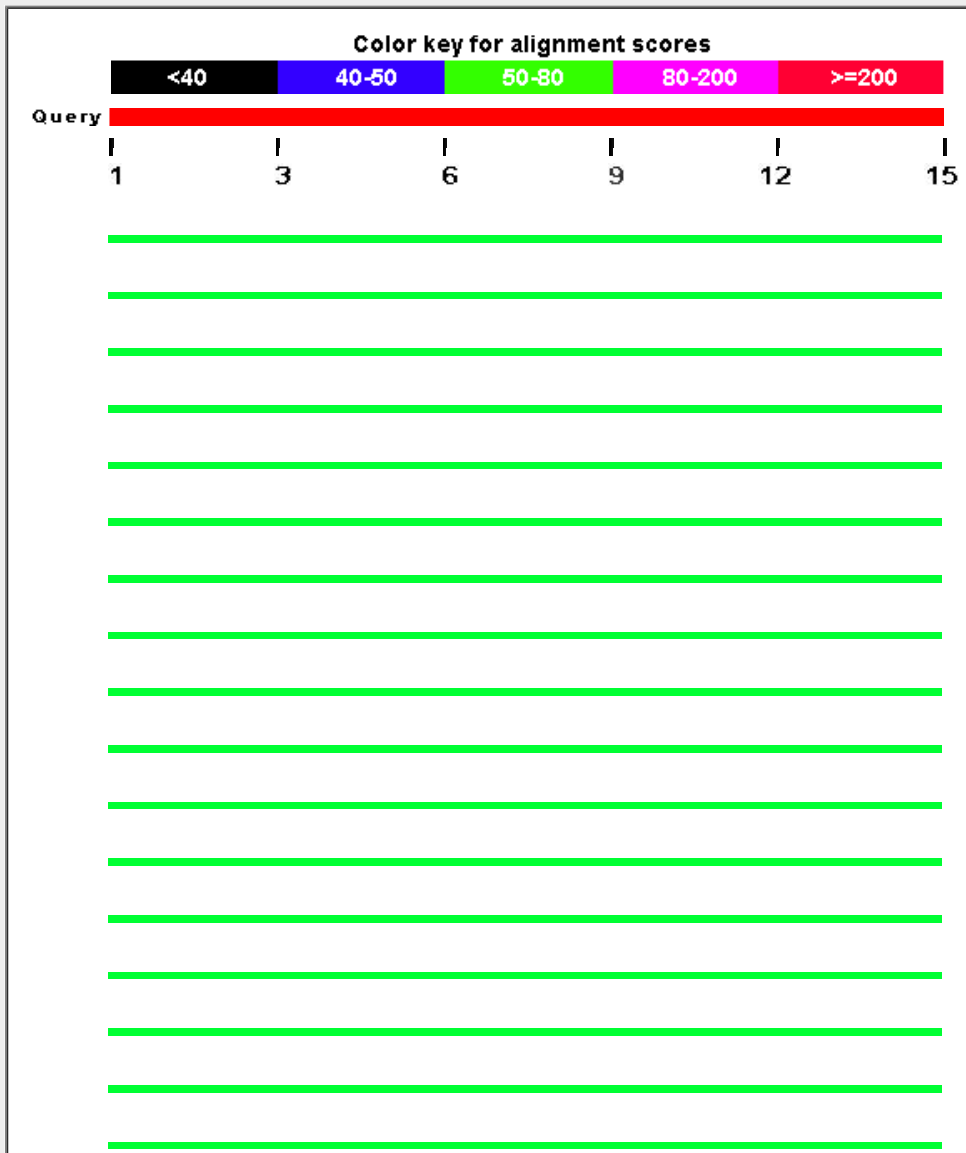



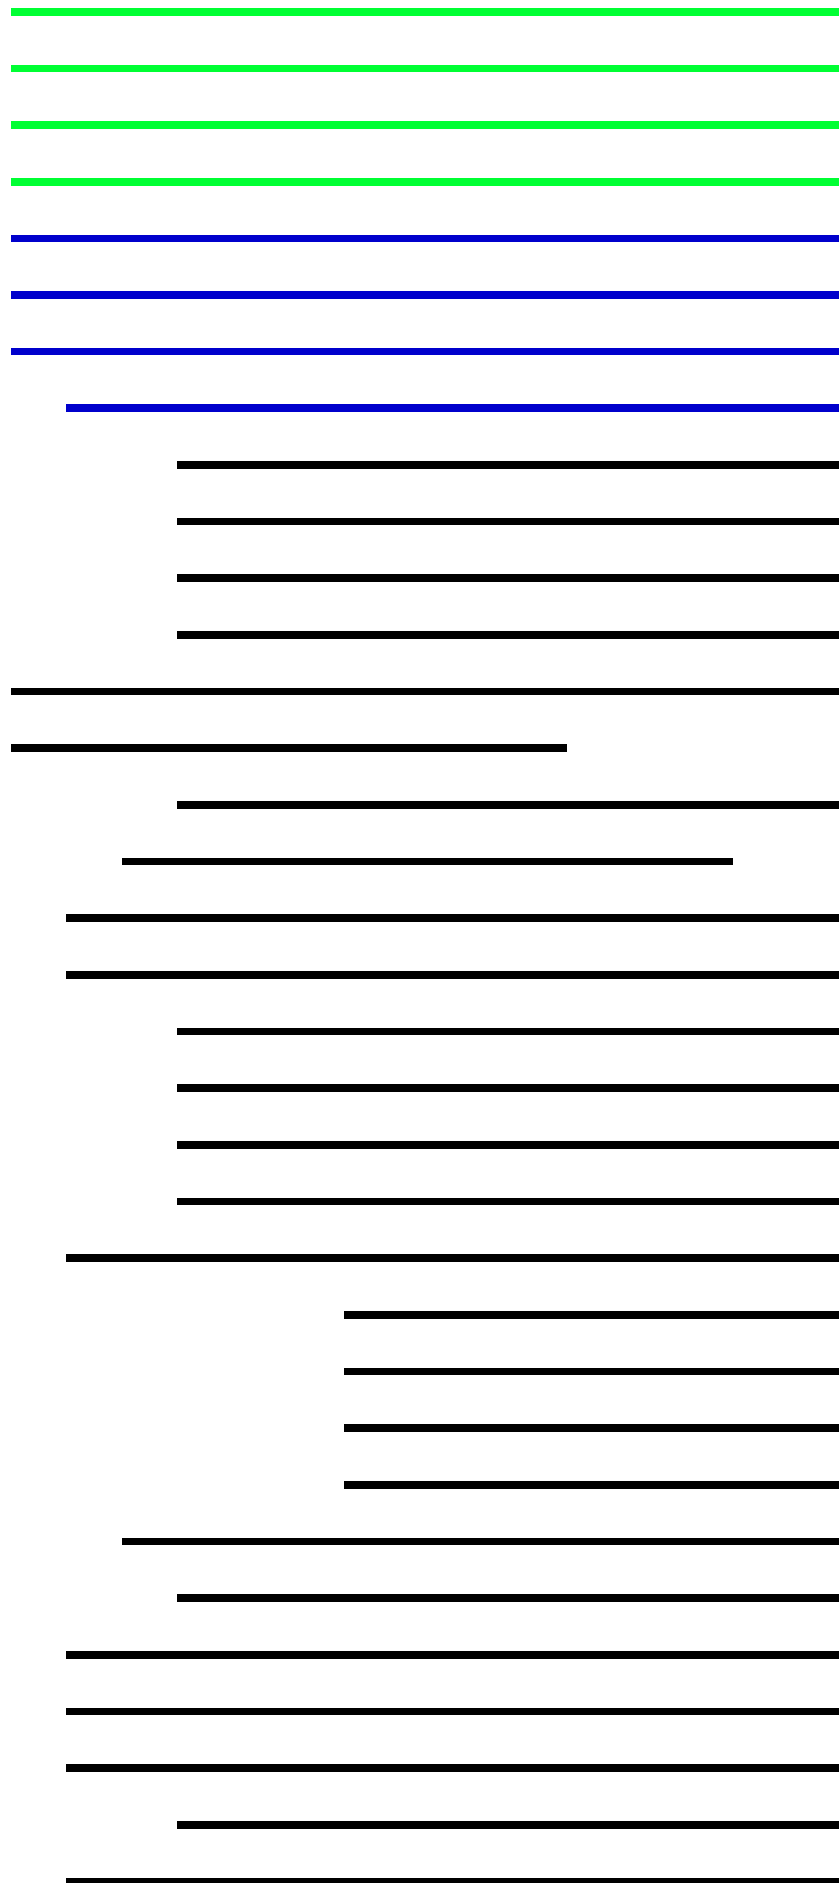

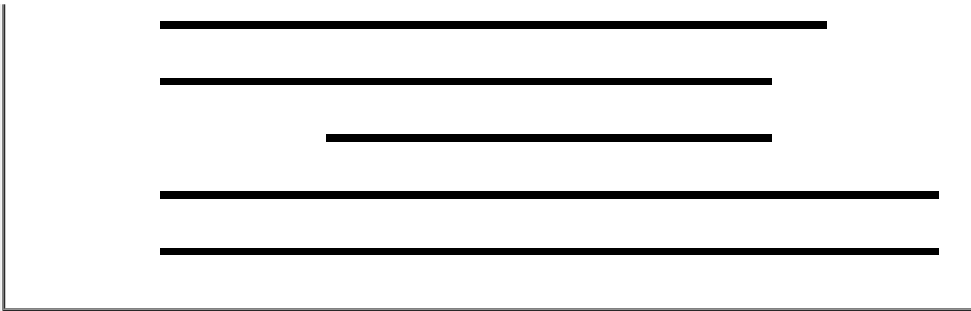

**Descriptions**

**Sequences producing significant alignments:**

Select: [All](#) [None](#) Selected:0

[Alignments](#)
[Download](#)
[GenPept](#)
[Graphics](#)
[Distance tree of results](#)
[Multiple alignment](#)


| Description                                                                          | Max score | Total score | Query cover | E value | Ident | Accession                                   |
|--------------------------------------------------------------------------------------|-----------|-------------|-------------|---------|-------|---------------------------------------------|
| <a href="#">unnamed protein product [Homo sapiens]</a>                               | 50.3      | 50.3        | 100%        | 6e-06   | 93%   | <a href="#">gi 194384234 BAG64890.1</a>     |
| <a href="#">PREDICTED: cysteine-rich secretory protein 3 isoform X2 [Chlorocebus</a> | 50.3      | 50.3        | 100%        | 7e-06   | 93%   | <a href="#">gi 635094563 XP_007970486.1</a> |
| <a href="#">RecName: Full=Cysteine-rich secretory protein 3; Short=CRISP</a>         | 50.3      | 50.3        | 100%        | 7e-06   | 93%   | <a href="#">gi 1706135 P54108.1</a>         |
| <a href="#">SGP28 protein [Homo sapiens]</a>                                         | 50.3      | 50.3        | 100%        | 7e-06   | 93%   | <a href="#">gi 1213613 CAA63984.1</a>       |
| <a href="#">PREDICTED: cysteine-rich secretory protein 3 [Papio anubis]</a>          | 50.3      | 50.3        | 100%        | 7e-06   | 93%   | <a href="#">gi 402867229 XP_003897768.1</a> |
| <a href="#">PREDICTED: cysteine-rich secretory protein 3 isoform 1 [Nomascus</a>     | 50.3      | 50.3        | 100%        | 7e-06   | 93%   | <a href="#">gi 332210261 XP_003254226.1</a> |
| <a href="#">PREDICTED: cysteine-rich secretory protein 3 isoform 2 [Macaca</a>       | 50.3      | 50.3        | 100%        | 7e-06   | 93%   | <a href="#">gi 109071442 XP_001105287.1</a> |
| <a href="#">cysteine-rich secretory protein 3 variant [Homo sapiens]</a>             | 50.3      | 50.3        | 100%        | 7e-06   | 93%   | <a href="#">gi 62898321 BAD97100.1</a>      |
| <a href="#">PREDICTED: LOW QUALITY PROTEIN: cysteine-rich secretor</a>               | 50.3      | 50.3        | 100%        | 7e-06   | 93%   | <a href="#">gi 544427465 XP_005552824.1</a> |
| <a href="#">PREDICTED: cysteine-rich secretory protein 3 isoform 1 [Gorilla</a>      | 50.3      | 50.3        | 100%        | 7e-06   | 93%   | <a href="#">gi 426353468 XP_004044216.1</a> |
| <a href="#">PREDICTED: cysteine-rich secretory protein 3 isoform X2 [Pan</a>         | 50.3      | 50.3        | 100%        | 7e-06   | 93%   | <a href="#">gi 397526631 XP_003833222.1</a> |
| <a href="#">cysteine-rich secretory protein 3 isoform 1 precursor [Homo sa</a>       | 50.3      | 50.3        | 100%        | 7e-06   | 93%   | <a href="#">gi 300244560 NP_006052.2</a>    |
| <a href="#">PREDICTED: cysteine-rich secretory protein 3 isoform X2 [Pon</a>         | 50.3      | 50.3        | 100%        | 7e-06   | 93%   | <a href="#">gi 297678316 XP_002817022.1</a> |
| <a href="#">unnamed protein product [Homo sapiens]</a>                               | 50.3      | 50.3        | 100%        | 7e-06   | 93%   | <a href="#">gi 158259033 BAF85475.1</a>     |
| <a href="#">PREDICTED: cysteine-rich secretory protein 3 isoform X2 [Pan</a>         | 50.3      | 50.3        | 100%        | 7e-06   | 93%   | <a href="#">gi 114607750 XP_001148602.1</a> |
| <a href="#">PREDICTED: cysteine-rich secretory protein 3 isoform 2 [Gorilla</a>      | 50.3      | 50.3        | 100%        | 7e-06   | 93%   | <a href="#">gi 426353470 XP_004044217.1</a> |
| <a href="#">PREDICTED: cysteine-rich secretory protein 3 isoform X1 [Pan</a>         | 50.3      | 50.3        | 100%        | 7e-06   | 93%   | <a href="#">gi 397526633 XP_003833223.1</a> |
| <a href="#">PREDICTED: cysteine-rich secretory protein 3 isoform X1 [Pon</a>         | 50.3      | 50.3        | 100%        | 7e-06   | 93%   | <a href="#">gi 395737328 XP_003776901.1</a> |
| <a href="#">PREDICTED: cysteine-rich secretory protein 3 isoform X1 [Pan</a>         | 50.3      | 50.3        | 100%        | 7e-06   | 93%   | <a href="#">gi 332824193 XP_001148538.2</a> |
| <a href="#">cysteine-rich secretory protein 3 isoform 2 precursor [Homo sa</a>       | 50.3      | 50.3        | 100%        | 7e-06   | 93%   | <a href="#">gi 300244562 NP_001177915.1</a> |
| <a href="#">PREDICTED: cysteine-rich secretory protein 3 isoform X1 [Chlor</a>       | 50.3      | 50.3        | 100%        | 7e-06   | 93%   | <a href="#">gi 635094561 XP_007970484.1</a> |
| <a href="#">PREDICTED: cysteine-rich secretory protein 3 [Rhinopithecus r</a>        | 47.7      | 47.7        | 100%        | 5e-05   | 87%   | <a href="#">gi 724882502 XP_010373294.1</a> |
| <a href="#">PREDICTED: cysteine-rich secretory protein 3 isoform X2 [Sair</a>        | 47.7      | 47.7        | 100%        | 5e-05   | 87%   | <a href="#">gi 403261483 XP_003923149.1</a> |
| <a href="#">PREDICTED: cysteine-rich secretory protein 3 isoform X1 [Sair</a>        | 47.7      | 47.7        | 100%        | 5e-05   | 87%   | <a href="#">gi 403261485 XP_003923150.1</a> |
| <a href="#">PREDICTED: cysteine-rich secretory protein 3 [Pteropus alecto</a>        | 40.1      | 40.1        | 93%         | 0.018   | 79%   | <a href="#">gi 586556147 XP_006926516.1</a> |
| <a href="#">PREDICTED: cysteine-rich secretory protein 3 [Galeopterus va</a>         | 36.7      | 36.7        | 80%         | 0.23    | 83%   | <a href="#">gi 667299696 XP_008580716.1</a> |
| <a href="#">PREDICTED: cysteine-rich secretory protein 2-like [Sarcophilus</a>       | 32.5      | 32.5        | 80%         | 5.3     | 75%   | <a href="#">gi 395537432 XP_003770705.1</a> |
| <a href="#">PREDICTED: cysteine-rich secretory protein 3-like [Tarsius syri</a>      | 32.5      | 32.5        | 80%         | 5.3     | 75%   | <a href="#">gi 640824360 XP_008069246.1</a> |
| <a href="#">PREDICTED: cysteine-rich secretory protein 3-like [Fukomys d</a>         | 32.5      | 32.5        | 80%         | 5.4     | 75%   | <a href="#">gi 731231228 XP_010629409.1</a> |

|                                                                                 |      |      |      |      |      |                                             |
|---------------------------------------------------------------------------------|------|------|------|------|------|---------------------------------------------|
| <a href="#">PREDICTED: cysteine-rich secretory protein 3-like [Loxodonta</a>    | 32.0 | 32.0 | 100% | 7.3  | 60%  | <a href="#">gil731453844 XP_003404193.2</a> |
| <a href="#">PREDICTED: cysteine-rich secretory protein 2-like [Trichechus</a>   | 31.6 | 31.6 | 66%  | 10.0 | 80%  | <a href="#">gil471414464 XP_004388770.1</a> |
| <a href="#">PREDICTED: cysteine-rich secretory protein 3 [Tupaia chinens</a>    | 31.2 | 31.2 | 80%  | 14   | 75%  | <a href="#">gil562840038 XP_006149164.1</a> |
| <a href="#">uncharacterized protein TOT_030000442 [Theileria orientalis st</a>  | 31.2 | 31.2 | 73%  | 14   | 82%  | <a href="#">gil697892480 XP_009691480.1</a> |
| <a href="#">PREDICTED: cysteine-rich secretory protein 2 isoform X2 [Can</a>    | 30.8 | 30.8 | 93%  | 19   | 64%  | <a href="#">gil545519430 XP_005627520.1</a> |
| <a href="#">PREDICTED: cysteine-rich secretory protein 2 isoform X1 [Can</a>    | 30.8 | 30.8 | 93%  | 19   | 64%  | <a href="#">gil545519428 XP_005627519.1</a> |
| <a href="#">Cysteine-rich secretory protein 3 [Myotis brandtii]</a>             | 30.3 | 30.3 | 80%  | 24   | 67%  | <a href="#">gil521023357 EPQ05145.1</a>     |
| <a href="#">PREDICTED: cysteine-rich secretory protein 3 [Myotis lucifugus</a>  | 30.3 | 30.3 | 80%  | 25   | 67%  | <a href="#">gil558145271 XP_006093280.1</a> |
| <a href="#">PREDICTED: cysteine-rich secretory protein 3 [Myotis brandtii]</a>  | 30.3 | 30.3 | 80%  | 25   | 67%  | <a href="#">gil554534799 XP_005862127.1</a> |
| <a href="#">PREDICTED: cysteine-rich secretory protein 3 [Myotis davidii]</a>   | 30.3 | 30.3 | 80%  | 25   | 67%  | <a href="#">gil584041718 XP_006765775.1</a> |
| <a href="#">PREDICTED: cysteine-rich secretory protein 2-like [Felis catus]</a> | 30.3 | 30.3 | 93%  | 25   | 71%  | <a href="#">gil586986758 XP_003986274.2</a> |
| <a href="#">PREDICTED: fatty-acid amide hydrolase 1-like [Pundamilia nye</a>    | 30.3 | 30.3 | 60%  | 26   | 89%  | <a href="#">gil548459219 XP_005747619.1</a> |
| <a href="#">PREDICTED: fatty-acid amide hydrolase 1-like [Haplochromis t</a>    | 30.3 | 30.3 | 60%  | 26   | 89%  | <a href="#">gil554885687 XP_005952459.1</a> |
| <a href="#">PREDICTED: fatty-acid amide hydrolase 1-like isoform X2 [May</a>    | 30.3 | 30.3 | 60%  | 26   | 89%  | <a href="#">gil499001912 XP_004555098.1</a> |
| <a href="#">PREDICTED: fatty-acid amide hydrolase 1-like isoform X1 [May</a>    | 30.3 | 30.3 | 60%  | 27   | 89%  | <a href="#">gil499001908 XP_004555097.1</a> |
| <a href="#">PREDICTED: cysteine-rich secretory protein 3-like [Erinaceus e</a>  | 29.9 | 29.9 | 86%  | 35   | 69%  | <a href="#">gil617602602 XP_007523359.1</a> |
| <a href="#">PREDICTED: cysteine-rich secretory protein 2-like [Leptonych</a>    | 29.9 | 29.9 | 80%  | 35   | 67%  | <a href="#">gil585150326 XP_006727639.1</a> |
| <a href="#">PREDICTED: cysteine-rich secretory protein 3-like [Camelus dr</a>   | 29.9 | 29.9 | 93%  | 35   | 57%  | <a href="#">gil744591208 XP_010987243.1</a> |
| <a href="#">PREDICTED: cysteine-rich secretory protein 3 [Vicugna pacos]</a>    | 29.9 | 29.9 | 93%  | 35   | 57%  | <a href="#">gil560959057 XP_006201984.1</a> |
| <a href="#">PREDICTED: cysteine-rich secretory protein 3 [Camelus ferus]</a>    | 29.9 | 29.9 | 93%  | 35   | 57%  | <a href="#">gil560929288 XP_006190797.1</a> |
| <a href="#">PREDICTED: cysteine-rich secretory protein 3 [Mustela putoriu</a>   | 29.9 | 29.9 | 80%  | 35   | 67%  | <a href="#">gil511904944 XP_004771951.1</a> |
| <a href="#">PREDICTED: cysteine-rich secretory protein 3 [Ceratotherium s</a>   | 29.9 | 29.9 | 93%  | 35   | 57%  | <a href="#">gil478500344 XP_004424494.1</a> |
| <a href="#">hypothetical protein Moror_2055 [Moniliophthora roreri MCA 29</a>   | 29.5 | 29.5 | 80%  | 48   | 75%  | <a href="#">gil630205342 XP_007853192.1</a> |
| <a href="#">PREDICTED: chorion-specific transcription factor GCmb [Peloc</a>    | 29.5 | 29.5 | 73%  | 49   | 44%  | <a href="#">gil558230180 XP_006138838.1</a> |
| <a href="#">hypothetical protein LOAG_07568 [Loa loa]</a>                       | 29.1 | 29.1 | 53%  | 64   | 100% | <a href="#">gil312081727 XP_003143149.1</a> |
| <a href="#">cysteine-rich secretory protein 3 precursor [Equus caballus]</a>    | 29.1 | 29.1 | 93%  | 64   | 57%  | <a href="#">gil126352542 NP_001075343.1</a> |
| <a href="#">PREDICTED: cysteine-rich secretory protein 3 [Ochotona princ</a>    | 29.1 | 29.1 | 93%  | 64   | 64%  | <a href="#">gil504158252 XP_004590597.1</a> |
| <a href="#">PREDICTED: uncharacterized protein LOC104218494 isoform</a>         | 29.1 | 29.1 | 73%  | 66   | 82%  | <a href="#">gil698545175 XP_009767299.1</a> |
| <a href="#">PREDICTED: uncharacterized protein LOC104218494 isoform</a>         | 29.1 | 29.1 | 73%  | 66   | 82%  | <a href="#">gil698545171 XP_009767298.1</a> |
| <a href="#">PREDICTED: uncharacterized protein LOC104218494 isoform</a>         | 29.1 | 29.1 | 73%  | 66   | 82%  | <a href="#">gil698545156 XP_009767295.1</a> |
| <a href="#">hypothetical protein THERM_01169520 [Tetrahymena thermo</a>         | 29.1 | 29.1 | 86%  | 68   | 64%  | <a href="#">gil118395393 XP_001030047.1</a> |
| <a href="#">hypothetical protein THERM_01169520 [Tetrahymena thermo</a>         | 29.1 | 29.1 | 86%  | 68   | 64%  | <a href="#">gil586737343 EAR82384.2</a>     |
| <a href="#">hypothetical protein [Achromobacter xylosoxidans]</a>               | 28.6 | 28.6 | 66%  | 80   | 70%  | <a href="#">gil737214877 WP_035199582.1</a> |
| <a href="#">GM15650 [Drosophila sechellia]</a>                                  | 28.6 | 28.6 | 60%  | 90   | 89%  | <a href="#">gil195346678 XP_002039884.1</a> |
| <a href="#">GE18088 [Drosophila yakuba]</a>                                     | 28.6 | 28.6 | 60%  | 90   | 89%  | <a href="#">gil195488632 XP_002092397.1</a> |
| <a href="#">GG20706 [Drosophila erecta]</a>                                     | 28.6 | 28.6 | 60%  | 91   | 89%  | <a href="#">gil194882155 XP_001975178.1</a> |
| <a href="#">hypothetical protein H105_06384 [Trichophyton soudanense Cl</a>     | 28.6 | 28.6 | 60%  | 92   | 89%  | <a href="#">gil607938037 EZF71419.1</a>     |
| <a href="#">hypothetical protein H106_06212 [Trichophyton rubrum CBS 7:</a>     | 28.6 | 28.6 | 60%  | 92   | 89%  | <a href="#">gil607974736 EZG03991.1</a>     |
| <a href="#">hypothetical protein TERG_01735 [Trichophyton rubrum CBS 1</a>      | 28.6 | 28.6 | 60%  | 92   | 89%  | <a href="#">gil327304641 XP_003237012.1</a> |
| <a href="#">tRNA 2' phosphotransferase, putative [Eimeria acervulina]</a>       | 28.6 | 28.6 | 86%  | 92   | 63%  | <a href="#">gil557124170 CDI78405.1</a>     |
| <a href="#">hypothetical protein PPL_01971 [Polysphondylium pallidum PN</a>     | 28.6 | 28.6 | 66%  | 92   | 80%  | <a href="#">gil281210811 EFA84977.1</a>     |
| <a href="#">Cysteine-rich secretory protein 2 [Pteropus alecto]</a>             | 28.2 | 28.2 | 80%  | 118  | 67%  | <a href="#">gil431838288 ELK00220.1</a>     |
| <a href="#">PREDICTED: cysteine-rich secretory protein 2 [Pteropus alecto</a>   | 28.2 | 28.2 | 80%  | 120  | 67%  | <a href="#">gil586556149 XP_006926517.1</a> |
| <a href="#">PREDICTED: cysteine-rich secretory protein 2 [Ictidomys tridec</a>  | 28.2 | 28.2 | 80%  | 120  | 67%  | <a href="#">gil532065569 XP_005318643.1</a> |
| <a href="#">PREDICTED: cysteine-rich secretory protein 3 [Chrysochloris a</a>   | 28.2 | 28.2 | 93%  | 120  | 57%  | <a href="#">gil586460042 XP_006860679.1</a> |

|                                                                                  |      |      |     |     |      |                                             |
|----------------------------------------------------------------------------------|------|------|-----|-----|------|---------------------------------------------|
| <a href="#">PREDICTED: cysteine-rich secretory protein 2-like [Galeopterus]</a>  | 28.2 | 28.2 | 80% | 122 | 67%  | <a href="#">gi 667335258 XP_008592870.1</a> |
| <a href="#">SAP domain-containing protein [Trichophyton equinum CBS 12]</a>      | 28.2 | 28.2 | 60% | 125 | 89%  | <a href="#">gi 326477338 EGE01348.1</a>     |
| <a href="#">conserved hypothetical protein [Trichophyton verrucosum HKI C]</a>   | 28.2 | 28.2 | 60% | 125 | 89%  | <a href="#">gi 302667025 XP_003025107.1</a> |
| <a href="#">hypothetical protein H109_04555 [Trichophyton interdigitale MF]</a>  | 28.2 | 28.2 | 60% | 125 | 89%  | <a href="#">gi 633046989 KDB23552.1</a>     |
| <a href="#">hypothetical protein H101_02809 [Trichophyton interdigitale H6]</a>  | 28.2 | 28.2 | 60% | 125 | 89%  | <a href="#">gi 607894816 EZF33634.1</a>     |
| <a href="#">hypothetical protein TESH_04396 [Trichophyton tonsurans CBS]</a>     | 28.2 | 28.2 | 60% | 125 | 89%  | <a href="#">gi 326472966 EGD96975.1</a>     |
| <a href="#">conserved hypothetical protein [Arthroderma benhamiae CBS 1]</a>     | 28.2 | 28.2 | 60% | 125 | 89%  | <a href="#">gi 302501356 XP_003012670.1</a> |
| <a href="#">PREDICTED: cysteine-rich secretory protein 2-like [Ursus marit]</a>  | 27.8 | 27.8 | 80% | 163 | 67%  | <a href="#">gi 670998279 XP_008690031.1</a> |
| <a href="#">PREDICTED: cysteine-rich secretory protein 3-like [Nannospal]</a>    | 27.8 | 27.8 | 80% | 164 | 67%  | <a href="#">gi 674104542 XP_008823456.1</a> |
| <a href="#">PREDICTED: cysteine-rich secretory protein 2-like [Panthera ti]</a>  | 27.8 | 27.8 | 93% | 164 | 64%  | <a href="#">gi 591340164 XP_007095568.1</a> |
| <a href="#">hypothetical protein CCM_02846 [Cordyceps militaris CM01]</a>        | 27.8 | 27.8 | 60% | 165 | 89%  | <a href="#">gi 573980232 XP_006668061.1</a> |
| <a href="#">PREDICTED: cysteine-rich secretory protein 3-like [Chinchilla l]</a> | 27.8 | 27.8 | 80% | 166 | 67%  | <a href="#">gi 533125534 XP_005377985.1</a> |
| <a href="#">Solute carrier organic anion transporter family member 4A1 [Cr]</a>  | 27.8 | 27.8 | 60% | 169 | 89%  | <a href="#">gi 405958473 EKC24600.1</a>     |
| <a href="#">hypothetical protein [Plasmodium yoelii yoelii 17XNL]</a>            | 27.8 | 27.8 | 73% | 171 | 73%  | <a href="#">gi 82541076 XP_724807.1</a>     |
| <a href="#">hypothetical protein YYC_03031 [Plasmodium yoelii 17X]</a>           | 27.8 | 27.8 | 73% | 171 | 73%  | <a href="#">gi 564278173 ETB59592.1</a>     |
| <a href="#">liver specific protein 1 [Plasmodium yoelii]</a>                     | 27.8 | 27.8 | 73% | 171 | 73%  | <a href="#">gi 675232727 CDU85100.1</a>     |
| <a href="#">hypothetical protein BC1G_16107 [Botryotinia fuckeliana B05.1]</a>   | 27.4 | 27.4 | 73% | 207 | 82%  | <a href="#">gi 154289331 XP_001545300.1</a> |
| <a href="#">PREDICTED: cysteine-rich secretory protein 3 [Echinops telfair</a>   | 27.4 | 27.4 | 93% | 223 | 57%  | <a href="#">gi 507620678 XP_004696622.1</a> |
| <a href="#">Tms1p [Rhizophagus irregularis DAOM 197198w]</a>                     | 27.4 | 27.4 | 73% | 228 | 73%  | <a href="#">gi 595438682 EXX52304.1</a>     |
| <a href="#">hypothetical protein LRAMOSA01456 [Absidia idahoensis var. t]</a>    | 27.4 | 27.4 | 73% | 229 | 73%  | <a href="#">gi 671692776 CDS07507.1</a>     |
| <a href="#">related to tms1 protein [Lichtheimia corymbifera JMRC:FSU:96]</a>    | 27.4 | 27.4 | 73% | 229 | 73%  | <a href="#">gi 661183725 CDH53974.1</a>     |
| <a href="#">PREDICTED: uncharacterized protein LOC101258431 [Solanu</a>          | 27.4 | 27.4 | 73% | 229 | 82%  | <a href="#">gi 723675971 XP_010316951.1</a> |
| <a href="#">hypothetical protein [Mucilaginibacter paludis]</a>                  | 26.9 | 26.9 | 46% | 272 | 100% | <a href="#">gi 495785995 WP_008510574.1</a> |
| <a href="#">hypothetical protein GMDG_07051 [Pseudogymnoascus destru</a>         | 26.9 | 26.9 | 46% | 294 | 100% | <a href="#">gi 440634907 ELR04826.1</a>     |
| <a href="#">PREDICTED: tetraspanin-8 [Poecilia reticulata]</a>                   | 26.9 | 26.9 | 93% | 305 | 48%  | <a href="#">gi 658918509 XP_008399014.1</a> |
| <a href="#">cysteine-rich secretory protein 2 precursor [Xenopus (Silurana)</a>  | 26.9 | 26.9 | 93% | 306 | 64%  | <a href="#">gi 56118480 NP_001008204.1</a>  |

## Alignments

Download GenPept Graphics

Next Previous Descriptions

unnamed protein product [Homo sapiens]

Sequence ID: [gi|194384234|dbj|BAG64890.1](#) Length: 155 Number of Matches: 1

Range 1: 141 to 155 GenPept Graphics

Next Match Previous Match

| Score          | Expect | Identities | Positives   | Gaps     |
|----------------|--------|------------|-------------|----------|
| 50.3 bits(111) | 6e-06  | 14/15(93%) | 15/15(100%) | 0/15(0%) |

Query 1 RDSCKASCDCSNSIY 15  
 RDSCKASC+CSNSIY  
 Sbjct 141 RDSCKASCDCSNSIY 155

### Related Information

[Gene](#) - associated gene details

Download GenPept Graphics

Next Previous Descriptions

PREDICTED: cysteine-rich secretory protein 3 isoform X2 [Chlorocebus sabaeus]

Sequence ID: [gi|635094563|ref|XP\\_007970486.1](#) Length: 245 Number of Matches: 1

See 1 more title(s)

Range 1: 231 to 245 GenPept Graphics

Next Match Previous Match

| Score          | Expect | Identities | Positives   | Gaps     |
|----------------|--------|------------|-------------|----------|
| 50.3 bits(111) | 7e-06  | 14/15(93%) | 15/15(100%) | 0/15(0%) |

### Related Information

[Gene](#) - associated gene details

[Map Viewer](#) - aligned genomic

Query 1 RDSCKASCDCSNSIY 15  
 RDSCKASC+CSNSIY  
 Sbjct 231 RDSCKASCNCNSIY 245

context  
[Identical Proteins](#) - Proteins  
 identical to the subject

[Download](#) [GenPept](#) [Graphics](#)

[Next](#) [Previous](#) [Descriptions](#)

RecName: Full=Cysteine-rich secretory protein 3; Short=CRISP-3; AltName: Full=Specific granule protein of 28 kDa;  
 Short=SGP28; Flags: Precursor [Homo sapiens]

Sequence ID: [gi|1706135|sp|P54108.1|CRIS3\\_HUMAN](#) Length: 245 Number of Matches: 1

[See 6 more title\(s\)](#)

Range 1: 231 to 245 [GenPept](#) [Graphics](#) [Next Match](#) [Previous Match](#)

| Score          | Expect | Identities | Positives   | Gaps     |
|----------------|--------|------------|-------------|----------|
| 50.3 bits(111) | 7e-06  | 14/15(93%) | 15/15(100%) | 0/15(0%) |

Query 1 RDSCKASCDCSNSIY 15  
 RDSCKASC+CSNSIY  
 Sbjct 231 RDSCKASCNCNSIY 245

**Related Information**

[Gene](#) - associated gene details  
[Identical Proteins](#) - Proteins  
 identical to the subject

[Download](#) [GenPept](#) [Graphics](#)

[Next](#) [Previous](#) [Descriptions](#)

SGP28 protein [Homo sapiens]

Sequence ID: [gi|1213613|emb|CAA63984.1](#) Length: 245 Number of Matches: 1

[See 2 more title\(s\)](#)

Range 1: 231 to 245 [GenPept](#) [Graphics](#) [Next Match](#) [Previous Match](#)

| Score          | Expect | Identities | Positives   | Gaps     |
|----------------|--------|------------|-------------|----------|
| 50.3 bits(111) | 7e-06  | 14/15(93%) | 15/15(100%) | 0/15(0%) |

Query 1 RDSCKASCDCSNSIY 15  
 RDSCKASC+CSNSIY  
 Sbjct 231 RDSCKASCNCNSIY 245

**Related Information**

[Gene](#) - associated gene details  
[Identical Proteins](#) - Proteins  
 identical to the subject

[Download](#) [GenPept](#) [Graphics](#)

[Next](#) [Previous](#) [Descriptions](#)

PREDICTED: cysteine-rich secretory protein 3 [Papio anubis]

Sequence ID: [gi|402867229|ref|XP\\_003897768.1](#) Length: 245 Number of Matches: 1

[See 4 more title\(s\)](#)

Range 1: 231 to 245 [GenPept](#) [Graphics](#) [Next Match](#) [Previous Match](#)

| Score          | Expect | Identities | Positives   | Gaps     |
|----------------|--------|------------|-------------|----------|
| 50.3 bits(111) | 7e-06  | 14/15(93%) | 15/15(100%) | 0/15(0%) |

Query 1 RDSCKASCDCSNSIY 15  
 RDSCKASC+CSNSIY  
 Sbjct 231 RDSCKASCNCNSIY 245

**Related Information**

[Gene](#) - associated gene details  
[Map Viewer](#) - aligned genomic context  
[Identical Proteins](#) - Proteins  
 identical to the subject

BLAST is a registered trademark of the National Library of Medicine.



NCBI/ BLAST/ blastp suite/ Formatting Results - B94UF42601R

Your search parameters were adjusted to search for a short input sequence.

Edit and Resubmit Save Search Strategies Formatting options Download

YouTube How to read this page Blast report description

CRISP3\_RDSCKASCNCNSIY\_NonMod

RID B94UF42601R (Expires on 01-14 10:38 am)

Query ID lcl|191300
Description None
Molecule type amino acid
Query Length 15

Database Name nr
Description All non-redundant GenBank CDS translations+PDB+SwissProt+PIR excluding environmental samples from WGS projects
Program BLASTP 2.2.30+ Citation

Other reports: Search Summary Taxonomy reports Distance tree of results Multiple alignment

Graphic Summary

Show Conserved Domains

No putative conserved domains have been detected

Distribution of 101 Blast Hits on the Query Sequence

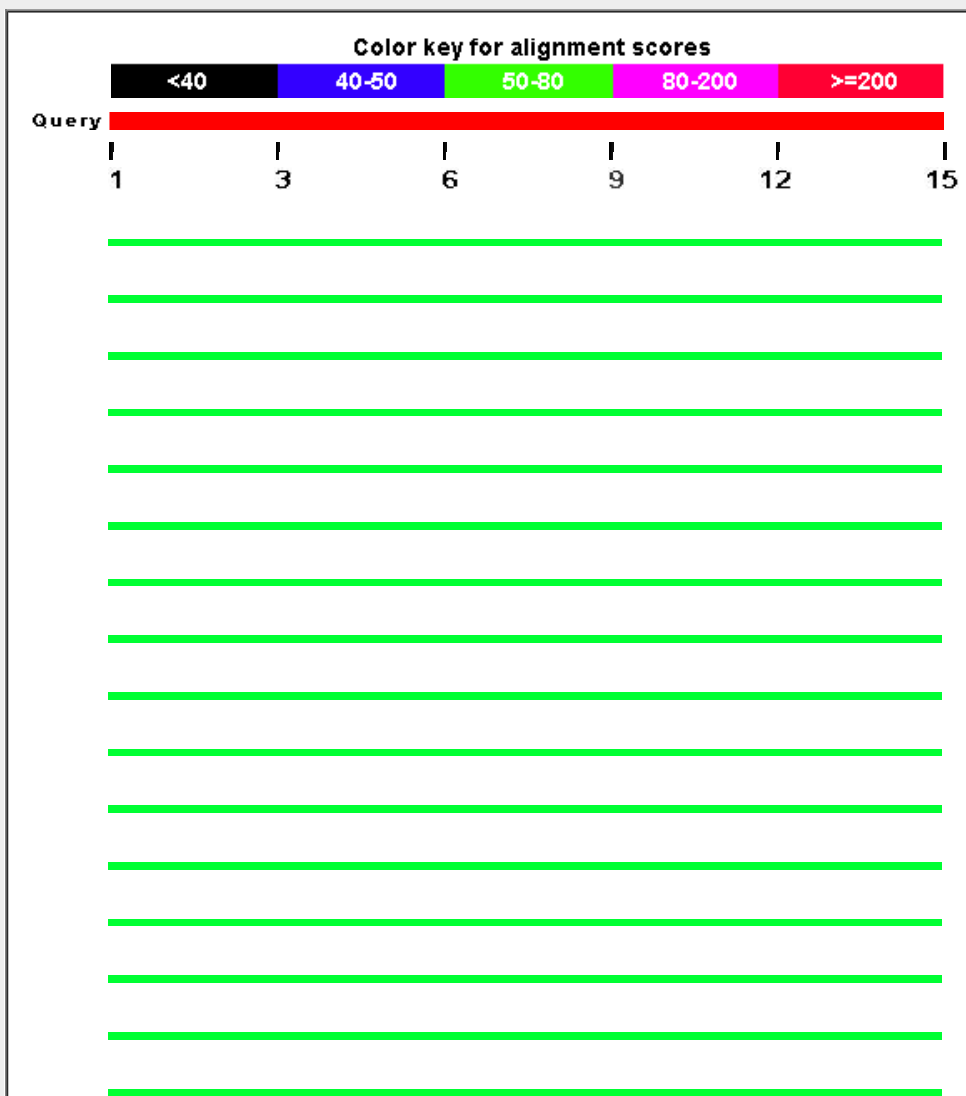

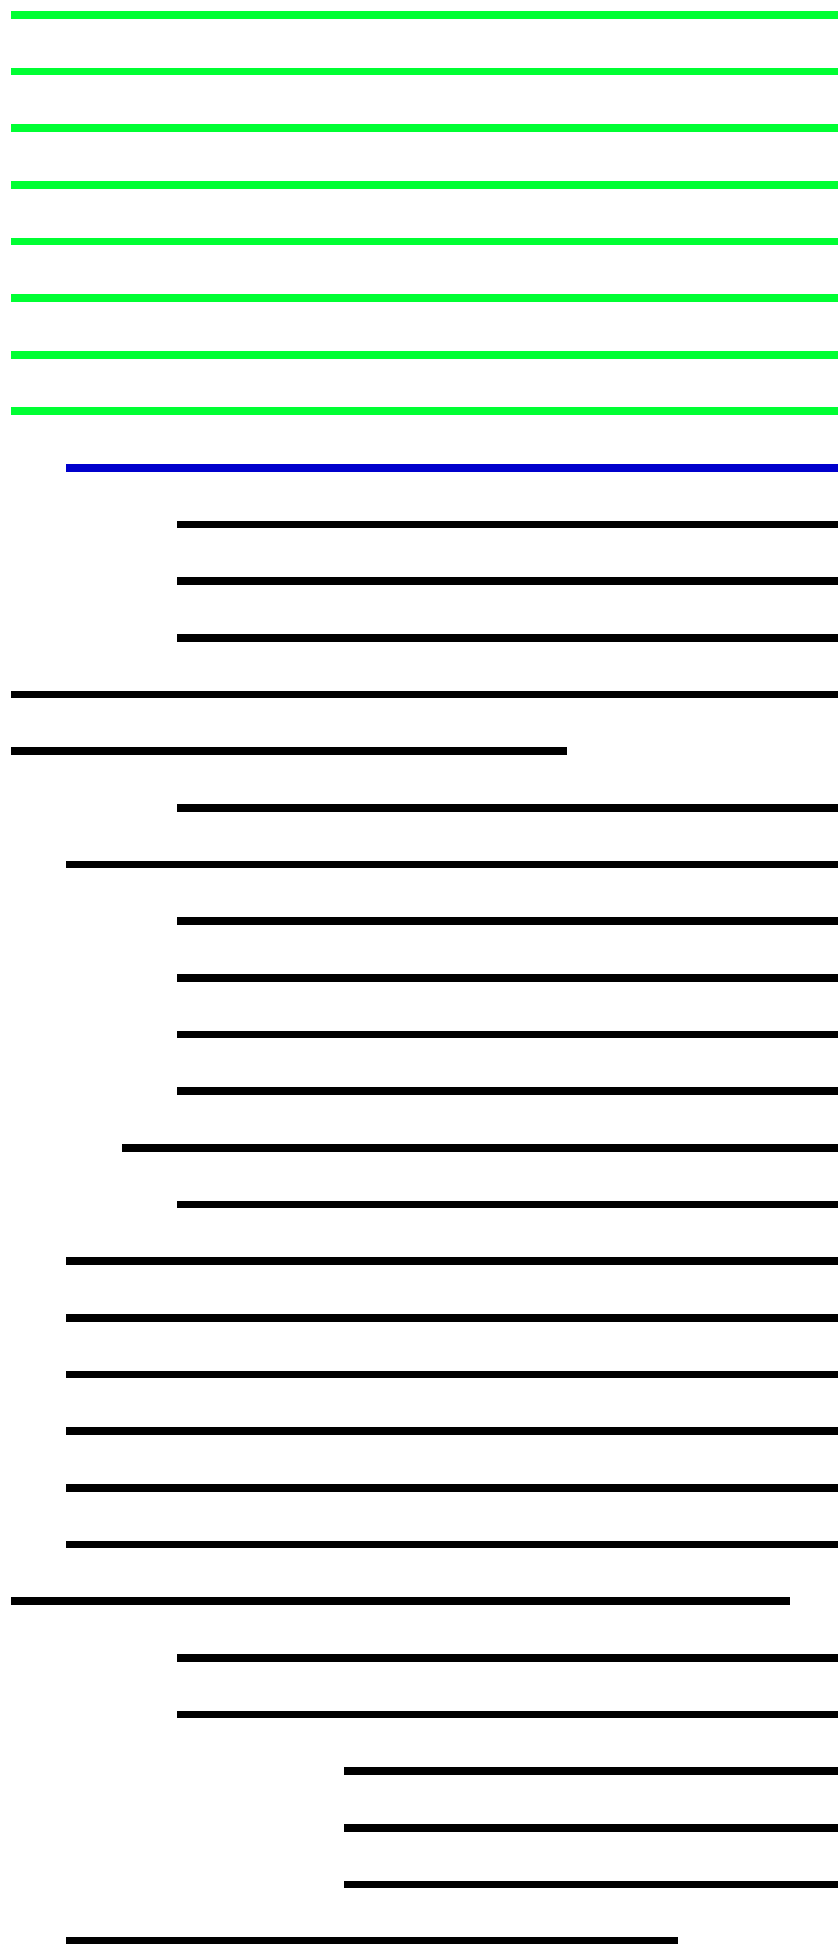

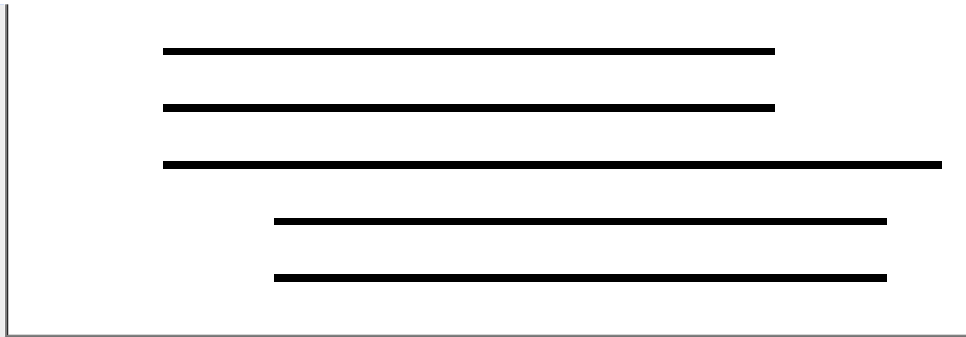

**Descriptions**

**Sequences producing significant alignments:**

Select: [All](#) [None](#) Selected:0

[Alignments](#)
[Download](#)
[GenPept](#)
[Graphics](#)
[Distance tree of results](#)
[Multiple alignment](#)

| Description                                                                                                  | Max score | Total score | Query cover | E value | Ident | Accession                                   |
|--------------------------------------------------------------------------------------------------------------|-----------|-------------|-------------|---------|-------|---------------------------------------------|
| <a href="#">unnamed protein product [Homo sapiens]</a>                                                       | 52.8      | 52.8        | 100%        | 7e-07   | 100%  | <a href="#">gil194384234 BAG64890.1</a>     |
| <a href="#">PREDICTED: cysteine-rich secretory protein 3 isoform X2 [Chloroceryle</a>                        | 52.8      | 52.8        | 100%        | 9e-07   | 100%  | <a href="#">gil635094563 XP_007970486.1</a> |
| <a href="#">RecName: Full=Cysteine-rich secretory protein 3; Short=CRISP-3; SGP28 protein [Homo sapiens]</a> | 52.8      | 52.8        | 100%        | 9e-07   | 100%  | <a href="#">gil1706135 P54108.1</a>         |
| <a href="#">SGP28 protein [Homo sapiens]</a>                                                                 | 52.8      | 52.8        | 100%        | 9e-07   | 100%  | <a href="#">gil1213613 CAA63984.1</a>       |
| <a href="#">PREDICTED: cysteine-rich secretory protein 3 [Papio anubis]</a>                                  | 52.8      | 52.8        | 100%        | 9e-07   | 100%  | <a href="#">gil402867229 XP_003897768.1</a> |
| <a href="#">PREDICTED: cysteine-rich secretory protein 3 isoform 1 [Nomascus</a>                             | 52.8      | 52.8        | 100%        | 9e-07   | 100%  | <a href="#">gil332210261 XP_003254226.1</a> |
| <a href="#">PREDICTED: cysteine-rich secretory protein 3 isoform 2 [Macaca n</a>                             | 52.8      | 52.8        | 100%        | 9e-07   | 100%  | <a href="#">gil109071442 XP_001105287.1</a> |
| <a href="#">cysteine-rich secretory protein 3 variant [Homo sapiens]</a>                                     | 52.8      | 52.8        | 100%        | 9e-07   | 100%  | <a href="#">gil62898321 BAD97100.1</a>      |
| <a href="#">PREDICTED: LOW QUALITY PROTEIN: cysteine-rich secretory pr</a>                                   | 52.8      | 52.8        | 100%        | 9e-07   | 100%  | <a href="#">gil544427465 XP_005552824.1</a> |
| <a href="#">PREDICTED: cysteine-rich secretory protein 3 isoform 1 [Gorilla go</a>                           | 52.8      | 52.8        | 100%        | 9e-07   | 100%  | <a href="#">gil426353468 XP_004044216.1</a> |
| <a href="#">PREDICTED: cysteine-rich secretory protein 3 isoform X2 [Pan pan</a>                             | 52.8      | 52.8        | 100%        | 9e-07   | 100%  | <a href="#">gil397526631 XP_003833222.1</a> |
| <a href="#">cysteine-rich secretory protein 3 isoform 1 precursor [Homo sapiens</a>                          | 52.8      | 52.8        | 100%        | 9e-07   | 100%  | <a href="#">gil300244560 NP_006052.2</a>    |
| <a href="#">PREDICTED: cysteine-rich secretory protein 3 isoform X2 [Pongo a</a>                             | 52.8      | 52.8        | 100%        | 9e-07   | 100%  | <a href="#">gil297678316 XP_002817022.1</a> |
| <a href="#">unnamed protein product [Homo sapiens]</a>                                                       | 52.8      | 52.8        | 100%        | 9e-07   | 100%  | <a href="#">gil158259033 BAF85475.1</a>     |
| <a href="#">PREDICTED: cysteine-rich secretory protein 3 isoform X2 [Pan trog</a>                            | 52.8      | 52.8        | 100%        | 9e-07   | 100%  | <a href="#">gil114607750 XP_001148602.1</a> |
| <a href="#">PREDICTED: cysteine-rich secretory protein 3 isoform 2 [Gorilla go</a>                           | 52.8      | 52.8        | 100%        | 9e-07   | 100%  | <a href="#">gil426353470 XP_004044217.1</a> |
| <a href="#">PREDICTED: cysteine-rich secretory protein 3 isoform X1 [Pan pan</a>                             | 52.8      | 52.8        | 100%        | 9e-07   | 100%  | <a href="#">gil397526633 XP_003833223.1</a> |
| <a href="#">PREDICTED: cysteine-rich secretory protein 3 isoform X1 [Pongo a</a>                             | 52.8      | 52.8        | 100%        | 9e-07   | 100%  | <a href="#">gil395737328 XP_003776901.1</a> |
| <a href="#">PREDICTED: cysteine-rich secretory protein 3 isoform X1 [Pan trog</a>                            | 52.8      | 52.8        | 100%        | 9e-07   | 100%  | <a href="#">gil332824193 XP_001148538.2</a> |
| <a href="#">cysteine-rich secretory protein 3 isoform 2 precursor [Homo sapiens</a>                          | 52.8      | 52.8        | 100%        | 9e-07   | 100%  | <a href="#">gil300244562 NP_001177915.1</a> |
| <a href="#">PREDICTED: cysteine-rich secretory protein 3 isoform X1 [Chloroceryle</a>                        | 52.8      | 52.8        | 100%        | 9e-07   | 100%  | <a href="#">gil635094561 XP_007970484.1</a> |
| <a href="#">PREDICTED: cysteine-rich secretory protein 3 [Rhinopithecus roxel</a>                            | 50.3      | 50.3        | 100%        | 6e-06   | 93%   | <a href="#">gil724882502 XP_010373294.1</a> |
| <a href="#">PREDICTED: cysteine-rich secretory protein 3 isoform X2 [Saimiri t</a>                           | 50.3      | 50.3        | 100%        | 6e-06   | 93%   | <a href="#">gil403261483 XP_003923149.1</a> |
| <a href="#">PREDICTED: cysteine-rich secretory protein 3 isoform X1 [Saimiri t</a>                           | 50.3      | 50.3        | 100%        | 7e-06   | 93%   | <a href="#">gil403261485 XP_003923150.1</a> |
| <a href="#">PREDICTED: cysteine-rich secretory protein 3 [Pteropus alecto]</a>                               | 42.6      | 42.6        | 93%         | 0.002   | 86%   | <a href="#">gil586556147 XP_006926516.1</a> |
| <a href="#">PREDICTED: cysteine-rich secretory protein 3 [Galeopterus variega</a>                            | 39.2      | 39.2        | 80%         | 0.031   | 92%   | <a href="#">gil667299696 XP_008580716.1</a> |
| <a href="#">PREDICTED: cysteine-rich secretory protein 3-like [Tarsius syrichte</a>                          | 35.0      | 35.0        | 80%         | 0.77    | 83%   | <a href="#">gil640824360 XP_008069246.1</a> |
| <a href="#">PREDICTED: cysteine-rich secretory protein 3-like [Fukomys dama</a>                              | 35.0      | 35.0        | 80%         | 0.77    | 83%   | <a href="#">gil731231228 XP_010629409.1</a> |



|                                                                      |      |      |      |     |     |                                             |
|----------------------------------------------------------------------|------|------|------|-----|-----|---------------------------------------------|
| PREDICTED: cysteine-rich secretory protein 3-like [Loxodonta afric   | 34.6 | 34.6 | 100% | 1.1 | 67% | <a href="#">gij731453844 XP_003404193.2</a> |
| PREDICTED: cysteine-rich secretory protein 2-like [Trichechus mar    | 34.1 | 34.1 | 66%  | 1.4 | 90% | <a href="#">gij471414464 XP_004388770.1</a> |
| PREDICTED: cysteine-rich secretory protein 3 [Tupaia chinensis]      | 33.7 | 33.7 | 80%  | 2.0 | 83% | <a href="#">gij562840038 XP_006149164.1</a> |
| PREDICTED: cysteine-rich secretory protein 2-like [Felis catus]      | 33.3 | 33.3 | 93%  | 2.7 | 71% | <a href="#">gij586986758 XP_003986274.2</a> |
| Cysteine-rich secretory protein 3 [Myotis brandtii]                  | 32.9 | 32.9 | 80%  | 3.4 | 75% | <a href="#">gij521023357 EPQ05145.1</a>     |
| PREDICTED: cysteine-rich secretory protein 3 [Myotis lucifugus]      | 32.9 | 32.9 | 80%  | 3.7 | 75% | <a href="#">gij558145271 XP_006093280.1</a> |
| PREDICTED: cysteine-rich secretory protein 3 [Myotis brandtii]       | 32.9 | 32.9 | 80%  | 3.7 | 75% | <a href="#">gij554534799 XP_005862127.1</a> |
| PREDICTED: cysteine-rich secretory protein 3 [Myotis davidii]        | 32.9 | 32.9 | 80%  | 3.7 | 75% | <a href="#">gij584041718 XP_006765775.1</a> |
| PREDICTED: cysteine-rich secretory protein 3-like [Erinaceus euro]   | 32.5 | 32.5 | 86%  | 5.1 | 77% | <a href="#">gij617602602 XP_007523359.1</a> |
| PREDICTED: cysteine-rich secretory protein 2-like [Sarcophilus ha    | 32.0 | 32.0 | 80%  | 6.9 | 75% | <a href="#">gij395537432 XP_003770705.1</a> |
| PREDICTED: cysteine-rich secretory protein 2 isoform X2 [Canis lu    | 32.0 | 32.0 | 93%  | 7.0 | 64% | <a href="#">gij545519430 XP_005627520.1</a> |
| PREDICTED: cysteine-rich secretory protein 2 isoform X1 [Canis lu    | 32.0 | 32.0 | 93%  | 7.0 | 64% | <a href="#">gij545519428 XP_005627519.1</a> |
| PREDICTED: cysteine-rich secretory protein 3 [Vicugna pacos]         | 31.2 | 31.2 | 93%  | 13  | 57% | <a href="#">gij560959057 XP_006201984.1</a> |
| PREDICTED: cysteine-rich secretory protein 3 [Camelus ferus]         | 31.2 | 31.2 | 93%  | 13  | 57% | <a href="#">gij560929288 XP_006190797.1</a> |
| PREDICTED: cysteine-rich secretory protein 3 [Ochotona princeps]     | 31.2 | 31.2 | 93%  | 13  | 64% | <a href="#">gij504158252 XP_004590597.1</a> |
| PREDICTED: cysteine-rich secretory protein 2-like [Panthera tigris   | 30.8 | 30.8 | 93%  | 18  | 64% | <a href="#">gij591340164 XP_007095568.1</a> |
| PREDICTED: cysteine-rich secretory protein 3 [Chrysochloris asiati   | 30.8 | 30.8 | 93%  | 18  | 64% | <a href="#">gij586460042 XP_006860679.1</a> |
| PREDICTED: cysteine-rich secretory protein 3-like [Nannospalax g     | 30.3 | 30.3 | 80%  | 24  | 75% | <a href="#">gij674104542 XP_008823456.1</a> |
| PREDICTED: cysteine-rich secretory protein 3-like [Chinchilla lanig  | 30.3 | 30.3 | 80%  | 25  | 75% | <a href="#">gij533125534 XP_005377985.1</a> |
| hypothetical protein H105_06384 [Trichophyton soudanense CBS 4       | 30.3 | 30.3 | 60%  | 25  | 89% | <a href="#">gij607938037 EZF71419.1</a>     |
| hypothetical protein H106_06212 [Trichophyton rubrum CBS 735.8       | 30.3 | 30.3 | 60%  | 25  | 89% | <a href="#">gij607974736 EZG03991.1</a>     |
| hypothetical protein TERG_01735 [Trichophyton rubrum CBS 1188        | 30.3 | 30.3 | 60%  | 25  | 89% | <a href="#">gij327304641 XP_003237012.1</a> |
| hypothetical protein [Plasmodium yoelii yoelii 17XNL]                | 30.3 | 30.3 | 73%  | 26  | 82% | <a href="#">gij82541076 XP_724807.1</a>     |
| hypothetical protein YYC_03031 [Plasmodium yoelii 17X]               | 30.3 | 30.3 | 73%  | 26  | 82% | <a href="#">gij564278173 ETB59592.1</a>     |
| liver specific protein 1 [Plasmodium yoelii]                         | 30.3 | 30.3 | 73%  | 26  | 82% | <a href="#">gij675232727 CDU85100.1</a>     |
| PREDICTED: cysteine-rich secretory protein 3 [Echinops telfairi]     | 29.9 | 29.9 | 93%  | 33  | 64% | <a href="#">gij507620678 XP_004696622.1</a> |
| Tms1p [Rhizophagus irregularis DAOM 197198w]                         | 29.9 | 29.9 | 73%  | 34  | 82% | <a href="#">gij595438682 EXX52304.1</a>     |
| hypothetical protein LRAMOSA01456 [Absidia idahoensis var. therr     | 29.9 | 29.9 | 73%  | 34  | 82% | <a href="#">gij671692776 CDS07507.1</a>     |
| related to tms1 protein [Lichtheimia corymbifera JMRC:FSU:9682]      | 29.9 | 29.9 | 73%  | 34  | 82% | <a href="#">gij661183725 CDH53974.1</a>     |
| PREDICTED: tetraspanin-8 [Poecilia reticulata]                       | 29.5 | 29.5 | 93%  | 44  | 52% | <a href="#">gij658918509 XP_008399014.1</a> |
| PREDICTED: cysteine-rich secretory protein 3 [Ceratotherium simu     | 29.5 | 29.5 | 93%  | 45  | 57% | <a href="#">gij478500344 XP_004424494.1</a> |
| SAP domain-containing protein [Trichophyton equinum CBS 127.97       | 29.5 | 29.5 | 60%  | 47  | 89% | <a href="#">gij326477338 EGE01348.1</a>     |
| conserved hypothetical protein [Trichophyton verrucosum HKI 0517     | 29.5 | 29.5 | 60%  | 47  | 89% | <a href="#">gij302667025 XP_003025107.1</a> |
| hypothetical protein H109_04555 [Trichophyton interdigitale MR816    | 29.5 | 29.5 | 60%  | 47  | 89% | <a href="#">gij633046989 KDB23552.1</a>     |
| hypothetical protein H101_02809 [Trichophyton interdigitale H6]      | 29.5 | 29.5 | 60%  | 47  | 89% | <a href="#">gij607894816 EZF33634.1</a>     |
| hypothetical protein TESH_04396 [Trichophyton tonsurans CBS 11       | 29.5 | 29.5 | 60%  | 47  | 89% | <a href="#">gij326472966 EGD96975.1</a>     |
| conserved hypothetical protein [Arthroderma benhamiae CBS 1123       | 29.5 | 29.5 | 60%  | 47  | 89% | <a href="#">gij302501356 XP_003012670.1</a> |
| hypothetical protein D910_03959 [Dendroctonus ponderosae]            | 29.5 | 29.5 | 86%  | 47  | 77% | <a href="#">gij546675335 ERL86552.1</a>     |
| hypothetical protein YQE_02834 [Dendroctonus ponderosae]             | 29.5 | 29.5 | 86%  | 47  | 77% | <a href="#">gij478261334 ENN80748.1</a>     |
| Laminin subunit beta-1 [Zootermopsis nevadensis]                     | 29.5 | 53.4 | 93%  | 47  | 75% | <a href="#">gij646710327 KDR15871.1</a>     |
| hypothetical protein BC1G_16107 [Botryotinia fuckeliana B05.10]      | 29.1 | 29.1 | 73%  | 55  | 82% | <a href="#">gij154289331 XP_001545300.1</a> |
| cysteine-rich secretory protein 2 precursor [Xenopus (Silurana) trop | 29.1 | 29.1 | 93%  | 61  | 64% | <a href="#">gij56118480 NP_001008204.1</a>  |
| PREDICTED: cysteine-rich secretory protein 3 [Ictidomys tridecemli   | 29.1 | 29.1 | 80%  | 61  | 67% | <a href="#">gij532065565 XP_005318641.1</a> |
| PREDICTED: cysteine-rich secretory protein 3 [Jaculus jaculus]       | 29.1 | 29.1 | 86%  | 61  | 62% | <a href="#">gij507530833 XP_004649500.1</a> |
| hypothetical protein CAEBREN_14933 [Caenorhabditis brenneri]         | 28.6 | 28.6 | 73%  | 80  | 64% | <a href="#">gij341904208 EGT60041.1</a>     |

|                                                                                                           |      |      |     |     |     |                                             |
|-----------------------------------------------------------------------------------------------------------|------|------|-----|-----|-----|---------------------------------------------|
| <a href="#">hypothetical protein [Atopobium sp. oral taxon 810]</a>                                       | 28.2 | 28.2 | 60% | 83  | 89% | <a href="#">gil545384353 WP_021625327.1</a> |
| <a href="#">PREDICTED: cysteine-rich secretory protein 3-like [Eptesicus fuscus]</a>                      | 28.6 | 28.6 | 80% | 83  | 67% | <a href="#">gil641723213 XP_008151421.1</a> |
| <a href="#">PREDICTED: cysteine-rich secretory protein 3-like [Orycteropus afer]</a>                      | 28.6 | 28.6 | 86% | 83  | 69% | <a href="#">gil634835100 XP_007934348.1</a> |
| <a href="#">cysteine-rich secretory protein 3 precursor [Equus caballus]</a>                              | 28.6 | 28.6 | 93% | 83  | 57% | <a href="#">gil126352542 NP_001075343.1</a> |
| <a href="#">uncharacterized protein TOT_030000442 [Theileria orientalis strain]</a>                       | 28.6 | 28.6 | 73% | 86  | 73% | <a href="#">gil697892480 XP_009691480.1</a> |
| <a href="#">neuraminidase [Influenza A virus (A/turkey/France/03295/2003)(H9N2)]</a>                      | 28.2 | 28.2 | 60% | 102 | 89% | <a href="#">gil319412002 CAM29146.1</a>     |
| <a href="#">PREDICTED: cysteine-rich secretory protein 2-like [Leptonychotes]</a>                         | 28.2 | 28.2 | 80% | 113 | 67% | <a href="#">gil585150326 XP_006727639.1</a> |
| <a href="#">PREDICTED: cysteine-rich secretory protein 3 [Condylura cristata]</a>                         | 28.2 | 28.2 | 86% | 113 | 69% | <a href="#">gil507924694 XP_004673614.1</a> |
| <a href="#">PREDICTED: cysteine-rich secretory protein 3-like [Oryctolagus cuniculus]</a>                 | 28.2 | 28.2 | 93% | 114 | 57% | <a href="#">gil291396349 XP_002714427.1</a> |
| <a href="#">PREDICTED: cysteine-rich secretory protein 3 [Mustela putorius furo]</a>                      | 28.2 | 28.2 | 80% | 114 | 67% | <a href="#">gil511904944 XP_004771951.1</a> |
| <a href="#">neuraminidase [Influenza A virus (A/duck/Hong Kong/278/1978)(H2N2)]</a>                       | 28.2 | 28.2 | 60% | 117 | 89% | <a href="#">gil78097496 ABB20243.1</a>      |
| <a href="#">neuraminidase [Influenza A virus (A/duck/Hong Kong/562/1979)(H1N1)]</a>                       | 28.2 | 28.2 | 60% | 117 | 89% | <a href="#">gil125995193 BAF47128.1</a>     |
| <a href="#">neuraminidase [Influenza A virus (A/duck/Hong Kong/278/1978)(H2N2)]</a>                       | 28.2 | 28.2 | 60% | 117 | 89% | <a href="#">gil125995201 BAF47132.1</a>     |
| <a href="#">neuraminidase [Influenza A virus (A/duck/Hong Kong/562/1979)(H1N1)]</a>                       | 28.2 | 28.2 | 60% | 117 | 89% | <a href="#">gil115278151 ABI84470.1</a>     |
| <a href="#">PREDICTED: EGF-like module-containing mucin-like hormone receptor class 1B [Homo sapiens]</a> | 28.2 | 28.2 | 73% | 117 | 73% | <a href="#">gil542240884 XP_005457837.1</a> |
| <a href="#">PREDICTED: EGF-like module-containing mucin-like hormone receptor class 1B [Homo sapiens]</a> | 28.2 | 28.2 | 73% | 117 | 73% | <a href="#">gil499015500 XP_004558563.1</a> |
| <a href="#">PREDICTED: EGF-like module-containing mucin-like hormone receptor class 1B [Homo sapiens]</a> | 28.2 | 28.2 | 73% | 118 | 73% | <a href="#">gil548382986 XP_005734751.1</a> |
| <a href="#">PREDICTED: EGF-like module-containing mucin-like hormone receptor class 1B [Homo sapiens]</a> | 28.2 | 28.2 | 73% | 118 | 73% | <a href="#">gil554873208 XP_005946535.1</a> |
| <a href="#">unnamed protein product [Oikopleura dioica]</a>                                               | 28.2 | 28.2 | 80% | 119 | 69% | <a href="#">gil313236333 CBY11653.1</a>     |
| <a href="#">PREDICTED: serotriflin-like [Chinchilla lanigera]</a>                                         | 27.8 | 27.8 | 86% | 152 | 62% | <a href="#">gil533125536 XP_005377986.1</a> |
| <a href="#">Cysteine-rich secretory protein 2 [Pteropus alecto]</a>                                       | 27.8 | 27.8 | 80% | 153 | 67% | <a href="#">gil431838288 ELK00220.1</a>     |
| <a href="#">unnamed protein product [Oncorhynchus mykiss]</a>                                             | 27.8 | 27.8 | 73% | 155 | 64% | <a href="#">gil642099914 CDQ77198.1</a>     |
| <a href="#">PREDICTED: cysteine-rich venom protein tigrin-like [Xenopus (Silurana) laevis]</a>            | 27.8 | 27.8 | 80% | 155 | 67% | <a href="#">gil301608117 XP_002933626.1</a> |
| <a href="#">PREDICTED: cysteine-rich secretory protein 2 [Pteropus alecto]</a>                            | 27.8 | 27.8 | 80% | 155 | 67% | <a href="#">gil586556149 XP_006926517.1</a> |
| <a href="#">PREDICTED: cysteine-rich secretory protein 2 [Ictidomys tridecemlineatus]</a>                 | 27.8 | 27.8 | 80% | 155 | 67% | <a href="#">gil532065569 XP_005318643.1</a> |
| <a href="#">PREDICTED: furin-1-like [Neolamprologus brichardi]</a>                                        | 27.8 | 27.8 | 73% | 155 | 64% | <a href="#">gil584031494 XP_006810189.1</a> |
| <a href="#">putative uncharacterized protein [Faecalibacterium sp. CAG:74]</a>                            | 27.8 | 27.8 | 73% | 156 | 73% | <a href="#">gil548226737 WP_022445585.1</a> |

## Alignments

[Download](#) [GenPept](#) [Graphics](#) [Next](#) [Previous](#) [Descriptions](#)

unnamed protein product [Homo sapiens]

Sequence ID: [gil194384234|dbj|BAG64890.1](#) Length: 155 Number of Matches: 1

Range 1: 141 to 155 [GenPept](#) [Graphics](#) [Next Match](#) [Previous Match](#)

| Score          | Expect | Identities  | Positives   | Gaps     |
|----------------|--------|-------------|-------------|----------|
| 52.8 bits(117) | 7e-07  | 15/15(100%) | 15/15(100%) | 0/15(0%) |

Query 1 RDSCKASCNSNSIY 15  
 RDSCKASCNSNSIY  
 Sbjct 141 RDSCKASCNSNSIY 155

### Related Information

[Gene](#) - associated gene details

[Download](#) [GenPept](#) [Graphics](#) [Next](#) [Previous](#) [Descriptions](#)

PREDICTED: cysteine-rich secretory protein 3 isoform X2 [Chlorocebus sabaeus]

Sequence ID: [gil635094563|ref|XP\\_007970486.1](#) Length: 245 Number of Matches: 1

[See 1 more title\(s\)](#)

Range 1: 231 to 245 [GenPept](#) [Graphics](#) [Next Match](#) [Previous Match](#)

| Score          | Expect | Identities  | Positives   | Gaps     |
|----------------|--------|-------------|-------------|----------|
| 52.8 bits(117) | 9e-07  | 15/15(100%) | 15/15(100%) | 0/15(0%) |

### Related Information

[Gene](#) - associated gene details  
[Map Viewer](#) - aligned genomic context

Query 1 RDCKASCNCNSIY 15  
 Sbjct 231 RDCKASCNCNSIY 245

[Identical Proteins](#) - Proteins  
 identical to the subject

[Download](#) [GenPept](#) [Graphics](#)

[Next](#) [Previous](#) [Descriptions](#)

RecName: Full=Cysteine-rich secretory protein 3; Short=CRISP-3; AltName: Full=Specific granule protein of 28 kDa; Short=SGP28; Flags: Precursor [Homo sapiens]

Sequence ID: [gi|1706135|sp|P54108.1|CRIS3\\_HUMAN](#) Length: 245 Number of Matches: 1

[See 6 more title\(s\)](#)

Range 1: 231 to 245 [GenPept](#) [Graphics](#)

[Next Match](#) [Previous Match](#)

| Score          | Expect | Identities  | Positives   | Gaps     |
|----------------|--------|-------------|-------------|----------|
| 52.8 bits(117) | 9e-07  | 15/15(100%) | 15/15(100%) | 0/15(0%) |

Query 1 RDCKASCNCNSIY 15  
 Sbjct 231 RDCKASCNCNSIY 245

**Related Information**

[Gene](#) - associated gene details  
[Identical Proteins](#) - Proteins  
 identical to the subject

[Download](#) [GenPept](#) [Graphics](#)

[Next](#) [Previous](#) [Descriptions](#)

SGP28 protein [Homo sapiens]

Sequence ID: [gi|1213613|emb|CAA63984.1](#) Length: 245 Number of Matches: 1

[See 2 more title\(s\)](#)

Range 1: 231 to 245 [GenPept](#) [Graphics](#)

[Next Match](#) [Previous Match](#)

| Score          | Expect | Identities  | Positives   | Gaps     |
|----------------|--------|-------------|-------------|----------|
| 52.8 bits(117) | 9e-07  | 15/15(100%) | 15/15(100%) | 0/15(0%) |

Query 1 RDCKASCNCNSIY 15  
 Sbjct 231 RDCKASCNCNSIY 245

**Related Information**

[Gene](#) - associated gene details  
[Identical Proteins](#) - Proteins  
 identical to the subject

[Download](#) [GenPept](#) [Graphics](#)

[Next](#) [Previous](#) [Descriptions](#)

PREDICTED: cysteine-rich secretory protein 3 [Papio anubis]

Sequence ID: [gi|402867229|ref|XP\\_003897768.1](#) Length: 245 Number of Matches: 1

[See 4 more title\(s\)](#)

Range 1: 231 to 245 [GenPept](#) [Graphics](#)

[Next Match](#) [Previous Match](#)

| Score          | Expect | Identities  | Positives   | Gaps     |
|----------------|--------|-------------|-------------|----------|
| 52.8 bits(117) | 9e-07  | 15/15(100%) | 15/15(100%) | 0/15(0%) |

Query 1 RDCKASCNCNSIY 15  
 Sbjct 231 RDCKASCNCNSIY 245

**Related Information**

[Gene](#) - associated gene details  
[Map Viewer](#) - aligned genomic context  
[Identical Proteins](#) - Proteins  
 identical to the subject

BLAST is a registered trademark of the National Library of Medicine.

▶ NCBI/ BLAST/ blastp suite/ Formatting Results - BVDCCBR501R

**i** Your search parameters were adjusted to search for a short input sequence.

[Edit and Resubmit](#) [Save Search Strategies](#) ▶ [Formatting options](#) ▶ [Download](#) [YouTube](#) [How to read this page](#) [Blast report description](#)

### DBH\_RSLEAIDGSLQMGLQRV\_Mod

RID [BVDCCBR501R](#) (Expires on 01-21 08:55 am)

**Query ID** |cl|391439  
**Description** None  
**Molecule type** amino acid  
**Query Length** 18

**Database Name** nr  
**Description** All non-redundant GenBank CDS translations+PDB+SwissProt+PIR+PRF excluding environmental samples from WGS projects  
**Program** BLASTP 2.2.30+ ▶ [Citation](#)

Other reports: ▶ [Search Summary](#) [[Taxonomy reports](#)] [[Distance tree of results](#)] [[Multiple alignment](#)]

### **Graphic Summary**

[Show Conserved Domains](#)

No putative conserved domains have been detected

Distribution of 100 Blast Hits on the Query Sequence

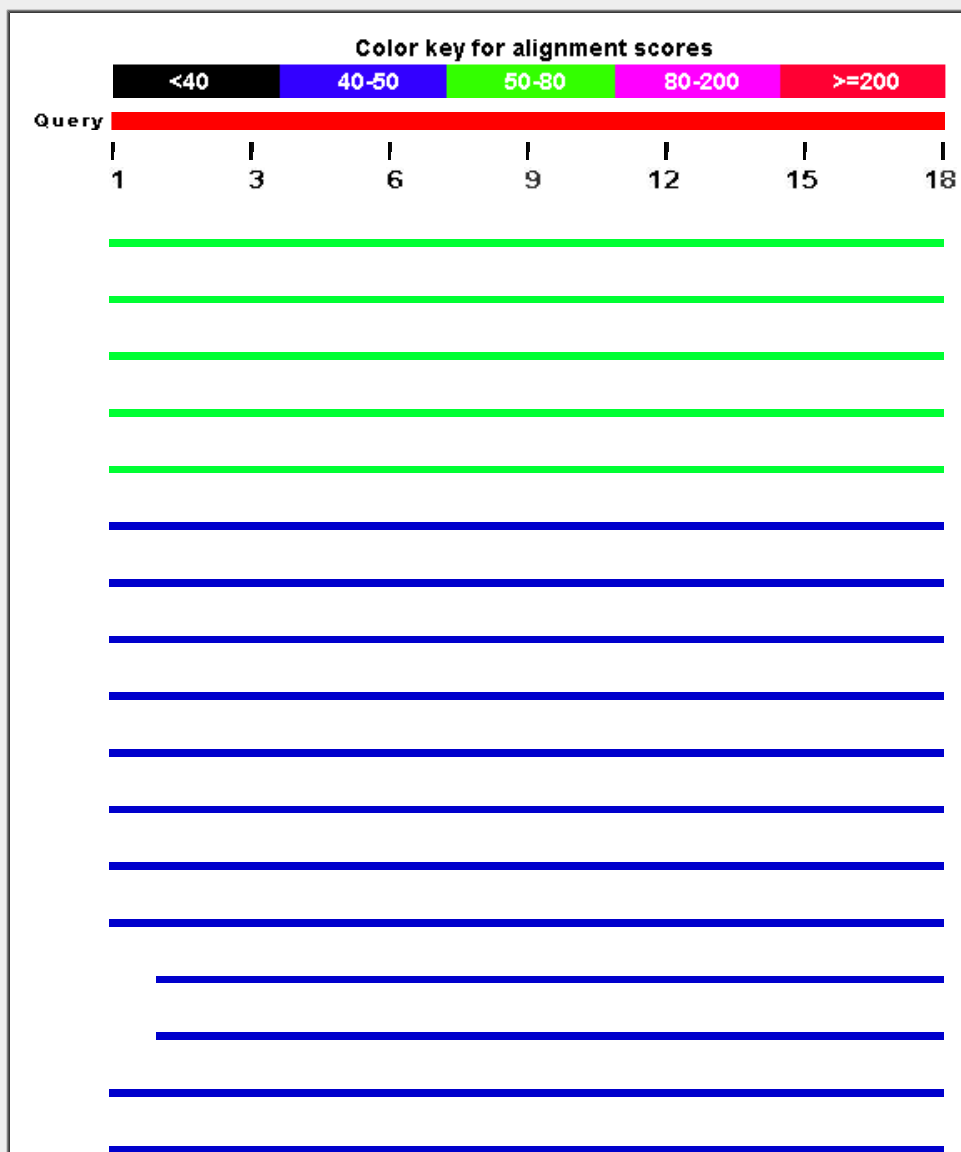

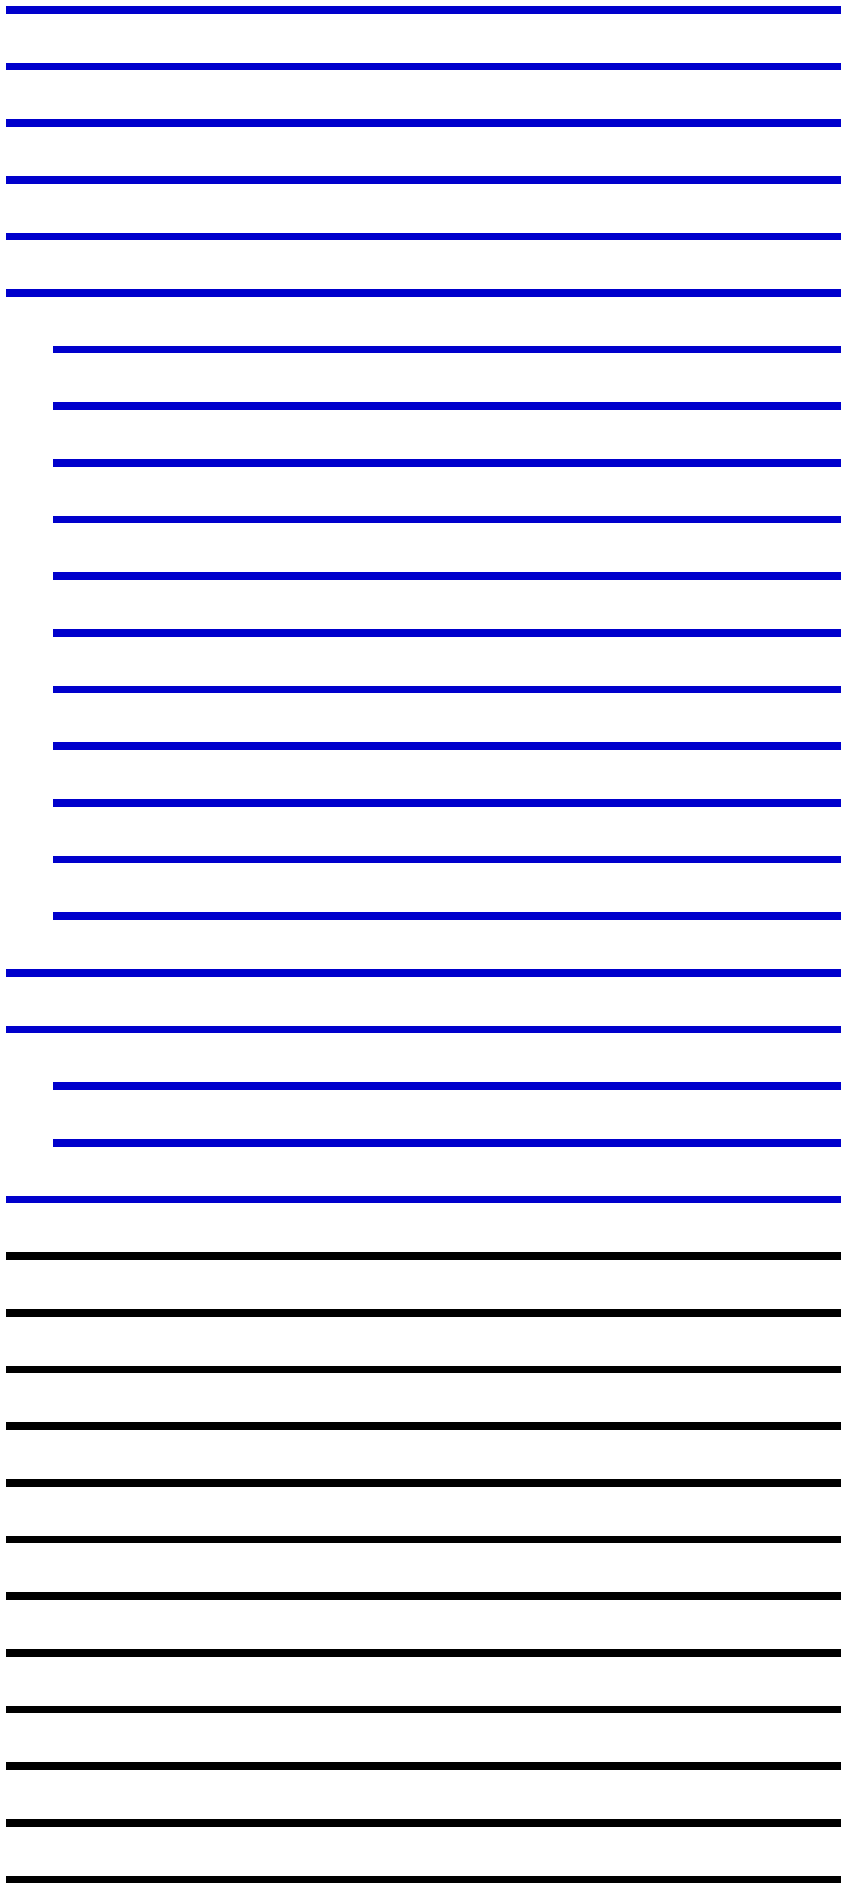

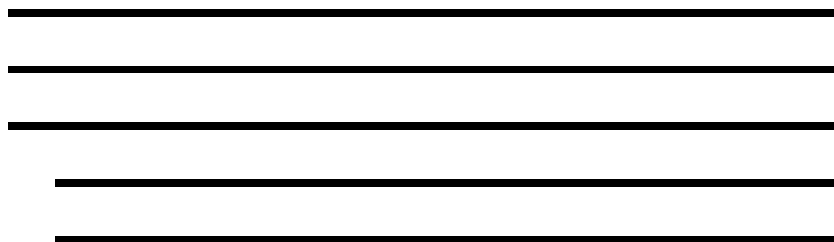

## Descriptions

### Sequences producing significant alignments:

Select: [All](#) [None](#) Selected:0

[Alignments](#)
[Download](#)
[GenPept](#)
[Graphics](#)
[Distance tree of results](#)
[Multiple alignment](#)

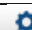

| Description                                                                            | Max score | Total score | Query cover | E value | Ident | Accession                      |
|----------------------------------------------------------------------------------------|-----------|-------------|-------------|---------|-------|--------------------------------|
| <a href="#">dopamine beta-hydroxylase preprotein (AA -25 to 578) [Homo sapiens]</a>    | 56.2      | 56.2        | 100%        | 1e-07   | 94%   | <a href="#">CAA31631.1</a>     |
| <a href="#">DBH protein [Homo sapiens]</a>                                             | 56.2      | 56.2        | 100%        | 1e-07   | 94%   | <a href="#">AAH17174.1</a>     |
| <a href="#">unnamed protein product [Homo sapiens]</a>                                 | 56.2      | 56.2        | 100%        | 1e-07   | 94%   | <a href="#">CAA68285.1</a>     |
| <a href="#">Homo sapiens dopamine beta-hydroxylase (dopamine beta-monooxygenase)</a>   | 56.2      | 56.2        | 100%        | 1e-07   | 94%   | <a href="#">AAP36138.1</a>     |
| <a href="#">dopamine beta-hydroxylase precursor [Homo sapiens]</a>                     | 56.2      | 56.2        | 100%        | 1e-07   | 94%   | <a href="#">NP_000778.3</a>    |
| <a href="#">PREDICTED: dopamine beta-hydroxylase isoform X2 [Pan troglodytes]</a>      | 49.8      | 49.8        | 100%        | 2e-05   | 89%   | <a href="#">XP_009455932.1</a> |
| <a href="#">PREDICTED: dopamine beta-hydroxylase [Gorilla gorilla gorilla]</a>         | 49.8      | 49.8        | 100%        | 2e-05   | 89%   | <a href="#">XP_004048873.1</a> |
| <a href="#">PREDICTED: dopamine beta-hydroxylase [Pongo abelii]</a>                    | 49.8      | 49.8        | 100%        | 2e-05   | 89%   | <a href="#">XP_002820399.1</a> |
| <a href="#">PREDICTED: dopamine beta-hydroxylase isoform X1 [Pan troglodytes]</a>      | 49.8      | 49.8        | 100%        | 2e-05   | 89%   | <a href="#">XP_520341.2</a>    |
| <a href="#">PREDICTED: dopamine beta-hydroxylase isoform 1 [Nomascus leucogenys]</a>   | 46.4      | 46.4        | 100%        | 2e-04   | 83%   | <a href="#">XP_003276787.1</a> |
| <a href="#">dopamine beta-hydroxylase [Sus scrofa]</a>                                 | 44.8      | 44.8        | 100%        | 8e-04   | 83%   | <a href="#">AAZ30054.1</a>     |
| <a href="#">PREDICTED: dopamine beta-hydroxylase [Sus scrofa]</a>                      | 44.8      | 44.8        | 100%        | 8e-04   | 83%   | <a href="#">XP_001927246.3</a> |
| <a href="#">PREDICTED: dopamine beta-hydroxylase [Ursus maritimus]</a>                 | 44.8      | 44.8        | 100%        | 8e-04   | 83%   | <a href="#">XP_008707666.1</a> |
| <a href="#">PREDICTED: dopamine beta-hydroxylase [Saimiri boliviensis boliviensis]</a> | 43.5      | 43.5        | 94%         | 0.002   | 82%   | <a href="#">XP_003941430.1</a> |
| <a href="#">PREDICTED: LOW QUALITY PROTEIN: dopamine beta-hydroxylase [Callithr</a>    | 43.5      | 43.5        | 94%         | 0.002   | 82%   | <a href="#">XP_003732129.1</a> |
| <a href="#">PREDICTED: dopamine beta-hydroxylase [Sorex araneus]</a>                   | 43.1      | 43.1        | 100%        | 0.003   | 78%   | <a href="#">XP_004613476.1</a> |
| <a href="#">PREDICTED: dopamine beta-hydroxylase [Tupaia chinensis]</a>                | 42.6      | 42.6        | 100%        | 0.004   | 83%   | <a href="#">XP_006164329.1</a> |
| <a href="#">hypothetical protein EGM_06549 [Macaca fascicularis]</a>                   | 42.2      | 42.2        | 100%        | 0.005   | 78%   | <a href="#">EHH56997.1</a>     |
| <a href="#">hypothetical protein EGK_07229 [Macaca mulatta]</a>                        | 42.2      | 42.2        | 100%        | 0.005   | 78%   | <a href="#">EHH23697.1</a>     |
| <a href="#">PREDICTED: dopamine beta-hydroxylase [Felis catus]</a>                     | 42.2      | 42.2        | 100%        | 0.005   | 78%   | <a href="#">XP_003996085.1</a> |
| <a href="#">PREDICTED: dopamine beta-hydroxylase [Macaca fascicularis]</a>             | 42.2      | 42.2        | 100%        | 0.005   | 78%   | <a href="#">XP_005580554.1</a> |
| <a href="#">PREDICTED: dopamine beta-hydroxylase [Papio anubis]</a>                    | 42.2      | 42.2        | 100%        | 0.005   | 78%   | <a href="#">XP_003911179.1</a> |
| <a href="#">dopamine beta-hydroxylase [Macaca mulatta]</a>                             | 42.2      | 42.2        | 100%        | 0.005   | 78%   | <a href="#">NP_001265274.1</a> |
| <a href="#">dopamine beta-hydroxylase [Canis lupus familiaris]</a>                     | 42.2      | 42.2        | 94%         | 0.005   | 82%   | <a href="#">NP_001005263.1</a> |
| <a href="#">PREDICTED: dopamine beta-hydroxylase [Trichechus manatus latirostris]</a>  | 41.4      | 41.4        | 94%         | 0.010   | 82%   | <a href="#">XP_004388724.1</a> |
| <a href="#">PREDICTED: dopamine beta-hydroxylase [Odobenus rosmarus divergens]</a>     | 41.4      | 41.4        | 94%         | 0.010   | 82%   | <a href="#">XP_004411441.1</a> |
| <a href="#">PREDICTED: dopamine beta-hydroxylase [Fukomys damarensis]</a>              | 41.4      | 41.4        | 94%         | 0.010   | 82%   | <a href="#">XP_010607223.1</a> |
| <a href="#">PREDICTED: dopamine beta-hydroxylase [Orycteropus afer afer]</a>           | 41.4      | 41.4        | 94%         | 0.010   | 82%   | <a href="#">XP_007952494.1</a> |
| <a href="#">PREDICTED: dopamine beta-hydroxylase [Heterocephalus glaber]</a>           | 41.4      | 41.4        | 94%         | 0.010   | 82%   | <a href="#">XP_004849647.1</a> |

|                                                                                        |      |      |      |       |     |                                |
|----------------------------------------------------------------------------------------|------|------|------|-------|-----|--------------------------------|
| <a href="#">PREDICTED: dopamine beta-hydroxylase [Heterocephalus glaber]</a>           | 41.4 | 41.4 | 94%  | 0.010 | 82% | <a href="#">XP_004888900.1</a> |
| <a href="#">PREDICTED: dopamine beta-hydroxylase [Otolemur garnettii]</a>              | 41.4 | 41.4 | 94%  | 0.010 | 82% | <a href="#">XP_003795019.1</a> |
| <a href="#">PREDICTED: dopamine beta-hydroxylase [Cavia porcellus]</a>                 | 41.4 | 41.4 | 94%  | 0.010 | 82% | <a href="#">XP_003473049.1</a> |
| <a href="#">Dopamine beta-hydroxylase [Fukomys damarensis]</a>                         | 41.4 | 41.4 | 94%  | 0.010 | 82% | <a href="#">KFO21516.1</a>     |
| <a href="#">Dopamine beta-hydroxylase [Heterocephalus glaber]</a>                      | 41.4 | 41.4 | 94%  | 0.010 | 82% | <a href="#">EHB05593.1</a>     |
| <a href="#">PREDICTED: dopamine beta-hydroxylase [Pantholops hodgsonii]</a>            | 40.5 | 40.5 | 100% | 0.019 | 78% | <a href="#">XP_005984927.1</a> |
| <a href="#">PREDICTED: dopamine beta-hydroxylase [Bos mutus]</a>                       | 40.5 | 40.5 | 100% | 0.019 | 78% | <a href="#">XP_005897496.1</a> |
| <a href="#">PREDICTED: dopamine beta-hydroxylase-like [Ailuropoda melanoleuca]</a>     | 40.5 | 40.5 | 94%  | 0.019 | 82% | <a href="#">XP_002920753.1</a> |
| <a href="#">hypothetical protein PANDA_009520 [Ailuropoda melanoleuca]</a>             | 40.5 | 40.5 | 94%  | 0.019 | 82% | <a href="#">EFB24902.1</a>     |
| <a href="#">Dopamine beta-hydroxylase [Bos mutus]</a>                                  | 40.5 | 40.5 | 100% | 0.019 | 78% | <a href="#">ELR55184.1</a>     |
| <a href="#">PREDICTED: LOW QUALITY PROTEIN: dopamine beta-hydroxylase (dopam</a>       | 39.7 | 39.7 | 100% | 0.035 | 72% | <a href="#">XP_007099357.1</a> |
| <a href="#">PREDICTED: dopamine beta-hydroxylase [Bubalus bubalis]</a>                 | 39.7 | 39.7 | 100% | 0.035 | 78% | <a href="#">XP_006062530.1</a> |
| <a href="#">PREDICTED: dopamine beta-hydroxylase-like [Vicugna pacos]</a>              | 39.2 | 39.2 | 100% | 0.046 | 72% | <a href="#">XP_006219741.1</a> |
| <a href="#">dopamine beta-hydroxylase [Bos taurus]</a>                                 | 39.2 | 39.2 | 100% | 0.048 | 72% | <a href="#">AAA30491.1</a>     |
| <a href="#">dopamine beta-hydroxylase [Camelus ferus]</a>                              | 39.2 | 39.2 | 100% | 0.048 | 72% | <a href="#">EPY84719.1</a>     |
| <a href="#">PREDICTED: dopamine beta-hydroxylase [Camelus ferus]</a>                   | 39.2 | 39.2 | 100% | 0.048 | 72% | <a href="#">XP_006179943.1</a> |
| <a href="#">PREDICTED: dopamine beta-hydroxylase [Camelus dromedarius]</a>             | 39.2 | 39.2 | 100% | 0.048 | 72% | <a href="#">XP_010998455.1</a> |
| <a href="#">PREDICTED: dopamine beta-hydroxylase [Camelus bactrianus]</a>              | 39.2 | 39.2 | 100% | 0.048 | 72% | <a href="#">XP_010952799.1</a> |
| <a href="#">dopamine beta-hydroxylase precursor (EC 1.14.17.1) [Bos taurus]</a>        | 39.2 | 39.2 | 100% | 0.048 | 72% | <a href="#">AAA30490.1</a>     |
| <a href="#">dopamine beta-hydroxylase precursor [Bos taurus]</a>                       | 39.2 | 39.2 | 100% | 0.048 | 72% | <a href="#">AAD09829.1</a>     |
| <a href="#">dopamine beta-hydroxylase precursor [Bos taurus]</a>                       | 39.2 | 39.2 | 100% | 0.048 | 72% | <a href="#">ABG81467.1</a>     |
| <a href="#">PREDICTED: dopamine beta-hydroxylase [Bison bison bison]</a>               | 39.2 | 39.2 | 100% | 0.048 | 72% | <a href="#">XP_010831066.1</a> |
| <a href="#">RecName: Full=Dopamine beta-hydroxylase; AltName: Full=Dopamine beta-n</a> | 39.2 | 39.2 | 100% | 0.048 | 72% | <a href="#">P15101.2</a>       |
| <a href="#">dopamine beta-hydroxylase precursor [Bos taurus]</a>                       | 39.2 | 39.2 | 100% | 0.048 | 72% | <a href="#">NP_851338.1</a>    |
| <a href="#">PREDICTED: dopamine beta-hydroxylase [Nannospalax galii]</a>               | 39.2 | 39.2 | 100% | 0.048 | 78% | <a href="#">XP_008842140.1</a> |
| <a href="#">PREDICTED: dopamine beta-hydroxylase [Rhinopithecus roxellana]</a>         | 38.8 | 38.8 | 94%  | 0.066 | 76% | <a href="#">XP_010371175.1</a> |
| <a href="#">PREDICTED: dopamine beta-hydroxylase isoform X2 [Chlorocebus sabaeus]</a>  | 38.8 | 38.8 | 94%  | 0.066 | 76% | <a href="#">XP_008003949.1</a> |
| <a href="#">PREDICTED: dopamine beta-hydroxylase [Ochotona princeps]</a>               | 38.8 | 38.8 | 100% | 0.066 | 72% | <a href="#">XP_004593508.1</a> |
| <a href="#">PREDICTED: dopamine beta-hydroxylase isoform X1 [Chlorocebus sabaeus]</a>  | 38.8 | 38.8 | 94%  | 0.066 | 76% | <a href="#">XP_008003948.1</a> |
| <a href="#">PREDICTED: LOW QUALITY PROTEIN: dopamine beta-hydroxylase [Tursio</a>      | 38.4 | 38.4 | 94%  | 0.090 | 76% | <a href="#">XP_004314127.1</a> |
| <a href="#">PREDICTED: dopamine beta-hydroxylase [Lipotes vexillifer]</a>              | 38.4 | 38.4 | 94%  | 0.090 | 76% | <a href="#">XP_007453141.1</a> |
| <a href="#">PREDICTED: dopamine beta-hydroxylase [Balaenoptera acutorostrata scamn</a> | 38.4 | 38.4 | 94%  | 0.090 | 76% | <a href="#">XP_007194475.1</a> |
| <a href="#">PREDICTED: dopamine beta-hydroxylase [Physeter catodon]</a>                | 38.4 | 38.4 | 94%  | 0.090 | 76% | <a href="#">XP_007111132.1</a> |
| <a href="#">PREDICTED: dopamine beta-hydroxylase [Mustela putorius furo]</a>           | 38.4 | 38.4 | 94%  | 0.090 | 76% | <a href="#">XP_004757456.1</a> |
| <a href="#">PREDICTED: dopamine beta-hydroxylase [Orcinus orca]</a>                    | 38.4 | 38.4 | 94%  | 0.090 | 76% | <a href="#">XP_004285054.1</a> |
| <a href="#">PREDICTED: dopamine beta-hydroxylase [Galeopterus variegatus]</a>          | 38.4 | 38.4 | 94%  | 0.090 | 76% | <a href="#">XP_008578902.1</a> |
| <a href="#">PREDICTED: dopamine beta-hydroxylase [Microtus ochrogaster]</a>            | 38.4 | 38.4 | 94%  | 0.090 | 76% | <a href="#">XP_005346784.1</a> |
| <a href="#">dopamine beta-hydroxylase [Mus musculus]</a>                               | 38.4 | 38.4 | 94%  | 0.090 | 76% | <a href="#">NP_620392.2</a>    |
| <a href="#">PREDICTED: dopamine beta-hydroxylase [Mesocricetus auratus]</a>            | 38.4 | 38.4 | 94%  | 0.090 | 76% | <a href="#">XP_005085459.1</a> |
| <a href="#">PREDICTED: dopamine beta-hydroxylase [Leptonychotes weddellii]</a>         | 38.0 | 38.0 | 94%  | 0.12  | 76% | <a href="#">XP_006746395.1</a> |
| <a href="#">Dopamine beta-hydroxylase [Pteropus alecto]</a>                            | 38.0 | 38.0 | 94%  | 0.12  | 76% | <a href="#">ELK07341.1</a>     |
| <a href="#">PREDICTED: dopamine beta-hydroxylase [Chinchilla lanigera]</a>             | 38.0 | 38.0 | 94%  | 0.12  | 76% | <a href="#">XP_005408512.1</a> |
| <a href="#">PREDICTED: LOW QUALITY PROTEIN: dopamine beta-hydroxylase [Pterop</a>      | 38.0 | 38.0 | 94%  | 0.12  | 76% | <a href="#">XP_006918159.1</a> |
| <a href="#">PREDICTED: dopamine beta-hydroxylase [Chrysochloris asiatica]</a>          | 37.5 | 37.5 | 94%  | 0.17  | 76% | <a href="#">XP_006863887.1</a> |
| <a href="#">PREDICTED: dopamine beta-hydroxylase [Ceratotherium simum simum]</a>       | 37.5 | 37.5 | 94%  | 0.17  | 76% | <a href="#">XP_004423687.1</a> |

|                                                                                        |      |      |      |      |     |                                |
|----------------------------------------------------------------------------------------|------|------|------|------|-----|--------------------------------|
| <a href="#">PREDICTED: dopamine beta-hydroxylase [Octodon degus]</a>                   | 37.5 | 37.5 | 94%  | 0.17 | 76% | <a href="#">XP_004640601.1</a> |
| <a href="#">PREDICTED: dopamine beta-hydroxylase [Myotis brandtii]</a>                 | 37.1 | 37.1 | 94%  | 0.23 | 76% | <a href="#">XP_005871861.1</a> |
| <a href="#">PREDICTED: dopamine beta-hydroxylase [Capra hircus]</a>                    | 37.1 | 37.1 | 94%  | 0.23 | 76% | <a href="#">XP_005687409.1</a> |
| <a href="#">PREDICTED: dopamine beta-hydroxylase [Eptesicus fuscus]</a>                | 37.1 | 37.1 | 94%  | 0.23 | 76% | <a href="#">XP_008150706.1</a> |
| <a href="#">PREDICTED: dopamine beta-hydroxylase [Loxodonta africana]</a>              | 36.7 | 36.7 | 94%  | 0.31 | 76% | <a href="#">XP_003420517.1</a> |
| <a href="#">PREDICTED: dopamine beta-hydroxylase [Ornithorhynchus anatinus]</a>        | 36.3 | 36.3 | 88%  | 0.43 | 75% | <a href="#">XP_001505587.2</a> |
| <a href="#">PREDICTED: dopamine beta-hydroxylase [Elephantulus edwardii]</a>           | 35.4 | 35.4 | 94%  | 0.80 | 76% | <a href="#">XP_006900619.1</a> |
| <a href="#">PREDICTED: dopamine beta-hydroxylase [Sarcophilus harrisii]</a>            | 35.4 | 35.4 | 94%  | 0.80 | 71% | <a href="#">XP_003757519.1</a> |
| <a href="#">PREDICTED: dopamine beta-hydroxylase [Equus przewalskii]</a>               | 35.0 | 35.0 | 94%  | 1.1  | 71% | <a href="#">XP_008537782.1</a> |
| <a href="#">PREDICTED: dopamine beta-hydroxylase [Jaculus jaculus]</a>                 | 35.0 | 35.0 | 83%  | 1.1  | 80% | <a href="#">XP_004654117.1</a> |
| <a href="#">dopamine beta-hydroxylase [Equus caballus]</a>                             | 35.0 | 35.0 | 94%  | 1.1  | 71% | <a href="#">NP_001075239.1</a> |
| <a href="#">PREDICTED: dopamine beta-hydroxylase [Myotis davidii]</a>                  | 34.1 | 34.1 | 88%  | 2.0  | 75% | <a href="#">XP_006776660.1</a> |
| <a href="#">PREDICTED: dopamine beta-hydroxylase [Chrysemys picta bellii]</a>          | 34.1 | 34.1 | 100% | 2.0  | 67% | <a href="#">XP_005293531.2</a> |
| <a href="#">PREDICTED: dopamine beta-hydroxylase [Serinus canaria]</a>                 | 34.1 | 34.1 | 100% | 2.0  | 67% | <a href="#">XP_009091623.1</a> |
| <a href="#">RecName: Full=Dopamine beta-hydroxylase; AltName: Full=Dopamine beta-n</a> | 34.1 | 34.1 | 94%  | 2.0  | 71% | <a href="#">Q05754.1</a>       |
| <a href="#">dopamine beta hydroxylase [Rattus norvegicus]</a>                          | 34.1 | 34.1 | 94%  | 2.0  | 71% | <a href="#">EDL93440.1</a>     |
| <a href="#">dopamine beta-hydroxylase [Rattus norvegicus]</a>                          | 34.1 | 34.1 | 94%  | 2.0  | 71% | <a href="#">NP_037290.2</a>    |
| <a href="#">Dopamine beta-hydroxylase [Tauraco erythrolophus]</a>                      | 33.3 | 33.3 | 100% | 3.7  | 67% | <a href="#">KFV13733.1</a>     |
| <a href="#">PREDICTED: LOW QUALITY PROTEIN: dopamine beta-hydroxylase [Taurac</a>      | 33.3 | 33.3 | 100% | 3.7  | 67% | <a href="#">XP_009980321.1</a> |
| <a href="#">PREDICTED: dopamine beta-hydroxylase [Peromyscus maniculatus bairdii]</a>  | 33.3 | 33.3 | 94%  | 3.7  | 71% | <a href="#">XP_006993176.1</a> |
| <a href="#">PREDICTED: dopamine beta-hydroxylase [Ictidomys tridecemlineatus]</a>      | 32.9 | 32.9 | 94%  | 5.1  | 71% | <a href="#">XP_005337059.1</a> |
| <a href="#">PREDICTED: dopamine beta-hydroxylase [Tarsius syrichta]</a>                | 32.9 | 32.9 | 94%  | 5.1  | 71% | <a href="#">XP_008068990.1</a> |
| <a href="#">PREDICTED: dopamine beta-hydroxylase isoform X2 [Cricetulus griseus]</a>   | 32.9 | 32.9 | 94%  | 5.1  | 76% | <a href="#">XP_007618621.1</a> |
| <a href="#">dopamine beta-hydroxylase [Mus musculus]</a>                               | 32.9 | 32.9 | 94%  | 5.1  | 71% | <a href="#">AAB24330.1</a>     |
| <a href="#">dopamine beta-hydroxylase-like protein [Cricetulus griseus]</a>            | 32.9 | 32.9 | 94%  | 5.1  | 76% | <a href="#">ERE71366.1</a>     |
| <a href="#">dopamine beta-hydroxylase-like protein [Cricetulus griseus]</a>            | 32.9 | 32.9 | 94%  | 5.1  | 76% | <a href="#">ERE71365.1</a>     |

## Alignments

Download GenPept Graphics

Next Previous Descriptions

dopamine beta-hydroxylase preprotein (AA -25 to 578) [Homo sapiens]

Sequence ID: [emb|CAA31631.1](#) Length: 603 Number of Matches: 1

See 1 more title(s)

Range 1: 164 to 181 GenPept Graphics

Next Match Previous Match

| Score          | Expect | Identities | Positives   | Gaps     |
|----------------|--------|------------|-------------|----------|
| 56.2 bits(125) | 1e-07  | 17/18(94%) | 18/18(100%) | 0/18(0%) |

Query 1 RSLEAIDGSLQMGLQRV 18  
 RSLEAI+GSGLQMGLQRV  
 Sbjct 164 RSLEAINGSGLQMGLQRV 181

### Related Information

[Gene](#) - associated gene details  
[Identical Proteins](#) - Proteins identical to the subject

Download GenPept Graphics

Next Previous Descriptions

DBH protein [Homo sapiens]

Sequence ID: [gb|AAH17174.1](#) Length: 603 Number of Matches: 1

See 3 more title(s)

Range 1: 164 to 181 GenPept Graphics

Next Match Previous Match

### Related Information

[Gene](#) - associated gene details



| Score          | Expect | Identities | Positives   | Gaps     |
|----------------|--------|------------|-------------|----------|
| 56.2 bits(125) | 1e-07  | 17/18(94%) | 18/18(100%) | 0/18(0%) |

[Identical Proteins](#) - Proteins identical to the subject

Query 1 RSLEAIDGSGLQMGLQRV 18  
 RSLEAI+GSGLQMGLQRV  
 Sbjct 164 RSLEAINGSGLQMGLQRV 181

[Download](#) [GenPept](#) [Graphics](#)

[Next](#) [Previous](#) [Descriptions](#)

unnamed protein product [Homo sapiens]

Sequence ID: [emb|CAA68285.1|](#) Length: 603 Number of Matches: 1

Range 1: 164 to 181 [GenPept](#) [Graphics](#)

[Next Match](#) [Previous Match](#)

| Score          | Expect | Identities | Positives   | Gaps     |
|----------------|--------|------------|-------------|----------|
| 56.2 bits(125) | 1e-07  | 17/18(94%) | 18/18(100%) | 0/18(0%) |

Query 1 RSLEAIDGSGLQMGLQRV 18  
 RSLEAI+GSGLQMGLQRV  
 Sbjct 164 RSLEAINGSGLQMGLQRV 181

**Related Information**

[Gene](#) - associated gene details

[Download](#) [GenPept](#) [Graphics](#)

[Next](#) [Previous](#) [Descriptions](#)

Homo sapiens dopamine beta-hydroxylase (dopamine beta-monoxygenase) [synthetic construct]

Sequence ID: [gb|AAP36138.1|](#) Length: 604 Number of Matches: 1

[See 2 more title\(s\)](#)

Range 1: 164 to 181 [GenPept](#) [Graphics](#)

[Next Match](#) [Previous Match](#)

| Score          | Expect | Identities | Positives   | Gaps     |
|----------------|--------|------------|-------------|----------|
| 56.2 bits(125) | 1e-07  | 17/18(94%) | 18/18(100%) | 0/18(0%) |

Query 1 RSLEAIDGSGLQMGLQRV 18  
 RSLEAI+GSGLQMGLQRV  
 Sbjct 164 RSLEAINGSGLQMGLQRV 181

**Related Information**

[Identical Proteins](#) - Proteins identical to the subject

[Download](#) [GenPept](#) [Graphics](#)

[Next](#) [Previous](#) [Descriptions](#)

dopamine beta-hydroxylase precursor [Homo sapiens]

Sequence ID: [ref|NP\\_000778.3|](#) Length: 617 Number of Matches: 1

[See 2 more title\(s\)](#)

Range 1: 178 to 195 [GenPept](#) [Graphics](#)

[Next Match](#) [Previous Match](#)

| Score          | Expect | Identities | Positives   | Gaps     |
|----------------|--------|------------|-------------|----------|
| 56.2 bits(125) | 1e-07  | 17/18(94%) | 18/18(100%) | 0/18(0%) |

Query 1 RSLEAIDGSGLQMGLQRV 18  
 RSLEAI+GSGLQMGLQRV  
 Sbjct 178 RSLEAINGSGLQMGLQRV 195

**Related Information**

[Gene](#) - associated gene details  
[UniGene](#) - clustered expressed sequence tags  
[PubChem BioAssay](#) - bioactivity screening  
[Map Viewer](#) - aligned genomic context  
[Identical Proteins](#) - Proteins identical to the subject

BLAST is a registered trademark of the National Library of Medicine.

NCBI/ BLAST/ blastp suite/ Formatting Results - B9CS4HMC01R

**i** Your search parameters were adjusted to search for a short input sequence.

[Edit and Resubmit](#) [Save Search Strategies](#) [▶ Formatting options](#) [▶ Download](#)

[YouTube](#) [How to read this page](#) [Blast report description](#)

**DBH\_RSLEAINSGQLQMGLQRV\_NonMod**

RID [B9CS4HMC01R](#) (Expires on 01-14 12:54 pm)

**Query ID** |cl|195719  
**Description** None  
**Molecule type** amino acid  
**Query Length** 18

**Database Name** nr  
**Description** All non-redundant GenBank CDS translations+PDB+SwissProt+PIR excluding environmental samples from WGS projects  
**Program** BLASTP 2.2.30+ [▶ Citation](#)

Other reports: [▶ Search Summary](#) [\[Taxonomy reports\]](#) [\[Distance tree of results\]](#) [\[Multiple alignment\]](#)

**Graphic Summary**

[Show Conserved Domains](#)

No putative conserved domains have been detected

Distribution of 100 Blast Hits on the Query Sequence

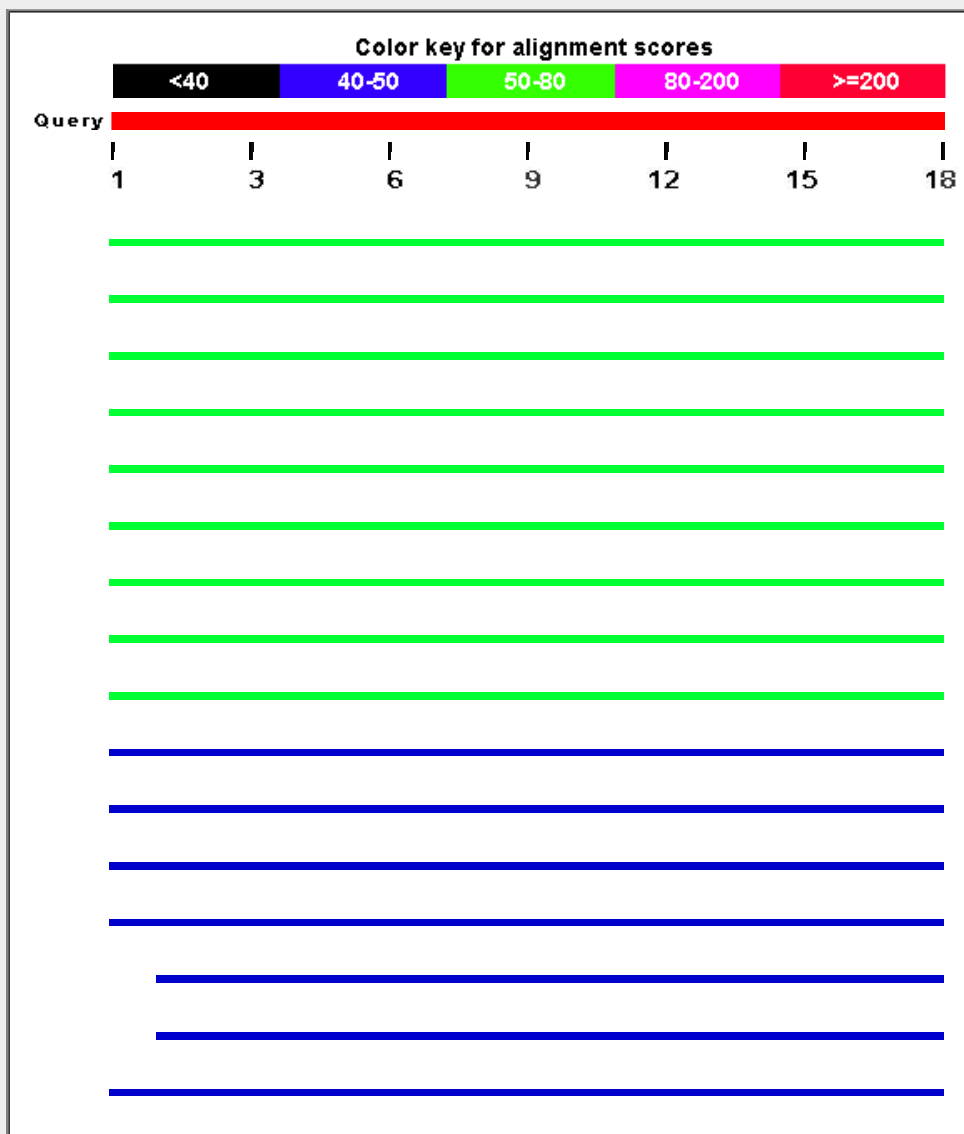

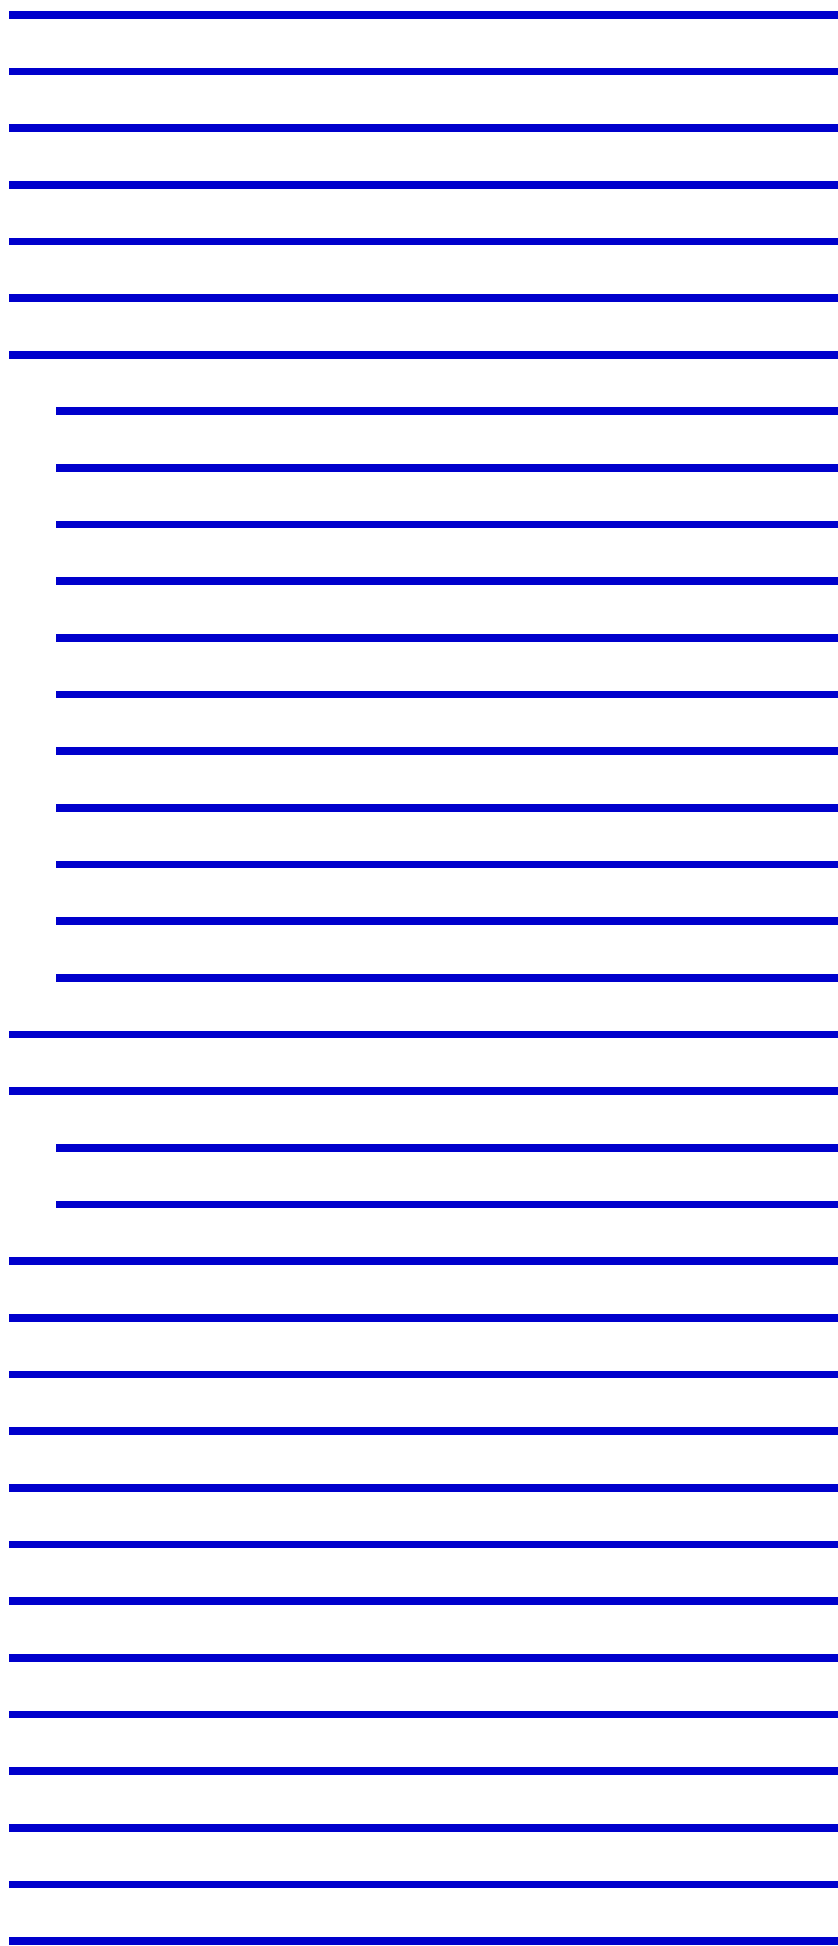

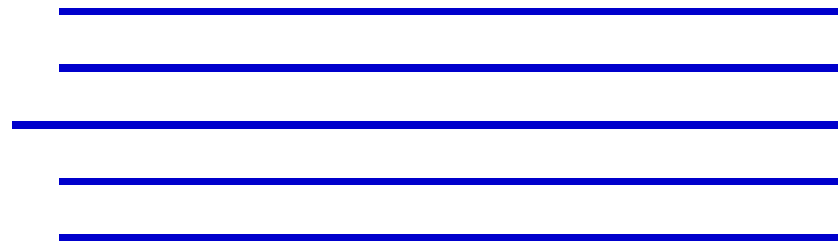

## Descriptions

### Sequences producing significant alignments:

Select: [All](#) [None](#) Selected:0

[Alignments](#)
[Download](#)
[GenPept](#)
[Graphics](#)
[Distance tree of results](#)
[Multiple alignment](#)

| Description                                                                                                 | Max score | Total score | Query cover | E value | Ident | Accession                                   |
|-------------------------------------------------------------------------------------------------------------|-----------|-------------|-------------|---------|-------|---------------------------------------------|
| <a href="#">dopamine beta-hydroxylase preprotein (AA -25 to 578) [Homo sapiens]</a>                         | 58.7      | 58.7        | 100%        | 1e-08   | 100%  | <a href="#">gi 30474 CAA31631.1</a>         |
| <a href="#">DBH protein [Homo sapiens]</a>                                                                  | 58.7      | 58.7        | 100%        | 1e-08   | 100%  | <a href="#">gi 16877893 AAH17174.1</a>      |
| <a href="#">unnamed protein product [Homo sapiens]</a>                                                      | 58.7      | 58.7        | 100%        | 1e-08   | 100%  | <a href="#">gi 30456 CAA68285.1</a>         |
| <a href="#">Homo sapiens dopamine beta-hydroxylase (dopamine beta-monooxygenase) [Homo sapiens]</a>         | 58.7      | 58.7        | 100%        | 1e-08   | 100%  | <a href="#">gi 30583779 AAP36138.1</a>      |
| <a href="#">dopamine beta-hydroxylase precursor [Homo sapiens]</a>                                          | 58.7      | 58.7        | 100%        | 1e-08   | 100%  | <a href="#">gi 116534900 NP_000778.3</a>    |
| <a href="#">PREDICTED: dopamine beta-hydroxylase isoform X2 [Pan troglodytes]</a>                           | 52.4      | 52.4        | 100%        | 2e-06   | 94%   | <a href="#">gi 694937949 XP_009455932.1</a> |
| <a href="#">PREDICTED: dopamine beta-hydroxylase [Gorilla gorilla gorilla]</a>                              | 52.4      | 52.4        | 100%        | 2e-06   | 94%   | <a href="#">gi 426363490 XP_004048873.1</a> |
| <a href="#">PREDICTED: dopamine beta-hydroxylase [Pongo abelii]</a>                                         | 52.4      | 52.4        | 100%        | 2e-06   | 94%   | <a href="#">gi 297685657 XP_002820399.1</a> |
| <a href="#">PREDICTED: dopamine beta-hydroxylase isoform X1 [Pan troglodytes]</a>                           | 52.4      | 52.4        | 100%        | 2e-06   | 94%   | <a href="#">gi 114627409 XP_520341.2</a>    |
| <a href="#">PREDICTED: dopamine beta-hydroxylase isoform 1 [Nomascus leucogenus]</a>                        | 49.0      | 49.0        | 100%        | 3e-05   | 89%   | <a href="#">gi 332255334 XP_003276787.1</a> |
| <a href="#">dopamine beta-hydroxylase [Sus scrofa]</a>                                                      | 47.3      | 47.3        | 100%        | 1e-04   | 89%   | <a href="#">gi 71361891 AAZ30054.1</a>      |
| <a href="#">PREDICTED: dopamine beta-hydroxylase [Sus scrofa]</a>                                           | 47.3      | 47.3        | 100%        | 1e-04   | 89%   | <a href="#">gi 335281176 XP_001927246.3</a> |
| <a href="#">PREDICTED: dopamine beta-hydroxylase [Ursus maritimus]</a>                                      | 47.3      | 47.3        | 100%        | 1e-04   | 89%   | <a href="#">gi 671033689 XP_008707666.1</a> |
| <a href="#">PREDICTED: dopamine beta-hydroxylase [Saimiri boliviensis boliviensis]</a>                      | 46.0      | 46.0        | 94%         | 3e-04   | 88%   | <a href="#">gi 403301510 XP_003941430.1</a> |
| <a href="#">PREDICTED: LOW QUALITY PROTEIN: dopamine beta-hydroxylase [Saimiri boliviensis boliviensis]</a> | 46.0      | 46.0        | 94%         | 3e-04   | 88%   | <a href="#">gi 390458508 XP_003732129.1</a> |
| <a href="#">PREDICTED: dopamine beta-hydroxylase [Sorex araneus]</a>                                        | 45.6      | 45.6        | 100%        | 4e-04   | 83%   | <a href="#">gi 505839906 XP_004613476.1</a> |
| <a href="#">PREDICTED: dopamine beta-hydroxylase [Tupaia chinensis]</a>                                     | 45.2      | 45.2        | 100%        | 5e-04   | 89%   | <a href="#">gi 562872827 XP_006164329.1</a> |
| <a href="#">hypothetical protein EGM_06549 [Macaca fascicularis]</a>                                        | 44.8      | 44.8        | 100%        | 7e-04   | 83%   | <a href="#">gi 355752951 EHH56997.1</a>     |
| <a href="#">hypothetical protein EGK_07229 [Macaca mulatta]</a>                                             | 44.8      | 44.8        | 100%        | 7e-04   | 83%   | <a href="#">gi 355567356 EHH23697.1</a>     |
| <a href="#">PREDICTED: dopamine beta-hydroxylase [Felis catus]</a>                                          | 44.8      | 44.8        | 100%        | 7e-04   | 83%   | <a href="#">gi 410979427 XP_003996085.1</a> |
| <a href="#">PREDICTED: dopamine beta-hydroxylase [Macaca fascicularis]</a>                                  | 44.8      | 44.8        | 100%        | 7e-04   | 83%   | <a href="#">gi 544491671 XP_005580554.1</a> |
| <a href="#">PREDICTED: dopamine beta-hydroxylase [Papio anubis]</a>                                         | 44.8      | 44.8        | 100%        | 7e-04   | 83%   | <a href="#">gi 402896169 XP_003911179.1</a> |
| <a href="#">dopamine beta-hydroxylase [Macaca mulatta]</a>                                                  | 44.8      | 44.8        | 100%        | 7e-04   | 83%   | <a href="#">gi 507588252 NP_001265274.1</a> |
| <a href="#">dopamine beta-hydroxylase [Canis lupus familiaris]</a>                                          | 44.8      | 44.8        | 94%         | 7e-04   | 88%   | <a href="#">gi 55742740 NP_001005263.1</a>  |
| <a href="#">PREDICTED: dopamine beta-hydroxylase [Trichechus manatus latirostris]</a>                       | 43.9      | 43.9        | 94%         | 0.001   | 88%   | <a href="#">gi 471414372 XP_004388724.1</a> |
| <a href="#">PREDICTED: dopamine beta-hydroxylase [Odobenus rosmarus divinatorius]</a>                       | 43.9      | 43.9        | 94%         | 0.001   | 88%   | <a href="#">gi 472384135 XP_004411441.1</a> |
| <a href="#">PREDICTED: dopamine beta-hydroxylase [Fukomys damarensis]</a>                                   | 43.9      | 43.9        | 94%         | 0.001   | 88%   | <a href="#">gi 731276514 XP_010607223.1</a> |
| <a href="#">PREDICTED: dopamine beta-hydroxylase [Orycteropus afer afer]</a>                                | 43.9      | 43.9        | 94%         | 0.001   | 88%   | <a href="#">gi 634885829 XP_007952494.1</a> |

|                                                                                                                         |      |      |      |       |     |                                             |
|-------------------------------------------------------------------------------------------------------------------------|------|------|------|-------|-----|---------------------------------------------|
| <a href="#">PREDICTED: dopamine beta-hydroxylase [Heterocephalus glaber]</a>                                            | 43.9 | 43.9 | 94%  | 0.001 | 88% | <a href="#">gij512975138 XP_004849647.1</a> |
| <a href="#">PREDICTED: dopamine beta-hydroxylase [Heterocephalus glaber]</a>                                            | 43.9 | 43.9 | 94%  | 0.001 | 88% | <a href="#">gij512857645 XP_004888900.1</a> |
| <a href="#">PREDICTED: dopamine beta-hydroxylase [Otolemur garnettii]</a>                                               | 43.9 | 43.9 | 94%  | 0.001 | 88% | <a href="#">gij395844543 XP_003795019.1</a> |
| <a href="#">PREDICTED: dopamine beta-hydroxylase [Cavia porcellus]</a>                                                  | 43.9 | 43.9 | 94%  | 0.001 | 88% | <a href="#">gij348574542 XP_003473049.1</a> |
| <a href="#">Dopamine beta-hydroxylase [Fukomys damarensis]</a>                                                          | 43.9 | 43.9 | 94%  | 0.001 | 88% | <a href="#">gij676265268 KFO21516.1</a>     |
| <a href="#">Dopamine beta-hydroxylase [Heterocephalus glaber]</a>                                                       | 43.9 | 43.9 | 94%  | 0.001 | 88% | <a href="#">gij351702674 EHB05593.1</a>     |
| <a href="#">PREDICTED: dopamine beta-hydroxylase [Pantholops hodgsonii]</a>                                             | 43.1 | 43.1 | 100% | 0.003 | 83% | <a href="#">gij556779765 XP_005984927.1</a> |
| <a href="#">PREDICTED: dopamine beta-hydroxylase [Bos mutus]</a>                                                        | 43.1 | 43.1 | 100% | 0.003 | 83% | <a href="#">gij555970958 XP_005897496.1</a> |
| <a href="#">PREDICTED: dopamine beta-hydroxylase-like [Ailuropoda melanoleuca]</a>                                      | 43.1 | 43.1 | 94%  | 0.003 | 88% | <a href="#">gij301770661 XP_002920753.1</a> |
| <a href="#">hypothetical protein PANDA_009520 [Ailuropoda melanoleuca]</a>                                              | 43.1 | 43.1 | 94%  | 0.003 | 88% | <a href="#">gij281349318 EFB24902.1</a>     |
| <a href="#">Dopamine beta-hydroxylase [Bos mutus]</a>                                                                   | 43.1 | 43.1 | 100% | 0.003 | 83% | <a href="#">gij440904711 ELR55184.1</a>     |
| <a href="#">PREDICTED: LOW QUALITY PROTEIN: dopamine beta-hydroxylase precursor [Bos taurus]</a>                        | 42.2 | 42.2 | 100% | 0.005 | 78% | <a href="#">gij591344199 XP_007099357.1</a> |
| <a href="#">PREDICTED: dopamine beta-hydroxylase [Bubalus bubalis]</a>                                                  | 42.2 | 42.2 | 100% | 0.005 | 83% | <a href="#">gij594077631 XP_006062530.1</a> |
| <a href="#">PREDICTED: dopamine beta-hydroxylase-like [Vicugna pacos]</a>                                               | 41.8 | 41.8 | 100% | 0.007 | 78% | <a href="#">gij560995302 XP_006219741.1</a> |
| <a href="#">dopamine beta-hydroxylase [Bos taurus]</a>                                                                  | 41.8 | 41.8 | 100% | 0.007 | 78% | <a href="#">gij162965 AAA30491.1</a>        |
| <a href="#">dopamine beta-hydroxylase [Camelus ferus]</a>                                                               | 41.8 | 41.8 | 100% | 0.007 | 78% | <a href="#">gij528765060 EPY84719.1</a>     |
| <a href="#">PREDICTED: dopamine beta-hydroxylase [Camelus ferus]</a>                                                    | 41.8 | 41.8 | 100% | 0.007 | 78% | <a href="#">gij560907230 XP_006179943.1</a> |
| <a href="#">dopamine beta-hydroxylase precursor (EC 1.14.17.1) [Bos taurus]</a>                                         | 41.8 | 41.8 | 100% | 0.007 | 78% | <a href="#">gij162963 AAA30490.1</a>        |
| <a href="#">dopamine beta-hydroxylase precursor [Bos taurus]</a>                                                        | 41.8 | 41.8 | 100% | 0.007 | 78% | <a href="#">gij4191614 AAD09829.1</a>       |
| <a href="#">dopamine beta-hydroxylase precursor [Bos taurus]</a>                                                        | 41.8 | 41.8 | 100% | 0.007 | 78% | <a href="#">gij110665642 ABG81467.1</a>     |
| <a href="#">RecName: Full=Dopamine beta-hydroxylase; AltName: Full=Dopamine beta-hydroxylase precursor [Bos taurus]</a> | 41.8 | 41.8 | 100% | 0.007 | 78% | <a href="#">gij158931121 P15101.2</a>       |
| <a href="#">dopamine beta-hydroxylase precursor [Bos taurus]</a>                                                        | 41.8 | 41.8 | 100% | 0.007 | 78% | <a href="#">gij30794286 NP_851338.1</a>     |
| <a href="#">PREDICTED: dopamine beta-hydroxylase [Nannospalax galili]</a>                                               | 41.8 | 41.8 | 100% | 0.007 | 83% | <a href="#">gij674070087 XP_008842140.1</a> |
| <a href="#">PREDICTED: dopamine beta-hydroxylase [Rhinopithecus roxellana]</a>                                          | 41.4 | 41.4 | 94%  | 0.009 | 82% | <a href="#">gij724871980 XP_010371175.1</a> |
| <a href="#">PREDICTED: dopamine beta-hydroxylase isoform X2 [Chlorocebus]</a>                                           | 41.4 | 41.4 | 94%  | 0.009 | 82% | <a href="#">gij635070261 XP_008003949.1</a> |
| <a href="#">PREDICTED: dopamine beta-hydroxylase [Ochotona princeps]</a>                                                | 41.4 | 41.4 | 100% | 0.009 | 78% | <a href="#">gij504167697 XP_004593508.1</a> |
| <a href="#">PREDICTED: dopamine beta-hydroxylase isoform X1 [Chlorocebus]</a>                                           | 41.4 | 41.4 | 94%  | 0.009 | 82% | <a href="#">gij635070259 XP_008003948.1</a> |
| <a href="#">PREDICTED: LOW QUALITY PROTEIN: dopamine beta-hydroxylase precursor [Bos taurus]</a>                        | 40.9 | 40.9 | 94%  | 0.013 | 82% | <a href="#">gij470606240 XP_004314127.1</a> |
| <a href="#">PREDICTED: dopamine beta-hydroxylase [Lipotes vexillifer]</a>                                               | 40.9 | 40.9 | 94%  | 0.013 | 82% | <a href="#">gij602680668 XP_007453141.1</a> |
| <a href="#">PREDICTED: dopamine beta-hydroxylase [Balaenoptera acutorostrata]</a>                                       | 40.9 | 40.9 | 94%  | 0.013 | 82% | <a href="#">gij594694468 XP_007194475.1</a> |
| <a href="#">PREDICTED: dopamine beta-hydroxylase [Physeter catodon]</a>                                                 | 40.9 | 40.9 | 94%  | 0.013 | 82% | <a href="#">gij593731032 XP_007111132.1</a> |
| <a href="#">PREDICTED: dopamine beta-hydroxylase [Mustela putorius furo]</a>                                            | 40.9 | 40.9 | 94%  | 0.013 | 82% | <a href="#">gij511874860 XP_004757456.1</a> |
| <a href="#">PREDICTED: dopamine beta-hydroxylase [Orcinus orca]</a>                                                     | 40.9 | 40.9 | 94%  | 0.013 | 82% | <a href="#">gij466083579 XP_004285054.1</a> |
| <a href="#">PREDICTED: dopamine beta-hydroxylase [Galeopterus variegatus]</a>                                           | 40.9 | 40.9 | 94%  | 0.013 | 82% | <a href="#">gij667294384 XP_008578902.1</a> |
| <a href="#">PREDICTED: dopamine beta-hydroxylase [Microtus ochrogaster]</a>                                             | 40.9 | 40.9 | 94%  | 0.013 | 82% | <a href="#">gij532005885 XP_005346784.1</a> |
| <a href="#">dopamine beta-hydroxylase [Mus musculus]</a>                                                                | 40.9 | 40.9 | 94%  | 0.013 | 82% | <a href="#">gij110815861 NP_620392.2</a>    |
| <a href="#">PREDICTED: dopamine beta-hydroxylase [Mesocricetus auratus]</a>                                             | 40.9 | 40.9 | 94%  | 0.013 | 82% | <a href="#">gij524971191 XP_005085459.1</a> |
| <a href="#">PREDICTED: dopamine beta-hydroxylase [Leptonychotes weddellii]</a>                                          | 40.5 | 40.5 | 94%  | 0.016 | 82% | <a href="#">gij585190200 XP_006746395.1</a> |
| <a href="#">Dopamine beta-hydroxylase [Pteropus alecto]</a>                                                             | 40.5 | 40.5 | 94%  | 0.017 | 82% | <a href="#">gij431898971 ELK07341.1</a>     |
| <a href="#">PREDICTED: dopamine beta-hydroxylase [Chinchilla lanigera]</a>                                              | 40.5 | 40.5 | 94%  | 0.018 | 82% | <a href="#">gij533191305 XP_005408512.1</a> |
| <a href="#">PREDICTED: LOW QUALITY PROTEIN: dopamine beta-hydroxylase precursor [Bos taurus]</a>                        | 40.5 | 40.5 | 94%  | 0.018 | 82% | <a href="#">gij586526429 XP_006918159.1</a> |
| <a href="#">PREDICTED: dopamine beta-hydroxylase [Chrysochloris asiatica]</a>                                           | 40.1 | 40.1 | 94%  | 0.024 | 82% | <a href="#">gij586466542 XP_006863887.1</a> |
| <a href="#">PREDICTED: dopamine beta-hydroxylase [Ceratotherium simum simum]</a>                                        | 40.1 | 40.1 | 94%  | 0.024 | 82% | <a href="#">gij478498710 XP_004423687.1</a> |
| <a href="#">PREDICTED: dopamine beta-hydroxylase [Octodon degus]</a>                                                    | 40.1 | 40.1 | 94%  | 0.024 | 82% | <a href="#">gij507685735 XP_004640601.1</a> |
| <a href="#">PREDICTED: dopamine beta-hydroxylase [Myotis brandtii]</a>                                                  | 39.7 | 39.7 | 94%  | 0.033 | 82% | <a href="#">gij554554817 XP_005871861.1</a> |

|                                                                                |      |      |      |       |     |                                             |
|--------------------------------------------------------------------------------|------|------|------|-------|-----|---------------------------------------------|
| <a href="#">PREDICTED: dopamine beta-hydroxylase [Capra hircus]</a>            | 39.7 | 39.7 | 94%  | 0.033 | 82% | <a href="#">gil548487730 XP_005687409.1</a> |
| <a href="#">PREDICTED: dopamine beta-hydroxylase [Eptesicus fuscus]</a>        | 39.7 | 39.7 | 94%  | 0.033 | 82% | <a href="#">gil641721931 XP_008150706.1</a> |
| <a href="#">PREDICTED: dopamine beta-hydroxylase [Loxodonta africana]</a>      | 39.2 | 39.2 | 94%  | 0.045 | 82% | <a href="#">gil344297665 XP_003420517.1</a> |
| <a href="#">PREDICTED: dopamine beta-hydroxylase [Ornithorhynchus anatinu]</a> | 38.8 | 38.8 | 88%  | 0.062 | 81% | <a href="#">gil620943845 XP_001505587.2</a> |
| <a href="#">PREDICTED: dopamine beta-hydroxylase [Elephantulus edwardii]</a>   | 38.0 | 38.0 | 94%  | 0.12  | 82% | <a href="#">gil585713239 XP_006900619.1</a> |
| <a href="#">PREDICTED: dopamine beta-hydroxylase [Sarcophilus harrisii]</a>    | 38.0 | 38.0 | 94%  | 0.12  | 76% | <a href="#">gil395506397 XP_003757519.1</a> |
| <a href="#">PREDICTED: dopamine beta-hydroxylase [Equus przewalskii]</a>       | 37.5 | 37.5 | 94%  | 0.16  | 76% | <a href="#">gil664760398 XP_008537782.1</a> |
| <a href="#">PREDICTED: dopamine beta-hydroxylase [Jaculus jaculus]</a>         | 37.5 | 37.5 | 83%  | 0.16  | 87% | <a href="#">gil507540225 XP_004654117.1</a> |
| <a href="#">dopamine beta-hydroxylase [Equus caballus]</a>                     | 37.5 | 37.5 | 94%  | 0.16  | 76% | <a href="#">gil126352385 NP_001075239.1</a> |
| <a href="#">PREDICTED: dopamine beta-hydroxylase [Myotis davidii]</a>          | 36.7 | 36.7 | 88%  | 0.30  | 81% | <a href="#">gil584064603 XP_006776660.1</a> |
| <a href="#">PREDICTED: dopamine beta-hydroxylase [Chrysemys picta bellii]</a>  | 36.7 | 36.7 | 100% | 0.30  | 72% | <a href="#">gil641764396 XP_005293531.2</a> |
| <a href="#">PREDICTED: dopamine beta-hydroxylase [Serinus canaria]</a>         | 36.7 | 36.7 | 100% | 0.30  | 72% | <a href="#">gil683921403 XP_009091623.1</a> |
| <a href="#">RecName: Full=Dopamine beta-hydroxylase; AltName: Full=Dopam</a>   | 36.7 | 36.7 | 94%  | 0.30  | 76% | <a href="#">gil729362 Q05754.1</a>          |
| <a href="#">dopamine beta hydroxylase [Rattus norvegicus]</a>                  | 36.7 | 36.7 | 94%  | 0.30  | 76% | <a href="#">gil149039220 EDL93440.1</a>     |
| <a href="#">dopamine beta-hydroxylase [Rattus norvegicus]</a>                  | 36.7 | 36.7 | 94%  | 0.30  | 76% | <a href="#">gil140970928 NP_037290.2</a>    |
| <a href="#">Dopamine beta-hydroxylase [Tauraco erythrolophus]</a>              | 35.8 | 35.8 | 100% | 0.55  | 72% | <a href="#">gil678144567 KFV13733.1</a>     |
| <a href="#">PREDICTED: LOW QUALITY PROTEIN: dopamine beta-hydroxyla</a>        | 35.8 | 35.8 | 100% | 0.55  | 72% | <a href="#">gil701335236 XP_009980321.1</a> |
| <a href="#">PREDICTED: dopamine beta-hydroxylase [Peromyscus maniculatu</a>    | 35.8 | 35.8 | 94%  | 0.55  | 76% | <a href="#">gil589961209 XP_006993176.1</a> |
| <a href="#">PREDICTED: dopamine beta-hydroxylase [Ictidomys tridecemlinea</a>  | 35.4 | 35.4 | 94%  | 0.75  | 76% | <a href="#">gil532102904 XP_005337059.1</a> |
| <a href="#">PREDICTED: dopamine beta-hydroxylase [Tarsius syrichta]</a>        | 35.4 | 35.4 | 94%  | 0.75  | 76% | <a href="#">gil640823891 XP_008068990.1</a> |
| <a href="#">PREDICTED: dopamine beta-hydroxylase isoform X2 [Cricetulus gr</a> | 35.4 | 35.4 | 94%  | 0.75  | 82% | <a href="#">gil625254557 XP_007618621.1</a> |
| <a href="#">dopamine beta-hydroxylase [Mus musculus]</a>                       | 35.4 | 35.4 | 94%  | 0.75  | 76% | <a href="#">gil260873 AAB24330.1</a>        |
| <a href="#">dopamine beta-hydroxylase-like protein [Cricetulus griseus]</a>    | 35.4 | 35.4 | 94%  | 0.75  | 82% | <a href="#">gil537149913 ERE71366.1</a>     |
| <a href="#">dopamine beta-hydroxylase-like protein [Cricetulus griseus]</a>    | 35.4 | 35.4 | 94%  | 0.76  | 82% | <a href="#">gil537149912 ERE71365.1</a>     |
| <a href="#">PREDICTED: LOW QUALITY PROTEIN: dopamine beta-hydroxyla</a>        | 34.1 | 34.1 | 100% | 1.9   | 72% | <a href="#">gil449478274 XP_004174400.1</a> |
| <a href="#">PREDICTED: dopamine beta-hydroxylase [Dasypus novemcinctus]</a>    | 33.7 | 33.7 | 94%  | 2.6   | 76% | <a href="#">gil488586293 XP_004478484.1</a> |
| <a href="#">PREDICTED: dopamine beta-hydroxylase isoform X1 [Monodelphis</a>   | 33.7 | 33.7 | 94%  | 2.6   | 71% | <a href="#">gil126297977 XP_001371885.1</a> |

## Alignments

Download GenPept Graphics

Next Previous Descriptions

dopamine beta-hydroxylase preprotein (AA -25 to 578) [Homo sapiens]

Sequence ID: [gil30474|emb|CAA31631.1](#) Length: 603 Number of Matches: 1

[▶ See 1 more title\(s\)](#)

Range 1: 164 to 181 GenPept Graphics

Next Match Previous Match

| Score          | Expect | Identities  | Positives   | Gaps     |
|----------------|--------|-------------|-------------|----------|
| 58.7 bits(131) | 1e-08  | 18/18(100%) | 18/18(100%) | 0/18(0%) |

Query 1 RSLEAINGSGLQMGQRV 18  
 RSLEAINGSGLQMGQRV  
 Sbjct 164 RSLEAINGSGLQMGQRV 181

### Related Information

[Gene](#) - associated gene details  
[Identical Proteins](#) - Proteins identical to the subject

Download GenPept Graphics

Next Previous Descriptions

DBH protein [Homo sapiens]

Sequence ID: [gil16877893|gb|AAH17174.1](#) Length: 603 Number of Matches: 1

[▶ See 3 more title\(s\)](#)

Range 1: 164 to 181 GenPept Graphics

Next Match Previous Match

| Score | Expect | Identities | Positives | Gaps |
|-------|--------|------------|-----------|------|
|-------|--------|------------|-----------|------|

### Related Information

[Gene](#) - associated gene details  
[Identical Proteins](#) - Proteins

58.7 bits(131) 1e-08 18/18(100%) 18/18(100%) 0/18(0%)

identical to the subject

Query 1 RSLEAINGSLQMGLQRV 18  
 RSLEAINGSLQMGLQRV  
 Sbjct 164 RSLEAINGSLQMGLQRV 181

Download [GenPept](#) [Graphics](#)

[Next](#) [Previous](#) [Descriptions](#)

unnamed protein product [Homo sapiens]

Sequence ID: [gi|30456|emb|CAA68285.1](#) Length: 603 Number of Matches: 1

Range 1: 164 to 181 [GenPept](#) [Graphics](#)

[Next Match](#) [Previous Match](#)

| Score          | Expect | Identities  | Positives   | Gaps     |
|----------------|--------|-------------|-------------|----------|
| 58.7 bits(131) | 1e-08  | 18/18(100%) | 18/18(100%) | 0/18(0%) |

Query 1 RSLEAINGSLQMGLQRV 18  
 RSLEAINGSLQMGLQRV  
 Sbjct 164 RSLEAINGSLQMGLQRV 181

**Related Information**

[Gene](#) - associated gene details

Download [GenPept](#) [Graphics](#)

[Next](#) [Previous](#) [Descriptions](#)

Homo sapiens dopamine beta-hydroxylase (dopamine beta-monoxygenase) [synthetic construct]

Sequence ID: [gi|30583779|gb|AAP36138.1](#) Length: 604 Number of Matches: 1

[See 2 more title\(s\)](#)

Range 1: 164 to 181 [GenPept](#) [Graphics](#)

[Next Match](#) [Previous Match](#)

| Score          | Expect | Identities  | Positives   | Gaps     |
|----------------|--------|-------------|-------------|----------|
| 58.7 bits(131) | 1e-08  | 18/18(100%) | 18/18(100%) | 0/18(0%) |

Query 1 RSLEAINGSLQMGLQRV 18  
 RSLEAINGSLQMGLQRV  
 Sbjct 164 RSLEAINGSLQMGLQRV 181

**Related Information**

[Identical Proteins](#) - Proteins

identical to the subject

Download [GenPept](#) [Graphics](#)

[Next](#) [Previous](#) [Descriptions](#)

dopamine beta-hydroxylase precursor [Homo sapiens]

Sequence ID: [gi|116534900|ref|NP\\_000778.3](#) Length: 617 Number of Matches: 1

[See 2 more title\(s\)](#)

Range 1: 178 to 195 [GenPept](#) [Graphics](#)

[Next Match](#) [Previous Match](#)

| Score          | Expect | Identities  | Positives   | Gaps     |
|----------------|--------|-------------|-------------|----------|
| 58.7 bits(131) | 1e-08  | 18/18(100%) | 18/18(100%) | 0/18(0%) |

Query 1 RSLEAINGSLQMGLQRV 18  
 RSLEAINGSLQMGLQRV  
 Sbjct 178 RSLEAINGSLQMGLQRV 195

**Related Information**

[Gene](#) - associated gene details

[UniGene](#) - clustered expressed sequence tags

[PubChem BioAssay](#) - bioactivity screening

[Map Viewer](#) - aligned genomic context

[Identical Proteins](#) - Proteins

identical to the subject



NCBI/ BLAST/ blastp suite/ Formatting Results - BTH1SCEE013

Your search parameters were adjusted to search for a short input sequence.

[Edit and Resubmit](#) [Save Search Strategies](#) [Formatting options](#) [Download](#) [YouTube](#) [How to read this page](#) [Blast report description](#)

F11\_KDSVTETLPRVDRT\_Mod

RID [BTH1SCEE013](#) (Expires on 01-20 15:45 pm)

Query ID [Icl|22001](#)  
 Description None  
 Molecule type amino acid  
 Query Length 14

Database Name [nr](#)  
 Description All non-redundant GenBank CDS translations+PDB+SwissProt+PIR+PRF excluding environmental samples from WGS projects  
 Program BLASTP 2.2.30+ [Citation](#)

Other reports: [Search Summary](#) [Taxonomy reports](#) [Distance tree of results](#) [Multiple alignment](#)

Graphic Summary

[Show Conserved Domains](#)

No putative conserved domains have been detected

Distribution of 100 Blast Hits on the Query Sequence

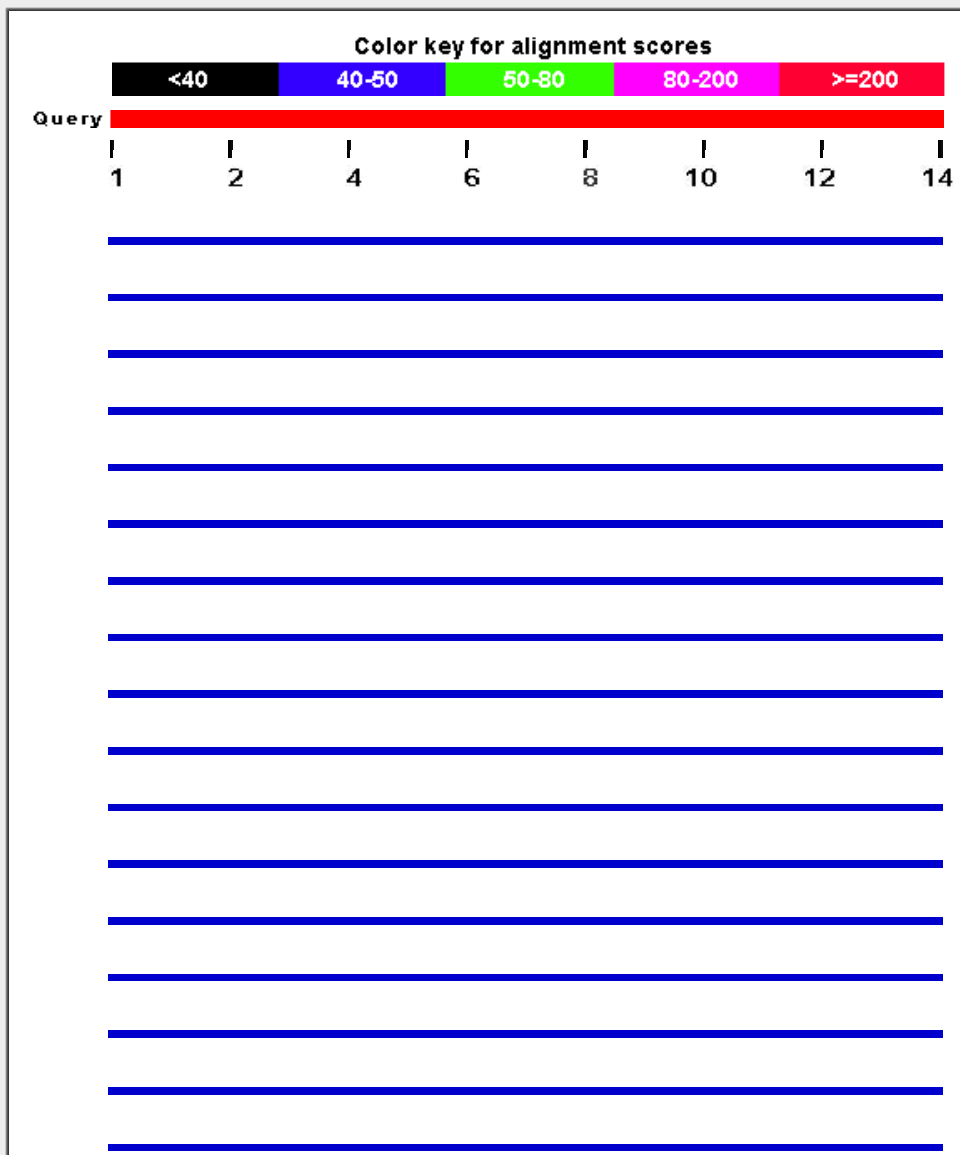



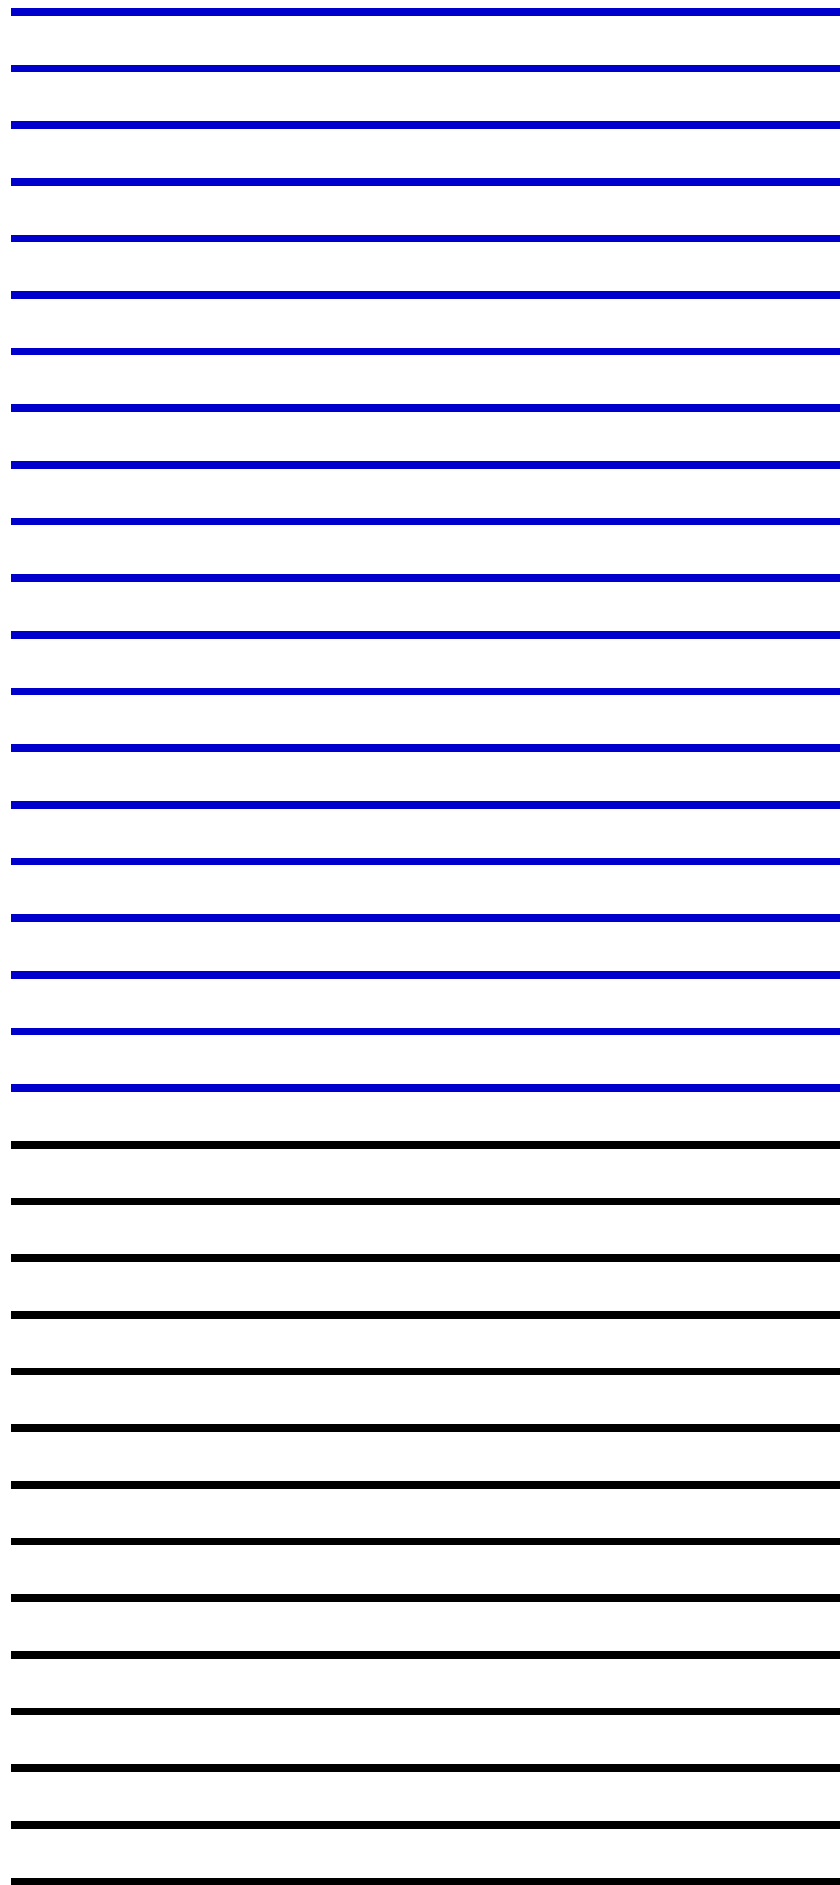

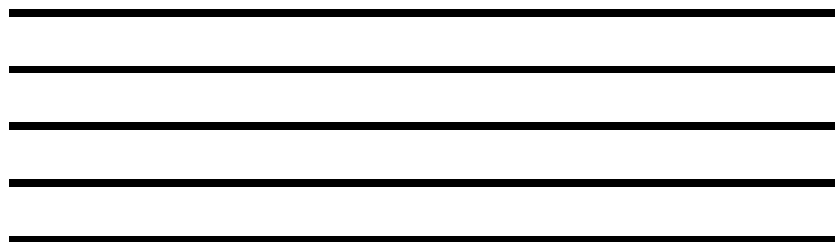

## Descriptions

### Sequences producing significant alignments:

Select: [All](#) [None](#) Selected:0

[Alignments](#)
[Download](#)
[GenPept](#)
[Graphics](#)
[Distance tree of results](#)
[Multiple alignment](#)


| Description                                                                            | Max score | Total score | Query cover | E value | Ident | Accession                                   |
|----------------------------------------------------------------------------------------|-----------|-------------|-------------|---------|-------|---------------------------------------------|
| <a href="#">PREDICTED: coagulation factor XI isoform X5 [Homo sapiens]</a>             | 44.3      | 44.3        | 100%        | 6e-04   | 93%   | <a href="#">gi 530377344 XP_005262882.1</a> |
| <a href="#">PREDICTED: coagulation factor XI isoform X4 [Homo sapiens]</a>             | 44.3      | 44.3        | 100%        | 7e-04   | 93%   | <a href="#">gi 530377342 XP_005262881.1</a> |
| <a href="#">PREDICTED: coagulation factor XI isoform X2 [Pan paniscus]</a>             | 44.3      | 44.3        | 100%        | 7e-04   | 93%   | <a href="#">gi 675774870 XP_008975412.1</a> |
| <a href="#">PREDICTED: coagulation factor XI isoform X5 [Pan troglodytes]</a>          | 44.3      | 44.3        | 100%        | 7e-04   | 93%   | <a href="#">gi 694909938 XP_009446987.1</a> |
| <a href="#">PREDICTED: coagulation factor XI isoform X3 [Homo sapiens]</a>             | 44.3      | 44.3        | 100%        | 7e-04   | 93%   | <a href="#">gi 530377340 XP_005262880.1</a> |
| <a href="#">platelet factor XI [Homo sapiens]</a>                                      | 44.3      | 44.3        | 100%        | 7e-04   | 93%   | <a href="#">gi 3258649 AAC24506.1</a>       |
| <a href="#">PREDICTED: coagulation factor XI [Gorilla gorilla gorilla]</a>             | 44.3      | 44.3        | 100%        | 7e-04   | 93%   | <a href="#">gi 426346208 XP_004040776.1</a> |
| <a href="#">PREDICTED: coagulation factor XI isoform X3 [Saimiri boliviensis]</a>      | 44.3      | 44.3        | 100%        | 7e-04   | 93%   | <a href="#">gi 725582192 XP_010342663.1</a> |
| <a href="#">PREDICTED: coagulation factor XI isoform X4 [Pan troglodytes]</a>          | 44.3      | 44.3        | 100%        | 7e-04   | 93%   | <a href="#">gi 694909936 XP_009446986.1</a> |
| <a href="#">PREDICTED: coagulation factor XI isoform X2 [Homo sapiens]</a>             | 44.3      | 44.3        | 100%        | 7e-04   | 93%   | <a href="#">gi 530377338 XP_005262879.1</a> |
| <a href="#">PREDICTED: coagulation factor XI isoform X2 [Rhinopithecus roosevelti]</a> | 44.3      | 44.3        | 100%        | 7e-04   | 93%   | <a href="#">gi 724897372 XP_010376291.1</a> |
| <a href="#">PREDICTED: coagulation factor XI isoform X2 [Papio anubis]</a>             | 44.3      | 44.3        | 100%        | 7e-04   | 93%   | <a href="#">gi 685544400 XP_009206295.1</a> |
| <a href="#">PREDICTED: coagulation factor XI isoform X2 [Chlorocebus sabaeus]</a>      | 44.3      | 44.3        | 100%        | 7e-04   | 93%   | <a href="#">gi 635046203 XP_007998683.1</a> |
| <a href="#">PREDICTED: coagulation factor XI isoform X2 [Macaca fascicularis]</a>      | 44.3      | 44.3        | 100%        | 7e-04   | 93%   | <a href="#">gi 544436077 XP_005556541.1</a> |
| <a href="#">PREDICTED: coagulation factor XI isoform X3 [Pan troglodytes]</a>          | 44.3      | 44.3        | 100%        | 7e-04   | 93%   | <a href="#">gi 694909934 XP_009446985.1</a> |
| <a href="#">PREDICTED: coagulation factor XI isoform X6 [Homo sapiens]</a>             | 44.3      | 44.3        | 100%        | 7e-04   | 93%   | <a href="#">gi 578808899 XP_006714200.1</a> |
| <a href="#">PREDICTED: coagulation factor XI isoform X2 [Saimiri boliviensis]</a>      | 44.3      | 44.3        | 100%        | 7e-04   | 93%   | <a href="#">gi 725582190 XP_010342661.1</a> |
| <a href="#">hypothetical protein EGM_04467 [Macaca fascicularis]</a>                   | 44.3      | 44.3        | 100%        | 7e-04   | 93%   | <a href="#">gi 355750969 EHH55296.1</a>     |
| <a href="#">hypothetical protein EGK_16300 [Macaca mulatta]</a>                        | 44.3      | 44.3        | 100%        | 7e-04   | 93%   | <a href="#">gi 355687768 EHH26352.1</a>     |
| <a href="#">PREDICTED: coagulation factor XI isoform X1 [Rhinopithecus roosevelti]</a> | 44.3      | 44.3        | 100%        | 7e-04   | 93%   | <a href="#">gi 724897369 XP_010376290.1</a> |
| <a href="#">PREDICTED: coagulation factor XI isoform X1 [Chlorocebus sabaeus]</a>      | 44.3      | 44.3        | 100%        | 7e-04   | 93%   | <a href="#">gi 635046201 XP_007998681.1</a> |
| <a href="#">PREDICTED: coagulation factor XI [Callithrix jacchus]</a>                  | 44.3      | 44.3        | 100%        | 7e-04   | 93%   | <a href="#">gi 296195030 XP_002745209.1</a> |
| <a href="#">coagulation factor XI [Homo sapiens]</a>                                   | 44.3      | 44.3        | 100%        | 7e-04   | 93%   | <a href="#">gi 180352 AAA51985.1</a>        |
| <a href="#">PREDICTED: coagulation factor XI isoform X1 [Macaca fascicularis]</a>      | 44.3      | 44.3        | 100%        | 7e-04   | 93%   | <a href="#">gi 544436075 XP_005556540.1</a> |
| <a href="#">coagulation factor XI precursor [Homo sapiens]</a>                         | 44.3      | 44.3        | 100%        | 7e-04   | 93%   | <a href="#">gi 4503627 NP_000119.1</a>      |
| <a href="#">PREDICTED: coagulation factor XI isoform X1 [Saimiri boliviensis]</a>      | 44.3      | 44.3        | 100%        | 7e-04   | 93%   | <a href="#">gi 725582188 XP_010342660.1</a> |
| <a href="#">PREDICTED: coagulation factor XI isoform X1 [Papio anubis]</a>             | 44.3      | 44.3        | 100%        | 7e-04   | 93%   | <a href="#">gi 402871005 XP_003899481.1</a> |
| <a href="#">PREDICTED: coagulation factor XI [Nomascus leucogenys]</a>                 | 44.3      | 44.3        | 100%        | 7e-04   | 93%   | <a href="#">gi 332244773 XP_003271548.1</a> |
| <a href="#">PREDICTED: coagulation factor XI [Pongo abelii]</a>                        | 44.3      | 44.3        | 100%        | 7e-04   | 93%   | <a href="#">gi 297674804 XP_002815399.1</a> |

|                                                                              |      |      |      |       |     |                                             |
|------------------------------------------------------------------------------|------|------|------|-------|-----|---------------------------------------------|
| <a href="#">PREDICTED: coagulation factor XI isoform X2 [Pan troglodytes</a> | 44.3 | 44.3 | 100% | 7e-04 | 93% | <a href="#">gi 114597210 XP_001165847.1</a> |
| <a href="#">PREDICTED: coagulation factor XI isoform X1 [Pan troglodytes</a> | 44.3 | 44.3 | 100% | 7e-04 | 93% | <a href="#">gi 694909931 XP_009446984.1</a> |
| <a href="#">PREDICTED: coagulation factor XI isoform X1 [Homo sapiens]</a>   | 44.3 | 44.3 | 100% | 7e-04 | 93% | <a href="#">gi 530377336 XP_005262878.1</a> |
| <a href="#">PREDICTED: coagulation factor XI-like [Macaca mulatta]</a>       | 44.3 | 44.3 | 100% | 7e-04 | 93% | <a href="#">gi 297293811 XP_001090398.2</a> |
| <a href="#">Coagulation factor XI [Myotis brandtii]</a>                      | 41.8 | 41.8 | 100% | 0.004 | 93% | <a href="#">gi 521037558 EPQ19336.1</a>     |
| <a href="#">PREDICTED: LOW QUALITY PROTEIN: coagulation factor XI</a>        | 41.8 | 41.8 | 100% | 0.005 | 93% | <a href="#">gi 554587005 XP_005884913.1</a> |
| <a href="#">PREDICTED: coagulation factor XI [Tarsius syrichta]</a>          | 40.1 | 40.1 | 100% | 0.017 | 86% | <a href="#">gi 640821392 XP_008067645.1</a> |
| <a href="#">PREDICTED: coagulation factor XI [Otolemur garnettii]</a>        | 40.1 | 40.1 | 100% | 0.017 | 86% | <a href="#">gi 395840032 XP_003792872.1</a> |
| <a href="#">PREDICTED: LOW QUALITY PROTEIN: coagulation factor XI</a>        | 39.2 | 39.2 | 100% | 0.032 | 86% | <a href="#">gi 586521035 XP_006926977.1</a> |
| <a href="#">PREDICTED: coagulation factor XI [Camelus bactrianus]</a>        | 39.2 | 39.2 | 100% | 0.033 | 86% | <a href="#">gi 743715881 XP_010951577.1</a> |
| <a href="#">PREDICTED: coagulation factor XI [Vicugna pacos]</a>             | 39.2 | 39.2 | 100% | 0.033 | 86% | <a href="#">gi 560951202 XP_006198143.1</a> |
| <a href="#">PREDICTED: LOW QUALITY PROTEIN: coagulation factor XI</a>        | 39.2 | 39.2 | 100% | 0.033 | 86% | <a href="#">gi 744611375 XP_010994033.1</a> |
| <a href="#">coagulation factor XI precursor [Canis lupus familiaris]</a>     | 39.2 | 39.2 | 100% | 0.033 | 86% | <a href="#">gi 205361194 NP_001128595.1</a> |
| <a href="#">PREDICTED: coagulation factor XI isoform X2 [Leptonychotes</a>   | 39.2 | 39.2 | 100% | 0.033 | 86% | <a href="#">gi 585180453 XP_006741890.1</a> |
| <a href="#">PREDICTED: coagulation factor XI [Sorex araneus]</a>             | 39.2 | 39.2 | 100% | 0.033 | 86% | <a href="#">gi 505830321 XP_004610458.1</a> |
| <a href="#">PREDICTED: coagulation factor XI isoform 3 [Odobenus rosma</a>   | 39.2 | 39.2 | 100% | 0.033 | 86% | <a href="#">gi 472396395 XP_004417424.1</a> |
| <a href="#">PREDICTED: coagulation factor XI-like [Ailuropoda melanoleuc</a> | 39.2 | 39.2 | 100% | 0.033 | 86% | <a href="#">gi 301776062 XP_002923450.1</a> |
| <a href="#">PREDICTED: LOW QUALITY PROTEIN: coagulation factor XI</a>        | 39.2 | 39.2 | 100% | 0.033 | 86% | <a href="#">gi 591347751 XP_007099050.1</a> |
| <a href="#">PREDICTED: coagulation factor XI [Camelus ferus]</a>             | 39.2 | 39.2 | 100% | 0.033 | 86% | <a href="#">gi 560904135 XP_006178431.1</a> |
| <a href="#">PREDICTED: coagulation factor XI isoform X2 [Canis lupus far</a> | 39.2 | 39.2 | 100% | 0.033 | 86% | <a href="#">gi 545526400 XP_005629983.1</a> |
| <a href="#">PREDICTED: coagulation factor XI [Felis catus]</a>               | 39.2 | 39.2 | 100% | 0.033 | 86% | <a href="#">gi 410956035 XP_003984650.1</a> |
| <a href="#">PREDICTED: coagulation factor XI isoform X3 [Leptonychotes</a>   | 39.2 | 39.2 | 100% | 0.033 | 86% | <a href="#">gi 585180455 XP_006741891.1</a> |
| <a href="#">PREDICTED: coagulation factor XI isoform 2 [Odobenus rosma</a>   | 39.2 | 39.2 | 100% | 0.033 | 86% | <a href="#">gi 472396393 XP_004417423.1</a> |
| <a href="#">PREDICTED: coagulation factor XI isoform X1 [Leptonychotes</a>   | 39.2 | 39.2 | 100% | 0.033 | 86% | <a href="#">gi 585180451 XP_006741889.1</a> |
| <a href="#">PREDICTED: coagulation factor XI isoform X1 [Canis lupus far</a> | 39.2 | 39.2 | 100% | 0.033 | 86% | <a href="#">gi 545526398 XP_005629982.1</a> |
| <a href="#">PREDICTED: coagulation factor XI [Mustela putorius furo]</a>     | 39.2 | 39.2 | 100% | 0.033 | 86% | <a href="#">gi 511876760 XP_004758357.1</a> |
| <a href="#">PREDICTED: coagulation factor XI isoform 1 [Odobenus rosma</a>   | 39.2 | 39.2 | 100% | 0.033 | 86% | <a href="#">gi 472396391 XP_004417422.1</a> |
| <a href="#">PREDICTED: LOW QUALITY PROTEIN: coagulation factor XI</a>        | 39.2 | 39.2 | 100% | 0.034 | 86% | <a href="#">gi 671035736 XP_008708722.1</a> |
| <a href="#">PREDICTED: coagulation factor XI [Octodon degus]</a>             | 37.5 | 37.5 | 100% | 0.12  | 79% | <a href="#">gi 507682719 XP_004639867.1</a> |
| <a href="#">PREDICTED: plasma kallikrein isoform X2 [Capra hircus]</a>       | 36.7 | 36.7 | 100% | 0.22  | 86% | <a href="#">gi 548524193 XP_005698801.1</a> |
| <a href="#">PREDICTED: plasma kallikrein [Bos mutus]</a>                     | 36.7 | 36.7 | 100% | 0.23  | 86% | <a href="#">gi 555974157 XP_005899073.1</a> |
| <a href="#">PREDICTED: plasma kallikrein [Sorex araneus]</a>                 | 36.7 | 36.7 | 100% | 0.23  | 86% | <a href="#">gi 505830323 XP_004610459.1</a> |
| <a href="#">Plasma kallikrein [Bos mutus]</a>                                | 36.7 | 36.7 | 100% | 0.23  | 86% | <a href="#">gi 440903405 ELR54069.1</a>     |
| <a href="#">PREDICTED: plasma kallikrein [Bison bison bison]</a>             | 36.7 | 36.7 | 100% | 0.23  | 86% | <a href="#">gi 742100671 XP_010834112.1</a> |
| <a href="#">plasma kallikrein precursor [Bos taurus]</a>                     | 36.7 | 36.7 | 100% | 0.23  | 86% | <a href="#">gi 114052314 NP_001039817.1</a> |
| <a href="#">PREDICTED: plasma kallikrein [Bubalus bubalis]</a>               | 36.7 | 36.7 | 100% | 0.23  | 86% | <a href="#">gi 594073050 XP_006060351.1</a> |
| <a href="#">PREDICTED: plasma kallikrein [Pantholops hodgsonii]</a>          | 36.7 | 36.7 | 100% | 0.23  | 86% | <a href="#">gi 556754531 XP_005972630.1</a> |
| <a href="#">PREDICTED: plasma kallikrein isoform X1 [Capra hircus]</a>       | 36.7 | 36.7 | 100% | 0.23  | 86% | <a href="#">gi 548524191 XP_005698800.1</a> |
| <a href="#">PREDICTED: plasma kallikrein [Ovis aries]</a>                    | 36.7 | 36.7 | 100% | 0.23  | 86% | <a href="#">gi 426256278 XP_004021768.1</a> |
| <a href="#">PREDICTED: plasma kallikrein [Cavia porcellus]</a>               | 36.7 | 36.7 | 100% | 0.23  | 86% | <a href="#">gi 348566841 XP_003469210.1</a> |
| <a href="#">PREDICTED: plasma kallikrein isoform X2 [Fukomys damarens</a>    | 36.7 | 36.7 | 100% | 0.23  | 86% | <a href="#">gi 731206513 XP_010618084.1</a> |
| <a href="#">PREDICTED: plasma kallikrein isoform X1 [Fukomys damarens</a>    | 36.7 | 36.7 | 100% | 0.23  | 86% | <a href="#">gi 731206510 XP_010618083.1</a> |
| <a href="#">Coagulation factor XI [Heterocephalus glaber]</a>                | 35.8 | 35.8 | 100% | 0.42  | 79% | <a href="#">gi 351708043 EHB10962.1</a>     |
| <a href="#">PREDICTED: coagulation factor XI isoform X4 [Heterocephalus</a>  | 35.8 | 35.8 | 100% | 0.42  | 79% | <a href="#">gi 512982227 XP_004853110.1</a> |
| <a href="#">PREDICTED: coagulation factor XI isoform X3 [Heterocephalus</a>  | 35.8 | 35.8 | 100% | 0.42  | 79% | <a href="#">gi 512892520 XP_004897310.1</a> |

|                                                                                |      |      |      |      |      |                                             |
|--------------------------------------------------------------------------------|------|------|------|------|------|---------------------------------------------|
| <a href="#">PREDICTED: coagulation factor XI [Dasypus novemcinctus]</a>        | 35.8 | 35.8 | 100% | 0.43 | 79%  | <a href="#">gi 488532217 XP_004457855.1</a> |
| <a href="#">PREDICTED: coagulation factor XI isoform X1 [Chinchilla lanig]</a> | 35.8 | 35.8 | 100% | 0.43 | 79%  | <a href="#">gi 533115750 XP_005373485.1</a> |
| <a href="#">PREDICTED: coagulation factor XI isoform X2 [Heterocephalus]</a>   | 35.8 | 35.8 | 100% | 0.43 | 79%  | <a href="#">gi 512982223 XP_004853108.1</a> |
| <a href="#">PREDICTED: coagulation factor XI isoform X1 [Heterocephalus]</a>   | 35.8 | 35.8 | 100% | 0.43 | 79%  | <a href="#">gi 512892512 XP_004897308.1</a> |
| <a href="#">PREDICTED: coagulation factor XI isoform X1 [Heterocephalus]</a>   | 35.8 | 35.8 | 100% | 0.43 | 79%  | <a href="#">gi 512982221 XP_004853107.1</a> |
| <a href="#">PREDICTED: coagulation factor XI isoform X2 [Heterocephalus]</a>   | 35.8 | 35.8 | 100% | 0.43 | 79%  | <a href="#">gi 512892516 XP_004897309.1</a> |
| <a href="#">PREDICTED: coagulation factor XI [Cavia porcellus]</a>             | 35.8 | 35.8 | 100% | 0.43 | 79%  | <a href="#">gi 348566839 XP_003469209.1</a> |
| <a href="#">PREDICTED: coagulation factor XI [Ictidomys tridecemlineatus]</a>  | 35.4 | 35.4 | 100% | 0.59 | 79%  | <a href="#">gi 532087072 XP_005329248.1</a> |
| <a href="#">PREDICTED: coagulation factor XI [Tupaia chinensis]</a>            | 35.0 | 35.0 | 100% | 0.80 | 79%  | <a href="#">gi 562864607 XP_006160530.1</a> |
| <a href="#">PREDICTED: coagulation factor XI [Chrysochloris asiatica]</a>      | 34.6 | 34.6 | 85%  | 1.1  | 83%  | <a href="#">gi 586451182 XP_006834518.1</a> |
| <a href="#">PREDICTED: plasma kallikrein [Mesocricetus auratus]</a>            | 34.6 | 34.6 | 100% | 1.1  | 79%  | <a href="#">gi 524924656 XP_005066575.1</a> |
| <a href="#">prekallikrein [Canis lupus familiaris]</a>                         | 34.1 | 34.1 | 71%  | 1.4  | 100% | <a href="#">gi 555289929 BAO03248.1</a>     |
| <a href="#">F11 protein [Bos taurus]</a>                                       | 34.1 | 34.1 | 100% | 1.5  | 79%  | <a href="#">gi 86821856 AAI05428.1</a>      |
| <a href="#">coagulation factor XI [Bos taurus]</a>                             | 34.1 | 34.1 | 100% | 1.5  | 79%  | <a href="#">gi 45861248 AAS78506.1</a>      |
| <a href="#">PREDICTED: coagulation factor XI isoform X3 [Fukomys dama]</a>     | 34.1 | 34.1 | 100% | 1.5  | 79%  | <a href="#">gi 731206524 XP_010618089.1</a> |
| <a href="#">blood coagulation factor XI [Bos taurus]</a>                       | 34.1 | 34.1 | 100% | 1.5  | 79%  | <a href="#">gi 45758733 AAS76646.1</a>      |
| <a href="#">PREDICTED: coagulation factor XI isoform X2 [Fukomys dama]</a>     | 34.1 | 34.1 | 100% | 1.5  | 79%  | <a href="#">gi 731206521 XP_010618088.1</a> |
| <a href="#">PREDICTED: coagulation factor XI [Equus caballus]</a>              | 34.1 | 34.1 | 100% | 1.5  | 79%  | <a href="#">gi 149742758 XP_001490330.1</a> |
| <a href="#">PREDICTED: coagulation factor XI isoform 2 [Ceratotherium sir]</a> | 34.1 | 34.1 | 100% | 1.5  | 79%  | <a href="#">gi 478509096 XP_004428828.1</a> |
| <a href="#">PREDICTED: coagulation factor XI [Bison bison bison]</a>           | 34.1 | 34.1 | 100% | 1.5  | 79%  | <a href="#">gi 742100675 XP_010834113.1</a> |
| <a href="#">PREDICTED: coagulation factor XI isoform X1 [Fukomys dama]</a>     | 34.1 | 34.1 | 100% | 1.5  | 79%  | <a href="#">gi 731206515 XP_010618085.1</a> |
| <a href="#">PREDICTED: coagulation factor XI [Nannospalax galili]</a>          | 34.1 | 34.1 | 100% | 1.5  | 79%  | <a href="#">gi 674087872 XP_008851827.1</a> |
| <a href="#">PREDICTED: coagulation factor XI [Equus przewalskii]</a>           | 34.1 | 34.1 | 100% | 1.5  | 79%  | <a href="#">gi 664778079 XP_008508352.1</a> |
| <a href="#">PREDICTED: coagulation factor XI [Bubalus bubalis]</a>             | 34.1 | 34.1 | 100% | 1.5  | 79%  | <a href="#">gi 594073052 XP_006060352.1</a> |
| <a href="#">PREDICTED: coagulation factor XI isoform 1 [Ceratotherium sir]</a> | 34.1 | 34.1 | 100% | 1.5  | 79%  | <a href="#">gi 478509094 XP_004428827.1</a> |
| <a href="#">PREDICTED: coagulation factor XI [Bos mutus]</a>                   | 34.1 | 34.1 | 100% | 1.5  | 79%  | <a href="#">gi 555974149 XP_005899069.1</a> |

## Alignments

Download GenPept Graphics

Next Previous Descriptions

PREDICTED: coagulation factor XI isoform X5 [Homo sapiens]

Sequence ID: [gi|530377344|ref|XP\\_005262882.1|](#) Length: 395 Number of Matches: 1

Range 1: 79 to 92 GenPept Graphics

Next Match Previous Match

| Score         | Expect | Identities | Positives   | Gaps     |
|---------------|--------|------------|-------------|----------|
| 44.3 bits(97) | 6e-04  | 13/14(93%) | 14/14(100%) | 0/14(0%) |

Query 1 KDSVTETLPRVDRT 14  
KDSVTETLPRV+RT  
Sbjct 79 KDSVTETLPRVNR 92

### Related Information

[Gene](#) - associated gene details

Download GenPept Graphics

Next Previous Descriptions

PREDICTED: coagulation factor XI isoform X4 [Homo sapiens]

Sequence ID: [gi|530377342|ref|XP\\_005262881.1|](#) Length: 534 Number of Matches: 1

Range 1: 79 to 92 GenPept Graphics

Next Match Previous Match

| Score         | Expect | Identities | Positives   | Gaps     |
|---------------|--------|------------|-------------|----------|
| 44.3 bits(97) | 7e-04  | 13/14(93%) | 14/14(100%) | 0/14(0%) |

### Related Information

[Gene](#) - associated gene details

[Map Viewer](#) - aligned genomic context

Query 1 KDSVTETLPRVDRT 14  
 KDSVTETLPRV+RT  
 Sbjct 79 KDSVTETLPRVNRT 92

Download [GenPept](#) [Graphics](#)

[▼ Next](#) [▲ Previous](#) [▲ Descriptions](#)

**PREDICTED: coagulation factor XI isoform X2 [Pan paniscus]**

Sequence ID: [gi|675774870|ref|XP\\_008975412.1|](#) Length: 535 Number of Matches: 1

Range 1: 79 to 92 [GenPept](#) [Graphics](#)

[▼ Next Match](#) [▲ Previous Match](#)

| Score         | Expect | Identities | Positives   | Gaps     |
|---------------|--------|------------|-------------|----------|
| 44.3 bits(97) | 7e-04  | 13/14(93%) | 14/14(100%) | 0/14(0%) |

Query 1 KDSVTETLPRVDRT 14  
 KDSVTETLPRV+RT  
 Sbjct 79 KDSVTETLPRVNRT 92

**Related Information**

[Gene](#) - associated gene details  
[Map Viewer](#) - aligned genomic context

Download [GenPept](#) [Graphics](#)

[▼ Next](#) [▲ Previous](#) [▲ Descriptions](#)

**PREDICTED: coagulation factor XI isoform X5 [Pan troglodytes]**

Sequence ID: [gi|694909938|ref|XP\\_009446987.1|](#) Length: 536 Number of Matches: 1

Range 1: 79 to 92 [GenPept](#) [Graphics](#)

[▼ Next Match](#) [▲ Previous Match](#)

| Score         | Expect | Identities | Positives   | Gaps     |
|---------------|--------|------------|-------------|----------|
| 44.3 bits(97) | 7e-04  | 13/14(93%) | 14/14(100%) | 0/14(0%) |

Query 1 KDSVTETLPRVDRT 14  
 KDSVTETLPRV+RT  
 Sbjct 79 KDSVTETLPRVNRT 92

**Related Information**

[Gene](#) - associated gene details

Download [GenPept](#) [Graphics](#)

[▼ Next](#) [▲ Previous](#) [▲ Descriptions](#)

**PREDICTED: coagulation factor XI isoform X3 [Homo sapiens]**

Sequence ID: [gi|530377340|ref|XP\\_005262880.1|](#) Length: 536 Number of Matches: 1

Range 1: 79 to 92 [GenPept](#) [Graphics](#)

[▼ Next Match](#) [▲ Previous Match](#)

| Score         | Expect | Identities | Positives   | Gaps     |
|---------------|--------|------------|-------------|----------|
| 44.3 bits(97) | 7e-04  | 13/14(93%) | 14/14(100%) | 0/14(0%) |

Query 1 KDSVTETLPRVDRT 14  
 KDSVTETLPRV+RT  
 Sbjct 79 KDSVTETLPRVNRT 92

**Related Information**

[Gene](#) - associated gene details

BLAST is a registered trademark of the National Library of Medicine.

NCBI/ BLAST/ blastp suite/ Formatting Results - B94UZJ3W01R

**i** Your search parameters were adjusted to search for a short input sequence.

[Edit and Resubmit](#) [Save Search Strategies](#) [▶ Formatting options](#) [▶ Download](#)

[YouTube](#) [How to read this page](#) [Blast report description](#)

### F11\_KDSVTETLPRVNRT\_NonMod

**RID** [B94UZJ3W01R](#) (Expires on 01-14 10:39 am)

**Query ID** |cl|195779  
**Description** None  
**Molecule type** amino acid  
**Query Length** 14

**Database Name** nr  
**Description** All non-redundant GenBank CDS translations+PDB+SwissProt+PIR excluding environmental samples from WGS projects  
**Program** BLASTP 2.2.30+ [▶ Citation](#)

Other reports: [▶ Search Summary](#) [\[Taxonomy reports\]](#) [\[Distance tree of results\]](#) [\[Multiple alignment\]](#)

### **G** Graphic Summary

**G** [Show Conserved Domains](#)

No putative conserved domains have been detected

Distribution of 100 Blast Hits on the Query Sequence

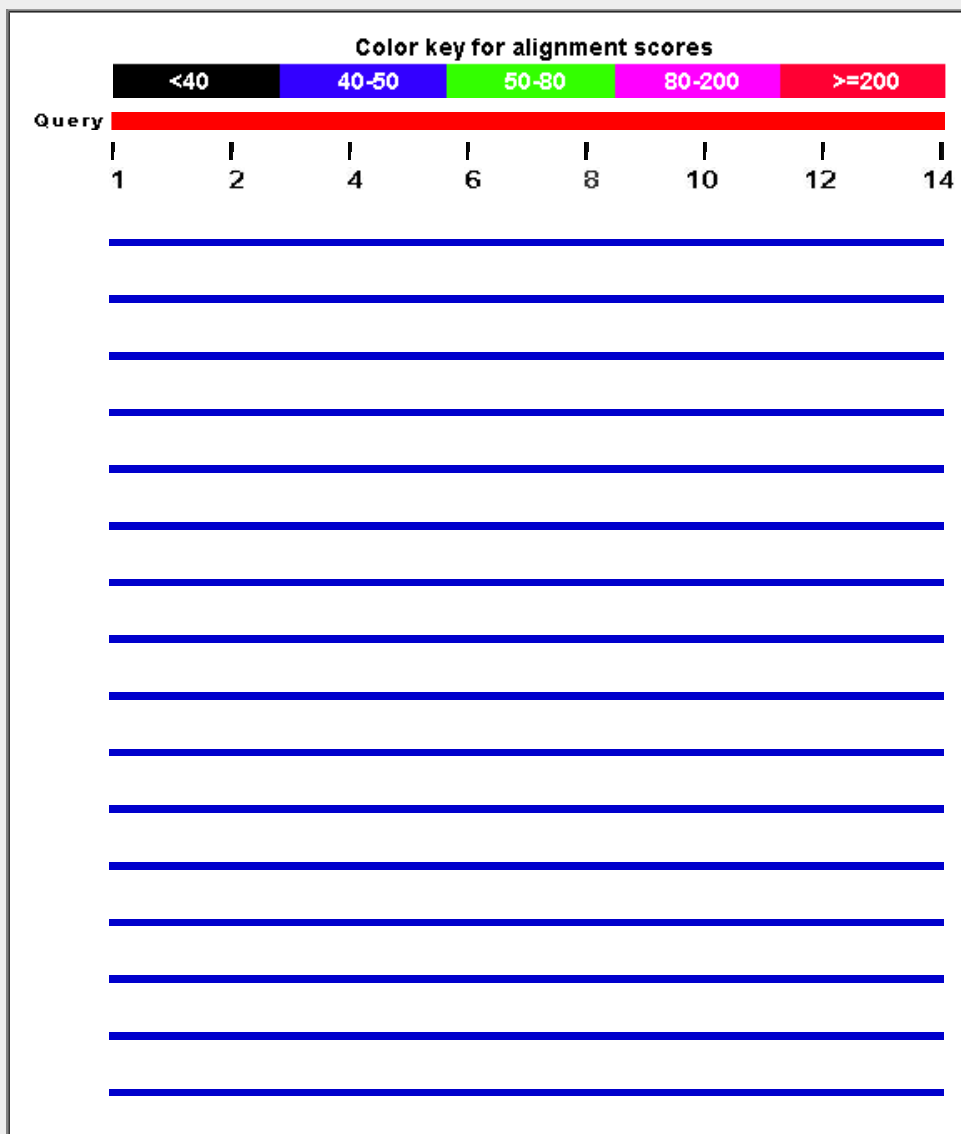

The image shows a table with 30 rows. Each row contains a single blue horizontal line, which appears to be a placeholder for data. The table is centered on the page and is flanked by light blue vertical bars on both sides.

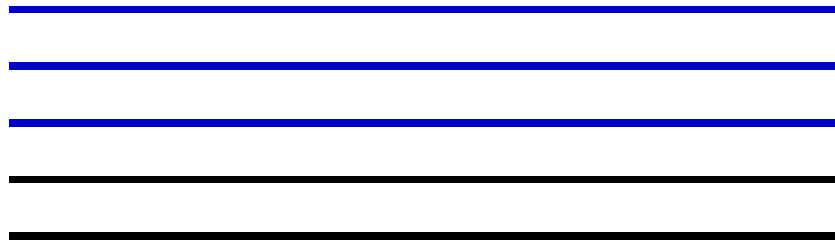

## Descriptions

### Sequences producing significant alignments:

Select: [All](#) [None](#) Selected:0

| <a href="#">Alignments</a> <a href="#">Download</a> <a href="#">GenPept</a> <a href="#">Graphics</a> <a href="#">Distance tree of results</a> <a href="#">Multiple alignment</a> |           |             |             |         |       |                                             |  |
|----------------------------------------------------------------------------------------------------------------------------------------------------------------------------------|-----------|-------------|-------------|---------|-------|---------------------------------------------|--|
| Description                                                                                                                                                                      | Max score | Total score | Query cover | E value | Ident | Accession                                   |  |
| <a href="#">PREDICTED: coagulation factor XI isoform X5 [Homo sapiens]</a>                                                                                                       | 46.9      | 46.9        | 100%        | 9e-05   | 100%  | <a href="#">gi 530377344 XP_005262882.1</a> |  |
| <a href="#">PREDICTED: coagulation factor XI isoform X4 [Homo sapiens]</a>                                                                                                       | 46.9      | 46.9        | 100%        | 9e-05   | 100%  | <a href="#">gi 530377342 XP_005262881.1</a> |  |
| <a href="#">PREDICTED: coagulation factor XI isoform X2 [Pan paniscus]</a>                                                                                                       | 46.9      | 46.9        | 100%        | 9e-05   | 100%  | <a href="#">gi 675774870 XP_008975412.1</a> |  |
| <a href="#">PREDICTED: coagulation factor XI isoform X5 [Pan troglodytes]</a>                                                                                                    | 46.9      | 46.9        | 100%        | 9e-05   | 100%  | <a href="#">gi 694909938 XP_009446987.1</a> |  |
| <a href="#">PREDICTED: coagulation factor XI isoform X3 [Homo sapiens]</a>                                                                                                       | 46.9      | 46.9        | 100%        | 9e-05   | 100%  | <a href="#">gi 530377340 XP_005262880.1</a> |  |
| <a href="#">platelet factor XI [Homo sapiens]</a>                                                                                                                                | 46.9      | 46.9        | 100%        | 9e-05   | 100%  | <a href="#">gi 3258649 AAC24506.1</a>       |  |
| <a href="#">PREDICTED: coagulation factor XI [Gorilla gorilla gorilla]</a>                                                                                                       | 46.9      | 46.9        | 100%        | 9e-05   | 100%  | <a href="#">gi 426346208 XP_004040776.1</a> |  |
| <a href="#">PREDICTED: coagulation factor XI isoform X3 [Saimiri boliviensis b</a>                                                                                               | 46.9      | 46.9        | 100%        | 9e-05   | 100%  | <a href="#">gi 725582192 XP_010342663.1</a> |  |
| <a href="#">PREDICTED: coagulation factor XI isoform X4 [Pan troglodytes]</a>                                                                                                    | 46.9      | 46.9        | 100%        | 9e-05   | 100%  | <a href="#">gi 694909936 XP_009446986.1</a> |  |
| <a href="#">PREDICTED: coagulation factor XI isoform X2 [Homo sapiens]</a>                                                                                                       | 46.9      | 46.9        | 100%        | 9e-05   | 100%  | <a href="#">gi 530377338 XP_005262879.1</a> |  |
| <a href="#">PREDICTED: coagulation factor XI isoform X2 [Rhinopithecus roxel</a>                                                                                                 | 46.9      | 46.9        | 100%        | 9e-05   | 100%  | <a href="#">gi 724897372 XP_010376291.1</a> |  |
| <a href="#">PREDICTED: coagulation factor XI isoform X2 [Papio anubis]</a>                                                                                                       | 46.9      | 46.9        | 100%        | 9e-05   | 100%  | <a href="#">gi 685544400 XP_009206295.1</a> |  |
| <a href="#">PREDICTED: coagulation factor XI isoform X2 [Chlorocebus sabaei</a>                                                                                                  | 46.9      | 46.9        | 100%        | 9e-05   | 100%  | <a href="#">gi 635046203 XP_007998683.1</a> |  |
| <a href="#">PREDICTED: coagulation factor XI isoform X2 [Macaca fascicularis</a>                                                                                                 | 46.9      | 46.9        | 100%        | 9e-05   | 100%  | <a href="#">gi 544436077 XP_005556541.1</a> |  |
| <a href="#">PREDICTED: coagulation factor XI isoform X3 [Pan troglodytes]</a>                                                                                                    | 46.9      | 46.9        | 100%        | 9e-05   | 100%  | <a href="#">gi 694909934 XP_009446985.1</a> |  |
| <a href="#">PREDICTED: coagulation factor XI isoform X6 [Homo sapiens]</a>                                                                                                       | 46.9      | 46.9        | 100%        | 9e-05   | 100%  | <a href="#">gi 578808899 XP_006714200.1</a> |  |
| <a href="#">PREDICTED: coagulation factor XI isoform X2 [Saimiri boliviensis b</a>                                                                                               | 46.9      | 46.9        | 100%        | 9e-05   | 100%  | <a href="#">gi 725582190 XP_010342661.1</a> |  |
| <a href="#">hypothetical protein EGM_04467 [Macaca fascicularis]</a>                                                                                                             | 46.9      | 46.9        | 100%        | 9e-05   | 100%  | <a href="#">gi 355750969 EHH55296.1</a>     |  |
| <a href="#">hypothetical protein EGK_16300 [Macaca mulatta]</a>                                                                                                                  | 46.9      | 46.9        | 100%        | 9e-05   | 100%  | <a href="#">gi 355687768 EHH26352.1</a>     |  |
| <a href="#">PREDICTED: coagulation factor XI isoform X1 [Rhinopithecus roxel</a>                                                                                                 | 46.9      | 46.9        | 100%        | 9e-05   | 100%  | <a href="#">gi 724897369 XP_010376290.1</a> |  |
| <a href="#">PREDICTED: coagulation factor XI isoform X1 [Chlorocebus sabaei</a>                                                                                                  | 46.9      | 46.9        | 100%        | 9e-05   | 100%  | <a href="#">gi 635046201 XP_007998681.1</a> |  |
| <a href="#">PREDICTED: coagulation factor XI [Callithrix jacchus]</a>                                                                                                            | 46.9      | 46.9        | 100%        | 9e-05   | 100%  | <a href="#">gi 296195030 XP_002745209.1</a> |  |
| <a href="#">coagulation factor XI [Homo sapiens]</a>                                                                                                                             | 46.9      | 46.9        | 100%        | 9e-05   | 100%  | <a href="#">gi 180352 AAA51985.1</a>        |  |
| <a href="#">PREDICTED: coagulation factor XI isoform X1 [Macaca fascicularis</a>                                                                                                 | 46.9      | 46.9        | 100%        | 9e-05   | 100%  | <a href="#">gi 544436075 XP_005556540.1</a> |  |
| <a href="#">coagulation factor XI precursor [Homo sapiens]</a>                                                                                                                   | 46.9      | 46.9        | 100%        | 9e-05   | 100%  | <a href="#">gi 4503627 NP_000119.1</a>      |  |
| <a href="#">PREDICTED: coagulation factor XI isoform X1 [Saimiri boliviensis b</a>                                                                                               | 46.9      | 46.9        | 100%        | 9e-05   | 100%  | <a href="#">gi 725582188 XP_010342660.1</a> |  |
| <a href="#">PREDICTED: coagulation factor XI isoform X1 [Papio anubis]</a>                                                                                                       | 46.9      | 46.9        | 100%        | 9e-05   | 100%  | <a href="#">gi 402871005 XP_003899481.1</a> |  |
| <a href="#">PREDICTED: coagulation factor XI [Nomascus leucogenys]</a>                                                                                                           | 46.9      | 46.9        | 100%        | 9e-05   | 100%  | <a href="#">gi 332244773 XP_003271548.1</a> |  |



|                                                                       |      |      |      |       |      |                                             |
|-----------------------------------------------------------------------|------|------|------|-------|------|---------------------------------------------|
| PREDICTED: coagulation factor XI [Pongo abelii]                       | 46.9 | 46.9 | 100% | 9e-05 | 100% | <a href="#">gij297674804 XP_002815399.1</a> |
| PREDICTED: coagulation factor XI isoform X2 [Pan troglodytes]         | 46.9 | 46.9 | 100% | 9e-05 | 100% | <a href="#">gij114597210 XP_001165847.1</a> |
| PREDICTED: coagulation factor XI isoform X1 [Pan troglodytes]         | 46.9 | 46.9 | 100% | 9e-05 | 100% | <a href="#">gij694909931 XP_009446984.1</a> |
| PREDICTED: coagulation factor XI isoform X1 [Homo sapiens]            | 46.9 | 46.9 | 100% | 9e-05 | 100% | <a href="#">gij530377336 XP_005262878.1</a> |
| PREDICTED: coagulation factor XI-like [Macaca mulatta]                | 46.9 | 46.9 | 100% | 9e-05 | 100% | <a href="#">gij297293811 XP_001090398.2</a> |
| PREDICTED: coagulation factor XI [Tarsius syrichta]                   | 42.6 | 42.6 | 100% | 0.002 | 93%  | <a href="#">gij640821392 XP_008067645.1</a> |
| PREDICTED: coagulation factor XI [Otolemur garnettii]                 | 42.6 | 42.6 | 100% | 0.002 | 93%  | <a href="#">gij395840032 XP_003792872.1</a> |
| PREDICTED: LOW QUALITY PROTEIN: coagulation factor XI [Pteropus       | 41.8 | 41.8 | 100% | 0.004 | 93%  | <a href="#">gij586521035 XP_006926977.1</a> |
| PREDICTED: coagulation factor XI [Vicugna pacos]                      | 41.8 | 41.8 | 100% | 0.005 | 93%  | <a href="#">gij560951202 XP_006198143.1</a> |
| coagulation factor XI precursor [Canis lupus familiaris]              | 41.8 | 41.8 | 100% | 0.005 | 93%  | <a href="#">gij205361194 NP_001128595.1</a> |
| PREDICTED: coagulation factor XI isoform X2 [Leptonychotes weddellii] | 41.8 | 41.8 | 100% | 0.005 | 93%  | <a href="#">gij585180453 XP_006741890.1</a> |
| PREDICTED: coagulation factor XI [Sorex araneus]                      | 41.8 | 41.8 | 100% | 0.005 | 93%  | <a href="#">gij505830321 XP_004610458.1</a> |
| PREDICTED: coagulation factor XI isoform 3 [Odobenus rosmarus]        | 41.8 | 41.8 | 100% | 0.005 | 93%  | <a href="#">gij472396395 XP_004417424.1</a> |
| PREDICTED: coagulation factor XI-like [Ailuropoda melanoleuca]        | 41.8 | 41.8 | 100% | 0.005 | 93%  | <a href="#">gij301776062 XP_002923450.1</a> |
| PREDICTED: LOW QUALITY PROTEIN: coagulation factor XI [Pan            | 41.8 | 41.8 | 100% | 0.005 | 93%  | <a href="#">gij591347751 XP_007099050.1</a> |
| PREDICTED: coagulation factor XI [Camelus ferus]                      | 41.8 | 41.8 | 100% | 0.005 | 93%  | <a href="#">gij560904135 XP_006178431.1</a> |
| PREDICTED: coagulation factor XI isoform X2 [Canis lupus familiaris]  | 41.8 | 41.8 | 100% | 0.005 | 93%  | <a href="#">gij545526400 XP_005629983.1</a> |
| PREDICTED: coagulation factor XI [Felis catus]                        | 41.8 | 41.8 | 100% | 0.005 | 93%  | <a href="#">gij410956035 XP_003984650.1</a> |
| PREDICTED: coagulation factor XI isoform X3 [Leptonychotes weddellii] | 41.8 | 41.8 | 100% | 0.005 | 93%  | <a href="#">gij585180455 XP_006741891.1</a> |
| PREDICTED: coagulation factor XI isoform 2 [Odobenus rosmarus]        | 41.8 | 41.8 | 100% | 0.005 | 93%  | <a href="#">gij472396393 XP_004417423.1</a> |
| PREDICTED: coagulation factor XI isoform X1 [Leptonychotes weddellii] | 41.8 | 41.8 | 100% | 0.005 | 93%  | <a href="#">gij585180451 XP_006741889.1</a> |
| PREDICTED: coagulation factor XI isoform X1 [Canis lupus familiaris]  | 41.8 | 41.8 | 100% | 0.005 | 93%  | <a href="#">gij545526398 XP_005629982.1</a> |
| PREDICTED: coagulation factor XI [Mustela putorius furo]              | 41.8 | 41.8 | 100% | 0.005 | 93%  | <a href="#">gij511876760 XP_004758357.1</a> |
| PREDICTED: coagulation factor XI isoform 1 [Odobenus rosmarus]        | 41.8 | 41.8 | 100% | 0.005 | 93%  | <a href="#">gij472396391 XP_004417422.1</a> |
| PREDICTED: LOW QUALITY PROTEIN: coagulation factor XI [Ursus          | 41.8 | 41.8 | 100% | 0.005 | 93%  | <a href="#">gij671035736 XP_008708722.1</a> |
| PREDICTED: coagulation factor XI [Octodon degus]                      | 40.1 | 40.1 | 100% | 0.017 | 86%  | <a href="#">gij507682719 XP_004639867.1</a> |
| Coagulation factor XI [Myotis brandtii]                               | 39.2 | 39.2 | 100% | 0.029 | 86%  | <a href="#">gij521037558 EPQ19336.1</a>     |
| PREDICTED: LOW QUALITY PROTEIN: coagulation factor XI [Myotis         | 39.2 | 39.2 | 100% | 0.031 | 86%  | <a href="#">gij554587005 XP_005884913.1</a> |
| PREDICTED: plasma kallikrein isoform X1 [Bos taurus]                  | 38.4 | 38.4 | 100% | 0.059 | 86%  | <a href="#">gij529009741 XP_005226045.1</a> |
| PREDICTED: plasma kallikrein isoform X2 [Capra hircus]                | 38.4 | 38.4 | 100% | 0.059 | 86%  | <a href="#">gij548524193 XP_005698801.1</a> |
| Coagulation factor XI [Heterocephalus glaber]                         | 38.4 | 38.4 | 100% | 0.059 | 86%  | <a href="#">gij351708043 EHB10962.1</a>     |
| PREDICTED: coagulation factor XI isoform X4 [Heterocephalus glaber]   | 38.4 | 38.4 | 100% | 0.059 | 86%  | <a href="#">gij512982227 XP_004853110.1</a> |
| PREDICTED: coagulation factor XI isoform X3 [Heterocephalus glaber]   | 38.4 | 38.4 | 100% | 0.059 | 86%  | <a href="#">gij512892520 XP_004897310.1</a> |
| PREDICTED: plasma kallikrein [Bos mutus]                              | 38.4 | 38.4 | 100% | 0.060 | 86%  | <a href="#">gij555974157 XP_005899073.1</a> |
| PREDICTED: coagulation factor XI [Dasypus novemcinctus]               | 38.4 | 38.4 | 100% | 0.060 | 86%  | <a href="#">gij488532217 XP_004457855.1</a> |
| PREDICTED: coagulation factor XI isoform X1 [Chinchilla lanigera]     | 38.4 | 38.4 | 100% | 0.060 | 86%  | <a href="#">gij533115750 XP_005373485.1</a> |
| PREDICTED: coagulation factor XI isoform X2 [Heterocephalus glaber]   | 38.4 | 38.4 | 100% | 0.060 | 86%  | <a href="#">gij512982223 XP_004853108.1</a> |
| PREDICTED: coagulation factor XI isoform X1 [Heterocephalus glaber]   | 38.4 | 38.4 | 100% | 0.060 | 86%  | <a href="#">gij512892512 XP_004897308.1</a> |
| PREDICTED: coagulation factor XI isoform X1 [Heterocephalus glaber]   | 38.4 | 38.4 | 100% | 0.060 | 86%  | <a href="#">gij512982221 XP_004853107.1</a> |
| PREDICTED: coagulation factor XI isoform X2 [Heterocephalus glaber]   | 38.4 | 38.4 | 100% | 0.060 | 86%  | <a href="#">gij512892516 XP_004897309.1</a> |
| PREDICTED: plasma kallikrein [Sorex araneus]                          | 38.4 | 38.4 | 100% | 0.060 | 86%  | <a href="#">gij505830323 XP_004610459.1</a> |
| PREDICTED: coagulation factor XI [Cavia porcellus]                    | 38.4 | 38.4 | 100% | 0.060 | 86%  | <a href="#">gij348566839 XP_003469209.1</a> |
| Plasma kallikrein [Bos mutus]                                         | 38.4 | 38.4 | 100% | 0.060 | 86%  | <a href="#">gij440903405 ELR54069.1</a>     |
| plasma kallikrein precursor [Bos taurus]                              | 38.4 | 38.4 | 100% | 0.060 | 86%  | <a href="#">gij114052314 NP_001039817.1</a> |
| PREDICTED: plasma kallikrein [Bubalus bubalis]                        | 38.4 | 38.4 | 100% | 0.060 | 86%  | <a href="#">gij594073050 XP_006060351.1</a> |

|                                                                                                |      |      |      |       |     |                                             |
|------------------------------------------------------------------------------------------------|------|------|------|-------|-----|---------------------------------------------|
| <a href="#">PREDICTED: plasma kallikrein [Pantholops hodgsonii]</a>                            | 38.4 | 38.4 | 100% | 0.060 | 86% | <a href="#">gil556754531 XP_005972630.1</a> |
| <a href="#">PREDICTED: plasma kallikrein isoform X1 [Capra hircus]</a>                         | 38.4 | 38.4 | 100% | 0.060 | 86% | <a href="#">gil548524191 XP_005698800.1</a> |
| <a href="#">PREDICTED: plasma kallikrein [Ovis aries]</a>                                      | 38.4 | 38.4 | 100% | 0.060 | 86% | <a href="#">gil426256278 XP_004021768.1</a> |
| <a href="#">PREDICTED: plasma kallikrein [Cavia porcellus]</a>                                 | 38.4 | 38.4 | 100% | 0.060 | 86% | <a href="#">gil348566841 XP_003469210.1</a> |
| <a href="#">PREDICTED: plasma kallikrein isoform X2 [Fukomys damarensis]</a>                   | 38.4 | 38.4 | 100% | 0.060 | 86% | <a href="#">gil731206513 XP_010618084.1</a> |
| <a href="#">PREDICTED: plasma kallikrein isoform X1 [Fukomys damarensis]</a>                   | 38.4 | 38.4 | 100% | 0.060 | 86% | <a href="#">gil731206510 XP_010618083.1</a> |
| <a href="#">PREDICTED: coagulation factor XI [Ictidomys tridecemlineatus]</a>                  | 38.0 | 38.0 | 100% | 0.082 | 86% | <a href="#">gil532087072 XP_005329248.1</a> |
| <a href="#">PREDICTED: coagulation factor XI [Tupaia chinensis]</a>                            | 37.5 | 37.5 | 100% | 0.11  | 86% | <a href="#">gil562864607 XP_006160530.1</a> |
| <a href="#">PREDICTED: coagulation factor XI [Chrysochloris asiatica]</a>                      | 37.1 | 37.1 | 85%  | 0.16  | 92% | <a href="#">gil586451182 XP_006834518.1</a> |
| <a href="#">F11 protein [Bos taurus]</a>                                                       | 36.7 | 36.7 | 100% | 0.21  | 86% | <a href="#">gil86821856 AAI05428.1</a>      |
| <a href="#">coagulation factor XI [Bos taurus]</a>                                             | 36.7 | 36.7 | 100% | 0.21  | 86% | <a href="#">gil45861248 AAS78506.1</a>      |
| <a href="#">PREDICTED: coagulation factor XI isoform X3 [Fukomys damarensis]</a>               | 36.7 | 36.7 | 100% | 0.21  | 86% | <a href="#">gil731206524 XP_010618089.1</a> |
| <a href="#">blood coagulation factor XI [Bos taurus]</a>                                       | 36.7 | 36.7 | 100% | 0.21  | 86% | <a href="#">gil45758733 AAS76646.1</a>      |
| <a href="#">PREDICTED: coagulation factor XI isoform X2 [Fukomys damarensis]</a>               | 36.7 | 36.7 | 100% | 0.21  | 86% | <a href="#">gil731206521 XP_010618088.1</a> |
| <a href="#">PREDICTED: coagulation factor XI [Equus caballus]</a>                              | 36.7 | 36.7 | 100% | 0.21  | 86% | <a href="#">gil149742758 XP_001490330.1</a> |
| <a href="#">PREDICTED: coagulation factor XI isoform 2 [Ceratotherium simum]</a>               | 36.7 | 36.7 | 100% | 0.21  | 86% | <a href="#">gil478509096 XP_004428828.1</a> |
| <a href="#">PREDICTED: coagulation factor XI isoform X1 [Fukomys damarensis]</a>               | 36.7 | 36.7 | 100% | 0.21  | 86% | <a href="#">gil731206515 XP_010618085.1</a> |
| <a href="#">PREDICTED: coagulation factor XI [Nannospalax galii]</a>                           | 36.7 | 36.7 | 100% | 0.21  | 86% | <a href="#">gil674087872 XP_008851827.1</a> |
| <a href="#">PREDICTED: coagulation factor XI [Equus przewalskii]</a>                           | 36.7 | 36.7 | 100% | 0.21  | 86% | <a href="#">gil664778079 XP_008508352.1</a> |
| <a href="#">PREDICTED: coagulation factor XI [Bubalus bubalis]</a>                             | 36.7 | 36.7 | 100% | 0.21  | 86% | <a href="#">gil594073052 XP_006060352.1</a> |
| <a href="#">PREDICTED: coagulation factor XI isoform 1 [Ceratotherium simum]</a>               | 36.7 | 36.7 | 100% | 0.21  | 86% | <a href="#">gil478509094 XP_004428827.1</a> |
| <a href="#">PREDICTED: coagulation factor XI [Bos mutus]</a>                                   | 36.7 | 36.7 | 100% | 0.21  | 86% | <a href="#">gil555974149 XP_005899069.1</a> |
| <a href="#">coagulation factor XI precursor [Bos taurus]</a>                                   | 36.7 | 36.7 | 100% | 0.21  | 86% | <a href="#">gil56710319 NP_001008665.1</a>  |
| <a href="#">TPA: coagulation factor XI precursor [Bos taurus]</a>                              | 36.7 | 36.7 | 100% | 0.21  | 86% | <a href="#">gil296472409 DAA14524.1</a>     |
| <a href="#">PREDICTED: coagulation factor XI [Mesocricetus auratus]</a>                        | 36.7 | 36.7 | 100% | 0.21  | 86% | <a href="#">gil524924928 XP_005066710.1</a> |
| <a href="#">PREDICTED: coagulation factor XI [Cricetulus griseus]</a>                          | 36.7 | 36.7 | 100% | 0.21  | 86% | <a href="#">gil354490732 XP_003507510.1</a> |
| <a href="#">PREDICTED: LOW QUALITY PROTEIN: coagulation factor XI [Peromyscus maniculatus]</a> | 36.7 | 36.7 | 100% | 0.22  | 86% | <a href="#">gil589915357 XP_006971011.1</a> |

## Alignments

Download GenPept Graphics

Next Previous Descriptions

**PREDICTED: coagulation factor XI isoform X5 [Homo sapiens]**  
 Sequence ID: [gil530377344|ref|XP\\_005262882.1](#) Length: 395 Number of Matches: 1

Range 1: 79 to 92 GenPept Graphics Next Match Previous Match

| Score          | Expect | Identities  | Positives   | Gaps     |
|----------------|--------|-------------|-------------|----------|
| 46.9 bits(103) | 9e-05  | 14/14(100%) | 14/14(100%) | 0/14(0%) |

Query 1 KDSVTETLPRVNRT 14  
 KDSVTETLPRVNRT  
 Sbjct 79 KDSVTETLPRVNRT 92

### Related Information

[Gene](#) - associated gene details

Download GenPept Graphics

Next Previous Descriptions

**PREDICTED: coagulation factor XI isoform X4 [Homo sapiens]**  
 Sequence ID: [gil530377342|ref|XP\\_005262881.1](#) Length: 534 Number of Matches: 1

Range 1: 79 to 92 GenPept Graphics Next Match Previous Match

| Score          | Expect | Identities  | Positives   | Gaps     |
|----------------|--------|-------------|-------------|----------|
| 46.9 bits(103) | 9e-05  | 14/14(100%) | 14/14(100%) | 0/14(0%) |

Query 1 KDSVTETLPRVNRT 14

### Related Information

[Gene](#) - associated gene details

[Map Viewer](#) - aligned genomic context

Sbjct 79 KDSVTETLPRVNRT 92

[Download](#) [GenPept](#) [Graphics](#)

[Next](#) [Previous](#) [Descriptions](#)

**PREDICTED: coagulation factor XI isoform X2 [Pan paniscus]**

Sequence ID: [gi|675774870|ref|XP\\_008975412.1|](#) Length: 535 Number of Matches: 1

Range 1: 79 to 92 [GenPept](#) [Graphics](#)

[Next Match](#) [Previous Match](#)

| Score          | Expect | Identities  | Positives   | Gaps     |
|----------------|--------|-------------|-------------|----------|
| 46.9 bits(103) | 9e-05  | 14/14(100%) | 14/14(100%) | 0/14(0%) |

Query 1 KDSVTETLPRVNRT 14  
 KDSVTETLPRVNRT  
 Sbjct 79 KDSVTETLPRVNRT 92

**Related Information**

[Gene](#) - associated gene details  
[Map Viewer](#) - aligned genomic context

[Download](#) [GenPept](#) [Graphics](#)

[Next](#) [Previous](#) [Descriptions](#)

**PREDICTED: coagulation factor XI isoform X5 [Pan troglodytes]**

Sequence ID: [gi|694909938|ref|XP\\_009446987.1|](#) Length: 536 Number of Matches: 1

Range 1: 79 to 92 [GenPept](#) [Graphics](#)

[Next Match](#) [Previous Match](#)

| Score          | Expect | Identities  | Positives   | Gaps     |
|----------------|--------|-------------|-------------|----------|
| 46.9 bits(103) | 9e-05  | 14/14(100%) | 14/14(100%) | 0/14(0%) |

Query 1 KDSVTETLPRVNRT 14  
 KDSVTETLPRVNRT  
 Sbjct 79 KDSVTETLPRVNRT 92

**Related Information**

[Gene](#) - associated gene details

[Download](#) [GenPept](#) [Graphics](#)

[Next](#) [Previous](#) [Descriptions](#)

**PREDICTED: coagulation factor XI isoform X3 [Homo sapiens]**

Sequence ID: [gi|530377340|ref|XP\\_005262880.1|](#) Length: 536 Number of Matches: 1

Range 1: 79 to 92 [GenPept](#) [Graphics](#)

[Next Match](#) [Previous Match](#)

| Score          | Expect | Identities  | Positives   | Gaps     |
|----------------|--------|-------------|-------------|----------|
| 46.9 bits(103) | 9e-05  | 14/14(100%) | 14/14(100%) | 0/14(0%) |

Query 1 KDSVTETLPRVNRT 14  
 KDSVTETLPRVNRT  
 Sbjct 79 KDSVTETLPRVNRT 92

**Related Information**

[Gene](#) - associated gene details

BLAST is a registered trademark of the National Library of Medicine.

▶ NCBI/ BLAST/ blastp suite/ Formatting Results - BTH21AWC016

**i** Your search parameters were adjusted to search for a short input sequence.

[Edit and Resubmit](#) [Save Search Strategies](#) ▶ [Formatting options](#) ▶ [Download](#) [YouTube](#) [How to read this page](#) [Blast report description](#)

### F11\_KGINYDSSVAKS\_Mod

RID [BTH21AWC016](#) (Expires on 01-20 15:45 pm)

**Query ID** |cl|28637  
**Description** None  
**Molecule type** amino acid  
**Query Length** 12

**Database Name** nr  
**Description** All non-redundant GenBank CDS translations+PDB+SwissProt+PIR+PRF excluding environmental samples from WGS projects  
**Program** BLASTP 2.2.30+ ▶ [Citation](#)

Other reports: ▶ [Search Summary](#) [[Taxonomy reports](#)] [[Distance tree of results](#)] [[Related Structures](#)] [[Multiple alignment](#)]

### Graphic Summary

[Show Conserved Domains](#)

No putative conserved domains have been detected

Distribution of 100 Blast Hits on the Query Sequence

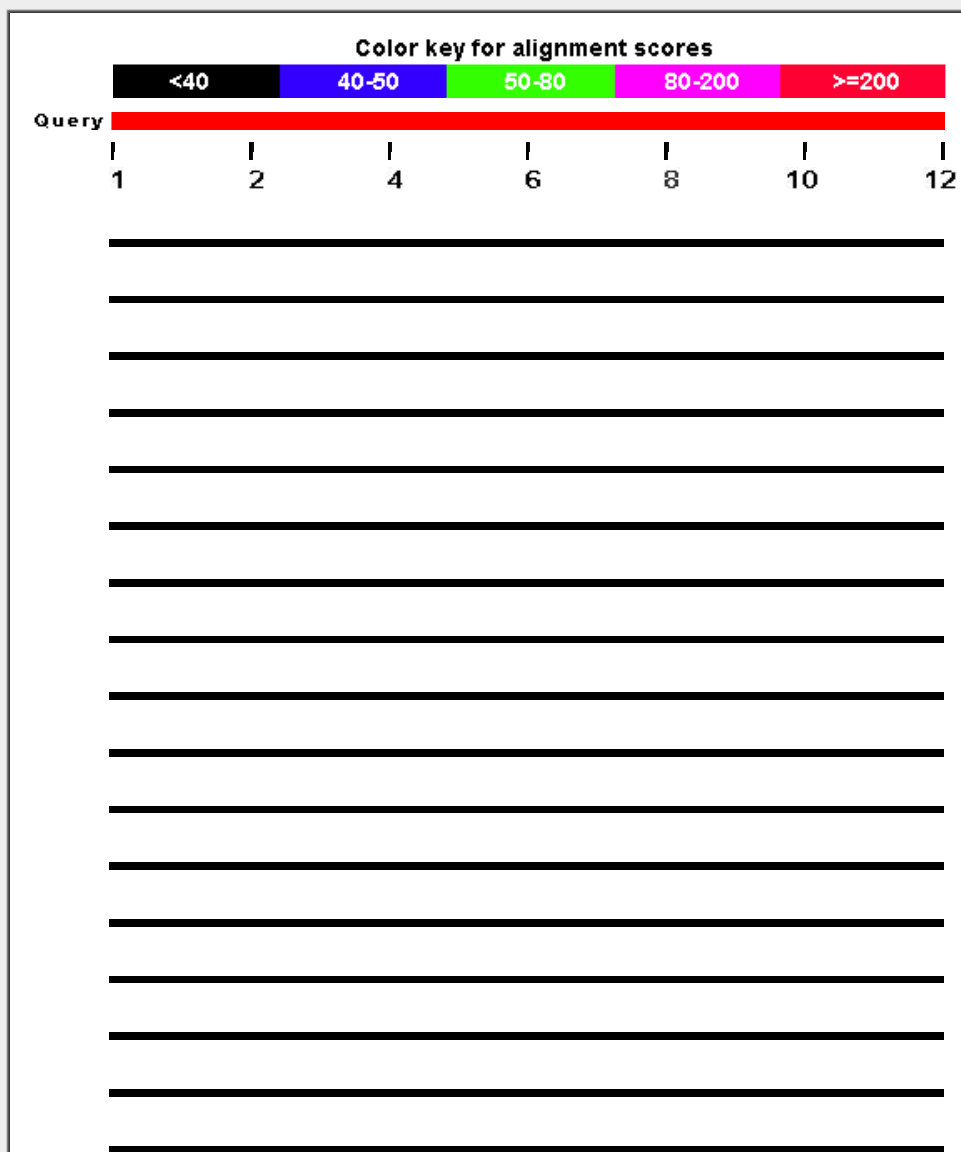

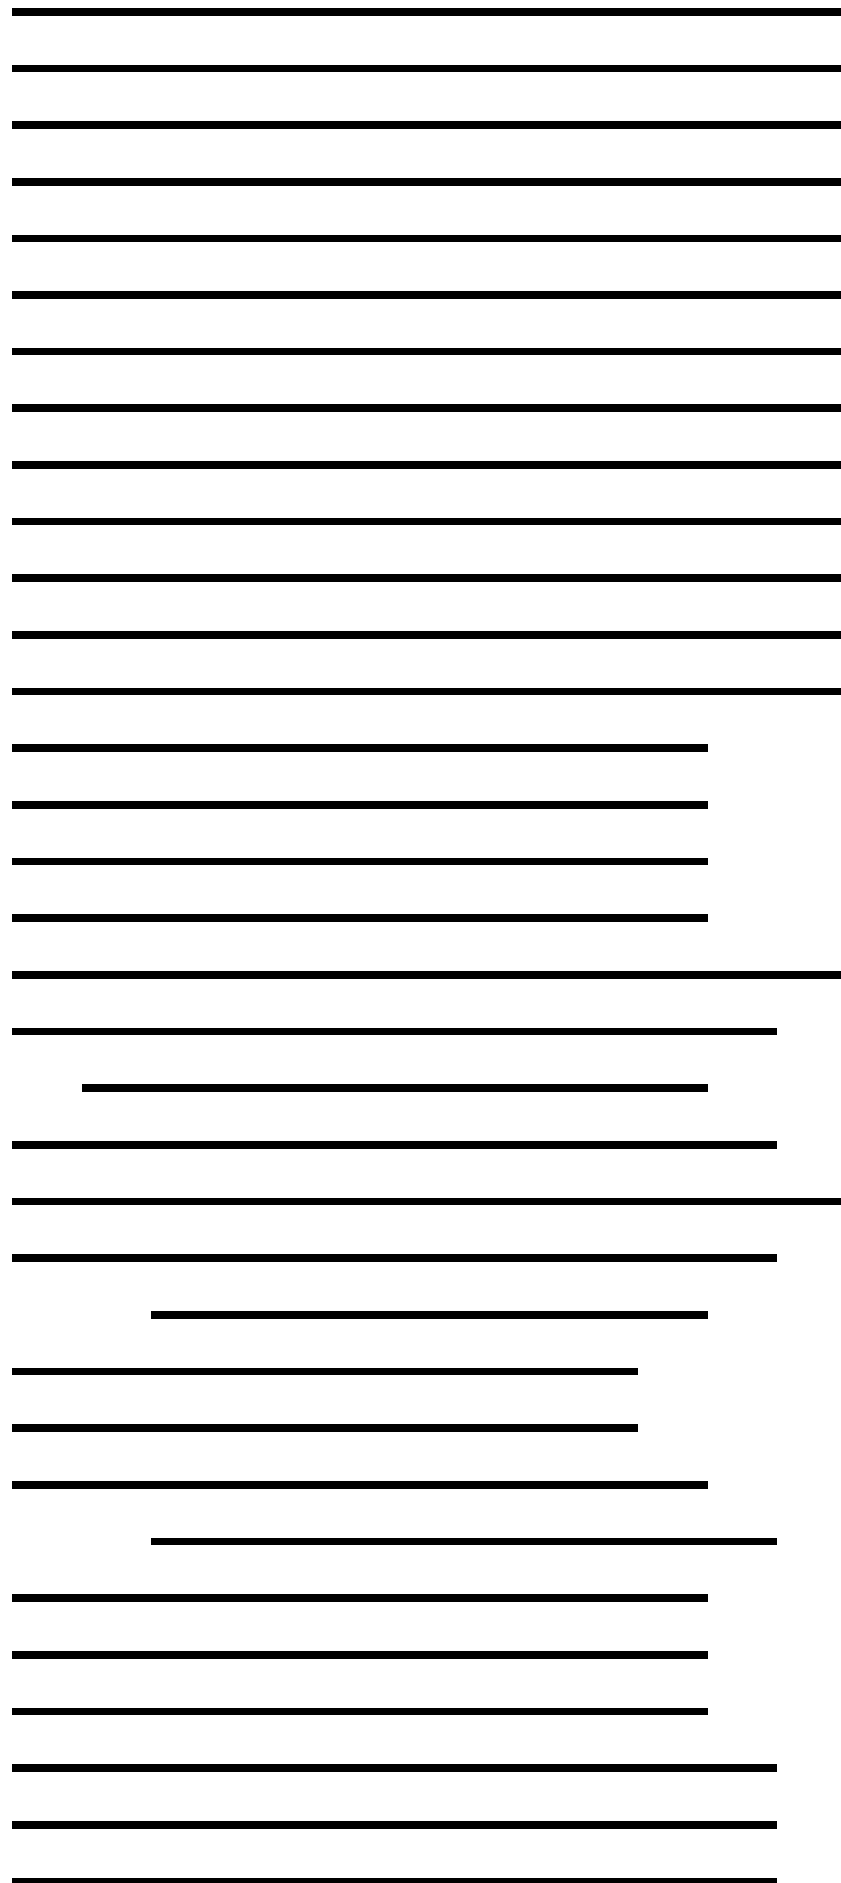

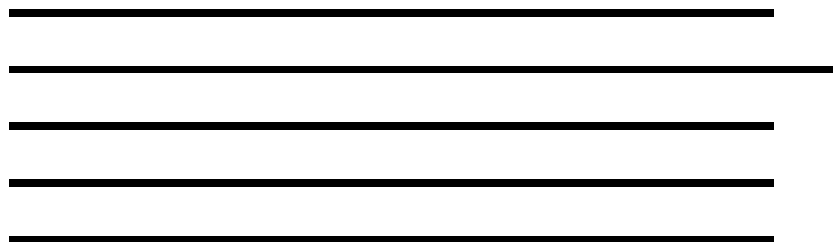

## Descriptions

### Sequences producing significant alignments:

Select: [All](#) [None](#) Selected:0

[Alignments](#)
[Download](#)
[GenPept](#)
[Graphics](#)
[Distance tree of results](#)
[Multiple alignment](#)


| Description                                                                     | Max score | Total score | Query cover | E value | Ident | Accession                                   |
|---------------------------------------------------------------------------------|-----------|-------------|-------------|---------|-------|---------------------------------------------|
| <a href="#">PREDICTED: coagulation factor XI isoform X5 [Homo sapiens]</a>      | 36.7      | 36.7        | 100%        | 0.18    | 92%   | <a href="#">gi 530377344 XP_005262882.1</a> |
| <a href="#">PREDICTED: coagulation factor XI isoform X4 [Homo sapiens]</a>      | 36.7      | 36.7        | 100%        | 0.18    | 92%   | <a href="#">gi 530377342 XP_005262881.1</a> |
| <a href="#">PREDICTED: coagulation factor XI isoform X2 [Pan paniscus]</a>      | 36.7      | 36.7        | 100%        | 0.18    | 92%   | <a href="#">gi 675774870 XP_008975412.1</a> |
| <a href="#">PREDICTED: coagulation factor XI isoform X5 [Pan troglodytes]</a>   | 36.7      | 36.7        | 100%        | 0.18    | 92%   | <a href="#">gi 694909938 XP_009446987.1</a> |
| <a href="#">PREDICTED: coagulation factor XI isoform X3 [Homo sapiens]</a>      | 36.7      | 36.7        | 100%        | 0.18    | 92%   | <a href="#">gi 530377340 XP_005262880.1</a> |
| <a href="#">PREDICTED: coagulation factor XI [Gorilla gorilla gorilla]</a>      | 36.7      | 36.7        | 100%        | 0.18    | 92%   | <a href="#">gi 426346208 XP_004040776.1</a> |
| <a href="#">PREDICTED: coagulation factor XI isoform X4 [Pan troglodytes]</a>   | 36.7      | 36.7        | 100%        | 0.18    | 92%   | <a href="#">gi 694909936 XP_009446986.1</a> |
| <a href="#">PREDICTED: coagulation factor XI isoform X2 [Homo sapiens]</a>      | 36.7      | 36.7        | 100%        | 0.18    | 92%   | <a href="#">gi 530377338 XP_005262879.1</a> |
| <a href="#">PREDICTED: coagulation factor XI isoform X3 [Pan troglodytes]</a>   | 36.7      | 36.7        | 100%        | 0.18    | 92%   | <a href="#">gi 694909934 XP_009446985.1</a> |
| <a href="#">PREDICTED: coagulation factor XI isoform X6 [Homo sapiens]</a>      | 36.7      | 36.7        | 100%        | 0.18    | 92%   | <a href="#">gi 578808899 XP_006714200.1</a> |
| <a href="#">coagulation factor XI [Homo sapiens]</a>                            | 36.7      | 36.7        | 100%        | 0.18    | 92%   | <a href="#">gi 180352 AAA51985.1</a>        |
| <a href="#">coagulation factor XI precursor [Homo sapiens]</a>                  | 36.7      | 36.7        | 100%        | 0.18    | 92%   | <a href="#">gi 4503627 NP_000119.1</a>      |
| <a href="#">PREDICTED: coagulation factor XI [Nomascus leucogenys]</a>          | 36.7      | 36.7        | 100%        | 0.18    | 92%   | <a href="#">gi 332244773 XP_003271548.1</a> |
| <a href="#">PREDICTED: coagulation factor XI [Pongo abelii]</a>                 | 36.7      | 36.7        | 100%        | 0.18    | 92%   | <a href="#">gi 297674804 XP_002815399.1</a> |
| <a href="#">PREDICTED: coagulation factor XI isoform X2 [Pan troglodytes]</a>   | 36.7      | 36.7        | 100%        | 0.18    | 92%   | <a href="#">gi 114597210 XP_001165847.1</a> |
| <a href="#">PREDICTED: coagulation factor XI isoform X1 [Pan troglodytes]</a>   | 36.7      | 36.7        | 100%        | 0.18    | 92%   | <a href="#">gi 694909931 XP_009446984.1</a> |
| <a href="#">PREDICTED: coagulation factor XI isoform X1 [Homo sapiens]</a>      | 36.7      | 36.7        | 100%        | 0.18    | 92%   | <a href="#">gi 530377336 XP_005262878.1</a> |
| <a href="#">PREDICTED: coagulation factor XI isoform X2 [Papio anubis]</a>      | 32.9      | 32.9        | 100%        | 3.2     | 83%   | <a href="#">gi 685544400 XP_009206295.1</a> |
| <a href="#">PREDICTED: coagulation factor XI isoform X2 [Chlorocebus sa]</a>    | 32.9      | 32.9        | 100%        | 3.2     | 83%   | <a href="#">gi 635046203 XP_007998683.1</a> |
| <a href="#">PREDICTED: coagulation factor XI isoform X2 [Macaca fascicu]</a>    | 32.9      | 32.9        | 100%        | 3.2     | 83%   | <a href="#">gi 544436077 XP_005556541.1</a> |
| <a href="#">PREDICTED: coagulation factor XI isoform X1 [Chlorocebus sa]</a>    | 32.9      | 32.9        | 100%        | 3.2     | 83%   | <a href="#">gi 635046201 XP_007998681.1</a> |
| <a href="#">PREDICTED: coagulation factor XI isoform X1 [Macaca fascicu]</a>    | 32.9      | 32.9        | 100%        | 3.2     | 83%   | <a href="#">gi 544436075 XP_005556540.1</a> |
| <a href="#">PREDICTED: coagulation factor XI isoform X1 [Papio anubis]</a>      | 32.9      | 32.9        | 100%        | 3.2     | 83%   | <a href="#">gi 402871005 XP_003899481.1</a> |
| <a href="#">PREDICTED: coagulation factor XI-like [Macaca mulatta]</a>          | 32.9      | 32.9        | 100%        | 3.3     | 83%   | <a href="#">gi 297293811 XP_001090398.2</a> |
| <a href="#">PREDICTED: coagulation factor XI isoform X3 [Saimiri boliviens]</a> | 31.2      | 31.2        | 100%        | 11      | 75%   | <a href="#">gi 725582192 XP_010342663.1</a> |
| <a href="#">PREDICTED: coagulation factor XI isoform X2 [Saimiri boliviens]</a> | 31.2      | 31.2        | 100%        | 11      | 75%   | <a href="#">gi 725582190 XP_010342661.1</a> |
| <a href="#">PREDICTED: coagulation factor XI isoform X1 [Saimiri boliviens]</a> | 31.2      | 31.2        | 100%        | 11      | 75%   | <a href="#">gi 725582188 XP_010342660.1</a> |
| <a href="#">PREDICTED: coagulation factor XI isoform X2 [Rhinopithecus r]</a>   | 30.3      | 30.3        | 100%        | 21      | 75%   | <a href="#">gi 724897372 XP_010376291.1</a> |
| <a href="#">PREDICTED: coagulation factor XI isoform X1 [Rhinopithecus r]</a>   | 30.3      | 30.3        | 100%        | 21      | 75%   | <a href="#">gi 724897369 XP_010376290.1</a> |

|                                                                                 |      |      |      |     |      |                                             |
|---------------------------------------------------------------------------------|------|------|------|-----|------|---------------------------------------------|
| <a href="#">PREDICTED: coagulation factor XI [Trichechus manatus latirois]</a>  | 30.3 | 30.3 | 100% | 21  | 83%  | <a href="#">gi 471399784 XP_004382857.1</a> |
| <a href="#">dNA polymerase [Clostridium sp. CAG:470]</a>                        | 29.1 | 29.1 | 83%  | 55  | 80%  | <a href="#">gi 548192314 WP_022413014.1</a> |
| <a href="#">dNA polymerase [Clostridium sp. CAG:389]</a>                        | 29.1 | 29.1 | 83%  | 55  | 80%  | <a href="#">gi 548291906 WP_022484756.1</a> |
| <a href="#">PREDICTED: uncharacterized protein LOC104705644 [Cameli]</a>        | 28.6 | 28.6 | 83%  | 65  | 80%  | <a href="#">gi 727487947 XP_010419992.1</a> |
| <a href="#">PREDICTED: uncharacterized protein LOC104735395 [Cameli]</a>        | 28.6 | 28.6 | 83%  | 65  | 80%  | <a href="#">gi 727562425 XP_010453485.1</a> |
| <a href="#">hypothetical protein EGK_16300 [Macaca mulatta]</a>                 | 28.6 | 28.6 | 100% | 74  | 75%  | <a href="#">gi 355687768 EHH26352.1</a>     |
| <a href="#">PREDICTED: coagulation factor XI [Condylura cristata]</a>           | 28.6 | 28.6 | 91%  | 74  | 82%  | <a href="#">gi 507947527 XP_004682554.1</a> |
| <a href="#">putative uncharacterized protein [Bacteroides sp. CAG:927]</a>      | 28.2 | 28.2 | 75%  | 98  | 89%  | <a href="#">gi 514415610 WP_016563464.1</a> |
| <a href="#">PREDICTED: coagulation factor XI [Equus caballus]</a>               | 28.2 | 28.2 | 91%  | 100 | 73%  | <a href="#">gi 149742758 XP_001490330.1</a> |
| <a href="#">hypothetical protein EGM_04467 [Macaca fascicularis]</a>            | 28.2 | 28.2 | 100% | 100 | 75%  | <a href="#">gi 355750969 EHH55296.1</a>     |
| <a href="#">PREDICTED: coagulation factor XI [Equus przewalskii]</a>            | 28.2 | 28.2 | 91%  | 100 | 73%  | <a href="#">gi 664778079 XP_008508352.1</a> |
| <a href="#">hypothetical protein LOTGIDRAFT_157972 [Lottia gigantea]</a>        | 28.2 | 28.2 | 66%  | 103 | 100% | <a href="#">gi 676439278 XP_009048802.1</a> |
| <a href="#">hypothetical protein [Capnocytophaga sp. oral taxon 326]</a>        | 27.8 | 27.8 | 75%  | 129 | 89%  | <a href="#">gi 736540851 WP_034555383.1</a> |
| <a href="#">hypothetical protein HMPREF9073_01445 [Capnocytophaga sp.]</a>      | 27.8 | 27.8 | 75%  | 133 | 89%  | <a href="#">gi 429176191 EKY17589.1</a>     |
| <a href="#">hypothetical protein, conserved [Eimeria praecox]</a>               | 27.8 | 27.8 | 83%  | 138 | 90%  | <a href="#">gi 557213591 CDI86720.1</a>     |
| <a href="#">ragB/SusD domain-containing protein [Bacteroides intestinalis (</a> | 27.4 | 27.4 | 75%  | 186 | 89%  | <a href="#">gi 548171327 WP_022393031.1</a> |
| <a href="#">3-phosphoshikimate 1-carboxyvinyltransferase [Bacillus cytotox</a>  | 26.9 | 26.9 | 83%  | 250 | 80%  | <a href="#">gi 500742744 WP_011984315.1</a> |
| <a href="#">3-phosphoshikimate 1-carboxyvinyltransferase [Roseburia sp. (</a>   | 26.9 | 26.9 | 83%  | 250 | 80%  | <a href="#">gi 548338740 WP_022516325.1</a> |
| <a href="#">3-phosphoshikimate 1-carboxyvinyltransferase [Coprococcus sp</a>    | 26.9 | 26.9 | 83%  | 250 | 80%  | <a href="#">gi 547196965 WP_021938274.1</a> |
| <a href="#">hypothetical protein COCSADRAFT_93161 [Bipolaris sorokinia</a>      | 26.9 | 26.9 | 91%  | 250 | 67%  | <a href="#">gi 628072979 XP_007701143.1</a> |
| <a href="#">PREDICTED: coagulation factor XI isoform X3 [Mus musculus]</a>      | 26.9 | 26.9 | 91%  | 252 | 73%  | <a href="#">gi 568954471 XP_006509309.1</a> |
| <a href="#">PREDICTED: coagulation factor XI isoform X2 [Mus musculus]</a>      | 26.9 | 26.9 | 91%  | 252 | 73%  | <a href="#">gi 568954469 XP_006509308.1</a> |
| <a href="#">PREDICTED: coagulation factor XI isoform X1 [Mus musculus]</a>      | 26.9 | 26.9 | 91%  | 252 | 73%  | <a href="#">gi 568954467 XP_006509307.1</a> |
| <a href="#">PREDICTED: coagulation factor XI [Octodon degus]</a>                | 26.9 | 26.9 | 100% | 253 | 67%  | <a href="#">gi 507682719 XP_004639867.1</a> |
| <a href="#">coagulation factor XI precursor [Mus musculus]</a>                  | 26.9 | 26.9 | 91%  | 253 | 73%  | <a href="#">gi 21312500 INP_082342.1</a>    |
| <a href="#">coagulation factor XI [Mus musculus]</a>                            | 26.9 | 26.9 | 91%  | 253 | 73%  | <a href="#">gi 13811665 AAK40233.1</a>      |
| <a href="#">PREDICTED: coagulation factor XI [Nannospalax galili]</a>           | 26.9 | 26.9 | 91%  | 253 | 73%  | <a href="#">gi 674087872 XP_008851827.1</a> |
| <a href="#">PREDICTED: coagulation factor XI [Callithrix jacchus]</a>           | 26.9 | 26.9 | 91%  | 253 | 73%  | <a href="#">gi 296195030 XP_002745209.1</a> |
| <a href="#">PREDICTED: coagulation factor XI [Mesocricetus auratus]</a>         | 26.9 | 26.9 | 91%  | 253 | 73%  | <a href="#">gi 524924928 XP_005066710.1</a> |
| <a href="#">PREDICTED: coagulation factor XI [Microtus ochrogaster]</a>         | 26.9 | 26.9 | 91%  | 253 | 73%  | <a href="#">gi 532039693 XP_005362704.1</a> |
| <a href="#">PREDICTED: coagulation factor XI [Cricetulus griseus]</a>           | 26.9 | 26.9 | 91%  | 253 | 73%  | <a href="#">gi 354490732 XP_003507510.1</a> |
| <a href="#">PREDICTED: LOW QUALITY PROTEIN: coagulation factor XI [</a>         | 26.9 | 26.9 | 91%  | 254 | 73%  | <a href="#">gi 589915357 XP_006971011.1</a> |
| <a href="#">plasma kallikrein-like protein [Cricetulus griseus]</a>             | 26.9 | 26.9 | 91%  | 255 | 73%  | <a href="#">gi 537243084 ERE87598.1</a>     |
| <a href="#">hypothetical protein [Spirochaeta cellobiosiphila]</a>              | 26.9 | 26.9 | 91%  | 256 | 73%  | <a href="#">gi 655903408 WP_028973763.1</a> |
| <a href="#">hypothetical protein MVEG_11016 [Mortierella verticillata NRR1</a>  | 26.5 | 26.5 | 75%  | 334 | 78%  | <a href="#">gi 672818076 KFH62978.1</a>     |
| <a href="#">UNKNOWN [Stylonychia lemnae]</a>                                    | 26.5 | 26.5 | 83%  | 335 | 80%  | <a href="#">gi 678318313 CDW85335.1</a>     |
| <a href="#">glutamine synthetase [Clostridium thermocellum]</a>                 | 26.5 | 26.5 | 75%  | 340 | 89%  | <a href="#">gi 489607843 WP_003512284.1</a> |
| <a href="#">dihydroliipoamide dehydrogenase [secondary endosymbiont of ]</a>    | 26.5 | 26.5 | 75%  | 341 | 78%  | <a href="#">gi 504701750 WP_014888852.1</a> |
| <a href="#">PREDICTED: coagulation factor XI [Vicugna pacos]</a>                | 26.5 | 26.5 | 100% | 344 | 67%  | <a href="#">gi 560951202 XP_006198143.1</a> |
| <a href="#">PREDICTED: coagulation factor XI [Camelus ferus]</a>                | 26.5 | 26.5 | 100% | 344 | 67%  | <a href="#">gi 560904135 XP_006178431.1</a> |
| <a href="#">regulatory factor X, other [Exophiala dermatitidis NIH/UT8656]</a>  | 26.5 | 26.5 | 83%  | 346 | 70%  | <a href="#">gi 684166392 XP_009157069.1</a> |
| <a href="#">hypothetical protein [Desulforegula conservatrix]</a>               | 26.5 | 26.5 | 83%  | 347 | 70%  | <a href="#">gi 653109506 WP_027359294.1</a> |
| <a href="#">PREDICTED: cyclin-Y-like protein 2 [Callithrix jacchus]</a>         | 26.1 | 26.1 | 83%  | 434 | 70%  | <a href="#">gi 675707925 XP_009007799.1</a> |
| <a href="#">PREDICTED: caffeic acid 3-O-methyltransferase-like [Malus do</a>    | 26.1 | 26.1 | 100% | 448 | 71%  | <a href="#">gi 658063095 XP_008367461.1</a> |
| <a href="#">PREDICTED: cyclin-Y-like protein 2 [Callithrix jacchus]</a>         | 26.1 | 26.1 | 83%  | 452 | 70%  | <a href="#">gi 675709832 XP_009008189.1</a> |

|                                                                               |      |      |      |     |      |                                             |
|-------------------------------------------------------------------------------|------|------|------|-----|------|---------------------------------------------|
| <a href="#">PREDICTED: caffeic acid 3-O-methyltransferase-like [Pyrus x t</a> | 26.1 | 26.1 | 100% | 453 | 71%  | <a href="#">gi 694444346 XP_009348698.1</a> |
| <a href="#">2-hydroxyglutaryl-CoA dehydratase [Dictyoglomus turgidum]</a>     | 26.1 | 26.1 | 91%  | 453 | 82%  | <a href="#">gi 501579763 WP_012584092.1</a> |
| <a href="#">2-hydroxyglutaryl-CoA dehydratase [Dictyoglomus thermophilu</a>   | 26.1 | 26.1 | 91%  | 453 | 82%  | <a href="#">gi 501543197 WP_012548312.1</a> |
| <a href="#">glutaminase [Sediminibacter sp. Hel. I_10]</a>                    | 26.1 | 26.1 | 83%  | 456 | 70%  | <a href="#">gi 652357354 WP_026753496.1</a> |
| <a href="#">glutaminase [Psychroflexus tropicus]</a>                          | 26.1 | 26.1 | 83%  | 456 | 80%  | <a href="#">gi 517867787 WP_019037995.1</a> |
| <a href="#">alpha-methylacyl-CoA racemase [Bacillus aurantiacus]</a>          | 26.1 | 26.1 | 83%  | 457 | 70%  | <a href="#">gi 737201816 WP_035187050.1</a> |
| <a href="#">growth hormone inducible transmembrane protein [Haemonchu</a>     | 26.1 | 26.1 | 75%  | 457 | 78%  | <a href="#">gi 560122294 CDJ93074.1</a>     |
| <a href="#">hypothetical protein Y032_0061g3215 [Ancylostoma ceylanicur</a>   | 26.1 | 26.1 | 75%  | 460 | 78%  | <a href="#">gi 597859796 EYC09216.1</a>     |
| <a href="#">hypothetical protein Y032_0061g3215 [Ancylostoma ceylanicur</a>   | 26.1 | 26.1 | 75%  | 461 | 78%  | <a href="#">gi 597859797 EYC09217.1</a>     |
| <a href="#">BoIA protein domain containing protein [Haemonchus contortus</a>  | 26.1 | 26.1 | 75%  | 463 | 78%  | <a href="#">gi 560117147 CDJ98221.1</a>     |
| <a href="#">ankyrin [Legionella pneumophila]</a>                              | 26.1 | 26.1 | 91%  | 465 | 82%  | <a href="#">gi 653016181 WP_027268203.1</a> |
| <a href="#">ankyrin [Legionella pneumophila]</a>                              | 26.1 | 26.1 | 91%  | 465 | 82%  | <a href="#">gi 504656216 WP_014843318.1</a> |
| <a href="#">hypothetical protein C807_00689 [Lachnospiraceae bacterium ;</a>  | 26.1 | 26.1 | 75%  | 465 | 89%  | <a href="#">gi 507774029 EOS32458.1</a>     |
| <a href="#">PREDICTED: coagulation factor XI [Loxodonta africana]</a>         | 26.1 | 26.1 | 100% | 467 | 75%  | <a href="#">gi 344281436 XP_003412485.1</a> |
| <a href="#">PREDICTED: metabotropic glutamate receptor 4-like [Saccogl</a>    | 26.1 | 26.1 | 66%  | 470 | 88%  | <a href="#">gi 291240817 XP_002740314.1</a> |
| <a href="#">PREDICTED: probable GPI-anchored adhesin-like protein PGA</a>     | 26.1 | 26.1 | 83%  | 472 | 53%  | <a href="#">gi 665792957 XP_008544105.1</a> |
| <a href="#">PREDICTED: probable GPI-anchored adhesin-like protein PGA</a>     | 26.1 | 26.1 | 83%  | 472 | 53%  | <a href="#">gi 665792955 XP_008544104.1</a> |
| <a href="#">PREDICTED: probable GPI-anchored adhesin-like protein PGA</a>     | 26.1 | 26.1 | 83%  | 472 | 53%  | <a href="#">gi 665792953 XP_008544103.1</a> |
| <a href="#">PREDICTED: probable GPI-anchored adhesin-like protein PGA</a>     | 26.1 | 26.1 | 83%  | 472 | 53%  | <a href="#">gi 665792951 XP_008544102.1</a> |
| <a href="#">hypothetical protein [Klebsiella oxytoca]</a>                     | 25.7 | 25.7 | 58%  | 525 | 100% | <a href="#">gi 695790815 WP_032705039.1</a> |
| <a href="#">hypothetical protein [Streptococcus intermedius]</a>              | 25.7 | 25.7 | 83%  | 532 | 80%  | <a href="#">gi 489165200 WP_003074810.1</a> |
| <a href="#">PREDICTED: C-type lectin domain family 4 member C-like [Ch</a>    | 25.7 | 25.7 | 58%  | 575 | 100% | <a href="#">gi 635064539 XP_007966340.1</a> |
| <a href="#">lipoprotein [Trabulsiella guamensis]</a>                          | 25.7 | 25.7 | 58%  | 587 | 100% | <a href="#">gi 740325027 WP_038162106.1</a> |
| <a href="#">threonine transporter RhtB [Bacillus endophyticus]</a>            | 25.7 | 25.7 | 58%  | 609 | 100% | <a href="#">gi 518221703 WP_019391911.1</a> |
| <a href="#">hypothetical protein NECAME_17362 [Necator americanus]</a>        | 25.7 | 25.7 | 58%  | 612 | 100% | <a href="#">gi 568297517 ETN83728.1</a>     |
| <a href="#">cytochrome C [Burkholderia rhizoxinica]</a>                       | 25.7 | 25.7 | 66%  | 617 | 88%  | <a href="#">gi 503200217 WP_013434878.1</a> |

BLAST is a registered trademark of the National Library of Medicine.





NCBI/ BLAST/ blastp suite/ Formatting Results - B94UCTUU01R

Your search parameters were adjusted to search for a short input sequence.

Edit and Resubmit Save Search Strategies Formatting options Download

YouTube How to read this page Blast report description

F11\_KGINYNSSVAKS\_NonMod

RID B94UCTUU01R (Expires on 01-14 10:38 am)

Query ID lcl|298721
Description None
Molecule type amino acid
Query Length 12

Database Name nr
Description All non-redundant GenBank CDS translations+PDB+SwissProt+PIR excluding environmental samples from WGS projects
Program BLASTP 2.2.30+ Citation

Other reports: Search Summary Taxonomy reports Distance tree of results Related Structures Multiple alignment

Graphic Summary

Show Conserved Domains

No putative conserved domains have been detected

Distribution of 100 Blast Hits on the Query Sequence

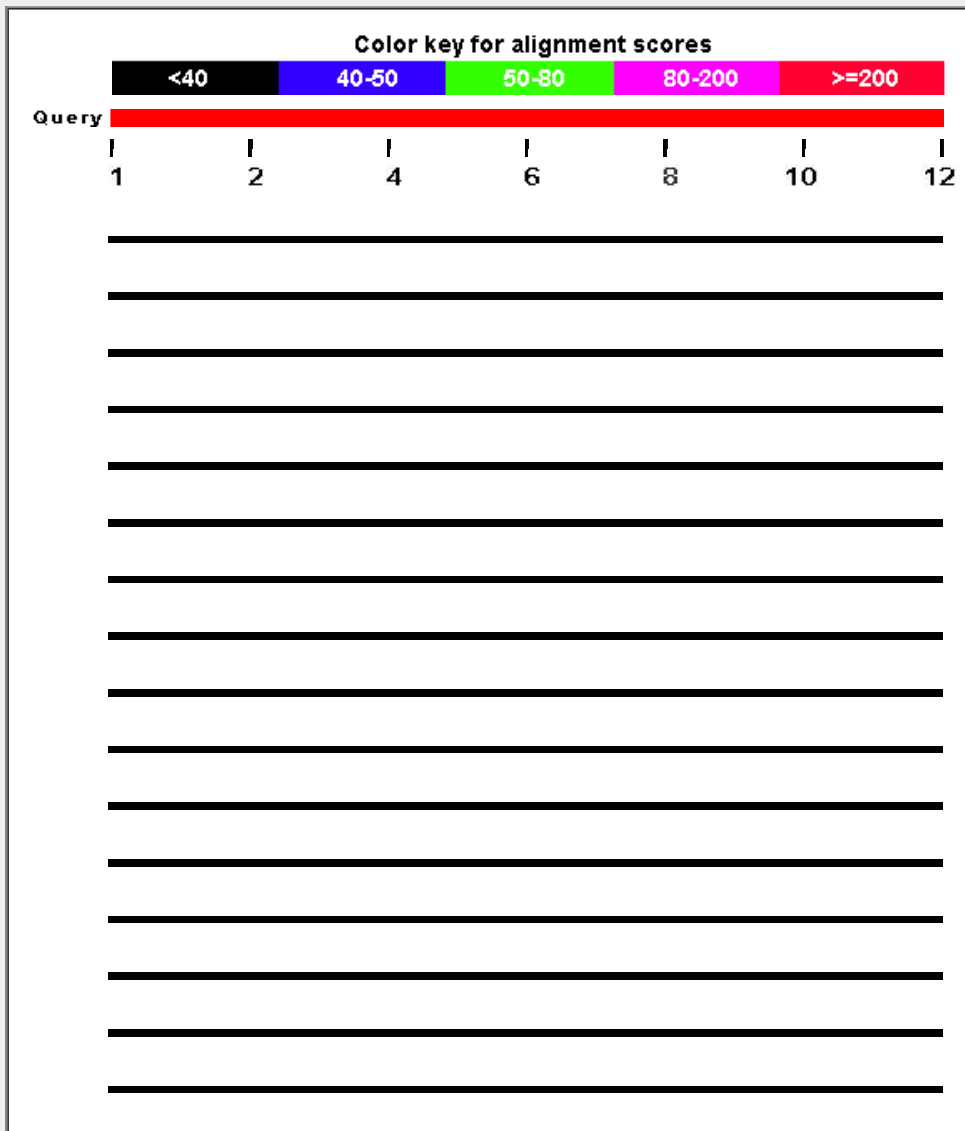

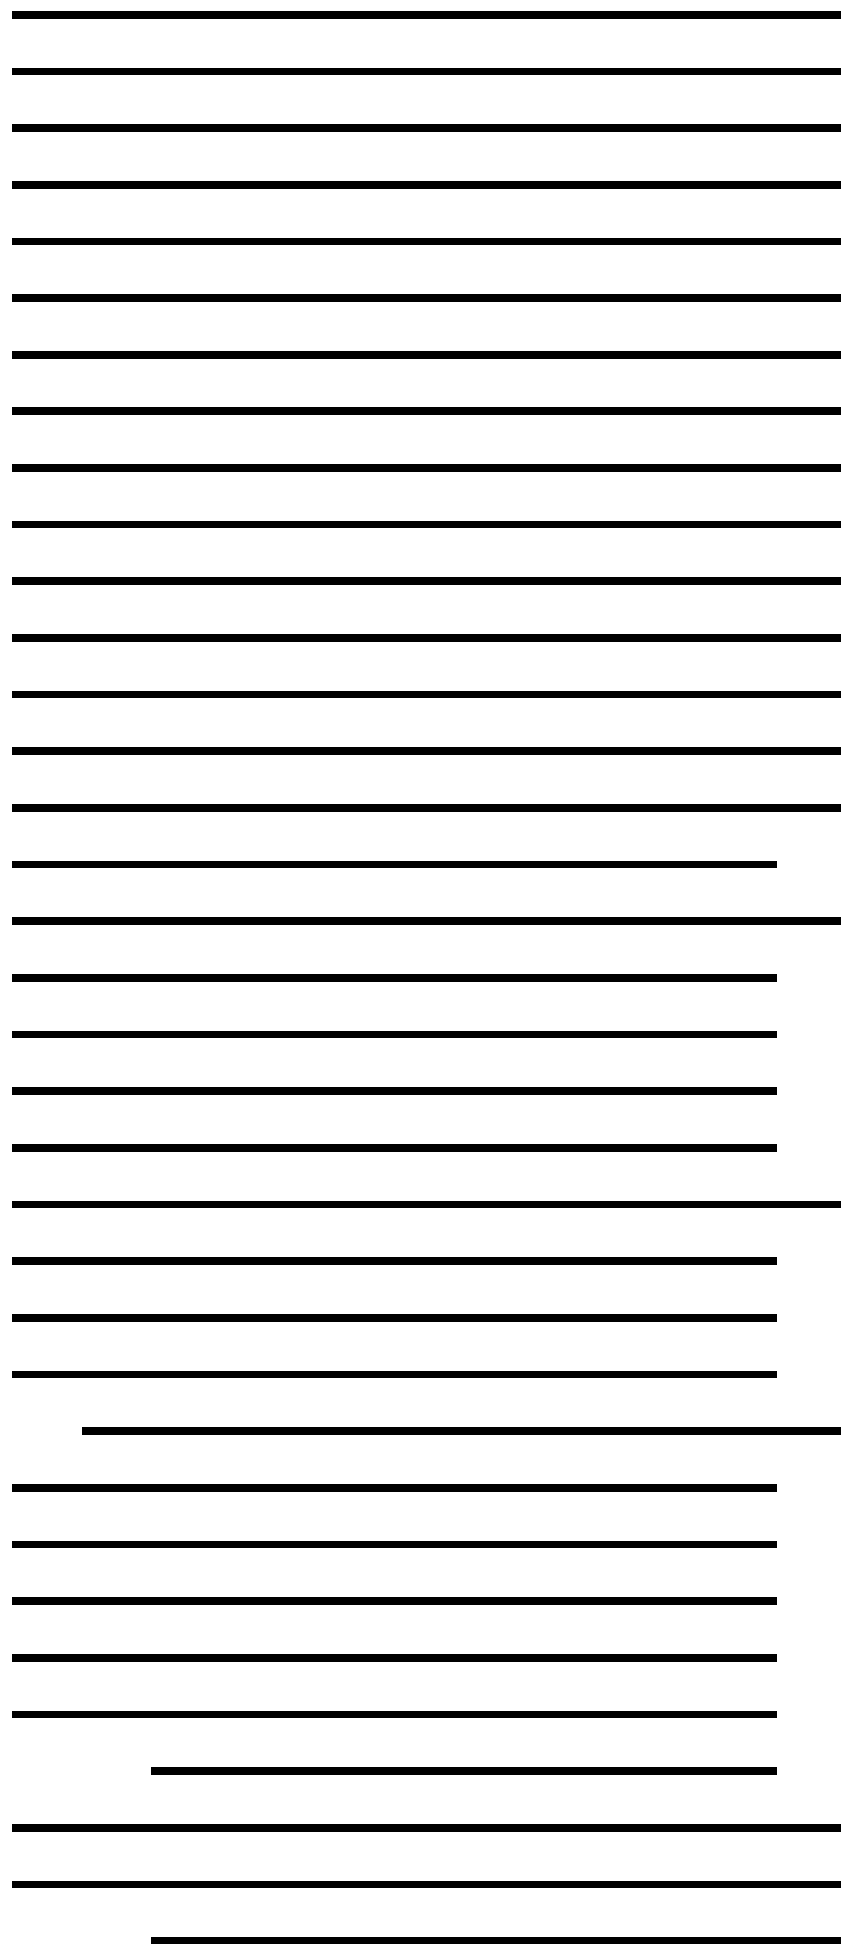

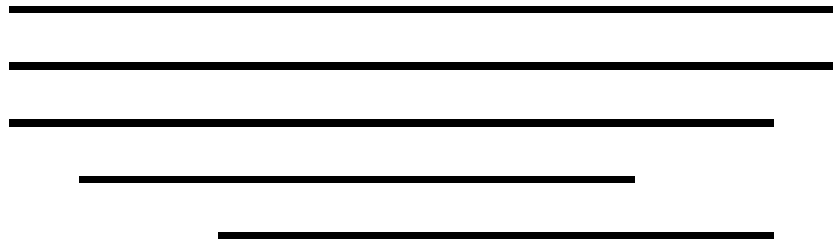

## Descriptions

### Sequences producing significant alignments:

Select: [All](#) [None](#) Selected:0

| <a href="#">Alignments</a> <a href="#">Download</a> <a href="#">GenPept</a> <a href="#">Graphics</a> <a href="#">Distance tree of results</a> <a href="#">Multiple alignment</a> |           |             |             |         |       |                                             |  |
|----------------------------------------------------------------------------------------------------------------------------------------------------------------------------------|-----------|-------------|-------------|---------|-------|---------------------------------------------|--|
| Description                                                                                                                                                                      | Max score | Total score | Query cover | E value | Ident | Accession                                   |  |
| <a href="#">PREDICTED: coagulation factor XI isoform X5 [Homo sapiens]</a>                                                                                                       | 39.2      | 39.2        | 100%        | 0.024   | 100%  | <a href="#">gil530377344 XP_005262882.1</a> |  |
| <a href="#">PREDICTED: coagulation factor XI isoform X4 [Homo sapiens]</a>                                                                                                       | 39.2      | 39.2        | 100%        | 0.025   | 100%  | <a href="#">gil530377342 XP_005262881.1</a> |  |
| <a href="#">PREDICTED: coagulation factor XI isoform X2 [Pan paniscus]</a>                                                                                                       | 39.2      | 39.2        | 100%        | 0.025   | 100%  | <a href="#">gil675774870 XP_008975412.1</a> |  |
| <a href="#">PREDICTED: coagulation factor XI isoform X5 [Pan troglodytes]</a>                                                                                                    | 39.2      | 39.2        | 100%        | 0.025   | 100%  | <a href="#">gil694909938 XP_009446987.1</a> |  |
| <a href="#">PREDICTED: coagulation factor XI isoform X3 [Homo sapiens]</a>                                                                                                       | 39.2      | 39.2        | 100%        | 0.025   | 100%  | <a href="#">gil530377340 XP_005262880.1</a> |  |
| <a href="#">PREDICTED: coagulation factor XI [Gorilla gorilla gorilla]</a>                                                                                                       | 39.2      | 39.2        | 100%        | 0.025   | 100%  | <a href="#">gil426346208 XP_004040776.1</a> |  |
| <a href="#">PREDICTED: coagulation factor XI isoform X4 [Pan troglodytes]</a>                                                                                                    | 39.2      | 39.2        | 100%        | 0.025   | 100%  | <a href="#">gil694909936 XP_009446986.1</a> |  |
| <a href="#">PREDICTED: coagulation factor XI isoform X2 [Homo sapiens]</a>                                                                                                       | 39.2      | 39.2        | 100%        | 0.025   | 100%  | <a href="#">gil530377338 XP_005262879.1</a> |  |
| <a href="#">PREDICTED: coagulation factor XI isoform X3 [Pan troglodytes]</a>                                                                                                    | 39.2      | 39.2        | 100%        | 0.025   | 100%  | <a href="#">gil694909934 XP_009446985.1</a> |  |
| <a href="#">PREDICTED: coagulation factor XI isoform X6 [Homo sapiens]</a>                                                                                                       | 39.2      | 39.2        | 100%        | 0.025   | 100%  | <a href="#">gil578808899 XP_006714200.1</a> |  |
| <a href="#">coagulation factor XI [Homo sapiens]</a>                                                                                                                             | 39.2      | 39.2        | 100%        | 0.025   | 100%  | <a href="#">gil180352 AAA51985.1</a>        |  |
| <a href="#">coagulation factor XI precursor [Homo sapiens]</a>                                                                                                                   | 39.2      | 39.2        | 100%        | 0.025   | 100%  | <a href="#">gil4503627 INP_000119.1</a>     |  |
| <a href="#">PREDICTED: coagulation factor XI [Nomascus leucogenys]</a>                                                                                                           | 39.2      | 39.2        | 100%        | 0.025   | 100%  | <a href="#">gil332244773 XP_003271548.1</a> |  |
| <a href="#">PREDICTED: coagulation factor XI [Pongo abelii]</a>                                                                                                                  | 39.2      | 39.2        | 100%        | 0.025   | 100%  | <a href="#">gil297674804 XP_002815399.1</a> |  |
| <a href="#">PREDICTED: coagulation factor XI isoform X2 [Pan troglodytes]</a>                                                                                                    | 39.2      | 39.2        | 100%        | 0.025   | 100%  | <a href="#">gil114597210 XP_001165847.1</a> |  |
| <a href="#">PREDICTED: coagulation factor XI isoform X1 [Pan troglodytes]</a>                                                                                                    | 39.2      | 39.2        | 100%        | 0.025   | 100%  | <a href="#">gil694909931 XP_009446984.1</a> |  |
| <a href="#">PREDICTED: coagulation factor XI isoform X1 [Homo sapiens]</a>                                                                                                       | 39.2      | 39.2        | 100%        | 0.025   | 100%  | <a href="#">gil530377336 XP_005262878.1</a> |  |
| <a href="#">PREDICTED: coagulation factor XI isoform X2 [Papio anubis]</a>                                                                                                       | 35.4      | 35.4        | 100%        | 0.46    | 92%   | <a href="#">gil685544400 XP_009206295.1</a> |  |
| <a href="#">PREDICTED: coagulation factor XI isoform X2 [Chlorocebus sabaei]</a>                                                                                                 | 35.4      | 35.4        | 100%        | 0.46    | 92%   | <a href="#">gil635046203 XP_007998683.1</a> |  |
| <a href="#">PREDICTED: coagulation factor XI isoform X2 [Macaca fascicularis]</a>                                                                                                | 35.4      | 35.4        | 100%        | 0.46    | 92%   | <a href="#">gil544436077 XP_005556541.1</a> |  |
| <a href="#">PREDICTED: coagulation factor XI isoform X1 [Chlorocebus sabaei]</a>                                                                                                 | 35.4      | 35.4        | 100%        | 0.46    | 92%   | <a href="#">gil635046201 XP_007998681.1</a> |  |
| <a href="#">PREDICTED: coagulation factor XI isoform X1 [Macaca fascicularis]</a>                                                                                                | 35.4      | 35.4        | 100%        | 0.46    | 92%   | <a href="#">gil544436075 XP_005556540.1</a> |  |
| <a href="#">PREDICTED: coagulation factor XI isoform X1 [Papio anubis]</a>                                                                                                       | 35.4      | 35.4        | 100%        | 0.46    | 92%   | <a href="#">gil402871005 XP_003899481.1</a> |  |
| <a href="#">PREDICTED: coagulation factor XI-like [Macaca mulatta]</a>                                                                                                           | 35.4      | 35.4        | 100%        | 0.46    | 92%   | <a href="#">gil297293811 XP_001090398.2</a> |  |
| <a href="#">PREDICTED: coagulation factor XI isoform X3 [Saimiri boliviensis b]</a>                                                                                              | 33.7      | 33.7        | 100%        | 1.6     | 83%   | <a href="#">gil725582192 XP_010342663.1</a> |  |
| <a href="#">PREDICTED: coagulation factor XI isoform X2 [Saimiri boliviensis b]</a>                                                                                              | 33.7      | 33.7        | 100%        | 1.6     | 83%   | <a href="#">gil725582190 XP_010342661.1</a> |  |
| <a href="#">PREDICTED: coagulation factor XI isoform X1 [Saimiri boliviensis b]</a>                                                                                              | 33.7      | 33.7        | 100%        | 1.6     | 83%   | <a href="#">gil725582188 XP_010342660.1</a> |  |
| <a href="#">PREDICTED: coagulation factor XI isoform X2 [Rhinopithecus roxel]</a>                                                                                                | 32.9      | 32.9        | 100%        | 3.1     | 83%   | <a href="#">gil724897372 XP_010376291.1</a> |  |

|                                                                                             |      |      |      |     |      |                                             |
|---------------------------------------------------------------------------------------------|------|------|------|-----|------|---------------------------------------------|
| <a href="#">PREDICTED: coagulation factor XI isoform X1 [Rhinopithecus roxel]</a>           | 32.9 | 32.9 | 100% | 3.1 | 83%  | <a href="#">gij724897369 XP_010376290.1</a> |
| <a href="#">PREDICTED: coagulation factor XI [Trichechus manatus latirostris]</a>           | 31.6 | 31.6 | 100% | 7.9 | 83%  | <a href="#">gij471399784 XP_004382857.1</a> |
| <a href="#">hypothetical protein EGK_16300 [Macaca mulatta]</a>                             | 31.2 | 31.2 | 100% | 11  | 83%  | <a href="#">gij355687768 EHH26352.1</a>     |
| <a href="#">PREDICTED: coagulation factor XI [Equus caballus]</a>                           | 30.8 | 30.8 | 91%  | 15  | 82%  | <a href="#">gij149742758 XP_001490330.1</a> |
| <a href="#">hypothetical protein EGM_04467 [Macaca fascicularis]</a>                        | 30.8 | 30.8 | 100% | 15  | 83%  | <a href="#">gij355750969 EHH55296.1</a>     |
| <a href="#">PREDICTED: coagulation factor XI [Equus przewalskii]</a>                        | 30.8 | 30.8 | 91%  | 15  | 82%  | <a href="#">gij664778079 XP_008508352.1</a> |
| <a href="#">PREDICTED: coagulation factor XI isoform X3 [Mus musculus]</a>                  | 29.5 | 29.5 | 91%  | 37  | 82%  | <a href="#">gij568954471 XP_006509309.1</a> |
| <a href="#">PREDICTED: coagulation factor XI isoform X2 [Mus musculus]</a>                  | 29.5 | 29.5 | 91%  | 38  | 82%  | <a href="#">gij568954469 XP_006509308.1</a> |
| <a href="#">PREDICTED: coagulation factor XI isoform X1 [Mus musculus]</a>                  | 29.5 | 29.5 | 91%  | 38  | 82%  | <a href="#">gij568954467 XP_006509307.1</a> |
| <a href="#">PREDICTED: coagulation factor XI [Octodon degus]</a>                            | 29.5 | 29.5 | 100% | 38  | 75%  | <a href="#">gij507682719 XP_004639867.1</a> |
| <a href="#">coagulation factor XI precursor [Mus musculus]</a>                              | 29.5 | 29.5 | 91%  | 38  | 82%  | <a href="#">gij21312500 NP_082342.1</a>     |
| <a href="#">coagulation factor XI [Mus musculus]</a>                                        | 29.5 | 29.5 | 91%  | 38  | 82%  | <a href="#">gij13811665 AAK40233.1</a>      |
| <a href="#">PREDICTED: coagulation factor XI [Nannospalax galili]</a>                       | 29.5 | 29.5 | 91%  | 38  | 82%  | <a href="#">gij674087872 XP_008851827.1</a> |
| <a href="#">PREDICTED: coagulation factor XI [Callithrix jacchus]</a>                       | 29.5 | 29.5 | 91%  | 38  | 82%  | <a href="#">gij296195030 XP_002745209.1</a> |
| <a href="#">PREDICTED: coagulation factor XI [Mesocricetus auratus]</a>                     | 29.5 | 29.5 | 91%  | 38  | 82%  | <a href="#">gij524924928 XP_005066710.1</a> |
| <a href="#">PREDICTED: coagulation factor XI [Microtus ochrogaster]</a>                     | 29.5 | 29.5 | 91%  | 38  | 82%  | <a href="#">gij532039693 XP_005362704.1</a> |
| <a href="#">PREDICTED: coagulation factor XI [Cricetulus griseus]</a>                       | 29.5 | 29.5 | 91%  | 38  | 82%  | <a href="#">gij354490732 XP_003507510.1</a> |
| <a href="#">PREDICTED: LOW QUALITY PROTEIN: coagulation factor XI [Peromyscus leucopus]</a> | 29.5 | 29.5 | 91%  | 38  | 82%  | <a href="#">gij589915357 XP_006971011.1</a> |
| <a href="#">plasma kallikrein-like protein [Cricetulus griseus]</a>                         | 29.5 | 29.5 | 91%  | 38  | 82%  | <a href="#">gij537243084 ERE87598.1</a>     |
| <a href="#">hypothetical protein MVEG_11016 [Mortierella verticillata NRRL 635]</a>         | 29.1 | 29.1 | 75%  | 49  | 89%  | <a href="#">gij672818076 KFH62978.1</a>     |
| <a href="#">PREDICTED: coagulation factor XI [Vicugna pacos]</a>                            | 29.1 | 29.1 | 100% | 51  | 75%  | <a href="#">gij560951202 XP_006198143.1</a> |
| <a href="#">PREDICTED: coagulation factor XI [Camelus ferus]</a>                            | 29.1 | 29.1 | 100% | 51  | 75%  | <a href="#">gij560904135 XP_006178431.1</a> |
| <a href="#">glutaminase [Sediminibacter sp. Hel_L_10]</a>                                   | 28.6 | 28.6 | 83%  | 68  | 80%  | <a href="#">gij652357354 WP_026753496.1</a> |
| <a href="#">PREDICTED: coagulation factor XI [Pantholops hodgsonii]</a>                     | 28.2 | 28.2 | 100% | 95  | 75%  | <a href="#">gij556754529 XP_005972629.1</a> |
| <a href="#">PREDICTED: coagulation factor XI [Capra hircus]</a>                             | 28.2 | 28.2 | 100% | 95  | 75%  | <a href="#">gij548524195 XP_005698802.1</a> |
| <a href="#">PREDICTED: coagulation factor XI [Condylura cristata]</a>                       | 28.2 | 28.2 | 91%  | 95  | 82%  | <a href="#">gij507947527 XP_004682554.1</a> |
| <a href="#">hypothetical protein [uncultured bacterium 270]</a>                             | 28.2 | 28.2 | 66%  | 96  | 100% | <a href="#">gij285808506 ADC36029.1</a>     |
| <a href="#">Methyl-accepting chemotaxis protein [Hoeftlea phototrophica DFL-4]</a>          | 27.8 | 27.8 | 66%  | 128 | 100% | <a href="#">gij685804179 EDQ33710.2</a>     |
| <a href="#">methyl-accepting chemotaxis protein [Hoeftlea phototrophica]</a>                | 27.8 | 27.8 | 66%  | 129 | 100% | <a href="#">gij494366291 WP_007196716.1</a> |
| <a href="#">PREDICTED: coagulation factor XI isoform 2 [Ceratotherium simum]</a>            | 27.8 | 27.8 | 91%  | 130 | 73%  | <a href="#">gij478509096 XP_004428828.1</a> |
| <a href="#">PREDICTED: coagulation factor XI [Jaculus jaculus]</a>                          | 27.8 | 27.8 | 100% | 130 | 75%  | <a href="#">gij507565537 XP_004666428.1</a> |
| <a href="#">PREDICTED: coagulation factor XI isoform 1 [Ceratotherium simum]</a>            | 27.8 | 27.8 | 91%  | 130 | 73%  | <a href="#">gij478509094 XP_004428827.1</a> |
| <a href="#">PREDICTED: coagulation factor XI [Chrysochloris asiatica]</a>                   | 27.8 | 27.8 | 100% | 130 | 67%  | <a href="#">gij586451182 XP_006834518.1</a> |
| <a href="#">PREDICTED: coagulation factor XI [Erinaceus europaeus]</a>                      | 27.8 | 27.8 | 100% | 130 | 67%  | <a href="#">gij617577865 XP_007517757.1</a> |
| <a href="#">PREDICTED: coagulation factor XI [Orycteropus afer afer]</a>                    | 27.8 | 27.8 | 100% | 130 | 67%  | <a href="#">gij634869242 XP_007946583.1</a> |
| <a href="#">hypothetical protein [Butyrivibrio sp. VCB2001]</a>                             | 27.8 | 27.8 | 75%  | 132 | 89%  | <a href="#">gij651419072 WP_026522039.1</a> |
| <a href="#">F11 protein [Bos taurus]</a>                                                    | 27.4 | 27.4 | 100% | 173 | 75%  | <a href="#">gij86821856 AAI05428.1</a>      |
| <a href="#">coagulation factor XI [Bos taurus]</a>                                          | 27.4 | 27.4 | 100% | 175 | 75%  | <a href="#">gij45861248 AAS78506.1</a>      |
| <a href="#">blood coagulation factor XI [Bos taurus]</a>                                    | 27.4 | 27.4 | 100% | 176 | 75%  | <a href="#">gij45758733 AAS76646.1</a>      |
| <a href="#">PREDICTED: coagulation factor XI [Ochotona princeps]</a>                        | 27.4 | 27.4 | 75%  | 176 | 89%  | <a href="#">gij504133468 XP_004579306.1</a> |
| <a href="#">PREDICTED: coagulation factor XI [Bubalus bubalis]</a>                          | 27.4 | 27.4 | 100% | 176 | 75%  | <a href="#">gij594073052 XP_006060352.1</a> |
| <a href="#">PREDICTED: coagulation factor XI [Ictidomys tridecemlineatus]</a>               | 27.4 | 27.4 | 91%  | 176 | 73%  | <a href="#">gij532087072 XP_005329248.1</a> |
| <a href="#">PREDICTED: coagulation factor XI [Bos mutus]</a>                                | 27.4 | 27.4 | 100% | 176 | 75%  | <a href="#">gij555974149 XP_005899069.1</a> |
| <a href="#">coagulation factor XI precursor [Bos taurus]</a>                                | 27.4 | 27.4 | 100% | 176 | 75%  | <a href="#">gij56710319 NP_001008665.1</a>  |
| <a href="#">PREDICTED: coagulation factor XI [Loxodonta africana]</a>                       | 27.4 | 27.4 | 100% | 176 | 75%  | <a href="#">gij344281436 XP_003412485.1</a> |

|                                                                                       |      |      |      |     |     |                                             |
|---------------------------------------------------------------------------------------|------|------|------|-----|-----|---------------------------------------------|
| <a href="#">TPA: coagulation factor XI precursor [Bos taurus]</a>                     | 27.4 | 27.4 | 100% | 176 | 75% | <a href="#">gil296472409 DAA14524.1</a>     |
| <a href="#">PREDICTED: coagulation factor XI [Cavia porcellus]</a>                    | 27.4 | 27.4 | 91%  | 176 | 73% | <a href="#">gil348566839 XP_003469209.1</a> |
| <a href="#">hypothetical protein COCMIDRAFT_82012 [Bipolaris oryzae ATCC]</a>         | 27.4 | 27.4 | 75%  | 179 | 89% | <a href="#">gil627820471 XP_007683075.1</a> |
| <a href="#">hypothetical protein [Butyricimonas virosa]</a>                           | 26.9 | 26.9 | 75%  | 208 | 89% | <a href="#">gil652947693 WP_027201158.1</a> |
| <a href="#">PREDICTED: uncharacterized protein LOC104705644 [Camelina sativa]</a>     | 26.9 | 26.9 | 83%  | 217 | 80% | <a href="#">gil727487947 XP_010419992.1</a> |
| <a href="#">PREDICTED: uncharacterized protein LOC104735395 [Camelina sativa]</a>     | 26.9 | 26.9 | 83%  | 217 | 80% | <a href="#">gil727562425 XP_010453485.1</a> |
| <a href="#">ABC transporter substrate-binding protein [Geobacter bremerensis]</a>     | 26.9 | 26.9 | 83%  | 233 | 59% | <a href="#">gil652446890 WP_026841868.1</a> |
| <a href="#">peptidase U32 [Desulfobacter curvatus]</a>                                | 26.9 | 26.9 | 91%  | 237 | 82% | <a href="#">gil522078314 WP_020589523.1</a> |
| <a href="#">peptidase U32 [Desulfobacter postgatei]</a>                               | 26.9 | 26.9 | 91%  | 237 | 82% | <a href="#">gil490175138 WP_004073771.1</a> |
| <a href="#">Coagulation factor XI [Tupaia chinensis]</a>                              | 26.5 | 26.5 | 83%  | 322 | 80% | <a href="#">gil444705646 ELW47049.1</a>     |
| <a href="#">conserved hypothetical protein [Pyrenophora tritici-repentis Pt-1C-E]</a> | 26.5 | 26.5 | 83%  | 322 | 56% | <a href="#">gil189190382 XP_001931530.1</a> |
| <a href="#">PREDICTED: coagulation factor XI isoform X4 [Fukomys damarens]</a>        | 26.5 | 26.5 | 83%  | 325 | 80% | <a href="#">gil731206526 XP_010618090.1</a> |
| <a href="#">PREDICTED: coagulation factor XI isoform X3 [Fukomys damarens]</a>        | 26.5 | 26.5 | 83%  | 325 | 80% | <a href="#">gil731206524 XP_010618089.1</a> |
| <a href="#">PREDICTED: coagulation factor XI isoform X2 [Fukomys damarens]</a>        | 26.5 | 26.5 | 83%  | 325 | 80% | <a href="#">gil731206521 XP_010618088.1</a> |
| <a href="#">PREDICTED: coagulation factor XI isoform X2 [Leptonychotes weddellii]</a> | 26.5 | 26.5 | 83%  | 326 | 80% | <a href="#">gil585180453 XP_006741890.1</a> |
| <a href="#">PREDICTED: coagulation factor XI isoform 3 [Odobenus rosmarus]</a>        | 26.5 | 26.5 | 83%  | 326 | 80% | <a href="#">gil472396395 XP_004417424.1</a> |
| <a href="#">PREDICTED: coagulation factor XI isoform X1 [Fukomys damarens]</a>        | 26.5 | 26.5 | 83%  | 326 | 80% | <a href="#">gil731206515 XP_010618085.1</a> |
| <a href="#">PREDICTED: coagulation factor XI [Otolemur garnettii]</a>                 | 26.5 | 26.5 | 75%  | 326 | 78% | <a href="#">gil395840032 XP_003792872.1</a> |
| <a href="#">PREDICTED: coagulation factor XI isoform X3 [Leptonychotes weddellii]</a> | 26.5 | 26.5 | 83%  | 326 | 80% | <a href="#">gil585180455 XP_006741891.1</a> |
| <a href="#">PREDICTED: coagulation factor XI isoform 2 [Odobenus rosmarus]</a>        | 26.5 | 26.5 | 83%  | 326 | 80% | <a href="#">gil472396393 XP_004417423.1</a> |
| <a href="#">PREDICTED: coagulation factor XI [Tupaia chinensis]</a>                   | 26.5 | 26.5 | 83%  | 326 | 80% | <a href="#">gil562864607 XP_006160530.1</a> |
| <a href="#">PREDICTED: coagulation factor XI isoform X1 [Leptonychotes weddellii]</a> | 26.5 | 26.5 | 83%  | 326 | 80% | <a href="#">gil585180451 XP_006741889.1</a> |
| <a href="#">PREDICTED: coagulation factor XI isoform 1 [Odobenus rosmarus]</a>        | 26.5 | 26.5 | 83%  | 326 | 80% | <a href="#">gil472396391 XP_004417422.1</a> |
| <a href="#">dNA polymerase [Clostridium sp. CAG:470]</a>                              | 26.5 | 26.5 | 83%  | 328 | 70% | <a href="#">gil548192314 WP_022413014.1</a> |
| <a href="#">dNA polymerase [Clostridium sp. CAG:389]</a>                              | 26.5 | 26.5 | 83%  | 328 | 70% | <a href="#">gil548291906 WP_022484756.1</a> |
| <a href="#">MULTISPECIES: TonB-linked outer membrane protein [Myroides]</a>           | 26.5 | 26.5 | 75%  | 329 | 89% | <a href="#">gil489076937 WP_002986882.1</a> |
| <a href="#">hypothetical protein TRIADDRAFT_53385 [Trichoplax adhaerens]</a>          | 26.1 | 26.1 | 75%  | 419 | 78% | <a href="#">gil195999058 XP_002109397.1</a> |

## Alignments

Download [GenPept](#) [Graphics](#)

Next Previous Descriptions

PREDICTED: coagulation factor XI isoform X5 [Homo sapiens]

Sequence ID: [gil530377344|ref|XP\\_005262882.1](#) Length: 395 Number of Matches: 1

Range 1: 121 to 132 [GenPept](#) [Graphics](#)

Next Match Previous Match

| Score         | Expect | Identities  | Positives   | Gaps     |
|---------------|--------|-------------|-------------|----------|
| 39.2 bits(85) | 0.024  | 12/12(100%) | 12/12(100%) | 0/12(0%) |

Query 1 KGINYNSSVAKS 12  
 KGINYNSSVAKS  
 Sbjct 121 KGINYNSSVAKS 132

### Related Information

[Gene](#) - associated gene details

Download [GenPept](#) [Graphics](#)

Next Previous Descriptions

PREDICTED: coagulation factor XI isoform X4 [Homo sapiens]

Sequence ID: [gil530377342|ref|XP\\_005262881.1](#) Length: 534 Number of Matches: 1

Range 1: 121 to 132 [GenPept](#) [Graphics](#)

Next Match Previous Match

| Score         | Expect | Identities  | Positives   | Gaps     |
|---------------|--------|-------------|-------------|----------|
| 39.2 bits(85) | 0.025  | 12/12(100%) | 12/12(100%) | 0/12(0%) |

Query 1 KGINYNSSVAKS 12

### Related Information

[Gene](#) - associated gene details

[Map Viewer](#) - aligned genomic context

Sbjct 121 KGINYNSSVAKS 132  
 KGINYNSSVAKS 132

[Download](#) [GenPept](#) [Graphics](#) [Next](#) [Previous](#) [Descriptions](#)

**PREDICTED: coagulation factor XI isoform X2 [Pan paniscus]**

Sequence ID: [gi|675774870|ref|XP\\_008975412.1|](#) Length: 535 Number of Matches: 1

Range 1: 121 to 132 [GenPept](#) [Graphics](#) [Next Match](#) [Previous Match](#)

| Score         | Expect | Identities  | Positives   | Gaps     |
|---------------|--------|-------------|-------------|----------|
| 39.2 bits(85) | 0.025  | 12/12(100%) | 12/12(100%) | 0/12(0%) |

Query 1 KGINYNSSVAKS 12  
 KGINYNSSVAKS  
 Sbjct 121 KGINYNSSVAKS 132

**Related Information**

[Gene](#) - associated gene details  
[Map Viewer](#) - aligned genomic context

[Download](#) [GenPept](#) [Graphics](#) [Next](#) [Previous](#) [Descriptions](#)

**PREDICTED: coagulation factor XI isoform X5 [Pan troglodytes]**

Sequence ID: [gi|694909938|ref|XP\\_009446987.1|](#) Length: 536 Number of Matches: 1

Range 1: 121 to 132 [GenPept](#) [Graphics](#) [Next Match](#) [Previous Match](#)

| Score         | Expect | Identities  | Positives   | Gaps     |
|---------------|--------|-------------|-------------|----------|
| 39.2 bits(85) | 0.025  | 12/12(100%) | 12/12(100%) | 0/12(0%) |

Query 1 KGINYNSSVAKS 12  
 KGINYNSSVAKS  
 Sbjct 121 KGINYNSSVAKS 132

**Related Information**

[Gene](#) - associated gene details

[Download](#) [GenPept](#) [Graphics](#) [Next](#) [Previous](#) [Descriptions](#)

**PREDICTED: coagulation factor XI isoform X3 [Homo sapiens]**

Sequence ID: [gi|530377340|ref|XP\\_005262880.1|](#) Length: 536 Number of Matches: 1

Range 1: 121 to 132 [GenPept](#) [Graphics](#) [Next Match](#) [Previous Match](#)

| Score         | Expect | Identities  | Positives   | Gaps     |
|---------------|--------|-------------|-------------|----------|
| 39.2 bits(85) | 0.025  | 12/12(100%) | 12/12(100%) | 0/12(0%) |

Query 1 KGINYNSSVAKS 12  
 KGINYNSSVAKS  
 Sbjct 121 KGINYNSSVAKS 132

**Related Information**

[Gene](#) - associated gene details

BLAST is a registered trademark of the National Library of Medicine.

NCBI/ BLAST/ blastp suite/ Formatting Results - BTH2AR3K013

Your search parameters were adjusted to search for a short input sequence.

[Edit and Resubmit](#) [Save Search Strategies](#) [Formatting options](#) [Download](#) [YouTube](#) [How to read this page](#) [Blast report description](#)

### F11\_KLETTVDYDTSQRPICLPSKG\_Mod

RID [BTH2AR3K013](#) (Expires on 01-20 15:46 pm)

Query ID |cl|42905 Database Name nr  
 Description None Description All non-redundant GenBank CDS translations+PDB+SwissProt+PIR+PRF excluding environmental samples from WGS projects  
 Molecule type amino acid Program BLASTP 2.2.30+ [Citation](#)  
 Query Length 21

Other reports: [Search Summary](#) [Taxonomy reports](#) [Distance tree of results](#) [Multiple alignment](#)

[New DELTA-BLAST](#) a more sensitive protein-protein search

### Graphic Summary

Show Conserved Domains

Putative conserved domains have been detected, click on the image below for detailed results.

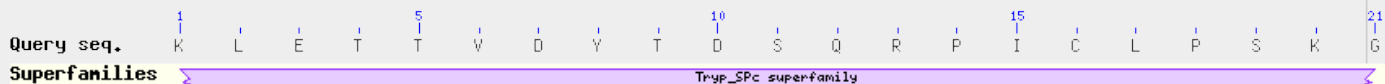

Distribution of 101 Blast Hits on the Query Sequence

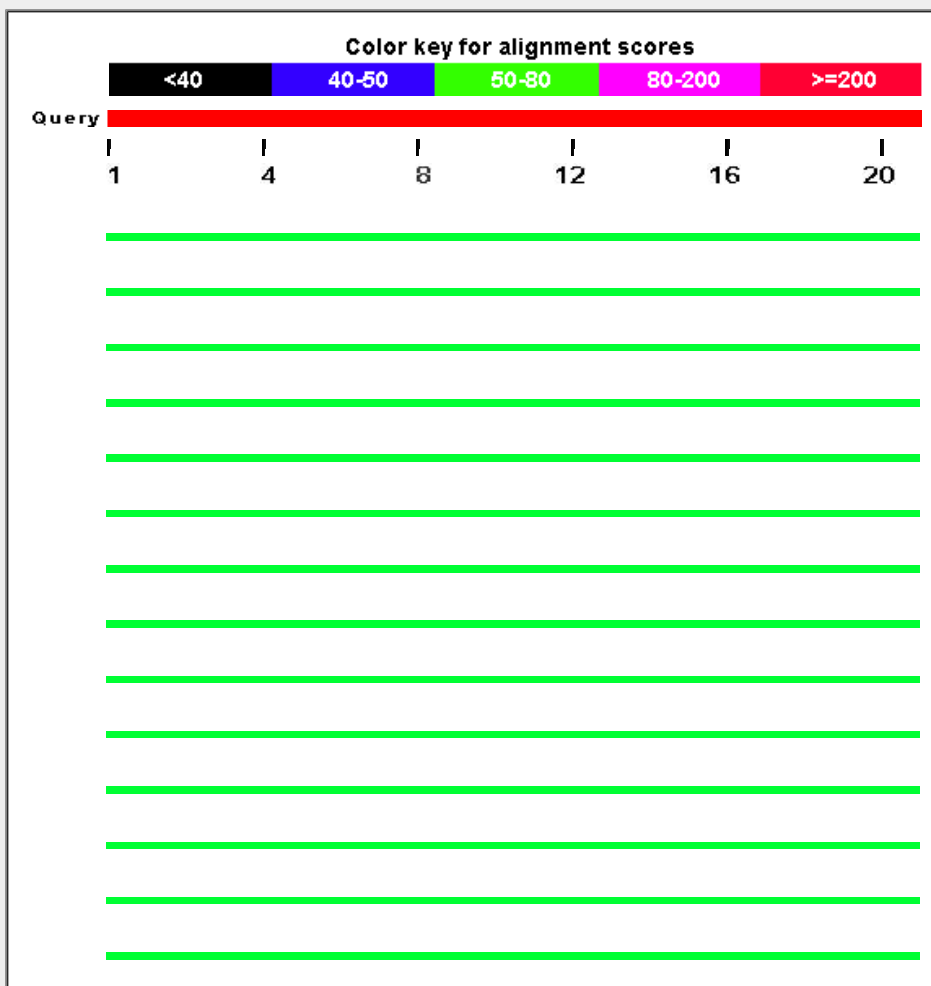





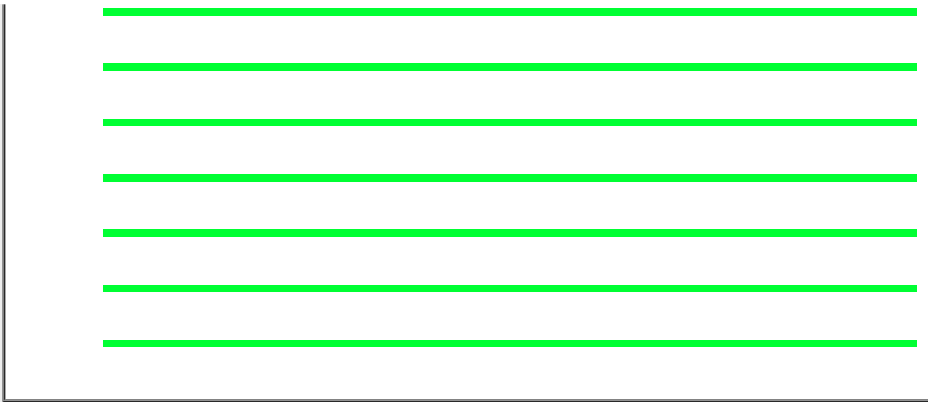

**Descriptions**

**Sequences producing significant alignments:**

Select: [All](#) [None](#) Selected:0

Alignments Download GenPept Graphics Distance tree of results Multiple alignment

| Description                                                                     | Max score | Total score | Query cover | E value | Ident | Accession                                   |
|---------------------------------------------------------------------------------|-----------|-------------|-------------|---------|-------|---------------------------------------------|
| <a href="#">Chain A. Crystal Structure Of The Fxia Catalytic Domain In Cor</a>  | 67.7      | 67.7        | 100%        | 2e-11   | 95%   | <a href="#">gij56967287 1XX9_A</a>          |
| <a href="#">Chain A. Factor Xia In Complex With The Inhibitor 3'-(2s,4r)-6-</a> | 67.7      | 67.7        | 100%        | 2e-11   | 95%   | <a href="#">gij584579944 4NA7_A</a>         |
| <a href="#">coagulation factor XI (plasma thromboplastin antecedent), isofo</a> | 67.7      | 67.7        | 100%        | 2e-11   | 95%   | <a href="#">gij119625025 EAX04620.1</a>     |
| <a href="#">PREDICTED: coagulation factor XI isoform X2 [Pan paniscus]</a>      | 67.7      | 67.7        | 100%        | 2e-11   | 95%   | <a href="#">gij675774870 XP_008975412.1</a> |
| <a href="#">PREDICTED: coagulation factor XI isoform X5 [Pan troglodytes</a>    | 67.7      | 67.7        | 100%        | 2e-11   | 95%   | <a href="#">gij694909938 XP_009446987.1</a> |
| <a href="#">PREDICTED: coagulation factor XI isoform X3 [Homo sapiens]</a>      | 67.7      | 67.7        | 100%        | 2e-11   | 95%   | <a href="#">gij530377340 XP_005262880.1</a> |
| <a href="#">platelet factor XI [Homo sapiens]</a>                               | 67.7      | 67.7        | 100%        | 2e-11   | 95%   | <a href="#">gij3258649 AAC24506.1</a>       |
| <a href="#">PREDICTED: coagulation factor XI [Gorilla gorilla gorilla]</a>      | 67.7      | 67.7        | 100%        | 2e-11   | 95%   | <a href="#">gij426346208 XP_004040776.1</a> |
| <a href="#">PREDICTED: coagulation factor XI isoform X2 [Rhinopithecus r</a>    | 67.7      | 67.7        | 100%        | 2e-11   | 95%   | <a href="#">gij724897372 XP_010376291.1</a> |
| <a href="#">PREDICTED: coagulation factor XI isoform X2 [Papio anubis]</a>      | 67.7      | 67.7        | 100%        | 2e-11   | 95%   | <a href="#">gij685544400 XP_009206295.1</a> |
| <a href="#">PREDICTED: coagulation factor XI isoform X2 [Chlorocebus sa</a>     | 67.7      | 67.7        | 100%        | 2e-11   | 95%   | <a href="#">gij635046203 XP_007998683.1</a> |
| <a href="#">PREDICTED: coagulation factor XI isoform X2 [Macaca fascicu</a>     | 67.7      | 67.7        | 100%        | 2e-11   | 95%   | <a href="#">gij544436077 XP_005556541.1</a> |
| <a href="#">PREDICTED: coagulation factor XI isoform X3 [Pan troglodytes</a>    | 67.7      | 67.7        | 100%        | 2e-11   | 95%   | <a href="#">gij694909934 XP_009446985.1</a> |
| <a href="#">PREDICTED: coagulation factor XI isoform X6 [Homo sapiens]</a>      | 67.7      | 67.7        | 100%        | 2e-11   | 95%   | <a href="#">gij578808899 XP_006714200.1</a> |
| <a href="#">PREDICTED: coagulation factor XI isoform X2 [Saimiri bolivien:</a>  | 67.7      | 67.7        | 100%        | 2e-11   | 95%   | <a href="#">gij725582190 XP_010342661.1</a> |
| <a href="#">hypothetical protein EGM_04467 [Macaca fascicularis]</a>            | 67.7      | 67.7        | 100%        | 2e-11   | 95%   | <a href="#">gij355750969 EHH55296.1</a>     |
| <a href="#">hypothetical protein EGK_16300 [Macaca mulatta]</a>                 | 67.7      | 67.7        | 100%        | 2e-11   | 95%   | <a href="#">gij355687768 EHH26352.1</a>     |
| <a href="#">PREDICTED: coagulation factor XI isoform X1 [Rhinopithecus r</a>    | 67.7      | 67.7        | 100%        | 2e-11   | 95%   | <a href="#">gij724897369 XP_010376290.1</a> |
| <a href="#">PREDICTED: coagulation factor XI isoform X1 [Chlorocebus sa</a>     | 67.7      | 67.7        | 100%        | 2e-11   | 95%   | <a href="#">gij635046201 XP_007998681.1</a> |
| <a href="#">coagulation factor XI [Homo sapiens]</a>                            | 67.7      | 67.7        | 100%        | 2e-11   | 95%   | <a href="#">gij180352 AAA51985.1</a>        |
| <a href="#">PREDICTED: coagulation factor XI isoform X1 [Macaca fascicu</a>     | 67.7      | 67.7        | 100%        | 2e-11   | 95%   | <a href="#">gij544436075 XP_005556540.1</a> |
| <a href="#">coagulation factor XI precursor [Homo sapiens]</a>                  | 67.7      | 67.7        | 100%        | 2e-11   | 95%   | <a href="#">gij4503627 NP_000119.1</a>      |
| <a href="#">PREDICTED: coagulation factor XI isoform X1 [Saimiri bolivien:</a>  | 67.7      | 67.7        | 100%        | 2e-11   | 95%   | <a href="#">gij725582188 XP_010342660.1</a> |
| <a href="#">PREDICTED: coagulation factor XI isoform X1 [Papio anubis]</a>      | 67.7      | 67.7        | 100%        | 2e-11   | 95%   | <a href="#">gij402871005 XP_003899481.1</a> |
| <a href="#">PREDICTED: coagulation factor XI [Nomascus leucogenys]</a>          | 67.7      | 67.7        | 100%        | 2e-11   | 95%   | <a href="#">gij332244773 XP_003271548.1</a> |
| <a href="#">PREDICTED: coagulation factor XI [Pongo abelii]</a>                 | 67.7      | 67.7        | 100%        | 2e-11   | 95%   | <a href="#">gij297674804 XP_002815399.1</a> |
| <a href="#">PREDICTED: coagulation factor XI isoform X2 [Pan troglodytes</a>    | 67.7      | 67.7        | 100%        | 2e-11   | 95%   | <a href="#">gij114597210 XP_001165847.1</a> |
| <a href="#">PREDICTED: coagulation factor XI isoform X1 [Pan troglodytes</a>    | 67.7      | 67.7        | 100%        | 2e-11   | 95%   | <a href="#">gij694909931 XP_009446984.1</a> |



|                                                               |      |      |      |       |     |                                             |
|---------------------------------------------------------------|------|------|------|-------|-----|---------------------------------------------|
| PREDICTED: coagulation factor XI isoform 3 [Odobenus rosma    | 59.6 | 59.6 | 100% | 1e-08 | 81% | <a href="#">gij472396395 XP_004417424.1</a> |
| PREDICTED: coagulation factor XI-like [Ailuropoda melanoleuc  | 59.6 | 59.6 | 100% | 1e-08 | 81% | <a href="#">gij301776062 XP_002923450.1</a> |
| PREDICTED: coagulation factor XI [Lipotes vexillifer]         | 59.6 | 59.6 | 100% | 1e-08 | 86% | <a href="#">gij602712769 XP_007466613.1</a> |
| PREDICTED: coagulation factor XI [Balaenoptera acutorostrat   | 59.6 | 59.6 | 100% | 1e-08 | 86% | <a href="#">gij594650157 XP_007174042.1</a> |
| PREDICTED: coagulation factor XI [Physeter catodon]           | 59.6 | 59.6 | 100% | 1e-08 | 86% | <a href="#">gij593742188 XP_007126520.1</a> |
| PREDICTED: coagulation factor XI [Jaculus jaculus]            | 59.6 | 59.6 | 95%  | 1e-08 | 85% | <a href="#">gij507565537 XP_004666428.1</a> |
| PREDICTED: coagulation factor XI isoform X3 [Leptonychotes    | 59.6 | 59.6 | 100% | 1e-08 | 81% | <a href="#">gij585180455 XP_006741891.1</a> |
| PREDICTED: coagulation factor XI isoform 2 [Odobenus rosma    | 59.6 | 59.6 | 100% | 1e-08 | 81% | <a href="#">gij472396393 XP_004417423.1</a> |
| PREDICTED: coagulation factor XI [Orcinus orca]               | 59.6 | 59.6 | 100% | 1e-08 | 86% | <a href="#">gij466045508 XP_004277238.1</a> |
| PREDICTED: coagulation factor XI isoform X1 [Leptonychotes    | 59.6 | 59.6 | 100% | 1e-08 | 81% | <a href="#">gij585180451 XP_006741889.1</a> |
| PREDICTED: coagulation factor XI [Mustela putorius furo]      | 59.6 | 59.6 | 100% | 1e-08 | 81% | <a href="#">gij511876760 XP_004758357.1</a> |
| PREDICTED: coagulation factor XI isoform 1 [Odobenus rosma    | 59.6 | 59.6 | 100% | 1e-08 | 81% | <a href="#">gij472396391 XP_004417422.1</a> |
| PREDICTED: LOW QUALITY PROTEIN: coagulation factor XI         | 59.6 | 59.6 | 100% | 1e-08 | 81% | <a href="#">gij671035736 XP_008708722.1</a> |
| PREDICTED: coagulation factor XI [Equus caballus]             | 59.2 | 59.2 | 100% | 2e-08 | 86% | <a href="#">gij149742758 XP_001490330.1</a> |
| PREDICTED: coagulation factor XI [Camelus bactrianus]         | 59.2 | 59.2 | 100% | 2e-08 | 86% | <a href="#">gij743715881 XP_010951577.1</a> |
| PREDICTED: coagulation factor XI [Vicugna pacos]              | 59.2 | 59.2 | 100% | 2e-08 | 86% | <a href="#">gij560951202 XP_006198143.1</a> |
| PREDICTED: LOW QUALITY PROTEIN: coagulation factor XI         | 59.2 | 59.2 | 100% | 2e-08 | 86% | <a href="#">gij744611375 XP_010994033.1</a> |
| PREDICTED: coagulation factor XI [Equus przewalskii]          | 59.2 | 59.2 | 100% | 2e-08 | 86% | <a href="#">gij664778079 XP_008508352.1</a> |
| PREDICTED: coagulation factor XI [Camelus ferus]              | 59.2 | 59.2 | 100% | 2e-08 | 86% | <a href="#">gij560904135 XP_006178431.1</a> |
| Chain A, Crystal Structure Of The Catalytic Domain Of Coagula | 58.7 | 58.7 | 100% | 2e-08 | 86% | <a href="#">gij75765761 1ZJD_A</a>          |
| Chain A, Factor Xi Catalytic Domain Complexed With 2-Guanid   | 58.7 | 58.7 | 100% | 2e-08 | 86% | <a href="#">gij109156985 1ZLR_A</a>         |
| Chain A, Crystal Structure Of The Catalytic Domain Of Coagula | 58.7 | 58.7 | 100% | 2e-08 | 86% | <a href="#">gij78101067 1ZHR_A</a>          |
| PREDICTED: coagulation factor XI [Otolemur garnettii]         | 58.7 | 58.7 | 100% | 2e-08 | 86% | <a href="#">gij395840032 XP_003792872.1</a> |
| coagulation factor XI precursor [Canis lupus familiaris]      | 58.3 | 58.3 | 100% | 3e-08 | 81% | <a href="#">gij205361194 NP_001128595.1</a> |
| PREDICTED: LOW QUALITY PROTEIN: coagulation factor XI         | 58.3 | 58.3 | 100% | 3e-08 | 81% | <a href="#">gij591347751 XP_007099050.1</a> |
| PREDICTED: coagulation factor XI isoform X2 [Canis lupus far  | 58.3 | 58.3 | 100% | 3e-08 | 81% | <a href="#">gij545526400 XP_005629983.1</a> |

## Alignments

Download [GenPept](#) [Graphics](#)

[Next](#) [Previous](#) [Descriptions](#)

Chain A, Crystal Structure Of The Fxia Catalytic Domain In Complex With Ecotinm84r

Sequence ID: [gij56967287|pdb1XX9|A](#) Length: 238 Number of Matches: 1

[See 1 more title\(s\)](#)

Range 1: 98 to 118 [GenPept](#) [Graphics](#)

[Next Match](#) [Previous Match](#)

| Score          | Expect | Identities | Positives   | Gaps     |
|----------------|--------|------------|-------------|----------|
| 67.7 bits(152) | 2e-11  | 20/21(95%) | 21/21(100%) | 0/21(0%) |

Query 1 KLETTVDYDTSQRPICLPSKG 21  
 KLETTV+YDTSQRPICLPSKG  
 Sbjct 98 KLETTVNYDTSQRPICLPSKG 118

### Related Information

[Structure](#) - 3D structure displays  
[Identical Proteins](#) - Proteins  
 identical to the subject

Download [GenPept](#) [Graphics](#)

[Next](#) [Previous](#) [Descriptions](#)

Chain A, Factor Xia In Complex With The Inhibitor 3'-[(2s,4r)-6-carbamimidoyl- 4-methyl-4-phenyl-1,2,3,4-tetrahydroquinolin-2-yl]-4-carbamoyl-5'- [(3-methylbutanoyl)amino]biphenyl-2-carboxylic Acid

Sequence ID: [gij584579944|pdb4NA7|A](#) Length: 244 Number of Matches: 1

[See 1 more title\(s\)](#)

Range 1: 98 to 118 [GenPept](#) [Graphics](#)

[Next Match](#) [Previous Match](#)

| Score | Expect | Identities | Positives | Gaps |
|-------|--------|------------|-----------|------|
|-------|--------|------------|-----------|------|

### Related Information

[Structure](#) - 3D structure displays  
[Identical Proteins](#) - Proteins

67.7 bits(152)      2e-11      20/21(95%)      21/21(100%)      0/21(0%)

identical to the subject

Query 1    KLETTVDYTDTSQRPICLPSKG    21  
           KLETTV+YTDTSQRPICLPSKG  
 Sbjct 98    KLETTVNYTDTSQRPICLPSKG    118

[Download](#) ▾ [GenPept](#) [Graphics](#) ▼ Next ▲ Previous ▲ Descriptions

coagulation factor XI (plasma thromboplastin antecedent), isoform CRA\_b [Homo sapiens]

Sequence ID: [gi|119625025|gb|EAX04620.1](#) Length: 470 Number of Matches: 1

Range 1: 330 to 350 [GenPept](#) [Graphics](#) ▼ Next Match ▲ Previous Match

| Score          | Expect | Identities | Positives   | Gaps     |
|----------------|--------|------------|-------------|----------|
| 67.7 bits(152) | 2e-11  | 20/21(95%) | 21/21(100%) | 0/21(0%) |

Query 1    KLETTVDYTDTSQRPICLPSKG    21  
           KLETTV+YTDTSQRPICLPSKG  
 Sbjct 330    KLETTVNYTDTSQRPICLPSKG    350

**Related Information**

[Gene](#) - associated gene details

[Download](#) ▾ [GenPept](#) [Graphics](#) ▼ Next ▲ Previous ▲ Descriptions

PREDICTED: coagulation factor XI isoform X2 [Pan paniscus]

Sequence ID: [gi|675774870|ref|XP\\_008975412.1](#) Length: 535 Number of Matches: 1

Range 1: 395 to 415 [GenPept](#) [Graphics](#) ▼ Next Match ▲ Previous Match

| Score          | Expect | Identities | Positives   | Gaps     |
|----------------|--------|------------|-------------|----------|
| 67.7 bits(152) | 2e-11  | 20/21(95%) | 21/21(100%) | 0/21(0%) |

Query 1    KLETTVDYTDTSQRPICLPSKG    21  
           KLETTV+YTDTSQRPICLPSKG  
 Sbjct 395    KLETTVNYTDTSQRPICLPSKG    415

**Related Information**

[Gene](#) - associated gene details

[Map Viewer](#) - aligned genomic context

[Download](#) ▾ [GenPept](#) [Graphics](#) ▼ Next ▲ Previous ▲ Descriptions

PREDICTED: coagulation factor XI isoform X5 [Pan troglodytes]

Sequence ID: [gi|694909938|ref|XP\\_009446987.1](#) Length: 536 Number of Matches: 1

Range 1: 396 to 416 [GenPept](#) [Graphics](#) ▼ Next Match ▲ Previous Match

| Score          | Expect | Identities | Positives   | Gaps     |
|----------------|--------|------------|-------------|----------|
| 67.7 bits(152) | 2e-11  | 20/21(95%) | 21/21(100%) | 0/21(0%) |

Query 1    KLETTVDYTDTSQRPICLPSKG    21  
           KLETTV+YTDTSQRPICLPSKG  
 Sbjct 396    KLETTVNYTDTSQRPICLPSKG    416

**Related Information**

[Gene](#) - associated gene details

BLAST is a registered trademark of the National Library of Medicine.

NCBI/BLAST/blastp suite/ Formatting Results - BVDEK6ZS01R

Your search parameters were adjusted to search for a short input sequence.

[Edit and Resubmit](#) [Save Search Strategies](#) [Formatting options](#) [Download](#)

[YouTube](#) [How to read this page](#) [Blast report description](#)

F11\_KLETTVDYTDSPICLPSKGDRN\_Mod

RID [BVDEK6ZS01R](#) (Expires on 01-21 08:56 am)

Query ID |cl|24533 Database Name nr

Description None Description All non-redundant GenBank CDS translations+PDB+SwissProt+PIR+PRF excluding environmental samples from WGS projects

Molecule type amino acid Program BLASTP 2.2.30+ [Citation](#)

Query Length 24

Other reports: [Search Summary](#) [Taxonomy reports](#) [Distance tree of results](#) [Multiple alignment](#)

**Graphic Summary**

Show Conserved Domains

Putative conserved domains have been detected, click on the image below for detailed results.

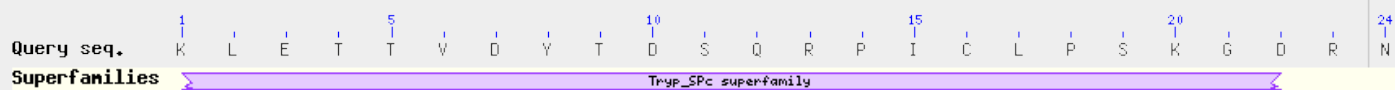

Distribution of 101 Blast Hits on the Query Sequence

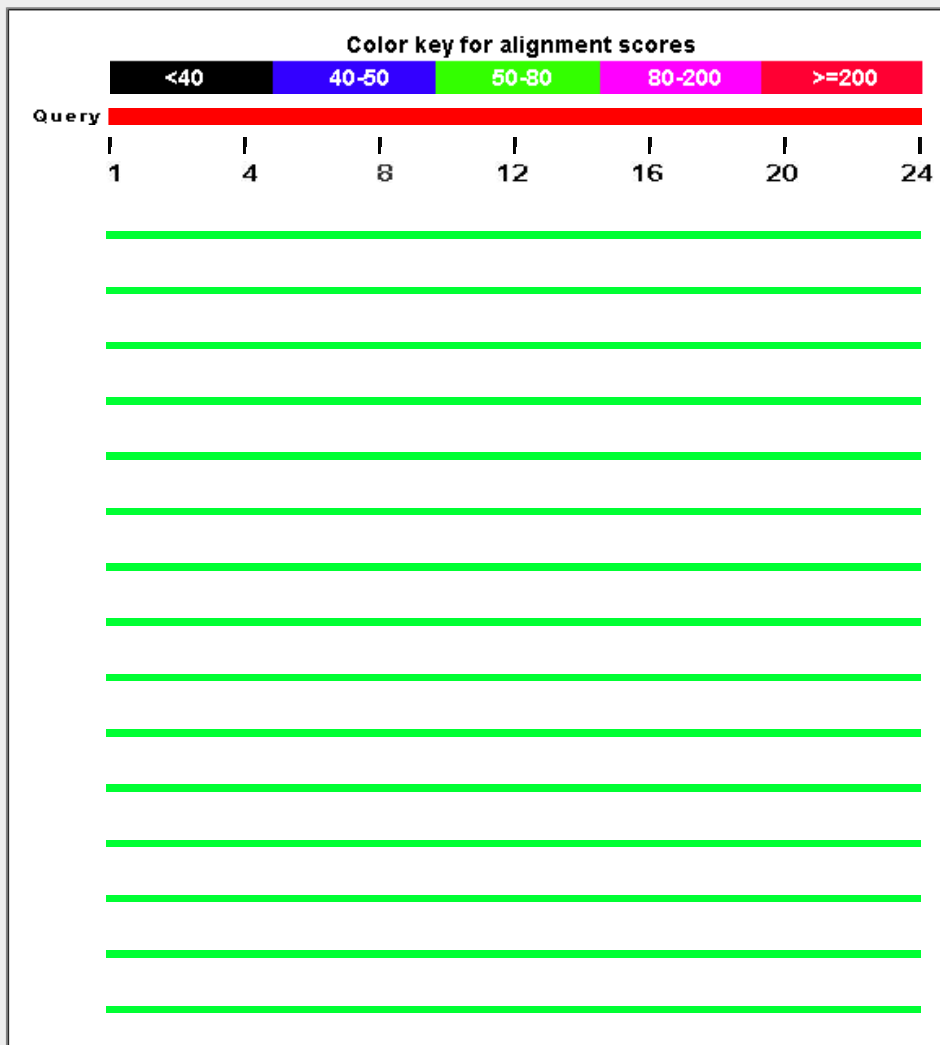

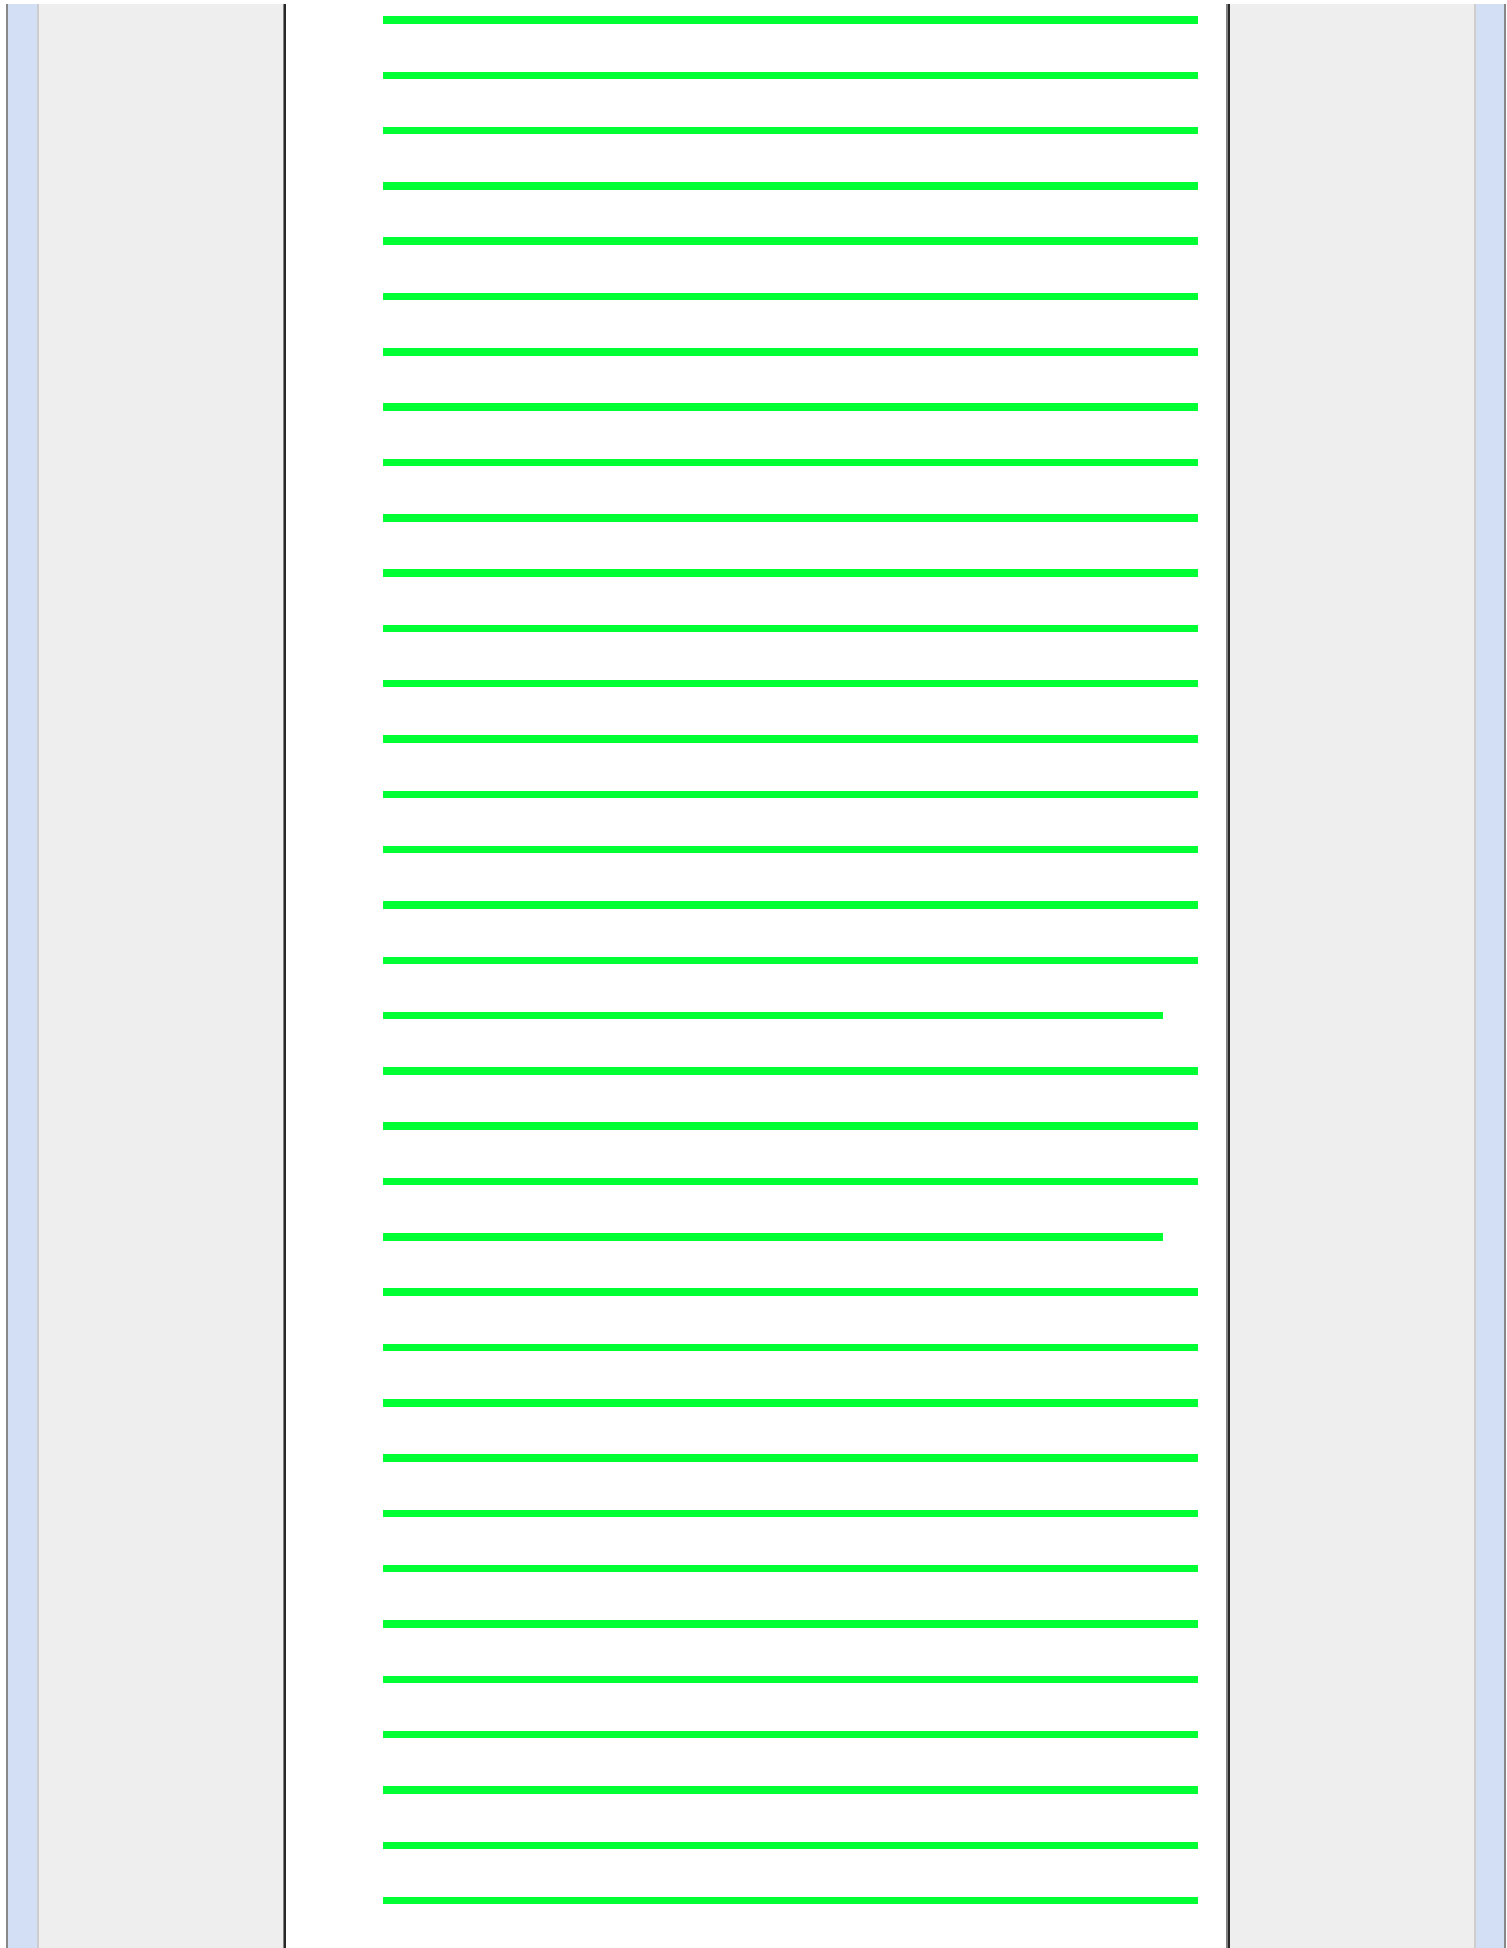

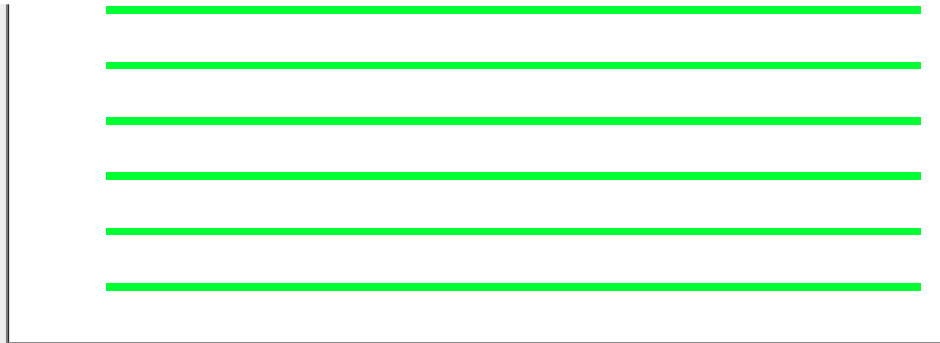

**Descriptions**

**Sequences producing significant alignments:**

Select: [All](#) [None](#) Selected:0

[Alignments](#)
[Download](#)
[GenPept](#)
[Graphics](#)
[Distance tree of results](#)
[Multiple alignment](#)

| Description                                                                                  | Max score | Total score | Query cover | E value | Ident | Accession                      |
|----------------------------------------------------------------------------------------------|-----------|-------------|-------------|---------|-------|--------------------------------|
| <a href="#">Chain A, Crystal Structure Of The Fxia Catalytic Domain In Complex With Ecc</a>  | 77.8      | 77.8        | 100%        | 8e-15   | 96%   | <a href="#">1XX9_A</a>         |
| <a href="#">Chain A, Factor Xia In Complex With The Inhibitor 3'-(2s,4r)-6-carbamimidoyl</a> | 77.8      | 77.8        | 100%        | 8e-15   | 96%   | <a href="#">4NA7_A</a>         |
| <a href="#">coagulation factor XI (plasma thromboplastin antecedent), isoform CRA_b [Hc</a>  | 77.8      | 77.8        | 100%        | 1e-14   | 96%   | <a href="#">EAX04620.1</a>     |
| <a href="#">PREDICTED: coagulation factor XI isoform X2 [Pan paniscus]</a>                   | 77.8      | 77.8        | 100%        | 1e-14   | 96%   | <a href="#">XP_008975412.1</a> |
| <a href="#">PREDICTED: coagulation factor XI isoform X5 [Pan troglodytes]</a>                | 77.8      | 77.8        | 100%        | 1e-14   | 96%   | <a href="#">XP_009446987.1</a> |
| <a href="#">PREDICTED: coagulation factor XI isoform X3 [Homo sapiens]</a>                   | 77.8      | 77.8        | 100%        | 1e-14   | 96%   | <a href="#">XP_005262880.1</a> |
| <a href="#">platelet factor XI [Homo sapiens]</a>                                            | 77.8      | 77.8        | 100%        | 1e-14   | 96%   | <a href="#">AAC24506.1</a>     |
| <a href="#">PREDICTED: coagulation factor XI [Gorilla gorilla gorilla]</a>                   | 77.8      | 77.8        | 100%        | 1e-14   | 96%   | <a href="#">XP_004040776.1</a> |
| <a href="#">PREDICTED: coagulation factor XI isoform X2 [Rhinopithecus roxellana]</a>        | 77.8      | 77.8        | 100%        | 1e-14   | 96%   | <a href="#">XP_010376291.1</a> |
| <a href="#">PREDICTED: coagulation factor XI isoform X2 [Papio anubis]</a>                   | 77.8      | 77.8        | 100%        | 1e-14   | 96%   | <a href="#">XP_009206295.1</a> |
| <a href="#">PREDICTED: coagulation factor XI isoform X2 [Chlorocebus sabaues]</a>            | 77.8      | 77.8        | 100%        | 1e-14   | 96%   | <a href="#">XP_007998683.1</a> |
| <a href="#">PREDICTED: coagulation factor XI isoform X2 [Macaca fascicularis]</a>            | 77.8      | 77.8        | 100%        | 1e-14   | 96%   | <a href="#">XP_005556541.1</a> |
| <a href="#">PREDICTED: coagulation factor XI isoform X3 [Pan troglodytes]</a>                | 77.8      | 77.8        | 100%        | 1e-14   | 96%   | <a href="#">XP_009446985.1</a> |
| <a href="#">PREDICTED: coagulation factor XI isoform X6 [Homo sapiens]</a>                   | 77.8      | 77.8        | 100%        | 1e-14   | 96%   | <a href="#">XP_006714200.1</a> |
| <a href="#">hypothetical protein EGM_04467 [Macaca fascicularis]</a>                         | 77.8      | 77.8        | 100%        | 1e-14   | 96%   | <a href="#">EHH55296.1</a>     |
| <a href="#">hypothetical protein EGK_16300 [Macaca mulatta]</a>                              | 77.8      | 77.8        | 100%        | 1e-14   | 96%   | <a href="#">EHH26352.1</a>     |
| <a href="#">PREDICTED: coagulation factor XI isoform X1 [Rhinopithecus roxellana]</a>        | 77.8      | 77.8        | 100%        | 1e-14   | 96%   | <a href="#">XP_010376290.1</a> |
| <a href="#">PREDICTED: coagulation factor XI isoform X1 [Chlorocebus sabaues]</a>            | 77.8      | 77.8        | 100%        | 1e-14   | 96%   | <a href="#">XP_007998681.1</a> |
| <a href="#">coagulation factor XI [Homo sapiens]</a>                                         | 77.8      | 77.8        | 100%        | 1e-14   | 96%   | <a href="#">AAA51985.1</a>     |
| <a href="#">PREDICTED: coagulation factor XI isoform X1 [Macaca fascicularis]</a>            | 77.8      | 77.8        | 100%        | 1e-14   | 96%   | <a href="#">XP_005556540.1</a> |
| <a href="#">coagulation factor XI precursor [Homo sapiens]</a>                               | 77.8      | 77.8        | 100%        | 1e-14   | 96%   | <a href="#">NP_000119.1</a>    |
| <a href="#">PREDICTED: coagulation factor XI isoform X1 [Papio anubis]</a>                   | 77.8      | 77.8        | 100%        | 1e-14   | 96%   | <a href="#">XP_003899481.1</a> |
| <a href="#">PREDICTED: coagulation factor XI [Nomascus leucogenys]</a>                       | 77.8      | 77.8        | 100%        | 1e-14   | 96%   | <a href="#">XP_003271548.1</a> |
| <a href="#">PREDICTED: coagulation factor XI [Pongo abelii]</a>                              | 77.8      | 77.8        | 100%        | 1e-14   | 96%   | <a href="#">XP_002815399.1</a> |
| <a href="#">PREDICTED: coagulation factor XI isoform X2 [Pan troglodytes]</a>                | 77.8      | 77.8        | 100%        | 1e-14   | 96%   | <a href="#">XP_001165847.1</a> |
| <a href="#">PREDICTED: coagulation factor XI isoform X1 [Pan troglodytes]</a>                | 77.8      | 77.8        | 100%        | 1e-14   | 96%   | <a href="#">XP_009446984.1</a> |
| <a href="#">PREDICTED: coagulation factor XI isoform X1 [Homo sapiens]</a>                   | 77.8      | 77.8        | 100%        | 1e-14   | 96%   | <a href="#">XP_005262878.1</a> |
| <a href="#">PREDICTED: coagulation factor XI-like [Macaca mulatta]</a>                       | 77.8      | 77.8        | 100%        | 1e-14   | 96%   | <a href="#">XP_001090398.2</a> |
| <a href="#">PREDICTED: coagulation factor XI [Ictidomys tridecemlineatus]</a>                | 75.7      | 75.7        | 100%        | 6e-14   | 92%   | <a href="#">XP_005329248.1</a> |

|                                                                                                 |      |      |      |       |     |                                |
|-------------------------------------------------------------------------------------------------|------|------|------|-------|-----|--------------------------------|
| <a href="#">Chain A. Crystal Structure Of The Catalytic Domain Of The Coagulation Facto</a>     | 74.4 | 74.4 | 100% | 1e-13 | 92% | <a href="#">1ZHM_A</a>         |
| <a href="#">Chain A. Crystal Structure Of The Catalytic Domain Of Coagulation Factor Xi</a>     | 74.4 | 74.4 | 100% | 1e-13 | 92% | <a href="#">1ZHP_A</a>         |
| <a href="#">Chain A. Crystal Structure Of The Fxia Catalytic Domain In Complex With Mut</a>     | 74.4 | 74.4 | 100% | 1e-13 | 92% | <a href="#">1XXD_A</a>         |
| <a href="#">PREDICTED: coagulation factor XI isoform X3 [Chinchilla lanigera]</a>               | 74.4 | 74.4 | 100% | 2e-13 | 92% | <a href="#">XP_005373487.1</a> |
| <a href="#">PREDICTED: coagulation factor XI isoform X2 [Saimiri boliviensis boliviensis]</a>   | 74.4 | 74.4 | 95%  | 2e-13 | 96% | <a href="#">XP_010342661.1</a> |
| <a href="#">coagulation factor XI precursor [Oryctolagus cuniculus]</a>                         | 74.4 | 74.4 | 100% | 2e-13 | 92% | <a href="#">NP_001076261.1</a> |
| <a href="#">PREDICTED: coagulation factor XI [Tarsius syrichta]</a>                             | 74.4 | 74.4 | 100% | 2e-13 | 92% | <a href="#">XP_008067645.1</a> |
| <a href="#">PREDICTED: coagulation factor XI isoform X1 [Chinchilla lanigera]</a>               | 74.4 | 74.4 | 100% | 2e-13 | 92% | <a href="#">XP_005373485.1</a> |
| <a href="#">PREDICTED: coagulation factor XI isoform X1 [Saimiri boliviensis boliviensis]</a>   | 74.4 | 74.4 | 95%  | 2e-13 | 96% | <a href="#">XP_010342660.1</a> |
| <a href="#">PREDICTED: coagulation factor XI [Mesocricetus auratus]</a>                         | 74.4 | 74.4 | 100% | 2e-13 | 92% | <a href="#">XP_005066710.1</a> |
| <a href="#">PREDICTED: coagulation factor XI [Cavia porcellus]</a>                              | 74.4 | 74.4 | 100% | 2e-13 | 92% | <a href="#">XP_003469209.1</a> |
| <a href="#">PREDICTED: coagulation factor XI [Erinaceus europaeus]</a>                          | 72.7 | 72.7 | 100% | 6e-13 | 92% | <a href="#">XP_007517757.1</a> |
| <a href="#">Chain A. Factor Xia In Complex With A Clorophenyl-tetrazole Inhibitor [Homo</a>     | 72.3 | 72.3 | 100% | 7e-13 | 92% | <a href="#">3SOR_A</a>         |
| <a href="#">Chain A. Factor Xi Catalytic Domain Complexed With N-((R)-1-(4- Bromophen</a>       | 72.3 | 72.3 | 100% | 7e-13 | 92% | <a href="#">1ZPZ_A</a>         |
| <a href="#">PREDICTED: coagulation factor XI [Sorex araneus]</a>                                | 71.9 | 71.9 | 100% | 1e-12 | 88% | <a href="#">XP_004610458.1</a> |
| <a href="#">PREDICTED: coagulation factor XI isoform X7 [Heterocephalus glaber]</a>             | 71.5 | 71.5 | 100% | 2e-12 | 88% | <a href="#">XP_004853113.1</a> |
| <a href="#">PREDICTED: coagulation factor XI isoform X6 [Heterocephalus glaber]</a>             | 71.5 | 71.5 | 100% | 2e-12 | 88% | <a href="#">XP_004897313.1</a> |
| <a href="#">PREDICTED: coagulation factor XI isoform X4 [Fukomys damarensis]</a>                | 71.5 | 71.5 | 100% | 2e-12 | 88% | <a href="#">XP_010618090.1</a> |
| <a href="#">PREDICTED: coagulation factor XI isoform X6 [Heterocephalus glaber]</a>             | 71.5 | 71.5 | 100% | 2e-12 | 88% | <a href="#">XP_004853112.1</a> |
| <a href="#">PREDICTED: coagulation factor XI isoform X5 [Heterocephalus glaber]</a>             | 71.5 | 71.5 | 100% | 2e-12 | 88% | <a href="#">XP_004897312.1</a> |
| <a href="#">PREDICTED: coagulation factor XI isoform X4 [Heterocephalus glaber]</a>             | 71.5 | 71.5 | 100% | 2e-12 | 88% | <a href="#">XP_004897311.1</a> |
| <a href="#">PREDICTED: coagulation factor XI isoform X5 [Heterocephalus glaber]</a>             | 71.5 | 71.5 | 100% | 2e-12 | 88% | <a href="#">XP_004853111.1</a> |
| <a href="#">PREDICTED: coagulation factor XI isoform X3 [Fukomys damarensis]</a>                | 71.5 | 71.5 | 100% | 2e-12 | 88% | <a href="#">XP_010618089.1</a> |
| <a href="#">Coagulation factor XI [Heterocephalus glaber]</a>                                   | 71.5 | 71.5 | 100% | 2e-12 | 88% | <a href="#">EHB10962.1</a>     |
| <a href="#">PREDICTED: coagulation factor XI isoform X4 [Heterocephalus glaber]</a>             | 71.5 | 71.5 | 100% | 2e-12 | 88% | <a href="#">XP_004853110.1</a> |
| <a href="#">PREDICTED: coagulation factor XI isoform X3 [Heterocephalus glaber]</a>             | 71.5 | 71.5 | 100% | 2e-12 | 88% | <a href="#">XP_004897310.1</a> |
| <a href="#">PREDICTED: coagulation factor XI isoform X2 [Fukomys damarensis]</a>                | 71.5 | 71.5 | 100% | 2e-12 | 88% | <a href="#">XP_010618088.1</a> |
| <a href="#">PREDICTED: coagulation factor XI isoform X1 [Fukomys damarensis]</a>                | 71.5 | 71.5 | 100% | 2e-12 | 88% | <a href="#">XP_010618085.1</a> |
| <a href="#">PREDICTED: coagulation factor XI [Nannospalax galili]</a>                           | 71.5 | 92.0 | 100% | 2e-12 | 88% | <a href="#">XP_008851827.1</a> |
| <a href="#">PREDICTED: coagulation factor XI isoform X2 [Heterocephalus glaber]</a>             | 71.5 | 71.5 | 100% | 2e-12 | 88% | <a href="#">XP_004853108.1</a> |
| <a href="#">PREDICTED: coagulation factor XI isoform X1 [Heterocephalus glaber]</a>             | 71.5 | 71.5 | 100% | 2e-12 | 88% | <a href="#">XP_004897308.1</a> |
| <a href="#">PREDICTED: coagulation factor XI isoform X1 [Heterocephalus glaber]</a>             | 71.5 | 71.5 | 100% | 2e-12 | 88% | <a href="#">XP_004853107.1</a> |
| <a href="#">PREDICTED: coagulation factor XI isoform X2 [Heterocephalus glaber]</a>             | 71.5 | 71.5 | 100% | 2e-12 | 88% | <a href="#">XP_004897309.1</a> |
| <a href="#">PREDICTED: coagulation factor XI isoform 2 [Ceratotherium simum simum]</a>          | 71.0 | 71.0 | 100% | 2e-12 | 88% | <a href="#">XP_004428828.1</a> |
| <a href="#">PREDICTED: coagulation factor XI isoform 1 [Ceratotherium simum simum]</a>          | 71.0 | 71.0 | 100% | 2e-12 | 88% | <a href="#">XP_004428827.1</a> |
| <a href="#">PREDICTED: coagulation factor XI [Ovis aries]</a>                                   | 71.0 | 71.0 | 100% | 2e-12 | 88% | <a href="#">XP_004021769.1</a> |
| <a href="#">Chain A. Factor Xia In Complex With The Inhibitor 4-(2-[(1s)-1-([(trans-4- (ami</a> | 70.2 | 70.2 | 100% | 4e-12 | 92% | <a href="#">4TY6_A</a>         |
| <a href="#">blood coagulation factor XI [Bos taurus]</a>                                        | 70.2 | 70.2 | 100% | 4e-12 | 88% | <a href="#">AAS76646.1</a>     |
| <a href="#">PREDICTED: coagulation factor XI [Bison bison bison]</a>                            | 70.2 | 70.2 | 100% | 4e-12 | 88% | <a href="#">XP_010834113.1</a> |
| <a href="#">PREDICTED: coagulation factor XI [Bos mutus]</a>                                    | 70.2 | 70.2 | 100% | 4e-12 | 88% | <a href="#">XP_005899069.1</a> |
| <a href="#">Chain A. Crystal Structure Of Factor Xia In Complex With Clavatadine A [Horr</a>    | 69.8 | 69.8 | 100% | 5e-12 | 88% | <a href="#">3BG8_A</a>         |
| <a href="#">PREDICTED: coagulation factor XI [Ochotona princeps]</a>                            | 69.8 | 69.8 | 95%  | 6e-12 | 91% | <a href="#">XP_004579306.1</a> |
| <a href="#">PREDICTED: coagulation factor XI isoform X2 [Leptonychotes weddellii]</a>           | 69.8 | 69.8 | 100% | 6e-12 | 83% | <a href="#">XP_006741890.1</a> |
| <a href="#">PREDICTED: coagulation factor XI isoform 3 [Odobenus rosmarus divergens]</a>        | 69.8 | 69.8 | 100% | 6e-12 | 83% | <a href="#">XP_004417424.1</a> |
| <a href="#">PREDICTED: coagulation factor XI-like [Ailuropoda melanoleuca]</a>                  | 69.8 | 69.8 | 100% | 6e-12 | 83% | <a href="#">XP_002923450.1</a> |
| <a href="#">PREDICTED: coagulation factor XI [Lipotes vexillifer]</a>                           | 69.8 | 69.8 | 100% | 6e-12 | 88% | <a href="#">XP_007466613.1</a> |



|                                                                                                                                              |      |      |      |       |     |                                |
|----------------------------------------------------------------------------------------------------------------------------------------------|------|------|------|-------|-----|--------------------------------|
| <a href="#">PREDICTED: coagulation factor XI [Balaenoptera acutorostrata scammonii]</a>                                                      | 69.8 | 69.8 | 100% | 6e-12 | 88% | <a href="#">XP_007174042.1</a> |
| <a href="#">PREDICTED: coagulation factor XI [Physeter catodon]</a>                                                                          | 69.8 | 69.8 | 100% | 6e-12 | 88% | <a href="#">XP_007126520.1</a> |
| <a href="#">PREDICTED: coagulation factor XI [Jaculus jaculus]</a>                                                                           | 69.8 | 69.8 | 95%  | 6e-12 | 87% | <a href="#">XP_004666428.1</a> |
| <a href="#">PREDICTED: coagulation factor XI isoform X3 [Leptonychotes weddellii]</a>                                                        | 69.8 | 69.8 | 100% | 6e-12 | 83% | <a href="#">XP_006741891.1</a> |
| <a href="#">PREDICTED: coagulation factor XI isoform 2 [Odobenus rosmarus divergens]</a>                                                     | 69.8 | 69.8 | 100% | 6e-12 | 83% | <a href="#">XP_004417423.1</a> |
| <a href="#">PREDICTED: coagulation factor XI [Orcinus orca]</a>                                                                              | 69.8 | 69.8 | 100% | 6e-12 | 88% | <a href="#">XP_004277238.1</a> |
| <a href="#">PREDICTED: coagulation factor XI isoform X1 [Leptonychotes weddellii]</a>                                                        | 69.8 | 69.8 | 100% | 6e-12 | 83% | <a href="#">XP_006741889.1</a> |
| <a href="#">PREDICTED: coagulation factor XI [Mustela putorius furo]</a>                                                                     | 69.8 | 69.8 | 100% | 6e-12 | 83% | <a href="#">XP_004758357.1</a> |
| <a href="#">PREDICTED: coagulation factor XI isoform 1 [Odobenus rosmarus divergens]</a>                                                     | 69.8 | 69.8 | 100% | 6e-12 | 83% | <a href="#">XP_004417422.1</a> |
| <a href="#">PREDICTED: LOW QUALITY PROTEIN: coagulation factor XI [Ursus maritimus]</a>                                                      | 69.8 | 69.8 | 100% | 6e-12 | 83% | <a href="#">XP_008708722.1</a> |
| <a href="#">PREDICTED: coagulation factor XI [Camelus bactrianus]</a>                                                                        | 69.4 | 69.4 | 100% | 9e-12 | 88% | <a href="#">XP_010951577.1</a> |
| <a href="#">PREDICTED: coagulation factor XI [Vicugna pacos]</a>                                                                             | 69.4 | 69.4 | 100% | 9e-12 | 88% | <a href="#">XP_006198143.1</a> |
| <a href="#">PREDICTED: LOW QUALITY PROTEIN: coagulation factor XI [Camelus dromedarius]</a>                                                  | 69.4 | 69.4 | 100% | 9e-12 | 88% | <a href="#">XP_010994033.1</a> |
| <a href="#">PREDICTED: coagulation factor XI [Callithrix jacchus]</a>                                                                        | 69.4 | 69.4 | 95%  | 9e-12 | 91% | <a href="#">XP_002745209.1</a> |
| <a href="#">PREDICTED: coagulation factor XI [Camelus ferus]</a>                                                                             | 69.4 | 69.4 | 100% | 9e-12 | 88% | <a href="#">XP_006178431.1</a> |
| <a href="#">Chain A, Crystal Structure Of The Catalytic Domain Of Coagulation Factor Xi [Canis lupus familiaris]</a>                         | 68.9 | 68.9 | 100% | 1e-11 | 88% | <a href="#">1ZJD_A</a>         |
| <a href="#">Chain A, Factor Xi Catalytic Domain Complexed With 2-Guanidino-1-(4-(4,4,5-trimethyl-1H-imidazol-2-yl)butan-1-yl)ethan-1-one</a> | 68.9 | 68.9 | 100% | 1e-11 | 88% | <a href="#">1ZLR_A</a>         |
| <a href="#">Chain A, Crystal Structure Of The Catalytic Domain Of Coagulation Factor Xi [Canis lupus familiaris]</a>                         | 68.9 | 68.9 | 100% | 1e-11 | 88% | <a href="#">1ZHR_A</a>         |
| <a href="#">coagulation factor XI precursor [Canis lupus familiaris]</a>                                                                     | 68.5 | 68.5 | 100% | 2e-11 | 83% | <a href="#">NP_001128595.1</a> |
| <a href="#">PREDICTED: coagulation factor XI [Dasypus novemcinctus]</a>                                                                      | 68.5 | 68.5 | 100% | 2e-11 | 83% | <a href="#">XP_004457855.1</a> |
| <a href="#">PREDICTED: coagulation factor XI isoform X2 [Canis lupus familiaris]</a>                                                         | 68.5 | 68.5 | 100% | 2e-11 | 83% | <a href="#">XP_005629983.1</a> |
| <a href="#">PREDICTED: coagulation factor XI isoform X1 [Canis lupus familiaris]</a>                                                         | 68.5 | 68.5 | 100% | 2e-11 | 83% | <a href="#">XP_005629982.1</a> |
| <a href="#">PREDICTED: coagulation factor XI [Trichechus manatus latirostris]</a>                                                            | 67.7 | 67.7 | 100% | 3e-11 | 83% | <a href="#">XP_004382857.1</a> |
| <a href="#">PREDICTED: coagulation factor XI [Bubalus bubalis]</a>                                                                           | 66.8 | 66.8 | 100% | 6e-11 | 83% | <a href="#">XP_006060352.1</a> |
| <a href="#">PREDICTED: coagulation factor XI [Pantholops hodgsonii]</a>                                                                      | 66.8 | 66.8 | 100% | 6e-11 | 83% | <a href="#">XP_005972629.1</a> |

## Alignments

Download [GenPept](#) [Graphics](#)

[Next](#) [Previous](#) [Descriptions](#)

Chain A, Crystal Structure Of The Fxia Catalytic Domain In Complex With Ecotinm84r

Sequence ID: [pdb|1XX9|A](#) Length: 238 Number of Matches: 1

[See 1 more title\(s\)](#)

Range 1: 98 to 121 [GenPept](#) [Graphics](#)

[Next Match](#) [Previous Match](#)

| Score          | Expect | Identities | Positives   | Gaps     |
|----------------|--------|------------|-------------|----------|
| 77.8 bits(176) | 8e-15  | 23/24(96%) | 24/24(100%) | 0/24(0%) |

```
Query 1 KLETTVDYTDSPICLPSKGDNR 24
        KLETTV+YTDSPICLPSKGDNR
Sbjct 98 KLETTVNYTDSPICLPSKGDNR 121
```

### Related Information

[Structure](#) - 3D structure displays  
[Identical Proteins](#) - Proteins  
 identical to the subject

Download [GenPept](#) [Graphics](#)

[Next](#) [Previous](#) [Descriptions](#)

Chain A, Factor Xia In Complex With The Inhibitor 3'-[(2s,4r)-6-carbamimidoyl- 4-methyl-4-phenyl-1,2,3,4-tetrahydroquinolin-2-yl]-4-carbamoyl-5'- [(3-methylbutanoyl)amino]biphenyl-2-carboxylic Acid

Sequence ID: [pdb|4NA7|A](#) Length: 244 Number of Matches: 1

[See 1 more title\(s\)](#)

Range 1: 98 to 121 [GenPept](#) [Graphics](#)

[Next Match](#) [Previous Match](#)

| Score          | Expect | Identities | Positives   | Gaps     |
|----------------|--------|------------|-------------|----------|
| 77.8 bits(176) | 8e-15  | 23/24(96%) | 24/24(100%) | 0/24(0%) |

### Related Information

[Structure](#) - 3D structure displays  
[Identical Proteins](#) - Proteins  
 identical to the subject

Query 1 KLETTVDYTDSPICLPSKGRN 24  
 KLETTV+YTDSPICLPSKGRN  
 Sbjct 98 KLETTVNYTDSPICLPSKGRN 121

[Download](#) [GenPept](#) [Graphics](#)

[▼ Next](#) [▲ Previous](#) [▲ Descriptions](#)

coagulation factor XI (plasma thromboplastin antecedent), isoform CRA\_b [Homo sapiens]

Sequence ID: [gb|EAX04620.1|](#) Length: 470 Number of Matches: 1

Range 1: 330 to 353 [GenPept](#) [Graphics](#)

[▼ Next Match](#) [▲ Previous Match](#)

| Score          | Expect | Identities | Positives   | Gaps     |
|----------------|--------|------------|-------------|----------|
| 77.8 bits(176) | 1e-14  | 23/24(96%) | 24/24(100%) | 0/24(0%) |

Query 1 KLETTVDYTDSPICLPSKGRN 24  
 KLETTV+YTDSPICLPSKGRN  
 Sbjct 330 KLETTVNYTDSPICLPSKGRN 353

**Related Information**

[Gene](#) - associated gene details

[Download](#) [GenPept](#) [Graphics](#)

[▼ Next](#) [▲ Previous](#) [▲ Descriptions](#)

PREDICTED: coagulation factor XI isoform X2 [Pan paniscus]

Sequence ID: [ref|XP\\_008975412.1|](#) Length: 535 Number of Matches: 1

Range 1: 395 to 418 [GenPept](#) [Graphics](#)

[▼ Next Match](#) [▲ Previous Match](#)

| Score          | Expect | Identities | Positives   | Gaps     |
|----------------|--------|------------|-------------|----------|
| 77.8 bits(176) | 1e-14  | 23/24(96%) | 24/24(100%) | 0/24(0%) |

Query 1 KLETTVDYTDSPICLPSKGRN 24  
 KLETTV+YTDSPICLPSKGRN  
 Sbjct 395 KLETTVNYTDSPICLPSKGRN 418

**Related Information**

[Gene](#) - associated gene details

[Map Viewer](#) - aligned genomic context

[Download](#) [GenPept](#) [Graphics](#)

[▼ Next](#) [▲ Previous](#) [▲ Descriptions](#)

PREDICTED: coagulation factor XI isoform X5 [Pan troglodytes]

Sequence ID: [ref|XP\\_009446987.1|](#) Length: 536 Number of Matches: 1

Range 1: 396 to 419 [GenPept](#) [Graphics](#)

[▼ Next Match](#) [▲ Previous Match](#)

| Score          | Expect | Identities | Positives   | Gaps     |
|----------------|--------|------------|-------------|----------|
| 77.8 bits(176) | 1e-14  | 23/24(96%) | 24/24(100%) | 0/24(0%) |

Query 1 KLETTVDYTDSPICLPSKGRN 24  
 KLETTV+YTDSPICLPSKGRN  
 Sbjct 396 KLETTVNYTDSPICLPSKGRN 419

**Related Information**

[Gene](#) - associated gene details

BLAST is a registered trademark of the National Library of Medicine.

NCBI/ BLAST/ blastp suite/ Formatting Results - B96432WD01R

**Your search parameters were adjusted to search for a short input sequence.**

[Edit and Resubmit](#) [Save Search Strategies](#) [Formatting options](#) [Download](#)

[YouTube](#) [How to read this page](#) [Blast report description](#)

### F11\_KLETTVNYTDSQRPICLPSKG\_NonMod

**RID** [B96432WD01R](#) (Expires on 01-14 11:01 am)

**Query ID** lcl|229952 **Database Name** nr

**Description** None **Description** All non-redundant GenBank CDS translations+PDB+SwissProt+PIR excluding environmental samples from WGS projects

**Molecule type** amino acid **Program** BLASTP 2.2.30+ [Citation](#)

**Query Length** 21

Other reports: [Search Summary](#) [\[Taxonomy reports\]](#) [\[Distance tree of results\]](#) [\[Multiple alignment\]](#)

### Graphic Summary

Show Conserved Domains

Putative conserved domains have been detected, click on the image below for detailed results.

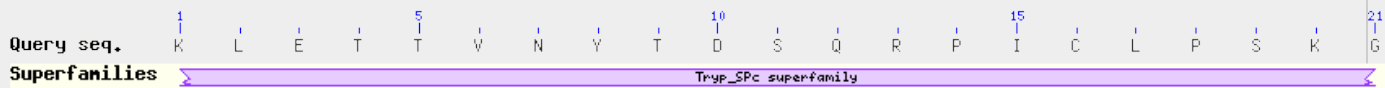

Distribution of 101 Blast Hits on the Query Sequence

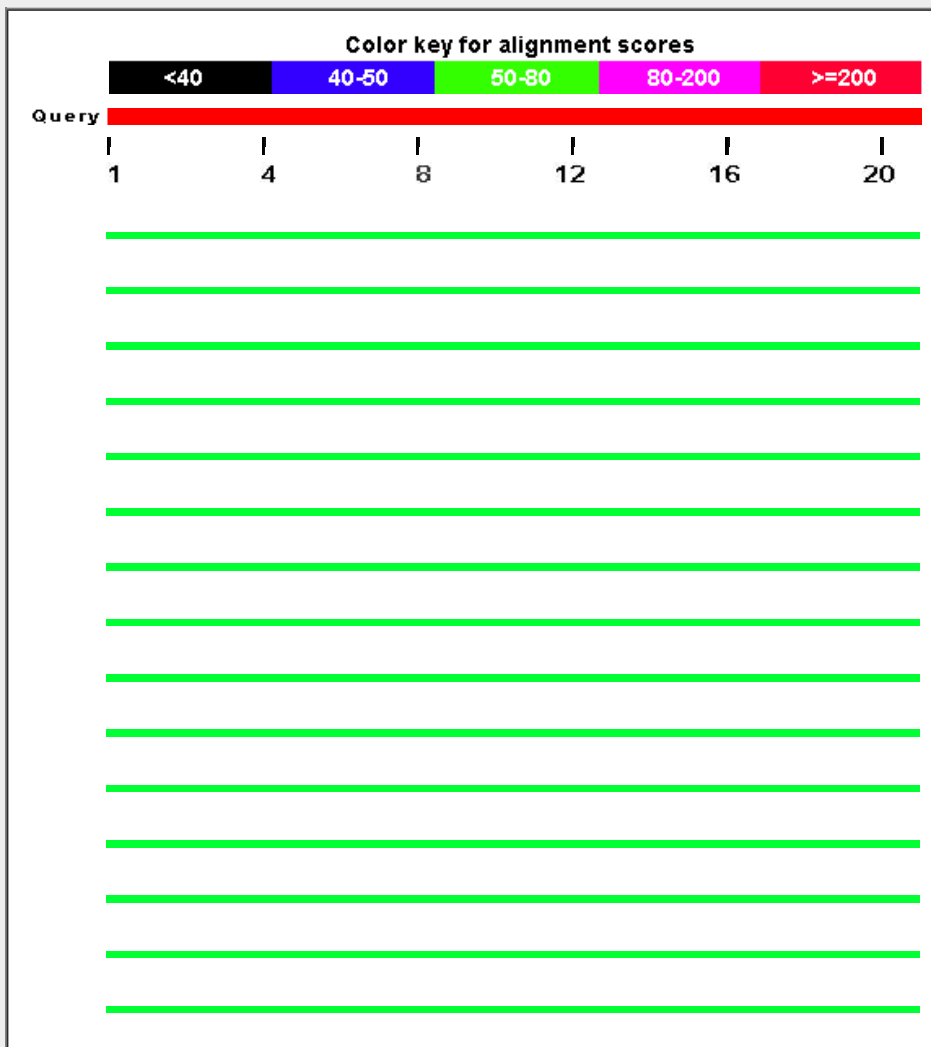

The image displays a table with 30 rows. Each row contains a single green horizontal line, which appears to be a placeholder for data. The table is positioned in the center of the page, flanked by light gray vertical bars on both sides.



**Descriptions**

**Sequences producing significant alignments:**

Select: [All](#) [None](#) Selected:0

[Alignments](#)
[Download](#)
[GenPept](#)
[Graphics](#)
[Distance tree of results](#)
[Multiple alignment](#)

| Description                                                                         | Max score | Total score | Query cover | E value | Ident | Accession                                   |
|-------------------------------------------------------------------------------------|-----------|-------------|-------------|---------|-------|---------------------------------------------|
| <a href="#">Chain A, Crystal Structure Of The Fxia Catalytic Domain In Comple</a>   | 70.2      | 70.2        | 100%        | 2e-12   | 100%  | <a href="#">gij56967287 1XX9_A</a>          |
| <a href="#">Chain A, Factor Xia In Complex With The Inhibitor 3'-(2s,4r)-6-cart</a> | 70.2      | 70.2        | 100%        | 2e-12   | 100%  | <a href="#">gij584579944 4NA7_A</a>         |
| <a href="#">coagulation factor XI (plasma thromboplastin antecedent), isoform C</a> | 70.2      | 70.2        | 100%        | 3e-12   | 100%  | <a href="#">gij119625025 EAX04620.1</a>     |
| <a href="#">PREDICTED: coagulation factor XI isoform X2 [Pan paniscus]</a>          | 70.2      | 70.2        | 100%        | 3e-12   | 100%  | <a href="#">gij675774870 XP_008975412.1</a> |
| <a href="#">PREDICTED: coagulation factor XI isoform X5 [Pan troglodytes]</a>       | 70.2      | 70.2        | 100%        | 3e-12   | 100%  | <a href="#">gij694909938 XP_009446987.1</a> |
| <a href="#">PREDICTED: coagulation factor XI isoform X3 [Homo sapiens]</a>          | 70.2      | 70.2        | 100%        | 3e-12   | 100%  | <a href="#">gij530377340 XP_005262880.1</a> |
| <a href="#">platelet factor XI [Homo sapiens]</a>                                   | 70.2      | 70.2        | 100%        | 3e-12   | 100%  | <a href="#">gij3258649 AAC24506.1</a>       |
| <a href="#">PREDICTED: coagulation factor XI [Gorilla gorilla gorilla]</a>          | 70.2      | 70.2        | 100%        | 3e-12   | 100%  | <a href="#">gij426346208 XP_004040776.1</a> |
| <a href="#">PREDICTED: coagulation factor XI isoform X2 [Rhinopithecus roxel</a>    | 70.2      | 70.2        | 100%        | 3e-12   | 100%  | <a href="#">gij724897372 XP_010376291.1</a> |
| <a href="#">PREDICTED: coagulation factor XI isoform X2 [Papio anubis]</a>          | 70.2      | 70.2        | 100%        | 3e-12   | 100%  | <a href="#">gij685544400 XP_009206295.1</a> |
| <a href="#">PREDICTED: coagulation factor XI isoform X2 [Chlorocebus sabae</a>      | 70.2      | 70.2        | 100%        | 3e-12   | 100%  | <a href="#">gij635046203 XP_007998683.1</a> |
| <a href="#">PREDICTED: coagulation factor XI isoform X2 [Macaca fascicularis</a>    | 70.2      | 70.2        | 100%        | 3e-12   | 100%  | <a href="#">gij544436077 XP_005556541.1</a> |
| <a href="#">PREDICTED: coagulation factor XI isoform X3 [Pan troglodytes]</a>       | 70.2      | 70.2        | 100%        | 3e-12   | 100%  | <a href="#">gij694909934 XP_009446985.1</a> |
| <a href="#">PREDICTED: coagulation factor XI isoform X6 [Homo sapiens]</a>          | 70.2      | 70.2        | 100%        | 3e-12   | 100%  | <a href="#">gij578808899 XP_006714200.1</a> |
| <a href="#">PREDICTED: coagulation factor XI isoform X2 [Saimiri boliviensis b</a>  | 70.2      | 70.2        | 100%        | 3e-12   | 100%  | <a href="#">gij725582190 XP_010342661.1</a> |
| <a href="#">hypothetical protein EGM_04467 [Macaca fascicularis]</a>                | 70.2      | 70.2        | 100%        | 3e-12   | 100%  | <a href="#">gij355750969 EHH55296.1</a>     |
| <a href="#">hypothetical protein EGK_16300 [Macaca mulatta]</a>                     | 70.2      | 70.2        | 100%        | 3e-12   | 100%  | <a href="#">gij355687768 EHH26352.1</a>     |
| <a href="#">PREDICTED: coagulation factor XI isoform X1 [Rhinopithecus roxel</a>    | 70.2      | 70.2        | 100%        | 3e-12   | 100%  | <a href="#">gij724897369 XP_010376290.1</a> |
| <a href="#">PREDICTED: coagulation factor XI isoform X1 [Chlorocebus sabae</a>      | 70.2      | 70.2        | 100%        | 3e-12   | 100%  | <a href="#">gij635046201 XP_007998681.1</a> |
| <a href="#">coagulation factor XI [Homo sapiens]</a>                                | 70.2      | 70.2        | 100%        | 3e-12   | 100%  | <a href="#">gij180352 AAA51985.1</a>        |
| <a href="#">PREDICTED: coagulation factor XI isoform X1 [Macaca fascicularis</a>    | 70.2      | 70.2        | 100%        | 3e-12   | 100%  | <a href="#">gij544436075 XP_005556540.1</a> |
| <a href="#">coagulation factor XI precursor [Homo sapiens]</a>                      | 70.2      | 70.2        | 100%        | 3e-12   | 100%  | <a href="#">gij4503627 NP_000119.1</a>      |
| <a href="#">PREDICTED: coagulation factor XI isoform X1 [Saimiri boliviensis b</a>  | 70.2      | 70.2        | 100%        | 3e-12   | 100%  | <a href="#">gij725582188 XP_010342660.1</a> |
| <a href="#">PREDICTED: coagulation factor XI isoform X1 [Papio anubis]</a>          | 70.2      | 70.2        | 100%        | 3e-12   | 100%  | <a href="#">gij402871005 XP_003899481.1</a> |
| <a href="#">PREDICTED: coagulation factor XI [Nomascus leucogenys]</a>              | 70.2      | 70.2        | 100%        | 3e-12   | 100%  | <a href="#">gij332244773 XP_003271548.1</a> |
| <a href="#">PREDICTED: coagulation factor XI [Pongo abelii]</a>                     | 70.2      | 70.2        | 100%        | 3e-12   | 100%  | <a href="#">gij297674804 XP_002815399.1</a> |
| <a href="#">PREDICTED: coagulation factor XI isoform X2 [Pan troglodytes]</a>       | 70.2      | 70.2        | 100%        | 3e-12   | 100%  | <a href="#">gij114597210 XP_001165847.1</a> |
| <a href="#">PREDICTED: coagulation factor XI isoform X1 [Pan troglodytes]</a>       | 70.2      | 70.2        | 100%        | 3e-12   | 100%  | <a href="#">gij694909931 XP_009446984.1</a> |
| <a href="#">PREDICTED: coagulation factor XI isoform X1 [Homo sapiens]</a>          | 70.2      | 70.2        | 100%        | 3e-12   | 100%  | <a href="#">gij530377336 XP_005262878.1</a> |

|                                                                                    |      |      |      |       |      |                                             |
|------------------------------------------------------------------------------------|------|------|------|-------|------|---------------------------------------------|
| <a href="#">PREDICTED: coagulation factor XI-like [Macaca mulatta]</a>             | 70.2 | 70.2 | 100% | 3e-12 | 100% | <a href="#">gij297293811 XP_001090398.2</a> |
| <a href="#">PREDICTED: coagulation factor XI [Ictidomys tridecemlineatus]</a>      | 68.1 | 68.1 | 100% | 1e-11 | 95%  | <a href="#">gij532087072 XP_005329248.1</a> |
| <a href="#">Chain A. Crystal Structure Of The Catalytic Domain Of The Coagula</a>  | 66.8 | 66.8 | 100% | 3e-11 | 95%  | <a href="#">gij781010651 ZHM_A</a>          |
| <a href="#">Chain A. Crystal Structure Of The Catalytic Domain Of Coagulation</a>  | 66.8 | 66.8 | 100% | 3e-11 | 95%  | <a href="#">gij781010661 ZHP_A</a>          |
| <a href="#">Chain A. Crystal Structure Of The Fxia Catalytic Domain In Comple</a>  | 66.8 | 66.8 | 100% | 3e-11 | 95%  | <a href="#">gij56967291 1XXD_A</a>          |
| <a href="#">PREDICTED: coagulation factor XI isoform X3 [Chinchilla lanigera]</a>  | 66.8 | 66.8 | 100% | 4e-11 | 95%  | <a href="#">gij533115754 XP_005373487.1</a> |
| <a href="#">coagulation factor XI precursor [Oryctolagus cuniculus]</a>            | 66.8 | 66.8 | 100% | 4e-11 | 95%  | <a href="#">gij130502142 NP_001076261.1</a> |
| <a href="#">PREDICTED: coagulation factor XI isoform 2 [Ceratotherium simur</a>    | 66.8 | 66.8 | 100% | 4e-11 | 95%  | <a href="#">gij478509096 XP_004428828.1</a> |
| <a href="#">PREDICTED: coagulation factor XI [Tarsius syrichta]</a>                | 66.8 | 66.8 | 100% | 4e-11 | 95%  | <a href="#">gij640821392 XP_008067645.1</a> |
| <a href="#">PREDICTED: coagulation factor XI isoform X1 [Chinchilla lanigera]</a>  | 66.8 | 66.8 | 100% | 4e-11 | 95%  | <a href="#">gij533115750 XP_005373485.1</a> |
| <a href="#">PREDICTED: coagulation factor XI isoform 1 [Ceratotherium simur</a>    | 66.8 | 66.8 | 100% | 4e-11 | 95%  | <a href="#">gij478509094 XP_004428827.1</a> |
| <a href="#">PREDICTED: coagulation factor XI [Mesocricetus auratus]</a>            | 66.8 | 66.8 | 100% | 4e-11 | 95%  | <a href="#">gij524924928 XP_005066710.1</a> |
| <a href="#">PREDICTED: coagulation factor XI [Cavia porcellus]</a>                 | 66.8 | 66.8 | 100% | 4e-11 | 95%  | <a href="#">gij348566839 XP_003469209.1</a> |
| <a href="#">PREDICTED: coagulation factor XI [Callithrix jacchus]</a>              | 65.1 | 65.1 | 100% | 2e-10 | 95%  | <a href="#">gij296195030 XP_002745209.1</a> |
| <a href="#">Chain A. Crystal Structure Of Factor Xia In Complex With Clavatadi</a> | 64.7 | 64.7 | 100% | 2e-10 | 95%  | <a href="#">gij217035335 3BG8_A</a>         |
| <a href="#">Chain A. Factor Xia In Complex With A Clorophenyl-tetrazole Inhibi</a> | 64.7 | 64.7 | 100% | 2e-10 | 95%  | <a href="#">gij383875445 3SOR_A</a>         |
| <a href="#">Chain A. Factor Xi Catalytic Domain Complexed With N-((R)-1-(4-E</a>   | 64.7 | 64.7 | 100% | 2e-10 | 95%  | <a href="#">gij109157010 ZPZ_A</a>          |
| <a href="#">PREDICTED: coagulation factor XI [Ochotona princeps]</a>               | 64.7 | 64.7 | 100% | 2e-10 | 90%  | <a href="#">gij504133468 XP_004579306.1</a> |
| <a href="#">PREDICTED: coagulation factor XI [Sorex araneus]</a>                   | 64.3 | 64.3 | 100% | 3e-10 | 90%  | <a href="#">gij505830321 XP_004610458.1</a> |
| <a href="#">PREDICTED: coagulation factor XI isoform X7 [Heterocephalus gla</a>    | 63.8 | 63.8 | 100% | 4e-10 | 90%  | <a href="#">gij512982233 XP_004853113.1</a> |
| <a href="#">PREDICTED: coagulation factor XI isoform X6 [Heterocephalus gla</a>    | 63.8 | 63.8 | 100% | 4e-10 | 90%  | <a href="#">gij512892532 XP_004897313.1</a> |
| <a href="#">PREDICTED: coagulation factor XI isoform X4 [Fukomys damarens</a>      | 63.8 | 63.8 | 100% | 4e-10 | 90%  | <a href="#">gij731206526 XP_010618090.1</a> |
| <a href="#">PREDICTED: coagulation factor XI isoform X6 [Heterocephalus gla</a>    | 63.8 | 63.8 | 100% | 4e-10 | 90%  | <a href="#">gij512982231 XP_004853112.1</a> |
| <a href="#">PREDICTED: coagulation factor XI isoform X5 [Heterocephalus gla</a>    | 63.8 | 63.8 | 100% | 4e-10 | 90%  | <a href="#">gij512892528 XP_004897312.1</a> |
| <a href="#">PREDICTED: coagulation factor XI isoform X4 [Heterocephalus gla</a>    | 63.8 | 63.8 | 100% | 4e-10 | 90%  | <a href="#">gij512892524 XP_004897311.1</a> |
| <a href="#">PREDICTED: coagulation factor XI isoform X5 [Heterocephalus gla</a>    | 63.8 | 63.8 | 100% | 4e-10 | 90%  | <a href="#">gij512982229 XP_004853111.1</a> |
| <a href="#">PREDICTED: coagulation factor XI isoform X3 [Fukomys damarens</a>      | 63.8 | 63.8 | 100% | 4e-10 | 90%  | <a href="#">gij731206524 XP_010618089.1</a> |
| <a href="#">Coagulation factor XI [Heterocephalus glaber]</a>                      | 63.8 | 63.8 | 100% | 4e-10 | 90%  | <a href="#">gij351708043 EHB10962.1</a>     |
| <a href="#">PREDICTED: coagulation factor XI isoform X4 [Heterocephalus gla</a>    | 63.8 | 63.8 | 100% | 4e-10 | 90%  | <a href="#">gij512982227 XP_004853110.1</a> |
| <a href="#">PREDICTED: coagulation factor XI isoform X3 [Heterocephalus gla</a>    | 63.8 | 63.8 | 100% | 4e-10 | 90%  | <a href="#">gij512892520 XP_004897310.1</a> |
| <a href="#">PREDICTED: coagulation factor XI isoform X2 [Fukomys damarens</a>      | 63.8 | 63.8 | 100% | 4e-10 | 90%  | <a href="#">gij731206521 XP_010618088.1</a> |
| <a href="#">PREDICTED: coagulation factor XI isoform X1 [Fukomys damarens</a>      | 63.8 | 63.8 | 100% | 4e-10 | 90%  | <a href="#">gij731206515 XP_010618085.1</a> |
| <a href="#">PREDICTED: coagulation factor XI [Nannospalax galii]</a>               | 63.8 | 84.4 | 100% | 4e-10 | 90%  | <a href="#">gij674087872 XP_008851827.1</a> |
| <a href="#">PREDICTED: coagulation factor XI isoform X2 [Heterocephalus gla</a>    | 63.8 | 63.8 | 100% | 4e-10 | 90%  | <a href="#">gij512982223 XP_004853108.1</a> |
| <a href="#">PREDICTED: coagulation factor XI isoform X1 [Heterocephalus gla</a>    | 63.8 | 63.8 | 100% | 4e-10 | 90%  | <a href="#">gij512892512 XP_004897308.1</a> |
| <a href="#">PREDICTED: coagulation factor XI isoform X1 [Heterocephalus gla</a>    | 63.8 | 63.8 | 100% | 4e-10 | 90%  | <a href="#">gij512982221 XP_004853107.1</a> |
| <a href="#">PREDICTED: coagulation factor XI isoform X2 [Heterocephalus gla</a>    | 63.8 | 63.8 | 100% | 4e-10 | 90%  | <a href="#">gij512892516 XP_004897309.1</a> |
| <a href="#">PREDICTED: coagulation factor XI [Erinaceus europaeus]</a>             | 63.8 | 63.8 | 100% | 4e-10 | 90%  | <a href="#">gij617577865 XP_007517757.1</a> |
| <a href="#">PREDICTED: coagulation factor XI [Dasypus novemcinctus]</a>            | 63.4 | 63.4 | 100% | 6e-10 | 90%  | <a href="#">gij488532217 XP_004457855.1</a> |
| <a href="#">PREDICTED: coagulation factor XI [Ovis aries]</a>                      | 63.4 | 63.4 | 100% | 6e-10 | 90%  | <a href="#">gij426256280 XP_004021769.1</a> |
| <a href="#">blood coagulation factor XI [Bos taurus]</a>                           | 62.6 | 62.6 | 100% | 1e-09 | 90%  | <a href="#">gij45758733 AAS76646.1</a>      |
| <a href="#">PREDICTED: coagulation factor XI [Bos mutus]</a>                       | 62.6 | 62.6 | 100% | 1e-09 | 90%  | <a href="#">gij555974149 XP_005899069.1</a> |
| <a href="#">PREDICTED: coagulation factor XI isoform X2 [Leptonychotes wed</a>     | 62.1 | 62.1 | 100% | 2e-09 | 86%  | <a href="#">gij585180453 XP_006741890.1</a> |
| <a href="#">PREDICTED: coagulation factor XI isoform 3 [Odobenus rosmarus</a>      | 62.1 | 62.1 | 100% | 2e-09 | 86%  | <a href="#">gij472396395 XP_004417424.1</a> |
| <a href="#">PREDICTED: coagulation factor XI-like [Ailuropoda melanoleuca]</a>     | 62.1 | 62.1 | 100% | 2e-09 | 86%  | <a href="#">gij301776062 XP_002923450.1</a> |
| <a href="#">PREDICTED: coagulation factor XI [Lipotes vexillifer]</a>              | 62.1 | 62.1 | 100% | 2e-09 | 90%  | <a href="#">gij602712769 XP_007466613.1</a> |

|                                                                                   |      |      |      |       |     |                                             |
|-----------------------------------------------------------------------------------|------|------|------|-------|-----|---------------------------------------------|
| <a href="#">PREDICTED: coagulation factor XI [Balaenoptera acutorostrata sca</a>  | 62.1 | 62.1 | 100% | 2e-09 | 90% | <a href="#">gij594650157 XP_007174042.1</a> |
| <a href="#">PREDICTED: coagulation factor XI [Physeter catodon]</a>               | 62.1 | 62.1 | 100% | 2e-09 | 90% | <a href="#">gij593742188 XP_007126520.1</a> |
| <a href="#">PREDICTED: coagulation factor XI [Jaculus jaculus]</a>                | 62.1 | 62.1 | 95%  | 2e-09 | 90% | <a href="#">gij507565537 XP_004666428.1</a> |
| <a href="#">PREDICTED: coagulation factor XI isoform X3 [Leptonychotes wed</a>    | 62.1 | 62.1 | 100% | 2e-09 | 86% | <a href="#">gij585180455 XP_006741891.1</a> |
| <a href="#">PREDICTED: coagulation factor XI isoform 2 [Odobenus rosmarus</a>     | 62.1 | 62.1 | 100% | 2e-09 | 86% | <a href="#">gij472396393 XP_004417423.1</a> |
| <a href="#">PREDICTED: coagulation factor XI [Orcinus orca]</a>                   | 62.1 | 62.1 | 100% | 2e-09 | 90% | <a href="#">gij466045508 XP_004277238.1</a> |
| <a href="#">PREDICTED: coagulation factor XI isoform X1 [Leptonychotes wed</a>    | 62.1 | 62.1 | 100% | 2e-09 | 86% | <a href="#">gij585180451 XP_006741889.1</a> |
| <a href="#">PREDICTED: coagulation factor XI [Mustela putorius furo]</a>          | 62.1 | 62.1 | 100% | 2e-09 | 86% | <a href="#">gij511876760 XP_004758357.1</a> |
| <a href="#">PREDICTED: coagulation factor XI isoform 1 [Odobenus rosmarus</a>     | 62.1 | 62.1 | 100% | 2e-09 | 86% | <a href="#">gij472396391 XP_004417422.1</a> |
| <a href="#">PREDICTED: LOW QUALITY PROTEIN: coagulation factor XI [Urs</a>        | 62.1 | 62.1 | 100% | 2e-09 | 86% | <a href="#">gij671035736 XP_008708722.1</a> |
| <a href="#">PREDICTED: coagulation factor XI [Equus caballus]</a>                 | 61.7 | 61.7 | 100% | 2e-09 | 90% | <a href="#">gij149742758 XP_001490330.1</a> |
| <a href="#">PREDICTED: coagulation factor XI [Vicugna pacos]</a>                  | 61.7 | 61.7 | 100% | 2e-09 | 90% | <a href="#">gij560951202 XP_006198143.1</a> |
| <a href="#">PREDICTED: coagulation factor XI [Equus przewalskii]</a>              | 61.7 | 61.7 | 100% | 2e-09 | 90% | <a href="#">gij664778079 XP_008508352.1</a> |
| <a href="#">PREDICTED: coagulation factor XI [Camelus ferus]</a>                  | 61.7 | 61.7 | 100% | 2e-09 | 90% | <a href="#">gij560904135 XP_006178431.1</a> |
| <a href="#">Chain A, Crystal Structure Of The Catalytic Domain Of Coagulation</a> | 61.3 | 61.3 | 100% | 2e-09 | 90% | <a href="#">gij75765761 1ZJD_A</a>          |
| <a href="#">Chain A, Factor Xi Catalytic Domain Complexed With 2-Guanidino-</a>   | 61.3 | 61.3 | 100% | 2e-09 | 90% | <a href="#">gij109156985 1ZLR_A</a>         |
| <a href="#">Chain A, Crystal Structure Of The Catalytic Domain Of Coagulation</a> | 61.3 | 61.3 | 100% | 2e-09 | 90% | <a href="#">gij78101067 1ZHR_A</a>          |
| <a href="#">PREDICTED: coagulation factor XI [Otolemur garnettii]</a>             | 61.3 | 61.3 | 100% | 3e-09 | 90% | <a href="#">gij395840032 XP_003792872.1</a> |
| <a href="#">coagulation factor XI precursor [Canis lupus familiaris]</a>          | 60.9 | 60.9 | 100% | 4e-09 | 86% | <a href="#">gij205361194 NP_001128595.1</a> |
| <a href="#">PREDICTED: LOW QUALITY PROTEIN: coagulation factor XI [Pan</a>        | 60.9 | 60.9 | 100% | 4e-09 | 86% | <a href="#">gij591347751 XP_007099050.1</a> |
| <a href="#">PREDICTED: coagulation factor XI isoform X2 [Canis lupus familiar</a> | 60.9 | 60.9 | 100% | 4e-09 | 86% | <a href="#">gij545526400 XP_005629983.1</a> |
| <a href="#">PREDICTED: coagulation factor XI [Trichechus manatus latirostris]</a> | 60.9 | 60.9 | 95%  | 4e-09 | 90% | <a href="#">gij471399784 XP_004382857.1</a> |
| <a href="#">PREDICTED: coagulation factor XI [Felis catus]</a>                    | 60.9 | 60.9 | 100% | 4e-09 | 86% | <a href="#">gij410956035 XP_003984650.1</a> |
| <a href="#">PREDICTED: coagulation factor XI isoform X1 [Canis lupus familiar</a> | 60.9 | 60.9 | 100% | 4e-09 | 86% | <a href="#">gij545526398 XP_005629982.1</a> |
| <a href="#">PREDICTED: coagulation factor XI [Cricetulus griseus]</a>             | 60.4 | 60.4 | 100% | 6e-09 | 86% | <a href="#">gij354490732 XP_003507510.1</a> |

## Alignments

Download [GenPept](#) [Graphics](#)

[Next](#) [Previous](#) [Descriptions](#)

Chain A, Crystal Structure Of The Fxia Catalytic Domain In Complex With Ecotinm84r

Sequence ID: [gij56967287|pdb|1XX9|A](#) Length: 238 Number of Matches: 1

[See 1 more title\(s\)](#)

Range 1: 98 to 118 [GenPept](#) [Graphics](#)

[Next Match](#) [Previous Match](#)

| Score          | Expect | Identities  | Positives   | Gaps     |
|----------------|--------|-------------|-------------|----------|
| 70.2 bits(158) | 2e-12  | 21/21(100%) | 21/21(100%) | 0/21(0%) |

Query 1 KLETTVNYTDSQRPICLPSKG 21  
 KLETTVNYTDSQRPICLPSKG  
 Sbjct 98 KLETTVNYTDSQRPICLPSKG 118

### Related Information

[Structure](#) - 3D structure displays  
[Identical Proteins](#) - Proteins  
 identical to the subject

Download [GenPept](#) [Graphics](#)

[Next](#) [Previous](#) [Descriptions](#)

Chain A, Factor Xia In Complex With The Inhibitor 3'-[(2s,4r)-6-carbamimidoyl- 4-methyl-4-phenyl-1,2,3,4-tetrahydroquinolin-2-yl]-4-carbamoyl-5'-[(3-methylbutanoyl)amino]biphenyl-2-carboxylic Acid

Sequence ID: [gij584579944|pdb|4NA7|A](#) Length: 244 Number of Matches: 1

[See 1 more title\(s\)](#)

Range 1: 98 to 118 [GenPept](#) [Graphics](#)

[Next Match](#) [Previous Match](#)

| Score          | Expect | Identities  | Positives   | Gaps     |
|----------------|--------|-------------|-------------|----------|
| 70.2 bits(158) | 2e-12  | 21/21(100%) | 21/21(100%) | 0/21(0%) |

Query 1 KLETTVNYTDSQRPICLPSKG 21  
 KLETTVNYTDSQRPICLPSKG  
 Sbjct 98 KLETTVNYTDSQRPICLPSKG 118

### Related Information

[Structure](#) - 3D structure displays  
[Identical Proteins](#) - Proteins  
 identical to the subject

[Download](#) ▾ [GenPept](#) [Graphics](#)

▼ Next ▲ Previous ▲ Descriptions

coagulation factor XI (plasma thromboplastin antecedent), isoform CRA\_b [Homo sapiens]

Sequence ID: [gi|119625025|gb|EAX04620.1](#) Length: 470 Number of Matches: 1

Range 1: 330 to 350 [GenPept](#) [Graphics](#)

▼ Next Match ▲ Previous Match

| Score          | Expect | Identities  | Positives   | Gaps     |
|----------------|--------|-------------|-------------|----------|
| 70.2 bits(158) | 3e-12  | 21/21(100%) | 21/21(100%) | 0/21(0%) |

Query 1 KLETTVNYTDSQRPICLPSKG 21  
 KLETTVNYTDSQRPICLPSKG  
 Sbjct 330 KLETTVNYTDSQRPICLPSKG 350

**Related Information**

[Gene](#) - associated gene details

[Download](#) ▾ [GenPept](#) [Graphics](#)

▼ Next ▲ Previous ▲ Descriptions

PREDICTED: coagulation factor XI isoform X2 [Pan paniscus]

Sequence ID: [gi|675774870|ref|XP\\_008975412.1](#) Length: 535 Number of Matches: 1

Range 1: 395 to 415 [GenPept](#) [Graphics](#)

▼ Next Match ▲ Previous Match

| Score          | Expect | Identities  | Positives   | Gaps     |
|----------------|--------|-------------|-------------|----------|
| 70.2 bits(158) | 3e-12  | 21/21(100%) | 21/21(100%) | 0/21(0%) |

Query 1 KLETTVNYTDSQRPICLPSKG 21  
 KLETTVNYTDSQRPICLPSKG  
 Sbjct 395 KLETTVNYTDSQRPICLPSKG 415

**Related Information**

[Gene](#) - associated gene details

[Map Viewer](#) - aligned genomic context

[Download](#) ▾ [GenPept](#) [Graphics](#)

▼ Next ▲ Previous ▲ Descriptions

PREDICTED: coagulation factor XI isoform X5 [Pan troglodytes]

Sequence ID: [gi|694909938|ref|XP\\_009446987.1](#) Length: 536 Number of Matches: 1

Range 1: 396 to 416 [GenPept](#) [Graphics](#)

▼ Next Match ▲ Previous Match

| Score          | Expect | Identities  | Positives   | Gaps     |
|----------------|--------|-------------|-------------|----------|
| 70.2 bits(158) | 3e-12  | 21/21(100%) | 21/21(100%) | 0/21(0%) |

Query 1 KLETTVNYTDSQRPICLPSKG 21  
 KLETTVNYTDSQRPICLPSKG  
 Sbjct 396 KLETTVNYTDSQRPICLPSKG 416

**Related Information**

[Gene](#) - associated gene details



▶ NCBI/ BLAST/ blastp suite/ Formatting Results - B94V42ZZ01R

**i** Your search parameters were adjusted to search for a short input sequence.

[Edit and Resubmit](#) [Save Search Strategies](#) ▶ [Formatting options](#) ▶ [Download](#)

[YouTube](#) [How to read this page](#) [Blast report description](#)

### F11\_KLETTVNYTDSQRPICLPSKGDRN\_NonMod

**RID** [B94V42ZZ01R](#) (Expires on 01-14 10:39 am)

**Query ID** lcl|304046  
**Description** None  
**Molecule type** amino acid  
**Query Length** 24

**Database Name** nr  
**Description** All non-redundant GenBank CDS translations+PDB+SwissProt+PIR excluding environmental samples from WGS projects  
**Program** BLASTP 2.2.30+ ▶ [Citation](#)

Other reports: ▶ [Search Summary](#) [[Taxonomy reports](#)] [[Distance tree of results](#)] [[Multiple alignment](#)]

### Graphic Summary

**Show Conserved Domains**

Putative conserved domains have been detected, click on the image below for detailed results.

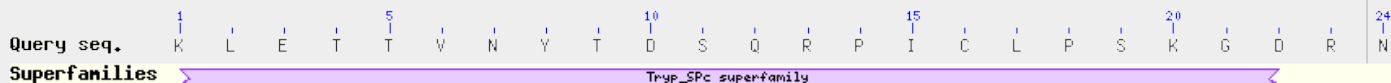

### Distribution of 101 Blast Hits on the Query Sequence

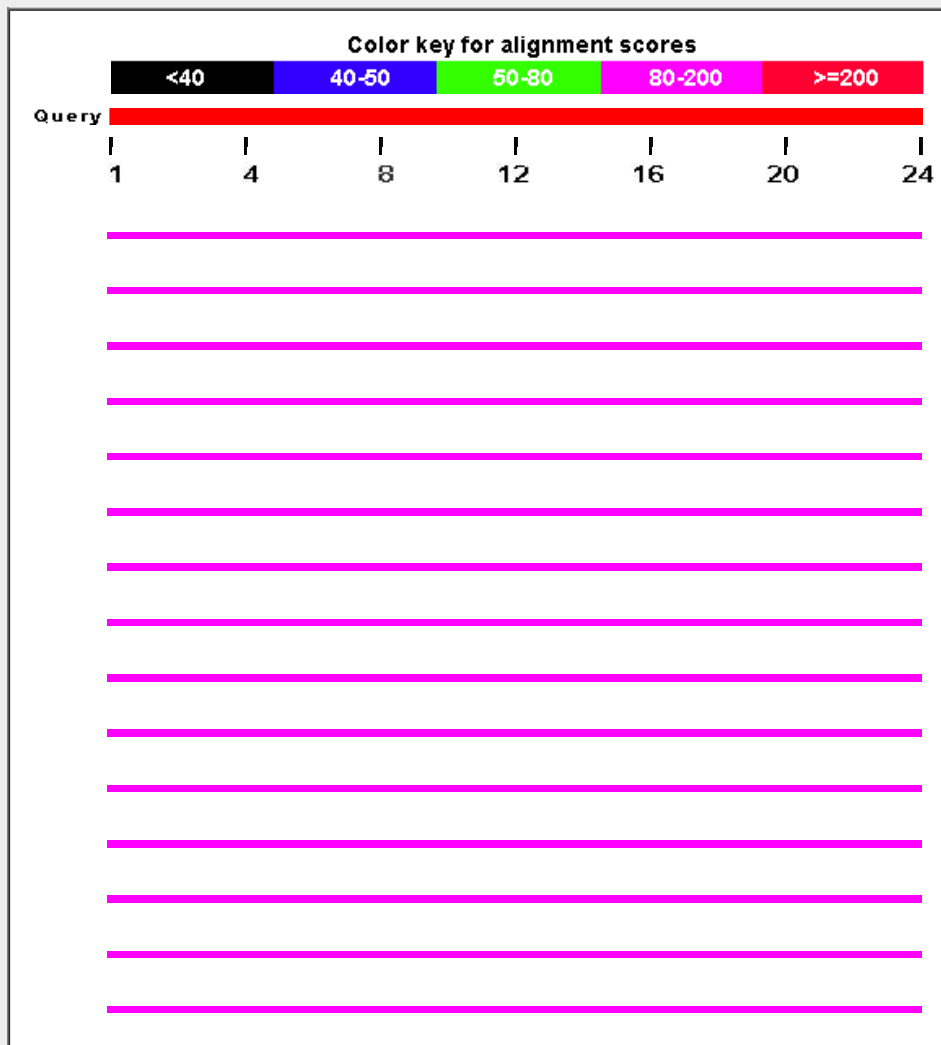

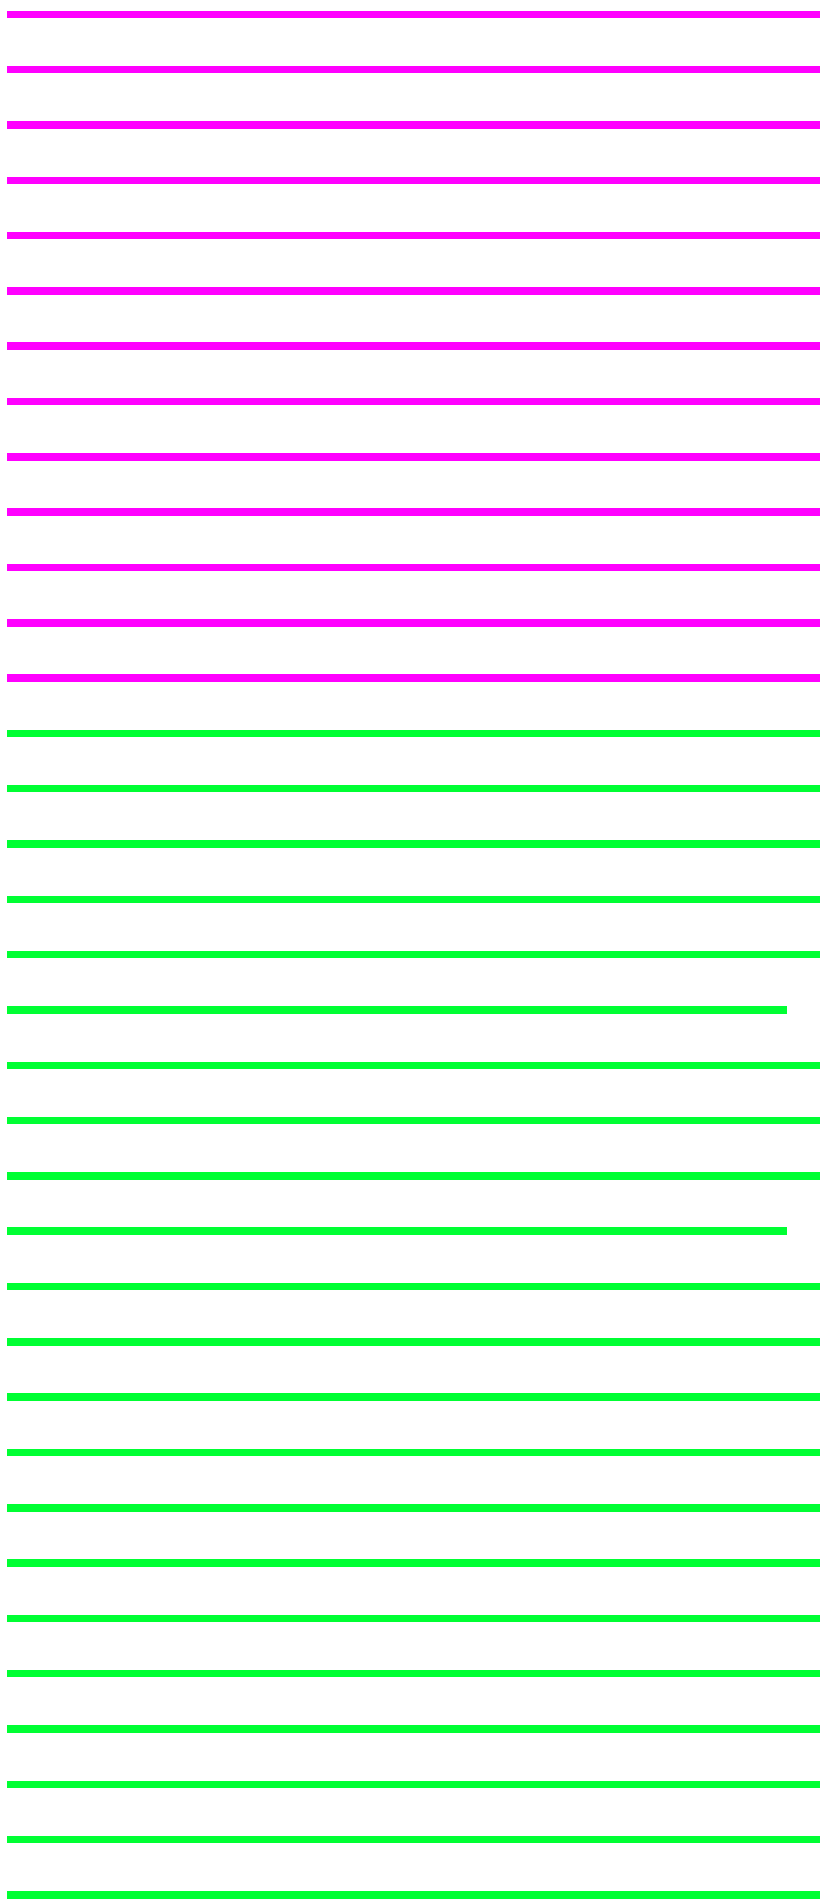

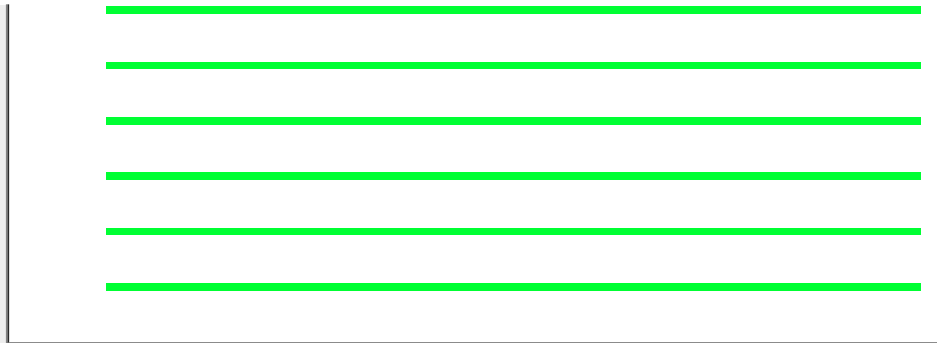

**Descriptions**

**Sequences producing significant alignments:**

Select: [All](#) [None](#) Selected:0

Alignments Download GenPept Graphics Distance tree of results Multiple alignment

| Description                                                                         | Max score | Total score | Query cover | E value | Ident | Accession                                   |
|-------------------------------------------------------------------------------------|-----------|-------------|-------------|---------|-------|---------------------------------------------|
| <a href="#">Chain A, Crystal Structure Of The Fxia Catalytic Domain In Comple</a>   | 80.4      | 80.4        | 100%        | 1e-15   | 100%  | <a href="#">gij56967287 1XX9_A</a>          |
| <a href="#">Chain A, Factor Xia In Complex With The Inhibitor 3'-(2s,4r)-6-cart</a> | 80.4      | 80.4        | 100%        | 1e-15   | 100%  | <a href="#">gij584579944 4NA7_A</a>         |
| <a href="#">coagulation factor XI (plasma thromboplastin antecedent), isoform C</a> | 80.4      | 80.4        | 100%        | 1e-15   | 100%  | <a href="#">gij119625025 EAX04620.1</a>     |
| <a href="#">PREDICTED: coagulation factor XI isoform X2 [Pan paniscus]</a>          | 80.4      | 80.4        | 100%        | 1e-15   | 100%  | <a href="#">gij675774870 XP_008975412.1</a> |
| <a href="#">PREDICTED: coagulation factor XI isoform X5 [Pan troglodytes]</a>       | 80.4      | 80.4        | 100%        | 1e-15   | 100%  | <a href="#">gij694909938 XP_009446987.1</a> |
| <a href="#">PREDICTED: coagulation factor XI isoform X3 [Homo sapiens]</a>          | 80.4      | 80.4        | 100%        | 1e-15   | 100%  | <a href="#">gij530377340 XP_005262880.1</a> |
| <a href="#">platelet factor XI [Homo sapiens]</a>                                   | 80.4      | 80.4        | 100%        | 1e-15   | 100%  | <a href="#">gij3258649 AAC24506.1</a>       |
| <a href="#">PREDICTED: coagulation factor XI [Gorilla gorilla gorilla]</a>          | 80.4      | 80.4        | 100%        | 1e-15   | 100%  | <a href="#">gij426346208 XP_004040776.1</a> |
| <a href="#">PREDICTED: coagulation factor XI isoform X2 [Rhinopithecus roxel</a>    | 80.4      | 80.4        | 100%        | 1e-15   | 100%  | <a href="#">gij724897372 XP_010376291.1</a> |
| <a href="#">PREDICTED: coagulation factor XI isoform X2 [Papio anubis]</a>          | 80.4      | 80.4        | 100%        | 1e-15   | 100%  | <a href="#">gij685544400 XP_009206295.1</a> |
| <a href="#">PREDICTED: coagulation factor XI isoform X2 [Chlorocebus sabae</a>      | 80.4      | 80.4        | 100%        | 1e-15   | 100%  | <a href="#">gij635046203 XP_007998683.1</a> |
| <a href="#">PREDICTED: coagulation factor XI isoform X2 [Macaca fascicularis</a>    | 80.4      | 80.4        | 100%        | 1e-15   | 100%  | <a href="#">gij544436077 XP_005556541.1</a> |
| <a href="#">PREDICTED: coagulation factor XI isoform X3 [Pan troglodytes]</a>       | 80.4      | 80.4        | 100%        | 1e-15   | 100%  | <a href="#">gij694909934 XP_009446985.1</a> |
| <a href="#">PREDICTED: coagulation factor XI isoform X6 [Homo sapiens]</a>          | 80.4      | 80.4        | 100%        | 1e-15   | 100%  | <a href="#">gij578808899 XP_006714200.1</a> |
| <a href="#">hypothetical protein EGM_04467 [Macaca fascicularis]</a>                | 80.4      | 80.4        | 100%        | 1e-15   | 100%  | <a href="#">gij355750969 EHH55296.1</a>     |
| <a href="#">hypothetical protein EGK_16300 [Macaca mulatta]</a>                     | 80.4      | 80.4        | 100%        | 1e-15   | 100%  | <a href="#">gij355687768 EHH26352.1</a>     |
| <a href="#">PREDICTED: coagulation factor XI isoform X1 [Rhinopithecus roxel</a>    | 80.4      | 80.4        | 100%        | 1e-15   | 100%  | <a href="#">gij724897369 XP_010376290.1</a> |
| <a href="#">PREDICTED: coagulation factor XI isoform X1 [Chlorocebus sabae</a>      | 80.4      | 80.4        | 100%        | 1e-15   | 100%  | <a href="#">gij635046201 XP_007998681.1</a> |
| <a href="#">coagulation factor XI [Homo sapiens]</a>                                | 80.4      | 80.4        | 100%        | 1e-15   | 100%  | <a href="#">gij180352 AAA51985.1</a>        |
| <a href="#">PREDICTED: coagulation factor XI isoform X1 [Macaca fascicularis</a>    | 80.4      | 80.4        | 100%        | 1e-15   | 100%  | <a href="#">gij544436075 XP_005556540.1</a> |
| <a href="#">coagulation factor XI precursor [Homo sapiens]</a>                      | 80.4      | 80.4        | 100%        | 1e-15   | 100%  | <a href="#">gij4503627 NP_000119.1</a>      |
| <a href="#">PREDICTED: coagulation factor XI isoform X1 [Papio anubis]</a>          | 80.4      | 80.4        | 100%        | 1e-15   | 100%  | <a href="#">gij402871005 XP_003899481.1</a> |
| <a href="#">PREDICTED: coagulation factor XI [Nomascus leucogenys]</a>              | 80.4      | 80.4        | 100%        | 1e-15   | 100%  | <a href="#">gij332244773 XP_003271548.1</a> |
| <a href="#">PREDICTED: coagulation factor XI [Pongo abelii]</a>                     | 80.4      | 80.4        | 100%        | 1e-15   | 100%  | <a href="#">gij297674804 XP_002815399.1</a> |
| <a href="#">PREDICTED: coagulation factor XI isoform X2 [Pan troglodytes]</a>       | 80.4      | 80.4        | 100%        | 1e-15   | 100%  | <a href="#">gij114597210 XP_001165847.1</a> |
| <a href="#">PREDICTED: coagulation factor XI isoform X1 [Pan troglodytes]</a>       | 80.4      | 80.4        | 100%        | 1e-15   | 100%  | <a href="#">gij694909931 XP_009446984.1</a> |
| <a href="#">PREDICTED: coagulation factor XI isoform X1 [Homo sapiens]</a>          | 80.4      | 80.4        | 100%        | 1e-15   | 100%  | <a href="#">gij530377336 XP_005262878.1</a> |
| <a href="#">PREDICTED: coagulation factor XI-like [Macaca mulatta]</a>              | 80.4      | 80.4        | 100%        | 1e-15   | 100%  | <a href="#">gij297293811 XP_001090398.2</a> |
| <a href="#">PREDICTED: coagulation factor XI [Ictidomys tridecemlineatus]</a>       | 78.3      | 78.3        | 100%        | 7e-15   | 96%   | <a href="#">gij532087072 XP_005329248.1</a> |

|                                                                                    |      |      |      |       |      |                                             |
|------------------------------------------------------------------------------------|------|------|------|-------|------|---------------------------------------------|
| <a href="#">Chain A. Crystal Structure Of The Catalytic Domain Of The Coagula</a>  | 77.0 | 77.0 | 100% | 2e-14 | 96%  | <a href="#">gij781010651ZHM_A</a>           |
| <a href="#">Chain A. Crystal Structure Of The Catalytic Domain Of Coagulation</a>  | 77.0 | 77.0 | 100% | 2e-14 | 96%  | <a href="#">gij781010661ZHP_A</a>           |
| <a href="#">Chain A. Crystal Structure Of The Fxia Catalytic Domain In Comple</a>  | 77.0 | 77.0 | 100% | 2e-14 | 96%  | <a href="#">gij569672911XXD_A</a>           |
| <a href="#">PREDICTED: coagulation factor XI isoform X3 [Chinchilla lanigera]</a>  | 77.0 | 77.0 | 100% | 2e-14 | 96%  | <a href="#">gij533115754 XP_005373487.1</a> |
| <a href="#">PREDICTED: coagulation factor XI isoform X2 [Saimiri boliviensis b</a> | 77.0 | 77.0 | 95%  | 2e-14 | 100% | <a href="#">gij725582190 XP_010342661.1</a> |
| <a href="#">coagulation factor XI precursor [Oryctolagus cuniculus]</a>            | 77.0 | 77.0 | 100% | 2e-14 | 96%  | <a href="#">gij130502142 NP_001076261.1</a> |
| <a href="#">PREDICTED: coagulation factor XI [Tarsius syrichta]</a>                | 77.0 | 77.0 | 100% | 2e-14 | 96%  | <a href="#">gij640821392 XP_008067645.1</a> |
| <a href="#">PREDICTED: coagulation factor XI isoform X1 [Chinchilla lanigera]</a>  | 77.0 | 77.0 | 100% | 2e-14 | 96%  | <a href="#">gij533115750 XP_005373485.1</a> |
| <a href="#">PREDICTED: coagulation factor XI isoform X1 [Saimiri boliviensis b</a> | 77.0 | 77.0 | 95%  | 2e-14 | 100% | <a href="#">gij725582188 XP_010342660.1</a> |
| <a href="#">PREDICTED: coagulation factor XI [Mesocricetus auratus]</a>            | 77.0 | 77.0 | 100% | 2e-14 | 96%  | <a href="#">gij524924928 XP_005066710.1</a> |
| <a href="#">PREDICTED: coagulation factor XI [Cavia porcellus]</a>                 | 77.0 | 77.0 | 100% | 2e-14 | 96%  | <a href="#">gij348566839 XP_003469209.1</a> |
| <a href="#">Chain A. Factor Xia In Complex With A Clorophenyl-tetrazole Inhibi</a> | 74.9 | 74.9 | 100% | 8e-14 | 96%  | <a href="#">gij383875445 3SOR_A</a>         |
| <a href="#">Chain A. Factor Xi Catalytic Domain Complexed With N-((R)-1-(4-F</a>   | 74.9 | 74.9 | 100% | 8e-14 | 96%  | <a href="#">gij109157010 1ZPZ_A</a>         |
| <a href="#">PREDICTED: coagulation factor XI [Sorex araneus]</a>                   | 74.4 | 74.4 | 100% | 1e-13 | 92%  | <a href="#">gij505830321 XP_004610458.1</a> |
| <a href="#">PREDICTED: coagulation factor XI isoform X7 [Heterocephalus gla</a>    | 74.0 | 74.0 | 100% | 2e-13 | 92%  | <a href="#">gij512982233 XP_004853113.1</a> |
| <a href="#">PREDICTED: coagulation factor XI isoform X6 [Heterocephalus gla</a>    | 74.0 | 74.0 | 100% | 2e-13 | 92%  | <a href="#">gij512892532 XP_004897313.1</a> |
| <a href="#">PREDICTED: coagulation factor XI isoform X4 [Fukomys damarens</a>      | 74.0 | 74.0 | 100% | 2e-13 | 92%  | <a href="#">gij731206526 XP_010618090.1</a> |
| <a href="#">PREDICTED: coagulation factor XI isoform X6 [Heterocephalus gla</a>    | 74.0 | 74.0 | 100% | 2e-13 | 92%  | <a href="#">gij512982231 XP_004853112.1</a> |
| <a href="#">PREDICTED: coagulation factor XI isoform X5 [Heterocephalus gla</a>    | 74.0 | 74.0 | 100% | 2e-13 | 92%  | <a href="#">gij512892528 XP_004897312.1</a> |
| <a href="#">PREDICTED: coagulation factor XI isoform X4 [Heterocephalus gla</a>    | 74.0 | 74.0 | 100% | 2e-13 | 92%  | <a href="#">gij512892524 XP_004897311.1</a> |
| <a href="#">PREDICTED: coagulation factor XI isoform X5 [Heterocephalus gla</a>    | 74.0 | 74.0 | 100% | 2e-13 | 92%  | <a href="#">gij512982229 XP_004853111.1</a> |
| <a href="#">PREDICTED: coagulation factor XI isoform X3 [Fukomys damarens</a>      | 74.0 | 74.0 | 100% | 2e-13 | 92%  | <a href="#">gij731206524 XP_010618089.1</a> |
| <a href="#">Coagulation factor XI [Heterocephalus glaber]</a>                      | 74.0 | 74.0 | 100% | 2e-13 | 92%  | <a href="#">gij351708043 EHB10962.1</a>     |
| <a href="#">PREDICTED: coagulation factor XI isoform X4 [Heterocephalus gla</a>    | 74.0 | 74.0 | 100% | 2e-13 | 92%  | <a href="#">gij512982227 XP_004853110.1</a> |
| <a href="#">PREDICTED: coagulation factor XI isoform X3 [Heterocephalus gla</a>    | 74.0 | 74.0 | 100% | 2e-13 | 92%  | <a href="#">gij512892520 XP_004897310.1</a> |
| <a href="#">PREDICTED: coagulation factor XI isoform X2 [Fukomys damarens</a>      | 74.0 | 74.0 | 100% | 2e-13 | 92%  | <a href="#">gij731206521 XP_010618088.1</a> |
| <a href="#">PREDICTED: coagulation factor XI isoform X1 [Fukomys damarens</a>      | 74.0 | 74.0 | 100% | 2e-13 | 92%  | <a href="#">gij731206515 XP_010618085.1</a> |
| <a href="#">PREDICTED: coagulation factor XI [Nannospalax galili]</a>              | 74.0 | 94.6 | 100% | 2e-13 | 92%  | <a href="#">gij674087872 XP_008851827.1</a> |
| <a href="#">PREDICTED: coagulation factor XI isoform X2 [Heterocephalus gla</a>    | 74.0 | 74.0 | 100% | 2e-13 | 92%  | <a href="#">gij512982223 XP_004853108.1</a> |
| <a href="#">PREDICTED: coagulation factor XI isoform X1 [Heterocephalus gla</a>    | 74.0 | 74.0 | 100% | 2e-13 | 92%  | <a href="#">gij512892512 XP_004897308.1</a> |
| <a href="#">PREDICTED: coagulation factor XI isoform X1 [Heterocephalus gla</a>    | 74.0 | 74.0 | 100% | 2e-13 | 92%  | <a href="#">gij512982221 XP_004853107.1</a> |
| <a href="#">PREDICTED: coagulation factor XI isoform X2 [Heterocephalus gla</a>    | 74.0 | 74.0 | 100% | 2e-13 | 92%  | <a href="#">gij512892516 XP_004897309.1</a> |
| <a href="#">PREDICTED: coagulation factor XI [Erinaceus europaeus]</a>             | 74.0 | 74.0 | 100% | 2e-13 | 92%  | <a href="#">gij617577865 XP_007517757.1</a> |
| <a href="#">PREDICTED: coagulation factor XI isoform 2 [Ceratotherium simur</a>    | 73.6 | 73.6 | 100% | 3e-13 | 92%  | <a href="#">gij478509096 XP_004428828.1</a> |
| <a href="#">PREDICTED: coagulation factor XI isoform 1 [Ceratotherium simur</a>    | 73.6 | 73.6 | 100% | 3e-13 | 92%  | <a href="#">gij478509094 XP_004428827.1</a> |
| <a href="#">PREDICTED: coagulation factor XI [Ovis aries]</a>                      | 73.6 | 73.6 | 100% | 3e-13 | 92%  | <a href="#">gij426256280 XP_004021769.1</a> |
| <a href="#">blood coagulation factor XI [Bos taurus]</a>                           | 72.7 | 72.7 | 100% | 6e-13 | 92%  | <a href="#">gij45758733 AAS76646.1</a>      |
| <a href="#">PREDICTED: coagulation factor XI [Bos mutus]</a>                       | 72.7 | 72.7 | 100% | 6e-13 | 92%  | <a href="#">gij555974149 XP_005899069.1</a> |
| <a href="#">Chain A. Crystal Structure Of Factor Xia In Complex With Clavatadi</a> | 72.3 | 72.3 | 100% | 6e-13 | 92%  | <a href="#">gij217035335 3BG8_A</a>         |
| <a href="#">PREDICTED: coagulation factor XI isoform X2 [Leptonychotes wed</a>     | 72.3 | 72.3 | 100% | 8e-13 | 88%  | <a href="#">gij585180453 XP_006741890.1</a> |
| <a href="#">PREDICTED: coagulation factor XI isoform 3 [Odobenus rosmarus</a>      | 72.3 | 72.3 | 100% | 8e-13 | 88%  | <a href="#">gij472396395 XP_004417424.1</a> |
| <a href="#">PREDICTED: coagulation factor XI-like [Ailuropoda melanoleuca]</a>     | 72.3 | 72.3 | 100% | 8e-13 | 88%  | <a href="#">gij301776062 XP_002923450.1</a> |
| <a href="#">PREDICTED: coagulation factor XI [Lipotes vexillifer]</a>              | 72.3 | 72.3 | 100% | 8e-13 | 92%  | <a href="#">gij602712769 XP_007466613.1</a> |
| <a href="#">PREDICTED: coagulation factor XI [Balaenoptera acutorostrata sca</a>   | 72.3 | 72.3 | 100% | 8e-13 | 92%  | <a href="#">gij594650157 XP_007174042.1</a> |
| <a href="#">PREDICTED: coagulation factor XI [Physeter catodon]</a>                | 72.3 | 72.3 | 100% | 8e-13 | 92%  | <a href="#">gij593742188 XP_007126520.1</a> |
| <a href="#">PREDICTED: coagulation factor XI [Jaculus jaculus]</a>                 | 72.3 | 72.3 | 95%  | 8e-13 | 91%  | <a href="#">gij507565537 XP_004666428.1</a> |

|                                                                                     |      |      |      |       |     |                                             |
|-------------------------------------------------------------------------------------|------|------|------|-------|-----|---------------------------------------------|
| <a href="#">PREDICTED: coagulation factor XI isoform X3 [Leptonychotes wed</a>      | 72.3 | 72.3 | 100% | 8e-13 | 88% | <a href="#">gij585180455 XP_006741891.1</a> |
| <a href="#">PREDICTED: coagulation factor XI isoform 2 [Odobenus rosmarus</a>       | 72.3 | 72.3 | 100% | 8e-13 | 88% | <a href="#">gij472396393 XP_004417423.1</a> |
| <a href="#">PREDICTED: coagulation factor XI [Orcinus orca]</a>                     | 72.3 | 72.3 | 100% | 8e-13 | 92% | <a href="#">gij466045508 XP_004277238.1</a> |
| <a href="#">PREDICTED: coagulation factor XI isoform X1 [Leptonychotes wed</a>      | 72.3 | 72.3 | 100% | 8e-13 | 88% | <a href="#">gij585180451 XP_006741889.1</a> |
| <a href="#">PREDICTED: coagulation factor XI [Mustela putorius furo]</a>            | 72.3 | 72.3 | 100% | 8e-13 | 88% | <a href="#">gij511876760 XP_004758357.1</a> |
| <a href="#">PREDICTED: coagulation factor XI isoform 1 [Odobenus rosmarus</a>       | 72.3 | 72.3 | 100% | 8e-13 | 88% | <a href="#">gij472396391 XP_004417422.1</a> |
| <a href="#">PREDICTED: LOW QUALITY PROTEIN: coagulation factor XI [Urs</a>          | 72.3 | 72.3 | 100% | 8e-13 | 88% | <a href="#">gij671035736 XP_008708722.1</a> |
| <a href="#">PREDICTED: coagulation factor XI [Vicugna pacos]</a>                    | 71.9 | 71.9 | 100% | 1e-12 | 92% | <a href="#">gij560951202 XP_006198143.1</a> |
| <a href="#">PREDICTED: coagulation factor XI [Callithrix jacchus]</a>               | 71.9 | 71.9 | 95%  | 1e-12 | 96% | <a href="#">gij296195030 XP_002745209.1</a> |
| <a href="#">PREDICTED: coagulation factor XI [Camelus ferus]</a>                    | 71.9 | 71.9 | 100% | 1e-12 | 92% | <a href="#">gij560904135 XP_006178431.1</a> |
| <a href="#">Chain A, Crystal Structure Of The Catalytic Domain Of Coagulation</a>   | 71.5 | 71.5 | 100% | 1e-12 | 92% | <a href="#">gij75765761 1ZJD_A</a>          |
| <a href="#">Chain A, Factor Xi Catalytic Domain Complexed With 2-Guanidino-</a>     | 71.5 | 71.5 | 100% | 1e-12 | 92% | <a href="#">gij109156985 1ZLR_A</a>         |
| <a href="#">Chain A, Crystal Structure Of The Catalytic Domain Of Coagulation</a>   | 71.5 | 71.5 | 100% | 1e-12 | 92% | <a href="#">gij78101067 1ZHR_A</a>          |
| <a href="#">PREDICTED: coagulation factor XI [Ochotona princeps]</a>                | 71.5 | 71.5 | 95%  | 2e-12 | 91% | <a href="#">gij504133468 XP_004579306.1</a> |
| <a href="#">coagulation factor XI precursor [Canis lupus familiaris]</a>            | 71.0 | 71.0 | 100% | 2e-12 | 88% | <a href="#">gij205361194 NP_001128595.1</a> |
| <a href="#">PREDICTED: coagulation factor XI [Dasypus novemcinctus]</a>             | 71.0 | 71.0 | 100% | 2e-12 | 88% | <a href="#">gij488532217 XP_004457855.1</a> |
| <a href="#">PREDICTED: coagulation factor XI isoform X2 [Canis lupus familiar</a>   | 71.0 | 71.0 | 100% | 2e-12 | 88% | <a href="#">gij545526400 XP_005629983.1</a> |
| <a href="#">PREDICTED: coagulation factor XI isoform X1 [Canis lupus familiar</a>   | 71.0 | 71.0 | 100% | 2e-12 | 88% | <a href="#">gij545526398 XP_005629982.1</a> |
| <a href="#">Chain A, Factor Xia In Complex With The Inhibitor 4-{2-[(1s)-1-((fr</a> | 70.2 | 70.2 | 100% | 3e-12 | 92% | <a href="#">gij728055500 4TY6_A</a>         |
| <a href="#">PREDICTED: coagulation factor XI [Trichechus manatus latirostris]</a>   | 70.2 | 70.2 | 100% | 4e-12 | 88% | <a href="#">gij471399784 XP_004382857.1</a> |
| <a href="#">PREDICTED: coagulation factor XI [Bubalus bubalis]</a>                  | 69.4 | 69.4 | 100% | 8e-12 | 88% | <a href="#">gij594073052 XP_006060352.1</a> |
| <a href="#">PREDICTED: coagulation factor XI [Pantholops hodgsonii]</a>             | 69.4 | 69.4 | 100% | 8e-12 | 88% | <a href="#">gij556754529 XP_005972629.1</a> |
| <a href="#">PREDICTED: LOW QUALITY PROTEIN: coagulation factor XI [Ech</a>          | 69.4 | 69.4 | 100% | 8e-12 | 88% | <a href="#">gij507618988 XP_004696215.1</a> |
| <a href="#">coagulation factor XI precursor [Bos taurus]</a>                        | 69.4 | 69.4 | 100% | 8e-12 | 88% | <a href="#">gij56710319 NP_001008665.1</a>  |
| <a href="#">TPA: coagulation factor XI precursor [Bos taurus]</a>                   | 69.4 | 69.4 | 100% | 8e-12 | 88% | <a href="#">gij296472409 DAA14524.1</a>     |

## Alignments

Download [GenPept](#) [Graphics](#)

[Next](#) [Previous](#) [Descriptions](#)

Chain A, Crystal Structure Of The Fxia Catalytic Domain In Complex With Ecotinm84r

Sequence ID: [gij56967287|pdb|1XX9|A](#) Length: 238 Number of Matches: 1

[See 1 more title\(s\)](#)

Range 1: 98 to 121 [GenPept](#) [Graphics](#)

[Next Match](#) [Previous Match](#)

| Score          | Expect | Identities  | Positives   | Gaps     |
|----------------|--------|-------------|-------------|----------|
| 80.4 bits(182) | 1e-15  | 24/24(100%) | 24/24(100%) | 0/24(0%) |

Query 1 KLETTVNYTDSQRPICLPSKGDRN 24  
 KLETTVNYTDSQRPICLPSKGDRN  
 Sbjct 98 KLETTVNYTDSQRPICLPSKGDRN 121

### Related Information

[Structure](#) - 3D structure displays  
[Identical Proteins](#) - Proteins  
 identical to the subject

Download [GenPept](#) [Graphics](#)

[Next](#) [Previous](#) [Descriptions](#)

Chain A, Factor Xia In Complex With The Inhibitor 3'-[(2s,4r)-6-carbamimidoyl-4-methyl-4-phenyl-1,2,3,4-tetrahydroquinolin-2-yl]-4-carbamoyl-5'-[(3-methylbutanoyl)amino]biphenyl-2-carboxylic Acid

Sequence ID: [gij584579944|pdb|4NA7|A](#) Length: 244 Number of Matches: 1

[See 1 more title\(s\)](#)

Range 1: 98 to 121 [GenPept](#) [Graphics](#)

[Next Match](#) [Previous Match](#)

| Score          | Expect | Identities  | Positives   | Gaps     |
|----------------|--------|-------------|-------------|----------|
| 80.4 bits(182) | 1e-15  | 24/24(100%) | 24/24(100%) | 0/24(0%) |

Query 1 KLETTVNYTDSQRPICLPSKGDRN 24  
 KLETTVNYTDSQRPICLPSKGDRN  
 Sbjct 98 KLETTVNYTDSQRPICLPSKGDRN 121

### Related Information

[Structure](#) - 3D structure displays  
[Identical Proteins](#) - Proteins  
 identical to the subject

[Download](#) ▾ [GenPept](#) [Graphics](#)

▼ Next ▲ Previous ▲ Descriptions

coagulation factor XI (plasma thromboplastin antecedent), isoform CRA\_b [Homo sapiens]

Sequence ID: [gi|119625025|gb|EAX04620.1](#) Length: 470 Number of Matches: 1

Range 1: 330 to 353 [GenPept](#) [Graphics](#)

▼ Next Match ▲ Previous Match

| Score          | Expect | Identities  | Positives   | Gaps     |
|----------------|--------|-------------|-------------|----------|
| 80.4 bits(182) | 1e-15  | 24/24(100%) | 24/24(100%) | 0/24(0%) |

Query 1 KLETTVNYTDSQRPICLPSKGDRN 24  
 KLETTVNYTDSQRPICLPSKGDRN  
 Sbjct 330 KLETTVNYTDSQRPICLPSKGDRN 353

**Related Information**

[Gene](#) - associated gene details

[Download](#) ▾ [GenPept](#) [Graphics](#)

▼ Next ▲ Previous ▲ Descriptions

PREDICTED: coagulation factor XI isoform X2 [Pan paniscus]

Sequence ID: [gi|675774870|ref|XP\\_008975412.1](#) Length: 535 Number of Matches: 1

Range 1: 395 to 418 [GenPept](#) [Graphics](#)

▼ Next Match ▲ Previous Match

| Score          | Expect | Identities  | Positives   | Gaps     |
|----------------|--------|-------------|-------------|----------|
| 80.4 bits(182) | 1e-15  | 24/24(100%) | 24/24(100%) | 0/24(0%) |

Query 1 KLETTVNYTDSQRPICLPSKGDRN 24  
 KLETTVNYTDSQRPICLPSKGDRN  
 Sbjct 395 KLETTVNYTDSQRPICLPSKGDRN 418

**Related Information**

[Gene](#) - associated gene details

[Map Viewer](#) - aligned genomic context

[Download](#) ▾ [GenPept](#) [Graphics](#)

▼ Next ▲ Previous ▲ Descriptions

PREDICTED: coagulation factor XI isoform X5 [Pan troglodytes]

Sequence ID: [gi|694909938|ref|XP\\_009446987.1](#) Length: 536 Number of Matches: 1

Range 1: 396 to 419 [GenPept](#) [Graphics](#)

▼ Next Match ▲ Previous Match

| Score          | Expect | Identities  | Positives   | Gaps     |
|----------------|--------|-------------|-------------|----------|
| 80.4 bits(182) | 1e-15  | 24/24(100%) | 24/24(100%) | 0/24(0%) |

Query 1 KLETTVNYTDSQRPICLPSKGDRN 24  
 KLETTVNYTDSQRPICLPSKGDRN  
 Sbjct 396 KLETTVNYTDSQRPICLPSKGDRN 419

**Related Information**

[Gene](#) - associated gene details

BLAST is a registered trademark of the National Library of Medicine.

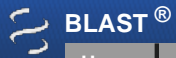

Home

Recent Results

Saved Strategies

Help

[\[Sign In\]](#) [\[Register\]](#)

NCBI/ BLAST/ blastp suite/ Formatting Results - BTH2V5DS016

Your search parameters were adjusted to search for a short input sequence.

[Edit and Resubmit](#) [Save Search Strategies](#) [Formatting options](#) [Download](#)

[YouTube](#) [How to read this page](#) [Blast report description](#)

### F11\_RVYSGILDQSEIKE\_Mod

RID [BTH2V5DS016](#) (Expires on 01-20 15:46 pm)

Query ID |cl|63587  
Description |None  
Molecule type |amino acid  
Query Length |14

Database Name |nr  
Description |All non-redundant GenBank CDS translations+PDB+SwissProt+PIR+PRF excluding environmental samples from WGS projects  
Program |BLASTP 2.2.30+ [Citation](#)

Other reports: [Search Summary](#) [Taxonomy reports](#) [Distance tree of results](#) [Multiple alignment](#)

### Graphic Summary

[Show Conserved Domains](#)

No putative conserved domains have been detected

Distribution of 100 Blast Hits on the Query Sequence



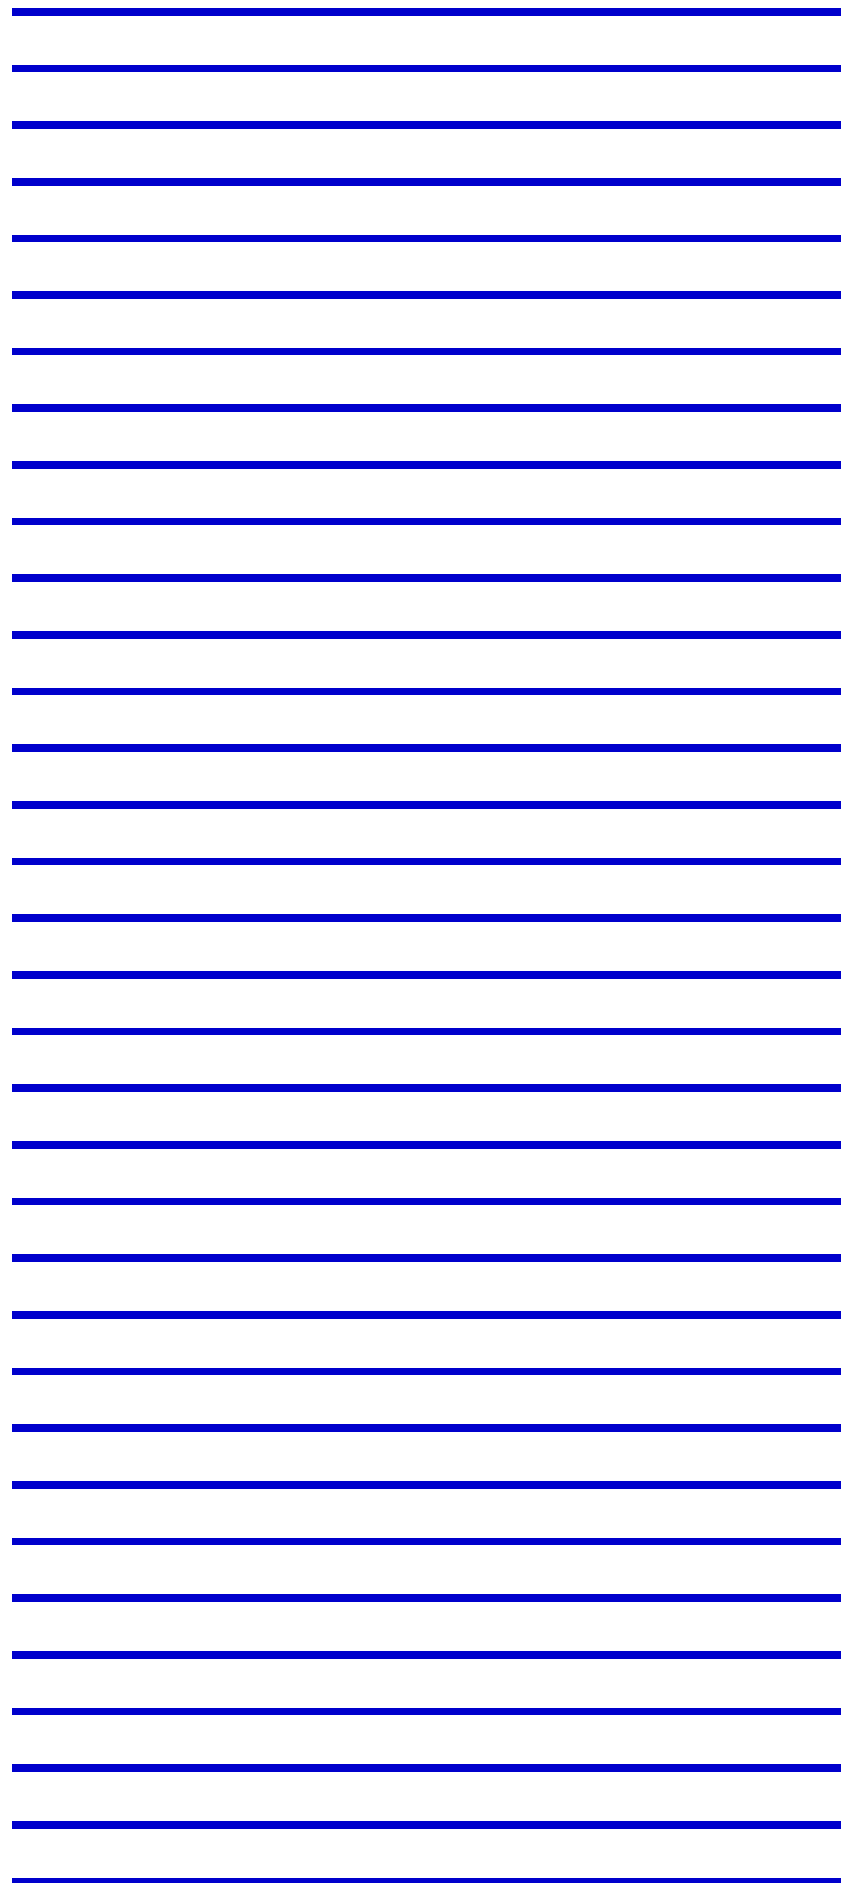





## Descriptions

### Sequences producing significant alignments:

Select: [All](#) [None](#) Selected:0

[Alignments](#)
[Download](#)
[GenPept](#)
[Graphics](#)
[Distance tree of results](#)
[Multiple alignment](#)

| Description                                                                      | Max score | Total score | Query cover | E value | Ident | Accession                                   |
|----------------------------------------------------------------------------------|-----------|-------------|-------------|---------|-------|---------------------------------------------|
| <a href="#">truncated coagulation factor XI [Bos taurus]</a>                     | 45.2      | 45.2        | 100%        | 4e-05   | 93%   | <a href="#">gi 89338423 ABD67506.1</a>      |
| <a href="#">coagulation factor XI [Bos taurus]</a>                               | 45.2      | 45.2        | 100%        | 5e-05   | 93%   | <a href="#">gi 237637253 ACR07926.1</a>     |
| <a href="#">coagulation factor XI [Bos taurus]</a>                               | 45.2      | 45.2        | 100%        | 8e-05   | 93%   | <a href="#">gi 89338421 ABD67505.1</a>      |
| <a href="#">Chain A, Crystal Structure Of Factor Xia In Complex With Clav</a>    | 45.2      | 45.2        | 100%        | 3e-04   | 93%   | <a href="#">gi 217035335 3BG8_A</a>         |
| <a href="#">Chain A, Crystal Structure Of The Fxia Catalytic Domain In Cor</a>   | 45.2      | 45.2        | 100%        | 3e-04   | 93%   | <a href="#">gi 56967287 1XX9_A</a>          |
| <a href="#">Chain A, Factor Xia In Complex With A Clorophenyl-tetrazole Ir</a>   | 45.2      | 45.2        | 100%        | 3e-04   | 93%   | <a href="#">gi 383875445 3SOR_A</a>         |
| <a href="#">Chain A, Factor Xia In Complex With The Inhibitor 4-{2-[(1s)-1-</a>  | 45.2      | 45.2        | 100%        | 3e-04   | 93%   | <a href="#">gi 728055500 4TY6_A</a>         |
| <a href="#">Chain A, Factor Xia In Complex With The Inhibitor 3'-[(2s,4r)-6-</a> | 45.2      | 45.2        | 100%        | 3e-04   | 93%   | <a href="#">gi 584579944 4NA7_A</a>         |
| <a href="#">coagulation factor XI [Bos taurus]</a>                               | 45.2      | 45.2        | 100%        | 3e-04   | 93%   | <a href="#">gi 45861248 AAS78506.1</a>      |
| <a href="#">coagulation factor XI (plasma thromboplastin antecedent), isofo</a>  | 45.2      | 45.2        | 100%        | 3e-04   | 93%   | <a href="#">gi 119625025 EAX04620.1</a>     |
| <a href="#">PREDICTED: coagulation factor XI isoform X4 [Homo sapiens]</a>       | 45.2      | 45.2        | 100%        | 3e-04   | 93%   | <a href="#">gi 530377342 XP_005262881.1</a> |
| <a href="#">PREDICTED: coagulation factor XI isoform X2 [Pan paniscus]</a>       | 45.2      | 45.2        | 100%        | 3e-04   | 93%   | <a href="#">gi 675774870 XP_008975412.1</a> |
| <a href="#">PREDICTED: coagulation factor XI isoform X5 [Pan troglodytes]</a>    | 45.2      | 45.2        | 100%        | 3e-04   | 93%   | <a href="#">gi 694909938 XP_009446987.1</a> |
| <a href="#">PREDICTED: coagulation factor XI isoform X3 [Homo sapiens]</a>       | 45.2      | 45.2        | 100%        | 3e-04   | 93%   | <a href="#">gi 530377340 XP_005262880.1</a> |
| <a href="#">platelet factor XI [Homo sapiens]</a>                                | 45.2      | 45.2        | 100%        | 3e-04   | 93%   | <a href="#">gi 3258649 AAC24506.1</a>       |
| <a href="#">blood coagulation factor XI [Bos taurus]</a>                         | 45.2      | 45.2        | 100%        | 3e-04   | 93%   | <a href="#">gi 45758733 AAS76646.1</a>      |
| <a href="#">PREDICTED: coagulation factor XI [Gorilla gorilla gorilla]</a>       | 45.2      | 45.2        | 100%        | 3e-04   | 93%   | <a href="#">gi 426346208 XP_004040776.1</a> |
| <a href="#">PREDICTED: coagulation factor XI isoform X3 [Saimiri bolivien:</a>   | 45.2      | 45.2        | 100%        | 3e-04   | 93%   | <a href="#">gi 725582192 XP_010342663.1</a> |
| <a href="#">PREDICTED: coagulation factor XI isoform X4 [Pan troglodytes]</a>    | 45.2      | 45.2        | 100%        | 3e-04   | 93%   | <a href="#">gi 694909936 XP_009446986.1</a> |
| <a href="#">PREDICTED: coagulation factor XI isoform X2 [Homo sapiens]</a>       | 45.2      | 45.2        | 100%        | 3e-04   | 93%   | <a href="#">gi 530377338 XP_005262879.1</a> |
| <a href="#">PREDICTED: coagulation factor XI isoform X3 [Pan troglodytes]</a>    | 45.2      | 45.2        | 100%        | 4e-04   | 93%   | <a href="#">gi 694909934 XP_009446985.1</a> |
| <a href="#">PREDICTED: coagulation factor XI isoform X6 [Homo sapiens]</a>       | 45.2      | 45.2        | 100%        | 4e-04   | 93%   | <a href="#">gi 578808899 XP_006714200.1</a> |
| <a href="#">PREDICTED: coagulation factor XI [Equus caballus]</a>                | 45.2      | 45.2        | 100%        | 4e-04   | 93%   | <a href="#">gi 149742758 XP_001490330.1</a> |
| <a href="#">PREDICTED: coagulation factor XI [Camelus bactrianus]</a>            | 45.2      | 45.2        | 100%        | 4e-04   | 93%   | <a href="#">gi 743715881 XP_010951577.1</a> |
| <a href="#">PREDICTED: coagulation factor XI [Vicugna pacos]</a>                 | 45.2      | 45.2        | 100%        | 4e-04   | 93%   | <a href="#">gi 560951202 XP_006198143.1</a> |
| <a href="#">PREDICTED: coagulation factor XI isoform X2 [Saimiri bolivien:</a>   | 45.2      | 45.2        | 100%        | 4e-04   | 93%   | <a href="#">gi 725582190 XP_010342661.1</a> |
| <a href="#">PREDICTED: LOW QUALITY PROTEIN: coagulation factor XI</a>            | 45.2      | 45.2        | 100%        | 4e-04   | 93%   | <a href="#">gi 744611375 XP_010994033.1</a> |
| <a href="#">PREDICTED: coagulation factor XI [Bison bison bison]</a>             | 45.2      | 45.2        | 100%        | 4e-04   | 93%   | <a href="#">gi 742100675 XP_010834113.1</a> |
| <a href="#">PREDICTED: coagulation factor XI [Equus przewalskii]</a>             | 45.2      | 45.2        | 100%        | 4e-04   | 93%   | <a href="#">gi 664778079 XP_008508352.1</a> |

|                                                                                   |      |      |      |       |     |                                             |
|-----------------------------------------------------------------------------------|------|------|------|-------|-----|---------------------------------------------|
| <a href="#">PREDICTED: coagulation factor XI [Callithrix jacchus]</a>             | 45.2 | 45.2 | 100% | 4e-04 | 93% | <a href="#">gij296195030 XP_002745209.1</a> |
| <a href="#">coagulation factor XI [Homo sapiens]</a>                              | 45.2 | 45.2 | 100% | 4e-04 | 93% | <a href="#">gij180352 AAA51985.1</a>        |
| <a href="#">PREDICTED: coagulation factor XI [Camelus ferus]</a>                  | 45.2 | 45.2 | 100% | 4e-04 | 93% | <a href="#">gij560904135 XP_006178431.1</a> |
| <a href="#">PREDICTED: coagulation factor XI [Pantholops hodgsonii]</a>           | 45.2 | 45.2 | 100% | 4e-04 | 93% | <a href="#">gij556754529 XP_005972629.1</a> |
| <a href="#">PREDICTED: coagulation factor XI [Condylura cristata]</a>             | 45.2 | 45.2 | 100% | 4e-04 | 93% | <a href="#">gij507947527 XP_004682554.1</a> |
| <a href="#">PREDICTED: coagulation factor XI [Bos mutus]</a>                      | 45.2 | 45.2 | 100% | 4e-04 | 93% | <a href="#">gij555974149 XP_005899069.1</a> |
| <a href="#">PREDICTED: coagulation factor XI [Ovis aries]</a>                     | 45.2 | 45.2 | 100% | 4e-04 | 93% | <a href="#">gij426256280 XP_004021769.1</a> |
| <a href="#">coagulation factor XI precursor [Bos taurus]</a>                      | 45.2 | 45.2 | 100% | 4e-04 | 93% | <a href="#">gij56710319 NP_001008665.1</a>  |
| <a href="#">coagulation factor XI precursor [Homo sapiens]</a>                    | 45.2 | 45.2 | 100% | 4e-04 | 93% | <a href="#">gij4503627 NP_000119.1</a>      |
| <a href="#">PREDICTED: coagulation factor XI isoform X1 [Saimiri boliviensis]</a> | 45.2 | 45.2 | 100% | 4e-04 | 93% | <a href="#">gij725582188 XP_010342660.1</a> |
| <a href="#">PREDICTED: coagulation factor XI [Otolemur garnettii]</a>             | 45.2 | 45.2 | 100% | 4e-04 | 93% | <a href="#">gij395840032 XP_003792872.1</a> |
| <a href="#">PREDICTED: coagulation factor XI [Loxodonta africana]</a>             | 45.2 | 45.2 | 100% | 4e-04 | 93% | <a href="#">gij344281436 XP_003412485.1</a> |
| <a href="#">PREDICTED: coagulation factor XI [Nomascus leucogenys]</a>            | 45.2 | 45.2 | 100% | 4e-04 | 93% | <a href="#">gij332244773 XP_003271548.1</a> |
| <a href="#">PREDICTED: coagulation factor XI [Pongo abelii]</a>                   | 45.2 | 45.2 | 100% | 4e-04 | 93% | <a href="#">gij297674804 XP_002815399.1</a> |
| <a href="#">TPA: coagulation factor XI precursor [Bos taurus]</a>                 | 45.2 | 45.2 | 100% | 4e-04 | 93% | <a href="#">gij296472409 DAA14524.1</a>     |
| <a href="#">PREDICTED: coagulation factor XI isoform X2 [Pan troglodytes]</a>     | 45.2 | 45.2 | 100% | 4e-04 | 93% | <a href="#">gij114597210 XP_001165847.1</a> |
| <a href="#">PREDICTED: coagulation factor XI isoform X1 [Pan troglodytes]</a>     | 45.2 | 45.2 | 100% | 4e-04 | 93% | <a href="#">gij694909931 XP_009446984.1</a> |
| <a href="#">PREDICTED: coagulation factor XI isoform X1 [Homo sapiens]</a>        | 45.2 | 45.2 | 100% | 4e-04 | 93% | <a href="#">gij530377336 XP_005262878.1</a> |
| <a href="#">PREDICTED: coagulation factor XI [Erinaceus europaeus]</a>            | 45.2 | 45.2 | 100% | 4e-04 | 93% | <a href="#">gij617577865 XP_007517757.1</a> |
| <a href="#">blood coagulation factor XI [Bubalus bubalis]</a>                     | 41.8 | 41.8 | 100% | 0.001 | 86% | <a href="#">gij78093735 ABB19358.1</a>      |
| <a href="#">blood coagulation factor XI [Bubalus bubalis]</a>                     | 41.8 | 41.8 | 100% | 0.001 | 86% | <a href="#">gij78146504 ABB22793.1</a>      |
| <a href="#">blood coagulation factor XI [Bubalus bubalis]</a>                     | 41.8 | 41.8 | 100% | 0.001 | 86% | <a href="#">gij586972963 AHK06000.1</a>     |
| <a href="#">Chain A, Crystal Structure Of The Catalytic Domain Of Coagula</a>     | 42.6 | 42.6 | 100% | 0.002 | 86% | <a href="#">gij75765761 1ZJD_A</a>          |
| <a href="#">Chain A, Crystal Structure Of The Catalytic Domain Of Coagula</a>     | 42.6 | 42.6 | 100% | 0.002 | 86% | <a href="#">gij78101066 1ZHP_A</a>          |
| <a href="#">Chain A, Crystal Structure Of The Fxia Catalytic Domain In Cor</a>    | 42.6 | 42.6 | 100% | 0.002 | 86% | <a href="#">gij56967291 1XXD_A</a>          |
| <a href="#">PREDICTED: coagulation factor XI isoform X2 [Rhinopithecus r</a>      | 42.6 | 42.6 | 100% | 0.002 | 86% | <a href="#">gij724897372 XP_010376291.1</a> |
| <a href="#">PREDICTED: coagulation factor XI isoform X1 [Rhinopithecus r</a>      | 42.6 | 42.6 | 100% | 0.002 | 86% | <a href="#">gij724897369 XP_010376290.1</a> |
| <a href="#">PREDICTED: coagulation factor XI [Balaenoptera acutorostrata</a>      | 42.6 | 42.6 | 100% | 0.002 | 86% | <a href="#">gij594650157 XP_007174042.1</a> |
| <a href="#">PREDICTED: coagulation factor XI [Physeter catodon]</a>               | 42.6 | 42.6 | 100% | 0.002 | 86% | <a href="#">gij593742188 XP_007126520.1</a> |
| <a href="#">PREDICTED: LOW QUALITY PROTEIN: coagulation factor XI  </a>           | 42.6 | 42.6 | 100% | 0.002 | 86% | <a href="#">gij507618988 XP_004696215.1</a> |
| <a href="#">PREDICTED: coagulation factor XI [Orycteropus afer afer]</a>          | 42.6 | 42.6 | 100% | 0.002 | 86% | <a href="#">gij634869242 XP_007946583.1</a> |
| <a href="#">PREDICTED: coagulation factor XI [Tarsius syrichta]</a>               | 42.2 | 42.2 | 100% | 0.003 | 86% | <a href="#">gij640821392 XP_008067645.1</a> |
| <a href="#">Plasma kallikrein [Pteropus alecto]</a>                               | 41.8 | 41.8 | 92%  | 0.004 | 92% | <a href="#">gij431902346 ELK08847.1</a>     |
| <a href="#">Coagulation factor XI [Tupaia chinensis]</a>                          | 41.8 | 41.8 | 100% | 0.005 | 86% | <a href="#">gij444705646 ELW47049.1</a>     |
| <a href="#">PREDICTED: LOW QUALITY PROTEIN: coagulation factor XI  </a>           | 41.8 | 41.8 | 92%  | 0.005 | 92% | <a href="#">gij586521035 XP_006926977.1</a> |
| <a href="#">coagulation factor XI precursor [Oryctolagus cuniculus]</a>           | 41.8 | 41.8 | 100% | 0.005 | 86% | <a href="#">gij130502142 NP_001076261.1</a> |
| <a href="#">PREDICTED: coagulation factor XI [Dasypus novemcinctus]</a>           | 41.8 | 41.8 | 100% | 0.005 | 86% | <a href="#">gij488532217 XP_004457855.1</a> |
| <a href="#">PREDICTED: coagulation factor XI isoform 2 [Ceratotherium sir</a>     | 41.8 | 41.8 | 100% | 0.005 | 86% | <a href="#">gij478509096 XP_004428828.1</a> |
| <a href="#">PREDICTED: coagulation factor XI isoform 3 [Odobenus rosma</a>        | 41.8 | 41.8 | 92%  | 0.005 | 92% | <a href="#">gij472396395 XP_004417424.1</a> |
| <a href="#">PREDICTED: coagulation factor XI-like [Ailuropoda melanoleuc</a>      | 41.8 | 41.8 | 92%  | 0.005 | 92% | <a href="#">gij301776062 XP_002923450.1</a> |
| <a href="#">PREDICTED: coagulation factor XI [Bubalus bubalis]</a>                | 41.8 | 41.8 | 100% | 0.005 | 86% | <a href="#">gij594073052 XP_006060352.1</a> |
| <a href="#">PREDICTED: coagulation factor XI [Capra hircus]</a>                   | 41.8 | 41.8 | 100% | 0.005 | 86% | <a href="#">gij548524195 XP_005698802.1</a> |
| <a href="#">PREDICTED: coagulation factor XI isoform 1 [Ceratotherium sir</a>     | 41.8 | 41.8 | 100% | 0.005 | 86% | <a href="#">gij478509094 XP_004428827.1</a> |
| <a href="#">PREDICTED: coagulation factor XI isoform 2 [Odobenus rosma</a>        | 41.8 | 41.8 | 92%  | 0.005 | 92% | <a href="#">gij472396393 XP_004417423.1</a> |
| <a href="#">PREDICTED: coagulation factor XI [Tupaia chinensis]</a>               | 41.8 | 41.8 | 100% | 0.005 | 86% | <a href="#">gij562864607 XP_006160530.1</a> |

|                                                                                |      |      |      |       |     |                                             |
|--------------------------------------------------------------------------------|------|------|------|-------|-----|---------------------------------------------|
| <a href="#">PREDICTED: coagulation factor XI [Mustela putorius furo]</a>       | 41.8 | 41.8 | 92%  | 0.005 | 92% | <a href="#">gi 511876760 XP_004758357.1</a> |
| <a href="#">PREDICTED: coagulation factor XI isoform 1 [Odobenus rosmo]</a>    | 41.8 | 41.8 | 92%  | 0.005 | 92% | <a href="#">gi 472396391 XP_004417422.1</a> |
| <a href="#">PREDICTED: LOW QUALITY PROTEIN: coagulation factor XI</a>          | 41.8 | 41.8 | 92%  | 0.005 | 92% | <a href="#">gi 671035736 XP_008708722.1</a> |
| <a href="#">PREDICTED: coagulation factor XI [Ictidomys tridecemlineatus]</a>  | 41.4 | 41.4 | 100% | 0.007 | 86% | <a href="#">gi 532087072 XP_005329248.1</a> |
| <a href="#">PREDICTED: coagulation factor XI [Lipotes vexillifer]</a>          | 40.9 | 40.9 | 100% | 0.009 | 86% | <a href="#">gi 602712769 XP_007466613.1</a> |
| <a href="#">PREDICTED: coagulation factor XI [Orcinus orca]</a>                | 40.9 | 40.9 | 100% | 0.009 | 86% | <a href="#">gi 466045508 XP_004277238.1</a> |
| <a href="#">PREDICTED: coagulation factor XI-like isoform X5 [Anas platyr]</a> | 40.1 | 40.1 | 100% | 0.017 | 86% | <a href="#">gi 514703781 XP_005009031.1</a> |
| <a href="#">PREDICTED: coagulation factor XI-like isoform X3 [Anas platyr]</a> | 40.1 | 40.1 | 100% | 0.017 | 86% | <a href="#">gi 514703777 XP_005009029.1</a> |
| <a href="#">Coagulation factor XI [Chlamydotis undulata macqueenii]</a>        | 40.1 | 40.1 | 100% | 0.017 | 86% | <a href="#">gi 677168326 KFP45777.1</a>     |
| <a href="#">PREDICTED: plasma kallikrein isoform X2 [Struthio camelus au]</a>  | 40.1 | 40.1 | 100% | 0.017 | 86% | <a href="#">gi 697488125 XP_009675004.1</a> |
| <a href="#">PREDICTED: coagulation factor XI-like [Chlamydotis undulata]</a>   | 40.1 | 40.1 | 100% | 0.017 | 86% | <a href="#">gi 705703357 XP_010126720.1</a> |
| <a href="#">PREDICTED: coagulation factor XI-like isoform X2 [Anas platyr]</a> | 40.1 | 40.1 | 100% | 0.017 | 86% | <a href="#">gi 514703775 XP_005009028.1</a> |
| <a href="#">Plasma kallikrein [Struthio camelus australis]</a>                 | 40.1 | 40.1 | 100% | 0.017 | 86% | <a href="#">gi 678215239 KfV82218.1</a>     |
| <a href="#">Plasma kallikrein [Anas platyrhynchos]</a>                         | 40.1 | 40.1 | 100% | 0.017 | 86% | <a href="#">gi 483525503 EOB09100.1</a>     |
| <a href="#">PREDICTED: coagulation factor XI-like isoform X1 [Anas platyr]</a> | 40.1 | 40.1 | 100% | 0.017 | 86% | <a href="#">gi 514703773 XP_005009027.1</a> |
| <a href="#">PREDICTED: plasma kallikrein isoform X1 [Struthio camelus au]</a>  | 40.1 | 40.1 | 100% | 0.017 | 86% | <a href="#">gi 697488121 XP_009675003.1</a> |
| <a href="#">PREDICTED: coagulation factor XI isoform X2 [Papio anubis]</a>     | 39.7 | 39.7 | 100% | 0.024 | 86% | <a href="#">gi 685544400 XP_009206295.1</a> |
| <a href="#">PREDICTED: coagulation factor XI isoform X2 [Chlorocebus sa]</a>   | 39.7 | 39.7 | 100% | 0.024 | 86% | <a href="#">gi 635046203 XP_007998683.1</a> |
| <a href="#">PREDICTED: coagulation factor XI isoform X2 [Macaca fascicu]</a>   | 39.7 | 39.7 | 100% | 0.024 | 86% | <a href="#">gi 544436077 XP_005556541.1</a> |
| <a href="#">hypothetical protein EGM_04467 [Macaca fascicularis]</a>           | 39.7 | 39.7 | 100% | 0.024 | 86% | <a href="#">gi 355750969 EHH55296.1</a>     |
| <a href="#">hypothetical protein EGK_16300 [Macaca mulatta]</a>                | 39.7 | 39.7 | 100% | 0.024 | 86% | <a href="#">gi 355687768 EHH26352.1</a>     |
| <a href="#">PREDICTED: coagulation factor XI isoform X1 [Chlorocebus sa]</a>   | 39.7 | 39.7 | 100% | 0.024 | 86% | <a href="#">gi 635046201 XP_007998681.1</a> |
| <a href="#">PREDICTED: coagulation factor XI isoform X1 [Macaca fascicu]</a>   | 39.7 | 39.7 | 100% | 0.024 | 86% | <a href="#">gi 544436075 XP_005556540.1</a> |
| <a href="#">PREDICTED: coagulation factor XI isoform X1 [Papio anubis]</a>     | 39.7 | 39.7 | 100% | 0.024 | 86% | <a href="#">gi 402871005 XP_003899481.1</a> |
| <a href="#">PREDICTED: coagulation factor XI-like [Macaca mulatta]</a>         | 39.7 | 39.7 | 100% | 0.024 | 86% | <a href="#">gi 297293811 XP_001090398.2</a> |
| <a href="#">Chain A, Factor Xi Catalytic Domain Complexed With N-((R)-1-</a>   | 39.2 | 39.2 | 100% | 0.030 | 86% | <a href="#">gi 109157010 1ZPZ_A</a>         |

BLAST is a registered trademark of the National Library of Medicine.



NCBI/ BLAST/ blastp suite/ Formatting Results - B94V723E01R

Your search parameters were adjusted to search for a short input sequence.

Edit and Resubmit Save Search Strategies Formatting options Download

YouTube How to read this page Blast report description

F11\_RVYSGILNQSEIKE\_NonMod

RID B94V723E01R (Expires on 01-14 10:39 am)

Query ID Icl|305543
Description None
Molecule type amino acid
Query Length 14

Database Name nr
Description All non-redundant GenBank CDS translations+PDB+SwissProt+PIR excluding environmental samples from WGS projects
Program BLASTP 2.2.30+ Citation

Other reports: Search Summary Taxonomy reports Distance tree of results Multiple alignment

Graphic Summary

Show Conserved Domains

No putative conserved domains have been detected

Distribution of 100 Blast Hits on the Query Sequence

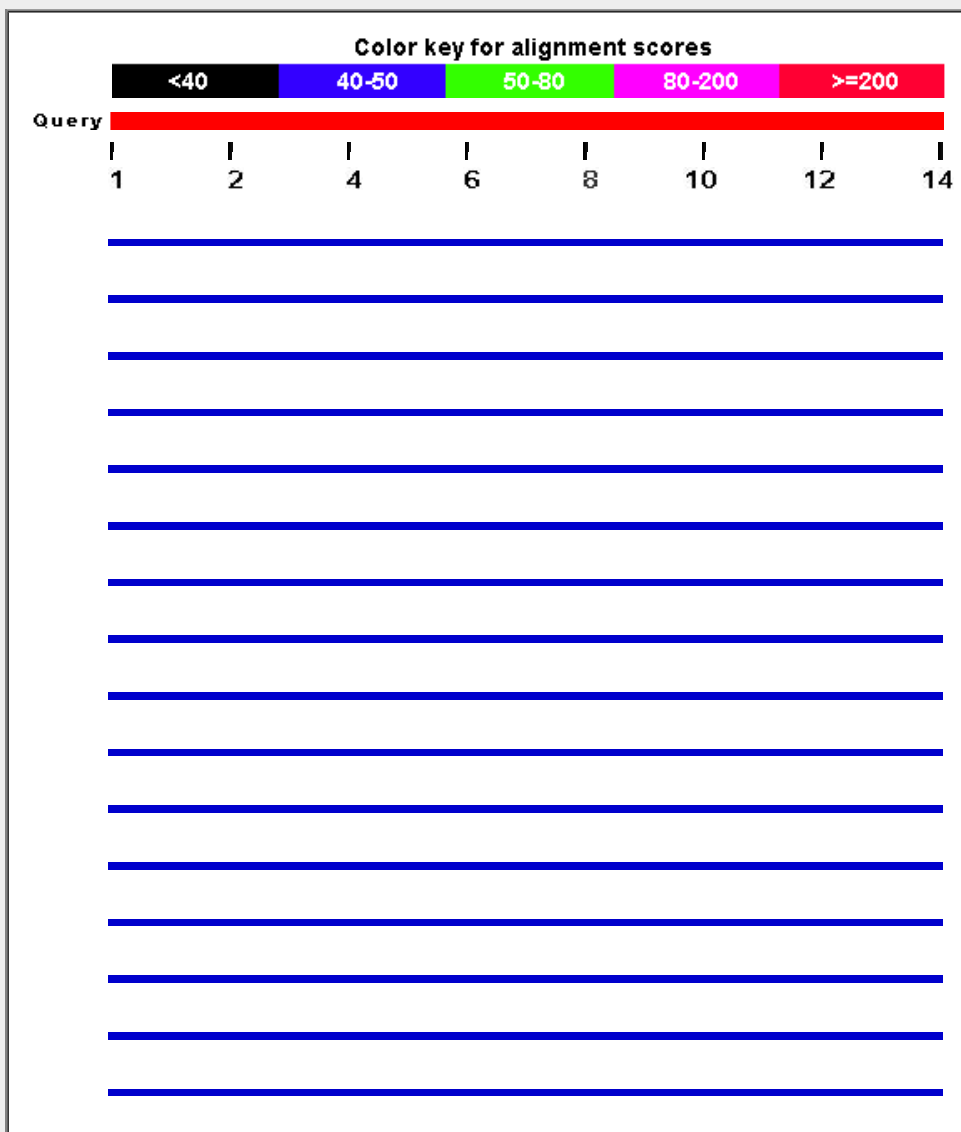

The image shows a table with 30 rows. Each row contains a single blue horizontal line, which is likely a placeholder for a sequence alignment or a data entry. The lines are evenly spaced and extend across most of the width of the table area.



**Descriptions**

**Sequences producing significant alignments:**

Select: [All](#) [None](#) Selected:0

[Alignments](#)
[Download](#)
[GenPept](#)
[Graphics](#)
[Distance tree of results](#)
[Multiple alignment](#)

| Description                                                                          | Max score | Total score | Query cover | E value | Ident | Accession                                   |
|--------------------------------------------------------------------------------------|-----------|-------------|-------------|---------|-------|---------------------------------------------|
| <a href="#">truncated coagulation factor XI [Bos taurus]</a>                         | 47.7      | 47.7        | 100%        | 4e-06   | 100%  | <a href="#">gij89338423 ABD67506.1</a>      |
| <a href="#">coagulation factor XI [Bos taurus]</a>                                   | 47.7      | 47.7        | 100%        | 6e-06   | 100%  | <a href="#">gij237637253 ACR07926.1</a>     |
| <a href="#">coagulation factor XI [Bos taurus]</a>                                   | 47.7      | 47.7        | 100%        | 8e-06   | 100%  | <a href="#">gij89338421 ABD67505.1</a>      |
| <a href="#">Chain A, Crystal Structure Of Factor Xia In Complex With Clavatadi</a>   | 47.7      | 47.7        | 100%        | 4e-05   | 100%  | <a href="#">gij217035335 3BG8_A</a>         |
| <a href="#">Chain A, Crystal Structure Of The Fxia Catalytic Domain In Comple</a>    | 47.7      | 47.7        | 100%        | 4e-05   | 100%  | <a href="#">gij56967287 1XX9_A</a>          |
| <a href="#">Chain A, Factor Xia In Complex With A Clorophenyl-tetrazole Inhibi</a>   | 47.7      | 47.7        | 100%        | 4e-05   | 100%  | <a href="#">gij383875445 3SOR_A</a>         |
| <a href="#">Chain A, Factor Xia In Complex With The Inhibitor 4-{2-[(1s)-1-((tra</a> | 47.7      | 47.7        | 100%        | 4e-05   | 100%  | <a href="#">gij728055500 4TY6_A</a>         |
| <a href="#">Chain A, Factor Xia In Complex With The Inhibitor 3'-[(2s,4r)-6-cart</a> | 47.7      | 47.7        | 100%        | 4e-05   | 100%  | <a href="#">gij584579944 4NA7_A</a>         |
| <a href="#">coagulation factor XI [Bos taurus]</a>                                   | 47.7      | 47.7        | 100%        | 5e-05   | 100%  | <a href="#">gij45861248 AAS78506.1</a>      |
| <a href="#">coagulation factor XI (plasma thromboplastin antecedent), isoform C</a>  | 47.7      | 47.7        | 100%        | 5e-05   | 100%  | <a href="#">gij119625025 EAX04620.1</a>     |
| <a href="#">PREDICTED: coagulation factor XI isoform X4 [Homo sapiens]</a>           | 47.7      | 47.7        | 100%        | 5e-05   | 100%  | <a href="#">gij530377342 XP_005262881.1</a> |
| <a href="#">PREDICTED: coagulation factor XI isoform X2 [Pan paniscus]</a>           | 47.7      | 47.7        | 100%        | 5e-05   | 100%  | <a href="#">gij675774870 XP_008975412.1</a> |
| <a href="#">PREDICTED: coagulation factor XI isoform X5 [Pan troglodytes]</a>        | 47.7      | 47.7        | 100%        | 5e-05   | 100%  | <a href="#">gij694909938 XP_009446987.1</a> |
| <a href="#">PREDICTED: coagulation factor XI isoform X3 [Homo sapiens]</a>           | 47.7      | 47.7        | 100%        | 5e-05   | 100%  | <a href="#">gij530377340 XP_005262880.1</a> |
| <a href="#">platelet factor XI [Homo sapiens]</a>                                    | 47.7      | 47.7        | 100%        | 5e-05   | 100%  | <a href="#">gij3258649 AAC24506.1</a>       |
| <a href="#">blood coagulation factor XI [Bos taurus]</a>                             | 47.7      | 47.7        | 100%        | 5e-05   | 100%  | <a href="#">gij45758733 AAS76646.1</a>      |
| <a href="#">PREDICTED: coagulation factor XI [Gorilla gorilla gorilla]</a>           | 47.7      | 47.7        | 100%        | 5e-05   | 100%  | <a href="#">gij426346208 XP_004040776.1</a> |
| <a href="#">PREDICTED: coagulation factor XI isoform X3 [Saimiri boliviensis b</a>   | 47.7      | 47.7        | 100%        | 5e-05   | 100%  | <a href="#">gij725582192 XP_010342663.1</a> |
| <a href="#">PREDICTED: coagulation factor XI isoform X4 [Pan troglodytes]</a>        | 47.7      | 47.7        | 100%        | 5e-05   | 100%  | <a href="#">gij694909936 XP_009446986.1</a> |
| <a href="#">PREDICTED: coagulation factor XI isoform X2 [Homo sapiens]</a>           | 47.7      | 47.7        | 100%        | 5e-05   | 100%  | <a href="#">gij530377338 XP_005262879.1</a> |
| <a href="#">PREDICTED: coagulation factor XI isoform X3 [Pan troglodytes]</a>        | 47.7      | 47.7        | 100%        | 5e-05   | 100%  | <a href="#">gij694909934 XP_009446985.1</a> |
| <a href="#">PREDICTED: coagulation factor XI isoform X6 [Homo sapiens]</a>           | 47.7      | 47.7        | 100%        | 5e-05   | 100%  | <a href="#">gij578808899 XP_006714200.1</a> |
| <a href="#">PREDICTED: coagulation factor XI [Equus caballus]</a>                    | 47.7      | 47.7        | 100%        | 5e-05   | 100%  | <a href="#">gij149742758 XP_001490330.1</a> |
| <a href="#">PREDICTED: coagulation factor XI [Vicugna pacos]</a>                     | 47.7      | 47.7        | 100%        | 5e-05   | 100%  | <a href="#">gij560951202 XP_006198143.1</a> |
| <a href="#">PREDICTED: coagulation factor XI isoform X2 [Saimiri boliviensis b</a>   | 47.7      | 47.7        | 100%        | 5e-05   | 100%  | <a href="#">gij725582190 XP_010342661.1</a> |
| <a href="#">PREDICTED: coagulation factor XI [Equus przewalskii]</a>                 | 47.7      | 47.7        | 100%        | 5e-05   | 100%  | <a href="#">gij664778079 XP_008508352.1</a> |
| <a href="#">PREDICTED: coagulation factor XI [Callithrix jacchus]</a>                | 47.7      | 47.7        | 100%        | 5e-05   | 100%  | <a href="#">gij296195030 XP_002745209.1</a> |
| <a href="#">coagulation factor XI [Homo sapiens]</a>                                 | 47.7      | 47.7        | 100%        | 5e-05   | 100%  | <a href="#">gij180352 AAA51985.1</a>        |

|                                                                                    |      |      |      |       |      |                                             |
|------------------------------------------------------------------------------------|------|------|------|-------|------|---------------------------------------------|
| <a href="#">PREDICTED: coagulation factor XI [Camelus ferus]</a>                   | 47.7 | 47.7 | 100% | 5e-05 | 100% | <a href="#">gij560904135 XP_006178431.1</a> |
| <a href="#">PREDICTED: coagulation factor XI [Pantholops hodgsonii]</a>            | 47.7 | 47.7 | 100% | 5e-05 | 100% | <a href="#">gij556754529 XP_005972629.1</a> |
| <a href="#">PREDICTED: coagulation factor XI [Condylura cristata]</a>              | 47.7 | 47.7 | 100% | 5e-05 | 100% | <a href="#">gij507947527 XP_004682554.1</a> |
| <a href="#">PREDICTED: coagulation factor XI [Bos mutus]</a>                       | 47.7 | 47.7 | 100% | 5e-05 | 100% | <a href="#">gij555974149 XP_005899069.1</a> |
| <a href="#">PREDICTED: coagulation factor XI [Ovis aries]</a>                      | 47.7 | 47.7 | 100% | 5e-05 | 100% | <a href="#">gij426256280 XP_004021769.1</a> |
| <a href="#">coagulation factor XI precursor [Bos taurus]</a>                       | 47.7 | 47.7 | 100% | 5e-05 | 100% | <a href="#">gij56710319 NP_001008665.1</a>  |
| <a href="#">coagulation factor XI precursor [Homo sapiens]</a>                     | 47.7 | 47.7 | 100% | 5e-05 | 100% | <a href="#">gij4503627 NP_000119.1</a>      |
| <a href="#">PREDICTED: coagulation factor XI isoform X1 [Saimiri boliviensis b</a> | 47.7 | 47.7 | 100% | 5e-05 | 100% | <a href="#">gij725582188 XP_010342660.1</a> |
| <a href="#">PREDICTED: coagulation factor XI [Otolemur garnettii]</a>              | 47.7 | 47.7 | 100% | 5e-05 | 100% | <a href="#">gij395840032 XP_003792872.1</a> |
| <a href="#">PREDICTED: coagulation factor XI [Loxodonta africana]</a>              | 47.7 | 47.7 | 100% | 5e-05 | 100% | <a href="#">gij344281436 XP_003412485.1</a> |
| <a href="#">PREDICTED: coagulation factor XI [Nomascus leucogenys]</a>             | 47.7 | 47.7 | 100% | 5e-05 | 100% | <a href="#">gij332244773 XP_003271548.1</a> |
| <a href="#">PREDICTED: coagulation factor XI [Pongo abelii]</a>                    | 47.7 | 47.7 | 100% | 5e-05 | 100% | <a href="#">gij297674804 XP_002815399.1</a> |
| <a href="#">TPA: coagulation factor XI precursor [Bos taurus]</a>                  | 47.7 | 47.7 | 100% | 5e-05 | 100% | <a href="#">gij296472409 DAA14524.1</a>     |
| <a href="#">PREDICTED: coagulation factor XI isoform X2 [Pan troglodytes]</a>      | 47.7 | 47.7 | 100% | 5e-05 | 100% | <a href="#">gij114597210 XP_001165847.1</a> |
| <a href="#">PREDICTED: coagulation factor XI isoform X1 [Pan troglodytes]</a>      | 47.7 | 47.7 | 100% | 5e-05 | 100% | <a href="#">gij694909931 XP_009446984.1</a> |
| <a href="#">PREDICTED: coagulation factor XI isoform X1 [Homo sapiens]</a>         | 47.7 | 47.7 | 100% | 5e-05 | 100% | <a href="#">gij530377336 XP_005262878.1</a> |
| <a href="#">PREDICTED: coagulation factor XI [Erinaceus europaeus]</a>             | 47.7 | 47.7 | 100% | 5e-05 | 100% | <a href="#">gij617577865 XP_007517757.1</a> |
| <a href="#">blood coagulation factor XI [Bubalus bubalis]</a>                      | 44.3 | 44.3 | 100% | 1e-04 | 93%  | <a href="#">gij78093735 ABB19358.1</a>      |
| <a href="#">blood coagulation factor XI [Bubalus bubalis]</a>                      | 44.3 | 44.3 | 100% | 2e-04 | 93%  | <a href="#">gij78146504 ABB22793.1</a>      |
| <a href="#">blood coagulation factor XI [Bubalus bubalis]</a>                      | 44.3 | 44.3 | 100% | 2e-04 | 93%  | <a href="#">gij586972963 AHK06000.1</a>     |
| <a href="#">Chain A, Crystal Structure Of The Catalytic Domain Of Coagulation</a>  | 45.2 | 45.2 | 100% | 3e-04 | 93%  | <a href="#">gij75765761 1ZJD_A</a>          |
| <a href="#">Chain A, Crystal Structure Of The Catalytic Domain Of Coagulation</a>  | 45.2 | 45.2 | 100% | 3e-04 | 93%  | <a href="#">gij78101066 1ZHP_A</a>          |
| <a href="#">Chain A, Crystal Structure Of The Fxia Catalytic Domain In Comple</a>  | 45.2 | 45.2 | 100% | 3e-04 | 93%  | <a href="#">gij56967291 1XXD_A</a>          |
| <a href="#">PREDICTED: coagulation factor XI isoform X2 [Rhinopithecus roxel</a>   | 45.2 | 45.2 | 100% | 3e-04 | 93%  | <a href="#">gij724897372 XP_010376291.1</a> |
| <a href="#">PREDICTED: coagulation factor XI isoform X1 [Rhinopithecus roxel</a>   | 45.2 | 45.2 | 100% | 3e-04 | 93%  | <a href="#">gij724897369 XP_010376290.1</a> |
| <a href="#">PREDICTED: coagulation factor XI [Balaenoptera acutorostrata sca</a>   | 45.2 | 45.2 | 100% | 3e-04 | 93%  | <a href="#">gij594650157 XP_007174042.1</a> |
| <a href="#">PREDICTED: coagulation factor XI [Physeter catodon]</a>                | 45.2 | 45.2 | 100% | 3e-04 | 93%  | <a href="#">gij593742188 XP_007126520.1</a> |
| <a href="#">PREDICTED: LOW QUALITY PROTEIN: coagulation factor XI [Ech</a>         | 45.2 | 45.2 | 100% | 3e-04 | 93%  | <a href="#">gij507618988 XP_004696215.1</a> |
| <a href="#">PREDICTED: coagulation factor XI [Orycteropus afer afer]</a>           | 45.2 | 45.2 | 100% | 3e-04 | 93%  | <a href="#">gij634869242 XP_007946583.1</a> |
| <a href="#">PREDICTED: coagulation factor XI [Tarsius syrichta]</a>                | 44.8 | 44.8 | 100% | 5e-04 | 93%  | <a href="#">gij640821392 XP_008067645.1</a> |
| <a href="#">Plasma kallikrein [Pteropus alecto]</a>                                | 44.3 | 44.3 | 92%  | 6e-04 | 100% | <a href="#">gij431902346 ELK08847.1</a>     |
| <a href="#">Coagulation factor XI [Tupaia chinensis]</a>                           | 44.3 | 44.3 | 100% | 6e-04 | 93%  | <a href="#">gij444705646 ELW47049.1</a>     |
| <a href="#">PREDICTED: LOW QUALITY PROTEIN: coagulation factor XI [Pter</a>        | 44.3 | 44.3 | 92%  | 6e-04 | 100% | <a href="#">gij586521035 XP_006926977.1</a> |
| <a href="#">coagulation factor XI precursor [Oryctolagus cuniculus]</a>            | 44.3 | 44.3 | 100% | 6e-04 | 93%  | <a href="#">gij130502142 NP_001076261.1</a> |
| <a href="#">PREDICTED: coagulation factor XI [Dasypus novemcinctus]</a>            | 44.3 | 44.3 | 100% | 6e-04 | 93%  | <a href="#">gij488532217 XP_004457855.1</a> |
| <a href="#">PREDICTED: coagulation factor XI isoform 2 [Ceratotherium simum</a>    | 44.3 | 44.3 | 100% | 6e-04 | 93%  | <a href="#">gij478509096 XP_004428828.1</a> |
| <a href="#">PREDICTED: coagulation factor XI isoform 3 [Odobenus rosmarus</a>      | 44.3 | 44.3 | 92%  | 6e-04 | 100% | <a href="#">gij472396395 XP_004417424.1</a> |
| <a href="#">PREDICTED: coagulation factor XI-like [Ailuropoda melanoleuca]</a>     | 44.3 | 44.3 | 92%  | 6e-04 | 100% | <a href="#">gij301776062 XP_002923450.1</a> |
| <a href="#">PREDICTED: coagulation factor XI [Bubalus bubalis]</a>                 | 44.3 | 44.3 | 100% | 6e-04 | 93%  | <a href="#">gij594073052 XP_006060352.1</a> |
| <a href="#">PREDICTED: coagulation factor XI [Capra hircus]</a>                    | 44.3 | 44.3 | 100% | 6e-04 | 93%  | <a href="#">gij548524195 XP_005698802.1</a> |
| <a href="#">PREDICTED: coagulation factor XI isoform 1 [Ceratotherium simum</a>    | 44.3 | 44.3 | 100% | 6e-04 | 93%  | <a href="#">gij478509094 XP_004428827.1</a> |
| <a href="#">PREDICTED: coagulation factor XI isoform 2 [Odobenus rosmarus</a>      | 44.3 | 44.3 | 92%  | 6e-04 | 100% | <a href="#">gij472396393 XP_004417423.1</a> |
| <a href="#">PREDICTED: coagulation factor XI [Tupaia chinensis]</a>                | 44.3 | 44.3 | 100% | 6e-04 | 93%  | <a href="#">gij562864607 XP_006160530.1</a> |
| <a href="#">PREDICTED: coagulation factor XI [Mustela putorius furo]</a>           | 44.3 | 44.3 | 92%  | 6e-04 | 100% | <a href="#">gij511876760 XP_004758357.1</a> |
| <a href="#">PREDICTED: coagulation factor XI isoform 1 [Odobenus rosmarus</a>      | 44.3 | 44.3 | 92%  | 6e-04 | 100% | <a href="#">gij472396391 XP_004417422.1</a> |

|                                                                                       |      |      |      |       |      |                                             |
|---------------------------------------------------------------------------------------|------|------|------|-------|------|---------------------------------------------|
| <a href="#">PREDICTED: LOW QUALITY PROTEIN: coagulation factor XI [Urs]</a>           | 44.3 | 44.3 | 92%  | 7e-04 | 100% | <a href="#">gil671035736 XP_008708722.1</a> |
| <a href="#">PREDICTED: coagulation factor XI [Ictidomys tridecemlineatus]</a>         | 43.9 | 43.9 | 100% | 9e-04 | 93%  | <a href="#">gil532087072 XP_005329248.1</a> |
| <a href="#">PREDICTED: coagulation factor XI [Lipotes vexillifer]</a>                 | 43.5 | 43.5 | 100% | 0.001 | 93%  | <a href="#">gil602712769 XP_007466613.1</a> |
| <a href="#">PREDICTED: coagulation factor XI [Orcinus orca]</a>                       | 43.5 | 43.5 | 100% | 0.001 | 93%  | <a href="#">gil466045508 XP_004277238.1</a> |
| <a href="#">PREDICTED: coagulation factor XI isoform X2 [Papio anubis]</a>            | 42.2 | 42.2 | 100% | 0.003 | 93%  | <a href="#">gil685544400 XP_009206295.1</a> |
| <a href="#">PREDICTED: coagulation factor XI isoform X2 [Chlorocebus sabaei]</a>      | 42.2 | 42.2 | 100% | 0.003 | 93%  | <a href="#">gil635046203 XP_007998683.1</a> |
| <a href="#">PREDICTED: coagulation factor XI isoform X2 [Macaca fascicularis]</a>     | 42.2 | 42.2 | 100% | 0.003 | 93%  | <a href="#">gil544436077 XP_005556541.1</a> |
| <a href="#">hypothetical protein EGM_04467 [Macaca fascicularis]</a>                  | 42.2 | 42.2 | 100% | 0.003 | 93%  | <a href="#">gil355750969 EHH55296.1</a>     |
| <a href="#">hypothetical protein EGK_16300 [Macaca mulatta]</a>                       | 42.2 | 42.2 | 100% | 0.003 | 93%  | <a href="#">gil355687768 EHH26352.1</a>     |
| <a href="#">PREDICTED: coagulation factor XI isoform X1 [Chlorocebus sabaei]</a>      | 42.2 | 42.2 | 100% | 0.003 | 93%  | <a href="#">gil635046201 XP_007998681.1</a> |
| <a href="#">PREDICTED: coagulation factor XI isoform X1 [Macaca fascicularis]</a>     | 42.2 | 42.2 | 100% | 0.003 | 93%  | <a href="#">gil544436075 XP_005556540.1</a> |
| <a href="#">PREDICTED: coagulation factor XI isoform X1 [Papio anubis]</a>            | 42.2 | 42.2 | 100% | 0.003 | 93%  | <a href="#">gil402871005 XP_003899481.1</a> |
| <a href="#">PREDICTED: coagulation factor XI-like [Macaca mulatta]</a>                | 42.2 | 42.2 | 100% | 0.003 | 93%  | <a href="#">gil297293811 XP_001090398.2</a> |
| <a href="#">Chain A, Factor Xi Catalytic Domain Complexed With N-((R)-1-(4-E</a>      | 41.8 | 41.8 | 100% | 0.004 | 93%  | <a href="#">gil109157010 1ZPZ_A</a>         |
| <a href="#">coagulation factor XI precursor [Canis lupus familiaris]</a>              | 41.8 | 41.8 | 92%  | 0.005 | 92%  | <a href="#">gil205361194 NP_001128595.1</a> |
| <a href="#">PREDICTED: coagulation factor XI isoform X2 [Leptonychotes weddellii]</a> | 41.8 | 41.8 | 92%  | 0.005 | 92%  | <a href="#">gil585180453 XP_006741890.1</a> |
| <a href="#">PREDICTED: coagulation factor XI [Sorex araneus]</a>                      | 41.8 | 41.8 | 100% | 0.005 | 86%  | <a href="#">gil505830321 XP_004610458.1</a> |
| <a href="#">PREDICTED: LOW QUALITY PROTEIN: coagulation factor XI [Panthera leo]</a>  | 41.8 | 41.8 | 92%  | 0.005 | 92%  | <a href="#">gil591347751 XP_007099050.1</a> |
| <a href="#">PREDICTED: coagulation factor XI isoform X2 [Canis lupus familiaris]</a>  | 41.8 | 41.8 | 92%  | 0.005 | 92%  | <a href="#">gil545526400 XP_005629983.1</a> |
| <a href="#">PREDICTED: coagulation factor XI [Felis catus]</a>                        | 41.8 | 41.8 | 92%  | 0.005 | 92%  | <a href="#">gil410956035 XP_003984650.1</a> |
| <a href="#">PREDICTED: coagulation factor XI isoform X3 [Leptonychotes weddellii]</a> | 41.8 | 41.8 | 92%  | 0.005 | 92%  | <a href="#">gil585180455 XP_006741891.1</a> |
| <a href="#">PREDICTED: coagulation factor XI [Chrysochloris asiatica]</a>             | 41.8 | 41.8 | 100% | 0.005 | 86%  | <a href="#">gil586451182 XP_006834518.1</a> |
| <a href="#">PREDICTED: coagulation factor XI isoform X1 [Leptonychotes weddellii]</a> | 41.8 | 41.8 | 92%  | 0.005 | 92%  | <a href="#">gil585180451 XP_006741889.1</a> |
| <a href="#">PREDICTED: coagulation factor XI isoform X1 [Canis lupus familiaris]</a>  | 41.8 | 41.8 | 92%  | 0.005 | 92%  | <a href="#">gil545526398 XP_005629982.1</a> |
| <a href="#">PREDICTED: coagulation factor XI-like isoform X5 [Anas platyrhynchos]</a> | 41.4 | 41.4 | 100% | 0.006 | 86%  | <a href="#">gil514703781 XP_005009031.1</a> |
| <a href="#">PREDICTED: coagulation factor XI-like isoform X3 [Anas platyrhynchos]</a> | 41.4 | 41.4 | 100% | 0.006 | 86%  | <a href="#">gil514703777 XP_005009029.1</a> |
| <a href="#">Coagulation factor XI [Chlamydotis undulata macqueenii]</a>               | 41.4 | 41.4 | 100% | 0.006 | 86%  | <a href="#">gil677168326 KFP45777.1</a>     |

## Alignments

[Download](#) [GenPept](#) [Graphics](#)

[Next](#) [Previous](#) [Descriptions](#)

truncated coagulation factor XI [Bos taurus]

Sequence ID: [gil89338423|gb|ABD67506.1](#) Length: 34 Number of Matches: 1

[See 2 more title\(s\)](#)

Range 1: 8 to 21 [GenPept](#) [Graphics](#)

[Next Match](#) [Previous Match](#)

| Score          | Expect | Identities  | Positives   | Gaps     |
|----------------|--------|-------------|-------------|----------|
| 47.7 bits(105) | 4e-06  | 14/14(100%) | 14/14(100%) | 0/14(0%) |

Query 1 RVYSGILNQSEIKE 14  
 RVYSGILNQSEIKE  
 Sbjct 8 RVYSGILNQSEIKE 21

### Related Information

[Gene](#) - associated gene details  
[Identical Proteins](#) - Proteins identical to the subject

[Download](#) [GenPept](#) [Graphics](#)

[Next](#) [Previous](#) [Descriptions](#)

coagulation factor XI, partial [Bos taurus]

Sequence ID: [gil237637253|gb|ACR07926.1](#) Length: 41 Number of Matches: 1

Range 1: 8 to 21 [GenPept](#) [Graphics](#)

[Next Match](#) [Previous Match](#)

| Score          | Expect | Identities  | Positives   | Gaps     |
|----------------|--------|-------------|-------------|----------|
| 47.7 bits(105) | 6e-06  | 14/14(100%) | 14/14(100%) | 0/14(0%) |

### Related Information



Query 1 RVYSGILNQSEIKE 14  
 Sbjct 8 RVYSGILNQSEIKE 21

[Download](#) [GenPept](#) [Graphics](#)

[▼ Next](#) [▲ Previous](#) [▲ Descriptions](#)

coagulation factor XI [Bos taurus]

Sequence ID: [gi|89338421|gb|ABD67505.1](#) Length: 48 Number of Matches: 1

[▶ See 1 more title\(s\)](#)

Range 1: 8 to 21 [GenPept](#) [Graphics](#)

[▼ Next Match](#) [▲ Previous Match](#)

| Score          | Expect | Identities  | Positives   | Gaps     |
|----------------|--------|-------------|-------------|----------|
| 47.7 bits(105) | 8e-06  | 14/14(100%) | 14/14(100%) | 0/14(0%) |

Query 1 RVYSGILNQSEIKE 14  
 Sbjct 8 RVYSGILNQSEIKE 21

**Related Information**

[Gene](#) - associated gene details  
[Identical Proteins](#) - Proteins identical to the subject

[Download](#) [GenPept](#) [Graphics](#)

[▼ Next](#) [▲ Previous](#) [▲ Descriptions](#)

Chain A, Crystal Structure Of Factor Xia In Complex With Clavatadine A

Sequence ID: [gi|217035335|pdb|3BG8|A](#) Length: 238 Number of Matches: 1

Range 1: 56 to 69 [GenPept](#) [Graphics](#)

[▼ Next Match](#) [▲ Previous Match](#)

| Score          | Expect | Identities  | Positives   | Gaps     |
|----------------|--------|-------------|-------------|----------|
| 47.7 bits(105) | 4e-05  | 14/14(100%) | 14/14(100%) | 0/14(0%) |

Query 1 RVYSGILNQSEIKE 14  
 Sbjct 56 RVYSGILNQSEIKE 69

**Related Information**

[Structure](#) - 3D structure displays

[Download](#) [GenPept](#) [Graphics](#)

[▼ Next](#) [▲ Previous](#) [▲ Descriptions](#)

Chain A, Crystal Structure Of The Fxia Catalytic Domain In Complex With Ecotinm84r

Sequence ID: [gi|56967287|pdb|1XX9|A](#) Length: 238 Number of Matches: 1

[▶ See 1 more title\(s\)](#)

Range 1: 56 to 69 [GenPept](#) [Graphics](#)

[▼ Next Match](#) [▲ Previous Match](#)

| Score          | Expect | Identities  | Positives   | Gaps     |
|----------------|--------|-------------|-------------|----------|
| 47.7 bits(105) | 4e-05  | 14/14(100%) | 14/14(100%) | 0/14(0%) |

Query 1 RVYSGILNQSEIKE 14  
 Sbjct 56 RVYSGILNQSEIKE 69

**Related Information**

[Structure](#) - 3D structure displays  
[Identical Proteins](#) - Proteins identical to the subject

BLAST is a registered trademark of the National Library of Medicine.

[Copyright](#) | [Disclaimer](#) | [Privacy](#) | [Accessibility](#) | [Contact](#) | [Send feedback](#)

[NCBI](#) | [NLM](#) | [NIH](#) | [DHHS](#)

▶ NCBI/ BLAST/ blastp suite/ Formatting Results - BVDM5A2W01R

**i** Your search parameters were adjusted to search for a short input sequence.

[Edit and Resubmit](#) [Save Search Strategies](#) ▶ [Formatting options](#) ▶ [Download](#) [YouTube](#) [How to read this page](#) [Blast report description](#)

### F13B\_KHGVIISSTVDTYEDGSSVEYRC\_Mod

|                      |                                                         |                      |                                                                                                                    |
|----------------------|---------------------------------------------------------|----------------------|--------------------------------------------------------------------------------------------------------------------|
| <b>RID</b>           | <a href="#">BVDM5A2W01R</a> (Expires on 01-21 08:59 am) | <b>Database Name</b> | nr                                                                                                                 |
| <b>Query ID</b>      | lcl 73820                                               | <b>Description</b>   | All non-redundant GenBank CDS translations+PDB+SwissProt+PIR+PRF excluding environmental samples from WGS projects |
| <b>Description</b>   | None                                                    | <b>Program</b>       | BLASTP 2.2.30+ ▶ <a href="#">Citation</a>                                                                          |
| <b>Molecule type</b> | amino acid                                              |                      |                                                                                                                    |
| <b>Query Length</b>  | 23                                                      |                      |                                                                                                                    |

Other reports: ▶ [Search Summary](#) [[Taxonomy reports](#)] [[Distance tree of results](#)] [[Multiple alignment](#)]

### Graphic Summary

[Show Conserved Domains](#)

No putative conserved domains have been detected

Distribution of 200 Blast Hits on the Query Sequence

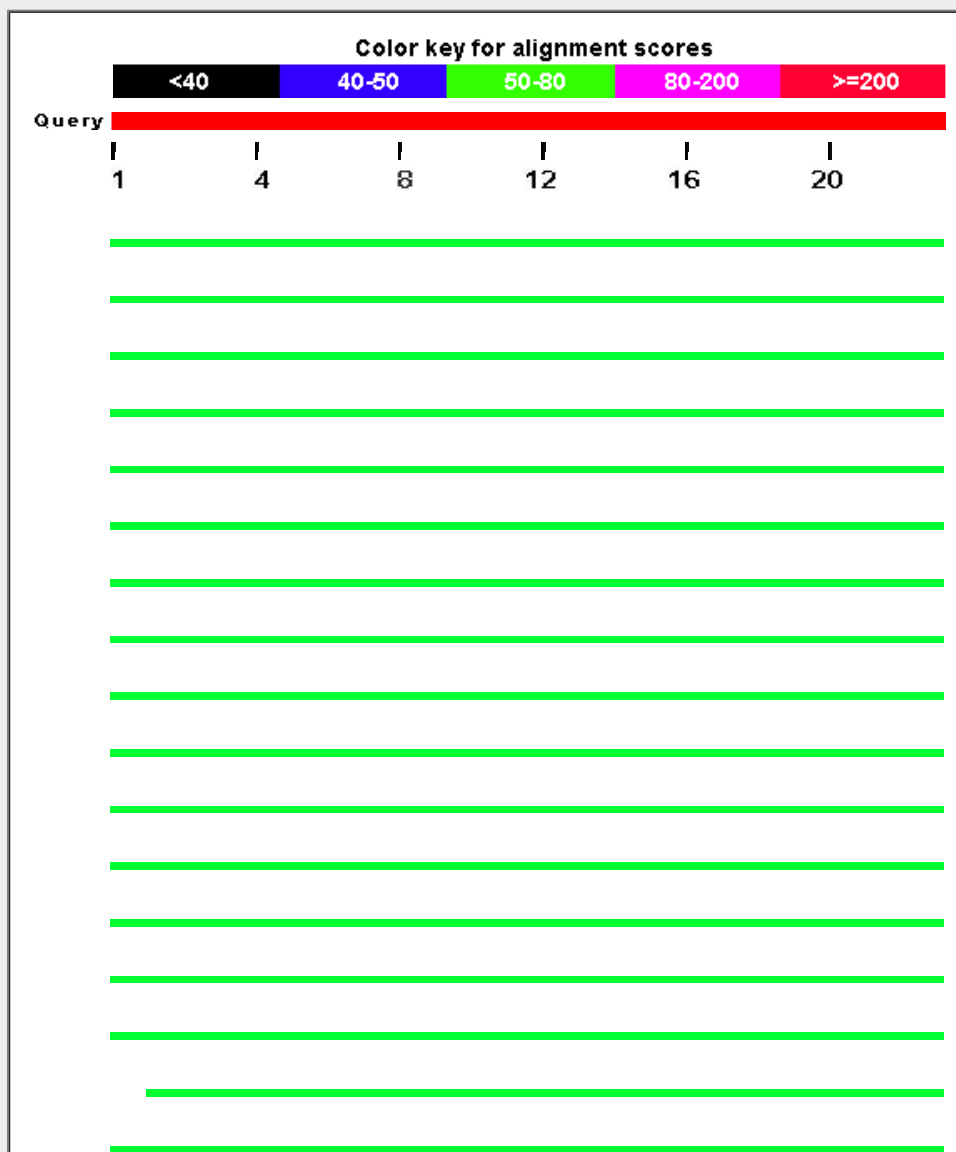

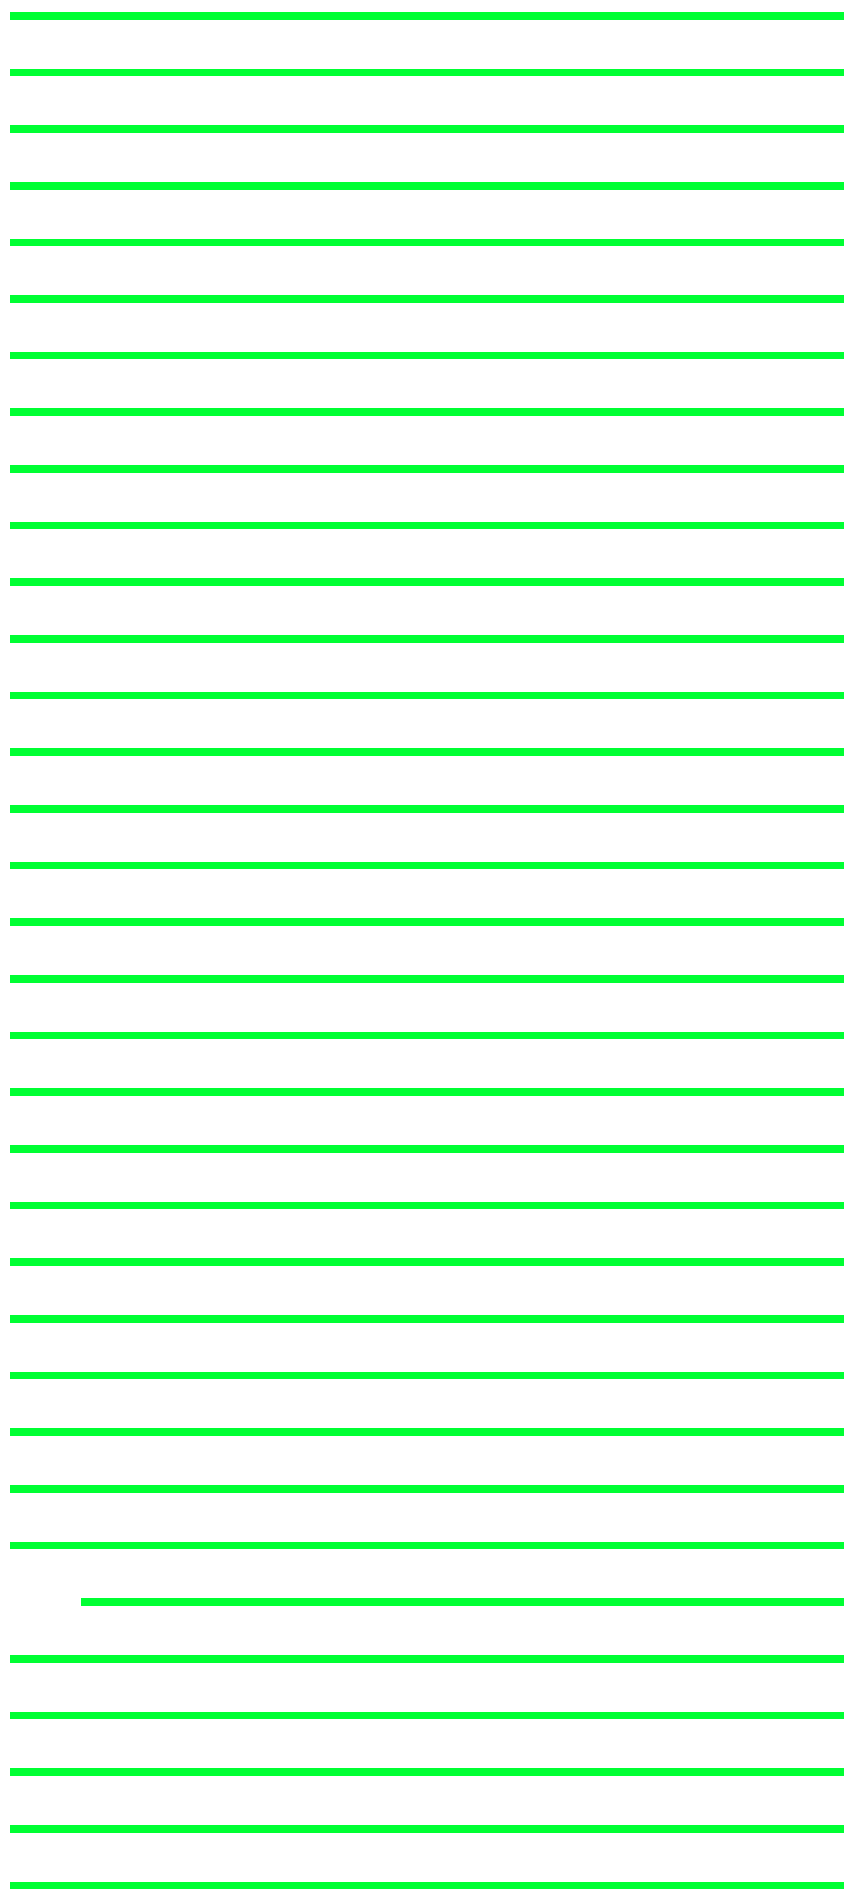



## Descriptions

### Sequences producing significant alignments:

Select: [All](#) [None](#) Selected:0

[Alignments](#)
[Download](#)
[GenPept](#)
[Graphics](#)
[Distance tree of results](#)
[Multiple alignment](#)

| Description                                                                                 | Max score | Total score | Query cover | E value | Ident | Accession                      |
|---------------------------------------------------------------------------------------------|-----------|-------------|-------------|---------|-------|--------------------------------|
| <a href="#">PREDICTED: coagulation factor XIII B chain isoform X4 [Pan troglodytes]</a>     | 74.0      | 104         | 100%        | 2e-13   | 96%   | <a href="#">XP_009438553.1</a> |
| <a href="#">PREDICTED: coagulation factor XIII B chain isoform X3 [Pan troglodytes]</a>     | 74.0      | 104         | 100%        | 2e-13   | 96%   | <a href="#">XP_009438550.1</a> |
| <a href="#">PREDICTED: coagulation factor XIII B chain isoform X2 [Homo sapiens]</a>        | 74.0      | 104         | 100%        | 2e-13   | 96%   | <a href="#">XP_005245011.1</a> |
| <a href="#">PREDICTED: coagulation factor XIII B chain isoform X2 [Pan troglodytes]</a>     | 74.0      | 104         | 100%        | 2e-13   | 96%   | <a href="#">XP_009438547.1</a> |
| <a href="#">PREDICTED: coagulation factor XIII B chain isoform X1 [Homo sapiens]</a>        | 74.0      | 104         | 100%        | 2e-13   | 96%   | <a href="#">XP_005245010.1</a> |
| <a href="#">factor XIII b subunit precursor [Homo sapiens]</a>                              | 74.0      | 104         | 100%        | 2e-13   | 96%   | <a href="#">AAA88042.1</a>     |
| <a href="#">coagulation factor XIIIb [Homo sapiens]</a>                                     | 74.0      | 104         | 100%        | 2e-13   | 96%   | <a href="#">AAA51821.1</a>     |
| <a href="#">PREDICTED: coagulation factor XIII B chain [Gorilla gorilla gorilla]</a>        | 74.0      | 104         | 100%        | 2e-13   | 96%   | <a href="#">XP_004028140.1</a> |
| <a href="#">coagulation factor XIII, B polypeptide [Homo sapiens]</a>                       | 74.0      | 104         | 100%        | 2e-13   | 96%   | <a href="#">AAT85802.1</a>     |
| <a href="#">PREDICTED: coagulation factor XIII B chain [Pan paniscus]</a>                   | 74.0      | 104         | 100%        | 2e-13   | 96%   | <a href="#">XP_003823128.1</a> |
| <a href="#">unnamed protein product [Homo sapiens]</a>                                      | 74.0      | 104         | 100%        | 2e-13   | 96%   | <a href="#">BAF83249.1</a>     |
| <a href="#">PREDICTED: coagulation factor XIII B chain isoform X1 [Pan troglodytes]</a>     | 74.0      | 104         | 100%        | 2e-13   | 96%   | <a href="#">XP_001137074.1</a> |
| <a href="#">coagulation factor XIII B chain precursor [Homo sapiens]</a>                    | 74.0      | 104         | 100%        | 2e-13   | 96%   | <a href="#">NP_001985.2</a>    |
| <a href="#">PREDICTED: coagulation factor XIII B chain [Rhinopithecus roxellana]</a>        | 70.2      | 101         | 100%        | 4e-12   | 91%   | <a href="#">XP_010356755.1</a> |
| <a href="#">PREDICTED: coagulation factor XIII B chain [Nomascus leucogenys]</a>            | 70.2      | 100         | 100%        | 4e-12   | 91%   | <a href="#">XP_003264551.1</a> |
| <a href="#">PREDICTED: LOW QUALITY PROTEIN: coagulation factor XIII B chain [Pongo]</a>     | 67.2      | 97.6        | 95%         | 4e-11   | 91%   | <a href="#">XP_002809712.2</a> |
| <a href="#">PREDICTED: coagulation factor XIII B chain [Galeopterus variegatus]</a>         | 66.4      | 96.7        | 100%        | 8e-11   | 87%   | <a href="#">XP_008590154.1</a> |
| <a href="#">PREDICTED: coagulation factor XIII B chain isoform X4 [Chinchilla lanigera]</a> | 66.0      | 92.0        | 100%        | 1e-10   | 87%   | <a href="#">XP_005375174.1</a> |
| <a href="#">PREDICTED: coagulation factor XIII B chain isoform X2 [Chinchilla lanigera]</a> | 66.0      | 92.0        | 100%        | 1e-10   | 87%   | <a href="#">XP_005375172.1</a> |
| <a href="#">PREDICTED: coagulation factor XIII B chain isoform X1 [Chinchilla lanigera]</a> | 66.0      | 92.0        | 100%        | 1e-10   | 87%   | <a href="#">XP_005375171.1</a> |
| <a href="#">PREDICTED: coagulation factor XIII B chain-like [Papio anubis]</a>              | 63.8      | 63.8        | 100%        | 3e-10   | 87%   | <a href="#">XP_009189228.1</a> |
| <a href="#">PREDICTED: coagulation factor XIII B chain isoform X2 [Chlorocebus sabaueu]</a> | 63.8      | 95.0        | 100%        | 6e-10   | 87%   | <a href="#">XP_007987269.1</a> |
| <a href="#">PREDICTED: coagulation factor XIII B chain isoform X1 [Chlorocebus sabaueu]</a> | 63.8      | 95.0        | 100%        | 6e-10   | 87%   | <a href="#">XP_007987268.1</a> |
| <a href="#">PREDICTED: coagulation factor XIII B chain isoform X4 [Macaca fascicularis]</a> | 63.4      | 94.6        | 100%        | 8e-10   | 87%   | <a href="#">XP_005540366.1</a> |
| <a href="#">PREDICTED: coagulation factor XIII B chain isoform X3 [Macaca fascicularis]</a> | 63.4      | 94.6        | 100%        | 8e-10   | 87%   | <a href="#">XP_005540365.1</a> |
| <a href="#">PREDICTED: coagulation factor XIII B chain isoform X2 [Macaca fascicularis]</a> | 63.4      | 94.6        | 100%        | 8e-10   | 87%   | <a href="#">XP_005540364.1</a> |
| <a href="#">hypothetical protein EGM_01565 [Macaca fascicularis]</a>                        | 63.4      | 94.6        | 100%        | 8e-10   | 87%   | <a href="#">EHH50697.1</a>     |
| <a href="#">PREDICTED: coagulation factor XIII B chain isoform 2 [Macaca mulatta]</a>       | 63.4      | 94.6        | 100%        | 8e-10   | 87%   | <a href="#">XP_001111017.1</a> |
| <a href="#">PREDICTED: coagulation factor XIII B chain isoform X5 [Callithrix jacchus]</a>  | 62.6      | 91.6        | 100%        | 2e-09   | 83%   | <a href="#">XP_008983391.1</a> |

|                                                                                                |      |      |      |       |     |                                |
|------------------------------------------------------------------------------------------------|------|------|------|-------|-----|--------------------------------|
| <a href="#">PREDICTED: coagulation factor XIII B chain isoform X4 [Callithrix jacchus]</a>     | 62.6 | 91.6 | 100% | 2e-09 | 83% | <a href="#">XP_002760512.2</a> |
| <a href="#">PREDICTED: coagulation factor XIII B chain isoform X3 [Callithrix jacchus]</a>     | 62.6 | 91.6 | 100% | 2e-09 | 83% | <a href="#">XP_008983390.1</a> |
| <a href="#">PREDICTED: coagulation factor XIII B chain isoform X2 [Callithrix jacchus]</a>     | 62.6 | 91.6 | 100% | 2e-09 | 83% | <a href="#">XP_008983389.1</a> |
| <a href="#">PREDICTED: coagulation factor XIII B chain isoform X1 [Callithrix jacchus]</a>     | 62.6 | 91.6 | 100% | 2e-09 | 83% | <a href="#">XP_008983388.1</a> |
| <a href="#">Coagulation factor XIII B chain [Heterocephalus glaber]</a>                        | 61.3 | 87.0 | 100% | 4e-09 | 83% | <a href="#">EHB10383.1</a>     |
| <a href="#">PREDICTED: coagulation factor XIII B chain [Heterocephalus glaber]</a>             | 61.3 | 87.0 | 100% | 4e-09 | 83% | <a href="#">XP_004860190.1</a> |
| <a href="#">PREDICTED: coagulation factor XIII B chain [Heterocephalus glaber]</a>             | 61.3 | 87.0 | 100% | 4e-09 | 83% | <a href="#">XP_004896309.1</a> |
| <a href="#">PREDICTED: coagulation factor XIII B chain [Otolemur garnettii]</a>                | 60.9 | 92.5 | 100% | 6e-09 | 78% | <a href="#">XP_003792408.1</a> |
| <a href="#">PREDICTED: coagulation factor XIII B chain [Cavia porcellus]</a>                   | 59.6 | 85.7 | 100% | 2e-08 | 78% | <a href="#">XP_003474759.1</a> |
| <a href="#">hypothetical protein PANDA_007949 [Ailuropoda melanoleuca]</a>                     | 59.2 | 88.7 | 100% | 2e-08 | 78% | <a href="#">EFB29754.1</a>     |
| <a href="#">PREDICTED: coagulation factor XIII B chain [Ursus maritimus]</a>                   | 59.2 | 90.8 | 100% | 2e-08 | 78% | <a href="#">XP_008683305.1</a> |
| <a href="#">PREDICTED: coagulation factor XIII B chain [Equus caballus]</a>                    | 59.2 | 86.5 | 100% | 2e-08 | 78% | <a href="#">XP_005608147.1</a> |
| <a href="#">PREDICTED: coagulation factor XIII B chain isoform X2 [Equus przewalskii]</a>      | 59.2 | 86.5 | 100% | 2e-08 | 78% | <a href="#">XP_008507405.1</a> |
| <a href="#">PREDICTED: coagulation factor XIII B chain [Condylura cristata]</a>                | 59.2 | 110  | 100% | 2e-08 | 78% | <a href="#">XP_004685543.1</a> |
| <a href="#">PREDICTED: coagulation factor XIII B chain-like [Ailuropoda melanoleuca]</a>       | 59.2 | 88.7 | 100% | 2e-08 | 78% | <a href="#">XP_002919322.1</a> |
| <a href="#">PREDICTED: coagulation factor XIII B chain isoform X1 [Equus przewalskii]</a>      | 59.2 | 86.5 | 100% | 2e-08 | 78% | <a href="#">XP_008507404.1</a> |
| <a href="#">PREDICTED: coagulation factor XIII B chain [Octodon degus]</a>                     | 58.3 | 106  | 91%  | 4e-08 | 86% | <a href="#">XP_004625499.1</a> |
| <a href="#">PREDICTED: coagulation factor XIII B chain [Canis lupus familiaris]</a>            | 57.9 | 89.5 | 100% | 6e-08 | 78% | <a href="#">XP_005622353.1</a> |
| <a href="#">PREDICTED: coagulation factor XIII B chain [Leptonychotes weddellii]</a>           | 57.5 | 89.1 | 100% | 8e-08 | 78% | <a href="#">XP_006734122.1</a> |
| <a href="#">PREDICTED: coagulation factor XIII B chain-like [Physeter catodon]</a>             | 56.6 | 85.7 | 100% | 1e-07 | 83% | <a href="#">XP_007106854.1</a> |
| <a href="#">PREDICTED: coagulation factor XIII B chain isoform X2 [Mustela putorius furc]</a>  | 56.6 | 86.5 | 100% | 1e-07 | 74% | <a href="#">XP_004756256.1</a> |
| <a href="#">PREDICTED: coagulation factor XIII B chain isoform X2 [Saimiri boliviensis bc]</a> | 56.6 | 87.0 | 100% | 1e-07 | 74% | <a href="#">XP_010347048.1</a> |
| <a href="#">PREDICTED: coagulation factor XIII B chain [Lipotes vexillifer]</a>                | 56.6 | 85.7 | 100% | 1e-07 | 83% | <a href="#">XP_007459727.1</a> |
| <a href="#">PREDICTED: coagulation factor XIII B chain [Orcinus orca]</a>                      | 56.6 | 86.5 | 100% | 1e-07 | 83% | <a href="#">XP_004285138.1</a> |
| <a href="#">PREDICTED: coagulation factor XIII B chain-like [Balaenoptera acutorostrata]</a>   | 56.6 | 85.7 | 100% | 1e-07 | 83% | <a href="#">XP_007167347.1</a> |
| <a href="#">PREDICTED: coagulation factor XIII B chain isoform X1 [Mustela putorius furc]</a>  | 56.6 | 86.5 | 100% | 1e-07 | 74% | <a href="#">XP_004756255.1</a> |
| <a href="#">PREDICTED: coagulation factor XIII B chain isoform X1 [Saimiri boliviensis bc]</a> | 56.6 | 87.0 | 100% | 1e-07 | 74% | <a href="#">XP_003938193.1</a> |
| <a href="#">PREDICTED: coagulation factor XIII B chain [Oryctolagus cuniculus]</a>             | 55.8 | 84.8 | 100% | 3e-07 | 74% | <a href="#">XP_008266934.1</a> |
| <a href="#">Coagulation factor XIII B chain [Pteropus alecto]</a>                              | 55.4 | 87.0 | 91%  | 4e-07 | 81% | <a href="#">ELK19109.1</a>     |
| <a href="#">PREDICTED: coagulation factor XIII B chain [Pteropus alecto]</a>                   | 55.4 | 87.0 | 91%  | 4e-07 | 81% | <a href="#">XP_006904520.1</a> |
| <a href="#">PREDICTED: coagulation factor XIII B chain [Trichechus manatus latirostris]</a>    | 54.9 | 81.4 | 100% | 5e-07 | 74% | <a href="#">XP_004375387.1</a> |
| <a href="#">Coagulation factor XIII B chain [Fukomys damarensis]</a>                           | 54.5 | 80.2 | 91%  | 8e-07 | 81% | <a href="#">KFO28612.1</a>     |
| <a href="#">PREDICTED: coagulation factor XIII B chain [Fukomys damarensis]</a>                | 54.5 | 80.2 | 91%  | 8e-07 | 81% | <a href="#">XP_010633708.1</a> |
| <a href="#">PREDICTED: coagulation factor XIII B chain [Odobenus rosmarus divergens]</a>       | 54.1 | 85.7 | 100% | 1e-06 | 74% | <a href="#">XP_004415556.1</a> |
| <a href="#">PREDICTED: coagulation factor XIII B chain [Felis catus]</a>                       | 54.1 | 85.7 | 100% | 1e-06 | 74% | <a href="#">XP_006943009.1</a> |
| <a href="#">PREDICTED: coagulation factor XIII B chain [Panthera tigris altaica]</a>           | 54.1 | 85.7 | 100% | 1e-06 | 74% | <a href="#">XP_007096339.1</a> |
| <a href="#">Coagulation factor XIII B chain [Tupaia chinensis]</a>                             | 53.2 | 82.7 | 100% | 2e-06 | 70% | <a href="#">ELW57877.1</a>     |
| <a href="#">PREDICTED: coagulation factor XIII B chain [Tupaia chinensis]</a>                  | 53.2 | 82.7 | 100% | 2e-06 | 70% | <a href="#">XP_006155486.1</a> |
| <a href="#">PREDICTED: coagulation factor XIII B chain [Echinops telfairi]</a>                 | 52.8 | 52.8 | 100% | 3e-06 | 74% | <a href="#">XP_004700122.1</a> |
| <a href="#">PREDICTED: coagulation factor XIII B chain [Orycteropus afer afer]</a>             | 52.8 | 82.7 | 100% | 3e-06 | 74% | <a href="#">XP_007939370.1</a> |
| <a href="#">hypothetical protein CB1_001441011 [Camelus ferus]</a>                             | 52.4 | 52.4 | 100% | 4e-06 | 74% | <a href="#">EPY76298.1</a>     |
| <a href="#">PREDICTED: coagulation factor XIII B chain isoform 2 [Dasypus novemcinctu]</a>     | 52.4 | 81.9 | 100% | 4e-06 | 78% | <a href="#">XP_004476414.1</a> |
| <a href="#">PREDICTED: coagulation factor XIII B chain [Vicugna pacos]</a>                     | 52.4 | 81.9 | 100% | 4e-06 | 74% | <a href="#">XP_006213311.1</a> |
| <a href="#">PREDICTED: LOW QUALITY PROTEIN: coagulation factor XIII B chain [Cam]</a>          | 52.4 | 81.9 | 100% | 4e-06 | 74% | <a href="#">XP_010980486.1</a> |
| <a href="#">PREDICTED: coagulation factor XIII B chain isoform X2 [Camelus bactrianus]</a>     | 52.4 | 81.9 | 100% | 4e-06 | 74% | <a href="#">XP_010954592.1</a> |

|                                                                                             |      |      |      |       |     |                                |
|---------------------------------------------------------------------------------------------|------|------|------|-------|-----|--------------------------------|
| <a href="#">PREDICTED: coagulation factor XIII B chain isoform X1 [Camelus bactrianus]</a>  | 52.4 | 81.9 | 100% | 4e-06 | 74% | <a href="#">XP_010954591.1</a> |
| <a href="#">PREDICTED: LOW QUALITY PROTEIN: coagulation factor XIII B chain [Cam</a>        | 52.4 | 81.9 | 100% | 4e-06 | 74% | <a href="#">XP_006191145.1</a> |
| <a href="#">PREDICTED: coagulation factor XIII B chain-like [Pantholops hodgsonii]</a>      | 52.4 | 82.3 | 100% | 4e-06 | 74% | <a href="#">XP_005979749.1</a> |
| <a href="#">PREDICTED: coagulation factor XIII B chain-like [Capra hircus]</a>              | 52.4 | 82.3 | 100% | 4e-06 | 74% | <a href="#">XP_005691104.1</a> |
| <a href="#">PREDICTED: coagulation factor XIII B chain isoform 1 [Dasypus novemcinctu</a>   | 52.4 | 81.9 | 100% | 4e-06 | 78% | <a href="#">XP_004476413.1</a> |
| <a href="#">PREDICTED: coagulation factor XIII B chain-like [Bos mutus]</a>                 | 52.4 | 82.3 | 100% | 4e-06 | 74% | <a href="#">XP_005897275.1</a> |
| <a href="#">PREDICTED: coagulation factor XIII B chain [Bison bison bison]</a>              | 52.4 | 105  | 100% | 4e-06 | 74% | <a href="#">XP_010829438.1</a> |
| <a href="#">PREDICTED: coagulation factor XIII B chain-like [Bubalus bubalis]</a>           | 51.1 | 81.0 | 100% | 1e-05 | 74% | <a href="#">XP_006064953.1</a> |
| <a href="#">PREDICTED: coagulation factor XIII B chain [Nannospalax galii]</a>              | 50.7 | 79.7 | 91%  | 1e-05 | 77% | <a href="#">XP_008829795.1</a> |
| <a href="#">PREDICTED: coagulation factor XIII B chain [Ceratotherium simum simum]</a>      | 50.3 | 81.9 | 100% | 2e-05 | 70% | <a href="#">XP_004439047.1</a> |
| <a href="#">PREDICTED: LOW QUALITY PROTEIN: coagulation factor XIII B chain [Ochr</a>       | 50.3 | 81.4 | 100% | 2e-05 | 70% | <a href="#">XP_004578856.1</a> |
| <a href="#">coagulation factor XIII B chain precursor [Bos taurus]</a>                      | 49.8 | 79.7 | 100% | 3e-05 | 74% | <a href="#">NP_001033618.1</a> |
| <a href="#">PREDICTED: coagulation factor XIII B chain [Tarsius syrichta]</a>               | 49.4 | 79.3 | 100% | 4e-05 | 65% | <a href="#">XP_008062916.1</a> |
| <a href="#">PREDICTED: coagulation factor XIII B chain [Ovis aries]</a>                     | 49.0 | 78.9 | 100% | 5e-05 | 70% | <a href="#">XP_004013974.1</a> |
| <a href="#">PREDICTED: coagulation factor XIII B chain [Peromyscus maniculatus bairdii]</a> | 48.6 | 74.7 | 100% | 7e-05 | 70% | <a href="#">XP_006982468.1</a> |
| <a href="#">PREDICTED: coagulation factor XIII B chain [Elephantulus edwardii]</a>          | 47.3 | 74.2 | 100% | 2e-04 | 70% | <a href="#">XP_006892166.1</a> |
| <a href="#">PREDICTED: coagulation factor XIII B chain [Ictidomys tridecemlineatus]</a>     | 47.3 | 73.8 | 100% | 2e-04 | 65% | <a href="#">XP_005330450.1</a> |
| <a href="#">PREDICTED: coagulation factor XIII B chain [Jaculus jaculus]</a>                | 46.9 | 76.4 | 100% | 2e-04 | 70% | <a href="#">XP_004659583.1</a> |
| <a href="#">PREDICTED: LOW QUALITY PROTEIN: coagulation factor XIII B chain [Micr</a>       | 46.9 | 76.4 | 82%  | 2e-04 | 74% | <a href="#">XP_005348510.1</a> |
| <a href="#">PREDICTED: coagulation factor XIII B chain [Sarcophilus harrisii]</a>           | 46.0 | 78.1 | 95%  | 5e-04 | 64% | <a href="#">XP_003767597.1</a> |
| <a href="#">PREDICTED: coagulation factor XIII B chain [Cricetulus griseus]</a>             | 45.6 | 74.7 | 82%  | 6e-04 | 74% | <a href="#">XP_003504725.2</a> |
| <a href="#">PREDICTED: coagulation factor XIII B chain [Sus scrofa]</a>                     | 44.8 | 74.7 | 100% | 0.001 | 61% | <a href="#">XP_003361662.1</a> |
| <a href="#">PREDICTED: coagulation factor XIII B chain isoform X2 [Mus musculus]</a>        | 44.3 | 74.7 | 91%  | 0.002 | 74% | <a href="#">XP_006529196.1</a> |
| <a href="#">PREDICTED: coagulation factor XIII B chain isoform X1 [Mus musculus]</a>        | 44.3 | 74.7 | 91%  | 0.002 | 74% | <a href="#">XP_006529195.1</a> |
| <a href="#">B subunit of factor XIII [Mus musculus]</a>                                     | 44.3 | 74.7 | 91%  | 0.002 | 74% | <a href="#">BAA00963.1</a>     |
| <a href="#">Coagulation factor XIII, beta subunit [Mus musculus]</a>                        | 44.3 | 74.7 | 91%  | 0.002 | 74% | <a href="#">AAH30166.1</a>     |

## Alignments

Download GenPept Graphics Sort by: E value Next Previous Descriptions

PREDICTED: coagulation factor XIII B chain isoform X4 [Pan troglodytes]

Sequence ID: [ref|XP\\_009438553.1|](#) Length: 613 Number of Matches: 2

Range 1: 483 to 505 GenPept Graphics Next Match Previous Match

| Score          | Expect | Identities | Positives   | Gaps     |
|----------------|--------|------------|-------------|----------|
| 74.0 bits(167) | 2e-13  | 22/23(96%) | 23/23(100%) | 0/23(0%) |

Query 1 KHGVIISSTVDTYEDGSSVEYRC 23  
 KHGVIISSTVDTYE+GSSVEYRC  
 Sbjct 483 KHGVIISSTVDTYENGSSVEYRC 505

### Related Information

[Gene](#) - associated gene details

Range 2: 367 to 377 GenPept Graphics Next Match Previous Match First Match

| Score         | Expect | Identities | Positives | Gaps     |
|---------------|--------|------------|-----------|----------|
| 30.3 bits(64) | 51     | 9/11(82%)  | 9/11(81%) | 0/11(0%) |

Query 13 YEDGSSVEYRC 23  
 Y GSSVEYRC  
 Sbjct 367 YATGSSVEYRC 377

Download GenPept Graphics Sort by: E value Next Previous Descriptions

**PREDICTED: coagulation factor XIII B chain isoform X3 [Pan troglodytes]**

Sequence ID: [ref|XP\\_009438550.1|](#) Length: 629 Number of Matches: 2

Range 1: 499 to 521 [GenPept](#) [Graphics](#)

▼ Next Match ▲ Previous Match

| Score          | Expect | Identities | Positives   | Gaps     |
|----------------|--------|------------|-------------|----------|
| 74.0 bits(167) | 2e-13  | 22/23(96%) | 23/23(100%) | 0/23(0%) |

Query 1 KHGVIISSTVDTYEDGSSVEYRC 23  
 KHGVIISSTVDTYE+GSSVEYRC  
 Sbjct 499 KHGVIISSTVDTYENGSSVEYRC 521

**Related Information**

[Gene](#) - associated gene details

Range 2: 383 to 393 [GenPept](#) [Graphics](#)

▼ Next Match ▲ Previous Match ▲ First Match

| Score         | Expect | Identities | Positives | Gaps     |
|---------------|--------|------------|-----------|----------|
| 30.3 bits(64) | 51     | 9/11(82%)  | 9/11(81%) | 0/11(0%) |

Query 13 YEDGSSVEYRC 23  
 Y GSSVEYRC  
 Sbjct 383 YATGSSVEYRC 393

[Download](#) ▼ [GenPept](#) [Graphics](#)

Sort by: E value

▼ Next ▲ Previous ▲ Descriptions

**PREDICTED: coagulation factor XIII B chain isoform X2 [Homo sapiens]**

Sequence ID: [ref|XP\\_005245011.1|](#) Length: 629 Number of Matches: 2

Range 1: 499 to 521 [GenPept](#) [Graphics](#)

▼ Next Match ▲ Previous Match

| Score          | Expect | Identities | Positives   | Gaps     |
|----------------|--------|------------|-------------|----------|
| 74.0 bits(167) | 2e-13  | 22/23(96%) | 23/23(100%) | 0/23(0%) |

Query 1 KHGVIISSTVDTYEDGSSVEYRC 23  
 KHGVIISSTVDTYE+GSSVEYRC  
 Sbjct 499 KHGVIISSTVDTYENGSSVEYRC 521

**Related Information**

[Gene](#) - associated gene details

[Map Viewer](#) - aligned genomic context

Range 2: 383 to 393 [GenPept](#) [Graphics](#)

▼ Next Match ▲ Previous Match ▲ First Match

| Score         | Expect | Identities | Positives | Gaps     |
|---------------|--------|------------|-----------|----------|
| 30.3 bits(64) | 51     | 9/11(82%)  | 9/11(81%) | 0/11(0%) |

Query 13 YEDGSSVEYRC 23  
 Y GSSVEYRC  
 Sbjct 383 YATGSSVEYRC 393

[Download](#) ▼ [GenPept](#) [Graphics](#)

Sort by: E value

▼ Next ▲ Previous ▲ Descriptions

**PREDICTED: coagulation factor XIII B chain isoform X2 [Pan troglodytes]**

Sequence ID: [ref|XP\\_009438547.1|](#) Length: 660 Number of Matches: 2

Range 1: 530 to 552 [GenPept](#) [Graphics](#)

▼ Next Match ▲ Previous Match

| Score          | Expect | Identities | Positives   | Gaps     |
|----------------|--------|------------|-------------|----------|
| 74.0 bits(167) | 2e-13  | 22/23(96%) | 23/23(100%) | 0/23(0%) |

Query 1 KHGVIISSTVDTYEDGSSVEYRC 23  
 KHGVIISSTVDTYE+GSSVEYRC  
 Sbjct 530 KHGVIISSTVDTYENGSSVEYRC 552

**Related Information**

[Gene](#) - associated gene details

Range 2: 414 to 424 [GenPept](#) [Graphics](#)

▼ Next Match ▲ Previous Match ▲ First Match

| Score         | Expect | Identities | Positives | Gaps     |
|---------------|--------|------------|-----------|----------|
| 30.3 bits(64) | 51     | 9/11(82%)  | 9/11(81%) | 0/11(0%) |

Query 13 YEDGSSVEYRC 23  
 Y GSSVEYRC  
 Sbjct 414 YATGSSVEYRC 424

[Download](#) ▼ [GenPept](#) [Graphics](#)

Sort by: E value

▼ Next ▲ Previous ▲ Descriptions

**PREDICTED: coagulation factor XIII B chain isoform X1 [Homo sapiens]**

Sequence ID: [ref|XP\\_005245010.1|](#) Length: 660 Number of Matches: 2

Range 1: 530 to 552 [GenPept](#) [Graphics](#)

▼ Next Match ▲ Previous Match

| Score          | Expect | Identities | Positives   | Gaps     |
|----------------|--------|------------|-------------|----------|
| 74.0 bits(167) | 2e-13  | 22/23(96%) | 23/23(100%) | 0/23(0%) |

Query 1 KHGVIISSTVDTYEDGSSVEYRC 23  
 KHGVIISSTVDTYE+GSSVEYRC  
 Sbjct 530 KHGVIISSTVDTYENGSSVEYRC 552

**Related Information**

[Gene](#) - associated gene details

[Map Viewer](#) - aligned genomic context

Range 2: 414 to 424 [GenPept](#) [Graphics](#)

[▼ Next Match](#) [▲ Previous Match](#) [▲ First Match](#)

| Score         | Expect | Identities | Positives | Gaps     |
|---------------|--------|------------|-----------|----------|
| 30.3 bits(64) | 51     | 9/11(82%)  | 9/11(81%) | 0/11(0%) |

|       |     |             |     |
|-------|-----|-------------|-----|
| Query | 13  | YEDGSSVEYRC | 23  |
|       |     | Y GSSVEYRC  |     |
| Sbjct | 414 | YATGSSVEYRC | 424 |

BLAST is a registered trademark of the National Library of Medicine.

[Copyright](#) | [Disclaimer](#) | [Privacy](#) | [Accessibility](#) | [Contact](#) | [Send feedback](#)

[NCBI](#) | [NLM](#) | [NIH](#) | [DHHS](#)





NCBI/ BLAST/ blastp suite/ Formatting Results - B94VMWFG01R

Your search parameters were adjusted to search for a short input sequence.

Edit and Resubmit Save Search Strategies Formatting options Download

YouTube How to read this page Blast report description

F13B\_KHGVIISSTVDTYENGSSVEYRC\_NonMod

RID B94VMWFG01R (Expires on 01-14 10:39 am)

Query ID lcl|308111
Description None
Molecule type amino acid
Query Length 23

Database Name nr
Description All non-redundant GenBank CDS translations+PDB+SwissProt+PIR excluding environmental samples from WGS projects
Program BLASTP 2.2.30+ Citation

Other reports: Search Summary Taxonomy reports Distance tree of results Multiple alignment

Graphic Summary

Show Conserved Domains

No putative conserved domains have been detected

Distribution of 200 Blast Hits on the Query Sequence

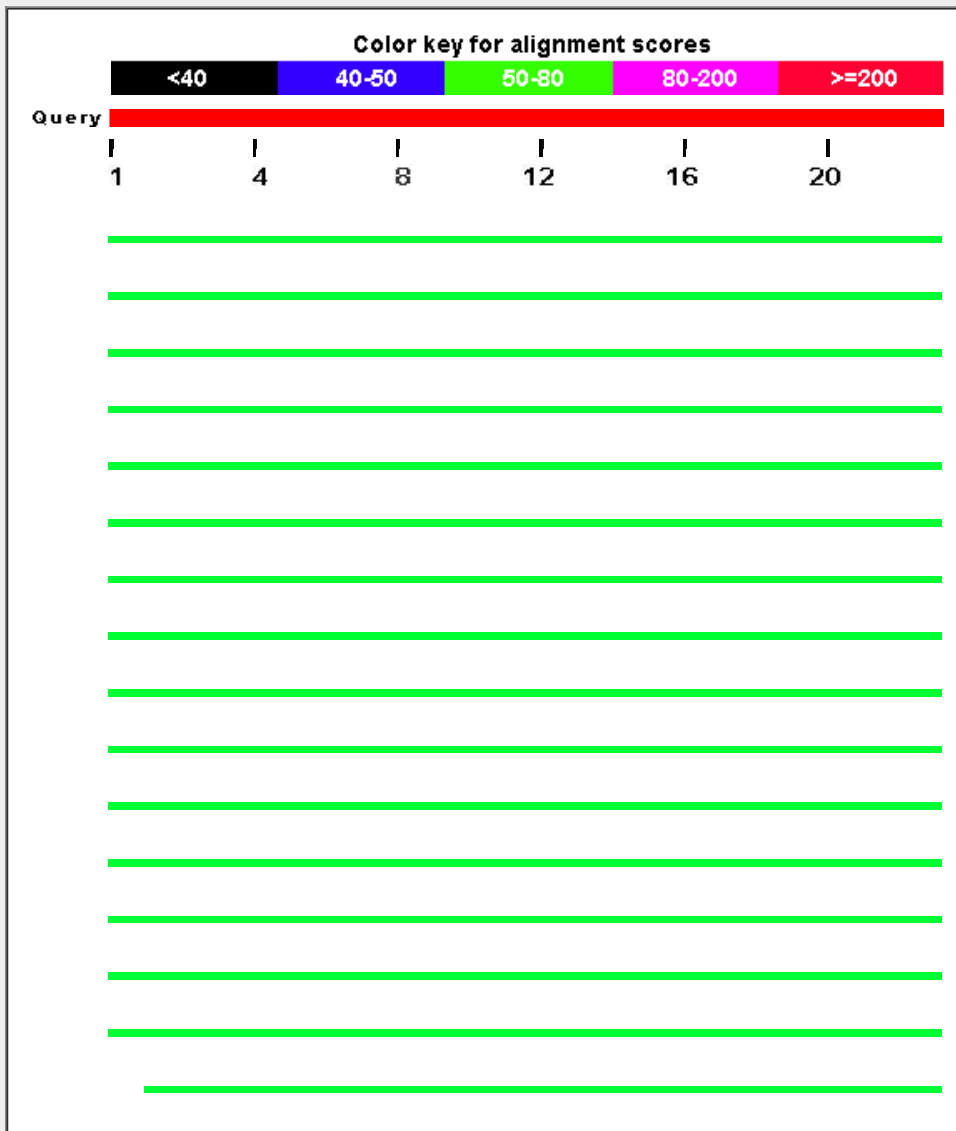

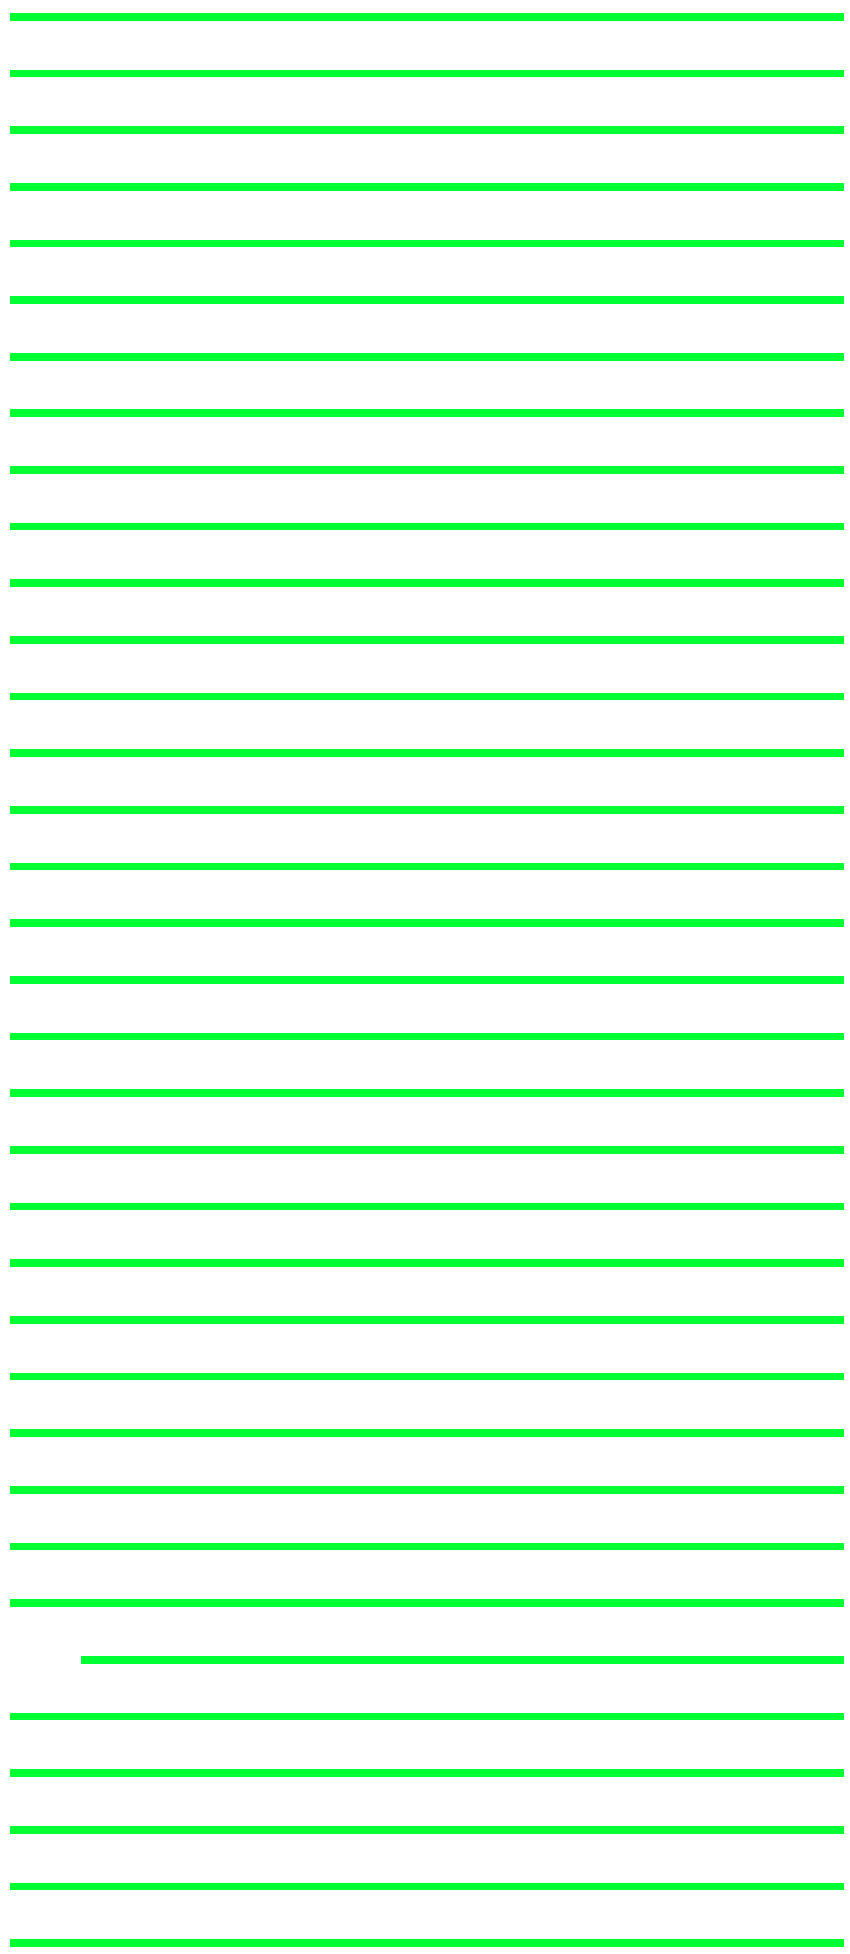

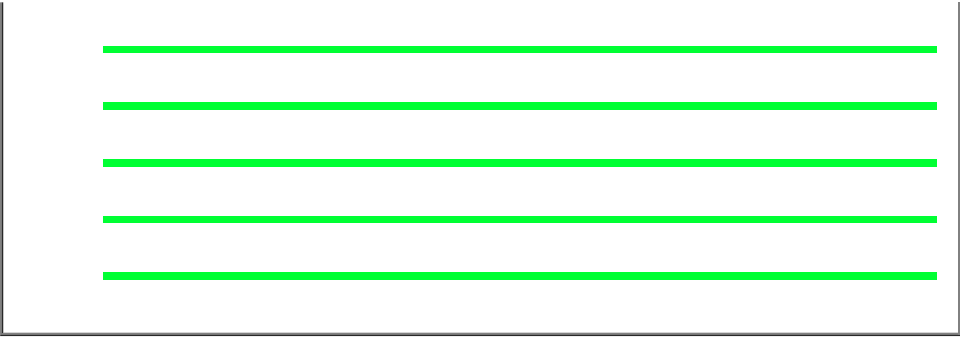

**Descriptions**

**Sequences producing significant alignments:**

Select: [All](#) [None](#) Selected:0

Alignments Download GenPept Graphics Distance tree of results Multiple alignment

| Description                                                                             | Max score | Total score | Query cover | E value | Ident | Accession                                   |
|-----------------------------------------------------------------------------------------|-----------|-------------|-------------|---------|-------|---------------------------------------------|
| <a href="#">PREDICTED: coagulation factor XIII B chain isoform X4 [Pan troglodytes]</a> | 76.6      | 108         | 100%        | 2e-14   | 100%  | <a href="#">gi 694890887 XP_009438553.1</a> |
| <a href="#">PREDICTED: coagulation factor XIII B chain isoform X3 [Pan troglodytes]</a> | 76.6      | 108         | 100%        | 2e-14   | 100%  | <a href="#">gi 694890885 XP_009438550.1</a> |
| <a href="#">PREDICTED: coagulation factor XIII B chain isoform X2 [Homo sapiens]</a>    | 76.6      | 108         | 100%        | 2e-14   | 100%  | <a href="#">gi 530364289 XP_005245011.1</a> |
| <a href="#">PREDICTED: coagulation factor XIII B chain isoform X2 [Pan troglodytes]</a> | 76.6      | 108         | 100%        | 2e-14   | 100%  | <a href="#">gi 694890883 XP_009438547.1</a> |
| <a href="#">PREDICTED: coagulation factor XIII B chain isoform X1 [Homo sapiens]</a>    | 76.6      | 108         | 100%        | 2e-14   | 100%  | <a href="#">gi 530364287 XP_005245010.1</a> |
| <a href="#">factor XIII b subunit precursor [Homo sapiens]</a>                          | 76.6      | 108         | 100%        | 2e-14   | 100%  | <a href="#">gi 182839 AAA88042.1</a>        |
| <a href="#">coagulation factor XIIIb [Homo sapiens]</a>                                 | 76.6      | 108         | 100%        | 2e-14   | 100%  | <a href="#">gi 179417 AAA51821.1</a>        |
| <a href="#">PREDICTED: coagulation factor XIII B chain [Gorilla gorilla gorilla]</a>    | 76.6      | 108         | 100%        | 2e-14   | 100%  | <a href="#">gi 426333135 XP_004028140.1</a> |
| <a href="#">coagulation factor XIII, B polypeptide [Homo sapiens]</a>                   | 76.6      | 108         | 100%        | 2e-14   | 100%  | <a href="#">gi 50897468 AAT85802.1</a>      |
| <a href="#">PREDICTED: coagulation factor XIII B chain [Pan paniscus]</a>               | 76.6      | 108         | 100%        | 2e-14   | 100%  | <a href="#">gi 397505134 XP_003823128.1</a> |
| <a href="#">unnamed protein product [Homo sapiens]</a>                                  | 76.6      | 108         | 100%        | 2e-14   | 100%  | <a href="#">gi 158254552 BAF83249.1</a>     |
| <a href="#">PREDICTED: coagulation factor XIII B chain isoform X1 [Pan troglodytes]</a> | 76.6      | 108         | 100%        | 2e-14   | 100%  | <a href="#">gi 114571621 XP_001137074.1</a> |
| <a href="#">coagulation factor XIII B chain precursor [Homo sapiens]</a>                | 76.6      | 108         | 100%        | 2e-14   | 100%  | <a href="#">gi 110611237 NP_001985.2</a>    |
| <a href="#">PREDICTED: coagulation factor XIII B chain [Rhinopithecus roxella]</a>      | 72.7      | 103         | 100%        | 5e-13   | 96%   | <a href="#">gi 724966976 XP_010356755.1</a> |
| <a href="#">PREDICTED: coagulation factor XIII B chain [Nomascus leucogeny]</a>         | 72.7      | 104         | 100%        | 5e-13   | 96%   | <a href="#">gi 332230735 XP_003264551.1</a> |
| <a href="#">PREDICTED: LOW QUALITY PROTEIN: coagulation factor XIII B c</a>             | 69.8      | 101         | 95%         | 5e-12   | 95%   | <a href="#">gi 395729264 XP_002809712.2</a> |
| <a href="#">PREDICTED: coagulation factor XIII B chain [Galeopterus variegat</a>        | 68.9      | 100         | 100%        | 1e-11   | 91%   | <a href="#">gi 667327246 XP_008590154.1</a> |
| <a href="#">PREDICTED: coagulation factor XIII B chain isoform X4 [Chinchilla</a>       | 68.5      | 95.9        | 100%        | 1e-11   | 91%   | <a href="#">gi 533119447 XP_005375174.1</a> |
| <a href="#">PREDICTED: coagulation factor XIII B chain isoform X2 [Chinchilla</a>       | 68.5      | 95.9        | 100%        | 1e-11   | 91%   | <a href="#">gi 533119443 XP_005375172.1</a> |
| <a href="#">PREDICTED: coagulation factor XIII B chain isoform X1 [Chinchilla</a>       | 68.5      | 95.9        | 100%        | 1e-11   | 91%   | <a href="#">gi 533119441 XP_005375171.1</a> |
| <a href="#">PREDICTED: coagulation factor XIII B chain-like [Papio anubis]</a>          | 66.4      | 66.4        | 100%        | 4e-11   | 91%   | <a href="#">gi 685520465 XP_009189228.1</a> |
| <a href="#">PREDICTED: coagulation factor XIII B chain isoform X2 [Chloroceb</a>        | 66.4      | 97.1        | 100%        | 7e-11   | 91%   | <a href="#">gi 635131774 XP_007987269.1</a> |
| <a href="#">PREDICTED: coagulation factor XIII B chain isoform X1 [Chloroceb</a>        | 66.4      | 97.1        | 100%        | 7e-11   | 91%   | <a href="#">gi 635131772 XP_007987268.1</a> |
| <a href="#">PREDICTED: coagulation factor XIII B chain isoform X4 [Macaca fa</a>        | 66.0      | 96.7        | 100%        | 1e-10   | 91%   | <a href="#">gi 544399131 XP_005540366.1</a> |
| <a href="#">PREDICTED: coagulation factor XIII B chain isoform X3 [Macaca fa</a>        | 66.0      | 96.7        | 100%        | 1e-10   | 91%   | <a href="#">gi 544399129 XP_005540365.1</a> |
| <a href="#">PREDICTED: coagulation factor XIII B chain isoform X2 [Macaca fa</a>        | 66.0      | 96.7        | 100%        | 1e-10   | 91%   | <a href="#">gi 544399127 XP_005540364.1</a> |
| <a href="#">hypothetical protein EGM_01565 [Macaca fascicularis]</a>                    | 66.0      | 96.7        | 100%        | 1e-10   | 91%   | <a href="#">gi 355746072 EHH50697.1</a>     |
| <a href="#">PREDICTED: coagulation factor XIII B chain isoform 2 [Macaca mu</a>         | 66.0      | 96.7        | 100%        | 1e-10   | 91%   | <a href="#">gi 109018994 XP_001111017.1</a> |

|                                                                                     |      |      |      |       |     |                                             |
|-------------------------------------------------------------------------------------|------|------|------|-------|-----|---------------------------------------------|
| <a href="#">PREDICTED: coagulation factor XIII B chain isoform X5 [Callithrix j</a> | 65.1 | 95.0 | 100% | 2e-10 | 87% | <a href="#">gij675747042 XP_008983391.1</a> |
| <a href="#">PREDICTED: coagulation factor XIII B chain isoform X4 [Callithrix j</a> | 65.1 | 95.0 | 100% | 2e-10 | 87% | <a href="#">gij390477211 XP_002760512.2</a> |
| <a href="#">PREDICTED: coagulation factor XIII B chain isoform X3 [Callithrix j</a> | 65.1 | 95.0 | 100% | 2e-10 | 87% | <a href="#">gij675747035 XP_008983390.1</a> |
| <a href="#">PREDICTED: coagulation factor XIII B chain isoform X2 [Callithrix j</a> | 65.1 | 95.0 | 100% | 2e-10 | 87% | <a href="#">gij675747031 XP_008983389.1</a> |
| <a href="#">PREDICTED: coagulation factor XIII B chain isoform X1 [Callithrix j</a> | 65.1 | 95.0 | 100% | 2e-10 | 87% | <a href="#">gij675747027 XP_008983388.1</a> |
| <a href="#">Coagulation factor XIII B chain [Heterocephalus glaber]</a>             | 63.8 | 90.8 | 100% | 5e-10 | 87% | <a href="#">gij351707464 EHB10383.1</a>     |
| <a href="#">PREDICTED: coagulation factor XIII B chain [Heterocephalus glabe</a>    | 63.8 | 90.8 | 100% | 5e-10 | 87% | <a href="#">gij512997230 XP_004860190.1</a> |
| <a href="#">PREDICTED: coagulation factor XIII B chain [Heterocephalus glabe</a>    | 63.8 | 90.8 | 100% | 5e-10 | 87% | <a href="#">gij512886082 XP_004896309.1</a> |
| <a href="#">PREDICTED: coagulation factor XIII B chain [Otolemur garnettii]</a>     | 63.4 | 96.3 | 100% | 7e-10 | 83% | <a href="#">gij395839035 XP_003792408.1</a> |
| <a href="#">PREDICTED: coagulation factor XIII B chain [Cavia porcellus]</a>        | 62.1 | 112  | 100% | 2e-09 | 83% | <a href="#">gij348577975 XP_003474759.1</a> |
| <a href="#">hypothetical protein PANDA_007949 [Ailuropoda melanoleuca]</a>          | 61.7 | 92.5 | 100% | 3e-09 | 83% | <a href="#">gij281354170 EFB29754.1</a>     |
| <a href="#">PREDICTED: coagulation factor XIII B chain [Ursus maritimus]</a>        | 61.7 | 94.6 | 100% | 3e-09 | 83% | <a href="#">gij670984420 XP_008683305.1</a> |
| <a href="#">PREDICTED: coagulation factor XIII B chain [Equus caballus]</a>         | 61.7 | 90.4 | 100% | 3e-09 | 83% | <a href="#">gij545210834 XP_005608147.1</a> |
| <a href="#">PREDICTED: coagulation factor XIII B chain isoform X2 [Equus prz</a>    | 61.7 | 90.4 | 100% | 3e-09 | 83% | <a href="#">gij664776253 XP_008507405.1</a> |
| <a href="#">PREDICTED: coagulation factor XIII B chain [Condylura cristata]</a>     | 61.7 | 94.2 | 100% | 3e-09 | 83% | <a href="#">gij507956228 XP_004685543.1</a> |
| <a href="#">PREDICTED: coagulation factor XIII B chain-like [Ailuropoda melan</a>   | 61.7 | 92.5 | 100% | 3e-09 | 83% | <a href="#">gij301767820 XP_002919322.1</a> |
| <a href="#">PREDICTED: coagulation factor XIII B chain isoform X1 [Equus prz</a>    | 61.7 | 90.4 | 100% | 3e-09 | 83% | <a href="#">gij664776251 XP_008507404.1</a> |
| <a href="#">PREDICTED: coagulation factor XIII B chain [Octodon degus]</a>          | 60.9 | 112  | 91%  | 5e-09 | 90% | <a href="#">gij507621809 XP_004625499.1</a> |
| <a href="#">PREDICTED: coagulation factor XIII B chain [Canis lupus familiaris]</a> | 60.4 | 93.3 | 100% | 7e-09 | 83% | <a href="#">gij545504208 XP_005622353.1</a> |
| <a href="#">PREDICTED: coagulation factor XIII B chain [Leptonychotes wedde</a>     | 60.0 | 92.9 | 100% | 1e-08 | 83% | <a href="#">gij585163917 XP_006734122.1</a> |
| <a href="#">PREDICTED: coagulation factor XIII B chain-like [Physeter catodon</a>   | 59.2 | 89.5 | 100% | 2e-08 | 87% | <a href="#">gij593721150 XP_007106854.1</a> |
| <a href="#">PREDICTED: coagulation factor XIII B chain isoform X2 [Mustela pi</a>   | 59.2 | 90.4 | 100% | 2e-08 | 78% | <a href="#">gij511871277 XP_004756256.1</a> |
| <a href="#">PREDICTED: coagulation factor XIII B chain isoform X2 [Saimiri bo</a>   | 59.2 | 90.8 | 100% | 2e-08 | 78% | <a href="#">gij725592693 XP_010347048.1</a> |
| <a href="#">PREDICTED: coagulation factor XIII B chain [Lipotes vexillifer]</a>     | 59.2 | 89.5 | 100% | 2e-08 | 87% | <a href="#">gij602695339 XP_007459727.1</a> |
| <a href="#">PREDICTED: coagulation factor XIII B chain [Orcinus orca]</a>           | 59.2 | 88.7 | 100% | 2e-08 | 87% | <a href="#">gij466083906 XP_004285138.1</a> |
| <a href="#">PREDICTED: coagulation factor XIII B chain-like [Balaenoptera acu</a>   | 59.2 | 89.5 | 100% | 2e-08 | 87% | <a href="#">gij594625548 XP_007167347.1</a> |
| <a href="#">PREDICTED: coagulation factor XIII B chain isoform X1 [Mustela pi</a>   | 59.2 | 90.4 | 100% | 2e-08 | 78% | <a href="#">gij511871274 XP_004756255.1</a> |
| <a href="#">PREDICTED: coagulation factor XIII B chain isoform X1 [Saimiri bo</a>   | 59.2 | 90.8 | 100% | 2e-08 | 78% | <a href="#">gij403294438 XP_003938193.1</a> |
| <a href="#">PREDICTED: coagulation factor XIII B chain [Oryctolagus cuniculus</a>   | 58.3 | 89.1 | 100% | 4e-08 | 78% | <a href="#">gij655861271 XP_008266934.1</a> |
| <a href="#">Coagulation factor XIII B chain [Pteropus alecto]</a>                   | 57.9 | 89.1 | 91%  | 5e-08 | 86% | <a href="#">gij431921906 ELK19109.1</a>     |
| <a href="#">PREDICTED: coagulation factor XIII B chain [Pteropus alecto]</a>        | 57.9 | 89.1 | 91%  | 5e-08 | 86% | <a href="#">gij586520298 XP_006904520.1</a> |
| <a href="#">PREDICTED: coagulation factor XIII B chain [Trichechus manatus ]</a>    | 57.5 | 85.3 | 100% | 7e-08 | 78% | <a href="#">gij471369745 XP_004375387.1</a> |
| <a href="#">Coagulation factor XIII B chain [Fukomys damarensis]</a>                | 57.1 | 84.0 | 91%  | 1e-07 | 86% | <a href="#">gij676274024 KFO28612.1</a>     |
| <a href="#">PREDICTED: coagulation factor XIII B chain [Fukomys damarensis</a>      | 57.1 | 84.0 | 91%  | 1e-07 | 86% | <a href="#">gij731240651 XP_010633708.1</a> |
| <a href="#">PREDICTED: coagulation factor XIII B chain [Odobenus rosmarus ]</a>     | 56.6 | 89.5 | 100% | 1e-07 | 78% | <a href="#">gij472392562 XP_004415556.1</a> |
| <a href="#">PREDICTED: coagulation factor XIII B chain [Felis catus]</a>            | 56.6 | 89.5 | 100% | 1e-07 | 78% | <a href="#">gij587018672 XP_006943009.1</a> |
| <a href="#">PREDICTED: coagulation factor XIII B chain [Panthera tigris altaica</a> | 56.6 | 89.5 | 100% | 1e-07 | 78% | <a href="#">gij591341832 XP_007096339.1</a> |
| <a href="#">Coagulation factor XIII B chain [Tupaia chinensis]</a>                  | 55.8 | 86.5 | 100% | 3e-07 | 74% | <a href="#">gij444717041 ELW57877.1</a>     |
| <a href="#">PREDICTED: coagulation factor XIII B chain [Tupaia chinensis]</a>       | 55.8 | 86.5 | 100% | 3e-07 | 74% | <a href="#">gij562853713 XP_006155486.1</a> |
| <a href="#">PREDICTED: coagulation factor XIII B chain [Echinops telfairi]</a>      | 55.4 | 55.4 | 100% | 4e-07 | 78% | <a href="#">gij507635138 XP_004700122.1</a> |
| <a href="#">PREDICTED: coagulation factor XIII B chain [Orycteropus afer afer]</a>  | 55.4 | 86.5 | 100% | 4e-07 | 78% | <a href="#">gij634849111 XP_007939370.1</a> |
| <a href="#">hypothetical protein CB1_001441011 [Camelus ferus]</a>                  | 54.9 | 54.9 | 100% | 5e-07 | 78% | <a href="#">gij528756639 EPY76298.1</a>     |
| <a href="#">PREDICTED: coagulation factor XIII B chain isoform 2 [Dasypus nc</a>    | 54.9 | 85.7 | 100% | 5e-07 | 83% | <a href="#">gij488581997 XP_004476414.1</a> |
| <a href="#">PREDICTED: coagulation factor XIII B chain [Vicugna pacos]</a>          | 54.9 | 85.7 | 100% | 5e-07 | 78% | <a href="#">gij560982160 XP_006213311.1</a> |
| <a href="#">PREDICTED: LOW QUALITY PROTEIN: coagulation factor XIII B c</a>         | 54.9 | 85.7 | 100% | 5e-07 | 78% | <a href="#">gij560930005 XP_006191145.1</a> |

|                                                                                    |      |      |      |       |     |                                             |
|------------------------------------------------------------------------------------|------|------|------|-------|-----|---------------------------------------------|
| <a href="#">PREDICTED: coagulation factor XIII B chain-like [Pantholops hodg</a>   | 54.9 | 86.1 | 100% | 5e-07 | 78% | <a href="#">gij556769078 XP_005979749.1</a> |
| <a href="#">PREDICTED: coagulation factor XIII B chain-like [Capra hircus]</a>     | 54.9 | 86.1 | 100% | 5e-07 | 78% | <a href="#">gij548499616 XP_005691104.1</a> |
| <a href="#">PREDICTED: coagulation factor XIII B chain isoform 1 [Dasypus nc</a>   | 54.9 | 85.7 | 100% | 5e-07 | 83% | <a href="#">gij488581995 XP_004476413.1</a> |
| <a href="#">PREDICTED: coagulation factor XIII B chain-like [Bos mutus]</a>        | 54.9 | 86.1 | 100% | 5e-07 | 78% | <a href="#">gij555970508 XP_005897275.1</a> |
| <a href="#">PREDICTED: coagulation factor XIII B chain-like [Bubalus bubalis]</a>  | 53.7 | 84.8 | 100% | 1e-06 | 78% | <a href="#">gij594082720 XP_006064953.1</a> |
| <a href="#">PREDICTED: coagulation factor XIII B chain [Nannospalax galii]</a>     | 53.2 | 83.6 | 91%  | 2e-06 | 82% | <a href="#">gij674047440 XP_008829795.1</a> |
| <a href="#">PREDICTED: coagulation factor XIII B chain [Ceratotherium simum</a>    | 52.8 | 85.7 | 100% | 3e-06 | 74% | <a href="#">gij478529758 XP_004439047.1</a> |
| <a href="#">PREDICTED: LOW QUALITY PROTEIN: coagulation factor XIII B c</a>        | 52.8 | 85.3 | 100% | 3e-06 | 74% | <a href="#">gij504132480 XP_004578856.1</a> |
| <a href="#">PREDICTED: coagulation factor XIII B chain isoform X1 [Bos taurus</a>  | 52.4 | 83.6 | 100% | 4e-06 | 78% | <a href="#">gij528980931 XP_005217396.1</a> |
| <a href="#">coagulation factor XIII B chain precursor [Bos taurus]</a>             | 52.4 | 83.6 | 100% | 4e-06 | 78% | <a href="#">gij84370091 INP_001033618.1</a> |
| <a href="#">PREDICTED: coagulation factor XIII B chain [Tarsius syrichta]</a>      | 52.0 | 83.1 | 100% | 5e-06 | 70% | <a href="#">gij640812512 XP_008062916.1</a> |
| <a href="#">PREDICTED: coagulation factor XIII B chain [Ovis aries]</a>            | 51.5 | 82.7 | 100% | 7e-06 | 74% | <a href="#">gij426240145 XP_004013974.1</a> |
| <a href="#">PREDICTED: coagulation factor XIII B chain [Peromyscus maniculæ</a>    | 51.1 | 78.5 | 100% | 9e-06 | 74% | <a href="#">gij589939450 XP_006982468.1</a> |
| <a href="#">PREDICTED: coagulation factor XIII B chain [Elephantulus edwardi</a>   | 49.8 | 98.2 | 100% | 2e-05 | 74% | <a href="#">gij585682032 XP_006892166.1</a> |
| <a href="#">PREDICTED: coagulation factor XIII B chain [Ictidomys tridecemlini</a> | 49.8 | 76.4 | 100% | 2e-05 | 70% | <a href="#">gij532089507 XP_005330450.1</a> |
| <a href="#">PREDICTED: coagulation factor XIII B chain [Jaculus jaculus]</a>       | 49.4 | 80.2 | 100% | 3e-05 | 74% | <a href="#">gij507551568 XP_004659583.1</a> |
| <a href="#">PREDICTED: LOW QUALITY PROTEIN: coagulation factor XIII B c</a>        | 49.4 | 80.2 | 82%  | 3e-05 | 79% | <a href="#">gij532009392 XP_005348510.1</a> |
| <a href="#">PREDICTED: coagulation factor XIII B chain [Sarcophilus harrisii]</a>  | 48.6 | 81.9 | 95%  | 6e-05 | 68% | <a href="#">gij395531053 XP_003767597.1</a> |
| <a href="#">PREDICTED: coagulation factor XIII B chain [Cricetulus griseus]</a>    | 48.1 | 78.1 | 82%  | 9e-05 | 79% | <a href="#">gij625203770 XP_003504725.2</a> |
| <a href="#">PREDICTED: coagulation factor XIII B chain [Sus scrofa]</a>            | 47.3 | 76.8 | 100% | 2e-04 | 65% | <a href="#">gij335309500 XP_003361662.1</a> |
| <a href="#">PREDICTED: coagulation factor XIII B chain isoform X2 [Mus musc</a>    | 46.9 | 78.5 | 91%  | 2e-04 | 79% | <a href="#">gij568908131 XP_006529196.1</a> |
| <a href="#">PREDICTED: coagulation factor XIII B chain isoform X1 [Mus musc</a>    | 46.9 | 78.5 | 91%  | 2e-04 | 79% | <a href="#">gij568908129 XP_006529195.1</a> |
| <a href="#">B subunit of factor XIII [Mus musculus]</a>                            | 46.9 | 78.5 | 91%  | 2e-04 | 79% | <a href="#">gij303652 BAA00963.1</a>        |
| <a href="#">Coagulation factor XIII, beta subunit [Mus musculus]</a>               | 46.9 | 78.5 | 91%  | 2e-04 | 79% | <a href="#">gij20987307 AAH30166.1</a>      |
| <a href="#">unnamed protein product [Mus musculus]</a>                             | 46.9 | 78.5 | 91%  | 2e-04 | 79% | <a href="#">gij74143591 BAE28851.1</a>      |
| <a href="#">coagulation factor XIII B chain precursor [Mus musculus]</a>           | 46.9 | 78.5 | 91%  | 2e-04 | 79% | <a href="#">gij224967112 INP_112441.2</a>   |
| <a href="#">PREDICTED: coagulation factor XIII B chain [Loxodonta africana]</a>    | 46.0 | 78.1 | 100% | 4e-04 | 70% | <a href="#">gij344277215 XP_003410399.1</a> |

## Alignments

Download [GenPept](#) [Graphics](#) Sort by: E value [Next](#) [Previous](#) [Descriptions](#)

PREDICTED: coagulation factor XIII B chain isoform X4 [Pan troglodytes]  
 Sequence ID: [gij694890887|ref|XP\\_009438553.1](#) Length: 613 Number of Matches: 2

Range 1: 483 to 505 [GenPept](#) [Graphics](#) [Next Match](#) [Previous Match](#)

| Score          | Expect | Identities  | Positives   | Gaps     |
|----------------|--------|-------------|-------------|----------|
| 76.6 bits(173) | 2e-14  | 23/23(100%) | 23/23(100%) | 0/23(0%) |

Query 1 KHGVIISSTVDTYENGSSVEYRC 23  
 KHGVIISSTVDTYENGSSVEYRC  
 Sbjct 483 KHGVIISSTVDTYENGSSVEYRC 505

Range 2: 367 to 377 [GenPept](#) [Graphics](#) [Next Match](#) [Previous Match](#) [First Match](#)

| Score         | Expect | Identities | Positives | Gaps     |
|---------------|--------|------------|-----------|----------|
| 31.6 bits(67) | 18     | 9/11(82%)  | 9/11(81%) | 0/11(0%) |

Query 13 YENGSSVEYRC 23  
 Y GSSVEYRC  
 Sbjct 367 YATGSSVEYRC 377

### Related Information

[Gene](#) - associated gene details

Download [GenPept](#) [Graphics](#) Sort by: E value [Next](#) [Previous](#) [Descriptions](#)

**PREDICTED: coagulation factor XIII B chain isoform X3 [Pan troglodytes]**

Sequence ID: [gi|694890885|ref|XP\\_009438550.1|](#) Length: 629 Number of Matches: 2

Range 1: 499 to 521 [GenPept](#) [Graphics](#) ▼ Next Match ▲ Previous Match

| Score          | Expect | Identities  | Positives   | Gaps     |
|----------------|--------|-------------|-------------|----------|
| 76.6 bits(173) | 2e-14  | 23/23(100%) | 23/23(100%) | 0/23(0%) |

Query 1 KHGVIISSTVDTYENGSSVEYRC 23  
 KHGVIISSTVDTYENGSSVEYRC  
 Sbjct 499 KHGVIISSTVDTYENGSSVEYRC 521

Range 2: 383 to 393 [GenPept](#) [Graphics](#) ▼ Next Match ▲ Previous Match ▲ First Match

| Score         | Expect | Identities | Positives | Gaps     |
|---------------|--------|------------|-----------|----------|
| 31.6 bits(67) | 18     | 9/11(82%)  | 9/11(81%) | 0/11(0%) |

Query 13 YENGSSVEYRC 23  
 Y GSSVEYRC  
 Sbjct 383 YATGSSVEYRC 393

**Related Information**

[Gene](#) - associated gene details

[Download](#) [GenPept](#) [Graphics](#) Sort by: E value

▼ Next ▲ Previous ▲ Descriptions

**PREDICTED: coagulation factor XIII B chain isoform X2 [Homo sapiens]**

Sequence ID: [gi|530364289|ref|XP\\_005245011.1|](#) Length: 629 Number of Matches: 2

Range 1: 499 to 521 [GenPept](#) [Graphics](#) ▼ Next Match ▲ Previous Match

| Score          | Expect | Identities  | Positives   | Gaps     |
|----------------|--------|-------------|-------------|----------|
| 76.6 bits(173) | 2e-14  | 23/23(100%) | 23/23(100%) | 0/23(0%) |

Query 1 KHGVIISSTVDTYENGSSVEYRC 23  
 KHGVIISSTVDTYENGSSVEYRC  
 Sbjct 499 KHGVIISSTVDTYENGSSVEYRC 521

Range 2: 383 to 393 [GenPept](#) [Graphics](#) ▼ Next Match ▲ Previous Match ▲ First Match

| Score         | Expect | Identities | Positives | Gaps     |
|---------------|--------|------------|-----------|----------|
| 31.6 bits(67) | 18     | 9/11(82%)  | 9/11(81%) | 0/11(0%) |

Query 13 YENGSSVEYRC 23  
 Y GSSVEYRC  
 Sbjct 383 YATGSSVEYRC 393

**Related Information**

[Gene](#) - associated gene details

[Map Viewer](#) - aligned genomic context

[Download](#) [GenPept](#) [Graphics](#) Sort by: E value

▼ Next ▲ Previous ▲ Descriptions

**PREDICTED: coagulation factor XIII B chain isoform X2 [Pan troglodytes]**

Sequence ID: [gi|694890883|ref|XP\\_009438547.1|](#) Length: 660 Number of Matches: 2

Range 1: 530 to 552 [GenPept](#) [Graphics](#) ▼ Next Match ▲ Previous Match

| Score          | Expect | Identities  | Positives   | Gaps     |
|----------------|--------|-------------|-------------|----------|
| 76.6 bits(173) | 2e-14  | 23/23(100%) | 23/23(100%) | 0/23(0%) |

Query 1 KHGVIISSTVDTYENGSSVEYRC 23  
 KHGVIISSTVDTYENGSSVEYRC  
 Sbjct 530 KHGVIISSTVDTYENGSSVEYRC 552

Range 2: 414 to 424 [GenPept](#) [Graphics](#) ▼ Next Match ▲ Previous Match ▲ First Match

| Score         | Expect | Identities | Positives | Gaps     |
|---------------|--------|------------|-----------|----------|
| 31.6 bits(67) | 18     | 9/11(82%)  | 9/11(81%) | 0/11(0%) |

Query 13 YENGSSVEYRC 23  
 Y GSSVEYRC  
 Sbjct 414 YATGSSVEYRC 424

**Related Information**

[Gene](#) - associated gene details

[Download](#) [GenPept](#) [Graphics](#) Sort by: E value

▼ Next ▲ Previous ▲ Descriptions

**PREDICTED: coagulation factor XIII B chain isoform X1 [Homo sapiens]**

Sequence ID: [gi|530364287|ref|XP\\_005245010.1|](#) Length: 660 Number of Matches: 2

Range 1: 530 to 552 [GenPept](#) [Graphics](#) ▼ Next Match ▲ Previous Match

| Score          | Expect | Identities  | Positives   | Gaps     |
|----------------|--------|-------------|-------------|----------|
| 76.6 bits(173) | 2e-14  | 23/23(100%) | 23/23(100%) | 0/23(0%) |

Query 1 KHGVIISSTVDTYENGSSVEYRC 23  
 KHGVIISSTVDTYENGSSVEYRC  
 Sbjct 530 KHGVIISSTVDTYENGSSVEYRC 552

Range 2: 414 to 424 [GenPept](#) [Graphics](#) ▼ Next Match ▲ Previous Match ▲ First Match

| Score         | Expect | Identities | Positives | Gaps     |
|---------------|--------|------------|-----------|----------|
| 31.6 bits(67) | 18     | 9/11(82%)  | 9/11(81%) | 0/11(0%) |

Query 13 YENGSSVEYRC 23

**Related Information**

[Gene](#) - associated gene details

[Map Viewer](#) - aligned genomic context

|       |     |             |          |  |
|-------|-----|-------------|----------|--|
|       |     | Y           | GSSVEYRC |  |
| Sbjct | 414 | YATGSSVEYRC | 424      |  |

BLAST is a registered trademark of the National Library of Medicine.

[Copyright](#) | [Disclaimer](#) | [Privacy](#) | [Accessibility](#) | [Contact](#) | [Send feedback](#)

[NCBI](#) | [NLM](#) | [NIH](#) | [DHHS](#)

▶ [NCBI/ BLAST/ blastp suite/ Formatting Results - BVDGPM5A01R](#)

**i** Your search parameters were adjusted to search for a short input sequence.

[Edit and Resubmit](#) [Save Search Strategies](#) ▶ [Formatting options](#) ▶ [Download](#) [YouTube](#) [How to read this page](#) [Blast report description](#)

## FBLN1\_RCATPHGDDASLEATFVKRC\_Mod

RID [BVDGPM5A01R](#) (Expires on 01-21 08:57 am)

**Query ID** |cl|44843  
**Description** None  
**Molecule type** amino acid  
**Query Length** 20

**Database Name** nr  
**Description** All non-redundant GenBank CDS translations+PDB+SwissProt+PIR+PRF excluding environmental samples from WGS projects  
**Program** BLASTP 2.2.30+ ▶ [Citation](#)

Other reports: ▶ [Search Summary](#) [[Taxonomy reports](#)] [[Distance tree of results](#)] [[Multiple alignment](#)]

### Graphic Summary

[Show Conserved Domains](#)

No putative conserved domains have been detected

Distribution of 100 Blast Hits on the Query Sequence

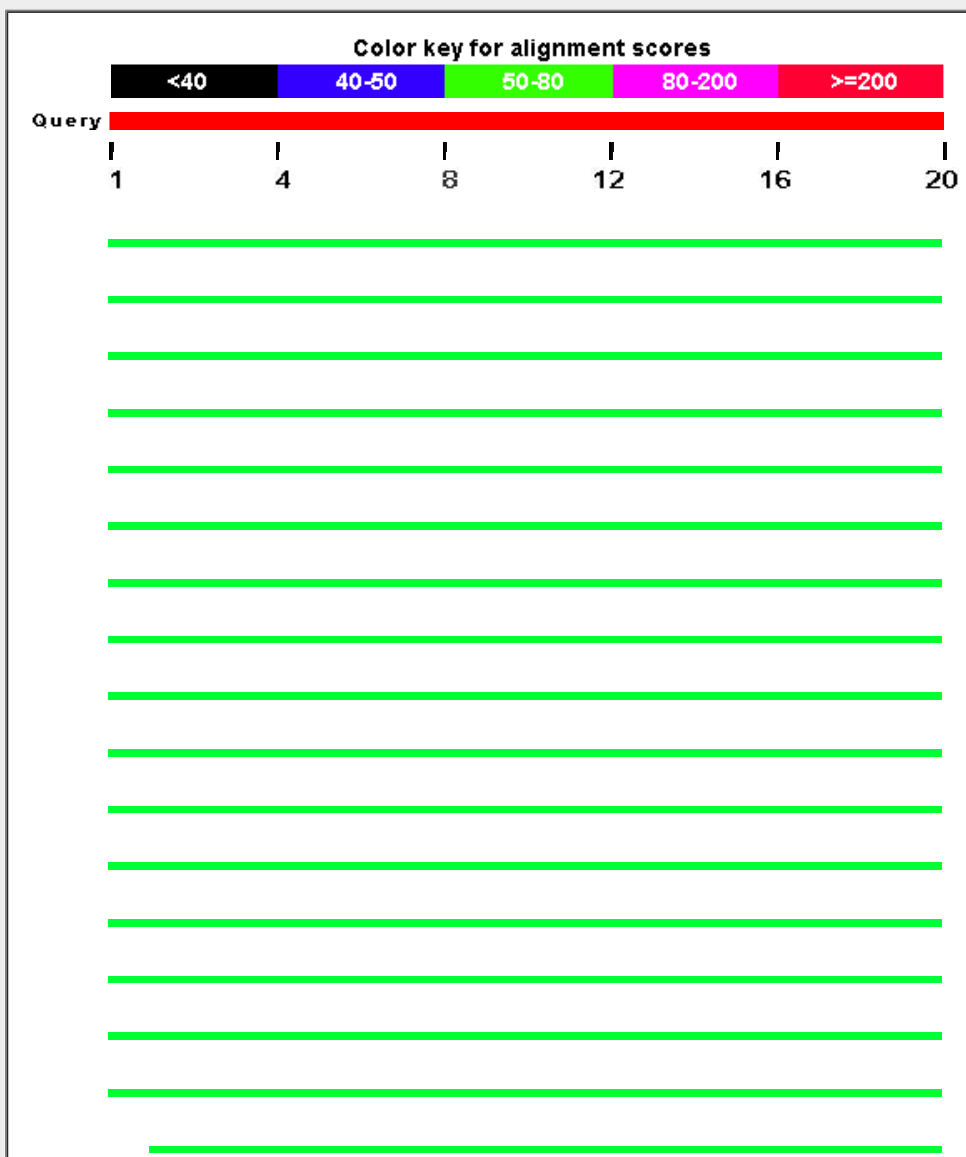



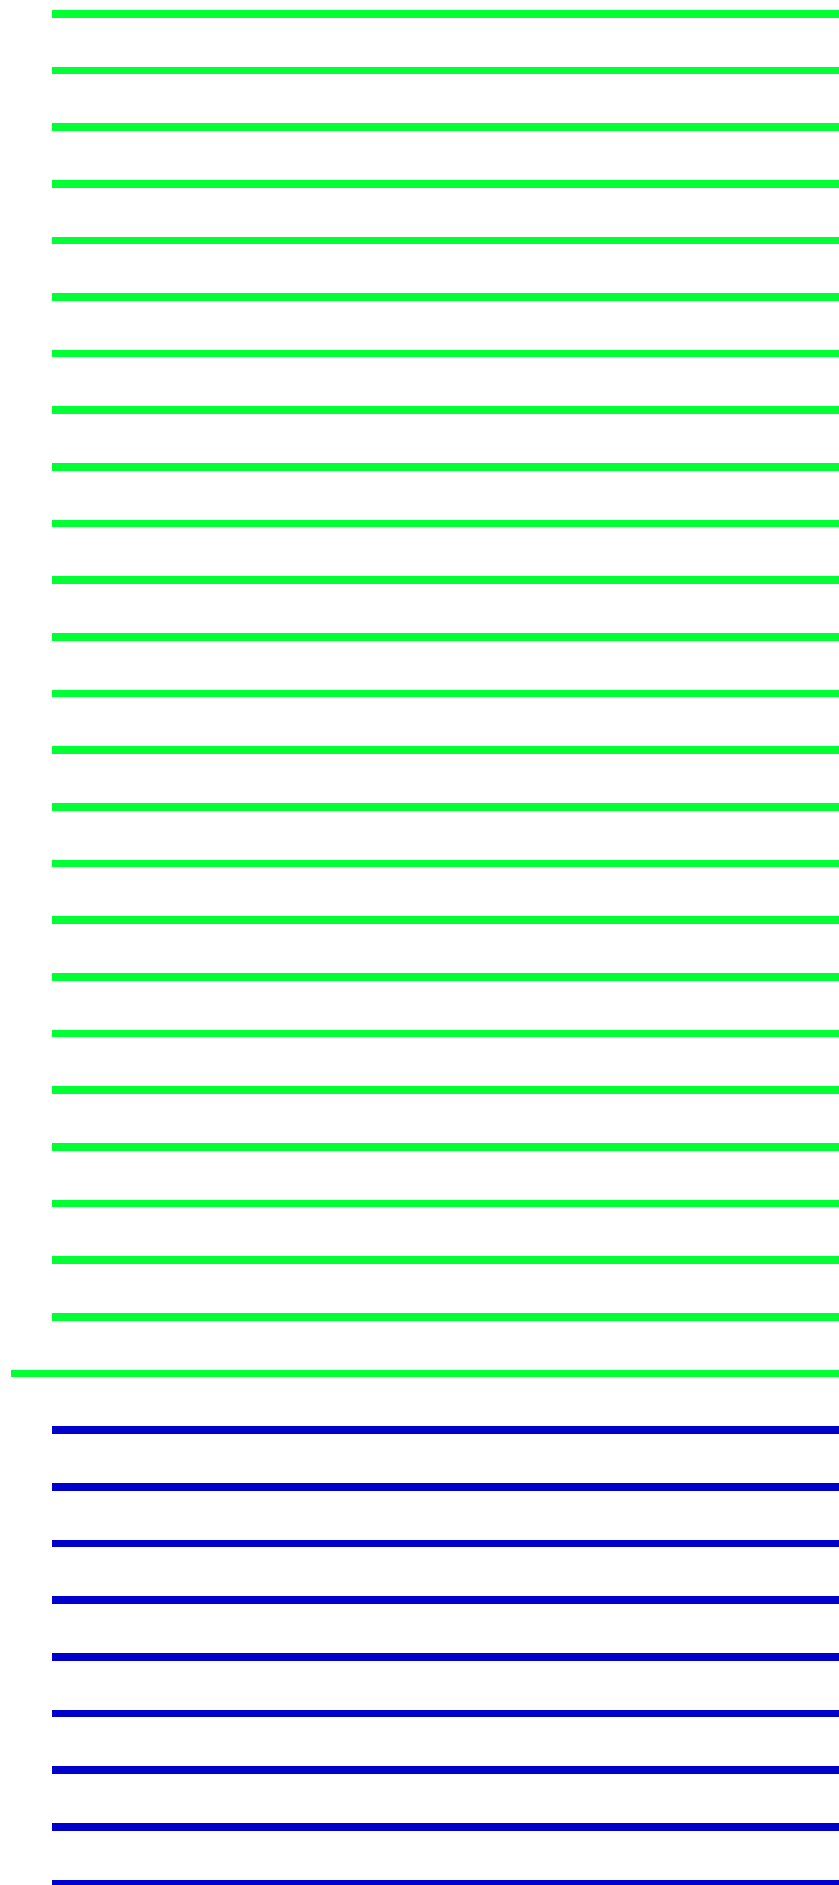

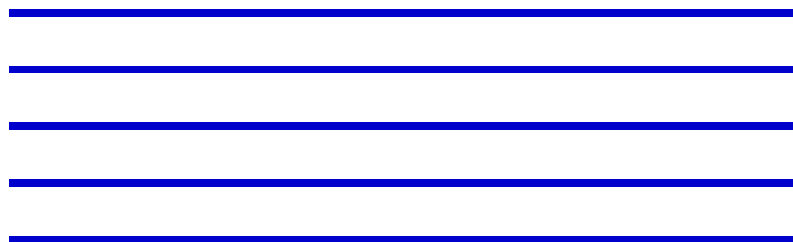

## Descriptions

### Sequences producing significant alignments:

Select: [All](#) [None](#) Selected:0

[Alignments](#)
[Download](#)
[GenPept](#)
[Graphics](#)
[Distance tree of results](#)
[Multiple alignment](#)


| Description                                                                            | Max score | Total score | Query cover | E value | Ident | Accession                      |
|----------------------------------------------------------------------------------------|-----------|-------------|-------------|---------|-------|--------------------------------|
| <a href="#">fibulin-1 isoform A precursor [Homo sapiens]</a>                           | 64.7      | 64.7        | 100%        | 2e-10   | 95%   | <a href="#">NP_006478.2</a>    |
| <a href="#">fibulin-1 A [Homo sapiens]</a>                                             | 64.7      | 64.7        | 100%        | 2e-10   | 95%   | <a href="#">CAA37770.1</a>     |
| <a href="#">fibulin 1, isoform CRA_b [Homo sapiens]</a>                                | 64.7      | 64.7        | 100%        | 2e-10   | 95%   | <a href="#">EAW73386.1</a>     |
| <a href="#">fibulin 1 precursor, splice form B - human [Homo sapiens]</a>              | 64.7      | 64.7        | 100%        | 2e-10   | 95%   | <a href="#">B36346</a>         |
| <a href="#">fibulin-1 isoform B precursor [Homo sapiens]</a>                           | 64.7      | 64.7        | 100%        | 2e-10   | 95%   | <a href="#">NP_006476.2</a>    |
| <a href="#">unnamed protein product [Homo sapiens]</a>                                 | 64.7      | 64.7        | 100%        | 2e-10   | 95%   | <a href="#">BAG62463.1</a>     |
| <a href="#">fibulin-1 isoform C precursor [Homo sapiens]</a>                           | 64.7      | 64.7        | 100%        | 2e-10   | 95%   | <a href="#">NP_001987.2</a>    |
| <a href="#">Fibulin 1 [Homo sapiens]</a>                                               | 64.7      | 64.7        | 100%        | 2e-10   | 95%   | <a href="#">AAH22497.1</a>     |
| <a href="#">fibulin-1 C [Homo sapiens]</a>                                             | 64.7      | 64.7        | 100%        | 2e-10   | 95%   | <a href="#">CAA37772.1</a>     |
| <a href="#">fibulin 1 [synthetic construct]</a>                                        | 64.7      | 64.7        | 100%        | 2e-10   | 95%   | <a href="#">ABM84973.1</a>     |
| <a href="#">fibulin 1, isoform CRA_f [Homo sapiens]</a>                                | 64.7      | 64.7        | 100%        | 2e-10   | 95%   | <a href="#">EAW73390.1</a>     |
| <a href="#">fibulin-1 isoform D precursor [Homo sapiens]</a>                           | 64.7      | 64.7        | 100%        | 2e-10   | 95%   | <a href="#">AAK37822.1</a>     |
| <a href="#">RecName: Full=Fibulin-1; Short=FIBL-1; Flags: Precursor [Homo sapiens]</a> | 64.7      | 64.7        | 100%        | 2e-10   | 95%   | <a href="#">P23142.4</a>       |
| <a href="#">fibulin-1 isoform D precursor [Homo sapiens]</a>                           | 64.7      | 64.7        | 100%        | 2e-10   | 95%   | <a href="#">NP_006477.2</a>    |
| <a href="#">PREDICTED: fibulin-1 isoform X1 [Pan paniscus]</a>                         | 61.7      | 61.7        | 100%        | 2e-09   | 90%   | <a href="#">XP_003812435.1</a> |
| <a href="#">PREDICTED: fibulin-1 [Pan troglodytes]</a>                                 | 61.7      | 61.7        | 100%        | 2e-09   | 90%   | <a href="#">XP_009436873.1</a> |
| <a href="#">PREDICTED: fibulin-1 [Nomascus leucogenys]</a>                             | 61.3      | 61.3        | 95%         | 3e-09   | 95%   | <a href="#">XP_003281320.2</a> |
| <a href="#">PREDICTED: fibulin-1 [Mustela putorius furo]</a>                           | 61.3      | 61.3        | 95%         | 3e-09   | 95%   | <a href="#">XP_004813974.1</a> |
| <a href="#">PREDICTED: fibulin-1 [Mustela putorius furo]</a>                           | 61.3      | 61.3        | 95%         | 3e-09   | 95%   | <a href="#">XP_004771346.1</a> |
| <a href="#">PREDICTED: fibulin-1 [Pongo abelii]</a>                                    | 61.3      | 61.3        | 95%         | 3e-09   | 95%   | <a href="#">XP_009232751.1</a> |
| <a href="#">PREDICTED: fibulin-1 [Gorilla gorilla gorilla]</a>                         | 58.3      | 58.3        | 95%         | 3e-08   | 89%   | <a href="#">XP_004063688.1</a> |
| <a href="#">PREDICTED: fibulin-1 isoform 2 [Odobenus rosmarus divergens]</a>           | 58.3      | 58.3        | 95%         | 3e-08   | 89%   | <a href="#">XP_004415897.1</a> |
| <a href="#">PREDICTED: fibulin-1 [Otolemur garnettii]</a>                              | 58.3      | 58.3        | 95%         | 3e-08   | 89%   | <a href="#">XP_003783160.1</a> |
| <a href="#">PREDICTED: fibulin-1 isoform 1 [Odobenus rosmarus divergens]</a>           | 58.3      | 58.3        | 95%         | 3e-08   | 89%   | <a href="#">XP_004415896.1</a> |
| <a href="#">PREDICTED: fibulin-1 isoform X4 [Rhinopithecus roxellana]</a>              | 57.9      | 57.9        | 95%         | 4e-08   | 89%   | <a href="#">XP_010365649.1</a> |
| <a href="#">PREDICTED: fibulin-1 isoform X3 [Rhinopithecus roxellana]</a>              | 57.9      | 57.9        | 95%         | 4e-08   | 89%   | <a href="#">XP_010365573.1</a> |
| <a href="#">PREDICTED: fibulin-1 isoform X2 [Rhinopithecus roxellana]</a>              | 57.9      | 57.9        | 95%         | 4e-08   | 89%   | <a href="#">XP_010365494.1</a> |
| <a href="#">PREDICTED: fibulin-1 isoform X1 [Rhinopithecus roxellana]</a>              | 57.9      | 57.9        | 95%         | 4e-08   | 89%   | <a href="#">XP_010365413.1</a> |
| <a href="#">PREDICTED: fibulin-1-like [Leptonychotes weddellii]</a>                    | 54.9      | 54.9        | 95%         | 4e-07   | 84%   | <a href="#">XP_006743570.1</a> |

|                                                                                        |      |      |      |       |     |                                |
|----------------------------------------------------------------------------------------|------|------|------|-------|-----|--------------------------------|
| <a href="#">PREDICTED: fibulin-1 [Ursus maritimus]</a>                                 | 54.9 | 54.9 | 95%  | 4e-07 | 84% | <a href="#">XP_008701224.1</a> |
| <a href="#">PREDICTED: fibulin-1 [Saimiri boliviensis boliviensis]</a>                 | 54.1 | 54.1 | 95%  | 8e-07 | 84% | <a href="#">XP_003932799.1</a> |
| <a href="#">PREDICTED: fibulin-1 isoform X2 [Canis lupus familiaris]</a>               | 54.1 | 54.1 | 95%  | 8e-07 | 84% | <a href="#">XP_005625812.1</a> |
| <a href="#">PREDICTED: fibulin-1 isoform X1 [Canis lupus familiaris]</a>               | 54.1 | 54.1 | 95%  | 8e-07 | 84% | <a href="#">XP_005625811.1</a> |
| <a href="#">PREDICTED: fibulin-1 isoform X3 [Chlorocebus sabaeus]</a>                  | 53.2 | 53.2 | 95%  | 1e-06 | 84% | <a href="#">XP_007974271.1</a> |
| <a href="#">RecName: Full=Fibulin-1; Short=FIBL-1 [Chlorocebus aethiops]</a>           | 53.2 | 53.2 | 95%  | 1e-06 | 84% | <a href="#">Q8MJJ9.1</a>       |
| <a href="#">PREDICTED: fibulin-1 [Macaca fascicularis]</a>                             | 53.2 | 53.2 | 95%  | 1e-06 | 84% | <a href="#">XP_005567067.1</a> |
| <a href="#">PREDICTED: fibulin-1 isoform X2 [Chlorocebus sabaeus]</a>                  | 53.2 | 53.2 | 95%  | 1e-06 | 84% | <a href="#">XP_007974270.1</a> |
| <a href="#">PREDICTED: fibulin-1 isoform X1 [Chlorocebus sabaeus]</a>                  | 53.2 | 53.2 | 95%  | 1e-06 | 84% | <a href="#">XP_007974269.1</a> |
| <a href="#">PREDICTED: fibulin-1 isoform 2 [Macaca mulatta]</a>                        | 53.2 | 53.2 | 95%  | 1e-06 | 84% | <a href="#">XP_001109966.2</a> |
| <a href="#">PREDICTED: fibulin-1 isoform X2 [Vicugna pacos]</a>                        | 52.0 | 52.0 | 95%  | 4e-06 | 84% | <a href="#">XP_006212641.1</a> |
| <a href="#">PREDICTED: fibulin-1 isoform X1 [Vicugna pacos]</a>                        | 52.0 | 52.0 | 95%  | 4e-06 | 84% | <a href="#">XP_006212640.1</a> |
| <a href="#">PREDICTED: fibulin-1 [Loxodonta africana]</a>                              | 50.3 | 50.3 | 100% | 1e-05 | 80% | <a href="#">XP_010598758.1</a> |
| <a href="#">PREDICTED: fibulin-1 [Papio anubis]</a>                                    | 49.8 | 49.8 | 95%  | 2e-05 | 79% | <a href="#">XP_003905746.1</a> |
| <a href="#">PREDICTED: fibulin-1 [Physeter catodon]</a>                                | 49.4 | 49.4 | 95%  | 3e-05 | 79% | <a href="#">XP_007128800.1</a> |
| <a href="#">PREDICTED: fibulin-1 [Callithrix jacchus]</a>                              | 49.4 | 49.4 | 95%  | 3e-05 | 79% | <a href="#">XP_008978454.1</a> |
| <a href="#">PREDICTED: fibulin-1 isoform X2 [Bison bison bison]</a>                    | 49.0 | 49.0 | 95%  | 4e-05 | 79% | <a href="#">XP_010835915.1</a> |
| <a href="#">PREDICTED: fibulin-1 isoform X1 [Bison bison bison]</a>                    | 49.0 | 49.0 | 95%  | 4e-05 | 79% | <a href="#">XP_010835914.1</a> |
| <a href="#">PREDICTED: LOW QUALITY PROTEIN: fibulin-1-like [Oryctolagus cuniculus]</a> | 49.0 | 49.0 | 95%  | 4e-05 | 79% | <a href="#">XP_008251212.1</a> |
| <a href="#">Fibulin-1 [Bos mutus]</a>                                                  | 49.0 | 49.0 | 95%  | 4e-05 | 79% | <a href="#">ELR55943.1</a>     |
| <a href="#">TPA: fibulin 1 [Bos taurus]</a>                                            | 49.0 | 49.0 | 95%  | 4e-05 | 79% | <a href="#">DAA29013.1</a>     |
| <a href="#">fibulin-1 precursor [Bos taurus]</a>                                       | 49.0 | 49.0 | 95%  | 4e-05 | 79% | <a href="#">NP_001091498.1</a> |
| <a href="#">PREDICTED: fibulin-1 [Bos mutus]</a>                                       | 49.0 | 49.0 | 95%  | 4e-05 | 79% | <a href="#">XP_005896425.1</a> |
| <a href="#">PREDICTED: fibulin-1 [Bubalus bubalis]</a>                                 | 49.0 | 49.0 | 95%  | 4e-05 | 79% | <a href="#">XP_006063368.1</a> |
| <a href="#">PREDICTED: fibulin-1 [Felis catus]</a>                                     | 48.6 | 48.6 | 95%  | 5e-05 | 79% | <a href="#">XP_006934231.1</a> |
| <a href="#">PREDICTED: fibulin-1 [Equus caballus]</a>                                  | 48.6 | 48.6 | 95%  | 5e-05 | 79% | <a href="#">XP_005606874.1</a> |
| <a href="#">PREDICTED: fibulin-1 [Pantholops hodgsonii]</a>                            | 48.6 | 48.6 | 95%  | 5e-05 | 79% | <a href="#">XP_005958536.1</a> |
| <a href="#">PREDICTED: fibulin-1 [Balaenoptera acutorostrata scammoni]</a>             | 47.7 | 47.7 | 95%  | 1e-04 | 79% | <a href="#">XP_007189256.1</a> |
| <a href="#">PREDICTED: fibulin-1 isoform 2 [Ceratotherium simum simum]</a>             | 46.9 | 46.9 | 95%  | 2e-04 | 79% | <a href="#">XP_004438039.1</a> |
| <a href="#">PREDICTED: fibulin-1 isoform 1 [Ceratotherium simum simum]</a>             | 46.9 | 46.9 | 95%  | 2e-04 | 79% | <a href="#">XP_004438038.1</a> |
| <a href="#">PREDICTED: fibulin-1-like [Tursiops truncatus]</a>                         | 46.4 | 46.4 | 95%  | 3e-04 | 74% | <a href="#">XP_004326152.1</a> |
| <a href="#">PREDICTED: fibulin-1 isoform X4 [Lipotes vexillifer]</a>                   | 46.4 | 46.4 | 95%  | 3e-04 | 74% | <a href="#">XP_007453975.1</a> |
| <a href="#">PREDICTED: fibulin-1 isoform X3 [Lipotes vexillifer]</a>                   | 46.4 | 46.4 | 95%  | 3e-04 | 74% | <a href="#">XP_007453974.1</a> |
| <a href="#">PREDICTED: fibulin-1 isoform X2 [Lipotes vexillifer]</a>                   | 46.4 | 46.4 | 95%  | 3e-04 | 74% | <a href="#">XP_007453973.1</a> |
| <a href="#">PREDICTED: fibulin-1 isoform X1 [Lipotes vexillifer]</a>                   | 46.4 | 46.4 | 95%  | 3e-04 | 74% | <a href="#">XP_007453972.1</a> |
| <a href="#">PREDICTED: fibulin-1 isoform 2 [Trichechus manatus latirostris]</a>        | 46.0 | 46.0 | 95%  | 4e-04 | 75% | <a href="#">XP_004380068.1</a> |
| <a href="#">PREDICTED: fibulin-1 isoform 1 [Trichechus manatus latirostris]</a>        | 46.0 | 46.0 | 95%  | 4e-04 | 75% | <a href="#">XP_004380067.1</a> |
| <a href="#">PREDICTED: LOW QUALITY PROTEIN: fibulin-1 [Cavia porcellus]</a>            | 45.6 | 45.6 | 95%  | 5e-04 | 74% | <a href="#">XP_004999606.1</a> |
| <a href="#">PREDICTED: fibulin-1 [Octodon degus]</a>                                   | 45.6 | 45.6 | 95%  | 5e-04 | 74% | <a href="#">XP_004642514.1</a> |
| <a href="#">PREDICTED: fibulin-1 isoform X2 [Sus scrofa]</a>                           | 45.2 | 45.2 | 95%  | 7e-04 | 74% | <a href="#">XP_005663793.1</a> |
| <a href="#">PREDICTED: fibulin-1 isoform X1 [Sus scrofa]</a>                           | 45.2 | 45.2 | 95%  | 7e-04 | 74% | <a href="#">XP_003126003.3</a> |
| <a href="#">PREDICTED: fibulin-1 isoform X2 [Camelus ferus]</a>                        | 43.9 | 43.9 | 95%  | 0.002 | 74% | <a href="#">XP_006176723.1</a> |
| <a href="#">PREDICTED: fibulin-1 isoform X1 [Camelus ferus]</a>                        | 43.9 | 43.9 | 95%  | 0.002 | 74% | <a href="#">XP_006176722.1</a> |
| <a href="#">PREDICTED: fibulin-1 [Tupaia chinensis]</a>                                | 43.9 | 43.9 | 95%  | 0.002 | 74% | <a href="#">XP_006164720.1</a> |
| <a href="#">PREDICTED: fibulin-1 [Camelus dromedarius]</a>                             | 43.9 | 43.9 | 95%  | 0.002 | 74% | <a href="#">XP_010981727.1</a> |

|                                                                                         |      |      |     |       |     |                                |
|-----------------------------------------------------------------------------------------|------|------|-----|-------|-----|--------------------------------|
| <a href="#">fibulin-1 isoform C precursor [Camelus ferus]</a>                           | 43.9 | 43.9 | 95% | 0.002 | 74% | <a href="#">EPY87041.1</a>     |
| <a href="#">Fibulin-1 [Tupaia chinensis]</a>                                            | 43.9 | 43.9 | 95% | 0.002 | 74% | <a href="#">ELV12523.1</a>     |
| <a href="#">PREDICTED: fibulin-1 isoform X2 [Chinchilla lanigera]</a>                   | 43.5 | 43.5 | 95% | 0.002 | 74% | <a href="#">XP_005379549.1</a> |
| <a href="#">PREDICTED: fibulin-1 isoform X1 [Chinchilla lanigera]</a>                   | 43.5 | 43.5 | 95% | 0.002 | 74% | <a href="#">XP_005379548.1</a> |
| <a href="#">PREDICTED: fibulin-1 isoform X2 [Erinaceus europaeus]</a>                   | 43.1 | 43.1 | 95% | 0.003 | 74% | <a href="#">XP_007531965.1</a> |
| <a href="#">PREDICTED: fibulin-1 isoform X1 [Erinaceus europaeus]</a>                   | 43.1 | 43.1 | 95% | 0.003 | 74% | <a href="#">XP_007531964.1</a> |
| <a href="#">PREDICTED: fibulin-1-like [Capra hircus]</a>                                | 42.6 | 42.6 | 95% | 0.005 | 68% | <a href="#">XP_005681284.1</a> |
| <a href="#">PREDICTED: fibulin-1 [Ovis aries]</a>                                       | 42.6 | 42.6 | 95% | 0.005 | 68% | <a href="#">XP_004007703.1</a> |
| <a href="#">PREDICTED: fibulin-1 [Tarsius syrichta]</a>                                 | 41.8 | 41.8 | 95% | 0.009 | 68% | <a href="#">XP_008053358.1</a> |
| <a href="#">PREDICTED: fibulin-1 [Orcinus orca]</a>                                     | 41.8 | 41.8 | 95% | 0.009 | 68% | <a href="#">XP_004279635.1</a> |
| <a href="#">PREDICTED: fibulin-1 [Ictidomys tridecemlineatus]</a>                       | 40.9 | 40.9 | 95% | 0.016 | 68% | <a href="#">XP_005335099.1</a> |
| <a href="#">PREDICTED: LOW QUALITY PROTEIN: fibulin-1-like [Galeopterus variegatus]</a> | 40.1 | 40.1 | 95% | 0.030 | 74% | <a href="#">XP_008579007.1</a> |
| <a href="#">PREDICTED: fibulin-1 isoform X2 [Fukomys damarensis]</a>                    | 39.2 | 39.2 | 95% | 0.056 | 68% | <a href="#">XP_010632637.1</a> |
| <a href="#">PREDICTED: fibulin-1 isoform X1 [Fukomys damarensis]</a>                    | 39.2 | 39.2 | 95% | 0.056 | 68% | <a href="#">XP_010632636.1</a> |
| <a href="#">PREDICTED: fibulin-1 [Pteropus alecto]</a>                                  | 38.8 | 38.8 | 95% | 0.076 | 68% | <a href="#">XP_006917380.1</a> |
| <a href="#">PREDICTED: fibulin-1 isoform X2 [Ochotona princeps]</a>                     | 38.4 | 38.4 | 95% | 0.10  | 68% | <a href="#">XP_004589482.1</a> |
| <a href="#">PREDICTED: fibulin-1 isoform X1 [Ochotona princeps]</a>                     | 38.4 | 38.4 | 95% | 0.10  | 68% | <a href="#">XP_004589481.1</a> |
| <a href="#">PREDICTED: fibulin-1 isoform X4 [Microtus ochrogaster]</a>                  | 37.5 | 37.5 | 95% | 0.19  | 63% | <a href="#">XP_005354460.1</a> |
| <a href="#">PREDICTED: fibulin-1 isoform X3 [Microtus ochrogaster]</a>                  | 37.5 | 37.5 | 95% | 0.19  | 63% | <a href="#">XP_005354459.1</a> |
| <a href="#">PREDICTED: fibulin-1 isoform X2 [Microtus ochrogaster]</a>                  | 37.5 | 37.5 | 95% | 0.19  | 63% | <a href="#">XP_005354458.1</a> |
| <a href="#">PREDICTED: fibulin-1 isoform X1 [Microtus ochrogaster]</a>                  | 37.5 | 37.5 | 95% | 0.19  | 63% | <a href="#">XP_005354457.1</a> |
| <a href="#">PREDICTED: fibulin-1 [Eptesicus fuscus]</a>                                 | 35.4 | 35.4 | 95% | 0.90  | 68% | <a href="#">XP_008153634.1</a> |
| <a href="#">PREDICTED: fibulin-1 [Jaculus jaculus]</a>                                  | 34.6 | 34.6 | 75% | 1.7   | 67% | <a href="#">XP_004650445.1</a> |
| <a href="#">PREDICTED: fibulin-1 isoform X2 [Peromyscus maniculatus bairdii]</a>        | 34.6 | 34.6 | 95% | 1.7   | 58% | <a href="#">XP_006980340.1</a> |
| <a href="#">PREDICTED: fibulin-1 isoform X1 [Peromyscus maniculatus bairdii]</a>        | 34.6 | 34.6 | 95% | 1.7   | 58% | <a href="#">XP_006980339.1</a> |
| <a href="#">PREDICTED: fibulin-1 [Myotis brandtii]</a>                                  | 34.1 | 34.1 | 60% | 2.3   | 83% | <a href="#">XP_005886100.1</a> |

## Alignments

Download GenPept Graphics

Next Previous Descriptions

fibulin-1 isoform A precursor [Homo sapiens]

Sequence ID: [ref|NP\\_006478.2](#) Length: 566 Number of Matches: 1

See 1 more title(s)

Range 1: 90 to 109 GenPept Graphics

Next Match Previous Match

| Score          | Expect | Identities | Positives   | Gaps     |
|----------------|--------|------------|-------------|----------|
| 64.7 bits(145) | 2e-10  | 19/20(95%) | 20/20(100%) | 0/20(0%) |

Query 1 RCATPHGDDASLEATFVKRC 20  
 RCATPHGD+ASLEATFVKRC  
 Sbjct 90 RCATPHGDNASLEATFVKRC 109

### Related Information

[Gene](#) - associated gene details  
[UniGene](#) - clustered expressed sequence tags  
[Map Viewer](#) - aligned genomic context  
[Identical Proteins](#) - Proteins identical to the subject

Download GenPept Graphics

Next Previous Descriptions

fibulin-1 A [Homo sapiens]

Sequence ID: [emb|CAA37770.1](#) Length: 566 Number of Matches: 1

Range 1: 90 to 109 GenPept Graphics

Next Match Previous Match

| Score          | Expect | Identities | Positives   | Gaps     |
|----------------|--------|------------|-------------|----------|
| 64.7 bits(145) | 2e-10  | 19/20(95%) | 20/20(100%) | 0/20(0%) |

### Related Information

[Gene](#) - associated gene details

Query 1 RCATPHGDDASLEATFVKRC 20  
 RCATPHGD+ASLEATFVKRC  
 Sbjct 90 RCATPHGDNASLEATFVKRC 109

[Download](#) [GenPept](#) [Graphics](#)

[▼ Next](#) [▲ Previous](#) [▲ Descriptions](#)

fibulin 1, isoform CRA\_b, partial [Homo sapiens]

Sequence ID: [gb|EAW73386.1|](#) Length: 581 Number of Matches: 1

Range 1: 90 to 109 [GenPept](#) [Graphics](#)

[▼ Next Match](#) [▲ Previous Match](#)

| Score          | Expect | Identities | Positives   | Gaps     |
|----------------|--------|------------|-------------|----------|
| 64.7 bits(145) | 2e-10  | 19/20(95%) | 20/20(100%) | 0/20(0%) |

Query 1 RCATPHGDDASLEATFVKRC 20  
 RCATPHGD+ASLEATFVKRC  
 Sbjct 90 RCATPHGDNASLEATFVKRC 109

**Related Information**

[Gene](#) - associated gene details

[Download](#) [GenPept](#) [Graphics](#)

[▼ Next](#) [▲ Previous](#) [▲ Descriptions](#)

fibulin 1 precursor, splice form B - human

Sequence ID: [pir|B36346](#) Length: 601 Number of Matches: 1

[▶ See 2 more title\(s\)](#)

Range 1: 90 to 109 [GenPept](#) [Graphics](#)

[▼ Next Match](#) [▲ Previous Match](#)

| Score          | Expect | Identities | Positives   | Gaps     |
|----------------|--------|------------|-------------|----------|
| 64.7 bits(145) | 2e-10  | 19/20(95%) | 20/20(100%) | 0/20(0%) |

Query 1 RCATPHGDDASLEATFVKRC 20  
 RCATPHGD+ASLEATFVKRC  
 Sbjct 90 RCATPHGDNASLEATFVKRC 109

**Related Information**

[Gene](#) - associated gene details

[Identical Proteins](#) - Proteins identical to the subject

[Download](#) [GenPept](#) [Graphics](#)

[▼ Next](#) [▲ Previous](#) [▲ Descriptions](#)

fibulin-1 isoform B precursor [Homo sapiens]

Sequence ID: [ref|NP\\_006476.2|](#) Length: 601 Number of Matches: 1

[▶ See 1 more title\(s\)](#)

Range 1: 90 to 109 [GenPept](#) [Graphics](#)

[▼ Next Match](#) [▲ Previous Match](#)

| Score          | Expect | Identities | Positives   | Gaps     |
|----------------|--------|------------|-------------|----------|
| 64.7 bits(145) | 2e-10  | 19/20(95%) | 20/20(100%) | 0/20(0%) |

Query 1 RCATPHGDDASLEATFVKRC 20  
 RCATPHGD+ASLEATFVKRC  
 Sbjct 90 RCATPHGDNASLEATFVKRC 109

**Related Information**

[Gene](#) - associated gene details

[UniGene](#) - clustered expressed sequence tags

[Map Viewer](#) - aligned genomic context

[Identical Proteins](#) - Proteins identical to the subject

BLAST is a registered trademark of the National Library of Medicine.

NCBI/ BLAST/ blastp suite/ Formatting Results - B94W0NM901R

Your search parameters were adjusted to search for a short input sequence.

[Edit and Resubmit](#) [Save Search Strategies](#) [Formatting options](#) [Download](#)

[YouTube](#) [How to read this page](#) [Blast report description](#)

### FBLN1\_RCATPHGDNASLEATFVKRC\_NonMod

RID [B94W0NM901R](#) (Expires on 01-14 10:39 am)

**Query ID** |cl|202649  
**Description** None  
**Molecule type** amino acid  
**Query Length** 20

**Database Name** nr  
**Description** All non-redundant GenBank CDS translations+PDB+SwissProt+PIR excluding environmental samples from WGS projects  
**Program** BLASTP 2.2.30+ [Citation](#)

Other reports: [Search Summary](#) [Taxonomy reports](#) [Distance tree of results](#) [Multiple alignment](#)

### Graphic Summary

Show Conserved Domains

No putative conserved domains have been detected

Distribution of 100 Blast Hits on the Query Sequence



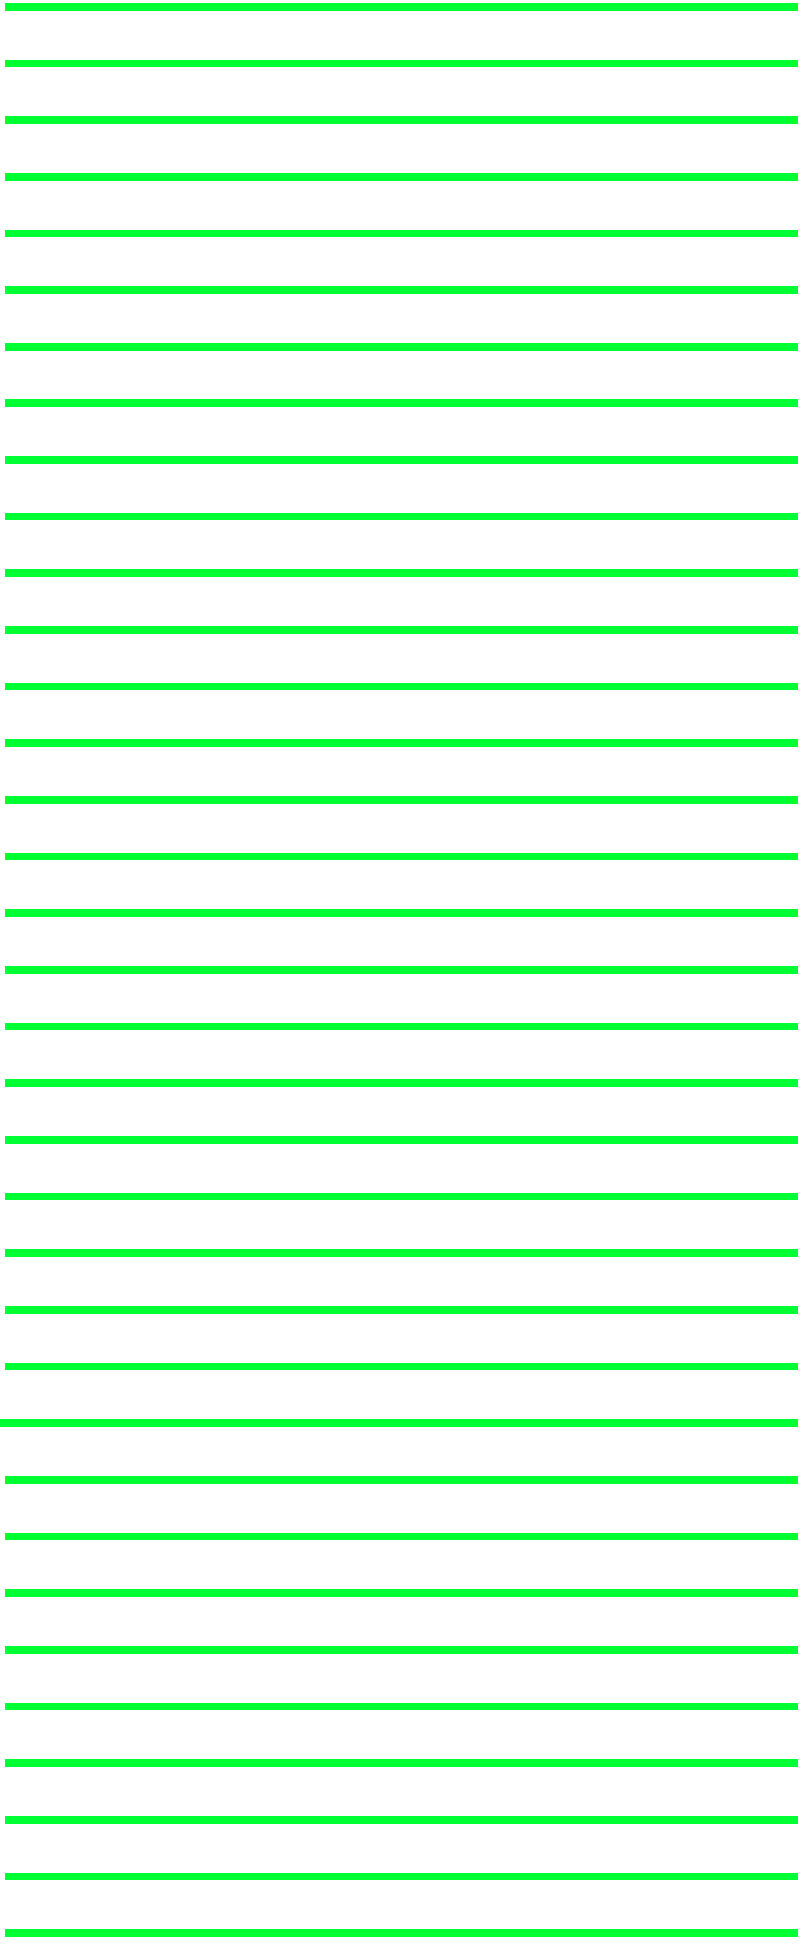

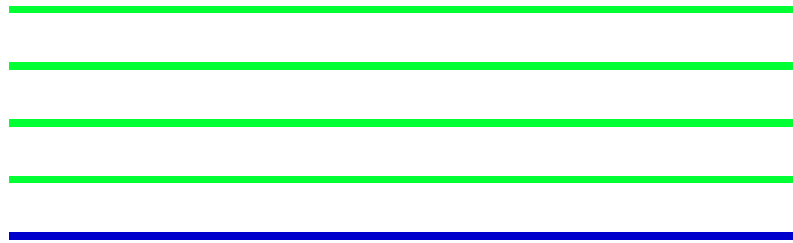

**Descriptions**

**Sequences producing significant alignments:**

Select: [All](#) [None](#) Selected:0

Alignments Download GenPept Graphics Distance tree of results Multiple alignment

| Description                                                                            | Max score | Total score | Query cover | E value | Ident | Accession                                   |
|----------------------------------------------------------------------------------------|-----------|-------------|-------------|---------|-------|---------------------------------------------|
| <a href="#">fibulin-1 isoform A precursor [Homo sapiens]</a>                           | 67.2      | 67.2        | 100%        | 2e-11   | 100%  | <a href="#">gij34734068 NP_006478.2</a>     |
| <a href="#">fibulin-1 A [Homo sapiens]</a>                                             | 67.2      | 67.2        | 100%        | 2e-11   | 100%  | <a href="#">gij31415 CAA37770.1</a>         |
| <a href="#">fibulin 1, isoform CRA_b [Homo sapiens]</a>                                | 67.2      | 67.2        | 100%        | 2e-11   | 100%  | <a href="#">gij119593792 EAW73386.1</a>     |
| <a href="#">fibulin 1 precursor, splice form B - human [Homo sapiens]</a>              | 67.2      | 67.2        | 100%        | 2e-11   | 100%  | <a href="#">gij106017 B36346</a>            |
| <a href="#">fibulin-1 isoform B precursor [Homo sapiens]</a>                           | 67.2      | 67.2        | 100%        | 2e-11   | 100%  | <a href="#">gij34734064 NP_006476.2</a>     |
| <a href="#">unnamed protein product [Homo sapiens]</a>                                 | 67.2      | 67.2        | 100%        | 2e-11   | 100%  | <a href="#">gij194374697 BAG62463.1</a>     |
| <a href="#">fibulin-1 isoform C precursor [Homo sapiens]</a>                           | 67.2      | 67.2        | 100%        | 3e-11   | 100%  | <a href="#">gij34734062 NP_001987.2</a>     |
| <a href="#">Fibulin 1 [Homo sapiens]</a>                                               | 67.2      | 67.2        | 100%        | 3e-11   | 100%  | <a href="#">gij18490682 AAH22497.1</a>      |
| <a href="#">fibulin-1 C [Homo sapiens]</a>                                             | 67.2      | 67.2        | 100%        | 3e-11   | 100%  | <a href="#">gij31419 CAA37772.1</a>         |
| <a href="#">fibulin 1 [synthetic construct]</a>                                        | 67.2      | 67.2        | 100%        | 3e-11   | 100%  | <a href="#">gij123994743 ABM84973.1</a>     |
| <a href="#">fibulin 1, isoform CRA_f [Homo sapiens]</a>                                | 67.2      | 67.2        | 100%        | 3e-11   | 100%  | <a href="#">gij119593796 EAW73390.1</a>     |
| <a href="#">fibulin-1 isoform D precursor [Homo sapiens]</a>                           | 67.2      | 67.2        | 100%        | 3e-11   | 100%  | <a href="#">gij13661193 AAK37822.1</a>      |
| <a href="#">RecName: Full=Fibulin-1; Short=FIBL-1; Flags: Precursor [Homo sapiens]</a> | 67.2      | 67.2        | 100%        | 3e-11   | 100%  | <a href="#">gij215274249 P23142.4</a>       |
| <a href="#">fibulin-1 isoform D precursor [Homo sapiens]</a>                           | 67.2      | 67.2        | 100%        | 3e-11   | 100%  | <a href="#">gij34734066 NP_006477.2</a>     |
| <a href="#">PREDICTED: fibulin-1 isoform X1 [Pan paniscus]</a>                         | 64.3      | 64.3        | 100%        | 3e-10   | 95%   | <a href="#">gij397482444 XP_003812435.1</a> |
| <a href="#">PREDICTED: fibulin-1 [Pan troglodytes]</a>                                 | 64.3      | 64.3        | 100%        | 3e-10   | 95%   | <a href="#">gij694983727 XP_009436873.1</a> |
| <a href="#">PREDICTED: fibulin-1 [Nomascus leucogenys]</a>                             | 63.8      | 63.8        | 95%         | 4e-10   | 100%  | <a href="#">gij441618218 XP_003281320.2</a> |
| <a href="#">PREDICTED: fibulin-1 [Mustela putorius furo]</a>                           | 63.8      | 63.8        | 95%         | 4e-10   | 100%  | <a href="#">gij511992630 XP_004813974.1</a> |
| <a href="#">PREDICTED: fibulin-1 [Mustela putorius furo]</a>                           | 63.8      | 63.8        | 95%         | 4e-10   | 100%  | <a href="#">gij511903702 XP_004771346.1</a> |
| <a href="#">PREDICTED: fibulin-1 [Pongo abelii]</a>                                    | 63.8      | 63.8        | 95%         | 4e-10   | 100%  | <a href="#">gij686764893 XP_009232751.1</a> |
| <a href="#">PREDICTED: fibulin-1 [Gorilla gorilla gorilla]</a>                         | 60.9      | 60.9        | 95%         | 4e-09   | 95%   | <a href="#">gij426394827 XP_004063688.1</a> |
| <a href="#">PREDICTED: fibulin-1 isoform 2 [Odobenus rosmarus divergens]</a>           | 60.9      | 60.9        | 95%         | 4e-09   | 95%   | <a href="#">gij472393253 XP_004415897.1</a> |
| <a href="#">PREDICTED: fibulin-1 [Otolemur garnettii]</a>                              | 60.9      | 60.9        | 95%         | 4e-09   | 95%   | <a href="#">gij395819580 XP_003783160.1</a> |
| <a href="#">PREDICTED: fibulin-1 isoform 1 [Odobenus rosmarus divergens]</a>           | 60.9      | 60.9        | 95%         | 4e-09   | 95%   | <a href="#">gij472393251 XP_004415896.1</a> |
| <a href="#">PREDICTED: fibulin-1 isoform X4 [Rhinopithecus roxellana]</a>              | 60.4      | 60.4        | 95%         | 5e-09   | 95%   | <a href="#">gij724795561 XP_010365649.1</a> |
| <a href="#">PREDICTED: fibulin-1 isoform X3 [Rhinopithecus roxellana]</a>              | 60.4      | 60.4        | 95%         | 5e-09   | 95%   | <a href="#">gij724795558 XP_010365573.1</a> |
| <a href="#">PREDICTED: fibulin-1 isoform X2 [Rhinopithecus roxellana]</a>              | 60.4      | 60.4        | 95%         | 5e-09   | 95%   | <a href="#">gij724795555 XP_010365494.1</a> |
| <a href="#">PREDICTED: fibulin-1 isoform X1 [Rhinopithecus roxellana]</a>              | 60.4      | 60.4        | 95%         | 5e-09   | 95%   | <a href="#">gij724795552 XP_010365413.1</a> |



|                                                                                 |      |      |      |       |     |                                             |
|---------------------------------------------------------------------------------|------|------|------|-------|-----|---------------------------------------------|
| <a href="#">PREDICTED: fibulin-1-like [Leptonychotes weddellii]</a>             | 57.5 | 57.5 | 95%  | 5e-08 | 89% | <a href="#">gij585183989 XP_006743570.1</a> |
| <a href="#">PREDICTED: fibulin-1 [Ursus maritimus]</a>                          | 57.5 | 57.5 | 95%  | 5e-08 | 89% | <a href="#">gij671020810 XP_008701224.1</a> |
| <a href="#">PREDICTED: fibulin-1 [Saimiri boliviensis boliviensis]</a>          | 56.6 | 56.6 | 95%  | 1e-07 | 89% | <a href="#">gij403282742 XP_003932799.1</a> |
| <a href="#">PREDICTED: fibulin-1 isoform X2 [Canis lupus familiaris]</a>        | 56.6 | 56.6 | 95%  | 1e-07 | 89% | <a href="#">gij545514461 XP_005625812.1</a> |
| <a href="#">PREDICTED: fibulin-1 isoform X1 [Canis lupus familiaris]</a>        | 56.6 | 56.6 | 95%  | 1e-07 | 89% | <a href="#">gij545514459 XP_005625811.1</a> |
| <a href="#">PREDICTED: fibulin-1 isoform X3 [Chlorocebus sabaeus]</a>           | 55.8 | 55.8 | 95%  | 2e-07 | 89% | <a href="#">gij635102866 XP_007974271.1</a> |
| <a href="#">RecName: Full=Fibulin-1; Short=FIBL-1 [Chlorocebus aethiops]</a>    | 55.8 | 55.8 | 95%  | 2e-07 | 89% | <a href="#">gij30580425 Q8MJJ9.1</a>        |
| <a href="#">PREDICTED: fibulin-1 [Macaca fascicularis]</a>                      | 55.8 | 55.8 | 95%  | 2e-07 | 89% | <a href="#">gij544461232 XP_005567067.1</a> |
| <a href="#">PREDICTED: fibulin-1 isoform X2 [Chlorocebus sabaeus]</a>           | 55.8 | 55.8 | 95%  | 2e-07 | 89% | <a href="#">gij635102864 XP_007974270.1</a> |
| <a href="#">PREDICTED: fibulin-1 isoform X1 [Chlorocebus sabaeus]</a>           | 55.8 | 55.8 | 95%  | 2e-07 | 89% | <a href="#">gij635102862 XP_007974269.1</a> |
| <a href="#">PREDICTED: fibulin-1 isoform 2 [Macaca mulatta]</a>                 | 55.8 | 55.8 | 95%  | 2e-07 | 89% | <a href="#">gij297261301 XP_001109966.2</a> |
| <a href="#">PREDICTED: fibulin-1 isoform X2 [Vicugna pacos]</a>                 | 54.5 | 54.5 | 95%  | 5e-07 | 89% | <a href="#">gij560980789 XP_006212641.1</a> |
| <a href="#">PREDICTED: fibulin-1 isoform X1 [Vicugna pacos]</a>                 | 54.5 | 54.5 | 95%  | 5e-07 | 89% | <a href="#">gij560980787 XP_006212640.1</a> |
| <a href="#">PREDICTED: fibulin-1 [Loxodonta africana]</a>                       | 52.8 | 52.8 | 100% | 2e-06 | 85% | <a href="#">gij731510789 XP_010598758.1</a> |
| <a href="#">PREDICTED: fibulin-1 [Papio anubis]</a>                             | 52.4 | 52.4 | 95%  | 2e-06 | 84% | <a href="#">gij402884556 XP_003905746.1</a> |
| <a href="#">PREDICTED: fibulin-1 [Physeter catodon]</a>                         | 52.0 | 52.0 | 95%  | 4e-06 | 84% | <a href="#">gij593746998 XP_007128800.1</a> |
| <a href="#">PREDICTED: fibulin-1 [Callithrix jacchus]</a>                       | 52.0 | 52.0 | 95%  | 4e-06 | 84% | <a href="#">gij675641753 XP_008978454.1</a> |
| <a href="#">PREDICTED: LOW QUALITY PROTEIN: fibulin-1-like [Oryctolagus]</a>    | 51.5 | 51.5 | 95%  | 5e-06 | 84% | <a href="#">gij655899479 XP_008251212.1</a> |
| <a href="#">Fibulin-1 [Bos mutus]</a>                                           | 51.5 | 51.5 | 95%  | 5e-06 | 84% | <a href="#">gij440905574 ELR55943.1</a>     |
| <a href="#">TPA: fibulin 1 [Bos taurus]</a>                                     | 51.5 | 51.5 | 95%  | 5e-06 | 84% | <a href="#">gij296486900 DAA29013.1</a>     |
| <a href="#">fibulin-1 precursor [Bos taurus]</a>                                | 51.5 | 51.5 | 95%  | 5e-06 | 84% | <a href="#">gij148232266 NP_001091498.1</a> |
| <a href="#">PREDICTED: fibulin-1 [Bos mutus]</a>                                | 51.5 | 51.5 | 95%  | 5e-06 | 84% | <a href="#">gij555968788 XP_005896425.1</a> |
| <a href="#">PREDICTED: fibulin-1 [Bubalus bubalis]</a>                          | 51.5 | 51.5 | 95%  | 5e-06 | 84% | <a href="#">gij594079384 XP_006063368.1</a> |
| <a href="#">PREDICTED: fibulin-1 [Felis catus]</a>                              | 51.1 | 51.1 | 95%  | 7e-06 | 84% | <a href="#">gij586993905 XP_006934231.1</a> |
| <a href="#">PREDICTED: fibulin-1 [Equus caballus]</a>                           | 51.1 | 51.1 | 95%  | 7e-06 | 84% | <a href="#">gij545206896 XP_005606874.1</a> |
| <a href="#">PREDICTED: fibulin-1 [Pantholops hodgsonii]</a>                     | 51.1 | 51.1 | 95%  | 7e-06 | 84% | <a href="#">gij556725504 XP_005958536.1</a> |
| <a href="#">PREDICTED: fibulin-1 [Balaenoptera acutorostrata scammoni]</a>      | 50.3 | 50.3 | 95%  | 1e-05 | 84% | <a href="#">gij594683418 XP_007189256.1</a> |
| <a href="#">PREDICTED: fibulin-1-like [Tursiops truncatus]</a>                  | 49.0 | 49.0 | 95%  | 3e-05 | 79% | <a href="#">gij470643167 XP_004326152.1</a> |
| <a href="#">PREDICTED: fibulin-1 isoform X4 [Lipotes vexillifer]</a>            | 49.0 | 49.0 | 95%  | 4e-05 | 79% | <a href="#">gij602683431 XP_007453975.1</a> |
| <a href="#">PREDICTED: fibulin-1 isoform X3 [Lipotes vexillifer]</a>            | 49.0 | 49.0 | 95%  | 4e-05 | 79% | <a href="#">gij602683429 XP_007453974.1</a> |
| <a href="#">PREDICTED: fibulin-1 isoform X2 [Lipotes vexillifer]</a>            | 49.0 | 49.0 | 95%  | 4e-05 | 79% | <a href="#">gij602683427 XP_007453973.1</a> |
| <a href="#">PREDICTED: fibulin-1 isoform X1 [Lipotes vexillifer]</a>            | 49.0 | 49.0 | 95%  | 4e-05 | 79% | <a href="#">gij602683425 XP_007453972.1</a> |
| <a href="#">PREDICTED: fibulin-1 isoform 2 [Trichechus manatus latirostris]</a> | 48.6 | 48.6 | 95%  | 5e-05 | 80% | <a href="#">gij471390788 XP_004380068.1</a> |
| <a href="#">PREDICTED: fibulin-1 isoform 1 [Trichechus manatus latirostris]</a> | 48.6 | 48.6 | 95%  | 5e-05 | 80% | <a href="#">gij471390784 XP_004380067.1</a> |
| <a href="#">PREDICTED: fibulin-1 isoform 2 [Ceratotherium simum simum]</a>      | 48.1 | 48.1 | 95%  | 7e-05 | 79% | <a href="#">gij478527715 XP_004438039.1</a> |
| <a href="#">PREDICTED: LOW QUALITY PROTEIN: fibulin-1 [Cavia porcellus]</a>     | 48.1 | 48.1 | 95%  | 7e-05 | 79% | <a href="#">gij514443922 XP_004999606.1</a> |
| <a href="#">PREDICTED: fibulin-1 isoform 1 [Ceratotherium simum simum]</a>      | 48.1 | 48.1 | 95%  | 7e-05 | 79% | <a href="#">gij478527713 XP_004438038.1</a> |
| <a href="#">PREDICTED: fibulin-1 [Octodon degus]</a>                            | 48.1 | 48.1 | 95%  | 7e-05 | 79% | <a href="#">gij507693081 XP_004642514.1</a> |
| <a href="#">PREDICTED: fibulin-1 isoform X2 [Sus scrofa]</a>                    | 47.7 | 47.7 | 95%  | 9e-05 | 79% | <a href="#">gij545824398 XP_005663793.1</a> |
| <a href="#">PREDICTED: fibulin-1 isoform X1 [Sus scrofa]</a>                    | 47.7 | 47.7 | 95%  | 9e-05 | 79% | <a href="#">gij350583711 XP_003126003.3</a> |
| <a href="#">PREDICTED: fibulin-1 isoform X2 [Camelus ferus]</a>                 | 46.4 | 46.4 | 95%  | 2e-04 | 79% | <a href="#">gij560900629 XP_006176723.1</a> |
| <a href="#">PREDICTED: fibulin-1 isoform X1 [Camelus ferus]</a>                 | 46.4 | 46.4 | 95%  | 2e-04 | 79% | <a href="#">gij560900627 XP_006176722.1</a> |
| <a href="#">PREDICTED: fibulin-1 [Tupaia chinensis]</a>                         | 46.4 | 46.4 | 95%  | 2e-04 | 79% | <a href="#">gij562873654 XP_006164720.1</a> |
| <a href="#">fibulin-1 isoform C precursor [Camelus ferus]</a>                   | 46.4 | 46.4 | 95%  | 2e-04 | 79% | <a href="#">gij528767382 EPY87041.1</a>     |
| <a href="#">Fibulin-1 [Tupaia chinensis]</a>                                    | 46.4 | 46.4 | 95%  | 3e-04 | 79% | <a href="#">gij444519033 ELV12523.1</a>     |

|                                                                                  |      |      |     |       |     |                                             |
|----------------------------------------------------------------------------------|------|------|-----|-------|-----|---------------------------------------------|
| <a href="#">PREDICTED: fibulin-1 isoform X2 [Chinchilla lanigera]</a>            | 46.0 | 46.0 | 95% | 3e-04 | 79% | <a href="#">gil533128844 XP_005379549.1</a> |
| <a href="#">PREDICTED: fibulin-1 isoform X1 [Chinchilla lanigera]</a>            | 46.0 | 46.0 | 95% | 3e-04 | 79% | <a href="#">gil533128842 XP_005379548.1</a> |
| <a href="#">PREDICTED: fibulin-1 isoform X2 [Erinaceus europaeus]</a>            | 45.6 | 45.6 | 95% | 5e-04 | 79% | <a href="#">gil617642052 XP_007531965.1</a> |
| <a href="#">PREDICTED: fibulin-1 isoform X1 [Erinaceus europaeus]</a>            | 45.6 | 45.6 | 95% | 5e-04 | 79% | <a href="#">gil617642049 XP_007531964.1</a> |
| <a href="#">PREDICTED: fibulin-1-like [Capra hircus]</a>                         | 45.2 | 45.2 | 95% | 6e-04 | 74% | <a href="#">gil548468863 XP_005681284.1</a> |
| <a href="#">PREDICTED: fibulin-1 [Ovis aries]</a>                                | 45.2 | 45.2 | 95% | 7e-04 | 74% | <a href="#">gil426227186 XP_004007703.1</a> |
| <a href="#">PREDICTED: fibulin-1 [Tarsius syrichta]</a>                          | 44.3 | 44.3 | 95% | 0.001 | 74% | <a href="#">gil640794658 XP_008053358.1</a> |
| <a href="#">PREDICTED: fibulin-1 [Orcinus orca]</a>                              | 44.3 | 44.3 | 95% | 0.001 | 74% | <a href="#">gil466057370 XP_004279635.1</a> |
| <a href="#">PREDICTED: fibulin-1 [Ictidomys tridecemlineatus]</a>                | 43.5 | 43.5 | 95% | 0.002 | 74% | <a href="#">gil532098910 XP_005335099.1</a> |
| <a href="#">PREDICTED: LOW QUALITY PROTEIN: fibulin-1-like [Galeopterus]</a>     | 41.8 | 41.8 | 95% | 0.008 | 74% | <a href="#">gil667294707 XP_008579007.1</a> |
| <a href="#">PREDICTED: fibulin-1 [Pteropus alecto]</a>                           | 41.4 | 41.4 | 95% | 0.011 | 74% | <a href="#">gil586524847 XP_006917380.1</a> |
| <a href="#">PREDICTED: fibulin-1 isoform X2 [Fukomys damarensis]</a>             | 40.9 | 40.9 | 95% | 0.015 | 68% | <a href="#">gil731238270 XP_010632637.1</a> |
| <a href="#">PREDICTED: fibulin-1 isoform X1 [Fukomys damarensis]</a>             | 40.9 | 40.9 | 95% | 0.015 | 68% | <a href="#">gil731238268 XP_010632636.1</a> |
| <a href="#">PREDICTED: fibulin-1 isoform X4 [Microtus ochrogaster]</a>           | 40.1 | 40.1 | 95% | 0.028 | 68% | <a href="#">gil532022189 XP_005354460.1</a> |
| <a href="#">PREDICTED: fibulin-1 isoform X3 [Microtus ochrogaster]</a>           | 40.1 | 40.1 | 95% | 0.028 | 68% | <a href="#">gil532022187 XP_005354459.1</a> |
| <a href="#">PREDICTED: fibulin-1 isoform X2 [Ochotona princeps]</a>              | 40.1 | 40.1 | 95% | 0.028 | 68% | <a href="#">gil504155089 XP_004589482.1</a> |
| <a href="#">PREDICTED: fibulin-1 isoform X2 [Microtus ochrogaster]</a>           | 40.1 | 40.1 | 95% | 0.028 | 68% | <a href="#">gil532022185 XP_005354458.1</a> |
| <a href="#">PREDICTED: fibulin-1 isoform X1 [Microtus ochrogaster]</a>           | 40.1 | 40.1 | 95% | 0.028 | 68% | <a href="#">gil532022183 XP_005354457.1</a> |
| <a href="#">PREDICTED: fibulin-1 isoform X1 [Ochotona princeps]</a>              | 40.1 | 40.1 | 95% | 0.028 | 68% | <a href="#">gil504155087 XP_004589481.1</a> |
| <a href="#">PREDICTED: fibulin-1 [Eptesicus fuscus]</a>                          | 38.0 | 38.0 | 95% | 0.13  | 74% | <a href="#">gil641727121 XP_008153634.1</a> |
| <a href="#">PREDICTED: fibulin-1 [Jaculus jaculus]</a>                           | 37.1 | 37.1 | 75% | 0.25  | 73% | <a href="#">gil507532747 XP_004650445.1</a> |
| <a href="#">PREDICTED: fibulin-1 isoform X2 [Peromyscus maniculatus bairdii]</a> | 37.1 | 37.1 | 95% | 0.25  | 63% | <a href="#">gil589935133 XP_006980340.1</a> |
| <a href="#">PREDICTED: fibulin-1 isoform X1 [Peromyscus maniculatus bairdii]</a> | 37.1 | 37.1 | 95% | 0.25  | 63% | <a href="#">gil589935131 XP_006980339.1</a> |
| <a href="#">PREDICTED: fibulin-1 [Myotis brandtii]</a>                           | 36.7 | 36.7 | 60% | 0.34  | 92% | <a href="#">gil554589517 XP_005886100.1</a> |
| <a href="#">PREDICTED: fibulin-1 [Myotis davidii]</a>                            | 36.3 | 36.3 | 95% | 0.46  | 68% | <a href="#">gil584059500 XP_006774235.1</a> |
| <a href="#">Fibulin-1 [Cricetulus griseus]</a>                                   | 34.1 | 34.1 | 95% | 2.1   | 60% | <a href="#">gil344257685 EGW13789.1</a>     |
| <a href="#">PREDICTED: fibulin-1 isoform X2 [Cricetulus griseus]</a>             | 34.1 | 34.1 | 95% | 2.1   | 60% | <a href="#">gil625255711 XP_007619196.1</a> |

## Alignments

[Download](#) [GenPept](#) [Graphics](#)

[Next](#) [Previous](#) [Descriptions](#)

fibulin-1 isoform A precursor [Homo sapiens]

Sequence ID: [gil34734068|ref|NP\\_006478.2|](#) Length: 566 Number of Matches: 1

[See 1 more title\(s\)](#)

Range 1: 90 to 109 [GenPept](#) [Graphics](#)

[Next Match](#) [Previous Match](#)

| Score          | Expect | Identities  | Positives   | Gaps     |
|----------------|--------|-------------|-------------|----------|
| 67.2 bits(151) | 2e-11  | 20/20(100%) | 20/20(100%) | 0/20(0%) |

|       |    |                      |     |
|-------|----|----------------------|-----|
| Query | 1  | RCATPHGDNASLEATFVKRC | 20  |
|       |    | RCATPHGDNASLEATFVKRC |     |
| Sbjct | 90 | RCATPHGDNASLEATFVKRC | 109 |

### Related Information

[Gene](#) - associated gene details  
[UniGene](#) - clustered expressed sequence tags  
[Map Viewer](#) - aligned genomic context  
[Identical Proteins](#) - Proteins identical to the subject

[Download](#) [GenPept](#) [Graphics](#)

[Next](#) [Previous](#) [Descriptions](#)

fibulin-1 A [Homo sapiens]

Sequence ID: [gil31415|emb|CAA37770.1|](#) Length: 566 Number of Matches: 1

Range 1: 90 to 109 [GenPept](#) [Graphics](#)

[Next Match](#) [Previous Match](#)

| Score          | Expect | Identities  | Positives   | Gaps     |
|----------------|--------|-------------|-------------|----------|
| 67.2 bits(151) | 2e-11  | 20/20(100%) | 20/20(100%) | 0/20(0%) |

### Related Information

[Gene](#) - associated gene details

Query 1 RCATPHGDNASLEATFVKRC 20  
 Sbjct 90 RCATPHGDNASLEATFVKRC 109

[Download](#) [GenPept](#) [Graphics](#)

[Next](#) [Previous](#) [Descriptions](#)

fibulin 1, isoform CRA\_b, partial [Homo sapiens]

Sequence ID: [gi|119593792|gb|EAW73386.1](#) Length: 581 Number of Matches: 1

Range 1: 90 to 109 [GenPept](#) [Graphics](#)

[Next Match](#) [Previous Match](#)

| Score          | Expect | Identities  | Positives   | Gaps     |
|----------------|--------|-------------|-------------|----------|
| 67.2 bits(151) | 2e-11  | 20/20(100%) | 20/20(100%) | 0/20(0%) |

Query 1 RCATPHGDNASLEATFVKRC 20  
 Sbjct 90 RCATPHGDNASLEATFVKRC 109

**Related Information**

[Gene](#) - associated gene details

[Download](#) [GenPept](#) [Graphics](#)

[Next](#) [Previous](#) [Descriptions](#)

fibulin 1 precursor, splice form B - human

Sequence ID: [gi|106017|pir|B36346](#) Length: 601 Number of Matches: 1

[See 2 more title\(s\)](#)

Range 1: 90 to 109 [GenPept](#) [Graphics](#)

[Next Match](#) [Previous Match](#)

| Score          | Expect | Identities  | Positives   | Gaps     |
|----------------|--------|-------------|-------------|----------|
| 67.2 bits(151) | 2e-11  | 20/20(100%) | 20/20(100%) | 0/20(0%) |

Query 1 RCATPHGDNASLEATFVKRC 20  
 Sbjct 90 RCATPHGDNASLEATFVKRC 109

**Related Information**

[Gene](#) - associated gene details

[Identical Proteins](#) - Proteins

identical to the subject

[Download](#) [GenPept](#) [Graphics](#)

[Next](#) [Previous](#) [Descriptions](#)

fibulin-1 isoform B precursor [Homo sapiens]

Sequence ID: [gi|34734064|ref|NP\\_006476.2](#) Length: 601 Number of Matches: 1

[See 1 more title\(s\)](#)

Range 1: 90 to 109 [GenPept](#) [Graphics](#)

[Next Match](#) [Previous Match](#)

| Score          | Expect | Identities  | Positives   | Gaps     |
|----------------|--------|-------------|-------------|----------|
| 67.2 bits(151) | 2e-11  | 20/20(100%) | 20/20(100%) | 0/20(0%) |

Query 1 RCATPHGDNASLEATFVKRC 20  
 Sbjct 90 RCATPHGDNASLEATFVKRC 109

**Related Information**

[Gene](#) - associated gene details

[UniGene](#) - clustered expressed sequence tags

[Map Viewer](#) - aligned genomic context

[Identical Proteins](#) - Proteins

identical to the subject

BLAST is a registered trademark of the National Library of Medicine.

NCBI/ BLAST/ blastp suite/ Formatting Results - BVDPEYVE01R

[Edit and Resubmit](#) [Save Search Strategies](#) [Formatting options](#) [Download](#) [YouTube](#) [How to read this page](#) [Blast report description](#)

### FBLN1\_RNCQDIDECVTGIHDCSIDETCFNIQGGFRC\_Mod

**RID** [BVDPEYVE01R](#) (Expires on 01-21 09:00 am)

**Query ID** |cl|97178  
**Description** None  
**Molecule type** amino acid  
**Query Length** 31

**Database Name** nr  
**Description** All non-redundant GenBank CDS translations+PDB+SwissProt+PIR+PRF excluding environmental samples from WGS projects  
**Program** BLASTP 2.2.30+ [Citation](#)

Other reports: [Search Summary](#) [Taxonomy reports](#) [Distance tree of results](#) [Multiple alignment](#)

### Graphic Summary

Show Conserved Domains

Putative conserved domains have been detected, click on the image below for detailed results.

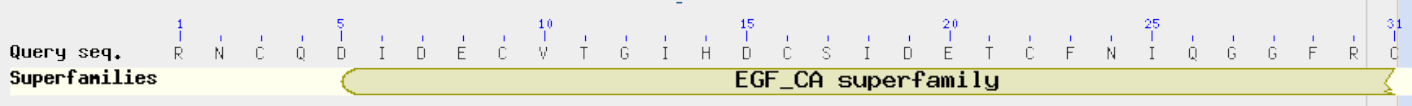

Distribution of 291 Blast Hits on the Query Sequence

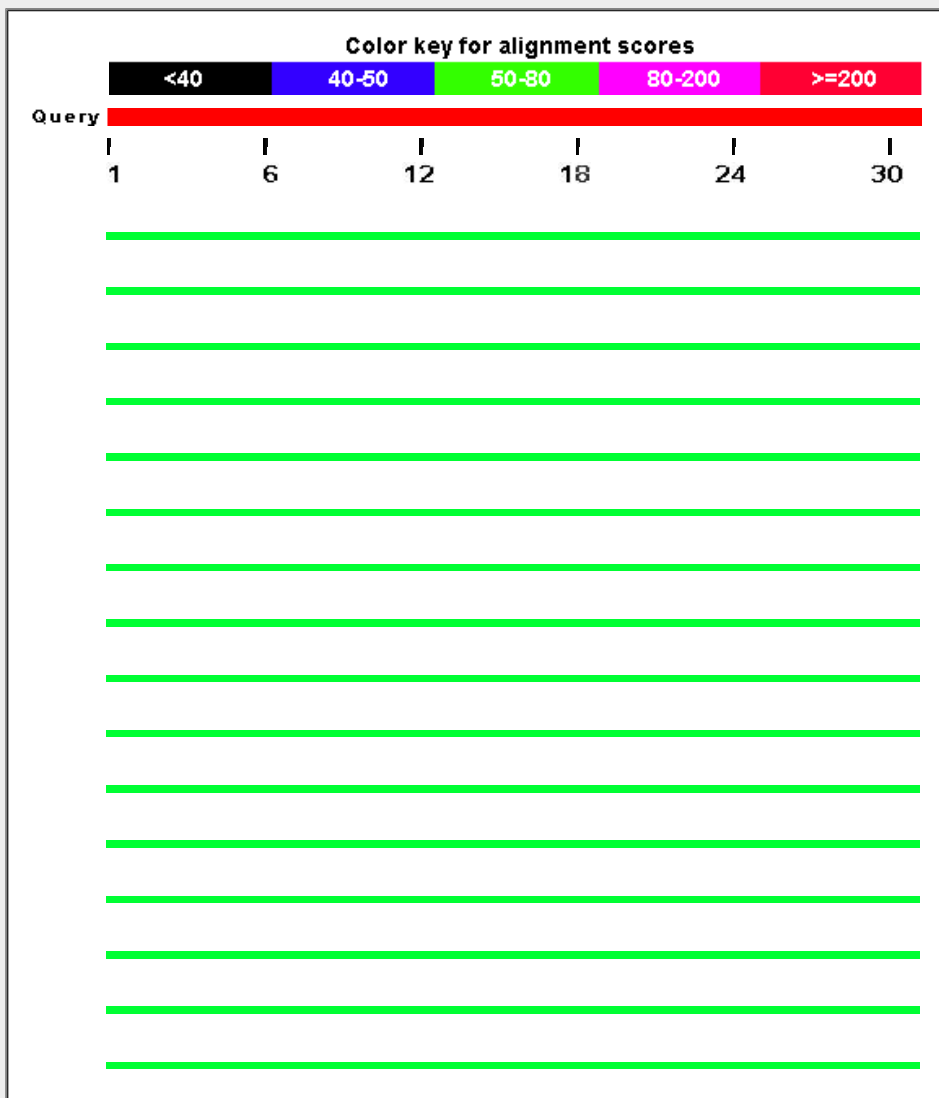

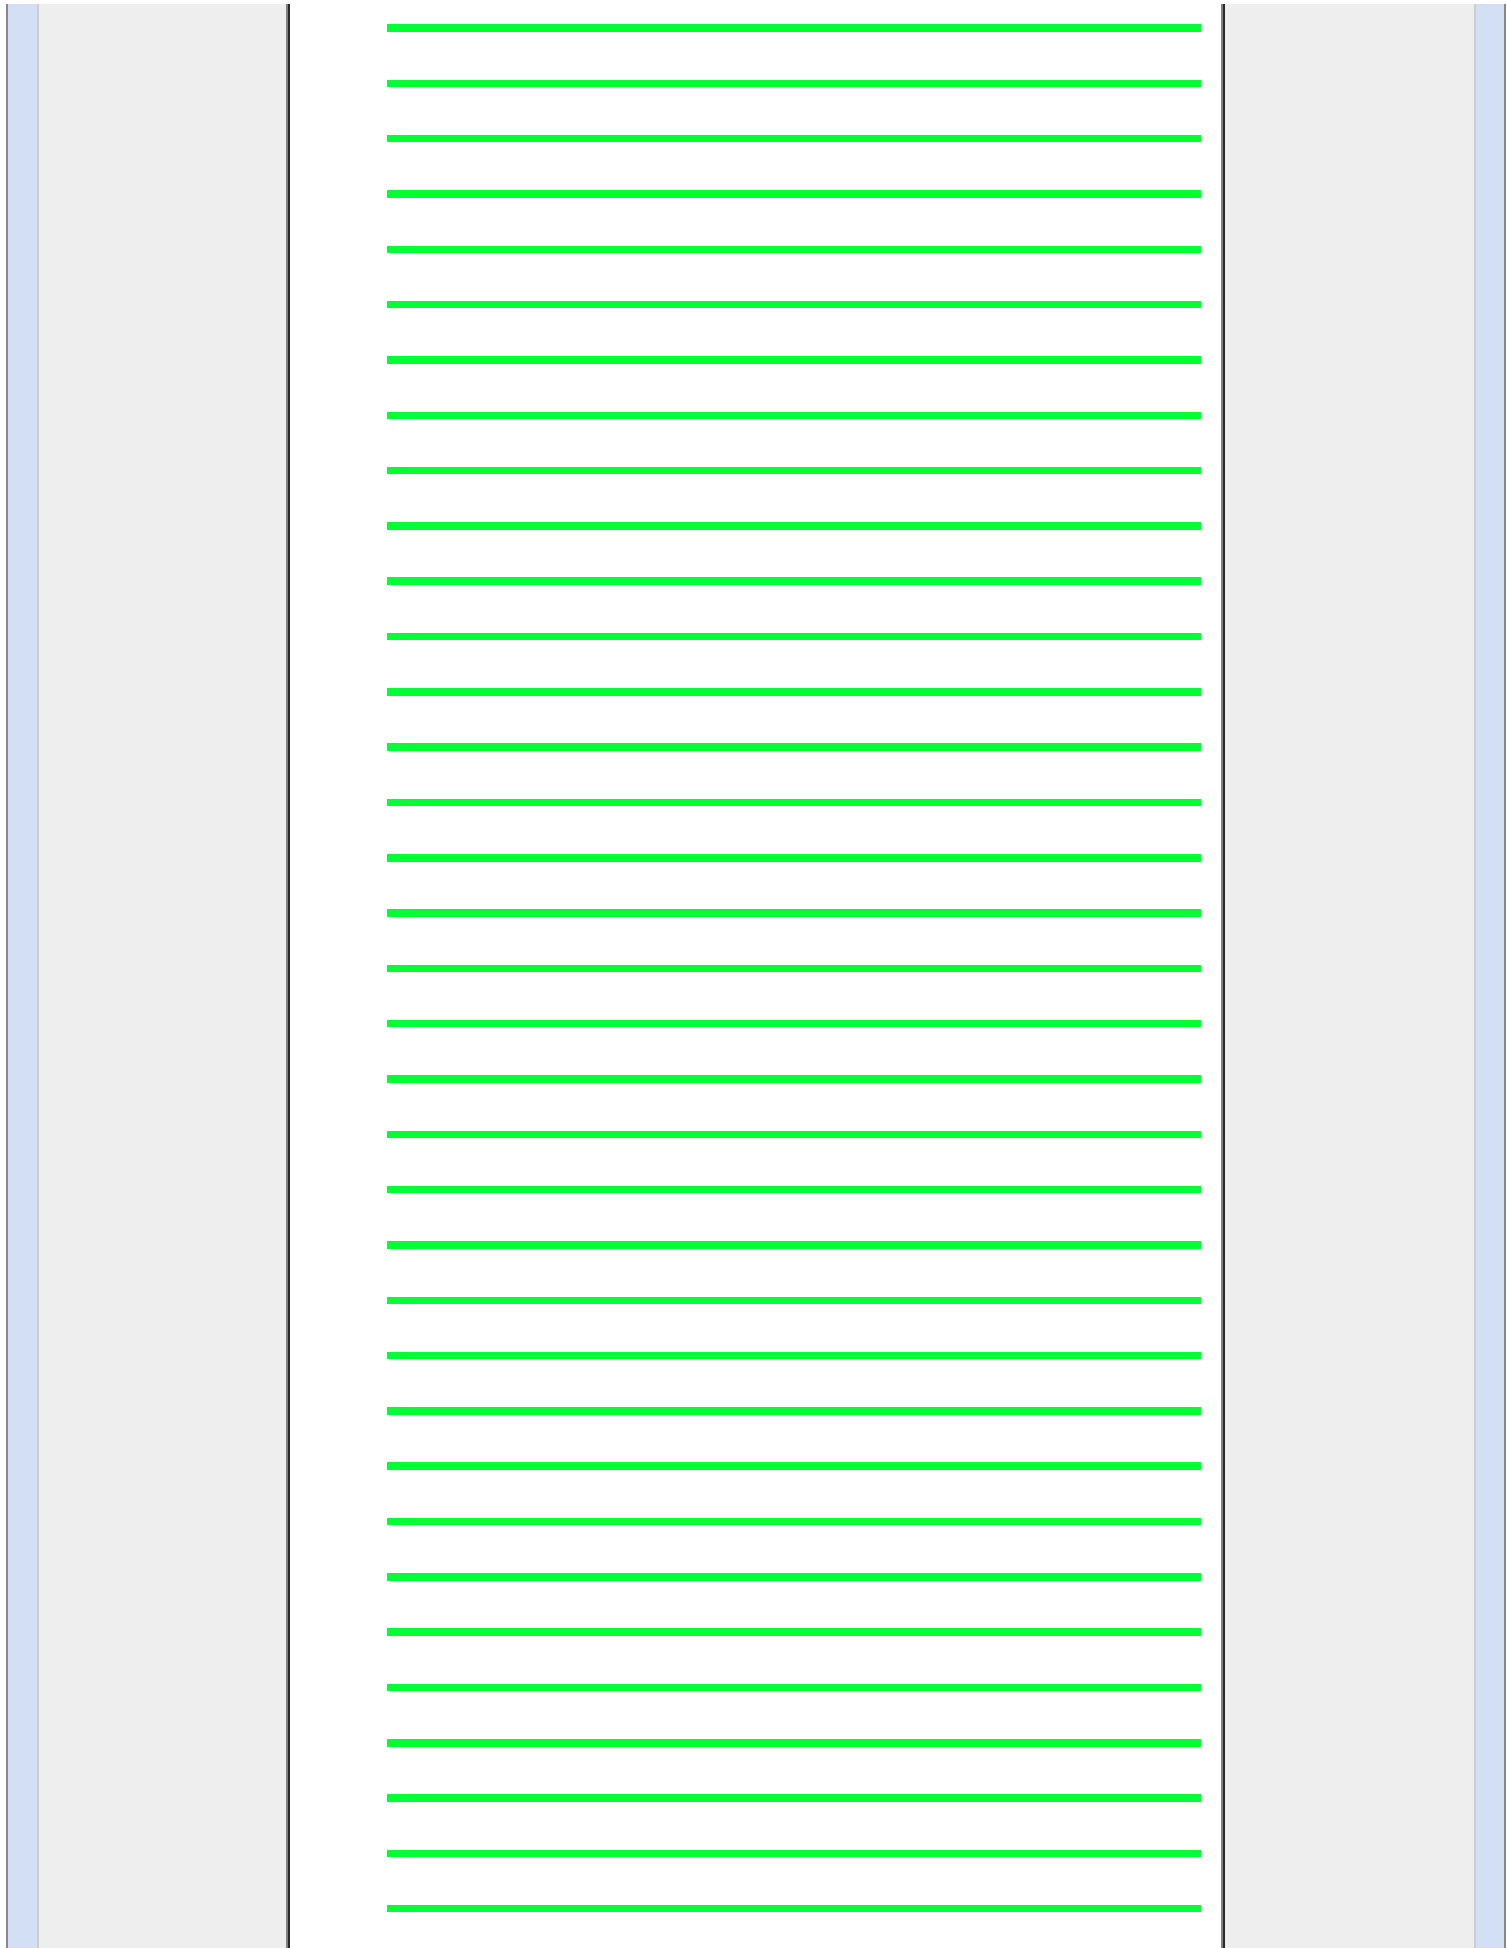

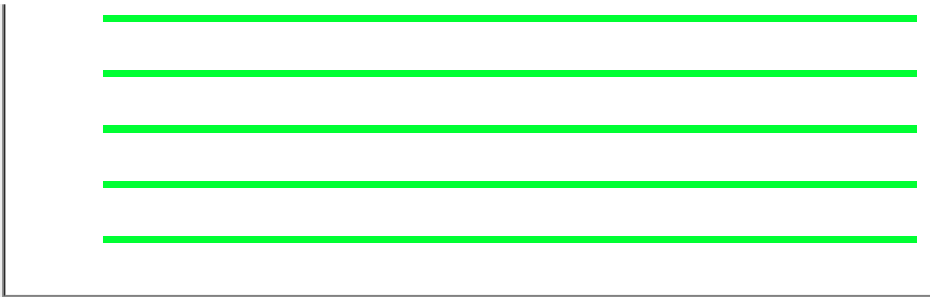

**Descriptions**

**Sequences producing significant alignments:**

Select: [All](#) [None](#) Selected:0

[Alignments](#)
[Download](#)
[GenPept](#)
[Graphics](#)
[Distance tree of results](#)
[Multiple alignment](#)

| Description                                                                     | Max score | Total score | Query cover | E value | Ident | Accession                      |
|---------------------------------------------------------------------------------|-----------|-------------|-------------|---------|-------|--------------------------------|
| <a href="#">unnamed protein product [Mus musculus]</a>                          | 63.2      | 63.2        | 100%        | 4e-11   | 90%   | <a href="#">BAE35396.1</a>     |
| <a href="#">PREDICTED: fibulin-1-like [Papio anubis]</a>                        | 64.3      | 64.3        | 100%        | 7e-11   | 94%   | <a href="#">XP_009215764.1</a> |
| <a href="#">PREDICTED: fibulin-1 [Oryctolagus cuniculus]</a>                    | 62.8      | 62.8        | 100%        | 8e-11   | 87%   | <a href="#">XP_008250507.1</a> |
| <a href="#">PREDICTED: fibulin-1 [Bubalus bubalis]</a>                          | 65.1      | 141         | 100%        | 8e-11   | 94%   | <a href="#">XP_006063368.1</a> |
| <a href="#">PREDICTED: fibulin-1 [Ovis aries]</a>                               | 65.1      | 140         | 100%        | 9e-11   | 94%   | <a href="#">XP_004007703.1</a> |
| <a href="#">fibulin-1 isoform C precursor [Camelus ferus]</a>                   | 64.7      | 103         | 100%        | 9e-11   | 90%   | <a href="#">EPY87041.1</a>     |
| <a href="#">PREDICTED: fibulin-1 [Pongo abelii]</a>                             | 64.7      | 142         | 100%        | 9e-11   | 94%   | <a href="#">XP_009232751.1</a> |
| <a href="#">PREDICTED: fibulin-1 [Mustela putorius furo]</a>                    | 64.3      | 140         | 100%        | 1e-10   | 94%   | <a href="#">XP_004771346.1</a> |
| <a href="#">PREDICTED: fibulin-1 isoform X2 [Erinaceus europaeus]</a>           | 64.3      | 142         | 100%        | 1e-10   | 94%   | <a href="#">XP_007531965.1</a> |
| <a href="#">PREDICTED: fibulin-1 [Ictidomys tridecemlineatus]</a>               | 64.3      | 144         | 100%        | 1e-10   | 94%   | <a href="#">XP_005335099.1</a> |
| <a href="#">PREDICTED: fibulin-1 isoform X2 [Rhinopithecus roxellana]</a>       | 64.3      | 141         | 100%        | 1e-10   | 94%   | <a href="#">XP_010365494.1</a> |
| <a href="#">RecName: Full=Fibulin-1; Short=FIBL-1 [Chlorocebus aethiops]</a>    | 64.3      | 140         | 100%        | 1e-10   | 94%   | <a href="#">Q8MJJ9.1</a>       |
| <a href="#">PREDICTED: fibulin-1 isoform 2 [Trichechus manatus latirostris]</a> | 64.3      | 142         | 100%        | 1e-10   | 94%   | <a href="#">XP_004380068.1</a> |
| <a href="#">PREDICTED: fibulin-1 isoform X2 [Nannospalax galii]</a>             | 64.3      | 143         | 100%        | 1e-10   | 94%   | <a href="#">XP_008842913.1</a> |
| <a href="#">PREDICTED: fibulin-1 isoform X4 [Lipotes vexillifer]</a>            | 64.3      | 137         | 100%        | 1e-10   | 94%   | <a href="#">XP_007453975.1</a> |
| <a href="#">PREDICTED: fibulin-1 [Mustela putorius furo]</a>                    | 64.3      | 140         | 100%        | 1e-10   | 94%   | <a href="#">XP_004813974.1</a> |
| <a href="#">PREDICTED: fibulin-1 isoform X2 [Canis lupus familiaris]</a>        | 64.3      | 142         | 100%        | 1e-10   | 94%   | <a href="#">XP_005625812.1</a> |
| <a href="#">fibulin-1 isoform C precursor [Homo sapiens]</a>                    | 64.3      | 141         | 100%        | 1e-10   | 94%   | <a href="#">NP_001987.2</a>    |
| <a href="#">unnamed protein product [Homo sapiens]</a>                          | 64.3      | 141         | 100%        | 1e-10   | 94%   | <a href="#">BAG62463.1</a>     |
| <a href="#">PREDICTED: fibulin-1 [Macaca fascicularis]</a>                      | 64.3      | 141         | 100%        | 1e-10   | 94%   | <a href="#">XP_005567067.1</a> |
| <a href="#">PREDICTED: fibulin-1 isoform X3 [Lipotes vexillifer]</a>            | 64.3      | 137         | 100%        | 1e-10   | 94%   | <a href="#">XP_007453974.1</a> |
| <a href="#">PREDICTED: fibulin-1 [Elephantulus edwardii]</a>                    | 64.3      | 140         | 100%        | 1e-10   | 94%   | <a href="#">XP_006888093.1</a> |
| <a href="#">PREDICTED: fibulin-1 [Gorilla gorilla gorilla]</a>                  | 64.3      | 141         | 100%        | 1e-10   | 94%   | <a href="#">XP_004063688.1</a> |
| <a href="#">PREDICTED: fibulin-1 [Physeter catodon]</a>                         | 64.3      | 137         | 100%        | 1e-10   | 94%   | <a href="#">XP_007128800.1</a> |
| <a href="#">PREDICTED: fibulin-1 [Balaenoptera acutorostrata scammoni]</a>      | 64.3      | 137         | 100%        | 1e-10   | 94%   | <a href="#">XP_007189256.1</a> |
| <a href="#">unnamed protein product [Homo sapiens]</a>                          | 64.3      | 141         | 100%        | 1e-10   | 94%   | <a href="#">BAC11705.1</a>     |
| <a href="#">PREDICTED: fibulin-1 [Otolemur garnettii]</a>                       | 64.3      | 145         | 100%        | 1e-10   | 94%   | <a href="#">XP_003783160.1</a> |
| <a href="#">fibulin 1, isoform CRA_f [Homo sapiens]</a>                         | 64.3      | 141         | 100%        | 1e-10   | 94%   | <a href="#">EAW73390.1</a>     |
| <a href="#">PREDICTED: fibulin-1-like [Leptonychotes weddellii]</a>             | 63.9      | 140         | 100%        | 1e-10   | 94%   | <a href="#">XP_006743570.1</a> |
| <a href="#">PREDICTED: fibulin-1 isoform X1 [Pan paniscus]</a>                  | 64.3      | 141         | 100%        | 1e-10   | 94%   | <a href="#">XP_003812435.1</a> |

|                                                                                         |      |     |      |       |     |                                |
|-----------------------------------------------------------------------------------------|------|-----|------|-------|-----|--------------------------------|
| <a href="#">PREDICTED: fibulin-1 [Orcinus orca]</a>                                     | 64.3 | 137 | 100% | 1e-10 | 94% | <a href="#">XP_004279635.1</a> |
| <a href="#">PREDICTED: fibulin-1 isoform 2 [Macaca mulatta]</a>                         | 64.3 | 141 | 100% | 1e-10 | 94% | <a href="#">XP_001109966.2</a> |
| <a href="#">PREDICTED: fibulin-1 isoform 2 [Odobenus rosmarus divergens]</a>            | 64.3 | 140 | 100% | 1e-10 | 94% | <a href="#">XP_004415897.1</a> |
| <a href="#">PREDICTED: fibulin-1 [Loxodonta africana]</a>                               | 63.9 | 142 | 100% | 1e-10 | 94% | <a href="#">XP_010598758.1</a> |
| <a href="#">PREDICTED: fibulin-1 [Chrysochloris asiatica]</a>                           | 63.9 | 141 | 100% | 1e-10 | 94% | <a href="#">XP_006866955.1</a> |
| <a href="#">PREDICTED: fibulin-1 [Tarsius syrichta]</a>                                 | 63.9 | 142 | 100% | 1e-10 | 94% | <a href="#">XP_008053358.1</a> |
| <a href="#">PREDICTED: fibulin-1 isoform X1 [Erinaceus europaeus]</a>                   | 63.9 | 141 | 100% | 2e-10 | 94% | <a href="#">XP_007531964.1</a> |
| <a href="#">PREDICTED: fibulin-1 isoform 1 [Trichechus manatus latirostris]</a>         | 63.9 | 141 | 100% | 2e-10 | 94% | <a href="#">XP_004380067.1</a> |
| <a href="#">PREDICTED: fibulin-1 [Nomascus leucogenys]</a>                              | 63.9 | 141 | 100% | 2e-10 | 94% | <a href="#">XP_003281320.2</a> |
| <a href="#">PREDICTED: fibulin-1 isoform X2 [Ochotona princeps]</a>                     | 63.9 | 141 | 100% | 2e-10 | 90% | <a href="#">XP_004589482.1</a> |
| <a href="#">PREDICTED: fibulin-1 isoform X1 [Canis lupus familiaris]</a>                | 63.9 | 141 | 100% | 2e-10 | 94% | <a href="#">XP_005625811.1</a> |
| <a href="#">PREDICTED: fibulin-1 [Octodon degus]</a>                                    | 63.9 | 143 | 100% | 2e-10 | 90% | <a href="#">XP_004642514.1</a> |
| <a href="#">PREDICTED: LOW QUALITY PROTEIN: fibulin-1-like [Galeopterus variegatus]</a> | 63.9 | 139 | 100% | 2e-10 | 94% | <a href="#">XP_008579007.1</a> |
| <a href="#">PREDICTED: fibulin-1 isoform X3 [Rhinopithecus roxellana]</a>               | 63.9 | 140 | 100% | 2e-10 | 94% | <a href="#">XP_010365573.1</a> |
| <a href="#">PREDICTED: fibulin-1 isoform X1 [Nannospalax galii]</a>                     | 63.9 | 142 | 100% | 2e-10 | 94% | <a href="#">XP_008842912.1</a> |
| <a href="#">PREDICTED: fibulin-1 [Galeopterus variegatus]</a>                           | 63.2 | 138 | 100% | 2e-10 | 94% | <a href="#">XP_008562356.1</a> |
| <a href="#">PREDICTED: fibulin-1 isoform X1 [Rhinopithecus roxellana]</a>               | 63.9 | 140 | 100% | 2e-10 | 94% | <a href="#">XP_010365413.1</a> |
| <a href="#">fibulin_1_isoform CRA_b [Homo sapiens]</a>                                  | 63.5 | 140 | 100% | 2e-10 | 94% | <a href="#">EAW73386.1</a>     |
| <a href="#">PREDICTED: fibulin-1 isoform 1 [Odobenus rosmarus divergens]</a>            | 63.9 | 140 | 100% | 2e-10 | 94% | <a href="#">XP_004415896.1</a> |
| <a href="#">PREDICTED: fibulin-1 isoform X2 [Lipotes vexillifer]</a>                    | 63.9 | 137 | 100% | 2e-10 | 94% | <a href="#">XP_007453973.1</a> |
| <a href="#">PREDICTED: fibulin-1 isoform X1 [Lipotes vexillifer]</a>                    | 63.9 | 137 | 100% | 2e-10 | 94% | <a href="#">XP_007453972.1</a> |
| <a href="#">fibulin-1 isoform B precursor [Homo sapiens]</a>                            | 63.9 | 140 | 100% | 2e-10 | 94% | <a href="#">NP_006476.2</a>    |
| <a href="#">PREDICTED: fibulin-1 [Pan troglodytes]</a>                                  | 63.9 | 141 | 100% | 2e-10 | 94% | <a href="#">XP_009436873.1</a> |
| <a href="#">RecName: Full=Fibulin-1; Short=FIBL-1; Flags: Precursor [Homo sapiens]</a>  | 63.9 | 141 | 100% | 2e-10 | 94% | <a href="#">P23142.4</a>       |
| <a href="#">fibulin-1 isoform D precursor [Homo sapiens]</a>                            | 63.9 | 141 | 100% | 2e-10 | 94% | <a href="#">NP_006477.2</a>    |
| <a href="#">PREDICTED: fibulin-1 [Jaculus jaculus]</a>                                  | 63.9 | 144 | 100% | 2e-10 | 94% | <a href="#">XP_004650445.1</a> |
| <a href="#">fibulin-1 isoform A precursor [Homo sapiens]</a>                            | 63.5 | 140 | 100% | 2e-10 | 94% | <a href="#">NP_006478.2</a>    |
| <a href="#">PREDICTED: fibulin-1 [Equus caballus]</a>                                   | 63.9 | 141 | 100% | 2e-10 | 90% | <a href="#">XP_005606874.1</a> |
| <a href="#">PREDICTED: fibulin-1 isoform X4 [Rhinopithecus roxellana]</a>               | 63.5 | 140 | 100% | 2e-10 | 94% | <a href="#">XP_010365649.1</a> |
| <a href="#">unknown [Homo sapiens]</a>                                                  | 63.5 | 140 | 100% | 2e-10 | 94% | <a href="#">AAG17241.1</a>     |
| <a href="#">PREDICTED: fibulin-1 isoform X2 [Camelus ferus]</a>                         | 63.5 | 139 | 100% | 2e-10 | 90% | <a href="#">XP_006176723.1</a> |
| <a href="#">PREDICTED: fibulin-1 isoform X2 [Pan paniscus]</a>                          | 63.5 | 140 | 100% | 2e-10 | 94% | <a href="#">XP_008963042.1</a> |
| <a href="#">PREDICTED: fibulin-1 isoform X2 [Chinchilla lanigera]</a>                   | 63.5 | 141 | 100% | 2e-10 | 90% | <a href="#">XP_005379549.1</a> |
| <a href="#">PREDICTED: fibulin-1-like [Echinops telfairi]</a>                           | 63.5 | 142 | 100% | 2e-10 | 90% | <a href="#">XP_004700279.1</a> |
| <a href="#">PREDICTED: fibulin-1 isoform X2 [Vicugna pacos]</a>                         | 63.5 | 140 | 100% | 2e-10 | 90% | <a href="#">XP_006212641.1</a> |
| <a href="#">PREDICTED: LOW QUALITY PROTEIN: fibulin-1 [Cavia porcellus]</a>             | 63.5 | 142 | 100% | 2e-10 | 90% | <a href="#">XP_004999606.1</a> |
| <a href="#">PREDICTED: fibulin-1 isoform X1 [Ochotona princeps]</a>                     | 63.5 | 141 | 100% | 2e-10 | 90% | <a href="#">XP_004589481.1</a> |
| <a href="#">PREDICTED: fibulin-1 [Felis catus]</a>                                      | 63.5 | 141 | 100% | 2e-10 | 90% | <a href="#">XP_006934231.1</a> |
| <a href="#">PREDICTED: fibulin-1 [Tupaia chinensis]</a>                                 | 63.5 | 139 | 100% | 2e-10 | 90% | <a href="#">XP_006164720.1</a> |
| <a href="#">PREDICTED: fibulin-1 [Camelus dromedarius]</a>                              | 63.5 | 139 | 100% | 2e-10 | 90% | <a href="#">XP_010981727.1</a> |
| <a href="#">PREDICTED: fibulin-1 isoform X1 [Camelus ferus]</a>                         | 63.5 | 139 | 100% | 2e-10 | 90% | <a href="#">XP_006176722.1</a> |
| <a href="#">PREDICTED: fibulin-1 isoform X1 [Chinchilla lanigera]</a>                   | 63.5 | 140 | 100% | 3e-10 | 90% | <a href="#">XP_005379548.1</a> |
| <a href="#">PREDICTED: fibulin-1 [Equus przewalskii]</a>                                | 63.2 | 140 | 100% | 3e-10 | 90% | <a href="#">XP_008529127.1</a> |
| <a href="#">PREDICTED: fibulin-1 isoform X1 [Vicugna pacos]</a>                         | 63.2 | 140 | 100% | 3e-10 | 90% | <a href="#">XP_006212640.1</a> |
| <a href="#">PREDICTED: fibulin-1 isoform X2 [Sorex araneus]</a>                         | 63.2 | 142 | 100% | 3e-10 | 87% | <a href="#">XP_004610628.1</a> |
| <a href="#">Fibulin-1 [Heterocephalus glaber]</a>                                       | 63.2 | 101 | 100% | 3e-10 | 94% | <a href="#">EHB13219.1</a>     |

|                                                                                   |      |     |      |       |     |                                |
|-----------------------------------------------------------------------------------|------|-----|------|-------|-----|--------------------------------|
| <a href="#">PREDICTED: fibulin-1 isoform 2 [Ceratotherium simum simum]</a>        | 63.2 | 140 | 100% | 3e-10 | 90% | <a href="#">XP_004438039.1</a> |
| <a href="#">PREDICTED: fibulin-1 isoform X1 [Sorex araneus]</a>                   | 63.2 | 141 | 100% | 3e-10 | 87% | <a href="#">XP_004610627.1</a> |
| <a href="#">Fibulin-1 [Tupaia chinensis]</a>                                      | 63.2 | 101 | 100% | 4e-10 | 90% | <a href="#">ELV12523.1</a>     |
| <a href="#">PREDICTED: fibulin-1 isoform 1 [Ceratotherium simum simum]</a>        | 62.8 | 140 | 100% | 4e-10 | 90% | <a href="#">XP_004438038.1</a> |
| <a href="#">PREDICTED: fibulin-1 isoform X2 [Heterocephalus glaber]</a>           | 62.8 | 142 | 100% | 4e-10 | 94% | <a href="#">XP_004845455.1</a> |
| <a href="#">PREDICTED: fibulin-1 isoform X1 [Heterocephalus glaber]</a>           | 62.4 | 141 | 100% | 5e-10 | 94% | <a href="#">XP_004845454.1</a> |
| <a href="#">PREDICTED: LOW QUALITY PROTEIN: fibulin-1 [Myotis lucifugus]</a>      | 62.4 | 138 | 100% | 5e-10 | 90% | <a href="#">XP_006104607.1</a> |
| <a href="#">PREDICTED: LOW QUALITY PROTEIN: fibulin-1 [Heterocephalus glaber]</a> | 62.4 | 137 | 100% | 5e-10 | 94% | <a href="#">XP_004900841.1</a> |
| <a href="#">fibulin-1 C [Homo sapiens]</a>                                        | 62.4 | 139 | 100% | 6e-10 | 90% | <a href="#">CAA37772.1</a>     |
| <a href="#">PREDICTED: fibulin-1 [Orycteropus afer afer]</a>                      | 62.4 | 140 | 100% | 6e-10 | 90% | <a href="#">XP_007953835.1</a> |
| <a href="#">Fibulin 1 [Homo sapiens]</a>                                          | 62.0 | 139 | 96%  | 7e-10 | 93% | <a href="#">AAH22497.1</a>     |
| <a href="#">PREDICTED: fibulin-1 [Bos mutus]</a>                                  | 62.4 | 138 | 100% | 7e-10 | 90% | <a href="#">XP_005896425.1</a> |
| <a href="#">PREDICTED: fibulin-1 isoform X2 [Chlorocebus sabaeus]</a>             | 62.0 | 139 | 100% | 7e-10 | 90% | <a href="#">XP_007974270.1</a> |
| <a href="#">fibulin 1 [synthetic construct]</a>                                   | 62.0 | 139 | 96%  | 7e-10 | 93% | <a href="#">ABM84973.1</a>     |
| <a href="#">Fibulin-1 [Cricetulus griseus]</a>                                    | 62.0 | 143 | 100% | 7e-10 | 90% | <a href="#">EGW13789.1</a>     |
| <a href="#">PREDICTED: fibulin-1 isoform X2 [Sus scrofa]</a>                      | 62.0 | 137 | 100% | 7e-10 | 90% | <a href="#">XP_005663793.1</a> |
| <a href="#">fibulin-1 isoform D precursor [Homo sapiens]</a>                      | 62.0 | 139 | 100% | 8e-10 | 90% | <a href="#">AAK37822.1</a>     |
| <a href="#">PREDICTED: fibulin-1 isoform X2 [Peromyscus maniculatus bairdii]</a>  | 62.0 | 142 | 100% | 8e-10 | 90% | <a href="#">XP_006980340.1</a> |
| <a href="#">PREDICTED: fibulin-1 [Eptesicus fuscus]</a>                           | 62.0 | 137 | 100% | 8e-10 | 90% | <a href="#">XP_008153634.1</a> |
| <a href="#">fibulin-1 isoform 2 [Cricetulus griseus]</a>                          | 62.0 | 143 | 100% | 8e-10 | 90% | <a href="#">ERE86479.1</a>     |
| <a href="#">fibulin 1 precursor, splice form B - human [Homo sapiens]</a>         | 62.0 | 139 | 100% | 8e-10 | 90% | <a href="#">B36346</a>         |
| <a href="#">PREDICTED: fibulin-1 isoform X2 [Bison bison bison]</a>               | 62.0 | 137 | 100% | 8e-10 | 90% | <a href="#">XP_010835915.1</a> |
| <a href="#">PREDICTED: fibulin-1 [Myotis davidii]</a>                             | 62.0 | 137 | 100% | 8e-10 | 90% | <a href="#">XP_006774235.1</a> |
| <a href="#">unnamed protein product [Mus musculus]</a>                            | 62.0 | 144 | 100% | 8e-10 | 90% | <a href="#">BAC39669.1</a>     |

## Alignments

[Download](#) [GenPept](#) [Graphics](#)

[Next](#) [Previous](#) [Descriptions](#)

unnamed protein product [Mus musculus]

Sequence ID: [dbj|BAE35396.1](#) Length: 228 Number of Matches: 1

Range 1: 46 to 76 [GenPept](#) [Graphics](#)

[Next Match](#) [Previous Match](#)

| Score          | Expect | Method                       | Identities | Positives  | Gaps     |
|----------------|--------|------------------------------|------------|------------|----------|
| 63.2 bits(152) | 4e-11  | Compositional matrix adjust. | 28/31(90%) | 30/31(96%) | 0/31(0%) |

Query 1 RNCQDIDECVTGIHDCSIDETCFNIQGGFRC 31  
 RNCQDIDECVTGIH+CSI+ETCFNIQG FRC  
 Sbjct 46 RNCQDIDECVTGIHNCSINETCFNIQGSFRC 76

### Related Information

[Gene](#) - associated gene details

[Download](#) [GenPept](#) [Graphics](#)

[Next](#) [Previous](#) [Descriptions](#)

PREDICTED: fibulin-1-like, partial [Papio anubis]

Sequence ID: [ref|XP\\_009215764.1](#) Length: 451 Number of Matches: 1

Range 1: 269 to 299 [GenPept](#) [Graphics](#)

[Next Match](#) [Previous Match](#)

| Score          | Expect | Method                       | Identities | Positives   | Gaps     |
|----------------|--------|------------------------------|------------|-------------|----------|
| 64.3 bits(155) | 7e-11  | Compositional matrix adjust. | 29/31(94%) | 31/31(100%) | 0/31(0%) |

Query 1 RNCQDIDECVTGIHDCSIDETCFNIQGGFRC 31  
 RNCQDIDECVTGIH+CSI+ETCFNIQGGFRC  
 Sbjct 269 RNCQDIDECVTGIHNCSINETCFNIQGGFRC 299

### Related Information

[Gene](#) - associated gene details

[Map Viewer](#) - aligned genomic context

[Download](#) [GenPept](#) [Graphics](#)

[Next](#) [Previous](#) [Descriptions](#)



**PREDICTED: fibulin-1, partial [Oryctolagus cuniculus]**

Sequence ID: [ref|XP\\_008250507.1|](#) Length: 246 Number of Matches: 1

Range 1: 64 to 94 [GenPept](#) [Graphics](#)

[Next Match](#) [Previous Match](#)

| Score          | Expect                          | Method                       | Identities | Positives  | Gaps     |
|----------------|---------------------------------|------------------------------|------------|------------|----------|
| 62.8 bits(151) | 8e-11                           | Compositional matrix adjust. | 27/31(87%) | 30/31(96%) | 0/31(0%) |
| Query 1        | RNCQDIDECVTGIHDCSIDETCFNIQGGFRC | 31                           |            |            |          |
| Sbjct 64       | RNCQDIDECVTG+H+CSI+ETCFNIQG FRC |                              |            |            |          |
|                | RNCQDIDECVTGVHNCINETCFNIQGSFRC  | 94                           |            |            |          |

**Related Information**

[Gene](#) - associated gene details  
[Map Viewer](#) - aligned genomic context

[Download](#) [GenPept](#) [Graphics](#) Sort by: E value

[Next](#) [Previous](#) [Descriptions](#)

**PREDICTED: fibulin-1 [Bubalus bubalis]**

Sequence ID: [ref|XP\\_006063368.1|](#) Length: 944 Number of Matches: 3

Range 1: 762 to 792 [GenPept](#) [Graphics](#)

[Next Match](#) [Previous Match](#)

| Score          | Expect                          | Method                       | Identities | Positives   | Gaps     |
|----------------|---------------------------------|------------------------------|------------|-------------|----------|
| 65.1 bits(157) | 8e-11                           | Compositional matrix adjust. | 29/31(94%) | 31/31(100%) | 0/31(0%) |
| Query 1        | RNCQDIDECVTGIHDCSIDETCFNIQGGFRC | 31                           |            |             |          |
| Sbjct 762      | RNCQDIDECVTGIH+CSI+ETCFNIQGGFRC |                              |            |             |          |
|                | RNCQDIDECVTGIHNCINETCFNIQGGFRC  | 792                          |            |             |          |

**Related Information**

[Gene](#) - associated gene details  
[Map Viewer](#) - aligned genomic context

Range 2: 454 to 483 [GenPept](#) [Graphics](#)

[Next Match](#) [Previous Match](#) [First Match](#)

| Score         | Expect                         | Method                       | Identities | Positives  | Gaps     |
|---------------|--------------------------------|------------------------------|------------|------------|----------|
| 38.5 bits(88) | 0.12                           | Compositional matrix adjust. | 14/30(47%) | 22/30(73%) | 0/30(0%) |
| Query 2       | NCQDIDECVTGIHDCSIDETCFNIQGGFRC | 31                           |            |            |          |
| Sbjct 454     | +C+D+EC+TG +C + E+C N G FRC    |                              |            |            |          |
|               | SCEDVNECITGSONCRLGESCINTVGSFRC | 483                          |            |            |          |

Range 3: 500 to 529 [GenPept](#) [Graphics](#)

[Next Match](#) [Previous Match](#) [First Match](#)

| Score         | Expect                          | Method                       | Identities | Positives  | Gaps     |
|---------------|---------------------------------|------------------------------|------------|------------|----------|
| 37.7 bits(86) | 0.19                            | Compositional matrix adjust. | 17/30(57%) | 21/30(70%) | 0/30(0%) |
| Query 2       | NCQDIDECVTGIHDCSIDETCFNIQGGFRC  | 31                           |            |            |          |
| Sbjct 500     | +C+DIDEC +GIH+C D C N G FRC     |                              |            |            |          |
|               | DCKDIDECESGIHNCCLPDFICQNTLGSFRC | 529                          |            |            |          |

[Download](#) [GenPept](#) [Graphics](#) Sort by: E value

[Next](#) [Previous](#) [Descriptions](#)

**PREDICTED: fibulin-1 [Ovis aries]**

Sequence ID: [ref|XP\\_004007703.1|](#) Length: 953 Number of Matches: 3

Range 1: 771 to 801 [GenPept](#) [Graphics](#)

[Next Match](#) [Previous Match](#)

| Score          | Expect                          | Method                       | Identities | Positives   | Gaps     |
|----------------|---------------------------------|------------------------------|------------|-------------|----------|
| 65.1 bits(157) | 9e-11                           | Compositional matrix adjust. | 29/31(94%) | 31/31(100%) | 0/31(0%) |
| Query 1        | RNCQDIDECVTGIHDCSIDETCFNIQGGFRC | 31                           |            |             |          |
| Sbjct 771      | RNCQDIDECVTGIH+CSI+ETCFNIQGGFRC |                              |            |             |          |
|                | RNCQDIDECVTGIHNCINETCFNIQGGFRC  | 801                          |            |             |          |

**Related Information**

[Gene](#) - associated gene details  
[UniGene](#) - clustered expressed sequence tags  
[Map Viewer](#) - aligned genomic context

Range 2: 508 to 537 [GenPept](#) [Graphics](#)

[Next Match](#) [Previous Match](#) [First Match](#)

| Score         | Expect                          | Method                       | Identities | Positives  | Gaps     |
|---------------|---------------------------------|------------------------------|------------|------------|----------|
| 37.4 bits(86) | 0.20                            | Compositional matrix adjust. | 17/30(57%) | 21/30(70%) | 0/30(0%) |
| Query 2       | NCQDIDECVTGIHDCSIDETCFNIQGGFRC  | 31                           |            |            |          |
| Sbjct 508     | +C+DIDEC +GIH+C D C N G FRC     |                              |            |            |          |
|               | DCKDIDECESGIHNCCLPDFICQNTLGSFRC | 537                          |            |            |          |

Range 3: 462 to 491 [GenPept](#) [Graphics](#)

[Next Match](#) [Previous Match](#) [First Match](#)

| Score         | Expect                         | Method                       | Identities | Positives  | Gaps     |
|---------------|--------------------------------|------------------------------|------------|------------|----------|
| 37.4 bits(85) | 0.25                           | Compositional matrix adjust. | 14/30(47%) | 21/30(70%) | 0/30(0%) |
| Query 2       | NCQDIDECVTGIHDCSIDETCFNIQGGFRC | 31                           |            |            |          |
| Sbjct 462     | +C+D++EC+ G +C + ETC N G FRC   |                              |            |            |          |
|               | SCEDVNECIKGSQNCRLGETCVNTVGSFRC | 491                          |            |            |          |



NCBI/ BLAST/ blastp suite/ Formatting Results - BVDNNF1801R

[Edit and Resubmit](#) [Save Search Strategies](#) [Formatting options](#) [Download](#) [YouTube](#) [How to read this page](#) [Blast report description](#)

### FBLN1\_RNCQDIDECVTGIHNC SIDETCFNIQGGFRC\_Mod

RID [BVDNNF1801R](#) (Expires on 01-21 09:00 am)

Query ID |cl|217118  
 Description None  
 Molecule type amino acid  
 Query Length 31

Database Name nr  
 Description All non-redundant GenBank CDS translations+PDB+SwissProt+PIR+PRF excluding environmental samples from WGS projects  
 Program BLASTP 2.2.30+ [Citation](#)

Other reports: [Search Summary](#) [Taxonomy reports](#) [Distance tree of results](#) [Multiple alignment](#)

### Graphic Summary

Show Conserved Domains

Putative conserved domains have been detected, click on the image below for detailed results.

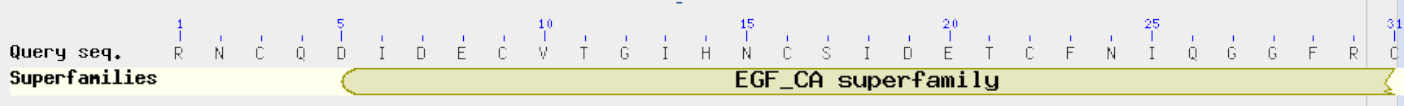

Distribution of 292 Blast Hits on the Query Sequence







**Descriptions**

**Sequences producing significant alignments:**

Select: [All](#) [None](#) Selected:0

| <a href="#">Alignments</a> <a href="#">Download</a> <a href="#">GenPept</a> <a href="#">Graphics</a> <a href="#">Distance tree of results</a> <a href="#">Multiple alignment</a> |           |             |             |         |       |                                |  |
|----------------------------------------------------------------------------------------------------------------------------------------------------------------------------------|-----------|-------------|-------------|---------|-------|--------------------------------|--|
| Description                                                                                                                                                                      | Max score | Total score | Query cover | E value | Ident | Accession                      |  |
| <a href="#">unnamed protein product [Mus musculus]</a>                                                                                                                           | 64.3      | 64.3        | 100%        | 1e-11   | 94%   | <a href="#">BAE35396.1</a>     |  |
| <a href="#">PREDICTED: fibulin-1 [Oryctolagus cuniculus]</a>                                                                                                                     | 63.9      | 63.9        | 100%        | 2e-11   | 90%   | <a href="#">XP_008250507.1</a> |  |
| <a href="#">PREDICTED: fibulin-1-like [Papio anubis]</a>                                                                                                                         | 65.9      | 65.9        | 100%        | 2e-11   | 97%   | <a href="#">XP_009215764.1</a> |  |
| <a href="#">PREDICTED: fibulin-1 [Bubalus bubalis]</a>                                                                                                                           | 66.6      | 146         | 100%        | 2e-11   | 97%   | <a href="#">XP_006063368.1</a> |  |
| <a href="#">PREDICTED: fibulin-1 [Ovis aries]</a>                                                                                                                                | 66.2      | 144         | 100%        | 3e-11   | 97%   | <a href="#">XP_004007703.1</a> |  |
| <a href="#">fibulin-1 isoform C precursor [Camelus ferus]</a>                                                                                                                    | 66.2      | 106         | 100%        | 3e-11   | 94%   | <a href="#">EPY87041.1</a>     |  |
| <a href="#">PREDICTED: fibulin-1 [Pongo abelii]</a>                                                                                                                              | 66.2      | 146         | 100%        | 3e-11   | 97%   | <a href="#">XP_009232751.1</a> |  |
| <a href="#">PREDICTED: fibulin-1 [Ictidomys tridecemlineatus]</a>                                                                                                                | 65.9      | 148         | 100%        | 3e-11   | 97%   | <a href="#">XP_005335099.1</a> |  |
| <a href="#">PREDICTED: fibulin-1 isoform X4 [Lipotes vexillifer]</a>                                                                                                             | 65.9      | 142         | 100%        | 3e-11   | 97%   | <a href="#">XP_007453975.1</a> |  |
| <a href="#">PREDICTED: fibulin-1 isoform X3 [Lipotes vexillifer]</a>                                                                                                             | 65.9      | 142         | 100%        | 3e-11   | 97%   | <a href="#">XP_007453974.1</a> |  |
| <a href="#">PREDICTED: fibulin-1 isoform X2 [Erinaceus europaeus]</a>                                                                                                            | 65.9      | 147         | 100%        | 3e-11   | 97%   | <a href="#">XP_007531965.1</a> |  |
| <a href="#">PREDICTED: fibulin-1 isoform 2 [Trichechus manatus latirostris]</a>                                                                                                  | 65.9      | 147         | 100%        | 3e-11   | 97%   | <a href="#">XP_004380068.1</a> |  |
| <a href="#">PREDICTED: fibulin-1 isoform 2 [Odobenus rosmarus divergens]</a>                                                                                                     | 65.9      | 145         | 100%        | 4e-11   | 97%   | <a href="#">XP_004415897.1</a> |  |
| <a href="#">fibulin-1 isoform C precursor [Homo sapiens]</a>                                                                                                                     | 65.9      | 145         | 100%        | 4e-11   | 97%   | <a href="#">NP_001987.2</a>    |  |
| <a href="#">fibulin 1, isoform CRA f [Homo sapiens]</a>                                                                                                                          | 65.9      | 145         | 100%        | 4e-11   | 97%   | <a href="#">FAW73390.1</a>     |  |
| <a href="#">PREDICTED: fibulin-1 [Otolemur garnettii]</a>                                                                                                                        | 65.9      | 149         | 100%        | 4e-11   | 97%   | <a href="#">XP_003783160.1</a> |  |
| <a href="#">PREDICTED: fibulin-1 isoform X2 [Nannospalax galii]</a>                                                                                                              | 65.9      | 147         | 100%        | 4e-11   | 97%   | <a href="#">XP_008842913.1</a> |  |
| <a href="#">PREDICTED: fibulin-1 isoform X2 [Rhinopithecus roxellana]</a>                                                                                                        | 65.9      | 145         | 100%        | 4e-11   | 97%   | <a href="#">XP_010365494.1</a> |  |
| <a href="#">PREDICTED: fibulin-1 [Mustela putorius furo]</a>                                                                                                                     | 65.9      | 145         | 100%        | 4e-11   | 97%   | <a href="#">XP_004813974.1</a> |  |
| <a href="#">PREDICTED: fibulin-1 [Physeter catodon]</a>                                                                                                                          | 65.9      | 142         | 100%        | 4e-11   | 97%   | <a href="#">XP_007128800.1</a> |  |
| <a href="#">RecName: Full=Fibulin-1; Short=FIBL-1 [Chlorocebus aethiops]</a>                                                                                                     | 65.5      | 144         | 100%        | 4e-11   | 97%   | <a href="#">Q8MJJ9.1</a>       |  |
| <a href="#">PREDICTED: fibulin-1 [Mustela putorius furo]</a>                                                                                                                     | 65.9      | 145         | 100%        | 4e-11   | 97%   | <a href="#">XP_004771346.1</a> |  |
| <a href="#">PREDICTED: fibulin-1 isoform X2 [Canis lupus familiaris]</a>                                                                                                         | 65.9      | 146         | 100%        | 4e-11   | 97%   | <a href="#">XP_005625812.1</a> |  |
| <a href="#">PREDICTED: fibulin-1 [Balaenoptera acutorostrata scammoni]</a>                                                                                                       | 65.5      | 142         | 100%        | 4e-11   | 97%   | <a href="#">XP_007189256.1</a> |  |
| <a href="#">PREDICTED: fibulin-1 isoform 2 [Macaca mulatta]</a>                                                                                                                  | 65.9      | 145         | 100%        | 4e-11   | 97%   | <a href="#">XP_001109966.2</a> |  |
| <a href="#">unnamed protein product [Homo sapiens]</a>                                                                                                                           | 65.5      | 145         | 100%        | 4e-11   | 97%   | <a href="#">BAG62463.1</a>     |  |
| <a href="#">PREDICTED: fibulin-1 [Gorilla gorilla gorilla]</a>                                                                                                                   | 65.5      | 145         | 100%        | 4e-11   | 97%   | <a href="#">XP_004063688.1</a> |  |
| <a href="#">PREDICTED: fibulin-1 [Macaca fascicularis]</a>                                                                                                                       | 65.5      | 145         | 100%        | 4e-11   | 97%   | <a href="#">XP_005567067.1</a> |  |
| <a href="#">PREDICTED: fibulin-1 [Elephantulus edwardii]</a>                                                                                                                     | 65.5      | 144         | 100%        | 4e-11   | 97%   | <a href="#">XP_006888093.1</a> |  |
| <a href="#">PREDICTED: fibulin-1 [Nomascus leucogenys]</a>                                                                                                                       | 65.9      | 144         | 100%        | 4e-11   | 97%   | <a href="#">XP_003281320.2</a> |  |

|                                                                                         |      |     |      |       |     |                                |
|-----------------------------------------------------------------------------------------|------|-----|------|-------|-----|--------------------------------|
| <a href="#">unnamed protein product [Homo sapiens]</a>                                  | 65.5 | 145 | 100% | 4e-11 | 97% | <a href="#">BAC11705.1</a>     |
| <a href="#">PREDICTED: fibulin-1 [Orcinus orca]</a>                                     | 65.5 | 142 | 100% | 4e-11 | 97% | <a href="#">XP_004279635.1</a> |
| <a href="#">PREDICTED: fibulin-1 isoform X1 [Pan paniscus]</a>                          | 65.5 | 144 | 100% | 4e-11 | 97% | <a href="#">XP_003812435.1</a> |
| <a href="#">PREDICTED: fibulin-1-like [Leptonychotes weddellii]</a>                     | 65.5 | 144 | 100% | 4e-11 | 97% | <a href="#">XP_006743570.1</a> |
| <a href="#">PREDICTED: fibulin-1 isoform 1 [Odobenus rosmarus divergens]</a>            | 65.5 | 144 | 100% | 4e-11 | 97% | <a href="#">XP_004415896.1</a> |
| <a href="#">PREDICTED: fibulin-1 isoform X2 [Lipotes vexillifer]</a>                    | 65.5 | 141 | 100% | 4e-11 | 97% | <a href="#">XP_007453973.1</a> |
| <a href="#">PREDICTED: fibulin-1 isoform 1 [Trichechus manatus latirostris]</a>         | 65.5 | 146 | 100% | 5e-11 | 97% | <a href="#">XP_004380067.1</a> |
| <a href="#">PREDICTED: fibulin-1 [Loxodonta africana]</a>                               | 65.5 | 147 | 100% | 5e-11 | 97% | <a href="#">XP_010598758.1</a> |
| <a href="#">PREDICTED: fibulin-1 [Pan troglodytes]</a>                                  | 65.5 | 144 | 100% | 5e-11 | 97% | <a href="#">XP_009436873.1</a> |
| <a href="#">PREDICTED: fibulin-1 isoform X1 [Erinaceus europaeus]</a>                   | 65.5 | 146 | 100% | 5e-11 | 97% | <a href="#">XP_007531964.1</a> |
| <a href="#">fibulin-1 isoform B precursor [Homo sapiens]</a>                            | 65.5 | 144 | 100% | 5e-11 | 97% | <a href="#">NP_006476.2</a>    |
| <a href="#">fibulin 1, isoform CRA_b [Homo sapiens]</a>                                 | 65.5 | 144 | 100% | 5e-11 | 97% | <a href="#">EAW73386.1</a>     |
| <a href="#">RecName: Full=Fibulin-1; Short=FIBL-1; Flags: Precursor [Homo sapiens]</a>  | 65.5 | 144 | 100% | 5e-11 | 97% | <a href="#">P23142.4</a>       |
| <a href="#">PREDICTED: fibulin-1 isoform X1 [Lipotes vexillifer]</a>                    | 65.5 | 141 | 100% | 5e-11 | 97% | <a href="#">XP_007453972.1</a> |
| <a href="#">PREDICTED: fibulin-1 [Chrysochloris asiatica]</a>                           | 65.5 | 145 | 100% | 5e-11 | 97% | <a href="#">XP_006866955.1</a> |
| <a href="#">PREDICTED: fibulin-1 isoform X1 [Nannospalax galii]</a>                     | 65.5 | 147 | 100% | 5e-11 | 97% | <a href="#">XP_008842912.1</a> |
| <a href="#">fibulin-1 isoform D precursor [Homo sapiens]</a>                            | 65.5 | 144 | 100% | 5e-11 | 97% | <a href="#">NP_006477.2</a>    |
| <a href="#">fibulin-1 isoform A precursor [Homo sapiens]</a>                            | 65.1 | 143 | 100% | 5e-11 | 97% | <a href="#">NP_006478.2</a>    |
| <a href="#">PREDICTED: fibulin-1 [Tarsius syrichta]</a>                                 | 65.5 | 145 | 100% | 5e-11 | 97% | <a href="#">XP_008053358.1</a> |
| <a href="#">PREDICTED: fibulin-1 isoform X1 [Canis lupus familiaris]</a>                | 65.5 | 146 | 100% | 5e-11 | 97% | <a href="#">XP_005625811.1</a> |
| <a href="#">PREDICTED: LOW QUALITY PROTEIN: fibulin-1-like [Galeopterus variegatus]</a> | 65.1 | 144 | 100% | 5e-11 | 97% | <a href="#">XP_008579007.1</a> |
| <a href="#">PREDICTED: fibulin-1 isoform X3 [Rhinopithecus roxellana]</a>               | 65.1 | 144 | 100% | 5e-11 | 97% | <a href="#">XP_010365573.1</a> |
| <a href="#">PREDICTED: fibulin-1 [Octodon degus]</a>                                    | 65.5 | 146 | 100% | 5e-11 | 94% | <a href="#">XP_004642514.1</a> |
| <a href="#">PREDICTED: fibulin-1 isoform X2 [Ochotona princeps]</a>                     | 65.5 | 146 | 100% | 5e-11 | 94% | <a href="#">XP_004589482.1</a> |
| <a href="#">PREDICTED: fibulin-1 isoform X1 [Rhinopithecus roxellana]</a>               | 65.5 | 144 | 100% | 5e-11 | 97% | <a href="#">XP_010365413.1</a> |
| <a href="#">PREDICTED: fibulin-1 [Galeopterus variegatus]</a>                           | 64.3 | 142 | 100% | 6e-11 | 97% | <a href="#">XP_008562356.1</a> |
| <a href="#">PREDICTED: fibulin-1 isoform X4 [Rhinopithecus roxellana]</a>               | 65.1 | 143 | 100% | 6e-11 | 97% | <a href="#">XP_010365649.1</a> |
| <a href="#">PREDICTED: fibulin-1 [Jaculus jaculus]</a>                                  | 65.1 | 149 | 100% | 6e-11 | 97% | <a href="#">XP_004650445.1</a> |
| <a href="#">unknown [Homo sapiens]</a>                                                  | 64.7 | 142 | 100% | 6e-11 | 97% | <a href="#">AAG17241.1</a>     |
| <a href="#">PREDICTED: fibulin-1 [Equus caballus]</a>                                   | 65.1 | 145 | 100% | 6e-11 | 94% | <a href="#">XP_005606874.1</a> |
| <a href="#">PREDICTED: fibulin-1-like [Echinops telfairi]</a>                           | 65.1 | 146 | 100% | 6e-11 | 94% | <a href="#">XP_004700279.1</a> |
| <a href="#">PREDICTED: fibulin-1 isoform X2 [Chinchilla lanigera]</a>                   | 65.1 | 144 | 100% | 6e-11 | 94% | <a href="#">XP_005379549.1</a> |
| <a href="#">PREDICTED: fibulin-1 isoform X2 [Pan paniscus]</a>                          | 65.1 | 144 | 100% | 6e-11 | 97% | <a href="#">XP_008963042.1</a> |
| <a href="#">PREDICTED: fibulin-1 isoform X2 [Vicugna pacos]</a>                         | 65.1 | 145 | 100% | 6e-11 | 94% | <a href="#">XP_006212641.1</a> |
| <a href="#">PREDICTED: fibulin-1 isoform X2 [Camelus ferus]</a>                         | 65.1 | 144 | 100% | 6e-11 | 94% | <a href="#">XP_006176723.1</a> |
| <a href="#">PREDICTED: LOW QUALITY PROTEIN: fibulin-1 [Cavia porcellus]</a>             | 65.1 | 146 | 100% | 6e-11 | 94% | <a href="#">XP_004999606.1</a> |
| <a href="#">PREDICTED: fibulin-1 isoform X1 [Ochotona princeps]</a>                     | 65.1 | 145 | 100% | 7e-11 | 94% | <a href="#">XP_004589481.1</a> |
| <a href="#">PREDICTED: fibulin-1 [Felis catus]</a>                                      | 65.1 | 146 | 100% | 7e-11 | 94% | <a href="#">XP_006934231.1</a> |
| <a href="#">PREDICTED: fibulin-1 [Camelus dromedarius]</a>                              | 65.1 | 143 | 100% | 8e-11 | 94% | <a href="#">XP_010981727.1</a> |
| <a href="#">PREDICTED: fibulin-1 isoform X1 [Chinchilla lanigera]</a>                   | 64.7 | 144 | 100% | 8e-11 | 94% | <a href="#">XP_005379548.1</a> |
| <a href="#">PREDICTED: fibulin-1 isoform X1 [Camelus ferus]</a>                         | 64.7 | 143 | 100% | 8e-11 | 94% | <a href="#">XP_006176722.1</a> |
| <a href="#">PREDICTED: fibulin-1 [Tupaia chinensis]</a>                                 | 64.7 | 141 | 100% | 8e-11 | 94% | <a href="#">XP_006164720.1</a> |
| <a href="#">PREDICTED: fibulin-1 [Equus przewalskii]</a>                                | 64.7 | 144 | 100% | 8e-11 | 94% | <a href="#">XP_008529127.1</a> |
| <a href="#">PREDICTED: fibulin-1 isoform X2 [Sorex araneus]</a>                         | 64.7 | 145 | 100% | 8e-11 | 90% | <a href="#">XP_004610628.1</a> |
| <a href="#">PREDICTED: fibulin-1 isoform X1 [Vicugna pacos]</a>                         | 64.7 | 144 | 100% | 9e-11 | 94% | <a href="#">XP_006212640.1</a> |
| <a href="#">PREDICTED: fibulin-1 isoform X1 [Sorex araneus]</a>                         | 64.7 | 145 | 100% | 1e-10 | 90% | <a href="#">XP_004610627.1</a> |

|                                                                                  |      |     |      |       |     |                                |
|----------------------------------------------------------------------------------|------|-----|------|-------|-----|--------------------------------|
| <a href="#">PREDICTED: fibulin-1 isoform 2 [Ceratotherium simum simum]</a>       | 64.7 | 145 | 100% | 1e-10 | 94% | <a href="#">XP_004438039.1</a> |
| <a href="#">Fibulin-1 [Tupaia chinensis]</a>                                     | 64.7 | 103 | 100% | 1e-10 | 94% | <a href="#">ELV12523.1</a>     |
| <a href="#">PREDICTED: fibulin-1 isoform 1 [Ceratotherium simum simum]</a>       | 64.3 | 145 | 100% | 1e-10 | 94% | <a href="#">XP_004438038.1</a> |
| <a href="#">PREDICTED: LOW QUALITY PROTEIN: fibulin-1 [Myotis lucifugus]</a>     | 63.9 | 141 | 100% | 2e-10 | 94% | <a href="#">XP_006104607.1</a> |
| <a href="#">PREDICTED: fibulin-1 [Orycteropus afer afer]</a>                     | 63.9 | 143 | 100% | 2e-10 | 94% | <a href="#">XP_007953835.1</a> |
| <a href="#">fibulin-1 C [Homo sapiens]</a>                                       | 63.9 | 143 | 100% | 2e-10 | 94% | <a href="#">CAA37772.1</a>     |
| <a href="#">Fibulin 1 [Homo sapiens]</a>                                         | 63.5 | 143 | 96%  | 2e-10 | 97% | <a href="#">AAH22497.1</a>     |
| <a href="#">fibulin 1 [synthetic construct]</a>                                  | 63.5 | 143 | 96%  | 2e-10 | 97% | <a href="#">ABM84973.1</a>     |
| <a href="#">PREDICTED: fibulin-1 isoform X2 [Chlorocebus sabaues]</a>            | 63.5 | 143 | 100% | 2e-10 | 94% | <a href="#">XP_007974270.1</a> |
| <a href="#">PREDICTED: fibulin-1 [Bos mutus]</a>                                 | 63.5 | 141 | 100% | 2e-10 | 94% | <a href="#">XP_005896425.1</a> |
| <a href="#">Fibulin-1 [Cricetulus griseus]</a>                                   | 63.5 | 147 | 100% | 2e-10 | 94% | <a href="#">EGW13789.1</a>     |
| <a href="#">PREDICTED: fibulin-1 [Eptesicus fuscus]</a>                          | 63.5 | 140 | 100% | 2e-10 | 94% | <a href="#">XP_008153634.1</a> |
| <a href="#">PREDICTED: fibulin-1 isoform X2 [Sus scrofa]</a>                     | 63.5 | 141 | 100% | 2e-10 | 94% | <a href="#">XP_005663793.1</a> |
| <a href="#">fibulin-1 isoform D precursor [Homo sapiens]</a>                     | 63.5 | 142 | 100% | 2e-10 | 94% | <a href="#">AAK37822.1</a>     |
| <a href="#">fibulin 1 precursor, splice form B - human [Homo sapiens]</a>        | 63.5 | 142 | 100% | 2e-10 | 94% | <a href="#">B36346</a>         |
| <a href="#">PREDICTED: fibulin-1 isoform X2 [Peromyscus maniculatus bairdii]</a> | 63.5 | 147 | 100% | 2e-10 | 94% | <a href="#">XP_006980340.1</a> |
| <a href="#">PREDICTED: fibulin-1 [Myotis brandtii]</a>                           | 63.5 | 140 | 100% | 3e-10 | 94% | <a href="#">XP_005886100.1</a> |
| <a href="#">fibulin-1 isoform 2 [Cricetulus griseus]</a>                         | 63.5 | 147 | 100% | 3e-10 | 94% | <a href="#">ERE86479.1</a>     |
| <a href="#">unnamed protein product [Mus musculus]</a>                           | 63.5 | 148 | 100% | 3e-10 | 94% | <a href="#">BAC39669.1</a>     |
| <a href="#">fibulin-1 A [Homo sapiens]</a>                                       | 63.2 | 142 | 100% | 3e-10 | 94% | <a href="#">CAA37770.1</a>     |
| <a href="#">TPA: fibulin 1 [Bos taurus]</a>                                      | 63.5 | 141 | 100% | 3e-10 | 94% | <a href="#">DAA29013.1</a>     |
| <a href="#">fibulin-1 precursor [Bos taurus]</a>                                 | 63.5 | 141 | 100% | 3e-10 | 94% | <a href="#">NP_001091498.1</a> |
| <a href="#">PREDICTED: fibulin-1 isoform X2 [Bison bison bison]</a>              | 63.2 | 140 | 100% | 3e-10 | 94% | <a href="#">XP_010835915.1</a> |
| <a href="#">fibulin-1 isoform 2 [Cricetulus griseus]</a>                         | 63.5 | 147 | 100% | 3e-10 | 94% | <a href="#">ERE86478.1</a>     |

## Alignments

[Download](#) [GenPept](#) [Graphics](#)

[Next](#) [Previous](#) [Descriptions](#)

unnamed protein product [Mus musculus]

Sequence ID: [dbj|BAE35396.1](#) Length: 228 Number of Matches: 1

Range 1: 46 to 76 [GenPept](#) [Graphics](#)

[Next Match](#) [Previous Match](#)

| Score          | Expect | Method                       | Identities | Positives  | Gaps     |
|----------------|--------|------------------------------|------------|------------|----------|
| 64.3 bits(155) | 1e-11  | Compositional matrix adjust. | 29/31(94%) | 30/31(96%) | 0/31(0%) |

Query 1 RNCQDIDECVTGIHNCSIDETCFNIQGGFRC 31  
 RNCQDIDECVTGIHNCSEI+ETCFNIQG FRC  
 Sbjct 46 RNCQDIDECVTGIHNCSEI+ETCFNIQGSFRC 76

### Related Information

[Gene](#) - associated gene details

[Download](#) [GenPept](#) [Graphics](#)

[Next](#) [Previous](#) [Descriptions](#)

PREDICTED: fibulin-1, partial [Oryctolagus cuniculus]

Sequence ID: [ref|XP\\_008250507.1](#) Length: 246 Number of Matches: 1

Range 1: 64 to 94 [GenPept](#) [Graphics](#)

[Next Match](#) [Previous Match](#)

| Score          | Expect | Method                       | Identities | Positives  | Gaps     |
|----------------|--------|------------------------------|------------|------------|----------|
| 63.9 bits(154) | 2e-11  | Compositional matrix adjust. | 28/31(90%) | 30/31(96%) | 0/31(0%) |

Query 1 RNCQDIDECVTGIHNCSIDETCFNIQGGFRC 31  
 RNCQDIDECVTG+HNCSI+ETCFNIQG FRC  
 Sbjct 64 RNCQDIDECVTGVHNCSEI+ETCFNIQGSFRC 94

### Related Information

[Gene](#) - associated gene details

[Map Viewer](#) - aligned genomic context

[Download](#) [GenPept](#) [Graphics](#)

[Next](#) [Previous](#) [Descriptions](#)

PREDICTED: fibulin-1-like, partial [Papio anubis]  
 Sequence ID: [ref|XP\\_009215764.1|](#) Length: 451 Number of Matches: 1

Range 1: 269 to 299 [GenPept](#) [Graphics](#) ▼ Next Match ▲ Previous Match

| Score          | Expect                           | Method                       | Identities | Positives   | Gaps     |
|----------------|----------------------------------|------------------------------|------------|-------------|----------|
| 65.9 bits(159) | 2e-11                            | Compositional matrix adjust. | 30/31(97%) | 31/31(100%) | 0/31(0%) |
| Query 1        | RNCQDIDECVTGIHNC SIDETCFNIQGGFRC | 31                           |            |             |          |
| Sbjct 269      | RNCQDIDECVTGIHNC SI+ETCFNIQGGFRC | 299                          |            |             |          |

**Related Information**  
[Gene](#) - associated gene details  
[Map Viewer](#) - aligned genomic context

[Download](#) ▼ [GenPept](#) [Graphics](#) Sort by: E value ▼ Next ▲ Previous ▲ Descriptions

PREDICTED: fibulin-1 [Bubalus bubalis]  
 Sequence ID: [ref|XP\\_006063368.1|](#) Length: 944 Number of Matches: 3

Range 1: 762 to 792 [GenPept](#) [Graphics](#) ▼ Next Match ▲ Previous Match

| Score          | Expect                           | Method                       | Identities | Positives   | Gaps     |
|----------------|----------------------------------|------------------------------|------------|-------------|----------|
| 66.6 bits(161) | 2e-11                            | Compositional matrix adjust. | 30/31(97%) | 31/31(100%) | 0/31(0%) |
| Query 1        | RNCQDIDECVTGIHNC SIDETCFNIQGGFRC | 31                           |            |             |          |
| Sbjct 762      | RNCQDIDECVTGIHNC SI+ETCFNIQGGFRC | 792                          |            |             |          |

**Related Information**  
[Gene](#) - associated gene details  
[Map Viewer](#) - aligned genomic context

Range 2: 454 to 483 [GenPept](#) [Graphics](#) ▼ Next Match ▲ Previous Match ▲ First Match

| Score         | Expect                          | Method                       | Identities | Positives  | Gaps     |
|---------------|---------------------------------|------------------------------|------------|------------|----------|
| 40.0 bits(92) | 0.037                           | Compositional matrix adjust. | 15/30(50%) | 22/30(73%) | 0/30(0%) |
| Query 2       | NCQDIDECVTGIHNC SIDETCFNIQGGFRC | 31                           |            |            |          |
| Sbjct 454     | +C+D+EC+TG NC + E+C N G FRC     | 483                          |            |            |          |

Range 3: 500 to 529 [GenPept](#) [Graphics](#) ▼ Next Match ▲ Previous Match ▲ First Match

| Score         | Expect                          | Method                       | Identities | Positives  | Gaps     |
|---------------|---------------------------------|------------------------------|------------|------------|----------|
| 39.7 bits(91) | 0.041                           | Compositional matrix adjust. | 18/30(60%) | 21/30(70%) | 0/30(0%) |
| Query 2       | NCQDIDECVTGIHNC SIDETCFNIQGGFRC | 31                           |            |            |          |
| Sbjct 500     | +C+DIDEC +GIHNC D C N G FRC     | 529                          |            |            |          |

[Download](#) ▼ [GenPept](#) [Graphics](#) Sort by: E value ▼ Next ▲ Previous ▲ Descriptions

PREDICTED: fibulin-1 [Ovis aries]  
 Sequence ID: [ref|XP\\_004007703.1|](#) Length: 953 Number of Matches: 3

Range 1: 771 to 801 [GenPept](#) [Graphics](#) ▼ Next Match ▲ Previous Match

| Score          | Expect                           | Method                       | Identities | Positives   | Gaps     |
|----------------|----------------------------------|------------------------------|------------|-------------|----------|
| 66.2 bits(160) | 3e-11                            | Compositional matrix adjust. | 30/31(97%) | 31/31(100%) | 0/31(0%) |
| Query 1        | RNCQDIDECVTGIHNC SIDETCFNIQGGFRC | 31                           |            |             |          |
| Sbjct 771      | RNCQDIDECVTGIHNC SI+ETCFNIQGGFRC | 801                          |            |             |          |

**Related Information**  
[Gene](#) - associated gene details  
[UniGene](#) - clustered expressed sequence tags  
[Map Viewer](#) - aligned genomic context

Range 2: 508 to 537 [GenPept](#) [Graphics](#) ▼ Next Match ▲ Previous Match ▲ First Match

| Score         | Expect                          | Method                       | Identities | Positives  | Gaps     |
|---------------|---------------------------------|------------------------------|------------|------------|----------|
| 39.7 bits(91) | 0.045                           | Compositional matrix adjust. | 18/30(60%) | 21/30(70%) | 0/30(0%) |
| Query 2       | NCQDIDECVTGIHNC SIDETCFNIQGGFRC | 31                           |            |            |          |
| Sbjct 508     | +C+DIDEC +GIHNC D C N G FRC     | 537                          |            |            |          |

Range 3: 462 to 491 [GenPept](#) [Graphics](#) ▼ Next Match ▲ Previous Match ▲ First Match

| Score         | Expect                          | Method                       | Identities | Positives  | Gaps     |
|---------------|---------------------------------|------------------------------|------------|------------|----------|
| 38.9 bits(89) | 0.081                           | Compositional matrix adjust. | 15/30(50%) | 21/30(70%) | 0/30(0%) |
| Query 2       | NCQDIDECVTGIHNC SIDETCFNIQGGFRC | 31                           |            |            |          |
| Sbjct 462     | +C+D++EC+ G NC + ETC N G FRC    | 491                          |            |            |          |





▶ NCBI/ BLAST/ blastp suite/ Formatting Results - B9E2HR6A01R

[Edit and Resubmit](#) [Save Search Strategies](#) [▶ Formatting options](#) [▶ Download](#)

**FBLN1\_RNCQDIDECVTGIHNC SINETCFNIQGGFRC\_NonMod**

[YouTube](#) [How to read this page](#) [Blast report description](#)

**RID** [B9E2HR6A01R](#) (Expires on 01-14 13:16 pm)

**Query ID** |cl|199112  
**Description** None  
**Molecule type** amino acid  
**Query Length** 31

**Database Name** nr  
**Description** All non-redundant GenBank CDS translations+PDB+SwissProt+PIR excluding environmental samples from WGS projects  
**Program** BLASTP 2.2.30+ [▶ Citation](#)

Other reports: [▶ Search Summary](#) [\[Taxonomy reports\]](#) [\[Distance tree of results\]](#) [\[Multiple alignment\]](#)

**Graphic Summary**

Show Conserved Domains

Putative conserved domains have been detected, click on the image below for detailed results.

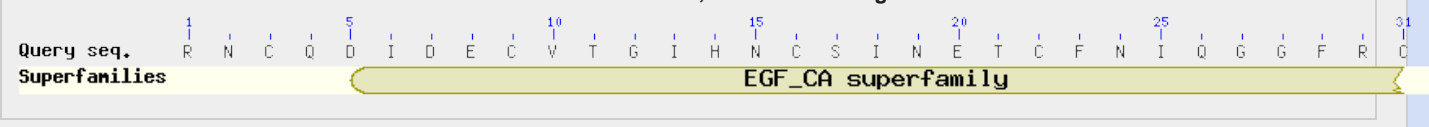

Distribution of 484 Blast Hits on the Query Sequence

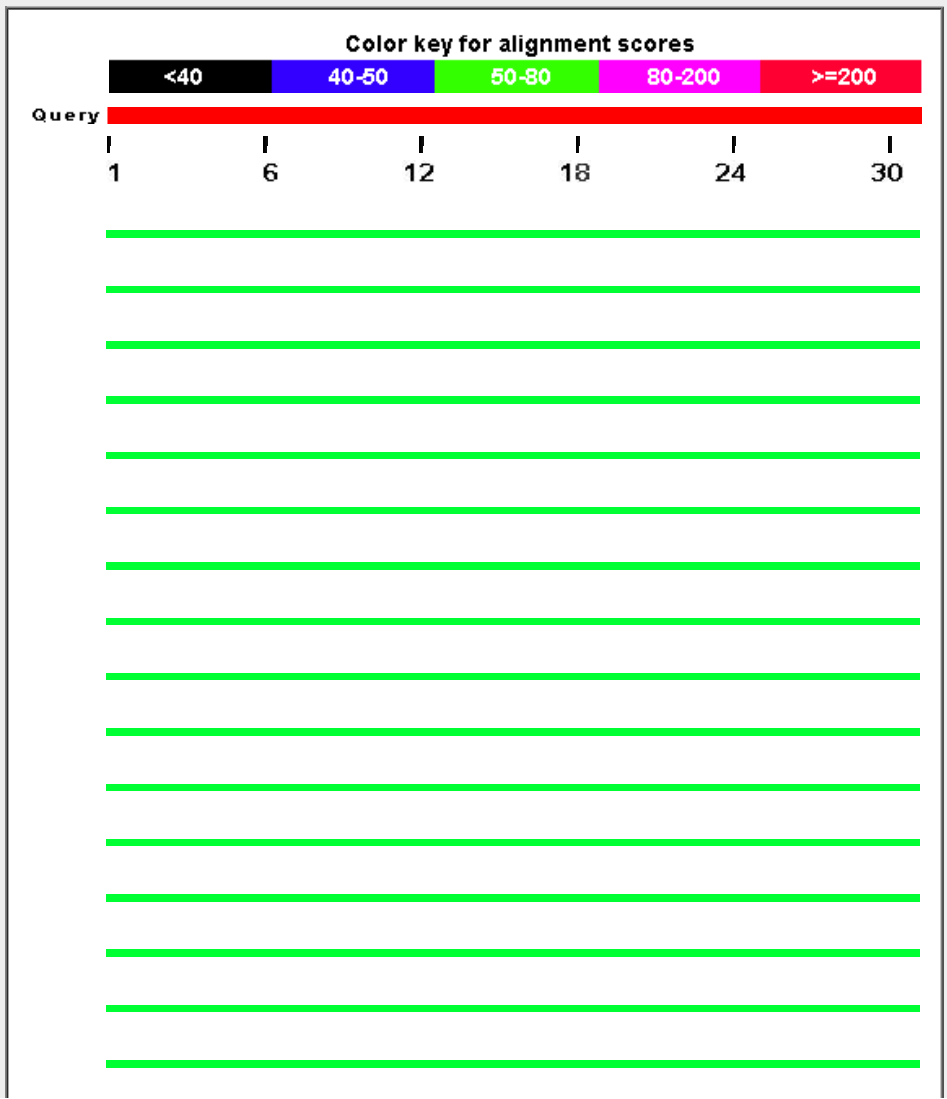

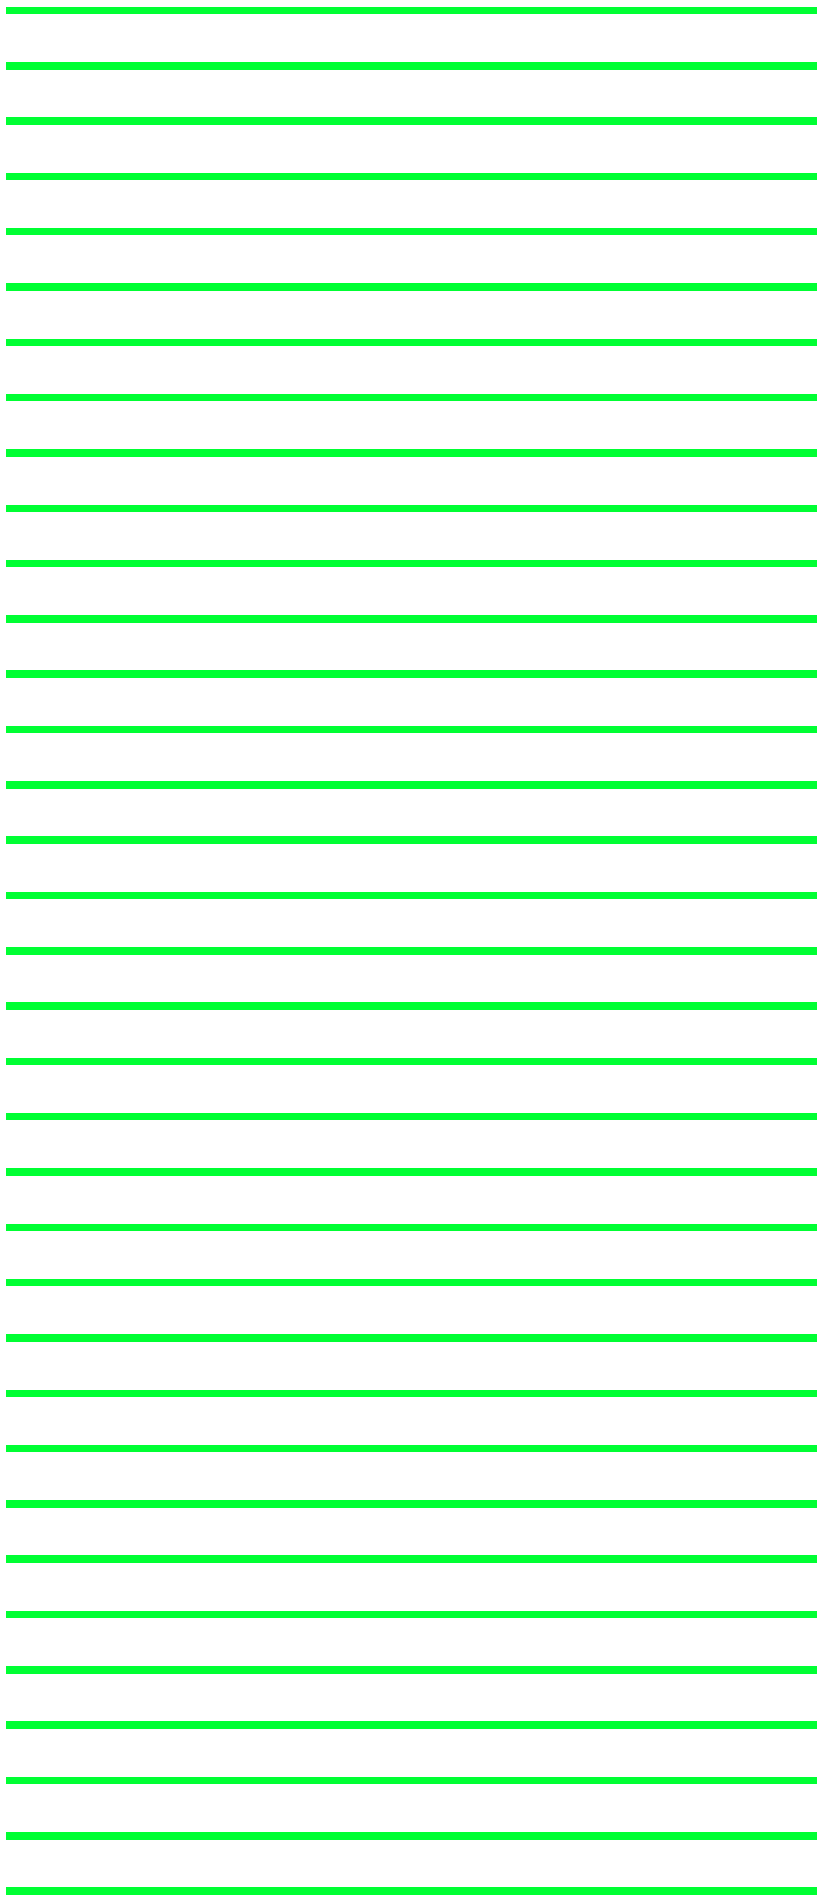

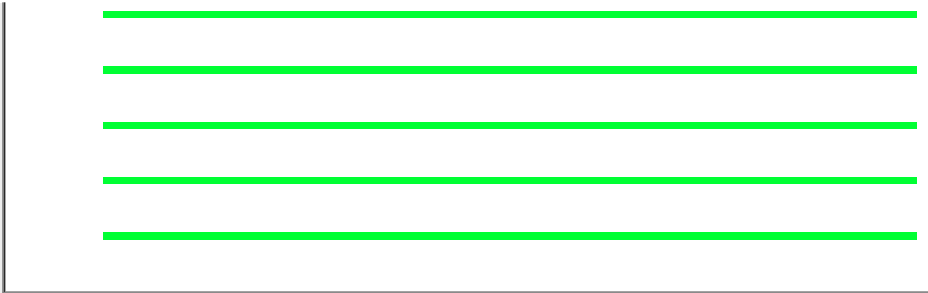

**Descriptions**

**Sequences producing significant alignments:**

Select: [All](#) [None](#) Selected:0

| <a href="#">↑</a> <a href="#">Alignments</a> <a href="#">Download</a> <a href="#">GenPept</a> <a href="#">Graphics</a> <a href="#">Distance tree of results</a> <a href="#">Multiple alignment</a>  |           |             |             |         |       |                                             |  |
|----------------------------------------------------------------------------------------------------------------------------------------------------------------------------------------------------------------------------------------------------------------------------------------|-----------|-------------|-------------|---------|-------|---------------------------------------------|--|
| Description                                                                                                                                                                                                                                                                            | Max score | Total score | Query cover | E value | Ident | Accession                                   |  |
| <a href="#">PREDICTED: fibulin-1 [Galeopterus variegatus]</a>                                                                                                                                                                                                                          | 75.1      | 236         | 100%        | 7e-15   | 100%  | <a href="#">gi 667341505 XP_008562356.1</a> |  |
| <a href="#">PREDICTED: fibulin-1-like [Papio anubis]</a>                                                                                                                                                                                                                               | 75.1      | 110         | 100%        | 1e-14   | 100%  | <a href="#">gi 685570016 XP_009215764.1</a> |  |
| <a href="#">unknown [Homo sapiens]</a>                                                                                                                                                                                                                                                 | 75.1      | 235         | 100%        | 1e-14   | 100%  | <a href="#">gi 10441928 AAG17241.1</a>      |  |
| <a href="#">unnamed protein product [Mus musculus]</a>                                                                                                                                                                                                                                 | 72.8      | 72.8        | 100%        | 1e-14   | 97%   | <a href="#">gi 74204653 BAE35396.1</a>      |  |
| <a href="#">PREDICTED: fibulin-1 isoform X4 [Rhinopithecus roxellana]</a>                                                                                                                                                                                                              | 75.1      | 233         | 100%        | 1e-14   | 100%  | <a href="#">gi 724795561 XP_010365649.1</a> |  |
| <a href="#">PREDICTED: fibulin-1 isoform X3 [Rhinopithecus roxellana]</a>                                                                                                                                                                                                              | 75.1      | 233         | 100%        | 2e-14   | 100%  | <a href="#">gi 724795558 XP_010365573.1</a> |  |
| <a href="#">fibulin-1 isoform A precursor [Homo sapiens]</a>                                                                                                                                                                                                                           | 75.1      | 235         | 100%        | 2e-14   | 100%  | <a href="#">gi 34734068 NP_006478.2</a>     |  |
| <a href="#">PREDICTED: fibulin-1 isoform X2 [Pan paniscus]</a>                                                                                                                                                                                                                         | 75.1      | 235         | 100%        | 2e-14   | 100%  | <a href="#">gi 675717942 XP_008963042.1</a> |  |
| <a href="#">fibulin 1, isoform CRA_b [Homo sapiens]</a>                                                                                                                                                                                                                                | 75.1      | 235         | 100%        | 2e-14   | 100%  | <a href="#">gi 119593792 EAW73386.1</a>     |  |
| <a href="#">PREDICTED: LOW QUALITY PROTEIN: fibulin-1-like [Galeopterus]</a>                                                                                                                                                                                                           | 75.1      | 236         | 100%        | 2e-14   | 100%  | <a href="#">gi 667294707 XP_008579007.1</a> |  |
| <a href="#">RecName: Full=Fibulin-1; Short=FIBL-1 [Chlorocebus aethiops]</a>                                                                                                                                                                                                           | 75.1      | 199         | 100%        | 2e-14   | 100%  | <a href="#">gi 30580425 Q8MJJ9.1</a>        |  |
| <a href="#">fibulin-1 isoform B precursor [Homo sapiens]</a>                                                                                                                                                                                                                           | 75.1      | 235         | 100%        | 2e-14   | 100%  | <a href="#">gi 34734064 NP_006476.2</a>     |  |
| <a href="#">PREDICTED: fibulin-1-like [Leptonychotes weddellii]</a>                                                                                                                                                                                                                    | 75.1      | 235         | 100%        | 2e-14   | 100%  | <a href="#">gi 585183989 XP_006743570.1</a> |  |
| <a href="#">unnamed protein product [Homo sapiens]</a>                                                                                                                                                                                                                                 | 75.1      | 235         | 100%        | 2e-14   | 100%  | <a href="#">gi 22761800 BAC11705.1</a>      |  |
| <a href="#">PREDICTED: fibulin-1 isoform X2 [Rhinopithecus roxellana]</a>                                                                                                                                                                                                              | 75.1      | 233         | 100%        | 2e-14   | 100%  | <a href="#">gi 724795555 XP_010365494.1</a> |  |
| <a href="#">unnamed protein product [Homo sapiens]</a>                                                                                                                                                                                                                                 | 75.1      | 235         | 100%        | 2e-14   | 100%  | <a href="#">gi 194374697 BAG62463.1</a>     |  |
| <a href="#">PREDICTED: fibulin-1 [Macaca fascicularis]</a>                                                                                                                                                                                                                             | 75.1      | 233         | 100%        | 2e-14   | 100%  | <a href="#">gi 544461232 XP_005567067.1</a> |  |
| <a href="#">PREDICTED: fibulin-1 [Gorilla gorilla gorilla]</a>                                                                                                                                                                                                                         | 75.1      | 235         | 100%        | 2e-14   | 100%  | <a href="#">gi 426394827 XP_004063688.1</a> |  |
| <a href="#">PREDICTED: fibulin-1 isoform X1 [Pan paniscus]</a>                                                                                                                                                                                                                         | 75.1      | 235         | 100%        | 2e-14   | 100%  | <a href="#">gi 397482444 XP_003812435.1</a> |  |
| <a href="#">PREDICTED: fibulin-1 [Loxodonta africana]</a>                                                                                                                                                                                                                              | 75.1      | 269         | 100%        | 2e-14   | 100%  | <a href="#">gi 731510789 XP_010598758.1</a> |  |
| <a href="#">PREDICTED: fibulin-1 [Elephantulus edwardii]</a>                                                                                                                                                                                                                           | 75.1      | 235         | 100%        | 2e-14   | 100%  | <a href="#">gi 585667023 XP_006888093.1</a> |  |
| <a href="#">PREDICTED: fibulin-1 [Tarsius syrichta]</a>                                                                                                                                                                                                                                | 75.1      | 269         | 100%        | 2e-14   | 100%  | <a href="#">gi 640794658 XP_008053358.1</a> |  |
| <a href="#">PREDICTED: fibulin-1 [Balaenoptera acutorostrata scammoni]</a>                                                                                                                                                                                                             | 75.1      | 197         | 100%        | 2e-14   | 100%  | <a href="#">gi 594683418 XP_007189256.1</a> |  |
| <a href="#">PREDICTED: fibulin-1 [Physeter catodon]</a>                                                                                                                                                                                                                                | 75.1      | 232         | 100%        | 2e-14   | 100%  | <a href="#">gi 593746998 XP_007128800.1</a> |  |
| <a href="#">PREDICTED: fibulin-1 [Orcinus orca]</a>                                                                                                                                                                                                                                    | 75.1      | 232         | 100%        | 2e-14   | 100%  | <a href="#">gi 466057370 XP_004279635.1</a> |  |
| <a href="#">PREDICTED: fibulin-1 [Ictidomys tridecemlineatus]</a>                                                                                                                                                                                                                      | 75.1      | 202         | 100%        | 2e-14   | 100%  | <a href="#">gi 532098910 XP_005335099.1</a> |  |
| <a href="#">PREDICTED: fibulin-1 isoform X1 [Rhinopithecus roxellana]</a>                                                                                                                                                                                                              | 75.1      | 233         | 100%        | 2e-14   | 100%  | <a href="#">gi 724795552 XP_010365413.1</a> |  |
| <a href="#">PREDICTED: fibulin-1 [Jaculus jaculus]</a>                                                                                                                                                                                                                                 | 75.1      | 238         | 100%        | 2e-14   | 100%  | <a href="#">gi 507532747 XP_004650445.1</a> |  |
| <a href="#">PREDICTED: fibulin-1 isoform X2 [Nannospalax galii]</a>                                                                                                                                                                                                                    | 75.1      | 236         | 100%        | 2e-14   | 100%  | <a href="#">gi 674071544 XP_008842913.1</a> |  |
| <a href="#">fibulin-1 isoform C precursor [Homo sapiens]</a>                                                                                                                                                                                                                           | 75.1      | 235         | 100%        | 2e-14   | 100%  | <a href="#">gi 34734062 NP_001987.2</a>     |  |

|                                                                                   |      |      |      |       |      |                                             |
|-----------------------------------------------------------------------------------|------|------|------|-------|------|---------------------------------------------|
| <a href="#">PREDICTED: fibulin-1 isoform X2 [Erinaceus europaeus]</a>             | 75.1 | 235  | 100% | 2e-14 | 100% | <a href="#">gi 617642052 XP_007531965.1</a> |
| <a href="#">PREDICTED: fibulin-1 isoform 2 [Odobenus rosmarus divergens]</a>      | 75.1 | 235  | 100% | 2e-14 | 100% | <a href="#">gi 472393253 XP_004415897.1</a> |
| <a href="#">PREDICTED: fibulin-1 isoform 2 [Trichechus manatus latirostris]</a>   | 75.1 | 236  | 100% | 2e-14 | 100% | <a href="#">gi 471390788 XP_004380068.1</a> |
| <a href="#">PREDICTED: fibulin-1 isoform X4 [Lipotes vexillifer]</a>              | 75.1 | 232  | 100% | 2e-14 | 100% | <a href="#">gi 602683431 XP_007453975.1</a> |
| <a href="#">PREDICTED: fibulin-1 isoform X3 [Lipotes vexillifer]</a>              | 75.1 | 232  | 100% | 2e-14 | 100% | <a href="#">gi 602683429 XP_007453974.1</a> |
| <a href="#">PREDICTED: fibulin-1 [Otolemur garnettii]</a>                         | 75.1 | 237  | 100% | 2e-14 | 100% | <a href="#">gi 395819580 XP_003783160.1</a> |
| <a href="#">PREDICTED: fibulin-1 isoform X2 [Canis lupus familiaris]</a>          | 75.1 | 237  | 100% | 2e-14 | 100% | <a href="#">gi 545514461 XP_005625812.1</a> |
| <a href="#">PREDICTED: fibulin-1 [Oryctolagus cuniculus]</a>                      | 72.4 | 72.4 | 100% | 2e-14 | 94%  | <a href="#">gi 655897280 XP_008250507.1</a> |
| <a href="#">fibulin_1_isoform CRA f [Homo sapiens]</a>                            | 75.1 | 235  | 100% | 2e-14 | 100% | <a href="#">gi 119593796 EAW73390.1</a>     |
| <a href="#">PREDICTED: fibulin-1 isoform X1 [Nannospalax galii]</a>               | 75.1 | 236  | 100% | 2e-14 | 100% | <a href="#">gi 674071542 XP_008842912.1</a> |
| <a href="#">PREDICTED: fibulin-1 [Pan troglodytes]</a>                            | 75.1 | 235  | 100% | 2e-14 | 100% | <a href="#">gi 694983727 XP_009436873.1</a> |
| <a href="#">RecName: Full=Fibulin-1; Short=FIBL-1; Flags: Precursor [Homo s;]</a> | 75.1 | 235  | 100% | 2e-14 | 100% | <a href="#">gi 215274249 P23142.4</a>       |
| <a href="#">fibulin-1 isoform D precursor [Homo sapiens]</a>                      | 75.1 | 235  | 100% | 2e-14 | 100% | <a href="#">gi 34734066 NP_006477.2</a>     |
| <a href="#">PREDICTED: fibulin-1 isoform X1 [Erinaceus europaeus]</a>             | 75.1 | 235  | 100% | 2e-14 | 100% | <a href="#">gi 617642049 XP_007531964.1</a> |
| <a href="#">PREDICTED: fibulin-1 isoform 1 [Odobenus rosmarus divergens]</a>      | 75.1 | 235  | 100% | 2e-14 | 100% | <a href="#">gi 472393251 XP_004415896.1</a> |
| <a href="#">PREDICTED: fibulin-1 isoform 1 [Trichechus manatus latirostris]</a>   | 75.1 | 236  | 100% | 2e-14 | 100% | <a href="#">gi 471390784 XP_004380067.1</a> |
| <a href="#">PREDICTED: fibulin-1 isoform X2 [Lipotes vexillifer]</a>              | 75.1 | 232  | 100% | 2e-14 | 100% | <a href="#">gi 602683427 XP_007453973.1</a> |
| <a href="#">PREDICTED: fibulin-1 isoform X1 [Lipotes vexillifer]</a>              | 75.1 | 232  | 100% | 2e-14 | 100% | <a href="#">gi 602683425 XP_007453972.1</a> |
| <a href="#">PREDICTED: fibulin-1 isoform X1 [Canis lupus familiaris]</a>          | 75.1 | 237  | 100% | 2e-14 | 100% | <a href="#">gi 545514459 XP_005625811.1</a> |
| <a href="#">PREDICTED: fibulin-1 [Chrysochloris asiatica]</a>                     | 75.1 | 234  | 100% | 2e-14 | 100% | <a href="#">gi 586472756 XP_006866955.1</a> |
| <a href="#">PREDICTED: fibulin-1 [Nomascus leucogenys]</a>                        | 75.1 | 235  | 100% | 2e-14 | 100% | <a href="#">gi 441618218 XP_003281320.2</a> |
| <a href="#">PREDICTED: fibulin-1 isoform 2 [Macaca mulatta]</a>                   | 75.1 | 198  | 100% | 2e-14 | 100% | <a href="#">gi 297261301 XP_001109966.2</a> |
| <a href="#">PREDICTED: fibulin-1 [Mustela putorius furo]</a>                      | 75.1 | 269  | 100% | 2e-14 | 100% | <a href="#">gi 511992630 XP_004813974.1</a> |
| <a href="#">PREDICTED: fibulin-1 [Equus przewalskii]</a>                          | 74.7 | 202  | 100% | 2e-14 | 97%  | <a href="#">gi 664743621 XP_008529127.1</a> |
| <a href="#">PREDICTED: fibulin-1 [Mustela putorius furo]</a>                      | 75.1 | 269  | 100% | 2e-14 | 100% | <a href="#">gi 511903702 XP_004771346.1</a> |
| <a href="#">PREDICTED: fibulin-1 [Pongo abelii]</a>                               | 75.1 | 235  | 100% | 2e-14 | 100% | <a href="#">gi 686764893 XP_009232751.1</a> |
| <a href="#">PREDICTED: fibulin-1 [Bubalus bubalis]</a>                            | 75.1 | 234  | 100% | 2e-14 | 100% | <a href="#">gi 594079384 XP_006063368.1</a> |
| <a href="#">PREDICTED: fibulin-1 [Ovis aries]</a>                                 | 75.1 | 233  | 100% | 2e-14 | 100% | <a href="#">gi 426227186 XP_004007703.1</a> |
| <a href="#">PREDICTED: fibulin-1 isoform X2 [Camelus ferus]</a>                   | 74.7 | 234  | 100% | 2e-14 | 97%  | <a href="#">gi 560900629 XP_006176723.1</a> |
| <a href="#">PREDICTED: fibulin-1-like [Echinops telfairi]</a>                     | 74.7 | 236  | 100% | 2e-14 | 97%  | <a href="#">gi 507635833 XP_004700279.1</a> |
| <a href="#">PREDICTED: fibulin-1 isoform X2 [Vicugna pacos]</a>                   | 74.7 | 236  | 100% | 2e-14 | 97%  | <a href="#">gi 560980789 XP_006212641.1</a> |
| <a href="#">PREDICTED: fibulin-1 isoform X1 [Camelus ferus]</a>                   | 74.7 | 234  | 100% | 3e-14 | 97%  | <a href="#">gi 560900627 XP_006176722.1</a> |
| <a href="#">PREDICTED: fibulin-1 isoform X1 [Vicugna pacos]</a>                   | 74.7 | 236  | 100% | 3e-14 | 97%  | <a href="#">gi 560980787 XP_006212640.1</a> |
| <a href="#">PREDICTED: fibulin-1 isoform X2 [Chinchilla lanigera]</a>             | 74.7 | 233  | 100% | 3e-14 | 97%  | <a href="#">gi 533128844 XP_005379549.1</a> |
| <a href="#">PREDICTED: fibulin-1 isoform X2 [Ochotona princeps]</a>               | 74.7 | 235  | 100% | 3e-14 | 97%  | <a href="#">gi 504155089 XP_004589482.1</a> |
| <a href="#">PREDICTED: fibulin-1 [Tupaia chinensis]</a>                           | 74.7 | 263  | 100% | 3e-14 | 97%  | <a href="#">gi 562873654 XP_006164720.1</a> |
| <a href="#">PREDICTED: LOW QUALITY PROTEIN: fibulin-1 [Cavia porcellus]</a>       | 74.7 | 235  | 100% | 3e-14 | 97%  | <a href="#">gi 514443922 XP_004999606.1</a> |
| <a href="#">PREDICTED: fibulin-1 isoform X1 [Chinchilla lanigera]</a>             | 74.7 | 233  | 100% | 3e-14 | 97%  | <a href="#">gi 533128842 XP_005379548.1</a> |
| <a href="#">PREDICTED: fibulin-1 isoform X1 [Ochotona princeps]</a>               | 74.7 | 235  | 100% | 3e-14 | 97%  | <a href="#">gi 504155087 XP_004589481.1</a> |
| <a href="#">PREDICTED: fibulin-1 [Felis catus]</a>                                | 74.7 | 237  | 100% | 3e-14 | 97%  | <a href="#">gi 586993905 XP_006934231.1</a> |
| <a href="#">PREDICTED: fibulin-1 [Equus caballus]</a>                             | 74.7 | 202  | 100% | 3e-14 | 97%  | <a href="#">gi 545206896 XP_005606874.1</a> |
| <a href="#">PREDICTED: fibulin-1 [Octodon degus]</a>                              | 74.7 | 267  | 100% | 3e-14 | 97%  | <a href="#">gi 507693081 XP_004642514.1</a> |
| <a href="#">fibulin-1 isoform C precursor [Camelus ferus]</a>                     | 74.7 | 191  | 100% | 3e-14 | 97%  | <a href="#">gi 528767382 EPY87041.1</a>     |
| <a href="#">PREDICTED: fibulin-1 isoform X2 [Sorex araneus]</a>                   | 74.3 | 234  | 100% | 4e-14 | 94%  | <a href="#">gi 505830669 XP_004610628.1</a> |
| <a href="#">PREDICTED: fibulin-1 isoform X1 [Sorex araneus]</a>                   | 74.3 | 234  | 100% | 4e-14 | 94%  | <a href="#">gi 505830667 XP_004610627.1</a> |
| <a href="#">Fibulin-1 [Tupaia chinensis]</a>                                      | 74.7 | 220  | 100% | 4e-14 | 97%  | <a href="#">gi 444519033 ELV12523.1</a>     |

|                                                                                  |      |     |      |       |      |                                             |
|----------------------------------------------------------------------------------|------|-----|------|-------|------|---------------------------------------------|
| <a href="#">PREDICTED: fibulin-1 isoform 2 [Ceratotherium simum simum]</a>       | 73.9 | 236 | 100% | 5e-14 | 97%  | <a href="#">gij478527715 XP_004438039.1</a> |
| <a href="#">PREDICTED: fibulin-1 isoform 1 [Ceratotherium simum simum]</a>       | 73.9 | 236 | 100% | 5e-14 | 97%  | <a href="#">gij478527713 XP_004438038.1</a> |
| <a href="#">PREDICTED: fibulin-1 [Oryzteropus afer afer]</a>                     | 73.2 | 233 | 100% | 8e-14 | 97%  | <a href="#">gij634889474 XP_007953835.1</a> |
| <a href="#">Fibulin 1 [Homo sapiens]</a>                                         | 73.2 | 233 | 96%  | 9e-14 | 100% | <a href="#">gij18490682 AAH22497.1</a>      |
| <a href="#">fibulin_1 [synthetic construct]</a>                                  | 73.2 | 233 | 96%  | 9e-14 | 100% | <a href="#">gij123994743 ABM84973.1</a>     |
| <a href="#">PREDICTED: fibulin-1 isoform X3 [Chlorocebus sabaueus]</a>           | 72.8 | 231 | 100% | 1e-13 | 97%  | <a href="#">gij635102866 XP_007974271.1</a> |
| <a href="#">fibulin-1 A [Homo sapiens]</a>                                       | 72.8 | 233 | 100% | 1e-13 | 97%  | <a href="#">gij31415 CAA37770.1</a>         |
| <a href="#">fibulin_1 precursor, splice form B - human [Homo sapiens]</a>        | 72.8 | 233 | 100% | 1e-13 | 97%  | <a href="#">gij106017 B36346</a>            |
| <a href="#">Fibulin-1 [Cricetulus griseus]</a>                                   | 72.8 | 202 | 100% | 1e-13 | 97%  | <a href="#">gij344257685 EGW13789.1</a>     |
| <a href="#">PREDICTED: fibulin-1 [Eptesicus fuscus]</a>                          | 72.8 | 196 | 100% | 1e-13 | 97%  | <a href="#">gij641727121 XP_008153634.1</a> |
| <a href="#">PREDICTED: fibulin-1 isoform X2 [Cricetulus griseus]</a>             | 72.8 | 238 | 100% | 1e-13 | 97%  | <a href="#">gij625255711 XP_007619196.1</a> |
| <a href="#">PREDICTED: fibulin-1 isoform X4 [Microtus ochrogaster]</a>           | 72.8 | 238 | 100% | 1e-13 | 97%  | <a href="#">gij532022189 XP_005354460.1</a> |
| <a href="#">PREDICTED: fibulin-1 isoform X3 [Microtus ochrogaster]</a>           | 72.8 | 238 | 100% | 1e-13 | 97%  | <a href="#">gij532022187 XP_005354459.1</a> |
| <a href="#">PREDICTED: fibulin-1 [Myotis brandtii]</a>                           | 72.8 | 196 | 100% | 1e-13 | 97%  | <a href="#">gij554589517 XP_005886100.1</a> |
| <a href="#">PREDICTED: fibulin-1 isoform X2 [Chlorocebus sabaueus]</a>           | 72.8 | 231 | 100% | 1e-13 | 97%  | <a href="#">gij635102864 XP_007974270.1</a> |
| <a href="#">fibulin-1 C [Homo sapiens]</a>                                       | 72.8 | 233 | 100% | 1e-13 | 97%  | <a href="#">gij31419 CAA37772.1</a>         |
| <a href="#">PREDICTED: fibulin-1 isoform X2 [Peromyscus maniculatus bairdii]</a> | 72.8 | 238 | 100% | 1e-13 | 97%  | <a href="#">gij589935133 XP_006980340.1</a> |
| <a href="#">PREDICTED: fibulin-1 isoform X1 [Mus musculus]</a>                   | 72.8 | 239 | 100% | 1e-13 | 97%  | <a href="#">gij568991352 XP_006520500.1</a> |
| <a href="#">unnamed protein product [Mus musculus]</a>                           | 72.8 | 239 | 100% | 1e-13 | 97%  | <a href="#">gij26352065 BAC39669.1</a>      |
| <a href="#">PREDICTED: fibulin-1 isoform X1 [Rattus norvegicus]</a>              | 72.8 | 239 | 100% | 1e-13 | 97%  | <a href="#">gij564361379 XP_006242223.1</a> |
| <a href="#">PREDICTED: fibulin-1 isoform X2 [Sus scrofa]</a>                     | 72.8 | 232 | 100% | 1e-13 | 97%  | <a href="#">gij545824398 XP_005663793.1</a> |
| <a href="#">PREDICTED: fibulin-1 [Myotis davidii]</a>                            | 72.8 | 196 | 100% | 1e-13 | 97%  | <a href="#">gij584059500 XP_006774235.1</a> |
| <a href="#">PREDICTED: fibulin-1 isoform X2 [Microtus ochrogaster]</a>           | 72.8 | 238 | 100% | 1e-13 | 97%  | <a href="#">gij532022185 XP_005354458.1</a> |
| <a href="#">PREDICTED: fibulin-1 isoform X1 [Microtus ochrogaster]</a>           | 72.8 | 238 | 100% | 1e-13 | 97%  | <a href="#">gij532022183 XP_005354457.1</a> |

## Alignments

Download [GenPept](#) [Graphics](#) Sort by: E value [Next](#) [Previous](#) [Descriptions](#)

PREDICTED: fibulin-1, partial [Galeopterus variegatus]  
 Sequence ID: [gij667341505|ref|XP\\_008562356.1](#) Length: 384 Number of Matches: 5

Range 1: 339 to 369 [GenPept](#) [Graphics](#) [Next Match](#) [Previous Match](#)

| Score          | Expect | Identities  | Positives   | Gaps     |
|----------------|--------|-------------|-------------|----------|
| 75.1 bits(183) | 7e-15  | 31/31(100%) | 31/31(100%) | 0/31(0%) |

Query 1 RNCQDIDECVTGIHNCNSINETCFNIQGGFRC 31  
 RNCQDIDECVTGIHNCNSINETCFNIQGGFRC  
 Sbjct 339 RNCQDIDECVTGIHNCNSINETCFNIQGGFRC 369

### Related Information

[Gene](#) - associated gene details  
[Map Viewer](#) - aligned genomic context

Range 2: 31 to 60 [GenPept](#) [Graphics](#) [Next Match](#) [Previous Match](#) [First Match](#)

| Score          | Expect | Identities | Positives  | Gaps     |
|----------------|--------|------------|------------|----------|
| 47.4 bits(111) | 6e-05  | 16/30(53%) | 22/30(73%) | 0/30(0%) |

Query 2 NCQDIDECVTGIHNCNSINETCFNIQGGFRC 31  
 +C+DI+EC+ G HNC + E+C N G FRC  
 Sbjct 31 SCEDINECIMGSHNCLPDFICQNTLGSFRC 60

Range 3: 77 to 106 [GenPept](#) [Graphics](#) [Next Match](#) [Previous Match](#) [First Match](#)

| Score          | Expect | Identities | Positives  | Gaps     |
|----------------|--------|------------|------------|----------|
| 43.1 bits(100) | 0.002  | 17/30(57%) | 21/30(70%) | 0/30(0%) |

Query 2 NCQDIDECVTGIHNCNSINETCFNIQGGFRC 31  
 +C+DI+EC+GIHNC + C N G FRC  
 Sbjct 77 SCKDIDECESGIHNCNCLPDFICQNTLGSFRC 106

Range 4: 123 to 152 [GenPept](#) [Graphics](#) [Next Match](#) [Previous Match](#) [First Match](#)

| Score         | Expect | Identities | Positives  | Gaps     |
|---------------|--------|------------|------------|----------|
| 35.4 bits(80) | 0.87   | 12/30(40%) | 19/30(63%) | 0/30(0%) |

Query 2 NCQDIDECVTGIHNCSINETCFNIQGGFRC 31  
 NC DI+EC++ C + +TC N +G + C  
 Sbjct 123 NCIDINECLSIAPCPVGTTCINTEGSYAC 152

Range 5: 297 to 325 [GenPept](#) [Graphics](#) [Next Match](#) [Previous Match](#) [First Match](#)

| Score         | Expect | Identities | Positives  | Gaps      |
|---------------|--------|------------|------------|-----------|
| 35.0 bits(79) | 1.2    | 17/31(55%) | 19/31(61%) | 4/31(12%) |

Query 3 CQDIDECV--TGIHNCSINETCFNIQGGFRC 31  
 C+DIDEC TG H CS C NI G F+C  
 Sbjct 297 CEDIDECALPTGGHICSYR--CINIPGSFQC 325

[Download](#) [GenPept](#) [Graphics](#) Sort by: E value [Next](#) [Previous](#) [Descriptions](#)

**PREDICTED: fibulin-1-like, partial [Papio anubis]**

Sequence ID: [gi|685570016|ref|XP\\_009215764.1](#) Length: 451 Number of Matches: 2

Range 1: 269 to 299 [GenPept](#) [Graphics](#) [Next Match](#) [Previous Match](#)

| Score          | Expect | Identities  | Positives   | Gaps     |
|----------------|--------|-------------|-------------|----------|
| 75.1 bits(183) | 1e-14  | 31/31(100%) | 31/31(100%) | 0/31(0%) |

Query 1 RNCQDIDECVTGIHNCSINETCFNIQGGFRC 31  
 RNCQDIDECVTGIHNCSINETCFNIQGGFRC  
 Sbjct 269 RNCQDIDECVTGIHNCSINETCFNIQGGFRC 299

Range 2: 227 to 255 [GenPept](#) [Graphics](#) [Next Match](#) [Previous Match](#) [First Match](#)

| Score         | Expect | Identities | Positives  | Gaps      |
|---------------|--------|------------|------------|-----------|
| 35.0 bits(79) | 1.3    | 17/31(55%) | 19/31(61%) | 4/31(12%) |

Query 3 CQDIDECV--TGIHNCSINETCFNIQGGFRC 31  
 C+DIDEC TG H CS C NI G F+C  
 Sbjct 227 CEDIDECALPTGGHICSYR--CINIPGSFQC 255

**Related Information**

[Gene](#) - associated gene details  
[Map Viewer](#) - aligned genomic context

[Download](#) [GenPept](#) [Graphics](#) Sort by: E value [Next](#) [Previous](#) [Descriptions](#)

**unknown [Homo sapiens]**

Sequence ID: [gi|10441928|gb|AAG17241.1|AF217999\\_1](#) Length: 495 Number of Matches: 5

Range 1: 391 to 421 [GenPept](#) [Graphics](#) [Next Match](#) [Previous Match](#)

| Score          | Expect | Identities  | Positives   | Gaps     |
|----------------|--------|-------------|-------------|----------|
| 75.1 bits(183) | 1e-14  | 31/31(100%) | 31/31(100%) | 0/31(0%) |

Query 1 RNCQDIDECVTGIHNCSINETCFNIQGGFRC 31  
 RNCQDIDECVTGIHNCSINETCFNIQGGFRC  
 Sbjct 391 RNCQDIDECVTGIHNCSINETCFNIQGGFRC 421

Range 2: 83 to 112 [GenPept](#) [Graphics](#) [Next Match](#) [Previous Match](#) [First Match](#)

| Score          | Expect | Identities | Positives  | Gaps     |
|----------------|--------|------------|------------|----------|
| 47.4 bits(111) | 8e-05  | 15/30(50%) | 23/30(76%) | 0/30(0%) |

Query 2 NCQDIDECVTGIHNCSINETCFNIQGGFRC 31  
 +C+D+EC+TG H+C + E+C N G FRC  
 Sbjct 83 SCEDVNECITGSHSRLGESCINTVGSFRC 112

Range 3: 129 to 158 [GenPept](#) [Graphics](#) [Next Match](#) [Previous Match](#) [First Match](#)

| Score          | Expect | Identities | Positives  | Gaps     |
|----------------|--------|------------|------------|----------|
| 43.1 bits(100) | 0.002  | 17/30(57%) | 21/30(70%) | 0/30(0%) |

Query 2 NCQDIDECVTGIHNCSINETCFNIQGGFRC 31  
 +C+DIDEC +GIHNC + C N G FRC  
 Sbjct 129 SCKDIDECESGIHNCLPDFICQNTLGSFRC 158

Range 4: 175 to 204 [GenPept](#) [Graphics](#) [Next Match](#) [Previous Match](#) [First Match](#)

| Score         | Expect | Identities | Positives  | Gaps     |
|---------------|--------|------------|------------|----------|
| 35.0 bits(79) | 1.3    | 13/30(43%) | 18/30(60%) | 0/30(0%) |

Query 2 NCQDIDECVTGIHNCSINETCFNIQGGFRC 31  
 NC DI+EC++ C I TC N +G + C  
 Sbjct 175 NCIDINECLSIAPCPIGHTTCINTEGSYTC 204

Range 5: 349 to 377 [GenPept](#) [Graphics](#) [Next Match](#) [Previous Match](#) [First Match](#)

| Score         | Expect | Identities | Positives  | Gaps      |
|---------------|--------|------------|------------|-----------|
| 35.0 bits(79) | 1.3    | 17/31(55%) | 19/31(61%) | 4/31(12%) |

Query 3 CQDIDECV--TGIHNCSINETCFNIQGGFRC 31  
 C+DIDEC TG H CS C NI G F+C  
 Sbjct 349 CEDIDECALPTGGHICSYR--CINIPGSFQC 377

**Related Information**

[Gene](#) - associated gene details

[Download](#) [GenPept](#) [Graphics](#)

[Next](#) [Previous](#) [Descriptions](#)

unnamed protein product [Mus musculus]

Sequence ID: [gi|74204653|dbj|BAE35396.1](#) Length: 228 Number of Matches: 1

Range 1: 46 to 76 [GenPept](#) [Graphics](#) [Next Match](#) [Previous Match](#)

| Score          | Expect | Identities | Positives  | Gaps     |
|----------------|--------|------------|------------|----------|
| 72.8 bits(177) | 1e-14  | 30/31(97%) | 30/31(96%) | 0/31(0%) |

Query 1 RNCQDIDECVTGIHNCSINETCFNIQGGFRC 31  
 RNCQDIDECVTGIHNCSINETCFNIQGG FRC  
 Sbjct 46 RNCQDIDECVTGIHNCSINETCFNIQGSFRC 76

**Related Information**

[Gene](#) - associated gene details

[Download](#) [GenPept](#) [Graphics](#)

Sort by: E value

[Next](#) [Previous](#) [Descriptions](#)

PREDICTED: fibulin-1 isoform X4 [Rhinopithecus roxellana]

Sequence ID: [gi|724795561|ref|XP\\_010365649.1](#) Length: 524 Number of Matches: 5

Range 1: 479 to 509 [GenPept](#) [Graphics](#) [Next Match](#) [Previous Match](#)

| Score          | Expect | Identities  | Positives   | Gaps     |
|----------------|--------|-------------|-------------|----------|
| 75.1 bits(183) | 1e-14  | 31/31(100%) | 31/31(100%) | 0/31(0%) |

Query 1 RNCQDIDECVTGIHNCSINETCFNIQGGFRC 31  
 RNCQDIDECVTGIHNCSINETCFNIQGGFRC  
 Sbjct 479 RNCQDIDECVTGIHNCSINETCFNIQGGFRC 509

**Related Information**

[Gene](#) - associated gene details

[Map Viewer](#) - aligned genomic context

Range 2: 171 to 200 [GenPept](#) [Graphics](#) [Next Match](#) [Previous Match](#) [First Match](#)

| Score          | Expect | Identities | Positives  | Gaps     |
|----------------|--------|------------|------------|----------|
| 47.0 bits(110) | 1e-04  | 15/30(50%) | 23/30(76%) | 0/30(0%) |

Query 2 NCQDIDECVTGIHNCSINETCFNIQGGFRC 31  
 +C+D++EC+TG H+C + E+C N G FRC  
 Sbjct 171 SCEDVNECITGSHSCLRGESCVNTVGSFRC 200

Range 3: 217 to 246 [GenPept](#) [Graphics](#) [Next Match](#) [Previous Match](#) [First Match](#)

| Score          | Expect | Identities | Positives  | Gaps     |
|----------------|--------|------------|------------|----------|
| 43.1 bits(100) | 0.002  | 17/30(57%) | 21/30(70%) | 0/30(0%) |

Query 2 NCQDIDECVTGIHNCSINETCFNIQGGFRC 31  
 +C+DIDEC +GIHNC + C N G FRC  
 Sbjct 217 SCKDIDECESGIHNCLPDFICQNTLGSFRC 246

Range 4: 437 to 465 [GenPept](#) [Graphics](#) [Next Match](#) [Previous Match](#) [First Match](#)

| Score         | Expect | Identities | Positives  | Gaps      |
|---------------|--------|------------|------------|-----------|
| 35.0 bits(79) | 1.3    | 17/31(55%) | 19/31(61%) | 4/31(12%) |

Query 3 CQDIDECV--TGIHNCSINETCFNIQGGFRC 31  
 C+DIDEC TG H CS C NI G F+C  
 Sbjct 437 CEDIDECALPTGGHICYSR--CINIPGSFQC 465

Range 5: 263 to 292 [GenPept](#) [Graphics](#) [Next Match](#) [Previous Match](#) [First Match](#)

| Score         | Expect | Identities | Positives  | Gaps     |
|---------------|--------|------------|------------|----------|
| 33.1 bits(74) | 5.9    | 12/30(40%) | 17/30(56%) | 0/30(0%) |

Query 2 NCQDIDECVTGIHNCSINETCFNIQGGFRC 31  
 NC DI+EC++ C TC N +G + C  
 Sbjct 263 NCIDINECLISAPCPTGHTCINTEGSYTC 292

BLAST is a registered trademark of the National Library of Medicine.



NCBI/ BLAST/ blastp suite/ Formatting Results - BVDRF04B01R

Your search parameters were adjusted to search for a short input sequence.

[Edit and Resubmit](#) [Save Search Strategies](#) [Formatting options](#) [Download](#) [YouTube](#) [How to read this page](#) [Blast report description](#)

### FCGBP\_RGLCVLSVGADLTTFDGARG\_Mod

RID [BVDRF04B01R](#) (Expires on 01-21 09:01 am)

Query ID [Icl|244730](#) Database Name [nr](#)

Description [None](#) Description [All non-redundant GenBank CDS translations+PDB+SwissProt+PIR+PRF excluding environmental samples from WGS projects](#)

Molecule type [amino acid](#) Program [BLASTP 2.2.30+](#) [Citation](#)

Query Length [20](#)

Other reports: [Search Summary](#) [Taxonomy reports](#) [Distance tree of results](#) [Multiple alignment](#)

### Graphic Summary

[Show Conserved Domains](#)

No putative conserved domains have been detected

Distribution of 115 Blast Hits on the Query Sequence

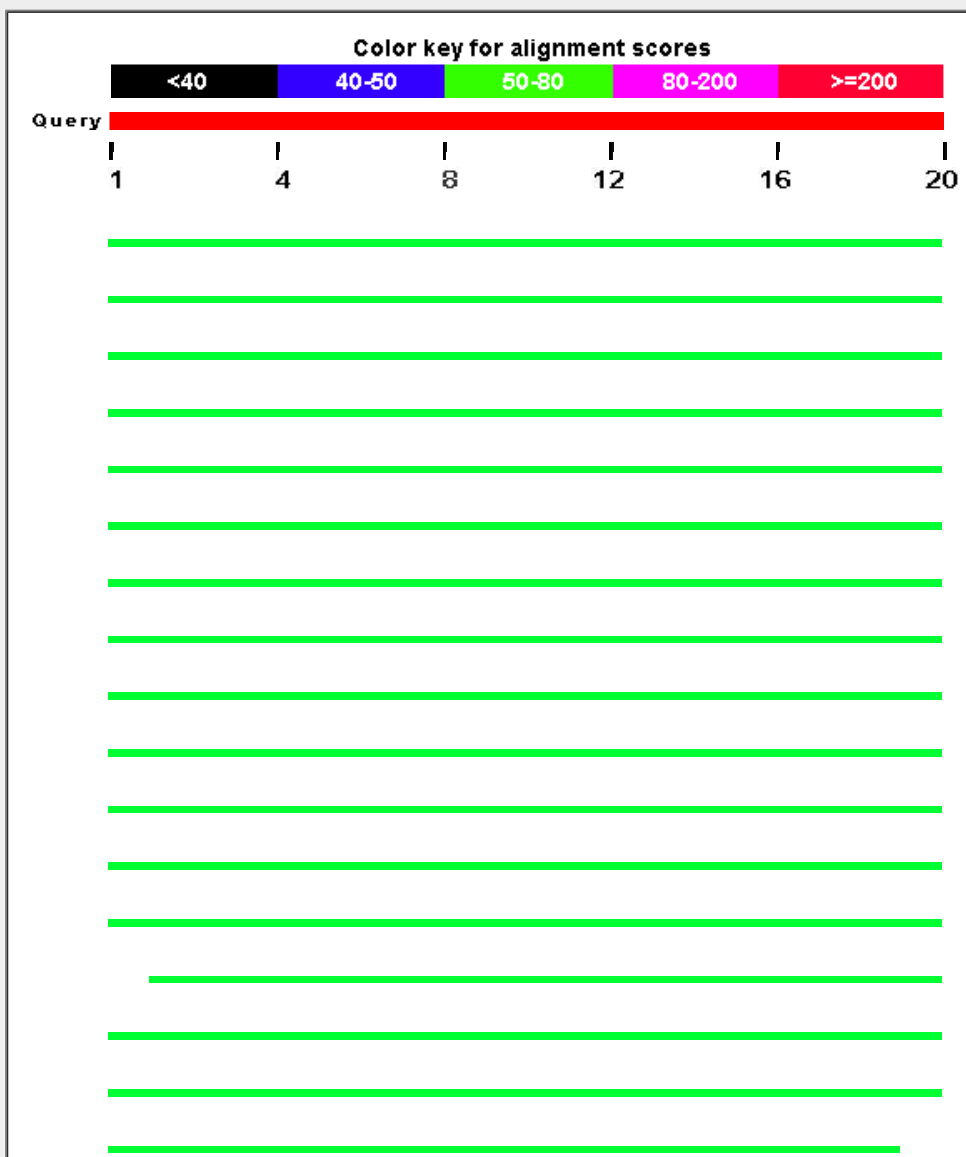

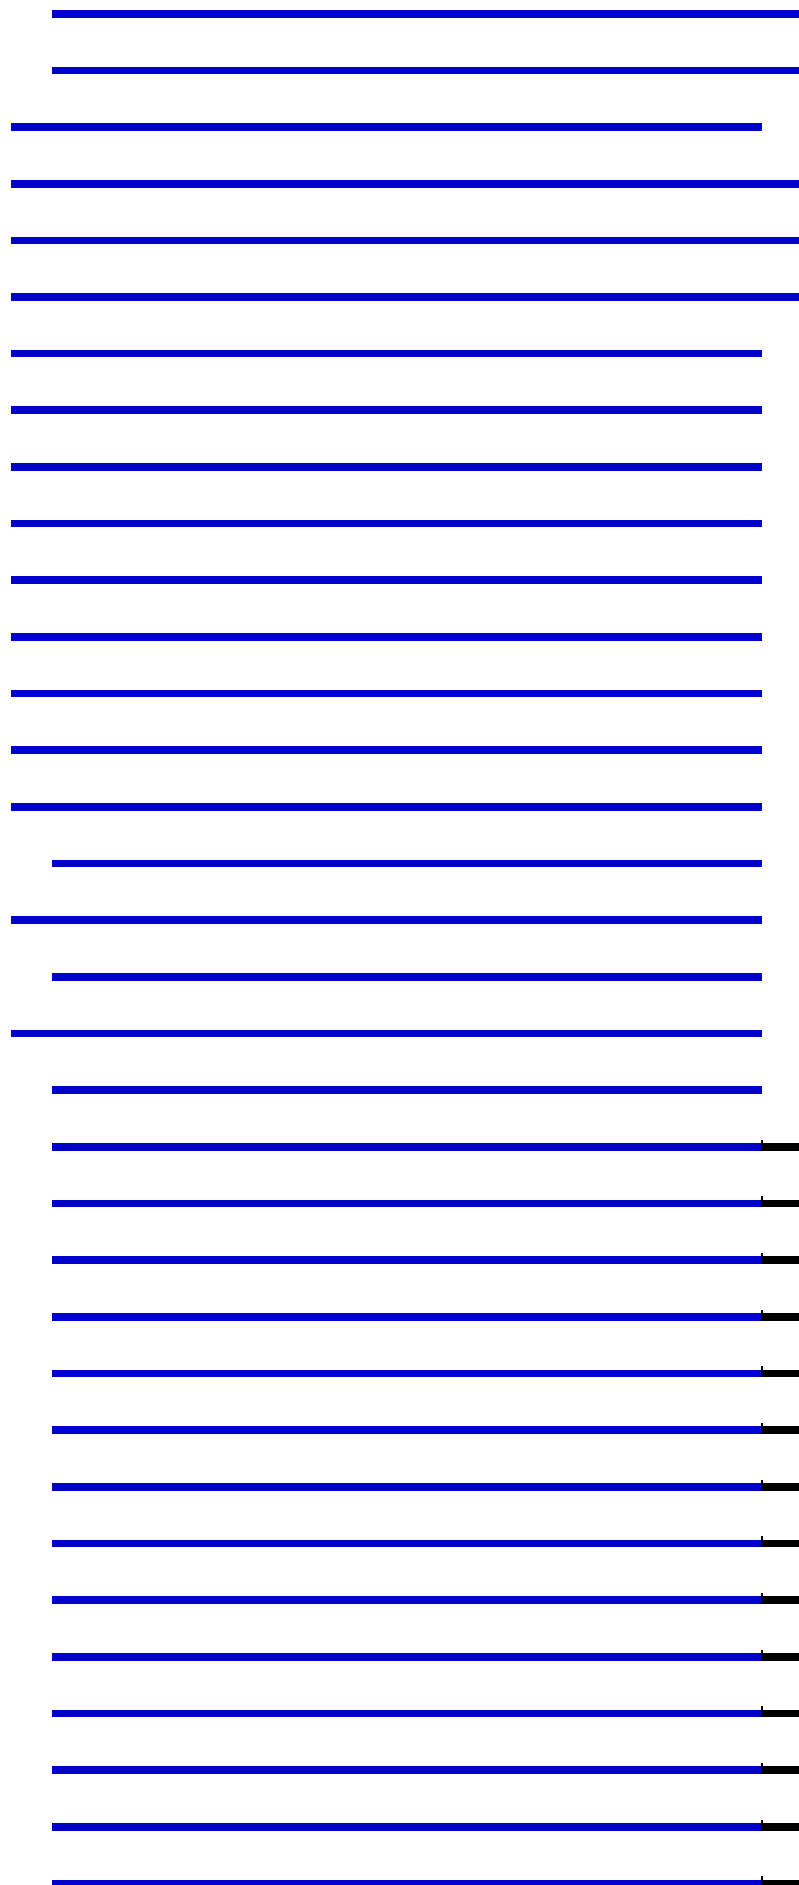

## Descriptions

### Sequences producing significant alignments:

Select: [All](#) [None](#) Selected:0

| <a href="#">Alignments</a> <a href="#">Download</a> <a href="#">GenPept</a> <a href="#">Graphics</a> <a href="#">Distance tree of results</a> <a href="#">Multiple alignment</a> |           |             |             |         |       |                                |  |
|----------------------------------------------------------------------------------------------------------------------------------------------------------------------------------|-----------|-------------|-------------|---------|-------|--------------------------------|--|
| Description                                                                                                                                                                      | Max score | Total score | Query cover | E value | Ident | Accession                      |  |
| <a href="#">IgG Fc binding protein [AA 4671-5405] [Homo sapiens]</a>                                                                                                             | 60.9      | 60.9        | 100%        | 4e-09   | 95%   | <a href="#">AAD15624.1</a>     |  |
| <a href="#">Fc fragment of IgG binding protein [Homo sapiens]</a>                                                                                                                | 60.9      | 60.9        | 100%        | 4e-09   | 95%   | <a href="#">EAW56926.1</a>     |  |
| <a href="#">PREDICTED: IgGFc-binding protein-like [Macaca mulatta]</a>                                                                                                           | 60.9      | 60.9        | 100%        | 4e-09   | 95%   | <a href="#">XP_001088892.2</a> |  |
| <a href="#">PREDICTED: IgGFc-binding protein [Chlorocebus sabaeus]</a>                                                                                                           | 60.9      | 60.9        | 100%        | 4e-09   | 95%   | <a href="#">XP_007996683.1</a> |  |
| <a href="#">PREDICTED: LOW QUALITY PROTEIN: IgGFc-binding protein [Pan paniscus]</a>                                                                                             | 60.9      | 60.9        | 100%        | 4e-09   | 95%   | <a href="#">XP_008963216.1</a> |  |
| <a href="#">PREDICTED: LOW QUALITY PROTEIN: IgGFc-binding protein [Papio anubis]</a>                                                                                             | 60.9      | 60.9        | 100%        | 4e-09   | 95%   | <a href="#">XP_003915593.1</a> |  |
| <a href="#">PREDICTED: IgGFc-binding protein [Nomascus leucogenys]</a>                                                                                                           | 60.9      | 60.9        | 100%        | 4e-09   | 95%   | <a href="#">XP_003270573.1</a> |  |
| <a href="#">PREDICTED: LOW QUALITY PROTEIN: IgGFc-binding protein [Pongo abelii]</a>                                                                                             | 60.9      | 60.9        | 100%        | 4e-09   | 95%   | <a href="#">XP_009230865.1</a> |  |
| <a href="#">PREDICTED: LOW QUALITY PROTEIN: IgGFc-binding protein [Gorilla gorilla]</a>                                                                                          | 60.9      | 60.9        | 100%        | 4e-09   | 95%   | <a href="#">XP_004060816.1</a> |  |
| <a href="#">PREDICTED: IgGFc-binding protein [Macaca fascicularis]</a>                                                                                                           | 60.9      | 60.9        | 100%        | 4e-09   | 95%   | <a href="#">XP_005590715.1</a> |  |
| <a href="#">PREDICTED: LOW QUALITY PROTEIN: IgGFc-binding protein [Pan troglody]</a>                                                                                             | 60.9      | 60.9        | 100%        | 4e-09   | 95%   | <a href="#">XP_009433882.1</a> |  |
| <a href="#">IgG Fc binding protein [Homo sapiens]</a>                                                                                                                            | 60.9      | 60.9        | 100%        | 4e-09   | 95%   | <a href="#">BAA19526.1</a>     |  |
| <a href="#">IgGFc-binding protein precursor [Homo sapiens]</a>                                                                                                                   | 60.9      | 60.9        | 100%        | 4e-09   | 95%   | <a href="#">NP_003881.2</a>    |  |
| <a href="#">PREDICTED: LOW QUALITY PROTEIN: IgGFc-binding protein [Rhinopithecus]</a>                                                                                            | 57.5      | 57.5        | 95%         | 6e-08   | 95%   | <a href="#">XP_010379186.1</a> |  |
| <a href="#">PREDICTED: IgGFc-binding protein [Saimiri boliviensis boliviensis]</a>                                                                                               | 54.5      | 54.5        | 100%        | 6e-07   | 90%   | <a href="#">XP_010329397.1</a> |  |
| <a href="#">PREDICTED: LOW QUALITY PROTEIN: IgGFc-binding protein [Callithrix jacq]</a>                                                                                          | 54.5      | 54.5        | 100%        | 6e-07   | 90%   | <a href="#">XP_008986248.1</a> |  |
| <a href="#">PREDICTED: IgGFc-binding protein [Tarsius syrichta]</a>                                                                                                              | 52.8      | 52.8        | 95%         | 2e-06   | 89%   | <a href="#">XP_008052981.1</a> |  |
| <a href="#">PREDICTED: LOW QUALITY PROTEIN: IgGFc-binding protein [Equus przew]</a>                                                                                              | 49.4      | 49.4        | 90%         | 3e-05   | 89%   | <a href="#">XP_008530313.1</a> |  |
| <a href="#">PREDICTED: LOW QUALITY PROTEIN: IgGFc-binding protein [Equus caball]</a>                                                                                             | 49.4      | 49.4        | 90%         | 3e-05   | 89%   | <a href="#">XP_005596726.1</a> |  |
| <a href="#">PREDICTED: IgGFc-binding protein [Jaculus jaculus]</a>                                                                                                               | 49.4      | 49.4        | 90%         | 3e-05   | 89%   | <a href="#">XP_004670397.1</a> |  |
| <a href="#">PREDICTED: IgGFc-binding protein-like [Tursiops truncatus]</a>                                                                                                       | 49.0      | 49.0        | 95%         | 4e-05   | 84%   | <a href="#">XP_004313750.1</a> |  |
| <a href="#">PREDICTED: IgGFc-binding protein [Lipotes vexillifer]</a>                                                                                                            | 49.0      | 49.0        | 95%         | 4e-05   | 84%   | <a href="#">XP_007458763.1</a> |  |
| <a href="#">PREDICTED: IgGFc-binding protein [Orcinus orca]</a>                                                                                                                  | 49.0      | 49.0        | 95%         | 4e-05   | 84%   | <a href="#">XP_004271425.1</a> |  |
| <a href="#">Fcgbp protein [Mus musculus]</a>                                                                                                                                     | 46.0      | 46.0        | 90%         | 3e-04   | 83%   | <a href="#">AAH24554.1</a>     |  |
| <a href="#">Fcgbp protein [Mus musculus]</a>                                                                                                                                     | 46.0      | 46.0        | 90%         | 3e-04   | 83%   | <a href="#">AAH24520.1</a>     |  |
| <a href="#">Fcgbp protein [Mus musculus]</a>                                                                                                                                     | 46.0      | 46.0        | 90%         | 3e-04   | 83%   | <a href="#">AAH55475.1</a>     |  |
| <a href="#">Fcgbp protein [Mus musculus]</a>                                                                                                                                     | 46.0      | 46.0        | 90%         | 4e-04   | 83%   | <a href="#">AAH69956.1</a>     |  |
| <a href="#">Fcgbp protein [Mus musculus]</a>                                                                                                                                     | 46.0      | 46.0        | 90%         | 4e-04   | 83%   | <a href="#">AAH92067.1</a>     |  |
| <a href="#">Fcgbp protein [Mus musculus]</a>                                                                                                                                     | 46.0      | 46.0        | 90%         | 4e-04   | 83%   | <a href="#">AAH26653.1</a>     |  |

|                                                                                             |      |      |      |       |     |                                |
|---------------------------------------------------------------------------------------------|------|------|------|-------|-----|--------------------------------|
| <a href="#">Fcgbp protein [Mus musculus]</a>                                                | 46.0 | 46.0 | 90%  | 4e-04 | 83% | <a href="#">AAH30871.1</a>     |
| <a href="#">mCG145390, isoform CRA_b [Mus musculus]</a>                                     | 46.0 | 46.0 | 90%  | 4e-04 | 83% | <a href="#">EDL24158.1</a>     |
| <a href="#">mCG145390, isoform CRA_a [Mus musculus]</a>                                     | 46.0 | 46.0 | 90%  | 4e-04 | 83% | <a href="#">EDL24157.1</a>     |
| <a href="#">rCG54015 [Rattus norvegicus]</a>                                                | 46.0 | 46.0 | 85%  | 4e-04 | 88% | <a href="#">EDM07917.1</a>     |
| <a href="#">PREDICTED: IgGFc-binding protein-like [Peromyscus maniculatus bairdii]</a>      | 46.0 | 46.0 | 90%  | 4e-04 | 83% | <a href="#">XP_006996523.1</a> |
| <a href="#">PREDICTED: IgGFc-binding protein-like [Nannospalax galili]</a>                  | 46.0 | 46.0 | 85%  | 4e-04 | 88% | <a href="#">XP_008852263.1</a> |
| <a href="#">Fc fragment of IgG binding protein precursor [Mus musculus]</a>                 | 46.0 | 46.0 | 90%  | 4e-04 | 83% | <a href="#">NP_001116075.1</a> |
| <a href="#">Fc fragment of IgG binding protein precursor [Rattus norvegicus]</a>            | 46.0 | 46.0 | 85%  | 4e-04 | 88% | <a href="#">NP_001158129.2</a> |
| <a href="#">PREDICTED: IgGFc-binding protein isoform X2 [Bubalus bubalis]</a>               | 46.0 | 66.6 | 90%  | 4e-04 | 88% | <a href="#">XP_006050099.1</a> |
| <a href="#">PREDICTED: IgGFc-binding protein isoform X2 [Bos taurus]</a>                    | 46.0 | 66.6 | 90%  | 4e-04 | 88% | <a href="#">XP_010813252.1</a> |
| <a href="#">PREDICTED: IgGFc-binding protein isoform X2 [Bos taurus]</a>                    | 46.0 | 66.6 | 90%  | 4e-04 | 88% | <a href="#">XP_010798219.1</a> |
| <a href="#">PREDICTED: zinc finger protein 780B-like isoform X1 [Heterocephalus glaber]</a> | 46.0 | 66.6 | 90%  | 4e-04 | 88% | <a href="#">XP_004874222.1</a> |
| <a href="#">PREDICTED: zinc finger protein 780B [Heterocephalus glaber]</a>                 | 46.0 | 66.6 | 90%  | 4e-04 | 88% | <a href="#">XP_004878581.1</a> |
| <a href="#">PREDICTED: IgGFc-binding protein [Bison bison bison]</a>                        | 46.0 | 66.6 | 90%  | 4e-04 | 88% | <a href="#">XP_010847529.1</a> |
| <a href="#">PREDICTED: IgGFc-binding protein isoform X1 [Bubalus bubalis]</a>               | 46.0 | 66.6 | 90%  | 4e-04 | 88% | <a href="#">XP_006050098.1</a> |
| <a href="#">PREDICTED: IgGFc-binding protein isoform X1 [Bos taurus]</a>                    | 46.0 | 66.6 | 90%  | 4e-04 | 88% | <a href="#">XP_010813251.1</a> |
| <a href="#">PREDICTED: IgGFc-binding protein isoform X1 [Bos taurus]</a>                    | 46.0 | 66.6 | 90%  | 4e-04 | 88% | <a href="#">XP_010798218.1</a> |
| <a href="#">PREDICTED: IgGFc-binding protein [Pantholops hodgsonii]</a>                     | 46.0 | 66.6 | 90%  | 4e-04 | 88% | <a href="#">XP_005963590.1</a> |
| <a href="#">TPA: Fc fragment of IgG binding protein-like [Bos taurus]</a>                   | 46.0 | 66.6 | 90%  | 4e-04 | 88% | <a href="#">DAA19876.1</a>     |
| <a href="#">PREDICTED: LOW QUALITY PROTEIN: IgGFc-binding protein [Ovis aries]</a>          | 46.0 | 66.6 | 90%  | 4e-04 | 88% | <a href="#">XP_004015739.1</a> |
| <a href="#">PREDICTED: LOW QUALITY PROTEIN: IgGFc-binding protein [Bos mutus]</a>           | 46.0 | 66.6 | 90%  | 4e-04 | 88% | <a href="#">XP_005890645.1</a> |
| <a href="#">PREDICTED: LOW QUALITY PROTEIN: IgGFc-binding protein [Capra hircus]</a>        | 46.0 | 66.6 | 90%  | 4e-04 | 88% | <a href="#">XP_005692605.1</a> |
| <a href="#">PREDICTED: LOW QUALITY PROTEIN: Fc fragment of IgG binding protein [F]</a>      | 45.6 | 45.6 | 90%  | 5e-04 | 83% | <a href="#">XP_005674577.1</a> |
| <a href="#">PREDICTED: LOW QUALITY PROTEIN: IgGFc-binding protein [Ursus maritimus]</a>     | 45.6 | 45.6 | 95%  | 5e-04 | 79% | <a href="#">XP_008686987.1</a> |
| <a href="#">PREDICTED: IgGFc-binding protein isoform X2 [Balaenoptera acutorostrata s]</a>  | 45.6 | 45.6 | 90%  | 5e-04 | 83% | <a href="#">XP_007180031.1</a> |
| <a href="#">PREDICTED: IgGFc-binding protein [Physeter catodon]</a>                         | 45.6 | 65.3 | 90%  | 5e-04 | 83% | <a href="#">XP_007122066.1</a> |
| <a href="#">PREDICTED: IgGFc-binding protein isoform X1 [Balaenoptera acutorostrata s]</a>  | 45.6 | 45.6 | 90%  | 5e-04 | 83% | <a href="#">XP_007180030.1</a> |
| <a href="#">IgGFc-binding protein [Myotis davidii]</a>                                      | 43.1 | 43.1 | 85%  | 0.003 | 82% | <a href="#">ELK30313.1</a>     |
| <a href="#">PREDICTED: IgGFc-binding protein [Myotis davidii]</a>                           | 43.1 | 43.1 | 85%  | 0.003 | 82% | <a href="#">XP_006763740.1</a> |
| <a href="#">RGD1311906 protein [Rattus norvegicus]</a>                                      | 42.6 | 42.6 | 85%  | 0.005 | 82% | <a href="#">AAH99756.1</a>     |
| <a href="#">PREDICTED: IgGFc-binding protein [Fukomys damarensis]</a>                       | 42.6 | 42.6 | 85%  | 0.005 | 82% | <a href="#">XP_010612839.1</a> |
| <a href="#">Fc fragment of IgG binding protein-like precursor [Rattus norvegicus]</a>       | 42.6 | 42.6 | 85%  | 0.005 | 82% | <a href="#">NP_001158128.1</a> |
| <a href="#">IgGFc-binding protein [Fukomys damarensis]</a>                                  | 42.6 | 42.6 | 85%  | 0.005 | 82% | <a href="#">KFO19029.1</a>     |
| <a href="#">PREDICTED: IgGFc-binding protein [Octodon degus]</a>                            | 42.6 | 42.6 | 85%  | 0.005 | 82% | <a href="#">XP_004648069.1</a> |
| <a href="#">PREDICTED: IgGFc-binding protein-like [Nannospalax galili]</a>                  | 42.2 | 42.2 | 90%  | 0.006 | 78% | <a href="#">XP_008852264.1</a> |
| <a href="#">PREDICTED: IgGFc-binding protein-like [Peromyscus maniculatus bairdii]</a>      | 41.8 | 41.8 | 90%  | 0.009 | 78% | <a href="#">XP_006996525.1</a> |
| <a href="#">PREDICTED: IgGFc-binding protein [Pteropus alecto]</a>                          | 41.8 | 41.8 | 80%  | 0.009 | 81% | <a href="#">XP_006905494.1</a> |
| <a href="#">IgGFc-binding protein [Pteropus alecto]</a>                                     | 41.8 | 41.8 | 80%  | 0.009 | 81% | <a href="#">ELK18209.1</a>     |
| <a href="#">PREDICTED: IgGFc-binding protein-like [Ailuropoda melanoleuca]</a>              | 41.4 | 41.4 | 95%  | 0.012 | 74% | <a href="#">XP_002923768.1</a> |
| <a href="#">PREDICTED: LOW QUALITY PROTEIN: Fc fragment of IgG binding protein [I]</a>      | 41.4 | 41.4 | 95%  | 0.012 | 74% | <a href="#">XP_006752469.1</a> |
| <a href="#">PREDICTED: IgGFc-binding protein [Orycteropus afer afer]</a>                    | 40.1 | 40.1 | 95%  | 0.031 | 74% | <a href="#">XP_007941342.1</a> |
| <a href="#">PREDICTED: IgGFc-binding protein [Cavia porcellus]</a>                          | 40.1 | 40.1 | 80%  | 0.031 | 81% | <a href="#">XP_003462033.1</a> |
| <a href="#">PREDICTED: IgGFc-binding protein [Galeopterus variegatus]</a>                   | 39.7 | 39.7 | 85%  | 0.042 | 76% | <a href="#">XP_008580791.1</a> |
| <a href="#">PREDICTED: IgGFc-binding protein [Tupaia chinensis]</a>                         | 39.2 | 39.2 | 100% | 0.058 | 70% | <a href="#">XP_006140449.1</a> |
| <a href="#">IgGFc-binding protein [Tupaia chinensis]</a>                                    | 39.2 | 39.2 | 100% | 0.058 | 70% | <a href="#">ELW72413.1</a>     |

|                                                                                       |      |      |     |       |     |                                |
|---------------------------------------------------------------------------------------|------|------|-----|-------|-----|--------------------------------|
| <a href="#">PREDICTED: LOW QUALITY PROTEIN: IgGFc-binding protein [Loxodonta af</a>   | 38.8 | 38.8 | 90% | 0.079 | 72% | <a href="#">XP_010598700.1</a> |
| <a href="#">PREDICTED: LOW QUALITY PROTEIN: Fc fragment of IgG binding protein [</a>  | 38.8 | 38.8 | 95% | 0.079 | 68% | <a href="#">XP_004417817.1</a> |
| <a href="#">PREDICTED: IgGFc-binding protein [Otolemur garnettii]</a>                 | 38.8 | 38.8 | 90% | 0.079 | 78% | <a href="#">XP_003802201.1</a> |
| <a href="#">IgGFc-binding protein [Cricetulus griseus]</a>                            | 38.4 | 38.4 | 90% | 0.095 | 72% | <a href="#">ERE59847.1</a>     |
| <a href="#">PREDICTED: IgGFc-binding protein [Mesocricetus auratus]</a>               | 38.4 | 38.4 | 90% | 0.11  | 72% | <a href="#">XP_005086657.1</a> |
| <a href="#">PREDICTED: LOW QUALITY PROTEIN: IgGFc-binding protein-like isoform X</a>  | 38.4 | 38.4 | 90% | 0.11  | 72% | <a href="#">XP_007616229.1</a> |
| <a href="#">PREDICTED: IgGFc-binding protein isoform X2 [Chinchilla lanigera]</a>     | 38.4 | 38.4 | 90% | 0.11  | 78% | <a href="#">XP_005414139.1</a> |
| <a href="#">PREDICTED: LOW QUALITY PROTEIN: IgGFc-binding protein-like isoform X</a>  | 38.4 | 38.4 | 90% | 0.11  | 72% | <a href="#">XP_007643925.1</a> |
| <a href="#">PREDICTED: IgGFc-binding protein isoform X1 [Chinchilla lanigera]</a>     | 38.4 | 38.4 | 90% | 0.11  | 78% | <a href="#">XP_005414138.1</a> |
| <a href="#">PREDICTED: IgGFc-binding protein [Elephantulus edwardii]</a>              | 38.4 | 38.4 | 85% | 0.11  | 76% | <a href="#">XP_006901006.1</a> |
| <a href="#">PREDICTED: IgGFc-binding protein [Ictidomys tridecemlineatus]</a>         | 38.4 | 38.4 | 85% | 0.11  | 76% | <a href="#">XP_005336544.1</a> |
| <a href="#">PREDICTED: IgGFc-binding protein [Erinaceus europaeus]</a>                | 37.5 | 37.5 | 90% | 0.20  | 72% | <a href="#">XP_007538724.1</a> |
| <a href="#">PREDICTED: IgGFc-binding protein [Ochotona princeps]</a>                  | 37.1 | 37.1 | 85% | 0.27  | 71% | <a href="#">XP_004599764.1</a> |
| <a href="#">Fc fragment of IgG binding protein [Camelus ferus]</a>                    | 37.1 | 37.1 | 85% | 0.27  | 71% | <a href="#">EPY85977.1</a>     |
| <a href="#">PREDICTED: IgGFc-binding protein [Camelus dromedarius]</a>                | 37.1 | 37.1 | 85% | 0.27  | 71% | <a href="#">XP_010983489.1</a> |
| <a href="#">PREDICTED: IgGFc-binding protein [Camelus bactrianus]</a>                 | 37.1 | 37.1 | 85% | 0.27  | 71% | <a href="#">XP_010945545.1</a> |
| <a href="#">PREDICTED: IgGFc-binding protein [Vicugna pacos]</a>                      | 37.1 | 37.1 | 85% | 0.27  | 71% | <a href="#">XP_006215157.1</a> |
| <a href="#">PREDICTED: IgGFc-binding protein [Camelus ferus]</a>                      | 37.1 | 37.1 | 85% | 0.27  | 71% | <a href="#">XP_006178015.1</a> |
| <a href="#">PREDICTED: IgGFc-binding protein [Microtus ochrogaster]</a>               | 36.3 | 36.3 | 85% | 0.50  | 71% | <a href="#">XP_005371357.1</a> |
| <a href="#">IgGFc-binding protein [Cricetulus griseus]</a>                            | 35.8 | 35.8 | 85% | 0.62  | 71% | <a href="#">ERE60529.1</a>     |
| <a href="#">PREDICTED: IgGFc-binding protein-like isoform X2 [Cricetulus griseus]</a> | 35.8 | 35.8 | 85% | 0.68  | 71% | <a href="#">XP_007616228.1</a> |
| <a href="#">PREDICTED: IgGFc-binding protein-like isoform X1 [Cricetulus griseus]</a> | 35.8 | 35.8 | 85% | 0.68  | 71% | <a href="#">XP_003505295.2</a> |
| <a href="#">Fc fragment of IgG binding protein-like precursor [Mus musculus]</a>      | 35.8 | 35.8 | 85% | 0.68  | 71% | <a href="#">NP_001158127.1</a> |
| <a href="#">PREDICTED: IgGFc-binding protein [Panthera tigris altaica]</a>            | 35.8 | 35.8 | 90% | 0.68  | 72% | <a href="#">XP_007087304.1</a> |
| <a href="#">PREDICTED: IgGFc-binding protein [Echinops telfairii]</a>                 | 35.8 | 35.8 | 90% | 0.68  | 72% | <a href="#">XP_004710550.1</a> |
| <a href="#">PREDICTED: IgGFc-binding protein [Oryctolagus cuniculus]</a>              | 35.4 | 35.4 | 75% | 0.93  | 73% | <a href="#">XP_008249744.1</a> |

## Alignments

Download ▼ [GenPept](#) [Graphics](#)

▼ Next ▲ Previous ▲ Descriptions

IgG Fc binding protein [AA 4671-5405] [Homo sapiens]

Sequence ID: [gb|AAD15624.1|](#) Length: 735 Number of Matches: 1

Range 1: 562 to 581 [GenPept](#) [Graphics](#)

▼ Next Match ▲ Previous Match

### Related Information

[Gene](#) - associated gene details

| Score          | Expect | Identities | Positives   | Gaps     |
|----------------|--------|------------|-------------|----------|
| 60.9 bits(136) | 4e-09  | 19/20(95%) | 20/20(100%) | 0/20(0%) |

Query 1 RGLCVLSVGADLTTFDGARG 20  
 RGLCVLSVGA+LTTFDGARG  
 Sbjct 562 RGLCVLSVGANLTTFDGARG 581

Download ▼ [GenPept](#) [Graphics](#)

▼ Next ▲ Previous ▲ Descriptions

Fc fragment of IgG binding protein [Homo sapiens]

Sequence ID: [gb|EAW56926.1|](#) Length: 3004 Number of Matches: 1

Range 1: 2831 to 2850 [GenPept](#) [Graphics](#)

▼ Next Match ▲ Previous Match

### Related Information

[Gene](#) - associated gene details

| Score          | Expect | Identities | Positives   | Gaps     |
|----------------|--------|------------|-------------|----------|
| 60.9 bits(136) | 4e-09  | 19/20(95%) | 20/20(100%) | 0/20(0%) |

Query 1 RGLCVLSVSGADLTTFDGARG 20  
 RGLCVLSVGA+LTTFDGARG  
 Sbjct 2831 RGLCVLSVGANLTTFDGARG 2850

Download [GenPept](#) [Graphics](#)

[▼ Next](#) [▲ Previous](#) [▲ Descriptions](#)

**PREDICTED: igGfC-binding protein-like [Macaca mulatta]**

Sequence ID: [ref|XP\\_001088892.2|](#) Length: 3029 Number of Matches: 1

Range 1: 2856 to 2875 [GenPept](#) [Graphics](#)

[▼ Next Match](#) [▲ Previous Match](#)

| Score          | Expect | Identities | Positives   | Gaps     |
|----------------|--------|------------|-------------|----------|
| 60.9 bits(136) | 4e-09  | 19/20(95%) | 20/20(100%) | 0/20(0%) |

Query 1 RGLCVLSVSGADLTTFDGARG 20  
 RGLCVLSVGA+LTTFDGARG  
 Sbjct 2856 RGLCVLSVGANLTTFDGARG 2875

**Related Information**

[Gene](#) - associated gene details  
[UniGene](#) - clustered expressed sequence tags  
[Map Viewer](#) - aligned genomic context

Download [GenPept](#) [Graphics](#)

[▼ Next](#) [▲ Previous](#) [▲ Descriptions](#)

**PREDICTED: IgGfC-binding protein [Chlorocebus sabaeus]**

Sequence ID: [ref|XP\\_007996683.1|](#) Length: 3043 Number of Matches: 1

Range 1: 2870 to 2889 [GenPept](#) [Graphics](#)

[▼ Next Match](#) [▲ Previous Match](#)

| Score          | Expect | Identities | Positives   | Gaps     |
|----------------|--------|------------|-------------|----------|
| 60.9 bits(136) | 4e-09  | 19/20(95%) | 20/20(100%) | 0/20(0%) |

Query 1 RGLCVLSVSGADLTTFDGARG 20  
 RGLCVLSVGA+LTTFDGARG  
 Sbjct 2870 RGLCVLSVGANLTTFDGARG 2889

**Related Information**

[Gene](#) - associated gene details  
[Map Viewer](#) - aligned genomic context

Download [GenPept](#) [Graphics](#)

[▼ Next](#) [▲ Previous](#) [▲ Descriptions](#)

**PREDICTED: LOW QUALITY PROTEIN: IgGfC-binding protein [Pan paniscus]**

Sequence ID: [ref|XP\\_008963216.1|](#) Length: 3331 Number of Matches: 1

Range 1: 3158 to 3177 [GenPept](#) [Graphics](#)

[▼ Next Match](#) [▲ Previous Match](#)

| Score          | Expect | Identities | Positives   | Gaps     |
|----------------|--------|------------|-------------|----------|
| 60.9 bits(136) | 4e-09  | 19/20(95%) | 20/20(100%) | 0/20(0%) |

Query 1 RGLCVLSVSGADLTTFDGARG 20  
 RGLCVLSVGA+LTTFDGARG  
 Sbjct 3158 RGLCVLSVGANLTTFDGARG 3177

**Related Information**

[Gene](#) - associated gene details  
[Map Viewer](#) - aligned genomic context

BLAST is a registered trademark of the National Library of Medicine.



NCBI/ BLAST/ blastp suite/ Formatting Results - B951AMP601R

Your search parameters were adjusted to search for a short input sequence.

Edit and Resubmit Save Search Strategies Formatting options Download

YouTube How to read this page Blast report description

FCGBP\_RGLCVLSVGANLTTFDGARG\_NonMod

RID B951AMP601R (Expires on 01-14 10:42 am)

Query ID Icl|240446
Description None
Molecule type amino acid
Query Length 20

Database Name nr
Description All non-redundant GenBank CDS translations+PDB+SwissProt+PIR excluding environmental samples from WGS projects
Program BLASTP 2.2.30+ Citation

Other reports: Search Summary Taxonomy reports Distance tree of results Multiple alignment

Graphic Summary

Show Conserved Domains

No putative conserved domains have been detected

Distribution of 115 Blast Hits on the Query Sequence

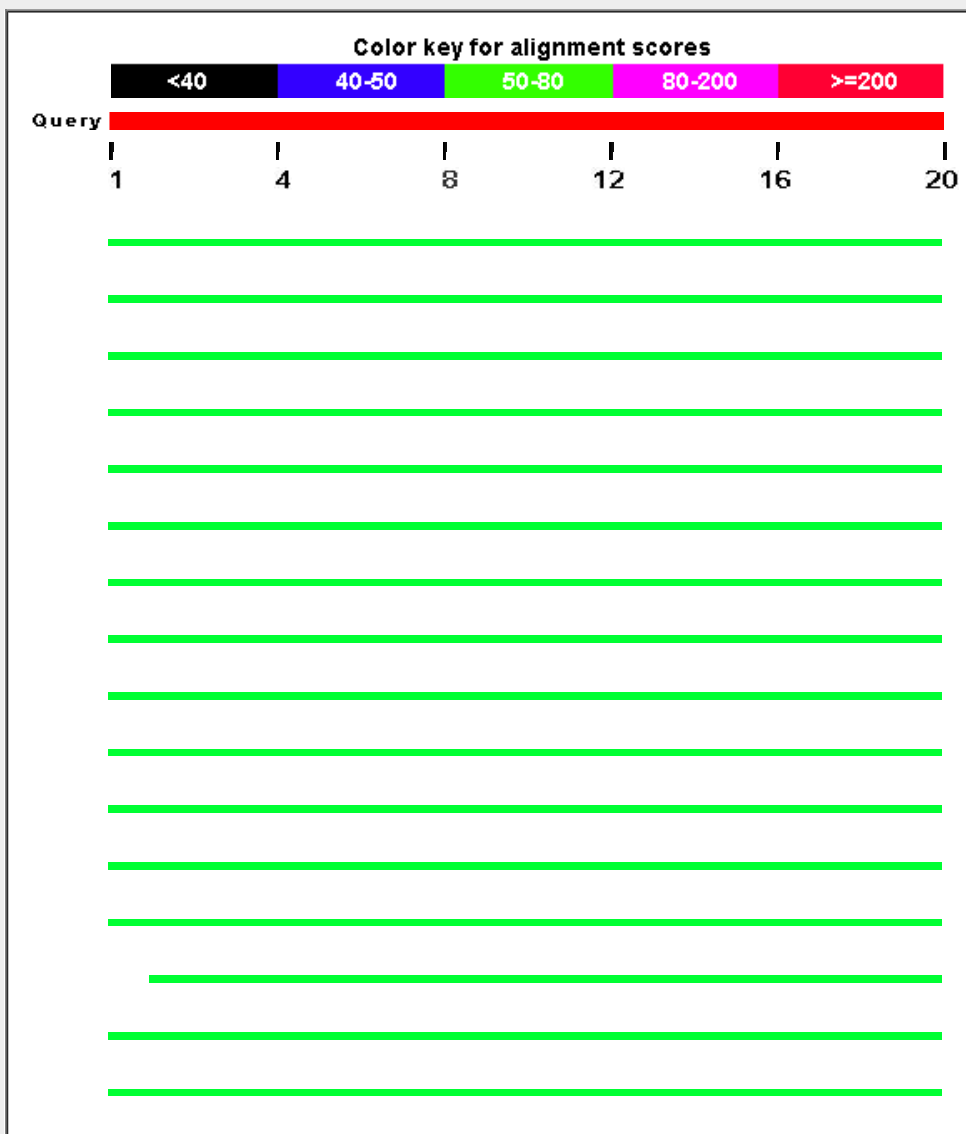

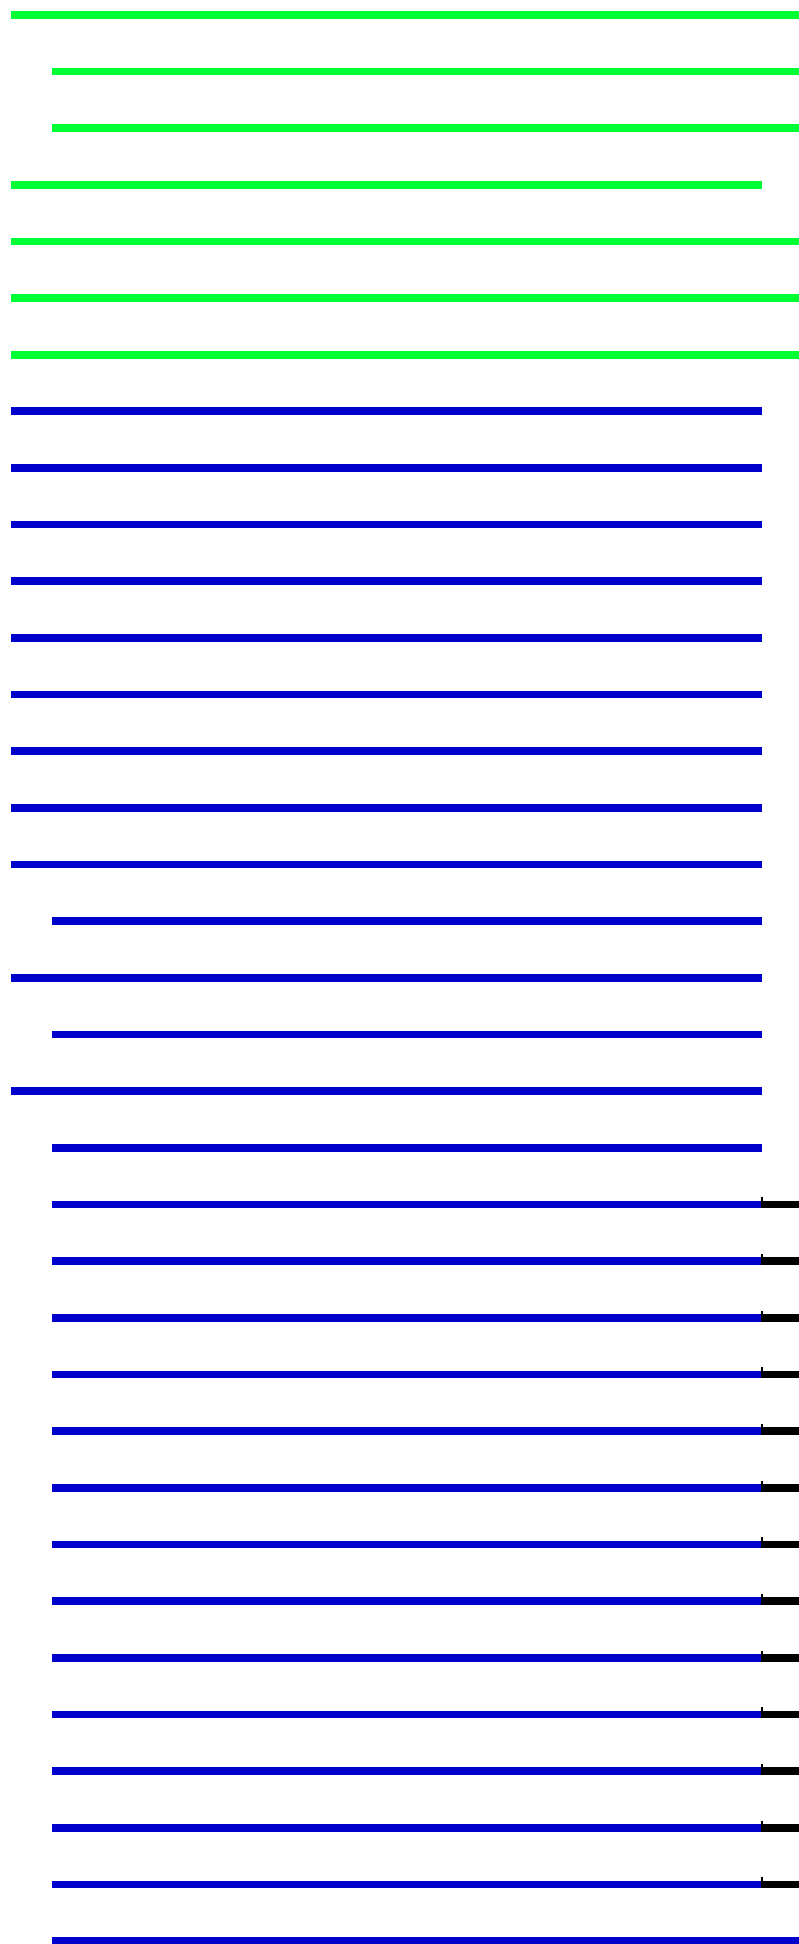



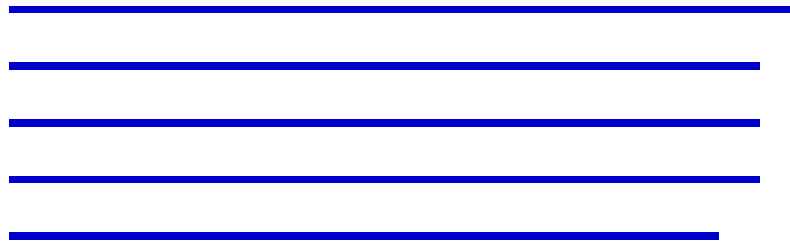

**Descriptions**

**Sequences producing significant alignments:**

Select: [All](#) [None](#) Selected:0

Alignments Download GenPept Graphics Distance tree of results Multiple alignment

| Description                                                                        | Max score | Total score | Query cover | E value | Ident | Accession                                   |
|------------------------------------------------------------------------------------|-----------|-------------|-------------|---------|-------|---------------------------------------------|
| <a href="#">IgG Fc binding protein [AA 4671-5405] [Homo sapiens]</a>               | 63.4      | 63.4        | 100%        | 5e-10   | 100%  | <a href="#">gij4321127 AAD15624.1</a>       |
| <a href="#">Fc fragment of IgG binding protein [Homo sapiens]</a>                  | 63.4      | 63.4        | 100%        | 5e-10   | 100%  | <a href="#">gij119577330 EAW56926.1</a>     |
| <a href="#">PREDICTED: igGFc-binding protein-like [Macaca mulatta]</a>             | 63.4      | 63.4        | 100%        | 5e-10   | 100%  | <a href="#">gij297277050 XP_001088892.2</a> |
| <a href="#">PREDICTED: IgGFc-binding protein [Chlorocebus sabaeus]</a>             | 63.4      | 63.4        | 100%        | 5e-10   | 100%  | <a href="#">gij635042256 XP_007996683.1</a> |
| <a href="#">PREDICTED: LOW QUALITY PROTEIN: IgGFc-binding protein [Pa]</a>         | 63.4      | 63.4        | 100%        | 5e-10   | 100%  | <a href="#">gij675718714 XP_008963216.1</a> |
| <a href="#">PREDICTED: LOW QUALITY PROTEIN: IgGFc-binding protein [Pa]</a>         | 63.4      | 63.4        | 100%        | 5e-10   | 100%  | <a href="#">gij402905577 XP_003915593.1</a> |
| <a href="#">PREDICTED: IgGFc-binding protein [Nomascus leucogenys]</a>             | 63.4      | 63.4        | 100%        | 5e-10   | 100%  | <a href="#">gij332242810 XP_003270573.1</a> |
| <a href="#">PREDICTED: LOW QUALITY PROTEIN: IgGFc-binding protein [Po]</a>         | 63.4      | 63.4        | 100%        | 5e-10   | 100%  | <a href="#">gij686758917 XP_009230865.1</a> |
| <a href="#">PREDICTED: LOW QUALITY PROTEIN: IgGFc-binding protein [Go]</a>         | 63.4      | 63.4        | 100%        | 5e-10   | 100%  | <a href="#">gij426388791 XP_004060816.1</a> |
| <a href="#">PREDICTED: IgGFc-binding protein [Macaca fascicularis]</a>             | 63.4      | 63.4        | 100%        | 5e-10   | 100%  | <a href="#">gij544514342 XP_005590715.1</a> |
| <a href="#">PREDICTED: LOW QUALITY PROTEIN: IgGFc-binding protein [Pa]</a>         | 63.4      | 63.4        | 100%        | 5e-10   | 100%  | <a href="#">gij694975150 XP_009433882.1</a> |
| <a href="#">IgG Fc binding protein [Homo sapiens]</a>                              | 63.4      | 63.4        | 100%        | 5e-10   | 100%  | <a href="#">gij1944352 BAA19526.1</a>       |
| <a href="#">IgGFc-binding protein precursor [Homo sapiens]</a>                     | 63.4      | 63.4        | 100%        | 5e-10   | 100%  | <a href="#">gij154146262 NP_003881.2</a>    |
| <a href="#">PREDICTED: LOW QUALITY PROTEIN: IgGFc-binding protein [Rh]</a>         | 60.0      | 60.0        | 95%         | 8e-09   | 100%  | <a href="#">gij724909919 XP_010379186.1</a> |
| <a href="#">PREDICTED: IgGFc-binding protein [Saimiri boliviensis boliviensis]</a> | 57.1      | 57.1        | 100%        | 8e-08   | 95%   | <a href="#">gij725605545 XP_010329397.1</a> |
| <a href="#">PREDICTED: LOW QUALITY PROTEIN: IgGFc-binding protein [Ca]</a>         | 57.1      | 57.1        | 100%        | 8e-08   | 95%   | <a href="#">gij675761213 XP_008986248.1</a> |
| <a href="#">PREDICTED: IgGFc-binding protein [Tarsius syrichta]</a>                | 55.4      | 55.4        | 95%         | 3e-07   | 95%   | <a href="#">gij640776875 XP_008052981.1</a> |
| <a href="#">PREDICTED: LOW QUALITY PROTEIN: IgGFc-binding protein [Eq]</a>         | 52.0      | 52.0        | 90%         | 4e-06   | 94%   | <a href="#">gij664745941 XP_008530313.1</a> |
| <a href="#">PREDICTED: LOW QUALITY PROTEIN: IgGFc-binding protein [Eq]</a>         | 52.0      | 52.0        | 90%         | 4e-06   | 94%   | <a href="#">gij545176771 XP_005596726.1</a> |
| <a href="#">PREDICTED: IgGFc-binding protein [Jaculus jaculus]</a>                 | 52.0      | 52.0        | 90%         | 4e-06   | 94%   | <a href="#">gij507573627 XP_004670397.1</a> |
| <a href="#">PREDICTED: IgGFc-binding protein-like [Tursiops truncatus]</a>         | 51.5      | 51.5        | 95%         | 5e-06   | 89%   | <a href="#">gij470605142 XP_004313750.1</a> |
| <a href="#">PREDICTED: IgGFc-binding protein [Lipotes vexillifer]</a>              | 51.5      | 51.5        | 95%         | 5e-06   | 89%   | <a href="#">gij602693350 XP_007458763.1</a> |
| <a href="#">PREDICTED: IgGFc-binding protein [Orcinus orca]</a>                    | 51.5      | 51.5        | 95%         | 5e-06   | 89%   | <a href="#">gij466016931 XP_004271425.1</a> |
| <a href="#">Fcgbp protein [Mus musculus]</a>                                       | 48.6      | 48.6        | 90%         | 5e-05   | 89%   | <a href="#">gij19353631 AAH24554.1</a>      |
| <a href="#">Fcgbp protein [Mus musculus]</a>                                       | 48.6      | 48.6        | 90%         | 5e-05   | 89%   | <a href="#">gij19353600 AAH24520.1</a>      |
| <a href="#">Fcgbp protein [Mus musculus]</a>                                       | 48.6      | 48.6        | 90%         | 5e-05   | 89%   | <a href="#">gij33585463 AAH55475.1</a>      |
| <a href="#">Fcgbp protein [Mus musculus]</a>                                       | 48.6      | 48.6        | 90%         | 5e-05   | 89%   | <a href="#">gij47682932 AAH69956.1</a>      |
| <a href="#">Fcgbp protein [Mus musculus]</a>                                       | 48.6      | 48.6        | 90%         | 5e-05   | 89%   | <a href="#">gij62024652 AAH92067.1</a>      |

|                                                                                                             |      |      |      |       |     |                                             |
|-------------------------------------------------------------------------------------------------------------|------|------|------|-------|-----|---------------------------------------------|
| <a href="#">Fcgbp protein [Mus musculus]</a>                                                                | 48.6 | 48.6 | 90%  | 5e-05 | 89% | <a href="#">gij20072053 AAH26653.1</a>      |
| <a href="#">Fcgbp protein [Mus musculus]</a>                                                                | 48.6 | 48.6 | 90%  | 5e-05 | 89% | <a href="#">gij21410127 AAH30871.1</a>      |
| <a href="#">mCG145390. isoform CRA_b [Mus musculus]</a>                                                     | 48.6 | 48.6 | 90%  | 5e-05 | 89% | <a href="#">gij148692211 EDL24158.1</a>     |
| <a href="#">mCG145390. isoform CRA_a [Mus musculus]</a>                                                     | 48.6 | 48.6 | 90%  | 5e-05 | 89% | <a href="#">gij148692210 EDL24157.1</a>     |
| <a href="#">rCG54015 [Rattus norvegicus]</a>                                                                | 48.6 | 48.6 | 85%  | 5e-05 | 94% | <a href="#">gij149056486 EDM07917.1</a>     |
| <a href="#">PREDICTED: IgGFc-binding protein-like [Peromyscus maniculatus]</a>                              | 48.6 | 48.6 | 90%  | 5e-05 | 89% | <a href="#">gij589968051 XP_006996523.1</a> |
| <a href="#">PREDICTED: IgGFc-binding protein-like [Nannospalax galii]</a>                                   | 48.6 | 48.6 | 85%  | 5e-05 | 94% | <a href="#">gij674088661 XP_008852263.1</a> |
| <a href="#">Fc fragment of IgG binding protein precursor [Mus musculus]</a>                                 | 48.6 | 48.6 | 90%  | 5e-05 | 89% | <a href="#">gij169790797 NP_001116075.1</a> |
| <a href="#">Fc fragment of IgG binding protein precursor [Rattus norvegicus]</a>                            | 48.6 | 48.6 | 85%  | 5e-05 | 94% | <a href="#">gij695917199 NP_001158129.2</a> |
| <a href="#">PREDICTED: IgGFc-binding protein isoform X2 [Bubalus bubalis]</a>                               | 48.6 | 69.1 | 90%  | 5e-05 | 94% | <a href="#">gij594051532 XP_006050099.1</a> |
| <a href="#">PREDICTED: IgGFc-binding protein isoform X1 [Bos taurus]</a>                                    | 48.6 | 69.1 | 90%  | 5e-05 | 94% | <a href="#">gij528991889 XP_002695104.2</a> |
| <a href="#">PREDICTED: IgGFc-binding protein isoform X1 [Bos taurus]</a>                                    | 48.6 | 69.1 | 90%  | 5e-05 | 94% | <a href="#">gij528933616 XP_005200216.1</a> |
| <a href="#">PREDICTED: zinc finger protein 780B-like isoform X1 [Heterocephalus glaber]</a>                 | 48.6 | 69.1 | 90%  | 5e-05 | 94% | <a href="#">gij513026092 XP_004874222.1</a> |
| <a href="#">PREDICTED: zinc finger protein 780B [Heterocephalus glaber]</a>                                 | 48.6 | 69.1 | 90%  | 5e-05 | 94% | <a href="#">gij512817473 XP_004878581.1</a> |
| <a href="#">PREDICTED: IgGFc-binding protein isoform X1 [Bubalus bubalis]</a>                               | 48.6 | 69.1 | 90%  | 5e-05 | 94% | <a href="#">gij594051530 XP_006050098.1</a> |
| <a href="#">PREDICTED: IgGFc-binding protein isoform X2 [Bos taurus]</a>                                    | 48.6 | 69.1 | 90%  | 5e-05 | 94% | <a href="#">gij528991887 XP_005219168.1</a> |
| <a href="#">PREDICTED: IgGFc-binding protein isoform X2 [Bos taurus]</a>                                    | 48.6 | 69.1 | 90%  | 5e-05 | 94% | <a href="#">gij528933614 XP_614095.6</a>    |
| <a href="#">PREDICTED: IgGFc-binding protein [Pantholops hodgsonii]</a>                                     | 48.6 | 69.1 | 90%  | 5e-05 | 94% | <a href="#">gij556735974 XP_005963590.1</a> |
| <a href="#">TPA: Fc fragment of IgG binding protein-like [Bos taurus]</a>                                   | 48.6 | 69.1 | 90%  | 5e-05 | 94% | <a href="#">gij296477761 DAA19876.1</a>     |
| <a href="#">PREDICTED: LOW QUALITY PROTEIN: IgGFc-binding protein [Ovis montanus]</a>                       | 48.6 | 69.1 | 90%  | 5e-05 | 94% | <a href="#">gij426243806 XP_004015739.1</a> |
| <a href="#">PREDICTED: LOW QUALITY PROTEIN: IgGFc-binding protein [Bos taurus]</a>                          | 48.6 | 69.1 | 90%  | 5e-05 | 94% | <a href="#">gij555957014 XP_005890645.1</a> |
| <a href="#">PREDICTED: LOW QUALITY PROTEIN: IgGFc-binding protein [Capra hircus]</a>                        | 48.6 | 69.1 | 90%  | 5e-05 | 94% | <a href="#">gij548504606 XP_005692605.1</a> |
| <a href="#">PREDICTED: LOW QUALITY PROTEIN: Fc fragment of IgG binding protein precursor [Mus musculus]</a> | 48.1 | 48.1 | 90%  | 7e-05 | 89% | <a href="#">gij545830918 XP_005674577.1</a> |
| <a href="#">PREDICTED: LOW QUALITY PROTEIN: IgGFc-binding protein [Ursus arctos]</a>                        | 48.1 | 48.1 | 95%  | 7e-05 | 84% | <a href="#">gij670991993 XP_008686987.1</a> |
| <a href="#">PREDICTED: IgGFc-binding protein isoform X2 [Balaenoptera acuta]</a>                            | 48.1 | 48.1 | 90%  | 7e-05 | 89% | <a href="#">gij594663750 XP_007180031.1</a> |
| <a href="#">PREDICTED: IgGFc-binding protein [Physeter catodon]</a>                                         | 48.1 | 67.9 | 90%  | 7e-05 | 89% | <a href="#">gij593767123 XP_007122066.1</a> |
| <a href="#">PREDICTED: IgGFc-binding protein isoform X1 [Balaenoptera acuta]</a>                            | 48.1 | 48.1 | 90%  | 7e-05 | 89% | <a href="#">gij594663748 XP_007180030.1</a> |
| <a href="#">IgGFc-binding protein [Myotis davidii]</a>                                                      | 45.6 | 45.6 | 85%  | 5e-04 | 88% | <a href="#">gij432102846 ELK30313.1</a>     |
| <a href="#">PREDICTED: IgGFc-binding protein [Myotis davidii]</a>                                           | 45.6 | 45.6 | 85%  | 5e-04 | 88% | <a href="#">gij584088170 XP_006763740.1</a> |
| <a href="#">RGD1311906 protein [Rattus norvegicus]</a>                                                      | 45.2 | 45.2 | 85%  | 7e-04 | 88% | <a href="#">gij71681025 AAH99756.1</a>      |
| <a href="#">PREDICTED: IgGFc-binding protein [Fukomys damarensis]</a>                                       | 45.2 | 45.2 | 85%  | 7e-04 | 88% | <a href="#">gij731289476 XP_010612839.1</a> |
| <a href="#">Fc fragment of IgG binding protein-like precursor [Rattus norvegicus]</a>                       | 45.2 | 45.2 | 85%  | 7e-04 | 88% | <a href="#">gij257467627 NP_001158128.1</a> |
| <a href="#">IgGFc-binding protein [Fukomys damarensis]</a>                                                  | 45.2 | 45.2 | 85%  | 7e-04 | 88% | <a href="#">gij676261951 KFO19029.1</a>     |
| <a href="#">PREDICTED: IgGFc-binding protein [Octodon degus]</a>                                            | 45.2 | 45.2 | 85%  | 7e-04 | 88% | <a href="#">gij507714064 XP_004648069.1</a> |
| <a href="#">PREDICTED: IgGFc-binding protein-like [Nannospalax galii]</a>                                   | 44.8 | 44.8 | 90%  | 0.001 | 83% | <a href="#">gij674088663 XP_008852264.1</a> |
| <a href="#">PREDICTED: IgGFc-binding protein-like [Peromyscus maniculatus]</a>                              | 44.3 | 44.3 | 90%  | 0.001 | 83% | <a href="#">gij589968055 XP_006996525.1</a> |
| <a href="#">PREDICTED: IgGFc-binding protein [Pteropus alecto]</a>                                          | 44.3 | 44.3 | 80%  | 0.001 | 88% | <a href="#">gij586524140 XP_006905494.1</a> |
| <a href="#">IgGFc-binding protein [Pteropus alecto]</a>                                                     | 44.3 | 44.3 | 80%  | 0.001 | 88% | <a href="#">gij431920170 ELK18209.1</a>     |
| <a href="#">PREDICTED: IgGFc-binding protein-like [Ailuropoda melanoleuca]</a>                              | 43.9 | 43.9 | 95%  | 0.002 | 79% | <a href="#">gij301776693 XP_002923768.1</a> |
| <a href="#">PREDICTED: LOW QUALITY PROTEIN: Fc fragment of IgG binding protein precursor [Mus musculus]</a> | 43.9 | 43.9 | 95%  | 0.002 | 79% | <a href="#">gij585183803 XP_006752469.1</a> |
| <a href="#">PREDICTED: IgGFc-binding protein [Orycteropus afer]</a>                                         | 42.6 | 42.6 | 95%  | 0.004 | 79% | <a href="#">gij634854573 XP_007941342.1</a> |
| <a href="#">PREDICTED: IgGFc-binding protein [Cavia porcellus]</a>                                          | 42.6 | 42.6 | 80%  | 0.004 | 88% | <a href="#">gij348552434 XP_003462033.1</a> |
| <a href="#">PREDICTED: IgGFc-binding protein [Galeopterus variegatus]</a>                                   | 42.2 | 42.2 | 85%  | 0.006 | 82% | <a href="#">gij667245485 XP_008580791.1</a> |
| <a href="#">PREDICTED: IgGFc-binding protein [Tupaia chinensis]</a>                                         | 41.8 | 41.8 | 100% | 0.008 | 75% | <a href="#">gij562821062 XP_006140449.1</a> |
| <a href="#">IgGFc-binding protein [Tupaia chinensis]</a>                                                    | 41.8 | 41.8 | 100% | 0.008 | 75% | <a href="#">gij444732094 ELW72413.1</a>     |

|                                                                                   |      |      |     |       |     |                                             |
|-----------------------------------------------------------------------------------|------|------|-----|-------|-----|---------------------------------------------|
| <a href="#">PREDICTED: LOW QUALITY PROTEIN: IgGFc-binding protein [Lo</a>         | 41.4 | 41.4 | 90% | 0.011 | 78% | <a href="#">gij731510651 XP_010598700.1</a> |
| <a href="#">PREDICTED: LOW QUALITY PROTEIN: Fc fragment of IgG bindin</a>         | 41.4 | 41.4 | 95% | 0.011 | 74% | <a href="#">gij472353763 XP_004417817.1</a> |
| <a href="#">PREDICTED: IgGFc-binding protein [Otolemur garnettii]</a>             | 41.4 | 41.4 | 90% | 0.011 | 83% | <a href="#">gij395859762 XP_003802201.1</a> |
| <a href="#">IgGFc-binding protein [Cricetulus griseus]</a>                        | 40.9 | 40.9 | 90% | 0.013 | 78% | <a href="#">gij537107439 ERE59847.1</a>     |
| <a href="#">PREDICTED: IgGFc-binding protein [Mesocricetus auratus]</a>           | 40.9 | 40.9 | 90% | 0.016 | 78% | <a href="#">gij524973628 XP_005086657.1</a> |
| <a href="#">PREDICTED: LOW QUALITY PROTEIN: IgGFc-binding protein-like</a>        | 40.9 | 40.9 | 90% | 0.016 | 78% | <a href="#">gij625249858 XP_007616229.1</a> |
| <a href="#">PREDICTED: IgGFc-binding protein isoform X2 [Chinchilla lanigera]</a> | 40.9 | 40.9 | 90% | 0.016 | 83% | <a href="#">gij533203235 XP_005414139.1</a> |
| <a href="#">PREDICTED: LOW QUALITY PROTEIN: IgGFc-binding protein-like</a>        | 40.9 | 40.9 | 90% | 0.016 | 78% | <a href="#">gij625205140 XP_007643925.1</a> |
| <a href="#">PREDICTED: IgGFc-binding protein isoform X1 [Chinchilla lanigera]</a> | 40.9 | 40.9 | 90% | 0.016 | 83% | <a href="#">gij533203233 XP_005414138.1</a> |
| <a href="#">PREDICTED: IgGFc-binding protein [Elephantulus edwardii]</a>          | 40.9 | 40.9 | 85% | 0.016 | 82% | <a href="#">gij585714650 XP_006901006.1</a> |
| <a href="#">PREDICTED: IgGFc-binding protein [Ochotona princeps]</a>              | 39.7 | 39.7 | 85% | 0.040 | 76% | <a href="#">gij504182881 XP_004599764.1</a> |
| <a href="#">Fc fragment of IgG binding protein [Camelus ferus]</a>                | 39.7 | 39.7 | 85% | 0.040 | 76% | <a href="#">gij528766318 EPY85977.1</a>     |
| <a href="#">PREDICTED: IgGFc-binding protein [Vicugna pacos]</a>                  | 39.7 | 39.7 | 85% | 0.040 | 76% | <a href="#">gij560985920 XP_006215157.1</a> |
| <a href="#">PREDICTED: IgGFc-binding protein [Camelus ferus]</a>                  | 39.7 | 39.7 | 85% | 0.040 | 76% | <a href="#">gij560903281 XP_006178015.1</a> |
| <a href="#">PREDICTED: IgGFc-binding protein [Microtus ochrogaster]</a>           | 38.8 | 38.8 | 85% | 0.074 | 76% | <a href="#">gij532057309 XP_005371357.1</a> |
| <a href="#">PREDICTED: IgGFc-binding protein [Erinaceus europaeus]</a>            | 38.8 | 58.5 | 90% | 0.074 | 72% | <a href="#">gij617664909 XP_007538724.1</a> |
| <a href="#">IgGFc-binding protein [Cricetulus griseus]</a>                        | 38.4 | 38.4 | 85% | 0.089 | 76% | <a href="#">gij537109414 ERE60529.1</a>     |
| <a href="#">PREDICTED: IgGFc-binding protein-like isoform X2 [Cricetulus gris</a> | 38.4 | 38.4 | 85% | 0.10  | 76% | <a href="#">gij625249856 XP_007616228.1</a> |
| <a href="#">PREDICTED: IgGFc-binding protein-like isoform X1 [Cricetulus gris</a> | 38.4 | 38.4 | 85% | 0.10  | 76% | <a href="#">gij625205138 XP_003505295.2</a> |
| <a href="#">Fc fragment of IgG binding protein-like precursor [Mus musculus]</a>  | 38.4 | 38.4 | 85% | 0.10  | 76% | <a href="#">gij257467625 NP_001158127.1</a> |
| <a href="#">PREDICTED: IgGFc-binding protein [Panthera tigris altaica]</a>        | 38.4 | 38.4 | 90% | 0.10  | 78% | <a href="#">gij591322392 XP_007087304.1</a> |
| <a href="#">PREDICTED: IgGFc-binding protein [Oryctolagus cuniculus]</a>          | 38.0 | 38.0 | 75% | 0.14  | 80% | <a href="#">gij655895144 XP_008249744.1</a> |
| <a href="#">PREDICTED: IgGFc-binding protein [Ictidomys tridecemlineatus]</a>     | 38.0 | 38.0 | 85% | 0.14  | 76% | <a href="#">gij532101857 XP_005336544.1</a> |
| <a href="#">PREDICTED: LOW QUALITY PROTEIN: IgGFc-binding protein [My</a>         | 37.1 | 37.1 | 85% | 0.26  | 76% | <a href="#">gij554548727 XP_005868902.1</a> |
| <a href="#">PREDICTED: IgGFc-binding protein [Echinops telfairi]</a>              | 37.1 | 37.1 | 90% | 0.26  | 72% | <a href="#">gij507680836 XP_004710550.1</a> |
| <a href="#">PREDICTED: LOW QUALITY PROTEIN: Fc fragment of IgG bindin</a>         | 37.1 | 37.1 | 85% | 0.26  | 76% | <a href="#">gij558160938 XP_006109819.1</a> |
| <a href="#">IgGFc-binding protein [Myotis brandtii]</a>                           | 37.1 | 37.1 | 85% | 0.26  | 76% | <a href="#">gij521027545 EPQ09333.1</a>     |

## Alignments

Download GenPept Graphics

Next Previous Descriptions

IgG Fc binding protein [AA 4671-5405] [Homo sapiens]

Sequence ID: [gij4321127|gb|AAD15624.1](#) Length: 735 Number of Matches: 1

Range 1: 562 to 581 GenPept Graphics

Next Match Previous Match

| Score          | Expect | Identities  | Positives   | Gaps     |
|----------------|--------|-------------|-------------|----------|
| 63.4 bits(142) | 5e-10  | 20/20(100%) | 20/20(100%) | 0/20(0%) |

Query 1 RGLCVLSVGANLTTFDGARG 20  
 RGLCVLSVGANLTTFDGARG  
 Sbjct 562 RGLCVLSVGANLTTFDGARG 581

### Related Information

[Gene](#) - associated gene details

Download GenPept Graphics

Next Previous Descriptions

Fc fragment of IgG binding protein [Homo sapiens]

Sequence ID: [gij119577330|gb|EAW56926.1](#) Length: 3004 Number of Matches: 1

Range 1: 2831 to 2850 GenPept Graphics

Next Match Previous Match

| Score          | Expect | Identities  | Positives   | Gaps     |
|----------------|--------|-------------|-------------|----------|
| 63.4 bits(142) | 5e-10  | 20/20(100%) | 20/20(100%) | 0/20(0%) |

Query 1 RGLCVLSVGANLTTFDGARG 20

### Related Information

[Gene](#) - associated gene details

Sbjct 2831 RGLCVLSVGNLTTFDGARG 2850

[Download](#) [GenPept](#) [Graphics](#) [Next](#) [Previous](#) [Descriptions](#)

**PREDICTED: igGFc-binding protein-like [Macaca mulatta]**

Sequence ID: [gi|297277050|ref|XP\\_001088892.2|](#) Length: 3029 Number of Matches: 1

Range 1: 2856 to 2875 [GenPept](#) [Graphics](#) [Next Match](#) [Previous Match](#)

| Score          | Expect | Identities  | Positives   | Gaps     |
|----------------|--------|-------------|-------------|----------|
| 63.4 bits(142) | 5e-10  | 20/20(100%) | 20/20(100%) | 0/20(0%) |

Query 1 RGLCVLSVGNLTTFDGARG 20  
 RGLCVLSVGNLTTFDGARG  
 Sbjct 2856 RGLCVLSVGNLTTFDGARG 2875

**Related Information**

[Gene](#) - associated gene details  
[UniGene](#) - clustered expressed sequence tags  
[Map Viewer](#) - aligned genomic context

[Download](#) [GenPept](#) [Graphics](#) [Next](#) [Previous](#) [Descriptions](#)

**PREDICTED: IgGFc-binding protein [Chlorocebus sabaeus]**

Sequence ID: [gi|635042256|ref|XP\\_007996683.1|](#) Length: 3043 Number of Matches: 1

Range 1: 2870 to 2889 [GenPept](#) [Graphics](#) [Next Match](#) [Previous Match](#)

| Score          | Expect | Identities  | Positives   | Gaps     |
|----------------|--------|-------------|-------------|----------|
| 63.4 bits(142) | 5e-10  | 20/20(100%) | 20/20(100%) | 0/20(0%) |

Query 1 RGLCVLSVGNLTTFDGARG 20  
 RGLCVLSVGNLTTFDGARG  
 Sbjct 2870 RGLCVLSVGNLTTFDGARG 2889

**Related Information**

[Gene](#) - associated gene details  
[Map Viewer](#) - aligned genomic context

[Download](#) [GenPept](#) [Graphics](#) [Next](#) [Previous](#) [Descriptions](#)

**PREDICTED: LOW QUALITY PROTEIN: IgGFc-binding protein [Pan paniscus]**

Sequence ID: [gi|675718714|ref|XP\\_008963216.1|](#) Length: 3331 Number of Matches: 1

Range 1: 3158 to 3177 [GenPept](#) [Graphics](#) [Next Match](#) [Previous Match](#)

| Score          | Expect | Identities  | Positives   | Gaps     |
|----------------|--------|-------------|-------------|----------|
| 63.4 bits(142) | 5e-10  | 20/20(100%) | 20/20(100%) | 0/20(0%) |

Query 1 RGLCVLSVGNLTTFDGARG 20  
 RGLCVLSVGNLTTFDGARG  
 Sbjct 3158 RGLCVLSVGNLTTFDGARG 3177

**Related Information**

[Gene](#) - associated gene details  
[Map Viewer](#) - aligned genomic context

BLAST is a registered trademark of the National Library of Medicine.

▶ NCBI/ BLAST/ blastp suite/ Formatting Results - BVDVH16B01R

**i** Your search parameters were adjusted to search for a short input sequence.

[Edit and Resubmit](#) [Save Search Strategies](#) ▶ [Formatting options](#) ▶ [Download](#) [YouTube](#) [How to read this page](#) [Blast report description](#)

### FCGBP\_RLLISSLSESPASVSILSQADDTSKK\_Mod

RID [BVDVH16B01R](#) (Expires on 01-21 09:03 am)

**Query ID** |cl|308726  
**Description** None  
**Molecule type** amino acid  
**Query Length** 26

**Database Name** nr  
**Description** All non-redundant GenBank CDS translations+PDB+SwissProt+PIR+PRF excluding environmental samples from WGS projects  
**Program** BLASTP 2.2.30+ ▶ [Citation](#)

Other reports: ▶ [Search Summary](#) [[Taxonomy reports](#)] [[Distance tree of results](#)] [[Related Structures](#)] [[Multiple alignment](#)]

### Graphic Summary

[Show Conserved Domains](#)

No putative conserved domains have been detected

Distribution of 105 Blast Hits on the Query Sequence

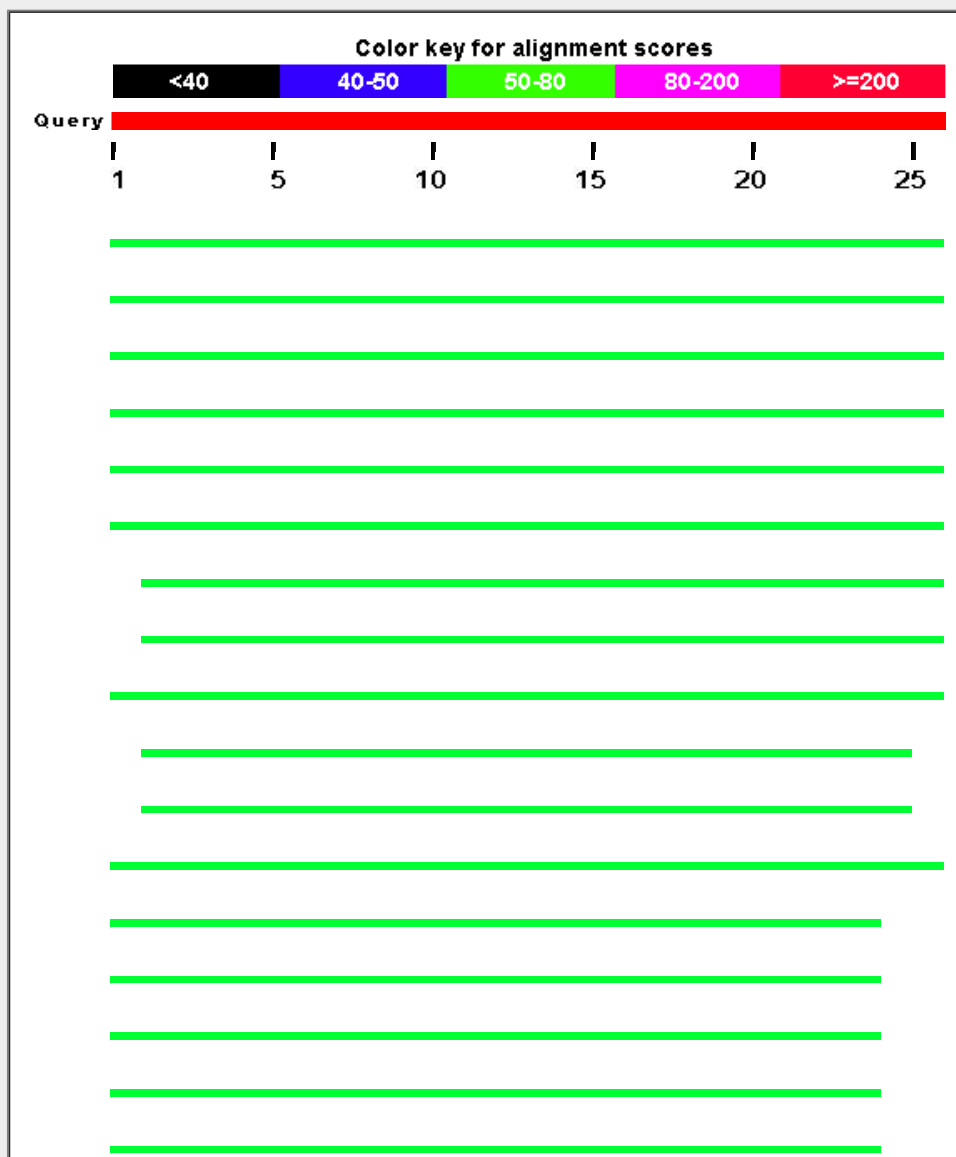

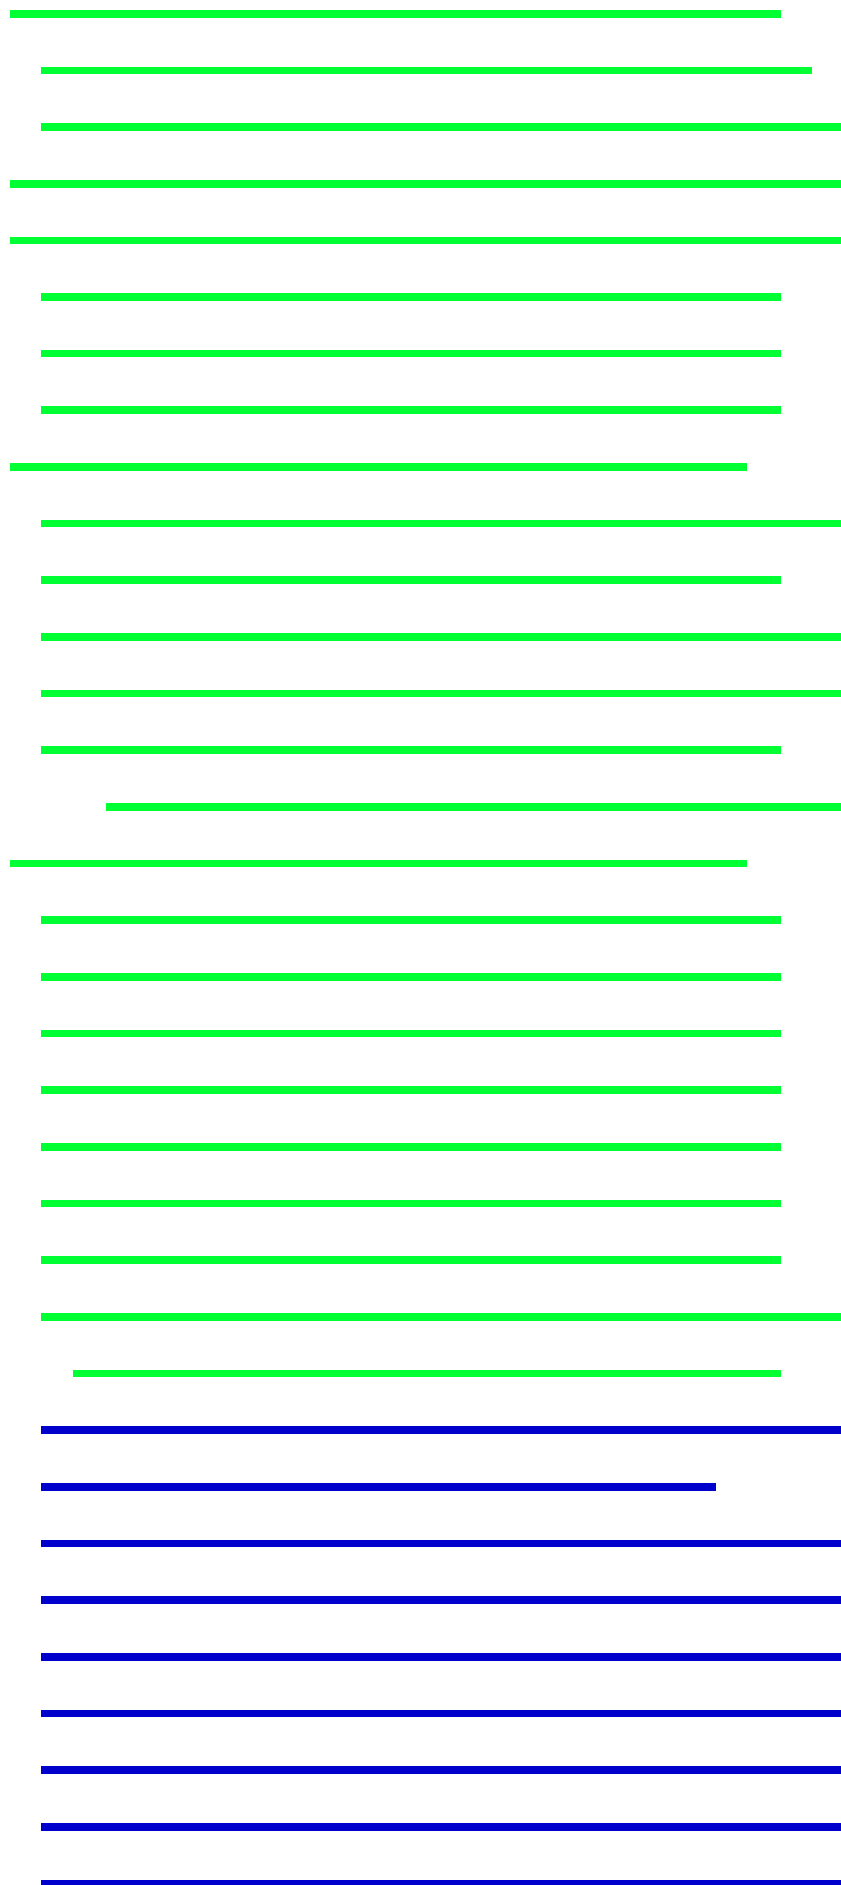

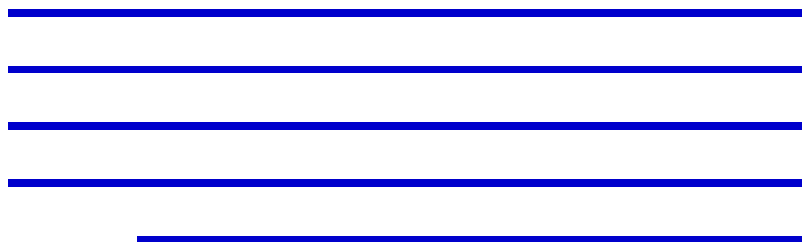

## Descriptions

### Sequences producing significant alignments:

Select: [All](#) [None](#) Selected:0

[Alignments](#)
[Download](#)
[GenPept](#)
[Graphics](#)
[Distance tree of results](#)
[Multiple alignment](#)



| Description                                                                             | Max score | Total score | Query cover | E value | Ident | Accession                      |
|-----------------------------------------------------------------------------------------|-----------|-------------|-------------|---------|-------|--------------------------------|
| <a href="#">Fc gamma BP [Homo sapiens]</a>                                              | 77.0      | 77.0        | 100%        | 3e-14   | 96%   | <a href="#">AAD39266.1</a>     |
| <a href="#">Fc fragment of IgG binding protein [Homo sapiens]</a>                       | 77.0      | 77.0        | 100%        | 3e-14   | 96%   | <a href="#">EAW56926.1</a>     |
| <a href="#">PREDICTED: LOW QUALITY PROTEIN: IgGFc-binding protein [Pan paniscus]</a>    | 77.0      | 77.0        | 100%        | 3e-14   | 96%   | <a href="#">XP_008963216.1</a> |
| <a href="#">PREDICTED: LOW QUALITY PROTEIN: IgGFc-binding protein [Pan troglody]</a>    | 77.0      | 77.0        | 100%        | 3e-14   | 96%   | <a href="#">XP_009433882.1</a> |
| <a href="#">IgG Fc binding protein [Homo sapiens]</a>                                   | 77.0      | 77.0        | 100%        | 3e-14   | 96%   | <a href="#">BAA19526.1</a>     |
| <a href="#">IgGFc-binding protein precursor [Homo sapiens]</a>                          | 77.0      | 77.0        | 100%        | 3e-14   | 96%   | <a href="#">NP_003881.2</a>    |
| <a href="#">PREDICTED: LOW QUALITY PROTEIN: IgGFc-binding protein [Pongo abelii]</a>    | 73.6      | 73.6        | 96%         | 4e-13   | 96%   | <a href="#">XP_009230865.1</a> |
| <a href="#">PREDICTED: LOW QUALITY PROTEIN: IgGFc-binding protein [Gorilla gorilla]</a> | 73.6      | 73.6        | 96%         | 4e-13   | 96%   | <a href="#">XP_004060816.1</a> |
| <a href="#">PREDICTED: IgGFc-binding protein [Chrysochloris asiatica]</a>               | 67.7      | 67.7        | 100%        | 5e-11   | 85%   | <a href="#">XP_006871587.1</a> |
| <a href="#">PREDICTED: IgGFc-binding protein [Cavia porcellus]</a>                      | 67.2      | 67.2        | 92%         | 6e-11   | 96%   | <a href="#">XP_003462033.1</a> |
| <a href="#">PREDICTED: IgGFc-binding protein [Nomascus leucogenys]</a>                  | 66.4      | 66.4        | 92%         | 1e-10   | 92%   | <a href="#">XP_003270573.1</a> |
| <a href="#">PREDICTED: IgGFc-binding protein [Tarsius syrichta]</a>                     | 66.0      | 66.0        | 100%        | 2e-10   | 88%   | <a href="#">XP_008052981.1</a> |
| <a href="#">hypothetical protein EGM_09727 [Macaca fascicularis]</a>                    | 63.4      | 63.4        | 92%         | 1e-09   | 92%   | <a href="#">EHH59582.1</a>     |
| <a href="#">hypothetical protein EGK_10612 [Macaca mulatta]</a>                         | 63.4      | 63.4        | 92%         | 1e-09   | 92%   | <a href="#">EHH30036.1</a>     |
| <a href="#">PREDICTED: igGFc-binding protein-like [Macaca mulatta]</a>                  | 63.4      | 63.4        | 92%         | 1e-09   | 92%   | <a href="#">XP_001088892.2</a> |
| <a href="#">PREDICTED: IgGFc-binding protein [Chlorocebus sabaeus]</a>                  | 63.4      | 63.4        | 92%         | 1e-09   | 92%   | <a href="#">XP_007996683.1</a> |
| <a href="#">PREDICTED: LOW QUALITY PROTEIN: IgGFc-binding protein [Papio anubis]</a>    | 63.4      | 63.4        | 92%         | 1e-09   | 92%   | <a href="#">XP_003915593.1</a> |
| <a href="#">PREDICTED: IgGFc-binding protein [Macaca fascicularis]</a>                  | 63.4      | 63.4        | 92%         | 1e-09   | 92%   | <a href="#">XP_005590715.1</a> |
| <a href="#">PREDICTED: LOW QUALITY PROTEIN: IgGFc-binding protein [Rhinopithecus]</a>   | 63.0      | 63.0        | 92%         | 2e-09   | 92%   | <a href="#">XP_010379186.1</a> |
| <a href="#">IgGFc-binding protein [Fukomys damarensis]</a>                              | 61.7      | 61.7        | 96%         | 4e-09   | 88%   | <a href="#">KFO19029.1</a>     |
| <a href="#">IgGFc-binding protein [Cricetulus griseus]</a>                              | 60.4      | 60.4        | 100%        | 1e-08   | 81%   | <a href="#">EGW06398.1</a>     |
| <a href="#">PREDICTED: LOW QUALITY PROTEIN: IgGFc-binding protein-like isoform X</a>    | 60.4      | 60.4        | 100%        | 1e-08   | 81%   | <a href="#">XP_007643925.1</a> |
| <a href="#">PREDICTED: IgGFc-binding protein [Saimiri boliviensis boliviensis]</a>      | 59.6      | 59.6        | 88%         | 2e-08   | 87%   | <a href="#">XP_010329397.1</a> |
| <a href="#">PREDICTED: LOW QUALITY PROTEIN: IgGFc-binding protein [Callithrix jacq]</a> | 59.6      | 59.6        | 88%         | 2e-08   | 87%   | <a href="#">XP_008986248.1</a> |
| <a href="#">PREDICTED: IgGFc-binding protein [Ceratotherium simum simum]</a>            | 58.7      | 58.7        | 88%         | 4e-08   | 87%   | <a href="#">XP_004441659.1</a> |
| <a href="#">PREDICTED: LOW QUALITY PROTEIN: IgGFc-binding protein [Loxodonta af]</a>    | 58.7      | 58.7        | 88%         | 4e-08   | 83%   | <a href="#">XP_010598700.1</a> |
| <a href="#">PREDICTED: IgGFc-binding protein [Felis catus]</a>                          | 58.3      | 58.3        | 96%         | 6e-08   | 80%   | <a href="#">XP_006941331.1</a> |
| <a href="#">PREDICTED: IgGFc-binding protein [Panthera tigris altaica]</a>              | 56.6      | 56.6        | 88%         | 2e-07   | 83%   | <a href="#">XP_007087304.1</a> |
| <a href="#">PREDICTED: IgGFc-binding protein [Echinops telfairi]</a>                    | 56.6      | 56.6        | 96%         | 2e-07   | 76%   | <a href="#">XP_004710550.1</a> |

|                                                                                           |      |      |     |       |     |                                |
|-------------------------------------------------------------------------------------------|------|------|-----|-------|-----|--------------------------------|
| <a href="#">PREDICTED: IgGFc-binding protein [Elephantulus edwardii]</a>                  | 55.8 | 55.8 | 96% | 4e-07 | 76% | <a href="#">XP_006901006.1</a> |
| <a href="#">IgGFc-binding protein [Myotis davidii]</a>                                    | 55.4 | 55.4 | 88% | 6e-07 | 78% | <a href="#">ELK30312.1</a>     |
| <a href="#">PREDICTED: IgGFc-binding protein isoform X1 [Chinchilla lanigera]</a>         | 54.9 | 54.9 | 88% | 8e-07 | 83% | <a href="#">XP_005414138.1</a> |
| <a href="#">IgGFc-binding protein [Tupaia chinensis]</a>                                  | 54.9 | 54.9 | 88% | 8e-07 | 83% | <a href="#">ELW72413.1</a>     |
| <a href="#">PREDICTED: LOW QUALITY PROTEIN: IgGFc-binding protein [Equus caball]</a>      | 53.7 | 53.7 | 88% | 2e-06 | 83% | <a href="#">XP_005596726.1</a> |
| <a href="#">PREDICTED: LOW QUALITY PROTEIN: IgGFc-binding protein [Myotis brand]</a>      | 53.7 | 53.7 | 88% | 2e-06 | 78% | <a href="#">XP_005868902.1</a> |
| <a href="#">PREDICTED: LOW QUALITY PROTEIN: Fc fragment of IgG binding protein [I</a>     | 53.7 | 53.7 | 88% | 2e-06 | 78% | <a href="#">XP_006109819.1</a> |
| <a href="#">IgGFc-binding protein [Myotis brandtii]</a>                                   | 53.7 | 53.7 | 88% | 2e-06 | 78% | <a href="#">EPQ09333.1</a>     |
| <a href="#">PREDICTED: IgGFc-binding protein [Pteropus alecto]</a>                        | 53.2 | 53.2 | 88% | 3e-06 | 78% | <a href="#">XP_006905494.1</a> |
| <a href="#">IgGFc-binding protein [Pteropus alecto]</a>                                   | 53.2 | 53.2 | 88% | 3e-06 | 78% | <a href="#">ELK18209.1</a>     |
| <a href="#">PREDICTED: IgGFc-binding protein [Galeopterus variegatus]</a>                 | 52.0 | 52.0 | 88% | 7e-06 | 83% | <a href="#">XP_008580791.1</a> |
| <a href="#">PREDICTED: IgGFc-binding protein [Otolemur garnettii]</a>                     | 52.0 | 52.0 | 96% | 7e-06 | 80% | <a href="#">XP_003802201.1</a> |
| <a href="#">PREDICTED: LOW QUALITY PROTEIN: IgGFc-binding protein [Eptesicus fus</a>      | 50.7 | 50.7 | 84% | 2e-05 | 78% | <a href="#">XP_008138255.1</a> |
| <a href="#">PREDICTED: IgGFc-binding protein [Condylura cristata]</a>                     | 49.8 | 49.8 | 96% | 4e-05 | 72% | <a href="#">XP_004693946.1</a> |
| <a href="#">PREDICTED: IgGFc-binding protein [Orycteropus afer afer]</a>                  | 49.8 | 49.8 | 80% | 4e-05 | 76% | <a href="#">XP_007941342.1</a> |
| <a href="#">PREDICTED: LOW QUALITY PROTEIN: IgGFc-binding protein [Capra hircus]</a>      | 49.0 | 49.0 | 96% | 7e-05 | 72% | <a href="#">XP_005692605.1</a> |
| <a href="#">IgGFc-binding protein [Heterocephalus glaber]</a>                             | 48.1 | 48.1 | 96% | 1e-04 | 76% | <a href="#">EHA99105.1</a>     |
| <a href="#">PREDICTED: IgGFc-binding protein [Lipotes vexillifer]</a>                     | 48.1 | 48.1 | 96% | 1e-04 | 72% | <a href="#">XP_007458763.1</a> |
| <a href="#">PREDICTED: IgGFc-binding protein [Octodon degus]</a>                          | 48.1 | 48.1 | 96% | 1e-04 | 76% | <a href="#">XP_004648069.1</a> |
| <a href="#">PREDICTED: IgGFc-binding protein [Erinaceus europaeus]</a>                    | 48.1 | 92.9 | 96% | 1e-04 | 64% | <a href="#">XP_007538724.1</a> |
| <a href="#">PREDICTED: IgGFc-binding protein [Orcinus orca]</a>                           | 45.6 | 45.6 | 96% | 8e-04 | 68% | <a href="#">XP_004271425.1</a> |
| <a href="#">Fc fragment of IgG binding protein-like protein [Camelus ferus]</a>           | 45.2 | 45.2 | 96% | 0.001 | 64% | <a href="#">EPY85976.1</a>     |
| <a href="#">PREDICTED: IgGFc-binding protein [Camelus dromedarius]</a>                    | 45.2 | 65.8 | 96% | 0.001 | 64% | <a href="#">XP_010983489.1</a> |
| <a href="#">PREDICTED: IgGFc-binding protein [Camelus bactrianus]</a>                     | 45.2 | 65.8 | 96% | 0.001 | 64% | <a href="#">XP_010945545.1</a> |
| <a href="#">PREDICTED: IgGFc-binding protein [Vicugna pacos]</a>                          | 45.2 | 65.8 | 96% | 0.001 | 64% | <a href="#">XP_006215157.1</a> |
| <a href="#">PREDICTED: IgGFc-binding protein [Camelus ferus]</a>                          | 45.2 | 65.8 | 96% | 0.001 | 64% | <a href="#">XP_006178015.1</a> |
| <a href="#">PREDICTED: IgGFc-binding protein [Mesocricetus auratus]</a>                   | 44.8 | 44.8 | 80% | 0.001 | 76% | <a href="#">XP_005086657.1</a> |
| <a href="#">PREDICTED: IgGFc-binding protein [Bison bison bison]</a>                      | 44.8 | 44.8 | 96% | 0.001 | 68% | <a href="#">XP_010847529.1</a> |
| <a href="#">PREDICTED: IgGFc-binding protein isoform X1 [Bubalus bubalis]</a>             | 44.8 | 44.8 | 96% | 0.001 | 68% | <a href="#">XP_006050098.1</a> |
| <a href="#">PREDICTED: IgGFc-binding protein isoform X1 [Bos taurus]</a>                  | 44.8 | 44.8 | 96% | 0.001 | 68% | <a href="#">XP_010813251.1</a> |
| <a href="#">PREDICTED: IgGFc-binding protein isoform X1 [Bos taurus]</a>                  | 44.8 | 44.8 | 96% | 0.001 | 68% | <a href="#">XP_010798218.1</a> |
| <a href="#">PREDICTED: IgGFc-binding protein [Pantholops hodgsonii]</a>                   | 44.8 | 44.8 | 96% | 0.001 | 68% | <a href="#">XP_005963590.1</a> |
| <a href="#">TPA: Fc fragment of IgG binding protein-like [Bos taurus]</a>                 | 44.8 | 44.8 | 96% | 0.001 | 68% | <a href="#">DAA19876.1</a>     |
| <a href="#">PREDICTED: LOW QUALITY PROTEIN: IgGFc-binding protein [Ovis aries]</a>        | 44.8 | 44.8 | 96% | 0.001 | 68% | <a href="#">XP_004015739.1</a> |
| <a href="#">PREDICTED: LOW QUALITY PROTEIN: IgGFc-binding protein [Bos mutus]</a>         | 44.8 | 44.8 | 96% | 0.001 | 68% | <a href="#">XP_005890645.1</a> |
| <a href="#">PREDICTED: IgGFc-binding protein isoform X2 [Balaenoptera acutorostrata s</a> | 43.9 | 43.9 | 96% | 0.003 | 68% | <a href="#">XP_007180031.1</a> |
| <a href="#">PREDICTED: IgGFc-binding protein isoform X1 [Balaenoptera acutorostrata s</a> | 43.9 | 43.9 | 96% | 0.003 | 68% | <a href="#">XP_007180030.1</a> |
| <a href="#">PREDICTED: IgGFc-binding protein [Physeter catodon]</a>                       | 42.2 | 42.2 | 88% | 0.009 | 70% | <a href="#">XP_007122066.1</a> |
| <a href="#">PREDICTED: LOW QUALITY PROTEIN: Fc fragment of IgG binding protein [I</a>     | 40.5 | 40.5 | 84% | 0.032 | 68% | <a href="#">XP_004417817.1</a> |
| <a href="#">PREDICTED: LOW QUALITY PROTEIN: Fc fragment of IgG binding protein [I</a>     | 40.5 | 40.5 | 84% | 0.032 | 68% | <a href="#">XP_006752469.1</a> |
| <a href="#">PREDICTED: IgGFc-binding protein [Ictidomys tridecemlineatus]</a>             | 40.1 | 40.1 | 84% | 0.043 | 68% | <a href="#">XP_005336544.1</a> |
| <a href="#">hypothetical protein PANDA_012964 [Ailuropoda melanoleuca]</a>                | 39.7 | 39.7 | 84% | 0.059 | 68% | <a href="#">EFB16331.1</a>     |
| <a href="#">PREDICTED: LOW QUALITY PROTEIN: IgGFc-binding protein [Ursus maritin</a>      | 39.7 | 39.7 | 84% | 0.059 | 68% | <a href="#">XP_008686987.1</a> |
| <a href="#">PREDICTED: IgGFc-binding protein-like [Ailuropoda melanoleuca]</a>            | 39.7 | 39.7 | 84% | 0.059 | 68% | <a href="#">XP_002923768.1</a> |
| <a href="#">PAS sensor protein [Methanoplanus limicola]</a>                               | 37.5 | 37.5 | 73% | 0.27  | 68% | <a href="#">WP_004076509.1</a> |



|                                                                                         |      |      |     |      |     |                                |
|-----------------------------------------------------------------------------------------|------|------|-----|------|-----|--------------------------------|
| <a href="#">PREDICTED: LOW QUALITY PROTEIN: IgGFc-binding protein [Canis lupus f</a>    | 37.5 | 37.5 | 84% | 0.28 | 64% | <a href="#">XP_005616636.1</a> |
| <a href="#">PREDICTED: LOW QUALITY PROTEIN: Fc fragment of IgG binding protein [I</a>   | 35.0 | 35.0 | 84% | 1.9  | 64% | <a href="#">XP_004828450.1</a> |
| <a href="#">Phosphoserine phosphatase 1 [Candidatus Accumulibacter sp. BA-94]</a>       | 34.1 | 34.1 | 65% | 3.4  | 48% | <a href="#">EXI80297.1</a>     |
| <a href="#">Polyketide synthase, enoylreductase [Penicillium expansum]</a>              | 32.9 | 32.9 | 88% | 9.5  | 40% | <a href="#">KGO47706.1</a>     |
| <a href="#">Importin 13, putative [Penicillium digitatum Pd1]</a>                       | 32.9 | 32.9 | 80% | 9.5  | 52% | <a href="#">EKV12548.1</a>     |
| <a href="#">RNA pseudouridine synthase superfamily protein [Toxoplasma gondii RUB]</a>  | 32.9 | 32.9 | 76% | 9.6  | 71% | <a href="#">KFG65999.1</a>     |
| <a href="#">RNA pseudouridine synthase superfamily protein [Toxoplasma gondii GT1]</a>  | 32.9 | 32.9 | 76% | 9.6  | 71% | <a href="#">EPR61036.1</a>     |
| <a href="#">RNA pseudouridine synthase superfamily protein [Toxoplasma gondii ME49]</a> | 32.9 | 32.9 | 76% | 9.6  | 71% | <a href="#">EPT26018.1</a>     |
| <a href="#">RNA pseudouridine synthase superfamily protein [Toxoplasma gondii VAND]</a> | 32.9 | 32.9 | 76% | 9.6  | 71% | <a href="#">KFH09647.1</a>     |
| <a href="#">PREDICTED: uncharacterized protein LOC104904663 [Beta vulgaris subsp. v</a> | 32.5 | 32.5 | 76% | 13   | 60% | <a href="#">XP_010691296.1</a> |
| <a href="#">PTS mannose transporter subunit IIABC [Corynebacterium lubricantis]</a>     | 32.5 | 32.5 | 57% | 13   | 73% | <a href="#">WP_026196293.1</a> |
| <a href="#">hypothetical protein PDE_00389 [Penicillium oxalicum 114-2]</a>             | 32.5 | 32.5 | 80% | 13   | 62% | <a href="#">EPS25456.1</a>     |
| <a href="#">hypothetical protein [Mycobacterium tuberculosis]</a>                       | 32.0 | 32.0 | 65% | 18   | 65% | <a href="#">WP_012775806.1</a> |
| <a href="#">oxidoreductase [Mycobacterium tuberculosis OFXR-6]</a>                      | 32.0 | 32.0 | 65% | 18   | 65% | <a href="#">KBJ45988.1</a>     |
| <a href="#">hypothetical protein [Mycobacterium tuberculosis]</a>                       | 32.0 | 32.0 | 65% | 18   | 65% | <a href="#">WP_010924322.1</a> |
| <a href="#">hypothetical protein [Mycobacterium tuberculosis]</a>                       | 32.0 | 32.0 | 65% | 18   | 65% | <a href="#">WP_031674284.1</a> |
| <a href="#">monooxygenase [Mycobacterium tuberculosis]</a>                              | 32.0 | 32.0 | 65% | 18   | 65% | <a href="#">WP_015629755.1</a> |
| <a href="#">hypothetical protein [Mycobacterium africanum]</a>                          | 32.0 | 32.0 | 65% | 18   | 65% | <a href="#">WP_003910233.1</a> |
| <a href="#">MULTISPECIES: hypothetical protein [Mycobacterium tuberculosis complex]</a> | 32.0 | 32.0 | 65% | 18   | 65% | <a href="#">WP_003898656.1</a> |
| <a href="#">hypothetical protein [Mycobacterium tuberculosis]</a>                       | 32.0 | 32.0 | 65% | 18   | 65% | <a href="#">WP_031652242.1</a> |
| <a href="#">hypothetical protein [Mycobacterium tuberculosis]</a>                       | 32.0 | 32.0 | 65% | 18   | 65% | <a href="#">WP_031744179.1</a> |
| <a href="#">hypothetical protein [Mycobacterium tuberculosis]</a>                       | 32.0 | 32.0 | 65% | 18   | 65% | <a href="#">WP_031745224.1</a> |
| <a href="#">hypothetical protein [Mycobacterium tuberculosis]</a>                       | 32.0 | 32.0 | 65% | 18   | 65% | <a href="#">WP_023641889.1</a> |
| <a href="#">hypothetical protein [Mycobacterium tuberculosis]</a>                       | 32.0 | 32.0 | 65% | 18   | 65% | <a href="#">WP_023641782.1</a> |
| <a href="#">monooxygenase [Mycobacterium tuberculosis]</a>                              | 32.0 | 32.0 | 65% | 18   | 65% | <a href="#">WP_015456187.1</a> |
| <a href="#">hypothetical protein [Mycobacterium tuberculosis]</a>                       | 32.0 | 32.0 | 65% | 18   | 65% | <a href="#">WP_003912992.1</a> |

## Alignments

[Download](#) [GenPept](#) [Graphics](#)

[Next](#) [Previous](#) [Descriptions](#)

Fc gamma BP, partial [Homo sapiens]

Sequence ID: [gb|AAD39266.1|AC007842\\_1](#) Length: 2843 Number of Matches: 1

Range 1: 54 to 79 [GenPept](#) [Graphics](#)

[Next Match](#) [Previous Match](#)

| Score          | Expect | Identities | Positives   | Gaps     |
|----------------|--------|------------|-------------|----------|
| 77.0 bits(174) | 3e-14  | 25/26(96%) | 26/26(100%) | 0/26(0%) |

Query 1 RLLISSLSESPASVSILSQADDTSKK 26  
 RLLISSLSESPASVSILSQAD+TSKK  
 Sbjct 54 RLLISSLSESPASVSILSQADNTSKK 79

### Related Information

[Gene](#) - associated gene details

[Download](#) [GenPept](#) [Graphics](#)

[Next](#) [Previous](#) [Descriptions](#)

Fc fragment of IgG binding protein [Homo sapiens]

Sequence ID: [gb|EAW56926.1|](#) Length: 3004 Number of Matches: 1

Range 1: 54 to 79 [GenPept](#) [Graphics](#)

[Next Match](#) [Previous Match](#)

| Score          | Expect | Identities | Positives   | Gaps     |
|----------------|--------|------------|-------------|----------|
| 77.0 bits(174) | 3e-14  | 25/26(96%) | 26/26(100%) | 0/26(0%) |

### Related Information

[Gene](#) - associated gene details

Query 1 RLLISSLSESPASVSILSQADDTSKK 26  
 RLLISSLSESPASVSILSQAD+TSKK  
 Sbjct 54 RLLISSLSESPASVSILSQADNTSKK 79

[Download](#) [GenPept](#) [Graphics](#)

[Next](#) [Previous](#) [Descriptions](#)

**PREDICTED: LOW QUALITY PROTEIN: IgGFc-binding protein [Pan paniscus]**

Sequence ID: [ref|XP\\_008963216.1|](#) Length: 3331 Number of Matches: 1

Range 1: 54 to 79 [GenPept](#) [Graphics](#)

[Next Match](#) [Previous Match](#)

| Score          | Expect | Identities | Positives   | Gaps     |
|----------------|--------|------------|-------------|----------|
| 77.0 bits(174) | 3e-14  | 25/26(96%) | 26/26(100%) | 0/26(0%) |

Query 1 RLLISSLSESPASVSILSQADDTSKK 26  
 RLLISSLSESPASVSILSQAD+TSKK  
 Sbjct 54 RLLISSLSESPASVSILSQADNTSKK 79

**Related Information**

[Gene](#) - associated gene details  
[Map Viewer](#) - aligned genomic context

[Download](#) [GenPept](#) [Graphics](#)

[Next](#) [Previous](#) [Descriptions](#)

**PREDICTED: LOW QUALITY PROTEIN: IgGFc-binding protein [Pan troglodytes]**

Sequence ID: [ref|XP\\_009433882.1|](#) Length: 5257 Number of Matches: 1

Range 1: 54 to 79 [GenPept](#) [Graphics](#)

[Next Match](#) [Previous Match](#)

| Score          | Expect | Identities | Positives   | Gaps     |
|----------------|--------|------------|-------------|----------|
| 77.0 bits(174) | 3e-14  | 25/26(96%) | 26/26(100%) | 0/26(0%) |

Query 1 RLLISSLSESPASVSILSQADDTSKK 26  
 RLLISSLSESPASVSILSQAD+TSKK  
 Sbjct 54 RLLISSLSESPASVSILSQADNTSKK 79

**Related Information**

[Gene](#) - associated gene details

[Download](#) [GenPept](#) [Graphics](#)

[Next](#) [Previous](#) [Descriptions](#)

**IgG Fc binding protein [Homo sapiens]**

Sequence ID: [dbj|BAA19526.1|](#) Length: 5405 Number of Matches: 1

Range 1: 54 to 79 [GenPept](#) [Graphics](#)

[Next Match](#) [Previous Match](#)

| Score          | Expect | Identities | Positives   | Gaps     |
|----------------|--------|------------|-------------|----------|
| 77.0 bits(174) | 3e-14  | 25/26(96%) | 26/26(100%) | 0/26(0%) |

Query 1 RLLISSLSESPASVSILSQADDTSKK 26  
 RLLISSLSESPASVSILSQAD+TSKK  
 Sbjct 54 RLLISSLSESPASVSILSQADNTSKK 79

**Related Information**

[Gene](#) - associated gene details

BLAST is a registered trademark of the National Library of Medicine.

▶ NCBI/ BLAST/ blastp suite/ Formatting Results - B9E2X3N901R

**i** Your search parameters were adjusted to search for a short input sequence.

[Edit and Resubmit](#) [Save Search Strategies](#) ▶ [Formatting options](#) ▶ [Download](#)

[YouTube](#) [How to read this page](#) [Blast report description](#)

**FCGBP\_RLLISSLSESPASVSILSQADNTSKK\_NonMod**

**RID** [B9E2X3N901R](#) (Expires on 01-14 13:17 pm)

**Query ID** Icl|203729  
**Description** None  
**Molecule type** amino acid  
**Query Length** 26

**Database Name** nr  
**Description** All non-redundant GenBank CDS translations+PDB+SwissProt+PIR excluding environmental samples from WGS projects  
**Program** BLASTP 2.2.30+ ▶ [Citation](#)

Other reports: ▶ [Search Summary](#) [[Taxonomy reports](#)] [[Distance tree of results](#)] [[Related Structures](#)] [[Multiple alignment](#)]

**Graphic Summary**

[Show Conserved Domains](#)

No putative conserved domains have been detected

Distribution of 103 Blast Hits on the Query Sequence

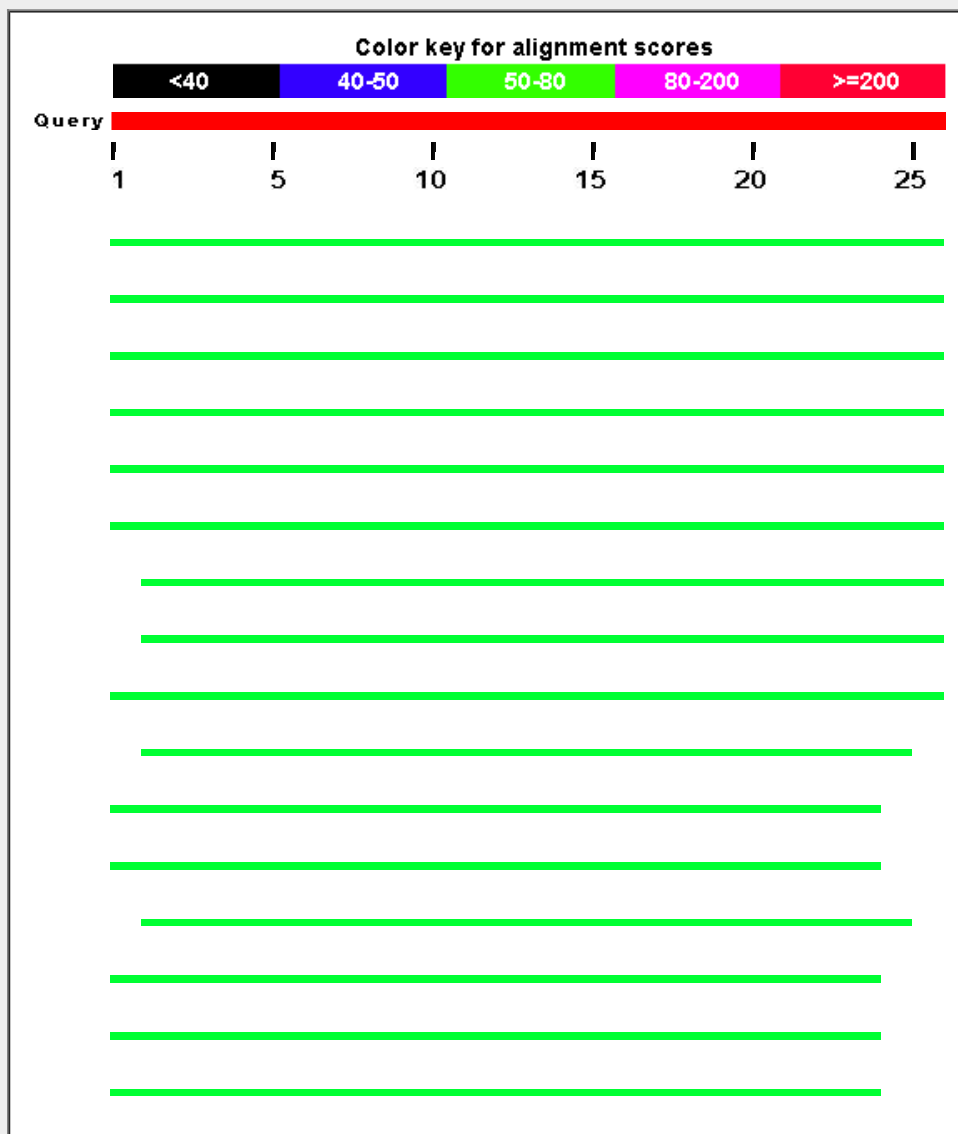

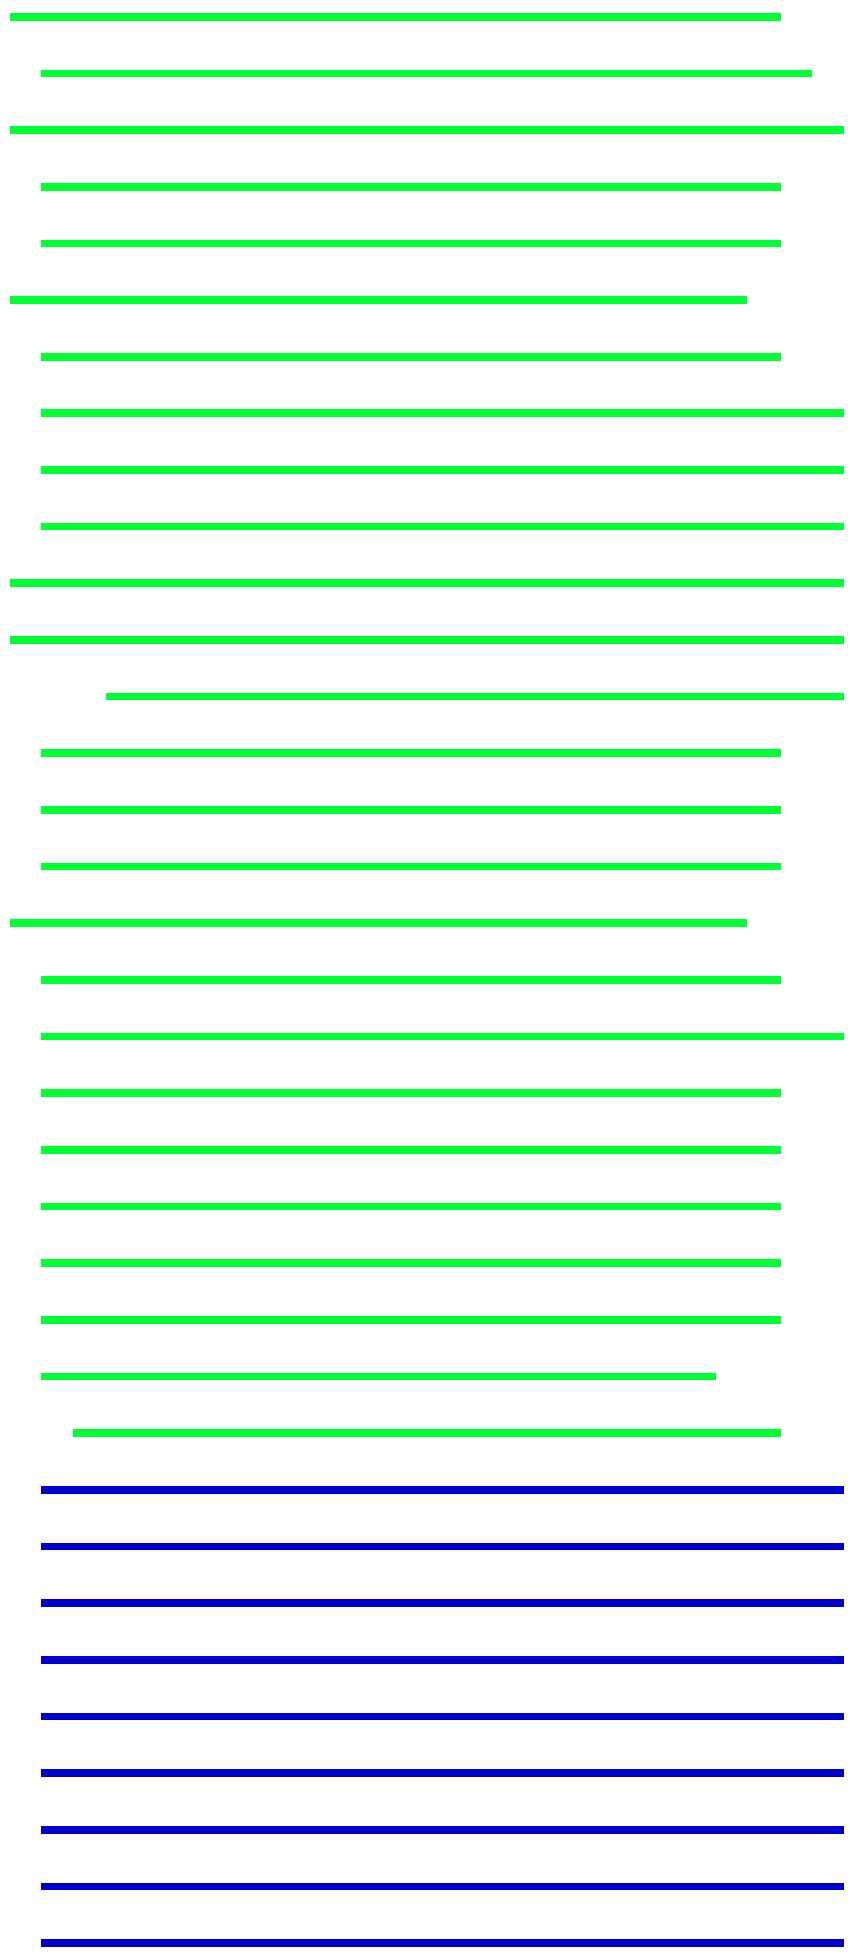

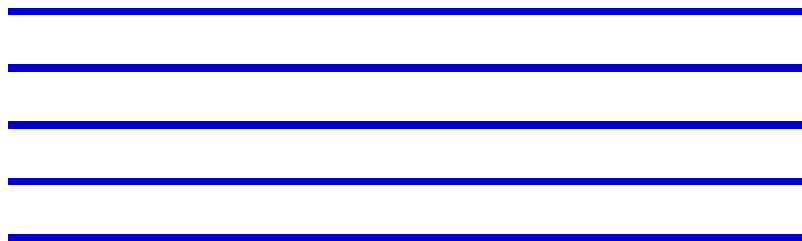

## Descriptions

### Sequences producing significant alignments:

Select: [All](#) [None](#) Selected:0

[Alignments](#)
[Download](#)
[GenPept](#)
[Graphics](#)
[Distance tree of results](#)
[Multiple alignment](#)

| Description                                                                        | Max score | Total score | Query cover | E value | Ident | Accession                                   |
|------------------------------------------------------------------------------------|-----------|-------------|-------------|---------|-------|---------------------------------------------|
| <a href="#">Fc gamma BP [Homo sapiens]</a>                                         | 79.5      | 79.5        | 100%        | 4e-15   | 100%  | <a href="#">gi 5080756 AAD39266.1</a>       |
| <a href="#">Fc fragment of IgG binding protein [Homo sapiens]</a>                  | 79.5      | 79.5        | 100%        | 4e-15   | 100%  | <a href="#">gi 119577330 EAW56926.1</a>     |
| <a href="#">PREDICTED: LOW QUALITY PROTEIN: IgGFc-binding protein [Pa</a>          | 79.5      | 79.5        | 100%        | 4e-15   | 100%  | <a href="#">gi 675718714 XP_008963216.1</a> |
| <a href="#">PREDICTED: LOW QUALITY PROTEIN: IgGFc-binding protein [Pa</a>          | 79.5      | 79.5        | 100%        | 4e-15   | 100%  | <a href="#">gi 694975150 XP_009433882.1</a> |
| <a href="#">IgG Fc binding protein [Homo sapiens]</a>                              | 79.5      | 79.5        | 100%        | 4e-15   | 100%  | <a href="#">gi 1944352 BAA19526.1</a>       |
| <a href="#">IgGFc-binding protein precursor [Homo sapiens]</a>                     | 79.5      | 79.5        | 100%        | 4e-15   | 100%  | <a href="#">gi 154146262 NP_003881.2</a>    |
| <a href="#">PREDICTED: LOW QUALITY PROTEIN: IgGFc-binding protein [Po</a>          | 76.1      | 76.1        | 96%         | 6e-14   | 100%  | <a href="#">gi 686758917 XP_009230865.1</a> |
| <a href="#">PREDICTED: LOW QUALITY PROTEIN: IgGFc-binding protein [Go</a>          | 76.1      | 76.1        | 96%         | 6e-14   | 100%  | <a href="#">gi 426388791 XP_004060816.1</a> |
| <a href="#">PREDICTED: IgGFc-binding protein [Chrysochloris asiatica]</a>          | 70.2      | 70.2        | 100%        | 6e-12   | 88%   | <a href="#">gi 586482145 XP_006871587.1</a> |
| <a href="#">PREDICTED: IgGFc-binding protein [Nomascus leucogenys]</a>             | 68.9      | 68.9        | 92%         | 2e-11   | 96%   | <a href="#">gi 332242810 XP_003270573.1</a> |
| <a href="#">hypothetical protein EGM_09727 [Macaca fascicularis]</a>               | 64.7      | 64.7        | 92%         | 4e-10   | 92%   | <a href="#">gi 355755835 EHH59582.1</a>     |
| <a href="#">hypothetical protein EGK_10612 [Macaca mulatta]</a>                    | 64.7      | 64.7        | 92%         | 4e-10   | 92%   | <a href="#">gi 355703545 EHH30036.1</a>     |
| <a href="#">PREDICTED: IgGFc-binding protein [Cavia porcellus]</a>                 | 64.7      | 64.7        | 92%         | 4e-10   | 92%   | <a href="#">gi 348552434 XP_003462033.1</a> |
| <a href="#">PREDICTED: igGFc-binding protein-like [Macaca mulatta]</a>             | 64.7      | 64.7        | 92%         | 4e-10   | 92%   | <a href="#">gi 297277050 XP_001088892.2</a> |
| <a href="#">PREDICTED: IgGFc-binding protein [Chlorocebus sabaesus]</a>            | 64.7      | 64.7        | 92%         | 4e-10   | 92%   | <a href="#">gi 635042256 XP_007996683.1</a> |
| <a href="#">PREDICTED: LOW QUALITY PROTEIN: IgGFc-binding protein [Pa</a>          | 64.7      | 64.7        | 92%         | 4e-10   | 92%   | <a href="#">gi 402905577 XP_003915593.1</a> |
| <a href="#">PREDICTED: IgGFc-binding protein [Macaca fascicularis]</a>             | 64.7      | 64.7        | 92%         | 4e-10   | 92%   | <a href="#">gi 544514342 XP_005590715.1</a> |
| <a href="#">PREDICTED: LOW QUALITY PROTEIN: IgGFc-binding protein [Rh</a>          | 64.3      | 64.3        | 92%         | 6e-10   | 92%   | <a href="#">gi 724909919 XP_010379186.1</a> |
| <a href="#">PREDICTED: IgGFc-binding protein [Tarsius syrichta]</a>                | 63.4      | 63.4        | 100%        | 1e-09   | 85%   | <a href="#">gi 640776875 XP_008052981.1</a> |
| <a href="#">PREDICTED: IgGFc-binding protein [Saimiri boliviensis boliviensis]</a> | 62.1      | 62.1        | 88%         | 3e-09   | 91%   | <a href="#">gi 725605545 XP_010329397.1</a> |
| <a href="#">PREDICTED: LOW QUALITY PROTEIN: IgGFc-binding protein [Ca</a>          | 62.1      | 62.1        | 88%         | 3e-09   | 91%   | <a href="#">gi 675761213 XP_008986248.1</a> |
| <a href="#">PREDICTED: LOW QUALITY PROTEIN: IgGFc-binding protein [Lo</a>          | 61.3      | 61.3        | 88%         | 6e-09   | 87%   | <a href="#">gi 731510651 XP_010598700.1</a> |
| <a href="#">PREDICTED: IgGFc-binding protein [Ceratotherium simum simum]</a>       | 60.4      | 60.4        | 88%         | 1e-08   | 87%   | <a href="#">gi 478535060 XP_004441659.1</a> |
| <a href="#">PREDICTED: IgGFc-binding protein [Echinops telfairi]</a>               | 59.2      | 59.2        | 96%         | 3e-08   | 80%   | <a href="#">gi 507680836 XP_004710550.1</a> |
| <a href="#">IgGFc-binding protein [Fukomys damarensis]</a>                         | 59.2      | 59.2        | 96%         | 3e-08   | 84%   | <a href="#">gi 676261951 KFO19029.1</a>     |
| <a href="#">PREDICTED: IgGFc-binding protein [Felis catus]</a>                     | 58.3      | 58.3        | 96%         | 6e-08   | 80%   | <a href="#">gi 587014135 XP_006941331.1</a> |
| <a href="#">IgGFc-binding protein [Cricetulus griseus]</a>                         | 57.9      | 57.9        | 100%        | 7e-08   | 77%   | <a href="#">gi 344250294 EGW06398.1</a>     |
| <a href="#">PREDICTED: LOW QUALITY PROTEIN: IgGFc-binding protein-like</a>         | 57.9      | 57.9        | 100%        | 8e-08   | 77%   | <a href="#">gi 625205140 XP_007643925.1</a> |

|                                                                                   |      |      |     |       |     |                                             |
|-----------------------------------------------------------------------------------|------|------|-----|-------|-----|---------------------------------------------|
| <a href="#">PREDICTED: IgGfc-binding protein isoform X1 [Chinchilla lanigera]</a> | 57.5 | 57.5 | 88% | 1e-07 | 87% | <a href="#">gij533203233 XP_005414138.1</a> |
| <a href="#">PREDICTED: IgGfc-binding protein [Panthera tigris altaica]</a>        | 56.6 | 56.6 | 88% | 2e-07 | 83% | <a href="#">gij591322392 XP_007087304.1</a> |
| <a href="#">IgGfc-binding protein [Myotis davidii]</a>                            | 55.4 | 55.4 | 88% | 5e-07 | 78% | <a href="#">gij432102845 ELK30312.1</a>     |
| <a href="#">PREDICTED: LOW QUALITY PROTEIN: IgGfc-binding protein [Eq</a>         | 55.4 | 55.4 | 88% | 5e-07 | 83% | <a href="#">gij545176771 XP_005596726.1</a> |
| <a href="#">IgGfc-binding protein [Tupaia chinensis]</a>                          | 54.9 | 54.9 | 88% | 7e-07 | 83% | <a href="#">gij444732094 ELW72413.1</a>     |
| <a href="#">PREDICTED: IgGfc-binding protein [Galeopterus variegatus]</a>         | 54.5 | 54.5 | 88% | 1e-06 | 87% | <a href="#">gij667245485 XP_008580791.1</a> |
| <a href="#">PREDICTED: IgGfc-binding protein [Elephantulus edwardii]</a>          | 54.1 | 54.1 | 96% | 1e-06 | 76% | <a href="#">gij585714650 XP_006901006.1</a> |
| <a href="#">PREDICTED: LOW QUALITY PROTEIN: IgGfc-binding protein [My</a>         | 53.7 | 53.7 | 88% | 2e-06 | 78% | <a href="#">gij554548727 XP_005868902.1</a> |
| <a href="#">PREDICTED: LOW QUALITY PROTEIN: Fc fragment of IgG bindin</a>         | 53.7 | 53.7 | 88% | 2e-06 | 78% | <a href="#">gij558160938 XP_006109819.1</a> |
| <a href="#">IgGfc-binding protein [Myotis brandtii]</a>                           | 53.7 | 53.7 | 88% | 2e-06 | 78% | <a href="#">gij521027545 EPQ09333.1</a>     |
| <a href="#">PREDICTED: IgGfc-binding protein [Pteropus alecto]</a>                | 53.2 | 53.2 | 88% | 3e-06 | 78% | <a href="#">gij586524140 XP_006905494.1</a> |
| <a href="#">IgGfc-binding protein [Pteropus alecto]</a>                           | 53.2 | 53.2 | 88% | 3e-06 | 78% | <a href="#">gij431920170 ELK18209.1</a>     |
| <a href="#">PREDICTED: IgGfc-binding protein [Orycteropus afer afer]</a>          | 52.4 | 52.4 | 80% | 5e-06 | 81% | <a href="#">gij634854573 XP_007941342.1</a> |
| <a href="#">PREDICTED: LOW QUALITY PROTEIN: IgGfc-binding protein [Ep</a>         | 50.7 | 50.7 | 84% | 2e-05 | 78% | <a href="#">gij641699510 XP_008138255.1</a> |
| <a href="#">PREDICTED: IgGfc-binding protein [Condylura cristata]</a>             | 49.8 | 49.8 | 96% | 3e-05 | 72% | <a href="#">gij507980555 XP_004693946.1</a> |
| <a href="#">PREDICTED: IgGfc-binding protein [Otolemur garnettii]</a>             | 49.4 | 49.4 | 96% | 5e-05 | 76% | <a href="#">gij395859762 XP_003802201.1</a> |
| <a href="#">PREDICTED: LOW QUALITY PROTEIN: IgGfc-binding protein [Ca</a>         | 49.0 | 49.0 | 96% | 6e-05 | 72% | <a href="#">gij548504606 XP_005692605.1</a> |
| <a href="#">IgGfc-binding protein [Heterocephalus glaber]</a>                     | 48.1 | 48.1 | 96% | 1e-04 | 76% | <a href="#">gij351696187 EHA99105.1</a>     |
| <a href="#">PREDICTED: IgGfc-binding protein [Lipotes vexillifer]</a>             | 48.1 | 48.1 | 96% | 1e-04 | 72% | <a href="#">gij602693350 XP_007458763.1</a> |
| <a href="#">PREDICTED: IgGfc-binding protein [Orcinus orca]</a>                   | 45.6 | 45.6 | 96% | 7e-04 | 68% | <a href="#">gij466016931 XP_004271425.1</a> |
| <a href="#">PREDICTED: IgGfc-binding protein [Octodon degus]</a>                  | 45.6 | 45.6 | 96% | 8e-04 | 72% | <a href="#">gij507714064 XP_004648069.1</a> |
| <a href="#">PREDICTED: IgGfc-binding protein [Erinaceus europaeus]</a>            | 45.6 | 87.8 | 96% | 8e-04 | 60% | <a href="#">gij617664909 XP_007538724.1</a> |
| <a href="#">Fc fragment of IgG binding protein-like protein [Camelus ferus]</a>   | 45.2 | 45.2 | 96% | 0.001 | 64% | <a href="#">gij528766317 EPY85976.1</a>     |
| <a href="#">PREDICTED: IgGfc-binding protein [Vicugna pacos]</a>                  | 45.2 | 65.8 | 96% | 0.001 | 64% | <a href="#">gij560985920 XP_006215157.1</a> |
| <a href="#">PREDICTED: IgGfc-binding protein [Camelus ferus]</a>                  | 45.2 | 65.8 | 96% | 0.001 | 64% | <a href="#">gij560903281 XP_006178015.1</a> |
| <a href="#">PREDICTED: IgGfc-binding protein isoform X1 [Bubalus bubalis]</a>     | 44.8 | 44.8 | 96% | 0.001 | 68% | <a href="#">gij594051530 XP_006050098.1</a> |
| <a href="#">PREDICTED: IgGfc-binding protein isoform X2 [Bos taurus]</a>          | 44.8 | 44.8 | 96% | 0.001 | 68% | <a href="#">gij528991887 XP_005219168.1</a> |
| <a href="#">PREDICTED: IgGfc-binding protein isoform X2 [Bos taurus]</a>          | 44.8 | 44.8 | 96% | 0.001 | 68% | <a href="#">gij528933614 XP_614095.6</a>    |
| <a href="#">PREDICTED: IgGfc-binding protein [Pantholops hodgsonii]</a>           | 44.8 | 44.8 | 96% | 0.001 | 68% | <a href="#">gij556735974 XP_005963590.1</a> |
| <a href="#">TPA: Fc fragment of IgG binding protein-like [Bos taurus]</a>         | 44.8 | 44.8 | 96% | 0.001 | 68% | <a href="#">gij296477761 DAA19876.1</a>     |
| <a href="#">PREDICTED: LOW QUALITY PROTEIN: IgGfc-binding protein [Ov</a>         | 44.8 | 44.8 | 96% | 0.001 | 68% | <a href="#">gij426243806 XP_004015739.1</a> |
| <a href="#">PREDICTED: LOW QUALITY PROTEIN: IgGfc-binding protein [Bo</a>         | 44.8 | 44.8 | 96% | 0.001 | 68% | <a href="#">gij555957014 XP_005890645.1</a> |
| <a href="#">PREDICTED: IgGfc-binding protein [Mesocricetus auratus]</a>           | 44.3 | 44.3 | 80% | 0.002 | 76% | <a href="#">gij524973628 XP_005086657.1</a> |
| <a href="#">PREDICTED: IgGfc-binding protein isoform X2 [Balaenoptera acut</a>    | 43.9 | 43.9 | 96% | 0.003 | 68% | <a href="#">gij594663750 XP_007180031.1</a> |
| <a href="#">PREDICTED: IgGfc-binding protein isoform X1 [Balaenoptera acut</a>    | 43.9 | 43.9 | 96% | 0.003 | 68% | <a href="#">gij594663748 XP_007180030.1</a> |
| <a href="#">PREDICTED: IgGfc-binding protein [Physeter catodon]</a>               | 42.2 | 42.2 | 88% | 0.009 | 70% | <a href="#">gij593767123 XP_007122066.1</a> |
| <a href="#">PREDICTED: IgGfc-binding protein [Ictidomys tridecemlineatus]</a>     | 41.4 | 41.4 | 84% | 0.016 | 68% | <a href="#">gij532101857 XP_005336544.1</a> |
| <a href="#">PREDICTED: LOW QUALITY PROTEIN: Fc fragment of IgG bindin</a>         | 40.5 | 40.5 | 84% | 0.030 | 68% | <a href="#">gij472353763 XP_004417817.1</a> |
| <a href="#">PREDICTED: LOW QUALITY PROTEIN: Fc fragment of IgG bindin</a>         | 40.5 | 40.5 | 84% | 0.030 | 68% | <a href="#">gij585183803 XP_006752469.1</a> |
| <a href="#">hypothetical protein PANDA_012964 [Ailuropoda melanoleuca]</a>        | 39.7 | 39.7 | 84% | 0.056 | 68% | <a href="#">gij281340747 EFB16331.1</a>     |
| <a href="#">PREDICTED: LOW QUALITY PROTEIN: IgGfc-binding protein [Urs</a>        | 39.7 | 39.7 | 84% | 0.056 | 68% | <a href="#">gij670991993 XP_008686987.1</a> |
| <a href="#">PREDICTED: IgGfc-binding protein-like [Ailuropoda melanoleuca]</a>    | 39.7 | 39.7 | 84% | 0.056 | 68% | <a href="#">gij301776693 XP_002923768.1</a> |
| <a href="#">PREDICTED: LOW QUALITY PROTEIN: IgGfc-binding protein [Ca</a>         | 37.5 | 37.5 | 84% | 0.26  | 64% | <a href="#">gij545488517 XP_005616636.1</a> |
| <a href="#">PAS sensor protein [Methanoplanus limicola]</a>                       | 36.7 | 36.7 | 69% | 0.48  | 72% | <a href="#">gij490177883 WP_004076509.1</a> |
| <a href="#">hypothetical protein PDE_00389 [Penicillium oxalicum 114-2]</a>       | 35.0 | 35.0 | 80% | 1.7   | 67% | <a href="#">gij525579206 EPS25456.1</a>     |

|                                                                                 |      |      |     |     |     |                                             |
|---------------------------------------------------------------------------------|------|------|-----|-----|-----|---------------------------------------------|
| <a href="#">PREDICTED: LOW QUALITY PROTEIN: Fc fragment of IgG bindin</a>       | 35.0 | 35.0 | 84% | 1.8 | 64% | <a href="#">gil511913755 XP_004828450.1</a> |
| <a href="#">Phosphoserine phosphatase 1 [Candidatus Accumulibacter sp. BA-</a>  | 34.1 | 34.1 | 65% | 3.2 | 48% | <a href="#">gil589608759 EXI80297.1</a>     |
| <a href="#">hypothetical protein [Acinetobacter bereziniae]</a>                 | 34.1 | 34.1 | 88% | 3.3 | 63% | <a href="#">gil491171937 WP_005030304.1</a> |
| <a href="#">tape measure domain protein [Acinetobacter sp. WC-743]</a>          | 34.1 | 34.1 | 88% | 3.3 | 63% | <a href="#">gil497269805 WP_009584022.1</a> |
| <a href="#">hypothetical protein Ecym_1439 [Eremothecium cymbalariae DBVP</a>   | 33.7 | 33.7 | 46% | 4.6 | 92% | <a href="#">gil363748528 XP_003644482.1</a> |
| <a href="#">hypothetical protein CAPTEDRAFT_194148 [Capitella teleta]</a>       | 32.9 | 32.9 | 88% | 8.8 | 61% | <a href="#">gil443689453 ELT91836.1</a>     |
| <a href="#">PTS mannose transporter subunit IIABC [Corynebacterium lubrican</a> | 32.5 | 32.5 | 57% | 12  | 73% | <a href="#">gil648504542 WP_026196293.1</a> |
| <a href="#">RNA pseudouridine synthase superfamily protein [Toxoplasma gon</a>  | 32.5 | 32.5 | 53% | 13  | 86% | <a href="#">gil672303151 KFG65999.1</a>     |
| <a href="#">RNA pseudouridine synthase superfamily protein [Toxoplasma gon</a>  | 32.5 | 32.5 | 53% | 13  | 86% | <a href="#">gil523574281 EPR61036.1</a>     |
| <a href="#">RNA pseudouridine synthase superfamily protein [Toxoplasma gon</a>  | 32.5 | 32.5 | 53% | 13  | 86% | <a href="#">gil527309382 EPT26018.1</a>     |
| <a href="#">RNA pseudouridine synthase superfamily protein [Toxoplasma gon</a>  | 32.5 | 32.5 | 53% | 13  | 86% | <a href="#">gil672570297 KFH09647.1</a>     |
| <a href="#">hypothetical protein [Mycobacterium tuberculosis]</a>               | 32.0 | 32.0 | 65% | 17  | 65% | <a href="#">gil502378810 WP_012775806.1</a> |
| <a href="#">oxidoreductase [Mycobacterium tuberculosis OFXR-6]</a>              | 32.0 | 32.0 | 65% | 17  | 65% | <a href="#">gil623377120 KBJ45988.1</a>     |
| <a href="#">hypothetical protein [Mycobacterium tuberculosis]</a>               | 32.0 | 32.0 | 65% | 17  | 65% | <a href="#">gil499226782 WP_010924322.1</a> |
| <a href="#">hypothetical protein [Mycobacterium tuberculosis]</a>               | 32.0 | 32.0 | 65% | 17  | 65% | <a href="#">gil685948989 WP_031674284.1</a> |
| <a href="#">monooxygenase [Mycobacterium tuberculosis]</a>                      | 32.0 | 32.0 | 65% | 17  | 65% | <a href="#">gil505442653 WP_015629755.1</a> |
| <a href="#">hypothetical protein [Mycobacterium africanum]</a>                  | 32.0 | 32.0 | 65% | 17  | 65% | <a href="#">gil490007392 WP_003910233.1</a> |
| <a href="#">MULTISPECIES: hypothetical protein [Mycobacterium tuberculosis</a>  | 32.0 | 32.0 | 65% | 17  | 65% | <a href="#">gil489995617 WP_003898656.1</a> |
| <a href="#">hypothetical protein [Mycobacterium tuberculosis]</a>               | 32.0 | 32.0 | 65% | 17  | 65% | <a href="#">gil685915310 WP_031652242.1</a> |
| <a href="#">hypothetical protein [Mycobacterium tuberculosis]</a>               | 32.0 | 32.0 | 65% | 17  | 65% | <a href="#">gil686073968 WP_031744179.1</a> |
| <a href="#">hypothetical protein [Mycobacterium tuberculosis]</a>               | 32.0 | 32.0 | 65% | 17  | 65% | <a href="#">gil686076415 WP_031745224.1</a> |
| <a href="#">hypothetical protein [Mycobacterium tuberculosis]</a>               | 32.0 | 32.0 | 65% | 17  | 65% | <a href="#">gil686031688 WP_031722692.1</a> |
| <a href="#">hypothetical protein [Mycobacterium tuberculosis]</a>               | 32.0 | 32.0 | 65% | 17  | 65% | <a href="#">gil685925501 WP_031660320.1</a> |
| <a href="#">hypothetical protein [Mycobacterium tuberculosis]</a>               | 32.0 | 32.0 | 65% | 17  | 65% | <a href="#">gil560884160 WP_023641889.1</a> |
| <a href="#">hypothetical protein [Mycobacterium tuberculosis]</a>               | 32.0 | 32.0 | 65% | 17  | 65% | <a href="#">gil560884051 WP_023641782.1</a> |
| <a href="#">monooxygenase [Mycobacterium tuberculosis]</a>                      | 32.0 | 32.0 | 65% | 17  | 65% | <a href="#">gil505269085 WP_015456187.1</a> |
| <a href="#">hypothetical protein [Mycobacterium tuberculosis]</a>               | 32.0 | 32.0 | 65% | 17  | 65% | <a href="#">gil490010216 WP_003912992.1</a> |

## Alignments

Download GenPept Graphics

Next Previous Descriptions

Fc gamma BP, partial [Homo sapiens]

Sequence ID: [gil5080756|gb|AAD39266.1|AC007842.1](#) Length: 2843 Number of Matches: 1

Range 1: 54 to 79 GenPept Graphics

Next Match Previous Match

| Score          | Expect | Identities  | Positives   | Gaps     |
|----------------|--------|-------------|-------------|----------|
| 79.5 bits(180) | 4e-15  | 26/26(100%) | 26/26(100%) | 0/26(0%) |

```
Query 1 RLLISSLSESPASVSILSQADNTSKK 26
      RLLISSLSESPASVSILSQADNTSKK
Sbjct 54 RLLISSLSESPASVSILSQADNTSKK 79
```

### Related Information

[Gene](#) - associated gene details

Download GenPept Graphics

Next Previous Descriptions

Fc fragment of IgG binding protein [Homo sapiens]

Sequence ID: [gil119577330|gb|EAW56926.1](#) Length: 3004 Number of Matches: 1

Range 1: 54 to 79 GenPept Graphics

Next Match Previous Match

| Score          | Expect | Identities  | Positives   | Gaps     |
|----------------|--------|-------------|-------------|----------|
| 79.5 bits(180) | 4e-15  | 26/26(100%) | 26/26(100%) | 0/26(0%) |

```
Query 1 RLLISSLSESPASVSILSQADNTSKK 26
```

### Related Information

[Gene](#) - associated gene details

Sbjct 54 RLLISLSESPASVSILSQADNTSKK 79

[Download](#) [GenPept](#) [Graphics](#) [Next](#) [Previous](#) [Descriptions](#)

**PREDICTED: LOW QUALITY PROTEIN: IgGfc-binding protein [Pan paniscus]**

Sequence ID: [gi|675718714|ref|XP\\_008963216.1](#) Length: 3331 Number of Matches: 1

Range 1: 54 to 79 [GenPept](#) [Graphics](#) [Next Match](#) [Previous Match](#)

| Score          | Expect | Identities  | Positives   | Gaps     |
|----------------|--------|-------------|-------------|----------|
| 79.5 bits(180) | 4e-15  | 26/26(100%) | 26/26(100%) | 0/26(0%) |

Query 1 RLLISLSESPASVSILSQADNTSKK 26  
 RLLISLSESPASVSILSQADNTSKK  
 Sbjct 54 RLLISLSESPASVSILSQADNTSKK 79

**Related Information**

[Gene](#) - associated gene details  
[Map Viewer](#) - aligned genomic context

[Download](#) [GenPept](#) [Graphics](#) [Next](#) [Previous](#) [Descriptions](#)

**PREDICTED: LOW QUALITY PROTEIN: IgGfc-binding protein [Pan troglodytes]**

Sequence ID: [gi|694975150|ref|XP\\_009433882.1](#) Length: 5257 Number of Matches: 1

Range 1: 54 to 79 [GenPept](#) [Graphics](#) [Next Match](#) [Previous Match](#)

| Score          | Expect | Identities  | Positives   | Gaps     |
|----------------|--------|-------------|-------------|----------|
| 79.5 bits(180) | 4e-15  | 26/26(100%) | 26/26(100%) | 0/26(0%) |

Query 1 RLLISLSESPASVSILSQADNTSKK 26  
 RLLISLSESPASVSILSQADNTSKK  
 Sbjct 54 RLLISLSESPASVSILSQADNTSKK 79

**Related Information**

[Gene](#) - associated gene details

[Download](#) [GenPept](#) [Graphics](#) [Next](#) [Previous](#) [Descriptions](#)

**IgG Fc binding protein [Homo sapiens]**

Sequence ID: [gi|1944352|dbj|BAA19526.1](#) Length: 5405 Number of Matches: 1

Range 1: 54 to 79 [GenPept](#) [Graphics](#) [Next Match](#) [Previous Match](#)

| Score          | Expect | Identities  | Positives   | Gaps     |
|----------------|--------|-------------|-------------|----------|
| 79.5 bits(180) | 4e-15  | 26/26(100%) | 26/26(100%) | 0/26(0%) |

Query 1 RLLISLSESPASVSILSQADNTSKK 26  
 RLLISLSESPASVSILSQADNTSKK  
 Sbjct 54 RLLISLSESPASVSILSQADNTSKK 79

**Related Information**

[Gene](#) - associated gene details

BLAST is a registered trademark of the National Library of Medicine.



NCBI/ BLAST/ blastp suite/ Formatting Results - BVDV1GJT01R

**i** Your search parameters were adjusted to search for a short input sequence.  
[Edit and Resubmit](#) [Save Search Strategies](#) [▶ Formatting options](#) [▶ Download](#) [YouTube](#) [How to read this page](#) [Blast report description](#)

### FCGBP\_RYLPVDSSLTSDCSERC\_Mod

**RID** [BVDV1GJT01R](#) (Expires on 01-21 09:03 am)  
**Query ID** lcl|300122  
**Description** None  
**Molecule type** amino acid  
**Query Length** 18  
**Database Name** nr  
**Description** All non-redundant GenBank CDS translations+PDB+SwissProt+PIR+PRF excluding environmental samples from WGS projects  
**Program** BLASTP 2.2.30+ [▶ Citation](#)

Other reports: [▶ Search Summary](#) [\[Taxonomy reports\]](#) [\[Distance tree of results\]](#) [\[Multiple alignment\]](#)

### Graphic Summary

[Show Conserved Domains](#)

No putative conserved domains have been detected

#### Distribution of 110 Blast Hits on the Query Sequence [?](#)

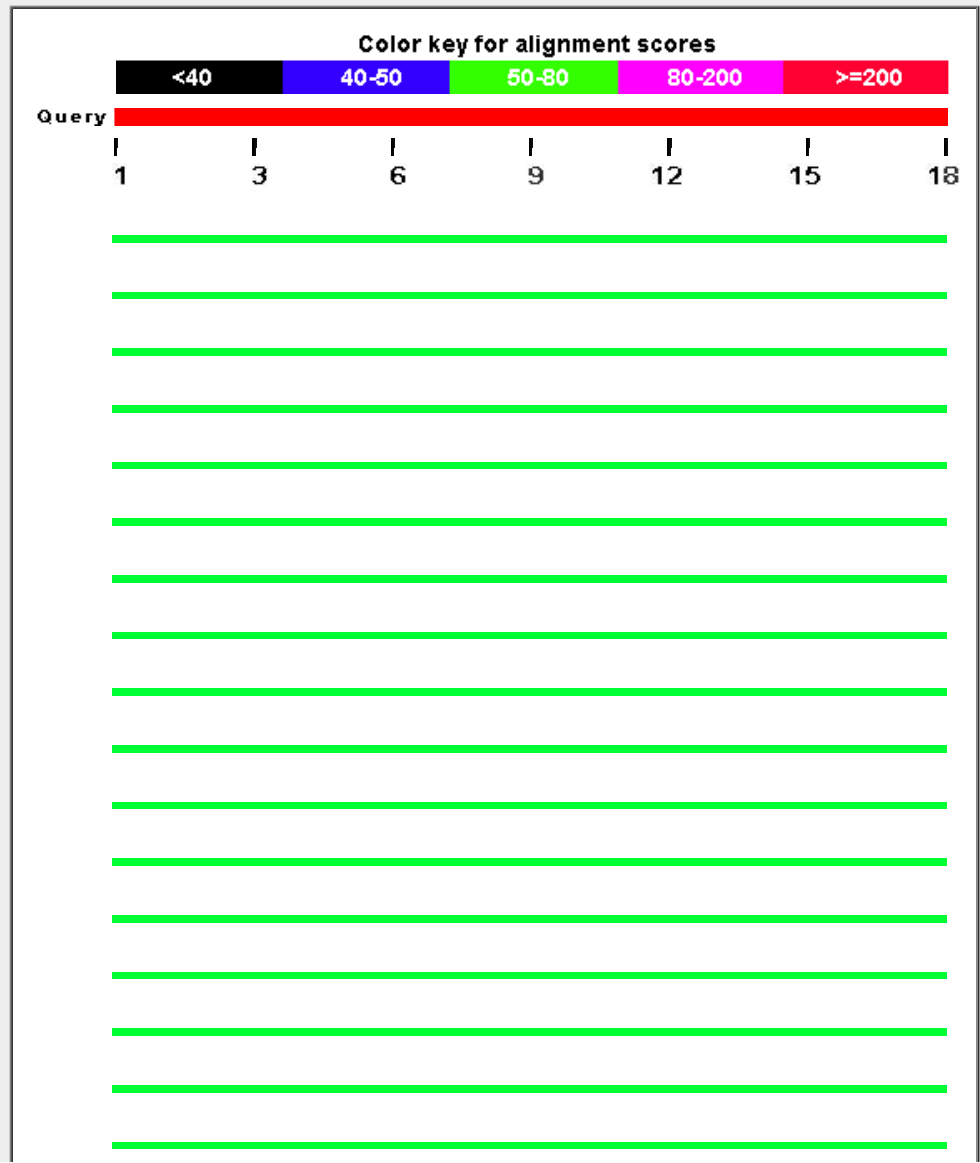

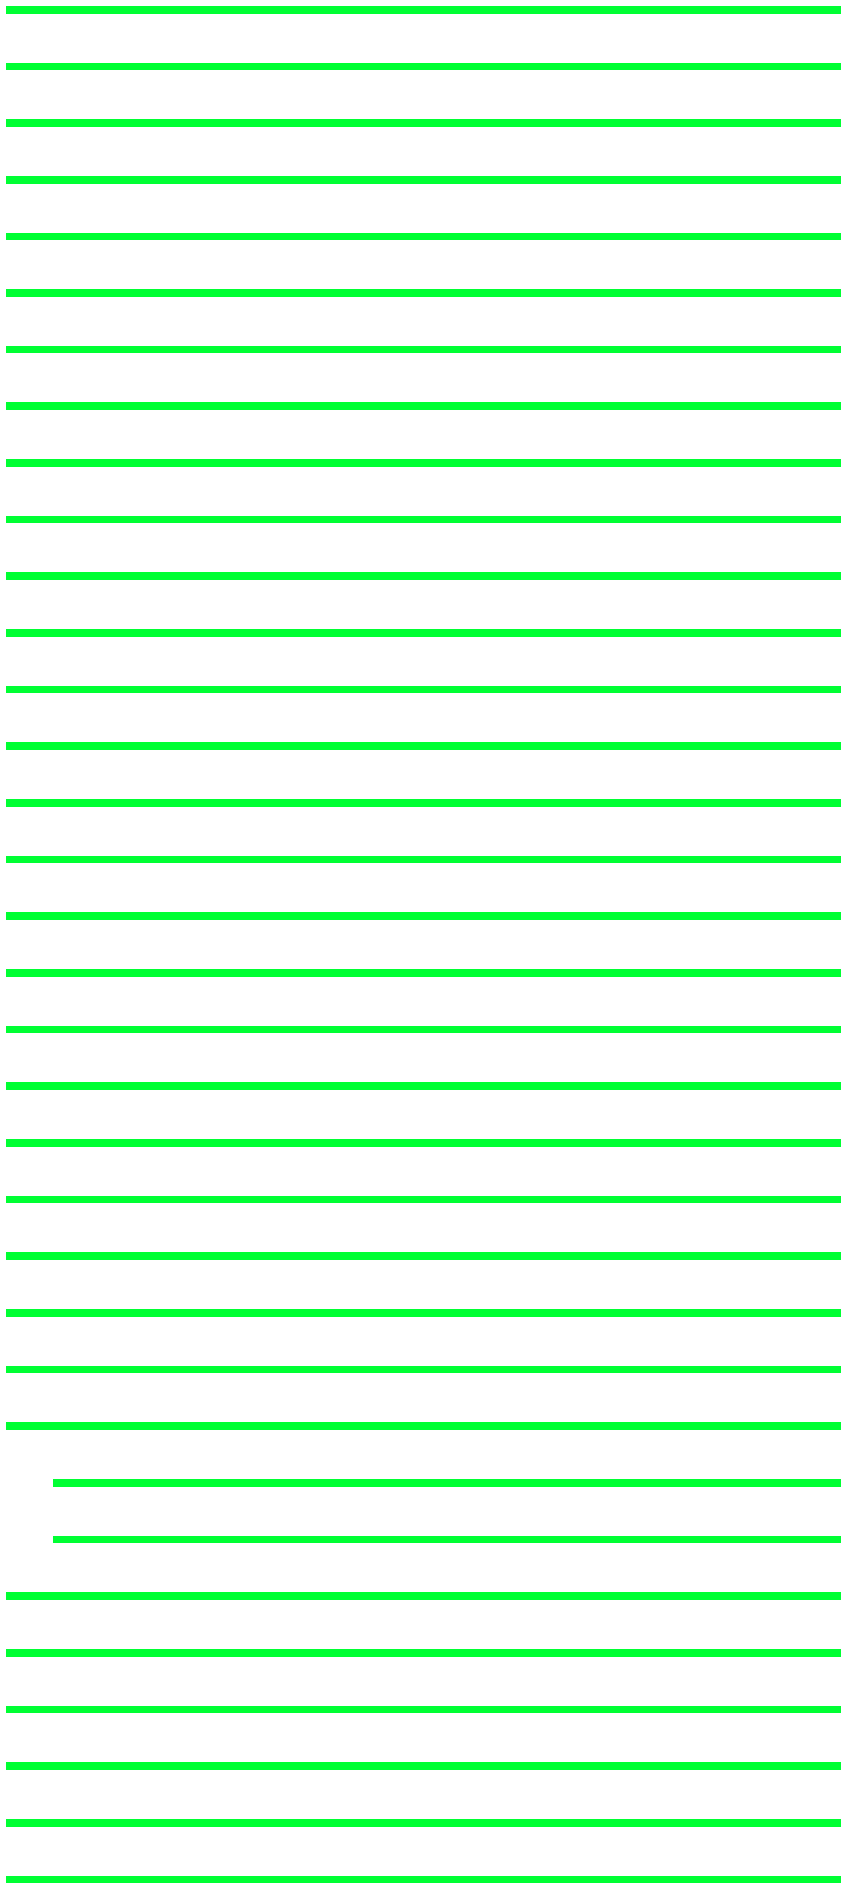

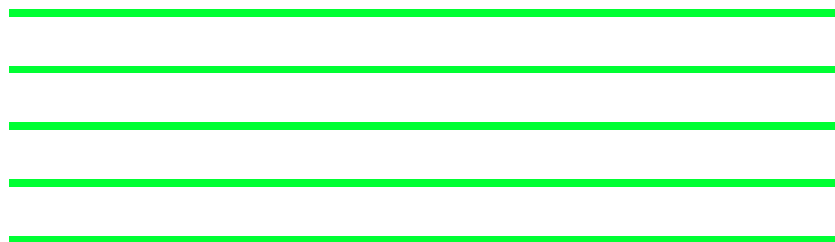

## Descriptions

### Sequences producing significant alignments:

Select: [All](#) [None](#) Selected:0

| <a href="#">Alignments</a> <a href="#">Download</a> <a href="#">GenPept</a> <a href="#">Graphics</a> <a href="#">Distance tree of results</a> <a href="#">Multiple alignment</a> |           |             |             |         |       |                                |  |
|----------------------------------------------------------------------------------------------------------------------------------------------------------------------------------|-----------|-------------|-------------|---------|-------|--------------------------------|--|
| Description                                                                                                                                                                      | Max score | Total score | Query cover | E value | Ident | Accession                      |  |
| <a href="#">IgG Fc binding protein [AA 4671-5405] [Homo sapiens]</a>                                                                                                             | 58.7      | 58.7        | 100%        | 2e-08   | 94%   | <a href="#">AAD15624.1</a>     |  |
| <a href="#">PREDICTED: IgGFc-binding protein [Dasypus novemcinctus]</a>                                                                                                          | 58.7      | 58.7        | 100%        | 2e-08   | 94%   | <a href="#">XP_004474079.1</a> |  |
| <a href="#">PREDICTED: IgGFc-binding protein-like [Nannospalax galili]</a>                                                                                                       | 58.7      | 58.7        | 100%        | 2e-08   | 94%   | <a href="#">XP_008852264.1</a> |  |
| <a href="#">PREDICTED: IgGFc-binding protein [Saimiri boliviensis boliviensis]</a>                                                                                               | 58.7      | 58.7        | 100%        | 2e-08   | 94%   | <a href="#">XP_010329397.1</a> |  |
| <a href="#">PREDICTED: LOW QUALITY PROTEIN: IgGFc-binding protein [Loxodonta af]</a>                                                                                             | 58.7      | 58.7        | 100%        | 2e-08   | 94%   | <a href="#">XP_010598700.1</a> |  |
| <a href="#">PREDICTED: IgGFc-binding protein [Orycteropus afer afer]</a>                                                                                                         | 58.7      | 58.7        | 100%        | 2e-08   | 94%   | <a href="#">XP_007941342.1</a> |  |
| <a href="#">PREDICTED: IgGFc-binding protein [Lipotes vexillifer]</a>                                                                                                            | 58.7      | 58.7        | 100%        | 2e-08   | 94%   | <a href="#">XP_007458763.1</a> |  |
| <a href="#">PREDICTED: IgGFc-binding protein [Chrysochloris asiatica]</a>                                                                                                        | 58.7      | 58.7        | 100%        | 2e-08   | 94%   | <a href="#">XP_006871587.1</a> |  |
| <a href="#">PREDICTED: IgGFc-binding protein isoform X2 [Balaenoptera acutorostrata s</a>                                                                                        | 58.7      | 58.7        | 100%        | 2e-08   | 94%   | <a href="#">XP_007180031.1</a> |  |
| <a href="#">Fc fragment of IgG binding protein [Homo sapiens]</a>                                                                                                                | 58.7      | 58.7        | 100%        | 2e-08   | 94%   | <a href="#">EAW56926.1</a>     |  |
| <a href="#">PREDICTED: IgGFc-binding protein isoform X1 [Balaenoptera acutorostrata s</a>                                                                                        | 58.7      | 58.7        | 100%        | 2e-08   | 94%   | <a href="#">XP_007180030.1</a> |  |
| <a href="#">PREDICTED: IgGFc-binding protein [Otolemur garnettii]</a>                                                                                                            | 58.7      | 58.7        | 100%        | 2e-08   | 94%   | <a href="#">XP_003802201.1</a> |  |
| <a href="#">PREDICTED: LOW QUALITY PROTEIN: IgGFc-binding protein [Pan paniscus]</a>                                                                                             | 58.7      | 58.7        | 100%        | 2e-08   | 94%   | <a href="#">XP_008963216.1</a> |  |
| <a href="#">PREDICTED: IgGFc-binding protein [Nomascus leucogenys]</a>                                                                                                           | 58.7      | 58.7        | 100%        | 2e-08   | 94%   | <a href="#">XP_003270573.1</a> |  |
| <a href="#">PREDICTED: LOW QUALITY PROTEIN: IgGFc-binding protein [Gorilla gorilla]</a>                                                                                          | 58.7      | 58.7        | 100%        | 2e-08   | 94%   | <a href="#">XP_004060816.1</a> |  |
| <a href="#">PREDICTED: LOW QUALITY PROTEIN: IgGFc-binding protein [Pan troglodyt]</a>                                                                                            | 58.7      | 58.7        | 100%        | 2e-08   | 94%   | <a href="#">XP_009433882.1</a> |  |
| <a href="#">IgG Fc binding protein [Homo sapiens]</a>                                                                                                                            | 58.7      | 58.7        | 100%        | 2e-08   | 94%   | <a href="#">BAA19526.1</a>     |  |
| <a href="#">IgGFc-binding protein precursor [Homo sapiens]</a>                                                                                                                   | 58.7      | 58.7        | 100%        | 2e-08   | 94%   | <a href="#">NP_003881.2</a>    |  |
| <a href="#">Fc fragment of IgG binding protein [Camelus ferus]</a>                                                                                                               | 56.2      | 76.4        | 100%        | 1e-07   | 89%   | <a href="#">EPY85977.1</a>     |  |
| <a href="#">PREDICTED: IgGFc-binding protein [Galeopterus variegatus]</a>                                                                                                        | 56.2      | 56.2        | 100%        | 1e-07   | 89%   | <a href="#">XP_008580791.1</a> |  |
| <a href="#">PREDICTED: IgGFc-binding protein [Camelus dromedarius]</a>                                                                                                           | 56.2      | 76.4        | 100%        | 1e-07   | 89%   | <a href="#">XP_010983489.1</a> |  |
| <a href="#">PREDICTED: IgGFc-binding protein [Camelus bactrianus]</a>                                                                                                            | 56.2      | 76.4        | 100%        | 1e-07   | 89%   | <a href="#">XP_010945545.1</a> |  |
| <a href="#">PREDICTED: IgGFc-binding protein [Vicugna pacos]</a>                                                                                                                 | 56.2      | 56.2        | 100%        | 1e-07   | 89%   | <a href="#">XP_006215157.1</a> |  |
| <a href="#">PREDICTED: IgGFc-binding protein [Elephantulus edwardii]</a>                                                                                                         | 56.2      | 56.2        | 100%        | 1e-07   | 89%   | <a href="#">XP_006901006.1</a> |  |
| <a href="#">PREDICTED: IgGFc-binding protein [Camelus ferus]</a>                                                                                                                 | 56.2      | 76.4        | 100%        | 1e-07   | 89%   | <a href="#">XP_006178015.1</a> |  |
| <a href="#">PREDICTED: IgGFc-binding protein [Trichechus manatus latirostris]</a>                                                                                                | 55.8      | 55.8        | 100%        | 2e-07   | 89%   | <a href="#">XP_004388281.1</a> |  |
| <a href="#">PREDICTED: LOW QUALITY PROTEIN: IgGFc-binding protein [Equus przew]</a>                                                                                              | 55.8      | 55.8        | 100%        | 2e-07   | 89%   | <a href="#">XP_008530313.1</a> |  |
| <a href="#">PREDICTED: IgGFc-binding protein isoform X2 [Bubalus bubalis]</a>                                                                                                    | 55.8      | 55.8        | 100%        | 2e-07   | 89%   | <a href="#">XP_006050099.1</a> |  |
| <a href="#">PREDICTED: IgGFc-binding protein isoform X2 [Bos taurus]</a>                                                                                                         | 55.8      | 55.8        | 100%        | 2e-07   | 89%   | <a href="#">XP_010813252.1</a> |  |

|                                                                                         |      |      |      |       |     |                                |
|-----------------------------------------------------------------------------------------|------|------|------|-------|-----|--------------------------------|
| <a href="#">PREDICTED: IgGfc-binding protein isoform X2 [Bos taurus]</a>                | 55.8 | 55.8 | 100% | 2e-07 | 89% | <a href="#">XP_010798219.1</a> |
| <a href="#">PREDICTED: LOW QUALITY PROTEIN: IgGfc-binding protein [Equus caball]</a>    | 55.8 | 55.8 | 100% | 2e-07 | 89% | <a href="#">XP_005596726.1</a> |
| <a href="#">PREDICTED: LOW QUALITY PROTEIN: IgGfc-binding protein [Myotis brand]</a>    | 55.8 | 55.8 | 100% | 2e-07 | 89% | <a href="#">XP_005868902.1</a> |
| <a href="#">PREDICTED: IgGfc-binding protein [Bison bison bison]</a>                    | 55.8 | 55.8 | 100% | 2e-07 | 89% | <a href="#">XP_010847529.1</a> |
| <a href="#">PREDICTED: IgGfc-binding protein isoform X1 [Bubalus bubalis]</a>           | 55.8 | 55.8 | 100% | 2e-07 | 89% | <a href="#">XP_006050098.1</a> |
| <a href="#">PREDICTED: IgGfc-binding protein isoform X1 [Bos taurus]</a>                | 55.8 | 55.8 | 100% | 2e-07 | 89% | <a href="#">XP_010813251.1</a> |
| <a href="#">PREDICTED: IgGfc-binding protein isoform X1 [Bos taurus]</a>                | 55.8 | 55.8 | 100% | 2e-07 | 89% | <a href="#">XP_010798218.1</a> |
| <a href="#">PREDICTED: LOW QUALITY PROTEIN: Fc fragment of IgG binding protein [I</a>   | 55.8 | 55.8 | 100% | 2e-07 | 89% | <a href="#">XP_006109819.1</a> |
| <a href="#">PREDICTED: IgGfc-binding protein [Pantholops hodgsonii]</a>                 | 55.8 | 55.8 | 100% | 2e-07 | 89% | <a href="#">XP_005963590.1</a> |
| <a href="#">TPA: Fc fragment of IgG binding protein-like [Bos taurus]</a>               | 55.8 | 55.8 | 100% | 2e-07 | 89% | <a href="#">DAA19876.1</a>     |
| <a href="#">PREDICTED: LOW QUALITY PROTEIN: IgGfc-binding protein [Bos mutus]</a>       | 55.8 | 55.8 | 100% | 2e-07 | 89% | <a href="#">XP_005890645.1</a> |
| <a href="#">PREDICTED: LOW QUALITY PROTEIN: IgGfc-binding protein [Capra hircus]</a>    | 55.8 | 55.8 | 100% | 2e-07 | 89% | <a href="#">XP_005692605.1</a> |
| <a href="#">IgGfc-binding protein [Myotis brandtii]</a>                                 | 55.8 | 55.8 | 100% | 2e-07 | 89% | <a href="#">EPQ09333.1</a>     |
| <a href="#">PREDICTED: IgGfc-binding protein [Jaculus jaculus]</a>                      | 55.8 | 55.8 | 100% | 2e-07 | 89% | <a href="#">XP_004670397.1</a> |
| <a href="#">PREDICTED: IgGfc-binding protein [Tupaia chinensis]</a>                     | 55.4 | 55.4 | 94%  | 2e-07 | 94% | <a href="#">XP_006140449.1</a> |
| <a href="#">IgGfc-binding protein [Tupaia chinensis]</a>                                | 55.4 | 55.4 | 94%  | 2e-07 | 94% | <a href="#">ELW72413.1</a>     |
| <a href="#">PREDICTED: IgGfc-binding protein-like [Tursiops truncatus]</a>              | 54.9 | 54.9 | 100% | 3e-07 | 89% | <a href="#">XP_004313750.1</a> |
| <a href="#">PREDICTED: IgGfc-binding protein [Orcinus orca]</a>                         | 54.9 | 54.9 | 100% | 3e-07 | 89% | <a href="#">XP_004271425.1</a> |
| <a href="#">PREDICTED: IgGfc-binding protein [Ictidomys tridecemlineatus]</a>           | 54.9 | 54.9 | 100% | 3e-07 | 89% | <a href="#">XP_005336544.1</a> |
| <a href="#">PREDICTED: IgGfc-binding protein [Physeter catodon]</a>                     | 54.5 | 54.5 | 100% | 5e-07 | 89% | <a href="#">XP_007122066.1</a> |
| <a href="#">PREDICTED: LOW QUALITY PROTEIN: IgGfc-binding protein [Pongo abelii]</a>    | 54.5 | 54.5 | 100% | 5e-07 | 89% | <a href="#">XP_009230865.1</a> |
| <a href="#">PREDICTED: IgGfc-binding protein-like [Nannospalax galii]</a>               | 53.7 | 53.7 | 100% | 9e-07 | 89% | <a href="#">XP_008852263.1</a> |
| <a href="#">PREDICTED: igGfc-binding protein-like [Macaca mulatta]</a>                  | 53.7 | 53.7 | 100% | 9e-07 | 89% | <a href="#">XP_001088892.2</a> |
| <a href="#">PREDICTED: IgGfc-binding protein [Chlorocebus sabaeus]</a>                  | 53.7 | 53.7 | 100% | 9e-07 | 89% | <a href="#">XP_007996683.1</a> |
| <a href="#">PREDICTED: LOW QUALITY PROTEIN: IgGfc-binding protein [Papio anubis]</a>    | 53.7 | 53.7 | 100% | 9e-07 | 89% | <a href="#">XP_003915593.1</a> |
| <a href="#">PREDICTED: LOW QUALITY PROTEIN: IgGfc-binding protein [Rhinopithecus]</a>   | 53.7 | 53.7 | 100% | 9e-07 | 89% | <a href="#">XP_010379186.1</a> |
| <a href="#">PREDICTED: IgGfc-binding protein [Macaca fascicularis]</a>                  | 53.7 | 53.7 | 100% | 9e-07 | 89% | <a href="#">XP_005590715.1</a> |
| <a href="#">PREDICTED: IgGfc-binding protein [Pteropus alecto]</a>                      | 53.2 | 53.2 | 100% | 1e-06 | 83% | <a href="#">XP_006905494.1</a> |
| <a href="#">IgGfc-binding protein [Pteropus alecto]</a>                                 | 53.2 | 53.2 | 100% | 1e-06 | 83% | <a href="#">ELK18209.1</a>     |
| <a href="#">PREDICTED: IgGfc-binding protein [Echinops telfairi]</a>                    | 52.8 | 52.8 | 100% | 2e-06 | 83% | <a href="#">XP_004710550.1</a> |
| <a href="#">PREDICTED: LOW QUALITY PROTEIN: IgGfc-binding protein [Callithrix jacc]</a> | 52.8 | 52.8 | 100% | 2e-06 | 83% | <a href="#">XP_008986248.1</a> |
| <a href="#">IgGfc-binding protein [Myotis davidii]</a>                                  | 52.4 | 52.4 | 100% | 2e-06 | 83% | <a href="#">ELK30313.1</a>     |
| <a href="#">PREDICTED: IgGfc-binding protein [Myotis davidii]</a>                       | 52.4 | 52.4 | 100% | 2e-06 | 83% | <a href="#">XP_006763740.1</a> |
| <a href="#">PREDICTED: LOW QUALITY PROTEIN: IgGfc-binding protein [Eptesicus fus]</a>   | 52.4 | 52.4 | 100% | 2e-06 | 83% | <a href="#">XP_008138255.1</a> |
| <a href="#">PREDICTED: IgGfc-binding protein [Tarsius syrichta]</a>                     | 52.0 | 52.0 | 100% | 3e-06 | 83% | <a href="#">XP_008052981.1</a> |
| <a href="#">PREDICTED: IgGfc-binding protein [Condylura cristata]</a>                   | 51.5 | 72.5 | 100% | 5e-06 | 83% | <a href="#">XP_004693946.1</a> |
| <a href="#">PREDICTED: LOW QUALITY PROTEIN: IgGfc-binding protein [Ovis aries]</a>      | 51.5 | 51.5 | 94%  | 5e-06 | 88% | <a href="#">XP_004015739.1</a> |
| <a href="#">PREDICTED: IgGfc-binding protein [Erinaceus europaeus]</a>                  | 51.5 | 51.5 | 100% | 5e-06 | 83% | <a href="#">XP_007538724.1</a> |
| <a href="#">9530053A07Rik protein [Mus musculus]</a>                                    | 49.8 | 49.8 | 94%  | 1e-05 | 82% | <a href="#">AAI26888.1</a>     |
| <a href="#">9530053A07Rik protein [Mus musculus]</a>                                    | 49.8 | 49.8 | 94%  | 1e-05 | 82% | <a href="#">AAI26887.1</a>     |
| <a href="#">Fc fragment of IgG binding protein-like precursor [Mus musculus]</a>        | 49.8 | 49.8 | 94%  | 2e-05 | 82% | <a href="#">NP_001158127.1</a> |
| <a href="#">Fcgbp protein [Mus musculus]</a>                                            | 47.3 | 47.3 | 94%  | 1e-04 | 76% | <a href="#">AAH24554.1</a>     |
| <a href="#">Fcgbp protein [Mus musculus]</a>                                            | 47.3 | 47.3 | 94%  | 1e-04 | 76% | <a href="#">AAH24520.1</a>     |
| <a href="#">Fcgbp protein [Mus musculus]</a>                                            | 47.3 | 47.3 | 94%  | 1e-04 | 76% | <a href="#">AAH55475.1</a>     |
| <a href="#">Fcgbp protein [Mus musculus]</a>                                            | 47.3 | 47.3 | 94%  | 1e-04 | 76% | <a href="#">AAH69956.1</a>     |

|                                                                                         |      |      |      |       |     |                                |
|-----------------------------------------------------------------------------------------|------|------|------|-------|-----|--------------------------------|
| <a href="#">Fcgbp protein [Mus musculus]</a>                                            | 47.3 | 47.3 | 94%  | 1e-04 | 76% | <a href="#">AAH92067.1</a>     |
| <a href="#">Fcgbp protein [Mus musculus]</a>                                            | 47.3 | 47.3 | 94%  | 1e-04 | 76% | <a href="#">AAH26653.1</a>     |
| <a href="#">Fcgbp protein [Mus musculus]</a>                                            | 47.3 | 47.3 | 94%  | 1e-04 | 76% | <a href="#">AAH30871.1</a>     |
| <a href="#">mCG145390_isoform CRA_b [Mus musculus]</a>                                  | 47.3 | 47.3 | 94%  | 1e-04 | 76% | <a href="#">EDL24158.1</a>     |
| <a href="#">mCG145390_isoform CRA_a [Mus musculus]</a>                                  | 47.3 | 47.3 | 94%  | 1e-04 | 76% | <a href="#">EDL24157.1</a>     |
| <a href="#">Fc fragment of IgG binding protein precursor [Mus musculus]</a>             | 47.3 | 47.3 | 94%  | 1e-04 | 76% | <a href="#">NP_001116075.1</a> |
| <a href="#">PREDICTED: IgGFc-binding protein [Panthera tigris altaica]</a>              | 47.3 | 47.3 | 94%  | 1e-04 | 82% | <a href="#">XP_007087304.1</a> |
| <a href="#">PREDICTED: IgGFc-binding protein [Felis catus]</a>                          | 47.3 | 47.3 | 94%  | 1e-04 | 82% | <a href="#">XP_006941331.1</a> |
| <a href="#">PREDICTED: IgGFc-binding protein [Oryctolagus cuniculus]</a>                | 46.4 | 66.6 | 100% | 2e-04 | 78% | <a href="#">XP_008249744.1</a> |
| <a href="#">PREDICTED: IgGFc-binding protein [Ochotona princeps]</a>                    | 46.0 | 67.0 | 100% | 3e-04 | 72% | <a href="#">XP_004599764.1</a> |
| <a href="#">hypothetical protein PANDA_012964 [Ailuropoda melanoleuca]</a>              | 45.6 | 45.6 | 94%  | 4e-04 | 76% | <a href="#">EFB16331.1</a>     |
| <a href="#">PREDICTED: LOW QUALITY PROTEIN: IgGFc-binding protein [Ursus maritimus]</a> | 45.6 | 45.6 | 94%  | 4e-04 | 76% | <a href="#">XP_008686987.1</a> |
| <a href="#">PREDICTED: IgGFc-binding protein-like [Ailuropoda melanoleuca]</a>          | 45.6 | 45.6 | 94%  | 4e-04 | 76% | <a href="#">XP_002923768.1</a> |
| <a href="#">PREDICTED: IgGFc-binding protein [Cavia porcellus]</a>                      | 44.8 | 44.8 | 100% | 8e-04 | 78% | <a href="#">XP_003462033.1</a> |
| <a href="#">PREDICTED: LOW QUALITY PROTEIN: IgGFc-binding protein [Canis lupus f]</a>   | 44.3 | 44.3 | 94%  | 0.001 | 76% | <a href="#">XP_005616636.1</a> |
| <a href="#">PREDICTED: LOW QUALITY PROTEIN: Fc fragment of IgG binding protein [I]</a>  | 44.3 | 44.3 | 94%  | 0.001 | 76% | <a href="#">XP_004828450.1</a> |
| <a href="#">PREDICTED: IgGFc-binding protein [Sorex araneus]</a>                        | 43.9 | 43.9 | 94%  | 0.002 | 76% | <a href="#">XP_004620845.1</a> |
| <a href="#">PREDICTED: IgGFc-binding protein [Microtus ochrogaster]</a>                 | 43.1 | 64.1 | 94%  | 0.003 | 76% | <a href="#">XP_005371357.1</a> |
| <a href="#">PREDICTED: LOW QUALITY PROTEIN: Fc fragment of IgG binding protein [I]</a>  | 42.2 | 42.2 | 94%  | 0.005 | 76% | <a href="#">XP_005674577.1</a> |
| <a href="#">PREDICTED: LOW QUALITY PROTEIN: Fc fragment of IgG binding protein [I]</a>  | 41.4 | 41.4 | 94%  | 0.010 | 71% | <a href="#">XP_004417817.1</a> |
| <a href="#">PREDICTED: IgGFc-binding protein-like [Peromyscus maniculatus bairdii]</a>  | 40.9 | 40.9 | 94%  | 0.014 | 71% | <a href="#">XP_006996523.1</a> |
| <a href="#">PREDICTED: IgGFc-binding protein isoform X2 [Chinchilla lanigera]</a>       | 40.9 | 61.1 | 100% | 0.014 | 72% | <a href="#">XP_005414139.1</a> |
| <a href="#">PREDICTED: IgGFc-binding protein isoform X1 [Chinchilla lanigera]</a>       | 40.9 | 61.1 | 100% | 0.014 | 72% | <a href="#">XP_005414138.1</a> |
| <a href="#">PREDICTED: IgGFc-binding protein [Monodelphis domestica]</a>                | 40.5 | 40.5 | 94%  | 0.020 | 71% | <a href="#">XP_007491957.1</a> |
| <a href="#">PREDICTED: IgGFc-binding protein [Octodon degus]</a>                        | 39.7 | 39.7 | 100% | 0.037 | 72% | <a href="#">XP_004648069.1</a> |
| <a href="#">rCG54015 [Rattus norvegicus]</a>                                            | 39.2 | 39.2 | 94%  | 0.050 | 71% | <a href="#">EDM07917.1</a>     |

## Alignments

Download v [GenPept](#) [Graphics](#)

v Next ^ Previous ^ Descriptions

IgG Fc binding protein [AA 4671-5405] [Homo sapiens]

Sequence ID: [gb|AAD15624.1](#) Length: 735 Number of Matches: 1

Range 1: 511 to 528 [GenPept](#) [Graphics](#)

v Next Match ^ Previous Match

| Score          | Expect | Identities | Positives   | Gaps     |
|----------------|--------|------------|-------------|----------|
| 58.7 bits(131) | 2e-08  | 17/18(94%) | 18/18(100%) | 0/18(0%) |

Query 1 RYLPVDSLLTSDCSERC 18  
 RYLPV+SLLTSDCSERC  
 Sbjct 511 RYLPVNSLLTSDCSERC 528

### Related Information

[Gene](#) - associated gene details

Download v [GenPept](#) [Graphics](#)

v Next ^ Previous ^ Descriptions

PREDICTED: IgGFc-binding protein [Dasypus novemcinctus]

Sequence ID: [ref|XP\\_004474079.1](#) Length: 2558 Number of Matches: 1

Range 1: 2334 to 2351 [GenPept](#) [Graphics](#)

v Next Match ^ Previous Match

| Score          | Expect | Identities | Positives   | Gaps     |
|----------------|--------|------------|-------------|----------|
| 58.7 bits(131) | 2e-08  | 17/18(94%) | 18/18(100%) | 0/18(0%) |

### Related Information

[Gene](#) - associated gene details

[Map Viewer](#) - aligned genomic context

Query 1 RYLPVDSLLTSDCSERC 18  
 RYLPV+SLLTSDCSERC  
 Sbjct 2334 RYLPVNSLLTSDCSERC 2351

[Download](#) [GenPept](#) [Graphics](#)

[Next](#) [Previous](#) [Descriptions](#)

PREDICTED: IgGfC-binding protein-like [Nannospalax galili]  
 Sequence ID: [ref|XP\\_008852264.1|](#) Length: 2577 Number of Matches: 1

Range 1: 2355 to 2372 [GenPept](#) [Graphics](#) [Next Match](#) [Previous Match](#)

| Score          | Expect | Identities | Positives   | Gaps     |
|----------------|--------|------------|-------------|----------|
| 58.7 bits(131) | 2e-08  | 17/18(94%) | 18/18(100%) | 0/18(0%) |

Query 1 RYLPVDSLLTSDCSERC 18  
 RYLPV+SLLTSDCSERC  
 Sbjct 2355 RYLPVNSLLTSDCSERC 2372

**Related Information**

[Gene](#) - associated gene details  
[Map Viewer](#) - aligned genomic context

[Download](#) [GenPept](#) [Graphics](#)

[Next](#) [Previous](#) [Descriptions](#)

PREDICTED: IgGfC-binding protein [Saimiri boliviensis boliviensis]  
 Sequence ID: [ref|XP\\_010329397.1|](#) Length: 2834 Number of Matches: 1

Range 1: 2610 to 2627 [GenPept](#) [Graphics](#) [Next Match](#) [Previous Match](#)

| Score          | Expect | Identities | Positives   | Gaps     |
|----------------|--------|------------|-------------|----------|
| 58.7 bits(131) | 2e-08  | 17/18(94%) | 18/18(100%) | 0/18(0%) |

Query 1 RYLPVDSLLTSDCSERC 18  
 RYLPV+SLLTSDCSERC  
 Sbjct 2610 RYLPVNSLLTSDCSERC 2627

**Related Information**

[Gene](#) - associated gene details  
[Map Viewer](#) - aligned genomic context

[Download](#) [GenPept](#) [Graphics](#)

[Next](#) [Previous](#) [Descriptions](#)

PREDICTED: LOW QUALITY PROTEIN: IgGfC-binding protein [Loxodonta africana]  
 Sequence ID: [ref|XP\\_010598700.1|](#) Length: 2952 Number of Matches: 1

Range 1: 2730 to 2747 [GenPept](#) [Graphics](#) [Next Match](#) [Previous Match](#)

| Score          | Expect | Identities | Positives   | Gaps     |
|----------------|--------|------------|-------------|----------|
| 58.7 bits(131) | 2e-08  | 17/18(94%) | 18/18(100%) | 0/18(0%) |

Query 1 RYLPVDSLLTSDCSERC 18  
 RYLPV+SLLTSDCSERC  
 Sbjct 2730 RYLPVNSLLTSDCSERC 2747

**Related Information**

[Gene](#) - associated gene details

BLAST is a registered trademark of the National Library of Medicine.

▶ NCBI/ BLAST/ blastp suite/ Formatting Results - B9E60EFB01R

**i** Your search parameters were adjusted to search for a short input sequence.

[Edit and Resubmit](#) [Save Search Strategies](#) ▶ [Formatting options](#) ▶ [Download](#)

[YouTube](#) [How to read this page](#) [Blast report description](#)

### FCGBP\_RYLPVNSSLTSDCSERC\_NonMod

RID [B9E60EFB01R](#) (Expires on 01-14 13:18 pm)

**Query ID** Icl|301508  
**Description** None  
**Molecule type** amino acid  
**Query Length** 18

**Database Name** nr  
**Description** All non-redundant GenBank CDS translations+PDB+SwissProt+PIR excluding environmental samples from WGS projects  
**Program** BLASTP 2.2.30+ ▶ [Citation](#)

Other reports: ▶ [Search Summary](#) [[Taxonomy reports](#)] [[Distance tree of results](#)] [[Multiple alignment](#)]

### **G**raphic Summary

[Show Conserved Domains](#)

No putative conserved domains have been detected

Distribution of 108 Blast Hits on the Query Sequence



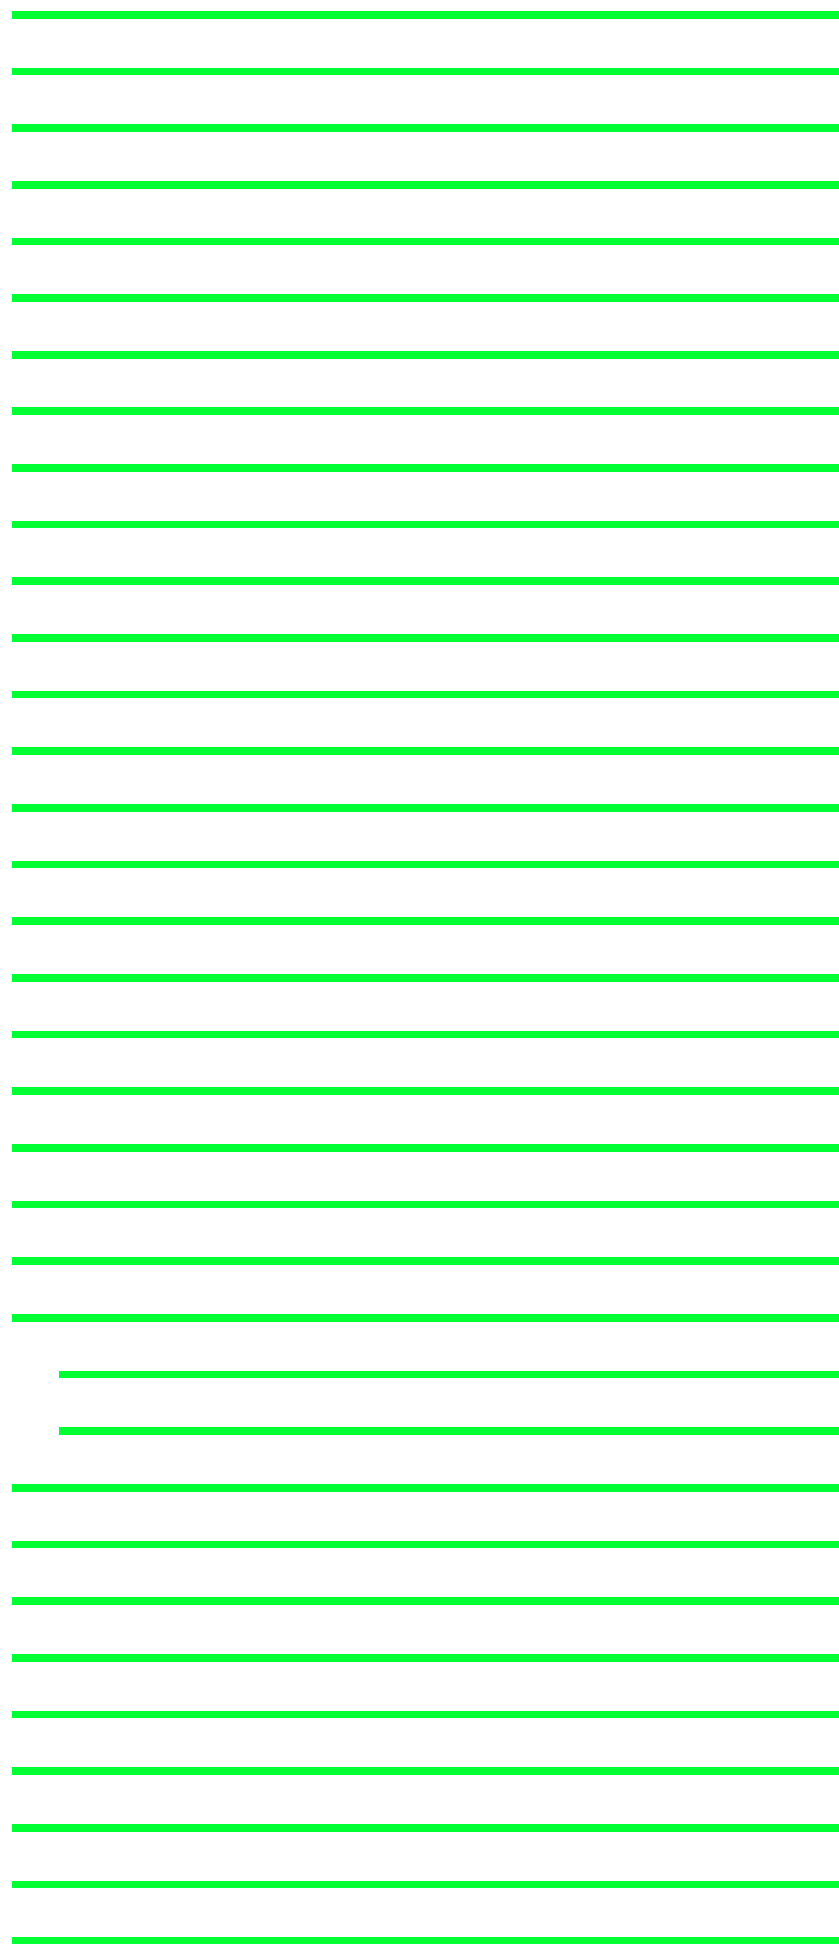





**Descriptions**

**Sequences producing significant alignments:**

Select: [All](#) [None](#) Selected:0

[Alignments](#)
[Download](#)
[GenPept](#)
[Graphics](#)
[Distance tree of results](#)
[Multiple alignment](#)

| Description                                                                        | Max score | Total score | Query cover | E value | Ident | Accession                                   |
|------------------------------------------------------------------------------------|-----------|-------------|-------------|---------|-------|---------------------------------------------|
| <a href="#">IgG Fc binding protein [AA 4671-5405] [Homo sapiens]</a>               | 61.3      | 61.3        | 100%        | 2e-09   | 100%  | <a href="#">gij4321127 AAD15624.1</a>       |
| <a href="#">PREDICTED: IgGFc-binding protein [Dasypus novemcinctus]</a>            | 61.3      | 61.3        | 100%        | 2e-09   | 100%  | <a href="#">gij488568912 XP_004474079.1</a> |
| <a href="#">PREDICTED: IgGFc-binding protein-like [Nannospalax galili]</a>         | 61.3      | 61.3        | 100%        | 2e-09   | 100%  | <a href="#">gij674088663 XP_008852264.1</a> |
| <a href="#">PREDICTED: IgGFc-binding protein [Saimiri boliviensis boliviensis]</a> | 61.3      | 61.3        | 100%        | 2e-09   | 100%  | <a href="#">gij725605545 XP_010329397.1</a> |
| <a href="#">PREDICTED: LOW QUALITY PROTEIN: IgGFc-binding protein [Lo:</a>         | 61.3      | 61.3        | 100%        | 2e-09   | 100%  | <a href="#">gij731510651 XP_010598700.1</a> |
| <a href="#">PREDICTED: IgGFc-binding protein [Orycteropus afer afer]</a>           | 61.3      | 61.3        | 100%        | 2e-09   | 100%  | <a href="#">gij634854573 XP_007941342.1</a> |
| <a href="#">PREDICTED: IgGFc-binding protein [Lipotes vexillifer]</a>              | 61.3      | 61.3        | 100%        | 2e-09   | 100%  | <a href="#">gij602693350 XP_007458763.1</a> |
| <a href="#">PREDICTED: IgGFc-binding protein [Chrysochloris asiatica]</a>          | 61.3      | 61.3        | 100%        | 2e-09   | 100%  | <a href="#">gij586482145 XP_006871587.1</a> |
| <a href="#">PREDICTED: IgGFc-binding protein isoform X2 [Balaenoptera acut</a>     | 61.3      | 61.3        | 100%        | 2e-09   | 100%  | <a href="#">gij594663750 XP_007180031.1</a> |
| <a href="#">Fc fragment of IgG binding protein [Homo sapiens]</a>                  | 61.3      | 61.3        | 100%        | 2e-09   | 100%  | <a href="#">gij119577330 EAW56926.1</a>     |
| <a href="#">PREDICTED: IgGFc-binding protein isoform X1 [Balaenoptera acut</a>     | 61.3      | 61.3        | 100%        | 2e-09   | 100%  | <a href="#">gij594663748 XP_007180030.1</a> |
| <a href="#">PREDICTED: IgGFc-binding protein [Otolemur garnettii]</a>              | 61.3      | 61.3        | 100%        | 2e-09   | 100%  | <a href="#">gij395859762 XP_003802201.1</a> |
| <a href="#">PREDICTED: LOW QUALITY PROTEIN: IgGFc-binding protein [Pa</a>          | 61.3      | 61.3        | 100%        | 2e-09   | 100%  | <a href="#">gij675718714 XP_008963216.1</a> |
| <a href="#">PREDICTED: IgGFc-binding protein [Nomascus leucogenys]</a>             | 61.3      | 61.3        | 100%        | 2e-09   | 100%  | <a href="#">gij332242810 XP_003270573.1</a> |
| <a href="#">PREDICTED: LOW QUALITY PROTEIN: IgGFc-binding protein [Go</a>          | 61.3      | 61.3        | 100%        | 2e-09   | 100%  | <a href="#">gij426388791 XP_004060816.1</a> |
| <a href="#">PREDICTED: LOW QUALITY PROTEIN: IgGFc-binding protein [Pa</a>          | 61.3      | 61.3        | 100%        | 2e-09   | 100%  | <a href="#">gij694975150 XP_009433882.1</a> |
| <a href="#">IgG Fc binding protein [Homo sapiens]</a>                              | 61.3      | 61.3        | 100%        | 2e-09   | 100%  | <a href="#">gij1944352 BAA19526.1</a>       |
| <a href="#">IgGFc-binding protein precursor [Homo sapiens]</a>                     | 61.3      | 61.3        | 100%        | 2e-09   | 100%  | <a href="#">gij154146262 NP_003881.2</a>    |
| <a href="#">Fc fragment of IgG binding protein [Camelus ferus]</a>                 | 58.7      | 78.9        | 100%        | 2e-08   | 94%   | <a href="#">gij528766318 EPY85977.1</a>     |
| <a href="#">PREDICTED: IgGFc-binding protein [Galeopterus variegatus]</a>          | 58.7      | 58.7        | 100%        | 2e-08   | 94%   | <a href="#">gij667245485 XP_008580791.1</a> |
| <a href="#">PREDICTED: IgGFc-binding protein [Vicugna pacos]</a>                   | 58.7      | 58.7        | 100%        | 2e-08   | 94%   | <a href="#">gij560985920 XP_006215157.1</a> |
| <a href="#">PREDICTED: IgGFc-binding protein [Elephantulus edwardii]</a>           | 58.7      | 58.7        | 100%        | 2e-08   | 94%   | <a href="#">gij585714650 XP_006901006.1</a> |
| <a href="#">PREDICTED: IgGFc-binding protein [Camelus ferus]</a>                   | 58.7      | 78.9        | 100%        | 2e-08   | 94%   | <a href="#">gij560903281 XP_006178015.1</a> |
| <a href="#">PREDICTED: IgGFc-binding protein [Trichechus manatus latirostris</a>   | 58.3      | 58.3        | 100%        | 2e-08   | 94%   | <a href="#">gij471413470 XP_004388281.1</a> |
| <a href="#">PREDICTED: LOW QUALITY PROTEIN: IgGFc-binding protein [Eq</a>          | 58.3      | 58.3        | 100%        | 2e-08   | 94%   | <a href="#">gij664745941 XP_008530313.1</a> |
| <a href="#">PREDICTED: IgGFc-binding protein isoform X2 [Bubalus bubalis]</a>      | 58.3      | 58.3        | 100%        | 2e-08   | 94%   | <a href="#">gij594051532 XP_006050099.1</a> |
| <a href="#">PREDICTED: IgGFc-binding protein isoform X1 [Bos taurus]</a>           | 58.3      | 58.3        | 100%        | 2e-08   | 94%   | <a href="#">gij528991889 XP_002695104.2</a> |
| <a href="#">PREDICTED: IgGFc-binding protein isoform X1 [Bos taurus]</a>           | 58.3      | 58.3        | 100%        | 2e-08   | 94%   | <a href="#">gij528933616 XP_005200216.1</a> |

|                                                               |      |      |      |       |      |                                             |
|---------------------------------------------------------------|------|------|------|-------|------|---------------------------------------------|
| PREDICTED: LOW QUALITY PROTEIN: IgGFc-binding protein [Eq     | 58.3 | 58.3 | 100% | 2e-08 | 94%  | <a href="#">gij545176771 XP_005596726.1</a> |
| PREDICTED: LOW QUALITY PROTEIN: IgGFc-binding protein [My     | 58.3 | 58.3 | 100% | 2e-08 | 94%  | <a href="#">gij554548727 XP_005868902.1</a> |
| PREDICTED: IgGFc-binding protein isoform X1 [Bubalus bubalis] | 58.3 | 58.3 | 100% | 2e-08 | 94%  | <a href="#">gij594051530 XP_006050098.1</a> |
| PREDICTED: IgGFc-binding protein isoform X2 [Bos taurus]      | 58.3 | 58.3 | 100% | 2e-08 | 94%  | <a href="#">gij528991887 XP_005219168.1</a> |
| PREDICTED: IgGFc-binding protein isoform X2 [Bos taurus]      | 58.3 | 58.3 | 100% | 2e-08 | 94%  | <a href="#">gij528933614 XP_614095.6</a>    |
| PREDICTED: LOW QUALITY PROTEIN: Fc fragment of IgG bindin     | 58.3 | 58.3 | 100% | 2e-08 | 94%  | <a href="#">gij558160938 XP_006109819.1</a> |
| PREDICTED: IgGFc-binding protein [Pantholops hodgsonii]       | 58.3 | 58.3 | 100% | 2e-08 | 94%  | <a href="#">gij556735974 XP_005963590.1</a> |
| TPA: Fc fragment of IgG binding protein-like [Bos taurus]     | 58.3 | 58.3 | 100% | 2e-08 | 94%  | <a href="#">gij296477761 DAA19876.1</a>     |
| PREDICTED: LOW QUALITY PROTEIN: IgGFc-binding protein [Bo     | 58.3 | 58.3 | 100% | 2e-08 | 94%  | <a href="#">gij555957014 XP_005890645.1</a> |
| PREDICTED: LOW QUALITY PROTEIN: IgGFc-binding protein [Ca     | 58.3 | 58.3 | 100% | 2e-08 | 94%  | <a href="#">gij548504606 XP_005692605.1</a> |
| IgGFc-binding protein [Myotis brandtii]                       | 58.3 | 58.3 | 100% | 2e-08 | 94%  | <a href="#">gij521027545 EPQ09333.1</a>     |
| PREDICTED: IgGFc-binding protein [Jaculus jaculus]            | 58.3 | 58.3 | 100% | 2e-08 | 94%  | <a href="#">gij507573627 XP_004670397.1</a> |
| PREDICTED: IgGFc-binding protein [Tupaia chinensis]           | 57.9 | 57.9 | 94%  | 3e-08 | 100% | <a href="#">gij562821062 XP_006140449.1</a> |
| IgGFc-binding protein [Tupaia chinensis]                      | 57.9 | 57.9 | 94%  | 3e-08 | 100% | <a href="#">gij444732094 ELW72413.1</a>     |
| PREDICTED: IgGFc-binding protein-like [Tursiops truncatus]    | 57.5 | 57.5 | 100% | 4e-08 | 94%  | <a href="#">gij470605142 XP_004313750.1</a> |
| PREDICTED: IgGFc-binding protein [Orcinus orca]               | 57.5 | 57.5 | 100% | 4e-08 | 94%  | <a href="#">gij466016931 XP_004271425.1</a> |
| PREDICTED: IgGFc-binding protein [Ictidomys tridecemlineatus] | 57.5 | 57.5 | 100% | 4e-08 | 94%  | <a href="#">gij532101857 XP_005336544.1</a> |
| PREDICTED: IgGFc-binding protein [Physeter catodon]           | 57.1 | 57.1 | 100% | 6e-08 | 94%  | <a href="#">gij593767123 XP_007122066.1</a> |
| PREDICTED: LOW QUALITY PROTEIN: IgGFc-binding protein [Po     | 57.1 | 57.1 | 100% | 6e-08 | 94%  | <a href="#">gij686758917 XP_009230865.1</a> |
| PREDICTED: IgGFc-binding protein-like [Nannospalax galili]    | 56.2 | 56.2 | 100% | 1e-07 | 94%  | <a href="#">gij674088661 XP_008852263.1</a> |
| PREDICTED: IgGFc-binding protein-like [Macaca mulatta]        | 56.2 | 56.2 | 100% | 1e-07 | 94%  | <a href="#">gij297277050 XP_001088892.2</a> |
| PREDICTED: IgGFc-binding protein [Chlorocebus sabaues]        | 56.2 | 56.2 | 100% | 1e-07 | 94%  | <a href="#">gij635042256 XP_007996683.1</a> |
| PREDICTED: LOW QUALITY PROTEIN: IgGFc-binding protein [Pa     | 56.2 | 56.2 | 100% | 1e-07 | 94%  | <a href="#">gij402905577 XP_003915593.1</a> |
| PREDICTED: LOW QUALITY PROTEIN: IgGFc-binding protein [Rh     | 56.2 | 56.2 | 100% | 1e-07 | 94%  | <a href="#">gij724909919 XP_010379186.1</a> |
| PREDICTED: IgGFc-binding protein [Macaca fascicularis]        | 56.2 | 56.2 | 100% | 1e-07 | 94%  | <a href="#">gij544514342 XP_005590715.1</a> |
| PREDICTED: IgGFc-binding protein [Pteropus alecto]            | 55.8 | 55.8 | 100% | 2e-07 | 89%  | <a href="#">gij586524140 XP_006905494.1</a> |
| IgGFc-binding protein [Pteropus alecto]                       | 55.8 | 55.8 | 100% | 2e-07 | 89%  | <a href="#">gij431920170 ELK18209.1</a>     |
| PREDICTED: IgGFc-binding protein [Echinops telfairi]          | 55.4 | 55.4 | 100% | 2e-07 | 89%  | <a href="#">gij507680836 XP_004710550.1</a> |
| PREDICTED: LOW QUALITY PROTEIN: IgGFc-binding protein [Ca     | 55.4 | 55.4 | 100% | 2e-07 | 89%  | <a href="#">gij675761213 XP_008986248.1</a> |
| IgGFc-binding protein [Myotis davidii]                        | 54.9 | 54.9 | 100% | 3e-07 | 89%  | <a href="#">gij432102846 ELK30313.1</a>     |
| PREDICTED: IgGFc-binding protein [Myotis davidii]             | 54.9 | 54.9 | 100% | 3e-07 | 89%  | <a href="#">gij584088170 XP_006763740.1</a> |
| PREDICTED: LOW QUALITY PROTEIN: IgGFc-binding protein [Ep     | 54.9 | 54.9 | 100% | 3e-07 | 89%  | <a href="#">gij641699510 XP_008138255.1</a> |
| PREDICTED: IgGFc-binding protein [Tarsius syrichta]           | 54.5 | 54.5 | 100% | 4e-07 | 89%  | <a href="#">gij640776875 XP_008052981.1</a> |
| PREDICTED: IgGFc-binding protein [Condylura cristata]         | 54.1 | 75.1 | 100% | 6e-07 | 89%  | <a href="#">gij507980555 XP_004693946.1</a> |
| PREDICTED: LOW QUALITY PROTEIN: IgGFc-binding protein [Ov     | 54.1 | 54.1 | 94%  | 6e-07 | 94%  | <a href="#">gij426243806 XP_004015739.1</a> |
| PREDICTED: IgGFc-binding protein [Erinaceus europaeus]        | 54.1 | 54.1 | 100% | 6e-07 | 89%  | <a href="#">gij617664909 XP_007538724.1</a> |
| Fcgbp protein [Mus musculus]                                  | 49.8 | 49.8 | 94%  | 1e-05 | 82%  | <a href="#">gij19353631 AAH24554.1</a>      |
| Fcgbp protein [Mus musculus]                                  | 49.8 | 49.8 | 94%  | 1e-05 | 82%  | <a href="#">gij19353600 AAH24520.1</a>      |
| Fcgbp protein [Mus musculus]                                  | 49.8 | 49.8 | 94%  | 1e-05 | 82%  | <a href="#">gij33585463 AAH55475.1</a>      |
| Fcgbp protein [Mus musculus]                                  | 49.8 | 49.8 | 94%  | 1e-05 | 82%  | <a href="#">gij47682932 AAH69956.1</a>      |
| Fcgbp protein [Mus musculus]                                  | 49.8 | 49.8 | 94%  | 1e-05 | 82%  | <a href="#">gij62024652 AAH92067.1</a>      |
| Fcgbp protein [Mus musculus]                                  | 49.8 | 49.8 | 94%  | 1e-05 | 82%  | <a href="#">gij20072053 AAH26653.1</a>      |
| Fcgbp protein [Mus musculus]                                  | 49.8 | 49.8 | 94%  | 2e-05 | 82%  | <a href="#">gij21410127 AAH30871.1</a>      |
| mCG145390, isoform CRA_b [Mus musculus]                       | 49.8 | 49.8 | 94%  | 2e-05 | 82%  | <a href="#">gij148692211 EDL24158.1</a>     |
| mCG145390, isoform CRA_a [Mus musculus]                       | 49.8 | 49.8 | 94%  | 2e-05 | 82%  | <a href="#">gij148692210 EDL24157.1</a>     |

|                                                                                                   |      |      |      |       |     |                                             |
|---------------------------------------------------------------------------------------------------|------|------|------|-------|-----|---------------------------------------------|
| <a href="#">Fc fragment of IgG binding protein precursor [Mus musculus]</a>                       | 49.8 | 49.8 | 94%  | 2e-05 | 82% | <a href="#">gil169790797 NP_001116075.1</a> |
| <a href="#">PREDICTED: IgGfc-binding protein [Panthera tigris altaica]</a>                        | 49.8 | 49.8 | 94%  | 2e-05 | 88% | <a href="#">gil591322392 XP_007087304.1</a> |
| <a href="#">PREDICTED: IgGfc-binding protein [Felis catus]</a>                                    | 49.8 | 49.8 | 94%  | 2e-05 | 88% | <a href="#">gil587014135 XP_006941331.1</a> |
| <a href="#">PREDICTED: IgGfc-binding protein [Oryctolagus cuniculus]</a>                          | 49.0 | 69.1 | 100% | 3e-05 | 83% | <a href="#">gil655895144 XP_008249744.1</a> |
| <a href="#">PREDICTED: IgGfc-binding protein [Ochotona princeps]</a>                              | 48.6 | 69.6 | 100% | 4e-05 | 78% | <a href="#">gil504182881 XP_004599764.1</a> |
| <a href="#">hypothetical protein PANDA_012964 [Ailuropoda melanoleuca]</a>                        | 48.1 | 48.1 | 94%  | 6e-05 | 82% | <a href="#">gil281340747 EFB16331.1</a>     |
| <a href="#">PREDICTED: LOW QUALITY PROTEIN: IgGfc-binding protein [Ursus arctos]</a>              | 48.1 | 48.1 | 94%  | 6e-05 | 82% | <a href="#">gil670991993 XP_008686987.1</a> |
| <a href="#">PREDICTED: IgGfc-binding protein-like [Ailuropoda melanoleuca]</a>                    | 48.1 | 48.1 | 94%  | 6e-05 | 82% | <a href="#">gil301776693 XP_002923768.1</a> |
| <a href="#">9530053A07Rik protein [Mus musculus]</a>                                              | 47.3 | 47.3 | 94%  | 9e-05 | 76% | <a href="#">gil119850932 AAI26888.1</a>     |
| <a href="#">9530053A07Rik protein [Mus musculus]</a>                                              | 47.3 | 47.3 | 94%  | 9e-05 | 76% | <a href="#">gil119850803 AAI26887.1</a>     |
| <a href="#">Fc fragment of IgG binding protein-like precursor [Mus musculus]</a>                  | 47.3 | 47.3 | 94%  | 1e-04 | 76% | <a href="#">gil257467625 NP_001158127.1</a> |
| <a href="#">PREDICTED: IgGfc-binding protein [Cavia porcellus]</a>                                | 47.3 | 47.3 | 100% | 1e-04 | 83% | <a href="#">gil348552434 XP_003462033.1</a> |
| <a href="#">PREDICTED: LOW QUALITY PROTEIN: IgGfc-binding protein [Cavia porcellus]</a>           | 46.9 | 46.9 | 94%  | 2e-04 | 82% | <a href="#">gil545488517 XP_005616636.1</a> |
| <a href="#">PREDICTED: LOW QUALITY PROTEIN: Fc fragment of IgG binding protein [Mus musculus]</a> | 46.9 | 46.9 | 94%  | 2e-04 | 82% | <a href="#">gil511913755 XP_004828450.1</a> |
| <a href="#">PREDICTED: IgGfc-binding protein [Sorex araneus]</a>                                  | 46.4 | 46.4 | 94%  | 2e-04 | 82% | <a href="#">gil505854851 XP_004620845.1</a> |
| <a href="#">PREDICTED: IgGfc-binding protein [Microtus ochrogaster]</a>                           | 45.6 | 66.6 | 94%  | 4e-04 | 82% | <a href="#">gil532057309 XP_005371357.1</a> |
| <a href="#">PREDICTED: LOW QUALITY PROTEIN: Fc fragment of IgG binding protein [Mus musculus]</a> | 44.8 | 44.8 | 94%  | 8e-04 | 82% | <a href="#">gil545830918 XP_005674577.1</a> |
| <a href="#">PREDICTED: LOW QUALITY PROTEIN: Fc fragment of IgG binding protein [Mus musculus]</a> | 43.9 | 43.9 | 94%  | 0.001 | 76% | <a href="#">gil472353763 XP_004417817.1</a> |
| <a href="#">PREDICTED: IgGfc-binding protein-like [Peromyscus maniculatus]</a>                    | 43.5 | 43.5 | 94%  | 0.002 | 76% | <a href="#">gil589968051 XP_006996523.1</a> |
| <a href="#">PREDICTED: IgGfc-binding protein isoform X2 [Chinchilla lanigera]</a>                 | 43.5 | 63.6 | 100% | 0.002 | 78% | <a href="#">gil533203235 XP_005414139.1</a> |
| <a href="#">PREDICTED: IgGfc-binding protein isoform X1 [Chinchilla lanigera]</a>                 | 43.5 | 63.6 | 100% | 0.002 | 78% | <a href="#">gil533203233 XP_005414138.1</a> |
| <a href="#">PREDICTED: IgGfc-binding protein [Monodelphis domestica]</a>                          | 43.1 | 43.1 | 94%  | 0.003 | 76% | <a href="#">gil612025837 XP_007491957.1</a> |
| <a href="#">PREDICTED: IgGfc-binding protein [Octodon degus]</a>                                  | 42.2 | 42.2 | 100% | 0.005 | 78% | <a href="#">gil507714064 XP_004648069.1</a> |
| <a href="#">rCG54015 [Rattus norvegicus]</a>                                                      | 41.8 | 41.8 | 94%  | 0.007 | 76% | <a href="#">gil149056486 EDM07917.1</a>     |
| <a href="#">RGD1311906 protein [Rattus norvegicus]</a>                                            | 41.8 | 41.8 | 94%  | 0.007 | 76% | <a href="#">gil71681025 AAH99756.1</a>      |
| <a href="#">Fc fragment of IgG binding protein-like precursor [Rattus norvegicus]</a>             | 41.8 | 41.8 | 94%  | 0.007 | 76% | <a href="#">gil257467627 NP_001158128.1</a> |
| <a href="#">Fc fragment of IgG binding protein precursor [Rattus norvegicus]</a>                  | 41.8 | 41.8 | 94%  | 0.007 | 76% | <a href="#">gil695917199 NP_001158129.2</a> |

## Alignments

Download GenPept Graphics

Next Previous Descriptions

IgG Fc binding protein [AA 4671-5405] [Homo sapiens]

Sequence ID: [gil4321127|gb|AAD15624.1](#) Length: 735 Number of Matches: 1

Range 1: 511 to 528 GenPept Graphics

Next Match Previous Match

| Score          | Expect | Identities  | Positives   | Gaps     |
|----------------|--------|-------------|-------------|----------|
| 61.3 bits(137) | 2e-09  | 18/18(100%) | 18/18(100%) | 0/18(0%) |

Query 1 RYLPVNSSLTSDCSERC 18  
 RYLPVNSSLTSDCSERC  
 Sbjct 511 RYLPVNSSLTSDCSERC 528

### Related Information

[Gene](#) - associated gene details

Download GenPept Graphics

Next Previous Descriptions

PREDICTED: IgGfc-binding protein [Dasypus novemcinctus]

Sequence ID: [gil488568912|ref|XP\\_004474079.1](#) Length: 2558 Number of Matches: 1

Range 1: 2334 to 2351 GenPept Graphics

Next Match Previous Match

| Score          | Expect | Identities  | Positives   | Gaps     |
|----------------|--------|-------------|-------------|----------|
| 61.3 bits(137) | 2e-09  | 18/18(100%) | 18/18(100%) | 0/18(0%) |

Query 1 RYLPVNSSLTSDCSERC 18

### Related Information

[Gene](#) - associated gene details

[Map Viewer](#) - aligned genomic context

Sbjct 2334 RYLPVNSSLTSDCSERC 2351

[Download](#) [GenPept](#) [Graphics](#) [Next](#) [Previous](#) [Descriptions](#)

**PREDICTED: IgGFc-binding protein-like [Nannospalax galili]**

Sequence ID: [gi|674088663|ref|XP\\_008852264.1](#) Length: 2577 Number of Matches: 1

Range 1: 2355 to 2372 [GenPept](#) [Graphics](#) [Next Match](#) [Previous Match](#)

| Score          | Expect | Identities  | Positives   | Gaps     |
|----------------|--------|-------------|-------------|----------|
| 61.3 bits(137) | 2e-09  | 18/18(100%) | 18/18(100%) | 0/18(0%) |

Query 1 RYLPVNSSLTSDCSERC 18  
 RYLPVNSSLTSDCSERC  
 Sbjct 2355 RYLPVNSSLTSDCSERC 2372

**Related Information**

[Gene](#) - associated gene details  
[Map Viewer](#) - aligned genomic context

[Download](#) [GenPept](#) [Graphics](#) [Next](#) [Previous](#) [Descriptions](#)

**PREDICTED: IgGFc-binding protein [Saimiri boliviensis boliviensis]**

Sequence ID: [gi|725605545|ref|XP\\_010329397.1](#) Length: 2834 Number of Matches: 1

Range 1: 2610 to 2627 [GenPept](#) [Graphics](#) [Next Match](#) [Previous Match](#)

| Score          | Expect | Identities  | Positives   | Gaps     |
|----------------|--------|-------------|-------------|----------|
| 61.3 bits(137) | 2e-09  | 18/18(100%) | 18/18(100%) | 0/18(0%) |

Query 1 RYLPVNSSLTSDCSERC 18  
 RYLPVNSSLTSDCSERC  
 Sbjct 2610 RYLPVNSSLTSDCSERC 2627

**Related Information**

[Gene](#) - associated gene details  
[Map Viewer](#) - aligned genomic context

[Download](#) [GenPept](#) [Graphics](#) [Next](#) [Previous](#) [Descriptions](#)

**PREDICTED: LOW QUALITY PROTEIN: IgGFc-binding protein [Loxodonta africana]**

Sequence ID: [gi|731510651|ref|XP\\_010598700.1](#) Length: 2952 Number of Matches: 1

Range 1: 2730 to 2747 [GenPept](#) [Graphics](#) [Next Match](#) [Previous Match](#)

| Score          | Expect | Identities  | Positives   | Gaps     |
|----------------|--------|-------------|-------------|----------|
| 61.3 bits(137) | 2e-09  | 18/18(100%) | 18/18(100%) | 0/18(0%) |

Query 1 RYLPVNSSLTSDCSERC 18  
 RYLPVNSSLTSDCSERC  
 Sbjct 2730 RYLPVNSSLTSDCSERC 2747

**Related Information**

[Gene](#) - associated gene details

BLAST is a registered trademark of the National Library of Medicine.

NCBI/ BLAST/ blastp suite/ Formatting Results - BVDWU9V801R

Your search parameters were adjusted to search for a short input sequence.  
Edit and Resubmit Save Search Strategies Formatting options Download YouTube How to read this page Blast report description

FLT4\_KLVIQNADV SAMYKC\_Mod

RID BVDWU9V801R (Expires on 01-21 09:04 am)

Query ID |cl|327098  
Description None  
Molecule type amino acid  
Query Length 15

Database Name nr  
Description All non-redundant GenBank CDS translations+PDB+SwissProt+PIR+PRF excluding environmental samples from WGS projects  
Program BLASTP 2.2.30+ Citation

Other reports: Search Summary Taxonomy reports Distance tree of results Multiple alignment

Graphic Summary

Show Conserved Domains

No putative conserved domains have been detected

Distribution of 101 Blast Hits on the Query Sequence

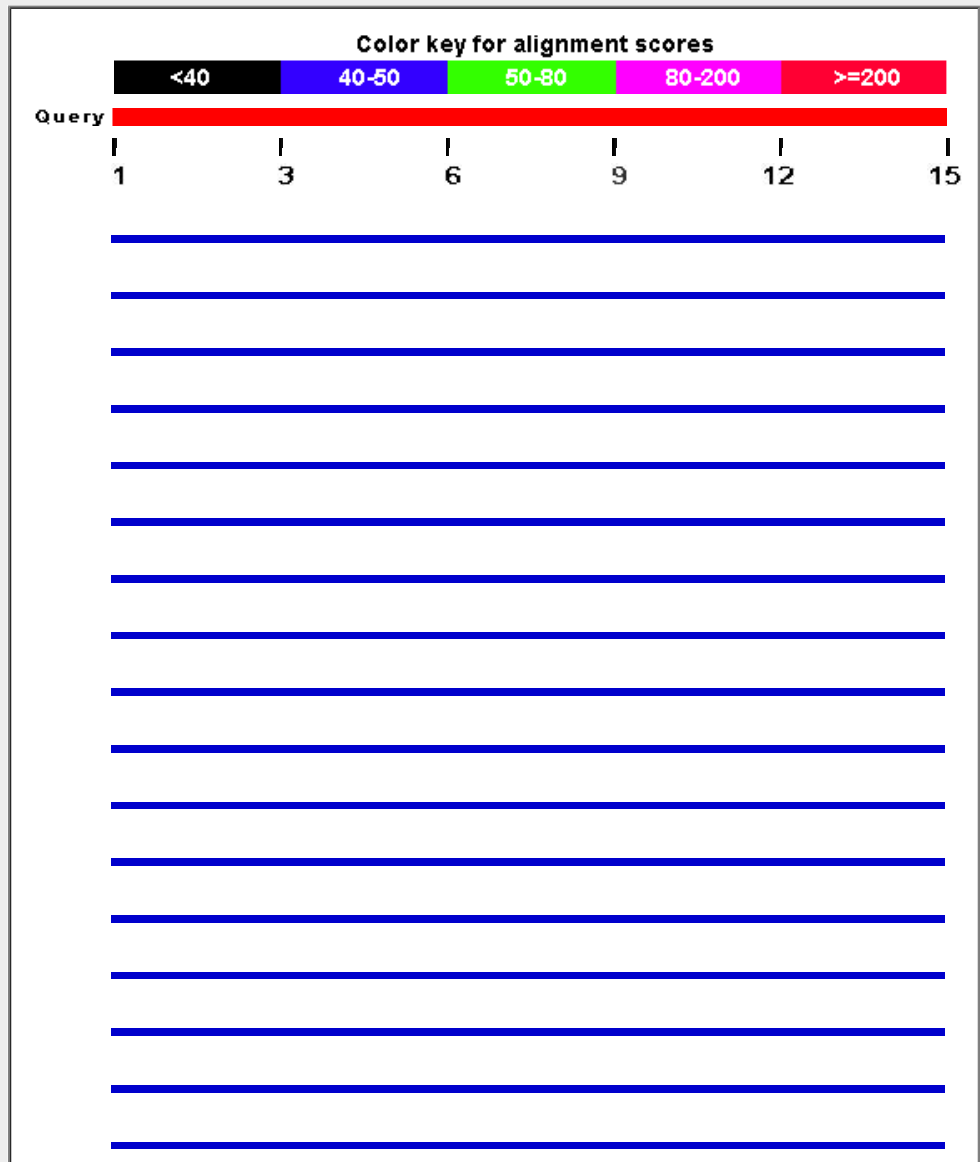

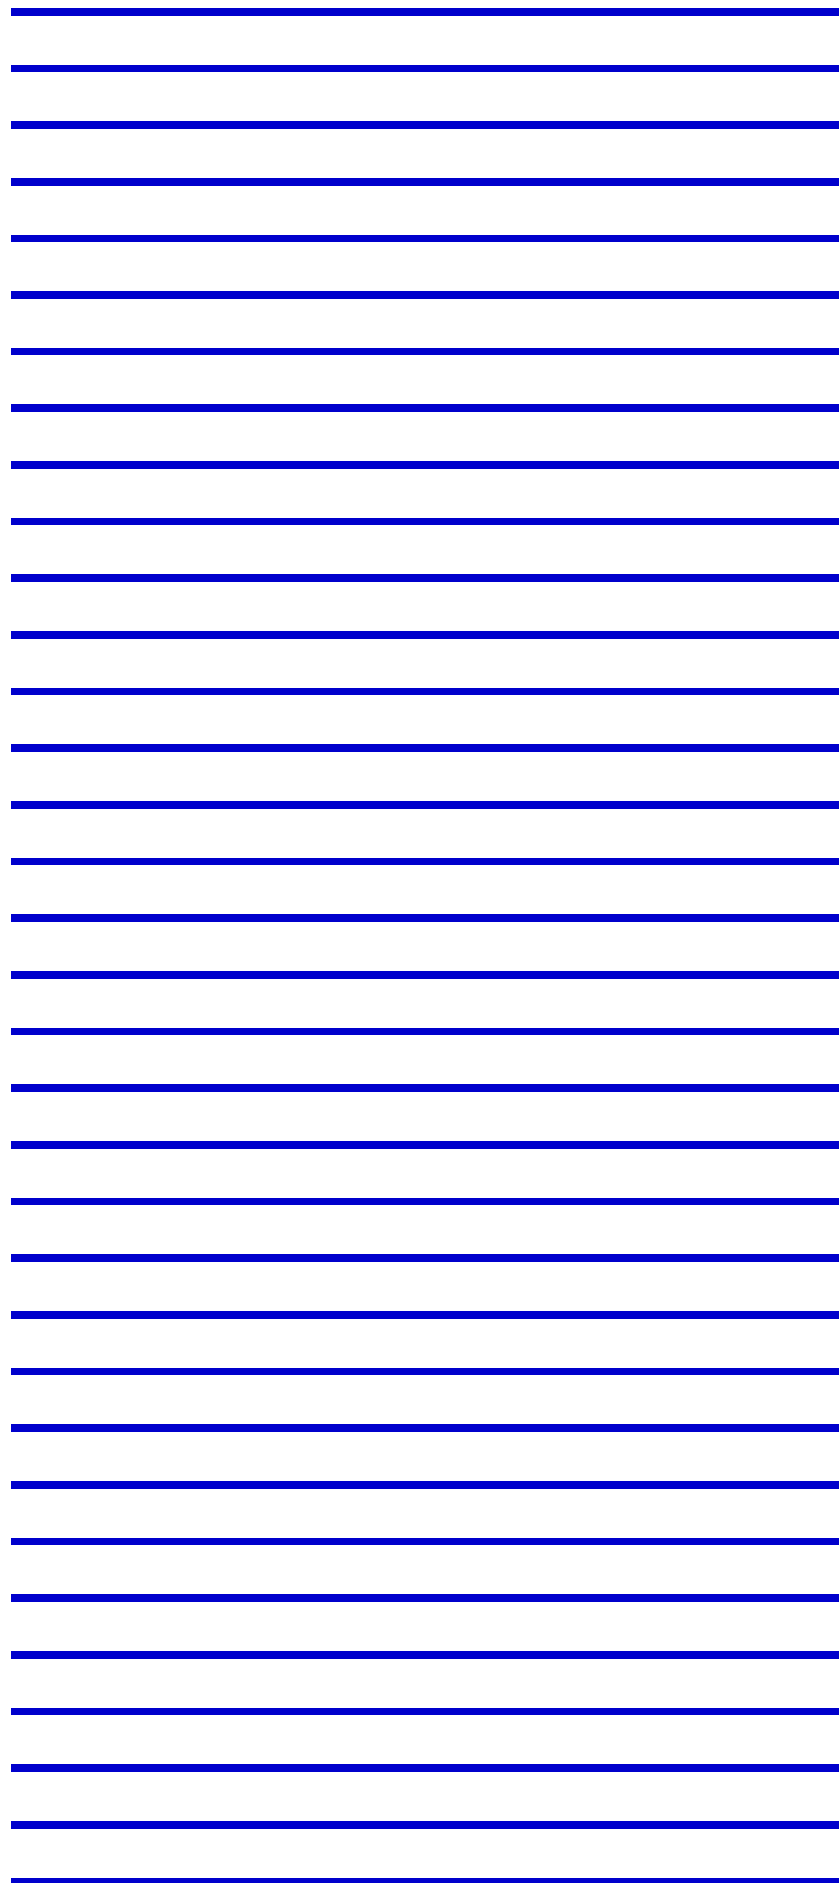

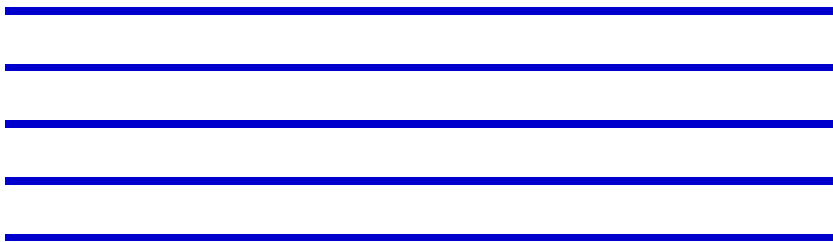

**Descriptions**

**Sequences producing significant alignments:**

Select: [All](#) [None](#) Selected:0

[Alignments](#)
[Download](#)
[GenPept](#)
[Graphics](#)
[Distance tree of results](#)
[Multiple alignment](#)


| Description                                                                                                             | Max score | Total score | Query cover | E value | Ident | Accession                      |
|-------------------------------------------------------------------------------------------------------------------------|-----------|-------------|-------------|---------|-------|--------------------------------|
| <a href="#">Chain A, Crystal Structure Of Vegfr-3 Extracellular Domains D4-5 [Homo sapiens]</a>                         | 49.8      | 49.8        | 100%        | 9e-06   | 93%   | <a href="#">4BSJ_A</a>         |
| <a href="#">PREDICTED: vascular endothelial growth factor receptor 3 [Pongo abelii]</a>                                 | 49.8      | 49.8        | 100%        | 1e-05   | 93%   | <a href="#">XP_009239654.1</a> |
| <a href="#">Vascular endothelial growth factor receptor 3 precursor variant [Homo sapiens]</a>                          | 49.8      | 49.8        | 100%        | 1e-05   | 93%   | <a href="#">BAD92874.1</a>     |
| <a href="#">soluble VEGFR3 variant 1 [Homo sapiens]</a>                                                                 | 49.8      | 49.8        | 100%        | 1e-05   | 93%   | <a href="#">ACF47600.1</a>     |
| <a href="#">PREDICTED: vascular endothelial growth factor receptor 3-like [Leptonychotes]</a>                           | 49.8      | 49.8        | 100%        | 1e-05   | 93%   | <a href="#">XP_006746634.1</a> |
| <a href="#">PREDICTED: vascular endothelial growth factor receptor 3 isoform X3 [Rhinohippos]</a>                       | 49.8      | 49.8        | 100%        | 1e-05   | 93%   | <a href="#">XP_010373329.1</a> |
| <a href="#">PREDICTED: vascular endothelial growth factor receptor 3 isoform X7 [Pan troglodytes]</a>                   | 49.8      | 49.8        | 100%        | 1e-05   | 93%   | <a href="#">XP_009448613.1</a> |
| <a href="#">PREDICTED: vascular endothelial growth factor receptor 3 isoform X2 [Rhinohippos]</a>                       | 49.8      | 49.8        | 100%        | 1e-05   | 93%   | <a href="#">XP_010373327.1</a> |
| <a href="#">PREDICTED: LOW QUALITY PROTEIN: vascular endothelial growth factor receptor 3 isoform X4 [Homo sapiens]</a> | 49.8      | 49.8        | 100%        | 1e-05   | 93%   | <a href="#">XP_008987571.1</a> |
| <a href="#">PREDICTED: vascular endothelial growth factor receptor 3 isoform X3 [Chlorocebus]</a>                       | 49.8      | 49.8        | 100%        | 1e-05   | 93%   | <a href="#">XP_008013748.1</a> |
| <a href="#">PREDICTED: vascular endothelial growth factor receptor 3 isoform X2 [Saimiri]</a>                           | 49.8      | 49.8        | 100%        | 1e-05   | 93%   | <a href="#">XP_010330147.1</a> |
| <a href="#">PREDICTED: LOW QUALITY PROTEIN: vascular endothelial growth factor receptor 3 isoform X5 [Homo sapiens]</a> | 49.8      | 49.8        | 100%        | 1e-05   | 93%   | <a href="#">XP_002816373.1</a> |
| <a href="#">PREDICTED: vascular endothelial growth factor receptor 3 isoform X2 [Chlorocebus]</a>                       | 49.8      | 49.8        | 100%        | 1e-05   | 93%   | <a href="#">XP_008013747.1</a> |
| <a href="#">PREDICTED: vascular endothelial growth factor receptor 3 isoform X6 [Pan troglodytes]</a>                   | 49.8      | 49.8        | 100%        | 1e-05   | 93%   | <a href="#">XP_009448612.1</a> |
| <a href="#">unnamed protein product [Homo sapiens]</a>                                                                  | 49.8      | 49.8        | 100%        | 1e-05   | 93%   | <a href="#">CAA49505.1</a>     |
| <a href="#">vascular endothelial growth factor receptor 3 isoform 2 precursor [Homo sapiens]</a>                        | 49.8      | 49.8        | 100%        | 1e-05   | 93%   | <a href="#">NP_002011.2</a>    |
| <a href="#">unnamed protein product [Homo sapiens]</a>                                                                  | 49.8      | 49.8        | 100%        | 1e-05   | 93%   | <a href="#">BAF84368.1</a>     |
| <a href="#">VEGFR3 short form [Homo sapiens]</a>                                                                        | 49.8      | 49.8        | 100%        | 1e-05   | 93%   | <a href="#">AAO89504.1</a>     |
| <a href="#">FTL4 [Homo sapiens]</a>                                                                                     | 49.8      | 49.8        | 100%        | 1e-05   | 93%   | <a href="#">CAA48290.1</a>     |
| <a href="#">hypothetical protein PANDA_017671 [Ailuropoda melanoleuca]</a>                                              | 49.8      | 49.8        | 100%        | 1e-05   | 93%   | <a href="#">EFB13501.1</a>     |
| <a href="#">PREDICTED: vascular endothelial growth factor receptor 3 isoform X5 [Pan troglodytes]</a>                   | 49.8      | 49.8        | 100%        | 1e-05   | 93%   | <a href="#">XP_009448611.1</a> |
| <a href="#">PREDICTED: vascular endothelial growth factor receptor 3 isoform X4 [Pan troglodytes]</a>                   | 49.8      | 49.8        | 100%        | 1e-05   | 93%   | <a href="#">XP_009448610.1</a> |
| <a href="#">PREDICTED: vascular endothelial growth factor receptor 3 isoform X1 [Rhinohippos]</a>                       | 49.8      | 49.8        | 100%        | 1e-05   | 93%   | <a href="#">XP_010373326.1</a> |
| <a href="#">PREDICTED: vascular endothelial growth factor receptor 3-like [Macaca mulatta]</a>                          | 49.8      | 49.8        | 100%        | 1e-05   | 93%   | <a href="#">XP_001107118.2</a> |
| <a href="#">PREDICTED: vascular endothelial growth factor receptor 3 [Gorilla gorilla gorilla]</a>                      | 49.8      | 49.8        | 100%        | 1e-05   | 93%   | <a href="#">XP_004043215.1</a> |
| <a href="#">PREDICTED: vascular endothelial growth factor receptor 3 isoform X3 [Mustelidae]</a>                        | 49.8      | 49.8        | 100%        | 1e-05   | 93%   | <a href="#">XP_004759037.1</a> |
| <a href="#">PREDICTED: vascular endothelial growth factor receptor 3 [Ochotona princeps]</a>                            | 49.8      | 49.8        | 100%        | 1e-05   | 93%   | <a href="#">XP_004599097.1</a> |
| <a href="#">PREDICTED: vascular endothelial growth factor receptor 3 isoform X1 [Chlorocebus]</a>                       | 49.8      | 49.8        | 100%        | 1e-05   | 93%   | <a href="#">XP_008013746.1</a> |
| <a href="#">PREDICTED: vascular endothelial growth factor receptor 3 [Macaca fascicularis]</a>                          | 49.8      | 49.8        | 100%        | 1e-05   | 93%   | <a href="#">XP_005558869.1</a> |

|                                                                                                                         |      |      |      |       |     |                                |
|-------------------------------------------------------------------------------------------------------------------------|------|------|------|-------|-----|--------------------------------|
| <a href="#">PREDICTED: vascular endothelial growth factor receptor 3 isoform X1 [Saimiri sciureus]</a>                  | 49.8 | 49.8 | 100% | 1e-05 | 93% | <a href="#">XP_003944009.1</a> |
| <a href="#">PREDICTED: LOW QUALITY PROTEIN: vascular endothelial growth factor receptor 3 isoform X1 [Homo sapiens]</a> | 49.8 | 49.8 | 100% | 1e-05 | 93% | <a href="#">XP_003900691.1</a> |
| <a href="#">VEGFR3 long form [Homo sapiens]</a>                                                                         | 49.8 | 49.8 | 100% | 1e-05 | 93% | <a href="#">AAO89505.1</a>     |
| <a href="#">PREDICTED: vascular endothelial growth factor receptor 3 isoform 2 [Nomascus leucogenus]</a>                | 49.8 | 49.8 | 100% | 1e-05 | 93% | <a href="#">XP_003279615.2</a> |
| <a href="#">PREDICTED: vascular endothelial growth factor receptor 3 isoform X3 [Pan troglodytes]</a>                   | 49.8 | 49.8 | 100% | 1e-05 | 93% | <a href="#">XP_518160.4</a>    |
| <a href="#">vascular endothelial growth factor receptor 3 isoform 1 precursor [Homo sapiens]</a>                        | 49.8 | 49.8 | 100% | 1e-05 | 93% | <a href="#">NP_891555.2</a>    |
| <a href="#">PREDICTED: vascular endothelial growth factor receptor 3 isoform X2 [Mustela putorius]</a>                  | 49.8 | 49.8 | 100% | 1e-05 | 93% | <a href="#">XP_004759036.1</a> |
| <a href="#">PREDICTED: vascular endothelial growth factor receptor 3 isoform X1 [Mustela putorius]</a>                  | 49.8 | 49.8 | 100% | 1e-05 | 93% | <a href="#">XP_004759035.1</a> |
| <a href="#">PREDICTED: vascular endothelial growth factor receptor 3 isoform X2 [Pan troglodytes]</a>                   | 49.8 | 49.8 | 100% | 1e-05 | 93% | <a href="#">XP_009448609.1</a> |
| <a href="#">PREDICTED: vascular endothelial growth factor receptor 3 [Ursus maritimus]</a>                              | 49.8 | 49.8 | 100% | 1e-05 | 93% | <a href="#">XP_008707769.1</a> |
| <a href="#">PREDICTED: LOW QUALITY PROTEIN: vascular endothelial growth factor receptor 3 isoform X1 [Homo sapiens]</a> | 49.8 | 49.8 | 100% | 1e-05 | 93% | <a href="#">XP_008955193.1</a> |
| <a href="#">PREDICTED: vascular endothelial growth factor receptor 3-like [Ailuropoda maculosa]</a>                     | 49.8 | 49.8 | 100% | 1e-05 | 93% | <a href="#">XP_002927834.1</a> |
| <a href="#">PREDICTED: vascular endothelial growth factor receptor 3 isoform X1 [Pan troglodytes]</a>                   | 49.8 | 49.8 | 100% | 1e-05 | 93% | <a href="#">XP_009448608.1</a> |
| <a href="#">PREDICTED: vascular endothelial growth factor receptor 3 [Odobenus rosmarus]</a>                            | 49.8 | 49.8 | 100% | 1e-05 | 93% | <a href="#">XP_004412739.1</a> |
| <a href="#">PREDICTED: vascular endothelial growth factor receptor 3 [Erinaceus europaeus]</a>                          | 49.8 | 49.8 | 100% | 1e-05 | 93% | <a href="#">XP_007527230.1</a> |
| <a href="#">PREDICTED: vascular endothelial growth factor receptor 3-like [Tarsius syrichta]</a>                        | 47.3 | 47.3 | 100% | 8e-05 | 87% | <a href="#">XP_008072035.1</a> |
| <a href="#">rCG35022_isoform CRA_a [Rattus norvegicus]</a>                                                              | 47.3 | 47.3 | 100% | 8e-05 | 87% | <a href="#">EDM04224.1</a>     |
| <a href="#">Vascular endothelial growth factor receptor 3 [Pteropus alecto]</a>                                         | 47.3 | 47.3 | 100% | 8e-05 | 87% | <a href="#">ELK03188.1</a>     |
| <a href="#">PREDICTED: vascular endothelial growth factor receptor 3-like [Myotis lucifugus]</a>                        | 47.3 | 47.3 | 100% | 8e-05 | 87% | <a href="#">XP_006108959.1</a> |
| <a href="#">rCG35022_isoform CRA_c [Rattus norvegicus]</a>                                                              | 47.3 | 47.3 | 100% | 8e-05 | 87% | <a href="#">EDM04226.1</a>     |
| <a href="#">receptor tyrosine kinase VEGFR-3kt [Rattus norvegicus]</a>                                                  | 47.3 | 47.3 | 100% | 8e-05 | 87% | <a href="#">AAL13270.1</a>     |
| <a href="#">PREDICTED: LOW QUALITY PROTEIN: vascular endothelial growth factor receptor 3 isoform X1 [Homo sapiens]</a> | 47.3 | 47.3 | 100% | 8e-05 | 87% | <a href="#">XP_010592785.1</a> |
| <a href="#">vascular endothelial growth factor receptor [Cricetulus griseus]</a>                                        | 47.3 | 47.3 | 100% | 8e-05 | 87% | <a href="#">ERE67633.1</a>     |
| <a href="#">PREDICTED: vascular endothelial growth factor receptor 3 isoform X4 [Panthera leo]</a>                      | 47.3 | 47.3 | 100% | 8e-05 | 87% | <a href="#">XP_007083127.1</a> |
| <a href="#">PREDICTED: vascular endothelial growth factor receptor 3 isoform X4 [Felis concolor]</a>                    | 47.3 | 47.3 | 100% | 8e-05 | 87% | <a href="#">XP_006927563.1</a> |
| <a href="#">Vascular endothelial growth factor receptor 3 [Cricetulus griseus]</a>                                      | 47.3 | 47.3 | 100% | 8e-05 | 87% | <a href="#">EGW02874.1</a>     |
| <a href="#">PREDICTED: vascular endothelial growth factor receptor 3 [Myotis brandtii]</a>                              | 47.3 | 47.3 | 100% | 8e-05 | 87% | <a href="#">XP_005865016.1</a> |
| <a href="#">PREDICTED: vascular endothelial growth factor receptor 3 [Myotis davidii]</a>                               | 47.3 | 47.3 | 100% | 8e-05 | 87% | <a href="#">XP_006775477.1</a> |
| <a href="#">PREDICTED: vascular endothelial growth factor receptor 3 [Pteropus alecto]</a>                              | 47.3 | 47.3 | 100% | 8e-05 | 87% | <a href="#">XP_006923300.1</a> |
| <a href="#">FMS-like tyrosine kinase 4 [Mus musculus]</a>                                                               | 47.3 | 47.3 | 100% | 8e-05 | 87% | <a href="#">EDL33745.1</a>     |
| <a href="#">PREDICTED: LOW QUALITY PROTEIN: vascular endothelial growth factor receptor 3 isoform X1 [Homo sapiens]</a> | 47.3 | 47.3 | 100% | 8e-05 | 87% | <a href="#">XP_007644094.1</a> |
| <a href="#">PREDICTED: vascular endothelial growth factor receptor 3 isoform X3 [Felis concolor]</a>                    | 47.3 | 47.3 | 100% | 8e-05 | 87% | <a href="#">XP_006927562.1</a> |
| <a href="#">PREDICTED: vascular endothelial growth factor receptor 3 [Camelus ferus]</a>                                | 47.3 | 47.3 | 100% | 8e-05 | 87% | <a href="#">XP_006175816.1</a> |
| <a href="#">PREDICTED: vascular endothelial growth factor receptor 3 isoform X3 [Panthera leo]</a>                      | 47.3 | 47.3 | 100% | 8e-05 | 87% | <a href="#">XP_007083126.1</a> |
| <a href="#">PREDICTED: vascular endothelial growth factor receptor 3 isoform X2 [Panthera leo]</a>                      | 47.3 | 47.3 | 100% | 8e-05 | 87% | <a href="#">XP_007083125.1</a> |
| <a href="#">fms-related tyrosine kinase 4 isoform 1-like protein [Camelus ferus]</a>                                    | 47.3 | 47.3 | 100% | 8e-05 | 87% | <a href="#">EPY87675.1</a>     |
| <a href="#">PREDICTED: vascular endothelial growth factor receptor 3 isoform X1 [Panthera leo]</a>                      | 47.3 | 47.3 | 100% | 8e-05 | 87% | <a href="#">XP_007083124.1</a> |
| <a href="#">PREDICTED: vascular endothelial growth factor receptor 3 [Camelus dromedarius]</a>                          | 47.3 | 47.3 | 100% | 8e-05 | 87% | <a href="#">XP_010991945.1</a> |
| <a href="#">PREDICTED: LOW QUALITY PROTEIN: vascular endothelial growth factor receptor 3 isoform X1 [Homo sapiens]</a> | 47.3 | 47.3 | 100% | 8e-05 | 87% | <a href="#">XP_002721370.2</a> |
| <a href="#">PREDICTED: vascular endothelial growth factor receptor 3 isoform X2 [Camelus ferus]</a>                     | 47.3 | 47.3 | 100% | 8e-05 | 87% | <a href="#">XP_010944438.1</a> |
| <a href="#">PREDICTED: vascular endothelial growth factor receptor 3 isoform X2 [Fukoria fukoria]</a>                   | 47.3 | 47.3 | 100% | 8e-05 | 87% | <a href="#">XP_010622027.1</a> |
| <a href="#">PREDICTED: vascular endothelial growth factor receptor 3 isoform X1 [Fukoria fukoria]</a>                   | 47.3 | 47.3 | 100% | 8e-05 | 87% | <a href="#">XP_010622026.1</a> |
| <a href="#">PREDICTED: vascular endothelial growth factor receptor 3 isoform X1 [Camelus ferus]</a>                     | 47.3 | 47.3 | 100% | 8e-05 | 87% | <a href="#">XP_010944437.1</a> |
| <a href="#">PREDICTED: vascular endothelial growth factor receptor 3 [Orycteropus afer]</a>                             | 47.3 | 67.4 | 100% | 8e-05 | 87% | <a href="#">XP_007951628.1</a> |
| <a href="#">PREDICTED: vascular endothelial growth factor receptor 3 [Jaculus jaculus]</a>                              | 47.3 | 47.3 | 100% | 8e-05 | 87% | <a href="#">XP_004666583.1</a> |



|                                                                                                                                              |      |      |      |       |     |                                |
|----------------------------------------------------------------------------------------------------------------------------------------------|------|------|------|-------|-----|--------------------------------|
| <a href="#">PREDICTED: vascular endothelial growth factor receptor 3 [Orcinus orca]</a>                                                      | 47.3 | 47.3 | 100% | 8e-05 | 87% | <a href="#">XP_004284117.1</a> |
| <a href="#">PREDICTED: vascular endothelial growth factor receptor 3 [Nannospalax galii]</a>                                                 | 47.3 | 47.3 | 100% | 8e-05 | 87% | <a href="#">XP_008850448.1</a> |
| <a href="#">PREDICTED: vascular endothelial growth factor receptor 3 [Eptesicus fuscus]</a>                                                  | 47.3 | 47.3 | 100% | 8e-05 | 87% | <a href="#">XP_008156907.1</a> |
| <a href="#">PREDICTED: vascular endothelial growth factor receptor 3 [Echinops telfairi]</a>                                                 | 47.3 | 47.3 | 100% | 8e-05 | 87% | <a href="#">XP_004697235.1</a> |
| <a href="#">PREDICTED: vascular endothelial growth factor receptor 3-like [Tursiops truncatus CG35022, isoform CRA_b [Rattus norvegicus]</a> | 47.3 | 47.3 | 100% | 8e-05 | 87% | <a href="#">EDM04225.1</a>     |
| <a href="#">vascular endothelial growth factor receptor 3 precursor [Rattus norvegicus]</a>                                                  | 47.3 | 47.3 | 100% | 8e-05 | 87% | <a href="#">NP_446104.1</a>    |
| <a href="#">vascular endothelial growth factor receptor 3 precursor [Mus musculus]</a>                                                       | 47.3 | 47.3 | 100% | 8e-05 | 87% | <a href="#">NP_032055.1</a>    |
| <a href="#">PREDICTED: vascular endothelial growth factor receptor 3 [Ictidomys tridecerus]</a>                                              | 47.3 | 47.3 | 100% | 8e-05 | 87% | <a href="#">XP_005339388.1</a> |
| <a href="#">PREDICTED: vascular endothelial growth factor receptor 3 isoform X2 [Felis catus]</a>                                            | 47.3 | 47.3 | 100% | 8e-05 | 87% | <a href="#">XP_006927561.1</a> |
| <a href="#">PREDICTED: vascular endothelial growth factor receptor 3 isoform X1 [Felis catus]</a>                                            | 47.3 | 47.3 | 100% | 8e-05 | 87% | <a href="#">XP_006927560.1</a> |
| <a href="#">PREDICTED: vascular endothelial growth factor receptor 3 [Canis lupus familiaris]</a>                                            | 47.3 | 47.3 | 100% | 8e-05 | 87% | <a href="#">XP_005626341.1</a> |
| <a href="#">PREDICTED: vascular endothelial growth factor receptor 3 isoform X4 [Balaeniceps rex]</a>                                        | 47.3 | 47.3 | 100% | 8e-05 | 87% | <a href="#">XP_007169893.1</a> |
| <a href="#">PREDICTED: vascular endothelial growth factor receptor 3 isoform X3 [Balaeniceps rex]</a>                                        | 47.3 | 47.3 | 100% | 8e-05 | 87% | <a href="#">XP_007169892.1</a> |
| <a href="#">PREDICTED: vascular endothelial growth factor receptor 3 isoform X2 [Balaeniceps rex]</a>                                        | 47.3 | 47.3 | 100% | 8e-05 | 87% | <a href="#">XP_007169891.1</a> |
| <a href="#">PREDICTED: vascular endothelial growth factor receptor 3 isoform X1 [Balaeniceps rex]</a>                                        | 47.3 | 47.3 | 100% | 8e-05 | 87% | <a href="#">XP_007169890.1</a> |
| <a href="#">PREDICTED: vascular endothelial growth factor receptor 3 [Galeopterus variegatus]</a>                                            | 47.3 | 47.3 | 100% | 8e-05 | 87% | <a href="#">XP_008570738.1</a> |
| <a href="#">PREDICTED: vascular endothelial growth factor receptor 3 [Mesocricetus auratus]</a>                                              | 47.3 | 47.3 | 100% | 8e-05 | 87% | <a href="#">XP_005072029.1</a> |
| <a href="#">Vascular endothelial growth factor receptor 3 [Fukomys damarensis]</a>                                                           | 47.3 | 47.3 | 100% | 8e-05 | 87% | <a href="#">KFO33406.1</a>     |
| <a href="#">PREDICTED: vascular endothelial growth factor receptor 3 [Microtus ochrogaster]</a>                                              | 47.3 | 47.3 | 100% | 8e-05 | 87% | <a href="#">XP_005350374.1</a> |
| <a href="#">PREDICTED: vascular endothelial growth factor receptor 3 [Cavia porcellus]</a>                                                   | 47.3 | 47.3 | 100% | 8e-05 | 87% | <a href="#">XP_003461142.2</a> |
| <a href="#">PREDICTED: vascular endothelial growth factor receptor 3 [Otolemur garnettii]</a>                                                | 47.3 | 47.3 | 100% | 8e-05 | 87% | <a href="#">XP_003799229.1</a> |
| <a href="#">PREDICTED: vascular endothelial growth factor receptor 3 [Sus scrofa]</a>                                                        | 47.3 | 47.3 | 100% | 8e-05 | 87% | <a href="#">XP_005661495.1</a> |
| <a href="#">PREDICTED: vascular endothelial growth factor receptor 3 [Ceratotherium simum]</a>                                               | 47.3 | 47.3 | 100% | 8e-05 | 87% | <a href="#">XP_004428735.1</a> |
| <a href="#">PREDICTED: vascular endothelial growth factor receptor 3-like [Physeter catenifer]</a>                                           | 47.3 | 47.3 | 100% | 8e-05 | 87% | <a href="#">XP_007123800.1</a> |
| <a href="#">PREDICTED: LOW QUALITY PROTEIN: vascular endothelial growth factor receptor 3 [Sus scrofa]</a>                                   | 47.3 | 47.3 | 100% | 8e-05 | 87% | <a href="#">XP_006199176.1</a> |

## Alignments

Download [GenPept](#) [Graphics](#)

[Next](#) [Previous](#) [Descriptions](#)

### Chain A, Crystal Structure Of Vegfr-3 Extracellular Domains D4-5

Sequence ID: [pdb|4BSJ|A](#) Length: 232 Number of Matches: 1

Range 1: 193 to 207 [GenPept](#) [Graphics](#)

[Next Match](#) [Previous Match](#)

| Score          | Expect | Identities | Positives   | Gaps     |
|----------------|--------|------------|-------------|----------|
| 49.8 bits(110) | 9e-06  | 14/15(93%) | 15/15(100%) | 0/15(0%) |

Query 1 KLVIQNADVVSAMYKC 15  
 KLVIQNA+VSAMYKC  
 Sbjct 193 KLVIQNADVVSAMYKC 207

#### Related Information

[Structure](#) - 3D structure displays

Download [GenPept](#) [Graphics](#)

[Next](#) [Previous](#) [Descriptions](#)

### PREDICTED: vascular endothelial growth factor receptor 3, partial [Pongo abelii]

Sequence ID: [ref|XP\\_009239654.1|](#) Length: 440 Number of Matches: 1

Range 1: 408 to 422 [GenPept](#) [Graphics](#)

[Next Match](#) [Previous Match](#)

| Score          | Expect | Identities | Positives   | Gaps     |
|----------------|--------|------------|-------------|----------|
| 49.8 bits(110) | 1e-05  | 14/15(93%) | 15/15(100%) | 0/15(0%) |

#### Related Information

[Gene](#) - associated gene details  
[Map Viewer](#) - aligned genomic context

Query 1 KLVIQNADVVSAMYKC 15  
 KLVIQNA+VSAMYKC  
 Sbjct 408 KLVIQNAVVSAMYKC 422

Download [GenPept](#) [Graphics](#)

[▼ Next](#) [▲ Previous](#) [▲ Descriptions](#)

Vascular endothelial growth factor receptor 3 precursor variant [Homo sapiens]

Sequence ID: [dbj|BAD92874.1](#) Length: 649 Number of Matches: 1

Range 1: 218 to 232 [GenPept](#) [Graphics](#)

[▼ Next Match](#) [▲ Previous Match](#)

| Score          | Expect | Identities | Positives   | Gaps     |
|----------------|--------|------------|-------------|----------|
| 49.8 bits(110) | 1e-05  | 14/15(93%) | 15/15(100%) | 0/15(0%) |

Query 1 KLVIQNADVVSAMYKC 15  
 KLVIQNA+VSAMYKC  
 Sbjct 218 KLVIQNAVVSAMYKC 232

**Related Information**

[Gene](#) - associated gene details

Download [GenPept](#) [Graphics](#)

[▼ Next](#) [▲ Previous](#) [▲ Descriptions](#)

soluble VEGFR3 variant 1 [Homo sapiens]

Sequence ID: [gb|ACF47600.1](#) Length: 765 Number of Matches: 1

Range 1: 520 to 534 [GenPept](#) [Graphics](#)

[▼ Next Match](#) [▲ Previous Match](#)

| Score          | Expect | Identities | Positives   | Gaps     |
|----------------|--------|------------|-------------|----------|
| 49.8 bits(110) | 1e-05  | 14/15(93%) | 15/15(100%) | 0/15(0%) |

Query 1 KLVIQNADVVSAMYKC 15  
 KLVIQNA+VSAMYKC  
 Sbjct 520 KLVIQNAVVSAMYKC 534

**Related Information**

[Gene](#) - associated gene details

Download [GenPept](#) [Graphics](#)

[▼ Next](#) [▲ Previous](#) [▲ Descriptions](#)

PREDICTED: vascular endothelial growth factor receptor 3-like [Leptonychotes weddellii]

Sequence ID: [ref|XP\\_006746634.1](#) Length: 968 Number of Matches: 1

Range 1: 126 to 140 [GenPept](#) [Graphics](#)

[▼ Next Match](#) [▲ Previous Match](#)

| Score          | Expect | Identities | Positives   | Gaps     |
|----------------|--------|------------|-------------|----------|
| 49.8 bits(110) | 1e-05  | 14/15(93%) | 15/15(100%) | 0/15(0%) |

Query 1 KLVIQNADVVSAMYKC 15  
 KLVIQNA+VSAMYKC  
 Sbjct 126 KLVIQNAVVSAMYKC 140

**Related Information**

[Gene](#) - associated gene details

[Map Viewer](#) - aligned genomic context

BLAST is a registered trademark of the National Library of Medicine.

NCBI/ BLAST/ blastp suite/ Formatting Results - B9E3NW7301R

Your search parameters were adjusted to search for a short input sequence.

Edit and Resubmit Save Search Strategies Formatting options Download

YouTube How to read this page Blast report description

### FLT4\_KLVIQANVVSAMYKC\_NonMod

RID [B9E3NW7301R](#) (Expires on 01-14 13:17 pm)

Query ID |cl|282674  
 Description None  
 Molecule type amino acid  
 Query Length 15

Database Name nr  
 Description All non-redundant GenBank CDS translations+PDB+SwissProt+PIR excluding environmental samples from WGS projects  
 Program BLASTP 2.2.30+ [Citation](#)

Other reports: [Search Summary](#) [Taxonomy reports](#) [Distance tree of results](#) [Multiple alignment](#)

### Graphic Summary

Show Conserved Domains

No putative conserved domains have been detected

Distribution of 100 Blast Hits on the Query Sequence

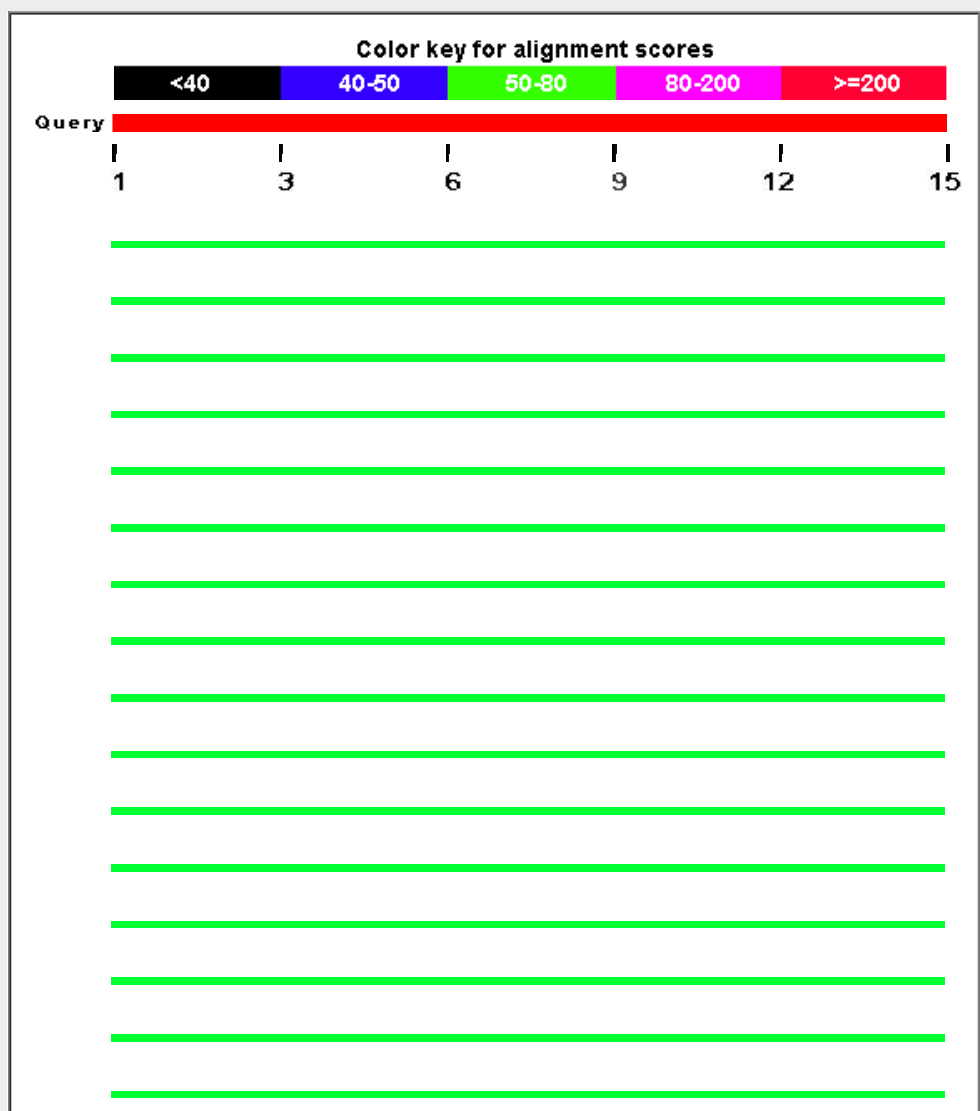

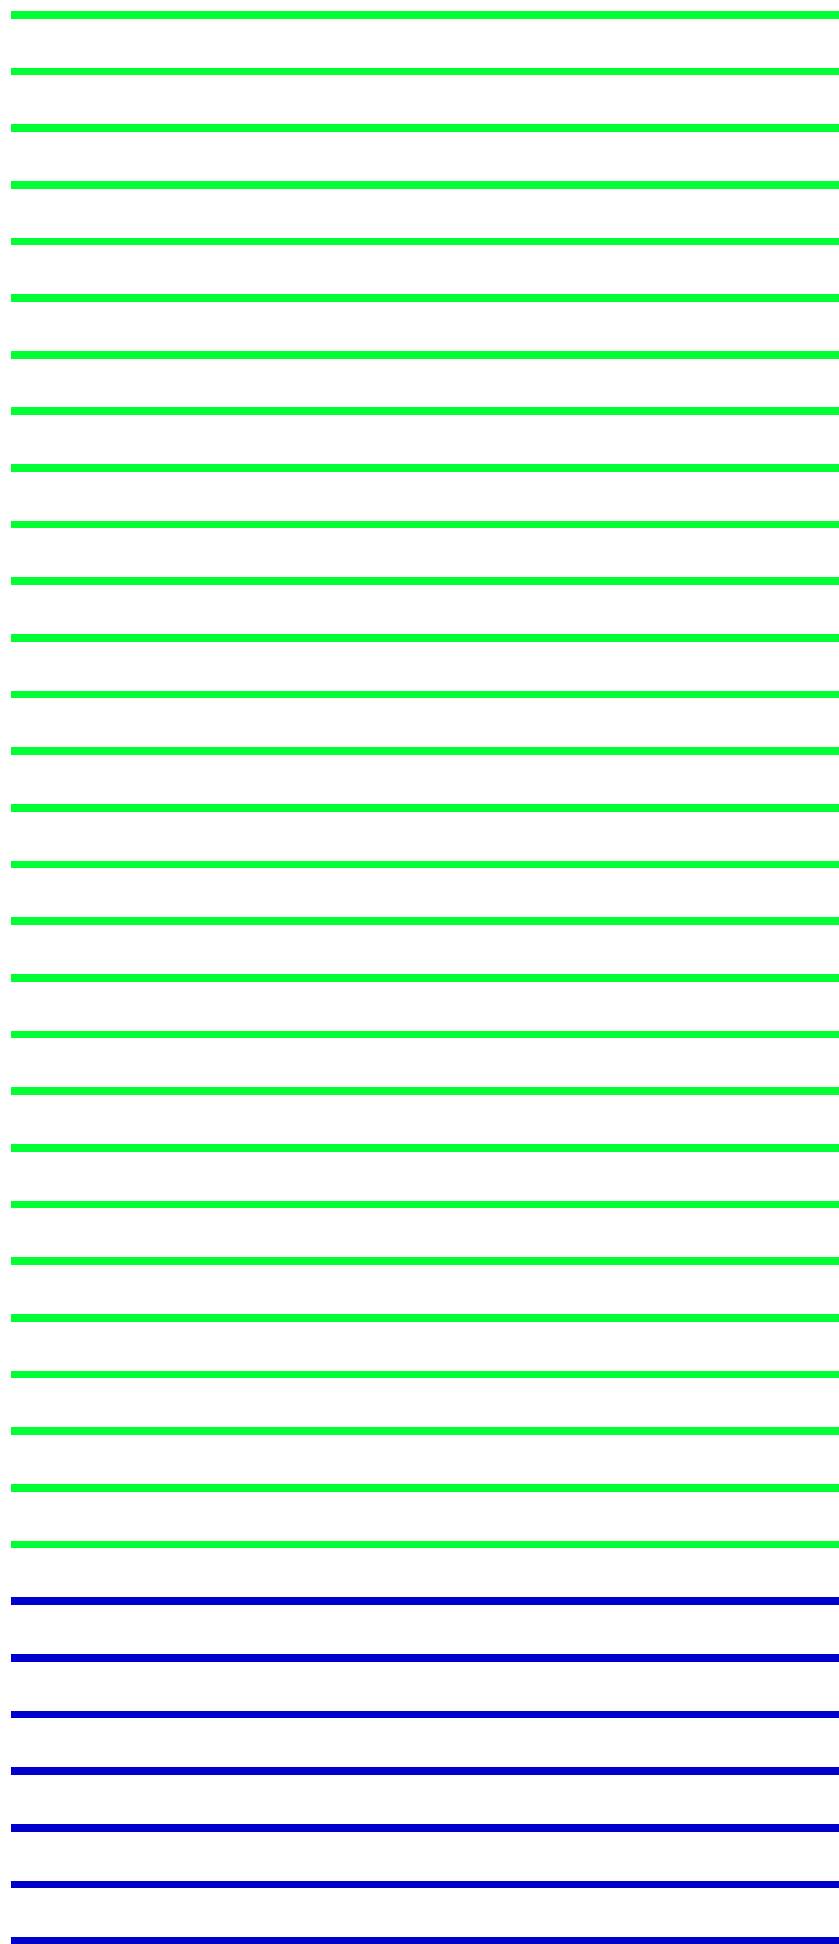

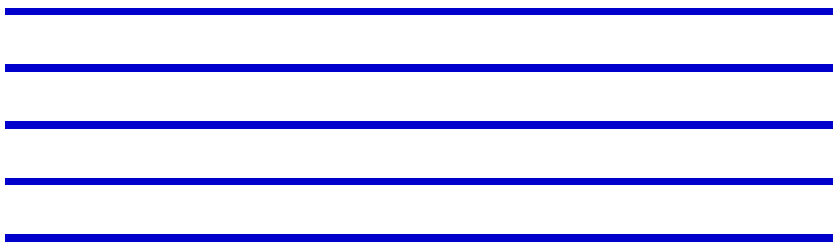

**Descriptions**

**Sequences producing significant alignments:**

Select: [All](#) [None](#) Selected:0

[Alignments](#)
[Download](#)
[GenPept](#)
[Graphics](#)
[Distance tree of results](#)
[Multiple alignment](#)

| Description                                                                          | Max score | Total score | Query cover | E value | Ident | Accession                                   |
|--------------------------------------------------------------------------------------|-----------|-------------|-------------|---------|-------|---------------------------------------------|
| <a href="#">Chain A, Crystal Structure Of Vegfr-3 Extracellular Domains D4-5 [t</a>  | 52.4      | 52.4        | 100%        | 1e-06   | 100%  | <a href="#">gij528081982 4BSJ_A</a>         |
| <a href="#">PREDICTED: vascular endothelial growth factor receptor 3 [Pongo</a>      | 52.4      | 52.4        | 100%        | 1e-06   | 100%  | <a href="#">gij686720607 XP_009239654.1</a> |
| <a href="#">Vascular endothelial growth factor receptor 3 precursor variant [Hor</a> | 52.4      | 52.4        | 100%        | 1e-06   | 100%  | <a href="#">gij62088854 BAD92874.1</a>      |
| <a href="#">soluble VEGFR3 variant 1 [Homo sapiens]</a>                              | 52.4      | 52.4        | 100%        | 1e-06   | 100%  | <a href="#">gij194318424 ACF47600.1</a>     |
| <a href="#">PREDICTED: vascular endothelial growth factor receptor 3-like [Lej</a>   | 52.4      | 52.4        | 100%        | 1e-06   | 100%  | <a href="#">gij585190706 XP_006746634.1</a> |
| <a href="#">PREDICTED: vascular endothelial growth factor receptor 3 isoform</a>     | 52.4      | 52.4        | 100%        | 1e-06   | 100%  | <a href="#">gij724882613 XP_010373329.1</a> |
| <a href="#">PREDICTED: vascular endothelial growth factor receptor 3 isoform</a>     | 52.4      | 52.4        | 100%        | 1e-06   | 100%  | <a href="#">gij694914105 XP_009448613.1</a> |
| <a href="#">PREDICTED: vascular endothelial growth factor receptor 3 isoform</a>     | 52.4      | 52.4        | 100%        | 1e-06   | 100%  | <a href="#">gij724882610 XP_010373327.1</a> |
| <a href="#">PREDICTED: LOW QUALITY PROTEIN: vascular endothelial grow</a>            | 52.4      | 52.4        | 100%        | 1e-06   | 100%  | <a href="#">gij675644040 XP_008987571.1</a> |
| <a href="#">PREDICTED: vascular endothelial growth factor receptor 3 isoform</a>     | 52.4      | 52.4        | 100%        | 1e-06   | 100%  | <a href="#">gij635125862 XP_008013748.1</a> |
| <a href="#">PREDICTED: vascular endothelial growth factor receptor 3 isoform</a>     | 52.4      | 52.4        | 100%        | 1e-06   | 100%  | <a href="#">gij725607374 XP_010330147.1</a> |
| <a href="#">PREDICTED: LOW QUALITY PROTEIN: vascular endothelial grow</a>            | 52.4      | 52.4        | 100%        | 1e-06   | 100%  | <a href="#">gij297676933 XP_002816373.1</a> |
| <a href="#">PREDICTED: vascular endothelial growth factor receptor 3 isoform</a>     | 52.4      | 52.4        | 100%        | 1e-06   | 100%  | <a href="#">gij635125860 XP_008013747.1</a> |
| <a href="#">PREDICTED: vascular endothelial growth factor receptor 3 isoform</a>     | 52.4      | 52.4        | 100%        | 1e-06   | 100%  | <a href="#">gij694914102 XP_009448612.1</a> |
| <a href="#">unnamed protein product [Homo sapiens]</a>                               | 52.4      | 52.4        | 100%        | 1e-06   | 100%  | <a href="#">gij297050 CAA49505.1</a>        |
| <a href="#">vascular endothelial growth factor receptor 3 isoform 2 precursor [H</a> | 52.4      | 52.4        | 100%        | 1e-06   | 100%  | <a href="#">gij103472027 INP_002011.2</a>   |
| <a href="#">unnamed protein product [Homo sapiens]</a>                               | 52.4      | 52.4        | 100%        | 1e-06   | 100%  | <a href="#">gij158256790 BAF84368.1</a>     |
| <a href="#">VEGFR3 short form [Homo sapiens]</a>                                     | 52.4      | 52.4        | 100%        | 1e-06   | 100%  | <a href="#">gij29691195 AAO89504.1</a>      |
| <a href="#">FTL4 [Homo sapiens]</a>                                                  | 52.4      | 52.4        | 100%        | 1e-06   | 100%  | <a href="#">gij388522 CAA48290.1</a>        |
| <a href="#">hypothetical protein PANDA_017671 [Ailuropoda melanoleuca]</a>           | 52.4      | 52.4        | 100%        | 1e-06   | 100%  | <a href="#">gij281337917 EFB13501.1</a>     |
| <a href="#">PREDICTED: vascular endothelial growth factor receptor 3 isoform</a>     | 52.4      | 52.4        | 100%        | 1e-06   | 100%  | <a href="#">gij694914100 XP_009448611.1</a> |
| <a href="#">PREDICTED: vascular endothelial growth factor receptor 3 isoform</a>     | 52.4      | 52.4        | 100%        | 1e-06   | 100%  | <a href="#">gij694914098 XP_009448610.1</a> |
| <a href="#">PREDICTED: vascular endothelial growth factor receptor 3 isoform</a>     | 52.4      | 52.4        | 100%        | 1e-06   | 100%  | <a href="#">gij724882607 XP_010373326.1</a> |
| <a href="#">PREDICTED: vascular endothelial growth factor receptor 3-like [Ma</a>    | 52.4      | 52.4        | 100%        | 1e-06   | 100%  | <a href="#">gij297295921 XP_001107118.2</a> |
| <a href="#">PREDICTED: vascular endothelial growth factor receptor 3 [Gorilla</a>    | 52.4      | 52.4        | 100%        | 1e-06   | 100%  | <a href="#">gij426351351 XP_004043215.1</a> |
| <a href="#">PREDICTED: vascular endothelial growth factor receptor 3 isoform</a>     | 52.4      | 52.4        | 100%        | 1e-06   | 100%  | <a href="#">gij511878159 XP_004759037.1</a> |
| <a href="#">PREDICTED: vascular endothelial growth factor receptor 3 [Ochoto</a>     | 52.4      | 52.4        | 100%        | 1e-06   | 100%  | <a href="#">gij504181140 XP_004599097.1</a> |
| <a href="#">PREDICTED: vascular endothelial growth factor receptor 3 isoform</a>     | 52.4      | 52.4        | 100%        | 1e-06   | 100%  | <a href="#">gij635125858 XP_008013746.1</a> |

|                                                                                                              |      |      |      |       |      |                                             |
|--------------------------------------------------------------------------------------------------------------|------|------|------|-------|------|---------------------------------------------|
| <a href="#">PREDICTED: vascular endothelial growth factor receptor 3 [Macaca mulatta]</a>                    | 52.4 | 52.4 | 100% | 1e-06 | 100% | <a href="#">gij544441629 XP_005558869.1</a> |
| <a href="#">PREDICTED: vascular endothelial growth factor receptor 3 isoform 1 [Macaca mulatta]</a>          | 52.4 | 52.4 | 100% | 1e-06 | 100% | <a href="#">gij403307013 XP_003944009.1</a> |
| <a href="#">PREDICTED: LOW QUALITY PROTEIN: vascular endothelial growth factor receptor 3 [Homo sapiens]</a> | 52.4 | 52.4 | 100% | 1e-06 | 100% | <a href="#">gij402873672 XP_003900691.1</a> |
| <a href="#">VEGFR3 long form [Homo sapiens]</a>                                                              | 52.4 | 52.4 | 100% | 1e-06 | 100% | <a href="#">gij29691197 AAO89505.1</a>      |
| <a href="#">PREDICTED: vascular endothelial growth factor receptor 3 isoform 1 [Macaca mulatta]</a>          | 52.4 | 52.4 | 100% | 1e-06 | 100% | <a href="#">gij441595610 XP_003279615.2</a> |
| <a href="#">PREDICTED: vascular endothelial growth factor receptor 3 isoform 1 [Macaca mulatta]</a>          | 52.4 | 52.4 | 100% | 1e-06 | 100% | <a href="#">gij410040129 XP_518160.4</a>    |
| <a href="#">vascular endothelial growth factor receptor 3 isoform 1 precursor [Homo sapiens]</a>             | 52.4 | 52.4 | 100% | 1e-06 | 100% | <a href="#">gij104294888 NP_891555.2</a>    |
| <a href="#">PREDICTED: vascular endothelial growth factor receptor 3 isoform 1 [Macaca mulatta]</a>          | 52.4 | 52.4 | 100% | 1e-06 | 100% | <a href="#">gij511878157 XP_004759036.1</a> |
| <a href="#">PREDICTED: vascular endothelial growth factor receptor 3 isoform 1 [Macaca mulatta]</a>          | 52.4 | 52.4 | 100% | 1e-06 | 100% | <a href="#">gij511878155 XP_004759035.1</a> |
| <a href="#">PREDICTED: vascular endothelial growth factor receptor 3 isoform 1 [Macaca mulatta]</a>          | 52.4 | 52.4 | 100% | 1e-06 | 100% | <a href="#">gij694914096 XP_009448609.1</a> |
| <a href="#">PREDICTED: vascular endothelial growth factor receptor 3 [Ursus arctos]</a>                      | 52.4 | 52.4 | 100% | 1e-06 | 100% | <a href="#">gij671033898 XP_008707769.1</a> |
| <a href="#">PREDICTED: LOW QUALITY PROTEIN: vascular endothelial growth factor receptor 3 [Homo sapiens]</a> | 52.4 | 52.4 | 100% | 1e-06 | 100% | <a href="#">gij675687833 XP_008955193.1</a> |
| <a href="#">PREDICTED: vascular endothelial growth factor receptor 3-like [Ailuropus melanoleucus]</a>       | 52.4 | 52.4 | 100% | 1e-06 | 100% | <a href="#">gij301784839 XP_002927834.1</a> |
| <a href="#">PREDICTED: vascular endothelial growth factor receptor 3 isoform 1 [Macaca mulatta]</a>          | 52.4 | 52.4 | 100% | 1e-06 | 100% | <a href="#">gij694914094 XP_009448608.1</a> |
| <a href="#">PREDICTED: vascular endothelial growth factor receptor 3 [Odobenus rosmarus]</a>                 | 52.4 | 52.4 | 100% | 1e-06 | 100% | <a href="#">gij472386779 XP_004412739.1</a> |
| <a href="#">PREDICTED: vascular endothelial growth factor receptor 3 [Erinaceus europaeus]</a>               | 52.4 | 52.4 | 100% | 1e-06 | 100% | <a href="#">gij617620255 XP_007527230.1</a> |
| <a href="#">PREDICTED: vascular endothelial growth factor receptor 3-like [Tupaia chrysochloris]</a>         | 49.8 | 49.8 | 100% | 1e-05 | 93%  | <a href="#">gij640780561 XP_008072035.1</a> |
| <a href="#">rCG35022, isoform CRA_a [Rattus norvegicus]</a>                                                  | 49.8 | 49.8 | 100% | 1e-05 | 93%  | <a href="#">gij149052407 EDM04224.1</a>     |
| <a href="#">Vascular endothelial growth factor receptor 3 [Pteropus alecto]</a>                              | 49.8 | 49.8 | 100% | 1e-05 | 93%  | <a href="#">gij431892755 ELK03188.1</a>     |
| <a href="#">PREDICTED: vascular endothelial growth factor receptor 3-like [Myotis myotis]</a>                | 49.8 | 49.8 | 100% | 1e-05 | 93%  | <a href="#">gij558217352 XP_006108959.1</a> |
| <a href="#">rCG35022, isoform CRA_c [Rattus norvegicus]</a>                                                  | 49.8 | 49.8 | 100% | 1e-05 | 93%  | <a href="#">gij149052409 EDM04226.1</a>     |
| <a href="#">receptor tyrosine kinase VEGFR-3kt [Rattus norvegicus]</a>                                       | 49.8 | 49.8 | 100% | 1e-05 | 93%  | <a href="#">gij16033530 AAL13270.1</a>      |
| <a href="#">PREDICTED: LOW QUALITY PROTEIN: vascular endothelial growth factor receptor 3 [Homo sapiens]</a> | 49.8 | 49.8 | 100% | 1e-05 | 93%  | <a href="#">gij731455917 XP_010592785.1</a> |
| <a href="#">vascular endothelial growth factor receptor [Cricetulus griseus]</a>                             | 49.8 | 49.8 | 100% | 1e-05 | 93%  | <a href="#">gij537140755 ERE67633.1</a>     |
| <a href="#">PREDICTED: vascular endothelial growth factor receptor 3 isoform 1 [Macaca mulatta]</a>          | 49.8 | 49.8 | 100% | 1e-05 | 93%  | <a href="#">gij591313353 XP_007083127.1</a> |
| <a href="#">PREDICTED: vascular endothelial growth factor receptor 3 isoform 1 [Macaca mulatta]</a>          | 49.8 | 49.8 | 100% | 1e-05 | 93%  | <a href="#">gij586974127 XP_006927563.1</a> |
| <a href="#">Vascular endothelial growth factor receptor 3 [Cricetulus griseus]</a>                           | 49.8 | 49.8 | 100% | 1e-05 | 93%  | <a href="#">gij344246770 EGW02874.1</a>     |
| <a href="#">PREDICTED: vascular endothelial growth factor receptor 3 [Myotis myotis]</a>                     | 49.8 | 49.8 | 100% | 1e-05 | 93%  | <a href="#">gij554540751 XP_005865016.1</a> |
| <a href="#">PREDICTED: vascular endothelial growth factor receptor 3 [Myotis myotis]</a>                     | 49.8 | 49.8 | 100% | 1e-05 | 93%  | <a href="#">gij584062112 XP_006775477.1</a> |
| <a href="#">PREDICTED: vascular endothelial growth factor receptor 3 [Pteropus alecto]</a>                   | 49.8 | 49.8 | 100% | 1e-05 | 93%  | <a href="#">gij586536882 XP_006923300.1</a> |
| <a href="#">FMS-like tyrosine kinase 4 [Mus musculus]</a>                                                    | 49.8 | 49.8 | 100% | 1e-05 | 93%  | <a href="#">gij148701798 EDL33745.1</a>     |
| <a href="#">PREDICTED: LOW QUALITY PROTEIN: vascular endothelial growth factor receptor 3 [Homo sapiens]</a> | 49.8 | 49.8 | 100% | 1e-05 | 93%  | <a href="#">gij625205554 XP_007644094.1</a> |
| <a href="#">PREDICTED: vascular endothelial growth factor receptor 3 isoform 1 [Macaca mulatta]</a>          | 49.8 | 49.8 | 100% | 1e-05 | 93%  | <a href="#">gij586974125 XP_006927562.1</a> |
| <a href="#">PREDICTED: vascular endothelial growth factor receptor 3 [Camelus ferus]</a>                     | 49.8 | 49.8 | 100% | 1e-05 | 93%  | <a href="#">gij560898747 XP_006175816.1</a> |
| <a href="#">PREDICTED: vascular endothelial growth factor receptor 3 isoform 1 [Macaca mulatta]</a>          | 49.8 | 49.8 | 100% | 1e-05 | 93%  | <a href="#">gij591313351 XP_007083126.1</a> |
| <a href="#">PREDICTED: vascular endothelial growth factor receptor 3 isoform 1 [Macaca mulatta]</a>          | 49.8 | 49.8 | 100% | 1e-05 | 93%  | <a href="#">gij591313349 XP_007083125.1</a> |
| <a href="#">fms-related tyrosine kinase 4 isoform 1-like protein [Camelus ferus]</a>                         | 49.8 | 49.8 | 100% | 1e-05 | 93%  | <a href="#">gij528768016 EPY87675.1</a>     |
| <a href="#">PREDICTED: vascular endothelial growth factor receptor 3 isoform 1 [Macaca mulatta]</a>          | 49.8 | 49.8 | 100% | 1e-05 | 93%  | <a href="#">gij591313347 XP_007083124.1</a> |
| <a href="#">PREDICTED: LOW QUALITY PROTEIN: vascular endothelial growth factor receptor 3 [Homo sapiens]</a> | 49.8 | 49.8 | 100% | 1e-05 | 93%  | <a href="#">gij655883932 XP_002721370.2</a> |
| <a href="#">PREDICTED: vascular endothelial growth factor receptor 3 isoform 1 [Macaca mulatta]</a>          | 49.8 | 49.8 | 100% | 1e-05 | 93%  | <a href="#">gij731215213 XP_010622027.1</a> |
| <a href="#">PREDICTED: vascular endothelial growth factor receptor 3 isoform 1 [Macaca mulatta]</a>          | 49.8 | 49.8 | 100% | 1e-05 | 93%  | <a href="#">gij731215211 XP_010622026.1</a> |
| <a href="#">PREDICTED: vascular endothelial growth factor receptor 3 [Oryzomys latipes]</a>                  | 49.8 | 49.8 | 100% | 1e-05 | 93%  | <a href="#">gij634883366 XP_007951628.1</a> |
| <a href="#">PREDICTED: vascular endothelial growth factor receptor 3 [Jaculus jaculus]</a>                   | 49.8 | 49.8 | 100% | 1e-05 | 93%  | <a href="#">gij507565865 XP_004666583.1</a> |
| <a href="#">PREDICTED: vascular endothelial growth factor receptor 3 [Orcinus orca]</a>                      | 49.8 | 49.8 | 100% | 1e-05 | 93%  | <a href="#">gij466079414 XP_004284117.1</a> |
| <a href="#">PREDICTED: vascular endothelial growth factor receptor 3 [Nannospiza nesiotis]</a>               | 49.8 | 49.8 | 100% | 1e-05 | 93%  | <a href="#">gij674085341 XP_008850448.1</a> |

|                                                                                     |      |      |      |       |     |                                             |
|-------------------------------------------------------------------------------------|------|------|------|-------|-----|---------------------------------------------|
| <a href="#">PREDICTED: vascular endothelial growth factor receptor 3 [Eptesic</a>   | 49.8 | 49.8 | 100% | 1e-05 | 93% | <a href="#">gil641733026 XP_008156907.1</a> |
| <a href="#">PREDICTED: vascular endothelial growth factor receptor 3 [Echino</a>    | 49.8 | 49.8 | 100% | 1e-05 | 93% | <a href="#">gil507623209 XP_004697235.1</a> |
| <a href="#">PREDICTED: vascular endothelial growth factor receptor 3-like [Tu</a>   | 49.8 | 49.8 | 100% | 1e-05 | 93% | <a href="#">gil470634767 XP_004322923.1</a> |
| <a href="#">rCG35022_isoform CRA_b [Rattus norvegicus]</a>                          | 49.8 | 49.8 | 100% | 1e-05 | 93% | <a href="#">gil149052408 EDM04225.1</a>     |
| <a href="#">vascular endothelial growth factor receptor 3 precursor [Rattus nor</a> | 49.8 | 49.8 | 100% | 1e-05 | 93% | <a href="#">gil16758466 NP_446104.1</a>     |
| <a href="#">vascular endothelial growth factor receptor 3 precursor [Mus muscu</a>  | 49.8 | 49.8 | 100% | 1e-05 | 93% | <a href="#">gil6679813 NP_032055.1</a>      |
| <a href="#">PREDICTED: vascular endothelial growth factor receptor 3 [Ictidom</a>   | 49.8 | 49.8 | 100% | 1e-05 | 93% | <a href="#">gil532109344 XP_005339388.1</a> |
| <a href="#">PREDICTED: vascular endothelial growth factor receptor 3 isoform</a>    | 49.8 | 49.8 | 100% | 1e-05 | 93% | <a href="#">gil586974123 XP_006927561.1</a> |
| <a href="#">PREDICTED: vascular endothelial growth factor receptor 3 isoform</a>    | 49.8 | 49.8 | 100% | 1e-05 | 93% | <a href="#">gil586974121 XP_006927560.1</a> |
| <a href="#">PREDICTED: vascular endothelial growth factor receptor 3 [Canis l</a>   | 49.8 | 49.8 | 100% | 1e-05 | 93% | <a href="#">gil545516115 XP_005626341.1</a> |
| <a href="#">PREDICTED: vascular endothelial growth factor receptor 3 isoform</a>    | 49.8 | 49.8 | 100% | 1e-05 | 93% | <a href="#">gil594632793 XP_007169893.1</a> |
| <a href="#">PREDICTED: vascular endothelial growth factor receptor 3 isoform</a>    | 49.8 | 49.8 | 100% | 1e-05 | 93% | <a href="#">gil594632791 XP_007169892.1</a> |
| <a href="#">PREDICTED: vascular endothelial growth factor receptor 3 isoform</a>    | 49.8 | 49.8 | 100% | 1e-05 | 93% | <a href="#">gil594632789 XP_007169891.1</a> |
| <a href="#">PREDICTED: vascular endothelial growth factor receptor 3 isoform</a>    | 49.8 | 49.8 | 100% | 1e-05 | 93% | <a href="#">gil594632787 XP_007169890.1</a> |
| <a href="#">PREDICTED: vascular endothelial growth factor receptor 3 [Galeop</a>    | 49.8 | 49.8 | 100% | 1e-05 | 93% | <a href="#">gil667270562 XP_008570738.1</a> |
| <a href="#">PREDICTED: vascular endothelial growth factor receptor 3 [Mesocr</a>    | 49.8 | 49.8 | 100% | 1e-05 | 93% | <a href="#">gil524939685 XP_005072029.1</a> |
| <a href="#">Vascular endothelial growth factor receptor 3 [Fukomys damarensis</a>   | 49.8 | 49.8 | 100% | 1e-05 | 93% | <a href="#">gil676279442 KFO33406.1</a>     |
| <a href="#">PREDICTED: vascular endothelial growth factor receptor 3 [Microtu</a>   | 49.8 | 49.8 | 100% | 1e-05 | 93% | <a href="#">gil532013185 XP_005350374.1</a> |
| <a href="#">PREDICTED: vascular endothelial growth factor receptor 3 [Cavia r</a>   | 49.8 | 49.8 | 100% | 1e-05 | 93% | <a href="#">gil514443259 XP_003461142.2</a> |
| <a href="#">PREDICTED: vascular endothelial growth factor receptor 3 [Otolem</a>    | 49.8 | 49.8 | 100% | 1e-05 | 93% | <a href="#">gil395853466 XP_003799229.1</a> |
| <a href="#">PREDICTED: vascular endothelial growth factor receptor 3 [Sus sci</a>   | 49.8 | 49.8 | 100% | 1e-05 | 93% | <a href="#">gil545811050 XP_005661495.1</a> |
| <a href="#">PREDICTED: vascular endothelial growth factor receptor 3 [Cerato</a>    | 49.8 | 49.8 | 100% | 1e-05 | 93% | <a href="#">gil478508908 XP_004428735.1</a> |
| <a href="#">PREDICTED: vascular endothelial growth factor receptor 3-like [Ph</a>   | 49.8 | 49.8 | 100% | 1e-05 | 93% | <a href="#">gil593770855 XP_007123800.1</a> |
| <a href="#">PREDICTED: LOW QUALITY PROTEIN: vascular endothelial grow</a>           | 49.8 | 49.8 | 100% | 1e-05 | 93% | <a href="#">gil560953322 XP_006199176.1</a> |
| <a href="#">PREDICTED: vascular endothelial growth factor receptor 3 isoform</a>    | 49.8 | 49.8 | 100% | 1e-05 | 93% | <a href="#">gil625276407 XP_007629826.1</a> |
| <a href="#">PREDICTED: vascular endothelial growth factor receptor 3 [Trichec</a>   | 49.8 | 49.8 | 100% | 1e-05 | 93% | <a href="#">gil471411380 XP_004387243.1</a> |
| <a href="#">PREDICTED: vascular endothelial growth factor receptor 3 [Condy</a>     | 49.8 | 49.8 | 100% | 1e-05 | 93% | <a href="#">gil507979923 XP_004693728.1</a> |

## Alignments

Download [GenPept](#) [Graphics](#)

Next Previous Descriptions

Chain A, Crystal Structure Of Vegfr-3 Extracellular Domains D4-5

Sequence ID: [gil528081982|pdb|4BSJ|A](#) Length: 232 Number of Matches: 1

Range 1: 193 to 207 [GenPept](#) [Graphics](#)

Next Match Previous Match

| Score          | Expect | Identities  | Positives   | Gaps     |
|----------------|--------|-------------|-------------|----------|
| 52.4 bits(116) | 1e-06  | 15/15(100%) | 15/15(100%) | 0/15(0%) |

Query 1 KLVIQNANVSAMYKC 15  
 Sbjct 193 KLVIQNANVSAMYKC 207

### Related Information

[Structure](#) - 3D structure displays

Download [GenPept](#) [Graphics](#)

Next Previous Descriptions

PREDICTED: vascular endothelial growth factor receptor 3, partial [Pongo abelii]

Sequence ID: [gil686720607|ref|XP\\_009239654.1](#) Length: 440 Number of Matches: 1

Range 1: 408 to 422 [GenPept](#) [Graphics](#)

Next Match Previous Match

| Score          | Expect | Identities  | Positives   | Gaps     |
|----------------|--------|-------------|-------------|----------|
| 52.4 bits(116) | 1e-06  | 15/15(100%) | 15/15(100%) | 0/15(0%) |

Query 1 KLVIQNANVSAMYKC 15

### Related Information

[Gene](#) - associated gene details  
[Map Viewer](#) - aligned genomic context

Sbjct 408 KLVIQNAVVSAMYKC 422

[Download](#) [GenPept](#) [Graphics](#) [Next](#) [Previous](#) [Descriptions](#)

Vascular endothelial growth factor receptor 3 precursor variant [Homo sapiens]

Sequence ID: [gi|62088854|dbj|BAD92874.1](#) Length: 649 Number of Matches: 1

Range 1: 218 to 232 [GenPept](#) [Graphics](#) [Next Match](#) [Previous Match](#)

| Score          | Expect | Identities  | Positives   | Gaps     |
|----------------|--------|-------------|-------------|----------|
| 52.4 bits(116) | 1e-06  | 15/15(100%) | 15/15(100%) | 0/15(0%) |

Query 1 KLVIQNAVVSAMYKC 15  
 KLVIQNAVVSAMYKC  
 Sbjct 218 KLVIQNAVVSAMYKC 232

**Related Information**  
[Gene](#) - associated gene details

[Download](#) [GenPept](#) [Graphics](#) [Next](#) [Previous](#) [Descriptions](#)

soluble VEGFR3 variant 1 [Homo sapiens]

Sequence ID: [gi|194318424|gb|ACF47600.1](#) Length: 765 Number of Matches: 1

Range 1: 520 to 534 [GenPept](#) [Graphics](#) [Next Match](#) [Previous Match](#)

| Score          | Expect | Identities  | Positives   | Gaps     |
|----------------|--------|-------------|-------------|----------|
| 52.4 bits(116) | 1e-06  | 15/15(100%) | 15/15(100%) | 0/15(0%) |

Query 1 KLVIQNAVVSAMYKC 15  
 KLVIQNAVVSAMYKC  
 Sbjct 520 KLVIQNAVVSAMYKC 534

**Related Information**  
[Gene](#) - associated gene details

[Download](#) [GenPept](#) [Graphics](#) [Next](#) [Previous](#) [Descriptions](#)

PREDICTED: vascular endothelial growth factor receptor 3-like [Leptonychotes weddellii]

Sequence ID: [gi|585190706|ref|XP\\_006746634.1](#) Length: 968 Number of Matches: 1

Range 1: 126 to 140 [GenPept](#) [Graphics](#) [Next Match](#) [Previous Match](#)

| Score          | Expect | Identities  | Positives   | Gaps     |
|----------------|--------|-------------|-------------|----------|
| 52.4 bits(116) | 1e-06  | 15/15(100%) | 15/15(100%) | 0/15(0%) |

Query 1 KLVIQNAVVSAMYKC 15  
 KLVIQNAVVSAMYKC  
 Sbjct 126 KLVIQNAVVSAMYKC 140

**Related Information**  
[Gene](#) - associated gene details  
[Map Viewer](#) - aligned genomic context

BLAST is a registered trademark of the National Library of Medicine.



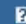

NCBI/ BLAST/ blastp suite/ Formatting Results - BVDXS4GB01R

Your search parameters were adjusted to search for a short input sequence.

[Edit and Resubmit](#) [Save Search Strategies](#) [Formatting options](#) [Download](#)

[YouTube](#) [How to read this page](#) [Blast report description](#)

GOLM1\_KAVLVNDITTGERL\_Mod

RID [BVDXS4GB01R](#) (Expires on 01-21 09:04 am)

Query ID |cl|335339  
Description None  
Molecule type amino acid  
Query Length 14

Database Name nr  
Description All non-redundant GenBank CDS translations+PDB+SwissProt+PIR+PRF excluding environmental samples from WGS projects  
Program BLASTP 2.2.30+ [Citation](#)

Other reports: [Search Summary](#) [Taxonomy reports](#) [Distance tree of results](#) [Multiple alignment](#)

Graphic Summary

Show Conserved Domains

No putative conserved domains have been detected

Distribution of 100 Blast Hits on the Query Sequence



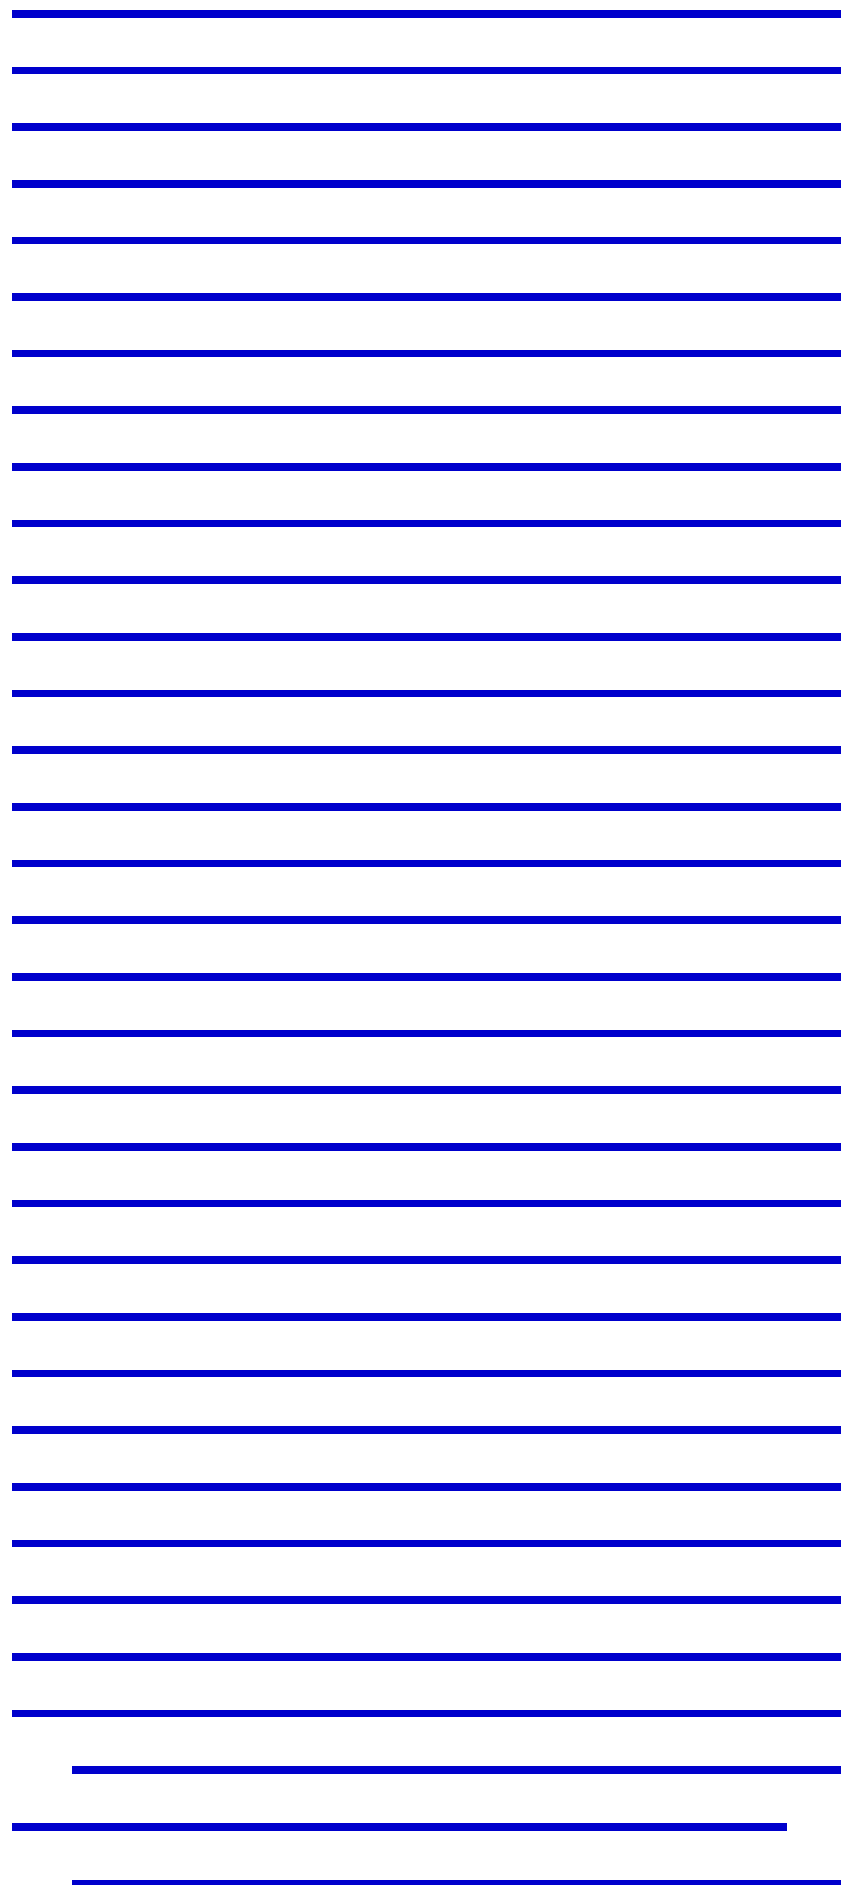

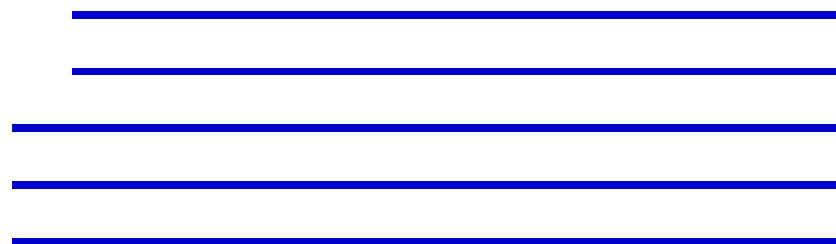

## Descriptions

### Sequences producing significant alignments:

Select: [All](#) [None](#) Selected:0

[Alignments](#)
[Download](#)
[GenPept](#)
[Graphics](#)
[Distance tree of results](#)
[Multiple alignment](#)


| Description                                                                              | Max score | Total score | Query cover | E value | Ident | Accession                      |
|------------------------------------------------------------------------------------------|-----------|-------------|-------------|---------|-------|--------------------------------|
| <a href="#">PREDICTED: uncharacterized protein LOC104673793 [Rhinopithecus roxellae]</a> | 43.5      | 43.5        | 100%        | 0.001   | 93%   | <a href="#">XP_010376237.1</a> |
| <a href="#">PREDICTED: Golgi membrane protein 1 [Camelus ferus]</a>                      | 43.5      | 43.5        | 100%        | 0.001   | 93%   | <a href="#">XP_006187389.1</a> |
| <a href="#">PREDICTED: Golgi membrane protein 1 [Camelus dromedarius]</a>                | 43.5      | 43.5        | 100%        | 0.001   | 93%   | <a href="#">XP_010973186.1</a> |
| <a href="#">PREDICTED: Golgi membrane protein 1 [Ursus maritimus]</a>                    | 43.5      | 43.5        | 100%        | 0.001   | 93%   | <a href="#">XP_008694047.1</a> |
| <a href="#">PREDICTED: Golgi membrane protein 1 isoform X5 [Pan paniscus]</a>            | 43.5      | 43.5        | 100%        | 0.001   | 93%   | <a href="#">XP_008959606.1</a> |
| <a href="#">PREDICTED: Golgi membrane protein 1 isoform X4 [Pan paniscus]</a>            | 43.5      | 43.5        | 100%        | 0.001   | 93%   | <a href="#">XP_008959605.1</a> |
| <a href="#">PREDICTED: Golgi membrane protein 1 isoform X5 [Bubalus bubalis]</a>         | 43.5      | 43.5        | 100%        | 0.001   | 93%   | <a href="#">XP_006066905.1</a> |
| <a href="#">PREDICTED: Golgi membrane protein 1 isoform X3 [Bos taurus]</a>              | 43.5      | 43.5        | 100%        | 0.001   | 93%   | <a href="#">XP_010806444.1</a> |
| <a href="#">PREDICTED: Golgi membrane protein 1 isoform X3 [Tarsius syrichta]</a>        | 43.5      | 43.5        | 100%        | 0.001   | 93%   | <a href="#">XP_008069750.1</a> |
| <a href="#">PREDICTED: Golgi membrane protein 1 isoform X4 [Bubalus bubalis]</a>         | 43.5      | 43.5        | 100%        | 0.001   | 93%   | <a href="#">XP_006066904.1</a> |
| <a href="#">PREDICTED: Golgi membrane protein 1 isoform X2 [Bos taurus]</a>              | 43.5      | 43.5        | 100%        | 0.001   | 93%   | <a href="#">XP_010806443.1</a> |
| <a href="#">PREDICTED: Golgi membrane protein 1 isoform X3 [Pan paniscus]</a>            | 43.5      | 43.5        | 100%        | 0.001   | 93%   | <a href="#">XP_008959604.1</a> |
| <a href="#">PREDICTED: Golgi membrane protein 1 isoform X2 [Tarsius syrichta]</a>        | 43.5      | 43.5        | 100%        | 0.001   | 93%   | <a href="#">XP_008069749.1</a> |
| <a href="#">PREDICTED: Golgi membrane protein 1 [Chrysochloris asiatica]</a>             | 43.5      | 43.5        | 100%        | 0.001   | 93%   | <a href="#">XP_006877790.1</a> |
| <a href="#">PREDICTED: Golgi membrane protein 1 isoform 2 [Nomascus leucogenys]</a>      | 43.5      | 43.5        | 100%        | 0.001   | 93%   | <a href="#">XP_004087075.1</a> |
| <a href="#">golgi membrane protein GP73 [Homo sapiens]</a>                               | 43.5      | 43.5        | 100%        | 0.001   | 93%   | <a href="#">AAF44663.1</a>     |
| <a href="#">GOLPH2 [Homo sapiens]</a>                                                    | 43.5      | 43.5        | 100%        | 0.001   | 93%   | <a href="#">CAG33482.1</a>     |
| <a href="#">PREDICTED: Golgi membrane protein 1 [Camelus bactrianus]</a>                 | 43.5      | 43.5        | 100%        | 0.001   | 93%   | <a href="#">XP_010965740.1</a> |
| <a href="#">Golgi membrane protein 1 [Homo sapiens]</a>                                  | 43.5      | 43.5        | 100%        | 0.001   | 93%   | <a href="#">NP_057632.2</a>    |
| <a href="#">PREDICTED: Golgi membrane protein 1 [Pantholops hodgsonii]</a>               | 43.5      | 43.5        | 100%        | 0.001   | 93%   | <a href="#">XP_005971557.1</a> |
| <a href="#">PREDICTED: Golgi membrane protein 1 [Ceratotherium simum simum]</a>          | 43.5      | 43.5        | 100%        | 0.001   | 93%   | <a href="#">XP_004440862.1</a> |
| <a href="#">PREDICTED: Golgi membrane protein 1 [Callithrix jacchus]</a>                 | 43.5      | 43.5        | 100%        | 0.001   | 93%   | <a href="#">XP_002742818.2</a> |
| <a href="#">PREDICTED: Golgi membrane protein 1 isoform X1 [Tarsius syrichta]</a>        | 43.5      | 43.5        | 100%        | 0.001   | 93%   | <a href="#">XP_008069747.1</a> |
| <a href="#">PREDICTED: Golgi membrane protein 1 [Odobenus rosmarus divergens]</a>        | 43.5      | 43.5        | 100%        | 0.001   | 93%   | <a href="#">XP_004407641.1</a> |
| <a href="#">PREDICTED: Golgi membrane protein 1 [Chlorocebus sabaeus]</a>                | 43.5      | 43.5        | 100%        | 0.001   | 93%   | <a href="#">XP_007967835.1</a> |
| <a href="#">PREDICTED: Golgi membrane protein 1 [Papio anubis]</a>                       | 43.5      | 43.5        | 100%        | 0.001   | 93%   | <a href="#">XP_003911922.1</a> |
| <a href="#">PREDICTED: Golgi membrane protein 1 isoform X2 [Pan paniscus]</a>            | 43.5      | 43.5        | 100%        | 0.001   | 93%   | <a href="#">XP_003809220.1</a> |
| <a href="#">PREDICTED: Golgi membrane protein 1 isoform X1 [Bubalus bubalis]</a>         | 43.5      | 43.5        | 100%        | 0.001   | 93%   | <a href="#">XP_006066901.1</a> |
| <a href="#">PREDICTED: Golgi membrane protein 1 [Bos mutus]</a>                          | 43.5      | 43.5        | 100%        | 0.001   | 93%   | <a href="#">XP_005900661.1</a> |

|                                                                                                  |      |      |      |       |     |                                |
|--------------------------------------------------------------------------------------------------|------|------|------|-------|-----|--------------------------------|
| <a href="#">PREDICTED: Golgi membrane protein 1 isoform X2 [Capra hircus]</a>                    | 43.5 | 43.5 | 100% | 0.001 | 93% | <a href="#">XP_005684184.1</a> |
| <a href="#">PREDICTED: Golgi membrane protein 1 [Ovis aries]</a>                                 | 43.5 | 43.5 | 100% | 0.001 | 93% | <a href="#">XP_004004148.1</a> |
| <a href="#">Golgi membrane protein 1 [Bos taurus]</a>                                            | 43.5 | 43.5 | 100% | 0.001 | 93% | <a href="#">NP_001179392.1</a> |
| <a href="#">PREDICTED: Golgi membrane protein 1 [Orycteropus afer afer]</a>                      | 43.5 | 43.5 | 100% | 0.001 | 93% | <a href="#">XP_007937219.1</a> |
| <a href="#">PREDICTED: Golgi membrane protein 1 isoform X1 [Canis lupus familiaris]</a>          | 43.5 | 43.5 | 100% | 0.001 | 93% | <a href="#">XP_005615865.1</a> |
| <a href="#">PREDICTED: LOW QUALITY PROTEIN: Golgi membrane protein 1 [Myotis d]</a>              | 43.5 | 43.5 | 100% | 0.001 | 93% | <a href="#">XP_006759551.1</a> |
| <a href="#">PREDICTED: Golgi membrane protein 1 isoform X2 [Canis lupus familiaris]</a>          | 43.5 | 43.5 | 100% | 0.001 | 93% | <a href="#">XP_533506.4</a>    |
| <a href="#">PREDICTED: Golgi membrane protein 1 isoform X1 [Capra hircus]</a>                    | 43.5 | 43.5 | 100% | 0.001 | 93% | <a href="#">XP_005684183.1</a> |
| <a href="#">PREDICTED: Golgi membrane protein 1 [Sus scrofa]</a>                                 | 43.5 | 43.5 | 100% | 0.001 | 93% | <a href="#">XP_005656864.1</a> |
| <a href="#">PREDICTED: Golgi membrane protein 1 isoform X2 [Saimiri boliviensis boliviensis]</a> | 43.5 | 43.5 | 100% | 0.001 | 93% | <a href="#">XP_010350172.1</a> |
| <a href="#">PREDICTED: Golgi membrane protein 1 isoform X1 [Saimiri boliviensis boliviensis]</a> | 43.5 | 43.5 | 100% | 0.001 | 93% | <a href="#">XP_010350171.1</a> |
| <a href="#">PREDICTED: Golgi membrane protein 1 [Vicugna pacos]</a>                              | 43.5 | 43.5 | 100% | 0.001 | 93% | <a href="#">XP_006209334.1</a> |
| <a href="#">PREDICTED: LOW QUALITY PROTEIN: Golgi membrane protein 1 [Myotis lu]</a>             | 43.5 | 43.5 | 100% | 0.001 | 93% | <a href="#">XP_006102193.1</a> |
| <a href="#">PREDICTED: Golgi membrane protein 1-like [Ailuropoda melanoleuca]</a>                | 43.5 | 43.5 | 100% | 0.001 | 93% | <a href="#">XP_002915059.1</a> |
| <a href="#">PREDICTED: Golgi membrane protein 1 [Pan troglodytes]</a>                            | 43.5 | 43.5 | 100% | 0.001 | 93% | <a href="#">XP_520104.5</a>    |
| <a href="#">PREDICTED: Golgi membrane protein 1 isoform X1 [Pan paniscus]</a>                    | 43.5 | 43.5 | 100% | 0.001 | 93% | <a href="#">XP_008959602.1</a> |
| <a href="#">PREDICTED: LOW QUALITY PROTEIN: Golgi membrane protein 1 [Myotis b]</a>              | 43.5 | 43.5 | 100% | 0.001 | 93% | <a href="#">XP_005868323.1</a> |
| <a href="#">PREDICTED: Golgi membrane protein 1 [Bison bison bison]</a>                          | 43.5 | 43.5 | 100% | 0.001 | 93% | <a href="#">XP_010838473.1</a> |
| <a href="#">PREDICTED: Golgi membrane protein 1 isoform X2 [Cricetulus griseus]</a>              | 41.4 | 41.4 | 100% | 0.006 | 86% | <a href="#">XP_007614235.1</a> |
| <a href="#">PREDICTED: Golgi membrane protein 1 [Pongo abelii]</a>                               | 40.5 | 40.5 | 92%  | 0.012 | 92% | <a href="#">XP_003777442.1</a> |
| <a href="#">PREDICTED: Golgi membrane protein 1 [Echinops telfairi]</a>                          | 40.5 | 40.5 | 92%  | 0.012 | 92% | <a href="#">XP_004716038.1</a> |
| <a href="#">Golgi membrane protein 1 [Bos mutus]</a>                                             | 40.5 | 40.5 | 92%  | 0.012 | 92% | <a href="#">ELR52897.1</a>     |
| <a href="#">Golgi membrane protein 1 [Myotis davidii]</a>                                        | 40.5 | 40.5 | 92%  | 0.012 | 92% | <a href="#">ELK33482.1</a>     |
| <a href="#">Cytosolic carboxypeptidase 1 [Myotis brandtii]</a>                                   | 40.5 | 40.5 | 92%  | 0.013 | 92% | <a href="#">EPQ09014.1</a>     |
| <a href="#">PREDICTED: Golgi membrane protein 1 [Oryctolagus cuniculus]</a>                      | 40.1 | 40.1 | 100% | 0.017 | 86% | <a href="#">XP_008255630.1</a> |
| <a href="#">PREDICTED: Golgi membrane protein 1 [Panthera tigris altaica]</a>                    | 40.1 | 40.1 | 100% | 0.017 | 86% | <a href="#">XP_007091183.1</a> |
| <a href="#">PREDICTED: Golgi membrane protein 1 isoform X2 [Physeter catodon]</a>                | 40.1 | 40.1 | 100% | 0.017 | 86% | <a href="#">XP_007118655.1</a> |
| <a href="#">Golgi membrane protein 1 [Mus musculus]</a>                                          | 40.1 | 40.1 | 100% | 0.017 | 86% | <a href="#">NP_001030294.1</a> |
| <a href="#">Golgi membrane protein 1 [Mus musculus]</a>                                          | 40.1 | 40.1 | 100% | 0.017 | 86% | <a href="#">AAH11152.1</a>     |
| <a href="#">unnamed protein product [Mus musculus]</a>                                           | 40.1 | 40.1 | 100% | 0.017 | 86% | <a href="#">BAE21897.1</a>     |
| <a href="#">unnamed protein product [Mus musculus]</a>                                           | 40.1 | 40.1 | 100% | 0.017 | 86% | <a href="#">BAE39697.1</a>     |
| <a href="#">Golgi membrane protein 1 [Mus musculus]</a>                                          | 40.1 | 40.1 | 100% | 0.017 | 86% | <a href="#">AAH98486.1</a>     |
| <a href="#">PREDICTED: Golgi membrane protein 1 [Eptesicus fuscus]</a>                           | 40.1 | 40.1 | 100% | 0.017 | 86% | <a href="#">XP_008140237.1</a> |
| <a href="#">PREDICTED: Golgi membrane protein 1 [Ictidomys tridecemlineatus]</a>                 | 40.1 | 40.1 | 100% | 0.017 | 86% | <a href="#">XP_005337493.1</a> |
| <a href="#">PREDICTED: LOW QUALITY PROTEIN: Golgi membrane protein 1 [Equus p]</a>               | 40.1 | 40.1 | 100% | 0.017 | 86% | <a href="#">XP_008536302.1</a> |
| <a href="#">PREDICTED: Golgi membrane protein 1 [Otolemur garnettii]</a>                         | 40.1 | 40.1 | 100% | 0.017 | 86% | <a href="#">XP_003783039.1</a> |
| <a href="#">PREDICTED: Golgi membrane protein 1 [Equus caballus]</a>                             | 40.1 | 40.1 | 100% | 0.017 | 86% | <a href="#">XP_001495688.3</a> |
| <a href="#">PREDICTED: Golgi membrane protein 1 [Tupaia chinensis]</a>                           | 40.1 | 40.1 | 100% | 0.017 | 86% | <a href="#">XP_006139911.1</a> |
| <a href="#">PREDICTED: Golgi membrane protein 1 [Lipotes vexillifer]</a>                         | 40.1 | 40.1 | 100% | 0.017 | 86% | <a href="#">XP_007456171.1</a> |
| <a href="#">PREDICTED: Golgi membrane protein 1 isoform X3 [Balaenoptera acutorostr]</a>         | 40.1 | 40.1 | 100% | 0.017 | 86% | <a href="#">XP_007177015.1</a> |
| <a href="#">PREDICTED: Golgi membrane protein 1 isoform X1 [Physeter catodon]</a>                | 40.1 | 40.1 | 100% | 0.017 | 86% | <a href="#">XP_007118654.1</a> |
| <a href="#">PREDICTED: Golgi membrane protein 1 [Tursiops truncatus]</a>                         | 40.1 | 40.1 | 100% | 0.017 | 86% | <a href="#">XP_004317452.1</a> |
| <a href="#">PREDICTED: Golgi membrane protein 1 [Orcinus orca]</a>                               | 40.1 | 40.1 | 100% | 0.017 | 86% | <a href="#">XP_004283095.1</a> |
| <a href="#">PREDICTED: Golgi membrane protein 1 [Felis catus]</a>                                | 40.1 | 40.1 | 100% | 0.017 | 86% | <a href="#">XP_003995502.1</a> |
| <a href="#">PREDICTED: Golgi membrane protein 1 [Nannospalax galii]</a>                          | 40.1 | 40.1 | 100% | 0.017 | 86% | <a href="#">XP_008831327.1</a> |

|                                                                                          |      |      |      |       |     |                                |
|------------------------------------------------------------------------------------------|------|------|------|-------|-----|--------------------------------|
| <a href="#">PREDICTED: Golgi membrane protein 1 isoform X4 [Rattus norvegicus]</a>       | 40.1 | 40.1 | 100% | 0.017 | 86% | <a href="#">XP_001056825.3</a> |
| <a href="#">PREDICTED: Golgi membrane protein 1 isoform X3 [Rattus norvegicus]</a>       | 40.1 | 40.1 | 100% | 0.017 | 86% | <a href="#">XP_006253609.1</a> |
| <a href="#">PREDICTED: Golgi membrane protein 1 isoform X2 [Rattus norvegicus]</a>       | 40.1 | 40.1 | 100% | 0.017 | 86% | <a href="#">XP_006253608.1</a> |
| <a href="#">PREDICTED: Golgi membrane protein 1 isoform X1 [Rattus norvegicus]</a>       | 40.1 | 40.1 | 100% | 0.017 | 86% | <a href="#">XP_006222393.1</a> |
| <a href="#">PREDICTED: Golgi membrane protein 1 [Callithrix jacchus]</a>                 | 39.7 | 39.7 | 100% | 0.023 | 86% | <a href="#">XP_009001845.1</a> |
| <a href="#">PREDICTED: Golgi membrane protein 1 isoform X1 [Cricetulus griseus]</a>      | 38.4 | 38.4 | 92%  | 0.061 | 85% | <a href="#">XP_003512118.1</a> |
| <a href="#">Golgi membrane protein 1 [Cricetulus griseus]</a>                            | 38.4 | 38.4 | 92%  | 0.061 | 85% | <a href="#">EGW03539.1</a>     |
| <a href="#">PREDICTED: Golgi membrane protein 1 [Condylura cristata]</a>                 | 37.1 | 37.1 | 100% | 0.16  | 79% | <a href="#">XP_004678038.1</a> |
| <a href="#">PREDICTED: Golgi membrane protein 1 isoform 3 [Dasybus novemcinctus]</a>     | 37.1 | 37.1 | 100% | 0.16  | 79% | <a href="#">XP_004461590.1</a> |
| <a href="#">PREDICTED: Golgi membrane protein 1 [Pteropus alecto]</a>                    | 37.1 | 37.1 | 100% | 0.16  | 79% | <a href="#">XP_006916141.1</a> |
| <a href="#">PREDICTED: Golgi membrane protein 1 [Trichechus manatus latirostris]</a>     | 37.1 | 37.1 | 100% | 0.16  | 79% | <a href="#">XP_004381373.1</a> |
| <a href="#">PREDICTED: Golgi membrane protein 1 isoform X2 [Balaenoptera acutorostr]</a> | 37.1 | 37.1 | 92%  | 0.16  | 85% | <a href="#">XP_007177014.1</a> |
| <a href="#">PREDICTED: Golgi membrane protein 1 isoform 2 [Dasybus novemcinctus]</a>     | 37.1 | 37.1 | 100% | 0.16  | 79% | <a href="#">XP_004461589.1</a> |
| <a href="#">PREDICTED: Golgi membrane protein 1 isoform 1 [Dasybus novemcinctus]</a>     | 37.1 | 37.1 | 100% | 0.16  | 79% | <a href="#">XP_004461588.1</a> |
| <a href="#">PREDICTED: Golgi membrane protein 1 isoform X1 [Balaenoptera acutorostr]</a> | 37.1 | 37.1 | 92%  | 0.16  | 85% | <a href="#">XP_007177013.1</a> |
| <a href="#">Golgi membrane protein 1 [Pteropus alecto]</a>                               | 37.1 | 37.1 | 100% | 0.16  | 79% | <a href="#">ELK09097.1</a>     |
| <a href="#">Golgi membrane protein 1 [Tupaia chinensis]</a>                              | 37.1 | 37.1 | 92%  | 0.17  | 85% | <a href="#">ELW72919.1</a>     |
| <a href="#">PREDICTED: Golgi membrane protein 1 [Peromyscus maniculatus bairdii]</a>     | 36.7 | 36.7 | 100% | 0.22  | 79% | <a href="#">XP_006981757.1</a> |
| <a href="#">PREDICTED: Golgi membrane protein 1 isoform X1 [Mustela putorius furo]</a>   | 36.7 | 36.7 | 100% | 0.22  | 79% | <a href="#">XP_004816631.1</a> |
| <a href="#">PREDICTED: Golgi membrane protein 1 isoform X3 [Mustela putorius furo]</a>   | 36.7 | 36.7 | 100% | 0.22  | 79% | <a href="#">XP_004774167.1</a> |
| <a href="#">PREDICTED: Golgi membrane protein 1 isoform X2 [Mustela putorius furo]</a>   | 36.7 | 36.7 | 100% | 0.22  | 79% | <a href="#">XP_004774166.1</a> |
| <a href="#">PREDICTED: Golgi membrane protein 1 isoform X1 [Mustela putorius furo]</a>   | 36.7 | 36.7 | 100% | 0.22  | 79% | <a href="#">XP_004774165.1</a> |
| <a href="#">PREDICTED: Golgi membrane protein 1 isoform X2 [Chinchilla lanigera]</a>     | 36.3 | 36.3 | 100% | 0.30  | 79% | <a href="#">XP_005387979.1</a> |
| <a href="#">PREDICTED: Golgi membrane protein 1 [Octodon degus]</a>                      | 36.3 | 36.3 | 100% | 0.30  | 79% | <a href="#">XP_004639443.1</a> |
| <a href="#">PREDICTED: Golgi membrane protein 1 isoform X1 [Chinchilla lanigera]</a>     | 36.3 | 36.3 | 100% | 0.30  | 79% | <a href="#">XP_005387978.1</a> |
| <a href="#">PREDICTED: Golgi membrane protein 1 [Microtus ochrogaster]</a>               | 34.6 | 34.6 | 100% | 1.1   | 71% | <a href="#">XP_005355363.1</a> |

## Alignments

Download v [GenPept](#) [Graphics](#)

v Next ▲ Previous ▲ Descriptions

PREDICTED: uncharacterized protein LOC104673793, partial [Rhinopithecus roxellana]

Sequence ID: [ref|XP\\_010376237.1|](#) Length: 292 Number of Matches: 1

Range 1: 247 to 260 [GenPept](#) [Graphics](#)

v Next Match ▲ Previous Match

| Score         | Expect | Identities | Positives   | Gaps     |
|---------------|--------|------------|-------------|----------|
| 43.5 bits(95) | 0.001  | 13/14(93%) | 14/14(100%) | 0/14(0%) |

Query 1 KAVLVNDITTGERL 14  
KAVLVN+ITTGERL  
Sbjct 247 KAVLVNNDITTGERL 260

### Related Information

[Gene](#) - associated gene details  
[Map Viewer](#) - aligned genomic context

Download v [GenPept](#) [Graphics](#)

v Next ▲ Previous ▲ Descriptions

PREDICTED: Golgi membrane protein 1 [Camelus ferus]

Sequence ID: [ref|XP\\_006187389.1|](#) Length: 313 Number of Matches: 1

Range 1: 103 to 116 [GenPept](#) [Graphics](#)

v Next Match ▲ Previous Match

| Score         | Expect | Identities | Positives   | Gaps     |
|---------------|--------|------------|-------------|----------|
| 43.5 bits(95) | 0.001  | 13/14(93%) | 14/14(100%) | 0/14(0%) |

### Related Information

[Gene](#) - associated gene details

Query 1 KAVLVNDITTGERL 14  
 KAVLVN+ITTGERL  
 Sbjct 103 KAVLVNNITTGERL 116

Download [GenPept](#) [Graphics](#)

[▼ Next](#) [▲ Previous](#) [▲ Descriptions](#)

**PREDICTED: Golgi membrane protein 1 [Camelus dromedarius]**

Sequence ID: [ref|XP\\_010973186.1|](#) Length: 322 Number of Matches: 1

Range 1: 103 to 116 [GenPept](#) [Graphics](#)

[▼ Next Match](#) [▲ Previous Match](#)

| Score         | Expect | Identities | Positives   | Gaps     |
|---------------|--------|------------|-------------|----------|
| 43.5 bits(95) | 0.001  | 13/14(93%) | 14/14(100%) | 0/14(0%) |

Query 1 KAVLVNDITTGERL 14  
 KAVLVN+ITTGERL  
 Sbjct 103 KAVLVNNITTGERL 116

**Related Information**

[Gene](#) - associated gene details

Download [GenPept](#) [Graphics](#)

[▼ Next](#) [▲ Previous](#) [▲ Descriptions](#)

**PREDICTED: Golgi membrane protein 1 [Ursus maritimus]**

Sequence ID: [ref|XP\\_008694047.1|](#) Length: 373 Number of Matches: 1

Range 1: 103 to 116 [GenPept](#) [Graphics](#)

[▼ Next Match](#) [▲ Previous Match](#)

| Score         | Expect | Identities | Positives   | Gaps     |
|---------------|--------|------------|-------------|----------|
| 43.5 bits(95) | 0.001  | 13/14(93%) | 14/14(100%) | 0/14(0%) |

Query 1 KAVLVNDITTGERL 14  
 KAVLVN+ITTGERL  
 Sbjct 103 KAVLVNNITTGERL 116

**Related Information**

[Gene](#) - associated gene details

[Map Viewer](#) - aligned genomic context

Download [GenPept](#) [Graphics](#)

[▼ Next](#) [▲ Previous](#) [▲ Descriptions](#)

**PREDICTED: Golgi membrane protein 1 isoform X5 [Pan paniscus]**

Sequence ID: [ref|XP\\_008959606.1|](#) Length: 382 Number of Matches: 1

Range 1: 103 to 116 [GenPept](#) [Graphics](#)

[▼ Next Match](#) [▲ Previous Match](#)

| Score         | Expect | Identities | Positives   | Gaps     |
|---------------|--------|------------|-------------|----------|
| 43.5 bits(95) | 0.001  | 13/14(93%) | 14/14(100%) | 0/14(0%) |

Query 1 KAVLVNDITTGERL 14  
 KAVLVN+ITTGERL  
 Sbjct 103 KAVLVNNITTGERL 116

**Related Information**

[Gene](#) - associated gene details

[Map Viewer](#) - aligned genomic context

BLAST is a registered trademark of the National Library of Medicine.

NCBI/ BLAST/ blastp suite/ Formatting Results - B9E6EREC01R

Your search parameters were adjusted to search for a short input sequence.

Edit and Resubmit Save Search Strategies Formatting options Download

YouTube How to read this page Blast report description

### GOLM1\_KAVLVNNTTGERL\_NonMod

RID [B9E6EREC01R](#) (Expires on 01-14 13:18 pm)

Query ID |cl|305648  
 Description None  
 Molecule type amino acid  
 Query Length 14

Database Name nr  
 Description All non-redundant GenBank CDS translations+PDB+SwissProt+PIR excluding environmental samples from WGS projects  
 Program BLASTP 2.2.30+ [Citation](#)

Other reports: [Search Summary](#) [Taxonomy reports](#) [Distance tree of results](#) [Multiple alignment](#)

### Graphic Summary

Show Conserved Domains

No putative conserved domains have been detected

Distribution of 100 Blast Hits on the Query Sequence

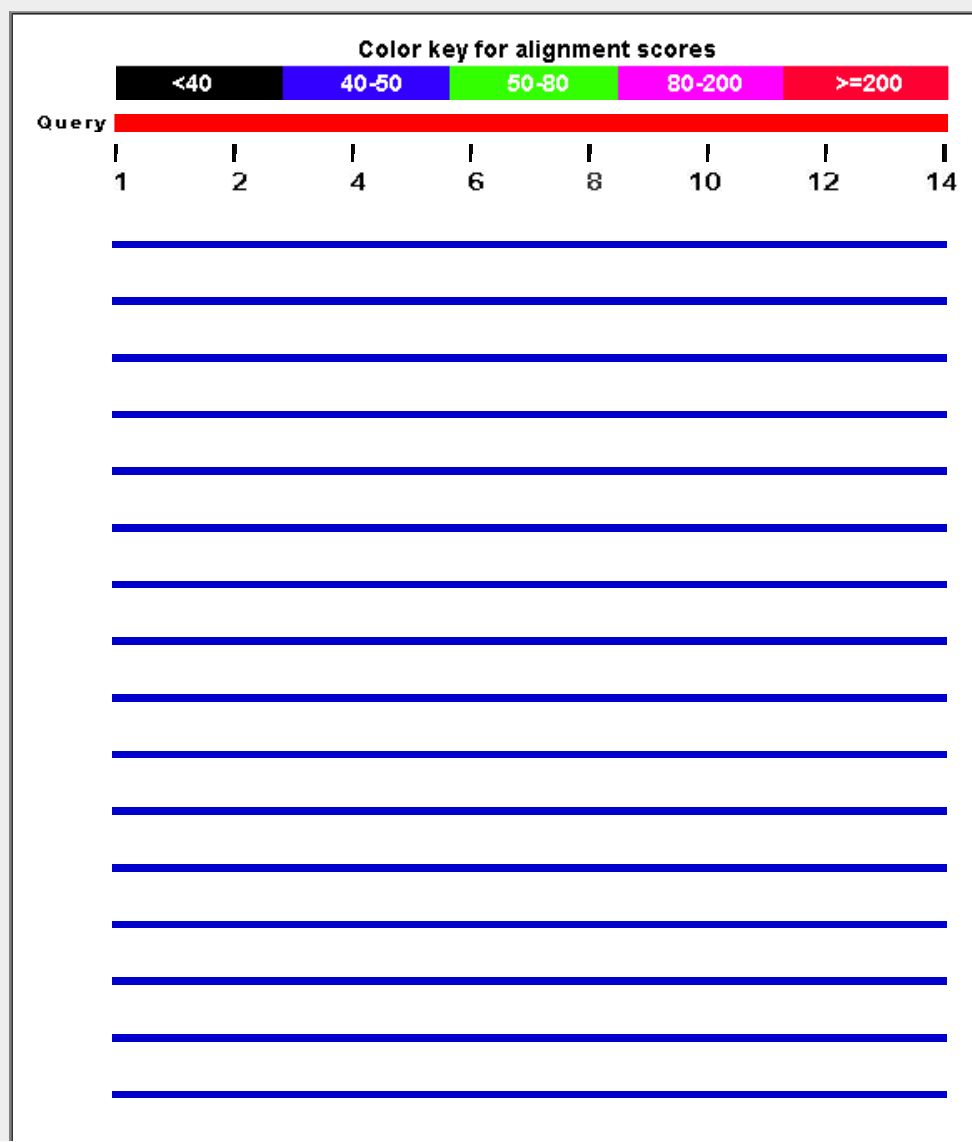

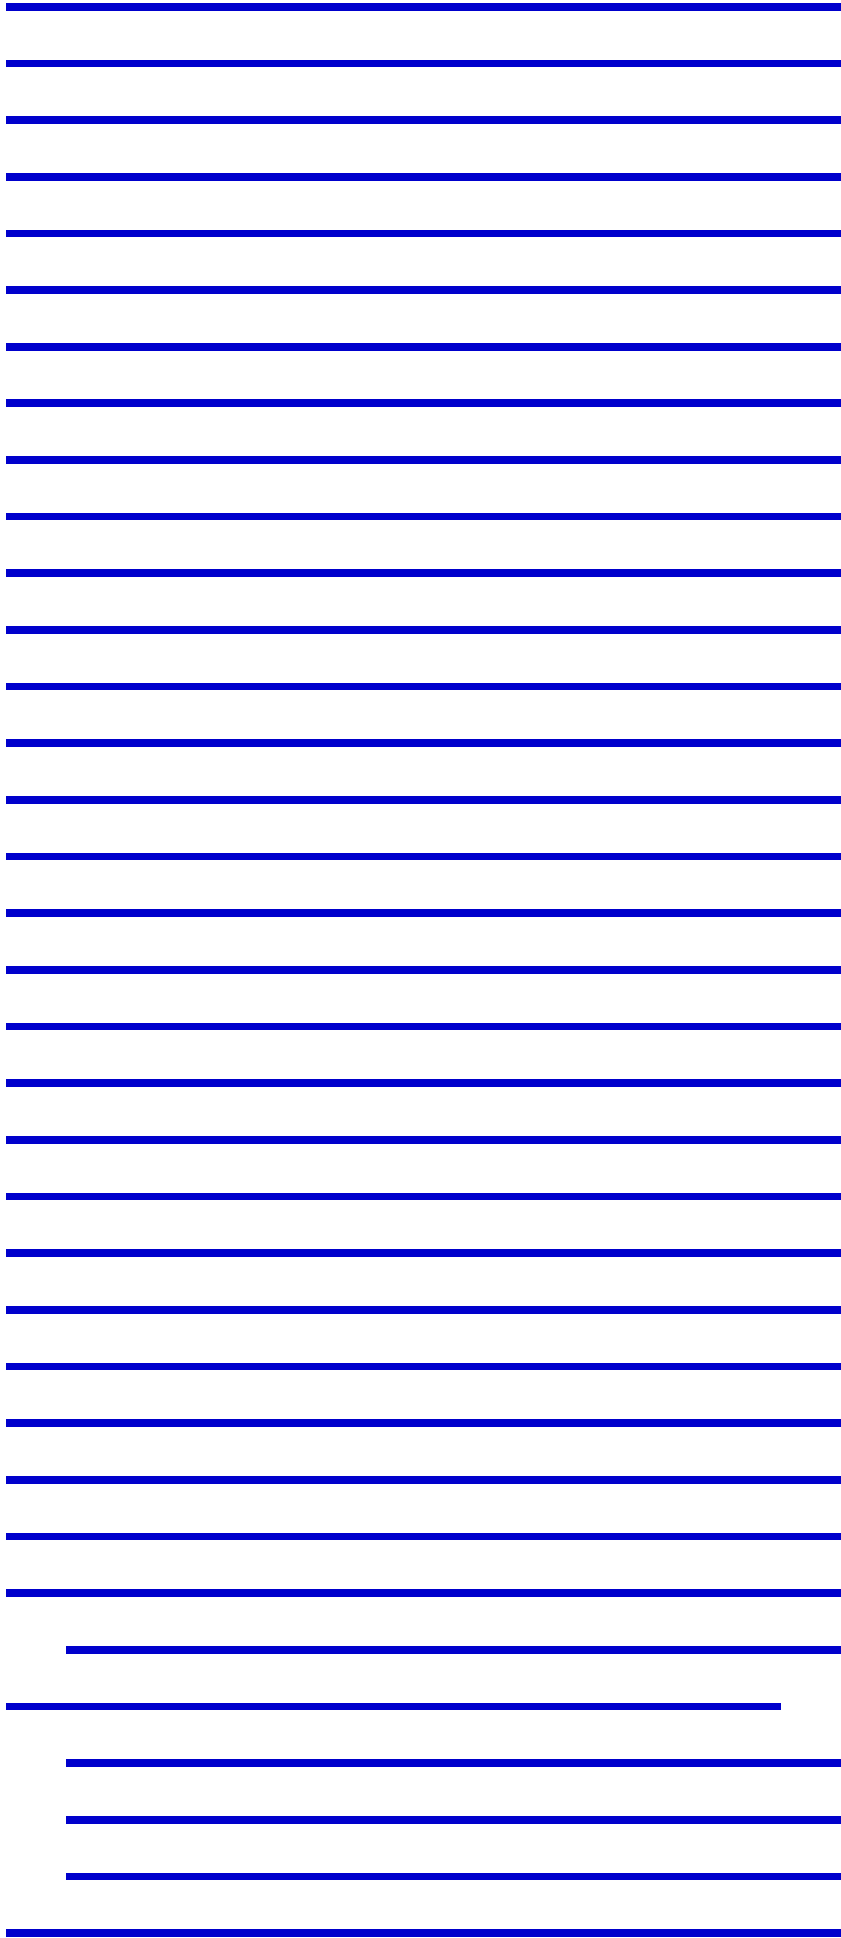



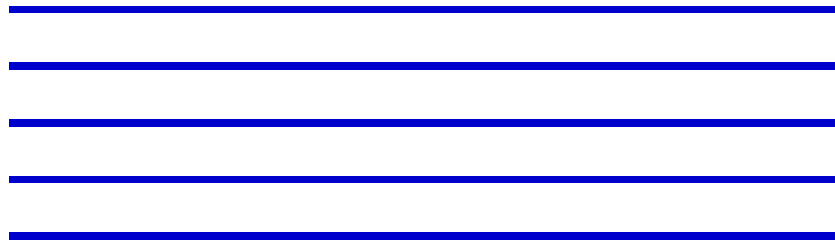

## Descriptions

### Sequences producing significant alignments:

Select: [All](#) [None](#) Selected:0

[↑](#) [Alignments](#)
[Download](#)
[GenPept](#)
[Graphics](#)
[Distance tree of results](#)
[Multiple alignment](#)

| Description                                                                     | Max score | Total score | Query cover | E value | Ident | Accession                                   |
|---------------------------------------------------------------------------------|-----------|-------------|-------------|---------|-------|---------------------------------------------|
| <a href="#">PREDICTED: uncharacterized protein LOC104673793 [Rhinopithec</a>    | 46.0      | 46.0        | 100%        | 2e-04   | 100%  | <a href="#">gij724801945 XP_010376237.1</a> |
| <a href="#">PREDICTED: Golgi membrane protein 1 [Camelus ferus]</a>             | 46.0      | 46.0        | 100%        | 2e-04   | 100%  | <a href="#">gij560922380 XP_006187389.1</a> |
| <a href="#">PREDICTED: Golgi membrane protein 1 [Ursus maritimus]</a>           | 46.0      | 46.0        | 100%        | 2e-04   | 100%  | <a href="#">gij671006359 XP_008694047.1</a> |
| <a href="#">PREDICTED: Golgi membrane protein 1 isoform X5 [Pan paniscus]</a>   | 46.0      | 46.0        | 100%        | 2e-04   | 100%  | <a href="#">gij675701076 XP_008959606.1</a> |
| <a href="#">PREDICTED: Golgi membrane protein 1 isoform X4 [Pan paniscus]</a>   | 46.0      | 46.0        | 100%        | 2e-04   | 100%  | <a href="#">gij675701074 XP_008959605.1</a> |
| <a href="#">PREDICTED: Golgi membrane protein 1 isoform X5 [Bubalus bubal</a>   | 46.0      | 46.0        | 100%        | 2e-04   | 100%  | <a href="#">gij594086823 XP_006066905.1</a> |
| <a href="#">PREDICTED: Golgi membrane protein 1 isoform X5 [Bos taurus]</a>     | 46.0      | 46.0        | 100%        | 2e-04   | 100%  | <a href="#">gij528959493 XP_005210451.1</a> |
| <a href="#">PREDICTED: Golgi membrane protein 1 isoform X3 [Tarsius syrichi</a> | 46.0      | 46.0        | 100%        | 2e-04   | 100%  | <a href="#">gij640825296 XP_008069750.1</a> |
| <a href="#">PREDICTED: Golgi membrane protein 1 isoform X4 [Bubalus bubal</a>   | 46.0      | 46.0        | 100%        | 2e-04   | 100%  | <a href="#">gij594086821 XP_006066904.1</a> |
| <a href="#">PREDICTED: Golgi membrane protein 1 isoform X4 [Bos taurus]</a>     | 46.0      | 46.0        | 100%        | 2e-04   | 100%  | <a href="#">gij528959491 XP_005210450.1</a> |
| <a href="#">PREDICTED: Golgi membrane protein 1 isoform X3 [Pan paniscus]</a>   | 46.0      | 46.0        | 100%        | 2e-04   | 100%  | <a href="#">gij675701072 XP_008959604.1</a> |
| <a href="#">PREDICTED: Golgi membrane protein 1 isoform X2 [Tarsius syrichi</a> | 46.0      | 46.0        | 100%        | 2e-04   | 100%  | <a href="#">gij640825294 XP_008069749.1</a> |
| <a href="#">PREDICTED: Golgi membrane protein 1 [Chrysochloris asiatica]</a>    | 46.0      | 46.0        | 100%        | 2e-04   | 100%  | <a href="#">gij586494692 XP_006877790.1</a> |
| <a href="#">PREDICTED: Golgi membrane protein 1 isoform 2 [Nomascus leuc</a>    | 46.0      | 46.0        | 100%        | 2e-04   | 100%  | <a href="#">gij441593338 XP_004087075.1</a> |
| <a href="#">golgi membrane protein GP73 [Homo sapiens]</a>                      | 46.0      | 46.0        | 100%        | 2e-04   | 100%  | <a href="#">gij7271867 AAF44663.1</a>       |
| <a href="#">GOLPH2 [Homo sapiens]</a>                                           | 46.0      | 46.0        | 100%        | 2e-04   | 100%  | <a href="#">gij48146519 CAG33482.1</a>      |
| <a href="#">Golgi membrane protein 1 [Homo sapiens]</a>                         | 46.0      | 46.0        | 100%        | 2e-04   | 100%  | <a href="#">gij29550838 NP_057632.2</a>     |
| <a href="#">PREDICTED: Golgi membrane protein 1 [Pantholops hodgsonii]</a>      | 46.0      | 46.0        | 100%        | 2e-04   | 100%  | <a href="#">gij556752330 XP_005971557.1</a> |
| <a href="#">PREDICTED: Golgi membrane protein 1 [Ceratotherium simum sim</a>    | 46.0      | 46.0        | 100%        | 2e-04   | 100%  | <a href="#">gij478533440 XP_004440862.1</a> |
| <a href="#">PREDICTED: Golgi membrane protein 1 [Callithrix jacchus]</a>        | 46.0      | 46.0        | 100%        | 2e-04   | 100%  | <a href="#">gij675637249 XP_002742818.2</a> |
| <a href="#">PREDICTED: Golgi membrane protein 1 isoform X1 [Tarsius syrichi</a> | 46.0      | 46.0        | 100%        | 2e-04   | 100%  | <a href="#">gij640825292 XP_008069747.1</a> |
| <a href="#">PREDICTED: Golgi membrane protein 1 [Odobenus rosmarus dive</a>     | 46.0      | 46.0        | 100%        | 2e-04   | 100%  | <a href="#">gij472376412 XP_004407641.1</a> |
| <a href="#">PREDICTED: Golgi membrane protein 1 [Chlorocebus sabaeus]</a>       | 46.0      | 46.0        | 100%        | 2e-04   | 100%  | <a href="#">gij635074424 XP_007967835.1</a> |
| <a href="#">PREDICTED: Golgi membrane protein 1 [Papio anubis]</a>              | 46.0      | 46.0        | 100%        | 2e-04   | 100%  | <a href="#">gij402897779 XP_003911922.1</a> |
| <a href="#">PREDICTED: Golgi membrane protein 1 isoform X2 [Pan paniscus]</a>   | 46.0      | 46.0        | 100%        | 2e-04   | 100%  | <a href="#">gij397475597 XP_003809220.1</a> |
| <a href="#">PREDICTED: Golgi membrane protein 1 isoform X1 [Bubalus bubal</a>   | 46.0      | 46.0        | 100%        | 2e-04   | 100%  | <a href="#">gij594086815 XP_006066901.1</a> |
| <a href="#">PREDICTED: Golgi membrane protein 1 [Bos mutus]</a>                 | 46.0      | 46.0        | 100%        | 2e-04   | 100%  | <a href="#">gij555977415 XP_005900661.1</a> |
| <a href="#">PREDICTED: Golgi membrane protein 1 isoform X2 [Capra hircus]</a>   | 46.0      | 46.0        | 100%        | 2e-04   | 100%  | <a href="#">gij548477923 XP_005684184.1</a> |

|                                                                 |      |      |      |       |      |                                             |
|-----------------------------------------------------------------|------|------|------|-------|------|---------------------------------------------|
| PREDICTED: Golgi membrane protein 1 [Ovis aries]                | 46.0 | 46.0 | 100% | 2e-04 | 100% | <a href="#">gij426219885 XP_004004148.1</a> |
| <a href="#">Golgi membrane protein 1 [Bos taurus]</a>           | 46.0 | 46.0 | 100% | 2e-04 | 100% | <a href="#">gij300794576 NP_001179392.1</a> |
| PREDICTED: Golgi membrane protein 1 [Orycteropus afer afer]     | 46.0 | 46.0 | 100% | 2e-04 | 100% | <a href="#">gij634822876 XP_007937219.1</a> |
| PREDICTED: Golgi membrane protein 1 isoform X1 [Canis lupus fa  | 46.0 | 46.0 | 100% | 2e-04 | 100% | <a href="#">gij545486427 XP_005615865.1</a> |
| PREDICTED: LOW QUALITY PROTEIN: Golgi membrane protein 1        | 46.0 | 46.0 | 100% | 2e-04 | 100% | <a href="#">gij584078847 XP_006759551.1</a> |
| PREDICTED: Golgi membrane protein 1 isoform X2 [Canis lupus fa  | 46.0 | 46.0 | 100% | 2e-04 | 100% | <a href="#">gij545486425 XP_533506.4</a>    |
| PREDICTED: Golgi membrane protein 1 isoform X1 [Capra hircus]   | 46.0 | 46.0 | 100% | 2e-04 | 100% | <a href="#">gij548477921 XP_005684183.1</a> |
| PREDICTED: Golgi membrane protein 1 [Sus scrofa]                | 46.0 | 46.0 | 100% | 2e-04 | 100% | <a href="#">gij545852940 XP_005656864.1</a> |
| PREDICTED: Golgi membrane protein 1 isoform X2 [Saimiri bolivie | 46.0 | 46.0 | 100% | 2e-04 | 100% | <a href="#">gij725600181 XP_010350172.1</a> |
| PREDICTED: Golgi membrane protein 1 isoform X1 [Saimiri bolivie | 46.0 | 46.0 | 100% | 2e-04 | 100% | <a href="#">gij725600179 XP_010350171.1</a> |
| PREDICTED: Golgi membrane protein 1 [Vicugna pacos]             | 46.0 | 46.0 | 100% | 2e-04 | 100% | <a href="#">gij560974024 XP_006209334.1</a> |
| PREDICTED: LOW QUALITY PROTEIN: Golgi membrane protein 1        | 46.0 | 46.0 | 100% | 2e-04 | 100% | <a href="#">gij558185268 XP_006102193.1</a> |
| PREDICTED: Golgi membrane protein 1-like [Ailuropoda melanoleu  | 46.0 | 46.0 | 100% | 2e-04 | 100% | <a href="#">gij301758432 XP_002915059.1</a> |
| PREDICTED: Golgi membrane protein 1 [Pan troglodytes]           | 46.0 | 46.0 | 100% | 2e-04 | 100% | <a href="#">gij694930481 XP_520104.5</a>    |
| PREDICTED: Golgi membrane protein 1 isoform X1 [Pan paniscus]   | 46.0 | 46.0 | 100% | 2e-04 | 100% | <a href="#">gij675701065 XP_008959602.1</a> |
| PREDICTED: LOW QUALITY PROTEIN: Golgi membrane protein 1        | 46.0 | 46.0 | 100% | 2e-04 | 100% | <a href="#">gij554547544 XP_005868323.1</a> |
| PREDICTED: Golgi membrane protein 1 isoform X2 [Cricetulus gris | 43.9 | 43.9 | 100% | 8e-04 | 93%  | <a href="#">gij625245956 XP_007614235.1</a> |
| PREDICTED: Golgi membrane protein 1 [Pongo abelii]              | 43.1 | 43.1 | 92%  | 0.002 | 100% | <a href="#">gij395740598 XP_003777442.1</a> |
| PREDICTED: Golgi membrane protein 1 [Echinops telfairi]         | 43.1 | 43.1 | 92%  | 0.002 | 100% | <a href="#">gij507704042 XP_004716038.1</a> |
| <a href="#">Golgi membrane protein 1 [Bos mutus]</a>            | 43.1 | 43.1 | 92%  | 0.002 | 100% | <a href="#">gij440902052 ELR52897.1</a>     |
| <a href="#">Golgi membrane protein 1 [Myotis davidii]</a>       | 43.1 | 43.1 | 92%  | 0.002 | 100% | <a href="#">gij432109012 ELK33482.1</a>     |
| <a href="#">Cytosolic carboxypeptidase 1 [Myotis brandtii]</a>  | 43.1 | 43.1 | 92%  | 0.002 | 100% | <a href="#">gij521027226 EPQ09014.1</a>     |
| PREDICTED: Golgi membrane protein 1 [Oryctolagus cuniculus]     | 42.6 | 42.6 | 100% | 0.002 | 93%  | <a href="#">gij655600783 XP_008255630.1</a> |
| PREDICTED: Golgi membrane protein 1 [Panthera tigris altaica]   | 42.6 | 42.6 | 100% | 0.002 | 93%  | <a href="#">gij591330699 XP_007091183.1</a> |
| PREDICTED: Golgi membrane protein 1 isoform X2 [Physeter cator  | 42.6 | 42.6 | 100% | 0.002 | 93%  | <a href="#">gij593759817 XP_007118655.1</a> |
| <a href="#">Golgi membrane protein 1 [Mus musculus]</a>         | 42.6 | 42.6 | 100% | 0.002 | 93%  | <a href="#">gij78190500 NP_001030294.1</a>  |
| <a href="#">Golgi membrane protein 1 [Mus musculus]</a>         | 42.6 | 42.6 | 100% | 0.002 | 93%  | <a href="#">gij15029858 AAH11152.1</a>      |
| <a href="#">unnamed protein product [Mus musculus]</a>          | 42.6 | 42.6 | 100% | 0.002 | 93%  | <a href="#">gij74228820 BAE21897.1</a>      |
| <a href="#">unnamed protein product [Mus musculus]</a>          | 42.6 | 42.6 | 100% | 0.002 | 93%  | <a href="#">gij74198427 BAE39697.1</a>      |
| <a href="#">Golgi membrane protein 1 [Mus musculus]</a>         | 42.6 | 42.6 | 100% | 0.002 | 93%  | <a href="#">gij68534689 AAH98486.1</a>      |
| PREDICTED: Golgi membrane protein 1 [Eptesicus fuscus]          | 42.6 | 42.6 | 100% | 0.002 | 93%  | <a href="#">gij641703059 XP_008140237.1</a> |
| PREDICTED: Golgi membrane protein 1 [Ictidomys tridecemlineatu  | 42.6 | 42.6 | 100% | 0.002 | 93%  | <a href="#">gij532103791 XP_005337493.1</a> |
| PREDICTED: LOW QUALITY PROTEIN: Golgi membrane protein 1        | 42.6 | 42.6 | 100% | 0.002 | 93%  | <a href="#">gij664757550 XP_008536302.1</a> |
| PREDICTED: Golgi membrane protein 1 [Otolemur garnettii]        | 42.6 | 42.6 | 100% | 0.002 | 93%  | <a href="#">gij395819314 XP_003783039.1</a> |
| PREDICTED: Golgi membrane protein 1 [Equus caballus]            | 42.6 | 42.6 | 100% | 0.002 | 93%  | <a href="#">gij338719632 XP_001495688.3</a> |
| PREDICTED: Golgi membrane protein 1 [Tupaia chinensis]          | 42.6 | 42.6 | 100% | 0.002 | 93%  | <a href="#">gij562819874 XP_006139911.1</a> |
| PREDICTED: Golgi membrane protein 1 [Lipotes vexillifer]        | 42.6 | 42.6 | 100% | 0.002 | 93%  | <a href="#">gij602687893 XP_007456171.1</a> |
| PREDICTED: Golgi membrane protein 1 isoform X3 [Balaenoptera :  | 42.6 | 42.6 | 100% | 0.002 | 93%  | <a href="#">gij594657336 XP_007177015.1</a> |
| PREDICTED: Golgi membrane protein 1 isoform X1 [Physeter cator  | 42.6 | 42.6 | 100% | 0.002 | 93%  | <a href="#">gij593759815 XP_007118654.1</a> |
| PREDICTED: Golgi membrane protein 1 [Tursiops truncatus]        | 42.6 | 42.6 | 100% | 0.002 | 93%  | <a href="#">gij470617224 XP_004317452.1</a> |
| PREDICTED: Golgi membrane protein 1 [Orcinus orca]              | 42.6 | 42.6 | 100% | 0.002 | 93%  | <a href="#">gij466074240 XP_004283095.1</a> |
| PREDICTED: Golgi membrane protein 1 [Felis catus]               | 42.6 | 42.6 | 100% | 0.002 | 93%  | <a href="#">gij410978237 XP_003995502.1</a> |
| PREDICTED: Golgi membrane protein 1 [Nannospalax galii]         | 42.6 | 42.6 | 100% | 0.002 | 93%  | <a href="#">gij674050240 XP_008831327.1</a> |
| PREDICTED: Golgi membrane protein 1 isoform X4 [Rattus norveg   | 42.6 | 42.6 | 100% | 0.002 | 93%  | <a href="#">gij564390273 XP_001056825.3</a> |
| PREDICTED: Golgi membrane protein 1 isoform X3 [Rattus norveg   | 42.6 | 42.6 | 100% | 0.002 | 93%  | <a href="#">gij564390271 XP_006253609.1</a> |

|                                                                                        |      |      |      |       |     |                                             |
|----------------------------------------------------------------------------------------|------|------|------|-------|-----|---------------------------------------------|
| <a href="#">PREDICTED: Golgi membrane protein 1 isoform X2 [Rattus norvegicus]</a>     | 42.6 | 42.6 | 100% | 0.002 | 93% | <a href="#">gil564390269 XP_006253608.1</a> |
| <a href="#">PREDICTED: Golgi membrane protein 1 isoform X1 [Rattus norvegicus]</a>     | 42.6 | 42.6 | 100% | 0.002 | 93% | <a href="#">gil564319421 XP_006222393.1</a> |
| <a href="#">PREDICTED: Golgi membrane protein 1 [Callithrix jacchus]</a>               | 42.2 | 42.2 | 100% | 0.003 | 93% | <a href="#">gil675678184 XP_009001845.1</a> |
| <a href="#">PREDICTED: Golgi membrane protein 1 isoform X1 [Cricetulus gris]</a>       | 40.9 | 40.9 | 92%  | 0.008 | 92% | <a href="#">gil354500055 XP_003512118.1</a> |
| <a href="#">Golgi membrane protein 1 [Cricetulus griseus]</a>                          | 40.9 | 40.9 | 92%  | 0.008 | 92% | <a href="#">gil344247435 EGW03539.1</a>     |
| <a href="#">PREDICTED: Golgi membrane protein 1 [Condylura cristata]</a>               | 39.7 | 39.7 | 100% | 0.022 | 86% | <a href="#">gil507933604 XP_004678038.1</a> |
| <a href="#">PREDICTED: Golgi membrane protein 1 isoform 3 [Dasypus novemcinctus]</a>   | 39.7 | 39.7 | 100% | 0.022 | 86% | <a href="#">gil488539956 XP_004461590.1</a> |
| <a href="#">PREDICTED: Golgi membrane protein 1 [Pteropus alecto]</a>                  | 39.7 | 39.7 | 100% | 0.022 | 86% | <a href="#">gil586565826 XP_006916141.1</a> |
| <a href="#">PREDICTED: Golgi membrane protein 1 [Trichechus manatus latirostris]</a>   | 39.7 | 39.7 | 100% | 0.022 | 86% | <a href="#">gil471395002 XP_004381373.1</a> |
| <a href="#">PREDICTED: Golgi membrane protein 1 isoform X2 [Balaenoptera musculus]</a> | 39.7 | 39.7 | 92%  | 0.022 | 92% | <a href="#">gil594657334 XP_007177014.1</a> |
| <a href="#">PREDICTED: Golgi membrane protein 1 isoform 2 [Dasypus novemcinctus]</a>   | 39.7 | 39.7 | 100% | 0.022 | 86% | <a href="#">gil488539954 XP_004461589.1</a> |
| <a href="#">PREDICTED: Golgi membrane protein 1 isoform 1 [Dasypus novemcinctus]</a>   | 39.7 | 39.7 | 100% | 0.022 | 86% | <a href="#">gil488539952 XP_004461588.1</a> |
| <a href="#">PREDICTED: Golgi membrane protein 1 isoform X1 [Balaenoptera musculus]</a> | 39.7 | 39.7 | 92%  | 0.022 | 92% | <a href="#">gil594657332 XP_007177013.1</a> |
| <a href="#">Golgi membrane protein 1 [Pteropus alecto]</a>                             | 39.7 | 39.7 | 100% | 0.022 | 86% | <a href="#">gil431902882 ELK09097.1</a>     |
| <a href="#">Golgi membrane protein 1 [Tupaia chinensis]</a>                            | 39.7 | 39.7 | 92%  | 0.023 | 92% | <a href="#">gil444732635 ELW72919.1</a>     |
| <a href="#">PREDICTED: Golgi membrane protein 1 [Peromyscus maniculatus]</a>           | 39.2 | 39.2 | 100% | 0.030 | 86% | <a href="#">gil589938004 XP_006981757.1</a> |
| <a href="#">PREDICTED: Golgi membrane protein 1 isoform X1 [Mustela putorius]</a>      | 39.2 | 39.2 | 100% | 0.030 | 86% | <a href="#">gil511998126 XP_004816631.1</a> |
| <a href="#">PREDICTED: Golgi membrane protein 1 isoform X3 [Mustela putorius]</a>      | 39.2 | 39.2 | 100% | 0.031 | 86% | <a href="#">gil511909490 XP_004774167.1</a> |
| <a href="#">PREDICTED: Golgi membrane protein 1 isoform X2 [Mustela putorius]</a>      | 39.2 | 39.2 | 100% | 0.031 | 86% | <a href="#">gil511909488 XP_004774166.1</a> |
| <a href="#">PREDICTED: Golgi membrane protein 1 isoform X1 [Mustela putorius]</a>      | 39.2 | 39.2 | 100% | 0.031 | 86% | <a href="#">gil511909486 XP_004774165.1</a> |
| <a href="#">PREDICTED: Golgi membrane protein 1 isoform X2 [Chinchilla lanigera]</a>   | 38.8 | 38.8 | 100% | 0.042 | 86% | <a href="#">gil533147122 XP_005387979.1</a> |
| <a href="#">PREDICTED: Golgi membrane protein 1 [Octodon degus]</a>                    | 38.8 | 38.8 | 100% | 0.042 | 86% | <a href="#">gil507681012 XP_004639443.1</a> |
| <a href="#">PREDICTED: Golgi membrane protein 1 isoform X1 [Chinchilla lanigera]</a>   | 38.8 | 38.8 | 100% | 0.042 | 86% | <a href="#">gil533147120 XP_005387978.1</a> |
| <a href="#">PREDICTED: Golgi membrane protein 1 [Microtus ochrogaster]</a>             | 37.1 | 37.1 | 100% | 0.15  | 79% | <a href="#">gil532024082 XP_005355363.1</a> |
| <a href="#">PREDICTED: Golgi membrane protein 1-like [Elephantulus edwardsi]</a>       | 36.3 | 36.3 | 100% | 0.29  | 86% | <a href="#">gil585714388 XP_006900934.1</a> |
| <a href="#">PREDICTED: Golgi membrane protein 1 [Loxodonta africana]</a>               | 36.3 | 36.3 | 100% | 0.29  | 79% | <a href="#">gil344271969 XP_003407809.1</a> |
| <a href="#">Golgi membrane protein 1 [Chelonia mydas]</a>                              | 35.8 | 35.8 | 92%  | 0.37  | 85% | <a href="#">gil465964601 EMP30393.1</a>     |

## Alignments

Download [GenPept](#) [Graphics](#)

Next Previous Descriptions

PREDICTED: uncharacterized protein LOC104673793, partial [Rhinopithecus roxellana]

Sequence ID: [gil724801945|ref|XP\\_010376237.1](#) Length: 292 Number of Matches: 1

Range 1: 247 to 260 [GenPept](#) [Graphics](#)

Next Match Previous Match

| Score          | Expect | Identities  | Positives   | Gaps     |
|----------------|--------|-------------|-------------|----------|
| 46.0 bits(101) | 2e-04  | 14/14(100%) | 14/14(100%) | 0/14(0%) |

Query 1 KAVLVNNTTGERL 14  
 KAVLVNNTTGERL  
 Sbjct 247 KAVLVNNTTGERL 260

### Related Information

[Gene](#) - associated gene details  
[Map Viewer](#) - aligned genomic context

Download [GenPept](#) [Graphics](#)

Next Previous Descriptions

PREDICTED: Golgi membrane protein 1 [Camelus ferus]

Sequence ID: [gil560922380|ref|XP\\_006187389.1](#) Length: 313 Number of Matches: 1

Range 1: 103 to 116 [GenPept](#) [Graphics](#)

Next Match Previous Match

| Score          | Expect | Identities  | Positives   | Gaps     |
|----------------|--------|-------------|-------------|----------|
| 46.0 bits(101) | 2e-04  | 14/14(100%) | 14/14(100%) | 0/14(0%) |

Query 1 KAVLVNNTTGERL 14

### Related Information

[Gene](#) - associated gene details

Sbjct 103 KAVLVNITTGERL 116

[Download](#) [GenPept](#) [Graphics](#)

[Next](#) [Previous](#) [Descriptions](#)

**PREDICTED: Golgi membrane protein 1 [Ursus maritimus]**

Sequence ID: [gi|671006359|ref|XP\\_008694047.1|](#) Length: 373 Number of Matches: 1

Range 1: 103 to 116 [GenPept](#) [Graphics](#)

[Next Match](#) [Previous Match](#)

| Score          | Expect | Identities  | Positives   | Gaps     |
|----------------|--------|-------------|-------------|----------|
| 46.0 bits(101) | 2e-04  | 14/14(100%) | 14/14(100%) | 0/14(0%) |

Query 1 KAVLVNITTGERL 14  
 KAVLVNITTGERL  
 Sbjct 103 KAVLVNITTGERL 116

**Related Information**

[Gene](#) - associated gene details  
[Map Viewer](#) - aligned genomic context

[Download](#) [GenPept](#) [Graphics](#)

[Next](#) [Previous](#) [Descriptions](#)

**PREDICTED: Golgi membrane protein 1 isoform X5 [Pan paniscus]**

Sequence ID: [gi|675701076|ref|XP\\_008959606.1|](#) Length: 382 Number of Matches: 1

Range 1: 103 to 116 [GenPept](#) [Graphics](#)

[Next Match](#) [Previous Match](#)

| Score          | Expect | Identities  | Positives   | Gaps     |
|----------------|--------|-------------|-------------|----------|
| 46.0 bits(101) | 2e-04  | 14/14(100%) | 14/14(100%) | 0/14(0%) |

Query 1 KAVLVNITTGERL 14  
 KAVLVNITTGERL  
 Sbjct 103 KAVLVNITTGERL 116

**Related Information**

[Gene](#) - associated gene details  
[Map Viewer](#) - aligned genomic context

[Download](#) [GenPept](#) [Graphics](#)

[Next](#) [Previous](#) [Descriptions](#)

**PREDICTED: Golgi membrane protein 1 isoform X4 [Pan paniscus]**

Sequence ID: [gi|675701074|ref|XP\\_008959605.1|](#) Length: 383 Number of Matches: 1

Range 1: 103 to 116 [GenPept](#) [Graphics](#)

[Next Match](#) [Previous Match](#)

| Score          | Expect | Identities  | Positives   | Gaps     |
|----------------|--------|-------------|-------------|----------|
| 46.0 bits(101) | 2e-04  | 14/14(100%) | 14/14(100%) | 0/14(0%) |

Query 1 KAVLVNITTGERL 14  
 KAVLVNITTGERL  
 Sbjct 103 KAVLVNITTGERL 116

**Related Information**

[Gene](#) - associated gene details  
[Map Viewer](#) - aligned genomic context

BLAST is a registered trademark of the National Library of Medicine.

▶ [NCBI/ BLAST/ blastp suite/ Formatting Results - BVDYR8U601R](#)

**i** Your search parameters were adjusted to search for a short input sequence.

[Edit and Resubmit](#) | [Save Search Strategies](#) | [▶ Formatting options](#) | [▶ Download](#)
[YouTube](#) [How to read this page](#) [Blast report description](#)

### GPLD1\_KEKLNVEAADWTVRG\_Mod

**RID** [BVDYR8U601R](#) (Expires on 01-21 09:05 am)

**Query ID** |cl|192983  
**Description** None  
**Molecule type** amino acid  
**Query Length** 15

**Database Name** nr  
**Description** All non-redundant GenBank CDS translations+PDB+SwissProt+PIR+PRF excluding environmental samples from WGS projects  
**Program** BLASTP 2.2.30+ [▶ Citation](#)

Other reports: [▶ Search Summary](#) [[Taxonomy reports](#)] [[Distance tree of results](#)] [[Multiple alignment](#)]

### **[-]** Graphic Summary

**[-]** [Show Conserved Domains](#)

No putative conserved domains have been detected

Distribution of 100 Blast Hits on the Query Sequence 

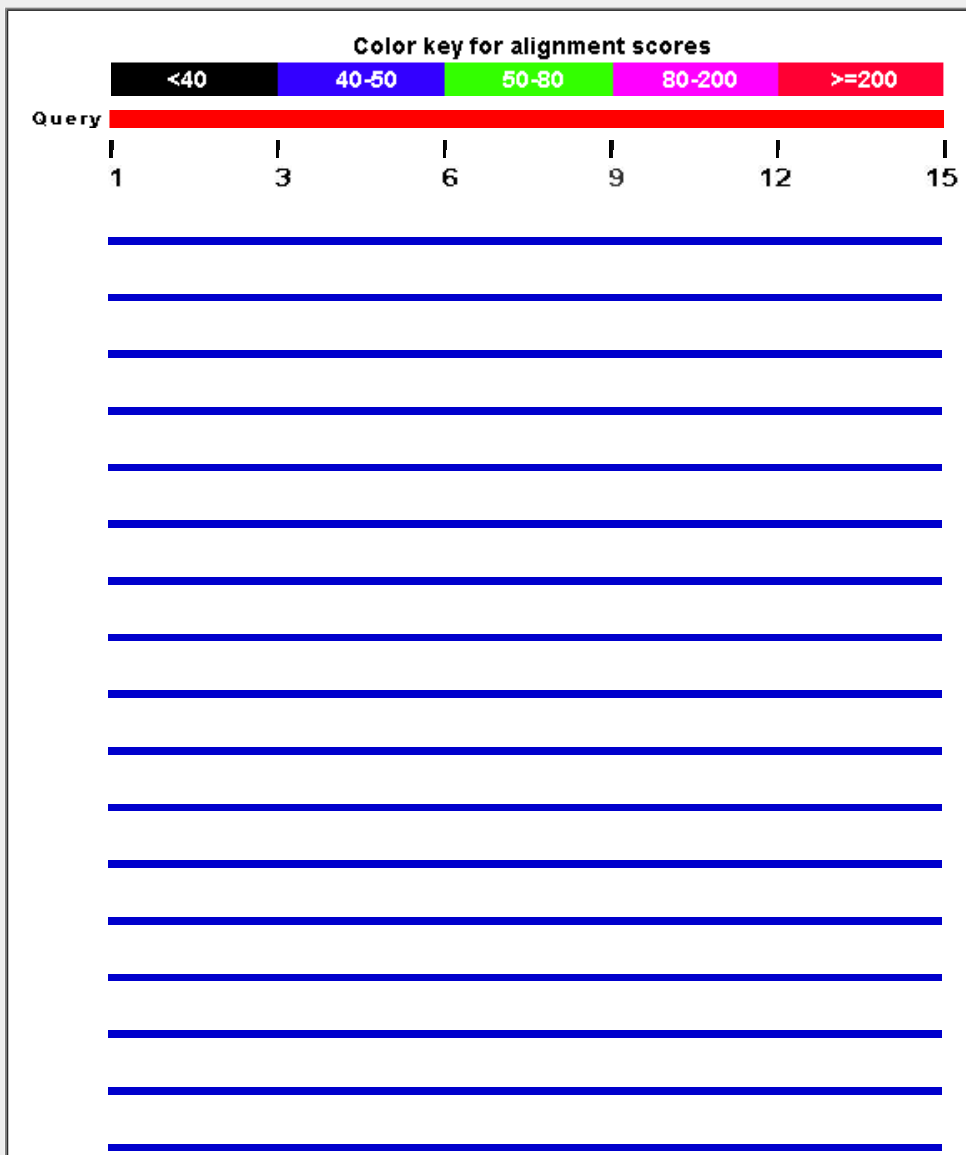

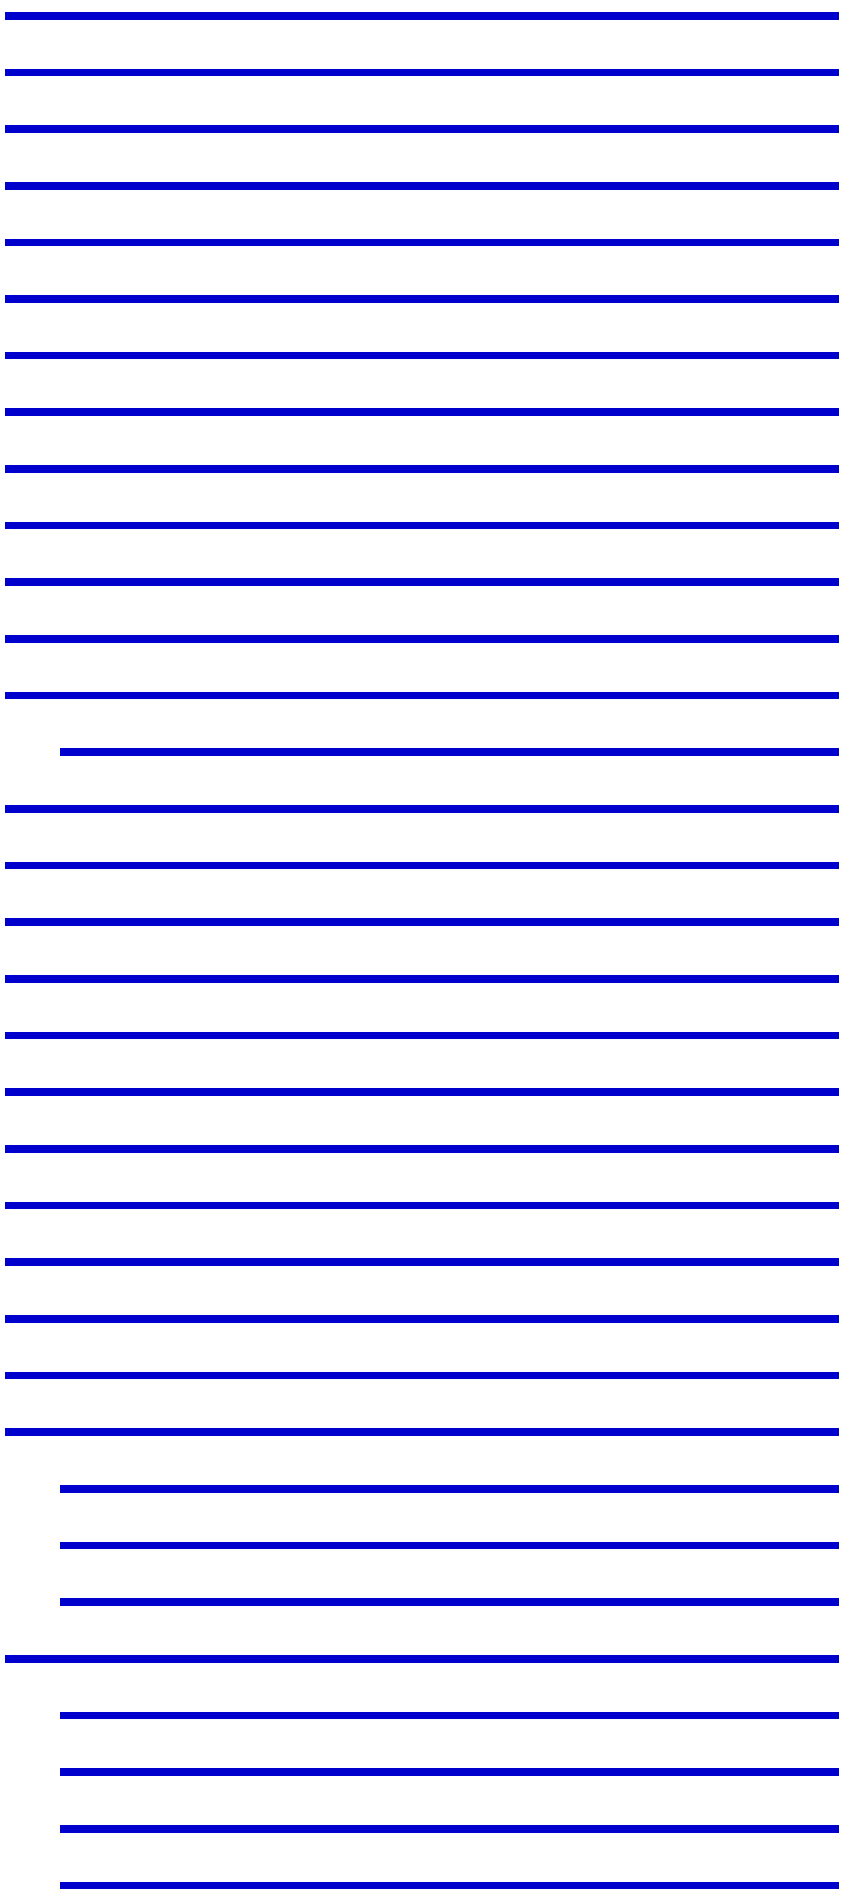

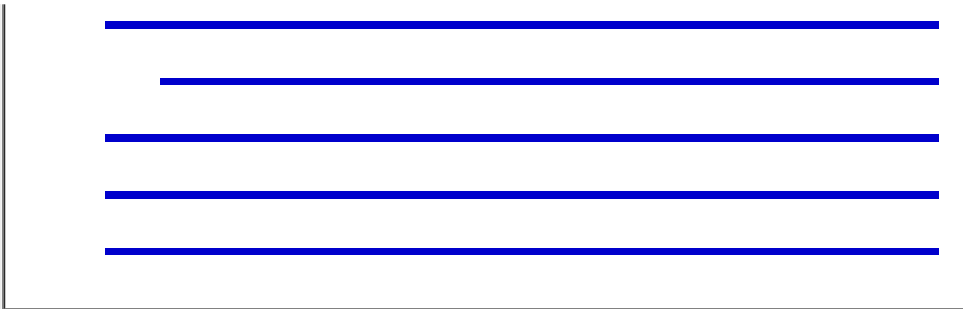

**Descriptions**

**Sequences producing significant alignments:**

Select: [All](#) [None](#) Selected:0

[Alignments](#)
[Download](#)
[GenPept](#)
[Graphics](#)
[Distance tree of results](#)
[Multiple alignment](#)


| Description                                                                                  | Max score | Total score | Query cover | E value | Ident | Accession                      |
|----------------------------------------------------------------------------------------------|-----------|-------------|-------------|---------|-------|--------------------------------|
| <a href="#">glycosylphosphatidylinositol phospholipase D [Homo sapiens]</a>                  | 48.6      | 48.6        | 100%        | 3e-05   | 93%   | <a href="#">CAC14844.1</a>     |
| <a href="#">Unknown (protein for IMAGE:3354070) [Homo sapiens]</a>                           | 48.6      | 48.6        | 100%        | 3e-05   | 93%   | <a href="#">AAH07614.1</a>     |
| <a href="#">PREDICTED: phosphatidylinositol-glycan-specific phospholipase D isoform X:</a>   | 48.6      | 48.6        | 100%        | 3e-05   | 93%   | <a href="#">XP_009202774.1</a> |
| <a href="#">PREDICTED: phosphatidylinositol-glycan-specific phospholipase D isoform X:</a>   | 48.6      | 48.6        | 100%        | 3e-05   | 93%   | <a href="#">XP_008975042.1</a> |
| <a href="#">PREDICTED: phosphatidylinositol-glycan-specific phospholipase D isoform X:</a>   | 48.6      | 48.6        | 100%        | 3e-05   | 93%   | <a href="#">XP_005553977.1</a> |
| <a href="#">PREDICTED: phosphatidylinositol-glycan-specific phospholipase D isoform X:</a>   | 48.6      | 48.6        | 100%        | 3e-05   | 93%   | <a href="#">XP_005249075.1</a> |
| <a href="#">PREDICTED: phosphatidylinositol-glycan-specific phospholipase D isoform X:</a>   | 48.6      | 48.6        | 100%        | 3e-05   | 93%   | <a href="#">XP_009202773.1</a> |
| <a href="#">PREDICTED: phosphatidylinositol-glycan-specific phospholipase D isoform X:</a>   | 48.6      | 48.6        | 100%        | 3e-05   | 93%   | <a href="#">XP_007971742.1</a> |
| <a href="#">PREDICTED: phosphatidylinositol-glycan-specific phospholipase D-like [Macaca</a> | 48.6      | 48.6        | 100%        | 3e-05   | 93%   | <a href="#">XP_002803682.1</a> |
| <a href="#">PREDICTED: phosphatidylinositol-glycan-specific phospholipase D [Pongo ab</a>    | 48.6      | 48.6        | 100%        | 3e-05   | 93%   | <a href="#">XP_009239742.1</a> |
| <a href="#">PREDICTED: phosphatidylinositol-glycan-specific phospholipase D isoform X:</a>   | 48.6      | 48.6        | 100%        | 3e-05   | 93%   | <a href="#">XP_007971741.1</a> |
| <a href="#">PREDICTED: phosphatidylinositol-glycan-specific phospholipase D isoform X:</a>   | 48.6      | 48.6        | 100%        | 3e-05   | 93%   | <a href="#">XP_007971740.1</a> |
| <a href="#">PREDICTED: phosphatidylinositol-glycan-specific phospholipase D isoform X:</a>   | 48.6      | 48.6        | 100%        | 3e-05   | 93%   | <a href="#">XP_007971746.1</a> |
| <a href="#">PREDICTED: phosphatidylinositol-glycan-specific phospholipase D isoform 2</a>    | 48.6      | 48.6        | 100%        | 3e-05   | 93%   | <a href="#">XP_004043389.1</a> |
| <a href="#">PREDICTED: phosphatidylinositol-glycan-specific phospholipase D isoform 1</a>    | 48.6      | 48.6        | 100%        | 3e-05   | 93%   | <a href="#">XP_004043388.1</a> |
| <a href="#">glycosylphosphatidylinositol phospholipase D [Homo sapiens]</a>                  | 48.6      | 48.6        | 100%        | 3e-05   | 93%   | <a href="#">CAC87068.1</a>     |
| <a href="#">phospholipase D [Homo sapiens]</a>                                               | 48.6      | 48.6        | 100%        | 3e-05   | 93%   | <a href="#">AAA36445.1</a>     |
| <a href="#">PREDICTED: phosphatidylinositol-glycan-specific phospholipase D isoform X:</a>   | 48.6      | 48.6        | 100%        | 3e-05   | 93%   | <a href="#">XP_003823243.1</a> |
| <a href="#">phosphatidylinositol-glycan-specific phospholipase D precursor [Homo sapien:</a> | 48.6      | 48.6        | 100%        | 3e-05   | 93%   | <a href="#">NP_001494.2</a>    |
| <a href="#">glycosylphosphatidylinositol-specific phospholipase D precursor [Homo sapier</a> | 48.6      | 48.6        | 100%        | 3e-05   | 93%   | <a href="#">AAG16627.2</a>     |
| <a href="#">PREDICTED: phosphatidylinositol-glycan-specific phospholipase D [Rhinopith</a>   | 48.6      | 48.6        | 100%        | 3e-05   | 93%   | <a href="#">XP_010363586.1</a> |
| <a href="#">phospholipase D [Homo sapiens]</a>                                               | 48.6      | 48.6        | 100%        | 3e-05   | 93%   | <a href="#">AAA36444.1</a>     |
| <a href="#">PREDICTED: phosphatidylinositol-glycan-specific phospholipase D isoform X:</a>   | 48.6      | 48.6        | 100%        | 3e-05   | 93%   | <a href="#">XP_005553976.1</a> |
| <a href="#">PREDICTED: phosphatidylinositol-glycan-specific phospholipase D isoform X:</a>   | 48.6      | 48.6        | 100%        | 3e-05   | 93%   | <a href="#">XP_003897171.1</a> |
| <a href="#">PREDICTED: phosphatidylinositol-glycan-specific phospholipase D [Pan trogl</a>   | 48.6      | 48.6        | 100%        | 3e-05   | 93%   | <a href="#">XP_518268.4</a>    |
| <a href="#">PREDICTED: phosphatidylinositol-glycan-specific phospholipase D isoform X:</a>   | 48.6      | 48.6        | 100%        | 3e-05   | 93%   | <a href="#">XP_009202772.1</a> |
| <a href="#">PREDICTED: phosphatidylinositol-glycan-specific phospholipase D isoform X:</a>   | 48.6      | 48.6        | 100%        | 3e-05   | 93%   | <a href="#">XP_008975041.1</a> |
| <a href="#">hypothetical protein EGM_13271 [Macaca fascicularis]</a>                         | 48.6      | 48.6        | 100%        | 3e-05   | 93%   | <a href="#">EHH52757.1</a>     |
| <a href="#">glycosylphosphatidylinositol specific phospholipase D1, isoform CRA_c [Homo</a>  | 48.6      | 48.6        | 100%        | 3e-05   | 93%   | <a href="#">EAW55450.1</a>     |

|                                                                                             |      |      |      |       |      |                                |
|---------------------------------------------------------------------------------------------|------|------|------|-------|------|--------------------------------|
| <a href="#">PREDICTED: phosphatidylinositol-glycan-specific phospholipase D isoform X:</a>  | 48.6 | 48.6 | 100% | 3e-05 | 93%  | <a href="#">XP_005553975.1</a> |
| <a href="#">PREDICTED: phosphatidylinositol-glycan-specific phospholipase D [Saimiri b:</a> | 48.1 | 48.1 | 93%  | 4e-05 | 100% | <a href="#">XP_003927350.1</a> |
| <a href="#">PREDICTED: phosphatidylinositol-glycan-specific phospholipase D [Callithrix</a> | 47.7 | 47.7 | 100% | 6e-05 | 93%  | <a href="#">XP_002746229.2</a> |
| <a href="#">PREDICTED: phosphatidylinositol-glycan-specific phospholipase D [Orycterop</a>  | 45.2 | 45.2 | 100% | 4e-04 | 93%  | <a href="#">XP_007948002.1</a> |
| <a href="#">hypothetical protein EGK_21153 [Macaca mulatta]</a>                             | 44.8 | 44.8 | 100% | 6e-04 | 87%  | <a href="#">EHH25414.1</a>     |
| <a href="#">PREDICTED: phosphatidylinositol-glycan-specific phospholipase D [Condylur:</a>  | 44.3 | 44.3 | 100% | 8e-04 | 87%  | <a href="#">XP_004693375.1</a> |
| <a href="#">PREDICTED: phosphatidylinositol-glycan-specific phospholipase D [Sus scrof</a>  | 44.3 | 44.3 | 100% | 8e-04 | 87%  | <a href="#">XP_001925944.5</a> |
| <a href="#">Phosphatidylinositol-glycan-specific phospholipase D [Pteropus alecto]</a>      | 43.9 | 43.9 | 100% | 0.001 | 87%  | <a href="#">ELK05805.1</a>     |
| <a href="#">PREDICTED: phosphatidylinositol-glycan-specific phospholipase D isoform X:</a>  | 43.9 | 43.9 | 100% | 0.001 | 87%  | <a href="#">XP_006919597.1</a> |
| <a href="#">PREDICTED: phosphatidylinositol-glycan-specific phospholipase D [Leptonyc]</a>  | 43.9 | 43.9 | 100% | 0.001 | 87%  | <a href="#">XP_006739372.1</a> |
| <a href="#">PREDICTED: phosphatidylinositol-glycan-specific phospholipase D [Nomascu</a>    | 43.9 | 43.9 | 100% | 0.001 | 87%  | <a href="#">XP_003263611.1</a> |
| <a href="#">PREDICTED: phosphatidylinositol-glycan-specific phospholipase D [Trichech</a>   | 41.8 | 41.8 | 100% | 0.005 | 87%  | <a href="#">XP_004384046.1</a> |
| <a href="#">PREDICTED: phosphatidylinositol-glycan-specific phospholipase D [Loxodont</a>   | 41.8 | 41.8 | 100% | 0.005 | 87%  | <a href="#">XP_003416488.1</a> |
| <a href="#">PREDICTED: phosphatidylinositol-glycan-specific phospholipase D [Qodobenu</a>   | 41.4 | 41.4 | 100% | 0.008 | 80%  | <a href="#">XP_004406584.1</a> |
| <a href="#">PREDICTED: phosphatidylinositol-glycan-specific phospholipase D isoform X:</a>  | 40.9 | 40.9 | 93%  | 0.010 | 86%  | <a href="#">XP_006051268.1</a> |
| <a href="#">PREDICTED: phosphatidylinositol-glycan-specific phospholipase D [Capra hir</a>  | 40.9 | 40.9 | 93%  | 0.010 | 86%  | <a href="#">XP_005696842.1</a> |
| <a href="#">PREDICTED: phosphatidylinositol-glycan-specific phospholipase D [Ovis arie:</a> | 40.9 | 40.9 | 93%  | 0.010 | 86%  | <a href="#">XP_004019154.1</a> |
| <a href="#">PREDICTED: phosphatidylinositol-glycan-specific phospholipase D [Panthera</a>   | 40.9 | 40.9 | 100% | 0.010 | 80%  | <a href="#">XP_007074479.1</a> |
| <a href="#">PREDICTED: phosphatidylinositol-glycan-specific phospholipase D isoform X:</a>  | 40.9 | 40.9 | 93%  | 0.010 | 86%  | <a href="#">XP_006051267.1</a> |
| <a href="#">PREDICTED: phosphatidylinositol-glycan-specific phospholipase D isoform X:</a>  | 40.9 | 40.9 | 93%  | 0.010 | 86%  | <a href="#">XP_006051266.1</a> |
| <a href="#">PREDICTED: phosphatidylinositol-glycan-specific phospholipase D isoform X:</a>  | 40.9 | 40.9 | 93%  | 0.010 | 86%  | <a href="#">XP_006051265.1</a> |
| <a href="#">PREDICTED: phosphatidylinositol-glycan-specific phospholipase D isoform X:</a>  | 40.9 | 40.9 | 93%  | 0.010 | 86%  | <a href="#">XP_006051264.1</a> |
| <a href="#">hypothetical protein CB1_000595062 [Camelus ferus]</a>                          | 40.5 | 40.5 | 100% | 0.014 | 80%  | <a href="#">EPY83136.1</a>     |
| <a href="#">PREDICTED: phosphatidylinositol-glycan-specific phospholipase D [Eptesicus</a>  | 40.5 | 40.5 | 93%  | 0.014 | 86%  | <a href="#">XP_008145534.1</a> |
| <a href="#">PREDICTED: LOW QUALITY PROTEIN: phosphatidylinositol-glycan-specific</a>        | 40.5 | 40.5 | 100% | 0.014 | 80%  | <a href="#">XP_006182298.1</a> |
| <a href="#">PREDICTED: phosphatidylinositol-glycan-specific phospholipase D [Camelus</a>    | 40.5 | 40.5 | 100% | 0.014 | 80%  | <a href="#">XP_010944080.1</a> |
| <a href="#">PREDICTED: LOW QUALITY PROTEIN: phosphatidylinositol-glycan-specific</a>        | 40.5 | 40.5 | 100% | 0.014 | 80%  | <a href="#">XP_010978426.1</a> |
| <a href="#">PREDICTED: phosphatidylinositol-glycan-specific phospholipase D [Vicugna r</a>  | 40.5 | 40.5 | 100% | 0.014 | 80%  | <a href="#">XP_006198740.1</a> |
| <a href="#">PREDICTED: LOW QUALITY PROTEIN: phosphatidylinositol-glycan-specific</a>        | 40.1 | 40.1 | 93%  | 0.020 | 86%  | <a href="#">XP_005863221.1</a> |
| <a href="#">PREDICTED: phosphatidylinositol-glycan-specific phospholipase D isoform X:</a>  | 39.7 | 39.7 | 100% | 0.027 | 80%  | <a href="#">XP_008511735.1</a> |
| <a href="#">PREDICTED: phosphatidylinositol-glycan-specific phospholipase D isoform X:</a>  | 39.7 | 39.7 | 100% | 0.027 | 80%  | <a href="#">XP_008511734.1</a> |
| <a href="#">PREDICTED: phosphatidylinositol-glycan-specific phospholipase D [Equus ca</a>   | 39.7 | 39.7 | 100% | 0.027 | 80%  | <a href="#">XP_001497586.1</a> |
| <a href="#">PREDICTED: phosphatidylinositol-glycan-specific phospholipase D isoform X:</a>  | 39.7 | 39.7 | 100% | 0.027 | 80%  | <a href="#">XP_008511732.1</a> |
| <a href="#">PREDICTED: phosphatidylinositol-glycan-specific phospholipase D isoform X:</a>  | 39.7 | 39.7 | 100% | 0.027 | 80%  | <a href="#">XP_008511731.1</a> |
| <a href="#">PREDICTED: phosphatidylinositol-glycan-specific phospholipase D isoform X:</a>  | 39.7 | 39.7 | 100% | 0.027 | 80%  | <a href="#">XP_008511730.1</a> |
| <a href="#">Phosphatidylinositol-glycan-specific phospholipase D [Myotis brandtii]</a>      | 39.2 | 39.2 | 86%  | 0.037 | 92%  | <a href="#">EPQ05831.1</a>     |
| <a href="#">PREDICTED: phosphatidylinositol-glycan-specific phospholipase D isoform X:</a>  | 39.2 | 39.2 | 100% | 0.038 | 80%  | <a href="#">XP_004761311.1</a> |
| <a href="#">PREDICTED: phosphatidylinositol-glycan-specific phospholipase D [Physeter</a>   | 39.2 | 39.2 | 100% | 0.038 | 80%  | <a href="#">XP_007116306.1</a> |
| <a href="#">PREDICTED: phosphatidylinositol-glycan-specific phospholipase D [Orcinus c</a>  | 39.2 | 39.2 | 100% | 0.038 | 80%  | <a href="#">XP_004273574.1</a> |
| <a href="#">PREDICTED: phosphatidylinositol-glycan-specific phospholipase D isoform X:</a>  | 39.2 | 39.2 | 100% | 0.038 | 80%  | <a href="#">XP_007197201.1</a> |
| <a href="#">PREDICTED: phosphatidylinositol-glycan-specific phospholipase D isoform X:</a>  | 39.2 | 39.2 | 100% | 0.038 | 80%  | <a href="#">XP_007197200.1</a> |
| <a href="#">PREDICTED: phosphatidylinositol-glycan-specific phospholipase D isoform X:</a>  | 39.2 | 39.2 | 100% | 0.038 | 80%  | <a href="#">XP_004761310.1</a> |
| <a href="#">PREDICTED: phosphatidylinositol-glycan-specific phospholipase D [Tursiops</a>   | 39.2 | 39.2 | 100% | 0.038 | 80%  | <a href="#">XP_004313968.1</a> |
| <a href="#">PREDICTED: phosphatidylinositol-glycan-specific phospholipase D [Ochotona</a>   | 38.4 | 38.4 | 100% | 0.071 | 80%  | <a href="#">XP_004593176.1</a> |
| <a href="#">PREDICTED: phosphatidylinositol-glycan-specific phospholipase D [Ceratotho</a>  | 38.4 | 38.4 | 100% | 0.071 | 80%  | <a href="#">XP_004432133.1</a> |



|                                                                                             |      |      |      |       |     |                                |
|---------------------------------------------------------------------------------------------|------|------|------|-------|-----|--------------------------------|
| <a href="#">PREDICTED: phosphatidylinositol-glycan-specific phospholipase D isoform X:</a>  | 38.0 | 38.0 | 100% | 0.098 | 80% | <a href="#">XP_007454575.1</a> |
| <a href="#">PREDICTED: phosphatidylinositol-glycan-specific phospholipase D isoform X:</a>  | 38.0 | 38.0 | 100% | 0.098 | 80% | <a href="#">XP_007454574.1</a> |
| <a href="#">PREDICTED: phosphatidylinositol-glycan-specific phospholipase D [Elephant</a>   | 38.0 | 38.0 | 100% | 0.098 | 80% | <a href="#">XP_006888712.1</a> |
| <a href="#">PREDICTED: LOW QUALITY PROTEIN: phosphatidylinositol-glycan-specific</a>        | 37.5 | 37.5 | 93%  | 0.13  | 79% | <a href="#">XP_005903212.1</a> |
| <a href="#">Phosphatidylinositol-glycan-specific phospholipase D [Bos mutus]</a>            | 37.5 | 37.5 | 93%  | 0.13  | 79% | <a href="#">ELR50996.1</a>     |
| <a href="#">PREDICTED: phosphatidylinositol-glycan-specific phospholipase D isoform X:</a>  | 37.5 | 37.5 | 93%  | 0.13  | 79% | <a href="#">XP_010841812.1</a> |
| <a href="#">phosphatidylinositol-glycan-specific phospholipase D precursor [Bos taurus]</a> | 37.5 | 37.5 | 93%  | 0.13  | 79% | <a href="#">NP_777241.1</a>    |
| <a href="#">TPA: phosphatidylinositol-glycan-specific phospholipase D [Bos taurus]</a>      | 37.5 | 37.5 | 93%  | 0.13  | 79% | <a href="#">DAA16116.1</a>     |
| <a href="#">PREDICTED: phosphatidylinositol-glycan-specific phospholipase D isoform X:</a>  | 37.5 | 37.5 | 93%  | 0.13  | 79% | <a href="#">XP_010841810.1</a> |
| <a href="#">PREDICTED: phosphatidylinositol-glycan-specific phospholipase D isoform X:</a>  | 37.5 | 37.5 | 93%  | 0.13  | 79% | <a href="#">XP_005223795.1</a> |
| <a href="#">PREDICTED: phosphatidylinositol-glycan-specific phospholipase D isoform X:</a>  | 37.5 | 37.5 | 93%  | 0.13  | 79% | <a href="#">XP_005223794.1</a> |
| <a href="#">PREDICTED: phosphatidylinositol-glycan-specific phospholipase D isoform X:</a>  | 37.5 | 37.5 | 93%  | 0.13  | 79% | <a href="#">XP_010816770.1</a> |
| <a href="#">PREDICTED: phosphatidylinositol-glycan-specific phospholipase D [Erinaceu</a>   | 37.1 | 37.1 | 100% | 0.18  | 73% | <a href="#">XP_007526005.1</a> |
| <a href="#">hypothetical protein PANDA_003876 [Ailuropoda melanoleuca]</a>                  | 36.7 | 36.7 | 93%  | 0.25  | 79% | <a href="#">EFB28343.1</a>     |
| <a href="#">PREDICTED: phosphatidylinositol-glycan-specific phospholipase D isoform X:</a>  | 36.7 | 36.7 | 93%  | 0.25  | 86% | <a href="#">XP_005640137.1</a> |
| <a href="#">PREDICTED: phosphatidylinositol-glycan-specific phospholipase D isoformX1</a>   | 36.7 | 36.7 | 93%  | 0.25  | 86% | <a href="#">XP_535902.2</a>    |
| <a href="#">PREDICTED: phosphatidylinositol-glycan-specific phospholipase D-like [Ailur</a> | 36.7 | 36.7 | 93%  | 0.25  | 79% | <a href="#">XP_002915859.1</a> |
| <a href="#">PREDICTED: phosphatidylinositol-glycan-specific phospholipase D isoform X:</a>  | 36.7 | 36.7 | 93%  | 0.25  | 86% | <a href="#">XP_005640136.1</a> |
| <a href="#">PREDICTED: phosphatidylinositol-glycan-specific phospholipase D [Pantholo</a>   | 36.3 | 36.3 | 93%  | 0.35  | 79% | <a href="#">XP_005973908.1</a> |
| <a href="#">PREDICTED: phosphatidylinositol-glycan-specific phospholipase D [Galeopte</a>   | 36.3 | 36.3 | 100% | 0.35  | 73% | <a href="#">XP_008578807.1</a> |
| <a href="#">PREDICTED: phosphatidylinositol-glycan-specific phospholipase D [Chinchill</a>  | 35.8 | 35.8 | 80%  | 0.48  | 92% | <a href="#">XP_005403486.1</a> |
| <a href="#">PREDICTED: phosphatidylinositol-glycan-specific phospholipase D [Tarsius s:</a> | 35.0 | 35.0 | 100% | 0.89  | 73% | <a href="#">XP_008048656.1</a> |
| <a href="#">PREDICTED: phosphatidylinositol-glycan-specific phospholipase D [Jaculus j:</a> | 34.6 | 34.6 | 80%  | 1.2   | 83% | <a href="#">XP_004669997.1</a> |
| <a href="#">PREDICTED: phosphatidylinositol-glycan-specific phospholipase D [Ictidomys</a>  | 34.6 | 34.6 | 93%  | 1.2   | 79% | <a href="#">XP_005337080.1</a> |
| <a href="#">PREDICTED: LOW QUALITY PROTEIN: phosphatidylinositol-glycan-specific</a>        | 34.6 | 34.6 | 100% | 1.2   | 73% | <a href="#">XP_003788429.1</a> |
| <a href="#">PREDICTED: phosphatidylinositol-glycan-specific phospholipase D [Chrysoch</a>   | 32.9 | 32.9 | 93%  | 4.2   | 71% | <a href="#">XP_006878008.1</a> |

## Alignments

Download [GenPept](#) [Graphics](#)

[Next](#) [Previous](#) [Descriptions](#)

glycosylphosphatidylinositol phospholipase D [Homo sapiens]

Sequence ID: [emb|CAC14844.1](#) Length: 457 Number of Matches: 1

Range 1: 176 to 190 [GenPept](#) [Graphics](#)

[Next Match](#) [Previous Match](#)

| Score          | Expect | Identities | Positives   | Gaps     |
|----------------|--------|------------|-------------|----------|
| 48.6 bits(107) | 3e-05  | 14/15(93%) | 15/15(100%) | 0/15(0%) |

Query 1 KEKLNVEAADWTVRG 15  
KEKLNVEAA+WTVRG  
Sbjct 176 KEKLNVEAANWTVRG 190

### Related Information

[Gene](#) - associated gene details

Download [GenPept](#) [Graphics](#)

[Next](#) [Previous](#) [Descriptions](#)

Unknown (protein for IMAGE:3354070), partial [Homo sapiens]

Sequence ID: [gb|AAH07614.1](#) Length: 575 Number of Matches: 1

Range 1: 294 to 308 [GenPept](#) [Graphics](#)

[Next Match](#) [Previous Match](#)

| Score          | Expect | Identities | Positives   | Gaps     |
|----------------|--------|------------|-------------|----------|
| 48.6 bits(107) | 3e-05  | 14/15(93%) | 15/15(100%) | 0/15(0%) |

### Related Information

[Gene](#) - associated gene details

Query 1 KEKLNVEAADWTVRG 15  
 KEKLNVEAA+WTVRG  
 Sbjct 294 KEKLNVEAANWTVRG 308

[Download](#) [GenPept](#) [Graphics](#)

[Next](#) [Previous](#) [Descriptions](#)

PREDICTED: phosphatidylinositol-glycan-specific phospholipase D isoform X4 [Papio anubis]

Sequence ID: [ref|XP\\_009202774.1|](#) Length: 677 Number of Matches: 1

Range 1: 396 to 410 [GenPept](#) [Graphics](#)

[Next Match](#) [Previous Match](#)

| Score          | Expect | Identities | Positives   | Gaps     |
|----------------|--------|------------|-------------|----------|
| 48.6 bits(107) | 3e-05  | 14/15(93%) | 15/15(100%) | 0/15(0%) |

Query 1 KEKLNVEAADWTVRG 15  
 KEKLNVEAA+WTVRG  
 Sbjct 396 KEKLNVEAANWTVRG 410

**Related Information**

[Gene](#) - associated gene details  
[Map Viewer](#) - aligned genomic context

[Download](#) [GenPept](#) [Graphics](#)

[Next](#) [Previous](#) [Descriptions](#)

PREDICTED: phosphatidylinositol-glycan-specific phospholipase D isoform X3 [Pan paniscus]

Sequence ID: [ref|XP\\_008975042.1|](#) Length: 677 Number of Matches: 1

Range 1: 396 to 410 [GenPept](#) [Graphics](#)

[Next Match](#) [Previous Match](#)

| Score          | Expect | Identities | Positives   | Gaps     |
|----------------|--------|------------|-------------|----------|
| 48.6 bits(107) | 3e-05  | 14/15(93%) | 15/15(100%) | 0/15(0%) |

Query 1 KEKLNVEAADWTVRG 15  
 KEKLNVEAA+WTVRG  
 Sbjct 396 KEKLNVEAANWTVRG 410

**Related Information**

[Gene](#) - associated gene details  
[Map Viewer](#) - aligned genomic context

[Download](#) [GenPept](#) [Graphics](#)

[Next](#) [Previous](#) [Descriptions](#)

PREDICTED: phosphatidylinositol-glycan-specific phospholipase D isoform X3 [Macaca fascicularis]

Sequence ID: [ref|XP\\_005553977.1|](#) Length: 677 Number of Matches: 1

Range 1: 396 to 410 [GenPept](#) [Graphics](#)

[Next Match](#) [Previous Match](#)

| Score          | Expect | Identities | Positives   | Gaps     |
|----------------|--------|------------|-------------|----------|
| 48.6 bits(107) | 3e-05  | 14/15(93%) | 15/15(100%) | 0/15(0%) |

Query 1 KEKLNVEAADWTVRG 15  
 KEKLNVEAA+WTVRG  
 Sbjct 396 KEKLNVEAANWTVRG 410

**Related Information**

[Gene](#) - associated gene details

BLAST is a registered trademark of the National Library of Medicine.



NCBI/ BLAST/ blastp suite/ Formatting Results - B9FCV9F301R

Your search parameters were adjusted to search for a short input sequence.

Edit and Resubmit Save Search Strategies Formatting options Download

YouTube How to read this page Blast report description

GPLD1\_KEKLNVEAANWTVRG\_NonMod

RID B9FCV9F301R (Expires on 01-14 13:39 pm)

Query ID lcl|253118
Description None
Molecule type amino acid
Query Length 15

Database Name nr
Description All non-redundant GenBank CDS translations+PDB+SwissProt+PIR excluding environmental samples from WGS projects
Program BLASTP 2.2.30+ Citation

Other reports: Search Summary Taxonomy reports Distance tree of results Multiple alignment

Graphic Summary

Show Conserved Domains

No putative conserved domains have been detected

Distribution of 100 Blast Hits on the Query Sequence

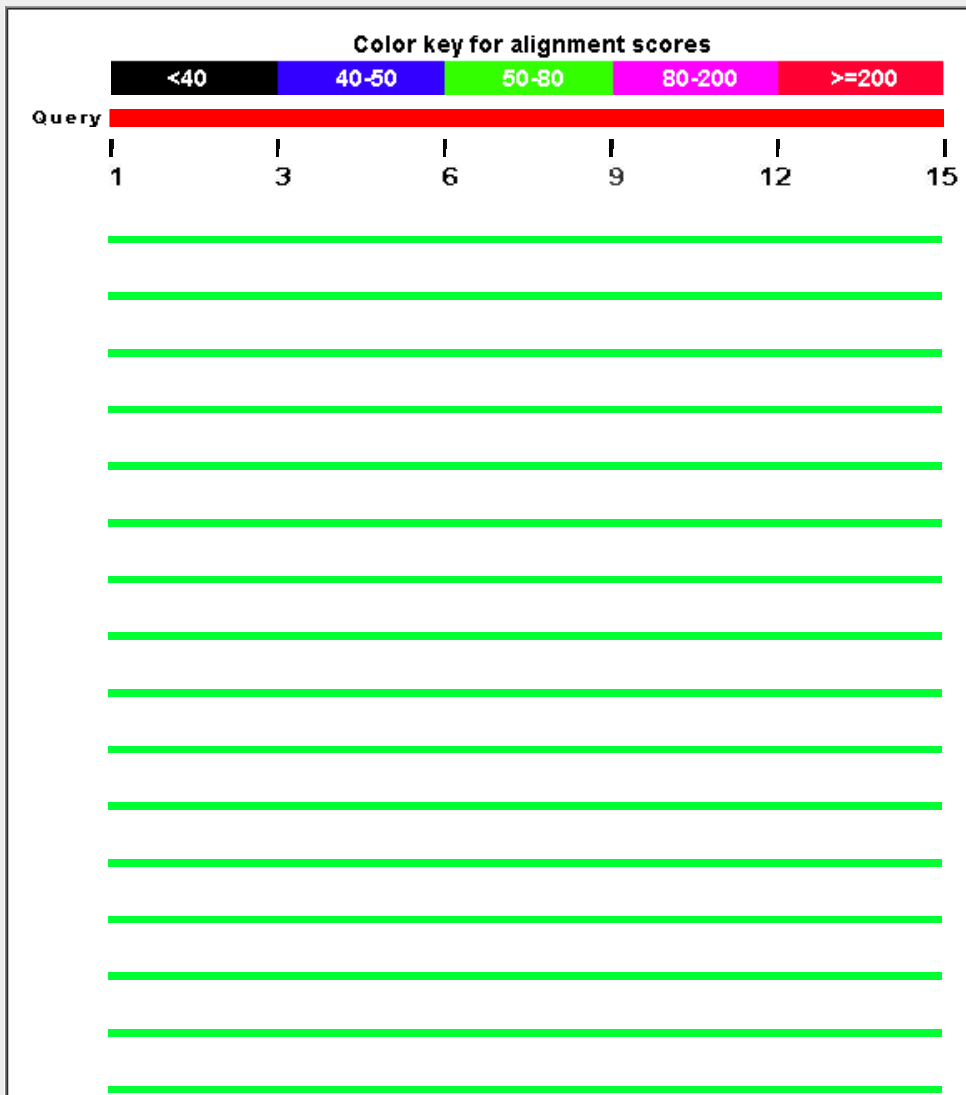

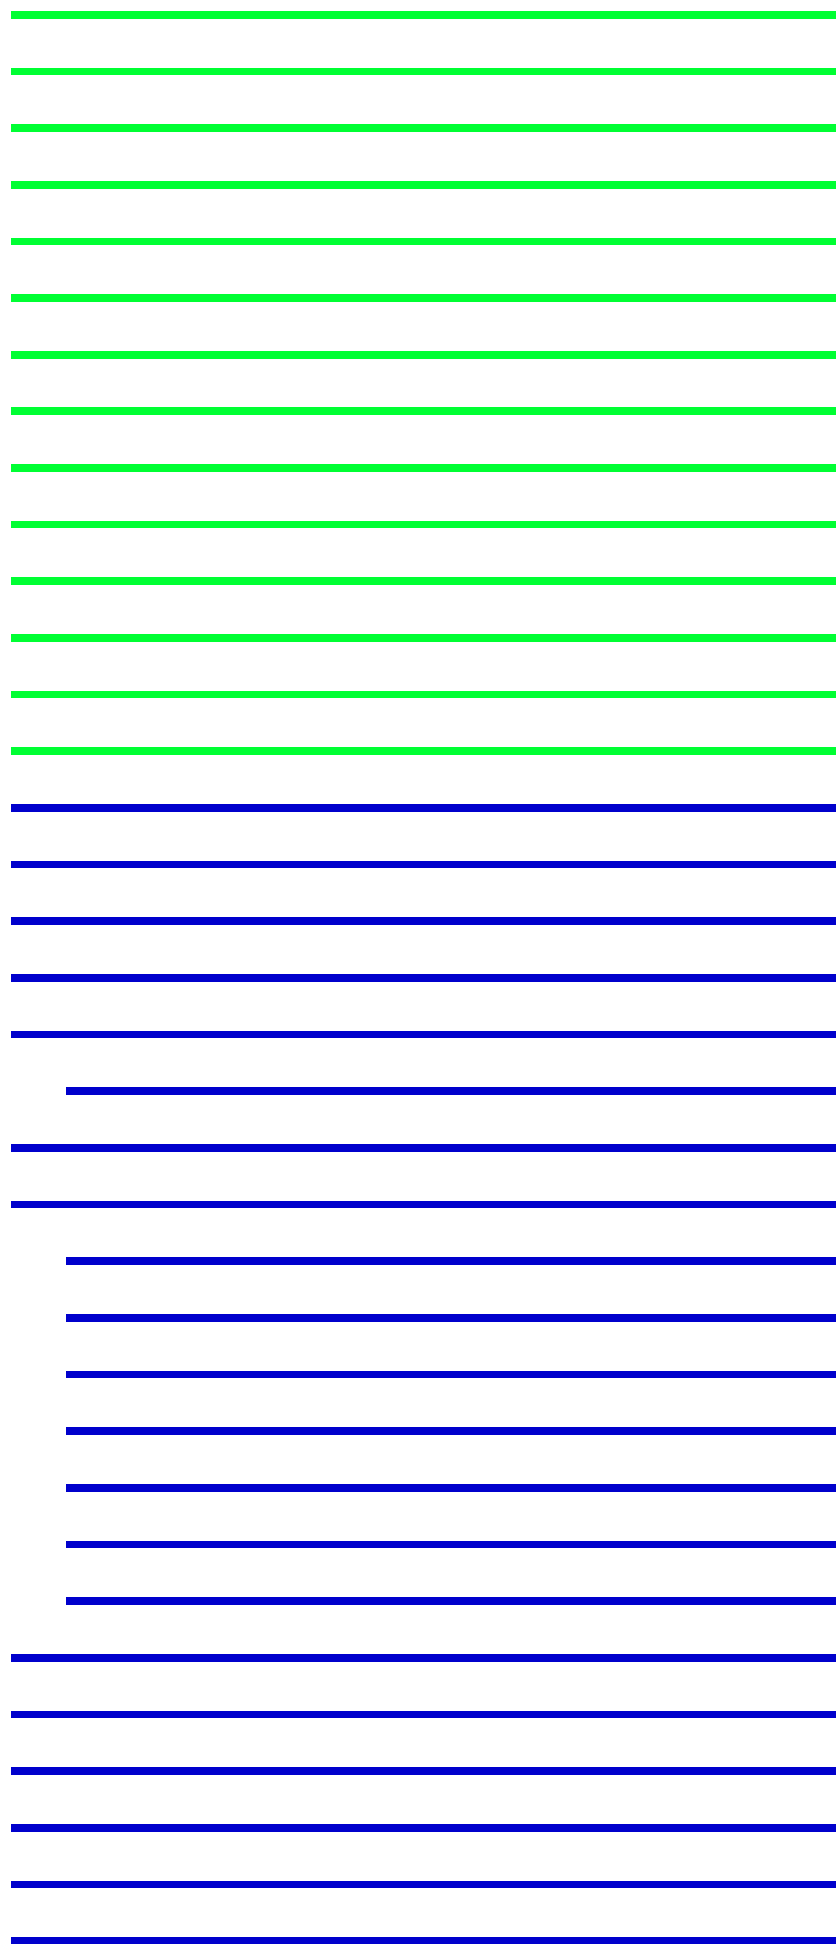

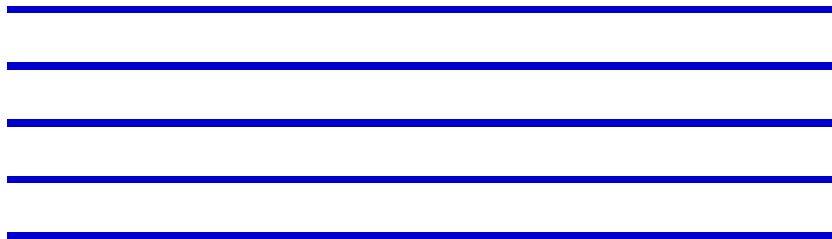

**Descriptions**

**Sequences producing significant alignments:**

Select: [All](#) [None](#) Selected:0

Alignments Download GenPept Graphics Distance tree of results Multiple alignment

| Description                                                                         | Max score | Total score | Query cover | E value | Ident | Accession                                   |
|-------------------------------------------------------------------------------------|-----------|-------------|-------------|---------|-------|---------------------------------------------|
| <a href="#">glycosylphosphatidylinositol phospholipase D [Homo sapiens]</a>         | 51.1      | 51.1        | 100%        | 4e-06   | 100%  | <a href="#">gi 11122875 CAC14844.1</a>      |
| <a href="#">Unknown (protein for IMAGE:3354070) [Homo sapiens]</a>                  | 51.1      | 51.1        | 100%        | 4e-06   | 100%  | <a href="#">gi 14043248 AAH07614.1</a>      |
| <a href="#">PREDICTED: phosphatidylinositol-glycan-specific phospholipase D</a>     | 51.1      | 51.1        | 100%        | 4e-06   | 100%  | <a href="#">gi 685535046 XP_009202774.1</a> |
| <a href="#">PREDICTED: phosphatidylinositol-glycan-specific phospholipase D</a>     | 51.1      | 51.1        | 100%        | 4e-06   | 100%  | <a href="#">gi 675773160 XP_008975042.1</a> |
| <a href="#">PREDICTED: phosphatidylinositol-glycan-specific phospholipase D</a>     | 51.1      | 51.1        | 100%        | 4e-06   | 100%  | <a href="#">gi 544429971 XP_005553977.1</a> |
| <a href="#">PREDICTED: phosphatidylinositol-glycan-specific phospholipase D</a>     | 51.1      | 51.1        | 100%        | 4e-06   | 100%  | <a href="#">gi 530381810 XP_005249075.1</a> |
| <a href="#">PREDICTED: phosphatidylinositol-glycan-specific phospholipase D</a>     | 51.1      | 51.1        | 100%        | 4e-06   | 100%  | <a href="#">gi 685535044 XP_009202773.1</a> |
| <a href="#">PREDICTED: phosphatidylinositol-glycan-specific phospholipase D</a>     | 51.1      | 51.1        | 100%        | 4e-06   | 100%  | <a href="#">gi 635096985 XP_007971742.1</a> |
| <a href="#">PREDICTED: phosphatidylinositol-glycan-specific phospholipase D</a>     | 51.1      | 51.1        | 100%        | 4e-06   | 100%  | <a href="#">gi 297290177 XP_002803682.1</a> |
| <a href="#">PREDICTED: phosphatidylinositol-glycan-specific phospholipase D</a>     | 51.1      | 51.1        | 100%        | 4e-06   | 100%  | <a href="#">gi 686720936 XP_009239742.1</a> |
| <a href="#">PREDICTED: phosphatidylinositol-glycan-specific phospholipase D</a>     | 51.1      | 51.1        | 100%        | 4e-06   | 100%  | <a href="#">gi 635096983 XP_007971741.1</a> |
| <a href="#">PREDICTED: phosphatidylinositol-glycan-specific phospholipase D</a>     | 51.1      | 51.1        | 100%        | 4e-06   | 100%  | <a href="#">gi 635096981 XP_007971740.1</a> |
| <a href="#">PREDICTED: phosphatidylinositol-glycan-specific phospholipase D</a>     | 51.1      | 51.1        | 100%        | 4e-06   | 100%  | <a href="#">gi 635096993 XP_007971746.1</a> |
| <a href="#">PREDICTED: phosphatidylinositol-glycan-specific phospholipase D</a>     | 51.1      | 51.1        | 100%        | 4e-06   | 100%  | <a href="#">gi 426351748 XP_004043389.1</a> |
| <a href="#">PREDICTED: phosphatidylinositol-glycan-specific phospholipase D</a>     | 51.1      | 51.1        | 100%        | 4e-06   | 100%  | <a href="#">gi 426351746 XP_004043388.1</a> |
| <a href="#">glycosylphosphatidylinositol phospholipase D [Homo sapiens]</a>         | 51.1      | 51.1        | 100%        | 4e-06   | 100%  | <a href="#">gi 20269065 CAC87068.1</a>      |
| <a href="#">phospholipase D [Homo sapiens]</a>                                      | 51.1      | 51.1        | 100%        | 4e-06   | 100%  | <a href="#">gi 388765 AAA36445.1</a>        |
| <a href="#">PREDICTED: phosphatidylinositol-glycan-specific phospholipase D</a>     | 51.1      | 51.1        | 100%        | 4e-06   | 100%  | <a href="#">gi 397505380 XP_003823243.1</a> |
| <a href="#">phosphatidylinositol-glycan-specific phospholipase D precursor [Ho</a>  | 51.1      | 51.1        | 100%        | 4e-06   | 100%  | <a href="#">gi 29171717 INP_001494.2</a>    |
| <a href="#">glycosylphosphatidylinositol-specific phospholipase D precursor [Hc</a> | 51.1      | 51.1        | 100%        | 4e-06   | 100%  | <a href="#">gi 14195001 AAG16627.2</a>      |
| <a href="#">PREDICTED: phosphatidylinositol-glycan-specific phospholipase D</a>     | 51.1      | 51.1        | 100%        | 4e-06   | 100%  | <a href="#">gi 724798150 XP_010363586.1</a> |
| <a href="#">phospholipase D [Homo sapiens]</a>                                      | 51.1      | 51.1        | 100%        | 4e-06   | 100%  | <a href="#">gi 388763 AAA36444.1</a>        |
| <a href="#">PREDICTED: phosphatidylinositol-glycan-specific phospholipase D</a>     | 51.1      | 51.1        | 100%        | 4e-06   | 100%  | <a href="#">gi 544429969 XP_005553976.1</a> |
| <a href="#">PREDICTED: phosphatidylinositol-glycan-specific phospholipase D</a>     | 51.1      | 51.1        | 100%        | 4e-06   | 100%  | <a href="#">gi 402865969 XP_003897171.1</a> |
| <a href="#">PREDICTED: phosphatidylinositol-glycan-specific phospholipase D</a>     | 51.1      | 51.1        | 100%        | 4e-06   | 100%  | <a href="#">gi 410040317 XP_518268.4</a>    |
| <a href="#">PREDICTED: phosphatidylinositol-glycan-specific phospholipase D</a>     | 51.1      | 51.1        | 100%        | 4e-06   | 100%  | <a href="#">gi 685535041 XP_009202772.1</a> |
| <a href="#">PREDICTED: phosphatidylinositol-glycan-specific phospholipase D</a>     | 51.1      | 51.1        | 100%        | 4e-06   | 100%  | <a href="#">gi 675773152 XP_008975041.1</a> |
| <a href="#">hypothetical protein EGM_13271 [Macaca fascicularis]</a>                | 51.1      | 51.1        | 100%        | 4e-06   | 100%  | <a href="#">gi 355748274 EHH52757.1</a>     |

|                                                                                    |      |      |      |       |      |                                             |
|------------------------------------------------------------------------------------|------|------|------|-------|------|---------------------------------------------|
| glycosylphosphatidylinositol specific phospholipase D1, isoform CR.                | 51.1 | 51.1 | 100% | 4e-06 | 100% | <a href="#">gil119575854 EAW55450.1</a>     |
| <a href="#">PREDICTED: phosphatidylinositol-glycan-specific phospholipase D</a>    | 51.1 | 51.1 | 100% | 4e-06 | 100% | <a href="#">gil544429967 XP_005553975.1</a> |
| <a href="#">hypothetical protein EGK_21153 [Macaca mulatta]</a>                    | 47.3 | 47.3 | 100% | 7e-05 | 93%  | <a href="#">gil355569342 EHH25414.1</a>     |
| <a href="#">PREDICTED: phosphatidylinositol-glycan-specific phospholipase D</a>    | 46.9 | 46.9 | 100% | 1e-04 | 93%  | <a href="#">gil507979038 XP_004693375.1</a> |
| <a href="#">PREDICTED: phosphatidylinositol-glycan-specific phospholipase D</a>    | 46.9 | 46.9 | 100% | 1e-04 | 93%  | <a href="#">gil545837650 XP_001925944.5</a> |
| <a href="#">PREDICTED: phosphatidylinositol-glycan-specific phospholipase D</a>    | 46.4 | 46.4 | 100% | 1e-04 | 93%  | <a href="#">gil585175123 XP_006739372.1</a> |
| <a href="#">PREDICTED: phosphatidylinositol-glycan-specific phospholipase D</a>    | 46.4 | 46.4 | 100% | 1e-04 | 93%  | <a href="#">gil332228866 XP_003263611.1</a> |
| <a href="#">PREDICTED: phosphatidylinositol-glycan-specific phospholipase D</a>    | 45.6 | 45.6 | 93%  | 3e-04 | 93%  | <a href="#">gil403270800 XP_003927350.1</a> |
| <a href="#">PREDICTED: phosphatidylinositol-glycan-specific phospholipase D</a>    | 45.2 | 45.2 | 100% | 4e-04 | 87%  | <a href="#">gil675650934 XP_002746229.2</a> |
| <a href="#">PREDICTED: phosphatidylinositol-glycan-specific phospholipase D</a>    | 43.9 | 43.9 | 100% | 0.001 | 87%  | <a href="#">gil472374241 XP_004406584.1</a> |
| <a href="#">PREDICTED: phosphatidylinositol-glycan-specific phospholipase D</a>    | 43.5 | 43.5 | 93%  | 0.001 | 93%  | <a href="#">gil594053987 XP_006051268.1</a> |
| <a href="#">PREDICTED: phosphatidylinositol-glycan-specific phospholipase D</a>    | 43.5 | 43.5 | 93%  | 0.001 | 93%  | <a href="#">gil548518368 XP_005696842.1</a> |
| <a href="#">PREDICTED: phosphatidylinositol-glycan-specific phospholipase D</a>    | 43.5 | 43.5 | 93%  | 0.001 | 93%  | <a href="#">gil426250866 XP_004019154.1</a> |
| <a href="#">PREDICTED: phosphatidylinositol-glycan-specific phospholipase D</a>    | 43.5 | 43.5 | 93%  | 0.001 | 93%  | <a href="#">gil594053985 XP_006051267.1</a> |
| <a href="#">PREDICTED: phosphatidylinositol-glycan-specific phospholipase D</a>    | 43.5 | 43.5 | 93%  | 0.001 | 93%  | <a href="#">gil594053983 XP_006051266.1</a> |
| <a href="#">PREDICTED: phosphatidylinositol-glycan-specific phospholipase D</a>    | 43.5 | 43.5 | 93%  | 0.001 | 93%  | <a href="#">gil594053981 XP_006051265.1</a> |
| <a href="#">PREDICTED: phosphatidylinositol-glycan-specific phospholipase D</a>    | 43.5 | 43.5 | 93%  | 0.001 | 93%  | <a href="#">gil594053979 XP_006051264.1</a> |
| <a href="#">hypothetical protein CB1_000595062 [Camelus ferus]</a>                 | 43.1 | 43.1 | 100% | 0.002 | 87%  | <a href="#">gil528763477 EPY83136.1</a>     |
| <a href="#">PREDICTED: LOW QUALITY PROTEIN: phosphatidylinositol-glyca</a>         | 43.1 | 43.1 | 100% | 0.002 | 87%  | <a href="#">gil560912019 XP_006182298.1</a> |
| <a href="#">PREDICTED: phosphatidylinositol-glycan-specific phospholipase D</a>    | 43.1 | 43.1 | 100% | 0.002 | 87%  | <a href="#">gil560952422 XP_006198740.1</a> |
| <a href="#">PREDICTED: phosphatidylinositol-glycan-specific phospholipase D</a>    | 42.6 | 42.6 | 100% | 0.003 | 87%  | <a href="#">gil634873155 XP_007948002.1</a> |
| <a href="#">PREDICTED: phosphatidylinositol-glycan-specific phospholipase D</a>    | 42.2 | 42.2 | 100% | 0.004 | 87%  | <a href="#">gil664709546 XP_008511735.1</a> |
| <a href="#">PREDICTED: phosphatidylinositol-glycan-specific phospholipase D</a>    | 42.2 | 42.2 | 100% | 0.004 | 87%  | <a href="#">gil664709544 XP_008511734.1</a> |
| <a href="#">PREDICTED: phosphatidylinositol-glycan-specific phospholipase D</a>    | 42.2 | 42.2 | 100% | 0.004 | 87%  | <a href="#">gil149732005 XP_001497586.1</a> |
| <a href="#">PREDICTED: phosphatidylinositol-glycan-specific phospholipase D</a>    | 42.2 | 42.2 | 100% | 0.004 | 87%  | <a href="#">gil664709542 XP_008511732.1</a> |
| <a href="#">PREDICTED: phosphatidylinositol-glycan-specific phospholipase D</a>    | 42.2 | 42.2 | 100% | 0.004 | 87%  | <a href="#">gil664709540 XP_008511731.1</a> |
| <a href="#">PREDICTED: phosphatidylinositol-glycan-specific phospholipase D</a>    | 42.2 | 42.2 | 100% | 0.004 | 87%  | <a href="#">gil664709538 XP_008511730.1</a> |
| <a href="#">PREDICTED: phosphatidylinositol-glycan-specific phospholipase D</a>    | 41.8 | 41.8 | 100% | 0.005 | 87%  | <a href="#">gil511882880 XP_004761311.1</a> |
| <a href="#">PREDICTED: phosphatidylinositol-glycan-specific phospholipase D</a>    | 41.8 | 41.8 | 100% | 0.005 | 87%  | <a href="#">gil593754864 XP_007116306.1</a> |
| <a href="#">PREDICTED: phosphatidylinositol-glycan-specific phospholipase D</a>    | 41.8 | 41.8 | 100% | 0.005 | 87%  | <a href="#">gil466027702 XP_004273574.1</a> |
| <a href="#">PREDICTED: phosphatidylinositol-glycan-specific phospholipase D</a>    | 41.8 | 41.8 | 100% | 0.005 | 87%  | <a href="#">gil594700264 XP_007197201.1</a> |
| <a href="#">PREDICTED: phosphatidylinositol-glycan-specific phospholipase D</a>    | 41.8 | 41.8 | 100% | 0.005 | 87%  | <a href="#">gil594700262 XP_007197200.1</a> |
| <a href="#">PREDICTED: phosphatidylinositol-glycan-specific phospholipase D</a>    | 41.8 | 41.8 | 100% | 0.005 | 87%  | <a href="#">gil511882878 XP_004761310.1</a> |
| <a href="#">PREDICTED: phosphatidylinositol-glycan-specific phospholipase D</a>    | 41.8 | 41.8 | 100% | 0.005 | 87%  | <a href="#">gil470605744 XP_004313968.1</a> |
| <a href="#">Phosphatidylinositol-glycan-specific phospholipase D [Pteropus ale</a> | 41.4 | 41.4 | 100% | 0.007 | 80%  | <a href="#">gil431896393 ELK05805.1</a>     |
| <a href="#">PREDICTED: phosphatidylinositol-glycan-specific phospholipase D</a>    | 41.4 | 41.4 | 100% | 0.007 | 80%  | <a href="#">gil586529361 XP_006919597.1</a> |
| <a href="#">PREDICTED: phosphatidylinositol-glycan-specific phospholipase D</a>    | 40.9 | 40.9 | 100% | 0.010 | 87%  | <a href="#">gil478515788 XP_004432133.1</a> |
| <a href="#">PREDICTED: LOW QUALITY PROTEIN: phosphatidylinositol-glyca</a>         | 40.1 | 40.1 | 93%  | 0.019 | 86%  | <a href="#">gil555982613 XP_005903212.1</a> |
| <a href="#">Phosphatidylinositol-glycan-specific phospholipase D [Bos mutus]</a>   | 40.1 | 40.1 | 93%  | 0.019 | 86%  | <a href="#">gil440899735 ELR50996.1</a>     |
| <a href="#">phosphatidylinositol-glycan-specific phospholipase D precursor [Bo</a> | 40.1 | 40.1 | 93%  | 0.019 | 86%  | <a href="#">gil27807363 NP_777241.1</a>     |
| <a href="#">TPA: phosphatidylinositol-glycan-specific phospholipase D [Bos tau</a> | 40.1 | 40.1 | 93%  | 0.019 | 86%  | <a href="#">gil296474001 DAA16116.1</a>     |
| <a href="#">PREDICTED: phosphatidylinositol-glycan-specific phospholipase D</a>    | 40.1 | 40.1 | 93%  | 0.019 | 86%  | <a href="#">gil529003874 XP_005223795.1</a> |
| <a href="#">PREDICTED: phosphatidylinositol-glycan-specific phospholipase D</a>    | 40.1 | 40.1 | 93%  | 0.019 | 86%  | <a href="#">gil529003872 XP_005223794.1</a> |
| <a href="#">PREDICTED: phosphatidylinositol-glycan-specific phospholipase D</a>    | 40.1 | 40.1 | 93%  | 0.019 | 86%  | <a href="#">gil529003870 XP_005223793.1</a> |
| <a href="#">PREDICTED: phosphatidylinositol-glycan-specific phospholipase D</a>    | 39.7 | 39.7 | 100% | 0.026 | 80%  | <a href="#">gil617615072 XP_007526005.1</a> |

|                                                                                    |      |      |      |       |     |                                             |
|------------------------------------------------------------------------------------|------|------|------|-------|-----|---------------------------------------------|
| <a href="#">hypothetical protein PANDA_003876 [Ailuropoda melanoleuca]</a>         | 39.2 | 39.2 | 93%  | 0.035 | 86% | <a href="#">gil281352759 EFB28343.1</a>     |
| <a href="#">PREDICTED: phosphatidylinositol-glycan-specific phospholipase D</a>    | 39.2 | 39.2 | 100% | 0.035 | 80% | <a href="#">gil471403600 XP_004384046.1</a> |
| <a href="#">PREDICTED: phosphatidylinositol-glycan-specific phospholipase D</a>    | 39.2 | 39.2 | 100% | 0.035 | 80% | <a href="#">gil344289516 XP_003416488.1</a> |
| <a href="#">PREDICTED: phosphatidylinositol-glycan-specific phospholipase D</a>    | 39.2 | 39.2 | 93%  | 0.035 | 86% | <a href="#">gil301760102 XP_002915859.1</a> |
| <a href="#">PREDICTED: phosphatidylinositol-glycan-specific phospholipase D</a>    | 38.8 | 38.8 | 93%  | 0.049 | 86% | <a href="#">gil556757122 XP_005973908.1</a> |
| <a href="#">PREDICTED: phosphatidylinositol-glycan-specific phospholipase D</a>    | 38.8 | 38.8 | 100% | 0.049 | 80% | <a href="#">gil667294118 XP_008578807.1</a> |
| <a href="#">PREDICTED: phosphatidylinositol-glycan-specific phospholipase D</a>    | 38.4 | 38.4 | 100% | 0.067 | 73% | <a href="#">gil591294474 XP_007074479.1</a> |
| <a href="#">PREDICTED: phosphatidylinositol-glycan-specific phospholipase D</a>    | 38.0 | 38.0 | 93%  | 0.092 | 79% | <a href="#">gil641712629 XP_008145534.1</a> |
| <a href="#">PREDICTED: phosphatidylinositol-glycan-specific phospholipase D</a>    | 37.5 | 37.5 | 93%  | 0.13  | 86% | <a href="#">gil545554532 XP_005640137.1</a> |
| <a href="#">PREDICTED: phosphatidylinositol-glycan-specific phospholipase D</a>    | 37.5 | 37.5 | 93%  | 0.13  | 86% | <a href="#">gil74003954 XP_535902.2</a>     |
| <a href="#">PREDICTED: phosphatidylinositol-glycan-specific phospholipase D</a>    | 37.5 | 37.5 | 93%  | 0.13  | 86% | <a href="#">gil545554529 XP_005640136.1</a> |
| <a href="#">PREDICTED: LOW QUALITY PROTEIN: phosphatidylinositol-glyca</a>         | 37.5 | 37.5 | 93%  | 0.13  | 79% | <a href="#">gil554537051 XP_005863221.1</a> |
| <a href="#">Phosphatidylinositol-glycan-specific phospholipase D [Myotis brand</a> | 36.7 | 36.7 | 86%  | 0.24  | 85% | <a href="#">gil521024043 EPQ05831.1</a>     |
| <a href="#">PREDICTED: phosphatidylinositol-glycan-specific phospholipase D</a>    | 35.8 | 35.8 | 100% | 0.45  | 73% | <a href="#">gil504166674 XP_004593176.1</a> |
| <a href="#">PREDICTED: phosphatidylinositol-glycan-specific phospholipase D</a>    | 35.4 | 35.4 | 100% | 0.61  | 73% | <a href="#">gil602684652 XP_007454575.1</a> |
| <a href="#">PREDICTED: phosphatidylinositol-glycan-specific phospholipase D</a>    | 35.4 | 35.4 | 100% | 0.61  | 73% | <a href="#">gil602684650 XP_007454574.1</a> |
| <a href="#">PREDICTED: phosphatidylinositol-glycan-specific phospholipase D</a>    | 35.4 | 35.4 | 93%  | 0.61  | 79% | <a href="#">gil586495128 XP_006878008.1</a> |
| <a href="#">PREDICTED: phosphatidylinositol-glycan-specific phospholipase D</a>    | 35.4 | 35.4 | 100% | 0.61  | 73% | <a href="#">gil585669334 XP_006888712.1</a> |
| <a href="#">PREDICTED: phosphatidylinositol-glycan-specific phospholipase D</a>    | 34.6 | 34.6 | 93%  | 1.1   | 79% | <a href="#">gil671000878 XP_008691294.1</a> |
| <a href="#">PREDICTED: phosphatidylinositol-glycan-specific phospholipase D</a>    | 33.3 | 33.3 | 80%  | 2.9   | 83% | <a href="#">gil533180623 XP_005403486.1</a> |
| <a href="#">PREDICTED: phosphatidylinositol-glycan-specific phospholipase D</a>    | 32.9 | 32.9 | 100% | 4.0   | 67% | <a href="#">gil612008081 XP_007487938.1</a> |
| <a href="#">PREDICTED: phosphatidylinositol-glycan-specific phospholipase D</a>    | 32.9 | 32.9 | 100% | 4.0   | 67% | <a href="#">gil612008079 XP_001375600.2</a> |
| <a href="#">PREDICTED: phosphatidylinositol-glycan-specific phospholipase D</a>    | 32.9 | 32.9 | 100% | 4.0   | 67% | <a href="#">gil612008077 XP_007487937.1</a> |
| <a href="#">PREDICTED: phosphatidylinositol-glycan-specific phospholipase D</a>    | 32.5 | 32.5 | 100% | 5.4   | 67% | <a href="#">gil640776034 XP_008048656.1</a> |
| <a href="#">PREDICTED: phosphatidylinositol-glycan-specific phospholipase D</a>    | 32.0 | 32.0 | 80%  | 7.4   | 75% | <a href="#">gil507572817 XP_004669997.1</a> |
| <a href="#">PREDICTED: phosphatidylinositol-glycan-specific phospholipase D</a>    | 32.0 | 32.0 | 93%  | 7.4   | 71% | <a href="#">gil532102948 XP_005337080.1</a> |
| <a href="#">PREDICTED: LOW QUALITY PROTEIN: phosphatidylinositol-glyca</a>         | 32.0 | 32.0 | 100% | 7.4   | 67% | <a href="#">gil395830643 XP_003788429.1</a> |

## Alignments

[Download](#) [GenPept](#) [Graphics](#)

[Next](#) [Previous](#) [Descriptions](#)

glycosylphosphatidylinositol phospholipase D [Homo sapiens]

Sequence ID: [gil11122875|emb|CAC14844.1](#) Length: 457 Number of Matches: 1

Range 1: 176 to 190 [GenPept](#) [Graphics](#)

[Next Match](#) [Previous Match](#)

| Score          | Expect | Identities  | Positives   | Gaps     |
|----------------|--------|-------------|-------------|----------|
| 51.1 bits(113) | 4e-06  | 15/15(100%) | 15/15(100%) | 0/15(0%) |

Query 1 KEKLNVEAANWTVRG 15  
 KEKLNVEAANWTVRG  
 Sbjct 176 KEKLNVEAANWTVRG 190

### Related Information

[Gene](#) - associated gene details

[Download](#) [GenPept](#) [Graphics](#)

[Next](#) [Previous](#) [Descriptions](#)

Unknown (protein for IMAGE:3354070), partial [Homo sapiens]

Sequence ID: [gil14043248|gb|AAH07614.1](#) Length: 575 Number of Matches: 1

Range 1: 294 to 308 [GenPept](#) [Graphics](#)

[Next Match](#) [Previous Match](#)

| Score          | Expect | Identities  | Positives   | Gaps     |
|----------------|--------|-------------|-------------|----------|
| 51.1 bits(113) | 4e-06  | 15/15(100%) | 15/15(100%) | 0/15(0%) |

Query 1 KEKLNVEAANWTVRG 15

### Related Information

[Gene](#) - associated gene details

Sbjct 294 KEKLNVEAANWTVRG  
 KEKLNVEAANWTVRG 308

[Download](#) [GenPept](#) [Graphics](#) [Next](#) [Previous](#) [Descriptions](#)

PREDICTED: phosphatidylinositol-glycan-specific phospholipase D isoform X4 [Papio anubis]

Sequence ID: [gi|685535046|ref|XP\\_009202774.1|](#) Length: 677 Number of Matches: 1

Range 1: 396 to 410 [GenPept](#) [Graphics](#) [Next Match](#) [Previous Match](#)

| Score          | Expect | Identities  | Positives   | Gaps     |
|----------------|--------|-------------|-------------|----------|
| 51.1 bits(113) | 4e-06  | 15/15(100%) | 15/15(100%) | 0/15(0%) |

Query 1 KEKLNVEAANWTVRG 15  
 KEKLNVEAANWTVRG  
 Sbjct 396 KEKLNVEAANWTVRG 410

**Related Information**

[Gene](#) - associated gene details  
[Map Viewer](#) - aligned genomic context

[Download](#) [GenPept](#) [Graphics](#) [Next](#) [Previous](#) [Descriptions](#)

PREDICTED: phosphatidylinositol-glycan-specific phospholipase D isoform X3 [Pan paniscus]

Sequence ID: [gi|675773160|ref|XP\\_008975042.1|](#) Length: 677 Number of Matches: 1

Range 1: 396 to 410 [GenPept](#) [Graphics](#) [Next Match](#) [Previous Match](#)

| Score          | Expect | Identities  | Positives   | Gaps     |
|----------------|--------|-------------|-------------|----------|
| 51.1 bits(113) | 4e-06  | 15/15(100%) | 15/15(100%) | 0/15(0%) |

Query 1 KEKLNVEAANWTVRG 15  
 KEKLNVEAANWTVRG  
 Sbjct 396 KEKLNVEAANWTVRG 410

**Related Information**

[Gene](#) - associated gene details  
[Map Viewer](#) - aligned genomic context

[Download](#) [GenPept](#) [Graphics](#) [Next](#) [Previous](#) [Descriptions](#)

PREDICTED: phosphatidylinositol-glycan-specific phospholipase D isoform X3 [Macaca fascicularis]

Sequence ID: [gi|544429971|ref|XP\\_005553977.1|](#) Length: 677 Number of Matches: 1

Range 1: 396 to 410 [GenPept](#) [Graphics](#) [Next Match](#) [Previous Match](#)

| Score          | Expect | Identities  | Positives   | Gaps     |
|----------------|--------|-------------|-------------|----------|
| 51.1 bits(113) | 4e-06  | 15/15(100%) | 15/15(100%) | 0/15(0%) |

Query 1 KEKLNVEAANWTVRG 15  
 KEKLNVEAANWTVRG  
 Sbjct 396 KEKLNVEAANWTVRG 410

**Related Information**

[Gene](#) - associated gene details

BLAST is a registered trademark of the National Library of Medicine.



▶ NCBI/ BLAST/ blastp suite/ Formatting Results - BVE0ZZZ001R

**i** Your search parameters were adjusted to search for a short input sequence.

[Edit and Resubmit](#) [Save Search Strategies](#) ▶ [Formatting options](#) ▶ [Download](#) [YouTube](#) [How to read this page](#) [Blast report description](#)

### GPLD1\_KFHDSVESTHWTPFLDASVHYIRE\_Mod

RID [BVE0ZZZ001R](#) (Expires on 01-21 09:06 am)

**Query ID** |cl|216296  
**Description** None  
**Molecule type** amino acid  
**Query Length** 24

**Database Name** nr  
**Description** All non-redundant GenBank CDS translations+PDB+SwissProt+PIR+PRF excluding environmental samples from WGS projects  
**Program** BLASTP 2.2.30+ ▶ [Citation](#)

Other reports: ▶ [Search Summary](#) [[Taxonomy reports](#)] [[Distance tree of results](#)] [[Multiple alignment](#)]

### Graphic Summary

[Show Conserved Domains](#)

No putative conserved domains have been detected

Distribution of 100 Blast Hits on the Query Sequence

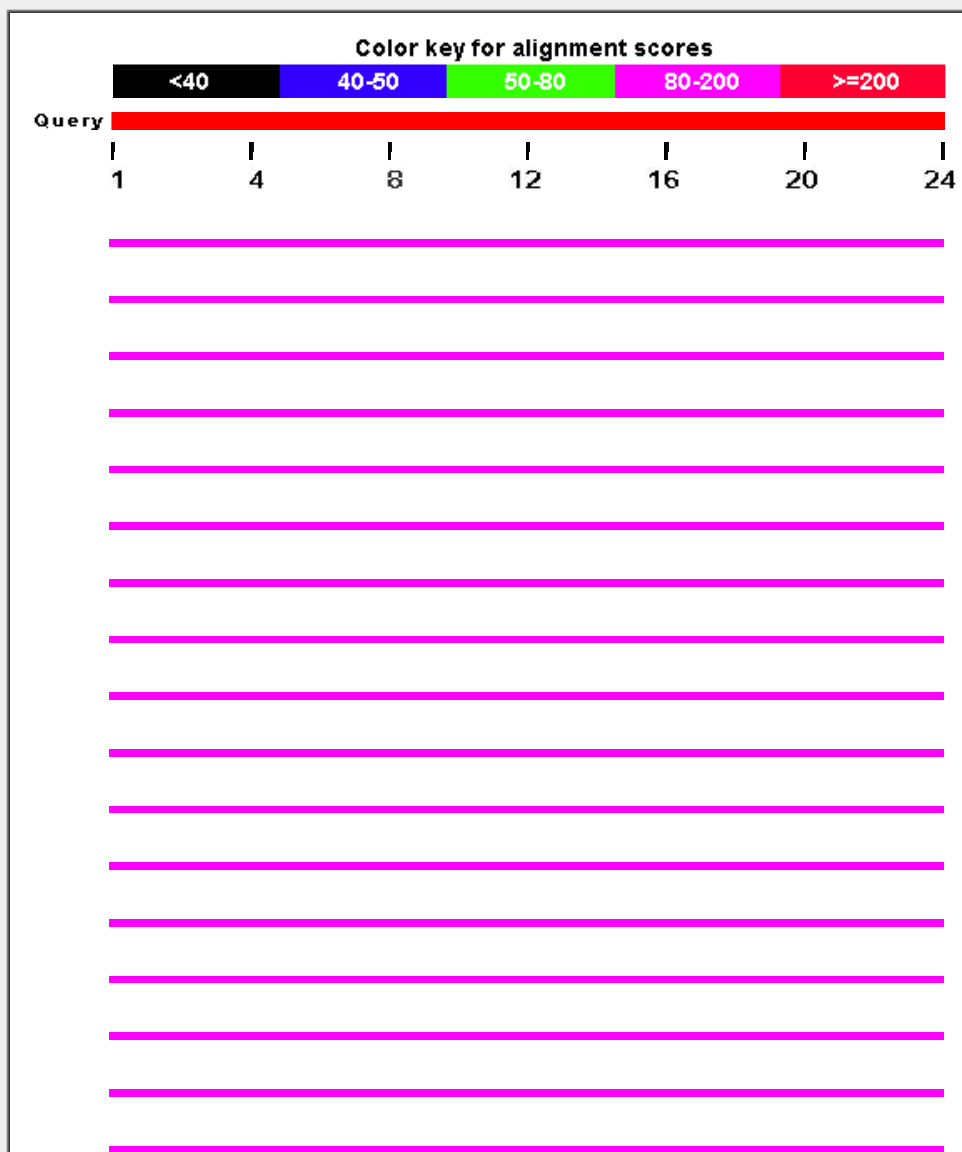

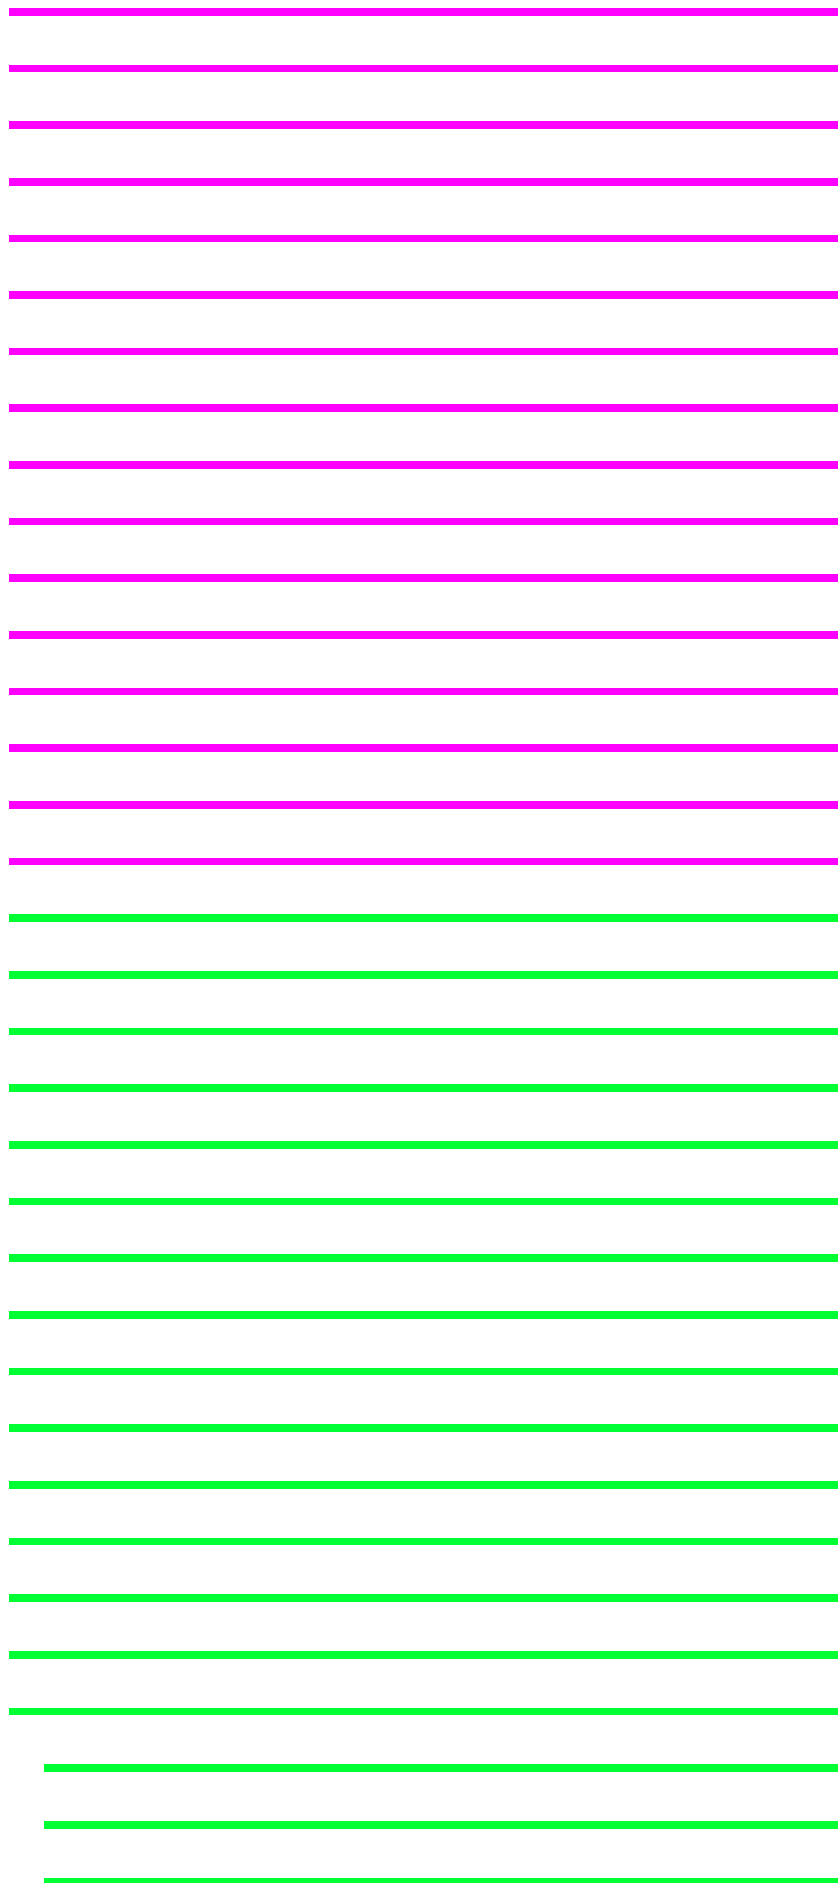

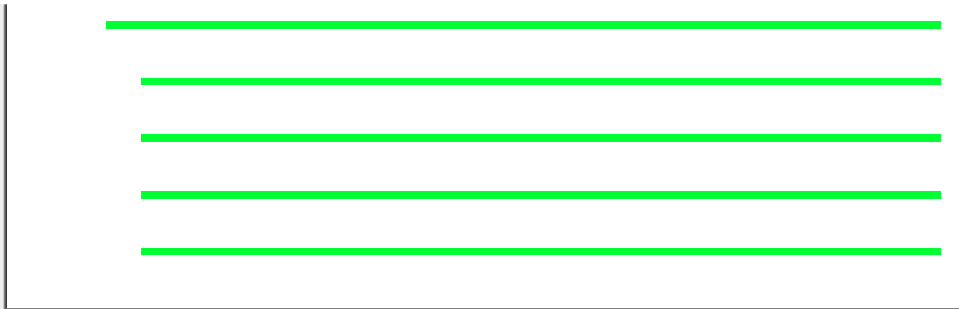

**Descriptions**

**Sequences producing significant alignments:**

Select: [All](#) [None](#) Selected:0

[Alignments](#)
[Download](#)
[GenPept](#)
[Graphics](#)
[Distance tree of results](#)
[Multiple alignment](#)
⚙

| Description                                                                                                | Max score | Total score | Query cover | E value | Ident | Accession                      |
|------------------------------------------------------------------------------------------------------------|-----------|-------------|-------------|---------|-------|--------------------------------|
| <a href="#">Glycosylphosphatidylinositol specific phospholipase D1, isoform 2 precursor [Homo sapiens]</a> | 81.2      | 81.2        | 100%        | 5e-16   | 96%   | <a href="#">AAI12002.1</a>     |
| <a href="#">Glycosylphosphatidylinositol specific phospholipase D1 [Homo sapiens]</a>                      | 81.2      | 81.2        | 100%        | 5e-16   | 96%   | <a href="#">AAH20748.1</a>     |
| <a href="#">glycosylphosphatidylinositol specific phospholipase D1, isoform CRA_b [Homo sapiens]</a>       | 81.2      | 81.2        | 100%        | 5e-16   | 96%   | <a href="#">EAW55449.1</a>     |
| <a href="#">PREDICTED: phosphatidylinositol-glycan-specific phospholipase D-like [Macaca mulatta]</a>      | 81.2      | 81.2        | 100%        | 8e-16   | 96%   | <a href="#">XP_002803682.1</a> |
| <a href="#">PREDICTED: phosphatidylinositol-glycan-specific phospholipase D isoform X1 [Homo sapiens]</a>  | 81.2      | 81.2        | 100%        | 8e-16   | 96%   | <a href="#">XP_007971741.1</a> |
| <a href="#">PREDICTED: phosphatidylinositol-glycan-specific phospholipase D isoform X1 [Homo sapiens]</a>  | 81.2      | 81.2        | 100%        | 8e-16   | 96%   | <a href="#">XP_010621250.1</a> |
| <a href="#">PREDICTED: phosphatidylinositol-glycan-specific phospholipase D isoform X1 [Homo sapiens]</a>  | 81.2      | 81.2        | 100%        | 8e-16   | 96%   | <a href="#">XP_007971740.1</a> |
| <a href="#">PREDICTED: phosphatidylinositol-glycan-specific phospholipase D isoform X1 [Homo sapiens]</a>  | 81.2      | 81.2        | 100%        | 8e-16   | 96%   | <a href="#">XP_008511734.1</a> |
| <a href="#">PREDICTED: phosphatidylinositol-glycan-specific phospholipase D isoform X1 [Homo sapiens]</a>  | 81.2      | 81.2        | 100%        | 8e-16   | 96%   | <a href="#">XP_010621248.1</a> |
| <a href="#">PREDICTED: phosphatidylinositol-glycan-specific phospholipase D isoform X1 [Homo sapiens]</a>  | 81.2      | 81.2        | 100%        | 8e-16   | 96%   | <a href="#">XP_004761311.1</a> |
| <a href="#">PREDICTED: phosphatidylinositol-glycan-specific phospholipase D isoform X1 [Homo sapiens]</a>  | 81.2      | 81.2        | 100%        | 8e-16   | 96%   | <a href="#">XP_007971746.1</a> |
| <a href="#">PREDICTED: phosphatidylinositol-glycan-specific phospholipase D isoform 2 [Homo sapiens]</a>   | 81.2      | 81.2        | 100%        | 8e-16   | 96%   | <a href="#">XP_004043389.1</a> |
| <a href="#">PREDICTED: phosphatidylinositol-glycan-specific phospholipase D isoform 1 [Homo sapiens]</a>   | 81.2      | 81.2        | 100%        | 8e-16   | 96%   | <a href="#">XP_004043388.1</a> |
| <a href="#">glycosylphosphatidylinositol phospholipase D [Homo sapiens]</a>                                | 81.2      | 81.2        | 100%        | 8e-16   | 96%   | <a href="#">CAC87068.1</a>     |
| <a href="#">phospholipase D [Homo sapiens]</a>                                                             | 81.2      | 81.2        | 100%        | 8e-16   | 96%   | <a href="#">AAA36445.1</a>     |
| <a href="#">PREDICTED: phosphatidylinositol-glycan-specific phospholipase D [Saimiri sciureus]</a>         | 81.2      | 81.2        | 100%        | 8e-16   | 96%   | <a href="#">XP_003927350.1</a> |
| <a href="#">phosphatidylinositol-glycan-specific phospholipase D precursor [Homo sapiens]</a>              | 81.2      | 81.2        | 100%        | 8e-16   | 96%   | <a href="#">NP_001494.2</a>    |
| <a href="#">glycosylphosphatidylinositol-specific phospholipase D precursor [Homo sapiens]</a>             | 81.2      | 81.2        | 100%        | 8e-16   | 96%   | <a href="#">AAG16627.2</a>     |
| <a href="#">PREDICTED: phosphatidylinositol-glycan-specific phospholipase D [Rhinopithecus roosevelti]</a> | 81.2      | 81.2        | 100%        | 8e-16   | 96%   | <a href="#">XP_010363586.1</a> |
| <a href="#">phospholipase D [Homo sapiens]</a>                                                             | 81.2      | 81.2        | 100%        | 8e-16   | 96%   | <a href="#">AAA36444.1</a>     |
| <a href="#">PREDICTED: phosphatidylinositol-glycan-specific phospholipase D isoform X1 [Homo sapiens]</a>  | 81.2      | 81.2        | 100%        | 8e-16   | 96%   | <a href="#">XP_005553976.1</a> |
| <a href="#">PREDICTED: phosphatidylinositol-glycan-specific phospholipase D isoform X1 [Homo sapiens]</a>  | 81.2      | 81.2        | 100%        | 8e-16   | 96%   | <a href="#">XP_003897171.1</a> |
| <a href="#">PREDICTED: phosphatidylinositol-glycan-specific phospholipase D [Equus caballus]</a>           | 81.2      | 81.2        | 100%        | 8e-16   | 96%   | <a href="#">XP_001497586.1</a> |
| <a href="#">PREDICTED: phosphatidylinositol-glycan-specific phospholipase D isoform X1 [Homo sapiens]</a>  | 81.2      | 81.2        | 100%        | 8e-16   | 96%   | <a href="#">XP_008511732.1</a> |
| <a href="#">PREDICTED: phosphatidylinositol-glycan-specific phospholipase D isoform X1 [Homo sapiens]</a>  | 81.2      | 81.2        | 100%        | 8e-16   | 96%   | <a href="#">XP_008511731.1</a> |
| <a href="#">PREDICTED: phosphatidylinositol-glycan-specific phospholipase D isoform X1 [Homo sapiens]</a>  | 81.2      | 81.2        | 100%        | 8e-16   | 96%   | <a href="#">XP_009202772.1</a> |
| <a href="#">PREDICTED: phosphatidylinositol-glycan-specific phospholipase D isoform X1 [Homo sapiens]</a>  | 81.2      | 81.2        | 100%        | 8e-16   | 96%   | <a href="#">XP_004761310.1</a> |
| <a href="#">hypothetical protein EGK_21153 [Macaca mulatta]</a>                                            | 81.2      | 81.2        | 100%        | 8e-16   | 96%   | <a href="#">EHH25414.1</a>     |
| <a href="#">glycosylphosphatidylinositol specific phospholipase D1, isoform CRA_c [Homo sapiens]</a>       | 81.2      | 81.2        | 100%        | 8e-16   | 96%   | <a href="#">EAW55450.1</a>     |

|                                                                                               |      |      |      |       |     |                                |
|-----------------------------------------------------------------------------------------------|------|------|------|-------|-----|--------------------------------|
| <a href="#">PREDICTED: phosphatidylinositol-glycan-specific phospholipase D [Nomascu</a>      | 81.2 | 81.2 | 100% | 8e-16 | 96% | <a href="#">XP_003263611.1</a> |
| <a href="#">PREDICTED: phosphatidylinositol-glycan-specific phospholipase D isoform X:</a>    | 81.2 | 81.2 | 100% | 8e-16 | 96% | <a href="#">XP_005553975.1</a> |
| <a href="#">Phosphatidylinositol-glycan-specific phospholipase D [Fukomys damarensis]</a>     | 81.2 | 81.2 | 100% | 8e-16 | 96% | <a href="#">KFO33840.1</a>     |
| <a href="#">PREDICTED: phosphatidylinositol-glycan-specific phospholipase D isoform X:</a>    | 81.2 | 81.2 | 100% | 8e-16 | 96% | <a href="#">XP_008511730.1</a> |
| <a href="#">PREDICTED: phosphatidylinositol-glycan-specific phospholipase D [Octodon</a>      | 79.1 | 79.1 | 100% | 4e-15 | 92% | <a href="#">XP_004640232.1</a> |
| <a href="#">PREDICTED: phosphatidylinositol-glycan-specific phospholipase D isoform X:</a>    | 79.1 | 79.1 | 100% | 4e-15 | 92% | <a href="#">XP_005003342.1</a> |
| <a href="#">PREDICTED: phosphatidylinositol-glycan-specific phospholipase D isoform X:</a>    | 79.1 | 79.1 | 100% | 4e-15 | 92% | <a href="#">XP_003468912.1</a> |
| <a href="#">PREDICTED: LOW QUALITY PROTEIN: phosphatidylinositol-glycan-specific</a>          | 79.1 | 79.1 | 100% | 4e-15 | 92% | <a href="#">XP_004462113.1</a> |
| <a href="#">PREDICTED: phosphatidylinositol-glycan-specific phospholipase D [Galeopte</a>     | 79.1 | 79.1 | 100% | 4e-15 | 92% | <a href="#">XP_008578807.1</a> |
| <a href="#">PREDICTED: phosphatidylinositol-glycan-specific phospholipase D [Tarsius s</a>    | 79.1 | 79.1 | 100% | 4e-15 | 92% | <a href="#">XP_008048656.1</a> |
| <a href="#">PREDICTED: phosphatidylinositol-glycan-specific phospholipase D [Condylur</a>     | 79.1 | 79.1 | 100% | 4e-15 | 92% | <a href="#">XP_004693375.1</a> |
| <a href="#">PREDICTED: phosphatidylinositol-glycan-specific phospholipase D [Erinaceu</a>     | 79.1 | 79.1 | 100% | 4e-15 | 92% | <a href="#">XP_007526005.1</a> |
| <a href="#">hypothetical protein EGM_13271 [Macaca fascicularis]</a>                          | 79.1 | 79.1 | 100% | 4e-15 | 92% | <a href="#">EHH52757.1</a>     |
| <a href="#">PREDICTED: phosphatidylinositol-glycan-specific phospholipase D [Chinchill</a>    | 79.1 | 79.1 | 100% | 4e-15 | 92% | <a href="#">XP_005403486.1</a> |
| <a href="#">Phosphatidylinositol-glycan-specific phospholipase D [Heterocephalus glaber]</a>  | 78.7 | 78.7 | 100% | 6e-15 | 92% | <a href="#">EHB09593.1</a>     |
| <a href="#">PREDICTED: phosphatidylinositol-glycan-specific phospholipase D isoform X:</a>    | 78.7 | 78.7 | 100% | 6e-15 | 92% | <a href="#">XP_004847665.1</a> |
| <a href="#">PREDICTED: phosphatidylinositol-glycan-specific phospholipase D isoform X:</a>    | 78.7 | 78.7 | 100% | 6e-15 | 92% | <a href="#">XP_004847664.1</a> |
| <a href="#">PREDICTED: phosphatidylinositol-glycan-specific phospholipase D isoform X:</a>    | 78.7 | 78.7 | 100% | 6e-15 | 92% | <a href="#">XP_004847663.1</a> |
| <a href="#">PREDICTED: phosphatidylinositol-glycan-specific phospholipase D [Heteroce</a>     | 78.7 | 78.7 | 100% | 6e-15 | 92% | <a href="#">XP_004895023.1</a> |
| <a href="#">hypothetical protein CB1_000595062 [Camelus ferus]</a>                            | 78.3 | 78.3 | 95%  | 8e-15 | 96% | <a href="#">EPY83136.1</a>     |
| <a href="#">PREDICTED: phosphatidylinositol-glycan-specific phospholipase D [Ursus ma</a>     | 78.3 | 78.3 | 95%  | 8e-15 | 96% | <a href="#">XP_008691294.1</a> |
| <a href="#">PREDICTED: LOW QUALITY PROTEIN: phosphatidylinositol-glycan-specific</a>          | 78.3 | 78.3 | 95%  | 8e-15 | 96% | <a href="#">XP_004614021.1</a> |
| <a href="#">PREDICTED: phosphatidylinositol-glycan-specific phospholipase D [Pongo ab</a>     | 78.3 | 78.3 | 100% | 8e-15 | 92% | <a href="#">XP_009239742.1</a> |
| <a href="#">PREDICTED: phosphatidylinositol-glycan-specific phospholipase D [Felis catu</a>   | 78.3 | 78.3 | 95%  | 8e-15 | 96% | <a href="#">XP_003985826.1</a> |
| <a href="#">PREDICTED: phosphatidylinositol-glycan-specific phospholipase D isoform X:</a>    | 78.3 | 78.3 | 95%  | 8e-15 | 96% | <a href="#">XP_005640137.1</a> |
| <a href="#">PREDICTED: LOW QUALITY PROTEIN: phosphatidylinositol-glycan-specific</a>          | 78.3 | 78.3 | 95%  | 8e-15 | 96% | <a href="#">XP_006182298.1</a> |
| <a href="#">PREDICTED: phosphatidylinositol-glycan-specific phospholipase D [Camelus</a>      | 78.3 | 78.3 | 95%  | 8e-15 | 96% | <a href="#">XP_010944080.1</a> |
| <a href="#">PREDICTED: phosphatidylinositol-glycan-specific phospholipase D isoformX1</a>     | 78.3 | 78.3 | 95%  | 8e-15 | 96% | <a href="#">XP_535902.2</a>    |
| <a href="#">PREDICTED: phosphatidylinositol-glycan-specific phospholipase D [Ictidomys</a>    | 78.3 | 78.3 | 100% | 8e-15 | 92% | <a href="#">XP_005337080.1</a> |
| <a href="#">PREDICTED: phosphatidylinositol-glycan-specific phospholipase D [Panthera</a>     | 78.3 | 78.3 | 95%  | 8e-15 | 96% | <a href="#">XP_007074479.1</a> |
| <a href="#">PREDICTED: phosphatidylinositol-glycan-specific phospholipase D isoform X:</a>    | 78.3 | 78.3 | 100% | 8e-15 | 92% | <a href="#">XP_003823243.1</a> |
| <a href="#">PREDICTED: LOW QUALITY PROTEIN: phosphatidylinositol-glycan-specific</a>          | 78.3 | 78.3 | 95%  | 8e-15 | 96% | <a href="#">XP_010978426.1</a> |
| <a href="#">PREDICTED: phosphatidylinositol-glycan-specific phospholipase D [Ceratoth</a>     | 78.3 | 78.3 | 95%  | 8e-15 | 96% | <a href="#">XP_004432133.1</a> |
| <a href="#">PREDICTED: phosphatidylinositol-glycan-specific phospholipase D isoform X:</a>    | 78.3 | 78.3 | 95%  | 8e-15 | 96% | <a href="#">XP_005640136.1</a> |
| <a href="#">PREDICTED: phosphatidylinositol-glycan-specific phospholipase D [Pan trogl</a>    | 78.3 | 78.3 | 100% | 8e-15 | 92% | <a href="#">XP_518268.4</a>    |
| <a href="#">PREDICTED: phosphatidylinositol-glycan-specific phospholipase D isoform X:</a>    | 78.3 | 78.3 | 100% | 8e-15 | 92% | <a href="#">XP_008975041.1</a> |
| <a href="#">PREDICTED: phosphatidylinositol-glycan-specific phospholipase D isoform X:</a>    | 76.6 | 76.6 | 100% | 3e-14 | 88% | <a href="#">XP_008769857.1</a> |
| <a href="#">phosphatidylinositol-glycan-specific phospholipase D precursor [Rattus norveg</a> | 76.6 | 76.6 | 100% | 3e-14 | 88% | <a href="#">NP_001093982.1</a> |
| <a href="#">RecName: Full=Phosphatidylinositol-glycan-specific phospholipase D; Short=I</a>   | 76.6 | 76.6 | 100% | 3e-14 | 88% | <a href="#">Q8R2H5.1</a>       |
| <a href="#">PREDICTED: LOW QUALITY PROTEIN: phosphatidylinositol-glycan-specific</a>          | 76.6 | 76.6 | 100% | 3e-14 | 88% | <a href="#">XP_006145185.1</a> |
| <a href="#">Phosphatidylinositol-glycan-specific phospholipase D [Tupaia chinensis]</a>       | 76.6 | 76.6 | 100% | 3e-14 | 88% | <a href="#">ELW68777.1</a>     |
| <a href="#">Phosphatidylinositol-glycan-specific phospholipase D [Pteropus alecto]</a>        | 76.1 | 76.1 | 95%  | 4e-14 | 91% | <a href="#">ELK05805.1</a>     |
| <a href="#">PREDICTED: phosphatidylinositol-glycan-specific phospholipase D isoform X:</a>    | 76.1 | 76.1 | 95%  | 4e-14 | 91% | <a href="#">XP_006919597.1</a> |
| <a href="#">PREDICTED: phosphatidylinositol-glycan-specific phospholipase D [Leptonyc</a>     | 76.1 | 76.1 | 95%  | 4e-14 | 91% | <a href="#">XP_006739372.1</a> |
| <a href="#">PREDICTED: phosphatidylinositol-glycan-specific phospholipase D [Qodobenu</a>     | 76.1 | 76.1 | 95%  | 4e-14 | 91% | <a href="#">XP_004406584.1</a> |

|                                                                                             |      |      |      |       |     |                                |
|---------------------------------------------------------------------------------------------|------|------|------|-------|-----|--------------------------------|
| <a href="#">PREDICTED: phosphatidylinositol-glycan-specific phospholipase D [Myotis da</a>  | 75.7 | 75.7 | 95%  | 6e-14 | 91% | <a href="#">XP_006763163.1</a> |
| <a href="#">PREDICTED: phosphatidylinositol-glycan-specific phospholipase D [Jaculus j</a>  | 75.3 | 75.3 | 100% | 8e-14 | 88% | <a href="#">XP_004669997.1</a> |
| <a href="#">PREDICTED: phosphatidylinositol-glycan-specific phospholipase D [Nannosp</a>    | 75.3 | 75.3 | 100% | 8e-14 | 88% | <a href="#">XP_008845321.1</a> |
| <a href="#">PREDICTED: phosphatidylinositol-glycan-specific phospholipase D [Vicugna r</a>  | 75.3 | 75.3 | 95%  | 8e-14 | 96% | <a href="#">XP_006198740.1</a> |
| <a href="#">PREDICTED: phosphatidylinositol-glycan-specific phospholipase D isoform X</a>   | 74.9 | 74.9 | 100% | 1e-13 | 88% | <a href="#">XP_008260728.1</a> |
| <a href="#">hypothetical protein PANDA_003876 [Ailuropoda melanoleuca]</a>                  | 74.9 | 74.9 | 95%  | 1e-13 | 91% | <a href="#">EFB28343.1</a>     |
| <a href="#">PREDICTED: LOW QUALITY PROTEIN: phosphatidylinositol-glycan-specific</a>        | 74.9 | 74.9 | 91%  | 1e-13 | 95% | <a href="#">XP_005903212.1</a> |
| <a href="#">Phosphatidylinositol-glycan-specific phospholipase D [Bos mutus]</a>            | 74.9 | 74.9 | 91%  | 1e-13 | 95% | <a href="#">ELR50996.1</a>     |
| <a href="#">PREDICTED: phosphatidylinositol-glycan-specific phospholipase D isoform X</a>   | 74.9 | 74.9 | 100% | 1e-13 | 88% | <a href="#">XP_008260723.1</a> |
| <a href="#">PREDICTED: phosphatidylinositol-glycan-specific phospholipase D isoform X</a>   | 74.9 | 74.9 | 91%  | 1e-13 | 95% | <a href="#">XP_010841812.1</a> |
| <a href="#">PREDICTED: phosphatidylinositol-glycan-specific phospholipase D isoform X</a>   | 74.9 | 74.9 | 91%  | 1e-13 | 95% | <a href="#">XP_006051268.1</a> |
| <a href="#">PREDICTED: phosphatidylinositol-glycan-specific phospholipase D [Pantholo</a>   | 74.9 | 74.9 | 91%  | 1e-13 | 95% | <a href="#">XP_005973908.1</a> |
| <a href="#">PREDICTED: phosphatidylinositol-glycan-specific phospholipase D [Capra hir</a>  | 74.9 | 74.9 | 91%  | 1e-13 | 95% | <a href="#">XP_005696842.1</a> |
| <a href="#">PREDICTED: phosphatidylinositol-glycan-specific phospholipase D [Ochotona</a>   | 74.9 | 74.9 | 100% | 1e-13 | 88% | <a href="#">XP_004593176.1</a> |
| <a href="#">phosphatidylinositol-glycan-specific phospholipase D precursor [Bos taurus]</a> | 74.9 | 74.9 | 91%  | 1e-13 | 95% | <a href="#">NP_777241.1</a>    |
| <a href="#">TPA: phosphatidylinositol-glycan-specific phospholipase D [Bos taurus]</a>      | 74.9 | 74.9 | 91%  | 1e-13 | 95% | <a href="#">DAA16116.1</a>     |
| <a href="#">PREDICTED: phosphatidylinositol-glycan-specific phospholipase D-like [Ailur</a> | 74.9 | 74.9 | 95%  | 1e-13 | 91% | <a href="#">XP_002915859.1</a> |
| <a href="#">PREDICTED: phosphatidylinositol-glycan-specific phospholipase D isoform X</a>   | 74.9 | 74.9 | 91%  | 1e-13 | 95% | <a href="#">XP_010841810.1</a> |
| <a href="#">PREDICTED: phosphatidylinositol-glycan-specific phospholipase D isoform X</a>   | 74.9 | 74.9 | 91%  | 1e-13 | 95% | <a href="#">XP_005223795.1</a> |
| <a href="#">PREDICTED: phosphatidylinositol-glycan-specific phospholipase D isoform X</a>   | 74.9 | 74.9 | 91%  | 1e-13 | 95% | <a href="#">XP_006051267.1</a> |
| <a href="#">PREDICTED: phosphatidylinositol-glycan-specific phospholipase D isoform X</a>   | 74.9 | 74.9 | 91%  | 1e-13 | 95% | <a href="#">XP_005223794.1</a> |
| <a href="#">PREDICTED: phosphatidylinositol-glycan-specific phospholipase D isoform X</a>   | 74.9 | 74.9 | 91%  | 1e-13 | 95% | <a href="#">XP_006051266.1</a> |
| <a href="#">PREDICTED: phosphatidylinositol-glycan-specific phospholipase D isoform X</a>   | 74.9 | 74.9 | 91%  | 1e-13 | 95% | <a href="#">XP_006051265.1</a> |
| <a href="#">PREDICTED: phosphatidylinositol-glycan-specific phospholipase D isoform X</a>   | 74.9 | 74.9 | 91%  | 1e-13 | 95% | <a href="#">XP_006051264.1</a> |
| <a href="#">PREDICTED: phosphatidylinositol-glycan-specific phospholipase D isoform X</a>   | 74.9 | 74.9 | 91%  | 1e-13 | 95% | <a href="#">XP_010816770.1</a> |
| <a href="#">PREDICTED: phosphatidylinositol-glycan-specific phospholipase D [Sus scrof</a>  | 74.4 | 74.4 | 95%  | 2e-13 | 91% | <a href="#">XP_001925944.5</a> |

## Alignments

Download [GenPept](#) [Graphics](#)

[Next](#) [Previous](#) [Descriptions](#)

Glycosylphosphatidylinositol specific phospholipase D1, isoform 2 precursor [Homo sapiens]

Sequence ID: [gb|AAI12002.1|](#) Length: 176 Number of Matches: 1

Range 1: 79 to 102 [GenPept](#) [Graphics](#)

[Next Match](#) [Previous Match](#)

| Score          | Expect | Identities | Positives   | Gaps     |
|----------------|--------|------------|-------------|----------|
| 81.2 bits(184) | 5e-16  | 23/24(96%) | 24/24(100%) | 0/24(0%) |

Query 1 KFHDVSESTHWTPFLDASVHYIRE 24  
 KFHDVSESTHWTPFL+ASVHYIRE  
 Sbjct 79 KFHDVSESTHWTPFLNASVHYIRE 102

### Related Information

[Gene](#) - associated gene details

Download [GenPept](#) [Graphics](#)

[Next](#) [Previous](#) [Descriptions](#)

Glycosylphosphatidylinositol specific phospholipase D1 [Homo sapiens]

Sequence ID: [gb|AAH20748.1|](#) Length: 176 Number of Matches: 1

[See 3 more title\(s\)](#)

Range 1: 79 to 102 [GenPept](#) [Graphics](#)

[Next Match](#) [Previous Match](#)

| Score          | Expect | Identities | Positives   | Gaps     |
|----------------|--------|------------|-------------|----------|
| 81.2 bits(184) | 5e-16  | 23/24(96%) | 24/24(100%) | 0/24(0%) |

### Related Information

[Gene](#) - associated gene details

[Identical Proteins](#) - Proteins

identical to the subject

Query 1 KFHDVSESTHWTPFLDASVHYIRE 24  
 KFHDVSESTHWTPFL+ASVHYIRE  
 Sbjct 79 KFHDVSESTHWTPFLNASVHYIRE 102

[Download](#) [GenPept](#) [Graphics](#)

[Next](#) [Previous](#) [Descriptions](#)

glycosylphosphatidylinositol specific phospholipase D1, isoform CRA\_b [Homo sapiens]

Sequence ID: [gb|EAW55449.1](#) Length: 186 Number of Matches: 1

Range 1: 89 to 112 [GenPept](#) [Graphics](#)

[Next Match](#) [Previous Match](#)

| Score          | Expect | Identities | Positives   | Gaps     |
|----------------|--------|------------|-------------|----------|
| 81.2 bits(184) | 5e-16  | 23/24(96%) | 24/24(100%) | 0/24(0%) |

Query 1 KFHDVSESTHWTPFLDASVHYIRE 24  
 KFHDVSESTHWTPFL+ASVHYIRE  
 Sbjct 89 KFHDVSESTHWTPFLNASVHYIRE 112

**Related Information**

[Gene](#) - associated gene details

[Download](#) [GenPept](#) [Graphics](#)

[Next](#) [Previous](#) [Descriptions](#)

PREDICTED: phosphatidylinositol-glycan-specific phospholipase D-like [Macaca mulatta]

Sequence ID: [ref|XP\\_002803682.1](#) Length: 734 Number of Matches: 1

Range 1: 66 to 89 [GenPept](#) [Graphics](#)

[Next Match](#) [Previous Match](#)

| Score          | Expect | Identities | Positives   | Gaps     |
|----------------|--------|------------|-------------|----------|
| 81.2 bits(184) | 8e-16  | 23/24(96%) | 24/24(100%) | 0/24(0%) |

Query 1 KFHDVSESTHWTPFLDASVHYIRE 24  
 KFHDVSESTHWTPFL+ASVHYIRE  
 Sbjct 66 KFHDVSESTHWTPFLNASVHYIRE 89

**Related Information**

[Gene](#) - associated gene details

[UniGene](#) - clustered expressed sequence tags

[Map Viewer](#) - aligned genomic context

[Download](#) [GenPept](#) [Graphics](#)

[Next](#) [Previous](#) [Descriptions](#)

PREDICTED: phosphatidylinositol-glycan-specific phospholipase D isoform X2 [Chlorocebus sabaeus]

Sequence ID: [ref|XP\\_007971741.1](#) Length: 772 Number of Matches: 1

Range 1: 50 to 73 [GenPept](#) [Graphics](#)

[Next Match](#) [Previous Match](#)

| Score          | Expect | Identities | Positives   | Gaps     |
|----------------|--------|------------|-------------|----------|
| 81.2 bits(184) | 8e-16  | 23/24(96%) | 24/24(100%) | 0/24(0%) |

Query 1 KFHDVSESTHWTPFLDASVHYIRE 24  
 KFHDVSESTHWTPFL+ASVHYIRE  
 Sbjct 50 KFHDVSESTHWTPFLNASVHYIRE 73

**Related Information**

[Gene](#) - associated gene details

[Map Viewer](#) - aligned genomic context

BLAST is a registered trademark of the National Library of Medicine.

▶ NCBI/ BLAST/ blastp suite/ Formatting Results - B9ED1FSV01R

**i** Your search parameters were adjusted to search for a short input sequence.

[Edit and Resubmit](#) [Save Search Strategies](#) ▶ [Formatting options](#) ▶ [Download](#)

[YouTube](#) [How to read this page](#) [Blast report description](#)

### GPLD1\_KFHDSVESTHWTPFLNASVHYIRE\_NonMod

**RID** [B9ED1FSV01R](#) (Expires on 01-14 13:22 pm)

**Query ID** |cl|377669  
**Description** None  
**Molecule type** amino acid  
**Query Length** 24

**Database Name** nr  
**Description** All non-redundant GenBank CDS translations+PDB+SwissProt+PIR excluding environmental samples from WGS projects  
**Program** BLASTP 2.2.30+ ▶ [Citation](#)

Other reports: ▶ [Search Summary](#) [[Taxonomy reports](#)] [[Distance tree of results](#)] [[Multiple alignment](#)]

### **G** Graphic Summary

**G** [Show Conserved Domains](#)

No putative conserved domains have been detected

Distribution of 100 Blast Hits on the Query Sequence 

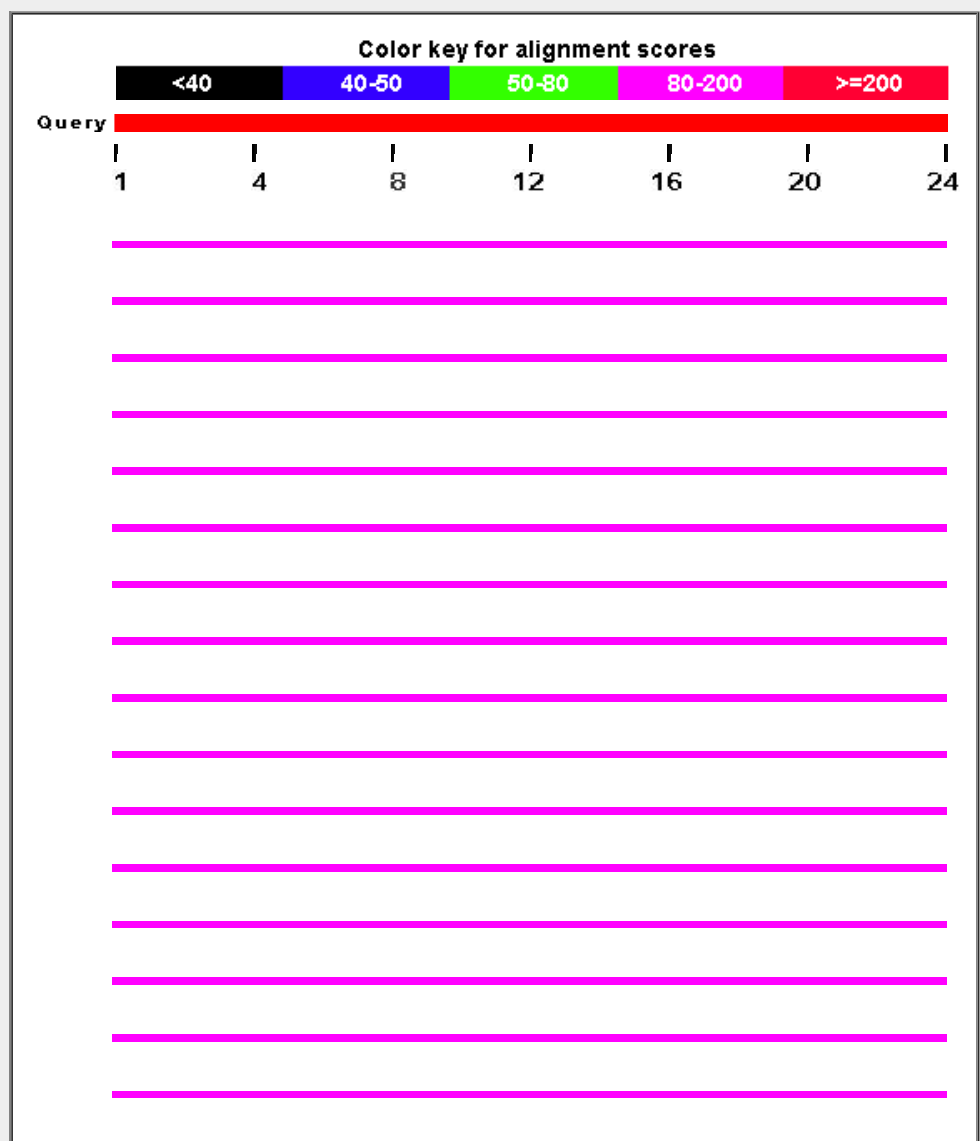





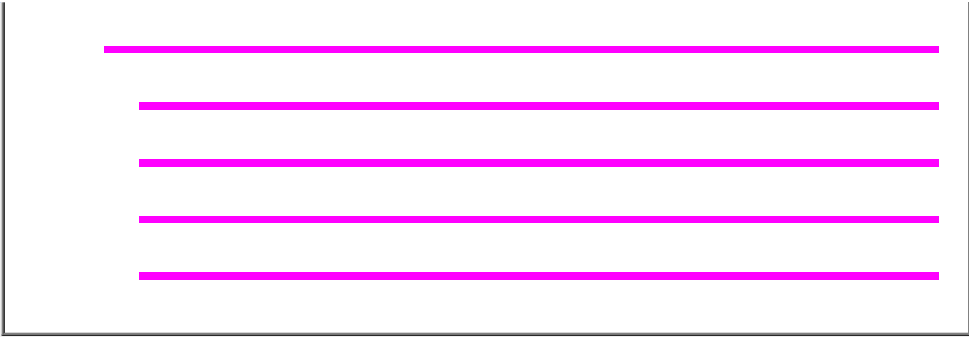

**Descriptions**

**Sequences producing significant alignments:**

Select: [All](#) [None](#) Selected:0

[↑](#) [Alignments](#)
[Download](#)
[GenPept](#)
[Graphics](#)
[Distance tree of results](#)
[Multiple alignment](#)
⚙

| Description                                                                         | Max score | Total score | Query cover | E value | Ident | Accession                                   |
|-------------------------------------------------------------------------------------|-----------|-------------|-------------|---------|-------|---------------------------------------------|
| <a href="#">Glycosylphosphatidylinositol specific phospholipase D1, isoform 2 p</a> | 83.8      | 83.8        | 100%        | 6e-17   | 100%  | <a href="#">gij185567090 AAI12002.1</a>     |
| <a href="#">Glycosylphosphatidylinositol specific phospholipase D1 [Homo sapi</a>   | 83.8      | 83.8        | 100%        | 6e-17   | 100%  | <a href="#">gij18088448 AAH20748.1</a>      |
| <a href="#">glycosylphosphatidylinositol specific phospholipase D1, isoform CR</a>  | 83.8      | 83.8        | 100%        | 6e-17   | 100%  | <a href="#">gij119575853 EAW55449.1</a>     |
| <a href="#">PREDICTED: phosphatidylinositol-glycan-specific phospholipase D</a>     | 83.8      | 83.8        | 100%        | 1e-16   | 100%  | <a href="#">gij297290177 XP_002803682.1</a> |
| <a href="#">PREDICTED: phosphatidylinositol-glycan-specific phospholipase D</a>     | 83.8      | 83.8        | 100%        | 1e-16   | 100%  | <a href="#">gij635096983 XP_007971741.1</a> |
| <a href="#">PREDICTED: phosphatidylinositol-glycan-specific phospholipase D</a>     | 83.8      | 83.8        | 100%        | 1e-16   | 100%  | <a href="#">gij731213592 XP_010621250.1</a> |
| <a href="#">PREDICTED: phosphatidylinositol-glycan-specific phospholipase D</a>     | 83.8      | 83.8        | 100%        | 1e-16   | 100%  | <a href="#">gij635096981 XP_007971740.1</a> |
| <a href="#">PREDICTED: phosphatidylinositol-glycan-specific phospholipase D</a>     | 83.8      | 83.8        | 100%        | 1e-16   | 100%  | <a href="#">gij664709544 XP_008511734.1</a> |
| <a href="#">PREDICTED: phosphatidylinositol-glycan-specific phospholipase D</a>     | 83.8      | 83.8        | 100%        | 1e-16   | 100%  | <a href="#">gij731213588 XP_010621248.1</a> |
| <a href="#">PREDICTED: phosphatidylinositol-glycan-specific phospholipase D</a>     | 83.8      | 83.8        | 100%        | 1e-16   | 100%  | <a href="#">gij511882880 XP_004761311.1</a> |
| <a href="#">PREDICTED: phosphatidylinositol-glycan-specific phospholipase D</a>     | 83.8      | 83.8        | 100%        | 1e-16   | 100%  | <a href="#">gij635096993 XP_007971746.1</a> |
| <a href="#">PREDICTED: phosphatidylinositol-glycan-specific phospholipase D</a>     | 83.8      | 83.8        | 100%        | 1e-16   | 100%  | <a href="#">gij426351748 XP_004043389.1</a> |
| <a href="#">PREDICTED: phosphatidylinositol-glycan-specific phospholipase D</a>     | 83.8      | 83.8        | 100%        | 1e-16   | 100%  | <a href="#">gij426351746 XP_004043388.1</a> |
| <a href="#">glycosylphosphatidylinositol phospholipase D [Homo sapiens]</a>         | 83.8      | 83.8        | 100%        | 1e-16   | 100%  | <a href="#">gij20269065 CAC87068.1</a>      |
| <a href="#">phospholipase D [Homo sapiens]</a>                                      | 83.8      | 83.8        | 100%        | 1e-16   | 100%  | <a href="#">gij388765 AAA36445.1</a>        |
| <a href="#">PREDICTED: phosphatidylinositol-glycan-specific phospholipase D</a>     | 83.8      | 83.8        | 100%        | 1e-16   | 100%  | <a href="#">gij403270800 XP_003927350.1</a> |
| <a href="#">phosphatidylinositol-glycan-specific phospholipase D precursor [Ho</a>  | 83.8      | 83.8        | 100%        | 1e-16   | 100%  | <a href="#">gij29171717 INP_001494.2</a>    |
| <a href="#">glycosylphosphatidylinositol-specific phospholipase D precursor [Hc</a> | 83.8      | 83.8        | 100%        | 1e-16   | 100%  | <a href="#">gij14195001 AAG16627.2</a>      |
| <a href="#">PREDICTED: phosphatidylinositol-glycan-specific phospholipase D</a>     | 83.8      | 83.8        | 100%        | 1e-16   | 100%  | <a href="#">gij724798150 XP_010363586.1</a> |
| <a href="#">phospholipase D [Homo sapiens]</a>                                      | 83.8      | 83.8        | 100%        | 1e-16   | 100%  | <a href="#">gij388763 AAA36444.1</a>        |
| <a href="#">PREDICTED: phosphatidylinositol-glycan-specific phospholipase D</a>     | 83.8      | 83.8        | 100%        | 1e-16   | 100%  | <a href="#">gij544429969 XP_005553976.1</a> |
| <a href="#">PREDICTED: phosphatidylinositol-glycan-specific phospholipase D</a>     | 83.8      | 83.8        | 100%        | 1e-16   | 100%  | <a href="#">gij402865969 XP_003897171.1</a> |
| <a href="#">PREDICTED: phosphatidylinositol-glycan-specific phospholipase D</a>     | 83.8      | 83.8        | 100%        | 1e-16   | 100%  | <a href="#">gij149732005 XP_001497586.1</a> |
| <a href="#">PREDICTED: phosphatidylinositol-glycan-specific phospholipase D</a>     | 83.8      | 83.8        | 100%        | 1e-16   | 100%  | <a href="#">gij664709542 XP_008511732.1</a> |
| <a href="#">PREDICTED: phosphatidylinositol-glycan-specific phospholipase D</a>     | 83.8      | 83.8        | 100%        | 1e-16   | 100%  | <a href="#">gij664709540 XP_008511731.1</a> |
| <a href="#">PREDICTED: phosphatidylinositol-glycan-specific phospholipase D</a>     | 83.8      | 83.8        | 100%        | 1e-16   | 100%  | <a href="#">gij685535041 XP_009202772.1</a> |
| <a href="#">PREDICTED: phosphatidylinositol-glycan-specific phospholipase D</a>     | 83.8      | 83.8        | 100%        | 1e-16   | 100%  | <a href="#">gij511882878 XP_004761310.1</a> |
| <a href="#">hypothetical protein EGK_21153 [Macaca mulatta]</a>                     | 83.8      | 83.8        | 100%        | 1e-16   | 100%  | <a href="#">gij355569342 EHH25414.1</a>     |

|                                                                                     |      |      |      |       |      |                                             |
|-------------------------------------------------------------------------------------|------|------|------|-------|------|---------------------------------------------|
| glycosylphosphatidylinositol specific phospholipase D1, isoform CR.                 | 83.8 | 83.8 | 100% | 1e-16 | 100% | <a href="#">gij119575854 EAW55450.1</a>     |
| <a href="#">PREDICTED: phosphatidylinositol-glycan-specific phospholipase D</a>     | 83.8 | 83.8 | 100% | 1e-16 | 100% | <a href="#">gij332228866 XP_003263611.1</a> |
| <a href="#">PREDICTED: phosphatidylinositol-glycan-specific phospholipase D</a>     | 83.8 | 83.8 | 100% | 1e-16 | 100% | <a href="#">gij544429967 XP_005553975.1</a> |
| <a href="#">Phosphatidylinositol-glycan-specific phospholipase D [Fukomys dar</a>   | 83.8 | 83.8 | 100% | 1e-16 | 100% | <a href="#">gij676279913 KFO33840.1</a>     |
| <a href="#">PREDICTED: phosphatidylinositol-glycan-specific phospholipase D</a>     | 83.8 | 83.8 | 100% | 1e-16 | 100% | <a href="#">gij664709538 XP_008511730.1</a> |
| <a href="#">PREDICTED: phosphatidylinositol-glycan-specific phospholipase D</a>     | 81.7 | 81.7 | 100% | 5e-16 | 96%  | <a href="#">gij507684247 XP_004640232.1</a> |
| <a href="#">PREDICTED: phosphatidylinositol-glycan-specific phospholipase D</a>     | 81.7 | 81.7 | 100% | 5e-16 | 96%  | <a href="#">gij514459231 XP_005003342.1</a> |
| <a href="#">PREDICTED: phosphatidylinositol-glycan-specific phospholipase D</a>     | 81.7 | 81.7 | 100% | 5e-16 | 96%  | <a href="#">gij348566244 XP_003468912.1</a> |
| <a href="#">PREDICTED: LOW QUALITY PROTEIN: phosphatidylinositol-glyca</a>          | 81.7 | 81.7 | 100% | 5e-16 | 96%  | <a href="#">gij488541031 XP_004462113.1</a> |
| <a href="#">PREDICTED: phosphatidylinositol-glycan-specific phospholipase D</a>     | 81.7 | 81.7 | 100% | 5e-16 | 96%  | <a href="#">gij667294118 XP_008578807.1</a> |
| <a href="#">PREDICTED: phosphatidylinositol-glycan-specific phospholipase D</a>     | 81.7 | 81.7 | 100% | 5e-16 | 96%  | <a href="#">gij640776034 XP_008048656.1</a> |
| <a href="#">PREDICTED: phosphatidylinositol-glycan-specific phospholipase D</a>     | 81.7 | 81.7 | 100% | 5e-16 | 96%  | <a href="#">gij507979038 XP_004693375.1</a> |
| <a href="#">PREDICTED: phosphatidylinositol-glycan-specific phospholipase D</a>     | 81.7 | 81.7 | 100% | 5e-16 | 96%  | <a href="#">gij617615072 XP_007526005.1</a> |
| <a href="#">hypothetical protein EGM_13271 [Macaca fascicularis]</a>                | 81.7 | 81.7 | 100% | 5e-16 | 96%  | <a href="#">gij355748274 EHH52757.1</a>     |
| <a href="#">PREDICTED: phosphatidylinositol-glycan-specific phospholipase D</a>     | 81.7 | 81.7 | 100% | 5e-16 | 96%  | <a href="#">gij533180623 XP_005403486.1</a> |
| <a href="#">Phosphatidylinositol-glycan-specific phospholipase D [Heterocephala</a> | 81.2 | 81.2 | 100% | 7e-16 | 96%  | <a href="#">gij351706674 EHB09593.1</a>     |
| <a href="#">PREDICTED: phosphatidylinositol-glycan-specific phospholipase D</a>     | 81.2 | 81.2 | 100% | 7e-16 | 96%  | <a href="#">gij512971060 XP_004847665.1</a> |
| <a href="#">PREDICTED: phosphatidylinositol-glycan-specific phospholipase D</a>     | 81.2 | 81.2 | 100% | 7e-16 | 96%  | <a href="#">gij512971057 XP_004847664.1</a> |
| <a href="#">PREDICTED: phosphatidylinositol-glycan-specific phospholipase D</a>     | 81.2 | 81.2 | 100% | 7e-16 | 96%  | <a href="#">gij512971055 XP_004847663.1</a> |
| <a href="#">PREDICTED: phosphatidylinositol-glycan-specific phospholipase D</a>     | 81.2 | 81.2 | 100% | 7e-16 | 96%  | <a href="#">gij512880679 XP_004895023.1</a> |
| <a href="#">hypothetical protein CB1_000595062 [Camelus ferus]</a>                  | 80.8 | 80.8 | 95%  | 1e-15 | 100% | <a href="#">gij528763477 IEPY83136.1</a>    |
| <a href="#">PREDICTED: phosphatidylinositol-glycan-specific phospholipase D</a>     | 80.8 | 80.8 | 95%  | 1e-15 | 100% | <a href="#">gij671000878 XP_008691294.1</a> |
| <a href="#">PREDICTED: LOW QUALITY PROTEIN: phosphatidylinositol-glyca</a>          | 80.8 | 80.8 | 95%  | 1e-15 | 100% | <a href="#">gij505841011 XP_004614021.1</a> |
| <a href="#">PREDICTED: phosphatidylinositol-glycan-specific phospholipase D</a>     | 80.8 | 80.8 | 100% | 1e-15 | 96%  | <a href="#">gij686720936 XP_009239742.1</a> |
| <a href="#">PREDICTED: phosphatidylinositol-glycan-specific phospholipase D</a>     | 80.8 | 80.8 | 95%  | 1e-15 | 100% | <a href="#">gij410958439 XP_003985826.1</a> |
| <a href="#">PREDICTED: phosphatidylinositol-glycan-specific phospholipase D</a>     | 80.8 | 80.8 | 95%  | 1e-15 | 100% | <a href="#">gij545554532 XP_005640137.1</a> |
| <a href="#">PREDICTED: LOW QUALITY PROTEIN: phosphatidylinositol-glyca</a>          | 80.8 | 80.8 | 95%  | 1e-15 | 100% | <a href="#">gij560912019 XP_006182298.1</a> |
| <a href="#">PREDICTED: phosphatidylinositol-glycan-specific phospholipase D</a>     | 80.8 | 80.8 | 95%  | 1e-15 | 100% | <a href="#">gij74003954 XP_535902.2</a>     |
| <a href="#">PREDICTED: phosphatidylinositol-glycan-specific phospholipase D</a>     | 80.8 | 80.8 | 100% | 1e-15 | 96%  | <a href="#">gij532102948 XP_005337080.1</a> |
| <a href="#">PREDICTED: phosphatidylinositol-glycan-specific phospholipase D</a>     | 80.8 | 80.8 | 95%  | 1e-15 | 100% | <a href="#">gij591294474 XP_007074479.1</a> |
| <a href="#">PREDICTED: phosphatidylinositol-glycan-specific phospholipase D</a>     | 80.8 | 80.8 | 100% | 1e-15 | 96%  | <a href="#">gij397505380 XP_003823243.1</a> |
| <a href="#">PREDICTED: phosphatidylinositol-glycan-specific phospholipase D</a>     | 80.8 | 80.8 | 95%  | 1e-15 | 100% | <a href="#">gij478515788 XP_004432133.1</a> |
| <a href="#">PREDICTED: phosphatidylinositol-glycan-specific phospholipase D</a>     | 80.8 | 80.8 | 95%  | 1e-15 | 100% | <a href="#">gij545554529 XP_005640136.1</a> |
| <a href="#">PREDICTED: phosphatidylinositol-glycan-specific phospholipase D</a>     | 80.8 | 80.8 | 100% | 1e-15 | 96%  | <a href="#">gij410040317 XP_518268.4</a>    |
| <a href="#">PREDICTED: phosphatidylinositol-glycan-specific phospholipase D</a>     | 80.8 | 80.8 | 100% | 1e-15 | 96%  | <a href="#">gij675773152 XP_008975041.1</a> |
| <a href="#">PREDICTED: phosphatidylinositol-glycan-specific phospholipase D</a>     | 79.1 | 79.1 | 100% | 4e-15 | 92%  | <a href="#">gij672081759 XP_008769857.1</a> |
| <a href="#">phosphatidylinositol-glycan-specific phospholipase D precursor [Rai</a> | 79.1 | 79.1 | 100% | 4e-15 | 92%  | <a href="#">gij213688382 NP_001093982.1</a> |
| <a href="#">RecName: Full=Phosphatidylinositol-glycan-specific phospholipase</a>    | 79.1 | 79.1 | 100% | 4e-15 | 92%  | <a href="#">gij81871416 Q8R2H5.1</a>        |
| <a href="#">PREDICTED: LOW QUALITY PROTEIN: phosphatidylinositol-glyca</a>          | 79.1 | 79.1 | 100% | 4e-15 | 92%  | <a href="#">gij562831414 XP_006145185.1</a> |
| <a href="#">Phosphatidylinositol-glycan-specific phospholipase D [Tupaia chine</a>  | 79.1 | 79.1 | 100% | 4e-15 | 92%  | <a href="#">gij444728318 ELW68777.1</a>     |
| <a href="#">Phosphatidylinositol-glycan-specific phospholipase D [Pteropus ale</a>  | 78.7 | 78.7 | 95%  | 5e-15 | 96%  | <a href="#">gij431896393 ELK05805.1</a>     |
| <a href="#">PREDICTED: phosphatidylinositol-glycan-specific phospholipase D</a>     | 78.7 | 78.7 | 95%  | 5e-15 | 96%  | <a href="#">gij586529361 XP_006919597.1</a> |
| <a href="#">PREDICTED: phosphatidylinositol-glycan-specific phospholipase D</a>     | 78.7 | 78.7 | 95%  | 5e-15 | 96%  | <a href="#">gij585175123 XP_006739372.1</a> |
| <a href="#">PREDICTED: phosphatidylinositol-glycan-specific phospholipase D</a>     | 78.7 | 78.7 | 95%  | 5e-15 | 96%  | <a href="#">gij472374241 XP_004406584.1</a> |
| <a href="#">PREDICTED: phosphatidylinositol-glycan-specific phospholipase D</a>     | 78.3 | 78.3 | 95%  | 7e-15 | 96%  | <a href="#">gij584086909 XP_006763163.1</a> |

|                                                                                    |      |      |      |       |      |                                             |
|------------------------------------------------------------------------------------|------|------|------|-------|------|---------------------------------------------|
| <a href="#">PREDICTED: phosphatidylinositol-glycan-specific phospholipase D</a>    | 77.8 | 77.8 | 100% | 1e-14 | 92%  | <a href="#">gij507572817 XP_004669997.1</a> |
| <a href="#">PREDICTED: phosphatidylinositol-glycan-specific phospholipase D</a>    | 77.8 | 77.8 | 100% | 1e-14 | 92%  | <a href="#">gij674075950 XP_008845321.1</a> |
| <a href="#">PREDICTED: phosphatidylinositol-glycan-specific phospholipase D</a>    | 77.4 | 77.4 | 100% | 1e-14 | 92%  | <a href="#">gij655839984 XP_008260728.1</a> |
| <a href="#">hypothetical protein PANDA_003876 [Ailuropoda melanoleuca]</a>         | 77.4 | 77.4 | 95%  | 1e-14 | 96%  | <a href="#">gij281352759 EFB28343.1</a>     |
| <a href="#">PREDICTED: LOW QUALITY PROTEIN: phosphatidylinositol-glyca</a>         | 77.4 | 77.4 | 91%  | 1e-14 | 100% | <a href="#">gij555982613 XP_005903212.1</a> |
| <a href="#">Phosphatidylinositol-glycan-specific phospholipase D [Bos mutus]</a>   | 77.4 | 77.4 | 91%  | 1e-14 | 100% | <a href="#">gij440899735 ELR50996.1</a>     |
| <a href="#">PREDICTED: phosphatidylinositol-glycan-specific phospholipase D</a>    | 77.4 | 77.4 | 100% | 1e-14 | 92%  | <a href="#">gij655839976 XP_008260723.1</a> |
| <a href="#">PREDICTED: phosphatidylinositol-glycan-specific phospholipase D</a>    | 77.4 | 77.4 | 91%  | 1e-14 | 100% | <a href="#">gij594053987 XP_006051268.1</a> |
| <a href="#">PREDICTED: phosphatidylinositol-glycan-specific phospholipase D</a>    | 77.4 | 77.4 | 91%  | 1e-14 | 100% | <a href="#">gij556757122 XP_005973908.1</a> |
| <a href="#">PREDICTED: phosphatidylinositol-glycan-specific phospholipase D</a>    | 77.4 | 77.4 | 91%  | 1e-14 | 100% | <a href="#">gij548518368 XP_005696842.1</a> |
| <a href="#">PREDICTED: phosphatidylinositol-glycan-specific phospholipase D</a>    | 77.4 | 77.4 | 100% | 1e-14 | 92%  | <a href="#">gij504166674 XP_004593176.1</a> |
| <a href="#">phosphatidylinositol-glycan-specific phospholipase D precursor [Bo</a> | 77.4 | 77.4 | 91%  | 1e-14 | 100% | <a href="#">gij27807363 NP_777241.1</a>     |
| <a href="#">TPA: phosphatidylinositol-glycan-specific phospholipase D [Bos tau</a> | 77.4 | 77.4 | 91%  | 1e-14 | 100% | <a href="#">gij296474001 DAA16116.1</a>     |
| <a href="#">PREDICTED: phosphatidylinositol-glycan-specific phospholipase D</a>    | 77.4 | 77.4 | 95%  | 1e-14 | 96%  | <a href="#">gij301760102 XP_002915859.1</a> |
| <a href="#">PREDICTED: phosphatidylinositol-glycan-specific phospholipase D</a>    | 77.4 | 77.4 | 91%  | 1e-14 | 100% | <a href="#">gij529003874 XP_005223795.1</a> |
| <a href="#">PREDICTED: phosphatidylinositol-glycan-specific phospholipase D</a>    | 77.4 | 77.4 | 91%  | 1e-14 | 100% | <a href="#">gij594053985 XP_006051267.1</a> |
| <a href="#">PREDICTED: phosphatidylinositol-glycan-specific phospholipase D</a>    | 77.4 | 77.4 | 91%  | 1e-14 | 100% | <a href="#">gij529003872 XP_005223794.1</a> |
| <a href="#">PREDICTED: phosphatidylinositol-glycan-specific phospholipase D</a>    | 77.4 | 77.4 | 91%  | 1e-14 | 100% | <a href="#">gij594053983 XP_006051266.1</a> |
| <a href="#">PREDICTED: phosphatidylinositol-glycan-specific phospholipase D</a>    | 77.4 | 77.4 | 91%  | 1e-14 | 100% | <a href="#">gij594053981 XP_006051265.1</a> |
| <a href="#">PREDICTED: phosphatidylinositol-glycan-specific phospholipase D</a>    | 77.4 | 77.4 | 91%  | 1e-14 | 100% | <a href="#">gij529003870 XP_005223793.1</a> |
| <a href="#">PREDICTED: phosphatidylinositol-glycan-specific phospholipase D</a>    | 77.4 | 77.4 | 91%  | 1e-14 | 100% | <a href="#">gij594053979 XP_006051264.1</a> |
| <a href="#">PREDICTED: phosphatidylinositol-glycan-specific phospholipase D</a>    | 77.0 | 77.0 | 95%  | 2e-14 | 96%  | <a href="#">gij545837650 XP_001925944.5</a> |
| <a href="#">PREDICTED: phosphatidylinositol-glycan-specific phospholipase D</a>    | 76.6 | 76.6 | 95%  | 3e-14 | 96%  | <a href="#">gij560952422 XP_006198740.1</a> |
| <a href="#">PREDICTED: LOW QUALITY PROTEIN: phosphatidylinositol-glyca</a>         | 76.6 | 76.6 | 100% | 3e-14 | 92%  | <a href="#">gij395830643 XP_003788429.1</a> |
| <a href="#">PREDICTED: phosphatidylinositol-glycan-specific phospholipase D</a>    | 76.1 | 76.1 | 95%  | 4e-14 | 91%  | <a href="#">gij466027702 XP_004273574.1</a> |
| <a href="#">PREDICTED: phosphatidylinositol-glycan-specific phospholipase D</a>    | 76.1 | 76.1 | 100% | 4e-14 | 88%  | <a href="#">gij634873155 XP_007948002.1</a> |
| <a href="#">PREDICTED: phosphatidylinositol-glycan-specific phospholipase D</a>    | 76.1 | 76.1 | 100% | 4e-14 | 88%  | <a href="#">gij471403600 XP_004384046.1</a> |

## Alignments

Download GenPept Graphics

Next Previous Descriptions

Glycosylphosphatidylinositol specific phospholipase D1, isoform 2 precursor [Homo sapiens]

Sequence ID: [gij85567090|gb|AAI12002.1](#) Length: 176 Number of Matches: 1

Range 1: 79 to 102 GenPept Graphics

Next Match Previous Match

| Score          | Expect | Identities  | Positives   | Gaps     |
|----------------|--------|-------------|-------------|----------|
| 83.8 bits(190) | 6e-17  | 24/24(100%) | 24/24(100%) | 0/24(0%) |

Query 1 KFHDVSESTHWTPFLNASVHYIRE 24  
 KFHDVSESTHWTPFLNASVHYIRE  
 Sbjct 79 KFHDVSESTHWTPFLNASVHYIRE 102

### Related Information

[Gene](#) - associated gene details

Download GenPept Graphics

Next Previous Descriptions

Glycosylphosphatidylinositol specific phospholipase D1 [Homo sapiens]

Sequence ID: [gij18088448|gb|AAH20748.1](#) Length: 176 Number of Matches: 1

[▶ See 3 more title\(s\)](#)

Range 1: 79 to 102 GenPept Graphics

Next Match Previous Match

| Score          | Expect | Identities  | Positives   | Gaps     |
|----------------|--------|-------------|-------------|----------|
| 83.8 bits(190) | 6e-17  | 24/24(100%) | 24/24(100%) | 0/24(0%) |

### Related Information

[Gene](#) - associated gene details

[Identical Proteins](#) - Proteins

identical to the subject

Query 1 KFHDVSESTHWTPFLNASVHYIRE 24  
 Sbjct 79 KFHDVSESTHWTPFLNASVHYIRE 102

[Download](#) [GenPept](#) [Graphics](#)

[Next](#) [Previous](#) [Descriptions](#)

glycosylphosphatidylinositol specific phospholipase D1, isoform CRA\_b [Homo sapiens]

Sequence ID: [gi|119575853|gb|EAW55449.1](#) Length: 186 Number of Matches: 1

Range 1: 89 to 112 [GenPept](#) [Graphics](#)

[Next Match](#) [Previous Match](#)

| Score          | Expect | Identities  | Positives   | Gaps     |
|----------------|--------|-------------|-------------|----------|
| 83.8 bits(190) | 6e-17  | 24/24(100%) | 24/24(100%) | 0/24(0%) |

Query 1 KFHDVSESTHWTPFLNASVHYIRE 24  
 Sbjct 89 KFHDVSESTHWTPFLNASVHYIRE 112

**Related Information**

[Gene](#) - associated gene details

[Download](#) [GenPept](#) [Graphics](#)

[Next](#) [Previous](#) [Descriptions](#)

PREDICTED: phosphatidylinositol-glycan-specific phospholipase D-like [Macaca mulatta]

Sequence ID: [gi|297290177|ref|XP\\_002803682.1](#) Length: 734 Number of Matches: 1

Range 1: 66 to 89 [GenPept](#) [Graphics](#)

[Next Match](#) [Previous Match](#)

| Score          | Expect | Identities  | Positives   | Gaps     |
|----------------|--------|-------------|-------------|----------|
| 83.8 bits(190) | 1e-16  | 24/24(100%) | 24/24(100%) | 0/24(0%) |

Query 1 KFHDVSESTHWTPFLNASVHYIRE 24  
 Sbjct 66 KFHDVSESTHWTPFLNASVHYIRE 89

**Related Information**

[Gene](#) - associated gene details  
[UniGene](#) - clustered expressed sequence tags  
[Map Viewer](#) - aligned genomic context

[Download](#) [GenPept](#) [Graphics](#)

[Next](#) [Previous](#) [Descriptions](#)

PREDICTED: phosphatidylinositol-glycan-specific phospholipase D isoform X2 [Chlorocebus sabaeus]

Sequence ID: [gi|635096983|ref|XP\\_007971741.1](#) Length: 772 Number of Matches: 1

Range 1: 50 to 73 [GenPept](#) [Graphics](#)

[Next Match](#) [Previous Match](#)

| Score          | Expect | Identities  | Positives   | Gaps     |
|----------------|--------|-------------|-------------|----------|
| 83.8 bits(190) | 1e-16  | 24/24(100%) | 24/24(100%) | 0/24(0%) |

Query 1 KFHDVSESTHWTPFLNASVHYIRE 24  
 Sbjct 50 KFHDVSESTHWTPFLNASVHYIRE 73

**Related Information**

[Gene](#) - associated gene details  
[Map Viewer](#) - aligned genomic context

BLAST is a registered trademark of the National Library of Medicine.

NCBI/ BLAST/ blastp suite/ Formatting Results - BVE3BK8T01R

Your search parameters were adjusted to search for a short input sequence.

[Edit and Resubmit](#) [Save Search Strategies](#) [Formatting options](#) [Download](#) [YouTube](#) [How to read this page](#) [Blast report description](#)

GPLD1\_KLGTSLSSGHVLMGTLKQ\_Mod

RID [BVE3BK8T01R](#) (Expires on 01-21 09:07 am)

Query ID |cl|250205  
 Description None  
 Molecule type amino acid  
 Query Length 19

Database Name nr  
 Description All non-redundant GenBank CDS translations+PDB+SwissProt+PIR+PRF excluding environmental samples from WGS projects  
 Program BLASTP 2.2.30+ [Citation](#)

Other reports: [Search Summary](#) [Taxonomy reports](#) [Distance tree of results](#) [Multiple alignment](#)

Graphic Summary

Show Conserved Domains

No putative conserved domains have been detected

Distribution of 100 Blast Hits on the Query Sequence

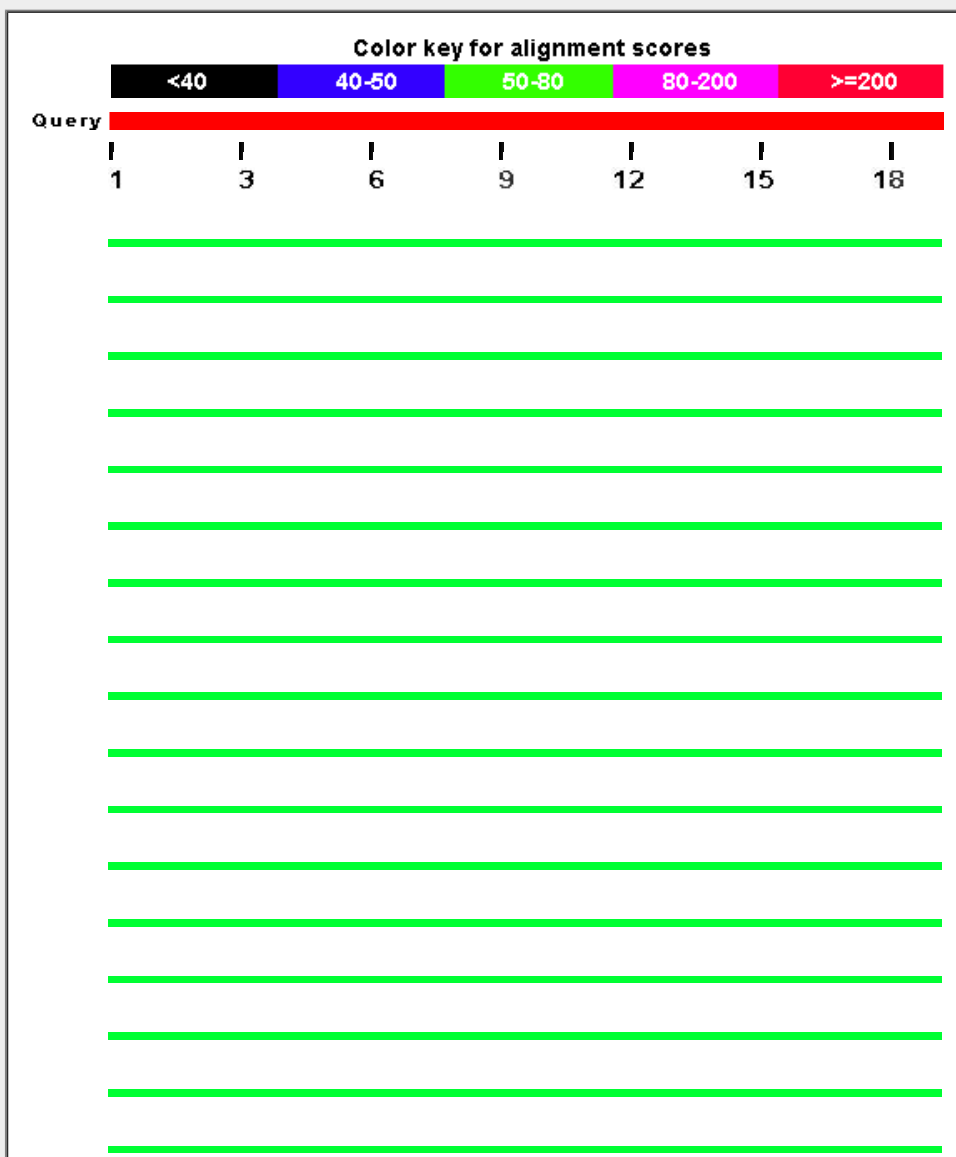

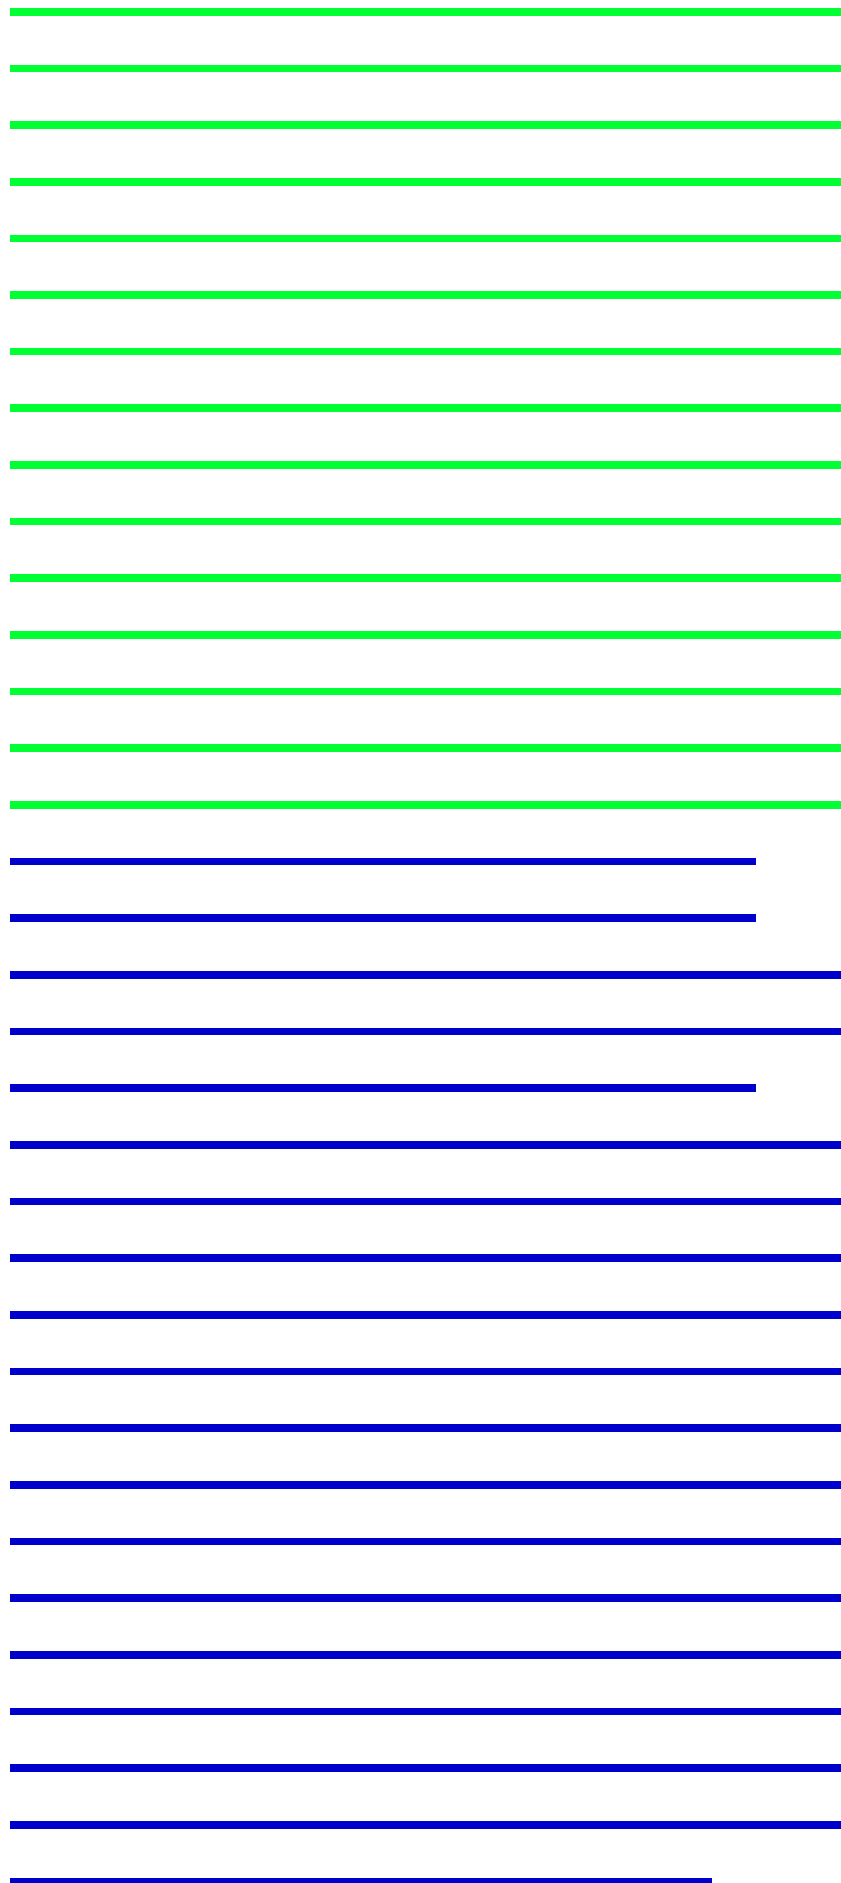

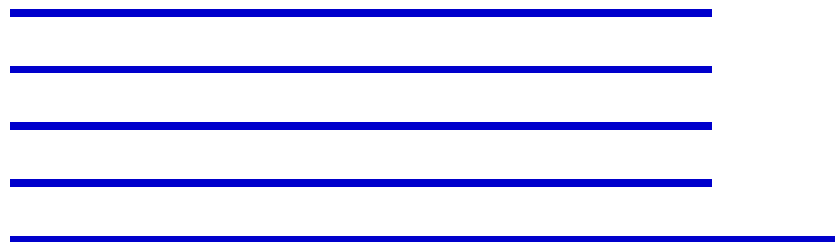

## Descriptions

### Sequences producing significant alignments:

Select: [All](#) [None](#) Selected:0

| Alignments                                                                                   | Download  | GenPept     | Graphics    | Distance tree of results | Multiple alignment |                                |  |
|----------------------------------------------------------------------------------------------|-----------|-------------|-------------|--------------------------|--------------------|--------------------------------|--|
| Description                                                                                  | Max score | Total score | Query cover | E value                  | Ident              | Accession                      |  |
| <a href="#">glycosylphosphatidylinositol phospholipase D [Homo sapiens]</a>                  | 57.9      | 57.9        | 100%        | 3e-08                    | 95%                | <a href="#">CAC14844.1</a>     |  |
| <a href="#">Unknown (protein for IMAGE:3354070) [Homo sapiens]</a>                           | 57.9      | 57.9        | 100%        | 3e-08                    | 95%                | <a href="#">AAH07614.1</a>     |  |
| <a href="#">PREDICTED: phosphatidylinositol-glycan-specific phospholipase D isoform X:</a>   | 57.9      | 57.9        | 100%        | 3e-08                    | 95%                | <a href="#">XP_005249075.1</a> |  |
| <a href="#">glycosylphosphatidylinositol phospholipase D [Homo sapiens]</a>                  | 57.9      | 57.9        | 100%        | 4e-08                    | 95%                | <a href="#">CAC87068.1</a>     |  |
| <a href="#">phospholipase D [Homo sapiens]</a>                                               | 57.9      | 57.9        | 100%        | 4e-08                    | 95%                | <a href="#">AAA36445.1</a>     |  |
| <a href="#">phosphatidylinositol-glycan-specific phospholipase D precursor [Homo sapien:</a> | 57.9      | 57.9        | 100%        | 4e-08                    | 95%                | <a href="#">NP_001494.2</a>    |  |
| <a href="#">glycosylphosphatidylinositol-specific phospholipase D precursor [Homo sapien</a> | 57.9      | 57.9        | 100%        | 4e-08                    | 95%                | <a href="#">AAG16627.2</a>     |  |
| <a href="#">glycosylphosphatidylinositol specific phospholipase D1, isoform CRA_c [Hom</a>   | 57.9      | 57.9        | 100%        | 4e-08                    | 95%                | <a href="#">EAW55450.1</a>     |  |
| <a href="#">PREDICTED: phosphatidylinositol-glycan-specific phospholipase D isoform X:</a>   | 53.7      | 53.7        | 100%        | 9e-07                    | 89%                | <a href="#">XP_009202774.1</a> |  |
| <a href="#">PREDICTED: phosphatidylinositol-glycan-specific phospholipase D isoform X:</a>   | 53.7      | 53.7        | 100%        | 9e-07                    | 89%                | <a href="#">XP_005553977.1</a> |  |
| <a href="#">PREDICTED: phosphatidylinositol-glycan-specific phospholipase D isoform X:</a>   | 53.7      | 53.7        | 100%        | 9e-07                    | 89%                | <a href="#">XP_009202773.1</a> |  |
| <a href="#">PREDICTED: phosphatidylinositol-glycan-specific phospholipase D isoform X:</a>   | 53.7      | 53.7        | 100%        | 9e-07                    | 89%                | <a href="#">XP_007971742.1</a> |  |
| <a href="#">PREDICTED: phosphatidylinositol-glycan-specific phospholipase D-like [Maca</a>   | 53.7      | 53.7        | 100%        | 9e-07                    | 89%                | <a href="#">XP_002803682.1</a> |  |
| <a href="#">PREDICTED: phosphatidylinositol-glycan-specific phospholipase D [Pongo ab</a>    | 53.7      | 53.7        | 100%        | 9e-07                    | 89%                | <a href="#">XP_009239742.1</a> |  |
| <a href="#">PREDICTED: phosphatidylinositol-glycan-specific phospholipase D isoform X:</a>   | 53.7      | 53.7        | 100%        | 9e-07                    | 89%                | <a href="#">XP_007971741.1</a> |  |
| <a href="#">PREDICTED: phosphatidylinositol-glycan-specific phospholipase D isoform X:</a>   | 53.7      | 53.7        | 100%        | 9e-07                    | 89%                | <a href="#">XP_007971740.1</a> |  |
| <a href="#">PREDICTED: phosphatidylinositol-glycan-specific phospholipase D isoform X:</a>   | 53.7      | 53.7        | 100%        | 9e-07                    | 89%                | <a href="#">XP_007971746.1</a> |  |
| <a href="#">PREDICTED: phosphatidylinositol-glycan-specific phospholipase D [Tarsius s</a>   | 53.7      | 53.7        | 100%        | 9e-07                    | 89%                | <a href="#">XP_008048656.1</a> |  |
| <a href="#">phospholipase D [Homo sapiens]</a>                                               | 53.7      | 53.7        | 100%        | 9e-07                    | 89%                | <a href="#">AAA36444.1</a>     |  |
| <a href="#">PREDICTED: phosphatidylinositol-glycan-specific phospholipase D isoform X:</a>   | 53.7      | 53.7        | 100%        | 9e-07                    | 89%                | <a href="#">XP_005553976.1</a> |  |
| <a href="#">PREDICTED: phosphatidylinositol-glycan-specific phospholipase D isoform X:</a>   | 53.7      | 53.7        | 100%        | 9e-07                    | 89%                | <a href="#">XP_003897171.1</a> |  |
| <a href="#">PREDICTED: phosphatidylinositol-glycan-specific phospholipase D isoform X:</a>   | 53.7      | 53.7        | 100%        | 1e-06                    | 89%                | <a href="#">XP_009202772.1</a> |  |
| <a href="#">hypothetical protein EGM_13271 [Macaca fascicularis]</a>                         | 53.7      | 53.7        | 100%        | 1e-06                    | 89%                | <a href="#">EHH52757.1</a>     |  |
| <a href="#">hypothetical protein EGK_21153 [Macaca mulatta]</a>                              | 53.7      | 53.7        | 100%        | 1e-06                    | 89%                | <a href="#">EHH25414.1</a>     |  |
| <a href="#">PREDICTED: phosphatidylinositol-glycan-specific phospholipase D [Nomascu</a>     | 53.7      | 53.7        | 100%        | 1e-06                    | 89%                | <a href="#">XP_003263611.1</a> |  |
| <a href="#">PREDICTED: phosphatidylinositol-glycan-specific phospholipase D isoform X:</a>   | 53.7      | 53.7        | 100%        | 1e-06                    | 89%                | <a href="#">XP_005553975.1</a> |  |
| <a href="#">PREDICTED: phosphatidylinositol-glycan-specific phospholipase D isoform X:</a>   | 51.1      | 51.1        | 100%        | 7e-06                    | 84%                | <a href="#">XP_004847666.1</a> |  |
| <a href="#">Phosphatidylinositol-glycan-specific phospholipase D [Heterocephalus glaber]</a> | 51.1      | 51.1        | 100%        | 7e-06                    | 84%                | <a href="#">EHB09593.1</a>     |  |
| <a href="#">PREDICTED: phosphatidylinositol-glycan-specific phospholipase D isoform X:</a>   | 51.1      | 51.1        | 100%        | 7e-06                    | 84%                | <a href="#">XP_004847665.1</a> |  |

|                                                                                                 |      |      |      |       |     |                                |
|-------------------------------------------------------------------------------------------------|------|------|------|-------|-----|--------------------------------|
| <a href="#">PREDICTED: phosphatidylinositol-glycan-specific phospholipase D isoform X;</a>      | 51.1 | 51.1 | 100% | 7e-06 | 84% | <a href="#">XP_004847664.1</a> |
| <a href="#">PREDICTED: phosphatidylinositol-glycan-specific phospholipase D isoform X;</a>      | 51.1 | 51.1 | 100% | 7e-06 | 84% | <a href="#">XP_004847663.1</a> |
| <a href="#">PREDICTED: phosphatidylinositol-glycan-specific phospholipase D [Heteroce</a>       | 51.1 | 51.1 | 100% | 7e-06 | 84% | <a href="#">XP_004895023.1</a> |
| <a href="#">PREDICTED: phosphatidylinositol-glycan-specific phospholipase D isoform X;</a>      | 49.0 | 49.0 | 89%  | 3e-05 | 88% | <a href="#">XP_010621250.1</a> |
| <a href="#">PREDICTED: phosphatidylinositol-glycan-specific phospholipase D isoform X;</a>      | 49.0 | 49.0 | 89%  | 3e-05 | 88% | <a href="#">XP_010621248.1</a> |
| <a href="#">PREDICTED: phosphatidylinositol-glycan-specific phospholipase D isoform X;</a>      | 49.0 | 49.0 | 100% | 3e-05 | 84% | <a href="#">XP_007454575.1</a> |
| <a href="#">PREDICTED: phosphatidylinositol-glycan-specific phospholipase D isoform X;</a>      | 49.0 | 49.0 | 100% | 3e-05 | 84% | <a href="#">XP_007454574.1</a> |
| <a href="#">Phosphatidylinositol-glycan-specific phospholipase D [Fukomys damarensis]</a>       | 49.0 | 49.0 | 89%  | 3e-05 | 88% | <a href="#">KFO33840.1</a>     |
| <a href="#">PREDICTED: phosphatidylinositol-glycan-specific phospholipase D [Chinchilla</a>     | 49.0 | 49.0 | 100% | 3e-05 | 79% | <a href="#">XP_005403486.1</a> |
| <a href="#">PREDICTED: phosphatidylinositol-glycan-specific phospholipase D [Callithrix</a>     | 49.0 | 49.0 | 100% | 3e-05 | 84% | <a href="#">XP_002746229.2</a> |
| <a href="#">PREDICTED: phosphatidylinositol-glycan-specific phospholipase D [Rhinopith</a>      | 48.6 | 48.6 | 100% | 5e-05 | 84% | <a href="#">XP_010363586.1</a> |
| <a href="#">PREDICTED: phosphatidylinositol-glycan-specific phospholipase D isoform X;</a>      | 48.1 | 48.1 | 100% | 6e-05 | 79% | <a href="#">XP_008975042.1</a> |
| <a href="#">PREDICTED: phosphatidylinositol-glycan-specific phospholipase D isoform X;</a>      | 48.1 | 48.1 | 100% | 7e-05 | 79% | <a href="#">XP_005003342.1</a> |
| <a href="#">PREDICTED: phosphatidylinositol-glycan-specific phospholipase D isoform X;</a>      | 48.1 | 48.1 | 100% | 7e-05 | 79% | <a href="#">XP_003468912.1</a> |
| <a href="#">PREDICTED: phosphatidylinositol-glycan-specific phospholipase D isoform 2</a>       | 48.1 | 48.1 | 100% | 7e-05 | 79% | <a href="#">XP_004043389.1</a> |
| <a href="#">PREDICTED: phosphatidylinositol-glycan-specific phospholipase D isoform 1</a>       | 48.1 | 48.1 | 100% | 7e-05 | 79% | <a href="#">XP_004043388.1</a> |
| <a href="#">PREDICTED: phosphatidylinositol-glycan-specific phospholipase D isoform X;</a>      | 48.1 | 48.1 | 100% | 7e-05 | 79% | <a href="#">XP_003823243.1</a> |
| <a href="#">PREDICTED: phosphatidylinositol-glycan-specific phospholipase D [Pan trogl</a>      | 48.1 | 48.1 | 100% | 7e-05 | 79% | <a href="#">XP_518268.4</a>    |
| <a href="#">PREDICTED: phosphatidylinositol-glycan-specific phospholipase D isoform X;</a>      | 48.1 | 48.1 | 100% | 7e-05 | 79% | <a href="#">XP_008975041.1</a> |
| <a href="#">PREDICTED: phosphatidylinositol-glycan-specific phospholipase D [Galeopte</a>       | 46.9 | 46.9 | 100% | 2e-04 | 79% | <a href="#">XP_008578807.1</a> |
| <a href="#">PREDICTED: phosphatidylinositol-glycan-specific phospholipase D [Loxodont</a>       | 46.9 | 46.9 | 100% | 2e-04 | 79% | <a href="#">XP_003416488.1</a> |
| <a href="#">PREDICTED: phosphatidylinositol-glycan-specific phospholipase D [Physeter</a>       | 46.0 | 46.0 | 84%  | 3e-04 | 88% | <a href="#">XP_007116306.1</a> |
| <a href="#">PREDICTED: phosphatidylinositol-glycan-specific phospholipase D [Orcinus c</a>      | 46.0 | 46.0 | 84%  | 3e-04 | 88% | <a href="#">XP_004273574.1</a> |
| <a href="#">PREDICTED: phosphatidylinositol-glycan-specific phospholipase D isoform X;</a>      | 46.0 | 46.0 | 84%  | 3e-04 | 88% | <a href="#">XP_007197201.1</a> |
| <a href="#">PREDICTED: phosphatidylinositol-glycan-specific phospholipase D isoform X;</a>      | 46.0 | 46.0 | 84%  | 3e-04 | 88% | <a href="#">XP_007197200.1</a> |
| <a href="#">PREDICTED: phosphatidylinositol-glycan-specific phospholipase D [Tursiops</a>       | 46.0 | 46.0 | 84%  | 3e-04 | 88% | <a href="#">XP_004313968.1</a> |
| <a href="#">PREDICTED: phosphatidylinositol-glycan-specific phospholipase D [Saimiri br</a>     | 45.2 | 45.2 | 100% | 6e-04 | 79% | <a href="#">XP_003927350.1</a> |
| <a href="#">PREDICTED: phosphatidylinositol-glycan-specific phospholipase D [Felis catu</a>     | 43.9 | 43.9 | 100% | 0.002 | 79% | <a href="#">XP_003985826.1</a> |
| <a href="#">PREDICTED: phosphatidylinositol-glycan-specific phospholipase D [Panthera</a>       | 43.9 | 43.9 | 100% | 0.002 | 79% | <a href="#">XP_007074479.1</a> |
| <a href="#">PREDICTED: phosphatidylinositol-glycan-specific phospholipase D isoform X;</a>      | 43.1 | 43.1 | 100% | 0.003 | 79% | <a href="#">XP_007627730.1</a> |
| <a href="#">phosphatidylinositol-glycan-specific phospholipase D-like protein [Cricetulus g</a> | 43.1 | 43.1 | 100% | 0.003 | 79% | <a href="#">ERE77282.1</a>     |
| <a href="#">Phosphatidylinositol-glycan-specific phospholipase D [Cricetulus griseus]</a>       | 43.1 | 43.1 | 100% | 0.003 | 79% | <a href="#">EGV94314.1</a>     |
| <a href="#">PREDICTED: phosphatidylinositol-glycan-specific phospholipase D isoform X;</a>      | 43.1 | 43.1 | 100% | 0.003 | 79% | <a href="#">XP_004761311.1</a> |
| <a href="#">PREDICTED: phosphatidylinositol-glycan-specific phospholipase D [Leptonycl</a>      | 43.1 | 43.1 | 100% | 0.003 | 79% | <a href="#">XP_006739372.1</a> |
| <a href="#">PREDICTED: phosphatidylinositol-glycan-specific phospholipase D [Peromysc</a>       | 43.1 | 43.1 | 100% | 0.003 | 79% | <a href="#">XP_006977193.1</a> |
| <a href="#">PREDICTED: phosphatidylinositol-glycan-specific phospholipase D [Microtus</a>       | 43.1 | 43.1 | 100% | 0.003 | 79% | <a href="#">XP_005355039.1</a> |
| <a href="#">PREDICTED: phosphatidylinositol-glycan-specific phospholipase D isoform X;</a>      | 43.1 | 43.1 | 100% | 0.003 | 79% | <a href="#">XP_003502241.1</a> |
| <a href="#">PREDICTED: phosphatidylinositol-glycan-specific phospholipase D isoform X;</a>      | 43.1 | 43.1 | 100% | 0.003 | 79% | <a href="#">XP_004761310.1</a> |
| <a href="#">PREDICTED: phosphatidylinositol-glycan-specific phospholipase D [Mesocric</a>       | 43.1 | 43.1 | 100% | 0.003 | 79% | <a href="#">XP_005066341.1</a> |
| <a href="#">PREDICTED: phosphatidylinositol-glycan-specific phospholipase D [Orycterop</a>      | 42.2 | 42.2 | 100% | 0.006 | 74% | <a href="#">XP_007948002.1</a> |
| <a href="#">PREDICTED: phosphatidylinositol-glycan-specific phospholipase D [Trichechu</a>      | 42.2 | 42.2 | 100% | 0.006 | 74% | <a href="#">XP_004384046.1</a> |
| <a href="#">PREDICTED: phosphatidylinositol-glycan-specific phospholipase D isoform X;</a>      | 41.8 | 41.8 | 100% | 0.008 | 74% | <a href="#">XP_008260728.1</a> |
| <a href="#">PREDICTED: phosphatidylinositol-glycan-specific phospholipase D isoform X;</a>      | 41.8 | 41.8 | 100% | 0.008 | 74% | <a href="#">XP_008260723.1</a> |
| <a href="#">PREDICTED: phosphatidylinositol-glycan-specific phospholipase D [Echinops</a>       | 41.4 | 41.4 | 78%  | 0.011 | 87% | <a href="#">XP_004712567.1</a> |
| <a href="#">PREDICTED: phosphatidylinositol-glycan-specific phospholipase D [Qodobenu</a>       | 41.4 | 41.4 | 100% | 0.011 | 74% | <a href="#">XP_004406584.1</a> |



|                                                                                             |      |      |      |       |     |                                |
|---------------------------------------------------------------------------------------------|------|------|------|-------|-----|--------------------------------|
| <a href="#">PREDICTED: phosphatidylinositol-glycan-specific phospholipase D [Octodon</a>    | 40.9 | 40.9 | 89%  | 0.015 | 76% | <a href="#">XP_004640232.1</a> |
| <a href="#">PREDICTED: phosphatidylinositol-glycan-specific phospholipase D [Eptesicus</a>  | 40.9 | 40.9 | 84%  | 0.015 | 81% | <a href="#">XP_008145534.1</a> |
| <a href="#">PREDICTED: LOW QUALITY PROTEIN: phosphatidylinositol-glycan-specific</a>        | 40.9 | 40.9 | 84%  | 0.015 | 81% | <a href="#">XP_005903212.1</a> |
| <a href="#">Phosphatidylinositol-glycan-specific phospholipase D [Bos mutus]</a>            | 40.9 | 40.9 | 84%  | 0.015 | 81% | <a href="#">ELR50996.1</a>     |
| <a href="#">PREDICTED: phosphatidylinositol-glycan-specific phospholipase D isoform X:</a>  | 40.9 | 40.9 | 84%  | 0.015 | 81% | <a href="#">XP_010841812.1</a> |
| <a href="#">PREDICTED: phosphatidylinositol-glycan-specific phospholipase D [Nannosp:</a>   | 40.9 | 40.9 | 89%  | 0.015 | 82% | <a href="#">XP_008845321.1</a> |
| <a href="#">PREDICTED: phosphatidylinositol-glycan-specific phospholipase D isoform X:</a>  | 40.9 | 40.9 | 84%  | 0.015 | 81% | <a href="#">XP_006051268.1</a> |
| <a href="#">phosphatidylinositol-glycan-specific phospholipase D precursor [Bos taurus]</a> | 40.9 | 40.9 | 84%  | 0.015 | 81% | <a href="#">NP_777241.1</a>    |
| <a href="#">TPA: phosphatidylinositol-glycan-specific phospholipase D [Bos taurus]</a>      | 40.9 | 40.9 | 84%  | 0.015 | 81% | <a href="#">DAA16116.1</a>     |
| <a href="#">PREDICTED: phosphatidylinositol-glycan-specific phospholipase D isoform X:</a>  | 40.9 | 40.9 | 84%  | 0.015 | 81% | <a href="#">XP_006919597.1</a> |
| <a href="#">PREDICTED: phosphatidylinositol-glycan-specific phospholipase D isoform X:</a>  | 40.9 | 40.9 | 84%  | 0.015 | 81% | <a href="#">XP_010841810.1</a> |
| <a href="#">PREDICTED: phosphatidylinositol-glycan-specific phospholipase D isoform X:</a>  | 40.9 | 40.9 | 84%  | 0.015 | 81% | <a href="#">XP_005223795.1</a> |
| <a href="#">PREDICTED: phosphatidylinositol-glycan-specific phospholipase D isoform X:</a>  | 40.9 | 40.9 | 84%  | 0.015 | 81% | <a href="#">XP_006051267.1</a> |
| <a href="#">PREDICTED: phosphatidylinositol-glycan-specific phospholipase D isoform X:</a>  | 40.9 | 40.9 | 84%  | 0.015 | 81% | <a href="#">XP_005223794.1</a> |
| <a href="#">PREDICTED: phosphatidylinositol-glycan-specific phospholipase D isoform X:</a>  | 40.9 | 40.9 | 84%  | 0.015 | 81% | <a href="#">XP_006051266.1</a> |
| <a href="#">PREDICTED: phosphatidylinositol-glycan-specific phospholipase D [Sus scrof</a>  | 40.9 | 40.9 | 84%  | 0.015 | 81% | <a href="#">XP_001925944.5</a> |
| <a href="#">PREDICTED: phosphatidylinositol-glycan-specific phospholipase D isoform X:</a>  | 40.9 | 40.9 | 84%  | 0.015 | 81% | <a href="#">XP_006051265.1</a> |
| <a href="#">PREDICTED: phosphatidylinositol-glycan-specific phospholipase D isoform X:</a>  | 40.9 | 40.9 | 84%  | 0.015 | 81% | <a href="#">XP_006051264.1</a> |
| <a href="#">PREDICTED: phosphatidylinositol-glycan-specific phospholipase D isoform X:</a>  | 40.9 | 40.9 | 84%  | 0.015 | 81% | <a href="#">XP_010816770.1</a> |
| <a href="#">PREDICTED: phosphatidylinositol-glycan-specific phospholipase D isoform X:</a>  | 40.5 | 40.5 | 100% | 0.021 | 74% | <a href="#">XP_005640137.1</a> |
| <a href="#">PREDICTED: phosphatidylinositol-glycan-specific phospholipase D isoformX1</a>   | 40.5 | 40.5 | 100% | 0.021 | 74% | <a href="#">XP_535902.2</a>    |
| <a href="#">PREDICTED: phosphatidylinositol-glycan-specific phospholipase D [Elephantu</a>  | 40.5 | 40.5 | 100% | 0.021 | 68% | <a href="#">XP_006888712.1</a> |
| <a href="#">PREDICTED: phosphatidylinositol-glycan-specific phospholipase D isoform X:</a>  | 40.5 | 40.5 | 100% | 0.021 | 74% | <a href="#">XP_005640136.1</a> |
| <a href="#">PREDICTED: phosphatidylinositol-glycan-specific phospholipase D [Ursus ma</a>   | 40.1 | 40.1 | 84%  | 0.028 | 81% | <a href="#">XP_008691294.1</a> |
| <a href="#">hypothetical protein PANDA_003876 [Ailuropoda melanoleuca]</a>                  | 40.1 | 40.1 | 84%  | 0.028 | 81% | <a href="#">EFB28343.1</a>     |
| <a href="#">PREDICTED: LOW QUALITY PROTEIN: phosphatidylinositol-glycan-specific</a>        | 40.1 | 40.1 | 100% | 0.028 | 74% | <a href="#">XP_004462113.1</a> |

## Alignments

Download [GenPept](#) [Graphics](#)

[Next](#) [Previous](#) [Descriptions](#)

glycosylphosphatidylinositol phospholipase D [Homo sapiens]

Sequence ID: [emb|CAC14844.1|](#) Length: 457 Number of Matches: 1

Range 1: 263 to 281 [GenPept](#) [Graphics](#)

[Next Match](#) [Previous Match](#)

| Score          | Expect | Identities | Positives   | Gaps     |
|----------------|--------|------------|-------------|----------|
| 57.9 bits(129) | 3e-08  | 18/19(95%) | 19/19(100%) | 0/19(0%) |

Query 1 KLGTSLSSGHVLMGDTLKQ 19  
 KLGTSLSSGHVLM+GTLKQ  
 Sbjct 263 KLGTSLSSGHVLMNGTLKQ 281

### Related Information

[Gene](#) - associated gene details

Download [GenPept](#) [Graphics](#)

[Next](#) [Previous](#) [Descriptions](#)

Unknown (protein for IMAGE:3354070), partial [Homo sapiens]

Sequence ID: [gb|AAH07614.1|](#) Length: 575 Number of Matches: 1

Range 1: 381 to 399 [GenPept](#) [Graphics](#)

[Next Match](#) [Previous Match](#)

| Score          | Expect | Identities | Positives   | Gaps     |
|----------------|--------|------------|-------------|----------|
| 57.9 bits(129) | 3e-08  | 18/19(95%) | 19/19(100%) | 0/19(0%) |

### Related Information

[Gene](#) - associated gene details

Query 1 KLGTSLSSGHVLM DGT LKQ 19  
KLGTSLSSGHVLM+GTLKQ  
Sbjct 381 KLGTSLSSGHVLMNGTLKQ 399

[Download](#) [GenPept](#) [Graphics](#) [Next](#) [Previous](#) [Descriptions](#)

**PREDICTED: phosphatidylinositol-glycan-specific phospholipase D isoform X3 [Homo sapiens]**  
Sequence ID: [ref|XP\\_005249075.1|](#) Length: 677 Number of Matches: 1

Range 1: 483 to 501 [GenPept](#) [Graphics](#) [Next Match](#) [Previous Match](#)

| Score          | Expect | Identities | Positives   | Gaps     |
|----------------|--------|------------|-------------|----------|
| 57.9 bits(129) | 3e-08  | 18/19(95%) | 19/19(100%) | 0/19(0%) |

Query 1 KLGTSLSSGHVLM DGT LKQ 19  
KLGTSLSSGHVLM+GTLKQ  
Sbjct 483 KLGTSLSSGHVLMNGTLKQ 501

**Related Information**  
[Gene](#) - associated gene details  
[Map Viewer](#) - aligned genomic context

[Download](#) [GenPept](#) [Graphics](#) [Next](#) [Previous](#) [Descriptions](#)

**glycosylphosphatidylinositol phospholipase D [Homo sapiens]**  
Sequence ID: [emb|CAC87068.1|](#) Length: 840 Number of Matches: 1

[See 1 more title\(s\)](#)

Range 1: 646 to 664 [GenPept](#) [Graphics](#) [Next Match](#) [Previous Match](#)

| Score          | Expect | Identities | Positives   | Gaps     |
|----------------|--------|------------|-------------|----------|
| 57.9 bits(129) | 4e-08  | 18/19(95%) | 19/19(100%) | 0/19(0%) |

Query 1 KLGTSLSSGHVLM DGT LKQ 19  
KLGTSLSSGHVLM+GTLKQ  
Sbjct 646 KLGTSLSSGHVLMNGTLKQ 664

**Related Information**  
[Gene](#) - associated gene details  
[Identical Proteins](#) - Proteins identical to the subject

[Download](#) [GenPept](#) [Graphics](#) [Next](#) [Previous](#) [Descriptions](#)

**phospholipase D [Homo sapiens]**  
Sequence ID: [gb|AAA36445.1|](#) Length: 840 Number of Matches: 1

Range 1: 646 to 664 [GenPept](#) [Graphics](#) [Next Match](#) [Previous Match](#)

| Score          | Expect | Identities | Positives   | Gaps     |
|----------------|--------|------------|-------------|----------|
| 57.9 bits(129) | 4e-08  | 18/19(95%) | 19/19(100%) | 0/19(0%) |

Query 1 KLGTSLSSGHVLM DGT LKQ 19  
KLGTSLSSGHVLM+GTLKQ  
Sbjct 646 KLGTSLSSGHVLMNGTLKQ 664

**Related Information**  
[Gene](#) - associated gene details

BLAST is a registered trademark of the National Library of Medicine.



NCBI/ BLAST/ blastp suite/ Formatting Results - B9E7AZE601R

Your search parameters were adjusted to search for a short input sequence.

Edit and Resubmit Save Search Strategies Formatting options Download

YouTube How to read this page Blast report description

GPLD1\_KLGTSLSSGHVLMNGTLKQ\_NonMod

RID B9E7AZE601R (Expires on 01-14 13:19 pm)

Query ID lcl|316949
Description None
Molecule type amino acid
Query Length 19

Database Name nr
Description All non-redundant GenBank CDS translations+PDB+SwissProt+PIR excluding environmental samples from WGS projects
Program BLASTP 2.2.30+ Citation

Other reports: Search Summary Taxonomy reports Distance tree of results Multiple alignment

Graphic Summary

Show Conserved Domains

No putative conserved domains have been detected

Distribution of 100 Blast Hits on the Query Sequence



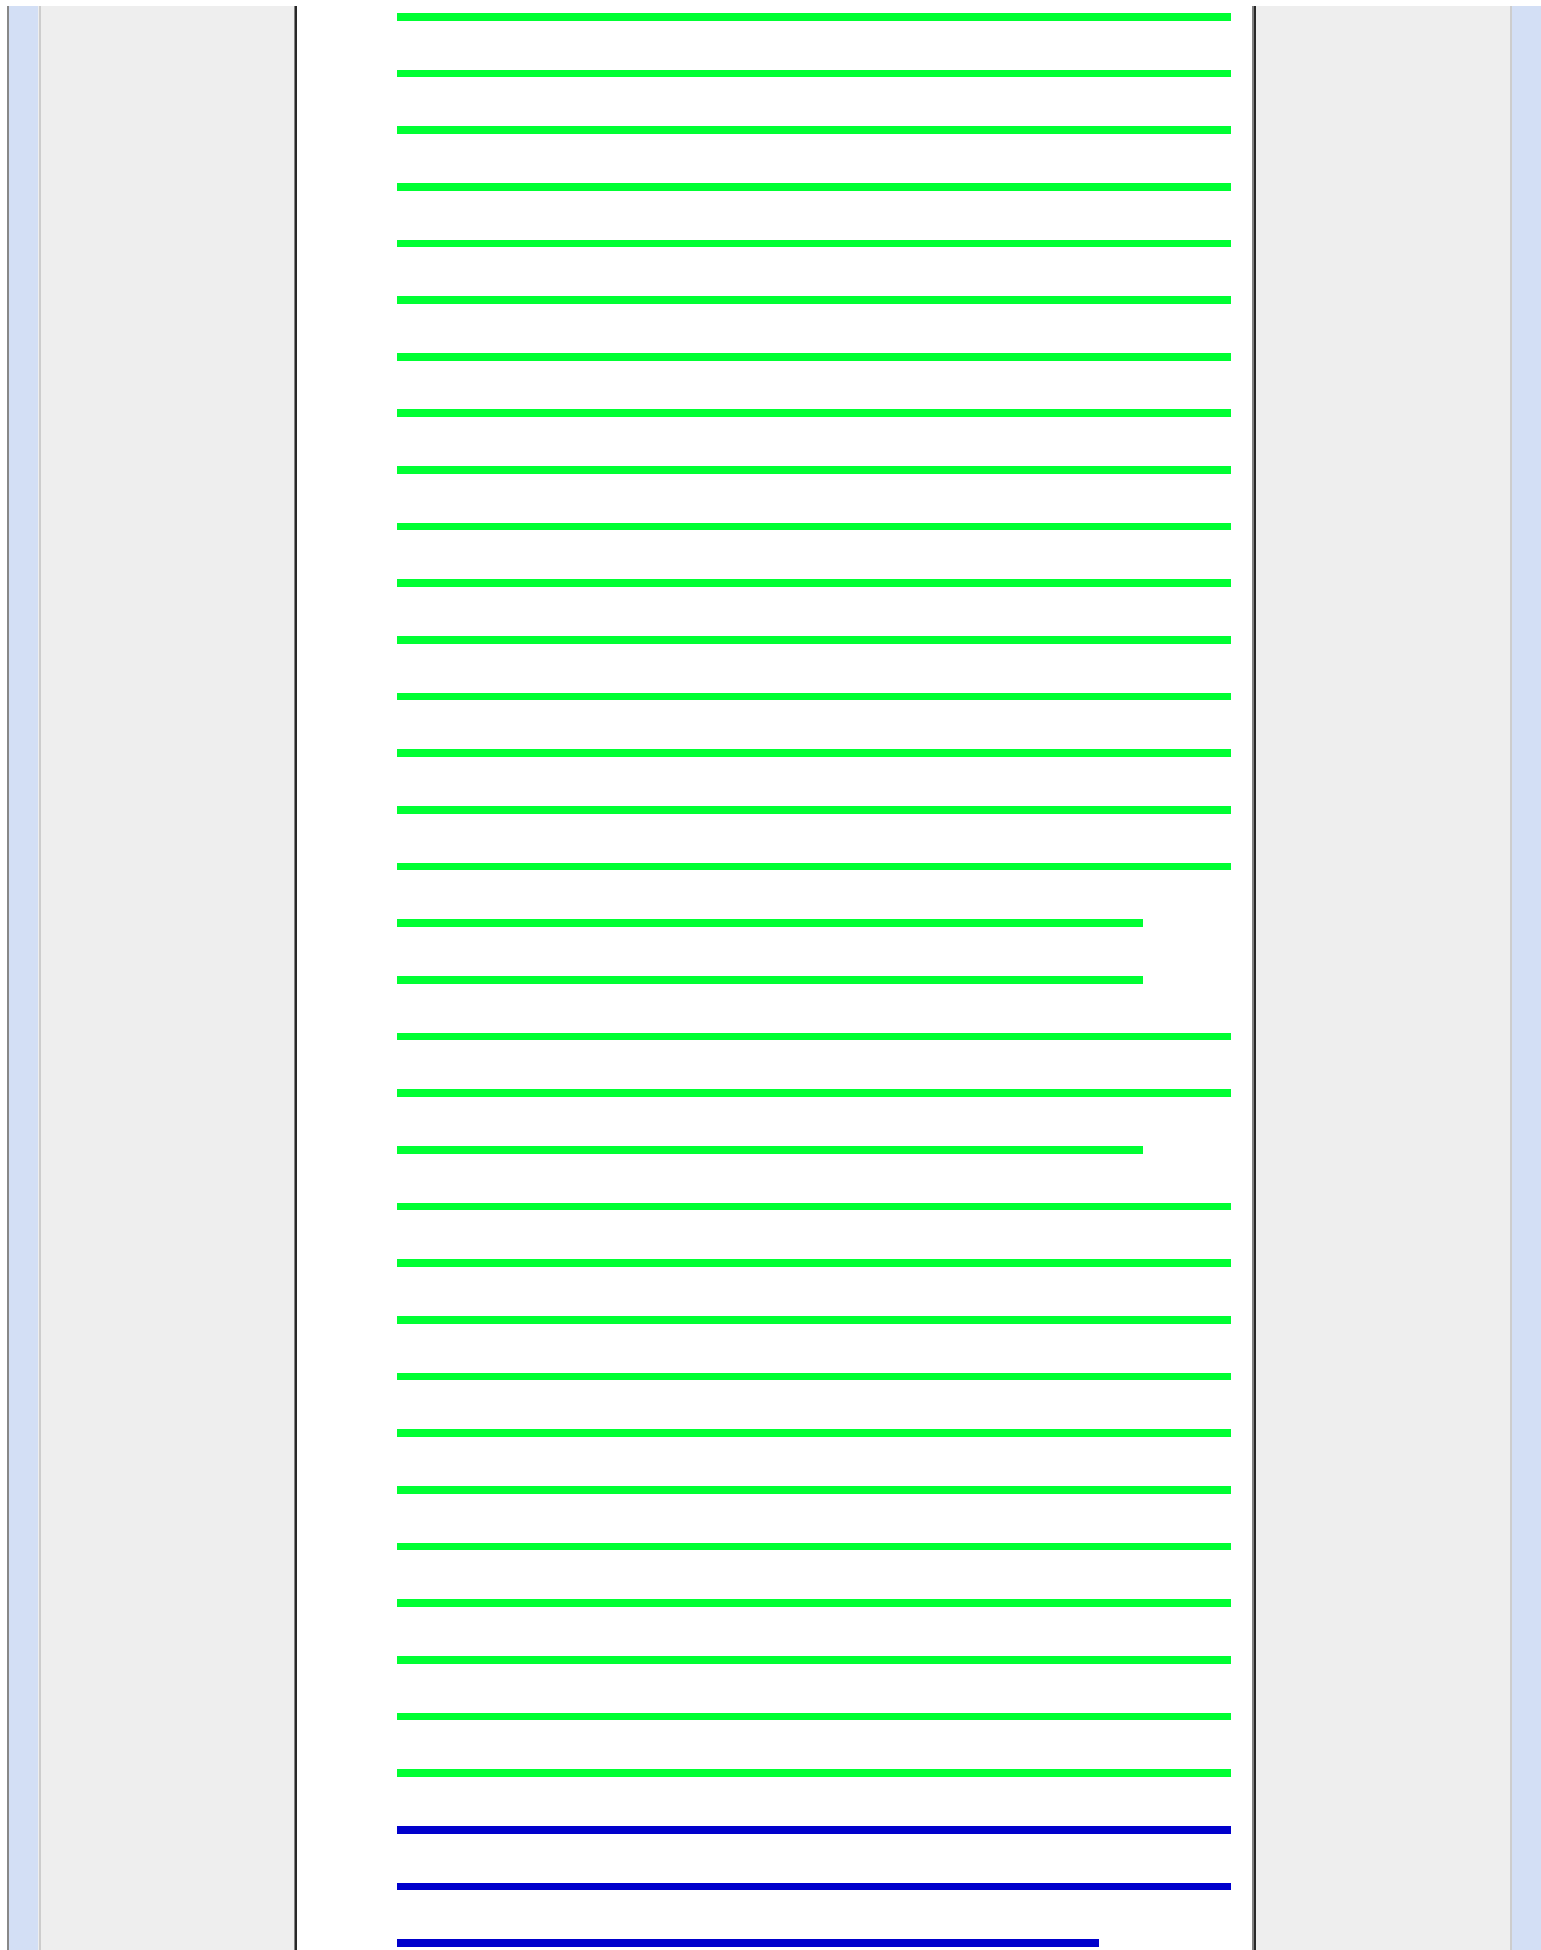

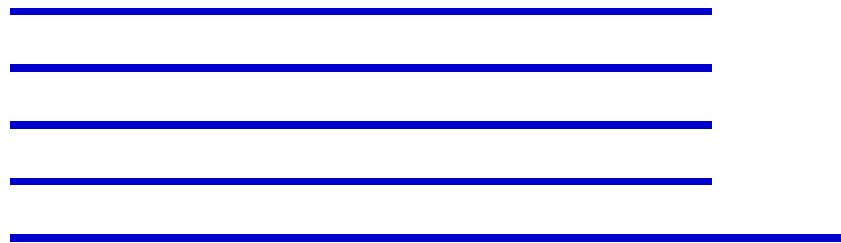

**Descriptions**

**Sequences producing significant alignments:**

Select: [All](#) [None](#) Selected:0

[Alignments](#)
[Download](#)
[GenPept](#)
[Graphics](#)
[Distance tree of results](#)
[Multiple alignment](#)

| Description                                                                         | Max score | Total score | Query cover | E value | Ident | Accession                                   |
|-------------------------------------------------------------------------------------|-----------|-------------|-------------|---------|-------|---------------------------------------------|
| <a href="#">glycosylphosphatidylinositol phospholipase D [Homo sapiens]</a>         | 60.4      | 60.4        | 100%        | 4e-09   | 100%  | <a href="#">gij11122875 CAC14844.1</a>      |
| <a href="#">Unknown (protein for IMAGE:3354070) [Homo sapiens]</a>                  | 60.4      | 60.4        | 100%        | 4e-09   | 100%  | <a href="#">gij14043248 AAH07614.1</a>      |
| <a href="#">PREDICTED: phosphatidylinositol-glycan-specific phospholipase D</a>     | 60.4      | 60.4        | 100%        | 4e-09   | 100%  | <a href="#">gij530381810 XP_005249075.1</a> |
| <a href="#">glycosylphosphatidylinositol phospholipase D [Homo sapiens]</a>         | 60.4      | 60.4        | 100%        | 5e-09   | 100%  | <a href="#">gij20269065 CAC87068.1</a>      |
| <a href="#">phospholipase D [Homo sapiens]</a>                                      | 60.4      | 60.4        | 100%        | 5e-09   | 100%  | <a href="#">gij388765 AAA36445.1</a>        |
| <a href="#">phosphatidylinositol-glycan-specific phospholipase D precursor [Ho]</a> | 60.4      | 60.4        | 100%        | 5e-09   | 100%  | <a href="#">gij29171717 JNP_001494.2</a>    |
| <a href="#">glycosylphosphatidylinositol-specific phospholipase D precursor [Hc</a> | 60.4      | 60.4        | 100%        | 5e-09   | 100%  | <a href="#">gij14195001 AAG16627.2</a>      |
| <a href="#">glycosylphosphatidylinositol specific phospholipase D1, isoform CR</a>  | 60.4      | 60.4        | 100%        | 5e-09   | 100%  | <a href="#">gij119575854 EAW55450.1</a>     |
| <a href="#">PREDICTED: phosphatidylinositol-glycan-specific phospholipase D</a>     | 56.2      | 56.2        | 100%        | 1e-07   | 95%   | <a href="#">gij685535046 XP_009202774.1</a> |
| <a href="#">PREDICTED: phosphatidylinositol-glycan-specific phospholipase D</a>     | 56.2      | 56.2        | 100%        | 1e-07   | 95%   | <a href="#">gij544429971 XP_005553977.1</a> |
| <a href="#">PREDICTED: phosphatidylinositol-glycan-specific phospholipase D</a>     | 56.2      | 56.2        | 100%        | 1e-07   | 95%   | <a href="#">gij685535044 XP_009202773.1</a> |
| <a href="#">PREDICTED: phosphatidylinositol-glycan-specific phospholipase D</a>     | 56.2      | 56.2        | 100%        | 1e-07   | 95%   | <a href="#">gij635096985 XP_007971742.1</a> |
| <a href="#">PREDICTED: phosphatidylinositol-glycan-specific phospholipase D</a>     | 56.2      | 56.2        | 100%        | 1e-07   | 95%   | <a href="#">gij297290177 XP_002803682.1</a> |
| <a href="#">PREDICTED: phosphatidylinositol-glycan-specific phospholipase D</a>     | 56.2      | 56.2        | 100%        | 1e-07   | 95%   | <a href="#">gij686720936 XP_009239742.1</a> |
| <a href="#">PREDICTED: phosphatidylinositol-glycan-specific phospholipase D</a>     | 56.2      | 56.2        | 100%        | 1e-07   | 95%   | <a href="#">gij635096983 XP_007971741.1</a> |
| <a href="#">PREDICTED: phosphatidylinositol-glycan-specific phospholipase D</a>     | 56.2      | 56.2        | 100%        | 1e-07   | 95%   | <a href="#">gij635096981 XP_007971740.1</a> |
| <a href="#">PREDICTED: phosphatidylinositol-glycan-specific phospholipase D</a>     | 56.2      | 56.2        | 100%        | 1e-07   | 95%   | <a href="#">gij635096993 XP_007971746.1</a> |
| <a href="#">PREDICTED: phosphatidylinositol-glycan-specific phospholipase D</a>     | 56.2      | 56.2        | 100%        | 1e-07   | 95%   | <a href="#">gij640776034 XP_008048656.1</a> |
| <a href="#">phospholipase D [Homo sapiens]</a>                                      | 56.2      | 56.2        | 100%        | 1e-07   | 95%   | <a href="#">gij388763 AAA36444.1</a>        |
| <a href="#">PREDICTED: phosphatidylinositol-glycan-specific phospholipase D</a>     | 56.2      | 56.2        | 100%        | 1e-07   | 95%   | <a href="#">gij544429969 XP_005553976.1</a> |
| <a href="#">PREDICTED: phosphatidylinositol-glycan-specific phospholipase D</a>     | 56.2      | 56.2        | 100%        | 1e-07   | 95%   | <a href="#">gij402865969 XP_003897171.1</a> |
| <a href="#">PREDICTED: phosphatidylinositol-glycan-specific phospholipase D</a>     | 56.2      | 56.2        | 100%        | 1e-07   | 95%   | <a href="#">gij685535041 XP_009202772.1</a> |
| <a href="#">hypothetical protein EGM_13271 [Macaca fascicularis]</a>                | 56.2      | 56.2        | 100%        | 1e-07   | 95%   | <a href="#">gij355748274 EHH52757.1</a>     |
| <a href="#">hypothetical protein EGK_21153 [Macaca mulatta]</a>                     | 56.2      | 56.2        | 100%        | 1e-07   | 95%   | <a href="#">gij355569342 EHH25414.1</a>     |
| <a href="#">PREDICTED: phosphatidylinositol-glycan-specific phospholipase D</a>     | 56.2      | 56.2        | 100%        | 1e-07   | 95%   | <a href="#">gij332228866 XP_003263611.1</a> |
| <a href="#">PREDICTED: phosphatidylinositol-glycan-specific phospholipase D</a>     | 56.2      | 56.2        | 100%        | 1e-07   | 95%   | <a href="#">gij544429967 XP_005553975.1</a> |
| <a href="#">PREDICTED: phosphatidylinositol-glycan-specific phospholipase D</a>     | 53.7      | 53.7        | 100%        | 9e-07   | 89%   | <a href="#">gij512971062 XP_004847666.1</a> |
| <a href="#">Phosphatidylinositol-glycan-specific phospholipase D [Heteroceph</a>    | 53.7      | 53.7        | 100%        | 9e-07   | 89%   | <a href="#">gij351706674 EHB09593.1</a>     |

|                                                                                      |      |      |      |       |     |                                             |
|--------------------------------------------------------------------------------------|------|------|------|-------|-----|---------------------------------------------|
| PREDICTED: phosphatidylinositol-glycan-specific phospholipase D                      | 53.7 | 53.7 | 100% | 9e-07 | 89% | <a href="#">gil512971060 XP_004847665.1</a> |
| <a href="#">PREDICTED: phosphatidylinositol-glycan-specific phospholipase D</a>      | 53.7 | 53.7 | 100% | 9e-07 | 89% | <a href="#">gil512971057 XP_004847664.1</a> |
| <a href="#">PREDICTED: phosphatidylinositol-glycan-specific phospholipase D</a>      | 53.7 | 53.7 | 100% | 9e-07 | 89% | <a href="#">gil512971055 XP_004847663.1</a> |
| <a href="#">PREDICTED: phosphatidylinositol-glycan-specific phospholipase D</a>      | 53.7 | 53.7 | 100% | 9e-07 | 89% | <a href="#">gil512880679 XP_004895023.1</a> |
| <a href="#">PREDICTED: phosphatidylinositol-glycan-specific phospholipase D</a>      | 51.5 | 51.5 | 89%  | 5e-06 | 94% | <a href="#">gil731213592 XP_010621250.1</a> |
| <a href="#">PREDICTED: phosphatidylinositol-glycan-specific phospholipase D</a>      | 51.5 | 51.5 | 89%  | 5e-06 | 94% | <a href="#">gil731213588 XP_010621248.1</a> |
| <a href="#">PREDICTED: phosphatidylinositol-glycan-specific phospholipase D</a>      | 51.5 | 51.5 | 100% | 5e-06 | 89% | <a href="#">gil602684652 XP_007454575.1</a> |
| <a href="#">PREDICTED: phosphatidylinositol-glycan-specific phospholipase D</a>      | 51.5 | 51.5 | 100% | 5e-06 | 89% | <a href="#">gil602684650 XP_007454574.1</a> |
| <a href="#">Phosphatidylinositol-glycan-specific phospholipase D [Fukomys dar</a>    | 51.5 | 51.5 | 89%  | 5e-06 | 94% | <a href="#">gil676279913 KFO33840.1</a>     |
| <a href="#">PREDICTED: phosphatidylinositol-glycan-specific phospholipase D</a>      | 51.5 | 51.5 | 100% | 5e-06 | 84% | <a href="#">gil533180623 XP_005403486.1</a> |
| <a href="#">PREDICTED: phosphatidylinositol-glycan-specific phospholipase D</a>      | 51.5 | 51.5 | 100% | 5e-06 | 89% | <a href="#">gil675650934 XP_002746229.2</a> |
| <a href="#">PREDICTED: phosphatidylinositol-glycan-specific phospholipase D</a>      | 51.1 | 51.1 | 100% | 6e-06 | 89% | <a href="#">gil724798150 XP_010363586.1</a> |
| <a href="#">PREDICTED: phosphatidylinositol-glycan-specific phospholipase D</a>      | 50.7 | 50.7 | 100% | 9e-06 | 84% | <a href="#">gil675773160 XP_008975042.1</a> |
| <a href="#">PREDICTED: phosphatidylinositol-glycan-specific phospholipase D</a>      | 50.7 | 50.7 | 100% | 9e-06 | 84% | <a href="#">gil514459231 XP_005003342.1</a> |
| <a href="#">PREDICTED: phosphatidylinositol-glycan-specific phospholipase D</a>      | 50.7 | 50.7 | 100% | 9e-06 | 84% | <a href="#">gil348566244 XP_003468912.1</a> |
| <a href="#">PREDICTED: phosphatidylinositol-glycan-specific phospholipase D</a>      | 50.7 | 50.7 | 100% | 9e-06 | 84% | <a href="#">gil426351748 XP_004043389.1</a> |
| <a href="#">PREDICTED: phosphatidylinositol-glycan-specific phospholipase D</a>      | 50.7 | 50.7 | 100% | 9e-06 | 84% | <a href="#">gil426351746 XP_004043388.1</a> |
| <a href="#">PREDICTED: phosphatidylinositol-glycan-specific phospholipase D</a>      | 50.7 | 50.7 | 100% | 9e-06 | 84% | <a href="#">gil397505380 XP_003823243.1</a> |
| <a href="#">PREDICTED: phosphatidylinositol-glycan-specific phospholipase D</a>      | 50.7 | 50.7 | 100% | 9e-06 | 84% | <a href="#">gil410040317 XP_518268.4</a>    |
| <a href="#">PREDICTED: phosphatidylinositol-glycan-specific phospholipase D</a>      | 50.7 | 50.7 | 100% | 9e-06 | 84% | <a href="#">gil675773152 XP_008975041.1</a> |
| <a href="#">PREDICTED: phosphatidylinositol-glycan-specific phospholipase D</a>      | 49.4 | 49.4 | 100% | 2e-05 | 84% | <a href="#">gil667294118 XP_008578807.1</a> |
| <a href="#">PREDICTED: phosphatidylinositol-glycan-specific phospholipase D</a>      | 49.4 | 49.4 | 100% | 2e-05 | 84% | <a href="#">gil344289516 XP_003416488.1</a> |
| <a href="#">PREDICTED: phosphatidylinositol-glycan-specific phospholipase D</a>      | 48.6 | 48.6 | 84%  | 4e-05 | 94% | <a href="#">gil593754864 XP_007116306.1</a> |
| <a href="#">PREDICTED: phosphatidylinositol-glycan-specific phospholipase D</a>      | 48.6 | 48.6 | 84%  | 4e-05 | 94% | <a href="#">gil466027702 XP_004273574.1</a> |
| <a href="#">PREDICTED: phosphatidylinositol-glycan-specific phospholipase D</a>      | 48.6 | 48.6 | 84%  | 4e-05 | 94% | <a href="#">gil594700264 XP_007197201.1</a> |
| <a href="#">PREDICTED: phosphatidylinositol-glycan-specific phospholipase D</a>      | 48.6 | 48.6 | 84%  | 4e-05 | 94% | <a href="#">gil594700262 XP_007197200.1</a> |
| <a href="#">PREDICTED: phosphatidylinositol-glycan-specific phospholipase D</a>      | 48.6 | 48.6 | 84%  | 4e-05 | 94% | <a href="#">gil470605744 XP_004313968.1</a> |
| <a href="#">PREDICTED: phosphatidylinositol-glycan-specific phospholipase D</a>      | 47.7 | 47.7 | 100% | 9e-05 | 84% | <a href="#">gil403270800 XP_003927350.1</a> |
| <a href="#">PREDICTED: phosphatidylinositol-glycan-specific phospholipase D</a>      | 46.4 | 46.4 | 100% | 2e-04 | 84% | <a href="#">gil410958439 XP_003985826.1</a> |
| <a href="#">PREDICTED: phosphatidylinositol-glycan-specific phospholipase D</a>      | 46.4 | 46.4 | 100% | 2e-04 | 84% | <a href="#">gil591294474 XP_007074479.1</a> |
| <a href="#">PREDICTED: phosphatidylinositol-glycan-specific phospholipase D</a>      | 45.6 | 45.6 | 100% | 4e-04 | 84% | <a href="#">gil625272320 XP_007627730.1</a> |
| <a href="#">phosphatidylinositol-glycan-specific phospholipase D-like protein [C</a> | 45.6 | 45.6 | 100% | 4e-04 | 84% | <a href="#">gil537192249 ERE77282.1</a>     |
| <a href="#">Phosphatidylinositol-glycan-specific phospholipase D [Cricetulus gri</a> | 45.6 | 45.6 | 100% | 4e-04 | 84% | <a href="#">gil344238211 EGV94314.1</a>     |
| <a href="#">PREDICTED: phosphatidylinositol-glycan-specific phospholipase D</a>      | 45.6 | 45.6 | 100% | 4e-04 | 84% | <a href="#">gil511882880 XP_004761311.1</a> |
| <a href="#">PREDICTED: phosphatidylinositol-glycan-specific phospholipase D</a>      | 45.6 | 45.6 | 100% | 4e-04 | 84% | <a href="#">gil585175123 XP_006739372.1</a> |
| <a href="#">PREDICTED: phosphatidylinositol-glycan-specific phospholipase D</a>      | 45.6 | 45.6 | 100% | 4e-04 | 84% | <a href="#">gil589928750 XP_006977193.1</a> |
| <a href="#">PREDICTED: phosphatidylinositol-glycan-specific phospholipase D</a>      | 45.6 | 45.6 | 100% | 4e-04 | 84% | <a href="#">gil532023384 XP_005355039.1</a> |
| <a href="#">PREDICTED: phosphatidylinositol-glycan-specific phospholipase D</a>      | 45.6 | 45.6 | 100% | 4e-04 | 84% | <a href="#">gil354480090 XP_003502241.1</a> |
| <a href="#">PREDICTED: phosphatidylinositol-glycan-specific phospholipase D</a>      | 45.6 | 45.6 | 100% | 4e-04 | 84% | <a href="#">gil511882878 XP_004761310.1</a> |
| <a href="#">PREDICTED: phosphatidylinositol-glycan-specific phospholipase D</a>      | 45.6 | 45.6 | 100% | 4e-04 | 84% | <a href="#">gil524924187 XP_005066341.1</a> |
| <a href="#">PREDICTED: phosphatidylinositol-glycan-specific phospholipase D</a>      | 44.8 | 44.8 | 100% | 8e-04 | 79% | <a href="#">gil634873155 XP_007948002.1</a> |
| <a href="#">PREDICTED: phosphatidylinositol-glycan-specific phospholipase D</a>      | 44.8 | 44.8 | 100% | 8e-04 | 79% | <a href="#">gil471403600 XP_004384046.1</a> |
| <a href="#">PREDICTED: phosphatidylinositol-glycan-specific phospholipase D</a>      | 44.3 | 44.3 | 100% | 0.001 | 79% | <a href="#">gil655839984 XP_008260728.1</a> |
| <a href="#">PREDICTED: phosphatidylinositol-glycan-specific phospholipase D</a>      | 44.3 | 44.3 | 100% | 0.001 | 79% | <a href="#">gil655839976 XP_008260723.1</a> |
| <a href="#">PREDICTED: phosphatidylinositol-glycan-specific phospholipase D</a>      | 43.9 | 43.9 | 78%  | 0.002 | 93% | <a href="#">gil507689072 XP_004712567.1</a> |

|                                                                                    |      |      |      |       |     |                                             |
|------------------------------------------------------------------------------------|------|------|------|-------|-----|---------------------------------------------|
| <a href="#">PREDICTED: phosphatidylinositol-glycan-specific phospholipase D</a>    | 43.9 | 43.9 | 100% | 0.002 | 79% | <a href="#">gil472374241 XP_004406584.1</a> |
| <a href="#">PREDICTED: phosphatidylinositol-glycan-specific phospholipase D</a>    | 43.5 | 43.5 | 89%  | 0.002 | 82% | <a href="#">gil507684247 XP_004640232.1</a> |
| <a href="#">PREDICTED: phosphatidylinositol-glycan-specific phospholipase D</a>    | 43.5 | 43.5 | 84%  | 0.002 | 88% | <a href="#">gil641712629 XP_008145534.1</a> |
| <a href="#">PREDICTED: LOW QUALITY PROTEIN: phosphatidylinositol-glyca</a>         | 43.5 | 43.5 | 84%  | 0.002 | 88% | <a href="#">gil555982613 XP_005903212.1</a> |
| <a href="#">Phosphatidylinositol-glycan-specific phospholipase D [Bos mutus]</a>   | 43.5 | 43.5 | 84%  | 0.002 | 88% | <a href="#">gil440899735 ELR50996.1</a>     |
| <a href="#">PREDICTED: phosphatidylinositol-glycan-specific phospholipase D</a>    | 43.5 | 43.5 | 89%  | 0.002 | 88% | <a href="#">gil674075950 XP_008845321.1</a> |
| <a href="#">PREDICTED: phosphatidylinositol-glycan-specific phospholipase D</a>    | 43.5 | 43.5 | 84%  | 0.002 | 88% | <a href="#">gil594053987 XP_006051268.1</a> |
| <a href="#">phosphatidylinositol-glycan-specific phospholipase D precursor [Bo</a> | 43.5 | 43.5 | 84%  | 0.002 | 88% | <a href="#">gil27807363 NP_777241.1</a>     |
| <a href="#">TPA: phosphatidylinositol-glycan-specific phospholipase D [Bos tau</a> | 43.5 | 43.5 | 84%  | 0.002 | 88% | <a href="#">gil296474001 DAA11616.1</a>     |
| <a href="#">PREDICTED: phosphatidylinositol-glycan-specific phospholipase D</a>    | 43.5 | 43.5 | 84%  | 0.002 | 88% | <a href="#">gil586529361 XP_006919597.1</a> |
| <a href="#">PREDICTED: phosphatidylinositol-glycan-specific phospholipase D</a>    | 43.5 | 43.5 | 84%  | 0.002 | 88% | <a href="#">gil529003874 XP_005223795.1</a> |
| <a href="#">PREDICTED: phosphatidylinositol-glycan-specific phospholipase D</a>    | 43.5 | 43.5 | 84%  | 0.002 | 88% | <a href="#">gil594053985 XP_006051267.1</a> |
| <a href="#">PREDICTED: phosphatidylinositol-glycan-specific phospholipase D</a>    | 43.5 | 43.5 | 84%  | 0.002 | 88% | <a href="#">gil529003872 XP_005223794.1</a> |
| <a href="#">PREDICTED: phosphatidylinositol-glycan-specific phospholipase D</a>    | 43.5 | 43.5 | 84%  | 0.002 | 88% | <a href="#">gil594053983 XP_006051266.1</a> |
| <a href="#">PREDICTED: phosphatidylinositol-glycan-specific phospholipase D</a>    | 43.5 | 43.5 | 84%  | 0.002 | 88% | <a href="#">gil545837650 XP_001925944.5</a> |
| <a href="#">PREDICTED: phosphatidylinositol-glycan-specific phospholipase D</a>    | 43.5 | 43.5 | 84%  | 0.002 | 88% | <a href="#">gil594053981 XP_006051265.1</a> |
| <a href="#">PREDICTED: phosphatidylinositol-glycan-specific phospholipase D</a>    | 43.5 | 43.5 | 84%  | 0.002 | 88% | <a href="#">gil529003870 XP_005223793.1</a> |
| <a href="#">PREDICTED: phosphatidylinositol-glycan-specific phospholipase D</a>    | 43.5 | 43.5 | 84%  | 0.002 | 88% | <a href="#">gil594053979 XP_006051264.1</a> |
| <a href="#">PREDICTED: phosphatidylinositol-glycan-specific phospholipase D</a>    | 43.1 | 43.1 | 100% | 0.003 | 79% | <a href="#">gil545554532 XP_005640137.1</a> |
| <a href="#">PREDICTED: phosphatidylinositol-glycan-specific phospholipase D</a>    | 43.1 | 43.1 | 100% | 0.003 | 79% | <a href="#">gil74003954 XP_535902.2</a>     |
| <a href="#">PREDICTED: phosphatidylinositol-glycan-specific phospholipase D</a>    | 43.1 | 43.1 | 100% | 0.003 | 74% | <a href="#">gil585669334 XP_006888712.1</a> |
| <a href="#">PREDICTED: phosphatidylinositol-glycan-specific phospholipase D</a>    | 43.1 | 43.1 | 100% | 0.003 | 79% | <a href="#">gil545554529 XP_005640136.1</a> |
| <a href="#">PREDICTED: phosphatidylinositol-glycan-specific phospholipase D</a>    | 42.6 | 42.6 | 84%  | 0.004 | 88% | <a href="#">gil671000878 XP_008691294.1</a> |
| <a href="#">hypothetical protein PANDA_003876 [Ailuropoda melanoleuca]</a>         | 42.6 | 42.6 | 84%  | 0.004 | 88% | <a href="#">gil281352759 EFB28343.1</a>     |
| <a href="#">PREDICTED: LOW QUALITY PROTEIN: phosphatidylinositol-glyca</a>         | 42.6 | 42.6 | 100% | 0.004 | 79% | <a href="#">gil488541031 XP_004462113.1</a> |
| <a href="#">PREDICTED: phosphatidylinositol-glycan-specific phospholipase D</a>    | 42.6 | 42.6 | 84%  | 0.004 | 88% | <a href="#">gil301760102 XP_002915859.1</a> |
| <a href="#">PREDICTED: phosphatidylinositol-glycan-specific phospholipase D</a>    | 42.2 | 42.2 | 100% | 0.005 | 79% | <a href="#">gil586495128 XP_006878008.1</a> |

## Alignments

[Download](#) [GenPept](#) [Graphics](#)

[Next](#) [Previous](#) [Descriptions](#)

glycosylphosphatidylinositol phospholipase D [Homo sapiens]

Sequence ID: [gil11122875|emb|CAC14844.1](#) Length: 457 Number of Matches: 1

Range 1: 263 to 281 [GenPept](#) [Graphics](#)

[Next Match](#) [Previous Match](#)

| Score          | Expect | Identities  | Positives   | Gaps     |
|----------------|--------|-------------|-------------|----------|
| 60.4 bits(135) | 4e-09  | 19/19(100%) | 19/19(100%) | 0/19(0%) |

Query 1 KLGTSLSSGHVLMNGTLKQ 19  
 KLGTSLSSGHVLMNGTLKQ  
 Sbjct 263 KLGTSLSSGHVLMNGTLKQ 281

### Related Information

[Gene](#) - associated gene details

[Download](#) [GenPept](#) [Graphics](#)

[Next](#) [Previous](#) [Descriptions](#)

Unknown (protein for IMAGE:3354070), partial [Homo sapiens]

Sequence ID: [gil14043248|gb|AAH07614.1](#) Length: 575 Number of Matches: 1

Range 1: 381 to 399 [GenPept](#) [Graphics](#)

[Next Match](#) [Previous Match](#)

| Score          | Expect | Identities  | Positives   | Gaps     |
|----------------|--------|-------------|-------------|----------|
| 60.4 bits(135) | 4e-09  | 19/19(100%) | 19/19(100%) | 0/19(0%) |

Query 1 KLGTSLSSGHVLMNGTLKQ 19

### Related Information

[Gene](#) - associated gene details

Sbjct 381 KLGTSLSSGHVLMNGTLKQ  
 KLGTSLSSGHVLMNGTLKQ 399

[Download](#) [GenPept](#) [Graphics](#) [Next](#) [Previous](#) [Descriptions](#)

**PREDICTED: phosphatidylinositol-glycan-specific phospholipase D isoform X3 [Homo sapiens]**

Sequence ID: [gi|530381810|ref|XP\\_005249075.1|](#) Length: 677 Number of Matches: 1

Range 1: 483 to 501 [GenPept](#) [Graphics](#) [Next Match](#) [Previous Match](#)

| Score          | Expect | Identities  | Positives   | Gaps     |
|----------------|--------|-------------|-------------|----------|
| 60.4 bits(135) | 4e-09  | 19/19(100%) | 19/19(100%) | 0/19(0%) |

Query 1 KLGTSLSSGHVLMNGTLKQ 19  
 KLGTSLSSGHVLMNGTLKQ  
 Sbjct 483 KLGTSLSSGHVLMNGTLKQ 501

**Related Information**

[Gene](#) - associated gene details  
[Map Viewer](#) - aligned genomic context

[Download](#) [GenPept](#) [Graphics](#) [Next](#) [Previous](#) [Descriptions](#)

**glycosylphosphatidylinositol phospholipase D [Homo sapiens]**

Sequence ID: [gi|20269065|emb|CAC87068.1|](#) Length: 840 Number of Matches: 1

[See 1 more title\(s\)](#)

Range 1: 646 to 664 [GenPept](#) [Graphics](#) [Next Match](#) [Previous Match](#)

| Score          | Expect | Identities  | Positives   | Gaps     |
|----------------|--------|-------------|-------------|----------|
| 60.4 bits(135) | 5e-09  | 19/19(100%) | 19/19(100%) | 0/19(0%) |

Query 1 KLGTSLSSGHVLMNGTLKQ 19  
 KLGTSLSSGHVLMNGTLKQ  
 Sbjct 646 KLGTSLSSGHVLMNGTLKQ 664

**Related Information**

[Gene](#) - associated gene details  
[Identical Proteins](#) - Proteins identical to the subject

[Download](#) [GenPept](#) [Graphics](#) [Next](#) [Previous](#) [Descriptions](#)

**phospholipase D [Homo sapiens]**

Sequence ID: [gi|388765|gb|AAA36445.1|](#) Length: 840 Number of Matches: 1

Range 1: 646 to 664 [GenPept](#) [Graphics](#) [Next Match](#) [Previous Match](#)

| Score          | Expect | Identities  | Positives   | Gaps     |
|----------------|--------|-------------|-------------|----------|
| 60.4 bits(135) | 5e-09  | 19/19(100%) | 19/19(100%) | 0/19(0%) |

Query 1 KLGTSLSSGHVLMNGTLKQ 19  
 KLGTSLSSGHVLMNGTLKQ  
 Sbjct 646 KLGTSLSSGHVLMNGTLKQ 664

**Related Information**

[Gene](#) - associated gene details

BLAST is a registered trademark of the National Library of Medicine.



NCBI/ BLAST/ blastp suite/ Formatting Results - BVE4BZK901R

Your search parameters were adjusted to search for a short input sequence.

[Edit and Resubmit](#) [Save Search Strategies](#) [Formatting options](#) [Download](#) [YouTube](#) [How to read this page](#) [Blast report description](#)

GPLD1\_KLNVEAADWTVRG\_Mod

RID [BVE4BZK901R](#) (Expires on 01-21 09:08 am)

Query ID |cl|263726  
 Description None  
 Molecule type amino acid  
 Query Length 13

Database Name nr  
 Description All non-redundant GenBank CDS translations+PDB+SwissProt+PIR+PRF excluding environmental samples from WGS projects  
 Program BLASTP 2.2.30+ [Citation](#)

Other reports: [Search Summary](#) [Taxonomy reports](#) [Distance tree of results](#) [Related Structures](#) [Multiple alignment](#)

Graphic Summary

Show Conserved Domains

No putative conserved domains have been detected

Distribution of 100 Blast Hits on the Query Sequence

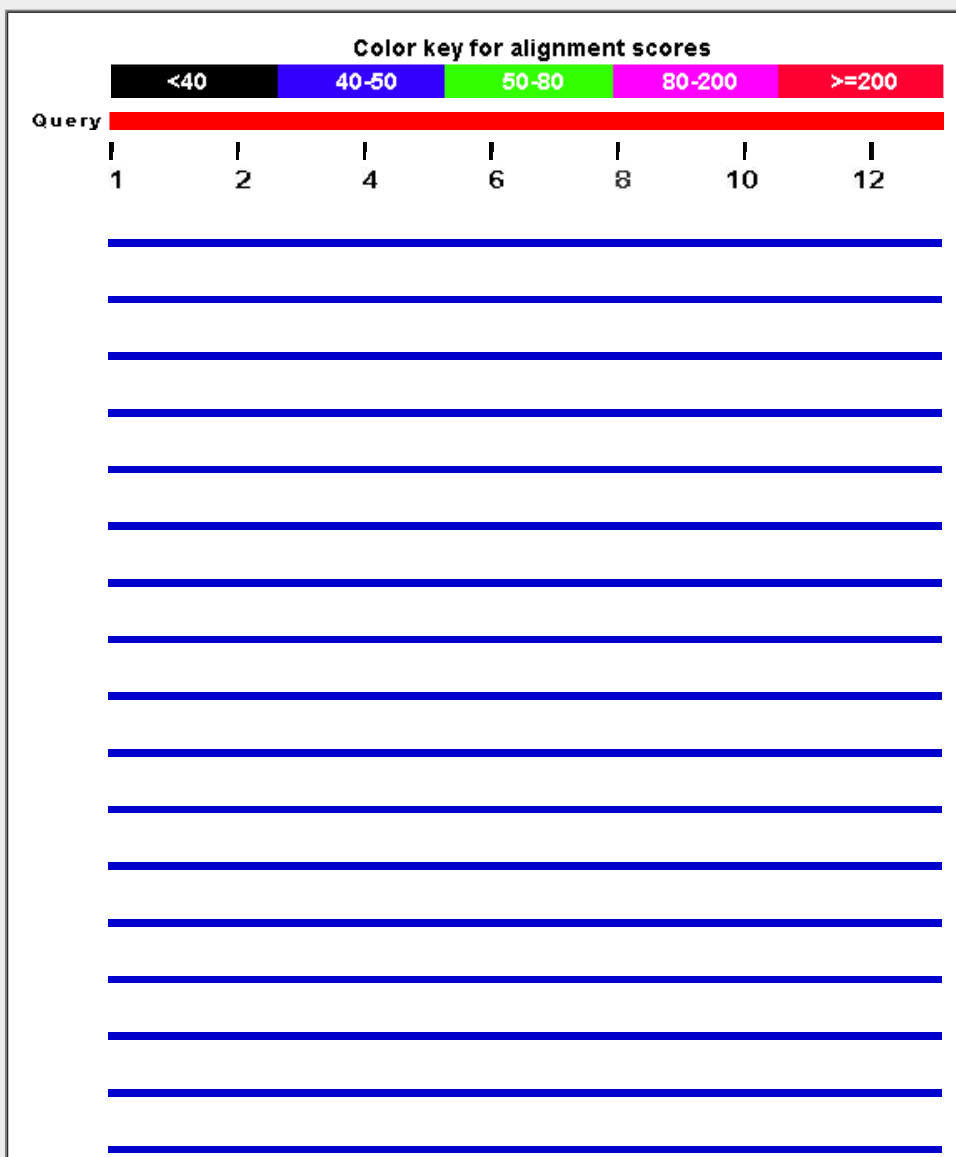

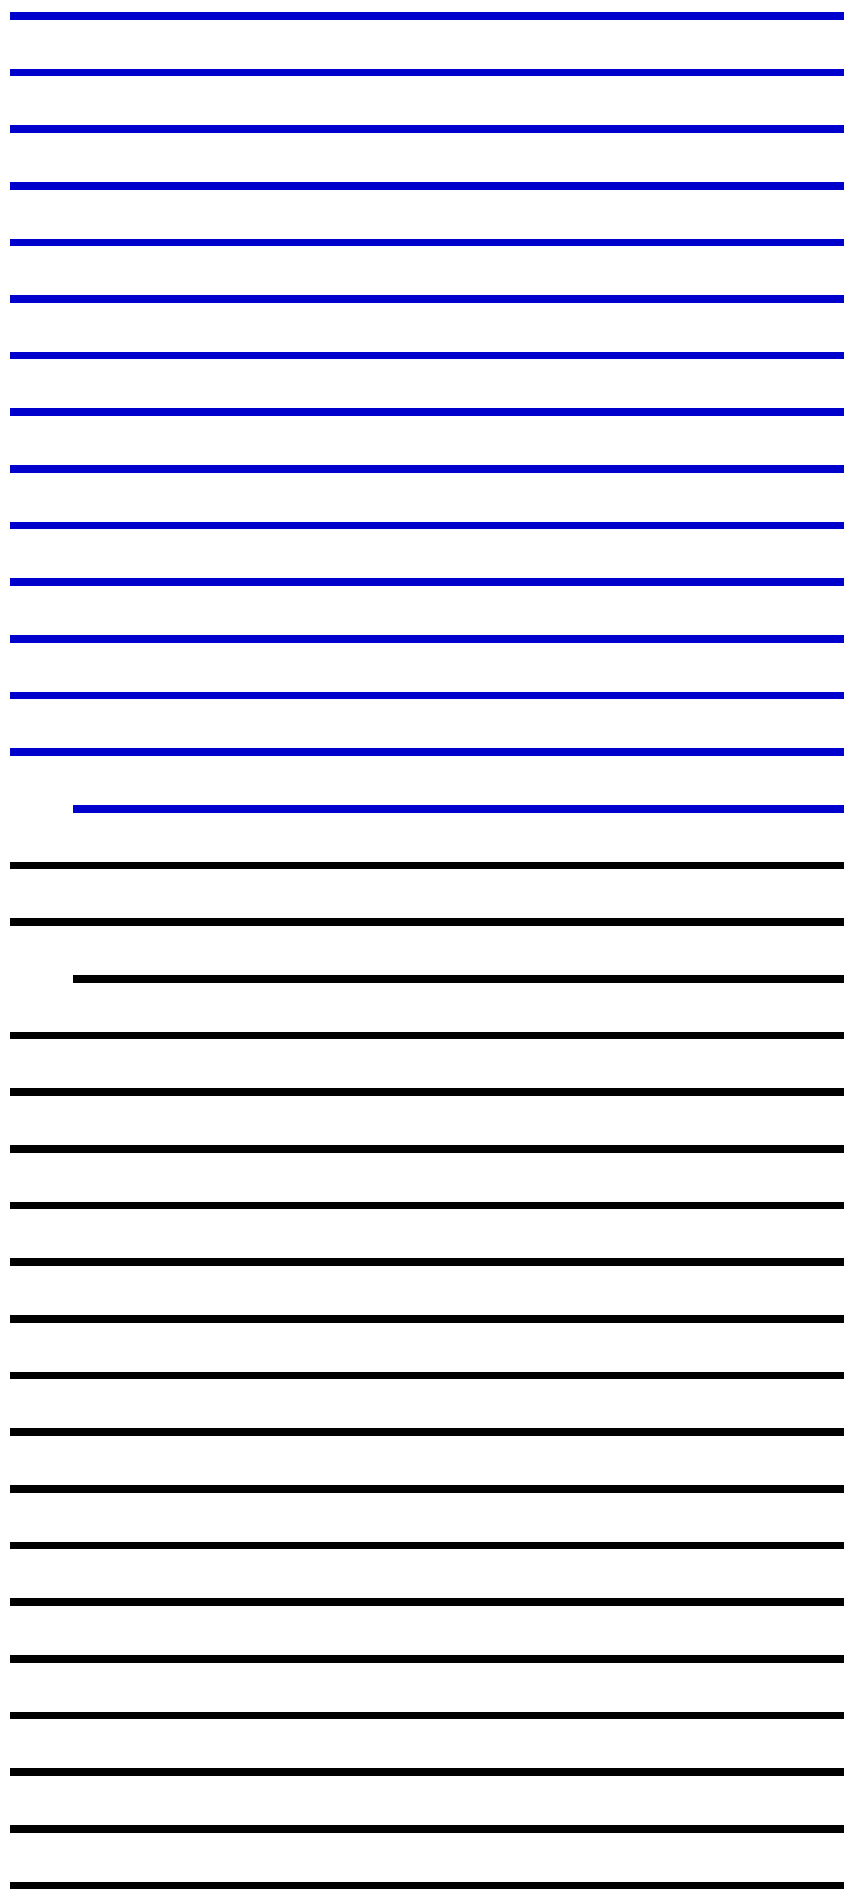

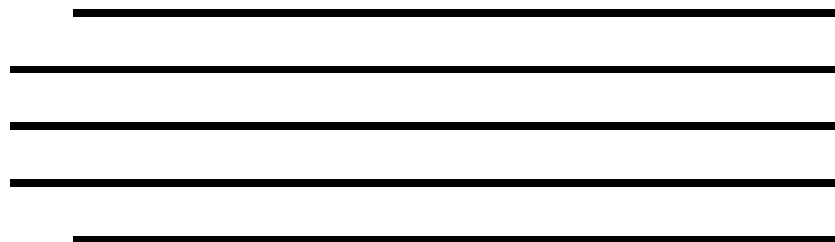

## Descriptions

### Sequences producing significant alignments:

Select: [All](#) [None](#) Selected:0

[Alignments](#)
[Download](#)
[GenPept](#)
[Graphics](#)
[Distance tree of results](#)
[Multiple alignment](#)


| Description                                                                                                | Max score | Total score | Query cover | E value | Ident | Accession                      |
|------------------------------------------------------------------------------------------------------------|-----------|-------------|-------------|---------|-------|--------------------------------|
| <a href="#">PREDICTED: phosphatidylinositol-glycan-specific phospholipase D [Saimiri brycon</a>            | 44.8      | 44.8        | 100%        | 4e-04   | 100%  | <a href="#">XP_003927350.1</a> |
| <a href="#">glycosylphosphatidylinositol phospholipase D [Homo sapiens]</a>                                | 42.2      | 42.2        | 100%        | 0.003   | 92%   | <a href="#">CAC14844.1</a>     |
| <a href="#">Unknown (protein for IMAGE:3354070) [Homo sapiens]</a>                                         | 42.2      | 42.2        | 100%        | 0.003   | 92%   | <a href="#">AAH07614.1</a>     |
| <a href="#">PREDICTED: phosphatidylinositol-glycan-specific phospholipase D isoform X1</a>                 | 42.2      | 42.2        | 100%        | 0.003   | 92%   | <a href="#">XP_009202774.1</a> |
| <a href="#">PREDICTED: phosphatidylinositol-glycan-specific phospholipase D isoform X1</a>                 | 42.2      | 42.2        | 100%        | 0.003   | 92%   | <a href="#">XP_008975042.1</a> |
| <a href="#">PREDICTED: phosphatidylinositol-glycan-specific phospholipase D isoform X1</a>                 | 42.2      | 42.2        | 100%        | 0.003   | 92%   | <a href="#">XP_005553977.1</a> |
| <a href="#">PREDICTED: phosphatidylinositol-glycan-specific phospholipase D isoform X1</a>                 | 42.2      | 42.2        | 100%        | 0.003   | 92%   | <a href="#">XP_005249075.1</a> |
| <a href="#">PREDICTED: phosphatidylinositol-glycan-specific phospholipase D isoform X1</a>                 | 42.2      | 42.2        | 100%        | 0.003   | 92%   | <a href="#">XP_009202773.1</a> |
| <a href="#">PREDICTED: phosphatidylinositol-glycan-specific phospholipase D isoform X1</a>                 | 42.2      | 42.2        | 100%        | 0.003   | 92%   | <a href="#">XP_007971742.1</a> |
| <a href="#">PREDICTED: phosphatidylinositol-glycan-specific phospholipase D-like [Macaca fascicularis]</a> | 42.2      | 42.2        | 100%        | 0.003   | 92%   | <a href="#">XP_002803682.1</a> |
| <a href="#">PREDICTED: phosphatidylinositol-glycan-specific phospholipase D [Pongo abelii]</a>             | 42.2      | 42.2        | 100%        | 0.003   | 92%   | <a href="#">XP_009239742.1</a> |
| <a href="#">PREDICTED: phosphatidylinositol-glycan-specific phospholipase D isoform X1</a>                 | 42.2      | 42.2        | 100%        | 0.003   | 92%   | <a href="#">XP_007971741.1</a> |
| <a href="#">PREDICTED: phosphatidylinositol-glycan-specific phospholipase D isoform X1</a>                 | 42.2      | 42.2        | 100%        | 0.003   | 92%   | <a href="#">XP_007971740.1</a> |
| <a href="#">PREDICTED: phosphatidylinositol-glycan-specific phospholipase D isoform X1</a>                 | 42.2      | 42.2        | 100%        | 0.003   | 92%   | <a href="#">XP_007971746.1</a> |
| <a href="#">PREDICTED: phosphatidylinositol-glycan-specific phospholipase D isoform 2</a>                  | 42.2      | 42.2        | 100%        | 0.003   | 92%   | <a href="#">XP_004043389.1</a> |
| <a href="#">PREDICTED: phosphatidylinositol-glycan-specific phospholipase D isoform 1</a>                  | 42.2      | 42.2        | 100%        | 0.003   | 92%   | <a href="#">XP_004043388.1</a> |
| <a href="#">glycosylphosphatidylinositol phospholipase D [Homo sapiens]</a>                                | 42.2      | 42.2        | 100%        | 0.003   | 92%   | <a href="#">CAC87068.1</a>     |
| <a href="#">phospholipase D [Homo sapiens]</a>                                                             | 42.2      | 42.2        | 100%        | 0.003   | 92%   | <a href="#">AAA36445.1</a>     |
| <a href="#">PREDICTED: phosphatidylinositol-glycan-specific phospholipase D isoform X1</a>                 | 42.2      | 42.2        | 100%        | 0.003   | 92%   | <a href="#">XP_003823243.1</a> |
| <a href="#">phosphatidylinositol-glycan-specific phospholipase D precursor [Homo sapiens]</a>              | 42.2      | 42.2        | 100%        | 0.003   | 92%   | <a href="#">NP_001494.2</a>    |
| <a href="#">glycosylphosphatidylinositol-specific phospholipase D precursor [Homo sapiens]</a>             | 42.2      | 42.2        | 100%        | 0.003   | 92%   | <a href="#">AAG16627.2</a>     |
| <a href="#">PREDICTED: phosphatidylinositol-glycan-specific phospholipase D [Rhinopithecus</a>             | 42.2      | 42.2        | 100%        | 0.003   | 92%   | <a href="#">XP_010363586.1</a> |
| <a href="#">phospholipase D [Homo sapiens]</a>                                                             | 42.2      | 42.2        | 100%        | 0.003   | 92%   | <a href="#">AAA36444.1</a>     |
| <a href="#">PREDICTED: phosphatidylinositol-glycan-specific phospholipase D isoform X1</a>                 | 42.2      | 42.2        | 100%        | 0.003   | 92%   | <a href="#">XP_005553976.1</a> |
| <a href="#">PREDICTED: phosphatidylinositol-glycan-specific phospholipase D isoform X1</a>                 | 42.2      | 42.2        | 100%        | 0.003   | 92%   | <a href="#">XP_003897171.1</a> |
| <a href="#">PREDICTED: phosphatidylinositol-glycan-specific phospholipase D [Pan troglodytes]</a>          | 42.2      | 42.2        | 100%        | 0.003   | 92%   | <a href="#">XP_518268.4</a>    |
| <a href="#">PREDICTED: phosphatidylinositol-glycan-specific phospholipase D isoform X1</a>                 | 42.2      | 42.2        | 100%        | 0.003   | 92%   | <a href="#">XP_009202772.1</a> |
| <a href="#">PREDICTED: phosphatidylinositol-glycan-specific phospholipase D isoform X1</a>                 | 42.2      | 42.2        | 100%        | 0.003   | 92%   | <a href="#">XP_008975041.1</a> |
| <a href="#">hypothetical protein EGM_13271 [Macaca fascicularis]</a>                                       | 42.2      | 42.2        | 100%        | 0.003   | 92%   | <a href="#">EHH52757.1</a>     |

|                                                                                             |      |      |      |       |      |                                |
|---------------------------------------------------------------------------------------------|------|------|------|-------|------|--------------------------------|
| <a href="#">glycosylphosphatidylinositol specific phospholipase D1, isoform CRA_c [Homo</a> | 42.2 | 42.2 | 100% | 0.003 | 92%  | <a href="#">EAW55450.1</a>     |
| <a href="#">PREDICTED: phosphatidylinositol-glycan-specific phospholipase D isoform X:</a>  | 42.2 | 42.2 | 100% | 0.003 | 92%  | <a href="#">XP_005553975.1</a> |
| <a href="#">PREDICTED: phosphatidylinositol-glycan-specific phospholipase D [Callithrix</a> | 41.8 | 41.8 | 92%  | 0.004 | 100% | <a href="#">XP_002746229.2</a> |
| <a href="#">PREDICTED: phosphatidylinositol-glycan-specific phospholipase D [Eptesicus</a>  | 39.7 | 39.7 | 100% | 0.022 | 92%  | <a href="#">XP_008145534.1</a> |
| <a href="#">Phosphatidylinositol-glycan-specific phospholipase D [Myotis brandtii]</a>      | 39.2 | 39.2 | 100% | 0.030 | 92%  | <a href="#">EPQ05831.1</a>     |
| <a href="#">PREDICTED: phosphatidylinositol-glycan-specific phospholipase D [Condylur:</a>  | 39.2 | 39.2 | 92%  | 0.030 | 92%  | <a href="#">XP_004693375.1</a> |
| <a href="#">PREDICTED: LOW QUALITY PROTEIN: phosphatidylinositol-glycan-specific</a>        | 39.2 | 39.2 | 100% | 0.030 | 92%  | <a href="#">XP_005863221.1</a> |
| <a href="#">PREDICTED: phosphatidylinositol-glycan-specific phospholipase D [Orycteroq</a>  | 38.8 | 38.8 | 100% | 0.042 | 92%  | <a href="#">XP_007948002.1</a> |
| <a href="#">hypothetical protein EGK_21153 [Macaca mulatta]</a>                             | 38.4 | 38.4 | 100% | 0.058 | 85%  | <a href="#">EHH25414.1</a>     |
| <a href="#">PREDICTED: phosphatidylinositol-glycan-specific phospholipase D [Sus scrof</a>  | 38.0 | 38.0 | 100% | 0.080 | 85%  | <a href="#">XP_001925944.5</a> |
| <a href="#">Phosphatidylinositol-glycan-specific phospholipase D [Pteropus alecto]</a>      | 37.5 | 37.5 | 100% | 0.11  | 85%  | <a href="#">ELK05805.1</a>     |
| <a href="#">PREDICTED: phosphatidylinositol-glycan-specific phospholipase D isoform X:</a>  | 37.5 | 37.5 | 100% | 0.11  | 85%  | <a href="#">XP_006051268.1</a> |
| <a href="#">PREDICTED: phosphatidylinositol-glycan-specific phospholipase D [Capra hir</a>  | 37.5 | 37.5 | 100% | 0.11  | 85%  | <a href="#">XP_005696842.1</a> |
| <a href="#">PREDICTED: phosphatidylinositol-glycan-specific phospholipase D [Ovis arie:</a> | 37.5 | 37.5 | 100% | 0.11  | 85%  | <a href="#">XP_004019154.1</a> |
| <a href="#">PREDICTED: phosphatidylinositol-glycan-specific phospholipase D isoform X:</a>  | 37.5 | 37.5 | 100% | 0.11  | 85%  | <a href="#">XP_006919597.1</a> |
| <a href="#">PREDICTED: phosphatidylinositol-glycan-specific phospholipase D [Leptonyc]</a>  | 37.5 | 37.5 | 100% | 0.11  | 85%  | <a href="#">XP_006739372.1</a> |
| <a href="#">PREDICTED: phosphatidylinositol-glycan-specific phospholipase D isoform X:</a>  | 37.5 | 37.5 | 100% | 0.11  | 85%  | <a href="#">XP_006051267.1</a> |
| <a href="#">PREDICTED: phosphatidylinositol-glycan-specific phospholipase D isoform X:</a>  | 37.5 | 37.5 | 100% | 0.11  | 85%  | <a href="#">XP_006051266.1</a> |
| <a href="#">PREDICTED: phosphatidylinositol-glycan-specific phospholipase D [Nomascu</a>    | 37.5 | 37.5 | 100% | 0.11  | 85%  | <a href="#">XP_003263611.1</a> |
| <a href="#">PREDICTED: phosphatidylinositol-glycan-specific phospholipase D isoform X:</a>  | 37.5 | 37.5 | 100% | 0.11  | 85%  | <a href="#">XP_006051265.1</a> |
| <a href="#">PREDICTED: phosphatidylinositol-glycan-specific phospholipase D isoform X:</a>  | 37.5 | 37.5 | 100% | 0.11  | 85%  | <a href="#">XP_006051264.1</a> |
| <a href="#">PREDICTED: phosphatidylinositol-glycan-specific phospholipase D [Ochotona</a>   | 37.1 | 37.1 | 100% | 0.15  | 85%  | <a href="#">XP_004593176.1</a> |
| <a href="#">PREDICTED: phosphatidylinositol-glycan-specific phospholipase D [Chinchilla</a> | 35.8 | 35.8 | 92%  | 0.40  | 92%  | <a href="#">XP_005403486.1</a> |
| <a href="#">PREDICTED: phosphatidylinositol-glycan-specific phospholipase D [Trichechu</a>  | 35.4 | 35.4 | 100% | 0.54  | 85%  | <a href="#">XP_004384046.1</a> |
| <a href="#">PREDICTED: phosphatidylinositol-glycan-specific phospholipase D [Loxodont</a>   | 35.4 | 35.4 | 100% | 0.54  | 85%  | <a href="#">XP_003416488.1</a> |
| <a href="#">PREDICTED: phosphatidylinositol-glycan-specific phospholipase D [Odobenu</a>    | 35.0 | 35.0 | 100% | 0.75  | 77%  | <a href="#">XP_004406584.1</a> |
| <a href="#">hypothetical protein CB1_000595062 [Camelus ferus]</a>                          | 34.6 | 34.6 | 92%  | 1.0   | 83%  | <a href="#">EPY83136.1</a>     |
| <a href="#">PREDICTED: phosphatidylinositol-glycan-specific phospholipase D isoform X:</a>  | 34.6 | 34.6 | 92%  | 1.0   | 83%  | <a href="#">XP_008511735.1</a> |
| <a href="#">PREDICTED: phosphatidylinositol-glycan-specific phospholipase D [Jaculus j:</a> | 34.6 | 34.6 | 92%  | 1.0   | 83%  | <a href="#">XP_004669997.1</a> |
| <a href="#">PREDICTED: LOW QUALITY PROTEIN: phosphatidylinositol-glycan-specific</a>        | 34.6 | 34.6 | 92%  | 1.0   | 83%  | <a href="#">XP_006182298.1</a> |
| <a href="#">PREDICTED: phosphatidylinositol-glycan-specific phospholipase D [Camelus</a>    | 34.6 | 34.6 | 92%  | 1.0   | 83%  | <a href="#">XP_010944080.1</a> |
| <a href="#">PREDICTED: phosphatidylinositol-glycan-specific phospholipase D isoform X:</a>  | 34.6 | 34.6 | 92%  | 1.0   | 83%  | <a href="#">XP_008511734.1</a> |
| <a href="#">PREDICTED: phosphatidylinositol-glycan-specific phospholipase D isoform X:</a>  | 34.6 | 34.6 | 92%  | 1.0   | 83%  | <a href="#">XP_004761311.1</a> |
| <a href="#">PREDICTED: phosphatidylinositol-glycan-specific phospholipase D [Physeter</a>   | 34.6 | 34.6 | 92%  | 1.0   | 83%  | <a href="#">XP_007116306.1</a> |
| <a href="#">PREDICTED: phosphatidylinositol-glycan-specific phospholipase D [Pantholo</a>   | 34.6 | 34.6 | 92%  | 1.0   | 83%  | <a href="#">XP_005973908.1</a> |
| <a href="#">PREDICTED: phosphatidylinositol-glycan-specific phospholipase D [Orcinus c</a>  | 34.6 | 34.6 | 92%  | 1.0   | 83%  | <a href="#">XP_004273574.1</a> |
| <a href="#">PREDICTED: phosphatidylinositol-glycan-specific phospholipase D [Panthera</a>   | 34.6 | 34.6 | 92%  | 1.0   | 83%  | <a href="#">XP_007074479.1</a> |
| <a href="#">PREDICTED: LOW QUALITY PROTEIN: phosphatidylinositol-glycan-specific</a>        | 34.6 | 34.6 | 92%  | 1.0   | 83%  | <a href="#">XP_010978426.1</a> |
| <a href="#">PREDICTED: phosphatidylinositol-glycan-specific phospholipase D [Equus ca</a>   | 34.6 | 34.6 | 92%  | 1.0   | 83%  | <a href="#">XP_001497586.1</a> |
| <a href="#">PREDICTED: phosphatidylinositol-glycan-specific phospholipase D [Vicugna r</a>  | 34.6 | 34.6 | 92%  | 1.0   | 83%  | <a href="#">XP_006198740.1</a> |
| <a href="#">PREDICTED: phosphatidylinositol-glycan-specific phospholipase D isoform X:</a>  | 34.6 | 34.6 | 92%  | 1.0   | 83%  | <a href="#">XP_007197201.1</a> |
| <a href="#">PREDICTED: phosphatidylinositol-glycan-specific phospholipase D isoform X:</a>  | 34.6 | 34.6 | 92%  | 1.0   | 83%  | <a href="#">XP_008511732.1</a> |
| <a href="#">PREDICTED: phosphatidylinositol-glycan-specific phospholipase D isoform X:</a>  | 34.6 | 34.6 | 92%  | 1.0   | 83%  | <a href="#">XP_008511731.1</a> |
| <a href="#">PREDICTED: phosphatidylinositol-glycan-specific phospholipase D isoform X:</a>  | 34.6 | 34.6 | 92%  | 1.0   | 83%  | <a href="#">XP_007197200.1</a> |
| <a href="#">PREDICTED: phosphatidylinositol-glycan-specific phospholipase D isoform X:</a>  | 34.6 | 34.6 | 92%  | 1.0   | 83%  | <a href="#">XP_004761310.1</a> |

|                                                                                              |      |      |      |     |      |                                |
|----------------------------------------------------------------------------------------------|------|------|------|-----|------|--------------------------------|
| <a href="#">PREDICTED: phosphatidylinositol-glycan-specific phospholipase D [Tursiops</a>    | 34.6 | 34.6 | 92%  | 1.0 | 83%  | <a href="#">XP_004313968.1</a> |
| <a href="#">PREDICTED: phosphatidylinositol-glycan-specific phospholipase D isoform X:</a>   | 34.6 | 34.6 | 92%  | 1.0 | 83%  | <a href="#">XP_008511730.1</a> |
| <a href="#">PREDICTED: LOW QUALITY PROTEIN: phosphatidylinositol-glycan-specific</a>         | 34.1 | 34.1 | 100% | 1.4 | 77%  | <a href="#">XP_005903212.1</a> |
| <a href="#">Phosphatidylinositol-glycan-specific phospholipase D [Bos mutus]</a>             | 34.1 | 34.1 | 100% | 1.4 | 77%  | <a href="#">ELR50996.1</a>     |
| <a href="#">PREDICTED: phosphatidylinositol-glycan-specific phospholipase D isoform X:</a>   | 34.1 | 34.1 | 100% | 1.4 | 77%  | <a href="#">XP_010841812.1</a> |
| <a href="#">phosphatidylinositol-glycan-specific phospholipase D precursor [Bos taurus]</a>  | 34.1 | 34.1 | 100% | 1.4 | 77%  | <a href="#">NP_777241.1</a>    |
| <a href="#">TPA: phosphatidylinositol-glycan-specific phospholipase D [Bos taurus]</a>       | 34.1 | 34.1 | 100% | 1.4 | 77%  | <a href="#">DAA16116.1</a>     |
| <a href="#">PREDICTED: phosphatidylinositol-glycan-specific phospholipase D isoform X:</a>   | 34.1 | 34.1 | 100% | 1.4 | 77%  | <a href="#">XP_010841810.1</a> |
| <a href="#">PREDICTED: phosphatidylinositol-glycan-specific phospholipase D isoform X:</a>   | 34.1 | 34.1 | 100% | 1.4 | 77%  | <a href="#">XP_005223795.1</a> |
| <a href="#">PREDICTED: phosphatidylinositol-glycan-specific phospholipase D isoform X:</a>   | 34.1 | 34.1 | 100% | 1.4 | 77%  | <a href="#">XP_005223794.1</a> |
| <a href="#">PREDICTED: phosphatidylinositol-glycan-specific phospholipase D isoform X:</a>   | 34.1 | 34.1 | 100% | 1.4 | 77%  | <a href="#">XP_010816770.1</a> |
| <a href="#">hypothetical protein PANDA_003876 [Ailuropoda melanoleuca]</a>                   | 33.3 | 33.3 | 100% | 2.6 | 77%  | <a href="#">EFB28343.1</a>     |
| <a href="#">PREDICTED: phosphatidylinositol-glycan-specific phospholipase D isoform X:</a>   | 33.3 | 33.3 | 100% | 2.6 | 85%  | <a href="#">XP_005640137.1</a> |
| <a href="#">PREDICTED: phosphatidylinositol-glycan-specific phospholipase D isoformX1</a>    | 33.3 | 33.3 | 100% | 2.6 | 85%  | <a href="#">XP_535902.2</a>    |
| <a href="#">PREDICTED: phosphatidylinositol-glycan-specific phospholipase D isoform X:</a>   | 33.3 | 33.3 | 92%  | 2.6 | 83%  | <a href="#">XP_007454575.1</a> |
| <a href="#">PREDICTED: phosphatidylinositol-glycan-specific phospholipase D isoform X:</a>   | 33.3 | 33.3 | 92%  | 2.6 | 83%  | <a href="#">XP_007454574.1</a> |
| <a href="#">PREDICTED: phosphatidylinositol-glycan-specific phospholipase D-like [Ailurc</a> | 33.3 | 33.3 | 100% | 2.6 | 77%  | <a href="#">XP_002915859.1</a> |
| <a href="#">PREDICTED: phosphatidylinositol-glycan-specific phospholipase D [Ceratothe</a>   | 33.3 | 33.3 | 92%  | 2.6 | 83%  | <a href="#">XP_004432133.1</a> |
| <a href="#">PREDICTED: phosphatidylinositol-glycan-specific phospholipase D isoform X:</a>   | 33.3 | 33.3 | 100% | 2.6 | 85%  | <a href="#">XP_005640136.1</a> |
| <a href="#">Alpha-glucan water dikinase, chloroplastic [Auxenochlorella protothecoides]</a>  | 32.9 | 32.9 | 69%  | 3.6 | 100% | <a href="#">KFM28490.1</a>     |
| <a href="#">hypothetical protein [Haloferax prahovense]</a>                                  | 32.5 | 32.5 | 92%  | 4.8 | 77%  | <a href="#">WP_008095608.1</a> |
| <a href="#">PREDICTED: phosphatidylinositol-glycan-specific phospholipase D [Octodon</a>     | 32.5 | 32.5 | 92%  | 4.9 | 83%  | <a href="#">XP_004640232.1</a> |
| <a href="#">PREDICTED: phosphatidylinositol-glycan-specific phospholipase D isoform X:</a>   | 32.5 | 32.5 | 92%  | 4.9 | 83%  | <a href="#">XP_010621250.1</a> |
| <a href="#">PREDICTED: phosphatidylinositol-glycan-specific phospholipase D isoform X:</a>   | 32.5 | 32.5 | 92%  | 4.9 | 83%  | <a href="#">XP_010621248.1</a> |
| <a href="#">PREDICTED: phosphatidylinositol-glycan-specific phospholipase D [Ictidomys</a>   | 32.5 | 32.5 | 92%  | 4.9 | 83%  | <a href="#">XP_005337080.1</a> |
| <a href="#">PREDICTED: LOW QUALITY PROTEIN: phosphatidylinositol-glycan-specific</a>         | 32.5 | 32.5 | 100% | 4.9 | 77%  | <a href="#">XP_003788429.1</a> |

## Alignments

Download [GenPept](#) [Graphics](#)

[▼ Next](#) [▲ Previous](#) [▲ Descriptions](#)

PREDICTED: phosphatidylinositol-glycan-specific phospholipase D [Saimiri boliviensis boliviensis]

Sequence ID: [ref|XP\\_003927350.1|](#) Length: 840 Number of Matches: 1

Range 1: 561 to 573 [GenPept](#) [Graphics](#)

[▼ Next Match](#) [▲ Previous Match](#)

| Score         | Expect | Identities  | Positives   | Gaps     |
|---------------|--------|-------------|-------------|----------|
| 44.8 bits(98) | 4e-04  | 13/13(100%) | 13/13(100%) | 0/13(0%) |

Query 1 KLNVEAADWTVRG 13  
KLNVEAADWTVRG  
Sbjct 561 KLNVEAADWTVRG 573

### Related Information

[Gene](#) - associated gene details  
[Map Viewer](#) - aligned genomic context

Download [GenPept](#) [Graphics](#)

[▼ Next](#) [▲ Previous](#) [▲ Descriptions](#)

glycosylphosphatidylinositol phospholipase D [Homo sapiens]

Sequence ID: [emb|CAC14844.1|](#) Length: 457 Number of Matches: 1

Range 1: 178 to 190 [GenPept](#) [Graphics](#)

[▼ Next Match](#) [▲ Previous Match](#)

| Score         | Expect | Identities | Positives   | Gaps     |
|---------------|--------|------------|-------------|----------|
| 42.2 bits(92) | 0.003  | 12/13(92%) | 13/13(100%) | 0/13(0%) |

### Related Information

[Gene](#) - associated gene details

Query 1 KLNVEAADWTVRG 13  
 KLNVEAA+WTVRG  
 Sbjct 178 KLNVEAANWTVRG 190

[Download](#) [GenPept](#) [Graphics](#)

[Next](#) [Previous](#) [Descriptions](#)

Unknown (protein for IMAGE:3354070), partial [Homo sapiens]

Sequence ID: [gb|AAH07614.1](#) Length: 575 Number of Matches: 1

Range 1: 296 to 308 [GenPept](#) [Graphics](#)

[Next Match](#) [Previous Match](#)

| Score         | Expect | Identities | Positives   | Gaps     |
|---------------|--------|------------|-------------|----------|
| 42.2 bits(92) | 0.003  | 12/13(92%) | 13/13(100%) | 0/13(0%) |

Query 1 KLNVEAADWTVRG 13  
 KLNVEAA+WTVRG  
 Sbjct 296 KLNVEAANWTVRG 308

**Related Information**

[Gene](#) - associated gene details

[Download](#) [GenPept](#) [Graphics](#)

[Next](#) [Previous](#) [Descriptions](#)

PREDICTED: phosphatidylinositol-glycan-specific phospholipase D isoform X4 [Papio anubis]

Sequence ID: [ref|XP\\_009202774.1](#) Length: 677 Number of Matches: 1

Range 1: 398 to 410 [GenPept](#) [Graphics](#)

[Next Match](#) [Previous Match](#)

| Score         | Expect | Identities | Positives   | Gaps     |
|---------------|--------|------------|-------------|----------|
| 42.2 bits(92) | 0.003  | 12/13(92%) | 13/13(100%) | 0/13(0%) |

Query 1 KLNVEAADWTVRG 13  
 KLNVEAA+WTVRG  
 Sbjct 398 KLNVEAANWTVRG 410

**Related Information**

[Gene](#) - associated gene details

[Map Viewer](#) - aligned genomic context

[Download](#) [GenPept](#) [Graphics](#)

[Next](#) [Previous](#) [Descriptions](#)

PREDICTED: phosphatidylinositol-glycan-specific phospholipase D isoform X3 [Pan paniscus]

Sequence ID: [ref|XP\\_008975042.1](#) Length: 677 Number of Matches: 1

Range 1: 398 to 410 [GenPept](#) [Graphics](#)

[Next Match](#) [Previous Match](#)

| Score         | Expect | Identities | Positives   | Gaps     |
|---------------|--------|------------|-------------|----------|
| 42.2 bits(92) | 0.003  | 12/13(92%) | 13/13(100%) | 0/13(0%) |

Query 1 KLNVEAADWTVRG 13  
 KLNVEAA+WTVRG  
 Sbjct 398 KLNVEAANWTVRG 410

**Related Information**

[Gene](#) - associated gene details

[Map Viewer](#) - aligned genomic context

BLAST is a registered trademark of the National Library of Medicine.



NCBI/ BLAST/ blastp suite/ Formatting Results - B9E7U9DD01R

Your search parameters were adjusted to search for a short input sequence.

Edit and Resubmit Save Search Strategies Formatting options Download

YouTube How to read this page Blast report description

GPLD1\_KLNVEAANWTVRG\_NonMod

RID B9E7U9DD01R (Expires on 01-14 13:19 pm)

Query ID lcl|321260
Description None
Molecule type amino acid
Query Length 13

Database Name nr
Description All non-redundant GenBank CDS translations+PDB+SwissProt+PIR excluding environmental samples from WGS projects
Program BLASTP 2.2.30+ Citation

Other reports: Search Summary Taxonomy reports Distance tree of results Related Structures Multiple alignment

Graphic Summary

Show Conserved Domains

No putative conserved domains have been detected

Distribution of 101 Blast Hits on the Query Sequence

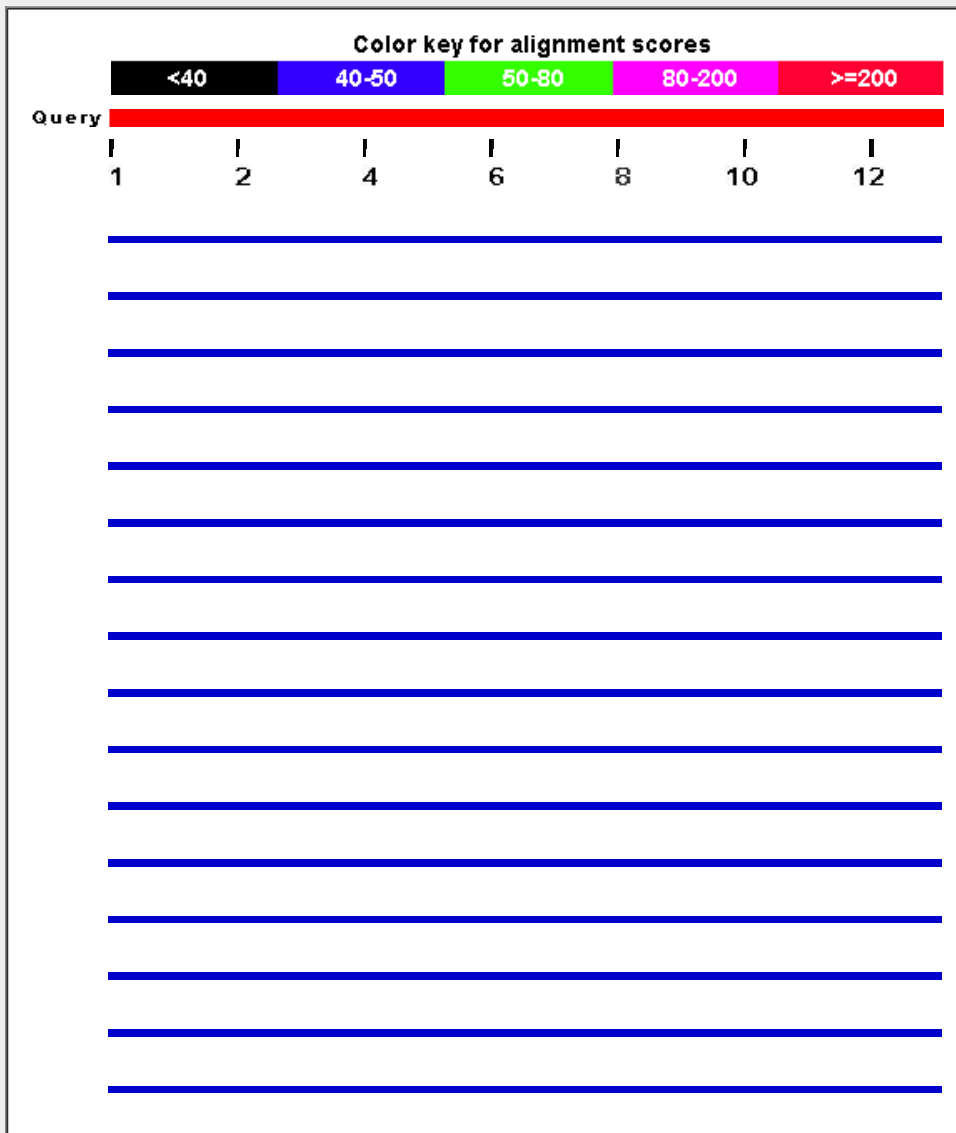

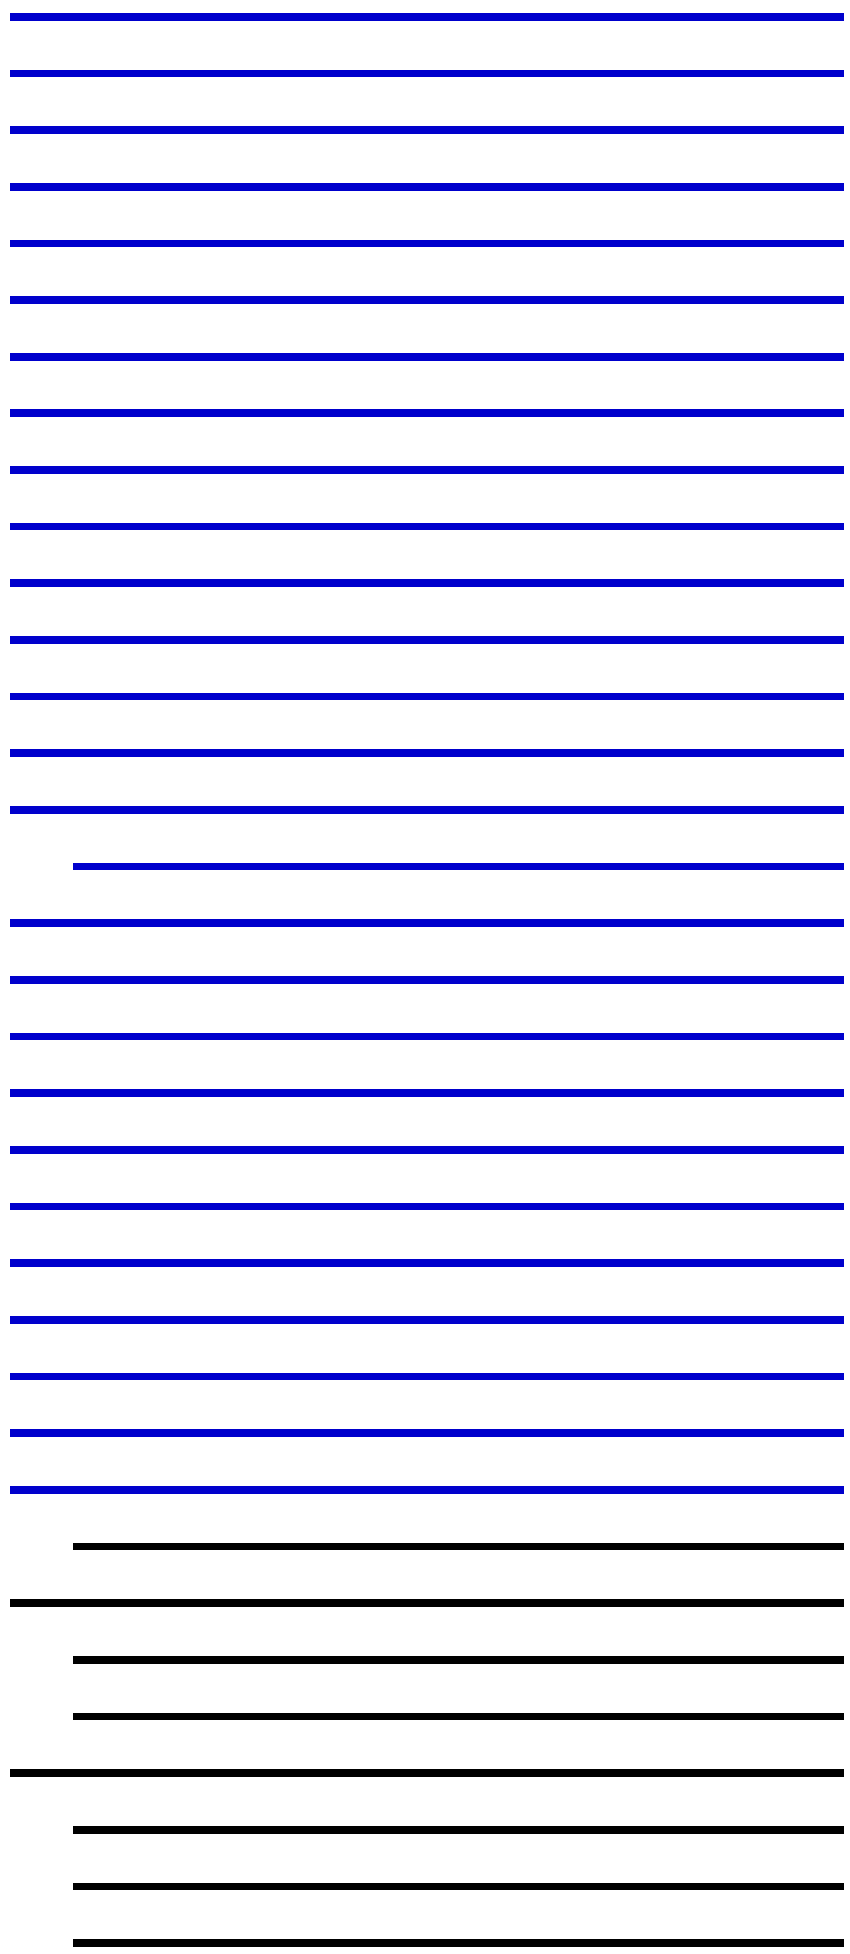



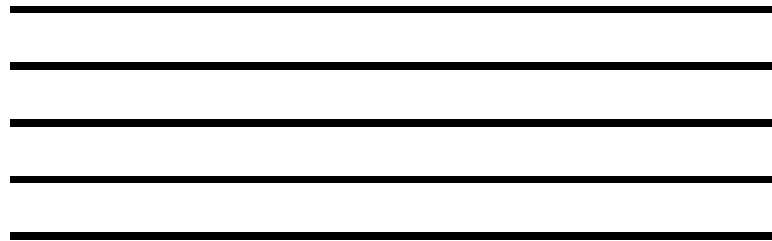

**Descriptions**

**Sequences producing significant alignments:**

Select: [All](#) [None](#) Selected:0

Alignments Download GenPept Graphics Distance tree of results Multiple alignment

| Description                                                                         | Max score | Total score | Query cover | E value | Ident | Accession                                   |
|-------------------------------------------------------------------------------------|-----------|-------------|-------------|---------|-------|---------------------------------------------|
| <a href="#">glycosylphosphatidylinositol phospholipase D [Homo sapiens]</a>         | 44.8      | 44.8        | 100%        | 4e-04   | 100%  | <a href="#">gil11122875 CAC14844.1</a>      |
| <a href="#">Unknown (protein for IMAGE:3354070) [Homo sapiens]</a>                  | 44.8      | 44.8        | 100%        | 4e-04   | 100%  | <a href="#">gil14043248 AAH07614.1</a>      |
| <a href="#">PREDICTED: phosphatidylinositol-glycan-specific phospholipase D</a>     | 44.8      | 44.8        | 100%        | 4e-04   | 100%  | <a href="#">gil685535046 XP_009202774.1</a> |
| <a href="#">PREDICTED: phosphatidylinositol-glycan-specific phospholipase D</a>     | 44.8      | 44.8        | 100%        | 4e-04   | 100%  | <a href="#">gil675773160 XP_008975042.1</a> |
| <a href="#">PREDICTED: phosphatidylinositol-glycan-specific phospholipase D</a>     | 44.8      | 44.8        | 100%        | 4e-04   | 100%  | <a href="#">gil544429971 XP_005553977.1</a> |
| <a href="#">PREDICTED: phosphatidylinositol-glycan-specific phospholipase D</a>     | 44.8      | 44.8        | 100%        | 4e-04   | 100%  | <a href="#">gil530381810 XP_005249075.1</a> |
| <a href="#">PREDICTED: phosphatidylinositol-glycan-specific phospholipase D</a>     | 44.8      | 44.8        | 100%        | 4e-04   | 100%  | <a href="#">gil685535044 XP_009202773.1</a> |
| <a href="#">PREDICTED: phosphatidylinositol-glycan-specific phospholipase D</a>     | 44.8      | 44.8        | 100%        | 4e-04   | 100%  | <a href="#">gil635096985 XP_007971742.1</a> |
| <a href="#">PREDICTED: phosphatidylinositol-glycan-specific phospholipase D</a>     | 44.8      | 44.8        | 100%        | 4e-04   | 100%  | <a href="#">gil297290177 XP_002803682.1</a> |
| <a href="#">PREDICTED: phosphatidylinositol-glycan-specific phospholipase D</a>     | 44.8      | 44.8        | 100%        | 4e-04   | 100%  | <a href="#">gil686720936 XP_009239742.1</a> |
| <a href="#">PREDICTED: phosphatidylinositol-glycan-specific phospholipase D</a>     | 44.8      | 44.8        | 100%        | 4e-04   | 100%  | <a href="#">gil635096983 XP_007971741.1</a> |
| <a href="#">PREDICTED: phosphatidylinositol-glycan-specific phospholipase D</a>     | 44.8      | 44.8        | 100%        | 4e-04   | 100%  | <a href="#">gil635096981 XP_007971740.1</a> |
| <a href="#">PREDICTED: phosphatidylinositol-glycan-specific phospholipase D</a>     | 44.8      | 44.8        | 100%        | 4e-04   | 100%  | <a href="#">gil635096993 XP_007971746.1</a> |
| <a href="#">PREDICTED: phosphatidylinositol-glycan-specific phospholipase D</a>     | 44.8      | 44.8        | 100%        | 4e-04   | 100%  | <a href="#">gil426351748 XP_004043389.1</a> |
| <a href="#">PREDICTED: phosphatidylinositol-glycan-specific phospholipase D</a>     | 44.8      | 44.8        | 100%        | 4e-04   | 100%  | <a href="#">gil426351746 XP_004043388.1</a> |
| <a href="#">glycosylphosphatidylinositol phospholipase D [Homo sapiens]</a>         | 44.8      | 44.8        | 100%        | 4e-04   | 100%  | <a href="#">gil20269065 CAC87068.1</a>      |
| <a href="#">phospholipase D [Homo sapiens]</a>                                      | 44.8      | 44.8        | 100%        | 4e-04   | 100%  | <a href="#">gil388765 AAA36445.1</a>        |
| <a href="#">PREDICTED: phosphatidylinositol-glycan-specific phospholipase D</a>     | 44.8      | 44.8        | 100%        | 4e-04   | 100%  | <a href="#">gil397505380 XP_003823243.1</a> |
| <a href="#">phosphatidylinositol-glycan-specific phospholipase D precursor [Ho</a>  | 44.8      | 44.8        | 100%        | 4e-04   | 100%  | <a href="#">gil29171717 INP_001494.2</a>    |
| <a href="#">glycosylphosphatidylinositol-specific phospholipase D precursor [Hc</a> | 44.8      | 44.8        | 100%        | 4e-04   | 100%  | <a href="#">gil14195001 AAG16627.2</a>      |
| <a href="#">PREDICTED: phosphatidylinositol-glycan-specific phospholipase D</a>     | 44.8      | 44.8        | 100%        | 4e-04   | 100%  | <a href="#">gil724798150 XP_010363586.1</a> |
| <a href="#">phospholipase D [Homo sapiens]</a>                                      | 44.8      | 44.8        | 100%        | 4e-04   | 100%  | <a href="#">gil388763 AAA36444.1</a>        |
| <a href="#">PREDICTED: phosphatidylinositol-glycan-specific phospholipase D</a>     | 44.8      | 44.8        | 100%        | 4e-04   | 100%  | <a href="#">gil544429969 XP_005553976.1</a> |
| <a href="#">PREDICTED: phosphatidylinositol-glycan-specific phospholipase D</a>     | 44.8      | 44.8        | 100%        | 4e-04   | 100%  | <a href="#">gil402865969 XP_003897171.1</a> |
| <a href="#">PREDICTED: phosphatidylinositol-glycan-specific phospholipase D</a>     | 44.8      | 44.8        | 100%        | 4e-04   | 100%  | <a href="#">gil410040317 XP_518268.4</a>    |
| <a href="#">PREDICTED: phosphatidylinositol-glycan-specific phospholipase D</a>     | 44.8      | 44.8        | 100%        | 4e-04   | 100%  | <a href="#">gil685535041 XP_009202772.1</a> |
| <a href="#">PREDICTED: phosphatidylinositol-glycan-specific phospholipase D</a>     | 44.8      | 44.8        | 100%        | 4e-04   | 100%  | <a href="#">gil675773152 XP_008975041.1</a> |
| <a href="#">hypothetical protein EGM_13271 [Macaca fascicularis]</a>                | 44.8      | 44.8        | 100%        | 4e-04   | 100%  | <a href="#">gil355748274 EHH52757.1</a>     |

|                                                                                    |      |      |      |       |      |                                             |
|------------------------------------------------------------------------------------|------|------|------|-------|------|---------------------------------------------|
| glycosylphosphatidylinositol specific phospholipase D1, isoform CR.                | 44.8 | 44.8 | 100% | 4e-04 | 100% | <a href="#">gij119575854 EAW55450.1</a>     |
| <a href="#">PREDICTED: phosphatidylinositol-glycan-specific phospholipase D</a>    | 44.8 | 44.8 | 100% | 4e-04 | 100% | <a href="#">gij544429967 XP_005553975.1</a> |
| <a href="#">PREDICTED: phosphatidylinositol-glycan-specific phospholipase D</a>    | 42.2 | 42.2 | 100% | 0.003 | 92%  | <a href="#">gij403270800 XP_003927350.1</a> |
| <a href="#">PREDICTED: phosphatidylinositol-glycan-specific phospholipase D</a>    | 41.8 | 41.8 | 92%  | 0.004 | 100% | <a href="#">gij507979038 XP_004693375.1</a> |
| <a href="#">hypothetical protein EGK_21153 [Macaca mulatta]</a>                    | 40.9 | 40.9 | 100% | 0.008 | 92%  | <a href="#">gij355569342 EHH25414.1</a>     |
| <a href="#">PREDICTED: phosphatidylinositol-glycan-specific phospholipase D</a>    | 40.5 | 40.5 | 100% | 0.011 | 92%  | <a href="#">gij545837650 XP_001925944.5</a> |
| <a href="#">PREDICTED: phosphatidylinositol-glycan-specific phospholipase D</a>    | 40.1 | 40.1 | 100% | 0.015 | 92%  | <a href="#">gij594053987 XP_006051268.1</a> |
| <a href="#">PREDICTED: phosphatidylinositol-glycan-specific phospholipase D</a>    | 40.1 | 40.1 | 100% | 0.015 | 92%  | <a href="#">gij548518368 XP_005696842.1</a> |
| <a href="#">PREDICTED: phosphatidylinositol-glycan-specific phospholipase D</a>    | 40.1 | 40.1 | 100% | 0.015 | 92%  | <a href="#">gij426250866 XP_004019154.1</a> |
| <a href="#">PREDICTED: phosphatidylinositol-glycan-specific phospholipase D</a>    | 40.1 | 40.1 | 100% | 0.015 | 92%  | <a href="#">gij585175123 XP_006739372.1</a> |
| <a href="#">PREDICTED: phosphatidylinositol-glycan-specific phospholipase D</a>    | 40.1 | 40.1 | 100% | 0.015 | 92%  | <a href="#">gij594053985 XP_006051267.1</a> |
| <a href="#">PREDICTED: phosphatidylinositol-glycan-specific phospholipase D</a>    | 40.1 | 40.1 | 100% | 0.015 | 92%  | <a href="#">gij594053983 XP_006051266.1</a> |
| <a href="#">PREDICTED: phosphatidylinositol-glycan-specific phospholipase D</a>    | 40.1 | 40.1 | 100% | 0.015 | 92%  | <a href="#">gij332228866 XP_003263611.1</a> |
| <a href="#">PREDICTED: phosphatidylinositol-glycan-specific phospholipase D</a>    | 40.1 | 40.1 | 100% | 0.015 | 92%  | <a href="#">gij594053981 XP_006051265.1</a> |
| <a href="#">PREDICTED: phosphatidylinositol-glycan-specific phospholipase D</a>    | 40.1 | 40.1 | 100% | 0.015 | 92%  | <a href="#">gij594053979 XP_006051264.1</a> |
| <a href="#">PREDICTED: phosphatidylinositol-glycan-specific phospholipase D</a>    | 39.2 | 39.2 | 92%  | 0.029 | 92%  | <a href="#">gij675650934 XP_002746229.2</a> |
| <a href="#">PREDICTED: phosphatidylinositol-glycan-specific phospholipase D</a>    | 37.5 | 37.5 | 100% | 0.10  | 85%  | <a href="#">gij472374241 XP_004406584.1</a> |
| <a href="#">hypothetical protein CB1_000595062 [Camelus ferus]</a>                 | 37.1 | 37.1 | 92%  | 0.14  | 92%  | <a href="#">gij528763477 EYP83136.1</a>     |
| <a href="#">PREDICTED: phosphatidylinositol-glycan-specific phospholipase D</a>    | 37.1 | 37.1 | 92%  | 0.14  | 92%  | <a href="#">gij664709546 XP_008511735.1</a> |
| <a href="#">PREDICTED: phosphatidylinositol-glycan-specific phospholipase D</a>    | 37.1 | 37.1 | 100% | 0.14  | 85%  | <a href="#">gij641712629 XP_008145534.1</a> |
| <a href="#">PREDICTED: LOW QUALITY PROTEIN: phosphatidylinositol-glyca</a>         | 37.1 | 37.1 | 92%  | 0.14  | 92%  | <a href="#">gij560912019 XP_006182298.1</a> |
| <a href="#">PREDICTED: phosphatidylinositol-glycan-specific phospholipase D</a>    | 37.1 | 37.1 | 92%  | 0.14  | 92%  | <a href="#">gij664709544 XP_008511734.1</a> |
| <a href="#">PREDICTED: phosphatidylinositol-glycan-specific phospholipase D</a>    | 37.1 | 37.1 | 92%  | 0.14  | 92%  | <a href="#">gij511882880 XP_004761311.1</a> |
| <a href="#">PREDICTED: phosphatidylinositol-glycan-specific phospholipase D</a>    | 37.1 | 37.1 | 92%  | 0.14  | 92%  | <a href="#">gij593754864 XP_007116306.1</a> |
| <a href="#">PREDICTED: phosphatidylinositol-glycan-specific phospholipase D</a>    | 37.1 | 37.1 | 92%  | 0.14  | 92%  | <a href="#">gij556757122 XP_005973908.1</a> |
| <a href="#">PREDICTED: phosphatidylinositol-glycan-specific phospholipase D</a>    | 37.1 | 37.1 | 92%  | 0.14  | 92%  | <a href="#">gij466027702 XP_004273574.1</a> |
| <a href="#">PREDICTED: phosphatidylinositol-glycan-specific phospholipase D</a>    | 37.1 | 37.1 | 92%  | 0.14  | 92%  | <a href="#">gij149732005 XP_001497586.1</a> |
| <a href="#">PREDICTED: phosphatidylinositol-glycan-specific phospholipase D</a>    | 37.1 | 37.1 | 92%  | 0.14  | 92%  | <a href="#">gij560952422 XP_006198740.1</a> |
| <a href="#">PREDICTED: phosphatidylinositol-glycan-specific phospholipase D</a>    | 37.1 | 37.1 | 92%  | 0.14  | 92%  | <a href="#">gij594700264 XP_007197201.1</a> |
| <a href="#">PREDICTED: phosphatidylinositol-glycan-specific phospholipase D</a>    | 37.1 | 37.1 | 92%  | 0.14  | 92%  | <a href="#">gij664709542 XP_008511732.1</a> |
| <a href="#">PREDICTED: phosphatidylinositol-glycan-specific phospholipase D</a>    | 37.1 | 37.1 | 92%  | 0.14  | 92%  | <a href="#">gij664709540 XP_008511731.1</a> |
| <a href="#">PREDICTED: phosphatidylinositol-glycan-specific phospholipase D</a>    | 37.1 | 37.1 | 92%  | 0.14  | 92%  | <a href="#">gij594700262 XP_007197200.1</a> |
| <a href="#">PREDICTED: phosphatidylinositol-glycan-specific phospholipase D</a>    | 37.1 | 37.1 | 92%  | 0.14  | 92%  | <a href="#">gij511882878 XP_004761310.1</a> |
| <a href="#">PREDICTED: phosphatidylinositol-glycan-specific phospholipase D</a>    | 37.1 | 37.1 | 92%  | 0.14  | 92%  | <a href="#">gij470605744 XP_004313968.1</a> |
| <a href="#">PREDICTED: phosphatidylinositol-glycan-specific phospholipase D</a>    | 37.1 | 37.1 | 92%  | 0.14  | 92%  | <a href="#">gij664709538 XP_008511730.1</a> |
| <a href="#">Phosphatidylinositol-glycan-specific phospholipase D [Myotis brand</a> | 36.7 | 36.7 | 100% | 0.20  | 85%  | <a href="#">gij521024043 EPQ05831.1</a>     |
| <a href="#">PREDICTED: LOW QUALITY PROTEIN: phosphatidylinositol-glyca</a>         | 36.7 | 36.7 | 100% | 0.20  | 85%  | <a href="#">gij555982613 XP_005903212.1</a> |
| <a href="#">Phosphatidylinositol-glycan-specific phospholipase D [Bos mutus]</a>   | 36.7 | 36.7 | 100% | 0.20  | 85%  | <a href="#">gij440899735 ELR50996.1</a>     |
| <a href="#">phosphatidylinositol-glycan-specific phospholipase D precursor [Bo</a> | 36.7 | 36.7 | 100% | 0.20  | 85%  | <a href="#">gij27807363 NP_777241.1</a>     |
| <a href="#">TPA: phosphatidylinositol-glycan-specific phospholipase D [Bos tau</a> | 36.7 | 36.7 | 100% | 0.20  | 85%  | <a href="#">gij296474001 DAA16116.1</a>     |
| <a href="#">PREDICTED: phosphatidylinositol-glycan-specific phospholipase D</a>    | 36.7 | 36.7 | 100% | 0.20  | 85%  | <a href="#">gij529003874 XP_005223795.1</a> |
| <a href="#">PREDICTED: phosphatidylinositol-glycan-specific phospholipase D</a>    | 36.7 | 36.7 | 100% | 0.20  | 85%  | <a href="#">gij529003872 XP_005223794.1</a> |
| <a href="#">PREDICTED: phosphatidylinositol-glycan-specific phospholipase D</a>    | 36.7 | 36.7 | 100% | 0.20  | 85%  | <a href="#">gij529003870 XP_005223793.1</a> |
| <a href="#">PREDICTED: LOW QUALITY PROTEIN: phosphatidylinositol-glyca</a>         | 36.7 | 36.7 | 100% | 0.20  | 85%  | <a href="#">gij554537051 XP_005863221.1</a> |
| <a href="#">PREDICTED: phosphatidylinositol-glycan-specific phospholipase D</a>    | 36.3 | 36.3 | 100% | 0.27  | 85%  | <a href="#">gij634873155 XP_007948002.1</a> |

|                                                                                    |      |      |      |      |     |                                             |
|------------------------------------------------------------------------------------|------|------|------|------|-----|---------------------------------------------|
| <a href="#">hypothetical protein PANDA_003876 [Ailuropoda melanoleuca]</a>         | 35.8 | 35.8 | 100% | 0.37 | 85% | <a href="#">gij281352759 EFB28343.1</a>     |
| <a href="#">PREDICTED: phosphatidylinositol-glycan-specific phospholipase D</a>    | 35.8 | 35.8 | 100% | 0.37 | 85% | <a href="#">gij301760102 XP_002915859.1</a> |
| <a href="#">PREDICTED: phosphatidylinositol-glycan-specific phospholipase D</a>    | 35.8 | 35.8 | 92%  | 0.37 | 92% | <a href="#">gij478515788 XP_004432133.1</a> |
| <a href="#">Phosphatidylinositol-glycan-specific phospholipase D [Pteropus ale</a> | 35.0 | 35.0 | 100% | 0.70 | 77% | <a href="#">gij431896393 ELK05805.1</a>     |
| <a href="#">PREDICTED: phosphatidylinositol-glycan-specific phospholipase D</a>    | 35.0 | 35.0 | 100% | 0.70 | 77% | <a href="#">gij586529361 XP_006919597.1</a> |
| <a href="#">PREDICTED: phosphatidylinositol-glycan-specific phospholipase D</a>    | 34.6 | 34.6 | 100% | 0.96 | 77% | <a href="#">gij504166674 XP_004593176.1</a> |
| <a href="#">PREDICTED: phosphatidylinositol-glycan-specific phospholipase D</a>    | 34.1 | 34.1 | 100% | 1.3  | 85% | <a href="#">gij545554532 XP_005640137.1</a> |
| <a href="#">PREDICTED: phosphatidylinositol-glycan-specific phospholipase D</a>    | 34.1 | 34.1 | 100% | 1.3  | 85% | <a href="#">gij74003954 XP_535902.2</a>     |
| <a href="#">PREDICTED: phosphatidylinositol-glycan-specific phospholipase D</a>    | 34.1 | 34.1 | 100% | 1.3  | 85% | <a href="#">gij545554529 XP_005640136.1</a> |
| <a href="#">PREDICTED: phosphatidylinositol-glycan-specific phospholipase D</a>    | 33.3 | 33.3 | 100% | 2.5  | 77% | <a href="#">gij617615072 XP_007526005.1</a> |
| <a href="#">PREDICTED: phosphatidylinositol-glycan-specific phospholipase D</a>    | 33.3 | 33.3 | 92%  | 2.5  | 83% | <a href="#">gij533180623 XP_005403486.1</a> |
| <a href="#">PREDICTED: phosphatidylinositol-glycan-specific phospholipase D</a>    | 32.9 | 32.9 | 92%  | 3.4  | 83% | <a href="#">gij671000878 XP_008691294.1</a> |
| <a href="#">PREDICTED: phosphatidylinositol-glycan-specific phospholipase D</a>    | 32.9 | 32.9 | 92%  | 3.4  | 83% | <a href="#">gij667294118 XP_008578807.1</a> |
| <a href="#">PREDICTED: phosphatidylinositol-glycan-specific phospholipase D</a>    | 32.9 | 32.9 | 100% | 3.4  | 77% | <a href="#">gij471403600 XP_004384046.1</a> |
| <a href="#">PREDICTED: phosphatidylinositol-glycan-specific phospholipase D</a>    | 32.9 | 32.9 | 100% | 3.4  | 77% | <a href="#">gij344289516 XP_003416488.1</a> |
| <a href="#">PREDICTED: phosphatidylinositol-glycan-specific phospholipase D</a>    | 32.0 | 32.0 | 92%  | 6.4  | 75% | <a href="#">gij507572817 XP_004669997.1</a> |
| <a href="#">PREDICTED: phosphatidylinositol-glycan-specific phospholipase D</a>    | 32.0 | 32.0 | 100% | 6.4  | 77% | <a href="#">gij586495128 XP_006878008.1</a> |
| <a href="#">PREDICTED: phosphatidylinositol-glycan-specific phospholipase D</a>    | 32.0 | 32.0 | 92%  | 6.4  | 75% | <a href="#">gij591294474 XP_007074479.1</a> |
| <a href="#">hypothetical protein [Corynebacterium mastitidis]</a>                  | 31.6 | 31.6 | 84%  | 8.5  | 91% | <a href="#">gij516827401 WP_018118945.1</a> |
| <a href="#">PREDICTED: phosphatidylinositol-glycan-specific phospholipase D</a>    | 30.8 | 30.8 | 92%  | 16   | 75% | <a href="#">gij602684652 XP_007454575.1</a> |
| <a href="#">PREDICTED: phosphatidylinositol-glycan-specific phospholipase D</a>    | 30.8 | 30.8 | 92%  | 16   | 75% | <a href="#">gij602684650 XP_007454574.1</a> |
| <a href="#">abortive infection protein [Leptolyngbya sp. PCC 7376]</a>             | 30.3 | 50.1 | 92%  | 22   | 75% | <a href="#">gij504946464 WP_015133566.1</a> |
| <a href="#">PTS mannitol transporter subunit IIBC [Tepidanaerobacter acetatox</a>  | 30.3 | 30.3 | 69%  | 22   | 89% | <a href="#">gij503544991 WP_013779067.1</a> |
| <a href="#">phosphoenolpyruvate-dependent sugar phosphotransferase system</a>      | 30.3 | 30.3 | 69%  | 22   | 89% | <a href="#">gij505108599 WP_015295701.1</a> |
| <a href="#">PREDICTED: phosphatidylinositol-glycan-specific phospholipase D</a>    | 30.3 | 30.3 | 92%  | 22   | 75% | <a href="#">gij612008081 XP_007487938.1</a> |
| <a href="#">PREDICTED: phosphatidylinositol-glycan-specific phospholipase D</a>    | 30.3 | 30.3 | 92%  | 22   | 75% | <a href="#">gij612008079 XP_001375600.2</a> |
| <a href="#">PREDICTED: phosphatidylinositol-glycan-specific phospholipase D</a>    | 30.3 | 30.3 | 92%  | 22   | 75% | <a href="#">gij612008077 XP_007487937.1</a> |

## Alignments

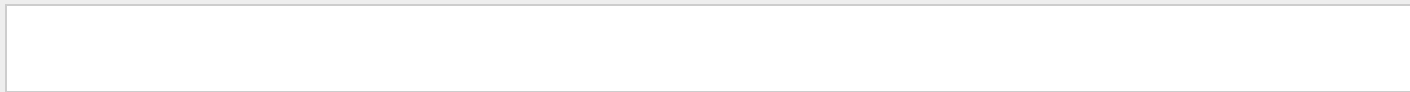

BLAST is a registered trademark of the National Library of Medicine.

NCBI/ BLAST/ blastp suite/ Formatting Results - BVE5DH9K01R

Your search parameters were adjusted to search for a short input sequence.

[Edit and Resubmit](#) [Save Search Strategies](#) [Formatting options](#) [Download](#) [YouTube](#) [How to read this page](#) [Blast report description](#)

GPLD1\_KNDFHRDLTSLTESVDRN\_Mod

RID [BVE5DH9K01R](#) (Expires on 01-21 09:08 am)

Query ID |cl|280655  
 Description None  
 Molecule type amino acid  
 Query Length 19

Database Name nr  
 Description All non-redundant GenBank CDS translations+PDB+SwissProt+PIR+PRF excluding environmental samples from WGS projects  
 Program BLASTP 2.2.30+ [Citation](#)

Other reports: [Search Summary](#) [Taxonomy reports](#) [Distance tree of results](#) [Related Structures](#) [Multiple alignment](#)

Graphic Summary

Show Conserved Domains

No putative conserved domains have been detected

Distribution of 103 Blast Hits on the Query Sequence

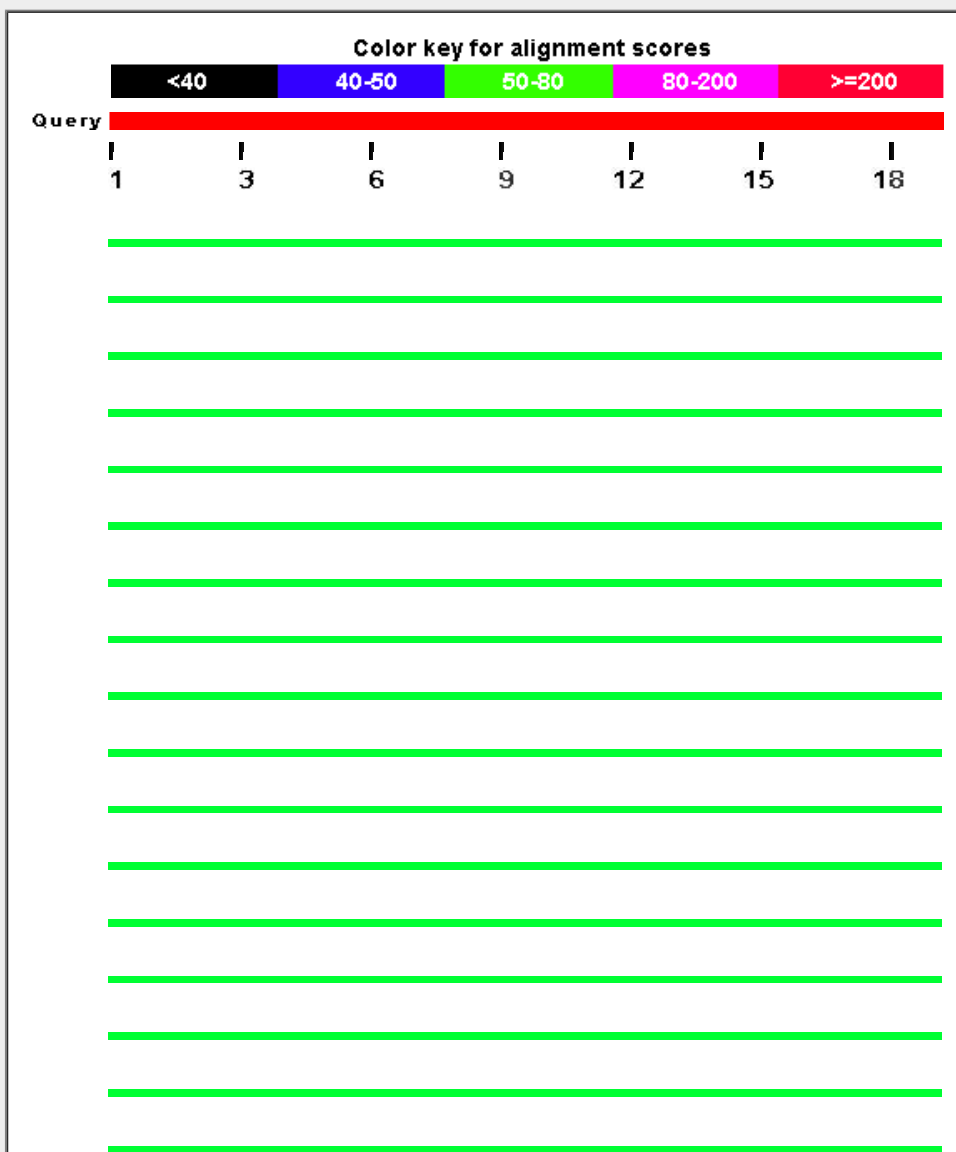

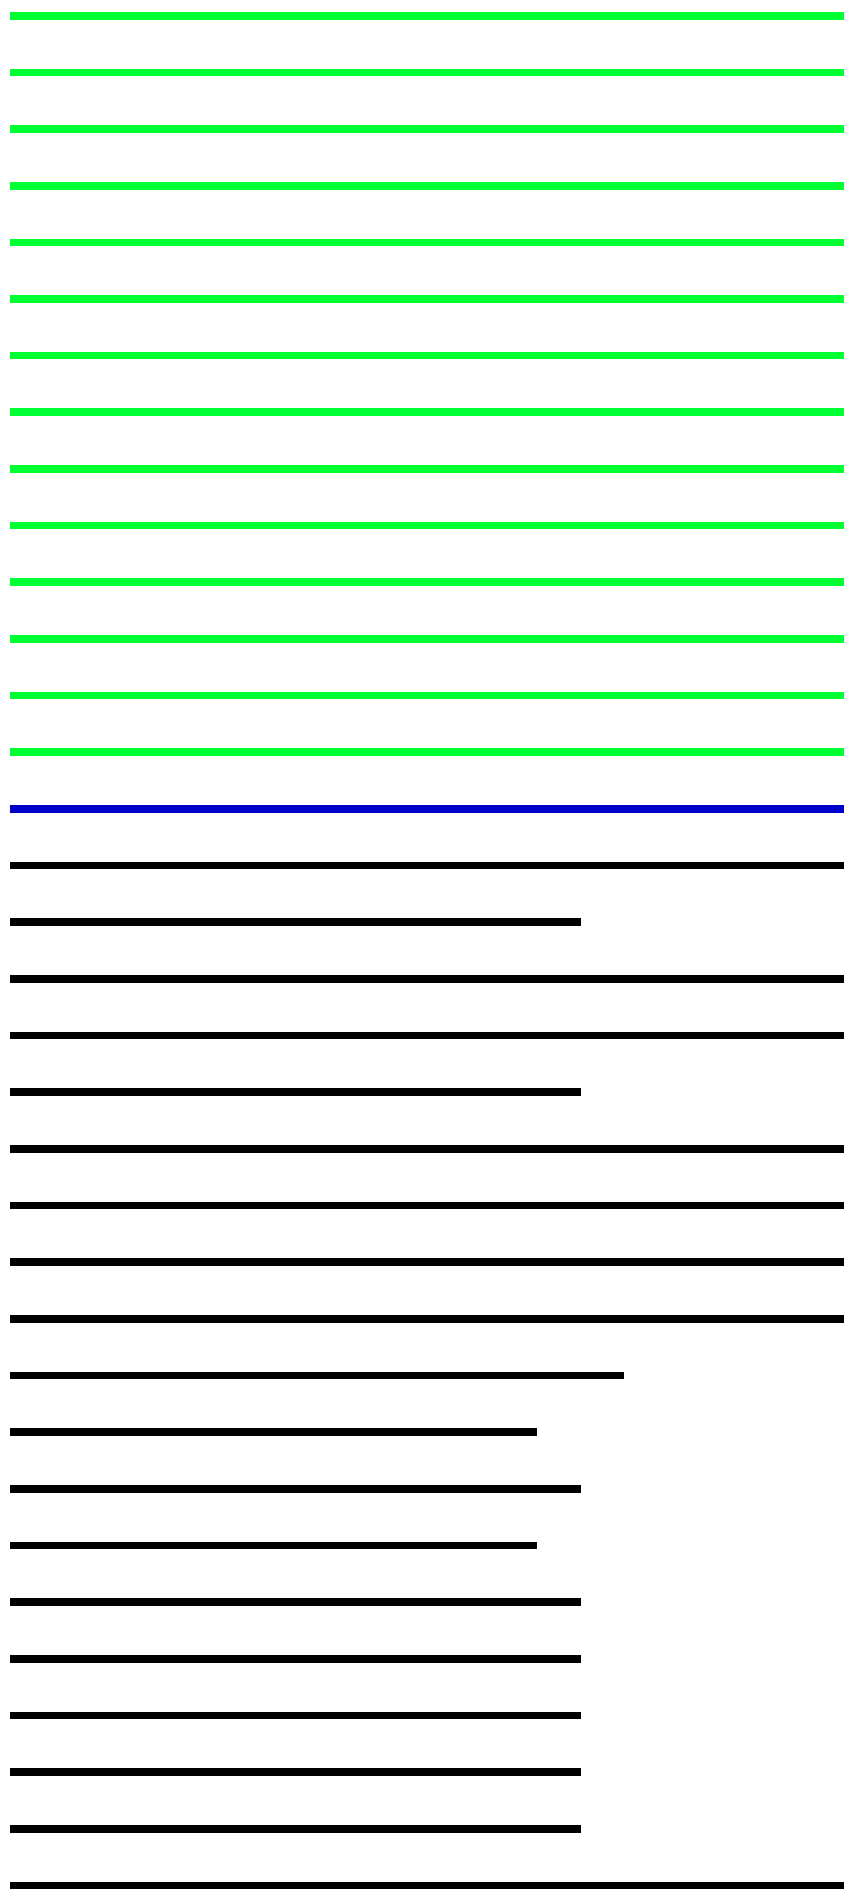

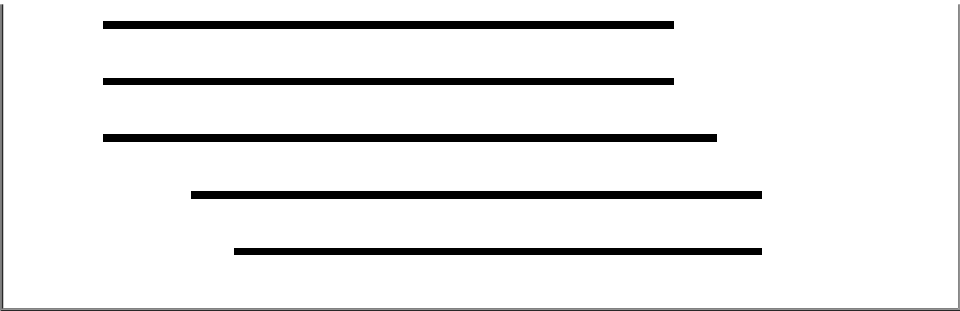

**Descriptions**

**Sequences producing significant alignments:**

Select: [All](#) [None](#) Selected:0

[Alignments](#)
[Download](#)
[GenPept](#)
[Graphics](#)
[Distance tree of results](#)
[Multiple alignment](#)

| Description                                                                                  | Max score | Total score | Query cover | E value | Ident | Accession                      |
|----------------------------------------------------------------------------------------------|-----------|-------------|-------------|---------|-------|--------------------------------|
| <a href="#">Unknown (protein for IMAGE:3354070) [Homo sapiens]</a>                           | 61.3      | 61.3        | 100%        | 2e-09   | 95%   | <a href="#">AAH07614.1</a>     |
| <a href="#">PREDICTED: phosphatidylinositol-glycan-specific phospholipase D isoform X:</a>   | 61.3      | 61.3        | 100%        | 2e-09   | 95%   | <a href="#">XP_008975042.1</a> |
| <a href="#">PREDICTED: phosphatidylinositol-glycan-specific phospholipase D isoform X:</a>   | 61.3      | 61.3        | 100%        | 2e-09   | 95%   | <a href="#">XP_005249075.1</a> |
| <a href="#">PREDICTED: phosphatidylinositol-glycan-specific phospholipase D [Pongo ab</a>    | 61.3      | 61.3        | 100%        | 2e-09   | 95%   | <a href="#">XP_009239742.1</a> |
| <a href="#">glycosylphosphatidylinositol phospholipase D [Homo sapiens]</a>                  | 61.3      | 61.3        | 100%        | 2e-09   | 95%   | <a href="#">CAC87068.1</a>     |
| <a href="#">phospholipase D [Homo sapiens]</a>                                               | 61.3      | 61.3        | 100%        | 2e-09   | 95%   | <a href="#">AAA36445.1</a>     |
| <a href="#">PREDICTED: phosphatidylinositol-glycan-specific phospholipase D isoform X:</a>   | 61.3      | 61.3        | 100%        | 2e-09   | 95%   | <a href="#">XP_003823243.1</a> |
| <a href="#">phosphatidylinositol-glycan-specific phospholipase D precursor [Homo sapien:</a> | 61.3      | 61.3        | 100%        | 2e-09   | 95%   | <a href="#">NP_001494.2</a>    |
| <a href="#">glycosylphosphatidylinositol-specific phospholipase D precursor [Homo sapien</a> | 61.3      | 61.3        | 100%        | 2e-09   | 95%   | <a href="#">AAG16627.2</a>     |
| <a href="#">PREDICTED: phosphatidylinositol-glycan-specific phospholipase D [Pan trogl</a>   | 61.3      | 61.3        | 100%        | 2e-09   | 95%   | <a href="#">XP_518268.4</a>    |
| <a href="#">PREDICTED: phosphatidylinositol-glycan-specific phospholipase D isoform X:</a>   | 61.3      | 61.3        | 100%        | 2e-09   | 95%   | <a href="#">XP_008975041.1</a> |
| <a href="#">glycosylphosphatidylinositol specific phospholipase D1, isoform CRA_c [Hom</a>   | 61.3      | 61.3        | 100%        | 2e-09   | 95%   | <a href="#">EAW55450.1</a>     |
| <a href="#">PREDICTED: phosphatidylinositol-glycan-specific phospholipase D [Nomascu</a>     | 61.3      | 61.3        | 100%        | 2e-09   | 95%   | <a href="#">XP_003263611.1</a> |
| <a href="#">PREDICTED: phosphatidylinositol-glycan-specific phospholipase D isoform 2</a>    | 59.2      | 59.2        | 100%        | 1e-08   | 89%   | <a href="#">XP_004043389.1</a> |
| <a href="#">PREDICTED: phosphatidylinositol-glycan-specific phospholipase D isoform 1</a>    | 59.2      | 59.2        | 100%        | 1e-08   | 89%   | <a href="#">XP_004043388.1</a> |
| <a href="#">PREDICTED: phosphatidylinositol-glycan-specific phospholipase D isoform X:</a>   | 56.6      | 56.6        | 100%        | 9e-08   | 84%   | <a href="#">XP_009202774.1</a> |
| <a href="#">PREDICTED: phosphatidylinositol-glycan-specific phospholipase D isoform X:</a>   | 56.6      | 56.6        | 100%        | 9e-08   | 84%   | <a href="#">XP_009202773.1</a> |
| <a href="#">PREDICTED: phosphatidylinositol-glycan-specific phospholipase D isoform X:</a>   | 56.6      | 56.6        | 100%        | 9e-08   | 84%   | <a href="#">XP_007971742.1</a> |
| <a href="#">PREDICTED: phosphatidylinositol-glycan-specific phospholipase D isoform X:</a>   | 56.6      | 56.6        | 100%        | 9e-08   | 84%   | <a href="#">XP_007971741.1</a> |
| <a href="#">PREDICTED: phosphatidylinositol-glycan-specific phospholipase D isoform X:</a>   | 56.6      | 56.6        | 100%        | 9e-08   | 84%   | <a href="#">XP_007971740.1</a> |
| <a href="#">PREDICTED: phosphatidylinositol-glycan-specific phospholipase D isoform X:</a>   | 56.6      | 56.6        | 100%        | 9e-08   | 84%   | <a href="#">XP_007971746.1</a> |
| <a href="#">PREDICTED: phosphatidylinositol-glycan-specific phospholipase D isoform X:</a>   | 56.6      | 56.6        | 100%        | 9e-08   | 84%   | <a href="#">XP_003897171.1</a> |
| <a href="#">PREDICTED: phosphatidylinositol-glycan-specific phospholipase D isoform X:</a>   | 56.6      | 56.6        | 100%        | 9e-08   | 84%   | <a href="#">XP_009202772.1</a> |
| <a href="#">PREDICTED: phosphatidylinositol-glycan-specific phospholipase D isoform X:</a>   | 53.7      | 53.7        | 100%        | 9e-07   | 79%   | <a href="#">XP_005553977.1</a> |
| <a href="#">PREDICTED: phosphatidylinositol-glycan-specific phospholipase D-like [Maca</a>   | 53.7      | 53.7        | 100%        | 9e-07   | 79%   | <a href="#">XP_002803682.1</a> |
| <a href="#">phospholipase D [Homo sapiens]</a>                                               | 53.7      | 53.7        | 100%        | 9e-07   | 79%   | <a href="#">AAA36444.1</a>     |
| <a href="#">PREDICTED: phosphatidylinositol-glycan-specific phospholipase D isoform X:</a>   | 53.7      | 53.7        | 100%        | 9e-07   | 79%   | <a href="#">XP_005553976.1</a> |
| <a href="#">hypothetical protein EGM_13271 [Macaca fascicularis]</a>                         | 53.7      | 53.7        | 100%        | 1e-06   | 79%   | <a href="#">EHH52757.1</a>     |
| <a href="#">hypothetical protein EGK_21153 [Macaca mulatta]</a>                              | 53.7      | 53.7        | 100%        | 1e-06   | 79%   | <a href="#">EHH25414.1</a>     |

|                                                                                                  |      |      |      |       |     |                                |
|--------------------------------------------------------------------------------------------------|------|------|------|-------|-----|--------------------------------|
| <a href="#">PREDICTED: phosphatidylinositol-glycan-specific phospholipase D isoform X:</a>       | 53.7 | 53.7 | 100% | 1e-06 | 79% | <a href="#">XP_005553975.1</a> |
| <a href="#">PREDICTED: phosphatidylinositol-glycan-specific phospholipase D [Rhinopith</a>       | 50.3 | 50.3 | 100% | 1e-05 | 74% | <a href="#">XP_010363586.1</a> |
| <a href="#">PREDICTED: LOW QUALITY PROTEIN: phosphatidylinositol-glycan-specific</a>             | 40.5 | 40.5 | 100% | 0.021 | 63% | <a href="#">XP_003788429.1</a> |
| <a href="#">PREDICTED: phosphatidylinositol-glycan-specific phospholipase D [Leptonyci</a>       | 39.7 | 39.7 | 100% | 0.039 | 68% | <a href="#">XP_006739372.1</a> |
| <a href="#">PREDICTED: phosphatidylinositol-glycan-specific phospholipase D [Odobenu</a>         | 38.8 | 38.8 | 68%  | 0.072 | 85% | <a href="#">XP_004406584.1</a> |
| <a href="#">PREDICTED: phosphatidylinositol-glycan-specific phospholipase D [Saimiri br</a>      | 38.8 | 38.8 | 100% | 0.072 | 63% | <a href="#">XP_003927350.1</a> |
| <a href="#">PREDICTED: phosphatidylinositol-glycan-specific phospholipase D [Camelus</a>         | 38.0 | 38.0 | 100% | 0.13  | 58% | <a href="#">XP_010944080.1</a> |
| <a href="#">PREDICTED: phosphatidylinositol-glycan-specific phospholipase D [Ceratothe</a>       | 38.0 | 38.0 | 68%  | 0.13  | 85% | <a href="#">XP_004432133.1</a> |
| <a href="#">PREDICTED: phosphatidylinositol-glycan-specific phospholipase D [Galeopte</a>        | 37.5 | 37.5 | 100% | 0.18  | 63% | <a href="#">XP_008578807.1</a> |
| <a href="#">PREDICTED: LOW QUALITY PROTEIN: phosphatidylinositol-glycan-specific</a>             | 36.7 | 36.7 | 100% | 0.34  | 58% | <a href="#">XP_006182298.1</a> |
| <a href="#">PREDICTED: LOW QUALITY PROTEIN: phosphatidylinositol-glycan-specific</a>             | 36.7 | 36.7 | 100% | 0.34  | 58% | <a href="#">XP_010978426.1</a> |
| <a href="#">PREDICTED: phosphatidylinositol-glycan-specific phospholipase D [Vicugna r</a>       | 36.7 | 36.7 | 100% | 0.34  | 58% | <a href="#">XP_006198740.1</a> |
| <a href="#">PREDICTED: phosphatidylinositol-glycan-specific phospholipase D [Jaculus j:</a>      | 36.3 | 36.3 | 73%  | 0.46  | 71% | <a href="#">XP_004669997.1</a> |
| <a href="#">PREDICTED: phosphatidylinositol-glycan-specific phospholipase D isoform X:</a>       | 35.8 | 35.8 | 63%  | 0.63  | 83% | <a href="#">XP_004761311.1</a> |
| <a href="#">PREDICTED: phosphatidylinositol-glycan-specific phospholipase D [Tarsius s:</a>      | 35.8 | 35.8 | 68%  | 0.63  | 77% | <a href="#">XP_008048656.1</a> |
| <a href="#">PREDICTED: phosphatidylinositol-glycan-specific phospholipase D isoform X:</a>       | 35.8 | 35.8 | 63%  | 0.63  | 83% | <a href="#">XP_004761310.1</a> |
| <a href="#">PREDICTED: phosphatidylinositol-glycan-specific phospholipase D [Eptesicus</a>       | 35.4 | 35.4 | 68%  | 0.86  | 77% | <a href="#">XP_008145534.1</a> |
| <a href="#">PREDICTED: phosphatidylinositol-glycan-specific phospholipase D [Felis catu</a>      | 35.4 | 35.4 | 68%  | 0.86  | 77% | <a href="#">XP_003985826.1</a> |
| <a href="#">PREDICTED: phosphatidylinositol-glycan-specific phospholipase D [Panthera</a>        | 35.4 | 35.4 | 68%  | 0.86  | 77% | <a href="#">XP_007074479.1</a> |
| <a href="#">PREDICTED: phosphatidylinositol-glycan-specific phospholipase D isoform X:</a>       | 35.0 | 35.0 | 68%  | 1.2   | 77% | <a href="#">XP_010621250.1</a> |
| <a href="#">PREDICTED: phosphatidylinositol-glycan-specific phospholipase D isoform X:</a>       | 35.0 | 35.0 | 68%  | 1.2   | 77% | <a href="#">XP_010621248.1</a> |
| <a href="#">PREDICTED: phosphatidylinositol-glycan-specific phospholipase D [Loxodont</a>        | 35.0 | 35.0 | 100% | 1.2   | 58% | <a href="#">XP_003416488.1</a> |
| <a href="#">Phosphatidylinositol-glycan-specific phospholipase D [Fukomys damarensis]</a>        | 35.0 | 35.0 | 68%  | 1.2   | 77% | <a href="#">KFO33840.1</a>     |
| <a href="#">PREDICTED: phosphatidylinositol-glycan-specific phospholipase D [Erinaceu:</a>       | 33.7 | 33.7 | 68%  | 2.9   | 79% | <a href="#">XP_007526005.1</a> |
| <a href="#">hypothetical protein STEHIDRAFT_159394 [Stereum hirsutum FP-91666 SS1</a>            | 32.9 | 102  | 73%  | 5.4   | 63% | <a href="#">XP_007306926.1</a> |
| <a href="#">DGPF domain-containing protein [Amycolatopsis halophila]</a>                         | 32.5 | 32.5 | 68%  | 6.6   | 77% | <a href="#">WP_034267665.1</a> |
| <a href="#">transcriptional regulator [Weissella ceti]</a>                                       | 32.5 | 32.5 | 63%  | 6.7   | 83% | <a href="#">WP_009765332.1</a> |
| <a href="#">PREDICTED: phosphatidylinositol-glycan-specific phospholipase D isoform X:</a>       | 32.5 | 32.5 | 68%  | 7.4   | 69% | <a href="#">XP_004847666.1</a> |
| <a href="#">Phosphatidylinositol-glycan-specific phospholipase D [Heterocephalus glaber]</a>     | 32.5 | 32.5 | 68%  | 7.4   | 69% | <a href="#">EHB09593.1</a>     |
| <a href="#">PREDICTED: phosphatidylinositol-glycan-specific phospholipase D isoform X:</a>       | 32.5 | 32.5 | 68%  | 7.4   | 69% | <a href="#">XP_004847665.1</a> |
| <a href="#">PREDICTED: phosphatidylinositol-glycan-specific phospholipase D isoform X:</a>       | 32.5 | 32.5 | 68%  | 7.4   | 69% | <a href="#">XP_004847664.1</a> |
| <a href="#">PREDICTED: phosphatidylinositol-glycan-specific phospholipase D isoform X:</a>       | 32.5 | 32.5 | 68%  | 7.4   | 69% | <a href="#">XP_004847663.1</a> |
| <a href="#">PREDICTED: phosphatidylinositol-glycan-specific phospholipase D [Heteroce:</a>       | 32.5 | 32.5 | 68%  | 7.4   | 69% | <a href="#">XP_004895023.1</a> |
| <a href="#">PREDICTED: phosphatidylinositol-glycan-specific phospholipase D [Physeter</a>        | 32.5 | 32.5 | 68%  | 7.4   | 69% | <a href="#">XP_007116306.1</a> |
| <a href="#">PREDICTED: phosphatidylinositol-glycan-specific phospholipase D isoform X:</a>       | 32.5 | 32.5 | 68%  | 7.4   | 69% | <a href="#">XP_007197201.1</a> |
| <a href="#">PREDICTED: phosphatidylinositol-glycan-specific phospholipase D isoform X:</a>       | 32.5 | 32.5 | 68%  | 7.4   | 69% | <a href="#">XP_007197200.1</a> |
| <a href="#">DEAD/DEAH box helicase domain protein [Desulfotomaculum gibsoniae]</a>               | 32.5 | 32.5 | 68%  | 7.5   | 85% | <a href="#">WP_006520515.1</a> |
| <a href="#">hypothetical protein [Nocardia araoensis]</a>                                        | 32.0 | 32.0 | 52%  | 9.4   | 90% | <a href="#">WP_039804003.1</a> |
| <a href="#">hypothetical protein [Lactobacillus rossiae]</a>                                     | 32.0 | 32.0 | 73%  | 9.7   | 71% | <a href="#">WP_017261062.1</a> |
| <a href="#">Bacterial type II secretion system protein F domain (flaJ-A, flaJ) [uncultured m</a> | 32.0 | 32.0 | 89%  | 9.8   | 48% | <a href="#">AIF05804.1</a>     |
| <a href="#">Bacterial type II secretion system protein F domain (flaJ-A, flaJ) [uncultured m</a> | 32.0 | 32.0 | 89%  | 9.8   | 48% | <a href="#">AIE95188.1</a>     |
| <a href="#">Phosphatidylinositol-glycan-specific phospholipase D [Pteropus alecto]</a>           | 32.0 | 32.0 | 100% | 10    | 58% | <a href="#">ELK05805.1</a>     |
| <a href="#">PREDICTED: phosphatidylinositol-glycan-specific phospholipase D isoform X:</a>       | 32.0 | 32.0 | 100% | 10    | 58% | <a href="#">XP_006919597.1</a> |
| <a href="#">PREDICTED: phosphatidylinositol-glycan-specific phospholipase D [Condylur:</a>       | 32.0 | 32.0 | 84%  | 10    | 69% | <a href="#">XP_004693375.1</a> |
| <a href="#">PREDICTED: phosphatidylinositol-glycan-specific phospholipase D [Microtus :</a>      | 32.0 | 32.0 | 57%  | 10    | 82% | <a href="#">XP_005355039.1</a> |

|                                                                                                  |      |      |      |    |     |                                |
|--------------------------------------------------------------------------------------------------|------|------|------|----|-----|--------------------------------|
| <a href="#">PREDICTED: phosphatidylinositol-glycan-specific phospholipase D isoform X:</a>       | 31.6 | 31.6 | 57%  | 14 | 82% | <a href="#">XP_008260728.1</a> |
| <a href="#">PREDICTED: phosphatidylinositol-glycan-specific phospholipase D isoform X:</a>       | 31.6 | 31.6 | 57%  | 14 | 82% | <a href="#">XP_008260723.1</a> |
| <a href="#">PREDICTED: phosphatidylinositol-glycan-specific phospholipase D isoform X:</a>       | 31.6 | 31.6 | 68%  | 14 | 69% | <a href="#">XP_007454575.1</a> |
| <a href="#">PREDICTED: phosphatidylinositol-glycan-specific phospholipase D isoform X:</a>       | 31.6 | 31.6 | 68%  | 14 | 69% | <a href="#">XP_007454574.1</a> |
| <a href="#">hypothetical protein [Brachyspira pilosicoli]</a>                                    | 31.2 | 31.2 | 73%  | 17 | 69% | <a href="#">WP_013245184.1</a> |
| <a href="#">hypothetical protein PANDA_003876 [Ailuropoda melanoleuca]</a>                       | 31.2 | 31.2 | 68%  | 19 | 69% | <a href="#">EFB28343.1</a>     |
| <a href="#">PREDICTED: phosphatidylinositol-glycan-specific phospholipase D-like [Ailur</a>      | 31.2 | 31.2 | 68%  | 19 | 69% | <a href="#">XP_002915859.1</a> |
| <a href="#">hypothetical protein [Janthinobacterium sp. HH01]</a>                                | 30.8 | 30.8 | 68%  | 24 | 69% | <a href="#">WP_008451733.1</a> |
| <a href="#">hypothetical protein [Hassallia byssoidea]</a>                                       | 30.8 | 30.8 | 57%  | 25 | 91% | <a href="#">WP_039749624.1</a> |
| <a href="#">hypothetical protein [Streptococcus mitis]</a>                                       | 30.8 | 30.8 | 94%  | 25 | 61% | <a href="#">WP_033682715.1</a> |
| <a href="#">hypothetical protein HMPREF8571_0577 [Streptococcus mitis ATCC 6249]</a>             | 30.8 | 30.8 | 94%  | 25 | 61% | <a href="#">EFM31924.1</a>     |
| <a href="#">hypothetical protein [Streptococcus mitis]</a>                                       | 30.8 | 30.8 | 94%  | 25 | 61% | <a href="#">WP_000241006.1</a> |
| <a href="#">Bacterial type II secretion system protein F domain (flaJ-A, flaJ) [uncultured m</a> | 30.8 | 30.8 | 78%  | 25 | 52% | <a href="#">AIF01437.1</a>     |
| <a href="#">glycosylphosphatidylinositol specific phospholipase D1, isoform CRA_a [Mus ]</a>     | 30.8 | 30.8 | 47%  | 26 | 89% | <a href="#">EDL32465.1</a>     |
| <a href="#">PREDICTED: phosphatidylinositol-glycan-specific phospholipase D isoform X:</a>       | 30.8 | 30.8 | 47%  | 26 | 89% | <a href="#">XP_006253988.1</a> |
| <a href="#">RecName: Full=Phosphatidylinositol-glycan-specific phospholipase D; Short=</a>       | 30.8 | 30.8 | 47%  | 26 | 89% | <a href="#">O70362.1</a>       |
| <a href="#">glycosylphosphatidylinositol specific phospholipase D1, isoform CRA_c [Mus ]</a>     | 30.8 | 30.8 | 47%  | 26 | 89% | <a href="#">EDL32467.1</a>     |
| <a href="#">PREDICTED: phosphatidylinositol-glycan-specific phospholipase D [Orycterop</a>       | 30.8 | 30.8 | 100% | 26 | 58% | <a href="#">XP_007948002.1</a> |
| <a href="#">PREDICTED: phosphatidylinositol-glycan-specific phospholipase D isoform X:</a>       | 30.8 | 30.8 | 47%  | 26 | 89% | <a href="#">XP_008769857.1</a> |
| <a href="#">glycosylphosphatidylinositol-specific phospholipase D precursor [Mus muscul</a>      | 30.8 | 30.8 | 47%  | 26 | 89% | <a href="#">AAP93132.1</a>     |
| <a href="#">glycosylphosphatidylinositol phospholipase D [Mus musculus]</a>                      | 30.8 | 30.8 | 47%  | 26 | 89% | <a href="#">AAL87452.1</a>     |
| <a href="#">phosphatidylinositol-glycan-specific phospholipase D precursor [Mus musculu:</a>     | 30.8 | 30.8 | 47%  | 26 | 89% | <a href="#">NP_032182.2</a>    |
| <a href="#">unnamed protein product [Mus musculus]</a>                                           | 30.8 | 30.8 | 47%  | 26 | 89% | <a href="#">BAB23698.1</a>     |
| <a href="#">phosphatidylinositol-glycan-specific phospholipase D precursor [Rattus norveg</a>    | 30.8 | 30.8 | 47%  | 26 | 89% | <a href="#">NP_001093982.1</a> |
| <a href="#">RecName: Full=Phosphatidylinositol-glycan-specific phospholipase D; Short=</a>       | 30.8 | 30.8 | 47%  | 26 | 89% | <a href="#">Q8R2H5.1</a>       |
| <a href="#">PREDICTED: phosphatidylinositol-glycan-specific phospholipase D [Mesocric</a>        | 30.8 | 30.8 | 47%  | 26 | 89% | <a href="#">XP_005066341.1</a> |

## Alignments

Download GenPept Graphics

Next Previous Descriptions

Unknown (protein for IMAGE:3354070), partial [Homo sapiens]

Sequence ID: [gb|AAH07614.1|](#) Length: 575 Number of Matches: 1

Range 1: 36 to 54 GenPept Graphics

Next Match Previous Match

| Score          | Expect | Identities | Positives   | Gaps     |
|----------------|--------|------------|-------------|----------|
| 61.3 bits(137) | 2e-09  | 18/19(95%) | 19/19(100%) | 0/19(0%) |

Query 1 KNDFHRDLTTSLETESVDRN 19  
KNDFHR+LTTSLTESVDRN  
Sbjct 36 KNDFHRNLTTSLETESVDRN 54

### Related Information

[Gene](#) - associated gene details

Download GenPept Graphics

Next Previous Descriptions

PREDICTED: phosphatidylinositol-glycan-specific phospholipase D isoform X3 [Pan paniscus]

Sequence ID: [ref|XP\\_008975042.1|](#) Length: 677 Number of Matches: 1

Range 1: 138 to 156 GenPept Graphics

Next Match Previous Match

| Score          | Expect | Identities | Positives   | Gaps     |
|----------------|--------|------------|-------------|----------|
| 61.3 bits(137) | 2e-09  | 18/19(95%) | 19/19(100%) | 0/19(0%) |

### Related Information

[Gene](#) - associated gene details

[Map Viewer](#) - aligned genomic context



Query 1 KNDFHRDLTTSLTESVDRN 19  
 KNDFHR+LTTSLTESVDRN  
 Sbjct 138 KNDFHRNLTTSLTESVDRN 156

Download [GenPept](#) [Graphics](#)

[▼ Next](#) [▲ Previous](#) [▲ Descriptions](#)

PREDICTED: phosphatidylinositol-glycan-specific phospholipase D isoform X3 [Homo sapiens]

Sequence ID: [ref|XP\\_005249075.1|](#) Length: 677 Number of Matches: 1

Range 1: 138 to 156 [GenPept](#) [Graphics](#)

[▼ Next Match](#) [▲ Previous Match](#)

| Score          | Expect | Identities | Positives   | Gaps     |
|----------------|--------|------------|-------------|----------|
| 61.3 bits(137) | 2e-09  | 18/19(95%) | 19/19(100%) | 0/19(0%) |

Query 1 KNDFHRDLTTSLTESVDRN 19  
 KNDFHR+LTTSLTESVDRN  
 Sbjct 138 KNDFHRNLTTSLTESVDRN 156

**Related Information**

[Gene](#) - associated gene details  
[Map Viewer](#) - aligned genomic context

Download [GenPept](#) [Graphics](#)

[▼ Next](#) [▲ Previous](#) [▲ Descriptions](#)

PREDICTED: phosphatidylinositol-glycan-specific phospholipase D [Pongo abelii]

Sequence ID: [ref|XP\\_009239742.1|](#) Length: 754 Number of Matches: 1

Range 1: 235 to 253 [GenPept](#) [Graphics](#)

[▼ Next Match](#) [▲ Previous Match](#)

| Score          | Expect | Identities | Positives   | Gaps     |
|----------------|--------|------------|-------------|----------|
| 61.3 bits(137) | 2e-09  | 18/19(95%) | 19/19(100%) | 0/19(0%) |

Query 1 KNDFHRDLTTSLTESVDRN 19  
 KNDFHR+LTTSLTESVDRN  
 Sbjct 235 KNDFHRNLTTSLTESVDRN 253

**Related Information**

[Gene](#) - associated gene details  
[Map Viewer](#) - aligned genomic context

Download [GenPept](#) [Graphics](#)

[▼ Next](#) [▲ Previous](#) [▲ Descriptions](#)

glycosylphosphatidylinositol phospholipase D [Homo sapiens]

Sequence ID: [emb|CAC87068.1|](#) Length: 840 Number of Matches: 1

[▶ See 1 more title\(s\)](#)

Range 1: 301 to 319 [GenPept](#) [Graphics](#)

[▼ Next Match](#) [▲ Previous Match](#)

| Score          | Expect | Identities | Positives   | Gaps     |
|----------------|--------|------------|-------------|----------|
| 61.3 bits(137) | 2e-09  | 18/19(95%) | 19/19(100%) | 0/19(0%) |

Query 1 KNDFHRDLTTSLTESVDRN 19  
 KNDFHR+LTTSLTESVDRN  
 Sbjct 301 KNDFHRNLTTSLTESVDRN 319

**Related Information**

[Gene](#) - associated gene details  
[Identical Proteins](#) - Proteins identical to the subject

BLAST is a registered trademark of the National Library of Medicine.

▶ [NCBI/ BLAST/ blastp suite/ Formatting Results - B9EDC96A01R](#)

**i** Your search parameters were adjusted to search for a short input sequence.

[Edit and Resubmit](#) [Save Search Strategies](#) ▶ [Formatting options](#) ▶ [Download](#)

[YouTube](#) [How to read this page](#) [Blast report description](#)

### GPLD1\_KNDFHRNLTTSLTESVDRN\_NonMod

RID [B9EDC96A01R](#) (Expires on 01-14 13:22 pm)

**Query ID** |cl|383879  
**Description** None  
**Molecule type** amino acid  
**Query Length** 19

**Database Name** nr  
**Description** All non-redundant GenBank CDS translations+PDB+SwissProt+PIR excluding environmental samples from WGS projects  
**Program** BLASTP 2.2.30+ ▶ [Citation](#)

Other reports: ▶ [Search Summary](#) [[Taxonomy reports](#)] [[Distance tree of results](#)] [[Related Structures](#)] [[Multiple alignment](#)]

### Graphic Summary

[Show Conserved Domains](#)

No putative conserved domains have been detected

Distribution of 100 Blast Hits on the Query Sequence



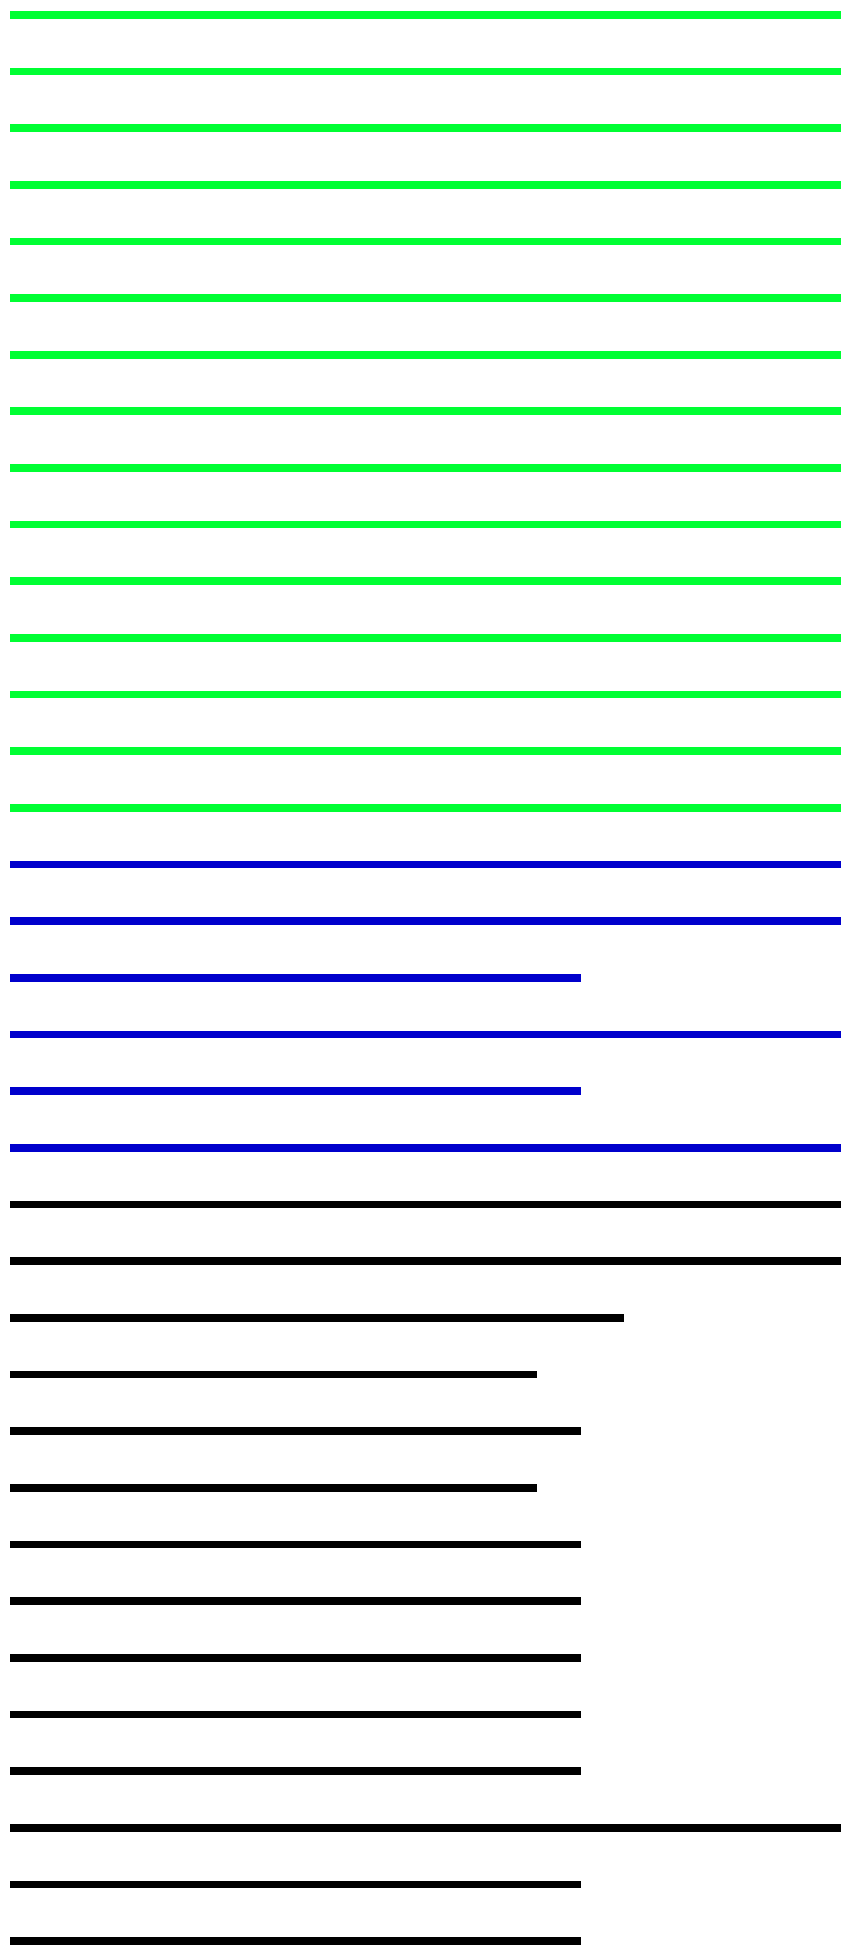

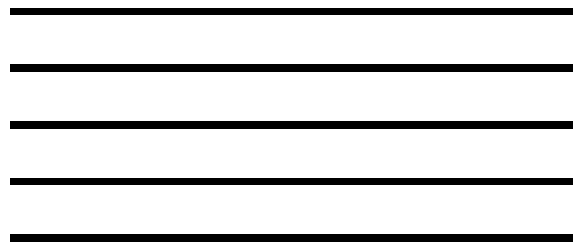

**Descriptions**

**Sequences producing significant alignments:**

Select: [All](#) [None](#) Selected:0

[Alignments](#)
[Download](#)
[GenPept](#)
[Graphics](#)
[Distance tree of results](#)
[Multiple alignment](#)

| Description                                                                         | Max score | Total score | Query cover | E value | Ident | Accession                                   |
|-------------------------------------------------------------------------------------|-----------|-------------|-------------|---------|-------|---------------------------------------------|
| <a href="#">Unknown (protein for IMAGE:3354070) [Homo sapiens]</a>                  | 63.8      | 63.8        | 100%        | 3e-10   | 100%  | <a href="#">gi 14043248 AAH07614.1</a>      |
| <a href="#">PREDICTED: phosphatidylinositol-glycan-specific phospholipase D</a>     | 63.8      | 63.8        | 100%        | 3e-10   | 100%  | <a href="#">gi 675773160 XP_008975042.1</a> |
| <a href="#">PREDICTED: phosphatidylinositol-glycan-specific phospholipase D</a>     | 63.8      | 63.8        | 100%        | 3e-10   | 100%  | <a href="#">gi 530381810 XP_005249075.1</a> |
| <a href="#">PREDICTED: phosphatidylinositol-glycan-specific phospholipase D</a>     | 63.8      | 63.8        | 100%        | 3e-10   | 100%  | <a href="#">gi 686720936 XP_009239742.1</a> |
| <a href="#">glycosylphosphatidylinositol phospholipase D [Homo sapiens]</a>         | 63.8      | 63.8        | 100%        | 3e-10   | 100%  | <a href="#">gi 20269065 CAC87068.1</a>      |
| <a href="#">phospholipase D [Homo sapiens]</a>                                      | 63.8      | 63.8        | 100%        | 3e-10   | 100%  | <a href="#">gi 388765 AAA36445.1</a>        |
| <a href="#">PREDICTED: phosphatidylinositol-glycan-specific phospholipase D</a>     | 63.8      | 63.8        | 100%        | 3e-10   | 100%  | <a href="#">gi 397505380 XP_003823243.1</a> |
| <a href="#">phosphatidylinositol-glycan-specific phospholipase D precursor [Ho</a>  | 63.8      | 63.8        | 100%        | 3e-10   | 100%  | <a href="#">gi 29171717 INP_001494.2</a>    |
| <a href="#">glycosylphosphatidylinositol-specific phospholipase D precursor [Hc</a> | 63.8      | 63.8        | 100%        | 3e-10   | 100%  | <a href="#">gi 14195001 AAG16627.2</a>      |
| <a href="#">PREDICTED: phosphatidylinositol-glycan-specific phospholipase D</a>     | 63.8      | 63.8        | 100%        | 3e-10   | 100%  | <a href="#">gi 410040317 XP_518268.4</a>    |
| <a href="#">PREDICTED: phosphatidylinositol-glycan-specific phospholipase D</a>     | 63.8      | 63.8        | 100%        | 3e-10   | 100%  | <a href="#">gi 675773152 XP_008975041.1</a> |
| <a href="#">glycosylphosphatidylinositol specific phospholipase D1, isoform CR</a>  | 63.8      | 63.8        | 100%        | 3e-10   | 100%  | <a href="#">gi 119575854 EAW55450.1</a>     |
| <a href="#">PREDICTED: phosphatidylinositol-glycan-specific phospholipase D</a>     | 63.8      | 63.8        | 100%        | 3e-10   | 100%  | <a href="#">gi 332228866 XP_003263611.1</a> |
| <a href="#">PREDICTED: phosphatidylinositol-glycan-specific phospholipase D</a>     | 61.7      | 61.7        | 100%        | 2e-09   | 95%   | <a href="#">gi 426351748 XP_004043389.1</a> |
| <a href="#">PREDICTED: phosphatidylinositol-glycan-specific phospholipase D</a>     | 61.7      | 61.7        | 100%        | 2e-09   | 95%   | <a href="#">gi 426351746 XP_004043388.1</a> |
| <a href="#">PREDICTED: phosphatidylinositol-glycan-specific phospholipase D</a>     | 59.2      | 59.2        | 100%        | 1e-08   | 89%   | <a href="#">gi 685535046 XP_009202774.1</a> |
| <a href="#">PREDICTED: phosphatidylinositol-glycan-specific phospholipase D</a>     | 59.2      | 59.2        | 100%        | 1e-08   | 89%   | <a href="#">gi 685535044 XP_009202773.1</a> |
| <a href="#">PREDICTED: phosphatidylinositol-glycan-specific phospholipase D</a>     | 59.2      | 59.2        | 100%        | 1e-08   | 89%   | <a href="#">gi 635096985 XP_007971742.1</a> |
| <a href="#">PREDICTED: phosphatidylinositol-glycan-specific phospholipase D</a>     | 59.2      | 59.2        | 100%        | 1e-08   | 89%   | <a href="#">gi 635096983 XP_007971741.1</a> |
| <a href="#">PREDICTED: phosphatidylinositol-glycan-specific phospholipase D</a>     | 59.2      | 59.2        | 100%        | 1e-08   | 89%   | <a href="#">gi 635096981 XP_007971740.1</a> |
| <a href="#">PREDICTED: phosphatidylinositol-glycan-specific phospholipase D</a>     | 59.2      | 59.2        | 100%        | 1e-08   | 89%   | <a href="#">gi 635096993 XP_007971746.1</a> |
| <a href="#">PREDICTED: phosphatidylinositol-glycan-specific phospholipase D</a>     | 59.2      | 59.2        | 100%        | 1e-08   | 89%   | <a href="#">gi 402865969 XP_003897171.1</a> |
| <a href="#">PREDICTED: phosphatidylinositol-glycan-specific phospholipase D</a>     | 59.2      | 59.2        | 100%        | 1e-08   | 89%   | <a href="#">gi 685535041 XP_009202772.1</a> |
| <a href="#">PREDICTED: phosphatidylinositol-glycan-specific phospholipase D</a>     | 56.2      | 56.2        | 100%        | 1e-07   | 84%   | <a href="#">gi 544429971 XP_005553977.1</a> |
| <a href="#">PREDICTED: phosphatidylinositol-glycan-specific phospholipase D</a>     | 56.2      | 56.2        | 100%        | 1e-07   | 84%   | <a href="#">gi 297290177 XP_002803682.1</a> |
| <a href="#">phospholipase D [Homo sapiens]</a>                                      | 56.2      | 56.2        | 100%        | 1e-07   | 84%   | <a href="#">gi 388763 AAA36444.1</a>        |
| <a href="#">PREDICTED: phosphatidylinositol-glycan-specific phospholipase D</a>     | 56.2      | 56.2        | 100%        | 1e-07   | 84%   | <a href="#">gi 544429969 XP_005553976.1</a> |
| <a href="#">hypothetical protein EGM_13271 [Macaca fascicularis]</a>                | 56.2      | 56.2        | 100%        | 1e-07   | 84%   | <a href="#">gi 355748274 EHH52757.1</a>     |

|                                                                                    |      |      |      |       |      |                                             |
|------------------------------------------------------------------------------------|------|------|------|-------|------|---------------------------------------------|
| hypothetical protein EGK_21153 [Macaca mulatta]                                    | 56.2 | 56.2 | 100% | 1e-07 | 84%  | <a href="#">gil355569342 EHH25414.1</a>     |
| <a href="#">PREDICTED: phosphatidylinositol-glycan-specific phospholipase D</a>    | 56.2 | 56.2 | 100% | 1e-07 | 84%  | <a href="#">gil544429967 XP_005553975.1</a> |
| <a href="#">PREDICTED: phosphatidylinositol-glycan-specific phospholipase D</a>    | 52.8 | 52.8 | 100% | 2e-06 | 79%  | <a href="#">gil724798150 XP_010363586.1</a> |
| <a href="#">PREDICTED: LOW QUALITY PROTEIN: phosphatidylinositol-glyca</a>         | 43.1 | 43.1 | 100% | 0.003 | 68%  | <a href="#">gil395830643 XP_003788429.1</a> |
| <a href="#">PREDICTED: phosphatidylinositol-glycan-specific phospholipase D</a>    | 42.2 | 42.2 | 100% | 0.005 | 74%  | <a href="#">gil585175123 XP_006739372.1</a> |
| <a href="#">PREDICTED: phosphatidylinositol-glycan-specific phospholipase D</a>    | 41.4 | 41.4 | 68%  | 0.010 | 92%  | <a href="#">gil472374241 XP_004406584.1</a> |
| <a href="#">PREDICTED: phosphatidylinositol-glycan-specific phospholipase D</a>    | 41.4 | 41.4 | 100% | 0.010 | 68%  | <a href="#">gil403270800 XP_003927350.1</a> |
| <a href="#">PREDICTED: phosphatidylinositol-glycan-specific phospholipase D</a>    | 40.5 | 40.5 | 68%  | 0.019 | 92%  | <a href="#">gil478515788 XP_004432133.1</a> |
| <a href="#">PREDICTED: phosphatidylinositol-glycan-specific phospholipase D</a>    | 40.1 | 40.1 | 100% | 0.027 | 68%  | <a href="#">gil667294118 XP_008578807.1</a> |
| <a href="#">PREDICTED: LOW QUALITY PROTEIN: phosphatidylinositol-glyca</a>         | 39.2 | 39.2 | 100% | 0.050 | 63%  | <a href="#">gil560912019 XP_006182298.1</a> |
| <a href="#">PREDICTED: phosphatidylinositol-glycan-specific phospholipase D</a>    | 39.2 | 39.2 | 100% | 0.050 | 63%  | <a href="#">gil560952422 XP_006198740.1</a> |
| <a href="#">PREDICTED: phosphatidylinositol-glycan-specific phospholipase D</a>    | 38.8 | 38.8 | 73%  | 0.068 | 79%  | <a href="#">gil507572817 XP_004669997.1</a> |
| <a href="#">PREDICTED: phosphatidylinositol-glycan-specific phospholipase D</a>    | 38.4 | 38.4 | 63%  | 0.093 | 92%  | <a href="#">gil511882880 XP_004761311.1</a> |
| <a href="#">PREDICTED: phosphatidylinositol-glycan-specific phospholipase D</a>    | 38.4 | 38.4 | 68%  | 0.093 | 85%  | <a href="#">gil640776034 XP_008048656.1</a> |
| <a href="#">PREDICTED: phosphatidylinositol-glycan-specific phospholipase D</a>    | 38.4 | 38.4 | 63%  | 0.093 | 92%  | <a href="#">gil511882878 XP_004761310.1</a> |
| <a href="#">PREDICTED: phosphatidylinositol-glycan-specific phospholipase D</a>    | 38.0 | 38.0 | 68%  | 0.13  | 85%  | <a href="#">gil641712629 XP_008145534.1</a> |
| <a href="#">PREDICTED: phosphatidylinositol-glycan-specific phospholipase D</a>    | 38.0 | 38.0 | 68%  | 0.13  | 85%  | <a href="#">gil410958439 XP_003985826.1</a> |
| <a href="#">PREDICTED: phosphatidylinositol-glycan-specific phospholipase D</a>    | 38.0 | 38.0 | 68%  | 0.13  | 85%  | <a href="#">gil591294474 XP_007074479.1</a> |
| <a href="#">PREDICTED: phosphatidylinositol-glycan-specific phospholipase D</a>    | 37.5 | 37.5 | 68%  | 0.17  | 85%  | <a href="#">gil731213592 XP_010621250.1</a> |
| <a href="#">PREDICTED: phosphatidylinositol-glycan-specific phospholipase D</a>    | 37.5 | 37.5 | 68%  | 0.17  | 85%  | <a href="#">gil731213588 XP_010621248.1</a> |
| <a href="#">PREDICTED: phosphatidylinositol-glycan-specific phospholipase D</a>    | 37.5 | 37.5 | 100% | 0.17  | 63%  | <a href="#">gil344289516 XP_003416488.1</a> |
| <a href="#">Phosphatidylinositol-glycan-specific phospholipase D [Fukomys dar</a>  | 37.5 | 37.5 | 68%  | 0.17  | 85%  | <a href="#">gil676279913 KFO33840.1</a>     |
| <a href="#">PREDICTED: phosphatidylinositol-glycan-specific phospholipase D</a>    | 36.3 | 36.3 | 68%  | 0.44  | 86%  | <a href="#">gil617615072 XP_007526005.1</a> |
| <a href="#">PREDICTED: phosphatidylinositol-glycan-specific phospholipase D</a>    | 35.0 | 35.0 | 68%  | 1.1   | 77%  | <a href="#">gil512971062 XP_004847666.1</a> |
| <a href="#">Phosphatidylinositol-glycan-specific phospholipase D [Heteroceph</a>   | 35.0 | 35.0 | 68%  | 1.1   | 77%  | <a href="#">gil351706674 EHB09593.1</a>     |
| <a href="#">PREDICTED: phosphatidylinositol-glycan-specific phospholipase D</a>    | 35.0 | 35.0 | 68%  | 1.1   | 77%  | <a href="#">gil512971060 XP_004847665.1</a> |
| <a href="#">PREDICTED: phosphatidylinositol-glycan-specific phospholipase D</a>    | 35.0 | 35.0 | 68%  | 1.1   | 77%  | <a href="#">gil512971057 XP_004847664.1</a> |
| <a href="#">PREDICTED: phosphatidylinositol-glycan-specific phospholipase D</a>    | 35.0 | 35.0 | 68%  | 1.1   | 77%  | <a href="#">gil512971055 XP_004847663.1</a> |
| <a href="#">PREDICTED: phosphatidylinositol-glycan-specific phospholipase D</a>    | 35.0 | 35.0 | 68%  | 1.1   | 77%  | <a href="#">gil512880679 XP_004895023.1</a> |
| <a href="#">PREDICTED: phosphatidylinositol-glycan-specific phospholipase D</a>    | 35.0 | 35.0 | 68%  | 1.1   | 77%  | <a href="#">gil593754864 XP_007116306.1</a> |
| <a href="#">PREDICTED: phosphatidylinositol-glycan-specific phospholipase D</a>    | 35.0 | 35.0 | 68%  | 1.1   | 77%  | <a href="#">gil594700264 XP_007197201.1</a> |
| <a href="#">PREDICTED: phosphatidylinositol-glycan-specific phospholipase D</a>    | 35.0 | 35.0 | 68%  | 1.1   | 77%  | <a href="#">gil594700262 XP_007197200.1</a> |
| <a href="#">Phosphatidylinositol-glycan-specific phospholipase D [Pteropus ale</a> | 34.6 | 34.6 | 100% | 1.5   | 63%  | <a href="#">gil431896393 ELK05805.1</a>     |
| <a href="#">PREDICTED: phosphatidylinositol-glycan-specific phospholipase D</a>    | 34.6 | 34.6 | 100% | 1.5   | 63%  | <a href="#">gil586529361 XP_006919597.1</a> |
| <a href="#">PREDICTED: phosphatidylinositol-glycan-specific phospholipase D</a>    | 34.6 | 34.6 | 84%  | 1.5   | 75%  | <a href="#">gil507979038 XP_004693375.1</a> |
| <a href="#">PREDICTED: phosphatidylinositol-glycan-specific phospholipase D</a>    | 34.6 | 34.6 | 57%  | 1.5   | 91%  | <a href="#">gil532023384 XP_005355039.1</a> |
| <a href="#">PREDICTED: phosphatidylinositol-glycan-specific phospholipase D</a>    | 34.1 | 34.1 | 57%  | 2.0   | 91%  | <a href="#">gil655839984 XP_008260728.1</a> |
| <a href="#">PREDICTED: phosphatidylinositol-glycan-specific phospholipase D</a>    | 34.1 | 34.1 | 57%  | 2.0   | 91%  | <a href="#">gil655839976 XP_008260723.1</a> |
| <a href="#">PREDICTED: phosphatidylinositol-glycan-specific phospholipase D</a>    | 34.1 | 34.1 | 68%  | 2.0   | 77%  | <a href="#">gil602684652 XP_007454575.1</a> |
| <a href="#">PREDICTED: phosphatidylinositol-glycan-specific phospholipase D</a>    | 34.1 | 34.1 | 68%  | 2.0   | 77%  | <a href="#">gil602684650 XP_007454574.1</a> |
| hypothetical protein PANDA_003876 [Ailuropoda melanoleuca]                         | 33.7 | 33.7 | 68%  | 2.8   | 77%  | <a href="#">gil281352759 EFB28343.1</a>     |
| <a href="#">PREDICTED: phosphatidylinositol-glycan-specific phospholipase D</a>    | 33.7 | 33.7 | 68%  | 2.8   | 77%  | <a href="#">gil301760102 XP_002915859.1</a> |
| glycosylphosphatidylinositol specific phospholipase D1, isoform CR                 | 33.3 | 33.3 | 47%  | 3.7   | 100% | <a href="#">gil148700518 EDL32465.1</a>     |
| <a href="#">PREDICTED: phosphatidylinositol-glycan-specific phospholipase D</a>    | 33.3 | 33.3 | 47%  | 3.8   | 100% | <a href="#">gil564391385 XP_006253988.1</a> |
| <a href="#">RecName: Full=Phosphatidylinositol-glycan-specific phospholipase</a>   | 33.3 | 33.3 | 47%  | 3.8   | 100% | <a href="#">gil6225846 O70362.1</a>         |

|                                                                                                    |      |      |      |     |      |                                             |
|----------------------------------------------------------------------------------------------------|------|------|------|-----|------|---------------------------------------------|
| <a href="#">glycosylphosphatidylinositol specific phospholipase D1, isoform CR</a>                 | 33.3 | 33.3 | 47%  | 3.8 | 100% | <a href="#">gi 148700520 EDL32467.1</a>     |
| PREDICTED: phosphatidylinositol-glycan-specific phospholipase D                                    | 33.3 | 33.3 | 100% | 3.8 | 63%  | <a href="#">gi 634873155 XP_007948002.1</a> |
| PREDICTED: phosphatidylinositol-glycan-specific phospholipase D                                    | 33.3 | 33.3 | 47%  | 3.8 | 100% | <a href="#">gi 672081759 XP_008769857.1</a> |
| <a href="#">glycosylphosphatidylinositol-specific phospholipase D precursor [Mus musculus]</a>     | 33.3 | 33.3 | 47%  | 3.8 | 100% | <a href="#">gi 33088003 AAP93132.1</a>      |
| <a href="#">glycosylphosphatidylinositol phospholipase D [Mus musculus]</a>                        | 33.3 | 33.3 | 47%  | 3.8 | 100% | <a href="#">gi 19547985 AAL87452.1</a>      |
| <a href="#">phosphatidylinositol-glycan-specific phospholipase D precursor [Mus musculus]</a>      | 33.3 | 33.3 | 47%  | 3.8 | 100% | <a href="#">gi 111378397 NP_032182.2</a>    |
| <a href="#">unnamed protein product [Mus musculus]</a>                                             | 33.3 | 33.3 | 47%  | 3.8 | 100% | <a href="#">gi 12836535 BAB23698.1</a>      |
| <a href="#">phosphatidylinositol-glycan-specific phospholipase D precursor [Rattus norvegicus]</a> | 33.3 | 33.3 | 47%  | 3.8 | 100% | <a href="#">gi 213688382 NP_001093982.1</a> |
| RecName: Full=Phosphatidylinositol-glycan-specific phospholipase                                   | 33.3 | 33.3 | 47%  | 3.8 | 100% | <a href="#">gi 81871416 Q8R2H5.1</a>        |
| PREDICTED: phosphatidylinositol-glycan-specific phospholipase D                                    | 33.3 | 33.3 | 47%  | 3.8 | 100% | <a href="#">gi 524924187 XP_005066341.1</a> |
| PREDICTED: phosphatidylinositol-glycan-specific phospholipase D                                    | 32.9 | 32.9 | 68%  | 5.1 | 77%  | <a href="#">gi 545837650 XP_001925944.5</a> |
| PREDICTED: phosphatidylinositol-glycan-specific phospholipase D                                    | 32.5 | 32.5 | 68%  | 7.0 | 85%  | <a href="#">gi 664709546 XP_008511735.1</a> |
| PREDICTED: phosphatidylinositol-glycan-specific phospholipase D                                    | 32.5 | 32.5 | 100% | 7.0 | 63%  | <a href="#">gi 545554532 XP_005640137.1</a> |
| PREDICTED: phosphatidylinositol-glycan-specific phospholipase D                                    | 32.5 | 32.5 | 68%  | 7.0 | 85%  | <a href="#">gi 664709544 XP_008511734.1</a> |
| PREDICTED: phosphatidylinositol-glycan-specific phospholipase D                                    | 32.5 | 32.5 | 100% | 7.0 | 63%  | <a href="#">gi 74003954 XP_535902.2</a>     |
| PREDICTED: LOW QUALITY PROTEIN: phosphatidylinositol-glycan-specific phospholipase D               | 32.5 | 32.5 | 84%  | 7.0 | 69%  | <a href="#">gi 488541031 XP_004462113.1</a> |
| PREDICTED: phosphatidylinositol-glycan-specific phospholipase D                                    | 32.5 | 32.5 | 68%  | 7.0 | 85%  | <a href="#">gi 149732005 XP_001497586.1</a> |
| PREDICTED: phosphatidylinositol-glycan-specific phospholipase D                                    | 32.5 | 32.5 | 100% | 7.0 | 63%  | <a href="#">gi 545554529 XP_005640136.1</a> |
| PREDICTED: phosphatidylinositol-glycan-specific phospholipase D                                    | 32.5 | 32.5 | 68%  | 7.0 | 85%  | <a href="#">gi 664709542 XP_008511732.1</a> |
| PREDICTED: phosphatidylinositol-glycan-specific phospholipase D                                    | 32.5 | 32.5 | 68%  | 7.0 | 85%  | <a href="#">gi 664709540 XP_008511731.1</a> |
| PREDICTED: phosphatidylinositol-glycan-specific phospholipase D                                    | 32.5 | 32.5 | 68%  | 7.0 | 85%  | <a href="#">gi 664709538 XP_008511730.1</a> |
| <a href="#">ATP-dependent helicase [Haloterrigena thermotolerans]</a>                              | 32.5 | 32.5 | 89%  | 7.0 | 65%  | <a href="#">gi 493699931 WP_006649723.1</a> |
| <a href="#">helicase [Natriema pellirubrum]</a>                                                    | 32.5 | 32.5 | 89%  | 7.0 | 65%  | <a href="#">gi 493181691 WP_006179974.1</a> |
| <a href="#">Signal transduction histidine kinase [Magnetospirillum magneticum]</a>                 | 32.0 | 32.0 | 68%  | 9.5 | 77%  | <a href="#">gi 499703955 WP_011384689.1</a> |
| <a href="#">Signal transduction histidine kinase [Magnetospirillum sp. SO-1]</a>                   | 31.6 | 31.6 | 68%  | 13  | 77%  | <a href="#">gi 495889881 WP_008614460.1</a> |
| <a href="#">malate dehydrogenase [candidate division WWE1 bacterium JGI O-1]</a>                   | 30.8 | 30.8 | 47%  | 24  | 100% | <a href="#">gi 661254578 WP_029950068.1</a> |
| MULTISPECIES: malate dehydrogenase [unclassified candidate division]                               | 30.8 | 30.8 | 47%  | 24  | 100% | <a href="#">gi 635657985 WP_024304809.1</a> |

## Alignments

Download GenPept Graphics

Next Previous Descriptions

Unknown (protein for IMAGE:3354070), partial [Homo sapiens]  
 Sequence ID: [gi|14043248|gb|AAH07614.1](#) Length: 575 Number of Matches: 1

Range 1: 36 to 54 GenPept Graphics Next Match Previous Match

| Score          | Expect | Identities  | Positives   | Gaps     |
|----------------|--------|-------------|-------------|----------|
| 63.8 bits(143) | 3e-10  | 19/19(100%) | 19/19(100%) | 0/19(0%) |

Query 1 KNDFHRNLTSLTESVDRN 19  
 KNDFHRNLTSLTESVDRN  
 Sbjct 36 KNDFHRNLTSLTESVDRN 54

### Related Information

[Gene](#) - associated gene details

Download GenPept Graphics

Next Previous Descriptions

PREDICTED: phosphatidylinositol-glycan-specific phospholipase D isoform X3 [Pan paniscus]  
 Sequence ID: [gi|675773160|ref|XP\\_008975042.1](#) Length: 677 Number of Matches: 1

Range 1: 138 to 156 GenPept Graphics Next Match Previous Match

| Score          | Expect | Identities  | Positives   | Gaps     |
|----------------|--------|-------------|-------------|----------|
| 63.8 bits(143) | 3e-10  | 19/19(100%) | 19/19(100%) | 0/19(0%) |

Query 1 KNDFHRNLTSLTESVDRN 19

### Related Information

[Gene](#) - associated gene details

[Map Viewer](#) - aligned genomic context

Sbjct 138 KNDFHRNLTTSLTESVDRN 156

[Download](#) [GenPept](#) [Graphics](#) [Next](#) [Previous](#) [Descriptions](#)

PREDICTED: phosphatidylinositol-glycan-specific phospholipase D isoform X3 [Homo sapiens]

Sequence ID: [gi|530381810|ref|XP\\_005249075.1|](#) Length: 677 Number of Matches: 1

Range 1: 138 to 156 [GenPept](#) [Graphics](#) [Next Match](#) [Previous Match](#)

| Score          | Expect | Identities  | Positives   | Gaps     |
|----------------|--------|-------------|-------------|----------|
| 63.8 bits(143) | 3e-10  | 19/19(100%) | 19/19(100%) | 0/19(0%) |

Query 1 KNDFHRNLTTSLTESVDRN 19  
 KNDFHRNLTTSLTESVDRN  
 Sbjct 138 KNDFHRNLTTSLTESVDRN 156

**Related Information**

[Gene](#) - associated gene details  
[Map Viewer](#) - aligned genomic context

[Download](#) [GenPept](#) [Graphics](#) [Next](#) [Previous](#) [Descriptions](#)

PREDICTED: phosphatidylinositol-glycan-specific phospholipase D [Pongo abelii]

Sequence ID: [gi|686720936|ref|XP\\_009239742.1|](#) Length: 754 Number of Matches: 1

Range 1: 235 to 253 [GenPept](#) [Graphics](#) [Next Match](#) [Previous Match](#)

| Score          | Expect | Identities  | Positives   | Gaps     |
|----------------|--------|-------------|-------------|----------|
| 63.8 bits(143) | 3e-10  | 19/19(100%) | 19/19(100%) | 0/19(0%) |

Query 1 KNDFHRNLTTSLTESVDRN 19  
 KNDFHRNLTTSLTESVDRN  
 Sbjct 235 KNDFHRNLTTSLTESVDRN 253

**Related Information**

[Gene](#) - associated gene details  
[Map Viewer](#) - aligned genomic context

[Download](#) [GenPept](#) [Graphics](#) [Next](#) [Previous](#) [Descriptions](#)

glycosylphosphatidylinositol phospholipase D [Homo sapiens]

Sequence ID: [gi|20269065|emb|CAC87068.1|](#) Length: 840 Number of Matches: 1

[See 1 more title\(s\)](#)

Range 1: 301 to 319 [GenPept](#) [Graphics](#) [Next Match](#) [Previous Match](#)

| Score          | Expect | Identities  | Positives   | Gaps     |
|----------------|--------|-------------|-------------|----------|
| 63.8 bits(143) | 3e-10  | 19/19(100%) | 19/19(100%) | 0/19(0%) |

Query 1 KNDFHRNLTTSLTESVDRN 19  
 KNDFHRNLTTSLTESVDRN  
 Sbjct 301 KNDFHRNLTTSLTESVDRN 319

**Related Information**

[Gene](#) - associated gene details  
[Identical Proteins](#) - Proteins identical to the subject

BLAST is a registered trademark of the National Library of Medicine.

▶ [NCBI/ BLAST/ blastp suite/ Formatting Results - BVE65GHE01R](#)

**i** Your search parameters were adjusted to search for a short input sequence.

[Edit and Resubmit](#) [Save Search Strategies](#) ▶ [Formatting options](#) ▶ [Download](#)

[YouTube](#) [How to read this page](#) [Blast report description](#)

## GPLD1\_RGEEDFSWFGYSLHGVTVDDRT\_Mod

RID [BVE65GHE01R](#) (Expires on 01-21 09:09 am)

**Query ID** |cl|290501  
**Description** None  
**Molecule type** amino acid  
**Query Length** 22

**Database Name** nr  
**Description** All non-redundant GenBank CDS translations+PDB+SwissProt+PIR+PRF excluding environmental samples from WGS projects  
**Program** BLASTP 2.2.30+ ▶ [Citation](#)

Other reports: ▶ [Search Summary](#) [[Taxonomy reports](#)] [[Distance tree of results](#)] [[Multiple alignment](#)]

### Graphic Summary

[Show Conserved Domains](#)

No putative conserved domains have been detected

Distribution of 100 Blast Hits on the Query Sequence

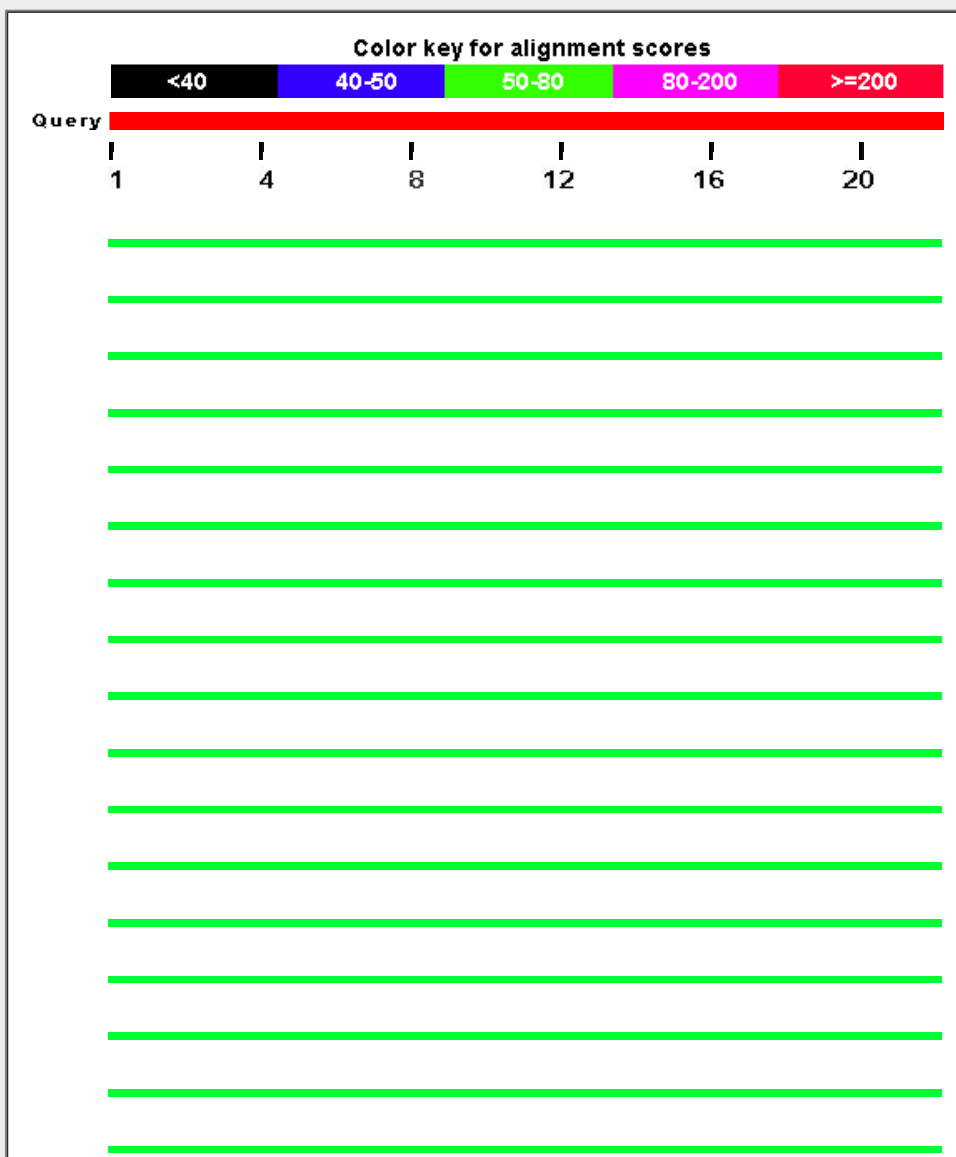



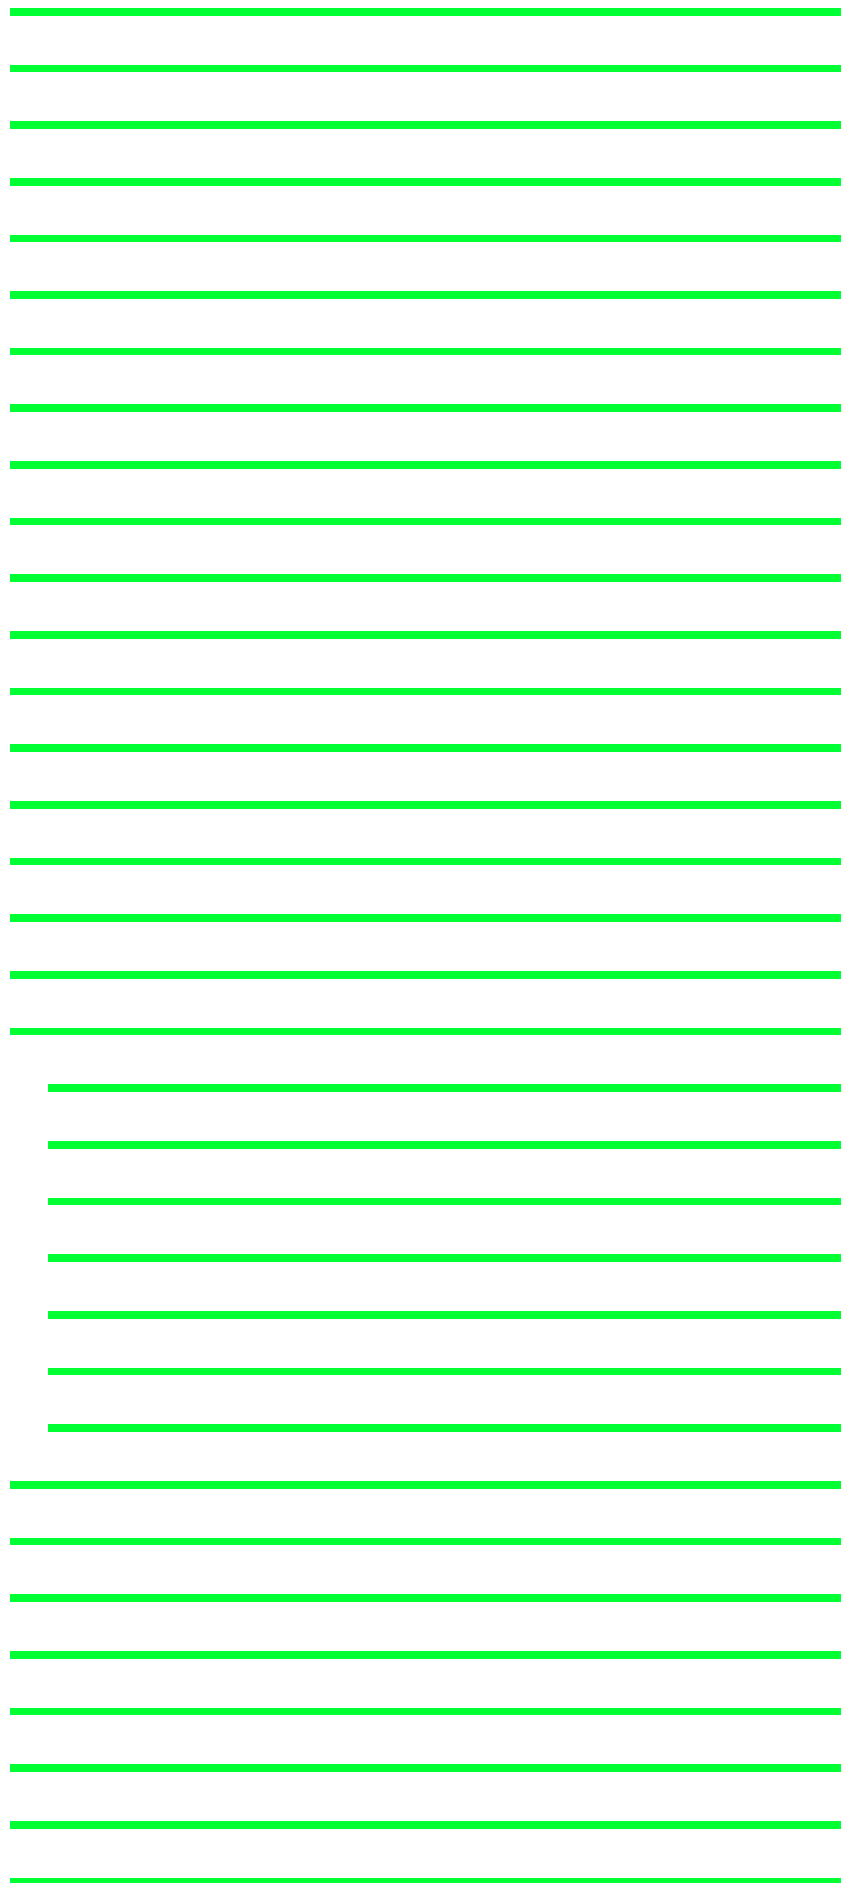

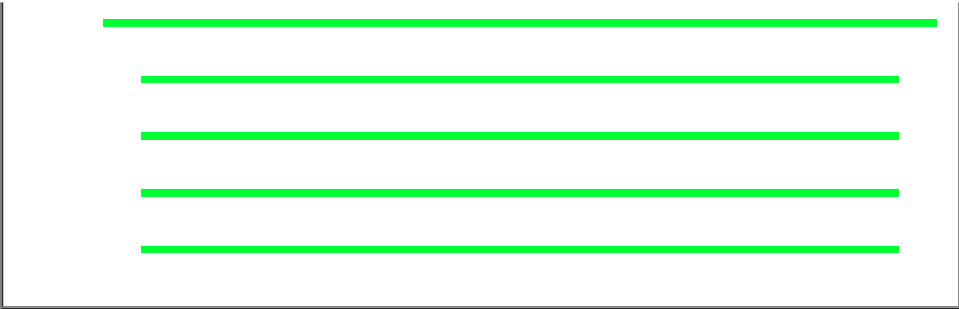

**Descriptions**

**Sequences producing significant alignments:**

Select: [All](#) [None](#) Selected:0

[Alignments](#)
[Download](#)
[GenPept](#)
[Graphics](#)
[Distance tree of results](#)
[Multiple alignment](#)
⚙

| Description                                                                                           | Max score | Total score | Query cover | E value | Ident | Accession                      |
|-------------------------------------------------------------------------------------------------------|-----------|-------------|-------------|---------|-------|--------------------------------|
| <a href="#">glycosylphosphatidylinositol phospholipase D [Homo sapiens]</a>                           | 73.2      | 73.2        | 100%        | 3e-13   | 95%   | <a href="#">CAC14844.1</a>     |
| <a href="#">Unknown (protein for IMAGE:3354070) [Homo sapiens]</a>                                    | 73.2      | 73.2        | 100%        | 3e-13   | 95%   | <a href="#">AAH07614.1</a>     |
| <a href="#">PREDICTED: phosphatidylinositol-glycan-specific phospholipase D isoform X1</a>            | 73.2      | 73.2        | 100%        | 3e-13   | 95%   | <a href="#">XP_008975042.1</a> |
| <a href="#">PREDICTED: phosphatidylinositol-glycan-specific phospholipase D isoform X1</a>            | 73.2      | 73.2        | 100%        | 3e-13   | 95%   | <a href="#">XP_005249075.1</a> |
| <a href="#">PREDICTED: phosphatidylinositol-glycan-specific phospholipase D [Pongo abelii]</a>        | 73.2      | 73.2        | 100%        | 3e-13   | 95%   | <a href="#">XP_009239742.1</a> |
| <a href="#">PREDICTED: phosphatidylinositol-glycan-specific phospholipase D isoform 2</a>             | 73.2      | 73.2        | 100%        | 3e-13   | 95%   | <a href="#">XP_004043389.1</a> |
| <a href="#">PREDICTED: phosphatidylinositol-glycan-specific phospholipase D isoform 1</a>             | 73.2      | 73.2        | 100%        | 3e-13   | 95%   | <a href="#">XP_004043388.1</a> |
| <a href="#">glycosylphosphatidylinositol phospholipase D [Homo sapiens]</a>                           | 73.2      | 73.2        | 100%        | 3e-13   | 95%   | <a href="#">CAC87068.1</a>     |
| <a href="#">phospholipase D [Homo sapiens]</a>                                                        | 73.2      | 73.2        | 100%        | 3e-13   | 95%   | <a href="#">AAA36445.1</a>     |
| <a href="#">PREDICTED: phosphatidylinositol-glycan-specific phospholipase D isoform X1</a>            | 73.2      | 73.2        | 100%        | 3e-13   | 95%   | <a href="#">XP_003823243.1</a> |
| <a href="#">phosphatidylinositol-glycan-specific phospholipase D precursor [Homo sapiens]</a>         | 73.2      | 73.2        | 100%        | 3e-13   | 95%   | <a href="#">NP_001494.2</a>    |
| <a href="#">glycosylphosphatidylinositol-specific phospholipase D precursor [Homo sapiens]</a>        | 73.2      | 73.2        | 100%        | 3e-13   | 95%   | <a href="#">AAG16627.2</a>     |
| <a href="#">PREDICTED: phosphatidylinositol-glycan-specific phospholipase D [Rhinopithecus]</a>       | 73.2      | 73.2        | 100%        | 3e-13   | 95%   | <a href="#">XP_010363586.1</a> |
| <a href="#">PREDICTED: phosphatidylinositol-glycan-specific phospholipase D [Pan troglodytes]</a>     | 73.2      | 73.2        | 100%        | 3e-13   | 95%   | <a href="#">XP_518268.4</a>    |
| <a href="#">PREDICTED: phosphatidylinositol-glycan-specific phospholipase D isoform X1</a>            | 73.2      | 73.2        | 100%        | 3e-13   | 95%   | <a href="#">XP_008975041.1</a> |
| <a href="#">glycosylphosphatidylinositol specific phospholipase D1, isoform CRA_c [Homo sapiens]</a>  | 73.2      | 73.2        | 100%        | 3e-13   | 95%   | <a href="#">EAW55450.1</a>     |
| <a href="#">PREDICTED: phosphatidylinositol-glycan-specific phospholipase D [Nomascus]</a>            | 73.2      | 73.2        | 100%        | 3e-13   | 95%   | <a href="#">XP_003263611.1</a> |
| <a href="#">PREDICTED: phosphatidylinositol-glycan-specific phospholipase D isoform X1</a>            | 70.6      | 70.6        | 100%        | 2e-12   | 91%   | <a href="#">XP_009202774.1</a> |
| <a href="#">PREDICTED: phosphatidylinositol-glycan-specific phospholipase D isoform X1</a>            | 70.6      | 70.6        | 100%        | 2e-12   | 91%   | <a href="#">XP_005553977.1</a> |
| <a href="#">PREDICTED: phosphatidylinositol-glycan-specific phospholipase D isoform X1</a>            | 70.6      | 70.6        | 100%        | 2e-12   | 91%   | <a href="#">XP_009202773.1</a> |
| <a href="#">PREDICTED: phosphatidylinositol-glycan-specific phospholipase D isoform X1</a>            | 70.6      | 70.6        | 100%        | 2e-12   | 91%   | <a href="#">XP_007971742.1</a> |
| <a href="#">PREDICTED: phosphatidylinositol-glycan-specific phospholipase D-like [Macaca mulatta]</a> | 70.6      | 70.6        | 100%        | 2e-12   | 91%   | <a href="#">XP_002803682.1</a> |
| <a href="#">PREDICTED: phosphatidylinositol-glycan-specific phospholipase D isoform X1</a>            | 70.6      | 70.6        | 100%        | 2e-12   | 91%   | <a href="#">XP_007971741.1</a> |
| <a href="#">PREDICTED: phosphatidylinositol-glycan-specific phospholipase D isoform X1</a>            | 70.6      | 70.6        | 100%        | 2e-12   | 91%   | <a href="#">XP_007971740.1</a> |
| <a href="#">PREDICTED: phosphatidylinositol-glycan-specific phospholipase D isoform X1</a>            | 70.6      | 70.6        | 100%        | 2e-12   | 91%   | <a href="#">XP_007971746.1</a> |
| <a href="#">phospholipase D [Homo sapiens]</a>                                                        | 70.6      | 70.6        | 100%        | 2e-12   | 91%   | <a href="#">AAA36444.1</a>     |
| <a href="#">PREDICTED: phosphatidylinositol-glycan-specific phospholipase D isoform X1</a>            | 70.6      | 70.6        | 100%        | 2e-12   | 91%   | <a href="#">XP_005553976.1</a> |
| <a href="#">PREDICTED: phosphatidylinositol-glycan-specific phospholipase D isoform X1</a>            | 70.6      | 70.6        | 100%        | 2e-12   | 91%   | <a href="#">XP_003897171.1</a> |
| <a href="#">PREDICTED: phosphatidylinositol-glycan-specific phospholipase D isoform X1</a>            | 70.6      | 70.6        | 100%        | 2e-12   | 91%   | <a href="#">XP_009202772.1</a> |

|                                                                                                 |      |      |      |       |     |                                |
|-------------------------------------------------------------------------------------------------|------|------|------|-------|-----|--------------------------------|
| <a href="#">hypothetical protein EGM_13271 [Macaca fascicularis]</a>                            | 70.6 | 70.6 | 100% | 2e-12 | 91% | <a href="#">EHH52757.1</a>     |
| <a href="#">hypothetical protein EGK_21153 [Macaca mulatta]</a>                                 | 70.6 | 70.6 | 100% | 2e-12 | 91% | <a href="#">EHH25414.1</a>     |
| <a href="#">PREDICTED: phosphatidylinositol-glycan-specific phospholipase D isoform X:</a>      | 70.6 | 70.6 | 100% | 2e-12 | 91% | <a href="#">XP_005553975.1</a> |
| <a href="#">PREDICTED: phosphatidylinositol-glycan-specific phospholipase D [Tarsius s:</a>     | 68.1 | 68.1 | 100% | 2e-11 | 86% | <a href="#">XP_008048656.1</a> |
| <a href="#">PREDICTED: phosphatidylinositol-glycan-specific phospholipase D isoform X:</a>      | 66.0 | 66.0 | 100% | 1e-10 | 86% | <a href="#">XP_010621250.1</a> |
| <a href="#">PREDICTED: phosphatidylinositol-glycan-specific phospholipase D isoform X:</a>      | 66.0 | 66.0 | 100% | 1e-10 | 86% | <a href="#">XP_010621248.1</a> |
| <a href="#">Phosphatidylinositol-glycan-specific phospholipase D [Fukomys damarensis]</a>       | 66.0 | 66.0 | 100% | 1e-10 | 86% | <a href="#">KFO33840.1</a>     |
| <a href="#">PREDICTED: phosphatidylinositol-glycan-specific phospholipase D isoform X:</a>      | 64.3 | 64.3 | 95%  | 4e-10 | 90% | <a href="#">XP_007627730.1</a> |
| <a href="#">phosphatidylinositol-glycan-specific phospholipase D-like protein [Cricetulus g</a> | 64.3 | 64.3 | 95%  | 4e-10 | 90% | <a href="#">ERE77282.1</a>     |
| <a href="#">Phosphatidylinositol-glycan-specific phospholipase D [Cricetulus griseus]</a>       | 64.3 | 64.3 | 95%  | 4e-10 | 90% | <a href="#">EGV94314.1</a>     |
| <a href="#">PREDICTED: phosphatidylinositol-glycan-specific phospholipase D [Peromysc</a>       | 64.3 | 64.3 | 95%  | 4e-10 | 90% | <a href="#">XP_006977193.1</a> |
| <a href="#">PREDICTED: phosphatidylinositol-glycan-specific phospholipase D [Microtus ]</a>     | 64.3 | 64.3 | 95%  | 4e-10 | 90% | <a href="#">XP_005355039.1</a> |
| <a href="#">PREDICTED: phosphatidylinositol-glycan-specific phospholipase D isoform X:</a>      | 64.3 | 64.3 | 95%  | 4e-10 | 90% | <a href="#">XP_003502241.1</a> |
| <a href="#">PREDICTED: phosphatidylinositol-glycan-specific phospholipase D [Mesocrici</a>      | 64.3 | 64.3 | 95%  | 4e-10 | 90% | <a href="#">XP_005066341.1</a> |
| <a href="#">PREDICTED: phosphatidylinositol-glycan-specific phospholipase D [Panthera</a>       | 63.8 | 63.8 | 100% | 5e-10 | 86% | <a href="#">XP_007074479.1</a> |
| <a href="#">PREDICTED: phosphatidylinositol-glycan-specific phospholipase D isoform X:</a>      | 63.4 | 63.4 | 100% | 7e-10 | 82% | <a href="#">XP_004847666.1</a> |
| <a href="#">Phosphatidylinositol-glycan-specific phospholipase D [Heterocephalus glaber]</a>    | 63.4 | 63.4 | 100% | 7e-10 | 82% | <a href="#">EHB09593.1</a>     |
| <a href="#">PREDICTED: phosphatidylinositol-glycan-specific phospholipase D isoform X:</a>      | 63.4 | 63.4 | 100% | 7e-10 | 82% | <a href="#">XP_004847665.1</a> |
| <a href="#">PREDICTED: phosphatidylinositol-glycan-specific phospholipase D isoform X:</a>      | 63.4 | 63.4 | 100% | 7e-10 | 82% | <a href="#">XP_004847664.1</a> |
| <a href="#">PREDICTED: phosphatidylinositol-glycan-specific phospholipase D isoform X:</a>      | 63.4 | 63.4 | 100% | 7e-10 | 82% | <a href="#">XP_004847663.1</a> |
| <a href="#">PREDICTED: phosphatidylinositol-glycan-specific phospholipase D [Heterocei</a>      | 63.4 | 63.4 | 100% | 7e-10 | 82% | <a href="#">XP_004895023.1</a> |
| <a href="#">PREDICTED: phosphatidylinositol-glycan-specific phospholipase D [Chinchilla</a>     | 63.4 | 63.4 | 100% | 7e-10 | 82% | <a href="#">XP_005403486.1</a> |
| <a href="#">PREDICTED: phosphatidylinositol-glycan-specific phospholipase D [Condylur;</a>      | 62.6 | 62.6 | 100% | 1e-09 | 82% | <a href="#">XP_004693375.1</a> |
| <a href="#">glycosylphosphatidylinositol specific phospholipase D1, isoform CRA_a [Mus ]</a>    | 62.1 | 62.1 | 90%  | 2e-09 | 90% | <a href="#">EDL32465.1</a>     |
| <a href="#">PREDICTED: phosphatidylinositol-glycan-specific phospholipase D isoform X:</a>      | 62.1 | 62.1 | 90%  | 2e-09 | 90% | <a href="#">XP_006253988.1</a> |
| <a href="#">RecName: Full=Phosphatidylinositol-glycan-specific phospholipase D; Short=I</a>     | 62.1 | 62.1 | 90%  | 2e-09 | 90% | <a href="#">O70362.1</a>       |
| <a href="#">glycosylphosphatidylinositol specific phospholipase D1, isoform CRA_c [Mus ]</a>    | 62.1 | 62.1 | 90%  | 2e-09 | 90% | <a href="#">EDL32467.1</a>     |
| <a href="#">PREDICTED: phosphatidylinositol-glycan-specific phospholipase D [Saimiri br</a>     | 62.1 | 62.1 | 100% | 2e-09 | 82% | <a href="#">XP_003927350.1</a> |
| <a href="#">PREDICTED: phosphatidylinositol-glycan-specific phospholipase D [Erinaceu;</a>      | 62.1 | 62.1 | 95%  | 2e-09 | 86% | <a href="#">XP_007526005.1</a> |
| <a href="#">PREDICTED: phosphatidylinositol-glycan-specific phospholipase D isoform X:</a>      | 62.1 | 62.1 | 90%  | 2e-09 | 90% | <a href="#">XP_008769857.1</a> |
| <a href="#">glycosylphosphatidylinositol-specific phospholipase D precursor [Mus musculu</a>    | 62.1 | 62.1 | 90%  | 2e-09 | 90% | <a href="#">AAP93132.1</a>     |
| <a href="#">glycosylphosphatidylinositol phospholipase D [Mus musculus]</a>                     | 62.1 | 62.1 | 90%  | 2e-09 | 90% | <a href="#">AAL87452.1</a>     |
| <a href="#">phosphatidylinositol-glycan-specific phospholipase D precursor [Mus musculu;</a>    | 62.1 | 62.1 | 90%  | 2e-09 | 90% | <a href="#">NP_032182.2</a>    |
| <a href="#">unnamed protein product [Mus musculus]</a>                                          | 62.1 | 62.1 | 90%  | 2e-09 | 90% | <a href="#">BAB23698.1</a>     |
| <a href="#">phosphatidylinositol-glycan-specific phospholipase D precursor [Rattus norveg</a>   | 62.1 | 62.1 | 90%  | 2e-09 | 90% | <a href="#">NP_001093982.1</a> |
| <a href="#">RecName: Full=Phosphatidylinositol-glycan-specific phospholipase D; Short=I</a>     | 62.1 | 62.1 | 90%  | 2e-09 | 90% | <a href="#">Q8R2H5.1</a>       |
| <a href="#">PREDICTED: phosphatidylinositol-glycan-specific phospholipase D [Callithrix</a>     | 62.1 | 62.1 | 100% | 2e-09 | 82% | <a href="#">XP_002746229.2</a> |
| <a href="#">PREDICTED: phosphatidylinositol-glycan-specific phospholipase D [Chrysoch</a>       | 61.7 | 61.7 | 100% | 3e-09 | 77% | <a href="#">XP_006878008.1</a> |
| <a href="#">PREDICTED: phosphatidylinositol-glycan-specific phospholipase D [Octodon ]</a>      | 60.9 | 60.9 | 100% | 5e-09 | 77% | <a href="#">XP_004640232.1</a> |
| <a href="#">PREDICTED: phosphatidylinositol-glycan-specific phospholipase D [Nannosp;</a>       | 60.9 | 60.9 | 90%  | 5e-09 | 85% | <a href="#">XP_008845321.1</a> |
| <a href="#">PREDICTED: phosphatidylinositol-glycan-specific phospholipase D isoform X:</a>      | 60.0 | 60.0 | 100% | 1e-08 | 82% | <a href="#">XP_005640137.1</a> |
| <a href="#">PREDICTED: phosphatidylinositol-glycan-specific phospholipase D isoform X1</a>      | 60.0 | 60.0 | 100% | 1e-08 | 82% | <a href="#">XP_535902.2</a>    |
| <a href="#">PREDICTED: phosphatidylinositol-glycan-specific phospholipase D isoform X:</a>      | 60.0 | 60.0 | 100% | 1e-08 | 77% | <a href="#">XP_007454575.1</a> |
| <a href="#">PREDICTED: phosphatidylinositol-glycan-specific phospholipase D isoform X:</a>      | 60.0 | 60.0 | 100% | 1e-08 | 77% | <a href="#">XP_007454574.1</a> |
| <a href="#">PREDICTED: phosphatidylinositol-glycan-specific phospholipase D [Physeter</a>       | 60.0 | 60.0 | 100% | 1e-08 | 77% | <a href="#">XP_007116306.1</a> |

|                                                                                            |      |      |      |       |     |                                |
|--------------------------------------------------------------------------------------------|------|------|------|-------|-----|--------------------------------|
| <a href="#">PREDICTED: phosphatidylinositol-glycan-specific phospholipase D [Pantholop</a> | 60.0 | 60.0 | 100% | 1e-08 | 77% | <a href="#">XP_005973908.1</a> |
| <a href="#">PREDICTED: phosphatidylinositol-glycan-specific phospholipase D [Capra hir</a> | 60.0 | 60.0 | 100% | 1e-08 | 77% | <a href="#">XP_005696842.1</a> |
| <a href="#">PREDICTED: phosphatidylinositol-glycan-specific phospholipase D [Ochotona</a>  | 60.0 | 60.0 | 100% | 1e-08 | 77% | <a href="#">XP_004593176.1</a> |
| <a href="#">PREDICTED: phosphatidylinositol-glycan-specific phospholipase D [Ovis arie</a> | 60.0 | 60.0 | 100% | 1e-08 | 77% | <a href="#">XP_004019154.1</a> |
| <a href="#">PREDICTED: phosphatidylinositol-glycan-specific phospholipase D [Vicugna f</a> | 60.0 | 60.0 | 100% | 1e-08 | 77% | <a href="#">XP_006198740.1</a> |
| <a href="#">PREDICTED: phosphatidylinositol-glycan-specific phospholipase D isoform X</a>  | 60.0 | 60.0 | 100% | 1e-08 | 82% | <a href="#">XP_005640136.1</a> |
| <a href="#">PREDICTED: LOW QUALITY PROTEIN: phosphatidylinositol-glycan-specific</a>       | 60.0 | 60.0 | 100% | 1e-08 | 77% | <a href="#">XP_003788429.1</a> |
| <a href="#">PREDICTED: phosphatidylinositol-glycan-specific phospholipase D [Galeopte</a>  | 59.6 | 59.6 | 95%  | 1e-08 | 76% | <a href="#">XP_008578807.1</a> |
| <a href="#">PREDICTED: phosphatidylinositol-glycan-specific phospholipase D isoform X</a>  | 59.2 | 59.2 | 100% | 2e-08 | 77% | <a href="#">XP_006051268.1</a> |
| <a href="#">PREDICTED: phosphatidylinositol-glycan-specific phospholipase D [Trichechu</a> | 59.2 | 59.2 | 100% | 2e-08 | 77% | <a href="#">XP_004384046.1</a> |
| <a href="#">PREDICTED: phosphatidylinositol-glycan-specific phospholipase D isoform X</a>  | 59.2 | 59.2 | 100% | 2e-08 | 77% | <a href="#">XP_006051267.1</a> |
| <a href="#">PREDICTED: phosphatidylinositol-glycan-specific phospholipase D isoform X</a>  | 59.2 | 59.2 | 100% | 2e-08 | 77% | <a href="#">XP_006051266.1</a> |
| <a href="#">PREDICTED: phosphatidylinositol-glycan-specific phospholipase D isoform X</a>  | 59.2 | 59.2 | 100% | 2e-08 | 77% | <a href="#">XP_006051265.1</a> |
| <a href="#">PREDICTED: phosphatidylinositol-glycan-specific phospholipase D isoform X</a>  | 59.2 | 59.2 | 100% | 2e-08 | 77% | <a href="#">XP_006051264.1</a> |
| <a href="#">hypothetical protein CB1_000595062 [Camelus ferus]</a>                         | 57.9 | 57.9 | 100% | 5e-08 | 73% | <a href="#">EPY83136.1</a>     |
| <a href="#">PREDICTED: LOW QUALITY PROTEIN: phosphatidylinositol-glycan-specific</a>       | 57.9 | 57.9 | 100% | 5e-08 | 73% | <a href="#">XP_006182298.1</a> |
| <a href="#">PREDICTED: phosphatidylinositol-glycan-specific phospholipase D [Camelus</a>   | 57.9 | 57.9 | 100% | 5e-08 | 73% | <a href="#">XP_010944080.1</a> |
| <a href="#">PREDICTED: phosphatidylinositol-glycan-specific phospholipase D [Loxodont</a>  | 57.9 | 57.9 | 100% | 5e-08 | 73% | <a href="#">XP_003416488.1</a> |
| <a href="#">PREDICTED: LOW QUALITY PROTEIN: phosphatidylinositol-glycan-specific</a>       | 57.9 | 57.9 | 100% | 5e-08 | 73% | <a href="#">XP_010978426.1</a> |
| <a href="#">PREDICTED: phosphatidylinositol-glycan-specific phospholipase D [Orcinus c</a> | 57.5 | 57.5 | 100% | 7e-08 | 73% | <a href="#">XP_004273574.1</a> |
| <a href="#">PREDICTED: phosphatidylinositol-glycan-specific phospholipase D [Tursiops</a>  | 57.5 | 57.5 | 100% | 7e-08 | 73% | <a href="#">XP_004313968.1</a> |
| <a href="#">PREDICTED: phosphatidylinositol-glycan-specific phospholipase D isoform X</a>  | 56.6 | 56.6 | 100% | 1e-07 | 73% | <a href="#">XP_007197201.1</a> |
| <a href="#">PREDICTED: phosphatidylinositol-glycan-specific phospholipase D isoform X</a>  | 56.6 | 56.6 | 100% | 1e-07 | 73% | <a href="#">XP_007197200.1</a> |
| <a href="#">Phosphatidylinositol-glycan-specific phospholipase D [Pteropus alecto]</a>     | 55.8 | 55.8 | 100% | 3e-07 | 73% | <a href="#">ELK05805.1</a>     |
| <a href="#">PREDICTED: LOW QUALITY PROTEIN: phosphatidylinositol-glycan-specific</a>       | 55.8 | 55.8 | 95%  | 3e-07 | 76% | <a href="#">XP_005903212.1</a> |
| <a href="#">Phosphatidylinositol-glycan-specific phospholipase D [Bos mutus]</a>           | 55.8 | 55.8 | 95%  | 3e-07 | 76% | <a href="#">ELR50996.1</a>     |

## Alignments

Download [GenPept](#) [Graphics](#)

[Next](#) [Previous](#) [Descriptions](#)

glycosylphosphatidylinositol phospholipase D [Homo sapiens]

Sequence ID: [emb|CAC14844.1](#) Length: 457 Number of Matches: 1

Range 1: 189 to 210 [GenPept](#) [Graphics](#)

[Next Match](#) [Previous Match](#)

| Score          | Expect | Identities | Positives   | Gaps     |
|----------------|--------|------------|-------------|----------|
| 73.2 bits(165) | 3e-13  | 21/22(95%) | 22/22(100%) | 0/22(0%) |

|       |     |                        |     |
|-------|-----|------------------------|-----|
| Query | 1   | RGEEDFSWFGYSLHGVTVDDRT | 22  |
|       |     | RGEEDFSWFGYSLHGVTVD+RT |     |
| Sbjct | 189 | RGEEDFSWFGYSLHGVTVDNRT | 210 |

### Related Information

[Gene](#) - associated gene details

Download [GenPept](#) [Graphics](#)

[Next](#) [Previous](#) [Descriptions](#)

Unknown (protein for IMAGE:3354070), partial [Homo sapiens]

Sequence ID: [gb|AAH07614.1](#) Length: 575 Number of Matches: 1

Range 1: 307 to 328 [GenPept](#) [Graphics](#)

[Next Match](#) [Previous Match](#)

| Score          | Expect | Identities | Positives   | Gaps     |
|----------------|--------|------------|-------------|----------|
| 73.2 bits(165) | 3e-13  | 21/22(95%) | 22/22(100%) | 0/22(0%) |

### Related Information

[Gene](#) - associated gene details

Query 1 RGEEDFSWFGYSLHGVTVDDRT 22  
 RGEEDFSWFGYSLHGVTVD+RT  
 Sbjct 307 RGEEDFSWFGYSLHGVTVDNRT 328

[Download](#) [GenPept](#) [Graphics](#)

[Next](#) [Previous](#) [Descriptions](#)

PREDICTED: phosphatidylinositol-glycan-specific phospholipase D isoform X3 [Pan paniscus]

Sequence ID: [ref|XP\\_008975042.1|](#) Length: 677 Number of Matches: 1

Range 1: 409 to 430 [GenPept](#) [Graphics](#)

[Next Match](#) [Previous Match](#)

| Score          | Expect | Identities | Positives   | Gaps     |
|----------------|--------|------------|-------------|----------|
| 73.2 bits(165) | 3e-13  | 21/22(95%) | 22/22(100%) | 0/22(0%) |

Query 1 RGEEDFSWFGYSLHGVTVDDRT 22  
 RGEEDFSWFGYSLHGVTVD+RT  
 Sbjct 409 RGEEDFSWFGYSLHGVTVDNRT 430

**Related Information**

[Gene](#) - associated gene details  
[Map Viewer](#) - aligned genomic context

[Download](#) [GenPept](#) [Graphics](#)

[Next](#) [Previous](#) [Descriptions](#)

PREDICTED: phosphatidylinositol-glycan-specific phospholipase D isoform X3 [Homo sapiens]

Sequence ID: [ref|XP\\_005249075.1|](#) Length: 677 Number of Matches: 1

Range 1: 409 to 430 [GenPept](#) [Graphics](#)

[Next Match](#) [Previous Match](#)

| Score          | Expect | Identities | Positives   | Gaps     |
|----------------|--------|------------|-------------|----------|
| 73.2 bits(165) | 3e-13  | 21/22(95%) | 22/22(100%) | 0/22(0%) |

Query 1 RGEEDFSWFGYSLHGVTVDDRT 22  
 RGEEDFSWFGYSLHGVTVD+RT  
 Sbjct 409 RGEEDFSWFGYSLHGVTVDNRT 430

**Related Information**

[Gene](#) - associated gene details  
[Map Viewer](#) - aligned genomic context

[Download](#) [GenPept](#) [Graphics](#)

[Next](#) [Previous](#) [Descriptions](#)

PREDICTED: phosphatidylinositol-glycan-specific phospholipase D [Pongo abelii]

Sequence ID: [ref|XP\\_009239742.1|](#) Length: 754 Number of Matches: 1

Range 1: 506 to 527 [GenPept](#) [Graphics](#)

[Next Match](#) [Previous Match](#)

| Score          | Expect | Identities | Positives   | Gaps     |
|----------------|--------|------------|-------------|----------|
| 73.2 bits(165) | 3e-13  | 21/22(95%) | 22/22(100%) | 0/22(0%) |

Query 1 RGEEDFSWFGYSLHGVTVDDRT 22  
 RGEEDFSWFGYSLHGVTVD+RT  
 Sbjct 506 RGEEDFSWFGYSLHGVTVDNRT 527

**Related Information**

[Gene](#) - associated gene details  
[Map Viewer](#) - aligned genomic context

BLAST is a registered trademark of the National Library of Medicine.

▶ NCBI/ BLAST/ blastp suite/ Formatting Results - B9EHPJXX01R

**i** Your search parameters were adjusted to search for a short input sequence.

[Edit and Resubmit](#) [Save Search Strategies](#) ▶ [Formatting options](#) ▶ [Download](#)

[YouTube](#) [How to read this page](#) [Blast report description](#)

**GPLD1\_RGEEDFSWFGYSLHGVTVDNRT\_NonMod**

**RID** [B9EHPJXX01R](#) (Expires on 01-14 13:24 pm)

**Query ID** |cl|329909  
**Description** None  
**Molecule type** amino acid  
**Query Length** 22

**Database Name** nr  
**Description** All non-redundant GenBank CDS translations+PDB+SwissProt+PIR excluding environmental samples from WGS projects  
**Program** BLASTP 2.2.30+ ▶ [Citation](#)

Other reports: ▶ [Search Summary](#) [[Taxonomy reports](#)] [[Distance tree of results](#)] [[Multiple alignment](#)]

**Graphic Summary**

[Show Conserved Domains](#)

No putative conserved domains have been detected

Distribution of 100 Blast Hits on the Query Sequence

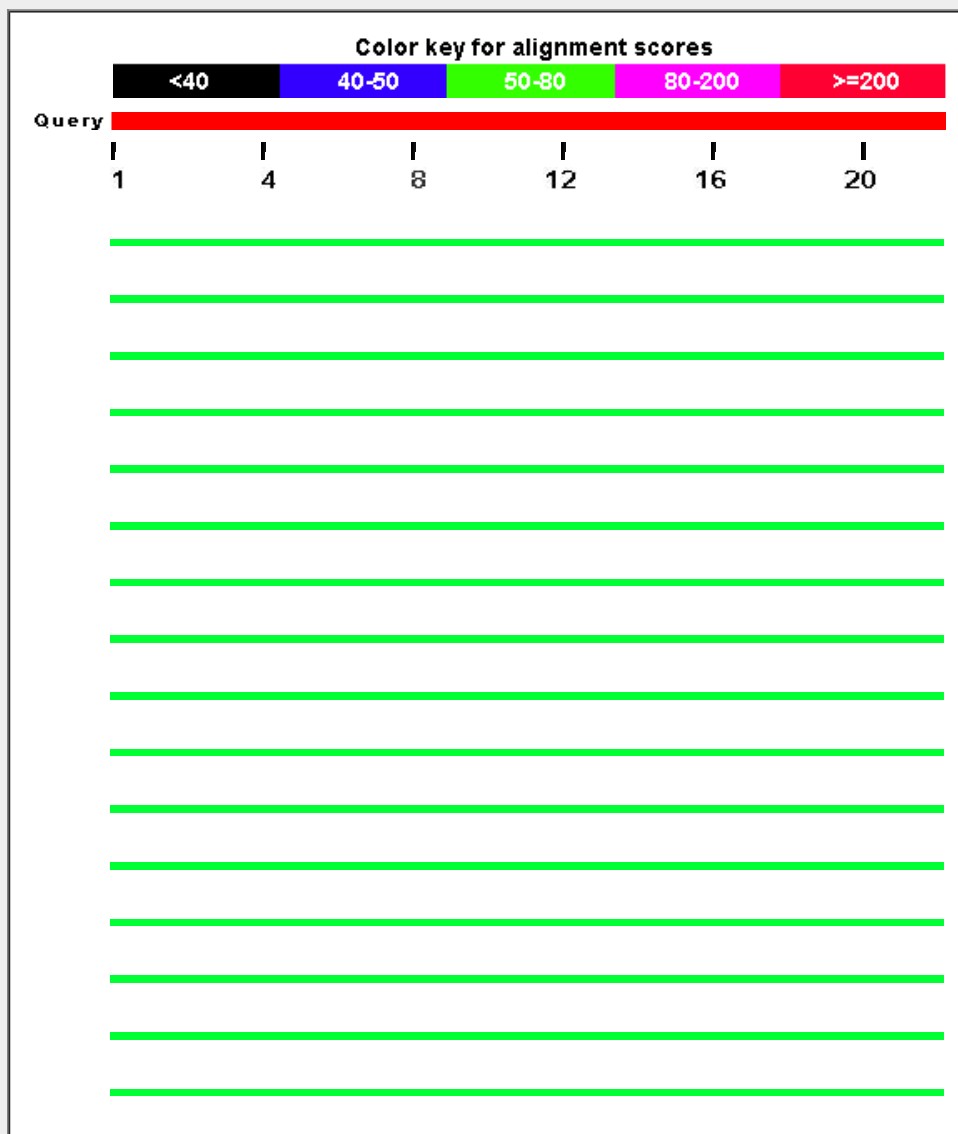

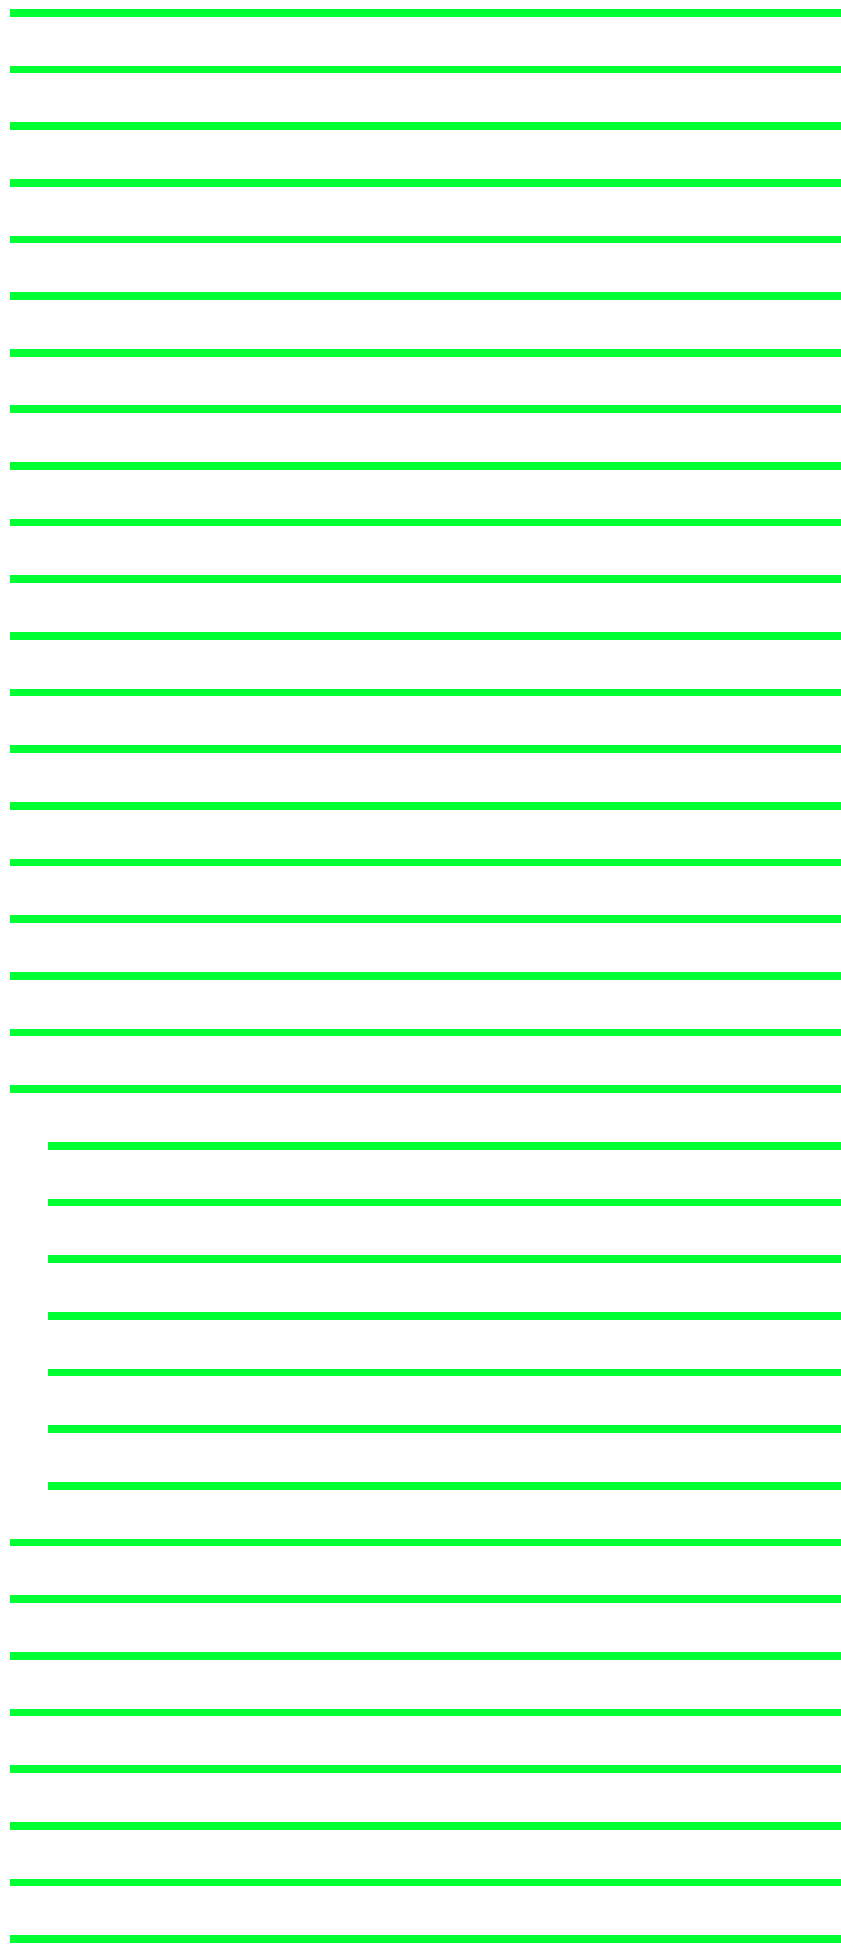

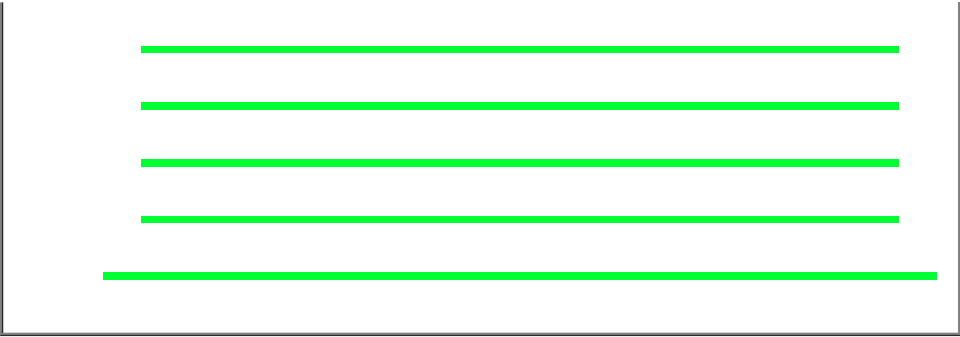

**Descriptions**

**Sequences producing significant alignments:**

Select: [All](#) [None](#) Selected:0

[↑](#) [Alignments](#)
[Download](#)
[GenPept](#)
[Graphics](#)
[Distance tree of results](#)
[Multiple alignment](#)
⚙

| Description                                                                         | Max score | Total score | Query cover | E value | Ident | Accession                                   |
|-------------------------------------------------------------------------------------|-----------|-------------|-------------|---------|-------|---------------------------------------------|
| <a href="#">glycosylphosphatidylinositol phospholipase D [Homo sapiens]</a>         | 75.7      | 75.7        | 100%        | 4e-14   | 100%  | <a href="#">gil11122875 CAC14844.1</a>      |
| <a href="#">Unknown (protein for IMAGE:3354070) [Homo sapiens]</a>                  | 75.7      | 75.7        | 100%        | 4e-14   | 100%  | <a href="#">gil14043248 AAH07614.1</a>      |
| <a href="#">PREDICTED: phosphatidylinositol-glycan-specific phospholipase D</a>     | 75.7      | 75.7        | 100%        | 4e-14   | 100%  | <a href="#">gil675773160 XP_008975042.1</a> |
| <a href="#">PREDICTED: phosphatidylinositol-glycan-specific phospholipase D</a>     | 75.7      | 75.7        | 100%        | 4e-14   | 100%  | <a href="#">gil530381810 XP_005249075.1</a> |
| <a href="#">PREDICTED: phosphatidylinositol-glycan-specific phospholipase D</a>     | 75.7      | 75.7        | 100%        | 4e-14   | 100%  | <a href="#">gil686720936 XP_009239742.1</a> |
| <a href="#">PREDICTED: phosphatidylinositol-glycan-specific phospholipase D</a>     | 75.7      | 75.7        | 100%        | 4e-14   | 100%  | <a href="#">gil426351748 XP_004043389.1</a> |
| <a href="#">PREDICTED: phosphatidylinositol-glycan-specific phospholipase D</a>     | 75.7      | 75.7        | 100%        | 4e-14   | 100%  | <a href="#">gil426351746 XP_004043388.1</a> |
| <a href="#">glycosylphosphatidylinositol phospholipase D [Homo sapiens]</a>         | 75.7      | 75.7        | 100%        | 4e-14   | 100%  | <a href="#">gil20269065 CAC87068.1</a>      |
| <a href="#">phospholipase D [Homo sapiens]</a>                                      | 75.7      | 75.7        | 100%        | 4e-14   | 100%  | <a href="#">gil388765 AAA36445.1</a>        |
| <a href="#">PREDICTED: phosphatidylinositol-glycan-specific phospholipase D</a>     | 75.7      | 75.7        | 100%        | 4e-14   | 100%  | <a href="#">gil397505380 XP_003823243.1</a> |
| <a href="#">phosphatidylinositol-glycan-specific phospholipase D precursor [Ho</a>  | 75.7      | 75.7        | 100%        | 4e-14   | 100%  | <a href="#">gil29171717 INP_001494.2</a>    |
| <a href="#">glycosylphosphatidylinositol-specific phospholipase D precursor [Hc</a> | 75.7      | 75.7        | 100%        | 4e-14   | 100%  | <a href="#">gil14195001 AAG16627.2</a>      |
| <a href="#">PREDICTED: phosphatidylinositol-glycan-specific phospholipase D</a>     | 75.7      | 75.7        | 100%        | 4e-14   | 100%  | <a href="#">gil724798150 XP_010363586.1</a> |
| <a href="#">PREDICTED: phosphatidylinositol-glycan-specific phospholipase D</a>     | 75.7      | 75.7        | 100%        | 4e-14   | 100%  | <a href="#">gil410040317 XP_518268.4</a>    |
| <a href="#">PREDICTED: phosphatidylinositol-glycan-specific phospholipase D</a>     | 75.7      | 75.7        | 100%        | 4e-14   | 100%  | <a href="#">gil675773152 XP_008975041.1</a> |
| <a href="#">glycosylphosphatidylinositol specific phospholipase D1, isoform CR</a>  | 75.7      | 75.7        | 100%        | 4e-14   | 100%  | <a href="#">gil119575854 EAW55450.1</a>     |
| <a href="#">PREDICTED: phosphatidylinositol-glycan-specific phospholipase D</a>     | 75.7      | 75.7        | 100%        | 4e-14   | 100%  | <a href="#">gil332228866 XP_003263611.1</a> |
| <a href="#">PREDICTED: phosphatidylinositol-glycan-specific phospholipase D</a>     | 73.2      | 73.2        | 100%        | 3e-13   | 95%   | <a href="#">gil685535046 XP_009202774.1</a> |
| <a href="#">PREDICTED: phosphatidylinositol-glycan-specific phospholipase D</a>     | 73.2      | 73.2        | 100%        | 3e-13   | 95%   | <a href="#">gil544429971 XP_005553977.1</a> |
| <a href="#">PREDICTED: phosphatidylinositol-glycan-specific phospholipase D</a>     | 73.2      | 73.2        | 100%        | 3e-13   | 95%   | <a href="#">gil685535044 XP_009202773.1</a> |
| <a href="#">PREDICTED: phosphatidylinositol-glycan-specific phospholipase D</a>     | 73.2      | 73.2        | 100%        | 3e-13   | 95%   | <a href="#">gil635096985 XP_007971742.1</a> |
| <a href="#">PREDICTED: phosphatidylinositol-glycan-specific phospholipase D</a>     | 73.2      | 73.2        | 100%        | 3e-13   | 95%   | <a href="#">gil297290177 XP_002803682.1</a> |
| <a href="#">PREDICTED: phosphatidylinositol-glycan-specific phospholipase D</a>     | 73.2      | 73.2        | 100%        | 3e-13   | 95%   | <a href="#">gil635096983 XP_007971741.1</a> |
| <a href="#">PREDICTED: phosphatidylinositol-glycan-specific phospholipase D</a>     | 73.2      | 73.2        | 100%        | 3e-13   | 95%   | <a href="#">gil635096981 XP_007971740.1</a> |
| <a href="#">PREDICTED: phosphatidylinositol-glycan-specific phospholipase D</a>     | 73.2      | 73.2        | 100%        | 3e-13   | 95%   | <a href="#">gil635096993 XP_007971746.1</a> |
| <a href="#">phospholipase D [Homo sapiens]</a>                                      | 73.2      | 73.2        | 100%        | 3e-13   | 95%   | <a href="#">gil388763 AAA36444.1</a>        |
| <a href="#">PREDICTED: phosphatidylinositol-glycan-specific phospholipase D</a>     | 73.2      | 73.2        | 100%        | 3e-13   | 95%   | <a href="#">gil544429969 XP_005553976.1</a> |
| <a href="#">PREDICTED: phosphatidylinositol-glycan-specific phospholipase D</a>     | 73.2      | 73.2        | 100%        | 3e-13   | 95%   | <a href="#">gil402865969 XP_003897171.1</a> |



|                                                                                      |      |      |      |       |     |                                             |
|--------------------------------------------------------------------------------------|------|------|------|-------|-----|---------------------------------------------|
| PREDICTED: phosphatidylinositol-glycan-specific phospholipase D                      | 73.2 | 73.2 | 100% | 3e-13 | 95% | <a href="#">gij685535041 XP_009202772.1</a> |
| <a href="#">hypothetical protein EGM_13271 [Macaca fascicularis]</a>                 | 73.2 | 73.2 | 100% | 3e-13 | 95% | <a href="#">gij355748274 EHH52757.1</a>     |
| <a href="#">hypothetical protein EGK_21153 [Macaca mulatta]</a>                      | 73.2 | 73.2 | 100% | 3e-13 | 95% | <a href="#">gij355569342 EHH25414.1</a>     |
| PREDICTED: phosphatidylinositol-glycan-specific phospholipase D                      | 73.2 | 73.2 | 100% | 3e-13 | 95% | <a href="#">gij544429967 XP_005553975.1</a> |
| PREDICTED: phosphatidylinositol-glycan-specific phospholipase D                      | 70.6 | 70.6 | 100% | 2e-12 | 91% | <a href="#">gij640776034 XP_008048656.1</a> |
| PREDICTED: phosphatidylinositol-glycan-specific phospholipase D                      | 68.5 | 68.5 | 100% | 1e-11 | 91% | <a href="#">gij731213592 XP_010621250.1</a> |
| PREDICTED: phosphatidylinositol-glycan-specific phospholipase D                      | 68.5 | 68.5 | 100% | 1e-11 | 91% | <a href="#">gij731213588 XP_010621248.1</a> |
| <a href="#">Phosphatidylinositol-glycan-specific phospholipase D [Fukomys dar</a>    | 68.5 | 68.5 | 100% | 1e-11 | 91% | <a href="#">gij676279913 KFO33840.1</a>     |
| PREDICTED: phosphatidylinositol-glycan-specific phospholipase D                      | 66.8 | 66.8 | 95%  | 5e-11 | 95% | <a href="#">gij625272320 XP_007627730.1</a> |
| <a href="#">phosphatidylinositol-glycan-specific phospholipase D-like protein [C</a> | 66.8 | 66.8 | 95%  | 5e-11 | 95% | <a href="#">gij537192249 ERE77282.1</a>     |
| <a href="#">Phosphatidylinositol-glycan-specific phospholipase D [Cricetulus gri</a> | 66.8 | 66.8 | 95%  | 5e-11 | 95% | <a href="#">gij344238211 EGV94314.1</a>     |
| PREDICTED: phosphatidylinositol-glycan-specific phospholipase D                      | 66.8 | 66.8 | 95%  | 5e-11 | 95% | <a href="#">gij589928750 XP_006977193.1</a> |
| PREDICTED: phosphatidylinositol-glycan-specific phospholipase D                      | 66.8 | 66.8 | 95%  | 5e-11 | 95% | <a href="#">gij532023384 XP_005355039.1</a> |
| PREDICTED: phosphatidylinositol-glycan-specific phospholipase D                      | 66.8 | 66.8 | 95%  | 5e-11 | 95% | <a href="#">gij354480090 XP_003502241.1</a> |
| PREDICTED: phosphatidylinositol-glycan-specific phospholipase D                      | 66.8 | 66.8 | 95%  | 5e-11 | 95% | <a href="#">gij524924187 XP_005066341.1</a> |
| PREDICTED: phosphatidylinositol-glycan-specific phospholipase D                      | 66.0 | 66.0 | 100% | 9e-11 | 86% | <a href="#">gij512971062 XP_004847666.1</a> |
| <a href="#">Phosphatidylinositol-glycan-specific phospholipase D [Heterocepha</a>    | 66.0 | 66.0 | 100% | 9e-11 | 86% | <a href="#">gij351706674 EHB09593.1</a>     |
| PREDICTED: phosphatidylinositol-glycan-specific phospholipase D                      | 66.0 | 66.0 | 100% | 9e-11 | 86% | <a href="#">gij512971060 XP_004847665.1</a> |
| PREDICTED: phosphatidylinositol-glycan-specific phospholipase D                      | 66.0 | 66.0 | 100% | 9e-11 | 86% | <a href="#">gij512971057 XP_004847664.1</a> |
| PREDICTED: phosphatidylinositol-glycan-specific phospholipase D                      | 66.0 | 66.0 | 100% | 9e-11 | 86% | <a href="#">gij512971055 XP_004847663.1</a> |
| PREDICTED: phosphatidylinositol-glycan-specific phospholipase D                      | 66.0 | 66.0 | 100% | 9e-11 | 86% | <a href="#">gij512880679 XP_004895023.1</a> |
| PREDICTED: phosphatidylinositol-glycan-specific phospholipase D                      | 66.0 | 66.0 | 100% | 9e-11 | 86% | <a href="#">gij533180623 XP_005403486.1</a> |
| PREDICTED: phosphatidylinositol-glycan-specific phospholipase D                      | 65.1 | 65.1 | 100% | 2e-10 | 86% | <a href="#">gij507979038 XP_004693375.1</a> |
| <a href="#">glycosylphosphatidylinositol specific phospholipase D1, isoform CR,</a>  | 64.7 | 64.7 | 90%  | 2e-10 | 95% | <a href="#">gij148700518 EDL32465.1</a>     |
| PREDICTED: phosphatidylinositol-glycan-specific phospholipase D                      | 64.7 | 64.7 | 90%  | 2e-10 | 95% | <a href="#">gij564391385 XP_006253988.1</a> |
| <a href="#">RecName: Full=Phosphatidylinositol-glycan-specific phospholipase</a>     | 64.7 | 64.7 | 90%  | 2e-10 | 95% | <a href="#">gij6225846 O70362.1</a>         |
| <a href="#">glycosylphosphatidylinositol specific phospholipase D1, isoform CR,</a>  | 64.7 | 64.7 | 90%  | 2e-10 | 95% | <a href="#">gij148700520 EDL32467.1</a>     |
| PREDICTED: phosphatidylinositol-glycan-specific phospholipase D                      | 64.7 | 64.7 | 100% | 2e-10 | 86% | <a href="#">gij403270800 XP_003927350.1</a> |
| PREDICTED: phosphatidylinositol-glycan-specific phospholipase D                      | 64.7 | 64.7 | 95%  | 2e-10 | 90% | <a href="#">gij617615072 XP_007526005.1</a> |
| PREDICTED: phosphatidylinositol-glycan-specific phospholipase D                      | 64.7 | 64.7 | 90%  | 2e-10 | 95% | <a href="#">gij672081759 XP_008769857.1</a> |
| <a href="#">glycosylphosphatidylinositol-specific phospholipase D precursor [M</a>   | 64.7 | 64.7 | 90%  | 2e-10 | 95% | <a href="#">gij33088003 AAP93132.1</a>      |
| <a href="#">glycosylphosphatidylinositol phospholipase D [Mus musculus]</a>          | 64.7 | 64.7 | 90%  | 2e-10 | 95% | <a href="#">gij19547985 AAL87452.1</a>      |
| <a href="#">phosphatidylinositol-glycan-specific phospholipase D precursor [Mu</a>   | 64.7 | 64.7 | 90%  | 2e-10 | 95% | <a href="#">gij111378397 NP_032182.2</a>    |
| <a href="#">unnamed protein product [Mus musculus]</a>                               | 64.7 | 64.7 | 90%  | 2e-10 | 95% | <a href="#">gij12836535 BAB23698.1</a>      |
| <a href="#">phosphatidylinositol-glycan-specific phospholipase D precursor [Ra</a>   | 64.7 | 64.7 | 90%  | 2e-10 | 95% | <a href="#">gij213688382 NP_001093982.1</a> |
| <a href="#">RecName: Full=Phosphatidylinositol-glycan-specific phospholipase</a>     | 64.7 | 64.7 | 90%  | 2e-10 | 95% | <a href="#">gij81871416 Q8R2H5.1</a>        |
| PREDICTED: phosphatidylinositol-glycan-specific phospholipase D                      | 64.7 | 64.7 | 100% | 2e-10 | 86% | <a href="#">gij675650934 XP_002746229.2</a> |
| PREDICTED: phosphatidylinositol-glycan-specific phospholipase D                      | 64.3 | 64.3 | 100% | 3e-10 | 82% | <a href="#">gij586495128 XP_006878008.1</a> |
| PREDICTED: phosphatidylinositol-glycan-specific phospholipase D                      | 63.4 | 63.4 | 100% | 7e-10 | 82% | <a href="#">gij507684247 XP_004640232.1</a> |
| PREDICTED: phosphatidylinositol-glycan-specific phospholipase D                      | 63.4 | 63.4 | 90%  | 7e-10 | 90% | <a href="#">gij674075950 XP_008845321.1</a> |
| PREDICTED: phosphatidylinositol-glycan-specific phospholipase D                      | 62.6 | 62.6 | 100% | 1e-09 | 86% | <a href="#">gij545554532 XP_005640137.1</a> |
| PREDICTED: phosphatidylinositol-glycan-specific phospholipase D                      | 62.6 | 62.6 | 100% | 1e-09 | 86% | <a href="#">gij74003954 XP_535902.2</a>     |
| PREDICTED: phosphatidylinositol-glycan-specific phospholipase D                      | 62.6 | 62.6 | 100% | 1e-09 | 82% | <a href="#">gij602684652 XP_007454575.1</a> |
| PREDICTED: phosphatidylinositol-glycan-specific phospholipase D                      | 62.6 | 62.6 | 100% | 1e-09 | 82% | <a href="#">gij602684650 XP_007454574.1</a> |
| PREDICTED: phosphatidylinositol-glycan-specific phospholipase D                      | 62.6 | 62.6 | 100% | 1e-09 | 82% | <a href="#">gij593754864 XP_007116306.1</a> |

|                                                                                    |      |      |      |       |     |                                             |
|------------------------------------------------------------------------------------|------|------|------|-------|-----|---------------------------------------------|
| <a href="#">PREDICTED: phosphatidylinositol-glycan-specific phospholipase D</a>    | 62.6 | 62.6 | 100% | 1e-09 | 82% | <a href="#">gij556757122 XP_005973908.1</a> |
| <a href="#">PREDICTED: phosphatidylinositol-glycan-specific phospholipase D</a>    | 62.6 | 62.6 | 100% | 1e-09 | 82% | <a href="#">gij548518368 XP_005696842.1</a> |
| <a href="#">PREDICTED: phosphatidylinositol-glycan-specific phospholipase D</a>    | 62.6 | 62.6 | 100% | 1e-09 | 82% | <a href="#">gij504166674 XP_004593176.1</a> |
| <a href="#">PREDICTED: phosphatidylinositol-glycan-specific phospholipase D</a>    | 62.6 | 62.6 | 100% | 1e-09 | 82% | <a href="#">gij426250866 XP_004019154.1</a> |
| <a href="#">PREDICTED: phosphatidylinositol-glycan-specific phospholipase D</a>    | 62.6 | 62.6 | 100% | 1e-09 | 82% | <a href="#">gij560952422 XP_006198740.1</a> |
| <a href="#">PREDICTED: phosphatidylinositol-glycan-specific phospholipase D</a>    | 62.6 | 62.6 | 100% | 1e-09 | 86% | <a href="#">gij545554529 XP_005640136.1</a> |
| <a href="#">PREDICTED: LOW QUALITY PROTEIN: phosphatidylinositol-glyca</a>         | 62.6 | 62.6 | 100% | 1e-09 | 82% | <a href="#">gij395830643 XP_003788429.1</a> |
| <a href="#">PREDICTED: phosphatidylinositol-glycan-specific phospholipase D</a>    | 62.1 | 62.1 | 95%  | 2e-09 | 81% | <a href="#">gij667294118 XP_008578807.1</a> |
| <a href="#">PREDICTED: phosphatidylinositol-glycan-specific phospholipase D</a>    | 61.7 | 61.7 | 100% | 2e-09 | 82% | <a href="#">gij594053987 XP_006051268.1</a> |
| <a href="#">PREDICTED: phosphatidylinositol-glycan-specific phospholipase D</a>    | 61.7 | 61.7 | 100% | 2e-09 | 82% | <a href="#">gij594053985 XP_006051267.1</a> |
| <a href="#">PREDICTED: phosphatidylinositol-glycan-specific phospholipase D</a>    | 61.7 | 61.7 | 100% | 2e-09 | 82% | <a href="#">gij594053983 XP_006051266.1</a> |
| <a href="#">PREDICTED: phosphatidylinositol-glycan-specific phospholipase D</a>    | 61.7 | 61.7 | 100% | 2e-09 | 82% | <a href="#">gij594053981 XP_006051265.1</a> |
| <a href="#">PREDICTED: phosphatidylinositol-glycan-specific phospholipase D</a>    | 61.7 | 61.7 | 100% | 2e-09 | 82% | <a href="#">gij594053979 XP_006051264.1</a> |
| <a href="#">PREDICTED: phosphatidylinositol-glycan-specific phospholipase D</a>    | 61.3 | 61.3 | 100% | 3e-09 | 82% | <a href="#">gij591294474 XP_007074479.1</a> |
| <a href="#">PREDICTED: phosphatidylinositol-glycan-specific phospholipase D</a>    | 60.9 | 60.9 | 100% | 5e-09 | 77% | <a href="#">gij471403600 XP_004384046.1</a> |
| <a href="#">hypothetical protein CB1_000595062 [Camelus ferus]</a>                 | 60.4 | 60.4 | 100% | 7e-09 | 77% | <a href="#">gij528763477 EPY83136.1</a>     |
| <a href="#">PREDICTED: LOW QUALITY PROTEIN: phosphatidylinositol-glyca</a>         | 60.4 | 60.4 | 100% | 7e-09 | 77% | <a href="#">gij560912019 XP_006182298.1</a> |
| <a href="#">PREDICTED: phosphatidylinositol-glycan-specific phospholipase D</a>    | 60.4 | 60.4 | 100% | 7e-09 | 77% | <a href="#">gij344289516 XP_003416488.1</a> |
| <a href="#">PREDICTED: phosphatidylinositol-glycan-specific phospholipase D</a>    | 60.0 | 60.0 | 100% | 9e-09 | 77% | <a href="#">gij466027702 XP_004273574.1</a> |
| <a href="#">PREDICTED: phosphatidylinositol-glycan-specific phospholipase D</a>    | 60.0 | 60.0 | 100% | 9e-09 | 77% | <a href="#">gij470605744 XP_004313968.1</a> |
| <a href="#">PREDICTED: phosphatidylinositol-glycan-specific phospholipase D</a>    | 59.2 | 59.2 | 100% | 2e-08 | 77% | <a href="#">gij594700264 XP_007197201.1</a> |
| <a href="#">PREDICTED: phosphatidylinositol-glycan-specific phospholipase D</a>    | 59.2 | 59.2 | 100% | 2e-08 | 77% | <a href="#">gij594700262 XP_007197200.1</a> |
| <a href="#">Phosphatidylinositol-glycan-specific phospholipase D [Pteropus ale</a> | 58.3 | 58.3 | 100% | 3e-08 | 77% | <a href="#">gij431896393 ELK05805.1</a>     |
| <a href="#">PREDICTED: LOW QUALITY PROTEIN: phosphatidylinositol-glyca</a>         | 58.3 | 58.3 | 95%  | 3e-08 | 81% | <a href="#">gij555982613 XP_005903212.1</a> |
| <a href="#">Phosphatidylinositol-glycan-specific phospholipase D [Bos mutus]</a>   | 58.3 | 58.3 | 95%  | 3e-08 | 81% | <a href="#">gij440899735 ELR50996.1</a>     |
| <a href="#">phosphatidylinositol-glycan-specific phospholipase D precursor [Bo</a> | 58.3 | 58.3 | 95%  | 3e-08 | 81% | <a href="#">gij27807363 NP_777241.1</a>     |
| <a href="#">TPA: phosphatidylinositol-glycan-specific phospholipase D [Bos tau</a> | 58.3 | 58.3 | 95%  | 3e-08 | 81% | <a href="#">gij296474001 DAA16116.1</a>     |

## Alignments

[Download](#) [GenPept](#) [Graphics](#)

[Next](#) [Previous](#) [Descriptions](#)

glycosylphosphatidylinositol phospholipase D [Homo sapiens]

Sequence ID: [gij11122875|emb|CAC14844.1](#) Length: 457 Number of Matches: 1

Range 1: 189 to 210 [GenPept](#) [Graphics](#)

[Next Match](#) [Previous Match](#)

| Score          | Expect | Identities  | Positives   | Gaps     |
|----------------|--------|-------------|-------------|----------|
| 75.7 bits(171) | 4e-14  | 22/22(100%) | 22/22(100%) | 0/22(0%) |

Query 1 RGEEDFSWFGYSLHGVTVDNRT 22  
 RGEEDFSWFGYSLHGVTVDNRT  
 Sbjct 189 RGEEDFSWFGYSLHGVTVDNRT 210

### Related Information

[Gene](#) - associated gene details

[Download](#) [GenPept](#) [Graphics](#)

[Next](#) [Previous](#) [Descriptions](#)

Unknown (protein for IMAGE:3354070), partial [Homo sapiens]

Sequence ID: [gij14043248|gb|AAH07614.1](#) Length: 575 Number of Matches: 1

Range 1: 307 to 328 [GenPept](#) [Graphics](#)

[Next Match](#) [Previous Match](#)

| Score          | Expect | Identities  | Positives   | Gaps     |
|----------------|--------|-------------|-------------|----------|
| 75.7 bits(171) | 4e-14  | 22/22(100%) | 22/22(100%) | 0/22(0%) |

Query 1 RGEEDFSWFGYSLHGVTVDNRT 22

### Related Information

[Gene](#) - associated gene details

Sbjct 307 RGEEDFSWFGYSLHGVTVDNRT 328

[Download](#) [GenPept](#) [Graphics](#) [Next](#) [Previous](#) [Descriptions](#)

PREDICTED: phosphatidylinositol-glycan-specific phospholipase D isoform X3 [Pan paniscus]

Sequence ID: [gi|675773160|ref|XP\\_008975042.1|](#) Length: 677 Number of Matches: 1

Range 1: 409 to 430 [GenPept](#) [Graphics](#) [Next Match](#) [Previous Match](#)

| Score          | Expect | Identities  | Positives   | Gaps     |
|----------------|--------|-------------|-------------|----------|
| 75.7 bits(171) | 4e-14  | 22/22(100%) | 22/22(100%) | 0/22(0%) |

Query 1 RGEEDFSWFGYSLHGVTVDNRT 22  
 RGEEDFSWFGYSLHGVTVDNRT  
 Sbjct 409 RGEEDFSWFGYSLHGVTVDNRT 430

**Related Information**

[Gene](#) - associated gene details  
[Map Viewer](#) - aligned genomic context

[Download](#) [GenPept](#) [Graphics](#) [Next](#) [Previous](#) [Descriptions](#)

PREDICTED: phosphatidylinositol-glycan-specific phospholipase D isoform X3 [Homo sapiens]

Sequence ID: [gi|530381810|ref|XP\\_005249075.1|](#) Length: 677 Number of Matches: 1

Range 1: 409 to 430 [GenPept](#) [Graphics](#) [Next Match](#) [Previous Match](#)

| Score          | Expect | Identities  | Positives   | Gaps     |
|----------------|--------|-------------|-------------|----------|
| 75.7 bits(171) | 4e-14  | 22/22(100%) | 22/22(100%) | 0/22(0%) |

Query 1 RGEEDFSWFGYSLHGVTVDNRT 22  
 RGEEDFSWFGYSLHGVTVDNRT  
 Sbjct 409 RGEEDFSWFGYSLHGVTVDNRT 430

**Related Information**

[Gene](#) - associated gene details  
[Map Viewer](#) - aligned genomic context

[Download](#) [GenPept](#) [Graphics](#) [Next](#) [Previous](#) [Descriptions](#)

PREDICTED: phosphatidylinositol-glycan-specific phospholipase D [Pongo abelii]

Sequence ID: [gi|686720936|ref|XP\\_009239742.1|](#) Length: 754 Number of Matches: 1

Range 1: 506 to 527 [GenPept](#) [Graphics](#) [Next Match](#) [Previous Match](#)

| Score          | Expect | Identities  | Positives   | Gaps     |
|----------------|--------|-------------|-------------|----------|
| 75.7 bits(171) | 4e-14  | 22/22(100%) | 22/22(100%) | 0/22(0%) |

Query 1 RGEEDFSWFGYSLHGVTVDNRT 22  
 RGEEDFSWFGYSLHGVTVDNRT  
 Sbjct 506 RGEEDFSWFGYSLHGVTVDNRT 527

**Related Information**

[Gene](#) - associated gene details  
[Map Viewer](#) - aligned genomic context

BLAST is a registered trademark of the National Library of Medicine.

▶ [NCBI/ BLAST/ blastp suite/ Formatting Results - BVE75ZC201R](#)

**i** Your search parameters were adjusted to search for a short input sequence.

[Edit and Resubmit](#) | [Save Search Strategies](#) | [▶ Formatting options](#) | [▶ Download](#)

[YouTube](#) | [How to read this page](#) | [Blast report description](#)

### GPLD1\_RTLLLVGSPTWKDASRL\_Mod

**RID** [BVE75ZC201R](#) (Expires on 01-21 09:09 am)

|                                  |                                                                                                                                        |
|----------------------------------|----------------------------------------------------------------------------------------------------------------------------------------|
| <b>Query ID</b>  cl 52946        | <b>Database Name</b>  nr                                                                                                               |
| <b>Description</b>  None         | <b>Description</b>  All non-redundant GenBank CDS translations+PDB+SwissProt+PIR+PRF excluding environmental samples from WGS projects |
| <b>Molecule type</b>  amino acid | <b>Program</b>  BLASTP 2.2.30+ <a href="#">▶ Citation</a>                                                                              |
| <b>Query Length</b>  17          |                                                                                                                                        |

Other reports: [▶ Search Summary](#) [[Taxonomy reports](#)] [[Distance tree of results](#)] [[Multiple alignment](#)]

### Graphic Summary

[Show Conserved Domains](#)

No putative conserved domains have been detected

Distribution of 198 Blast Hits on the Query Sequence 

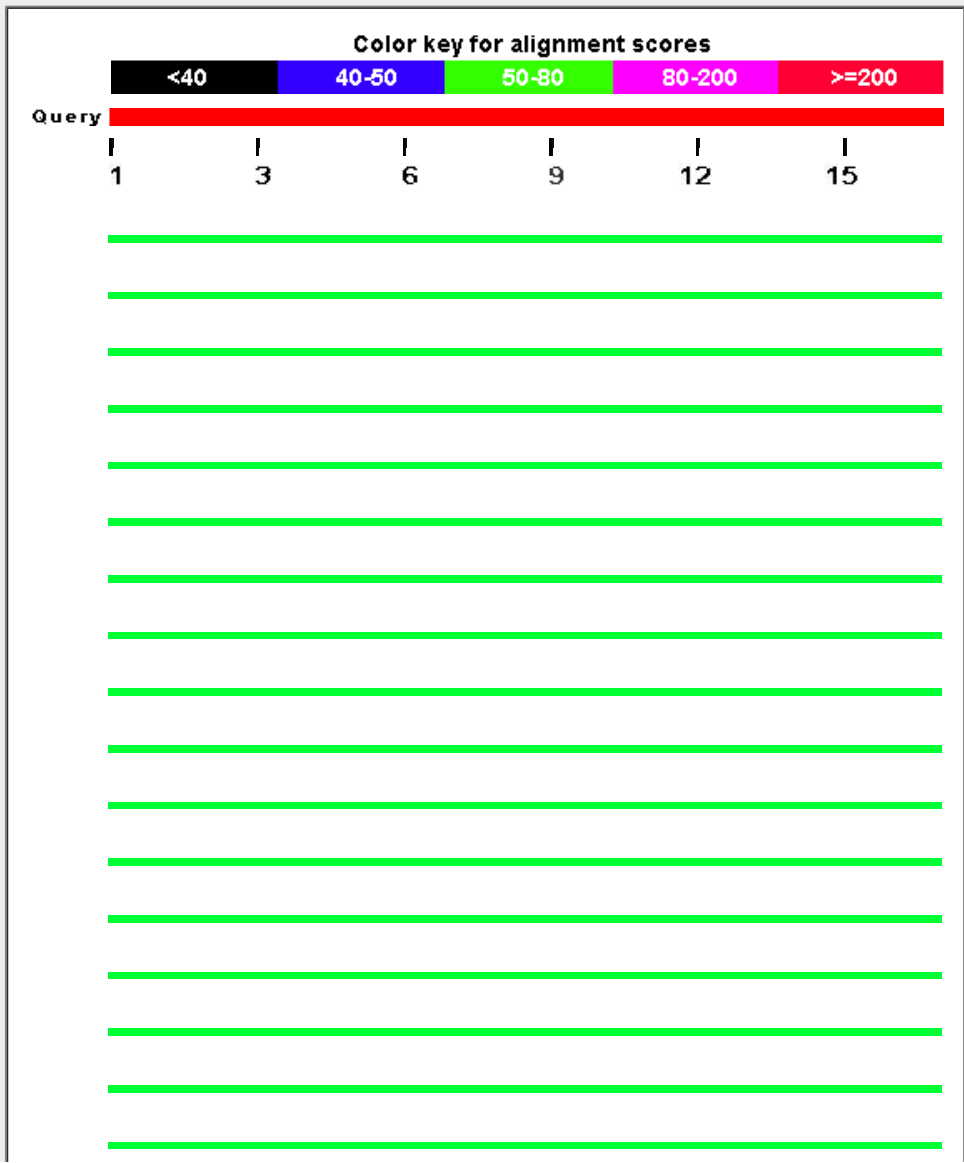

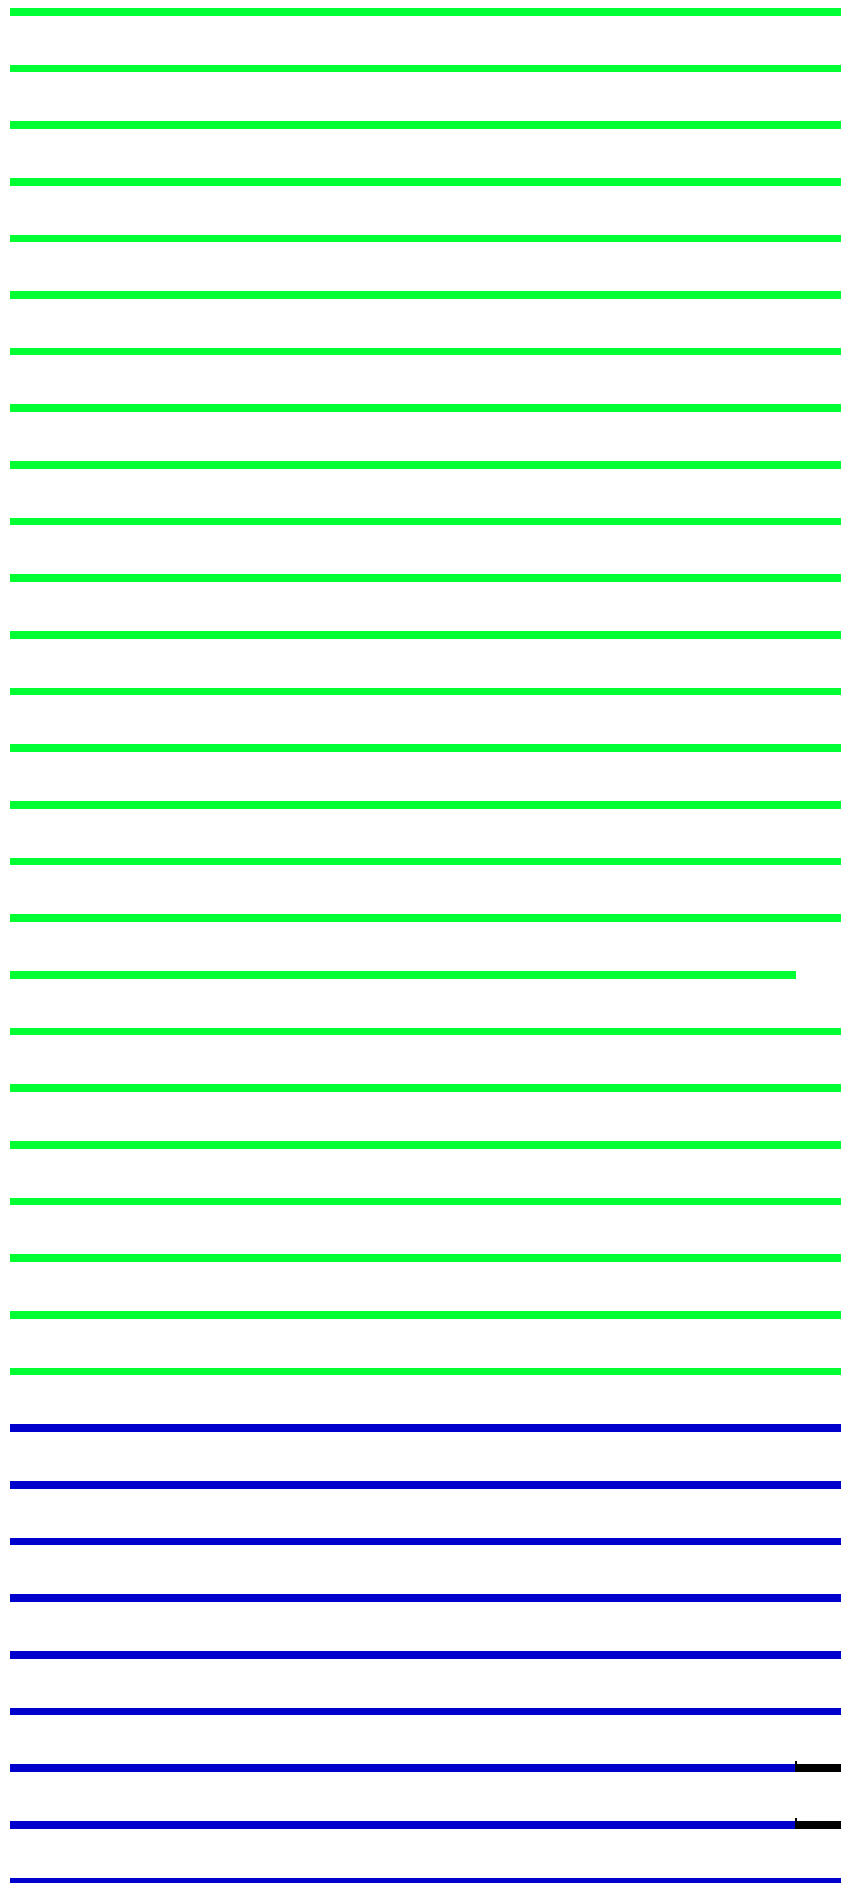

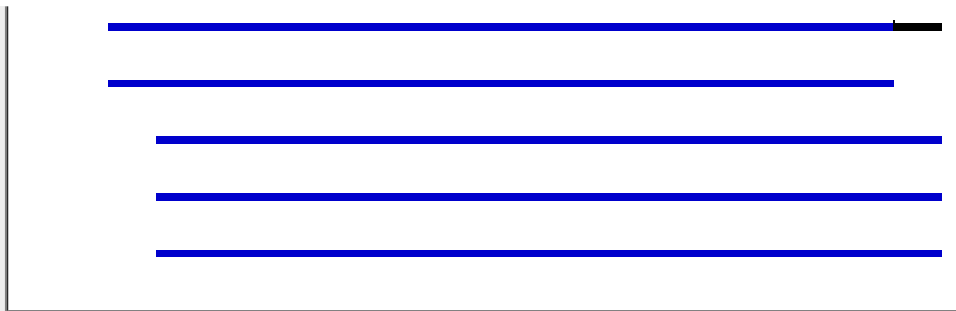

## Descriptions

### Sequences producing significant alignments:

Select: [All](#) [None](#) Selected:0

[Alignments](#)
[Download](#)
[GenPept](#)
[Graphics](#)
[Distance tree of results](#)
[Multiple alignment](#)

| Description                                                                                                | Max score | Total score | Query cover | E value | Ident | Accession                      |
|------------------------------------------------------------------------------------------------------------|-----------|-------------|-------------|---------|-------|--------------------------------|
| <a href="#">glycosylphosphatidylinositol phospholipase D [Homo sapiens]</a>                                | 53.7      | 76.8        | 100%        | 7e-07   | 94%   | <a href="#">CAC14844.1</a>     |
| <a href="#">Unknown (protein for IMAGE:3354070) [Homo sapiens]</a>                                         | 53.7      | 76.8        | 100%        | 7e-07   | 94%   | <a href="#">AAH07614.1</a>     |
| <a href="#">PREDICTED: phosphatidylinositol-glycan-specific phospholipase D isoform X:</a>                 | 53.7      | 78.5        | 100%        | 7e-07   | 94%   | <a href="#">XP_009202774.1</a> |
| <a href="#">PREDICTED: phosphatidylinositol-glycan-specific phospholipase D isoform X:</a>                 | 53.7      | 76.8        | 100%        | 7e-07   | 94%   | <a href="#">XP_008975042.1</a> |
| <a href="#">PREDICTED: phosphatidylinositol-glycan-specific phospholipase D isoform X:</a>                 | 53.7      | 78.5        | 100%        | 7e-07   | 94%   | <a href="#">XP_005553977.1</a> |
| <a href="#">PREDICTED: phosphatidylinositol-glycan-specific phospholipase D isoform X:</a>                 | 53.7      | 76.8        | 100%        | 7e-07   | 94%   | <a href="#">XP_005249075.1</a> |
| <a href="#">PREDICTED: phosphatidylinositol-glycan-specific phospholipase D isoform X:</a>                 | 53.7      | 78.5        | 100%        | 7e-07   | 94%   | <a href="#">XP_009202773.1</a> |
| <a href="#">PREDICTED: phosphatidylinositol-glycan-specific phospholipase D isoform X:</a>                 | 53.7      | 78.5        | 100%        | 7e-07   | 94%   | <a href="#">XP_007971742.1</a> |
| <a href="#">PREDICTED: phosphatidylinositol-glycan-specific phospholipase D-like [Macaca fascicularis]</a> | 53.7      | 78.5        | 100%        | 7e-07   | 94%   | <a href="#">XP_002803682.1</a> |
| <a href="#">PREDICTED: phosphatidylinositol-glycan-specific phospholipase D [Pongo abelii]</a>             | 53.7      | 75.9        | 100%        | 7e-07   | 94%   | <a href="#">XP_009239742.1</a> |
| <a href="#">PREDICTED: phosphatidylinositol-glycan-specific phospholipase D isoform X:</a>                 | 53.7      | 78.5        | 100%        | 7e-07   | 94%   | <a href="#">XP_007971741.1</a> |
| <a href="#">PREDICTED: phosphatidylinositol-glycan-specific phospholipase D isoform X:</a>                 | 53.7      | 78.5        | 100%        | 7e-07   | 94%   | <a href="#">XP_007971740.1</a> |
| <a href="#">PREDICTED: phosphatidylinositol-glycan-specific phospholipase D isoform X:</a>                 | 53.7      | 78.5        | 100%        | 7e-07   | 94%   | <a href="#">XP_007971746.1</a> |
| <a href="#">PREDICTED: phosphatidylinositol-glycan-specific phospholipase D [Tarsius syrrhaptes]</a>       | 53.7      | 76.4        | 100%        | 7e-07   | 94%   | <a href="#">XP_008048656.1</a> |
| <a href="#">PREDICTED: phosphatidylinositol-glycan-specific phospholipase D isoform 2</a>                  | 53.7      | 78.1        | 100%        | 7e-07   | 94%   | <a href="#">XP_004043389.1</a> |
| <a href="#">PREDICTED: phosphatidylinositol-glycan-specific phospholipase D isoform 1</a>                  | 53.7      | 76.8        | 100%        | 7e-07   | 94%   | <a href="#">XP_004043388.1</a> |
| <a href="#">glycosylphosphatidylinositol phospholipase D [Homo sapiens]</a>                                | 53.7      | 76.8        | 100%        | 7e-07   | 94%   | <a href="#">CAC87068.1</a>     |
| <a href="#">phospholipase D [Homo sapiens]</a>                                                             | 53.7      | 76.8        | 100%        | 7e-07   | 94%   | <a href="#">AAA36445.1</a>     |
| <a href="#">PREDICTED: phosphatidylinositol-glycan-specific phospholipase D isoform X:</a>                 | 53.7      | 76.8        | 100%        | 7e-07   | 94%   | <a href="#">XP_003823243.1</a> |
| <a href="#">phosphatidylinositol-glycan-specific phospholipase D precursor [Homo sapiens]</a>              | 53.7      | 76.8        | 100%        | 7e-07   | 94%   | <a href="#">NP_001494.2</a>    |
| <a href="#">glycosylphosphatidylinositol-specific phospholipase D precursor [Homo sapiens]</a>             | 53.7      | 76.8        | 100%        | 7e-07   | 94%   | <a href="#">AAG16627.2</a>     |
| <a href="#">PREDICTED: phosphatidylinositol-glycan-specific phospholipase D [Rhinopithecus roosevelti]</a> | 53.7      | 78.5        | 100%        | 7e-07   | 94%   | <a href="#">XP_010363586.1</a> |
| <a href="#">phospholipase D [Homo sapiens]</a>                                                             | 53.7      | 78.5        | 100%        | 7e-07   | 94%   | <a href="#">AAA36444.1</a>     |
| <a href="#">PREDICTED: phosphatidylinositol-glycan-specific phospholipase D isoform X:</a>                 | 53.7      | 78.5        | 100%        | 7e-07   | 94%   | <a href="#">XP_005553976.1</a> |
| <a href="#">PREDICTED: phosphatidylinositol-glycan-specific phospholipase D isoform X:</a>                 | 53.7      | 78.5        | 100%        | 7e-07   | 94%   | <a href="#">XP_003897171.1</a> |
| <a href="#">PREDICTED: phosphatidylinositol-glycan-specific phospholipase D [Pan troglodytes]</a>          | 53.7      | 75.5        | 100%        | 7e-07   | 94%   | <a href="#">XP_518268.4</a>    |
| <a href="#">PREDICTED: phosphatidylinositol-glycan-specific phospholipase D isoform X:</a>                 | 53.7      | 78.5        | 100%        | 7e-07   | 94%   | <a href="#">XP_009202772.1</a> |
| <a href="#">PREDICTED: phosphatidylinositol-glycan-specific phospholipase D isoform X:</a>                 | 53.7      | 76.8        | 100%        | 7e-07   | 94%   | <a href="#">XP_008975041.1</a> |
| <a href="#">hypothetical protein EGM_13271 [Macaca fascicularis]</a>                                       | 53.7      | 78.5        | 100%        | 7e-07   | 94%   | <a href="#">EHH52757.1</a>     |

|                                                                                                 |      |      |      |       |     |                                |
|-------------------------------------------------------------------------------------------------|------|------|------|-------|-----|--------------------------------|
| <a href="#">hypothetical protein EGK_21153 [Macaca mulatta]</a>                                 | 53.7 | 78.5 | 100% | 7e-07 | 94% | <a href="#">EHH25414.1</a>     |
| <a href="#">glycosylphosphatidylinositol specific phospholipase D1, isoform CRA_c [Homo</a>     | 53.7 | 76.8 | 100% | 7e-07 | 94% | <a href="#">EAW55450.1</a>     |
| <a href="#">PREDICTED: phosphatidylinositol-glycan-specific phospholipase D [Nomascu</a>        | 53.7 | 76.4 | 100% | 7e-07 | 94% | <a href="#">XP_003263611.1</a> |
| <a href="#">PREDICTED: phosphatidylinositol-glycan-specific phospholipase D isoform X:</a>      | 53.7 | 78.5 | 100% | 7e-07 | 94% | <a href="#">XP_005553975.1</a> |
| <a href="#">PREDICTED: phosphatidylinositol-glycan-specific phospholipase D [Mesocric</a>       | 53.7 | 76.4 | 100% | 7e-07 | 94% | <a href="#">XP_005066341.1</a> |
| <a href="#">PREDICTED: phosphatidylinositol-glycan-specific phospholipase D [Octodon</a>        | 50.7 | 71.7 | 94%  | 7e-06 | 94% | <a href="#">XP_004640232.1</a> |
| <a href="#">PREDICTED: phosphatidylinositol-glycan-specific phospholipase D [Saimiri br</a>     | 50.7 | 73.4 | 100% | 7e-06 | 88% | <a href="#">XP_003927350.1</a> |
| <a href="#">PREDICTED: phosphatidylinositol-glycan-specific phospholipase D [Callithrix</a>     | 50.7 | 73.4 | 100% | 7e-06 | 88% | <a href="#">XP_002746229.2</a> |
| <a href="#">PREDICTED: phosphatidylinositol-glycan-specific phospholipase D isoform X:</a>      | 50.3 | 50.3 | 100% | 1e-05 | 88% | <a href="#">XP_007627730.1</a> |
| <a href="#">phosphatidylinositol-glycan-specific phospholipase D-like protein [Cricetulus g</a> | 50.3 | 50.3 | 100% | 1e-05 | 88% | <a href="#">ERE77282.1</a>     |
| <a href="#">Phosphatidylinositol-glycan-specific phospholipase D [Cricetulus griseus]</a>       | 50.3 | 50.3 | 100% | 1e-05 | 88% | <a href="#">EGV94314.1</a>     |
| <a href="#">PREDICTED: phosphatidylinositol-glycan-specific phospholipase D [Microtus</a>       | 50.3 | 73.0 | 100% | 1e-05 | 88% | <a href="#">XP_005355039.1</a> |
| <a href="#">PREDICTED: phosphatidylinositol-glycan-specific phospholipase D isoform X:</a>      | 50.3 | 50.3 | 100% | 1e-05 | 88% | <a href="#">XP_003502241.1</a> |
| <a href="#">PREDICTED: phosphatidylinositol-glycan-specific phospholipase D [Condylur</a>       | 49.0 | 71.3 | 100% | 3e-05 | 88% | <a href="#">XP_004693375.1</a> |
| <a href="#">PREDICTED: phosphatidylinositol-glycan-specific phospholipase D [Trichech</a>       | 49.0 | 70.8 | 100% | 3e-05 | 88% | <a href="#">XP_004384046.1</a> |
| <a href="#">PREDICTED: phosphatidylinositol-glycan-specific phospholipase D [Erinaceu</a>       | 49.0 | 74.2 | 100% | 3e-05 | 88% | <a href="#">XP_007526005.1</a> |
| <a href="#">PREDICTED: phosphatidylinositol-glycan-specific phospholipase D isoform X:</a>      | 49.0 | 92.7 | 100% | 3e-05 | 88% | <a href="#">XP_007487938.1</a> |
| <a href="#">PREDICTED: phosphatidylinositol-glycan-specific phospholipase D isoform X:</a>      | 49.0 | 92.7 | 100% | 3e-05 | 88% | <a href="#">XP_001375600.2</a> |
| <a href="#">PREDICTED: phosphatidylinositol-glycan-specific phospholipase D isoform X:</a>      | 49.0 | 92.7 | 100% | 3e-05 | 88% | <a href="#">XP_007487937.1</a> |
| <a href="#">PREDICTED: phosphatidylinositol-glycan-specific phospholipase D isoform X:</a>      | 47.7 | 70.4 | 100% | 7e-05 | 88% | <a href="#">XP_008260728.1</a> |
| <a href="#">PREDICTED: phosphatidylinositol-glycan-specific phospholipase D isoform X:</a>      | 47.7 | 70.4 | 100% | 7e-05 | 88% | <a href="#">XP_008260723.1</a> |
| <a href="#">PREDICTED: phosphatidylinositol-glycan-specific phospholipase D [Ictidomys</a>      | 47.3 | 70.4 | 100% | 1e-04 | 82% | <a href="#">XP_005337080.1</a> |
| <a href="#">PREDICTED: phosphatidylinositol-glycan-specific phospholipase D [Peromys</a>        | 47.3 | 72.1 | 100% | 1e-04 | 88% | <a href="#">XP_006977193.1</a> |
| <a href="#">hypothetical protein CB1_000595062 [Camelus ferus]</a>                              | 46.9 | 69.1 | 94%  | 1e-04 | 88% | <a href="#">EPY83136.1</a>     |
| <a href="#">PREDICTED: phosphatidylinositol-glycan-specific phospholipase D isoform X:</a>      | 46.9 | 70.8 | 94%  | 1e-04 | 88% | <a href="#">XP_010621250.1</a> |
| <a href="#">PREDICTED: phosphatidylinositol-glycan-specific phospholipase D isoform X:</a>      | 46.9 | 70.8 | 94%  | 1e-04 | 88% | <a href="#">XP_010621248.1</a> |
| <a href="#">Phosphatidylinositol-glycan-specific phospholipase D [Fukomys damarensis]</a>       | 46.9 | 70.8 | 94%  | 1e-04 | 88% | <a href="#">KFO33840.1</a>     |
| <a href="#">PREDICTED: phosphatidylinositol-glycan-specific phospholipase D isoform X:</a>      | 46.4 | 67.4 | 100% | 2e-04 | 82% | <a href="#">XP_005640137.1</a> |
| <a href="#">PREDICTED: phosphatidylinositol-glycan-specific phospholipase D isoformX1</a>       | 46.4 | 67.4 | 100% | 2e-04 | 82% | <a href="#">XP_535902.2</a>    |
| <a href="#">PREDICTED: phosphatidylinositol-glycan-specific phospholipase D isoform X:</a>      | 46.4 | 67.4 | 100% | 2e-04 | 82% | <a href="#">XP_005640136.1</a> |
| <a href="#">Phosphatidylinositol-glycan-specific phospholipase D [Pteropus alecto]</a>          | 46.0 | 46.0 | 100% | 3e-04 | 82% | <a href="#">ELK05805.1</a>     |
| <a href="#">PREDICTED: phosphatidylinositol-glycan-specific phospholipase D [Chrysoch</a>       | 46.0 | 67.9 | 100% | 3e-04 | 82% | <a href="#">XP_006878008.1</a> |
| <a href="#">PREDICTED: phosphatidylinositol-glycan-specific phospholipase D [Orycterop</a>      | 46.0 | 67.9 | 100% | 3e-04 | 82% | <a href="#">XP_007948002.1</a> |
| <a href="#">PREDICTED: phosphatidylinositol-glycan-specific phospholipase D isoform X:</a>      | 46.0 | 67.0 | 100% | 3e-04 | 82% | <a href="#">XP_006919597.1</a> |
| <a href="#">PREDICTED: phosphatidylinositol-glycan-specific phospholipase D isoform X:</a>      | 45.6 | 68.7 | 100% | 4e-04 | 88% | <a href="#">XP_008511735.1</a> |
| <a href="#">PREDICTED: LOW QUALITY PROTEIN: phosphatidylinositol-glycan-specific</a>            | 45.6 | 67.4 | 100% | 4e-04 | 88% | <a href="#">XP_004614021.1</a> |
| <a href="#">PREDICTED: phosphatidylinositol-glycan-specific phospholipase D isoform X:</a>      | 45.6 | 68.7 | 100% | 4e-04 | 88% | <a href="#">XP_008511734.1</a> |
| <a href="#">PREDICTED: phosphatidylinositol-glycan-specific phospholipase D [Ceratophe</a>      | 45.6 | 68.3 | 100% | 4e-04 | 88% | <a href="#">XP_004432133.1</a> |
| <a href="#">PREDICTED: phosphatidylinositol-glycan-specific phospholipase D [Equus ca</a>       | 45.6 | 68.7 | 100% | 4e-04 | 88% | <a href="#">XP_001497586.1</a> |
| <a href="#">PREDICTED: phosphatidylinositol-glycan-specific phospholipase D isoform X:</a>      | 45.6 | 68.7 | 100% | 4e-04 | 88% | <a href="#">XP_008511732.1</a> |
| <a href="#">PREDICTED: phosphatidylinositol-glycan-specific phospholipase D isoform X:</a>      | 45.6 | 68.7 | 100% | 4e-04 | 88% | <a href="#">XP_008511731.1</a> |
| <a href="#">PREDICTED: phosphatidylinositol-glycan-specific phospholipase D [Sus scrof</a>      | 45.6 | 70.4 | 100% | 4e-04 | 88% | <a href="#">XP_001925944.5</a> |
| <a href="#">PREDICTED: phosphatidylinositol-glycan-specific phospholipase D isoform X:</a>      | 45.6 | 68.7 | 100% | 4e-04 | 88% | <a href="#">XP_008511730.1</a> |
| <a href="#">PREDICTED: LOW QUALITY PROTEIN: phosphatidylinositol-glycan-specific</a>            | 45.2 | 67.4 | 100% | 5e-04 | 82% | <a href="#">XP_006182298.1</a> |
| <a href="#">PREDICTED: phosphatidylinositol-glycan-specific phospholipase D [Camelus</a>        | 45.2 | 67.4 | 100% | 5e-04 | 82% | <a href="#">XP_010944080.1</a> |

|                                                                                              |      |      |      |       |     |                                |
|----------------------------------------------------------------------------------------------|------|------|------|-------|-----|--------------------------------|
| <a href="#">PREDICTED: phosphatidylinositol-glycan-specific phospholipase D isoform X:</a>   | 45.2 | 66.2 | 100% | 5e-04 | 82% | <a href="#">XP_007454575.1</a> |
| <a href="#">PREDICTED: phosphatidylinositol-glycan-specific phospholipase D isoform X:</a>   | 45.2 | 66.2 | 100% | 5e-04 | 82% | <a href="#">XP_007454574.1</a> |
| <a href="#">PREDICTED: phosphatidylinositol-glycan-specific phospholipase D [Physeter</a>    | 45.2 | 67.4 | 100% | 5e-04 | 82% | <a href="#">XP_007116306.1</a> |
| <a href="#">PREDICTED: LOW QUALITY PROTEIN: phosphatidylinositol-glycan-specific</a>         | 45.2 | 67.4 | 100% | 5e-04 | 82% | <a href="#">XP_010978426.1</a> |
| <a href="#">PREDICTED: phosphatidylinositol-glycan-specific phospholipase D [Vicugna f</a>   | 45.2 | 67.4 | 100% | 5e-04 | 82% | <a href="#">XP_006198740.1</a> |
| <a href="#">PREDICTED: phosphatidylinositol-glycan-specific phospholipase D isoform X:</a>   | 45.2 | 67.4 | 100% | 5e-04 | 82% | <a href="#">XP_007197201.1</a> |
| <a href="#">PREDICTED: phosphatidylinositol-glycan-specific phospholipase D isoform X:</a>   | 45.2 | 67.4 | 100% | 5e-04 | 82% | <a href="#">XP_007197200.1</a> |
| <a href="#">PREDICTED: phosphatidylinositol-glycan-specific phospholipase D isoform X:</a>   | 44.3 | 67.0 | 94%  | 0.001 | 88% | <a href="#">XP_004847666.1</a> |
| <a href="#">Phosphatidylinositol-glycan-specific phospholipase D [Heterocephalus glaber]</a> | 44.3 | 67.0 | 94%  | 0.001 | 88% | <a href="#">EHB09593.1</a>     |
| <a href="#">PREDICTED: phosphatidylinositol-glycan-specific phospholipase D isoform X:</a>   | 44.3 | 67.0 | 94%  | 0.001 | 88% | <a href="#">XP_004847665.1</a> |
| <a href="#">PREDICTED: phosphatidylinositol-glycan-specific phospholipase D isoform X:</a>   | 44.3 | 67.0 | 94%  | 0.001 | 88% | <a href="#">XP_004847664.1</a> |
| <a href="#">PREDICTED: phosphatidylinositol-glycan-specific phospholipase D isoform X:</a>   | 44.3 | 67.0 | 94%  | 0.001 | 88% | <a href="#">XP_004847663.1</a> |
| <a href="#">PREDICTED: phosphatidylinositol-glycan-specific phospholipase D [Heteroce</a>    | 44.3 | 67.0 | 94%  | 0.001 | 88% | <a href="#">XP_004895023.1</a> |
| <a href="#">PREDICTED: phosphatidylinositol-glycan-specific phospholipase D [Panthera</a>    | 43.9 | 64.9 | 100% | 0.001 | 76% | <a href="#">XP_007074479.1</a> |
| <a href="#">PREDICTED: phosphatidylinositol-glycan-specific phospholipase D [Sarcophil</a>   | 43.9 | 68.7 | 100% | 0.001 | 87% | <a href="#">XP_003760182.1</a> |
| <a href="#">PREDICTED: phosphatidylinositol-glycan-specific phospholipase D [Elephant</a>    | 43.5 | 64.5 | 82%  | 0.002 | 93% | <a href="#">XP_006888712.1</a> |
| <a href="#">PREDICTED: LOW QUALITY PROTEIN: phosphatidylinositol-glycan-specific</a>         | 43.1 | 65.3 | 88%  | 0.003 | 87% | <a href="#">XP_005903212.1</a> |
| <a href="#">Phosphatidylinositol-glycan-specific phospholipase D [Bos mutus]</a>             | 43.1 | 65.3 | 88%  | 0.003 | 87% | <a href="#">ELR50996.1</a>     |
| <a href="#">PREDICTED: phosphatidylinositol-glycan-specific phospholipase D isoform X:</a>   | 43.1 | 65.3 | 88%  | 0.003 | 87% | <a href="#">XP_010841812.1</a> |
| <a href="#">phosphatidylinositol-glycan-specific phospholipase D precursor [Bos taurus]</a>  | 43.1 | 65.3 | 88%  | 0.003 | 87% | <a href="#">NP_777241.1</a>    |
| <a href="#">TPA: phosphatidylinositol-glycan-specific phospholipase D [Bos taurus]</a>       | 43.1 | 65.3 | 88%  | 0.003 | 87% | <a href="#">DAA16116.1</a>     |
| <a href="#">PREDICTED: phosphatidylinositol-glycan-specific phospholipase D [Loxodont</a>    | 43.1 | 64.9 | 88%  | 0.003 | 87% | <a href="#">XP_003416488.1</a> |
| <a href="#">PREDICTED: phosphatidylinositol-glycan-specific phospholipase D isoform X:</a>   | 43.1 | 65.3 | 88%  | 0.003 | 87% | <a href="#">XP_010841810.1</a> |
| <a href="#">PREDICTED: phosphatidylinositol-glycan-specific phospholipase D isoform X:</a>   | 43.1 | 65.3 | 88%  | 0.003 | 87% | <a href="#">XP_005223795.1</a> |
| <a href="#">PREDICTED: phosphatidylinositol-glycan-specific phospholipase D isoform X:</a>   | 43.1 | 65.3 | 88%  | 0.003 | 87% | <a href="#">XP_005223794.1</a> |
| <a href="#">PREDICTED: phosphatidylinositol-glycan-specific phospholipase D isoform X:</a>   | 43.1 | 65.3 | 88%  | 0.003 | 87% | <a href="#">XP_010816770.1</a> |

BLAST is a registered trademark of the National Library of Medicine.

[Copyright](#) | [Disclaimer](#) | [Privacy](#) | [Accessibility](#) | [Contact](#) | [Send feedback](#)[NCBI](#) | [NLM](#) | [NIH](#) | [DHHS](#)



NCBI/ BLAST/ blastp suite/ Formatting Results - B9E8UW2A01R

Your search parameters were adjusted to search for a short input sequence.

[Edit and Resubmit](#) [Save Search Strategies](#) [Formatting options](#) [Download](#)

[YouTube](#) [How to read this page](#) [Blast report description](#)

### GPLD1\_RTLLLVGSPTWKNASRL\_NonMod

RID [B9E8UW2A01R](#) (Expires on 01-14 13:20 pm)

Query ID |cl|254936  
 Description None  
 Molecule type amino acid  
 Query Length 17

Database Name nr  
 Description All non-redundant GenBank CDS translations+PDB+SwissProt+PIR excluding environmental samples from WGS projects  
 Program BLASTP 2.2.30+ [Citation](#)

Other reports: [Search Summary](#) [Taxonomy reports](#) [Distance tree of results](#) [Multiple alignment](#)

### Graphic Summary

[Show Conserved Domains](#)

No putative conserved domains have been detected

Distribution of 197 Blast Hits on the Query Sequence



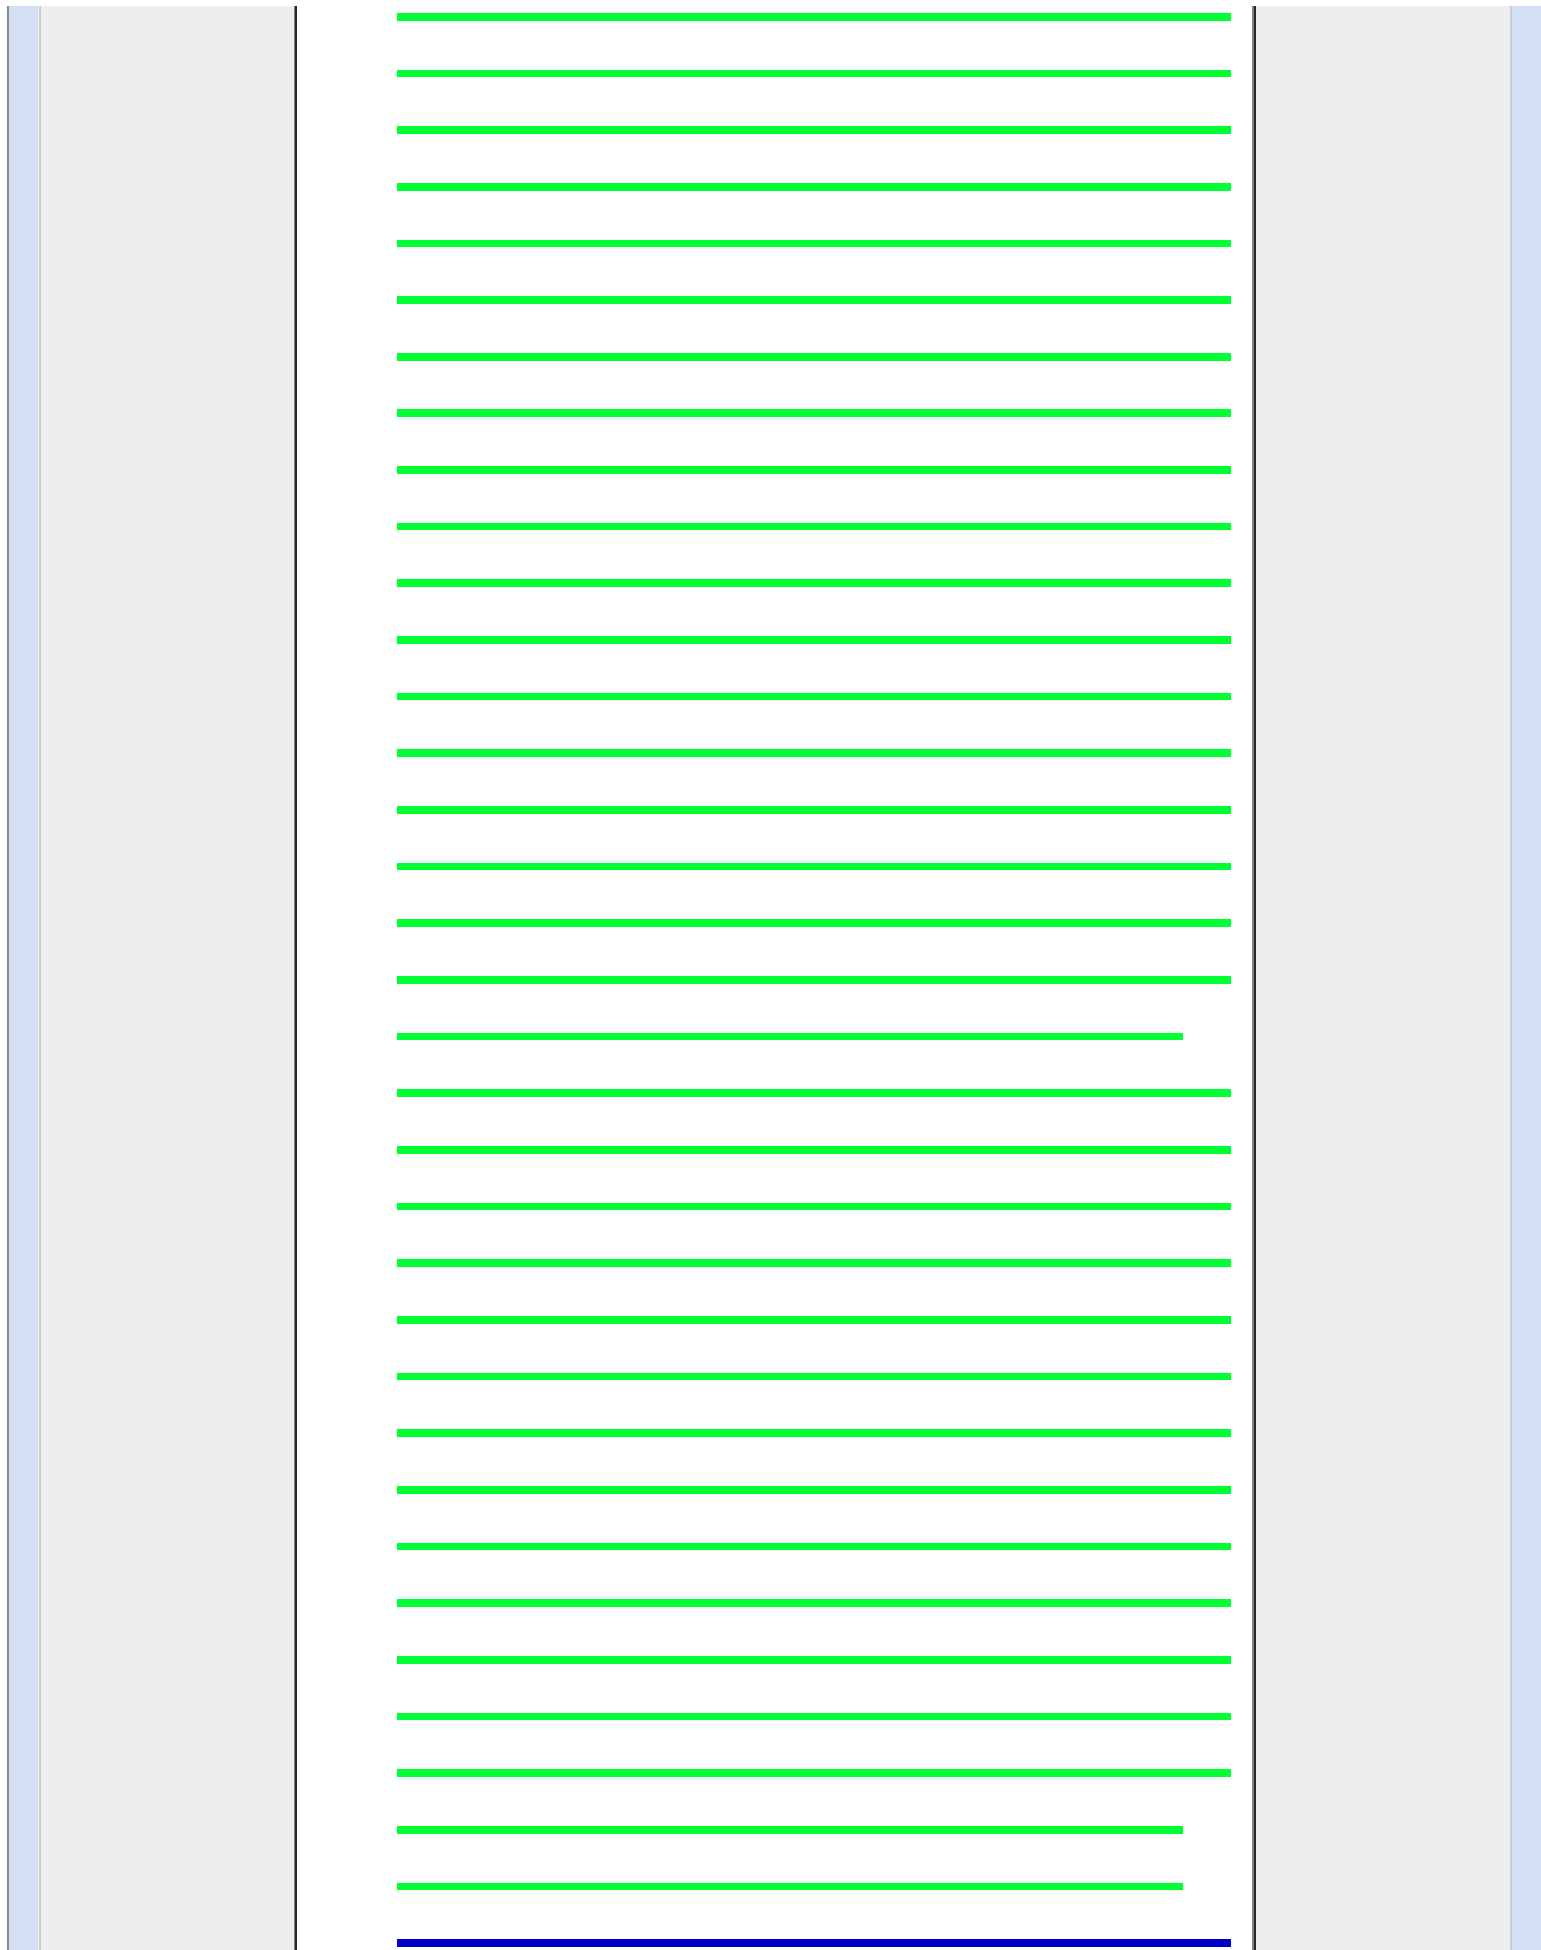

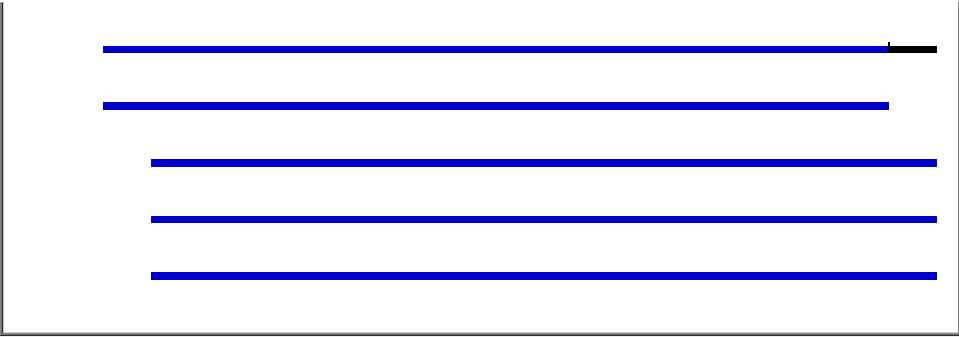

**Descriptions**

**Sequences producing significant alignments:**

Select: [All](#) [None](#) Selected:0

Alignments Download GenPept Graphics Distance tree of results Multiple alignment

| Description                                                                         | Max score | Total score | Query cover | E value | Ident | Accession                                   |
|-------------------------------------------------------------------------------------|-----------|-------------|-------------|---------|-------|---------------------------------------------|
| <a href="#">glycosylphosphatidylinositol phospholipase D [Homo sapiens]</a>         | 56.2      | 78.1        | 100%        | 9e-08   | 100%  | <a href="#">gil11122875 CAC14844.1</a>      |
| <a href="#">Unknown (protein for IMAGE:3354070) [Homo sapiens]</a>                  | 56.2      | 78.1        | 100%        | 9e-08   | 100%  | <a href="#">gil14043248 AAH07614.1</a>      |
| <a href="#">PREDICTED: phosphatidylinositol-glycan-specific phospholipase D</a>     | 56.2      | 78.5        | 100%        | 9e-08   | 100%  | <a href="#">gil685535046 XP_009202774.1</a> |
| <a href="#">PREDICTED: phosphatidylinositol-glycan-specific phospholipase D</a>     | 56.2      | 78.1        | 100%        | 9e-08   | 100%  | <a href="#">gil675773160 XP_008975042.1</a> |
| <a href="#">PREDICTED: phosphatidylinositol-glycan-specific phospholipase D</a>     | 56.2      | 78.5        | 100%        | 9e-08   | 100%  | <a href="#">gil544429971 XP_005553977.1</a> |
| <a href="#">PREDICTED: phosphatidylinositol-glycan-specific phospholipase D</a>     | 56.2      | 78.1        | 100%        | 9e-08   | 100%  | <a href="#">gil530381810 XP_005249075.1</a> |
| <a href="#">PREDICTED: phosphatidylinositol-glycan-specific phospholipase D</a>     | 56.2      | 78.5        | 100%        | 9e-08   | 100%  | <a href="#">gil685535044 XP_009202773.1</a> |
| <a href="#">PREDICTED: phosphatidylinositol-glycan-specific phospholipase D</a>     | 56.2      | 78.5        | 100%        | 9e-08   | 100%  | <a href="#">gil635096985 XP_007971742.1</a> |
| <a href="#">PREDICTED: phosphatidylinositol-glycan-specific phospholipase D</a>     | 56.2      | 78.5        | 100%        | 9e-08   | 100%  | <a href="#">gil297290177 XP_002803682.1</a> |
| <a href="#">PREDICTED: phosphatidylinositol-glycan-specific phospholipase D</a>     | 56.2      | 78.1        | 100%        | 9e-08   | 100%  | <a href="#">gil686720936 XP_009239742.1</a> |
| <a href="#">PREDICTED: phosphatidylinositol-glycan-specific phospholipase D</a>     | 56.2      | 78.5        | 100%        | 1e-07   | 100%  | <a href="#">gil635096983 XP_007971741.1</a> |
| <a href="#">PREDICTED: phosphatidylinositol-glycan-specific phospholipase D</a>     | 56.2      | 78.5        | 100%        | 1e-07   | 100%  | <a href="#">gil635096981 XP_007971740.1</a> |
| <a href="#">PREDICTED: phosphatidylinositol-glycan-specific phospholipase D</a>     | 56.2      | 78.5        | 100%        | 1e-07   | 100%  | <a href="#">gil635096993 XP_007971746.1</a> |
| <a href="#">PREDICTED: phosphatidylinositol-glycan-specific phospholipase D</a>     | 56.2      | 78.1        | 100%        | 1e-07   | 100%  | <a href="#">gil640776034 XP_008048656.1</a> |
| <a href="#">PREDICTED: phosphatidylinositol-glycan-specific phospholipase D</a>     | 56.2      | 78.1        | 100%        | 1e-07   | 100%  | <a href="#">gil426351748 XP_004043389.1</a> |
| <a href="#">PREDICTED: phosphatidylinositol-glycan-specific phospholipase D</a>     | 56.2      | 78.1        | 100%        | 1e-07   | 100%  | <a href="#">gil426351746 XP_004043388.1</a> |
| <a href="#">glycosylphosphatidylinositol phospholipase D [Homo sapiens]</a>         | 56.2      | 78.1        | 100%        | 1e-07   | 100%  | <a href="#">gil20269065 CAC87068.1</a>      |
| <a href="#">phospholipase D [Homo sapiens]</a>                                      | 56.2      | 78.1        | 100%        | 1e-07   | 100%  | <a href="#">gil388765 AAA36445.1</a>        |
| <a href="#">PREDICTED: phosphatidylinositol-glycan-specific phospholipase D</a>     | 56.2      | 78.1        | 100%        | 1e-07   | 100%  | <a href="#">gil397505380 XP_003823243.1</a> |
| <a href="#">phosphatidylinositol-glycan-specific phospholipase D precursor [Ho]</a> | 56.2      | 78.1        | 100%        | 1e-07   | 100%  | <a href="#">gil29171717 JNP_001494.2</a>    |
| <a href="#">glycosylphosphatidylinositol-specific phospholipase D precursor [Hc</a> | 56.2      | 78.1        | 100%        | 1e-07   | 100%  | <a href="#">gil14195001 AAG16627.2</a>      |
| <a href="#">PREDICTED: phosphatidylinositol-glycan-specific phospholipase D</a>     | 56.2      | 78.5        | 100%        | 1e-07   | 100%  | <a href="#">gil724798150 XP_010363586.1</a> |
| <a href="#">phospholipase D [Homo sapiens]</a>                                      | 56.2      | 78.5        | 100%        | 1e-07   | 100%  | <a href="#">gil388763 AAA36444.1</a>        |
| <a href="#">PREDICTED: phosphatidylinositol-glycan-specific phospholipase D</a>     | 56.2      | 78.5        | 100%        | 1e-07   | 100%  | <a href="#">gil544429969 XP_005553976.1</a> |
| <a href="#">PREDICTED: phosphatidylinositol-glycan-specific phospholipase D</a>     | 56.2      | 78.5        | 100%        | 1e-07   | 100%  | <a href="#">gil402865969 XP_003897171.1</a> |
| <a href="#">PREDICTED: phosphatidylinositol-glycan-specific phospholipase D</a>     | 56.2      | 78.1        | 100%        | 1e-07   | 100%  | <a href="#">gil410040317 XP_518268.4</a>    |
| <a href="#">PREDICTED: phosphatidylinositol-glycan-specific phospholipase D</a>     | 56.2      | 78.5        | 100%        | 1e-07   | 100%  | <a href="#">gil685535041 XP_009202772.1</a> |
| <a href="#">PREDICTED: phosphatidylinositol-glycan-specific phospholipase D</a>     | 56.2      | 78.1        | 100%        | 1e-07   | 100%  | <a href="#">gil675773152 XP_008975041.1</a> |

|                                                                                      |      |      |      |       |      |                                             |
|--------------------------------------------------------------------------------------|------|------|------|-------|------|---------------------------------------------|
| hypothetical protein EGM_13271 [Macaca fascicularis]                                 | 56.2 | 78.5 | 100% | 1e-07 | 100% | <a href="#">gij355748274 EHH52757.1</a>     |
| <a href="#">hypothetical protein EGK_21153 [Macaca mulatta]</a>                      | 56.2 | 78.5 | 100% | 1e-07 | 100% | <a href="#">gij355569342 EHH25414.1</a>     |
| <a href="#">glycosylphosphatidylinositol specific phospholipase D1, isoform CR</a>   | 56.2 | 78.1 | 100% | 1e-07 | 100% | <a href="#">gij119575854 EAW55450.1</a>     |
| <a href="#">PREDICTED: phosphatidylinositol-glycan-specific phospholipase D</a>      | 56.2 | 78.1 | 100% | 1e-07 | 100% | <a href="#">gij332228866 XP_003263611.1</a> |
| <a href="#">PREDICTED: phosphatidylinositol-glycan-specific phospholipase D</a>      | 56.2 | 78.5 | 100% | 1e-07 | 100% | <a href="#">gij544429967 XP_005553975.1</a> |
| <a href="#">PREDICTED: phosphatidylinositol-glycan-specific phospholipase D</a>      | 56.2 | 78.1 | 100% | 1e-07 | 100% | <a href="#">gij524924187 XP_005066341.1</a> |
| <a href="#">PREDICTED: phosphatidylinositol-glycan-specific phospholipase D</a>      | 53.2 | 74.2 | 94%  | 1e-06 | 100% | <a href="#">gij507684247 XP_004640232.1</a> |
| <a href="#">PREDICTED: phosphatidylinositol-glycan-specific phospholipase D</a>      | 53.2 | 75.1 | 100% | 1e-06 | 94%  | <a href="#">gij403270800 XP_003927350.1</a> |
| <a href="#">PREDICTED: phosphatidylinositol-glycan-specific phospholipase D</a>      | 53.2 | 75.1 | 100% | 1e-06 | 94%  | <a href="#">gij675650934 XP_002746229.2</a> |
| <a href="#">PREDICTED: phosphatidylinositol-glycan-specific phospholipase D</a>      | 52.8 | 52.8 | 100% | 1e-06 | 94%  | <a href="#">gij625272320 XP_007627730.1</a> |
| <a href="#">phosphatidylinositol-glycan-specific phospholipase D-like protein [C</a> | 52.8 | 52.8 | 100% | 1e-06 | 94%  | <a href="#">gij537192249 ERE77282.1</a>     |
| <a href="#">Phosphatidylinositol-glycan-specific phospholipase D [Cricetulus gri</a> | 52.8 | 52.8 | 100% | 1e-06 | 94%  | <a href="#">gij344238211 EGV94314.1</a>     |
| <a href="#">PREDICTED: phosphatidylinositol-glycan-specific phospholipase D</a>      | 52.8 | 74.7 | 100% | 1e-06 | 94%  | <a href="#">gij532023384 XP_005355039.1</a> |
| <a href="#">PREDICTED: phosphatidylinositol-glycan-specific phospholipase D</a>      | 52.8 | 52.8 | 100% | 1e-06 | 94%  | <a href="#">gij354480090 XP_003502241.1</a> |
| <a href="#">PREDICTED: phosphatidylinositol-glycan-specific phospholipase D</a>      | 51.5 | 73.0 | 100% | 4e-06 | 94%  | <a href="#">gij507979038 XP_004693375.1</a> |
| <a href="#">PREDICTED: phosphatidylinositol-glycan-specific phospholipase D</a>      | 51.5 | 73.4 | 100% | 4e-06 | 94%  | <a href="#">gij471403600 XP_004384046.1</a> |
| <a href="#">PREDICTED: phosphatidylinositol-glycan-specific phospholipase D</a>      | 51.5 | 74.2 | 100% | 4e-06 | 94%  | <a href="#">gij617615072 XP_007526005.1</a> |
| <a href="#">PREDICTED: phosphatidylinositol-glycan-specific phospholipase D</a>      | 51.5 | 93.5 | 100% | 4e-06 | 94%  | <a href="#">gij612008081 XP_007487938.1</a> |
| <a href="#">PREDICTED: phosphatidylinositol-glycan-specific phospholipase D</a>      | 51.5 | 93.5 | 100% | 4e-06 | 94%  | <a href="#">gij612008079 XP_001375600.2</a> |
| <a href="#">PREDICTED: phosphatidylinositol-glycan-specific phospholipase D</a>      | 51.5 | 93.5 | 100% | 4e-06 | 94%  | <a href="#">gij612008077 XP_007487937.1</a> |
| <a href="#">PREDICTED: phosphatidylinositol-glycan-specific phospholipase D</a>      | 50.3 | 72.1 | 94%  | 1e-05 | 94%  | <a href="#">gij655839984 XP_008260728.1</a> |
| <a href="#">PREDICTED: phosphatidylinositol-glycan-specific phospholipase D</a>      | 50.3 | 72.1 | 94%  | 1e-05 | 94%  | <a href="#">gij655839976 XP_008260723.1</a> |
| <a href="#">PREDICTED: phosphatidylinositol-glycan-specific phospholipase D</a>      | 49.8 | 72.1 | 100% | 1e-05 | 88%  | <a href="#">gij532102948 XP_005337080.1</a> |
| <a href="#">PREDICTED: phosphatidylinositol-glycan-specific phospholipase D</a>      | 49.8 | 72.1 | 100% | 1e-05 | 94%  | <a href="#">gij589928750 XP_006977193.1</a> |
| <a href="#">hypothetical protein CB1_000595062 [Camelus ferus]</a>                   | 49.4 | 71.7 | 94%  | 2e-05 | 94%  | <a href="#">gij528763477 EPY83136.1</a>     |
| <a href="#">PREDICTED: phosphatidylinositol-glycan-specific phospholipase D</a>      | 49.4 | 71.3 | 94%  | 2e-05 | 94%  | <a href="#">gij731213592 XP_010621250.1</a> |
| <a href="#">PREDICTED: phosphatidylinositol-glycan-specific phospholipase D</a>      | 49.4 | 71.3 | 94%  | 2e-05 | 94%  | <a href="#">gij731213588 XP_010621248.1</a> |
| <a href="#">Phosphatidylinositol-glycan-specific phospholipase D [Fukomys dar</a>    | 49.4 | 71.3 | 94%  | 2e-05 | 94%  | <a href="#">gij676279913 KFO33840.1</a>     |
| <a href="#">PREDICTED: phosphatidylinositol-glycan-specific phospholipase D</a>      | 49.0 | 70.0 | 100% | 3e-05 | 88%  | <a href="#">gij545554532 XP_005640137.1</a> |
| <a href="#">PREDICTED: phosphatidylinositol-glycan-specific phospholipase D</a>      | 49.0 | 70.0 | 100% | 3e-05 | 88%  | <a href="#">gij74003954 XP_535902.2</a>     |
| <a href="#">PREDICTED: phosphatidylinositol-glycan-specific phospholipase D</a>      | 49.0 | 70.0 | 100% | 3e-05 | 88%  | <a href="#">gij545554529 XP_005640136.1</a> |
| <a href="#">Phosphatidylinositol-glycan-specific phospholipase D [Pteropus ale</a>   | 48.6 | 48.6 | 100% | 4e-05 | 88%  | <a href="#">gij431896393 ELK05805.1</a>     |
| <a href="#">PREDICTED: phosphatidylinositol-glycan-specific phospholipase D</a>      | 48.6 | 69.6 | 100% | 4e-05 | 88%  | <a href="#">gij586495128 XP_006878008.1</a> |
| <a href="#">PREDICTED: phosphatidylinositol-glycan-specific phospholipase D</a>      | 48.6 | 69.6 | 100% | 4e-05 | 88%  | <a href="#">gij634873155 XP_007948002.1</a> |
| <a href="#">PREDICTED: phosphatidylinositol-glycan-specific phospholipase D</a>      | 48.6 | 69.6 | 100% | 4e-05 | 88%  | <a href="#">gij586529361 XP_006919597.1</a> |
| <a href="#">PREDICTED: phosphatidylinositol-glycan-specific phospholipase D</a>      | 48.1 | 70.4 | 100% | 5e-05 | 94%  | <a href="#">gij664709546 XP_008511735.1</a> |
| <a href="#">PREDICTED: LOW QUALITY PROTEIN: phosphatidylinositol-glyca</a>           | 48.1 | 69.6 | 100% | 5e-05 | 94%  | <a href="#">gij505841011 XP_004614021.1</a> |
| <a href="#">PREDICTED: phosphatidylinositol-glycan-specific phospholipase D</a>      | 48.1 | 70.4 | 100% | 5e-05 | 94%  | <a href="#">gij664709544 XP_008511734.1</a> |
| <a href="#">PREDICTED: phosphatidylinositol-glycan-specific phospholipase D</a>      | 48.1 | 70.4 | 100% | 5e-05 | 94%  | <a href="#">gij478515788 XP_004432133.1</a> |
| <a href="#">PREDICTED: phosphatidylinositol-glycan-specific phospholipase D</a>      | 48.1 | 70.4 | 100% | 5e-05 | 94%  | <a href="#">gij149732005 XP_001497586.1</a> |
| <a href="#">PREDICTED: phosphatidylinositol-glycan-specific phospholipase D</a>      | 48.1 | 70.4 | 100% | 5e-05 | 94%  | <a href="#">gij664709542 XP_008511732.1</a> |
| <a href="#">PREDICTED: phosphatidylinositol-glycan-specific phospholipase D</a>      | 48.1 | 70.4 | 100% | 5e-05 | 94%  | <a href="#">gij664709540 XP_008511731.1</a> |
| <a href="#">PREDICTED: phosphatidylinositol-glycan-specific phospholipase D</a>      | 48.1 | 70.4 | 100% | 5e-05 | 94%  | <a href="#">gij545837650 XP_001925944.5</a> |
| <a href="#">PREDICTED: phosphatidylinositol-glycan-specific phospholipase D</a>      | 48.1 | 70.4 | 100% | 5e-05 | 94%  | <a href="#">gij664709538 XP_008511730.1</a> |
| <a href="#">PREDICTED: LOW QUALITY PROTEIN: phosphatidylinositol-glyca</a>           | 47.7 | 70.0 | 100% | 7e-05 | 88%  | <a href="#">gij560912019 XP_006182298.1</a> |

|                                                                                      |      |      |      |       |     |                                             |
|--------------------------------------------------------------------------------------|------|------|------|-------|-----|---------------------------------------------|
| <a href="#">PREDICTED: phosphatidylinositol-glycan-specific phospholipase D</a>      | 47.7 | 68.7 | 100% | 7e-05 | 88% | <a href="#">gij602684652 XP_007454575.1</a> |
| <a href="#">PREDICTED: phosphatidylinositol-glycan-specific phospholipase D</a>      | 47.7 | 68.7 | 100% | 7e-05 | 88% | <a href="#">gij602684650 XP_007454574.1</a> |
| <a href="#">PREDICTED: phosphatidylinositol-glycan-specific phospholipase D</a>      | 47.7 | 70.0 | 100% | 7e-05 | 88% | <a href="#">gij593754864 XP_007116306.1</a> |
| <a href="#">PREDICTED: phosphatidylinositol-glycan-specific phospholipase D</a>      | 47.7 | 70.0 | 100% | 7e-05 | 88% | <a href="#">gij560952422 XP_006198740.1</a> |
| <a href="#">PREDICTED: phosphatidylinositol-glycan-specific phospholipase D</a>      | 47.7 | 70.0 | 100% | 7e-05 | 88% | <a href="#">gij594700264 XP_007197201.1</a> |
| <a href="#">PREDICTED: phosphatidylinositol-glycan-specific phospholipase D</a>      | 47.7 | 70.0 | 100% | 7e-05 | 88% | <a href="#">gij594700262 XP_007197200.1</a> |
| <a href="#">PREDICTED: phosphatidylinositol-glycan-specific phospholipase D</a>      | 46.4 | 67.4 | 100% | 2e-04 | 82% | <a href="#">gij591294474 XP_007074479.1</a> |
| <a href="#">PREDICTED: phosphatidylinositol-glycan-specific phospholipase D</a>      | 46.4 | 68.7 | 100% | 2e-04 | 93% | <a href="#">gij395511886 XP_003760182.1</a> |
| <a href="#">PREDICTED: phosphatidylinositol-glycan-specific phospholipase D</a>      | 45.6 | 67.4 | 94%  | 3e-04 | 88% | <a href="#">gij512971062 XP_004847666.1</a> |
| <a href="#">Phosphatidylinositol-glycan-specific phospholipase D [Heterocephala</a>  | 45.6 | 67.4 | 94%  | 3e-04 | 88% | <a href="#">gij351706674 EHB09593.1</a>     |
| <a href="#">PREDICTED: phosphatidylinositol-glycan-specific phospholipase D</a>      | 45.6 | 67.4 | 94%  | 3e-04 | 88% | <a href="#">gij512971060 XP_004847665.1</a> |
| <a href="#">PREDICTED: phosphatidylinositol-glycan-specific phospholipase D</a>      | 45.6 | 67.4 | 94%  | 3e-04 | 88% | <a href="#">gij512971057 XP_004847664.1</a> |
| <a href="#">PREDICTED: phosphatidylinositol-glycan-specific phospholipase D</a>      | 45.6 | 67.4 | 94%  | 3e-04 | 88% | <a href="#">gij512971055 XP_004847663.1</a> |
| <a href="#">PREDICTED: phosphatidylinositol-glycan-specific phospholipase D</a>      | 45.6 | 67.4 | 94%  | 3e-04 | 88% | <a href="#">gij512880679 XP_004895023.1</a> |
| <a href="#">PREDICTED: phosphatidylinositol-glycan-specific phospholipase D</a>      | 45.6 | 67.4 | 88%  | 3e-04 | 93% | <a href="#">gij344289516 XP_003416488.1</a> |
| <a href="#">glycosylphosphatidylinositol specific phospholipase D1, isoform CR</a>   | 45.2 | 67.0 | 100% | 5e-04 | 76% | <a href="#">gij148700518 EDL32465.1</a>     |
| <a href="#">PREDICTED: phosphatidylinositol-glycan-specific phospholipase D</a>      | 45.2 | 67.4 | 100% | 5e-04 | 82% | <a href="#">gij641712629 XP_008145534.1</a> |
| <a href="#">PREDICTED: phosphatidylinositol-glycan-specific phospholipase D</a>      | 45.2 | 67.0 | 94%  | 5e-04 | 88% | <a href="#">gij514459231 XP_005003342.1</a> |
| <a href="#">RecName: Full=Phosphatidylinositol-glycan-specific phospholipase</a>     | 45.2 | 67.0 | 100% | 5e-04 | 76% | <a href="#">gij6225846 O70362.1</a>         |
| <a href="#">PREDICTED: phosphatidylinositol-glycan-specific phospholipase D</a>      | 45.2 | 67.0 | 94%  | 5e-04 | 88% | <a href="#">gij348566244 XP_003468912.1</a> |
| <a href="#">glycosylphosphatidylinositol specific phospholipase D1, isoform CR</a>   | 45.2 | 67.0 | 100% | 5e-04 | 76% | <a href="#">gij148700520 EDL32467.1</a>     |
| <a href="#">PREDICTED: phosphatidylinositol-glycan-specific phospholipase D</a>      | 45.2 | 67.0 | 100% | 5e-04 | 75% | <a href="#">gij667294118 XP_008578807.1</a> |
| <a href="#">glycosylphosphatidylinositol-specific phospholipase D precursor [Mus</a> | 45.2 | 67.0 | 100% | 5e-04 | 76% | <a href="#">gij33088003 AAP93132.1</a>      |
| <a href="#">glycosylphosphatidylinositol phospholipase D [Mus musculus]</a>          | 45.2 | 67.0 | 100% | 5e-04 | 76% | <a href="#">gij19547985 AAL87452.1</a>      |
| <a href="#">phosphatidylinositol-glycan-specific phospholipase D precursor [Mus</a>  | 45.2 | 67.0 | 100% | 5e-04 | 76% | <a href="#">gij111378397 NP_032182.2</a>    |
| <a href="#">unnamed protein product [Mus musculus]</a>                               | 45.2 | 67.0 | 100% | 5e-04 | 76% | <a href="#">gij12836535 BAB23698.1</a>      |
| <a href="#">Phosphatidylinositol-glycan-specific phospholipase D [Myotis brand</a>   | 44.8 | 44.8 | 100% | 7e-04 | 75% | <a href="#">gij521024043 EPQ05831.1</a>     |

## Alignments

Download [GenPept](#) [Graphics](#) Sort by: E value ▼ Next ▲ Previous ▲ Descriptions

glycosylphosphatidylinositol phospholipase D [Homo sapiens]  
 Sequence ID: [gij11122875|emb|CAC14844.1](#) Length: 457 Number of Matches: 2

Range 1: 209 to 225 [GenPept](#) [Graphics](#) ▼ Next Match ▲ Previous Match

| Score          | Expect | Identities  | Positives   | Gaps     |
|----------------|--------|-------------|-------------|----------|
| 56.2 bits(125) | 9e-08  | 17/17(100%) | 17/17(100%) | 0/17(0%) |

Query 1 RTLLLVGSPTWKNASRL 17  
 RTLLLVGSPTWKNASRL  
 Sbjct 209 RTLLLVGSPTWKNASRL 225

**Related Information**  
[Gene](#) - associated gene details

Range 2: 278 to 289 [GenPept](#) [Graphics](#) ▼ Next Match ▲ Previous Match ▲ First Match

| Score         | Expect | Identities | Positives | Gaps      |
|---------------|--------|------------|-----------|-----------|
| 21.8 bits(44) | 20913  | 8/12(67%)  | 8/12(66%) | 3/12(25%) |

Query 2 TL---LLVGSPT 10  
 TL LLVG PT  
 Sbjct 278 TLKQVLLVGAPT 289

Download [GenPept](#) [Graphics](#) Sort by: E value ▼ Next ▲ Previous ▲ Descriptions

Unknown (protein for IMAGE:3354070), partial [Homo sapiens]

Sequence ID: [gi|14043248|gb|AAH07614.1](#) Length: 575 Number of Matches: 2

Range 1: 327 to 343 [GenPept](#) [Graphics](#) [Next Match](#) [Previous Match](#)

| Score          | Expect | Identities  | Positives   | Gaps     |
|----------------|--------|-------------|-------------|----------|
| 56.2 bits(125) | 9e-08  | 17/17(100%) | 17/17(100%) | 0/17(0%) |

Query 1 RTLLLVGSPTWKNASRL 17  
 RTLLLVGSPTWKNASRL  
 Sbjct 327 RTLLLVGSPTWKNASRL 343

Range 2: 396 to 407 [GenPept](#) [Graphics](#) [Next Match](#) [Previous Match](#) [First Match](#)

| Score         | Expect | Identities | Positives | Gaps      |
|---------------|--------|------------|-----------|-----------|
| 21.8 bits(44) | 20945  | 8/12(67%)  | 8/12(66%) | 3/12(25%) |

Query 2 TL---LLVGSPT 10  
 TL LLVG PT  
 Sbjct 396 TLQVLLVGAPT 407

**Related Information**

[Gene](#) - associated gene details

[Download](#) [GenPept](#) [Graphics](#) Sort by: E value

[Next](#) [Previous](#) [Descriptions](#)

PREDICTED: phosphatidylinositol-glycan-specific phospholipase D isoform X4 [Papio anubis]

Sequence ID: [gi|685535046|ref|XP\\_009202774.1](#) Length: 677 Number of Matches: 2

Range 1: 429 to 445 [GenPept](#) [Graphics](#) [Next Match](#) [Previous Match](#)

| Score          | Expect | Identities  | Positives   | Gaps     |
|----------------|--------|-------------|-------------|----------|
| 56.2 bits(125) | 9e-08  | 17/17(100%) | 17/17(100%) | 0/17(0%) |

Query 1 RTLLLVGSPTWKNASRL 17  
 RTLLLVGSPTWKNASRL  
 Sbjct 429 RTLLLVGSPTWKNASRL 445

Range 2: 498 to 516 [GenPept](#) [Graphics](#) [Next Match](#) [Previous Match](#) [First Match](#)

| Score         | Expect | Identities | Positives  | Gaps      |
|---------------|--------|------------|------------|-----------|
| 22.3 bits(45) | 14709  | 9/19(47%)  | 11/19(57%) | 3/19(15%) |

Query 2 TL---LLVGSPTWKNASRL 17  
 TL LLVG PT + S +  
 Sbjct 498 TLQVLLVGAPTRDDVSKM 516

**Related Information**

[Gene](#) - associated gene details

[Map Viewer](#) - aligned genomic context

[Download](#) [GenPept](#) [Graphics](#) Sort by: E value

[Next](#) [Previous](#) [Descriptions](#)

PREDICTED: phosphatidylinositol-glycan-specific phospholipase D isoform X3 [Pan paniscus]

Sequence ID: [gi|675773160|ref|XP\\_008975042.1](#) Length: 677 Number of Matches: 2

Range 1: 429 to 445 [GenPept](#) [Graphics](#) [Next Match](#) [Previous Match](#)

| Score          | Expect | Identities  | Positives   | Gaps     |
|----------------|--------|-------------|-------------|----------|
| 56.2 bits(125) | 9e-08  | 17/17(100%) | 17/17(100%) | 0/17(0%) |

Query 1 RTLLLVGSPTWKNASRL 17  
 RTLLLVGSPTWKNASRL  
 Sbjct 429 RTLLLVGSPTWKNASRL 445

Range 2: 498 to 509 [GenPept](#) [Graphics](#) [Next Match](#) [Previous Match](#) [First Match](#)

| Score         | Expect | Identities | Positives | Gaps      |
|---------------|--------|------------|-----------|-----------|
| 21.8 bits(44) | 20964  | 8/12(67%)  | 8/12(66%) | 3/12(25%) |

Query 2 TL---LLVGSPT 10  
 TL LLVG PT  
 Sbjct 498 TLQVLLVGAPT 509

**Related Information**

[Gene](#) - associated gene details

[Map Viewer](#) - aligned genomic context

[Download](#) [GenPept](#) [Graphics](#) Sort by: E value

[Next](#) [Previous](#) [Descriptions](#)

PREDICTED: phosphatidylinositol-glycan-specific phospholipase D isoform X3 [Macaca fascicularis]

Sequence ID: [gi|544429971|ref|XP\\_005553977.1](#) Length: 677 Number of Matches: 2

Range 1: 429 to 445 [GenPept](#) [Graphics](#) [Next Match](#) [Previous Match](#)

| Score          | Expect | Identities  | Positives   | Gaps     |
|----------------|--------|-------------|-------------|----------|
| 56.2 bits(125) | 9e-08  | 17/17(100%) | 17/17(100%) | 0/17(0%) |

Query 1 RTLLLVGSPTWKNASRL 17  
 RTLLLVGSPTWKNASRL  
 Sbjct 429 RTLLLVGSPTWKNASRL 445

Range 2: 498 to 516 [GenPept](#) [Graphics](#) [Next Match](#) [Previous Match](#) [First Match](#)

| Score         | Expect | Identities | Positives  | Gaps      |
|---------------|--------|------------|------------|-----------|
| 22.3 bits(45) | 14709  | 9/19(47%)  | 11/19(57%) | 3/19(15%) |

Query 2 TL---LLVGSPTWKNASRL 17

**Related Information**

[Gene](#) - associated gene details

```
      TL  LLVG PT  + S +  
Sbjct 498  TLTQVLLVGAPTRDDVSKM 516
```

BLAST is a registered trademark of the National Library of Medicine.

[Copyright](#) | [Disclaimer](#) | [Privacy](#) | [Accessibility](#) | [Contact](#) | [Send feedback](#)

[NCBI](#) | [NLM](#) | [NIH](#) | [DHHS](#)

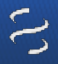

NCBI/ BLAST/ blastp suite/ Formatting Results - BVE7ZF1W01R

Your search parameters were adjusted to search for a short input sequence.  
[Edit and Resubmit](#) [Save Search Strategies](#) [Formatting options](#) [Download](#) [YouTube](#) [How to read this page](#) [Blast report description](#)

GPR116\_KANEQVVQSLDQTYKM\_Mod

**RID** [BVE7ZF1W01R](#) (Expires on 01-21 09:10 am)  
**Query ID** |cl|63041  
**Description** None  
**Molecule type** amino acid  
**Query Length** 16  
**Database Name** nr  
**Description** All non-redundant GenBank CDS translations+PDB+SwissProt+PIR+PRF excluding environmental samples from WGS projects  
**Program** BLASTP 2.2.30+ [Citation](#)

Other reports: [Search Summary](#) [Taxonomy reports](#) [Distance tree of results](#) [Multiple alignment](#)

Graphic Summary

Show Conserved Domains

No putative conserved domains have been detected

Distribution of 100 Blast Hits on the Query Sequence

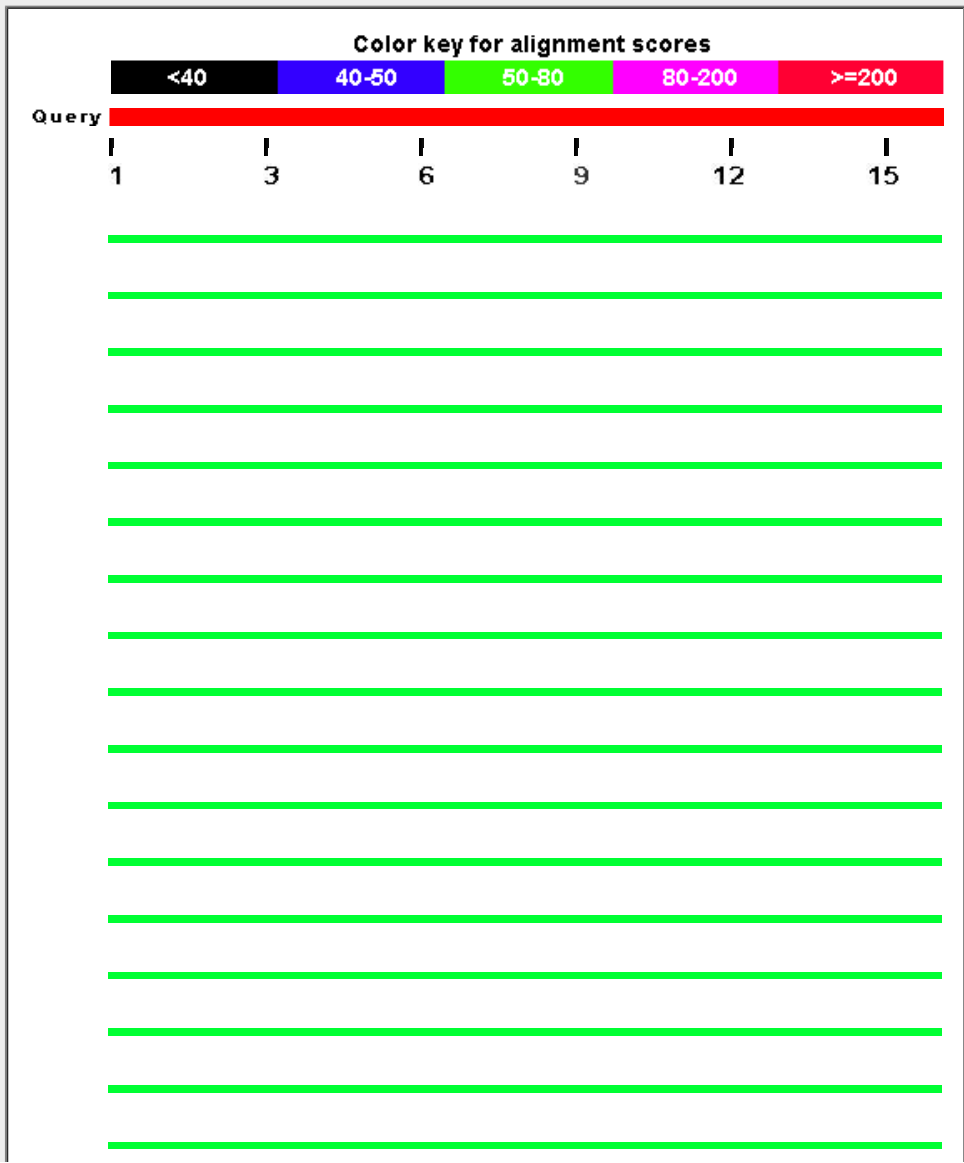



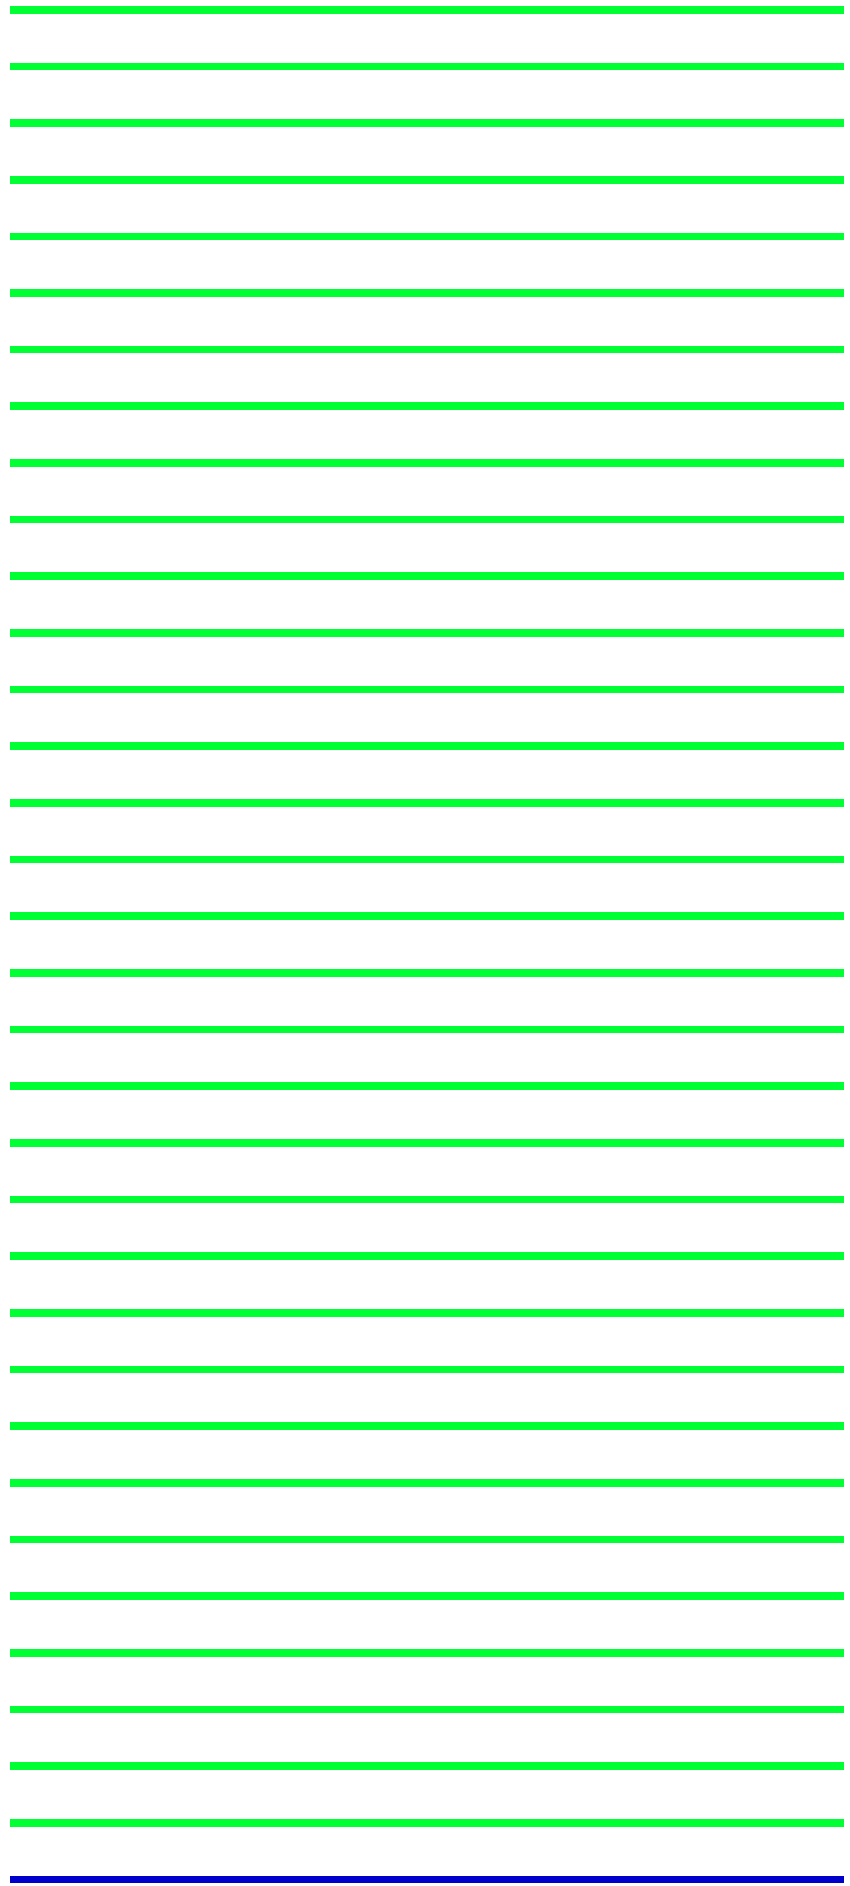



## Descriptions

### Sequences producing significant alignments:

Select: [All](#) [None](#) Selected:0

| <a href="#">Alignments</a> <a href="#">Download</a> <a href="#">GenPept</a> <a href="#">Graphics</a> <a href="#">Distance tree of results</a> <a href="#">Multiple alignment</a> |           |             |             |         |       |                                |  |
|----------------------------------------------------------------------------------------------------------------------------------------------------------------------------------|-----------|-------------|-------------|---------|-------|--------------------------------|--|
| Description                                                                                                                                                                      | Max score | Total score | Query cover | E value | Ident | Accession                      |  |
| <a href="#">hypothetical protein [Homo sapiens]</a>                                                                                                                              | 52.8      | 52.8        | 100%        | 1e-06   | 94%   | <a href="#">CAB43394.1</a>     |  |
| <a href="#">hypothetical protein [synthetic construct]</a>                                                                                                                       | 52.8      | 52.8        | 100%        | 1e-06   | 94%   | <a href="#">CAL38391.1</a>     |  |
| <a href="#">PREDICTED: probable G-protein coupled receptor 116 isoform X3 [Pongo ab]</a>                                                                                         | 52.8      | 52.8        | 100%        | 1e-06   | 94%   | <a href="#">XP_009240213.1</a> |  |
| <a href="#">G-protein coupled receptor GPR116 [Homo sapiens]</a>                                                                                                                 | 52.8      | 52.8        | 100%        | 1e-06   | 94%   | <a href="#">AAN46672.1</a>     |  |
| <a href="#">PREDICTED: probable G-protein coupled receptor 116 isoform X5 [Papio anu]</a>                                                                                        | 52.8      | 52.8        | 100%        | 1e-06   | 94%   | <a href="#">XP_009203591.1</a> |  |
| <a href="#">PREDICTED: probable G-protein coupled receptor 116 isoform X4 [Papio anu]</a>                                                                                        | 52.8      | 52.8        | 100%        | 1e-06   | 94%   | <a href="#">XP_009203590.1</a> |  |
| <a href="#">PREDICTED: probable G-protein coupled receptor 116 isoform X5 [Pan troglc]</a>                                                                                       | 52.8      | 52.8        | 100%        | 1e-06   | 94%   | <a href="#">XP_009449688.1</a> |  |
| <a href="#">PREDICTED: probable G-protein coupled receptor 116 isoform X4 [Pan panis]</a>                                                                                        | 52.8      | 52.8        | 100%        | 1e-06   | 94%   | <a href="#">XP_008956931.1</a> |  |
| <a href="#">PREDICTED: probable G-protein coupled receptor 116 isoform X2 [Rhinopith]</a>                                                                                        | 52.8      | 52.8        | 100%        | 1e-06   | 94%   | <a href="#">XP_010354809.1</a> |  |
| <a href="#">PREDICTED: probable G-protein coupled receptor 116 isoform X4 [Macaca fa]</a>                                                                                        | 52.8      | 52.8        | 100%        | 1e-06   | 94%   | <a href="#">XP_005552855.1</a> |  |
| <a href="#">PREDICTED: probable G-protein coupled receptor 116 isoform X3 [Papio anu]</a>                                                                                        | 52.8      | 52.8        | 100%        | 1e-06   | 94%   | <a href="#">XP_003897745.1</a> |  |
| <a href="#">hypothetical protein EGM_13658 [Macaca fascicularis]</a>                                                                                                             | 52.8      | 52.8        | 100%        | 1e-06   | 94%   | <a href="#">EHH53094.1</a>     |  |
| <a href="#">hypothetical protein EGK_14976 [Macaca mulatta]</a>                                                                                                                  | 52.8      | 52.8        | 100%        | 1e-06   | 94%   | <a href="#">EHH18396.1</a>     |  |
| <a href="#">PREDICTED: probable G-protein coupled receptor 116 isoform 1 [Gorilla goril]</a>                                                                                     | 52.8      | 52.8        | 100%        | 1e-06   | 94%   | <a href="#">XP_004044192.1</a> |  |
| <a href="#">G protein-coupled receptor 116 [Homo sapiens]</a>                                                                                                                    | 52.8      | 52.8        | 100%        | 1e-06   | 94%   | <a href="#">AAH66121.1</a>     |  |
| <a href="#">PREDICTED: probable G-protein coupled receptor 116 isoform X3 [Pan panis]</a>                                                                                        | 52.8      | 52.8        | 100%        | 1e-06   | 94%   | <a href="#">XP_003833242.1</a> |  |
| <a href="#">PREDICTED: probable G-protein coupled receptor 116 isoform X4 [Pan troglc]</a>                                                                                       | 52.8      | 52.8        | 100%        | 1e-06   | 94%   | <a href="#">XP_001140861.2</a> |  |
| <a href="#">PREDICTED: probable G-protein coupled receptor 116 isoform 1 [Nomascus]</a>                                                                                          | 52.8      | 52.8        | 100%        | 1e-06   | 94%   | <a href="#">XP_003254249.1</a> |  |
| <a href="#">PREDICTED: probable G-protein coupled receptor 116 isoform X2 [Pongo ab]</a>                                                                                         | 52.8      | 52.8        | 100%        | 1e-06   | 94%   | <a href="#">XP_002817007.1</a> |  |
| <a href="#">unnamed protein product [Homo sapiens]</a>                                                                                                                           | 52.8      | 52.8        | 100%        | 1e-06   | 94%   | <a href="#">BAF82192.1</a>     |  |
| <a href="#">G protein-coupled receptor 116, isoform CRA_a [Homo sapiens]</a>                                                                                                     | 52.8      | 52.8        | 100%        | 1e-06   | 94%   | <a href="#">EAX04307.1</a>     |  |
| <a href="#">G protein coupled receptor 116 [Homo sapiens]</a>                                                                                                                    | 52.8      | 52.8        | 100%        | 1e-06   | 94%   | <a href="#">AAS21061.1</a>     |  |
| <a href="#">probable G-protein coupled receptor 116 precursor [Homo sapiens]</a>                                                                                                 | 52.8      | 52.8        | 100%        | 1e-06   | 94%   | <a href="#">NP_001091988.1</a> |  |
| <a href="#">G protein-coupled receptor 116, isoform CRA_b [Homo sapiens]</a>                                                                                                     | 52.8      | 52.8        | 100%        | 1e-06   | 94%   | <a href="#">EAX04309.1</a>     |  |
| <a href="#">KIAA0758 protein [Homo sapiens]</a>                                                                                                                                  | 52.8      | 52.8        | 100%        | 1e-06   | 94%   | <a href="#">BAA34478.2</a>     |  |
| <a href="#">PREDICTED: probable G-protein coupled receptor 116 isoform X2 [Papio anu]</a>                                                                                        | 52.8      | 52.8        | 100%        | 1e-06   | 94%   | <a href="#">XP_009203589.1</a> |  |
| <a href="#">PREDICTED: probable G-protein coupled receptor 116 isoform X3 [Macaca fa]</a>                                                                                        | 52.8      | 52.8        | 100%        | 1e-06   | 94%   | <a href="#">XP_005552854.1</a> |  |
| <a href="#">PREDICTED: probable G-protein coupled receptor 116 isoform X3 [Pan troglc]</a>                                                                                       | 52.8      | 52.8        | 100%        | 1e-06   | 94%   | <a href="#">XP_009449687.1</a> |  |
| <a href="#">PREDICTED: probable G-protein coupled receptor 116 isoform X4 [Homo sap]</a>                                                                                         | 52.8      | 52.8        | 100%        | 1e-06   | 94%   | <a href="#">XP_005248952.1</a> |  |

|                                                                                           |      |      |      |       |     |                                |
|-------------------------------------------------------------------------------------------|------|------|------|-------|-----|--------------------------------|
| <a href="#">PREDICTED: probable G-protein coupled receptor 116 isoform X2 [Pan trogl</a>  | 52.8 | 52.8 | 100% | 1e-06 | 94% | <a href="#">XP_009449686.1</a> |
| <a href="#">PREDICTED: probable G-protein coupled receptor 116 isoform X2 [Pan panis</a>  | 52.8 | 52.8 | 100% | 1e-06 | 94% | <a href="#">XP_008956930.1</a> |
| <a href="#">PREDICTED: probable G-protein coupled receptor 116 isoform X3 [Homo sap</a>   | 52.8 | 52.8 | 100% | 1e-06 | 94% | <a href="#">XP_005248951.1</a> |
| <a href="#">PREDICTED: probable G-protein coupled receptor 116 isoform X1 [Rhinopith</a>  | 52.8 | 52.8 | 100% | 1e-06 | 94% | <a href="#">XP_010354807.1</a> |
| <a href="#">PREDICTED: probable G-protein coupled receptor 116 isoform X1 [Papio anu</a>  | 52.8 | 52.8 | 100% | 1e-06 | 94% | <a href="#">XP_009203587.1</a> |
| <a href="#">PREDICTED: probable G-protein coupled receptor 116 isoform X1 [Macaca fe</a>  | 52.8 | 52.8 | 100% | 1e-06 | 94% | <a href="#">XP_005552852.1</a> |
| <a href="#">PREDICTED: probable G-protein coupled receptor 116 isoform X1 [Pan troglc</a> | 52.8 | 52.8 | 100% | 1e-06 | 94% | <a href="#">XP_009449683.1</a> |
| <a href="#">PREDICTED: probable G-protein coupled receptor 116 isoform X1 [Pongo ab</a>   | 52.8 | 52.8 | 100% | 1e-06 | 94% | <a href="#">XP_009240212.1</a> |
| <a href="#">PREDICTED: probable G-protein coupled receptor 116 isoform X1 [Pan panis</a>  | 52.8 | 52.8 | 100% | 1e-06 | 94% | <a href="#">XP_008956928.1</a> |
| <a href="#">PREDICTED: probable G-protein coupled receptor 116 isoform X1 [Homo sap</a>   | 52.8 | 52.8 | 100% | 1e-06 | 94% | <a href="#">XP_005248949.1</a> |
| <a href="#">PREDICTED: probable G-protein coupled receptor 116 [Macaca mulatta]</a>       | 52.8 | 52.8 | 100% | 1e-06 | 94% | <a href="#">XP_001103527.2</a> |
| <a href="#">PREDICTED: probable G-protein coupled receptor 116 isoform 6 [Dasypus nc</a>  | 50.7 | 50.7 | 100% | 6e-06 | 88% | <a href="#">XP_004452861.1</a> |
| <a href="#">PREDICTED: probable G-protein coupled receptor 116 isoform 5 [Dasypus nc</a>  | 50.7 | 50.7 | 100% | 7e-06 | 88% | <a href="#">XP_004452860.1</a> |
| <a href="#">PREDICTED: probable G-protein coupled receptor 116 [Orycteropus afer afer</a> | 50.7 | 50.7 | 100% | 7e-06 | 88% | <a href="#">XP_007934357.1</a> |
| <a href="#">PREDICTED: probable G-protein coupled receptor 116 isoform 4 [Dasypus nc</a>  | 50.7 | 50.7 | 100% | 7e-06 | 88% | <a href="#">XP_004452859.1</a> |
| <a href="#">PREDICTED: probable G-protein coupled receptor 116 [Trichechus manatus ]</a>  | 50.7 | 50.7 | 100% | 7e-06 | 88% | <a href="#">XP_004379588.1</a> |
| <a href="#">PREDICTED: probable G-protein coupled receptor 116 isoform 3 [Dasypus nc</a>  | 50.7 | 50.7 | 100% | 7e-06 | 88% | <a href="#">XP_004452858.1</a> |
| <a href="#">PREDICTED: probable G-protein coupled receptor 116 isoform 1 [Dasypus nc</a>  | 50.7 | 50.7 | 100% | 7e-06 | 88% | <a href="#">XP_004452856.1</a> |
| <a href="#">PREDICTED: probable G-protein coupled receptor 116 isoform X3 [Chloroceb</a>  | 50.3 | 50.3 | 100% | 9e-06 | 88% | <a href="#">XP_007970519.1</a> |
| <a href="#">PREDICTED: probable G-protein coupled receptor 116 isoform X2 [Chloroceb</a>  | 50.3 | 50.3 | 100% | 9e-06 | 88% | <a href="#">XP_007970518.1</a> |
| <a href="#">PREDICTED: probable G-protein coupled receptor 116 isoform X1 [Chloroceb</a>  | 50.3 | 50.3 | 100% | 9e-06 | 88% | <a href="#">XP_007970516.1</a> |
| <a href="#">PREDICTED: probable G-protein coupled receptor 116 [Echinops telfairi]</a>    | 49.4 | 49.4 | 100% | 2e-05 | 88% | <a href="#">XP_004710942.1</a> |
| <a href="#">PREDICTED: probable G-protein coupled receptor 116 [Otolemur garnettii]</a>   | 49.4 | 49.4 | 100% | 2e-05 | 88% | <a href="#">XP_003789395.1</a> |
| <a href="#">PREDICTED: probable G-protein coupled receptor 116 [Ictidomys tridecemlin</a> | 48.1 | 48.1 | 100% | 5e-05 | 81% | <a href="#">XP_005318657.1</a> |
| <a href="#">PREDICTED: probable G-protein coupled receptor 116 [Tarsius syrichta]</a>     | 48.1 | 48.1 | 100% | 5e-05 | 81% | <a href="#">XP_008056651.1</a> |
| <a href="#">PREDICTED: probable G-protein coupled receptor 116 [Sorex araneus]</a>        | 48.1 | 48.1 | 100% | 5e-05 | 81% | <a href="#">XP_004605897.1</a> |
| <a href="#">probable G-protein coupled receptor 116 precursor [Rattus norvegicus]</a>     | 48.1 | 48.1 | 100% | 5e-05 | 81% | <a href="#">NP_620810.1</a>    |
| <a href="#">PREDICTED: probable G-protein coupled receptor 116 isoform X5 [Rattus noi</a> | 48.1 | 48.1 | 100% | 5e-05 | 81% | <a href="#">XP_008765057.1</a> |
| <a href="#">PREDICTED: probable G-protein coupled receptor 116 isoform X4 [Rattus noi</a> | 48.1 | 48.1 | 100% | 5e-05 | 81% | <a href="#">XP_006244656.1</a> |
| <a href="#">PREDICTED: probable G-protein coupled receptor 116 isoform X3 [Rattus noi</a> | 48.1 | 48.1 | 100% | 5e-05 | 81% | <a href="#">XP_008765056.1</a> |
| <a href="#">PREDICTED: probable G-protein coupled receptor 116 isoform X2 [Rattus noi</a> | 48.1 | 48.1 | 100% | 5e-05 | 81% | <a href="#">XP_008765054.1</a> |
| <a href="#">hypothetical protein PANDA_007624 [Ailuropoda melanoleuca]</a>                | 46.9 | 46.9 | 100% | 1e-04 | 81% | <a href="#">EFB13334.1</a>     |
| <a href="#">PREDICTED: probable G-protein coupled receptor 116 [Tupaia chinensis]</a>     | 46.9 | 46.9 | 100% | 1e-04 | 81% | <a href="#">XP_006149150.1</a> |
| <a href="#">PREDICTED: probable G-protein coupled receptor 116 isoform X3 [Ursus mai</a>  | 46.9 | 46.9 | 100% | 1e-04 | 81% | <a href="#">XP_008690048.1</a> |
| <a href="#">PREDICTED: probable G-protein coupled receptor 116 [Leptonychotes wedde</a>   | 46.9 | 46.9 | 100% | 1e-04 | 81% | <a href="#">XP_006727631.1</a> |
| <a href="#">PREDICTED: probable G-protein coupled receptor 116 isoform X7 [Mustela p</a>  | 46.9 | 46.9 | 100% | 1e-04 | 81% | <a href="#">XP_004739803.1</a> |
| <a href="#">PREDICTED: probable G-protein coupled receptor 116 [Odobenus rosmarus ]</a>   | 46.9 | 46.9 | 100% | 1e-04 | 81% | <a href="#">XP_004408503.1</a> |
| <a href="#">PREDICTED: probable G-protein coupled receptor 116-like [Ailuropoda melan</a> | 46.9 | 46.9 | 100% | 1e-04 | 81% | <a href="#">XP_002919049.1</a> |
| <a href="#">PREDICTED: probable G-protein coupled receptor 116 isoform X3 [Oryctolagi</a> | 46.9 | 46.9 | 100% | 1e-04 | 81% | <a href="#">XP_008261239.1</a> |
| <a href="#">PREDICTED: probable G-protein coupled receptor 116 isoform X6 [Mustela p</a>  | 46.9 | 46.9 | 100% | 1e-04 | 81% | <a href="#">XP_004739802.1</a> |
| <a href="#">PREDICTED: probable G-protein coupled receptor 116 isoform X2 [Ursus mai</a>  | 46.9 | 46.9 | 100% | 1e-04 | 81% | <a href="#">XP_008690046.1</a> |
| <a href="#">PREDICTED: probable G-protein coupled receptor 116 isoform X2 [Oryctolagi</a> | 46.9 | 46.9 | 100% | 1e-04 | 81% | <a href="#">XP_008261237.1</a> |
| <a href="#">PREDICTED: probable G-protein coupled receptor 116 isoform X1 [Ursus mai</a>  | 46.9 | 46.9 | 100% | 1e-04 | 81% | <a href="#">XP_008690044.1</a> |
| <a href="#">PREDICTED: probable G-protein coupled receptor 116 isoform X1 [Oryctolagi</a> | 46.9 | 46.9 | 100% | 1e-04 | 81% | <a href="#">XP_008261235.1</a> |
| <a href="#">PREDICTED: probable G-protein coupled receptor 116 isoform X5 [Mustela p</a>  | 46.9 | 46.9 | 100% | 1e-04 | 81% | <a href="#">XP_004739801.1</a> |

|                                                                                             |      |      |      |       |     |                                |
|---------------------------------------------------------------------------------------------|------|------|------|-------|-----|--------------------------------|
| <a href="#">PREDICTED: probable G-protein coupled receptor 116 isoform X3 [Mustela p</a>    | 46.9 | 46.9 | 100% | 1e-04 | 81% | <a href="#">XP_004739799.1</a> |
| <a href="#">PREDICTED: probable G-protein coupled receptor 116 isoform X1 [Mustela p</a>    | 46.9 | 46.9 | 100% | 1e-04 | 81% | <a href="#">XP_004739797.1</a> |
| <a href="#">putative G-protein coupled receptor 116 [Tupaia chinensis]</a>                  | 46.9 | 46.9 | 100% | 1e-04 | 81% | <a href="#">ELW65642.1</a>     |
| <a href="#">PREDICTED: probable G-protein coupled receptor 116 isoform 2 [Ceratotheri</a>   | 46.4 | 46.4 | 100% | 2e-04 | 81% | <a href="#">XP_004424105.1</a> |
| <a href="#">PREDICTED: probable G-protein coupled receptor 116 [Ochotona princeps]</a>      | 46.4 | 46.4 | 100% | 2e-04 | 81% | <a href="#">XP_004590480.1</a> |
| <a href="#">PREDICTED: probable G-protein coupled receptor 116 isoform X5 [Equus cat</a>    | 46.4 | 46.4 | 100% | 2e-04 | 81% | <a href="#">XP_005604037.1</a> |
| <a href="#">PREDICTED: probable G-protein coupled receptor 116 isoform 1 [Ceratotheri</a>   | 46.4 | 46.4 | 100% | 2e-04 | 81% | <a href="#">XP_004424104.1</a> |
| <a href="#">PREDICTED: probable G-protein coupled receptor 116 isoformX1 [Equus cab</a>     | 46.4 | 46.4 | 100% | 2e-04 | 81% | <a href="#">XP_001498309.2</a> |
| <a href="#">PREDICTED: probable G-protein coupled receptor 116 isoform X4 [Equus cat</a>    | 46.4 | 46.4 | 100% | 2e-04 | 81% | <a href="#">XP_005604036.1</a> |
| <a href="#">PREDICTED: probable G-protein coupled receptor 116 isoform X6 [Equus prz</a>    | 46.4 | 46.4 | 100% | 2e-04 | 81% | <a href="#">XP_008540805.1</a> |
| <a href="#">PREDICTED: probable G-protein coupled receptor 116 isoform X2 [Equus cat</a>    | 46.4 | 46.4 | 100% | 2e-04 | 81% | <a href="#">XP_005604034.1</a> |
| <a href="#">PREDICTED: probable G-protein coupled receptor 116 isoform X5 [Equus prz</a>    | 46.4 | 46.4 | 100% | 2e-04 | 81% | <a href="#">XP_008540804.1</a> |
| <a href="#">PREDICTED: probable G-protein coupled receptor 116 isoform X4 [Equus prz</a>    | 46.4 | 46.4 | 100% | 2e-04 | 81% | <a href="#">XP_008540803.1</a> |
| <a href="#">PREDICTED: probable G-protein coupled receptor 116 isoform X3 [Equus prz</a>    | 46.4 | 46.4 | 100% | 2e-04 | 81% | <a href="#">XP_008540802.1</a> |
| <a href="#">PREDICTED: probable G-protein coupled receptor 116 isoform X2 [Equus prz</a>    | 46.4 | 46.4 | 100% | 2e-04 | 81% | <a href="#">XP_008540801.1</a> |
| <a href="#">PREDICTED: probable G-protein coupled receptor 116 isoform X1 [Equus prz</a>    | 46.4 | 46.4 | 100% | 2e-04 | 81% | <a href="#">XP_008540800.1</a> |
| <a href="#">PREDICTED: probable G-protein coupled receptor 116 [Physeter catodon]</a>       | 46.0 | 46.0 | 100% | 2e-04 | 81% | <a href="#">XP_007120943.1</a> |
| <a href="#">PREDICTED: probable G-protein coupled receptor 116 [Lipotes vexillifer]</a>     | 46.0 | 46.0 | 100% | 2e-04 | 81% | <a href="#">XP_007451968.1</a> |
| <a href="#">PREDICTED: probable G-protein coupled receptor 116 [Loxodonta africana]</a>     | 46.0 | 46.0 | 100% | 2e-04 | 88% | <a href="#">XP_010587260.1</a> |
| <a href="#">PREDICTED: probable G-protein coupled receptor 116 isoform X4 [Callithrix j</a> | 45.6 | 45.6 | 100% | 3e-04 | 81% | <a href="#">XP_008992789.1</a> |
| <a href="#">PREDICTED: probable G-protein coupled receptor 116 isoform X2 [Saimiri bo</a>   | 45.6 | 45.6 | 100% | 3e-04 | 81% | <a href="#">XP_003923134.1</a> |
| <a href="#">PREDICTED: probable G-protein coupled receptor 116 isoform X3 [Callithrix j</a> | 45.6 | 45.6 | 100% | 3e-04 | 81% | <a href="#">XP_008992788.1</a> |
| <a href="#">PREDICTED: probable G-protein coupled receptor 116 isoform X2 [Callithrix j</a> | 45.6 | 45.6 | 100% | 3e-04 | 81% | <a href="#">XP_008992787.1</a> |
| <a href="#">PREDICTED: probable G-protein coupled receptor 116 isoform X1 [Callithrix j</a> | 45.6 | 45.6 | 100% | 3e-04 | 81% | <a href="#">XP_008992785.1</a> |
| <a href="#">PREDICTED: probable G-protein coupled receptor 116 isoform X1 [Saimiri bo</a>   | 45.6 | 45.6 | 100% | 3e-04 | 81% | <a href="#">XP_010332277.1</a> |
| <a href="#">probable G-protein coupled receptor 116 precursor [Mus musculus]</a>            | 45.2 | 45.2 | 100% | 5e-04 | 75% | <a href="#">NP_001074647.1</a> |

## Alignments

Download [GenPept](#) [Graphics](#)

[Next](#) [Previous](#) [Descriptions](#)

hypothetical protein [Homo sapiens]

Sequence ID: [emb|CAB43394.1](#) Length: 618 Number of Matches: 1

Range 1: 246 to 261 [GenPept](#) [Graphics](#)

[Next Match](#) [Previous Match](#)

| Score          | Expect | Identities | Positives   | Gaps     |
|----------------|--------|------------|-------------|----------|
| 52.8 bits(117) | 1e-06  | 15/16(94%) | 16/16(100%) | 0/16(0%) |

Query 1 KANEQVVQSLDQTYKM 16  
KANEQVVQSL+QTYKM  
Sbjct 246 KANEQVVQSLNQTYKM 261

### Related Information

[Gene](#) - associated gene details

Download [GenPept](#) [Graphics](#)

[Next](#) [Previous](#) [Descriptions](#)

hypothetical protein [synthetic construct]

Sequence ID: [emb|CAL38391.1](#) Length: 1204 Number of Matches: 1

Range 1: 246 to 261 [GenPept](#) [Graphics](#)

[Next Match](#) [Previous Match](#)

| Score          | Expect | Identities | Positives   | Gaps     |
|----------------|--------|------------|-------------|----------|
| 52.8 bits(117) | 1e-06  | 15/16(94%) | 16/16(100%) | 0/16(0%) |

### Related Information

[Gene](#) - associated gene details

Query 1 KANEQVVQSLDQTYKM 16  
 KANEQVVQSL+QTYKM  
 Sbjct 246 KANEQVVQSLNQTYKM 261

Download [GenPept](#) [Graphics](#)

[▼ Next](#) [▲ Previous](#) [▲ Descriptions](#)

PREDICTED: probable G-protein coupled receptor 116 isoform X3 [Pongo abelii]

Sequence ID: [ref|XP\\_009240213.1|](#) Length: 1289 Number of Matches: 1

Range 1: 246 to 261 [GenPept](#) [Graphics](#)

[▼ Next Match](#) [▲ Previous Match](#)

| Score          | Expect | Identities | Positives   | Gaps     |
|----------------|--------|------------|-------------|----------|
| 52.8 bits(117) | 1e-06  | 15/16(94%) | 16/16(100%) | 0/16(0%) |

Query 1 KANEQVVQSLDQTYKM 16  
 KANEQVVQSL+QTYKM  
 Sbjct 246 KANEQVVQSLNQTYKM 261

**Related Information**

[Gene](#) - associated gene details  
[Map Viewer](#) - aligned genomic context

Download [GenPept](#) [Graphics](#)

[▼ Next](#) [▲ Previous](#) [▲ Descriptions](#)

G-protein coupled receptor GPR116 [Homo sapiens]

Sequence ID: [gb|AAN46672.1|](#) Length: 1300 Number of Matches: 1

Range 1: 246 to 261 [GenPept](#) [Graphics](#)

[▼ Next Match](#) [▲ Previous Match](#)

| Score          | Expect | Identities | Positives   | Gaps     |
|----------------|--------|------------|-------------|----------|
| 52.8 bits(117) | 1e-06  | 15/16(94%) | 16/16(100%) | 0/16(0%) |

Query 1 KANEQVVQSLDQTYKM 16  
 KANEQVVQSL+QTYKM  
 Sbjct 246 KANEQVVQSLNQTYKM 261

**Related Information**

[Gene](#) - associated gene details

Download [GenPept](#) [Graphics](#)

[▼ Next](#) [▲ Previous](#) [▲ Descriptions](#)

PREDICTED: probable G-protein coupled receptor 116 isoform X5 [Papio anubis]

Sequence ID: [ref|XP\\_009203591.1|](#) Length: 1338 Number of Matches: 1

Range 1: 198 to 213 [GenPept](#) [Graphics](#)

[▼ Next Match](#) [▲ Previous Match](#)

| Score          | Expect | Identities | Positives   | Gaps     |
|----------------|--------|------------|-------------|----------|
| 52.8 bits(117) | 1e-06  | 15/16(94%) | 16/16(100%) | 0/16(0%) |

Query 1 KANEQVVQSLDQTYKM 16  
 KANEQVVQSL+QTYKM  
 Sbjct 198 KANEQVVQSLNQTYKM 213

**Related Information**

[Gene](#) - associated gene details  
[Map Viewer](#) - aligned genomic context

BLAST is a registered trademark of the National Library of Medicine.

Your search parameters were adjusted to search for a short input sequence.

[Edit and Resubmit](#) [Save Search Strategies](#) [Formatting options](#) [Download](#)

[YouTube](#) [How to read this page](#) [Blast report description](#)

### GPR116\_KANEQVVQSLNQTYKM\_NonMod

RID [B9FDBUXS01R](#) (Expires on 01-14 13:39 pm)

**Query ID** |cl|257423  
**Description** None  
**Molecule type** amino acid  
**Query Length** 16

**Database Name** nr  
**Description** All non-redundant GenBank CDS translations+PDB+SwissProt+PIR excluding environmental samples from WGS projects  
**Program** BLASTP 2.2.30+ [Citation](#)

Other reports: [Search Summary](#) [Taxonomy reports](#) [Distance tree of results](#) [Multiple alignment](#)

## Graphic Summary

[Show Conserved Domains](#)

No putative conserved domains have been detected

Distribution of 100 Blast Hits on the Query Sequence

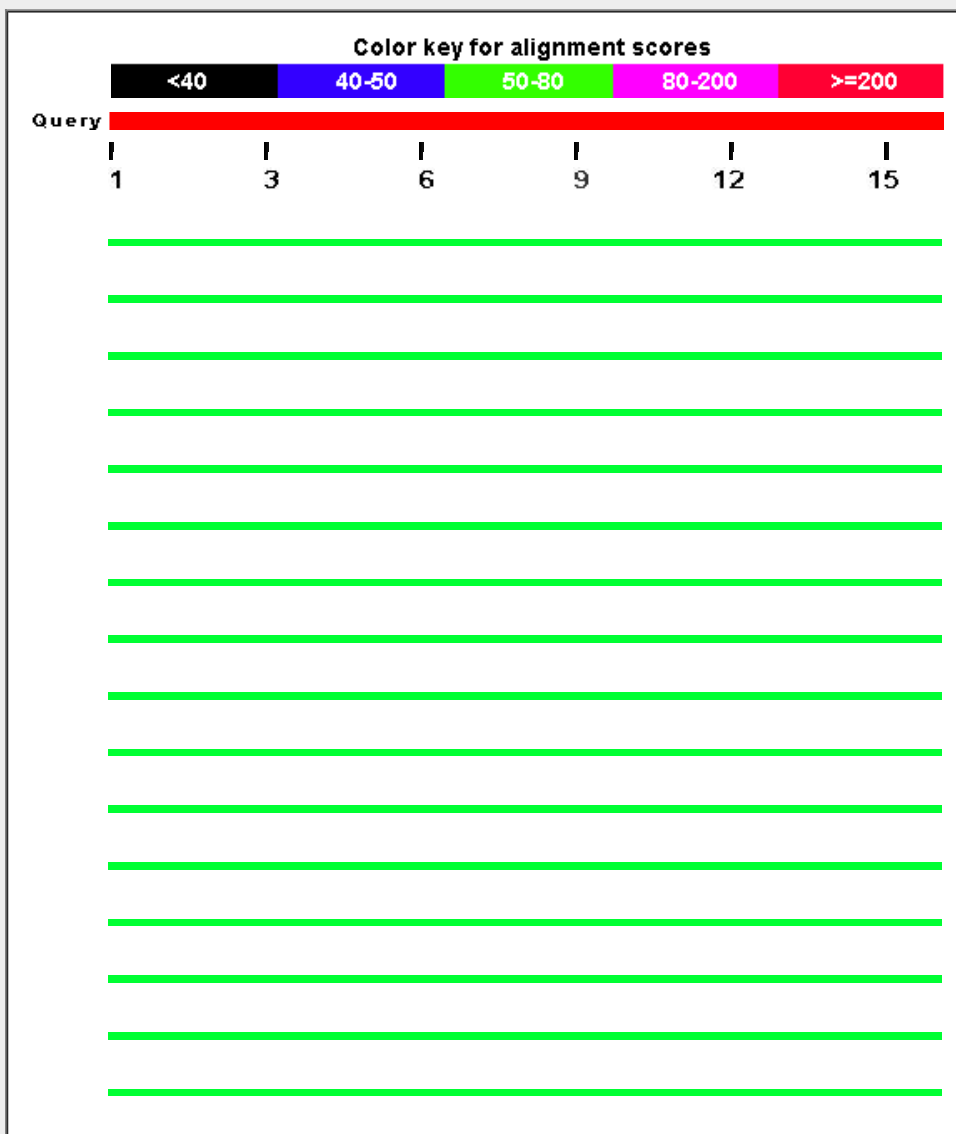





## Descriptions

### Sequences producing significant alignments:

Select: [All](#) [None](#) Selected:0

[Alignments](#)
[Download](#)
[GenPept](#)
[Graphics](#)
[Distance tree of results](#)
[Multiple alignment](#)

| Description                                                                      | Max score | Total score | Query cover | E value | Ident | Accession                                    |
|----------------------------------------------------------------------------------|-----------|-------------|-------------|---------|-------|----------------------------------------------|
| <a href="#">hypothetical protein [Homo sapiens]</a>                              | 55.4      | 55.4        | 100%        | 2e-07   | 100%  | <a href="#">gij4886491 CAB43394.1</a>        |
| <a href="#">hypothetical protein [synthetic construct]</a>                       | 55.4      | 55.4        | 100%        | 2e-07   | 100%  | <a href="#">gij117645848 CAL38391.1</a>      |
| <a href="#">PREDICTED: probable G-protein coupled receptor 116 isoform X3</a>    | 55.4      | 55.4        | 100%        | 2e-07   | 100%  | <a href="#">gij686722337 XP_009240213.1</a>  |
| <a href="#">G-protein coupled receptor GPR116 [Homo sapiens]</a>                 | 55.4      | 55.4        | 100%        | 2e-07   | 100%  | <a href="#">gij24286029 AAN46672.1</a>       |
| <a href="#">PREDICTED: probable G-protein coupled receptor 116 isoform X5</a>    | 55.4      | 55.4        | 100%        | 2e-07   | 100%  | <a href="#">gij685537071 XP_009203591.1</a>  |
| <a href="#">PREDICTED: probable G-protein coupled receptor 116 isoform X4</a>    | 55.4      | 55.4        | 100%        | 2e-07   | 100%  | <a href="#">gij685537069 XP_009203590.1</a>  |
| <a href="#">PREDICTED: probable G-protein coupled receptor 116 isoform X5</a>    | 55.4      | 55.4        | 100%        | 2e-07   | 100%  | <a href="#">gij694916767 XP_009449688.1</a>  |
| <a href="#">PREDICTED: probable G-protein coupled receptor 116 isoform X4</a>    | 55.4      | 55.4        | 100%        | 2e-07   | 100%  | <a href="#">gij675802057 XP_008956931.1</a>  |
| <a href="#">PREDICTED: probable G-protein coupled receptor 116 isoform X2</a>    | 55.4      | 55.4        | 100%        | 2e-07   | 100%  | <a href="#">gij724961251 XP_010354809.1</a>  |
| <a href="#">PREDICTED: probable G-protein coupled receptor 116 isoform X4</a>    | 55.4      | 55.4        | 100%        | 2e-07   | 100%  | <a href="#">gij544427534 XP_005552855.1</a>  |
| <a href="#">PREDICTED: probable G-protein coupled receptor 116 isoform X3</a>    | 55.4      | 55.4        | 100%        | 2e-07   | 100%  | <a href="#">gij402867181 XP_003897745.1</a>  |
| <a href="#">hypothetical protein EGM_13658 [Macaca fascicularis]</a>             | 55.4      | 55.4        | 100%        | 2e-07   | 100%  | <a href="#">gij355748611 EHH53094.1</a>      |
| <a href="#">hypothetical protein EGK_14976 [Macaca mulatta]</a>                  | 55.4      | 55.4        | 100%        | 2e-07   | 100%  | <a href="#">gij355561764 EHH18396.1</a>      |
| <a href="#">PREDICTED: probable G-protein coupled receptor 116 isoform 1 [C</a>  | 55.4      | 55.4        | 100%        | 2e-07   | 100%  | <a href="#">gij426353420 XP_004044192.1</a>  |
| <a href="#">G protein-coupled receptor 116 [Homo sapiens]</a>                    | 55.4      | 55.4        | 100%        | 2e-07   | 100%  | <a href="#">gij42490767 AAH66121.1</a>       |
| <a href="#">PREDICTED: probable G-protein coupled receptor 116 isoform X3</a>    | 55.4      | 55.4        | 100%        | 2e-07   | 100%  | <a href="#">gij397526671 XP_003833242.1</a>  |
| <a href="#">PREDICTED: probable G-protein coupled receptor 116 isoform X4</a>    | 55.4      | 55.4        | 100%        | 2e-07   | 100%  | <a href="#">gij332824352 XP_001140861.2</a>  |
| <a href="#">PREDICTED: probable G-protein coupled receptor 116 isoform 1 [H</a>  | 55.4      | 55.4        | 100%        | 2e-07   | 100%  | <a href="#">gij332210305 XP_003254249.1</a>  |
| <a href="#">PREDICTED: probable G-protein coupled receptor 116 isoform X2</a>    | 55.4      | 55.4        | 100%        | 2e-07   | 100%  | <a href="#">gij297678285 XP_002817007.1</a>  |
| <a href="#">unnamed protein product [Homo sapiens]</a>                           | 55.4      | 55.4        | 100%        | 2e-07   | 100%  | <a href="#">gij158260029 BAF82192.1</a>      |
| <a href="#">G protein-coupled receptor 116, isoform CRA_a [Homo sapiens]</a>     | 55.4      | 55.4        | 100%        | 2e-07   | 100%  | <a href="#">gij119624712 EAX04307.1</a>      |
| <a href="#">G protein coupled receptor 116 [Homo sapiens]</a>                    | 55.4      | 55.4        | 100%        | 2e-07   | 100%  | <a href="#">gij42566596 AAS21061.1</a>       |
| <a href="#">probable G-protein coupled receptor 116 precursor [Homo sapiens]</a> | 55.4      | 55.4        | 100%        | 2e-07   | 100%  | <a href="#">gij148719671 INP_001091988.1</a> |
| <a href="#">G protein-coupled receptor 116, isoform CRA_b [Homo sapiens]</a>     | 55.4      | 55.4        | 100%        | 2e-07   | 100%  | <a href="#">gij119624714 EAX04309.1</a>      |
| <a href="#">KIAA0758 protein [Homo sapiens]</a>                                  | 55.4      | 55.4        | 100%        | 2e-07   | 100%  | <a href="#">gij71891679 BAA34478.2</a>       |
| <a href="#">PREDICTED: probable G-protein coupled receptor 116 isoform X2</a>    | 55.4      | 55.4        | 100%        | 2e-07   | 100%  | <a href="#">gij685537065 XP_009203589.1</a>  |
| <a href="#">PREDICTED: probable G-protein coupled receptor 116 isoform X3</a>    | 55.4      | 55.4        | 100%        | 2e-07   | 100%  | <a href="#">gij544427532 XP_005552854.1</a>  |
| <a href="#">PREDICTED: probable G-protein coupled receptor 116 isoform X3</a>    | 55.4      | 55.4        | 100%        | 2e-07   | 100%  | <a href="#">gij694916763 XP_009449687.1</a>  |



|                                                                                    |      |      |      |       |      |                                             |
|------------------------------------------------------------------------------------|------|------|------|-------|------|---------------------------------------------|
| <a href="#">PREDICTED: probable G-protein coupled receptor 116 isoform X4</a>      | 55.4 | 55.4 | 100% | 2e-07 | 100% | <a href="#">gij530381555 XP_005248952.1</a> |
| <a href="#">PREDICTED: probable G-protein coupled receptor 116 isoform X2</a>      | 55.4 | 55.4 | 100% | 2e-07 | 100% | <a href="#">gij694916761 XP_009449686.1</a> |
| <a href="#">PREDICTED: probable G-protein coupled receptor 116 isoform X2</a>      | 55.4 | 55.4 | 100% | 2e-07 | 100% | <a href="#">gij675802053 XP_008956930.1</a> |
| <a href="#">PREDICTED: probable G-protein coupled receptor 116 isoform X3</a>      | 55.4 | 55.4 | 100% | 2e-07 | 100% | <a href="#">gij530381553 XP_005248951.1</a> |
| <a href="#">PREDICTED: probable G-protein coupled receptor 116 isoform X1</a>      | 55.4 | 55.4 | 100% | 2e-07 | 100% | <a href="#">gij724961247 XP_010354807.1</a> |
| <a href="#">PREDICTED: probable G-protein coupled receptor 116 isoform X1</a>      | 55.4 | 55.4 | 100% | 2e-07 | 100% | <a href="#">gij685537061 XP_009203587.1</a> |
| <a href="#">PREDICTED: probable G-protein coupled receptor 116 isoform X1</a>      | 55.4 | 55.4 | 100% | 2e-07 | 100% | <a href="#">gij544427528 XP_005552852.1</a> |
| <a href="#">PREDICTED: probable G-protein coupled receptor 116 isoform X1</a>      | 55.4 | 55.4 | 100% | 2e-07 | 100% | <a href="#">gij694916757 XP_009449683.1</a> |
| <a href="#">PREDICTED: probable G-protein coupled receptor 116 isoform X1</a>      | 55.4 | 55.4 | 100% | 2e-07 | 100% | <a href="#">gij686722333 XP_009240212.1</a> |
| <a href="#">PREDICTED: probable G-protein coupled receptor 116 isoform X1</a>      | 55.4 | 55.4 | 100% | 2e-07 | 100% | <a href="#">gij675802049 XP_008956928.1</a> |
| <a href="#">PREDICTED: probable G-protein coupled receptor 116 isoform X1</a>      | 55.4 | 55.4 | 100% | 2e-07 | 100% | <a href="#">gij530381549 XP_005248949.1</a> |
| <a href="#">PREDICTED: probable G-protein coupled receptor 116 [Macaca mu]</a>     | 55.4 | 55.4 | 100% | 2e-07 | 100% | <a href="#">gij297290986 XP_001103527.2</a> |
| <a href="#">PREDICTED: probable G-protein coupled receptor 116 isoform 6 [C</a>    | 53.2 | 53.2 | 100% | 8e-07 | 94%  | <a href="#">gij488521900 XP_004452861.1</a> |
| <a href="#">PREDICTED: probable G-protein coupled receptor 116 isoform 5 [C</a>    | 53.2 | 53.2 | 100% | 9e-07 | 94%  | <a href="#">gij488521898 XP_004452860.1</a> |
| <a href="#">PREDICTED: probable G-protein coupled receptor 116 [Orycteropu</a>     | 53.2 | 53.2 | 100% | 9e-07 | 94%  | <a href="#">gij634835124 XP_007934357.1</a> |
| <a href="#">PREDICTED: probable G-protein coupled receptor 116 isoform 4 [C</a>    | 53.2 | 53.2 | 100% | 9e-07 | 94%  | <a href="#">gij488521896 XP_004452859.1</a> |
| <a href="#">PREDICTED: probable G-protein coupled receptor 116 [Trichechus</a>     | 53.2 | 53.2 | 100% | 9e-07 | 94%  | <a href="#">gij471389220 XP_004379588.1</a> |
| <a href="#">PREDICTED: probable G-protein coupled receptor 116 isoform 3 [C</a>    | 53.2 | 53.2 | 100% | 9e-07 | 94%  | <a href="#">gij488521894 XP_004452858.1</a> |
| <a href="#">PREDICTED: probable G-protein coupled receptor 116 isoform 1 [C</a>    | 53.2 | 53.2 | 100% | 9e-07 | 94%  | <a href="#">gij488521890 XP_004452856.1</a> |
| <a href="#">PREDICTED: probable G-protein coupled receptor 116 isoform X3</a>      | 52.8 | 52.8 | 100% | 1e-06 | 94%  | <a href="#">gij635094630 XP_007970519.1</a> |
| <a href="#">PREDICTED: probable G-protein coupled receptor 116 isoform X2</a>      | 52.8 | 52.8 | 100% | 1e-06 | 94%  | <a href="#">gij635094628 XP_007970518.1</a> |
| <a href="#">PREDICTED: probable G-protein coupled receptor 116 isoform X1</a>      | 52.8 | 52.8 | 100% | 1e-06 | 94%  | <a href="#">gij635094624 XP_007970516.1</a> |
| <a href="#">PREDICTED: probable G-protein coupled receptor 116 [Echinops t</a>     | 52.0 | 52.0 | 100% | 2e-06 | 94%  | <a href="#">gij507682428 XP_004710942.1</a> |
| <a href="#">PREDICTED: probable G-protein coupled receptor 116 [Otolemur g</a>     | 52.0 | 52.0 | 100% | 2e-06 | 94%  | <a href="#">gij395832700 XP_003789395.1</a> |
| <a href="#">PREDICTED: probable G-protein coupled receptor 116 [Ictidomys t</a>    | 50.7 | 50.7 | 100% | 6e-06 | 88%  | <a href="#">gij532065597 XP_005318657.1</a> |
| <a href="#">PREDICTED: probable G-protein coupled receptor 116 [Tarsius syr</a>    | 50.7 | 50.7 | 100% | 6e-06 | 88%  | <a href="#">gij640800780 XP_008056651.1</a> |
| <a href="#">PREDICTED: probable G-protein coupled receptor 116 [Sorex aran</a>     | 50.7 | 50.7 | 100% | 6e-06 | 88%  | <a href="#">gij505791455 XP_004605897.1</a> |
| <a href="#">probable G-protein coupled receptor 116 precursor [Rattus norvegic</a> | 50.7 | 50.7 | 100% | 6e-06 | 88%  | <a href="#">gij20806161 INP_620810.1</a>    |
| <a href="#">PREDICTED: probable G-protein coupled receptor 116 isoform X5</a>      | 50.7 | 50.7 | 100% | 6e-06 | 88%  | <a href="#">gij672064229 XP_008765057.1</a> |
| <a href="#">PREDICTED: probable G-protein coupled receptor 116 isoform X4</a>      | 50.7 | 50.7 | 100% | 6e-06 | 88%  | <a href="#">gij564367517 XP_006244656.1</a> |
| <a href="#">PREDICTED: probable G-protein coupled receptor 116 isoform X3</a>      | 50.7 | 50.7 | 100% | 6e-06 | 88%  | <a href="#">gij672064226 XP_008765056.1</a> |
| <a href="#">PREDICTED: probable G-protein coupled receptor 116 isoform X2</a>      | 50.7 | 50.7 | 100% | 6e-06 | 88%  | <a href="#">gij672064222 XP_008765054.1</a> |
| <a href="#">hypothetical protein PANDA_007624 [Ailuropoda melanoleuca]</a>         | 49.4 | 49.4 | 100% | 2e-05 | 88%  | <a href="#">gij281337750 EFB13334.1</a>     |
| <a href="#">PREDICTED: probable G-protein coupled receptor 116 [Tupaia chi</a>     | 49.4 | 49.4 | 100% | 2e-05 | 88%  | <a href="#">gij562840007 XP_006149150.1</a> |
| <a href="#">PREDICTED: probable G-protein coupled receptor 116 isoform X3</a>      | 49.4 | 49.4 | 100% | 2e-05 | 88%  | <a href="#">gij670998310 XP_008690048.1</a> |
| <a href="#">PREDICTED: probable G-protein coupled receptor 116 [Leptonych</a>      | 49.4 | 49.4 | 100% | 2e-05 | 88%  | <a href="#">gij585150307 XP_006727631.1</a> |
| <a href="#">PREDICTED: probable G-protein coupled receptor 116 isoform X7</a>      | 49.4 | 49.4 | 100% | 2e-05 | 88%  | <a href="#">gij511830214 XP_004739803.1</a> |
| <a href="#">PREDICTED: probable G-protein coupled receptor 116 [Odobenus</a>       | 49.4 | 49.4 | 100% | 2e-05 | 88%  | <a href="#">gij472378162 XP_004408503.1</a> |
| <a href="#">PREDICTED: probable G-protein coupled receptor 116-like [Ailurog</a>   | 49.4 | 49.4 | 100% | 2e-05 | 88%  | <a href="#">gij301767272 XP_002919049.1</a> |
| <a href="#">PREDICTED: probable G-protein coupled receptor 116 isoform X3</a>      | 49.4 | 49.4 | 100% | 2e-05 | 88%  | <a href="#">gij655841660 XP_008261239.1</a> |
| <a href="#">PREDICTED: probable G-protein coupled receptor 116 isoform X6</a>      | 49.4 | 49.4 | 100% | 2e-05 | 88%  | <a href="#">gij511830212 XP_004739802.1</a> |
| <a href="#">PREDICTED: probable G-protein coupled receptor 116 isoform X2</a>      | 49.4 | 49.4 | 100% | 2e-05 | 88%  | <a href="#">gij670998308 XP_008690046.1</a> |
| <a href="#">PREDICTED: probable G-protein coupled receptor 116 isoform X2</a>      | 49.4 | 49.4 | 100% | 2e-05 | 88%  | <a href="#">gij655841657 XP_008261237.1</a> |
| <a href="#">PREDICTED: probable G-protein coupled receptor 116 isoform X1</a>      | 49.4 | 49.4 | 100% | 2e-05 | 88%  | <a href="#">gij670998304 XP_008690044.1</a> |
| <a href="#">PREDICTED: probable G-protein coupled receptor 116 isoform X1</a>      | 49.4 | 49.4 | 100% | 2e-05 | 88%  | <a href="#">gij655841651 XP_008261235.1</a> |

|                                                                                  |      |      |      |       |     |                                              |
|----------------------------------------------------------------------------------|------|------|------|-------|-----|----------------------------------------------|
| <a href="#">PREDICTED: probable G-protein coupled receptor 116 isoform X5</a>    | 49.4 | 49.4 | 100% | 2e-05 | 88% | <a href="#">gil511830210 XP_004739801.1</a>  |
| <a href="#">PREDICTED: probable G-protein coupled receptor 116 isoform X3</a>    | 49.4 | 49.4 | 100% | 2e-05 | 88% | <a href="#">gil511830206 XP_004739799.1</a>  |
| <a href="#">PREDICTED: probable G-protein coupled receptor 116 isoform X1</a>    | 49.4 | 49.4 | 100% | 2e-05 | 88% | <a href="#">gil511830202 XP_004739797.1</a>  |
| <a href="#">putative G-protein coupled receptor 116 [Tupaia chinensis]</a>       | 49.4 | 49.4 | 100% | 2e-05 | 88% | <a href="#">gil444725062 ELW65642.1</a>      |
| <a href="#">PREDICTED: probable G-protein coupled receptor 116 isoform 2 [C</a>  | 49.0 | 49.0 | 100% | 2e-05 | 88% | <a href="#">gil478499560 XP_004424105.1</a>  |
| <a href="#">PREDICTED: probable G-protein coupled receptor 116 [Ochotona ]</a>   | 49.0 | 49.0 | 100% | 2e-05 | 88% | <a href="#">gil504157919 XP_004590480.1</a>  |
| <a href="#">PREDICTED: probable G-protein coupled receptor 116 isoform X5</a>    | 49.0 | 49.0 | 100% | 2e-05 | 88% | <a href="#">gil545198452 XP_005604037.1</a>  |
| <a href="#">PREDICTED: probable G-protein coupled receptor 116 isoform 1 [C</a>  | 49.0 | 49.0 | 100% | 2e-05 | 88% | <a href="#">gil478499558 XP_004424104.1</a>  |
| <a href="#">PREDICTED: probable G-protein coupled receptor 116 isoform X1 [</a>  | 49.0 | 49.0 | 100% | 2e-05 | 88% | <a href="#">gil194223572 XP_001498309.2</a>  |
| <a href="#">PREDICTED: probable G-protein coupled receptor 116 isoform X4</a>    | 49.0 | 49.0 | 100% | 2e-05 | 88% | <a href="#">gil545198450 XP_005604036.1</a>  |
| <a href="#">PREDICTED: probable G-protein coupled receptor 116 isoform X6</a>    | 49.0 | 49.0 | 100% | 2e-05 | 88% | <a href="#">gil664766618 XP_008540805.1</a>  |
| <a href="#">PREDICTED: probable G-protein coupled receptor 116 isoform X2</a>    | 49.0 | 49.0 | 100% | 2e-05 | 88% | <a href="#">gil545198446 XP_005604034.1</a>  |
| <a href="#">PREDICTED: probable G-protein coupled receptor 116 isoform X5</a>    | 49.0 | 49.0 | 100% | 2e-05 | 88% | <a href="#">gil664766616 XP_008540804.1</a>  |
| <a href="#">PREDICTED: probable G-protein coupled receptor 116 isoform X4</a>    | 49.0 | 49.0 | 100% | 2e-05 | 88% | <a href="#">gil664766614 XP_008540803.1</a>  |
| <a href="#">PREDICTED: probable G-protein coupled receptor 116 isoform X3</a>    | 49.0 | 49.0 | 100% | 2e-05 | 88% | <a href="#">gil664766612 XP_008540802.1</a>  |
| <a href="#">PREDICTED: probable G-protein coupled receptor 116 isoform X2</a>    | 49.0 | 49.0 | 100% | 2e-05 | 88% | <a href="#">gil664766610 XP_008540801.1</a>  |
| <a href="#">PREDICTED: probable G-protein coupled receptor 116 isoform X1</a>    | 49.0 | 49.0 | 100% | 2e-05 | 88% | <a href="#">gil664766608 XP_008540800.1</a>  |
| <a href="#">PREDICTED: probable G-protein coupled receptor 116 [Physeter c;</a>  | 48.6 | 48.6 | 100% | 3e-05 | 88% | <a href="#">gil593764740 XP_007120943.1</a>  |
| <a href="#">PREDICTED: probable G-protein coupled receptor 116 [Lipotes ve]</a>  | 48.6 | 48.6 | 100% | 3e-05 | 88% | <a href="#">gil602733162 XP_007451968.1</a>  |
| <a href="#">PREDICTED: probable G-protein coupled receptor 116 [Loxodonta</a>    | 48.6 | 48.6 | 100% | 3e-05 | 94% | <a href="#">gil731454283 XP_010587260.1</a>  |
| <a href="#">PREDICTED: probable G-protein coupled receptor 116 isoform X4</a>    | 48.1 | 48.1 | 100% | 4e-05 | 88% | <a href="#">gil675652897 XP_008992789.1</a>  |
| <a href="#">PREDICTED: probable G-protein coupled receptor 116 isoform X2</a>    | 48.1 | 48.1 | 100% | 4e-05 | 88% | <a href="#">gil403261451 XP_003923134.1</a>  |
| <a href="#">PREDICTED: probable G-protein coupled receptor 116 isoform X3</a>    | 48.1 | 48.1 | 100% | 4e-05 | 88% | <a href="#">gil675652895 XP_008992788.1</a>  |
| <a href="#">PREDICTED: probable G-protein coupled receptor 116 isoform X2</a>    | 48.1 | 48.1 | 100% | 4e-05 | 88% | <a href="#">gil675652893 XP_008992787.1</a>  |
| <a href="#">PREDICTED: probable G-protein coupled receptor 116 isoform X1</a>    | 48.1 | 48.1 | 100% | 4e-05 | 88% | <a href="#">gil675652889 XP_008992785.1</a>  |
| <a href="#">PREDICTED: probable G-protein coupled receptor 116 isoform X1</a>    | 48.1 | 48.1 | 100% | 4e-05 | 88% | <a href="#">gil725556657 XP_010332277.1</a>  |
| <a href="#">probable G-protein coupled receptor 116 precursor [Mus musculus]</a> | 47.7 | 47.7 | 100% | 6e-05 | 81% | <a href="#">gil124487171 INP_001074647.1</a> |

## Alignments

Download GenPept Graphics

Next Previous Descriptions

hypothetical protein [Homo sapiens]

Sequence ID: [gil4886491|emb|CAB43394.1](#) Length: 618 Number of Matches: 1

Range 1: 246 to 261 GenPept Graphics

Next Match Previous Match

| Score          | Expect | Identities  | Positives   | Gaps     |
|----------------|--------|-------------|-------------|----------|
| 55.4 bits(123) | 2e-07  | 16/16(100%) | 16/16(100%) | 0/16(0%) |

Query 1 KANEQVVQSLNQTYSKM 16  
KANEQVVQSLNQTYSKM  
Sbjct 246 KANEQVVQSLNQTYSKM 261

### Related Information

[Gene](#) - associated gene details

Download GenPept Graphics

Next Previous Descriptions

hypothetical protein [synthetic construct]

Sequence ID: [gil117645848|emb|CAL38391.1](#) Length: 1204 Number of Matches: 1

Range 1: 246 to 261 GenPept Graphics

Next Match Previous Match

| Score          | Expect | Identities  | Positives   | Gaps     |
|----------------|--------|-------------|-------------|----------|
| 55.4 bits(123) | 2e-07  | 16/16(100%) | 16/16(100%) | 0/16(0%) |

Query 1 KANEQVVQSLNQTYSKM 16

### Related Information

[Gene](#) - associated gene details

Sbjct 246 KANEQVVQSLNQTYSKM 261

[Download](#) [GenPept](#) [Graphics](#)

[Next](#) [Previous](#) [Descriptions](#)

PREDICTED: probable G-protein coupled receptor 116 isoform X3 [Pongo abelii]

Sequence ID: [gi|686722337|ref|XP\\_009240213.1|](#) Length: 1289 Number of Matches: 1

Range 1: 246 to 261 [GenPept](#) [Graphics](#)

[Next Match](#) [Previous Match](#)

| Score          | Expect | Identities  | Positives   | Gaps     |
|----------------|--------|-------------|-------------|----------|
| 55.4 bits(123) | 2e-07  | 16/16(100%) | 16/16(100%) | 0/16(0%) |

Query 1 KANEQVVQSLNQTYSKM 16  
 KANEQVVQSLNQTYSKM  
 Sbjct 246 KANEQVVQSLNQTYSKM 261

**Related Information**

[Gene](#) - associated gene details  
[Map Viewer](#) - aligned genomic context

[Download](#) [GenPept](#) [Graphics](#)

[Next](#) [Previous](#) [Descriptions](#)

G-protein coupled receptor GPR116 [Homo sapiens]

Sequence ID: [gi|24286029|gb|AAN46672.1|](#) Length: 1300 Number of Matches: 1

Range 1: 246 to 261 [GenPept](#) [Graphics](#)

[Next Match](#) [Previous Match](#)

| Score          | Expect | Identities  | Positives   | Gaps     |
|----------------|--------|-------------|-------------|----------|
| 55.4 bits(123) | 2e-07  | 16/16(100%) | 16/16(100%) | 0/16(0%) |

Query 1 KANEQVVQSLNQTYSKM 16  
 KANEQVVQSLNQTYSKM  
 Sbjct 246 KANEQVVQSLNQTYSKM 261

**Related Information**

[Gene](#) - associated gene details

[Download](#) [GenPept](#) [Graphics](#)

[Next](#) [Previous](#) [Descriptions](#)

PREDICTED: probable G-protein coupled receptor 116 isoform X5 [Papio anubis]

Sequence ID: [gi|685537071|ref|XP\\_009203591.1|](#) Length: 1338 Number of Matches: 1

Range 1: 198 to 213 [GenPept](#) [Graphics](#)

[Next Match](#) [Previous Match](#)

| Score          | Expect | Identities  | Positives   | Gaps     |
|----------------|--------|-------------|-------------|----------|
| 55.4 bits(123) | 2e-07  | 16/16(100%) | 16/16(100%) | 0/16(0%) |

Query 1 KANEQVVQSLNQTYSKM 16  
 KANEQVVQSLNQTYSKM  
 Sbjct 198 KANEQVVQSLNQTYSKM 213

**Related Information**

[Gene](#) - associated gene details  
[Map Viewer](#) - aligned genomic context

BLAST is a registered trademark of the National Library of Medicine.

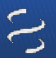

Your search parameters were adjusted to search for a short input sequence.

Edit and Resubmit Save Search Strategies Formatting options Download

YouTube How to read this page Blast report description

THBS1\_KVVNSTTGPGEHLRN\_NonMod

RID BE8AVDBH014 (Expires on 01-16 09:09 am)
Query ID lcl|15533
Description None
Molecule type amino acid
Query Length 15

Database Name nr
Description All non-redundant GenBank CDS translations+PDB+SwissProt+PIR excluding environmental samples from WGS projects
Program BLASTP 2.2.30+ Citation

Other reports: Search Summary [Taxonomy reports] [Distance tree of results] [Multiple alignment]

New DELTA-BLAST a more sensitive protein-protein search

Graphic Summary

Show Conserved Domains

Putative conserved domains have been detected, click on the image below for detailed results.

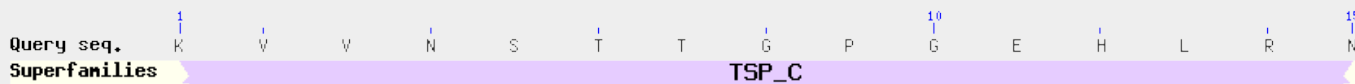

Distribution of 100 Blast Hits on the Query Sequence

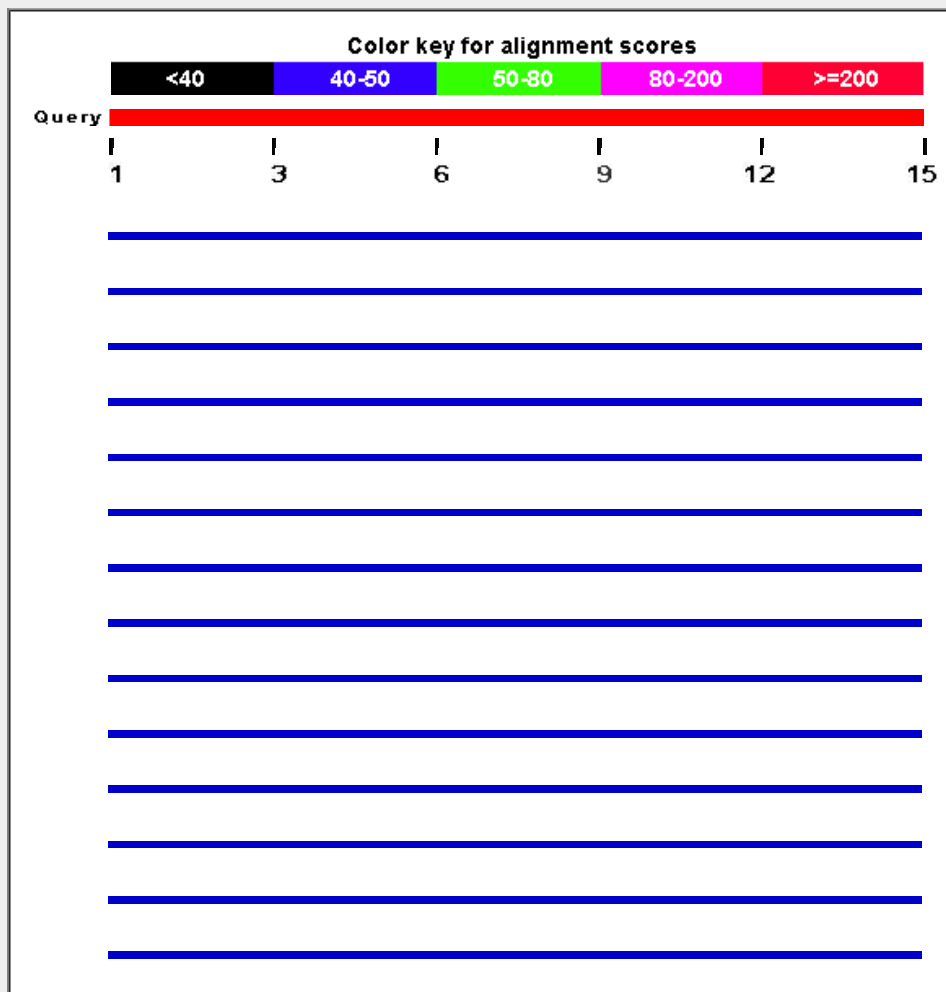

The image displays a table with 30 rows and 2 columns. The table is currently empty, with each cell containing a solid blue horizontal line. The table is bordered by a light blue vertical bar on the left and right sides, and a light gray background for the main content area.

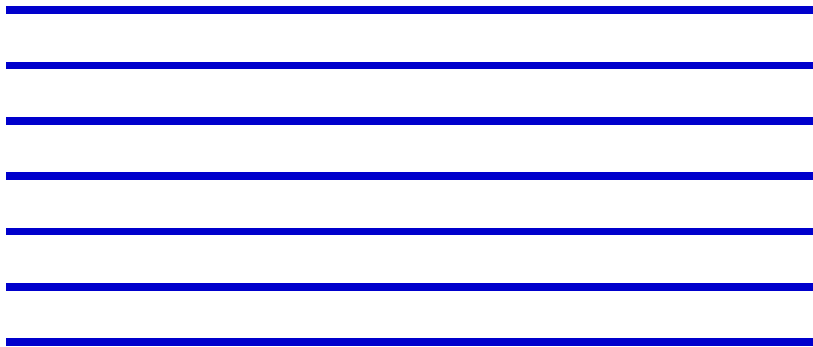

## Descriptions

### Sequences producing significant alignments:

Select: [All](#) [None](#) Selected:0

| <a href="#">Alignments</a> <a href="#">Download</a> <a href="#">GenPept</a> <a href="#">Graphics</a> <a href="#">Distance tree of results</a> <a href="#">Multiple alignment</a> |           |             |             |         |       |                                             |  |
|----------------------------------------------------------------------------------------------------------------------------------------------------------------------------------|-----------|-------------|-------------|---------|-------|---------------------------------------------|--|
| Description                                                                                                                                                                      | Max score | Total score | Query cover | E value | Ident | Accession                                   |  |
| <a href="#">thrombospondin [Homo sapiens]</a>                                                                                                                                    | 49.4      | 49.4        | 100%        | 1e-05   | 100%  | <a href="#">gi 339669 AAB59366.1</a>        |  |
| <a href="#">Thrombospondin-1 [Calypte anna]</a>                                                                                                                                  | 49.4      | 49.4        | 100%        | 1e-05   | 100%  | <a href="#">gi 676764737 KFO95071.1</a>     |  |
| <a href="#">PREDICTED: thrombospondin-1-like [Taeniopygia guttata]</a>                                                                                                           | 49.4      | 49.4        | 100%        | 1e-05   | 100%  | <a href="#">gi 449511879 XP_002188235.2</a> |  |
| <a href="#">unnamed protein product [Mus musculus]</a>                                                                                                                           | 49.4      | 49.4        | 100%        | 1e-05   | 100%  | <a href="#">gi 74218775 BAE37804.1</a>      |  |
| <a href="#">unnamed protein product [Mus musculus]</a>                                                                                                                           | 49.4      | 49.4        | 100%        | 1e-05   | 100%  | <a href="#">gi 74224666 BAE37878.1</a>      |  |
| <a href="#">unnamed protein product [Oncorhynchus mykiss]</a>                                                                                                                    | 49.4      | 49.4        | 100%        | 1e-05   | 100%  | <a href="#">gi 641983478 CDQ99562.1</a>     |  |
| <a href="#">unnamed protein product [Oncorhynchus mykiss]</a>                                                                                                                    | 49.4      | 49.4        | 100%        | 1e-05   | 100%  | <a href="#">gi 642012171 CDQ96481.1</a>     |  |
| <a href="#">thrombospondin [Bos taurus]</a>                                                                                                                                      | 49.4      | 49.4        | 100%        | 1e-05   | 100%  | <a href="#">gi 860883 CAA60950.1</a>        |  |
| <a href="#">Thrombospondin-1 [Cricetulus griseus]</a>                                                                                                                            | 49.4      | 49.4        | 100%        | 1e-05   | 100%  | <a href="#">gi 344248202 EGW04306.1</a>     |  |
| <a href="#">PREDICTED: thrombospondin-1-like [Danio rerio]</a>                                                                                                                   | 49.4      | 49.4        | 100%        | 2e-05   | 100%  | <a href="#">gi 528505376 XP_002667003.3</a> |  |
| <a href="#">PREDICTED: thrombospondin-1-like [Xiphophorus maculatus]</a>                                                                                                         | 49.4      | 49.4        | 100%        | 2e-05   | 100%  | <a href="#">gi 551507462 XP_005805261.1</a> |  |
| <a href="#">PREDICTED: thrombospondin-1 isoform X2 [Latimeria chalumnae]</a>                                                                                                     | 49.4      | 49.4        | 100%        | 2e-05   | 100%  | <a href="#">gi 556952909 XP_005988415.1</a> |  |
| <a href="#">PREDICTED: thrombospondin-1-like [Poecilia reticulata]</a>                                                                                                           | 49.4      | 49.4        | 100%        | 2e-05   | 100%  | <a href="#">gi 658912204 XP_008396149.1</a> |  |
| <a href="#">PREDICTED: thrombospondin-1 [Ornithorhynchus anatinus]</a>                                                                                                           | 49.4      | 49.4        | 100%        | 2e-05   | 100%  | <a href="#">gi 620951278 XP_007664158.1</a> |  |
| <a href="#">thrombospondin 1, isoform CRA_a [Mus musculus]</a>                                                                                                                   | 49.4      | 49.4        | 100%        | 2e-05   | 100%  | <a href="#">gi 148695954 EDL27901.1</a>     |  |
| <a href="#">PREDICTED: thrombospondin-1 isoform X2 [Eptesicus fuscus]</a>                                                                                                        | 49.4      | 49.4        | 100%        | 2e-05   | 100%  | <a href="#">gi 641704796 XP_008141208.1</a> |  |
| <a href="#">PREDICTED: thrombospondin-1 isoform X2 [Orycteropus afer afer]</a>                                                                                                   | 49.4      | 49.4        | 100%        | 2e-05   | 100%  | <a href="#">gi 634847136 XP_007938654.1</a> |  |
| <a href="#">unnamed protein product [Homo sapiens]</a>                                                                                                                           | 49.4      | 49.4        | 100%        | 2e-05   | 100%  | <a href="#">gi 194388250 BAG65509.1</a>     |  |
| <a href="#">PREDICTED: thrombospondin-1 isoform X2 [Leptonychotes wedde]</a>                                                                                                     | 49.4      | 49.4        | 100%        | 2e-05   | 100%  | <a href="#">gi 585180878 XP_006742087.1</a> |  |
| <a href="#">PREDICTED: thrombospondin-1 isoform X2 [Pantholops hodgsonii]</a>                                                                                                    | 49.4      | 49.4        | 100%        | 2e-05   | 100%  | <a href="#">gi 556766553 XP_005978527.1</a> |  |
| <a href="#">PREDICTED: thrombospondin-1 isoform 2 [Ovis aries]</a>                                                                                                               | 49.4      | 49.4        | 100%        | 2e-05   | 100%  | <a href="#">gi 426232960 XP_004010485.1</a> |  |
| <a href="#">PREDICTED: thrombospondin-1 [Macaca mulatta]</a>                                                                                                                     | 49.4      | 49.4        | 100%        | 2e-05   | 100%  | <a href="#">gi 297296130 XP_001093770.2</a> |  |
| <a href="#">PREDICTED: thrombospondin-1-like [Alligator mississippiensis]</a>                                                                                                    | 49.4      | 49.4        | 100%        | 2e-05   | 100%  | <a href="#">gi 564252372 XP_006265214.1</a> |  |
| <a href="#">Thrombospondin-1 [Corvus brachyrhynchos]</a>                                                                                                                         | 49.4      | 49.4        | 100%        | 2e-05   | 100%  | <a href="#">gi 676421514 KFO63667.1</a>     |  |
| <a href="#">Thrombospondin-1 [Buceros rhinoceros silvestris]</a>                                                                                                                 | 49.4      | 49.4        | 100%        | 2e-05   | 100%  | <a href="#">gi 676717688 KFO88878.1</a>     |  |
| <a href="#">Thrombospondin-1 [Calypte anna]</a>                                                                                                                                  | 49.4      | 49.4        | 100%        | 2e-05   | 100%  | <a href="#">gi 676766381 KFO96190.1</a>     |  |
| <a href="#">Thrombospondin-1 [Nestor notabilis]</a>                                                                                                                              | 49.4      | 49.4        | 100%        | 2e-05   | 100%  | <a href="#">gi 677450281 KFO42080.1</a>     |  |
| <a href="#">Thrombospondin-1 [Apaloderma vittatum]</a>                                                                                                                           | 49.4      | 49.4        | 100%        | 2e-05   | 100%  | <a href="#">gi 677298994 KFP81422.1</a>     |  |

|                                                                                 |      |      |      |       |      |                                             |
|---------------------------------------------------------------------------------|------|------|------|-------|------|---------------------------------------------|
| <a href="#">Thrombospondin-1 [Charadrius vociferus]</a>                         | 49.4 | 49.4 | 100% | 2e-05 | 100% | <a href="#">gi 697454601 KGL92027.1</a>     |
| <a href="#">Thrombospondin-1 [Manacus vitellinus]</a>                           | 49.4 | 49.4 | 100% | 2e-05 | 100% | <a href="#">gi 679183398 KFW75047.1</a>     |
| <a href="#">Thrombospondin-1 [Fulmarus glacialis]</a>                           | 49.4 | 49.4 | 100% | 2e-05 | 100% | <a href="#">gi 678980495 KFW92396.1</a>     |
| <a href="#">Thrombospondin-1 [Acanthisitta chloris]</a>                         | 49.4 | 49.4 | 100% | 2e-05 | 100% | <a href="#">gi 677304493 KFP86921.1</a>     |
| <a href="#">Thrombospondin-1 [Podiceps cristatus]</a>                           | 49.4 | 49.4 | 100% | 2e-05 | 100% | <a href="#">gi 683474149 KFZ68358.1</a>     |
| <a href="#">Thrombospondin-1 [Phalacrocorax carbo]</a>                          | 49.4 | 49.4 | 100% | 2e-05 | 100% | <a href="#">gi 679241896 KFW95848.1</a>     |
| <a href="#">Thrombospondin-1 [Pygoscelis adeliae]</a>                           | 49.4 | 49.4 | 100% | 2e-05 | 100% | <a href="#">gi 679135448 KFW65009.1</a>     |
| <a href="#">Thrombospondin-1 [Eurypyga helias]</a>                              | 49.4 | 49.4 | 100% | 2e-05 | 100% | <a href="#">gi 679001503 KFW04094.1</a>     |
| <a href="#">Thrombospondin-1 [Struthio camelus australis]</a>                   | 49.4 | 49.4 | 100% | 2e-05 | 100% | <a href="#">gi 678211234 KFV78213.1</a>     |
| <a href="#">Thrombospondin-1 [Gavia stellata]</a>                               | 49.4 | 49.4 | 100% | 2e-05 | 100% | <a href="#">gi 678187521 KFW55243.1</a>     |
| <a href="#">Thrombospondin-1 [Tyto alba]</a>                                    | 49.4 | 49.4 | 100% | 2e-05 | 100% | <a href="#">gi 678174761 KFV42717.1</a>     |
| <a href="#">Thrombospondin-1 [Tauraco erythrolophus]</a>                        | 49.4 | 49.4 | 100% | 2e-05 | 100% | <a href="#">gi 678130136 KFU99322.1</a>     |
| <a href="#">Thrombospondin-1 [Pterocles gutturalis]</a>                         | 49.4 | 49.4 | 100% | 2e-05 | 100% | <a href="#">gi 678127604 KFU96792.1</a>     |
| <a href="#">Thrombospondin-1 [Chaetura pelagica]</a>                            | 49.4 | 49.4 | 100% | 2e-05 | 100% | <a href="#">gi 678107932 KFU85223.1</a>     |
| <a href="#">Thrombospondin-1 [Nipponia nippon]</a>                              | 49.4 | 49.4 | 100% | 2e-05 | 100% | <a href="#">gi 677546093 KFR07154.1</a>     |
| <a href="#">Thrombospondin-1 [Opisthocomus hoazin]</a>                          | 49.4 | 49.4 | 100% | 2e-05 | 100% | <a href="#">gi 677545920 KFR07008.1</a>     |
| <a href="#">Thrombospondin-1 [Pelecanus crispus]</a>                            | 49.4 | 49.4 | 100% | 2e-05 | 100% | <a href="#">gi 677471751 KFQ61165.1</a>     |
| <a href="#">Thrombospondin-1 [Merops nubicus]</a>                               | 49.4 | 49.4 | 100% | 2e-05 | 100% | <a href="#">gi 677408397 KFQ17938.1</a>     |
| <a href="#">Thrombospondin-1 [Leptosomus discolor]</a>                          | 49.4 | 49.4 | 100% | 2e-05 | 100% | <a href="#">gi 677395134 KFQ12753.1</a>     |
| <a href="#">Thrombospondin-1 [Haliaeetus albicilla]</a>                         | 49.4 | 49.4 | 100% | 2e-05 | 100% | <a href="#">gi 677384050 KFQ05795.1</a>     |
| <a href="#">Thrombospondin-1 [Cariama cristata]</a>                             | 49.4 | 49.4 | 100% | 2e-05 | 100% | <a href="#">gi 677248464 KFP58732.1</a>     |
| <a href="#">Thrombospondin-1 [Cathartes aura]</a>                               | 49.4 | 49.4 | 100% | 2e-05 | 100% | <a href="#">gi 677245954 KFP57718.1</a>     |
| <a href="#">Thrombospondin-1 [Colius striatus]</a>                              | 49.4 | 49.4 | 100% | 2e-05 | 100% | <a href="#">gi 677085189 KFP29490.1</a>     |
| <a href="#">Thrombospondin-1 [Egretta garzetta]</a>                             | 49.4 | 49.4 | 100% | 2e-05 | 100% | <a href="#">gi 676816388 KFP12089.1</a>     |
| <a href="#">Thrombospondin-1 [Balearica pavonina gibbericeps]</a>               | 49.4 | 49.4 | 100% | 2e-05 | 100% | <a href="#">gi 676248881 KFO12753.1</a>     |
| <a href="#">Thrombospondin-1 [Tinamus guttatus]</a>                             | 49.4 | 49.4 | 100% | 2e-05 | 100% | <a href="#">gi 697424097 KGL85097.1</a>     |
| <a href="#">Thrombospondin-1 [Bos mutus]</a>                                    | 49.4 | 49.4 | 100% | 2e-05 | 100% | <a href="#">gi 440911658 ELR61299.1</a>     |
| <a href="#">thrombospondin_1, isoform CRA_b [Mus musculus]</a>                  | 49.4 | 49.4 | 100% | 2e-05 | 100% | <a href="#">gi 148695955 EDL27902.1</a>     |
| <a href="#">Thrombospondin-1 [Macaca fascicularis]</a>                          | 49.4 | 49.4 | 100% | 2e-05 | 100% | <a href="#">gi 355777934 EHH62970.1</a>     |
| <a href="#">thrombospondin-1a precursor [Oreochromis niloticus]</a>             | 49.4 | 49.4 | 100% | 2e-05 | 100% | <a href="#">gi 525344264 NP_001266664.1</a> |
| <a href="#">PREDICTED: thrombospondin-1-like [Takifugu rubripes]</a>            | 49.4 | 49.4 | 100% | 2e-05 | 100% | <a href="#">gi 410916673 XP_003971811.1</a> |
| <a href="#">PREDICTED: thrombospondin-1 [Gorilla gorilla gorilla]</a>           | 49.4 | 49.4 | 100% | 2e-05 | 100% | <a href="#">gi 426378604 XP_004056005.1</a> |
| <a href="#">PREDICTED: thrombospondin-1 isoform 1 [Ovis aries]</a>              | 49.4 | 49.4 | 100% | 2e-05 | 100% | <a href="#">gi 426232958 XP_004010484.1</a> |
| <a href="#">PREDICTED: thrombospondin-1 isoform X1 [Mus musculus]</a>           | 49.4 | 49.4 | 100% | 2e-05 | 100% | <a href="#">gi 568916267 XP_006499215.1</a> |
| <a href="#">RecName: Full=Thrombospondin-1; Flags: Precursor [Mus musculus]</a> | 49.4 | 49.4 | 100% | 2e-05 | 100% | <a href="#">gi 549134 P35441.1</a>          |
| <a href="#">precursor polypeptide (AA -31 to 1139) [Homo sapiens]</a>           | 49.4 | 49.4 | 100% | 2e-05 | 100% | <a href="#">gi 37465 CAA32889.1</a>         |
| <a href="#">thrombospondin-1 precursor [Bos taurus]</a>                         | 49.4 | 49.4 | 100% | 2e-05 | 100% | <a href="#">gi 41386685 NP_776621.1</a>     |
| <a href="#">PREDICTED: thrombospondin-1 [Felis catus]</a>                       | 49.4 | 49.4 | 100% | 2e-05 | 100% | <a href="#">gi 410961529 XP_003987333.1</a> |
| <a href="#">PREDICTED: thrombospondin-1 [Saimiri boliviensis boliviensis]</a>   | 49.4 | 49.4 | 100% | 2e-05 | 100% | <a href="#">gi 403289260 XP_003935780.1</a> |
| <a href="#">PREDICTED: thrombospondin-1 [Papio anubis]</a>                      | 49.4 | 49.4 | 100% | 2e-05 | 100% | <a href="#">gi 402873929 XP_003900802.1</a> |
| <a href="#">PREDICTED: thrombospondin-1 [Pan paniscus]</a>                      | 49.4 | 49.4 | 100% | 2e-05 | 100% | <a href="#">gi 397512548 XP_003826603.1</a> |
| <a href="#">PREDICTED: thrombospondin-1 [Otolemur garnettii]</a>                | 49.4 | 49.4 | 100% | 2e-05 | 100% | <a href="#">gi 395837664 XP_003791750.1</a> |
| <a href="#">PREDICTED: thrombospondin-1 [Canis lupus familiaris]</a>            | 49.4 | 49.4 | 100% | 2e-05 | 100% | <a href="#">gi 345794639 XP_544610.3</a>    |
| <a href="#">PREDICTED: thrombospondin-1 [Pan troglodytes]</a>                   | 49.4 | 49.4 | 100% | 2e-05 | 100% | <a href="#">gi 332843483 XP_510294.3</a>    |
| <a href="#">PREDICTED: thrombospondin-1 isoform 1 [Nomascus leucogenys]</a>     | 49.4 | 49.4 | 100% | 2e-05 | 100% | <a href="#">gi 332235127 XP_003266759.1</a> |
| <a href="#">PREDICTED: thrombospondin-1-like [Ailuropoda melanoleuca]</a>       | 49.4 | 49.4 | 100% | 2e-05 | 100% | <a href="#">gi 301754930 XP_002913278.1</a> |

|                                                                         |      |      |      |       |      |                                             |
|-------------------------------------------------------------------------|------|------|------|-------|------|---------------------------------------------|
| <a href="#">PREDICTED: thrombospondin-1 [Pongo abelii]</a>              | 49.4 | 49.4 | 100% | 2e-05 | 100% | <a href="#">gi 297696281 XP_002825327.1</a> |
| <a href="#">TPA: thrombospondin 1 precursor [Bos taurus]</a>            | 49.4 | 49.4 | 100% | 2e-05 | 100% | <a href="#">gi 296483305 DAA25420.1</a>     |
| <a href="#">thrombospondin-1 precursor [synthetic construct]</a>        | 49.4 | 49.4 | 100% | 2e-05 | 100% | <a href="#">gi 168278042 BAG10999.1</a>     |
| <a href="#">unnamed protein product [Homo sapiens]</a>                  | 49.4 | 49.4 | 100% | 2e-05 | 100% | <a href="#">gi 158256710 BAF84328.1</a>     |
| <a href="#">PREDICTED: thrombospondin-1 isoform X2 [Danio rerio]</a>    | 49.4 | 49.4 | 100% | 2e-05 | 100% | <a href="#">gi 292624775 XP_690395.4</a>    |
| <a href="#">PREDICTED: thrombospondin-1 [Equus caballus]</a>            | 49.4 | 49.4 | 100% | 2e-05 | 100% | <a href="#">gi 149692076 XP_001503649.1</a> |
| <a href="#">thrombospondin-1 precursor [Homo sapiens]</a>               | 49.4 | 49.4 | 100% | 2e-05 | 100% | <a href="#">gi 40317626 NP_003237.2</a>     |
| <a href="#">thrombospondin-1 precursor [Rattus norvegicus]</a>          | 49.4 | 49.4 | 100% | 2e-05 | 100% | <a href="#">gi 61556835 NP_001013080.1</a>  |
| <a href="#">unnamed protein product [Tetraodon nigroviridis]</a>        | 49.4 | 49.4 | 100% | 2e-05 | 100% | <a href="#">gi 47230253 CAG10667.1</a>      |
| <a href="#">Thrombospondin 1 [Mus musculus]</a>                         | 49.4 | 49.4 | 100% | 2e-05 | 100% | <a href="#">gi 27502731 AAH42422.1</a>      |
| <a href="#">PREDICTED: thrombospondin-1-like [Takifugu rubripes]</a>    | 49.4 | 49.4 | 100% | 2e-05 | 100% | <a href="#">gi 410898329 XP_003962650.1</a> |
| <a href="#">thrombospondin-1b precursor [Oreochromis niloticus]</a>     | 49.4 | 49.4 | 100% | 2e-05 | 100% | <a href="#">gi 525344287 NP_001266666.1</a> |
| <a href="#">PREDICTED: thrombospondin-1 [Monodelphis domestica]</a>     | 49.4 | 49.4 | 100% | 2e-05 | 100% | <a href="#">gi 126278346 XP_001380945.1</a> |
| <a href="#">thrombospondin-1 precursor [Gallus gallus]</a>              | 49.4 | 49.4 | 100% | 2e-05 | 100% | <a href="#">gi 313661364 NP_001186382.1</a> |
| <a href="#">thrombospondin-1 [Ambystoma mexicanum]</a>                  | 49.4 | 49.4 | 100% | 2e-05 | 100% | <a href="#">gi 323301354 ADX36088.1</a>     |
| <a href="#">PREDICTED: thrombospondin-1 [Meleagris gallopavo]</a>       | 49.4 | 49.4 | 100% | 2e-05 | 100% | <a href="#">gi 733889736 XP_010709922.1</a> |
| <a href="#">Thrombospondin-1 [Tupaia chinensis]</a>                     | 49.4 | 49.4 | 100% | 2e-05 | 100% | <a href="#">gi 444706864 ELW48182.1</a>     |
| <a href="#">thrombospondin-1a precursor [Oryzias latipes]</a>           | 49.4 | 49.4 | 100% | 2e-05 | 100% | <a href="#">gi 253314439 NP_001156590.1</a> |
| <a href="#">unnamed protein product [Tetraodon nigroviridis]</a>        | 49.4 | 49.4 | 100% | 2e-05 | 100% | <a href="#">gi 47224540 CAG03524.1</a>      |
| <a href="#">Thrombospondin-1 [Pteropus alecto]</a>                      | 49.4 | 49.4 | 100% | 2e-05 | 100% | <a href="#">gi 431896138 ELK05556.1</a>     |
| <a href="#">PREDICTED: LOW QUALITY PROTEIN: thrombospondin-1 [Cavia</a> | 49.4 | 49.4 | 100% | 2e-05 | 100% | <a href="#">gi 348579399 XP_003475467.1</a> |
| <a href="#">thrombospondin-1b precursor [Oryzias latipes]</a>           | 49.4 | 49.4 | 100% | 2e-05 | 100% | <a href="#">gi 253314468 NP_001156600.1</a> |
| <a href="#">thrombospondin 1 precursor variant [Homo sapiens]</a>       | 49.4 | 49.4 | 100% | 2e-05 | 100% | <a href="#">gi 62089410 BAD93149.1</a>      |
| <a href="#">Thrombospondin-1 [Macaca mulatta]</a>                       | 49.4 | 49.4 | 100% | 2e-05 | 100% | <a href="#">gi 355692594 EHH27197.1</a>     |
| <a href="#">PREDICTED: thrombospondin-1 [Sarcophilus harrisii]</a>      | 49.4 | 49.4 | 100% | 2e-05 | 100% | <a href="#">gi 395503381 XP_003756045.1</a> |
| <a href="#">Thrombospondin-1 [Heterocephalus glaber]</a>                | 49.4 | 49.4 | 100% | 2e-05 | 100% | <a href="#">gi 351707373 EHB10292.1</a>     |

## Alignments

[Download](#) [GenPept](#) [Graphics](#)

[Next](#) [Previous](#) [Descriptions](#)

thrombospondin, partial [Homo sapiens]

Sequence ID: [gi|339669|gb|AAB59366.1](#) Length: 143 Number of Matches: 1

Range 1: 37 to 51 [GenPept](#) [Graphics](#)

[Next Match](#) [Previous Match](#)

### Related Information

[Gene](#) - associated gene details

| Score          | Expect | Identities  | Positives   | Gaps     |
|----------------|--------|-------------|-------------|----------|
| 49.4 bits(109) | 1e-05  | 15/15(100%) | 15/15(100%) | 0/15(0%) |

Query 1 KVVNSTTGPGEHLRN 15  
KVVNSTTGPGEHLRN  
Sbjct 37 KVVNSTTGPGEHLRN 51

[Download](#) [GenPept](#) [Graphics](#)

[Next](#) [Previous](#) [Descriptions](#)

Thrombospondin-1, partial [Calypte anna]

Sequence ID: [gi|676764737|gb|KFO95071.1](#) Length: 172 Number of Matches: 1

Range 1: 66 to 80 [GenPept](#) [Graphics](#)

[Next Match](#) [Previous Match](#)

### Related Information

| Score          | Expect | Identities  | Positives   | Gaps     |
|----------------|--------|-------------|-------------|----------|
| 49.4 bits(109) | 1e-05  | 15/15(100%) | 15/15(100%) | 0/15(0%) |

Query 1 KVVNSTTGPGEHLRN 15  
KVVNSTTGPGEHLRN  
Sbjct 66 KVVNSTTGPGEHLRN 80



Download [GenPept](#) [Graphics](#)

▼ Next ▲ Previous ▲ Descriptions

**PREDICTED: thrombospondin-1-like, partial [Taeniopygia guttata]**

Sequence ID: [gi|449511879|ref|XP\\_002188235.2|](#) Length: 245 Number of Matches: 1

Range 1: 141 to 155 [GenPept](#) [Graphics](#)

▼ Next Match ▲ Previous Match

| Score          | Expect | Identities  | Positives   | Gaps     |
|----------------|--------|-------------|-------------|----------|
| 49.4 bits(109) | 1e-05  | 15/15(100%) | 15/15(100%) | 0/15(0%) |

```

Query 1   KVVNSTTGPGEHLRN 15
          KVVNSTTGPGEHLRN
Sbjct 141 KVVNSTTGPGEHLRN 155
    
```

**Related Information**

[Gene](#) - associated gene details  
[Map Viewer](#) - aligned genomic context

Download [GenPept](#) [Graphics](#)

▼ Next ▲ Previous ▲ Descriptions

**unnamed protein product [Mus musculus]**

Sequence ID: [gi|74218775|dbj|BAE37804.1|](#) Length: 259 Number of Matches: 1

Range 1: 153 to 167 [GenPept](#) [Graphics](#)

▼ Next Match ▲ Previous Match

| Score          | Expect | Identities  | Positives   | Gaps     |
|----------------|--------|-------------|-------------|----------|
| 49.4 bits(109) | 1e-05  | 15/15(100%) | 15/15(100%) | 0/15(0%) |

```

Query 1   KVVNSTTGPGEHLRN 15
          KVVNSTTGPGEHLRN
Sbjct 153 KVVNSTTGPGEHLRN 167
    
```

**Related Information**

[Gene](#) - associated gene details

Download [GenPept](#) [Graphics](#)

▼ Next ▲ Previous ▲ Descriptions

**unnamed protein product [Mus musculus]**

Sequence ID: [gi|74224666|dbj|BAE37878.1|](#) Length: 262 Number of Matches: 1

Range 1: 156 to 170 [GenPept](#) [Graphics](#)

▼ Next Match ▲ Previous Match

| Score          | Expect | Identities  | Positives   | Gaps     |
|----------------|--------|-------------|-------------|----------|
| 49.4 bits(109) | 1e-05  | 15/15(100%) | 15/15(100%) | 0/15(0%) |

```

Query 1   KVVNSTTGPGEHLRN 15
          KVVNSTTGPGEHLRN
Sbjct 156 KVVNSTTGPGEHLRN 170
    
```

**Related Information**

[Gene](#) - associated gene details

BLAST is a registered trademark of the National Library of Medicine.



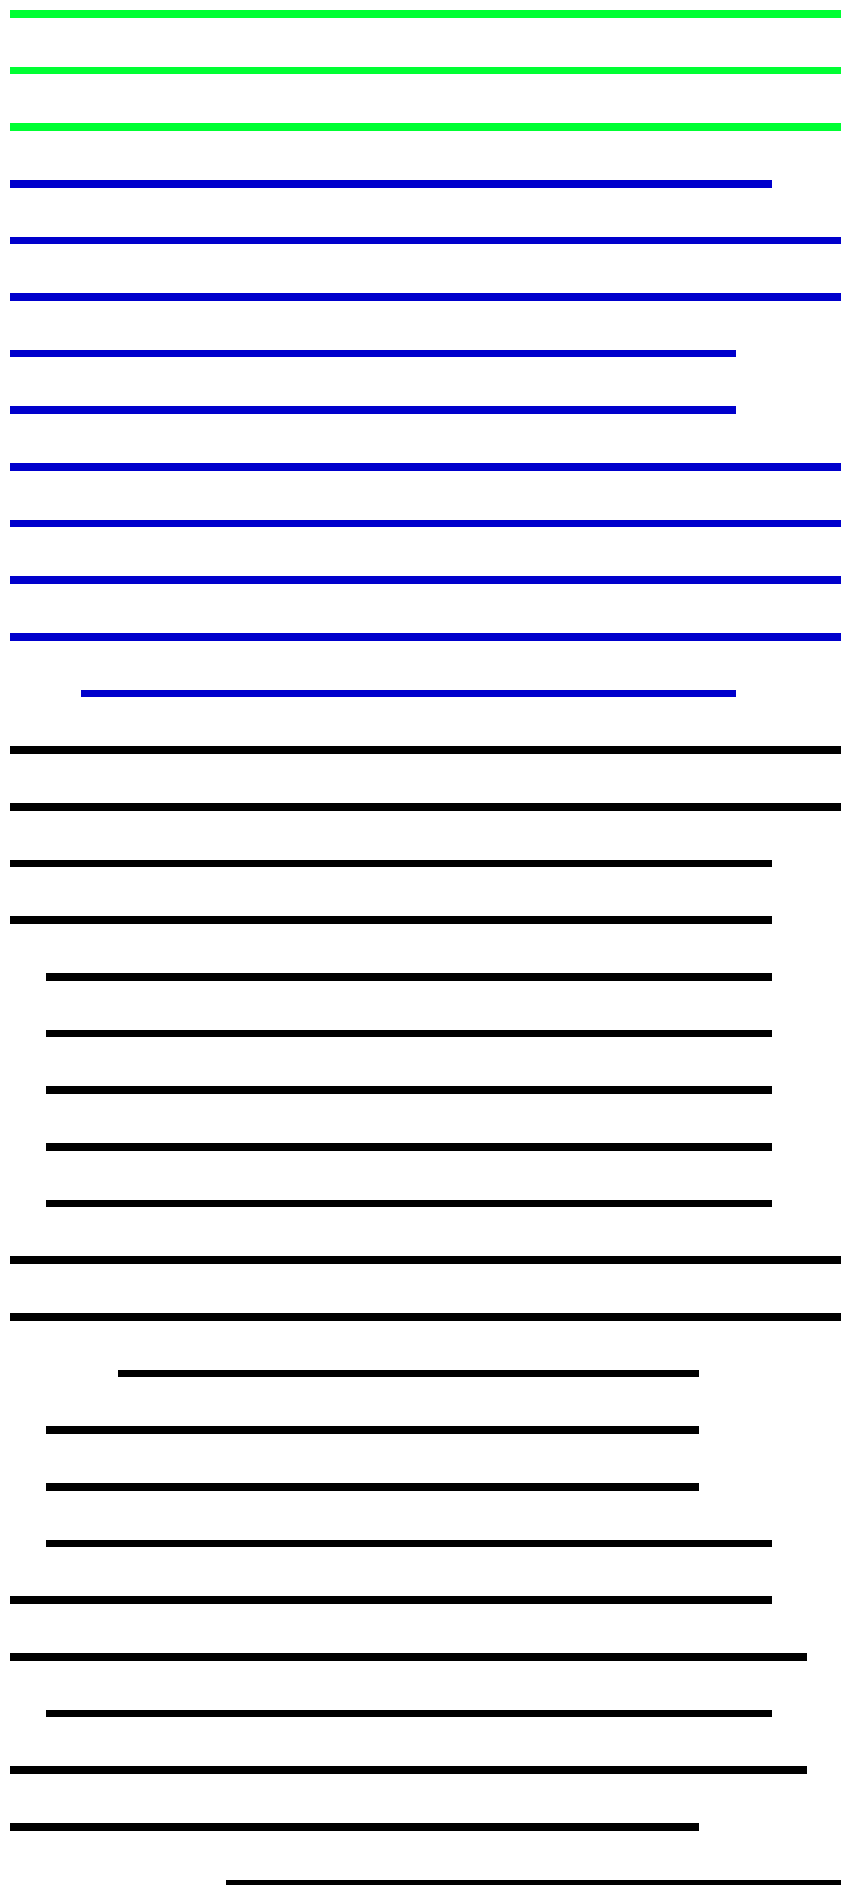

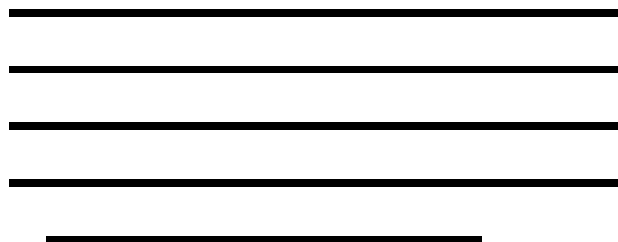

## Descriptions

### Sequences producing significant alignments:

Select: [All](#) [None](#) Selected:0

| <a href="#">Alignments</a> <a href="#">Download</a> <a href="#">GenPept</a> <a href="#">Graphics</a> <a href="#">Distance tree of results</a> <a href="#">Multiple alignment</a> |           |             |             |         |       |                                |  |
|----------------------------------------------------------------------------------------------------------------------------------------------------------------------------------|-----------|-------------|-------------|---------|-------|--------------------------------|--|
| Description                                                                                                                                                                      | Max score | Total score | Query cover | E value | Ident | Accession                      |  |
| <a href="#">PREDICTED: LOW QUALITY PROTEIN: protein HEG homolog 1 [Nomascus KIAA1237 protein [Homo sapiens]</a>                                                                  | 68.9      | 68.9        | 100%        | 1e-11   | 96%   | <a href="#">XP_003275622.1</a> |  |
| <a href="#">PREDICTED: protein HEG homolog 1 [Pan paniscus]</a>                                                                                                                  | 68.9      | 68.9        | 100%        | 1e-11   | 96%   | <a href="#">XP_008948773.1</a> |  |
| <a href="#">protein HEG homolog 1 precursor [Homo sapiens]</a>                                                                                                                   | 68.9      | 68.9        | 100%        | 1e-11   | 96%   | <a href="#">NP_065784.1</a>    |  |
| <a href="#">PREDICTED: protein HEG homolog 1 isoform X2 [Pan troglodytes]</a>                                                                                                    | 68.9      | 68.9        | 100%        | 1e-11   | 96%   | <a href="#">XP_516708.4</a>    |  |
| <a href="#">PREDICTED: protein HEG homolog 1 [Gorilla gorilla gorilla]</a>                                                                                                       | 68.9      | 68.9        | 100%        | 1e-11   | 96%   | <a href="#">XP_004036264.1</a> |  |
| <a href="#">PREDICTED: protein HEG homolog 1 isoform X1 [Homo sapiens]</a>                                                                                                       | 68.9      | 68.9        | 100%        | 1e-11   | 96%   | <a href="#">XP_005247723.1</a> |  |
| <a href="#">HEG homolog 1 [synthetic construct]</a>                                                                                                                              | 68.9      | 68.9        | 100%        | 1e-11   | 96%   | <a href="#">BAG10442.1</a>     |  |
| <a href="#">PREDICTED: protein HEG homolog 1 isoform X1 [Pan troglodytes]</a>                                                                                                    | 68.9      | 68.9        | 100%        | 1e-11   | 96%   | <a href="#">XP_009444603.1</a> |  |
| <a href="#">PREDICTED: protein HEG homolog 1 isoform X1 [Rhinopithecus roxellana]</a>                                                                                            | 63.8      | 63.8        | 100%        | 6e-10   | 91%   | <a href="#">XP_010353116.1</a> |  |
| <a href="#">PREDICTED: protein HEG homolog 1 isoform X5 [Chlorocebus sabaeus]</a>                                                                                                | 61.3      | 61.3        | 100%        | 4e-09   | 87%   | <a href="#">XP_007983733.1</a> |  |
| <a href="#">PREDICTED: protein HEG homolog 1 isoform X1 [Chlorocebus sabaeus]</a>                                                                                                | 61.3      | 61.3        | 100%        | 4e-09   | 87%   | <a href="#">XP_007983729.1</a> |  |
| <a href="#">PREDICTED: protein HEG homolog 1 isoform X7 [Chlorocebus sabaeus]</a>                                                                                                | 61.3      | 61.3        | 100%        | 4e-09   | 87%   | <a href="#">XP_007983735.1</a> |  |
| <a href="#">PREDICTED: protein HEG homolog 1 [Papio anubis]</a>                                                                                                                  | 61.3      | 61.3        | 100%        | 4e-09   | 87%   | <a href="#">XP_009198408.1</a> |  |
| <a href="#">PREDICTED: protein HEG homolog 1-like [Saimiri boliviensis boliviensis]</a>                                                                                          | 59.2      | 59.2        | 100%        | 2e-08   | 87%   | <a href="#">XP_010350754.1</a> |  |
| <a href="#">PREDICTED: protein HEG homolog 1 isoform X3 [Callithrix jacchus]</a>                                                                                                 | 58.7      | 58.7        | 100%        | 3e-08   | 83%   | <a href="#">XP_008980554.1</a> |  |
| <a href="#">PREDICTED: protein HEG homolog 1 isoform X2 [Callithrix jacchus]</a>                                                                                                 | 58.7      | 117         | 100%        | 3e-08   | 83%   | <a href="#">XP_008980553.1</a> |  |
| <a href="#">PREDICTED: protein HEG homolog 1 isoform X1 [Callithrix jacchus]</a>                                                                                                 | 58.7      | 117         | 100%        | 3e-08   | 83%   | <a href="#">XP_008980552.1</a> |  |
| <a href="#">PREDICTED: protein HEG homolog 1 [Macaca fascicularis]</a>                                                                                                           | 55.4      | 55.4        | 100%        | 4e-07   | 83%   | <a href="#">XP_005547989.1</a> |  |
| <a href="#">PREDICTED: protein HEG homolog 1-like [Macaca mulatta]</a>                                                                                                           | 55.4      | 55.4        | 100%        | 4e-07   | 83%   | <a href="#">XP_002802724.1</a> |  |
| <a href="#">PREDICTED: protein HEG homolog 1 [Tarsius syrichta]</a>                                                                                                              | 45.6      | 45.6        | 91%         | 6e-04   | 76%   | <a href="#">XP_008071068.1</a> |  |
| <a href="#">PREDICTED: protein HEG homolog 1 [Canis lupus familiaris]</a>                                                                                                        | 43.5      | 43.5        | 100%        | 0.003   | 65%   | <a href="#">XP_005639641.1</a> |  |
| <a href="#">PREDICTED: protein HEG homolog 1 isoform X1 [Mustela putorius furo]</a>                                                                                              | 43.5      | 43.5        | 100%        | 0.003   | 65%   | <a href="#">XP_004745464.1</a> |  |
| <a href="#">PREDICTED: protein HEG homolog 1 [Loxodonta africana]</a>                                                                                                            | 42.6      | 42.6        | 86%         | 0.006   | 70%   | <a href="#">XP_010591299.1</a> |  |
| <a href="#">PREDICTED: protein HEG homolog 1 [Trichechus manatus latirostris]</a>                                                                                                | 42.2      | 42.2        | 86%         | 0.008   | 70%   | <a href="#">XP_004373773.1</a> |  |
| <a href="#">PREDICTED: protein HEG homolog 1 [Capra hircus]</a>                                                                                                                  | 40.9      | 40.9        | 100%        | 0.020   | 65%   | <a href="#">XP_005675295.1</a> |  |
| <a href="#">PREDICTED: LOW QUALITY PROTEIN: protein HEG homolog 1 [Ovis aries]</a>                                                                                               | 40.9      | 40.9        | 100%        | 0.020   | 65%   | <a href="#">XP_004003855.1</a> |  |
| <a href="#">PREDICTED: protein HEG homolog 1 [Pantholops hodgsonii]</a>                                                                                                          | 40.9      | 40.9        | 100%        | 0.020   | 65%   | <a href="#">XP_005982396.1</a> |  |
| <a href="#">PREDICTED: protein HEG homolog 1 [Bubalus bubalis]</a>                                                                                                               | 40.9      | 40.9        | 100%        | 0.020   | 65%   | <a href="#">XP_006078628.1</a> |  |

|                                                                                                |      |      |      |       |     |                                |
|------------------------------------------------------------------------------------------------|------|------|------|-------|-----|--------------------------------|
| <a href="#">PREDICTED: protein HEG homolog 1 [Galeopterus variegatus]</a>                      | 40.1 | 40.1 | 78%  | 0.037 | 72% | <a href="#">XP_008575868.1</a> |
| <a href="#">PREDICTED: protein HEG homolog 1 [Vicugna pacos]</a>                               | 39.7 | 39.7 | 100% | 0.050 | 65% | <a href="#">XP_006201131.1</a> |
| <a href="#">PREDICTED: protein HEG homolog 1 [Camelus ferus]</a>                               | 39.7 | 39.7 | 100% | 0.050 | 65% | <a href="#">XP_006195026.1</a> |
| <a href="#">PREDICTED: protein HEG homolog 1 [Chrysochloris asiatica]</a>                      | 39.2 | 39.2 | 91%  | 0.068 | 73% | <a href="#">XP_006869492.1</a> |
| <a href="#">PREDICTED: protein HEG homolog 1 [Oryctolagus cuniculus]</a>                       | 39.2 | 39.2 | 91%  | 0.068 | 73% | <a href="#">XP_008264981.1</a> |
| <a href="#">PREDICTED: protein HEG homolog 1 [Myotis davidii]</a>                              | 39.2 | 39.2 | 86%  | 0.068 | 70% | <a href="#">XP_006775087.1</a> |
| <a href="#">PREDICTED: protein HEG homolog 1 [Myotis lucifugus]</a>                            | 38.8 | 38.8 | 86%  | 0.092 | 70% | <a href="#">XP_006092920.1</a> |
| <a href="#">PREDICTED: protein HEG homolog 1 [Heterocephalus glaber]</a>                       | 38.0 | 38.0 | 86%  | 0.17  | 65% | <a href="#">XP_004878675.1</a> |
| <a href="#">PREDICTED: protein HEG homolog 1 [Heterocephalus glaber]</a>                       | 38.0 | 38.0 | 86%  | 0.17  | 65% | <a href="#">XP_004835845.1</a> |
| <a href="#">HEG-like protein 1 [Heterocephalus glaber]</a>                                     | 38.0 | 38.0 | 86%  | 0.17  | 65% | <a href="#">EHA99185.1</a>     |
| <a href="#">PREDICTED: protein HEG homolog 1 [Felis catus]</a>                                 | 38.0 | 38.0 | 100% | 0.17  | 61% | <a href="#">XP_006936214.1</a> |
| <a href="#">PREDICTED: protein HEG homolog 1 [Panthera tigris altaica]</a>                     | 38.0 | 38.0 | 100% | 0.17  | 61% | <a href="#">XP_007098431.1</a> |
| <a href="#">PREDICTED: protein HEG homolog 1 [Otolemur garnettii]</a>                          | 37.5 | 37.5 | 69%  | 0.23  | 75% | <a href="#">XP_003795152.1</a> |
| <a href="#">PREDICTED: protein HEG homolog 1 [Fukomys damarensis]</a>                          | 37.1 | 37.1 | 78%  | 0.32  | 67% | <a href="#">XP_010616571.1</a> |
| <a href="#">Integrin beta-5 [Fukomys damarensis]</a>                                           | 37.1 | 57.3 | 78%  | 0.32  | 67% | <a href="#">KFO38306.1</a>     |
| <a href="#">PREDICTED: protein HEG homolog 1 [Cavia porcellus]</a>                             | 36.7 | 36.7 | 86%  | 0.43  | 65% | <a href="#">XP_003464197.2</a> |
| <a href="#">PREDICTED: protein HEG homolog 1 [Ceratotherium simum simum]</a>                   | 36.3 | 36.3 | 91%  | 0.59  | 67% | <a href="#">XP_004424850.1</a> |
| <a href="#">hypothetical protein PANDA_004926 [Ailuropoda melanoleuca]</a>                     | 36.3 | 36.3 | 95%  | 0.59  | 59% | <a href="#">EFB14274.1</a>     |
| <a href="#">PREDICTED: protein HEG homolog 1 [Eptesicus fuscus]</a>                            | 36.3 | 36.3 | 86%  | 0.59  | 70% | <a href="#">XP_008153759.1</a> |
| <a href="#">PREDICTED: protein HEG homolog 1-like [Ailuropoda melanoleuca]</a>                 | 36.3 | 36.3 | 95%  | 0.59  | 59% | <a href="#">XP_002916796.1</a> |
| <a href="#">PREDICTED: protein HEG homolog 1 [Balaenoptera acutorostrata scammoni]</a>         | 36.3 | 36.3 | 82%  | 0.59  | 68% | <a href="#">XP_007182838.1</a> |
| <a href="#">Protein HEG-like protein 1 [Bos mutus]</a>                                         | 35.8 | 35.8 | 73%  | 0.80  | 71% | <a href="#">ELR45395.1</a>     |
| <a href="#">TPA: neurogenic locus notch homolog protein 2-like [Bos taurus]</a>                | 35.8 | 35.8 | 73%  | 0.80  | 71% | <a href="#">DAA33474.1</a>     |
| <a href="#">PREDICTED: protein HEG homolog 1 [Bos mutus]</a>                                   | 35.8 | 35.8 | 73%  | 0.80  | 71% | <a href="#">XP_005910670.1</a> |
| <a href="#">PREDICTED: protein HEG homolog 1 [Bison bison bison]</a>                           | 35.8 | 35.8 | 73%  | 0.80  | 71% | <a href="#">XP_010832714.1</a> |
| <a href="#">PREDICTED: protein HEG homolog 1 [Bos taurus]</a>                                  | 35.8 | 35.8 | 73%  | 0.80  | 71% | <a href="#">XP_005196144.1</a> |
| <a href="#">fumarate hydratase [Propionibacteriaceae bacterium P6A17]</a>                      | 34.6 | 34.6 | 52%  | 2.0   | 92% | <a href="#">WP_028705241.1</a> |
| <a href="#">PREDICTED: protein HEG homolog 1 [Octodon degus]</a>                               | 34.6 | 34.6 | 60%  | 2.0   | 71% | <a href="#">XP_004642279.1</a> |
| <a href="#">hypothetical protein THAOC_18311 [Thalassiosira oceanica]</a>                      | 34.1 | 34.1 | 73%  | 2.6   | 71% | <a href="#">EJK61241.1</a>     |
| <a href="#">hypothetical protein COCSUDRAFT_42503 [Coccomyxa subellipsoidea C-165]</a>         | 33.7 | 33.7 | 82%  | 3.7   | 60% | <a href="#">XP_005646654.1</a> |
| <a href="#">siroheme synthase [Citromicrobium bathyomarinum]</a>                               | 33.3 | 33.3 | 73%  | 5.0   | 64% | <a href="#">WP_010238762.1</a> |
| <a href="#">beta-ketoacyl synthase [Saccharomonospora xinjiangensis]</a>                       | 33.3 | 33.3 | 73%  | 5.1   | 72% | <a href="#">WP_006236443.1</a> |
| <a href="#">aminopeptidase N [Pluralibacter gergoviae]</a>                                     | 33.3 | 33.3 | 56%  | 5.2   | 67% | <a href="#">AIR02013.1</a>     |
| <a href="#">PREDICTED: aminopeptidase N-like [Ceratitis capitata]</a>                          | 33.3 | 33.3 | 56%  | 5.2   | 67% | <a href="#">XP_004528055.1</a> |
| <a href="#">Protein HEG like protein 1 [Myotis brandtii]</a>                                   | 33.3 | 33.3 | 86%  | 5.2   | 65% | <a href="#">EPQ11995.1</a>     |
| <a href="#">PREDICTED: protein HEG homolog 1 [Myotis brandtii]</a>                             | 33.3 | 33.3 | 86%  | 5.2   | 65% | <a href="#">XP_005873280.1</a> |
| <a href="#">probable PHO8-repressible alkaline phosphatase vacuolar [Claviceps purpure]</a>    | 33.3 | 33.3 | 69%  | 5.2   | 76% | <a href="#">CCE27560.1</a>     |
| <a href="#">polyketide synthase family protein [Saccharomonospora xinjiangensis]</a>           | 33.3 | 33.3 | 73%  | 5.3   | 72% | <a href="#">WP_006236454.1</a> |
| <a href="#">2,3,4,5-tetrahydropyridine-2,6-carboxylate N-succinyltransferase [Mycobacteri]</a> | 32.9 | 32.9 | 82%  | 7.0   | 68% | <a href="#">WP_005147008.1</a> |
| <a href="#">glycosyltransferase [Rothia mucilaginosa]</a>                                      | 32.9 | 32.9 | 65%  | 7.0   | 74% | <a href="#">WP_005506238.1</a> |
| <a href="#">transcriptional regulator [Streptomyces cellulosa]</a>                             | 32.9 | 32.9 | 65%  | 7.1   | 65% | <a href="#">WP_030669364.1</a> |
| <a href="#">PREDICTED: protein HEG homolog 1 [Pteropus alecto]</a>                             | 32.9 | 32.9 | 91%  | 7.2   | 62% | <a href="#">XP_006905661.1</a> |
| <a href="#">Protein HEG like protein 1 [Pteropus alecto]</a>                                   | 32.9 | 32.9 | 91%  | 7.2   | 62% | <a href="#">ELK18108.1</a>     |
| <a href="#">phage gp6-like head-tail connector protein [Caulobacter vibrioides]</a>            | 32.5 | 32.5 | 73%  | 8.8   | 63% | <a href="#">WP_024265851.1</a> |
| <a href="#">hypothetical protein [Caulobacter segnis]</a>                                      | 32.5 | 32.5 | 73%  | 8.8   | 63% | <a href="#">WP_013078162.1</a> |

|                                                                                             |      |      |     |      |     |                                |
|---------------------------------------------------------------------------------------------|------|------|-----|------|-----|--------------------------------|
| <a href="#">hypothetical protein PPTG_19648 [Phytophthora parasitica INRA-310]</a>          | 32.5 | 32.5 | 86% | 9.6  | 50% | <a href="#">XP_008916451.1</a> |
| <a href="#">lysine decarboxylase [Agrobacterium tumefaciens]</a>                            | 32.5 | 32.5 | 56% | 9.6  | 73% | <a href="#">WP_035241982.1</a> |
| <a href="#">hypothetical protein Agau_C101591 [Agrobacterium tumefaciens F2]</a>            | 32.5 | 32.5 | 56% | 9.6  | 73% | <a href="#">EGP58724.1</a>     |
| <a href="#">lysine decarboxylase [Rhizobium sp. PDO1-076]</a>                               | 32.5 | 32.5 | 60% | 9.7  | 76% | <a href="#">WP_007607716.1</a> |
| <a href="#">histidine kinase [Hyphomonas jannaschiana]</a>                                  | 32.5 | 32.5 | 60% | 9.8  | 75% | <a href="#">WP_035581823.1</a> |
| <a href="#">histidine kinase [Hyphomonas adhaerens]</a>                                     | 32.5 | 32.5 | 60% | 9.8  | 75% | <a href="#">WP_035571639.1</a> |
| <a href="#">histidine kinase [Hyphomonas sp. CY54-11-8]</a>                                 | 32.5 | 32.5 | 60% | 9.8  | 75% | <a href="#">WP_034767069.1</a> |
| <a href="#">sensor histidine kinase [Hyphomonas jannaschiana VP2]</a>                       | 32.5 | 32.5 | 60% | 9.8  | 75% | <a href="#">KCZ88660.1</a>     |
| <a href="#">histidine kinase [Hyphomonas sp. CY54-11-8]</a>                                 | 32.5 | 32.5 | 60% | 9.8  | 75% | <a href="#">KCZ47047.1</a>     |
| <a href="#">sensor histidine kinase [Hyphomonas adhaerens MHS-3]</a>                        | 32.5 | 32.5 | 60% | 9.8  | 75% | <a href="#">KCZ84965.1</a>     |
| <a href="#">chemotaxis protein histidine kinase-like protein [Microcoleus sp. PCC 7113]</a> | 32.5 | 32.5 | 65% | 9.9  | 76% | <a href="#">WP_015182642.1</a> |
| <a href="#">PREDICTED: protein HEG homolog 1 [Nannospalax gallii]</a>                       | 32.5 | 32.5 | 86% | 9.9  | 60% | <a href="#">XP_008841199.1</a> |
| <a href="#">PREDICTED: protein HEG homolog 1 [Erinaceus europaeus]</a>                      | 32.5 | 32.5 | 91% | 10.0 | 57% | <a href="#">XP_007536091.1</a> |
| <a href="#">PREDICTED: protein HEG homolog 1 [Rattus norvegicus]</a>                        | 32.5 | 32.5 | 73% | 10.0 | 59% | <a href="#">XP_006221221.1</a> |
| <a href="#">DNA-binding protein [Isosphaera pallida]</a>                                    | 32.0 | 32.0 | 56% | 13   | 77% | <a href="#">WP_013565862.1</a> |
| <a href="#">hypothetical protein [Nocardiosis chromatogenes]</a>                            | 32.0 | 32.0 | 52% | 13   | 92% | <a href="#">WP_017626765.1</a> |
| <a href="#">hypothetical protein [Leifsonia aquatica]</a>                                   | 32.0 | 32.0 | 56% | 13   | 85% | <a href="#">WP_025157970.1</a> |
| <a href="#">hypothetical protein [Streptomyces xanthophaeus]</a>                            | 32.0 | 32.0 | 56% | 13   | 85% | <a href="#">WP_031151916.1</a> |
| <a href="#">hypothetical protein [Streptomyces xanthophaeus]</a>                            | 32.0 | 32.0 | 56% | 13   | 85% | <a href="#">WP_031138202.1</a> |
| <a href="#">hypothetical protein [Pseudomonas nitroreducens]</a>                            | 32.0 | 53.4 | 60% | 13   | 82% | <a href="#">WP_017518469.1</a> |
| <a href="#">beta-glucosidase [Deinococcus misasensis]</a>                                   | 32.0 | 32.0 | 91% | 14   | 57% | <a href="#">WP_034342803.1</a> |
| <a href="#">hypothetical protein [Paracoccus pantotrophus]</a>                              | 32.0 | 32.0 | 69% | 14   | 65% | <a href="#">WP_028710187.1</a> |
| <a href="#">unnamed protein product [Blastocystis hominis]</a>                              | 32.0 | 32.0 | 47% | 14   | 91% | <a href="#">CBK25175.2</a>     |
| <a href="#">thiamine pyrophosphate domain-containing TPP-binding protein [Natrialba ch]</a> | 32.0 | 32.0 | 73% | 14   | 71% | <a href="#">WP_006169172.1</a> |
| <a href="#">fumarate hydratase [Mobiluncus curtisii]</a>                                    | 32.0 | 32.0 | 52% | 14   | 83% | <a href="#">WP_004010370.1</a> |
| <a href="#">fumarate hydratase [Mobiluncus curtisii]</a>                                    | 32.0 | 32.0 | 52% | 14   | 83% | <a href="#">WP_004009960.1</a> |

## Alignments

Download GenPept Graphics

Next Previous Descriptions

PREDICTED: LOW QUALITY PROTEIN: protein HEG homolog 1 [Nomascus leucogenys]

Sequence ID: [ref|XP\\_003275622.1|](#) Length: 1211 Number of Matches: 1

Range 1: 150 to 172 GenPept Graphics

Next Match Previous Match

| Score          | Expect | Identities | Positives   | Gaps     |
|----------------|--------|------------|-------------|----------|
| 68.9 bits(155) | 1e-11  | 22/23(96%) | 23/23(100%) | 0/23(0%) |

Query 1 KSHAASDAPEDLTLAETADARG 23  
KSHAASDAPE+LTLAETADARG  
Sbjct 150 KSHAASDAPENLTLAETADARG 172

### Related Information

[Gene](#) - associated gene details  
[Map Viewer](#) - aligned genomic context

Download GenPept Graphics

Next Previous Descriptions

KIAA1237 protein [Homo sapiens]

Sequence ID: [dbj|BAA86551.2|](#) Length: 1268 Number of Matches: 1

Range 1: 36 to 58 GenPept Graphics

Next Match Previous Match

| Score          | Expect | Identities | Positives   | Gaps     |
|----------------|--------|------------|-------------|----------|
| 68.9 bits(155) | 1e-11  | 22/23(96%) | 23/23(100%) | 0/23(0%) |

### Related Information

[Gene](#) - associated gene details

Query 1 KSHAASDAPEDLTLAETADARG 23  
 KSHAASDAPE+LTLAETADARG  
 Sbjct 36 KSHAASDAPENLTLAETADARG 58

Download [GenPept](#) [Graphics](#)

[▼ Next](#) [▲ Previous](#) [▲ Descriptions](#)

PREDICTED: protein HEG homolog 1 [Pan paniscus]  
 Sequence ID: [ref|XP\\_008948773.1|](#) Length: 1349 Number of Matches: 1

Range 1: 7 to 29 [GenPept](#) [Graphics](#) [▼ Next Match](#) [▲ Previous Match](#)

| Score          | Expect | Identities | Positives   | Gaps     |
|----------------|--------|------------|-------------|----------|
| 68.9 bits(155) | 1e-11  | 22/23(96%) | 23/23(100%) | 0/23(0%) |

Query 1 KSHAASDAPEDLTLAETADARG 23  
 KSHAASDAPE+LTLAETADARG  
 Sbjct 7 KSHAASDAPENLTLAETADARG 29

**Related Information**

[Gene](#) - associated gene details  
[Map Viewer](#) - aligned genomic context

Download [GenPept](#) [Graphics](#)

[▼ Next](#) [▲ Previous](#) [▲ Descriptions](#)

protein HEG homolog 1 precursor [Homo sapiens]  
 Sequence ID: [ref|NP\\_065784.1|](#) Length: 1381 Number of Matches: 1

[▶ See 1 more title\(s\)](#)

Range 1: 149 to 171 [GenPept](#) [Graphics](#) [▼ Next Match](#) [▲ Previous Match](#)

| Score          | Expect | Identities | Positives   | Gaps     |
|----------------|--------|------------|-------------|----------|
| 68.9 bits(155) | 1e-11  | 22/23(96%) | 23/23(100%) | 0/23(0%) |

Query 1 KSHAASDAPEDLTLAETADARG 23  
 KSHAASDAPE+LTLAETADARG  
 Sbjct 149 KSHAASDAPENLTLAETADARG 171

**Related Information**

[Gene](#) - associated gene details  
[UniGene](#) - clustered expressed sequence tags  
[Map Viewer](#) - aligned genomic context  
[Identical Proteins](#) - Proteins identical to the subject

Download [GenPept](#) [Graphics](#)

[▼ Next](#) [▲ Previous](#) [▲ Descriptions](#)

PREDICTED: protein HEG homolog 1 isoform X2 [Pan troglodytes]  
 Sequence ID: [ref|XP\\_516708.4|](#) Length: 1391 Number of Matches: 1

Range 1: 149 to 171 [GenPept](#) [Graphics](#) [▼ Next Match](#) [▲ Previous Match](#)

| Score          | Expect | Identities | Positives   | Gaps     |
|----------------|--------|------------|-------------|----------|
| 68.9 bits(155) | 1e-11  | 22/23(96%) | 23/23(100%) | 0/23(0%) |

Query 1 KSHAASDAPEDLTLAETADARG 23  
 KSHAASDAPE+LTLAETADARG  
 Sbjct 149 KSHAASDAPENLTLAETADARG 171

**Related Information**

[Gene](#) - associated gene details  
[UniGene](#) - clustered expressed sequence tags  
[Map Viewer](#) - aligned genomic context

BLAST is a registered trademark of the National Library of Medicine.

NCBI/ BLAST/ blastp suite/ Formatting Results - B9FJDRCG01R

Your search parameters were adjusted to search for a short input sequence.

[Edit and Resubmit](#) [Save Search Strategies](#) [Formatting options](#) [Download](#)

[YouTube](#) [How to read this page](#) [Blast report description](#)

### HEG1\_KSHAASDAPENLTLAETADARG\_NonMod

RID [B9FJDRCG01R](#) (Expires on 01-14 13:42 pm)

Query ID |cl|226166  
 Description None  
 Molecule type amino acid  
 Query Length 23

Database Name nr  
 Description All non-redundant GenBank CDS translations+PDB+SwissProt+PIR excluding environmental samples from WGS projects  
 Program BLASTP 2.2.30+ [Citation](#)

Other reports: [Search Summary](#) [Taxonomy reports](#) [Distance tree of results](#) [Related Structures](#) [Multiple alignment](#)

### Graphic Summary

[Show Conserved Domains](#)

No putative conserved domains have been detected

Distribution of 102 Blast Hits on the Query Sequence

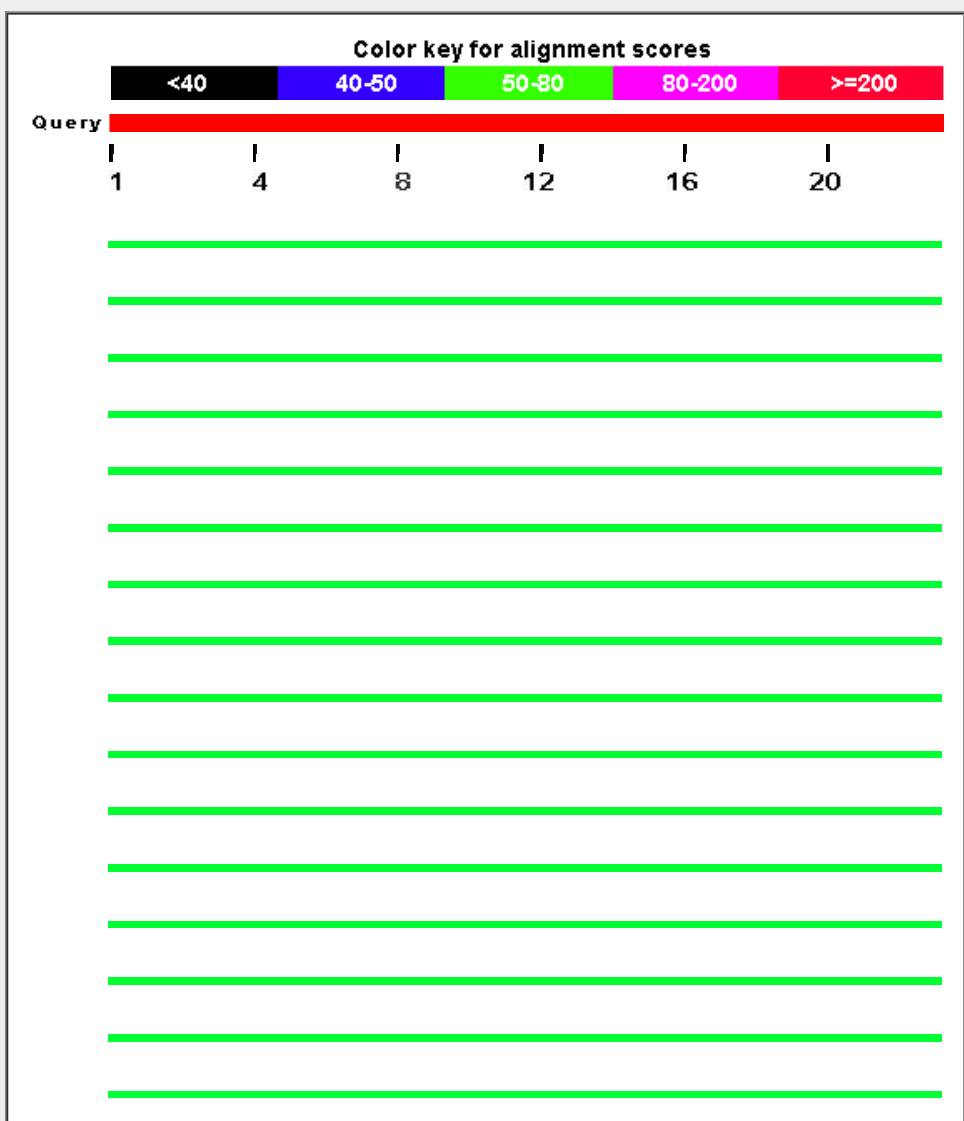



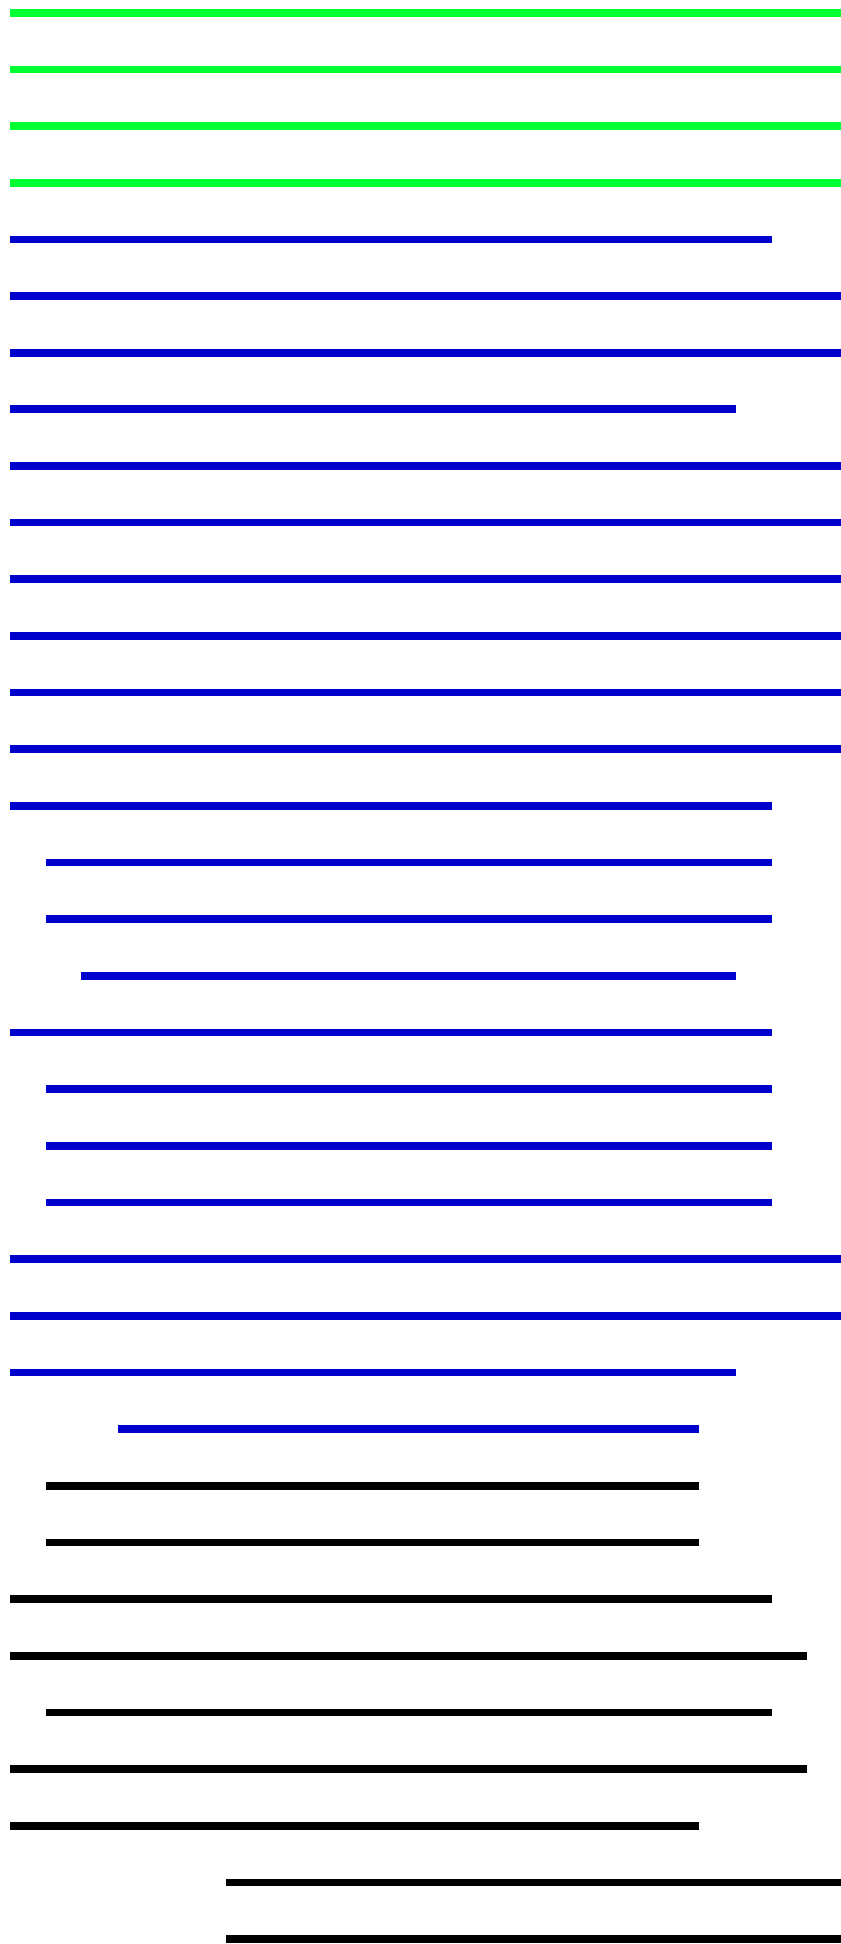

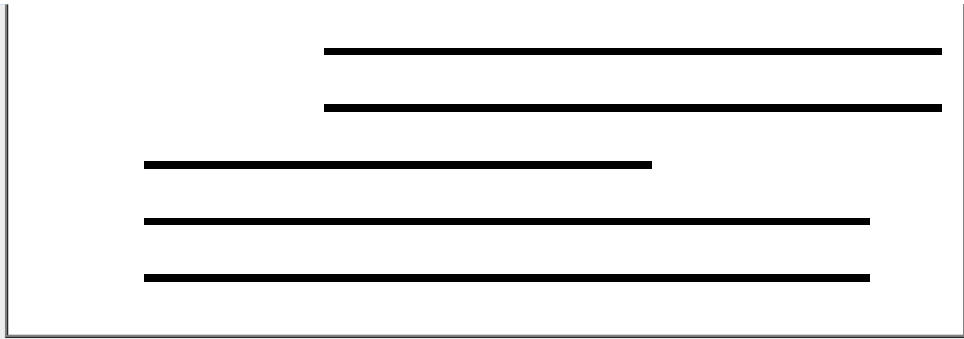

**Descriptions**

**Sequences producing significant alignments:**

Select: [All](#) [None](#) Selected:0

[↑](#) [Alignments](#)
[Download](#)
[GenPept](#)
[Graphics](#)
[Distance tree of results](#)
[Multiple alignment](#)
⚙

| Description                                                                             | Max score | Total score | Query cover | E value | Ident | Accession                                   |
|-----------------------------------------------------------------------------------------|-----------|-------------|-------------|---------|-------|---------------------------------------------|
| <a href="#">PREDICTED: LOW QUALITY PROTEIN: protein HEG homolog 1 [Homo sapiens]</a>    | 71.5      | 71.5        | 100%        | 1e-12   | 100%  | <a href="#">gij332252962 XP_003275622.1</a> |
| <a href="#">KIAA1237 protein [Homo sapiens]</a>                                         | 71.5      | 71.5        | 100%        | 1e-12   | 100%  | <a href="#">gij34327974 BAA86551.2</a>      |
| <a href="#">PREDICTED: protein HEG homolog 1 [Pan paniscus]</a>                         | 71.5      | 71.5        | 100%        | 1e-12   | 100%  | <a href="#">gij675781584 XP_008948773.1</a> |
| <a href="#">protein HEG homolog 1 precursor [Homo sapiens]</a>                          | 71.5      | 71.5        | 100%        | 1e-12   | 100%  | <a href="#">gij153792110 NP_065784.1</a>    |
| <a href="#">PREDICTED: protein HEG homolog 1 isoform X2 [Pan troglodytes]</a>           | 71.5      | 71.5        | 100%        | 1e-12   | 100%  | <a href="#">gij410037372 XP_516708.4</a>    |
| <a href="#">PREDICTED: protein HEG homolog 1 [Gorilla gorilla gorilla]</a>              | 71.5      | 71.5        | 100%        | 1e-12   | 100%  | <a href="#">gij426341907 XP_004036264.1</a> |
| <a href="#">PREDICTED: protein HEG homolog 1 isoform X1 [Homo sapiens]</a>              | 71.5      | 71.5        | 100%        | 1e-12   | 100%  | <a href="#">gij530375053 XP_005247723.1</a> |
| <a href="#">HEG homolog 1 [synthetic construct]</a>                                     | 71.5      | 71.5        | 100%        | 1e-12   | 100%  | <a href="#">gij168273206 BAG10442.1</a>     |
| <a href="#">PREDICTED: protein HEG homolog 1 isoform X1 [Pan troglodytes]</a>           | 71.5      | 71.5        | 100%        | 1e-12   | 100%  | <a href="#">gij694903827 XP_009444603.1</a> |
| <a href="#">PREDICTED: protein HEG homolog 1 isoform X1 [Rhinopithecus roosevelti]</a>  | 66.4      | 66.4        | 100%        | 8e-11   | 96%   | <a href="#">gij724956033 XP_010353116.1</a> |
| <a href="#">PREDICTED: protein HEG homolog 1 isoform X5 [Chlorocebus sabaeus]</a>       | 63.8      | 63.8        | 100%        | 6e-10   | 91%   | <a href="#">gij635121296 XP_007983733.1</a> |
| <a href="#">PREDICTED: protein HEG homolog 1 isoform X1 [Chlorocebus sabaeus]</a>       | 63.8      | 63.8        | 100%        | 6e-10   | 91%   | <a href="#">gij635121288 XP_007983729.1</a> |
| <a href="#">PREDICTED: protein HEG homolog 1 isoform X7 [Chlorocebus sabaeus]</a>       | 63.8      | 63.8        | 100%        | 6e-10   | 91%   | <a href="#">gij635121300 XP_007983735.1</a> |
| <a href="#">PREDICTED: protein HEG homolog 1 [Papio anubis]</a>                         | 63.8      | 63.8        | 100%        | 6e-10   | 91%   | <a href="#">gij685523313 XP_009198408.1</a> |
| <a href="#">PREDICTED: protein HEG homolog 1 isoform X3 [Callithrix jacchus]</a>        | 61.3      | 61.3        | 100%        | 4e-09   | 87%   | <a href="#">gij675731167 XP_008980554.1</a> |
| <a href="#">PREDICTED: protein HEG homolog 1 isoform X2 [Callithrix jacchus]</a>        | 61.3      | 122         | 100%        | 4e-09   | 87%   | <a href="#">gij675731165 XP_008980553.1</a> |
| <a href="#">PREDICTED: protein HEG homolog 1 isoform X1 [Callithrix jacchus]</a>        | 61.3      | 122         | 100%        | 4e-09   | 87%   | <a href="#">gij675731163 XP_008980552.1</a> |
| <a href="#">PREDICTED: protein HEG homolog 1-like [Saimiri boliviensis boliviensis]</a> | 60.9      | 60.9        | 100%        | 4e-09   | 87%   | <a href="#">gij725601602 XP_010350754.1</a> |
| <a href="#">PREDICTED: protein HEG homolog 1 [Macaca fascicularis]</a>                  | 57.9      | 57.9        | 100%        | 6e-08   | 87%   | <a href="#">gij544416142 XP_005547989.1</a> |
| <a href="#">PREDICTED: protein HEG homolog 1-like [Macaca mulatta]</a>                  | 57.9      | 57.9        | 100%        | 6e-08   | 87%   | <a href="#">gij297285172 XP_002802724.1</a> |
| <a href="#">PREDICTED: protein HEG homolog 1 [Tarsius syrichta]</a>                     | 48.1      | 48.1        | 91%         | 9e-05   | 81%   | <a href="#">gij640830988 XP_008071068.1</a> |
| <a href="#">PREDICTED: protein HEG homolog 1 [Canis lupus familiaris]</a>               | 46.0      | 46.0        | 100%        | 4e-04   | 70%   | <a href="#">gij545553118 XP_005639641.1</a> |
| <a href="#">PREDICTED: protein HEG homolog 1 isoform X1 [Mustela putorius]</a>          | 46.0      | 46.0        | 100%        | 4e-04   | 70%   | <a href="#">gij511841975 XP_004745464.1</a> |
| <a href="#">PREDICTED: protein HEG homolog 1 [Trichechus manatus latirostris]</a>       | 44.8      | 44.8        | 86%         | 0.001   | 75%   | <a href="#">gij471366480 XP_004373773.1</a> |
| <a href="#">PREDICTED: protein HEG homolog 1 [Capra hircus]</a>                         | 43.5      | 43.5        | 100%        | 0.003   | 70%   | <a href="#">gij548450985 XP_005675295.1</a> |
| <a href="#">PREDICTED: LOW QUALITY PROTEIN: protein HEG homolog 1 [Homo sapiens]</a>    | 43.5      | 43.5        | 100%        | 0.003   | 70%   | <a href="#">gij426219281 XP_004003855.1</a> |
| <a href="#">PREDICTED: protein HEG homolog 1 [Pantholops hodgsonii]</a>                 | 43.5      | 43.5        | 100%        | 0.003   | 70%   | <a href="#">gij556774526 XP_005982396.1</a> |
| <a href="#">PREDICTED: protein HEG homolog 1 [Bubalus bubalis]</a>                      | 43.5      | 43.5        | 100%        | 0.003   | 70%   | <a href="#">gij594111623 XP_006078628.1</a> |

|                                                                |      |      |      |       |     |                                             |
|----------------------------------------------------------------|------|------|------|-------|-----|---------------------------------------------|
| PREDICTED: protein HEG homolog 1 [Vicugna pacos]               | 42.2 | 42.2 | 100% | 0.007 | 70% | <a href="#">gij560957313 XP_006201131.1</a> |
| PREDICTED: protein HEG homolog 1 [Camelus ferus]               | 42.2 | 42.2 | 100% | 0.007 | 70% | <a href="#">gij560938470 XP_006195026.1</a> |
| PREDICTED: protein HEG homolog 1 [Chrysochloris asiatica]      | 41.8 | 41.8 | 91%  | 0.010 | 77% | <a href="#">gij586477913 XP_006869492.1</a> |
| PREDICTED: protein HEG homolog 1 [Myotis davidii]              | 41.8 | 41.8 | 86%  | 0.010 | 75% | <a href="#">gij584061295 XP_006775087.1</a> |
| PREDICTED: protein HEG homolog 1 [Myotis lucifugus]            | 41.4 | 41.4 | 86%  | 0.014 | 75% | <a href="#">gij558143649 XP_006092920.1</a> |
| PREDICTED: protein HEG homolog 1 [Galeopterus variegatus]      | 41.4 | 41.4 | 78%  | 0.014 | 72% | <a href="#">gij667285651 XP_008575868.1</a> |
| PREDICTED: protein HEG homolog 1 [Oryctolagus cuniculus]       | 40.9 | 40.9 | 91%  | 0.019 | 73% | <a href="#">gij655854339 XP_008264981.1</a> |
| PREDICTED: protein HEG homolog 1 [Heterocephalus glaber]       | 40.5 | 40.5 | 86%  | 0.025 | 70% | <a href="#">gij512817826 XP_004878675.1</a> |
| PREDICTED: protein HEG homolog 1 [Heterocephalus glaber]       | 40.5 | 40.5 | 86%  | 0.025 | 70% | <a href="#">gij512946721 XP_004835845.1</a> |
| HEG-like protein 1 [Heterocephalus glaber]                     | 40.5 | 40.5 | 86%  | 0.025 | 70% | <a href="#">gij351696267 EHA99185.1</a>     |
| PREDICTED: protein HEG homolog 1 [Felis catus]                 | 40.5 | 40.5 | 100% | 0.025 | 65% | <a href="#">gij586999546 XP_006936214.1</a> |
| PREDICTED: protein HEG homolog 1 [Panthera tigris altaica]     | 40.5 | 40.5 | 100% | 0.025 | 65% | <a href="#">gij591346369 XP_007098431.1</a> |
| PREDICTED: protein HEG homolog 1 [Loxodonta africana]          | 40.1 | 40.1 | 86%  | 0.035 | 65% | <a href="#">gij731491397 XP_010591299.1</a> |
| PREDICTED: protein HEG homolog 1 [Otolemur garnettii]          | 40.1 | 40.1 | 69%  | 0.035 | 81% | <a href="#">gij395844827 XP_003795152.1</a> |
| PREDICTED: protein HEG homolog 1 [Fukomys damarensis]          | 39.7 | 39.7 | 78%  | 0.047 | 72% | <a href="#">gij731191401 XP_010616571.1</a> |
| Integrin beta-5 [Fukomys damarensis]                           | 39.7 | 39.7 | 78%  | 0.048 | 72% | <a href="#">gij676287424 KFO38306.1</a>     |
| PREDICTED: protein HEG homolog 1 [Ceratotherium simum simum]   | 38.8 | 38.8 | 91%  | 0.087 | 71% | <a href="#">gij478501073 XP_004424850.1</a> |
| hypothetical protein PANDA_004926 [Ailuropoda melanoleuca]     | 38.8 | 38.8 | 95%  | 0.087 | 64% | <a href="#">gij281338690 EFB14274.1</a>     |
| PREDICTED: protein HEG homolog 1 [Eptesicus fuscus]            | 38.8 | 38.8 | 86%  | 0.087 | 75% | <a href="#">gij641727343 XP_008153759.1</a> |
| PREDICTED: protein HEG homolog 1-like [Ailuropoda melanoleuca] | 38.8 | 38.8 | 95%  | 0.087 | 64% | <a href="#">gij301762794 XP_002916796.1</a> |
| PREDICTED: protein HEG homolog 1 [Balaenoptera acutorostrata]  | 38.8 | 38.8 | 82%  | 0.087 | 74% | <a href="#">gij594669717 XP_007182838.1</a> |
| Protein HEG-like protein 1 [Bos mutus]                         | 38.4 | 38.4 | 73%  | 0.12  | 76% | <a href="#">gij440892002 ELR45395.1</a>     |
| PREDICTED: protein HEG homolog 1 isoform X2 [Bos taurus]       | 38.4 | 38.4 | 73%  | 0.12  | 76% | <a href="#">gij194664090 XP_589074.4</a>    |
| PREDICTED: protein HEG homolog 1 [Bos mutus]                   | 38.4 | 38.4 | 73%  | 0.12  | 76% | <a href="#">gij555997906 XP_005910670.1</a> |
| PREDICTED: protein HEG homolog 1 isoform X1 [Bos taurus]       | 38.4 | 38.4 | 73%  | 0.12  | 76% | <a href="#">gij528899646 XP_005196144.1</a> |
| PREDICTED: protein HEG homolog 1 [Octodon degus]               | 37.1 | 37.1 | 60%  | 0.30  | 79% | <a href="#">gij507692540 XP_004642279.1</a> |
| Protein HEG like protein 1 [Myotis brandtii]                   | 35.8 | 35.8 | 86%  | 0.75  | 70% | <a href="#">gij521030208 EPQ11995.1</a>     |
| PREDICTED: protein HEG homolog 1 [Myotis brandtii]             | 35.8 | 35.8 | 86%  | 0.75  | 70% | <a href="#">gij554557733 XP_005873280.1</a> |
| PREDICTED: protein HEG homolog 1 [Pteropus alecto]             | 35.4 | 35.4 | 91%  | 1.0   | 67% | <a href="#">gij586541026 XP_006905661.1</a> |
| Protein HEG like protein 1 [Pteropus alecto]                   | 35.4 | 35.4 | 91%  | 1.0   | 67% | <a href="#">gij431919751 ELK18108.1</a>     |
| PREDICTED: protein HEG homolog 1 [Erinaceus europaeus]         | 35.0 | 35.0 | 91%  | 1.4   | 62% | <a href="#">gij617657334 XP_007536091.1</a> |
| PREDICTED: protein HEG homolog 1 [Rattus norvegicus]           | 35.0 | 35.0 | 73%  | 1.4   | 65% | <a href="#">gij564314514 XP_006221221.1</a> |
| hypothetical protein [Pseudomonas nitroreducens]               | 34.6 | 34.6 | 47%  | 1.9   | 91% | <a href="#">gij516087889 WP_017518469.1</a> |
| PREDICTED: protein HEG homolog 1 [Condylura cristata]          | 34.6 | 34.6 | 91%  | 1.9   | 57% | <a href="#">gij507928473 XP_004675488.1</a> |
| PREDICTED: protein HEG homolog 1 [Ictidomys tridecemlineatus]  | 34.6 | 34.6 | 86%  | 1.9   | 70% | <a href="#">gij532108416 XP_005338931.1</a> |
| fumarate hydratase [Propionibacteriaceae bacterium P6A17]      | 34.1 | 34.1 | 52%  | 2.6   | 92% | <a href="#">gij655296257 WP_028705241.1</a> |
| PREDICTED: protein HEG homolog 1 [Cavia porcellus]             | 34.1 | 34.1 | 86%  | 2.6   | 60% | <a href="#">gij514450244 XP_003464197.2</a> |
| PREDICTED: protein HEG homolog 1-like [Lipotes vexillifer]     | 33.7 | 33.7 | 82%  | 3.6   | 68% | <a href="#">gij602724388 XP_007447667.1</a> |
| PREDICTED: protein HEG homolog 1 [Tupaia chinensis]            | 33.7 | 33.7 | 91%  | 3.6   | 62% | <a href="#">gij562851896 XP_006154654.1</a> |
| PREDICTED: protein HEG homolog 1-like [Physeter catodon]       | 33.7 | 33.7 | 82%  | 3.6   | 68% | <a href="#">gij593768203 XP_007122570.1</a> |
| ATP-binding protein [Streptomyces lividans]                    | 33.3 | 33.3 | 86%  | 4.9   | 55% | <a href="#">gij490072157 WP_003974332.1</a> |
| ATP/GTP binding protein [Streptomyces lividans TK24]           | 33.3 | 33.3 | 86%  | 4.9   | 55% | <a href="#">gij672370134 AIJ14016.1</a>     |
| putative ATP/GTP binding protein [Streptomyces lividans]       | 33.3 | 33.3 | 86%  | 4.9   | 55% | <a href="#">gij511096551 WP_016327021.1</a> |
| PREDICTED: protein HEG homolog 1 [Nannospalax galili]          | 33.3 | 33.3 | 86%  | 4.9   | 60% | <a href="#">gij674068341 XP_008841199.1</a> |
| PREDICTED: LOW QUALITY PROTEIN: protein HEG homolog 1 [S       | 32.9 | 32.9 | 91%  | 6.8   | 57% | <a href="#">gij545865686 XP_005670209.1</a> |

|                                                                                     |      |      |     |     |     |                                             |
|-------------------------------------------------------------------------------------|------|------|-----|-----|-----|---------------------------------------------|
| <a href="#">putative lyase [Nocardia cyriacigeorgica]</a>                           | 32.5 | 32.5 | 86% | 8.9 | 67% | <a href="#">gil504119683 WP_014353669.1</a> |
| <a href="#">transcriptional regulator [Streptomyces bicolor]</a>                    | 32.0 | 32.0 | 60% | 12  | 71% | <a href="#">gil671496762 WP_031485889.1</a> |
| <a href="#">DNA recombination protein RecO [Arthrobacter sp. H20]</a>               | 32.0 | 32.0 | 86% | 13  | 52% | <a href="#">gil651491855 WP_026552230.1</a> |
| <a href="#">hypothetical protein SMCB_0775 [Comamonadaceae bacterium B1]</a>        | 32.0 | 32.0 | 78% | 13  | 64% | <a href="#">gil635597847 BAO83003.1</a>     |
| <a href="#">rRNA methylase [Bifidobacterium callitrichos DSM 23973]</a>             | 32.0 | 32.0 | 65% | 13  | 75% | <a href="#">gil672955716 KFI51333.1</a>     |
| <a href="#">tetratricopeptide domain protein [Burkholderiales bacterium GJ-E10]</a> | 32.0 | 32.0 | 65% | 13  | 73% | <a href="#">gil723004031 BAP89185.1</a>     |
| <a href="#">unnamed protein product [Blastocystis hominis]</a>                      | 32.0 | 32.0 | 47% | 13  | 91% | <a href="#">gil300123904 CBK25175.2</a>     |
| <a href="#">unnamed protein product [Blastocystis hominis]</a>                      | 32.0 | 32.0 | 47% | 13  | 91% | <a href="#">gil300123935 CBK25206.2</a>     |
| <a href="#">alpha-amylase [Variovorax sp. CF313]</a>                                | 32.0 | 32.0 | 95% | 13  | 52% | <a href="#">gil495108088 WP_007832910.1</a> |
| <a href="#">conserved hypothetical protein [Leishmania braziliensis MHOM/BR/]</a>   | 32.0 | 32.0 | 52% | 13  | 92% | <a href="#">gil154341182 XP_001566544.1</a> |
| <a href="#">hypothetical protein THAOC_18311 [Thalassiosira oceanica]</a>           | 31.6 | 31.6 | 73% | 17  | 65% | <a href="#">gil397611241 EJK61241.1</a>     |
| <a href="#">transcriptional regulator [Streptomyces cellulosa]</a>                  | 31.6 | 31.6 | 65% | 18  | 60% | <a href="#">gil664132708 WP_030669364.1</a> |
| <a href="#">phosphoribosylaminoimidazolecarboxamide formyltransferase [Bifid]</a>   | 31.6 | 31.6 | 78% | 18  | 68% | <a href="#">gil705400339 WP_033496408.1</a> |
| <a href="#">fumarate hydratase [Mobiluncus curtisii]</a>                            | 31.6 | 31.6 | 52% | 18  | 83% | <a href="#">gil490109655 WP_004010370.1</a> |
| <a href="#">fumarate hydratase [Mobiluncus curtisii]</a>                            | 31.6 | 31.6 | 52% | 18  | 83% | <a href="#">gil490109230 WP_004009960.1</a> |
| <a href="#">fumarate hydratase [Arsenicococcus bolidensis]</a>                      | 31.6 | 31.6 | 52% | 18  | 83% | <a href="#">gil656265923 WP_029211857.1</a> |
| <a href="#">GH17958 [Drosophila grimshawi]</a>                                      | 31.6 | 31.6 | 82% | 18  | 70% | <a href="#">gil195060409 XP_001995800.1</a> |
| <a href="#">probable PHO8-repressible alkaline phosphatase vacuolar [Clavice]</a>   | 31.6 | 31.6 | 69% | 18  | 76% | <a href="#">gil399171823 CCF27560.1</a>     |
| <a href="#">PREDICTED: LOW QUALITY PROTEIN: laminin subunit gamma-1</a>             | 31.6 | 31.6 | 65% | 18  | 73% | <a href="#">gil584028919 XP_006808984.1</a> |
| <a href="#">PREDICTED: protein HEG homolog 1 [Chinchilla lanigera]</a>              | 31.6 | 31.6 | 91% | 18  | 57% | <a href="#">gil533144146 XP_005386602.1</a> |
| <a href="#">PREDICTED: laminin subunit gamma-1-like isoform X2 [Oreochron</a>       | 31.6 | 31.6 | 65% | 18  | 73% | <a href="#">gil542257771 XP_005464262.1</a> |
| <a href="#">PREDICTED: laminin subunit gamma-1-like [Pundamilia nyererei]</a>       | 31.6 | 31.6 | 65% | 18  | 73% | <a href="#">gil548523070 XP_005751418.1</a> |
| <a href="#">PREDICTED: laminin subunit gamma-1-like [Haplochromis burtoni]</a>      | 31.6 | 31.6 | 65% | 18  | 73% | <a href="#">gil554871791 XP_005945845.1</a> |
| <a href="#">PREDICTED: laminin subunit gamma-1-like isoform X2 [Maylandia</a>       | 31.6 | 31.6 | 65% | 18  | 73% | <a href="#">gil499045975 XP_004573568.1</a> |
| <a href="#">PREDICTED: laminin subunit gamma-1-like isoform X1 [Oreochron</a>       | 31.6 | 31.6 | 65% | 18  | 73% | <a href="#">gil348543037 XP_003458990.1</a> |
| <a href="#">PREDICTED: laminin subunit gamma-1-like isoform X1 [Maylandia</a>       | 31.6 | 31.6 | 65% | 18  | 73% | <a href="#">gil499045973 XP_004573567.1</a> |
| <a href="#">PREDICTED: uncharacterized protein LOC103455671 [Malus dome</a>         | 31.2 | 31.2 | 69% | 24  | 75% | <a href="#">gil657948135 XP_008393478.1</a> |

## Alignments

Download [GenPept](#) [Graphics](#) ▼ Next ▲ Previous ▲ Descriptions

**PREDICTED: LOW QUALITY PROTEIN: protein HEG homolog 1 [Nomascus leucogenys]**

Sequence ID: [gil332252962|ref|XP\\_003275622.1](#) Length: 1211 Number of Matches: 1

Range 1: 150 to 172 [GenPept](#) [Graphics](#) ▼ Next Match ▲ Previous Match

| Score          | Expect | Identities  | Positives   | Gaps     |
|----------------|--------|-------------|-------------|----------|
| 71.5 bits(161) | 1e-12  | 23/23(100%) | 23/23(100%) | 0/23(0%) |

Query 1 KSHAASDAPENLTLAETADARG 23  
 KSHAASDAPENLTLAETADARG  
 Sbjct 150 KSHAASDAPENLTLAETADARG 172

### Related Information

[Gene](#) - associated gene details  
[Map Viewer](#) - aligned genomic context

Download [GenPept](#) [Graphics](#) ▼ Next ▲ Previous ▲ Descriptions

**KIAA1237 protein [Homo sapiens]**

Sequence ID: [gil34327974|dbj|BAA86551.2](#) Length: 1268 Number of Matches: 1

Range 1: 36 to 58 [GenPept](#) [Graphics](#) ▼ Next Match ▲ Previous Match

| Score          | Expect | Identities  | Positives   | Gaps     |
|----------------|--------|-------------|-------------|----------|
| 71.5 bits(161) | 1e-12  | 23/23(100%) | 23/23(100%) | 0/23(0%) |

Query 1 KSHAASDAPENLTLAETADARG 23

### Related Information

[Gene](#) - associated gene details

Sbjct 36 KSHAASDAPENLTLAETADARG 58

[Download](#) [GenPept](#) [Graphics](#)

[Next](#) [Previous](#) [Descriptions](#)

PREDICTED: protein HEG homolog 1 [Pan paniscus]

Sequence ID: [gi|675781584|ref|XP\\_008948773.1|](#) Length: 1349 Number of Matches: 1

Range 1: 7 to 29 [GenPept](#) [Graphics](#)

[Next Match](#) [Previous Match](#)

| Score          | Expect | Identities  | Positives   | Gaps     |
|----------------|--------|-------------|-------------|----------|
| 71.5 bits(161) | 1e-12  | 23/23(100%) | 23/23(100%) | 0/23(0%) |

Query 1 KSHAASDAPENLTLAETADARG 23  
 KSHAASDAPENLTLAETADARG  
 Sbjct 7 KSHAASDAPENLTLAETADARG 29

**Related Information**

[Gene](#) - associated gene details  
[Map Viewer](#) - aligned genomic context

[Download](#) [GenPept](#) [Graphics](#)

[Next](#) [Previous](#) [Descriptions](#)

protein HEG homolog 1 precursor [Homo sapiens]

Sequence ID: [gi|153792110|ref|NP\\_065784.1|](#) Length: 1381 Number of Matches: 1

[See 1 more title\(s\)](#)

Range 1: 149 to 171 [GenPept](#) [Graphics](#)

[Next Match](#) [Previous Match](#)

| Score          | Expect | Identities  | Positives   | Gaps     |
|----------------|--------|-------------|-------------|----------|
| 71.5 bits(161) | 1e-12  | 23/23(100%) | 23/23(100%) | 0/23(0%) |

Query 1 KSHAASDAPENLTLAETADARG 23  
 KSHAASDAPENLTLAETADARG  
 Sbjct 149 KSHAASDAPENLTLAETADARG 171

**Related Information**

[Gene](#) - associated gene details  
[UniGene](#) - clustered expressed sequence tags  
[Map Viewer](#) - aligned genomic context  
[Identical Proteins](#) - Proteins identical to the subject

[Download](#) [GenPept](#) [Graphics](#)

[Next](#) [Previous](#) [Descriptions](#)

PREDICTED: protein HEG homolog 1 isoform X2 [Pan troglodytes]

Sequence ID: [gi|410037372|ref|XP\\_516708.4|](#) Length: 1391 Number of Matches: 1

Range 1: 149 to 171 [GenPept](#) [Graphics](#)

[Next Match](#) [Previous Match](#)

| Score          | Expect | Identities  | Positives   | Gaps     |
|----------------|--------|-------------|-------------|----------|
| 71.5 bits(161) | 1e-12  | 23/23(100%) | 23/23(100%) | 0/23(0%) |

Query 1 KSHAASDAPENLTLAETADARG 23  
 KSHAASDAPENLTLAETADARG  
 Sbjct 149 KSHAASDAPENLTLAETADARG 171

**Related Information**

[Gene](#) - associated gene details  
[UniGene](#) - clustered expressed sequence tags  
[Map Viewer](#) - aligned genomic context

BLAST is a registered trademark of the National Library of Medicine.

NCBI/ BLAST/ blastp suite/ Formatting Results - BVGGW1N701R

Your search parameters were adjusted to search for a short input sequence.

[Edit and Resubmit](#) [Save Search Strategies](#) [Formatting options](#) [Download](#) [YouTube](#) [How to read this page](#) [Blast report description](#)

HGAC\_RDSVSVVLGQHFFDRT\_Mod

RID [BVGGW1N701R](#) (Expires on 01-21 09:49 am)

Query ID [Icl|239321](#) Database Name [nr](#)

Description [None](#) Description [All non-redundant GenBank CDS translations+PDB+SwissProt+PIR+PRF excluding environmental samples from WGS projects](#)

Molecule type [amino acid](#) Program [BLASTP 2.2.30+](#) [Citation](#)

Query Length [16](#)

Other reports: [Search Summary](#) [Taxonomy reports](#) [Distance tree of results](#) [Multiple alignment](#)

Graphic Summary

Show Conserved Domains

No putative conserved domains have been detected

Distribution of 100 Blast Hits on the Query Sequence

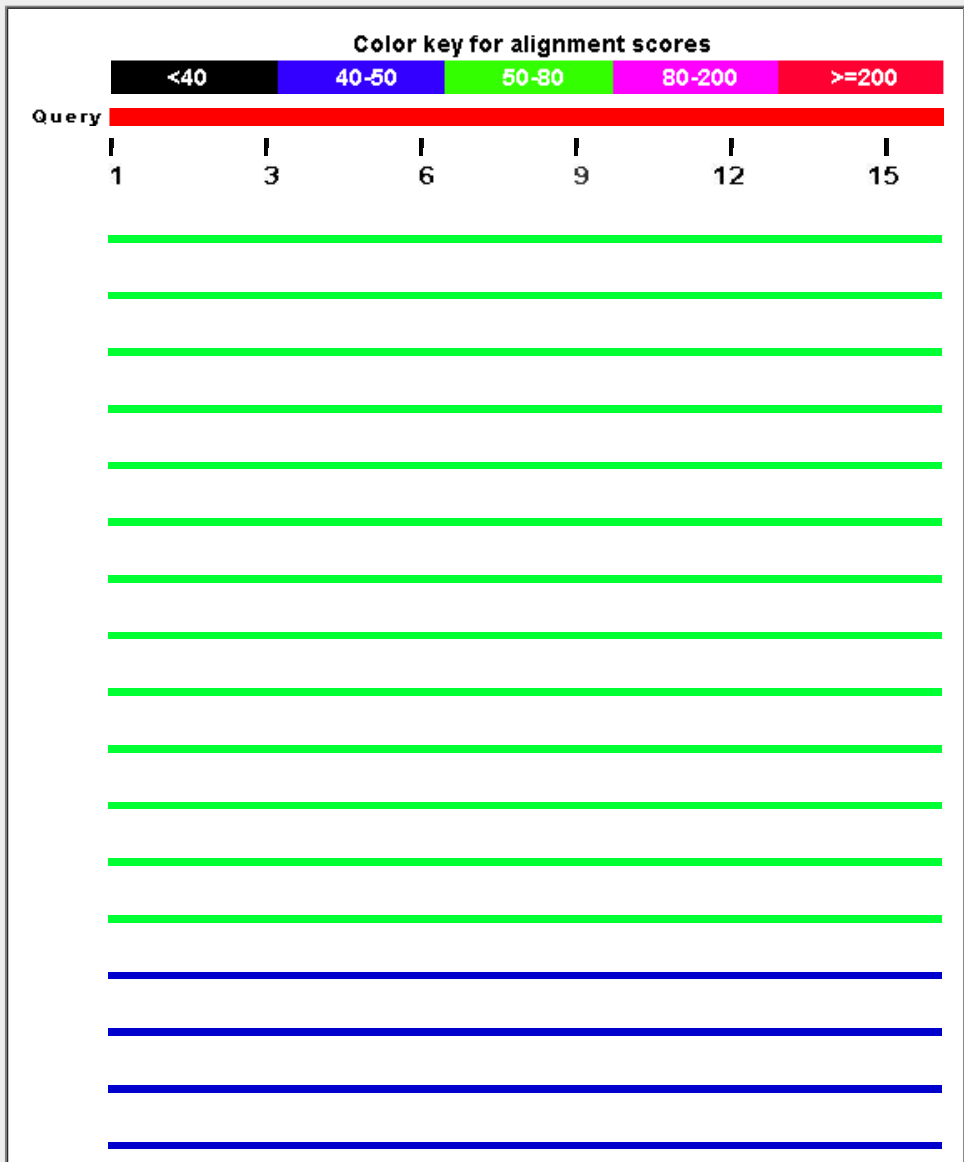

The image shows a table with 30 rows. Each row contains a single blue horizontal line, which is likely a placeholder for a sequence alignment or a data entry. The lines are evenly spaced and extend across most of the width of the table area.



## Descriptions

### Sequences producing significant alignments:

Select: [All](#) [None](#) Selected:0

[Alignments](#)
[Download](#)
[GenPept](#)
[Graphics](#)
[Distance tree of results](#)
[Multiple alignment](#)


| Description                                                                                   | Max score | Total score | Query cover | E value | Ident | Accession                      |
|-----------------------------------------------------------------------------------------------|-----------|-------------|-------------|---------|-------|--------------------------------|
| <a href="#">Chain A, Short Form Hgfa With Inhibitory Fab75 [Homo sapiens]</a>                 | 51.5      | 51.5        | 100%        | 3e-06   | 94%   | <a href="#">2ROL_A</a>         |
| <a href="#">Chain A, Crystal Structure Of Hgfa In Complex With The Allosteric Non-Inhibit</a> | 51.5      | 51.5        | 100%        | 3e-06   | 94%   | <a href="#">2WUB_A</a>         |
| <a href="#">Chain A, Protease Domain Of Hgfa With No Inhibitor [Homo sapiens]</a>             | 51.5      | 51.5        | 100%        | 3e-06   | 94%   | <a href="#">1YBW_A</a>         |
| <a href="#">PREDICTED: hepatocyte growth factor activator isoform X3 [Callithrix jacchus</a>  | 51.5      | 51.5        | 100%        | 3e-06   | 94%   | <a href="#">XP_008991932.1</a> |
| <a href="#">PREDICTED: hepatocyte growth factor activator isoform X2 [Callithrix jacchus</a>  | 51.5      | 51.5        | 100%        | 3e-06   | 94%   | <a href="#">XP_008991931.1</a> |
| <a href="#">PREDICTED: hepatocyte growth factor activator [Ceratotherium simum simur</a>      | 51.5      | 51.5        | 100%        | 3e-06   | 94%   | <a href="#">XP_004432296.1</a> |
| <a href="#">PREDICTED: hepatocyte growth factor activator isoform X1 [Callithrix jacchus</a>  | 51.5      | 51.5        | 100%        | 3e-06   | 94%   | <a href="#">XP_002746077.1</a> |
| <a href="#">HGF activator, preproprotein [Homo sapiens]</a>                                   | 51.5      | 51.5        | 100%        | 3e-06   | 94%   | <a href="#">AA12193.1</a>      |
| <a href="#">PREDICTED: LOW QUALITY PROTEIN: hepatocyte growth factor activator [C</a>         | 51.5      | 51.5        | 100%        | 3e-06   | 94%   | <a href="#">XP_004038404.1</a> |
| <a href="#">hepatocyte growth factor activator isoform 2 preproprotein [Homo sapiens]</a>     | 51.5      | 51.5        | 100%        | 3e-06   | 94%   | <a href="#">NP_001519.1</a>    |
| <a href="#">PREDICTED: hepatocyte growth factor activator isoform X2 [Pan paniscus]</a>       | 51.5      | 51.5        | 100%        | 3e-06   | 94%   | <a href="#">XP_003804416.1</a> |
| <a href="#">PREDICTED: hepatocyte growth factor activator [Pan troglodytes]</a>               | 51.5      | 51.5        | 100%        | 3e-06   | 94%   | <a href="#">XP_001174601.2</a> |
| <a href="#">hepatocyte growth factor activator isoform 1 preproprotein [Homo sapiens]</a>     | 51.5      | 51.5        | 100%        | 3e-06   | 94%   | <a href="#">NP_001284368.1</a> |
| <a href="#">PREDICTED: hepatocyte growth factor activator [Sorex araneus]</a>                 | 49.4      | 49.4        | 100%        | 2e-05   | 88%   | <a href="#">XP_004617524.1</a> |
| <a href="#">PREDICTED: LOW QUALITY PROTEIN: hepatocyte growth factor activator [F</a>         | 49.4      | 49.4        | 100%        | 2e-05   | 88%   | <a href="#">XP_006919081.1</a> |
| <a href="#">PREDICTED: hepatocyte growth factor activator-like [Equus przewalskii]</a>        | 49.0      | 49.0        | 100%        | 2e-05   | 88%   | <a href="#">XP_008509987.1</a> |
| <a href="#">PREDICTED: hepatocyte growth factor activator [Dasypus novemcinctus]</a>          | 49.0      | 49.0        | 100%        | 2e-05   | 88%   | <a href="#">XP_004481097.1</a> |
| <a href="#">PREDICTED: hepatocyte growth factor activator [Ovis aries]</a>                    | 49.0      | 49.0        | 100%        | 2e-05   | 88%   | <a href="#">XP_004010188.1</a> |
| <a href="#">PREDICTED: hepatocyte growth factor activator [Tarsius syrichta]</a>              | 49.0      | 49.0        | 100%        | 2e-05   | 88%   | <a href="#">XP_008046016.1</a> |
| <a href="#">PREDICTED: hepatocyte growth factor activator [Capra hircus]</a>                  | 49.0      | 49.0        | 100%        | 2e-05   | 88%   | <a href="#">XP_005682051.1</a> |
| <a href="#">TPA: HGF activator preproprotein-like [Bos taurus]</a>                            | 49.0      | 49.0        | 100%        | 2e-05   | 88%   | <a href="#">DAA28460.1</a>     |
| <a href="#">PREDICTED: hepatocyte growth factor activator [Physeter catodon]</a>              | 49.0      | 49.0        | 100%        | 2e-05   | 88%   | <a href="#">XP_007109331.1</a> |
| <a href="#">PREDICTED: hepatocyte growth factor activator isoform X2 [Balaenoptera ac</a>     | 49.0      | 49.0        | 100%        | 2e-05   | 88%   | <a href="#">XP_007172367.1</a> |
| <a href="#">Hepatocyte growth factor activator [Macaca fascicularis]</a>                      | 49.0      | 49.0        | 100%        | 2e-05   | 88%   | <a href="#">EHH49413.1</a>     |
| <a href="#">PREDICTED: hepatocyte growth factor activator-like [Macaca mulatta]</a>           | 49.0      | 49.0        | 100%        | 2e-05   | 88%   | <a href="#">XP_001114822.2</a> |
| <a href="#">PREDICTED: hepatocyte growth factor activator isoform X3 [Heterocephalus s</a>    | 49.0      | 49.0        | 100%        | 2e-05   | 88%   | <a href="#">XP_004847421.1</a> |
| <a href="#">PREDICTED: hepatocyte growth factor activator-like isoform X2 [Sus scrofa]</a>    | 49.0      | 49.0        | 100%        | 2e-05   | 88%   | <a href="#">XP_005666566.1</a> |
| <a href="#">PREDICTED: hepatocyte growth factor activator isoform X2 [Macaca fascicul</a>     | 49.0      | 49.0        | 100%        | 2e-05   | 88%   | <a href="#">XP_005554416.1</a> |
| <a href="#">PREDICTED: LOW QUALITY PROTEIN: hepatocyte growth factor activator [E</a>         | 49.0      | 49.0        | 100%        | 2e-05   | 88%   | <a href="#">XP_005609072.1</a> |



|                                                                                                         |      |      |      |       |     |                                |
|---------------------------------------------------------------------------------------------------------|------|------|------|-------|-----|--------------------------------|
| <a href="#">PREDICTED: hepatocyte growth factor activator [Rhinopithecus roxellana]</a>                 | 49.0 | 49.0 | 100% | 2e-05 | 88% | <a href="#">XP_010382705.1</a> |
| <a href="#">PREDICTED: hepatocyte growth factor activator isoform X1 [Macaca fascicularis]</a>          | 49.0 | 49.0 | 100% | 2e-05 | 88% | <a href="#">XP_005554415.1</a> |
| <a href="#">PREDICTED: hepatocyte growth factor activator [Chlorocebus sabaeus]</a>                     | 49.0 | 49.0 | 100% | 2e-05 | 88% | <a href="#">XP_008016229.1</a> |
| <a href="#">hepatocyte growth factor activator preproprotein [Bos taurus]</a>                           | 49.0 | 49.0 | 100% | 2e-05 | 88% | <a href="#">NP_001193958.1</a> |
| <a href="#">PREDICTED: hepatocyte growth factor activator [Mesocricetus auratus]</a>                    | 49.0 | 49.0 | 100% | 2e-05 | 88% | <a href="#">XP_005068916.1</a> |
| <a href="#">Hepatocyte growth factor activator [Bos mutus]</a>                                          | 49.0 | 49.0 | 100% | 2e-05 | 88% | <a href="#">ELR57284.1</a>     |
| <a href="#">PREDICTED: hepatocyte growth factor activator isoform X1 [Galeopterus varius]</a>           | 49.0 | 49.0 | 100% | 2e-05 | 88% | <a href="#">XP_008566189.1</a> |
| <a href="#">PREDICTED: hepatocyte growth factor activator-like isoform X1 [Sus scrofa]</a>              | 49.0 | 49.0 | 100% | 2e-05 | 88% | <a href="#">XP_003482383.1</a> |
| <a href="#">PREDICTED: hepatocyte growth factor activator [Lipotes vexillifer]</a>                      | 49.0 | 49.0 | 100% | 2e-05 | 88% | <a href="#">XP_007456919.1</a> |
| <a href="#">PREDICTED: hepatocyte growth factor activator isoform X1 [Balaenoptera acronotus]</a>       | 49.0 | 49.0 | 100% | 2e-05 | 88% | <a href="#">XP_007172366.1</a> |
| <a href="#">PREDICTED: hepatocyte growth factor activator isoform X2 [Heterocephalus glaber]</a>        | 49.0 | 49.0 | 100% | 2e-05 | 88% | <a href="#">XP_004847420.1</a> |
| <a href="#">PREDICTED: hepatocyte growth factor activator [Nannospalax galii]</a>                       | 49.0 | 49.0 | 100% | 2e-05 | 88% | <a href="#">XP_008840096.1</a> |
| <a href="#">PREDICTED: hepatocyte growth factor activator [Ictidomys tridecemlineatus]</a>              | 49.0 | 49.0 | 100% | 2e-05 | 88% | <a href="#">XP_005319055.1</a> |
| <a href="#">PREDICTED: hepatocyte growth factor activator [Nomascus leucogenys]</a>                     | 49.0 | 49.0 | 100% | 2e-05 | 88% | <a href="#">XP_003279052.1</a> |
| <a href="#">PREDICTED: hepatocyte growth factor activator isoform X2 [Galeopterus varius]</a>           | 49.0 | 49.0 | 100% | 2e-05 | 88% | <a href="#">XP_008566259.1</a> |
| <a href="#">PREDICTED: LOW QUALITY PROTEIN: hepatocyte growth factor activator [Fukomys damarensis]</a> | 49.0 | 49.0 | 100% | 2e-05 | 88% | <a href="#">XP_009238032.1</a> |
| <a href="#">PREDICTED: hepatocyte growth factor activator [Tursiops truncatus]</a>                      | 49.0 | 49.0 | 100% | 2e-05 | 88% | <a href="#">XP_004311082.1</a> |
| <a href="#">PREDICTED: hepatocyte growth factor activator [Orcinus orca]</a>                            | 49.0 | 49.0 | 100% | 2e-05 | 88% | <a href="#">XP_004265212.1</a> |
| <a href="#">PREDICTED: hepatocyte growth factor activator isoform X1 [Heterocephalus glaber]</a>        | 49.0 | 49.0 | 100% | 2e-05 | 88% | <a href="#">XP_004847419.1</a> |
| <a href="#">PREDICTED: hepatocyte growth factor activator [Bison bison bison]</a>                       | 49.0 | 49.0 | 100% | 2e-05 | 88% | <a href="#">XP_010846427.1</a> |
| <a href="#">PREDICTED: hepatocyte growth factor activator [Bos mutus]</a>                               | 49.0 | 49.0 | 100% | 2e-05 | 88% | <a href="#">XP_005894504.1</a> |
| <a href="#">PREDICTED: hepatocyte growth factor activator [Bubalus bubalis]</a>                         | 49.0 | 49.0 | 100% | 2e-05 | 88% | <a href="#">XP_006074671.1</a> |
| <a href="#">PREDICTED: hepatocyte growth factor activator [Pantholops hodgsonii]</a>                    | 49.0 | 49.0 | 100% | 2e-05 | 88% | <a href="#">XP_005984423.1</a> |
| <a href="#">PREDICTED: hepatocyte growth factor activator [Papio anubis]</a>                            | 49.0 | 49.0 | 100% | 2e-05 | 88% | <a href="#">XP_009209400.1</a> |
| <a href="#">Hepatocyte growth factor activator [Macaca mulatta]</a>                                     | 49.0 | 49.0 | 100% | 2e-05 | 88% | <a href="#">EHH14171.1</a>     |
| <a href="#">PREDICTED: hepatocyte growth factor activator isoform X1 [Rattus norvegicus]</a>            | 46.9 | 46.9 | 100% | 1e-04 | 81% | <a href="#">XP_008768574.1</a> |
| <a href="#">PREDICTED: hepatocyte growth factor activator isoform X2 [Mus musculus]</a>                 | 46.9 | 46.9 | 100% | 1e-04 | 81% | <a href="#">XP_006504095.1</a> |
| <a href="#">PREDICTED: hepatocyte growth factor activator [Cavia porcellus]</a>                         | 46.9 | 46.9 | 100% | 1e-04 | 88% | <a href="#">XP_003461921.2</a> |
| <a href="#">PREDICTED: hepatocyte growth factor activator [Peromyscus maniculatus bayleyi]</a>          | 46.9 | 46.9 | 100% | 1e-04 | 81% | <a href="#">XP_006985637.1</a> |
| <a href="#">PREDICTED: hepatocyte growth factor activator [Cricetulus griseus]</a>                      | 46.9 | 46.9 | 100% | 1e-04 | 81% | <a href="#">XP_007624029.1</a> |
| <a href="#">PREDICTED: hepatocyte growth factor activator [Cricetulus griseus]</a>                      | 46.9 | 46.9 | 100% | 1e-04 | 81% | <a href="#">XP_003496650.1</a> |
| <a href="#">hepatocyte growth factor activator precursor [Rattus norvegicus]</a>                        | 46.9 | 46.9 | 100% | 1e-04 | 81% | <a href="#">NP_445772.1</a>    |
| <a href="#">hepatocyte growth factor activator HGFA [Mus musculus]</a>                                  | 46.9 | 46.9 | 100% | 1e-04 | 81% | <a href="#">AAF34712.1</a>     |
| <a href="#">unnamed protein product [Mus musculus]</a>                                                  | 46.9 | 46.9 | 100% | 1e-04 | 81% | <a href="#">BAE41500.1</a>     |
| <a href="#">hepatocyte growth factor activator preproprotein [Mus musculus]</a>                         | 46.9 | 46.9 | 100% | 1e-04 | 81% | <a href="#">NP_062320.2</a>    |
| <a href="#">Hepatocyte growth factor activator [Mus musculus]</a>                                       | 46.9 | 46.9 | 100% | 1e-04 | 81% | <a href="#">AAH19376.1</a>     |
| <a href="#">PREDICTED: hepatocyte growth factor activator isoform X1 [Mus musculus]</a>                 | 46.9 | 46.9 | 100% | 1e-04 | 81% | <a href="#">XP_006504094.1</a> |
| <a href="#">hepatocyte growth factor activator [Cricetulus griseus]</a>                                 | 46.9 | 46.9 | 100% | 1e-04 | 81% | <a href="#">ERE89786.1</a>     |
| <a href="#">Hepatocyte growth factor activator [Cricetulus griseus]</a>                                 | 46.9 | 46.9 | 100% | 1e-04 | 81% | <a href="#">EGV91591.1</a>     |
| <a href="#">PREDICTED: hepatocyte growth factor activator [Fukomys damarensis]</a>                      | 46.9 | 46.9 | 100% | 1e-04 | 88% | <a href="#">XP_010640070.1</a> |
| <a href="#">Hepatocyte growth factor activator [Fukomys damarensis]</a>                                 | 46.9 | 46.9 | 100% | 1e-04 | 88% | <a href="#">KFO25725.1</a>     |
| <a href="#">PREDICTED: hepatocyte growth factor activator [Jaculus jaculus]</a>                         | 46.4 | 46.4 | 100% | 2e-04 | 88% | <a href="#">XP_004656058.1</a> |
| <a href="#">PREDICTED: LOW QUALITY PROTEIN: hepatocyte growth factor activator [Fukomys damarensis]</a> | 45.2 | 45.2 | 100% | 5e-04 | 81% | <a href="#">XP_010995899.1</a> |
| <a href="#">PREDICTED: hepatocyte growth factor activator [Vicugna pacos]</a>                           | 45.2 | 45.2 | 100% | 5e-04 | 81% | <a href="#">XP_006213089.1</a> |
| <a href="#">PREDICTED: hepatocyte growth factor activator [Camelus bactrianus]</a>                      | 45.2 | 45.2 | 100% | 5e-04 | 81% | <a href="#">XP_010957586.1</a> |

|                                                                                               |      |      |      |       |     |                                |
|-----------------------------------------------------------------------------------------------|------|------|------|-------|-----|--------------------------------|
| <a href="#">PREDICTED: LOW QUALITY PROTEIN: hepatocyte growth factor activator [C</a>         | 45.2 | 45.2 | 100% | 5e-04 | 81% | <a href="#">XP_006181198.1</a> |
| <a href="#">PREDICTED: hepatocyte growth factor activator [Erinaceus europaeus]</a>           | 45.2 | 45.2 | 100% | 5e-04 | 81% | <a href="#">XP_007536851.1</a> |
| <a href="#">PREDICTED: hepatocyte growth factor activator [Microtus ochrogaster]</a>          | 44.3 | 44.3 | 100% | 9e-04 | 75% | <a href="#">XP_005365974.1</a> |
| <a href="#">Hepatocyte growth factor activator [Myotis davidii]</a>                           | 42.6 | 42.6 | 87%  | 0.003 | 86% | <a href="#">ELK32958.1</a>     |
| <a href="#">PREDICTED: hepatocyte growth factor activator [Myotis davidii]</a>                | 42.6 | 42.6 | 87%  | 0.003 | 86% | <a href="#">XP_006760204.1</a> |
| <a href="#">PREDICTED: hepatocyte growth factor activator [Eptesicus fuscus]</a>              | 42.6 | 42.6 | 87%  | 0.003 | 86% | <a href="#">XP_008149119.1</a> |
| <a href="#">PREDICTED: hepatocyte growth factor activator [Echinops telfairi]</a>             | 42.6 | 42.6 | 87%  | 0.003 | 86% | <a href="#">XP_004715151.1</a> |
| <a href="#">PREDICTED: hepatocyte growth factor activator [Elephantulus edwardii]</a>         | 42.6 | 42.6 | 87%  | 0.003 | 86% | <a href="#">XP_006893724.1</a> |
| <a href="#">PREDICTED: hepatocyte growth factor activator isoform X2 [Chinchilla laniger]</a> | 42.2 | 42.2 | 100% | 0.004 | 81% | <a href="#">XP_005408819.1</a> |
| <a href="#">PREDICTED: hepatocyte growth factor activator isoform X1 [Chinchilla laniger]</a> | 42.2 | 42.2 | 100% | 0.004 | 81% | <a href="#">XP_005408818.1</a> |
| <a href="#">PREDICTED: hepatocyte growth factor activator [Odobenus rosmarus diverge</a>      | 41.4 | 41.4 | 100% | 0.008 | 81% | <a href="#">XP_004396253.1</a> |
| <a href="#">PREDICTED: hepatocyte growth factor activator isoform X3 [Tupaia chinensis</a>    | 40.5 | 40.5 | 100% | 0.016 | 75% | <a href="#">XP_006153008.1</a> |
| <a href="#">PREDICTED: hepatocyte growth factor activator isoform X2 [Tupaia chinensis</a>    | 40.5 | 40.5 | 100% | 0.016 | 75% | <a href="#">XP_006153007.1</a> |
| <a href="#">PREDICTED: hepatocyte growth factor activator isoform X1 [Tupaia chinensis</a>    | 40.5 | 40.5 | 100% | 0.016 | 75% | <a href="#">XP_006153006.1</a> |
| <a href="#">PREDICTED: hepatocyte growth factor activator [Otolemur garnettii]</a>            | 39.7 | 39.7 | 93%  | 0.028 | 80% | <a href="#">XP_003801207.1</a> |
| <a href="#">PREDICTED: hepatocyte growth factor activator [Myotis brandtii]</a>               | 39.2 | 39.2 | 81%  | 0.041 | 85% | <a href="#">XP_005886528.1</a> |
| <a href="#">PREDICTED: hepatocyte growth factor activator [Chrysochloris asiatica]</a>        | 39.2 | 39.2 | 81%  | 0.041 | 85% | <a href="#">XP_006875389.1</a> |
| <a href="#">PREDICTED: hepatocyte growth factor activator [Panthera tigris altaica]</a>       | 38.8 | 38.8 | 100% | 0.055 | 75% | <a href="#">XP_007089521.1</a> |
| <a href="#">PREDICTED: hepatocyte growth factor activator isoform X5 [Mustela putorius</a>    | 38.8 | 38.8 | 100% | 0.055 | 75% | <a href="#">XP_004772296.1</a> |
| <a href="#">PREDICTED: hepatocyte growth factor activator isoform X6 [Mustela putorius</a>    | 38.8 | 38.8 | 100% | 0.056 | 75% | <a href="#">XP_004801526.1</a> |
| <a href="#">PREDICTED: hepatocyte growth factor activator [Ursus maritimus]</a>               | 38.8 | 38.8 | 100% | 0.056 | 75% | <a href="#">XP_008704513.1</a> |
| <a href="#">PREDICTED: hepatocyte growth factor activator isoform X4 [Mustela putorius</a>    | 38.8 | 38.8 | 100% | 0.056 | 75% | <a href="#">XP_004772295.1</a> |
| <a href="#">PREDICTED: hepatocyte growth factor activator isoform X5 [Mustela putorius</a>    | 38.8 | 38.8 | 100% | 0.056 | 75% | <a href="#">XP_004801525.1</a> |
| <a href="#">PREDICTED: hepatocyte growth factor activator [Ochotona princeps]</a>             | 38.8 | 38.8 | 93%  | 0.056 | 73% | <a href="#">XP_004579433.1</a> |
| <a href="#">PREDICTED: LOW QUALITY PROTEIN: hepatocyte growth factor activator-llj</a>        | 38.8 | 38.8 | 100% | 0.056 | 75% | <a href="#">XP_002916611.1</a> |
| <a href="#">PREDICTED: hepatocyte growth factor activator isoform X3 [Mustela putorius</a>    | 38.8 | 38.8 | 100% | 0.056 | 75% | <a href="#">XP_004772294.1</a> |

## Alignments

Download GenPept Graphics

Next Previous Descriptions

### Chain A, Short Form Hgfa With Inhibitory Fab75

Sequence ID: [pdb|2R0L|A](#) Length: 248 Number of Matches: 1

Range 1: 48 to 63 GenPept Graphics

Next Match Previous Match

#### Related Information

[Structure](#) - 3D structure displays

| Score          | Expect | Identities | Positives   | Gaps     |
|----------------|--------|------------|-------------|----------|
| 51.5 bits(114) | 3e-06  | 15/16(94%) | 16/16(100%) | 0/16(0%) |

Query 1 RDSVSVVLGQHFFDRT 16  
RDSVSVVLGQHFF+RT  
Sbjct 48 RDSVSVVLGQHFFNRT 63

Download GenPept Graphics

Next Previous Descriptions

### Chain A, Crystal Structure Of Hgfa In Complex With The Allosteric Non-Inhibitory Antibody Fab40.Deltatr

Sequence ID: [pdb|2WUB|A](#) Length: 257 Number of Matches: 1

See 3 more title(s)

Range 1: 48 to 63 GenPept Graphics

Next Match Previous Match

#### Related Information

[Structure](#) - 3D structure displays

[Identical Proteins](#) - Proteins

| Score          | Expect | Identities | Positives   | Gaps     |
|----------------|--------|------------|-------------|----------|
| 51.5 bits(114) | 3e-06  | 15/16(94%) | 16/16(100%) | 0/16(0%) |

identical to the subject

Query 1 RDSVSVVLGQHFFDRT 16  
 RDSVSVVLGQHFF+RT  
 Sbjct 48 RDSVSVVLGQHFFNRT 63

[Download](#) [GenPept](#) [Graphics](#)

[Next](#) [Previous](#) [Descriptions](#)

Chain A, Protease Domain Of Hgfa With No Inhibitor

Sequence ID: [pdb1YBWJA](#) Length: 283 Number of Matches: 1

[See 3 more title\(s\)](#)

Range 1: 83 to 98 [GenPept](#) [Graphics](#) [Next Match](#) [Previous Match](#)

| Score          | Expect | Identities | Positives   | Gaps     |
|----------------|--------|------------|-------------|----------|
| 51.5 bits(114) | 3e-06  | 15/16(94%) | 16/16(100%) | 0/16(0%) |

Query 1 RDSVSVVLGQHFFDRT 16  
 RDSVSVVLGQHFF+RT  
 Sbjct 83 RDSVSVVLGQHFFNRT 98

**Related Information**

[Structure](#) - 3D structure displays  
[Identical Proteins](#) - Proteins  
 identical to the subject

[Download](#) [GenPept](#) [Graphics](#)

[Next](#) [Previous](#) [Descriptions](#)

PREDICTED: hepatocyte growth factor activator isoform X3 [Callithrix jacchus]

Sequence ID: [ref|XP\\_008991932.1](#) Length: 539 Number of Matches: 1

Range 1: 339 to 354 [GenPept](#) [Graphics](#) [Next Match](#) [Previous Match](#)

| Score          | Expect | Identities | Positives   | Gaps     |
|----------------|--------|------------|-------------|----------|
| 51.5 bits(114) | 3e-06  | 15/16(94%) | 16/16(100%) | 0/16(0%) |

Query 1 RDSVSVVLGQHFFDRT 16  
 RDSVSVVLGQHFF+RT  
 Sbjct 339 RDSVSVVLGQHFFNRT 354

**Related Information**

[Gene](#) - associated gene details  
[Map Viewer](#) - aligned genomic  
 context

[Download](#) [GenPept](#) [Graphics](#)

[Next](#) [Previous](#) [Descriptions](#)

PREDICTED: hepatocyte growth factor activator isoform X2 [Callithrix jacchus]

Sequence ID: [ref|XP\\_008991931.1](#) Length: 607 Number of Matches: 1

Range 1: 454 to 469 [GenPept](#) [Graphics](#) [Next Match](#) [Previous Match](#)

| Score          | Expect | Identities | Positives   | Gaps     |
|----------------|--------|------------|-------------|----------|
| 51.5 bits(114) | 3e-06  | 15/16(94%) | 16/16(100%) | 0/16(0%) |

Query 1 RDSVSVVLGQHFFDRT 16  
 RDSVSVVLGQHFF+RT  
 Sbjct 454 RDSVSVVLGQHFFNRT 469

**Related Information**

[Gene](#) - associated gene details  
[Map Viewer](#) - aligned genomic  
 context

BLAST is a registered trademark of the National Library of Medicine.

▶ NCBI/ BLAST/ blastp suite/ Formatting Results - B9HE25MV01R

**i** Your search parameters were adjusted to search for a short input sequence.

[Edit and Resubmit](#) [Save Search Strategies](#) [▶ Formatting options](#) [▶ Download](#)

[YouTube](#) [How to read this page](#) [Blast report description](#)

HGFAC\_RDSVSVVLGQHFFNRT\_NonMod

RID [B9HE25MV01R](#) (Expires on 01-14 14:14 pm)

**Query ID** |cl|124214  
**Description** None  
**Molecule type** amino acid  
**Query Length** 16

**Database Name** nr  
**Description** All non-redundant GenBank CDS translations+PDB+SwissProt+PIR excluding environmental samples from WGS projects  
**Program** BLASTP 2.2.30+ [▶ Citation](#)

Other reports: [▶ Search Summary](#) [\[Taxonomy reports\]](#) [\[Distance tree of results\]](#) [\[Multiple alignment\]](#)

**Graphic Summary**

[Show Conserved Domains](#)

No putative conserved domains have been detected

Distribution of 100 Blast Hits on the Query Sequence

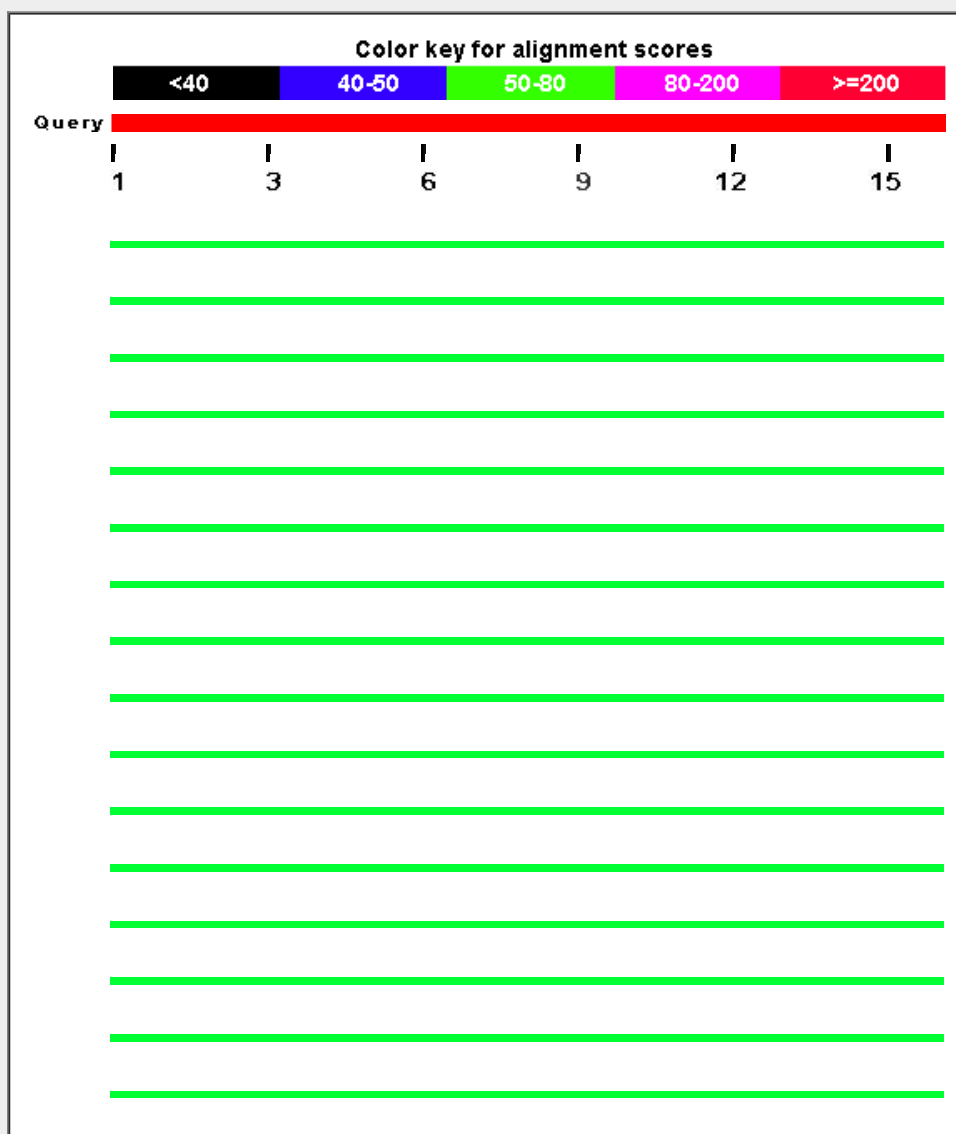

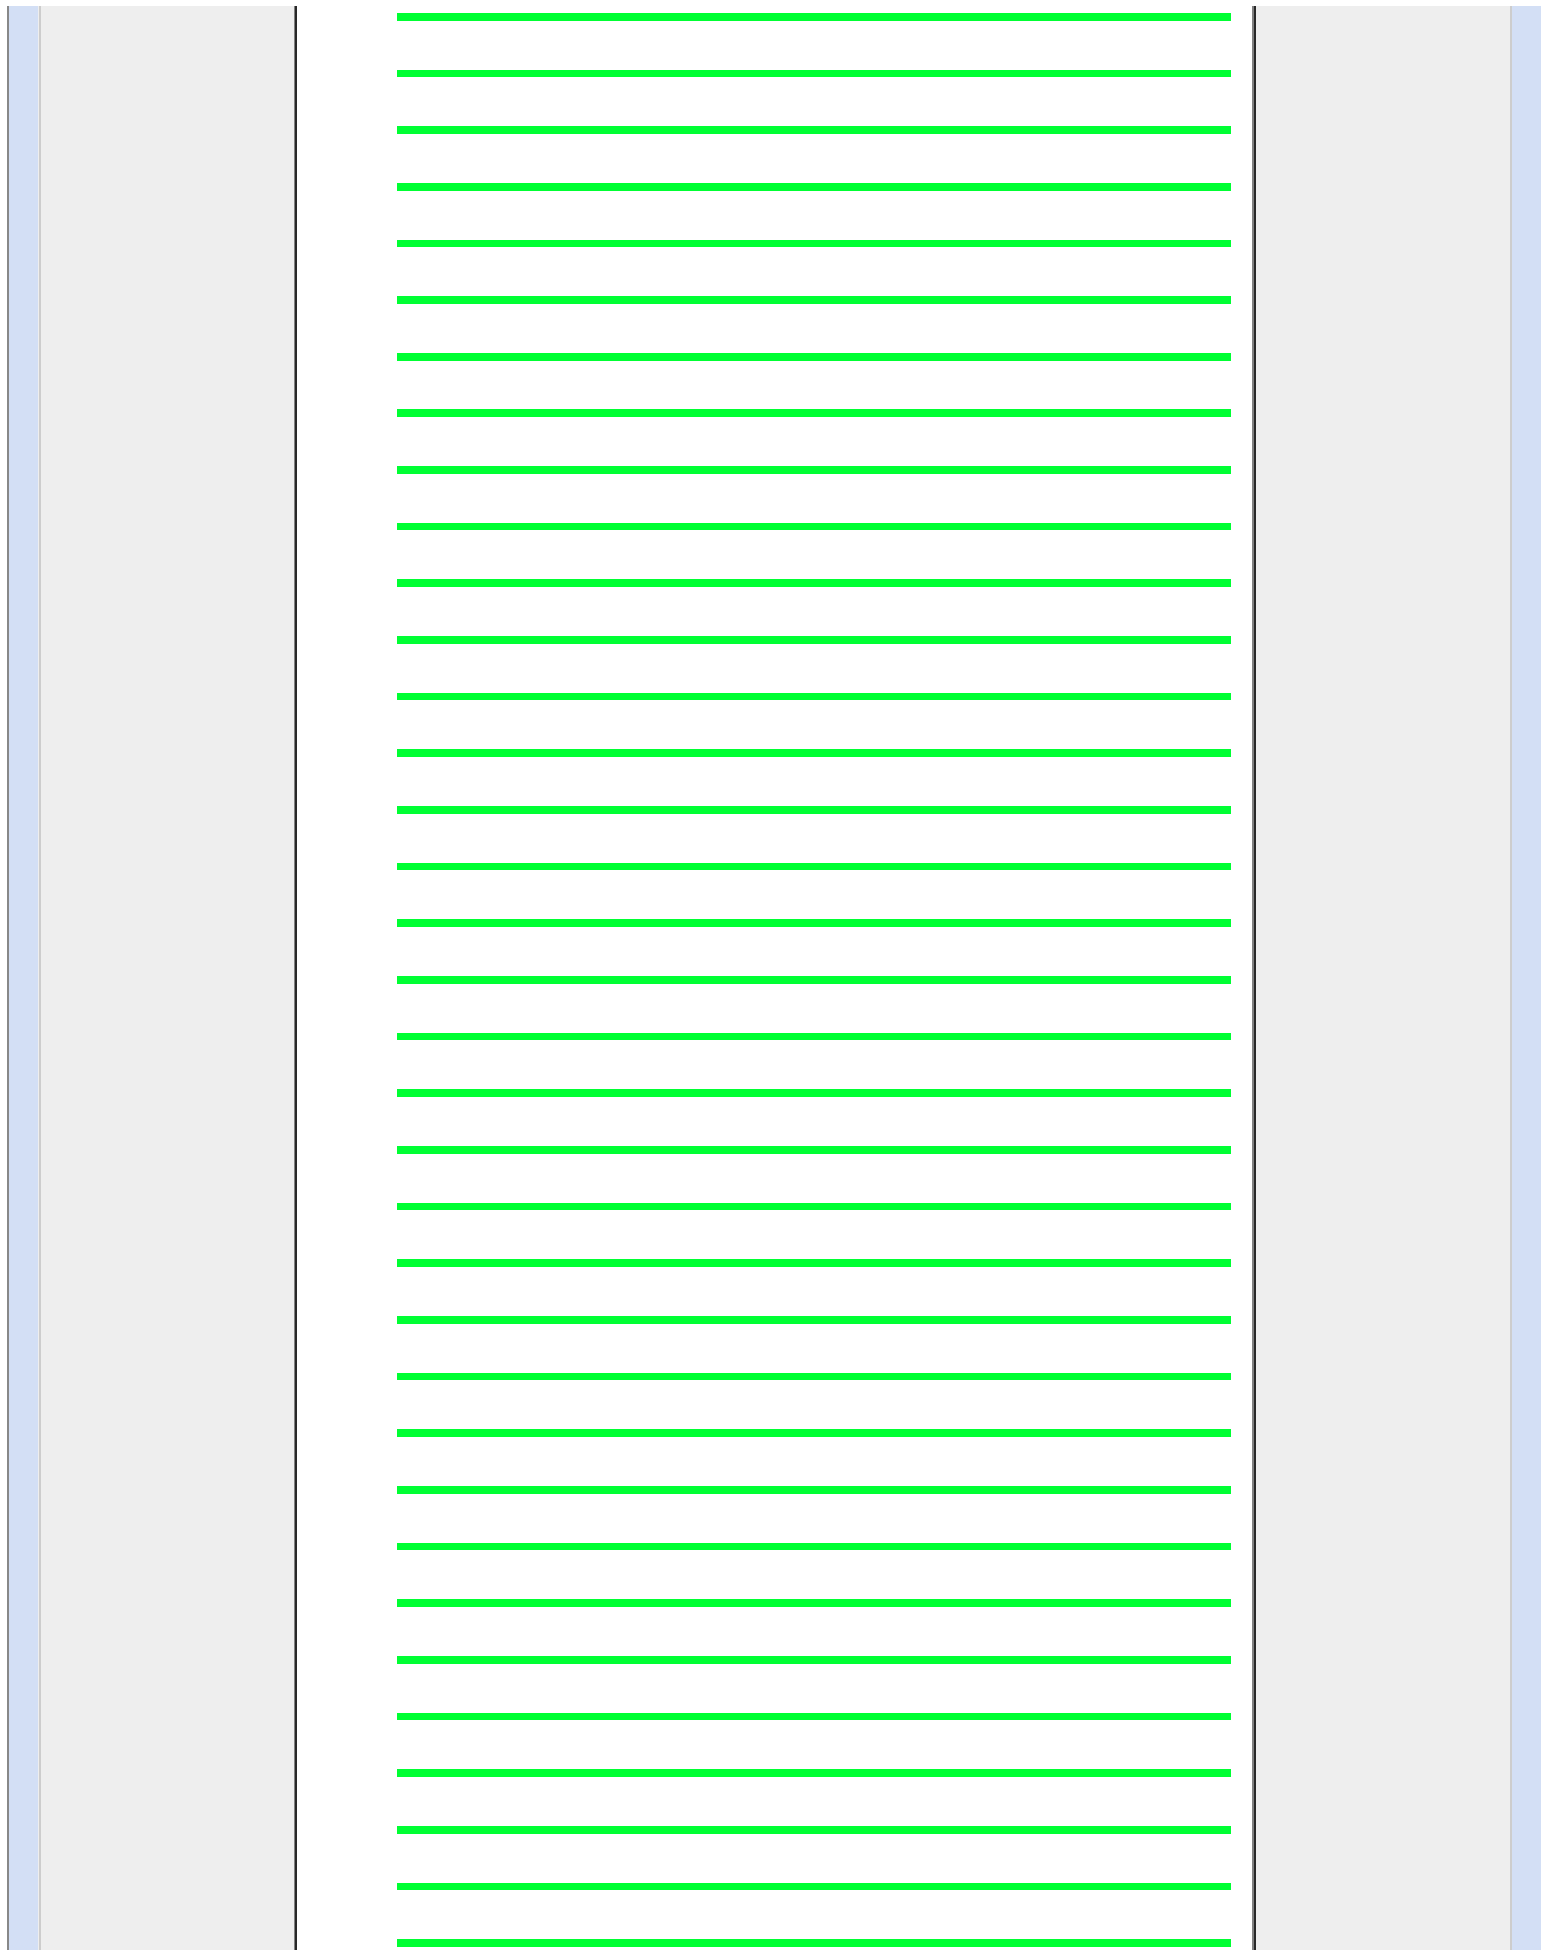

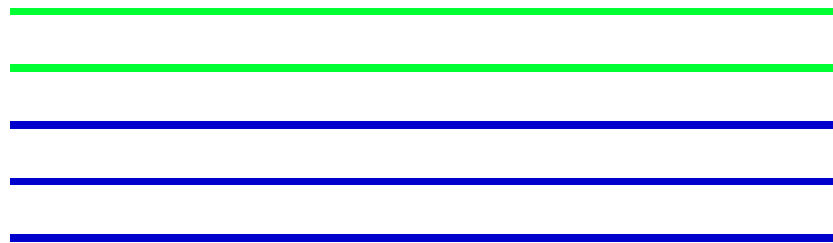

**Descriptions**

**Sequences producing significant alignments:**

Select: [All](#) [None](#) Selected:0

[↑](#) [Alignments](#)
[Download](#)
[GenPept](#)
[Graphics](#)
[Distance tree of results](#)
[Multiple alignment](#)
⚙

| Description                                                                         | Max score | Total score | Query cover | E value | Ident | Accession                                   |
|-------------------------------------------------------------------------------------|-----------|-------------|-------------|---------|-------|---------------------------------------------|
| <a href="#">Chain A, Short Form Hgfa With Inhibitory Fab75 [Homo sapiens]</a>       | 54.1      | 54.1        | 100%        | 4e-07   | 100%  | <a href="#">gij163931039 2R0L_A</a>         |
| <a href="#">Chain A, Crystal Structure Of Hgfa In Complex With The Allosteric I</a> | 54.1      | 54.1        | 100%        | 4e-07   | 100%  | <a href="#">gij281306940 2WUB_A</a>         |
| <a href="#">Chain A, Protease Domain Of Hgfa With No Inhibitor [Homo sapien</a>     | 54.1      | 54.1        | 100%        | 4e-07   | 100%  | <a href="#">gij61680579 1YBW_A</a>          |
| <a href="#">PREDICTED: hepatocyte growth factor activator isoform X3 [Calliith</a>  | 54.1      | 54.1        | 100%        | 4e-07   | 100%  | <a href="#">gij675650394 XP_008991932.1</a> |
| <a href="#">PREDICTED: hepatocyte growth factor activator isoform X2 [Calliith</a>  | 54.1      | 54.1        | 100%        | 4e-07   | 100%  | <a href="#">gij675650392 XP_008991931.1</a> |
| <a href="#">PREDICTED: hepatocyte growth factor activator [Ceratotherium sirr</a>   | 54.1      | 54.1        | 100%        | 4e-07   | 100%  | <a href="#">gij478516120 XP_004432296.1</a> |
| <a href="#">PREDICTED: hepatocyte growth factor activator isoform X1 [Calliith</a>  | 54.1      | 54.1        | 100%        | 4e-07   | 100%  | <a href="#">gij296196985 XP_002746077.1</a> |
| <a href="#">HGF activator, preproprotein [Homo sapiens]</a>                         | 54.1      | 54.1        | 100%        | 4e-07   | 100%  | <a href="#">gij85567253 AAI12193.1</a>      |
| <a href="#">PREDICTED: LOW QUALITY PROTEIN: hepatocyte growth factor :</a>          | 54.1      | 54.1        | 100%        | 4e-07   | 100%  | <a href="#">gij426343647 XP_004038404.1</a> |
| <a href="#">hepatocyte growth factor activator isoform 2 preproprotein [Homo s</a>  | 54.1      | 54.1        | 100%        | 4e-07   | 100%  | <a href="#">gij4504383 NP_001519.1</a>      |
| <a href="#">PREDICTED: hepatocyte growth factor activator isoform X2 [Pan p</a>     | 54.1      | 54.1        | 100%        | 4e-07   | 100%  | <a href="#">gij397465226 XP_003804416.1</a> |
| <a href="#">PREDICTED: hepatocyte growth factor activator [Pan troglodytes]</a>     | 54.1      | 54.1        | 100%        | 4e-07   | 100%  | <a href="#">gij332818997 XP_001174601.2</a> |
| <a href="#">hepatocyte growth factor activator isoform 1 preproprotein [Homo s</a>  | 54.1      | 54.1        | 100%        | 4e-07   | 100%  | <a href="#">gij661903023 NP_001284368.1</a> |
| <a href="#">PREDICTED: hepatocyte growth factor activator [Sorex araneus]</a>       | 52.0      | 52.0        | 100%        | 2e-06   | 94%   | <a href="#">gij505848131 XP_004617524.1</a> |
| <a href="#">PREDICTED: LOW QUALITY PROTEIN: hepatocyte growth factor :</a>          | 52.0      | 52.0        | 100%        | 2e-06   | 94%   | <a href="#">gij586528318 XP_006919081.1</a> |
| <a href="#">PREDICTED: hepatocyte growth factor activator-like [Equus przew</a>     | 51.5      | 51.5        | 100%        | 3e-06   | 94%   | <a href="#">gij664781339 XP_008509987.1</a> |
| <a href="#">PREDICTED: hepatocyte growth factor activator [Dasypus novemci</a>      | 51.5      | 51.5        | 100%        | 3e-06   | 94%   | <a href="#">gij488591674 XP_004481097.1</a> |
| <a href="#">PREDICTED: hepatocyte growth factor activator [Ovis aries]</a>          | 51.5      | 51.5        | 100%        | 3e-06   | 94%   | <a href="#">gij426232343 XP_004010188.1</a> |
| <a href="#">PREDICTED: hepatocyte growth factor activator [Tarsius syrichta]</a>    | 51.5      | 51.5        | 100%        | 3e-06   | 94%   | <a href="#">gij640780818 XP_008046016.1</a> |
| <a href="#">PREDICTED: hepatocyte growth factor activator [Capra hircus]</a>        | 51.5      | 51.5        | 100%        | 3e-06   | 94%   | <a href="#">gij548471340 XP_005682051.1</a> |
| <a href="#">TPA: HGF activator preproprotein-like [Bos taurus]</a>                  | 51.5      | 51.5        | 100%        | 3e-06   | 94%   | <a href="#">gij296486347 DAA28460.1</a>     |
| <a href="#">PREDICTED: hepatocyte growth factor activator [Physeter catodon]</a>    | 51.5      | 51.5        | 100%        | 3e-06   | 94%   | <a href="#">gij593726599 XP_007109331.1</a> |
| <a href="#">PREDICTED: hepatocyte growth factor activator isoform X2 [Balaer</a>    | 51.5      | 51.5        | 100%        | 3e-06   | 94%   | <a href="#">gij594638131 XP_007172367.1</a> |
| <a href="#">Hepatocyte growth factor activator [Macaca fascicularis]</a>            | 51.5      | 51.5        | 100%        | 3e-06   | 94%   | <a href="#">gij355744788 EHH49413.1</a>     |
| <a href="#">PREDICTED: hepatocyte growth factor activator-like [Macaca mula</a>     | 51.5      | 51.5        | 100%        | 3e-06   | 94%   | <a href="#">gij297281947 XP_001114822.2</a> |
| <a href="#">PREDICTED: hepatocyte growth factor activator isoform X3 [Heterc</a>    | 51.5      | 51.5        | 100%        | 3e-06   | 94%   | <a href="#">gij512970560 XP_004847421.1</a> |
| <a href="#">PREDICTED: hepatocyte growth factor activator-like isoform X2 [S</a>    | 51.5      | 51.5        | 100%        | 3e-06   | 94%   | <a href="#">gij545843795 XP_005666566.1</a> |
| <a href="#">PREDICTED: hepatocyte growth factor activator isoform X2 [Macac</a>     | 51.5      | 51.5        | 100%        | 3e-06   | 94%   | <a href="#">gij544431060 XP_005554416.1</a> |

|                                                                                    |      |      |      |       |     |                                             |
|------------------------------------------------------------------------------------|------|------|------|-------|-----|---------------------------------------------|
| PREDICTED: LOW QUALITY PROTEIN: hepatocyte growth factor :                         | 51.5 | 51.5 | 100% | 3e-06 | 94% | <a href="#">gij545213511 XP_005609072.1</a> |
| <a href="#">PREDICTED: hepatocyte growth factor activator [Rhinopithecus rox</a>   | 51.5 | 51.5 | 100% | 3e-06 | 94% | <a href="#">gij724928379 XP_010382705.1</a> |
| <a href="#">PREDICTED: hepatocyte growth factor activator isoform X1 [Macac</a>    | 51.5 | 51.5 | 100% | 3e-06 | 94% | <a href="#">gij544431058 XP_005554415.1</a> |
| <a href="#">PREDICTED: hepatocyte growth factor activator [Chlorocebus saba</a>    | 51.5 | 51.5 | 100% | 3e-06 | 94% | <a href="#">gij635138752 XP_008016229.1</a> |
| <a href="#">hepatocyte growth factor activator preproprotein [Bos taurus]</a>      | 51.5 | 51.5 | 100% | 3e-06 | 94% | <a href="#">gij333360891 NP_001193958.1</a> |
| <a href="#">PREDICTED: hepatocyte growth factor activator [Mesocricetus aur</a>    | 51.5 | 51.5 | 100% | 3e-06 | 94% | <a href="#">gij524929421 XP_005068916.1</a> |
| <a href="#">Hepatocyte growth factor activator [Bos mutus]</a>                     | 51.5 | 51.5 | 100% | 3e-06 | 94% | <a href="#">gij440907097 ELR57284.1</a>     |
| <a href="#">PREDICTED: hepatocyte growth factor activator isoform X1 [Galeo</a>    | 51.5 | 51.5 | 100% | 3e-06 | 94% | <a href="#">gij667239445 XP_008566189.1</a> |
| <a href="#">PREDICTED: hepatocyte growth factor activator-like isoform X1 [Su</a>  | 51.5 | 51.5 | 100% | 3e-06 | 94% | <a href="#">gij350587301 XP_003482383.1</a> |
| <a href="#">PREDICTED: hepatocyte growth factor activator [Lipotes vexillifer]</a> | 51.5 | 51.5 | 100% | 3e-06 | 94% | <a href="#">gij602689402 XP_007456919.1</a> |
| <a href="#">PREDICTED: hepatocyte growth factor activator isoform X1 [Balaer</a>   | 51.5 | 51.5 | 100% | 3e-06 | 94% | <a href="#">gij594638129 XP_007172366.1</a> |
| <a href="#">PREDICTED: hepatocyte growth factor activator isoform X2 [Heterc</a>   | 51.5 | 51.5 | 100% | 3e-06 | 94% | <a href="#">gij512970558 XP_004847420.1</a> |
| <a href="#">PREDICTED: hepatocyte growth factor activator [Nannospalax galil</a>   | 51.5 | 51.5 | 100% | 3e-06 | 94% | <a href="#">gij674066317 XP_008840096.1</a> |
| <a href="#">PREDICTED: hepatocyte growth factor activator [Ictidomys tridecer</a>  | 51.5 | 51.5 | 100% | 3e-06 | 94% | <a href="#">gij532066402 XP_005319055.1</a> |
| <a href="#">PREDICTED: hepatocyte growth factor activator [Nomascus leucog</a>     | 51.5 | 51.5 | 100% | 3e-06 | 94% | <a href="#">gij332259962 XP_003279052.1</a> |
| <a href="#">PREDICTED: hepatocyte growth factor activator isoform X2 [Galeo</a>    | 51.5 | 51.5 | 100% | 3e-06 | 94% | <a href="#">gij667239448 XP_008566259.1</a> |
| <a href="#">PREDICTED: LOW QUALITY PROTEIN: hepatocyte growth factor :</a>         | 51.5 | 51.5 | 100% | 3e-06 | 94% | <a href="#">gij686715189 XP_009238032.1</a> |
| <a href="#">PREDICTED: hepatocyte growth factor activator [Tursiops truncatu</a>   | 51.5 | 51.5 | 100% | 3e-06 | 94% | <a href="#">gij470596733 XP_004311082.1</a> |
| <a href="#">PREDICTED: hepatocyte growth factor activator [Orcinus orca]</a>       | 51.5 | 51.5 | 100% | 3e-06 | 94% | <a href="#">gij465982188 XP_004265212.1</a> |
| <a href="#">PREDICTED: hepatocyte growth factor activator isoform X1 [Heterc</a>   | 51.5 | 51.5 | 100% | 3e-06 | 94% | <a href="#">gij512970556 XP_004847419.1</a> |
| <a href="#">PREDICTED: hepatocyte growth factor activator [Bos mutus]</a>          | 51.5 | 51.5 | 100% | 3e-06 | 94% | <a href="#">gij555964887 XP_005894504.1</a> |
| <a href="#">PREDICTED: hepatocyte growth factor activator [Bubalus bubalis]</a>    | 51.5 | 51.5 | 100% | 3e-06 | 94% | <a href="#">gij594103282 XP_006074671.1</a> |
| <a href="#">PREDICTED: hepatocyte growth factor activator [Pantholops hodgs</a>    | 51.5 | 51.5 | 100% | 3e-06 | 94% | <a href="#">gij556778715 XP_005984423.1</a> |
| <a href="#">PREDICTED: hepatocyte growth factor activator [Papio anubis]</a>       | 51.5 | 51.5 | 100% | 3e-06 | 94% | <a href="#">gij685511454 XP_009209400.1</a> |
| <a href="#">Hepatocyte growth factor activator [Macaca mulatta]</a>                | 51.5 | 51.5 | 100% | 3e-06 | 94% | <a href="#">gij355557391 EHH14171.1</a>     |
| <a href="#">PREDICTED: hepatocyte growth factor activator isoform X1 [Rattus</a>   | 49.4 | 49.4 | 100% | 2e-05 | 88% | <a href="#">gij672076919 XP_008768574.1</a> |
| <a href="#">PREDICTED: hepatocyte growth factor activator isoform X2 [Mus r</a>    | 49.4 | 49.4 | 100% | 2e-05 | 88% | <a href="#">gij568934380 XP_006504095.1</a> |
| <a href="#">PREDICTED: hepatocyte growth factor activator [Cavia porcellus]</a>    | 49.4 | 49.4 | 100% | 2e-05 | 94% | <a href="#">gij514445291 XP_003461921.2</a> |
| <a href="#">PREDICTED: hepatocyte growth factor activator [Peromyscus mani</a>     | 49.4 | 49.4 | 100% | 2e-05 | 88% | <a href="#">gij589945912 XP_006985637.1</a> |
| <a href="#">PREDICTED: hepatocyte growth factor activator [Cricetulus griseus</a>  | 49.4 | 49.4 | 100% | 2e-05 | 88% | <a href="#">gij625265138 XP_007624029.1</a> |
| <a href="#">PREDICTED: hepatocyte growth factor activator [Cricetulus griseus</a>  | 49.4 | 49.4 | 100% | 2e-05 | 88% | <a href="#">gij354468418 XP_003496650.1</a> |
| <a href="#">hepatocyte growth factor activator precursor [Rattus norvegicus]</a>   | 49.4 | 49.4 | 100% | 2e-05 | 88% | <a href="#">gij61097947 NP_445772.1</a>     |
| <a href="#">hepatocyte growth factor activator HGFA [Mus musculus]</a>             | 49.4 | 49.4 | 100% | 2e-05 | 88% | <a href="#">gij6980072 AAF34712.1</a>       |
| <a href="#">unnamed protein product [Mus musculus]</a>                             | 49.4 | 49.4 | 100% | 2e-05 | 88% | <a href="#">gij74199664 BAE41500.1</a>      |
| <a href="#">hepatocyte growth factor activator preproprotein [Mus musculus]</a>    | 49.4 | 49.4 | 100% | 2e-05 | 88% | <a href="#">gij188219651 NP_062320.2</a>    |
| <a href="#">Hepatocyte growth factor activator [Mus musculus]</a>                  | 49.4 | 49.4 | 100% | 2e-05 | 88% | <a href="#">gij18044173 AAH19376.1</a>      |
| <a href="#">PREDICTED: hepatocyte growth factor activator isoform X1 [Mus r</a>    | 49.4 | 49.4 | 100% | 2e-05 | 88% | <a href="#">gij568934378 XP_006504094.1</a> |
| <a href="#">hepatocyte growth factor activator [Cricetulus griseus]</a>            | 49.4 | 49.4 | 100% | 2e-05 | 88% | <a href="#">gij537259644 ERE89786.1</a>     |
| <a href="#">Hepatocyte growth factor activator [Cricetulus griseus]</a>            | 49.4 | 49.4 | 100% | 2e-05 | 88% | <a href="#">gij344235488 EGV91591.1</a>     |
| <a href="#">PREDICTED: hepatocyte growth factor activator [Fukomys damare</a>      | 49.4 | 49.4 | 100% | 2e-05 | 94% | <a href="#">gij731254756 XP_010640070.1</a> |
| <a href="#">Hepatocyte growth factor activator [Fukomys damarensis]</a>            | 49.4 | 49.4 | 100% | 2e-05 | 94% | <a href="#">gij676270515 KFO25725.1</a>     |
| <a href="#">PREDICTED: hepatocyte growth factor activator [Jaculus jaculus]</a>    | 49.0 | 49.0 | 100% | 2e-05 | 94% | <a href="#">gij507544157 XP_004656058.1</a> |
| <a href="#">PREDICTED: hepatocyte growth factor activator [Vicugna pacos]</a>      | 47.7 | 47.7 | 100% | 6e-05 | 88% | <a href="#">gij560981704 XP_006213089.1</a> |
| <a href="#">PREDICTED: LOW QUALITY PROTEIN: hepatocyte growth factor :</a>         | 47.7 | 47.7 | 100% | 6e-05 | 88% | <a href="#">gij560909785 XP_006181198.1</a> |
| <a href="#">PREDICTED: hepatocyte growth factor activator [Erinaceus europa</a>    | 47.7 | 47.7 | 100% | 6e-05 | 88% | <a href="#">gij617659508 XP_007536851.1</a> |

|                                                                                       |      |      |      |       |     |                                             |
|---------------------------------------------------------------------------------------|------|------|------|-------|-----|---------------------------------------------|
| <a href="#">PREDICTED: hepatocyte growth factor activator [Microtus ochrogas</a>      | 46.9 | 46.9 | 100% | 1e-04 | 81% | <a href="#">gil532046356 XP_005365974.1</a> |
| <a href="#">Hepatocyte growth factor activator [Myotis davidii]</a>                   | 45.2 | 45.2 | 87%  | 4e-04 | 93% | <a href="#">gil432107907 ELK32958.1</a>     |
| <a href="#">PREDICTED: hepatocyte growth factor activator [Myotis davidii]</a>        | 45.2 | 45.2 | 87%  | 4e-04 | 93% | <a href="#">gil584080689 XP_006760204.1</a> |
| <a href="#">PREDICTED: hepatocyte growth factor activator [Eptesicus fuscus]</a>      | 45.2 | 45.2 | 87%  | 4e-04 | 93% | <a href="#">gil641719053 XP_008149119.1</a> |
| <a href="#">PREDICTED: hepatocyte growth factor activator [Echinops telfairi]</a>     | 45.2 | 45.2 | 87%  | 4e-04 | 93% | <a href="#">gil507700282 XP_004715151.1</a> |
| <a href="#">PREDICTED: hepatocyte growth factor activator [Elephantulus edw</a>       | 45.2 | 45.2 | 87%  | 4e-04 | 93% | <a href="#">gil585687633 XP_006893724.1</a> |
| <a href="#">PREDICTED: hepatocyte growth factor activator isoform X2 [Chinca</a>      | 44.8 | 44.8 | 100% | 6e-04 | 88% | <a href="#">gil533191952 XP_005408819.1</a> |
| <a href="#">PREDICTED: hepatocyte growth factor activator isoform X1 [Chinca</a>      | 44.8 | 44.8 | 100% | 6e-04 | 88% | <a href="#">gil533191950 XP_005408818.1</a> |
| <a href="#">PREDICTED: hepatocyte growth factor activator [Odobenus rosmar</a>        | 43.9 | 43.9 | 100% | 0.001 | 88% | <a href="#">gil472353164 XP_004396253.1</a> |
| <a href="#">PREDICTED: hepatocyte growth factor activator isoform X3 [Tupaia</a>      | 43.1 | 43.1 | 100% | 0.002 | 81% | <a href="#">gil562848375 XP_006153008.1</a> |
| <a href="#">PREDICTED: hepatocyte growth factor activator isoform X2 [Tupaia</a>      | 43.1 | 43.1 | 100% | 0.002 | 81% | <a href="#">gil562848373 XP_006153007.1</a> |
| <a href="#">PREDICTED: hepatocyte growth factor activator isoform X1 [Tupaia</a>      | 43.1 | 43.1 | 100% | 0.002 | 81% | <a href="#">gil562848371 XP_006153006.1</a> |
| <a href="#">PREDICTED: hepatocyte growth factor activator [Otolemur garnettii</a>     | 42.2 | 42.2 | 93%  | 0.004 | 87% | <a href="#">gil395857659 XP_003801207.1</a> |
| <a href="#">PREDICTED: hepatocyte growth factor activator [Myotis brandtii]</a>       | 41.8 | 41.8 | 81%  | 0.006 | 92% | <a href="#">gil554590398 XP_005886528.1</a> |
| <a href="#">PREDICTED: hepatocyte growth factor activator [Chrysochloris asi</a>      | 41.8 | 41.8 | 81%  | 0.006 | 92% | <a href="#">gil586489842 XP_006875389.1</a> |
| <a href="#">PREDICTED: hepatocyte growth factor activator [Panthera tigris alt</a>    | 41.4 | 41.4 | 100% | 0.008 | 81% | <a href="#">gil591327132 XP_007089521.1</a> |
| <a href="#">PREDICTED: hepatocyte growth factor activator isoform X5 [Mustel</a>      | 41.4 | 41.4 | 100% | 0.008 | 81% | <a href="#">gil511905650 XP_004772296.1</a> |
| <a href="#">PREDICTED: hepatocyte growth factor activator isoform X6 [Mustel</a>      | 41.4 | 41.4 | 100% | 0.008 | 81% | <a href="#">gil511966828 XP_004801526.1</a> |
| <a href="#">PREDICTED: hepatocyte growth factor activator [Ursus maritimus]</a>       | 41.4 | 41.4 | 100% | 0.008 | 81% | <a href="#">gil670981313 XP_008704513.1</a> |
| <a href="#">PREDICTED: hepatocyte growth factor activator isoform X4 [Mustel</a>      | 41.4 | 41.4 | 100% | 0.008 | 81% | <a href="#">gil511905648 XP_004772295.1</a> |
| <a href="#">PREDICTED: hepatocyte growth factor activator isoform X5 [Mustel</a>      | 41.4 | 41.4 | 100% | 0.008 | 81% | <a href="#">gil511966826 XP_004801525.1</a> |
| <a href="#">PREDICTED: hepatocyte growth factor activator [Ochotona princep</a>       | 41.4 | 41.4 | 93%  | 0.008 | 80% | <a href="#">gil504133750 XP_004579433.1</a> |
| <a href="#">PREDICTED: LOW QUALITY PROTEIN: hepatocyte growth factor :</a>            | 41.4 | 41.4 | 100% | 0.008 | 81% | <a href="#">gil301762376 XP_002916611.1</a> |
| <a href="#">PREDICTED: hepatocyte growth factor activator isoform X3 [Mustel</a>      | 41.4 | 41.4 | 100% | 0.008 | 81% | <a href="#">gil511905646 XP_004772294.1</a> |
| <a href="#">hepatocyte growth factor activator precursor [Canis lupus familiaris]</a> | 41.4 | 41.4 | 100% | 0.008 | 81% | <a href="#">gil73532760 NP_001026985.1</a>  |
| <a href="#">PREDICTED: hepatocyte growth factor activator [Felis catus]</a>           | 41.4 | 41.4 | 100% | 0.008 | 81% | <a href="#">gil410958042 XP_003985632.1</a> |
| <a href="#">PREDICTED: hepatocyte growth factor activator isoform X2 [Mustel</a>      | 41.4 | 41.4 | 100% | 0.008 | 81% | <a href="#">gil511905644 XP_004772293.1</a> |

## Alignments

Download [GenPept](#) [Graphics](#) ▼ Next ▲ Previous ▲ Descriptions

### Chain A, Short Form Hgfa With Inhibitory Fab75

Sequence ID: [gil163931039|pdb|2R0L|A](#) Length: 248 Number of Matches: 1

Range 1: 48 to 63 [GenPept](#) [Graphics](#) ▼ Next Match ▲ Previous Match

| Score          | Expect | Identities  | Positives   | Gaps     |
|----------------|--------|-------------|-------------|----------|
| 54.1 bits(120) | 4e-07  | 16/16(100%) | 16/16(100%) | 0/16(0%) |

Query 1 RDSVSVVLGQHFFNRT 16  
 RDSVSVVLGQHFFNRT  
 Sbjct 48 RDSVSVVLGQHFFNRT 63

#### Related Information

[Structure](#) - 3D structure displays

Download [GenPept](#) [Graphics](#) ▼ Next ▲ Previous ▲ Descriptions

### Chain A, Crystal Structure Of Hgfa In Complex With The Allosteric Non-Inhibitory Antibody Fab40.Deltatrp

Sequence ID: [gil281306940|pdb|2WUB|A](#) Length: 257 Number of Matches: 1

▶ See 3 more title(s)

Range 1: 48 to 63 [GenPept](#) [Graphics](#) ▼ Next Match ▲ Previous Match

| Score          | Expect | Identities  | Positives   | Gaps     |
|----------------|--------|-------------|-------------|----------|
| 54.1 bits(120) | 4e-07  | 16/16(100%) | 16/16(100%) | 0/16(0%) |

#### Related Information

[Structure](#) - 3D structure displays

[Identical Proteins](#) - Proteins identical to the subject



Query 1 RDSVSVVLGQHFFNRT 16  
 RDSVSVVLGQHFFNRT  
 Sbjct 48 RDSVSVVLGQHFFNRT 63

[Download](#) [GenPept](#) [Graphics](#)

[Next](#) [Previous](#) [Descriptions](#)

Chain A, Protease Domain Of Hgfa With No Inhibitor

Sequence ID: [gi|61680579|pdb|1YBW|A](#) Length: 283 Number of Matches: 1

[See 3 more title\(s\)](#)

Range 1: 83 to 98 [GenPept](#) [Graphics](#)

[Next Match](#) [Previous Match](#)

| Score          | Expect | Identities  | Positives   | Gaps     |
|----------------|--------|-------------|-------------|----------|
| 54.1 bits(120) | 4e-07  | 16/16(100%) | 16/16(100%) | 0/16(0%) |

Query 1 RDSVSVVLGQHFFNRT 16  
 RDSVSVVLGQHFFNRT  
 Sbjct 83 RDSVSVVLGQHFFNRT 98

**Related Information**

[Structure](#) - 3D structure displays  
[Identical Proteins](#) - Proteins  
 identical to the subject

[Download](#) [GenPept](#) [Graphics](#)

[Next](#) [Previous](#) [Descriptions](#)

PREDICTED: hepatocyte growth factor activator isoform X3 [Callithrix jacchus]

Sequence ID: [gi|675650394|ref|XP\\_008991932.1|](#) Length: 539 Number of Matches: 1

Range 1: 339 to 354 [GenPept](#) [Graphics](#)

[Next Match](#) [Previous Match](#)

| Score          | Expect | Identities  | Positives   | Gaps     |
|----------------|--------|-------------|-------------|----------|
| 54.1 bits(120) | 4e-07  | 16/16(100%) | 16/16(100%) | 0/16(0%) |

Query 1 RDSVSVVLGQHFFNRT 16  
 RDSVSVVLGQHFFNRT  
 Sbjct 339 RDSVSVVLGQHFFNRT 354

**Related Information**

[Gene](#) - associated gene details  
[Map Viewer](#) - aligned genomic  
 context

[Download](#) [GenPept](#) [Graphics](#)

[Next](#) [Previous](#) [Descriptions](#)

PREDICTED: hepatocyte growth factor activator isoform X2 [Callithrix jacchus]

Sequence ID: [gi|675650392|ref|XP\\_008991931.1|](#) Length: 607 Number of Matches: 1

Range 1: 454 to 469 [GenPept](#) [Graphics](#)

[Next Match](#) [Previous Match](#)

| Score          | Expect | Identities  | Positives   | Gaps     |
|----------------|--------|-------------|-------------|----------|
| 54.1 bits(120) | 4e-07  | 16/16(100%) | 16/16(100%) | 0/16(0%) |

Query 1 RDSVSVVLGQHFFNRT 16  
 RDSVSVVLGQHFFNRT  
 Sbjct 454 RDSVSVVLGQHFFNRT 469

**Related Information**

[Gene](#) - associated gene details  
[Map Viewer](#) - aligned genomic  
 context

BLAST is a registered trademark of the National Library of Medicine.

▶ [NCBI/ BLAST/ blastp suite/ Formatting Results - BVGSCDJR01R](#)

**i** Your search parameters were adjusted to search for a short input sequence.

[Edit and Resubmit](#) [Save Search Strategies](#) ▶ [Formatting options](#) ▶ [Download](#) [YouTube](#) [How to read this page](#) [Blast report description](#)

## ICAM1\_RADLTVLLRG\_Mod

**RID** [BVGSCDJR01R](#) (Expires on 01-21 09:53 am)

**Query ID** |cl|334439  
**Description** None  
**Molecule type** amino acid  
**Query Length** 11

**Database Name** nr  
**Description** All non-redundant GenBank CDS translations+PDB+SwissProt+PIR+PRF excluding environmental samples from WGS projects  
**Program** BLASTP 2.2.30+ ▶ [Citation](#)

Other reports: ▶ [Search Summary](#) [[Taxonomy reports](#)] [[Distance tree of results](#)] [[Related Structures](#)] [[Multiple alignment](#)]

### **Graphic Summary**

[Show Conserved Domains](#)

No putative conserved domains have been detected

Distribution of 100 Blast Hits on the Query Sequence

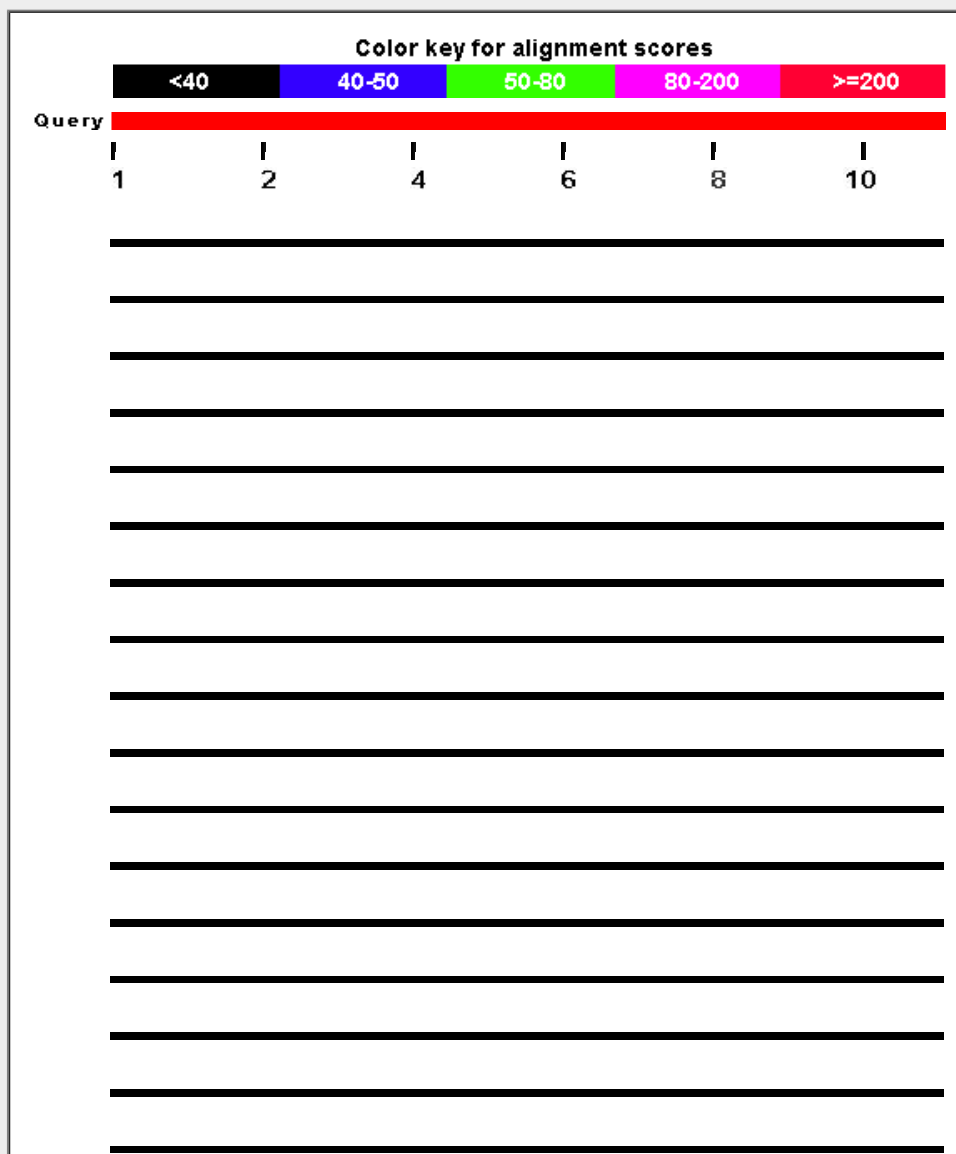

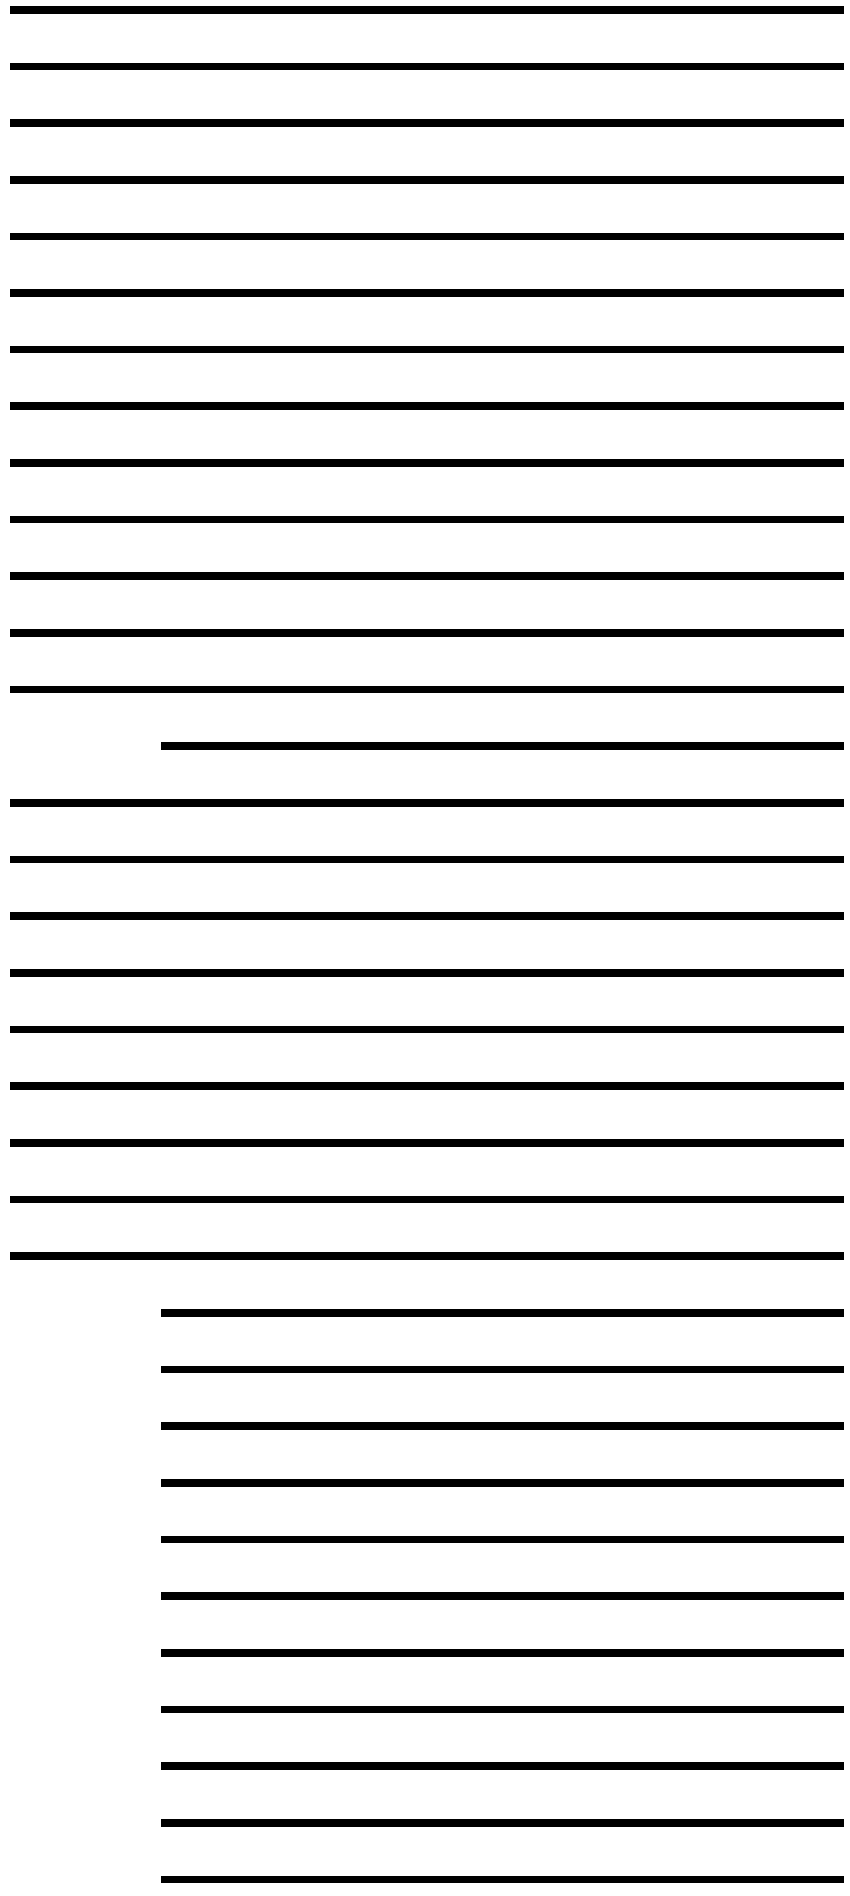

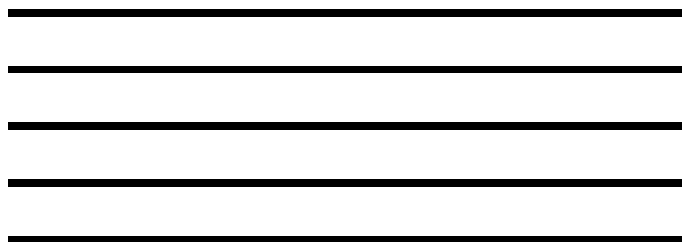

## ☐ Descriptions

### Sequences producing significant alignments:

Select: [All](#) [None](#) Selected:0

| <a href="#">Alignments</a> <a href="#">Download</a> <a href="#">GenPept</a> <a href="#">Graphics</a> <a href="#">Distance tree of results</a> <a href="#">Multiple alignment</a> <span style="float: right;">⚙</span> |           |             |             |         |       |                                |  |
|-----------------------------------------------------------------------------------------------------------------------------------------------------------------------------------------------------------------------|-----------|-------------|-------------|---------|-------|--------------------------------|--|
| Description                                                                                                                                                                                                           | Max score | Total score | Query cover | E value | Ident | Accession                      |  |
| <a href="#">cell surface glycoprotein [Homo sapiens]</a>                                                                                                                                                              | 33.7      | 33.7        | 100%        | 1.3     | 91%   | <a href="#">AAA60392.1</a>     |  |
| <a href="#">Chain A, D1d2-Icam-1 Fully Glycosylated, Variation Of D1-D2 Interdomain An</a>                                                                                                                            | 33.7      | 33.7        | 100%        | 1.4     | 91%   | <a href="#">1D3L_A</a>         |  |
| <a href="#">Chain A, The Crystal Structure For The N-Terminal Two Domains Of Icam-1 [I</a>                                                                                                                            | 33.7      | 33.7        | 100%        | 1.4     | 91%   | <a href="#">1IC1_A</a>         |  |
| <a href="#">Chain B, The Crystal Structure For The N-Terminal Two Domains Of Icam-1 [I</a>                                                                                                                            | 33.7      | 33.7        | 100%        | 1.4     | 91%   | <a href="#">1IC1_B</a>         |  |
| <a href="#">Chain A, Crystal Structure Of Alpha I Domain In Complex With Icam-1 [Homo</a>                                                                                                                             | 33.7      | 33.7        | 100%        | 1.5     | 91%   | <a href="#">1MQ8_A</a>         |  |
| <a href="#">unnamed protein product [Homo sapiens]</a>                                                                                                                                                                | 33.7      | 33.7        | 100%        | 1.5     | 91%   | <a href="#">BAG60348.1</a>     |  |
| <a href="#">unnamed protein product [Homo sapiens]</a>                                                                                                                                                                | 33.7      | 33.7        | 100%        | 1.5     | 91%   | <a href="#">BAG61077.1</a>     |  |
| <a href="#">Chain I, Cryo-Em Structure Of Human Coxsackievirus A21 Complexed With F</a>                                                                                                                               | 33.7      | 33.7        | 100%        | 1.5     | 91%   | <a href="#">1Z7Z_I</a>         |  |
| <a href="#">PREDICTED: intercellular adhesion molecule 1 [Pongo abelii]</a>                                                                                                                                           | 33.7      | 33.7        | 100%        | 1.5     | 91%   | <a href="#">XP_002828698.2</a> |  |
| <a href="#">intercellular adhesion molecule 1 [Pan troglodytes]</a>                                                                                                                                                   | 33.7      | 33.7        | 100%        | 1.5     | 91%   | <a href="#">AAA35415.1</a>     |  |
| <a href="#">intercellular adhesion molecule 1 [Homo sapiens]</a>                                                                                                                                                      | 33.7      | 33.7        | 100%        | 1.5     | 91%   | <a href="#">AAQ14902.1</a>     |  |
| <a href="#">intercellular adhesion molecule 1 [Pongo pygmaeus]</a>                                                                                                                                                    | 33.7      | 33.7        | 100%        | 1.5     | 91%   | <a href="#">AAQ14904.1</a>     |  |
| <a href="#">PREDICTED: intercellular adhesion molecule 1 [Nomascus leucogenys]</a>                                                                                                                                    | 33.7      | 33.7        | 100%        | 1.5     | 91%   | <a href="#">XP_003275780.1</a> |  |
| <a href="#">PREDICTED: intercellular adhesion molecule 1 [Chlorocebus sabaeus]</a>                                                                                                                                    | 33.7      | 33.7        | 100%        | 1.5     | 91%   | <a href="#">XP_007993410.1</a> |  |
| <a href="#">intercellular adhesion molecule-1 precursor [Homo sapiens]</a>                                                                                                                                            | 33.7      | 33.7        | 100%        | 1.5     | 91%   | <a href="#">AAA52709.1</a>     |  |
| <a href="#">PREDICTED: intercellular adhesion molecule 1 [Pan paniscus]</a>                                                                                                                                           | 33.7      | 33.7        | 100%        | 1.5     | 91%   | <a href="#">XP_003809639.1</a> |  |
| <a href="#">intercellular adhesion molecule 1 precursor [Pan troglodytes]</a>                                                                                                                                         | 33.7      | 33.7        | 100%        | 1.5     | 91%   | <a href="#">NP_001009946.1</a> |  |
| <a href="#">intercellular adhesion molecule 1 precursor [Homo sapiens]</a>                                                                                                                                            | 33.7      | 33.7        | 100%        | 1.5     | 91%   | <a href="#">NP_000192.2</a>    |  |
| <a href="#">PREDICTED: intercellular adhesion molecule 1 [Papio anubis]</a>                                                                                                                                           | 33.7      | 33.7        | 100%        | 1.5     | 91%   | <a href="#">XP_009191725.1</a> |  |
| <a href="#">intercellular adhesion molecule 1 [Homo sapiens]</a>                                                                                                                                                      | 33.7      | 33.7        | 100%        | 1.5     | 91%   | <a href="#">AAQ14901.1</a>     |  |
| <a href="#">Homo sapiens intercellular adhesion molecule 1 (CD54), human rhinovirus rec</a>                                                                                                                           | 33.7      | 33.7        | 100%        | 1.5     | 91%   | <a href="#">AAP36234.1</a>     |  |
| <a href="#">PREDICTED: intercellular adhesion molecule 1 [Saimiri boliviensis boliviensis]</a>                                                                                                                        | 33.7      | 33.7        | 100%        | 1.5     | 91%   | <a href="#">XP_003938996.1</a> |  |
| <a href="#">PREDICTED: intercellular adhesion molecule 1 [Elephantulus edwardii]</a>                                                                                                                                  | 33.7      | 33.7        | 100%        | 1.5     | 91%   | <a href="#">XP_006898825.1</a> |  |
| <a href="#">PREDICTED: intercellular adhesion molecule 3 [Trichechus manatus latirostri]</a>                                                                                                                          | 33.7      | 33.7        | 100%        | 1.6     | 91%   | <a href="#">XP_004378609.1</a> |  |
| <a href="#">PREDICTED: intercellular adhesion molecule 3 [Elephantulus edwardii]</a>                                                                                                                                  | 33.7      | 33.7        | 100%        | 1.6     | 91%   | <a href="#">XP_006898902.1</a> |  |
| <a href="#">Snap ICAM-1 fusion protein [synthetic construct]</a>                                                                                                                                                      | 33.7      | 33.7        | 100%        | 1.6     | 91%   | <a href="#">AIZ77117.1</a>     |  |
| <a href="#">Chain A, Structure Of The Two Amino-Terminal Domains Of Human Intercellu</a>                                                                                                                              | 32.0      | 32.0        | 100%        | 5.0     | 91%   | <a href="#">1IAM_A</a>         |  |
| <a href="#">PREDICTED: intercellular adhesion molecule 1 [Ceratottherium simum simum]</a>                                                                                                                             | 31.2      | 31.2        | 100%        | 10      | 91%   | <a href="#">XP_004442677.1</a> |  |
| <a href="#">PREDICTED: intercellular adhesion molecule 1 [Galeopterus variegatus]</a>                                                                                                                                 | 31.2      | 31.2        | 100%        | 10      | 91%   | <a href="#">XP_008576239.1</a> |  |

|                                                                                              |      |      |      |    |      |                                |
|----------------------------------------------------------------------------------------------|------|------|------|----|------|--------------------------------|
| <a href="#">PREDICTED: intercellular adhesion molecule 3 [Ceratothorium simum simum]</a>     | 31.2 | 31.2 | 100% | 10 | 91%  | <a href="#">XP_004442732.1</a> |
| <a href="#">enoyl-CoA hydratase [Mycobacterium avium]</a>                                    | 30.3 | 30.3 | 81%  | 13 | 100% | <a href="#">WP_031350797.1</a> |
| <a href="#">enoyl-CoA hydratase [Achromobacter xylosoxidans AXX-A]</a>                       | 30.8 | 30.8 | 100% | 14 | 91%  | <a href="#">EGP42811.1</a>     |
| <a href="#">enoyl-CoA hydratase [Achromobacter insuavis]</a>                                 | 30.8 | 30.8 | 100% | 14 | 91%  | <a href="#">WP_035360557.1</a> |
| <a href="#">PREDICTED: intercellular adhesion molecule 1 isoform X2 [Felis catus]</a>        | 30.8 | 30.8 | 100% | 14 | 82%  | <a href="#">XP_006928451.1</a> |
| <a href="#">RecName: Full=Intercellular adhesion molecule 1; Short=ICAM-1; AltName: C</a>    | 30.8 | 30.8 | 100% | 14 | 82%  | <a href="#">P33729.2</a>       |
| <a href="#">intercellular adhesion molecule 1 precursor [Canis lupus familiaris]</a>         | 30.8 | 30.8 | 100% | 14 | 82%  | <a href="#">NP_001003291.1</a> |
| <a href="#">PREDICTED: intercellular adhesion molecule 1 isoform X1 [Felis catus]</a>        | 30.8 | 30.8 | 100% | 14 | 82%  | <a href="#">XP_003981899.1</a> |
| <a href="#">PREDICTED: intercellular adhesion molecule 3 isoform X1 [Felis catus]</a>        | 30.8 | 30.8 | 100% | 14 | 82%  | <a href="#">XP_003981917.1</a> |
| <a href="#">PREDICTED: intercellular adhesion molecule 3 [Canis lupus familiaris]</a>        | 30.8 | 30.8 | 100% | 14 | 82%  | <a href="#">XP_003432901.1</a> |
| <a href="#">PREDICTED: intercellular adhesion molecule 1 [Loxodonta africana]</a>            | 30.8 | 30.8 | 100% | 14 | 82%  | <a href="#">XP_003413428.1</a> |
| <a href="#">enoyl-CoA hydratase [Mycobacterium avium]</a>                                    | 30.3 | 30.3 | 81%  | 19 | 100% | <a href="#">WP_031350798.1</a> |
| <a href="#">enoyl-CoA hydratase [Mycobacterium avium subsp. paratuberculosis 10-4404]</a>    | 30.3 | 30.3 | 81%  | 19 | 100% | <a href="#">ETB04169.1</a>     |
| <a href="#">enoyl-CoA hydratase [Mycobacterium vulneris]</a>                                 | 30.3 | 30.3 | 81%  | 19 | 100% | <a href="#">WP_036445570.1</a> |
| <a href="#">enoyl-CoA hydratase/isomerase family protein [Mycobacterium avium 2285 (R</a>    | 30.3 | 30.3 | 81%  | 19 | 100% | <a href="#">EUA41425.1</a>     |
| <a href="#">enoyl-CoA hydratase/isomerase family protein [Mycobacterium intracellulare M</a> | 30.3 | 30.3 | 81%  | 19 | 100% | <a href="#">ETZ37455.1</a>     |
| <a href="#">enoyl-CoA hydratase [Mycobacterium indicus pranii]</a>                           | 30.3 | 30.3 | 81%  | 19 | 100% | <a href="#">WP_014941527.1</a> |
| <a href="#">enoyl-CoA hydratase [Mycobacterium intracellulare]</a>                           | 30.3 | 30.3 | 81%  | 19 | 100% | <a href="#">WP_014384111.1</a> |
| <a href="#">enoyl-CoA hydratase [Mycobacterium intracellulare]</a>                           | 30.3 | 30.3 | 81%  | 19 | 100% | <a href="#">WP_014382115.1</a> |
| <a href="#">enoyl-CoA hydratase [Mycobacterium intracellulare]</a>                           | 30.3 | 30.3 | 81%  | 19 | 100% | <a href="#">WP_014379614.1</a> |
| <a href="#">enoyl-CoA hydratase/isomerase [Mycobacterium vulneris]</a>                       | 30.3 | 30.3 | 81%  | 19 | 100% | <a href="#">CDO27409.1</a>     |
| <a href="#">enoyl-CoA hydratase [Mycobacterium smegmatis]</a>                                | 30.3 | 30.3 | 81%  | 19 | 100% | <a href="#">WP_003893595.1</a> |
| <a href="#">enoyl-CoA hydratase [Mycobacterium farcinogenes]</a>                             | 30.3 | 30.3 | 81%  | 19 | 100% | <a href="#">WP_036388478.1</a> |
| <a href="#">enoyl-CoA hydratase [Mycobacterium hassiacum]</a>                                | 30.3 | 30.3 | 81%  | 19 | 100% | <a href="#">WP_005626218.1</a> |
| <a href="#">enoyl-CoA hydratase [Mycobacterium fortuitum]</a>                                | 30.3 | 30.3 | 81%  | 19 | 100% | <a href="#">WP_003881307.1</a> |
| <a href="#">enoyl-CoA hydratase [Mycobacterium thermoresistibile]</a>                        | 30.3 | 30.3 | 81%  | 19 | 100% | <a href="#">WP_003927267.1</a> |
| <a href="#">enoyl-CoA hydratase [Mycobacterium triplex]</a>                                  | 30.3 | 30.3 | 81%  | 19 | 100% | <a href="#">WP_036470614.1</a> |
| <a href="#">enoyl-CoA hydratase [Mycobacterium smegmatis]</a>                                | 30.3 | 30.3 | 81%  | 19 | 100% | <a href="#">WP_014877338.1</a> |
| <a href="#">enoyl-CoA hydratase [Mycobacterium rhodesiae]</a>                                | 30.3 | 30.3 | 81%  | 19 | 100% | <a href="#">WP_014214268.1</a> |
| <a href="#">enoyl-CoA hydratase [Mycobacterium sp. URHD0025]</a>                             | 30.3 | 30.3 | 81%  | 19 | 100% | <a href="#">WP_029111550.1</a> |
| <a href="#">enoyl-CoA hydratase [Mycobacterium avium]</a>                                    | 30.3 | 30.3 | 81%  | 19 | 100% | <a href="#">WP_003877383.1</a> |
| <a href="#">enoyl-CoA hydratase [Mycobacterium avium]</a>                                    | 30.3 | 30.3 | 81%  | 19 | 100% | <a href="#">WP_023897844.1</a> |
| <a href="#">enoyl-CoA hydratase [Mycobacterium avium]</a>                                    | 30.3 | 30.3 | 81%  | 19 | 100% | <a href="#">WP_023865499.1</a> |
| <a href="#">enoyl-CoA hydratase [Mycobacterium avium]</a>                                    | 30.3 | 30.3 | 81%  | 19 | 100% | <a href="#">WP_023868654.1</a> |
| <a href="#">enoyl-CoA hydratase [Mycobacterium avium]</a>                                    | 30.3 | 30.3 | 81%  | 19 | 100% | <a href="#">WP_003873168.1</a> |
| <a href="#">enoyl-CoA hydratase [Mycobacterium avium]</a>                                    | 30.3 | 30.3 | 81%  | 19 | 100% | <a href="#">WP_009975789.1</a> |
| <a href="#">MULTISPECIES: enoyl-CoA hydratase [Mycobacterium]</a>                            | 30.3 | 30.3 | 81%  | 19 | 100% | <a href="#">WP_011724238.1</a> |
| <a href="#">enoyl-CoA hydratase [Mycobacterium asiaticum]</a>                                | 30.3 | 30.3 | 81%  | 19 | 100% | <a href="#">WP_036358004.1</a> |
| <a href="#">enoyl-CoA hydratase [Mycobacterium intracellulare]</a>                           | 30.3 | 30.3 | 81%  | 19 | 100% | <a href="#">WP_036458505.1</a> |
| <a href="#">enoyl-CoA hydratase [Mycobacterium parascrofulaceum]</a>                         | 30.3 | 30.3 | 81%  | 19 | 100% | <a href="#">WP_007169328.1</a> |
| <a href="#">hypothetical protein [Mycobacterium yongonense]</a>                              | 30.3 | 30.3 | 81%  | 19 | 100% | <a href="#">WP_020822025.1</a> |
| <a href="#">enoyl-CoA hydratase [Mycobacterium intracellulare]</a>                           | 30.3 | 30.3 | 81%  | 19 | 100% | <a href="#">WP_020188779.1</a> |
| <a href="#">MULTISPECIES: enoyl-CoA hydratase/isomerase [Mycobacterium]</a>                  | 30.3 | 30.3 | 81%  | 19 | 100% | <a href="#">WP_008254944.1</a> |
| <a href="#">enoyl-CoA hydratase [Mycobacterium sp. MOTT36Y]</a>                              | 30.3 | 30.3 | 81%  | 19 | 100% | <a href="#">WP_014711113.1</a> |
| <a href="#">enoyl-CoA hydratase [Mycobacterium intracellulare]</a>                           | 30.3 | 30.3 | 81%  | 19 | 100% | <a href="#">WP_009957717.1</a> |

|                                                                                          |      |      |      |    |      |                                |
|------------------------------------------------------------------------------------------|------|------|------|----|------|--------------------------------|
| <a href="#">enoyl-CoA hydratase [Mycobacterium setense]</a>                              | 30.3 | 30.3 | 81%  | 19 | 100% | <a href="#">WP_039318073.1</a> |
| <a href="#">enoyl-CoA hydratase [Mycobacterium setense]</a>                              | 30.3 | 30.3 | 81%  | 19 | 100% | <a href="#">WP_039378841.1</a> |
| <a href="#">hypothetical protein K875_04408 [Mycobacterium tuberculosis TKK-01-0051]</a> | 30.3 | 30.3 | 81%  | 19 | 100% | <a href="#">KBZ61452.1</a>     |
| <a href="#">enoyl-CoA hydratase [Mycobacterium colombiense]</a>                          | 30.3 | 30.3 | 81%  | 19 | 100% | <a href="#">WP_007773968.1</a> |
| <a href="#">enoyl-CoA hydratase [Nocardia sp. 348MFTsu5.1]</a>                           | 30.3 | 30.3 | 81%  | 19 | 100% | <a href="#">WP_020106389.1</a> |
| <a href="#">enoyl-CoA hydratase [Mycobacterium sp. JLS]</a>                              | 30.3 | 30.3 | 81%  | 19 | 100% | <a href="#">WP_011855230.1</a> |
| <a href="#">MULTISPECIES: enoyl-CoA hydratase [Mycobacterium]</a>                        | 30.3 | 30.3 | 81%  | 19 | 100% | <a href="#">WP_011559168.1</a> |
| <a href="#">enoyl-CoA hydratase [Mycobacterium vaccae]</a>                               | 30.3 | 30.3 | 81%  | 19 | 100% | <a href="#">WP_003928815.1</a> |
| <a href="#">enoyl-CoA hydratase [Mycobacterium tusciae]</a>                              | 30.3 | 30.3 | 81%  | 19 | 100% | <a href="#">WP_006245820.1</a> |
| <a href="#">PREDICTED: intercellular adhesion molecule 1 [Macaca fascicularis]</a>       | 30.3 | 30.3 | 100% | 20 | 82%  | <a href="#">XP_005587991.1</a> |
| <a href="#">intercellular adhesion molecule 1 precursor [Macaca mulatta]</a>             | 30.3 | 30.3 | 100% | 20 | 82%  | <a href="#">NP_001040600.1</a> |
| <a href="#">Intercellular adhesion molecule 1 [Macaca mulatta]</a>                       | 30.3 | 30.3 | 100% | 20 | 82%  | <a href="#">EHH29617.1</a>     |
| <a href="#">PREDICTED: intercellular adhesion molecule 1 [Callithrix jacchus]</a>        | 30.3 | 30.3 | 100% | 20 | 82%  | <a href="#">XP_008985482.1</a> |
| <a href="#">AraC family transcriptional regulator [Frankia sp. Eu11c]</a>                | 29.9 | 29.9 | 100% | 25 | 91%  | <a href="#">WP_013425582.1</a> |
| <a href="#">PREDICTED: LOW QUALITY PROTEIN: intercellular adhesion molecule 1 [E]</a>    | 29.9 | 29.9 | 100% | 27 | 82%  | <a href="#">XP_005612007.1</a> |
| <a href="#">intercellular adhesion molecule 1 precursor [Gorilla gorilla]</a>            | 29.9 | 29.9 | 100% | 27 | 82%  | <a href="#">NP_001266532.1</a> |
| <a href="#">PREDICTED: intercellular adhesion molecule 3 [Equus przewalskii]</a>         | 29.9 | 29.9 | 100% | 27 | 82%  | <a href="#">XP_008508983.1</a> |
| <a href="#">PREDICTED: LOW QUALITY PROTEIN: intercellular adhesion molecule 3 [E]</a>    | 29.9 | 29.9 | 100% | 27 | 82%  | <a href="#">XP_005612008.1</a> |
| <a href="#">PREDICTED: intercellular adhesion molecule 1 [Equus przewalskii]</a>         | 29.9 | 29.9 | 100% | 27 | 82%  | <a href="#">XP_008529085.1</a> |
| <a href="#">PREDICTED: intercellular adhesion molecule 3 [Erinaceus europaeus]</a>       | 29.5 | 29.5 | 100% | 37 | 82%  | <a href="#">XP_007526090.1</a> |
| <a href="#">hypothetical protein IV02_14020 [Pseudomonas syringae]</a>                   | 29.1 | 29.1 | 90%  | 46 | 83%  | <a href="#">KFE51120.1</a>     |
| <a href="#">hypothetical protein [Bradyrhizobium diazoefficiens]</a>                     | 28.6 | 28.6 | 90%  | 58 | 80%  | <a href="#">WP_011090401.1</a> |
| <a href="#">pentapeptide repeat-containing protein [Paracoccus denitrificans]</a>        | 28.6 | 28.6 | 100% | 65 | 82%  | <a href="#">WP_011750157.1</a> |
| <a href="#">hydrolase [Nocardia araoensis]</a>                                           | 28.6 | 28.6 | 90%  | 66 | 90%  | <a href="#">WP_039800000.1</a> |
| <a href="#">hydrolase [Nocardia araoensis]</a>                                           | 28.6 | 28.6 | 90%  | 66 | 90%  | <a href="#">WP_039798989.1</a> |
| <a href="#">hypothetical protein [Sphingomonas sp. PAMC 26621]</a>                       | 28.2 | 28.2 | 100% | 83 | 83%  | <a href="#">WP_026046693.1</a> |

## Alignments

[Download](#) [GenPept](#) [Graphics](#)

[Next](#) [Previous](#) [Descriptions](#)

cell surface glycoprotein, partial [Homo sapiens]

Sequence ID: [gb|AAA60392.1](#) Length: 151 Number of Matches: 1

Range 1: 58 to 68 [GenPept](#) [Graphics](#)

[Next Match](#) [Previous Match](#)

### Related Information

| Score         | Expect | Identities | Positives   | Gaps     |
|---------------|--------|------------|-------------|----------|
| 33.7 bits(72) | 1.3    | 10/11(91%) | 11/11(100%) | 0/11(0%) |

Query 1 RADLTVVLLRG 11  
RA+LTVVLLRG  
Sbjct 58 RANLTVVLLRG 68

[Download](#) [GenPept](#) [Graphics](#)

[Next](#) [Previous](#) [Descriptions](#)

Chain A, D1d2-Icam-1 Fully Glycosylated, Variation Of D1-D2 Interdomain Angle In Different Crystal Structures.

Sequence ID: [pdb|1D3L|A](#) Length: 185 Number of Matches: 1

[See 2 more title\(s\)](#)

Range 1: 116 to 126 [GenPept](#) [Graphics](#)

[Next Match](#) [Previous Match](#)

### Related Information

| Score         | Expect | Identities | Positives   | Gaps     |
|---------------|--------|------------|-------------|----------|
| 33.7 bits(72) | 1.4    | 10/11(91%) | 11/11(100%) | 0/11(0%) |

[Structure](#) - 3D structure displays  
[Identical Proteins](#) - Proteins

identical to the subject

Query 1 RADLTVVLLRG 11  
 RA+LTVVLLRG  
 Sbjct 116 RANLTVVLLRG 126

[Download](#) [GenPept](#) [Graphics](#)

[▼ Next](#) [▲ Previous](#) [▲ Descriptions](#)

Chain A, The Crystal Structure For The N-Terminal Two Domains Of Icam-1

Sequence ID: [pdb|1IC1A](#) Length: 190 Number of Matches: 1

Range 1: 116 to 126 [GenPept](#) [Graphics](#)

[▼ Next Match](#) [▲ Previous Match](#)

| Score         | Expect | Identities | Positives   | Gaps     |
|---------------|--------|------------|-------------|----------|
| 33.7 bits(72) | 1.4    | 10/11(91%) | 11/11(100%) | 0/11(0%) |

Query 1 RADLTVVLLRG 11  
 RA+LTVVLLRG  
 Sbjct 116 RANLTVVLLRG 126

**Related Information**

[Structure](#) - 3D structure displays

[Download](#) [GenPept](#) [Graphics](#)

[▼ Next](#) [▲ Previous](#) [▲ Descriptions](#)

Chain B, The Crystal Structure For The N-Terminal Two Domains Of Icam-1

Sequence ID: [pdb|1IC1B](#) Length: 190 Number of Matches: 1

Range 1: 116 to 126 [GenPept](#) [Graphics](#)

[▼ Next Match](#) [▲ Previous Match](#)

| Score         | Expect | Identities | Positives   | Gaps     |
|---------------|--------|------------|-------------|----------|
| 33.7 bits(72) | 1.4    | 10/11(91%) | 11/11(100%) | 0/11(0%) |

Query 1 RADLTVVLLRG 11  
 RA+LTVVLLRG  
 Sbjct 116 RANLTVVLLRG 126

**Related Information**

[Structure](#) - 3D structure displays

[Download](#) [GenPept](#) [Graphics](#)

[▼ Next](#) [▲ Previous](#) [▲ Descriptions](#)

Chain A, Crystal Structure Of Alpha I Domain In Complex With Icam-1

Sequence ID: [pdb|1MQ8A](#) Length: 291 Number of Matches: 1

[▶ See 1 more title\(s\)](#)

Range 1: 116 to 126 [GenPept](#) [Graphics](#)

[▼ Next Match](#) [▲ Previous Match](#)

| Score         | Expect | Identities | Positives   | Gaps     |
|---------------|--------|------------|-------------|----------|
| 33.7 bits(72) | 1.5    | 10/11(91%) | 11/11(100%) | 0/11(0%) |

Query 1 RADLTVVLLRG 11  
 RA+LTVVLLRG  
 Sbjct 116 RANLTVVLLRG 126

**Related Information**

[Structure](#) - 3D structure displays

[Identical Proteins](#) - Proteins

identical to the subject

BLAST is a registered trademark of the National Library of Medicine.



NCBI/ BLAST/ blastp suite/ Formatting Results - B9FFCEMB01R

Your search parameters were adjusted to search for a short input sequence.

Edit and Resubmit Save Search Strategies Formatting options Download

YouTube How to read this page Blast report description

ICAM1\_RANLTVLLRG\_NonMod

RID B9FFCEMB01R (Expires on 01-14 13:40 pm)

Query ID Icl|203444
Description None
Molecule type amino acid
Query Length 11

Database Name nr
Description All non-redundant GenBank CDS translations+PDB+SwissProt+PIR excluding environmental samples from WGS projects
Program BLASTP 2.2.30+ Citation

Other reports: Search Summary Taxonomy reports Distance tree of results Related Structures Multiple alignment

Graphic Summary

Show Conserved Domains

No putative conserved domains have been detected

Distribution of 101 Blast Hits on the Query Sequence





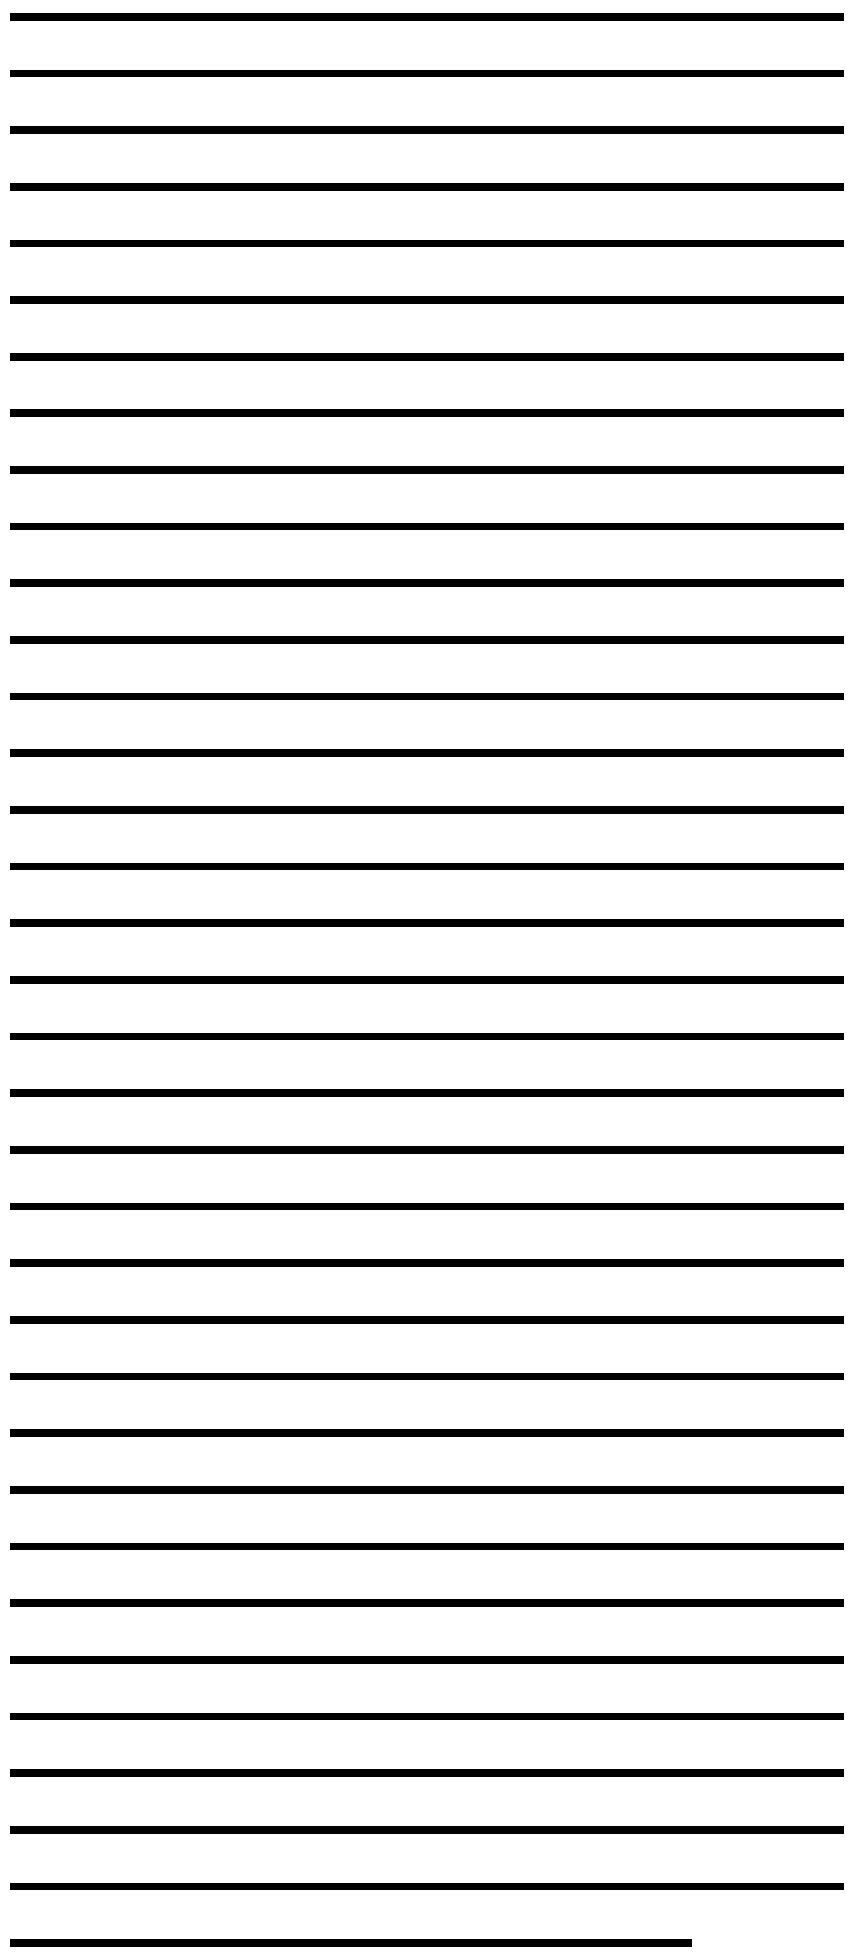



**Descriptions**

**Sequences producing significant alignments:**

Select: [All](#) [None](#) Selected:0

[Alignments](#)
[Download](#)
[GenPept](#)
[Graphics](#)
[Distance tree of results](#)
[Multiple alignment](#)

| Description                                                                          | Max score | Total score | Query cover | E value | Ident | Accession                                   |
|--------------------------------------------------------------------------------------|-----------|-------------|-------------|---------|-------|---------------------------------------------|
| <a href="#">cell surface glycoprotein [Homo sapiens]</a>                             | 36.3      | 36.3        | 100%        | 0.18    | 100%  | <a href="#">gij338068 AAA60392.1</a>        |
| <a href="#">Chain A, D1d2-Icam-1 Fully Glycosylated, Variation Of D1-D2 Inter</a>    | 36.3      | 36.3        | 100%        | 0.19    | 100%  | <a href="#">gij6573330 1D3L_A</a>           |
| <a href="#">Chain A, The Crystal Structure For The N-Terminal Two Domains C</a>      | 36.3      | 36.3        | 100%        | 0.19    | 100%  | <a href="#">gij3318903 1IC1_A</a>           |
| <a href="#">Chain B, The Crystal Structure For The N-Terminal Two Domains C</a>      | 36.3      | 36.3        | 100%        | 0.19    | 100%  | <a href="#">gij3318904 1IC1_B</a>           |
| <a href="#">Chain A, Crystal Structure Of Alpha I Domain In Complex With Icar</a>    | 36.3      | 36.3        | 100%        | 0.20    | 100%  | <a href="#">gij2837377 1MQ8_A</a>           |
| <a href="#">unnamed protein product [Homo sapiens]</a>                               | 36.3      | 36.3        | 100%        | 0.21    | 100%  | <a href="#">gij194388760 BAG60348.1</a>     |
| <a href="#">unnamed protein product [Homo sapiens]</a>                               | 36.3      | 36.3        | 100%        | 0.21    | 100%  | <a href="#">gij194386534 BAG61077.1</a>     |
| <a href="#">Chain I, Cryo-Em Structure Of Human Coxsackievirus A21 Comple</a>        | 36.3      | 36.3        | 100%        | 0.21    | 100%  | <a href="#">gij73535843 1Z7Z_I</a>          |
| <a href="#">PREDICTED: intercellular adhesion molecule 1 [Pongo abelii]</a>          | 36.3      | 36.3        | 100%        | 0.21    | 100%  | <a href="#">gij395750443 XP_002828698.2</a> |
| <a href="#">intercellular adhesion molecule 1 [Pan troglodytes]</a>                  | 36.3      | 36.3        | 100%        | 0.21    | 100%  | <a href="#">gij176796 AAA35415.1</a>        |
| <a href="#">intercellular adhesion molecule 1 [Homo sapiens]</a>                     | 36.3      | 36.3        | 100%        | 0.21    | 100%  | <a href="#">gij33340675 AAQ14902.1</a>      |
| <a href="#">intercellular adhesion molecule 1 [Pongo pygmaeus]</a>                   | 36.3      | 36.3        | 100%        | 0.21    | 100%  | <a href="#">gij33340679 AAQ14904.1</a>      |
| <a href="#">PREDICTED: intercellular adhesion molecule 1 [Nomascus leucoge</a>       | 36.3      | 36.3        | 100%        | 0.21    | 100%  | <a href="#">gij332253293 XP_003275780.1</a> |
| <a href="#">PREDICTED: intercellular adhesion molecule 1 [Chlorocebus sabae</a>      | 36.3      | 36.3        | 100%        | 0.21    | 100%  | <a href="#">gij635036004 XP_007993410.1</a> |
| <a href="#">intercellular adhesion molecule-1 precursor [Homo sapiens]</a>           | 36.3      | 36.3        | 100%        | 0.21    | 100%  | <a href="#">gij306896 AAA52709.1</a>        |
| <a href="#">PREDICTED: intercellular adhesion molecule 1 [Pan paniscus]</a>          | 36.3      | 36.3        | 100%        | 0.21    | 100%  | <a href="#">gij397476504 XP_003809639.1</a> |
| <a href="#">intercellular adhesion molecule 1 precursor [Pan troglodytes]</a>        | 36.3      | 36.3        | 100%        | 0.21    | 100%  | <a href="#">gij57977287 NP_001009946.1</a>  |
| <a href="#">intercellular adhesion molecule 1 precursor [Homo sapiens]</a>           | 36.3      | 36.3        | 100%        | 0.21    | 100%  | <a href="#">gij167466198 NP_000192.2</a>    |
| <a href="#">PREDICTED: intercellular adhesion molecule 1 [Papio anubis]</a>          | 36.3      | 36.3        | 100%        | 0.21    | 100%  | <a href="#">gij685605924 XP_009191725.1</a> |
| <a href="#">intercellular adhesion molecule 1 [Homo sapiens]</a>                     | 36.3      | 36.3        | 100%        | 0.21    | 100%  | <a href="#">gij33340673 AAQ14901.1</a>      |
| <a href="#">Homo sapiens intercellular adhesion molecule 1 (CD54), human rhi</a>     | 36.3      | 36.3        | 100%        | 0.21    | 100%  | <a href="#">gij30583971 AAP36234.1</a>      |
| <a href="#">PREDICTED: intercellular adhesion molecule 1 [Saimiri boliviensis ]</a>  | 36.3      | 36.3        | 100%        | 0.21    | 100%  | <a href="#">gij403296180 XP_003938996.1</a> |
| <a href="#">PREDICTED: intercellular adhesion molecule 1 [Elephantulus edwa</a>      | 36.3      | 36.3        | 100%        | 0.21    | 100%  | <a href="#">gij585706580 XP_006898825.1</a> |
| <a href="#">PREDICTED: intercellular adhesion molecule 3 [Trichechus manatu</a>      | 36.3      | 36.3        | 100%        | 0.21    | 100%  | <a href="#">gij471381636 XP_004378609.1</a> |
| <a href="#">PREDICTED: intercellular adhesion molecule 3 [Elephantulus edwa</a>      | 36.3      | 36.3        | 100%        | 0.21    | 100%  | <a href="#">gij585706861 XP_006898902.1</a> |
| <a href="#">PREDICTED: intercellular adhesion molecule 1 isoform X2 [Felis ca</a>    | 33.3      | 33.3        | 100%        | 2.0     | 91%   | <a href="#">gij586976762 XP_006928451.1</a> |
| <a href="#">RecName: Full=Intercellular adhesion molecule 1; Short=ICAM-1; A</a>     | 33.3      | 33.3        | 100%        | 2.0     | 91%   | <a href="#">gij2506778 P33729.2</a>         |
| <a href="#">intercellular adhesion molecule 1 precursor [Canis lupus familiaris]</a> | 33.3      | 33.3        | 100%        | 2.0     | 91%   | <a href="#">gij308081738 NP_001003291.1</a> |

|                                                                                   |      |      |      |     |      |                                              |
|-----------------------------------------------------------------------------------|------|------|------|-----|------|----------------------------------------------|
| <a href="#">PREDICTED: intercellular adhesion molecule 1 isoform X1 [Felis ca</a> | 33.3 | 33.3 | 100% | 2.0 | 91%  | <a href="#">gij410950410 XP_003981899.1</a>  |
| <a href="#">PREDICTED: intercellular adhesion molecule 3 isoform X1 [Felis ca</a> | 33.3 | 33.3 | 100% | 2.0 | 91%  | <a href="#">gij410950448 XP_003981917.1</a>  |
| <a href="#">PREDICTED: intercellular adhesion molecule 3 [Canis lupus familia</a> | 33.3 | 33.3 | 100% | 2.0 | 91%  | <a href="#">gij345787203 XP_003432901.1</a>  |
| <a href="#">PREDICTED: intercellular adhesion molecule 1 [Loxodonta africana</a>  | 33.3 | 33.3 | 100% | 2.0 | 91%  | <a href="#">gij344283337 XP_003413428.1</a>  |
| <a href="#">PREDICTED: intercellular adhesion molecule 1 [Ceratotherium simu</a>  | 32.9 | 32.9 | 100% | 2.8 | 91%  | <a href="#">gij478537121 XP_004442677.1</a>  |
| <a href="#">PREDICTED: intercellular adhesion molecule 1 [Galeopterus varieg</a>  | 32.9 | 32.9 | 100% | 2.8 | 91%  | <a href="#">gij667286704 XP_008576239.1</a>  |
| <a href="#">PREDICTED: intercellular adhesion molecule 1 [Macaca fasciculari:</a> | 32.9 | 32.9 | 100% | 2.8 | 91%  | <a href="#">gij544508624 XP_005587991.1</a>  |
| <a href="#">intercellular adhesion molecule 1 precursor [Macaca mulatta]</a>      | 32.9 | 32.9 | 100% | 2.8 | 91%  | <a href="#">gij114051944 INP_001040600.1</a> |
| <a href="#">Intercellular adhesion molecule 1 [Macaca mulatta]</a>                | 32.9 | 32.9 | 100% | 2.8 | 91%  | <a href="#">gij355703126 EHH29617.1</a>      |
| <a href="#">PREDICTED: intercellular adhesion molecule 1 [Callithrix jacchus]</a> | 32.9 | 32.9 | 100% | 2.8 | 91%  | <a href="#">gij675757750 XP_008985482.1</a>  |
| <a href="#">PREDICTED: intercellular adhesion molecule 3 [Ceratotherium simu</a>  | 32.9 | 51.8 | 100% | 2.8 | 91%  | <a href="#">gij478537234 XP_004442732.1</a>  |
| <a href="#">PREDICTED: LOW QUALITY PROTEIN: intercellular adhesion mol:</a>       | 32.5 | 32.5 | 100% | 3.8 | 91%  | <a href="#">gij545222252 XP_005612007.1</a>  |
| <a href="#">intercellular adhesion molecule 1 precursor [Gorilla gorilla]</a>     | 32.5 | 32.5 | 100% | 3.8 | 91%  | <a href="#">gij525342618 INP_001266532.1</a> |
| <a href="#">PREDICTED: intercellular adhesion molecule 3 [Equus przewalskii]</a>  | 32.5 | 32.5 | 100% | 3.8 | 91%  | <a href="#">gij664779359 XP_008508983.1</a>  |
| <a href="#">PREDICTED: LOW QUALITY PROTEIN: intercellular adhesion mol:</a>       | 32.5 | 32.5 | 100% | 3.8 | 91%  | <a href="#">gij545222257 XP_005612008.1</a>  |
| <a href="#">PREDICTED: intercellular adhesion molecule 1 [Equus przewalskii]</a>  | 32.5 | 32.5 | 100% | 3.8 | 91%  | <a href="#">gij664743540 XP_008529085.1</a>  |
| <a href="#">PREDICTED: intercellular adhesion molecule 3 [Erinaceus europae</a>   | 32.0 | 32.0 | 100% | 5.2 | 91%  | <a href="#">gij617615325 XP_007526090.1</a>  |
| <a href="#">Chain A. Structure Of The Two Amino-Terminal Domains Of Humar</a>     | 31.6 | 31.6 | 100% | 6.5 | 91%  | <a href="#">gij157831419 IAM_A</a>           |
| <a href="#">PREDICTED: intercellular adhesion molecule 3 isoform X2 [Mustela</a>  | 30.8 | 30.8 | 100% | 13  | 91%  | <a href="#">gij511848267 XP_004748507.1</a>  |
| <a href="#">PREDICTED: intercellular adhesion molecule 3 isoform X1 [Mustela</a>  | 30.8 | 30.8 | 100% | 13  | 91%  | <a href="#">gij511848265 XP_004748506.1</a>  |
| <a href="#">PREDICTED: intercellular adhesion molecule 1 [Mustela putorius fu</a> | 30.8 | 30.8 | 100% | 13  | 91%  | <a href="#">gij512013981 XP_004824339.1</a>  |
| <a href="#">PREDICTED: intercellular adhesion molecule 1 [Mustela putorius fu</a> | 30.8 | 30.8 | 100% | 13  | 91%  | <a href="#">gij511848273 XP_004748510.1</a>  |
| <a href="#">PREDICTED: intercellular adhesion molecule 1 [Trichechus manatu</a>   | 30.3 | 30.3 | 81%  | 18  | 100% | <a href="#">gij471381640 XP_004378611.1</a>  |
| <a href="#">Intercellular adhesion molecule 1 [Bos mutus]</a>                     | 29.9 | 29.9 | 100% | 25  | 82%  | <a href="#">gij440899924 ELR51165.1</a>      |
| <a href="#">hypothetical protein PANDA_010324 [Ailuropoda melanoleuca]</a>        | 29.9 | 29.9 | 100% | 25  | 82%  | <a href="#">gij281337407 EFB12991.1</a>      |
| <a href="#">hypothetical protein PANDA_010318 [Ailuropoda melanoleuca]</a>        | 29.9 | 29.9 | 100% | 25  | 82%  | <a href="#">gij281337401 EFB12985.1</a>      |
| <a href="#">PREDICTED: intercellular adhesion molecule 3-like [Ailuropoda me</a>  | 29.9 | 29.9 | 100% | 25  | 82%  | <a href="#">gij301772028 XP_002921447.1</a>  |
| <a href="#">intercellular adhesion molecule 1 precursor [Bos taurus]</a>          | 29.9 | 29.9 | 100% | 25  | 82%  | <a href="#">gij27805931 INP_776773.1</a>     |
| <a href="#">TPA: intercellular adhesion molecule 1 precursor [Bos taurus]</a>     | 29.9 | 29.9 | 100% | 25  | 82%  | <a href="#">gij296485887 DAA28002.1</a>      |
| <a href="#">intercellular adhesion molecule 1 [Bos taurus]</a>                    | 29.9 | 29.9 | 100% | 25  | 82%  | <a href="#">gij161701470 ABX75547.1</a>      |
| <a href="#">intercellular adhesion molecule 3 precursor [Bos taurus]</a>          | 29.9 | 29.9 | 100% | 25  | 82%  | <a href="#">gij41386693 INP_776774.1</a>     |
| <a href="#">TPA: intercellular adhesion molecule 3 precursor [Bos taurus]</a>     | 29.9 | 29.9 | 100% | 25  | 82%  | <a href="#">gij296485888 DAA28003.1</a>      |
| <a href="#">PREDICTED: intercellular adhesion molecule 3 [Ursus maritimus]</a>    | 29.9 | 29.9 | 100% | 25  | 82%  | <a href="#">gij671031024 XP_008706311.1</a>  |
| <a href="#">PREDICTED: intercellular adhesion molecule 1-like [Ailuropoda me</a>  | 29.9 | 29.9 | 100% | 25  | 82%  | <a href="#">gij301772040 XP_002921450.1</a>  |
| <a href="#">PREDICTED: intercellular adhesion molecule 1 [Ursus maritimus]</a>    | 29.9 | 29.9 | 100% | 25  | 82%  | <a href="#">gij671031105 XP_008706351.1</a>  |
| <a href="#">PREDICTED: intercellular adhesion molecule 3 [Galeopterus varieg</a>  | 29.1 | 29.1 | 100% | 46  | 82%  | <a href="#">gij667286729 XP_008576247.1</a>  |
| <a href="#">PREDICTED: intercellular adhesion molecule 3 [Orcinus orca]</a>       | 29.1 | 29.1 | 100% | 47  | 82%  | <a href="#">gij466047921 XP_004277724.1</a>  |
| <a href="#">PREDICTED: intercellular adhesion molecule 3 [Chrysochloris asiat</a> | 28.6 | 28.6 | 100% | 64  | 82%  | <a href="#">gij586489511 XP_006875225.1</a>  |
| <a href="#">enoyl-CoA hydratase [Achromobacter insuavis]</a>                      | 28.2 | 28.2 | 100% | 84  | 82%  | <a href="#">gij493440403 WP_006395856.1</a>  |
| <a href="#">FTR1 family iron permease [Pseudomonas sp. TKP]</a>                   | 28.2 | 28.2 | 90%  | 85  | 90%  | <a href="#">gij568200678 WP_024075042.1</a>  |
| <a href="#">PREDICTED: LOW QUALITY PROTEIN: intercellular adhesion mol:</a>       | 28.2 | 28.2 | 100% | 88  | 82%  | <a href="#">gij505846701 XP_004616823.1</a>  |
| <a href="#">PREDICTED: intercellular adhesion molecule 1 [Rhinopithecus roxe</a>  | 28.2 | 28.2 | 100% | 88  | 82%  | <a href="#">gij724876734 XP_010372081.1</a>  |
| <a href="#">PREDICTED: pentatricopeptide repeat-containing protein At5g1501</a>   | 28.2 | 28.2 | 90%  | 88  | 80%  | <a href="#">gij502107026 XP_004493133.1</a>  |
| <a href="#">PREDICTED: ribonucleoprotein PTB-binding 1 [Sorex araneus]</a>        | 28.2 | 28.2 | 100% | 89  | 82%  | <a href="#">gij505846707 XP_004616826.1</a>  |
| <a href="#">enoyl-CoA hydratase [Mycobacterium avium]</a>                         | 27.8 | 27.8 | 81%  | 90  | 89%  | <a href="#">gij665984837 WP_031350797.1</a>  |

|                                                                                             |      |      |     |     |     |                                             |
|---------------------------------------------------------------------------------------------|------|------|-----|-----|-----|---------------------------------------------|
| <a href="#">enoyl-CoA hydratase [Mycobacterium avium]</a>                                   | 27.8 | 27.8 | 81% | 116 | 89% | <a href="#">gij665984838 WP_031350798.1</a> |
| <a href="#">enoyl-CoA hydratase [Mycobacterium avium subsp. paratuberculosis]</a>           | 27.8 | 27.8 | 81% | 116 | 89% | <a href="#">gij564160320 ETB04169.1</a>     |
| <a href="#">enoyl-CoA hydratase/isomerase family protein [Mycobacterium avium]</a>          | 27.8 | 27.8 | 81% | 116 | 89% | <a href="#">gij576447784 EUA41425.1</a>     |
| <a href="#">enoyl-CoA hydratase/isomerase family protein [Mycobacterium intracellulare]</a> | 27.8 | 27.8 | 81% | 116 | 89% | <a href="#">gij576342910 ETZ37455.1</a>     |
| <a href="#">enoyl-CoA hydratase [Mycobacterium indicus pranii]</a>                          | 27.8 | 27.8 | 81% | 116 | 89% | <a href="#">gij504754425 WP_014941527.1</a> |
| <a href="#">enoyl-CoA hydratase [Mycobacterium intracellulare]</a>                          | 27.8 | 27.8 | 81% | 116 | 89% | <a href="#">gij504197009 WP_014384111.1</a> |
| <a href="#">enoyl-CoA hydratase [Mycobacterium intracellulare]</a>                          | 27.8 | 27.8 | 81% | 116 | 89% | <a href="#">gij504195013 WP_014382115.1</a> |
| <a href="#">enoyl-CoA hydratase [Mycobacterium intracellulare]</a>                          | 27.8 | 27.8 | 81% | 116 | 89% | <a href="#">gij504192512 WP_014379614.1</a> |
| <a href="#">enoyl-CoA hydratase/isomerase [Mycobacterium vulneris]</a>                      | 27.8 | 27.8 | 81% | 116 | 89% | <a href="#">gij602522334 CDO27409.1</a>     |
| <a href="#">enoyl-CoA hydratase [Mycobacterium smegmatis]</a>                               | 27.8 | 27.8 | 81% | 116 | 89% | <a href="#">gij489990538 WP_003893595.1</a> |
| <a href="#">enoyl-CoA hydratase/isomerase [Mycobacterium farcinogenes]</a>                  | 27.8 | 27.8 | 81% | 116 | 89% | <a href="#">gij633838277 CDP84038.1</a>     |
| <a href="#">enoyl-CoA hydratase [Mycobacterium hassiacum]</a>                               | 27.8 | 27.8 | 81% | 116 | 89% | <a href="#">gij491838896 WP_005626218.1</a> |
| <a href="#">enoyl-CoA hydratase [Mycobacterium fortuitum]</a>                               | 27.8 | 27.8 | 81% | 116 | 89% | <a href="#">gij489978170 WP_003881307.1</a> |
| <a href="#">enoyl-CoA hydratase [Mycobacterium thermoresistibile]</a>                       | 27.8 | 27.8 | 81% | 116 | 89% | <a href="#">gij490024790 WP_003927267.1</a> |
| <a href="#">enoyl-CoA hydratase/carnithine racemase [Mycobacterium triplex]</a>             | 27.8 | 27.8 | 81% | 116 | 89% | <a href="#">gij620041031 CDO89870.1</a>     |
| <a href="#">enoyl-CoA hydratase [Mycobacterium smegmatis]</a>                               | 27.8 | 27.8 | 81% | 116 | 89% | <a href="#">gij504690236 WP_014877338.1</a> |
| <a href="#">enoyl-CoA hydratase [Mycobacterium rhodesiae]</a>                               | 27.8 | 27.8 | 81% | 116 | 89% | <a href="#">gij503980274 WP_014214268.1</a> |
| <a href="#">enoyl-CoA hydratase [Mycobacterium sp. URHD0025]</a>                            | 27.8 | 27.8 | 81% | 116 | 89% | <a href="#">gij656080510 WP_029111550.1</a> |
| <a href="#">enoyl-CoA hydratase [Mycobacterium avium]</a>                                   | 27.8 | 27.8 | 81% | 116 | 89% | <a href="#">gij489974194 WP_003877383.1</a> |
| <a href="#">enoyl-CoA hydratase [Mycobacterium avium]</a>                                   | 27.8 | 27.8 | 81% | 116 | 89% | <a href="#">gij565650440 WP_023897844.1</a> |
| <a href="#">enoyl-CoA hydratase [Mycobacterium avium]</a>                                   | 27.8 | 27.8 | 81% | 116 | 89% | <a href="#">gij564856878 WP_023865499.1</a> |
| <a href="#">enoyl-CoA hydratase [Mycobacterium avium]</a>                                   | 27.8 | 27.8 | 81% | 116 | 89% | <a href="#">gij564861315 WP_023868654.1</a> |
| <a href="#">enoyl-CoA hydratase [Mycobacterium avium]</a>                                   | 27.8 | 27.8 | 81% | 116 | 89% | <a href="#">gij489969930 WP_003873168.1</a> |
| <a href="#">enoyl-CoA hydratase [Mycobacterium avium]</a>                                   | 27.8 | 27.8 | 81% | 116 | 89% | <a href="#">gij497661605 WP_009975789.1</a> |
| <b>MULTISPECIES: enoyl-CoA hydratase [Mycobacterium]</b>                                    | 27.8 | 27.8 | 81% | 116 | 89% | <a href="#">gij500043520 WP_011724238.1</a> |
| <a href="#">hypothetical protein [Mycobacterium yongonense]</a>                             | 27.8 | 27.8 | 81% | 116 | 89% | <a href="#">gij523909424 WP_020822025.1</a> |
| <a href="#">enoyl-CoA hydratase [Mycobacterium intracellulare]</a>                          | 27.8 | 27.8 | 81% | 116 | 89% | <a href="#">gij519032904 WP_020188779.1</a> |

**Alignments**

Download [GenPept](#) [Graphics](#) ▼ Next ▲ Previous ▲ Descriptions

cell surface glycoprotein, partial [Homo sapiens]  
 Sequence ID: [gij338068|gb|AAA60392.1](#) Length: 151 Number of Matches: 1

**Related Information**

Range 1: 58 to 68 [GenPept](#) [Graphics](#) ▼ Next Match ▲ Previous Match

| Score         | Expect | Identities  | Positives   | Gaps     |
|---------------|--------|-------------|-------------|----------|
| 36.3 bits(78) | 0.18   | 11/11(100%) | 11/11(100%) | 0/11(0%) |

Query 1 RANLTVVLLRG 11  
 RANLTVVLLRG  
 Sbjct 58 RANLTVVLLRG 68

Download [GenPept](#) [Graphics](#) ▼ Next ▲ Previous ▲ Descriptions

Chain A, D1d2-Icam-1 Fully Glycosylated, Variation Of D1-D2 Interdomain Angle In Different Crystal Structures.  
 Sequence ID: [gij6573330|pdb|1D3L|A](#) Length: 185 Number of Matches: 1

[▶ See 2 more title\(s\)](#)

**Related Information**

Range 1: 116 to 126 [GenPept](#) [Graphics](#) ▼ Next Match ▲ Previous Match

| Score         | Expect | Identities  | Positives   | Gaps     |
|---------------|--------|-------------|-------------|----------|
| 36.3 bits(78) | 0.19   | 11/11(100%) | 11/11(100%) | 0/11(0%) |

[Structure](#) - 3D structure displays  
[Identical Proteins](#) - Proteins  
 identical to the subject

Query 1 RANLTVLLRG 11  
 Sbjct 116 RANLTVLLRG 126

Download [GenPept](#) [Graphics](#)

Next Previous Descriptions

**Chain A, The Crystal Structure For The N-Terminal Two Domains Of Icam-1**

Sequence ID: [gi|3318903|pdb|1IC1|A](#) Length: 190 Number of Matches: 1

**Related Information**

[Structure](#) - 3D structure displays

Range 1: 116 to 126 [GenPept](#) [Graphics](#)

Next Match Previous Match

| Score         | Expect | Identities  | Positives   | Gaps     |
|---------------|--------|-------------|-------------|----------|
| 36.3 bits(78) | 0.19   | 11/11(100%) | 11/11(100%) | 0/11(0%) |

Query 1 RANLTVLLRG 11  
 Sbjct 116 RANLTVLLRG 126

Download [GenPept](#) [Graphics](#)

Next Previous Descriptions

**Chain B, The Crystal Structure For The N-Terminal Two Domains Of Icam-1**

Sequence ID: [gi|3318904|pdb|1IC1|B](#) Length: 190 Number of Matches: 1

**Related Information**

[Structure](#) - 3D structure displays

Range 1: 116 to 126 [GenPept](#) [Graphics](#)

Next Match Previous Match

| Score         | Expect | Identities  | Positives   | Gaps     |
|---------------|--------|-------------|-------------|----------|
| 36.3 bits(78) | 0.19   | 11/11(100%) | 11/11(100%) | 0/11(0%) |

Query 1 RANLTVLLRG 11  
 Sbjct 116 RANLTVLLRG 126

Download [GenPept](#) [Graphics](#)

Next Previous Descriptions

**Chain A, Crystal Structure Of Alpha I Domain In Complex With Icam-1**

Sequence ID: [gi|28373771|pdb|1MQ8|A](#) Length: 291 Number of Matches: 1

[▶ See 1 more title\(s\)](#)

**Related Information**

[Structure](#) - 3D structure displays

[Identical Proteins](#) - Proteins identical to the subject

Range 1: 116 to 126 [GenPept](#) [Graphics](#)

Next Match Previous Match

| Score         | Expect | Identities  | Positives   | Gaps     |
|---------------|--------|-------------|-------------|----------|
| 36.3 bits(78) | 0.20   | 11/11(100%) | 11/11(100%) | 0/11(0%) |

Query 1 RANLTVLLRG 11  
 Sbjct 116 RANLTVLLRG 126

BLAST is a registered trademark of the National Library of Medicine.

▶ [NCBI/ BLAST/ blastp suite/ Formatting Results - BVGXJJG701R](#)

 **Your search parameters were adjusted to search for a short input sequence.**  
[Edit and Resubmit](#) | [Save Search Strategies](#) | [▶ Formatting options](#) | [▶ Download](#)
[YouTube](#) [How to read this page](#) [Blast report description](#)

### ICAM1\_RLNPTVTYGDSSFSKA\_Mod

**RID** [BVGXJJG701R](#) (Expires on 01-21 09:55 am)  
**Query ID** |cl|386285      **Database Name** nr  
**Description** None      **Description** All non-redundant GenBank CDS translations+PDB+SwissProt+PIR+PRF excluding environmental samples from WGS projects  
**Molecule type** amino acid      **Program** BLASTP 2.2.30+ [▶ Citation](#)  
**Query Length** 17

Other reports: [▶ Search Summary](#) [[Taxonomy reports](#)] [[Distance tree of results](#)] [[Related Structures](#)] [[Multiple alignment](#)]

### **Graphic Summary**

 [Show Conserved Domains](#)

No putative conserved domains have been detected

Distribution of 107 Blast Hits on the Query Sequence 

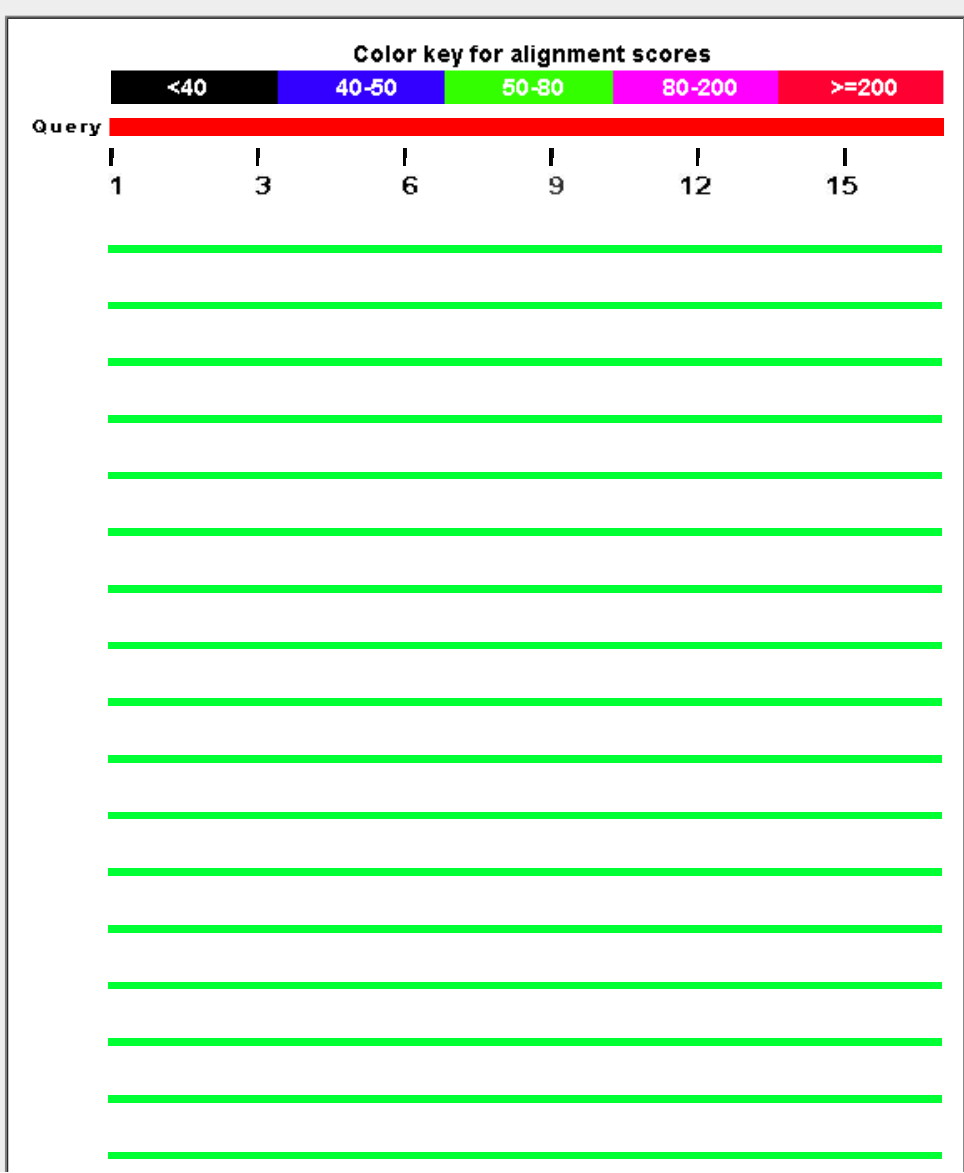

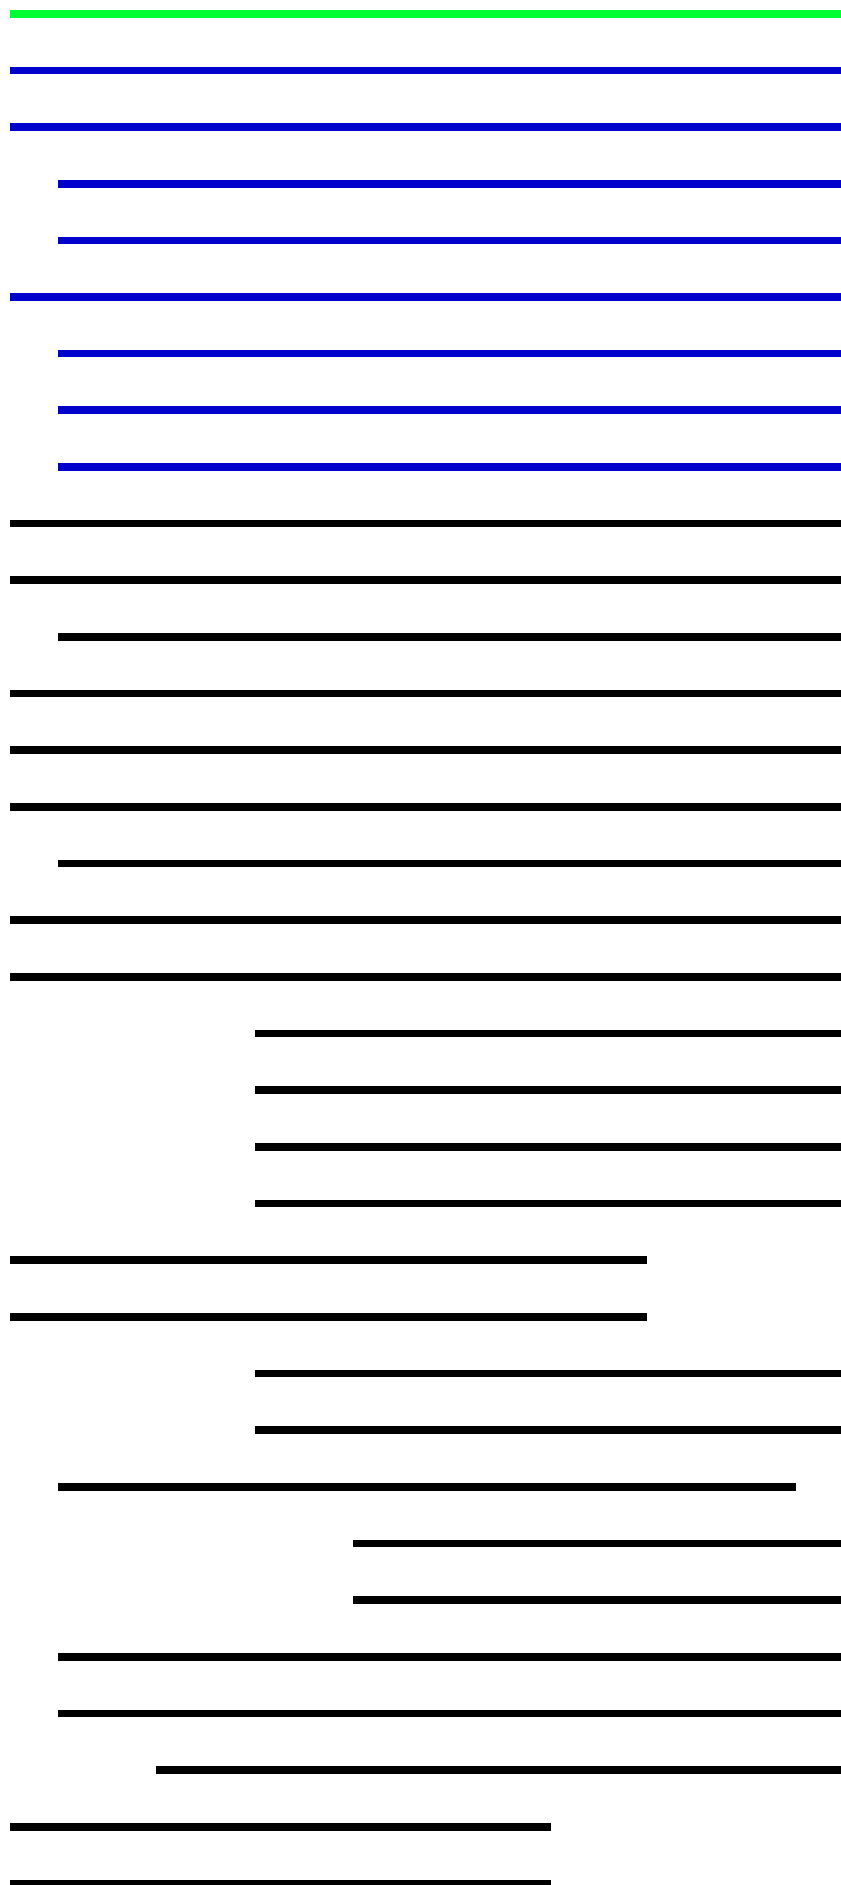

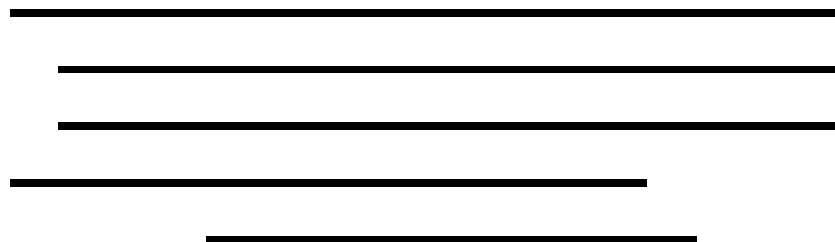

## Descriptions

### Sequences producing significant alignments:

Select: [All](#) [None](#) Selected:0

| Alignments                                                                                     | Download  | GenPept     | Graphics    | Distance tree of results | Multiple alignment |                                |  |
|------------------------------------------------------------------------------------------------|-----------|-------------|-------------|--------------------------|--------------------|--------------------------------|--|
| Description                                                                                    | Max score | Total score | Query cover | E value                  | Ident              | Accession                      |  |
| <a href="#">Chain A, Structural Plasticity In Igsf Domain 4 Of Icam-1 Mediates Cell Surfac</a> | 53.2      | 53.2        | 100%        | 9e-07                    | 94%                | <a href="#">2OZ4_A</a>         |  |
| <a href="#">Chain A, The Crystal Structure Of Icam-1 D3-D5 Fragment [Homo sapiens]</a>         | 53.2      | 53.2        | 100%        | 9e-07                    | 94%                | <a href="#">1P53_A</a>         |  |
| <a href="#">cell surface glycoprotein [Homo sapiens]</a>                                       | 53.2      | 53.2        | 100%        | 9e-07                    | 94%                | <a href="#">AAA60393.1</a>     |  |
| <a href="#">Chain A, Crystal Structure Of Alpha I Domain In Complex With Icam-1 [Homo</a>      | 53.2      | 53.2        | 100%        | 9e-07                    | 94%                | <a href="#">1MQ8_A</a>         |  |
| <a href="#">unnamed protein product [Homo sapiens]</a>                                         | 53.2      | 53.2        | 100%        | 9e-07                    | 94%                | <a href="#">BAG62944.1</a>     |  |
| <a href="#">unnamed protein product [Homo sapiens]</a>                                         | 53.2      | 53.2        | 100%        | 1e-06                    | 94%                | <a href="#">BAG60348.1</a>     |  |
| <a href="#">unnamed protein product [Homo sapiens]</a>                                         | 53.2      | 53.2        | 100%        | 1e-06                    | 94%                | <a href="#">BAG61077.1</a>     |  |
| <a href="#">Chain I, Cryo-Em Structure Of Human Coxsackievirus A21 Complexed With F</a>        | 53.2      | 53.2        | 100%        | 1e-06                    | 94%                | <a href="#">1Z7Z_I</a>         |  |
| <a href="#">intercellular adhesion molecule 1 [Pan troglodytes]</a>                            | 53.2      | 53.2        | 100%        | 1e-06                    | 94%                | <a href="#">AAA35415.1</a>     |  |
| <a href="#">intercellular adhesion molecule 1 [Homo sapiens]</a>                               | 53.2      | 53.2        | 100%        | 1e-06                    | 94%                | <a href="#">AAQ14902.1</a>     |  |
| <a href="#">intercellular adhesion molecule-1 precursor [Homo sapiens]</a>                     | 53.2      | 53.2        | 100%        | 1e-06                    | 94%                | <a href="#">AAA52709.1</a>     |  |
| <a href="#">PREDICTED: intercellular adhesion molecule 1 [Pan paniscus]</a>                    | 53.2      | 53.2        | 100%        | 1e-06                    | 94%                | <a href="#">XP_003809639.1</a> |  |
| <a href="#">intercellular adhesion molecule 1 precursor [Gorilla gorilla]</a>                  | 53.2      | 53.2        | 100%        | 1e-06                    | 94%                | <a href="#">NP_001266532.1</a> |  |
| <a href="#">intercellular adhesion molecule 1 precursor [Pan troglodytes]</a>                  | 53.2      | 53.2        | 100%        | 1e-06                    | 94%                | <a href="#">NP_001009946.1</a> |  |
| <a href="#">intercellular adhesion molecule 1 precursor [Homo sapiens]</a>                     | 53.2      | 53.2        | 100%        | 1e-06                    | 94%                | <a href="#">NP_000192.2</a>    |  |
| <a href="#">intercellular adhesion molecule 1 [Homo sapiens]</a>                               | 53.2      | 53.2        | 100%        | 1e-06                    | 94%                | <a href="#">AAQ14901.1</a>     |  |
| <a href="#">Homo sapiens intercellular adhesion molecule 1 (CD54), human rhinovirus rec</a>    | 53.2      | 53.2        | 100%        | 1e-06                    | 94%                | <a href="#">AAP36234.1</a>     |  |
| <a href="#">Snap ICAM-1 fusion protein [synthetic construct]</a>                               | 53.2      | 53.2        | 100%        | 1e-06                    | 94%                | <a href="#">AIZ77117.1</a>     |  |
| <a href="#">PREDICTED: intercellular adhesion molecule 1 [Pongo abelii]</a>                    | 43.9      | 43.9        | 100%        | 0.001                    | 88%                | <a href="#">XP_002828698.2</a> |  |
| <a href="#">intercellular adhesion molecule 1 [Pongo pygmaeus]</a>                             | 43.9      | 43.9        | 100%        | 0.001                    | 88%                | <a href="#">AAQ14904.1</a>     |  |
| <a href="#">PREDICTED: intercellular adhesion molecule 1 [Papio anubis]</a>                    | 42.6      | 42.6        | 94%         | 0.003                    | 81%                | <a href="#">XP_009191725.1</a> |  |
| <a href="#">PREDICTED: intercellular adhesion molecule 1 [Rhinopithecus roxellana]</a>         | 42.2      | 42.2        | 94%         | 0.005                    | 81%                | <a href="#">XP_010372081.1</a> |  |
| <a href="#">PREDICTED: intercellular adhesion molecule 1 [Nomascus leucogenys]</a>             | 41.4      | 41.4        | 100%        | 0.009                    | 82%                | <a href="#">XP_003275780.1</a> |  |
| <a href="#">PREDICTED: intercellular adhesion molecule 1 [Chlorocebus sabaeus]</a>             | 40.1      | 40.1        | 94%         | 0.023                    | 75%                | <a href="#">XP_007993410.1</a> |  |
| <a href="#">intercellular adhesion molecule 1 precursor [Macaca mulatta]</a>                   | 40.1      | 40.1        | 94%         | 0.023                    | 75%                | <a href="#">NP_001040600.1</a> |  |
| <a href="#">Intercellular adhesion molecule 1 [Macaca mulatta]</a>                             | 40.1      | 40.1        | 94%         | 0.023                    | 75%                | <a href="#">EHH29617.1</a>     |  |
| <a href="#">PREDICTED: intercellular adhesion molecule 1 [Tarsius syrichta]</a>                | 39.7      | 39.7        | 100%        | 0.031                    | 71%                | <a href="#">XP_008058814.1</a> |  |
| <a href="#">PREDICTED: intercellular adhesion molecule 1 [Ceratothrium simum simum]</a>        | 36.7      | 36.7        | 100%        | 0.29                     | 76%                | <a href="#">XP_004442677.1</a> |  |
| <a href="#">PREDICTED: intercellular adhesion molecule 1 [Macaca fascicularis]</a>             | 35.0      | 35.0        | 94%         | 1.0                      | 69%                | <a href="#">XP_005587991.1</a> |  |



|                                                                                                 |      |      |      |     |      |                                |
|-------------------------------------------------------------------------------------------------|------|------|------|-----|------|--------------------------------|
| <a href="#">PREDICTED: intercellular adhesion molecule 1 [Ictidomys tridecemlineatus]</a>       | 35.0 | 35.0 | 100% | 1.0 | 71%  | <a href="#">XP_005336176.1</a> |
| <a href="#">PREDICTED: intercellular adhesion molecule 1 [Balaenoptera acutorostrata s</a>      | 34.1 | 34.1 | 100% | 1.9 | 71%  | <a href="#">XP_007169059.1</a> |
| <a href="#">Intercellular adhesion molecule 1 [Heterocephalus glaber]</a>                       | 33.7 | 33.7 | 100% | 2.6 | 71%  | <a href="#">EHB03343.1</a>     |
| <a href="#">PREDICTED: intercellular adhesion molecule 1 [Saimiri boliviensis boliviensis]</a>  | 33.7 | 33.7 | 94%  | 2.6 | 75%  | <a href="#">XP_003938996.1</a> |
| <a href="#">PREDICTED: intercellular adhesion molecule 1 [Heterocephalus glaber]</a>            | 33.7 | 33.7 | 100% | 2.6 | 71%  | <a href="#">XP_004865541.1</a> |
| <a href="#">PREDICTED: LOW QUALITY PROTEIN: intercellular adhesion molecule 1 [H</a>            | 33.7 | 33.7 | 100% | 2.6 | 71%  | <a href="#">XP_004885318.1</a> |
| <a href="#">hypothetical protein [Bartonella queenslandensis]</a>                               | 32.0 | 32.0 | 70%  | 7.9 | 83%  | <a href="#">WP_039760587.1</a> |
| <a href="#">hypothetical protein [Bartonella rattimassiliensis]</a>                             | 32.0 | 32.0 | 70%  | 7.9 | 83%  | <a href="#">WP_007347503.1</a> |
| <a href="#">hypothetical protein [Bartonella elizabethae]</a>                                   | 32.0 | 32.0 | 70%  | 7.9 | 83%  | <a href="#">WP_005774841.1</a> |
| <a href="#">hypothetical protein [Bartonella tribocorum]</a>                                    | 32.0 | 32.0 | 70%  | 7.9 | 83%  | <a href="#">WP_012232107.1</a> |
| <a href="#">TonB-dependent heme/hemoglobin receptor family protein [Bartonella schoen</a>       | 32.0 | 32.0 | 76%  | 8.9 | 67%  | <a href="#">CBI81923.1</a>     |
| <a href="#">outer membrane hemin receptor [Bartonella schoenbuchensis]</a>                      | 32.0 | 32.0 | 76%  | 8.9 | 67%  | <a href="#">CDP79874.1</a>     |
| <a href="#">hypothetical protein [Bartonella taylorii]</a>                                      | 31.6 | 31.6 | 70%  | 11  | 75%  | <a href="#">WP_004861272.1</a> |
| <a href="#">hypothetical protein [Bartonella sp. DB5-6]</a>                                     | 31.6 | 31.6 | 70%  | 11  | 75%  | <a href="#">WP_007553558.1</a> |
| <a href="#">hypothetical protein NDAI_0A00940 [Naumovozyma dairenensis CBS 421]</a>             | 31.6 | 31.6 | 88%  | 12  | 61%  | <a href="#">XP_003667495.1</a> |
| <a href="#">hypothetical protein [Bartonella sp. R4(2010)]</a>                                  | 31.2 | 31.2 | 58%  | 15  | 90%  | <a href="#">WP_019220110.1</a> |
| <a href="#">hypothetical protein [Bartonella birtlesii]</a>                                     | 31.2 | 31.2 | 58%  | 15  | 90%  | <a href="#">WP_006590415.1</a> |
| <a href="#">PREDICTED: intercellular adhesion molecule 1 [Callithrix jacchus]</a>               | 31.2 | 31.2 | 94%  | 16  | 69%  | <a href="#">XP_008985482.1</a> |
| <a href="#">PREDICTED: intercellular adhesion molecule 1 [Octodon degus]</a>                    | 31.2 | 31.2 | 94%  | 16  | 75%  | <a href="#">XP_004633061.1</a> |
| <a href="#">hypothetical protein [Streptomyces sp. NRRL F-525]</a>                              | 31.2 | 31.2 | 82%  | 17  | 57%  | <a href="#">WP_033281104.1</a> |
| <a href="#">nucleotide pyrophosphatase [Bifidobacterium saguini]</a>                            | 30.8 | 30.8 | 64%  | 22  | 82%  | <a href="#">WP_033890129.1</a> |
| <a href="#">ATP-dependent DNA helicase RecQ [Cytophaga fermentans DSM 9555]</a>                 | 30.8 | 30.8 | 64%  | 23  | 83%  | <a href="#">GAF04645.1</a>     |
| <a href="#">PREDICTED: intercellular adhesion molecule 1 [Myotis lucifugus]</a>                 | 30.3 | 30.3 | 100% | 30  | 59%  | <a href="#">XP_006104121.1</a> |
| <a href="#">PREDICTED: intercellular adhesion molecule 1 isoform X2 [Chinchilla laniger</a>     | 30.3 | 30.3 | 94%  | 30  | 69%  | <a href="#">XP_005405644.1</a> |
| <a href="#">PREDICTED: intercellular adhesion molecule 1 isoform X1 [Chinchilla laniger</a>     | 30.3 | 30.3 | 94%  | 30  | 69%  | <a href="#">XP_005405643.1</a> |
| <a href="#">beta-galactosidase [Streptomyces violaceusniger]</a>                                | 30.3 | 30.3 | 76%  | 31  | 77%  | <a href="#">WP_014056372.1</a> |
| <a href="#">hypothetical protein [Actinobacillus capsulatus]</a>                                | 29.9 | 29.9 | 58%  | 40  | 83%  | <a href="#">WP_018651119.1</a> |
| <a href="#">hypothetical protein [Bacteroides finegoldii]</a>                                   | 29.9 | 29.9 | 58%  | 41  | 80%  | <a href="#">WP_007756738.1</a> |
| <a href="#">putative tetratricopeptide repeat-containing domain protein [Bacteroides finegc</a> | 29.9 | 29.9 | 58%  | 41  | 80%  | <a href="#">WP_022275680.1</a> |
| <a href="#">hypothetical protein [Bacteroides finegoldii]</a>                                   | 29.9 | 29.9 | 58%  | 41  | 80%  | <a href="#">WP_007767617.1</a> |
| <a href="#">endoglucanase [Streptomyces sp. NRRL F-525]</a>                                     | 29.9 | 29.9 | 76%  | 41  | 77%  | <a href="#">WP_033281181.1</a> |
| <a href="#">hypothetical protein [Rhizobiales bacterium YIM 77505]</a>                          | 29.9 | 29.9 | 58%  | 42  | 71%  | <a href="#">WP_037015194.1</a> |
| <a href="#">excinuclease ABC subunit A [Corynebacterium massiliense]</a>                        | 29.9 | 29.9 | 88%  | 42  | 57%  | <a href="#">WP_022863416.1</a> |
| <a href="#">adhesion exoprotein [Pediococcus pentosaceus]</a>                                   | 29.9 | 197  | 76%  | 42  | 58%  | <a href="#">WP_011672852.1</a> |
| <a href="#">hypothetical protein [Bartonella grahamii]</a>                                      | 29.5 | 29.5 | 70%  | 52  | 75%  | <a href="#">WP_015856692.1</a> |
| <a href="#">hypothetical protein [Bartonella koehlerae]</a>                                     | 29.5 | 29.5 | 70%  | 53  | 75%  | <a href="#">WP_034460029.1</a> |
| <a href="#">hypothetical protein [Bartonella henselae]</a>                                      | 29.5 | 29.5 | 70%  | 53  | 75%  | <a href="#">WP_038525266.1</a> |
| <a href="#">hypothetical protein [Bartonella henselae]</a>                                      | 29.5 | 29.5 | 70%  | 53  | 75%  | <a href="#">WP_034454929.1</a> |
| <a href="#">hypothetical protein [Bartonella senegalensis]</a>                                  | 29.5 | 29.5 | 70%  | 53  | 75%  | <a href="#">WP_019222025.1</a> |
| <a href="#">hypothetical protein [Bartonella henselae]</a>                                      | 29.5 | 29.5 | 70%  | 53  | 75%  | <a href="#">WP_011181121.1</a> |
| <a href="#">hypothetical protein [Bartonella alsatica]</a>                                      | 29.5 | 29.5 | 70%  | 53  | 75%  | <a href="#">WP_005864603.1</a> |
| <a href="#">hypothetical protein [Inquilinus limosus]</a>                                       | 29.5 | 29.5 | 47%  | 55  | 100% | <a href="#">WP_034830816.1</a> |
| <a href="#">PREDICTED: LOW QUALITY PROTEIN: intercellular adhesion molecule 1 [C</a>            | 29.5 | 29.5 | 94%  | 56  | 69%  | <a href="#">XP_003460914.2</a> |
| <a href="#">MULTISPECIES: type VI secretion protein VgrG [Enterobacter]</a>                     | 29.5 | 29.5 | 70%  | 56  | 79%  | <a href="#">WP_032648936.1</a> |
| <a href="#">hypothetical protein CHLNCDRAFT_58365 [Chlorella variabilis]</a>                    | 29.5 | 29.5 | 58%  | 57  | 80%  | <a href="#">XP_005846113.1</a> |

|                                                                                                           |      |      |      |     |      |                                |
|-----------------------------------------------------------------------------------------------------------|------|------|------|-----|------|--------------------------------|
| <a href="#">Tubulin alpha-2/alpha-4 chain [Cerapachys biroii]</a>                                         | 29.1 | 29.1 | 64%  | 68  | 82%  | <a href="#">EZA57249.1</a>     |
| <a href="#">hypothetical protein [Bacteroides fragilis]</a>                                               | 29.1 | 29.1 | 64%  | 74  | 82%  | <a href="#">WP_005811591.1</a> |
| <a href="#">hypothetical protein [Bacteroides fragilis]</a>                                               | 29.1 | 29.1 | 64%  | 74  | 82%  | <a href="#">WP_032535354.1</a> |
| <a href="#">polysaccharide deacetylase-like protein [Cytophaga hutchinsonii]</a>                          | 29.1 | 29.1 | 52%  | 76  | 89%  | <a href="#">WP_011584100.1</a> |
| <a href="#">Eukaryotic aspartyl protease family protein, putative [Theobroma cacao]</a>                   | 29.1 | 29.1 | 52%  | 77  | 89%  | <a href="#">XP_007029843.1</a> |
| <a href="#">tRNA adenylyltransferase [Frankia sp. QA3]</a>                                                | 29.1 | 29.1 | 47%  | 77  | 100% | <a href="#">WP_009741483.1</a> |
| <a href="#">polynucleotide adenylyltransferase/metal dependent phosphohydrolase [Frankia sp. BMG5.12]</a> | 29.1 | 29.1 | 47%  | 77  | 100% | <a href="#">WP_006543050.1</a> |
| <a href="#">poly(A) polymerase [Frankia sp. BMG5.12]</a>                                                  | 29.1 | 29.1 | 47%  | 77  | 100% | <a href="#">WP_018636676.1</a> |
| <a href="#">PREDICTED: intercellular adhesion molecule 1 [Lipotes vexillifer]</a>                         | 29.1 | 29.1 | 100% | 77  | 65%  | <a href="#">XP_007460718.1</a> |
| <a href="#">hypothetical protein [Bacteroides sp. UW]</a>                                                 | 29.1 | 29.1 | 64%  | 77  | 82%  | <a href="#">WP_033572567.1</a> |
| <a href="#">hypothetical protein [Bacteroides fragilis]</a>                                               | 29.1 | 29.1 | 64%  | 77  | 82%  | <a href="#">WP_032543005.1</a> |
| <a href="#">hypothetical protein [Bacteroides fragilis]</a>                                               | 29.1 | 29.1 | 64%  | 77  | 82%  | <a href="#">WP_032543004.1</a> |
| <a href="#">hypothetical protein [Bacteroides fragilis]</a>                                               | 29.1 | 29.1 | 64%  | 77  | 82%  | <a href="#">WP_032530802.1</a> |
| <a href="#">hypothetical protein [Bacteroides fragilis]</a>                                               | 29.1 | 29.1 | 64%  | 77  | 82%  | <a href="#">WP_005811589.1</a> |
| <a href="#">vanomycin resistance protein VanB [Clostridiales bacterium 1_7_47FAA]</a>                     | 29.1 | 29.1 | 52%  | 77  | 89%  | <a href="#">WP_008716619.1</a> |
| <a href="#">vanomycin resistance protein VanB [Clostridiales bacterium VE202-28]</a>                      | 29.1 | 29.1 | 52%  | 77  | 89%  | <a href="#">WP_025487055.1</a> |
| <a href="#">Ig domain protein group 2 domain protein [Gemmatimonadetes bacterium KB5]</a>                 | 29.1 | 29.1 | 64%  | 77  | 82%  | <a href="#">AHG89512.1</a>     |
| <a href="#">hypothetical protein J421_2485 [Gemmatimonadetes bacterium KBS708]</a>                        | 29.1 | 29.1 | 64%  | 77  | 82%  | <a href="#">AHG90022.1</a>     |
| <a href="#">outer membrane hemin receptor [Bartonella bovis]</a>                                          | 29.1 | 29.1 | 76%  | 77  | 60%  | <a href="#">WP_010702223.1</a> |
| <a href="#">virulence protein E [Corynebacterium ulcerans]</a>                                            | 29.1 | 29.1 | 52%  | 78  | 89%  | <a href="#">WP_013911548.1</a> |
| <a href="#">Ig domain protein group 2 domain protein [Gemmatimonadetes bacterium KB5]</a>                 | 29.1 | 29.1 | 64%  | 78  | 82%  | <a href="#">AHG90021.1</a>     |
| <a href="#">thermostable neutral protease NprT precursor [Cytophaga fermentans DSM 9]</a>                 | 29.1 | 29.1 | 52%  | 78  | 89%  | <a href="#">GAF04339.1</a>     |
| <a href="#">hypothetical protein [Micavibrio aeruginosavorus]</a>                                         | 29.1 | 29.1 | 76%  | 78  | 69%  | <a href="#">WP_015468607.1</a> |
| <a href="#">hypothetical protein [Bartonella washoensis]</a>                                              | 28.6 | 28.6 | 58%  | 99  | 80%  | <a href="#">WP_006924877.1</a> |
| <a href="#">hypothetical protein [Bartonella washoensis]</a>                                              | 28.6 | 28.6 | 58%  | 99  | 80%  | <a href="#">WP_006924204.1</a> |
| <a href="#">hypothetical protein SXBG_00145 [Synechococcus phage S-CAM1]</a>                              | 28.6 | 28.6 | 88%  | 103 | 43%  | <a href="#">YP_007673059.1</a> |

## Alignments

[Download](#) [GenPept](#) [Graphics](#)

[Next](#) [Previous](#) [Descriptions](#)

### Chain A, Structural Plasticity In Igsf Domain 4 Of Icam-1 Mediates Cell Surface Dimerization

Sequence ID: [pdb|2QZ4|A](#) Length: 265 Number of Matches: 1

Range 1: 46 to 62 [GenPept](#) [Graphics](#)

[Next Match](#) [Previous Match](#)

| Score          | Expect | Identities | Positives   | Gaps     |
|----------------|--------|------------|-------------|----------|
| 53.2 bits(118) | 9e-07  | 16/17(94%) | 17/17(100%) | 0/17(0%) |

Query 1 RLNPTVTYGDDSFSAKA 17  
 RLNPTVTYG+DSFSAKA  
 Sbjct 46 RLNPTVTYGNDSFSAKA 62

#### Related Information

[Structure](#) - 3D structure displays

[Download](#) [GenPept](#) [Graphics](#)

[Next](#) [Previous](#) [Descriptions](#)

### Chain A, The Crystal Structure Of Icam-1 D3-D5 Fragment

Sequence ID: [pdb|1P53|A](#) Length: 266 Number of Matches: 1

[See 1 more title\(s\)](#)

Range 1: 47 to 63 [GenPept](#) [Graphics](#)

[Next Match](#) [Previous Match](#)

| Score          | Expect | Identities | Positives   | Gaps     |
|----------------|--------|------------|-------------|----------|
| 53.2 bits(118) | 9e-07  | 16/17(94%) | 17/17(100%) | 0/17(0%) |

#### Related Information

[Structure](#) - 3D structure displays

[Identical Proteins](#) - Proteins

identical to the subject

Query 1 RLNPTVTYGDSDSFAKA 17  
RLNPTVTYGDSDSFAKA  
Sbjct 47 RLNPTVTYGDSDSFAKA 63

[Download](#) [GenPept](#) [Graphics](#)

[Next](#) [Previous](#) [Descriptions](#)

cell surface glycoprotein, partial [Homo sapiens]

Sequence ID: [gb|AAA60393.1](#) Length: 276 Number of Matches: 1

Range 1: 2 to 18 [GenPept](#) [Graphics](#)

[Next Match](#) [Previous Match](#)

| Score          | Expect | Identities | Positives   | Gaps     |
|----------------|--------|------------|-------------|----------|
| 53.2 bits(118) | 9e-07  | 16/17(94%) | 17/17(100%) | 0/17(0%) |

Query 1 RLNPTVTYGDSDSFAKA 17  
RLNPTVTYGDSDSFAKA  
Sbjct 2 RLNPTVTYGDSDSFAKA 18

**Related Information**

[Gene](#) - associated gene details

[Download](#) [GenPept](#) [Graphics](#)

[Next](#) [Previous](#) [Descriptions](#)

Chain A, Crystal Structure Of Alpha I Domain In Complex With Icam-1

Sequence ID: [pdb|1MQ8|A](#) Length: 291 Number of Matches: 1

[See 1 more title\(s\)](#)

Range 1: 231 to 247 [GenPept](#) [Graphics](#)

[Next Match](#) [Previous Match](#)

| Score          | Expect | Identities | Positives   | Gaps     |
|----------------|--------|------------|-------------|----------|
| 53.2 bits(118) | 9e-07  | 16/17(94%) | 17/17(100%) | 0/17(0%) |

Query 1 RLNPTVTYGDSDSFAKA 17  
RLNPTVTYGDSDSFAKA  
Sbjct 231 RLNPTVTYGDSDSFAKA 247

**Related Information**

[Structure](#) - 3D structure displays  
[Identical Proteins](#) - Proteins  
identical to the subject

[Download](#) [GenPept](#) [Graphics](#)

[Next](#) [Previous](#) [Descriptions](#)

unnamed protein product [Homo sapiens]

Sequence ID: [dbj|BAG62944.1](#) Length: 310 Number of Matches: 1

Range 1: 36 to 52 [GenPept](#) [Graphics](#)

[Next Match](#) [Previous Match](#)

| Score          | Expect | Identities | Positives   | Gaps     |
|----------------|--------|------------|-------------|----------|
| 53.2 bits(118) | 9e-07  | 16/17(94%) | 17/17(100%) | 0/17(0%) |

Query 1 RLNPTVTYGDSDSFAKA 17  
RLNPTVTYGDSDSFAKA  
Sbjct 36 RLNPTVTYGDSDSFAKA 52

**Related Information**

[Gene](#) - associated gene details

BLAST is a registered trademark of the National Library of Medicine.

NCBI/ BLAST/ blastp suite/ Formatting Results - B9FFSHWS01R

**i** Your search parameters were adjusted to search for a short input sequence.

[Edit and Resubmit](#) [Save Search Strategies](#) [▶ Formatting options](#) [▶ Download](#)

[YouTube](#) [How to read this page](#) [Blast report description](#)

### ICAM1\_RLNPTVTYGNDSFSAKA\_NonMod

**RID** [B9FFSHWS01R](#) (Expires on 01-14 13:40 pm)

**Query ID** lcl|279146  
**Description** None  
**Molecule type** amino acid  
**Query Length** 17

**Database Name** nr  
**Description** All non-redundant GenBank CDS translations+PDB+SwissProt+PIR excluding environmental samples from WGS projects  
**Program** BLASTP 2.2.30+ [▶ Citation](#)

Other reports: [▶ Search Summary](#) [\[Taxonomy reports\]](#) [\[Distance tree of results\]](#) [\[Related Structures\]](#) [\[Multiple alignment\]](#)

### **G** Graphic Summary

**G** [Show Conserved Domains](#)

No putative conserved domains have been detected

Distribution of 101 Blast Hits on the Query Sequence



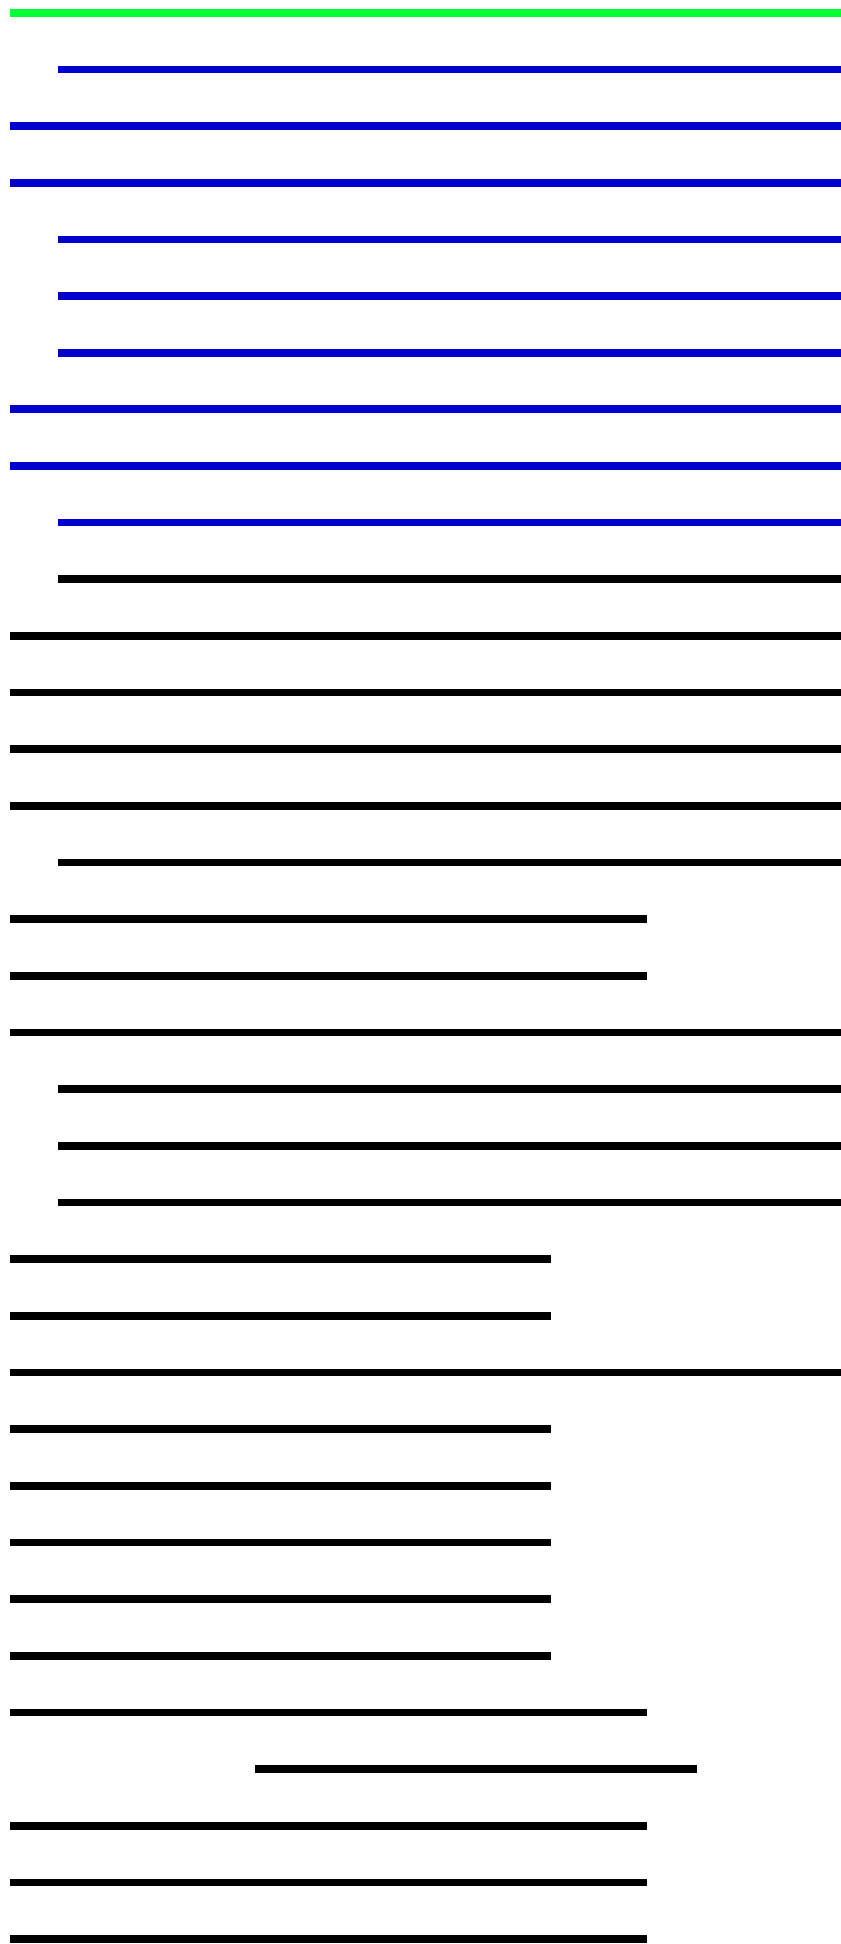

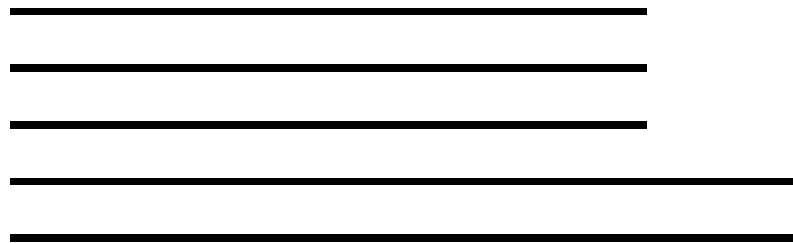

**Descriptions**

**Sequences producing significant alignments:**

Select: [All](#) [None](#) Selected:0

[Alignments](#)
[Download](#)
[GenPept](#)
[Graphics](#)
[Distance tree of results](#)
[Multiple alignment](#)

| Description                                                                          | Max score | Total score | Query cover | E value | Ident | Accession                                   |
|--------------------------------------------------------------------------------------|-----------|-------------|-------------|---------|-------|---------------------------------------------|
| <a href="#">Chain A, Structural Plasticity In Igsf Domain 4 Of Icam-1 Mediates (</a> | 55.8      | 55.8        | 100%        | 1e-07   | 100%  | <a href="#">gij158429270 2OZ4_A</a>         |
| <a href="#">Chain A, The Crystal Structure Of Icam-1 D3-D5 Fragment [Homo s</a>      | 55.8      | 55.8        | 100%        | 1e-07   | 100%  | <a href="#">gij48425199 1P53_A</a>          |
| <a href="#">cell surface glycoprotein [Homo sapiens]</a>                             | 55.8      | 55.8        | 100%        | 1e-07   | 100%  | <a href="#">gij338069 AAA60393.1</a>        |
| <a href="#">Chain A, Crystal Structure Of Alpha I Domain In Complex With Icar</a>    | 55.8      | 55.8        | 100%        | 1e-07   | 100%  | <a href="#">gij28373771 1MQ8_A</a>          |
| <a href="#">unnamed protein product [Homo sapiens]</a>                               | 55.8      | 55.8        | 100%        | 1e-07   | 100%  | <a href="#">gij194376370 BAG62944.1</a>     |
| <a href="#">unnamed protein product [Homo sapiens]</a>                               | 55.8      | 55.8        | 100%        | 1e-07   | 100%  | <a href="#">gij194388760 BAG60348.1</a>     |
| <a href="#">unnamed protein product [Homo sapiens]</a>                               | 55.8      | 55.8        | 100%        | 1e-07   | 100%  | <a href="#">gij194386534 BAG61077.1</a>     |
| <a href="#">Chain I, Cryo-Em Structure Of Human Coxsackievirus A21 Comple</a>        | 55.8      | 55.8        | 100%        | 1e-07   | 100%  | <a href="#">gij173535843 1Z7Z_I</a>         |
| <a href="#">intercellular adhesion molecule 1 [Pan troglodytes]</a>                  | 55.8      | 55.8        | 100%        | 1e-07   | 100%  | <a href="#">gij176796 AAA35415.1</a>        |
| <a href="#">intercellular adhesion molecule 1 [Homo sapiens]</a>                     | 55.8      | 55.8        | 100%        | 1e-07   | 100%  | <a href="#">gij33340675 AAQ14902.1</a>      |
| <a href="#">intercellular adhesion molecule-1 precursor [Homo sapiens]</a>           | 55.8      | 55.8        | 100%        | 1e-07   | 100%  | <a href="#">gij306896 AAA52709.1</a>        |
| <a href="#">PREDICTED: intercellular adhesion molecule 1 [Pan paniscus]</a>          | 55.8      | 55.8        | 100%        | 1e-07   | 100%  | <a href="#">gij397476504 XP_003809639.1</a> |
| <a href="#">intercellular adhesion molecule 1 precursor [Gorilla gorilla]</a>        | 55.8      | 55.8        | 100%        | 1e-07   | 100%  | <a href="#">gij525342618 NP_001266532.1</a> |
| <a href="#">intercellular adhesion molecule 1 precursor [Pan troglodytes]</a>        | 55.8      | 55.8        | 100%        | 1e-07   | 100%  | <a href="#">gij57977287 NP_001009946.1</a>  |
| <a href="#">intercellular adhesion molecule 1 precursor [Homo sapiens]</a>           | 55.8      | 55.8        | 100%        | 1e-07   | 100%  | <a href="#">gij167466198 NP_000192.2</a>    |
| <a href="#">intercellular adhesion molecule 1 [Homo sapiens]</a>                     | 55.8      | 55.8        | 100%        | 1e-07   | 100%  | <a href="#">gij33340673 AAQ14901.1</a>      |
| <a href="#">Homo sapiens intercellular adhesion molecule 1 (CD54), human rhi</a>     | 55.8      | 55.8        | 100%        | 1e-07   | 100%  | <a href="#">gij30583971 AAP36234.1</a>      |
| <a href="#">PREDICTED: intercellular adhesion molecule 1 [Rhinopithecus roxe</a>     | 44.8      | 44.8        | 94%         | 6e-04   | 88%   | <a href="#">gij724876734 XP_010372081.1</a> |
| <a href="#">PREDICTED: intercellular adhesion molecule 1 [Pongo abelii]</a>          | 43.9      | 43.9        | 100%        | 0.001   | 88%   | <a href="#">gij395750443 XP_002828698.2</a> |
| <a href="#">intercellular adhesion molecule 1 [Pongo pygmaeus]</a>                   | 43.9      | 43.9        | 100%        | 0.001   | 88%   | <a href="#">gij33340679 AAQ14904.1</a>      |
| <a href="#">PREDICTED: intercellular adhesion molecule 1 [Chlorocebus sabae</a>      | 42.6      | 42.6        | 94%         | 0.003   | 81%   | <a href="#">gij635036004 XP_007993410.1</a> |
| <a href="#">intercellular adhesion molecule 1 precursor [Macaca mulatta]</a>         | 42.6      | 42.6        | 94%         | 0.003   | 81%   | <a href="#">gij114051944 NP_001040600.1</a> |
| <a href="#">Intercellular adhesion molecule 1 [Macaca mulatta]</a>                   | 42.6      | 42.6        | 94%         | 0.003   | 81%   | <a href="#">gij355703126 EHH29617.1</a>     |
| <a href="#">PREDICTED: intercellular adhesion molecule 1 [Tarsius syrichta]</a>      | 42.2      | 42.2        | 100%        | 0.004   | 76%   | <a href="#">gij640804811 XP_008058814.1</a> |
| <a href="#">PREDICTED: intercellular adhesion molecule 1 [Nomascus leucoge</a>       | 41.4      | 41.4        | 100%        | 0.008   | 82%   | <a href="#">gij332253293 XP_003275780.1</a> |
| <a href="#">PREDICTED: intercellular adhesion molecule 1 [Papio anubis]</a>          | 40.1      | 40.1        | 94%         | 0.022   | 75%   | <a href="#">gij685605924 XP_009191725.1</a> |
| <a href="#">PREDICTED: intercellular adhesion molecule 1 [Macaca fasciculari</a>     | 37.5      | 37.5        | 94%         | 0.15    | 75%   | <a href="#">gij544508624 XP_005587991.1</a> |
| <a href="#">PREDICTED: intercellular adhesion molecule 1 [Ceratotherium sim</a>      | 36.7      | 36.7        | 100%        | 0.27    | 76%   | <a href="#">gij478537121 XP_004442677.1</a> |

|                                                                                                           |      |      |      |      |      |                                             |
|-----------------------------------------------------------------------------------------------------------|------|------|------|------|------|---------------------------------------------|
| Intercellular adhesion molecule 1 [Heterocephalus glaber]                                                 | 35.0 | 35.0 | 100% | 0.95 | 71%  | <a href="#">gij351700424 EHB03343.1</a>     |
| <a href="#">PREDICTED: intercellular adhesion molecule 1 [Heterocephalus glaber]</a>                      | 35.0 | 35.0 | 100% | 0.95 | 71%  | <a href="#">gij513008224 XP_004865541.1</a> |
| <a href="#">PREDICTED: LOW QUALITY PROTEIN: intercellular adhesion molecule 1 [Heterocephalus glaber]</a> | 35.0 | 35.0 | 100% | 0.95 | 71%  | <a href="#">gij512843756 XP_004885318.1</a> |
| <a href="#">PREDICTED: intercellular adhesion molecule 1 [Saimiri boliviensis]</a>                        | 34.6 | 34.6 | 94%  | 1.3  | 75%  | <a href="#">gij403296180 XP_003938996.1</a> |
| <a href="#">TonB-dependent heme/hemoglobin receptor family protein [Bartonella</a>                        | 34.6 | 34.6 | 76%  | 1.3  | 73%  | <a href="#">gij319408270 CBI81923.1</a>     |
| <a href="#">outer membrane hemin receptor [Bartonella schoenbuchensis]</a>                                | 34.6 | 34.6 | 76%  | 1.3  | 73%  | <a href="#">gij631776143 CDP79874.1</a>     |
| <a href="#">PREDICTED: intercellular adhesion molecule 1 [Ictidomys tridecemlineatus]</a>                 | 33.3 | 33.3 | 100% | 3.3  | 71%  | <a href="#">gij532101112 XP_005336176.1</a> |
| <a href="#">PREDICTED: intercellular adhesion molecule 1 isoform X2 [Chinchilla</a>                       | 32.9 | 32.9 | 94%  | 4.5  | 75%  | <a href="#">gij533185214 XP_005405644.1</a> |
| <a href="#">PREDICTED: intercellular adhesion molecule 1 isoform X1 [Chinchilla</a>                       | 32.9 | 32.9 | 94%  | 4.5  | 75%  | <a href="#">gij533185212 XP_005405643.1</a> |
| <a href="#">PREDICTED: intercellular adhesion molecule 1 [Callithrix jacchus]</a>                         | 32.0 | 32.0 | 94%  | 8.3  | 69%  | <a href="#">gij675757750 XP_008985482.1</a> |
| <a href="#">hypothetical protein [Bacteroides fragilis]</a>                                               | 31.6 | 31.6 | 64%  | 11   | 91%  | <a href="#">gij492329327 WP_005811591.1</a> |
| <a href="#">hypothetical protein [Bacteroides fragilis]</a>                                               | 31.6 | 31.6 | 64%  | 11   | 91%  | <a href="#">gij695337898 WP_032535354.1</a> |
| <a href="#">PREDICTED: intercellular adhesion molecule 1 [Balaenoptera acuta]</a>                         | 31.6 | 31.6 | 100% | 11   | 65%  | <a href="#">gij594631039 XP_007169059.1</a> |
| <a href="#">hypothetical protein [Bacteroides sp. UW]</a>                                                 | 31.6 | 31.6 | 64%  | 11   | 91%  | <a href="#">gij723595040 WP_033572567.1</a> |
| <a href="#">hypothetical protein [Bacteroides fragilis]</a>                                               | 31.6 | 31.6 | 64%  | 11   | 91%  | <a href="#">gij695346329 WP_032543005.1</a> |
| <a href="#">hypothetical protein [Bacteroides fragilis]</a>                                               | 31.6 | 31.6 | 64%  | 11   | 91%  | <a href="#">gij695346328 WP_032543004.1</a> |
| <a href="#">hypothetical protein [Bacteroides fragilis]</a>                                               | 31.6 | 31.6 | 64%  | 11   | 91%  | <a href="#">gij695332979 WP_032530802.1</a> |
| <a href="#">hypothetical protein [Bacteroides fragilis]</a>                                               | 31.6 | 31.6 | 64%  | 11   | 91%  | <a href="#">gij492329325 WP_005811589.1</a> |
| <a href="#">outer membrane hemin receptor [Bartonella bovis]</a>                                          | 31.6 | 31.6 | 76%  | 11   | 67%  | <a href="#">gij498388263 WP_010702223.1</a> |
| <a href="#">virulence protein E [Corynebacterium ulcerans]</a>                                            | 31.6 | 31.6 | 52%  | 11   | 100% | <a href="#">gij503677472 WP_013911548.1</a> |
| <a href="#">heme transporter CcmC [Bartonella quintana]</a>                                               | 31.2 | 31.2 | 76%  | 16   | 67%  | <a href="#">gij504736811 WP_014923913.1</a> |
| <a href="#">TonB-dependent hemoglobin/transferrin/lactoferrin receptor family p</a>                       | 31.2 | 31.2 | 76%  | 16   | 67%  | <a href="#">gij654330448 KEC59997.1</a>     |
| <a href="#">hypothetical protein Q651_01216 [Bartonella quintana BQ2-D70]</a>                             | 31.2 | 31.2 | 76%  | 16   | 67%  | <a href="#">gij572288853 ETS11689.1</a>     |
| <a href="#">heme transporter CcmC [Bartonella quintana]</a>                                               | 31.2 | 31.2 | 76%  | 16   | 67%  | <a href="#">gij499492564 WP_011179204.1</a> |
| <a href="#">heme transporter CcmC [Bartonella melophagii]</a>                                             | 31.2 | 31.2 | 76%  | 16   | 67%  | <a href="#">gij494742022 WP_007477430.1</a> |
| <a href="#">outer membrane hemin receptor [Bartonella schoenbuchensis]</a>                                | 31.2 | 31.2 | 76%  | 16   | 67%  | <a href="#">gij498389607 WP_010703528.1</a> |
| <a href="#">cephalosporin-C deacetylase [Prevotella bryantii]</a>                                         | 30.8 | 30.8 | 94%  | 21   | 38%  | <a href="#">gij493325652 WP_006282901.1</a> |
| <a href="#">acetyl xylan esterase [Prevotella bryantii]</a>                                               | 30.8 | 30.8 | 94%  | 21   | 38%  | <a href="#">gij653247601 WP_027453062.1</a> |
| <a href="#">MULTISPECIES: type VI secretion protein VgrG [Enterobacter]</a>                               | 30.8 | 30.8 | 70%  | 21   | 79%  | <a href="#">gij695721986 WP_032648936.1</a> |
| <a href="#">hypothetical protein CD33_15155 [Lysinibacillus sinduriensis BLB-1]</a>                       | 30.3 | 30.3 | 58%  | 27   | 91%  | <a href="#">gij704817868 KGR74435.1</a>     |
| <a href="#">hypothetical protein [Ureibacillus thermosphaericus]</a>                                      | 30.3 | 30.3 | 58%  | 27   | 91%  | <a href="#">gij648237934 WP_026019083.1</a> |
| <a href="#">endoglucanase [Streptomyces resistomyticificus]</a>                                           | 30.3 | 30.3 | 70%  | 28   | 83%  | <a href="#">gij662079400 WP_030042518.1</a> |
| <a href="#">PREDICTED: intercellular adhesion molecule 1 [Otolemur garnettii]</a>                         | 30.3 | 30.3 | 100% | 29   | 65%  | <a href="#">gij395851075 XP_003798092.1</a> |
| <a href="#">n-acetylmuramoyl-L-alanine amidase [Eubacterium sp. CAG:38]</a>                               | 30.3 | 30.3 | 82%  | 29   | 73%  | <a href="#">gij548214048 WP_022433505.1</a> |
| <a href="#">hypothetical protein [Bacteroides fingoldii]</a>                                              | 29.9 | 29.9 | 70%  | 38   | 75%  | <a href="#">gij495035370 WP_007760903.1</a> |
| <a href="#">beta-ketoacyl synthase [Niabella aurantiaca]</a>                                              | 29.9 | 29.9 | 100% | 39   | 71%  | <a href="#">gij517459815 WP_018630569.1</a> |
| <a href="#">hypothetical protein [Bartonella rattimassiliensis]</a>                                       | 29.5 | 29.5 | 70%  | 49   | 75%  | <a href="#">gij494588908 WP_007347503.1</a> |
| <a href="#">hypothetical protein [Bartonella elizabethae]</a>                                             | 29.5 | 29.5 | 70%  | 49   | 75%  | <a href="#">gij492193964 WP_005774841.1</a> |
| <a href="#">hypothetical protein [Bartonella tribocorum]</a>                                              | 29.5 | 29.5 | 70%  | 49   | 75%  | <a href="#">gij501189089 WP_012232107.1</a> |
| <a href="#">fimbrial protein [Lysobacter defluvi]</a>                                                     | 29.5 | 29.5 | 70%  | 49   | 83%  | <a href="#">gij652750201 WP_027070646.1</a> |
| <a href="#">3-dehydroquinate dehydratase [Roseivivax sp. 22II-s10s]</a>                                   | 29.5 | 29.5 | 82%  | 50   | 64%  | <a href="#">gij574574310 ETW11389.1</a>     |
| <a href="#">hypothetical protein [Niabella aurantiaca]</a>                                                | 29.5 | 29.5 | 76%  | 52   | 69%  | <a href="#">gij648618099 WP_026309850.1</a> |
| <a href="#">hypothetical protein P409_00850 [Inquilinus limosus MP06]</a>                                 | 29.5 | 29.5 | 47%  | 52   | 100% | <a href="#">gij699016581 KGM36053.1</a>     |
| <a href="#">endoglucanase [Streptomyces sp. NRRL F-525]</a>                                               | 29.5 | 29.5 | 76%  | 53   | 77%  | <a href="#">gij702842059 WP_033281181.1</a> |
| <a href="#">hypothetical protein [Bartonella taylorii]</a>                                                | 29.1 | 29.1 | 70%  | 68   | 67%  | <a href="#">gij490999549 WP_004861272.1</a> |

|                                                                                                 |      |      |      |    |      |                                             |
|-------------------------------------------------------------------------------------------------|------|------|------|----|------|---------------------------------------------|
| <a href="#">hypothetical protein [Bartonella sp. DB5-6]</a>                                     | 29.1 | 29.1 | 70%  | 68 | 67%  | <a href="#">gi 494818150 WP_007553558.1</a> |
| <a href="#">amino acid ABC transporter [Ketogulonicigenium vulgare]</a>                         | 29.1 | 29.1 | 58%  | 71 | 90%  | <a href="#">gi 503148425 WP_013383086.1</a> |
| <a href="#">hypothetical protein NCAS_0A01150 [Naumovozyma castellii CBS 211.10]</a>            | 29.1 | 29.1 | 52%  | 71 | 89%  | <a href="#">gi 366986599 XP_003673066.1</a> |
| <a href="#">multidrug ABC transporter ATP-binding protein [Chryseobacterium urogenitale]</a>    | 29.1 | 29.1 | 88%  | 72 | 73%  | <a href="#">gi 653130459 WP_027379845.1</a> |
| <a href="#">Intercellular adhesion molecule 1 [Myotis brandtii]</a>                             | 29.1 | 29.1 | 100% | 72 | 59%  | <a href="#">gi 521021531 EPQ03319.1</a>     |
| <a href="#">PREDICTED: intercellular adhesion molecule 1 [Myotis brandtii]</a>                  | 29.1 | 29.1 | 100% | 72 | 59%  | <a href="#">gi 554528924 XP_005859267.1</a> |
| <a href="#">dNA gyrase B subunit protein [Firmicutes bacterium CAG:103]</a>                     | 29.1 | 29.1 | 64%  | 73 | 82%  | <a href="#">gi 512388095 WP_016413966.1</a> |
| <a href="#">hypothetical protein NDAI_0A00940 [Naumovozyma dairenensis CBS 211.10]</a>          | 29.1 | 29.1 | 88%  | 73 | 56%  | <a href="#">gi 365981323 XP_003667495.1</a> |
| <a href="#">heme transporter CcmC [Bartonella rattaustaliani]</a>                               | 29.1 | 29.1 | 76%  | 73 | 67%  | <a href="#">gi 648396501 WP_026088252.1</a> |
| <a href="#">heme transporter CcmC [Bartonella tamiae]</a>                                       | 29.1 | 29.1 | 76%  | 73 | 60%  | <a href="#">gi 495314328 WP_008039076.1</a> |
| <a href="#">virulence protein E [Corynebacterium ulcerans]</a>                                  | 29.1 | 29.1 | 52%  | 73 | 89%  | <a href="#">gi 504649320 WP_014836422.1</a> |
| <a href="#">hypothetical protein [Prevotella oralis]</a>                                        | 29.1 | 29.1 | 76%  | 73 | 77%  | <a href="#">gi 565957381 WP_023983492.1</a> |
| <a href="#">hypothetical protein [Prevotella oralis]</a>                                        | 29.1 | 29.1 | 76%  | 73 | 77%  | <a href="#">gi 514977012 WP_016665216.1</a> |
| <a href="#">peptidase M16 [Prevotella oralis]</a>                                               | 29.1 | 29.1 | 76%  | 73 | 77%  | <a href="#">gi 490503902 WP_004369982.1</a> |
| <a href="#">hypothetical protein [Sphaerochaeta pleomorpha]</a>                                 | 29.1 | 50.5 | 82%  | 74 | 90%  | <a href="#">gi 504035116 WP_014269110.1</a> |
| <a href="#">SprA protein [Flavobacterium soli]</a>                                              | 29.1 | 29.1 | 82%  | 74 | 61%  | <a href="#">gi 652112013 WP_026704586.1</a> |
| <a href="#">hypothetical protein [Bartonella birtlesii]</a>                                     | 28.6 | 28.6 | 58%  | 93 | 80%  | <a href="#">gi 493638664 WP_006590415.1</a> |
| <a href="#">hypothetical protein KAFR_0E03080 [Kazachstania africana CBS 211.10]</a>            | 28.6 | 28.6 | 47%  | 98 | 100% | <a href="#">gi 410080029 XP_003957595.1</a> |
| <a href="#">MULTISPECIES: branched-chain amino acid ABC transporter permease [Bacillus sp.]</a> | 28.6 | 28.6 | 52%  | 98 | 89%  | <a href="#">gi 497479806 WP_009794004.1</a> |
| <a href="#">Similar to hypothetical protein [Botryotinia fuckeliana]: acc. no. CCE000000000</a> | 28.6 | 28.6 | 94%  | 98 | 61%  | <a href="#">gi 549054813 CCX06384.1</a>     |
| <a href="#">branched-chain amino acid ABC transporter permease [Bacillus sp.]</a>               | 28.6 | 28.6 | 52%  | 98 | 89%  | <a href="#">gi 560306555 WP_023615360.1</a> |
| <a href="#">branched-chain amino acid ABC transporter permease [Lysinibacillus sphaericus]</a>  | 28.6 | 28.6 | 52%  | 98 | 89%  | <a href="#">gi 640692002 WP_025116329.1</a> |
| <a href="#">branched-chain amino acid ABC transporter permease [Bacillus sp.]</a>               | 28.6 | 28.6 | 52%  | 98 | 89%  | <a href="#">gi 495454026 WP_008178720.1</a> |
| <a href="#">2,3-butanediol dehydrogenase [Virgibacillus halodenitrificans]</a>                  | 28.6 | 28.6 | 70%  | 98 | 50%  | <a href="#">gi 518206384 WP_019376592.1</a> |
| <a href="#">2,3-butanediol dehydrogenase [Salimicrobium sp. MJ3]</a>                            | 28.6 | 28.6 | 70%  | 98 | 50%  | <a href="#">gi 495868148 WP_008592727.1</a> |
| <a href="#">hypothetical protein SEPMUDRAFT_146579 [Sphaerulina musiva CBS 211.10]</a>          | 28.6 | 28.6 | 70%  | 98 | 75%  | <a href="#">gi 453089559 EMF17599.1</a>     |
| <a href="#">peptidase S41 [Joostella marina]</a>                                                | 28.6 | 28.6 | 52%  | 98 | 89%  | <a href="#">gi 495887111 WP_008611690.1</a> |

## Alignments

Download [GenPept](#) [Graphics](#) [Next](#) [Previous](#) [Descriptions](#)

Chain A, Structural Plasticity In Igsf Domain 4 Of Icam-1 Mediates Cell Surface Dimerization

Sequence ID: [gi|158429270|pdb|2OZ4|A](#) Length: 265 Number of Matches: 1

Range 1: 46 to 62 [GenPept](#) [Graphics](#) [Next Match](#) [Previous Match](#)

| Score          | Expect | Identities  | Positives   | Gaps     |
|----------------|--------|-------------|-------------|----------|
| 55.8 bits(124) | 1e-07  | 17/17(100%) | 17/17(100%) | 0/17(0%) |

Query 1 RLNPVTYGNDSFSAKA 17  
 RLNPVTYGNDSFSAKA  
 Sbjct 46 RLNPVTYGNDSFSAKA 62

### Related Information

[Structure](#) - 3D structure displays

Download [GenPept](#) [Graphics](#) [Next](#) [Previous](#) [Descriptions](#)

Chain A, The Crystal Structure Of Icam-1 D3-D5 Fragment

Sequence ID: [gi|48425199|pdb|1P53|A](#) Length: 266 Number of Matches: 1

[See 1 more title\(s\)](#)

Range 1: 47 to 63 [GenPept](#) [Graphics](#) [Next Match](#) [Previous Match](#)

| Score          | Expect | Identities  | Positives   | Gaps     |
|----------------|--------|-------------|-------------|----------|
| 55.8 bits(124) | 1e-07  | 17/17(100%) | 17/17(100%) | 0/17(0%) |

### Related Information

[Structure](#) - 3D structure displays

[Identical Proteins](#) - Proteins identical to the subject



Query 1 RLNPTVTYGNDSFSAKA 17  
 RLNPTVTYGNDSFSAKA  
 Sbjct 47 RLNPTVTYGNDSFSAKA 63

Download [GenPept](#) [Graphics](#)

[▼ Next](#) [▲ Previous](#) [▲ Descriptions](#)

cell surface glycoprotein, partial [Homo sapiens]

Sequence ID: [gi|338069|gb|AAA60393.1](#) Length: 276 Number of Matches: 1

Range 1: 2 to 18 [GenPept](#) [Graphics](#)

[▼ Next Match](#) [▲ Previous Match](#)

| Score          | Expect | Identities  | Positives   | Gaps     |
|----------------|--------|-------------|-------------|----------|
| 55.8 bits(124) | 1e-07  | 17/17(100%) | 17/17(100%) | 0/17(0%) |

Query 1 RLNPTVTYGNDSFSAKA 17  
 RLNPTVTYGNDSFSAKA  
 Sbjct 2 RLNPTVTYGNDSFSAKA 18

**Related Information**

[Gene](#) - associated gene details

Download [GenPept](#) [Graphics](#)

[▼ Next](#) [▲ Previous](#) [▲ Descriptions](#)

Chain A, Crystal Structure Of Alpha I Domain In Complex With Icam-1

Sequence ID: [gi|28373771|pdb|1MQ8|A](#) Length: 291 Number of Matches: 1

[▶ See 1 more title\(s\)](#)

Range 1: 231 to 247 [GenPept](#) [Graphics](#)

[▼ Next Match](#) [▲ Previous Match](#)

| Score          | Expect | Identities  | Positives   | Gaps     |
|----------------|--------|-------------|-------------|----------|
| 55.8 bits(124) | 1e-07  | 17/17(100%) | 17/17(100%) | 0/17(0%) |

Query 1 RLNPTVTYGNDSFSAKA 17  
 RLNPTVTYGNDSFSAKA  
 Sbjct 231 RLNPTVTYGNDSFSAKA 247

**Related Information**

[Structure](#) - 3D structure displays

[Identical Proteins](#) - Proteins

identical to the subject

Download [GenPept](#) [Graphics](#)

[▼ Next](#) [▲ Previous](#) [▲ Descriptions](#)

unnamed protein product [Homo sapiens]

Sequence ID: [gi|194376370|dbj|BAG62944.1](#) Length: 310 Number of Matches: 1

Range 1: 36 to 52 [GenPept](#) [Graphics](#)

[▼ Next Match](#) [▲ Previous Match](#)

| Score          | Expect | Identities  | Positives   | Gaps     |
|----------------|--------|-------------|-------------|----------|
| 55.8 bits(124) | 1e-07  | 17/17(100%) | 17/17(100%) | 0/17(0%) |

Query 1 RLNPTVTYGNDSFSAKA 17  
 RLNPTVTYGNDSFSAKA  
 Sbjct 36 RLNPTVTYGNDSFSAKA 52

**Related Information**

[Gene](#) - associated gene details

BLAST is a registered trademark of the National Library of Medicine.

NCBI/ BLAST/ blastp suite/ Formatting Results - BVGYC30R01R

Your search parameters were adjusted to search for a short input sequence.

[Edit and Resubmit](#) [Save Search Strategies](#) [Formatting options](#) [Download](#) [YouTube](#) [How to read this page](#) [Blast report description](#)

### ICAM2\_KAAPAPQEATATFDSTADRE\_Mod

RID [BVGYC30R01R](#) (Expires on 01-21 09:56 am)

Query ID |cl|4787  
 Description None  
 Molecule type amino acid  
 Query Length 20

Database Name nr  
 Description All non-redundant GenBank CDS translations+PDB+SwissProt+PIR+PRF excluding environmental samples from WGS projects  
 Program BLASTP 2.2.30+ [Citation](#)

Other reports: [Search Summary](#) [Taxonomy reports](#) [Distance tree of results](#) [Related Structures](#) [Multiple alignment](#)

### Graphic Summary

[Show Conserved Domains](#)

No putative conserved domains have been detected

Distribution of 100 Blast Hits on the Query Sequence

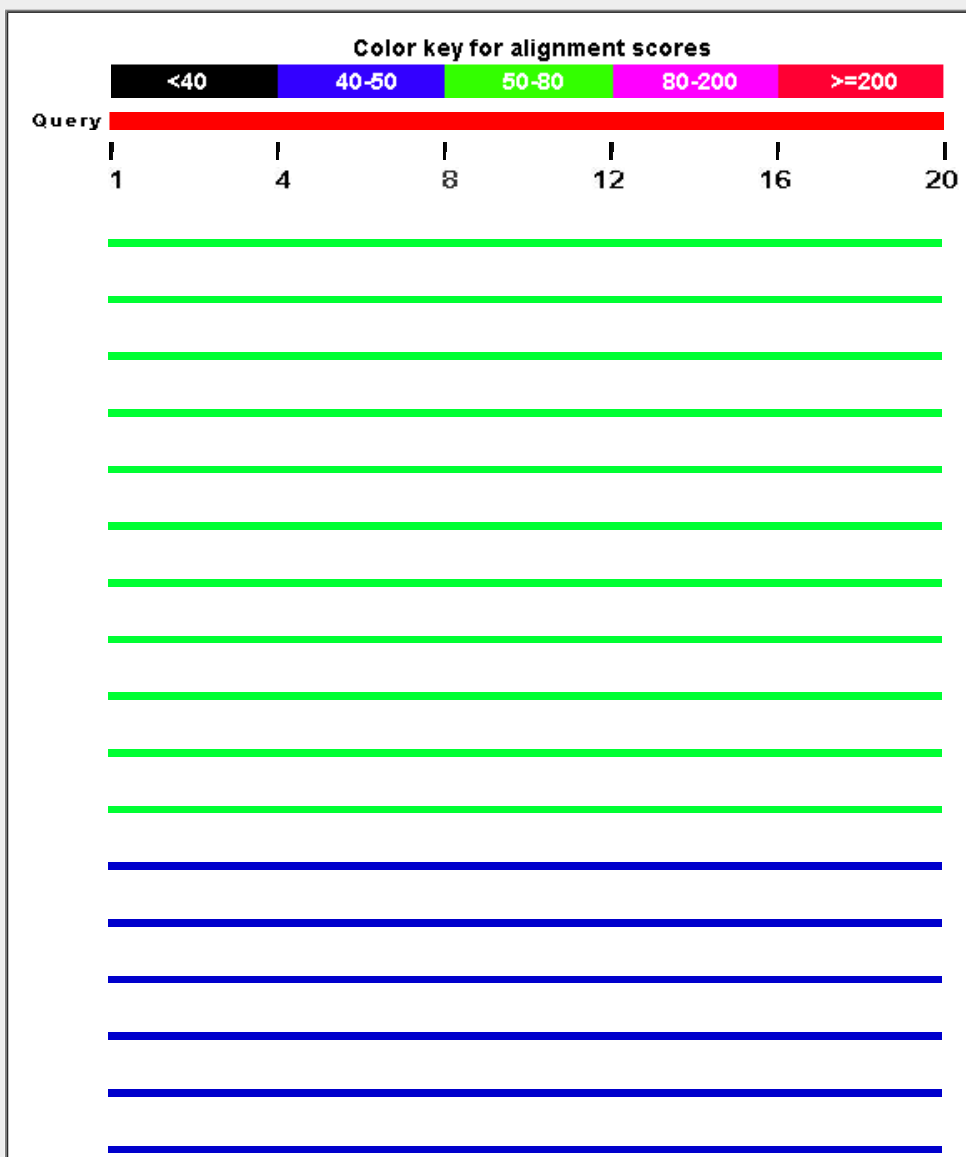

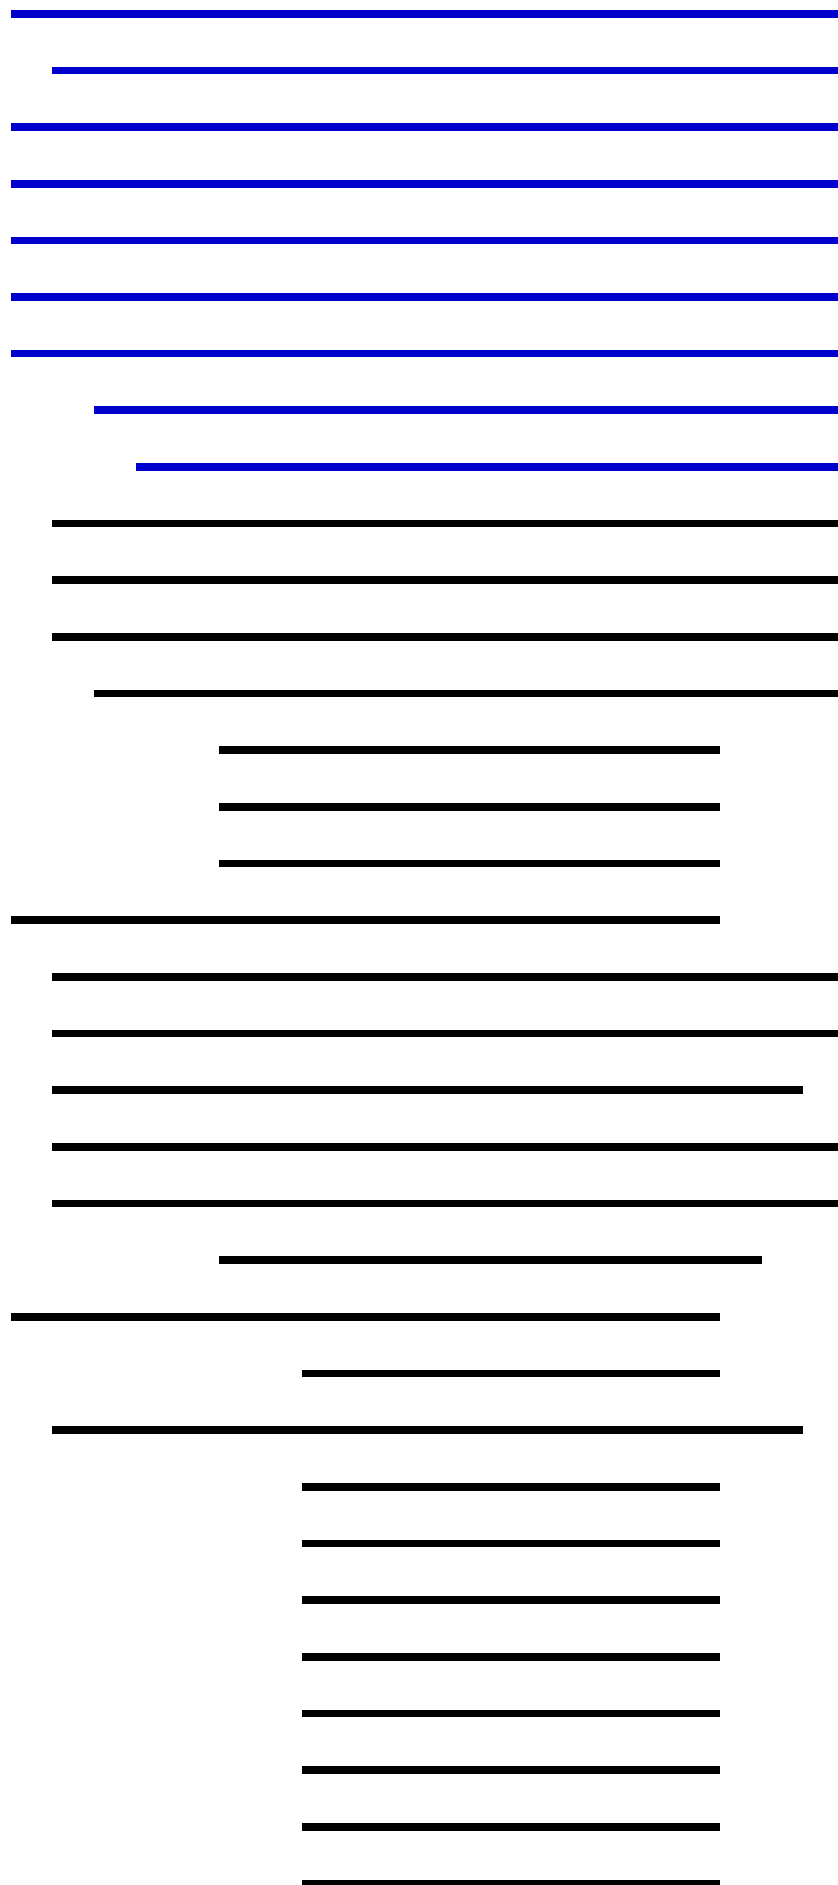

## Descriptions

### Sequences producing significant alignments:

Select: [All](#) [None](#) Selected:0

[Alignments](#)
[Download](#)
[GenPept](#)
[Graphics](#)
[Distance tree of results](#)
[Multiple alignment](#)


| Description                                                                                       | Max score | Total score | Query cover | E value | Ident | Accession                      |
|---------------------------------------------------------------------------------------------------|-----------|-------------|-------------|---------|-------|--------------------------------|
| <a href="#">Chain A, The Crystal Structure Of Icam-2 [Homo sapiens]</a>                           | 61.3      | 61.3        | 100%        | 2e-09   | 95%   | <a href="#">1ZXQ_A</a>         |
| <a href="#">intercellular adhesion molecule 2, isoform CRA_b [Homo sapiens]</a>                   | 61.3      | 61.3        | 100%        | 2e-09   | 95%   | <a href="#">EAW94217.1</a>     |
| <a href="#">intercellular adhesion molecule 2 precursor [Homo sapiens]</a>                        | 61.3      | 61.3        | 100%        | 2e-09   | 95%   | <a href="#">NP_001093256.1</a> |
| <a href="#">ICAM-2 preprotein (AA -21 to 254) [Homo sapiens]</a>                                  | 61.3      | 61.3        | 100%        | 2e-09   | 95%   | <a href="#">CAA33630.1</a>     |
| <a href="#">unnamed protein product [Homo sapiens]</a>                                            | 61.3      | 61.3        | 100%        | 2e-09   | 95%   | <a href="#">BAF85799.1</a>     |
| <a href="#">intercellular adhesion molecule 2 [synthetic construct]</a>                           | 61.3      | 61.3        | 100%        | 2e-09   | 95%   | <a href="#">AAX37087.1</a>     |
| <a href="#">intercellular adhesion molecule 2, isoform CRA_c [Homo sapiens]</a>                   | 61.3      | 61.3        | 100%        | 2e-09   | 95%   | <a href="#">EAW94218.1</a>     |
| <a href="#">intercellular adhesion molecule 2, isoform CRA_d [Homo sapiens]</a>                   | 61.3      | 61.3        | 100%        | 3e-09   | 95%   | <a href="#">EAW94220.1</a>     |
| <a href="#">intercellular adhesion molecule 2 precursor variant [Homo sapiens]</a>                | 61.3      | 61.3        | 100%        | 3e-09   | 95%   | <a href="#">BAD93115.1</a>     |
| <a href="#">intercellular adhesion molecule 2 precursor [Pan troglodytes]</a>                     | 55.4      | 55.4        | 100%        | 2e-07   | 85%   | <a href="#">NP_001009166.1</a> |
| <a href="#">intercellular adhesion molecule 2 precursor [Gorilla gorilla]</a>                     | 54.9      | 54.9        | 100%        | 3e-07   | 90%   | <a href="#">NP_001266588.1</a> |
| <a href="#">PREDICTED: intercellular adhesion molecule 2 [Pan paniscus]</a>                       | 49.0      | 49.0        | 100%        | 3e-05   | 80%   | <a href="#">XP_003811403.1</a> |
| <a href="#">PREDICTED: intercellular adhesion molecule 2 isoform X2 [Rhinopithecus roxellana]</a> | 47.3      | 47.3        | 100%        | 1e-04   | 85%   | <a href="#">XP_010378323.1</a> |
| <a href="#">PREDICTED: intercellular adhesion molecule 2 isoform 2 [Nomascus leucogenus]</a>      | 47.3      | 47.3        | 100%        | 1e-04   | 85%   | <a href="#">XP_003262689.1</a> |
| <a href="#">PREDICTED: intercellular adhesion molecule 2 [Pongo abelii]</a>                       | 47.3      | 47.3        | 100%        | 1e-04   | 85%   | <a href="#">XP_002827759.1</a> |
| <a href="#">PREDICTED: intercellular adhesion molecule 2 isoform X1 [Rhinopithecus roxellana]</a> | 47.3      | 47.3        | 100%        | 1e-04   | 85%   | <a href="#">XP_010378321.1</a> |
| <a href="#">PREDICTED: intercellular adhesion molecule 2 isoform X2 [Saimiri boliviensis]</a>     | 46.0      | 46.0        | 100%        | 3e-04   | 80%   | <a href="#">XP_010328611.1</a> |
| <a href="#">PREDICTED: intercellular adhesion molecule 2 isoform X1 [Saimiri boliviensis]</a>     | 46.0      | 46.0        | 100%        | 3e-04   | 80%   | <a href="#">XP_003942508.1</a> |
| <a href="#">PREDICTED: intercellular adhesion molecule 2 [Dasypus novemcinctus]</a>               | 46.0      | 46.0        | 95%         | 3e-04   | 79%   | <a href="#">XP_004454118.1</a> |
| <a href="#">PREDICTED: intercellular adhesion molecule 2 [Callithrix jacchus]</a>                 | 43.9      | 43.9        | 100%        | 0.002   | 80%   | <a href="#">XP_008995149.1</a> |
| <a href="#">intercellular adhesion molecule 2 [Macaca mulatta]</a>                                | 42.6      | 42.6        | 100%        | 0.004   | 80%   | <a href="#">AAQ14911.1</a>     |
| <a href="#">PREDICTED: intercellular adhesion molecule 2 [Papio anubis]</a>                       | 42.6      | 42.6        | 100%        | 0.004   | 80%   | <a href="#">XP_003913334.2</a> |
| <a href="#">PREDICTED: intercellular adhesion molecule 2 [Chlorocebus sabaeus]</a>                | 42.6      | 42.6        | 100%        | 0.004   | 80%   | <a href="#">XP_008010305.1</a> |
| <a href="#">intercellular adhesion molecule 2 precursor [Macaca mulatta]</a>                      | 42.6      | 42.6        | 100%        | 0.004   | 80%   | <a href="#">NP_001182318.1</a> |
| <a href="#">PREDICTED: intercellular adhesion molecule 2 [Tarsius syrichta]</a>                   | 41.4      | 41.4        | 90%         | 0.012   | 78%   | <a href="#">XP_008058639.1</a> |
| <a href="#">PREDICTED: intercellular adhesion molecule 2 [Otlemur garnettii]</a>                  | 40.1      | 40.1        | 85%         | 0.028   | 71%   | <a href="#">XP_003786673.1</a> |
| <a href="#">PREDICTED: intercellular adhesion molecule 2 [Heterocephalus glaber]</a>              | 39.2      | 39.2        | 95%         | 0.052   | 74%   | <a href="#">XP_004868694.1</a> |
| <a href="#">PREDICTED: intercellular adhesion molecule 2 [Heterocephalus glaber]</a>              | 39.2      | 39.2        | 95%         | 0.052   | 74%   | <a href="#">XP_004891551.1</a> |
| <a href="#">Intercellular adhesion molecule 2 [Heterocephalus glaber]</a>                         | 39.2      | 39.2        | 95%         | 0.053   | 74%   | <a href="#">EHB07342.1</a>     |

|                                                                                                 |      |      |      |       |      |                                |
|-------------------------------------------------------------------------------------------------|------|------|------|-------|------|--------------------------------|
| <a href="#">PREDICTED: intercellular adhesion molecule 2 [Ochotona princeps]</a>                | 38.8 | 38.8 | 90%  | 0.071 | 72%  | <a href="#">XP_004597413.1</a> |
| <a href="#">unnamed protein product [Mus musculus]</a>                                          | 37.1 | 37.1 | 60%  | 0.25  | 92%  | <a href="#">BAB25266.1</a>     |
| <a href="#">intercellular adhesion molecule 2 precursor [Mus musculus]</a>                      | 37.1 | 37.1 | 60%  | 0.25  | 92%  | <a href="#">NP_034624.1</a>    |
| <a href="#">intercellular adhesion molecule 2, isoform CRA_b [Mus musculus]</a>                 | 37.1 | 37.1 | 60%  | 0.25  | 92%  | <a href="#">EDL34295.1</a>     |
| <a href="#">hypothetical protein [Streptomyces albobivridis]</a>                                | 35.8 | 35.8 | 85%  | 0.55  | 76%  | <a href="#">WP_032760839.1</a> |
| <a href="#">PREDICTED: intercellular adhesion molecule 2 isoform X2 [Fukomys damarensis]</a>    | 35.0 | 35.0 | 95%  | 1.2   | 68%  | <a href="#">XP_010615058.1</a> |
| <a href="#">PREDICTED: intercellular adhesion molecule 2 isoform X1 [Fukomys damarensis]</a>    | 35.0 | 35.0 | 95%  | 1.2   | 68%  | <a href="#">XP_010615056.1</a> |
| <a href="#">NRPS protein [Streptomyces glaucescens]</a>                                         | 33.7 | 33.7 | 90%  | 3.2   | 50%  | <a href="#">AIS02180.1</a>     |
| <a href="#">PREDICTED: intercellular adhesion molecule 2 [Echinops telfairii]</a>               | 33.3 | 33.3 | 95%  | 4.1   | 68%  | <a href="#">XP_004707596.1</a> |
| <a href="#">PREDICTED: intercellular adhesion molecule 2 [Chrysochloris asiatica]</a>           | 33.3 | 33.3 | 95%  | 4.1   | 63%  | <a href="#">XP_006833790.1</a> |
| <a href="#">hypothetical protein [Sphingomonas sp. KC8]</a>                                     | 32.9 | 32.9 | 65%  | 5.0   | 77%  | <a href="#">WP_029624715.1</a> |
| <a href="#">hypothetical protein [Streptomyces sp. NRRL S-623]</a>                              | 32.9 | 32.9 | 85%  | 5.1   | 71%  | <a href="#">WP_031124043.1</a> |
| <a href="#">unknown [Saccharomyces cerevisiae]</a>                                              | 32.9 | 32.9 | 50%  | 5.4   | 100% | <a href="#">CAA90367.1</a>     |
| <a href="#">PREDICTED: intercellular adhesion molecule 2 [Jaculus jaculus]</a>                  | 32.9 | 32.9 | 90%  | 5.6   | 62%  | <a href="#">XP_004655694.1</a> |
| <a href="#">Mkc7p [Saccharomyces cerevisiae x Saccharomyces kudriavzevii VIN7]</a>              | 32.9 | 32.9 | 50%  | 5.7   | 100% | <a href="#">EHN08122.1</a>     |
| <a href="#">Mkc7p [Saccharomyces cerevisiae Lalvin QA23]</a>                                    | 32.9 | 32.9 | 50%  | 5.7   | 100% | <a href="#">EGA83540.1</a>     |
| <a href="#">Mkc7p [Saccharomyces cerevisiae EC1118]</a>                                         | 32.9 | 32.9 | 50%  | 5.7   | 100% | <a href="#">CAY78649.1</a>     |
| <a href="#">aspartyl protease [Saccharomyces cerevisiae RM11-1a]</a>                            | 32.9 | 32.9 | 50%  | 5.7   | 100% | <a href="#">EDV08165.1</a>     |
| <a href="#">prepro-aspartyl protease [Saccharomyces cerevisiae]</a>                             | 32.9 | 32.9 | 50%  | 5.7   | 100% | <a href="#">AAC49112.1</a>     |
| <a href="#">Mkc7p [Saccharomyces cerevisiae S288c]</a>                                          | 32.9 | 32.9 | 50%  | 5.7   | 100% | <a href="#">NP_010428.3</a>    |
| <a href="#">K7_Mkc7p [Saccharomyces cerevisiae Kyokai no. 7]</a>                                | 32.9 | 32.9 | 50%  | 5.7   | 100% | <a href="#">GAA22376.1</a>     |
| <a href="#">Mkc7p [Saccharomyces cerevisiae Vin13]</a>                                          | 32.9 | 32.9 | 50%  | 5.7   | 100% | <a href="#">EGA79523.1</a>     |
| <a href="#">Mkc7p [Saccharomyces cerevisiae FostersB]</a>                                       | 32.9 | 32.9 | 50%  | 5.7   | 100% | <a href="#">EGA59395.1</a>     |
| <a href="#">aspartyl protease [Saccharomyces cerevisiae YJM789]</a>                             | 32.9 | 32.9 | 50%  | 5.7   | 100% | <a href="#">EDN60484.1</a>     |
| <a href="#">choline transporter [Corynebacterium efficiens]</a>                                 | 32.9 | 32.9 | 90%  | 5.7   | 72%  | <a href="#">WP_035109369.1</a> |
| <a href="#">transporter, betaine/carnitine/choline family [Corynebacterium efficiens YS-31]</a> | 32.9 | 32.9 | 90%  | 5.8   | 72%  | <a href="#">EEW51311.1</a>     |
| <a href="#">choline transporter [Corynebacterium efficiens]</a>                                 | 32.9 | 32.9 | 90%  | 5.8   | 72%  | <a href="#">WP_011076076.1</a> |
| <a href="#">PREDICTED: intercellular adhesion molecule 2 [Galeopterus variegatus]</a>           | 32.5 | 32.5 | 85%  | 7.6   | 65%  | <a href="#">XP_008577292.1</a> |
| <a href="#">PREDICTED: intercellular adhesion molecule 2 [Orycteropus afer afer]</a>            | 32.0 | 32.0 | 100% | 10    | 60%  | <a href="#">XP_007957911.1</a> |
| <a href="#">PREDICTED: intercellular adhesion molecule 2 [Oryctolagus cuniculus]</a>            | 32.0 | 32.0 | 85%  | 10    | 65%  | <a href="#">XP_002719249.1</a> |
| <a href="#">hypothetical protein [Salinispora arenicola]</a>                                    | 32.0 | 32.0 | 80%  | 11    | 69%  | <a href="#">WP_032725575.1</a> |
| <a href="#">lipoprotein, putative [Pseudomonas pseudoalcaligenes]</a>                           | 31.6 | 31.6 | 70%  | 14    | 71%  | <a href="#">WP_003451105.1</a> |
| <a href="#">hypothetical protein [Streptomyces sp. R1-NS-10]</a>                                | 31.6 | 31.6 | 90%  | 15    | 67%  | <a href="#">WP_019073029.1</a> |
| <a href="#">hypothetical protein MCAG_05516 [Micromonospora sp. ATCC 39149]</a>                 | 31.2 | 31.2 | 95%  | 17    | 58%  | <a href="#">EEP75189.1</a>     |
| <a href="#">Yral [Streptomyces fulvissimus]</a>                                                 | 31.2 | 31.2 | 85%  | 18    | 71%  | <a href="#">WP_015609311.1</a> |
| <a href="#">cytochrome C551 [Bacillus akibai]</a>                                               | 31.2 | 31.2 | 90%  | 18    | 52%  | <a href="#">WP_035660838.1</a> |
| <a href="#">hypothetical protein [Micromonospora sp. ATCC 39149]</a>                            | 31.2 | 31.2 | 95%  | 19    | 58%  | <a href="#">WP_036375681.1</a> |
| <a href="#">hypothetical protein [Idiomarina sediminum]</a>                                     | 31.2 | 31.2 | 85%  | 19    | 62%  | <a href="#">WP_026861196.1</a> |
| <a href="#">hypothetical protein [Arthrobacter sp. Rue61a]</a>                                  | 31.2 | 31.2 | 85%  | 19    | 60%  | <a href="#">WP_011928020.1</a> |
| <a href="#">FliK family flagellar hook-length control protein [Lactobacillus casei]</a>         | 31.2 | 31.2 | 65%  | 20    | 77%  | <a href="#">WP_003566634.1</a> |
| <a href="#">para-aminobenzoate synthase component I [Halorubrum saccharovororum]</a>            | 31.2 | 31.2 | 90%  | 20    | 61%  | <a href="#">WP_004049467.1</a> |
| <a href="#">translation initiation factor IF-2 [Deinococcus sp. RL]</a>                         | 31.2 | 31.2 | 95%  | 20    | 63%  | <a href="#">WP_034403226.1</a> |
| <a href="#">translation initiation factor IF-2 [Deinococcus murrayi]</a>                        | 31.2 | 31.2 | 95%  | 20    | 63%  | <a href="#">WP_027460791.1</a> |
| <a href="#">alpha-1,2-mannosidase [Actinosynnema mirum]</a>                                     | 31.2 | 31.2 | 90%  | 20    | 46%  | <a href="#">WP_015800710.1</a> |
| <a href="#">NADH-quinone oxidoreductase [Streptomyces rimosus]</a>                              | 30.8 | 30.8 | 80%  | 27    | 67%  | <a href="#">WP_030676242.1</a> |

|                                                                                             |      |      |      |    |      |                                |
|---------------------------------------------------------------------------------------------|------|------|------|----|------|--------------------------------|
| <a href="#">hypothetical protein [Streptomyces griseofuscus]</a>                            | 30.8 | 30.8 | 90%  | 27 | 36%  | <a href="#">WP_037660275.1</a> |
| <a href="#">hypothetical protein [Bifidobacterium animalis]</a>                             | 30.8 | 30.8 | 45%  | 27 | 100% | <a href="#">WP_014710615.1</a> |
| <a href="#">hypothetical protein AH67_06940 [Bifidobacterium pseudolongum PV8-2]</a>        | 30.8 | 30.8 | 45%  | 27 | 100% | <a href="#">AIZ16684.1</a>     |
| <a href="#">PE-PGRS family protein [Bifidobacterium animalis]</a>                           | 30.8 | 30.8 | 45%  | 27 | 100% | <a href="#">WP_022542999.1</a> |
| <a href="#">hypothetical protein [Bifidobacterium animalis]</a>                             | 30.8 | 30.8 | 45%  | 27 | 100% | <a href="#">WP_004218191.1</a> |
| <a href="#">hypothetical protein [Bifidobacterium pseudolongum]</a>                         | 30.8 | 30.8 | 45%  | 27 | 100% | <a href="#">WP_034882776.1</a> |
| <a href="#">hypothetical protein [Bifidobacterium pseudolongum]</a>                         | 30.8 | 30.8 | 45%  | 27 | 100% | <a href="#">WP_033489377.1</a> |
| <a href="#">hypothetical protein [Bifidobacterium pseudolongum]</a>                         | 30.8 | 30.8 | 45%  | 27 | 100% | <a href="#">WP_033502396.1</a> |
| <a href="#">hypothetical protein [Bifidobacterium animalis]</a>                             | 30.8 | 30.8 | 45%  | 27 | 100% | <a href="#">WP_012619744.1</a> |
| <a href="#">ABC transporter substrate-binding protein [Agromyces italicus]</a>              | 30.8 | 30.8 | 80%  | 27 | 63%  | <a href="#">WP_022889834.1</a> |
| <a href="#">branched-chain alpha-keto acid dehydrogenase subunit E2 [Dyella ginsengisc]</a> | 30.8 | 30.8 | 100% | 27 | 65%  | <a href="#">WP_017460578.1</a> |
| <a href="#">RNA polymerase subunit sigma-54 [Granulicella mallensis]</a>                    | 30.8 | 30.8 | 85%  | 27 | 55%  | <a href="#">WP_014265120.1</a> |
| <a href="#">pyruvate dehydrogenase [Pontibacter actiniarum]</a>                             | 30.8 | 30.8 | 55%  | 28 | 91%  | <a href="#">WP_025606427.1</a> |
| <a href="#">flagellar motor protein MotB [Flavobacterium sp. CF136]</a>                     | 30.8 | 30.8 | 50%  | 28 | 90%  | <a href="#">WP_007807960.1</a> |
| <a href="#">hypothetical protein [Streptomyces sp. NRRL S-1868]</a>                         | 30.8 | 30.8 | 85%  | 28 | 56%  | <a href="#">WP_030874634.1</a> |
| <a href="#">hypothetical protein [Streptomyces sp. NRRL F-5053]</a>                         | 30.8 | 30.8 | 85%  | 28 | 56%  | <a href="#">WP_030888993.1</a> |
| <a href="#">hypothetical protein F775_12460 [Aegilops tauschii]</a>                         | 30.8 | 30.8 | 75%  | 28 | 63%  | <a href="#">EMT01600.1</a>     |
| <a href="#">hypothetical protein F775_00996 [Aegilops tauschii]</a>                         | 30.8 | 30.8 | 75%  | 28 | 63%  | <a href="#">EMT03056.1</a>     |
| <a href="#">Peptidoglycan-binding LysM [Xylanimonas cellulolytica]</a>                      | 30.8 | 30.8 | 80%  | 28 | 69%  | <a href="#">WP_012880165.1</a> |
| <a href="#">hemagglutinin repeat protein [Phascolarctobacterium succinatutens]</a>          | 30.8 | 30.8 | 55%  | 28 | 82%  | <a href="#">WP_021720813.1</a> |
| <a href="#">Cytochrome c-type biogenesis protein ccmE [Methylobacterium oryzae CBMB]</a>    | 30.3 | 30.3 | 80%  | 36 | 75%  | <a href="#">AIQ93447.1</a>     |
| <a href="#">CcmE/CycJ protein [Methylobacterium mesophilicum]</a>                           | 30.3 | 30.3 | 80%  | 36 | 75%  | <a href="#">WP_010684570.1</a> |
| <a href="#">membrane protein [Streptomyces sp. NRRL S-1022]</a>                             | 30.3 | 30.3 | 75%  | 37 | 73%  | <a href="#">WP_030346687.1</a> |
| <a href="#">integral membrane protein [Eggerthella sp. CAG:298]</a>                         | 30.3 | 30.3 | 70%  | 37 | 79%  | <a href="#">WP_022363249.1</a> |
| <a href="#">hypothetical protein FAH_00035580 [Eimeria acervulina]</a>                      | 30.3 | 30.3 | 55%  | 37 | 91%  | <a href="#">CDI78608.1</a>     |
| <a href="#">hypothetical protein [Haloferax prahovense]</a>                                 | 30.3 | 30.3 | 70%  | 37 | 71%  | <a href="#">WP_008092832.1</a> |

## Alignments

Download GenPept Graphics

Next Previous Descriptions

Chain A, The Crystal Structure Of Icam-2

Sequence ID: [pdb|1ZXQ|A](#) Length: 192 Number of Matches: 1

Range 1: 139 to 158 GenPept Graphics

Next Match Previous Match

| Score          | Expect | Identities | Positives   | Gaps     |
|----------------|--------|------------|-------------|----------|
| 61.3 bits(137) | 2e-09  | 19/20(95%) | 20/20(100%) | 0/20(0%) |

Query 1 KAAPAPQEATATFDSTADRE 20  
 KAAPAPQEATATF+STADRE  
 Sbjct 139 KAAPAPQEATATFNSTADRE 158

### Related Information

[Structure](#) - 3D structure displays

Download GenPept Graphics

Next Previous Descriptions

intercellular adhesion molecule 2, isoform CRA\_b [Homo sapiens]

Sequence ID: [gb|EAW94217.1|](#) Length: 255 Number of Matches: 1

See 1 more title(s)

Range 1: 163 to 182 GenPept Graphics

Next Match Previous Match

| Score          | Expect | Identities | Positives   | Gaps     |
|----------------|--------|------------|-------------|----------|
| 61.3 bits(137) | 2e-09  | 19/20(95%) | 20/20(100%) | 0/20(0%) |

### Related Information

[Gene](#) - associated gene details

[Identical Proteins](#) - Proteins

identical to the subject

Query 1 KAAPAPQEATATFDSTADRE 20  
 KAAPAPQEATATF+STADRE  
 Sbjct 163 KAAPAPQEATATFNSTADRE 182

[Download](#) [GenPept](#) [Graphics](#)

[▼ Next](#) [▲ Previous](#) [▲ Descriptions](#)

intercellular adhesion molecule 2 precursor [Homo sapiens]

Sequence ID: [ref|NP\\_001093256.1|](#) Length: 275 Number of Matches: 1

[▶ See 18 more title\(s\)](#)

Range 1: 163 to 182 [GenPept](#) [Graphics](#)

[▼ Next Match](#) [▲ Previous Match](#)

| Score          | Expect | Identities | Positives   | Gaps     |
|----------------|--------|------------|-------------|----------|
| 61.3 bits(137) | 2e-09  | 19/20(95%) | 20/20(100%) | 0/20(0%) |

Query 1 KAAPAPQEATATFDSTADRE 20  
 KAAPAPQEATATF+STADRE  
 Sbjct 163 KAAPAPQEATATFNSTADRE 182

**Related Information**

- [Gene](#) - associated gene details
- [UniGene](#) - clustered expressed sequence tags
- [Map Viewer](#) - aligned genomic context
- [Identical Proteins](#) - Proteins

identical to the subject

[Download](#) [GenPept](#) [Graphics](#)

[▼ Next](#) [▲ Previous](#) [▲ Descriptions](#)

ICAM-2 preprotein (AA -21 to 254) [Homo sapiens]

Sequence ID: [emb|CAA33630.1|](#) Length: 275 Number of Matches: 1

[▶ See 1 more title\(s\)](#)

Range 1: 163 to 182 [GenPept](#) [Graphics](#)

[▼ Next Match](#) [▲ Previous Match](#)

| Score          | Expect | Identities | Positives   | Gaps     |
|----------------|--------|------------|-------------|----------|
| 61.3 bits(137) | 2e-09  | 19/20(95%) | 20/20(100%) | 0/20(0%) |

Query 1 KAAPAPQEATATFDSTADRE 20  
 KAAPAPQEATATF+STADRE  
 Sbjct 163 KAAPAPQEATATFNSTADRE 182

**Related Information**

- [Gene](#) - associated gene details
- [Identical Proteins](#) - Proteins

identical to the subject

[Download](#) [GenPept](#) [Graphics](#)

[▼ Next](#) [▲ Previous](#) [▲ Descriptions](#)

unnamed protein product [Homo sapiens]

Sequence ID: [dbj|BAF85799.1|](#) Length: 275 Number of Matches: 1

Range 1: 163 to 182 [GenPept](#) [Graphics](#)

[▼ Next Match](#) [▲ Previous Match](#)

| Score          | Expect | Identities | Positives   | Gaps     |
|----------------|--------|------------|-------------|----------|
| 61.3 bits(137) | 2e-09  | 19/20(95%) | 20/20(100%) | 0/20(0%) |

Query 1 KAAPAPQEATATFDSTADRE 20  
 KAAPAPQEATATF+STADRE  
 Sbjct 163 KAAPAPQEATATFNSTADRE 182

**Related Information**

- [Gene](#) - associated gene details

BLAST is a registered trademark of the National Library of Medicine.



▶ [NCBI/ BLAST/ blastp suite/ Formatting Results - B9HHC4ED01R](#)

**i** Your search parameters were adjusted to search for a short input sequence.

[Edit and Resubmit](#) [Save Search Strategies](#) [▶ Formatting options](#) [▶ Download](#)

[YouTube](#) [How to read this page](#) [Blast report description](#)

### ICAM2\_KAAPAPQEATATFNSTADRE\_NonMod

RID [B9HHC4ED01R](#) (Expires on 01-14 14:15 pm)

**Query ID** |cl|54764  
**Description** None  
**Molecule type** amino acid  
**Query Length** 20

**Database Name** nr  
**Description** All non-redundant GenBank CDS translations+PDB+SwissProt+PIR excluding environmental samples from WGS projects  
**Program** BLASTP 2.2.30+ [▶ Citation](#)

Other reports: [▶ Search Summary](#) [\[Taxonomy reports\]](#) [\[Distance tree of results\]](#) [\[Related Structures\]](#) [\[Multiple alignment\]](#)

### **G** Graphic Summary

**G** [Show Conserved Domains](#)

No putative conserved domains have been detected

Distribution of 100 Blast Hits on the Query Sequence

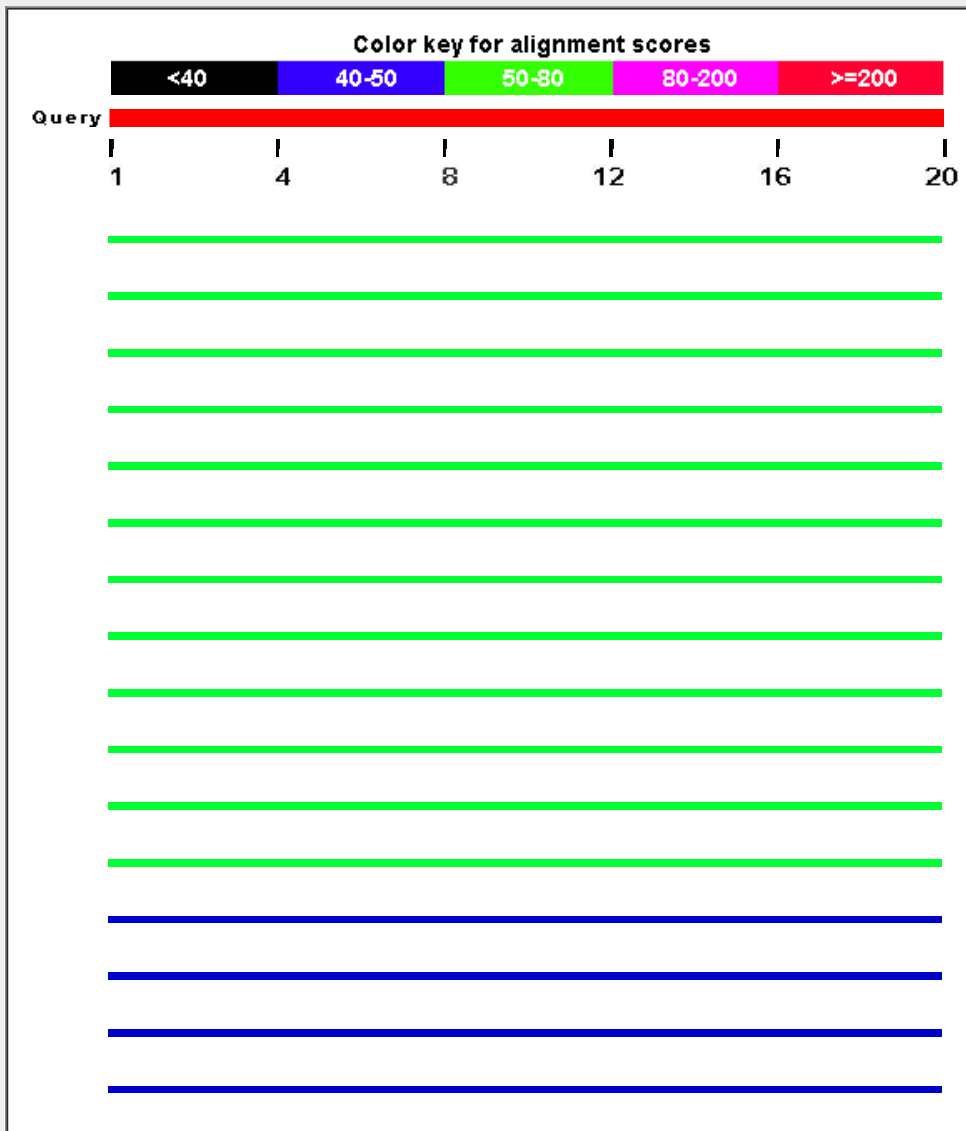



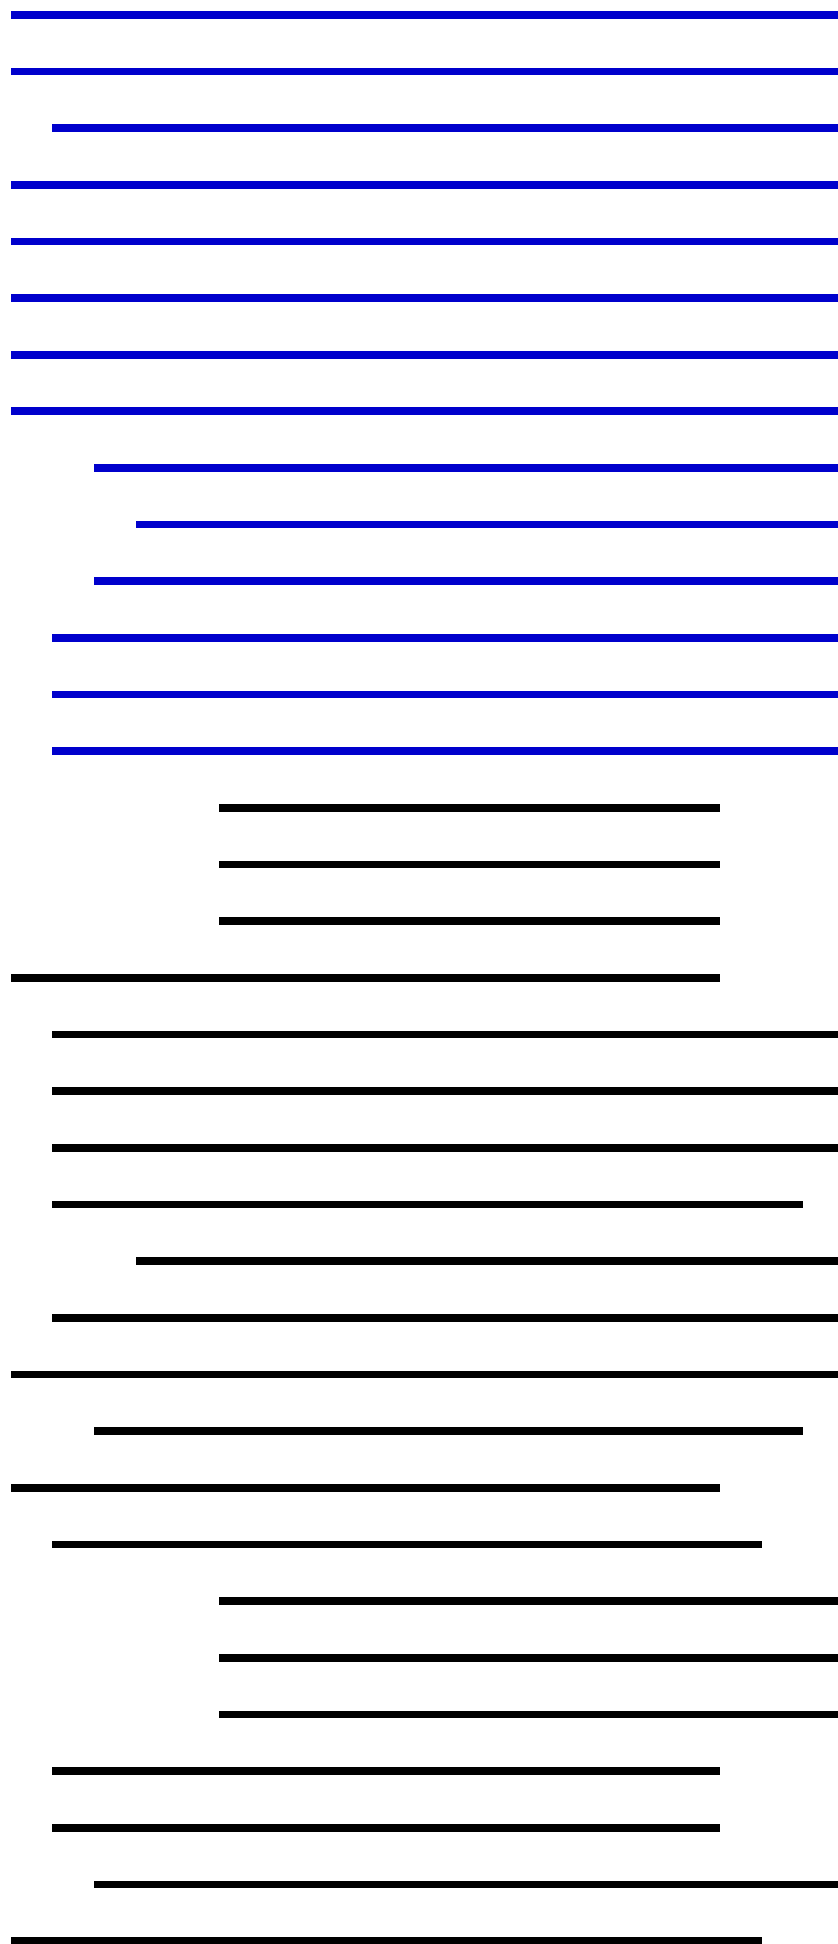

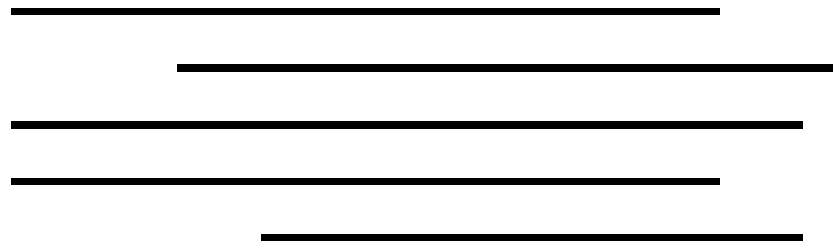

## Descriptions

### Sequences producing significant alignments:

Select: [All](#) [None](#) Selected:0

[Alignments](#)
[Download](#)
[GenPept](#)
[Graphics](#)
[Distance tree of results](#)
[Multiple alignment](#)

| Description                                                                          | Max score | Total score | Query cover | E value | Ident | Accession                                   |
|--------------------------------------------------------------------------------------|-----------|-------------|-------------|---------|-------|---------------------------------------------|
| <a href="#">Chain A, The Crystal Structure Of Icam-2 [Homo sapiens]</a>              | 63.8      | 63.8        | 100%        | 3e-10   | 100%  | <a href="#">gij157834428 1ZXQ_A</a>         |
| <a href="#">intercellular adhesion molecule 2, isoform CRA_b [Homo sapiens]</a>      | 63.8      | 63.8        | 100%        | 3e-10   | 100%  | <a href="#">gij119614623 EAW94217.1</a>     |
| <a href="#">intercellular adhesion molecule 2 precursor [Homo sapiens]</a>           | 63.8      | 63.8        | 100%        | 3e-10   | 100%  | <a href="#">gij153082686 NP_001093256.1</a> |
| <a href="#">ICAM-2 preprotein (AA -21 to 254) [Homo sapiens]</a>                     | 63.8      | 63.8        | 100%        | 3e-10   | 100%  | <a href="#">gij32624 CAA33630.1</a>         |
| <a href="#">unnamed protein product [Homo sapiens]</a>                               | 63.8      | 63.8        | 100%        | 3e-10   | 100%  | <a href="#">gij158259681 BAF85799.1</a>     |
| <a href="#">intercellular adhesion molecule 2 [synthetic construct]</a>              | 63.8      | 63.8        | 100%        | 3e-10   | 100%  | <a href="#">gij60834288 AAX37087.1</a>      |
| <a href="#">intercellular adhesion molecule 2, isoform CRA_c [Homo sapiens]</a>      | 63.8      | 63.8        | 100%        | 3e-10   | 100%  | <a href="#">gij119614624 EAW94218.1</a>     |
| <a href="#">intercellular adhesion molecule 2, isoform CRA_d [Homo sapiens]</a>      | 63.8      | 63.8        | 100%        | 3e-10   | 100%  | <a href="#">gij119614626 EAW94220.1</a>     |
| <a href="#">intercellular adhesion molecule 2 precursor variant [Homo sapiens]</a>   | 63.8      | 63.8        | 100%        | 3e-10   | 100%  | <a href="#">gij62089342 BAD93115.1</a>      |
| <a href="#">intercellular adhesion molecule 2 precursor [Pan troglodytes]</a>        | 57.9      | 57.9        | 100%        | 3e-08   | 90%   | <a href="#">gij57114204 NP_001009166.1</a>  |
| <a href="#">intercellular adhesion molecule 2 precursor [Gorilla gorilla]</a>        | 57.5      | 57.5        | 100%        | 4e-08   | 95%   | <a href="#">gij525343300 NP_001266588.1</a> |
| <a href="#">PREDICTED: intercellular adhesion molecule 2 [Pan paniscus]</a>          | 51.5      | 51.5        | 100%        | 5e-06   | 85%   | <a href="#">gij397480257 XP_003811403.1</a> |
| <a href="#">PREDICTED: intercellular adhesion molecule 2 isoform X2 [Rhinopi]</a>    | 49.0      | 49.0        | 100%        | 3e-05   | 85%   | <a href="#">gij724907294 XP_010378323.1</a> |
| <a href="#">PREDICTED: intercellular adhesion molecule 2 isoform 2 [Nomascu]</a>     | 49.0      | 49.0        | 100%        | 3e-05   | 85%   | <a href="#">gij332227028 XP_003262689.1</a> |
| <a href="#">PREDICTED: intercellular adhesion molecule 2 [Pongo abelii]</a>          | 49.0      | 49.0        | 100%        | 3e-05   | 85%   | <a href="#">gij297701532 XP_002827759.1</a> |
| <a href="#">PREDICTED: intercellular adhesion molecule 2 isoform X1 [Rhinopi]</a>    | 49.0      | 49.0        | 100%        | 3e-05   | 85%   | <a href="#">gij724907287 XP_010378321.1</a> |
| <a href="#">PREDICTED: intercellular adhesion molecule 2 isoform X2 [Saimiri]</a>    | 48.6      | 48.6        | 100%        | 4e-05   | 85%   | <a href="#">gij725603673 XP_010328611.1</a> |
| <a href="#">PREDICTED: intercellular adhesion molecule 2 isoform X1 [Saimiri]</a>    | 48.6      | 48.6        | 100%        | 5e-05   | 85%   | <a href="#">gij403303795 XP_003942508.1</a> |
| <a href="#">PREDICTED: intercellular adhesion molecule 2 [Dasypus novemcinctus]</a>  | 48.6      | 48.6        | 95%         | 5e-05   | 84%   | <a href="#">gij488524498 XP_004454118.1</a> |
| <a href="#">PREDICTED: intercellular adhesion molecule 2 [Callithrix jacchus]</a>    | 45.6      | 45.6        | 100%        | 4e-04   | 80%   | <a href="#">gij675659080 XP_008995149.1</a> |
| <a href="#">intercellular adhesion molecule 2 [Macaca mulatta]</a>                   | 44.3      | 44.3        | 100%        | 0.001   | 80%   | <a href="#">gij33340700 AAQ14911.1</a>      |
| <a href="#">PREDICTED: intercellular adhesion molecule 2 [Papio anubis]</a>          | 44.3      | 44.3        | 100%        | 0.001   | 80%   | <a href="#">gij685599161 XP_003913334.2</a> |
| <a href="#">PREDICTED: intercellular adhesion molecule 2 [Chlorocebus sabaeus]</a>   | 44.3      | 44.3        | 100%        | 0.001   | 80%   | <a href="#">gij635091279 XP_008010305.1</a> |
| <a href="#">intercellular adhesion molecule 2 precursor [Macaca mulatta]</a>         | 44.3      | 44.3        | 100%        | 0.001   | 80%   | <a href="#">gij306035196 NP_001182318.1</a> |
| <a href="#">PREDICTED: intercellular adhesion molecule 2 [Tarsius syrichta]</a>      | 43.9      | 43.9        | 90%         | 0.002   | 83%   | <a href="#">gij640804491 XP_008058639.1</a> |
| <a href="#">PREDICTED: intercellular adhesion molecule 2 [Otolemur garnettii]</a>    | 42.6      | 42.6        | 85%         | 0.004   | 76%   | <a href="#">gij395826945 XP_003786673.1</a> |
| <a href="#">PREDICTED: intercellular adhesion molecule 2 [Ochotona princeps]</a>     | 41.4      | 41.4        | 90%         | 0.010   | 78%   | <a href="#">gij504175805 XP_004597413.1</a> |
| <a href="#">PREDICTED: intercellular adhesion molecule 2 [Heterocephalus glaber]</a> | 40.1      | 40.1        | 95%         | 0.026   | 74%   | <a href="#">gij513014697 XP_004868694.1</a> |

|                                                                                        |      |      |      |       |      |                                             |
|----------------------------------------------------------------------------------------|------|------|------|-------|------|---------------------------------------------|
| PREDICTED: intercellular adhesion molecule 2 [Heterocephalus glaber]                   | 40.1 | 40.1 | 95%  | 0.026 | 74%  | <a href="#">gij512867855 XP_004891551.1</a> |
| <a href="#">Intercellular adhesion molecule 2 [Heterocephalus glaber]</a>              | 40.1 | 40.1 | 95%  | 0.027 | 74%  | <a href="#">gij351704423 EHB07342.1</a>     |
| <a href="#">unnamed protein product [Mus musculus]</a>                                 | 39.7 | 39.7 | 60%  | 0.036 | 100% | <a href="#">gij12841581 BAB25266.1</a>      |
| <a href="#">intercellular adhesion molecule 2 precursor [Mus musculus]</a>             | 39.7 | 39.7 | 60%  | 0.036 | 100% | <a href="#">gij6754274 NP_034624.1</a>      |
| <a href="#">intercellular adhesion molecule 2, isoform CRA_b [Mus musculus]</a>        | 39.7 | 39.7 | 60%  | 0.036 | 100% | <a href="#">gij148702348 EDL34295.1</a>     |
| <a href="#">hypothetical protein [Streptomyces albobiviridis]</a>                      | 35.8 | 35.8 | 85%  | 0.52  | 76%  | <a href="#">gij695847583 WP_032760839.1</a> |
| PREDICTED: intercellular adhesion molecule 2 isoform X2 [Fukomyces]                    | 35.8 | 35.8 | 95%  | 0.59  | 68%  | <a href="#">gij731294470 XP_010615058.1</a> |
| PREDICTED: intercellular adhesion molecule 2 [Chrysochloris asiatica]                  | 35.8 | 35.8 | 95%  | 0.60  | 68%  | <a href="#">gij586449703 XP_006833790.1</a> |
| PREDICTED: intercellular adhesion molecule 2 isoform X1 [Fukomyces]                    | 35.8 | 35.8 | 95%  | 0.60  | 68%  | <a href="#">gij731294465 XP_010615056.1</a> |
| PREDICTED: intercellular adhesion molecule 2 [Jaculus jaculus]                         | 35.4 | 35.4 | 90%  | 0.81  | 67%  | <a href="#">gij507543407 XP_004655694.1</a> |
| PREDICTED: intercellular adhesion molecule 2 [Galeopterus variegatus]                  | 35.0 | 35.0 | 85%  | 1.1   | 71%  | <a href="#">gij667289760 XP_008577292.1</a> |
| PREDICTED: intercellular adhesion molecule 2 [Echinops telfairii]                      | 35.0 | 35.0 | 95%  | 1.1   | 68%  | <a href="#">gij507666534 XP_004707596.1</a> |
| PREDICTED: intercellular adhesion molecule 2 [Orycteropus afer africanus]              | 34.6 | 34.6 | 100% | 1.5   | 65%  | <a href="#">gij634829692 XP_007957911.1</a> |
| PREDICTED: intercellular adhesion molecule 2 [Oryctolagus cuniculus]                   | 33.7 | 33.7 | 85%  | 2.8   | 65%  | <a href="#">gij291406375 XP_002719249.1</a> |
| <a href="#">hypothetical protein [Streptomyces sp. NRRL S-623]</a>                     | 32.9 | 32.9 | 85%  | 4.8   | 71%  | <a href="#">gij665521418 WP_031124043.1</a> |
| <a href="#">hypothetical protein [Arthrobacter sp. Rue61a]</a>                         | 32.9 | 32.9 | 85%  | 5.1   | 60%  | <a href="#">gij500342673 WP_011928020.1</a> |
| <a href="#">Intercellular adhesion molecule 2 [Pteropus alecto]</a>                    | 32.5 | 32.5 | 75%  | 7.1   | 73%  | <a href="#">gij431908872 ELK12464.1</a>     |
| PREDICTED: intercellular adhesion molecule 2 isoform X2 [Pteropus]                     | 32.5 | 32.5 | 75%  | 7.2   | 73%  | <a href="#">gij586558152 XP_006912368.1</a> |
| PREDICTED: intercellular adhesion molecule 2 isoform X1 [Pteropus]                     | 32.5 | 32.5 | 75%  | 7.2   | 73%  | <a href="#">gij586558150 XP_006912367.1</a> |
| PREDICTED: intercellular adhesion molecule 2 isoform X2 [Chinchilla]                   | 32.0 | 32.0 | 80%  | 9.8   | 69%  | <a href="#">gij533177935 XP_005402233.1</a> |
| PREDICTED: intercellular adhesion molecule 2 isoform X1 [Chinchilla]                   | 32.0 | 32.0 | 80%  | 9.8   | 69%  | <a href="#">gij533177932 XP_005402232.1</a> |
| <a href="#">hypothetical protein PHYSODRAFT_484822 [Phytophthora sojae]</a>            | 32.0 | 32.0 | 90%  | 10    | 57%  | <a href="#">gij695396271 XP_009521409.1</a> |
| <a href="#">dihydroliipoamide dehydrogenase [Thiothrix disciformis]</a>                | 32.0 | 32.0 | 90%  | 10    | 68%  | <a href="#">gij648463207 WP_026154958.1</a> |
| <a href="#">hypothetical protein N784_07195 [Pontibacillus litoralis JSM 072002]</a>   | 31.6 | 31.6 | 85%  | 13    | 65%  | <a href="#">gij717929143 KGX88444.1</a>     |
| PREDICTED: LOW QUALITY PROTEIN: intercellular adhesion molecule 2 [Rhizobium loti]     | 31.6 | 31.6 | 80%  | 13    | 69%  | <a href="#">gij587012049 XP_003997114.2</a> |
| <a href="#">chemotaxis motility protein [Rhizobium freirei]</a>                        | 31.6 | 31.6 | 95%  | 14    | 52%  | <a href="#">gij490216585 WP_004114965.1</a> |
| <a href="#">Yral [Streptomyces fulvissimus]</a>                                        | 31.2 | 31.2 | 85%  | 17    | 71%  | <a href="#">gij505422209 WP_015609311.1</a> |
| <a href="#">hypothetical protein [Streptomyces sp. HmicA12]</a>                        | 31.2 | 31.2 | 65%  | 19    | 69%  | <a href="#">gij648554995 WP_026246746.1</a> |
| <a href="#">predicted protein [Postia placenta Mad-698-R]</a>                          | 31.2 | 31.2 | 70%  | 19    | 79%  | <a href="#">gij242211389 XP_002471533.1</a> |
| <a href="#">translation initiation factor IF-2 [Deinococcus sp. RL]</a>                | 31.2 | 31.2 | 95%  | 19    | 63%  | <a href="#">gij656342093 KEF35053.1</a>     |
| <a href="#">translation initiation factor IF-2 [Deinococcus murrayi]</a>               | 31.2 | 31.2 | 95%  | 19    | 63%  | <a href="#">gij653256119 WP_027460791.1</a> |
| <a href="#">NRPS protein [Streptomyces glaucescens]</a>                                | 31.2 | 31.2 | 90%  | 19    | 46%  | <a href="#">gij692325976 AIS02180.1</a>     |
| PREDICTED: voltage-dependent calcium channel gamma-2 subunit [Arthrobacter sp. H5]     | 30.8 | 30.8 | 100% | 25    | 60%  | <a href="#">gij488529316 XP_004456445.1</a> |
| <a href="#">hypothetical protein [Arthrobacter sp. H5]</a>                             | 30.8 | 30.8 | 80%  | 25    | 65%  | <a href="#">gij654827001 WP_028279809.1</a> |
| PREDICTED: voltage-dependent calcium channel gamma-2 subunit [Arthrobacter sp. H5]     | 30.8 | 30.8 | 100% | 26    | 60%  | <a href="#">gij667303694 XP_008582077.1</a> |
| PREDICTED: voltage-dependent calcium channel gamma-2 subunit [Arthrobacter sp. H5]     | 30.8 | 30.8 | 100% | 26    | 60%  | <a href="#">gij488529314 XP_004456444.1</a> |
| <a href="#">ABC transporter [Paenibacillus polymyxa]</a>                               | 30.8 | 30.8 | 85%  | 26    | 71%  | <a href="#">gij647276067 WP_025721927.1</a> |
| <a href="#">hypothetical protein [Streptomyces sp. NRRL S-1022]</a>                    | 30.8 | 30.8 | 80%  | 26    | 71%  | <a href="#">gij663348860 WP_030347846.1</a> |
| <a href="#">branched-chain alpha-keto acid dehydrogenase subunit E2 [Dyella]</a>       | 30.8 | 30.8 | 100% | 26    | 65%  | <a href="#">gij516029995 WP_017460578.1</a> |
| <a href="#">pyruvate dehydrogenase [Pontibacter actiniarum]</a>                        | 30.8 | 30.8 | 55%  | 26    | 91%  | <a href="#">gij646878080 WP_025606427.1</a> |
| <a href="#">envelope glycoprotein [Human immunodeficiency virus 1]</a>                 | 30.8 | 30.8 | 50%  | 26    | 90%  | <a href="#">gij37682527 AAQ98215.1</a>      |
| <a href="#">hypothetical protein [Sphingomonas sp. KC8]</a>                            | 30.3 | 30.3 | 65%  | 33    | 69%  | <a href="#">gij657923241 WP_029624715.1</a> |
| <a href="#">unknown [Saccharomyces cerevisiae]</a>                                     | 30.3 | 30.3 | 50%  | 34    | 90%  | <a href="#">gij899394 CAA90367.1</a>        |
| PREDICTED: intercellular adhesion molecule 2 [Trichechus manatus]                      | 30.3 | 30.3 | 75%  | 35    | 73%  | <a href="#">gij471367485 XP_004374272.1</a> |
| PREDICTED: LOW QUALITY PROTEIN: intercellular adhesion molecule 2 [Trichechus manatus] | 30.3 | 30.3 | 80%  | 35    | 69%  | <a href="#">gij591324590 XP_007088336.1</a> |

|                                                                                                      |      |      |     |    |     |                                             |
|------------------------------------------------------------------------------------------------------|------|------|-----|----|-----|---------------------------------------------|
| <a href="#">hypothetical protein EAH_00035580 [Eimeria acervulina]</a>                               | 30.3 | 30.3 | 55% | 35 | 91% | <a href="#">gij557123960 CDI78608.1</a>     |
| <a href="#">ABC transporter [Paenibacillus polymyxa]</a>                                             | 30.3 | 30.3 | 85% | 35 | 71% | <a href="#">gij670514736 WP_031462258.1</a> |
| <a href="#">ceuA [Paenibacillus polymyxa SQR-21]</a>                                                 | 30.3 | 30.3 | 85% | 35 | 71% | <a href="#">gij595635719 AHM67977.1</a>     |
| <a href="#">cellulase (glycosyl hydrolase family 5) subfamily protein [Acanthamoeba castellanii]</a> | 30.3 | 30.3 | 55% | 35 | 82% | <a href="#">gij470406343 XP_004335946.1</a> |
| <a href="#">Mkc7p [Saccharomyces cerevisiae x Saccharomyces kudriavzevii V]</a>                      | 30.3 | 30.3 | 50% | 36 | 90% | <a href="#">gij365766626 EHN08122.1</a>     |
| <a href="#">Mkc7p [Saccharomyces cerevisiae Lalvin QA23]</a>                                         | 30.3 | 30.3 | 50% | 36 | 90% | <a href="#">gij323349313 EGA83540.1</a>     |
| <a href="#">Mkc7p [Saccharomyces cerevisiae EC1118]</a>                                              | 30.3 | 30.3 | 50% | 36 | 90% | <a href="#">gij259145385 CAY78649.1</a>     |
| <a href="#">aspartyl protease [Saccharomyces cerevisiae RM11-1a]</a>                                 | 30.3 | 30.3 | 50% | 36 | 90% | <a href="#">gij190404898 EDV08165.1</a>     |
| <a href="#">prepro-aspartyl protease [Saccharomyces cerevisiae]</a>                                  | 30.3 | 30.3 | 50% | 36 | 90% | <a href="#">gij1063606 AAC49112.1</a>       |
| <a href="#">Mkc7p [Saccharomyces cerevisiae S288c]</a>                                               | 30.3 | 30.3 | 50% | 36 | 90% | <a href="#">gij398365835 NP_010428.3</a>    |
| <a href="#">K7 Mkc7p [Saccharomyces cerevisiae Kyokai no. 7]</a>                                     | 30.3 | 30.3 | 50% | 36 | 90% | <a href="#">gij349577207 GAA22376.1</a>     |
| <a href="#">Mkc7p [Saccharomyces cerevisiae Vin13]</a>                                               | 30.3 | 30.3 | 50% | 36 | 90% | <a href="#">gij323338292 EGA79523.1</a>     |
| <a href="#">Mkc7p [Saccharomyces cerevisiae FostersB]</a>                                            | 30.3 | 30.3 | 50% | 36 | 90% | <a href="#">gij323305654 EGA59395.1</a>     |
| <a href="#">aspartyl protease [Saccharomyces cerevisiae YJM789]</a>                                  | 30.3 | 30.3 | 50% | 36 | 90% | <a href="#">gij151942128 EDN60484.1</a>     |
| <a href="#">choline transporter [Corynebacterium efficiens]</a>                                      | 30.3 | 30.3 | 90% | 36 | 67% | <a href="#">gij493821357 WP_006768864.1</a> |
| <a href="#">choline transporter [Corynebacterium efficiens]</a>                                      | 30.3 | 30.3 | 90% | 36 | 67% | <a href="#">gij499388609 WP_011076076.1</a> |
| <a href="#">hypothetical protein V501_03344 [Pseudogymnoascus pannorum V]</a>                        | 30.3 | 30.3 | 55% | 36 | 82% | <a href="#">gij682456359 KFZ14205.1</a>     |
| <a href="#">PREDICTED: intersectin-1 isoform X4 [Chrysemys picta bellii]</a>                         | 30.3 | 30.3 | 75% | 36 | 57% | <a href="#">gij641801520 XP_008163459.1</a> |
| <a href="#">PREDICTED: intersectin-1 isoform X3 [Chrysemys picta bellii]</a>                         | 30.3 | 30.3 | 75% | 36 | 57% | <a href="#">gij641801518 XP_008163458.1</a> |
| <a href="#">PREDICTED: intersectin-1 isoform X2 [Chrysemys picta bellii]</a>                         | 30.3 | 30.3 | 75% | 36 | 57% | <a href="#">gij641801516 XP_008163457.1</a> |
| <a href="#">PREDICTED: intersectin-1 isoform X1 [Chrysemys picta bellii]</a>                         | 30.3 | 30.3 | 75% | 36 | 57% | <a href="#">gij641801508 XP_008163453.1</a> |
| <a href="#">RecName: Full=Trans-splicing factor Raa3, chloroplastic; Flags: Pr</a>                   | 30.3 | 30.3 | 55% | 36 | 91% | <a href="#">gij20532239 Q9FEC4.1</a>        |
| <a href="#">psaA mRNA maturation factor 3 [Chlamydomonas reinhardtii]</a>                            | 30.3 | 30.3 | 55% | 36 | 91% | <a href="#">gij159469542 XP_001692922.1</a> |
| <a href="#">hypothetical protein [cyanobacterium PCC 7702]</a>                                       | 29.9 | 29.9 | 60% | 47 | 83% | <a href="#">gij515889762 WP_017320345.1</a> |
| <a href="#">Glucose-1-phosphate thymidyltransferase [Haliea rubra DSM 197]</a>                       | 29.9 | 29.9 | 80% | 48 | 69% | <a href="#">gij687957758 KGE02858.1</a>     |
| <a href="#">predicted protein [Hordeum vulgare subsp. vulgare]</a>                                   | 29.9 | 29.9 | 75% | 48 | 65% | <a href="#">gij326528445 BAJ93411.1</a>     |
| <a href="#">predicted protein [Hordeum vulgare subsp. vulgare]</a>                                   | 29.9 | 29.9 | 75% | 48 | 65% | <a href="#">gij326488801 BAJ98012.1</a>     |

## Alignments

[Download](#) [GenPept](#) [Graphics](#) ▼ Next ▲ Previous ▲ Descriptions

### Chain A, The Crystal Structure Of Icam-2

Sequence ID: [gij157834428|pdb|1ZXQ|A](#) Length: 192 Number of Matches: 1

Range 1: 139 to 158 [GenPept](#) [Graphics](#) ▼ Next Match ▲ Previous Match

| Score          | Expect | Identities  | Positives   | Gaps     |
|----------------|--------|-------------|-------------|----------|
| 63.8 bits(143) | 3e-10  | 20/20(100%) | 20/20(100%) | 0/20(0%) |

Query 1 KAAPAPQEATATFNSTADRE 20  
 KAAPAPQEATATFNSTADRE  
 Sbjct 139 KAAPAPQEATATFNSTADRE 158

#### Related Information

[Structure](#) - 3D structure displays

[Download](#) [GenPept](#) [Graphics](#) ▼ Next ▲ Previous ▲ Descriptions

### intercellular adhesion molecule 2, isoform CRA\_b [Homo sapiens]

Sequence ID: [gij119614623|gb|EAW94217.1](#) Length: 255 Number of Matches: 1

► [See 1 more title\(s\)](#)

Range 1: 163 to 182 [GenPept](#) [Graphics](#) ▼ Next Match ▲ Previous Match

| Score          | Expect | Identities  | Positives   | Gaps     |
|----------------|--------|-------------|-------------|----------|
| 63.8 bits(143) | 3e-10  | 20/20(100%) | 20/20(100%) | 0/20(0%) |

#### Related Information

[Gene](#) - associated gene details  
[Identical Proteins](#) - Proteins identical to the subject

Query 1 KAAPAPQEATATFNSTADRE 20  
 Sbjct 163 KAAPAPQEATATFNSTADRE 182

[Download](#) [GenPept](#) [Graphics](#)

[▼ Next](#) [▲ Previous](#) [▲ Descriptions](#)

intercellular adhesion molecule 2 precursor [Homo sapiens]

Sequence ID: [gi|153082686|ref|NP\\_001093256.1|](#) Length: 275 Number of Matches: 1

[▶ See 18 more title\(s\)](#)

Range 1: 163 to 182 [GenPept](#) [Graphics](#)

[▼ Next Match](#) [▲ Previous Match](#)

| Score          | Expect | Identities  | Positives   | Gaps     |
|----------------|--------|-------------|-------------|----------|
| 63.8 bits(143) | 3e-10  | 20/20(100%) | 20/20(100%) | 0/20(0%) |

Query 1 KAAPAPQEATATFNSTADRE 20  
 Sbjct 163 KAAPAPQEATATFNSTADRE 182

**Related Information**

- [Gene](#) - associated gene details
- [UniGene](#) - clustered expressed sequence tags
- [Map Viewer](#) - aligned genomic context
- [Identical Proteins](#) - Proteins identical to the subject

[Download](#) [GenPept](#) [Graphics](#)

[▼ Next](#) [▲ Previous](#) [▲ Descriptions](#)

ICAM-2 preprotein (AA -21 to 254) [Homo sapiens]

Sequence ID: [gi|32624|emb|CAA33630.1|](#) Length: 275 Number of Matches: 1

[▶ See 1 more title\(s\)](#)

Range 1: 163 to 182 [GenPept](#) [Graphics](#)

[▼ Next Match](#) [▲ Previous Match](#)

| Score          | Expect | Identities  | Positives   | Gaps     |
|----------------|--------|-------------|-------------|----------|
| 63.8 bits(143) | 3e-10  | 20/20(100%) | 20/20(100%) | 0/20(0%) |

Query 1 KAAPAPQEATATFNSTADRE 20  
 Sbjct 163 KAAPAPQEATATFNSTADRE 182

**Related Information**

- [Gene](#) - associated gene details
- [Identical Proteins](#) - Proteins identical to the subject

[Download](#) [GenPept](#) [Graphics](#)

[▼ Next](#) [▲ Previous](#) [▲ Descriptions](#)

unnamed protein product [Homo sapiens]

Sequence ID: [gi|158259681|dbj|BAF85799.1|](#) Length: 275 Number of Matches: 1

Range 1: 163 to 182 [GenPept](#) [Graphics](#)

[▼ Next Match](#) [▲ Previous Match](#)

| Score          | Expect | Identities  | Positives   | Gaps     |
|----------------|--------|-------------|-------------|----------|
| 63.8 bits(143) | 3e-10  | 20/20(100%) | 20/20(100%) | 0/20(0%) |

Query 1 KAAPAPQEATATFNSTADRE 20  
 Sbjct 163 KAAPAPQEATATFNSTADRE 182

**Related Information**

- [Gene](#) - associated gene details

BLAST is a registered trademark of the National Library of Medicine.

▶ NCBI/ BLAST/ blastp suite/ Formatting Results - BVH2P79P01R

**i** Your search parameters were adjusted to search for a short input sequence.

[Edit and Resubmit](#) [Save Search Strategies](#) ▶ [Formatting options](#) ▶ [Download](#) [YouTube](#) [How to read this page](#) [Blast report description](#)

### ITGB1\_RKEDSSEICSNNGECVCGQCVCRK\_Mod

|                                                                    |                                                                                                                                       |
|--------------------------------------------------------------------|---------------------------------------------------------------------------------------------------------------------------------------|
| <b>RID</b> <a href="#">BVH2P79P01R</a> (Expires on 01-21 09:58 am) | <b>Database Name</b> nr                                                                                                               |
| <b>Query ID</b>  cl 371267                                         | <b>Description</b> All non-redundant GenBank CDS translations+PDB+SwissProt+PIR+PRF excluding environmental samples from WGS projects |
| <b>Description</b> None                                            | <b>Program</b> BLASTP 2.2.30+ ▶ <a href="#">Citation</a>                                                                              |
| <b>Molecule type</b> amino acid                                    |                                                                                                                                       |
| <b>Query Length</b> 24                                             |                                                                                                                                       |

Other reports: ▶ [Search Summary](#) [[Taxonomy reports](#)] [[Distance tree of results](#)] [[Multiple alignment](#)]

### **Graphic Summary**

[Show Conserved Domains](#)

No putative conserved domains have been detected

Distribution of 103 Blast Hits on the Query Sequence



The image shows a table with 30 rows. Each row contains a single horizontal pink line. The table is centered on the page and is flanked by two vertical grey bars, one on the left and one on the right. The pink lines are evenly spaced and extend across most of the width of the table area.

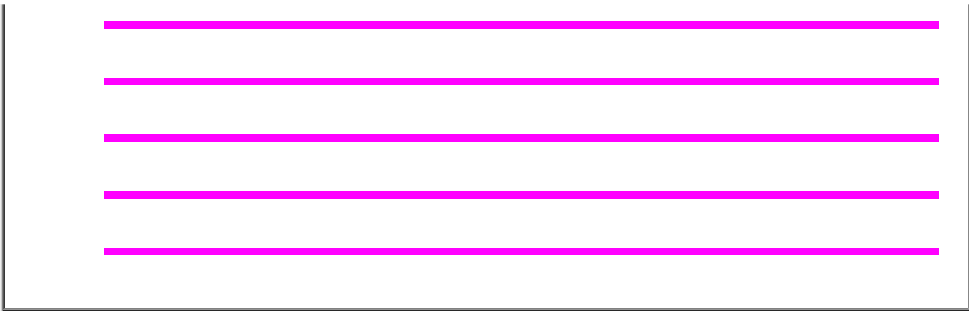

**Descriptions**

**Sequences producing significant alignments:**

Select: [All](#) [None](#) Selected:0

[Alignments](#)
[Download](#)
[GenPept](#)
[Graphics](#)
[Distance tree of results](#)
[Multiple alignment](#)


| Description                                                                                     | Max score | Total score | Query cover | E value | Ident | Accession                      |
|-------------------------------------------------------------------------------------------------|-----------|-------------|-------------|---------|-------|--------------------------------|
| <a href="#">beta1 integrin [Equus caballus]</a>                                                 | 80.4      | 80.4        | 100%        | 1e-15   | 96%   | <a href="#">BAG06145.1</a>     |
| <a href="#">unnamed protein product [Mus musculus]</a>                                          | 80.4      | 80.4        | 100%        | 1e-15   | 96%   | <a href="#">BAC36379.1</a>     |
| <a href="#">integrin, beta 1 (fibronectin receptor, beta polypeptide, antigen CD29 includes</a> | 80.4      | 80.4        | 100%        | 1e-15   | 96%   | <a href="#">EAW85956.1</a>     |
| <a href="#">PREDICTED: integrin beta-1 [Mesocricetus auratus]</a>                               | 80.4      | 80.4        | 100%        | 1e-15   | 96%   | <a href="#">XP_005083522.1</a> |
| <a href="#">PREDICTED: integrin beta-1 isoform X2 [Jaculus jaculus]</a>                         | 80.4      | 80.4        | 100%        | 1e-15   | 96%   | <a href="#">XP_004659843.1</a> |
| <a href="#">integrin beta-1 isoform 1 [Camelus ferus]</a>                                       | 80.4      | 80.4        | 100%        | 1e-15   | 96%   | <a href="#">EPY79213.1</a>     |
| <a href="#">PREDICTED: integrin beta-1 [Trichechus manatus latirostris]</a>                     | 80.4      | 80.4        | 100%        | 1e-15   | 96%   | <a href="#">XP_004387928.1</a> |
| <a href="#">PREDICTED: integrin beta-1 [Eptesicus fuscus]</a>                                   | 80.4      | 80.4        | 100%        | 1e-15   | 96%   | <a href="#">XP_008154521.1</a> |
| <a href="#">Integrin beta-1 [Tupaia chinensis]</a>                                              | 80.4      | 80.4        | 100%        | 1e-15   | 96%   | <a href="#">ELW48458.1</a>     |
| <a href="#">Integrin beta-1 [Pteropus alecto]</a>                                               | 80.4      | 80.4        | 100%        | 1e-15   | 96%   | <a href="#">ELK19641.1</a>     |
| <a href="#">PREDICTED: integrin beta-1-like [Pteropus alecto]</a>                               | 80.4      | 80.4        | 100%        | 1e-15   | 96%   | <a href="#">XP_006903905.1</a> |
| <a href="#">PREDICTED: integrin beta-1-like [Dasypus novemcinctus]</a>                          | 80.4      | 80.4        | 100%        | 1e-15   | 96%   | <a href="#">XP_004483041.1</a> |
| <a href="#">PREDICTED: integrin beta-1 [Sorex araneus]</a>                                      | 80.4      | 80.4        | 100%        | 1e-15   | 96%   | <a href="#">XP_004605564.1</a> |
| <a href="#">PREDICTED: integrin beta-1 [Macaca mulatta]</a>                                     | 80.4      | 80.4        | 100%        | 2e-15   | 96%   | <a href="#">XP_002805655.1</a> |
| <a href="#">hypothetical protein PANDA_013008 [Ailuropoda melanoleuca]</a>                      | 80.4      | 80.4        | 100%        | 2e-15   | 96%   | <a href="#">EFB17666.1</a>     |
| <a href="#">unnamed protein product [Mus musculus]</a>                                          | 80.4      | 80.4        | 100%        | 2e-15   | 96%   | <a href="#">BAE35290.1</a>     |
| <a href="#">beta-1 integrin subunit [Bos taurus]</a>                                            | 80.4      | 80.4        | 100%        | 2e-15   | 96%   | <a href="#">AAA80571.1</a>     |
| <a href="#">integrin, beta 1 (fibronectin receptor, beta polypeptide, antigen CD29 includes</a> | 80.4      | 80.4        | 100%        | 2e-15   | 96%   | <a href="#">EAW85960.1</a>     |
| <a href="#">PREDICTED: LOW QUALITY PROTEIN: integrin beta-1 [Erinaceus europaeu</a>             | 80.4      | 80.4        | 100%        | 2e-15   | 96%   | <a href="#">XP_007536525.1</a> |
| <a href="#">PREDICTED: integrin beta-1 [Ursus maritimus]</a>                                    | 80.4      | 80.4        | 100%        | 2e-15   | 96%   | <a href="#">XP_008682126.1</a> |
| <a href="#">PREDICTED: integrin beta-1 [Galeopterus variegatus]</a>                             | 80.4      | 80.4        | 100%        | 2e-15   | 96%   | <a href="#">XP_008584293.1</a> |
| <a href="#">PREDICTED: integrin beta-1 [Tarsius syrichta]</a>                                   | 80.4      | 80.4        | 100%        | 2e-15   | 96%   | <a href="#">XP_008063074.1</a> |
| <a href="#">PREDICTED: integrin beta-1 isoform X2 [Orycteropus afer afer]</a>                   | 80.4      | 80.4        | 100%        | 2e-15   | 96%   | <a href="#">XP_007940645.1</a> |
| <a href="#">PREDICTED: integrin beta-1 isoform X2 [Oryctolagus cuniculus]</a>                   | 80.4      | 80.4        | 100%        | 2e-15   | 96%   | <a href="#">XP_002721235.1</a> |
| <a href="#">PREDICTED: integrin beta-1 [Bubalus bubalis]</a>                                    | 80.4      | 80.4        | 100%        | 2e-15   | 96%   | <a href="#">XP_006063272.1</a> |
| <a href="#">integrin beta-1 precursor [Bos taurus]</a>                                          | 80.4      | 80.4        | 100%        | 2e-15   | 96%   | <a href="#">NP_776793.1</a>    |
| <a href="#">PREDICTED: integrin beta-1 isoform X3 [Lipotes vexillifer]</a>                      | 80.4      | 80.4        | 100%        | 2e-15   | 96%   | <a href="#">XP_007471382.1</a> |
| <a href="#">PREDICTED: integrin beta-1 isoform X5 [Balaenoptera acutorostrata scammo</a>        | 80.4      | 80.4        | 100%        | 2e-15   | 96%   | <a href="#">XP_007189916.1</a> |
| <a href="#">PREDICTED: integrin beta-1-like isoform X2 [Physeter catodon]</a>                   | 80.4      | 80.4        | 100%        | 2e-15   | 96%   | <a href="#">XP_007115902.1</a> |



|                                                                                              |      |      |      |       |     |                                |
|----------------------------------------------------------------------------------------------|------|------|------|-------|-----|--------------------------------|
| <a href="#">PREDICTED: integrin beta-1 isoform X1 [Panthera tigris altaica]</a>              | 80.4 | 80.4 | 100% | 2e-15 | 96% | <a href="#">XP_007092823.1</a> |
| <a href="#">PREDICTED: integrin beta-1 isoform X2 [Peromyscus maniculatus bairdii]</a>       | 80.4 | 80.4 | 100% | 2e-15 | 96% | <a href="#">XP_006982576.1</a> |
| <a href="#">PREDICTED: integrin beta-1-like isoform X2 [Elephantulus edwardii]</a>           | 80.4 | 80.4 | 100% | 2e-15 | 96% | <a href="#">XP_006889010.1</a> |
| <a href="#">PREDICTED: integrin beta-1 isoform X2 [Leptonychotes weddellii]</a>              | 80.4 | 80.4 | 100% | 2e-15 | 96% | <a href="#">XP_006737563.1</a> |
| <a href="#">PREDICTED: integrin beta-1 isoform X2 [Tupaia chinensis]</a>                     | 80.4 | 80.4 | 100% | 2e-15 | 96% | <a href="#">XP_006158348.1</a> |
| <a href="#">PREDICTED: integrin beta-1-like [Camelus ferus]</a>                              | 80.4 | 80.4 | 100% | 2e-15 | 96% | <a href="#">XP_006187117.1</a> |
| <a href="#">PREDICTED: integrin beta-1 isoform X2 [Myotis lucifugus]</a>                     | 80.4 | 80.4 | 100% | 2e-15 | 96% | <a href="#">XP_006086741.1</a> |
| <a href="#">PREDICTED: integrin beta-1 isoform X2 [Pantholops hodgsonii]</a>                 | 80.4 | 80.4 | 100% | 2e-15 | 96% | <a href="#">XP_005972136.1</a> |
| <a href="#">PREDICTED: integrin beta-1 isoform X2 [Bos mutus]</a>                            | 80.4 | 80.4 | 100% | 2e-15 | 96% | <a href="#">XP_005890244.1</a> |
| <a href="#">PREDICTED: integrin beta-1 isoform X2 [Ictidomys tridecemlineatus]</a>           | 80.4 | 80.4 | 100% | 2e-15 | 96% | <a href="#">XP_005330880.1</a> |
| <a href="#">PREDICTED: integrin beta-1 [Microtus ochrogaster]</a>                            | 80.4 | 80.4 | 100% | 2e-15 | 96% | <a href="#">XP_005345987.1</a> |
| <a href="#">PREDICTED: integrin beta-1 isoform X2 [Mustela putorius furo]</a>                | 80.4 | 80.4 | 100% | 2e-15 | 96% | <a href="#">XP_004774339.1</a> |
| <a href="#">PREDICTED: integrin beta-1-like [Octodon degus]</a>                              | 80.4 | 80.4 | 100% | 2e-15 | 96% | <a href="#">XP_004641911.1</a> |
| <a href="#">PREDICTED: integrin beta-1 isoform X1 [Jaculus jaculus]</a>                      | 80.4 | 80.4 | 100% | 2e-15 | 96% | <a href="#">XP_004659842.1</a> |
| <a href="#">PREDICTED: integrin beta-1 isoform 2 [Ceratotherium simum simum]</a>             | 80.4 | 80.4 | 100% | 2e-15 | 96% | <a href="#">XP_004425300.1</a> |
| <a href="#">PREDICTED: integrin beta-1 isoform 2 [Odobenus rosmarus divergens]</a>           | 80.4 | 80.4 | 100% | 2e-15 | 96% | <a href="#">XP_004401882.1</a> |
| <a href="#">PREDICTED: integrin beta-1 isoform 2 [Orcinus orca]</a>                          | 80.4 | 80.4 | 100% | 2e-15 | 96% | <a href="#">XP_004275966.1</a> |
| <a href="#">integrin beta-1 precursor [Pongo abelii]</a>                                     | 80.4 | 80.4 | 100% | 2e-15 | 96% | <a href="#">NP_001125324.1</a> |
| <a href="#">Fn receptor beta prechain [Mus musculus]</a>                                     | 80.4 | 80.4 | 100% | 2e-15 | 96% | <a href="#">CAA33272.1</a>     |
| <a href="#">integrin beta-1 precursor [Mus musculus]</a>                                     | 80.4 | 80.4 | 100% | 2e-15 | 96% | <a href="#">NP_034708.1</a>    |
| <a href="#">unnamed protein product [Homo sapiens]</a>                                       | 80.4 | 80.4 | 100% | 2e-15 | 96% | <a href="#">CAA30790.1</a>     |
| <a href="#">integrin beta-1 precursor [Felis catus]</a>                                      | 80.4 | 80.4 | 100% | 2e-15 | 96% | <a href="#">NP_001041625.1</a> |
| <a href="#">integrin subunit beta 1 [Capra hircus]</a>                                       | 80.4 | 80.4 | 100% | 2e-15 | 96% | <a href="#">AFP87513.1</a>     |
| <a href="#">PREDICTED: integrin beta-1 isoform X2 [Pan paniscus]</a>                         | 80.4 | 80.4 | 100% | 2e-15 | 96% | <a href="#">XP_003814839.1</a> |
| <a href="#">PREDICTED: integrin beta-1 isoform 1 [Otolemur garnettii]</a>                    | 80.4 | 80.4 | 100% | 2e-15 | 96% | <a href="#">XP_003786766.1</a> |
| <a href="#">PREDICTED: integrin beta-1 isoform X2 [Papio anubis]</a>                         | 80.4 | 80.4 | 100% | 2e-15 | 96% | <a href="#">XP_003903581.1</a> |
| <a href="#">PREDICTED: integrin beta-1 [Heterocephalus glaber]</a>                           | 80.4 | 80.4 | 100% | 2e-15 | 96% | <a href="#">XP_004861939.1</a> |
| <a href="#">PREDICTED: integrin beta-1 isoform 1 [Cavia porcellus]</a>                       | 80.4 | 80.4 | 100% | 2e-15 | 96% | <a href="#">XP_003468668.1</a> |
| <a href="#">PREDICTED: integrin beta-1 isoform X2 [Canis lupus familiaris]</a>               | 80.4 | 80.4 | 100% | 2e-15 | 96% | <a href="#">XP_005617006.1</a> |
| <a href="#">PREDICTED: integrin beta-1 [Loxodonta africana]</a>                              | 80.4 | 80.4 | 100% | 2e-15 | 96% | <a href="#">XP_003420767.1</a> |
| <a href="#">PREDICTED: integrin beta-1 isoform X2 [Cricetulus griseus]</a>                   | 80.4 | 80.4 | 100% | 2e-15 | 96% | <a href="#">XP_007621878.1</a> |
| <a href="#">PREDICTED: integrin beta-1 isoform X2 [Pan troglodytes]</a>                      | 80.4 | 80.4 | 100% | 2e-15 | 96% | <a href="#">XP_507735.3</a>    |
| <a href="#">PREDICTED: integrin beta-1 isoform 1 [Nomascus leucogenys]</a>                   | 80.4 | 80.4 | 100% | 2e-15 | 96% | <a href="#">XP_003276062.1</a> |
| <a href="#">PREDICTED: integrin beta-1-like [Ailuropoda melanoleuca]</a>                     | 80.4 | 80.4 | 100% | 2e-15 | 96% | <a href="#">XP_002923799.1</a> |
| <a href="#">integrin beta1 [Camelus dromedarius]</a>                                         | 80.4 | 80.4 | 100% | 2e-15 | 96% | <a href="#">ACT68325.1</a>     |
| <a href="#">integrin beta1 [Litocranius walleri]</a>                                         | 80.4 | 80.4 | 100% | 2e-15 | 96% | <a href="#">ACT68324.1</a>     |
| <a href="#">integrin beta-1 precursor [Ovis aries]</a>                                       | 80.4 | 80.4 | 100% | 2e-15 | 96% | <a href="#">NP_001107242.1</a> |
| <a href="#">unnamed protein product [Homo sapiens]</a>                                       | 80.4 | 80.4 | 100% | 2e-15 | 96% | <a href="#">BAF84386.1</a>     |
| <a href="#">RecName: Full=Integrin beta-1; AltName: Full=Fibronectin receptor subunit be</a> | 80.4 | 80.4 | 100% | 2e-15 | 96% | <a href="#">A5Z1X6.1</a>       |
| <a href="#">integrin beta-1 precursor [Rattus norvegicus]</a>                                | 80.4 | 80.4 | 100% | 2e-15 | 96% | <a href="#">NP_058718.2</a>    |
| <a href="#">hypothetical protein [synthetic construct]</a>                                   | 80.4 | 101  | 100% | 2e-15 | 96% | <a href="#">CAL38075.1</a>     |
| <a href="#">integrin beta 1 [Bos taurus]</a>                                                 | 80.4 | 80.4 | 100% | 2e-15 | 96% | <a href="#">ABH07895.1</a>     |
| <a href="#">unnamed protein product [Mus musculus]</a>                                       | 80.4 | 80.4 | 100% | 2e-15 | 96% | <a href="#">BAC40532.1</a>     |
| <a href="#">integrin beta-1 isoform 1A precursor [Homo sapiens]</a>                          | 80.4 | 80.4 | 100% | 2e-15 | 96% | <a href="#">NP_002202.2</a>    |
| <a href="#">PREDICTED: integrin beta-1 isoform X1 [Bison bison bison]</a>                    | 80.4 | 80.4 | 100% | 2e-15 | 96% | <a href="#">XP_010858191.1</a> |

|                                                                                             |      |      |      |       |     |                                |
|---------------------------------------------------------------------------------------------|------|------|------|-------|-----|--------------------------------|
| <a href="#">PREDICTED: integrin beta-1 [Nannospalax galili]</a>                             | 80.4 | 80.4 | 100% | 2e-15 | 96% | <a href="#">XP_008845808.1</a> |
| <a href="#">RecName: Full=Integrin beta-1; AltName: Full=Beta oligodendroglia; Short=Be</a> | 80.4 | 80.4 | 100% | 2e-15 | 96% | <a href="#">P49134.1</a>       |
| <a href="#">PREDICTED: integrin beta-1 [Sarcophilus harrisii]</a>                           | 80.4 | 104  | 100% | 2e-15 | 96% | <a href="#">XP_003771880.1</a> |
| <a href="#">PREDICTED: integrin beta-1 [Ornithorhynchus anatinus]</a>                       | 80.4 | 80.4 | 100% | 2e-15 | 96% | <a href="#">XP_007666003.1</a> |
| <a href="#">PREDICTED: integrin beta-1 isoform X1 [Monodelphis domestica]</a>               | 80.4 | 104  | 100% | 2e-15 | 96% | <a href="#">XP_001366567.1</a> |
| <a href="#">PREDICTED: integrin beta-1 isoform X2 [Camelus dromedarius]</a>                 | 80.4 | 80.4 | 100% | 2e-15 | 96% | <a href="#">XP_010991989.1</a> |
| <a href="#">PREDICTED: integrin beta-1 isoform X1 [Pan troglodytes]</a>                     | 80.4 | 80.4 | 100% | 2e-15 | 96% | <a href="#">XP_009456504.1</a> |
| <a href="#">PREDICTED: integrin beta-1 isoform X1 [Pan paniscus]</a>                        | 80.4 | 80.4 | 100% | 2e-15 | 96% | <a href="#">XP_008965875.1</a> |
| <a href="#">PREDICTED: integrin beta-1 isoform X1 [Oryctolagus cuniculus]</a>               | 80.4 | 80.4 | 100% | 2e-15 | 96% | <a href="#">XP_008272963.1</a> |
| <a href="#">PREDICTED: integrin beta-1 isoform X1 [Orycteropus afer afer]</a>               | 80.4 | 80.4 | 100% | 2e-15 | 96% | <a href="#">XP_007940644.1</a> |
| <a href="#">PREDICTED: integrin beta-1 isoform X1 [Bos taurus]</a>                          | 80.4 | 80.4 | 100% | 2e-15 | 96% | <a href="#">XP_005214205.1</a> |
| <a href="#">PREDICTED: integrin beta-1 isoform X2 [Lipotes vexillifer]</a>                  | 80.4 | 80.4 | 100% | 2e-15 | 96% | <a href="#">XP_007471381.1</a> |
| <a href="#">PREDICTED: integrin beta-1 isoform X1 [Balaenoptera acutorostrata scammo</a>    | 80.4 | 80.4 | 100% | 2e-15 | 96% | <a href="#">XP_007189912.1</a> |
| <a href="#">PREDICTED: integrin beta-1 isoform X1 [Peromyscus maniculatus bairdii]</a>      | 80.4 | 80.4 | 100% | 2e-15 | 96% | <a href="#">XP_006982575.1</a> |
| <a href="#">PREDICTED: integrin beta-1-like isoform X1 [Elephantulus edwardii]</a>          | 80.4 | 80.4 | 100% | 2e-15 | 96% | <a href="#">XP_006889009.1</a> |
| <a href="#">PREDICTED: integrin beta-1 isoform X1 [Leptonychotes weddellii]</a>             | 80.4 | 80.4 | 100% | 2e-15 | 96% | <a href="#">XP_006737562.1</a> |
| <a href="#">PREDICTED: integrin beta-1 isoform X1 [Rattus norvegicus]</a>                   | 80.4 | 80.4 | 100% | 2e-15 | 96% | <a href="#">XP_006255886.1</a> |
| <a href="#">PREDICTED: integrin beta-1 isoform X1 [Tupaia chinensis]</a>                    | 80.4 | 80.4 | 100% | 2e-15 | 96% | <a href="#">XP_006158347.1</a> |
| <a href="#">PREDICTED: integrin beta-1 isoform X1 [Myotis lucifugus]</a>                    | 80.4 | 80.4 | 100% | 2e-15 | 96% | <a href="#">XP_006086740.1</a> |
| <a href="#">PREDICTED: integrin beta-1 isoform X1 [Pantholops hodgsonii]</a>                | 80.4 | 80.4 | 100% | 2e-15 | 96% | <a href="#">XP_005972135.1</a> |
| <a href="#">PREDICTED: integrin beta-1 isoform X1 [Sus scrofa]</a>                          | 80.4 | 80.4 | 100% | 2e-15 | 96% | <a href="#">XP_005668230.1</a> |
| <a href="#">PREDICTED: integrin beta-1 isoform X1 [Canis lupus familiaris]</a>              | 80.4 | 80.4 | 100% | 2e-15 | 96% | <a href="#">XP_005617005.1</a> |
| <a href="#">PREDICTED: integrin beta-1 isoform X1 [Macaca fascicularis]</a>                 | 80.4 | 80.4 | 100% | 2e-15 | 96% | <a href="#">XP_005564990.1</a> |
| <a href="#">PREDICTED: integrin beta-1-like isoform X2 [Chinchilla lanigera]</a>            | 80.4 | 80.4 | 100% | 2e-15 | 96% | <a href="#">XP_005398209.1</a> |
| <a href="#">PREDICTED: integrin beta-1 isoform X1 [Ictidomys tridecemlineatus]</a>          | 80.4 | 80.4 | 100% | 2e-15 | 96% | <a href="#">XP_005330879.1</a> |
| <a href="#">PREDICTED: integrin beta-1 isoform X1 [Bos mutus]</a>                           | 80.4 | 80.4 | 100% | 2e-15 | 96% | <a href="#">XP_005890243.1</a> |

## Alignments

Download [GenPept](#) [Graphics](#)

[Next](#) [Previous](#) [Descriptions](#)

### beta1 integrin [Equus caballus]

Sequence ID: [dbj|BAG06145.1](#) Length: 221 Number of Matches: 1

Range 1: 19 to 42 [GenPept](#) [Graphics](#)

[Next Match](#) [Previous Match](#)

| Score          | Expect | Identities | Positives   | Gaps     |
|----------------|--------|------------|-------------|----------|
| 80.4 bits(182) | 1e-15  | 23/24(96%) | 24/24(100%) | 0/24(0%) |

Query 1 RKEDSSEICSNNGECVCGQCVCRK 24  
 RKE+SSEICSNNGECVCGQCVCRK  
 Sbjct 19 RKENSSEICSNNGECVCGQCVCRK 42

#### Related Information

[Gene](#) - associated gene details  
[Map Viewer](#) - aligned genomic context

Download [GenPept](#) [Graphics](#)

[Next](#) [Previous](#) [Descriptions](#)

### unnamed protein product [Mus musculus]

Sequence ID: [dbj|BAC36379.1](#) Length: 504 Number of Matches: 1

Range 1: 369 to 392 [GenPept](#) [Graphics](#)

[Next Match](#) [Previous Match](#)

| Score          | Expect | Identities | Positives   | Gaps     |
|----------------|--------|------------|-------------|----------|
| 80.4 bits(182) | 1e-15  | 23/24(96%) | 24/24(100%) | 0/24(0%) |

#### Related Information

[Gene](#) - associated gene details

Query 1 RKEDSSEICSNNGECVCGQCVCRK 24  
 RKE+SSEICSNNGECVCGQCVCRK  
 Sbjct 369 RKENSSEICSNNGECVCGQCVCRK 392

[Download](#) [GenPept](#) [Graphics](#)

[Next](#) [Previous](#) [Descriptions](#)

integrin, beta 1 (fibronectin receptor, beta polypeptide, antigen CD29 includes MDF2, MSK12), isoform CRA\_e [Homo sapiens]  
 Sequence ID: [gb|EAW85956.1|](#) Length: 682 Number of Matches: 1

Range 1: 460 to 483 [GenPept](#) [Graphics](#)

[Next Match](#) [Previous Match](#)

| Score          | Expect | Identities | Positives   | Gaps     |
|----------------|--------|------------|-------------|----------|
| 80.4 bits(182) | 1e-15  | 23/24(96%) | 24/24(100%) | 0/24(0%) |

Query 1 RKEDSSEICSNNGECVCGQCVCRK 24  
 RKE+SSEICSNNGECVCGQCVCRK  
 Sbjct 460 RKENSSEICSNNGECVCGQCVCRK 483

**Related Information**

[Gene](#) - associated gene details

[Download](#) [GenPept](#) [Graphics](#)

[Next](#) [Previous](#) [Descriptions](#)

PREDICTED: integrin beta-1 [Mesocricetus auratus]  
 Sequence ID: [ref|XP\\_005083522.1|](#) Length: 686 Number of Matches: 1

Range 1: 405 to 428 [GenPept](#) [Graphics](#)

[Next Match](#) [Previous Match](#)

| Score          | Expect | Identities | Positives   | Gaps     |
|----------------|--------|------------|-------------|----------|
| 80.4 bits(182) | 1e-15  | 23/24(96%) | 24/24(100%) | 0/24(0%) |

Query 1 RKEDSSEICSNNGECVCGQCVCRK 24  
 RKE+SSEICSNNGECVCGQCVCRK  
 Sbjct 405 RKENSSEICSNNGECVCGQCVCRK 428

**Related Information**

[Gene](#) - associated gene details  
[Map Viewer](#) - aligned genomic context

[Download](#) [GenPept](#) [Graphics](#)

[Next](#) [Previous](#) [Descriptions](#)

PREDICTED: integrin beta-1 isoform X2 [Jaculus jaculus]  
 Sequence ID: [ref|XP\\_004659843.1|](#) Length: 698 Number of Matches: 1

Range 1: 417 to 440 [GenPept](#) [Graphics](#)

[Next Match](#) [Previous Match](#)

| Score          | Expect | Identities | Positives   | Gaps     |
|----------------|--------|------------|-------------|----------|
| 80.4 bits(182) | 1e-15  | 23/24(96%) | 24/24(100%) | 0/24(0%) |

Query 1 RKEDSSEICSNNGECVCGQCVCRK 24  
 RKE+SSEICSNNGECVCGQCVCRK  
 Sbjct 417 RKENSSEICSNNGECVCGQCVCRK 440

**Related Information**

[Gene](#) - associated gene details  
[Map Viewer](#) - aligned genomic context

BLAST is a registered trademark of the National Library of Medicine.



NCBI/ BLAST/ blastp suite/ Formatting Results - B9FY0F8C01R

Your search parameters were adjusted to search for a short input sequence.

Edit and Resubmit Save Search Strategies Formatting options Download

YouTube How to read this page Blast report description

ITGB1\_RKENSSEICSNNGECVCGQCVCVKR\_NonMod

RID B9FY0F8C01R (Expires on 01-14 13:48 pm)

Query ID Icl|16271
Description None
Molecule type amino acid
Query Length 24

Database Name nr
Description All non-redundant GenBank CDS translations+PDB+SwissProt+PIR excluding environmental samples from WGS projects
Program BLASTP 2.2.30+ Citation

Other reports: Search Summary Taxonomy reports Distance tree of results Multiple alignment

Graphic Summary

Show Conserved Domains

No putative conserved domains have been detected

Distribution of 104 Blast Hits on the Query Sequence

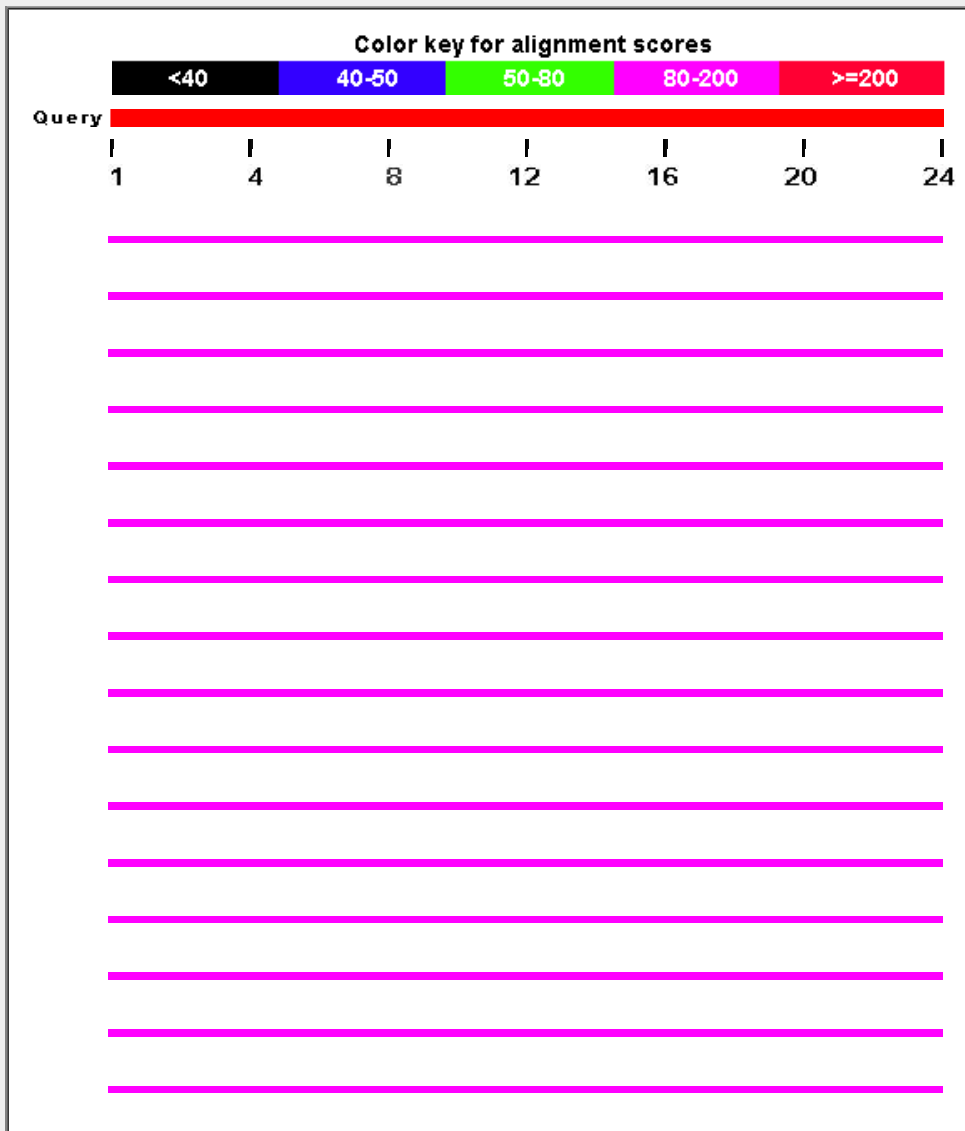

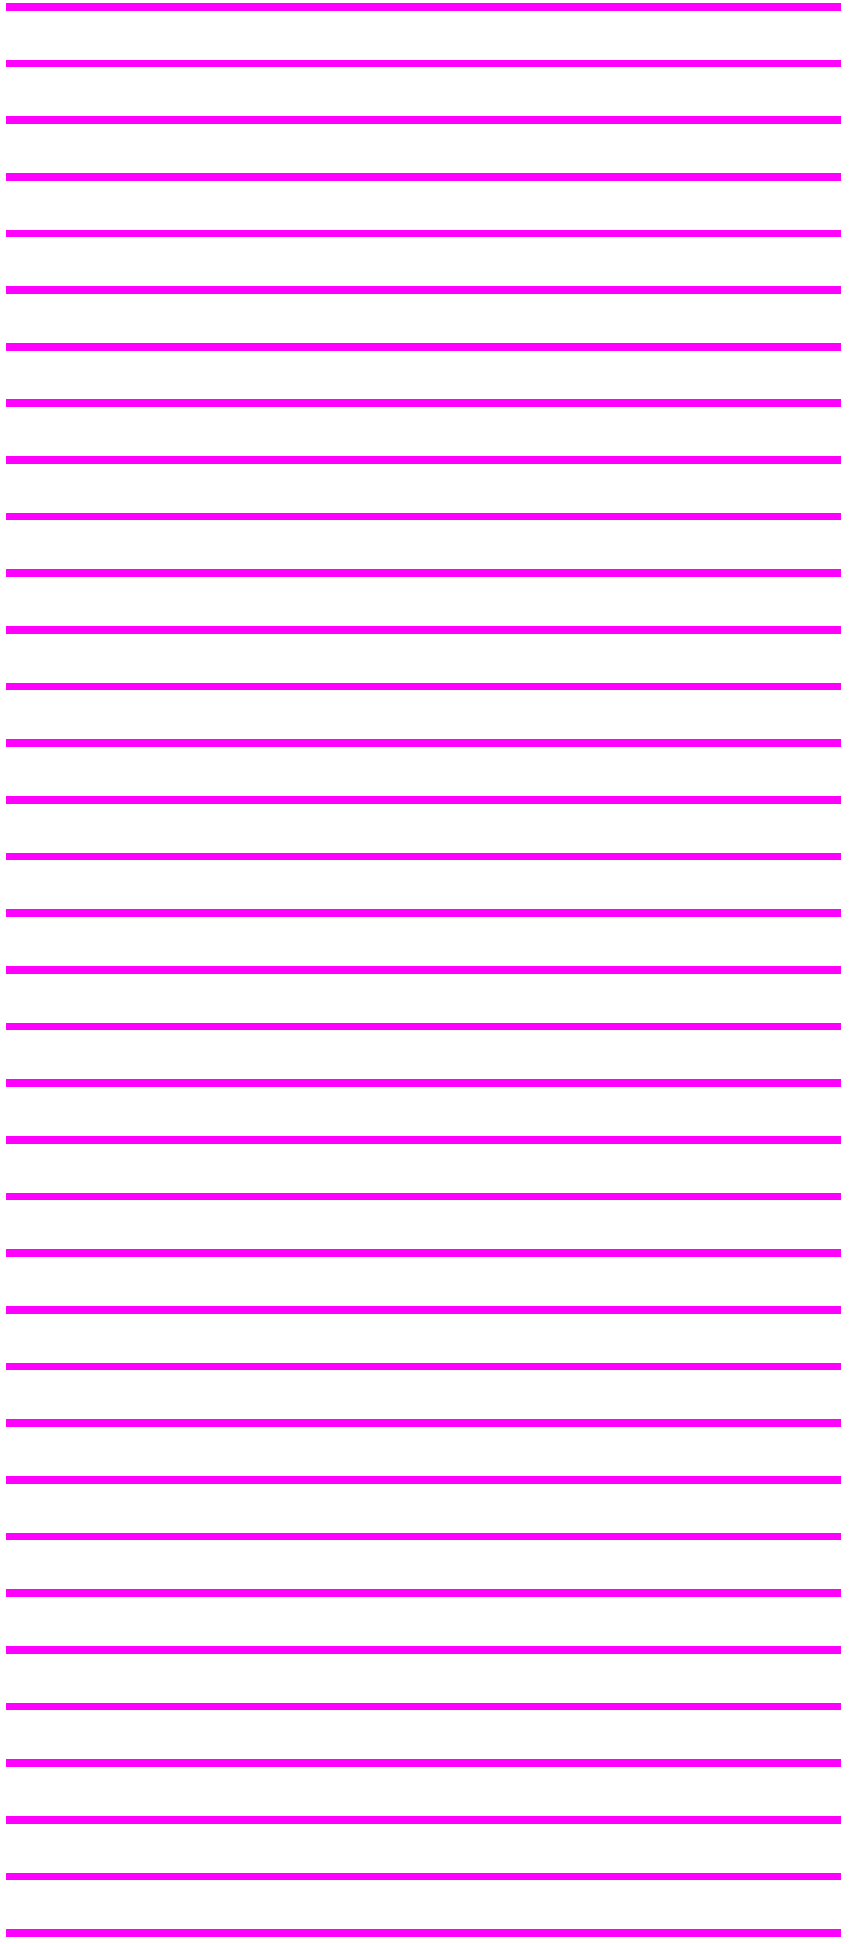

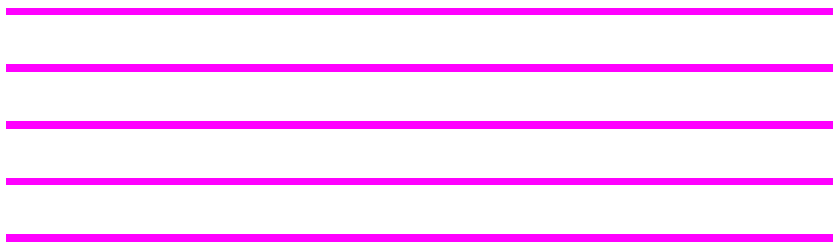

**Descriptions**

**Sequences producing significant alignments:**

Select: [All](#) [None](#) Selected:0

Alignments Download GenPept Graphics Distance tree of results Multiple alignment

| Description                                                                            | Max score | Total score | Query cover | E value | Ident | Accession                                   |
|----------------------------------------------------------------------------------------|-----------|-------------|-------------|---------|-------|---------------------------------------------|
| <a href="#">beta1 integrin [Equus caballus]</a>                                        | 82.9      | 82.9        | 100%        | 1e-16   | 100%  | <a href="#">gij166157373 BAG06145.1</a>     |
| <a href="#">unnamed protein product [Mus musculus]</a>                                 | 82.9      | 82.9        | 100%        | 2e-16   | 100%  | <a href="#">gij26345456 BAC36379.1</a>      |
| <a href="#">integrin, beta 1 (fibronectin receptor, beta polypeptide, antigen CD2)</a> | 82.9      | 82.9        | 100%        | 2e-16   | 100%  | <a href="#">gij119606362 EAW85956.1</a>     |
| <a href="#">PREDICTED: integrin beta-1 [Mesocricetus auratus]</a>                      | 82.9      | 82.9        | 100%        | 2e-16   | 100%  | <a href="#">gij524967265 XP_005083522.1</a> |
| <a href="#">PREDICTED: integrin beta-1 isoform X2 [Jaculus jaculus]</a>                | 82.9      | 82.9        | 100%        | 2e-16   | 100%  | <a href="#">gij507552093 XP_004659843.1</a> |
| <a href="#">integrin beta-1 isoform 1 [Camelus ferus]</a>                              | 82.9      | 82.9        | 100%        | 2e-16   | 100%  | <a href="#">gij528759554 EPY79213.1</a>     |
| <a href="#">PREDICTED: integrin beta-1 [Trichechus manatus latirostris]</a>            | 82.9      | 82.9        | 100%        | 2e-16   | 100%  | <a href="#">gij471412758 XP_004387928.1</a> |
| <a href="#">PREDICTED: integrin beta-1 [Eptesicus fuscus]</a>                          | 82.9      | 82.9        | 100%        | 2e-16   | 100%  | <a href="#">gij641728728 XP_008154521.1</a> |
| <a href="#">Integrin beta-1 [Tupaia chinensis]</a>                                     | 82.9      | 82.9        | 100%        | 2e-16   | 100%  | <a href="#">gij444707169 ELW48458.1</a>     |
| <a href="#">Integrin beta-1 [Pteropus alecto]</a>                                      | 82.9      | 82.9        | 100%        | 2e-16   | 100%  | <a href="#">gij431922892 ELK19641.1</a>     |
| <a href="#">PREDICTED: integrin beta-1-like [Pteropus alecto]</a>                      | 82.9      | 82.9        | 100%        | 2e-16   | 100%  | <a href="#">gij586519049 XP_006903905.1</a> |
| <a href="#">PREDICTED: integrin beta-1-like [Dasypus novemcinctus]</a>                 | 82.9      | 103         | 100%        | 2e-16   | 100%  | <a href="#">gij488595691 XP_004483041.1</a> |
| <a href="#">PREDICTED: integrin beta-1 [Sorex araneus]</a>                             | 82.9      | 82.9        | 100%        | 2e-16   | 100%  | <a href="#">gij505789884 XP_004605564.1</a> |
| <a href="#">PREDICTED: integrin beta-1 [Macaca mulatta]</a>                            | 82.9      | 82.9        | 100%        | 2e-16   | 100%  | <a href="#">gij297300768 XP_002805655.1</a> |
| <a href="#">hypothetical protein PANDA_013008 [Ailuropoda melanoleuca]</a>             | 82.9      | 82.9        | 100%        | 2e-16   | 100%  | <a href="#">gij281342082 EFB17666.1</a>     |
| <a href="#">unnamed protein product [Mus musculus]</a>                                 | 82.9      | 82.9        | 100%        | 2e-16   | 100%  | <a href="#">gij74198239 BAE35290.1</a>      |
| <a href="#">beta-1 integrin subunit [Bos taurus]</a>                                   | 82.9      | 82.9        | 100%        | 2e-16   | 100%  | <a href="#">gij520521 AAA80571.1</a>        |
| <a href="#">integrin, beta 1 (fibronectin receptor, beta polypeptide, antigen CD2)</a> | 82.9      | 82.9        | 100%        | 2e-16   | 100%  | <a href="#">gij119606366 EAW85960.1</a>     |
| <a href="#">PREDICTED: LOW QUALITY PROTEIN: integrin beta-1 [Erinaceus]</a>            | 82.9      | 82.9        | 100%        | 2e-16   | 100%  | <a href="#">gij617658590 XP_007536525.1</a> |
| <a href="#">PREDICTED: integrin beta-1 [Ursus maritimus]</a>                           | 82.9      | 82.9        | 100%        | 2e-16   | 100%  | <a href="#">gij671040340 XP_008682126.1</a> |
| <a href="#">PREDICTED: integrin beta-1 [Galeopterus variegatus]</a>                    | 82.9      | 82.9        | 100%        | 2e-16   | 100%  | <a href="#">gij667310115 XP_008584293.1</a> |
| <a href="#">PREDICTED: integrin beta-1 [Tarsius syrichta]</a>                          | 82.9      | 82.9        | 100%        | 2e-16   | 100%  | <a href="#">gij640812799 XP_008063074.1</a> |
| <a href="#">PREDICTED: integrin beta-1 isoform X2 [Orycteropus afer afer]</a>          | 82.9      | 82.9        | 100%        | 2e-16   | 100%  | <a href="#">gij634852628 XP_007940645.1</a> |
| <a href="#">PREDICTED: integrin beta-1 isoform X2 [Oryctolagus cuniculus]</a>          | 82.9      | 82.9        | 100%        | 2e-16   | 100%  | <a href="#">gij291409905 XP_002721235.1</a> |
| <a href="#">PREDICTED: integrin beta-1 [Bubalus bubalis]</a>                           | 82.9      | 82.9        | 100%        | 2e-16   | 100%  | <a href="#">gij594079184 XP_006063272.1</a> |
| <a href="#">integrin beta-1 precursor [Bos taurus]</a>                                 | 82.9      | 82.9        | 100%        | 2e-16   | 100%  | <a href="#">gij27805959 NP_776793.1</a>     |
| <a href="#">PREDICTED: integrin beta-1 isoform X3 [Lipotes vexillifer]</a>             | 82.9      | 82.9        | 100%        | 2e-16   | 100%  | <a href="#">gij602722472 XP_007471382.1</a> |
| <a href="#">PREDICTED: integrin beta-1 isoform X5 [Balaenoptera acutorostrat]</a>      | 82.9      | 82.9        | 100%        | 2e-16   | 100%  | <a href="#">gij594684797 XP_007189916.1</a> |

|                                                                                    |      |      |      |       |      |                                             |
|------------------------------------------------------------------------------------|------|------|------|-------|------|---------------------------------------------|
| <a href="#">PREDICTED: integrin beta-1-like isoform X2 [Physeter catodon]</a>      | 82.9 | 82.9 | 100% | 2e-16 | 100% | <a href="#">gij593754014 XP_007115902.1</a> |
| <a href="#">PREDICTED: integrin beta-1 isoform X1 [Panthera tigris altaica]</a>    | 82.9 | 82.9 | 100% | 2e-16 | 100% | <a href="#">gij591334243 XP_007092823.1</a> |
| <a href="#">PREDICTED: integrin beta-1 isoform X2 [Peromyscus maniculatus]</a>     | 82.9 | 82.9 | 100% | 2e-16 | 100% | <a href="#">gij589939670 XP_006982576.1</a> |
| <a href="#">PREDICTED: integrin beta-1-like isoform X2 [Elephantulus edwardi]</a>  | 82.9 | 82.9 | 100% | 2e-16 | 100% | <a href="#">gij585670442 XP_006889010.1</a> |
| <a href="#">PREDICTED: integrin beta-1 isoform X2 [Leptonychotes weddellii]</a>    | 82.9 | 82.9 | 100% | 2e-16 | 100% | <a href="#">gij585171151 XP_006737563.1</a> |
| <a href="#">PREDICTED: integrin beta-1 isoform X2 [Tupaia chinensis]</a>           | 82.9 | 82.9 | 100% | 2e-16 | 100% | <a href="#">gij562859888 XP_006158348.1</a> |
| <a href="#">PREDICTED: integrin beta-1-like [Camelus ferus]</a>                    | 82.9 | 82.9 | 100% | 2e-16 | 100% | <a href="#">gij560921824 XP_006187117.1</a> |
| <a href="#">PREDICTED: integrin beta-1 isoform X2 [Myotis lucifugus]</a>           | 82.9 | 82.9 | 100% | 2e-16 | 100% | <a href="#">gij558115793 XP_006086741.1</a> |
| <a href="#">PREDICTED: integrin beta-1 isoform X2 [Pantholops hodgsonii]</a>       | 82.9 | 82.9 | 100% | 2e-16 | 100% | <a href="#">gij556753520 XP_005972136.1</a> |
| <a href="#">PREDICTED: integrin beta-1 isoform X2 [Bos mutus]</a>                  | 82.9 | 82.9 | 100% | 2e-16 | 100% | <a href="#">gij555956189 XP_005890244.1</a> |
| <a href="#">PREDICTED: integrin beta-1 isoform X2 [Ictidomys tridecemlineatus]</a> | 82.9 | 82.9 | 100% | 2e-16 | 100% | <a href="#">gij532090374 XP_005330880.1</a> |
| <a href="#">PREDICTED: integrin beta-1 [Microtus ochrogaster]</a>                  | 82.9 | 82.9 | 100% | 2e-16 | 100% | <a href="#">gij532003510 XP_005345987.1</a> |
| <a href="#">PREDICTED: integrin beta-1 isoform X2 [Mustela putorius furo]</a>      | 82.9 | 82.9 | 100% | 2e-16 | 100% | <a href="#">gij511909857 XP_004774339.1</a> |
| <a href="#">PREDICTED: integrin beta-1-like [Octodon degus]</a>                    | 82.9 | 82.9 | 100% | 2e-16 | 100% | <a href="#">gij507691051 XP_004641911.1</a> |
| <a href="#">PREDICTED: integrin beta-1 isoform X1 [Jaculus jaculus]</a>            | 82.9 | 82.9 | 100% | 2e-16 | 100% | <a href="#">gij507552091 XP_004659842.1</a> |
| <a href="#">PREDICTED: integrin beta-1 isoform 2 [Ceratotherium simum simu]</a>    | 82.9 | 82.9 | 100% | 2e-16 | 100% | <a href="#">gij478501978 XP_004425300.1</a> |
| <a href="#">PREDICTED: integrin beta-1 isoform 2 [Odobenus rosmarus diverg]</a>    | 82.9 | 82.9 | 100% | 2e-16 | 100% | <a href="#">gij472364641 XP_004401882.1</a> |
| <a href="#">PREDICTED: integrin beta-1 isoform 2 [Orcinus orca]</a>                | 82.9 | 82.9 | 100% | 2e-16 | 100% | <a href="#">gij466039204 XP_004275966.1</a> |
| <a href="#">integrin beta-1 precursor [Pongo abelii]</a>                           | 82.9 | 82.9 | 100% | 2e-16 | 100% | <a href="#">gij197098822 NP_001125324.1</a> |
| <a href="#">Fn receptor beta prechain [Mus musculus]</a>                           | 82.9 | 82.9 | 100% | 2e-16 | 100% | <a href="#">gij762977 CAA33272.1</a>        |
| <a href="#">integrin beta-1 precursor [Mus musculus]</a>                           | 82.9 | 82.9 | 100% | 2e-16 | 100% | <a href="#">gij45504394 NP_034708.1</a>     |
| <a href="#">unnamed protein product [Homo sapiens]</a>                             | 82.9 | 82.9 | 100% | 2e-16 | 100% | <a href="#">gij31442 CAA30790.1</a>         |
| <a href="#">integrin beta-1 precursor [Felis catus]</a>                            | 82.9 | 82.9 | 100% | 2e-16 | 100% | <a href="#">gij114326428 NP_001041625.1</a> |
| <a href="#">integrin subunit beta 1 [Capra hircus]</a>                             | 82.9 | 82.9 | 100% | 2e-16 | 100% | <a href="#">gij400653598 AFP87513.1</a>     |
| <a href="#">PREDICTED: integrin beta-1 isoform X2 [Pan paniscus]</a>               | 82.9 | 82.9 | 100% | 2e-16 | 100% | <a href="#">gij397487507 XP_003814839.1</a> |
| <a href="#">PREDICTED: integrin beta-1 isoform 1 [Otolemur garnettii]</a>          | 82.9 | 82.9 | 100% | 2e-16 | 100% | <a href="#">gij395827144 XP_003786766.1</a> |
| <a href="#">PREDICTED: integrin beta-1 isoform X2 [Papio anubis]</a>               | 82.9 | 82.9 | 100% | 2e-16 | 100% | <a href="#">gij402879948 XP_003903581.1</a> |
| <a href="#">PREDICTED: integrin beta-1 [Heterocephalus glaber]</a>                 | 82.9 | 82.9 | 100% | 2e-16 | 100% | <a href="#">gij513000828 XP_004861939.1</a> |
| <a href="#">PREDICTED: integrin beta-1 isoform 1 [Cavia porcellus]</a>             | 82.9 | 82.9 | 100% | 2e-16 | 100% | <a href="#">gij348565755 XP_003468668.1</a> |
| <a href="#">PREDICTED: integrin beta-1 isoform X2 [Canis lupus familiaris]</a>     | 82.9 | 82.9 | 100% | 2e-16 | 100% | <a href="#">gij545489482 XP_005617006.1</a> |
| <a href="#">PREDICTED: integrin beta-1 [Loxodonta africana]</a>                    | 82.9 | 82.9 | 100% | 2e-16 | 100% | <a href="#">gij344298170 XP_003420767.1</a> |
| <a href="#">PREDICTED: integrin beta-1 isoform X2 [Cricetulus griseus]</a>         | 82.9 | 82.9 | 100% | 2e-16 | 100% | <a href="#">gij625260885 XP_007621878.1</a> |
| <a href="#">PREDICTED: integrin beta-1 isoform X2 [Pan troglodytes]</a>            | 82.9 | 82.9 | 100% | 2e-16 | 100% | <a href="#">gij332833907 XP_507735.3</a>    |
| <a href="#">PREDICTED: integrin beta-1 isoform 1 [Nomascus leucogenys]</a>         | 82.9 | 82.9 | 100% | 2e-16 | 100% | <a href="#">gij332253882 XP_003276062.1</a> |
| <a href="#">PREDICTED: integrin beta-1-like [Ailuropoda melanoleuca]</a>           | 82.9 | 82.9 | 100% | 2e-16 | 100% | <a href="#">gij301776761 XP_002923799.1</a> |
| <a href="#">integrin beta1 [Camelus dromedarius]</a>                               | 82.9 | 82.9 | 100% | 2e-16 | 100% | <a href="#">gij254575655 ACT68325.1</a>     |
| <a href="#">integrin beta1 [Litocranius walleri]</a>                               | 82.9 | 82.9 | 100% | 2e-16 | 100% | <a href="#">gij254575653 ACT68324.1</a>     |
| <a href="#">integrin beta-1 precursor [Ovis aries]</a>                             | 82.9 | 82.9 | 100% | 2e-16 | 100% | <a href="#">gij166157504 NP_001107242.1</a> |
| <a href="#">unnamed protein product [Homo sapiens]</a>                             | 82.9 | 82.9 | 100% | 2e-16 | 100% | <a href="#">gij158256826 BAF84386.1</a>     |
| <a href="#">RecName: Full=Integrin beta-1; AltName: Full=Fibronectin receptor</a>  | 82.9 | 82.9 | 100% | 2e-16 | 100% | <a href="#">gij215275341 A5Z1X6.1</a>       |
| <a href="#">integrin beta-1 precursor [Rattus norvegicus]</a>                      | 82.9 | 82.9 | 100% | 2e-16 | 100% | <a href="#">gij158303324 NP_058718.2</a>    |
| <a href="#">hypothetical protein [synthetic construct]</a>                         | 82.9 | 103  | 100% | 2e-16 | 100% | <a href="#">gij117645218 CAL38075.1</a>     |
| <a href="#">integrin beta 1 [Bos taurus]</a>                                       | 82.9 | 82.9 | 100% | 2e-16 | 100% | <a href="#">gij111183155 ABH07895.1</a>     |
| <a href="#">unnamed protein product [Mus musculus]</a>                             | 82.9 | 82.9 | 100% | 2e-16 | 100% | <a href="#">gij26353804 BAC40532.1</a>      |
| <a href="#">integrin beta-1 isoform 1A precursor [Homo sapiens]</a>                | 82.9 | 82.9 | 100% | 2e-16 | 100% | <a href="#">gij19743813 NP_002202.2</a>     |

|                                                                                   |      |      |      |       |      |                                             |
|-----------------------------------------------------------------------------------|------|------|------|-------|------|---------------------------------------------|
| <a href="#">PREDICTED: integrin beta-1 [Nannospalax galili]</a>                   | 82.9 | 82.9 | 100% | 2e-16 | 100% | <a href="#">gil674076844 XP_008845808.1</a> |
| <a href="#">RecName: Full=Integrin beta-1; AltName: Full=Beta oligodendrogli</a>  | 82.9 | 82.9 | 100% | 2e-16 | 100% | <a href="#">gil1352494 P49134.1</a>         |
| <a href="#">PREDICTED: integrin beta-1 [Sarcophilus harrisi]</a>                  | 82.9 | 107  | 100% | 2e-16 | 100% | <a href="#">gil395539855 XP_003771880.1</a> |
| <a href="#">PREDICTED: integrin beta-1 [Ornithorhynchus anatinus]</a>             | 82.9 | 82.9 | 100% | 2e-16 | 100% | <a href="#">gil620962569 XP_007666003.1</a> |
| <a href="#">PREDICTED: integrin beta-1 isoform X1 [Monodelphis domestica]</a>     | 82.9 | 106  | 100% | 2e-16 | 100% | <a href="#">gil126341188 XP_001366567.1</a> |
| <a href="#">PREDICTED: integrin beta-1 isoform X1 [Pan troglodytes]</a>           | 82.9 | 82.9 | 100% | 2e-16 | 100% | <a href="#">gil694939321 XP_009456504.1</a> |
| <a href="#">PREDICTED: integrin beta-1 isoform X1 [Pan paniscus]</a>              | 82.9 | 82.9 | 100% | 2e-16 | 100% | <a href="#">gil675729741 XP_008965875.1</a> |
| <a href="#">PREDICTED: integrin beta-1 isoform X1 [Oryctolagus cuniculus]</a>     | 82.9 | 82.9 | 100% | 2e-16 | 100% | <a href="#">gil655883134 XP_008272963.1</a> |
| <a href="#">PREDICTED: integrin beta-1 isoform X1 [Orycteropus afer afer]</a>     | 82.9 | 82.9 | 100% | 2e-16 | 100% | <a href="#">gil634852625 XP_007940644.1</a> |
| <a href="#">PREDICTED: integrin beta-1 isoform X1 [Bos taurus]</a>                | 82.9 | 82.9 | 100% | 2e-16 | 100% | <a href="#">gil528972462 XP_005214205.1</a> |
| <a href="#">PREDICTED: integrin beta-1 isoform X2 [Lipotes vexillifer]</a>        | 82.9 | 82.9 | 100% | 2e-16 | 100% | <a href="#">gil602722470 XP_007471381.1</a> |
| <a href="#">PREDICTED: integrin beta-1 isoform X1 [Balaenoptera acutorostrat</a>  | 82.9 | 82.9 | 100% | 2e-16 | 100% | <a href="#">gil594684789 XP_007189912.1</a> |
| <a href="#">PREDICTED: integrin beta-1 isoform X1 [Peromyscus maniculatus]</a>    | 82.9 | 82.9 | 100% | 2e-16 | 100% | <a href="#">gil589939668 XP_006982575.1</a> |
| <a href="#">PREDICTED: integrin beta-1-like isoform X1 [Elephantulus edwardi]</a> | 82.9 | 82.9 | 100% | 2e-16 | 100% | <a href="#">gil585670438 XP_006889009.1</a> |
| <a href="#">PREDICTED: integrin beta-1 isoform X1 [Leptonychotes weddellii]</a>   | 82.9 | 82.9 | 100% | 2e-16 | 100% | <a href="#">gil585171149 XP_006737562.1</a> |
| <a href="#">PREDICTED: integrin beta-1 isoform X1 [Rattus norvegicus]</a>         | 82.9 | 82.9 | 100% | 2e-16 | 100% | <a href="#">gil564396374 XP_006255886.1</a> |
| <a href="#">PREDICTED: integrin beta-1 isoform X1 [Tupaia chinensis]</a>          | 82.9 | 82.9 | 100% | 2e-16 | 100% | <a href="#">gil562859886 XP_006158347.1</a> |
| <a href="#">PREDICTED: integrin beta-1 isoform X1 [Myotis lucifugus]</a>          | 82.9 | 82.9 | 100% | 2e-16 | 100% | <a href="#">gil558115789 XP_006086740.1</a> |
| <a href="#">PREDICTED: integrin beta-1 isoform X1 [Pantholops hodgsonii]</a>      | 82.9 | 82.9 | 100% | 2e-16 | 100% | <a href="#">gil556753518 XP_005972135.1</a> |
| <a href="#">PREDICTED: integrin beta-1 isoform X1 [Sus scrofa]</a>                | 82.9 | 82.9 | 100% | 2e-16 | 100% | <a href="#">gil545853818 XP_005668230.1</a> |
| <a href="#">PREDICTED: integrin beta-1 isoform X1 [Canis lupus familiaris]</a>    | 82.9 | 82.9 | 100% | 2e-16 | 100% | <a href="#">gil545489480 XP_005617005.1</a> |
| <a href="#">PREDICTED: integrin beta-1 isoform X1 [Macaca fascicularis]</a>       | 82.9 | 82.9 | 100% | 2e-16 | 100% | <a href="#">gil544456576 XP_005564990.1</a> |
| <a href="#">PREDICTED: integrin beta-1-like isoform X2 [Chinchilla lanigera]</a>  | 82.9 | 82.9 | 100% | 2e-16 | 100% | <a href="#">gil533169242 XP_005398209.1</a> |
| <a href="#">PREDICTED: integrin beta-1 isoform X1 [Ictidomys tridecemlineatu</a>  | 82.9 | 82.9 | 100% | 2e-16 | 100% | <a href="#">gil532090372 XP_005330879.1</a> |
| <a href="#">PREDICTED: integrin beta-1 isoform X1 [Mustela putorius furo]</a>     | 82.9 | 82.9 | 100% | 2e-16 | 100% | <a href="#">gil511909855 XP_004774338.1</a> |
| <a href="#">PREDICTED: integrin beta-1 isoform 1 [Ceratotherium simum simu</a>    | 82.9 | 82.9 | 100% | 2e-16 | 100% | <a href="#">gil478501976 XP_004425299.1</a> |
| <a href="#">PREDICTED: integrin beta-1 isoform X1 [Bos mutus]</a>                 | 82.9 | 82.9 | 100% | 2e-16 | 100% | <a href="#">gil555956187 XP_005890243.1</a> |

## Alignments

Download [GenPept](#) [Graphics](#)

Next Previous Descriptions

beta1 integrin [Equus caballus]

Sequence ID: [gil166157373|dbj|BAG06145.1](#) Length: 221 Number of Matches: 1

Range 1: 19 to 42 [GenPept](#) [Graphics](#)

Next Match Previous Match

| Score          | Expect | Identities  | Positives   | Gaps     |
|----------------|--------|-------------|-------------|----------|
| 82.9 bits(188) | 1e-16  | 24/24(100%) | 24/24(100%) | 0/24(0%) |

Query 1 RKENSSEICSNNGECVCGQCVRK 24  
 RKENSSEICSNNGECVCGQCVRK  
 Sbjct 19 RKENSSEICSNNGECVCGQCVRK 42

### Related Information

[Gene](#) - associated gene details  
[Map Viewer](#) - aligned genomic context

Download [GenPept](#) [Graphics](#)

Next Previous Descriptions

unnamed protein product [Mus musculus]

Sequence ID: [gil26345456|dbj|BAC36379.1](#) Length: 504 Number of Matches: 1

Range 1: 369 to 392 [GenPept](#) [Graphics](#)

Next Match Previous Match

| Score          | Expect | Identities  | Positives   | Gaps     |
|----------------|--------|-------------|-------------|----------|
| 82.9 bits(188) | 2e-16  | 24/24(100%) | 24/24(100%) | 0/24(0%) |

Query 1 RKENSSEICSNNGECVCGQCVRK 24

### Related Information

[Gene](#) - associated gene details



Sbjct 369 RKENSSEICSNNGECVCGQCVCRK 392  
 RKENSSEICSNNGECVCGQCVCRK

[Download](#) [GenPept](#) [Graphics](#) [Next](#) [Previous](#) [Descriptions](#)

integrin, beta 1 (fibronectin receptor, beta polypeptide, antigen CD29 includes MDF2, MSK12), isoform CRA\_e [Homo sapiens]

Sequence ID: [gi|119606362|gb|EAW85956.1](#) Length: 682 Number of Matches: 1

Range 1: 460 to 483 [GenPept](#) [Graphics](#) [Next Match](#) [Previous Match](#)

| Score          | Expect | Identities  | Positives   | Gaps     |
|----------------|--------|-------------|-------------|----------|
| 82.9 bits(188) | 2e-16  | 24/24(100%) | 24/24(100%) | 0/24(0%) |

Query 1 RKENSSEICSNNGECVCGQCVCRK 24  
 RKENSSEICSNNGECVCGQCVCRK  
 Sbjct 460 RKENSSEICSNNGECVCGQCVCRK 483

**Related Information**

[Gene](#) - associated gene details

[Download](#) [GenPept](#) [Graphics](#) [Next](#) [Previous](#) [Descriptions](#)

PREDICTED: integrin beta-1 [Mesocricetus auratus]

Sequence ID: [gi|524967265|ref|XP\\_005083522.1](#) Length: 686 Number of Matches: 1

Range 1: 405 to 428 [GenPept](#) [Graphics](#) [Next Match](#) [Previous Match](#)

| Score          | Expect | Identities  | Positives   | Gaps     |
|----------------|--------|-------------|-------------|----------|
| 82.9 bits(188) | 2e-16  | 24/24(100%) | 24/24(100%) | 0/24(0%) |

Query 1 RKENSSEICSNNGECVCGQCVCRK 24  
 RKENSSEICSNNGECVCGQCVCRK  
 Sbjct 405 RKENSSEICSNNGECVCGQCVCRK 428

**Related Information**

[Gene](#) - associated gene details

[Map Viewer](#) - aligned genomic context

[Download](#) [GenPept](#) [Graphics](#) [Next](#) [Previous](#) [Descriptions](#)

PREDICTED: integrin beta-1 isoform X2 [Jaculus jaculus]

Sequence ID: [gi|507552093|ref|XP\\_004659843.1](#) Length: 698 Number of Matches: 1

Range 1: 417 to 440 [GenPept](#) [Graphics](#) [Next Match](#) [Previous Match](#)

| Score          | Expect | Identities  | Positives   | Gaps     |
|----------------|--------|-------------|-------------|----------|
| 82.9 bits(188) | 2e-16  | 24/24(100%) | 24/24(100%) | 0/24(0%) |

Query 1 RKENSSEICSNNGECVCGQCVCRK 24  
 RKENSSEICSNNGECVCGQCVCRK  
 Sbjct 417 RKENSSEICSNNGECVCGQCVCRK 440

**Related Information**

[Gene](#) - associated gene details

[Map Viewer](#) - aligned genomic context

BLAST is a registered trademark of the National Library of Medicine.

NCBI/ BLAST/ blastp suite/ Formatting Results - BVHXA0HZ01R

Your search parameters were adjusted to search for a short input sequence.

[Edit and Resubmit](#) [Save Search Strategies](#) [Formatting options](#) [Download](#) [YouTube](#) [How to read this page](#) [Blast report description](#)

### LAMP2\_KVASVININPDTTHSTGSCRS\_Mod

RID [BVHXA0HZ01R](#) (Expires on 01-21 10:12 am)

**Query ID** |cl|290063  
**Description** None  
**Molecule type** amino acid  
**Query Length** 21

**Database Name** nr  
**Description** All non-redundant GenBank CDS translations+PDB+SwissProt+PIR+PRF excluding environmental samples from WGS projects  
**Program** BLASTP 2.2.30+ [Citation](#)

Other reports: [Search Summary](#) [Taxonomy reports](#) [Distance tree of results](#) [Multiple alignment](#)

### Graphic Summary

[Show Conserved Domains](#)

No putative conserved domains have been detected

Distribution of 100 Blast Hits on the Query Sequence



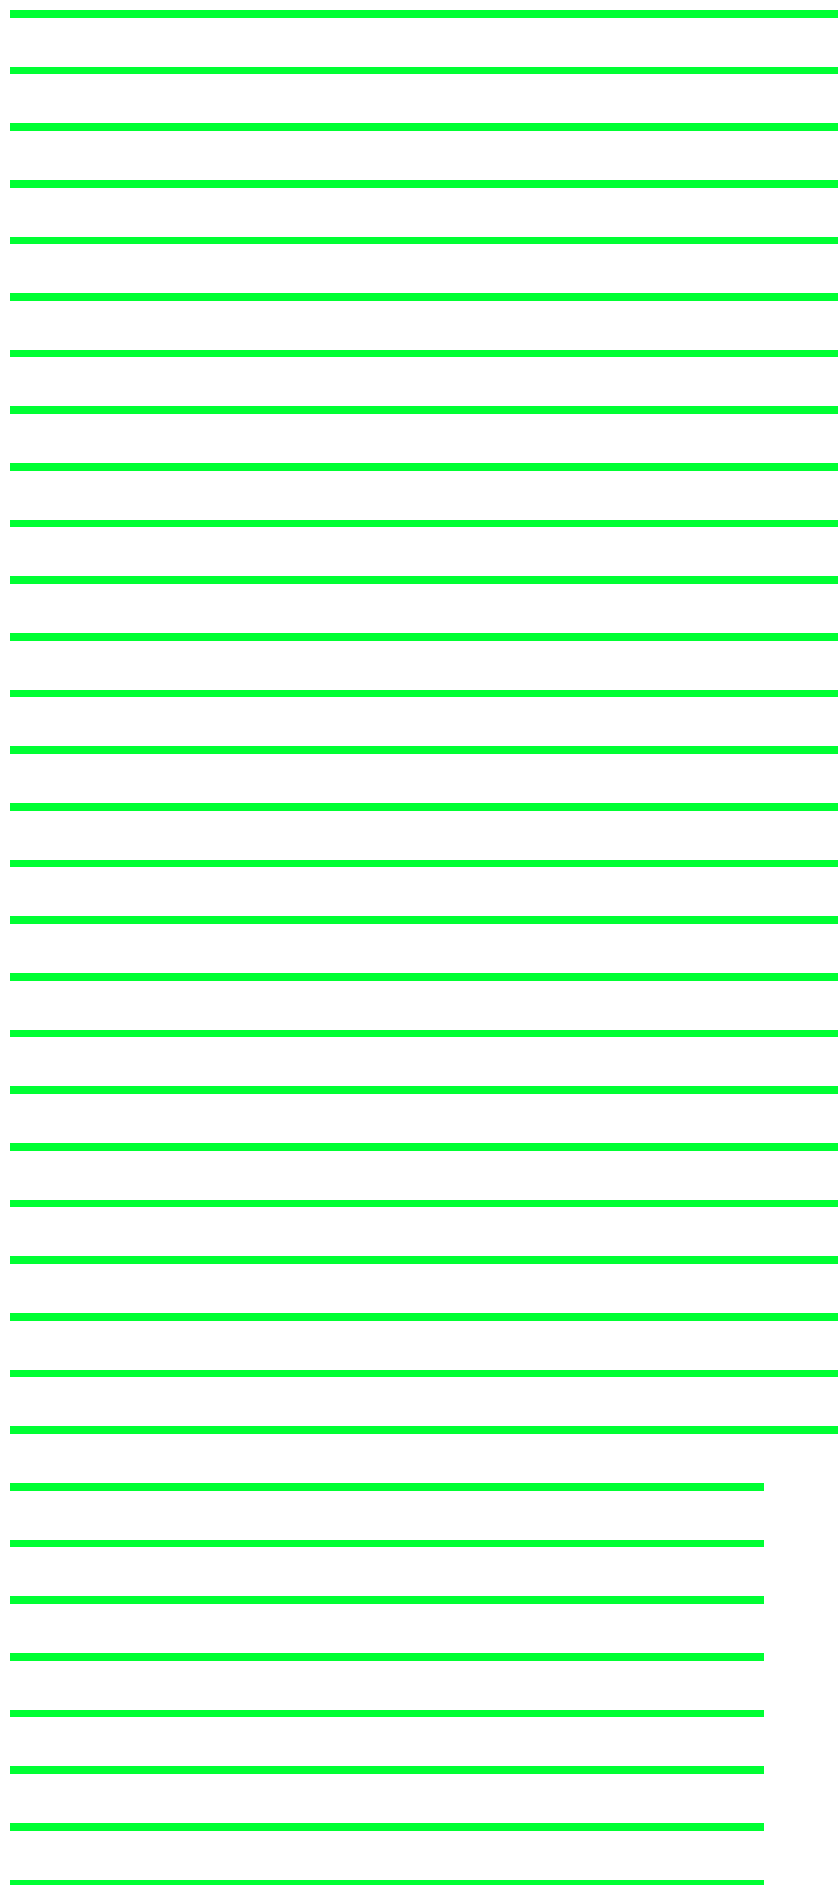

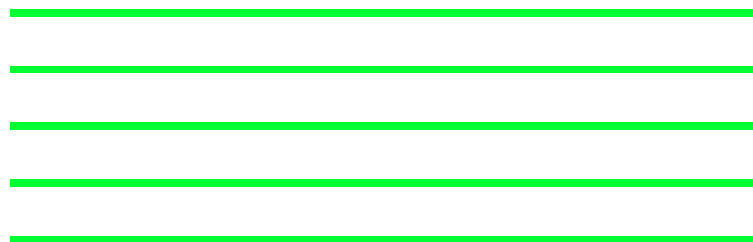

## Descriptions

### Sequences producing significant alignments:

Select: [All](#) [None](#) Selected:0

[Alignments](#)
[Download](#)
[GenPept](#)
[Graphics](#)
[Distance tree of results](#)
[Multiple alignment](#)


| Description                                                                                | Max score | Total score | Query cover | E value | Ident | Accession                      |
|--------------------------------------------------------------------------------------------|-----------|-------------|-------------|---------|-------|--------------------------------|
| <a href="#">unnamed protein product [Macaca fascicularis]</a>                              | 65.5      | 65.5        | 100%        | 8e-11   | 95%   | <a href="#">BAE87445.1</a>     |
| <a href="#">lysosome-associated membrane protein 2 [Homo sapiens]</a>                      | 65.5      | 65.5        | 100%        | 1e-10   | 95%   | <a href="#">2106261A</a>       |
| <a href="#">unnamed protein product [Homo sapiens]</a>                                     | 65.5      | 65.5        | 100%        | 1e-10   | 95%   | <a href="#">BAH11955.1</a>     |
| <a href="#">PREDICTED: lysosome-associated membrane glycoprotein 2 [Pan troglodyte]</a>    | 65.5      | 65.5        | 100%        | 1e-10   | 95%   | <a href="#">XP_009437861.1</a> |
| <a href="#">PREDICTED: lysosome-associated membrane glycoprotein 2 [Gorilla gorilla g]</a> | 65.5      | 65.5        | 100%        | 1e-10   | 95%   | <a href="#">XP_004064857.1</a> |
| <a href="#">PREDICTED: lysosome-associated membrane glycoprotein 2 isoform X3 [Rhi]</a>    | 65.5      | 65.5        | 100%        | 1e-10   | 95%   | <a href="#">XP_010353039.1</a> |
| <a href="#">unnamed protein product [Homo sapiens]</a>                                     | 65.5      | 65.5        | 100%        | 1e-10   | 95%   | <a href="#">BAG65239.1</a>     |
| <a href="#">lysosomal membrane glycoprotein-2 [Homo sapiens]</a>                           | 65.5      | 65.5        | 100%        | 1e-10   | 95%   | <a href="#">AAA60383.1</a>     |
| <a href="#">PREDICTED: lysosome-associated membrane glycoprotein 2 isoform X2 [Rhi]</a>    | 65.5      | 65.5        | 100%        | 1e-10   | 95%   | <a href="#">XP_010353037.1</a> |
| <a href="#">PREDICTED: lysosome-associated membrane glycoprotein 2 isoform X1 [Rhi]</a>    | 65.5      | 65.5        | 100%        | 1e-10   | 95%   | <a href="#">XP_010353036.1</a> |
| <a href="#">PREDICTED: lysosome-associated membrane glycoprotein 2 isoform X3 [Par]</a>    | 65.5      | 65.5        | 100%        | 1e-10   | 95%   | <a href="#">XP_009196467.1</a> |
| <a href="#">LAMP2 [synthetic construct]</a>                                                | 65.5      | 65.5        | 100%        | 1e-10   | 95%   | <a href="#">AIC54689.1</a>     |
| <a href="#">PREDICTED: lysosome-associated membrane glycoprotein 2 isoform X3 [Chi]</a>    | 65.5      | 65.5        | 100%        | 1e-10   | 95%   | <a href="#">XP_008017647.1</a> |
| <a href="#">PREDICTED: lysosome-associated membrane glycoprotein 2 isoform X2 [Chi]</a>    | 65.5      | 65.5        | 100%        | 1e-10   | 95%   | <a href="#">XP_008017646.1</a> |
| <a href="#">lysosomal membrane glycoprotein-2 [Homo sapiens]</a>                           | 65.5      | 65.5        | 100%        | 1e-10   | 95%   | <a href="#">AAB41647.1</a>     |
| <a href="#">lysosome-associated membrane glycoprotein 2 isoform B precursor [Homo sa]</a>  | 65.5      | 65.5        | 100%        | 1e-10   | 95%   | <a href="#">NP_054701.1</a>    |
| <a href="#">hypothetical protein [Pongo abelii]</a>                                        | 65.5      | 65.5        | 100%        | 1e-10   | 95%   | <a href="#">CAH92900.1</a>     |
| <a href="#">lysosome-associated membrane glycoprotein 2 isoform A precursor [Homo sa]</a>  | 65.5      | 65.5        | 100%        | 1e-10   | 95%   | <a href="#">NP_002285.1</a>    |
| <a href="#">PREDICTED: lysosome-associated membrane glycoprotein 2 isoform X2 [Par]</a>    | 65.5      | 65.5        | 100%        | 1e-10   | 95%   | <a href="#">XP_003918269.1</a> |
| <a href="#">PREDICTED: lysosome-associated membrane glycoprotein 2 isoform X2 [Par]</a>    | 65.5      | 65.5        | 100%        | 1e-10   | 95%   | <a href="#">XP_003823188.1</a> |
| <a href="#">PREDICTED: lysosome-associated membrane glycoprotein 2 isoform X3 [Par]</a>    | 65.5      | 65.5        | 100%        | 1e-10   | 95%   | <a href="#">XP_003823187.1</a> |
| <a href="#">PREDICTED: lysosome-associated membrane glycoprotein 2 isoform X2 [Por]</a>    | 65.5      | 65.5        | 100%        | 1e-10   | 95%   | <a href="#">XP_003779762.1</a> |
| <a href="#">PREDICTED: lysosome-associated membrane glycoprotein 2 isoform 1 [Nom]</a>     | 65.5      | 65.5        | 100%        | 1e-10   | 95%   | <a href="#">XP_003262323.1</a> |
| <a href="#">PREDICTED: lysosome-associated membrane glycoprotein 2 isoform X3 [Por]</a>    | 65.5      | 65.5        | 100%        | 1e-10   | 95%   | <a href="#">XP_002832104.1</a> |
| <a href="#">lysosome-associated membrane glycoprotein 2 precursor [Macaca mulatta]</a>     | 65.5      | 65.5        | 100%        | 1e-10   | 95%   | <a href="#">NP_001247737.1</a> |
| <a href="#">PREDICTED: lysosome-associated membrane glycoprotein 2 isoform X2 [Mar]</a>    | 65.5      | 65.5        | 100%        | 1e-10   | 95%   | <a href="#">XP_005594543.1</a> |
| <a href="#">PREDICTED: lysosome-associated membrane glycoprotein 2 isoform X4 [Rhi]</a>    | 65.5      | 65.5        | 100%        | 1e-10   | 95%   | <a href="#">XP_010353040.1</a> |
| <a href="#">PREDICTED: lysosome-associated membrane glycoprotein 2 isoform X1 [Chi]</a>    | 65.5      | 65.5        | 100%        | 1e-10   | 95%   | <a href="#">XP_008017645.1</a> |
| <a href="#">PREDICTED: lysosome-associated membrane glycoprotein 2 isoform X1 [Par]</a>    | 65.5      | 65.5        | 100%        | 1e-10   | 95%   | <a href="#">XP_003918270.1</a> |

|                                                                                           |      |      |      |       |     |                                |
|-------------------------------------------------------------------------------------------|------|------|------|-------|-----|--------------------------------|
| <a href="#">PREDICTED: lysosome-associated membrane glycoprotein 2 isoform X1 [Par</a>    | 65.5 | 65.5 | 100% | 1e-10 | 95% | <a href="#">XP_003823189.1</a> |
| <a href="#">PREDICTED: lysosome-associated membrane glycoprotein 2 isoform X1 [Por</a>    | 65.5 | 65.5 | 100% | 1e-10 | 95% | <a href="#">XP_003779763.1</a> |
| <a href="#">PREDICTED: lysosome-associated membrane glycoprotein 2 isoform 3 [Nom</a>     | 65.5 | 65.5 | 100% | 1e-10 | 95% | <a href="#">XP_003262325.1</a> |
| <a href="#">PREDICTED: lysosome-associated membrane glycoprotein 2 isoform X1 [Ma</a>     | 65.5 | 65.5 | 100% | 1e-10 | 95% | <a href="#">XP_005594542.1</a> |
| <a href="#">lysosome-associated membrane glycoprotein 2 isoform C precursor [Homo sa</a>  | 65.5 | 65.5 | 100% | 1e-10 | 95% | <a href="#">NP_001116078.1</a> |
| <a href="#">unnamed protein product [Homo sapiens]</a>                                    | 63.4 | 63.4 | 100% | 5e-10 | 90% | <a href="#">BAG57310.1</a>     |
| <a href="#">PREDICTED: lysosome-associated membrane glycoprotein 2 isoform X3 [Sai</a>    | 61.3 | 61.3 | 100% | 3e-09 | 90% | <a href="#">XP_010340007.1</a> |
| <a href="#">PREDICTED: lysosome-associated membrane glycoprotein 2 isoform X3 [Cal</a>    | 61.3 | 61.3 | 100% | 3e-09 | 90% | <a href="#">XP_002763275.1</a> |
| <a href="#">PREDICTED: lysosome-associated membrane glycoprotein 2 isoform X2 [Cal</a>    | 61.3 | 61.3 | 100% | 3e-09 | 90% | <a href="#">XP_002763274.1</a> |
| <a href="#">PREDICTED: lysosome-associated membrane glycoprotein 2 isoform X1 [Sai</a>    | 61.3 | 61.3 | 100% | 3e-09 | 90% | <a href="#">XP_003931138.1</a> |
| <a href="#">PREDICTED: lysosome-associated membrane glycoprotein 2 isoform X1 [Cal</a>    | 61.3 | 61.3 | 100% | 3e-09 | 90% | <a href="#">XP_008988091.1</a> |
| <a href="#">PREDICTED: lysosome-associated membrane glycoprotein 2 isoform X2 [Sai</a>    | 61.3 | 61.3 | 100% | 3e-09 | 90% | <a href="#">XP_003931139.1</a> |
| <a href="#">lysosome-associated membrane glycoprotein 2 isoform 1 precursor [Sus scro</a> | 52.4 | 52.4 | 100% | 3e-06 | 76% | <a href="#">NP_001231184.1</a> |
| <a href="#">lysosome-associated membrane glycoprotein 2 isoform 2 precursor [Sus scro</a> | 52.0 | 52.0 | 100% | 4e-06 | 76% | <a href="#">NP_001231185.1</a> |
| <a href="#">PREDICTED: lysosome-associated membrane glycoprotein 2-like [Tursiops tr</a>  | 50.7 | 50.7 | 90%  | 1e-05 | 84% | <a href="#">XP_004322447.1</a> |
| <a href="#">PREDICTED: lysosome-associated membrane glycoprotein 2 isoform X5 [Lip</a>    | 50.7 | 50.7 | 90%  | 1e-05 | 84% | <a href="#">XP_007464492.1</a> |
| <a href="#">PREDICTED: lysosome-associated membrane glycoprotein 2 isoform X4 [Lip</a>    | 50.7 | 50.7 | 90%  | 1e-05 | 84% | <a href="#">XP_007464491.1</a> |
| <a href="#">PREDICTED: lysosome-associated membrane glycoprotein 2 isoform X3 [Lip</a>    | 50.7 | 50.7 | 90%  | 1e-05 | 84% | <a href="#">XP_007464490.1</a> |
| <a href="#">PREDICTED: lysosome-associated membrane glycoprotein 2 isoform X2 [Lip</a>    | 50.7 | 50.7 | 90%  | 1e-05 | 84% | <a href="#">XP_007464489.1</a> |
| <a href="#">PREDICTED: lysosome-associated membrane glycoprotein 2 isoform X2 [Phy</a>    | 50.7 | 50.7 | 90%  | 1e-05 | 84% | <a href="#">XP_007116126.1</a> |
| <a href="#">PREDICTED: lysosome-associated membrane glycoprotein 2 isoform X1 [Phy</a>    | 50.7 | 50.7 | 90%  | 1e-05 | 84% | <a href="#">XP_007116125.1</a> |
| <a href="#">PREDICTED: lysosome-associated membrane glycoprotein 2 isoform 3 [Orcir</a>   | 50.7 | 50.7 | 90%  | 1e-05 | 84% | <a href="#">XP_004285633.1</a> |
| <a href="#">PREDICTED: lysosome-associated membrane glycoprotein 2 isoform 2 [Orcir</a>   | 50.7 | 50.7 | 90%  | 1e-05 | 84% | <a href="#">XP_004285632.1</a> |
| <a href="#">PREDICTED: lysosome-associated membrane glycoprotein 2 isoform X1 [Lip</a>    | 50.7 | 50.7 | 90%  | 1e-05 | 84% | <a href="#">XP_007464488.1</a> |
| <a href="#">PREDICTED: lysosome-associated membrane glycoprotein 2 isoform X2 [Bal</a>    | 50.7 | 50.7 | 90%  | 1e-05 | 84% | <a href="#">XP_007178670.1</a> |
| <a href="#">PREDICTED: lysosome-associated membrane glycoprotein 2 isoform X1 [Bal</a>    | 50.7 | 50.7 | 90%  | 1e-05 | 84% | <a href="#">XP_007178669.1</a> |
| <a href="#">PREDICTED: lysosome-associated membrane glycoprotein 2 isoform 1 [Orcir</a>   | 50.7 | 50.7 | 90%  | 1e-05 | 84% | <a href="#">XP_004285631.1</a> |
| <a href="#">lysosomal membrane glycoprotein lamp-2 homolog [Homo sapiens]</a>             | 50.3 | 50.3 | 76%  | 2e-05 | 94% | <a href="#">AAB28483.1</a>     |
| <a href="#">PREDICTED: lysosome-associated membrane glycoprotein 2 isoform X2 [Bis</a>    | 49.0 | 49.0 | 90%  | 4e-05 | 79% | <a href="#">XP_010830554.1</a> |
| <a href="#">PREDICTED: lysosome-associated membrane glycoprotein 2 isoform X1 [Bis</a>    | 49.0 | 49.0 | 90%  | 4e-05 | 79% | <a href="#">XP_010830553.1</a> |
| <a href="#">Lysosome-associated membrane glycoprotein 2 [Bos mutus]</a>                   | 49.0 | 49.0 | 90%  | 4e-05 | 79% | <a href="#">ELR59401.1</a>     |
| <a href="#">lysosome-associated membrane glycoprotein 2 isoform 2 precursor [Bos taur</a> | 49.0 | 49.0 | 90%  | 4e-05 | 79% | <a href="#">NP_001029742.1</a> |
| <a href="#">PREDICTED: lysosome-associated membrane glycoprotein 2 isoform X2 [Bos</a>    | 49.0 | 49.0 | 90%  | 4e-05 | 79% | <a href="#">XP_005891592.1</a> |
| <a href="#">PREDICTED: lysosome-associated membrane glycoprotein 2 isoform X1 [Bos</a>    | 49.0 | 49.0 | 90%  | 4e-05 | 79% | <a href="#">XP_005891591.1</a> |
| <a href="#">PREDICTED: lysosome-associated membrane glycoprotein 2 isoform 2 [Ovis</a>    | 49.0 | 49.0 | 90%  | 4e-05 | 79% | <a href="#">XP_004022400.1</a> |
| <a href="#">PREDICTED: lysosome-associated membrane glycoprotein 2 isoform 1 [Ovis</a>    | 49.0 | 49.0 | 90%  | 4e-05 | 79% | <a href="#">XP_004022399.1</a> |
| <a href="#">lysosome-associated membrane glycoprotein 2 isoform 1 precursor [Bos taur</a> | 49.0 | 49.0 | 90%  | 4e-05 | 79% | <a href="#">NP_001106715.1</a> |
| <a href="#">PREDICTED: lysosome-associated membrane glycoprotein 2 isoform X1 [Cav</a>    | 49.0 | 49.0 | 90%  | 4e-05 | 84% | <a href="#">XP_003465647.2</a> |
| <a href="#">PREDICTED: lysosome-associated membrane glycoprotein 2 isoform 3 [Ovis</a>    | 49.0 | 49.0 | 90%  | 4e-05 | 79% | <a href="#">XP_004022401.1</a> |
| <a href="#">PREDICTED: lysosome-associated membrane glycoprotein 2 isoform X2 [Cav</a>    | 49.0 | 49.0 | 90%  | 4e-05 | 84% | <a href="#">XP_005001877.1</a> |
| <a href="#">PREDICTED: lysosome-associated membrane glycoprotein 2 isoformX4 [Can</a>     | 49.0 | 49.0 | 90%  | 4e-05 | 84% | <a href="#">XP_864590.1</a>    |
| <a href="#">PREDICTED: lysosome-associated membrane glycoprotein 2 isoform X6 [Car</a>    | 49.0 | 49.0 | 90%  | 4e-05 | 84% | <a href="#">XP_005641822.1</a> |
| <a href="#">PREDICTED: lysosome-associated membrane glycoprotein 2 isoform X5 [Car</a>    | 49.0 | 49.0 | 90%  | 4e-05 | 84% | <a href="#">XP_005641821.1</a> |
| <a href="#">PREDICTED: lysosome-associated membrane glycoprotein 2 isoform X3 [But</a>    | 49.0 | 49.0 | 90%  | 4e-05 | 79% | <a href="#">XP_006048863.1</a> |
| <a href="#">PREDICTED: lysosome-associated membrane glycoprotein 2 isoform X2 [But</a>    | 49.0 | 49.0 | 90%  | 4e-05 | 79% | <a href="#">XP_006048862.1</a> |

|                                                                                        |      |      |      |       |     |                                |
|----------------------------------------------------------------------------------------|------|------|------|-------|-----|--------------------------------|
| <a href="#">PREDICTED: lysosome-associated membrane glycoprotein 2 isoform X2 [Par</a> | 49.0 | 49.0 | 90%  | 4e-05 | 79% | <a href="#">XP_005954005.1</a> |
| <a href="#">PREDICTED: lysosome-associated membrane glycoprotein 2 isoform X1 [Par</a> | 49.0 | 49.0 | 90%  | 4e-05 | 79% | <a href="#">XP_005954004.1</a> |
| <a href="#">PREDICTED: lysosome-associated membrane glycoprotein 2 isoform X2 [Car</a> | 49.0 | 49.0 | 90%  | 4e-05 | 79% | <a href="#">XP_005700397.1</a> |
| <a href="#">PREDICTED: lysosome-associated membrane glycoprotein 2 isoform X1 [Car</a> | 49.0 | 49.0 | 90%  | 4e-05 | 79% | <a href="#">XP_005700396.1</a> |
| <a href="#">PREDICTED: lysosome-associated membrane glycoprotein 2 isoform X1 [But</a> | 49.0 | 49.0 | 90%  | 4e-05 | 79% | <a href="#">XP_006048861.1</a> |
| <a href="#">PREDICTED: lysosome-associated membrane glycoprotein 2 isoform X1 [Bos</a> | 49.0 | 49.0 | 90%  | 4e-05 | 79% | <a href="#">XP_005227520.1</a> |
| <a href="#">PREDICTED: lysosome-associated membrane glycoprotein 2 [Octodon degus</a>  | 46.9 | 46.9 | 90%  | 2e-04 | 84% | <a href="#">XP_004647723.1</a> |
| <a href="#">PREDICTED: lysosome-associated membrane glycoprotein 2 isoform X3 [Ory</a> | 46.9 | 46.9 | 90%  | 2e-04 | 74% | <a href="#">XP_008271378.1</a> |
| <a href="#">PREDICTED: lysosome-associated membrane glycoprotein 2 isoform X2 [Ory</a> | 46.9 | 46.9 | 90%  | 2e-04 | 74% | <a href="#">XP_008271377.1</a> |
| <a href="#">PREDICTED: lysosome-associated membrane glycoprotein 2 isoform X1 [Ory</a> | 46.9 | 46.9 | 90%  | 2e-04 | 74% | <a href="#">XP_008271376.1</a> |
| <a href="#">PREDICTED: lysosome-associated membrane glycoprotein 2 isoform X2 [Tur</a> | 46.4 | 46.4 | 90%  | 3e-04 | 79% | <a href="#">XP_006165272.1</a> |
| <a href="#">PREDICTED: lysosome-associated membrane glycoprotein 2 isoform X1 [Tur</a> | 46.4 | 46.4 | 90%  | 3e-04 | 79% | <a href="#">XP_006165271.1</a> |
| <a href="#">PREDICTED: lysosome-associated membrane glycoprotein 2 isoform X3 [My</a>  | 46.4 | 46.4 | 100% | 3e-04 | 71% | <a href="#">XP_006082216.1</a> |
| <a href="#">PREDICTED: lysosome-associated membrane glycoprotein 2 isoform X2 [My</a>  | 46.4 | 46.4 | 100% | 3e-04 | 71% | <a href="#">XP_006082215.1</a> |
| <a href="#">PREDICTED: lysosome-associated membrane glycoprotein 2 isoform X3 [My</a>  | 46.4 | 46.4 | 100% | 3e-04 | 71% | <a href="#">XP_005884738.1</a> |
| <a href="#">PREDICTED: lysosome-associated membrane glycoprotein 2 isoform X2 [My</a>  | 46.4 | 46.4 | 100% | 3e-04 | 71% | <a href="#">XP_005884737.1</a> |
| <a href="#">PREDICTED: lysosome-associated membrane glycoprotein 2 isoform X3 [Tur</a> | 46.4 | 46.4 | 90%  | 3e-04 | 79% | <a href="#">XP_006165273.1</a> |
| <a href="#">PREDICTED: lysosome-associated membrane glycoprotein 2 isoform X1 [My</a>  | 46.4 | 46.4 | 100% | 3e-04 | 71% | <a href="#">XP_006082214.1</a> |
| <a href="#">PREDICTED: lysosome-associated membrane glycoprotein 2 isoform X1 [My</a>  | 46.4 | 46.4 | 100% | 3e-04 | 71% | <a href="#">XP_005884736.1</a> |
| <a href="#">Lysosome-associated membrane glycoprotein 2 [Tupaia chinensis]</a>         | 46.4 | 46.4 | 90%  | 3e-04 | 79% | <a href="#">ELV12237.1</a>     |
| <a href="#">Lysosome-associated membrane glycoprotein 2 [Myotis brandtii]</a>          | 46.4 | 46.4 | 100% | 3e-04 | 71% | <a href="#">EPQ19198.1</a>     |
| <a href="#">PREDICTED: lysosome-associated membrane glycoprotein 2 isoform X3 [Gal</a> | 46.0 | 46.0 | 90%  | 4e-04 | 79% | <a href="#">XP_008585587.1</a> |
| <a href="#">PREDICTED: lysosome-associated membrane glycoprotein 2 isoform X2 [Gal</a> | 46.0 | 46.0 | 90%  | 4e-04 | 79% | <a href="#">XP_008585586.1</a> |
| <a href="#">PREDICTED: lysosome-associated membrane glycoprotein 2 isoform X1 [Gal</a> | 46.0 | 46.0 | 90%  | 4e-04 | 79% | <a href="#">XP_008585585.1</a> |
| <a href="#">PREDICTED: lysosome-associated membrane glycoprotein 2 [Leptonyctotes</a>  | 45.6 | 45.6 | 90%  | 5e-04 | 79% | <a href="#">XP_006746269.1</a> |
| <a href="#">PREDICTED: lysosome-associated membrane glycoprotein 2 isoform X2 [Ory</a> | 45.6 | 45.6 | 90%  | 5e-04 | 79% | <a href="#">XP_007951511.1</a> |

## Alignments

Download GenPept Graphics

Next Previous Descriptions

unnamed protein product [Macaca fascicularis]

Sequence ID: [dbj|BAE87445.1](#) Length: 174 Number of Matches: 1

Range 1: 11 to 31 GenPept Graphics

Next Match Previous Match

| Score          | Expect | Identities | Positives   | Gaps     |
|----------------|--------|------------|-------------|----------|
| 65.5 bits(147) | 8e-11  | 20/21(95%) | 21/21(100%) | 0/21(0%) |

Query 1 KVASVININPDTTHTSTGSCRS 21  
 KVASVININP+THTSTGSCRS  
 Sbjct 11 KVASVININPNTTHTSTGSCRS 31

### Related Information

[Gene](#) - associated gene details

Download GenPept Graphics

Next Previous Descriptions

lysosome-associated membrane protein 2

Sequence ID: [prf||2106261A](#) Length: 268 Number of Matches: 1

Range 1: 105 to 125 GenPept Graphics

Next Match Previous Match

| Score          | Expect | Identities | Positives   | Gaps     |
|----------------|--------|------------|-------------|----------|
| 65.5 bits(147) | 1e-10  | 20/21(95%) | 21/21(100%) | 0/21(0%) |

### Related Information

Query 1 KVASVININPDTTHSTGSCRS 21  
 KVASVININP+TTHSTGSCRS  
 Sbjct 105 KVASVININPNTTTHSTGSCRS 125

[Download](#) [GenPept](#) [Graphics](#)

[▼ Next](#) [▲ Previous](#) [▲ Descriptions](#)

unnamed protein product [Homo sapiens]

Sequence ID: [dbj|BAH11955.1](#) Length: 300 Number of Matches: 1

Range 1: 136 to 156 [GenPept](#) [Graphics](#)

[▼ Next Match](#) [▲ Previous Match](#)

| Score          | Expect | Identities | Positives   | Gaps     |
|----------------|--------|------------|-------------|----------|
| 65.5 bits(147) | 1e-10  | 20/21(95%) | 21/21(100%) | 0/21(0%) |

Query 1 KVASVININPDTTHSTGSCRS 21  
 KVASVININP+TTHSTGSCRS  
 Sbjct 136 KVASVININPNTTTHSTGSCRS 156

**Related Information**

[Gene](#) - associated gene details

[Download](#) [GenPept](#) [Graphics](#)

[▼ Next](#) [▲ Previous](#) [▲ Descriptions](#)

PREDICTED: lysosome-associated membrane glycoprotein 2 [Pan troglodytes]

Sequence ID: [ref|XP\\_009437861.1](#) Length: 337 Number of Matches: 1

Range 1: 173 to 193 [GenPept](#) [Graphics](#)

[▼ Next Match](#) [▲ Previous Match](#)

| Score          | Expect | Identities | Positives   | Gaps     |
|----------------|--------|------------|-------------|----------|
| 65.5 bits(147) | 1e-10  | 20/21(95%) | 21/21(100%) | 0/21(0%) |

Query 1 KVASVININPDTTHSTGSCRS 21  
 KVASVININP+TTHSTGSCRS  
 Sbjct 173 KVASVININPNTTTHSTGSCRS 193

**Related Information**

[Gene](#) - associated gene details

[Download](#) [GenPept](#) [Graphics](#)

[▼ Next](#) [▲ Previous](#) [▲ Descriptions](#)

PREDICTED: lysosome-associated membrane glycoprotein 2 [Gorilla gorilla gorilla]

Sequence ID: [ref|XP\\_004064857.1](#) Length: 346 Number of Matches: 1

Range 1: 211 to 231 [GenPept](#) [Graphics](#)

[▼ Next Match](#) [▲ Previous Match](#)

| Score          | Expect | Identities | Positives   | Gaps     |
|----------------|--------|------------|-------------|----------|
| 65.5 bits(147) | 1e-10  | 20/21(95%) | 21/21(100%) | 0/21(0%) |

Query 1 KVASVININPDTTHSTGSCRS 21  
 KVASVININP+TTHSTGSCRS  
 Sbjct 211 KVASVININPNTTTHSTGSCRS 231

**Related Information**

[Gene](#) - associated gene details

[Map Viewer](#) - aligned genomic context

BLAST is a registered trademark of the National Library of Medicine.

NCBI/ BLAST/ blastp suite/ Formatting Results - B9HMRNH201R

Your search parameters were adjusted to search for a short input sequence.

[Edit and Resubmit](#) [Save Search Strategies](#) [Formatting options](#) [Download](#)

[YouTube](#) [How to read this page](#) [Blast report description](#)

### LAMP2\_KVASVININPNTTHSTGSCRS\_NonMod

RID [B9HMRNH201R](#) (Expires on 01-14 14:17 pm)

Query ID |cl|98360  
 Description None  
 Molecule type amino acid  
 Query Length 21

Database Name nr  
 Description All non-redundant GenBank CDS translations+PDB+SwissProt+PIR excluding environmental samples from WGS projects  
 Program BLASTP 2.2.30+ [Citation](#)

Other reports: [Search Summary](#) [Taxonomy reports](#) [Distance tree of results](#) [Multiple alignment](#)

### Graphic Summary

[Show Conserved Domains](#)

No putative conserved domains have been detected

Distribution of 100 Blast Hits on the Query Sequence

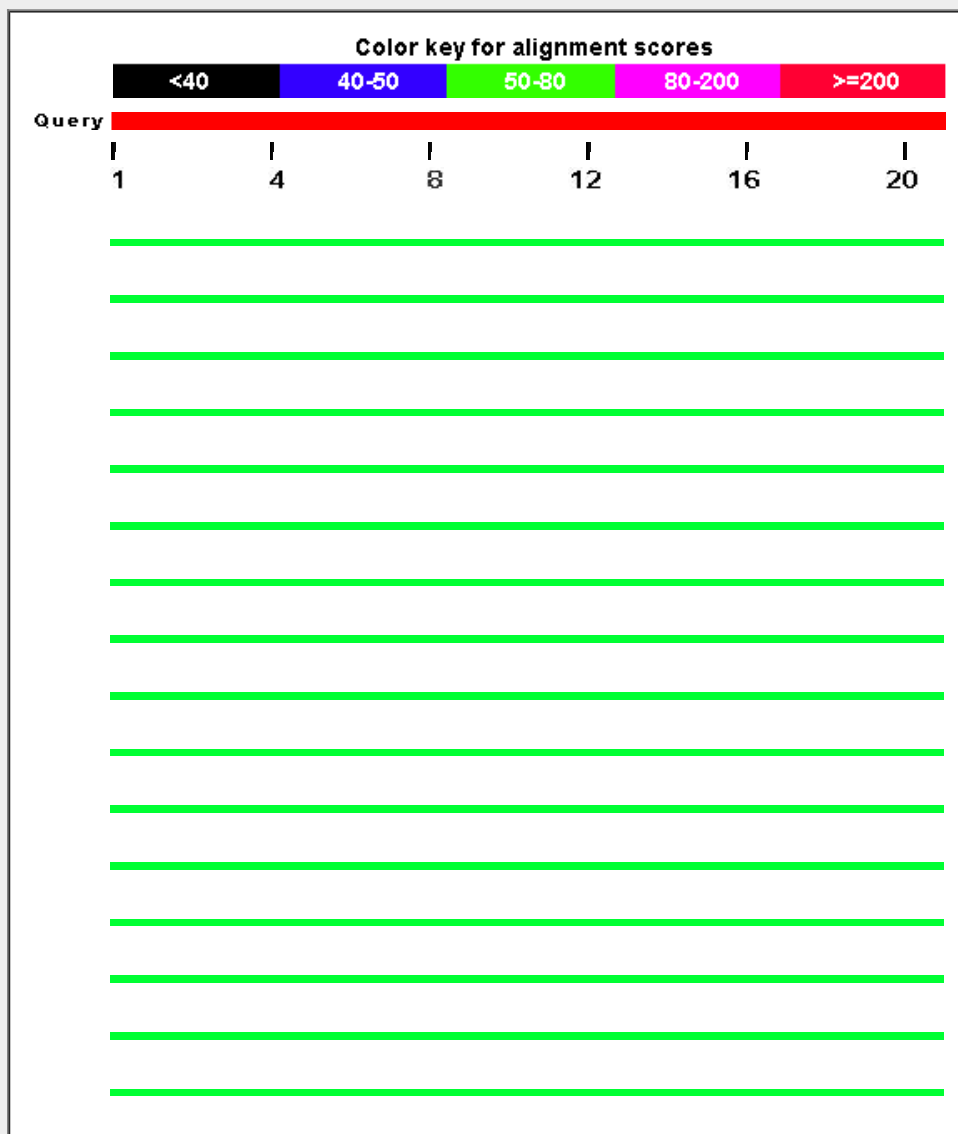



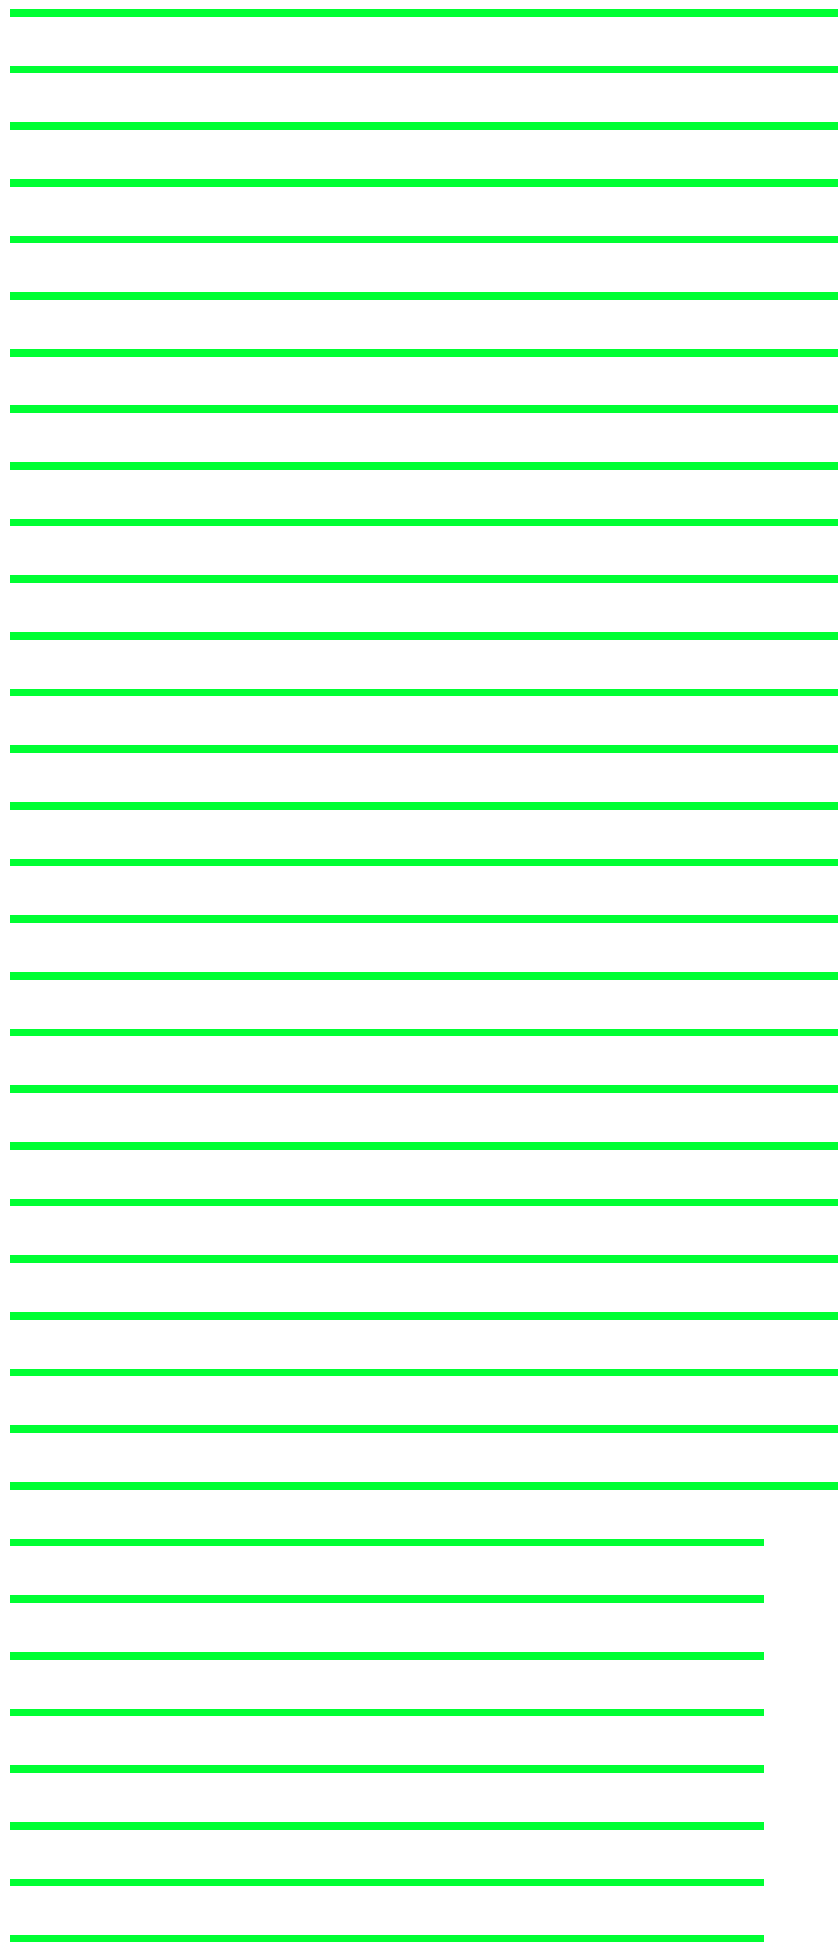

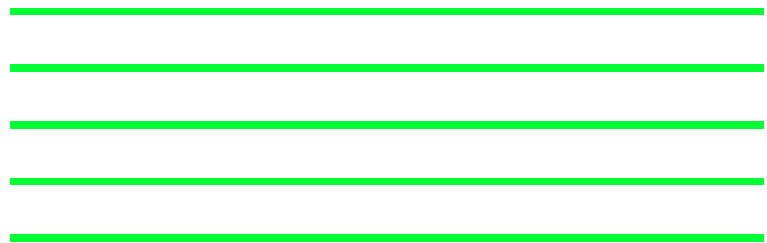

**Descriptions**

**Sequences producing significant alignments:**

Select: [All](#) [None](#) Selected:0

[Alignments](#)
[Download](#)
[GenPept](#)
[Graphics](#)
[Distance tree of results](#)
[Multiple alignment](#)

| Description                                                                     | Max score | Total score | Query cover | E value | Ident | Accession                                   |
|---------------------------------------------------------------------------------|-----------|-------------|-------------|---------|-------|---------------------------------------------|
| <a href="#">unnamed protein product [Macaca fascicularis]</a>                   | 68.1      | 68.1        | 100%        | 1e-11   | 100%  | <a href="#">gij90075530 BAE87445.1</a>      |
| <a href="#">lysosome-associated membrane protein 2 [Homo sapiens]</a>           | 68.1      | 68.1        | 100%        | 1e-11   | 100%  | <a href="#">gij1094569 2106261A</a>         |
| <a href="#">unnamed protein product [Homo sapiens]</a>                          | 68.1      | 68.1        | 100%        | 1e-11   | 100%  | <a href="#">gij221040556 BAH11955.1</a>     |
| <a href="#">PREDICTED: lysosome-associated membrane glycoprotein 2 [Pan</a>     | 68.1      | 68.1        | 100%        | 1e-11   | 100%  | <a href="#">gij694986114 XP_009437861.1</a> |
| <a href="#">PREDICTED: lysosome-associated membrane glycoprotein 2 [Gori</a>    | 68.1      | 68.1        | 100%        | 1e-11   | 100%  | <a href="#">gij426397293 XP_004064857.1</a> |
| <a href="#">PREDICTED: lysosome-associated membrane glycoprotein 2 isofor</a>   | 68.1      | 68.1        | 100%        | 1e-11   | 100%  | <a href="#">gij724955883 XP_010353039.1</a> |
| <a href="#">unnamed protein product [Homo sapiens]</a>                          | 68.1      | 68.1        | 100%        | 1e-11   | 100%  | <a href="#">gij194385728 BAG65239.1</a>     |
| <a href="#">lysosomal membrane glycoprotein-2 [Homo sapiens]</a>                | 68.1      | 68.1        | 100%        | 1e-11   | 100%  | <a href="#">gij307110 AAA60383.1</a>        |
| <a href="#">PREDICTED: lysosome-associated membrane glycoprotein 2 isofor</a>   | 68.1      | 68.1        | 100%        | 1e-11   | 100%  | <a href="#">gij724955880 XP_010353037.1</a> |
| <a href="#">PREDICTED: lysosome-associated membrane glycoprotein 2 isofor</a>   | 68.1      | 68.1        | 100%        | 1e-11   | 100%  | <a href="#">gij724955878 XP_010353036.1</a> |
| <a href="#">PREDICTED: lysosome-associated membrane glycoprotein 2 isofor</a>   | 68.1      | 68.1        | 100%        | 1e-11   | 100%  | <a href="#">gij685617844 XP_009196467.1</a> |
| <a href="#">LAMP2 [synthetic construct]</a>                                     | 68.1      | 68.1        | 100%        | 1e-11   | 100%  | <a href="#">gij649119698 AIC54689.1</a>     |
| <a href="#">PREDICTED: lysosome-associated membrane glycoprotein 2 isofor</a>   | 68.1      | 68.1        | 100%        | 1e-11   | 100%  | <a href="#">gij635147704 XP_008017647.1</a> |
| <a href="#">PREDICTED: lysosome-associated membrane glycoprotein 2 isofor</a>   | 68.1      | 68.1        | 100%        | 1e-11   | 100%  | <a href="#">gij635147702 XP_008017646.1</a> |
| <a href="#">lysosomal membrane glycoprotein-2 [Homo sapiens]</a>                | 68.1      | 68.1        | 100%        | 1e-11   | 100%  | <a href="#">gij1809215 AAB41647.1</a>       |
| <a href="#">lysosome-associated membrane glycoprotein 2 isoform B precursor</a> | 68.1      | 68.1        | 100%        | 1e-11   | 100%  | <a href="#">gij7669503 NP_054701.1</a>      |
| <a href="#">hypothetical protein [Pongo abelii]</a>                             | 68.1      | 68.1        | 100%        | 1e-11   | 100%  | <a href="#">gij55732398 CAH92900.1</a>      |
| <a href="#">lysosome-associated membrane glycoprotein 2 isoform A precursor</a> | 68.1      | 68.1        | 100%        | 1e-11   | 100%  | <a href="#">gij4504957 NP_002285.1</a>      |
| <a href="#">PREDICTED: lysosome-associated membrane glycoprotein 2 isofor</a>   | 68.1      | 68.1        | 100%        | 1e-11   | 100%  | <a href="#">gij402911290 XP_003918269.1</a> |
| <a href="#">PREDICTED: lysosome-associated membrane glycoprotein 2 isofor</a>   | 68.1      | 68.1        | 100%        | 1e-11   | 100%  | <a href="#">gij397505262 XP_003823188.1</a> |
| <a href="#">PREDICTED: lysosome-associated membrane glycoprotein 2 isofor</a>   | 68.1      | 68.1        | 100%        | 1e-11   | 100%  | <a href="#">gij397505260 XP_003823187.1</a> |
| <a href="#">PREDICTED: lysosome-associated membrane glycoprotein 2 isofor</a>   | 68.1      | 68.1        | 100%        | 1e-11   | 100%  | <a href="#">gij395754380 XP_003779762.1</a> |
| <a href="#">PREDICTED: lysosome-associated membrane glycoprotein 2 isofor</a>   | 68.1      | 68.1        | 100%        | 1e-11   | 100%  | <a href="#">gij332226294 XP_003262323.1</a> |
| <a href="#">PREDICTED: lysosome-associated membrane glycoprotein 2 isofor</a>   | 68.1      | 68.1        | 100%        | 1e-11   | 100%  | <a href="#">gij297710915 XP_002832104.1</a> |
| <a href="#">lysosome-associated membrane glycoprotein 2 precursor [Macaca</a>   | 68.1      | 68.1        | 100%        | 1e-11   | 100%  | <a href="#">gij386782257 NP_001247737.1</a> |
| <a href="#">PREDICTED: lysosome-associated membrane glycoprotein 2 isofor</a>   | 68.1      | 68.1        | 100%        | 1e-11   | 100%  | <a href="#">gij544522660 XP_005594543.1</a> |
| <a href="#">PREDICTED: lysosome-associated membrane glycoprotein 2 isofor</a>   | 68.1      | 68.1        | 100%        | 1e-11   | 100%  | <a href="#">gij724955885 XP_010353040.1</a> |
| <a href="#">PREDICTED: lysosome-associated membrane glycoprotein 2 isofor</a>   | 68.1      | 68.1        | 100%        | 1e-11   | 100%  | <a href="#">gij635147700 XP_008017645.1</a> |

|                                                                                             |      |      |      |       |      |                                             |
|---------------------------------------------------------------------------------------------|------|------|------|-------|------|---------------------------------------------|
| <a href="#">PREDICTED: lysosome-associated membrane glycoprotein 2 isoform C precursor</a>  | 68.1 | 68.1 | 100% | 1e-11 | 100% | <a href="#">gij402911292 XP_003918270.1</a> |
| <a href="#">PREDICTED: lysosome-associated membrane glycoprotein 2 isoform 1 precursor</a>  | 68.1 | 68.1 | 100% | 1e-11 | 100% | <a href="#">gij397505264 XP_003823189.1</a> |
| <a href="#">PREDICTED: lysosome-associated membrane glycoprotein 2 isoform 2 precursor</a>  | 68.1 | 68.1 | 100% | 1e-11 | 100% | <a href="#">gij395754382 XP_003779763.1</a> |
| <a href="#">PREDICTED: lysosome-associated membrane glycoprotein 2 isoform 3 precursor</a>  | 68.1 | 68.1 | 100% | 1e-11 | 100% | <a href="#">gij332226298 XP_003262325.1</a> |
| <a href="#">PREDICTED: lysosome-associated membrane glycoprotein 2 isoform 4 precursor</a>  | 68.1 | 68.1 | 100% | 1e-11 | 100% | <a href="#">gij544522658 XP_005594542.1</a> |
| <a href="#">lysosome-associated membrane glycoprotein 2 isoform C precursor</a>             | 68.1 | 68.1 | 100% | 1e-11 | 100% | <a href="#">gij169790833 NP_001116078.1</a> |
| <a href="#">unnamed protein product [Homo sapiens]</a>                                      | 66.0 | 66.0 | 100% | 7e-11 | 95%  | <a href="#">gij194375932 BAG57310.1</a>     |
| <a href="#">PREDICTED: lysosome-associated membrane glycoprotein 2 isoform 5 precursor</a>  | 63.8 | 63.8 | 100% | 4e-10 | 95%  | <a href="#">gij725575673 XP_010340007.1</a> |
| <a href="#">PREDICTED: lysosome-associated membrane glycoprotein 2 isoform 6 precursor</a>  | 63.8 | 63.8 | 100% | 4e-10 | 95%  | <a href="#">gij296236307 XP_002763275.1</a> |
| <a href="#">PREDICTED: lysosome-associated membrane glycoprotein 2 isoform 7 precursor</a>  | 63.8 | 63.8 | 100% | 4e-10 | 95%  | <a href="#">gij296236305 XP_002763274.1</a> |
| <a href="#">PREDICTED: lysosome-associated membrane glycoprotein 2 isoform 8 precursor</a>  | 63.8 | 63.8 | 100% | 4e-10 | 95%  | <a href="#">gij403279171 XP_003931138.1</a> |
| <a href="#">PREDICTED: lysosome-associated membrane glycoprotein 2 isoform 9 precursor</a>  | 63.8 | 63.8 | 100% | 4e-10 | 95%  | <a href="#">gij675769593 XP_008988091.1</a> |
| <a href="#">PREDICTED: lysosome-associated membrane glycoprotein 2 isoform 10 precursor</a> | 63.8 | 63.8 | 100% | 4e-10 | 95%  | <a href="#">gij403279173 XP_003931139.1</a> |
| <a href="#">lysosome-associated membrane glycoprotein 2 isoform 1 precursor</a>             | 54.9 | 54.9 | 100% | 4e-07 | 81%  | <a href="#">gij346716335 NP_001231184.1</a> |
| <a href="#">lysosome-associated membrane glycoprotein 2 isoform 2 precursor</a>             | 54.5 | 54.5 | 100% | 5e-07 | 81%  | <a href="#">gij346716337 NP_001231185.1</a> |
| <a href="#">PREDICTED: lysosome-associated membrane glycoprotein 2-like 1</a>               | 53.2 | 53.2 | 90%  | 1e-06 | 89%  | <a href="#">gij470632997 XP_004322447.1</a> |
| <a href="#">PREDICTED: lysosome-associated membrane glycoprotein 2 isoform 11 precursor</a> | 53.2 | 53.2 | 90%  | 1e-06 | 89%  | <a href="#">gij602708463 XP_007464492.1</a> |
| <a href="#">PREDICTED: lysosome-associated membrane glycoprotein 2 isoform 12 precursor</a> | 53.2 | 53.2 | 90%  | 1e-06 | 89%  | <a href="#">gij602708461 XP_007464491.1</a> |
| <a href="#">PREDICTED: lysosome-associated membrane glycoprotein 2 isoform 13 precursor</a> | 53.2 | 53.2 | 90%  | 1e-06 | 89%  | <a href="#">gij602708459 XP_007464490.1</a> |
| <a href="#">PREDICTED: lysosome-associated membrane glycoprotein 2 isoform 14 precursor</a> | 53.2 | 53.2 | 90%  | 1e-06 | 89%  | <a href="#">gij602708457 XP_007464489.1</a> |
| <a href="#">PREDICTED: lysosome-associated membrane glycoprotein 2 isoform 15 precursor</a> | 53.2 | 53.2 | 90%  | 1e-06 | 89%  | <a href="#">gij593754480 XP_007116126.1</a> |
| <a href="#">PREDICTED: lysosome-associated membrane glycoprotein 2 isoform 16 precursor</a> | 53.2 | 53.2 | 90%  | 1e-06 | 89%  | <a href="#">gij593754478 XP_007116125.1</a> |
| <a href="#">PREDICTED: lysosome-associated membrane glycoprotein 2 isoform 17 precursor</a> | 53.2 | 53.2 | 90%  | 1e-06 | 89%  | <a href="#">gij466085768 XP_004285633.1</a> |
| <a href="#">PREDICTED: lysosome-associated membrane glycoprotein 2 isoform 18 precursor</a> | 53.2 | 53.2 | 90%  | 1e-06 | 89%  | <a href="#">gij466085764 XP_004285632.1</a> |
| <a href="#">PREDICTED: lysosome-associated membrane glycoprotein 2 isoform 19 precursor</a> | 53.2 | 53.2 | 90%  | 1e-06 | 89%  | <a href="#">gij602708455 XP_007464488.1</a> |
| <a href="#">PREDICTED: lysosome-associated membrane glycoprotein 2 isoform 20 precursor</a> | 53.2 | 53.2 | 90%  | 1e-06 | 89%  | <a href="#">gij594660829 XP_007178670.1</a> |
| <a href="#">PREDICTED: lysosome-associated membrane glycoprotein 2 isoform 21 precursor</a> | 53.2 | 53.2 | 90%  | 1e-06 | 89%  | <a href="#">gij594660827 XP_007178669.1</a> |
| <a href="#">PREDICTED: lysosome-associated membrane glycoprotein 2 isoform 22 precursor</a> | 53.2 | 53.2 | 90%  | 1e-06 | 89%  | <a href="#">gij466085762 XP_004285631.1</a> |
| <a href="#">lysosomal membrane glycoprotein lamp-2 homolog [Homo sapiens]</a>               | 52.8 | 52.8 | 76%  | 2e-06 | 100% | <a href="#">gij435756 AAB28483.1</a>        |
| <a href="#">Lysosome-associated membrane glycoprotein 2 [Bos mutus]</a>                     | 51.5 | 51.5 | 90%  | 5e-06 | 84%  | <a href="#">gij440909498 ELR59401.1</a>     |
| <a href="#">lysosome-associated membrane glycoprotein 2 isoform 2 precursor</a>             | 51.5 | 51.5 | 90%  | 5e-06 | 84%  | <a href="#">gij77736087 NP_001029742.1</a>  |
| <a href="#">PREDICTED: lysosome-associated membrane glycoprotein 2 isoform 23 precursor</a> | 51.5 | 51.5 | 90%  | 5e-06 | 84%  | <a href="#">gij555958958 XP_005891592.1</a> |
| <a href="#">PREDICTED: lysosome-associated membrane glycoprotein 2 isoform 24 precursor</a> | 51.5 | 51.5 | 90%  | 5e-06 | 84%  | <a href="#">gij555958956 XP_005891591.1</a> |
| <a href="#">PREDICTED: lysosome-associated membrane glycoprotein 2 isoform 25 precursor</a> | 51.5 | 51.5 | 90%  | 5e-06 | 84%  | <a href="#">gij426257572 XP_004022400.1</a> |
| <a href="#">PREDICTED: lysosome-associated membrane glycoprotein 2 isoform 26 precursor</a> | 51.5 | 51.5 | 90%  | 5e-06 | 84%  | <a href="#">gij426257570 XP_004022399.1</a> |
| <a href="#">lysosome-associated membrane glycoprotein 2 isoform 1 precursor</a>             | 51.5 | 51.5 | 90%  | 5e-06 | 84%  | <a href="#">gij164420738 NP_001106715.1</a> |
| <a href="#">PREDICTED: lysosome-associated membrane glycoprotein 2 isoform 27 precursor</a> | 51.5 | 51.5 | 90%  | 5e-06 | 89%  | <a href="#">gij514453030 XP_003465647.2</a> |
| <a href="#">PREDICTED: lysosome-associated membrane glycoprotein 2 isoform 28 precursor</a> | 51.5 | 51.5 | 90%  | 5e-06 | 84%  | <a href="#">gij426257574 XP_004022401.1</a> |
| <a href="#">PREDICTED: lysosome-associated membrane glycoprotein 2 isoform 29 precursor</a> | 51.5 | 51.5 | 90%  | 5e-06 | 89%  | <a href="#">gij514453028 XP_005001877.1</a> |
| <a href="#">PREDICTED: lysosome-associated membrane glycoprotein 2 isoform 30 precursor</a> | 51.5 | 51.5 | 90%  | 5e-06 | 89%  | <a href="#">gij74008247 XP_864590.1</a>     |
| <a href="#">PREDICTED: lysosome-associated membrane glycoprotein 2 isoform 31 precursor</a> | 51.5 | 51.5 | 90%  | 5e-06 | 89%  | <a href="#">gij545559229 XP_005641822.1</a> |
| <a href="#">PREDICTED: lysosome-associated membrane glycoprotein 2 isoform 32 precursor</a> | 51.5 | 51.5 | 90%  | 5e-06 | 89%  | <a href="#">gij545559226 XP_005641821.1</a> |
| <a href="#">PREDICTED: lysosome-associated membrane glycoprotein 2 isoform 33 precursor</a> | 51.5 | 51.5 | 90%  | 5e-06 | 84%  | <a href="#">gij594048957 XP_006048863.1</a> |
| <a href="#">PREDICTED: lysosome-associated membrane glycoprotein 2 isoform 34 precursor</a> | 51.5 | 51.5 | 90%  | 5e-06 | 84%  | <a href="#">gij594048955 XP_006048862.1</a> |
| <a href="#">PREDICTED: lysosome-associated membrane glycoprotein 2 isoform 35 precursor</a> | 51.5 | 51.5 | 90%  | 5e-06 | 84%  | <a href="#">gij556716158 XP_005954005.1</a> |

|                                                                                |      |      |      |       |     |                                             |
|--------------------------------------------------------------------------------|------|------|------|-------|-----|---------------------------------------------|
| <a href="#">PREDICTED: lysosome-associated membrane glycoprotein 2 isofo</a>   | 51.5 | 51.5 | 90%  | 5e-06 | 84% | <a href="#">gij556716156 XP_005954004.1</a> |
| <a href="#">PREDICTED: lysosome-associated membrane glycoprotein 2 isofo</a>   | 51.5 | 51.5 | 90%  | 5e-06 | 84% | <a href="#">gij548529771 XP_005700397.1</a> |
| <a href="#">PREDICTED: lysosome-associated membrane glycoprotein 2 isofo</a>   | 51.5 | 51.5 | 90%  | 5e-06 | 84% | <a href="#">gij548529766 XP_005700396.1</a> |
| <a href="#">PREDICTED: lysosome-associated membrane glycoprotein 2 isofo</a>   | 51.5 | 51.5 | 90%  | 5e-06 | 84% | <a href="#">gij594048953 XP_006048861.1</a> |
| <a href="#">PREDICTED: lysosome-associated membrane glycoprotein 2 isofo</a>   | 51.5 | 51.5 | 90%  | 5e-06 | 84% | <a href="#">gij529013535 XP_005227520.1</a> |
| <a href="#">PREDICTED: lysosome-associated membrane glycoprotein 2 [Octo</a>   | 49.4 | 49.4 | 90%  | 3e-05 | 89% | <a href="#">gij507713360 XP_004647723.1</a> |
| <a href="#">PREDICTED: lysosome-associated membrane glycoprotein 2 isofo</a>   | 49.4 | 49.4 | 90%  | 3e-05 | 79% | <a href="#">gij655877736 XP_008271378.1</a> |
| <a href="#">PREDICTED: lysosome-associated membrane glycoprotein 2 isofo</a>   | 49.4 | 49.4 | 90%  | 3e-05 | 79% | <a href="#">gij655877734 XP_008271377.1</a> |
| <a href="#">PREDICTED: lysosome-associated membrane glycoprotein 2 isofo</a>   | 49.4 | 49.4 | 90%  | 3e-05 | 79% | <a href="#">gij655877732 XP_008271376.1</a> |
| <a href="#">PREDICTED: lysosome-associated membrane glycoprotein 2 isofo</a>   | 49.0 | 49.0 | 90%  | 4e-05 | 84% | <a href="#">gij562874873 XP_006165272.1</a> |
| <a href="#">PREDICTED: lysosome-associated membrane glycoprotein 2 isofo</a>   | 49.0 | 49.0 | 90%  | 4e-05 | 84% | <a href="#">gij562874871 XP_006165271.1</a> |
| <a href="#">PREDICTED: lysosome-associated membrane glycoprotein 2 isofo</a>   | 49.0 | 49.0 | 100% | 4e-05 | 76% | <a href="#">gij558099063 XP_006082216.1</a> |
| <a href="#">PREDICTED: lysosome-associated membrane glycoprotein 2 isofo</a>   | 49.0 | 49.0 | 100% | 4e-05 | 76% | <a href="#">gij558099061 XP_006082215.1</a> |
| <a href="#">PREDICTED: lysosome-associated membrane glycoprotein 2 isofo</a>   | 49.0 | 49.0 | 100% | 4e-05 | 76% | <a href="#">gij554586647 XP_005884738.1</a> |
| <a href="#">PREDICTED: lysosome-associated membrane glycoprotein 2 isofo</a>   | 49.0 | 49.0 | 100% | 4e-05 | 76% | <a href="#">gij554586645 XP_005884737.1</a> |
| <a href="#">PREDICTED: lysosome-associated membrane glycoprotein 2 isofo</a>   | 49.0 | 49.0 | 90%  | 4e-05 | 84% | <a href="#">gij562874875 XP_006165273.1</a> |
| <a href="#">PREDICTED: lysosome-associated membrane glycoprotein 2 isofo</a>   | 49.0 | 49.0 | 100% | 4e-05 | 76% | <a href="#">gij558099059 XP_006082214.1</a> |
| <a href="#">PREDICTED: lysosome-associated membrane glycoprotein 2 isofo</a>   | 49.0 | 49.0 | 100% | 4e-05 | 76% | <a href="#">gij554586643 XP_005884736.1</a> |
| <a href="#">Lysosome-associated membrane glycoprotein 2 [Tupaia chinensis]</a> | 49.0 | 49.0 | 90%  | 4e-05 | 84% | <a href="#">gij444518571 ELV12237.1</a>     |
| <a href="#">Lysosome-associated membrane glycoprotein 2 [Myotis brandtii]</a>  | 49.0 | 49.0 | 100% | 4e-05 | 76% | <a href="#">gij521037420 EPQ19198.1</a>     |
| <a href="#">PREDICTED: lysosome-associated membrane glycoprotein 2 isofo</a>   | 48.6 | 48.6 | 90%  | 5e-05 | 84% | <a href="#">gij667313899 XP_008585587.1</a> |
| <a href="#">PREDICTED: lysosome-associated membrane glycoprotein 2 isofo</a>   | 48.6 | 48.6 | 90%  | 5e-05 | 84% | <a href="#">gij667313896 XP_008585586.1</a> |
| <a href="#">PREDICTED: lysosome-associated membrane glycoprotein 2 isofo</a>   | 48.6 | 48.6 | 90%  | 5e-05 | 84% | <a href="#">gij667313892 XP_008585585.1</a> |
| <a href="#">PREDICTED: lysosome-associated membrane glycoprotein 2 [Lept</a>   | 48.1 | 48.1 | 90%  | 7e-05 | 84% | <a href="#">gij585189937 XP_006746269.1</a> |
| <a href="#">PREDICTED: lysosome-associated membrane glycoprotein 2 isofo</a>   | 48.1 | 48.1 | 90%  | 7e-05 | 84% | <a href="#">gij634883039 XP_007951511.1</a> |
| <a href="#">PREDICTED: lysosome-associated membrane glycoprotein 2 isofo</a>   | 48.1 | 48.1 | 90%  | 7e-05 | 84% | <a href="#">gij472375054 XP_004406977.1</a> |
| <a href="#">hypothetical protein PANDA_011592 [Ailuropoda melanoleuca]</a>     | 48.1 | 48.1 | 90%  | 7e-05 | 84% | <a href="#">gij281340908 EFB16492.1</a>     |

## Alignments

Download [GenPept](#) [Graphics](#)

[Next](#) [Previous](#) [Descriptions](#)

unnamed protein product [Macaca fascicularis]

Sequence ID: [gij90075530|dbj|BAE87445.1](#) Length: 174 Number of Matches: 1

Range 1: 11 to 31 [GenPept](#) [Graphics](#)

[Next Match](#) [Previous Match](#)

| Score          | Expect | Identities  | Positives   | Gaps     |
|----------------|--------|-------------|-------------|----------|
| 68.1 bits(153) | 1e-11  | 21/21(100%) | 21/21(100%) | 0/21(0%) |

Query 1 KVASVININPNTTHTGSCRS 21  
 KVASVININPNTTHTGSCRS  
 Sbjct 11 KVASVININPNTTHTGSCRS 31

### Related Information

[Gene](#) - associated gene details

Download [GenPept](#) [Graphics](#)

[Next](#) [Previous](#) [Descriptions](#)

lysosome-associated membrane protein 2

Sequence ID: [gij1094569|prf||2106261A](#) Length: 268 Number of Matches: 1

Range 1: 105 to 125 [GenPept](#) [Graphics](#)

[Next Match](#) [Previous Match](#)

| Score          | Expect | Identities  | Positives   | Gaps     |
|----------------|--------|-------------|-------------|----------|
| 68.1 bits(153) | 1e-11  | 21/21(100%) | 21/21(100%) | 0/21(0%) |

Query 1 KVASVININPNTTHTGSCRS 21

### Related Information

Sbjct 105 KVASVININPNTTHSTGSCRS 125  
 KVASVININPNTTHSTGSCRS 125

[Download](#) [GenPept](#) [Graphics](#) [Next](#) [Previous](#) [Descriptions](#)

unnamed protein product [Homo sapiens]

Sequence ID: [gi|221040556|dbj|BAH11955.1](#) Length: 300 Number of Matches: 1

Range 1: 136 to 156 [GenPept](#) [Graphics](#) [Next Match](#) [Previous Match](#)

| Score          | Expect | Identities  | Positives   | Gaps     |
|----------------|--------|-------------|-------------|----------|
| 68.1 bits(153) | 1e-11  | 21/21(100%) | 21/21(100%) | 0/21(0%) |

Query 1 KVASVININPNTTHSTGSCRS 21  
 KVASVININPNTTHSTGSCRS  
 Sbjct 136 KVASVININPNTTHSTGSCRS 156

**Related Information**

[Gene](#) - associated gene details

[Download](#) [GenPept](#) [Graphics](#) [Next](#) [Previous](#) [Descriptions](#)

PREDICTED: lysosome-associated membrane glycoprotein 2 [Pan troglodytes]

Sequence ID: [gi|694986114|ref|XP\\_009437861.1](#) Length: 337 Number of Matches: 1

Range 1: 173 to 193 [GenPept](#) [Graphics](#) [Next Match](#) [Previous Match](#)

| Score          | Expect | Identities  | Positives   | Gaps     |
|----------------|--------|-------------|-------------|----------|
| 68.1 bits(153) | 1e-11  | 21/21(100%) | 21/21(100%) | 0/21(0%) |

Query 1 KVASVININPNTTHSTGSCRS 21  
 KVASVININPNTTHSTGSCRS  
 Sbjct 173 KVASVININPNTTHSTGSCRS 193

**Related Information**

[Gene](#) - associated gene details

[Download](#) [GenPept](#) [Graphics](#) [Next](#) [Previous](#) [Descriptions](#)

PREDICTED: lysosome-associated membrane glycoprotein 2 [Gorilla gorilla gorilla]

Sequence ID: [gi|426397293|ref|XP\\_004064857.1](#) Length: 346 Number of Matches: 1

Range 1: 211 to 231 [GenPept](#) [Graphics](#) [Next Match](#) [Previous Match](#)

| Score          | Expect | Identities  | Positives   | Gaps     |
|----------------|--------|-------------|-------------|----------|
| 68.1 bits(153) | 1e-11  | 21/21(100%) | 21/21(100%) | 0/21(0%) |

Query 1 KVASVININPNTTHSTGSCRS 21  
 KVASVININPNTTHSTGSCRS  
 Sbjct 211 KVASVININPNTTHSTGSCRS 231

**Related Information**

[Gene](#) - associated gene details

[Map Viewer](#) - aligned genomic context

BLAST is a registered trademark of the National Library of Medicine.



NCBI/ BLAST/ blastp suite/ Formatting Results - BVHYXTMA01R

Your search parameters were adjusted to search for a short input sequence.

Edit and Resubmit Save Search Strategies Formatting options Download YouTube How to read this page Blast report description

LCAT\_KAELSDHTRPVILVPGCLGNQLEAKL\_Mod

RID BVHYXTMA01R (Expires on 01-21 10:13 am)

Query ID lcl|307745
Description None
Molecule type amino acid
Query Length 26

Database Name nr
Description All non-redundant GenBank CDS translations+PDB+SwissProt+PIR+PRF excluding environmental samples from WGS projects
Program BLASTP 2.2.30+ Citation

Other reports: Search Summary Taxonomy reports Distance tree of results Multiple alignment

Graphic Summary

Show Conserved Domains

No putative conserved domains have been detected

Distribution of 100 Blast Hits on the Query Sequence

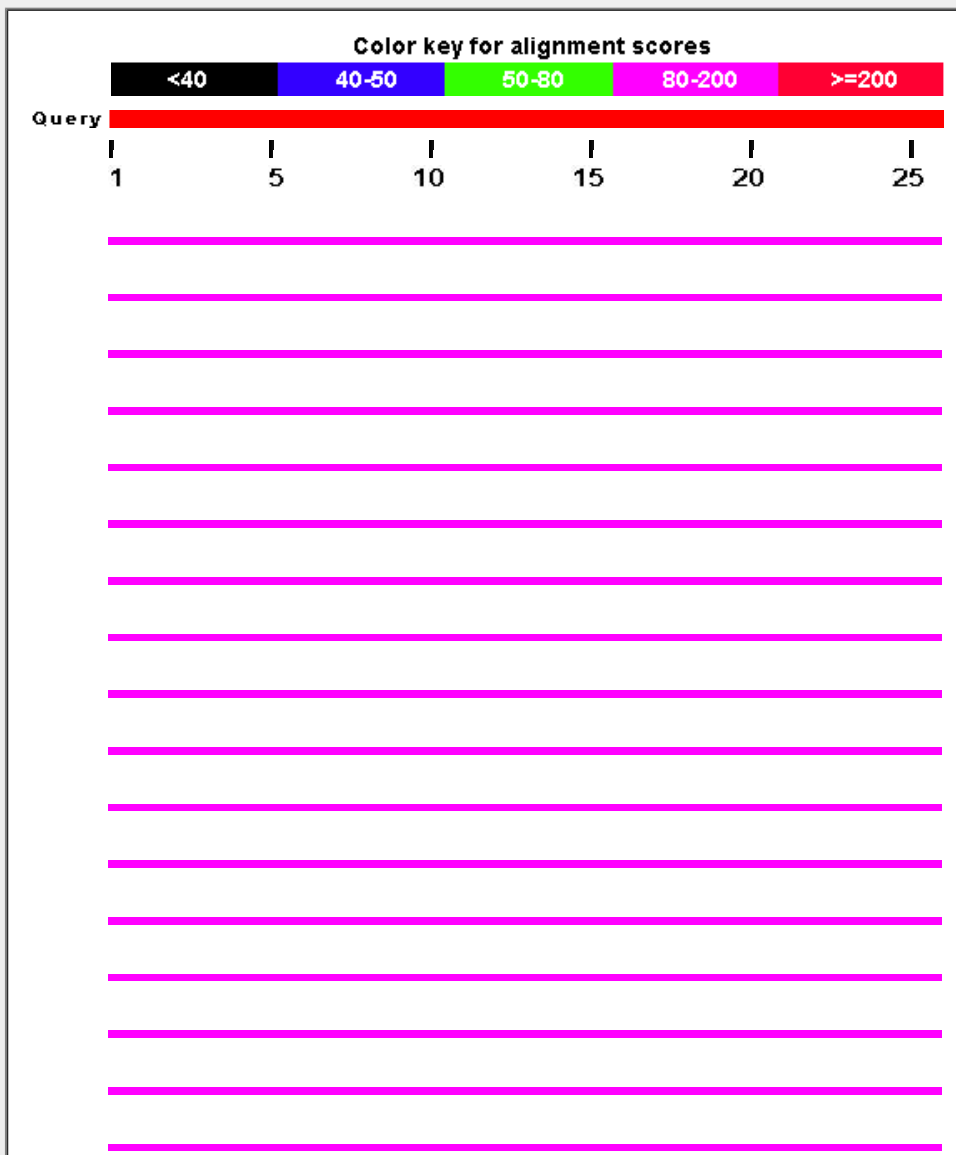

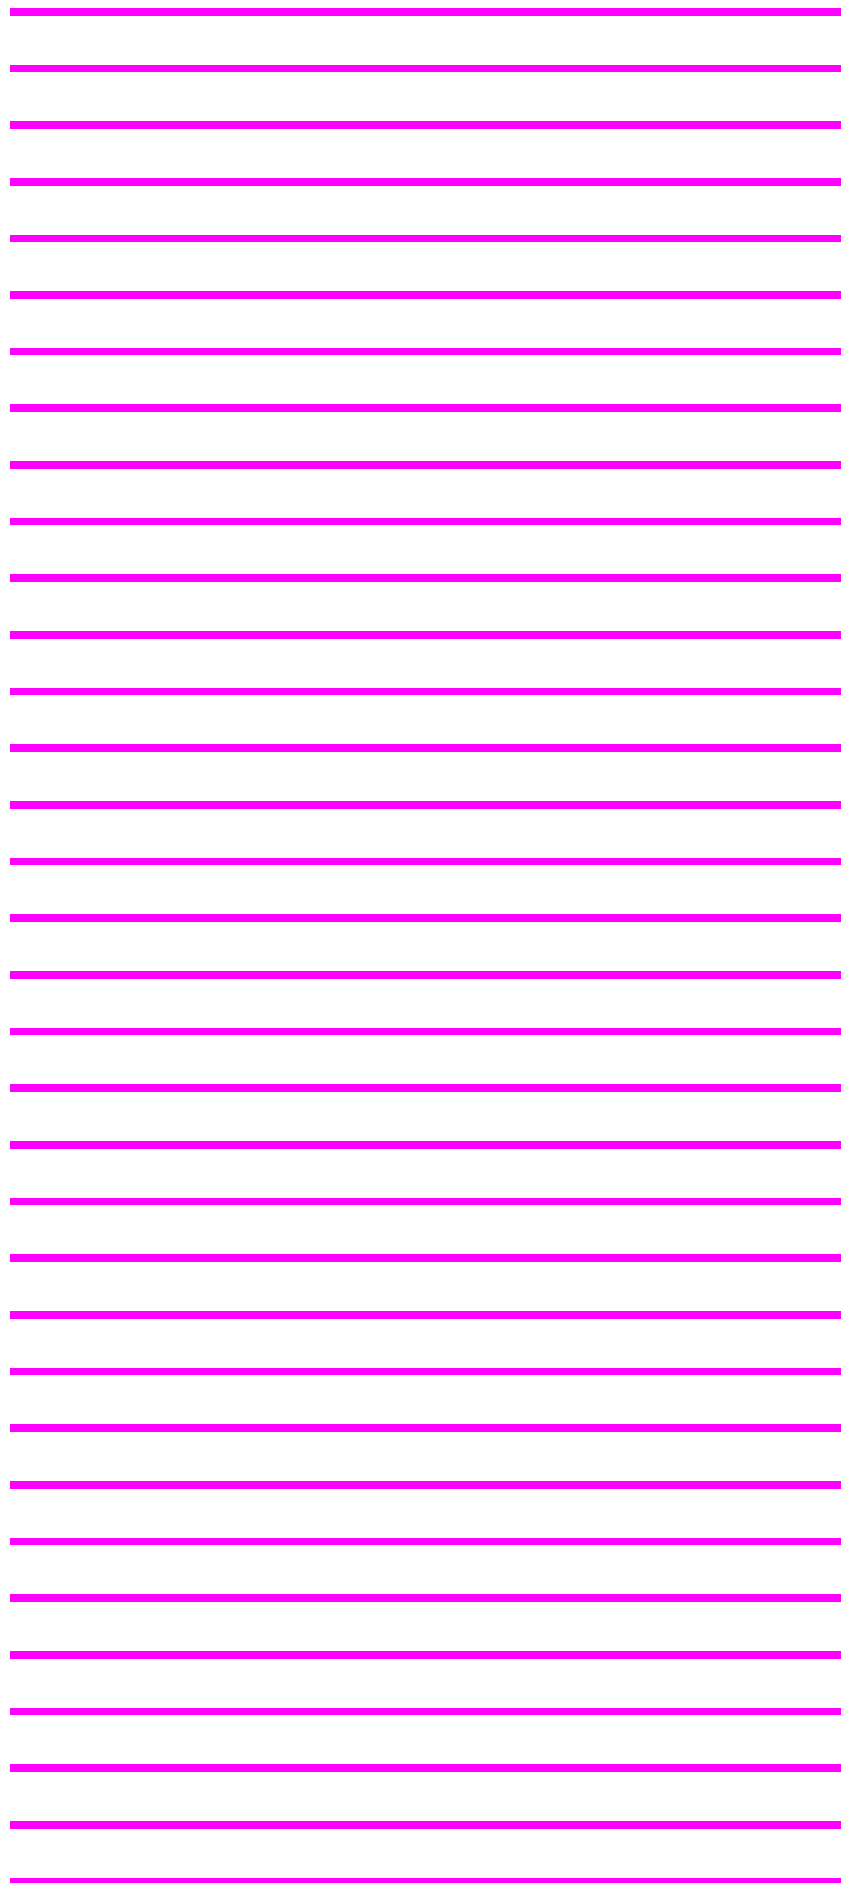

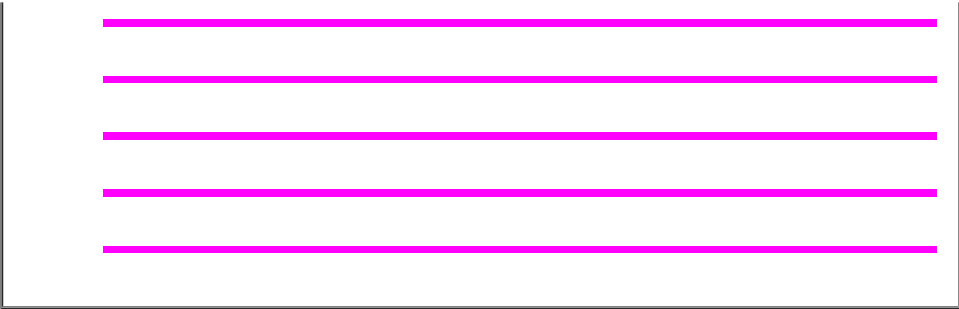

**Descriptions**

**Sequences producing significant alignments:**

Select: [All](#) [None](#) Selected:0

[Alignments](#)
[Download](#)
[GenPept](#)
[Graphics](#)
[Distance tree of results](#)
[Multiple alignment](#)


| Description                                                                                               | Max score | Total score | Query cover | E value | Ident | Accession                      |
|-----------------------------------------------------------------------------------------------------------|-----------|-------------|-------------|---------|-------|--------------------------------|
| <a href="#">lecithin cholesterol acyltransferase [Macaca sp.]</a>                                         | 81.7      | 81.7        | 100%        | 5e-16   | 96%   | <a href="#">AAM76621.1</a>     |
| <a href="#">lecithin cholesterol acyltransferase [Pongo pygmaeus]</a>                                     | 81.7      | 81.7        | 100%        | 5e-16   | 96%   | <a href="#">AAM76620.1</a>     |
| <a href="#">lecithin cholesterol acyltransferase [Gorilla gorilla]</a>                                    | 81.7      | 81.7        | 100%        | 5e-16   | 96%   | <a href="#">AAM76619.1</a>     |
| <a href="#">lecithin cholesterol acyltransferase [Saguinus oedipus]</a>                                   | 81.7      | 81.7        | 100%        | 5e-16   | 96%   | <a href="#">AAM76622.1</a>     |
| <a href="#">PREDICTED: phosphatidylcholine-sterol acyltransferase [Mesocricetus auratus]</a>              | 81.7      | 81.7        | 100%        | 6e-16   | 96%   | <a href="#">XP_005076409.1</a> |
| <a href="#">PREDICTED: phosphatidylcholine-sterol acyltransferase-like [Macaca mulatta]</a>               | 81.7      | 81.7        | 100%        | 6e-16   | 96%   | <a href="#">XP_001090154.2</a> |
| <a href="#">PREDICTED: phosphatidylcholine-sterol acyltransferase [Pongo abelii]</a>                      | 81.7      | 81.7        | 100%        | 6e-16   | 96%   | <a href="#">XP_009249145.1</a> |
| <a href="#">PREDICTED: phosphatidylcholine-sterol acyltransferase isoform X2 [Pan troglodytes]</a>        | 81.7      | 81.7        | 100%        | 6e-16   | 96%   | <a href="#">XP_009429355.1</a> |
| <a href="#">PREDICTED: phosphatidylcholine-sterol acyltransferase isoform X3 [Galeopterus variegatus]</a> | 81.7      | 81.7        | 100%        | 6e-16   | 96%   | <a href="#">XP_008565520.1</a> |
| <a href="#">PREDICTED: phosphatidylcholine-sterol acyltransferase isoform X3 [Equus caballus]</a>         | 81.7      | 81.7        | 100%        | 7e-16   | 96%   | <a href="#">XP_008516437.1</a> |
| <a href="#">PREDICTED: phosphatidylcholine-sterol acyltransferase isoform X3 [Equus caballus]</a>         | 81.7      | 81.7        | 100%        | 7e-16   | 96%   | <a href="#">XP_005608407.1</a> |
| <a href="#">lecithin:cholesterol acyltransferase, LCAT [Homo sapiens]</a>                                 | 81.7      | 81.7        | 100%        | 7e-16   | 96%   | <a href="#">AAB34898.1</a>     |
| <a href="#">PREDICTED: phosphatidylcholine-sterol acyltransferase isoform X2 [Panthera leo]</a>           | 81.7      | 81.7        | 100%        | 7e-16   | 96%   | <a href="#">XP_007090383.1</a> |
| <a href="#">lecithin:cholesterol acyltransferase precursor [Homo sapiens]</a>                             | 81.7      | 81.7        | 100%        | 7e-16   | 96%   | <a href="#">AAA59499.1</a>     |
| <a href="#">Phosphatidylcholine-sterol acyltransferase [Macaca fascicularis]</a>                          | 81.7      | 81.7        | 100%        | 7e-16   | 96%   | <a href="#">EHH60494.1</a>     |
| <a href="#">lecithin-cholesterol acyltransferase precursor (EC 2.3.1.43) [Homo sapiens]</a>               | 81.7      | 81.7        | 100%        | 7e-16   | 96%   | <a href="#">AAA59500.1</a>     |
| <a href="#">PREDICTED: phosphatidylcholine-sterol acyltransferase [Loxodonta africana]</a>                | 81.7      | 81.7        | 100%        | 7e-16   | 96%   | <a href="#">XP_003417179.1</a> |
| <a href="#">PREDICTED: phosphatidylcholine-sterol acyltransferase [Fukomys damarensis]</a>                | 81.7      | 81.7        | 100%        | 7e-16   | 96%   | <a href="#">XP_010610588.1</a> |
| <a href="#">PREDICTED: phosphatidylcholine-sterol acyltransferase isoform 2 [Canis lupus familiaris]</a>  | 81.7      | 81.7        | 100%        | 7e-16   | 96%   | <a href="#">XP_851673.1</a>    |
| <a href="#">PREDICTED: phosphatidylcholine-sterol acyltransferase [Chinchilla lanigera]</a>               | 81.7      | 81.7        | 100%        | 7e-16   | 96%   | <a href="#">XP_005403659.1</a> |
| <a href="#">PREDICTED: phosphatidylcholine-sterol acyltransferase [Heterocephalus glaber]</a>             | 81.7      | 81.7        | 100%        | 7e-16   | 96%   | <a href="#">XP_004843055.1</a> |
| <a href="#">PREDICTED: phosphatidylcholine-sterol acyltransferase isoform X1 [Heterocephalus glaber]</a>  | 81.7      | 81.7        | 100%        | 7e-16   | 96%   | <a href="#">XP_004907111.1</a> |
| <a href="#">PREDICTED: phosphatidylcholine-sterol acyltransferase [Orycteropus afer afer]</a>             | 81.7      | 81.7        | 100%        | 7e-16   | 96%   | <a href="#">XP_007938473.1</a> |
| <a href="#">PREDICTED: phosphatidylcholine-sterol acyltransferase [Chrysochloris asiatica]</a>            | 81.7      | 81.7        | 100%        | 7e-16   | 96%   | <a href="#">XP_006860289.1</a> |
| <a href="#">PREDICTED: phosphatidylcholine-sterol acyltransferase [Elephantulus edwardsi]</a>             | 81.7      | 81.7        | 100%        | 7e-16   | 96%   | <a href="#">XP_006878737.1</a> |
| <a href="#">PREDICTED: phosphatidylcholine-sterol acyltransferase [Trichechus manatus]</a>                | 81.7      | 81.7        | 100%        | 7e-16   | 96%   | <a href="#">XP_004371526.1</a> |
| <a href="#">PREDICTED: phosphatidylcholine-sterol acyltransferase [Bison bison bison]</a>                 | 81.7      | 81.7        | 100%        | 7e-16   | 96%   | <a href="#">XP_010849309.1</a> |
| <a href="#">PREDICTED: phosphatidylcholine-sterol acyltransferase [Rhinopithecus roxellus]</a>            | 81.7      | 81.7        | 100%        | 7e-16   | 96%   | <a href="#">XP_010353366.1</a> |
| <a href="#">PREDICTED: phosphatidylcholine-sterol acyltransferase isoform X2 [Galeopterus variegatus]</a> | 81.7      | 81.7        | 100%        | 7e-16   | 96%   | <a href="#">XP_008565513.1</a> |



|                                                                                              |      |      |      |       |     |                                |
|----------------------------------------------------------------------------------------------|------|------|------|-------|-----|--------------------------------|
| <a href="#">PREDICTED: phosphatidylcholine-sterol acyltransferase isoform X2 [Equus p</a>    | 81.7 | 81.7 | 100% | 7e-16 | 96% | <a href="#">XP_008516436.1</a> |
| <a href="#">PREDICTED: phosphatidylcholine-sterol acyltransferase [Tarsius syrichta]</a>     | 81.7 | 81.7 | 100% | 7e-16 | 96% | <a href="#">XP_008063935.1</a> |
| <a href="#">PREDICTED: phosphatidylcholine-sterol acyltransferase [Chlorocebus sabaeu</a>    | 81.7 | 81.7 | 100% | 7e-16 | 96% | <a href="#">XP_007992092.1</a> |
| <a href="#">PREDICTED: phosphatidylcholine-sterol acyltransferase isoform X2 [Tupaia c</a>   | 81.7 | 81.7 | 100% | 7e-16 | 96% | <a href="#">XP_006156948.1</a> |
| <a href="#">phosphatidylcholine-sterol acyltransferase precursor [Bos taurus]</a>            | 81.7 | 81.7 | 100% | 7e-16 | 96% | <a href="#">NP_001039534.1</a> |
| <a href="#">PREDICTED: phosphatidylcholine-sterol acyltransferase [Lipotes vexillifer]</a>   | 81.7 | 81.7 | 100% | 7e-16 | 96% | <a href="#">XP_007457320.1</a> |
| <a href="#">PREDICTED: phosphatidylcholine-sterol acyltransferase [Balaenoptera acuto</a>    | 81.7 | 81.7 | 100% | 7e-16 | 96% | <a href="#">XP_007198213.1</a> |
| <a href="#">PREDICTED: phosphatidylcholine-sterol acyltransferase isoform X1 [Bubalus</a>    | 81.7 | 81.7 | 100% | 7e-16 | 96% | <a href="#">XP_006041058.1</a> |
| <a href="#">PREDICTED: phosphatidylcholine-sterol acyltransferase isoform X1 [Panther</a>    | 81.7 | 81.7 | 100% | 7e-16 | 96% | <a href="#">XP_007090382.1</a> |
| <a href="#">PREDICTED: phosphatidylcholine-sterol acyltransferase [Peromyscus manicu</a>     | 81.7 | 81.7 | 100% | 7e-16 | 96% | <a href="#">XP_006986895.1</a> |
| <a href="#">PREDICTED: phosphatidylcholine-sterol acyltransferase isoform X2 [Leptony</a>    | 81.7 | 81.7 | 100% | 7e-16 | 96% | <a href="#">XP_006730154.1</a> |
| <a href="#">phosphatidylcholine-sterol acyltransferase precursor [Papio anubis]</a>          | 81.7 | 81.7 | 100% | 7e-16 | 96% | <a href="#">NP_001106083.1</a> |
| <a href="#">PREDICTED: phosphatidylcholine-sterol acyltransferase isoform X3 [Tupaia c</a>   | 81.7 | 81.7 | 100% | 7e-16 | 96% | <a href="#">XP_006156949.1</a> |
| <a href="#">PREDICTED: phosphatidylcholine-sterol acyltransferase [Vicugna pacos]</a>        | 81.7 | 81.7 | 100% | 7e-16 | 96% | <a href="#">XP_006203780.1</a> |
| <a href="#">PREDICTED: phosphatidylcholine-sterol acyltransferase [Camelus ferus]</a>        | 81.7 | 81.7 | 100% | 7e-16 | 96% | <a href="#">XP_006180662.1</a> |
| <a href="#">PREDICTED: phosphatidylcholine-sterol acyltransferase [Pantholops hodgso</a>     | 81.7 | 81.7 | 100% | 7e-16 | 96% | <a href="#">XP_005956897.1</a> |
| <a href="#">PREDICTED: phosphatidylcholine-sterol acyltransferase isoform X1 [Macaca</a>     | 81.7 | 81.7 | 100% | 7e-16 | 96% | <a href="#">XP_005592370.1</a> |
| <a href="#">PREDICTED: phosphatidylcholine-sterol acyltransferase [Ictidomys tridecemli</a>  | 81.7 | 81.7 | 100% | 7e-16 | 96% | <a href="#">XP_005318397.1</a> |
| <a href="#">PREDICTED: phosphatidylcholine-sterol acyltransferase [Condylura cristata]</a>   | 81.7 | 81.7 | 100% | 7e-16 | 96% | <a href="#">XP_004690509.1</a> |
| <a href="#">PREDICTED: phosphatidylcholine-sterol acyltransferase [Jaculus jaculus]</a>      | 81.7 | 81.7 | 100% | 7e-16 | 96% | <a href="#">XP_004661727.1</a> |
| <a href="#">PREDICTED: phosphatidylcholine-sterol acyltransferase [Sorex araneus]</a>        | 81.7 | 81.7 | 100% | 7e-16 | 96% | <a href="#">XP_004600640.1</a> |
| <a href="#">PREDICTED: phosphatidylcholine-sterol acyltransferase isoform 2 [Ceratothe</a>   | 81.7 | 81.7 | 100% | 7e-16 | 96% | <a href="#">XP_004431810.1</a> |
| <a href="#">PREDICTED: phosphatidylcholine-sterol acyltransferase [Tursiops truncatus]</a>   | 81.7 | 81.7 | 100% | 7e-16 | 96% | <a href="#">XP_004330924.1</a> |
| <a href="#">PREDICTED: phosphatidylcholine-sterol acyltransferase [Orcinus orca]</a>         | 81.7 | 81.7 | 100% | 7e-16 | 96% | <a href="#">XP_004273232.1</a> |
| <a href="#">PREDICTED: phosphatidylcholine-sterol acyltransferase [Bos mutus]</a>            | 81.7 | 81.7 | 100% | 7e-16 | 96% | <a href="#">XP_005896591.1</a> |
| <a href="#">PREDICTED: phosphatidylcholine-sterol acyltransferase [Pteropus alecto]</a>      | 81.7 | 81.7 | 100% | 7e-16 | 96% | <a href="#">XP_006909849.1</a> |
| <a href="#">phosphatidylcholine-sterol acyltransferase precursor [Oryctolagus cuniculus]</a> | 81.7 | 81.7 | 100% | 7e-16 | 96% | <a href="#">NP_001075659.1</a> |
| <a href="#">phosphatidylcholine-sterol acyltransferase precursor [Homo sapiens]</a>          | 81.7 | 81.7 | 100% | 7e-16 | 96% | <a href="#">NP_000220.1</a>    |
| <a href="#">Phosphatidylcholine-sterol acyltransferase [Macaca mulatta]</a>                  | 81.7 | 81.7 | 100% | 7e-16 | 96% | <a href="#">EHH31776.1</a>     |
| <a href="#">phosphatidylcholine-sterol acyltransferase precursor [Ovis aries]</a>            | 81.7 | 81.7 | 100% | 7e-16 | 96% | <a href="#">NP_001156040.1</a> |
| <a href="#">PREDICTED: phosphatidylcholine-sterol acyltransferase isoform X1 [Equus c</a>    | 81.7 | 81.7 | 100% | 7e-16 | 96% | <a href="#">XP_001498513.1</a> |
| <a href="#">lecithin-cholesterol acyltransferase [synthetic construct]</a>                   | 81.7 | 81.7 | 100% | 7e-16 | 96% | <a href="#">AAP88749.1</a>     |
| <a href="#">PREDICTED: phosphatidylcholine-sterol acyltransferase [Cavia porcellus]</a>      | 81.7 | 81.7 | 100% | 7e-16 | 96% | <a href="#">XP_003472190.1</a> |
| <a href="#">PREDICTED: phosphatidylcholine-sterol acyltransferase isoform X1 [Callithrix</a> | 81.7 | 81.7 | 100% | 7e-16 | 96% | <a href="#">XP_002761124.1</a> |
| <a href="#">PREDICTED: phosphatidylcholine-sterol acyltransferase [Otolemur garnettii]</a>   | 81.7 | 81.7 | 100% | 7e-16 | 96% | <a href="#">XP_003799423.1</a> |
| <a href="#">lecithin cholesterol acyltransferase [Meriones unguiculatus]</a>                 | 81.7 | 81.7 | 100% | 7e-16 | 96% | <a href="#">AGH06057.1</a>     |
| <a href="#">PREDICTED: phosphatidylcholine-sterol acyltransferase [Felis catus]</a>          | 81.7 | 81.7 | 100% | 7e-16 | 96% | <a href="#">XP_003998196.1</a> |
| <a href="#">PREDICTED: phosphatidylcholine-sterol acyltransferase isoform X1 [Tupaia c</a>   | 81.7 | 81.7 | 100% | 7e-16 | 96% | <a href="#">XP_006156947.1</a> |
| <a href="#">PREDICTED: phosphatidylcholine-sterol acyltransferase [Ochotona princeps]</a>    | 81.7 | 81.7 | 100% | 7e-16 | 96% | <a href="#">XP_004584021.1</a> |
| <a href="#">PREDICTED: phosphatidylcholine-sterol acyltransferase isoform X1 [Galeopte</a>   | 81.7 | 81.7 | 100% | 7e-16 | 96% | <a href="#">XP_008565507.1</a> |
| <a href="#">PREDICTED: phosphatidylcholine-sterol acyltransferase isoform X1 [Leptony</a>    | 81.7 | 81.7 | 100% | 7e-16 | 96% | <a href="#">XP_006730153.1</a> |
| <a href="#">PREDICTED: phosphatidylcholine-sterol acyltransferase isoform X1 [Equus p</a>    | 81.7 | 81.7 | 100% | 7e-16 | 96% | <a href="#">XP_008516435.1</a> |
| <a href="#">PREDICTED: phosphatidylcholine-sterol acyltransferase isoform X2 [Equus c</a>    | 81.7 | 81.7 | 100% | 7e-16 | 96% | <a href="#">XP_005608406.1</a> |
| <a href="#">PREDICTED: phosphatidylcholine-sterol acyltransferase isoform 1 [Ceratothe</a>   | 81.7 | 81.7 | 100% | 7e-16 | 96% | <a href="#">XP_004431809.1</a> |
| <a href="#">PREDICTED: phosphatidylcholine-sterol acyltransferase [Octodon degus]</a>        | 81.7 | 81.7 | 100% | 7e-16 | 96% | <a href="#">XP_004625900.1</a> |

|                                                                                             |      |      |      |       |     |                                |
|---------------------------------------------------------------------------------------------|------|------|------|-------|-----|--------------------------------|
| <a href="#">PREDICTED: phosphatidylcholine-sterol acyltransferase-like isoform X3 [Phys</a> | 81.7 | 81.7 | 100% | 7e-16 | 96% | <a href="#">XP_007120847.1</a> |
| <a href="#">PREDICTED: phosphatidylcholine-sterol acyltransferase-like isoform X2 [Phys</a> | 81.7 | 81.7 | 100% | 7e-16 | 96% | <a href="#">XP_007120846.1</a> |
| <a href="#">PREDICTED: phosphatidylcholine-sterol acyltransferase-like isoform X1 [Phys</a> | 81.7 | 81.7 | 100% | 7e-16 | 96% | <a href="#">XP_007120845.1</a> |
| <a href="#">solute carrier family 12 member 4-like isoform 4 [Camelus ferus]</a>            | 81.7 | 81.7 | 100% | 8e-16 | 96% | <a href="#">EPY84185.1</a>     |
| <a href="#">PREDICTED: phosphatidylcholine-sterol acyltransferase [Myotis lucifugus]</a>    | 79.5 | 79.5 | 100% | 4e-15 | 92% | <a href="#">XP_006099517.1</a> |
| <a href="#">PREDICTED: phosphatidylcholine-sterol acyltransferase [Myotis brandtii]</a>     | 79.5 | 79.5 | 100% | 4e-15 | 92% | <a href="#">XP_005876489.1</a> |
| <a href="#">PREDICTED: phosphatidylcholine-sterol acyltransferase [Myotis davidii]</a>      | 79.5 | 79.5 | 100% | 4e-15 | 92% | <a href="#">XP_006769815.1</a> |
| <a href="#">PREDICTED: phosphatidylcholine-sterol acyltransferase [Eptesicus fuscus]</a>    | 79.5 | 79.5 | 100% | 4e-15 | 92% | <a href="#">XP_008138152.1</a> |
| <a href="#">hypothetical protein PANDA_006959 [Ailuropoda melanoleuca]</a>                  | 79.1 | 79.1 | 100% | 5e-15 | 92% | <a href="#">EFB15890.1</a>     |
| <a href="#">PREDICTED: phosphatidylcholine-sterol acyltransferase isoform X2 [Ursus m</a>   | 79.1 | 79.1 | 100% | 5e-15 | 92% | <a href="#">XP_008700662.1</a> |
| <a href="#">PREDICTED: phosphatidylcholine-sterol acyltransferase isoform X4 [Mustela</a>   | 79.1 | 79.1 | 100% | 5e-15 | 92% | <a href="#">XP_004744543.1</a> |
| <a href="#">PREDICTED: phosphatidylcholine-sterol acyltransferase-like [Ailuropoda mel</a>  | 79.1 | 79.1 | 100% | 5e-15 | 92% | <a href="#">XP_002918480.1</a> |
| <a href="#">PREDICTED: phosphatidylcholine-sterol acyltransferase isoform X3 [Mustela</a>   | 79.1 | 79.1 | 100% | 5e-15 | 92% | <a href="#">XP_004744542.1</a> |
| <a href="#">PREDICTED: phosphatidylcholine-sterol acyltransferase isoform X2 [Mustela</a>   | 79.1 | 79.1 | 100% | 5e-15 | 92% | <a href="#">XP_004744541.1</a> |
| <a href="#">PREDICTED: phosphatidylcholine-sterol acyltransferase isoform X1 [Mustela</a>   | 79.1 | 79.1 | 100% | 5e-15 | 92% | <a href="#">XP_004744540.1</a> |
| <a href="#">PREDICTED: phosphatidylcholine-sterol acyltransferase isoform X1 [Saimiri b</a> | 78.7 | 78.7 | 96%  | 7e-15 | 96% | <a href="#">XP_010345110.1</a> |
| <a href="#">lecithin cholesterol acyltransferase, isoform CRA_b [Mus musculus]</a>          | 77.4 | 77.4 | 100% | 2e-14 | 92% | <a href="#">EDL11335.1</a>     |
| <a href="#">PREDICTED: phosphatidylcholine-sterol acyltransferase isoform X3 [Cricetulu</a> | 77.4 | 77.4 | 100% | 2e-14 | 92% | <a href="#">XP_007610057.1</a> |
| <a href="#">cholesterol acyltransferase [Mus musculus]</a>                                  | 77.4 | 77.4 | 100% | 2e-14 | 92% | <a href="#">AAA39419.1</a>     |
| <a href="#">phosphatidylcholine-sterol acyltransferase precursor [Mus musculus]</a>         | 77.4 | 77.4 | 100% | 2e-14 | 92% | <a href="#">NP_032516.2</a>    |
| <a href="#">PREDICTED: phosphatidylcholine-sterol acyltransferase [Microtus ochrogaste</a>  | 77.4 | 77.4 | 100% | 2e-14 | 92% | <a href="#">XP_005345498.1</a> |
| <a href="#">PREDICTED: phosphatidylcholine-sterol acyltransferase isoform 1 [Dasypus r</a>  | 77.4 | 77.4 | 100% | 2e-14 | 92% | <a href="#">XP_004459692.1</a> |
| <a href="#">PREDICTED: phosphatidylcholine-sterol acyltransferase isoform X2 [Cricetulu</a> | 77.4 | 77.4 | 100% | 2e-14 | 92% | <a href="#">XP_003504331.1</a> |
| <a href="#">unnamed protein product [Mus musculus]</a>                                      | 77.4 | 77.4 | 100% | 2e-14 | 92% | <a href="#">BAB23665.1</a>     |
| <a href="#">lecithin cholesterol acyltransferase [Sus scrofa]</a>                           | 75.3 | 75.3 | 100% | 1e-13 | 92% | <a href="#">ACV21076.1</a>     |
| <a href="#">phosphatidylcholine-sterol acyltransferase precursor [Sus scrofa]</a>           | 75.3 | 75.3 | 100% | 1e-13 | 92% | <a href="#">NP_001158328.1</a> |

## Alignments

Download GenPept Graphics

Next Previous Descriptions

lecithin cholesterol acyltransferase [Macaca sp.]

Sequence ID: [gb|AAM76621.1|](#) Length: 209 Number of Matches: 1

Range 1: 9 to 34 GenPept Graphics

Next Match Previous Match

**Related Information**

| Score          | Expect | Identities | Positives   | Gaps     |
|----------------|--------|------------|-------------|----------|
| 81.7 bits(185) | 5e-16  | 25/26(96%) | 26/26(100%) | 0/26(0%) |

Query 1 KAELSDHTRPVILVPGCLGNQLEAKL 26  
 KAELS+HTRPVILVPGCLGNQLEAKL  
 Sbjct 9 KAELSNHTRPVILVPGCLGNQLEAKL 34

Download GenPept Graphics

Next Previous Descriptions

lecithin cholesterol acyltransferase [Pongo pygmaeus]

Sequence ID: [gb|AAM76620.1|](#) Length: 209 Number of Matches: 1

Range 1: 9 to 34 GenPept Graphics

Next Match Previous Match

**Related Information**

| Score          | Expect | Identities | Positives   | Gaps     |
|----------------|--------|------------|-------------|----------|
| 81.7 bits(185) | 5e-16  | 25/26(96%) | 26/26(100%) | 0/26(0%) |

Query 1 KAELSDHTRPVILVPGCLGNQLEAKL 26  
 KAELS+HTRPVILVPGCLGNQLEAKL  
 Sbjct 9 KAELSNHTRPVILVPGCLGNQLEAKL 34

Download [GenPept](#) [Graphics](#)

Next Previous Descriptions

lecithin cholesterol acyltransferase [Gorilla gorilla]

Sequence ID: [gb|AAM76619.1|](#) Length: 209 Number of Matches: 1

**Related Information**

Range 1: 9 to 34 [GenPept](#) [Graphics](#) Next Match Previous Match

| Score          | Expect | Identities | Positives   | Gaps     |
|----------------|--------|------------|-------------|----------|
| 81.7 bits(185) | 5e-16  | 25/26(96%) | 26/26(100%) | 0/26(0%) |

Query 1 KAELSDHTRPVILVPGCLGNQLEAKL 26  
 KAELS+HTRPVILVPGCLGNQLEAKL  
 Sbjct 9 KAELSNHTRPVILVPGCLGNQLEAKL 34

Download [GenPept](#) [Graphics](#)

Next Previous Descriptions

lecithin cholesterol acyltransferase [Saguinus oedipus]

Sequence ID: [gb|AAM76622.1|](#) Length: 210 Number of Matches: 1

**Related Information**

Range 1: 9 to 34 [GenPept](#) [Graphics](#) Next Match Previous Match

| Score          | Expect | Identities | Positives   | Gaps     |
|----------------|--------|------------|-------------|----------|
| 81.7 bits(185) | 5e-16  | 25/26(96%) | 26/26(100%) | 0/26(0%) |

Query 1 KAELSDHTRPVILVPGCLGNQLEAKL 26  
 KAELS+HTRPVILVPGCLGNQLEAKL  
 Sbjct 9 KAELSNHTRPVILVPGCLGNQLEAKL 34

Download [GenPept](#) [Graphics](#)

Next Previous Descriptions

PREDICTED: phosphatidylcholine-sterol acyltransferase [Mesocricetus auratus]

Sequence ID: [ref|XP\\_005076409.1|](#) Length: 308 Number of Matches: 1

**Related Information**

[Gene](#) - associated gene details  
[Map Viewer](#) - aligned genomic context

Range 1: 38 to 63 [GenPept](#) [Graphics](#) Next Match Previous Match

| Score          | Expect | Identities | Positives   | Gaps     |
|----------------|--------|------------|-------------|----------|
| 81.7 bits(185) | 6e-16  | 25/26(96%) | 26/26(100%) | 0/26(0%) |

Query 1 KAELSDHTRPVILVPGCLGNQLEAKL 26  
 KAELS+HTRPVILVPGCLGNQLEAKL  
 Sbjct 38 KAELSNHTRPVILVPGCLGNQLEAKL 63

BLAST is a registered trademark of the National Library of Medicine.

▶ [NCBI/ BLAST/ blastp suite/ Formatting Results - B9HPATHC01R](#)

**i** Your search parameters were adjusted to search for a short input sequence.

[Edit and Resubmit](#) | [Save Search Strategies](#) | [▶ Formatting options](#) | [▶ Download](#)

[You Tube](#) | [How to read this page](#) | [Blast report description](#)

**LCAT\_KAELSNHTRPVILVPGCLGNQLEAKL\_NonMod**

**RID** [B9HPATHC01R](#) (Expires on 01-14 14:18 pm)

**Query ID** |cl|120449  
**Description** |None  
**Molecule type** |amino acid  
**Query Length** |26

**Database Name** |nr  
**Description** |All non-redundant GenBank CDS translations+PDB+SwissProt+PIR excluding environmental samples from WGS projects  
**Program** |BLASTP 2.2.30+ [▶ Citation](#)

Other reports: [▶ Search Summary](#) | [\[Taxonomy reports\]](#) | [\[Distance tree of results\]](#) | [\[Multiple alignment\]](#)

**Graphic Summary**

[Show Conserved Domains](#)

No putative conserved domains have been detected

Distribution of 100 Blast Hits on the Query Sequence

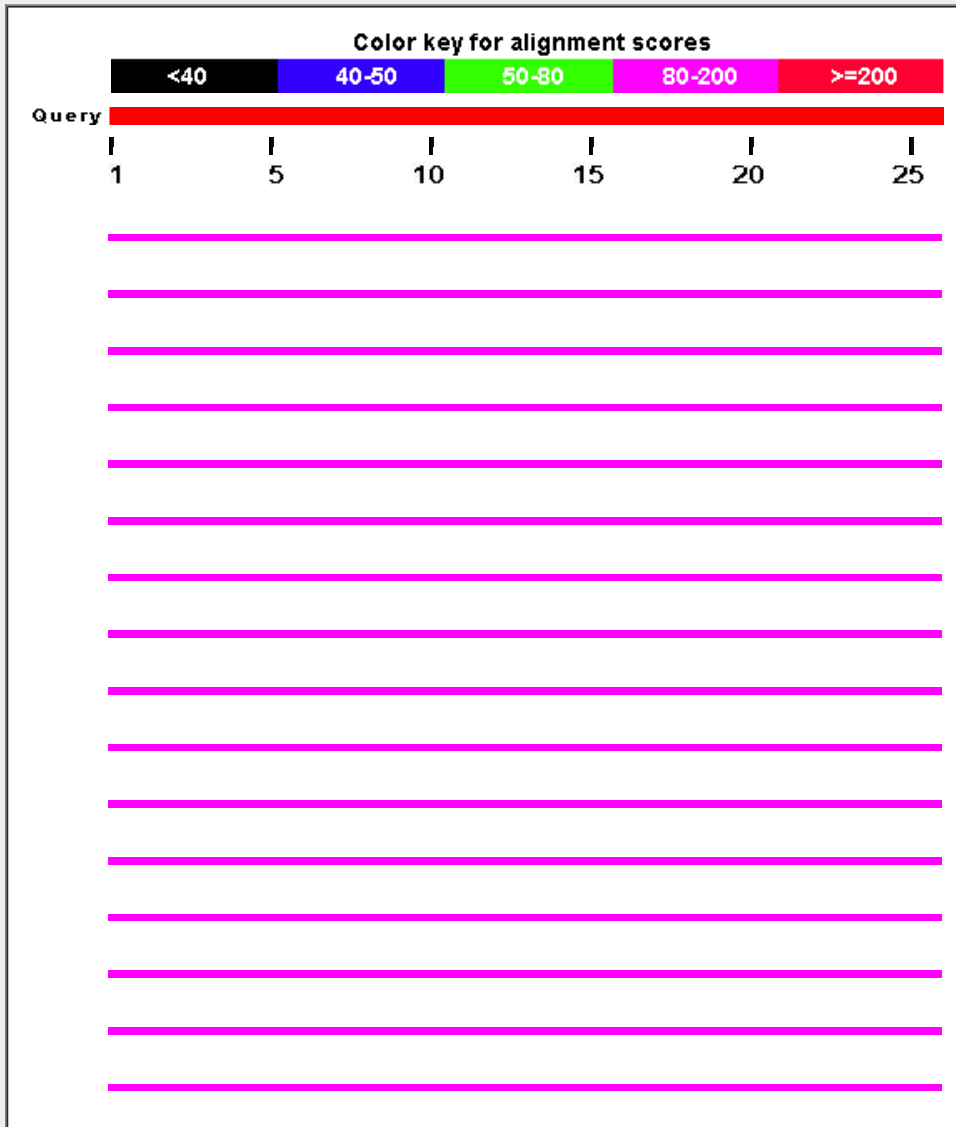

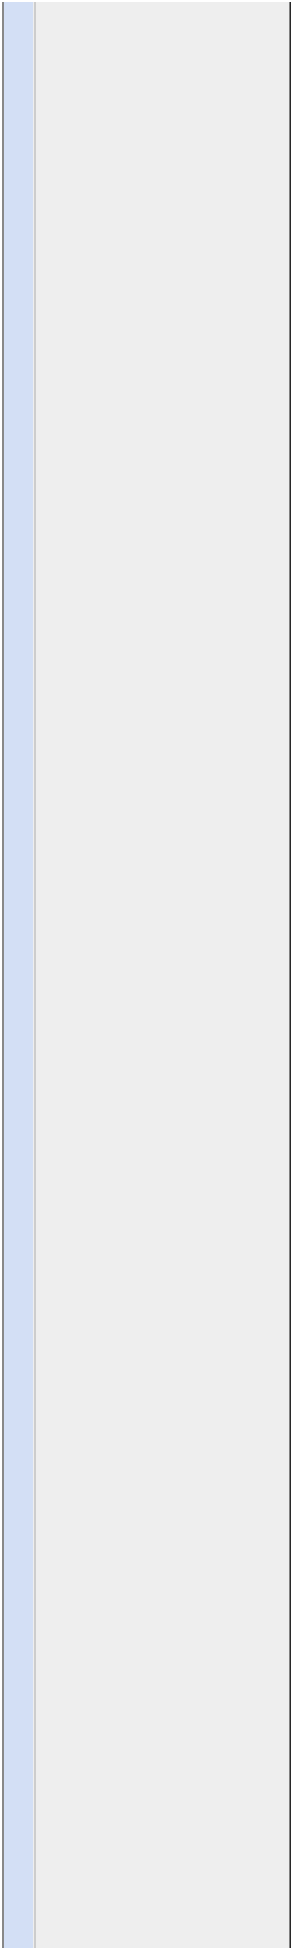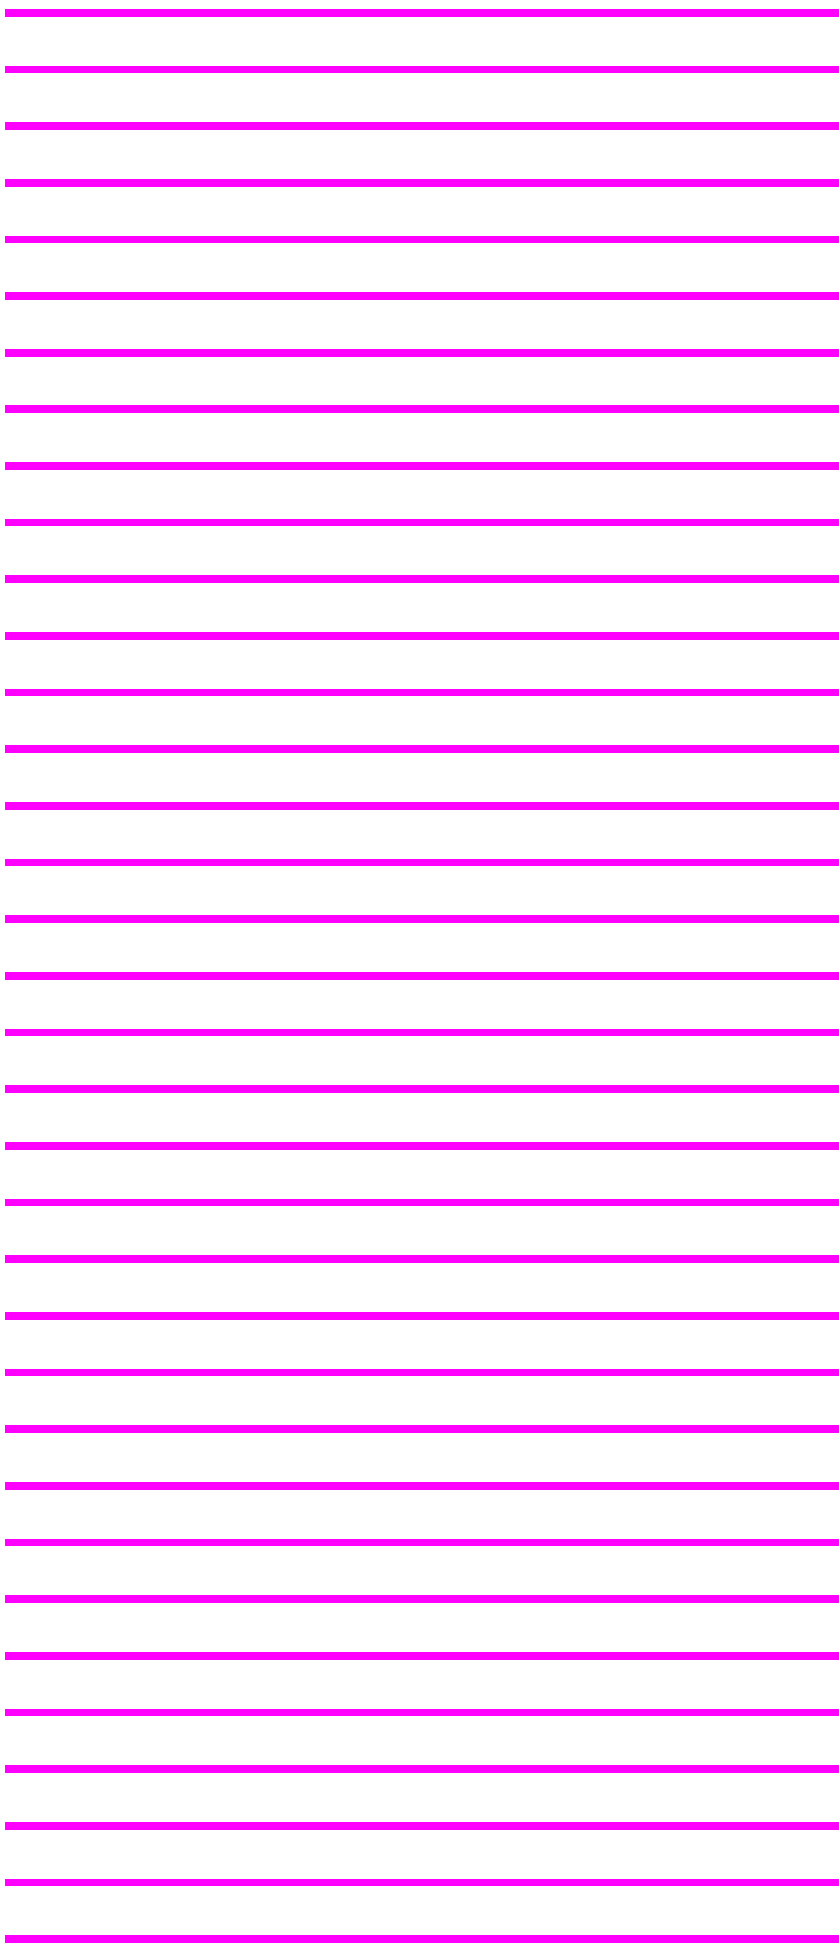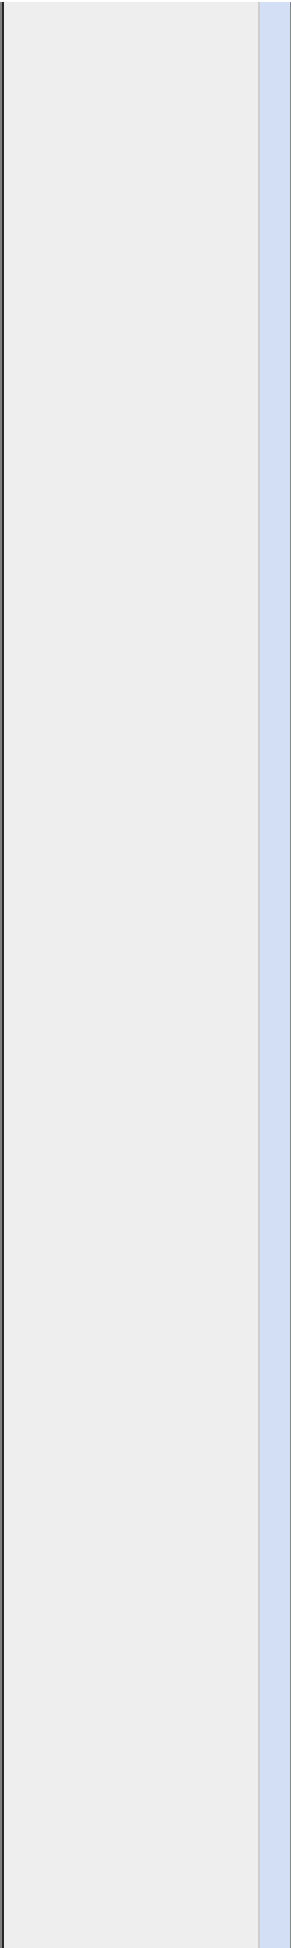



**Descriptions**

**Sequences producing significant alignments:**

Select: [All](#) [None](#) Selected:0

Alignments Download GenPept Graphics Distance tree of results Multiple alignment

| Description                                                                                                   | Max score | Total score | Query cover | E value | Ident | Accession                                   |
|---------------------------------------------------------------------------------------------------------------|-----------|-------------|-------------|---------|-------|---------------------------------------------|
| <a href="#">lecithin cholesterol acyltransferase [Macaca sp.]</a>                                             | 84.2      | 84.2        | 100%        | 6e-17   | 100%  | <a href="#">gij23379758 AAM76621.1</a>      |
| <a href="#">lecithin cholesterol acyltransferase [Pongo pygmaeus]</a>                                         | 84.2      | 84.2        | 100%        | 6e-17   | 100%  | <a href="#">gij23379756 AAM76620.1</a>      |
| <a href="#">lecithin cholesterol acyltransferase [Gorilla gorilla]</a>                                        | 84.2      | 84.2        | 100%        | 6e-17   | 100%  | <a href="#">gij23379754 AAM76619.1</a>      |
| <a href="#">lecithin cholesterol acyltransferase [Saguinus oedipus]</a>                                       | 84.2      | 84.2        | 100%        | 6e-17   | 100%  | <a href="#">gij23379760 AAM76622.1</a>      |
| <a href="#">PREDICTED: phosphatidylcholine-sterol acyltransferase [Mesocricetus auratus]</a>                  | 84.2      | 84.2        | 100%        | 7e-17   | 100%  | <a href="#">gij524952837 XP_005076409.1</a> |
| <a href="#">PREDICTED: phosphatidylcholine-sterol acyltransferase-like [Macaca fascicularis]</a>              | 84.2      | 84.2        | 100%        | 8e-17   | 100%  | <a href="#">gij297284280 XP_001090154.2</a> |
| <a href="#">PREDICTED: phosphatidylcholine-sterol acyltransferase [Pongo abelii]</a>                          | 84.2      | 84.2        | 100%        | 8e-17   | 100%  | <a href="#">gij686751128 XP_009249145.1</a> |
| <a href="#">PREDICTED: phosphatidylcholine-sterol acyltransferase isoform X2 [Pongo abelii]</a>               | 84.2      | 84.2        | 100%        | 8e-17   | 100%  | <a href="#">gij694964284 XP_009429355.1</a> |
| <a href="#">PREDICTED: phosphatidylcholine-sterol acyltransferase isoform X3 [Pongo abelii]</a>               | 84.2      | 84.2        | 100%        | 8e-17   | 100%  | <a href="#">gij667240883 XP_008565520.1</a> |
| <a href="#">PREDICTED: phosphatidylcholine-sterol acyltransferase isoform X3 [Pongo abelii]</a>               | 84.2      | 84.2        | 100%        | 8e-17   | 100%  | <a href="#">gij664718824 XP_008516437.1</a> |
| <a href="#">PREDICTED: phosphatidylcholine-sterol acyltransferase isoform X3 [Pongo abelii]</a>               | 84.2      | 84.2        | 100%        | 8e-17   | 100%  | <a href="#">gij545211579 XP_005608407.1</a> |
| <a href="#">lecithin:cholesterol acyltransferase, LCAT [Homo sapiens]</a>                                     | 84.2      | 84.2        | 100%        | 8e-17   | 100%  | <a href="#">gij998999 AAB34898.1</a>        |
| <a href="#">PREDICTED: phosphatidylcholine-sterol acyltransferase isoform X2 [Homo sapiens]</a>               | 84.2      | 84.2        | 100%        | 8e-17   | 100%  | <a href="#">gij591328993 XP_007090383.1</a> |
| <a href="#">lecithin:cholesterol acyltransferase precursor [Homo sapiens]</a>                                 | 84.2      | 84.2        | 100%        | 8e-17   | 100%  | <a href="#">gij187025 AAA59499.1</a>        |
| <a href="#">Phosphatidylcholine-sterol acyltransferase [Macaca fascicularis]</a>                              | 84.2      | 84.2        | 100%        | 8e-17   | 100%  | <a href="#">gij355756886 EHH60494.1</a>     |
| <a href="#">lecithin-cholesterol acyltransferase precursor (EC 2.3.1.43) [Homo sapiens]</a>                   | 84.2      | 84.2        | 100%        | 8e-17   | 100%  | <a href="#">gij386858 AAA59500.1</a>        |
| <a href="#">PREDICTED: phosphatidylcholine-sterol acyltransferase [Loxodonta cyclotis]</a>                    | 84.2      | 84.2        | 100%        | 8e-17   | 100%  | <a href="#">gij344290909 XP_003417179.1</a> |
| <a href="#">PREDICTED: phosphatidylcholine-sterol acyltransferase [Fukomys natalensis]</a>                    | 84.2      | 84.2        | 100%        | 8e-17   | 100%  | <a href="#">gij731284193 XP_010610588.1</a> |
| <a href="#">PREDICTED: phosphatidylcholine-sterol acyltransferase isoform 2 [Fukomys natalensis]</a>          | 84.2      | 84.2        | 100%        | 8e-17   | 100%  | <a href="#">gij73957241 XP_851673.1</a>     |
| <a href="#">PREDICTED: phosphatidylcholine-sterol acyltransferase [Chinchilla chinchilla]</a>                 | 84.2      | 84.2        | 100%        | 8e-17   | 100%  | <a href="#">gij533180990 XP_005403659.1</a> |
| <a href="#">PREDICTED: phosphatidylcholine-sterol acyltransferase [Heterocebus fulviflaxus]</a>               | 84.2      | 84.2        | 100%        | 8e-17   | 100%  | <a href="#">gij512961581 XP_004843055.1</a> |
| <a href="#">PREDICTED: phosphatidylcholine-sterol acyltransferase isoform X1 [Heterocebus fulviflaxus]</a>    | 84.2      | 84.2        | 100%        | 8e-17   | 100%  | <a href="#">gij512932199 XP_004907111.1</a> |
| <a href="#">PREDICTED: phosphatidylcholine-sterol acyltransferase [Oryzoterpes chrysomelas]</a>               | 84.2      | 84.2        | 100%        | 8e-17   | 100%  | <a href="#">gij634846635 XP_007938473.1</a> |
| <a href="#">PREDICTED: phosphatidylcholine-sterol acyltransferase [Chrysochloris asiatica]</a>                | 84.2      | 84.2        | 100%        | 8e-17   | 100%  | <a href="#">gij586459252 XP_006860289.1</a> |
| <a href="#">PREDICTED: phosphatidylcholine-sterol acyltransferase [Elephantulus infulatus]</a>                | 84.2      | 84.2        | 100%        | 8e-17   | 100%  | <a href="#">gij585637009 XP_006878737.1</a> |
| <a href="#">PREDICTED: phosphatidylcholine-sterol acyltransferase [Trichechus senegalensis]</a>               | 84.2      | 84.2        | 100%        | 8e-17   | 100%  | <a href="#">gij471361928 XP_004371526.1</a> |
| <a href="#">PREDICTED: phosphatidylcholine-sterol acyltransferase [Rhinopithecus leucostictus]</a>            | 84.2      | 84.2        | 100%        | 8e-17   | 100%  | <a href="#">gij724956501 XP_010353366.1</a> |
| <a href="#">PREDICTED: phosphatidylcholine-sterol acyltransferase isoform X2 [Rhinopithecus leucostictus]</a> | 84.2      | 84.2        | 100%        | 8e-17   | 100%  | <a href="#">gij667240880 XP_008565513.1</a> |

|                                                                                     |      |      |      |       |      |                                             |
|-------------------------------------------------------------------------------------|------|------|------|-------|------|---------------------------------------------|
| <a href="#">PREDICTED: phosphatidylcholine-sterol acyltransferase isoform X2</a>    | 84.2 | 84.2 | 100% | 8e-17 | 100% | <a href="#">gij664718822 XP_008516436.1</a> |
| <a href="#">PREDICTED: phosphatidylcholine-sterol acyltransferase [Tarsius sy</a>   | 84.2 | 84.2 | 100% | 8e-17 | 100% | <a href="#">gij640814419 XP_008063935.1</a> |
| <a href="#">PREDICTED: phosphatidylcholine-sterol acyltransferase [Chlorocet</a>    | 84.2 | 84.2 | 100% | 8e-17 | 100% | <a href="#">gij635033522 XP_007992092.1</a> |
| <a href="#">PREDICTED: phosphatidylcholine-sterol acyltransferase isoform X2</a>    | 84.2 | 84.2 | 100% | 8e-17 | 100% | <a href="#">gij562856857 XP_006156948.1</a> |
| <a href="#">phosphatidylcholine-sterol acyltransferase precursor [Bos taurus]</a>   | 84.2 | 84.2 | 100% | 8e-17 | 100% | <a href="#">gij114051546 NP_001039534.1</a> |
| <a href="#">PREDICTED: phosphatidylcholine-sterol acyltransferase [Lipotes ve</a>   | 84.2 | 84.2 | 100% | 8e-17 | 100% | <a href="#">gij602690230 XP_007457320.1</a> |
| <a href="#">PREDICTED: phosphatidylcholine-sterol acyltransferase [Balaenopi</a>    | 84.2 | 84.2 | 100% | 8e-17 | 100% | <a href="#">gij594627205 XP_007198213.1</a> |
| <a href="#">PREDICTED: phosphatidylcholine-sterol acyltransferase isoform X1</a>    | 84.2 | 84.2 | 100% | 8e-17 | 100% | <a href="#">gij594032594 XP_006041058.1</a> |
| <a href="#">PREDICTED: phosphatidylcholine-sterol acyltransferase isoform X1</a>    | 84.2 | 84.2 | 100% | 8e-17 | 100% | <a href="#">gij591328991 XP_007090382.1</a> |
| <a href="#">PREDICTED: phosphatidylcholine-sterol acyltransferase [Peromysc</a>     | 84.2 | 84.2 | 100% | 8e-17 | 100% | <a href="#">gij589948468 XP_006986895.1</a> |
| <a href="#">PREDICTED: phosphatidylcholine-sterol acyltransferase isoform X2</a>    | 84.2 | 84.2 | 100% | 8e-17 | 100% | <a href="#">gij585155641 XP_006730154.1</a> |
| <a href="#">phosphatidylcholine-sterol acyltransferase precursor [Papio anubis]</a> | 84.2 | 84.2 | 100% | 8e-17 | 100% | <a href="#">gij162951952 NP_001106083.1</a> |
| <a href="#">PREDICTED: phosphatidylcholine-sterol acyltransferase isoform X3</a>    | 84.2 | 84.2 | 100% | 8e-17 | 100% | <a href="#">gij562856859 XP_006156949.1</a> |
| <a href="#">PREDICTED: phosphatidylcholine-sterol acyltransferase [Vicugna p</a>    | 84.2 | 84.2 | 100% | 8e-17 | 100% | <a href="#">gij560962696 XP_006203780.1</a> |
| <a href="#">PREDICTED: phosphatidylcholine-sterol acyltransferase [Camelus l</a>    | 84.2 | 84.2 | 100% | 8e-17 | 100% | <a href="#">gij560908696 XP_006180662.1</a> |
| <a href="#">PREDICTED: phosphatidylcholine-sterol acyltransferase [Pantholog</a>    | 84.2 | 84.2 | 100% | 8e-17 | 100% | <a href="#">gij556722113 XP_005956897.1</a> |
| <a href="#">PREDICTED: phosphatidylcholine-sterol acyltransferase isoform X1</a>    | 84.2 | 84.2 | 100% | 8e-17 | 100% | <a href="#">gij544517956 XP_005592370.1</a> |
| <a href="#">PREDICTED: phosphatidylcholine-sterol acyltransferase [Ictidomys</a>    | 84.2 | 84.2 | 100% | 8e-17 | 100% | <a href="#">gij532065072 XP_005318397.1</a> |
| <a href="#">PREDICTED: phosphatidylcholine-sterol acyltransferase [Condylurc</a>    | 84.2 | 84.2 | 100% | 8e-17 | 100% | <a href="#">gij507970839 XP_004690509.1</a> |
| <a href="#">PREDICTED: phosphatidylcholine-sterol acyltransferase [Jaculus ja</a>   | 84.2 | 84.2 | 100% | 8e-17 | 100% | <a href="#">gij507555923 XP_004661727.1</a> |
| <a href="#">PREDICTED: phosphatidylcholine-sterol acyltransferase [Sorex ara</a>    | 84.2 | 84.2 | 100% | 8e-17 | 100% | <a href="#">gij505769153 XP_004600640.1</a> |
| <a href="#">PREDICTED: phosphatidylcholine-sterol acyltransferase isoform 2 [</a>   | 84.2 | 84.2 | 100% | 8e-17 | 100% | <a href="#">gij478515124 XP_004431810.1</a> |
| <a href="#">PREDICTED: phosphatidylcholine-sterol acyltransferase [Tursiops t</a>   | 84.2 | 84.2 | 100% | 8e-17 | 100% | <a href="#">gij470657693 XP_004330924.1</a> |
| <a href="#">PREDICTED: phosphatidylcholine-sterol acyltransferase [Orcinus o</a>    | 84.2 | 84.2 | 100% | 8e-17 | 100% | <a href="#">gij466026005 XP_004273232.1</a> |
| <a href="#">PREDICTED: phosphatidylcholine-sterol acyltransferase [Bos mutu</a>     | 84.2 | 84.2 | 100% | 8e-17 | 100% | <a href="#">gij555969128 XP_005896591.1</a> |
| <a href="#">PREDICTED: phosphatidylcholine-sterol acyltransferase [Pteropus</a>     | 84.2 | 84.2 | 100% | 8e-17 | 100% | <a href="#">gij586549557 XP_006909849.1</a> |
| <a href="#">phosphatidylcholine-sterol acyltransferase precursor [Oryctolagus c</a> | 84.2 | 84.2 | 100% | 8e-17 | 100% | <a href="#">gij126722618 NP_001075659.1</a> |
| <a href="#">phosphatidylcholine-sterol acyltransferase precursor [Homo sapiens</a>  | 84.2 | 84.2 | 100% | 8e-17 | 100% | <a href="#">gij4557892 NP_000220.1</a>      |
| <a href="#">Phosphatidylcholine-sterol acyltransferase [Macaca mulatta]</a>         | 84.2 | 84.2 | 100% | 8e-17 | 100% | <a href="#">gij355710312 EHH31776.1</a>     |
| <a href="#">phosphatidylcholine-sterol acyltransferase precursor [Ovis aries]</a>   | 84.2 | 84.2 | 100% | 8e-17 | 100% | <a href="#">gij242247443 NP_001156040.1</a> |
| <a href="#">PREDICTED: phosphatidylcholine-sterol acyltransferase isoform X1</a>    | 84.2 | 84.2 | 100% | 8e-17 | 100% | <a href="#">gij149699252 XP_001498513.1</a> |
| <a href="#">lecithin-cholesterol acyltransferase [synthetic construct]</a>          | 84.2 | 84.2 | 100% | 8e-17 | 100% | <a href="#">gij32879837 AAP88749.1</a>      |
| <a href="#">PREDICTED: phosphatidylcholine-sterol acyltransferase [Cavia por</a>    | 84.2 | 84.2 | 100% | 8e-17 | 100% | <a href="#">gij348572820 XP_003472190.1</a> |
| <a href="#">PREDICTED: phosphatidylcholine-sterol acyltransferase isoform X1</a>    | 84.2 | 84.2 | 100% | 8e-17 | 100% | <a href="#">gij296231379 XP_002761124.1</a> |
| <a href="#">PREDICTED: phosphatidylcholine-sterol acyltransferase [Otolemur</a>     | 84.2 | 84.2 | 100% | 8e-17 | 100% | <a href="#">gij395853873 XP_003799423.1</a> |
| <a href="#">lecithin cholesterol acyltransferase [Meriones unguiculatus]</a>        | 84.2 | 84.2 | 100% | 8e-17 | 100% | <a href="#">gij459996769 AGH06057.1</a>     |
| <a href="#">PREDICTED: phosphatidylcholine-sterol acyltransferase [Felis catu</a>   | 84.2 | 84.2 | 100% | 8e-17 | 100% | <a href="#">gij410983741 XP_003998196.1</a> |
| <a href="#">PREDICTED: phosphatidylcholine-sterol acyltransferase isoform X1</a>    | 84.2 | 84.2 | 100% | 8e-17 | 100% | <a href="#">gij562856855 XP_006156947.1</a> |
| <a href="#">PREDICTED: phosphatidylcholine-sterol acyltransferase [Ochotona</a>     | 84.2 | 84.2 | 100% | 8e-17 | 100% | <a href="#">gij504143175 XP_004584021.1</a> |
| <a href="#">PREDICTED: phosphatidylcholine-sterol acyltransferase isoform X1</a>    | 84.2 | 84.2 | 100% | 8e-17 | 100% | <a href="#">gij667240877 XP_008565507.1</a> |
| <a href="#">PREDICTED: phosphatidylcholine-sterol acyltransferase isoform X1</a>    | 84.2 | 84.2 | 100% | 8e-17 | 100% | <a href="#">gij585155639 XP_006730153.1</a> |
| <a href="#">PREDICTED: phosphatidylcholine-sterol acyltransferase isoform X1</a>    | 84.2 | 84.2 | 100% | 9e-17 | 100% | <a href="#">gij664718820 XP_008516435.1</a> |
| <a href="#">PREDICTED: phosphatidylcholine-sterol acyltransferase isoform X2</a>    | 84.2 | 84.2 | 100% | 9e-17 | 100% | <a href="#">gij545211576 XP_005608406.1</a> |
| <a href="#">PREDICTED: phosphatidylcholine-sterol acyltransferase isoform 1 [</a>   | 84.2 | 84.2 | 100% | 9e-17 | 100% | <a href="#">gij478515122 XP_004431809.1</a> |
| <a href="#">PREDICTED: phosphatidylcholine-sterol acyltransferase [Octodon c</a>    | 84.2 | 84.2 | 100% | 9e-17 | 100% | <a href="#">gij507623413 XP_004625900.1</a> |

|                                                                                      |      |      |      |       |      |                                             |
|--------------------------------------------------------------------------------------|------|------|------|-------|------|---------------------------------------------|
| <a href="#">PREDICTED: phosphatidylcholine-sterol acyltransferase-like isoform</a>   | 84.2 | 84.2 | 100% | 9e-17 | 100% | <a href="#">gij593764538 XP_007120847.1</a> |
| <a href="#">PREDICTED: phosphatidylcholine-sterol acyltransferase-like isoform</a>   | 84.2 | 84.2 | 100% | 9e-17 | 100% | <a href="#">gij593764535 XP_007120846.1</a> |
| <a href="#">PREDICTED: phosphatidylcholine-sterol acyltransferase-like isoform</a>   | 84.2 | 84.2 | 100% | 9e-17 | 100% | <a href="#">gij593764533 XP_007120845.1</a> |
| <a href="#">solute carrier family 12 member 4-like isoform 4 [Camelus ferus]</a>     | 84.2 | 84.2 | 100% | 1e-16 | 100% | <a href="#">gij528764526 EPY84185.1</a>     |
| <a href="#">PREDICTED: phosphatidylcholine-sterol acyltransferase [Myotis luc</a>    | 82.1 | 82.1 | 100% | 4e-16 | 96%  | <a href="#">gij558173082 XP_006099517.1</a> |
| <a href="#">PREDICTED: phosphatidylcholine-sterol acyltransferase [Myotis br</a>     | 82.1 | 82.1 | 100% | 4e-16 | 96%  | <a href="#">gij554564342 XP_005876489.1</a> |
| <a href="#">PREDICTED: phosphatidylcholine-sterol acyltransferase [Myotis da</a>     | 82.1 | 82.1 | 100% | 4e-16 | 96%  | <a href="#">gij584050215 XP_006769815.1</a> |
| <a href="#">PREDICTED: phosphatidylcholine-sterol acyltransferase [Eptesicus</a>     | 82.1 | 82.1 | 100% | 4e-16 | 96%  | <a href="#">gij641699319 XP_008138152.1</a> |
| <a href="#">hypothetical protein PANDA_006959 [Ailuropoda melanoleuca]</a>           | 81.7 | 81.7 | 100% | 6e-16 | 96%  | <a href="#">gij281340306 EFB15890.1</a>     |
| <a href="#">PREDICTED: phosphatidylcholine-sterol acyltransferase isoform X2</a>     | 81.7 | 81.7 | 100% | 6e-16 | 96%  | <a href="#">gij671019677 XP_008700662.1</a> |
| <a href="#">PREDICTED: phosphatidylcholine-sterol acyltransferase isoform X4</a>     | 81.7 | 81.7 | 100% | 6e-16 | 96%  | <a href="#">gij511840073 XP_004744543.1</a> |
| <a href="#">PREDICTED: phosphatidylcholine-sterol acyltransferase-like [Ailurc</a>   | 81.7 | 81.7 | 100% | 6e-16 | 96%  | <a href="#">gij301766160 XP_002918480.1</a> |
| <a href="#">PREDICTED: phosphatidylcholine-sterol acyltransferase isoform X3</a>     | 81.7 | 81.7 | 100% | 6e-16 | 96%  | <a href="#">gij511840071 XP_004744542.1</a> |
| <a href="#">PREDICTED: phosphatidylcholine-sterol acyltransferase isoform X2</a>     | 81.7 | 81.7 | 100% | 6e-16 | 96%  | <a href="#">gij511840069 XP_004744541.1</a> |
| <a href="#">PREDICTED: phosphatidylcholine-sterol acyltransferase isoform X1</a>     | 81.7 | 81.7 | 100% | 6e-16 | 96%  | <a href="#">gij511840067 XP_004744540.1</a> |
| <a href="#">PREDICTED: phosphatidylcholine-sterol acyltransferase isoform X1</a>     | 81.2 | 81.2 | 96%  | 9e-16 | 100% | <a href="#">gij725588121 XP_010345110.1</a> |
| <a href="#">lecithin cholesterol acyltransferase, isoform CRA_b [Mus musculus]</a>   | 80.0 | 80.0 | 100% | 2e-15 | 96%  | <a href="#">gij148679388 EDL11335.1</a>     |
| <a href="#">PREDICTED: phosphatidylcholine-sterol acyltransferase isoform X3</a>     | 80.0 | 80.0 | 100% | 2e-15 | 96%  | <a href="#">gij625237667 XP_007610057.1</a> |
| <a href="#">cholesterol acyltransferase [Mus musculus]</a>                           | 80.0 | 80.0 | 100% | 2e-15 | 96%  | <a href="#">gij293697 AAA39419.1</a>        |
| <a href="#">phosphatidylcholine-sterol acyltransferase precursor [Mus musculus</a>   | 80.0 | 80.0 | 100% | 2e-15 | 96%  | <a href="#">gij244791354 NP_032516.2</a>    |
| <a href="#">PREDICTED: phosphatidylcholine-sterol acyltransferase [Microtus c</a>    | 80.0 | 80.0 | 100% | 2e-15 | 96%  | <a href="#">gij532002485 XP_005345498.1</a> |
| <a href="#">PREDICTED: phosphatidylcholine-sterol acyltransferase isoform 1  </a>    | 80.0 | 80.0 | 100% | 2e-15 | 96%  | <a href="#">gij488536006 XP_004459692.1</a> |
| <a href="#">PREDICTED: phosphatidylcholine-sterol acyltransferase isoform X2</a>     | 80.0 | 80.0 | 100% | 2e-15 | 96%  | <a href="#">gij354484309 XP_003504331.1</a> |
| <a href="#">unnamed protein product [Mus musculus]</a>                               | 80.0 | 80.0 | 100% | 2e-15 | 96%  | <a href="#">gij12836459 BAB23665.1</a>      |
| <a href="#">lecithin cholesterol acyltransferase [Sus scrofa]</a>                    | 77.8 | 77.8 | 100% | 1e-14 | 96%  | <a href="#">gij256790402 ACV21076.1</a>     |
| <a href="#">phosphatidylcholine-sterol acyltransferase precursor [Sus scrofa]</a>    | 77.8 | 77.8 | 100% | 1e-14 | 96%  | <a href="#">gij258690251 NP_001158328.1</a> |
| <a href="#">lecithin cholesterol acyltransferase, isoform CRA_a [Rattus norvegic</a> | 77.4 | 77.4 | 100% | 2e-14 | 92%  | <a href="#">gij149038063 EDL92423.1</a>     |

## Alignments

Download [GenPept](#) [Graphics](#)

Next Previous Descriptions

lecithin cholesterol acyltransferase [Macaca sp.]

Sequence ID: [gij23379758|gb|AAM76621.1](#) Length: 209 Number of Matches: 1

**Related Information**

Range 1: 9 to 34 [GenPept](#) [Graphics](#)

Next Match Previous Match

| Score          | Expect | Identities  | Positives   | Gaps     |
|----------------|--------|-------------|-------------|----------|
| 84.2 bits(191) | 6e-17  | 26/26(100%) | 26/26(100%) | 0/26(0%) |

```
Query 1 KAELSNHTRPVILVPGCLGNQLEAKL 26
      KAELSNHTRPVILVPGCLGNQLEAKL
Sbjct 9 KAELSNHTRPVILVPGCLGNQLEAKL 34
```

Download [GenPept](#) [Graphics](#)

Next Previous Descriptions

lecithin cholesterol acyltransferase [Pongo pygmaeus]

Sequence ID: [gij23379756|gb|AAM76620.1](#) Length: 209 Number of Matches: 1

**Related Information**

Range 1: 9 to 34 [GenPept](#) [Graphics](#)

Next Match Previous Match

| Score          | Expect | Identities  | Positives   | Gaps     |
|----------------|--------|-------------|-------------|----------|
| 84.2 bits(191) | 6e-17  | 26/26(100%) | 26/26(100%) | 0/26(0%) |

```
Query 1 KAELSNHTRPVILVPGCLGNQLEAKL 26
```



Sbjct 9 KAELSNHTRPVILVPGCLGNQLEAKL 34

[Download](#) [GenPept](#) [Graphics](#)

[▼ Next](#) [▲ Previous](#) [▲ Descriptions](#)

lecithin cholesterol acyltransferase [Gorilla gorilla]

Sequence ID: [gi|23379754|gb|AAM76619.1](#) Length: 209 Number of Matches: 1

**Related Information**

Range 1: 9 to 34 [GenPept](#) [Graphics](#) [▼ Next Match](#) [▲ Previous Match](#)

| Score          | Expect | Identities  | Positives   | Gaps     |
|----------------|--------|-------------|-------------|----------|
| 84.2 bits(191) | 6e-17  | 26/26(100%) | 26/26(100%) | 0/26(0%) |

Query 1 KAELSNHTRPVILVPGCLGNQLEAKL 26  
 KAELSNHTRPVILVPGCLGNQLEAKL  
 Sbjct 9 KAELSNHTRPVILVPGCLGNQLEAKL 34

[Download](#) [GenPept](#) [Graphics](#)

[▼ Next](#) [▲ Previous](#) [▲ Descriptions](#)

lecithin cholesterol acyltransferase [Saguinus oedipus]

Sequence ID: [gi|23379760|gb|AAM76622.1](#) Length: 210 Number of Matches: 1

**Related Information**

Range 1: 9 to 34 [GenPept](#) [Graphics](#) [▼ Next Match](#) [▲ Previous Match](#)

| Score          | Expect | Identities  | Positives   | Gaps     |
|----------------|--------|-------------|-------------|----------|
| 84.2 bits(191) | 6e-17  | 26/26(100%) | 26/26(100%) | 0/26(0%) |

Query 1 KAELSNHTRPVILVPGCLGNQLEAKL 26  
 KAELSNHTRPVILVPGCLGNQLEAKL  
 Sbjct 9 KAELSNHTRPVILVPGCLGNQLEAKL 34

[Download](#) [GenPept](#) [Graphics](#)

[▼ Next](#) [▲ Previous](#) [▲ Descriptions](#)

PREDICTED: phosphatidylcholine-sterol acyltransferase [Mesocricetus auratus]

Sequence ID: [gi|524952837|ref|XP\\_005076409.1](#) Length: 308 Number of Matches: 1

**Related Information**

Range 1: 38 to 63 [GenPept](#) [Graphics](#) [▼ Next Match](#) [▲ Previous Match](#)

| Score          | Expect | Identities  | Positives   | Gaps     |
|----------------|--------|-------------|-------------|----------|
| 84.2 bits(191) | 7e-17  | 26/26(100%) | 26/26(100%) | 0/26(0%) |

Query 1 KAELSNHTRPVILVPGCLGNQLEAKL 26  
 KAELSNHTRPVILVPGCLGNQLEAKL  
 Sbjct 38 KAELSNHTRPVILVPGCLGNQLEAKL 63

[Gene](#) - associated gene details  
[Map Viewer](#) - aligned genomic context

BLAST is a registered trademark of the National Library of Medicine.

▶ NCBI/ BLAST/ blastp suite/ Formatting Results - BVH4K6SH01R

**i** Your search parameters were adjusted to search for a short input sequence.

[Edit and Resubmit](#) | [Save Search Strategies](#) | [▶ Formatting options](#) | [▶ Download](#)

[YouTube](#) | [How to read this page](#) | [Blast report description](#)

### LGALS3BP\_RALGFEDATQALGRA\_Mod

RID [BVH4K6SH01R](#) (Expires on 01-21 09:59 am)

|                                  |                                                                                                                                        |
|----------------------------------|----------------------------------------------------------------------------------------------------------------------------------------|
| <b>Query ID</b>  cl 62054        | <b>Database Name</b>  nr                                                                                                               |
| <b>Description</b>  None         | <b>Description</b>  All non-redundant GenBank CDS translations+PDB+SwissProt+PIR+PRF excluding environmental samples from WGS projects |
| <b>Molecule type</b>  amino acid | <b>Program</b>  BLASTP 2.2.30+ <a href="#">▶ Citation</a>                                                                              |
| <b>Query Length</b>  15          |                                                                                                                                        |

Other reports: [▶ Search Summary](#) [[Taxonomy reports](#)] [[Distance tree of results](#)] [[Related Structures](#)] [[Multiple alignment](#)]

### Graphic Summary

[Show Conserved Domains](#)

No putative conserved domains have been detected

Distribution of 101 Blast Hits on the Query Sequence 

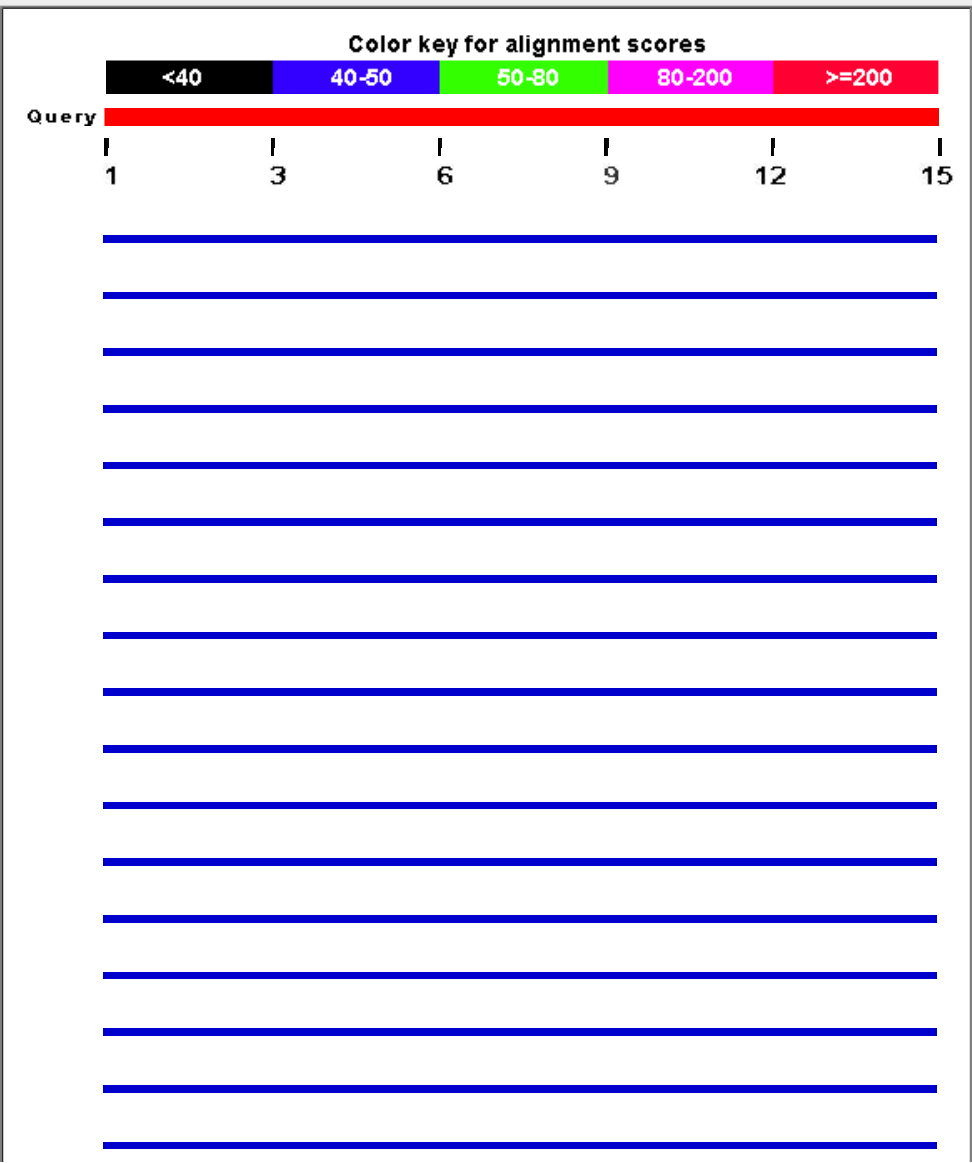

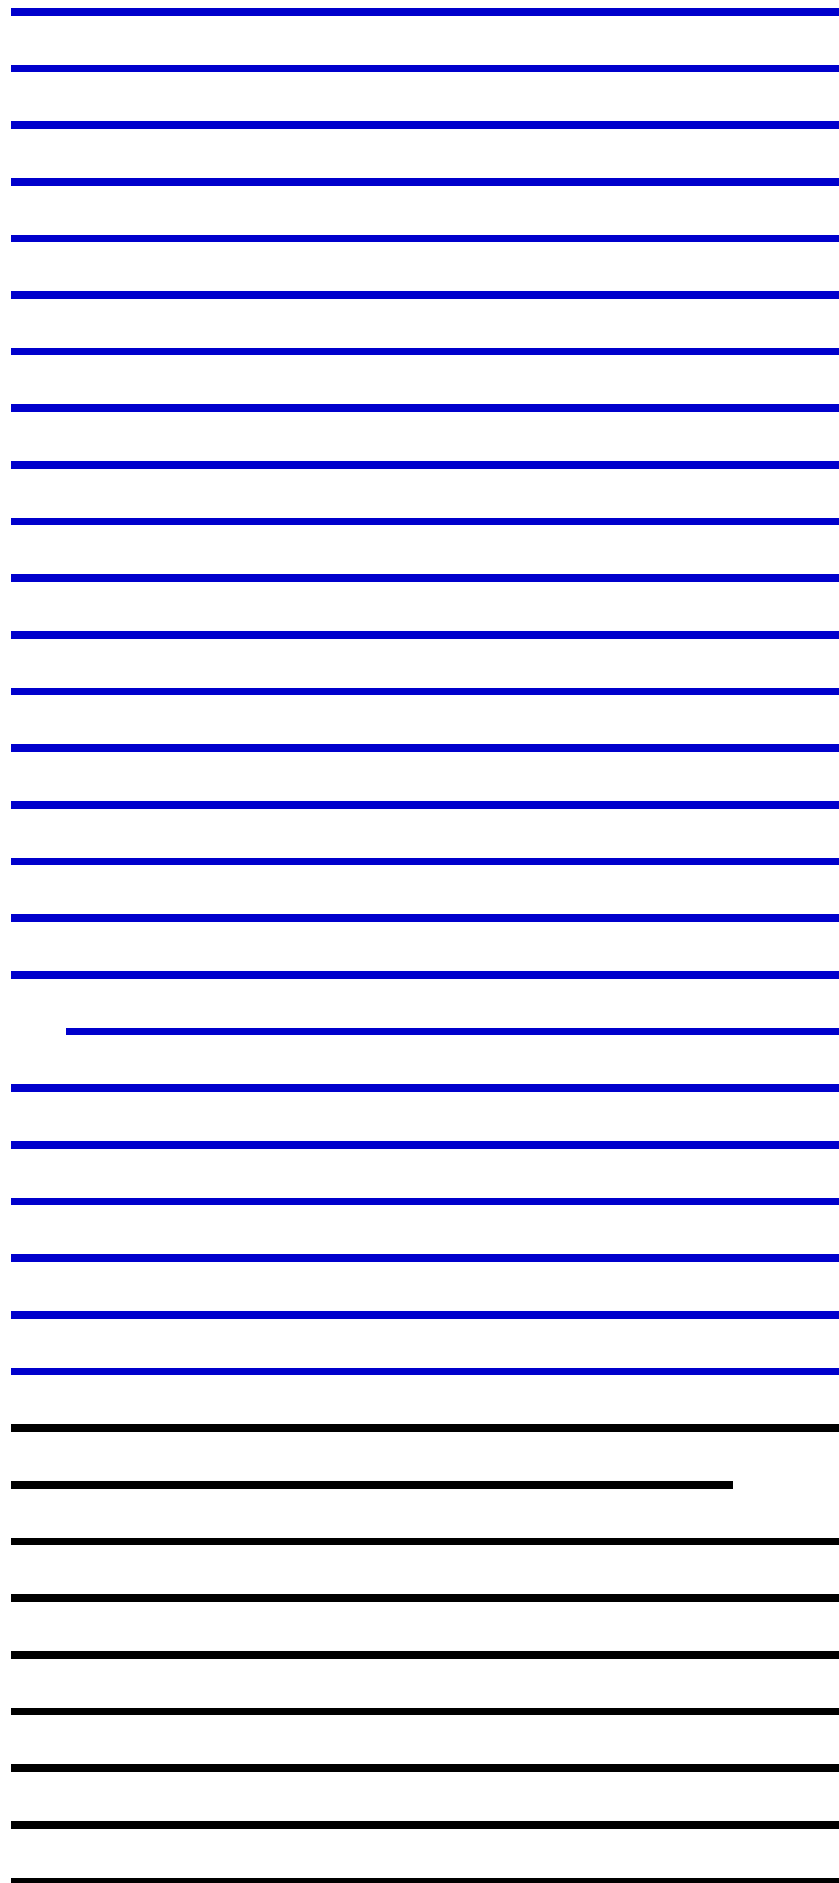

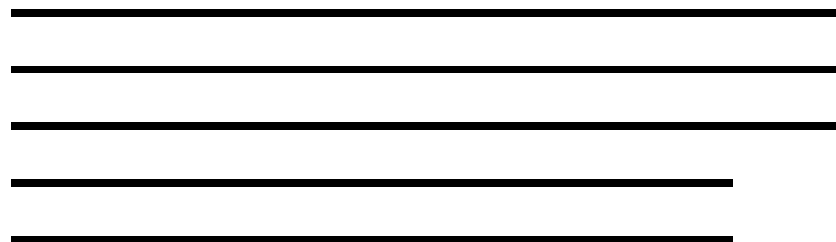

## Descriptions

### Sequences producing significant alignments:

Select: [All](#) [None](#) Selected:0

[Alignments](#)
[Download](#)
[GenPept](#)
[Graphics](#)
[Distance tree of results](#)
[Multiple alignment](#)


| Description                                                                                  | Max score | Total score | Query cover | E value | Ident | Accession                      |
|----------------------------------------------------------------------------------------------|-----------|-------------|-------------|---------|-------|--------------------------------|
| <a href="#">Chain A, Structure Of M2bp Scavenger Receptor Cysteine-rich Domain [Homo</a>     | 45.6      | 45.6        | 100%        | 2e-04   | 93%   | <a href="#">1BY2_A</a>         |
| <a href="#">lectin_galactoside-binding_soluble_3_binding_protein_isoform CRA_c [Homo s</a>   | 45.6      | 45.6        | 100%        | 2e-04   | 93%   | <a href="#">EAW89545.1</a>     |
| <a href="#">unnamed protein product [Homo sapiens]</a>                                       | 45.6      | 45.6        | 100%        | 3e-04   | 93%   | <a href="#">BAG58382.1</a>     |
| <a href="#">PREDICTED: LOW QUALITY PROTEIN: galectin-3-binding protein [Rhinopith</a>        | 45.6      | 45.6        | 100%        | 3e-04   | 93%   | <a href="#">XP_010380238.1</a> |
| <a href="#">unnamed protein product [Homo sapiens]</a>                                       | 45.6      | 45.6        | 100%        | 3e-04   | 93%   | <a href="#">BAG62653.1</a>     |
| <a href="#">lectin_galactoside-binding_soluble_3_binding_protein_isoform CRA_a [Homo s</a>   | 45.6      | 45.6        | 100%        | 3e-04   | 93%   | <a href="#">EAW89543.1</a>     |
| <a href="#">PREDICTED: galectin-3-binding protein [Chlorocebus sabaeus]</a>                  | 45.6      | 45.6        | 100%        | 3e-04   | 93%   | <a href="#">XP_008011313.1</a> |
| <a href="#">PREDICTED: galectin-3-binding protein isoform X2 [Macaca fascicularis]</a>       | 45.6      | 45.6        | 100%        | 3e-04   | 93%   | <a href="#">XP_005585203.1</a> |
| <a href="#">RecName: Full=Galectin-3-binding protein; AltName: Full=Lectin galactoside-f</a> | 45.6      | 45.6        | 100%        | 3e-04   | 93%   | <a href="#">Q5RDA4.1</a>       |
| <a href="#">PREDICTED: galectin-3-binding protein [Papio anubis]</a>                         | 45.6      | 45.6        | 100%        | 3e-04   | 93%   | <a href="#">XP_003913572.1</a> |
| <a href="#">PREDICTED: galectin-3-binding protein [Pan troglodytes]</a>                      | 45.6      | 45.6        | 100%        | 3e-04   | 93%   | <a href="#">XP_511716.1</a>    |
| <a href="#">galectin-3-binding protein precursor [Homo sapiens]</a>                          | 45.6      | 45.6        | 100%        | 3e-04   | 93%   | <a href="#">NP_005558.1</a>    |
| <a href="#">PREDICTED: galectin-3-binding protein isoform 1 [Gorilla gorilla gorilla]</a>    | 45.6      | 45.6        | 100%        | 3e-04   | 93%   | <a href="#">XP_004040917.1</a> |
| <a href="#">PREDICTED: galectin-3-binding protein [Pan paniscus]</a>                         | 45.6      | 45.6        | 100%        | 3e-04   | 93%   | <a href="#">XP_003818311.1</a> |
| <a href="#">PREDICTED: galectin-3-binding protein isoform 2 [Nomascus leucogenys]</a>        | 45.6      | 45.6        | 100%        | 3e-04   | 93%   | <a href="#">XP_003278481.1</a> |
| <a href="#">lectin_galactoside-binding_soluble_3_binding_protein [synthetic construct]</a>   | 45.6      | 45.6        | 100%        | 3e-04   | 93%   | <a href="#">ABM86350.1</a>     |
| <a href="#">hypothetical protein EGK_09048 [Macaca mulatta]</a>                              | 45.6      | 45.6        | 100%        | 3e-04   | 93%   | <a href="#">EHH25259.1</a>     |
| <a href="#">PREDICTED: galectin-3-binding protein isoform 1 [Macaca mulatta]</a>             | 45.6      | 45.6        | 100%        | 3e-04   | 93%   | <a href="#">XP_001109047.1</a> |
| <a href="#">PREDICTED: galectin-3-binding protein [Callithrix jacchus]</a>                   | 45.6      | 45.6        | 100%        | 3e-04   | 93%   | <a href="#">XP_002748850.2</a> |
| <a href="#">hypothetical protein EGM_08232 [Macaca fascicularis]</a>                         | 45.6      | 45.6        | 100%        | 3e-04   | 93%   | <a href="#">EHH58393.1</a>     |
| <a href="#">PREDICTED: galectin-3-binding protein isoform X1 [Macaca fascicularis]</a>       | 45.6      | 45.6        | 100%        | 3e-04   | 93%   | <a href="#">XP_005585202.1</a> |
| <a href="#">PREDICTED: galectin-3-binding protein isoform 1 [Nomascus leucogenys]</a>        | 45.6      | 45.6        | 100%        | 3e-04   | 93%   | <a href="#">XP_003278480.2</a> |
| <a href="#">PREDICTED: LOW QUALITY PROTEIN: galectin-3-binding protein [Myotis lu</a>        | 42.6      | 42.6        | 100%        | 0.003   | 87%   | <a href="#">XP_006108225.1</a> |
| <a href="#">cyclophilin C-associated protein [Mus musculus domesticus]</a>                   | 42.6      | 42.6        | 100%        | 0.003   | 87%   | <a href="#">AAA37499.1</a>     |
| <a href="#">PREDICTED: galectin-3-binding protein [Eptesicus fuscus]</a>                     | 42.6      | 42.6        | 100%        | 0.003   | 87%   | <a href="#">XP_008153225.1</a> |
| <a href="#">PREDICTED: galectin-3-binding protein [Ceratotherium simum simum]</a>            | 42.6      | 42.6        | 100%        | 0.003   | 87%   | <a href="#">XP_004432888.1</a> |
| <a href="#">PREDICTED: galectin-3-binding protein [Peromyscus maniculatus bairdii]</a>       | 42.6      | 42.6        | 100%        | 0.003   | 87%   | <a href="#">XP_006990333.1</a> |
| <a href="#">unnamed protein product [Mus musculus]</a>                                       | 42.6      | 42.6        | 100%        | 0.003   | 87%   | <a href="#">BAE31013.1</a>     |
| <a href="#">unnamed protein product [Mus musculus]</a>                                       | 42.6      | 42.6        | 100%        | 0.003   | 87%   | <a href="#">BAE29246.1</a>     |

|                                                                                                |      |      |      |       |     |                                |
|------------------------------------------------------------------------------------------------|------|------|------|-------|-----|--------------------------------|
| <a href="#">unnamed protein product [Mus musculus]</a>                                         | 42.6 | 42.6 | 100% | 0.003 | 87% | <a href="#">BAE31894.1</a>     |
| <a href="#">galectin-3-binding protein precursor [Mus musculus]</a>                            | 42.6 | 42.6 | 100% | 0.003 | 87% | <a href="#">NP_035280.1</a>    |
| <a href="#">galectin-3-binding protein precursor [Mesocricetus auratus]</a>                    | 42.6 | 42.6 | 100% | 0.003 | 87% | <a href="#">NP_001268610.1</a> |
| <a href="#">PREDICTED: galectin-3-binding protein [Otolemur garnettii]</a>                     | 42.6 | 42.6 | 100% | 0.003 | 87% | <a href="#">XP_003786610.1</a> |
| <a href="#">PREDICTED: galectin-3-binding protein [Tarsius syrichta]</a>                       | 42.6 | 42.6 | 100% | 0.003 | 87% | <a href="#">XP_008046502.1</a> |
| <a href="#">PREDICTED: galectin-3-binding protein [Nannospalax galili]</a>                     | 42.2 | 42.2 | 100% | 0.004 | 87% | <a href="#">XP_008847879.1</a> |
| <a href="#">PREDICTED: galectin-3-binding protein [Erinaceus europaeus]</a>                    | 42.2 | 42.2 | 93%  | 0.004 | 93% | <a href="#">XP_007533029.1</a> |
| <a href="#">PREDICTED: putative scavenger receptor cysteine-rich domain-containing pr</a>      | 40.9 | 40.9 | 100% | 0.009 | 87% | <a href="#">XP_007091541.1</a> |
| <a href="#">PREDICTED: galectin-3-binding protein [Trichechus manatus latirostris]</a>         | 40.9 | 40.9 | 100% | 0.010 | 87% | <a href="#">XP_004374429.1</a> |
| <a href="#">PREDICTED: galectin-3-binding protein isoform X1 [Felis catus]</a>                 | 40.9 | 40.9 | 100% | 0.010 | 87% | <a href="#">XP_003997300.1</a> |
| <a href="#">PREDICTED: galectin-3-binding protein [Equus caballus]</a>                         | 40.9 | 40.9 | 100% | 0.010 | 87% | <a href="#">XP_001491000.1</a> |
| <a href="#">PREDICTED: galectin-3-binding protein [Jaculus jaculus]</a>                        | 40.9 | 40.9 | 100% | 0.010 | 87% | <a href="#">XP_004655763.1</a> |
| <a href="#">PREDICTED: galectin-3-binding protein isoform X2 [Felis catus]</a>                 | 40.9 | 40.9 | 100% | 0.010 | 87% | <a href="#">XP_006940706.1</a> |
| <a href="#">PREDICTED: galectin-3-binding protein [Oryctolagus cuniculus]</a>                  | 39.7 | 39.7 | 100% | 0.027 | 80% | <a href="#">XP_002724384.1</a> |
| <a href="#">PREDICTED: galectin-3-binding protein [Ochotona princeps]</a>                      | 39.7 | 39.7 | 86%  | 0.027 | 92% | <a href="#">XP_004593086.1</a> |
| <a href="#">PREDICTED: galectin-3-binding protein [Saimiri boliviensis boliviensis]</a>        | 39.7 | 39.7 | 100% | 0.027 | 87% | <a href="#">XP_010340649.1</a> |
| <a href="#">galectin-3-binding protein precursor [Rattus norvegicus]</a>                       | 39.2 | 39.2 | 100% | 0.037 | 80% | <a href="#">NP_620796.1</a>    |
| <a href="#">RecName: Full=Galectin-3-binding protein; AltName: Full=Cyp-C-associated p</a>     | 39.2 | 39.2 | 100% | 0.037 | 80% | <a href="#">O70513.2</a>       |
| <a href="#">lectin, galactoside-binding, soluble, 3 binding protein, isoform CRA_a [Rattus</a> | 39.2 | 39.2 | 100% | 0.037 | 80% | <a href="#">EDM06755.1</a>     |
| <a href="#">galectin-3-binding protein [Cricetulus griseus]</a>                                | 38.4 | 38.4 | 100% | 0.069 | 80% | <a href="#">ERE69017.1</a>     |
| <a href="#">PREDICTED: galectin-3-binding protein [Cricetulus griseus]</a>                     | 38.4 | 38.4 | 100% | 0.070 | 80% | <a href="#">XP_007620278.1</a> |
| <a href="#">PREDICTED: galectin-3-binding protein [Cricetulus griseus]</a>                     | 38.4 | 38.4 | 100% | 0.070 | 80% | <a href="#">XP_003498865.1</a> |
| <a href="#">PREDICTED: galectin-3-binding protein [Microtus ochrogaster]</a>                   | 38.4 | 38.4 | 100% | 0.070 | 80% | <a href="#">XP_005350871.1</a> |
| <a href="#">PREDICTED: galectin-3-binding protein [Balaenoptera acutorostrata scammo</a>       | 37.5 | 37.5 | 100% | 0.13  | 80% | <a href="#">XP_007185856.1</a> |
| <a href="#">PREDICTED: galectin-3-binding protein [Lipotes vexillifer]</a>                     | 37.5 | 37.5 | 100% | 0.13  | 80% | <a href="#">XP_007462419.1</a> |
| <a href="#">PREDICTED: galectin-3-binding protein [Tursiops truncatus]</a>                     | 36.7 | 36.7 | 86%  | 0.25  | 85% | <a href="#">XP_004323016.1</a> |
| <a href="#">PREDICTED: galectin-3-binding protein [Orcinus orca]</a>                           | 36.7 | 36.7 | 86%  | 0.25  | 85% | <a href="#">XP_004275584.1</a> |
| <a href="#">PREDICTED: soluble calcium-activated nucleotidase 1 isoform X5 [Canis lup</a>      | 36.7 | 36.7 | 86%  | 0.25  | 85% | <a href="#">XP_540464.2</a>    |
| <a href="#">PREDICTED: galectin-3-binding protein [Chrysochloris asiatica]</a>                 | 36.7 | 36.7 | 86%  | 0.25  | 85% | <a href="#">XP_006869713.1</a> |
| <a href="#">PREDICTED: galectin-3-binding protein [Octodon degus]</a>                          | 36.7 | 36.7 | 86%  | 0.25  | 85% | <a href="#">XP_004639582.1</a> |
| <a href="#">PREDICTED: galectin-3-binding protein [Fukomys damarensis]</a>                     | 36.7 | 36.7 | 86%  | 0.25  | 85% | <a href="#">XP_010616820.1</a> |
| <a href="#">PREDICTED: galectin-3-binding protein [Chinchilla lanigera]</a>                    | 36.7 | 36.7 | 86%  | 0.25  | 85% | <a href="#">XP_005407410.1</a> |
| <a href="#">Galectin-3-binding protein [Tupaia chinensis]</a>                                  | 36.7 | 36.7 | 86%  | 0.25  | 85% | <a href="#">ELW68246.1</a>     |
| <a href="#">PREDICTED: galectin-3-binding protein [Cavia porcellus]</a>                        | 36.7 | 36.7 | 100% | 0.25  | 80% | <a href="#">XP_003464931.2</a> |
| <a href="#">PREDICTED: galectin-3-binding protein [Tupaia chinensis]</a>                       | 36.7 | 36.7 | 86%  | 0.25  | 85% | <a href="#">XP_006145764.1</a> |
| <a href="#">PREDICTED: soluble calcium-activated nucleotidase 1 isoform X1 [Canis lup</a>      | 36.7 | 36.7 | 86%  | 0.25  | 85% | <a href="#">XP_005624092.1</a> |
| <a href="#">Galectin-3-binding protein [Fukomys damarensis]</a>                                | 36.7 | 36.7 | 86%  | 0.26  | 85% | <a href="#">KFO35672.1</a>     |
| <a href="#">PREDICTED: galectin-3-binding protein [Camelus dromedarius]</a>                    | 35.4 | 35.4 | 100% | 0.64  | 80% | <a href="#">XP_010997923.1</a> |
| <a href="#">PREDICTED: galectin-3-binding protein isoform X2 [Physeter catodon]</a>            | 35.4 | 35.4 | 100% | 0.64  | 80% | <a href="#">XP_007106758.1</a> |
| <a href="#">PREDICTED: galectin-3-binding protein [Vicugna pacos]</a>                          | 35.4 | 35.4 | 100% | 0.64  | 80% | <a href="#">XP_006199496.1</a> |
| <a href="#">PREDICTED: galectin-3-binding protein-like [Camelus ferus]</a>                     | 35.4 | 35.4 | 100% | 0.64  | 80% | <a href="#">XP_006182736.1</a> |
| <a href="#">galectin-3-binding protein precursor [Camelus ferus]</a>                           | 35.4 | 35.4 | 100% | 0.64  | 80% | <a href="#">EPY80953.1</a>     |
| <a href="#">PREDICTED: galectin-3-binding protein [Camelus bactrianus]</a>                     | 35.4 | 35.4 | 100% | 0.64  | 80% | <a href="#">XP_010948995.1</a> |
| <a href="#">galectin-3-binding protein precursor [Camelus ferus]</a>                           | 35.4 | 35.4 | 100% | 0.64  | 80% | <a href="#">EPY82790.1</a>     |
| <a href="#">PREDICTED: galectin-3-binding protein isoform X1 [Physeter catodon]</a>            | 35.4 | 35.4 | 100% | 0.64  | 80% | <a href="#">XP_007106757.1</a> |

|                                                                                           |      |      |      |      |     |                                |
|-------------------------------------------------------------------------------------------|------|------|------|------|-----|--------------------------------|
| <a href="#">PREDICTED: galectin-3-binding protein [Echinops telfairi]</a>                 | 35.0 | 35.0 | 100% | 0.88 | 80% | <a href="#">XP_004709313.1</a> |
| <a href="#">PREDICTED: galectin-3-binding protein [Ictidomys tridecemlineatus]</a>        | 34.1 | 34.1 | 80%  | 1.6  | 83% | <a href="#">XP_005332681.1</a> |
| <a href="#">PREDICTED: galectin-3-binding protein [Elephantulus edwardii]</a>             | 34.1 | 34.1 | 80%  | 1.6  | 83% | <a href="#">XP_006886403.1</a> |
| <a href="#">PREDICTED: galectin-3-binding protein [Loxodonta africana]</a>                | 33.7 | 33.7 | 80%  | 1.9  | 83% | <a href="#">XP_010595362.1</a> |
| <a href="#">PREDICTED: galectin-3-binding protein isoform X2 [Bison bison bison]</a>      | 33.7 | 33.7 | 86%  | 2.2  | 77% | <a href="#">XP_010854576.1</a> |
| <a href="#">PREDICTED: galectin-3-binding protein isoform X1 [Bos taurus]</a>             | 33.7 | 33.7 | 86%  | 2.2  | 77% | <a href="#">XP_005221293.1</a> |
| <a href="#">galectin-3-binding protein precursor [Bos taurus]</a>                         | 33.7 | 33.7 | 86%  | 2.2  | 77% | <a href="#">NP_001039781.1</a> |
| <a href="#">PREDICTED: galectin-3-binding protein [Bos mutus]</a>                         | 33.7 | 33.7 | 86%  | 2.2  | 77% | <a href="#">XP_005910379.1</a> |
| <a href="#">PREDICTED: galectin-3-binding protein isoform X1 [Bison bison bison]</a>      | 33.7 | 33.7 | 86%  | 2.2  | 77% | <a href="#">XP_010854575.1</a> |
| <a href="#">PREDICTED: galectin-3-binding protein isoform X2 [Bos taurus]</a>             | 33.7 | 33.7 | 86%  | 2.2  | 77% | <a href="#">XP_005221292.1</a> |
| <a href="#">PREDICTED: galectin-3-binding protein [Heterocephalus glaber]</a>             | 33.7 | 33.7 | 86%  | 2.2  | 77% | <a href="#">XP_004860896.1</a> |
| <a href="#">PREDICTED: galectin-3-binding protein isoform X2 [Heterocephalus glaber]</a>  | 33.7 | 33.7 | 86%  | 2.2  | 77% | <a href="#">XP_004881532.1</a> |
| <a href="#">chromosome segregation protein SMC [Psychrobacter sp. PAMC 21119]</a>         | 33.7 | 33.7 | 73%  | 2.3  | 91% | <a href="#">WP_010196556.1</a> |
| <a href="#">Galectin-3-binding protein [Heterocephalus glaber]</a>                        | 33.7 | 62.8 | 86%  | 2.3  | 77% | <a href="#">EHB01017.1</a>     |
| <a href="#">hypothetical protein [Thioalkalivibrio sp. ALMg11]</a>                        | 33.7 | 33.7 | 93%  | 2.3  | 79% | <a href="#">WP_018948689.1</a> |
| <a href="#">PREDICTED: galectin-3-binding protein [Myotis davidii]</a>                    | 32.9 | 32.9 | 86%  | 4.1  | 77% | <a href="#">XP_006753504.1</a> |
| <a href="#">xanthine dehydrogenase [alpha proteobacterium BAL199]</a>                     | 32.5 | 32.5 | 93%  | 5.4  | 79% | <a href="#">WP_007673419.1</a> |
| <a href="#">methyl-accepting chemotaxis sensory transducer [Stenotrophomonas maltoph]</a> | 32.5 | 32.5 | 86%  | 5.5  | 86% | <a href="#">CCP16517.1</a>     |
| <a href="#">chemotaxis protein [Stenotrophomonas maltophilia]</a>                         | 32.5 | 32.5 | 86%  | 5.5  | 86% | <a href="#">WP_032970136.1</a> |
| <a href="#">chemotaxis protein [Stenotrophomonas maltophilia]</a>                         | 32.5 | 32.5 | 86%  | 5.6  | 86% | <a href="#">WP_033835503.1</a> |
| <a href="#">chemotaxis protein [Stenotrophomonas maltophilia]</a>                         | 32.5 | 32.5 | 86%  | 5.6  | 86% | <a href="#">WP_032127364.1</a> |
| <a href="#">chemotaxis protein [Pseudoxanthomonas sp. J35]</a>                            | 32.5 | 32.5 | 86%  | 5.6  | 86% | <a href="#">WP_028917099.1</a> |
| <a href="#">chemotaxis protein [Stenotrophomonas maltophilia]</a>                         | 32.5 | 32.5 | 86%  | 5.6  | 86% | <a href="#">WP_024958753.1</a> |
| <a href="#">chemotaxis protein [Stenotrophomonas rhizophila]</a>                          | 32.5 | 32.5 | 86%  | 5.6  | 86% | <a href="#">WP_038688404.1</a> |
| <a href="#">MULTISPECIES: chemotaxis protein [Stenotrophomonas]</a>                       | 32.5 | 32.5 | 86%  | 5.6  | 86% | <a href="#">WP_025879122.1</a> |
| <a href="#">chemotaxis protein [Stenotrophomonas maltophilia]</a>                         | 32.5 | 32.5 | 86%  | 5.6  | 86% | <a href="#">WP_017354425.1</a> |

## Alignments

Download ▼ [GenPept](#) [Graphics](#)

▼ Next ▲ Previous ▲ Descriptions

Chain A, Structure Of M2bp Scavenger Receptor Cysteine-rich Domain

Sequence ID: [pdb|1BY2|A](#) Length: 119 Number of Matches: 1

Range 1: 49 to 63 [GenPept](#) [Graphics](#)

▼ Next Match ▲ Previous Match

| Score          | Expect | Identities | Positives   | Gaps     |
|----------------|--------|------------|-------------|----------|
| 45.6 bits(100) | 2e-04  | 14/15(93%) | 15/15(100%) | 0/15(0%) |

Query 1 RALGFEDATQALGRA 15  
 RALGFE+ATQALGRA  
 Sbjct 49 RALGFENATQALGRA 63

### Related Information

[Structure](#) - 3D structure displays

Download ▼ [GenPept](#) [Graphics](#)

▼ Next ▲ Previous ▲ Descriptions

lectin, galactoside-binding, soluble, 3 binding protein, isoform CRA\_c, partial [Homo sapiens]

Sequence ID: [gb|EAW89545.1|](#) Length: 165 Number of Matches: 1

Range 1: 63 to 77 [GenPept](#) [Graphics](#)

▼ Next Match ▲ Previous Match

| Score          | Expect | Identities | Positives   | Gaps     |
|----------------|--------|------------|-------------|----------|
| 45.6 bits(100) | 2e-04  | 14/15(93%) | 15/15(100%) | 0/15(0%) |

### Related Information

[Gene](#) - associated gene details

Query 1 RALGFEDATQALGRA 15  
 RALGFE+ATQALGRA  
 Sbjct 63 RALGFENATQALGRA 77

Download [GenPept](#) [Graphics](#)

[▼ Next](#) [▲ Previous](#) [▲ Descriptions](#)

unnamed protein product [Homo sapiens]

Sequence ID: [dbj|BAG58382.1|](#) Length: 413 Number of Matches: 1

Range 1: 63 to 77 [GenPept](#) [Graphics](#)

[▼ Next Match](#) [▲ Previous Match](#)

| Score          | Expect | Identities | Positives   | Gaps     |
|----------------|--------|------------|-------------|----------|
| 45.6 bits(100) | 3e-04  | 14/15(93%) | 15/15(100%) | 0/15(0%) |

Query 1 RALGFEDATQALGRA 15  
 RALGFE+ATQALGRA  
 Sbjct 63 RALGFENATQALGRA 77

**Related Information**

[Gene](#) - associated gene details

Download [GenPept](#) [Graphics](#)

[▼ Next](#) [▲ Previous](#) [▲ Descriptions](#)

PREDICTED: LOW QUALITY PROTEIN: galectin-3-binding protein [Rhinopithecus roxellana]

Sequence ID: [ref|XP\\_010380238.1|](#) Length: 567 Number of Matches: 1

Range 1: 45 to 59 [GenPept](#) [Graphics](#)

[▼ Next Match](#) [▲ Previous Match](#)

| Score          | Expect | Identities | Positives   | Gaps     |
|----------------|--------|------------|-------------|----------|
| 45.6 bits(100) | 3e-04  | 14/15(93%) | 15/15(100%) | 0/15(0%) |

Query 1 RALGFEDATQALGRA 15  
 RALGFE+ATQALGRA  
 Sbjct 45 RALGFENATQALGRA 59

**Related Information**

[Gene](#) - associated gene details

[Map Viewer](#) - aligned genomic context

Download [GenPept](#) [Graphics](#)

[▼ Next](#) [▲ Previous](#) [▲ Descriptions](#)

unnamed protein product [Homo sapiens]

Sequence ID: [dbj|BAG62653.1|](#) Length: 573 Number of Matches: 1

Range 1: 63 to 77 [GenPept](#) [Graphics](#)

[▼ Next Match](#) [▲ Previous Match](#)

| Score          | Expect | Identities | Positives   | Gaps     |
|----------------|--------|------------|-------------|----------|
| 45.6 bits(100) | 3e-04  | 14/15(93%) | 15/15(100%) | 0/15(0%) |

Query 1 RALGFEDATQALGRA 15  
 RALGFE+ATQALGRA  
 Sbjct 63 RALGFENATQALGRA 77

**Related Information**

[Gene](#) - associated gene details

BLAST is a registered trademark of the National Library of Medicine.

NCBI/ BLAST/ blastp suite/ Formatting Results - B9HPN2C501R

Your search parameters were adjusted to search for a short input sequence.

[Edit and Resubmit](#) [Save Search Strategies](#) [Formatting options](#) [Download](#)

[YouTube](#) [How to read this page](#) [Blast report description](#)

### LGALS3BP\_RALGFENATQALGRA\_NonMod

RID [B9HPN2C501R](#) (Expires on 01-14 14:18 pm)

Query ID |cl|124499  
 Description None  
 Molecule type amino acid  
 Query Length 15

Database Name nr  
 Description All non-redundant GenBank CDS translations+PDB+SwissProt+PIR excluding environmental samples from WGS projects  
 Program BLASTP 2.2.30+ [Citation](#)

Other reports: [Search Summary](#) [Taxonomy reports](#) [Distance tree of results](#) [Multiple alignment](#)

### Graphic Summary

Show Conserved Domains

No putative conserved domains have been detected

Distribution of 101 Blast Hits on the Query Sequence

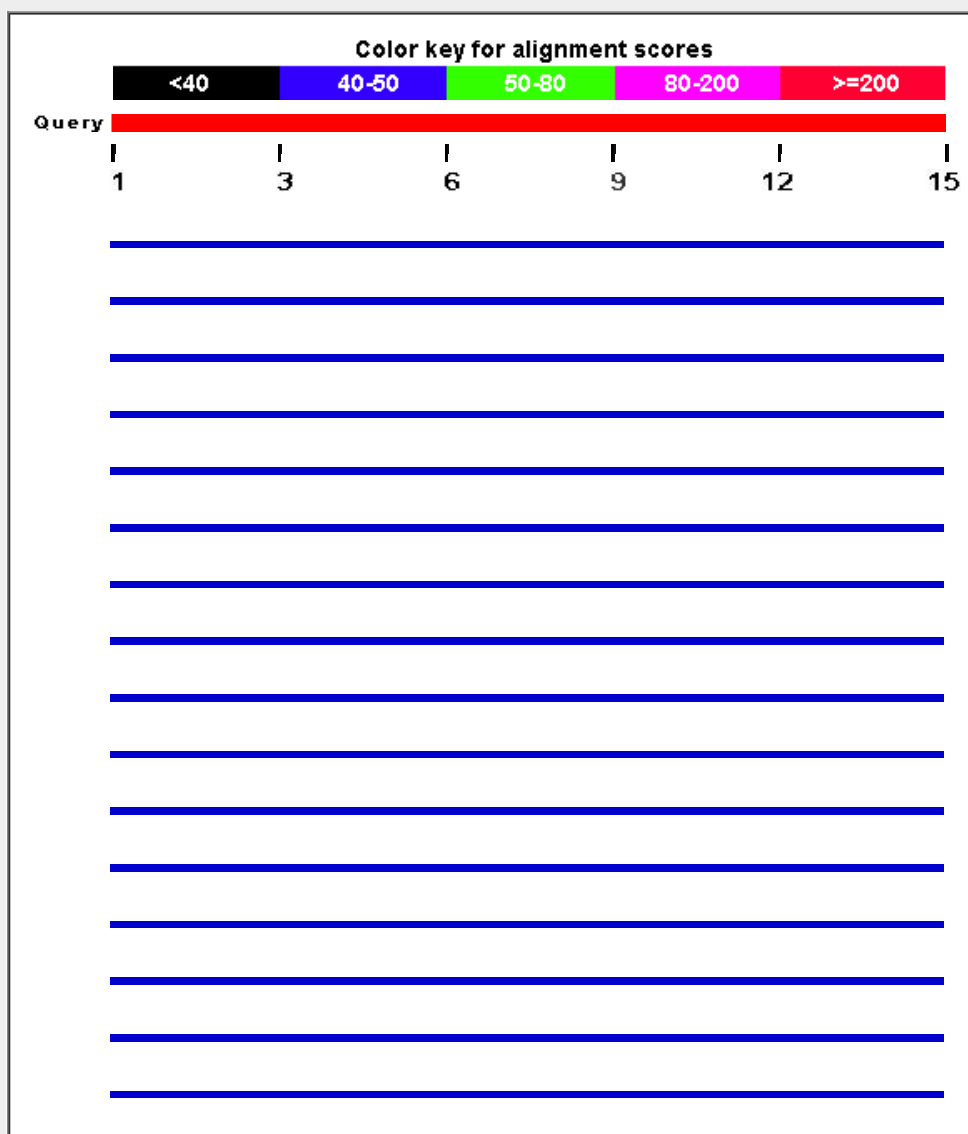



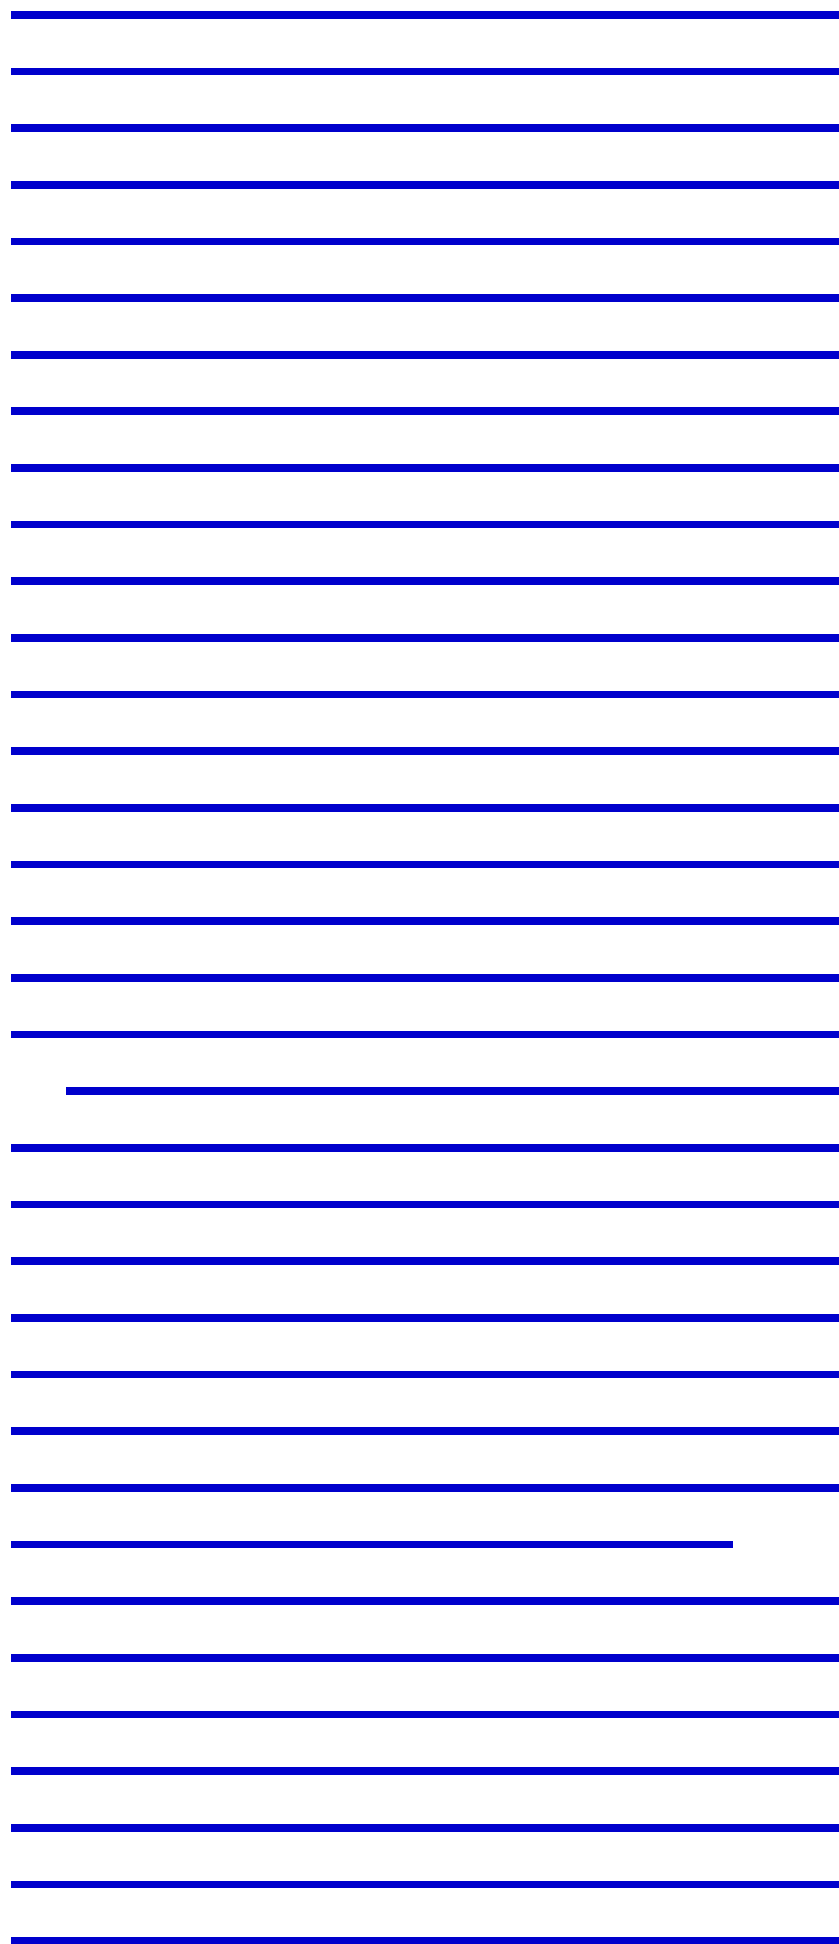

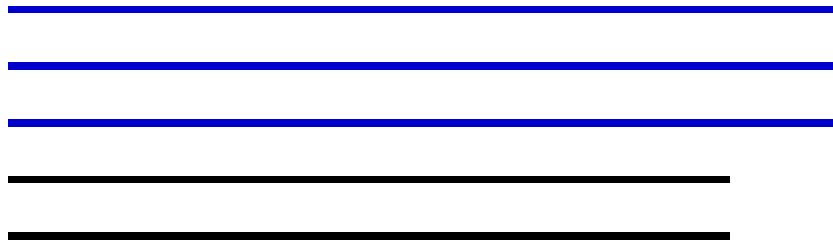

**Descriptions**

**Sequences producing significant alignments:**

Select: [All](#) [None](#) Selected:0

[↑](#) [Alignments](#)
[Download](#)
[GenPept](#)
[Graphics](#)
[Distance tree of results](#)
[Multiple alignment](#)

| Description                                                                             | Max score | Total score | Query cover | E value | Ident | Accession                                   |
|-----------------------------------------------------------------------------------------|-----------|-------------|-------------|---------|-------|---------------------------------------------|
| <a href="#">Chain A, Structure Of M2bp Scavenger Receptor Cysteine-rich Don</a>         | 48.1      | 48.1        | 100%        | 3e-05   | 100%  | <a href="#">gij157830494 1BY2_A</a>         |
| <a href="#">lectin, galactoside-binding, soluble, 3 binding protein, isoform CRA</a>    | 48.1      | 48.1        | 100%        | 3e-05   | 100%  | <a href="#">gij119609951 EAW89545.1</a>     |
| <a href="#">unnamed protein product [Homo sapiens]</a>                                  | 48.1      | 48.1        | 100%        | 4e-05   | 100%  | <a href="#">gij194380458 BAG58382.1</a>     |
| <a href="#">PREDICTED: LOW QUALITY PROTEIN: galectin-3-binding protein</a>              | 48.1      | 48.1        | 100%        | 4e-05   | 100%  | <a href="#">gij724915028 XP_010380238.1</a> |
| <a href="#">unnamed protein product [Homo sapiens]</a>                                  | 48.1      | 48.1        | 100%        | 4e-05   | 100%  | <a href="#">gij194375081 BAG62653.1</a>     |
| <a href="#">lectin, galactoside-binding, soluble, 3 binding protein, isoform CRA</a>    | 48.1      | 48.1        | 100%        | 4e-05   | 100%  | <a href="#">gij119609949 EAW89543.1</a>     |
| <a href="#">PREDICTED: galectin-3-binding protein [Chlorocebus sabaeus]</a>             | 48.1      | 48.1        | 100%        | 4e-05   | 100%  | <a href="#">gij635093239 XP_008011313.1</a> |
| <a href="#">PREDICTED: galectin-3-binding protein isoform X2 [Macaca fasci</a>          | 48.1      | 48.1        | 100%        | 4e-05   | 100%  | <a href="#">gij544502104 XP_005585203.1</a> |
| <a href="#">RecName: Full=Galectin-3-binding protein; AltName: Full=Lectin ga</a>       | 48.1      | 48.1        | 100%        | 4e-05   | 100%  | <a href="#">gij75042301 Q5RDA4.1</a>        |
| <a href="#">PREDICTED: galectin-3-binding protein [Papio anubis]</a>                    | 48.1      | 48.1        | 100%        | 4e-05   | 100%  | <a href="#">gij402901262 XP_003913572.1</a> |
| <a href="#">PREDICTED: galectin-3-binding protein [Pan troglodytes]</a>                 | 48.1      | 48.1        | 100%        | 4e-05   | 100%  | <a href="#">gij55646067 XP_511716.1</a>     |
| <a href="#">galectin-3-binding protein precursor [Homo sapiens]</a>                     | 48.1      | 48.1        | 100%        | 4e-05   | 100%  | <a href="#">gij5031863 NP_005558.1</a>      |
| <a href="#">PREDICTED: galectin-3-binding protein isoform 1 [Gorilla gorilla go</a>     | 48.1      | 48.1        | 100%        | 4e-05   | 100%  | <a href="#">gij426346505 XP_004040917.1</a> |
| <a href="#">PREDICTED: galectin-3-binding protein [Pan paniscus]</a>                    | 48.1      | 48.1        | 100%        | 4e-05   | 100%  | <a href="#">gij397494909 XP_003818311.1</a> |
| <a href="#">PREDICTED: galectin-3-binding protein isoform 2 [Nomascus leuco</a>         | 48.1      | 48.1        | 100%        | 4e-05   | 100%  | <a href="#">gij332258797 XP_003278481.1</a> |
| <a href="#">lectin, galactoside-binding, soluble, 3 binding protein [synthetic cons</a> | 48.1      | 48.1        | 100%        | 4e-05   | 100%  | <a href="#">gij123997497 ABM86350.1</a>     |
| <a href="#">hypothetical protein EGK_09048 [Macaca mulatta]</a>                         | 48.1      | 48.1        | 100%        | 4e-05   | 100%  | <a href="#">gij355568978 EHH25259.1</a>     |
| <a href="#">PREDICTED: galectin-3-binding protein isoform 1 [Macaca mulatta]</a>        | 48.1      | 48.1        | 100%        | 4e-05   | 100%  | <a href="#">gij109118737 XP_001109047.1</a> |
| <a href="#">PREDICTED: galectin-3-binding protein [Callithrix jacchus]</a>              | 48.1      | 48.1        | 100%        | 4e-05   | 100%  | <a href="#">gij675661532 XP_002748850.2</a> |
| <a href="#">hypothetical protein EGM_08232 [Macaca fascicularis]</a>                    | 48.1      | 48.1        | 100%        | 4e-05   | 100%  | <a href="#">gij355754428 EHH58393.1</a>     |
| <a href="#">PREDICTED: galectin-3-binding protein isoform X1 [Macaca fasci</a>          | 48.1      | 48.1        | 100%        | 4e-05   | 100%  | <a href="#">gij544502102 XP_005585202.1</a> |
| <a href="#">PREDICTED: galectin-3-binding protein isoform 1 [Nomascus leuco</a>         | 48.1      | 48.1        | 100%        | 4e-05   | 100%  | <a href="#">gij441643566 XP_003278480.2</a> |
| <a href="#">PREDICTED: LOW QUALITY PROTEIN: galectin-3-binding protein</a>              | 45.2      | 45.2        | 100%        | 4e-04   | 93%   | <a href="#">gij558213798 XP_006108225.1</a> |
| <a href="#">cyclophilin C-associated protein [Mus musculus domesticus]</a>              | 45.2      | 45.2        | 100%        | 4e-04   | 93%   | <a href="#">gij397800 AAA37499.1</a>        |
| <a href="#">PREDICTED: galectin-3-binding protein [Eptesicus fuscus]</a>                | 45.2      | 45.2        | 100%        | 4e-04   | 93%   | <a href="#">gij641726407 XP_008153225.1</a> |
| <a href="#">PREDICTED: galectin-3-binding protein [Ceratotherium simum simu</a>         | 45.2      | 45.2        | 100%        | 4e-04   | 93%   | <a href="#">gij478517307 XP_004432888.1</a> |
| <a href="#">PREDICTED: galectin-3-binding protein [Peromyscus maniculatus t</a>         | 45.2      | 45.2        | 100%        | 4e-04   | 93%   | <a href="#">gij589955428 XP_006990333.1</a> |
| <a href="#">unnamed protein product [Mus musculus]</a>                                  | 45.2      | 45.2        | 100%        | 4e-04   | 93%   | <a href="#">gij74212546 BAE31013.1</a>      |

|                                                                                      |      |      |      |       |      |                                             |
|--------------------------------------------------------------------------------------|------|------|------|-------|------|---------------------------------------------|
| <a href="#">unnamed protein product [Mus musculus]</a>                               | 45.2 | 45.2 | 100% | 4e-04 | 93%  | <a href="#">gij74211789 BAE29246.1</a>      |
| <a href="#">unnamed protein product [Mus musculus]</a>                               | 45.2 | 45.2 | 100% | 4e-04 | 93%  | <a href="#">gij74142260 BAE31894.1</a>      |
| <a href="#">galectin-3-binding protein precursor [Mus musculus]</a>                  | 45.2 | 45.2 | 100% | 4e-04 | 93%  | <a href="#">gij6755144 NP_035280.1</a>      |
| <a href="#">galectin-3-binding protein precursor [Mesocricetus auratus]</a>          | 45.2 | 45.2 | 100% | 4e-04 | 93%  | <a href="#">gij528078247 NP_001268610.1</a> |
| <a href="#">PREDICTED: galectin-3-binding protein [Otolemur garnettii]</a>           | 45.2 | 45.2 | 100% | 4e-04 | 93%  | <a href="#">gij395826815 XP_003786610.1</a> |
| <a href="#">PREDICTED: galectin-3-binding protein [Tarsius syrichta]</a>             | 45.2 | 45.2 | 100% | 4e-04 | 93%  | <a href="#">gij640781767 XP_008046502.1</a> |
| <a href="#">PREDICTED: galectin-3-binding protein [Nannospalax galili]</a>           | 44.8 | 44.8 | 100% | 5e-04 | 93%  | <a href="#">gij674080617 XP_008847879.1</a> |
| <a href="#">PREDICTED: galectin-3-binding protein [Erinaceus europaeus]</a>          | 44.8 | 44.8 | 93%  | 5e-04 | 100% | <a href="#">gij617646710 XP_007533029.1</a> |
| <a href="#">PREDICTED: putative scavenger receptor cysteine-rich domain-co</a>       | 43.5 | 43.5 | 100% | 0.001 | 93%  | <a href="#">gij591331486 XP_007091541.1</a> |
| <a href="#">PREDICTED: galectin-3-binding protein [Trichechus manatus latiro</a>     | 43.5 | 43.5 | 100% | 0.001 | 93%  | <a href="#">gij471367801 XP_004374429.1</a> |
| <a href="#">PREDICTED: galectin-3-binding protein isoform X1 [Felis catus]</a>       | 43.5 | 43.5 | 100% | 0.001 | 93%  | <a href="#">gij410981896 XP_003997300.1</a> |
| <a href="#">PREDICTED: galectin-3-binding protein [Equus caballus]</a>               | 43.5 | 43.5 | 100% | 0.001 | 93%  | <a href="#">gij149723277 XP_001491000.1</a> |
| <a href="#">PREDICTED: galectin-3-binding protein [Jaculus jaculus]</a>              | 43.5 | 43.5 | 100% | 0.001 | 93%  | <a href="#">gij507543547 XP_004655763.1</a> |
| <a href="#">PREDICTED: galectin-3-binding protein isoform X2 [Felis catus]</a>       | 43.5 | 43.5 | 100% | 0.001 | 93%  | <a href="#">gij587012494 XP_006940706.1</a> |
| <a href="#">PREDICTED: galectin-3-binding protein [Oryctolagus cuniculus]</a>        | 42.2 | 42.2 | 100% | 0.004 | 87%  | <a href="#">gij291416302 XP_002724384.1</a> |
| <a href="#">PREDICTED: galectin-3-binding protein [Ochotona princeps]</a>            | 42.2 | 42.2 | 86%  | 0.004 | 100% | <a href="#">gij504166431 XP_004593086.1</a> |
| <a href="#">PREDICTED: galectin-3-binding protein [Saimiri boliviensis bolivien</a>  | 42.2 | 42.2 | 100% | 0.004 | 93%  | <a href="#">gij725577242 XP_010340649.1</a> |
| <a href="#">galectin-3-binding protein precursor [Rattus norvegicus]</a>             | 41.8 | 41.8 | 100% | 0.005 | 87%  | <a href="#">gij20806135 NP_620796.1</a>     |
| <a href="#">RecName: Full=Galectin-3-binding protein; AltName: Full=Cyp-C-as</a>     | 41.8 | 41.8 | 100% | 0.005 | 87%  | <a href="#">gij218526547 O70513.2</a>       |
| <a href="#">lectin, galactoside-binding, soluble, 3 binding protein, isoform CRA</a> | 41.8 | 41.8 | 100% | 0.005 | 87%  | <a href="#">gij149054938 EDM06755.1</a>     |
| <a href="#">galectin-3-binding protein [Cricetulus griseus]</a>                      | 40.9 | 40.9 | 100% | 0.010 | 87%  | <a href="#">gij537143564 ERE69017.1</a>     |
| <a href="#">PREDICTED: galectin-3-binding protein [Cricetulus griseus]</a>           | 40.9 | 40.9 | 100% | 0.010 | 87%  | <a href="#">gij625257783 XP_007620278.1</a> |
| <a href="#">PREDICTED: galectin-3-binding protein [Cricetulus griseus]</a>           | 40.9 | 40.9 | 100% | 0.010 | 87%  | <a href="#">gij354473282 XP_003498865.1</a> |
| <a href="#">PREDICTED: galectin-3-binding protein [Microtus ochrogaster]</a>         | 40.9 | 40.9 | 100% | 0.010 | 87%  | <a href="#">gij532014189 XP_005350871.1</a> |
| <a href="#">PREDICTED: galectin-3-binding protein [Balaenoptera acutorostrat</a>     | 40.1 | 40.1 | 100% | 0.018 | 87%  | <a href="#">gij594676074 XP_007185856.1</a> |
| <a href="#">PREDICTED: galectin-3-binding protein [Lipotes vexillifer]</a>           | 40.1 | 40.1 | 100% | 0.018 | 87%  | <a href="#">gij602701011 XP_007462419.1</a> |
| <a href="#">PREDICTED: galectin-3-binding protein [Tursiops truncatus]</a>           | 39.2 | 39.2 | 86%  | 0.035 | 92%  | <a href="#">gij470634961 XP_004323016.1</a> |
| <a href="#">PREDICTED: galectin-3-binding protein [Orcinus orca]</a>                 | 39.2 | 39.2 | 86%  | 0.035 | 92%  | <a href="#">gij466037200 XP_004275584.1</a> |
| <a href="#">PREDICTED: soluble calcium-activated nucleotidase 1 isoform X5 [</a>     | 39.2 | 39.2 | 86%  | 0.035 | 92%  | <a href="#">gij73964953 XP_540464.2</a>     |
| <a href="#">PREDICTED: galectin-3-binding protein [Chrysochloris asiatica]</a>       | 39.2 | 39.2 | 86%  | 0.035 | 92%  | <a href="#">gij586478358 XP_006869713.1</a> |
| <a href="#">PREDICTED: galectin-3-binding protein [Octodon degus]</a>                | 39.2 | 39.2 | 86%  | 0.035 | 92%  | <a href="#">gij507681576 XP_004639582.1</a> |
| <a href="#">PREDICTED: galectin-3-binding protein [Fukomys damarensis]</a>           | 39.2 | 39.2 | 86%  | 0.035 | 92%  | <a href="#">gij731203892 XP_010616820.1</a> |
| <a href="#">PREDICTED: galectin-3-binding protein [Chinchilla lanigera]</a>          | 39.2 | 39.2 | 86%  | 0.035 | 92%  | <a href="#">gij533188976 XP_005407410.1</a> |
| <a href="#">Galectin-3-binding protein [Tupaia chinensis]</a>                        | 39.2 | 39.2 | 86%  | 0.035 | 92%  | <a href="#">gij444727768 ELW68246.1</a>     |
| <a href="#">PREDICTED: galectin-3-binding protein [Cavia porcellus]</a>              | 39.2 | 39.2 | 100% | 0.035 | 87%  | <a href="#">gij514451490 XP_003464931.2</a> |
| <a href="#">PREDICTED: galectin-3-binding protein [Tupaia chinensis]</a>             | 39.2 | 39.2 | 86%  | 0.035 | 92%  | <a href="#">gij562832654 XP_006145764.1</a> |
| <a href="#">PREDICTED: soluble calcium-activated nucleotidase 1 isoform X1 [</a>     | 39.2 | 39.2 | 86%  | 0.035 | 92%  | <a href="#">gij545509197 XP_005624092.1</a> |
| <a href="#">Galectin-3-binding protein [Fukomys damarensis]</a>                      | 39.2 | 39.2 | 86%  | 0.036 | 92%  | <a href="#">gij676282129 KFO35672.1</a>     |
| <a href="#">PREDICTED: galectin-3-binding protein isoform X2 [Physeter catod</a>     | 38.0 | 38.0 | 100% | 0.090 | 87%  | <a href="#">gij593720930 XP_007106758.1</a> |
| <a href="#">PREDICTED: galectin-3-binding protein [Vicugna pacos]</a>                | 38.0 | 38.0 | 100% | 0.090 | 87%  | <a href="#">gij560953982 XP_006199496.1</a> |
| <a href="#">PREDICTED: galectin-3-binding protein-like [Camelus ferus]</a>           | 38.0 | 38.0 | 100% | 0.090 | 87%  | <a href="#">gij560912913 XP_006182736.1</a> |
| <a href="#">galectin-3-binding protein precursor [Camelus ferus]</a>                 | 38.0 | 38.0 | 100% | 0.090 | 87%  | <a href="#">gij528761294 EPY80953.1</a>     |
| <a href="#">galectin-3-binding protein precursor [Camelus ferus]</a>                 | 38.0 | 38.0 | 100% | 0.090 | 87%  | <a href="#">gij528763131 EPY82790.1</a>     |
| <a href="#">PREDICTED: galectin-3-binding protein isoform X1 [Physeter catod</a>     | 38.0 | 38.0 | 100% | 0.091 | 87%  | <a href="#">gij593720928 XP_007106757.1</a> |
| <a href="#">PREDICTED: galectin-3-binding protein [Echinops telfairi]</a>            | 37.5 | 37.5 | 100% | 0.12  | 87%  | <a href="#">gij507673535 XP_004709313.1</a> |

|                                                                                           |      |      |     |      |      |                                             |
|-------------------------------------------------------------------------------------------|------|------|-----|------|------|---------------------------------------------|
| <a href="#">PREDICTED: galectin-3-binding protein [Ictidomys tridecemlineatus]</a>        | 36.7 | 36.7 | 80% | 0.23 | 92%  | <a href="#">gil532094003 XP_005332681.1</a> |
| <a href="#">PREDICTED: galectin-3-binding protein [Elephantulus edwardii]</a>             | 36.7 | 36.7 | 80% | 0.24 | 92%  | <a href="#">gil585660824 XP_006886403.1</a> |
| <a href="#">PREDICTED: galectin-3-binding protein [Loxodonta africana]</a>                | 36.3 | 36.3 | 80% | 0.27 | 92%  | <a href="#">gil731502681 XP_010595362.1</a> |
| <a href="#">PREDICTED: galectin-3-binding protein isoform X2 [Bos taurus]</a>             | 36.3 | 36.3 | 86% | 0.32 | 85%  | <a href="#">gil528997315 XP_005221293.1</a> |
| <a href="#">galectin-3-binding protein precursor [Bos taurus]</a>                         | 36.3 | 36.3 | 86% | 0.32 | 85%  | <a href="#">gil114052595 NP_001039781.1</a> |
| <a href="#">PREDICTED: galectin-3-binding protein [Bos mutus]</a>                         | 36.3 | 36.3 | 86% | 0.32 | 85%  | <a href="#">gil555997305 XP_005910379.1</a> |
| <a href="#">PREDICTED: galectin-3-binding protein isoform X1 [Bos taurus]</a>             | 36.3 | 36.3 | 86% | 0.32 | 85%  | <a href="#">gil528997313 XP_005221292.1</a> |
| <a href="#">PREDICTED: galectin-3-binding protein [Heterocephalus glaber]</a>             | 36.3 | 36.3 | 86% | 0.32 | 85%  | <a href="#">gil512998688 XP_004860896.1</a> |
| <a href="#">PREDICTED: galectin-3-binding protein isoform X2 [Heterocephalus]</a>         | 36.3 | 36.3 | 86% | 0.32 | 85%  | <a href="#">gil512828899 XP_004881532.1</a> |
| <a href="#">Galectin-3-binding protein [Heterocephalus glaber]</a>                        | 36.3 | 67.9 | 86% | 0.32 | 85%  | <a href="#">gil351698098 EHB01017.1</a>     |
| <a href="#">PREDICTED: galectin-3-binding protein [Myotis davidii]</a>                    | 35.4 | 35.4 | 86% | 0.60 | 85%  | <a href="#">gil584038281 XP_006753504.1</a> |
| <a href="#">hypothetical protein PANDA_006893 [Ailuropoda melanoleuca]</a>                | 35.0 | 35.0 | 86% | 0.82 | 85%  | <a href="#">gil281342805 EFB18389.1</a>     |
| <a href="#">PREDICTED: galectin-3-binding protein [Odobenus rosmarus divergens]</a>       | 35.0 | 35.0 | 86% | 0.82 | 85%  | <a href="#">gil472394090 XP_004416304.1</a> |
| <a href="#">PREDICTED: galectin-3-binding protein isoform X3 [Ursus maritimus]</a>        | 35.0 | 35.0 | 86% | 0.82 | 85%  | <a href="#">gil671002383 XP_008692049.1</a> |
| <a href="#">PREDICTED: galectin-3-binding protein-like [Ailuropoda melanoleuca]</a>       | 35.0 | 35.0 | 86% | 0.82 | 85%  | <a href="#">gil301766034 XP_002918426.1</a> |
| <a href="#">PREDICTED: galectin-3-binding protein isoform X2 [Ursus maritimus]</a>        | 35.0 | 35.0 | 86% | 0.84 | 85%  | <a href="#">gil671002381 XP_008692048.1</a> |
| <a href="#">PREDICTED: galectin-3-binding protein isoform X1 [Ursus maritimus]</a>        | 35.0 | 35.0 | 86% | 0.84 | 85%  | <a href="#">gil671002379 XP_008692047.1</a> |
| <a href="#">PREDICTED: galectin-3-binding protein isoform X3 [Galeopterus variegatus]</a> | 33.7 | 33.7 | 86% | 2.1  | 85%  | <a href="#">gil667281302 XP_008574380.1</a> |
| <a href="#">PREDICTED: galectin-3-binding protein isoform X2 [Galeopterus variegatus]</a> | 33.7 | 33.7 | 86% | 2.1  | 85%  | <a href="#">gil667281299 XP_008574379.1</a> |
| <a href="#">PREDICTED: galectin-3-binding protein isoform X1 [Galeopterus variegatus]</a> | 33.7 | 33.7 | 86% | 2.1  | 85%  | <a href="#">gil667281296 XP_008574378.1</a> |
| <a href="#">PREDICTED: galectin-3-binding protein [Leptonychotes weddellii]</a>           | 33.3 | 33.3 | 86% | 2.9  | 85%  | <a href="#">gil585188403 XP_006745574.1</a> |
| <a href="#">PREDICTED: soluble calcium-activated nucleotidase 1-like isoform</a>          | 33.3 | 33.3 | 86% | 2.9  | 85%  | <a href="#">gil511848965 XP_004748843.1</a> |
| <a href="#">PREDICTED: soluble calcium-activated nucleotidase 1-like isoform</a>          | 33.3 | 33.3 | 86% | 2.9  | 85%  | <a href="#">gil511848961 XP_004748841.1</a> |
| <a href="#">PREDICTED: soluble calcium-activated nucleotidase 1-like isoform</a>          | 33.3 | 33.3 | 86% | 2.9  | 85%  | <a href="#">gil511848959 XP_004748840.1</a> |
| <a href="#">PREDICTED: soluble calcium-activated nucleotidase 1-like isoform</a>          | 33.3 | 33.3 | 86% | 2.9  | 85%  | <a href="#">gil511848957 XP_004748839.1</a> |
| <a href="#">PREDICTED: soluble calcium-activated nucleotidase 1-like isoform</a>          | 33.3 | 33.3 | 86% | 2.9  | 85%  | <a href="#">gil511848955 XP_004748838.1</a> |
| <a href="#">Dtr system oriT relaxase [Ensifer adhaerens]</a>                              | 32.9 | 32.9 | 66% | 4.0  | 100% | <a href="#">gil645057598 WP_025428878.1</a> |

## Alignments

Download GenPept Graphics

Next Previous Descriptions

### Chain A, Structure Of M2bp Scavenger Receptor Cysteine-rich Domain

Sequence ID: [gil157830494|pdb|1BY2|A](#) Length: 119 Number of Matches: 1

Range 1: 49 to 63 GenPept Graphics

Next Match Previous Match

| Score          | Expect | Identities  | Positives   | Gaps     |
|----------------|--------|-------------|-------------|----------|
| 48.1 bits(106) | 3e-05  | 15/15(100%) | 15/15(100%) | 0/15(0%) |

Query 1 RALGFENATQALGRA 15  
 RALGFENATQALGRA  
 Sbjct 49 RALGFENATQALGRA 63

#### Related Information

[Structure](#) - 3D structure displays

Download GenPept Graphics

Next Previous Descriptions

### lectin, galactoside-binding, soluble, 3 binding protein, isoform CRA\_c, partial [Homo sapiens]

Sequence ID: [gil119609951|gb|EAW89545.1](#) Length: 165 Number of Matches: 1

Range 1: 63 to 77 GenPept Graphics

Next Match Previous Match

| Score          | Expect | Identities  | Positives   | Gaps     |
|----------------|--------|-------------|-------------|----------|
| 48.1 bits(106) | 3e-05  | 15/15(100%) | 15/15(100%) | 0/15(0%) |

Query 1 RALGFENATQALGRA 15

#### Related Information

[Gene](#) - associated gene details

Sbjct 63 RALGFENATQALGRA 77

[Download](#) [GenPept](#) [Graphics](#)

[Next](#) [Previous](#) [Descriptions](#)

unnamed protein product [Homo sapiens]

Sequence ID: [gi|194380458|dbj|BAG58382.1|](#) Length: 413 Number of Matches: 1

Range 1: 63 to 77 [GenPept](#) [Graphics](#)

[Next Match](#) [Previous Match](#)

| Score          | Expect | Identities  | Positives   | Gaps     |
|----------------|--------|-------------|-------------|----------|
| 48.1 bits(106) | 4e-05  | 15/15(100%) | 15/15(100%) | 0/15(0%) |

Query 1 RALGFENATQALGRA 15  
 RALGFENATQALGRA  
 Sbjct 63 RALGFENATQALGRA 77

**Related Information**

[Gene](#) - associated gene details

[Download](#) [GenPept](#) [Graphics](#)

[Next](#) [Previous](#) [Descriptions](#)

PREDICTED: LOW QUALITY PROTEIN: galectin-3-binding protein [Rhinopithecus roxellana]

Sequence ID: [gi|724915028|ref|XP\\_010380238.1|](#) Length: 567 Number of Matches: 1

Range 1: 45 to 59 [GenPept](#) [Graphics](#)

[Next Match](#) [Previous Match](#)

| Score          | Expect | Identities  | Positives   | Gaps     |
|----------------|--------|-------------|-------------|----------|
| 48.1 bits(106) | 4e-05  | 15/15(100%) | 15/15(100%) | 0/15(0%) |

Query 1 RALGFENATQALGRA 15  
 RALGFENATQALGRA  
 Sbjct 45 RALGFENATQALGRA 59

**Related Information**

[Gene](#) - associated gene details

[Map Viewer](#) - aligned genomic context

[Download](#) [GenPept](#) [Graphics](#)

[Next](#) [Previous](#) [Descriptions](#)

unnamed protein product [Homo sapiens]

Sequence ID: [gi|194375081|dbj|BAG62653.1|](#) Length: 573 Number of Matches: 1

Range 1: 63 to 77 [GenPept](#) [Graphics](#)

[Next Match](#) [Previous Match](#)

| Score          | Expect | Identities  | Positives   | Gaps     |
|----------------|--------|-------------|-------------|----------|
| 48.1 bits(106) | 4e-05  | 15/15(100%) | 15/15(100%) | 0/15(0%) |

Query 1 RALGFENATQALGRA 15  
 RALGFENATQALGRA  
 Sbjct 63 RALGFENATQALGRA 77

**Related Information**

[Gene](#) - associated gene details

BLAST is a registered trademark of the National Library of Medicine.

NCBI/ BLAST/ blastp suite/ Formatting Results - BVH5FPKY01R

Your search parameters were adjusted to search for a short input sequence.

[Edit and Resubmit](#) [Save Search Strategies](#) [Formatting options](#) [Download](#) [YouTube](#) [How to read this page](#) [Blast report description](#)

LGALS3BP\_RT VIRPFYLT DSSGVD\_Mod

RID [BVH5FPKY01R](#) (Expires on 01-21 09:59 am)

Query ID |cl|8051  
 Description None  
 Molecule type amino acid  
 Query Length 16

Database Name nr  
 Description All non-redundant GenBank CDS translations+PDB+SwissProt+PIR+PRF excluding environmental samples from WGS projects  
 Program BLASTP 2.2.30+ [Citation](#)

Other reports: [Search Summary](#) [Taxonomy reports](#) [Distance tree of results](#) [Multiple alignment](#)

Graphic Summary

Show Conserved Domains

No putative conserved domains have been detected

Distribution of 100 Blast Hits on the Query Sequence

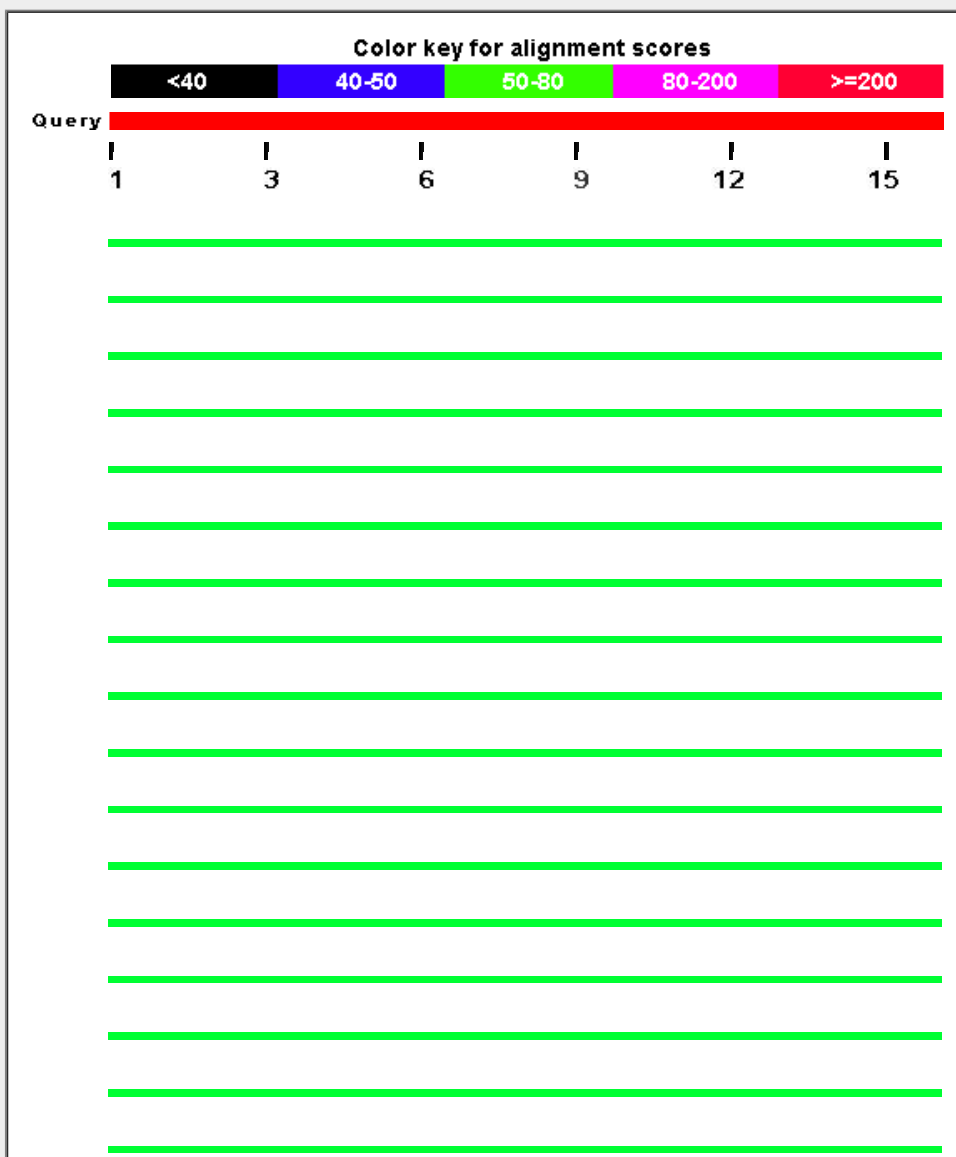

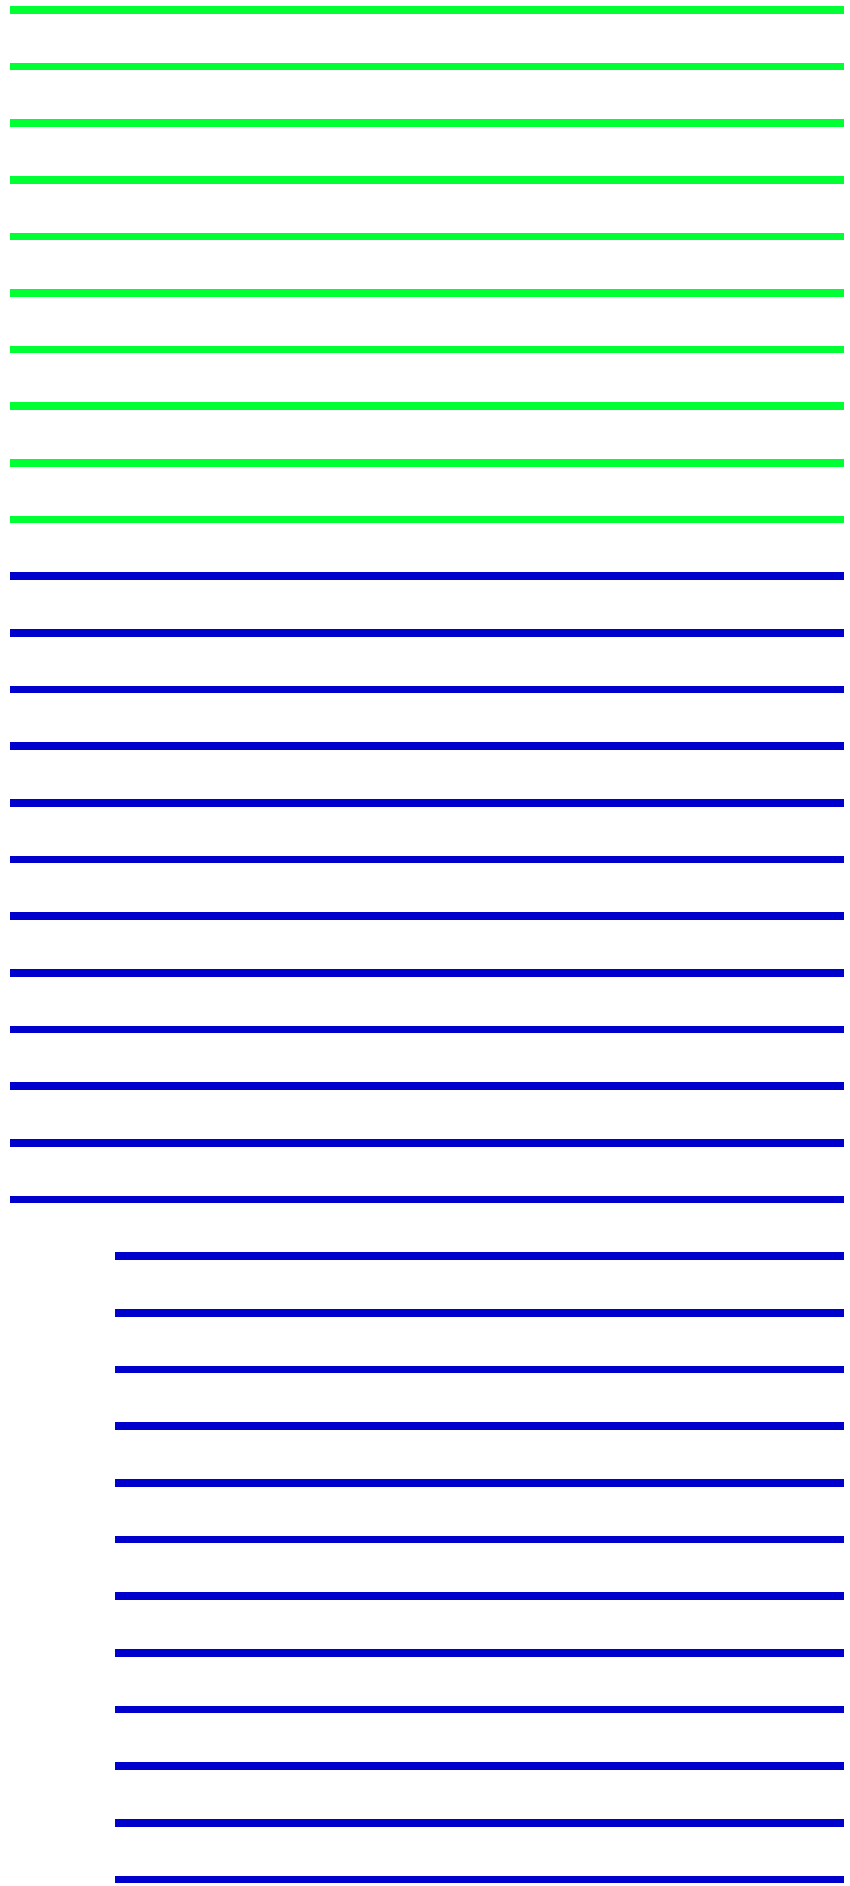

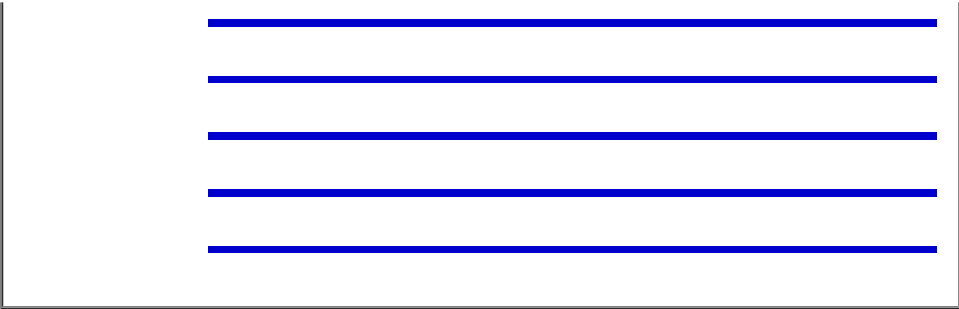

**Descriptions**

**Sequences producing significant alignments:**

Select: [All](#) [None](#) Selected:0

[Alignments](#)
[Download](#)
[GenPept](#)
[Graphics](#)
[Distance tree of results](#)
[Multiple alignment](#)


| Description                                                                                    | Max score | Total score | Query cover | E value | Ident | Accession                      |
|------------------------------------------------------------------------------------------------|-----------|-------------|-------------|---------|-------|--------------------------------|
| <a href="#">galectin-3-binding precursor-like protein [Callithrix jacchus]</a>                 | 51.5      | 51.5        | 100%        | 2e-06   | 94%   | <a href="#">ABQ22691.1</a>     |
| <a href="#">galectin-3-binding precursor-like protein [Callithrix jacchus]</a>                 | 51.5      | 51.5        | 100%        | 2e-06   | 94%   | <a href="#">ABQ22355.1</a>     |
| <a href="#">lectin, galactoside-binding, soluble, 3 binding protein, isoform CRA_b [Homo s</a> | 51.5      | 51.5        | 100%        | 3e-06   | 94%   | <a href="#">EAW89544.1</a>     |
| <a href="#">unnamed protein product [Homo sapiens]</a>                                         | 51.5      | 51.5        | 100%        | 3e-06   | 94%   | <a href="#">BAG58382.1</a>     |
| <a href="#">unnamed protein product [Homo sapiens]</a>                                         | 51.5      | 51.5        | 100%        | 3e-06   | 94%   | <a href="#">BAG62970.1</a>     |
| <a href="#">PREDICTED: galectin-3-binding protein isoform 3 [Macaca mulatta]</a>               | 51.5      | 51.5        | 100%        | 3e-06   | 94%   | <a href="#">XP_002800676.1</a> |
| <a href="#">unnamed protein product [Homo sapiens]</a>                                         | 51.5      | 51.5        | 100%        | 3e-06   | 94%   | <a href="#">BAG51600.1</a>     |
| <a href="#">unnamed protein product [Homo sapiens]</a>                                         | 51.5      | 51.5        | 100%        | 3e-06   | 94%   | <a href="#">BAG56725.1</a>     |
| <a href="#">PREDICTED: galectin-3-binding protein isoform 2 [Macaca mulatta]</a>               | 51.5      | 51.5        | 100%        | 3e-06   | 94%   | <a href="#">XP_002800675.1</a> |
| <a href="#">unnamed protein product [Homo sapiens]</a>                                         | 51.5      | 51.5        | 100%        | 3e-06   | 94%   | <a href="#">BAG62653.1</a>     |
| <a href="#">lectin, galactoside-binding, soluble, 3 binding protein, isoform CRA_a [Homo s</a> | 51.5      | 51.5        | 100%        | 3e-06   | 94%   | <a href="#">EAW89543.1</a>     |
| <a href="#">PREDICTED: galectin-3-binding protein [Chlorocebus sabaeus]</a>                    | 51.5      | 51.5        | 100%        | 3e-06   | 94%   | <a href="#">XP_008011313.1</a> |
| <a href="#">PREDICTED: galectin-3-binding protein isoform X2 [Macaca fascicularis]</a>         | 51.5      | 51.5        | 100%        | 3e-06   | 94%   | <a href="#">XP_005585203.1</a> |
| <a href="#">RecName: Full=Galectin-3-binding protein; AltName: Full=Lectin galactoside-t</a>   | 51.5      | 51.5        | 100%        | 3e-06   | 94%   | <a href="#">Q5RDA4.1</a>       |
| <a href="#">PREDICTED: galectin-3-binding protein [Papio anubis]</a>                           | 51.5      | 51.5        | 100%        | 3e-06   | 94%   | <a href="#">XP_003913572.1</a> |
| <a href="#">PREDICTED: galectin-3-binding protein [Pan troglodytes]</a>                        | 51.5      | 51.5        | 100%        | 3e-06   | 94%   | <a href="#">XP_511716.1</a>    |
| <a href="#">galectin-3-binding protein precursor [Homo sapiens]</a>                            | 51.5      | 51.5        | 100%        | 3e-06   | 94%   | <a href="#">NP_005558.1</a>    |
| <a href="#">PREDICTED: galectin-3-binding protein isoform 1 [Gorilla gorilla gorilla]</a>      | 51.5      | 51.5        | 100%        | 3e-06   | 94%   | <a href="#">XP_004040917.1</a> |
| <a href="#">PREDICTED: galectin-3-binding protein [Pan paniscus]</a>                           | 51.5      | 51.5        | 100%        | 3e-06   | 94%   | <a href="#">XP_003818311.1</a> |
| <a href="#">PREDICTED: galectin-3-binding protein isoform 2 [Nomascus leucogenys]</a>          | 51.5      | 51.5        | 100%        | 3e-06   | 94%   | <a href="#">XP_003278481.1</a> |
| <a href="#">PREDICTED: galectin-3-binding protein [Saimiri boliviensis boliviensis]</a>        | 51.5      | 51.5        | 100%        | 3e-06   | 94%   | <a href="#">XP_010340649.1</a> |
| <a href="#">hypothetical protein EGK_09048 [Macaca mulatta]</a>                                | 51.5      | 51.5        | 100%        | 3e-06   | 94%   | <a href="#">EHH25259.1</a>     |
| <a href="#">PREDICTED: galectin-3-binding protein isoform 1 [Macaca mulatta]</a>               | 51.5      | 51.5        | 100%        | 3e-06   | 94%   | <a href="#">XP_001109047.1</a> |
| <a href="#">PREDICTED: galectin-3-binding protein [Callithrix jacchus]</a>                     | 51.5      | 51.5        | 100%        | 3e-06   | 94%   | <a href="#">XP_002748850.2</a> |
| <a href="#">hypothetical protein EGM_08232 [Macaca fascicularis]</a>                           | 51.5      | 51.5        | 100%        | 3e-06   | 94%   | <a href="#">EHH58393.1</a>     |
| <a href="#">PREDICTED: galectin-3-binding protein isoform X1 [Macaca fascicularis]</a>         | 51.5      | 51.5        | 100%        | 3e-06   | 94%   | <a href="#">XP_005585202.1</a> |
| <a href="#">PREDICTED: galectin-3-binding protein isoform 1 [Nomascus leucogenys]</a>          | 51.5      | 51.5        | 100%        | 3e-06   | 94%   | <a href="#">XP_003278480.2</a> |
| <a href="#">PREDICTED: LOW QUALITY PROTEIN: galectin-3-binding protein-like [Pong</a>          | 49.0      | 49.0        | 100%        | 2e-05   | 88%   | <a href="#">XP_009234739.1</a> |
| <a href="#">PREDICTED: LOW QUALITY PROTEIN: galectin-3-binding protein [Pongo ab</a>           | 49.0      | 49.0        | 100%        | 2e-05   | 88%   | <a href="#">XP_003778963.1</a> |



|                                                                                               |      |      |      |       |     |                                |
|-----------------------------------------------------------------------------------------------|------|------|------|-------|-----|--------------------------------|
| <a href="#">Galectin-3-binding protein [Pteropus alecto]</a>                                  | 48.1 | 48.1 | 100% | 4e-05 | 88% | <a href="#">ELK12298.1</a>     |
| <a href="#">PREDICTED: galectin-3-binding protein [Pteropus alecto]</a>                       | 48.1 | 48.1 | 100% | 5e-05 | 88% | <a href="#">XP_006912443.1</a> |
| <a href="#">lectin, galactoside-binding, soluble, 3 binding protein [synthetic construct]</a> | 48.1 | 48.1 | 100% | 5e-05 | 88% | <a href="#">ABM86350.1</a>     |
| <a href="#">Galectin-3-binding protein [Myotis brandtii]</a>                                  | 46.0 | 46.0 | 100% | 2e-04 | 88% | <a href="#">EPQ18923.1</a>     |
| <a href="#">PREDICTED: galectin-3-binding protein [Myotis brandtii]</a>                       | 46.0 | 46.0 | 100% | 2e-04 | 88% | <a href="#">XP_005884378.1</a> |
| <a href="#">PREDICTED: LOW QUALITY PROTEIN: galectin-3-binding protein [Myotis lur]</a>       | 46.0 | 46.0 | 100% | 2e-04 | 88% | <a href="#">XP_006108225.1</a> |
| <a href="#">PREDICTED: galectin-3-binding protein [Eptesicus fuscus]</a>                      | 46.0 | 46.0 | 100% | 2e-04 | 88% | <a href="#">XP_008153225.1</a> |
| <a href="#">PREDICTED: galectin-3-binding protein isoform X3 [Galeopterus variegatus]</a>     | 45.6 | 45.6 | 100% | 3e-04 | 81% | <a href="#">XP_008574380.1</a> |
| <a href="#">PREDICTED: galectin-3-binding protein isoform X2 [Galeopterus variegatus]</a>     | 45.6 | 45.6 | 100% | 3e-04 | 81% | <a href="#">XP_008574379.1</a> |
| <a href="#">PREDICTED: galectin-3-binding protein isoform X1 [Galeopterus variegatus]</a>     | 45.6 | 45.6 | 100% | 3e-04 | 81% | <a href="#">XP_008574378.1</a> |
| <a href="#">hypothetical protein PANDA_006893 [Ailuropoda melanoleuca]</a>                    | 45.2 | 45.2 | 87%  | 4e-04 | 93% | <a href="#">EFB18389.1</a>     |
| <a href="#">PREDICTED: galectin-3-binding protein [Camelus dromedarius]</a>                   | 45.2 | 45.2 | 87%  | 4e-04 | 93% | <a href="#">XP_010997923.1</a> |
| <a href="#">PREDICTED: galectin-3-binding protein [Vicugna pacos]</a>                         | 45.2 | 45.2 | 87%  | 4e-04 | 93% | <a href="#">XP_006199496.1</a> |
| <a href="#">PREDICTED: galectin-3-binding protein-like [Camelus ferus]</a>                    | 45.2 | 45.2 | 87%  | 4e-04 | 93% | <a href="#">XP_006182736.1</a> |
| <a href="#">galectin-3-binding protein precursor [Camelus ferus]</a>                          | 45.2 | 45.2 | 87%  | 4e-04 | 93% | <a href="#">EPY80953.1</a>     |
| <a href="#">PREDICTED: galectin-3-binding protein [Odobenus rosmarus divergens]</a>           | 45.2 | 45.2 | 87%  | 4e-04 | 93% | <a href="#">XP_004416304.1</a> |
| <a href="#">PREDICTED: galectin-3-binding protein [Camelus bactrianus]</a>                    | 45.2 | 45.2 | 87%  | 4e-04 | 93% | <a href="#">XP_010948995.1</a> |
| <a href="#">PREDICTED: galectin-3-binding protein isoform X3 [Ursus maritimus]</a>            | 45.2 | 45.2 | 87%  | 4e-04 | 93% | <a href="#">XP_008692049.1</a> |
| <a href="#">PREDICTED: galectin-3-binding protein [Leptonychotes weddellii]</a>               | 45.2 | 45.2 | 87%  | 4e-04 | 93% | <a href="#">XP_006745574.1</a> |
| <a href="#">PREDICTED: soluble calcium-activated nucleotidase 1-like isoform X6 [Muste</a>    | 45.2 | 45.2 | 87%  | 4e-04 | 93% | <a href="#">XP_004748843.1</a> |
| <a href="#">PREDICTED: galectin-3-binding protein-like [Ailuropoda melanoleuca]</a>           | 45.2 | 45.2 | 87%  | 4e-04 | 93% | <a href="#">XP_002918426.1</a> |
| <a href="#">galectin-3-binding protein precursor [Camelus ferus]</a>                          | 45.2 | 45.2 | 87%  | 4e-04 | 93% | <a href="#">EPY82790.1</a>     |
| <a href="#">PREDICTED: soluble calcium-activated nucleotidase 1-like isoform X4 [Muste</a>    | 45.2 | 45.2 | 87%  | 4e-04 | 93% | <a href="#">XP_004748841.1</a> |
| <a href="#">PREDICTED: soluble calcium-activated nucleotidase 1-like isoform X3 [Muste</a>    | 45.2 | 45.2 | 87%  | 5e-04 | 93% | <a href="#">XP_004748840.1</a> |
| <a href="#">PREDICTED: galectin-3-binding protein isoform X2 [Ursus maritimus]</a>            | 45.2 | 45.2 | 87%  | 5e-04 | 93% | <a href="#">XP_008692048.1</a> |
| <a href="#">PREDICTED: soluble calcium-activated nucleotidase 1-like isoform X2 [Muste</a>    | 45.2 | 45.2 | 87%  | 5e-04 | 93% | <a href="#">XP_004748839.1</a> |
| <a href="#">PREDICTED: galectin-3-binding protein isoform X1 [Ursus maritimus]</a>            | 45.2 | 45.2 | 87%  | 5e-04 | 93% | <a href="#">XP_008692047.1</a> |
| <a href="#">PREDICTED: soluble calcium-activated nucleotidase 1-like isoform X1 [Muste</a>    | 45.2 | 45.2 | 87%  | 5e-04 | 93% | <a href="#">XP_004748838.1</a> |
| <a href="#">Galectin-3-binding protein [Myotis davidii]</a>                                   | 43.5 | 43.5 | 100% | 0.002 | 81% | <a href="#">ELK38015.1</a>     |
| <a href="#">PREDICTED: galectin-3-binding protein [Myotis davidii]</a>                        | 43.5 | 43.5 | 100% | 0.002 | 81% | <a href="#">XP_006753504.1</a> |
| <a href="#">PREDICTED: galectin-3-binding protein [Tursiops truncatus]</a>                    | 42.6 | 42.6 | 87%  | 0.003 | 86% | <a href="#">XP_004323016.1</a> |
| <a href="#">PREDICTED: galectin-3-binding protein [Orcinus orca]</a>                          | 42.6 | 42.6 | 87%  | 0.003 | 86% | <a href="#">XP_004275584.1</a> |
| <a href="#">PREDICTED: galectin-3-binding protein [Lipotes vexillifer]</a>                    | 42.6 | 42.6 | 87%  | 0.003 | 86% | <a href="#">XP_007462419.1</a> |
| <a href="#">PREDICTED: galectin-3-binding protein [Trichechus manatus latirostris]</a>        | 41.8 | 41.8 | 81%  | 0.006 | 92% | <a href="#">XP_004374429.1</a> |
| <a href="#">PREDICTED: galectin-3-binding protein [Ceratotherium simum simum]</a>             | 41.8 | 41.8 | 87%  | 0.006 | 86% | <a href="#">XP_004432888.1</a> |
| <a href="#">PREDICTED: galectin-3-binding protein [Orycteropus afer afer]</a>                 | 41.8 | 41.8 | 81%  | 0.006 | 92% | <a href="#">XP_007958025.1</a> |
| <a href="#">PREDICTED: soluble calcium-activated nucleotidase 1 isoform X5 [Canis lupu</a>    | 41.4 | 41.4 | 87%  | 0.008 | 86% | <a href="#">XP_540464.2</a>    |
| <a href="#">PREDICTED: soluble calcium-activated nucleotidase 1 isoform X1 [Canis lupu</a>    | 41.4 | 41.4 | 87%  | 0.008 | 86% | <a href="#">XP_005624092.1</a> |
| <a href="#">PREDICTED: LOW QUALITY PROTEIN: galectin-3-binding protein [Rhinopith</a>         | 40.1 | 40.1 | 100% | 0.021 | 81% | <a href="#">XP_010380238.1</a> |
| <a href="#">PREDICTED: galectin-3-binding protein isoform X2 [Physeter catodon]</a>           | 39.7 | 39.7 | 81%  | 0.029 | 85% | <a href="#">XP_007106758.1</a> |
| <a href="#">PREDICTED: galectin-3-binding protein [Balaenoptera acutorostrata scammo</a>      | 39.7 | 39.7 | 81%  | 0.029 | 85% | <a href="#">XP_007185856.1</a> |
| <a href="#">PREDICTED: galectin-3-binding protein isoform X1 [Physeter catodon]</a>           | 39.7 | 39.7 | 81%  | 0.030 | 85% | <a href="#">XP_007106757.1</a> |
| <a href="#">PREDICTED: galectin-3-binding protein [Ovis aries]</a>                            | 39.2 | 39.2 | 87%  | 0.040 | 79% | <a href="#">XP_004013518.1</a> |
| <a href="#">PREDICTED: LOW QUALITY PROTEIN: galectin-3-binding protein [Pantholo</a>          | 39.2 | 39.2 | 87%  | 0.040 | 79% | <a href="#">XP_005958671.1</a> |
| <a href="#">PREDICTED: galectin-3-binding protein isoform X2 [Capra hircus]</a>               | 39.2 | 39.2 | 87%  | 0.040 | 79% | <a href="#">XP_005694143.1</a> |

|                                                                                                  |      |      |      |       |     |                                |
|--------------------------------------------------------------------------------------------------|------|------|------|-------|-----|--------------------------------|
| <a href="#">PREDICTED: galectin-3-binding protein isoform X1 [Bubalus bubalis]</a>               | 39.2 | 39.2 | 87%  | 0.040 | 79% | <a href="#">XP_006064180.1</a> |
| <a href="#">PREDICTED: galectin-3-binding protein isoform X1 [Capra hircus]</a>                  | 39.2 | 39.2 | 87%  | 0.040 | 79% | <a href="#">XP_005694142.1</a> |
| <a href="#">PREDICTED: galectin-3-binding protein [Tarsius syrichta]</a>                         | 39.2 | 39.2 | 87%  | 0.041 | 79% | <a href="#">XP_008046502.1</a> |
| <a href="#">PREDICTED: galectin-3-binding protein isoform X1 [Felis catus]</a>                   | 38.8 | 38.8 | 87%  | 0.056 | 79% | <a href="#">XP_003997300.1</a> |
| <a href="#">PREDICTED: galectin-3-binding protein isoform X2 [Felis catus]</a>                   | 38.8 | 38.8 | 87%  | 0.056 | 79% | <a href="#">XP_006940706.1</a> |
| <a href="#">galectin-3-binding protein [Cricetulus griseus]</a>                                  | 37.1 | 37.1 | 100% | 0.20  | 69% | <a href="#">ERE69017.1</a>     |
| <a href="#">PREDICTED: galectin-3-binding protein [Cricetulus griseus]</a>                       | 37.1 | 37.1 | 100% | 0.20  | 69% | <a href="#">XP_007620278.1</a> |
| <a href="#">PREDICTED: galectin-3-binding protein [Cricetulus griseus]</a>                       | 37.1 | 37.1 | 100% | 0.20  | 69% | <a href="#">XP_003498865.1</a> |
| <a href="#">galectin-3-binding protein precursor [Mesocricetus auratus]</a>                      | 37.1 | 37.1 | 100% | 0.20  | 69% | <a href="#">NP_001268610.1</a> |
| <a href="#">PREDICTED: galectin-3-binding protein [Panthera tigris altaica]</a>                  | 36.3 | 36.3 | 68%  | 0.37  | 91% | <a href="#">XP_007091540.1</a> |
| <a href="#">PREDICTED: galectin-3-binding protein [Echinops telfairii]</a>                       | 36.3 | 36.3 | 68%  | 0.37  | 91% | <a href="#">XP_004709313.1</a> |
| <a href="#">RecName: Full=Galectin-3-binding protein; AltName: Full=Cyp-C-associated p</a>       | 35.8 | 35.8 | 75%  | 0.51  | 83% | <a href="#">O70513.2</a>       |
| <a href="#">90K protein precursor [Rattus norvegicus]</a>                                        | 35.8 | 35.8 | 75%  | 0.51  | 83% | <a href="#">AAS58489.1</a>     |
| <a href="#">unnamed protein product [Mus musculus]</a>                                           | 35.8 | 35.8 | 75%  | 0.51  | 83% | <a href="#">BAE31013.1</a>     |
| <a href="#">unnamed protein product [Mus musculus]</a>                                           | 35.8 | 35.8 | 75%  | 0.51  | 83% | <a href="#">BAE29246.1</a>     |
| <a href="#">unnamed protein product [Mus musculus]</a>                                           | 35.8 | 35.8 | 75%  | 0.51  | 83% | <a href="#">BAE31894.1</a>     |
| <a href="#">galectin-3-binding protein precursor [Mus musculus]</a>                              | 35.8 | 35.8 | 75%  | 0.51  | 83% | <a href="#">NP_035280.1</a>    |
| <a href="#">PREDICTED: galectin-3-binding protein [Otolemur garnettii]</a>                       | 35.8 | 35.8 | 87%  | 0.51  | 71% | <a href="#">XP_003786610.1</a> |
| <a href="#">lectin, galactoside-binding, soluble, 3 binding protein, isoform CRA_a [Rattus ]</a> | 35.8 | 35.8 | 75%  | 0.51  | 83% | <a href="#">EDM06755.1</a>     |
| <a href="#">PREDICTED: galectin-3-binding protein isoform X2 [Bison bison bison]</a>             | 35.4 | 35.4 | 87%  | 0.69  | 71% | <a href="#">XP_010854576.1</a> |
| <a href="#">PREDICTED: galectin-3-binding protein isoform X1 [Bos taurus]</a>                    | 35.4 | 35.4 | 87%  | 0.69  | 71% | <a href="#">XP_005221293.1</a> |
| <a href="#">galectin-3-binding protein precursor [Bos taurus]</a>                                | 35.4 | 35.4 | 87%  | 0.69  | 71% | <a href="#">NP_001039781.1</a> |
| <a href="#">PREDICTED: galectin-3-binding protein [Bos mutus]</a>                                | 35.4 | 35.4 | 87%  | 0.69  | 71% | <a href="#">XP_005910379.1</a> |
| <a href="#">PREDICTED: galectin-3-binding protein isoform X1 [Bison bison bison]</a>             | 35.4 | 35.4 | 87%  | 0.69  | 71% | <a href="#">XP_010854575.1</a> |
| <a href="#">PREDICTED: galectin-3-binding protein isoform X2 [Bos taurus]</a>                    | 35.4 | 35.4 | 87%  | 0.69  | 71% | <a href="#">XP_005221292.1</a> |
| <a href="#">PREDICTED: galectin-3-binding protein [Chrysochloris asiatica]</a>                   | 35.4 | 35.4 | 81%  | 0.69  | 77% | <a href="#">XP_006869713.1</a> |

## Alignments

Download GenPept Graphics

Next Previous Descriptions

galectin-3-binding precursor-like protein [Callithrix jacchus]

Sequence ID: [gb|ABQ22691.1|](#) Length: 125 Number of Matches: 1

Range 1: 110 to 125 GenPept Graphics

Next Match Previous Match

| Score          | Expect | Identities | Positives   | Gaps     |
|----------------|--------|------------|-------------|----------|
| 51.5 bits(114) | 2e-06  | 15/16(94%) | 16/16(100%) | 0/16(0%) |

Query 1 RTVIRPFYLTDSGGVD 16  
 RTVIRPFYLT+SSGVD  
 Sbjct 110 RTVIRPFYLTNSGGVD 125

### Related Information

[Gene](#) - associated gene details

Download GenPept Graphics

Next Previous Descriptions

galectin-3-binding precursor-like protein [Callithrix jacchus]

Sequence ID: [gb|ABQ22355.1|](#) Length: 125 Number of Matches: 1

Range 1: 110 to 125 GenPept Graphics

Next Match Previous Match

| Score          | Expect | Identities | Positives   | Gaps     |
|----------------|--------|------------|-------------|----------|
| 51.5 bits(114) | 2e-06  | 15/16(94%) | 16/16(100%) | 0/16(0%) |

### Related Information

[Gene](#) - associated gene details

Query 1 RTVIRPFYLT DSSGVD 16  
 RTVIRPFYLT+SSGVD  
 Sbjct 110 RTVIRPFYLT NSSGVD 125

[Download](#) [GenPept](#) [Graphics](#)

[▼ Next](#) [▲ Previous](#) [▲ Descriptions](#)

lectin, galactoside-binding, soluble, 3 binding protein, isoform CRA\_b [Homo sapiens]

Sequence ID: [dbj|EAW89544.1|](#) Length: 391 Number of Matches: 1

Range 1: 376 to 391 [GenPept](#) [Graphics](#)

[▼ Next Match](#) [▲ Previous Match](#)

| Score          | Expect | Identities | Positives   | Gaps     |
|----------------|--------|------------|-------------|----------|
| 51.5 bits(114) | 3e-06  | 15/16(94%) | 16/16(100%) | 0/16(0%) |

Query 1 RTVIRPFYLT DSSGVD 16  
 RTVIRPFYLT+SSGVD  
 Sbjct 376 RTVIRPFYLT NSSGVD 391

**Related Information**

[Gene](#) - associated gene details

[Download](#) [GenPept](#) [Graphics](#)

[▼ Next](#) [▲ Previous](#) [▲ Descriptions](#)

unnamed protein product [Homo sapiens]

Sequence ID: [dbj|BAG58382.1|](#) Length: 413 Number of Matches: 1

Range 1: 398 to 413 [GenPept](#) [Graphics](#)

[▼ Next Match](#) [▲ Previous Match](#)

| Score          | Expect | Identities | Positives   | Gaps     |
|----------------|--------|------------|-------------|----------|
| 51.5 bits(114) | 3e-06  | 15/16(94%) | 16/16(100%) | 0/16(0%) |

Query 1 RTVIRPFYLT DSSGVD 16  
 RTVIRPFYLT+SSGVD  
 Sbjct 398 RTVIRPFYLT NSSGVD 413

**Related Information**

[Gene](#) - associated gene details

[Download](#) [GenPept](#) [Graphics](#)

[▼ Next](#) [▲ Previous](#) [▲ Descriptions](#)

unnamed protein product [Homo sapiens]

Sequence ID: [dbj|BAG62970.1|](#) Length: 466 Number of Matches: 1

Range 1: 451 to 466 [GenPept](#) [Graphics](#)

[▼ Next Match](#) [▲ Previous Match](#)

| Score          | Expect | Identities | Positives   | Gaps     |
|----------------|--------|------------|-------------|----------|
| 51.5 bits(114) | 3e-06  | 15/16(94%) | 16/16(100%) | 0/16(0%) |

Query 1 RTVIRPFYLT DSSGVD 16  
 RTVIRPFYLT+SSGVD  
 Sbjct 451 RTVIRPFYLT NSSGVD 466

**Related Information**

[Gene](#) - associated gene details

BLAST is a registered trademark of the National Library of Medicine.

NCBI/ BLAST/ blastp suite/ Formatting Results - B9G1FU5S01R

Your search parameters were adjusted to search for a short input sequence.

[Edit and Resubmit](#) [Save Search Strategies](#) [Formatting options](#) [Download](#)

[YouTube](#) [How to read this page](#) [Blast report description](#)

LGALS3BP\_RT VIRPFYLTNSSGVD\_NonMod

RID [B9G1FU5S01R](#) (Expires on 01-14 13:50 pm)

Query ID |cl|378470  
 Description None  
 Molecule type amino acid  
 Query Length 16

Database Name nr  
 Description All non-redundant GenBank CDS translations+PDB+SwissProt+PIR excluding environmental samples from WGS projects  
 Program BLASTP 2.2.30+ [Citation](#)

Other reports: [Search Summary](#) [Taxonomy reports](#) [Distance tree of results](#) [Multiple alignment](#)

Graphic Summary

[Show Conserved Domains](#)

No putative conserved domains have been detected

Distribution of 100 Blast Hits on the Query Sequence



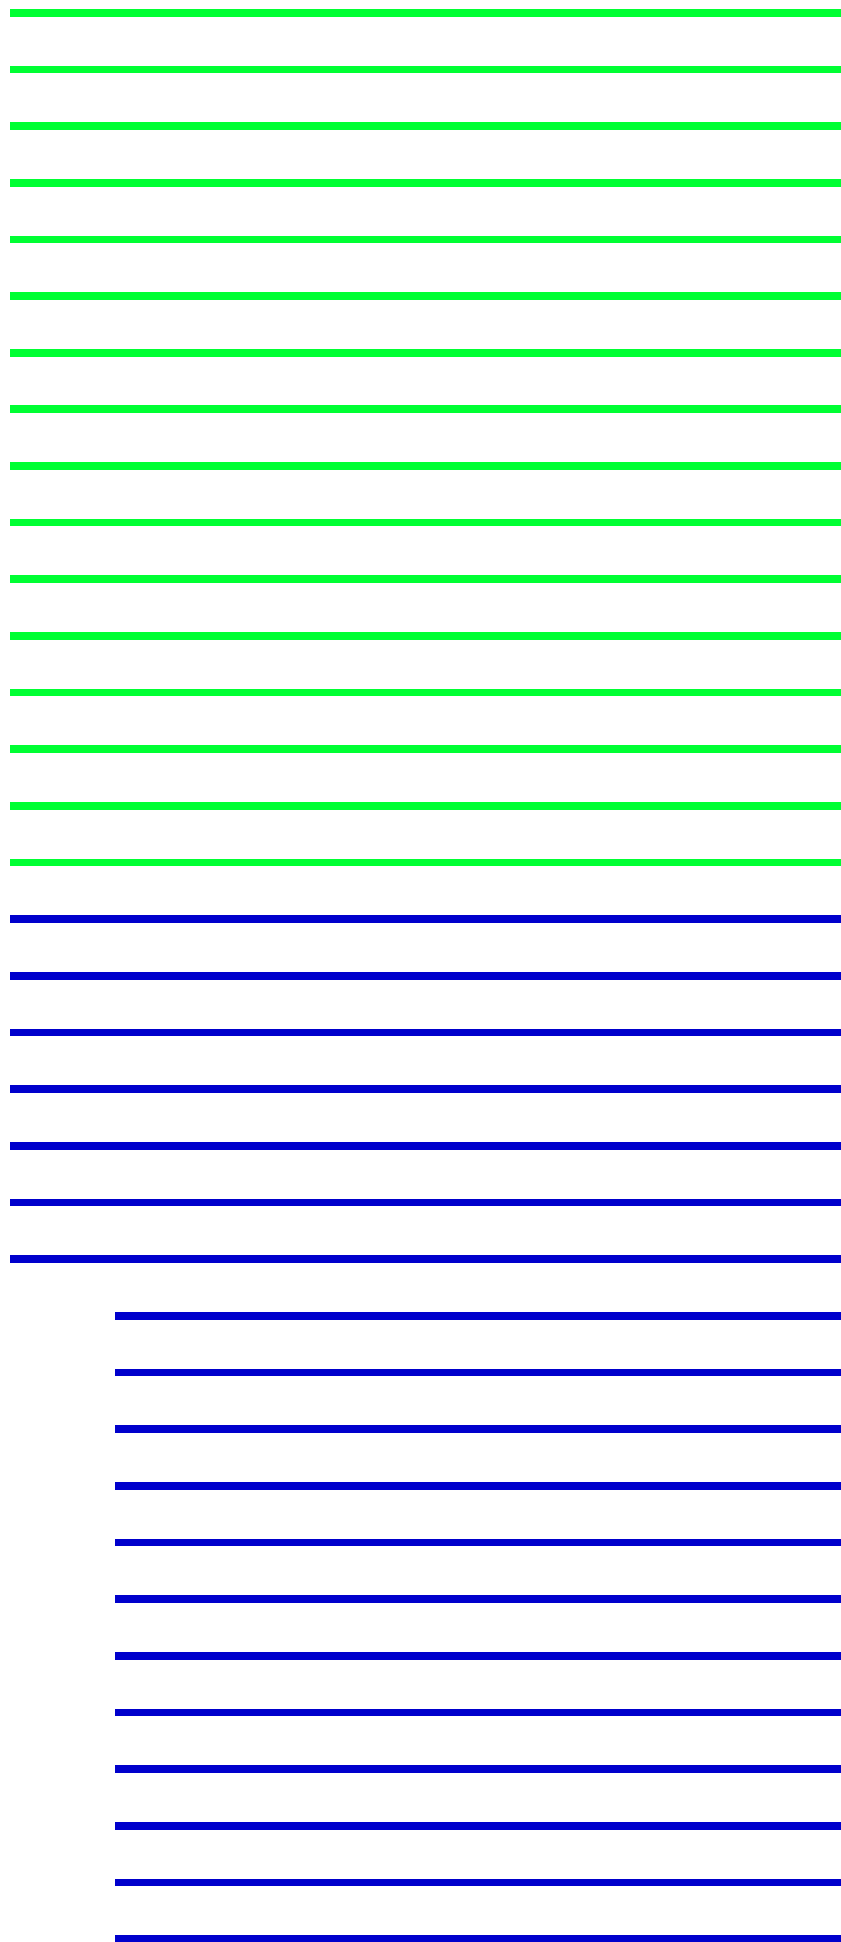

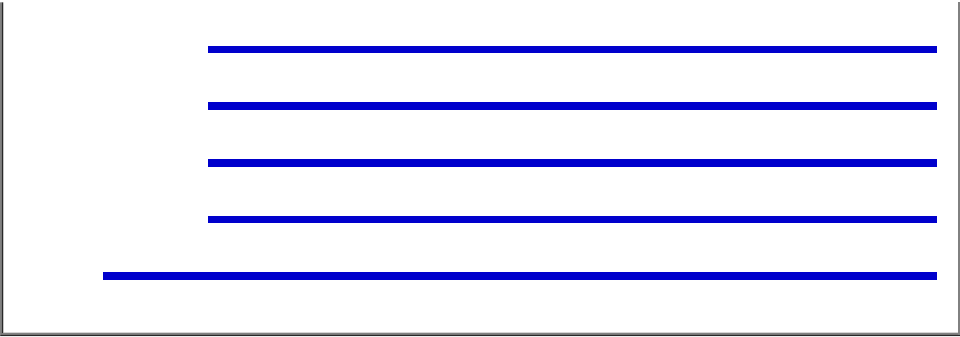

**Descriptions**

**Sequences producing significant alignments:**

Select: [All](#) [None](#) Selected:0

[Alignments](#)
[Download](#)
[GenPept](#)
[Graphics](#)
[Distance tree of results](#)
[Multiple alignment](#)


| Description                                                                          | Max score | Total score | Query cover | E value | Ident | Accession                                   |
|--------------------------------------------------------------------------------------|-----------|-------------|-------------|---------|-------|---------------------------------------------|
| <a href="#">galectin-3-binding precursor-like protein [Callithrix jacchus]</a>       | 54.1      | 54.1        | 100%        | 3e-07   | 100%  | <a href="#">gil146332371 ABQ22691.1</a>     |
| <a href="#">galectin-3-binding precursor-like protein [Callithrix jacchus]</a>       | 54.1      | 54.1        | 100%        | 3e-07   | 100%  | <a href="#">gil146331698 ABQ22355.1</a>     |
| <a href="#">lectin, galactoside-binding, soluble, 3 binding protein, isoform CRA</a> | 54.1      | 54.1        | 100%        | 4e-07   | 100%  | <a href="#">gil119609950 EAW89544.1</a>     |
| <a href="#">unnamed protein product [Homo sapiens]</a>                               | 54.1      | 54.1        | 100%        | 4e-07   | 100%  | <a href="#">gil194380458 BAG58382.1</a>     |
| <a href="#">unnamed protein product [Homo sapiens]</a>                               | 54.1      | 54.1        | 100%        | 4e-07   | 100%  | <a href="#">gil194376422 BAG62970.1</a>     |
| <a href="#">PREDICTED: galectin-3-binding protein isoform 3 [Macaca mulatta]</a>     | 54.1      | 54.1        | 100%        | 4e-07   | 100%  | <a href="#">gil297273768 XP_002800676.1</a> |
| <a href="#">unnamed protein product [Homo sapiens]</a>                               | 54.1      | 54.1        | 100%        | 4e-07   | 100%  | <a href="#">gil193786317 BAG51600.1</a>     |
| <a href="#">unnamed protein product [Homo sapiens]</a>                               | 54.1      | 54.1        | 100%        | 4e-07   | 100%  | <a href="#">gil194375560 BAG56725.1</a>     |
| <a href="#">PREDICTED: galectin-3-binding protein isoform 2 [Macaca mulatta]</a>     | 54.1      | 54.1        | 100%        | 4e-07   | 100%  | <a href="#">gil297273766 XP_002800675.1</a> |
| <a href="#">unnamed protein product [Homo sapiens]</a>                               | 54.1      | 54.1        | 100%        | 4e-07   | 100%  | <a href="#">gil194375081 BAG62653.1</a>     |
| <a href="#">lectin, galactoside-binding, soluble, 3 binding protein, isoform CRA</a> | 54.1      | 54.1        | 100%        | 4e-07   | 100%  | <a href="#">gil119609949 EAW89543.1</a>     |
| <a href="#">PREDICTED: galectin-3-binding protein [Chlorocebus sabaeus]</a>          | 54.1      | 54.1        | 100%        | 4e-07   | 100%  | <a href="#">gil635093239 XP_008011313.1</a> |
| <a href="#">PREDICTED: galectin-3-binding protein isoform X2 [Macaca fascicu</a>     | 54.1      | 54.1        | 100%        | 4e-07   | 100%  | <a href="#">gil544502104 XP_005585203.1</a> |
| <a href="#">RecName: Full=Galectin-3-binding protein; AltName: Full=Lectin ga</a>    | 54.1      | 54.1        | 100%        | 4e-07   | 100%  | <a href="#">gil75042301 Q5RDA4.1</a>        |
| <a href="#">PREDICTED: galectin-3-binding protein [Papio anubis]</a>                 | 54.1      | 54.1        | 100%        | 4e-07   | 100%  | <a href="#">gil402901262 XP_003913572.1</a> |
| <a href="#">PREDICTED: galectin-3-binding protein [Pan troglodytes]</a>              | 54.1      | 54.1        | 100%        | 4e-07   | 100%  | <a href="#">gil55646067 XP_511716.1</a>     |
| <a href="#">galectin-3-binding protein precursor [Homo sapiens]</a>                  | 54.1      | 54.1        | 100%        | 4e-07   | 100%  | <a href="#">gil5031863 NP_005558.1</a>      |
| <a href="#">PREDICTED: galectin-3-binding protein isoform 1 [Gorilla gorilla go</a>  | 54.1      | 54.1        | 100%        | 4e-07   | 100%  | <a href="#">gil426346505 XP_004040917.1</a> |
| <a href="#">PREDICTED: galectin-3-binding protein [Pan paniscus]</a>                 | 54.1      | 54.1        | 100%        | 4e-07   | 100%  | <a href="#">gil397494909 XP_003818311.1</a> |
| <a href="#">PREDICTED: galectin-3-binding protein isoform 2 [Nomascus leuco</a>      | 54.1      | 54.1        | 100%        | 4e-07   | 100%  | <a href="#">gil332258797 XP_003278481.1</a> |
| <a href="#">PREDICTED: galectin-3-binding protein [Saimiri boliviensis bolivien</a>  | 54.1      | 54.1        | 100%        | 4e-07   | 100%  | <a href="#">gil725577242 XP_010340649.1</a> |
| <a href="#">hypothetical protein EGK_09048 [Macaca mulatta]</a>                      | 54.1      | 54.1        | 100%        | 4e-07   | 100%  | <a href="#">gil355568978 EHH25259.1</a>     |
| <a href="#">PREDICTED: galectin-3-binding protein isoform 1 [Macaca mulatta]</a>     | 54.1      | 54.1        | 100%        | 4e-07   | 100%  | <a href="#">gil109118737 XP_001109047.1</a> |
| <a href="#">PREDICTED: galectin-3-binding protein [Callithrix jacchus]</a>           | 54.1      | 54.1        | 100%        | 4e-07   | 100%  | <a href="#">gil675661532 XP_002748850.2</a> |
| <a href="#">hypothetical protein EGM_08232 [Macaca fascicularis]</a>                 | 54.1      | 54.1        | 100%        | 4e-07   | 100%  | <a href="#">gil355754428 EHH58393.1</a>     |
| <a href="#">PREDICTED: galectin-3-binding protein isoform X1 [Macaca fascicu</a>     | 54.1      | 54.1        | 100%        | 4e-07   | 100%  | <a href="#">gil544502102 XP_005585202.1</a> |
| <a href="#">PREDICTED: galectin-3-binding protein isoform 1 [Nomascus leuco</a>      | 54.1      | 54.1        | 100%        | 4e-07   | 100%  | <a href="#">gil441643566 XP_003278480.2</a> |
| <a href="#">PREDICTED: LOW QUALITY PROTEIN: galectin-3-binding protein:</a>          | 51.5      | 51.5        | 100%        | 3e-06   | 94%   | <a href="#">gil686772908 XP_009234739.1</a> |

|                                                                                         |      |      |      |       |      |                                             |
|-----------------------------------------------------------------------------------------|------|------|------|-------|------|---------------------------------------------|
| PREDICTED: LOW QUALITY PROTEIN: galectin-3-binding protein                              | 51.5 | 51.5 | 100% | 3e-06 | 94%  | <a href="#">gij395749542 XP_003778963.1</a> |
| <a href="#">Galectin-3-binding protein [Pteropus alecto]</a>                            | 50.7 | 50.7 | 100% | 6e-06 | 94%  | <a href="#">gij431908706 ELK12298.1</a>     |
| PREDICTED: galectin-3-binding protein [Pteropus alecto]                                 | 50.7 | 50.7 | 100% | 6e-06 | 94%  | <a href="#">gij586558304 XP_006912443.1</a> |
| <a href="#">lectin, galactoside-binding, soluble, 3 binding protein [synthetic cons</a> | 50.7 | 50.7 | 100% | 6e-06 | 94%  | <a href="#">gij123997497 ABM86350.1</a>     |
| <a href="#">Galectin-3-binding protein [Myotis brandtii]</a>                            | 48.6 | 48.6 | 100% | 3e-05 | 94%  | <a href="#">gij521037145 EPQ18923.1</a>     |
| PREDICTED: galectin-3-binding protein [Myotis brandtii]                                 | 48.6 | 48.6 | 100% | 3e-05 | 94%  | <a href="#">gij554585904 XP_005884378.1</a> |
| PREDICTED: LOW QUALITY PROTEIN: galectin-3-binding protein                              | 48.6 | 48.6 | 100% | 3e-05 | 94%  | <a href="#">gij558213798 XP_006108225.1</a> |
| PREDICTED: galectin-3-binding protein [Eptesicus fuscus]                                | 48.6 | 48.6 | 100% | 3e-05 | 94%  | <a href="#">gij641726407 XP_008153225.1</a> |
| PREDICTED: galectin-3-binding protein isoform X3 [Galeopterus va                        | 48.1 | 48.1 | 100% | 4e-05 | 88%  | <a href="#">gij667281302 XP_008574380.1</a> |
| PREDICTED: galectin-3-binding protein isoform X2 [Galeopterus va                        | 48.1 | 48.1 | 100% | 4e-05 | 88%  | <a href="#">gij667281299 XP_008574379.1</a> |
| PREDICTED: galectin-3-binding protein isoform X1 [Galeopterus va                        | 48.1 | 48.1 | 100% | 4e-05 | 88%  | <a href="#">gij667281296 XP_008574378.1</a> |
| <a href="#">hypothetical protein PANDA_006893 [Ailuropoda melanoleuca]</a>              | 47.7 | 47.7 | 87%  | 6e-05 | 100% | <a href="#">gij281342805 EFB18389.1</a>     |
| PREDICTED: galectin-3-binding protein [Vicugna pacos]                                   | 47.7 | 47.7 | 87%  | 6e-05 | 100% | <a href="#">gij560953982 XP_006199496.1</a> |
| PREDICTED: galectin-3-binding protein-like [Camelus ferus]                              | 47.7 | 47.7 | 87%  | 6e-05 | 100% | <a href="#">gij560912913 XP_006182736.1</a> |
| <a href="#">galectin-3-binding protein precursor [Camelus ferus]</a>                    | 47.7 | 47.7 | 87%  | 6e-05 | 100% | <a href="#">gij528761294 EPY80953.1</a>     |
| PREDICTED: galectin-3-binding protein [Odobenus rosmarus diver                          | 47.7 | 47.7 | 87%  | 6e-05 | 100% | <a href="#">gij472394090 XP_004416304.1</a> |
| PREDICTED: galectin-3-binding protein isoform X3 [Ursus maritimu                        | 47.7 | 47.7 | 87%  | 6e-05 | 100% | <a href="#">gij671002383 XP_008692049.1</a> |
| PREDICTED: galectin-3-binding protein [Leptonychotes weddellii]                         | 47.7 | 47.7 | 87%  | 6e-05 | 100% | <a href="#">gij585188403 XP_006745574.1</a> |
| PREDICTED: soluble calcium-activated nucleotidase 1-like isoform                        | 47.7 | 47.7 | 87%  | 6e-05 | 100% | <a href="#">gij511848965 XP_004748843.1</a> |
| PREDICTED: galectin-3-binding protein-like [Ailuropoda melanoleu                        | 47.7 | 47.7 | 87%  | 6e-05 | 100% | <a href="#">gij301766034 XP_002918426.1</a> |
| <a href="#">galectin-3-binding protein precursor [Camelus ferus]</a>                    | 47.7 | 47.7 | 87%  | 6e-05 | 100% | <a href="#">gij528763131 EPY82790.1</a>     |
| PREDICTED: soluble calcium-activated nucleotidase 1-like isoform                        | 47.7 | 47.7 | 87%  | 6e-05 | 100% | <a href="#">gij511848961 XP_004748841.1</a> |
| PREDICTED: soluble calcium-activated nucleotidase 1-like isoform                        | 47.7 | 47.7 | 87%  | 6e-05 | 100% | <a href="#">gij511848959 XP_004748840.1</a> |
| PREDICTED: galectin-3-binding protein isoform X2 [Ursus maritimu                        | 47.7 | 47.7 | 87%  | 6e-05 | 100% | <a href="#">gij671002381 XP_008692048.1</a> |
| PREDICTED: soluble calcium-activated nucleotidase 1-like isoform                        | 47.7 | 47.7 | 87%  | 6e-05 | 100% | <a href="#">gij511848957 XP_004748839.1</a> |
| PREDICTED: galectin-3-binding protein isoform X1 [Ursus maritimu                        | 47.7 | 47.7 | 87%  | 6e-05 | 100% | <a href="#">gij671002379 XP_008692047.1</a> |
| PREDICTED: soluble calcium-activated nucleotidase 1-like isoform                        | 47.7 | 47.7 | 87%  | 6e-05 | 100% | <a href="#">gij511848955 XP_004748838.1</a> |
| <a href="#">Galectin-3-binding protein [Myotis davidii]</a>                             | 46.0 | 46.0 | 100% | 2e-04 | 88%  | <a href="#">gij432118125 ELK38015.1</a>     |
| PREDICTED: galectin-3-binding protein [Myotis davidii]                                  | 46.0 | 46.0 | 100% | 2e-04 | 88%  | <a href="#">gij584038281 XP_006753504.1</a> |
| PREDICTED: galectin-3-binding protein [Tursiops truncatus]                              | 45.2 | 45.2 | 87%  | 4e-04 | 93%  | <a href="#">gij470634961 XP_004323016.1</a> |
| PREDICTED: galectin-3-binding protein [Orcinus orca]                                    | 45.2 | 45.2 | 87%  | 4e-04 | 93%  | <a href="#">gij466037200 XP_004275584.1</a> |
| PREDICTED: galectin-3-binding protein [Lipotes vexillifer]                              | 45.2 | 45.2 | 87%  | 4e-04 | 93%  | <a href="#">gij602701011 XP_007462419.1</a> |
| PREDICTED: galectin-3-binding protein [Trichechus manatus latiro                        | 44.3 | 44.3 | 81%  | 8e-04 | 100% | <a href="#">gij471367801 XP_004374429.1</a> |
| PREDICTED: galectin-3-binding protein [Ceratotherium simum simu                         | 44.3 | 44.3 | 87%  | 8e-04 | 93%  | <a href="#">gij478517307 XP_004432888.1</a> |
| PREDICTED: galectin-3-binding protein [Orycteropus afer afer]                           | 44.3 | 44.3 | 81%  | 8e-04 | 100% | <a href="#">gij634830004 XP_007958025.1</a> |
| PREDICTED: soluble calcium-activated nucleotidase 1 isoform X5 [                        | 43.9 | 43.9 | 87%  | 0.001 | 93%  | <a href="#">gij73964953 XP_540464.2</a>     |
| PREDICTED: soluble calcium-activated nucleotidase 1 isoform X1 [                        | 43.9 | 43.9 | 87%  | 0.001 | 93%  | <a href="#">gij545509197 XP_005624092.1</a> |
| PREDICTED: LOW QUALITY PROTEIN: galectin-3-binding protein                              | 42.6 | 42.6 | 100% | 0.003 | 88%  | <a href="#">gij724915028 XP_010380238.1</a> |
| PREDICTED: galectin-3-binding protein isoform X2 [Physeter catod                        | 42.2 | 42.2 | 81%  | 0.004 | 92%  | <a href="#">gij593720930 XP_007106758.1</a> |
| PREDICTED: galectin-3-binding protein [Balaenoptera acutorostrat                        | 42.2 | 42.2 | 81%  | 0.004 | 92%  | <a href="#">gij594676074 XP_007185856.1</a> |
| PREDICTED: galectin-3-binding protein isoform X1 [Physeter catod                        | 42.2 | 42.2 | 81%  | 0.004 | 92%  | <a href="#">gij593720928 XP_007106757.1</a> |
| PREDICTED: galectin-3-binding protein [Ovis aries]                                      | 41.8 | 41.8 | 87%  | 0.006 | 86%  | <a href="#">gij426239209 XP_004013518.1</a> |
| PREDICTED: LOW QUALITY PROTEIN: galectin-3-binding protein                              | 41.8 | 41.8 | 87%  | 0.006 | 86%  | <a href="#">gij556725783 XP_005958671.1</a> |
| PREDICTED: galectin-3-binding protein isoform X2 [Capra hircus]                         | 41.8 | 41.8 | 87%  | 0.006 | 86%  | <a href="#">gij548509918 XP_005694143.1</a> |
| PREDICTED: galectin-3-binding protein isoform X1 [Bubalus bubali                        | 41.8 | 41.8 | 87%  | 0.006 | 86%  | <a href="#">gij594081110 XP_006064180.1</a> |

|                                                                                      |      |      |      |       |      |                                              |
|--------------------------------------------------------------------------------------|------|------|------|-------|------|----------------------------------------------|
| <a href="#">PREDICTED: galectin-3-binding protein isoform X1 [Capra hircus]</a>      | 41.8 | 41.8 | 87%  | 0.006 | 86%  | <a href="#">gil548509916 XP_005694142.1</a>  |
| <a href="#">PREDICTED: galectin-3-binding protein [Tarsius syrichta]</a>             | 41.8 | 41.8 | 87%  | 0.006 | 86%  | <a href="#">gil640781767 XP_008046502.1</a>  |
| <a href="#">PREDICTED: galectin-3-binding protein isoform X1 [Felis catus]</a>       | 41.4 | 41.4 | 87%  | 0.008 | 86%  | <a href="#">gil410981896 XP_003997300.1</a>  |
| <a href="#">PREDICTED: galectin-3-binding protein isoform X2 [Felis catus]</a>       | 41.4 | 41.4 | 87%  | 0.008 | 86%  | <a href="#">gil587012494 XP_006940706.1</a>  |
| <a href="#">galectin-3-binding protein [Cricetulus griseus]</a>                      | 39.7 | 39.7 | 100% | 0.028 | 75%  | <a href="#">gil537143564 ERE69017.1</a>      |
| <a href="#">PREDICTED: galectin-3-binding protein [Cricetulus griseus]</a>           | 39.7 | 39.7 | 100% | 0.028 | 75%  | <a href="#">gil625257783 XP_007620278.1</a>  |
| <a href="#">PREDICTED: galectin-3-binding protein [Cricetulus griseus]</a>           | 39.7 | 39.7 | 100% | 0.028 | 75%  | <a href="#">gil354473282 XP_003498865.1</a>  |
| <a href="#">galectin-3-binding protein precursor [Mesocricetus auratus]</a>          | 39.7 | 39.7 | 100% | 0.028 | 75%  | <a href="#">gil528078247 INP_001268610.1</a> |
| <a href="#">PREDICTED: galectin-3-binding protein [Panthera tigris altaica]</a>      | 38.8 | 38.8 | 68%  | 0.052 | 100% | <a href="#">gil591331484 XP_007091540.1</a>  |
| <a href="#">PREDICTED: galectin-3-binding protein [Echinops telfairii]</a>           | 38.8 | 38.8 | 68%  | 0.053 | 100% | <a href="#">gil507673535 XP_004709313.1</a>  |
| <a href="#">RecName: Full=Galectin-3-binding protein; AltName: Full=Cyp-C-as</a>     | 38.4 | 38.4 | 75%  | 0.072 | 92%  | <a href="#">gil218526547 O70513.2</a>        |
| <a href="#">90K protein precursor [Rattus norvegicus]</a>                            | 38.4 | 38.4 | 75%  | 0.072 | 92%  | <a href="#">gil45357062 AAS58489.1</a>       |
| <a href="#">unnamed protein product [Mus musculus]</a>                               | 38.4 | 38.4 | 75%  | 0.072 | 92%  | <a href="#">gil74212546 BAE31013.1</a>       |
| <a href="#">unnamed protein product [Mus musculus]</a>                               | 38.4 | 38.4 | 75%  | 0.072 | 92%  | <a href="#">gil74211789 BAE29246.1</a>       |
| <a href="#">unnamed protein product [Mus musculus]</a>                               | 38.4 | 38.4 | 75%  | 0.072 | 92%  | <a href="#">gil74142260 BAE31894.1</a>       |
| <a href="#">galectin-3-binding protein precursor [Mus musculus]</a>                  | 38.4 | 38.4 | 75%  | 0.072 | 92%  | <a href="#">gil6755144 INP_035280.1</a>      |
| <a href="#">PREDICTED: galectin-3-binding protein [Otolemur garnettii]</a>           | 38.4 | 38.4 | 87%  | 0.072 | 79%  | <a href="#">gil395826815 XP_003786610.1</a>  |
| <a href="#">lectin, galactoside-binding, soluble, 3 binding protein, isoform CRA</a> | 38.4 | 38.4 | 75%  | 0.072 | 92%  | <a href="#">gil149054938 EDM06755.1</a>      |
| <a href="#">PREDICTED: galectin-3-binding protein isoform X2 [Bos taurus]</a>        | 38.0 | 38.0 | 87%  | 0.099 | 79%  | <a href="#">gil528997315 XP_005221293.1</a>  |
| <a href="#">galectin-3-binding protein precursor [Bos taurus]</a>                    | 38.0 | 38.0 | 87%  | 0.099 | 79%  | <a href="#">gil114052595 INP_001039781.1</a> |
| <a href="#">PREDICTED: galectin-3-binding protein [Bos mutus]</a>                    | 38.0 | 38.0 | 87%  | 0.099 | 79%  | <a href="#">gil555997305 XP_005910379.1</a>  |
| <a href="#">PREDICTED: galectin-3-binding protein isoform X1 [Bos taurus]</a>        | 38.0 | 38.0 | 87%  | 0.099 | 79%  | <a href="#">gil528997313 XP_005221292.1</a>  |
| <a href="#">PREDICTED: galectin-3-binding protein [Chrysochloris asiatica]</a>       | 38.0 | 38.0 | 81%  | 0.099 | 85%  | <a href="#">gil586478358 XP_006869713.1</a>  |
| <a href="#">PREDICTED: galectin-3-binding protein [Erinaceus europaeus]</a>          | 38.0 | 38.0 | 75%  | 0.099 | 92%  | <a href="#">gil617646710 XP_007533029.1</a>  |
| <a href="#">PREDICTED: galectin-3-binding protein [Nannospalax galili]</a>           | 37.5 | 37.5 | 100% | 0.14  | 69%  | <a href="#">gil674080617 XP_008847879.1</a>  |
| <a href="#">galectin-3-binding protein precursor [Rattus norvegicus]</a>             | 37.1 | 37.1 | 75%  | 0.19  | 92%  | <a href="#">gil20806135 INP_620796.1</a>     |
| <a href="#">PREDICTED: galectin-3-binding protein [Jaculus jaculus]</a>              | 37.1 | 37.1 | 87%  | 0.19  | 79%  | <a href="#">gil507543547 XP_004655763.1</a>  |

## Alignments

Download [GenPept](#) [Graphics](#)

[Next](#) [Previous](#) [Descriptions](#)

galectin-3-binding precursor-like protein [Callithrix jacchus]

Sequence ID: [gil146332371|gb|ABQ22691.1](#) Length: 125 Number of Matches: 1

Range 1: 110 to 125 [GenPept](#) [Graphics](#)

[Next Match](#) [Previous Match](#)

| Score          | Expect | Identities  | Positives   | Gaps     |
|----------------|--------|-------------|-------------|----------|
| 54.1 bits(120) | 3e-07  | 16/16(100%) | 16/16(100%) | 0/16(0%) |

Query 1 RTVIRPFYLTNSSGVD 16  
 RTVIRPFYLTNSSGVD  
 Sbjct 110 RTVIRPFYLTNSSGVD 125

### Related Information

[Gene](#) - associated gene details

Download [GenPept](#) [Graphics](#)

[Next](#) [Previous](#) [Descriptions](#)

galectin-3-binding precursor-like protein [Callithrix jacchus]

Sequence ID: [gil146331698|gb|ABQ22355.1](#) Length: 125 Number of Matches: 1

Range 1: 110 to 125 [GenPept](#) [Graphics](#)

[Next Match](#) [Previous Match](#)

| Score          | Expect | Identities  | Positives   | Gaps     |
|----------------|--------|-------------|-------------|----------|
| 54.1 bits(120) | 3e-07  | 16/16(100%) | 16/16(100%) | 0/16(0%) |

Query 1 RTVIRPFYLTNSSGVD 16

### Related Information

[Gene](#) - associated gene details



Sbjct 110 RTVIRPFYLTNSSGVD  
 RTVIRPFYLTNSSGVD 125

[Download](#) [GenPept](#) [Graphics](#)

[Next](#) [Previous](#) [Descriptions](#)

lectin, galactoside-binding, soluble, 3 binding protein, isoform CRA\_b [Homo sapiens]

Sequence ID: [gi|119609950|gb|EAW89544.1](#) Length: 391 Number of Matches: 1

Range 1: 376 to 391 [GenPept](#) [Graphics](#)

[Next Match](#) [Previous Match](#)

| Score          | Expect | Identities  | Positives   | Gaps     |
|----------------|--------|-------------|-------------|----------|
| 54.1 bits(120) | 4e-07  | 16/16(100%) | 16/16(100%) | 0/16(0%) |

Query 1 RTVIRPFYLTNSSGVD 16  
 RTVIRPFYLTNSSGVD  
 Sbjct 376 RTVIRPFYLTNSSGVD 391

**Related Information**

[Gene](#) - associated gene details

[Download](#) [GenPept](#) [Graphics](#)

[Next](#) [Previous](#) [Descriptions](#)

unnamed protein product [Homo sapiens]

Sequence ID: [gi|194380458|dbj|BAG58382.1](#) Length: 413 Number of Matches: 1

Range 1: 398 to 413 [GenPept](#) [Graphics](#)

[Next Match](#) [Previous Match](#)

| Score          | Expect | Identities  | Positives   | Gaps     |
|----------------|--------|-------------|-------------|----------|
| 54.1 bits(120) | 4e-07  | 16/16(100%) | 16/16(100%) | 0/16(0%) |

Query 1 RTVIRPFYLTNSSGVD 16  
 RTVIRPFYLTNSSGVD  
 Sbjct 398 RTVIRPFYLTNSSGVD 413

**Related Information**

[Gene](#) - associated gene details

[Download](#) [GenPept](#) [Graphics](#)

[Next](#) [Previous](#) [Descriptions](#)

unnamed protein product [Homo sapiens]

Sequence ID: [gi|194376422|dbj|BAG62970.1](#) Length: 466 Number of Matches: 1

Range 1: 451 to 466 [GenPept](#) [Graphics](#)

[Next Match](#) [Previous Match](#)

| Score          | Expect | Identities  | Positives   | Gaps     |
|----------------|--------|-------------|-------------|----------|
| 54.1 bits(120) | 4e-07  | 16/16(100%) | 16/16(100%) | 0/16(0%) |

Query 1 RTVIRPFYLTNSSGVD 16  
 RTVIRPFYLTNSSGVD  
 Sbjct 451 RTVIRPFYLTNSSGVD 466

**Related Information**

[Gene](#) - associated gene details

BLAST is a registered trademark of the National Library of Medicine.



NCBI/ BLAST/ blastp suite/ Formatting Results - BVH6EW9B01R

Your search parameters were adjusted to search for a short input sequence.

Edit and Resubmit Save Search Strategies Formatting options Download

YouTube How to read this page Blast report description

LGALS3BP\_RYKGLDLTETYKPRI\_Mod

RID BVH6EW9B01R (Expires on 01-21 10:00 am)

Query ID lcl|26651
Description None
Molecule type amino acid
Query Length 16

Database Name nr
Description All non-redundant GenBank CDS translations+PDB+SwissProt+PIR+PRF excluding environmental samples from WGS projects
Program BLASTP 2.2.30+ Citation

Other reports: Search Summary Taxonomy reports Distance tree of results Multiple alignment

Graphic Summary

Show Conserved Domains

No putative conserved domains have been detected

Distribution of 100 Blast Hits on the Query Sequence

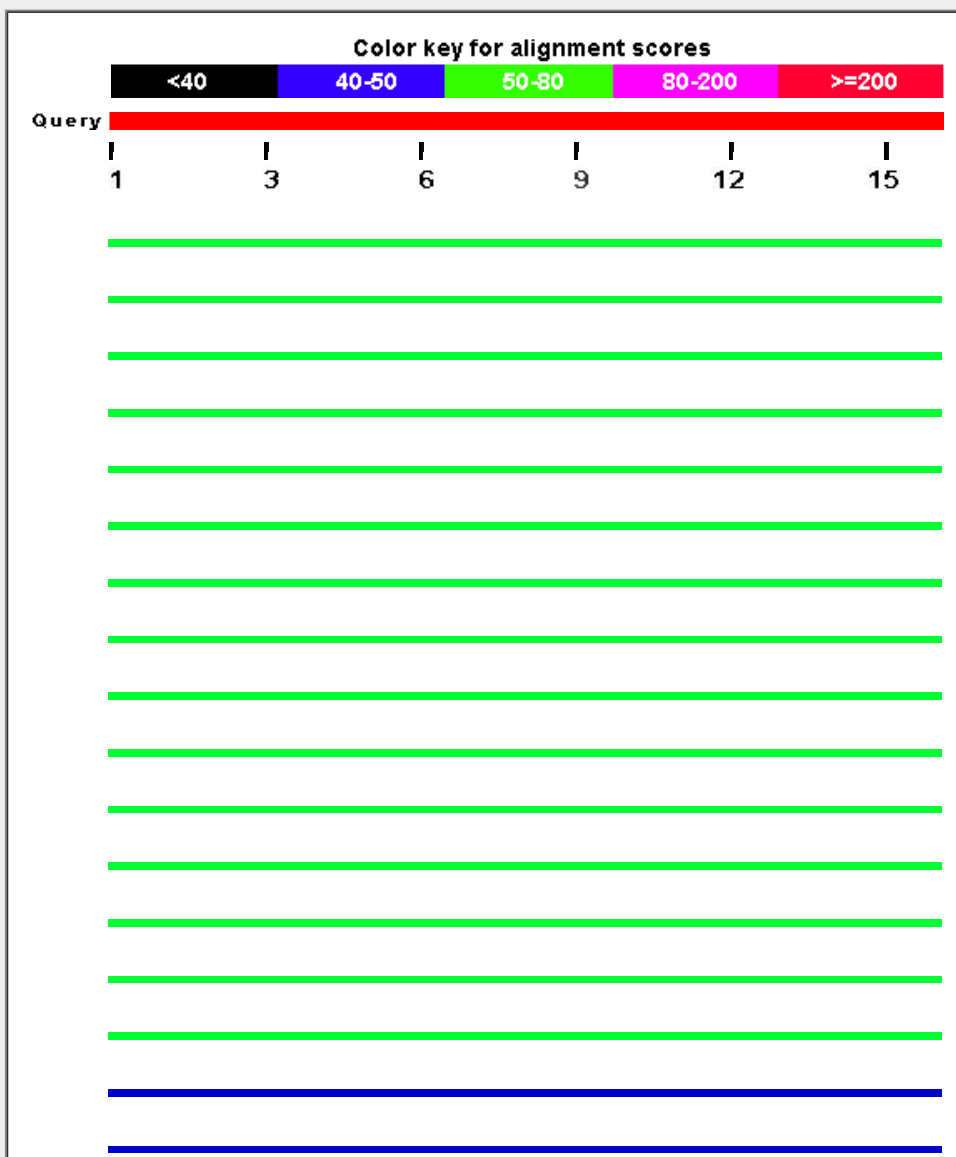

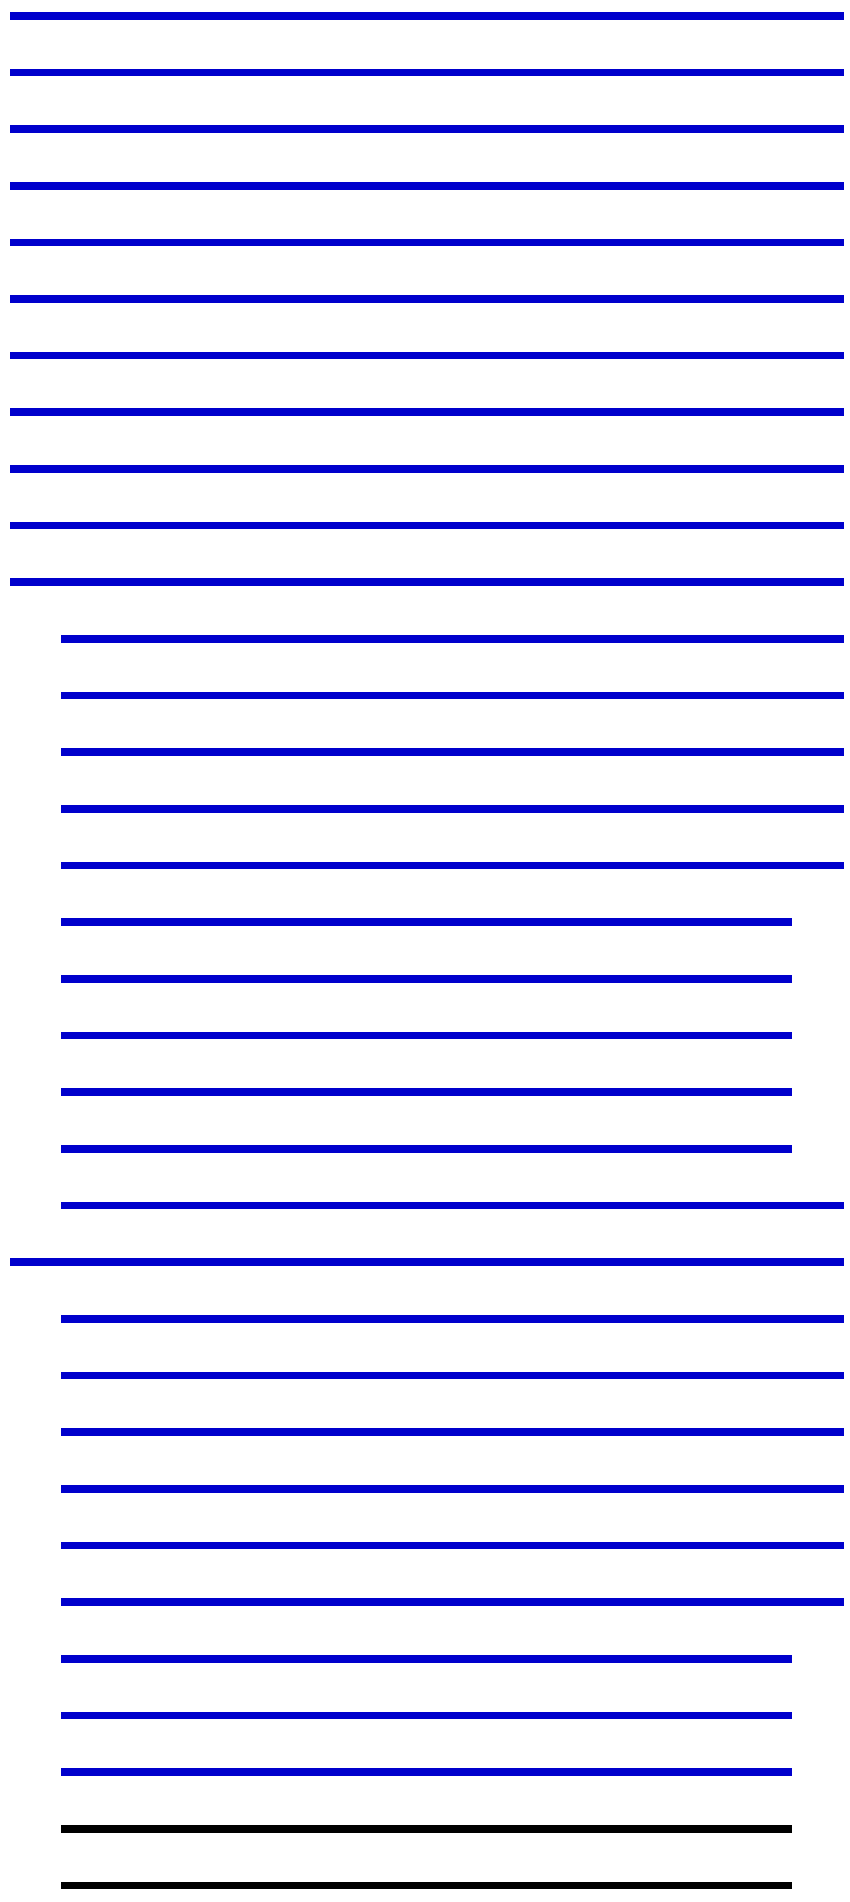

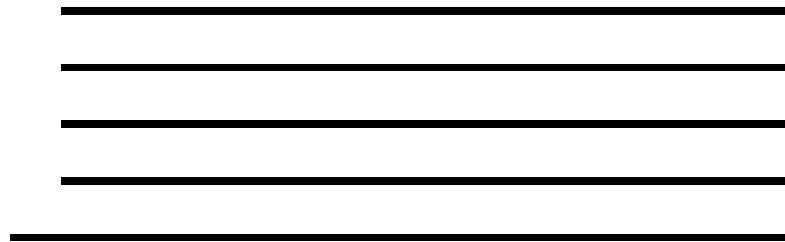

**Descriptions**

**Sequences producing significant alignments:**

Select: [All](#) [None](#) Selected:0

[Alignments](#)
[Download](#)
[GenPept](#)
[Graphics](#)
[Distance tree of results](#)
[Multiple alignment](#)


| Description                                                                                  | Max score | Total score | Query cover | E value | Ident | Accession                      |
|----------------------------------------------------------------------------------------------|-----------|-------------|-------------|---------|-------|--------------------------------|
| <a href="#">PREDICTED: LOW QUALITY PROTEIN: galectin-3-binding protein-like [Pong</a>        | 53.2      | 53.2        | 100%        | 8e-07   | 94%   | <a href="#">XP_009234739.1</a> |
| <a href="#">lectin_galactoside-binding_soluble_3_binding_protein_isoform_CRA_b[Homo s</a>    | 53.2      | 53.2        | 100%        | 8e-07   | 94%   | <a href="#">EAW89544.1</a>     |
| <a href="#">unnamed protein product [Homo sapiens]</a>                                       | 53.2      | 53.2        | 100%        | 8e-07   | 94%   | <a href="#">BAG58382.1</a>     |
| <a href="#">unnamed protein product [Homo sapiens]</a>                                       | 53.2      | 53.2        | 100%        | 9e-07   | 94%   | <a href="#">BAG62970.1</a>     |
| <a href="#">unnamed protein product [Homo sapiens]</a>                                       | 53.2      | 53.2        | 100%        | 9e-07   | 94%   | <a href="#">BAG51600.1</a>     |
| <a href="#">unnamed protein product [Homo sapiens]</a>                                       | 53.2      | 53.2        | 100%        | 9e-07   | 94%   | <a href="#">BAG56725.1</a>     |
| <a href="#">unnamed protein product [Homo sapiens]</a>                                       | 53.2      | 53.2        | 100%        | 9e-07   | 94%   | <a href="#">BAG62653.1</a>     |
| <a href="#">lectin_galactoside-binding_soluble_3_binding_protein_isoform_CRA_a[Homo s</a>    | 53.2      | 53.2        | 100%        | 9e-07   | 94%   | <a href="#">EAW89543.1</a>     |
| <a href="#">RecName: Full=Galectin-3-binding protein; AltName: Full=Lectin galactoside-f</a> | 53.2      | 53.2        | 100%        | 9e-07   | 94%   | <a href="#">Q5RDA4.1</a>       |
| <a href="#">PREDICTED: galectin-3-binding protein [Pan troglodytes]</a>                      | 53.2      | 53.2        | 100%        | 9e-07   | 94%   | <a href="#">XP_511716.1</a>    |
| <a href="#">galectin-3-binding protein precursor [Homo sapiens]</a>                          | 53.2      | 53.2        | 100%        | 9e-07   | 94%   | <a href="#">NP_005558.1</a>    |
| <a href="#">PREDICTED: galectin-3-binding protein isoform 1 [Gorilla gorilla gorilla]</a>    | 53.2      | 53.2        | 100%        | 9e-07   | 94%   | <a href="#">XP_004040917.1</a> |
| <a href="#">PREDICTED: galectin-3-binding protein [Pan paniscus]</a>                         | 53.2      | 53.2        | 100%        | 9e-07   | 94%   | <a href="#">XP_003818311.1</a> |
| <a href="#">lectin_galactoside-binding_soluble_3_binding_protein [synthetic construct]</a>   | 53.2      | 53.2        | 100%        | 9e-07   | 94%   | <a href="#">ABM86350.1</a>     |
| <a href="#">PREDICTED: LOW QUALITY PROTEIN: galectin-3-binding protein [Pongo ab</a>         | 53.2      | 53.2        | 100%        | 9e-07   | 94%   | <a href="#">XP_003778963.1</a> |
| <a href="#">PREDICTED: galectin-3-binding protein isoform 3 [Macaca mulatta]</a>             | 49.8      | 49.8        | 100%        | 1e-05   | 88%   | <a href="#">XP_002800676.1</a> |
| <a href="#">PREDICTED: galectin-3-binding protein isoform 2 [Macaca mulatta]</a>             | 49.8      | 49.8        | 100%        | 1e-05   | 88%   | <a href="#">XP_002800675.1</a> |
| <a href="#">PREDICTED: galectin-3-binding protein isoform X2 [Macaca fascicularis]</a>       | 49.8      | 49.8        | 100%        | 1e-05   | 88%   | <a href="#">XP_005585203.1</a> |
| <a href="#">PREDICTED: galectin-3-binding protein [Papio anubis]</a>                         | 49.8      | 49.8        | 100%        | 1e-05   | 88%   | <a href="#">XP_003913572.1</a> |
| <a href="#">PREDICTED: galectin-3-binding protein isoform 2 [Nomascus leucogenys]</a>        | 49.8      | 49.8        | 100%        | 1e-05   | 88%   | <a href="#">XP_003278481.1</a> |
| <a href="#">PREDICTED: galectin-3-binding protein [Saimiri boliviensis boliviensis]</a>      | 49.8      | 49.8        | 100%        | 1e-05   | 88%   | <a href="#">XP_010340649.1</a> |
| <a href="#">hypothetical protein EGK_09048 [Macaca mulatta]</a>                              | 49.8      | 49.8        | 100%        | 1e-05   | 88%   | <a href="#">EHH25259.1</a>     |
| <a href="#">PREDICTED: galectin-3-binding protein isoform 1 [Macaca mulatta]</a>             | 49.8      | 49.8        | 100%        | 1e-05   | 88%   | <a href="#">XP_001109047.1</a> |
| <a href="#">PREDICTED: galectin-3-binding protein [Callithrix jacchus]</a>                   | 49.8      | 49.8        | 100%        | 1e-05   | 88%   | <a href="#">XP_002748850.2</a> |
| <a href="#">hypothetical protein EGM_08232 [Macaca fascicularis]</a>                         | 49.8      | 49.8        | 100%        | 1e-05   | 88%   | <a href="#">EHH58393.1</a>     |
| <a href="#">PREDICTED: galectin-3-binding protein isoform X1 [Macaca fascicularis]</a>       | 49.8      | 49.8        | 100%        | 1e-05   | 88%   | <a href="#">XP_005585202.1</a> |
| <a href="#">PREDICTED: galectin-3-binding protein isoform 1 [Nomascus leucogenys]</a>        | 49.8      | 49.8        | 100%        | 1e-05   | 88%   | <a href="#">XP_003278480.2</a> |
| <a href="#">PREDICTED: galectin-3-binding protein [Jaculus jaculus]</a>                      | 47.7      | 47.7        | 100%        | 6e-05   | 88%   | <a href="#">XP_004655763.1</a> |
| <a href="#">PREDICTED: galectin-3-binding protein isoform X3 [Galeopterus variegatus]</a>    | 46.9      | 46.9        | 93%         | 1e-04   | 87%   | <a href="#">XP_008574380.1</a> |

|                                                                                                |      |      |      |       |     |                                |
|------------------------------------------------------------------------------------------------|------|------|------|-------|-----|--------------------------------|
| <a href="#">PREDICTED: galectin-3-binding protein isoform X2 [Galeopterus variegatus]</a>      | 46.9 | 46.9 | 93%  | 1e-04 | 87% | <a href="#">XP_008574379.1</a> |
| <a href="#">PREDICTED: galectin-3-binding protein [Nannospalax galili]</a>                     | 46.9 | 46.9 | 93%  | 1e-04 | 87% | <a href="#">XP_008847879.1</a> |
| <a href="#">PREDICTED: galectin-3-binding protein [Tarsius syrichta]</a>                       | 46.9 | 46.9 | 93%  | 1e-04 | 87% | <a href="#">XP_008046502.1</a> |
| <a href="#">PREDICTED: galectin-3-binding protein isoform X1 [Galeopterus variegatus]</a>      | 46.9 | 46.9 | 93%  | 1e-04 | 87% | <a href="#">XP_008574378.1</a> |
| <a href="#">cyclophilin C-associated protein [Mus musculus domesticus]</a>                     | 46.4 | 46.4 | 87%  | 2e-04 | 93% | <a href="#">AAA37499.1</a>     |
| <a href="#">unnamed protein product [Mus musculus]</a>                                         | 46.4 | 46.4 | 87%  | 2e-04 | 93% | <a href="#">BAE31013.1</a>     |
| <a href="#">unnamed protein product [Mus musculus]</a>                                         | 46.4 | 46.4 | 87%  | 2e-04 | 93% | <a href="#">BAE29246.1</a>     |
| <a href="#">unnamed protein product [Mus musculus]</a>                                         | 46.4 | 46.4 | 87%  | 2e-04 | 93% | <a href="#">BAE31894.1</a>     |
| <a href="#">galectin-3-binding protein precursor [Mus musculus]</a>                            | 46.4 | 46.4 | 87%  | 2e-04 | 93% | <a href="#">NP_035280.1</a>    |
| <a href="#">PREDICTED: galectin-3-binding protein [Chlorocebus sabaeus]</a>                    | 46.4 | 46.4 | 93%  | 2e-04 | 87% | <a href="#">XP_008011313.1</a> |
| <a href="#">PREDICTED: LOW QUALITY PROTEIN: galectin-3-binding protein [Rhinopith</a>          | 45.2 | 45.2 | 100% | 4e-04 | 81% | <a href="#">XP_010380238.1</a> |
| <a href="#">PREDICTED: galectin-3-binding protein [Heterocephalus glaber]</a>                  | 42.2 | 42.2 | 93%  | 0.004 | 80% | <a href="#">XP_004860896.1</a> |
| <a href="#">PREDICTED: galectin-3-binding protein isoform X2 [Heterocephalus glaber]</a>       | 42.2 | 42.2 | 93%  | 0.004 | 80% | <a href="#">XP_004881532.1</a> |
| <a href="#">PREDICTED: galectin-3-binding protein isoform X1 [Heterocephalus glaber]</a>       | 42.2 | 42.2 | 93%  | 0.004 | 80% | <a href="#">XP_004881531.1</a> |
| <a href="#">PREDICTED: galectin-3-binding protein [Fukomys damarensis]</a>                     | 42.2 | 42.2 | 93%  | 0.004 | 80% | <a href="#">XP_010616820.1</a> |
| <a href="#">Galectin-3-binding protein [Heterocephalus glaber]</a>                             | 42.2 | 42.2 | 93%  | 0.004 | 80% | <a href="#">EHB01017.1</a>     |
| <a href="#">Galectin-3-binding protein [Fukomys damarensis]</a>                                | 42.2 | 42.2 | 93%  | 0.004 | 80% | <a href="#">KFO35672.1</a>     |
| <a href="#">galectin-3-binding protein [Cricetulus griseus]</a>                                | 40.9 | 40.9 | 87%  | 0.011 | 79% | <a href="#">ERE69017.1</a>     |
| <a href="#">PREDICTED: galectin-3-binding protein [Cricetulus griseus]</a>                     | 40.9 | 40.9 | 87%  | 0.011 | 79% | <a href="#">XP_007620278.1</a> |
| <a href="#">PREDICTED: galectin-3-binding protein [Cricetulus griseus]</a>                     | 40.9 | 40.9 | 87%  | 0.011 | 79% | <a href="#">XP_003498865.1</a> |
| <a href="#">PREDICTED: galectin-3-binding protein [Ictidomys tridecemlineatus]</a>             | 39.7 | 39.7 | 87%  | 0.030 | 79% | <a href="#">XP_005332681.1</a> |
| <a href="#">PREDICTED: galectin-3-binding protein [Tursiops truncatus]</a>                     | 39.2 | 39.2 | 87%  | 0.040 | 79% | <a href="#">XP_004323016.1</a> |
| <a href="#">PREDICTED: galectin-3-binding protein [Orcinus orca]</a>                           | 39.2 | 39.2 | 87%  | 0.040 | 79% | <a href="#">XP_004275584.1</a> |
| <a href="#">PREDICTED: galectin-3-binding protein [Balaenoptera acutorostrata scammo</a>       | 39.2 | 39.2 | 87%  | 0.040 | 79% | <a href="#">XP_007185856.1</a> |
| <a href="#">galectin-3-binding protein precursor [Mesocricetus auratus]</a>                    | 39.2 | 39.2 | 87%  | 0.041 | 79% | <a href="#">NP_001268610.1</a> |
| <a href="#">PREDICTED: galectin-3-binding protein [Lipotes vexillifer]</a>                     | 39.2 | 39.2 | 87%  | 0.041 | 79% | <a href="#">XP_007462419.1</a> |
| <a href="#">PREDICTED: galectin-3-binding protein [Microtus ochrogaster]</a>                   | 38.8 | 38.8 | 93%  | 0.056 | 73% | <a href="#">XP_005350871.1</a> |
| <a href="#">PREDICTED: galectin-3-binding protein [Odobenus rosmarus divergens]</a>            | 37.1 | 37.1 | 87%  | 0.20  | 71% | <a href="#">XP_004416304.1</a> |
| <a href="#">PREDICTED: galectin-3-binding protein [Peromyscus maniculatus bairdii]</a>         | 37.1 | 37.1 | 87%  | 0.20  | 71% | <a href="#">XP_006990333.1</a> |
| <a href="#">PREDICTED: galectin-3-binding protein [Equus caballus]</a>                         | 36.7 | 36.7 | 93%  | 0.27  | 67% | <a href="#">XP_001491000.1</a> |
| <a href="#">PREDICTED: galectin-3-binding protein [Ceratotherium simum simum]</a>              | 36.7 | 36.7 | 87%  | 0.27  | 71% | <a href="#">XP_004432888.1</a> |
| <a href="#">Galectin-3-binding protein [Tupaia chinensis]</a>                                  | 36.7 | 36.7 | 93%  | 0.27  | 67% | <a href="#">ELW68246.1</a>     |
| <a href="#">PREDICTED: galectin-3-binding protein [Tupaia chinensis]</a>                       | 36.7 | 36.7 | 93%  | 0.27  | 67% | <a href="#">XP_006145764.1</a> |
| <a href="#">hypothetical protein PANDA_006893 [Ailuropoda melanoleuca]</a>                     | 35.8 | 35.8 | 87%  | 0.51  | 71% | <a href="#">EFB18389.1</a>     |
| <a href="#">PREDICTED: galectin-3-binding protein isoform X3 [Ursus maritimus]</a>             | 35.8 | 35.8 | 87%  | 0.51  | 71% | <a href="#">XP_008692049.1</a> |
| <a href="#">PREDICTED: galectin-3-binding protein [Leptonychotes weddellii]</a>                | 35.8 | 35.8 | 87%  | 0.51  | 71% | <a href="#">XP_006745574.1</a> |
| <a href="#">PREDICTED: galectin-3-binding protein-like [Ailuropoda melanoleuca]</a>            | 35.8 | 35.8 | 87%  | 0.51  | 71% | <a href="#">XP_002918426.1</a> |
| <a href="#">galectin-3-binding protein precursor [Rattus norvegicus]</a>                       | 35.8 | 35.8 | 87%  | 0.51  | 71% | <a href="#">NP_620796.1</a>    |
| <a href="#">RecName: Full=Galectin-3-binding protein; AltName: Full=Cyp-C-associated p</a>     | 35.8 | 35.8 | 87%  | 0.51  | 71% | <a href="#">O70513.2</a>       |
| <a href="#">90K protein precursor [Rattus norvegicus]</a>                                      | 35.8 | 35.8 | 87%  | 0.51  | 71% | <a href="#">AAS58489.1</a>     |
| <a href="#">lectin, galactoside-binding, soluble, 3 binding protein, isoform CRA_a [Rattus</a> | 35.8 | 35.8 | 87%  | 0.51  | 71% | <a href="#">EDM06755.1</a>     |
| <a href="#">PREDICTED: galectin-3-binding protein isoform X2 [Ursus maritimus]</a>             | 35.8 | 35.8 | 87%  | 0.51  | 71% | <a href="#">XP_008692048.1</a> |
| <a href="#">PREDICTED: galectin-3-binding protein isoform X1 [Ursus maritimus]</a>             | 35.8 | 35.8 | 87%  | 0.51  | 71% | <a href="#">XP_008692047.1</a> |
| <a href="#">PREDICTED: galectin-3-binding protein [Camelus dromedarius]</a>                    | 35.4 | 35.4 | 87%  | 0.69  | 71% | <a href="#">XP_010997923.1</a> |
| <a href="#">PREDICTED: galectin-3-binding protein isoform X2 [Physeter catodon]</a>            | 35.4 | 35.4 | 87%  | 0.69  | 71% | <a href="#">XP_007106758.1</a> |

|                                                                                             |      |      |      |      |     |                                |
|---------------------------------------------------------------------------------------------|------|------|------|------|-----|--------------------------------|
| <a href="#">PREDICTED: galectin-3-binding protein-like [Camelus ferus]</a>                  | 35.4 | 35.4 | 87%  | 0.69 | 71% | <a href="#">XP_006182736.1</a> |
| <a href="#">galectin-3-binding protein precursor [Camelus ferus]</a>                        | 35.4 | 35.4 | 87%  | 0.69 | 71% | <a href="#">EPY80953.1</a>     |
| <a href="#">PREDICTED: galectin-3-binding protein [Camelus bactrianus]</a>                  | 35.4 | 35.4 | 87%  | 0.69 | 71% | <a href="#">XP_010948995.1</a> |
| <a href="#">galectin-3-binding protein precursor [Camelus ferus]</a>                        | 35.4 | 35.4 | 87%  | 0.69 | 71% | <a href="#">EPY82790.1</a>     |
| <a href="#">PREDICTED: galectin-3-binding protein [Otolemur garnettii]</a>                  | 35.4 | 35.4 | 87%  | 0.69 | 71% | <a href="#">XP_003786610.1</a> |
| <a href="#">PREDICTED: galectin-3-binding protein isoform X1 [Physeter catodon]</a>         | 35.4 | 35.4 | 87%  | 0.69 | 71% | <a href="#">XP_007106757.1</a> |
| <a href="#">PREDICTED: galectin-3-binding protein [Cavia porcellus]</a>                     | 35.4 | 35.4 | 100% | 0.69 | 63% | <a href="#">XP_003464931.2</a> |
| <a href="#">PREDICTED: galectin-3-binding protein [Oryctolagus cuniculus]</a>               | 35.0 | 35.0 | 93%  | 0.95 | 67% | <a href="#">XP_002724384.1</a> |
| <a href="#">PREDICTED: galectin-3-binding protein [Chinchilla lanigera]</a>                 | 35.0 | 35.0 | 93%  | 0.95 | 67% | <a href="#">XP_005407410.1</a> |
| <a href="#">PREDICTED: serine-rich adhesin for platelets-like [Ceratitis capitata]</a>      | 34.1 | 34.1 | 75%  | 1.8  | 79% | <a href="#">XP_004526329.1</a> |
| <a href="#">Galectin-3-binding protein [Pteropus alecto]</a>                                | 33.7 | 33.7 | 93%  | 2.4  | 67% | <a href="#">ELK12298.1</a>     |
| <a href="#">PREDICTED: galectin-3-binding protein [Pteropus alecto]</a>                     | 33.7 | 33.7 | 93%  | 2.4  | 67% | <a href="#">XP_006912443.1</a> |
| <a href="#">PREDICTED: galectin-3-binding protein [Trichechus manatus latirostris]</a>      | 33.3 | 33.3 | 87%  | 3.3  | 64% | <a href="#">XP_004374429.1</a> |
| <a href="#">malate dehydrogenase [Sutterella wadsworthensis]</a>                            | 32.9 | 32.9 | 87%  | 4.3  | 79% | <a href="#">WP_005434869.1</a> |
| <a href="#">PREDICTED: soluble calcium-activated nucleotidase 1-like isoform X6 [Muste]</a> | 32.9 | 32.9 | 87%  | 4.5  | 64% | <a href="#">XP_004748843.1</a> |
| <a href="#">PREDICTED: soluble calcium-activated nucleotidase 1-like isoform X4 [Muste]</a> | 32.9 | 32.9 | 87%  | 4.5  | 64% | <a href="#">XP_004748841.1</a> |
| <a href="#">PREDICTED: soluble calcium-activated nucleotidase 1-like isoform X3 [Muste]</a> | 32.9 | 32.9 | 87%  | 4.5  | 64% | <a href="#">XP_004748840.1</a> |
| <a href="#">PREDICTED: soluble calcium-activated nucleotidase 1-like isoform X2 [Muste]</a> | 32.9 | 32.9 | 87%  | 4.5  | 64% | <a href="#">XP_004748839.1</a> |
| <a href="#">PREDICTED: soluble calcium-activated nucleotidase 1-like isoform X1 [Muste]</a> | 32.9 | 32.9 | 87%  | 4.5  | 64% | <a href="#">XP_004748838.1</a> |
| <a href="#">PREDICTED: galectin-3-binding protein [Ovis aries]</a>                          | 31.6 | 31.6 | 75%  | 11   | 75% | <a href="#">XP_004013518.1</a> |
| <a href="#">PREDICTED: LOW QUALITY PROTEIN: galectin-3-binding protein [Pantholor]</a>      | 31.6 | 31.6 | 75%  | 11   | 75% | <a href="#">XP_005958671.1</a> |
| <a href="#">PREDICTED: galectin-3-binding protein isoform X2 [Capra hircus]</a>             | 31.6 | 31.6 | 75%  | 11   | 75% | <a href="#">XP_005694143.1</a> |
| <a href="#">PREDICTED: galectin-3-binding protein isoform X1 [Capra hircus]</a>             | 31.6 | 31.6 | 75%  | 11   | 75% | <a href="#">XP_005694142.1</a> |
| <a href="#">PREDICTED: soluble calcium-activated nucleotidase 1 isoform X5 [Canis lupu]</a> | 31.6 | 31.6 | 75%  | 11   | 75% | <a href="#">XP_540464.2</a>    |
| <a href="#">PREDICTED: galectin-3-binding protein [Erinaceus europaeus]</a>                 | 31.6 | 31.6 | 87%  | 11   | 71% | <a href="#">XP_007533029.1</a> |
| <a href="#">PREDICTED: soluble calcium-activated nucleotidase 1 isoform X1 [Canis lupu]</a> | 31.6 | 31.6 | 75%  | 11   | 75% | <a href="#">XP_005624092.1</a> |

## Alignments

Download GenPept Graphics ▼ Next ▲ Previous ▲ Descriptions

PREDICTED: LOW QUALITY PROTEIN: galectin-3-binding protein-like, partial [Pongo abelii]

Sequence ID: [ref|XP\\_009234739.1](#) Length: 341 Number of Matches: 1

Range 1: 149 to 164 GenPept Graphics ▼ Next Match ▲ Previous Match

| Score          | Expect | Identities | Positives   | Gaps     |
|----------------|--------|------------|-------------|----------|
| 53.2 bits(118) | 8e-07  | 15/16(94%) | 16/16(100%) | 0/16(0%) |

Query 1 RYKGLDLTETYKPRI 16  
 RYKGL+LTETYKPRI  
 Sbjct 149 RYKGLNLTETYKPRI 164

### Related Information

[Gene](#) - associated gene details  
[Map Viewer](#) - aligned genomic context

Download GenPept Graphics ▼ Next ▲ Previous ▲ Descriptions

lectin, galactoside-binding, soluble, 3 binding protein, isoform CRA\_b [Homo sapiens]

Sequence ID: [gb|EAW89544.1](#) Length: 391 Number of Matches: 1

Range 1: 199 to 214 GenPept Graphics ▼ Next Match ▲ Previous Match

| Score          | Expect | Identities | Positives   | Gaps     |
|----------------|--------|------------|-------------|----------|
| 53.2 bits(118) | 8e-07  | 15/16(94%) | 16/16(100%) | 0/16(0%) |

### Related Information

[Gene](#) - associated gene details

Query 1 RYKGLDLTETYKPRI 16  
 RYKGL+LTETYKPRI  
 Sbjct 199 RYKGLNLTETYKPRI 214

[Download](#) [GenPept](#) [Graphics](#)

[▼ Next](#) [▲ Previous](#) [▲ Descriptions](#)

unnamed protein product [Homo sapiens]

Sequence ID: [dbj|BAG58382.1|](#) Length: 413 Number of Matches: 1

Range 1: 221 to 236 [GenPept](#) [Graphics](#)

[▼ Next Match](#) [▲ Previous Match](#)

| Score          | Expect | Identities | Positives   | Gaps     |
|----------------|--------|------------|-------------|----------|
| 53.2 bits(118) | 8e-07  | 15/16(94%) | 16/16(100%) | 0/16(0%) |

Query 1 RYKGLDLTETYKPRI 16  
 RYKGL+LTETYKPRI  
 Sbjct 221 RYKGLNLTETYKPRI 236

**Related Information**

[Gene](#) - associated gene details

[Download](#) [GenPept](#) [Graphics](#)

[▼ Next](#) [▲ Previous](#) [▲ Descriptions](#)

unnamed protein product [Homo sapiens]

Sequence ID: [dbj|BAG62970.1|](#) Length: 466 Number of Matches: 1

Range 1: 274 to 289 [GenPept](#) [Graphics](#)

[▼ Next Match](#) [▲ Previous Match](#)

| Score          | Expect | Identities | Positives   | Gaps     |
|----------------|--------|------------|-------------|----------|
| 53.2 bits(118) | 9e-07  | 15/16(94%) | 16/16(100%) | 0/16(0%) |

Query 1 RYKGLDLTETYKPRI 16  
 RYKGL+LTETYKPRI  
 Sbjct 274 RYKGLNLTETYKPRI 289

**Related Information**

[Gene](#) - associated gene details

[Download](#) [GenPept](#) [Graphics](#)

[▼ Next](#) [▲ Previous](#) [▲ Descriptions](#)

unnamed protein product [Homo sapiens]

Sequence ID: [dbj|BAG51600.1|](#) Length: 481 Number of Matches: 1

Range 1: 289 to 304 [GenPept](#) [Graphics](#)

[▼ Next Match](#) [▲ Previous Match](#)

| Score          | Expect | Identities | Positives   | Gaps     |
|----------------|--------|------------|-------------|----------|
| 53.2 bits(118) | 9e-07  | 15/16(94%) | 16/16(100%) | 0/16(0%) |

Query 1 RYKGLDLTETYKPRI 16  
 RYKGL+LTETYKPRI  
 Sbjct 289 RYKGLNLTETYKPRI 304

**Related Information**

[Gene](#) - associated gene details

BLAST is a registered trademark of the National Library of Medicine.



NCBI/ BLAST/ blastp suite/ Formatting Results - B9HSY82101R

Your search parameters were adjusted to search for a short input sequence.

Edit and Resubmit Save Search Strategies Formatting options Download

YouTube How to read this page Blast report description

LGALS3BP\_RYKGLNLTEDTYKPRI\_NonMod

RID B9HSY82101R (Expires on 01-14 14:19 pm)

Query ID lcl|147197
Description None
Molecule type amino acid
Query Length 16

Database Name nr
Description All non-redundant GenBank CDS translations+PDB+SwissProt+PIR excluding environmental samples from WGS projects
Program BLASTP 2.2.30+ Citation

Other reports: Search Summary Taxonomy reports Distance tree of results Multiple alignment

Graphic Summary

Show Conserved Domains

No putative conserved domains have been detected

Distribution of 100 Blast Hits on the Query Sequence

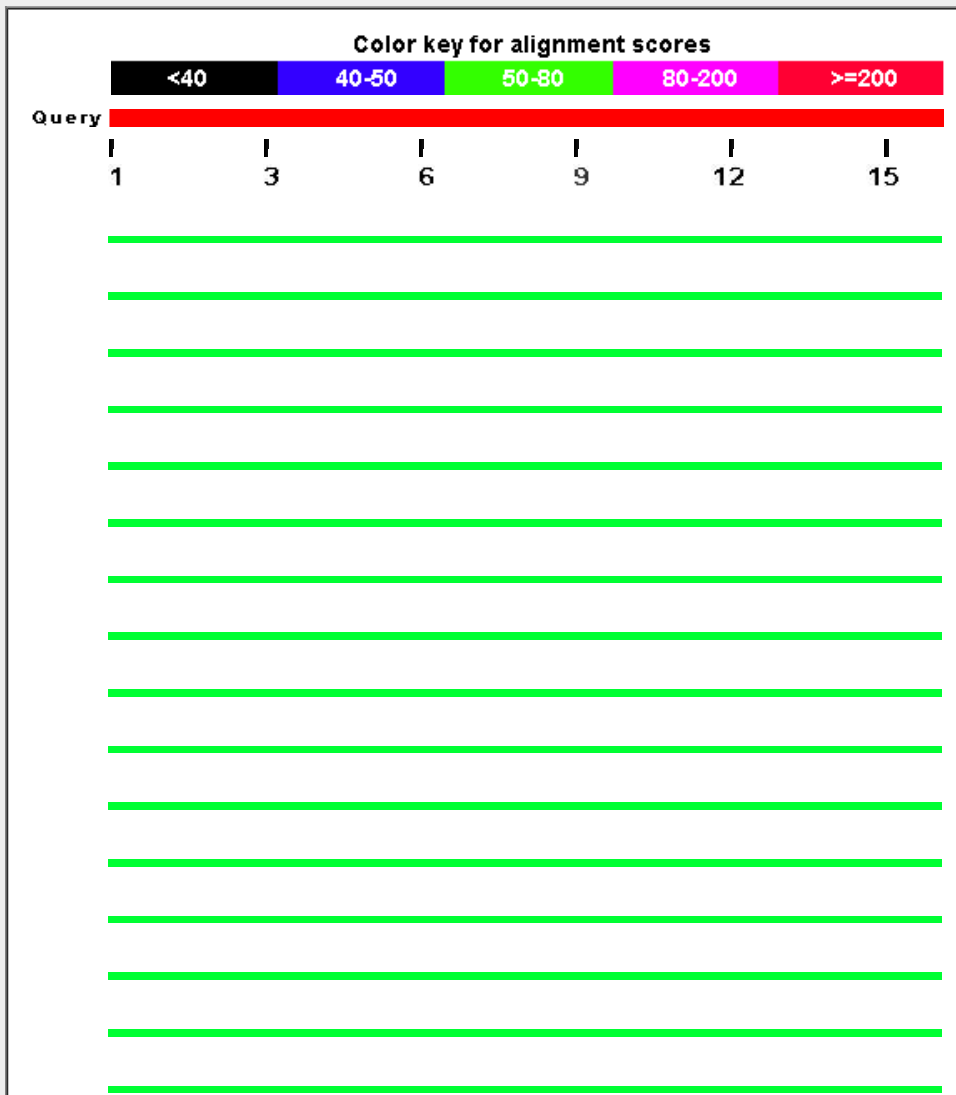



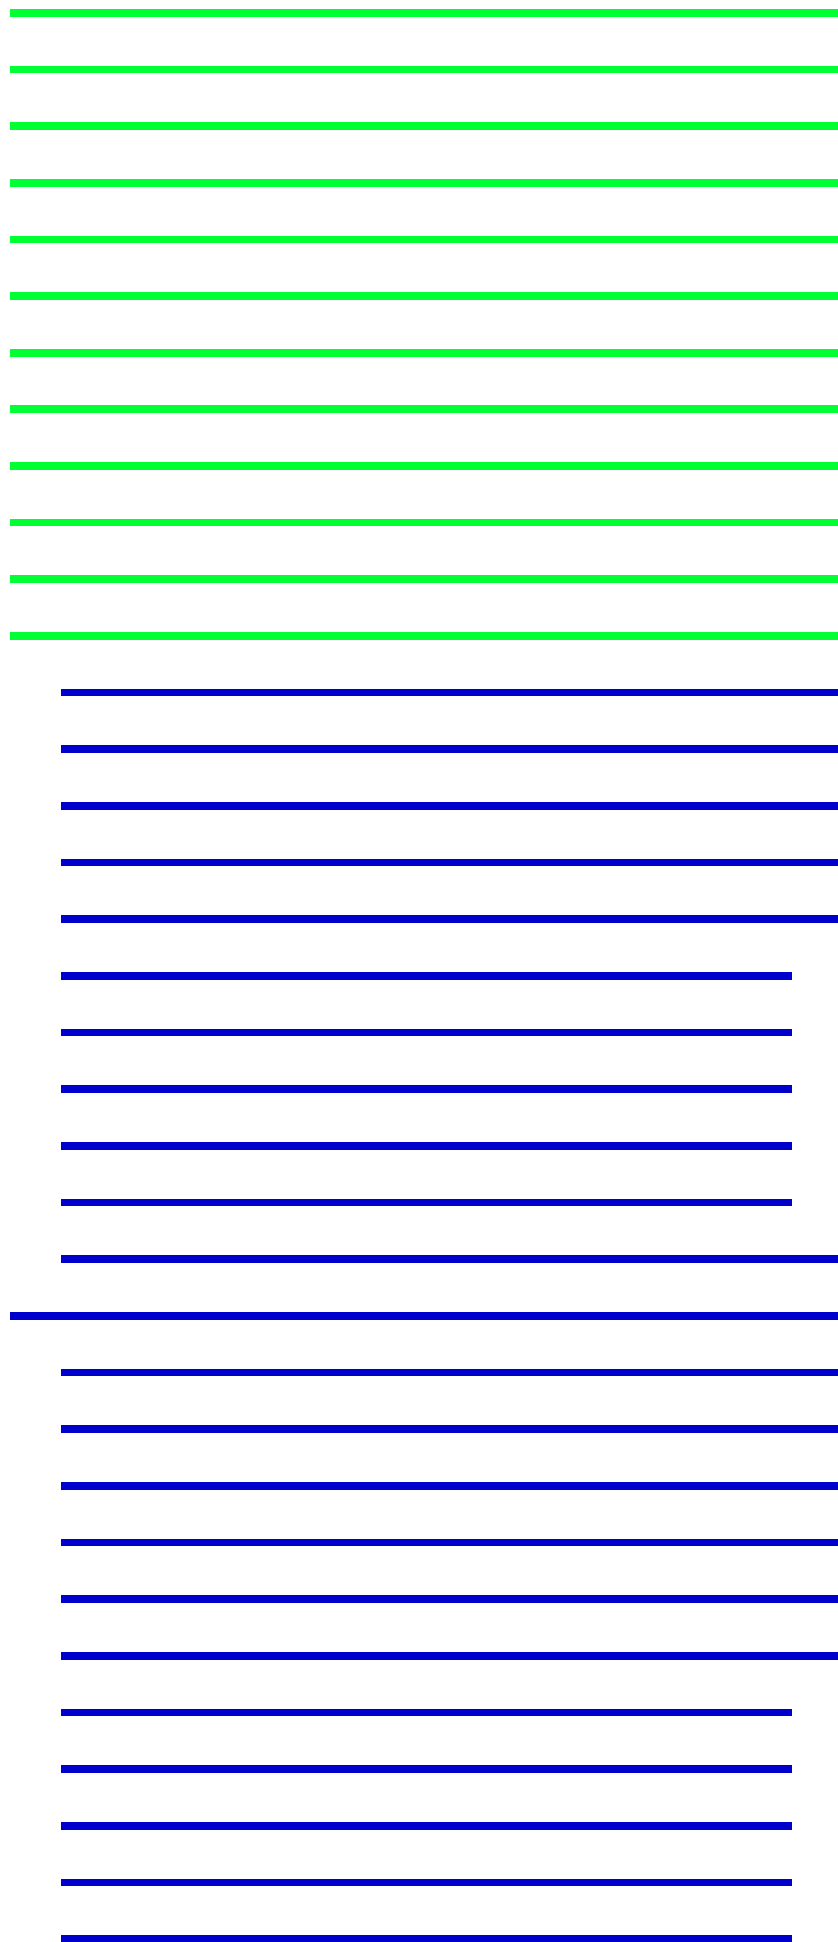

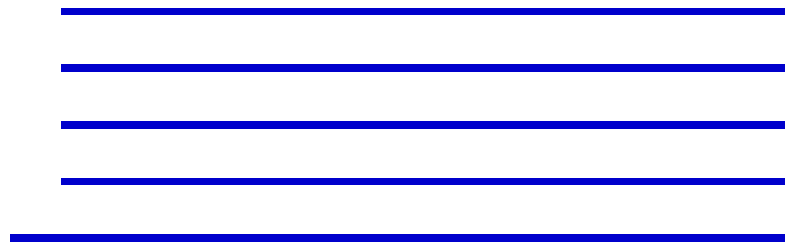

**Descriptions**

**Sequences producing significant alignments:**

Select: [All](#) [None](#) Selected:0

[↑](#) Alignments 
 [Download](#)
[GenPept](#)
[Graphics](#)
[Distance tree of results](#)
[Multiple alignment](#)
⚙

| Description                                                                                                                                        | Max score | Total score | Query cover | E value | Ident | Accession                                   |
|----------------------------------------------------------------------------------------------------------------------------------------------------|-----------|-------------|-------------|---------|-------|---------------------------------------------|
| <a href="#">PREDICTED: LOW QUALITY PROTEIN: galectin-3-binding protein: lectin, galactoside-binding, soluble, 3 binding protein, isoform CRA_1</a> | 55.8      | 55.8        | 100%        | 1e-07   | 100%  | <a href="#">gij686772908 XP_009234739.1</a> |
| <a href="#">unnamed protein product [Homo sapiens]</a>                                                                                             | 55.8      | 55.8        | 100%        | 1e-07   | 100%  | <a href="#">gij119609950 EAW89544.1</a>     |
| <a href="#">unnamed protein product [Homo sapiens]</a>                                                                                             | 55.8      | 55.8        | 100%        | 1e-07   | 100%  | <a href="#">gij194380458 BAG58382.1</a>     |
| <a href="#">unnamed protein product [Homo sapiens]</a>                                                                                             | 55.8      | 55.8        | 100%        | 1e-07   | 100%  | <a href="#">gij194376422 BAG62970.1</a>     |
| <a href="#">unnamed protein product [Homo sapiens]</a>                                                                                             | 55.8      | 55.8        | 100%        | 1e-07   | 100%  | <a href="#">gij193786317 BAG51600.1</a>     |
| <a href="#">unnamed protein product [Homo sapiens]</a>                                                                                             | 55.8      | 55.8        | 100%        | 1e-07   | 100%  | <a href="#">gij194375560 BAG56725.1</a>     |
| <a href="#">unnamed protein product [Homo sapiens]</a>                                                                                             | 55.8      | 55.8        | 100%        | 1e-07   | 100%  | <a href="#">gij194375081 BAG62653.1</a>     |
| <a href="#">lectin, galactoside-binding, soluble, 3 binding protein, isoform CRA_1</a>                                                             | 55.8      | 55.8        | 100%        | 1e-07   | 100%  | <a href="#">gij119609949 EAW89543.1</a>     |
| <a href="#">RecName: Full=Galectin-3-binding protein; AltName: Full=Lectin ga</a>                                                                  | 55.8      | 55.8        | 100%        | 1e-07   | 100%  | <a href="#">gij75042301 Q5RDA4.1</a>        |
| <a href="#">PREDICTED: galectin-3-binding protein [Pan troglodytes]</a>                                                                            | 55.8      | 55.8        | 100%        | 1e-07   | 100%  | <a href="#">gij55646067 XP_511716.1</a>     |
| <a href="#">galectin-3-binding protein precursor [Homo sapiens]</a>                                                                                | 55.8      | 55.8        | 100%        | 1e-07   | 100%  | <a href="#">gij5031863 NP_005558.1</a>      |
| <a href="#">PREDICTED: galectin-3-binding protein isoform 1 [Gorilla gorilla go</a>                                                                | 55.8      | 55.8        | 100%        | 1e-07   | 100%  | <a href="#">gij426346505 XP_004040917.1</a> |
| <a href="#">PREDICTED: galectin-3-binding protein [Pan paniscus]</a>                                                                               | 55.8      | 55.8        | 100%        | 1e-07   | 100%  | <a href="#">gij397494909 XP_003818311.1</a> |
| <a href="#">lectin, galactoside-binding, soluble, 3 binding protein [synthetic cons</a>                                                            | 55.8      | 55.8        | 100%        | 1e-07   | 100%  | <a href="#">gij123997497 ABM86350.1</a>     |
| <a href="#">PREDICTED: LOW QUALITY PROTEIN: galectin-3-binding protein</a>                                                                         | 55.8      | 55.8        | 100%        | 1e-07   | 100%  | <a href="#">gij395749542 XP_003778963.1</a> |
| <a href="#">PREDICTED: galectin-3-binding protein isoform 3 [Macaca mulatta]</a>                                                                   | 52.4      | 52.4        | 100%        | 2e-06   | 94%   | <a href="#">gij297273768 XP_002800676.1</a> |
| <a href="#">PREDICTED: galectin-3-binding protein isoform 2 [Macaca mulatta]</a>                                                                   | 52.4      | 52.4        | 100%        | 2e-06   | 94%   | <a href="#">gij297273766 XP_002800675.1</a> |
| <a href="#">PREDICTED: galectin-3-binding protein isoform X2 [Macaca fascicu</a>                                                                   | 52.4      | 52.4        | 100%        | 2e-06   | 94%   | <a href="#">gij544502104 XP_005585203.1</a> |
| <a href="#">PREDICTED: galectin-3-binding protein [Papio anubis]</a>                                                                               | 52.4      | 52.4        | 100%        | 2e-06   | 94%   | <a href="#">gij402901262 XP_003913572.1</a> |
| <a href="#">PREDICTED: galectin-3-binding protein isoform 2 [Nomascus leuco</a>                                                                    | 52.4      | 52.4        | 100%        | 2e-06   | 94%   | <a href="#">gij332258797 XP_003278481.1</a> |
| <a href="#">PREDICTED: galectin-3-binding protein [Saimiri boliviensis bolivien</a>                                                                | 52.4      | 52.4        | 100%        | 2e-06   | 94%   | <a href="#">gij725577242 XP_010340649.1</a> |
| <a href="#">hypothetical protein EGK_09048 [Macaca mulatta]</a>                                                                                    | 52.4      | 52.4        | 100%        | 2e-06   | 94%   | <a href="#">gij355568978 EHH25259.1</a>     |
| <a href="#">PREDICTED: galectin-3-binding protein isoform 1 [Macaca mulatta]</a>                                                                   | 52.4      | 52.4        | 100%        | 2e-06   | 94%   | <a href="#">gij109118737 XP_001109047.1</a> |
| <a href="#">PREDICTED: galectin-3-binding protein [Callithrix jacchus]</a>                                                                         | 52.4      | 52.4        | 100%        | 2e-06   | 94%   | <a href="#">gij675661532 XP_002748850.2</a> |
| <a href="#">hypothetical protein EGM_08232 [Macaca fascicularis]</a>                                                                               | 52.4      | 52.4        | 100%        | 2e-06   | 94%   | <a href="#">gij355754428 EHH58393.1</a>     |
| <a href="#">PREDICTED: galectin-3-binding protein isoform X1 [Macaca fascicu</a>                                                                   | 52.4      | 52.4        | 100%        | 2e-06   | 94%   | <a href="#">gij544502102 XP_005585202.1</a> |
| <a href="#">PREDICTED: galectin-3-binding protein isoform 1 [Nomascus leuco</a>                                                                    | 52.4      | 52.4        | 100%        | 2e-06   | 94%   | <a href="#">gij441643566 XP_003278480.2</a> |
| <a href="#">PREDICTED: galectin-3-binding protein [Jaculus jaculus]</a>                                                                            | 50.3      | 50.3        | 100%        | 8e-06   | 94%   | <a href="#">gij507543547 XP_004655763.1</a> |

|                                                                                      |      |      |      |       |      |                                             |
|--------------------------------------------------------------------------------------|------|------|------|-------|------|---------------------------------------------|
| <a href="#">PREDICTED: galectin-3-binding protein isoform X3 [Galeopterus va</a>     | 49.4 | 49.4 | 93%  | 2e-05 | 93%  | <a href="#">gij667281302 XP_008574380.1</a> |
| <a href="#">PREDICTED: galectin-3-binding protein isoform X2 [Galeopterus va</a>     | 49.4 | 49.4 | 93%  | 2e-05 | 93%  | <a href="#">gij667281299 XP_008574379.1</a> |
| <a href="#">PREDICTED: galectin-3-binding protein [Nannospalax galili]</a>           | 49.4 | 49.4 | 93%  | 2e-05 | 93%  | <a href="#">gij674080617 XP_008847879.1</a> |
| <a href="#">PREDICTED: galectin-3-binding protein [Tarsius syrichta]</a>             | 49.4 | 49.4 | 93%  | 2e-05 | 93%  | <a href="#">gij640781767 XP_008046502.1</a> |
| <a href="#">PREDICTED: galectin-3-binding protein isoform X1 [Galeopterus va</a>     | 49.4 | 49.4 | 93%  | 2e-05 | 93%  | <a href="#">gij667281296 XP_008574378.1</a> |
| <a href="#">cyclophilin C-associated protein [Mus musculus domesticus]</a>           | 49.0 | 49.0 | 87%  | 2e-05 | 100% | <a href="#">gij397800 AAA37499.1</a>        |
| <a href="#">unnamed protein product [Mus musculus]</a>                               | 49.0 | 49.0 | 87%  | 2e-05 | 100% | <a href="#">gij74212546 BAE31013.1</a>      |
| <a href="#">unnamed protein product [Mus musculus]</a>                               | 49.0 | 49.0 | 87%  | 2e-05 | 100% | <a href="#">gij74211789 BAE29246.1</a>      |
| <a href="#">unnamed protein product [Mus musculus]</a>                               | 49.0 | 49.0 | 87%  | 2e-05 | 100% | <a href="#">gij74142260 BAE31894.1</a>      |
| <a href="#">galectin-3-binding protein precursor [Mus musculus]</a>                  | 49.0 | 49.0 | 87%  | 2e-05 | 100% | <a href="#">gij6755144 NP_035280.1</a>      |
| <a href="#">PREDICTED: galectin-3-binding protein [Chlorocebus sabaeus]</a>          | 49.0 | 49.0 | 93%  | 2e-05 | 93%  | <a href="#">gij635093239 XP_008011313.1</a> |
| <a href="#">PREDICTED: LOW QUALITY PROTEIN: galectin-3-binding protein</a>           | 47.7 | 47.7 | 100% | 6e-05 | 88%  | <a href="#">gij724915028 XP_010380238.1</a> |
| <a href="#">PREDICTED: galectin-3-binding protein [Heterocephalus glaber]</a>        | 44.8 | 44.8 | 93%  | 6e-04 | 87%  | <a href="#">gij512998688 XP_004860896.1</a> |
| <a href="#">PREDICTED: galectin-3-binding protein isoform X2 [Heterocephalu</a>      | 44.8 | 44.8 | 93%  | 6e-04 | 87%  | <a href="#">gij512828899 XP_004881532.1</a> |
| <a href="#">PREDICTED: galectin-3-binding protein isoform X1 [Heterocephalu</a>      | 44.8 | 44.8 | 93%  | 6e-04 | 87%  | <a href="#">gij512828896 XP_004881531.1</a> |
| <a href="#">PREDICTED: galectin-3-binding protein [Fukomys damarensis]</a>           | 44.8 | 44.8 | 93%  | 6e-04 | 87%  | <a href="#">gij731203892 XP_010616820.1</a> |
| <a href="#">Galectin-3-binding protein [Heterocephalus glaber]</a>                   | 44.8 | 44.8 | 93%  | 6e-04 | 87%  | <a href="#">gij351698098 EHB01017.1</a>     |
| <a href="#">Galectin-3-binding protein [Fukomys damarensis]</a>                      | 44.8 | 44.8 | 93%  | 6e-04 | 87%  | <a href="#">gij676282129 KFO35672.1</a>     |
| <a href="#">galectin-3-binding protein [Cricetulus griseus]</a>                      | 43.5 | 43.5 | 87%  | 0.002 | 86%  | <a href="#">gij537143564 ERE69017.1</a>     |
| <a href="#">PREDICTED: galectin-3-binding protein [Cricetulus griseus]</a>           | 43.5 | 43.5 | 87%  | 0.002 | 86%  | <a href="#">gij625257783 XP_007620278.1</a> |
| <a href="#">PREDICTED: galectin-3-binding protein [Cricetulus griseus]</a>           | 43.5 | 43.5 | 87%  | 0.002 | 86%  | <a href="#">gij354473282 XP_003498865.1</a> |
| <a href="#">PREDICTED: galectin-3-binding protein [Ictidomys tridecemlineatus</a>    | 42.2 | 42.2 | 87%  | 0.004 | 86%  | <a href="#">gij532094003 XP_005332681.1</a> |
| <a href="#">PREDICTED: galectin-3-binding protein [Tursiops truncatus]</a>           | 41.8 | 41.8 | 87%  | 0.006 | 86%  | <a href="#">gij470634961 XP_004323016.1</a> |
| <a href="#">PREDICTED: galectin-3-binding protein [Orcinus orca]</a>                 | 41.8 | 41.8 | 87%  | 0.006 | 86%  | <a href="#">gij466037200 XP_004275584.1</a> |
| <a href="#">PREDICTED: galectin-3-binding protein [Balaenoptera acutorostrat</a>     | 41.8 | 41.8 | 87%  | 0.006 | 86%  | <a href="#">gij594676074 XP_007185856.1</a> |
| <a href="#">galectin-3-binding protein precursor [Mesocricetus auratus]</a>          | 41.8 | 41.8 | 87%  | 0.006 | 86%  | <a href="#">gij528078247 NP_001268610.1</a> |
| <a href="#">PREDICTED: galectin-3-binding protein [Lipotes vexillifer]</a>           | 41.8 | 41.8 | 87%  | 0.006 | 86%  | <a href="#">gij602701011 XP_007462419.1</a> |
| <a href="#">PREDICTED: galectin-3-binding protein [Microtus ochrogaster]</a>         | 41.4 | 41.4 | 93%  | 0.008 | 80%  | <a href="#">gij532014189 XP_005350871.1</a> |
| <a href="#">PREDICTED: galectin-3-binding protein [Odobenus rosmarus diver</a>       | 39.7 | 39.7 | 87%  | 0.028 | 79%  | <a href="#">gij472394090 XP_004416304.1</a> |
| <a href="#">PREDICTED: galectin-3-binding protein [Peromyscus maniculatus t</a>      | 39.7 | 39.7 | 87%  | 0.028 | 79%  | <a href="#">gij589955428 XP_006990333.1</a> |
| <a href="#">PREDICTED: galectin-3-binding protein [Equus caballus]</a>               | 39.2 | 39.2 | 93%  | 0.038 | 73%  | <a href="#">gij149723277 XP_001491000.1</a> |
| <a href="#">PREDICTED: galectin-3-binding protein [Ceratotherium simum simu</a>      | 39.2 | 39.2 | 87%  | 0.038 | 79%  | <a href="#">gij478517307 XP_004432888.1</a> |
| <a href="#">Galectin-3-binding protein [Tupaia chinensis]</a>                        | 39.2 | 39.2 | 93%  | 0.038 | 73%  | <a href="#">gij444727768 ELW68246.1</a>     |
| <a href="#">PREDICTED: galectin-3-binding protein [Tupaia chinensis]</a>             | 39.2 | 39.2 | 93%  | 0.038 | 73%  | <a href="#">gij562832654 XP_006145764.1</a> |
| <a href="#">hypothetical protein PANDA_006893 [Ailuropoda melanoleuca]</a>           | 38.4 | 38.4 | 87%  | 0.072 | 79%  | <a href="#">gij281342805 EFB18389.1</a>     |
| <a href="#">PREDICTED: galectin-3-binding protein isoform X3 [Ursus maritimu</a>     | 38.4 | 38.4 | 87%  | 0.072 | 79%  | <a href="#">gij671002383 XP_008692049.1</a> |
| <a href="#">PREDICTED: galectin-3-binding protein [Leptonychotes weddellii]</a>      | 38.4 | 38.4 | 87%  | 0.072 | 79%  | <a href="#">gij585188403 XP_006745574.1</a> |
| <a href="#">PREDICTED: galectin-3-binding protein-like [Ailuropoda melanoleu</a>     | 38.4 | 38.4 | 87%  | 0.072 | 79%  | <a href="#">gij301766034 XP_002918426.1</a> |
| <a href="#">galectin-3-binding protein precursor [Rattus norvegicus]</a>             | 38.4 | 38.4 | 87%  | 0.072 | 79%  | <a href="#">gij20806135 NP_620796.1</a>     |
| <a href="#">RecName: Full=Galectin-3-binding protein; AltName: Full=Cyp-C-a</a>      | 38.4 | 38.4 | 87%  | 0.072 | 79%  | <a href="#">gij218526547 O70513.2</a>       |
| <a href="#">90K protein precursor [Rattus norvegicus]</a>                            | 38.4 | 38.4 | 87%  | 0.072 | 79%  | <a href="#">gij45357062 AAS58489.1</a>      |
| <a href="#">lectin, galactoside-binding, soluble, 3 binding protein, isoform CRA</a> | 38.4 | 38.4 | 87%  | 0.072 | 79%  | <a href="#">gij149054938 EDM06755.1</a>     |
| <a href="#">PREDICTED: galectin-3-binding protein isoform X2 [Ursus maritimu</a>     | 38.4 | 38.4 | 87%  | 0.073 | 79%  | <a href="#">gij671002381 XP_008692048.1</a> |
| <a href="#">PREDICTED: galectin-3-binding protein isoform X1 [Ursus maritimu</a>     | 38.4 | 38.4 | 87%  | 0.073 | 79%  | <a href="#">gij671002379 XP_008692047.1</a> |
| <a href="#">PREDICTED: galectin-3-binding protein isoform X2 [Physeter catod</a>     | 38.0 | 38.0 | 87%  | 0.099 | 79%  | <a href="#">gij593720930 XP_007106758.1</a> |

|                                                                                   |      |      |      |       |     |                                             |
|-----------------------------------------------------------------------------------|------|------|------|-------|-----|---------------------------------------------|
| <a href="#">PREDICTED: galectin-3-binding protein-like [Camelus ferus]</a>        | 38.0 | 38.0 | 87%  | 0.099 | 79% | <a href="#">gil560912913 XP_006182736.1</a> |
| <a href="#">galectin-3-binding protein precursor [Camelus ferus]</a>              | 38.0 | 38.0 | 87%  | 0.099 | 79% | <a href="#">gil528761294 EPY80953.1</a>     |
| <a href="#">galectin-3-binding protein precursor [Camelus ferus]</a>              | 38.0 | 38.0 | 87%  | 0.099 | 79% | <a href="#">gil528763131 EPY82790.1</a>     |
| <a href="#">PREDICTED: galectin-3-binding protein [Otolemur garnettii]</a>        | 38.0 | 38.0 | 87%  | 0.099 | 79% | <a href="#">gil395826815 XP_003786610.1</a> |
| <a href="#">PREDICTED: galectin-3-binding protein isoform X1 [Physeter catod]</a> | 38.0 | 38.0 | 87%  | 0.099 | 79% | <a href="#">gil593720928 XP_007106757.1</a> |
| <a href="#">PREDICTED: galectin-3-binding protein [Cavia porcellus]</a>           | 38.0 | 38.0 | 100% | 0.099 | 69% | <a href="#">gil514451490 XP_003464931.2</a> |
| <a href="#">PREDICTED: galectin-3-binding protein [Oryctolagus cuniculus]</a>     | 37.5 | 37.5 | 93%  | 0.14  | 73% | <a href="#">gil291416302 XP_002724384.1</a> |
| <a href="#">PREDICTED: galectin-3-binding protein [Chinchilla lanigera]</a>       | 37.5 | 37.5 | 93%  | 0.14  | 73% | <a href="#">gil533188976 XP_005407410.1</a> |
| <a href="#">Galectin-3-binding protein [Pteropus alecto]</a>                      | 36.3 | 36.3 | 93%  | 0.34  | 73% | <a href="#">gil431908706 ELK12298.1</a>     |
| <a href="#">PREDICTED: galectin-3-binding protein [Pteropus alecto]</a>           | 36.3 | 36.3 | 93%  | 0.35  | 73% | <a href="#">gil586558304 XP_006912443.1</a> |
| <a href="#">PREDICTED: galectin-3-binding protein [Trichechus manatus latiro]</a> | 35.8 | 35.8 | 87%  | 0.47  | 71% | <a href="#">gil471367801 XP_004374429.1</a> |
| <a href="#">PREDICTED: soluble calcium-activated nucleotidase 1-like isoform</a>  | 35.4 | 35.4 | 87%  | 0.65  | 71% | <a href="#">gil511848965 XP_004748843.1</a> |
| <a href="#">PREDICTED: soluble calcium-activated nucleotidase 1-like isoform</a>  | 35.4 | 35.4 | 87%  | 0.65  | 71% | <a href="#">gil511848961 XP_004748841.1</a> |
| <a href="#">PREDICTED: soluble calcium-activated nucleotidase 1-like isoform</a>  | 35.4 | 35.4 | 87%  | 0.66  | 71% | <a href="#">gil511848959 XP_004748840.1</a> |
| <a href="#">PREDICTED: soluble calcium-activated nucleotidase 1-like isoform</a>  | 35.4 | 35.4 | 87%  | 0.66  | 71% | <a href="#">gil511848957 XP_004748839.1</a> |
| <a href="#">PREDICTED: soluble calcium-activated nucleotidase 1-like isoform</a>  | 35.4 | 35.4 | 87%  | 0.66  | 71% | <a href="#">gil511848955 XP_004748838.1</a> |
| <a href="#">PREDICTED: galectin-3-binding protein [Ovis aries]</a>                | 34.1 | 34.1 | 75%  | 1.7   | 83% | <a href="#">gil426239209 XP_004013518.1</a> |
| <a href="#">PREDICTED: LOW QUALITY PROTEIN: galectin-3-binding protein</a>        | 34.1 | 34.1 | 75%  | 1.7   | 83% | <a href="#">gil556725783 XP_005958671.1</a> |
| <a href="#">PREDICTED: galectin-3-binding protein isoform X2 [Capra hircus]</a>   | 34.1 | 34.1 | 75%  | 1.7   | 83% | <a href="#">gil548509918 XP_005694143.1</a> |
| <a href="#">PREDICTED: galectin-3-binding protein isoform X1 [Capra hircus]</a>   | 34.1 | 34.1 | 75%  | 1.7   | 83% | <a href="#">gil548509916 XP_005694142.1</a> |
| <a href="#">PREDICTED: soluble calcium-activated nucleotidase 1 isoform X5 [</a>  | 34.1 | 34.1 | 75%  | 1.7   | 83% | <a href="#">gil73964953 XP_540464.2</a>     |
| <a href="#">PREDICTED: soluble calcium-activated nucleotidase 1 isoform X1 [</a>  | 34.1 | 34.1 | 75%  | 1.7   | 83% | <a href="#">gil545509197 XP_005624092.1</a> |
| <a href="#">PREDICTED: galectin-3-binding protein [Echinops telfairi]</a>         | 33.7 | 33.7 | 93%  | 2.3   | 73% | <a href="#">gil507673535 XP_004709313.1</a> |
| <a href="#">PREDICTED: galectin-3-binding protein [Octodon degus]</a>             | 33.7 | 33.7 | 93%  | 2.3   | 69% | <a href="#">gil507681576 XP_004639582.1</a> |
| <a href="#">PREDICTED: galectin-3-binding protein [Panthera tigris altaica]</a>   | 32.9 | 32.9 | 87%  | 4.2   | 64% | <a href="#">gil591331484 XP_007091540.1</a> |
| <a href="#">PREDICTED: galectin-3-binding protein [Vicugna pacos]</a>             | 32.9 | 32.9 | 87%  | 4.2   | 71% | <a href="#">gil560953982 XP_006199496.1</a> |
| <a href="#">PREDICTED: galectin-3-binding protein isoform X1 [Bubalus bubali]</a> | 32.9 | 32.9 | 75%  | 4.2   | 83% | <a href="#">gil594081110 XP_006064180.1</a> |

## Alignments

[Download](#) [GenPept](#) [Graphics](#)

[Next](#) [Previous](#) [Descriptions](#)

**PREDICTED: LOW QUALITY PROTEIN: galectin-3-binding protein-like, partial [Pongo abelii]**

Sequence ID: [gil686772908|ref|XP\\_009234739.1](#) Length: 341 Number of Matches: 1

Range 1: 149 to 164 [GenPept](#) [Graphics](#)

[Next Match](#) [Previous Match](#)

| Score          | Expect | Identities  | Positives   | Gaps     |
|----------------|--------|-------------|-------------|----------|
| 55.8 bits(124) | 1e-07  | 16/16(100%) | 16/16(100%) | 0/16(0%) |

Query 1 RYKGLNLTEDTYKPRI 16  
 RYKGLNLTEDTYKPRI  
 Sbjct 149 RYKGLNLTEDTYKPRI 164

### Related Information

[Gene](#) - associated gene details  
[Map Viewer](#) - aligned genomic context

[Download](#) [GenPept](#) [Graphics](#)

[Next](#) [Previous](#) [Descriptions](#)

**lectin, galactoside-binding, soluble, 3 binding protein, isoform CRA\_b [Homo sapiens]**

Sequence ID: [gil119609950|gb|EAW89544.1](#) Length: 391 Number of Matches: 1

Range 1: 199 to 214 [GenPept](#) [Graphics](#)

[Next Match](#) [Previous Match](#)

| Score          | Expect | Identities  | Positives   | Gaps     |
|----------------|--------|-------------|-------------|----------|
| 55.8 bits(124) | 1e-07  | 16/16(100%) | 16/16(100%) | 0/16(0%) |

Query 1 RYKGLNLTEDTYKPRI 16

### Related Information

[Gene](#) - associated gene details

Sbjct 199 RYKGLNLTEDTYKPRI  
 RYKGLNLTEDTYKPRI 214

[Download](#) [GenPept](#) [Graphics](#)

[▼ Next](#) [▲ Previous](#) [▲ Descriptions](#)

unnamed protein product [Homo sapiens]

Sequence ID: [gi|194380458|dbj|BAG58382.1](#) Length: 413 Number of Matches: 1

Range 1: 221 to 236 [GenPept](#) [Graphics](#)

[▼ Next Match](#) [▲ Previous Match](#)

| Score          | Expect | Identities  | Positives   | Gaps     |
|----------------|--------|-------------|-------------|----------|
| 55.8 bits(124) | 1e-07  | 16/16(100%) | 16/16(100%) | 0/16(0%) |

Query 1 RYKGLNLTEDTYKPRI 16  
 RYKGLNLTEDTYKPRI  
 Sbjct 221 RYKGLNLTEDTYKPRI 236

**Related Information**

[Gene](#) - associated gene details

[Download](#) [GenPept](#) [Graphics](#)

[▼ Next](#) [▲ Previous](#) [▲ Descriptions](#)

unnamed protein product [Homo sapiens]

Sequence ID: [gi|194376422|dbj|BAG62970.1](#) Length: 466 Number of Matches: 1

Range 1: 274 to 289 [GenPept](#) [Graphics](#)

[▼ Next Match](#) [▲ Previous Match](#)

| Score          | Expect | Identities  | Positives   | Gaps     |
|----------------|--------|-------------|-------------|----------|
| 55.8 bits(124) | 1e-07  | 16/16(100%) | 16/16(100%) | 0/16(0%) |

Query 1 RYKGLNLTEDTYKPRI 16  
 RYKGLNLTEDTYKPRI  
 Sbjct 274 RYKGLNLTEDTYKPRI 289

**Related Information**

[Gene](#) - associated gene details

[Download](#) [GenPept](#) [Graphics](#)

[▼ Next](#) [▲ Previous](#) [▲ Descriptions](#)

unnamed protein product [Homo sapiens]

Sequence ID: [gi|193786317|dbj|BAG51600.1](#) Length: 481 Number of Matches: 1

Range 1: 289 to 304 [GenPept](#) [Graphics](#)

[▼ Next Match](#) [▲ Previous Match](#)

| Score          | Expect | Identities  | Positives   | Gaps     |
|----------------|--------|-------------|-------------|----------|
| 55.8 bits(124) | 1e-07  | 16/16(100%) | 16/16(100%) | 0/16(0%) |

Query 1 RYKGLNLTEDTYKPRI 16  
 RYKGLNLTEDTYKPRI  
 Sbjct 289 RYKGLNLTEDTYKPRI 304

**Related Information**

[Gene](#) - associated gene details

BLAST is a registered trademark of the National Library of Medicine.

NCBI/ BLAST/ blastp suite/ Formatting Results - BVH6YN4001R

Your search parameters were adjusted to search for a short input sequence.

[Edit and Resubmit](#) [Save Search Strategies](#) [Formatting options](#) [Download](#) [YouTube](#) [How to read this page](#) [Blast report description](#)

### LRP1\_KLTSCATDASICGDEARC\_Mod

RID [BVH6YN4001R](#) (Expires on 01-21 10:00 am)

Query ID |cl|36986  
 Description None  
 Molecule type amino acid  
 Query Length 18

Database Name nr  
 Description All non-redundant GenBank CDS translations+PDB+SwissProt+PIR+PRF excluding environmental samples from WGS projects  
 Program BLASTP 2.2.30+ [Citation](#)

Other reports: [Search Summary](#) [Taxonomy reports](#) [Distance tree of results](#) [Multiple alignment](#)

### Graphic Summary

[Show Conserved Domains](#)

No putative conserved domains have been detected

Distribution of 100 Blast Hits on the Query Sequence



The image displays a table with 30 rows. Each row contains a single horizontal green line, which is a common visual representation for a missing or empty data entry in a database or spreadsheet. The lines are evenly spaced and extend across most of the width of the table area.

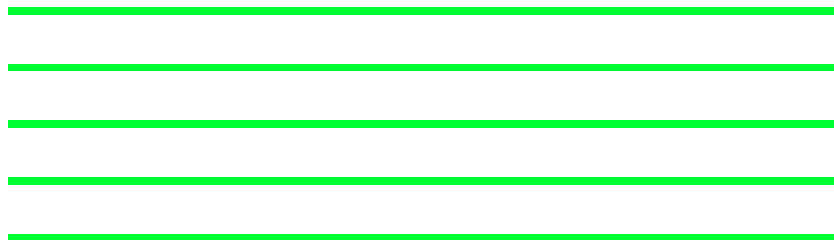

**Descriptions**

**Sequences producing significant alignments:**

Select: [All](#) [None](#) Selected:0

[Alignments](#)
[Download](#)
[GenPept](#)
[Graphics](#)
[Distance tree of results](#)
[Multiple alignment](#)


| Description                                                                                      | Max score | Total score | Query cover | E value | Ident | Accession                      |
|--------------------------------------------------------------------------------------------------|-----------|-------------|-------------|---------|-------|--------------------------------|
| <a href="#">PREDICTED: prolow-density lipoprotein receptor-related protein 1 [Galeopteri</a>     | 60.0      | 60.0        | 100%        | 6e-09   | 100%  | <a href="#">XP_008577888.1</a> |
| <a href="#">PREDICTED: prolow-density lipoprotein receptor-related protein 1-like [Gorilla</a>   | 57.5      | 57.5        | 100%        | 3e-08   | 94%   | <a href="#">XP_004053466.1</a> |
| <a href="#">alpha-2 macroglobulin receptor [Homo sapiens]</a>                                    | 57.5      | 57.5        | 100%        | 4e-08   | 94%   | <a href="#">CAA38905.1</a>     |
| <a href="#">PREDICTED: prolow-density lipoprotein receptor-related protein 1 [Macaca m</a>       | 57.5      | 57.5        | 100%        | 4e-08   | 94%   | <a href="#">XP_001099776.2</a> |
| <a href="#">PREDICTED: prolow-density lipoprotein receptor-related protein 1-like [Sus sc</a>    | 57.5      | 57.5        | 100%        | 4e-08   | 94%   | <a href="#">XP_005663981.1</a> |
| <a href="#">Prolow-density lipoprotein receptor-related protein 1 [Cricetulus griseus]</a>       | 57.5      | 57.5        | 100%        | 4e-08   | 94%   | <a href="#">EGW02265.1</a>     |
| <a href="#">low density lipoprotein-related protein 1 variant [Homo sapiens]</a>                 | 57.5      | 57.5        | 100%        | 4e-08   | 94%   | <a href="#">BAD92735.1</a>     |
| <a href="#">PREDICTED: LOW QUALITY PROTEIN: prolow-density lipoprotein receptor-r</a>            | 57.5      | 57.5        | 100%        | 5e-08   | 94%   | <a href="#">XP_005663982.1</a> |
| <a href="#">PREDICTED: prolow-density lipoprotein receptor-related protein 1-like [Leptor</a>    | 57.5      | 57.5        | 100%        | 5e-08   | 94%   | <a href="#">XP_006740139.1</a> |
| <a href="#">PREDICTED: prolow-density lipoprotein receptor-related protein 1 isoform X6</a>      | 57.5      | 57.5        | 100%        | 5e-08   | 94%   | <a href="#">XP_004861314.1</a> |
| <a href="#">PREDICTED: LOW QUALITY PROTEIN: prolow-density lipoprotein receptor-r</a>            | 57.5      | 57.5        | 100%        | 5e-08   | 94%   | <a href="#">XP_005079884.1</a> |
| <a href="#">PREDICTED: LOW QUALITY PROTEIN: prolow-density lipoprotein receptor-r</a>            | 57.5      | 57.5        | 100%        | 5e-08   | 94%   | <a href="#">XP_005680480.1</a> |
| <a href="#">PREDICTED: LOW QUALITY PROTEIN: prolow-density lipoprotein receptor-r</a>            | 57.5      | 57.5        | 100%        | 5e-08   | 94%   | <a href="#">XP_010837673.1</a> |
| <a href="#">PREDICTED: LOW QUALITY PROTEIN: prolow-density lipoprotein receptor-r</a>            | 57.5      | 57.5        | 100%        | 5e-08   | 94%   | <a href="#">XP_004089687.1</a> |
| <a href="#">PREDICTED: LOW QUALITY PROTEIN: prolow-density lipoprotein receptor-r</a>            | 57.5      | 57.5        | 100%        | 5e-08   | 94%   | <a href="#">XP_009246220.1</a> |
| <a href="#">prolow-density lipoprotein receptor-related protein 1 [Cricetulus griseus]</a>       | 57.5      | 57.5        | 100%        | 5e-08   | 94%   | <a href="#">ERE90595.1</a>     |
| <a href="#">low density lipoprotein-related protein 1 (alpha-2-macroglobulin receptor), isof</a> | 57.5      | 57.5        | 100%        | 5e-08   | 94%   | <a href="#">EAW96991.1</a>     |
| <a href="#">PREDICTED: prolow-density lipoprotein receptor-related protein 1 [Papio anul</a>     | 57.5      | 57.5        | 100%        | 5e-08   | 94%   | <a href="#">XP_009179348.1</a> |
| <a href="#">PREDICTED: LOW QUALITY PROTEIN: prolow-density lipoprotein receptor-r</a>            | 57.5      | 57.5        | 100%        | 5e-08   | 94%   | <a href="#">XP_006171989.1</a> |
| <a href="#">PREDICTED: LOW QUALITY PROTEIN: prolow-density lipoprotein receptor-r</a>            | 57.5      | 57.5        | 100%        | 5e-08   | 94%   | <a href="#">XP_004007507.1</a> |
| <a href="#">PREDICTED: prolow-density lipoprotein receptor-related protein 1 isoform X2</a>      | 57.5      | 57.5        | 100%        | 5e-08   | 94%   | <a href="#">XP_005571350.1</a> |
| <a href="#">PREDICTED: prolow-density lipoprotein receptor-related protein 1 [Nannospal</a>      | 57.5      | 57.5        | 100%        | 5e-08   | 94%   | <a href="#">XP_008842311.1</a> |
| <a href="#">PREDICTED: prolow-density lipoprotein receptor-related protein 1 [Eptesicus</a>      | 57.5      | 57.5        | 100%        | 5e-08   | 94%   | <a href="#">XP_008146901.1</a> |
| <a href="#">PREDICTED: prolow-density lipoprotein receptor-related protein 1 [Chloroceb</a>      | 57.5      | 57.5        | 100%        | 5e-08   | 94%   | <a href="#">XP_008001930.1</a> |
| <a href="#">PREDICTED: LOW QUALITY PROTEIN: prolow-density lipoprotein receptor-r</a>            | 57.5      | 57.5        | 100%        | 5e-08   | 94%   | <a href="#">XP_006077921.1</a> |
| <a href="#">PREDICTED: prolow-density lipoprotein receptor-related protein 1 [Peromysci</a>      | 57.5      | 57.5        | 100%        | 5e-08   | 94%   | <a href="#">XP_006973336.1</a> |
| <a href="#">LDL-receptor related precursor (AA -19 to 4525) [Homo sapiens]</a>                   | 57.5      | 57.5        | 100%        | 5e-08   | 94%   | <a href="#">CAA32112.1</a>     |
| <a href="#">PREDICTED: LOW QUALITY PROTEIN: prolow-density lipoprotein receptor-r</a>            | 57.5      | 57.5        | 100%        | 5e-08   | 94%   | <a href="#">XP_005970658.1</a> |
| <a href="#">PREDICTED: prolow-density lipoprotein receptor-related protein 1 isoform X1</a>      | 57.5      | 57.5        | 100%        | 5e-08   | 94%   | <a href="#">XP_005571349.1</a> |



|                                                                                                |      |      |      |       |     |                                |
|------------------------------------------------------------------------------------------------|------|------|------|-------|-----|--------------------------------|
| <a href="#">PREDICTED: prolow-density lipoprotein receptor-related protein 1 [Ictidomys l.</a> | 57.5 | 57.5 | 100% | 5e-08 | 94% | <a href="#">XP_005335719.1</a> |
| <a href="#">PREDICTED: prolow-density lipoprotein receptor-related protein 1 [Microtus o</a>   | 57.5 | 57.5 | 100% | 5e-08 | 94% | <a href="#">XP_005358067.1</a> |
| <a href="#">PREDICTED: prolow-density lipoprotein receptor-related protein 1 isoform X2</a>    | 57.5 | 57.5 | 100% | 5e-08 | 94% | <a href="#">XP_004773232.1</a> |
| <a href="#">PREDICTED: prolow-density lipoprotein receptor-related protein 1 [Ochotona</a>     | 57.5 | 57.5 | 100% | 5e-08 | 94% | <a href="#">XP_004582988.1</a> |
| <a href="#">PREDICTED: prolow-density lipoprotein receptor-related protein 1 [Cerather</a>     | 57.5 | 57.5 | 100% | 5e-08 | 94% | <a href="#">XP_004429344.1</a> |
| <a href="#">PREDICTED: prolow-density lipoprotein receptor-related protein 1 [Odobenus</a>     | 57.5 | 57.5 | 100% | 5e-08 | 94% | <a href="#">XP_004401759.1</a> |
| <a href="#">PREDICTED: prolow-density lipoprotein receptor-related protein 1 [Pteropus e</a>   | 57.5 | 57.5 | 100% | 5e-08 | 94% | <a href="#">XP_006908994.1</a> |
| <a href="#">PREDICTED: prolow-density lipoprotein receptor-related protein 1 [Gorilla gor</a>  | 57.5 | 57.5 | 100% | 5e-08 | 94% | <a href="#">XP_004053457.1</a> |
| <a href="#">PREDICTED: prolow-density lipoprotein receptor-related protein 1 [Felis catus</a>  | 57.5 | 57.5 | 100% | 5e-08 | 94% | <a href="#">XP_003988980.1</a> |
| <a href="#">PREDICTED: prolow-density lipoprotein receptor-related protein 1 [Pan panis</a>    | 57.5 | 57.5 | 100% | 5e-08 | 94% | <a href="#">XP_003824931.1</a> |
| <a href="#">PREDICTED: prolow-density lipoprotein receptor-related protein 1 [Otolemur c</a>   | 57.5 | 57.5 | 100% | 5e-08 | 94% | <a href="#">XP_003790595.1</a> |
| <a href="#">PREDICTED: prolow-density lipoprotein receptor-related protein 1 [Canis lupu</a>   | 57.5 | 57.5 | 100% | 5e-08 | 94% | <a href="#">XP_538245.4</a>    |
| <a href="#">PREDICTED: LOW QUALITY PROTEIN: prolow-density lipoprotein receptor-r</a>          | 57.5 | 57.5 | 100% | 5e-08 | 94% | <a href="#">XP_003586126.1</a> |
| <a href="#">PREDICTED: LOW QUALITY PROTEIN: prolow-density lipoprotein receptor-r</a>          | 57.5 | 57.5 | 100% | 5e-08 | 94% | <a href="#">XP_003582266.1</a> |
| <a href="#">PREDICTED: prolow-density lipoprotein receptor-related protein 1 isoform X1</a>    | 57.5 | 57.5 | 100% | 5e-08 | 94% | <a href="#">XP_003507539.1</a> |
| <a href="#">Prolow-density lipoprotein receptor-related protein 1 [Heterocephalus glaber]</a>  | 57.5 | 57.5 | 100% | 5e-08 | 94% | <a href="#">EHB07654.1</a>     |
| <a href="#">prolow-density lipoprotein receptor-related protein 1 precursor [Homo sapiens</a>  | 57.5 | 57.5 | 100% | 5e-08 | 94% | <a href="#">NP_002323.2</a>    |
| <a href="#">PREDICTED: prolow-density lipoprotein receptor-related protein 1 [Heterocep</a>    | 57.5 | 57.5 | 100% | 5e-08 | 94% | <a href="#">XP_004892003.1</a> |
| <a href="#">PREDICTED: prolow-density lipoprotein receptor-related protein 1 isoform X3</a>    | 57.5 | 57.5 | 100% | 5e-08 | 94% | <a href="#">XP_007631248.1</a> |
| <a href="#">PREDICTED: LOW QUALITY PROTEIN: prolow-density lipoprotein receptor-r</a>          | 57.5 | 57.5 | 100% | 5e-08 | 94% | <a href="#">XP_005901764.1</a> |
| <a href="#">PREDICTED: LOW QUALITY PROTEIN: prolow-density lipoprotein receptor-r</a>          | 57.5 | 57.5 | 100% | 5e-08 | 94% | <a href="#">XP_005006453.1</a> |
| <a href="#">PREDICTED: prolow-density lipoprotein receptor-related protein 1 isoform X5</a>    | 57.5 | 57.5 | 100% | 5e-08 | 94% | <a href="#">XP_004861313.1</a> |
| <a href="#">PREDICTED: LOW QUALITY PROTEIN: prolow-density lipoprotein receptor-r</a>          | 57.5 | 57.5 | 100% | 5e-08 | 94% | <a href="#">XP_002916050.1</a> |
| <a href="#">PREDICTED: prolow-density lipoprotein receptor-related protein 1 [Rhinopithe</a>   | 57.5 | 57.5 | 100% | 5e-08 | 94% | <a href="#">XP_010387314.1</a> |
| <a href="#">PREDICTED: prolow-density lipoprotein receptor-related protein 1 isoform X1</a>    | 57.5 | 57.5 | 100% | 5e-08 | 94% | <a href="#">XP_004773231.1</a> |
| <a href="#">PREDICTED: prolow-density lipoprotein receptor-related protein 1 [Panthera t</a>   | 57.5 | 57.5 | 100% | 5e-08 | 94% | <a href="#">XP_007081658.1</a> |
| <a href="#">PREDICTED: prolow-density lipoprotein receptor-related protein 1 [Orycteropi</a>   | 57.5 | 57.5 | 100% | 5e-08 | 94% | <a href="#">XP_007948203.1</a> |
| <a href="#">Prolow-density lipoprotein receptor-related protein 1 [Tupaia chinensis]</a>       | 57.5 | 57.5 | 100% | 5e-08 | 94% | <a href="#">ELV09244.1</a>     |
| <a href="#">PREDICTED: prolow-density lipoprotein receptor-related protein 1 isoform X4</a>    | 57.5 | 57.5 | 100% | 5e-08 | 94% | <a href="#">XP_004861312.1</a> |
| <a href="#">PREDICTED: prolow-density lipoprotein receptor-related protein 1 isoform X3</a>    | 57.5 | 57.5 | 100% | 5e-08 | 94% | <a href="#">XP_004861311.1</a> |
| <a href="#">PREDICTED: prolow-density lipoprotein receptor-related protein 1 isoform X2</a>    | 57.5 | 57.5 | 100% | 5e-08 | 94% | <a href="#">XP_004861310.1</a> |
| <a href="#">Prolow-density lipoprotein receptor-related protein 1 [Macaca mulatta]</a>         | 57.5 | 57.5 | 100% | 5e-08 | 94% | <a href="#">EHH20885.1</a>     |
| <a href="#">PREDICTED: prolow-density lipoprotein receptor-related protein 1 isoform X1</a>    | 57.5 | 57.5 | 100% | 5e-08 | 94% | <a href="#">XP_004861309.1</a> |
| <a href="#">PREDICTED: LOW QUALITY PROTEIN: prolow-density lipoprotein receptor-r</a>          | 57.5 | 57.5 | 100% | 5e-08 | 94% | <a href="#">XP_009423492.1</a> |
| <a href="#">PREDICTED: prolow-density lipoprotein receptor-related protein 1 [Saimiri bol</a>  | 54.5 | 54.5 | 100% | 5e-07 | 89% | <a href="#">XP_003926506.1</a> |
| <a href="#">PREDICTED: prolow-density lipoprotein receptor-related protein 1 [Fukomys c</a>    | 54.5 | 54.5 | 100% | 5e-07 | 89% | <a href="#">XP_010642934.1</a> |
| <a href="#">prolow-density lipoprotein receptor-related protein 1 precursor [Camelus ferus</a> | 54.1 | 54.1 | 100% | 6e-07 | 89% | <a href="#">EPY83079.1</a>     |
| <a href="#">PREDICTED: LOW QUALITY PROTEIN: prolow-density lipoprotein receptor-r</a>          | 54.1 | 54.1 | 100% | 6e-07 | 89% | <a href="#">XP_004319899.1</a> |
| <a href="#">PREDICTED: prolow-density lipoprotein receptor-related protein 1 [Equus prz</a>    | 54.1 | 54.1 | 100% | 6e-07 | 89% | <a href="#">XP_008538795.1</a> |
| <a href="#">PREDICTED: LOW QUALITY PROTEIN: prolow-density lipoprotein receptor-r</a>          | 54.1 | 54.1 | 100% | 6e-07 | 89% | <a href="#">XP_001916726.3</a> |
| <a href="#">PREDICTED: prolow-density lipoprotein receptor-related protein 1 [Dasypus n</a>    | 54.1 | 54.1 | 100% | 6e-07 | 89% | <a href="#">XP_004466256.1</a> |
| <a href="#">PREDICTED: LOW QUALITY PROTEIN: prolow-density lipoprotein receptor-r</a>          | 54.1 | 54.1 | 100% | 6e-07 | 89% | <a href="#">XP_006182311.1</a> |
| <a href="#">PREDICTED: prolow-density lipoprotein receptor-related protein 1 [Physeter c</a>   | 54.1 | 54.1 | 100% | 6e-07 | 89% | <a href="#">XP_007103970.1</a> |
| <a href="#">PREDICTED: LOW QUALITY PROTEIN: prolow-density lipoprotein receptor-r</a>          | 54.1 | 54.1 | 100% | 6e-07 | 89% | <a href="#">XP_010944587.1</a> |
| <a href="#">PREDICTED: prolow-density lipoprotein receptor-related protein 1 [Tarsius sy</a>   | 54.1 | 54.1 | 100% | 6e-07 | 89% | <a href="#">XP_008063421.1</a> |

|                                                                                                 |      |      |      |       |     |                                |
|-------------------------------------------------------------------------------------------------|------|------|------|-------|-----|--------------------------------|
| <a href="#">PREDICTED: prolow-density lipoprotein receptor-related protein 1 [Lipotes ve:</a>   | 54.1 | 54.1 | 100% | 6e-07 | 89% | <a href="#">XP_007467748.1</a> |
| <a href="#">PREDICTED: prolow-density lipoprotein receptor-related protein 1 [Balaenopt:</a>    | 54.1 | 54.1 | 100% | 6e-07 | 89% | <a href="#">XP_007179703.1</a> |
| <a href="#">PREDICTED: prolow-density lipoprotein receptor-related protein 1 [Orcinus or</a>    | 54.1 | 54.1 | 100% | 6e-07 | 89% | <a href="#">XP_004276566.1</a> |
| <a href="#">PREDICTED: prolow-density lipoprotein receptor-related protein 1 [Vicugna p:</a>    | 54.1 | 54.1 | 100% | 6e-07 | 89% | <a href="#">XP_006217992.1</a> |
| <a href="#">PREDICTED: LOW QUALITY PROTEIN: prolow-density lipoprotein receptor-r</a>           | 54.1 | 54.1 | 100% | 6e-07 | 89% | <a href="#">XP_010989287.1</a> |
| <a href="#">PREDICTED: prolow-density lipoprotein receptor-related protein 1 [Trichechus</a>    | 54.1 | 54.1 | 100% | 6e-07 | 89% | <a href="#">XP_004379953.1</a> |
| <a href="#">Prolow-density lipoprotein receptor-related protein 1 [Myotis brandtii]</a>         | 53.7 | 53.7 | 100% | 9e-07 | 89% | <a href="#">EPQ15635.1</a>     |
| <a href="#">PREDICTED: prolow-density lipoprotein receptor-related protein 1 [Condylura</a>     | 53.7 | 53.7 | 100% | 9e-07 | 89% | <a href="#">XP_004692481.1</a> |
| <a href="#">PREDICTED: LOW QUALITY PROTEIN: prolow-density lipoprotein receptor-r</a>           | 53.7 | 53.7 | 100% | 9e-07 | 89% | <a href="#">XP_005879129.1</a> |
| <a href="#">PREDICTED: prolow-density lipoprotein receptor-related protein 1 [Jaculus jar</a>   | 53.7 | 53.7 | 100% | 9e-07 | 89% | <a href="#">XP_004650057.1</a> |
| <a href="#">PREDICTED: LOW QUALITY PROTEIN: prolow-density lipoprotein receptor-r</a>           | 53.7 | 53.7 | 100% | 9e-07 | 89% | <a href="#">XP_002720990.1</a> |
| <a href="#">PREDICTED: prolow-density lipoprotein receptor-related protein 1 [Octodon d</a>     | 53.7 | 53.7 | 100% | 9e-07 | 89% | <a href="#">XP_004647047.1</a> |
| <a href="#">prolow-density lipoprotein receptor-related protein 1 precursor [Rattus norvegi</a> | 53.7 | 53.7 | 100% | 9e-07 | 89% | <a href="#">NP_001123962.1</a> |
| <a href="#">RecName: Full=Prolow-density lipoprotein receptor-related protein 1; Short=L</a>    | 53.7 | 53.7 | 100% | 9e-07 | 89% | <a href="#">Q91ZX7.1</a>       |
| <a href="#">AM2 receptor [Mus musculus]</a>                                                     | 53.7 | 53.7 | 100% | 9e-07 | 89% | <a href="#">CAA47817.1</a>     |
| <a href="#">prolow-density lipoprotein receptor-related protein 1 precursor [Mus musculus</a>   | 53.7 | 53.7 | 100% | 9e-07 | 89% | <a href="#">NP_032538.2</a>    |
| <a href="#">PREDICTED: prolow-density lipoprotein receptor-related protein 1 [Chinchilla</a>    | 53.7 | 53.7 | 100% | 9e-07 | 89% | <a href="#">XP_005397405.1</a> |
| <a href="#">PREDICTED: prolow-density lipoprotein receptor-related protein 1 isoform X1</a>     | 53.7 | 53.7 | 100% | 9e-07 | 89% | <a href="#">XP_008763615.1</a> |
| <a href="#">PREDICTED: prolow-density lipoprotein receptor-related protein 1 [Sorex arar</a>    | 52.8 | 52.8 | 100% | 2e-06 | 89% | <a href="#">XP_004602001.1</a> |
| <a href="#">PREDICTED: prolow-density lipoprotein receptor-related protein 1 [Chrysochl</a>     | 51.5 | 51.5 | 100% | 5e-06 | 83% | <a href="#">XP_006859524.1</a> |
| <a href="#">PREDICTED: prolow-density lipoprotein receptor-related protein 1 [Callithrix j:</a> | 51.1 | 51.1 | 100% | 6e-06 | 83% | <a href="#">XP_009002393.1</a> |
| <a href="#">PREDICTED: LOW QUALITY PROTEIN: prolow-density lipoprotein receptor-r</a>           | 51.1 | 51.1 | 100% | 6e-06 | 83% | <a href="#">XP_010599559.1</a> |
| <a href="#">PREDICTED: LOW QUALITY PROTEIN: prolow-density lipoprotein receptor-r</a>           | 51.1 | 51.1 | 100% | 6e-06 | 83% | <a href="#">XP_009002304.1</a> |
| <a href="#">PREDICTED: prolow-density lipoprotein receptor-related protein 1 [Echinops t</a>    | 50.7 | 50.7 | 100% | 9e-06 | 83% | <a href="#">XP_004700589.1</a> |
| <a href="#">PREDICTED: prolow-density lipoprotein receptor-related protein 1 [Elephantul</a>    | 50.3 | 50.3 | 100% | 1e-05 | 83% | <a href="#">XP_006897663.1</a> |
| <a href="#">PREDICTED: prolow-density lipoprotein receptor-related protein 1 [Erinaceus</a>     | 44.8 | 44.8 | 100% | 8e-04 | 72% | <a href="#">XP_007535029.1</a> |

## Alignments

Download GenPept Graphics

Next Previous Descriptions

PREDICTED: prolow-density lipoprotein receptor-related protein 1 [Galeopterus variegatus]

Sequence ID: [ref|XP\\_008577888.1|](#) Length: 4544 Number of Matches: 1

Range 1: 3781 to 3798 GenPept Graphics

Next Match Previous Match

| Score          | Expect | Identities  | Positives   | Gaps     |
|----------------|--------|-------------|-------------|----------|
| 60.0 bits(134) | 6e-09  | 18/18(100%) | 18/18(100%) | 0/18(0%) |

Query 1 KLTSCATDASICGDEARC 18  
 KLTSCATDASICGDEARC  
 Sbjct 3781 KLTSCATDASICGDEARC 3798

### Related Information

[Gene](#) - associated gene details  
[Map Viewer](#) - aligned genomic context

Download GenPept Graphics

Next Previous Descriptions

PREDICTED: prolow-density lipoprotein receptor-related protein 1-like [Gorilla gorilla gorilla]

Sequence ID: [ref|XP\\_004053466.1|](#) Length: 216 Number of Matches: 1

Range 1: 92 to 109 GenPept Graphics

Next Match Previous Match

| Score          | Expect | Identities | Positives   | Gaps     |
|----------------|--------|------------|-------------|----------|
| 57.5 bits(128) | 3e-08  | 17/18(94%) | 18/18(100%) | 0/18(0%) |

### Related Information

[Gene](#) - associated gene details  
[Map Viewer](#) - aligned genomic context

Query 1 KLTSCATDASICGDEARC 18  
 KLTSCAT+ASICGDEARC  
 Sbjct 92 KLTSCATNASICGDEARC 109

[Download](#) [GenPept](#) [Graphics](#)

[Next](#) [Previous](#) [Descriptions](#)

alpha-2 macroglobulin receptor, partial [Homo sapiens]

Sequence ID: [emb|CAA38905.1|](#) Length: 591 Number of Matches: 1

Range 1: 507 to 524 [GenPept](#) [Graphics](#)

[Next Match](#) [Previous Match](#)

| Score          | Expect | Identities | Positives   | Gaps     |
|----------------|--------|------------|-------------|----------|
| 57.5 bits(128) | 4e-08  | 17/18(94%) | 18/18(100%) | 0/18(0%) |

Query 1 KLTSCATDASICGDEARC 18  
 KLTSCAT+ASICGDEARC  
 Sbjct 507 KLTSCATNASICGDEARC 524

**Related Information**

[Gene](#) - associated gene details

[Download](#) [GenPept](#) [Graphics](#)

[Next](#) [Previous](#) [Descriptions](#)

PREDICTED: prolown-density lipoprotein receptor-related protein 1 [Macaca mulatta]

Sequence ID: [ref|XP\\_001099776.2|](#) Length: 1682 Number of Matches: 1

Range 1: 919 to 936 [GenPept](#) [Graphics](#)

[Next Match](#) [Previous Match](#)

| Score          | Expect | Identities | Positives   | Gaps     |
|----------------|--------|------------|-------------|----------|
| 57.5 bits(128) | 4e-08  | 17/18(94%) | 18/18(100%) | 0/18(0%) |

Query 1 KLTSCATDASICGDEARC 18  
 KLTSCAT+ASICGDEARC  
 Sbjct 919 KLTSCATNASICGDEARC 936

**Related Information**

[Gene](#) - associated gene details

[UniGene](#) - clustered expressed sequence tags

[Map Viewer](#) - aligned genomic context

[Download](#) [GenPept](#) [Graphics](#)

[Next](#) [Previous](#) [Descriptions](#)

PREDICTED: prolown-density lipoprotein receptor-related protein 1-like [Sus scrofa]

Sequence ID: [ref|XP\\_005663981.1|](#) Length: 1689 Number of Matches: 1

Range 1: 926 to 943 [GenPept](#) [Graphics](#)

[Next Match](#) [Previous Match](#)

| Score          | Expect | Identities | Positives   | Gaps     |
|----------------|--------|------------|-------------|----------|
| 57.5 bits(128) | 4e-08  | 17/18(94%) | 18/18(100%) | 0/18(0%) |

Query 1 KLTSCATDASICGDEARC 18  
 KLTSCAT+ASICGDEARC  
 Sbjct 926 KLTSCATNASICGDEARC 943

**Related Information**

[Gene](#) - associated gene details

BLAST is a registered trademark of the National Library of Medicine.

NCBI/ BLAST/ blastp suite/ Formatting Results - B9G227V901R

**i** Your search parameters were adjusted to search for a short input sequence.

[Edit and Resubmit](#) [Save Search Strategies](#) [▶ Formatting options](#) [▶ Download](#)

[YouTube](#) [How to read this page](#) [Blast report description](#)

### LRP1\_KLTSCATNASICGDEARC\_NonMod

RID [B9G227V901R](#) (Expires on 01-14 13:50 pm)

**Query ID** |cl|55787  
**Description** None  
**Molecule type** amino acid  
**Query Length** 18

**Database Name** nr  
**Description** All non-redundant GenBank CDS translations+PDB+SwissProt+PIR excluding environmental samples from WGS projects  
**Program** BLASTP 2.2.30+ [▶ Citation](#)

Other reports: [▶ Search Summary](#) [\[Taxonomy reports\]](#) [\[Distance tree of results\]](#) [\[Related Structures\]](#) [\[Multiple alignment\]](#)

### **G**raphic Summary

[Show Conserved Domains](#)

No putative conserved domains have been detected

Distribution of 185 Blast Hits on the Query Sequence



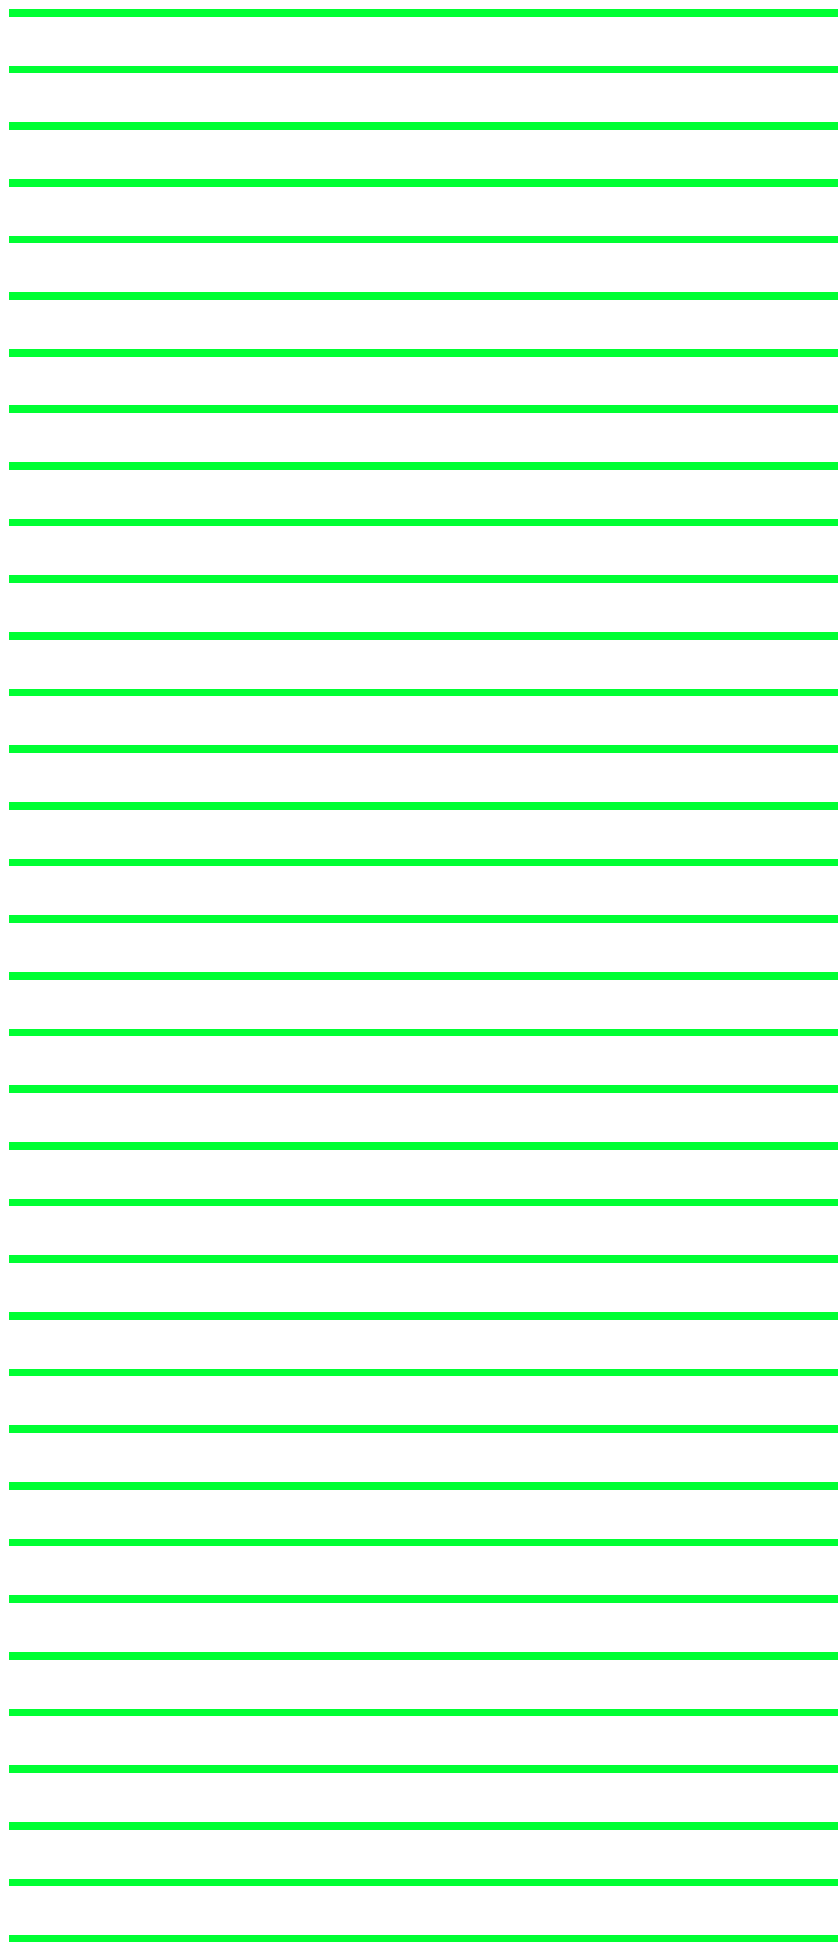

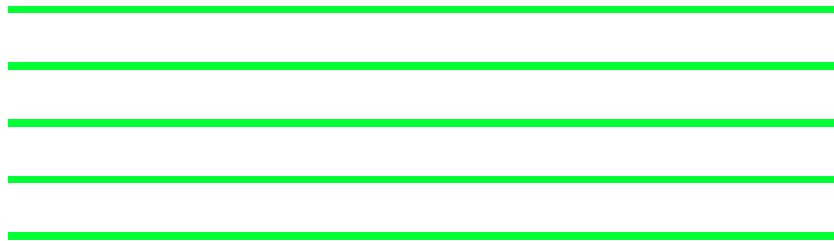

**Descriptions**

**Sequences producing significant alignments:**

Select: [All](#) [None](#) Selected:0

[↑](#) [Alignments](#)
[Download](#)
[GenPept](#)
[Graphics](#)
[Distance tree of results](#)
[Multiple alignment](#)
⚙

| Description                                                                                                                                            | Max score | Total score | Query cover | E value | Ident | Accession                                   |
|--------------------------------------------------------------------------------------------------------------------------------------------------------|-----------|-------------|-------------|---------|-------|---------------------------------------------|
| <a href="#">PREDICTED: prolow-density lipoprotein receptor-related protein 1-<br/>alpha-2 macroglobulin receptor [Homo sapiens]</a>                    | 60.0      | 60.0        | 100%        | 4e-09   | 100%  | <a href="#">gij426373132 XP_004053466.1</a> |
| <a href="#">PREDICTED: prolow-density lipoprotein receptor-related protein 1 [Homo sapiens]</a>                                                        | 60.0      | 60.0        | 100%        | 5e-09   | 100%  | <a href="#">gij24763 CAA38905.1</a>         |
| <a href="#">PREDICTED: prolow-density lipoprotein receptor-related protein 1 [Homo sapiens]</a>                                                        | 60.0      | 60.0        | 100%        | 6e-09   | 100%  | <a href="#">gij297262740 XP_001099776.2</a> |
| <a href="#">PREDICTED: prolow-density lipoprotein receptor-related protein 1-<br/>low density lipoprotein-related protein 1 variant [Homo sapiens]</a> | 60.0      | 60.0        | 100%        | 6e-09   | 100%  | <a href="#">gij545826194 XP_005663981.1</a> |
| <a href="#">Prolow-density lipoprotein receptor-related protein 1 [Cricetulus gris]</a>                                                                | 60.0      | 60.0        | 100%        | 6e-09   | 100%  | <a href="#">gij344246161 EGW02265.1</a>     |
| <a href="#">PREDICTED: LOW QUALITY PROTEIN: prolow-density lipoprotein receptor-related protein 1 [Homo sapiens]</a>                                   | 60.0      | 79.7        | 100%        | 6e-09   | 100%  | <a href="#">gij62088576 BAD92735.1</a>      |
| <a href="#">PREDICTED: LOW QUALITY PROTEIN: prolow-density lipoprotein receptor-related protein 1 [Homo sapiens]</a>                                   | 60.0      | 79.7        | 100%        | 6e-09   | 100%  | <a href="#">gij545826198 XP_005663982.1</a> |
| <a href="#">PREDICTED: prolow-density lipoprotein receptor-related protein 1 [Homo sapiens]</a>                                                        | 60.0      | 79.7        | 100%        | 6e-09   | 100%  | <a href="#">gij585176792 XP_006740139.1</a> |
| <a href="#">PREDICTED: prolow-density lipoprotein receptor-related protein 1 [Homo sapiens]</a>                                                        | 60.0      | 79.7        | 100%        | 6e-09   | 100%  | <a href="#">gij512999545 XP_004861314.1</a> |
| <a href="#">PREDICTED: LOW QUALITY PROTEIN: prolow-density lipoprotein receptor-related protein 1 [Homo sapiens]</a>                                   | 60.0      | 79.7        | 100%        | 6e-09   | 100%  | <a href="#">gij524959879 XP_005079884.1</a> |
| <a href="#">PREDICTED: LOW QUALITY PROTEIN: prolow-density lipoprotein receptor-related protein 1 [Homo sapiens]</a>                                   | 60.0      | 79.7        | 100%        | 6e-09   | 100%  | <a href="#">gij548466622 XP_005680480.1</a> |
| <a href="#">PREDICTED: LOW QUALITY PROTEIN: prolow-density lipoprotein receptor-related protein 1 [Homo sapiens]</a>                                   | 60.0      | 79.7        | 100%        | 6e-09   | 100%  | <a href="#">gij441632367 XP_004089687.1</a> |
| <a href="#">PREDICTED: LOW QUALITY PROTEIN: prolow-density lipoprotein receptor-related protein 1 [Homo sapiens]</a>                                   | 60.0      | 79.7        | 100%        | 6e-09   | 100%  | <a href="#">gij686741357 XP_009246220.1</a> |
| <a href="#">prolow-density lipoprotein receptor-related protein 1 [Cricetulus gris]</a>                                                                | 60.0      | 79.7        | 100%        | 6e-09   | 100%  | <a href="#">gij537264203 ERE90595.1</a>     |
| <a href="#">low density lipoprotein-related protein 1 (alpha-2-macroglobulin receptor-related protein 1) [Homo sapiens]</a>                            | 60.0      | 79.7        | 100%        | 6e-09   | 100%  | <a href="#">gij119617397 EAW96991.1</a>     |
| <a href="#">PREDICTED: prolow-density lipoprotein receptor-related protein 1 [Homo sapiens]</a>                                                        | 60.0      | 79.7        | 100%        | 6e-09   | 100%  | <a href="#">gij685573313 XP_009179348.1</a> |
| <a href="#">PREDICTED: LOW QUALITY PROTEIN: prolow-density lipoprotein receptor-related protein 1 [Homo sapiens]</a>                                   | 60.0      | 79.7        | 100%        | 6e-09   | 100%  | <a href="#">gij562889304 XP_006171989.1</a> |
| <a href="#">PREDICTED: LOW QUALITY PROTEIN: prolow-density lipoprotein receptor-related protein 1 [Homo sapiens]</a>                                   | 60.0      | 79.7        | 100%        | 6e-09   | 100%  | <a href="#">gij426226765 XP_004007507.1</a> |
| <a href="#">PREDICTED: prolow-density lipoprotein receptor-related protein 1 [Homo sapiens]</a>                                                        | 60.0      | 79.7        | 100%        | 6e-09   | 100%  | <a href="#">gij544470778 XP_005571350.1</a> |
| <a href="#">PREDICTED: prolow-density lipoprotein receptor-related protein 1 [Homo sapiens]</a>                                                        | 60.0      | 79.7        | 100%        | 6e-09   | 100%  | <a href="#">gij674070409 XP_008842311.1</a> |
| <a href="#">PREDICTED: prolow-density lipoprotein receptor-related protein 1 [Homo sapiens]</a>                                                        | 60.0      | 79.7        | 100%        | 6e-09   | 100%  | <a href="#">gij641715077 XP_008146901.1</a> |
| <a href="#">PREDICTED: prolow-density lipoprotein receptor-related protein 1 [Homo sapiens]</a>                                                        | 60.0      | 79.7        | 100%        | 6e-09   | 100%  | <a href="#">gij635066271 XP_008001930.1</a> |
| <a href="#">PREDICTED: LOW QUALITY PROTEIN: prolow-density lipoprotein receptor-related protein 1 [Homo sapiens]</a>                                   | 60.0      | 79.7        | 100%        | 6e-09   | 100%  | <a href="#">gij594110160 XP_006077921.1</a> |
| <a href="#">PREDICTED: prolow-density lipoprotein receptor-related protein 1 [Homo sapiens]</a>                                                        | 60.0      | 79.7        | 100%        | 6e-09   | 100%  | <a href="#">gij589920548 XP_006973336.1</a> |
| <a href="#">LDL-receptor related precursor (AA -19 to 4525) [Homo sapiens]</a>                                                                         | 60.0      | 79.7        | 100%        | 6e-09   | 100%  | <a href="#">gij34339 CAA32112.1</a>         |
| <a href="#">PREDICTED: LOW QUALITY PROTEIN: prolow-density lipoprotein receptor-related protein 1 [Homo sapiens]</a>                                   | 60.0      | 79.7        | 100%        | 6e-09   | 100%  | <a href="#">gij556750484 XP_005970658.1</a> |
| <a href="#">PREDICTED: prolow-density lipoprotein receptor-related protein 1 [Homo sapiens]</a>                                                        | 60.0      | 79.7        | 100%        | 6e-09   | 100%  | <a href="#">gij544470776 XP_005571349.1</a> |
| <a href="#">PREDICTED: prolow-density lipoprotein receptor-related protein 1 [Homo sapiens]</a>                                                        | 60.0      | 79.7        | 100%        | 6e-09   | 100%  | <a href="#">gij532100180 XP_005335719.1</a> |

|                                                                                      |      |      |      |       |      |                                             |
|--------------------------------------------------------------------------------------|------|------|------|-------|------|---------------------------------------------|
| PREDICTED: prolow-density lipoprotein receptor-related protein 1 [                   | 60.0 | 79.7 | 100% | 6e-09 | 100% | <a href="#">gij532030242 XP_005358067.1</a> |
| <a href="#">PREDICTED: prolow-density lipoprotein receptor-related protein 1 i</a>   | 60.0 | 79.7 | 100% | 6e-09 | 100% | <a href="#">gij511907565 XP_004773232.1</a> |
| <a href="#">PREDICTED: prolow-density lipoprotein receptor-related protein 1 [</a>   | 60.0 | 79.7 | 100% | 6e-09 | 100% | <a href="#">gij504141085 XP_004582988.1</a> |
| <a href="#">PREDICTED: prolow-density lipoprotein receptor-related protein 1 [</a>   | 60.0 | 79.7 | 100% | 6e-09 | 100% | <a href="#">gij478510137 XP_004429344.1</a> |
| <a href="#">PREDICTED: prolow-density lipoprotein receptor-related protein 1 [</a>   | 60.0 | 79.7 | 100% | 6e-09 | 100% | <a href="#">gij472364394 XP_004401759.1</a> |
| <a href="#">PREDICTED: prolow-density lipoprotein receptor-related protein 1 [</a>   | 60.0 | 79.7 | 100% | 6e-09 | 100% | <a href="#">gij586547805 XP_006908994.1</a> |
| <a href="#">PREDICTED: prolow-density lipoprotein receptor-related protein 1 [</a>   | 60.0 | 79.7 | 100% | 6e-09 | 100% | <a href="#">gij426373114 XP_004053457.1</a> |
| <a href="#">PREDICTED: prolow-density lipoprotein receptor-related protein 1 [</a>   | 60.0 | 79.7 | 100% | 6e-09 | 100% | <a href="#">gij410964879 XP_003988980.1</a> |
| <a href="#">PREDICTED: prolow-density lipoprotein receptor-related protein 1 [</a>   | 60.0 | 79.7 | 100% | 6e-09 | 100% | <a href="#">gij397509011 XP_003824931.1</a> |
| <a href="#">PREDICTED: prolow-density lipoprotein receptor-related protein 1 [</a>   | 60.0 | 79.7 | 100% | 6e-09 | 100% | <a href="#">gij395835250 XP_003790595.1</a> |
| <a href="#">PREDICTED: prolow-density lipoprotein receptor-related protein 1 [</a>   | 60.0 | 79.7 | 100% | 6e-09 | 100% | <a href="#">gij359320553 XP_538245.4</a>    |
| <a href="#">PREDICTED: LOW QUALITY PROTEIN: prolow-density lipoprotein</a>           | 60.0 | 79.7 | 100% | 6e-09 | 100% | <a href="#">gij359065534 XP_003586126.1</a> |
| <a href="#">PREDICTED: LOW QUALITY PROTEIN: prolow-density lipoprotein</a>           | 60.0 | 79.7 | 100% | 6e-09 | 100% | <a href="#">gij358412256 XP_003582266.1</a> |
| <a href="#">PREDICTED: prolow-density lipoprotein receptor-related protein 1 i</a>   | 60.0 | 79.7 | 100% | 6e-09 | 100% | <a href="#">gij354490790 XP_003507539.1</a> |
| <a href="#">Prolow-density lipoprotein receptor-related protein 1 [Heterocephal</a>  | 60.0 | 79.7 | 100% | 6e-09 | 100% | <a href="#">gij351704735 EHB07654.1</a>     |
| <a href="#">prolow-density lipoprotein receptor-related protein 1 precursor [Hor</a> | 60.0 | 79.7 | 100% | 6e-09 | 100% | <a href="#">gij126012562 NP_002323.2</a>    |
| <a href="#">PREDICTED: prolow-density lipoprotein receptor-related protein 1 [</a>   | 60.0 | 79.7 | 100% | 6e-09 | 100% | <a href="#">gij512869594 XP_004892003.1</a> |
| <a href="#">PREDICTED: prolow-density lipoprotein receptor-related protein 1 i</a>   | 60.0 | 79.7 | 100% | 6e-09 | 100% | <a href="#">gij625279203 XP_007631248.1</a> |
| <a href="#">PREDICTED: LOW QUALITY PROTEIN: prolow-density lipoprotein</a>           | 60.0 | 79.7 | 100% | 6e-09 | 100% | <a href="#">gij555979667 XP_005901764.1</a> |
| <a href="#">PREDICTED: LOW QUALITY PROTEIN: prolow-density lipoprotein</a>           | 60.0 | 79.7 | 100% | 6e-09 | 100% | <a href="#">gij514472752 XP_005006453.1</a> |
| <a href="#">PREDICTED: prolow-density lipoprotein receptor-related protein 1 i</a>   | 60.0 | 79.7 | 100% | 6e-09 | 100% | <a href="#">gij512999543 XP_004861313.1</a> |
| <a href="#">PREDICTED: LOW QUALITY PROTEIN: prolow-density lipoprotein</a>           | 60.0 | 79.7 | 100% | 6e-09 | 100% | <a href="#">gij301761302 XP_002916050.1</a> |
| <a href="#">PREDICTED: prolow-density lipoprotein receptor-related protein 1 [</a>   | 60.0 | 79.7 | 100% | 6e-09 | 100% | <a href="#">gij724946197 XP_010387314.1</a> |
| <a href="#">PREDICTED: prolow-density lipoprotein receptor-related protein 1 i</a>   | 60.0 | 79.7 | 100% | 6e-09 | 100% | <a href="#">gij511907563 XP_004773231.1</a> |
| <a href="#">PREDICTED: prolow-density lipoprotein receptor-related protein 1 [</a>   | 60.0 | 79.7 | 100% | 6e-09 | 100% | <a href="#">gij591310166 XP_007081658.1</a> |
| <a href="#">PREDICTED: prolow-density lipoprotein receptor-related protein 1 [</a>   | 60.0 | 79.7 | 100% | 6e-09 | 100% | <a href="#">gij634873719 XP_007948203.1</a> |
| <a href="#">Prolow-density lipoprotein receptor-related protein 1 [Tupaia chinen</a> | 60.0 | 79.7 | 100% | 6e-09 | 100% | <a href="#">gij444509407 ELV09244.1</a>     |
| <a href="#">PREDICTED: prolow-density lipoprotein receptor-related protein 1 i</a>   | 60.0 | 79.7 | 100% | 6e-09 | 100% | <a href="#">gij512999541 XP_004861312.1</a> |
| <a href="#">PREDICTED: prolow-density lipoprotein receptor-related protein 1 i</a>   | 60.0 | 79.7 | 100% | 6e-09 | 100% | <a href="#">gij512999539 XP_004861311.1</a> |
| <a href="#">PREDICTED: prolow-density lipoprotein receptor-related protein 1 i</a>   | 60.0 | 79.7 | 100% | 6e-09 | 100% | <a href="#">gij512999537 XP_004861310.1</a> |
| <a href="#">Prolow-density lipoprotein receptor-related protein 1 [Macaca mulat</a>  | 60.0 | 79.7 | 100% | 6e-09 | 100% | <a href="#">gij355564385 EHH20885.1</a>     |
| <a href="#">PREDICTED: prolow-density lipoprotein receptor-related protein 1 i</a>   | 60.0 | 79.7 | 100% | 6e-09 | 100% | <a href="#">gij512999535 XP_004861309.1</a> |
| <a href="#">PREDICTED: LOW QUALITY PROTEIN: prolow-density lipoprotein</a>           | 60.0 | 79.7 | 100% | 6e-09 | 100% | <a href="#">gij694949713 XP_009423492.1</a> |
| <a href="#">PREDICTED: prolow-density lipoprotein receptor-related protein 1 [</a>   | 57.5 | 77.2 | 100% | 4e-08 | 94%  | <a href="#">gij667291496 XP_008577888.1</a> |
| <a href="#">PREDICTED: prolow-density lipoprotein receptor-related protein 1 [</a>   | 57.1 | 76.8 | 100% | 6e-08 | 94%  | <a href="#">gij403268915 XP_003926506.1</a> |
| <a href="#">PREDICTED: prolow-density lipoprotein receptor-related protein 1 [</a>   | 57.1 | 76.8 | 100% | 6e-08 | 94%  | <a href="#">gij731261055 XP_010642934.1</a> |
| <a href="#">prolow-density lipoprotein receptor-related protein 1 precursor [Car</a> | 56.6 | 76.4 | 100% | 8e-08 | 94%  | <a href="#">gij528763420 EPY83079.1</a>     |
| <a href="#">PREDICTED: LOW QUALITY PROTEIN: prolow-density lipoprotein</a>           | 56.6 | 56.6 | 100% | 8e-08 | 94%  | <a href="#">gij470625014 XP_004319899.1</a> |
| <a href="#">PREDICTED: prolow-density lipoprotein receptor-related protein 1 [</a>   | 56.6 | 76.4 | 100% | 8e-08 | 94%  | <a href="#">gij664762329 XP_008538795.1</a> |
| <a href="#">PREDICTED: LOW QUALITY PROTEIN: prolow-density lipoprotein</a>           | 56.6 | 76.4 | 100% | 8e-08 | 94%  | <a href="#">gij545220722 XP_001916726.3</a> |
| <a href="#">PREDICTED: prolow-density lipoprotein receptor-related protein 1 [</a>   | 56.6 | 76.4 | 100% | 8e-08 | 94%  | <a href="#">gij488549570 XP_004466256.1</a> |
| <a href="#">PREDICTED: LOW QUALITY PROTEIN: prolow-density lipoprotein</a>           | 56.6 | 76.4 | 100% | 8e-08 | 94%  | <a href="#">gij560912045 XP_006182311.1</a> |
| <a href="#">PREDICTED: prolow-density lipoprotein receptor-related protein 1 [</a>   | 56.6 | 76.4 | 100% | 8e-08 | 94%  | <a href="#">gij593714981 XP_007103970.1</a> |
| <a href="#">PREDICTED: prolow-density lipoprotein receptor-related protein 1 [</a>   | 56.6 | 76.4 | 100% | 8e-08 | 94%  | <a href="#">gij640813454 XP_008063421.1</a> |
| <a href="#">PREDICTED: prolow-density lipoprotein receptor-related protein 1 [</a>   | 56.6 | 76.4 | 100% | 8e-08 | 94%  | <a href="#">gij602715078 XP_007467748.1</a> |

|                                                                                       |      |      |      |       |     |                                             |
|---------------------------------------------------------------------------------------|------|------|------|-------|-----|---------------------------------------------|
| <a href="#">PREDICTED: prolow-density lipoprotein receptor-related protein 1 [</a>    | 56.6 | 76.4 | 100% | 8e-08 | 94% | <a href="#">gij594663045 XP_007179703.1</a> |
| <a href="#">PREDICTED: prolow-density lipoprotein receptor-related protein 1 [</a>    | 56.6 | 76.4 | 100% | 8e-08 | 94% | <a href="#">gij466042191 XP_004276566.1</a> |
| <a href="#">PREDICTED: prolow-density lipoprotein receptor-related protein 1 [</a>    | 56.6 | 76.4 | 100% | 8e-08 | 94% | <a href="#">gij560991701 XP_006217992.1</a> |
| <a href="#">PREDICTED: prolow-density lipoprotein receptor-related protein 1 [</a>    | 56.6 | 76.4 | 100% | 8e-08 | 94% | <a href="#">gij471390420 XP_004379953.1</a> |
| <a href="#">Prolow-density lipoprotein receptor-related protein 1 [Myotis brandti</a> | 56.2 | 56.2 | 100% | 1e-07 | 94% | <a href="#">gij521033850 EPQ15635.1</a>     |
| <a href="#">PREDICTED: prolow-density lipoprotein receptor-related protein 1 [</a>    | 56.2 | 56.2 | 100% | 1e-07 | 94% | <a href="#">gij507976614 XP_004692481.1</a> |
| <a href="#">PREDICTED: LOW QUALITY PROTEIN: prolow-density lipoprotein</a>            | 56.2 | 75.9 | 100% | 1e-07 | 94% | <a href="#">gij554569741 XP_005879129.1</a> |
| <a href="#">PREDICTED: prolow-density lipoprotein receptor-related protein 1 [</a>    | 56.2 | 75.9 | 100% | 1e-07 | 94% | <a href="#">gij507531962 XP_004650057.1</a> |
| <a href="#">PREDICTED: LOW QUALITY PROTEIN: prolow-density lipoprotein</a>            | 56.2 | 75.9 | 100% | 1e-07 | 94% | <a href="#">gij291409329 XP_002720990.1</a> |
| <a href="#">PREDICTED: prolow-density lipoprotein receptor-related protein 1 [</a>    | 56.2 | 75.9 | 100% | 1e-07 | 94% | <a href="#">gij507710973 XP_004647047.1</a> |
| <a href="#">prolow-density lipoprotein receptor-related protein 1 precursor [Ratt</a> | 56.2 | 75.9 | 100% | 1e-07 | 94% | <a href="#">gij283837871 NP_001123962.1</a> |
| <a href="#">RecName: Full=Prolow-density lipoprotein receptor-related protein</a>     | 56.2 | 75.9 | 100% | 1e-07 | 94% | <a href="#">gij81867523 Q91ZX7.1</a>        |
| <a href="#">AM2 receptor [Mus musculus]</a>                                           | 56.2 | 75.9 | 100% | 1e-07 | 94% | <a href="#">gij49942 CAA47817.1</a>         |
| <a href="#">prolow-density lipoprotein receptor-related protein 1 precursor [Mus</a>  | 56.2 | 75.9 | 100% | 1e-07 | 94% | <a href="#">gij124494256 NP_032538.2</a>    |
| <a href="#">PREDICTED: prolow-density lipoprotein receptor-related protein 1 [</a>    | 56.2 | 56.2 | 100% | 1e-07 | 94% | <a href="#">gij533167518 XP_005397405.1</a> |
| <a href="#">PREDICTED: prolow-density lipoprotein receptor-related protein 1 [</a>    | 56.2 | 75.9 | 100% | 1e-07 | 94% | <a href="#">gij672058769 XP_008763615.1</a> |
| <a href="#">PREDICTED: prolow-density lipoprotein receptor-related protein 1 [</a>    | 55.4 | 55.4 | 100% | 2e-07 | 94% | <a href="#">gij505774707 XP_004602001.1</a> |
| <a href="#">PREDICTED: prolow-density lipoprotein receptor-related protein 1 [</a>    | 54.1 | 73.8 | 100% | 6e-07 | 89% | <a href="#">gij586457594 XP_006859524.1</a> |
| <a href="#">PREDICTED: prolow-density lipoprotein receptor-related protein 1 [</a>    | 53.7 | 53.7 | 100% | 8e-07 | 89% | <a href="#">gij675680855 XP_009002393.1</a> |
| <a href="#">PREDICTED: LOW QUALITY PROTEIN: prolow-density lipoprotein</a>            | 53.7 | 73.4 | 100% | 8e-07 | 89% | <a href="#">gij731457843 XP_010599559.1</a> |
| <a href="#">PREDICTED: LOW QUALITY PROTEIN: prolow-density lipoprotein</a>            | 53.7 | 73.4 | 100% | 8e-07 | 89% | <a href="#">gij675680438 XP_009002304.1</a> |
| <a href="#">PREDICTED: prolow-density lipoprotein receptor-related protein 1 [</a>    | 53.2 | 53.2 | 100% | 1e-06 | 89% | <a href="#">gij507637104 XP_004700589.1</a> |
| <a href="#">PREDICTED: prolow-density lipoprotein receptor-related protein 1 [</a>    | 52.8 | 72.5 | 100% | 2e-06 | 89% | <a href="#">gij585702292 XP_006897663.1</a> |
| <a href="#">PREDICTED: prolow-density lipoprotein receptor-related protein 1 [</a>    | 47.3 | 67.0 | 100% | 1e-04 | 78% | <a href="#">gij617654244 XP_007535029.1</a> |
| <a href="#">PREDICTED: prolow-density lipoprotein receptor-related protein 1-</a>     | 45.6 | 45.6 | 100% | 4e-04 | 78% | <a href="#">gij395540761 XP_003772319.1</a> |
| <a href="#">PREDICTED: LOW QUALITY PROTEIN: low density lipoprotein rec</a>           | 45.6 | 65.3 | 100% | 4e-04 | 78% | <a href="#">gij612062387 XP_007508013.1</a> |
| <a href="#">integrin-like protein [Candidatus Koribacter versatilis]</a>              | 33.7 | 33.7 | 83%  | 2.6   | 80% | <a href="#">gij499843048 WP_011523782.1</a> |

## Alignments

Download [GenPept](#) [Graphics](#) ▼ Next ▲ Previous ▲ Descriptions

**PREDICTED: prolow-density lipoprotein receptor-related protein 1-like [Gorilla gorilla gorilla]**  
 Sequence ID: [gij426373132|ref|XP\\_004053466.1](#) Length: 216 Number of Matches: 1

Range 1: 92 to 109 [GenPept](#) [Graphics](#) ▼ Next Match ▲ Previous Match

| Score          | Expect | Identities  | Positives   | Gaps     |
|----------------|--------|-------------|-------------|----------|
| 60.0 bits(134) | 4e-09  | 18/18(100%) | 18/18(100%) | 0/18(0%) |

Query 1 KLTSCATNASICGDEARC 18  
 Sbjct 92 KLTSCATNASICGDEARC 109

### Related Information

[Gene](#) - associated gene details  
[Map Viewer](#) - aligned genomic context

Download [GenPept](#) [Graphics](#) ▼ Next ▲ Previous ▲ Descriptions

**alpha-2 macroglobulin receptor, partial [Homo sapiens]**  
 Sequence ID: [gij24763|emb|CAA38905.1](#) Length: 591 Number of Matches: 1

Range 1: 507 to 524 [GenPept](#) [Graphics](#) ▼ Next Match ▲ Previous Match

| Score          | Expect | Identities  | Positives   | Gaps     |
|----------------|--------|-------------|-------------|----------|
| 60.0 bits(134) | 5e-09  | 18/18(100%) | 18/18(100%) | 0/18(0%) |

Query 1 KLTSCATNASICGDEARC 18

### Related Information

[Gene](#) - associated gene details



Sbjct 507 KLTSCATNASICGDEARC 524  
 KLTSCATNASICGDEARC

[Download](#) [GenPept](#) [Graphics](#)

[▼ Next](#) [▲ Previous](#) [▲ Descriptions](#)

**PREDICTED: prolow-density lipoprotein receptor-related protein 1 [Macaca mulatta]**

Sequence ID: [gi|297262740|ref|XP\\_001099776.2|](#) Length: 1682 Number of Matches: 1

Range 1: 919 to 936 [GenPept](#) [Graphics](#)

[▼ Next Match](#) [▲ Previous Match](#)

| Score          | Expect | Identities  | Positives   | Gaps     |
|----------------|--------|-------------|-------------|----------|
| 60.0 bits(134) | 6e-09  | 18/18(100%) | 18/18(100%) | 0/18(0%) |

Query 1 KLTSCATNASICGDEARC 18  
 KLTSCATNASICGDEARC  
 Sbjct 919 KLTSCATNASICGDEARC 936

**Related Information**

- [Gene](#) - associated gene details
- [UniGene](#) - clustered expressed sequence tags
- [Map Viewer](#) - aligned genomic context

[Download](#) [GenPept](#) [Graphics](#)

[▼ Next](#) [▲ Previous](#) [▲ Descriptions](#)

**PREDICTED: prolow-density lipoprotein receptor-related protein 1-like [Sus scrofa]**

Sequence ID: [gi|545826194|ref|XP\\_005663981.1|](#) Length: 1689 Number of Matches: 1

Range 1: 926 to 943 [GenPept](#) [Graphics](#)

[▼ Next Match](#) [▲ Previous Match](#)

| Score          | Expect | Identities  | Positives   | Gaps     |
|----------------|--------|-------------|-------------|----------|
| 60.0 bits(134) | 6e-09  | 18/18(100%) | 18/18(100%) | 0/18(0%) |

Query 1 KLTSCATNASICGDEARC 18  
 KLTSCATNASICGDEARC  
 Sbjct 926 KLTSCATNASICGDEARC 943

**Related Information**

- [Gene](#) - associated gene details

[Download](#) [GenPept](#) [Graphics](#)

[▼ Next](#) [▲ Previous](#) [▲ Descriptions](#)

**Prolow-density lipoprotein receptor-related protein 1 [Cricetulus griseus]**

Sequence ID: [gi|344246161|gb|EGW02265.1|](#) Length: 2217 Number of Matches: 1

Range 1: 1454 to 1471 [GenPept](#) [Graphics](#)

[▼ Next Match](#) [▲ Previous Match](#)

| Score          | Expect | Identities  | Positives   | Gaps     |
|----------------|--------|-------------|-------------|----------|
| 60.0 bits(134) | 6e-09  | 18/18(100%) | 18/18(100%) | 0/18(0%) |

Query 1 KLTSCATNASICGDEARC 18  
 KLTSCATNASICGDEARC  
 Sbjct 1454 KLTSCATNASICGDEARC 1471

**Related Information**

BLAST is a registered trademark of the National Library of Medicine.

NCBI/ BLAST/ blastp suite/ Formatting Results - BVH83S2201R

Your search parameters were adjusted to search for a short input sequence.

[Edit and Resubmit](#) [Save Search Strategies](#) [Formatting options](#) [Download](#) [YouTube](#) [How to read this page](#) [Blast report description](#)

LYVE1\_KANQLDFTEAKE\_Mod

RID [BVH83S2201R](#) (Expires on 01-21 10:01 am)

Query ID |cl|52364  
 Description None  
 Molecule type amino acid  
 Query Length 13

Database Name nr  
 Description All non-redundant GenBank CDS translations+PDB+SwissProt+PIR+PRF excluding environmental samples from WGS projects  
 Program BLASTP 2.2.30+ [Citation](#)

Other reports: [Search Summary](#) [Taxonomy reports](#) [Distance tree of results](#) [Related Structures](#) [Multiple alignment](#)

Graphic Summary

Show Conserved Domains

No putative conserved domains have been detected

Distribution of 100 Blast Hits on the Query Sequence

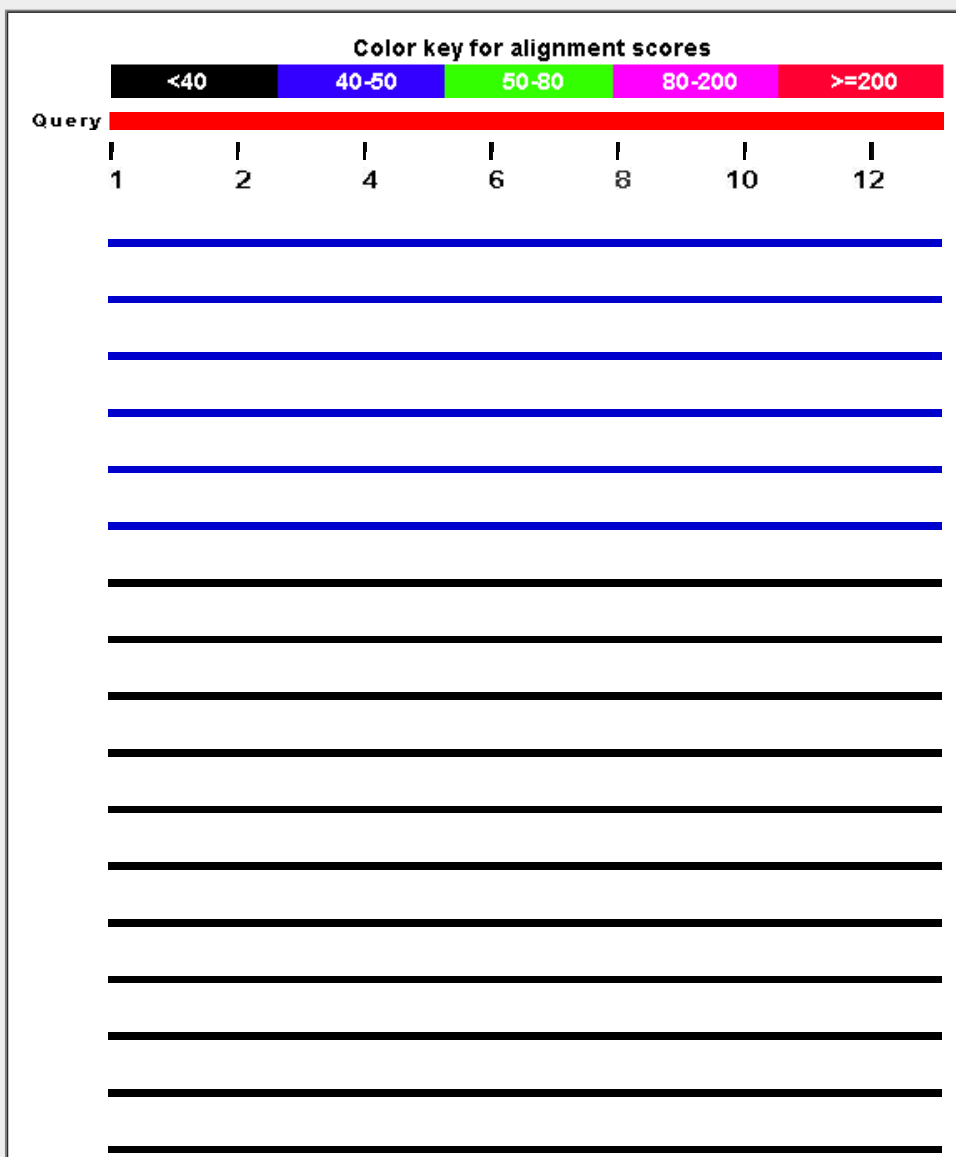

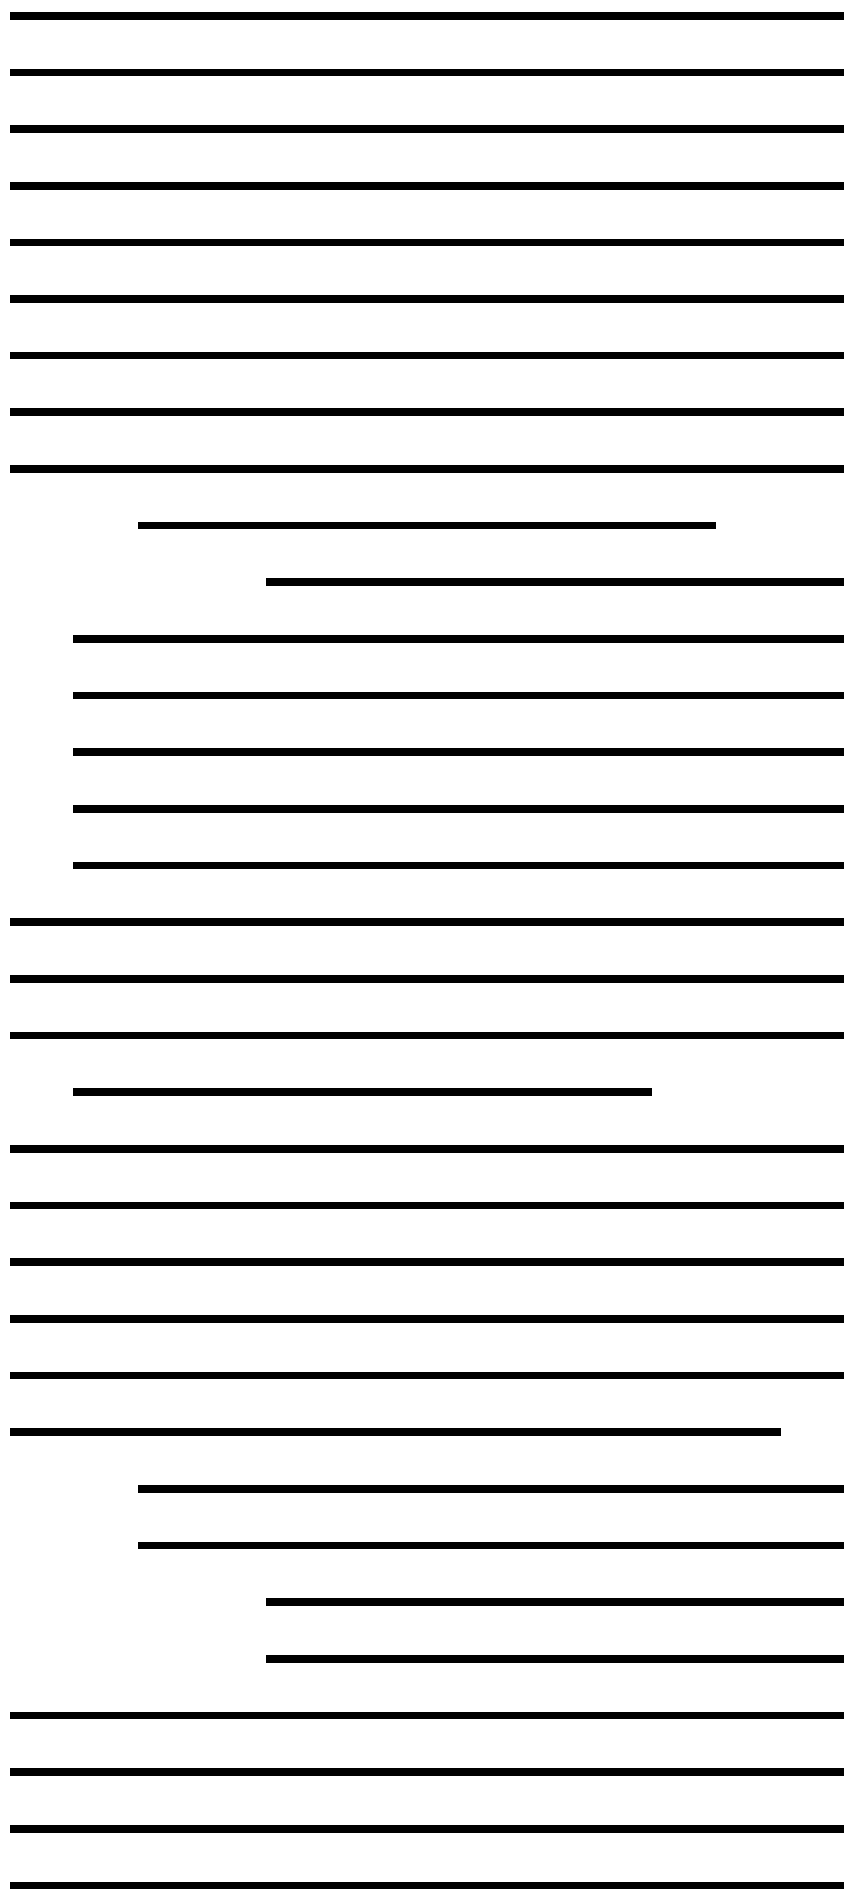

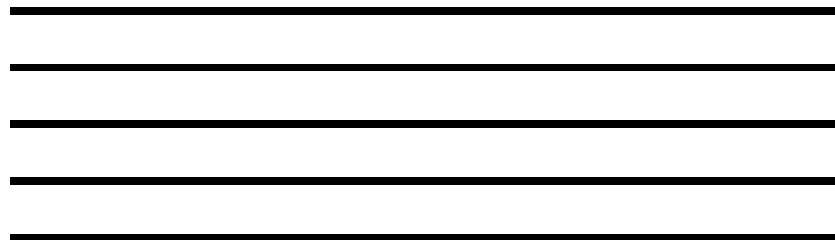

**Descriptions**

**Sequences producing significant alignments:**

Select: [All](#) [None](#) Selected:0

[Alignments](#)
[Download](#)
[GenPept](#)
[Graphics](#)
[Distance tree of results](#)
[Multiple alignment](#)

| Description                                                                                      | Max score | Total score | Query cover | E value | Ident | Accession                      |
|--------------------------------------------------------------------------------------------------|-----------|-------------|-------------|---------|-------|--------------------------------|
| <a href="#">lymphatic vessel endothelial hyaluronic acid receptor 1 precursor [Homo sapiens]</a> | 41.8      | 41.8        | 100%        | 0.004   | 92%   | <a href="#">NP_006682.2</a>    |
| <a href="#">lymphatic endothelium-specific hyaluronan receptor LYVE-1 [Homo sapiens]</a>         | 41.8      | 41.8        | 100%        | 0.004   | 92%   | <a href="#">AAD42764.1</a>     |
| <a href="#">PREDICTED: lymphatic vessel endothelial hyaluronic acid receptor 1 [Pan pa]</a>      | 41.8      | 41.8        | 100%        | 0.004   | 92%   | <a href="#">XP_003818206.1</a> |
| <a href="#">PREDICTED: lymphatic vessel endothelial hyaluronic acid receptor 1 [Pan tro]</a>     | 41.8      | 41.8        | 100%        | 0.004   | 92%   | <a href="#">XP_508283.2</a>    |
| <a href="#">Lymphatic vessel endothelial hyaluronan receptor 1 [Homo sapiens]</a>                | 41.8      | 41.8        | 100%        | 0.004   | 92%   | <a href="#">AAH26231.1</a>     |
| <a href="#">extracellular link domain containing 1 [synthetic construct]</a>                     | 41.8      | 41.8        | 100%        | 0.004   | 92%   | <a href="#">AAX36112.1</a>     |
| <a href="#">PREDICTED: lymphatic vessel endothelial hyaluronic acid receptor 1 [Rhinopi]</a>     | 37.1      | 37.1        | 100%        | 0.14    | 85%   | <a href="#">XP_010383112.1</a> |
| <a href="#">PREDICTED: lymphatic vessel endothelial hyaluronic acid receptor 1 [Chloroc]</a>     | 37.1      | 37.1        | 100%        | 0.14    | 85%   | <a href="#">XP_008004966.1</a> |
| <a href="#">PREDICTED: lymphatic vessel endothelial hyaluronic acid receptor 1 [Papiro a]</a>    | 37.1      | 37.1        | 100%        | 0.14    | 85%   | <a href="#">XP_003910275.1</a> |
| <a href="#">PREDICTED: lymphatic vessel endothelial hyaluronic acid receptor 1 [Macaca]</a>      | 37.1      | 37.1        | 100%        | 0.14    | 85%   | <a href="#">XP_005578681.1</a> |
| <a href="#">Lymphatic vessel endothelial hyaluronic acid receptor 1 [Macaca mulatta]</a>         | 37.1      | 37.1        | 100%        | 0.14    | 85%   | <a href="#">EHH23103.1</a>     |
| <a href="#">PREDICTED: lymphatic vessel endothelial hyaluronic acid receptor 1 isoform</a>       | 37.1      | 37.1        | 100%        | 0.14    | 85%   | <a href="#">XP_001100103.1</a> |
| <a href="#">PREDICTED: lymphatic vessel endothelial hyaluronic acid receptor 1 [Saimiri]</a>     | 37.1      | 37.1        | 100%        | 0.14    | 85%   | <a href="#">XP_003919881.1</a> |
| <a href="#">PREDICTED: lymphatic vessel endothelial hyaluronic acid receptor 1 [Pongo s]</a>     | 36.3      | 36.3        | 100%        | 0.26    | 85%   | <a href="#">XP_009244896.1</a> |
| <a href="#">PREDICTED: lymphatic vessel endothelial hyaluronic acid receptor 1 [Gorilla g]</a>   | 36.3      | 36.3        | 100%        | 0.27    | 85%   | <a href="#">XP_004050750.1</a> |
| <a href="#">PREDICTED: lymphatic vessel endothelial hyaluronic acid receptor 1 [Nomas]</a>       | 36.3      | 36.3        | 100%        | 0.27    | 85%   | <a href="#">XP_003254985.1</a> |
| <a href="#">PREDICTED: lymphatic vessel endothelial hyaluronic acid receptor 1 [Galeop]</a>      | 35.8      | 35.8        | 100%        | 0.37    | 77%   | <a href="#">XP_008584943.1</a> |
| <a href="#">PREDICTED: lymphatic vessel endothelial hyaluronic acid receptor 1 [Eptesic]</a>     | 35.8      | 35.8        | 100%        | 0.37    | 77%   | <a href="#">XP_008149260.1</a> |
| <a href="#">PREDICTED: lymphatic vessel endothelial hyaluronic acid receptor 1 [Orycter]</a>     | 35.0      | 35.0        | 100%        | 0.71    | 77%   | <a href="#">XP_007953340.1</a> |
| <a href="#">PREDICTED: lymphatic vessel endothelial hyaluronic acid receptor 1 [Mesocr]</a>      | 34.6      | 34.6        | 100%        | 0.97    | 77%   | <a href="#">XP_005075737.1</a> |
| <a href="#">PREDICTED: lymphatic vessel endothelial hyaluronic acid receptor 1 isoform</a>       | 34.1      | 34.1        | 100%        | 1.3     | 85%   | <a href="#">XP_002755091.2</a> |
| <a href="#">PREDICTED: lymphatic vessel endothelial hyaluronic acid receptor 1 isoform</a>       | 34.1      | 34.1        | 100%        | 1.3     | 85%   | <a href="#">XP_009005908.1</a> |
| <a href="#">PREDICTED: lymphatic vessel endothelial hyaluronic acid receptor 1 [Tarsius]</a>     | 33.7      | 33.7        | 100%        | 1.8     | 77%   | <a href="#">XP_008067473.1</a> |
| <a href="#">PREDICTED: lymphatic vessel endothelial hyaluronic acid receptor 1 [Myotis l]</a>    | 32.5      | 32.5        | 100%        | 4.7     | 77%   | <a href="#">XP_006089678.1</a> |
| <a href="#">PREDICTED: lymphatic vessel endothelial hyaluronic acid receptor 1 [Myotis l]</a>    | 32.5      | 32.5        | 100%        | 4.7     | 77%   | <a href="#">XP_005874034.1</a> |
| <a href="#">PREDICTED: lymphatic vessel endothelial hyaluronic acid receptor 1 [Myotis c]</a>    | 32.5      | 32.5        | 100%        | 4.7     | 77%   | <a href="#">XP_006763529.1</a> |
| <a href="#">hypothetical protein [Devosia sp. 17-2-E-8]</a>                                      | 32.5      | 32.5        | 69%         | 4.9     | 100%  | <a href="#">WP_035095607.1</a> |
| <a href="#">PREDICTED: lymphatic vessel endothelial hyaluronic acid receptor 1 [Chryso]</a>      | 32.0      | 32.0        | 69%         | 6.4     | 100%  | <a href="#">XP_006873070.1</a> |
| <a href="#">nucleoside-diphosphate-sugar epimerase [Xanthomonas vesicatoria]</a>                 | 31.2      | 31.2        | 92%         | 12      | 83%   | <a href="#">WP_005998050.1</a> |

|                                                                                              |      |      |      |    |      |                                |
|----------------------------------------------------------------------------------------------|------|------|------|----|------|--------------------------------|
| <a href="#">NmrA family protein [Xanthomonas vesicatoria]</a>                                | 31.2 | 31.2 | 92%  | 12 | 83%  | <a href="#">WP_039425432.1</a> |
| <a href="#">NmrA family protein [Xanthomonas arboricola]</a>                                 | 31.2 | 31.2 | 92%  | 12 | 83%  | <a href="#">WP_039517947.1</a> |
| <a href="#">NmrA family protein [Xanthomonas arboricola]</a>                                 | 31.2 | 31.2 | 92%  | 12 | 83%  | <a href="#">WP_024940476.1</a> |
| <a href="#">hypothetical protein [Mucispirillum schaedleri]</a>                              | 31.2 | 31.2 | 92%  | 12 | 85%  | <a href="#">WP_023275572.1</a> |
| <a href="#">PREDICTED: lymphatic vessel endothelial hyaluronic acid receptor 1 [Trichec</a>  | 30.8 | 30.8 | 100% | 16 | 69%  | <a href="#">XP_004369701.1</a> |
| <a href="#">PREDICTED: lymphatic vessel endothelial hyaluronic acid receptor 1 [Panthe</a>   | 30.3 | 30.3 | 100% | 23 | 69%  | <a href="#">XP_007083276.1</a> |
| <a href="#">PREDICTED: lymphatic vessel endothelial hyaluronic acid receptor 1 [Felis ca</a> | 30.3 | 30.3 | 100% | 23 | 69%  | <a href="#">XP_003993039.1</a> |
| <a href="#">aminoglycoside adenyltransferase [Streptomyces sp. CNS654]</a>                   | 29.9 | 29.9 | 69%  | 28 | 89%  | <a href="#">WP_032764358.1</a> |
| <a href="#">lymphatic vessel endothelial hyaluronic acid receptor 1 [Camelus ferus]</a>      | 29.9 | 29.9 | 100% | 30 | 69%  | <a href="#">EPY74693.1</a>     |
| <a href="#">PREDICTED: lymphatic vessel endothelial hyaluronic acid receptor 1 [Vicugn</a>   | 29.9 | 29.9 | 100% | 31 | 69%  | <a href="#">XP_006203587.1</a> |
| <a href="#">PREDICTED: lymphatic vessel endothelial hyaluronic acid receptor 1 [Camelu</a>   | 29.9 | 29.9 | 100% | 31 | 69%  | <a href="#">XP_006192969.1</a> |
| <a href="#">PREDICTED: lymphatic vessel endothelial hyaluronic acid receptor 1 [Camelu</a>   | 29.9 | 29.9 | 100% | 31 | 69%  | <a href="#">XP_010975450.1</a> |
| <a href="#">PREDICTED: lymphatic vessel endothelial hyaluronic acid receptor 1 [Camelu</a>   | 29.9 | 29.9 | 100% | 31 | 69%  | <a href="#">XP_010963177.1</a> |
| <a href="#">hypothetical protein [Vibrio proteolyticus]</a>                                  | 29.9 | 29.9 | 92%  | 32 | 63%  | <a href="#">WP_021706437.1</a> |
| <a href="#">hypothetical protein THERM_00780670 [Tetrahymena thermophila SB210]</a>          | 29.9 | 29.9 | 84%  | 33 | 82%  | <a href="#">EAS05978.2</a>     |
| <a href="#">hypothetical protein THERM_00780670 [Tetrahymena thermophila]</a>                | 29.9 | 29.9 | 84%  | 33 | 82%  | <a href="#">XP_001026223.1</a> |
| <a href="#">PREDICTED: LOW QUALITY PROTEIN: lymphatic vessel endothelial hyaluro</a>         | 29.5 | 29.5 | 69%  | 42 | 89%  | <a href="#">XP_003465744.1</a> |
| <a href="#">PREDICTED: lymphatic vessel endothelial hyaluronic acid receptor 1 [Ochoto</a>   | 29.5 | 29.5 | 69%  | 42 | 89%  | <a href="#">XP_004593845.1</a> |
| <a href="#">PREDICTED: lymphatic vessel endothelial hyaluronic acid receptor 1 isoform</a>   | 29.5 | 29.5 | 100% | 42 | 69%  | <a href="#">XP_004453453.1</a> |
| <a href="#">excinuclease ABC subunit C [Staphylococcus epidermidis]</a>                      | 29.5 | 29.5 | 100% | 43 | 69%  | <a href="#">WP_038812945.1</a> |
| <a href="#">MULTISPECIES: excinuclease ABC subunit C [Staphylococcus]</a>                    | 29.5 | 29.5 | 100% | 43 | 69%  | <a href="#">WP_002456231.1</a> |
| <a href="#">excinuclease ABC subunit C [Staphylococcus epidermidis]</a>                      | 29.5 | 29.5 | 100% | 43 | 69%  | <a href="#">WP_017464291.1</a> |
| <a href="#">excinuclease ABC subunit C [Staphylococcus epidermidis]</a>                      | 29.5 | 29.5 | 100% | 43 | 69%  | <a href="#">WP_001830175.1</a> |
| <a href="#">excinuclease ABC subunit C [Staphylococcus epidermidis]</a>                      | 29.5 | 29.5 | 100% | 43 | 69%  | <a href="#">WP_002486269.1</a> |
| <a href="#">UvrABC system protein C [Staphylococcus epidermidis]</a>                         | 29.5 | 29.5 | 100% | 43 | 69%  | <a href="#">WP_002476607.1</a> |
| <a href="#">excinuclease ABC subunit C [Staphylococcus epidermidis]</a>                      | 29.5 | 29.5 | 100% | 43 | 69%  | <a href="#">WP_002503092.1</a> |
| <a href="#">excinuclease ABC subunit C [Staphylococcus epidermidis]</a>                      | 29.5 | 29.5 | 100% | 43 | 69%  | <a href="#">WP_002498400.1</a> |
| <a href="#">excinuclease ABC subunit C [Staphylococcus epidermidis]</a>                      | 29.5 | 29.5 | 100% | 43 | 69%  | <a href="#">WP_002495462.1</a> |
| <a href="#">excinuclease ABC subunit C [Staphylococcus epidermidis]</a>                      | 29.5 | 29.5 | 100% | 43 | 69%  | <a href="#">WP_002493762.1</a> |
| <a href="#">excinuclease ABC subunit C [Staphylococcus epidermidis]</a>                      | 29.5 | 29.5 | 100% | 43 | 69%  | <a href="#">WP_002489759.1</a> |
| <a href="#">excinuclease ABC subunit C [Staphylococcus epidermidis]</a>                      | 29.5 | 29.5 | 100% | 43 | 69%  | <a href="#">WP_002485780.1</a> |
| <a href="#">excinuclease ABC subunit C [Staphylococcus epidermidis]</a>                      | 29.5 | 29.5 | 100% | 43 | 69%  | <a href="#">WP_002473256.1</a> |
| <a href="#">excinuclease ABC subunit C [Staphylococcus epidermidis]</a>                      | 29.5 | 29.5 | 100% | 43 | 69%  | <a href="#">WP_002470770.1</a> |
| <a href="#">excinuclease ABC subunit C [Staphylococcus epidermidis]</a>                      | 29.5 | 29.5 | 100% | 43 | 69%  | <a href="#">WP_002469571.1</a> |
| <a href="#">excinuclease ABC subunit C [Staphylococcus epidermidis]</a>                      | 29.5 | 29.5 | 100% | 43 | 69%  | <a href="#">WP_002457416.1</a> |
| <a href="#">excinuclease ABC. C subunit [Staphylococcus epidermidis M23864:W2(grey)]</a>     | 29.5 | 29.5 | 100% | 43 | 69%  | <a href="#">EFE59543.1</a>     |
| <a href="#">excinuclease ABC subunit C [Staphylococcus epidermidis]</a>                      | 29.5 | 29.5 | 100% | 43 | 69%  | <a href="#">WP_011082657.1</a> |
| <a href="#">excinuclease ABC. C subunit [Staphylococcus epidermidis BCM-HMP0060]</a>         | 29.5 | 29.5 | 100% | 43 | 69%  | <a href="#">EES58411.1</a>     |
| <a href="#">excinuclease ABC. C subunit [Staphylococcus epidermidis W23144]</a>              | 29.5 | 29.5 | 100% | 43 | 69%  | <a href="#">EES36408.1</a>     |
| <a href="#">excinuclease ABC subunit C [Staphylococcus epidermidis Scl25]</a>                | 29.5 | 29.5 | 100% | 43 | 69%  | <a href="#">EST99885.1</a>     |
| <a href="#">excinuclease ABC subunit C [Staphylococcus epidermidis CIM28]</a>                | 29.5 | 29.5 | 100% | 43 | 69%  | <a href="#">ESR05177.1</a>     |
| <a href="#">excinuclease ABC subunit C [Staphylococcus epidermidis Scl31]</a>                | 29.5 | 29.5 | 100% | 43 | 69%  | <a href="#">EST95350.1</a>     |
| <a href="#">hypothetical protein [Geminococcus roseus]</a>                                   | 29.5 | 29.5 | 76%  | 43 | 71%  | <a href="#">WP_035485321.1</a> |
| <a href="#">hypothetical protein OsJ_31277 [Oryza sativa Japonica Group]</a>                 | 29.1 | 29.1 | 61%  | 49 | 100% | <a href="#">EAZ15858.1</a>     |
| <a href="#">Os10g0371100 [Oryza sativa Japonica Group]</a>                                   | 29.1 | 29.1 | 61%  | 56 | 100% | <a href="#">NP_001176119.1</a> |

|                                                                                              |      |      |      |    |      |                                |
|----------------------------------------------------------------------------------------------|------|------|------|----|------|--------------------------------|
| <a href="#">Putative AP2 domain transcriptional regulator [Oryza sativa Japonica Group]</a>  | 29.1 | 29.1 | 61%  | 57 | 100% | <a href="#">AAM08622.1</a>     |
| <a href="#">hypothetical protein Osl_33276 [Oryza sativa Indica Group]</a>                   | 29.1 | 29.1 | 61%  | 57 | 100% | <a href="#">EAY78232.1</a>     |
| <a href="#">PREDICTED: lymphatic vessel endothelial hyaluronic acid receptor 1 [Canis l]</a> | 29.1 | 29.1 | 100% | 57 | 69%  | <a href="#">XP_003639831.1</a> |
| <a href="#">lymphatic vessel endothelial hyaluronic acid receptor 1 [Rattus norvegicus]</a>  | 29.1 | 29.1 | 92%  | 57 | 67%  | <a href="#">NP_001099756.1</a> |
| <a href="#">kinase domain protein [Tetrahymena thermophila SB210]</a>                        | 29.1 | 29.1 | 84%  | 59 | 82%  | <a href="#">EWS72078.1</a>     |
| <a href="#">ATPase P [Prevotella timonensis]</a>                                             | 29.1 | 29.1 | 69%  | 59 | 89%  | <a href="#">WP_028900777.1</a> |
| <a href="#">ATPase P [Prevotella timonensis]</a>                                             | 29.1 | 29.1 | 69%  | 59 | 89%  | <a href="#">WP_036926311.1</a> |
| <a href="#">copper-exporting ATPase [Prevotella timonensis]</a>                              | 29.1 | 29.1 | 69%  | 59 | 89%  | <a href="#">WP_008123083.1</a> |
| <a href="#">PREDICTED: uncharacterized protein LOC100900376 [Metaseiulus occidenta]</a>      | 29.1 | 29.1 | 69%  | 59 | 89%  | <a href="#">XP_003737880.1</a> |
| <a href="#">hypothetical protein [Flavobacterium daejeonense]</a>                            | 29.1 | 29.1 | 61%  | 59 | 100% | <a href="#">WP_026715491.1</a> |
| <a href="#">hypothetical protein [candidate division WWE1 bacterium JGI OTU-2]</a>           | 28.6 | 28.6 | 76%  | 76 | 80%  | <a href="#">WP_029949874.1</a> |
| <a href="#">Lymphatic vessel endothelial hyaluronic acid receptor 1 [Cricetulus griseus]</a> | 28.6 | 28.6 | 100% | 77 | 69%  | <a href="#">EGV97003.1</a>     |
| <a href="#">NmrA family protein [Xanthomonas arboricola]</a>                                 | 28.6 | 28.6 | 92%  | 78 | 75%  | <a href="#">WP_039529329.1</a> |
| <a href="#">PREDICTED: lymphatic vessel endothelial hyaluronic acid receptor 1 [Equus s]</a> | 28.6 | 28.6 | 100% | 78 | 69%  | <a href="#">XP_008531961.1</a> |
| <a href="#">PREDICTED: lymphatic vessel endothelial hyaluronic acid receptor 1 [Cricetu]</a> | 28.6 | 28.6 | 100% | 78 | 69%  | <a href="#">XP_007647074.1</a> |
| <a href="#">PREDICTED: lymphatic vessel endothelial hyaluronic acid receptor 1 [Octodo]</a>  | 28.6 | 28.6 | 100% | 78 | 62%  | <a href="#">XP_004634930.1</a> |
| <a href="#">PREDICTED: lymphatic vessel endothelial hyaluronic acid receptor 1 [Oryctol]</a> | 28.6 | 28.6 | 100% | 78 | 62%  | <a href="#">XP_002708858.1</a> |
| <a href="#">PREDICTED: lymphatic vessel endothelial hyaluronic acid receptor 1 [Jaculus]</a> | 28.6 | 28.6 | 84%  | 78 | 73%  | <a href="#">XP_004650927.1</a> |
| <a href="#">PREDICTED: lymphatic vessel endothelial hyaluronic acid receptor 1 [Equus s]</a> | 28.6 | 28.6 | 100% | 78 | 69%  | <a href="#">XP_001504970.1</a> |
| <a href="#">chorismate mutase [Exiguobacterium undae]</a>                                    | 28.6 | 28.6 | 69%  | 78 | 89%  | <a href="#">WP_026832308.1</a> |
| <a href="#">chorismate mutase [Exiguobacterium sibiricum]</a>                                | 28.6 | 28.6 | 69%  | 78 | 89%  | <a href="#">WP_026827712.1</a> |
| <a href="#">3-deoxy-7-phosphoheptulonate synthase [Exiguobacterium sibiricum]</a>            | 28.6 | 28.6 | 69%  | 78 | 89%  | <a href="#">WP_012371112.1</a> |
| <a href="#">3-deoxy-7-phosphoheptulonate synthase [Exiguobacterium antarcticum]</a>          | 28.6 | 28.6 | 69%  | 78 | 89%  | <a href="#">WP_014971028.1</a> |
| <a href="#">anthranilate synthase [Acaryochloris marina]</a>                                 | 28.6 | 28.6 | 92%  | 79 | 60%  | <a href="#">WP_012166745.1</a> |
| <a href="#">putative acid phosphatase [Metarhizium anisopliae]</a>                           | 28.6 | 28.6 | 69%  | 79 | 89%  | <a href="#">KEG83838.1</a>     |
| <a href="#">multidrug transporter [Bacillus sp. L1(2012)]</a>                                | 28.6 | 28.6 | 76%  | 79 | 80%  | <a href="#">WP_017729016.1</a> |

## Alignments

Download GenPept Graphics

Next Previous Descriptions

lymphatic vessel endothelial hyaluronic acid receptor 1 precursor [Homo sapiens]

Sequence ID: [ref|NP\\_006682.2|](#) Length: 322 Number of Matches: 1

See 6 more title(s)

Range 1: 47 to 59 GenPept Graphics

Next Match Previous Match

| Score         | Expect | Identities | Positives   | Gaps     |
|---------------|--------|------------|-------------|----------|
| 41.8 bits(91) | 0.004  | 12/13(92%) | 13/13(100%) | 0/13(0%) |

Query 1 KANQQLDFTEAKE 13  
 KANQQL+FTTEAKE  
 Sbjct 47 KANQQLNFTEAKE 59

### Related Information

- [Gene](#) - associated gene details
- [UniGene](#) - clustered expressed sequence tags
- [Map Viewer](#) - aligned genomic context
- [Identical Proteins](#) - Proteins identical to the subject

Download GenPept Graphics

Next Previous Descriptions

lymphatic endothelium-specific hyaluronan receptor LYVE-1 [Homo sapiens]

Sequence ID: [gb|AAD42764.1|AF118108\\_1](#) Length: 322 Number of Matches: 1

Range 1: 47 to 59 GenPept Graphics

Next Match Previous Match

| Score         | Expect | Identities | Positives   | Gaps     |
|---------------|--------|------------|-------------|----------|
| 41.8 bits(91) | 0.004  | 12/13(92%) | 13/13(100%) | 0/13(0%) |

### Related Information

- [Gene](#) - associated gene details

Query 1 KANQQLDFTEAKE 13  
 KANQQL+FTEAKE  
 Sbjct 47 KANQQLNFTEAKE 59

[Download](#) [GenPept](#) [Graphics](#)

[▼ Next](#) [▲ Previous](#) [▲ Descriptions](#)

PREDICTED: lymphatic vessel endothelial hyaluronic acid receptor 1 [Pan paniscus]

Sequence ID: [ref|XP\\_003818206.1|](#) Length: 322 Number of Matches: 1

Range 1: 47 to 59 [GenPept](#) [Graphics](#)

[▼ Next Match](#) [▲ Previous Match](#)

| Score         | Expect | Identities | Positives   | Gaps     |
|---------------|--------|------------|-------------|----------|
| 41.8 bits(91) | 0.004  | 12/13(92%) | 13/13(100%) | 0/13(0%) |

Query 1 KANQQLDFTEAKE 13  
 KANQQL+FTEAKE  
 Sbjct 47 KANQQLNFTEAKE 59

**Related Information**

[Gene](#) - associated gene details  
[Map Viewer](#) - aligned genomic context

[Download](#) [GenPept](#) [Graphics](#)

[▼ Next](#) [▲ Previous](#) [▲ Descriptions](#)

PREDICTED: lymphatic vessel endothelial hyaluronic acid receptor 1 [Pan troglodytes]

Sequence ID: [ref|XP\\_508283.2|](#) Length: 322 Number of Matches: 1

Range 1: 47 to 59 [GenPept](#) [Graphics](#)

[▼ Next Match](#) [▲ Previous Match](#)

| Score         | Expect | Identities | Positives   | Gaps     |
|---------------|--------|------------|-------------|----------|
| 41.8 bits(91) | 0.004  | 12/13(92%) | 13/13(100%) | 0/13(0%) |

Query 1 KANQQLDFTEAKE 13  
 KANQQL+FTEAKE  
 Sbjct 47 KANQQLNFTEAKE 59

**Related Information**

[Gene](#) - associated gene details  
[UniGene](#) - clustered expressed sequence tags  
[Map Viewer](#) - aligned genomic context

[Download](#) [GenPept](#) [Graphics](#)

[▼ Next](#) [▲ Previous](#) [▲ Descriptions](#)

Lymphatic vessel endothelial hyaluronan receptor 1 [Homo sapiens]

Sequence ID: [gb|AAH26231.1|](#) Length: 322 Number of Matches: 1

[▶ See 3 more title\(s\)](#)

Range 1: 47 to 59 [GenPept](#) [Graphics](#)

[▼ Next Match](#) [▲ Previous Match](#)

| Score         | Expect | Identities | Positives   | Gaps     |
|---------------|--------|------------|-------------|----------|
| 41.8 bits(91) | 0.004  | 12/13(92%) | 13/13(100%) | 0/13(0%) |

Query 1 KANQQLDFTEAKE 13  
 KANQQL+FTEAKE  
 Sbjct 47 KANQQLNFTEAKE 59

**Related Information**

[Gene](#) - associated gene details  
[Identical Proteins](#) - Proteins identical to the subject

BLAST is a registered trademark of the National Library of Medicine.

[Copyright](#) | [Disclaimer](#) | [Privacy](#) | [Accessibility](#) | [Contact](#) | [Send feedback](#)

[NCBI](#) | [NLM](#) | [NIH](#) | [DHHS](#)

NCBI/ BLAST/ blastp suite/ Formatting Results - B9G2BV3N01R

Your search parameters were adjusted to search for a short input sequence.

[Edit and Resubmit](#) [Save Search Strategies](#) [Formatting options](#) [Download](#)

[YouTube](#) [How to read this page](#) [Blast report description](#)

### LYVE1\_KANQQLNFTEAKE\_NonMod

RID [B9G2BV3N01R](#) (Expires on 01-14 13:50 pm)

Query ID |cl|58052  
 Description None  
 Molecule type amino acid  
 Query Length 13

Database Name nr  
 Description All non-redundant GenBank CDS translations+PDB+SwissProt+PIR excluding environmental samples from WGS projects  
 Program BLASTP 2.2.30+ [Citation](#)

Other reports: [Search Summary](#) [Taxonomy reports](#) [Distance tree of results](#) [Related Structures](#) [Multiple alignment](#)

### Graphic Summary

Show Conserved Domains

No putative conserved domains have been detected

Distribution of 100 Blast Hits on the Query Sequence

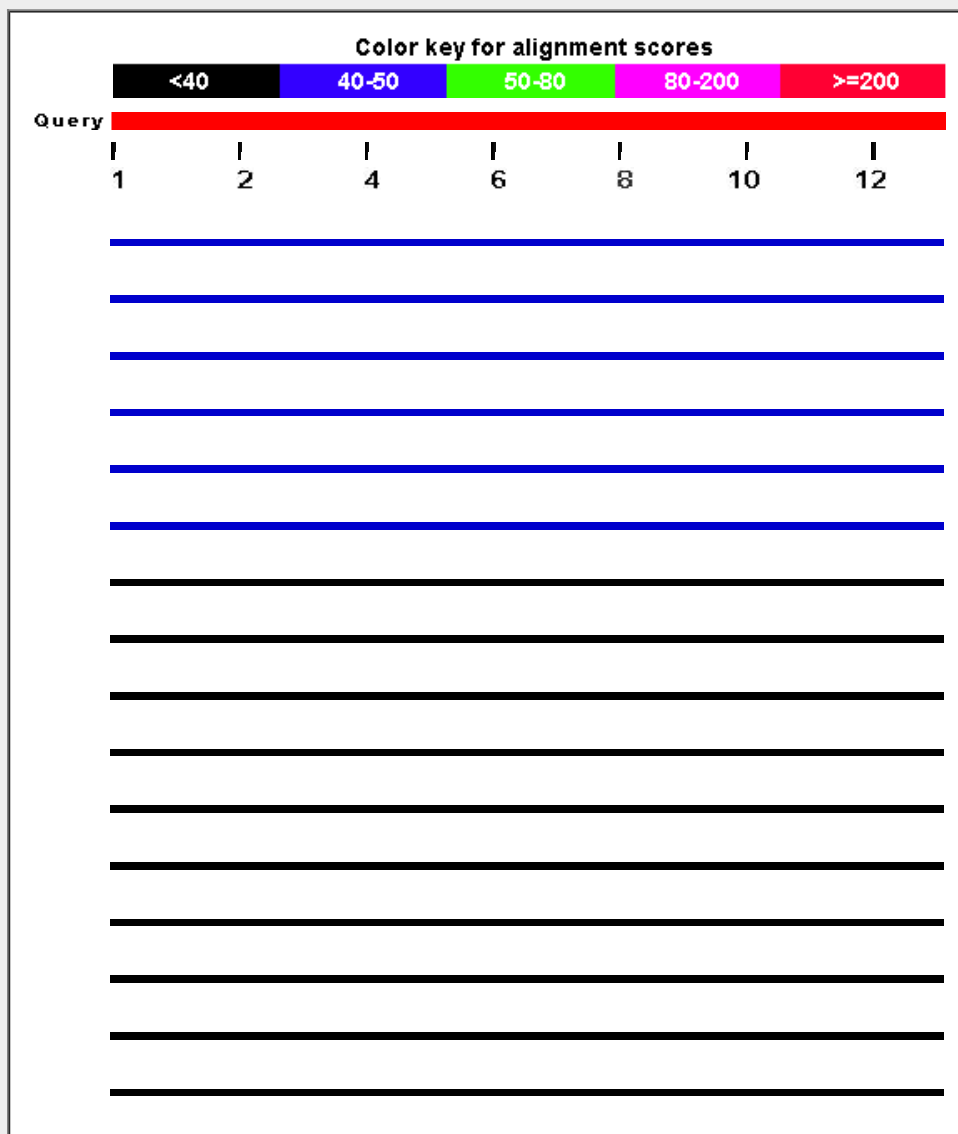



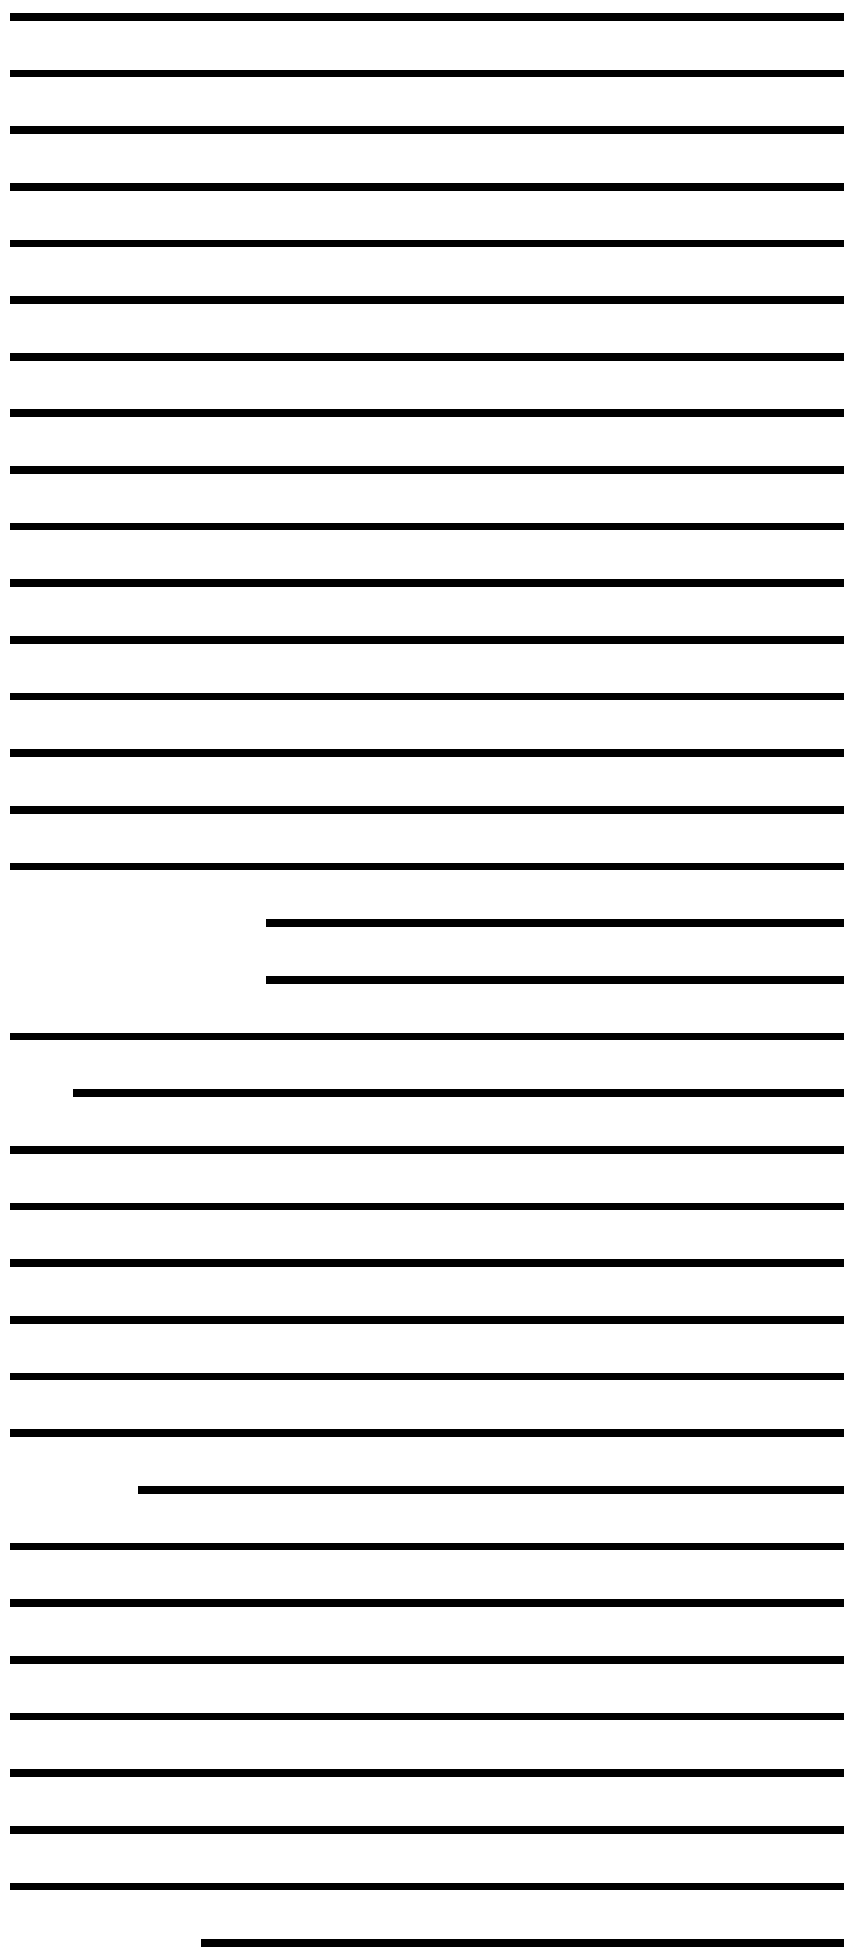

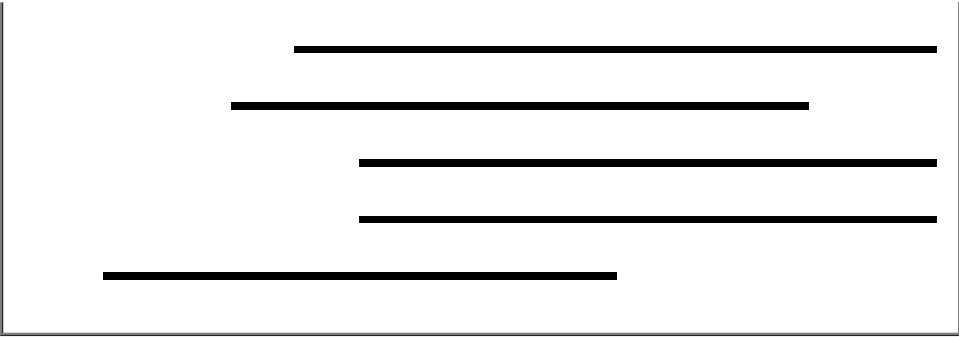

**Descriptions**

**Sequences producing significant alignments:**

Select: [All](#) [None](#) Selected:0

Alignments Download GenPept Graphics Distance tree of results Multiple alignment

| Description                                                                                      | Max score | Total score | Query cover | E value | Ident | Accession                                   |
|--------------------------------------------------------------------------------------------------|-----------|-------------|-------------|---------|-------|---------------------------------------------|
| <a href="#">lymphatic vessel endothelial hyaluronic acid receptor 1 precursor [Homo sapiens]</a> | 44.3      | 44.3        | 100%        | 5e-04   | 100%  | <a href="#">gi 40549451 NP_006682.2</a>     |
| <a href="#">lymphatic endothelium-specific hyaluronan receptor LYVE-1 [Homo sapiens]</a>         | 44.3      | 44.3        | 100%        | 5e-04   | 100%  | <a href="#">gi 5359673 AAD42764.1</a>       |
| <a href="#">PREDICTED: lymphatic vessel endothelial hyaluronic acid receptor</a>                 | 44.3      | 44.3        | 100%        | 5e-04   | 100%  | <a href="#">gi 397494690 XP_003818206.1</a> |
| <a href="#">PREDICTED: lymphatic vessel endothelial hyaluronic acid receptor</a>                 | 44.3      | 44.3        | 100%        | 5e-04   | 100%  | <a href="#">gi 114636135 XP_508283.2</a>    |
| <a href="#">Lymphatic vessel endothelial hyaluronan receptor 1 [Homo sapiens]</a>                | 44.3      | 44.3        | 100%        | 5e-04   | 100%  | <a href="#">gi 20070755 AAH26231.1</a>      |
| <a href="#">extracellular link domain containing 1 [synthetic construct]</a>                     | 44.3      | 44.3        | 100%        | 5e-04   | 100%  | <a href="#">gi 60810113 AAX36112.1</a>      |
| <a href="#">PREDICTED: lymphatic vessel endothelial hyaluronic acid receptor</a>                 | 39.7      | 39.7        | 100%        | 0.019   | 92%   | <a href="#">gi 724929569 XP_010383112.1</a> |
| <a href="#">PREDICTED: lymphatic vessel endothelial hyaluronic acid receptor</a>                 | 39.7      | 39.7        | 100%        | 0.019   | 92%   | <a href="#">gi 635015188 XP_008004966.1</a> |
| <a href="#">PREDICTED: lymphatic vessel endothelial hyaluronic acid receptor</a>                 | 39.7      | 39.7        | 100%        | 0.019   | 92%   | <a href="#">gi 402894236 XP_003910275.1</a> |
| <a href="#">PREDICTED: lymphatic vessel endothelial hyaluronic acid receptor</a>                 | 39.7      | 39.7        | 100%        | 0.019   | 92%   | <a href="#">gi 544487485 XP_005578681.1</a> |
| <a href="#">Lymphatic vessel endothelial hyaluronic acid receptor 1 [Macaca mulatta]</a>         | 39.7      | 39.7        | 100%        | 0.019   | 92%   | <a href="#">gi 355566724 EHH23103.1</a>     |
| <a href="#">PREDICTED: lymphatic vessel endothelial hyaluronic acid receptor</a>                 | 39.7      | 39.7        | 100%        | 0.019   | 92%   | <a href="#">gi 109107317 XP_001100103.1</a> |
| <a href="#">PREDICTED: lymphatic vessel endothelial hyaluronic acid receptor</a>                 | 39.7      | 39.7        | 100%        | 0.019   | 92%   | <a href="#">gi 403254235 XP_003919881.1</a> |
| <a href="#">PREDICTED: lymphatic vessel endothelial hyaluronic acid receptor</a>                 | 38.8      | 38.8        | 100%        | 0.035   | 92%   | <a href="#">gi 686737191 XP_009244896.1</a> |
| <a href="#">PREDICTED: lymphatic vessel endothelial hyaluronic acid receptor</a>                 | 38.8      | 38.8        | 100%        | 0.037   | 92%   | <a href="#">gi 426367460 XP_004050750.1</a> |
| <a href="#">PREDICTED: lymphatic vessel endothelial hyaluronic acid receptor</a>                 | 38.8      | 38.8        | 100%        | 0.037   | 92%   | <a href="#">gi 332211767 XP_003254985.1</a> |
| <a href="#">PREDICTED: lymphatic vessel endothelial hyaluronic acid receptor</a>                 | 38.4      | 38.4        | 100%        | 0.051   | 85%   | <a href="#">gi 667312009 XP_008584943.1</a> |
| <a href="#">PREDICTED: lymphatic vessel endothelial hyaluronic acid receptor</a>                 | 38.4      | 38.4        | 100%        | 0.051   | 85%   | <a href="#">gi 641719315 XP_008149260.1</a> |
| <a href="#">PREDICTED: lymphatic vessel endothelial hyaluronic acid receptor</a>                 | 37.5      | 37.5        | 100%        | 0.097   | 85%   | <a href="#">gi 634827344 XP_007953340.1</a> |
| <a href="#">PREDICTED: lymphatic vessel endothelial hyaluronic acid receptor</a>                 | 37.1      | 37.1        | 100%        | 0.13    | 85%   | <a href="#">gi 524951459 XP_005075737.1</a> |
| <a href="#">PREDICTED: lymphatic vessel endothelial hyaluronic acid receptor</a>                 | 36.3      | 36.3        | 100%        | 0.25    | 85%   | <a href="#">gi 640821058 XP_008067473.1</a> |
| <a href="#">PREDICTED: lymphatic vessel endothelial hyaluronic acid receptor</a>                 | 35.4      | 35.4        | 100%        | 0.48    | 85%   | <a href="#">gi 675698236 XP_002755091.2</a> |
| <a href="#">PREDICTED: lymphatic vessel endothelial hyaluronic acid receptor</a>                 | 35.4      | 35.4        | 100%        | 0.49    | 85%   | <a href="#">gi 675698233 XP_009005908.1</a> |
| <a href="#">PREDICTED: lymphatic vessel endothelial hyaluronic acid receptor</a>                 | 35.0      | 35.0        | 100%        | 0.66    | 85%   | <a href="#">gi 558128872 XP_006089678.1</a> |
| <a href="#">PREDICTED: lymphatic vessel endothelial hyaluronic acid receptor</a>                 | 35.0      | 35.0        | 100%        | 0.66    | 85%   | <a href="#">gi 554559276 XP_005874034.1</a> |
| <a href="#">PREDICTED: lymphatic vessel endothelial hyaluronic acid receptor</a>                 | 35.0      | 35.0        | 100%        | 0.66    | 85%   | <a href="#">gi 584087727 XP_006763529.1</a> |
| <a href="#">PREDICTED: lymphatic vessel endothelial hyaluronic acid receptor</a>                 | 33.3      | 33.3        | 100%        | 2.4     | 77%   | <a href="#">gi 471358234 XP_004369701.1</a> |
| <a href="#">PREDICTED: lymphatic vessel endothelial hyaluronic acid receptor</a>                 | 32.9      | 32.9        | 100%        | 3.2     | 77%   | <a href="#">gi 591313664 XP_007083276.1</a> |

|                                                                                      |      |      |      |     |      |                                              |
|--------------------------------------------------------------------------------------|------|------|------|-----|------|----------------------------------------------|
| PREDICTED: lymphatic vessel endothelial hyaluronic acid receptor                     | 32.9 | 32.9 | 100% | 3.2 | 77%  | <a href="#">gij410973193 XP_003993039.1</a>  |
| <a href="#">lymphatic vessel endothelial hyaluronic acid receptor 1 [Camelus fe</a>  | 32.5 | 32.5 | 100% | 4.3 | 77%  | <a href="#">gij528755034 EPY74693.1</a>      |
| PREDICTED: lymphatic vessel endothelial hyaluronic acid receptor                     | 32.5 | 32.5 | 100% | 4.4 | 77%  | <a href="#">gij560962305 XP_006203587.1</a>  |
| PREDICTED: lymphatic vessel endothelial hyaluronic acid receptor                     | 32.5 | 32.5 | 100% | 4.4 | 77%  | <a href="#">gij560933731 XP_006192969.1</a>  |
| PREDICTED: LOW QUALITY PROTEIN: lymphatic vessel endothel                            | 32.0 | 32.0 | 69%  | 6.1 | 100% | <a href="#">gij348559882 XP_003465744.1</a>  |
| PREDICTED: lymphatic vessel endothelial hyaluronic acid receptor                     | 32.0 | 32.0 | 69%  | 6.1 | 100% | <a href="#">gij504168401 XP_004593845.1</a>  |
| PREDICTED: lymphatic vessel endothelial hyaluronic acid receptor                     | 31.6 | 31.6 | 100% | 8.3 | 77%  | <a href="#">gij359322327 XP_003639831.1</a>  |
| <a href="#">lymphatic vessel endothelial hyaluronic acid receptor 1 [Rattus norv</a> | 31.6 | 31.6 | 92%  | 8.4 | 75%  | <a href="#">gij157820637 NP_001099756.1</a>  |
| <a href="#">Lymphatic vessel endothelial hyaluronic acid receptor 1 [Cricetulus</a>  | 31.2 | 31.2 | 100% | 11  | 77%  | <a href="#">gij344240900 EGV97003.1</a>      |
| PREDICTED: lymphatic vessel endothelial hyaluronic acid receptor                     | 31.2 | 31.2 | 100% | 11  | 77%  | <a href="#">gij664749112 XP_008531961.1</a>  |
| PREDICTED: lymphatic vessel endothelial hyaluronic acid receptor                     | 31.2 | 31.2 | 100% | 11  | 77%  | <a href="#">gij625212759 XP_007647074.1</a>  |
| PREDICTED: lymphatic vessel endothelial hyaluronic acid receptor                     | 31.2 | 31.2 | 100% | 11  | 69%  | <a href="#">gij507658988 XP_004634930.1</a>  |
| PREDICTED: lymphatic vessel endothelial hyaluronic acid receptor                     | 31.2 | 31.2 | 100% | 11  | 69%  | <a href="#">gij291384633 XP_002708858.1</a>  |
| PREDICTED: lymphatic vessel endothelial hyaluronic acid receptor                     | 31.2 | 31.2 | 100% | 11  | 69%  | <a href="#">gij488523123 XP_004453453.1</a>  |
| PREDICTED: lymphatic vessel endothelial hyaluronic acid receptor                     | 31.2 | 31.2 | 84%  | 11  | 82%  | <a href="#">gij507533735 XP_004650927.1</a>  |
| PREDICTED: lymphatic vessel endothelial hyaluronic acid receptor                     | 31.2 | 31.2 | 100% | 11  | 77%  | <a href="#">gij149719443 XP_001504970.1</a>  |
| <a href="#">protein MRV11-like protein [Cricetulus griseus]</a>                      | 31.2 | 31.2 | 100% | 12  | 77%  | <a href="#">gij537207244 ERE80129.1</a>      |
| <a href="#">protein MRV11-like protein [Cricetulus griseus]</a>                      | 31.2 | 31.2 | 100% | 12  | 77%  | <a href="#">gij537207245 ERE80130.1</a>      |
| <a href="#">protein MRV11-like protein [Cricetulus griseus]</a>                      | 31.2 | 31.2 | 100% | 12  | 77%  | <a href="#">gij537207243 ERE80128.1</a>      |
| PREDICTED: lymphatic vessel endothelial hyaluronic acid receptor                     | 30.8 | 30.8 | 100% | 15  | 69%  | <a href="#">gij344280563 XP_003412052.1</a>  |
| PREDICTED: lymphatic vessel endothelial hyaluronic acid receptor                     | 30.8 | 30.8 | 100% | 16  | 69%  | <a href="#">gij532082227 XP_005326862.1</a>  |
| PREDICTED: lymphatic vessel endothelial hyaluronic acid receptor                     | 30.3 | 30.3 | 100% | 21  | 69%  | <a href="#">gij478488200 XP_004418488.1</a>  |
| PREDICTED: lymphatic vessel endothelial hyaluronic acid receptor                     | 30.3 | 30.3 | 76%  | 21  | 90%  | <a href="#">gij617593622 XP_007521220.1</a>  |
| PREDICTED: lymphatic vessel endothelial hyaluronic acid receptor                     | 29.9 | 29.9 | 76%  | 29  | 80%  | <a href="#">gij395543482 XP_003773646.1</a>  |
| <a href="#">hypothetical protein JP74_21765 [Devosia sp. 17-2-E-8]</a>               | 29.9 | 29.9 | 69%  | 30  | 89%  | <a href="#">gij674759722 KFL24995.1</a>      |
| PREDICTED: lymphatic vessel endothelial hyaluronic acid receptor                     | 29.5 | 29.5 | 69%  | 39  | 89%  | <a href="#">gij586485154 XP_006873070.1</a>  |
| PREDICTED: lymphatic vessel endothelial hyaluronic acid receptor                     | 29.5 | 29.5 | 69%  | 39  | 89%  | <a href="#">gij507685057 XP_004711592.1</a>  |
| <a href="#">PTS maltose transporter subunit IIBC [Staphylococcus pettenkoferi]</a>   | 29.1 | 29.1 | 61%  | 52  | 100% | <a href="#">gij488401911 WIP_002471296.1</a> |
| PREDICTED: lymphatic vessel endothelial hyaluronic acid receptor                     | 29.1 | 29.1 | 100% | 54  | 69%  | <a href="#">gij593753137 XP_007115477.1</a>  |
| <a href="#">hypothetical protein Q664_06280 [Cystobacter violaceus Cb vi76]</a>      | 28.6 | 28.6 | 69%  | 69  | 89%  | <a href="#">gij667804508 KFA93874.1</a>      |
| <a href="#">nucleoside-diphosphate-sugar epimerase [Xanthomonas vesicatori;</a>      | 28.6 | 28.6 | 92%  | 73  | 75%  | <a href="#">gij492844096 WIP_005998050.1</a> |
| <a href="#">NmrA family protein [Xanthomonas vesicatoria]</a>                        | 28.6 | 28.6 | 92%  | 73  | 75%  | <a href="#">gij734006070 KHM91708.1</a>      |
| <a href="#">NmrA family protein [Xanthomonas arboricola pv. celebensis]</a>          | 28.6 | 28.6 | 92%  | 73  | 75%  | <a href="#">gij663494148 KER88267.1</a>      |
| <a href="#">NmrA family protein [Xanthomonas arboricola]</a>                         | 28.6 | 28.6 | 92%  | 73  | 75%  | <a href="#">gij640503525 WIP_024940476.1</a> |
| PREDICTED: lymphatic vessel endothelial hyaluronic acid receptor                     | 28.6 | 28.6 | 92%  | 73  | 75%  | <a href="#">gij511857195 XP_004752037.1</a>  |
| PREDICTED: lymphatic vessel endothelial hyaluronic acid receptor                     | 28.6 | 28.6 | 100% | 73  | 69%  | <a href="#">gij585152326 XP_006728583.1</a>  |
| PREDICTED: lymphatic vessel endothelial hyaluronic acid receptor                     | 28.6 | 28.6 | 100% | 73  | 69%  | <a href="#">gij472349885 XP_004394637.1</a>  |
| <a href="#">secretion protein HyID [Gramella forsetii]</a>                           | 28.6 | 28.6 | 76%  | 74  | 80%  | <a href="#">gij500027261 WIP_011707979.1</a> |
| <a href="#">hypothetical protein [Mucispirillum schaedleri]</a>                      | 28.6 | 28.6 | 92%  | 74  | 77%  | <a href="#">gij555545456 WIP_023275572.1</a> |
| <a href="#">histidine kinase [Myroides odoratimimus]</a>                             | 28.6 | 28.6 | 76%  | 74  | 80%  | <a href="#">gij640700956 WIP_025124556.1</a> |
| <a href="#">hypothetical protein [Myroides odoratimimus]</a>                         | 28.6 | 28.6 | 76%  | 74  | 80%  | <a href="#">gij514961695 WIP_016650279.1</a> |
| <a href="#">hypothetical protein [Myroides odoratimimus]</a>                         | 28.6 | 28.6 | 76%  | 74  | 80%  | <a href="#">gij493309248 WIP_006266752.1</a> |
| <a href="#">hypothetical protein [Myroides odoratimimus]</a>                         | 28.6 | 28.6 | 76%  | 74  | 80%  | <a href="#">gij493302210 WIP_006259803.1</a> |
| <a href="#">hypothetical protein [Myroides odoratimimus]</a>                         | 28.6 | 28.6 | 76%  | 74  | 80%  | <a href="#">gij493307022 WIP_006264558.1</a> |
| <a href="#">hypothetical protein [Myroides odoratimimus]</a>                         | 28.6 | 28.6 | 76%  | 74  | 80%  | <a href="#">gij493304767 WIP_006262325.1</a> |

|                                                                                                  |      |      |      |     |     |                                             |
|--------------------------------------------------------------------------------------------------|------|------|------|-----|-----|---------------------------------------------|
| <a href="#">Anthranilate synthase [Pseudanabaena biceps]</a>                                     | 28.6 | 28.6 | 84%  | 74  | 64% | <a href="#">gil497313899 WP_009628116.1</a> |
| <a href="#">conserved domain protein [Bacteroides fluxus]</a>                                    | 28.6 | 28.6 | 76%  | 75  | 90% | <a href="#">gil496417113 WP_009125960.1</a> |
| <a href="#">hypothetical protein [Flavobacterium chungangense]</a>                               | 28.2 | 28.2 | 69%  | 99  | 89% | <a href="#">gil670505903 WP_031453726.1</a> |
| <a href="#">lymphatic vessel endothelial hyaluronic acid receptor 1 precursor [Homo sapiens]</a> | 28.2 | 28.2 | 84%  | 100 | 73% | <a href="#">gil31560771 NP_444477.2</a>     |
| <a href="#">hyaluronan receptor [Mus musculus]</a>                                               | 28.2 | 28.2 | 84%  | 100 | 73% | <a href="#">gil13162223 CAC33082.1</a>      |
| <a href="#">PREDICTED: lymphatic vessel endothelial hyaluronic acid receptor</a>                 | 28.2 | 28.2 | 100% | 100 | 69% | <a href="#">gil589931814 XP_006978709.1</a> |
| <a href="#">hypothetical protein [Helcococcus sueciensis]</a>                                    | 28.2 | 28.2 | 69%  | 101 | 89% | <a href="#">gil653097184 WP_027347349.1</a> |
| <a href="#">unnamed protein product [Oikopleura dioica]</a>                                      | 28.2 | 28.2 | 92%  | 102 | 75% | <a href="#">gil313220375 CBY31230.1</a>     |
| <a href="#">unnamed protein product [Oikopleura dioica]</a>                                      | 28.2 | 28.2 | 92%  | 102 | 75% | <a href="#">gil313234209 CBY10277.1</a>     |
| <a href="#">GM20358 [Drosophila sechellia]</a>                                                   | 28.2 | 28.2 | 100% | 102 | 79% | <a href="#">gil195333784 XP_002033566.1</a> |
| <a href="#">dim gamma-tubulin 5, isoform A [Drosophila melanogaster]</a>                         | 28.2 | 28.2 | 100% | 103 | 79% | <a href="#">gil20129915 NP_610785.1</a>     |
| <a href="#">MULTISPECIES: hypothetical protein [Parabacteroides]</a>                             | 28.2 | 28.2 | 69%  | 104 | 89% | <a href="#">gil498502074 WP_010802776.1</a> |
| <a href="#">membrane protein [Parabacteroides goldsteini]</a>                                    | 28.2 | 28.2 | 69%  | 104 | 89% | <a href="#">gil494932066 WP_007658100.1</a> |
| <a href="#">hypothetical protein [Photobacterium sp. SKA34]</a>                                  | 27.8 | 27.8 | 69%  | 134 | 90% | <a href="#">gil493695244 WP_006645113.1</a> |
| <a href="#">amino acid ABC transporter substrate-binding protein [Streptococcus pneumoniae]</a>  | 27.8 | 27.8 | 69%  | 135 | 90% | <a href="#">gil489177246 WP_003086763.1</a> |
| <a href="#">MULTISPECIES: LysR family transcriptional regulator [Myroides]</a>                   | 27.8 | 27.8 | 100% | 135 | 71% | <a href="#">gil489076611 WP_002986559.1</a> |
| <a href="#">PREDICTED: lymphatic vessel endothelial hyaluronic acid receptor</a>                 | 27.8 | 27.8 | 69%  | 136 | 89% | <a href="#">gil602722618 XP_007471455.1</a> |
| <a href="#">PREDICTED: lymphatic vessel endothelial hyaluronic acid receptor</a>                 | 27.8 | 27.8 | 69%  | 136 | 89% | <a href="#">gil594653120 XP_007174994.1</a> |
| <a href="#">PREDICTED: lymphatic vessel endothelial hyaluronic acid receptor</a>                 | 27.8 | 27.8 | 100% | 136 | 62% | <a href="#">gil562879636 XP_006167495.1</a> |
| <a href="#">PREDICTED: lymphatic vessel endothelial hyaluronic acid receptor</a>                 | 27.8 | 27.8 | 69%  | 136 | 89% | <a href="#">gil470637957 XP_004324243.1</a> |
| <a href="#">PREDICTED: lymphatic vessel endothelial hyaluronic acid receptor</a>                 | 27.8 | 27.8 | 69%  | 136 | 89% | <a href="#">gil466055424 XP_004279241.1</a> |
| <a href="#">PREDICTED: lymphatic vessel endothelial hyaluronic acid receptor</a>                 | 27.8 | 27.8 | 69%  | 136 | 89% | <a href="#">gil350580301 XP_003480784.1</a> |
| <a href="#">PREDICTED: lymphatic vessel endothelial hyaluronic acid receptor</a>                 | 27.8 | 27.8 | 69%  | 136 | 89% | <a href="#">gil545808430 XP_005661187.1</a> |
| <a href="#">hypothetical protein [Mycoplasma crocodyli]</a>                                      | 27.8 | 27.8 | 92%  | 137 | 75% | <a href="#">gil502819168 WP_013054144.1</a> |
| <a href="#">hypothetical protein [Paramecium tetraurelia strain d4-2]</a>                        | 27.8 | 27.8 | 69%  | 138 | 90% | <a href="#">gil145515361 XP_001443580.1</a> |
| <a href="#">ATP-dependent protease ATP-binding subunit HslU [Lactobacillus casei]</a>            | 27.8 | 27.8 | 69%  | 138 | 89% | <a href="#">gil564809203 WP_023859436.1</a> |
| <a href="#">hypothetical protein [Pseudoalteromonas haloplanktis]</a>                            | 27.8 | 27.8 | 76%  | 139 | 75% | <a href="#">gil515078162 WP_016707948.1</a> |

## Alignments

[Download](#) [GenPept](#) [Graphics](#)

[Next](#) [Previous](#) [Descriptions](#)

lymphatic vessel endothelial hyaluronic acid receptor 1 precursor [Homo sapiens]

Sequence ID: [gil40549451|ref|NP\\_006682.2](#) Length: 322 Number of Matches: 1

[See 6 more title\(s\)](#)

Range 1: 47 to 59 [GenPept](#) [Graphics](#)

[Next Match](#) [Previous Match](#)

| Score         | Expect | Identities  | Positives   | Gaps     |
|---------------|--------|-------------|-------------|----------|
| 44.3 bits(97) | 5e-04  | 13/13(100%) | 13/13(100%) | 0/13(0%) |

Query 1 KANQQLNFTEAKE 13  
 KANQQLNFTEAKE  
 Sbjct 47 KANQQLNFTEAKE 59

### Related Information

[Gene](#) - associated gene details  
[UniGene](#) - clustered expressed sequence tags  
[Map Viewer](#) - aligned genomic context  
[Identical Proteins](#) - Proteins identical to the subject

[Download](#) [GenPept](#) [Graphics](#)

[Next](#) [Previous](#) [Descriptions](#)

lymphatic endothelium-specific hyaluronan receptor LYVE-1 [Homo sapiens]

Sequence ID: [gil5359673|gb|AAD42764.1|AF118108.1](#) Length: 322 Number of Matches: 1

Range 1: 47 to 59 [GenPept](#) [Graphics](#)

[Next Match](#) [Previous Match](#)

| Score         | Expect | Identities  | Positives   | Gaps     |
|---------------|--------|-------------|-------------|----------|
| 44.3 bits(97) | 5e-04  | 13/13(100%) | 13/13(100%) | 0/13(0%) |

### Related Information

[Gene](#) - associated gene details

Query 1 KANQQLNFTEAKE 13  
 KANQQLNFTEAKE  
 Sbjct 47 KANQQLNFTEAKE 59

[Download](#) [GenPept](#) [Graphics](#)

[Next](#) [Previous](#) [Descriptions](#)

PREDICTED: lymphatic vessel endothelial hyaluronic acid receptor 1 [Pan paniscus]

Sequence ID: [gi|397494690|ref|XP\\_003818206.1|](#) Length: 322 Number of Matches: 1

Range 1: 47 to 59 [GenPept](#) [Graphics](#)

[Next Match](#) [Previous Match](#)

| Score         | Expect | Identities  | Positives   | Gaps     |
|---------------|--------|-------------|-------------|----------|
| 44.3 bits(97) | 5e-04  | 13/13(100%) | 13/13(100%) | 0/13(0%) |

Query 1 KANQQLNFTEAKE 13  
 KANQQLNFTEAKE  
 Sbjct 47 KANQQLNFTEAKE 59

**Related Information**

[Gene](#) - associated gene details  
[Map Viewer](#) - aligned genomic context

[Download](#) [GenPept](#) [Graphics](#)

[Next](#) [Previous](#) [Descriptions](#)

PREDICTED: lymphatic vessel endothelial hyaluronic acid receptor 1 [Pan troglodytes]

Sequence ID: [gi|114636135|ref|XP\\_508283.2|](#) Length: 322 Number of Matches: 1

Range 1: 47 to 59 [GenPept](#) [Graphics](#)

[Next Match](#) [Previous Match](#)

| Score         | Expect | Identities  | Positives   | Gaps     |
|---------------|--------|-------------|-------------|----------|
| 44.3 bits(97) | 5e-04  | 13/13(100%) | 13/13(100%) | 0/13(0%) |

Query 1 KANQQLNFTEAKE 13  
 KANQQLNFTEAKE  
 Sbjct 47 KANQQLNFTEAKE 59

**Related Information**

[Gene](#) - associated gene details  
[UniGene](#) - clustered expressed sequence tags  
[Map Viewer](#) - aligned genomic context

[Download](#) [GenPept](#) [Graphics](#)

[Next](#) [Previous](#) [Descriptions](#)

Lymphatic vessel endothelial hyaluronan receptor 1 [Homo sapiens]

Sequence ID: [gi|20070755|gb|AAH26231.1|](#) Length: 322 Number of Matches: 1

[See 3 more title\(s\)](#)

Range 1: 47 to 59 [GenPept](#) [Graphics](#)

[Next Match](#) [Previous Match](#)

| Score         | Expect | Identities  | Positives   | Gaps     |
|---------------|--------|-------------|-------------|----------|
| 44.3 bits(97) | 5e-04  | 13/13(100%) | 13/13(100%) | 0/13(0%) |

Query 1 KANQQLNFTEAKE 13  
 KANQQLNFTEAKE  
 Sbjct 47 KANQQLNFTEAKE 59

**Related Information**

[Gene](#) - associated gene details  
[Identical Proteins](#) - Proteins identical to the subject

BLAST is a registered trademark of the National Library of Medicine.

▶ NCBI/ BLAST/ blastp suite/ Formatting Results - BVJ1G39001R

**i** Your search parameters were adjusted to search for a short input sequence.

[Edit and Resubmit](#) [Save Search Strategies](#) ▶ [Formatting options](#) ▶ [Download](#) [YouTube](#) [How to read this page](#) [Blast report description](#)

## MASP1\_RFGYLHTDDRT\_Mod

|                      |                                                         |                      |                                                                                                                    |
|----------------------|---------------------------------------------------------|----------------------|--------------------------------------------------------------------------------------------------------------------|
| <b>RID</b>           | <a href="#">BVJ1G39001R</a> (Expires on 01-21 10:14 am) | <b>Database Name</b> | nr                                                                                                                 |
| <b>Query ID</b>      | lcl 347621                                              | <b>Description</b>   | All non-redundant GenBank CDS translations+PDB+SwissProt+PIR+PRF excluding environmental samples from WGS projects |
| <b>Description</b>   | None                                                    | <b>Program</b>       | BLASTP 2.2.30+ ▶ <a href="#">Citation</a>                                                                          |
| <b>Molecule type</b> | amino acid                                              |                      |                                                                                                                    |
| <b>Query Length</b>  | 12                                                      |                      |                                                                                                                    |

Other reports: ▶ [Search Summary](#) [[Taxonomy reports](#)] [[Distance tree of results](#)] [[Multiple alignment](#)]

### Graphic Summary

[Show Conserved Domains](#)

No putative conserved domains have been detected

Distribution of 100 Blast Hits on the Query Sequence

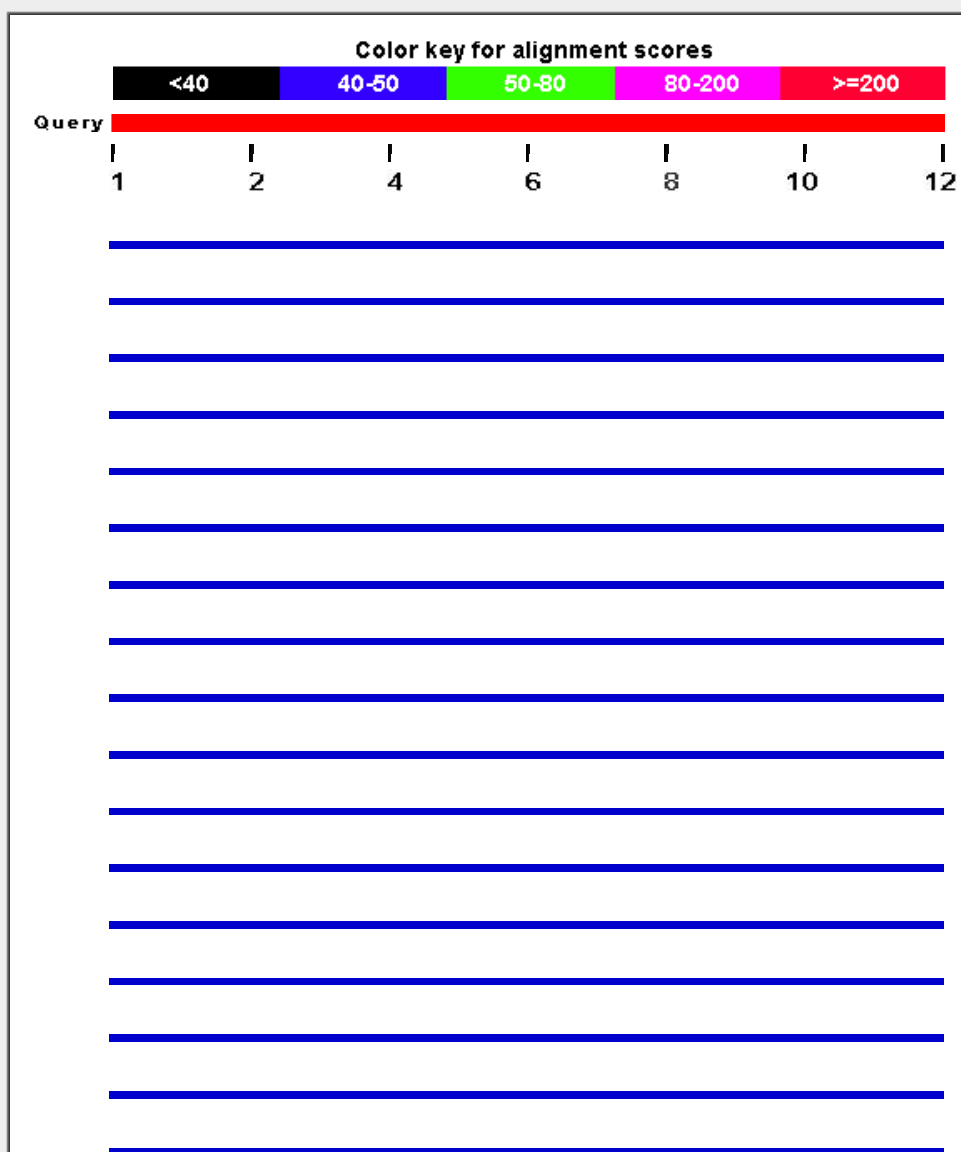



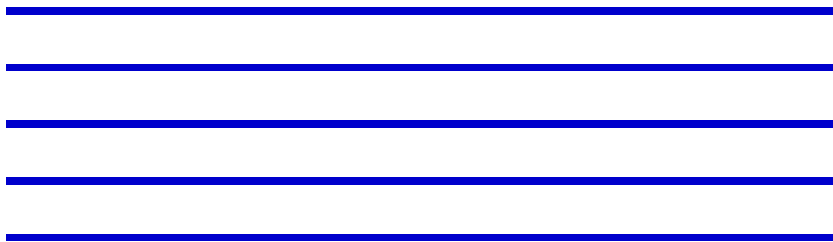

**Descriptions**

**Sequences producing significant alignments:**

Select: [All](#) [None](#) Selected:0

[Alignments](#)
[Download](#)
[GenPept](#)
[Graphics](#)
[Distance tree of results](#)
[Multiple alignment](#)


| Description                                                                                            | Max score | Total score | Query cover | E value | Ident | Accession                      |
|--------------------------------------------------------------------------------------------------------|-----------|-------------|-------------|---------|-------|--------------------------------|
| <a href="#">Ra-reactive factor serine protease p100 [Rattus norvegicus]</a>                            | 40.9      | 40.9        | 100%        | 0.006   | 92%   | <a href="#">AAB65832.1</a>     |
| <a href="#">Chain A, Cub1-egf-cub2 Domain Of Human Masp-1/3 [Homo sapiens]</a>                         | 40.9      | 40.9        | 100%        | 0.007   | 92%   | <a href="#">3DEM_A</a>         |
| <a href="#">unnamed protein product [Homo sapiens]</a>                                                 | 40.9      | 40.9        | 100%        | 0.007   | 92%   | <a href="#">BAG62349.1</a>     |
| <a href="#">PREDICTED: mannan-binding lectin serine protease 1 isoform X2 [Homo sapiens]</a>           | 40.9      | 40.9        | 100%        | 0.007   | 92%   | <a href="#">XP_006713764.1</a> |
| <a href="#">Chain A, Mbl-Ficolin Associated Protein-1, Map-1 Aka Map44 [Homo sapiens]</a>              | 40.9      | 40.9        | 100%        | 0.007   | 92%   | <a href="#">4AQB_A</a>         |
| <a href="#">PREDICTED: mannan-binding lectin serine protease 1 isoform X3 [Jaculus jaculus]</a>        | 40.9      | 40.9        | 100%        | 0.007   | 92%   | <a href="#">XP_004654346.1</a> |
| <a href="#">PREDICTED: mannan-binding lectin serine protease 1 isoform X4 [Oryctolagus cuniculus]</a>  | 40.9      | 40.9        | 100%        | 0.007   | 92%   | <a href="#">XP_008264861.1</a> |
| <a href="#">PREDICTED: mannan-binding lectin serine protease 1 isoform X3 [Bison bison]</a>            | 40.9      | 40.9        | 100%        | 0.007   | 92%   | <a href="#">XP_010852220.1</a> |
| <a href="#">PREDICTED: mannan-binding lectin serine protease 1 isoform X7 [Saimiri boliviensis]</a>    | 40.9      | 40.9        | 100%        | 0.007   | 92%   | <a href="#">XP_010336013.1</a> |
| <a href="#">PREDICTED: mannan-binding lectin serine protease 1 isoform X7 [Callithrix jacchus]</a>     | 40.9      | 40.9        | 100%        | 0.007   | 92%   | <a href="#">XP_008979623.1</a> |
| <a href="#">PREDICTED: mannan-binding lectin serine protease 1 isoform X2 [Nannospalax leucurus]</a>   | 40.9      | 40.9        | 100%        | 0.007   | 92%   | <a href="#">XP_008851360.1</a> |
| <a href="#">PREDICTED: mannan-binding lectin serine protease 1 isoform X5 [Eptesicus fuscus]</a>       | 40.9      | 40.9        | 100%        | 0.007   | 92%   | <a href="#">XP_008149800.1</a> |
| <a href="#">PREDICTED: mannan-binding lectin serine protease 1 isoform X4 [Tarsius syrrhaptes]</a>     | 40.9      | 40.9        | 100%        | 0.007   | 92%   | <a href="#">XP_008054567.1</a> |
| <a href="#">mannan-binding lectin serine protease 1 isoform 3 precursor [Homo sapiens]</a>             | 40.9      | 40.9        | 100%        | 0.007   | 92%   | <a href="#">NP_001027019.1</a> |
| <a href="#">PREDICTED: mannan-binding lectin serine protease 1-like isoform X3 [Bubalus bubalis]</a>   | 40.9      | 40.9        | 100%        | 0.007   | 92%   | <a href="#">XP_006042840.1</a> |
| <a href="#">PREDICTED: mannan-binding lectin serine protease 1 isoform X2 [Peromyscus maniculatus]</a> | 40.9      | 40.9        | 100%        | 0.007   | 92%   | <a href="#">XP_006985135.1</a> |
| <a href="#">PREDICTED: mannan-binding lectin serine protease 1 isoform X3 [Pteropus vampyrus]</a>      | 40.9      | 40.9        | 100%        | 0.007   | 92%   | <a href="#">XP_006925890.1</a> |
| <a href="#">PREDICTED: mannan-binding lectin serine protease 1 isoform X1 [Myotis daubentonii]</a>     | 40.9      | 40.9        | 100%        | 0.007   | 92%   | <a href="#">XP_006765915.1</a> |
| <a href="#">PREDICTED: mannan-binding lectin serine protease 1 isoform X3 [Tupaia chiroptera]</a>      | 40.9      | 40.9        | 100%        | 0.007   | 92%   | <a href="#">XP_006156800.1</a> |
| <a href="#">PREDICTED: mannan-binding lectin serine protease 1 isoform X3 [Vicugna pacca]</a>          | 40.9      | 40.9        | 100%        | 0.007   | 92%   | <a href="#">XP_006201041.1</a> |
| <a href="#">PREDICTED: mannan-binding lectin serine protease 1 isoform X3 [Camelus ferus]</a>          | 40.9      | 40.9        | 100%        | 0.007   | 92%   | <a href="#">XP_006188912.1</a> |
| <a href="#">PREDICTED: mannan-binding lectin serine protease 1 isoform X3 [Myotis lucifugus]</a>       | 40.9      | 40.9        | 100%        | 0.007   | 92%   | <a href="#">XP_006084855.1</a> |
| <a href="#">PREDICTED: mannan-binding lectin serine protease 1 isoform X2 [Pantholopus armatus]</a>    | 40.9      | 40.9        | 100%        | 0.007   | 92%   | <a href="#">XP_005969146.1</a> |
| <a href="#">PREDICTED: mannan-binding lectin serine protease 1 isoform X3 [Bos mutus]</a>              | 40.9      | 40.9        | 100%        | 0.007   | 92%   | <a href="#">XP_005899711.1</a> |
| <a href="#">PREDICTED: mannan-binding lectin serine protease 1 isoform X3 [Myotis blythii]</a>         | 40.9      | 40.9        | 100%        | 0.007   | 92%   | <a href="#">XP_005876336.1</a> |
| <a href="#">PREDICTED: mannan-binding lectin serine protease 1 isoform X3 [Capra hircus]</a>           | 40.9      | 40.9        | 100%        | 0.007   | 92%   | <a href="#">XP_005675200.1</a> |
| <a href="#">PREDICTED: mannan-binding lectin serine protease 1 isoform X3 [Sus scrofa]</a>             | 40.9      | 40.9        | 100%        | 0.007   | 92%   | <a href="#">XP_005657168.1</a> |
| <a href="#">PREDICTED: mannan-binding lectin serine protease 1 isoform X3 [Equus caballus]</a>         | 40.9      | 40.9        | 100%        | 0.007   | 92%   | <a href="#">XP_005601937.1</a> |
| <a href="#">PREDICTED: mannan-binding lectin serine protease 1 isoform X3 [Macaca fascicularis]</a>    | 40.9      | 40.9        | 100%        | 0.007   | 92%   | <a href="#">XP_005545503.1</a> |



|                                                                                              |      |      |      |       |     |                                |
|----------------------------------------------------------------------------------------------|------|------|------|-------|-----|--------------------------------|
| <a href="#">PREDICTED: mannan-binding lectin serine protease 1 isoform X3 [Bos taurus</a>    | 40.9 | 40.9 | 100% | 0.007 | 92% | <a href="#">XP_005201546.1</a> |
| <a href="#">PREDICTED: mannan-binding lectin serine protease 1 isoform 4 [Ceratotheri</a>    | 40.9 | 40.9 | 100% | 0.007 | 92% | <a href="#">XP_004424648.1</a> |
| <a href="#">PREDICTED: mannan-binding lectin serine protease 1 isoform 3 [Orcinus orc</a>    | 40.9 | 40.9 | 100% | 0.007 | 92% | <a href="#">XP_004278527.1</a> |
| <a href="#">hypothetical protein [Homo sapiens]</a>                                          | 40.9 | 40.9 | 100% | 0.007 | 92% | <a href="#">CAH18409.1</a>     |
| <a href="#">PREDICTED: mannan-binding lectin serine protease 1 isoform X4 [Pan troglo</a>    | 40.9 | 40.9 | 100% | 0.007 | 92% | <a href="#">XP_003310212.1</a> |
| <a href="#">PREDICTED: mannan-binding lectin serine protease 1 isoform 2 [Nomascus l</a>     | 40.9 | 40.9 | 100% | 0.007 | 92% | <a href="#">XP_003256677.1</a> |
| <a href="#">PREDICTED: mannan-binding lectin serine protease 1 isoform X3 [Fukomys c</a>     | 40.9 | 40.9 | 100% | 0.007 | 92% | <a href="#">XP_010622449.1</a> |
| <a href="#">PREDICTED: mannan-binding lectin serine protease 1 isoform X2 [Cavia porc</a>    | 40.9 | 40.9 | 100% | 0.007 | 92% | <a href="#">XP_005006929.1</a> |
| <a href="#">PREDICTED: mannan-binding lectin serine protease 1 isoform X3 [Heterocep</a>     | 40.9 | 40.9 | 100% | 0.007 | 92% | <a href="#">XP_004899716.1</a> |
| <a href="#">PREDICTED: mannan-binding lectin serine protease 1 isoform X2 [Rhinopithe</a>    | 40.9 | 40.9 | 100% | 0.007 | 92% | <a href="#">XP_010350856.1</a> |
| <a href="#">PREDICTED: mannan-binding lectin serine protease 1 isoform X2 [Chloroceb</a>     | 40.9 | 40.9 | 100% | 0.007 | 92% | <a href="#">XP_008007690.1</a> |
| <a href="#">PREDICTED: mannan-binding lectin serine protease 1 isoform X2 [Macaca fa</a>     | 40.9 | 40.9 | 100% | 0.007 | 92% | <a href="#">XP_005545502.1</a> |
| <a href="#">unnamed protein product [Macaca fascicularis]</a>                                | 40.9 | 40.9 | 100% | 0.007 | 92% | <a href="#">BAE90048.1</a>     |
| <a href="#">PREDICTED: mannan-binding lectin serine protease 1 isoform X2 [Rattus nor</a>    | 40.9 | 40.9 | 100% | 0.007 | 92% | <a href="#">XP_008767026.1</a> |
| <a href="#">PREDICTED: mannan-binding lectin serine protease 1 isoform X3 [Ictidomys t</a>   | 40.9 | 40.9 | 100% | 0.007 | 92% | <a href="#">XP_005331047.1</a> |
| <a href="#">PREDICTED: mannan-binding lectin serine protease 1 isoform X2 [Mus musc</a>      | 40.9 | 40.9 | 100% | 0.007 | 92% | <a href="#">XP_006521892.1</a> |
| <a href="#">PREDICTED: mannan-binding lectin serine protease 1 isoform X4 [Chinchilla</a>    | 40.9 | 40.9 | 100% | 0.007 | 92% | <a href="#">XP_005383312.1</a> |
| <a href="#">PREDICTED: mannan-binding lectin serine protease 1 isoform X3 [Pan troglo</a>    | 40.9 | 40.9 | 100% | 0.007 | 92% | <a href="#">XP_009445263.1</a> |
| <a href="#">PREDICTED: mannan-binding lectin serine protease 1 isoform X2 [Papio anul</a>    | 40.9 | 40.9 | 100% | 0.007 | 92% | <a href="#">XP_009200178.1</a> |
| <a href="#">PREDICTED: mannan-binding lectin serine protease 1 isoform X6 [Saimiri bol</a>   | 40.9 | 40.9 | 100% | 0.007 | 92% | <a href="#">XP_010336012.1</a> |
| <a href="#">PREDICTED: mannan-binding lectin serine protease 1 isoform 5 [Nomascus l</a>     | 40.9 | 40.9 | 100% | 0.007 | 92% | <a href="#">XP_003256680.1</a> |
| <a href="#">PREDICTED: mannan-binding lectin serine protease 1 isoform X6 [Callithrix je</a> | 40.9 | 40.9 | 100% | 0.007 | 92% | <a href="#">XP_008979622.1</a> |
| <a href="#">rCG36729, isoform CRA_b [Rattus norvegicus]</a>                                  | 40.9 | 40.9 | 100% | 0.007 | 92% | <a href="#">EDL78090.1</a>     |
| <a href="#">hypothetical protein CB1_001118022 [Camelus ferus]</a>                           | 40.9 | 40.9 | 100% | 0.007 | 92% | <a href="#">EPY78128.1</a>     |
| <a href="#">hypothetical protein [Homo sapiens]</a>                                          | 40.9 | 40.9 | 100% | 0.007 | 92% | <a href="#">CAI46037.1</a>     |
| <a href="#">MASP1 protein [Homo sapiens]</a>                                                 | 40.9 | 40.9 | 100% | 0.007 | 92% | <a href="#">AAH39724.1</a>     |
| <a href="#">PREDICTED: mannan-binding lectin serine protease 1-like isoform X2 [Bubal</a>    | 40.9 | 40.9 | 100% | 0.007 | 92% | <a href="#">XP_006042839.1</a> |
| <a href="#">PREDICTED: mannan-binding lectin serine protease 1-like isoform X1 [Bubal</a>    | 40.9 | 40.9 | 100% | 0.007 | 92% | <a href="#">XP_006042838.1</a> |
| <a href="#">PREDICTED: mannan-binding lectin serine protease 1 isoform X2 [Bos taurus</a>    | 40.9 | 40.9 | 100% | 0.007 | 92% | <a href="#">XP_005201545.1</a> |
| <a href="#">PREDICTED: mannan-binding lectin serine protease 1 isoform X5 [Saimiri bol</a>   | 40.9 | 40.9 | 100% | 0.007 | 92% | <a href="#">XP_010336011.1</a> |
| <a href="#">PREDICTED: mannan-binding lectin serine protease 1 isoform X2 [Erinaceus</a>     | 40.9 | 40.9 | 100% | 0.007 | 92% | <a href="#">XP_007532796.1</a> |
| <a href="#">PREDICTED: mannan-binding lectin serine protease 1 isoform X6 [Pongo abe</a>     | 40.9 | 40.9 | 100% | 0.007 | 92% | <a href="#">XP_009237913.1</a> |
| <a href="#">PREDICTED: mannan-binding lectin serine protease 1 [Galeopterus variegatu</a>    | 40.9 | 40.9 | 100% | 0.007 | 92% | <a href="#">XP_008589455.1</a> |
| <a href="#">PREDICTED: mannan-binding lectin serine protease 1 isoform X3 [Tarsius sy</a>    | 40.9 | 40.9 | 100% | 0.007 | 92% | <a href="#">XP_008054566.1</a> |
| <a href="#">unnamed protein product [Homo sapiens]</a>                                       | 40.9 | 40.9 | 100% | 0.007 | 92% | <a href="#">BAG65179.1</a>     |
| <a href="#">PREDICTED: mannan-binding lectin serine protease 1 isoform X2 [Pteropus e</a>    | 40.9 | 40.9 | 100% | 0.007 | 92% | <a href="#">XP_006925889.1</a> |
| <a href="#">PREDICTED: mannan-binding lectin serine protease 1 isoform X2 [Vicugna p</a>     | 40.9 | 40.9 | 100% | 0.007 | 92% | <a href="#">XP_006201040.1</a> |
| <a href="#">PREDICTED: mannan-binding lectin serine protease 1 isoform X2 [Camelus fr</a>    | 40.9 | 40.9 | 100% | 0.007 | 92% | <a href="#">XP_006188911.1</a> |
| <a href="#">PREDICTED: mannan-binding lectin serine protease 1 isoform X2 [Bos mutus</a>     | 40.9 | 40.9 | 100% | 0.007 | 92% | <a href="#">XP_005899710.1</a> |
| <a href="#">PREDICTED: mannan-binding lectin serine protease 1 isoform X2 [Condylura</a>     | 40.9 | 40.9 | 100% | 0.007 | 92% | <a href="#">XP_004675138.1</a> |
| <a href="#">PREDICTED: mannan-binding lectin serine protease 1 isoform X2 [Sorex arar</a>    | 40.9 | 40.9 | 100% | 0.007 | 92% | <a href="#">XP_004603078.1</a> |
| <a href="#">rCG36729, isoform CRA_a [Rattus norvegicus]</a>                                  | 40.9 | 40.9 | 100% | 0.007 | 92% | <a href="#">EDL78089.1</a>     |
| <a href="#">PREDICTED: mannan-binding lectin serine protease 1 isoform X4 [Eptesicus</a>     | 40.9 | 40.9 | 100% | 0.007 | 92% | <a href="#">XP_008149799.1</a> |
| <a href="#">PREDICTED: mannan-binding lectin serine protease 1-like [Python bivittatus]</a>  | 40.9 | 40.9 | 100% | 0.007 | 92% | <a href="#">XP_007442121.1</a> |
| <a href="#">mannan-binding lectin serine peptidase 1 (C4/C2 activating component of Ra</a>   | 40.9 | 40.9 | 100% | 0.007 | 92% | <a href="#">EAW78150.1</a>     |

|                                                                                              |      |      |      |       |     |                                |
|----------------------------------------------------------------------------------------------|------|------|------|-------|-----|--------------------------------|
| <a href="#">PREDICTED: mannan-binding lectin serine protease 1 isoform X2 [Jaculus jar</a>   | 40.9 | 40.9 | 100% | 0.007 | 92% | <a href="#">XP_004654345.1</a> |
| <a href="#">PREDICTED: LOW QUALITY PROTEIN: mannan-binding lectin serine protea</a>          | 40.9 | 40.9 | 100% | 0.007 | 92% | <a href="#">XP_002808386.1</a> |
| <a href="#">PREDICTED: mannan-binding lectin serine protease 1 isoform X5 [Pongo abe</a>     | 40.9 | 40.9 | 100% | 0.007 | 92% | <a href="#">XP_009237912.1</a> |
| <a href="#">PREDICTED: mannan-binding lectin serine protease 1 isoform X2 [Pan panisr</a>    | 40.9 | 40.9 | 100% | 0.007 | 92% | <a href="#">XP_008954144.1</a> |
| <a href="#">PREDICTED: mannan-binding lectin serine protease 1 isoform X3 [Chinchilla</a>    | 40.9 | 40.9 | 100% | 0.007 | 92% | <a href="#">XP_005383311.1</a> |
| <a href="#">PREDICTED: mannan-binding lectin serine protease 1 isoform 4 [Gorilla gorill</a> | 40.9 | 40.9 | 100% | 0.007 | 92% | <a href="#">XP_004038230.1</a> |
| <a href="#">PREDICTED: LOW QUALITY PROTEIN: mannan-binding lectin serine protea</a>          | 40.9 | 40.9 | 100% | 0.007 | 92% | <a href="#">XP_003804164.1</a> |
| <a href="#">PREDICTED: mannan-binding lectin serine protease 1 isoform 4 [Nomascus l</a>     | 40.9 | 40.9 | 100% | 0.007 | 92% | <a href="#">XP_003256679.1</a> |
| <a href="#">MASP-3 protein [Rattus norvegicus]</a>                                           | 40.9 | 40.9 | 100% | 0.007 | 92% | <a href="#">CAD32171.1</a>     |
| <a href="#">PREDICTED: mannan-binding lectin serine protease 1 isoform X2 [Camelus d</a>     | 40.9 | 40.9 | 100% | 0.007 | 92% | <a href="#">XP_010974431.1</a> |
| <a href="#">PREDICTED: mannan-binding lectin serine protease 1 isoform X2 [Camelus b</a>     | 40.9 | 40.9 | 100% | 0.007 | 92% | <a href="#">XP_010957528.1</a> |
| <a href="#">PREDICTED: mannan-binding lectin serine protease 1 isoform X2 [Bison biso</a>    | 40.9 | 40.9 | 100% | 0.007 | 92% | <a href="#">XP_010852216.1</a> |
| <a href="#">PREDICTED: mannan-binding lectin serine protease 1 isoform X2 [Fukomys c</a>     | 40.9 | 40.9 | 100% | 0.007 | 92% | <a href="#">XP_010622448.1</a> |
| <a href="#">PREDICTED: mannan-binding lectin serine protease 1 isoform X1 [Rhinopithe</a>    | 40.9 | 40.9 | 100% | 0.007 | 92% | <a href="#">XP_010350848.1</a> |
| <a href="#">PREDICTED: mannan-binding lectin serine protease 1 isoform X1 [Nannospal</a>     | 40.9 | 40.9 | 100% | 0.007 | 92% | <a href="#">XP_008851350.1</a> |
| <a href="#">PREDICTED: mannan-binding lectin serine protease 1 isoform X2 [Equus przi</a>    | 40.9 | 40.9 | 100% | 0.007 | 92% | <a href="#">XP_008532698.1</a> |
| <a href="#">PREDICTED: mannan-binding lectin serine protease 1 isoform X3 [Eptesicus</a>     | 40.9 | 40.9 | 100% | 0.007 | 92% | <a href="#">XP_008149798.1</a> |
| <a href="#">PREDICTED: mannan-binding lectin serine protease 1 isoform X2 [Tarsius sy</a>    | 40.9 | 40.9 | 100% | 0.007 | 92% | <a href="#">XP_008054564.1</a> |
| <a href="#">PREDICTED: mannan-binding lectin serine protease 1 isoform X1 [Chloroceb</a>     | 40.9 | 40.9 | 100% | 0.007 | 92% | <a href="#">XP_008007689.1</a> |
| <a href="#">PREDICTED: mannan-binding lectin serine protease 1 isoform X2 [Lipotes ve</a>    | 40.9 | 40.9 | 100% | 0.007 | 92% | <a href="#">XP_007448486.1</a> |
| <a href="#">PREDICTED: mannan-binding lectin serine protease 1 isoform X2 [Physeter c</a>    | 40.9 | 40.9 | 100% | 0.007 | 92% | <a href="#">XP_007111601.1</a> |
| <a href="#">PREDICTED: mannan-binding lectin serine protease 1 isoform X1 [Peromysci</a>     | 40.9 | 40.9 | 100% | 0.007 | 92% | <a href="#">XP_006985134.1</a> |
| <a href="#">PREDICTED: mannan-binding lectin serine protease 1 isoform X2 [Myotis dav</a>    | 40.9 | 40.9 | 100% | 0.007 | 92% | <a href="#">XP_006765916.1</a> |
| <a href="#">PREDICTED: mannan-binding lectin serine protease 1 isoform X2 [Tupaia chi</a>    | 40.9 | 40.9 | 100% | 0.007 | 92% | <a href="#">XP_006156799.1</a> |
| <a href="#">PREDICTED: mannan-binding lectin serine protease 1 isoform X2 [Myotis luci</a>   | 40.9 | 40.9 | 100% | 0.007 | 92% | <a href="#">XP_006084854.1</a> |
| <a href="#">PREDICTED: mannan-binding lectin serine protease 1 isoform X2 [Myotis bra</a>    | 40.9 | 40.9 | 100% | 0.007 | 92% | <a href="#">XP_005876335.1</a> |

## Alignments

Download [GenPept](#) [Graphics](#)

[▼ Next](#) [▲ Previous](#) [▲ Descriptions](#)

Ra-reactive factor serine protease p100 [Rattus norvegicus]

Sequence ID: [gb|AAB65832.1](#) Length: 212 Number of Matches: 1

Range 1: 163 to 174 [GenPept](#) [Graphics](#)

[▼ Next Match](#) [▲ Previous Match](#)

| Score         | Expect | Identities | Positives   | Gaps     |
|---------------|--------|------------|-------------|----------|
| 40.9 bits(89) | 0.006  | 11/12(92%) | 12/12(100%) | 0/12(0%) |

Query 1 RFGYILHTDDRT 12  
RFGYILHTD+RT  
Sbjct 163 RFGYILHTDNRT 174

### Related Information

[Gene](#) - associated gene details

Download [GenPept](#) [Graphics](#)

[▼ Next](#) [▲ Previous](#) [▲ Descriptions](#)

Chain A, Cub1-egf-cub2 Domain Of Human Masp-1/3

Sequence ID: [pdb|3DEM|A](#) Length: 278 Number of Matches: 1

[▶ See 1 more title\(s\)](#)

Range 1: 150 to 161 [GenPept](#) [Graphics](#)

[▼ Next Match](#) [▲ Previous Match](#)

| Score         | Expect | Identities | Positives   | Gaps     |
|---------------|--------|------------|-------------|----------|
| 40.9 bits(89) | 0.007  | 11/12(92%) | 12/12(100%) | 0/12(0%) |

### Related Information

[Structure](#) - 3D structure displays  
[Identical Proteins](#) - Proteins

identical to the subject

Query 1 RFGYILHTDDRT 12  
 RFGYILHTD+RT  
 Sbjct 150 RFGYILHTDNRT 161

[Download](#) [GenPept](#) [Graphics](#)

[Next](#) [Previous](#) [Descriptions](#)

unnamed protein product [Homo sapiens]

Sequence ID: [dbj|BAG62349.1](#) Length: 354 Number of Matches: 1

Range 1: 143 to 154 [GenPept](#) [Graphics](#)

[Next Match](#) [Previous Match](#)

| Score         | Expect | Identities | Positives   | Gaps     |
|---------------|--------|------------|-------------|----------|
| 40.9 bits(89) | 0.007  | 11/12(92%) | 12/12(100%) | 0/12(0%) |

Query 1 RFGYILHTDDRT 12  
 RFGYILHTD+RT  
 Sbjct 143 RFGYILHTDNRT 154

**Related Information**

[Gene](#) - associated gene details

[Download](#) [GenPept](#) [Graphics](#)

[Next](#) [Previous](#) [Descriptions](#)

PREDICTED: mannan-binding lectin serine protease 1 isoform X2 [Homo sapiens]

Sequence ID: [ref|XP\\_006713764.1](#) Length: 354 Number of Matches: 1

Range 1: 143 to 154 [GenPept](#) [Graphics](#)

[Next Match](#) [Previous Match](#)

| Score         | Expect | Identities | Positives   | Gaps     |
|---------------|--------|------------|-------------|----------|
| 40.9 bits(89) | 0.007  | 11/12(92%) | 12/12(100%) | 0/12(0%) |

Query 1 RFGYILHTDDRT 12  
 RFGYILHTD+RT  
 Sbjct 143 RFGYILHTDNRT 154

**Related Information**

[Gene](#) - associated gene details

[Download](#) [GenPept](#) [Graphics](#)

[Next](#) [Previous](#) [Descriptions](#)

Chain A, Mbl-Ficolin Associated Protein-1, Map-1 Aka Map44

Sequence ID: [pdb|4AQB|A](#) Length: 361 Number of Matches: 1

Range 1: 150 to 161 [GenPept](#) [Graphics](#)

[Next Match](#) [Previous Match](#)

| Score         | Expect | Identities | Positives   | Gaps     |
|---------------|--------|------------|-------------|----------|
| 40.9 bits(89) | 0.007  | 11/12(92%) | 12/12(100%) | 0/12(0%) |

Query 1 RFGYILHTDDRT 12  
 RFGYILHTD+RT  
 Sbjct 150 RFGYILHTDNRT 161

**Related Information**

[Structure](#) - 3D structure displays

BLAST is a registered trademark of the National Library of Medicine.

NCBI/ BLAST/ blastp suite/ Formatting Results - BVJ2FYVD01R

**i** Your search parameters were adjusted to search for a short input sequence.  
[Edit and Resubmit](#) [Save Search Strategies](#) [▶ Formatting options](#) [▶ Download](#) [YouTube](#) [How to read this page](#) [Blast report description](#)

### MASP1\_RFGYLHTDDRTCRV\_Mod

**RID** [BVJ2FYVD01R](#) (Expires on 01-21 10:15 am)

|                                 |                                                                                                                                       |
|---------------------------------|---------------------------------------------------------------------------------------------------------------------------------------|
| <b>Query ID</b>  cl 355772      | <b>Database Name</b> nr                                                                                                               |
| <b>Description</b> None         | <b>Description</b> All non-redundant GenBank CDS translations+PDB+SwissProt+PIR+PRF excluding environmental samples from WGS projects |
| <b>Molecule type</b> amino acid | <b>Program</b> BLASTP 2.2.30+ <a href="#">▶ Citation</a>                                                                              |
| <b>Query Length</b> 15          |                                                                                                                                       |

Other reports: [▶ Search Summary](#) [\[Taxonomy reports\]](#) [\[Distance tree of results\]](#) [\[Multiple alignment\]](#)

### Graphic Summary

[Show Conserved Domains](#)

No putative conserved domains have been detected

Distribution of 100 Blast Hits on the Query Sequence [ⓘ](#)

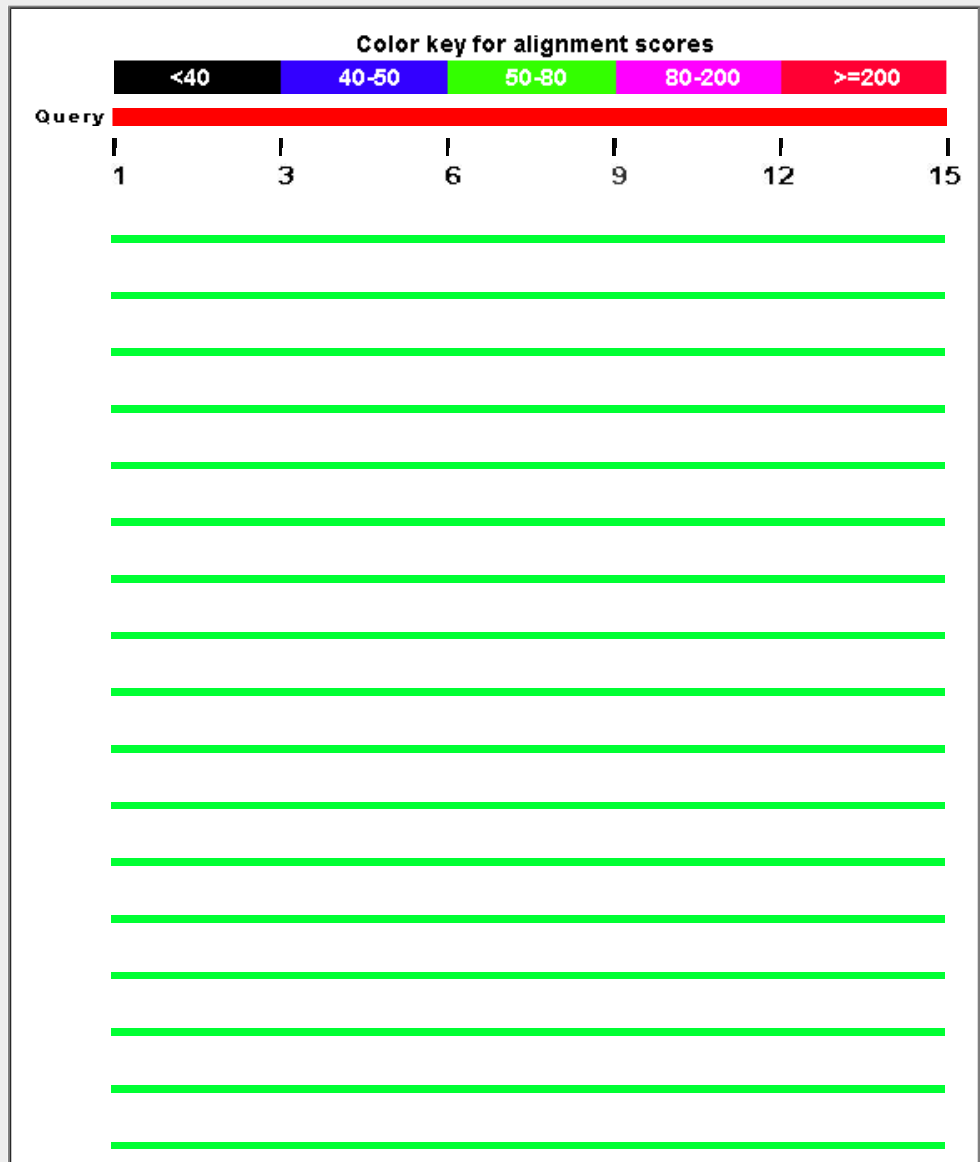



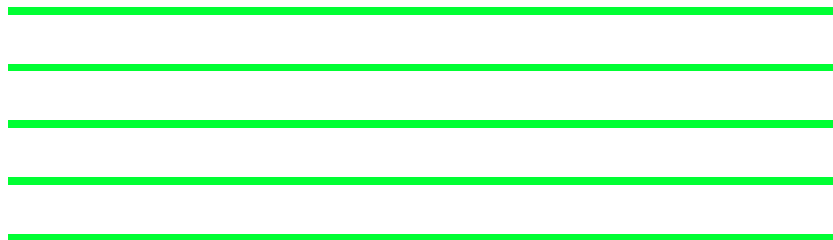

**Descriptions**

**Sequences producing significant alignments:**

Select: [All](#) [None](#) Selected:0

[Alignments](#)
[Download](#)
[GenPept](#)
[Graphics](#)
[Distance tree of results](#)
[Multiple alignment](#)


| Description                                                                                            | Max score | Total score | Query cover | E value | Ident | Accession                      |
|--------------------------------------------------------------------------------------------------------|-----------|-------------|-------------|---------|-------|--------------------------------|
| <a href="#">Ra-reactive factor serine protease p100 [Rattus norvegicus]</a>                            | 51.5      | 51.5        | 100%        | 2e-06   | 93%   | <a href="#">AAB65832.1</a>     |
| <a href="#">Chain A, Cub1-egf-cub2 Domain Of Human Masp-1/3 [Homo sapiens]</a>                         | 51.5      | 51.5        | 100%        | 3e-06   | 93%   | <a href="#">3DEM_A</a>         |
| <a href="#">unnamed protein product [Homo sapiens]</a>                                                 | 51.5      | 51.5        | 100%        | 3e-06   | 93%   | <a href="#">BAG62349.1</a>     |
| <a href="#">PREDICTED: mannan-binding lectin serine protease 1 isoform X2 [Homo sapiens]</a>           | 51.5      | 51.5        | 100%        | 3e-06   | 93%   | <a href="#">XP_006713764.1</a> |
| <a href="#">Chain A, Mbl-Ficolin Associated Protein-1, Map-1 Aka Map44 [Homo sapiens]</a>              | 51.5      | 51.5        | 100%        | 3e-06   | 93%   | <a href="#">4AQB_A</a>         |
| <a href="#">PREDICTED: mannan-binding lectin serine protease 1 isoform X3 [Jaculus jaculus]</a>        | 51.5      | 51.5        | 100%        | 3e-06   | 93%   | <a href="#">XP_004654346.1</a> |
| <a href="#">PREDICTED: mannan-binding lectin serine protease 1 isoform X4 [Oryctolagus cuniculus]</a>  | 51.5      | 51.5        | 100%        | 3e-06   | 93%   | <a href="#">XP_008264861.1</a> |
| <a href="#">PREDICTED: mannan-binding lectin serine protease 1 isoform X3 [Bison bison]</a>            | 51.5      | 51.5        | 100%        | 3e-06   | 93%   | <a href="#">XP_010852220.1</a> |
| <a href="#">PREDICTED: mannan-binding lectin serine protease 1 isoform X7 [Saimiri boliviensis]</a>    | 51.5      | 51.5        | 100%        | 3e-06   | 93%   | <a href="#">XP_010336013.1</a> |
| <a href="#">PREDICTED: mannan-binding lectin serine protease 1 isoform X7 [Callithrix jacchus]</a>     | 51.5      | 51.5        | 100%        | 3e-06   | 93%   | <a href="#">XP_008979623.1</a> |
| <a href="#">PREDICTED: mannan-binding lectin serine protease 1 isoform X2 [Nannospalax leucurus]</a>   | 51.5      | 51.5        | 100%        | 3e-06   | 93%   | <a href="#">XP_008851360.1</a> |
| <a href="#">PREDICTED: mannan-binding lectin serine protease 1 isoform X5 [Eptesicus fuscus]</a>       | 51.5      | 51.5        | 100%        | 3e-06   | 93%   | <a href="#">XP_008149800.1</a> |
| <a href="#">PREDICTED: mannan-binding lectin serine protease 1 isoform X4 [Tarsius syrrhaptes]</a>     | 51.5      | 51.5        | 100%        | 3e-06   | 93%   | <a href="#">XP_008054567.1</a> |
| <a href="#">mannan-binding lectin serine protease 1 isoform 3 precursor [Homo sapiens]</a>             | 51.5      | 51.5        | 100%        | 3e-06   | 93%   | <a href="#">NP_001027019.1</a> |
| <a href="#">PREDICTED: mannan-binding lectin serine protease 1-like isoform X3 [Bubalus bubalis]</a>   | 51.5      | 51.5        | 100%        | 3e-06   | 93%   | <a href="#">XP_006042840.1</a> |
| <a href="#">PREDICTED: mannan-binding lectin serine protease 1 isoform X2 [Peromyscus maniculatus]</a> | 51.5      | 51.5        | 100%        | 3e-06   | 93%   | <a href="#">XP_006985135.1</a> |
| <a href="#">PREDICTED: mannan-binding lectin serine protease 1 isoform X3 [Pteropus vampyrus]</a>      | 51.5      | 51.5        | 100%        | 3e-06   | 93%   | <a href="#">XP_006925890.1</a> |
| <a href="#">PREDICTED: mannan-binding lectin serine protease 1 isoform X1 [Myotis daubentonii]</a>     | 51.5      | 51.5        | 100%        | 3e-06   | 93%   | <a href="#">XP_006765915.1</a> |
| <a href="#">PREDICTED: mannan-binding lectin serine protease 1 isoform X3 [Tupaia chiroptera]</a>      | 51.5      | 51.5        | 100%        | 3e-06   | 93%   | <a href="#">XP_006156800.1</a> |
| <a href="#">PREDICTED: mannan-binding lectin serine protease 1 isoform X3 [Vicugna pacca]</a>          | 51.5      | 51.5        | 100%        | 3e-06   | 93%   | <a href="#">XP_006201041.1</a> |
| <a href="#">PREDICTED: mannan-binding lectin serine protease 1 isoform X3 [Camelus ferus]</a>          | 51.5      | 51.5        | 100%        | 3e-06   | 93%   | <a href="#">XP_006188912.1</a> |
| <a href="#">PREDICTED: mannan-binding lectin serine protease 1 isoform X3 [Myotis lucifugus]</a>       | 51.5      | 51.5        | 100%        | 3e-06   | 93%   | <a href="#">XP_006084855.1</a> |
| <a href="#">PREDICTED: mannan-binding lectin serine protease 1 isoform X2 [Pantholopus armatus]</a>    | 51.5      | 51.5        | 100%        | 3e-06   | 93%   | <a href="#">XP_005969146.1</a> |
| <a href="#">PREDICTED: mannan-binding lectin serine protease 1 isoform X3 [Bos mutus]</a>              | 51.5      | 51.5        | 100%        | 3e-06   | 93%   | <a href="#">XP_005899711.1</a> |
| <a href="#">PREDICTED: mannan-binding lectin serine protease 1 isoform X3 [Myotis blythii]</a>         | 51.5      | 51.5        | 100%        | 3e-06   | 93%   | <a href="#">XP_005876336.1</a> |
| <a href="#">PREDICTED: mannan-binding lectin serine protease 1 isoform X3 [Capra hircus]</a>           | 51.5      | 51.5        | 100%        | 3e-06   | 93%   | <a href="#">XP_005675200.1</a> |
| <a href="#">PREDICTED: mannan-binding lectin serine protease 1 isoform X3 [Sus scrofa]</a>             | 51.5      | 51.5        | 100%        | 3e-06   | 93%   | <a href="#">XP_005657168.1</a> |
| <a href="#">PREDICTED: mannan-binding lectin serine protease 1 isoform X3 [Equus caballus]</a>         | 51.5      | 51.5        | 100%        | 3e-06   | 93%   | <a href="#">XP_005601937.1</a> |
| <a href="#">PREDICTED: mannan-binding lectin serine protease 1 isoform X3 [Macaca fascicularis]</a>    | 51.5      | 51.5        | 100%        | 3e-06   | 93%   | <a href="#">XP_005545503.1</a> |

|                                                                                              |      |      |      |       |     |                                |
|----------------------------------------------------------------------------------------------|------|------|------|-------|-----|--------------------------------|
| <a href="#">PREDICTED: mannan-binding lectin serine protease 1 isoform X3 [Bos taurus</a>    | 51.5 | 51.5 | 100% | 3e-06 | 93% | <a href="#">XP_005201546.1</a> |
| <a href="#">PREDICTED: mannan-binding lectin serine protease 1 isoform 4 [Ceratotheri</a>    | 51.5 | 51.5 | 100% | 3e-06 | 93% | <a href="#">XP_004424648.1</a> |
| <a href="#">PREDICTED: mannan-binding lectin serine protease 1 isoform 3 [Orcinus orc</a>    | 51.5 | 51.5 | 100% | 3e-06 | 93% | <a href="#">XP_004278527.1</a> |
| <a href="#">hypothetical protein [Homo sapiens]</a>                                          | 51.5 | 51.5 | 100% | 3e-06 | 93% | <a href="#">CAH18409.1</a>     |
| <a href="#">PREDICTED: mannan-binding lectin serine protease 1 isoform X4 [Pan troglo</a>    | 51.5 | 51.5 | 100% | 3e-06 | 93% | <a href="#">XP_003310212.1</a> |
| <a href="#">PREDICTED: mannan-binding lectin serine protease 1 isoform 2 [Nomascus l</a>     | 51.5 | 51.5 | 100% | 3e-06 | 93% | <a href="#">XP_003256677.1</a> |
| <a href="#">PREDICTED: mannan-binding lectin serine protease 1 isoform X3 [Fukomys c</a>     | 51.5 | 51.5 | 100% | 3e-06 | 93% | <a href="#">XP_010622449.1</a> |
| <a href="#">PREDICTED: mannan-binding lectin serine protease 1 isoform X2 [Cavia porc</a>    | 51.5 | 51.5 | 100% | 3e-06 | 93% | <a href="#">XP_005006929.1</a> |
| <a href="#">PREDICTED: mannan-binding lectin serine protease 1 isoform X3 [Heterocep</a>     | 51.5 | 51.5 | 100% | 3e-06 | 93% | <a href="#">XP_004899716.1</a> |
| <a href="#">PREDICTED: mannan-binding lectin serine protease 1 isoform X2 [Rhinopithe</a>    | 51.5 | 51.5 | 100% | 3e-06 | 93% | <a href="#">XP_010350856.1</a> |
| <a href="#">PREDICTED: mannan-binding lectin serine protease 1 isoform X2 [Chloroceb</a>     | 51.5 | 51.5 | 100% | 3e-06 | 93% | <a href="#">XP_008007690.1</a> |
| <a href="#">PREDICTED: mannan-binding lectin serine protease 1 isoform X2 [Macaca fa</a>     | 51.5 | 51.5 | 100% | 3e-06 | 93% | <a href="#">XP_005545502.1</a> |
| <a href="#">unnamed protein product [Macaca fascicularis]</a>                                | 51.5 | 51.5 | 100% | 3e-06 | 93% | <a href="#">BAE90048.1</a>     |
| <a href="#">PREDICTED: mannan-binding lectin serine protease 1 isoform X2 [Rattus nor</a>    | 51.5 | 51.5 | 100% | 3e-06 | 93% | <a href="#">XP_008767026.1</a> |
| <a href="#">PREDICTED: mannan-binding lectin serine protease 1 isoform X3 [Ictidomys t</a>   | 51.5 | 51.5 | 100% | 3e-06 | 93% | <a href="#">XP_005331047.1</a> |
| <a href="#">PREDICTED: mannan-binding lectin serine protease 1 isoform X2 [Mus musc</a>      | 51.5 | 51.5 | 100% | 3e-06 | 93% | <a href="#">XP_006521892.1</a> |
| <a href="#">PREDICTED: mannan-binding lectin serine protease 1 isoform X4 [Chinchilla</a>    | 51.5 | 51.5 | 100% | 3e-06 | 93% | <a href="#">XP_005383312.1</a> |
| <a href="#">PREDICTED: mannan-binding lectin serine protease 1 isoform X3 [Pan troglo</a>    | 51.5 | 51.5 | 100% | 3e-06 | 93% | <a href="#">XP_009445263.1</a> |
| <a href="#">PREDICTED: mannan-binding lectin serine protease 1 isoform X2 [Papio anul</a>    | 51.5 | 51.5 | 100% | 3e-06 | 93% | <a href="#">XP_009200178.1</a> |
| <a href="#">PREDICTED: mannan-binding lectin serine protease 1 isoform X6 [Saimiri bol</a>   | 51.5 | 51.5 | 100% | 3e-06 | 93% | <a href="#">XP_010336012.1</a> |
| <a href="#">PREDICTED: mannan-binding lectin serine protease 1 isoform 5 [Nomascus l</a>     | 51.5 | 51.5 | 100% | 3e-06 | 93% | <a href="#">XP_003256680.1</a> |
| <a href="#">PREDICTED: mannan-binding lectin serine protease 1 isoform X6 [Callithrix je</a> | 51.5 | 51.5 | 100% | 3e-06 | 93% | <a href="#">XP_008979622.1</a> |
| <a href="#">rCG36729, isoform CRA_b [Rattus norvegicus]</a>                                  | 51.5 | 51.5 | 100% | 3e-06 | 93% | <a href="#">EDL78090.1</a>     |
| <a href="#">hypothetical protein CB1_001118022 [Camelus ferus]</a>                           | 51.5 | 51.5 | 100% | 3e-06 | 93% | <a href="#">EPY78128.1</a>     |
| <a href="#">hypothetical protein [Homo sapiens]</a>                                          | 51.5 | 51.5 | 100% | 3e-06 | 93% | <a href="#">CAI46037.1</a>     |
| <a href="#">MASP1 protein [Homo sapiens]</a>                                                 | 51.5 | 51.5 | 100% | 3e-06 | 93% | <a href="#">AAH39724.1</a>     |
| <a href="#">PREDICTED: mannan-binding lectin serine protease 1-like isoform X2 [Bubal</a>    | 51.5 | 51.5 | 100% | 3e-06 | 93% | <a href="#">XP_006042839.1</a> |
| <a href="#">PREDICTED: mannan-binding lectin serine protease 1-like isoform X1 [Bubal</a>    | 51.5 | 51.5 | 100% | 3e-06 | 93% | <a href="#">XP_006042838.1</a> |
| <a href="#">PREDICTED: mannan-binding lectin serine protease 1 isoform X2 [Bos taurus</a>    | 51.5 | 51.5 | 100% | 3e-06 | 93% | <a href="#">XP_005201545.1</a> |
| <a href="#">PREDICTED: mannan-binding lectin serine protease 1 isoform X5 [Saimiri bol</a>   | 51.5 | 51.5 | 100% | 3e-06 | 93% | <a href="#">XP_010336011.1</a> |
| <a href="#">PREDICTED: mannan-binding lectin serine protease 1 isoform X2 [Erinaceus</a>     | 51.5 | 51.5 | 100% | 3e-06 | 93% | <a href="#">XP_007532796.1</a> |
| <a href="#">PREDICTED: mannan-binding lectin serine protease 1 isoform X6 [Pongo abe</a>     | 51.5 | 51.5 | 100% | 3e-06 | 93% | <a href="#">XP_009237913.1</a> |
| <a href="#">PREDICTED: mannan-binding lectin serine protease 1 [Galeopterus variegatu</a>    | 51.5 | 51.5 | 100% | 3e-06 | 93% | <a href="#">XP_008589455.1</a> |
| <a href="#">PREDICTED: mannan-binding lectin serine protease 1 isoform X3 [Tarsius sy</a>    | 51.5 | 51.5 | 100% | 3e-06 | 93% | <a href="#">XP_008054566.1</a> |
| <a href="#">unnamed protein product [Homo sapiens]</a>                                       | 51.5 | 51.5 | 100% | 3e-06 | 93% | <a href="#">BAG65179.1</a>     |
| <a href="#">PREDICTED: mannan-binding lectin serine protease 1 isoform X2 [Pteropus e</a>    | 51.5 | 51.5 | 100% | 3e-06 | 93% | <a href="#">XP_006925889.1</a> |
| <a href="#">PREDICTED: mannan-binding lectin serine protease 1 isoform X2 [Vicugna p</a>     | 51.5 | 51.5 | 100% | 3e-06 | 93% | <a href="#">XP_006201040.1</a> |
| <a href="#">PREDICTED: mannan-binding lectin serine protease 1 isoform X2 [Camelus fr</a>    | 51.5 | 51.5 | 100% | 3e-06 | 93% | <a href="#">XP_006188911.1</a> |
| <a href="#">PREDICTED: mannan-binding lectin serine protease 1 isoform X2 [Bos mutus</a>     | 51.5 | 51.5 | 100% | 3e-06 | 93% | <a href="#">XP_005899710.1</a> |
| <a href="#">PREDICTED: mannan-binding lectin serine protease 1 isoform X2 [Condylura</a>     | 51.5 | 51.5 | 100% | 3e-06 | 93% | <a href="#">XP_004675138.1</a> |
| <a href="#">PREDICTED: mannan-binding lectin serine protease 1 isoform X2 [Sorex arar</a>    | 51.5 | 51.5 | 100% | 3e-06 | 93% | <a href="#">XP_004603078.1</a> |
| <a href="#">rCG36729, isoform CRA_a [Rattus norvegicus]</a>                                  | 51.5 | 51.5 | 100% | 3e-06 | 93% | <a href="#">EDL78089.1</a>     |
| <a href="#">PREDICTED: mannan-binding lectin serine protease 1 isoform X4 [Eptesicus</a>     | 51.5 | 51.5 | 100% | 3e-06 | 93% | <a href="#">XP_008149799.1</a> |
| <a href="#">mannan-binding lectin serine peptidase 1 (C4/C2 activating component of Ra</a>   | 51.5 | 51.5 | 100% | 3e-06 | 93% | <a href="#">EAW78150.1</a>     |
| <a href="#">PREDICTED: mannan-binding lectin serine protease 1 isoform X2 [Jaculus jar</a>   | 51.5 | 51.5 | 100% | 3e-06 | 93% | <a href="#">XP_004654345.1</a> |

|                                                                                              |      |      |      |       |     |                                |
|----------------------------------------------------------------------------------------------|------|------|------|-------|-----|--------------------------------|
| <a href="#">PREDICTED: LOW QUALITY PROTEIN: mannan-binding lectin serine protea</a>          | 51.5 | 51.5 | 100% | 3e-06 | 93% | <a href="#">XP_002808386.1</a> |
| <a href="#">PREDICTED: mannan-binding lectin serine protease 1 isoform X5 [Pongo abe</a>     | 51.5 | 51.5 | 100% | 3e-06 | 93% | <a href="#">XP_009237912.1</a> |
| <a href="#">PREDICTED: mannan-binding lectin serine protease 1 isoform X2 [Pan panis</a>     | 51.5 | 51.5 | 100% | 3e-06 | 93% | <a href="#">XP_008954144.1</a> |
| <a href="#">PREDICTED: mannan-binding lectin serine protease 1 isoform X3 [Chinchilla</a>    | 51.5 | 51.5 | 100% | 3e-06 | 93% | <a href="#">XP_005383311.1</a> |
| <a href="#">PREDICTED: mannan-binding lectin serine protease 1 isoform 4 [Gorilla gorill</a> | 51.5 | 51.5 | 100% | 3e-06 | 93% | <a href="#">XP_004038230.1</a> |
| <a href="#">PREDICTED: LOW QUALITY PROTEIN: mannan-binding lectin serine protea</a>          | 51.5 | 51.5 | 100% | 3e-06 | 93% | <a href="#">XP_003804164.1</a> |
| <a href="#">PREDICTED: mannan-binding lectin serine protease 1 isoform 4 [Nomascus l</a>     | 51.5 | 51.5 | 100% | 3e-06 | 93% | <a href="#">XP_003256679.1</a> |
| <a href="#">MASP-3 protein [Rattus norvegicus]</a>                                           | 51.5 | 51.5 | 100% | 3e-06 | 93% | <a href="#">CAD32171.1</a>     |
| <a href="#">PREDICTED: mannan-binding lectin serine protease 1 isoform X2 [Camelus c</a>     | 51.5 | 51.5 | 100% | 3e-06 | 93% | <a href="#">XP_010974431.1</a> |
| <a href="#">PREDICTED: mannan-binding lectin serine protease 1 isoform X2 [Camelus b</a>     | 51.5 | 51.5 | 100% | 3e-06 | 93% | <a href="#">XP_010957528.1</a> |
| <a href="#">PREDICTED: mannan-binding lectin serine protease 1 isoform X2 [Bison biso</a>    | 51.5 | 51.5 | 100% | 3e-06 | 93% | <a href="#">XP_010852216.1</a> |
| <a href="#">PREDICTED: mannan-binding lectin serine protease 1 isoform X2 [Fukomys c</a>     | 51.5 | 51.5 | 100% | 3e-06 | 93% | <a href="#">XP_010622448.1</a> |
| <a href="#">PREDICTED: mannan-binding lectin serine protease 1 isoform X1 [Rhinopithe</a>    | 51.5 | 51.5 | 100% | 3e-06 | 93% | <a href="#">XP_010350848.1</a> |
| <a href="#">PREDICTED: mannan-binding lectin serine protease 1 isoform X1 [Nannospal</a>     | 51.5 | 51.5 | 100% | 3e-06 | 93% | <a href="#">XP_008851350.1</a> |
| <a href="#">PREDICTED: mannan-binding lectin serine protease 1 isoform X2 [Equus przi</a>    | 51.5 | 51.5 | 100% | 3e-06 | 93% | <a href="#">XP_008532698.1</a> |
| <a href="#">PREDICTED: mannan-binding lectin serine protease 1 isoform X3 [Eptesicus</a>     | 51.5 | 51.5 | 100% | 3e-06 | 93% | <a href="#">XP_008149798.1</a> |
| <a href="#">PREDICTED: mannan-binding lectin serine protease 1 isoform X2 [Tarsius sy</a>    | 51.5 | 51.5 | 100% | 3e-06 | 93% | <a href="#">XP_008054564.1</a> |
| <a href="#">PREDICTED: mannan-binding lectin serine protease 1 isoform X1 [Chloroceb</a>     | 51.5 | 51.5 | 100% | 3e-06 | 93% | <a href="#">XP_008007689.1</a> |
| <a href="#">PREDICTED: mannan-binding lectin serine protease 1 isoform X2 [Lipotes ve</a>    | 51.5 | 51.5 | 100% | 3e-06 | 93% | <a href="#">XP_007448486.1</a> |
| <a href="#">PREDICTED: mannan-binding lectin serine protease 1 isoform X2 [Physeter c</a>    | 51.5 | 51.5 | 100% | 3e-06 | 93% | <a href="#">XP_007111601.1</a> |
| <a href="#">PREDICTED: mannan-binding lectin serine protease 1 isoform X1 [Peromysci</a>     | 51.5 | 51.5 | 100% | 3e-06 | 93% | <a href="#">XP_006985134.1</a> |
| <a href="#">PREDICTED: mannan-binding lectin serine protease 1 isoform X2 [Myotis dav</a>    | 51.5 | 51.5 | 100% | 3e-06 | 93% | <a href="#">XP_006765916.1</a> |
| <a href="#">PREDICTED: mannan-binding lectin serine protease 1 isoform X2 [Tupaia chi</a>    | 51.5 | 51.5 | 100% | 3e-06 | 93% | <a href="#">XP_006156799.1</a> |
| <a href="#">PREDICTED: mannan-binding lectin serine protease 1 isoform X2 [Myotis luci</a>   | 51.5 | 51.5 | 100% | 3e-06 | 93% | <a href="#">XP_006084854.1</a> |
| <a href="#">PREDICTED: mannan-binding lectin serine protease 1 isoform X2 [Myotis bra</a>    | 51.5 | 51.5 | 100% | 3e-06 | 93% | <a href="#">XP_005876335.1</a> |
| <a href="#">PREDICTED: mannan-binding lectin serine protease 1 isoform X2 [Capra hirc</a>    | 51.5 | 51.5 | 100% | 3e-06 | 93% | <a href="#">XP_005675199.1</a> |

## Alignments

Download GenPept Graphics

Next Previous Descriptions

Ra-reactive factor serine protease p100 [Rattus norvegicus]

Sequence ID: [gb|AAB65832.1](#) Length: 212 Number of Matches: 1

Range 1: 163 to 177 GenPept Graphics

Next Match Previous Match

| Score          | Expect | Identities | Positives   | Gaps     |
|----------------|--------|------------|-------------|----------|
| 51.5 bits(114) | 2e-06  | 14/15(93%) | 15/15(100%) | 0/15(0%) |

Query 1 RFGYILHTDDRTCRV 15  
 RFGYILHTD+RTCRV  
 Sbjct 163 RFGYILHTDNRTCRV 177

### Related Information

[Gene](#) - associated gene details

Download GenPept Graphics

Next Previous Descriptions

Chain A, Cub1-egf-cub2 Domain Of Human Masp-1/3

Sequence ID: [pdb|3DEM|A](#) Length: 278 Number of Matches: 1

See 1 more title(s)

Range 1: 150 to 164 GenPept Graphics

Next Match Previous Match

| Score          | Expect | Identities | Positives   | Gaps     |
|----------------|--------|------------|-------------|----------|
| 51.5 bits(114) | 3e-06  | 14/15(93%) | 15/15(100%) | 0/15(0%) |

### Related Information

[Structure](#) - 3D structure displays  
[Identical Proteins](#) - Proteins



identical to the subject

Query 1 RFGYILHTDDRTCRV 15  
 RFGYILHTD+RTCRV  
 Sbjct 150 RFGYILHTDNRTCRV 164

[Download](#) [GenPept](#) [Graphics](#)

[▼ Next](#) [▲ Previous](#) [▲ Descriptions](#)

unnamed protein product [Homo sapiens]

Sequence ID: [dbj|BAG62349.1](#) Length: 354 Number of Matches: 1

Range 1: 143 to 157 [GenPept](#) [Graphics](#)

[▼ Next Match](#) [▲ Previous Match](#)

| Score          | Expect | Identities | Positives   | Gaps     |
|----------------|--------|------------|-------------|----------|
| 51.5 bits(114) | 3e-06  | 14/15(93%) | 15/15(100%) | 0/15(0%) |

Query 1 RFGYILHTDDRTCRV 15  
 RFGYILHTD+RTCRV  
 Sbjct 143 RFGYILHTDNRTCRV 157

**Related Information**

[Gene](#) - associated gene details

[Download](#) [GenPept](#) [Graphics](#)

[▼ Next](#) [▲ Previous](#) [▲ Descriptions](#)

PREDICTED: mannan-binding lectin serine protease 1 isoform X2 [Homo sapiens]

Sequence ID: [ref|XP\\_006713764.1](#) Length: 354 Number of Matches: 1

Range 1: 143 to 157 [GenPept](#) [Graphics](#)

[▼ Next Match](#) [▲ Previous Match](#)

| Score          | Expect | Identities | Positives   | Gaps     |
|----------------|--------|------------|-------------|----------|
| 51.5 bits(114) | 3e-06  | 14/15(93%) | 15/15(100%) | 0/15(0%) |

Query 1 RFGYILHTDDRTCRV 15  
 RFGYILHTD+RTCRV  
 Sbjct 143 RFGYILHTDNRTCRV 157

**Related Information**

[Gene](#) - associated gene details

[Download](#) [GenPept](#) [Graphics](#)

[▼ Next](#) [▲ Previous](#) [▲ Descriptions](#)

Chain A, Mbl-Ficolin Associated Protein-1, Map-1 Aka Map44

Sequence ID: [pdb|4AQB|A](#) Length: 361 Number of Matches: 1

Range 1: 150 to 164 [GenPept](#) [Graphics](#)

[▼ Next Match](#) [▲ Previous Match](#)

| Score          | Expect | Identities | Positives   | Gaps     |
|----------------|--------|------------|-------------|----------|
| 51.5 bits(114) | 3e-06  | 14/15(93%) | 15/15(100%) | 0/15(0%) |

Query 1 RFGYILHTDDRTCRV 15  
 RFGYILHTD+RTCRV  
 Sbjct 150 RFGYILHTDNRTCRV 164

**Related Information**

[Structure](#) - 3D structure displays

BLAST is a registered trademark of the National Library of Medicine.



NCBI/ BLAST/ blastp suite/ Formatting Results - B9HUH2MT01R

Your search parameters were adjusted to search for a short input sequence.

Edit and Resubmit Save Search Strategies Formatting options Download

YouTube How to read this page Blast report description

MASP1\_RFGYLHTDNRT\_NonMod

RID B9HUH2MT01R (Expires on 01-14 14:20 pm)

Query ID Icl|220565
Description None
Molecule type amino acid
Query Length 12

Database Name nr
Description All non-redundant GenBank CDS translations+PDB+SwissProt+PIR excluding environmental samples from WGS projects
Program BLASTP 2.2.30+ Citation

Other reports: Search Summary Taxonomy reports Distance tree of results Multiple alignment

Graphic Summary

Show Conserved Domains

No putative conserved domains have been detected

Distribution of 100 Blast Hits on the Query Sequence

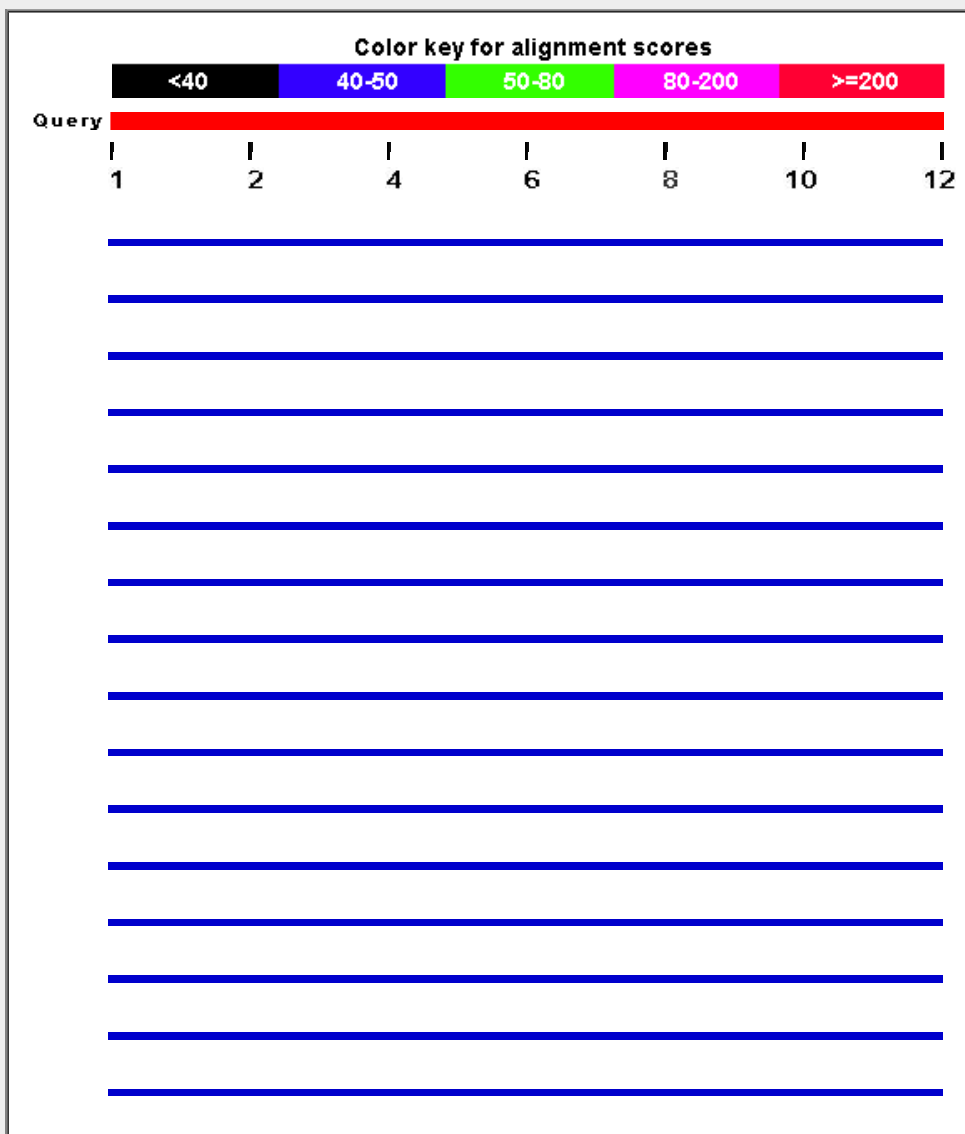

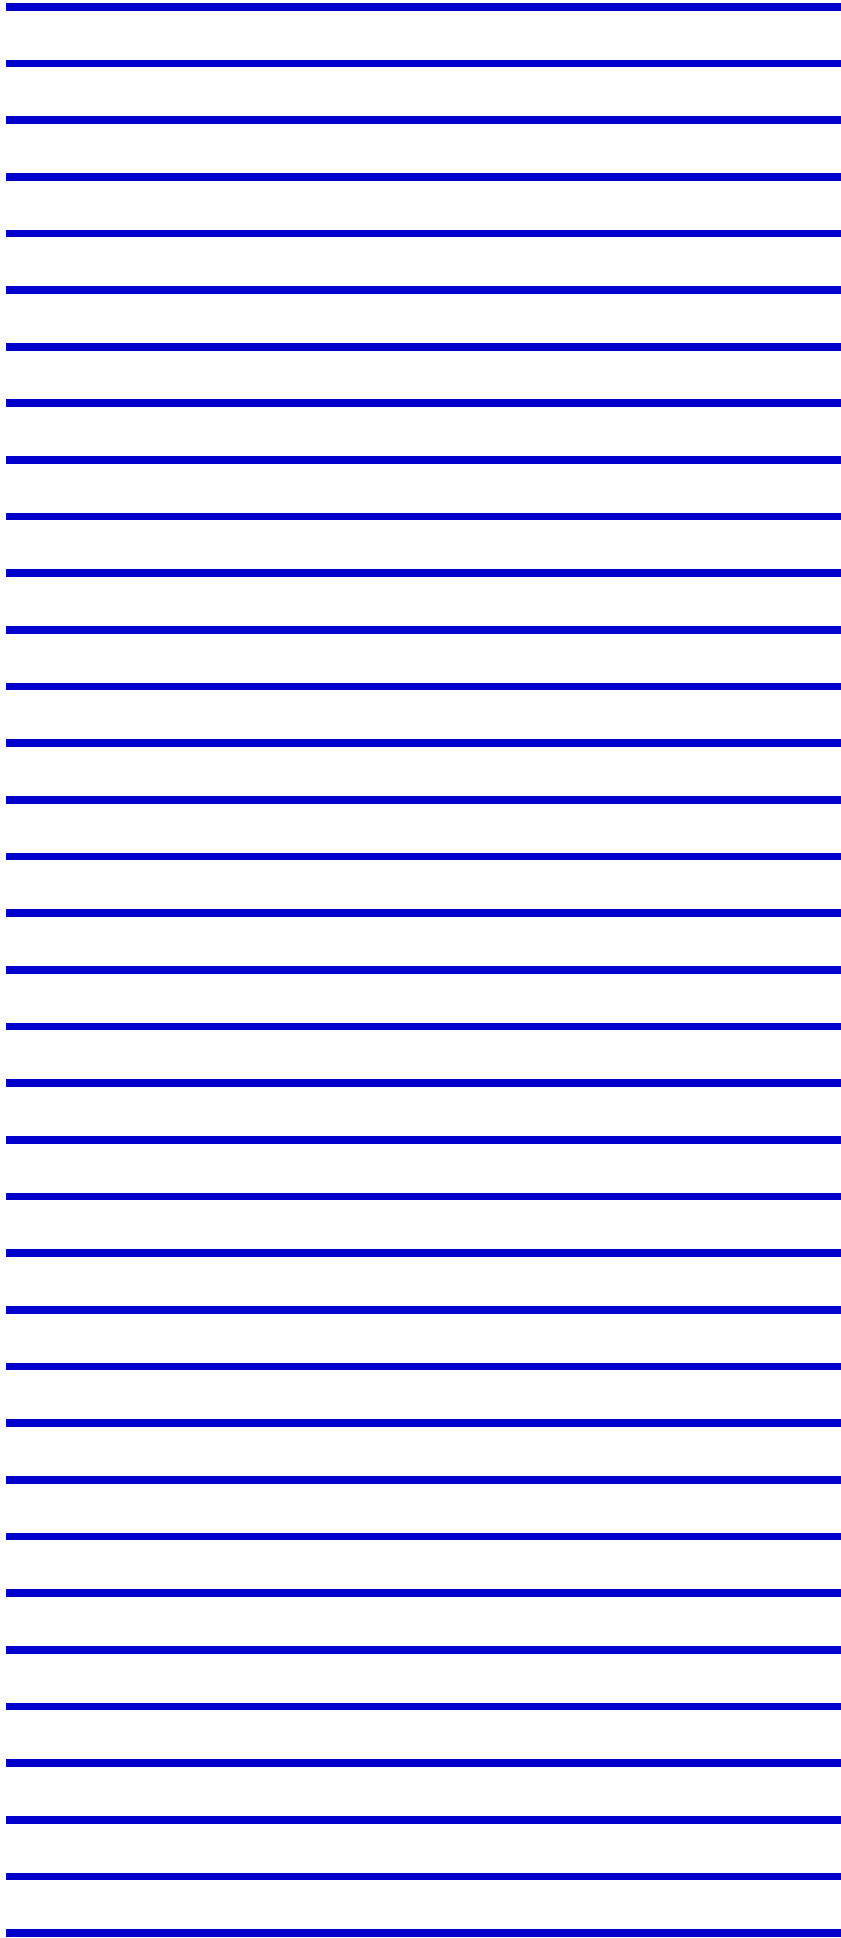



**Descriptions**

**Sequences producing significant alignments:**

Select: [All](#) [None](#) Selected:0

[↑](#) [Alignments](#)
[Download](#)
[GenPept](#)
[Graphics](#)
[Distance tree of results](#)
[Multiple alignment](#)

| Description                                                                                                | Max score | Total score | Query cover | E value | Ident | Accession                                   |
|------------------------------------------------------------------------------------------------------------|-----------|-------------|-------------|---------|-------|---------------------------------------------|
| <a href="#">Ra-reactive factor serine protease p100 [Rattus norvegicus]</a>                                | 43.5      | 43.5        | 100%        | 8e-04   | 100%  | <a href="#">gi 2209345 AAB65832.1</a>       |
| <a href="#">Chain A, Cub1-egf-cub2 Domain Of Human Masp-1/3 [Homo sapiens]</a>                             | 43.5      | 43.5        | 100%        | 9e-04   | 100%  | <a href="#">gi 193506834 3DEM_A</a>         |
| <a href="#">unnamed protein product [Homo sapiens]</a>                                                     | 43.5      | 43.5        | 100%        | 0.001   | 100%  | <a href="#">gi 194374073 BAG62349.1</a>     |
| <a href="#">PREDICTED: mannan-binding lectin serine protease 1 isoform X2 [Homo sapiens]</a>               | 43.5      | 43.5        | 100%        | 0.001   | 100%  | <a href="#">gi 578807591 XP_006713764.1</a> |
| <a href="#">Chain A, Mbl-Ficolin Associated Protein-1, Map-1 Aka Map44 [Homo sapiens]</a>                  | 43.5      | 43.5        | 100%        | 0.001   | 100%  | <a href="#">gi 400260714 4AQB_A</a>         |
| <a href="#">PREDICTED: mannan-binding lectin serine protease 1 isoform X3 [Homo sapiens]</a>               | 43.5      | 43.5        | 100%        | 0.001   | 100%  | <a href="#">gi 507540683 XP_004654346.1</a> |
| <a href="#">PREDICTED: mannan-binding lectin serine protease 1 isoform X4 [Homo sapiens]</a>               | 43.5      | 43.5        | 100%        | 0.001   | 100%  | <a href="#">gi 655853895 XP_008264861.1</a> |
| <a href="#">PREDICTED: mannan-binding lectin serine protease 1 isoform X7 [Homo sapiens]</a>               | 43.5      | 43.5        | 100%        | 0.001   | 100%  | <a href="#">gi 725565881 XP_010336013.1</a> |
| <a href="#">PREDICTED: mannan-binding lectin serine protease 1 isoform X7 [Homo sapiens]</a>               | 43.5      | 43.5        | 100%        | 0.001   | 100%  | <a href="#">gi 675726053 XP_008979623.1</a> |
| <a href="#">PREDICTED: mannan-binding lectin serine protease 1 isoform X2 [Homo sapiens]</a>               | 43.5      | 43.5        | 100%        | 0.001   | 100%  | <a href="#">gi 674036696 XP_008851360.1</a> |
| <a href="#">PREDICTED: mannan-binding lectin serine protease 1 isoform X5 [Homo sapiens]</a>               | 43.5      | 43.5        | 100%        | 0.001   | 100%  | <a href="#">gi 641720317 XP_008149800.1</a> |
| <a href="#">PREDICTED: mannan-binding lectin serine protease 1 isoform X4 [Homo sapiens]</a>               | 43.5      | 43.5        | 100%        | 0.001   | 100%  | <a href="#">gi 640796916 XP_008054567.1</a> |
| <a href="#">mannan-binding lectin serine protease 1 isoform 3 precursor [Homo sapiens]</a>                 | 43.5      | 43.5        | 100%        | 0.001   | 100%  | <a href="#">gi 73623026 NP_001027019.1</a>  |
| <a href="#">PREDICTED: mannan-binding lectin serine protease 1-like isoform 3 precursor [Homo sapiens]</a> | 43.5      | 43.5        | 100%        | 0.001   | 100%  | <a href="#">gi 594036350 XP_006042840.1</a> |
| <a href="#">PREDICTED: mannan-binding lectin serine protease 1 isoform X2 [Homo sapiens]</a>               | 43.5      | 43.5        | 100%        | 0.001   | 100%  | <a href="#">gi 589944897 XP_006985135.1</a> |
| <a href="#">PREDICTED: mannan-binding lectin serine protease 1 isoform X3 [Homo sapiens]</a>               | 43.5      | 43.5        | 100%        | 0.001   | 100%  | <a href="#">gi 586554872 XP_006925890.1</a> |
| <a href="#">PREDICTED: mannan-binding lectin serine protease 1 isoform X1 [Homo sapiens]</a>               | 43.5      | 43.5        | 100%        | 0.001   | 100%  | <a href="#">gi 584042008 XP_006765915.1</a> |
| <a href="#">PREDICTED: mannan-binding lectin serine protease 1 isoform X3 [Homo sapiens]</a>               | 43.5      | 43.5        | 100%        | 0.001   | 100%  | <a href="#">gi 562856537 XP_006156800.1</a> |
| <a href="#">PREDICTED: mannan-binding lectin serine protease 1 isoform X3 [Homo sapiens]</a>               | 43.5      | 43.5        | 100%        | 0.001   | 100%  | <a href="#">gi 560957130 XP_006201041.1</a> |
| <a href="#">PREDICTED: mannan-binding lectin serine protease 1 isoform X3 [Homo sapiens]</a>               | 43.5      | 43.5        | 100%        | 0.001   | 100%  | <a href="#">gi 560925459 XP_006188912.1</a> |
| <a href="#">PREDICTED: mannan-binding lectin serine protease 1 isoform X3 [Homo sapiens]</a>               | 43.5      | 43.5        | 100%        | 0.001   | 100%  | <a href="#">gi 558107313 XP_006084855.1</a> |
| <a href="#">PREDICTED: mannan-binding lectin serine protease 1 isoform X2 [Homo sapiens]</a>               | 43.5      | 43.5        | 100%        | 0.001   | 100%  | <a href="#">gi 556747385 XP_005969146.1</a> |
| <a href="#">PREDICTED: mannan-binding lectin serine protease 1 isoform X3 [Homo sapiens]</a>               | 43.5      | 43.5        | 100%        | 0.001   | 100%  | <a href="#">gi 555975459 XP_005899711.1</a> |
| <a href="#">PREDICTED: mannan-binding lectin serine protease 1 isoform X3 [Homo sapiens]</a>               | 43.5      | 43.5        | 100%        | 0.001   | 100%  | <a href="#">gi 554564031 XP_005876336.1</a> |
| <a href="#">PREDICTED: mannan-binding lectin serine protease 1 isoform X3 [Homo sapiens]</a>               | 43.5      | 43.5        | 100%        | 0.001   | 100%  | <a href="#">gi 548450456 XP_005675200.1</a> |
| <a href="#">PREDICTED: mannan-binding lectin serine protease 1 isoform X3 [Homo sapiens]</a>               | 43.5      | 43.5        | 100%        | 0.001   | 100%  | <a href="#">gi 545865224 XP_005657168.1</a> |
| <a href="#">PREDICTED: mannan-binding lectin serine protease 1 isoform X3 [Homo sapiens]</a>               | 43.5      | 43.5        | 100%        | 0.001   | 100%  | <a href="#">gi 545192257 XP_005601937.1</a> |
| <a href="#">PREDICTED: mannan-binding lectin serine protease 1 isoform X3 [Homo sapiens]</a>               | 43.5      | 43.5        | 100%        | 0.001   | 100%  | <a href="#">gi 544410516 XP_005545503.1</a> |

|                                                                                 |      |      |      |       |      |                                             |
|---------------------------------------------------------------------------------|------|------|------|-------|------|---------------------------------------------|
| <a href="#">PREDICTED: mannan-binding lectin serine protease 1 isoform X8 [</a> | 43.5 | 43.5 | 100% | 0.001 | 100% | <a href="#">gij528936770 XP_005201546.1</a> |
| <a href="#">PREDICTED: mannan-binding lectin serine protease 1 isoform 4 [C</a> | 43.5 | 43.5 | 100% | 0.001 | 100% | <a href="#">gij478500665 XP_004424648.1</a> |
| <a href="#">PREDICTED: mannan-binding lectin serine protease 1 isoform 3 [O</a> | 43.5 | 43.5 | 100% | 0.001 | 100% | <a href="#">gij466051806 XP_004278527.1</a> |
| <a href="#">hypothetical protein [Homo sapiens]</a>                             | 43.5 | 43.5 | 100% | 0.001 | 100% | <a href="#">gij51476886 CAH18409.1</a>      |
| <a href="#">PREDICTED: mannan-binding lectin serine protease 1 isoform X4 [</a> | 43.5 | 43.5 | 100% | 0.001 | 100% | <a href="#">gij332818681 XP_003310212.1</a> |
| <a href="#">PREDICTED: mannan-binding lectin serine protease 1 isoform 2 [N</a> | 43.5 | 43.5 | 100% | 0.001 | 100% | <a href="#">gij332215099 XP_003256677.1</a> |
| <a href="#">PREDICTED: mannan-binding lectin serine protease 1 isoform X3 [</a> | 43.5 | 43.5 | 100% | 0.001 | 100% | <a href="#">gij731216121 XP_010622449.1</a> |
| <a href="#">PREDICTED: mannan-binding lectin serine protease 1 isoform X2 [</a> | 43.5 | 43.5 | 100% | 0.001 | 100% | <a href="#">gij514474780 XP_005006929.1</a> |
| <a href="#">PREDICTED: mannan-binding lectin serine protease 1 isoform X3 [</a> | 43.5 | 43.5 | 100% | 0.001 | 100% | <a href="#">gij512902387 XP_004899716.1</a> |
| <a href="#">PREDICTED: mannan-binding lectin serine protease 1 isoform X2 [</a> | 43.5 | 43.5 | 100% | 0.001 | 100% | <a href="#">gij724805505 XP_010350856.1</a> |
| <a href="#">PREDICTED: mannan-binding lectin serine protease 1 isoform X2 [</a> | 43.5 | 43.5 | 100% | 0.001 | 100% | <a href="#">gij635086161 XP_008007690.1</a> |
| <a href="#">PREDICTED: mannan-binding lectin serine protease 1 isoform X2 [</a> | 43.5 | 43.5 | 100% | 0.001 | 100% | <a href="#">gij544410514 XP_005545502.1</a> |
| <a href="#">unnamed protein product [Macaca fascicularis]</a>                   | 43.5 | 43.5 | 100% | 0.001 | 100% | <a href="#">gij90081136 BAE90048.1</a>      |
| <a href="#">PREDICTED: mannan-binding lectin serine protease 1 isoform X2 [</a> | 43.5 | 43.5 | 100% | 0.001 | 100% | <a href="#">gij672071419 XP_008767026.1</a> |
| <a href="#">PREDICTED: mannan-binding lectin serine protease 1 isoform X3 [</a> | 43.5 | 43.5 | 100% | 0.001 | 100% | <a href="#">gij532090712 XP_005331047.1</a> |
| <a href="#">PREDICTED: mannan-binding lectin serine protease 1 isoform X2 [</a> | 43.5 | 43.5 | 100% | 0.001 | 100% | <a href="#">gij568994700 XP_006521892.1</a> |
| <a href="#">PREDICTED: mannan-binding lectin serine protease 1 isoform X4 [</a> | 43.5 | 43.5 | 100% | 0.001 | 100% | <a href="#">gij533136993 XP_005383312.1</a> |
| <a href="#">PREDICTED: mannan-binding lectin serine protease 1 isoform X3 [</a> | 43.5 | 43.5 | 100% | 0.001 | 100% | <a href="#">gij694905534 XP_009445263.1</a> |
| <a href="#">PREDICTED: mannan-binding lectin serine protease 1 isoform X2 [</a> | 43.5 | 43.5 | 100% | 0.001 | 100% | <a href="#">gij685527987 XP_009200178.1</a> |
| <a href="#">PREDICTED: mannan-binding lectin serine protease 1 isoform X6 [</a> | 43.5 | 43.5 | 100% | 0.001 | 100% | <a href="#">gij725565879 XP_010336012.1</a> |
| <a href="#">PREDICTED: mannan-binding lectin serine protease 1 isoform 5 [N</a> | 43.5 | 43.5 | 100% | 0.001 | 100% | <a href="#">gij332215105 XP_003256680.1</a> |
| <a href="#">PREDICTED: mannan-binding lectin serine protease 1 isoform X6 [</a> | 43.5 | 43.5 | 100% | 0.001 | 100% | <a href="#">gij675726049 XP_008979622.1</a> |
| <a href="#">rCG36729, isoform CRA_b [Rattus norvegicus]</a>                     | 43.5 | 43.5 | 100% | 0.001 | 100% | <a href="#">gij149019942 EDL78090.1</a>     |
| <a href="#">hypothetical protein CB1_001118022 [Camelus ferus]</a>              | 43.5 | 43.5 | 100% | 0.001 | 100% | <a href="#">gij528758469 EPY78128.1</a>     |
| <a href="#">hypothetical protein [Homo sapiens]</a>                             | 43.5 | 43.5 | 100% | 0.001 | 100% | <a href="#">gij57997478 CAI46037.1</a>      |
| <a href="#">MASP1 protein [Homo sapiens]</a>                                    | 43.5 | 43.5 | 100% | 0.001 | 100% | <a href="#">gij24981014 AAH39724.1</a>      |
| <a href="#">PREDICTED: mannan-binding lectin serine protease 1-like isoform</a> | 43.5 | 43.5 | 100% | 0.001 | 100% | <a href="#">gij594036348 XP_006042839.1</a> |
| <a href="#">PREDICTED: mannan-binding lectin serine protease 1-like isoform</a> | 43.5 | 43.5 | 100% | 0.001 | 100% | <a href="#">gij594036346 XP_006042838.1</a> |
| <a href="#">PREDICTED: mannan-binding lectin serine protease 1 isoform X7 [</a> | 43.5 | 43.5 | 100% | 0.001 | 100% | <a href="#">gij528936768 XP_005201545.1</a> |
| <a href="#">PREDICTED: mannan-binding lectin serine protease 1 isoform X5 [</a> | 43.5 | 43.5 | 100% | 0.001 | 100% | <a href="#">gij725565877 XP_010336011.1</a> |
| <a href="#">PREDICTED: mannan-binding lectin serine protease 1 isoform X6 [</a> | 43.5 | 43.5 | 100% | 0.001 | 100% | <a href="#">gij528936766 XP_005201544.1</a> |
| <a href="#">PREDICTED: mannan-binding lectin serine protease 1 isoform X2 [</a> | 43.5 | 43.5 | 100% | 0.001 | 100% | <a href="#">gij617646016 XP_007532796.1</a> |
| <a href="#">PREDICTED: mannan-binding lectin serine protease 1 isoform X6 [</a> | 43.5 | 43.5 | 100% | 0.001 | 100% | <a href="#">gij686714726 XP_009237913.1</a> |
| <a href="#">PREDICTED: mannan-binding lectin serine protease 1 [Galeopterus</a> | 43.5 | 43.5 | 100% | 0.001 | 100% | <a href="#">gij667325189 XP_008589455.1</a> |
| <a href="#">PREDICTED: mannan-binding lectin serine protease 1 isoform X3 [</a> | 43.5 | 43.5 | 100% | 0.001 | 100% | <a href="#">gij640796914 XP_008054566.1</a> |
| <a href="#">unnamed protein product [Homo sapiens]</a>                          | 43.5 | 43.5 | 100% | 0.001 | 100% | <a href="#">gij194385604 BAG65179.1</a>     |
| <a href="#">PREDICTED: mannan-binding lectin serine protease 1 isoform X2 [</a> | 43.5 | 43.5 | 100% | 0.001 | 100% | <a href="#">gij586554870 XP_006925889.1</a> |
| <a href="#">PREDICTED: mannan-binding lectin serine protease 1 isoform X2 [</a> | 43.5 | 43.5 | 100% | 0.001 | 100% | <a href="#">gij560957128 XP_006201040.1</a> |
| <a href="#">PREDICTED: mannan-binding lectin serine protease 1 isoform X2 [</a> | 43.5 | 43.5 | 100% | 0.001 | 100% | <a href="#">gij560925457 XP_006188911.1</a> |
| <a href="#">PREDICTED: mannan-binding lectin serine protease 1 isoform X5 [</a> | 43.5 | 43.5 | 100% | 0.001 | 100% | <a href="#">gij528936764 XP_005201543.1</a> |
| <a href="#">PREDICTED: mannan-binding lectin serine protease 1 isoform X2 [</a> | 43.5 | 43.5 | 100% | 0.001 | 100% | <a href="#">gij507927767 XP_004675138.1</a> |
| <a href="#">PREDICTED: mannan-binding lectin serine protease 1 isoform X2 [</a> | 43.5 | 43.5 | 100% | 0.001 | 100% | <a href="#">gij505778530 XP_004603078.1</a> |
| <a href="#">rCG36729, isoform CRA_a [Rattus norvegicus]</a>                     | 43.5 | 43.5 | 100% | 0.001 | 100% | <a href="#">gij149019941 EDL78089.1</a>     |
| <a href="#">PREDICTED: mannan-binding lectin serine protease 1 isoform X4 [</a> | 43.5 | 43.5 | 100% | 0.001 | 100% | <a href="#">gij641720315 XP_008149799.1</a> |
| <a href="#">PREDICTED: mannan-binding lectin serine protease 1-like [Python</a> | 43.5 | 43.5 | 100% | 0.001 | 100% | <a href="#">gij602673247 XP_007442121.1</a> |

|                                                                                   |      |      |      |       |      |                                             |
|-----------------------------------------------------------------------------------|------|------|------|-------|------|---------------------------------------------|
| <a href="#">PREDICTED: mannan-binding lectin serine protease 1 isoform X4 [</a>   | 43.5 | 43.5 | 100% | 0.001 | 100% | <a href="#">gij528936762 XP_005201542.1</a> |
| <a href="#">mannan-binding lectin serine peptidase 1 (C4/C2 activating compor</a> | 43.5 | 43.5 | 100% | 0.001 | 100% | <a href="#">gij119598556 EAW78150.1</a>     |
| <a href="#">PREDICTED: mannan-binding lectin serine protease 1 isoform X2 [</a>   | 43.5 | 43.5 | 100% | 0.001 | 100% | <a href="#">gij507540681 XP_004654345.1</a> |
| <a href="#">PREDICTED: LOW QUALITY PROTEIN: mannan-binding lectin_ser</a>         | 43.5 | 43.5 | 100% | 0.001 | 100% | <a href="#">gij297287139 XP_002808386.1</a> |
| <a href="#">PREDICTED: mannan-binding lectin serine protease 1 isoform X5 [</a>   | 43.5 | 43.5 | 100% | 0.001 | 100% | <a href="#">gij686714724 XP_009237912.1</a> |
| <a href="#">PREDICTED: mannan-binding lectin serine protease 1 isoform X2 [</a>   | 43.5 | 43.5 | 100% | 0.001 | 100% | <a href="#">gij675687274 XP_008954144.1</a> |
| <a href="#">PREDICTED: mannan-binding lectin serine protease 1 isoform X3 [</a>   | 43.5 | 43.5 | 100% | 0.001 | 100% | <a href="#">gij533136991 XP_005383311.1</a> |
| <a href="#">PREDICTED: mannan-binding lectin serine protease 1 isoform 4 [G</a>   | 43.5 | 43.5 | 100% | 0.001 | 100% | <a href="#">gij426343256 XP_004038230.1</a> |
| <a href="#">PREDICTED: LOW QUALITY PROTEIN: mannan-binding lectin_ser</a>         | 43.5 | 43.5 | 100% | 0.001 | 100% | <a href="#">gij395839796 XP_003804164.1</a> |
| <a href="#">PREDICTED: mannan-binding lectin serine protease 1 isoform 4 [N</a>   | 43.5 | 43.5 | 100% | 0.001 | 100% | <a href="#">gij332215103 XP_003256679.1</a> |
| <a href="#">MASP-3 protein [Rattus norvegicus]</a>                                | 43.5 | 43.5 | 100% | 0.001 | 100% | <a href="#">gij27527940 CAD32171.1</a>      |
| <a href="#">PREDICTED: mannan-binding lectin serine protease 1 isoform X2 [</a>   | 43.5 | 43.5 | 100% | 0.001 | 100% | <a href="#">gij731216119 XP_010622448.1</a> |
| <a href="#">PREDICTED: mannan-binding lectin serine protease 1 isoform X1 [</a>   | 43.5 | 43.5 | 100% | 0.001 | 100% | <a href="#">gij724805503 XP_010350848.1</a> |
| <a href="#">PREDICTED: mannan-binding lectin serine protease 1 isoform X1 [</a>   | 43.5 | 43.5 | 100% | 0.001 | 100% | <a href="#">gij674036694 XP_008851350.1</a> |
| <a href="#">PREDICTED: mannan-binding lectin serine protease 1 isoform X2 [</a>   | 43.5 | 43.5 | 100% | 0.001 | 100% | <a href="#">gij664750525 XP_008532698.1</a> |
| <a href="#">PREDICTED: mannan-binding lectin serine protease 1 isoform X3 [</a>   | 43.5 | 43.5 | 100% | 0.001 | 100% | <a href="#">gij641720313 XP_008149798.1</a> |
| <a href="#">PREDICTED: mannan-binding lectin serine protease 1 isoform X2 [</a>   | 43.5 | 43.5 | 100% | 0.001 | 100% | <a href="#">gij640796912 XP_008054564.1</a> |
| <a href="#">PREDICTED: mannan-binding lectin serine protease 1 isoform X1 [</a>   | 43.5 | 43.5 | 100% | 0.001 | 100% | <a href="#">gij635086159 XP_008007689.1</a> |
| <a href="#">PREDICTED: mannan-binding lectin serine protease 1 isoform X1 [</a>   | 43.5 | 43.5 | 100% | 0.001 | 100% | <a href="#">gij545865216 XP_005657166.1</a> |
| <a href="#">PREDICTED: mannan-binding lectin serine protease 1 isoform X2 [</a>   | 43.5 | 43.5 | 100% | 0.001 | 100% | <a href="#">gij602726051 XP_007448486.1</a> |
| <a href="#">PREDICTED: mannan-binding lectin serine protease 1 isoform X2 [</a>   | 43.5 | 43.5 | 100% | 0.001 | 100% | <a href="#">gij593732157 XP_007111601.1</a> |
| <a href="#">PREDICTED: mannan-binding lectin serine protease 1 isoform X1 [</a>   | 43.5 | 43.5 | 100% | 0.001 | 100% | <a href="#">gij589944895 XP_006985134.1</a> |
| <a href="#">PREDICTED: mannan-binding lectin serine protease 1 isoform X2 [</a>   | 43.5 | 43.5 | 100% | 0.001 | 100% | <a href="#">gij584042010 XP_006765916.1</a> |
| <a href="#">PREDICTED: mannan-binding lectin serine protease 1 isoform X2 [</a>   | 43.5 | 43.5 | 100% | 0.001 | 100% | <a href="#">gij554564029 XP_005876335.1</a> |
| <a href="#">PREDICTED: mannan-binding lectin serine protease 1 isoform X2 [</a>   | 43.5 | 43.5 | 100% | 0.001 | 100% | <a href="#">gij548450449 XP_005675199.1</a> |
| <a href="#">PREDICTED: mannan-binding lectin serine protease 1 isoform X1 [</a>   | 43.5 | 43.5 | 100% | 0.001 | 100% | <a href="#">gij545192255 XP_001499679.3</a> |
| <a href="#">PREDICTED: mannan-binding lectin serine protease 1 [Microtus oc</a>   | 43.5 | 43.5 | 100% | 0.001 | 100% | <a href="#">gij532000597 XP_005344817.1</a> |

## Alignments

[Download](#) [GenPept](#) [Graphics](#)

[Next](#) [Previous](#) [Descriptions](#)

Ra-reactive factor serine protease p100 [Rattus norvegicus]

Sequence ID: [gij2209345|gb|AAB65832.1](#) Length: 212 Number of Matches: 1

Range 1: 163 to 174 [GenPept](#) [Graphics](#)

[Next Match](#) [Previous Match](#)

| Score         | Expect | Identities  | Positives   | Gaps     |
|---------------|--------|-------------|-------------|----------|
| 43.5 bits(95) | 8e-04  | 12/12(100%) | 12/12(100%) | 0/12(0%) |

Query 1 RFGYILHTDNRT 12  
 RFGYILHTDNRT  
 Sbjct 163 RFGYILHTDNRT 174

### Related Information

[Gene](#) - associated gene details

[Download](#) [GenPept](#) [Graphics](#)

[Next](#) [Previous](#) [Descriptions](#)

Chain A, Cub1-egf-cub2 Domain Of Human Masp-1/3

Sequence ID: [gij193506834|pdb|3DEM|A](#) Length: 278 Number of Matches: 1

[See 1 more title\(s\)](#)

Range 1: 150 to 161 [GenPept](#) [Graphics](#)

[Next Match](#) [Previous Match](#)

| Score         | Expect | Identities  | Positives   | Gaps     |
|---------------|--------|-------------|-------------|----------|
| 43.5 bits(95) | 9e-04  | 12/12(100%) | 12/12(100%) | 0/12(0%) |

### Related Information

[Structure](#) - 3D structure displays  
[Identical Proteins](#) - Proteins identical to the subject

Query 1 RFGYILHTDNRT 12  
 RFGYILHTDNRT  
 Sbjct 150 RFGYILHTDNRT 161

[Download](#) [GenPept](#) [Graphics](#)

[▼ Next](#) [▲ Previous](#) [▲ Descriptions](#)

unnamed protein product [Homo sapiens]

Sequence ID: [gi|194374073|dbj|BAG62349.1](#) Length: 354 Number of Matches: 1

**Related Information**

[Gene](#) - associated gene details

Range 1: 143 to 154 [GenPept](#) [Graphics](#)

[▼ Next Match](#) [▲ Previous Match](#)

| Score         | Expect | Identities  | Positives   | Gaps     |
|---------------|--------|-------------|-------------|----------|
| 43.5 bits(95) | 0.001  | 12/12(100%) | 12/12(100%) | 0/12(0%) |

Query 1 RFGYILHTDNRT 12  
 RFGYILHTDNRT  
 Sbjct 143 RFGYILHTDNRT 154

[Download](#) [GenPept](#) [Graphics](#)

[▼ Next](#) [▲ Previous](#) [▲ Descriptions](#)

PREDICTED: mannan-binding lectin serine protease 1 isoform X2 [Homo sapiens]

Sequence ID: [gi|578807591|ref|XP\\_006713764.1](#) Length: 354 Number of Matches: 1

**Related Information**

[Gene](#) - associated gene details

Range 1: 143 to 154 [GenPept](#) [Graphics](#)

[▼ Next Match](#) [▲ Previous Match](#)

| Score         | Expect | Identities  | Positives   | Gaps     |
|---------------|--------|-------------|-------------|----------|
| 43.5 bits(95) | 0.001  | 12/12(100%) | 12/12(100%) | 0/12(0%) |

Query 1 RFGYILHTDNRT 12  
 RFGYILHTDNRT  
 Sbjct 143 RFGYILHTDNRT 154

[Download](#) [GenPept](#) [Graphics](#)

[▼ Next](#) [▲ Previous](#) [▲ Descriptions](#)

Chain A, Mbl-Ficolin Associated Protein-1, Map-1 Aka Map44

Sequence ID: [gi|400260714|pdb|4AQB|A](#) Length: 361 Number of Matches: 1

**Related Information**

[Structure](#) - 3D structure displays

Range 1: 150 to 161 [GenPept](#) [Graphics](#)

[▼ Next Match](#) [▲ Previous Match](#)

| Score         | Expect | Identities  | Positives   | Gaps     |
|---------------|--------|-------------|-------------|----------|
| 43.5 bits(95) | 0.001  | 12/12(100%) | 12/12(100%) | 0/12(0%) |

Query 1 RFGYILHTDNRT 12  
 RFGYILHTDNRT  
 Sbjct 150 RFGYILHTDNRT 161

BLAST is a registered trademark of the National Library of Medicine.



NCBI/ BLAST/ blastp suite/ Formatting Results - B9HUZBMB01R

Your search parameters were adjusted to search for a short input sequence.

Edit and Resubmit Save Search Strategies Formatting options Download

YouTube How to read this page Blast report description

MASP1\_RFGYLHTDNRTCRV\_NonMod

RID B9HUZBMB01R (Expires on 01-14 14:21 pm)

Query ID lcl|224324
Description None
Molecule type amino acid
Query Length 15

Database Name nr
Description All non-redundant GenBank CDS translations+PDB+SwissProt+PIR excluding environmental samples from WGS projects
Program BLASTP 2.2.30+ Citation

Other reports: Search Summary Taxonomy reports Distance tree of results Multiple alignment

Graphic Summary

Show Conserved Domains

No putative conserved domains have been detected

Distribution of 100 Blast Hits on the Query Sequence









**Descriptions**

**Sequences producing significant alignments:**

Select: [All](#) [None](#) Selected:0

[↑](#) Alignments 
 [Download](#)
[GenPept](#)
[Graphics](#)
[Distance tree of results](#)
[Multiple alignment](#)

| Description                                                                                                | Max score | Total score | Query cover | E value | Ident | Accession                                   |
|------------------------------------------------------------------------------------------------------------|-----------|-------------|-------------|---------|-------|---------------------------------------------|
| <a href="#">Ra-reactive factor serine protease p100 [Rattus norvegicus]</a>                                | 54.1      | 54.1        | 100%        | 3e-07   | 100%  | <a href="#">gij2209345 AAB65832.1</a>       |
| <a href="#">Chain A, Cub1-egf-cub2 Domain Of Human Masp-1/3 [Homo sapiens]</a>                             | 54.1      | 54.1        | 100%        | 3e-07   | 100%  | <a href="#">gij193506834 3DEM_A</a>         |
| <a href="#">unnamed protein product [Homo sapiens]</a>                                                     | 54.1      | 54.1        | 100%        | 3e-07   | 100%  | <a href="#">gij194374073 BAG62349.1</a>     |
| <a href="#">PREDICTED: mannan-binding lectin serine protease 1 isoform X2 [Homo sapiens]</a>               | 54.1      | 54.1        | 100%        | 3e-07   | 100%  | <a href="#">gij578807591 XP_006713764.1</a> |
| <a href="#">Chain A, Mbl-Ficolin Associated Protein-1, Map-1 Aka Map44 [Homo sapiens]</a>                  | 54.1      | 54.1        | 100%        | 3e-07   | 100%  | <a href="#">gij400260714 4AQB_A</a>         |
| <a href="#">PREDICTED: mannan-binding lectin serine protease 1 isoform X3 [Homo sapiens]</a>               | 54.1      | 54.1        | 100%        | 3e-07   | 100%  | <a href="#">gij507540683 XP_004654346.1</a> |
| <a href="#">PREDICTED: mannan-binding lectin serine protease 1 isoform X4 [Homo sapiens]</a>               | 54.1      | 54.1        | 100%        | 4e-07   | 100%  | <a href="#">gij655853895 XP_008264861.1</a> |
| <a href="#">PREDICTED: mannan-binding lectin serine protease 1 isoform X7 [Homo sapiens]</a>               | 54.1      | 54.1        | 100%        | 4e-07   | 100%  | <a href="#">gij725565881 XP_010336013.1</a> |
| <a href="#">PREDICTED: mannan-binding lectin serine protease 1 isoform X7 [Homo sapiens]</a>               | 54.1      | 54.1        | 100%        | 4e-07   | 100%  | <a href="#">gij675726053 XP_008979623.1</a> |
| <a href="#">PREDICTED: mannan-binding lectin serine protease 1 isoform X2 [Homo sapiens]</a>               | 54.1      | 54.1        | 100%        | 4e-07   | 100%  | <a href="#">gij674036696 XP_008851360.1</a> |
| <a href="#">PREDICTED: mannan-binding lectin serine protease 1 isoform X5 [Homo sapiens]</a>               | 54.1      | 54.1        | 100%        | 4e-07   | 100%  | <a href="#">gij641720317 XP_008149800.1</a> |
| <a href="#">PREDICTED: mannan-binding lectin serine protease 1 isoform X4 [Homo sapiens]</a>               | 54.1      | 54.1        | 100%        | 4e-07   | 100%  | <a href="#">gij640796916 XP_008054567.1</a> |
| <a href="#">mannan-binding lectin serine protease 1 isoform 3 precursor [Homo sapiens]</a>                 | 54.1      | 54.1        | 100%        | 4e-07   | 100%  | <a href="#">gij73623026 NP_001027019.1</a>  |
| <a href="#">PREDICTED: mannan-binding lectin serine protease 1-like isoform 3 precursor [Homo sapiens]</a> | 54.1      | 54.1        | 100%        | 4e-07   | 100%  | <a href="#">gij594036350 XP_006042840.1</a> |
| <a href="#">PREDICTED: mannan-binding lectin serine protease 1 isoform X2 [Homo sapiens]</a>               | 54.1      | 54.1        | 100%        | 4e-07   | 100%  | <a href="#">gij589944897 XP_006985135.1</a> |
| <a href="#">PREDICTED: mannan-binding lectin serine protease 1 isoform X3 [Homo sapiens]</a>               | 54.1      | 54.1        | 100%        | 4e-07   | 100%  | <a href="#">gij586554872 XP_006925890.1</a> |
| <a href="#">PREDICTED: mannan-binding lectin serine protease 1 isoform X1 [Homo sapiens]</a>               | 54.1      | 54.1        | 100%        | 4e-07   | 100%  | <a href="#">gij584042008 XP_006765915.1</a> |
| <a href="#">PREDICTED: mannan-binding lectin serine protease 1 isoform X3 [Homo sapiens]</a>               | 54.1      | 54.1        | 100%        | 4e-07   | 100%  | <a href="#">gij562856537 XP_006156800.1</a> |
| <a href="#">PREDICTED: mannan-binding lectin serine protease 1 isoform X3 [Homo sapiens]</a>               | 54.1      | 54.1        | 100%        | 4e-07   | 100%  | <a href="#">gij560957130 XP_006201041.1</a> |
| <a href="#">PREDICTED: mannan-binding lectin serine protease 1 isoform X3 [Homo sapiens]</a>               | 54.1      | 54.1        | 100%        | 4e-07   | 100%  | <a href="#">gij560925459 XP_006188912.1</a> |
| <a href="#">PREDICTED: mannan-binding lectin serine protease 1 isoform X3 [Homo sapiens]</a>               | 54.1      | 54.1        | 100%        | 4e-07   | 100%  | <a href="#">gij558107313 XP_006084855.1</a> |
| <a href="#">PREDICTED: mannan-binding lectin serine protease 1 isoform X2 [Homo sapiens]</a>               | 54.1      | 54.1        | 100%        | 4e-07   | 100%  | <a href="#">gij556747385 XP_005969146.1</a> |
| <a href="#">PREDICTED: mannan-binding lectin serine protease 1 isoform X3 [Homo sapiens]</a>               | 54.1      | 54.1        | 100%        | 4e-07   | 100%  | <a href="#">gij555975459 XP_005899711.1</a> |
| <a href="#">PREDICTED: mannan-binding lectin serine protease 1 isoform X3 [Homo sapiens]</a>               | 54.1      | 54.1        | 100%        | 4e-07   | 100%  | <a href="#">gij554564031 XP_005876336.1</a> |
| <a href="#">PREDICTED: mannan-binding lectin serine protease 1 isoform X3 [Homo sapiens]</a>               | 54.1      | 54.1        | 100%        | 4e-07   | 100%  | <a href="#">gij548450456 XP_005675200.1</a> |
| <a href="#">PREDICTED: mannan-binding lectin serine protease 1 isoform X3 [Homo sapiens]</a>               | 54.1      | 54.1        | 100%        | 4e-07   | 100%  | <a href="#">gij545865224 XP_005657168.1</a> |
| <a href="#">PREDICTED: mannan-binding lectin serine protease 1 isoform X3 [Homo sapiens]</a>               | 54.1      | 54.1        | 100%        | 4e-07   | 100%  | <a href="#">gij545192257 XP_005601937.1</a> |
| <a href="#">PREDICTED: mannan-binding lectin serine protease 1 isoform X3 [Homo sapiens]</a>               | 54.1      | 54.1        | 100%        | 4e-07   | 100%  | <a href="#">gij544410516 XP_005545503.1</a> |

|                                                                                 |      |      |      |       |      |                                             |
|---------------------------------------------------------------------------------|------|------|------|-------|------|---------------------------------------------|
| <a href="#">PREDICTED: mannan-binding lectin serine protease 1 isoform X8 [</a> | 54.1 | 54.1 | 100% | 4e-07 | 100% | <a href="#">gij528936770 XP_005201546.1</a> |
| <a href="#">PREDICTED: mannan-binding lectin serine protease 1 isoform 4 [C</a> | 54.1 | 54.1 | 100% | 4e-07 | 100% | <a href="#">gij478500665 XP_004424648.1</a> |
| <a href="#">PREDICTED: mannan-binding lectin serine protease 1 isoform 3 [O</a> | 54.1 | 54.1 | 100% | 4e-07 | 100% | <a href="#">gij466051806 XP_004278527.1</a> |
| <a href="#">hypothetical protein [Homo sapiens]</a>                             | 54.1 | 54.1 | 100% | 4e-07 | 100% | <a href="#">gij51476886 CAH18409.1</a>      |
| <a href="#">PREDICTED: mannan-binding lectin serine protease 1 isoform X4 [</a> | 54.1 | 54.1 | 100% | 4e-07 | 100% | <a href="#">gij332818681 XP_003310212.1</a> |
| <a href="#">PREDICTED: mannan-binding lectin serine protease 1 isoform 2 [N</a> | 54.1 | 54.1 | 100% | 4e-07 | 100% | <a href="#">gij332215099 XP_003256677.1</a> |
| <a href="#">PREDICTED: mannan-binding lectin serine protease 1 isoform X3 [</a> | 54.1 | 54.1 | 100% | 4e-07 | 100% | <a href="#">gij731216121 XP_010622449.1</a> |
| <a href="#">PREDICTED: mannan-binding lectin serine protease 1 isoform X2 [</a> | 54.1 | 54.1 | 100% | 4e-07 | 100% | <a href="#">gij514474780 XP_005006929.1</a> |
| <a href="#">PREDICTED: mannan-binding lectin serine protease 1 isoform X3 [</a> | 54.1 | 54.1 | 100% | 4e-07 | 100% | <a href="#">gij512902387 XP_004899716.1</a> |
| <a href="#">PREDICTED: mannan-binding lectin serine protease 1 isoform X2 [</a> | 54.1 | 54.1 | 100% | 4e-07 | 100% | <a href="#">gij724805505 XP_010350856.1</a> |
| <a href="#">PREDICTED: mannan-binding lectin serine protease 1 isoform X2 [</a> | 54.1 | 54.1 | 100% | 4e-07 | 100% | <a href="#">gij635086161 XP_008007690.1</a> |
| <a href="#">PREDICTED: mannan-binding lectin serine protease 1 isoform X2 [</a> | 54.1 | 54.1 | 100% | 4e-07 | 100% | <a href="#">gij544410514 XP_005545502.1</a> |
| <a href="#">unnamed protein product [Macaca fascicularis]</a>                   | 54.1 | 54.1 | 100% | 4e-07 | 100% | <a href="#">gij90081136 BAE90048.1</a>      |
| <a href="#">PREDICTED: mannan-binding lectin serine protease 1 isoform X2 [</a> | 54.1 | 54.1 | 100% | 4e-07 | 100% | <a href="#">gij672071419 XP_008767026.1</a> |
| <a href="#">PREDICTED: mannan-binding lectin serine protease 1 isoform X3 [</a> | 54.1 | 54.1 | 100% | 4e-07 | 100% | <a href="#">gij532090712 XP_005331047.1</a> |
| <a href="#">PREDICTED: mannan-binding lectin serine protease 1 isoform X2 [</a> | 54.1 | 54.1 | 100% | 4e-07 | 100% | <a href="#">gij568994700 XP_006521892.1</a> |
| <a href="#">PREDICTED: mannan-binding lectin serine protease 1 isoform X4 [</a> | 54.1 | 54.1 | 100% | 4e-07 | 100% | <a href="#">gij533136993 XP_005383312.1</a> |
| <a href="#">PREDICTED: mannan-binding lectin serine protease 1 isoform X3 [</a> | 54.1 | 54.1 | 100% | 4e-07 | 100% | <a href="#">gij694905534 XP_009445263.1</a> |
| <a href="#">PREDICTED: mannan-binding lectin serine protease 1 isoform X2 [</a> | 54.1 | 54.1 | 100% | 4e-07 | 100% | <a href="#">gij685527987 XP_009200178.1</a> |
| <a href="#">PREDICTED: mannan-binding lectin serine protease 1 isoform X6 [</a> | 54.1 | 54.1 | 100% | 4e-07 | 100% | <a href="#">gij725565879 XP_010336012.1</a> |
| <a href="#">PREDICTED: mannan-binding lectin serine protease 1 isoform 5 [N</a> | 54.1 | 54.1 | 100% | 4e-07 | 100% | <a href="#">gij332215105 XP_003256680.1</a> |
| <a href="#">PREDICTED: mannan-binding lectin serine protease 1 isoform X6 [</a> | 54.1 | 54.1 | 100% | 4e-07 | 100% | <a href="#">gij675726049 XP_008979622.1</a> |
| <a href="#">rCG36729, isoform CRA_b [Rattus norvegicus]</a>                     | 54.1 | 54.1 | 100% | 4e-07 | 100% | <a href="#">gij149019942 EDL78090.1</a>     |
| <a href="#">hypothetical protein CB1_001118022 [Camelus ferus]</a>              | 54.1 | 54.1 | 100% | 4e-07 | 100% | <a href="#">gij528758469 EPY78128.1</a>     |
| <a href="#">hypothetical protein [Homo sapiens]</a>                             | 54.1 | 54.1 | 100% | 4e-07 | 100% | <a href="#">gij57997478 CAI46037.1</a>      |
| <a href="#">MASP1 protein [Homo sapiens]</a>                                    | 54.1 | 54.1 | 100% | 4e-07 | 100% | <a href="#">gij24981014 AAH39724.1</a>      |
| <a href="#">PREDICTED: mannan-binding lectin serine protease 1-like isoform</a> | 54.1 | 54.1 | 100% | 4e-07 | 100% | <a href="#">gij594036348 XP_006042839.1</a> |
| <a href="#">PREDICTED: mannan-binding lectin serine protease 1-like isoform</a> | 54.1 | 54.1 | 100% | 4e-07 | 100% | <a href="#">gij594036346 XP_006042838.1</a> |
| <a href="#">PREDICTED: mannan-binding lectin serine protease 1 isoform X7 [</a> | 54.1 | 54.1 | 100% | 4e-07 | 100% | <a href="#">gij528936768 XP_005201545.1</a> |
| <a href="#">PREDICTED: mannan-binding lectin serine protease 1 isoform X5 [</a> | 54.1 | 54.1 | 100% | 4e-07 | 100% | <a href="#">gij725565877 XP_010336011.1</a> |
| <a href="#">PREDICTED: mannan-binding lectin serine protease 1 isoform X6 [</a> | 54.1 | 54.1 | 100% | 4e-07 | 100% | <a href="#">gij528936766 XP_005201544.1</a> |
| <a href="#">PREDICTED: mannan-binding lectin serine protease 1 isoform X2 [</a> | 54.1 | 54.1 | 100% | 4e-07 | 100% | <a href="#">gij617646016 XP_007532796.1</a> |
| <a href="#">PREDICTED: mannan-binding lectin serine protease 1 isoform X6 [</a> | 54.1 | 54.1 | 100% | 4e-07 | 100% | <a href="#">gij686714726 XP_009237913.1</a> |
| <a href="#">PREDICTED: mannan-binding lectin serine protease 1 [Galeopterus</a> | 54.1 | 54.1 | 100% | 4e-07 | 100% | <a href="#">gij667325189 XP_008589455.1</a> |
| <a href="#">PREDICTED: mannan-binding lectin serine protease 1 isoform X3 [</a> | 54.1 | 54.1 | 100% | 4e-07 | 100% | <a href="#">gij640796914 XP_008054566.1</a> |
| <a href="#">unnamed protein product [Homo sapiens]</a>                          | 54.1 | 54.1 | 100% | 4e-07 | 100% | <a href="#">gij194385604 BAG65179.1</a>     |
| <a href="#">PREDICTED: mannan-binding lectin serine protease 1 isoform X2 [</a> | 54.1 | 54.1 | 100% | 4e-07 | 100% | <a href="#">gij586554870 XP_006925889.1</a> |
| <a href="#">PREDICTED: mannan-binding lectin serine protease 1 isoform X2 [</a> | 54.1 | 54.1 | 100% | 4e-07 | 100% | <a href="#">gij560957128 XP_006201040.1</a> |
| <a href="#">PREDICTED: mannan-binding lectin serine protease 1 isoform X2 [</a> | 54.1 | 54.1 | 100% | 4e-07 | 100% | <a href="#">gij560925457 XP_006188911.1</a> |
| <a href="#">PREDICTED: mannan-binding lectin serine protease 1 isoform X5 [</a> | 54.1 | 54.1 | 100% | 4e-07 | 100% | <a href="#">gij528936764 XP_005201543.1</a> |
| <a href="#">PREDICTED: mannan-binding lectin serine protease 1 isoform X2 [</a> | 54.1 | 54.1 | 100% | 4e-07 | 100% | <a href="#">gij507927767 XP_004675138.1</a> |
| <a href="#">PREDICTED: mannan-binding lectin serine protease 1 isoform X2 [</a> | 54.1 | 54.1 | 100% | 4e-07 | 100% | <a href="#">gij505778530 XP_004603078.1</a> |
| <a href="#">rCG36729, isoform CRA_a [Rattus norvegicus]</a>                     | 54.1 | 54.1 | 100% | 4e-07 | 100% | <a href="#">gij149019941 EDL78089.1</a>     |
| <a href="#">PREDICTED: mannan-binding lectin serine protease 1 isoform X4 [</a> | 54.1 | 54.1 | 100% | 4e-07 | 100% | <a href="#">gij641720315 XP_008149799.1</a> |
| <a href="#">PREDICTED: mannan-binding lectin serine protease 1 isoform X4 [</a> | 54.1 | 54.1 | 100% | 4e-07 | 100% | <a href="#">gij528936762 XP_005201542.1</a> |

|                                                                                   |      |      |      |       |      |                                             |
|-----------------------------------------------------------------------------------|------|------|------|-------|------|---------------------------------------------|
| <a href="#">mannan-binding lectin serine peptidase 1 (C4/C2 activating compor</a> | 54.1 | 54.1 | 100% | 4e-07 | 100% | <a href="#">gij119598556 FAW78150.1</a>     |
| <a href="#">PREDICTED: mannan-binding lectin serine protease 1 isoform X2 [</a>   | 54.1 | 54.1 | 100% | 4e-07 | 100% | <a href="#">gij507540681 XP_004654345.1</a> |
| <a href="#">PREDICTED: LOW QUALITY PROTEIN: mannan-binding lectin ser</a>         | 54.1 | 54.1 | 100% | 4e-07 | 100% | <a href="#">gij297287139 XP_002808386.1</a> |
| <a href="#">PREDICTED: mannan-binding lectin serine protease 1 isoform X5 [</a>   | 54.1 | 54.1 | 100% | 4e-07 | 100% | <a href="#">gij686714724 XP_009237912.1</a> |
| <a href="#">PREDICTED: mannan-binding lectin serine protease 1 isoform X2 [</a>   | 54.1 | 54.1 | 100% | 4e-07 | 100% | <a href="#">gij675687274 XP_008954144.1</a> |
| <a href="#">PREDICTED: mannan-binding lectin serine protease 1 isoform X3 [</a>   | 54.1 | 54.1 | 100% | 4e-07 | 100% | <a href="#">gij533136991 XP_005383311.1</a> |
| <a href="#">PREDICTED: mannan-binding lectin serine protease 1 isoform 4 [G</a>   | 54.1 | 54.1 | 100% | 4e-07 | 100% | <a href="#">gij426343256 XP_004038230.1</a> |
| <a href="#">PREDICTED: LOW QUALITY PROTEIN: mannan-binding lectin ser</a>         | 54.1 | 54.1 | 100% | 4e-07 | 100% | <a href="#">gij395839796 XP_003804164.1</a> |
| <a href="#">PREDICTED: mannan-binding lectin serine protease 1 isoform 4 [N</a>   | 54.1 | 54.1 | 100% | 4e-07 | 100% | <a href="#">gij332215103 XP_003256679.1</a> |
| <a href="#">MASP-3 protein [Rattus norvegicus]</a>                                | 54.1 | 54.1 | 100% | 4e-07 | 100% | <a href="#">gij27527940 CAD32171.1</a>      |
| <a href="#">PREDICTED: mannan-binding lectin serine protease 1 isoform X2 [</a>   | 54.1 | 54.1 | 100% | 4e-07 | 100% | <a href="#">gij731216119 XP_010622448.1</a> |
| <a href="#">PREDICTED: mannan-binding lectin serine protease 1 isoform X1 [</a>   | 54.1 | 54.1 | 100% | 4e-07 | 100% | <a href="#">gij724805503 XP_010350848.1</a> |
| <a href="#">PREDICTED: mannan-binding lectin serine protease 1 isoform X1 [</a>   | 54.1 | 54.1 | 100% | 4e-07 | 100% | <a href="#">gij674036694 XP_008851350.1</a> |
| <a href="#">PREDICTED: mannan-binding lectin serine protease 1 isoform X2 [</a>   | 54.1 | 54.1 | 100% | 4e-07 | 100% | <a href="#">gij664750525 XP_008532698.1</a> |
| <a href="#">PREDICTED: mannan-binding lectin serine protease 1 isoform X3 [</a>   | 54.1 | 54.1 | 100% | 4e-07 | 100% | <a href="#">gij641720313 XP_008149798.1</a> |
| <a href="#">PREDICTED: mannan-binding lectin serine protease 1 isoform X2 [</a>   | 54.1 | 54.1 | 100% | 4e-07 | 100% | <a href="#">gij640796912 XP_008054564.1</a> |
| <a href="#">PREDICTED: mannan-binding lectin serine protease 1 isoform X1 [</a>   | 54.1 | 54.1 | 100% | 4e-07 | 100% | <a href="#">gij635086159 XP_008007689.1</a> |
| <a href="#">PREDICTED: mannan-binding lectin serine protease 1 isoform X1 [</a>   | 54.1 | 54.1 | 100% | 4e-07 | 100% | <a href="#">gij545865216 XP_005657166.1</a> |
| <a href="#">PREDICTED: mannan-binding lectin serine protease 1 isoform X2 [</a>   | 54.1 | 54.1 | 100% | 4e-07 | 100% | <a href="#">gij602726051 XP_007448486.1</a> |
| <a href="#">PREDICTED: mannan-binding lectin serine protease 1 isoform X2 [</a>   | 54.1 | 54.1 | 100% | 4e-07 | 100% | <a href="#">gij593732157 XP_007111601.1</a> |
| <a href="#">PREDICTED: mannan-binding lectin serine protease 1 isoform X1 [</a>   | 54.1 | 54.1 | 100% | 4e-07 | 100% | <a href="#">gij589944895 XP_006985134.1</a> |
| <a href="#">PREDICTED: mannan-binding lectin serine protease 1 isoform X2 [</a>   | 54.1 | 54.1 | 100% | 4e-07 | 100% | <a href="#">gij584042010 XP_006765916.1</a> |
| <a href="#">PREDICTED: mannan-binding lectin serine protease 1 isoform X2 [</a>   | 54.1 | 54.1 | 100% | 4e-07 | 100% | <a href="#">gij554564029 XP_005876335.1</a> |
| <a href="#">PREDICTED: mannan-binding lectin serine protease 1 isoform X2 [</a>   | 54.1 | 54.1 | 100% | 4e-07 | 100% | <a href="#">gij548450449 XP_005675199.1</a> |
| <a href="#">PREDICTED: mannan-binding lectin serine protease 1 isoform X1 [</a>   | 54.1 | 54.1 | 100% | 4e-07 | 100% | <a href="#">gij545192255 XP_001499679.3</a> |
| <a href="#">PREDICTED: mannan-binding lectin serine protease 1 [Microtus oc</a>   | 54.1 | 54.1 | 100% | 4e-07 | 100% | <a href="#">gij532000597 XP_005344817.1</a> |
| <a href="#">PREDICTED: mannan-binding lectin serine protease 1 isoform X2 [</a>   | 54.1 | 54.1 | 100% | 4e-07 | 100% | <a href="#">gij528936758 XP_005201540.1</a> |

## Alignments

Download GenPept Graphics

Next Previous Descriptions

Ra-reactive factor serine protease p100 [Rattus norvegicus]

Sequence ID: [gij2209345|gb|AAB65832.1](#) Length: 212 Number of Matches: 1

Range 1: 163 to 177 GenPept Graphics

Next Match Previous Match

| Score          | Expect | Identities  | Positives   | Gaps     |
|----------------|--------|-------------|-------------|----------|
| 54.1 bits(120) | 3e-07  | 15/15(100%) | 15/15(100%) | 0/15(0%) |

Query 1 RFGYILHTDNRTCRV 15  
 RFGYILHTDNRTCRV  
 Sbjct 163 RFGYILHTDNRTCRV 177

### Related Information

[Gene](#) - associated gene details

Download GenPept Graphics

Next Previous Descriptions

Chain A, Cub1-egf-cub2 Domain Of Human Masp-1/3

Sequence ID: [gij193506834|pdb|3DEM|A](#) Length: 278 Number of Matches: 1

[▶ See 1 more title\(s\)](#)

Range 1: 150 to 164 GenPept Graphics

Next Match Previous Match

| Score          | Expect | Identities  | Positives   | Gaps     |
|----------------|--------|-------------|-------------|----------|
| 54.1 bits(120) | 3e-07  | 15/15(100%) | 15/15(100%) | 0/15(0%) |

### Related Information

[Structure](#) - 3D structure displays  
[Identical Proteins](#) - Proteins identical to the subject

Query 1 RFGYILHTDNRTCRV 15  
 RFGYILHTDNRTCRV  
 Sbjct 150 RFGYILHTDNRTCRV 164

[Download](#) [GenPept](#) [Graphics](#)

[Next](#) [Previous](#) [Descriptions](#)

unnamed protein product [Homo sapiens]

Sequence ID: [gi|194374073|dbj|BAG62349.1](#) Length: 354 Number of Matches: 1

**Related Information**

[Gene](#) - associated gene details

Range 1: 143 to 157 [GenPept](#) [Graphics](#)

[Next Match](#) [Previous Match](#)

| Score          | Expect | Identities  | Positives   | Gaps     |
|----------------|--------|-------------|-------------|----------|
| 54.1 bits(120) | 3e-07  | 15/15(100%) | 15/15(100%) | 0/15(0%) |

Query 1 RFGYILHTDNRTCRV 15  
 RFGYILHTDNRTCRV  
 Sbjct 143 RFGYILHTDNRTCRV 157

[Download](#) [GenPept](#) [Graphics](#)

[Next](#) [Previous](#) [Descriptions](#)

PREDICTED: mannan-binding lectin serine protease 1 isoform X2 [Homo sapiens]

Sequence ID: [gi|578807591|ref|XP\\_006713764.1](#) Length: 354 Number of Matches: 1

**Related Information**

[Gene](#) - associated gene details

Range 1: 143 to 157 [GenPept](#) [Graphics](#)

[Next Match](#) [Previous Match](#)

| Score          | Expect | Identities  | Positives   | Gaps     |
|----------------|--------|-------------|-------------|----------|
| 54.1 bits(120) | 3e-07  | 15/15(100%) | 15/15(100%) | 0/15(0%) |

Query 1 RFGYILHTDNRTCRV 15  
 RFGYILHTDNRTCRV  
 Sbjct 143 RFGYILHTDNRTCRV 157

[Download](#) [GenPept](#) [Graphics](#)

[Next](#) [Previous](#) [Descriptions](#)

Chain A, Mbl-Ficolin Associated Protein-1, Map-1 Aka Map44

Sequence ID: [gi|400260714|pdb|4AQB|A](#) Length: 361 Number of Matches: 1

**Related Information**

[Structure](#) - 3D structure displays

Range 1: 150 to 164 [GenPept](#) [Graphics](#)

[Next Match](#) [Previous Match](#)

| Score          | Expect | Identities  | Positives   | Gaps     |
|----------------|--------|-------------|-------------|----------|
| 54.1 bits(120) | 3e-07  | 15/15(100%) | 15/15(100%) | 0/15(0%) |

Query 1 RFGYILHTDNRTCRV 15  
 RFGYILHTDNRTCRV  
 Sbjct 150 RFGYILHTDNRTCRV 164

BLAST is a registered trademark of the National Library of Medicine.

▶ [NCBI/ BLAST/ blastp suite/ Formatting Results - BVJ4WU4Y01R](#)

**i** Your search parameters were adjusted to search for a short input sequence.

[Edit and Resubmit](#) [Save Search Strategies](#) ▶ [Formatting options](#) ▶ [Download](#) [YouTube](#) [How to read this page](#) [Blast report description](#)

### MEGF8\_RALLTDVSSVALGSRR\_Mod

**RID** [BVJ4WU4Y01R](#) (Expires on 01-21 10:16 am)

**Query ID** lcl|348617  
**Description** None  
**Molecule type** amino acid  
**Query Length** 16

**Database Name** nr  
**Description** All non-redundant GenBank CDS translations+PDB+SwissProt+PIR+PRF excluding environmental samples from WGS projects  
**Program** BLASTP 2.2.30+ ▶ [Citation](#)

Other reports: ▶ [Search Summary](#) [[Taxonomy reports](#)] [[Distance tree of results](#)] [[Multiple alignment](#)]

### **[-]** Graphic Summary

**[-]** [Show Conserved Domains](#)

No putative conserved domains have been detected

Distribution of 100 Blast Hits on the Query Sequence

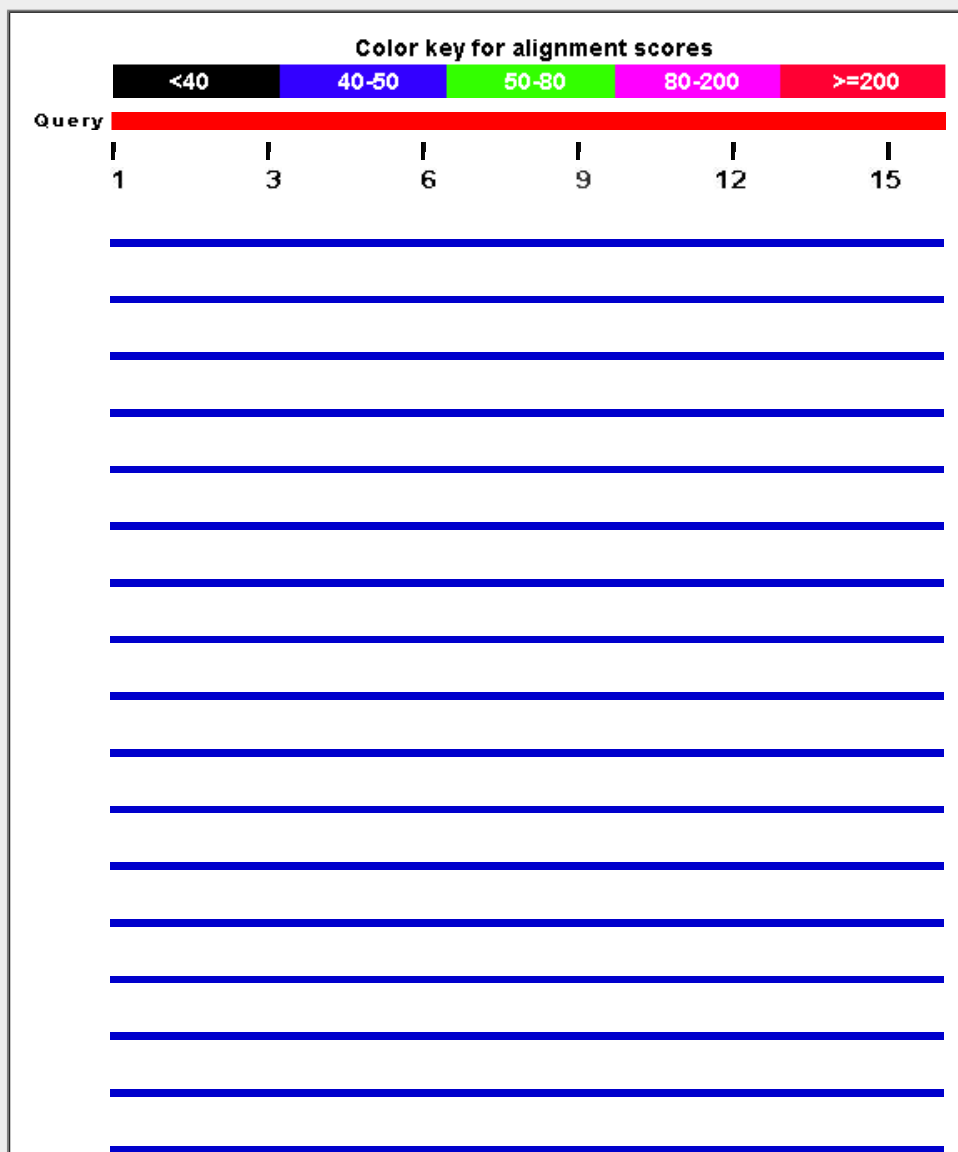

The image displays a table with 30 rows. Each row is represented by a single, solid blue horizontal line. The lines are evenly spaced and extend across the width of the table area. The table is flanked by light gray vertical bars on both the left and right sides.



## Descriptions

### Sequences producing significant alignments:

Select: [All](#) [None](#) Selected:0

| <a href="#">Alignments</a> <a href="#">Download</a> <a href="#">GenPept</a> <a href="#">Graphics</a> <a href="#">Distance tree of results</a> <a href="#">Multiple alignment</a> |           |             |             |         |       |                                |  |
|----------------------------------------------------------------------------------------------------------------------------------------------------------------------------------|-----------|-------------|-------------|---------|-------|--------------------------------|--|
| Description                                                                                                                                                                      | Max score | Total score | Query cover | E value | Ident | Accession                      |  |
| <a href="#">multiple epidermal growth factor-like domain protein 8 [Cricetulus griseus]</a>                                                                                      | 47.3      | 47.3        | 100%        | 9e-05   | 94%   | <a href="#">ERE28575.1</a>     |  |
| <a href="#">EGF-like-domain, multiple 4 [Rattus norvegicus]</a>                                                                                                                  | 47.3      | 47.3        | 100%        | 9e-05   | 94%   | <a href="#">EDM08030.1</a>     |  |
| <a href="#">TPA: Multiple epidermal growth factor-like domains protein 8-like [Bos taurus]</a>                                                                                   | 47.3      | 47.3        | 100%        | 9e-05   | 94%   | <a href="#">DAA19729.1</a>     |  |
| <a href="#">PREDICTED: multiple epidermal growth factor-like domains protein 8 [Sarcop]</a>                                                                                      | 47.3      | 47.3        | 100%        | 9e-05   | 94%   | <a href="#">XP_003766871.1</a> |  |
| <a href="#">EGF-like-domain, multiple 4, isoform CRA_b [Homo sapiens]</a>                                                                                                        | 47.3      | 47.3        | 100%        | 9e-05   | 94%   | <a href="#">EAW57133.1</a>     |  |
| <a href="#">PREDICTED: multiple epidermal growth factor-like domains protein 8 isoform</a>                                                                                       | 47.3      | 47.3        | 100%        | 9e-05   | 94%   | <a href="#">XP_007647681.1</a> |  |
| <a href="#">EGF-like-domain, multiple 4, isoform CRA_a [Homo sapiens]</a>                                                                                                        | 47.3      | 47.3        | 100%        | 9e-05   | 94%   | <a href="#">EAW57132.1</a>     |  |
| <a href="#">PREDICTED: multiple epidermal growth factor-like domains protein 8 isoform</a>                                                                                       | 47.3      | 47.3        | 100%        | 9e-05   | 94%   | <a href="#">XP_010945027.1</a> |  |
| <a href="#">PREDICTED: multiple epidermal growth factor-like domains protein 8 isoform</a>                                                                                       | 47.3      | 47.3        | 100%        | 9e-05   | 94%   | <a href="#">XP_007102249.1</a> |  |
| <a href="#">PREDICTED: LOW QUALITY PROTEIN: multiple epidermal growth factor-like</a>                                                                                            | 47.3      | 47.3        | 100%        | 9e-05   | 94%   | <a href="#">XP_008707927.1</a> |  |
| <a href="#">mCG145770 [Mus musculus]</a>                                                                                                                                         | 47.3      | 47.3        | 100%        | 9e-05   | 94%   | <a href="#">EDL24275.1</a>     |  |
| <a href="#">PREDICTED: multiple epidermal growth factor-like domains protein 8 isoform</a>                                                                                       | 47.3      | 47.3        | 100%        | 9e-05   | 94%   | <a href="#">XP_010945026.1</a> |  |
| <a href="#">PREDICTED: multiple epidermal growth factor-like domains protein 8 isoform</a>                                                                                       | 47.3      | 47.3        | 100%        | 9e-05   | 94%   | <a href="#">XP_010329368.1</a> |  |
| <a href="#">PREDICTED: multiple epidermal growth factor-like domains protein 8 isoform</a>                                                                                       | 47.3      | 47.3        | 100%        | 9e-05   | 94%   | <a href="#">XP_009433972.1</a> |  |
| <a href="#">PREDICTED: multiple epidermal growth factor-like domains protein 8 isoform</a>                                                                                       | 47.3      | 47.3        | 100%        | 9e-05   | 94%   | <a href="#">XP_009192884.1</a> |  |
| <a href="#">PREDICTED: multiple epidermal growth factor-like domains protein 8 isoform</a>                                                                                       | 47.3      | 47.3        | 100%        | 9e-05   | 94%   | <a href="#">XP_008962406.1</a> |  |
| <a href="#">PREDICTED: multiple epidermal growth factor-like domains protein 8 isoform</a>                                                                                       | 47.3      | 47.3        | 100%        | 9e-05   | 94%   | <a href="#">XP_007995187.1</a> |  |
| <a href="#">EGF domain-containing protein [Homo sapiens]</a>                                                                                                                     | 47.3      | 47.3        | 100%        | 9e-05   | 94%   | <a href="#">AAP35084.1</a>     |  |
| <a href="#">PREDICTED: multiple epidermal growth factor-like domains protein 8 isoform</a>                                                                                       | 47.3      | 47.3        | 100%        | 9e-05   | 94%   | <a href="#">XP_004873071.1</a> |  |
| <a href="#">PREDICTED: multiple epidermal growth factor-like domains protein 8 isoform</a>                                                                                       | 47.3      | 47.3        | 100%        | 9e-05   | 94%   | <a href="#">XP_004884074.1</a> |  |
| <a href="#">PREDICTED: LOW QUALITY PROTEIN: multiple EGF-like-domains 8 [Panther]</a>                                                                                            | 47.3      | 47.3        | 100%        | 9e-05   | 94%   | <a href="#">XP_007099373.1</a> |  |
| <a href="#">Multiple epidermal growth factor-like domains protein 8 [Myotis davidii]</a>                                                                                         | 47.3      | 47.3        | 100%        | 9e-05   | 94%   | <a href="#">ELK32302.1</a>     |  |
| <a href="#">PREDICTED: LOW QUALITY PROTEIN: multiple epidermal growth factor-like</a>                                                                                            | 47.3      | 47.3        | 100%        | 9e-05   | 94%   | <a href="#">XP_003281030.2</a> |  |
| <a href="#">PREDICTED: LOW QUALITY PROTEIN: multiple EGF-like-domains 8 [Equus</a>                                                                                               | 47.3      | 47.3        | 100%        | 9e-05   | 94%   | <a href="#">XP_005596735.1</a> |  |
| <a href="#">Multiple epidermal growth factor-like domains 8 [Cricetulus griseus]</a>                                                                                             | 47.3      | 47.3        | 100%        | 9e-05   | 94%   | <a href="#">EGW10451.1</a>     |  |
| <a href="#">PREDICTED: multiple epidermal growth factor-like domains protein 8 isoform</a>                                                                                       | 47.3      | 47.3        | 100%        | 9e-05   | 94%   | <a href="#">XP_008844639.1</a> |  |
| <a href="#">PREDICTED: multiple epidermal growth factor-like domains protein 8 [Orycter</a>                                                                                      | 47.3      | 47.3        | 100%        | 9e-05   | 94%   | <a href="#">XP_007941322.1</a> |  |
| <a href="#">Multiple epidermal growth factor-like domains protein 8 [Tupaia chinensis]</a>                                                                                       | 47.3      | 47.3        | 100%        | 9e-05   | 94%   | <a href="#">ELW71057.1</a>     |  |
| <a href="#">PREDICTED: multiple epidermal growth factor-like domains protein 8 isoform</a>                                                                                       | 47.3      | 47.3        | 100%        | 9e-05   | 94%   | <a href="#">XP_007102248.1</a> |  |



|                                                                                                |      |      |      |       |     |                                |
|------------------------------------------------------------------------------------------------|------|------|------|-------|-----|--------------------------------|
| <a href="#">PREDICTED: LOW QUALITY PROTEIN: multiple epidermal growth factor-like</a>          | 47.3 | 47.3 | 100% | 9e-05 | 94% | <a href="#">XP_004015751.1</a> |
| <a href="#">PREDICTED: LOW QUALITY PROTEIN: multiple epidermal growth factor-like</a>          | 47.3 | 47.3 | 100% | 9e-05 | 94% | <a href="#">XP_005971449.1</a> |
| <a href="#">PREDICTED: multiple epidermal growth factor-like domains protein 8 [Echinoz</a>    | 47.3 | 47.3 | 100% | 9e-05 | 94% | <a href="#">XP_004710580.1</a> |
| <a href="#">PREDICTED: LOW QUALITY PROTEIN: multiple epidermal growth factor-like</a>          | 47.3 | 47.3 | 100% | 9e-05 | 94% | <a href="#">XP_006142201.1</a> |
| <a href="#">PREDICTED: multiple epidermal growth factor-like domains protein 8 [Sorex e</a>    | 47.3 | 47.3 | 100% | 9e-05 | 94% | <a href="#">XP_004620816.1</a> |
| <a href="#">PREDICTED: multiple epidermal growth factor-like domains protein 8 [Myotis ]</a>   | 47.3 | 47.3 | 100% | 9e-05 | 94% | <a href="#">XP_005883977.1</a> |
| <a href="#">PREDICTED: multiple epidermal growth factor-like domains protein 8 [Trichec</a>    | 47.3 | 47.3 | 100% | 9e-05 | 94% | <a href="#">XP_004388865.1</a> |
| <a href="#">PREDICTED: multiple epidermal growth factor-like domains protein 8 [Myotis .</a>   | 47.3 | 47.3 | 100% | 9e-05 | 94% | <a href="#">XP_006761144.1</a> |
| <a href="#">PREDICTED: multiple epidermal growth factor-like domains protein 8 isoform</a>     | 47.3 | 47.3 | 100% | 9e-05 | 94% | <a href="#">XP_007623649.1</a> |
| <a href="#">PREDICTED: multiple epidermal growth factor-like domains protein 8 isoform</a>     | 47.3 | 47.3 | 100% | 9e-05 | 94% | <a href="#">XP_005001354.1</a> |
| <a href="#">PREDICTED: LOW QUALITY PROTEIN: multiple epidermal growth factor-like</a>          | 47.3 | 47.3 | 100% | 9e-05 | 94% | <a href="#">XP_004318216.1</a> |
| <a href="#">PREDICTED: multiple epidermal growth factor-like domains protein 8 isoform</a>     | 47.3 | 47.3 | 100% | 9e-05 | 94% | <a href="#">XP_006103655.1</a> |
| <a href="#">PREDICTED: multiple epidermal growth factor-like domains protein 8 isoform</a>     | 47.3 | 47.3 | 100% | 9e-05 | 94% | <a href="#">XP_005412420.1</a> |
| <a href="#">PREDICTED: multiple epidermal growth factor-like domains protein 8 isoform</a>     | 47.3 | 47.3 | 100% | 9e-05 | 94% | <a href="#">XP_005338206.1</a> |
| <a href="#">PREDICTED: multiple epidermal growth factor-like domains protein 8 isoform</a>     | 47.3 | 47.3 | 100% | 9e-05 | 94% | <a href="#">XP_005087119.1</a> |
| <a href="#">PREDICTED: LOW QUALITY PROTEIN: multiple epidermal growth factor-like</a>          | 47.3 | 47.3 | 100% | 9e-05 | 94% | <a href="#">XP_010585188.1</a> |
| <a href="#">PREDICTED: LOW QUALITY PROTEIN: multiple epidermal growth factor-like</a>          | 47.3 | 47.3 | 100% | 9e-05 | 94% | <a href="#">XP_002924008.1</a> |
| <a href="#">PREDICTED: multiple EGF-like-domains 8 isoform X3 [Sus scrofa]</a>                 | 47.3 | 47.3 | 100% | 9e-05 | 94% | <a href="#">XP_005655932.1</a> |
| <a href="#">Multiple epidermal growth factor-like domains protein 8 [Fukomys damarensis]</a>   | 47.3 | 47.3 | 100% | 9e-05 | 94% | <a href="#">KFO33644.1</a>     |
| <a href="#">PREDICTED: LOW QUALITY PROTEIN: multiple epidermal growth factor-like</a>          | 47.3 | 47.3 | 100% | 9e-05 | 94% | <a href="#">XP_010979734.1</a> |
| <a href="#">hypothetical protein EGK_10681 [Macaca mulatta]</a>                                | 47.3 | 47.3 | 100% | 9e-05 | 94% | <a href="#">EHH30092.1</a>     |
| <a href="#">PREDICTED: multiple epidermal growth factor-like domains protein 8 [Jaculus</a>    | 47.3 | 47.3 | 100% | 9e-05 | 94% | <a href="#">XP_004670378.1</a> |
| <a href="#">PREDICTED: LOW QUALITY PROTEIN: multiple epidermal growth factor-like</a>          | 47.3 | 47.3 | 100% | 9e-05 | 94% | <a href="#">XP_005692637.1</a> |
| <a href="#">PREDICTED: multiple epidermal growth factor-like domains protein 8 [Lipotes</a>    | 47.3 | 47.3 | 100% | 9e-05 | 94% | <a href="#">XP_007458757.1</a> |
| <a href="#">hypothetical protein EGM_09795 [Macaca fascicularis]</a>                           | 47.3 | 47.3 | 100% | 9e-05 | 94% | <a href="#">EHH59637.1</a>     |
| <a href="#">multiple epidermal growth factor-like domains protein 8 isoform 2 precursor [H</a> | 47.3 | 47.3 | 100% | 9e-05 | 94% | <a href="#">NP_001401.2</a>    |
| <a href="#">PREDICTED: multiple epidermal growth factor-like domains protein 8 isoform</a>     | 47.3 | 47.3 | 100% | 9e-05 | 94% | <a href="#">XP_010329367.1</a> |
| <a href="#">PREDICTED: multiple epidermal growth factor-like domains protein 8 isoform</a>     | 47.3 | 47.3 | 100% | 9e-05 | 94% | <a href="#">XP_010945025.1</a> |
| <a href="#">PREDICTED: multiple epidermal growth factor-like domains protein 8 [Pteropi</a>    | 47.3 | 47.3 | 100% | 9e-05 | 94% | <a href="#">XP_006903917.1</a> |
| <a href="#">MEGF8 [Homo sapiens]</a>                                                           | 47.3 | 47.3 | 100% | 9e-05 | 94% | <a href="#">BAA32469.2</a>     |
| <a href="#">PREDICTED: multiple epidermal growth factor-like domains protein 8 isoform</a>     | 47.3 | 47.3 | 100% | 9e-05 | 94% | <a href="#">XP_009433968.1</a> |
| <a href="#">PREDICTED: multiple epidermal growth factor-like domains protein 8 [Erinace</a>    | 47.3 | 47.3 | 100% | 9e-05 | 94% | <a href="#">XP_007532999.1</a> |
| <a href="#">PREDICTED: multiple epidermal growth factor-like domains protein 8 isoform</a>     | 47.3 | 47.3 | 100% | 9e-05 | 94% | <a href="#">XP_006228426.1</a> |
| <a href="#">PREDICTED: multiple epidermal growth factor-like domains protein 8 isoform</a>     | 47.3 | 47.3 | 100% | 9e-05 | 94% | <a href="#">XP_004873069.1</a> |
| <a href="#">PREDICTED: multiple epidermal growth factor-like domains protein 8 isoform</a>     | 47.3 | 47.3 | 100% | 9e-05 | 94% | <a href="#">XP_004884072.1</a> |
| <a href="#">PREDICTED: multiple epidermal growth factor-like domains protein 8 [Ochoto</a>     | 47.3 | 47.3 | 100% | 9e-05 | 94% | <a href="#">XP_004598048.1</a> |
| <a href="#">PREDICTED: multiple epidermal growth factor-like domains protein 8 isoform</a>     | 47.3 | 47.3 | 100% | 9e-05 | 94% | <a href="#">XP_003464586.1</a> |
| <a href="#">PREDICTED: LOW QUALITY PROTEIN: multiple epidermal growth factor-like</a>          | 47.3 | 47.3 | 100% | 9e-05 | 94% | <a href="#">XP_010621622.1</a> |
| <a href="#">PREDICTED: multiple epidermal growth factor-like domains protein 8 [Galeop</a>     | 47.3 | 47.3 | 100% | 9e-05 | 94% | <a href="#">XP_008565470.1</a> |
| <a href="#">RecName: Full=Multiple epidermal growth factor-like domains protein 8; Short</a>   | 47.3 | 47.3 | 100% | 9e-05 | 94% | <a href="#">Q9QYP0.2</a>       |
| <a href="#">PREDICTED: LOW QUALITY PROTEIN: multiple epidermal growth factor-like</a>          | 47.3 | 47.3 | 100% | 9e-05 | 94% | <a href="#">XP_010840927.1</a> |
| <a href="#">PREDICTED: multiple epidermal growth factor-like domains protein 8 isoform</a>     | 47.3 | 47.3 | 100% | 9e-05 | 94% | <a href="#">XP_009192883.1</a> |
| <a href="#">PREDICTED: multiple epidermal growth factor-like domains protein 8 isoform</a>     | 47.3 | 47.3 | 100% | 9e-05 | 94% | <a href="#">XP_008962404.1</a> |
| <a href="#">PREDICTED: multiple epidermal growth factor-like domains protein 8 isoform</a>     | 47.3 | 47.3 | 100% | 9e-05 | 94% | <a href="#">XP_008844638.1</a> |
| <a href="#">PREDICTED: multiple epidermal growth factor-like domains protein 8 [Eptesic</a>    | 47.3 | 47.3 | 100% | 9e-05 | 94% | <a href="#">XP_008158439.1</a> |

|                                                                                                |      |      |      |       |     |                                |
|------------------------------------------------------------------------------------------------|------|------|------|-------|-----|--------------------------------|
| <a href="#">PREDICTED: multiple epidermal growth factor-like domains protein 8 isoform</a>     | 47.3 | 47.3 | 100% | 9e-05 | 94% | <a href="#">XP_007995186.1</a> |
| <a href="#">multiple epidermal growth factor-like domains protein 8 precursor [Mus muscu</a>   | 47.3 | 47.3 | 100% | 9e-05 | 94% | <a href="#">NP_001153872.1</a> |
| <a href="#">PREDICTED: multiple epidermal growth factor-like domains protein 8 [Balaen</a>     | 47.3 | 47.3 | 100% | 9e-05 | 94% | <a href="#">XP_007168092.1</a> |
| <a href="#">PREDICTED: multiple epidermal growth factor-like domains protein 8 isoform</a>     | 47.3 | 47.3 | 100% | 9e-05 | 94% | <a href="#">XP_007102247.1</a> |
| <a href="#">PREDICTED: multiple epidermal growth factor-like domains protein 8 isoform</a>     | 47.3 | 47.3 | 100% | 9e-05 | 94% | <a href="#">XP_006988122.1</a> |
| <a href="#">PREDICTED: LOW QUALITY PROTEIN: multiple EGF-like-domains 8 [Felis c</a>           | 47.3 | 47.3 | 100% | 9e-05 | 94% | <a href="#">XP_006941287.1</a> |
| <a href="#">PREDICTED: multiple epidermal growth factor-like domains protein 8 isoform</a>     | 47.3 | 47.3 | 100% | 9e-05 | 94% | <a href="#">XP_006103654.1</a> |
| <a href="#">PREDICTED: multiple EGF-like-domains 8 isoform X1 [Sus scrofa]</a>                 | 47.3 | 47.3 | 100% | 9e-05 | 94% | <a href="#">XP_005655930.1</a> |
| <a href="#">PREDICTED: multiple epidermal growth factor-like domains protein 8 isoform</a>     | 47.3 | 47.3 | 100% | 9e-05 | 94% | <a href="#">XP_005412419.1</a> |
| <a href="#">PREDICTED: multiple epidermal growth factor-like domains protein 8 isoform</a>     | 47.3 | 47.3 | 100% | 9e-05 | 94% | <a href="#">XP_005338205.1</a> |
| <a href="#">PREDICTED: multiple epidermal growth factor-like domains protein 8 [Microtu</a>    | 47.3 | 47.3 | 100% | 9e-05 | 94% | <a href="#">XP_005361208.1</a> |
| <a href="#">PREDICTED: multiple epidermal growth factor-like domains protein 8 isoform</a>     | 47.3 | 47.3 | 100% | 9e-05 | 94% | <a href="#">XP_005087118.1</a> |
| <a href="#">PREDICTED: multiple epidermal growth factor-like domains protein 8 [Orcinus</a>    | 47.3 | 47.3 | 100% | 9e-05 | 94% | <a href="#">XP_004271289.1</a> |
| <a href="#">PREDICTED: multiple epidermal growth factor-like domains protein 8 [Gorilla</a>    | 47.3 | 47.3 | 100% | 9e-05 | 94% | <a href="#">XP_004060891.1</a> |
| <a href="#">multiple epidermal growth factor-like domains protein 8 precursor [Rattus norv</a> | 47.3 | 47.3 | 100% | 9e-05 | 94% | <a href="#">NP_446080.1</a>    |
| <a href="#">PREDICTED: LOW QUALITY PROTEIN: multiple epidermal growth factor-like</a>          | 47.3 | 47.3 | 100% | 9e-05 | 94% | <a href="#">XP_010822001.1</a> |
| <a href="#">PREDICTED: multiple epidermal growth factor-like domains protein 8 isoform</a>     | 47.3 | 47.3 | 100% | 9e-05 | 94% | <a href="#">XP_006988121.1</a> |
| <a href="#">Multiple epidermal growth factor-like domains 8 [Pteropus alecto]</a>              | 47.3 | 47.3 | 100% | 9e-05 | 94% | <a href="#">ELK19616.1</a>     |
| <a href="#">PREDICTED: LOW QUALITY PROTEIN: multiple epidermal growth factor-like</a>          | 47.3 | 47.3 | 100% | 9e-05 | 94% | <a href="#">XP_008247909.1</a> |
| <a href="#">PREDICTED: multiple epidermal growth factor-like domains protein 8 [Tarsius</a>    | 47.3 | 47.3 | 100% | 9e-05 | 94% | <a href="#">XP_008060623.1</a> |
| <a href="#">PREDICTED: LOW QUALITY PROTEIN: multiple epidermal growth factor-like</a>          | 47.3 | 47.3 | 100% | 9e-05 | 94% | <a href="#">XP_004767868.1</a> |
| <a href="#">PREDICTED: multiple epidermal growth factor-like domains protein 8 isoform</a>     | 47.3 | 47.3 | 100% | 9e-05 | 94% | <a href="#">XP_010813563.1</a> |
| <a href="#">PREDICTED: LOW QUALITY PROTEIN: multiple epidermal growth factor-like</a>          | 47.3 | 47.3 | 100% | 9e-05 | 94% | <a href="#">XP_008530249.1</a> |
| <a href="#">Multiple epidermal growth factor-like domains 8 [Heterocephalus glaber]</a>        | 47.3 | 47.3 | 100% | 9e-05 | 94% | <a href="#">EHB02528.1</a>     |
| <a href="#">PREDICTED: LOW QUALITY PROTEIN: multiple epidermal growth factor-like</a>          | 47.3 | 47.3 | 100% | 9e-05 | 94% | <a href="#">XP_006871573.1</a> |
| <a href="#">PREDICTED: multiple epidermal growth factor-like domains protein 8 [Condyl</a>     | 47.3 | 47.3 | 100% | 9e-05 | 94% | <a href="#">XP_004693985.1</a> |

## Alignments

Download [GenPept](#) [Graphics](#)

[Next](#) [Previous](#) [Descriptions](#)

multiple epidermal growth factor-like domain protein 8, partial [Cricetulus griseus]

Sequence ID: [gb|ERE28575.1|](#) Length: 639 Number of Matches: 1

Range 1: 365 to 380 [GenPept](#) [Graphics](#)

[Next Match](#) [Previous Match](#)

### Related Information

| Score          | Expect | Identities | Positives   | Gaps     |
|----------------|--------|------------|-------------|----------|
| 47.3 bits(104) | 9e-05  | 15/16(94%) | 16/16(100%) | 0/16(0%) |

Query 1 RALLTDVSSVALGSRR 16  
 RALLT+VSSVALGSRR  
 Sbjct 365 RALLTNVSSVALGSRR 380

Download [GenPept](#) [Graphics](#)

[Next](#) [Previous](#) [Descriptions](#)

EGF-like-domain, multiple 4 [Rattus norvegicus]

Sequence ID: [gb|EDM08030.1|](#) Length: 1221 Number of Matches: 1

Range 1: 807 to 822 [GenPept](#) [Graphics](#)

[Next Match](#) [Previous Match](#)

### Related Information

[Gene](#) - associated gene details

| Score          | Expect | Identities | Positives   | Gaps     |
|----------------|--------|------------|-------------|----------|
| 47.3 bits(104) | 9e-05  | 15/16(94%) | 16/16(100%) | 0/16(0%) |

Query 1 RALLTDVSSVALGSRR 16  
 RALLT+VSSVALGSRR  
 Sbjct 807 RALLTNVSSVALGSRR 822

[Download](#) [GenPept](#) [Graphics](#)

[Next](#) [Previous](#) [Descriptions](#)

TPA: Multiple epidermal growth factor-like domains protein 8-like [Bos taurus]

Sequence ID: [tpg|DAA19729.1](#) Length: 1397 Number of Matches: 1

Range 1: 235 to 250 [GenPept](#) [Graphics](#)

[Next Match](#) [Previous Match](#)

| Score          | Expect | Identities | Positives   | Gaps     |
|----------------|--------|------------|-------------|----------|
| 47.3 bits(104) | 9e-05  | 15/16(94%) | 16/16(100%) | 0/16(0%) |

Query 1 RALLTDVSSVALGSRR 16  
 RALLT+VSSVALGSRR  
 Sbjct 235 RALLTNVSSVALGSRR 250

**Related Information**

[Gene](#) - associated gene details

[Download](#) [GenPept](#) [Graphics](#)

[Next](#) [Previous](#) [Descriptions](#)

PREDICTED: multiple epidermal growth factor-like domains protein 8, partial [Sarcophilus harrisii]

Sequence ID: [ref|XP\\_003766871.1](#) Length: 1566 Number of Matches: 1

Range 1: 230 to 245 [GenPept](#) [Graphics](#)

[Next Match](#) [Previous Match](#)

| Score          | Expect | Identities | Positives   | Gaps     |
|----------------|--------|------------|-------------|----------|
| 47.3 bits(104) | 9e-05  | 15/16(94%) | 16/16(100%) | 0/16(0%) |

Query 1 RALLTDVSSVALGSRR 16  
 RALLT+VSSVALGSRR  
 Sbjct 230 RALLTNVSSVALGSRR 245

**Related Information**

[Gene](#) - associated gene details

[Map Viewer](#) - aligned genomic context

[Download](#) [GenPept](#) [Graphics](#)

[Next](#) [Previous](#) [Descriptions](#)

EGF-like-domain, multiple 4, isoform CRA\_b [Homo sapiens]

Sequence ID: [gb|EAW57133.1](#) Length: 2091 Number of Matches: 1

Range 1: 512 to 527 [GenPept](#) [Graphics](#)

[Next Match](#) [Previous Match](#)

| Score          | Expect | Identities | Positives   | Gaps     |
|----------------|--------|------------|-------------|----------|
| 47.3 bits(104) | 9e-05  | 15/16(94%) | 16/16(100%) | 0/16(0%) |

Query 1 RALLTDVSSVALGSRR 16  
 RALLT+VSSVALGSRR  
 Sbjct 512 RALLTNVSSVALGSRR 527

**Related Information**

[Gene](#) - associated gene details

BLAST is a registered trademark of the National Library of Medicine.

NCBI/ BLAST/ blastp suite/ Formatting Results - B9G6T51401R

Your search parameters were adjusted to search for a short input sequence.

[Edit and Resubmit](#) [Save Search Strategies](#) [Formatting options](#) [Download](#)

[YouTube](#) [How to read this page](#) [Blast report description](#)

### MEGF8\_RALLTNVSSVALGSRR\_NonMod

RID [B9G6T51401R](#) (Expires on 01-14 13:53 pm)

Query ID |cl|119030  
 Description None  
 Molecule type amino acid  
 Query Length 16

Database Name nr  
 Description All non-redundant GenBank CDS translations+PDB+SwissProt+PIR excluding environmental samples from WGS projects  
 Program BLASTP 2.2.30+ [Citation](#)

Other reports: [Search Summary](#) [Taxonomy reports](#) [Distance tree of results](#) [Multiple alignment](#)

### Graphic Summary

[Show Conserved Domains](#)

No putative conserved domains have been detected

Distribution of 100 Blast Hits on the Query Sequence

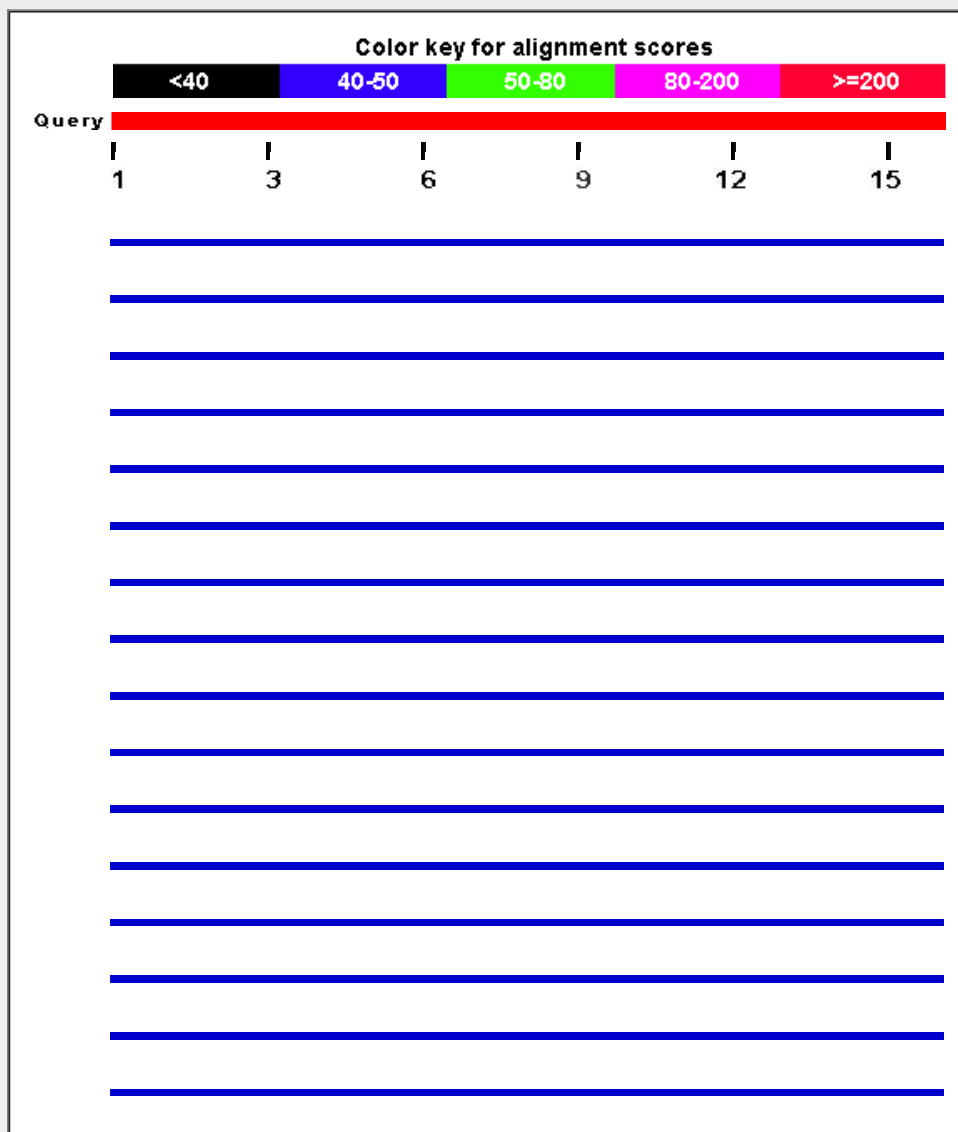

The image shows a table with 30 rows. Each row contains a single blue horizontal line, which appears to be a placeholder for data. The table is centered on the page and is flanked by light gray vertical bars on both sides.



**Descriptions**

**Sequences producing significant alignments:**

Select: [All](#) [None](#) Selected:0

[Alignments](#)
[Download](#)
[GenPept](#)
[Graphics](#)
[Distance tree of results](#)
[Multiple alignment](#)

| Description                                                                                  | Max score | Total score | Query cover | E value | Ident | Accession                                   |
|----------------------------------------------------------------------------------------------|-----------|-------------|-------------|---------|-------|---------------------------------------------|
| <a href="#">multiple epidermal growth factor-like domain protein 8 [Cricetulus g...</a>      | 49.8      | 49.8        | 100%        | 1e-05   | 100%  | <a href="#">gij537058530 ERE28575.1</a>     |
| <a href="#">EGF-like-domain, multiple 4 [Rattus norvegicus]</a>                              | 49.8      | 49.8        | 100%        | 1e-05   | 100%  | <a href="#">gij149056599 EDM08030.1</a>     |
| <a href="#">TPA: Multiple epidermal growth factor-like domains protein 8-like [E...</a>      | 49.8      | 49.8        | 100%        | 1e-05   | 100%  | <a href="#">gij296477614 DAA19729.1</a>     |
| <a href="#">PREDICTED: multiple epidermal growth factor-like domains protein</a>             | 49.8      | 49.8        | 100%        | 1e-05   | 100%  | <a href="#">gij395529545 XP_003766871.1</a> |
| <a href="#">EGF-like-domain, multiple 4, isoform CRA_b [Homo sapiens]</a>                    | 49.8      | 49.8        | 100%        | 1e-05   | 100%  | <a href="#">gij119577537 EAW57133.1</a>     |
| <a href="#">PREDICTED: multiple epidermal growth factor-like domains protein</a>             | 49.8      | 49.8        | 100%        | 1e-05   | 100%  | <a href="#">gij625214225 XP_007647681.1</a> |
| <a href="#">EGF-like-domain, multiple 4, isoform CRA_a [Homo sapiens]</a>                    | 49.8      | 49.8        | 100%        | 1e-05   | 100%  | <a href="#">gij119577536 EAW57132.1</a>     |
| <a href="#">PREDICTED: multiple epidermal growth factor-like domains protein</a>             | 49.8      | 49.8        | 100%        | 1e-05   | 100%  | <a href="#">gij593711377 XP_007102249.1</a> |
| <a href="#">PREDICTED: LOW QUALITY PROTEIN: multiple epidermal growth</a>                    | 49.8      | 49.8        | 100%        | 1e-05   | 100%  | <a href="#">gij671034203 XP_008707927.1</a> |
| <a href="#">mCG145770 [Mus musculus]</a>                                                     | 49.8      | 49.8        | 100%        | 1e-05   | 100%  | <a href="#">gij148692328 EDL24275.1</a>     |
| <a href="#">PREDICTED: multiple epidermal growth factor-like domains protein</a>             | 49.8      | 49.8        | 100%        | 1e-05   | 100%  | <a href="#">gij725605478 XP_010329368.1</a> |
| <a href="#">PREDICTED: multiple epidermal growth factor-like domains protein</a>             | 49.8      | 49.8        | 100%        | 1e-05   | 100%  | <a href="#">gij694975356 XP_009433972.1</a> |
| <a href="#">PREDICTED: multiple epidermal growth factor-like domains protein</a>             | 49.8      | 49.8        | 100%        | 1e-05   | 100%  | <a href="#">gij685608722 XP_009192884.1</a> |
| <a href="#">PREDICTED: multiple epidermal growth factor-like domains protein</a>             | 49.8      | 49.8        | 100%        | 1e-05   | 100%  | <a href="#">gij675714718 XP_008962406.1</a> |
| <a href="#">PREDICTED: multiple epidermal growth factor-like domains protein</a>             | 49.8      | 49.8        | 100%        | 1e-05   | 100%  | <a href="#">gij635039364 XP_007995187.1</a> |
| <a href="#">EGF domain-containing protein [Homo sapiens]</a>                                 | 49.8      | 49.8        | 100%        | 1e-05   | 100%  | <a href="#">gij30841835 AAP35084.1</a>      |
| <a href="#">PREDICTED: multiple epidermal growth factor-like domains protein</a>             | 49.8      | 49.8        | 100%        | 1e-05   | 100%  | <a href="#">gij513023676 XP_004873071.1</a> |
| <a href="#">PREDICTED: multiple epidermal growth factor-like domains protein</a>             | 49.8      | 49.8        | 100%        | 1e-05   | 100%  | <a href="#">gij512838904 XP_004884074.1</a> |
| <a href="#">PREDICTED: LOW QUALITY PROTEIN: multiple EGF-like-domain:</a>                    | 49.8      | 49.8        | 100%        | 1e-05   | 100%  | <a href="#">gij591321080 XP_007099373.1</a> |
| <a href="#">Multiple epidermal growth factor-like domains protein 8 [Myotis dav...</a>       | 49.8      | 49.8        | 100%        | 1e-05   | 100%  | <a href="#">gij432106646 ELK32302.1</a>     |
| <a href="#">PREDICTED: LOW QUALITY PROTEIN: multiple epidermal growth</a>                    | 49.8      | 49.8        | 100%        | 1e-05   | 100%  | <a href="#">gij441656214 XP_003281030.2</a> |
| <a href="#">PREDICTED: LOW QUALITY PROTEIN: multiple EGF-like-domain:</a>                    | 49.8      | 49.8        | 100%        | 1e-05   | 100%  | <a href="#">gij545176793 XP_005596735.1</a> |
| <a href="#">Multiple epidermal growth factor-like domains protein 8 [Cricetulus griseus]</a> | 49.8      | 49.8        | 100%        | 1e-05   | 100%  | <a href="#">gij344254347 EGW10451.1</a>     |
| <a href="#">PREDICTED: multiple epidermal growth factor-like domains protein</a>             | 49.8      | 49.8        | 100%        | 1e-05   | 100%  | <a href="#">gij674074682 XP_008844639.1</a> |
| <a href="#">PREDICTED: multiple epidermal growth factor-like domains protein</a>             | 49.8      | 49.8        | 100%        | 1e-05   | 100%  | <a href="#">gij634854516 XP_007941322.1</a> |
| <a href="#">Multiple epidermal growth factor-like domains protein 8 [Tupaia chir...</a>      | 49.8      | 49.8        | 100%        | 1e-05   | 100%  | <a href="#">gij444730683 ELW71057.1</a>     |
| <a href="#">PREDICTED: multiple epidermal growth factor-like domains protein</a>             | 49.8      | 49.8        | 100%        | 1e-05   | 100%  | <a href="#">gij593711375 XP_007102248.1</a> |
| <a href="#">PREDICTED: LOW QUALITY PROTEIN: multiple epidermal growth</a>                    | 49.8      | 49.8        | 100%        | 1e-05   | 100%  | <a href="#">gij426243838 XP_004015751.1</a> |

|                                                                                      |      |      |      |       |      |                                             |
|--------------------------------------------------------------------------------------|------|------|------|-------|------|---------------------------------------------|
| PREDICTED: LOW QUALITY PROTEIN: multiple epidermal growth                            | 49.8 | 49.8 | 100% | 1e-05 | 100% | <a href="#">gij556752106 XP_005971449.1</a> |
| <a href="#">PREDICTED: multiple epidermal growth factor-like domains protein</a>     | 49.8 | 49.8 | 100% | 1e-05 | 100% | <a href="#">gij507680955 XP_004710580.1</a> |
| PREDICTED: LOW QUALITY PROTEIN: multiple epidermal growth                            | 49.8 | 49.8 | 100% | 1e-05 | 100% | <a href="#">gij562824919 XP_006142201.1</a> |
| <a href="#">PREDICTED: multiple epidermal growth factor-like domains protein</a>     | 49.8 | 49.8 | 100% | 1e-05 | 100% | <a href="#">gij505854790 XP_004620816.1</a> |
| <a href="#">PREDICTED: multiple epidermal growth factor-like domains protein</a>     | 49.8 | 49.8 | 100% | 1e-05 | 100% | <a href="#">gij554585066 XP_005883977.1</a> |
| <a href="#">PREDICTED: multiple epidermal growth factor-like domains protein</a>     | 49.8 | 49.8 | 100% | 1e-05 | 100% | <a href="#">gij471414659 XP_004388865.1</a> |
| <a href="#">PREDICTED: multiple epidermal growth factor-like domains protein</a>     | 49.8 | 49.8 | 100% | 1e-05 | 100% | <a href="#">gij584082657 XP_006761144.1</a> |
| <a href="#">PREDICTED: multiple epidermal growth factor-like domains protein</a>     | 49.8 | 49.8 | 100% | 1e-05 | 100% | <a href="#">gij625264390 XP_007623649.1</a> |
| <a href="#">PREDICTED: multiple epidermal growth factor-like domains protein</a>     | 49.8 | 49.8 | 100% | 1e-05 | 100% | <a href="#">gij514450989 XP_005001354.1</a> |
| PREDICTED: LOW QUALITY PROTEIN: multiple epidermal growth                            | 49.8 | 49.8 | 100% | 1e-05 | 100% | <a href="#">gij470619649 XP_004318216.1</a> |
| <a href="#">PREDICTED: multiple epidermal growth factor-like domains protein</a>     | 49.8 | 49.8 | 100% | 1e-05 | 100% | <a href="#">gij558192196 XP_006103655.1</a> |
| <a href="#">PREDICTED: multiple epidermal growth factor-like domains protein</a>     | 49.8 | 49.8 | 100% | 1e-05 | 100% | <a href="#">gij533199656 XP_005412420.1</a> |
| <a href="#">PREDICTED: multiple epidermal growth factor-like domains protein</a>     | 49.8 | 49.8 | 100% | 1e-05 | 100% | <a href="#">gij532105233 XP_005338206.1</a> |
| <a href="#">PREDICTED: multiple epidermal growth factor-like domains protein</a>     | 49.8 | 49.8 | 100% | 1e-05 | 100% | <a href="#">gij524974566 XP_005087119.1</a> |
| PREDICTED: LOW QUALITY PROTEIN: multiple epidermal growth                            | 49.8 | 49.8 | 100% | 1e-05 | 100% | <a href="#">gij731460637 XP_010585188.1</a> |
| PREDICTED: LOW QUALITY PROTEIN: multiple epidermal growth                            | 49.8 | 49.8 | 100% | 1e-05 | 100% | <a href="#">gij301777173 XP_002924008.1</a> |
| <a href="#">PREDICTED: multiple EGF-like-domains 8 isoform X3 [Sus scrofa]</a>       | 49.8 | 49.8 | 100% | 1e-05 | 100% | <a href="#">gij545831091 XP_005655932.1</a> |
| <a href="#">Multiple epidermal growth factor-like domains protein 8 [Fukomys d</a>   | 49.8 | 49.8 | 100% | 1e-05 | 100% | <a href="#">gij676279706 KFO33644.1</a>     |
| <a href="#">hypothetical protein EGK_10681 [Macaca mulatta]</a>                      | 49.8 | 49.8 | 100% | 1e-05 | 100% | <a href="#">gij355703601 EHH30092.1</a>     |
| <a href="#">PREDICTED: multiple epidermal growth factor-like domains protein</a>     | 49.8 | 49.8 | 100% | 1e-05 | 100% | <a href="#">gij507573586 XP_004670378.1</a> |
| PREDICTED: LOW QUALITY PROTEIN: multiple epidermal growth                            | 49.8 | 49.8 | 100% | 1e-05 | 100% | <a href="#">gij548504796 XP_005692637.1</a> |
| <a href="#">PREDICTED: multiple epidermal growth factor-like domains protein</a>     | 49.8 | 49.8 | 100% | 1e-05 | 100% | <a href="#">gij602693338 XP_007458757.1</a> |
| <a href="#">hypothetical protein EGM_09795 [Macaca fascicularis]</a>                 | 49.8 | 49.8 | 100% | 1e-05 | 100% | <a href="#">gij355755890 EHH59637.1</a>     |
| <a href="#">multiple epidermal growth factor-like domains protein 8 isoform 2 pr</a> | 49.8 | 49.8 | 100% | 1e-05 | 100% | <a href="#">gij145701025 NP_001401.2</a>    |
| <a href="#">PREDICTED: multiple epidermal growth factor-like domains protein</a>     | 49.8 | 49.8 | 100% | 1e-05 | 100% | <a href="#">gij725605476 XP_010329367.1</a> |
| <a href="#">PREDICTED: multiple epidermal growth factor-like domains protein</a>     | 49.8 | 49.8 | 100% | 1e-05 | 100% | <a href="#">gij586519074 XP_006903917.1</a> |
| <a href="#">MEGF8 [Homo sapiens]</a>                                                 | 49.8 | 49.8 | 100% | 1e-05 | 100% | <a href="#">gij58801254 BAA32469.2</a>      |
| <a href="#">PREDICTED: multiple epidermal growth factor-like domains protein</a>     | 49.8 | 49.8 | 100% | 1e-05 | 100% | <a href="#">gij694975350 XP_009433968.1</a> |
| <a href="#">PREDICTED: multiple epidermal growth factor-like domains protein</a>     | 49.8 | 49.8 | 100% | 1e-05 | 100% | <a href="#">gij617646624 XP_007532999.1</a> |
| <a href="#">PREDICTED: multiple epidermal growth factor-like domains protein</a>     | 49.8 | 49.8 | 100% | 1e-05 | 100% | <a href="#">gij564326450 XP_006228426.1</a> |
| <a href="#">PREDICTED: multiple epidermal growth factor-like domains protein</a>     | 49.8 | 49.8 | 100% | 1e-05 | 100% | <a href="#">gij513023671 XP_004873069.1</a> |
| <a href="#">PREDICTED: multiple epidermal growth factor-like domains protein</a>     | 49.8 | 49.8 | 100% | 1e-05 | 100% | <a href="#">gij512838897 XP_004884072.1</a> |
| <a href="#">PREDICTED: multiple epidermal growth factor-like domains protein</a>     | 49.8 | 49.8 | 100% | 1e-05 | 100% | <a href="#">gij504177813 XP_004598048.1</a> |
| <a href="#">PREDICTED: multiple epidermal growth factor-like domains protein</a>     | 49.8 | 49.8 | 100% | 1e-05 | 100% | <a href="#">gij348557558 XP_003464586.1</a> |
| PREDICTED: LOW QUALITY PROTEIN: multiple epidermal growth                            | 49.8 | 49.8 | 100% | 1e-05 | 100% | <a href="#">gij731214348 XP_010621622.1</a> |
| <a href="#">PREDICTED: multiple epidermal growth factor-like domains protein</a>     | 49.8 | 49.8 | 100% | 1e-05 | 100% | <a href="#">gij667255277 XP_008565470.1</a> |
| <a href="#">RecName: Full=Multiple epidermal growth factor-like domains prote</a>    | 49.8 | 49.8 | 100% | 1e-05 | 100% | <a href="#">gij218511692 Q9QYP0.2</a>       |
| <a href="#">PREDICTED: multiple epidermal growth factor-like domains protein</a>     | 49.8 | 49.8 | 100% | 1e-05 | 100% | <a href="#">gij685608720 XP_009192883.1</a> |
| <a href="#">PREDICTED: multiple epidermal growth factor-like domains protein</a>     | 49.8 | 49.8 | 100% | 1e-05 | 100% | <a href="#">gij675714711 XP_008962404.1</a> |
| <a href="#">PREDICTED: multiple epidermal growth factor-like domains protein</a>     | 49.8 | 49.8 | 100% | 1e-05 | 100% | <a href="#">gij674074680 XP_008844638.1</a> |
| <a href="#">PREDICTED: multiple epidermal growth factor-like domains protein</a>     | 49.8 | 49.8 | 100% | 1e-05 | 100% | <a href="#">gij641735729 XP_008158439.1</a> |
| <a href="#">PREDICTED: multiple epidermal growth factor-like domains protein</a>     | 49.8 | 49.8 | 100% | 1e-05 | 100% | <a href="#">gij635039362 XP_007995186.1</a> |
| <a href="#">multiple epidermal growth factor-like domains protein 8 precursor [A</a> | 49.8 | 49.8 | 100% | 1e-05 | 100% | <a href="#">gij237874245 NP_001153872.1</a> |
| <a href="#">PREDICTED: multiple epidermal growth factor-like domains protein</a>     | 49.8 | 49.8 | 100% | 1e-05 | 100% | <a href="#">gij594629019 XP_007168092.1</a> |
| <a href="#">PREDICTED: multiple epidermal growth factor-like domains protein</a>     | 49.8 | 49.8 | 100% | 1e-05 | 100% | <a href="#">gij593711373 XP_007102247.1</a> |

|                                                                                      |      |      |      |       |      |                                             |
|--------------------------------------------------------------------------------------|------|------|------|-------|------|---------------------------------------------|
| <a href="#">PREDICTED: multiple epidermal growth factor-like domains protein</a>     | 49.8 | 49.8 | 100% | 1e-05 | 100% | <a href="#">gil589950942 XP_006988122.1</a> |
| <a href="#">PREDICTED: LOW QUALITY PROTEIN: multiple EGF-like-domain</a>             | 49.8 | 49.8 | 100% | 1e-05 | 100% | <a href="#">gil587014011 XP_006941287.1</a> |
| <a href="#">PREDICTED: multiple epidermal growth factor-like domains protein</a>     | 49.8 | 49.8 | 100% | 1e-05 | 100% | <a href="#">gil558192191 XP_006103654.1</a> |
| <a href="#">PREDICTED: multiple EGF-like-domains 8 isoform X1 [Sus scrofa]</a>       | 49.8 | 49.8 | 100% | 1e-05 | 100% | <a href="#">gil545831085 XP_005655930.1</a> |
| <a href="#">PREDICTED: multiple epidermal growth factor-like domains protein</a>     | 49.8 | 49.8 | 100% | 1e-05 | 100% | <a href="#">gil533199654 XP_005412419.1</a> |
| <a href="#">PREDICTED: multiple epidermal growth factor-like domains protein</a>     | 49.8 | 49.8 | 100% | 1e-05 | 100% | <a href="#">gil532105231 XP_005338205.1</a> |
| <a href="#">PREDICTED: multiple epidermal growth factor-like domains protein</a>     | 49.8 | 49.8 | 100% | 1e-05 | 100% | <a href="#">gil532036646 XP_005361208.1</a> |
| <a href="#">PREDICTED: multiple epidermal growth factor-like domains protein</a>     | 49.8 | 49.8 | 100% | 1e-05 | 100% | <a href="#">gil524974564 XP_005087118.1</a> |
| <a href="#">PREDICTED: multiple epidermal growth factor-like domains protein</a>     | 49.8 | 49.8 | 100% | 1e-05 | 100% | <a href="#">gil466016225 XP_004271289.1</a> |
| <a href="#">PREDICTED: multiple epidermal growth factor-like domains protein</a>     | 49.8 | 49.8 | 100% | 1e-05 | 100% | <a href="#">gil426388952 XP_004060891.1</a> |
| <a href="#">multiple epidermal growth factor-like domains protein 8 precursor [F</a> | 49.8 | 49.8 | 100% | 1e-05 | 100% | <a href="#">gil472824971 NP_446080.1</a>    |
| <a href="#">PREDICTED: multiple epidermal growth factor-like domains protein</a>     | 49.8 | 49.8 | 100% | 1e-05 | 100% | <a href="#">gil589950940 XP_006988121.1</a> |
| <a href="#">Multiple epidermal growth factor-like domains 8 [Pteropus alecto]</a>    | 49.8 | 49.8 | 100% | 1e-05 | 100% | <a href="#">gil431922711 ELK19616.1</a>     |
| <a href="#">PREDICTED: LOW QUALITY PROTEIN: multiple epidermal growth</a>            | 49.8 | 49.8 | 100% | 1e-05 | 100% | <a href="#">gil655889437 XP_008247909.1</a> |
| <a href="#">PREDICTED: multiple epidermal growth factor-like domains protein</a>     | 49.8 | 49.8 | 100% | 1e-05 | 100% | <a href="#">gil640808207 XP_008060623.1</a> |
| <a href="#">PREDICTED: LOW QUALITY PROTEIN: multiple epidermal growth</a>            | 49.8 | 49.8 | 100% | 1e-05 | 100% | <a href="#">gil511896543 XP_004767868.1</a> |
| <a href="#">PREDICTED: LOW QUALITY PROTEIN: multiple epidermal growth</a>            | 49.8 | 49.8 | 100% | 1e-05 | 100% | <a href="#">gil664745816 XP_008530249.1</a> |
| <a href="#">Multiple epidermal growth factor-like domains 8 [Heterocephalus gl</a>   | 49.8 | 49.8 | 100% | 1e-05 | 100% | <a href="#">gil351699609 EHB02528.1</a>     |
| <a href="#">PREDICTED: LOW QUALITY PROTEIN: multiple epidermal growth</a>            | 49.8 | 49.8 | 100% | 1e-05 | 100% | <a href="#">gil586482113 XP_006871573.1</a> |
| <a href="#">PREDICTED: multiple epidermal growth factor-like domains protein</a>     | 49.8 | 49.8 | 100% | 1e-05 | 100% | <a href="#">gil507980664 XP_004693985.1</a> |
| <a href="#">PREDICTED: multiple epidermal growth factor-like domains protein</a>     | 49.8 | 49.8 | 100% | 1e-05 | 100% | <a href="#">gil585714714 XP_006901022.1</a> |
| <a href="#">PREDICTED: multiple epidermal growth factor-like domains protein</a>     | 49.8 | 49.8 | 100% | 1e-05 | 100% | <a href="#">gil478532502 XP_004440401.1</a> |
| <a href="#">PREDICTED: multiple epidermal growth factor-like domains protein</a>     | 49.8 | 49.8 | 100% | 1e-05 | 100% | <a href="#">gil694975358 XP_003953558.2</a> |
| <a href="#">PREDICTED: LOW QUALITY PROTEIN: multiple epidermal growth</a>            | 49.8 | 49.8 | 100% | 1e-05 | 100% | <a href="#">gil555994565 XP_005909034.1</a> |
| <a href="#">PREDICTED: LOW QUALITY PROTEIN: multiple epidermal growth</a>            | 49.8 | 49.8 | 100% | 1e-05 | 100% | <a href="#">gil686759192 XP_009230946.1</a> |
| <a href="#">PREDICTED: multiple epidermal growth factor-like domains protein</a>     | 49.8 | 49.8 | 100% | 1e-05 | 100% | <a href="#">gil675714722 XP_003811809.2</a> |
| <a href="#">PREDICTED: LOW QUALITY PROTEIN: multiple epidermal growth</a>            | 49.8 | 49.8 | 100% | 1e-05 | 100% | <a href="#">gil544511660 XP_005589436.1</a> |

## Alignments

Download [GenPept](#) [Graphics](#)

Next Previous Descriptions

multiple epidermal growth factor-like domain protein 8, partial [*Cricetulus griseus*]

Sequence ID: [gil537058530|gb|ERE28575.1](#) Length: 639 Number of Matches: 1

**Related Information**

Range 1: 365 to 380 [GenPept](#) [Graphics](#)

Next Match Previous Match

| Score          | Expect | Identities  | Positives   | Gaps     |
|----------------|--------|-------------|-------------|----------|
| 49.8 bits(110) | 1e-05  | 16/16(100%) | 16/16(100%) | 0/16(0%) |

Query 1 RALLTNVSSVALGSRR 16  
 RALLTNVSSVALGSRR  
 Sbjct 365 RALLTNVSSVALGSRR 380

Download [GenPept](#) [Graphics](#)

Next Previous Descriptions

EGF-like-domain, multiple 4 [*Rattus norvegicus*]

Sequence ID: [gil149056599|gb|EDM08030.1](#) Length: 1221 Number of Matches: 1

**Related Information**

Range 1: 807 to 822 [GenPept](#) [Graphics](#)

Next Match Previous Match

| Score          | Expect | Identities  | Positives   | Gaps     |
|----------------|--------|-------------|-------------|----------|
| 49.8 bits(110) | 1e-05  | 16/16(100%) | 16/16(100%) | 0/16(0%) |

Query 1 RALLTNVSSVALGSRR 16

[Gene](#) - associated gene details



Sbjct 807 RALLTNVSSVALGSRR  
RALLTNVSSVALGSRR 822

[Download](#) [GenPept](#) [Graphics](#)

[Next](#) [Previous](#) [Descriptions](#)

TPA: Multiple epidermal growth factor-like domains protein 8-like [Bos taurus]

Sequence ID: [gi|296477614|tpg|DAA19729.1](#) Length: 1397 Number of Matches: 1

Range 1: 235 to 250 [GenPept](#) [Graphics](#)

[Next Match](#) [Previous Match](#)

| Score          | Expect | Identities  | Positives   | Gaps     |
|----------------|--------|-------------|-------------|----------|
| 49.8 bits(110) | 1e-05  | 16/16(100%) | 16/16(100%) | 0/16(0%) |

Query 1 RALLTNVSSVALGSRR 16  
RALLTNVSSVALGSRR  
Sbjct 235 RALLTNVSSVALGSRR 250

**Related Information**

[Gene](#) - associated gene details

[Download](#) [GenPept](#) [Graphics](#)

[Next](#) [Previous](#) [Descriptions](#)

PREDICTED: multiple epidermal growth factor-like domains protein 8, partial [Sarcophilus harrisii]

Sequence ID: [gi|395529545|ref|XP\\_003766871.1](#) Length: 1566 Number of Matches: 1

Range 1: 230 to 245 [GenPept](#) [Graphics](#)

[Next Match](#) [Previous Match](#)

| Score          | Expect | Identities  | Positives   | Gaps     |
|----------------|--------|-------------|-------------|----------|
| 49.8 bits(110) | 1e-05  | 16/16(100%) | 16/16(100%) | 0/16(0%) |

Query 1 RALLTNVSSVALGSRR 16  
RALLTNVSSVALGSRR  
Sbjct 230 RALLTNVSSVALGSRR 245

**Related Information**

[Gene](#) - associated gene details

[Map Viewer](#) - aligned genomic context

[Download](#) [GenPept](#) [Graphics](#)

[Next](#) [Previous](#) [Descriptions](#)

EGF-like-domain, multiple 4, isoform CRA\_b [Homo sapiens]

Sequence ID: [gi|119577537|gb|EAW57133.1](#) Length: 2091 Number of Matches: 1

Range 1: 512 to 527 [GenPept](#) [Graphics](#)

[Next Match](#) [Previous Match](#)

| Score          | Expect | Identities  | Positives   | Gaps     |
|----------------|--------|-------------|-------------|----------|
| 49.8 bits(110) | 1e-05  | 16/16(100%) | 16/16(100%) | 0/16(0%) |

Query 1 RALLTNVSSVALGSRR 16  
RALLTNVSSVALGSRR  
Sbjct 512 RALLTNVSSVALGSRR 527

**Related Information**

[Gene](#) - associated gene details

BLAST is a registered trademark of the National Library of Medicine.



NCBI/ BLAST/ blastp suite/ Formatting Results - BVJ667M501R

Your search parameters were adjusted to search for a short input sequence.

Edit and Resubmit Save Search Strategies Formatting options Download YouTube How to read this page Blast report description

MMRN1\_KFNPGAESVVLSDSTLKF\_Mod

RID BVJ667M501R (Expires on 01-21 10:17 am)

Query ID lcl|359957
Description None
Molecule type amino acid
Query Length 18

Database Name nr
Description All non-redundant GenBank CDS translations+PDB+SwissProt+PIR+PRF excluding environmental samples from WGS projects
Program BLASTP 2.2.30+ Citation

Other reports: Search Summary Taxonomy reports Distance tree of results Multiple alignment

Graphic Summary

Show Conserved Domains

No putative conserved domains have been detected

Distribution of 100 Blast Hits on the Query Sequence

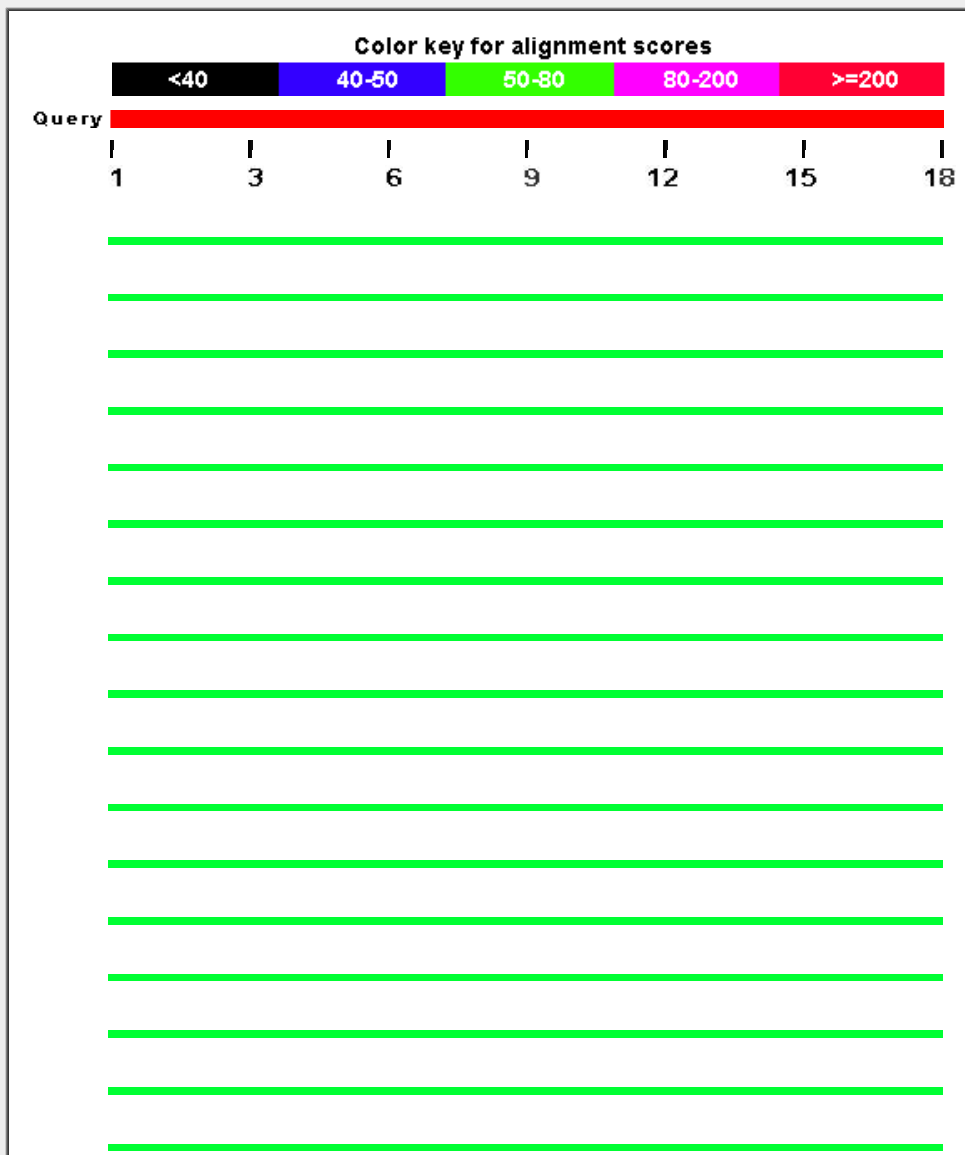

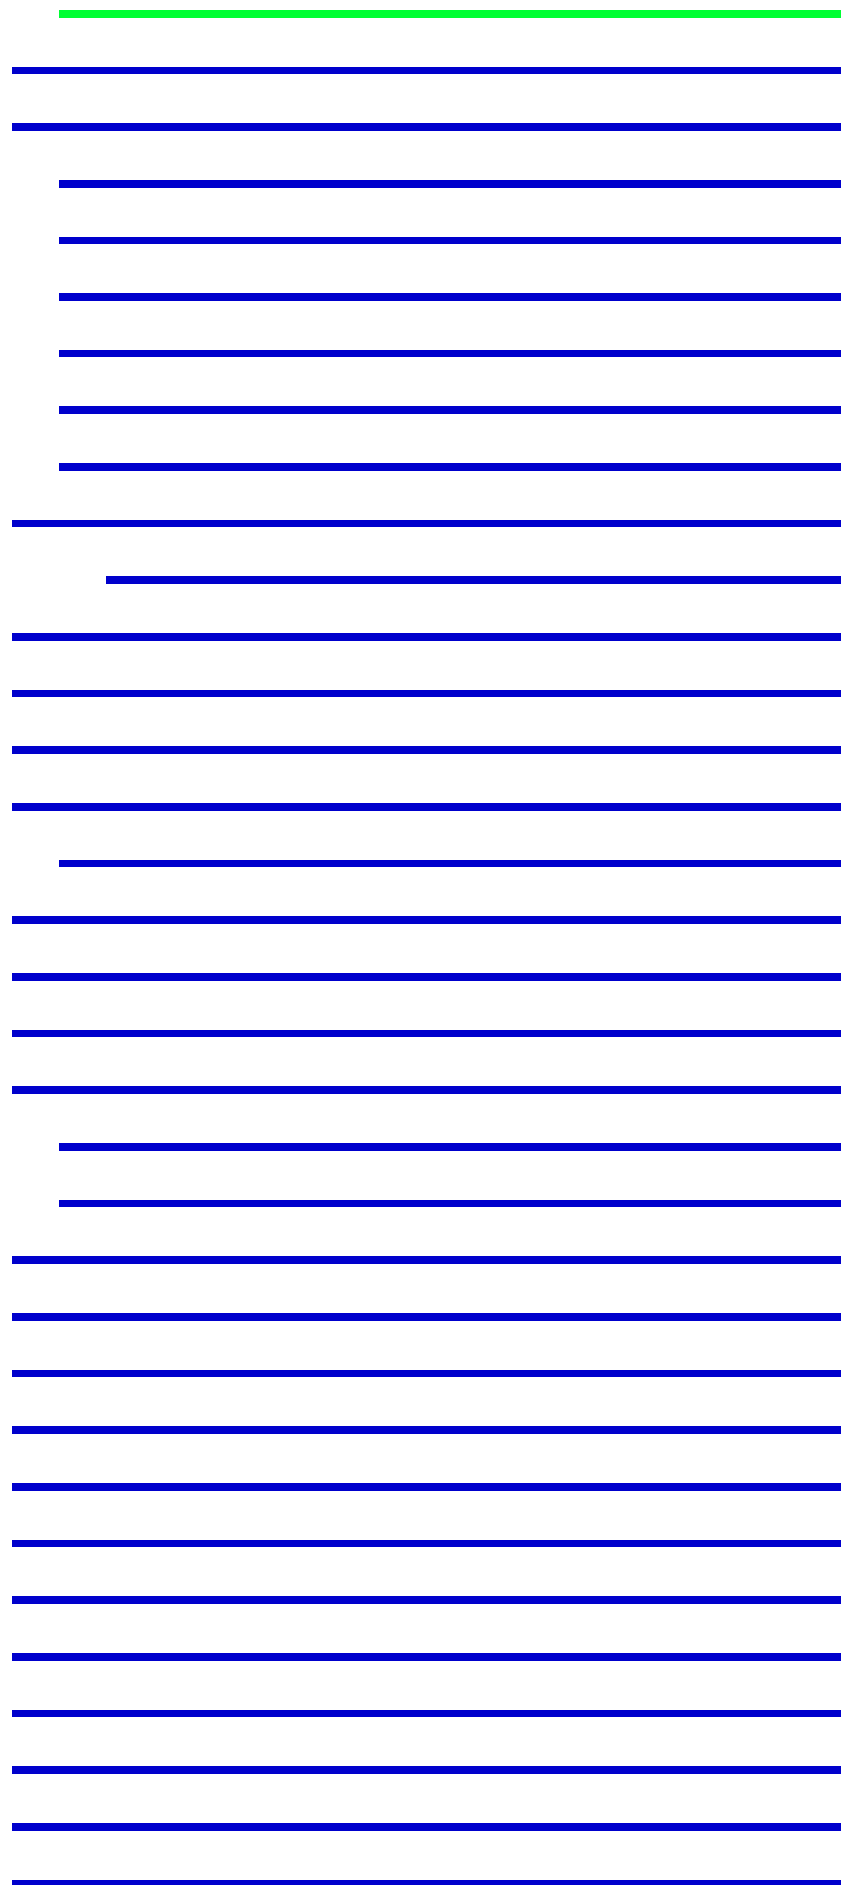

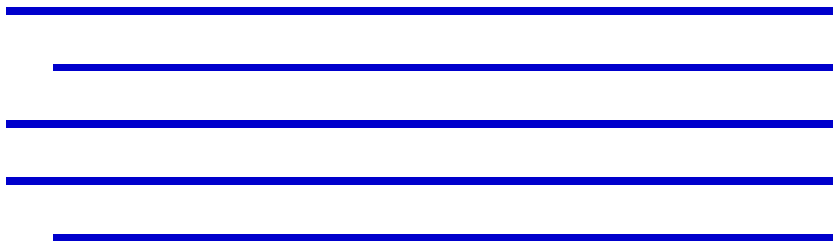

**Descriptions**

**Sequences producing significant alignments:**

Select: [All](#) [None](#) Selected:0

[Alignments](#)
[Download](#)
[GenPept](#)
[Graphics](#)
[Distance tree of results](#)
[Multiple alignment](#)

| Description                                                                 | Max score | Total score | Query cover | E value | Ident | Accession                      |
|-----------------------------------------------------------------------------|-----------|-------------|-------------|---------|-------|--------------------------------|
| <a href="#">multimerin 1, isoform CRA_a [Homo sapiens]</a>                  | 55.4      | 55.4        | 100%        | 2e-07   | 94%   | <a href="#">EAX06037.1</a>     |
| <a href="#">unnamed protein product [Homo sapiens]</a>                      | 55.4      | 55.4        | 100%        | 2e-07   | 94%   | <a href="#">BAC86201.1</a>     |
| <a href="#">PREDICTED: multimerin-1-like [Galeopterus variegatus]</a>       | 55.4      | 55.4        | 100%        | 2e-07   | 94%   | <a href="#">XP_008591205.1</a> |
| <a href="#">PREDICTED: multimerin-1 isoform X2 [Pan troglodytes]</a>        | 55.4      | 55.4        | 100%        | 2e-07   | 94%   | <a href="#">XP_009446302.1</a> |
| <a href="#">PREDICTED: multimerin-1 isoform X1 [Homo sapiens]</a>           | 55.4      | 55.4        | 100%        | 2e-07   | 94%   | <a href="#">XP_005262913.1</a> |
| <a href="#">PREDICTED: LOW QUALITY PROTEIN: multimerin-1 [Pongo abelii]</a> | 55.4      | 55.4        | 100%        | 2e-07   | 94%   | <a href="#">XP_002815014.1</a> |
| <a href="#">prepromultimerin [Homo sapiens]</a>                             | 55.4      | 55.4        | 100%        | 2e-07   | 94%   | <a href="#">AAC52065.1</a>     |
| <a href="#">multimerin-1 precursor [Homo sapiens]</a>                       | 55.4      | 55.4        | 100%        | 2e-07   | 94%   | <a href="#">NP_031377.2</a>    |
| <a href="#">PREDICTED: multimerin-1 [Gorilla gorilla gorilla]</a>           | 55.4      | 55.4        | 100%        | 2e-07   | 94%   | <a href="#">XP_004039176.1</a> |
| <a href="#">Multimerin 1 [Homo sapiens]</a>                                 | 55.4      | 55.4        | 100%        | 2e-07   | 94%   | <a href="#">AAH63848.1</a>     |
| <a href="#">PREDICTED: multimerin-1 isoform 1 [Nomascus leucogenys]</a>     | 55.4      | 55.4        | 100%        | 2e-07   | 94%   | <a href="#">XP_003257586.1</a> |
| <a href="#">PREDICTED: multimerin-1 isoform X1 [Pan troglodytes]</a>        | 55.4      | 55.4        | 100%        | 2e-07   | 94%   | <a href="#">XP_517342.2</a>    |
| <a href="#">Multimerin-1 [Myotis brandtii]</a>                              | 52.0      | 52.0        | 100%        | 3e-06   | 89%   | <a href="#">EPQ17910.1</a>     |
| <a href="#">PREDICTED: multimerin-1 [Myotis lucifugus]</a>                  | 52.0      | 52.0        | 100%        | 3e-06   | 89%   | <a href="#">XP_006084681.1</a> |
| <a href="#">PREDICTED: multimerin-1 [Myotis brandtii]</a>                   | 52.0      | 52.0        | 100%        | 3e-06   | 89%   | <a href="#">XP_005882685.1</a> |
| <a href="#">PREDICTED: multimerin-1 [Rhinopithecus roxellana]</a>           | 52.0      | 52.0        | 100%        | 3e-06   | 89%   | <a href="#">XP_010374576.1</a> |
| <a href="#">PREDICTED: multimerin-1 [Saimiri boliviensis boliviensis]</a>   | 51.5      | 51.5        | 100%        | 4e-06   | 89%   | <a href="#">XP_010333103.1</a> |
| <a href="#">PREDICTED: multimerin-1 [Tarsius syrichta]</a>                  | 50.3      | 50.3        | 94%         | 1e-05   | 88%   | <a href="#">XP_008069714.1</a> |
| <a href="#">PREDICTED: multimerin-1 [Myotis davidii]</a>                    | 49.4      | 49.4        | 100%        | 2e-05   | 83%   | <a href="#">XP_006768249.1</a> |
| <a href="#">PREDICTED: multimerin-1 [Pan paniscus]</a>                      | 49.4      | 49.4        | 100%        | 2e-05   | 89%   | <a href="#">XP_003829944.1</a> |
| <a href="#">PREDICTED: multimerin-1 isoform X2 [Chlorocebus sabaeus]</a>    | 49.0      | 49.0        | 94%         | 3e-05   | 88%   | <a href="#">XP_007997465.1</a> |
| <a href="#">PREDICTED: multimerin-1 isoform X2 [Macaca fascicularis]</a>    | 49.0      | 49.0        | 94%         | 3e-05   | 88%   | <a href="#">XP_005555483.1</a> |
| <a href="#">hypothetical protein EGM_14545 [Macaca fascicularis]</a>        | 49.0      | 49.0        | 94%         | 3e-05   | 88%   | <a href="#">EHH53841.1</a>     |
| <a href="#">hypothetical protein EGK_15920 [Macaca mulatta]</a>             | 49.0      | 49.0        | 94%         | 3e-05   | 88%   | <a href="#">EHH26039.1</a>     |
| <a href="#">PREDICTED: multimerin-1 isoform X1 [Macaca fascicularis]</a>    | 49.0      | 49.0        | 94%         | 3e-05   | 88%   | <a href="#">XP_005555482.1</a> |
| <a href="#">PREDICTED: multimerin-1 isoform X1 [Chlorocebus sabaeus]</a>    | 49.0      | 49.0        | 94%         | 3e-05   | 88%   | <a href="#">XP_007997463.1</a> |
| <a href="#">PREDICTED: multimerin-1 [Chrysochloris asiatica]</a>            | 48.6      | 48.6        | 100%        | 4e-05   | 83%   | <a href="#">XP_006873035.1</a> |
| <a href="#">PREDICTED: multimerin-1 [Elephantulus edwardii]</a>             | 48.6      | 48.6        | 88%         | 4e-05   | 94%   | <a href="#">XP_006894545.1</a> |
| <a href="#">PREDICTED: multimerin-1 [Callithrix jacchus]</a>                | 48.1      | 48.1        | 100%        | 6e-05   | 83%   | <a href="#">XP_008991221.1</a> |

|                                                                                |      |      |      |       |     |                                |
|--------------------------------------------------------------------------------|------|------|------|-------|-----|--------------------------------|
| <a href="#">PREDICTED: multimerin-1 [Echinops telfairi]</a>                    | 47.3 | 47.3 | 100% | 1e-04 | 83% | <a href="#">XP_004703488.1</a> |
| <a href="#">PREDICTED: multimerin-1 [Oryctolagus cuniculus]</a>                | 47.3 | 47.3 | 100% | 1e-04 | 83% | <a href="#">XP_008265817.1</a> |
| <a href="#">PREDICTED: multimerin-1 [Otolemur garnettii]</a>                   | 46.0 | 46.0 | 100% | 3e-04 | 78% | <a href="#">XP_003790061.1</a> |
| <a href="#">PREDICTED: multimerin-1 [Trichechus manatus latirostris]</a>       | 45.6 | 45.6 | 94%  | 4e-04 | 82% | <a href="#">XP_004389070.1</a> |
| <a href="#">Multimerin-1 [Pteropus alecto]</a>                                 | 45.6 | 45.6 | 100% | 4e-04 | 83% | <a href="#">ELK13694.1</a>     |
| <a href="#">PREDICTED: LOW QUALITY PROTEIN: multimerin-1 [Felis catus]</a>     | 45.6 | 45.6 | 100% | 4e-04 | 83% | <a href="#">XP_006931027.1</a> |
| <a href="#">PREDICTED: multimerin-1 [Pteropus alecto]</a>                      | 45.6 | 45.6 | 100% | 4e-04 | 83% | <a href="#">XP_006910794.1</a> |
| <a href="#">PREDICTED: multimerin-1 [Ochotona princeps]</a>                    | 45.2 | 45.2 | 100% | 6e-04 | 78% | <a href="#">XP_004590628.1</a> |
| <a href="#">PREDICTED: multimerin-1 [Eptesicus fuscus]</a>                     | 45.2 | 45.2 | 94%  | 6e-04 | 88% | <a href="#">XP_008141774.1</a> |
| <a href="#">PREDICTED: multimerin-1 [Papio anubis]</a>                         | 44.8 | 44.8 | 94%  | 8e-04 | 82% | <a href="#">XP_009205449.1</a> |
| <a href="#">PREDICTED: multimerin-1 isoform X2 [Bos mutus]</a>                 | 44.3 | 44.3 | 100% | 0.001 | 78% | <a href="#">XP_005904519.1</a> |
| <a href="#">multimerin-1 precursor [Bos taurus]</a>                            | 44.3 | 44.3 | 100% | 0.001 | 78% | <a href="#">NP_001095970.1</a> |
| <a href="#">PREDICTED: multimerin-1 isoform X3 [Bubalus bubalis]</a>           | 44.3 | 44.3 | 100% | 0.001 | 78% | <a href="#">XP_006066338.1</a> |
| <a href="#">PREDICTED: multimerin-1 [Pantholops hodgsonii]</a>                 | 44.3 | 44.3 | 100% | 0.001 | 78% | <a href="#">XP_005970399.1</a> |
| <a href="#">PREDICTED: multimerin-1 isoform X2 [Capra hircus]</a>              | 44.3 | 44.3 | 100% | 0.001 | 78% | <a href="#">XP_005681484.1</a> |
| <a href="#">PREDICTED: multimerin-1 isoform X1 [Bos mutus]</a>                 | 44.3 | 44.3 | 100% | 0.001 | 78% | <a href="#">XP_005904518.1</a> |
| <a href="#">PREDICTED: multimerin-1 [Ovis aries]</a>                           | 44.3 | 44.3 | 100% | 0.001 | 78% | <a href="#">XP_004009754.1</a> |
| <a href="#">PREDICTED: multimerin-1 isoform X2 [Bison bison bison]</a>         | 44.3 | 44.3 | 100% | 0.001 | 78% | <a href="#">XP_010858450.1</a> |
| <a href="#">PREDICTED: multimerin-1 isoform X2 [Bubalus bubalis]</a>           | 44.3 | 44.3 | 100% | 0.001 | 78% | <a href="#">XP_006066337.1</a> |
| <a href="#">PREDICTED: multimerin-1 isoform X1 [Bison bison bison]</a>         | 44.3 | 44.3 | 100% | 0.001 | 78% | <a href="#">XP_010858449.1</a> |
| <a href="#">PREDICTED: multimerin-1 isoform X1 [Bubalus bubalis]</a>           | 44.3 | 44.3 | 100% | 0.001 | 78% | <a href="#">XP_006066336.1</a> |
| <a href="#">PREDICTED: multimerin-1 isoform X1 [Capra hircus]</a>              | 44.3 | 44.3 | 100% | 0.001 | 78% | <a href="#">XP_005681483.1</a> |
| <a href="#">PREDICTED: multimerin-1 isoform X1 [Bos taurus]</a>                | 44.3 | 44.3 | 100% | 0.001 | 78% | <a href="#">XP_005207828.1</a> |
| <a href="#">PREDICTED: multimerin-1 [Orycteropus afer afer]</a>                | 43.9 | 43.9 | 94%  | 0.002 | 82% | <a href="#">XP_007952403.1</a> |
| <a href="#">PREDICTED: multimerin-1-like isoform 2 [Dasypus novemcinctus]</a>  | 43.9 | 43.9 | 100% | 0.002 | 78% | <a href="#">XP_004454437.1</a> |
| <a href="#">PREDICTED: multimerin-1-like isoform 1 [Dasypus novemcinctus]</a>  | 43.9 | 43.9 | 100% | 0.002 | 78% | <a href="#">XP_004454436.1</a> |
| <a href="#">PREDICTED: multimerin-1 isoform 2 [Macaca mulatta]</a>             | 43.9 | 43.9 | 94%  | 0.002 | 82% | <a href="#">XP_001101702.1</a> |
| <a href="#">PREDICTED: multimerin-1 [Orcinus orca]</a>                         | 43.5 | 43.5 | 94%  | 0.002 | 82% | <a href="#">XP_004277020.1</a> |
| <a href="#">PREDICTED: multimerin-1 [Lipotes vexillifer]</a>                   | 43.5 | 43.5 | 94%  | 0.002 | 82% | <a href="#">XP_007450078.1</a> |
| <a href="#">PREDICTED: multimerin-1 [Balaenoptera acutorostrata scammonii]</a> | 43.5 | 43.5 | 94%  | 0.002 | 82% | <a href="#">XP_007184155.1</a> |
| <a href="#">PREDICTED: multimerin-1 [Ceratotherium simum simum]</a>            | 43.5 | 43.5 | 100% | 0.002 | 83% | <a href="#">XP_004431014.1</a> |
| <a href="#">PREDICTED: multimerin-1 isoform X1 [Sus scrofa]</a>                | 43.5 | 43.5 | 94%  | 0.002 | 82% | <a href="#">XP_003129371.2</a> |
| <a href="#">PREDICTED: multimerin-1 isoform X2 [Sus scrofa]</a>                | 43.5 | 43.5 | 94%  | 0.002 | 82% | <a href="#">XP_005667049.1</a> |
| <a href="#">multimerin-1 isoform 2 [Camelus ferus]</a>                         | 43.1 | 43.1 | 100% | 0.003 | 78% | <a href="#">EPY80404.1</a>     |
| <a href="#">PREDICTED: multimerin-1 isoform X3 [Mustela putorius furo]</a>     | 43.1 | 43.1 | 100% | 0.003 | 78% | <a href="#">XP_004756128.1</a> |
| <a href="#">PREDICTED: multimerin-1 isoform X1 [Mustela putorius furo]</a>     | 43.1 | 43.1 | 100% | 0.003 | 78% | <a href="#">XP_004756126.1</a> |
| <a href="#">PREDICTED: multimerin-1 [Leptonychotes weddellii]</a>              | 43.1 | 43.1 | 100% | 0.003 | 78% | <a href="#">XP_006727121.1</a> |
| <a href="#">PREDICTED: multimerin-1 [Odobenus rosmarus divergens]</a>          | 43.1 | 43.1 | 100% | 0.003 | 78% | <a href="#">XP_004391570.1</a> |
| <a href="#">PREDICTED: multimerin-1 [Camelus ferus]</a>                        | 43.1 | 43.1 | 100% | 0.003 | 78% | <a href="#">XP_006185760.1</a> |
| <a href="#">PREDICTED: multimerin-1 [Camelus dromedarius]</a>                  | 43.1 | 43.1 | 100% | 0.003 | 78% | <a href="#">XP_010998048.1</a> |
| <a href="#">PREDICTED: multimerin-1 [Camelus bactrianus]</a>                   | 43.1 | 43.1 | 100% | 0.003 | 78% | <a href="#">XP_010968268.1</a> |
| <a href="#">hypothetical protein PANDA_006107 [Ailuropoda melanoleuca]</a>     | 43.1 | 43.1 | 100% | 0.003 | 78% | <a href="#">EFB19438.1</a>     |
| <a href="#">PREDICTED: multimerin-1-like [Ailuropoda melanoleuca]</a>          | 43.1 | 43.1 | 100% | 0.003 | 78% | <a href="#">XP_002917756.1</a> |
| <a href="#">PREDICTED: multimerin-1 [Ursus maritimus]</a>                      | 43.1 | 43.1 | 100% | 0.003 | 78% | <a href="#">XP_008705370.1</a> |
| <a href="#">PREDICTED: multimerin-1 [Heterocephalus glaber]</a>                | 42.6 | 42.6 | 83%  | 0.004 | 87% | <a href="#">XP_004903189.1</a> |

|                                                                                      |      |      |      |       |     |                                |
|--------------------------------------------------------------------------------------|------|------|------|-------|-----|--------------------------------|
| <a href="#">PREDICTED: multimerin-1 [Panthera tigris altaica]</a>                    | 42.2 | 42.2 | 100% | 0.005 | 78% | <a href="#">XP_007074744.1</a> |
| <a href="#">PREDICTED: multimerin-1 [Physeter catodon]</a>                           | 40.9 | 40.9 | 94%  | 0.014 | 76% | <a href="#">XP_007105448.1</a> |
| <a href="#">PREDICTED: multimerin-1 [Ictidomys tridecemlineatus]</a>                 | 40.5 | 40.5 | 83%  | 0.019 | 87% | <a href="#">XP_005337593.1</a> |
| <a href="#">PREDICTED: multimerin-1 [Vicugna pacos]</a>                              | 40.1 | 40.1 | 94%  | 0.026 | 76% | <a href="#">XP_006210017.1</a> |
| <a href="#">PREDICTED: multimerin-1 isoform X2 [Canis lupus familiaris]</a>          | 39.7 | 39.7 | 88%  | 0.036 | 81% | <a href="#">XP_544980.2</a>    |
| <a href="#">PREDICTED: multimerin-1 isoform X3 [Canis lupus familiaris]</a>          | 39.7 | 39.7 | 88%  | 0.036 | 81% | <a href="#">XP_005639245.1</a> |
| <a href="#">Multimerin-1 [Tupaia chinensis]</a>                                      | 39.2 | 39.2 | 100% | 0.049 | 72% | <a href="#">ELW70184.1</a>     |
| <a href="#">PREDICTED: multimerin-1 [Tupaia chinensis]</a>                           | 39.2 | 39.2 | 100% | 0.049 | 72% | <a href="#">XP_006143301.1</a> |
| <a href="#">PREDICTED: multimerin-1 [Condylura cristata]</a>                         | 38.0 | 38.0 | 100% | 0.13  | 72% | <a href="#">XP_004681178.1</a> |
| <a href="#">PREDICTED: multimerin-1 [Loxodonta africana]</a>                         | 36.7 | 36.7 | 83%  | 0.32  | 80% | <a href="#">XP_003414128.1</a> |
| <a href="#">PREDICTED: multimerin-1 isoform X1 [Cavia porcellus]</a>                 | 36.3 | 36.3 | 94%  | 0.44  | 71% | <a href="#">XP_003467522.1</a> |
| <a href="#">PREDICTED: multimerin-1 isoform X2 [Cavia porcellus]</a>                 | 36.3 | 36.3 | 94%  | 0.44  | 71% | <a href="#">XP_005002721.1</a> |
| <a href="#">PREDICTED: multimerin-1 isoform X2 [Chinchilla lanigera]</a>             | 36.3 | 36.3 | 94%  | 0.44  | 59% | <a href="#">XP_005374311.1</a> |
| <a href="#">PREDICTED: multimerin-1 isoform X1 [Chinchilla lanigera]</a>             | 36.3 | 36.3 | 94%  | 0.44  | 59% | <a href="#">XP_005374310.1</a> |
| <a href="#">PREDICTED: multimerin-1-like [Peromyscus maniculatus bairdii]</a>        | 35.8 | 35.8 | 83%  | 0.60  | 73% | <a href="#">XP_006992024.1</a> |
| <a href="#">PREDICTED: multimerin-1-like [Octodon degus]</a>                         | 35.4 | 35.4 | 77%  | 0.81  | 79% | <a href="#">XP_004648455.1</a> |
| <a href="#">PREDICTED: multimerin-1 [Nannospalax galili]</a>                         | 33.7 | 33.7 | 83%  | 2.8   | 73% | <a href="#">XP_008842849.1</a> |
| <a href="#">PREDICTED: multimerin-1 [Jaculus jaculus]</a>                            | 33.7 | 33.7 | 77%  | 2.8   | 71% | <a href="#">XP_004665470.1</a> |
| <a href="#">PREDICTED: multimerin-1 [Equus caballus]</a>                             | 33.7 | 33.7 | 94%  | 2.8   | 71% | <a href="#">XP_001497011.1</a> |
| <a href="#">PREDICTED: multimerin-1 [Equus przewalskii]</a>                          | 33.7 | 33.7 | 94%  | 2.8   | 71% | <a href="#">XP_008512609.1</a> |
| <a href="#">hypothetical protein [Phaeobacter daeponensis]</a>                       | 32.5 | 32.5 | 72%  | 6.6   | 72% | <a href="#">WP_027246211.1</a> |
| <a href="#">hypothetical protein [Phaeobacter daeponensis]</a>                       | 32.5 | 32.5 | 72%  | 6.6   | 72% | <a href="#">WP_027246178.1</a> |
| <a href="#">hypothetical protein GLOTRDRAFT_139696 [Gloeophyllum trabeum ATCC 11</a> | 32.0 | 32.0 | 88%  | 9.5   | 69% | <a href="#">XP_007867799.1</a> |
| <a href="#">unnamed protein product [Oncorhynchus mykiss]</a>                        | 31.6 | 31.6 | 61%  | 12    | 91% | <a href="#">CDQ60969.1</a>     |
| <a href="#">PREDICTED: protein phosphatase PTC7 homolog [Esox lucius]</a>            | 31.6 | 31.6 | 61%  | 12    | 91% | <a href="#">XP_010875817.1</a> |
| <a href="#">PREDICTED: protein phosphatase PTC7 homolog [Notothenia coriiceps]</a>   | 31.6 | 31.6 | 61%  | 12    | 91% | <a href="#">XP_010778629.1</a> |

## Alignments

[Download](#) [GenPept](#) [Graphics](#) [Next](#) [Previous](#) [Descriptions](#)

multimerin 1, isoform CRA\_a [Homo sapiens]

Sequence ID: [gb|EAX06037.1|](#) Length: 531 Number of Matches: 1

Range 1: 90 to 107 [GenPept](#) [Graphics](#) [Next Match](#) [Previous Match](#)

| Score          | Expect | Identities | Positives   | Gaps     |
|----------------|--------|------------|-------------|----------|
| 55.4 bits(123) | 2e-07  | 17/18(94%) | 18/18(100%) | 0/18(0%) |

Query 1 KFNPGAESVVLSDSTLKF 18  
KFNPGAESVVLSTLKF  
Sbjct 90 KFNPGAESVVLSTLKF 107

### Related Information

[Gene](#) - associated gene details

[Download](#) [GenPept](#) [Graphics](#) [Next](#) [Previous](#) [Descriptions](#)

unnamed protein product [Homo sapiens]

Sequence ID: [dbj|BAC86201.1|](#) Length: 531 Number of Matches: 1

Range 1: 90 to 107 [GenPept](#) [Graphics](#) [Next Match](#) [Previous Match](#)

| Score          | Expect | Identities | Positives   | Gaps     |
|----------------|--------|------------|-------------|----------|
| 55.4 bits(123) | 2e-07  | 17/18(94%) | 18/18(100%) | 0/18(0%) |

### Related Information

[Gene](#) - associated gene details

Query 1 KFNPGAESVVLSDSTLKF 18  
 KFNPGAESVVL+STLKF  
 Sbjct 90 KFNPGAESVVLNSTLKF 107

[Download](#) [GenPept](#) [Graphics](#)

[Next](#) [Previous](#) [Descriptions](#)

PREDICTED: multimerin-1-like [Galeopterus variegatus]

Sequence ID: [ref|XP\\_008591205.1|](#) Length: 988 Number of Matches: 1

Range 1: 125 to 142 [GenPept](#) [Graphics](#)

[Next Match](#) [Previous Match](#)

| Score          | Expect | Identities | Positives   | Gaps     |
|----------------|--------|------------|-------------|----------|
| 55.4 bits(123) | 2e-07  | 17/18(94%) | 18/18(100%) | 0/18(0%) |

Query 1 KFNPGAESVVLSDSTLKF 18  
 KFNPGAESVVL+STLKF  
 Sbjct 125 KFNPGAESVVLNSTLKF 142

**Related Information**

[Gene](#) - associated gene details  
[Map Viewer](#) - aligned genomic context

[Download](#) [GenPept](#) [Graphics](#)

[Next](#) [Previous](#) [Descriptions](#)

PREDICTED: multimerin-1 isoform X2 [Pan troglodytes]

Sequence ID: [ref|XP\\_009446302.1|](#) Length: 1193 Number of Matches: 1

Range 1: 124 to 141 [GenPept](#) [Graphics](#)

[Next Match](#) [Previous Match](#)

| Score          | Expect | Identities | Positives   | Gaps     |
|----------------|--------|------------|-------------|----------|
| 55.4 bits(123) | 2e-07  | 17/18(94%) | 18/18(100%) | 0/18(0%) |

Query 1 KFNPGAESVVLSDSTLKF 18  
 KFNPGAESVVL+STLKF  
 Sbjct 124 KFNPGAESVVLNSTLKF 141

**Related Information**

[Gene](#) - associated gene details

[Download](#) [GenPept](#) [Graphics](#)

[Next](#) [Previous](#) [Descriptions](#)

PREDICTED: multimerin-1 isoform X1 [Homo sapiens]

Sequence ID: [ref|XP\\_005262913.1|](#) Length: 1193 Number of Matches: 1

Range 1: 124 to 141 [GenPept](#) [Graphics](#)

[Next Match](#) [Previous Match](#)

| Score          | Expect | Identities | Positives   | Gaps     |
|----------------|--------|------------|-------------|----------|
| 55.4 bits(123) | 2e-07  | 17/18(94%) | 18/18(100%) | 0/18(0%) |

Query 1 KFNPGAESVVLSDSTLKF 18  
 KFNPGAESVVL+STLKF  
 Sbjct 124 KFNPGAESVVLNSTLKF 141

**Related Information**

[Gene](#) - associated gene details  
[Map Viewer](#) - aligned genomic context

BLAST is a registered trademark of the National Library of Medicine.

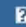

NCBI/ BLAST/ blastp suite/ Formatting Results - BVJ8BSK101R

Your search parameters were adjusted to search for a short input sequence.

[Edit and Resubmit](#) [Save Search Strategies](#) [Formatting options](#) [Download](#)

[YouTube](#) [How to read this page](#) [Blast report description](#)

MMRN1\_KLQDLTLPTDASIKF\_Mod

RID [BVJ8BSK101R](#) (Expires on 01-21 10:18 am)

Query ID |cl|20561  
Description None  
Molecule type amino acid  
Query Length 15

Database Name nr  
Description All non-redundant GenBank CDS translations+PDB+SwissProt+PIR+PRF excluding environmental samples from WGS projects  
Program BLASTP 2.2.30+ [Citation](#)

Other reports: [Search Summary](#) [Taxonomy reports](#) [Distance tree of results](#) [Related Structures](#) [Multiple alignment](#)

Graphic Summary

[Show Conserved Domains](#)

No putative conserved domains have been detected

Distribution of 100 Blast Hits on the Query Sequence

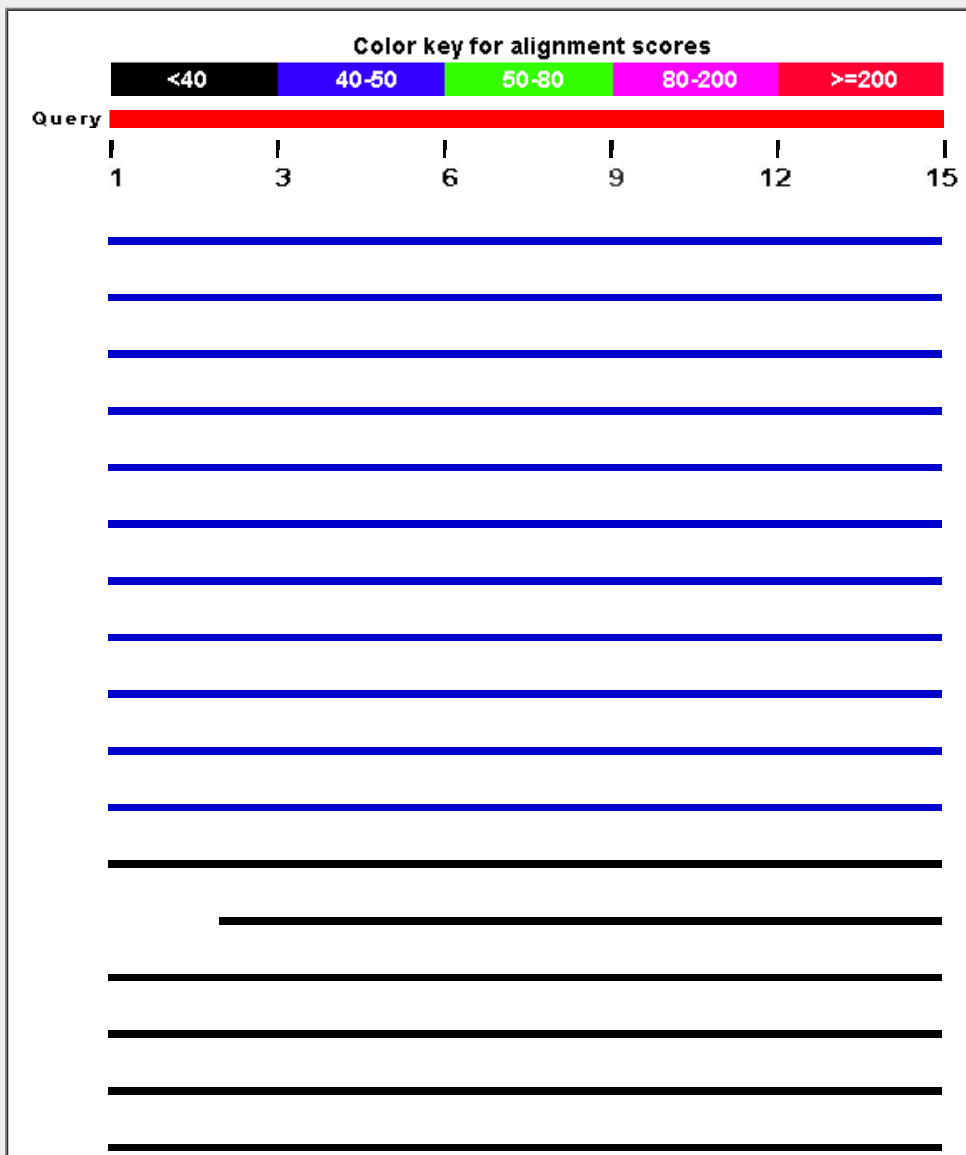



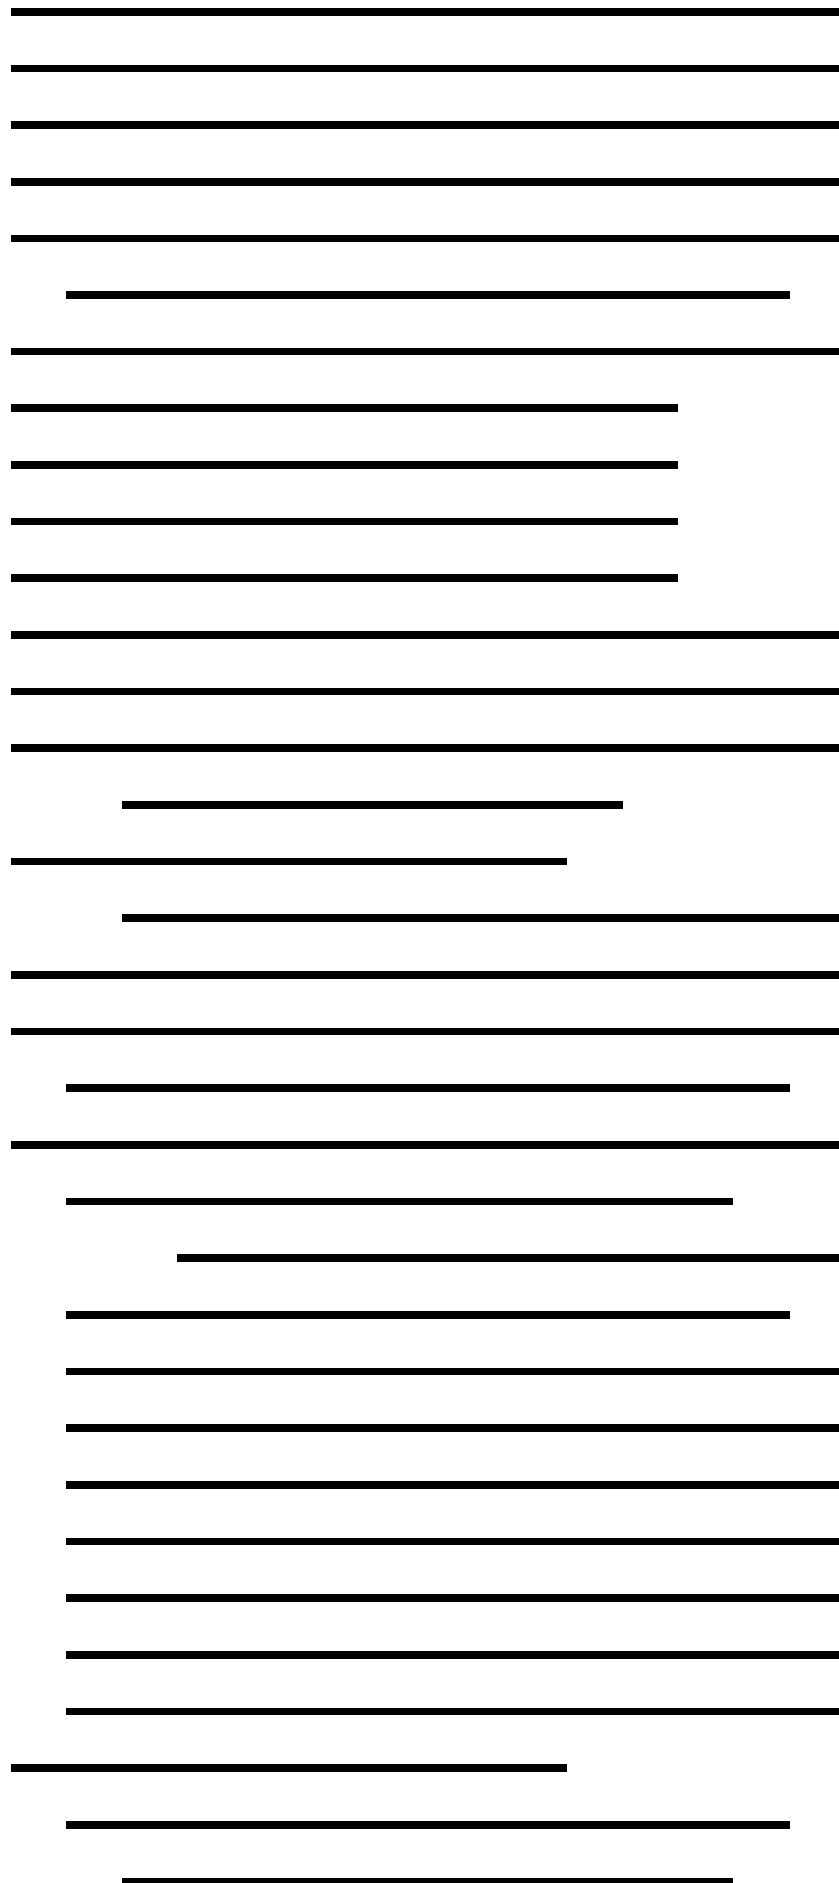

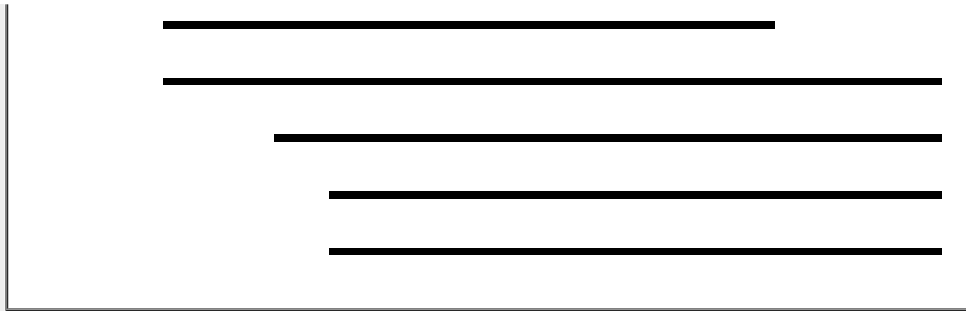

**Descriptions**

**Sequences producing significant alignments:**

Select: [All](#) [None](#) Selected:0

[Alignments](#)
[Download](#)
[GenPept](#)
[Graphics](#)
[Distance tree of results](#)
[Multiple alignment](#)


| Description                                                                 | Max score | Total score | Query cover | E value | Ident | Accession                      |
|-----------------------------------------------------------------------------|-----------|-------------|-------------|---------|-------|--------------------------------|
| <a href="#">multimerin 1, isoform CRA_a [Homo sapiens]</a>                  | 44.8      | 44.8        | 100%        | 5e-04   | 87%   | <a href="#">EAX06037.1</a>     |
| <a href="#">unnamed protein product [Homo sapiens]</a>                      | 44.8      | 44.8        | 100%        | 5e-04   | 87%   | <a href="#">BAC86201.1</a>     |
| <a href="#">PREDICTED: multimerin-1 isoform X2 [Pan troglodytes]</a>        | 44.8      | 44.8        | 100%        | 6e-04   | 87%   | <a href="#">XP_009446302.1</a> |
| <a href="#">PREDICTED: multimerin-1 isoform X1 [Homo sapiens]</a>           | 44.8      | 44.8        | 100%        | 6e-04   | 87%   | <a href="#">XP_005262913.1</a> |
| <a href="#">PREDICTED: LOW QUALITY PROTEIN: multimerin-1 [Pongo abelii]</a> | 44.8      | 44.8        | 100%        | 6e-04   | 87%   | <a href="#">XP_002815014.1</a> |
| <a href="#">PREDICTED: multimerin-1 [Pan paniscus]</a>                      | 44.8      | 44.8        | 100%        | 6e-04   | 87%   | <a href="#">XP_003829944.1</a> |
| <a href="#">prepromultimerin [Homo sapiens]</a>                             | 44.8      | 44.8        | 100%        | 6e-04   | 87%   | <a href="#">AAC52065.1</a>     |
| <a href="#">multimerin-1 precursor [Homo sapiens]</a>                       | 44.8      | 44.8        | 100%        | 6e-04   | 87%   | <a href="#">NP_031377.2</a>    |
| <a href="#">PREDICTED: multimerin-1 [Gorilla gorilla gorilla]</a>           | 44.8      | 44.8        | 100%        | 6e-04   | 87%   | <a href="#">XP_004039176.1</a> |
| <a href="#">Multimerin 1 [Homo sapiens]</a>                                 | 44.8      | 44.8        | 100%        | 6e-04   | 87%   | <a href="#">AAH63848.1</a>     |
| <a href="#">PREDICTED: multimerin-1 isoform X1 [Pan troglodytes]</a>        | 44.8      | 44.8        | 100%        | 6e-04   | 87%   | <a href="#">XP_517342.2</a>    |
| <a href="#">PREDICTED: multimerin-1 [Rhinopithecus roxellana]</a>           | 39.7      | 39.7        | 100%        | 0.028   | 80%   | <a href="#">XP_010374576.1</a> |
| <a href="#">PREDICTED: multimerin-1 isoform 1 [Nomascus leucogenys]</a>     | 38.8      | 38.8        | 86%         | 0.052   | 85%   | <a href="#">XP_003257586.1</a> |
| <a href="#">phosphoenolpyruvate carboxylase [Psychromonas hadalis]</a>      | 35.0      | 35.0        | 100%        | 0.89    | 68%   | <a href="#">WP_022942648.1</a> |
| <a href="#">PREDICTED: multimerin-1 isoform X2 [Chlorocebus sabaeus]</a>    | 35.0      | 35.0        | 100%        | 0.90    | 73%   | <a href="#">XP_007997465.1</a> |
| <a href="#">PREDICTED: multimerin-1 isoform X2 [Macaca fascicularis]</a>    | 35.0      | 35.0        | 100%        | 0.90    | 73%   | <a href="#">XP_005555483.1</a> |
| <a href="#">hypothetical protein EGM_14545 [Macaca fascicularis]</a>        | 35.0      | 35.0        | 100%        | 0.90    | 73%   | <a href="#">EHH53841.1</a>     |
| <a href="#">PREDICTED: multimerin-1 isoform 2 [Macaca mulatta]</a>          | 35.0      | 35.0        | 100%        | 0.90    | 73%   | <a href="#">XP_001101702.1</a> |
| <a href="#">PREDICTED: multimerin-1 [Papio anubis]</a>                      | 35.0      | 35.0        | 100%        | 0.90    | 73%   | <a href="#">XP_009205449.1</a> |
| <a href="#">PREDICTED: multimerin-1 isoform X1 [Macaca fascicularis]</a>    | 35.0      | 35.0        | 100%        | 0.90    | 73%   | <a href="#">XP_005555482.1</a> |
| <a href="#">PREDICTED: multimerin-1 isoform X1 [Chlorocebus sabaeus]</a>    | 35.0      | 35.0        | 100%        | 0.90    | 73%   | <a href="#">XP_007997463.1</a> |
| <a href="#">PREDICTED: multimerin-1 [Saimiri boliviensis boliviensis]</a>   | 34.6      | 34.6        | 100%        | 1.2     | 73%   | <a href="#">XP_010333103.1</a> |
| <a href="#">PREDICTED: multimerin-1 [Ictidomys tridecemlineatus]</a>        | 34.6      | 34.6        | 86%         | 1.2     | 77%   | <a href="#">XP_005337593.1</a> |
| <a href="#">PREDICTED: multimerin-1 [Orycteropus afer afer]</a>             | 33.3      | 33.3        | 100%        | 3.1     | 67%   | <a href="#">XP_007952403.1</a> |
| <a href="#">hypothetical protein [Porphyromonas sp. COT-108_OH2963]</a>     | 31.6      | 31.6        | 80%         | 10      | 73%   | <a href="#">WP_036864374.1</a> |
| <a href="#">hypothetical protein [Porphyromonas canoris]</a>                | 31.6      | 31.6        | 80%         | 10      | 73%   | <a href="#">WP_036791018.1</a> |
| <a href="#">hypothetical protein [Porphyromonas sp. COT-108_OH1349]</a>     | 31.6      | 31.6        | 80%         | 10      | 73%   | <a href="#">WP_036848306.1</a> |
| <a href="#">hypothetical protein [Porphyromonas canoris]</a>                | 31.6      | 31.6        | 80%         | 10      | 73%   | <a href="#">WP_036867510.1</a> |
| <a href="#">phosphoenolpyruvate carboxylase [Psychromonas ossibalaenae]</a> | 31.6      | 31.6        | 100%        | 11      | 68%   | <a href="#">WP_019615923.1</a> |

|                                                                                                |      |      |      |    |      |                                |
|------------------------------------------------------------------------------------------------|------|------|------|----|------|--------------------------------|
| <a href="#">Multimerin-1 [Pteropus alecto]</a>                                                 | 31.6 | 31.6 | 100% | 11 | 67%  | <a href="#">ELK13694.1</a>     |
| <a href="#">PREDICTED: multimerin-1 [Pteropus alecto]</a>                                      | 31.6 | 31.6 | 100% | 11 | 67%  | <a href="#">XP_006910794.1</a> |
| <a href="#">hypothetical protein [Halomonas zhanjiangensis]</a>                                | 31.2 | 31.2 | 60%  | 14 | 100% | <a href="#">WP_018916207.1</a> |
| <a href="#">hypothetical protein FOWG_16134 [Fusarium oxysporum f. sp. lycopersici MN]</a>     | 31.2 | 31.2 | 66%  | 14 | 90%  | <a href="#">EWZ79806.1</a>     |
| <a href="#">PREDICTED: multimerin-1 [Chrysochloris asiatica]</a>                               | 31.2 | 31.2 | 86%  | 15 | 69%  | <a href="#">XP_006873035.1</a> |
| <a href="#">PREDICTED: multimerin-1 [Callithrix jacchus]</a>                                   | 31.2 | 31.2 | 100% | 15 | 67%  | <a href="#">XP_008991221.1</a> |
| <a href="#">hypothetical protein V499_07655 [Pseudogymnoascus pannorum VKM F-103]</a>          | 30.8 | 30.8 | 100% | 19 | 67%  | <a href="#">KFY72188.1</a>     |
| <a href="#">hypothetical protein [Gardnerella vaginalis]</a>                                   | 30.8 | 30.8 | 86%  | 20 | 77%  | <a href="#">WP_004128804.1</a> |
| <a href="#">hypothetical protein EGK_15920 [Macaca mulatta]</a>                                | 30.8 | 30.8 | 100% | 20 | 67%  | <a href="#">EHH26039.1</a>     |
| <a href="#">hypothetical protein [Flexibacter litoralis]</a>                                   | 30.3 | 30.3 | 80%  | 25 | 75%  | <a href="#">WP_014799626.1</a> |
| <a href="#">hypothetical protein [Cytophaga fermentans]</a>                                    | 30.3 | 30.3 | 80%  | 27 | 52%  | <a href="#">WP_027470994.1</a> |
| <a href="#">hypothetical protein ACD_46C00522G0006 [uncultured bacterium]</a>                  | 30.3 | 30.3 | 86%  | 27 | 73%  | <a href="#">EKD70491.1</a>     |
| <a href="#">hypothetical protein [Vibrio parahaemolyticus]</a>                                 | 29.9 | 29.9 | 93%  | 31 | 71%  | <a href="#">WP_031849783.1</a> |
| <a href="#">hypothetical protein EM49_19725 [Vibrio parahaemolyticus]</a>                      | 29.9 | 29.9 | 93%  | 33 | 71%  | <a href="#">KEE73909.1</a>     |
| <a href="#">hypothetical protein [Vibrio jasicida]</a>                                         | 29.9 | 29.9 | 93%  | 33 | 71%  | <a href="#">WP_038872131.1</a> |
| <a href="#">hypothetical protein [Vibrio parahaemolyticus]</a>                                 | 29.9 | 29.9 | 93%  | 33 | 71%  | <a href="#">WP_025639665.1</a> |
| <a href="#">hypothetical protein [Vibrio parahaemolyticus]</a>                                 | 29.9 | 29.9 | 93%  | 33 | 71%  | <a href="#">WP_020838860.1</a> |
| <a href="#">hypothetical protein [Vibrio harveyi]</a>                                          | 29.9 | 29.9 | 93%  | 33 | 71%  | <a href="#">WP_017190352.1</a> |
| <a href="#">hypothetical protein EM78_09700 [Vibrio parahaemolyticus]</a>                      | 29.9 | 29.9 | 93%  | 34 | 71%  | <a href="#">KEE82834.1</a>     |
| <a href="#">MULTISPECIES: hypothetical protein [Parabacteroides]</a>                           | 29.9 | 29.9 | 66%  | 37 | 90%  | <a href="#">WP_010802263.1</a> |
| <a href="#">PREDICTED: protein CASC5 [Phalacrocorax carbo]</a>                                 | 29.9 | 29.9 | 86%  | 37 | 73%  | <a href="#">XP_009510534.1</a> |
| <a href="#">glycoside hydrolase family 47 protein [Jaapia argillacea MUCL 33604]</a>           | 29.5 | 29.5 | 73%  | 49 | 82%  | <a href="#">KDQ58337.1</a>     |
| <a href="#">possible exported protein [Grimontia hollisae]</a>                                 | 29.5 | 29.5 | 73%  | 50 | 82%  | <a href="#">WP_005502223.1</a> |
| <a href="#">hypothetical protein [Chryseobacterium jeonii]</a>                                 | 29.5 | 29.5 | 93%  | 50 | 63%  | <a href="#">WP_039351852.1</a> |
| <a href="#">Phenylalanyl-tRNA synthetase beta subunit [uncultured bacterium]</a>               | 29.1 | 29.1 | 80%  | 58 | 67%  | <a href="#">EKE11218.1</a>     |
| <a href="#">hypothetical protein [Shewanella marina]</a>                                       | 29.1 | 29.1 | 73%  | 63 | 82%  | <a href="#">WP_025820399.1</a> |
| <a href="#">Secretory pathway protein Sec39 [Blumeria graminis f. sp. tritici 96224]</a>       | 29.1 | 29.1 | 73%  | 68 | 73%  | <a href="#">EPQ66354.1</a>     |
| <a href="#">hypothetical protein FOWG_04277 [Fusarium oxysporum f. sp. lycopersici MN]</a>     | 29.1 | 29.1 | 80%  | 68 | 83%  | <a href="#">EWZ97076.1</a>     |
| <a href="#">unnamed protein product [Penicillium roqueforti FM164]</a>                         | 28.6 | 28.6 | 93%  | 87 | 71%  | <a href="#">CDM36912.1</a>     |
| <a href="#">hypothetical protein PRUPE_ppa020384mg [Prunus persica]</a>                        | 28.6 | 28.6 | 80%  | 87 | 71%  | <a href="#">XP_007203351.1</a> |
| <a href="#">PREDICTED: PRA1 family protein F2-like [Prunus mume]</a>                           | 28.6 | 28.6 | 80%  | 88 | 71%  | <a href="#">XP_008242408.1</a> |
| <a href="#">hypothetical protein DI43_15215 [Geobacillus sp. CAMR12739]</a>                    | 28.6 | 28.6 | 66%  | 89 | 71%  | <a href="#">KDE46291.1</a>     |
| <a href="#">GTP cyclohydrolase [Platynereis dumerilii]</a>                                     | 28.6 | 28.6 | 60%  | 89 | 89%  | <a href="#">AIT11920.1</a>     |
| <a href="#">peptidase M20 [Pandoraea sp. RB-44]</a>                                            | 28.6 | 28.6 | 73%  | 90 | 82%  | <a href="#">WP_023871670.1</a> |
| <a href="#">MULTISPECIES: peptidase M20 [Pandoraea]</a>                                        | 28.6 | 28.6 | 73%  | 90 | 82%  | <a href="#">WP_024788613.1</a> |
| <a href="#">peptidase M20 [Pandoraea pnomensua]</a>                                            | 28.6 | 28.6 | 73%  | 90 | 82%  | <a href="#">WP_023595404.1</a> |
| <a href="#">unnamed protein product [Penicillium roqueforti FM164]</a>                         | 28.6 | 28.6 | 93%  | 91 | 71%  | <a href="#">CDM30137.1</a>     |
| <a href="#">hypothetical protein HELRODRAFT_110051 [Helobdella robusta]</a>                    | 28.6 | 28.6 | 93%  | 91 | 64%  | <a href="#">XP_009013176.1</a> |
| <a href="#">hypothetical protein BRAFLDRAFT_217213 [Branchiostoma floridae]</a>                | 28.6 | 28.6 | 73%  | 91 | 73%  | <a href="#">XP_002604890.1</a> |
| <a href="#">TonB-dependent receptor [Chryseobacterium soli]</a>                                | 28.6 | 28.6 | 80%  | 92 | 59%  | <a href="#">WP_034710303.1</a> |
| <a href="#">MATE efflux family protein subfamily [Trichosporon asahii var. asahii CBS 89C]</a> | 28.6 | 28.6 | 66%  | 92 | 90%  | <a href="#">EKC97848.1</a>     |
| <a href="#">MATE efflux family protein subfamily [Trichosporon asahii var. asahii CBS 247]</a> | 28.6 | 28.6 | 66%  | 92 | 90%  | <a href="#">EJT49131.1</a>     |
| <a href="#">hypothetical protein IW15_06475 [Chryseobacterium soli]</a>                        | 28.6 | 28.6 | 80%  | 92 | 59%  | <a href="#">KFF13437.1</a>     |
| <a href="#">hypothetical protein [Chryseobacterium luteum]</a>                                 | 28.6 | 28.6 | 80%  | 92 | 59%  | <a href="#">WP_034705311.1</a> |
| <a href="#">hypothetical protein [Chryseobacterium caeni]</a>                                  | 28.6 | 28.6 | 80%  | 92 | 59%  | <a href="#">WP_027383905.1</a> |

|                                                                                              |      |      |      |     |      |                                |
|----------------------------------------------------------------------------------------------|------|------|------|-----|------|--------------------------------|
| <a href="#">phosphoenolpyruvate carboxylase [Psychromonas aquimarina]</a>                    | 28.6 | 28.6 | 93%  | 92  | 67%  | <a href="#">WP_028862380.1</a> |
| <a href="#">PREDICTED: multimerin-1-like [Galeoscoptes variegatus]</a>                       | 28.6 | 28.6 | 100% | 92  | 63%  | <a href="#">XP_008591205.1</a> |
| <a href="#">PREDICTED: multimerin-1 [Panthera tigris altaica]</a>                            | 28.6 | 28.6 | 100% | 93  | 67%  | <a href="#">XP_007074744.1</a> |
| <a href="#">PREDICTED: LOW QUALITY PROTEIN: multimerin-1 [Felis catus]</a>                   | 28.6 | 28.6 | 100% | 93  | 67%  | <a href="#">XP_006931027.1</a> |
| <a href="#">PREDICTED: protein CASC5 [Caprimulgus carolinensis]</a>                          | 28.6 | 28.6 | 73%  | 93  | 73%  | <a href="#">XP_010164966.1</a> |
| <a href="#">spoU family RNA methylase [Prevotella sp. CAG:1092]</a>                          | 28.2 | 28.2 | 53%  | 111 | 100% | <a href="#">WP_021991197.1</a> |
| <a href="#">iron ABC transporter [Photobacterium leiognathi]</a>                             | 28.2 | 28.2 | 53%  | 121 | 100% | <a href="#">WP_008989570.1</a> |
| <a href="#">histidinol phosphatase [Leuconostoc lactis]</a>                                  | 28.2 | 28.2 | 60%  | 121 | 89%  | <a href="#">WP_029510314.1</a> |
| <a href="#">histidinol phosphatase [Leuconostoc lactis]</a>                                  | 28.2 | 28.2 | 60%  | 121 | 89%  | <a href="#">WP_010000985.1</a> |
| <a href="#">hypothetical protein [Caulobacter sp. UNC358MFTsu5.1]</a>                        | 28.2 | 28.2 | 53%  | 122 | 100% | <a href="#">WP_029911009.1</a> |
| <a href="#">hypothetical protein [Caulobacter henricii]</a>                                  | 28.2 | 28.2 | 53%  | 122 | 100% | <a href="#">WP_035073808.1</a> |
| <a href="#">eukaryotic aspartyl protease [Rhizoctonia solani AG-3 Rhs1AP]</a>                | 28.2 | 28.2 | 80%  | 122 | 67%  | <a href="#">EUC53735.1</a>     |
| <a href="#">permease [Hafnia alvei FB1]</a>                                                  | 28.2 | 28.2 | 86%  | 123 | 64%  | <a href="#">AIU73358.1</a>     |
| <a href="#">hypothetical protein PTSG_10810 [Salpingoeca rosetta]</a>                        | 28.2 | 28.2 | 100% | 123 | 57%  | <a href="#">XP_004988775.1</a> |
| <a href="#">Hypothetical protein SS50377_17976 [Spironucleus salmonicida]</a>                | 28.2 | 28.2 | 86%  | 124 | 61%  | <a href="#">EST42420.1</a>     |
| <a href="#">hypothetical protein F443_04437 [Phytophthora parasitica P1569]</a>              | 28.2 | 28.2 | 53%  | 126 | 100% | <a href="#">ETI52400.1</a>     |
| <a href="#">hypothetical protein L969DRAFT_49956 [Mixia osmundae IAM 14324]</a>              | 28.2 | 28.2 | 53%  | 126 | 100% | <a href="#">KEI38670.1</a>     |
| <a href="#">hypothetical protein E5Q_03545 [Mixia osmundae IAM 14324]</a>                    | 28.2 | 28.2 | 53%  | 126 | 100% | <a href="#">GAA96872.1</a>     |
| <a href="#">MULTISPECIES: phosphinothricin acetyltransferase [Vibrio]</a>                    | 27.8 | 27.8 | 66%  | 160 | 80%  | <a href="#">WP_006074211.1</a> |
| <a href="#">type VI secretion protein [Variovorax paradoxus]</a>                             | 27.8 | 27.8 | 86%  | 161 | 79%  | <a href="#">WP_013539055.1</a> |
| <a href="#">hypothetical protein JAAARDRAFT_47044 [Jaapia argillacea MUCL 33604]</a>         | 27.8 | 27.8 | 100% | 164 | 67%  | <a href="#">KDQ58670.1</a>     |
| <a href="#">hypothetical protein IL54_3232 [Sphingobium sp. ba1]</a>                         | 27.8 | 27.8 | 86%  | 164 | 69%  | <a href="#">KFL47805.1</a>     |
| <a href="#">membrane protein [Sphingobium sp. ba1]</a>                                       | 27.8 | 27.8 | 86%  | 165 | 69%  | <a href="#">WP_037476657.1</a> |
| <a href="#">membrane protein [Sphingobium sp. Ant17]</a>                                     | 27.8 | 27.8 | 86%  | 165 | 69%  | <a href="#">EXS69799.1</a>     |
| <a href="#">hemolysin [Methylophilum sp. M107]</a>                                           | 27.8 | 27.8 | 60%  | 165 | 89%  | <a href="#">WP_026362771.1</a> |
| <a href="#">transcriptional activator, putative, Baf family [Synechococcus sp. PCC 7335]</a> | 27.8 | 27.8 | 60%  | 166 | 89%  | <a href="#">WP_006454569.1</a> |

## Alignments

Download GenPept Graphics

Next Previous Descriptions

multimerin 1, isoform CRA\_a [Homo sapiens]

Sequence ID: [gb|EAX06037.1](#) Length: 531 Number of Matches: 1

Range 1: 77 to 91 GenPept Graphics

Next Match Previous Match

| Score         | Expect | Identities | Positives   | Gaps     |
|---------------|--------|------------|-------------|----------|
| 44.8 bits(98) | 5e-04  | 13/15(87%) | 15/15(100%) | 0/15(0%) |

Query 1 KLQDLTLPDASIKF 15  
 KLQ+LTLPT+ASIKF  
 Sbjct 77 KLQNLTLPTNASIKF 91

### Related Information

[Gene](#) - associated gene details

Download GenPept Graphics

Next Previous Descriptions

unnamed protein product [Homo sapiens]

Sequence ID: [dbj|BAC86201.1](#) Length: 531 Number of Matches: 1

Range 1: 77 to 91 GenPept Graphics

Next Match Previous Match

| Score         | Expect | Identities | Positives   | Gaps     |
|---------------|--------|------------|-------------|----------|
| 44.8 bits(98) | 5e-04  | 13/15(87%) | 15/15(100%) | 0/15(0%) |

### Related Information

[Gene](#) - associated gene details

Query 1 KLQDLTLPDASIKF 15  
 KLQ+LTLPT+ASIKF  
 Sbjct 77 KLQNLTLPTNASIKF 91

[Download](#) [GenPept](#) [Graphics](#)

[Next](#) [Previous](#) [Descriptions](#)

**PREDICTED: multimerin-1 isoform X2 [Pan troglodytes]**

Sequence ID: [ref|XP\\_009446302.1|](#) Length: 1193 Number of Matches: 1

Range 1: 111 to 125 [GenPept](#) [Graphics](#)

[Next Match](#) [Previous Match](#)

| Score         | Expect | Identities | Positives   | Gaps     |
|---------------|--------|------------|-------------|----------|
| 44.8 bits(98) | 6e-04  | 13/15(87%) | 15/15(100%) | 0/15(0%) |

Query 1 KLQDLTLPDASIKF 15  
 KLQ+LTLPT+ASIKF  
 Sbjct 111 KLQNLTLPTNASIKF 125

**Related Information**

[Gene](#) - associated gene details

[Download](#) [GenPept](#) [Graphics](#)

[Next](#) [Previous](#) [Descriptions](#)

**PREDICTED: multimerin-1 isoform X1 [Homo sapiens]**

Sequence ID: [ref|XP\\_005262913.1|](#) Length: 1193 Number of Matches: 1

Range 1: 111 to 125 [GenPept](#) [Graphics](#)

[Next Match](#) [Previous Match](#)

| Score         | Expect | Identities | Positives   | Gaps     |
|---------------|--------|------------|-------------|----------|
| 44.8 bits(98) | 6e-04  | 13/15(87%) | 15/15(100%) | 0/15(0%) |

Query 1 KLQDLTLPDASIKF 15  
 KLQ+LTLPT+ASIKF  
 Sbjct 111 KLQNLTLPTNASIKF 125

**Related Information**

[Gene](#) - associated gene details

[Map Viewer](#) - aligned genomic context

[Download](#) [GenPept](#) [Graphics](#)

[Next](#) [Previous](#) [Descriptions](#)

**PREDICTED: LOW QUALITY PROTEIN: multimerin-1 [Pongo abelii]**

Sequence ID: [ref|XP\\_002815014.1|](#) Length: 1222 Number of Matches: 1

Range 1: 111 to 125 [GenPept](#) [Graphics](#)

[Next Match](#) [Previous Match](#)

| Score         | Expect | Identities | Positives   | Gaps     |
|---------------|--------|------------|-------------|----------|
| 44.8 bits(98) | 6e-04  | 13/15(87%) | 15/15(100%) | 0/15(0%) |

Query 1 KLQDLTLPDASIKF 15  
 KLQ+LTLPT+ASIKF  
 Sbjct 111 KLQNLTLPTNASIKF 125

**Related Information**

[Gene](#) - associated gene details

[Map Viewer](#) - aligned genomic context

BLAST is a registered trademark of the National Library of Medicine.

NCBI/ BLAST/ blastp suite/ Formatting Results - B9P97ME701R

**i** Your search parameters were adjusted to search for a short input sequence.

[Edit and Resubmit](#) [Save Search Strategies](#) [▶ Formatting options](#) [▶ Download](#)

[YouTube](#) [How to read this page](#) [Blast report description](#)

### MMRN1\_KLQNLTLPTNASIKF\_NonMod

RID [B9P97ME701R](#) (Expires on 01-14 15:36 pm)

**Query ID** |cl|127451  
**Description** None  
**Molecule type** amino acid  
**Query Length** 15

**Database Name** nr  
**Description** All non-redundant GenBank CDS translations+PDB+SwissProt+PIR excluding environmental samples from WGS projects  
**Program** BLASTP 2.2.30+ [▶ Citation](#)

Other reports: [▶ Search Summary](#) [\[Taxonomy reports\]](#) [\[Distance tree of results\]](#) [\[Related Structures\]](#) [\[Multiple alignment\]](#)

### **G**raphic Summary

**G** Show Conserved Domains

No putative conserved domains have been detected

Distribution of 100 Blast Hits on the Query Sequence

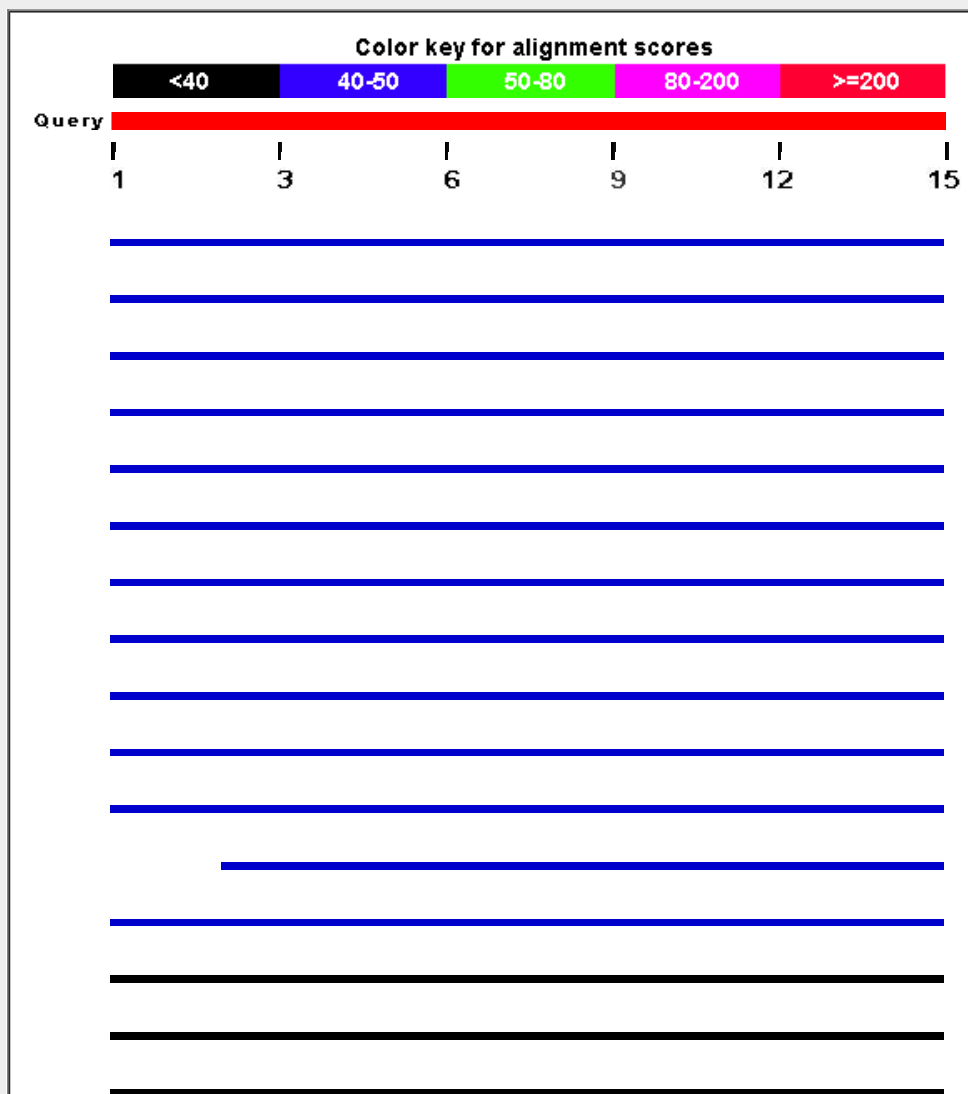

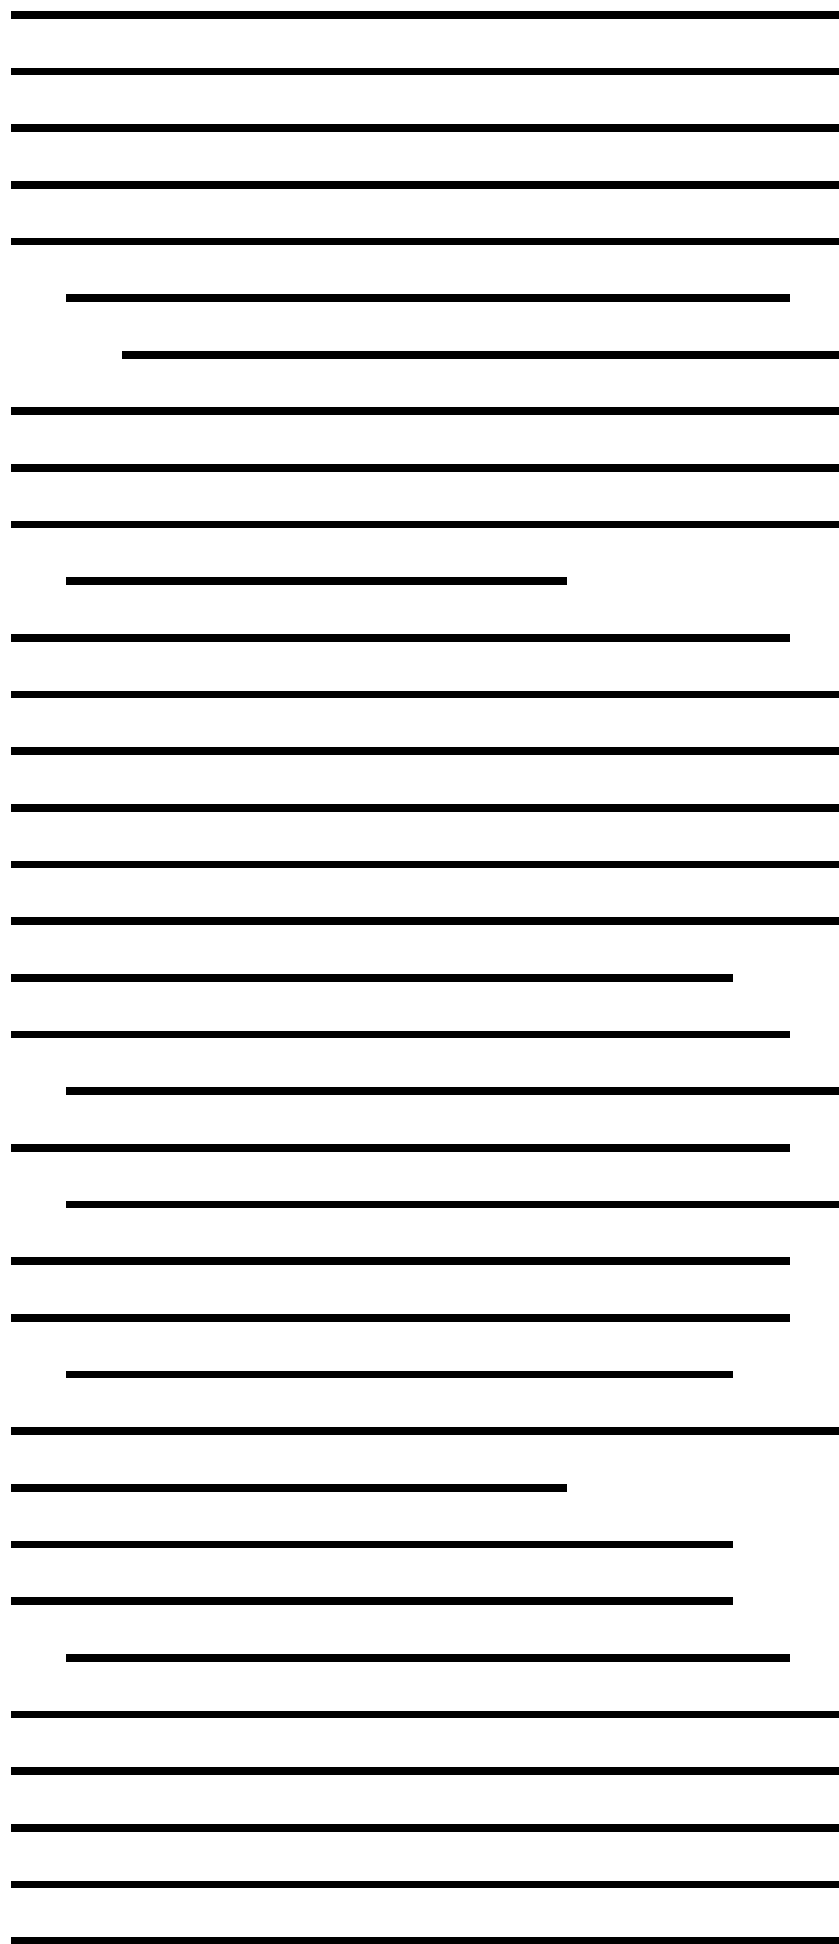

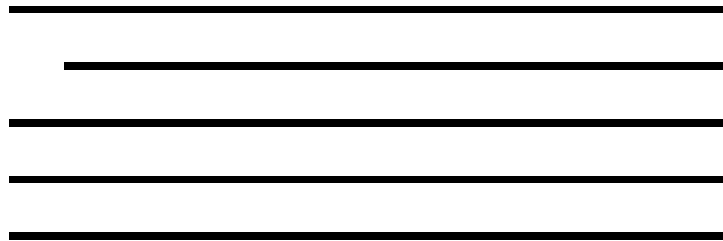

**Descriptions**

**Sequences producing significant alignments:**

Select: [All](#) [None](#) Selected:0

Alignments Download GenPept Graphics Distance tree of results Multiple alignment

| Description                                                                | Max score | Total score | Query cover | E value | Ident | Accession                                   |
|----------------------------------------------------------------------------|-----------|-------------|-------------|---------|-------|---------------------------------------------|
| <a href="#">multimerin 1, isoform CRA_a [Homo sapiens]</a>                 | 49.8      | 49.8        | 100%        | 1e-05   | 100%  | <a href="#">gij119626442 EAX06037.1</a>     |
| <a href="#">unnamed protein product [Homo sapiens]</a>                     | 49.8      | 49.8        | 100%        | 1e-05   | 100%  | <a href="#">gij34531690 BAC86201.1</a>      |
| <a href="#">PREDICTED: multimerin-1 isoform X2 [Pan troglodytes]</a>       | 49.8      | 49.8        | 100%        | 1e-05   | 100%  | <a href="#">gij694908198 XP_009446302.1</a> |
| <a href="#">PREDICTED: multimerin-1 isoform X1 [Homo sapiens]</a>          | 49.8      | 49.8        | 100%        | 1e-05   | 100%  | <a href="#">gij530377406 XP_005262913.1</a> |
| <a href="#">PREDICTED: LOW QUALITY PROTEIN: multimerin-1 [Pongo abeli]</a> | 49.8      | 49.8        | 100%        | 1e-05   | 100%  | <a href="#">gij297673972 XP_002815014.1</a> |
| <a href="#">PREDICTED: multimerin-1 [Pan paniscus]</a>                     | 49.8      | 49.8        | 100%        | 1e-05   | 100%  | <a href="#">gij397519601 XP_003829944.1</a> |
| <a href="#">prepromultimerin [Homo sapiens]</a>                            | 49.8      | 49.8        | 100%        | 1e-05   | 100%  | <a href="#">gij927596 AAC52065.1</a>        |
| <a href="#">multimerin-1 precursor [Homo sapiens]</a>                      | 49.8      | 49.8        | 100%        | 1e-05   | 100%  | <a href="#">gij45269141 NP_031377.2</a>     |
| <a href="#">PREDICTED: multimerin-1 [Gorilla gorilla gorilla]</a>          | 49.8      | 49.8        | 100%        | 1e-05   | 100%  | <a href="#">gij426344970 XP_004039176.1</a> |
| <a href="#">Multimerin 1 [Homo sapiens]</a>                                | 49.8      | 49.8        | 100%        | 1e-05   | 100%  | <a href="#">gij39645323 AAH63848.1</a>      |
| <a href="#">PREDICTED: multimerin-1 isoform X1 [Pan troglodytes]</a>       | 49.8      | 49.8        | 100%        | 1e-05   | 100%  | <a href="#">gij114595173 XP_517342.2</a>    |
| <a href="#">PREDICTED: multimerin-1 isoform 1 [Nomascus leucogenys]</a>    | 43.9      | 43.9        | 86%         | 0.001   | 100%  | <a href="#">gij332216893 XP_003257586.1</a> |
| <a href="#">PREDICTED: multimerin-1 [Rhinopithecus roxellana]</a>          | 43.5      | 43.5        | 100%        | 0.001   | 87%   | <a href="#">gij724888364 XP_010374576.1</a> |
| <a href="#">PREDICTED: multimerin-1 isoform X2 [Chlorocebus sabaeus]</a>   | 38.8      | 38.8        | 100%        | 0.049   | 80%   | <a href="#">gij635043771 XP_007997465.1</a> |
| <a href="#">PREDICTED: multimerin-1 isoform X2 [Macaca fascicularis]</a>   | 38.8      | 38.8        | 100%        | 0.049   | 80%   | <a href="#">gij544433553 XP_005555483.1</a> |
| <a href="#">hypothetical protein EGM_14545 [Macaca fascicularis]</a>       | 38.8      | 38.8        | 100%        | 0.049   | 80%   | <a href="#">gij355749442 EHH53841.1</a>     |
| <a href="#">PREDICTED: multimerin-1 isoform 2 [Macaca mulatta]</a>         | 38.8      | 38.8        | 100%        | 0.049   | 80%   | <a href="#">gij109074983 XP_001101702.1</a> |
| <a href="#">PREDICTED: multimerin-1 [Papio anubis]</a>                     | 38.8      | 38.8        | 100%        | 0.049   | 80%   | <a href="#">gij685542090 XP_009205449.1</a> |
| <a href="#">PREDICTED: multimerin-1 isoform X1 [Macaca fascicularis]</a>   | 38.8      | 38.8        | 100%        | 0.049   | 80%   | <a href="#">gij544433551 XP_005555482.1</a> |
| <a href="#">PREDICTED: multimerin-1 isoform X1 [Chlorocebus sabaeus]</a>   | 38.8      | 38.8        | 100%        | 0.049   | 80%   | <a href="#">gij635043767 XP_007997463.1</a> |
| <a href="#">PREDICTED: multimerin-1 [Saimiri boliviensis boliviensis]</a>  | 38.4      | 38.4        | 100%        | 0.068   | 80%   | <a href="#">gij725558699 XP_010333103.1</a> |
| <a href="#">PREDICTED: multimerin-1 [Ictidomys tridecemlineatus]</a>       | 35.4      | 35.4        | 86%         | 0.62    | 85%   | <a href="#">gij532103995 XP_005337593.1</a> |
| <a href="#">PREDICTED: multimerin-1 [Chrysochloris asiatica]</a>           | 35.0      | 35.0        | 86%         | 0.85    | 77%   | <a href="#">gij586485083 XP_006873035.1</a> |
| <a href="#">PREDICTED: multimerin-1 [Callithrix jacchus]</a>               | 35.0      | 35.0        | 100%        | 0.85    | 73%   | <a href="#">gij675648553 XP_008991221.1</a> |
| <a href="#">hypothetical protein EGK_15920 [Macaca mulatta]</a>            | 34.6      | 34.6        | 100%        | 1.2     | 73%   | <a href="#">gij355687455 EHH26039.1</a>     |
| <a href="#">PREDICTED: multimerin-1 [Orycteropus afer afer]</a>            | 33.3      | 33.3        | 100%        | 2.9     | 67%   | <a href="#">gij634885587 XP_007952403.1</a> |
| <a href="#">hypothetical protein [Dictyoglomus thermophilum]</a>           | 31.6      | 31.6        | 60%         | 9.6     | 100%  | <a href="#">gij501543543 WP_012548656.1</a> |
| <a href="#">MULTISPECIES: hemolysin D [Clostridium]</a>                    | 31.2      | 31.2        | 93%         | 13      | 80%   | <a href="#">gij503003899 WP_013238875.1</a> |



|                                                                                          |      |      |      |    |     |                                             |
|------------------------------------------------------------------------------------------|------|------|------|----|-----|---------------------------------------------|
| Multimerin-1 [ <i>Pteropus alecto</i> ]                                                  | 31.2 | 31.2 | 100% | 14 | 67% | <a href="#">gij431911488 ELK13694.1</a>     |
| <a href="#">PREDICTED: multimerin-1 [<i>Panthera tigris altaica</i>]</a>                 | 31.2 | 31.2 | 100% | 14 | 67% | <a href="#">gij591295050 XP_007074744.1</a> |
| <a href="#">PREDICTED: LOW QUALITY PROTEIN: multimerin-1 [<i>Felis catus</i>]</a>        | 31.2 | 31.2 | 100% | 14 | 67% | <a href="#">gij586984339 XP_006931027.1</a> |
| <a href="#">PREDICTED: multimerin-1 [<i>Pteropus alecto</i>]</a>                         | 31.2 | 31.2 | 100% | 14 | 67% | <a href="#">gij586551480 XP_006910794.1</a> |
| <a href="#">PREDICTED: multimerin-1 [<i>Otolemur garnettii</i>]</a>                      | 31.2 | 31.2 | 100% | 14 | 60% | <a href="#">gij395834121 XP_003790061.1</a> |
| <a href="#">predicted protein [<i>Naegleria gruberi</i> strain NEG-M]</a>                | 31.2 | 31.2 | 86%  | 14 | 65% | <a href="#">gij290976432 XP_002670944.1</a> |
| <a href="#">PREDICTED: toll-like receptor 1 [<i>Zonotrichia albicollis</i>]</a>          | 30.8 | 30.8 | 93%  | 19 | 79% | <a href="#">gij542163848 XP_005490559.1</a> |
| <a href="#">PREDICTED: multimerin-1 [<i>Tarsius syrichta</i>]</a>                        | 30.8 | 30.8 | 93%  | 19 | 64% | <a href="#">gij640825228 XP_008069714.1</a> |
| <a href="#">PREDICTED: uncharacterized protein LOC101774446 [<i>Setaria italic</i>]</a>  | 30.3 | 30.3 | 93%  | 25 | 67% | <a href="#">gij514813686 XP_004981625.1</a> |
| <a href="#">hypothetical protein An02g10500 [<i>Aspergillus niger</i>]</a>               | 29.9 | 29.9 | 93%  | 32 | 71% | <a href="#">gij134057111 CAK44399.1</a>     |
| <a href="#">sodium:proton antiporter [<i>Clostridium botulinum</i>]</a>                  | 29.9 | 29.9 | 93%  | 34 | 69% | <a href="#">gij501425231 WP_012449901.1</a> |
| <a href="#">hypothetical protein SORBIDRAFT_01g006920 [<i>Sorghum bicolor</i>]</a>       | 29.9 | 29.9 | 93%  | 34 | 67% | <a href="#">gij242032863 XP_002463826.1</a> |
| <a href="#">family 3 glycoside hydrolase [<i>Phytophthora sojae</i>]</a>                 | 29.9 | 29.9 | 80%  | 34 | 69% | <a href="#">gij695391545 XP_009520058.1</a> |
| <a href="#">PREDICTED: multimerin-1-like [<i>Galeopterus variegatus</i>]</a>             | 29.9 | 29.9 | 100% | 35 | 69% | <a href="#">gij667330346 XP_008591205.1</a> |
| <a href="#">putative ESAT-secreted protein, BA2188 homolog [<i>Paenibacillus sp</i>]</a> | 29.5 | 29.5 | 66%  | 45 | 90% | <a href="#">gij565876420 WP_023957733.1</a> |
| <a href="#">PREDICTED: toll-like receptor 1 isoform X1 [<i>Ficedula albicollis</i>]</a>  | 29.5 | 29.5 | 86%  | 47 | 77% | <a href="#">gij524995230 XP_005045420.1</a> |
| <a href="#">PREDICTED: toll-like receptor 1 [<i>Geospiza fortis</i>]</a>                 | 29.5 | 29.5 | 86%  | 47 | 77% | <a href="#">gij543244114 XP_005415510.1</a> |
| <a href="#">hypothetical protein [<i>Dyadobacter beijingensis</i>]</a>                   | 29.5 | 29.5 | 86%  | 47 | 79% | <a href="#">gij518784338 WP_019941627.1</a> |
| <a href="#">PREDICTED: multimerin-1 isoform X3 [<i>Mustela putorius furo</i>]</a>        | 29.5 | 29.5 | 100% | 47 | 67% | <a href="#">gij511870693 XP_004756128.1</a> |
| <a href="#">PREDICTED: multimerin-1 isoform X1 [<i>Mustela putorius furo</i>]</a>        | 29.5 | 29.5 | 100% | 47 | 67% | <a href="#">gij511870687 XP_004756126.1</a> |
| <a href="#">PREDICTED: multimerin-1 [<i>Leptonychotes weddellii</i>]</a>                 | 29.5 | 29.5 | 100% | 47 | 67% | <a href="#">gij585149232 XP_006727121.1</a> |
| <a href="#">PREDICTED: multimerin-1 [<i>Balaenoptera acutorostrata scammonii</i>]</a>    | 29.5 | 29.5 | 100% | 47 | 60% | <a href="#">gij594672475 XP_007184155.1</a> |
| <a href="#">PREDICTED: multimerin-1 [<i>Ursus maritimus</i>]</a>                         | 29.5 | 29.5 | 100% | 47 | 67% | <a href="#">gij671029176 XP_008705370.1</a> |
| <a href="#">hypothetical protein Phum_PHUM221870 [<i>Pediculus humanus corp</i>]</a>     | 29.5 | 29.5 | 86%  | 47 | 71% | <a href="#">gij242010134 XP_002425831.1</a> |
| <a href="#">Phenylalanyl-tRNA synthetase beta subunit [uncultured bacterium]</a>         | 29.1 | 29.1 | 80%  | 55 | 67% | <a href="#">gij406991759 EKE11218.1</a>     |
| <a href="#">hypothetical protein CISIN_1g0392312mg [<i>Citrus sinensis</i>]</a>          | 29.1 | 29.1 | 86%  | 61 | 69% | <a href="#">gij641817332 KDO38777.1</a>     |
| <a href="#">hypothetical protein CISIN_1g036471mg [<i>Citrus sinensis</i>]</a>           | 29.1 | 29.1 | 86%  | 63 | 69% | <a href="#">gij641858195 KDO76917.1</a>     |
| <a href="#">hypothetical protein CICLE_v10014868mg [<i>Citrus clementina</i>]</a>        | 29.1 | 29.1 | 86%  | 63 | 69% | <a href="#">gij567912219 XP_006448423.1</a> |
| <a href="#">hypothetical protein PSAKL28_00270 [<i>Pseudomonas alkylphenolia</i>]</a>    | 29.1 | 29.1 | 93%  | 63 | 61% | <a href="#">gij675318936 AIL59265.1</a>     |
| <a href="#">PREDICTED: probable receptor-like protein kinase At1g67000-like</a>          | 29.1 | 29.1 | 86%  | 63 | 69% | <a href="#">gij568828835 XP_006468743.1</a> |
| <a href="#">hypothetical protein CICLE_v10014492mg [<i>Citrus clementina</i>]</a>        | 29.1 | 29.1 | 86%  | 63 | 69% | <a href="#">gij567912201 XP_006448414.1</a> |
| <a href="#">recombinase RecJ [<i>Psychriilyobacter atlanticus</i>]</a>                   | 29.1 | 29.1 | 66%  | 64 | 90% | <a href="#">gij655473680 WP_028856519.1</a> |
| <a href="#">hypothetical protein CICLE_v10014231mg [<i>Citrus clementina</i>]</a>        | 29.1 | 29.1 | 86%  | 64 | 69% | <a href="#">gij567912207 XP_006448417.1</a> |
| <a href="#">hypothetical protein SEPMDRAFT_149012 [<i>Sphaerulina musiva S</i>]</a>      | 29.1 | 29.1 | 93%  | 64 | 69% | <a href="#">gij453085824 EMF13867.1</a>     |
| <a href="#">GGDEF domain protein [<i>Cyclobacteriaceae bacterium AK24</i>]</a>           | 29.1 | 29.1 | 80%  | 64 | 71% | <a href="#">gij499124481 WP_010853371.1</a> |
| <a href="#">unnamed protein product [<i>Albugo candida</i>]</a>                          | 29.1 | 29.1 | 73%  | 64 | 82% | <a href="#">gij635360053 CCI11005.1</a>     |
| <a href="#">PREDICTED: multimerin-1 [<i>Physeter catodon</i>]</a>                        | 29.1 | 29.1 | 100% | 64 | 60% | <a href="#">gij593718138 XP_007105448.1</a> |
| <a href="#">general secretion pathway protein G [<i>Sphingomonas parapaucimob</i>]</a>   | 28.6 | 28.6 | 73%  | 80 | 82% | <a href="#">gij723385750 GAM00671.1</a>     |
| <a href="#">unnamed protein product [<i>Penicillium roqueforti</i> FM164]</a>            | 28.6 | 28.6 | 93%  | 82 | 71% | <a href="#">gij584408082 CDM36912.1</a>     |
| <a href="#">hypothetical protein PRUPE_ppa020384mg [<i>Prunus persica</i>]</a>           | 28.6 | 28.6 | 80%  | 82 | 71% | <a href="#">gij595812142 XP_007203351.1</a> |
| <a href="#">PREDICTED: PRA1 family protein F2-like [<i>Prunus mume</i>]</a>              | 28.6 | 28.6 | 80%  | 82 | 71% | <a href="#">gij645274586 XP_008242408.1</a> |
| <a href="#">PREDICTED: toll-like receptor 1 [<i>Mesitornis unicolor</i>]</a>             | 28.6 | 28.6 | 80%  | 83 | 83% | <a href="#">gij704573972 XP_010186347.1</a> |
| <a href="#">formyltetrahydrofolate deformylase [<i>Francisella tularensis</i>]</a>       | 28.6 | 28.6 | 86%  | 84 | 77% | <a href="#">gij504360783 WP_014547885.1</a> |
| <a href="#">hypothetical protein CISIN_1g045366mg [<i>Citrus sinensis</i>]</a>           | 28.6 | 28.6 | 100% | 84 | 45% | <a href="#">gij641823498 KDO42902.1</a>     |
| <a href="#">hypothetical protein CICLE_v10003553mg [<i>Citrus clementina</i>]</a>        | 28.6 | 28.6 | 100% | 84 | 45% | <a href="#">gij567879199 XP_006432158.1</a> |

|                                                                                     |      |      |      |     |     |                                             |
|-------------------------------------------------------------------------------------|------|------|------|-----|-----|---------------------------------------------|
| <a href="#">replication associated protein [Tomato leaf curl Antsiranana virus]</a> | 28.6 | 28.6 | 60%  | 85  | 89% | <a href="#">gil154090423 CAM91945.1</a>     |
| <a href="#">replication associated protein [Tobacco leaf curl Comoros virus]</a>    | 28.6 | 28.6 | 60%  | 85  | 89% | <a href="#">gil154090379 CAM91908.1</a>     |
| <a href="#">replication associated protein [Tobacco leaf curl Comoros virus]</a>    | 28.6 | 28.6 | 60%  | 85  | 89% | <a href="#">gil154090390 CAM91917.1</a>     |
| <a href="#">hypothetical protein [Algoriphagus marincola]</a>                       | 28.6 | 28.6 | 80%  | 85  | 77% | <a href="#">gil652553724 WP_026947324.1</a> |
| <a href="#">Hydroxymethylglutaryl-CoA synthase [Mycobacterium marinum]</a>          | 28.6 | 28.6 | 60%  | 85  | 89% | <a href="#">gil522805207 WP_020729397.1</a> |
| <a href="#">Hydroxymethylglutaryl-CoA synthase [Mycobacterium marinum]</a>          | 28.6 | 28.6 | 60%  | 85  | 89% | <a href="#">gil522731922 WP_020725611.1</a> |
| <a href="#">Hydroxymethylglutaryl-CoA synthase [Mycobacterium sp. 012931]</a>       | 28.6 | 28.6 | 60%  | 85  | 89% | <a href="#">gil523653246 WP_020787124.1</a> |
| <a href="#">hydroxymethylglutaryl-coenzyme A synthase. PksG [Mycobacterium]</a>     | 28.6 | 28.6 | 60%  | 85  | 89% | <a href="#">gil505169048 WP_015356150.1</a> |
| <a href="#">3-hydroxy-3-methylglutaryl-CoA synthase [Mycobacterium marinum]</a>     | 28.6 | 28.6 | 60%  | 85  | 89% | <a href="#">gil501363310 WP_012394876.1</a> |
| <a href="#">unnamed protein product [Penicillium roqueforti FM164]</a>              | 28.6 | 28.6 | 93%  | 86  | 71% | <a href="#">gil584411374 CDM30137.1</a>     |
| <a href="#">hypothetical protein HETIRDRAFT_474453 [Heterobasidion irregulare]</a>  | 28.6 | 28.6 | 80%  | 86  | 52% | <a href="#">gil695550226 XP_009545576.1</a> |
| <a href="#">Alpha-glucosidase [Ceratophyllum demersum]</a>                          | 28.6 | 28.6 | 80%  | 87  | 75% | <a href="#">gil607365917 EZA60093.1</a>     |
| <a href="#">PREDICTED: multimerin-1 [Orcinus orca]</a>                              | 28.6 | 28.6 | 100% | 87  | 60% | <a href="#">gil466044414 XP_004277020.1</a> |
| <a href="#">hypothetical protein [Catenovulum agarivorans]</a>                      | 28.6 | 28.6 | 100% | 87  | 61% | <a href="#">gil515521939 WP_016955193.1</a> |
| <a href="#">TetR family transcriptional regulator [Acinetobacter baumannii]</a>     | 28.2 | 28.2 | 80%  | 104 | 56% | <a href="#">gil645914882 WP_025468867.1</a> |
| <a href="#">TetR family transcriptional regulator [Acinetobacter baumannii]</a>     | 28.2 | 28.2 | 80%  | 105 | 56% | <a href="#">gil691164973 WP_032071071.1</a> |
| <a href="#">TetR family transcriptional regulator [Acinetobacter baumannii ABN]</a> | 28.2 | 28.2 | 80%  | 108 | 56% | <a href="#">gil475944208 EMU11513.1</a>     |
| <a href="#">Putative membrane protein [Staphylococcus xylosus]</a>                  | 28.2 | 28.2 | 100% | 110 | 61% | <a href="#">gil683403486 CEF18275.1</a>     |
| <a href="#">hypothetical protein, ydb-like protein [Staphylococcus xylosus]</a>     | 28.2 | 28.2 | 100% | 110 | 61% | <a href="#">gil657168032 AID42270.1</a>     |
| <a href="#">hypothetical protein [Staphylococcus xylosus]</a>                       | 28.2 | 28.2 | 100% | 110 | 61% | <a href="#">gil657290509 WP_029377959.1</a> |
| <a href="#">hypothetical protein [Staphylococcus xylosus]</a>                       | 28.2 | 28.2 | 100% | 110 | 61% | <a href="#">gil516331459 WP_017722118.1</a> |
| <a href="#">TetR family transcriptional regulator [Acinetobacter baumannii]</a>     | 28.2 | 28.2 | 80%  | 111 | 56% | <a href="#">gil487944513 WP_002017979.1</a> |
| <a href="#">TetR family transcriptional regulator [Acinetobacter baumannii]</a>     | 28.2 | 28.2 | 80%  | 111 | 56% | <a href="#">gil691082399 WP_032018237.1</a> |
| <a href="#">TetR family transcriptional regulator [Acinetobacter baumannii]</a>     | 28.2 | 28.2 | 80%  | 111 | 56% | <a href="#">gil516427340 WP_017816702.1</a> |
| <a href="#">TetR family transcriptional regulator [Acinetobacter baumannii]</a>     | 28.2 | 28.2 | 80%  | 111 | 56% | <a href="#">gil488001344 WP_002073183.1</a> |
| <a href="#">Zinc carboxypeptidase A 1 [Acromyrmex echinator]</a>                    | 28.2 | 28.2 | 86%  | 112 | 63% | <a href="#">gil332032038 EGI71157.1</a>     |
| <a href="#">PREDICTED: PRA1 family protein F2-like [Malus domestica]</a>            | 28.2 | 28.2 | 80%  | 112 | 71% | <a href="#">gil658005128 XP_008337698.1</a> |

## Alignments

Download [GenPept](#) [Graphics](#) ▼ Next ▲ Previous ▲ Descriptions

multimerin 1, isoform CRA\_a [Homo sapiens]

Sequence ID: [gil119626442|gb|EAX06037.1](#) Length: 531 Number of Matches: 1

Range 1: 77 to 91 [GenPept](#) [Graphics](#) ▼ Next Match ▲ Previous Match

| Score          | Expect | Identities  | Positives   | Gaps     |
|----------------|--------|-------------|-------------|----------|
| 49.8 bits(110) | 1e-05  | 15/15(100%) | 15/15(100%) | 0/15(0%) |

```
Query 1 KLQNLTLPTNASIKF 15
      KLQNLTLPTNASIKF
Sbjct 77 KLQNLTLPTNASIKF 91
```

### Related Information

[Gene](#) - associated gene details

Download [GenPept](#) [Graphics](#) ▼ Next ▲ Previous ▲ Descriptions

unnamed protein product [Homo sapiens]

Sequence ID: [gil34531690|dbj|BAC86201.1](#) Length: 531 Number of Matches: 1

Range 1: 77 to 91 [GenPept](#) [Graphics](#) ▼ Next Match ▲ Previous Match

| Score          | Expect | Identities  | Positives   | Gaps     |
|----------------|--------|-------------|-------------|----------|
| 49.8 bits(110) | 1e-05  | 15/15(100%) | 15/15(100%) | 0/15(0%) |

```
Query 1 KLQNLTLPTNASIKF 15
```

### Related Information

[Gene](#) - associated gene details

Sbjct 77 KLQNLTLPTNASIKF 91  
 KLQNLTLPTNASIKF 91

[Download](#) [GenPept](#) [Graphics](#)

[Next](#) [Previous](#) [Descriptions](#)

**PREDICTED: multimerin-1 isoform X2 [Pan troglodytes]**

Sequence ID: [gi|694908198|ref|XP\\_009446302.1](#) Length: 1193 Number of Matches: 1

Range 1: 111 to 125 [GenPept](#) [Graphics](#)

[Next Match](#) [Previous Match](#)

| Score          | Expect | Identities  | Positives   | Gaps     |
|----------------|--------|-------------|-------------|----------|
| 49.8 bits(110) | 1e-05  | 15/15(100%) | 15/15(100%) | 0/15(0%) |

Query 1 KLQNLTLPTNASIKF 15  
 KLQNLTLPTNASIKF  
 Sbjct 111 KLQNLTLPTNASIKF 125

**Related Information**

[Gene](#) - associated gene details

[Download](#) [GenPept](#) [Graphics](#)

[Next](#) [Previous](#) [Descriptions](#)

**PREDICTED: multimerin-1 isoform X1 [Homo sapiens]**

Sequence ID: [gi|530377406|ref|XP\\_005262913.1](#) Length: 1193 Number of Matches: 1

Range 1: 111 to 125 [GenPept](#) [Graphics](#)

[Next Match](#) [Previous Match](#)

| Score          | Expect | Identities  | Positives   | Gaps     |
|----------------|--------|-------------|-------------|----------|
| 49.8 bits(110) | 1e-05  | 15/15(100%) | 15/15(100%) | 0/15(0%) |

Query 1 KLQNLTLPTNASIKF 15  
 KLQNLTLPTNASIKF  
 Sbjct 111 KLQNLTLPTNASIKF 125

**Related Information**

[Gene](#) - associated gene details

[Map Viewer](#) - aligned genomic context

[Download](#) [GenPept](#) [Graphics](#)

[Next](#) [Previous](#) [Descriptions](#)

**PREDICTED: LOW QUALITY PROTEIN: multimerin-1 [Pongo abelii]**

Sequence ID: [gi|297673972|ref|XP\\_002815014.1](#) Length: 1222 Number of Matches: 1

Range 1: 111 to 125 [GenPept](#) [Graphics](#)

[Next Match](#) [Previous Match](#)

| Score          | Expect | Identities  | Positives   | Gaps     |
|----------------|--------|-------------|-------------|----------|
| 49.8 bits(110) | 1e-05  | 15/15(100%) | 15/15(100%) | 0/15(0%) |

Query 1 KLQNLTLPTNASIKF 15  
 KLQNLTLPTNASIKF  
 Sbjct 111 KLQNLTLPTNASIKF 125

**Related Information**

[Gene](#) - associated gene details

[Map Viewer](#) - aligned genomic context

BLAST is a registered trademark of the National Library of Medicine.

▶ [NCBI/ BLAST/ blastp suite/ Formatting Results - BVJAT7FR01R](#)

**i** Your search parameters were adjusted to search for a short input sequence.  
[Edit and Resubmit](#) [Save Search Strategies](#) ▶ [Formatting options](#) ▶ [Download](#) [YouTube](#) [How to read this page](#) [Blast report description](#)

**MMRN1\_KTQAALSDLTCCIDRS\_Mod**

**RID** [BVJAT7FR01R](#) (Expires on 01-21 10:19 am)

|                                 |                                                                                                                                       |
|---------------------------------|---------------------------------------------------------------------------------------------------------------------------------------|
| <b>Query ID</b>  cl 6104        | <b>Database Name</b> nr                                                                                                               |
| <b>Description</b> None         | <b>Description</b> All non-redundant GenBank CDS translations+PDB+SwissProt+PIR+PRF excluding environmental samples from WGS projects |
| <b>Molecule type</b> amino acid | <b>Program</b> BLASTP 2.2.30+ ▶ <a href="#">Citation</a>                                                                              |
| <b>Query Length</b> 16          |                                                                                                                                       |

Other reports: ▶ [Search Summary](#) [[Taxonomy reports](#)] [[Distance tree of results](#)] [[Related Structures](#)] [[Multiple alignment](#)]

**Graphic Summary**

[Show Conserved Domains](#)

No putative conserved domains have been detected

Distribution of 100 Blast Hits on the Query Sequence

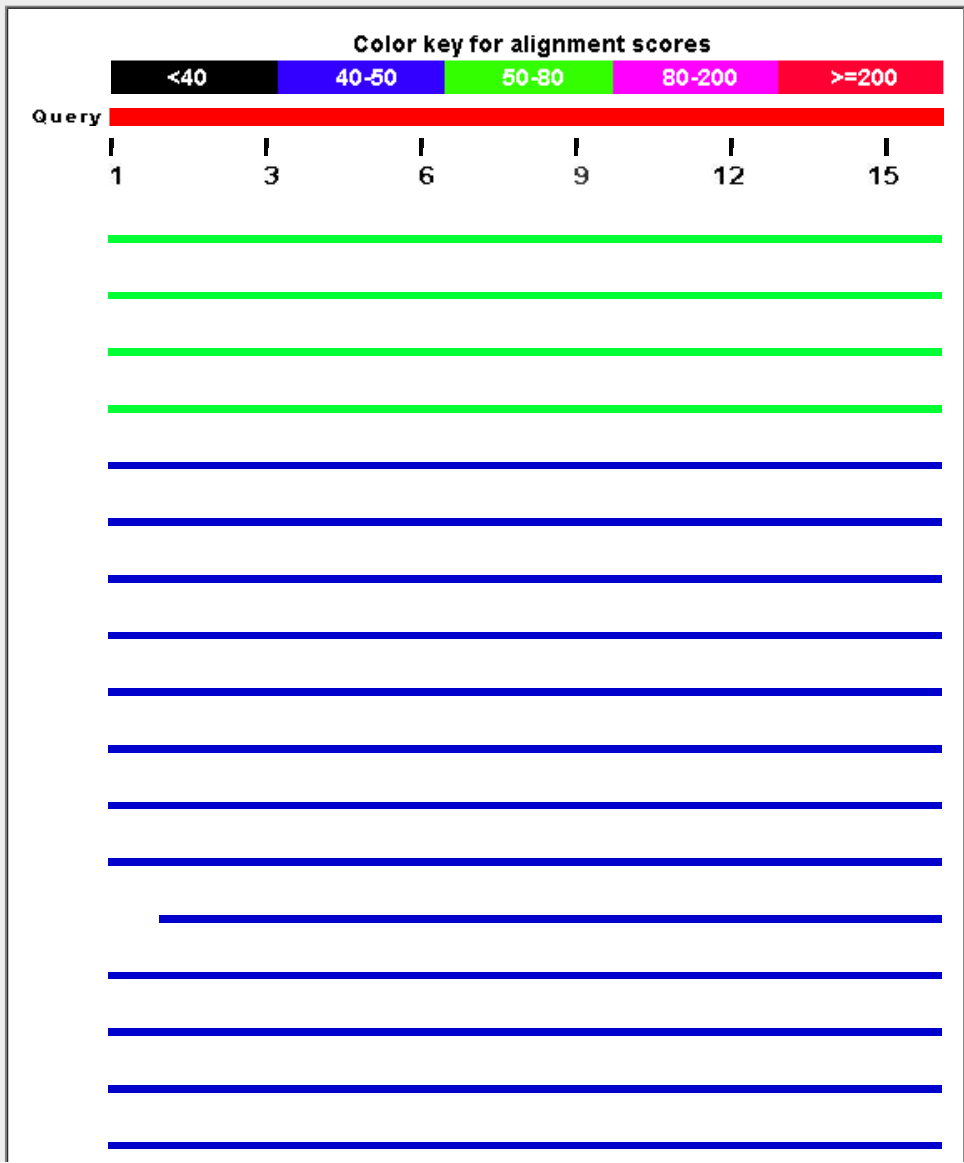

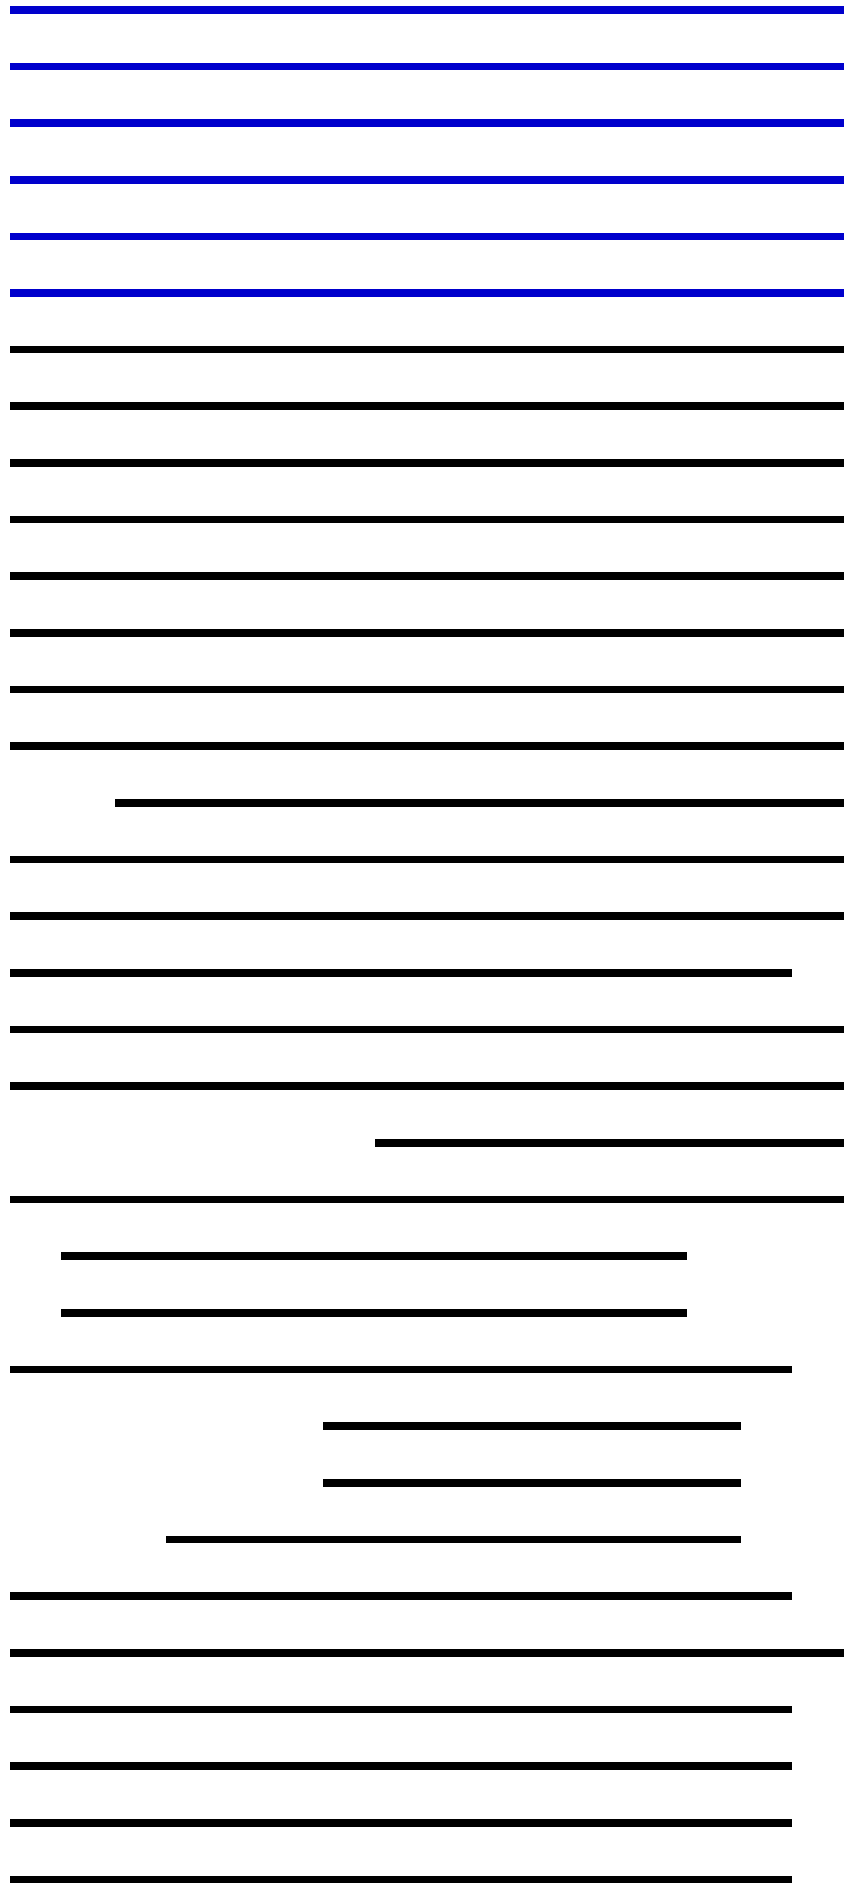

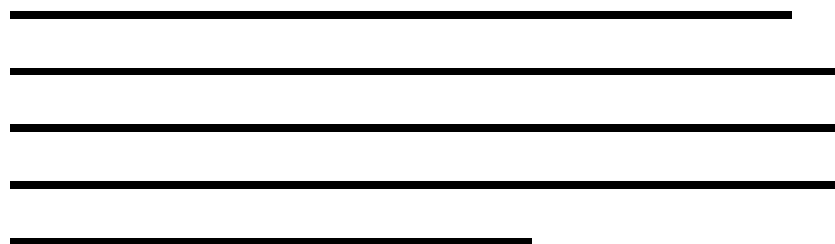

## Descriptions

### Sequences producing significant alignments:

Select: [All](#) [None](#) Selected:0

[Alignments](#)
[Download](#)
[GenPept](#)
[Graphics](#)
[Distance tree of results](#)
[Multiple alignment](#)


| Description                                                                 | Max score | Total score | Query cover | E value | Ident | Accession                      |
|-----------------------------------------------------------------------------|-----------|-------------|-------------|---------|-------|--------------------------------|
| <a href="#">unnamed protein product [Homo sapiens]</a>                      | 51.1      | 51.1        | 100%        | 5e-06   | 94%   | <a href="#">BAH13704.1</a>     |
| <a href="#">PREDICTED: multimerin-1 isoform X1 [Homo sapiens]</a>           | 51.1      | 51.1        | 100%        | 5e-06   | 94%   | <a href="#">XP_005262913.1</a> |
| <a href="#">multimerin-1 precursor [Homo sapiens]</a>                       | 51.1      | 51.1        | 100%        | 5e-06   | 94%   | <a href="#">NP_031377.2</a>    |
| <a href="#">Multimerin 1 [Homo sapiens]</a>                                 | 51.1      | 51.1        | 100%        | 5e-06   | 94%   | <a href="#">AAH63848.1</a>     |
| <a href="#">PREDICTED: multimerin-1 isoform X2 [Pan troglodytes]</a>        | 47.7      | 47.7        | 100%        | 7e-05   | 88%   | <a href="#">XP_009446302.1</a> |
| <a href="#">PREDICTED: LOW QUALITY PROTEIN: multimerin-1 [Pongo abelii]</a> | 47.7      | 47.7        | 100%        | 7e-05   | 88%   | <a href="#">XP_002815014.1</a> |
| <a href="#">PREDICTED: multimerin-1 [Gorilla gorilla gorilla]</a>           | 47.7      | 47.7        | 100%        | 7e-05   | 88%   | <a href="#">XP_004039176.1</a> |
| <a href="#">PREDICTED: multimerin-1 isoform X1 [Pan troglodytes]</a>        | 47.7      | 47.7        | 100%        | 7e-05   | 88%   | <a href="#">XP_517342.2</a>    |
| <a href="#">PREDICTED: multimerin-1 isoform 2 [Nomascus leucogenys]</a>     | 46.4      | 46.4        | 100%        | 2e-04   | 88%   | <a href="#">XP_004089067.1</a> |
| <a href="#">PREDICTED: multimerin-1 isoform 1 [Nomascus leucogenys]</a>     | 46.4      | 46.4        | 100%        | 2e-04   | 88%   | <a href="#">XP_003257586.1</a> |
| <a href="#">PREDICTED: multimerin-1 [Pan paniscus]</a>                      | 45.2      | 45.2        | 100%        | 5e-04   | 81%   | <a href="#">XP_003829944.1</a> |
| <a href="#">prepromultimerin [Homo sapiens]</a>                             | 44.8      | 44.8        | 100%        | 6e-04   | 88%   | <a href="#">AAC52065.1</a>     |
| <a href="#">PREDICTED: multimerin-1 [Rhinopithecus roxellana]</a>           | 44.8      | 44.8        | 93%         | 6e-04   | 87%   | <a href="#">XP_010374576.1</a> |
| <a href="#">PREDICTED: multimerin-1 [Macaca mulatta]</a>                    | 43.5      | 43.5        | 100%        | 0.002   | 81%   | <a href="#">XP_002804181.1</a> |
| <a href="#">PREDICTED: multimerin-1 isoform X2 [Macaca fascicularis]</a>    | 43.5      | 43.5        | 100%        | 0.002   | 81%   | <a href="#">XP_005555483.1</a> |
| <a href="#">hypothetical protein EGM_14545 [Macaca fascicularis]</a>        | 43.5      | 43.5        | 100%        | 0.002   | 81%   | <a href="#">EHH53841.1</a>     |
| <a href="#">hypothetical protein EGK_15920 [Macaca mulatta]</a>             | 43.5      | 43.5        | 100%        | 0.002   | 81%   | <a href="#">EHH26039.1</a>     |
| <a href="#">PREDICTED: multimerin-1 isoform 2 [Macaca mulatta]</a>          | 43.5      | 43.5        | 100%        | 0.002   | 81%   | <a href="#">XP_001101702.1</a> |
| <a href="#">PREDICTED: multimerin-1 [Papio anubis]</a>                      | 43.5      | 43.5        | 100%        | 0.002   | 81%   | <a href="#">XP_009205449.1</a> |
| <a href="#">PREDICTED: multimerin-1 isoform X1 [Macaca fascicularis]</a>    | 43.5      | 43.5        | 100%        | 0.002   | 81%   | <a href="#">XP_005555482.1</a> |
| <a href="#">PREDICTED: multimerin-1 [Saimiri boliviensis boliviensis]</a>   | 43.5      | 43.5        | 100%        | 0.002   | 81%   | <a href="#">XP_010333103.1</a> |
| <a href="#">PREDICTED: multimerin-1 isoform X2 [Chlorocebus sabaeus]</a>    | 40.9      | 40.9        | 100%        | 0.012   | 75%   | <a href="#">XP_007997465.1</a> |
| <a href="#">PREDICTED: multimerin-1 isoform X1 [Chlorocebus sabaeus]</a>    | 40.9      | 40.9        | 100%        | 0.012   | 75%   | <a href="#">XP_007997463.1</a> |
| <a href="#">PREDICTED: multimerin-1 [Callithrix jacchus]</a>                | 39.7      | 39.7        | 100%        | 0.030   | 75%   | <a href="#">XP_008991221.1</a> |
| <a href="#">PREDICTED: multimerin-1 [Trichechus manatus latirostris]</a>    | 34.6      | 34.6        | 100%        | 1.3     | 81%   | <a href="#">XP_004389070.1</a> |
| <a href="#">Multimerin-1 [Tupaia chinensis]</a>                             | 34.6      | 34.6        | 100%        | 1.3     | 81%   | <a href="#">ELW70184.1</a>     |
| <a href="#">PREDICTED: multimerin-1 [Chrysochloris asiatica]</a>            | 34.6      | 34.6        | 100%        | 1.3     | 81%   | <a href="#">XP_006873035.1</a> |
| <a href="#">PREDICTED: multimerin-1 [Oryctolagus cuniculus]</a>             | 34.6      | 34.6        | 100%        | 1.3     | 81%   | <a href="#">XP_008265817.1</a> |
| <a href="#">PREDICTED: multimerin-1 [Loxodonta africana]</a>                | 34.6      | 34.6        | 100%        | 1.3     | 81%   | <a href="#">XP_003414128.1</a> |

|                                                                                             |      |      |      |     |      |                                |
|---------------------------------------------------------------------------------------------|------|------|------|-----|------|--------------------------------|
| <a href="#">PREDICTED: multimerin-1 [Tupaia chinensis]</a>                                  | 34.6 | 34.6 | 100% | 1.3 | 81%  | <a href="#">XP_006143301.1</a> |
| <a href="#">PREDICTED: multimerin-1 [Tarsius syrichta]</a>                                  | 33.3 | 33.3 | 100% | 3.4 | 75%  | <a href="#">XP_008069714.1</a> |
| <a href="#">hypothetical protein COCVIDRAFT_82402 [Bipolaris victoriae FI3]</a>             | 32.5 | 32.5 | 87%  | 5.8 | 60%  | <a href="#">EUN22480.1</a>     |
| <a href="#">PREDICTED: multimerin-1-like isoform 2 [Dasypus novemcinctus]</a>               | 32.0 | 32.0 | 100% | 8.4 | 75%  | <a href="#">XP_004454437.1</a> |
| <a href="#">PREDICTED: multimerin-1-like isoform 1 [Dasypus novemcinctus]</a>               | 32.0 | 32.0 | 100% | 8.5 | 75%  | <a href="#">XP_004454436.1</a> |
| <a href="#">PREDICTED: multimerin-1 [Ictidomys tridecemlineatus]</a>                        | 32.0 | 32.0 | 93%  | 8.5 | 80%  | <a href="#">XP_005337593.1</a> |
| <a href="#">PREDICTED: multimerin-1 [Ochotona princeps]</a>                                 | 31.6 | 31.6 | 100% | 11  | 75%  | <a href="#">XP_004590628.1</a> |
| <a href="#">PREDICTED: multimerin-1 [Elephantulus edwardii]</a>                             | 31.6 | 31.6 | 100% | 11  | 75%  | <a href="#">XP_006894545.1</a> |
| <a href="#">Gamma-tubulin complex component 2 [Triticum urartu]</a>                         | 31.2 | 31.2 | 56%  | 15  | 89%  | <a href="#">EMS52405.1</a>     |
| <a href="#">PREDICTED: multimerin-1 [Otolemur garnettii]</a>                                | 31.2 | 31.2 | 100% | 16  | 75%  | <a href="#">XP_003790061.1</a> |
| <a href="#">membrane lipoprotein tmpC precursor [Halorubrum californiense]</a>              | 30.8 | 30.8 | 75%  | 20  | 58%  | <a href="#">WP_008441495.1</a> |
| <a href="#">membrane lipoprotein tmpC precursor [Halorubrum coriense]</a>                   | 30.8 | 30.8 | 75%  | 20  | 58%  | <a href="#">WP_006112854.1</a> |
| <a href="#">PREDICTED: multimerin-1 [Mesocricetus auratus]</a>                              | 30.8 | 30.8 | 93%  | 21  | 80%  | <a href="#">XP_005076113.1</a> |
| <a href="#">hypothetical protein [Trypanosoma brucei TREU927]</a>                           | 30.3 | 30.3 | 50%  | 28  | 100% | <a href="#">XP_828719.1</a>    |
| <a href="#">unnamed protein product [Trypanosoma congolense IL3000]</a>                     | 30.3 | 30.3 | 50%  | 28  | 100% | <a href="#">CCC95274.1</a>     |
| <a href="#">VP1 protein homologue [Craterostigma plantagineum]</a>                          | 30.3 | 30.3 | 68%  | 29  | 82%  | <a href="#">CAA04184.1</a>     |
| <a href="#">Multimerin-1 [Cricetulus griseus]</a>                                           | 30.3 | 30.3 | 93%  | 29  | 73%  | <a href="#">EGV92276.1</a>     |
| <a href="#">PREDICTED: multimerin-1 [Orycteropus afer afer]</a>                             | 30.3 | 30.3 | 100% | 29  | 75%  | <a href="#">XP_007952403.1</a> |
| <a href="#">multimerin-1 [Cricetulus griseus]</a>                                           | 30.3 | 30.3 | 93%  | 29  | 73%  | <a href="#">ERE67090.1</a>     |
| <a href="#">PREDICTED: multimerin-1 isoform X2 [Cricetulus griseus]</a>                     | 30.3 | 30.3 | 93%  | 29  | 73%  | <a href="#">XP_007635662.1</a> |
| <a href="#">PREDICTED: multimerin-1 isoform X2 [Cricetulus griseus]</a>                     | 30.3 | 30.3 | 93%  | 29  | 73%  | <a href="#">XP_007642492.1</a> |
| <a href="#">PREDICTED: multimerin-1 isoform X1 [Cricetulus griseus]</a>                     | 30.3 | 30.3 | 93%  | 29  | 73%  | <a href="#">XP_007635661.1</a> |
| <a href="#">PREDICTED: multimerin-1 isoform X1 [Cricetulus griseus]</a>                     | 30.3 | 30.3 | 93%  | 29  | 73%  | <a href="#">XP_003503775.1</a> |
| <a href="#">PREDICTED: multimerin-1 [Ceratotherium simum simum]</a>                         | 30.3 | 30.3 | 100% | 29  | 69%  | <a href="#">XP_004431014.1</a> |
| <a href="#">PREDICTED: multimerin-1 [Equus caballus]</a>                                    | 30.3 | 30.3 | 100% | 29  | 69%  | <a href="#">XP_001497011.1</a> |
| <a href="#">PREDICTED: multimerin-1 [Equus przewalskii]</a>                                 | 30.3 | 30.3 | 100% | 29  | 69%  | <a href="#">XP_008512609.1</a> |
| <a href="#">multimerin-1 [Mus musculus]</a>                                                 | 29.9 | 29.9 | 62%  | 38  | 90%  | <a href="#">CAE52464.1</a>     |
| <a href="#">acyl-CoA dehydrogenase [Bordetella avium]</a>                                   | 29.9 | 29.9 | 93%  | 38  | 67%  | <a href="#">WP_012418659.1</a> |
| <a href="#">Mmrn1 protein [Mus musculus]</a>                                                | 29.9 | 29.9 | 62%  | 38  | 90%  | <a href="#">AAH46425.1</a>     |
| <a href="#">PREDICTED: multimerin-1 isoform X2 [Microtus ochrogaster]</a>                   | 29.9 | 29.9 | 62%  | 39  | 90%  | <a href="#">XP_005360610.1</a> |
| <a href="#">PREDICTED: multimerin-1 isoform X1 [Microtus ochrogaster]</a>                   | 29.9 | 29.9 | 62%  | 39  | 90%  | <a href="#">XP_005360609.1</a> |
| <a href="#">Mmrn1 protein [Mus musculus]</a>                                                | 29.9 | 29.9 | 62%  | 39  | 90%  | <a href="#">AAI44790.1</a>     |
| <a href="#">multimerin-1 isoform b precursor [Mus musculus]</a>                             | 29.9 | 29.9 | 62%  | 39  | 90%  | <a href="#">NP_001156979.1</a> |
| <a href="#">multimerin-1 isoform a precursor [Mus musculus]</a>                             | 29.9 | 29.9 | 62%  | 39  | 90%  | <a href="#">NP_081889.1</a>    |
| <a href="#">RecName: Full=Multimerin-1; Flags: Precursor [Mus musculus]</a>                 | 29.9 | 29.9 | 62%  | 39  | 90%  | <a href="#">B2RPV6.2</a>       |
| <a href="#">Multimerin 1 [Mus musculus]</a>                                                 | 29.9 | 29.9 | 62%  | 39  | 90%  | <a href="#">AAI37624.1</a>     |
| <a href="#">PREDICTED: multimerin-1-like [Peromyscus maniculatus bairdii]</a>               | 29.9 | 29.9 | 62%  | 39  | 90%  | <a href="#">XP_006992024.1</a> |
| <a href="#">XRE family transcriptional regulator [Acinetobacter junii]</a>                  | 29.5 | 29.5 | 93%  | 43  | 67%  | <a href="#">WP_005403322.1</a> |
| <a href="#">hypothetical protein COCSADRAFT_70880 [Bipolaris sorokiniana ND90Pr]</a>        | 29.5 | 29.5 | 87%  | 51  | 55%  | <a href="#">XP_007704439.1</a> |
| <a href="#">hypothetical protein DAPPUDRAFT_263068 [Daphnia pulex]</a>                      | 29.5 | 29.5 | 56%  | 52  | 100% | <a href="#">EFX66515.1</a>     |
| <a href="#">PREDICTED: multimerin-1 [Condylura cristata]</a>                                | 29.5 | 29.5 | 100% | 53  | 63%  | <a href="#">XP_004681178.1</a> |
| <a href="#">conserved hypothetical protein [Albugo laibachii Nc14]</a>                      | 29.5 | 29.5 | 68%  | 53  | 82%  | <a href="#">CCA14698.1</a>     |
| <a href="#">methenyltetrahydrofolate cyclohydrolase [Pseudomonas syringae pv. syringae]</a> | 29.1 | 29.1 | 87%  | 68  | 71%  | <a href="#">KEZ65083.1</a>     |
| <a href="#">methenyltetrahydrofolate cyclohydrolase [Pseudomonas syringae]</a>              | 29.1 | 29.1 | 87%  | 70  | 71%  | <a href="#">WP_029571777.1</a> |
| <a href="#">methenyltetrahydrofolate cyclohydrolase [Pseudomonas syringae]</a>              | 29.1 | 29.1 | 87%  | 70  | 71%  | <a href="#">WP_024647974.1</a> |

|                                                                                            |      |      |     |    |     |                                |
|--------------------------------------------------------------------------------------------|------|------|-----|----|-----|--------------------------------|
| <a href="#">methenyltetrahydrofolate cyclohydrolase [Pseudomonas syringae]</a>             | 29.1 | 29.1 | 87% | 70 | 71% | <a href="#">WP_003404473.1</a> |
| <a href="#">methenyltetrahydrofolate cyclohydrolase [Pseudomonas sp. 45MFCo3.1]</a>        | 29.1 | 29.1 | 87% | 70 | 71% | <a href="#">WP_019648405.1</a> |
| <a href="#">MULTISPECIES: methenyltetrahydrofolate cyclohydrolase [Pseudomonas]</a>        | 29.1 | 29.1 | 87% | 70 | 71% | <a href="#">WP_018925421.1</a> |
| <a href="#">methenyltetrahydrofolate cyclohydrolase [Pseudomonas syringae]</a>             | 29.1 | 29.1 | 87% | 70 | 71% | <a href="#">WP_017278097.1</a> |
| <a href="#">Bifunctional 5.10-methylene-tetrahydrofolate dehydrogenase/ 5.10-methylene</a> | 29.1 | 29.1 | 87% | 70 | 71% | <a href="#">WP_016567611.1</a> |
| <a href="#">Bifunctional 5.10-methylene-tetrahydrofolate dehydrogenase/ 5.10-methylene</a> | 29.1 | 29.1 | 87% | 70 | 71% | <a href="#">WP_004418524.1</a> |
| <a href="#">methenyltetrahydrofolate cyclohydrolase [Pseudomonas syringae]</a>             | 29.1 | 29.1 | 87% | 70 | 71% | <a href="#">WP_003415751.1</a> |
| <a href="#">methenyltetrahydrofolate cyclohydrolase [Pseudomonas sp. GM18]</a>             | 29.1 | 29.1 | 87% | 70 | 71% | <a href="#">WP_007940405.1</a> |
| <a href="#">methenyltetrahydrofolate cyclohydrolase [Pseudomonas syringae]</a>             | 29.1 | 29.1 | 87% | 70 | 71% | <a href="#">WP_003304374.1</a> |
| <a href="#">methenyltetrahydrofolate cyclohydrolase [Pseudomonas syringae]</a>             | 29.1 | 29.1 | 87% | 70 | 71% | <a href="#">WP_010437123.1</a> |
| <a href="#">serine/threonine protein kinase [Streptomyces griseus]</a>                     | 29.1 | 29.1 | 87% | 72 | 71% | <a href="#">WP_037709105.1</a> |
| <a href="#">serine/threonine protein kinase [Streptomyces sp. NRRL F-5727]</a>             | 29.1 | 29.1 | 87% | 72 | 71% | <a href="#">WP_031012850.1</a> |
| <a href="#">serine/threonine protein kinase [Microtraspota glauca]</a>                     | 29.1 | 29.1 | 87% | 72 | 71% | <a href="#">WP_030495013.1</a> |
| <a href="#">hypothetical protein [Sulfitobacter mediterraneus]</a>                         | 28.6 | 28.6 | 56% | 90 | 89% | <a href="#">WP_025050044.1</a> |
| <a href="#">putative acyl-CoA dehydrogenase [Bordetella hinzii 8-296-03]</a>               | 28.6 | 28.6 | 81% | 97 | 69% | <a href="#">KCB36636.1</a>     |
| <a href="#">acyl-CoA dehydrogenase [Bordetella hinzii]</a>                                 | 28.6 | 28.6 | 81% | 97 | 69% | <a href="#">WP_029580134.1</a> |
| <a href="#">hypothetical protein O988_05182 [Pseudogymnoascus pannorum VKM F-380]</a>      | 28.6 | 28.6 | 50% | 97 | 88% | <a href="#">KFX96755.1</a>     |
| <a href="#">hypothetical protein LPMP_281060 [Leishmania panamensis]</a>                   | 28.6 | 28.6 | 56% | 97 | 75% | <a href="#">XP_010700446.1</a> |
| <a href="#">hypothetical protein, conserved [Leishmania donovani]</a>                      | 28.6 | 28.6 | 62% | 97 | 90% | <a href="#">XP_003862207.1</a> |
| <a href="#">conserved hypothetical protein [Leishmania mexicana MHOM/GT/2001/U1105]</a>    | 28.6 | 28.6 | 62% | 97 | 90% | <a href="#">XP_003876937.1</a> |
| <a href="#">conserved hypothetical protein [Leishmania infantum JPCM5]</a>                 | 28.6 | 28.6 | 62% | 97 | 90% | <a href="#">XP_001470138.1</a> |
| <a href="#">conserved hypothetical protein [Leishmania braziliensis MHOM/BR/75/M2904]</a>  | 28.6 | 28.6 | 56% | 97 | 75% | <a href="#">XP_001566137.1</a> |
| <a href="#">conserved hypothetical protein [Leishmania major strain Friedlin]</a>          | 28.6 | 28.6 | 62% | 97 | 90% | <a href="#">XP_001684380.1</a> |
| <a href="#">BnaC09g40530D [Brassica napus]</a>                                             | 28.6 | 28.6 | 50% | 98 | 88% | <a href="#">CDY16926.1</a>     |
| <a href="#">putative het domain-containing protein [Eutypa lata UCREL1]</a>                | 28.6 | 28.6 | 75% | 98 | 58% | <a href="#">XP_007791007.1</a> |
| <a href="#">PREDICTED: gamma-tubulin complex component 2-like isoform X3 [Camelin]</a>     | 28.6 | 28.6 | 50% | 98 | 88% | <a href="#">XP_010420460.1</a> |

## Alignments

Download GenPept Graphics

Next Previous Descriptions

unnamed protein product [Homo sapiens]

Sequence ID: [dbj|BAH13704.1](#) Length: 970 Number of Matches: 1

Range 1: 716 to 731 GenPept Graphics

Next Match Previous Match

| Score          | Expect | Identities | Positives   | Gaps     |
|----------------|--------|------------|-------------|----------|
| 51.1 bits(113) | 5e-06  | 15/16(94%) | 16/16(100%) | 0/16(0%) |

Query 1 KTQAALSDLTCCIDRS 16  
KTQAALS+LTCCIDRS  
Sbjct 716 KTQAALSNTCCIDRS 731

### Related Information

[Gene](#) - associated gene details

Download GenPept Graphics

Next Previous Descriptions

PREDICTED: multimerin-1 isoform X1 [Homo sapiens]

Sequence ID: [ref|XP\\_005262913.1](#) Length: 1193 Number of Matches: 1

Range 1: 939 to 954 GenPept Graphics

Next Match Previous Match

| Score          | Expect | Identities | Positives   | Gaps     |
|----------------|--------|------------|-------------|----------|
| 51.1 bits(113) | 5e-06  | 15/16(94%) | 16/16(100%) | 0/16(0%) |

### Related Information

[Gene](#) - associated gene details

[Map Viewer](#) - aligned genomic context



Query 1 KTQAALSDLTCCIDRS 16  
 KTQAALS+LTCCIDRS  
 Sbjct 939 KTQAALSNLTCCIDRS 954

[Download](#) [GenPept](#) [Graphics](#)

[▼ Next](#) [▲ Previous](#) [▲ Descriptions](#)

multimerin-1 precursor [Homo sapiens]

Sequence ID: [ref|NP\\_031377.2|](#) Length: 1228 Number of Matches: 1

[▶ See 5 more title\(s\)](#)

Range 1: 974 to 989 [GenPept](#) [Graphics](#)

[▼ Next Match](#) [▲ Previous Match](#)

| Score          | Expect | Identities | Positives   | Gaps     |
|----------------|--------|------------|-------------|----------|
| 51.1 bits(113) | 5e-06  | 15/16(94%) | 16/16(100%) | 0/16(0%) |

Query 1 KTQAALSDLTCCIDRS 16  
 KTQAALS+LTCCIDRS  
 Sbjct 974 KTQAALSNLTCCIDRS 989

**Related Information**

[Gene](#) - associated gene details  
[UniGene](#) - clustered expressed sequence tags  
[Map Viewer](#) - aligned genomic context  
[Identical Proteins](#) - Proteins identical to the subject

[Download](#) [GenPept](#) [Graphics](#)

[▼ Next](#) [▲ Previous](#) [▲ Descriptions](#)

Multimerin 1 [Homo sapiens]

Sequence ID: [gb|AAH63848.1|](#) Length: 1228 Number of Matches: 1

[▶ See 2 more title\(s\)](#)

Range 1: 974 to 989 [GenPept](#) [Graphics](#)

[▼ Next Match](#) [▲ Previous Match](#)

| Score          | Expect | Identities | Positives   | Gaps     |
|----------------|--------|------------|-------------|----------|
| 51.1 bits(113) | 5e-06  | 15/16(94%) | 16/16(100%) | 0/16(0%) |

Query 1 KTQAALSDLTCCIDRS 16  
 KTQAALS+LTCCIDRS  
 Sbjct 974 KTQAALSNLTCCIDRS 989

**Related Information**

[Gene](#) - associated gene details  
[Identical Proteins](#) - Proteins identical to the subject

[Download](#) [GenPept](#) [Graphics](#)

[▼ Next](#) [▲ Previous](#) [▲ Descriptions](#)

PREDICTED: multimerin-1 isoform X2 [Pan troglodytes]

Sequence ID: [ref|XP\\_009446302.1|](#) Length: 1193 Number of Matches: 1

Range 1: 939 to 954 [GenPept](#) [Graphics](#)

[▼ Next Match](#) [▲ Previous Match](#)

| Score          | Expect | Identities | Positives  | Gaps     |
|----------------|--------|------------|------------|----------|
| 47.7 bits(105) | 7e-05  | 14/16(88%) | 15/16(93%) | 0/16(0%) |

Query 1 KTQAALSDLTCCIDRS 16  
 KTQA LS+LTCCIDRS  
 Sbjct 939 KTQAVLSNLTCCIDRS 954

**Related Information**

[Gene](#) - associated gene details

BLAST is a registered trademark of the National Library of Medicine.

NCBI/ BLAST/ blastp suite/ Formatting Results - B9G8D3VU01R

**i** Your search parameters were adjusted to search for a short input sequence.

[Edit and Resubmit](#) [Save Search Strategies](#) [▶ Formatting options](#) [▶ Download](#)

[YouTube](#) [How to read this page](#) [Blast report description](#)

### MMRN1\_KTQAALSNTCCIDRS\_NonMod

RID [B9G8D3VU01R](#) (Expires on 01-14 13:54 pm)

**Query ID** |cl|59156  
**Description** None  
**Molecule type** amino acid  
**Query Length** 16

**Database Name** nr  
**Description** All non-redundant GenBank CDS translations+PDB+SwissProt+PIR excluding environmental samples from WGS projects  
**Program** BLASTP 2.2.30+ [▶ Citation](#)

Other reports: [▶ Search Summary](#) [\[Taxonomy reports\]](#) [\[Distance tree of results\]](#) [\[Related Structures\]](#) [\[Multiple alignment\]](#)

### **Graphic Summary**

[Show Conserved Domains](#)

No putative conserved domains have been detected

Distribution of 100 Blast Hits on the Query Sequence

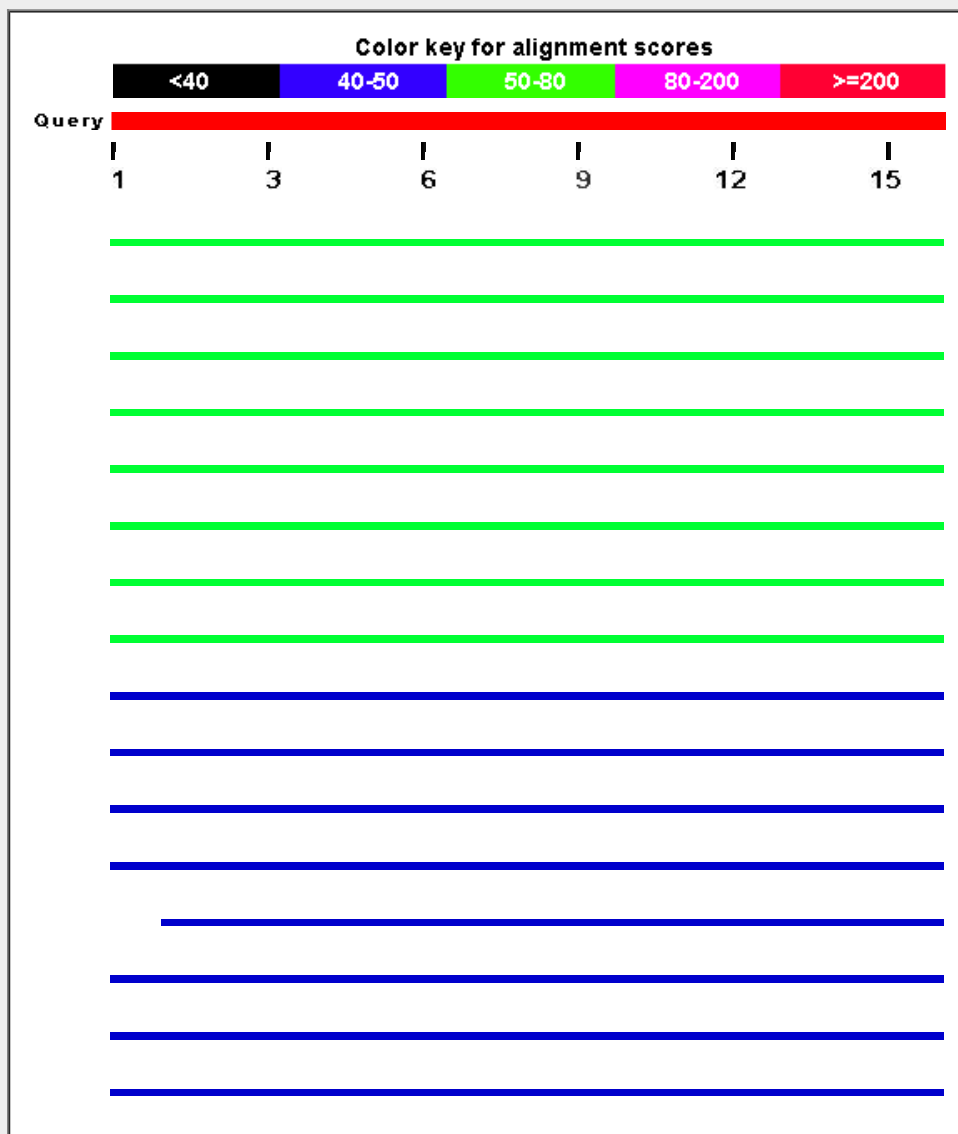

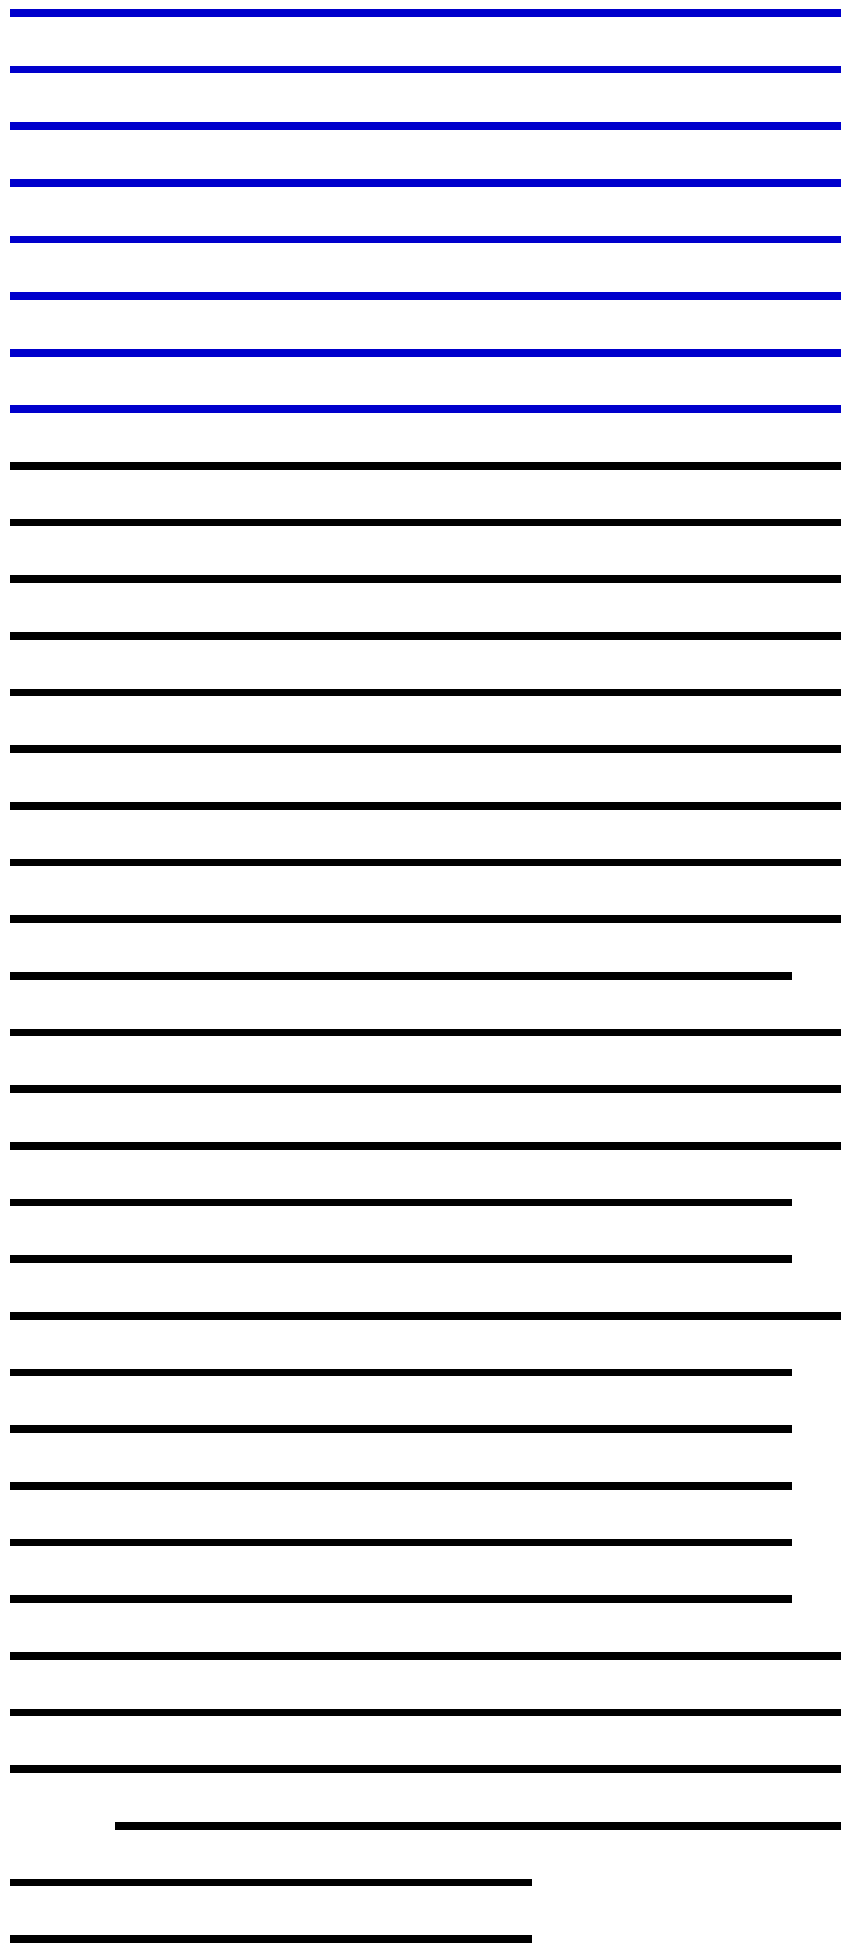

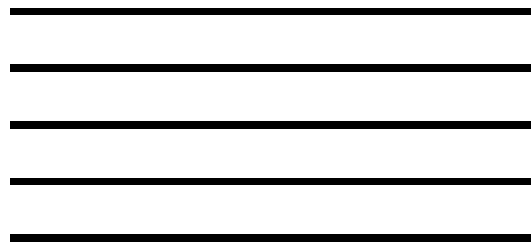

**Descriptions**

**Sequences producing significant alignments:**

Select: [All](#) [None](#) Selected:0

[Alignments](#)
[Download](#)
[GenPept](#)
[Graphics](#)
[Distance tree of results](#)
[Multiple alignment](#)

| Description                                                                | Max score | Total score | Query cover | E value | Ident | Accession                                   |
|----------------------------------------------------------------------------|-----------|-------------|-------------|---------|-------|---------------------------------------------|
| <a href="#">unnamed protein product [Homo sapiens]</a>                     | 53.7      | 53.7        | 100%        | 6e-07   | 100%  | <a href="#">gij221044054 BAH13704.1</a>     |
| <a href="#">PREDICTED: multimerin-1 isoform X1 [Homo sapiens]</a>          | 53.7      | 53.7        | 100%        | 6e-07   | 100%  | <a href="#">gij530377406 XP_005262913.1</a> |
| <a href="#">multimerin-1 precursor [Homo sapiens]</a>                      | 53.7      | 53.7        | 100%        | 6e-07   | 100%  | <a href="#">gij45269141 NP_031377.2</a>     |
| <a href="#">Multimerin 1 [Homo sapiens]</a>                                | 53.7      | 53.7        | 100%        | 6e-07   | 100%  | <a href="#">gij39645323 AAH63848.1</a>      |
| <a href="#">PREDICTED: multimerin-1 isoform X2 [Pan troglodytes]</a>       | 50.3      | 50.3        | 100%        | 9e-06   | 94%   | <a href="#">gij694908198 XP_009446302.1</a> |
| <a href="#">PREDICTED: LOW QUALITY PROTEIN: multimerin-1 [Pongo abeli]</a> | 50.3      | 50.3        | 100%        | 9e-06   | 94%   | <a href="#">gij297673972 XP_002815014.1</a> |
| <a href="#">PREDICTED: multimerin-1 [Gorilla gorilla gorilla]</a>          | 50.3      | 50.3        | 100%        | 9e-06   | 94%   | <a href="#">gij426344970 XP_004039176.1</a> |
| <a href="#">PREDICTED: multimerin-1 isoform X1 [Pan troglodytes]</a>       | 50.3      | 50.3        | 100%        | 9e-06   | 94%   | <a href="#">gij114595173 XP_517342.2</a>    |
| <a href="#">PREDICTED: multimerin-1 isoform 2 [Nomascus leucogenys]</a>    | 49.0      | 49.0        | 100%        | 2e-05   | 94%   | <a href="#">gij441625381 XP_004089067.1</a> |
| <a href="#">PREDICTED: multimerin-1 isoform 1 [Nomascus leucogenys]</a>    | 49.0      | 49.0        | 100%        | 2e-05   | 94%   | <a href="#">gij332216893 XP_003257586.1</a> |
| <a href="#">PREDICTED: multimerin-1 [Pan paniscus]</a>                     | 47.7      | 47.7        | 100%        | 6e-05   | 88%   | <a href="#">gij397519601 XP_003829944.1</a> |
| <a href="#">prepromultimerin [Homo sapiens]</a>                            | 47.3      | 47.3        | 100%        | 9e-05   | 94%   | <a href="#">gij927596 AAC52065.1</a>        |
| <a href="#">PREDICTED: multimerin-1 [Rhinopithecus roxellana]</a>          | 47.3      | 47.3        | 93%         | 9e-05   | 93%   | <a href="#">gij724888364 XP_010374576.1</a> |
| <a href="#">PREDICTED: multimerin-1 [Macaca mulatta]</a>                   | 46.0      | 46.0        | 100%        | 2e-04   | 88%   | <a href="#">gij297293024 XP_002804181.1</a> |
| <a href="#">PREDICTED: multimerin-1 isoform X2 [Macaca fascicularis]</a>   | 46.0      | 46.0        | 100%        | 2e-04   | 88%   | <a href="#">gij544433553 XP_005555483.1</a> |
| <a href="#">hypothetical protein EGM_14545 [Macaca fascicularis]</a>       | 46.0      | 46.0        | 100%        | 2e-04   | 88%   | <a href="#">gij355749442 EHH53841.1</a>     |
| <a href="#">hypothetical protein EGK_15920 [Macaca mulatta]</a>            | 46.0      | 46.0        | 100%        | 2e-04   | 88%   | <a href="#">gij355687455 EHH26039.1</a>     |
| <a href="#">PREDICTED: multimerin-1 isoform 2 [Macaca mulatta]</a>         | 46.0      | 46.0        | 100%        | 2e-04   | 88%   | <a href="#">gij109074983 XP_001101702.1</a> |
| <a href="#">PREDICTED: multimerin-1 [Papio anubis]</a>                     | 46.0      | 46.0        | 100%        | 2e-04   | 88%   | <a href="#">gij685542090 XP_009205449.1</a> |
| <a href="#">PREDICTED: multimerin-1 isoform X1 [Macaca fascicularis]</a>   | 46.0      | 46.0        | 100%        | 2e-04   | 88%   | <a href="#">gij544433551 XP_005555482.1</a> |
| <a href="#">PREDICTED: multimerin-1 [Saimiri boliviensis boliviensis]</a>  | 46.0      | 46.0        | 100%        | 2e-04   | 88%   | <a href="#">gij725558699 XP_010333103.1</a> |
| <a href="#">PREDICTED: multimerin-1 isoform X2 [Chlorocebus sabaeus]</a>   | 43.5      | 43.5        | 100%        | 0.002   | 81%   | <a href="#">gij635043771 XP_007997465.1</a> |
| <a href="#">PREDICTED: multimerin-1 isoform X1 [Chlorocebus sabaeus]</a>   | 43.5      | 43.5        | 100%        | 0.002   | 81%   | <a href="#">gij635043767 XP_007997463.1</a> |
| <a href="#">PREDICTED: multimerin-1 [Callithrix jacchus]</a>               | 42.2      | 42.2        | 100%        | 0.004   | 81%   | <a href="#">gij675648553 XP_008991221.1</a> |
| <a href="#">PREDICTED: multimerin-1 [Trichechus manatus latirostris]</a>   | 37.1      | 37.1        | 100%        | 0.19    | 88%   | <a href="#">gij471415079 XP_004389070.1</a> |
| <a href="#">Multimerin-1 [Tupaia chinensis]</a>                            | 37.1      | 37.1        | 100%        | 0.19    | 88%   | <a href="#">gij444729780 ELW70184.1</a>     |
| <a href="#">PREDICTED: multimerin-1 [Chrysochloris asiatica]</a>           | 37.1      | 37.1        | 100%        | 0.19    | 88%   | <a href="#">gij586485083 XP_006873035.1</a> |
| <a href="#">PREDICTED: multimerin-1 [Oryctolagus cuniculus]</a>            | 37.1      | 37.1        | 100%        | 0.19    | 88%   | <a href="#">gij655857200 XP_008265817.1</a> |

|                                                                                 |      |      |      |      |      |                                             |
|---------------------------------------------------------------------------------|------|------|------|------|------|---------------------------------------------|
| <a href="#">PREDICTED: multimerin-1 [Loxodonta africana]</a>                    | 37.1 | 37.1 | 100% | 0.19 | 88%  | <a href="#">gij344284751 XP_003414128.1</a> |
| <a href="#">PREDICTED: multimerin-1 [Tupaia chinensis]</a>                      | 37.1 | 37.1 | 100% | 0.19 | 88%  | <a href="#">gij562827341 XP_006143301.1</a> |
| <a href="#">PREDICTED: multimerin-1 [Tarsius syrichta]</a>                      | 35.8 | 35.8 | 100% | 0.49 | 81%  | <a href="#">gij640825228 XP_008069714.1</a> |
| <a href="#">PREDICTED: multimerin-1-like isoform 2 [Dasypus novemcinctus]</a>   | 34.6 | 34.6 | 100% | 1.2  | 81%  | <a href="#">gij488525158 XP_004454437.1</a> |
| <a href="#">PREDICTED: multimerin-1-like isoform 1 [Dasypus novemcinctus]</a>   | 34.6 | 34.6 | 100% | 1.2  | 81%  | <a href="#">gij488525156 XP_004454436.1</a> |
| <a href="#">PREDICTED: multimerin-1 [Ictidomys tridecemlineatus]</a>            | 34.6 | 34.6 | 93%  | 1.2  | 87%  | <a href="#">gij532103995 XP_005337593.1</a> |
| <a href="#">PREDICTED: multimerin-1 [Ochotona princeps]</a>                     | 34.1 | 34.1 | 100% | 1.7  | 81%  | <a href="#">gij504158342 XP_004590628.1</a> |
| <a href="#">PREDICTED: multimerin-1 [Elephantulus edwardii]</a>                 | 34.1 | 34.1 | 100% | 1.7  | 81%  | <a href="#">gij585690668 XP_006894545.1</a> |
| <a href="#">PREDICTED: multimerin-1 [Otolemur garnettii]</a>                    | 33.7 | 33.7 | 100% | 2.3  | 81%  | <a href="#">gij395834121 XP_003790061.1</a> |
| <a href="#">PREDICTED: multimerin-1 [Mesocricetus auratus]</a>                  | 33.3 | 33.3 | 93%  | 3.2  | 87%  | <a href="#">gij524952230 XP_005076113.1</a> |
| <a href="#">Multimerin-1 [Cricetulus griseus]</a>                               | 32.9 | 32.9 | 93%  | 4.3  | 80%  | <a href="#">gij344236173 EGV92276.1</a>     |
| <a href="#">PREDICTED: multimerin-1 [Orycteropus afer afer]</a>                 | 32.9 | 32.9 | 100% | 4.3  | 81%  | <a href="#">gij634885587 XP_007952403.1</a> |
| <a href="#">multimerin-1 [Cricetulus griseus]</a>                               | 32.9 | 32.9 | 93%  | 4.3  | 80%  | <a href="#">gij537138121 ERE67090.1</a>     |
| <a href="#">PREDICTED: multimerin-1 isoform X2 [Cricetulus griseus]</a>         | 32.9 | 32.9 | 93%  | 4.3  | 80%  | <a href="#">gij625287884 XP_007635662.1</a> |
| <a href="#">PREDICTED: multimerin-1 isoform X2 [Cricetulus griseus]</a>         | 32.9 | 32.9 | 93%  | 4.3  | 80%  | <a href="#">gij625201541 XP_007642492.1</a> |
| <a href="#">PREDICTED: multimerin-1 isoform X1 [Cricetulus griseus]</a>         | 32.9 | 32.9 | 93%  | 4.3  | 80%  | <a href="#">gij625287882 XP_007635661.1</a> |
| <a href="#">PREDICTED: multimerin-1 isoform X1 [Cricetulus griseus]</a>         | 32.9 | 32.9 | 93%  | 4.3  | 80%  | <a href="#">gij354483185 XP_003503775.1</a> |
| <a href="#">PREDICTED: multimerin-1 [Ceratotherium simum simum]</a>             | 32.9 | 32.9 | 100% | 4.3  | 75%  | <a href="#">gij478513518 XP_004431014.1</a> |
| <a href="#">PREDICTED: multimerin-1 [Equus caballus]</a>                        | 32.9 | 32.9 | 100% | 4.3  | 75%  | <a href="#">gij149701546 XP_001497011.1</a> |
| <a href="#">PREDICTED: multimerin-1 [Equus przewalskii]</a>                     | 32.9 | 32.9 | 100% | 4.3  | 75%  | <a href="#">gij664711276 XP_008512609.1</a> |
| <a href="#">hypothetical protein COCOVIDRAFT_82402 [Bipolaris victorae FI3]</a> | 32.5 | 32.5 | 87%  | 5.4  | 60%  | <a href="#">gij578484972 EUN22480.1</a>     |
| <a href="#">multimerin-1 [Mus musculus]</a>                                     | 32.5 | 32.5 | 62%  | 5.5  | 100% | <a href="#">gij48290287 CAE52464.1</a>      |
| <a href="#">Mmrn1 protein [Mus musculus]</a>                                    | 32.5 | 32.5 | 62%  | 5.6  | 100% | <a href="#">gij28386085 AAH46425.1</a>      |
| <a href="#">PREDICTED: multimerin-1 isoform X2 [Microtus ochrogaster]</a>       | 32.5 | 32.5 | 62%  | 5.8  | 100% | <a href="#">gij532035424 XP_005360610.1</a> |
| <a href="#">PREDICTED: multimerin-1 isoform X1 [Microtus ochrogaster]</a>       | 32.5 | 32.5 | 62%  | 5.8  | 100% | <a href="#">gij532035422 XP_005360609.1</a> |
| <a href="#">Mmrn1 protein [Mus musculus]</a>                                    | 32.5 | 32.5 | 62%  | 5.8  | 100% | <a href="#">gij219519560 AAI44790.1</a>     |
| <a href="#">multimerin-1 isoform b precursor [Mus musculus]</a>                 | 32.5 | 32.5 | 62%  | 5.8  | 100% | <a href="#">gij254588077 NP_001156979.1</a> |
| <a href="#">multimerin-1 isoform a precursor [Mus musculus]</a>                 | 32.5 | 32.5 | 62%  | 5.8  | 100% | <a href="#">gij254588075 NP_081889.1</a>    |
| <a href="#">RecName: Full=Multimerin-1; Flags: Precursor [Mus musculus]</a>     | 32.5 | 32.5 | 62%  | 5.8  | 100% | <a href="#">gij229486321 B2RPV6.2</a>       |
| <a href="#">Multimerin 1 [Mus musculus]</a>                                     | 32.5 | 32.5 | 62%  | 5.8  | 100% | <a href="#">gij187950723 AAI37624.1</a>     |
| <a href="#">PREDICTED: multimerin-1-like [Peromyscus maniculatus bairdii]</a>   | 32.5 | 32.5 | 62%  | 5.8  | 100% | <a href="#">gij589958869 XP_006992024.1</a> |
| <a href="#">PREDICTED: multimerin-1 [Condylura cristata]</a>                    | 32.0 | 32.0 | 100% | 8.0  | 69%  | <a href="#">gij507942523 XP_004681178.1</a> |
| <a href="#">PREDICTED: multimerin-1 [Fukomys damarensis]</a>                    | 30.8 | 30.8 | 93%  | 20   | 80%  | <a href="#">gij731190588 XP_010624565.1</a> |
| <a href="#">PREDICTED: multimerin-1 [Jaculus jaculus]</a>                       | 30.8 | 30.8 | 81%  | 20   | 77%  | <a href="#">gij507563580 XP_004665470.1</a> |
| <a href="#">PREDICTED: multimerin-1-like [Galeopterus variegatus]</a>           | 30.3 | 30.3 | 100% | 27   | 75%  | <a href="#">gij667259514 XP_008566937.1</a> |
| <a href="#">PREDICTED: multimerin-1-like [Galeopterus variegatus]</a>           | 30.3 | 30.3 | 100% | 27   | 75%  | <a href="#">gij667330346 XP_008591205.1</a> |
| <a href="#">PREDICTED: multimerin-1 isoform X1 [Sus scrofa]</a>                 | 30.3 | 30.3 | 100% | 27   | 69%  | <a href="#">gij335294081 XP_003129371.2</a> |
| <a href="#">PREDICTED: multimerin-1 isoform X2 [Sus scrofa]</a>                 | 30.3 | 30.3 | 100% | 27   | 69%  | <a href="#">gij545846726 XP_005667049.1</a> |
| <a href="#">WSSV511 [Shrimp white spot syndrome virus]</a>                      | 29.9 | 29.9 | 50%  | 31   | 100% | <a href="#">gij19482103 AAL89379.1</a>      |
| <a href="#">wsv451 [Shrimp white spot syndrome virus]</a>                       | 29.9 | 29.9 | 50%  | 31   | 100% | <a href="#">gij17158552 INP_477973.1</a>    |
| <a href="#">wsv451 [White spot syndrome virus]</a>                              | 29.9 | 29.9 | 50%  | 31   | 100% | <a href="#">gij417072679 AFX59828.1</a>     |
| <a href="#">unnamed protein product [Oikopleura dioica]</a>                     | 29.9 | 29.9 | 56%  | 36   | 89%  | <a href="#">gij313225274 CBY06748.1</a>     |
| <a href="#">PREDICTED: multimerin-1 [Heterocephalus glaber]</a>                 | 29.9 | 29.9 | 87%  | 37   | 79%  | <a href="#">gij512916002 XP_004903189.1</a> |
| <a href="#">XRE family transcriptional regulator [Acinetobacter junii]</a>      | 29.5 | 29.5 | 93%  | 40   | 67%  | <a href="#">gij491545706 WP_005403322.1</a> |
| <a href="#">hypothetical protein COCSADRAFT_70880 [Bipolaris sorokiniana N</a>  | 29.5 | 29.5 | 87%  | 48   | 55%  | <a href="#">gij628085178 XP_007704439.1</a> |

|                                                                                       |      |      |      |     |     |                                             |
|---------------------------------------------------------------------------------------|------|------|------|-----|-----|---------------------------------------------|
| <a href="#">Protein Bm2028, isoform g [Brugia malayi]</a>                             | 29.5 | 29.5 | 68%  | 50  | 69% | <a href="#">gil671415026 CDP92562.1</a>     |
| <a href="#">calpain family protein 1, isoform d [Brugia malayi]</a>                   | 29.5 | 29.5 | 68%  | 50  | 69% | <a href="#">gil170581386 XP_001895660.1</a> |
| <a href="#">kinesin light chain 3 [Pyrenophora tritici-repentis Pt-1C-BFP]</a>        | 29.5 | 29.5 | 81%  | 50  | 58% | <a href="#">gil189210760 XP_001941711.1</a> |
| <a href="#">hypothetical protein [Advenella kashmirensis]</a>                         | 29.1 | 29.1 | 87%  | 66  | 69% | <a href="#">gil665874760 WP_031241966.1</a> |
| <a href="#">glycosyl transferase [Advenella kashmirensis W13003]</a>                  | 29.1 | 29.1 | 87%  | 67  | 69% | <a href="#">gil565409456 ETF03785.1</a>     |
| <a href="#">inositolphosphorylceramide synthase, putative: phosphatidylinositol</a>   | 29.1 | 29.1 | 62%  | 67  | 90% | <a href="#">gil241955385 XP_002420413.1</a> |
| <a href="#">PREDICTED: multimerin-1 isoform X3 [Rattus norvegicus]</a>                | 29.1 | 29.1 | 62%  | 69  | 90% | <a href="#">gil564303841 XP_006225012.1</a> |
| <a href="#">PREDICTED: multimerin-1 isoform X2 [Rattus norvegicus]</a>                | 29.1 | 29.1 | 62%  | 69  | 90% | <a href="#">gil564303839 XP_006225011.1</a> |
| <a href="#">PREDICTED: multimerin-1 isoform X1 [Rattus norvegicus]</a>                | 29.1 | 29.1 | 62%  | 69  | 90% | <a href="#">gil293346833 XP_001065496.2</a> |
| <a href="#">isochorismate synthase [Enterovibrio calviensis]</a>                      | 28.6 | 28.6 | 62%  | 92  | 90% | <a href="#">gil654557540 WP_028024913.1</a> |
| <a href="#">Gamma-tubulin complex component 2 [Triticum urartu]</a>                   | 28.6 | 28.6 | 56%  | 93  | 78% | <a href="#">gil474005391 EMS52405.1</a>     |
| <a href="#">PREDICTED: multimerin-1-like [Tursiops truncatus]</a>                     | 28.6 | 28.6 | 100% | 93  | 69% | <a href="#">gil470612518 XP_004316075.1</a> |
| <a href="#">PREDICTED: multimerin-1 [Echinops telfairi]</a>                           | 28.6 | 28.6 | 100% | 93  | 75% | <a href="#">gil507648892 XP_004703488.1</a> |
| <a href="#">PREDICTED: multimerin-1 [Orcinus orca]</a>                                | 28.6 | 28.6 | 100% | 93  | 69% | <a href="#">gil466044414 XP_004277020.1</a> |
| <a href="#">PREDICTED: multimerin-1 [Lipotes vexillifer]</a>                          | 28.6 | 28.6 | 100% | 93  | 69% | <a href="#">gil602729302 XP_007450078.1</a> |
| <a href="#">PREDICTED: multimerin-1 [Physeter catodon]</a>                            | 28.6 | 28.6 | 100% | 93  | 69% | <a href="#">gil593718138 XP_007105448.1</a> |
| <a href="#">PREDICTED: multimerin-1 [Balaenoptera acutorostrata scammoni]</a>         | 28.6 | 28.6 | 100% | 93  | 69% | <a href="#">gil594672475 XP_007184155.1</a> |
| <a href="#">PREDICTED: multimerin-1 isoform X2 [Chinchilla lanigera]</a>              | 28.6 | 28.6 | 100% | 93  | 67% | <a href="#">gil533117571 XP_005374311.1</a> |
| <a href="#">PREDICTED: multimerin-1 isoform X1 [Chinchilla lanigera]</a>              | 28.6 | 28.6 | 100% | 93  | 67% | <a href="#">gil533117569 XP_005374310.1</a> |
| <a href="#">tail protein [Eggerthella lenta]</a>                                      | 28.2 | 28.2 | 62%  | 122 | 71% | <a href="#">gil506241535 WP_015761310.1</a> |
| <a href="#">membrane lipoprotein tmpC precursor [Halorubrum californiense]</a>        | 28.2 | 28.2 | 75%  | 124 | 53% | <a href="#">gil495716916 WP_008441495.1</a> |
| <a href="#">membrane lipoprotein tmpC precursor [Halorubrum coriense]</a>             | 28.2 | 28.2 | 75%  | 124 | 53% | <a href="#">gil493053490 WP_006112854.1</a> |
| <a href="#">glycoside hydrolase family 30 protein [Thielavia terrestris NRRL 812]</a> | 28.2 | 28.2 | 75%  | 125 | 80% | <a href="#">gil367054370 XP_003657563.1</a> |
| <a href="#">PREDICTED: NADPH oxidase 3 [Pan troglodytes]</a>                          | 28.2 | 28.2 | 87%  | 126 | 63% | <a href="#">gil114609915 XP_527546.2</a>    |
| <a href="#">PREDICTED: multimerin-1 isoform X1 [Cavia porcellus]</a>                  | 28.2 | 28.2 | 62%  | 127 | 90% | <a href="#">gil348563454 XP_003467522.1</a> |
| <a href="#">PREDICTED: multimerin-1 isoform X2 [Cavia porcellus]</a>                  | 28.2 | 28.2 | 62%  | 127 | 90% | <a href="#">gil514456652 XP_005002721.1</a> |
| <a href="#">PREDICTED: multimerin-1-like [Octodon degus]</a>                          | 28.2 | 28.2 | 62%  | 127 | 90% | <a href="#">gil507714859 XP_004648455.1</a> |

## Alignments

Download GenPept Graphics

Next Previous Descriptions

unnamed protein product [Homo sapiens]

Sequence ID: [gil221044054|dbj|BAH13704.1](#) Length: 970 Number of Matches: 1

Range 1: 716 to 731 GenPept Graphics

Next Match Previous Match

| Score          | Expect | Identities  | Positives   | Gaps     |
|----------------|--------|-------------|-------------|----------|
| 53.7 bits(119) | 6e-07  | 16/16(100%) | 16/16(100%) | 0/16(0%) |

Query 1 KTQAALSNLTCCIDRS 16  
KTQAALSNLTCCIDRS  
Sbjct 716 KTQAALSNLTCCIDRS 731

### Related Information

[Gene](#) - associated gene details

Download GenPept Graphics

Next Previous Descriptions

PREDICTED: multimerin-1 isoform X1 [Homo sapiens]

Sequence ID: [gil530377406|ref|XP\\_005262913.1](#) Length: 1193 Number of Matches: 1

Range 1: 939 to 954 GenPept Graphics

Next Match Previous Match

| Score          | Expect | Identities  | Positives   | Gaps     |
|----------------|--------|-------------|-------------|----------|
| 53.7 bits(119) | 6e-07  | 16/16(100%) | 16/16(100%) | 0/16(0%) |

Query 1 KTQAALSNLTCCIDRS 16

### Related Information

[Gene](#) - associated gene details

[Map Viewer](#) - aligned genomic context

Sbjct 939 KTQAALSNLTCCIDRS  
 KTQAALSNLTCCIDRS 954

[Download](#) [GenPept](#) [Graphics](#)

[Next](#) [Previous](#) [Descriptions](#)

multimerin-1 precursor [Homo sapiens]

Sequence ID: [gi|45269141|ref|NP\\_031377.2](#) Length: 1228 Number of Matches: 1

[See 5 more title\(s\)](#)

Range 1: 974 to 989 [GenPept](#) [Graphics](#)

[Next Match](#) [Previous Match](#)

| Score          | Expect | Identities  | Positives   | Gaps     |
|----------------|--------|-------------|-------------|----------|
| 53.7 bits(119) | 6e-07  | 16/16(100%) | 16/16(100%) | 0/16(0%) |

Query 1 KTQAALSNLTCCIDRS 16  
 KTQAALSNLTCCIDRS  
 Sbjct 974 KTQAALSNLTCCIDRS 989

**Related Information**

[Gene](#) - associated gene details  
[UniGene](#) - clustered expressed sequence tags  
[Map Viewer](#) - aligned genomic context  
[Identical Proteins](#) - Proteins identical to the subject

[Download](#) [GenPept](#) [Graphics](#)

[Next](#) [Previous](#) [Descriptions](#)

Multimerin 1 [Homo sapiens]

Sequence ID: [gi|39645323|gb|AAH63848.1](#) Length: 1228 Number of Matches: 1

[See 2 more title\(s\)](#)

Range 1: 974 to 989 [GenPept](#) [Graphics](#)

[Next Match](#) [Previous Match](#)

| Score          | Expect | Identities  | Positives   | Gaps     |
|----------------|--------|-------------|-------------|----------|
| 53.7 bits(119) | 6e-07  | 16/16(100%) | 16/16(100%) | 0/16(0%) |

Query 1 KTQAALSNLTCCIDRS 16  
 KTQAALSNLTCCIDRS  
 Sbjct 974 KTQAALSNLTCCIDRS 989

**Related Information**

[Gene](#) - associated gene details  
[Identical Proteins](#) - Proteins identical to the subject

[Download](#) [GenPept](#) [Graphics](#)

[Next](#) [Previous](#) [Descriptions](#)

PREDICTED: multimerin-1 isoform X2 [Pan troglodytes]

Sequence ID: [gi|694908198|ref|XP\\_009446302.1](#) Length: 1193 Number of Matches: 1

Range 1: 939 to 954 [GenPept](#) [Graphics](#)

[Next Match](#) [Previous Match](#)

| Score          | Expect | Identities | Positives  | Gaps     |
|----------------|--------|------------|------------|----------|
| 50.3 bits(111) | 9e-06  | 15/16(94%) | 15/16(93%) | 0/16(0%) |

Query 1 KTQAALSNLTCCIDRS 16  
 KTQA LSNLTCCIDRS  
 Sbjct 939 KTQAVLSNLTCCIDRS 954

**Related Information**

[Gene](#) - associated gene details

BLAST is a registered trademark of the National Library of Medicine.

NCBI/ BLAST/ blastp suite/ Formatting Results - BVJBTM5501R

Your search parameters were adjusted to search for a short input sequence.

[Edit and Resubmit](#) [Save Search Strategies](#) [Formatting options](#) [Download](#) [YouTube](#) [How to read this page](#) [Blast report description](#)

### MST1\_KGEGYRGTDTTAGVPCQRW\_Mod

RID [BVJBTM5501R](#) (Expires on 01-21 10:20 am)

Query ID |cl|55271 Database Name nr  
 Description None Description All non-redundant GenBank CDS translations+PDB+SwissProt+PIR+PRF excluding environmental samples from WGS projects  
 Molecule type amino acid Program BLASTP 2.2.30+ [Citation](#)  
 Query Length 21

Other reports: [Search Summary](#) [Taxonomy reports](#) [Distance tree of results](#) [Multiple alignment](#)

### Graphic Summary

Show Conserved Domains

Putative conserved domains have been detected, click on the image below for detailed results.

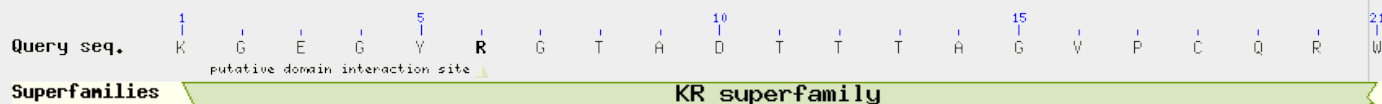

Distribution of 367 Blast Hits on the Query Sequence

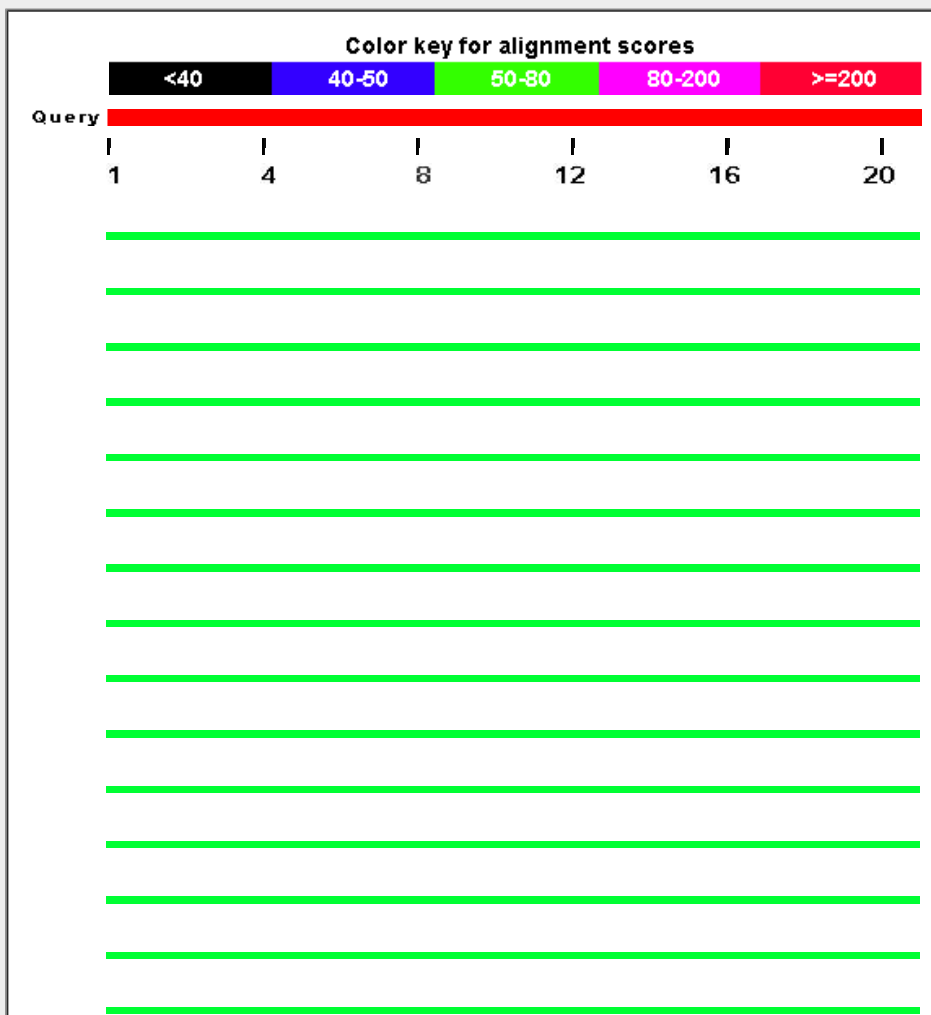



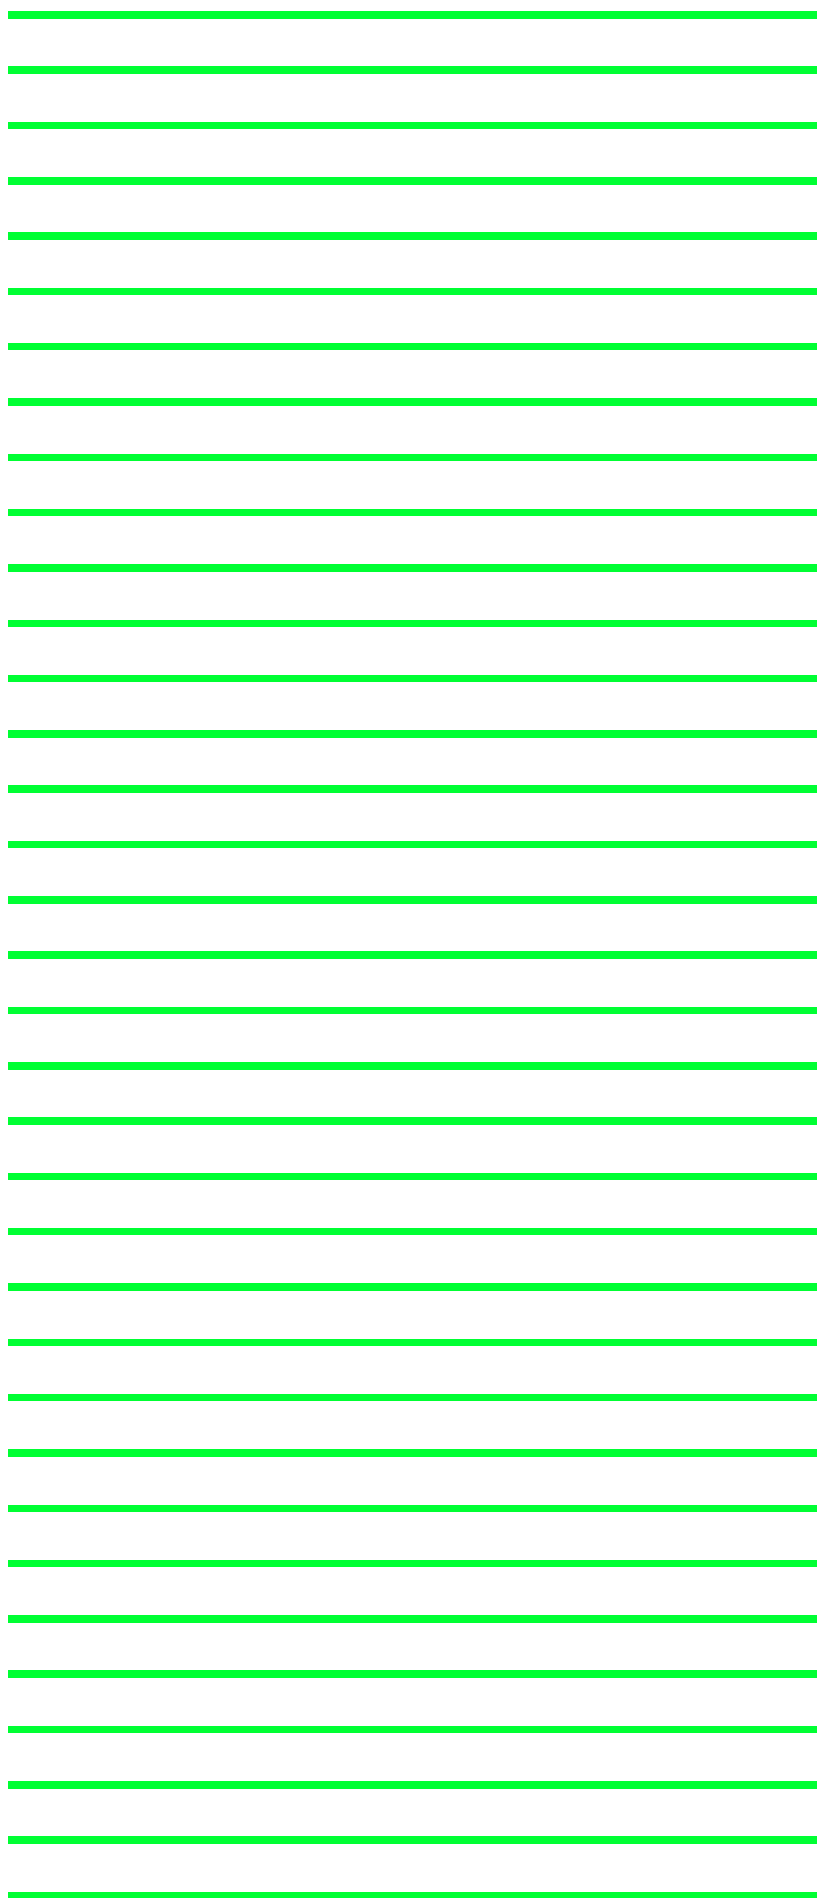

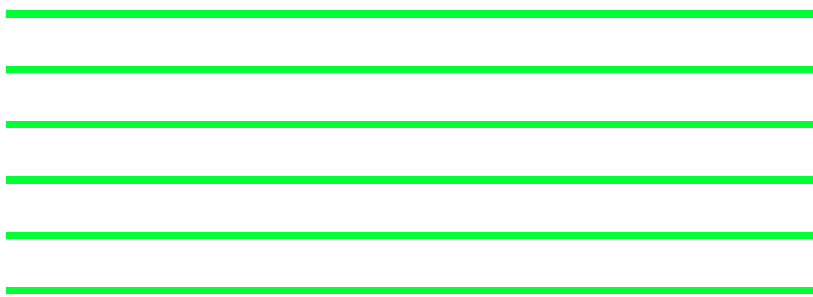

## Descriptions

### Sequences producing significant alignments:

Select: [All](#) [None](#) Selected:0

| Alignments                                                                                                                       | Download  | GenPept     | Graphics    | Distance tree of results | Multiple alignment |                                |  |
|----------------------------------------------------------------------------------------------------------------------------------|-----------|-------------|-------------|--------------------------|--------------------|--------------------------------|--|
| Description                                                                                                                      | Max score | Total score | Query cover | E value                  | Ident              | Accession                      |  |
| <a href="#">MST1 protein [Homo sapiens]</a>                                                                                      | 68.1      | 99.3        | 100%        | 1e-11                    | 95%                | <a href="#">AAH44862.1</a>     |  |
| <a href="#">unnamed protein product [Homo sapiens]</a>                                                                           | 68.1      | 133         | 100%        | 1e-11                    | 95%                | <a href="#">BAH12793.1</a>     |  |
| <a href="#">macrophage stimulating 1 (hepatocyte growth factor-like), isoform CRA_d [Homo sapiens]</a>                           | 68.1      | 99.3        | 100%        | 1e-11                    | 95%                | <a href="#">EAW65002.1</a>     |  |
| <a href="#">unnamed protein product [Homo sapiens]</a>                                                                           | 68.1      | 133         | 100%        | 1e-11                    | 95%                | <a href="#">BAH11736.1</a>     |  |
| <a href="#">PREDICTED: hepatocyte growth factor-like protein isoform X4 [Homo sapiens]</a>                                       | 68.1      | 167         | 100%        | 2e-11                    | 95%                | <a href="#">XP_006713232.1</a> |  |
| <a href="#">hepatocyte growth factor-like protein homolog [Homo sapiens]</a>                                                     | 68.1      | 159         | 100%        | 2e-11                    | 95%                | <a href="#">AAC63092.1</a>     |  |
| <a href="#">PREDICTED: hepatocyte growth factor-like protein isoform X2 [Macaca fascicularis]</a>                                | 68.1      | 168         | 100%        | 2e-11                    | 95%                | <a href="#">XP_005547205.1</a> |  |
| <a href="#">macrophage stimulating 1 (hepatocyte growth factor-like), isoform CRA_e [Homo sapiens]</a>                           | 68.1      | 132         | 100%        | 2e-11                    | 95%                | <a href="#">EAW65003.1</a>     |  |
| <a href="#">PREDICTED: hepatocyte growth factor-like protein isoform X2 [Homo sapiens]</a>                                       | 68.1      | 167         | 100%        | 2e-11                    | 95%                | <a href="#">XP_006713230.1</a> |  |
| <a href="#">PREDICTED: hepatocyte growth factor-like protein isoform X5 [Chlorocebus sabaeus]</a>                                | 68.1      | 135         | 100%        | 2e-11                    | 95%                | <a href="#">XP_007982450.1</a> |  |
| <a href="#">PREDICTED: hepatocyte growth factor-like protein [Echinops telfairii]</a>                                            | 68.1      | 136         | 100%        | 2e-11                    | 95%                | <a href="#">XP_004715222.1</a> |  |
| <a href="#">PREDICTED: hepatocyte growth factor-like protein isoform X2 [Papio anubis]</a>                                       | 68.1      | 168         | 100%        | 2e-11                    | 95%                | <a href="#">XP_009199018.1</a> |  |
| <a href="#">macrophage-stimulating protein [Homo sapiens]</a>                                                                    | 68.1      | 167         | 100%        | 2e-11                    | 95%                | <a href="#">AAA59872.1</a>     |  |
| <a href="#">RecName: Full=Hepatocyte growth factor-like protein; AltName: Full=Macrophage-stimulating protein [Homo sapiens]</a> | 68.1      | 167         | 100%        | 2e-11                    | 95%                | <a href="#">P26927.2</a>       |  |
| <a href="#">hepatocyte growth factor-like protein [Homo sapiens]</a>                                                             | 68.1      | 167         | 100%        | 2e-11                    | 95%                | <a href="#">AAA50165.1</a>     |  |
| <a href="#">hypothetical protein EGM_20500 [Macaca fascicularis]</a>                                                             | 68.1      | 168         | 100%        | 2e-11                    | 95%                | <a href="#">EHH62249.1</a>     |  |
| <a href="#">hypothetical protein EGK_11631 [Macaca mulatta]</a>                                                                  | 68.1      | 168         | 100%        | 2e-11                    | 95%                | <a href="#">EHH16360.1</a>     |  |
| <a href="#">hypothetical protein [Macaca fascicularis]</a>                                                                       | 68.1      | 168         | 100%        | 2e-11                    | 95%                | <a href="#">BAF47378.1</a>     |  |
| <a href="#">macrophage stimulating 1 (hepatocyte growth factor-like) variant [Homo sapiens]</a>                                  | 68.1      | 170         | 100%        | 2e-11                    | 95%                | <a href="#">BAD96613.1</a>     |  |
| <a href="#">PREDICTED: hepatocyte growth factor-like protein isoform X4 [Chlorocebus sabaeus]</a>                                | 68.1      | 135         | 100%        | 2e-11                    | 95%                | <a href="#">XP_007982449.1</a> |  |
| <a href="#">PREDICTED: hepatocyte growth factor-like protein isoform X1 [Cavia porcellus]</a>                                    | 68.1      | 153         | 100%        | 2e-11                    | 95%                | <a href="#">XP_003476721.1</a> |  |
| <a href="#">PREDICTED: hepatocyte growth factor-like protein [Pteropus alecto]</a>                                               | 68.1      | 171         | 100%        | 2e-11                    | 95%                | <a href="#">XP_006909162.1</a> |  |
| <a href="#">PREDICTED: hepatocyte growth factor-like protein [Pongo abelii]</a>                                                  | 68.1      | 169         | 100%        | 2e-11                    | 95%                | <a href="#">XP_002813790.1</a> |  |
| <a href="#">PREDICTED: hepatocyte growth factor-like protein isoform X3 [Chlorocebus sabaeus]</a>                                | 68.1      | 168         | 100%        | 2e-11                    | 95%                | <a href="#">XP_007982448.1</a> |  |
| <a href="#">PREDICTED: hepatocyte growth factor-like protein isoform X1 [Macaca fascicularis]</a>                                | 68.1      | 168         | 100%        | 2e-11                    | 95%                | <a href="#">XP_005547204.1</a> |  |
| <a href="#">PREDICTED: hepatocyte growth factor-like protein [Gorilla gorilla gorilla]</a>                                       | 68.1      | 167         | 100%        | 2e-11                    | 95%                | <a href="#">XP_004034204.1</a> |  |
| <a href="#">PREDICTED: hepatocyte growth factor-like protein isoform X1 [Papio anubis]</a>                                       | 68.1      | 168         | 100%        | 2e-11                    | 95%                | <a href="#">XP_003894463.1</a> |  |
| <a href="#">PREDICTED: hepatocyte growth factor-like protein [Nomascus leucogenys]</a>                                           | 68.1      | 163         | 100%        | 2e-11                    | 95%                | <a href="#">XP_003257123.1</a> |  |
| <a href="#">hepatocyte growth factor-like protein precursor [Homo sapiens]</a>                                                   | 68.1      | 167         | 100%        | 2e-11                    | 95%                | <a href="#">NP_066278.3</a>    |  |

|                                                                                               |      |     |      |       |     |                                |
|-----------------------------------------------------------------------------------------------|------|-----|------|-------|-----|--------------------------------|
| <a href="#">PREDICTED: hepatocyte growth factor-like protein [Macaca mulatta]</a>             | 68.1 | 168 | 100% | 2e-11 | 95% | <a href="#">XP_001107946.1</a> |
| <a href="#">PREDICTED: hepatocyte growth factor-like protein isoform X2 [Chlorocebus s</a>    | 68.1 | 135 | 100% | 2e-11 | 95% | <a href="#">XP_007982445.1</a> |
| <a href="#">PREDICTED: hepatocyte growth factor-like protein isoform X2 [Cavia porcellu</a>   | 68.1 | 153 | 100% | 2e-11 | 95% | <a href="#">XP_005006713.1</a> |
| <a href="#">PREDICTED: hepatocyte growth factor-like protein isoform X1 [Chlorocebus s</a>    | 68.1 | 135 | 100% | 2e-11 | 95% | <a href="#">XP_007982444.1</a> |
| <a href="#">PREDICTED: LOW QUALITY PROTEIN: hepatocyte growth factor-like proteir</a>         | 68.1 | 165 | 100% | 2e-11 | 95% | <a href="#">XP_516465.4</a>    |
| <a href="#">PREDICTED: LOW QUALITY PROTEIN: hepatocyte growth factor-like proteir</a>         | 65.1 | 163 | 100% | 2e-10 | 90% | <a href="#">XP_005326984.1</a> |
| <a href="#">PREDICTED: hepatocyte growth factor-like protein isoform X4 [Equus przewa</a>     | 64.7 | 167 | 100% | 2e-10 | 90% | <a href="#">XP_008522208.1</a> |
| <a href="#">PREDICTED: hepatocyte growth factor-like protein isoform X2 [Saimiri bolivie</a>  | 64.7 | 161 | 100% | 2e-10 | 90% | <a href="#">XP_010345462.1</a> |
| <a href="#">PREDICTED: hepatocyte growth factor-like protein isoform X2 [Equus caballu</a>    | 64.7 | 139 | 100% | 2e-10 | 90% | <a href="#">XP_005600717.1</a> |
| <a href="#">PREDICTED: hepatocyte growth factor-like protein isoform X2 [Equus przewa</a>     | 64.7 | 167 | 100% | 2e-10 | 90% | <a href="#">XP_008522206.1</a> |
| <a href="#">hypothetical protein PANDA_009343 [Ailuropoda melanoleuca]</a>                    | 64.7 | 156 | 100% | 2e-10 | 90% | <a href="#">EFB13926.1</a>     |
| <a href="#">PREDICTED: hepatocyte growth factor-like protein [Erinaceus europaeus]</a>        | 64.7 | 148 | 100% | 2e-10 | 90% | <a href="#">XP_007527316.1</a> |
| <a href="#">PREDICTED: hepatocyte growth factor-like protein [Galeopterus variegatus]</a>     | 64.7 | 162 | 100% | 2e-10 | 90% | <a href="#">XP_008569781.1</a> |
| <a href="#">PREDICTED: hepatocyte growth factor-like protein [Tarsius syrichta]</a>           | 64.7 | 168 | 100% | 2e-10 | 90% | <a href="#">XP_008061363.1</a> |
| <a href="#">PREDICTED: hepatocyte growth factor-like protein [Orycteropus afer afer]</a>      | 64.7 | 166 | 100% | 2e-10 | 90% | <a href="#">XP_007953538.1</a> |
| <a href="#">PREDICTED: hepatocyte growth factor-like protein [Leptonychotes weddellii]</a>    | 64.7 | 161 | 100% | 2e-10 | 90% | <a href="#">XP_006744596.1</a> |
| <a href="#">PREDICTED: hepatocyte growth factor-like protein [Tupaia chinensis]</a>           | 64.7 | 161 | 100% | 2e-10 | 90% | <a href="#">XP_006171012.1</a> |
| <a href="#">PREDICTED: hepatocyte growth factor-like protein isoform X3 [Mustela putori</a>   | 64.7 | 156 | 100% | 2e-10 | 90% | <a href="#">XP_004820133.1</a> |
| <a href="#">PREDICTED: hepatocyte growth factor-like protein [Mustela putorius furo]</a>      | 64.7 | 156 | 100% | 2e-10 | 90% | <a href="#">XP_004760697.1</a> |
| <a href="#">PREDICTED: hepatocyte growth factor-like protein [Odobenus rosmarus dive</a>      | 64.7 | 158 | 100% | 2e-10 | 90% | <a href="#">XP_004399304.1</a> |
| <a href="#">PREDICTED: hepatocyte growth factor-like protein [Ceratotherium simum sim</a>     | 64.7 | 160 | 100% | 2e-10 | 90% | <a href="#">XP_004419765.1</a> |
| <a href="#">PREDICTED: hepatocyte growth factor-like protein [Sorex araneus]</a>              | 64.7 | 158 | 100% | 2e-10 | 90% | <a href="#">XP_004615300.1</a> |
| <a href="#">PREDICTED: LOW QUALITY PROTEIN: hepatocyte growth factor-like proteir</a>         | 64.7 | 170 | 100% | 2e-10 | 90% | <a href="#">XP_003409924.1</a> |
| <a href="#">PREDICTED: hepatocyte growth factor-like protein [Eptesicus fuscus]</a>           | 64.7 | 153 | 100% | 2e-10 | 90% | <a href="#">XP_008153797.1</a> |
| <a href="#">PREDICTED: hepatocyte growth factor-like protein [Pantholops hodgsonii]</a>       | 64.7 | 130 | 100% | 2e-10 | 90% | <a href="#">XP_005969335.1</a> |
| <a href="#">PREDICTED: hepatocyte growth factor-like protein isoform X1 [Equus caballu</a>    | 64.7 | 167 | 100% | 2e-10 | 90% | <a href="#">XP_005600716.1</a> |
| <a href="#">PREDICTED: hepatocyte growth factor-like protein [Felis catus]</a>                | 64.7 | 165 | 100% | 2e-10 | 90% | <a href="#">XP_003982280.1</a> |
| <a href="#">PREDICTED: hepatocyte growth factor-like protein isoform X1 [Saimiri bolivie</a>  | 64.7 | 161 | 100% | 2e-10 | 90% | <a href="#">XP_003936704.1</a> |
| <a href="#">PREDICTED: hepatocyte growth factor-like protein [Canis lupus familiaris]</a>     | 64.7 | 161 | 100% | 2e-10 | 90% | <a href="#">XP_541884.3</a>    |
| <a href="#">PREDICTED: LOW QUALITY PROTEIN: hepatocyte growth factor-like proteir</a>         | 64.7 | 125 | 100% | 2e-10 | 90% | <a href="#">XP_004018505.1</a> |
| <a href="#">Hepatocyte growth factor-like protein [Tupaia chinensis]</a>                      | 64.7 | 161 | 100% | 2e-10 | 90% | <a href="#">ELV09642.1</a>     |
| <a href="#">PREDICTED: hepatocyte growth factor-like protein-like [Ailuropoda melanoleu</a>   | 64.7 | 156 | 100% | 2e-10 | 90% | <a href="#">XP_002920612.1</a> |
| <a href="#">PREDICTED: hepatocyte growth factor-like protein isoform X3 [Chinchilla lanu</a>  | 64.3 | 122 | 100% | 3e-10 | 90% | <a href="#">XP_005410271.1</a> |
| <a href="#">PREDICTED: hepatocyte growth factor-like protein isoform X2 [Chinchilla lanu</a>  | 64.3 | 122 | 100% | 3e-10 | 90% | <a href="#">XP_005410270.1</a> |
| <a href="#">PREDICTED: hepatocyte growth factor-like protein isoform X1 [Chinchilla lanu</a>  | 64.3 | 122 | 100% | 3e-10 | 90% | <a href="#">XP_005410269.1</a> |
| <a href="#">PREDICTED: hepatocyte growth factor-like protein [Rhinopithecus roxellana]</a>    | 63.8 | 165 | 100% | 4e-10 | 90% | <a href="#">XP_010367959.1</a> |
| <a href="#">PREDICTED: hepatocyte growth factor-like protein isoform X2 [Callithrix jacch</a> | 62.6 | 122 | 100% | 1e-09 | 86% | <a href="#">XP_008979888.1</a> |
| <a href="#">PREDICTED: hepatocyte growth factor-like protein isoform X1 [Callithrix jacch</a> | 62.6 | 156 | 100% | 1e-09 | 86% | <a href="#">XP_002758398.1</a> |
| <a href="#">PREDICTED: hepatocyte growth factor-like protein [Otolemur garnettii]</a>         | 62.1 | 164 | 100% | 2e-09 | 86% | <a href="#">XP_003800642.1</a> |
| <a href="#">PREDICTED: hepatocyte growth factor-like protein [Elephantulus edwardii]</a>      | 61.7 | 166 | 100% | 2e-09 | 86% | <a href="#">XP_006892963.1</a> |
| <a href="#">PREDICTED: hepatocyte growth factor-like protein [Dasypus novemcinctus]</a>       | 61.7 | 164 | 100% | 2e-09 | 86% | <a href="#">XP_004451933.1</a> |
| <a href="#">PREDICTED: hepatocyte growth factor-like protein [Bubalus bubalis]</a>            | 61.3 | 131 | 100% | 3e-09 | 86% | <a href="#">XP_006053335.1</a> |
| <a href="#">PREDICTED: hepatocyte growth factor-like protein [Bos mutus]</a>                  | 61.3 | 131 | 100% | 3e-09 | 86% | <a href="#">XP_005892185.1</a> |
| <a href="#">TPA: hepatocyte growth factor-like protein [Bos taurus]</a>                       | 61.3 | 131 | 100% | 3e-09 | 86% | <a href="#">DAA16921.1</a>     |
| <a href="#">hepatocyte growth factor-like protein precursor [Bos taurus]</a>                  | 61.3 | 131 | 100% | 3e-09 | 86% | <a href="#">NP_001069145.1</a> |
| <a href="#">PREDICTED: hepatocyte growth factor-like protein [Camelus bactrianus]</a>         | 61.3 | 158 | 100% | 3e-09 | 86% | <a href="#">XP_010967473.1</a> |

|                                                                                              |      |      |      |       |     |                                |
|----------------------------------------------------------------------------------------------|------|------|------|-------|-----|--------------------------------|
| <a href="#">Hepatocyte growth factor-like protein [Bos mutus]</a>                            | 61.3 | 131  | 100% | 3e-09 | 86% | <a href="#">ELR58967.1</a>     |
| <a href="#">PREDICTED: hepatocyte growth factor-like protein [Jaculus jaculus]</a>           | 61.3 | 151  | 100% | 3e-09 | 86% | <a href="#">XP_004664298.1</a> |
| <a href="#">PREDICTED: hepatocyte growth factor-like protein isoform X2 [Bison bison bi]</a> | 61.3 | 131  | 100% | 3e-09 | 86% | <a href="#">XP_010850156.1</a> |
| <a href="#">PREDICTED: hepatocyte growth factor-like protein [Balaenoptera acutorostr]</a>   | 61.3 | 157  | 100% | 3e-09 | 86% | <a href="#">XP_007168789.1</a> |
| <a href="#">PREDICTED: hepatocyte growth factor-like protein isoform X1 [Bison bison bi]</a> | 61.3 | 131  | 100% | 3e-09 | 86% | <a href="#">XP_010850155.1</a> |
| <a href="#">PREDICTED: hepatocyte growth factor-like protein [Lipotes vexillifer]</a>        | 61.3 | 157  | 100% | 3e-09 | 86% | <a href="#">XP_007446274.1</a> |
| <a href="#">PREDICTED: hepatocyte growth factor-like protein [Physeter catodon]</a>          | 61.3 | 153  | 100% | 3e-09 | 86% | <a href="#">XP_007129906.1</a> |
| <a href="#">PREDICTED: LOW QUALITY PROTEIN: hepatocyte growth factor-like proteir</a>        | 61.3 | 158  | 100% | 3e-09 | 86% | <a href="#">XP_006196588.1</a> |
| <a href="#">PREDICTED: hepatocyte growth factor-like protein isoform X2 [Bos taurus]</a>     | 61.3 | 131  | 100% | 3e-09 | 86% | <a href="#">XP_005222861.1</a> |
| <a href="#">PREDICTED: hepatocyte growth factor-like protein [Tursiops truncatus]</a>        | 61.3 | 157  | 100% | 3e-09 | 86% | <a href="#">XP_004314855.1</a> |
| <a href="#">PREDICTED: hepatocyte growth factor-like protein [Orcinus orca]</a>              | 61.3 | 157  | 100% | 3e-09 | 86% | <a href="#">XP_004284002.1</a> |
| <a href="#">PREDICTED: hepatocyte growth factor-like protein [Camelus dromedarius]</a>       | 61.3 | 158  | 100% | 3e-09 | 86% | <a href="#">XP_010976658.1</a> |
| <a href="#">PREDICTED: hepatocyte growth factor-like protein [Octodon degus]</a>             | 60.9 | 155  | 100% | 4e-09 | 86% | <a href="#">XP_004625159.1</a> |
| <a href="#">PREDICTED: hepatocyte growth factor-like protein [Ochotona princeps]</a>         | 60.9 | 147  | 100% | 4e-09 | 86% | <a href="#">XP_004581815.1</a> |
| <a href="#">PREDICTED: hepatocyte growth factor-like protein [Trichechus manatus latiro</a>  | 60.4 | 171  | 100% | 6e-09 | 86% | <a href="#">XP_004368594.1</a> |
| <a href="#">PREDICTED: hepatocyte growth factor-like protein [Chrysochloris asiatica]</a>    | 59.6 | 160  | 100% | 1e-08 | 81% | <a href="#">XP_006873659.1</a> |
| <a href="#">Hepatocyte growth factor-like protein [Cricetulus griseus]</a>                   | 58.3 | 58.3 | 100% | 1e-08 | 81% | <a href="#">EGW08932.1</a>     |
| <a href="#">hepatocyte growth factor-like protein [Cricetulus griseus]</a>                   | 58.3 | 81.9 | 100% | 3e-08 | 81% | <a href="#">ERE75628.1</a>     |
| <a href="#">PREDICTED: hepatocyte growth factor-like protein isoform X2 [Mus musculus]</a>   | 58.3 | 144  | 100% | 3e-08 | 81% | <a href="#">XP_006511702.1</a> |
| <a href="#">PREDICTED: hepatocyte growth factor-like protein [Nannospalax galii]</a>         | 58.3 | 108  | 100% | 3e-08 | 81% | <a href="#">XP_008851489.1</a> |
| <a href="#">Macrophage stimulating 1 (hepatocyte growth factor-like) [Mus musculus]</a>      | 58.3 | 144  | 100% | 3e-08 | 81% | <a href="#">AAH10551.1</a>     |
| <a href="#">hepatocyte growth factor-like protein precursor [Mus musculus]</a>               | 58.3 | 144  | 100% | 3e-08 | 81% | <a href="#">NP_032269.3</a>    |
| <a href="#">PREDICTED: hepatocyte growth factor-like protein [Mesocricetus auratus]</a>      | 58.3 | 134  | 100% | 3e-08 | 81% | <a href="#">XP_005074975.1</a> |
| <a href="#">unnamed protein product [Mus musculus]</a>                                       | 58.3 | 144  | 100% | 3e-08 | 81% | <a href="#">BAE22056.1</a>     |
| <a href="#">hepatocyte growth factor-like protein [Mus musculus]</a>                         | 58.3 | 144  | 100% | 3e-08 | 81% | <a href="#">AAA50167.1</a>     |

## Alignments

Download [GenPept](#) [Graphics](#) Sort by: E value [Next](#) [Previous](#) [Descriptions](#)

### MST1 protein [Homo sapiens]

Sequence ID: [gb|AAH44862.1|](#) Length: 188 Number of Matches: 2

Range 1: 150 to 170 [GenPept](#) [Graphics](#)

[Next Match](#) [Previous Match](#)

| Score          | Expect | Identities | Positives   | Gaps     |
|----------------|--------|------------|-------------|----------|
| 68.1 bits(153) | 1e-11  | 20/21(95%) | 21/21(100%) | 0/21(0%) |

Query 1 KGEGYRGTDITTTAGVPCQRW 21  
 KEGEGYRGTA+ITTTAGVPCQRW  
 Sbjct 150 KGEGYRGTA+ITTTAGVPCQRW 170

Range 2: 59 to 78 [GenPept](#) [Graphics](#)

[Next Match](#) [Previous Match](#) [First Match](#)

| Score         | Expect | Identities | Positives  | Gaps     |
|---------------|--------|------------|------------|----------|
| 31.2 bits(66) | 21     | 12/20(60%) | 12/20(60%) | 0/20(0%) |

Query 2 GEGYRGTDITTTAGVPCQRW 21  
 GE YRG D T G CQRW  
 Sbjct 59 GEEYRGAVDRTESGRECQRW 78

### Related Information

[Gene](#) - associated gene details

Download [GenPept](#) [Graphics](#) Sort by: E value [Next](#) [Previous](#) [Descriptions](#)

### unnamed protein product [Homo sapiens]

Sequence ID: [dbj|BAH12793.1|](#) Length: 264 Number of Matches: 3

### Related Information

Range 1: 226 to 246 [GenPept](#) [Graphics](#) [Next Match](#) [Previous Match](#)

| Score          | Expect | Identities | Positives   | Gaps     |
|----------------|--------|------------|-------------|----------|
| 68.1 bits(153) | 1e-11  | 20/21(95%) | 21/21(100%) | 0/21(0%) |

Query 1 KGEGYRGTTAGVPCQRW 21  
 KGEGYRGTA+TTTAGVPCQRW  
 Sbjct 226 KGEGYRGTTAGVPCQRW 246

[Gene](#) - associated gene details

Range 2: 56 to 73 [GenPept](#) [Graphics](#) [Next Match](#) [Previous Match](#) [First Match](#)

| Score         | Expect | Identities | Positives  | Gaps     |
|---------------|--------|------------|------------|----------|
| 34.6 bits(74) | 1.7    | 12/18(67%) | 12/18(66%) | 0/18(0%) |

Query 4 GYRGTTAGVPCQRW 21  
 GYRGTT G PCQ W  
 Sbjct 56 GYRGTMATTVGGLPCQAW 73

Range 3: 135 to 154 [GenPept](#) [Graphics](#) [Next Match](#) [Previous Match](#) [First Match](#)

| Score         | Expect | Identities | Positives  | Gaps     |
|---------------|--------|------------|------------|----------|
| 31.2 bits(66) | 21     | 12/20(60%) | 12/20(60%) | 0/20(0%) |

Query 2 GEGYRGTTAGVPCQRW 21  
 GE YRG D T G CQRW  
 Sbjct 135 GEEYRGAVDRTEGREGCQRW 154

[Download](#) [GenPept](#) [Graphics](#) Sort by: E value [Next](#) [Previous](#) [Descriptions](#)

macrophage stimulating 1 (hepatocyte growth factor-like), isoform CRA\_d [Homo sapiens]  
 Sequence ID: [gb|EAW65002.1](#) Length: 331 Number of Matches: 2

**Related Information**

[Gene](#) - associated gene details

Range 1: 225 to 245 [GenPept](#) [Graphics](#) [Next Match](#) [Previous Match](#)

| Score          | Expect | Identities | Positives   | Gaps     |
|----------------|--------|------------|-------------|----------|
| 68.1 bits(153) | 1e-11  | 20/21(95%) | 21/21(100%) | 0/21(0%) |

Query 1 KGEGYRGTTAGVPCQRW 21  
 KGEGYRGTA+TTTAGVPCQRW  
 Sbjct 225 KGEGYRGTTAGVPCQRW 245

Range 2: 134 to 153 [GenPept](#) [Graphics](#) [Next Match](#) [Previous Match](#) [First Match](#)

| Score         | Expect | Identities | Positives  | Gaps     |
|---------------|--------|------------|------------|----------|
| 31.2 bits(66) | 21     | 12/20(60%) | 12/20(60%) | 0/20(0%) |

Query 2 GEGYRGTTAGVPCQRW 21  
 GE YRG D T G CQRW  
 Sbjct 134 GEEYRGAVDRTEGREGCQRW 153

[Download](#) [GenPept](#) [Graphics](#) Sort by: E value [Next](#) [Previous](#) [Descriptions](#)

unnamed protein product [Homo sapiens]  
 Sequence ID: [dbj|BAH11736.1](#) Length: 339 Number of Matches: 3

**Related Information**

[Gene](#) - associated gene details

Range 1: 301 to 321 [GenPept](#) [Graphics](#) [Next Match](#) [Previous Match](#)

| Score          | Expect | Identities | Positives   | Gaps     |
|----------------|--------|------------|-------------|----------|
| 68.1 bits(153) | 1e-11  | 20/21(95%) | 21/21(100%) | 0/21(0%) |

Query 1 KGEGYRGTTAGVPCQRW 21  
 KGEGYRGTA+TTTAGVPCQRW  
 Sbjct 301 KGEGYRGTTAGVPCQRW 321

Range 2: 131 to 148 [GenPept](#) [Graphics](#) [Next Match](#) [Previous Match](#) [First Match](#)

| Score         | Expect | Identities | Positives  | Gaps     |
|---------------|--------|------------|------------|----------|
| 34.6 bits(74) | 1.7    | 12/18(67%) | 12/18(66%) | 0/18(0%) |

Query 4 GYRGTTAGVPCQRW 21  
 GYRGTT G PCQ W  
 Sbjct 131 GYRGTMATTVGGLPCQAW 148

Range 3: 210 to 229 [GenPept](#) [Graphics](#) [Next Match](#) [Previous Match](#) [First Match](#)

| Score         | Expect | Identities | Positives  | Gaps     |
|---------------|--------|------------|------------|----------|
| 31.2 bits(66) | 21     | 12/20(60%) | 12/20(60%) | 0/20(0%) |

Query 2 GEGYRGTTAGVPCQRW 21  
 GE YRG D T G CQRW  
 Sbjct 210 GEEYRGAVDRTEGREGCQRW 229

[Download](#) [GenPept](#) [Graphics](#) Sort by: E value [Next](#) [Previous](#) [Descriptions](#)

PREDICTED: hepatocyte growth factor-like protein isoform X4 [Homo sapiens]  
 Sequence ID: [ref|XP\\_006713232.1](#) Length: 519 Number of Matches: 4

**Related Information**  
[Gene](#) - associated gene details

Range 1: 301 to 321 [GenPept](#) [Graphics](#) [Next Match](#) [Previous Match](#)

| Score          | Expect | Identities | Positives   | Gaps     |
|----------------|--------|------------|-------------|----------|
| 68.1 bits(153) | 2e-11  | 20/21(95%) | 21/21(100%) | 0/21(0%) |

Query 1 KGEGYRGTTAGVPCQRW 21  
 KGEGYRGTA+TTTAGVPCQRW  
 Sbjct 301 KGEGYRGTTAGVPCQRW 321

Range 2: 131 to 148 [GenPept](#) [Graphics](#) [Next Match](#) [Previous Match](#) [First Match](#)

| Score         | Expect | Identities | Positives  | Gaps     |
|---------------|--------|------------|------------|----------|
| 34.6 bits(74) | 1.8    | 12/18(67%) | 12/18(66%) | 0/18(0%) |

Query 4 GYRGTTAGVPCQRW 21  
 GYRG TT G PCQ W  
 Sbjct 131 GYRGTTAGVPCQRW 148

Range 3: 389 to 408 [GenPept](#) [Graphics](#) [Next Match](#) [Previous Match](#) [First Match](#)

| Score         | Expect | Identities | Positives  | Gaps     |
|---------------|--------|------------|------------|----------|
| 33.7 bits(72) | 3.3    | 13/20(65%) | 13/20(65%) | 0/20(0%) |

Query 2 GEGYRGTTAGVPCQRW 21  
 GE YRG T GV CQRW  
 Sbjct 389 GEYRGTVSKTRKGVQCQRW 408

Range 4: 210 to 229 [GenPept](#) [Graphics](#) [Next Match](#) [Previous Match](#) [First Match](#)

| Score         | Expect | Identities | Positives  | Gaps     |
|---------------|--------|------------|------------|----------|
| 31.2 bits(66) | 22     | 12/20(60%) | 12/20(60%) | 0/20(0%) |

Query 2 GEGYRGTTAGVPCQRW 21  
 GE YRG D T G CQRW  
 Sbjct 210 GEEYRGAVDRTEGREGCQRW 229

BLAST is a registered trademark of the National Library of Medicine.

NCBI/ BLAST/ blastp suite/ Formatting Results - B9P2EFER01R

**ⓘ** Your search parameters were adjusted to search for a short input sequence.  
[Edit and Resubmit](#) [Save Search Strategies](#) [▶ Formatting options](#) [▶ Download](#)

**MST1\_KGEGYRGTANTTTAGVPCQRW\_NonMod** [YouTube](#) [How to read this page](#) [Blast report description](#)

**RID** [B9P2EFER01R](#) (Expires on 01-14 15:33 pm)

|                                 |                                                                                                                                   |
|---------------------------------|-----------------------------------------------------------------------------------------------------------------------------------|
| <b>Query ID</b>  cl 23225       | <b>Database Name</b> nr                                                                                                           |
| <b>Description</b> None         | <b>Description</b> All non-redundant GenBank CDS translations+PDB+SwissProt+PIR excluding environmental samples from WGS projects |
| <b>Molecule type</b> amino acid | <b>Program</b> BLASTP 2.2.30+ <a href="#">▶ Citation</a>                                                                          |
| <b>Query Length</b> 21          |                                                                                                                                   |

Other reports: [▶ Search Summary](#) [\[Taxonomy reports\]](#) [\[Distance tree of results\]](#) [\[Multiple alignment\]](#)

**Graphic Summary**

Show Conserved Domains

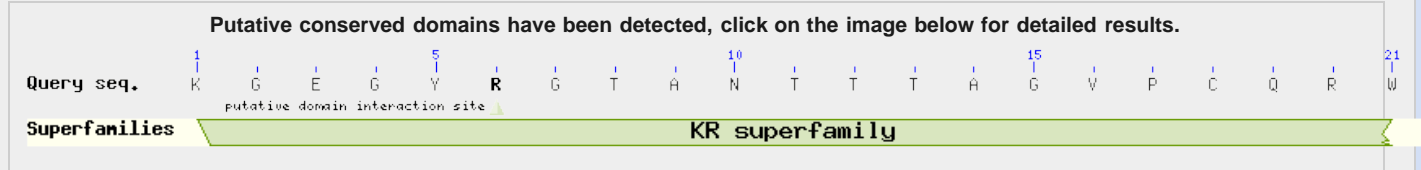

Distribution of 379 Blast Hits on the Query Sequence ⓘ

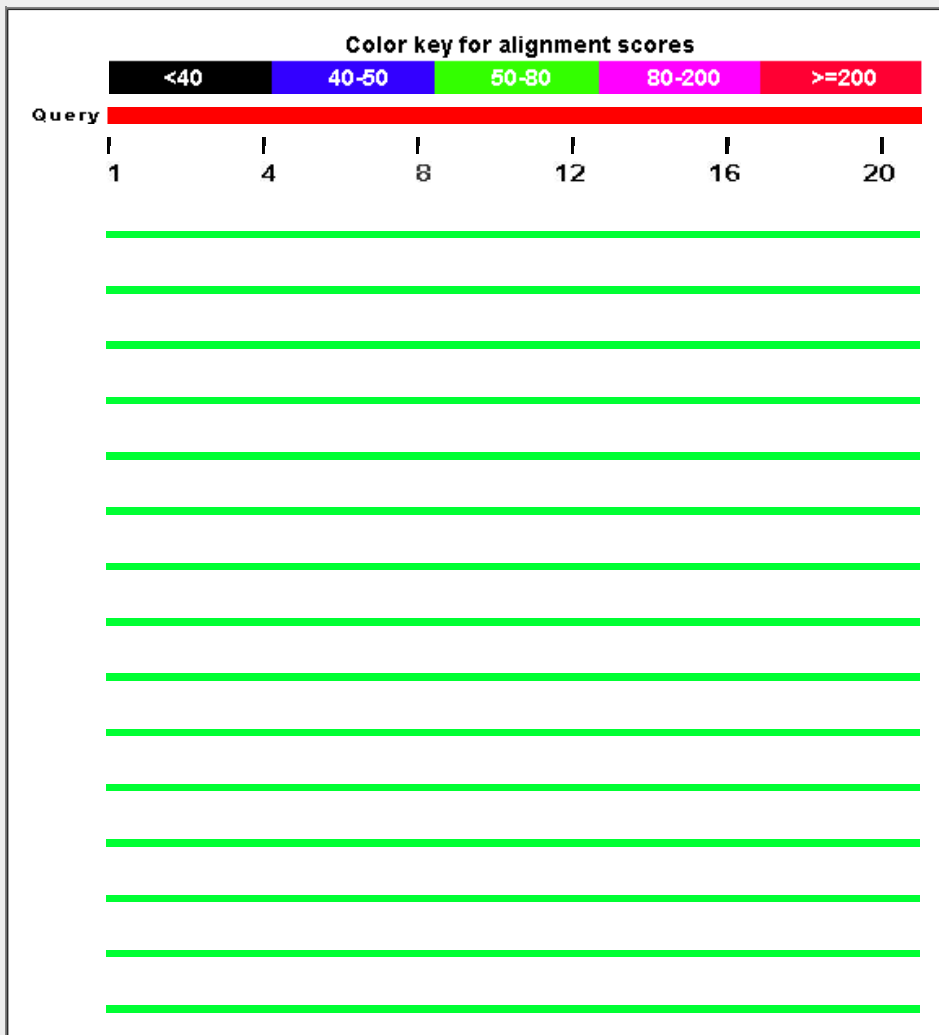

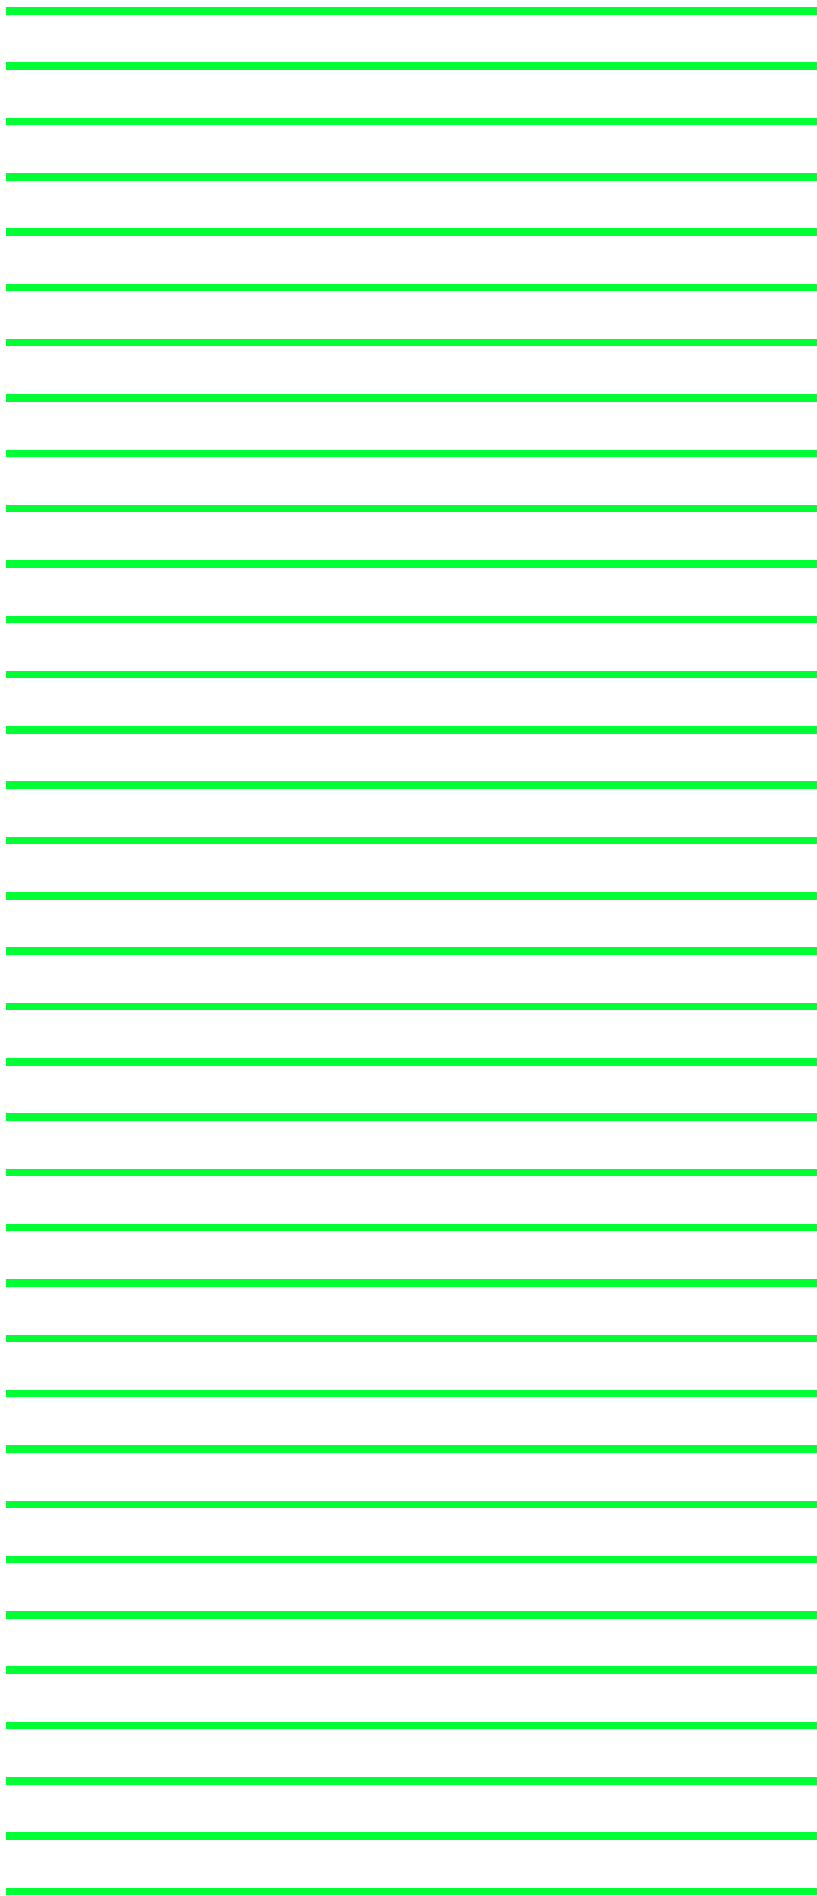



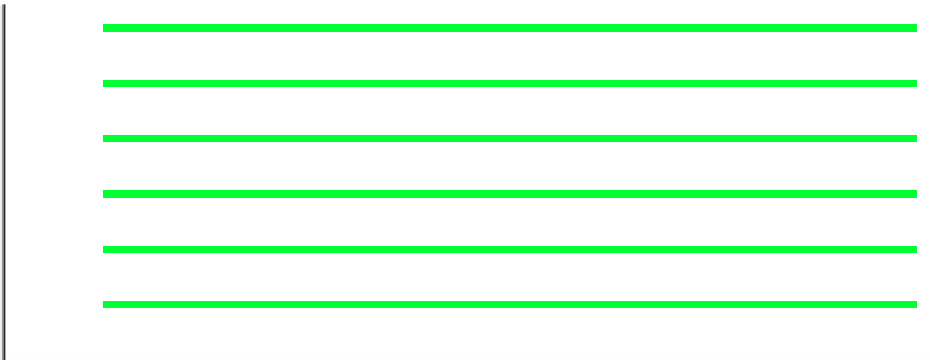

**Descriptions**

**Sequences producing significant alignments:**

Select: [All](#) [None](#) Selected:0

| <a href="#">Alignments</a> <a href="#">Download</a> <a href="#">GenPept</a> <a href="#">Graphics</a> <a href="#">Distance tree of results</a> <a href="#">Multiple alignment</a> |           |             |             |         |       |                                             |  |
|----------------------------------------------------------------------------------------------------------------------------------------------------------------------------------|-----------|-------------|-------------|---------|-------|---------------------------------------------|--|
| Description                                                                                                                                                                      | Max score | Total score | Query cover | E value | Ident | Accession                                   |  |
| <a href="#">MST1 protein [Homo sapiens]</a>                                                                                                                                      | 70.6      | 99.3        | 100%        | 1e-12   | 100%  | <a href="#">gi 71297286 AAH44862.1</a>      |  |
| <a href="#">unnamed protein product [Homo sapiens]</a>                                                                                                                           | 70.6      | 133         | 100%        | 2e-12   | 100%  | <a href="#">gi 221042232 BAH12793.1</a>     |  |
| <a href="#">macrophage stimulating 1 (hepatocyte growth factor-like), isoform C</a>                                                                                              | 70.6      | 99.3        | 100%        | 2e-12   | 100%  | <a href="#">gi 119585406 EAW65002.1</a>     |  |
| <a href="#">unnamed protein product [Homo sapiens]</a>                                                                                                                           | 70.6      | 133         | 100%        | 2e-12   | 100%  | <a href="#">gi 221039946 BAH11736.1</a>     |  |
| <a href="#">PREDICTED: hepatocyte growth factor-like protein isoform X4 [Hor</a>                                                                                                 | 70.6      | 168         | 100%        | 2e-12   | 100%  | <a href="#">gi 578806141 XP_006713232.1</a> |  |
| <a href="#">hepatocyte growth factor-like protein homolog [Homo sapiens]</a>                                                                                                     | 70.6      | 160         | 100%        | 2e-12   | 100%  | <a href="#">gi 1141775 AAC63092.1</a>       |  |
| <a href="#">PREDICTED: hepatocyte growth factor-like protein isoform X2 [Mac</a>                                                                                                 | 70.6      | 170         | 100%        | 2e-12   | 100%  | <a href="#">gi 544414366 XP_005547205.1</a> |  |
| <a href="#">macrophage stimulating 1 (hepatocyte growth factor-like), isoform C</a>                                                                                              | 70.6      | 134         | 100%        | 2e-12   | 100%  | <a href="#">gi 119585407 EAW65003.1</a>     |  |
| <a href="#">PREDICTED: hepatocyte growth factor-like protein isoform X2 [Hor</a>                                                                                                 | 70.6      | 168         | 100%        | 2e-12   | 100%  | <a href="#">gi 578806131 XP_006713230.1</a> |  |
| <a href="#">PREDICTED: hepatocyte growth factor-like protein isoform X5 [Chi</a>                                                                                                 | 70.6      | 134         | 100%        | 2e-12   | 100%  | <a href="#">gi 635118817 XP_007982450.1</a> |  |
| <a href="#">PREDICTED: hepatocyte growth factor-like protein [Echinops telfair</a>                                                                                               | 70.6      | 161         | 100%        | 2e-12   | 100%  | <a href="#">gi 507700568 XP_004715222.1</a> |  |
| <a href="#">PREDICTED: hepatocyte growth factor-like protein isoform X2 [Pap</a>                                                                                                 | 70.6      | 170         | 100%        | 2e-12   | 100%  | <a href="#">gi 685524931 XP_009199018.1</a> |  |
| <a href="#">macrophage-stimulating protein [Homo sapiens]</a>                                                                                                                    | 70.6      | 168         | 100%        | 2e-12   | 100%  | <a href="#">gi 398038 AAA59872.1</a>        |  |
| <a href="#">RecName: Full=Hepatocyte growth factor-like protein; AltName: Fu</a>                                                                                                 | 70.6      | 168         | 100%        | 2e-12   | 100%  | <a href="#">gi 147744563 P26927.2</a>       |  |
| <a href="#">hepatocyte growth factor-like protein [Homo sapiens]</a>                                                                                                             | 70.6      | 168         | 100%        | 2e-12   | 100%  | <a href="#">gi 183977 AAA50165.1</a>        |  |
| <a href="#">hypothetical protein EGM_20500 [Macaca fascicularis]</a>                                                                                                             | 70.6      | 170         | 100%        | 2e-12   | 100%  | <a href="#">gi 355764094 EHH62249.1</a>     |  |
| <a href="#">hypothetical protein EGK_11631 [Macaca mulatta]</a>                                                                                                                  | 70.6      | 170         | 100%        | 2e-12   | 100%  | <a href="#">gi 355559632 EHH16360.1</a>     |  |
| <a href="#">hypothetical protein [Macaca fascicularis]</a>                                                                                                                       | 70.6      | 170         | 100%        | 2e-12   | 100%  | <a href="#">gi 126143528 BAF47378.1</a>     |  |
| <a href="#">macrophage stimulating 1 (hepatocyte growth factor-like) variant [H</a>                                                                                              | 70.6      | 172         | 100%        | 2e-12   | 100%  | <a href="#">gi 62897345 BAD96613.1</a>      |  |
| <a href="#">PREDICTED: hepatocyte growth factor-like protein isoform X4 [Chi</a>                                                                                                 | 70.6      | 134         | 100%        | 2e-12   | 100%  | <a href="#">gi 635118815 XP_007982449.1</a> |  |
| <a href="#">PREDICTED: hepatocyte growth factor-like protein isoform X1 [Cav</a>                                                                                                 | 70.6      | 135         | 100%        | 2e-12   | 100%  | <a href="#">gi 348581912 XP_003476721.1</a> |  |
| <a href="#">PREDICTED: hepatocyte growth factor-like protein [Pteropus alect</a>                                                                                                 | 70.6      | 173         | 100%        | 2e-12   | 100%  | <a href="#">gi 586548158 XP_006909162.1</a> |  |
| <a href="#">PREDICTED: hepatocyte growth factor-like protein [Pongo abelii]</a>                                                                                                  | 70.6      | 170         | 100%        | 2e-12   | 100%  | <a href="#">gi 297671325 XP_002813790.1</a> |  |
| <a href="#">PREDICTED: hepatocyte growth factor-like protein isoform X3 [Chi</a>                                                                                                 | 70.6      | 170         | 100%        | 2e-12   | 100%  | <a href="#">gi 635118813 XP_007982448.1</a> |  |
| <a href="#">PREDICTED: hepatocyte growth factor-like protein isoform X1 [Mac</a>                                                                                                 | 70.6      | 170         | 100%        | 2e-12   | 100%  | <a href="#">gi 544414364 XP_005547204.1</a> |  |
| <a href="#">PREDICTED: hepatocyte growth factor-like protein [Gorilla gorilla g</a>                                                                                              | 70.6      | 169         | 100%        | 2e-12   | 100%  | <a href="#">gi 426340575 XP_004034204.1</a> |  |
| <a href="#">PREDICTED: hepatocyte growth factor-like protein isoform X1 [Pap</a>                                                                                                 | 70.6      | 170         | 100%        | 2e-12   | 100%  | <a href="#">gi 402860079 XP_003894463.1</a> |  |
| <a href="#">PREDICTED: hepatocyte growth factor-like protein [Nomascus leuc</a>                                                                                                  | 70.6      | 165         | 100%        | 2e-12   | 100%  | <a href="#">gi 332215988 XP_003257123.1</a> |  |
| <a href="#">hepatocyte growth factor-like protein precursor [Homo sapiens]</a>                                                                                                   | 70.6      | 168         | 100%        | 2e-12   | 100%  | <a href="#">gi 205277383 NP_066278.3</a>    |  |

|                                                                                     |      |     |      |       |      |                                             |
|-------------------------------------------------------------------------------------|------|-----|------|-------|------|---------------------------------------------|
| <a href="#">PREDICTED: hepatocyte growth factor-like protein [Macaca mulatta]</a>   | 70.6 | 170 | 100% | 2e-12 | 100% | <a href="#">gi 109039656 XP_001107946.1</a> |
| <a href="#">PREDICTED: hepatocyte growth factor-like protein isoform X2 [Chl]</a>   | 70.6 | 134 | 100% | 2e-12 | 100% | <a href="#">gi 635118807 XP_007982445.1</a> |
| <a href="#">PREDICTED: hepatocyte growth factor-like protein isoform X2 [Cav]</a>   | 70.6 | 135 | 100% | 2e-12 | 100% | <a href="#">gi 514473830 XP_005006713.1</a> |
| <a href="#">PREDICTED: hepatocyte growth factor-like protein isoform X1 [Chl]</a>   | 70.6 | 134 | 100% | 2e-12 | 100% | <a href="#">gi 635118805 XP_007982444.1</a> |
| <a href="#">PREDICTED: LOW QUALITY PROTEIN: hepatocyte growth factor-</a>           | 70.6 | 166 | 100% | 2e-12 | 100% | <a href="#">gi 410036983 XP_516465.4</a>    |
| <a href="#">PREDICTED: LOW QUALITY PROTEIN: hepatocyte growth factor-</a>           | 67.7 | 165 | 100% | 2e-11 | 95%  | <a href="#">gi 532082473 XP_005326984.1</a> |
| <a href="#">PREDICTED: hepatocyte growth factor-like protein isoform X4 [Equ]</a>   | 67.2 | 168 | 100% | 3e-11 | 95%  | <a href="#">gi 664730013 XP_008522208.1</a> |
| <a href="#">PREDICTED: hepatocyte growth factor-like protein isoform X2 [Sai]</a>   | 67.2 | 162 | 100% | 3e-11 | 95%  | <a href="#">gi 725588970 XP_010345462.1</a> |
| <a href="#">PREDICTED: hepatocyte growth factor-like protein isoform X2 [Equ]</a>   | 67.2 | 139 | 100% | 3e-11 | 95%  | <a href="#">gi 545188630 XP_005600717.1</a> |
| <a href="#">PREDICTED: hepatocyte growth factor-like protein isoform X2 [Equ]</a>   | 67.2 | 168 | 100% | 3e-11 | 95%  | <a href="#">gi 664730009 XP_008522206.1</a> |
| <a href="#">hypothetical protein PANDA_009343 [Ailuropoda melanoleuca]</a>          | 67.2 | 157 | 100% | 3e-11 | 95%  | <a href="#">gi 281338342 EFB13926.1</a>     |
| <a href="#">PREDICTED: hepatocyte growth factor-like protein [Erinaceus euro]</a>   | 67.2 | 151 | 100% | 3e-11 | 95%  | <a href="#">gi 617622190 XP_007527316.1</a> |
| <a href="#">PREDICTED: hepatocyte growth factor-like protein [Galeopterus va]</a>   | 67.2 | 164 | 100% | 3e-11 | 95%  | <a href="#">gi 667267781 XP_008569781.1</a> |
| <a href="#">PREDICTED: hepatocyte growth factor-like protein [Tarsius syrichte]</a> | 67.2 | 169 | 100% | 3e-11 | 95%  | <a href="#">gi 640809594 XP_008061363.1</a> |
| <a href="#">PREDICTED: hepatocyte growth factor-like protein [Orycteropus afi]</a>  | 67.2 | 167 | 100% | 3e-11 | 95%  | <a href="#">gi 634888659 XP_007953538.1</a> |
| <a href="#">PREDICTED: hepatocyte growth factor-like protein [Leptonychotes]</a>    | 67.2 | 162 | 100% | 3e-11 | 95%  | <a href="#">gi 585186199 XP_006744596.1</a> |
| <a href="#">PREDICTED: hepatocyte growth factor-like protein [Tupaia chinens]</a>   | 67.2 | 162 | 100% | 3e-11 | 95%  | <a href="#">gi 562887217 XP_006171012.1</a> |
| <a href="#">PREDICTED: hepatocyte growth factor-like protein isoform X3 [Mus]</a>   | 67.2 | 158 | 100% | 3e-11 | 95%  | <a href="#">gi 512005359 XP_004820133.1</a> |
| <a href="#">PREDICTED: hepatocyte growth factor-like protein [Mustela putoriu]</a>  | 67.2 | 158 | 100% | 3e-11 | 95%  | <a href="#">gi 511881610 XP_004760697.1</a> |
| <a href="#">PREDICTED: hepatocyte growth factor-like protein [Odobenus rosn]</a>    | 67.2 | 159 | 100% | 3e-11 | 95%  | <a href="#">gi 472359375 XP_004399304.1</a> |
| <a href="#">PREDICTED: hepatocyte growth factor-like protein [Ceratotherium ]</a>   | 67.2 | 162 | 100% | 3e-11 | 95%  | <a href="#">gi 478490786 XP_004419765.1</a> |
| <a href="#">PREDICTED: hepatocyte growth factor-like protein [Sorex araneus]</a>    | 67.2 | 159 | 100% | 3e-11 | 95%  | <a href="#">gi 505843606 XP_004615300.1</a> |
| <a href="#">PREDICTED: LOW QUALITY PROTEIN: hepatocyte growth factor-</a>           | 67.2 | 172 | 100% | 3e-11 | 95%  | <a href="#">gi 344276255 XP_003409924.1</a> |
| <a href="#">PREDICTED: hepatocyte growth factor-like protein [Eptesicus fusc]</a>   | 67.2 | 154 | 100% | 3e-11 | 95%  | <a href="#">gi 641693981 XP_008153797.1</a> |
| <a href="#">PREDICTED: hepatocyte growth factor-like protein [Pantholops hoc]</a>   | 67.2 | 153 | 100% | 3e-11 | 95%  | <a href="#">gi 556747770 XP_005969335.1</a> |
| <a href="#">PREDICTED: hepatocyte growth factor-like protein isoform X1 [Equ]</a>   | 67.2 | 168 | 100% | 3e-11 | 95%  | <a href="#">gi 545188628 XP_005600716.1</a> |
| <a href="#">PREDICTED: hepatocyte growth factor-like protein [Felis catus]</a>      | 67.2 | 167 | 100% | 3e-11 | 95%  | <a href="#">gi 410951187 XP_003982280.1</a> |
| <a href="#">PREDICTED: hepatocyte growth factor-like protein isoform X1 [Sai]</a>   | 67.2 | 162 | 100% | 3e-11 | 95%  | <a href="#">gi 403291235 XP_003936704.1</a> |
| <a href="#">PREDICTED: hepatocyte growth factor-like protein [Canis lupus far]</a>  | 67.2 | 162 | 100% | 3e-11 | 95%  | <a href="#">gi 345787353 XP_541884.3</a>    |
| <a href="#">PREDICTED: LOW QUALITY PROTEIN: hepatocyte growth factor-</a>           | 67.2 | 147 | 100% | 3e-11 | 95%  | <a href="#">gi 426249535 XP_004018505.1</a> |
| <a href="#">Hepatocyte growth factor-like protein [Tupaia chinensis]</a>            | 67.2 | 162 | 100% | 3e-11 | 95%  | <a href="#">gi 444510620 ELV09642.1</a>     |
| <a href="#">PREDICTED: hepatocyte growth factor-like protein-like [Ailuropoda]</a>  | 67.2 | 157 | 100% | 3e-11 | 95%  | <a href="#">gi 301770361 XP_002920612.1</a> |
| <a href="#">PREDICTED: hepatocyte growth factor-like protein isoform X3 [Chii]</a>  | 66.8 | 148 | 100% | 4e-11 | 95%  | <a href="#">gi 533195097 XP_005410271.1</a> |
| <a href="#">PREDICTED: hepatocyte growth factor-like protein isoform X2 [Chii]</a>  | 66.8 | 148 | 100% | 4e-11 | 95%  | <a href="#">gi 533195095 XP_005410270.1</a> |
| <a href="#">PREDICTED: hepatocyte growth factor-like protein isoform X1 [Chii]</a>  | 66.8 | 148 | 100% | 4e-11 | 95%  | <a href="#">gi 533195093 XP_005410269.1</a> |
| <a href="#">PREDICTED: hepatocyte growth factor-like protein [Rhinopithecus ]</a>   | 66.4 | 166 | 100% | 6e-11 | 95%  | <a href="#">gi 724799330 XP_010367959.1</a> |
| <a href="#">PREDICTED: hepatocyte growth factor-like protein isoform X2 [Call]</a>  | 65.1 | 124 | 100% | 2e-10 | 90%  | <a href="#">gi 675727602 XP_008979888.1</a> |
| <a href="#">PREDICTED: hepatocyte growth factor-like protein isoform X1 [Call]</a>  | 65.1 | 157 | 100% | 2e-10 | 90%  | <a href="#">gi 296225219 XP_002758398.1</a> |
| <a href="#">PREDICTED: hepatocyte growth factor-like protein [Otolemur garni]</a>   | 64.7 | 165 | 100% | 2e-10 | 90%  | <a href="#">gi 395856451 XP_003800642.1</a> |
| <a href="#">PREDICTED: hepatocyte growth factor-like protein [Elephantulus e]</a>   | 64.3 | 168 | 100% | 3e-10 | 90%  | <a href="#">gi 585684863 XP_006892963.1</a> |
| <a href="#">PREDICTED: hepatocyte growth factor-like protein [Dasypus novor]</a>    | 64.3 | 165 | 100% | 3e-10 | 90%  | <a href="#">gi 488519988 XP_004451933.1</a> |
| <a href="#">PREDICTED: hepatocyte growth factor-like protein [Bubalus bubali]</a>   | 63.8 | 155 | 100% | 4e-10 | 90%  | <a href="#">gi 594058341 XP_006053335.1</a> |
| <a href="#">PREDICTED: hepatocyte growth factor-like protein [Bos mutus]</a>        | 63.8 | 153 | 100% | 4e-10 | 90%  | <a href="#">gi 555960159 XP_005892185.1</a> |
| <a href="#">TPA: hepatocyte growth factor-like protein [Bos taurus]</a>             | 63.8 | 153 | 100% | 4e-10 | 90%  | <a href="#">gi 296474806 DAA16921.1</a>     |
| <a href="#">hepatocyte growth factor-like protein precursor [Bos taurus]</a>        | 63.8 | 153 | 100% | 4e-10 | 90%  | <a href="#">gi 115496876 NP_001069145.1</a> |
| <a href="#">Hepatocyte growth factor-like protein [Bos mutus]</a>                   | 63.8 | 153 | 100% | 4e-10 | 90%  | <a href="#">gi 440909008 ELR58967.1</a>     |

|                                                                     |      |      |      |       |     |                                             |
|---------------------------------------------------------------------|------|------|------|-------|-----|---------------------------------------------|
| PREDICTED: hepatocyte growth factor-like protein [Jaculus jaculus   | 63.8 | 153  | 100% | 4e-10 | 90% | <a href="#">gij507561196 XP_004664298.1</a> |
| PREDICTED: hepatocyte growth factor-like protein [Balaenoptera a    | 63.8 | 159  | 100% | 4e-10 | 90% | <a href="#">gij594630485 XP_007168789.1</a> |
| PREDICTED: hepatocyte growth factor-like protein [Lipotes vexillife | 63.8 | 159  | 100% | 4e-10 | 90% | <a href="#">gij602681551 XP_007446274.1</a> |
| PREDICTED: hepatocyte growth factor-like protein [Physeter catod    | 63.8 | 154  | 100% | 4e-10 | 90% | <a href="#">gij593749341 XP_007129906.1</a> |
| PREDICTED: LOW QUALITY PROTEIN: hepatocyte growth factor-           | 63.8 | 159  | 100% | 4e-10 | 90% | <a href="#">gij560948035 XP_006196588.1</a> |
| PREDICTED: hepatocyte growth factor-like protein isoform X4 [Bos    | 63.8 | 153  | 100% | 4e-10 | 90% | <a href="#">gij529001498 XP_005222861.1</a> |
| PREDICTED: hepatocyte growth factor-like protein [Tursiops trunc    | 63.8 | 159  | 100% | 4e-10 | 90% | <a href="#">gij470608261 XP_004314855.1</a> |
| PREDICTED: hepatocyte growth factor-like protein [Orcinus orca]     | 63.8 | 159  | 100% | 4e-10 | 90% | <a href="#">gij466078823 XP_004284002.1</a> |
| PREDICTED: hepatocyte growth factor-like protein [Octodon degus     | 63.4 | 157  | 100% | 6e-10 | 90% | <a href="#">gij507620447 XP_004625159.1</a> |
| PREDICTED: hepatocyte growth factor-like protein [Ochotona princ    | 63.4 | 148  | 100% | 6e-10 | 90% | <a href="#">gij504138720 XP_004581815.1</a> |
| PREDICTED: hepatocyte growth factor-like protein [Trichechus ma     | 63.0 | 173  | 100% | 8e-10 | 90% | <a href="#">gij471355983 XP_004368594.1</a> |
| PREDICTED: hepatocyte growth factor-like protein [Chrysochloris e   | 62.1 | 161  | 100% | 2e-09 | 86% | <a href="#">gij586486348 XP_006873659.1</a> |
| Hepatocyte growth factor-like protein [Cricetulus griseus]          | 60.9 | 60.9 | 100% | 2e-09 | 86% | <a href="#">gij344252828 EGW08932.1</a>     |
| hepatocyte growth factor-like protein [Cricetulus griseus]          | 60.9 | 86.1 | 100% | 4e-09 | 86% | <a href="#">gij537178774 ERE75628.1</a>     |
| PREDICTED: hepatocyte growth factor-like protein isoform X2 [Mus    | 60.9 | 145  | 100% | 4e-09 | 86% | <a href="#">gij568962765 XP_006511702.1</a> |
| PREDICTED: hepatocyte growth factor-like protein [Nannospalax g     | 60.9 | 110  | 100% | 4e-09 | 86% | <a href="#">gij674087268 XP_008851489.1</a> |
| Macrophage stimulating 1 (hepatocyte growth factor-like) [Mus mus   | 60.9 | 145  | 100% | 4e-09 | 86% | <a href="#">gij14714805 AAH10551.1</a>      |
| hepatocyte growth factor-like protein precursor [Mus musculus]      | 60.9 | 145  | 100% | 4e-09 | 86% | <a href="#">gij254675205 NP_032269.3</a>    |
| PREDICTED: hepatocyte growth factor-like protein [Mesocricetus a    | 60.9 | 135  | 100% | 4e-09 | 86% | <a href="#">gij524949917 XP_005074975.1</a> |
| unnamed protein product [Mus musculus]                              | 60.9 | 145  | 100% | 4e-09 | 86% | <a href="#">gij74140912 BAE22056.1</a>      |
| hepatocyte growth factor-like protein [Mus musculus]                | 60.9 | 145  | 100% | 4e-09 | 86% | <a href="#">gij193834 AAA50167.1</a>        |
| hepatocyte growth factor-like protein precursor [Rattus norvegicus] | 60.9 | 145  | 100% | 4e-09 | 86% | <a href="#">gij13242239 NP_077328.1</a>     |
| PREDICTED: hepatocyte growth factor-like protein [Peromyscus m      | 60.9 | 141  | 100% | 4e-09 | 86% | <a href="#">gij589931181 XP_006978395.1</a> |
| PREDICTED: hepatocyte growth factor-like protein isoform X1 [Mic    | 60.9 | 145  | 100% | 4e-09 | 86% | <a href="#">gij532008239 XP_005347942.1</a> |
| PREDICTED: hepatocyte growth factor-like protein isoform X2 [Mic    | 60.9 | 145  | 100% | 4e-09 | 86% | <a href="#">gij532008241 XP_005347943.1</a> |

## Alignments

Download [GenPept](#) [Graphics](#) Sort by: E value [Next](#) [Previous](#) [Descriptions](#)

### MST1 protein [Homo sapiens]

Sequence ID: [gij71297286|gb|AAH44862.1](#) Length: 188 Number of Matches: 2

Range 1: 150 to 170 [GenPept](#) [Graphics](#) [Next Match](#) [Previous Match](#)

| Score          | Expect | Identities  | Positives   | Gaps     |
|----------------|--------|-------------|-------------|----------|
| 70.6 bits(159) | 1e-12  | 21/21(100%) | 21/21(100%) | 0/21(0%) |

Query 1 KGEGYRGTTANTTTAGVPCQRW 21  
 KGEGYRGTTANTTTAGVPCQRW  
 Sbjct 150 KGEGYRGTTANTTTAGVPCQRW 170

Range 2: 59 to 78 [GenPept](#) [Graphics](#) [Next Match](#) [Previous Match](#) [First Match](#)

| Score         | Expect | Identities | Positives  | Gaps     |
|---------------|--------|------------|------------|----------|
| 28.6 bits(60) | 142    | 11/20(55%) | 12/20(60%) | 0/20(0%) |

Query 2 GEGYRGTTANTTTAGVPCQRW 21  
 GE YRG + T G CQRW  
 Sbjct 59 GEEYRGAVDRITESGRECQRW 78

### Related Information

[Gene](#) - associated gene details

Download [GenPept](#) [Graphics](#) Sort by: E value [Next](#) [Previous](#) [Descriptions](#)

### unnamed protein product [Homo sapiens]

Sequence ID: [gij221042232|dbj|BAH12793.1](#) Length: 264 Number of Matches: 3

Range 1: 226 to 246 [GenPept](#) [Graphics](#) [Next Match](#) [Previous Match](#)

| Score | Expect | Identities | Positives | Gaps |
|-------|--------|------------|-----------|------|
|-------|--------|------------|-----------|------|

### Related Information

[Gene](#) - associated gene details

70.6 bits(159) 2e-12 21/21(100%) 21/21(100%) 0/21(0%)

Query 1 KGEGYRGTANTTTAGVPCQRW 21  
 KEGEGYRGTANTTTAGVPCQRW  
 Sbjct 226 KGEGYRGTANTTTAGVPCQRW 246

Range 2: 56 to 73 [GenPept](#) [Graphics](#) [Next Match](#) [Previous Match](#) [First Match](#)

| Score         | Expect | Identities | Positives  | Gaps     |
|---------------|--------|------------|------------|----------|
| 34.1 bits(73) | 2.2    | 12/18(67%) | 12/18(66%) | 0/18(0%) |

Query 4 GYRGTANTTTAGVPCQRW 21  
 GYRGT TT G PCQ W  
 Sbjct 56 GYRGTMTTVGGLPCQAW 73

Range 3: 135 to 154 [GenPept](#) [Graphics](#) [Next Match](#) [Previous Match](#) [First Match](#)

| Score         | Expect | Identities | Positives  | Gaps     |
|---------------|--------|------------|------------|----------|
| 28.6 bits(60) | 143    | 11/20(55%) | 12/20(60%) | 0/20(0%) |

Query 2 GEGYRGTANTTTAGVPCQRW 21  
 GE YRG + T G CQRW  
 Sbjct 135 GEEYRGAVDRTESGRECQRW 154

[Download](#) [GenPept](#) [Graphics](#) Sort by: E value [Next](#) [Previous](#) [Descriptions](#)

macrophage stimulating 1 (hepatocyte growth factor-like), isoform CRA\_d [Homo sapiens]

Sequence ID: [gi|119585406|gb|EAW65002.1](#) Length: 331 Number of Matches: 2

**Related Information**

[Gene](#) - associated gene details

Range 1: 225 to 245 [GenPept](#) [Graphics](#) [Next Match](#) [Previous Match](#)

| Score          | Expect | Identities  | Positives   | Gaps     |
|----------------|--------|-------------|-------------|----------|
| 70.6 bits(159) | 2e-12  | 21/21(100%) | 21/21(100%) | 0/21(0%) |

Query 1 KGEGYRGTANTTTAGVPCQRW 21  
 KEGEGYRGTANTTTAGVPCQRW  
 Sbjct 225 KGEGYRGTANTTTAGVPCQRW 245

Range 2: 134 to 153 [GenPept](#) [Graphics](#) [Next Match](#) [Previous Match](#) [First Match](#)

| Score         | Expect | Identities | Positives  | Gaps     |
|---------------|--------|------------|------------|----------|
| 28.6 bits(60) | 144    | 11/20(55%) | 12/20(60%) | 0/20(0%) |

Query 2 GEGYRGTANTTTAGVPCQRW 21  
 GE YRG + T G CQRW  
 Sbjct 134 GEEYRGAVDRTESGRECQRW 153

[Download](#) [GenPept](#) [Graphics](#) Sort by: E value [Next](#) [Previous](#) [Descriptions](#)

unnamed protein product [Homo sapiens]

Sequence ID: [gi|221039946|dbj|BAH11736.1](#) Length: 339 Number of Matches: 3

**Related Information**

[Gene](#) - associated gene details

Range 1: 301 to 321 [GenPept](#) [Graphics](#) [Next Match](#) [Previous Match](#)

| Score          | Expect | Identities  | Positives   | Gaps     |
|----------------|--------|-------------|-------------|----------|
| 70.6 bits(159) | 2e-12  | 21/21(100%) | 21/21(100%) | 0/21(0%) |

Query 1 KGEGYRGTANTTTAGVPCQRW 21  
 KEGEGYRGTANTTTAGVPCQRW  
 Sbjct 301 KGEGYRGTANTTTAGVPCQRW 321

Range 2: 131 to 148 [GenPept](#) [Graphics](#) [Next Match](#) [Previous Match](#) [First Match](#)

| Score         | Expect | Identities | Positives  | Gaps     |
|---------------|--------|------------|------------|----------|
| 34.1 bits(73) | 2.2    | 12/18(67%) | 12/18(66%) | 0/18(0%) |

Query 4 GYRGTANTTTAGVPCQRW 21  
 GYRGT TT G PCQ W  
 Sbjct 131 GYRGTMTTVGGLPCQAW 148

Range 3: 210 to 229 [GenPept](#) [Graphics](#) [Next Match](#) [Previous Match](#) [First Match](#)

| Score         | Expect | Identities | Positives  | Gaps     |
|---------------|--------|------------|------------|----------|
| 28.6 bits(60) | 144    | 11/20(55%) | 12/20(60%) | 0/20(0%) |

Query 2 GEGYRGTANTTTAGVPCQRW 21  
 GE YRG + T G CQRW  
 Sbjct 210 GEEYRGAVDRTESGRECQRW 229

[Download](#) [GenPept](#) [Graphics](#) Sort by: E value [Next](#) [Previous](#) [Descriptions](#)

PREDICTED: hepatocyte growth factor-like protein isoform X4 [Homo sapiens]

Sequence ID: [gi|578806141|ref|XP\\_006713232.1](#) Length: 519 Number of Matches: 4

**Related Information**

[Gene](#) - associated gene details

Range 1: 301 to 321 [GenPept](#) [Graphics](#) [Next Match](#) [Previous Match](#)

| Score          | Expect | Identities  | Positives   | Gaps     |
|----------------|--------|-------------|-------------|----------|
| 70.6 bits(159) | 2e-12  | 21/21(100%) | 21/21(100%) | 0/21(0%) |

Query 1 KGEGYRGTANTTTAGVPCQRW 21  
 KGEGYRGTANTTTAGVPCQRW  
 Sbjct 301 KGEGYRGTANTTTAGVPCQRW 321

Range 2: 389 to 408 [GenPept](#) [Graphics](#) [▼ Next Match](#) [▲ Previous Match](#) [▲ First Match](#)

| Score         | Expect | Identities | Positives  | Gaps     |
|---------------|--------|------------|------------|----------|
| 35.4 bits(76) | 0.89   | 13/20(65%) | 13/20(65%) | 0/20(0%) |

Query 2 GEGYRGTANTTTAGVPCQRW 21  
 GE YRGT T GV CQRW  
 Sbjct 389 GEQYRGTVSKTRKGVQCQRW 408

Range 3: 131 to 148 [GenPept](#) [Graphics](#) [▼ Next Match](#) [▲ Previous Match](#) [▲ First Match](#)

| Score         | Expect | Identities | Positives  | Gaps     |
|---------------|--------|------------|------------|----------|
| 34.1 bits(73) | 2.3    | 12/18(67%) | 12/18(66%) | 0/18(0%) |

Query 4 GYRGTANTTTAGVPCQRW 21  
 GYRGT TT G PCQ W  
 Sbjct 131 GYRGTMTTVGGLPCQAW 148

Range 4: 210 to 229 [GenPept](#) [Graphics](#) [▼ Next Match](#) [▲ Previous Match](#) [▲ First Match](#)

| Score         | Expect | Identities | Positives  | Gaps     |
|---------------|--------|------------|------------|----------|
| 28.6 bits(60) | 145    | 11/20(55%) | 12/20(60%) | 0/20(0%) |

Query 2 GEGYRGTANTTTAGVPCQRW 21  
 GE YRG + T G CQRW  
 Sbjct 210 GEEYRGAVDRTESGRECQRW 229

BLAST is a registered trademark of the National Library of Medicine.

▶ [NCBI/ BLAST/ blastp suite/ Formatting Results - BVJMG49T01R](#)

**i** Your search parameters were adjusted to search for a short input sequence.

[Edit and Resubmit](#) [Save Search Strategies](#) ▶ [Formatting options](#) ▶ [Download](#) [YouTube](#) [How to read this page](#) [Blast report description](#)

### MST1\_KGTGDDTVLNVALLNVISNQECNIKH\_Mod

**RID** [BVJMG49T01R](#) (Expires on 01-21 10:25 am)

**Query ID** |cl|155489  
**Description** None  
**Molecule type** amino acid  
**Query Length** 26

**Database Name** nr  
**Description** All non-redundant GenBank CDS translations+PDB+SwissProt+PIR+PRF excluding environmental samples from WGS projects  
**Program** BLASTP 2.2.30+ ▶ [Citation](#)

Other reports: ▶ [Search Summary](#) [[Taxonomy reports](#)] [[Distance tree of results](#)] [[Multiple alignment](#)]

### **Graphic Summary**

[Show Conserved Domains](#)

No putative conserved domains have been detected

Distribution of 100 Blast Hits on the Query Sequence



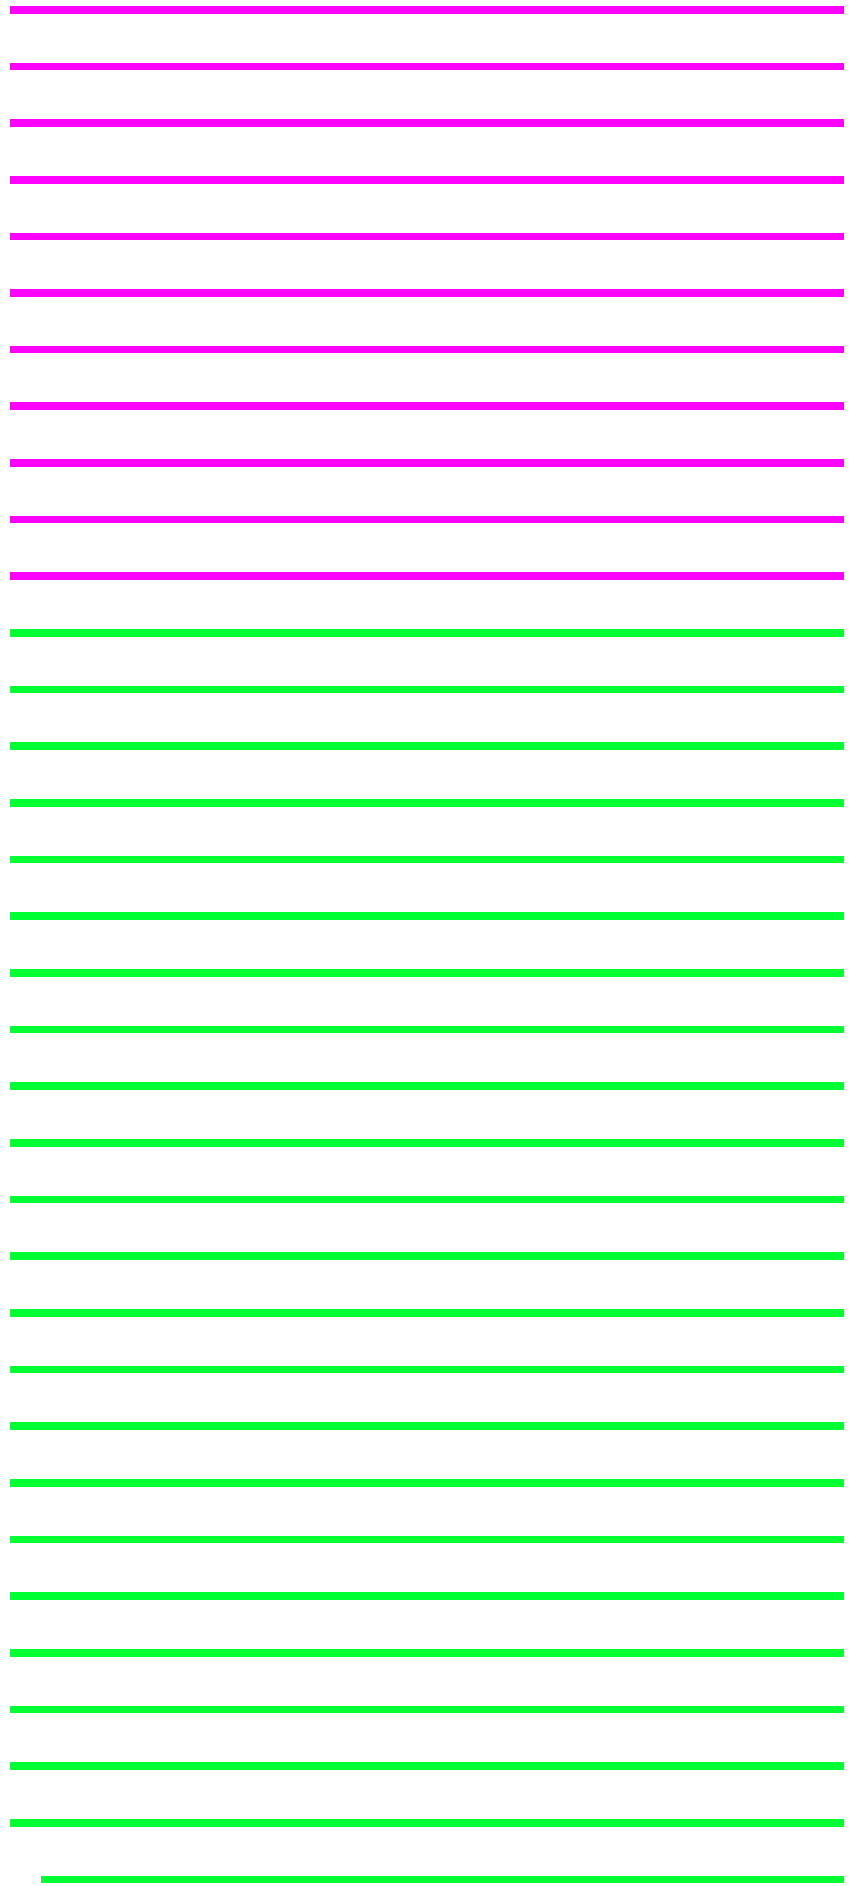

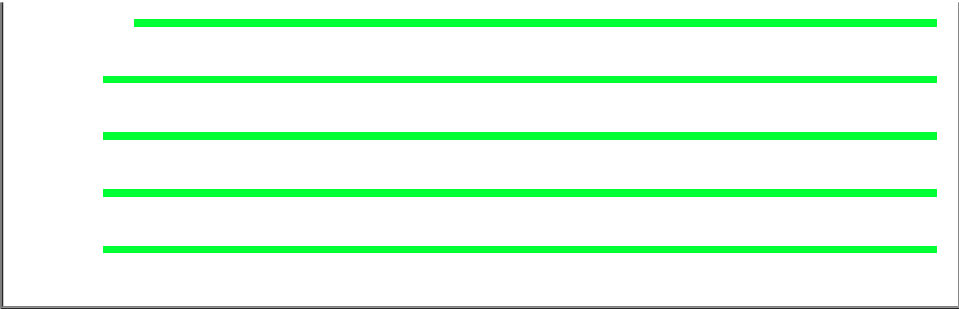

**Descriptions**

**Sequences producing significant alignments:**

Select: [All](#) [None](#) Selected:0

[Alignments](#)
[Download](#)
[GenPept](#)
[Graphics](#)
[Distance tree of results](#)
[Multiple alignment](#)
⚙

| Description                                                                                                                                      | Max score | Total score | Query cover | E value | Ident | Accession                      |
|--------------------------------------------------------------------------------------------------------------------------------------------------|-----------|-------------|-------------|---------|-------|--------------------------------|
| <a href="#">macrophage stimulating 1 (hepatocyte growth factor-like), isoform CRA_c [Homo sapiens]</a>                                           | 82.5      | 82.5        | 100%        | 2e-16   | 96%   | <a href="#">EAW65001.1</a>     |
| <a href="#">Chain B, Crystal Structure Of The Beta-Chain Of HgflMSP [Homo sapiens]</a>                                                           | 82.5      | 82.5        | 100%        | 3e-16   | 96%   | <a href="#">2ASU_B</a>         |
| <a href="#">Chain C, Crystal Structure Of Ron Sema-psi-ipt1 Extracellular Domains In Complex With Sema4 [Homo sapiens]</a>                       | 82.5      | 82.5        | 100%        | 3e-16   | 96%   | <a href="#">4QT8_C</a>         |
| <a href="#">hepatocyte growth factor-like protein homolog [Homo sapiens]</a>                                                                     | 82.5      | 82.5        | 100%        | 3e-16   | 96%   | <a href="#">AAC35412.1</a>     |
| <a href="#">PREDICTED: hepatocyte growth factor-like protein isoform X2 [Macaca fascicularis]</a>                                                | 82.5      | 82.5        | 100%        | 4e-16   | 96%   | <a href="#">XP_005547205.1</a> |
| <a href="#">PREDICTED: hepatocyte growth factor-like protein isoform X3 [Homo sapiens]</a>                                                       | 82.5      | 82.5        | 100%        | 4e-16   | 96%   | <a href="#">XP_006713231.1</a> |
| <a href="#">macrophage stimulating 1 (hepatocyte growth factor-like), isoform CRA_e [Homo sapiens]</a>                                           | 82.5      | 82.5        | 100%        | 4e-16   | 96%   | <a href="#">EAW65003.1</a>     |
| <a href="#">PREDICTED: hepatocyte growth factor-like protein isoform X1 [Homo sapiens]</a>                                                       | 82.5      | 82.5        | 100%        | 4e-16   | 96%   | <a href="#">XP_006713229.1</a> |
| <a href="#">brain-rescue-factor-1 [Homo sapiens]</a>                                                                                             | 82.5      | 82.5        | 100%        | 4e-16   | 96%   | <a href="#">AAP20103.1</a>     |
| <a href="#">putative macrophage stimulating 1-like protein [Homo sapiens]</a>                                                                    | 82.5      | 82.5        | 100%        | 4e-16   | 96%   | <a href="#">NP_001258662.1</a> |
| <a href="#">PREDICTED: hepatocyte growth factor-like protein isoform X2 [Papio anubis]</a>                                                       | 82.5      | 82.5        | 100%        | 4e-16   | 96%   | <a href="#">XP_009199018.1</a> |
| <a href="#">RecName: Full=Hepatocyte growth factor-like protein; AltName: Full=Macrophage stimulating 1-like protein [Homo sapiens]</a>          | 82.5      | 82.5        | 100%        | 4e-16   | 96%   | <a href="#">P26927.2</a>       |
| <a href="#">hepatocyte growth factor-like protein [Homo sapiens]</a>                                                                             | 82.5      | 82.5        | 100%        | 4e-16   | 96%   | <a href="#">AAA50165.1</a>     |
| <a href="#">hypothetical protein EGM_20500 [Macaca fascicularis]</a>                                                                             | 82.5      | 82.5        | 100%        | 4e-16   | 96%   | <a href="#">EHH62249.1</a>     |
| <a href="#">hypothetical protein EGK_11631 [Macaca mulatta]</a>                                                                                  | 82.5      | 82.5        | 100%        | 4e-16   | 96%   | <a href="#">EHH16360.1</a>     |
| <a href="#">hypothetical protein [Macaca fascicularis]</a>                                                                                       | 82.5      | 82.5        | 100%        | 4e-16   | 96%   | <a href="#">BAF47378.1</a>     |
| <a href="#">macrophage stimulating 1 (hepatocyte growth factor-like) variant [Homo sapiens]</a>                                                  | 82.5      | 82.5        | 100%        | 4e-16   | 96%   | <a href="#">BAD96613.1</a>     |
| <a href="#">RecName: Full=Putative macrophage stimulating 1-like protein; AltName: Full=Macrophage stimulating 1-like protein [Homo sapiens]</a> | 82.5      | 82.5        | 100%        | 4e-16   | 96%   | <a href="#">Q2TV78.2</a>       |
| <a href="#">PREDICTED: hepatocyte growth factor-like protein [Pongo abelii]</a>                                                                  | 82.5      | 82.5        | 100%        | 4e-16   | 96%   | <a href="#">XP_002813790.1</a> |
| <a href="#">PREDICTED: hepatocyte growth factor-like protein isoform X1 [Macaca fascicularis]</a>                                                | 82.5      | 82.5        | 100%        | 4e-16   | 96%   | <a href="#">XP_005547204.1</a> |
| <a href="#">PREDICTED: hepatocyte growth factor-like protein [Gorilla gorilla gorilla]</a>                                                       | 82.5      | 82.5        | 100%        | 4e-16   | 96%   | <a href="#">XP_004034204.1</a> |
| <a href="#">PREDICTED: hepatocyte growth factor-like protein isoform X1 [Papio anubis]</a>                                                       | 82.5      | 82.5        | 100%        | 4e-16   | 96%   | <a href="#">XP_003894463.1</a> |
| <a href="#">hepatocyte growth factor-like protein precursor [Homo sapiens]</a>                                                                   | 82.5      | 82.5        | 100%        | 4e-16   | 96%   | <a href="#">NP_066278.3</a>    |
| <a href="#">PREDICTED: hepatocyte growth factor-like protein [Macaca mulatta]</a>                                                                | 82.5      | 82.5        | 100%        | 4e-16   | 96%   | <a href="#">XP_001107946.1</a> |
| <a href="#">PREDICTED: LOW QUALITY PROTEIN: hepatocyte growth factor-like protein [Homo sapiens]</a>                                             | 82.5      | 82.5        | 100%        | 4e-16   | 96%   | <a href="#">XP_516465.4</a>    |
| <a href="#">PREDICTED: LOW QUALITY PROTEIN: hepatocyte growth factor-like protein [Homo sapiens]</a>                                             | 80.4      | 80.4        | 100%        | 2e-15   | 92%   | <a href="#">XP_005696011.1</a> |
| <a href="#">PREDICTED: hepatocyte growth factor-like protein [Pantholops hodgsonii]</a>                                                          | 80.4      | 80.4        | 100%        | 2e-15   | 92%   | <a href="#">XP_005969335.1</a> |
| <a href="#">PREDICTED: LOW QUALITY PROTEIN: hepatocyte growth factor-like protein [Homo sapiens]</a>                                             | 80.4      | 80.4        | 100%        | 2e-15   | 92%   | <a href="#">XP_004018505.1</a> |
| <a href="#">PREDICTED: hepatocyte growth factor-like protein isoform X1 [Saimiri boliviensis]</a>                                                | 78.7      | 78.7        | 100%        | 7e-15   | 92%   | <a href="#">XP_003936704.1</a> |



|                                                                                                |      |      |      |       |     |                                |
|------------------------------------------------------------------------------------------------|------|------|------|-------|-----|--------------------------------|
| <a href="#">macrophage-stimulating protein [Homo sapiens]</a>                                  | 78.3 | 78.3 | 100% | 1e-14 | 92% | <a href="#">AAA59872.1</a>     |
| <a href="#">PREDICTED: hepatocyte growth factor-like protein [Rhinopithecus roxellana]</a>     | 77.8 | 77.8 | 100% | 1e-14 | 92% | <a href="#">XP_010367959.1</a> |
| <a href="#">PREDICTED: hepatocyte growth factor-like protein isoform X2 [Callithrix jacch]</a> | 77.0 | 77.0 | 100% | 3e-14 | 92% | <a href="#">XP_008979888.1</a> |
| <a href="#">PREDICTED: hepatocyte growth factor-like protein [Bubalus bubalis]</a>             | 77.0 | 77.0 | 100% | 3e-14 | 88% | <a href="#">XP_006053335.1</a> |
| <a href="#">PREDICTED: hepatocyte growth factor-like protein [Bos mutus]</a>                   | 77.0 | 77.0 | 100% | 3e-14 | 88% | <a href="#">XP_005892185.1</a> |
| <a href="#">TPA: hepatocyte growth factor-like protein [Bos taurus]</a>                        | 77.0 | 77.0 | 100% | 3e-14 | 88% | <a href="#">DAA16921.1</a>     |
| <a href="#">hepatocyte growth factor-like protein precursor [Bos taurus]</a>                   | 77.0 | 77.0 | 100% | 3e-14 | 88% | <a href="#">NP_001069145.1</a> |
| <a href="#">Hepatocyte growth factor-like protein [Bos mutus]</a>                              | 77.0 | 77.0 | 100% | 3e-14 | 88% | <a href="#">ELR58967.1</a>     |
| <a href="#">PREDICTED: hepatocyte growth factor-like protein isoform X2 [Bison bison bi]</a>   | 77.0 | 77.0 | 100% | 3e-14 | 88% | <a href="#">XP_010850156.1</a> |
| <a href="#">PREDICTED: hepatocyte growth factor-like protein isoform X1 [Bison bison bi]</a>   | 77.0 | 77.0 | 100% | 3e-14 | 88% | <a href="#">XP_010850155.1</a> |
| <a href="#">PREDICTED: hepatocyte growth factor-like protein isoform X1 [Callithrix jacch]</a> | 77.0 | 77.0 | 100% | 3e-14 | 92% | <a href="#">XP_002758398.1</a> |
| <a href="#">PREDICTED: hepatocyte growth factor-like protein isoform X2 [Bos taurus]</a>       | 77.0 | 77.0 | 100% | 3e-14 | 88% | <a href="#">XP_005222861.1</a> |
| <a href="#">PREDICTED: hepatocyte growth factor-like protein [Nomascus leucogenys]</a>         | 77.0 | 77.0 | 100% | 3e-14 | 92% | <a href="#">XP_003257123.1</a> |
| <a href="#">PREDICTED: hepatocyte growth factor-like protein isoform X1 [Bos taurus]</a>       | 77.0 | 77.0 | 100% | 3e-14 | 88% | <a href="#">XP_005222860.1</a> |
| <a href="#">PREDICTED: hepatocyte growth factor-like protein isoform X6 [Chlorocebus s</a>     | 76.1 | 76.1 | 100% | 5e-14 | 92% | <a href="#">XP_007982452.1</a> |
| <a href="#">PREDICTED: hepatocyte growth factor-like protein isoform X5 [Chlorocebus s</a>     | 76.1 | 76.1 | 100% | 5e-14 | 92% | <a href="#">XP_007982450.1</a> |
| <a href="#">PREDICTED: hepatocyte growth factor-like protein [Galeopterus variegatus]</a>      | 76.1 | 76.1 | 100% | 6e-14 | 92% | <a href="#">XP_008569781.1</a> |
| <a href="#">PREDICTED: hepatocyte growth factor-like protein isoform X4 [Chlorocebus s</a>     | 76.1 | 76.1 | 100% | 6e-14 | 92% | <a href="#">XP_007982449.1</a> |
| <a href="#">PREDICTED: hepatocyte growth factor-like protein isoform X3 [Chlorocebus s</a>     | 76.1 | 76.1 | 100% | 6e-14 | 92% | <a href="#">XP_007982448.1</a> |
| <a href="#">PREDICTED: hepatocyte growth factor-like protein isoform X2 [Chlorocebus s</a>     | 76.1 | 76.1 | 100% | 6e-14 | 92% | <a href="#">XP_007982445.1</a> |
| <a href="#">PREDICTED: hepatocyte growth factor-like protein isoform X1 [Chlorocebus s</a>     | 76.1 | 76.1 | 100% | 6e-14 | 92% | <a href="#">XP_007982444.1</a> |
| <a href="#">PREDICTED: hepatocyte growth factor-like protein isoform X2 [Oryctolagus ci</a>    | 73.2 | 73.2 | 96%  | 6e-13 | 92% | <a href="#">XP_008258875.1</a> |
| <a href="#">PREDICTED: hepatocyte growth factor-like protein isoform X1 [Oryctolagus ci</a>    | 73.2 | 73.2 | 96%  | 6e-13 | 92% | <a href="#">XP_008258874.1</a> |
| <a href="#">PREDICTED: hepatocyte growth factor-like protein isoform X2 [Sus scrofa]</a>       | 72.7 | 72.7 | 100% | 8e-13 | 88% | <a href="#">XP_005669634.1</a> |
| <a href="#">PREDICTED: hepatocyte growth factor-like protein-like [Sus scrofa]</a>             | 72.7 | 72.7 | 100% | 8e-13 | 88% | <a href="#">XP_005674335.1</a> |
| <a href="#">PREDICTED: hepatocyte growth factor-like protein [Otolemur garnettii]</a>          | 72.7 | 72.7 | 100% | 8e-13 | 88% | <a href="#">XP_003800642.1</a> |
| <a href="#">PREDICTED: hepatocyte growth factor-like protein [Ochotona princeps]</a>           | 72.7 | 72.7 | 100% | 8e-13 | 88% | <a href="#">XP_004581815.1</a> |
| <a href="#">PREDICTED: hepatocyte growth factor-like protein isoform X1 [Sus scrofa]</a>       | 72.7 | 72.7 | 100% | 8e-13 | 88% | <a href="#">XP_003132263.1</a> |
| <a href="#">Hepatocyte growth factor-like protein [Heterocephalus glaber]</a>                  | 71.0 | 71.0 | 100% | 3e-12 | 88% | <a href="#">EHB14811.1</a>     |
| <a href="#">PREDICTED: hepatocyte growth factor-like protein isoform X3 [Fukomys dam</a>       | 71.0 | 71.0 | 100% | 3e-12 | 88% | <a href="#">XP_010613848.1</a> |
| <a href="#">Hepatocyte growth factor-like protein [Fukomys damarensis]</a>                     | 71.0 | 71.0 | 100% | 3e-12 | 88% | <a href="#">KFO18588.1</a>     |
| <a href="#">PREDICTED: hepatocyte growth factor-like protein [Camelus bactrianus]</a>          | 71.0 | 71.0 | 100% | 3e-12 | 88% | <a href="#">XP_010967473.1</a> |
| <a href="#">PREDICTED: LOW QUALITY PROTEIN: hepatocyte growth factor-like proteir</a>          | 71.0 | 71.0 | 100% | 3e-12 | 88% | <a href="#">XP_006174176.1</a> |
| <a href="#">PREDICTED: hepatocyte growth factor-like protein isoform X2 [Fukomys dam</a>       | 71.0 | 71.0 | 100% | 3e-12 | 88% | <a href="#">XP_010613847.1</a> |
| <a href="#">PREDICTED: LOW QUALITY PROTEIN: hepatocyte growth factor-like proteir</a>          | 71.0 | 71.0 | 100% | 3e-12 | 88% | <a href="#">XP_004903551.1</a> |
| <a href="#">PREDICTED: hepatocyte growth factor-like protein isoform X2 [Heterocephal</a>      | 71.0 | 71.0 | 100% | 3e-12 | 88% | <a href="#">XP_004834104.1</a> |
| <a href="#">PREDICTED: hepatocyte growth factor-like protein isoform X1 [Fukomys dam</a>       | 71.0 | 71.0 | 100% | 3e-12 | 88% | <a href="#">XP_010613846.1</a> |
| <a href="#">PREDICTED: hepatocyte growth factor-like protein isoform X1 [Heterocephal</a>      | 71.0 | 71.0 | 100% | 3e-12 | 88% | <a href="#">XP_004834103.1</a> |
| <a href="#">PREDICTED: LOW QUALITY PROTEIN: hepatocyte growth factor-like proteir</a>          | 71.0 | 71.0 | 100% | 3e-12 | 88% | <a href="#">XP_006196588.1</a> |
| <a href="#">macrophage stimulating 1-like protein [Camelus ferus]</a>                          | 71.0 | 71.0 | 100% | 3e-12 | 88% | <a href="#">EQB77066.1</a>     |
| <a href="#">PREDICTED: hepatocyte growth factor-like protein [Camelus dromedarius]</a>         | 71.0 | 71.0 | 100% | 3e-12 | 88% | <a href="#">XP_010976658.1</a> |
| <a href="#">PREDICTED: hepatocyte growth factor-like protein isoform X2 [Equus caballu</a>     | 70.2 | 70.2 | 100% | 6e-12 | 85% | <a href="#">XP_005600717.1</a> |
| <a href="#">PREDICTED: hepatocyte growth factor-like protein isoform X2 [Equus przewa</a>      | 70.2 | 70.2 | 100% | 6e-12 | 85% | <a href="#">XP_008522206.1</a> |
| <a href="#">PREDICTED: hepatocyte growth factor-like protein [Dasybus novemcinctus]</a>        | 70.2 | 70.2 | 100% | 6e-12 | 88% | <a href="#">XP_004451933.1</a> |
| <a href="#">PREDICTED: hepatocyte growth factor-like protein isoform X1 [Equus caballu</a>     | 70.2 | 70.2 | 100% | 6e-12 | 85% | <a href="#">XP_005600716.1</a> |

|                                                                                             |      |      |      |       |     |                                |
|---------------------------------------------------------------------------------------------|------|------|------|-------|-----|--------------------------------|
| <a href="#">PREDICTED: hepatocyte growth factor-like protein [Lipotes vexillifer]</a>       | 69.8 | 69.8 | 100% | 8e-12 | 85% | <a href="#">XP_007446274.1</a> |
| <a href="#">PREDICTED: hepatocyte growth factor-like protein [Physeter catodon]</a>         | 69.8 | 69.8 | 100% | 8e-12 | 85% | <a href="#">XP_007129906.1</a> |
| <a href="#">PREDICTED: hepatocyte growth factor-like protein [Tursiops truncatus]</a>       | 69.8 | 69.8 | 100% | 8e-12 | 85% | <a href="#">XP_004314855.1</a> |
| <a href="#">PREDICTED: hepatocyte growth factor-like protein [Orcinus orca]</a>             | 69.8 | 69.8 | 100% | 8e-12 | 85% | <a href="#">XP_004284002.1</a> |
| <a href="#">PREDICTED: LOW QUALITY PROTEIN: hepatocyte growth factor-like proteir</a>       | 69.4 | 69.4 | 100% | 1e-11 | 85% | <a href="#">XP_007088585.1</a> |
| <a href="#">PREDICTED: hepatocyte growth factor-like protein [Tupaia chinensis]</a>         | 69.4 | 69.4 | 96%  | 1e-11 | 88% | <a href="#">XP_006171012.1</a> |
| <a href="#">PREDICTED: hepatocyte growth factor-like protein [Ceratotherium simum sim</a>   | 69.4 | 69.4 | 100% | 1e-11 | 85% | <a href="#">XP_004419765.1</a> |
| <a href="#">PREDICTED: hepatocyte growth factor-like protein [Felis catus]</a>              | 69.4 | 69.4 | 100% | 1e-11 | 85% | <a href="#">XP_003982280.1</a> |
| <a href="#">PREDICTED: hepatocyte growth factor-like protein [Canis lupus familiaris]</a>   | 69.4 | 69.4 | 100% | 1e-11 | 85% | <a href="#">XP_541884.3</a>    |
| <a href="#">Hepatocyte growth factor-like protein [Tupaia chinensis]</a>                    | 69.4 | 69.4 | 96%  | 1e-11 | 88% | <a href="#">ELV09642.1</a>     |
| <a href="#">PREDICTED: hepatocyte growth factor-like protein [Tarsius syrichta]</a>         | 68.5 | 68.5 | 100% | 2e-11 | 85% | <a href="#">XP_008061363.1</a> |
| <a href="#">PREDICTED: hepatocyte growth factor-like protein [Odobenus rosmarus divei</a>   | 68.1 | 68.1 | 100% | 3e-11 | 81% | <a href="#">XP_004399304.1</a> |
| <a href="#">Hepatocyte growth factor-like protein [Myotis brandtii]</a>                     | 67.7 | 67.7 | 92%  | 4e-11 | 83% | <a href="#">EPQ07261.1</a>     |
| <a href="#">PREDICTED: hepatocyte growth factor-like protein [Myotis brandtii]</a>          | 67.7 | 67.7 | 92%  | 4e-11 | 83% | <a href="#">XP_005865438.1</a> |
| <a href="#">PREDICTED: hepatocyte growth factor-like protein [Eptesicus fuscus]</a>         | 67.7 | 67.7 | 92%  | 4e-11 | 83% | <a href="#">XP_008153797.1</a> |
| <a href="#">PREDICTED: hepatocyte growth factor-like protein [Leptonychotes weddellii]</a>  | 66.8 | 66.8 | 100% | 8e-11 | 81% | <a href="#">XP_006744596.1</a> |
| <a href="#">PREDICTED: LOW QUALITY PROTEIN: hepatocyte growth factor-like proteir</a>       | 66.0 | 66.0 | 100% | 2e-10 | 81% | <a href="#">XP_005326984.1</a> |
| <a href="#">PREDICTED: hepatocyte growth factor-like protein [Ursus maritimus]</a>          | 65.5 | 65.5 | 100% | 2e-10 | 81% | <a href="#">XP_008702001.1</a> |
| <a href="#">hypothetical protein PANDA_009343 [Ailuropoda melanoleuca]</a>                  | 65.5 | 65.5 | 100% | 2e-10 | 81% | <a href="#">EFB13926.1</a>     |
| <a href="#">PREDICTED: hepatocyte growth factor-like protein [Elephantulus edwardii]</a>    | 65.5 | 65.5 | 100% | 2e-10 | 81% | <a href="#">XP_006892963.1</a> |
| <a href="#">PREDICTED: hepatocyte growth factor-like protein isoform X3 [Mustela putori</a> | 65.5 | 65.5 | 100% | 2e-10 | 81% | <a href="#">XP_004820133.1</a> |
| <a href="#">PREDICTED: hepatocyte growth factor-like protein [Mustela putorius furo]</a>    | 65.5 | 65.5 | 100% | 2e-10 | 81% | <a href="#">XP_004760697.1</a> |
| <a href="#">PREDICTED: hepatocyte growth factor-like protein [Sorex araneus]</a>            | 65.5 | 65.5 | 100% | 2e-10 | 81% | <a href="#">XP_004615300.1</a> |
| <a href="#">PREDICTED: hepatocyte growth factor-like protein-like [Ailuropoda melanoleu</a> | 65.5 | 65.5 | 100% | 2e-10 | 81% | <a href="#">XP_002920612.1</a> |
| <a href="#">PREDICTED: hepatocyte growth factor-like protein isoform X2 [Mustela putori</a> | 65.5 | 65.5 | 100% | 2e-10 | 81% | <a href="#">XP_004820132.1</a> |
| <a href="#">PREDICTED: hepatocyte growth factor-like protein isoform X1 [Mustela putori</a> | 65.5 | 65.5 | 100% | 2e-10 | 81% | <a href="#">XP_004820131.1</a> |

## Alignments

[Download](#) [GenPept](#) [Graphics](#) [Next](#) [Previous](#) [Descriptions](#)

macrophage stimulating 1 (hepatocyte growth factor-like), isoform CRA\_c [Homo sapiens]

Sequence ID: [gb|EAW65001.1|](#) Length: 183 Number of Matches: 1

Range 1: 83 to 108 [GenPept](#) [Graphics](#)

[Next Match](#) [Previous Match](#)

### Related Information

[Gene](#) - associated gene details

| Score          | Expect | Identities | Positives   | Gaps     |
|----------------|--------|------------|-------------|----------|
| 82.5 bits(187) | 2e-16  | 25/26(96%) | 26/26(100%) | 0/26(0%) |

Query 1 KGTGDDTFLNVALLNVISNQCENIKH 26  
 KGTG+DTFLNVALLNVISNQCENIKH  
 Sbjct 83 KGTGNDTFLNVALLNVISNQCENIKH 108

[Download](#) [GenPept](#) [Graphics](#) [Next](#) [Previous](#) [Descriptions](#)

Chain B, Crystal Structure Of The Beta-Chain Of HgflMSP

Sequence ID: [pdb|2ASU|B](#) Length: 234 Number of Matches: 1

Range 1: 128 to 153 [GenPept](#) [Graphics](#)

[Next Match](#) [Previous Match](#)

### Related Information

[Structure](#) - 3D structure displays

| Score          | Expect | Identities | Positives   | Gaps     |
|----------------|--------|------------|-------------|----------|
| 82.5 bits(187) | 3e-16  | 25/26(96%) | 26/26(100%) | 0/26(0%) |

Query 1 KGTGDDTVLNVALLNVISNQEENIKH 26  
 KGTG+DTVLNVALLNVISNQEENIKH  
 Sbjct 128 KGTGNDTVLNVALLNVISNQEENIKH 153

Download [GenPept](#) [Graphics](#)

[▼ Next](#) [▲ Previous](#) [▲ Descriptions](#)

Chain C, Crystal Structure Of Ron Sema-psi-ipt1 Extracellular Domains In Complex With Msp Beta-chain

Sequence ID: [pdb|4QT8|C](#) Length: 253 Number of Matches: 1

[▶ See 1 more title\(s\)](#)

Range 1: 147 to 172 [GenPept](#) [Graphics](#)

[▼ Next Match](#) [▲ Previous Match](#)

| Score          | Expect | Identities | Positives   | Gaps     |
|----------------|--------|------------|-------------|----------|
| 82.5 bits(187) | 3e-16  | 25/26(96%) | 26/26(100%) | 0/26(0%) |

Query 1 KGTGDDTVLNVALLNVISNQEENIKH 26  
 KGTG+DTVLNVALLNVISNQEENIKH  
 Sbjct 147 KGTGNDTVLNVALLNVISNQEENIKH 172

**Related Information**

[Structure](#) - 3D structure displays  
[Identical Proteins](#) - Proteins  
 identical to the subject

Download [GenPept](#) [Graphics](#)

[▼ Next](#) [▲ Previous](#) [▲ Descriptions](#)

hepatocyte growth factor-like protein homolog [Homo sapiens]

Sequence ID: [gb|AAC35412.1|](#) Length: 286 Number of Matches: 1

Range 1: 186 to 211 [GenPept](#) [Graphics](#)

[▼ Next Match](#) [▲ Previous Match](#)

| Score          | Expect | Identities | Positives   | Gaps     |
|----------------|--------|------------|-------------|----------|
| 82.5 bits(187) | 3e-16  | 25/26(96%) | 26/26(100%) | 0/26(0%) |

Query 1 KGTGDDTVLNVALLNVISNQEENIKH 26  
 KGTG+DTVLNVALLNVISNQEENIKH  
 Sbjct 186 KGTGNDTVLNVALLNVISNQEENIKH 211

**Related Information**

[Gene](#) - associated gene details

Download [GenPept](#) [Graphics](#)

[▼ Next](#) [▲ Previous](#) [▲ Descriptions](#)

PREDICTED: hepatocyte growth factor-like protein isoform X2 [Macaca fascicularis]

Sequence ID: [ref|XP\\_005547205.1|](#) Length: 600 Number of Matches: 1

Range 1: 500 to 525 [GenPept](#) [Graphics](#)

[▼ Next Match](#) [▲ Previous Match](#)

| Score          | Expect | Identities | Positives   | Gaps     |
|----------------|--------|------------|-------------|----------|
| 82.5 bits(187) | 4e-16  | 25/26(96%) | 26/26(100%) | 0/26(0%) |

Query 1 KGTGDDTVLNVALLNVISNQEENIKH 26  
 KGTG+DTVLNVALLNVISNQEENIKH  
 Sbjct 500 KGTGNDTVLNVALLNVISNQEENIKH 525

**Related Information**

[Gene](#) - associated gene details

BLAST is a registered trademark of the National Library of Medicine.

► [NCBI/BLAST/blastp suite/ Formatting Results - B9P624AG01R](#)

**i** Your search parameters were adjusted to search for a short input sequence.

[Edit and Resubmit](#) [Save Search Strategies](#) [► Formatting options](#) [► Download](#)

[YouTube](#) [How to read this page](#) [Blast report description](#)

**MST1\_KGTGNDTVLNVALLNVISNQECNIKH\_NonMod**

**RID** [B9P624AG01R](#) (Expires on 01-14 15:35 pm)

**Query ID** lcl|66740  
**Description** None  
**Molecule type** amino acid  
**Query Length** 26

**Database Name** nr  
**Description** All non-redundant GenBank CDS translations+PDB+SwissProt+PIR excluding environmental samples from WGS projects  
**Program** BLASTP 2.2.30+ [► Citation](#)

Other reports: [► Search Summary](#) [\[Taxonomy reports\]](#) [\[Distance tree of results\]](#) [\[Multiple alignment\]](#)

**Graphic Summary**

[Show Conserved Domains](#)

No putative conserved domains have been detected

Distribution of 100 Blast Hits on the Query Sequence [?](#)

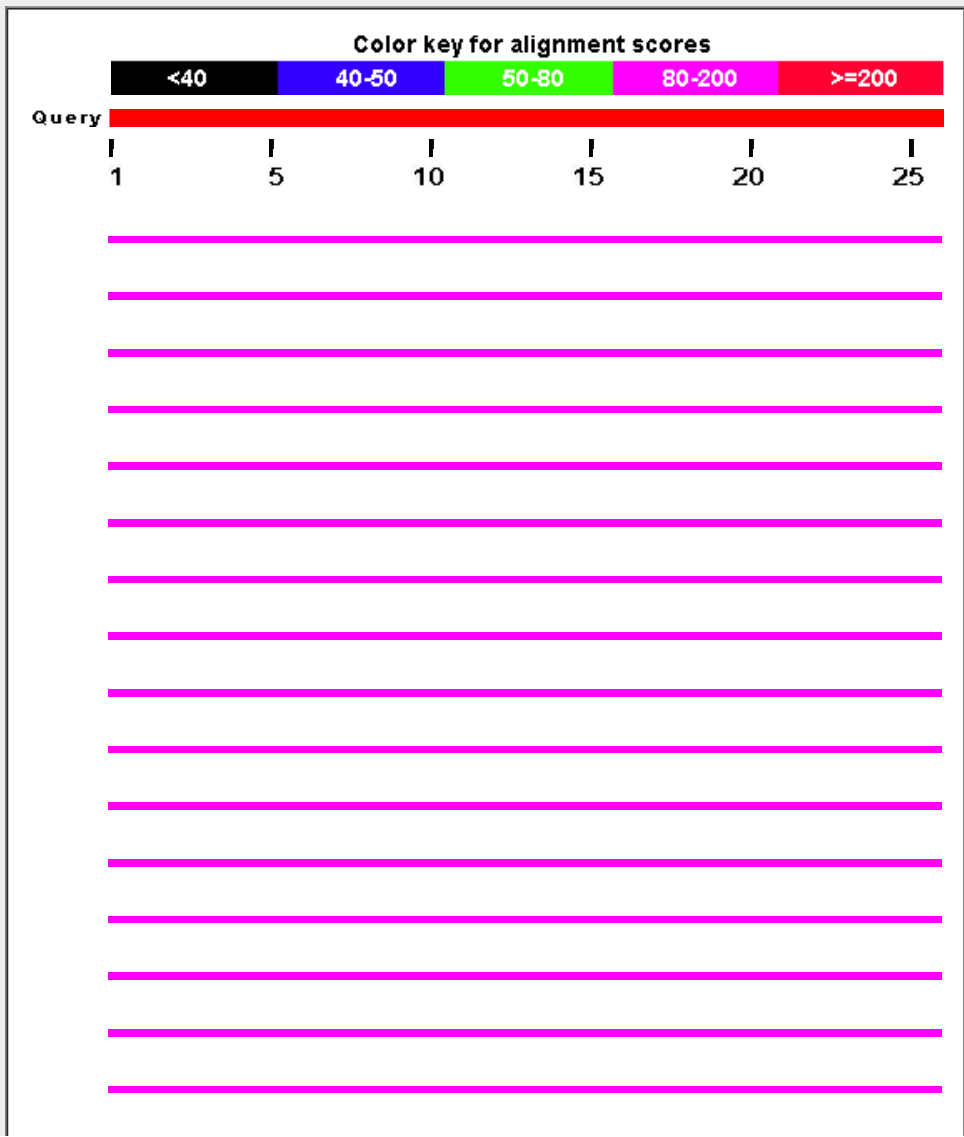

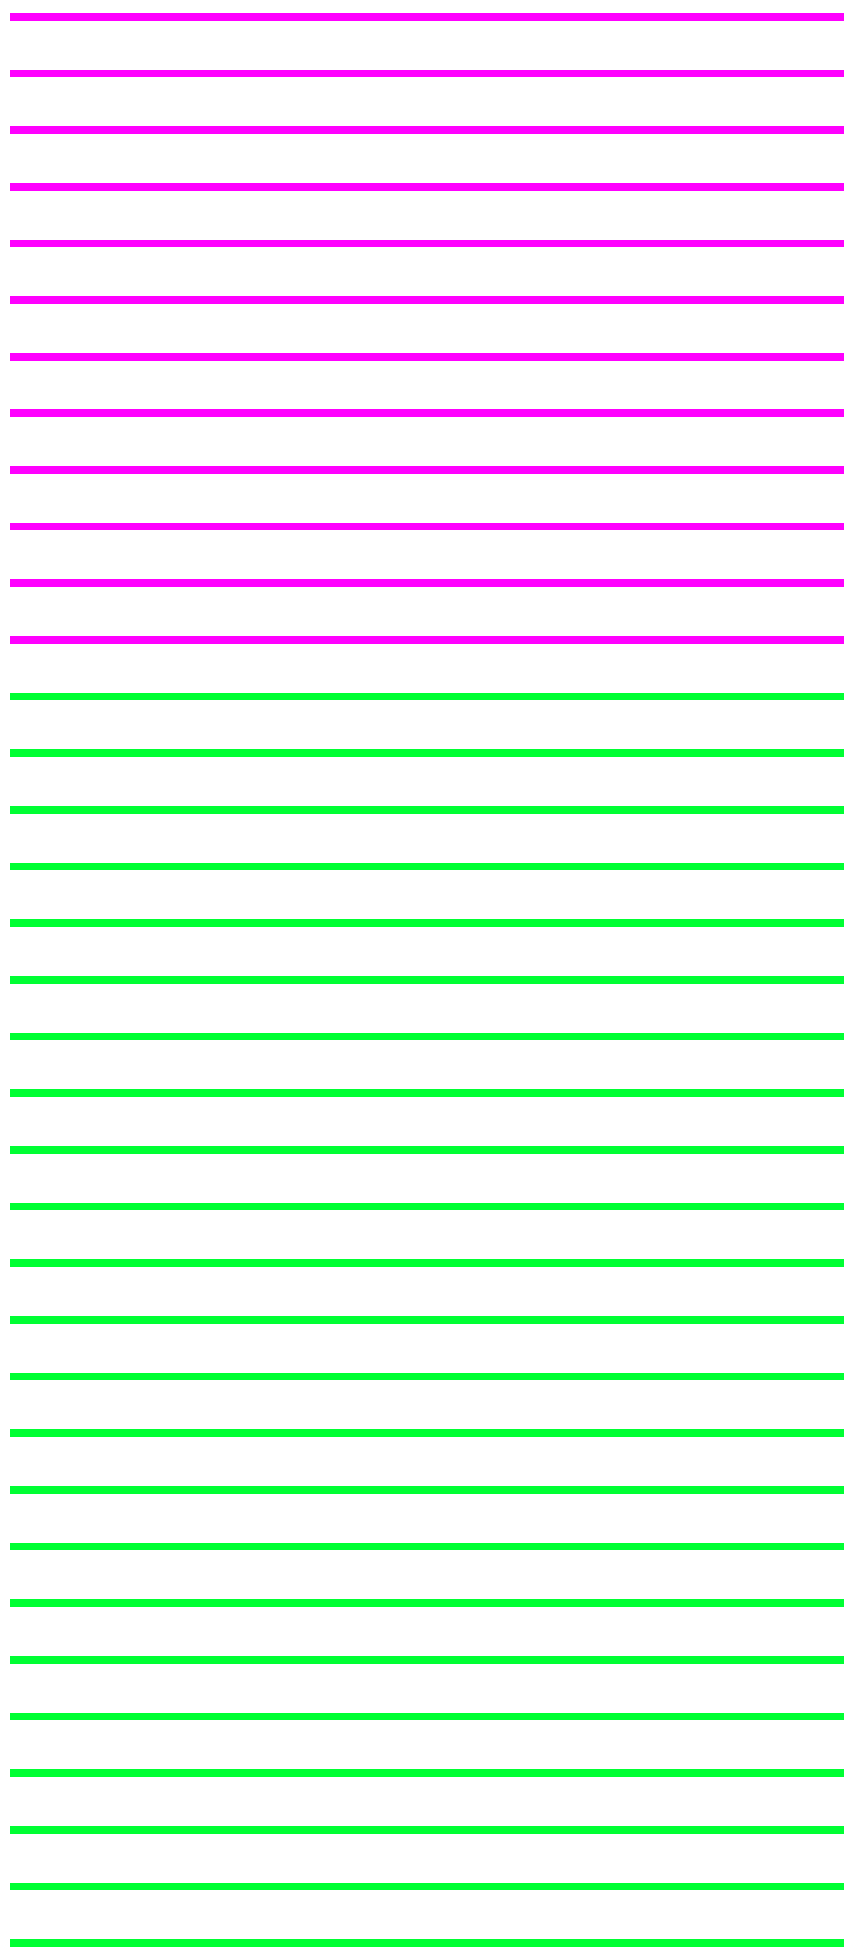



**Descriptions**

**Sequences producing significant alignments:**

Select: [All](#) [None](#) Selected:0

[↑](#) [Alignments](#)
[Download](#)
[GenPept](#)
[Graphics](#)
[Distance tree of results](#)
[Multiple alignment](#)
⚙

| Description                                                                         | Max score | Total score | Query cover | E value | Ident | Accession                                   |
|-------------------------------------------------------------------------------------|-----------|-------------|-------------|---------|-------|---------------------------------------------|
| <a href="#">macrophage stimulating 1 (hepatocyte growth factor-like), isoform C</a> | 85.0      | 85.0        | 100%        | 3e-17   | 100%  | <a href="#">gij119585405 EAW65001.1</a>     |
| <a href="#">Chain B. Crystal Structure Of The Beta-Chain Of HgfMSP [Homo s</a>      | 85.0      | 85.0        | 100%        | 3e-17   | 100%  | <a href="#">gij83754035 2ASU_B</a>          |
| <a href="#">Chain C. Crystal Structure Of Ron Sema-psi-ipt1 Extracellular Dom</a>   | 85.0      | 85.0        | 100%        | 4e-17   | 100%  | <a href="#">gij685425760 4QT8_C</a>         |
| <a href="#">hepatocyte growth factor-like protein homolog [Homo sapiens]</a>        | 85.0      | 85.0        | 100%        | 4e-17   | 100%  | <a href="#">gij1141777 AAC35412.1</a>       |
| <a href="#">PREDICTED: hepatocyte growth factor-like protein isoform X2 [Mar</a>    | 85.0      | 85.0        | 100%        | 5e-17   | 100%  | <a href="#">gij544414366 XP_005547205.1</a> |
| <a href="#">PREDICTED: hepatocyte growth factor-like protein isoform X3 [Hon</a>    | 85.0      | 85.0        | 100%        | 5e-17   | 100%  | <a href="#">gij578806133 XP_006713231.1</a> |
| <a href="#">macrophage stimulating 1 (hepatocyte growth factor-like), isoform C</a> | 85.0      | 85.0        | 100%        | 5e-17   | 100%  | <a href="#">gij119585407 EAW65003.1</a>     |
| <a href="#">PREDICTED: hepatocyte growth factor-like protein isoform X1 [Hon</a>    | 85.0      | 85.0        | 100%        | 5e-17   | 100%  | <a href="#">gij578806129 XP_006713229.1</a> |
| <a href="#">brain-rescue-factor-1 [Homo sapiens]</a>                                | 85.0      | 85.0        | 100%        | 5e-17   | 100%  | <a href="#">gij37780053 AAP20103.1</a>      |
| <a href="#">putative macrophage stimulating 1-like protein [Homo sapiens]</a>       | 85.0      | 85.0        | 100%        | 5e-17   | 100%  | <a href="#">gij413081806 NP_001258662.1</a> |
| <a href="#">PREDICTED: hepatocyte growth factor-like protein isoform X2 [Pap</a>    | 85.0      | 85.0        | 100%        | 5e-17   | 100%  | <a href="#">gij685524931 XP_009199018.1</a> |
| <a href="#">RecName: Full=Hepatocyte growth factor-like protein; AltName: Fu</a>    | 85.0      | 85.0        | 100%        | 5e-17   | 100%  | <a href="#">gij147744563 P26927.2</a>       |
| <a href="#">hepatocyte growth factor-like protein [Homo sapiens]</a>                | 85.0      | 85.0        | 100%        | 5e-17   | 100%  | <a href="#">gij183977 AAA50165.1</a>        |
| <a href="#">hypothetical protein EGM_20500 [Macaca fascicularis]</a>                | 85.0      | 85.0        | 100%        | 5e-17   | 100%  | <a href="#">gij355764094 EHH62249.1</a>     |
| <a href="#">hypothetical protein EGK_11631 [Macaca mulatta]</a>                     | 85.0      | 85.0        | 100%        | 5e-17   | 100%  | <a href="#">gij355559632 EHH16360.1</a>     |
| <a href="#">hypothetical protein [Macaca fascicularis]</a>                          | 85.0      | 85.0        | 100%        | 5e-17   | 100%  | <a href="#">gij126143528 BAF47378.1</a>     |
| <a href="#">macrophage stimulating 1 (hepatocyte growth factor-like) variant [H</a> | 85.0      | 85.0        | 100%        | 5e-17   | 100%  | <a href="#">gij62897345 BAD96613.1</a>      |
| <a href="#">RecName: Full=Putative macrophage stimulating 1-like protein; Alt</a>   | 85.0      | 85.0        | 100%        | 5e-17   | 100%  | <a href="#">gij205829211 Q2TV78.2</a>       |
| <a href="#">PREDICTED: hepatocyte growth factor-like protein [Pongo abelii]</a>     | 85.0      | 85.0        | 100%        | 5e-17   | 100%  | <a href="#">gij297671325 XP_002813790.1</a> |
| <a href="#">PREDICTED: hepatocyte growth factor-like protein isoform X1 [Mar</a>    | 85.0      | 85.0        | 100%        | 5e-17   | 100%  | <a href="#">gij544414364 XP_005547204.1</a> |
| <a href="#">PREDICTED: hepatocyte growth factor-like protein [Gorilla gorilla g</a> | 85.0      | 85.0        | 100%        | 5e-17   | 100%  | <a href="#">gij426340575 XP_004034204.1</a> |
| <a href="#">PREDICTED: hepatocyte growth factor-like protein isoform X1 [Pap</a>    | 85.0      | 85.0        | 100%        | 5e-17   | 100%  | <a href="#">gij402860079 XP_003894463.1</a> |
| <a href="#">hepatocyte growth factor-like protein precursor [Homo sapiens]</a>      | 85.0      | 85.0        | 100%        | 5e-17   | 100%  | <a href="#">gij205277383 NP_066278.3</a>    |
| <a href="#">PREDICTED: hepatocyte growth factor-like protein [Macaca mulatt</a>     | 85.0      | 85.0        | 100%        | 5e-17   | 100%  | <a href="#">gij109039656 XP_001107946.1</a> |
| <a href="#">PREDICTED: LOW QUALITY PROTEIN: hepatocyte growth factor-</a>           | 85.0      | 85.0        | 100%        | 5e-17   | 100%  | <a href="#">gij410036983 XP_516465.4</a>    |
| <a href="#">PREDICTED: hepatocyte growth factor-like protein isoform X1 [Sair</a>   | 81.2      | 81.2        | 100%        | 1e-15   | 96%   | <a href="#">gij403291235 XP_003936704.1</a> |
| <a href="#">macrophage-stimulating protein [Homo sapiens]</a>                       | 80.8      | 80.8        | 100%        | 1e-15   | 96%   | <a href="#">gij398038 AAA59872.1</a>        |
| <a href="#">PREDICTED: hepatocyte growth factor-like protein [Rhinopithecus ]</a>   | 80.4      | 80.4        | 100%        | 2e-15   | 96%   | <a href="#">gij724799330 XP_010367959.1</a> |

|                                                                    |      |      |      |       |     |                                             |
|--------------------------------------------------------------------|------|------|------|-------|-----|---------------------------------------------|
| PREDICTED: hepatocyte growth factor-like protein isoform X2 [Call  | 79.5 | 79.5 | 100% | 4e-15 | 96% | <a href="#">gij675727602 XP_008979888.1</a> |
| PREDICTED: hepatocyte growth factor-like protein isoform X1 [Call  | 79.5 | 79.5 | 100% | 4e-15 | 96% | <a href="#">gij296225219 XP_002758398.1</a> |
| PREDICTED: hepatocyte growth factor-like protein [Nomascus leuc    | 79.5 | 79.5 | 100% | 4e-15 | 96% | <a href="#">gij332215988 XP_003257123.1</a> |
| PREDICTED: hepatocyte growth factor-like protein isoform X6 [Chl   | 78.7 | 78.7 | 100% | 7e-15 | 96% | <a href="#">gij635118819 XP_007982452.1</a> |
| PREDICTED: hepatocyte growth factor-like protein isoform X5 [Chl   | 78.7 | 78.7 | 100% | 7e-15 | 96% | <a href="#">gij635118817 XP_007982450.1</a> |
| PREDICTED: hepatocyte growth factor-like protein isoform X4 [Chl   | 78.7 | 78.7 | 100% | 7e-15 | 96% | <a href="#">gij635118815 XP_007982449.1</a> |
| PREDICTED: hepatocyte growth factor-like protein isoform X3 [Chl   | 78.7 | 78.7 | 100% | 7e-15 | 96% | <a href="#">gij635118813 XP_007982448.1</a> |
| PREDICTED: hepatocyte growth factor-like protein isoform X2 [Chl   | 78.7 | 78.7 | 100% | 7e-15 | 96% | <a href="#">gij635118807 XP_007982445.1</a> |
| PREDICTED: hepatocyte growth factor-like protein isoform X1 [Chl   | 78.7 | 78.7 | 100% | 7e-15 | 96% | <a href="#">gij635118805 XP_007982444.1</a> |
| PREDICTED: LOW QUALITY PROTEIN: hepatocyte growth factor-          | 77.8 | 77.8 | 100% | 1e-14 | 88% | <a href="#">gij548515581 XP_005696011.1</a> |
| PREDICTED: hepatocyte growth factor-like protein [Pantholops hoc   | 77.8 | 77.8 | 100% | 1e-14 | 88% | <a href="#">gij556747770 XP_005969335.1</a> |
| PREDICTED: LOW QUALITY PROTEIN: hepatocyte growth factor-          | 77.8 | 77.8 | 100% | 1e-14 | 88% | <a href="#">gij426249535 XP_004018505.1</a> |
| PREDICTED: hepatocyte growth factor-like protein [Bubalus bubalis  | 74.4 | 74.4 | 100% | 2e-13 | 85% | <a href="#">gij594058341 XP_006053335.1</a> |
| PREDICTED: hepatocyte growth factor-like protein [Bos mutus]       | 74.4 | 74.4 | 100% | 2e-13 | 85% | <a href="#">gij555960159 XP_005892185.1</a> |
| TPA: hepatocyte growth factor-like protein [Bos taurus]            | 74.4 | 74.4 | 100% | 2e-13 | 85% | <a href="#">gij296474806 DAA16921.1</a>     |
| hepatocyte growth factor-like protein precursor [Bos taurus]       | 74.4 | 74.4 | 100% | 2e-13 | 85% | <a href="#">gij115496876 NP_001069145.1</a> |
| Hepatocyte growth factor-like protein [Bos mutus]                  | 74.4 | 74.4 | 100% | 2e-13 | 85% | <a href="#">gij440909008 ELR58967.1</a>     |
| PREDICTED: hepatocyte growth factor-like protein isoform X4 [Bos   | 74.4 | 74.4 | 100% | 2e-13 | 85% | <a href="#">gij529001498 XP_005222861.1</a> |
| PREDICTED: hepatocyte growth factor-like protein isoform X3 [Bos   | 74.4 | 74.4 | 100% | 2e-13 | 85% | <a href="#">gij529001496 XP_005222860.1</a> |
| PREDICTED: hepatocyte growth factor-like protein isoform X2 [Bos   | 74.4 | 74.4 | 100% | 2e-13 | 85% | <a href="#">gij529001494 XP_005222859.1</a> |
| PREDICTED: hepatocyte growth factor-like protein isoform X1 [Bos   | 74.4 | 74.4 | 100% | 2e-13 | 85% | <a href="#">gij529001492 XP_005222858.1</a> |
| PREDICTED: hepatocyte growth factor-like protein [Galeopterus va   | 73.6 | 73.6 | 100% | 4e-13 | 88% | <a href="#">gij667267781 XP_008569781.1</a> |
| Hepatocyte growth factor-like protein [Heterocephalus glaber]      | 72.7 | 72.7 | 100% | 7e-13 | 88% | <a href="#">gij351711892 EHB14811.1</a>     |
| PREDICTED: hepatocyte growth factor-like protein isoform X3 [Fuk   | 72.7 | 72.7 | 100% | 7e-13 | 88% | <a href="#">gij731291722 XP_010613848.1</a> |
| Hepatocyte growth factor-like protein [Fukomys damarensis]         | 72.7 | 72.7 | 100% | 7e-13 | 88% | <a href="#">gij676261358 KFO18588.1</a>     |
| PREDICTED: hepatocyte growth factor-like protein isoform X2 [Fuk   | 72.7 | 72.7 | 100% | 7e-13 | 88% | <a href="#">gij731291719 XP_010613847.1</a> |
| PREDICTED: LOW QUALITY PROTEIN: hepatocyte growth factor-          | 72.7 | 72.7 | 100% | 7e-13 | 88% | <a href="#">gij512917516 XP_004903551.1</a> |
| PREDICTED: hepatocyte growth factor-like protein isoform X2 [Het   | 72.7 | 72.7 | 100% | 7e-13 | 88% | <a href="#">gij512943136 XP_004834104.1</a> |
| PREDICTED: hepatocyte growth factor-like protein isoform X1 [Fuk   | 72.7 | 72.7 | 100% | 7e-13 | 88% | <a href="#">gij731291717 XP_010613846.1</a> |
| PREDICTED: hepatocyte growth factor-like protein isoform X1 [Het   | 72.7 | 72.7 | 100% | 7e-13 | 88% | <a href="#">gij512943134 XP_004834103.1</a> |
| PREDICTED: LOW QUALITY PROTEIN: hepatocyte growth factor-          | 71.9 | 71.9 | 100% | 1e-12 | 88% | <a href="#">gij591325127 XP_007088585.1</a> |
| PREDICTED: hepatocyte growth factor-like protein [Tupaia chinens   | 71.9 | 71.9 | 96%  | 1e-12 | 92% | <a href="#">gij562887217 XP_006171012.1</a> |
| PREDICTED: hepatocyte growth factor-like protein [Felis catus]     | 71.9 | 71.9 | 100% | 1e-12 | 88% | <a href="#">gij410951187 XP_003982280.1</a> |
| PREDICTED: hepatocyte growth factor-like protein [Canis lupus far  | 71.9 | 71.9 | 100% | 1e-12 | 88% | <a href="#">gij345787353 XP_541884.3</a>    |
| Hepatocyte growth factor-like protein [Tupaia chinensis]           | 71.9 | 71.9 | 96%  | 1e-12 | 92% | <a href="#">gij444510620 ELV09642.1</a>     |
| PREDICTED: hepatocyte growth factor-like protein [Tarsius syrichte | 71.0 | 71.0 | 100% | 3e-12 | 88% | <a href="#">gij640809594 XP_008061363.1</a> |
| PREDICTED: hepatocyte growth factor-like protein isoform X2 [Ory   | 70.6 | 70.6 | 96%  | 4e-12 | 88% | <a href="#">gij655834514 XP_008258875.1</a> |
| PREDICTED: hepatocyte growth factor-like protein [Odobenus rosn    | 70.6 | 70.6 | 100% | 4e-12 | 85% | <a href="#">gij472359375 XP_004399304.1</a> |
| PREDICTED: hepatocyte growth factor-like protein isoform X1 [Ory   | 70.6 | 70.6 | 96%  | 4e-12 | 88% | <a href="#">gij655834511 XP_008258874.1</a> |
| Hepatocyte growth factor-like protein [Myotis brandtii]            | 70.2 | 70.2 | 92%  | 5e-12 | 88% | <a href="#">gij521025473 EPQ07261.1</a>     |
| PREDICTED: hepatocyte growth factor-like protein [Myotis brandtii] | 70.2 | 70.2 | 92%  | 5e-12 | 88% | <a href="#">gij554541621 XP_005865438.1</a> |
| PREDICTED: hepatocyte growth factor-like protein isoform X2 [Sus   | 70.2 | 70.2 | 100% | 5e-12 | 85% | <a href="#">gij545862433 XP_005669634.1</a> |
| PREDICTED: hepatocyte growth factor-like protein-like [Sus scrofa  | 70.2 | 70.2 | 100% | 5e-12 | 85% | <a href="#">gij545890597 XP_005674335.1</a> |
| PREDICTED: hepatocyte growth factor-like protein [Otolemur game    | 70.2 | 70.2 | 100% | 5e-12 | 85% | <a href="#">gij395856451 XP_003800642.1</a> |
| PREDICTED: hepatocyte growth factor-like protein [Eptesicus fusc   | 70.2 | 70.2 | 92%  | 5e-12 | 88% | <a href="#">gij641693981 XP_008153797.1</a> |

|                                                                                    |      |      |      |       |     |                                             |
|------------------------------------------------------------------------------------|------|------|------|-------|-----|---------------------------------------------|
| <a href="#">PREDICTED: hepatocyte growth factor-like protein [Ochotona princ</a>   | 70.2 | 70.2 | 100% | 5e-12 | 85% | <a href="#">gil504138720 XP_004581815.1</a> |
| <a href="#">PREDICTED: hepatocyte growth factor-like protein isoform X1 [Sus</a>   | 70.2 | 70.2 | 100% | 5e-12 | 85% | <a href="#">gil311268909 XP_003132263.1</a> |
| <a href="#">PREDICTED: hepatocyte growth factor-like protein [Leptonychotes</a>    | 69.4 | 69.4 | 100% | 1e-11 | 85% | <a href="#">gil585186199 XP_006744596.1</a> |
| <a href="#">PREDICTED: LOW QUALITY PROTEIN: hepatocyte growth factor-</a>          | 68.5 | 68.5 | 100% | 2e-11 | 85% | <a href="#">gil560895401 XP_006174176.1</a> |
| <a href="#">PREDICTED: LOW QUALITY PROTEIN: hepatocyte growth factor-</a>          | 68.5 | 68.5 | 100% | 2e-11 | 85% | <a href="#">gil560948035 XP_006196588.1</a> |
| <a href="#">macrophage stimulating 1-like protein [Camelus ferus]</a>              | 68.5 | 68.5 | 100% | 2e-11 | 85% | <a href="#">gil530666765 EQB77066.1</a>     |
| <a href="#">PREDICTED: hepatocyte growth factor-like protein [Ursus maritimu</a>   | 68.1 | 68.1 | 100% | 3e-11 | 85% | <a href="#">gil671022372 XP_008702001.1</a> |
| <a href="#">hypothetical protein PANDA_009343 [Ailuropoda melanoleuca]</a>         | 68.1 | 68.1 | 100% | 3e-11 | 85% | <a href="#">gil281338342 EFB13926.1</a>     |
| <a href="#">PREDICTED: hepatocyte growth factor-like protein isoform X3 [Mus</a>   | 68.1 | 68.1 | 100% | 3e-11 | 85% | <a href="#">gil512005359 XP_004820133.1</a> |
| <a href="#">PREDICTED: hepatocyte growth factor-like protein [Mustela putoriu</a>  | 68.1 | 68.1 | 100% | 3e-11 | 85% | <a href="#">gil511881610 XP_004760697.1</a> |
| <a href="#">PREDICTED: hepatocyte growth factor-like protein-like [Ailuropoda</a>  | 68.1 | 68.1 | 100% | 3e-11 | 85% | <a href="#">gil301770361 XP_002920612.1</a> |
| <a href="#">PREDICTED: hepatocyte growth factor-like protein isoform X2 [Mus</a>   | 68.1 | 68.1 | 100% | 3e-11 | 85% | <a href="#">gil512005357 XP_004820132.1</a> |
| <a href="#">PREDICTED: hepatocyte growth factor-like protein isoform X1 [Mus</a>   | 68.1 | 68.1 | 100% | 3e-11 | 85% | <a href="#">gil512005355 XP_004820131.1</a> |
| <a href="#">PREDICTED: hepatocyte growth factor-like protein isoform X2 [Equ</a>   | 67.7 | 67.7 | 100% | 4e-11 | 81% | <a href="#">gil545188630 XP_005600717.1</a> |
| <a href="#">PREDICTED: hepatocyte growth factor-like protein isoform X2 [Equ</a>   | 67.7 | 67.7 | 100% | 4e-11 | 81% | <a href="#">gil664730009 XP_008522206.1</a> |
| <a href="#">PREDICTED: hepatocyte growth factor-like protein [Dasypus nove</a>     | 67.7 | 67.7 | 100% | 4e-11 | 85% | <a href="#">gil488519988 XP_004451933.1</a> |
| <a href="#">PREDICTED: hepatocyte growth factor-like protein isoform X1 [Equ</a>   | 67.7 | 67.7 | 100% | 4e-11 | 81% | <a href="#">gil545188628 XP_005600716.1</a> |
| <a href="#">PREDICTED: hepatocyte growth factor-like protein [Lipotes vexillif</a> | 67.2 | 67.2 | 100% | 5e-11 | 81% | <a href="#">gil602681551 XP_007446274.1</a> |
| <a href="#">PREDICTED: hepatocyte growth factor-like protein [Physeter catod</a>   | 67.2 | 67.2 | 100% | 5e-11 | 81% | <a href="#">gil593749341 XP_007129906.1</a> |
| <a href="#">PREDICTED: hepatocyte growth factor-like protein [Tursiops trunca</a>  | 67.2 | 67.2 | 100% | 5e-11 | 81% | <a href="#">gil470608261 XP_004314855.1</a> |
| <a href="#">PREDICTED: hepatocyte growth factor-like protein [Orcinus orca]</a>    | 67.2 | 67.2 | 100% | 5e-11 | 81% | <a href="#">gil466078823 XP_004284002.1</a> |
| <a href="#">PREDICTED: hepatocyte growth factor-like protein [Ceratotherium :</a>  | 66.8 | 66.8 | 100% | 8e-11 | 81% | <a href="#">gil478490786 XP_004419765.1</a> |
| <a href="#">PREDICTED: hepatocyte growth factor-like protein isoform X3 [Chi</a>   | 66.4 | 66.4 | 96%  | 1e-10 | 84% | <a href="#">gil533195097 XP_005410271.1</a> |
| <a href="#">PREDICTED: hepatocyte growth factor-like protein isoform X2 [Chi</a>   | 66.4 | 66.4 | 96%  | 1e-10 | 84% | <a href="#">gil533195095 XP_005410270.1</a> |
| <a href="#">PREDICTED: hepatocyte growth factor-like protein isoform X1 [Chi</a>   | 66.4 | 66.4 | 96%  | 1e-10 | 84% | <a href="#">gil533195093 XP_005410269.1</a> |
| <a href="#">PREDICTED: hepatocyte growth factor-like protein [Orycteropus af</a>   | 65.5 | 65.5 | 100% | 2e-10 | 85% | <a href="#">gil634888659 XP_007953538.1</a> |
| <a href="#">PREDICTED: hepatocyte growth factor-like protein [Trichechus ma</a>    | 65.5 | 65.5 | 100% | 2e-10 | 85% | <a href="#">gil471355983 XP_004368594.1</a> |

## Alignments

[Download](#) [GenPept](#) [Graphics](#) [Next](#) [Previous](#) [Descriptions](#)

macrophage stimulating 1 (hepatocyte growth factor-like), isoform CRA\_c [Homo sapiens]  
 Sequence ID: [gil119585405|gb|EAW65001.1](#) Length: 183 Number of Matches: 1

Range 1: 83 to 108 [GenPept](#) [Graphics](#) [Next Match](#) [Previous Match](#)

| Score          | Expect | Identities  | Positives   | Gaps     |
|----------------|--------|-------------|-------------|----------|
| 85.0 bits(193) | 3e-17  | 26/26(100%) | 26/26(100%) | 0/26(0%) |

Query 1 KGTGNDTVLNVALLNVISNQCENIKH 26  
 KGTGNDTVLNVALLNVISNQCENIKH  
 Sbjct 83 KGTGNDTVLNVALLNVISNQCENIKH 108

**Related Information**  
[Gene](#) - associated gene details

[Download](#) [GenPept](#) [Graphics](#) [Next](#) [Previous](#) [Descriptions](#)

Chain B, Crystal Structure Of The Beta-Chain Of HgflMSP  
 Sequence ID: [gil83754035|pdb|2ASU|B](#) Length: 234 Number of Matches: 1

Range 1: 128 to 153 [GenPept](#) [Graphics](#) [Next Match](#) [Previous Match](#)

| Score          | Expect | Identities  | Positives   | Gaps     |
|----------------|--------|-------------|-------------|----------|
| 85.0 bits(193) | 3e-17  | 26/26(100%) | 26/26(100%) | 0/26(0%) |

Query 1 KGTGNDTVLNVALLNVISNQCENIKH 26

**Related Information**  
[Structure](#) - 3D structure displays



Sbjct 128 KGTGNDTVLNVALLNVISNQEENIKH 153

[Download](#) [GenPept](#) [Graphics](#) [Next](#) [Previous](#) [Descriptions](#)

Chain C, Crystal Structure Of Ron Sema-psi-ipt1 Extracellular Domains In Complex With Msp Beta-chain

Sequence ID: [gi|685425760|pdb|4QT8|C](#) Length: 253 Number of Matches: 1

[See 1 more title\(s\)](#)

Range 1: 147 to 172 [GenPept](#) [Graphics](#) [Next Match](#) [Previous Match](#)

| Score          | Expect | Identities  | Positives   | Gaps     |
|----------------|--------|-------------|-------------|----------|
| 85.0 bits(193) | 4e-17  | 26/26(100%) | 26/26(100%) | 0/26(0%) |

Query 1 KGTGNDTVLNVALLNVISNQEENIKH 26  
 KGTGNDTVLNVALLNVISNQEENIKH  
 Sbjct 147 KGTGNDTVLNVALLNVISNQEENIKH 172

**Related Information**

[Structure](#) - 3D structure displays  
[Identical Proteins](#) - Proteins identical to the subject

[Download](#) [GenPept](#) [Graphics](#) [Next](#) [Previous](#) [Descriptions](#)

hepatocyte growth factor-like protein homolog [Homo sapiens]

Sequence ID: [gi|1141777|gb|AAC35412.1|](#) Length: 286 Number of Matches: 1

Range 1: 186 to 211 [GenPept](#) [Graphics](#) [Next Match](#) [Previous Match](#)

| Score          | Expect | Identities  | Positives   | Gaps     |
|----------------|--------|-------------|-------------|----------|
| 85.0 bits(193) | 4e-17  | 26/26(100%) | 26/26(100%) | 0/26(0%) |

Query 1 KGTGNDTVLNVALLNVISNQEENIKH 26  
 KGTGNDTVLNVALLNVISNQEENIKH  
 Sbjct 186 KGTGNDTVLNVALLNVISNQEENIKH 211

**Related Information**

[Gene](#) - associated gene details

[Download](#) [GenPept](#) [Graphics](#) [Next](#) [Previous](#) [Descriptions](#)

PREDICTED: hepatocyte growth factor-like protein isoform X2 [Macaca fascicularis]

Sequence ID: [gi|544414366|ref|XP\\_005547205.1|](#) Length: 600 Number of Matches: 1

Range 1: 500 to 525 [GenPept](#) [Graphics](#) [Next Match](#) [Previous Match](#)

| Score          | Expect | Identities  | Positives   | Gaps     |
|----------------|--------|-------------|-------------|----------|
| 85.0 bits(193) | 5e-17  | 26/26(100%) | 26/26(100%) | 0/26(0%) |

Query 1 KGTGNDTVLNVALLNVISNQEENIKH 26  
 KGTGNDTVLNVALLNVISNQEENIKH  
 Sbjct 500 KGTGNDTVLNVALLNVISNQEENIKH 525

**Related Information**

[Gene](#) - associated gene details

BLAST is a registered trademark of the National Library of Medicine.

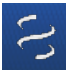

Your search parameters were adjusted to search for a short input sequence.

Edit and Resubmit Save Search Strategies Formatting options Download YouTube How to read this page Blast report description

MST1\_RGKGEGYRGTDTTTAGVPCQRW\_Mod

RID BVJKKGCZ01R (Expires on 01-21 10:24 am)

Query ID lcl|141497
Description None
Molecule type amino acid
Query Length 23

Database Name nr
Description All non-redundant GenBank CDS translations+PDB+SwissProt+PIR+PRF excluding environmental samples from WGS projects
Program BLASTP 2.2.30+ Citation

Other reports: Search Summary Taxonomy reports Distance tree of results Multiple alignment

Graphic Summary

Show Conserved Domains

Putative conserved domains have been detected, click on the image below for detailed results.

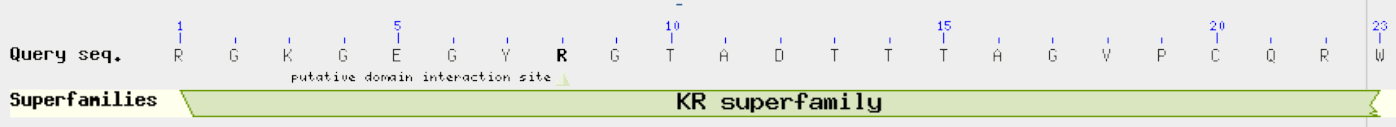

Distribution of 372 Blast Hits on the Query Sequence

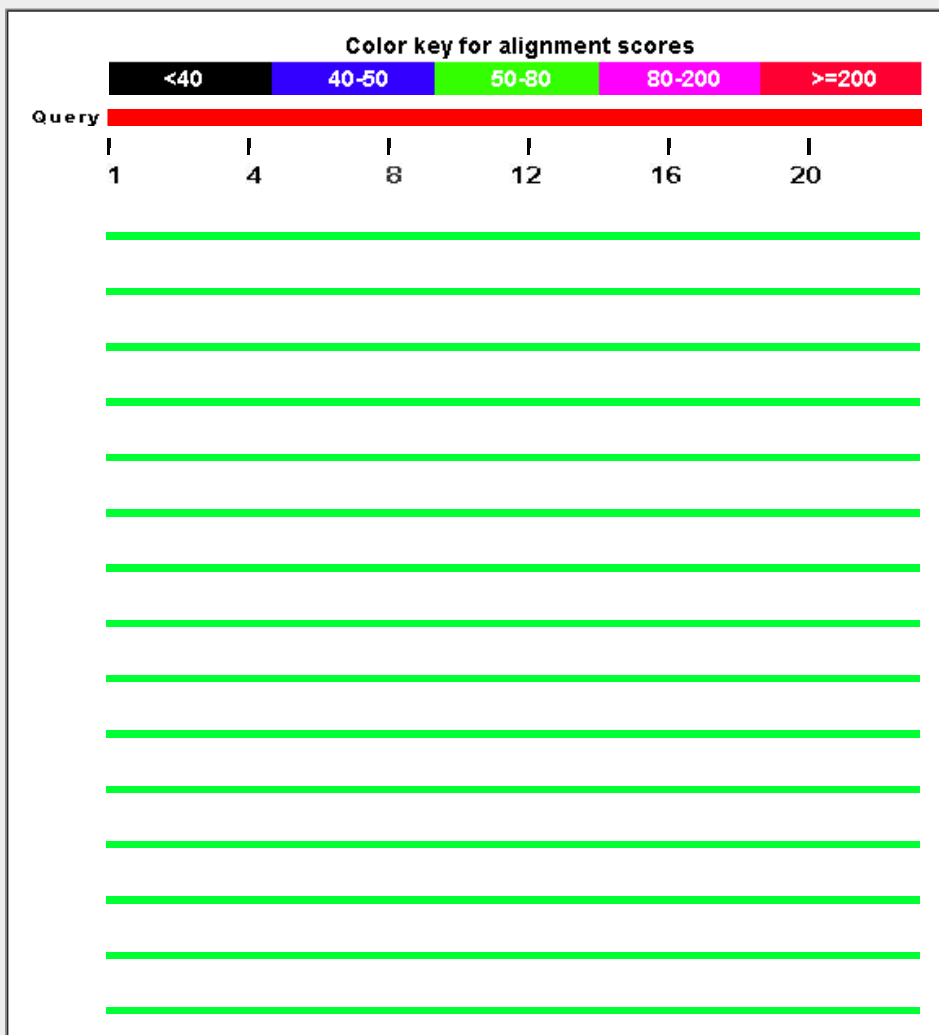

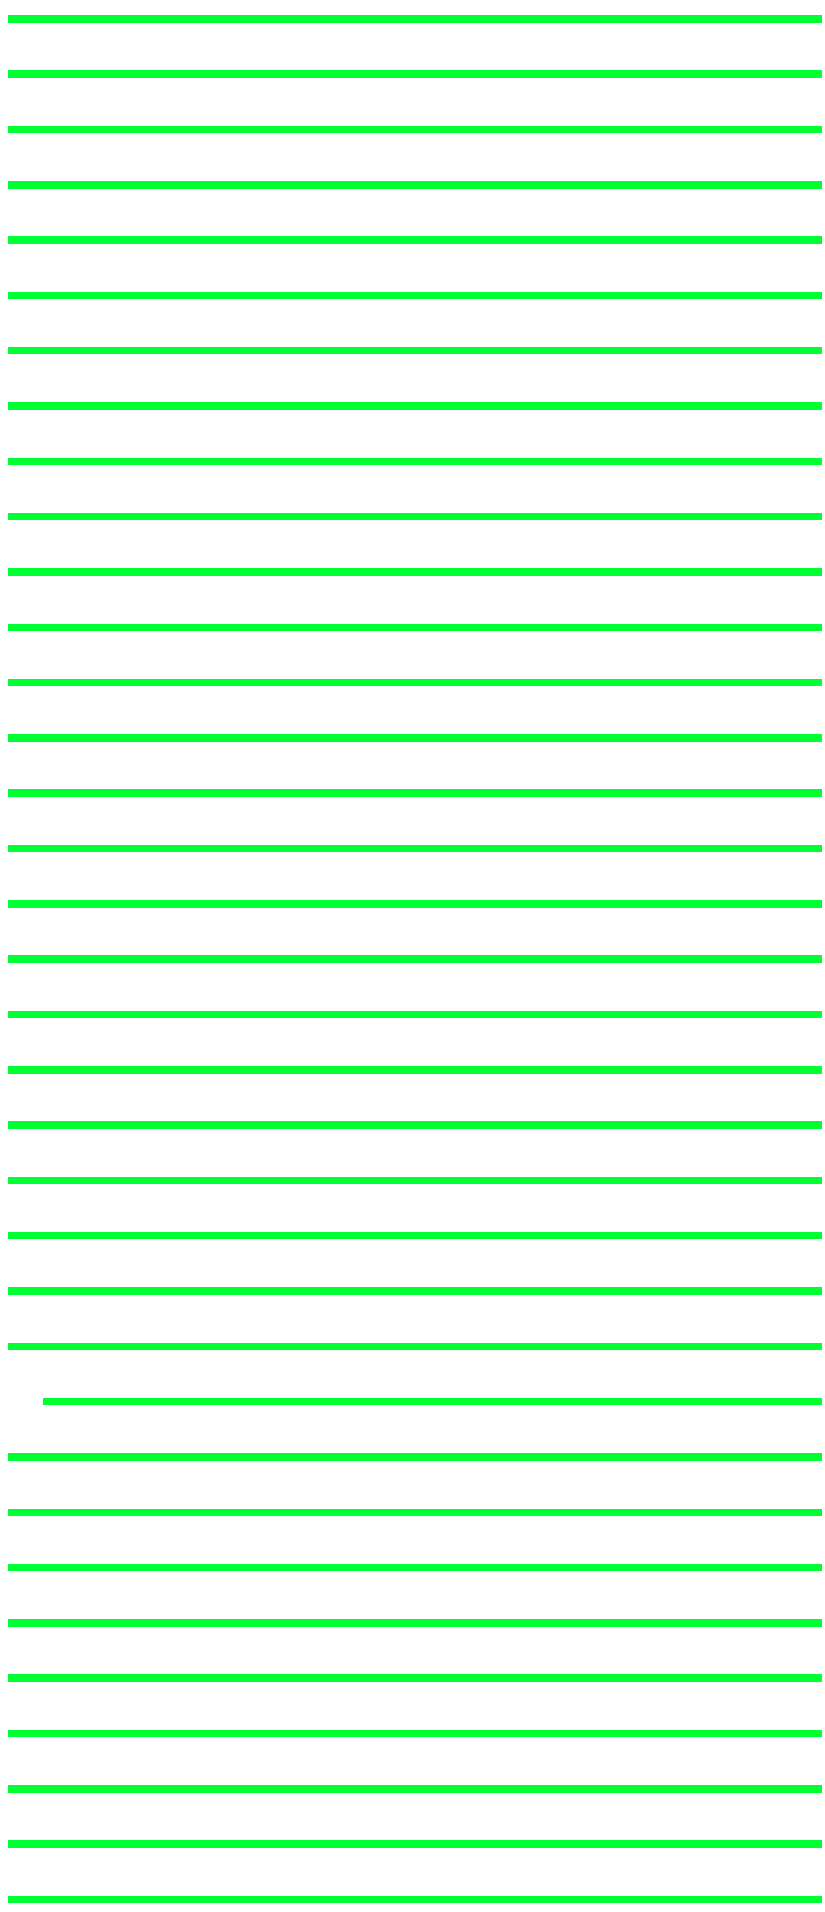

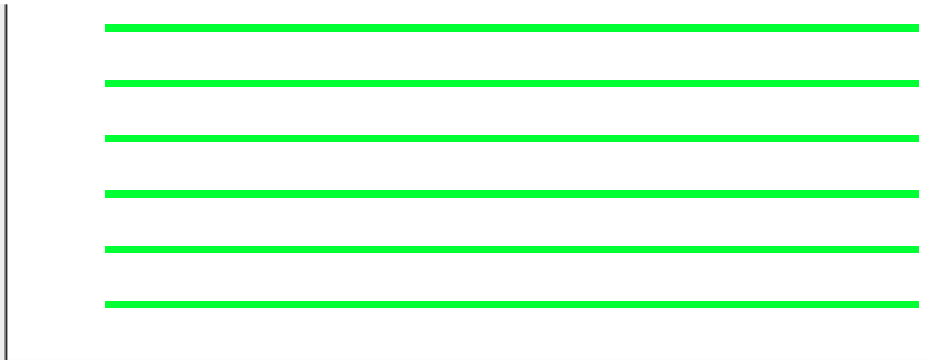

**Descriptions**

**Sequences producing significant alignments:**

Select: [All](#) [None](#) Selected:0

Alignments  [GenPept](#) [Graphics](#) [Distance tree of results](#) [Multiple alignment](#)

| Description                                                                                                                      | Max score | Total score | Query cover | E value | Ident | Accession                      |
|----------------------------------------------------------------------------------------------------------------------------------|-----------|-------------|-------------|---------|-------|--------------------------------|
| <a href="#">MST1 protein [Homo sapiens]</a>                                                                                      | 74.0      | 105         | 100%        | 1e-13   | 96%   | <a href="#">AAH44862.1</a>     |
| <a href="#">unnamed protein product [Homo sapiens]</a>                                                                           | 74.0      | 139         | 100%        | 2e-13   | 96%   | <a href="#">BAH12793.1</a>     |
| <a href="#">macrophage stimulating 1 (hepatocyte growth factor-like), isoform CRA_d [Homo sapiens]</a>                           | 74.0      | 105         | 100%        | 2e-13   | 96%   | <a href="#">EAW65002.1</a>     |
| <a href="#">unnamed protein product [Homo sapiens]</a>                                                                           | 74.0      | 139         | 100%        | 2e-13   | 96%   | <a href="#">BAH11736.1</a>     |
| <a href="#">PREDICTED: hepatocyte growth factor-like protein isoform X4 [Homo sapiens]</a>                                       | 74.0      | 173         | 100%        | 2e-13   | 96%   | <a href="#">XP_006713232.1</a> |
| <a href="#">hepatocyte growth factor-like protein homolog [Homo sapiens]</a>                                                     | 74.0      | 165         | 100%        | 2e-13   | 96%   | <a href="#">AAC63092.1</a>     |
| <a href="#">PREDICTED: hepatocyte growth factor-like protein isoform X2 [Macaca fascicularis]</a>                                | 74.0      | 176         | 100%        | 2e-13   | 96%   | <a href="#">XP_005547205.1</a> |
| <a href="#">macrophage stimulating 1 (hepatocyte growth factor-like), isoform CRA_e [Homo sapiens]</a>                           | 74.0      | 138         | 100%        | 2e-13   | 96%   | <a href="#">EAW65003.1</a>     |
| <a href="#">PREDICTED: hepatocyte growth factor-like protein isoform X2 [Homo sapiens]</a>                                       | 74.0      | 173         | 100%        | 2e-13   | 96%   | <a href="#">XP_006713230.1</a> |
| <a href="#">PREDICTED: hepatocyte growth factor-like protein isoform X5 [Chlorocebus sabaeus]</a>                                | 74.0      | 141         | 100%        | 2e-13   | 96%   | <a href="#">XP_007982450.1</a> |
| <a href="#">PREDICTED: hepatocyte growth factor-like protein isoform X2 [Papio anubis]</a>                                       | 74.0      | 176         | 100%        | 2e-13   | 96%   | <a href="#">XP_009199018.1</a> |
| <a href="#">macrophage-stimulating protein [Homo sapiens]</a>                                                                    | 74.0      | 173         | 100%        | 2e-13   | 96%   | <a href="#">AAA59872.1</a>     |
| <a href="#">RecName: Full=Hepatocyte growth factor-like protein; AltName: Full=Macrophage-stimulating protein [Homo sapiens]</a> | 74.0      | 173         | 100%        | 2e-13   | 96%   | <a href="#">P26927.2</a>       |
| <a href="#">hepatocyte growth factor-like protein [Homo sapiens]</a>                                                             | 74.0      | 173         | 100%        | 2e-13   | 96%   | <a href="#">AAA50165.1</a>     |
| <a href="#">hypothetical protein EGM_20500 [Macaca fascicularis]</a>                                                             | 74.0      | 176         | 100%        | 2e-13   | 96%   | <a href="#">EHH62249.1</a>     |
| <a href="#">hypothetical protein EGK_11631 [Macaca mulatta]</a>                                                                  | 74.0      | 176         | 100%        | 2e-13   | 96%   | <a href="#">EHH16360.1</a>     |
| <a href="#">hypothetical protein [Macaca fascicularis]</a>                                                                       | 74.0      | 176         | 100%        | 2e-13   | 96%   | <a href="#">BAF47378.1</a>     |
| <a href="#">macrophage stimulating 1 (hepatocyte growth factor-like) variant [Homo sapiens]</a>                                  | 74.0      | 176         | 100%        | 2e-13   | 96%   | <a href="#">BAD96613.1</a>     |
| <a href="#">PREDICTED: hepatocyte growth factor-like protein isoform X4 [Chlorocebus sabaeus]</a>                                | 74.0      | 141         | 100%        | 2e-13   | 96%   | <a href="#">XP_007982449.1</a> |
| <a href="#">PREDICTED: hepatocyte growth factor-like protein isoform X1 [Cavia porcellus]</a>                                    | 74.0      | 160         | 100%        | 2e-13   | 96%   | <a href="#">XP_003476721.1</a> |
| <a href="#">PREDICTED: hepatocyte growth factor-like protein [Pteropus alecto]</a>                                               | 74.0      | 177         | 100%        | 2e-13   | 96%   | <a href="#">XP_006909162.1</a> |
| <a href="#">PREDICTED: hepatocyte growth factor-like protein [Pongo abelii]</a>                                                  | 74.0      | 175         | 100%        | 2e-13   | 96%   | <a href="#">XP_002813790.1</a> |
| <a href="#">PREDICTED: hepatocyte growth factor-like protein isoform X3 [Chlorocebus sabaeus]</a>                                | 74.0      | 176         | 100%        | 2e-13   | 96%   | <a href="#">XP_007982448.1</a> |
| <a href="#">PREDICTED: hepatocyte growth factor-like protein isoform X1 [Macaca fascicularis]</a>                                | 74.0      | 176         | 100%        | 2e-13   | 96%   | <a href="#">XP_005547204.1</a> |
| <a href="#">PREDICTED: hepatocyte growth factor-like protein [Gorilla gorilla gorilla]</a>                                       | 74.0      | 173         | 100%        | 2e-13   | 96%   | <a href="#">XP_004034204.1</a> |
| <a href="#">PREDICTED: hepatocyte growth factor-like protein isoform X1 [Papio anubis]</a>                                       | 74.0      | 176         | 100%        | 2e-13   | 96%   | <a href="#">XP_003894463.1</a> |
| <a href="#">PREDICTED: hepatocyte growth factor-like protein [Nomascus leucogenys]</a>                                           | 74.0      | 169         | 100%        | 2e-13   | 96%   | <a href="#">XP_003257123.1</a> |
| <a href="#">hepatocyte growth factor-like protein precursor [Homo sapiens]</a>                                                   | 74.0      | 173         | 100%        | 2e-13   | 96%   | <a href="#">NP_066278.3</a>    |
| <a href="#">PREDICTED: hepatocyte growth factor-like protein [Macaca mulatta]</a>                                                | 74.0      | 176         | 100%        | 2e-13   | 96%   | <a href="#">XP_001107946.1</a> |

|                                                                                               |      |     |      |       |     |                                |
|-----------------------------------------------------------------------------------------------|------|-----|------|-------|-----|--------------------------------|
| <a href="#">PREDICTED: hepatocyte growth factor-like protein isoform X2 [Chlorocebus s</a>    | 74.0 | 141 | 100% | 2e-13 | 96% | <a href="#">XP_007982445.1</a> |
| <a href="#">PREDICTED: hepatocyte growth factor-like protein isoform X2 [Cavia porcellu</a>   | 74.0 | 160 | 100% | 2e-13 | 96% | <a href="#">XP_005006713.1</a> |
| <a href="#">PREDICTED: hepatocyte growth factor-like protein isoform X1 [Chlorocebus s</a>    | 74.0 | 141 | 100% | 2e-13 | 96% | <a href="#">XP_007982444.1</a> |
| <a href="#">PREDICTED: LOW QUALITY PROTEIN: hepatocyte growth factor-like proteir</a>         | 74.0 | 170 | 100% | 2e-13 | 96% | <a href="#">XP_516465.4</a>    |
| <a href="#">PREDICTED: LOW QUALITY PROTEIN: hepatocyte growth factor-like proteir</a>         | 71.0 | 170 | 100% | 2e-12 | 91% | <a href="#">XP_005326984.1</a> |
| <a href="#">PREDICTED: hepatocyte growth factor-like protein isoform X4 [Equus przewa</a>     | 70.6 | 175 | 100% | 3e-12 | 91% | <a href="#">XP_008522208.1</a> |
| <a href="#">PREDICTED: hepatocyte growth factor-like protein isoform X2 [Saimiri bolivie</a>  | 70.6 | 168 | 100% | 3e-12 | 91% | <a href="#">XP_010345462.1</a> |
| <a href="#">PREDICTED: hepatocyte growth factor-like protein isoform X2 [Equus caballu</a>    | 70.6 | 145 | 100% | 3e-12 | 91% | <a href="#">XP_005600717.1</a> |
| <a href="#">PREDICTED: hepatocyte growth factor-like protein isoform X2 [Equus przewa</a>     | 70.6 | 175 | 100% | 3e-12 | 91% | <a href="#">XP_008522206.1</a> |
| <a href="#">hypothetical protein PANDA_009343 [Ailuropoda melanoleuca]</a>                    | 70.6 | 162 | 100% | 3e-12 | 91% | <a href="#">EFB13926.1</a>     |
| <a href="#">PREDICTED: hepatocyte growth factor-like protein [Erinaceus europaeus]</a>        | 70.6 | 158 | 100% | 3e-12 | 91% | <a href="#">XP_007527316.1</a> |
| <a href="#">PREDICTED: hepatocyte growth factor-like protein [Echinops telfairii]</a>         | 70.6 | 138 | 95%  | 3e-12 | 95% | <a href="#">XP_004715222.1</a> |
| <a href="#">PREDICTED: hepatocyte growth factor-like protein [Galeopterus variegatus]</a>     | 70.6 | 168 | 100% | 3e-12 | 91% | <a href="#">XP_008569781.1</a> |
| <a href="#">PREDICTED: hepatocyte growth factor-like protein [Tarsius syrichta]</a>           | 70.6 | 175 | 100% | 3e-12 | 91% | <a href="#">XP_008061363.1</a> |
| <a href="#">PREDICTED: hepatocyte growth factor-like protein [Orycteropus afer afer]</a>      | 70.6 | 172 | 100% | 3e-12 | 91% | <a href="#">XP_007953538.1</a> |
| <a href="#">PREDICTED: hepatocyte growth factor-like protein [Leptonychotes weddellii]</a>    | 70.6 | 167 | 100% | 3e-12 | 91% | <a href="#">XP_006744596.1</a> |
| <a href="#">PREDICTED: hepatocyte growth factor-like protein [Tupaia chinensis]</a>           | 70.6 | 167 | 100% | 3e-12 | 91% | <a href="#">XP_006171012.1</a> |
| <a href="#">PREDICTED: hepatocyte growth factor-like protein isoform X3 [Mustela putori</a>   | 70.6 | 162 | 100% | 3e-12 | 91% | <a href="#">XP_004820133.1</a> |
| <a href="#">PREDICTED: hepatocyte growth factor-like protein [Mustela putorius furo]</a>      | 70.6 | 162 | 100% | 3e-12 | 91% | <a href="#">XP_004760697.1</a> |
| <a href="#">PREDICTED: hepatocyte growth factor-like protein [Odobenus rosmarus dive</a>      | 70.6 | 164 | 100% | 3e-12 | 91% | <a href="#">XP_004399304.1</a> |
| <a href="#">PREDICTED: hepatocyte growth factor-like protein [Ceratotherium simum sim</a>     | 70.6 | 166 | 100% | 3e-12 | 91% | <a href="#">XP_004419765.1</a> |
| <a href="#">PREDICTED: hepatocyte growth factor-like protein [Sorex araneus]</a>              | 70.6 | 164 | 100% | 3e-12 | 91% | <a href="#">XP_004615300.1</a> |
| <a href="#">PREDICTED: LOW QUALITY PROTEIN: hepatocyte growth factor-like proteir</a>         | 70.6 | 178 | 100% | 3e-12 | 91% | <a href="#">XP_003409924.1</a> |
| <a href="#">PREDICTED: hepatocyte growth factor-like protein [Eptesicus fuscus]</a>           | 70.6 | 160 | 100% | 3e-12 | 91% | <a href="#">XP_008153797.1</a> |
| <a href="#">PREDICTED: hepatocyte growth factor-like protein [Pantholops hodgsonii]</a>       | 70.6 | 136 | 100% | 3e-12 | 91% | <a href="#">XP_005969335.1</a> |
| <a href="#">PREDICTED: hepatocyte growth factor-like protein isoform X1 [Equus caballu</a>    | 70.6 | 175 | 100% | 3e-12 | 91% | <a href="#">XP_005600716.1</a> |
| <a href="#">PREDICTED: hepatocyte growth factor-like protein [Felis catus]</a>                | 70.6 | 171 | 100% | 3e-12 | 91% | <a href="#">XP_003982280.1</a> |
| <a href="#">PREDICTED: hepatocyte growth factor-like protein isoform X1 [Saimiri bolivie</a>  | 70.6 | 168 | 100% | 3e-12 | 91% | <a href="#">XP_003936704.1</a> |
| <a href="#">PREDICTED: hepatocyte growth factor-like protein [Canis lupus familiaris]</a>     | 70.6 | 167 | 100% | 3e-12 | 91% | <a href="#">XP_541884.3</a>    |
| <a href="#">PREDICTED: LOW QUALITY PROTEIN: hepatocyte growth factor-like proteir</a>         | 70.6 | 131 | 100% | 3e-12 | 91% | <a href="#">XP_004018505.1</a> |
| <a href="#">Hepatocyte growth factor-like protein [Tupaia chinensis]</a>                      | 70.6 | 167 | 100% | 3e-12 | 91% | <a href="#">ELV09642.1</a>     |
| <a href="#">PREDICTED: hepatocyte growth factor-like protein-like [Ailuropoda melanoleu</a>   | 70.6 | 162 | 100% | 3e-12 | 91% | <a href="#">XP_002920612.1</a> |
| <a href="#">PREDICTED: hepatocyte growth factor-like protein [Rhinopithecus roxellana]</a>    | 69.8 | 172 | 100% | 5e-12 | 91% | <a href="#">XP_010367959.1</a> |
| <a href="#">PREDICTED: hepatocyte growth factor-like protein isoform X2 [Callithrix jacch</a> | 68.5 | 129 | 100% | 1e-11 | 87% | <a href="#">XP_008979888.1</a> |
| <a href="#">PREDICTED: hepatocyte growth factor-like protein isoform X1 [Callithrix jacch</a> | 68.5 | 163 | 100% | 1e-11 | 87% | <a href="#">XP_002758398.1</a> |
| <a href="#">PREDICTED: hepatocyte growth factor-like protein [Otolemur garnettii]</a>         | 68.1 | 171 | 100% | 2e-11 | 87% | <a href="#">XP_003800642.1</a> |
| <a href="#">PREDICTED: hepatocyte growth factor-like protein [Elephantulus edwardii]</a>      | 67.7 | 175 | 100% | 3e-11 | 87% | <a href="#">XP_006892963.1</a> |
| <a href="#">PREDICTED: hepatocyte growth factor-like protein [Dasypus novemcinctus]</a>       | 67.7 | 170 | 100% | 3e-11 | 87% | <a href="#">XP_004451933.1</a> |
| <a href="#">PREDICTED: hepatocyte growth factor-like protein [Bubalus bubalis]</a>            | 67.2 | 137 | 100% | 4e-11 | 87% | <a href="#">XP_006053335.1</a> |
| <a href="#">PREDICTED: hepatocyte growth factor-like protein [Bos mutus]</a>                  | 67.2 | 137 | 100% | 4e-11 | 87% | <a href="#">XP_005892185.1</a> |
| <a href="#">TPA: hepatocyte growth factor-like protein [Bos taurus]</a>                       | 67.2 | 137 | 100% | 4e-11 | 87% | <a href="#">DAA16921.1</a>     |
| <a href="#">hepatocyte growth factor-like protein precursor [Bos taurus]</a>                  | 67.2 | 137 | 100% | 4e-11 | 87% | <a href="#">NP_001069145.1</a> |
| <a href="#">PREDICTED: hepatocyte growth factor-like protein [Camelus bactrianus]</a>         | 67.2 | 164 | 100% | 4e-11 | 87% | <a href="#">XP_010967473.1</a> |
| <a href="#">Hepatocyte growth factor-like protein [Bos mutus]</a>                             | 67.2 | 137 | 100% | 4e-11 | 87% | <a href="#">ELR58967.1</a>     |
| <a href="#">PREDICTED: hepatocyte growth factor-like protein [Jaculus jaculus]</a>            | 67.2 | 158 | 100% | 4e-11 | 87% | <a href="#">XP_004664298.1</a> |
| <a href="#">PREDICTED: hepatocyte growth factor-like protein isoform X2 [Bison bison bi</a>   | 67.2 | 137 | 100% | 4e-11 | 87% | <a href="#">XP_010850156.1</a> |

|                                                                                              |      |     |      |       |     |                                |
|----------------------------------------------------------------------------------------------|------|-----|------|-------|-----|--------------------------------|
| <a href="#">PREDICTED: hepatocyte growth factor-like protein [Balaenoptera acutorostr</a>    | 67.2 | 163 | 100% | 4e-11 | 87% | <a href="#">XP_007168789.1</a> |
| <a href="#">PREDICTED: hepatocyte growth factor-like protein isoform X1 [Bison bison bi</a>  | 67.2 | 137 | 100% | 4e-11 | 87% | <a href="#">XP_010850155.1</a> |
| <a href="#">PREDICTED: hepatocyte growth factor-like protein [Lipotes vexillifer]</a>        | 67.2 | 163 | 100% | 4e-11 | 87% | <a href="#">XP_007446274.1</a> |
| <a href="#">PREDICTED: hepatocyte growth factor-like protein [Physeter catodon]</a>          | 67.2 | 159 | 100% | 4e-11 | 87% | <a href="#">XP_007129906.1</a> |
| <a href="#">PREDICTED: LOW QUALITY PROTEIN: hepatocyte growth factor-like proteir</a>        | 67.2 | 164 | 100% | 4e-11 | 87% | <a href="#">XP_006196588.1</a> |
| <a href="#">PREDICTED: hepatocyte growth factor-like protein isoform X2 [Bos taurus]</a>     | 67.2 | 137 | 100% | 4e-11 | 87% | <a href="#">XP_005222861.1</a> |
| <a href="#">PREDICTED: hepatocyte growth factor-like protein [Tursiops truncatus]</a>        | 67.2 | 163 | 100% | 4e-11 | 87% | <a href="#">XP_004314855.1</a> |
| <a href="#">PREDICTED: hepatocyte growth factor-like protein [Orcinus orca]</a>              | 67.2 | 163 | 100% | 4e-11 | 87% | <a href="#">XP_004284002.1</a> |
| <a href="#">PREDICTED: hepatocyte growth factor-like protein [Camelus dromedarius]</a>       | 67.2 | 164 | 100% | 4e-11 | 87% | <a href="#">XP_010976658.1</a> |
| <a href="#">PREDICTED: hepatocyte growth factor-like protein isoform X3 [Chinchilla lanu</a> | 66.8 | 125 | 95%  | 6e-11 | 91% | <a href="#">XP_005410271.1</a> |
| <a href="#">PREDICTED: hepatocyte growth factor-like protein isoform X2 [Chinchilla lanu</a> | 66.8 | 125 | 95%  | 6e-11 | 91% | <a href="#">XP_005410270.1</a> |
| <a href="#">PREDICTED: hepatocyte growth factor-like protein [Octodon degus]</a>             | 66.8 | 162 | 100% | 6e-11 | 87% | <a href="#">XP_004625159.1</a> |
| <a href="#">PREDICTED: hepatocyte growth factor-like protein isoform X1 [Chinchilla lanu</a> | 66.8 | 125 | 95%  | 6e-11 | 91% | <a href="#">XP_005410269.1</a> |
| <a href="#">PREDICTED: hepatocyte growth factor-like protein [Ochotona princeps]</a>         | 66.8 | 154 | 100% | 6e-11 | 87% | <a href="#">XP_004581815.1</a> |
| <a href="#">PREDICTED: hepatocyte growth factor-like protein [Trichechus manatus latiro</a>  | 66.4 | 179 | 100% | 8e-11 | 87% | <a href="#">XP_004368594.1</a> |
| <a href="#">PREDICTED: hepatocyte growth factor-like protein [Chrysochloris asiatica]</a>    | 65.5 | 166 | 100% | 2e-10 | 83% | <a href="#">XP_006873659.1</a> |
| <a href="#">PREDICTED: hepatocyte growth factor-like protein isoform X2 [Mus musculus</a>    | 64.3 | 151 | 100% | 4e-10 | 83% | <a href="#">XP_006511702.1</a> |
| <a href="#">PREDICTED: hepatocyte growth factor-like protein [Nannospalax galili]</a>        | 64.3 | 115 | 100% | 4e-10 | 83% | <a href="#">XP_008851489.1</a> |
| <a href="#">Macrophage stimulating 1 (hepatocyte growth factor-like) [Mus musculus]</a>      | 64.3 | 151 | 100% | 4e-10 | 83% | <a href="#">AAH10551.1</a>     |
| <a href="#">hepatocyte growth factor-like protein precursor [Mus musculus]</a>               | 64.3 | 151 | 100% | 4e-10 | 83% | <a href="#">NP_032269.3</a>    |
| <a href="#">PREDICTED: hepatocyte growth factor-like protein [Mesocricetus auratus]</a>      | 64.3 | 141 | 100% | 4e-10 | 83% | <a href="#">XP_005074975.1</a> |
| <a href="#">unnamed protein product [Mus musculus]</a>                                       | 64.3 | 151 | 100% | 4e-10 | 83% | <a href="#">BAE22056.1</a>     |
| <a href="#">hepatocyte growth factor-like protein [Mus musculus]</a>                         | 64.3 | 151 | 100% | 4e-10 | 83% | <a href="#">AAA50167.1</a>     |
| <a href="#">hepatocyte growth factor-like protein precursor [Rattus norvegicus]</a>          | 64.3 | 151 | 100% | 4e-10 | 83% | <a href="#">NP_077328.1</a>    |
| <a href="#">PREDICTED: hepatocyte growth factor-like protein [Peromyscus maniculatus</a>     | 64.3 | 148 | 100% | 4e-10 | 83% | <a href="#">XP_006978395.1</a> |

## Alignments

Download [GenPept](#) [Graphics](#) Sort by: E value [Next](#) [Previous](#) [Descriptions](#)

### MST1 protein [Homo sapiens]

Sequence ID: [gb|AAH44862.1](#) Length: 188 Number of Matches: 2

Range 1: 148 to 170 [GenPept](#) [Graphics](#) [Next Match](#) [Previous Match](#)

| Score          | Expect | Identities | Positives   | Gaps     |
|----------------|--------|------------|-------------|----------|
| 74.0 bits(167) | 1e-13  | 22/23(96%) | 23/23(100%) | 0/23(0%) |

```

Query 1  RGKGEGYRGTDADTTTAGVPCQRW 23
          RGKGEGYRGTA+TTTAGVPCQRW
Sbjct 148 RGKGEGYRGTDADTTTAGVPCQRW 170
    
```

Range 2: 59 to 78 [GenPept](#) [Graphics](#) [Next Match](#) [Previous Match](#) [First Match](#)

| Score         | Expect | Identities | Positives  | Gaps     |
|---------------|--------|------------|------------|----------|
| 31.2 bits(66) | 25     | 12/20(60%) | 12/20(60%) | 0/20(0%) |

```

Query 4  GEGYRGTDADTTTAGVPCQRW 23
          GE YRG D T G CQRW
Sbjct 59  GEEYRGAVDRTESGRECQRW 78
    
```

Download [GenPept](#) [Graphics](#) Sort by: E value [Next](#) [Previous](#) [Descriptions](#)

### unnamed protein product [Homo sapiens]

Sequence ID: [dbj|BAH12793.1](#) Length: 264 Number of Matches: 3

#### Related Information

[Gene](#) - associated gene details

#### Related Information

Range 1: 224 to 246 [GenPept](#) [Graphics](#) [Next Match](#) [Previous Match](#)

| Score          | Expect | Identities | Positives   | Gaps     |
|----------------|--------|------------|-------------|----------|
| 74.0 bits(167) | 2e-13  | 22/23(96%) | 23/23(100%) | 0/23(0%) |

Query 1 RGKGEGYRGTADTTTAGVPCQRW 23  
 RGKGEGYRGTATA+TTAGVPCQRW  
 Sbjct 224 RGKGEGYRGTANTTTAGVPCQRW 246

[Gene](#) - associated gene details

Range 2: 56 to 73 [GenPept](#) [Graphics](#) [Next Match](#) [Previous Match](#) [First Match](#)

| Score         | Expect | Identities | Positives  | Gaps     |
|---------------|--------|------------|------------|----------|
| 34.6 bits(74) | 1.9    | 12/18(67%) | 12/18(66%) | 0/18(0%) |

Query 6 GYRGTDTTTAGVPCQRW 23  
 GYRGT TT G PCQ W  
 Sbjct 56 GYRGTMTTVGGLPCQAW 73

Range 3: 135 to 154 [GenPept](#) [Graphics](#) [Next Match](#) [Previous Match](#) [First Match](#)

| Score         | Expect | Identities | Positives  | Gaps     |
|---------------|--------|------------|------------|----------|
| 31.2 bits(66) | 26     | 12/20(60%) | 12/20(60%) | 0/20(0%) |

Query 4 GEGYRGTADTTTAGVPCQRW 23  
 GE YRG D T G CQRW  
 Sbjct 135 GEEYRGAVDRTEGREGCQRW 154

[Download](#) [GenPept](#) [Graphics](#) Sort by: E value

[Next](#) [Previous](#) [Descriptions](#)

macrophage stimulating 1 (hepatocyte growth factor-like), isoform CRA\_d [Homo sapiens]  
 Sequence ID: [gb|EAW65002.1](#) Length: 331 Number of Matches: 2

**Related Information**

[Gene](#) - associated gene details

Range 1: 223 to 245 [GenPept](#) [Graphics](#) [Next Match](#) [Previous Match](#)

| Score          | Expect | Identities | Positives   | Gaps     |
|----------------|--------|------------|-------------|----------|
| 74.0 bits(167) | 2e-13  | 22/23(96%) | 23/23(100%) | 0/23(0%) |

Query 1 RGKGEGYRGTADTTTAGVPCQRW 23  
 RGKGEGYRGTATA+TTAGVPCQRW  
 Sbjct 223 RGKGEGYRGTANTTTAGVPCQRW 245

Range 2: 134 to 153 [GenPept](#) [Graphics](#) [Next Match](#) [Previous Match](#) [First Match](#)

| Score         | Expect | Identities | Positives  | Gaps     |
|---------------|--------|------------|------------|----------|
| 31.2 bits(66) | 26     | 12/20(60%) | 12/20(60%) | 0/20(0%) |

Query 4 GEGYRGTADTTTAGVPCQRW 23  
 GE YRG D T G CQRW  
 Sbjct 134 GEEYRGAVDRTEGREGCQRW 153

[Download](#) [GenPept](#) [Graphics](#) Sort by: E value

[Next](#) [Previous](#) [Descriptions](#)

unnamed protein product [Homo sapiens]  
 Sequence ID: [dbj|BAH11736.1](#) Length: 339 Number of Matches: 3

**Related Information**

[Gene](#) - associated gene details

Range 1: 299 to 321 [GenPept](#) [Graphics](#) [Next Match](#) [Previous Match](#)

| Score          | Expect | Identities | Positives   | Gaps     |
|----------------|--------|------------|-------------|----------|
| 74.0 bits(167) | 2e-13  | 22/23(96%) | 23/23(100%) | 0/23(0%) |

Query 1 RGKGEGYRGTADTTTAGVPCQRW 23  
 RGKGEGYRGTATA+TTAGVPCQRW  
 Sbjct 299 RGKGEGYRGTANTTTAGVPCQRW 321

Range 2: 131 to 148 [GenPept](#) [Graphics](#) [Next Match](#) [Previous Match](#) [First Match](#)

| Score         | Expect | Identities | Positives  | Gaps     |
|---------------|--------|------------|------------|----------|
| 34.6 bits(74) | 2.0    | 12/18(67%) | 12/18(66%) | 0/18(0%) |

Query 6 GYRGTDTTTAGVPCQRW 23  
 GYRGT TT G PCQ W  
 Sbjct 131 GYRGTMTTVGGLPCQAW 148

Range 3: 210 to 229 [GenPept](#) [Graphics](#) [Next Match](#) [Previous Match](#) [First Match](#)

| Score         | Expect | Identities | Positives  | Gaps     |
|---------------|--------|------------|------------|----------|
| 31.2 bits(66) | 26     | 12/20(60%) | 12/20(60%) | 0/20(0%) |

Query 4 GEGYRGTADTTTAGVPCQRW 23  
 GE YRG D T G CQRW  
 Sbjct 210 GEEYRGAVDRTEGREGCQRW 229

[Download](#) [GenPept](#) [Graphics](#) Sort by: E value

[Next](#) [Previous](#) [Descriptions](#)

PREDICTED: hepatocyte growth factor-like protein isoform X4 [Homo sapiens]  
 Sequence ID: [ref|XP\\_006713232.1](#) Length: 519 Number of Matches: 4

**Related Information**  
[Gene](#) - associated gene details

Range 1: 299 to 321 [GenPept](#) [Graphics](#) [▼ Next Match](#) [▲ Previous Match](#)

| Score          | Expect | Identities | Positives   | Gaps     |
|----------------|--------|------------|-------------|----------|
| 74.0 bits(167) | 2e-13  | 22/23(96%) | 23/23(100%) | 0/23(0%) |

Query 1 RGKGEGYRGTADTTTAGVPCQRW 23  
 RGKGEGYRGTA+TTTAGVPCQRW  
 Sbjct 299 RGKGEGYRGTANTTTAGVPCQRW 321

Range 2: 131 to 148 [GenPept](#) [Graphics](#) [▼ Next Match](#) [▲ Previous Match](#) [▲ First Match](#)

| Score         | Expect | Identities | Positives  | Gaps     |
|---------------|--------|------------|------------|----------|
| 34.6 bits(74) | 2.0    | 12/18(67%) | 12/18(66%) | 0/18(0%) |

Query 6 GYRGTDTTTAGVPCQRW 23  
 GYRGTT G PCQ W  
 Sbjct 131 GYRGTMATTVGGLPCQAW 148

Range 3: 389 to 408 [GenPept](#) [Graphics](#) [▼ Next Match](#) [▲ Previous Match](#) [▲ First Match](#)

| Score         | Expect | Identities | Positives  | Gaps     |
|---------------|--------|------------|------------|----------|
| 33.7 bits(72) | 3.8    | 13/20(65%) | 13/20(65%) | 0/20(0%) |

Query 4 GEGYRGTADTTTAGVPCQRW 23  
 GE YRG T GV CQRW  
 Sbjct 389 GEYRGTVSKTRKGVQCQRW 408

Range 4: 210 to 229 [GenPept](#) [Graphics](#) [▼ Next Match](#) [▲ Previous Match](#) [▲ First Match](#)

| Score         | Expect | Identities | Positives  | Gaps     |
|---------------|--------|------------|------------|----------|
| 31.2 bits(66) | 26     | 12/20(60%) | 12/20(60%) | 0/20(0%) |

Query 4 GEGYRGTADTTTAGVPCQRW 23  
 GE YRG D T G CQRW  
 Sbjct 210 GEEYRGAVDRTEGREGCQRW 229

BLAST is a registered trademark of the National Library of Medicine.







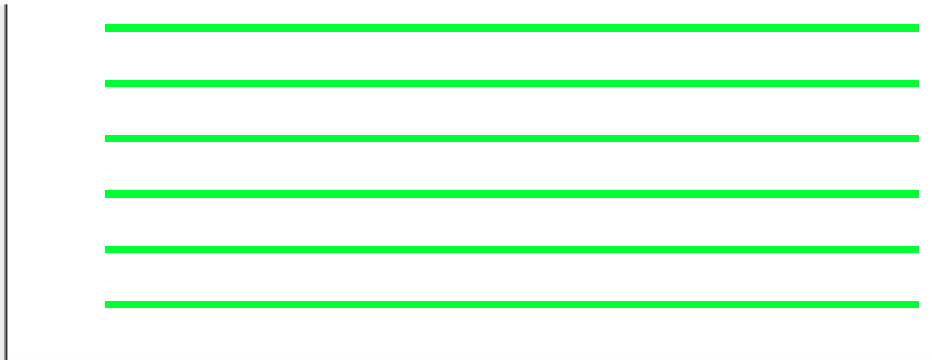

**Descriptions**

**Sequences producing significant alignments:**

Select: [All](#) [None](#) Selected:0

| <a href="#">Alignments</a> <a href="#">Download</a> <a href="#">GenPept</a> <a href="#">Graphics</a> <a href="#">Distance tree of results</a> <a href="#">Multiple alignment</a> |           |             |             |         |       |                                             |  |
|----------------------------------------------------------------------------------------------------------------------------------------------------------------------------------|-----------|-------------|-------------|---------|-------|---------------------------------------------|--|
| Description                                                                                                                                                                      | Max score | Total score | Query cover | E value | Ident | Accession                                   |  |
| <a href="#">MST1 protein [Homo sapiens]</a>                                                                                                                                      | 76.6      | 105         | 100%        | 2e-14   | 100%  | <a href="#">gi 71297286 AAH44862.1</a>      |  |
| <a href="#">unnamed protein product [Homo sapiens]</a>                                                                                                                           | 76.6      | 139         | 100%        | 2e-14   | 100%  | <a href="#">gi 221042232 BAH12793.1</a>     |  |
| <a href="#">macrophage stimulating 1 (hepatocyte growth factor-like), isoform C</a>                                                                                              | 76.6      | 105         | 100%        | 2e-14   | 100%  | <a href="#">gi 119585406 EAW65002.1</a>     |  |
| <a href="#">unnamed protein product [Homo sapiens]</a>                                                                                                                           | 76.6      | 139         | 100%        | 2e-14   | 100%  | <a href="#">gi 221039946 BAH11736.1</a>     |  |
| <a href="#">PREDICTED: hepatocyte growth factor-like protein isoform X4 [Hor</a>                                                                                                 | 76.6      | 174         | 100%        | 2e-14   | 100%  | <a href="#">gi 578806141 XP_006713232.1</a> |  |
| <a href="#">hepatocyte growth factor-like protein homolog [Homo sapiens]</a>                                                                                                     | 76.6      | 166         | 100%        | 2e-14   | 100%  | <a href="#">gi 1141775 AAC63092.1</a>       |  |
| <a href="#">PREDICTED: hepatocyte growth factor-like protein isoform X2 [Mac</a>                                                                                                 | 76.6      | 177         | 100%        | 2e-14   | 100%  | <a href="#">gi 544414366 XP_005547205.1</a> |  |
| <a href="#">macrophage stimulating 1 (hepatocyte growth factor-like), isoform C</a>                                                                                              | 76.6      | 140         | 100%        | 2e-14   | 100%  | <a href="#">gi 119585407 EAW65003.1</a>     |  |
| <a href="#">PREDICTED: hepatocyte growth factor-like protein isoform X2 [Hor</a>                                                                                                 | 76.6      | 174         | 100%        | 2e-14   | 100%  | <a href="#">gi 578806131 XP_006713230.1</a> |  |
| <a href="#">PREDICTED: hepatocyte growth factor-like protein isoform X5 [Chl</a>                                                                                                 | 76.6      | 140         | 100%        | 2e-14   | 100%  | <a href="#">gi 635118817 XP_007982450.1</a> |  |
| <a href="#">PREDICTED: hepatocyte growth factor-like protein isoform X2 [Pap</a>                                                                                                 | 76.6      | 177         | 100%        | 2e-14   | 100%  | <a href="#">gi 685524931 XP_009199018.1</a> |  |
| <a href="#">macrophage-stimulating protein [Homo sapiens]</a>                                                                                                                    | 76.6      | 174         | 100%        | 2e-14   | 100%  | <a href="#">gi 398038 AAA59872.1</a>        |  |
| <a href="#">RecName: Full=Hepatocyte growth factor-like protein; AltName: Fu</a>                                                                                                 | 76.6      | 174         | 100%        | 2e-14   | 100%  | <a href="#">gi 147744563 P26927.2</a>       |  |
| <a href="#">hepatocyte growth factor-like protein [Homo sapiens]</a>                                                                                                             | 76.6      | 174         | 100%        | 2e-14   | 100%  | <a href="#">gi 183977 AAA50165.1</a>        |  |
| <a href="#">hypothetical protein EGM_20500 [Macaca fascicularis]</a>                                                                                                             | 76.6      | 177         | 100%        | 2e-14   | 100%  | <a href="#">gi 355764094 EHH62249.1</a>     |  |
| <a href="#">hypothetical protein EGK_11631 [Macaca mulatta]</a>                                                                                                                  | 76.6      | 177         | 100%        | 2e-14   | 100%  | <a href="#">gi 355559632 EHH16360.1</a>     |  |
| <a href="#">hypothetical protein [Macaca fascicularis]</a>                                                                                                                       | 76.6      | 177         | 100%        | 2e-14   | 100%  | <a href="#">gi 126143528 BAF47378.1</a>     |  |
| <a href="#">macrophage stimulating 1 (hepatocyte growth factor-like) variant [H</a>                                                                                              | 76.6      | 178         | 100%        | 2e-14   | 100%  | <a href="#">gi 62897345 BAD96613.1</a>      |  |
| <a href="#">PREDICTED: hepatocyte growth factor-like protein isoform X4 [Chl</a>                                                                                                 | 76.6      | 140         | 100%        | 2e-14   | 100%  | <a href="#">gi 635118815 XP_007982449.1</a> |  |
| <a href="#">PREDICTED: hepatocyte growth factor-like protein isoform X1 [Cav</a>                                                                                                 | 76.6      | 142         | 100%        | 2e-14   | 100%  | <a href="#">gi 348581912 XP_003476721.1</a> |  |
| <a href="#">PREDICTED: hepatocyte growth factor-like protein [Pteropus alect</a>                                                                                                 | 76.6      | 179         | 100%        | 2e-14   | 100%  | <a href="#">gi 586548158 XP_006909162.1</a> |  |
| <a href="#">PREDICTED: hepatocyte growth factor-like protein [Pongo abelii]</a>                                                                                                  | 76.6      | 176         | 100%        | 2e-14   | 100%  | <a href="#">gi 297671325 XP_002813790.1</a> |  |
| <a href="#">PREDICTED: hepatocyte growth factor-like protein isoform X3 [Chl</a>                                                                                                 | 76.6      | 177         | 100%        | 2e-14   | 100%  | <a href="#">gi 635118813 XP_007982448.1</a> |  |
| <a href="#">PREDICTED: hepatocyte growth factor-like protein isoform X1 [Mac</a>                                                                                                 | 76.6      | 177         | 100%        | 2e-14   | 100%  | <a href="#">gi 544414364 XP_005547204.1</a> |  |
| <a href="#">PREDICTED: hepatocyte growth factor-like protein [Gorilla gorilla g</a>                                                                                              | 76.6      | 175         | 100%        | 2e-14   | 100%  | <a href="#">gi 426340575 XP_004034204.1</a> |  |
| <a href="#">PREDICTED: hepatocyte growth factor-like protein isoform X1 [Pap</a>                                                                                                 | 76.6      | 177         | 100%        | 2e-14   | 100%  | <a href="#">gi 402860079 XP_003894463.1</a> |  |
| <a href="#">PREDICTED: hepatocyte growth factor-like protein [Nomascus leuc</a>                                                                                                  | 76.6      | 170         | 100%        | 2e-14   | 100%  | <a href="#">gi 332215988 XP_003257123.1</a> |  |
| <a href="#">hepatocyte growth factor-like protein precursor [Homo sapiens]</a>                                                                                                   | 76.6      | 174         | 100%        | 2e-14   | 100%  | <a href="#">gi 205277383 NP_066278.3</a>    |  |
| <a href="#">PREDICTED: hepatocyte growth factor-like protein [Macaca mulatt</a>                                                                                                  | 76.6      | 177         | 100%        | 2e-14   | 100%  | <a href="#">gi 109039656 XP_001107946.1</a> |  |

|                                                                                     |      |     |      |       |      |                                             |
|-------------------------------------------------------------------------------------|------|-----|------|-------|------|---------------------------------------------|
| <a href="#">PREDICTED: hepatocyte growth factor-like protein isoform X2 [Chl</a>    | 76.6 | 140 | 100% | 2e-14 | 100% | <a href="#">gi 635118807 XP_007982445.1</a> |
| <a href="#">PREDICTED: hepatocyte growth factor-like protein isoform X2 [Cav</a>    | 76.6 | 142 | 100% | 2e-14 | 100% | <a href="#">gi 514473830 XP_005006713.1</a> |
| <a href="#">PREDICTED: hepatocyte growth factor-like protein isoform X1 [Chl</a>    | 76.6 | 140 | 100% | 2e-14 | 100% | <a href="#">gi 635118805 XP_007982444.1</a> |
| <a href="#">PREDICTED: LOW QUALITY PROTEIN: hepatocyte growth factor-</a>           | 76.6 | 172 | 100% | 2e-14 | 100% | <a href="#">gi 410036983 XP_516465.4</a>    |
| <a href="#">PREDICTED: LOW QUALITY PROTEIN: hepatocyte growth factor-</a>           | 73.6 | 171 | 100% | 3e-13 | 96%  | <a href="#">gi 532082473 XP_005326984.1</a> |
| <a href="#">PREDICTED: hepatocyte growth factor-like protein isoform X4 [Equ</a>    | 73.2 | 176 | 100% | 3e-13 | 96%  | <a href="#">gi 664730013 XP_008522208.1</a> |
| <a href="#">PREDICTED: hepatocyte growth factor-like protein isoform X2 [Sair</a>   | 73.2 | 170 | 100% | 3e-13 | 96%  | <a href="#">gi 725588970 XP_010345462.1</a> |
| <a href="#">PREDICTED: hepatocyte growth factor-like protein isoform X2 [Equ</a>    | 73.2 | 145 | 100% | 4e-13 | 96%  | <a href="#">gi 545188630 XP_005600717.1</a> |
| <a href="#">PREDICTED: hepatocyte growth factor-like protein isoform X2 [Equ</a>    | 73.2 | 176 | 100% | 4e-13 | 96%  | <a href="#">gi 664730009 XP_008522206.1</a> |
| <a href="#">hypothetical protein PANDA_009343 [Ailuropoda melanoleuca]</a>          | 73.2 | 163 | 100% | 4e-13 | 96%  | <a href="#">gi 281338342 EFB13926.1</a>     |
| <a href="#">PREDICTED: hepatocyte growth factor-like protein [Erinaceus euro</a>    | 73.2 | 162 | 100% | 4e-13 | 96%  | <a href="#">gi 617622190 XP_007527316.1</a> |
| <a href="#">PREDICTED: hepatocyte growth factor-like protein [Echinops telfair</a>  | 73.2 | 164 | 95%  | 4e-13 | 100% | <a href="#">gi 507700568 XP_004715222.1</a> |
| <a href="#">PREDICTED: hepatocyte growth factor-like protein [Galeopterus va</a>    | 73.2 | 170 | 100% | 4e-13 | 96%  | <a href="#">gi 667267781 XP_008569781.1</a> |
| <a href="#">PREDICTED: hepatocyte growth factor-like protein [Tarsius syrichte</a>  | 73.2 | 176 | 100% | 4e-13 | 96%  | <a href="#">gi 640809594 XP_008061363.1</a> |
| <a href="#">PREDICTED: hepatocyte growth factor-like protein [Orycteropus afi</a>   | 73.2 | 173 | 100% | 4e-13 | 96%  | <a href="#">gi 634888659 XP_007953538.1</a> |
| <a href="#">PREDICTED: hepatocyte growth factor-like protein [Leptonychotes</a>     | 73.2 | 168 | 100% | 4e-13 | 96%  | <a href="#">gi 585186199 XP_006744596.1</a> |
| <a href="#">PREDICTED: hepatocyte growth factor-like protein [Tupaia chinens</a>    | 73.2 | 168 | 100% | 4e-13 | 96%  | <a href="#">gi 562887217 XP_006171012.1</a> |
| <a href="#">PREDICTED: hepatocyte growth factor-like protein isoform X3 [Mus</a>    | 73.2 | 164 | 100% | 4e-13 | 96%  | <a href="#">gi 512005359 XP_004820133.1</a> |
| <a href="#">PREDICTED: hepatocyte growth factor-like protein [Mustela putoriu</a>   | 73.2 | 164 | 100% | 4e-13 | 96%  | <a href="#">gi 511881610 XP_004760697.1</a> |
| <a href="#">PREDICTED: hepatocyte growth factor-like protein [Odobenus rosn</a>     | 73.2 | 165 | 100% | 4e-13 | 96%  | <a href="#">gi 472359375 XP_004399304.1</a> |
| <a href="#">PREDICTED: hepatocyte growth factor-like protein [Ceratotherium :</a>   | 73.2 | 167 | 100% | 4e-13 | 96%  | <a href="#">gi 478490786 XP_004419765.1</a> |
| <a href="#">PREDICTED: hepatocyte growth factor-like protein [Sorex araneus]</a>    | 73.2 | 165 | 100% | 4e-13 | 96%  | <a href="#">gi 505843606 XP_004615300.1</a> |
| <a href="#">PREDICTED: LOW QUALITY PROTEIN: hepatocyte growth factor-</a>           | 73.2 | 180 | 100% | 4e-13 | 96%  | <a href="#">gi 344276255 XP_003409924.1</a> |
| <a href="#">PREDICTED: hepatocyte growth factor-like protein [Eptesicus fusc</a>    | 73.2 | 161 | 100% | 4e-13 | 96%  | <a href="#">gi 641693981 XP_008153797.1</a> |
| <a href="#">PREDICTED: hepatocyte growth factor-like protein [Pantholops hoc</a>    | 73.2 | 159 | 100% | 4e-13 | 96%  | <a href="#">gi 556747770 XP_005969335.1</a> |
| <a href="#">PREDICTED: hepatocyte growth factor-like protein isoform X1 [Equ</a>    | 73.2 | 176 | 100% | 4e-13 | 96%  | <a href="#">gi 545188628 XP_005600716.1</a> |
| <a href="#">PREDICTED: hepatocyte growth factor-like protein [Felis catus]</a>      | 73.2 | 173 | 100% | 4e-13 | 96%  | <a href="#">gi 410951187 XP_003982280.1</a> |
| <a href="#">PREDICTED: hepatocyte growth factor-like protein isoform X1 [Sair</a>   | 73.2 | 170 | 100% | 4e-13 | 96%  | <a href="#">gi 403291235 XP_003936704.1</a> |
| <a href="#">PREDICTED: hepatocyte growth factor-like protein [Canis lupus far</a>   | 73.2 | 168 | 100% | 4e-13 | 96%  | <a href="#">gi 345787353 XP_541884.3</a>    |
| <a href="#">PREDICTED: LOW QUALITY PROTEIN: hepatocyte growth factor-</a>           | 73.2 | 153 | 100% | 4e-13 | 96%  | <a href="#">gi 426249535 XP_004018505.1</a> |
| <a href="#">Hepatocyte growth factor-like protein [Tupaia chinensis]</a>            | 73.2 | 168 | 100% | 4e-13 | 96%  | <a href="#">gi 444510620 ELV09642.1</a>     |
| <a href="#">PREDICTED: hepatocyte growth factor-like protein-like [Ailuropoda</a>   | 73.2 | 163 | 100% | 4e-13 | 96%  | <a href="#">gi 301770361 XP_002920612.1</a> |
| <a href="#">PREDICTED: hepatocyte growth factor-like protein [Rhinopithecus ]</a>   | 72.3 | 173 | 100% | 7e-13 | 96%  | <a href="#">gi 724799330 XP_010367959.1</a> |
| <a href="#">PREDICTED: hepatocyte growth factor-like protein isoform X2 [Call</a>   | 71.0 | 131 | 100% | 2e-12 | 91%  | <a href="#">gi 675727602 XP_008979888.1</a> |
| <a href="#">PREDICTED: hepatocyte growth factor-like protein isoform X1 [Call</a>   | 71.0 | 164 | 100% | 2e-12 | 91%  | <a href="#">gi 296225219 XP_002758398.1</a> |
| <a href="#">PREDICTED: hepatocyte growth factor-like protein [Otolemur garn</a>     | 70.6 | 172 | 100% | 3e-12 | 91%  | <a href="#">gi 395856451 XP_003800642.1</a> |
| <a href="#">PREDICTED: hepatocyte growth factor-like protein [Elephantulus e</a>    | 70.2 | 177 | 100% | 4e-12 | 91%  | <a href="#">gi 585684863 XP_006892963.1</a> |
| <a href="#">PREDICTED: hepatocyte growth factor-like protein [Dasypus nover</a>     | 70.2 | 171 | 100% | 4e-12 | 91%  | <a href="#">gi 488519988 XP_004451933.1</a> |
| <a href="#">PREDICTED: hepatocyte growth factor-like protein [Bubalus bubali</a>    | 69.8 | 161 | 100% | 5e-12 | 91%  | <a href="#">gi 594058341 XP_006053335.1</a> |
| <a href="#">PREDICTED: hepatocyte growth factor-like protein [Bos mutus]</a>        | 69.8 | 159 | 100% | 5e-12 | 91%  | <a href="#">gi 555960159 XP_005892185.1</a> |
| <a href="#">TPA: hepatocyte growth factor-like protein [Bos taurus]</a>             | 69.8 | 159 | 100% | 5e-12 | 91%  | <a href="#">gi 296474806 DAA16921.1</a>     |
| <a href="#">hepatocyte growth factor-like protein precursor [Bos taurus]</a>        | 69.8 | 159 | 100% | 5e-12 | 91%  | <a href="#">gi 115496876 NP_001069145.1</a> |
| <a href="#">Hepatocyte growth factor-like protein [Bos mutus]</a>                   | 69.8 | 159 | 100% | 5e-12 | 91%  | <a href="#">gi 440909008 ELR58967.1</a>     |
| <a href="#">PREDICTED: hepatocyte growth factor-like protein [Jaculus jaculus</a>   | 69.8 | 160 | 100% | 5e-12 | 91%  | <a href="#">gi 507561196 XP_004664298.1</a> |
| <a href="#">PREDICTED: hepatocyte growth factor-like protein [Balaenoptera a</a>    | 69.8 | 165 | 100% | 5e-12 | 91%  | <a href="#">gi 594630485 XP_007168789.1</a> |
| <a href="#">PREDICTED: hepatocyte growth factor-like protein [Lipotes vexillife</a> | 69.8 | 165 | 100% | 5e-12 | 91%  | <a href="#">gi 602681551 XP_007446274.1</a> |

|                                                                                     |      |     |      |       |     |                                             |
|-------------------------------------------------------------------------------------|------|-----|------|-------|-----|---------------------------------------------|
| <a href="#">PREDICTED: hepatocyte growth factor-like protein [Physeter catod</a>    | 69.8 | 160 | 100% | 5e-12 | 91% | <a href="#">gij593749341 XP_007129906.1</a> |
| <a href="#">PREDICTED: LOW QUALITY PROTEIN: hepatocyte growth factor-</a>           | 69.8 | 165 | 100% | 5e-12 | 91% | <a href="#">gij560948035 XP_006196588.1</a> |
| <a href="#">PREDICTED: hepatocyte growth factor-like protein isoform X4 [Bos</a>    | 69.8 | 159 | 100% | 5e-12 | 91% | <a href="#">gij529001498 XP_005222861.1</a> |
| <a href="#">PREDICTED: hepatocyte growth factor-like protein [Tursiops truncu</a>   | 69.8 | 165 | 100% | 5e-12 | 91% | <a href="#">gij470608261 XP_004314855.1</a> |
| <a href="#">PREDICTED: hepatocyte growth factor-like protein [Orcinus orca]</a>     | 69.8 | 165 | 100% | 5e-12 | 91% | <a href="#">gij466078823 XP_004284002.1</a> |
| <a href="#">PREDICTED: hepatocyte growth factor-like protein isoform X3 [Chi</a>    | 69.4 | 151 | 95%  | 7e-12 | 95% | <a href="#">gij533195097 XP_005410271.1</a> |
| <a href="#">PREDICTED: hepatocyte growth factor-like protein isoform X2 [Chi</a>    | 69.4 | 151 | 95%  | 7e-12 | 95% | <a href="#">gij533195095 XP_005410270.1</a> |
| <a href="#">PREDICTED: hepatocyte growth factor-like protein [Octodon degus</a>     | 69.4 | 164 | 100% | 7e-12 | 91% | <a href="#">gij507620447 XP_004625159.1</a> |
| <a href="#">PREDICTED: hepatocyte growth factor-like protein isoform X1 [Chi</a>    | 69.4 | 151 | 95%  | 7e-12 | 95% | <a href="#">gij533195093 XP_005410269.1</a> |
| <a href="#">PREDICTED: hepatocyte growth factor-like protein [Ochotona princ</a>    | 69.4 | 156 | 100% | 7e-12 | 91% | <a href="#">gij504138720 XP_004581815.1</a> |
| <a href="#">PREDICTED: hepatocyte growth factor-like protein [Trichechus ma</a>     | 68.9 | 181 | 100% | 1e-11 | 91% | <a href="#">gij471355983 XP_004368594.1</a> |
| <a href="#">PREDICTED: hepatocyte growth factor-like protein [Chrysochloris e</a>   | 68.1 | 167 | 100% | 2e-11 | 87% | <a href="#">gij586486348 XP_006873659.1</a> |
| <a href="#">PREDICTED: hepatocyte growth factor-like protein isoform X2 [Mus</a>    | 66.8 | 152 | 100% | 5e-11 | 87% | <a href="#">gij568962765 XP_006511702.1</a> |
| <a href="#">PREDICTED: hepatocyte growth factor-like protein [Nannospalax g</a>     | 66.8 | 116 | 100% | 5e-11 | 87% | <a href="#">gij674087268 XP_008851489.1</a> |
| <a href="#">Macrophage stimulating 1 (hepatocyte growth factor-like) [Mus mus</a>   | 66.8 | 152 | 100% | 5e-11 | 87% | <a href="#">gij14714805 AAH10551.1</a>      |
| <a href="#">hepatocyte growth factor-like protein precursor [Mus musculus]</a>      | 66.8 | 152 | 100% | 5e-11 | 87% | <a href="#">gij254675205 NP_032269.3</a>    |
| <a href="#">PREDICTED: hepatocyte growth factor-like protein [Mesocricetus a</a>    | 66.8 | 142 | 100% | 5e-11 | 87% | <a href="#">gij524949917 XP_005074975.1</a> |
| <a href="#">unnamed protein product [Mus musculus]</a>                              | 66.8 | 152 | 100% | 5e-11 | 87% | <a href="#">gij74140912 BAE22056.1</a>      |
| <a href="#">hepatocyte growth factor-like protein [Mus musculus]</a>                | 66.8 | 152 | 100% | 5e-11 | 87% | <a href="#">gij193834 AAA50167.1</a>        |
| <a href="#">hepatocyte growth factor-like protein precursor [Rattus norvegicus]</a> | 66.8 | 152 | 100% | 5e-11 | 87% | <a href="#">gij13242239 NP_077328.1</a>     |
| <a href="#">PREDICTED: hepatocyte growth factor-like protein [Peromyscus m</a>      | 66.8 | 149 | 100% | 5e-11 | 87% | <a href="#">gij589931181 XP_006978395.1</a> |
| <a href="#">PREDICTED: hepatocyte growth factor-like protein isoform X1 [Mic</a>    | 66.8 | 151 | 100% | 5e-11 | 87% | <a href="#">gij532008239 XP_005347942.1</a> |
| <a href="#">PREDICTED: hepatocyte growth factor-like protein isoform X2 [Mic</a>    | 66.8 | 151 | 100% | 5e-11 | 87% | <a href="#">gij532008241 XP_005347943.1</a> |
| <a href="#">PREDICTED: hepatocyte growth factor-like protein isoform X1 [Rat</a>    | 66.8 | 152 | 100% | 5e-11 | 87% | <a href="#">gij564365338 XP_006243768.1</a> |
| <a href="#">PREDICTED: hepatocyte growth factor-like protein isoform X1 [Mus</a>    | 66.8 | 152 | 100% | 5e-11 | 87% | <a href="#">gij568962763 XP_006511701.1</a> |

## Alignments

Download [GenPept](#) [Graphics](#) Sort by: E value [Next](#) [Previous](#) [Descriptions](#)

### MST1 protein [Homo sapiens]

Sequence ID: [gij71297286|gb|AAH44862.1](#) Length: 188 Number of Matches: 2

Range 1: 148 to 170 [GenPept](#) [Graphics](#) [Next Match](#) [Previous Match](#)

| Score          | Expect | Identities  | Positives   | Gaps     |
|----------------|--------|-------------|-------------|----------|
| 76.6 bits(173) | 2e-14  | 23/23(100%) | 23/23(100%) | 0/23(0%) |

Query 1 RGKGEGYRGTANTTTAGVPCQRW 23  
 RGKGEGYRGTANTTTAGVPCQRW  
 Sbjct 148 RGKGEGYRGTANTTTAGVPCQRW 170

Range 2: 59 to 78 [GenPept](#) [Graphics](#) [Next Match](#) [Previous Match](#) [First Match](#)

| Score         | Expect | Identities | Positives  | Gaps     |
|---------------|--------|------------|------------|----------|
| 28.6 bits(60) | 180    | 11/20(55%) | 12/20(60%) | 0/20(0%) |

Query 4 GEGYRGTANTTTAGVPCQRW 23  
 GE YRG + T G CQRW  
 Sbjct 59 GEEYRGAVDRITESGRECQRW 78

### Related Information

[Gene](#) - associated gene details

Download [GenPept](#) [Graphics](#) Sort by: E value [Next](#) [Previous](#) [Descriptions](#)

### unnamed protein product [Homo sapiens]

Sequence ID: [gij221042232|dbj|BAH12793.1](#) Length: 264 Number of Matches: 3

Range 1: 224 to 246 [GenPept](#) [Graphics](#) [Next Match](#) [Previous Match](#)

| Score | Expect | Identities | Positives | Gaps |
|-------|--------|------------|-----------|------|
|       |        |            |           |      |

### Related Information

[Gene](#) - associated gene details

76.6 bits(173) 2e-14 23/23(100%) 23/23(100%) 0/23(0%)

Query 1 RGKGEGYRGTANTTTAGVPCQRW 23  
 RGKGEGYRGTANTTTAGVPCQRW  
 Sbjct 224 RGKGEGYRGTANTTTAGVPCQRW 246

Range 2: 56 to 73 [GenPept](#) [Graphics](#) ▼ Next Match ▲ Previous Match ▲ First Match

| Score         | Expect | Identities | Positives  | Gaps     |
|---------------|--------|------------|------------|----------|
| 34.1 bits(73) | 2.5    | 12/18(67%) | 12/18(66%) | 0/18(0%) |

Query 6 GYRGTANTTTAGVPCQRW 23  
 GYRGT TT G PCQ W  
 Sbjct 56 GYRGTMTTVGGLPCQAW 73

Range 3: 135 to 154 [GenPept](#) [Graphics](#) ▼ Next Match ▲ Previous Match ▲ First Match

| Score         | Expect | Identities | Positives  | Gaps     |
|---------------|--------|------------|------------|----------|
| 28.6 bits(60) | 182    | 11/20(55%) | 12/20(60%) | 0/20(0%) |

Query 4 GEGYRGTANTTTAGVPCQRW 23  
 GE YRG + T G CQRW  
 Sbjct 135 GEEYRGAVDRTESGRECQRW 154

[Download](#) [GenPept](#) [Graphics](#) Sort by: E value ▼ Next ▲ Previous ▲ Descriptions

macrophage stimulating 1 (hepatocyte growth factor-like), isoform CRA\_d [Homo sapiens]

Sequence ID: [gi|119585406|gb|EAW65002.1](#) Length: 331 Number of Matches: 2

**Related Information**

[Gene](#) - associated gene details

Range 1: 223 to 245 [GenPept](#) [Graphics](#) ▼ Next Match ▲ Previous Match

| Score          | Expect | Identities  | Positives   | Gaps     |
|----------------|--------|-------------|-------------|----------|
| 76.6 bits(173) | 2e-14  | 23/23(100%) | 23/23(100%) | 0/23(0%) |

Query 1 RGKGEGYRGTANTTTAGVPCQRW 23  
 RGKGEGYRGTANTTTAGVPCQRW  
 Sbjct 223 RGKGEGYRGTANTTTAGVPCQRW 245

Range 2: 134 to 153 [GenPept](#) [Graphics](#) ▼ Next Match ▲ Previous Match ▲ First Match

| Score         | Expect | Identities | Positives  | Gaps     |
|---------------|--------|------------|------------|----------|
| 28.6 bits(60) | 183    | 11/20(55%) | 12/20(60%) | 0/20(0%) |

Query 4 GEGYRGTANTTTAGVPCQRW 23  
 GE YRG + T G CQRW  
 Sbjct 134 GEEYRGAVDRTESGRECQRW 153

[Download](#) [GenPept](#) [Graphics](#) Sort by: E value ▼ Next ▲ Previous ▲ Descriptions

unnamed protein product [Homo sapiens]

Sequence ID: [gi|221039946|dbj|BAH11736.1](#) Length: 339 Number of Matches: 3

**Related Information**

[Gene](#) - associated gene details

Range 1: 299 to 321 [GenPept](#) [Graphics](#) ▼ Next Match ▲ Previous Match

| Score          | Expect | Identities  | Positives   | Gaps     |
|----------------|--------|-------------|-------------|----------|
| 76.6 bits(173) | 2e-14  | 23/23(100%) | 23/23(100%) | 0/23(0%) |

Query 1 RGKGEGYRGTANTTTAGVPCQRW 23  
 RGKGEGYRGTANTTTAGVPCQRW  
 Sbjct 299 RGKGEGYRGTANTTTAGVPCQRW 321

Range 2: 131 to 148 [GenPept](#) [Graphics](#) ▼ Next Match ▲ Previous Match ▲ First Match

| Score         | Expect | Identities | Positives  | Gaps     |
|---------------|--------|------------|------------|----------|
| 34.1 bits(73) | 2.5    | 12/18(67%) | 12/18(66%) | 0/18(0%) |

Query 6 GYRGTANTTTAGVPCQRW 23  
 GYRGT TT G PCQ W  
 Sbjct 131 GYRGTMTTVGGLPCQAW 148

Range 3: 210 to 229 [GenPept](#) [Graphics](#) ▼ Next Match ▲ Previous Match ▲ First Match

| Score         | Expect | Identities | Positives  | Gaps     |
|---------------|--------|------------|------------|----------|
| 28.6 bits(60) | 183    | 11/20(55%) | 12/20(60%) | 0/20(0%) |

Query 4 GEGYRGTANTTTAGVPCQRW 23  
 GE YRG + T G CQRW  
 Sbjct 210 GEEYRGAVDRTESGRECQRW 229

[Download](#) [GenPept](#) [Graphics](#) Sort by: E value ▼ Next ▲ Previous ▲ Descriptions

PREDICTED: hepatocyte growth factor-like protein isoform X4 [Homo sapiens]

Sequence ID: [gi|578806141|ref|XP\\_006713232.1](#) Length: 519 Number of Matches: 4

**Related Information**

[Gene](#) - associated gene details

Range 1: 299 to 321 [GenPept](#) [Graphics](#) ▼ Next Match ▲ Previous Match

| Score          | Expect | Identities  | Positives   | Gaps     |
|----------------|--------|-------------|-------------|----------|
| 76.6 bits(173) | 2e-14  | 23/23(100%) | 23/23(100%) | 0/23(0%) |

Query 1 RGKGEGYRGTANTTTAGVPCQRW 23  
 RGKGEGYRGTANTTTAGVPCQRW  
 Sbjct 299 RGKGEGYRGTANTTTAGVPCQRW 321

Range 2: 389 to 408 [GenPept](#) [Graphics](#) [▼ Next Match](#) [▲ Previous Match](#) [▲ First Match](#)

| Score         | Expect | Identities | Positives  | Gaps     |
|---------------|--------|------------|------------|----------|
| 35.4 bits(76) | 1.0    | 13/20(65%) | 13/20(65%) | 0/20(0%) |

Query 4 GEGYRGTANTTTAGVPCQRW 23  
 GE YRGT T GV CQRW  
 Sbjct 389 GEQYRGTVSKTRKGVQCQRW 408

Range 3: 131 to 148 [GenPept](#) [Graphics](#) [▼ Next Match](#) [▲ Previous Match](#) [▲ First Match](#)

| Score         | Expect | Identities | Positives  | Gaps     |
|---------------|--------|------------|------------|----------|
| 34.1 bits(73) | 2.6    | 12/18(67%) | 12/18(66%) | 0/18(0%) |

Query 6 GYRGTANTTTAGVPCQRW 23  
 GYRGT TT G PCQ W  
 Sbjct 131 GYRGTMTTVGGLPCQAW 148

Range 4: 210 to 229 [GenPept](#) [Graphics](#) [▼ Next Match](#) [▲ Previous Match](#) [▲ First Match](#)

| Score         | Expect | Identities | Positives  | Gaps     |
|---------------|--------|------------|------------|----------|
| 28.6 bits(60) | 185    | 11/20(55%) | 12/20(60%) | 0/20(0%) |

Query 4 GEGYRGTANTTTAGVPCQRW 23  
 GE YRG + T G CQRW  
 Sbjct 210 GEEYRGAVDRTESGRECQRW 229

BLAST is a registered trademark of the National Library of Medicine.

NCBI/ BLAST/ blastp suite/ Formatting Results - BVJR5A1G01R

**i** Your search parameters were adjusted to search for a short input sequence.

[Edit and Resubmit](#) [Save Search Strategies](#) [▶ Formatting options](#) [▶ Download](#) [YouTube](#) [How to read this page](#) [Blast report description](#)

### ORM1\_REYQTRQDQCIYDTTYLNVQRE\_Mod

RID [BVJR5A1G01R](#) (Expires on 01-21 10:26 am)

**Query ID** |cl|189329  
**Description** None  
**Molecule type** amino acid  
**Query Length** 22

**Database Name** nr  
**Description** All non-redundant GenBank CDS translations+PDB+SwissProt+PIR+PRF excluding environmental samples from WGS projects  
**Program** BLASTP 2.2.30+ [▶ Citation](#)

Other reports: [▶ Search Summary](#) [\[Taxonomy reports\]](#) [\[Distance tree of results\]](#) [\[Multiple alignment\]](#)

### **Graphic Summary**

[Show Conserved Domains](#)

No putative conserved domains have been detected

Distribution of 100 Blast Hits on the Query Sequence [?](#)

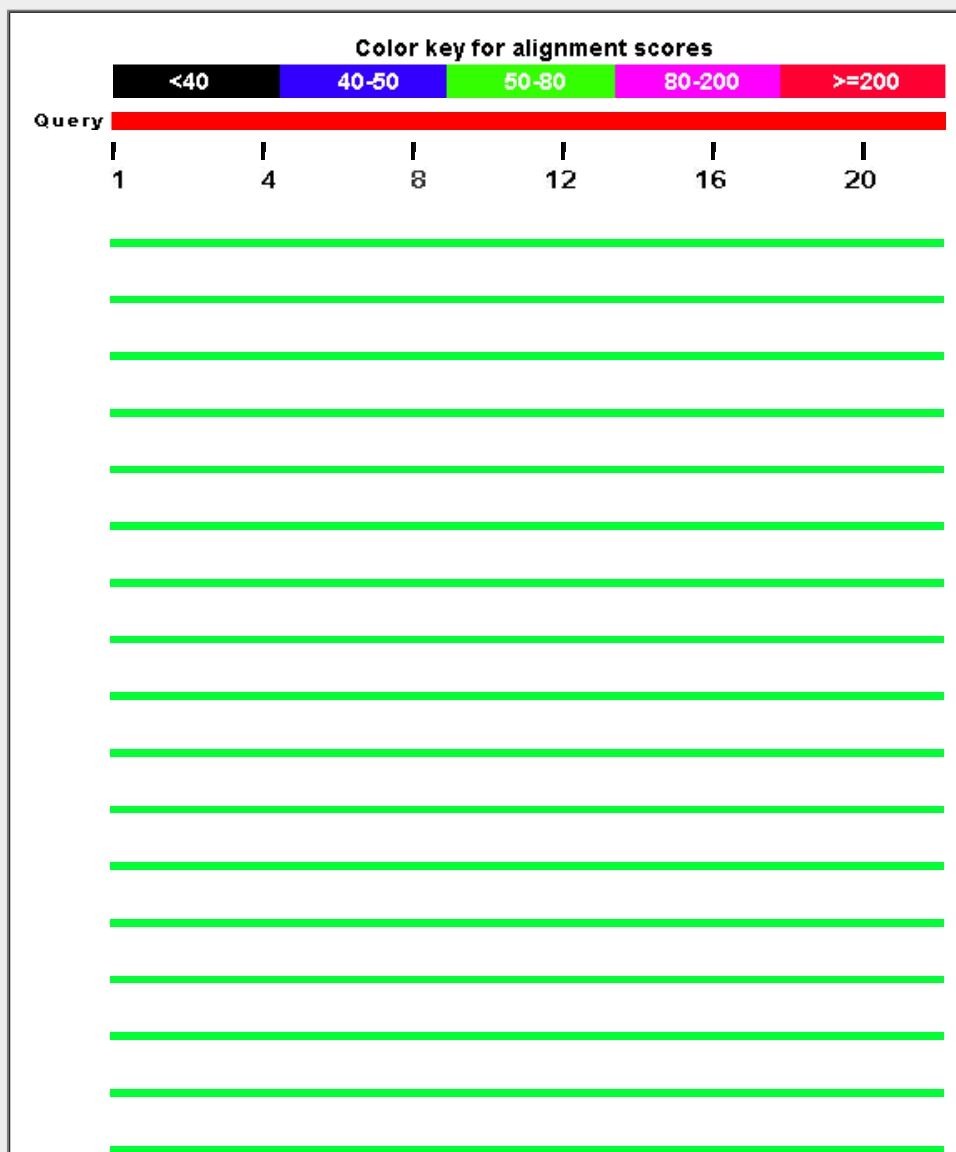



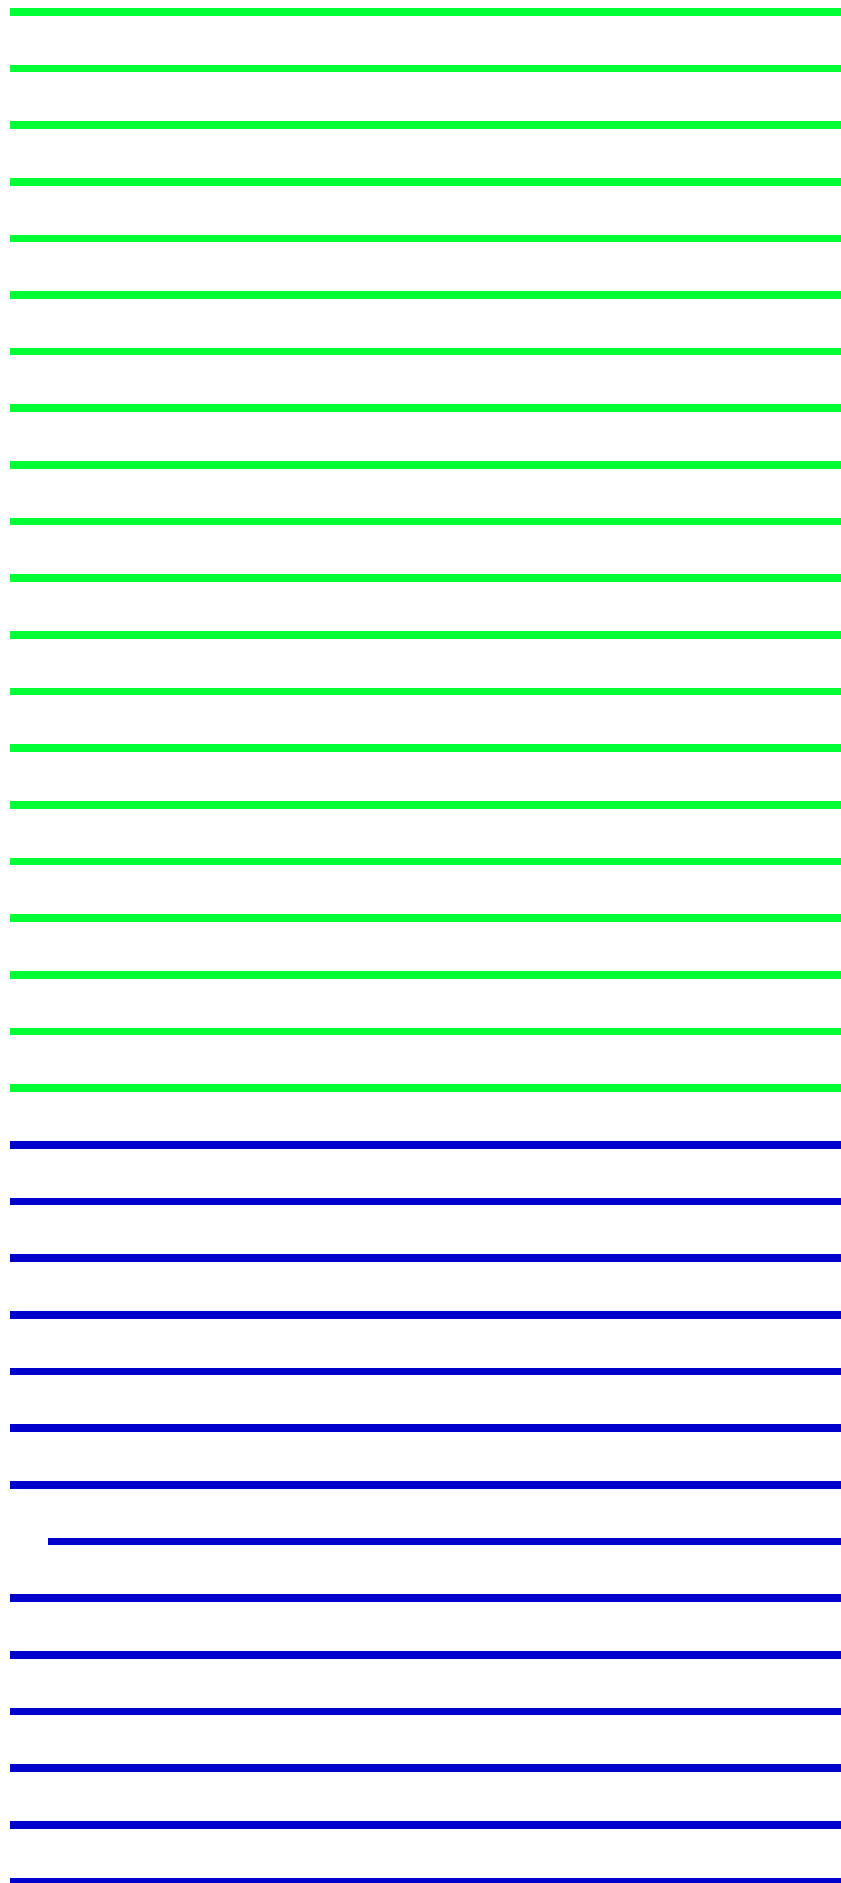

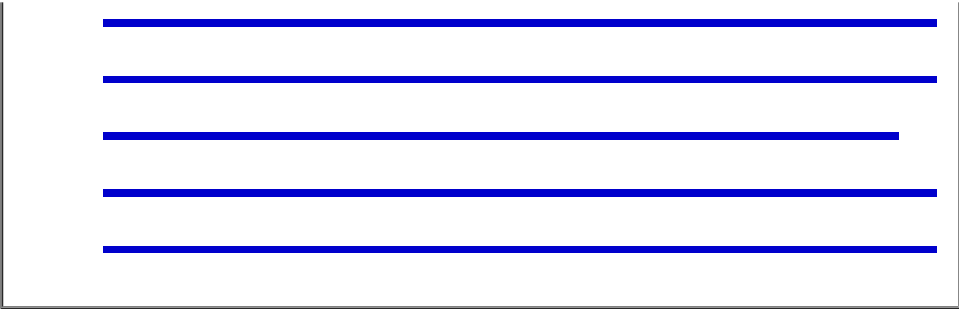

**Descriptions**

**Sequences producing significant alignments:**

Select: [All](#) [None](#) Selected:0

[Alignments](#)
[Download](#)
[GenPept](#)
[Graphics](#)
[Distance tree of results](#)
[Multiple alignment](#)

| Description                                                                                   | Max score | Total score | Query cover | E value | Ident | Accession                      |
|-----------------------------------------------------------------------------------------------|-----------|-------------|-------------|---------|-------|--------------------------------|
| <a href="#">protein.alpha1 acid glyco [Homo sapiens]</a>                                      | 76.6      | 76.6        | 100%        | 1e-14   | 95%   | <a href="#">720005A</a>        |
| <a href="#">Chain A, Crystal Structure Of Human Alpha1-Acid Glycoprotein [Homo sapien</a>     | 76.6      | 76.6        | 100%        | 2e-14   | 95%   | <a href="#">3KQ0_A</a>         |
| <a href="#">Chain A, Crystal Structure Of Human Alpha 1 Acid Glycoprotein [Homo sapier</a>    | 76.6      | 76.6        | 100%        | 2e-14   | 95%   | <a href="#">3BX6_A</a>         |
| <a href="#">ORM1 [synthetic construct]</a>                                                    | 76.6      | 76.6        | 100%        | 2e-14   | 95%   | <a href="#">AIC54852.1</a>     |
| <a href="#">Orosomuroid 1 [Homo sapiens]</a>                                                  | 76.6      | 76.6        | 100%        | 2e-14   | 95%   | <a href="#">AAI43315.1</a>     |
| <a href="#">alpha-1-acid glycoprotein 1 precursor [Homo sapiens]</a>                          | 76.6      | 76.6        | 100%        | 2e-14   | 95%   | <a href="#">CAA29229.1</a>     |
| <a href="#">RecName: Full=Alpha-1-acid glycoprotein 1; Short=AGP 1; AltName: Full=Orc</a>     | 76.6      | 76.6        | 100%        | 2e-14   | 95%   | <a href="#">P02763.1</a>       |
| <a href="#">alpha-1-acid glycoprotein 1 precursor [Homo sapiens]</a>                          | 76.6      | 76.6        | 100%        | 2e-14   | 95%   | <a href="#">NP_000598.2</a>    |
| <a href="#">orosomuroid 1 [synthetic construct]</a>                                           | 76.6      | 76.6        | 100%        | 2e-14   | 95%   | <a href="#">AAV38575.1</a>     |
| <a href="#">orosomuroid 1 [synthetic construct]</a>                                           | 76.6      | 76.6        | 100%        | 2e-14   | 95%   | <a href="#">AAV38574.1</a>     |
| <a href="#">PREDICTED: alpha-1-acid glycoprotein 1-like [Gorilla gorilla gorilla]</a>         | 72.3      | 72.3        | 100%        | 5e-13   | 91%   | <a href="#">XP_004048543.1</a> |
| <a href="#">PREDICTED: LOW QUALITY PROTEIN: alpha-1-acid glycoprotein 1 [Pan troglodytes]</a> | 72.3      | 72.3        | 100%        | 5e-13   | 91%   | <a href="#">XP_009455427.1</a> |
| <a href="#">PREDICTED: alpha-1-acid glycoprotein 1 isoform 1 [Nomascus leucogenys]</a>        | 72.3      | 72.3        | 100%        | 5e-13   | 91%   | <a href="#">XP_003264088.1</a> |
| <a href="#">PREDICTED: alpha-1-acid glycoprotein 1 [Pongo abelii]</a>                         | 72.3      | 72.3        | 100%        | 5e-13   | 91%   | <a href="#">XP_002820180.1</a> |
| <a href="#">PREDICTED: alpha-1-acid glycoprotein 1-like isoform 2 [Macaca mulatta]</a>        | 71.0      | 71.0        | 100%        | 1e-12   | 86%   | <a href="#">XP_001100289.1</a> |
| <a href="#">Alpha-1-acid glycoprotein 1 [Macaca mulatta]</a>                                  | 71.0      | 71.0        | 100%        | 1e-12   | 86%   | <a href="#">EHH23840.1</a>     |
| <a href="#">PREDICTED: alpha-1-acid glycoprotein 1 [Chlorocebus sabaeus]</a>                  | 71.0      | 71.0        | 100%        | 1e-12   | 86%   | <a href="#">XP_007966502.1</a> |
| <a href="#">PREDICTED: alpha-1-acid glycoprotein 1 isoform X3 [Macaca fascicularis]</a>       | 68.1      | 68.1        | 100%        | 1e-11   | 82%   | <a href="#">XP_005581033.1</a> |
| <a href="#">PREDICTED: alpha-1-acid glycoprotein 1 isoform X2 [Macaca fascicularis]</a>       | 68.1      | 68.1        | 100%        | 1e-11   | 82%   | <a href="#">XP_005581032.1</a> |
| <a href="#">PREDICTED: alpha-1-acid glycoprotein 1 isoform X1 [Macaca fascicularis]</a>       | 68.1      | 68.1        | 100%        | 1e-11   | 82%   | <a href="#">XP_005581031.1</a> |
| <a href="#">PREDICTED: alpha-1-acid glycoprotein 1 [Papio anubis]</a>                         | 67.2      | 67.2        | 100%        | 3e-11   | 82%   | <a href="#">XP_009186482.1</a> |
| <a href="#">PREDICTED: alpha-1-acid glycoprotein 1 [Rhinopithecus roxellana]</a>              | 65.1      | 65.1        | 100%        | 1e-10   | 77%   | <a href="#">XP_010368793.1</a> |
| <a href="#">Chain A, Crystal Structure Of The A Variant Of Human Alpha1-Acid Glycoprot</a>    | 63.8      | 63.8        | 100%        | 4e-10   | 77%   | <a href="#">3APU_A</a>         |
| <a href="#">ORM2 [synthetic construct]</a>                                                    | 63.8      | 63.8        | 100%        | 4e-10   | 77%   | <a href="#">AIC54853.1</a>     |
| <a href="#">alpha-1-acid glycoprotein 2 precursor [Homo sapiens]</a>                          | 63.8      | 63.8        | 100%        | 4e-10   | 77%   | <a href="#">CAA29873.2</a>     |
| <a href="#">alpha-1-acid glycoprotein 2 precursor [Homo sapiens]</a>                          | 63.8      | 63.8        | 100%        | 4e-10   | 77%   | <a href="#">NP_000599.1</a>    |
| <a href="#">PREDICTED: alpha-1-acid glycoprotein 1-like [Gorilla gorilla gorilla]</a>         | 63.8      | 63.8        | 100%        | 4e-10   | 77%   | <a href="#">XP_004048546.1</a> |
| <a href="#">ORM2 [Homo sapiens]</a>                                                           | 63.8      | 63.8        | 100%        | 4e-10   | 77%   | <a href="#">CAG33211.1</a>     |
| <a href="#">PREDICTED: alpha-1-acid glycoprotein 2-like [Pan troglodytes]</a>                 | 63.8      | 63.8        | 100%        | 4e-10   | 77%   | <a href="#">XP_520209.3</a>    |

|                                                                                              |      |      |      |       |     |                                |
|----------------------------------------------------------------------------------------------|------|------|------|-------|-----|--------------------------------|
| <a href="#">PREDICTED: LOW QUALITY PROTEIN: alpha-1-acid glycoprotein 2 [Pan pa</a>          | 63.8 | 63.8 | 100% | 4e-10 | 77% | <a href="#">XP_008957108.1</a> |
| <a href="#">unnamed protein product [Homo sapiens]</a>                                       | 61.3 | 61.3 | 100% | 3e-09 | 73% | <a href="#">BAG35159.1</a>     |
| <a href="#">PREDICTED: alpha-1-acid glycoprotein 1 [Callithrix jacchus]</a>                  | 55.8 | 55.8 | 100% | 2e-07 | 73% | <a href="#">XP_002760492.1</a> |
| <a href="#">PREDICTED: alpha-1-acid glycoprotein 2-like [Galeopterus variegatus]</a>         | 52.4 | 52.4 | 100% | 3e-06 | 68% | <a href="#">XP_008588097.1</a> |
| <a href="#">PREDICTED: alpha-1-acid glycoprotein 1 [Galeopterus variegatus]</a>              | 52.4 | 52.4 | 100% | 3e-06 | 68% | <a href="#">XP_008588094.1</a> |
| <a href="#">PREDICTED: alpha-1-acid glycoprotein 1 [Elephantulus edwardii]</a>               | 52.0 | 52.0 | 100% | 4e-06 | 68% | <a href="#">XP_006890779.1</a> |
| <a href="#">PREDICTED: alpha-1-acid glycoprotein 1 [Saimiri boliviensis boliviensis]</a>     | 51.5 | 51.5 | 100% | 6e-06 | 64% | <a href="#">XP_003925252.1</a> |
| <a href="#">PREDICTED: alpha-1-acid glycoprotein 2-like [Loxodonta africana]</a>             | 51.1 | 51.1 | 100% | 8e-06 | 68% | <a href="#">XP_003407553.1</a> |
| <a href="#">PREDICTED: alpha-1-acid glycoprotein 2 [Otolemur garnettii]</a>                  | 49.4 | 49.4 | 100% | 3e-05 | 68% | <a href="#">XP_003785445.1</a> |
| <a href="#">PREDICTED: alpha-1-acid glycoprotein 1 [Orycteropus afer afer]</a>               | 48.6 | 48.6 | 100% | 5e-05 | 68% | <a href="#">XP_007934876.1</a> |
| <a href="#">PREDICTED: alpha-1-acid glycoprotein [Felis catus]</a>                           | 48.1 | 48.1 | 100% | 7e-05 | 64% | <a href="#">XP_003995824.1</a> |
| <a href="#">hypothetical protein PANDA_003840 [Ailuropoda melanoleuca]</a>                   | 47.7 | 47.7 | 100% | 8e-05 | 64% | <a href="#">EFB15505.1</a>     |
| <a href="#">PREDICTED: alpha-1-acid glycoprotein-like [Ailuropoda melanoleuca]</a>           | 47.7 | 47.7 | 100% | 1e-04 | 64% | <a href="#">XP_002915823.1</a> |
| <a href="#">PREDICTED: alpha-1-acid glycoprotein 1 [Nannospalax galili]</a>                  | 46.4 | 46.4 | 100% | 3e-04 | 64% | <a href="#">XP_008831764.1</a> |
| <a href="#">PREDICTED: alpha-1-acid glycoprotein 2 [Trichechus manatus latirostris]</a>      | 46.4 | 46.4 | 100% | 3e-04 | 64% | <a href="#">XP_004372401.1</a> |
| <a href="#">PREDICTED: alpha-1-acid glycoprotein 2 [Chrysochloris asiatica]</a>              | 46.0 | 46.0 | 95%  | 4e-04 | 62% | <a href="#">XP_006865789.1</a> |
| <a href="#">PREDICTED: alpha-1-acid glycoprotein-like [Panthera tigris altaica]</a>          | 45.6 | 45.6 | 100% | 5e-04 | 59% | <a href="#">XP_007094388.1</a> |
| <a href="#">PREDICTED: alpha-1-acid glycoprotein 1 isoform X2 [Canis lupus familiaris]</a>   | 44.8 | 44.8 | 100% | 0.001 | 59% | <a href="#">XP_005627010.1</a> |
| <a href="#">PREDICTED: alpha-1-acid glycoprotein 1 isoform X1 [Canis lupus familiaris]</a>   | 44.8 | 44.8 | 100% | 0.001 | 59% | <a href="#">XP_003431634.1</a> |
| <a href="#">PREDICTED: alpha-1-acid glycoprotein 2-like [Galeopterus variegatus]</a>         | 44.3 | 44.3 | 100% | 0.001 | 64% | <a href="#">XP_008588096.1</a> |
| <a href="#">Alpha-1-acid glycoprotein [Myotis davidii]</a>                                   | 43.9 | 43.9 | 100% | 0.001 | 64% | <a href="#">ELK26646.1</a>     |
| <a href="#">alpha-1-acid glycoprotein precursor [Rattus norvegicus]</a>                      | 43.5 | 43.5 | 100% | 0.002 | 64% | <a href="#">NP_445740.1</a>    |
| <a href="#">PREDICTED: alpha-1-acid glycoprotein 2-like [Trichechus manatus latirostris]</a> | 43.5 | 43.5 | 100% | 0.002 | 59% | <a href="#">XP_004391192.1</a> |
| <a href="#">alpha-1-acid glycoprotein [Mus musculus]</a>                                     | 43.1 | 43.1 | 100% | 0.003 | 55% | <a href="#">AAA91744.1</a>     |
| <a href="#">PREDICTED: alpha-1-acid glycoprotein 1 [Erinaceus europaeus]</a>                 | 43.1 | 43.1 | 95%  | 0.003 | 62% | <a href="#">XP_007526815.1</a> |
| <a href="#">alpha-1-acid glycoprotein (AGP) precursor [Mus caroli]</a>                       | 43.1 | 43.1 | 100% | 0.003 | 55% | <a href="#">AAA37197.1</a>     |
| <a href="#">RecName: Full=Alpha-1-acid glycoprotein 1; Short=AGP 1; AltName: Full=Orc</a>    | 43.1 | 43.1 | 100% | 0.003 | 55% | <a href="#">P21350.1</a>       |
| <a href="#">alpha-1-acid glycoprotein 2 precursor [Mus musculus]</a>                         | 43.1 | 43.1 | 100% | 0.003 | 55% | <a href="#">NP_035146.1</a>    |
| <a href="#">PREDICTED: alpha-1-acid glycoprotein 1-like [Mustela putorius furo]</a>          | 42.2 | 42.2 | 100% | 0.006 | 59% | <a href="#">XP_004828368.1</a> |
| <a href="#">PREDICTED: alpha-1-acid glycoprotein 1-like [Echinops telfairi]</a>              | 42.2 | 42.2 | 100% | 0.006 | 64% | <a href="#">XP_004718018.1</a> |
| <a href="#">PREDICTED: alpha-1-acid glycoprotein-like [Ursus maritimus]</a>                  | 42.2 | 42.2 | 100% | 0.006 | 59% | <a href="#">XP_008707882.1</a> |
| <a href="#">PREDICTED: alpha-1-acid glycoprotein-like [Ursus maritimus]</a>                  | 42.2 | 42.2 | 100% | 0.006 | 59% | <a href="#">XP_008707881.1</a> |
| <a href="#">PREDICTED: alpha-1-acid glycoprotein 1 [Echinops telfairi]</a>                   | 42.2 | 42.2 | 100% | 0.006 | 64% | <a href="#">XP_004712638.1</a> |
| <a href="#">Alpha-1-acid glycoprotein 1 [Cricetulus griseus]</a>                             | 41.4 | 41.4 | 95%  | 0.012 | 57% | <a href="#">EGW06649.1</a>     |
| <a href="#">PREDICTED: alpha-1-acid glycoprotein 1 [Cricetulus griseus]</a>                  | 41.4 | 41.4 | 95%  | 0.012 | 57% | <a href="#">XP_003503497.1</a> |
| <a href="#">PREDICTED: alpha-1-acid glycoprotein 2-like [Equus caballus]</a>                 | 41.4 | 41.4 | 100% | 0.012 | 64% | <a href="#">XP_001488199.1</a> |
| <a href="#">PREDICTED: alpha-1-acid glycoprotein 2-like [Loxodonta africana]</a>             | 41.4 | 41.4 | 100% | 0.012 | 55% | <a href="#">XP_003407554.1</a> |
| <a href="#">alpha-1-acid glycoprotein 1 [Cricetulus griseus]</a>                             | 41.4 | 41.4 | 95%  | 0.012 | 57% | <a href="#">ERE86355.1</a>     |
| <a href="#">alpha-1-acid glycoprotein 1 [Cricetulus griseus]</a>                             | 41.4 | 41.4 | 95%  | 0.012 | 57% | <a href="#">ERE86354.1</a>     |
| <a href="#">PREDICTED: LOW QUALITY PROTEIN: orosomucoid 1 [Myotis lucifugus]</a>             | 40.9 | 40.9 | 100% | 0.017 | 59% | <a href="#">XP_006109685.1</a> |
| <a href="#">PREDICTED: alpha-1-acid glycoprotein 2-like [Loxodonta africana]</a>             | 40.9 | 40.9 | 100% | 0.017 | 55% | <a href="#">XP_010586317.1</a> |
| <a href="#">alpha-1 acid glycoprotein [Sus scrofa]</a>                                       | 40.1 | 40.1 | 100% | 0.030 | 59% | <a href="#">AAA30983.1</a>     |
| <a href="#">PREDICTED: alpha-1-acid glycoprotein-like [Sus scrofa]</a>                       | 40.1 | 40.1 | 100% | 0.030 | 59% | <a href="#">XP_005660423.1</a> |
| <a href="#">PREDICTED: alpha-1-acid glycoprotein 2-like [Loxodonta africana]</a>             | 40.1 | 40.1 | 100% | 0.031 | 64% | <a href="#">XP_003407551.1</a> |
| <a href="#">PREDICTED: alpha-1-acid glycoprotein isoform X1 [Sus scrofa]</a>                 | 40.1 | 40.1 | 100% | 0.031 | 59% | <a href="#">XP_005660428.1</a> |

|                                                                                            |      |      |      |       |     |                                |
|--------------------------------------------------------------------------------------------|------|------|------|-------|-----|--------------------------------|
| <a href="#">PREDICTED: alpha-1-acid glycoprotein 2-like [Myotis lucifugus]</a>             | 39.2 | 39.2 | 100% | 0.057 | 59% | <a href="#">XP_006108237.1</a> |
| <a href="#">PREDICTED: alpha-1-acid glycoprotein 2-like isoform X2 [Tupaia chinensis]</a>  | 38.8 | 38.8 | 100% | 0.078 | 59% | <a href="#">XP_006142836.1</a> |
| <a href="#">PREDICTED: alpha-1-acid glycoprotein-like [Peromyscus maniculatus bairdii]</a> | 38.4 | 38.4 | 95%  | 0.11  | 57% | <a href="#">XP_006979617.1</a> |
| <a href="#">PREDICTED: alpha-1-acid glycoprotein-like [Microtus ochrogaster]</a>           | 38.4 | 38.4 | 95%  | 0.11  | 57% | <a href="#">XP_005352666.1</a> |
| <a href="#">PREDICTED: alpha-1-acid glycoprotein 1-like [Myotis brandtii]</a>              | 38.0 | 38.0 | 100% | 0.13  | 59% | <a href="#">XP_005880983.1</a> |
| <a href="#">PREDICTED: alpha-1-acid glycoprotein 2-like [Myotis lucifugus]</a>             | 38.0 | 38.0 | 100% | 0.15  | 64% | <a href="#">XP_006099427.1</a> |
| <a href="#">PREDICTED: alpha-1-acid glycoprotein-like [Trichechus manatus latirostris]</a> | 38.0 | 38.0 | 100% | 0.15  | 55% | <a href="#">XP_004391229.1</a> |
| <a href="#">PREDICTED: alpha-1-acid glycoprotein-like [Myotis lucifugus]</a>               | 38.0 | 38.0 | 100% | 0.15  | 59% | <a href="#">XP_006099428.1</a> |
| <a href="#">PREDICTED: alpha-1-acid glycoprotein 2 [Pteropus alecto]</a>                   | 37.5 | 37.5 | 100% | 0.20  | 55% | <a href="#">XP_006917195.1</a> |
| <a href="#">PREDICTED: alpha-1-acid glycoprotein 1 [Jaculus jaculus]</a>                   | 37.1 | 37.1 | 95%  | 0.27  | 57% | <a href="#">XP_004662736.1</a> |
| <a href="#">PREDICTED: alpha-1-acid glycoprotein 2-like [Myotis lucifugus]</a>             | 37.1 | 37.1 | 100% | 0.27  | 59% | <a href="#">XP_006099415.1</a> |
| <a href="#">PREDICTED: alpha-1-acid glycoprotein 2-like [Tarsius syrichta]</a>             | 36.7 | 36.7 | 100% | 0.37  | 59% | <a href="#">XP_008055404.1</a> |
| <a href="#">PREDICTED: alpha-1-acid glycoprotein 2-like isoform X4 [Equus przewalskii]</a> | 36.3 | 36.3 | 100% | 0.48  | 59% | <a href="#">XP_008509904.1</a> |
| <a href="#">PREDICTED: alpha-1-acid glycoprotein 2-like isoform X2 [Equus przewalskii]</a> | 36.3 | 36.3 | 100% | 0.49  | 59% | <a href="#">XP_008509901.1</a> |
| <a href="#">PREDICTED: alpha-1-acid glycoprotein 2-like isoform X2 [Equus caballus]</a>    | 36.3 | 36.3 | 100% | 0.51  | 59% | <a href="#">XP_005605797.1</a> |
| <a href="#">alpha-1 acid glycoprotein [Capra hircus]</a>                                   | 35.8 | 35.8 | 86%  | 0.67  | 58% | <a href="#">CAL48252.1</a>     |
| <a href="#">PREDICTED: alpha-1-acid glycoprotein-like [Ovis aries]</a>                     | 35.8 | 35.8 | 86%  | 0.69  | 58% | <a href="#">XP_004004031.1</a> |
| <a href="#">alpha 1 acid glycoprotein precursor [Capra hircus]</a>                         | 35.8 | 35.8 | 86%  | 0.69  | 58% | <a href="#">NP_001272559.1</a> |
| <a href="#">PREDICTED: LOW QUALITY PROTEIN: alpha-1-acid glycoprotein 1-like [My</a>       | 35.8 | 35.8 | 100% | 0.69  | 64% | <a href="#">XP_005880984.1</a> |
| <a href="#">mCG7142, isoform CRA_b [Mus musculus]</a>                                      | 35.4 | 35.4 | 100% | 0.93  | 59% | <a href="#">EDL31111.1</a>     |
| <a href="#">RecName: Full=Alpha-1-acid glycoprotein 3; Short=AGP 3; AltName: Full=Orc</a>  | 35.4 | 35.4 | 100% | 0.95  | 50% | <a href="#">Q63805.1</a>       |
| <a href="#">alpha-1-acid glycoprotein 3 precursor [Mus musculus]</a>                       | 35.4 | 35.4 | 100% | 0.95  | 50% | <a href="#">NP_038651.2</a>    |
| <a href="#">alpha-1-acid glycoprotein precursor [Mus caroli]</a>                           | 35.4 | 35.4 | 100% | 0.95  | 59% | <a href="#">AAB67844.1</a>     |
| <a href="#">alpha-1-acid glycoprotein 1 precursor [Mus musculus]</a>                       | 35.4 | 35.4 | 100% | 0.95  | 59% | <a href="#">NP_032794.1</a>    |
| <a href="#">PREDICTED: alpha-1-acid glycoprotein 1 [Condylura cristata]</a>                | 35.4 | 35.4 | 90%  | 0.95  | 55% | <a href="#">XP_004677999.1</a> |
| <a href="#">Orosomuroid 1 [Mus musculus]</a>                                               | 35.4 | 35.4 | 100% | 0.95  | 59% | <a href="#">AAH12725.1</a>     |

## Alignments

[Download](#) [GenPept](#) [Graphics](#)

[Next](#) [Previous](#) [Descriptions](#)

protein,alpha1 acid glyco

Sequence ID: [prf|720005A](#) Length: 182 Number of Matches: 1

Range 1: 64 to 85 [GenPept](#) [Graphics](#)

[Next Match](#) [Previous Match](#)

### Related Information

| Score          | Expect | Identities | Positives   | Gaps     |
|----------------|--------|------------|-------------|----------|
| 76.6 bits(173) | 1e-14  | 21/22(95%) | 22/22(100%) | 0/22(0%) |

Query 1 REYQTRQDQCIYDTTYLNVQRE 22  
 REYQTRQDQCIY+TTYLNVQRE  
 Sbjct 64 REYQTRQDQCIYNTTYLNVQRE 85

[Download](#) [GenPept](#) [Graphics](#)

[Next](#) [Previous](#) [Descriptions](#)

Chain A, Crystal Structure Of Human Alpha1-Acid Glycoprotein

Sequence ID: [pdb|3KQ0|A](#) Length: 192 Number of Matches: 1

Range 1: 63 to 84 [GenPept](#) [Graphics](#)

[Next Match](#) [Previous Match](#)

### Related Information

| Score          | Expect | Identities | Positives   | Gaps     |
|----------------|--------|------------|-------------|----------|
| 76.6 bits(173) | 2e-14  | 21/22(95%) | 22/22(100%) | 0/22(0%) |

[Structure](#) - 3D structure displays

Query 1 REYQTRQDQCIYDTTYLNQRE 22  
 REYQTRQDQCIY+TTYLNQRE  
 Sbjct 63 REYQTRQDQCIYNTTYLNQRE 84

[Download](#) [GenPept](#) [Graphics](#)

[▼ Next](#) [▲ Previous](#) [▲ Descriptions](#)

**Chain A, Crystal Structure Of Human Alpha 1 Acid Glycoprotein**

Sequence ID: [pdb|3BX6|A](#) Length: 192 Number of Matches: 1

Range 1: 63 to 84 [GenPept](#) [Graphics](#)

[▼ Next Match](#) [▲ Previous Match](#)

**Related Information**

| Score          | Expect | Identities | Positives   | Gaps     |
|----------------|--------|------------|-------------|----------|
| 76.6 bits(173) | 2e-14  | 21/22(95%) | 22/22(100%) | 0/22(0%) |

Query 1 REYQTRQDQCIYDTTYLNQRE 22  
 REYQTRQDQCIY+TTYLNQRE  
 Sbjct 63 REYQTRQDQCIYNTTYLNQRE 84

[Download](#) [GenPept](#) [Graphics](#)

[▼ Next](#) [▲ Previous](#) [▲ Descriptions](#)

**ORM1, partial [synthetic construct]**

Sequence ID: [gb|AIC54852.1|](#) Length: 201 Number of Matches: 1

Range 1: 81 to 102 [GenPept](#) [Graphics](#)

[▼ Next Match](#) [▲ Previous Match](#)

**Related Information**

| Score          | Expect | Identities | Positives   | Gaps     |
|----------------|--------|------------|-------------|----------|
| 76.6 bits(173) | 2e-14  | 21/22(95%) | 22/22(100%) | 0/22(0%) |

Query 1 REYQTRQDQCIYDTTYLNQRE 22  
 REYQTRQDQCIY+TTYLNQRE  
 Sbjct 81 REYQTRQDQCIYNTTYLNQRE 102

[Download](#) [GenPept](#) [Graphics](#)

[▼ Next](#) [▲ Previous](#) [▲ Descriptions](#)

**Orosomucoid 1 [Homo sapiens]**

Sequence ID: [gb|AAI43315.1|](#) Length: 201 Number of Matches: 1

Range 1: 81 to 102 [GenPept](#) [Graphics](#)

[▼ Next Match](#) [▲ Previous Match](#)

**Related Information**

[Gene](#) - associated gene details

| Score          | Expect | Identities | Positives   | Gaps     |
|----------------|--------|------------|-------------|----------|
| 76.6 bits(173) | 2e-14  | 21/22(95%) | 22/22(100%) | 0/22(0%) |

Query 1 REYQTRQDQCIYDTTYLNQRE 22  
 REYQTRQDQCIY+TTYLNQRE  
 Sbjct 81 REYQTRQDQCIYNTTYLNQRE 102

BLAST is a registered trademark of the National Library of Medicine.

▶ NCBI/ BLAST/ blastp suite/ Formatting Results - BVJS1C0B01R

**i** Your search parameters were adjusted to search for a short input sequence.

[Edit and Resubmit](#) [Save Search Strategies](#) ▶ [Formatting options](#) ▶ [Download](#) [YouTube](#) [How to read this page](#) [Blast report description](#)

## ORM1\_REYQTRQDQCIYDTTYLNVQRENGTISRY\_Mod

**RID** [BVJS1C0B01R](#) (Expires on 01-21 10:26 am)

**Query ID** lcl|199553  
**Description** None  
**Molecule type** amino acid  
**Query Length** 29

**Database Name** nr  
**Description** All non-redundant GenBank CDS translations+PDB+SwissProt+PIR+PRF excluding environmental samples from WGS projects  
**Program** BLASTP 2.2.30+ ▶ [Citation](#)

Other reports: ▶ [Search Summary](#) [[Taxonomy reports](#)] [[Distance tree of results](#)] [[Multiple alignment](#)]

### **Graphic Summary**

[Show Conserved Domains](#)

No putative conserved domains have been detected

Distribution of 100 Blast Hits on the Query Sequence

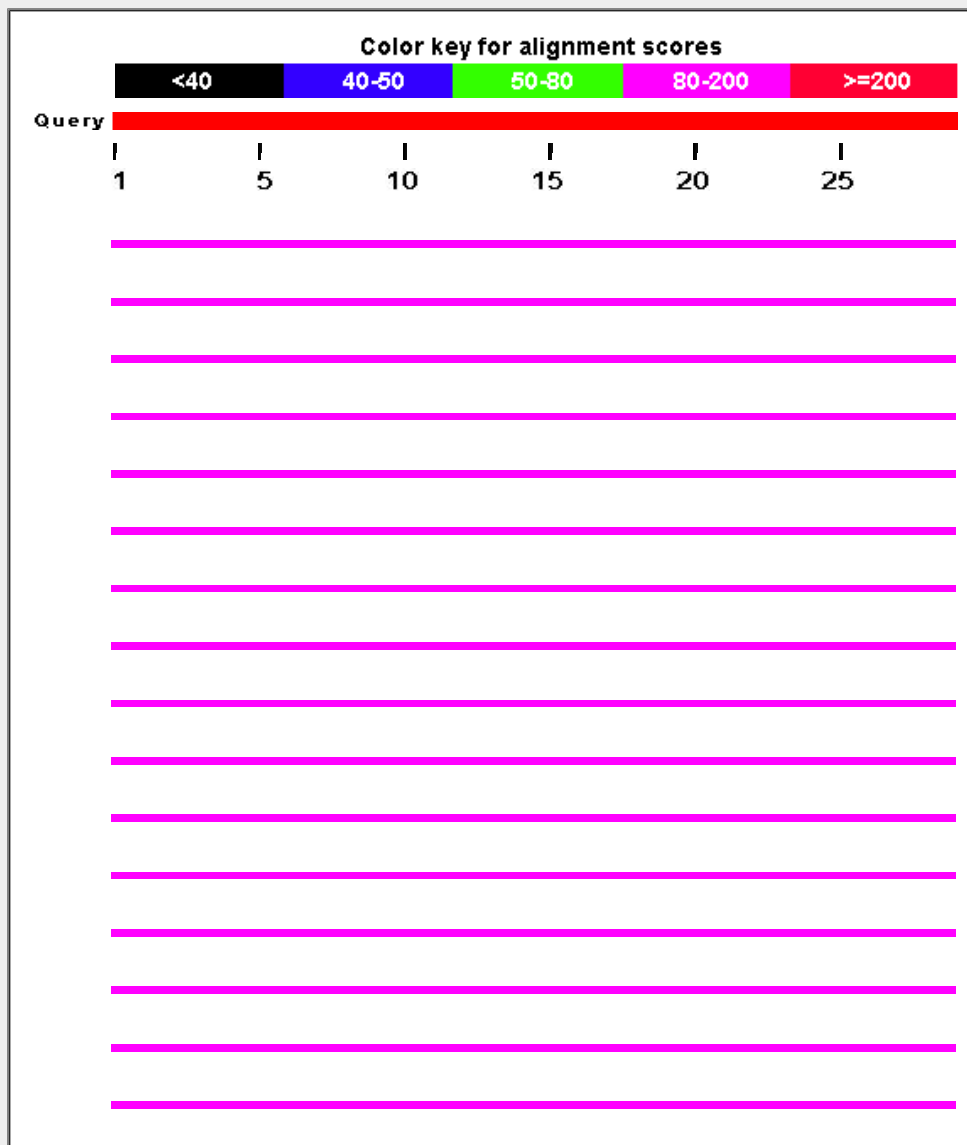

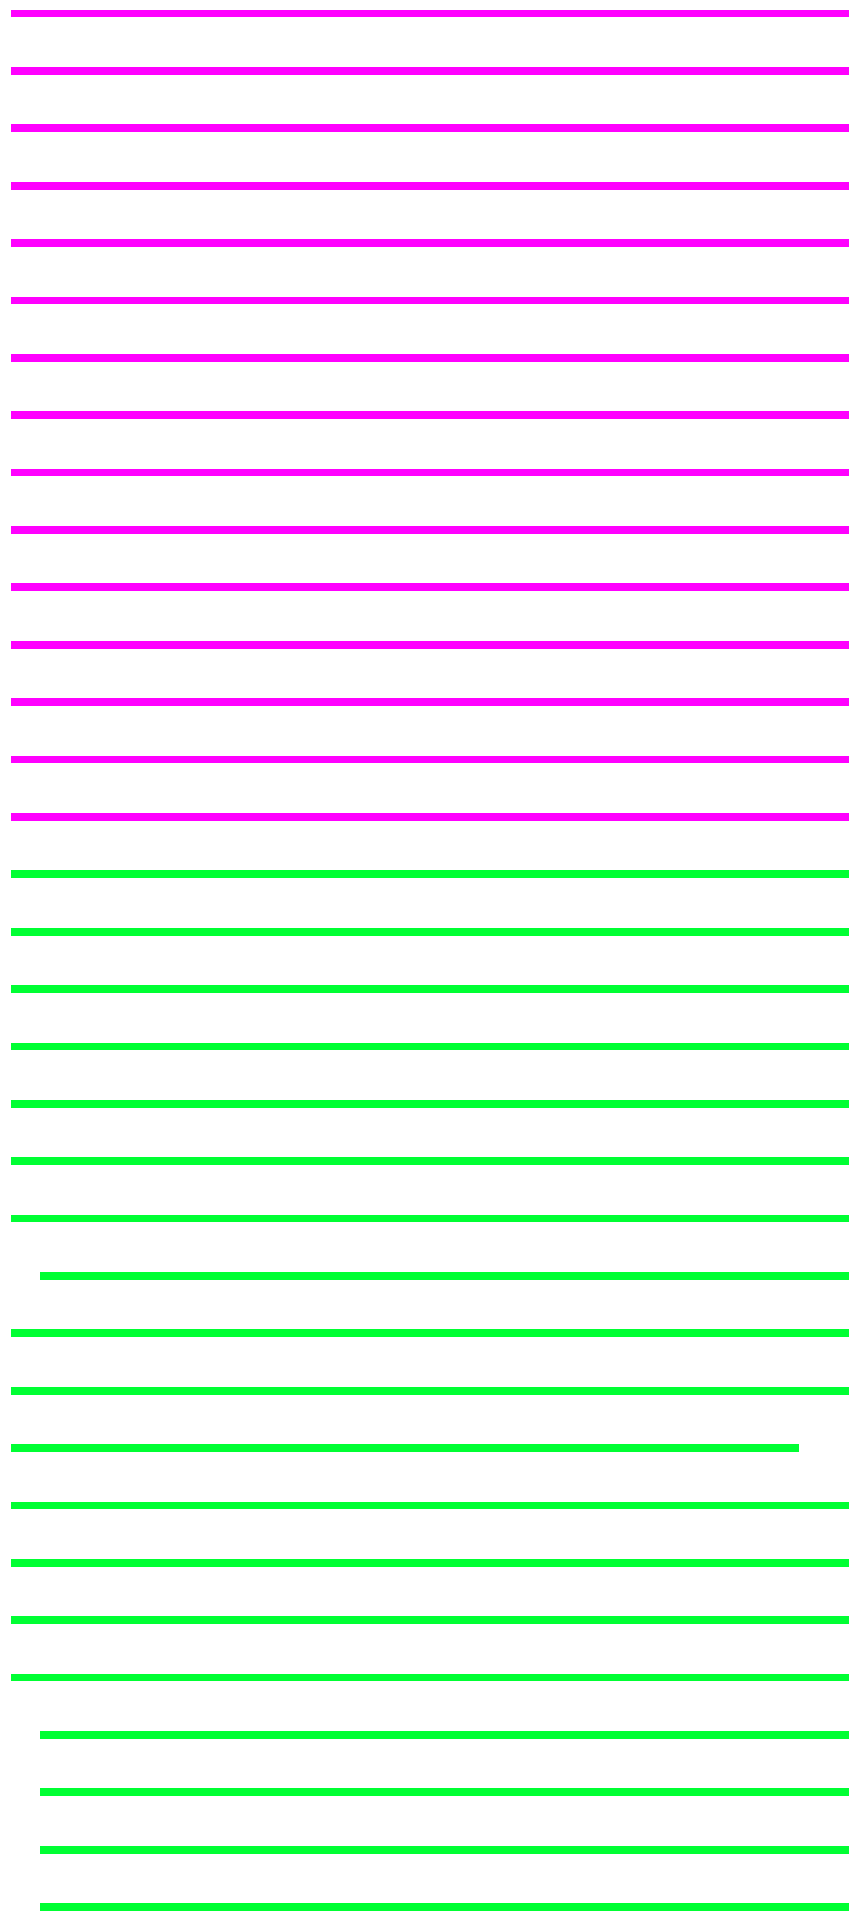

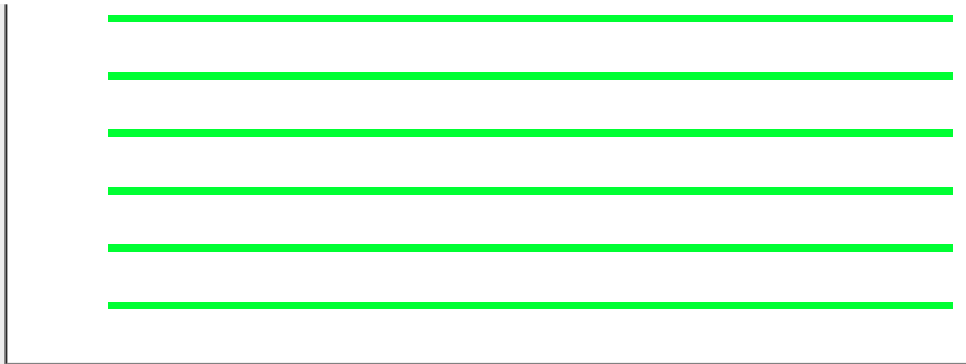

**Descriptions**

**Sequences producing significant alignments:**

Select: [All](#) [None](#) Selected:0

[Alignments](#)
[Download](#)
[GenPept](#)
[Graphics](#)
[Distance tree of results](#)
[Multiple alignment](#)

| Description                                        | Max score | Total score | Query cover | E value | Ident | Accession                      |
|----------------------------------------------------|-----------|-------------|-------------|---------|-------|--------------------------------|
| <a href="#">protein.alpha1 acid glyco [Homo s:</a> | 99.0      | 99.0        | 100%        | 6e-22   | 97%   | <a href="#">720005A</a>        |
| <a href="#">Chain A, Crystal Structure Of Hum</a>  | 99.0      | 99.0        | 100%        | 6e-22   | 97%   | <a href="#">3KQ0_A</a>         |
| <a href="#">Chain A, Crystal Structure Of Hum</a>  | 99.0      | 99.0        | 100%        | 6e-22   | 97%   | <a href="#">3BX6_A</a>         |
| <a href="#">ORM1 [synthetic construct]</a>         | 99.0      | 99.0        | 100%        | 7e-22   | 97%   | <a href="#">AIC54852.1</a>     |
| <a href="#">Orosomuroid 1 [Homo sapiens]</a>       | 99.0      | 99.0        | 100%        | 7e-22   | 97%   | <a href="#">AAI43315.1</a>     |
| <a href="#">alpha-1-acid glycoprotein 1 precur</a> | 99.0      | 99.0        | 100%        | 7e-22   | 97%   | <a href="#">CAA29229.1</a>     |
| <a href="#">RecName: Full=Alpha-1-acid glycc</a>   | 99.0      | 99.0        | 100%        | 7e-22   | 97%   | <a href="#">P02763.1</a>       |
| <a href="#">alpha-1-acid glycoprotein 1 precur</a> | 99.0      | 99.0        | 100%        | 7e-22   | 97%   | <a href="#">NP_000598.2</a>    |
| <a href="#">orosomuroid 1 [synthetic construc</a>  | 99.0      | 99.0        | 100%        | 7e-22   | 97%   | <a href="#">AAV38575.1</a>     |
| <a href="#">orosomuroid 1 [synthetic construc</a>  | 99.0      | 99.0        | 100%        | 7e-22   | 97%   | <a href="#">AAV38574.1</a>     |
| <a href="#">PREDICTED: alpha-1-acid glycopi</a>    | 94.8      | 94.8        | 100%        | 2e-20   | 93%   | <a href="#">XP_004048543.1</a> |
| <a href="#">PREDICTED: alpha-1-acid glycopi</a>    | 94.8      | 94.8        | 100%        | 2e-20   | 93%   | <a href="#">XP_002820180.1</a> |
| <a href="#">PREDICTED: alpha-1-acid glycopi</a>    | 93.5      | 93.5        | 100%        | 6e-20   | 90%   | <a href="#">XP_007966502.1</a> |
| <a href="#">PREDICTED: LOW QUALITY PRG</a>         | 92.3      | 92.3        | 100%        | 2e-19   | 90%   | <a href="#">XP_009455427.1</a> |
| <a href="#">PREDICTED: alpha-1-acid glycopi</a>    | 92.3      | 92.3        | 100%        | 2e-19   | 90%   | <a href="#">XP_003264088.1</a> |
| <a href="#">PREDICTED: alpha-1-acid glycopi</a>    | 90.1      | 90.1        | 100%        | 8e-19   | 86%   | <a href="#">XP_001100289.1</a> |
| <a href="#">Alpha-1-acid glycoprotein 1 [Maca</a>  | 90.1      | 90.1        | 100%        | 8e-19   | 86%   | <a href="#">EHH23840.1</a>     |
| <a href="#">PREDICTED: alpha-1-acid glycopi</a>    | 87.2      | 87.2        | 100%        | 9e-18   | 83%   | <a href="#">XP_005581033.1</a> |
| <a href="#">PREDICTED: alpha-1-acid glycopi</a>    | 87.2      | 87.2        | 100%        | 9e-18   | 83%   | <a href="#">XP_005581032.1</a> |
| <a href="#">PREDICTED: alpha-1-acid glycopi</a>    | 87.2      | 87.2        | 100%        | 1e-17   | 83%   | <a href="#">XP_005581031.1</a> |
| <a href="#">PREDICTED: alpha-1-acid glycopi</a>    | 86.3      | 86.3        | 100%        | 2e-17   | 83%   | <a href="#">XP_009186482.1</a> |
| <a href="#">PREDICTED: alpha-1-acid glycopi</a>    | 84.2      | 84.2        | 100%        | 1e-16   | 79%   | <a href="#">XP_010368793.1</a> |
| <a href="#">Chain A, Crystal Structure Of The</a>  | 83.8      | 83.8        | 100%        | 1e-16   | 79%   | <a href="#">3APU_A</a>         |
| <a href="#">ORM2 [synthetic construct]</a>         | 83.8      | 83.8        | 100%        | 1e-16   | 79%   | <a href="#">AIC54853.1</a>     |
| <a href="#">alpha-1-acid glycoprotein 2 precur</a> | 83.8      | 83.8        | 100%        | 1e-16   | 79%   | <a href="#">CAA29873.2</a>     |



|                                                     |      |      |      |       |     |                                |
|-----------------------------------------------------|------|------|------|-------|-----|--------------------------------|
| <a href="#">alpha-1-acid glycoprotein 2 precu</a>   | 83.8 | 83.8 | 100% | 1e-16 | 79% | <a href="#">NP_000599.1</a>    |
| <a href="#">PREDICTED: alpha-1-acid glycop</a>      | 83.8 | 83.8 | 100% | 1e-16 | 79% | <a href="#">XP_004048546.1</a> |
| <a href="#">ORM2 [Homo sapiens]</a>                 | 83.8 | 83.8 | 100% | 1e-16 | 79% | <a href="#">CAG33211.1</a>     |
| <a href="#">PREDICTED: alpha-1-acid glycop</a>      | 83.8 | 83.8 | 100% | 1e-16 | 79% | <a href="#">XP_520209.3</a>    |
| <a href="#">PREDICTED: LOW QUALITY PRO</a>          | 83.8 | 83.8 | 100% | 2e-16 | 79% | <a href="#">XP_008957108.1</a> |
| <a href="#">unnamed protein product [Homo s</a>     | 81.2 | 81.2 | 100% | 1e-15 | 76% | <a href="#">BAG35159.1</a>     |
| <a href="#">PREDICTED: alpha-1-acid glycop</a>      | 71.5 | 71.5 | 100% | 2e-12 | 72% | <a href="#">XP_002760492.1</a> |
| <a href="#">PREDICTED: alpha-1-acid glycop</a>      | 68.5 | 68.5 | 100% | 2e-11 | 72% | <a href="#">XP_003785445.1</a> |
| <a href="#">PREDICTED: alpha-1-acid glycop</a>      | 67.2 | 67.2 | 100% | 6e-11 | 66% | <a href="#">XP_003925252.1</a> |
| <a href="#">PREDICTED: alpha-1-acid glycop</a>      | 66.4 | 66.4 | 100% | 1e-10 | 69% | <a href="#">XP_003407553.1</a> |
| <a href="#">PREDICTED: alpha-1-acid glycop</a>      | 65.1 | 65.1 | 100% | 3e-10 | 69% | <a href="#">XP_004372401.1</a> |
| <a href="#">PREDICTED: alpha-1-acid glycop</a>      | 64.7 | 64.7 | 100% | 4e-10 | 66% | <a href="#">XP_008588097.1</a> |
| <a href="#">PREDICTED: alpha-1-acid glycop</a>      | 64.7 | 64.7 | 100% | 4e-10 | 66% | <a href="#">XP_008588094.1</a> |
| <a href="#">PREDICTED: alpha-1-acid glycop</a>      | 64.7 | 64.7 | 96%  | 4e-10 | 68% | <a href="#">XP_006865789.1</a> |
| <a href="#">hypothetical protein PANDA_0038</a>     | 63.0 | 63.0 | 100% | 1e-09 | 66% | <a href="#">EFB15505.1</a>     |
| <a href="#">PREDICTED: alpha-1-acid glycop</a>      | 63.4 | 63.4 | 100% | 1e-09 | 69% | <a href="#">XP_007934876.1</a> |
| <a href="#">PREDICTED: alpha-1-acid glycop</a>      | 63.0 | 63.0 | 93%  | 2e-09 | 70% | <a href="#">XP_006890779.1</a> |
| <a href="#">PREDICTED: alpha-1-acid glycop</a>      | 63.0 | 63.0 | 100% | 2e-09 | 66% | <a href="#">XP_002915823.1</a> |
| <a href="#">PREDICTED: alpha-1-acid glycop</a>      | 62.1 | 62.1 | 100% | 3e-09 | 66% | <a href="#">XP_004391192.1</a> |
| <a href="#">PREDICTED: alpha-1-acid glycop</a>      | 61.3 | 61.3 | 100% | 6e-09 | 62% | <a href="#">XP_005627010.1</a> |
| <a href="#">PREDICTED: alpha-1-acid glycop</a>      | 61.3 | 61.3 | 100% | 6e-09 | 62% | <a href="#">XP_003431634.1</a> |
| <a href="#">Alpha-1-acid glycoprotein 1 [Crice</a>  | 60.4 | 60.4 | 96%  | 1e-08 | 64% | <a href="#">EGW06649.1</a>     |
| <a href="#">PREDICTED: alpha-1-acid glycop</a>      | 60.4 | 60.4 | 96%  | 1e-08 | 64% | <a href="#">XP_003503497.1</a> |
| <a href="#">alpha-1-acid glycoprotein 1 [Crice</a>  | 60.4 | 60.4 | 96%  | 1e-08 | 64% | <a href="#">ERE86355.1</a>     |
| <a href="#">alpha-1-acid glycoprotein 1 [Crice</a>  | 60.4 | 60.4 | 96%  | 1e-08 | 64% | <a href="#">ERE86354.1</a>     |
| <a href="#">PREDICTED: alpha-1-acid glycop</a>      | 58.7 | 58.7 | 100% | 4e-08 | 62% | <a href="#">XP_008707881.1</a> |
| <a href="#">alpha-1-acid glycoprotein [Mus mu</a>   | 58.3 | 58.3 | 100% | 5e-08 | 59% | <a href="#">AAA91744.1</a>     |
| <a href="#">PREDICTED: alpha-1-acid glycop</a>      | 58.3 | 58.3 | 100% | 6e-08 | 62% | <a href="#">XP_008831764.1</a> |
| <a href="#">alpha-1-acid glycoprotein (AGP) p</a>   | 58.3 | 58.3 | 100% | 6e-08 | 59% | <a href="#">AAA37197.1</a>     |
| <a href="#">RecName: Full=Alpha-1-acid glycc</a>    | 58.3 | 58.3 | 100% | 6e-08 | 59% | <a href="#">P21350.1</a>       |
| <a href="#">alpha-1-acid glycoprotein 2 precu</a>   | 58.3 | 58.3 | 100% | 6e-08 | 59% | <a href="#">NP_035146.1</a>    |
| <a href="#">PREDICTED: alpha-1-acid glycop</a>      | 57.9 | 57.9 | 100% | 8e-08 | 66% | <a href="#">XP_006142836.1</a> |
| <a href="#">PREDICTED: alpha-1-acid glycop</a>      | 57.5 | 57.5 | 100% | 9e-08 | 62% | <a href="#">XP_004828368.1</a> |
| <a href="#">PREDICTED: alpha-1-acid glycop</a>      | 57.5 | 57.5 | 100% | 1e-07 | 62% | <a href="#">XP_008707882.1</a> |
| <a href="#">PREDICTED: alpha-1-acid glycop</a>      | 56.6 | 56.6 | 100% | 2e-07 | 62% | <a href="#">XP_004391229.1</a> |
| <a href="#">PREDICTED: alpha-1-acid glycop</a>      | 56.6 | 56.6 | 100% | 2e-07 | 59% | <a href="#">XP_003407554.1</a> |
| <a href="#">PREDICTED: alpha-1-acid glycop</a>      | 56.2 | 56.2 | 93%  | 3e-07 | 63% | <a href="#">XP_003995824.1</a> |
| <a href="#">Alpha-1-acid glycoprotein [Myotis c</a> | 55.8 | 55.8 | 100% | 3e-07 | 62% | <a href="#">ELK26646.1</a>     |
| <a href="#">PREDICTED: alpha-1-acid glycop</a>      | 55.4 | 55.4 | 100% | 6e-07 | 66% | <a href="#">XP_008055404.1</a> |
| <a href="#">alpha-1-acid glycoprotein precursc</a>  | 54.5 | 54.5 | 93%  | 1e-06 | 67% | <a href="#">NP_445740.1</a>    |
| <a href="#">PREDICTED: alpha-1-acid glycop</a>      | 53.7 | 53.7 | 96%  | 2e-06 | 61% | <a href="#">XP_005075189.1</a> |

|                                                    |      |      |      |       |     |                                |
|----------------------------------------------------|------|------|------|-------|-----|--------------------------------|
| <a href="#">PREDICTED: alpha-1-acid glycop</a>     | 53.7 | 53.7 | 93%  | 2e-06 | 59% | <a href="#">XP_007094388.1</a> |
| <a href="#">PREDICTED: alpha-1-acid glycop</a>     | 53.2 | 53.2 | 89%  | 3e-06 | 65% | <a href="#">XP_006979617.1</a> |
| <a href="#">PREDICTED: LOW QUALITY PR</a>          | 52.8 | 52.8 | 100% | 4e-06 | 59% | <a href="#">XP_006109685.1</a> |
| <a href="#">PREDICTED: alpha-1-acid glycop</a>     | 52.4 | 52.4 | 100% | 5e-06 | 59% | <a href="#">XP_006917195.1</a> |
| <a href="#">PREDICTED: alpha-1-acid glycop</a>     | 52.0 | 52.0 | 93%  | 7e-06 | 63% | <a href="#">XP_008588096.1</a> |
| <a href="#">PREDICTED: alpha-1-acid glycop</a>     | 52.0 | 52.0 | 93%  | 8e-06 | 59% | <a href="#">XP_010586317.1</a> |
| <a href="#">PREDICTED: LOW QUALITY PR</a>          | 51.1 | 51.1 | 100% | 1e-05 | 66% | <a href="#">XP_005880984.1</a> |
| <a href="#">PREDICTED: alpha-1-acid glycop</a>     | 50.7 | 50.7 | 100% | 2e-05 | 59% | <a href="#">XP_004595034.1</a> |
| <a href="#">PREDICTED: alpha-1-acid glycop</a>     | 50.3 | 50.3 | 96%  | 2e-05 | 64% | <a href="#">XP_004718018.1</a> |
| <a href="#">mCG7142, isoform CRA_b [Mus nr</a>     | 50.3 | 50.3 | 100% | 2e-05 | 62% | <a href="#">EDL31111.1</a>     |
| <a href="#">PREDICTED: alpha-1-acid glycop</a>     | 50.3 | 50.3 | 96%  | 3e-05 | 57% | <a href="#">XP_005352666.1</a> |
| <a href="#">alpha-1-acid glycoprotein precursc</a> | 50.3 | 50.3 | 100% | 3e-05 | 62% | <a href="#">AAB67844.1</a>     |
| <a href="#">alpha-1-acid glycoprotein 1 precur</a> | 50.3 | 50.3 | 100% | 3e-05 | 62% | <a href="#">NP_032794.1</a>    |
| <a href="#">PREDICTED: alpha-1-acid glycop</a>     | 50.3 | 50.3 | 96%  | 3e-05 | 64% | <a href="#">XP_004712638.1</a> |
| <a href="#">RecName: Full=Alpha-1-acid glycc</a>   | 50.3 | 50.3 | 100% | 3e-05 | 62% | <a href="#">P21352.1</a>       |
| <a href="#">Orosomuroid 1 [Mus musculus]</a>       | 50.3 | 50.3 | 100% | 3e-05 | 62% | <a href="#">AAH12725.1</a>     |
| <a href="#">mCG7142, isoform CRA_e [Mus nr</a>     | 50.3 | 50.3 | 100% | 3e-05 | 62% | <a href="#">EDL31114.1</a>     |
| <a href="#">PREDICTED: alpha-1-acid glycop</a>     | 49.8 | 49.8 | 100% | 3e-05 | 62% | <a href="#">XP_006099427.1</a> |
| <a href="#">PREDICTED: alpha-1-acid glycop</a>     | 49.4 | 49.4 | 93%  | 5e-05 | 67% | <a href="#">XP_010995686.1</a> |
| <a href="#">PREDICTED: alpha-1-acid glycop</a>     | 49.4 | 49.4 | 93%  | 5e-05 | 67% | <a href="#">XP_006186090.1</a> |
| <a href="#">PREDICTED: alpha-1-acid glycop</a>     | 49.4 | 49.4 | 93%  | 5e-05 | 63% | <a href="#">XP_003407551.1</a> |
| <a href="#">PREDICTED: alpha-1-acid glycop</a>     | 49.0 | 49.0 | 93%  | 5e-05 | 63% | <a href="#">XP_005880983.1</a> |
| <a href="#">PREDICTED: alpha-1-acid glycop</a>     | 48.6 | 48.6 | 93%  | 9e-05 | 63% | <a href="#">XP_001488199.1</a> |
| <a href="#">alpha-1 acid glycoprotein [Sus scr</a> | 48.1 | 48.1 | 93%  | 1e-04 | 59% | <a href="#">AAA30983.1</a>     |
| <a href="#">PREDICTED: alpha-1-acid glycop</a>     | 48.1 | 48.1 | 93%  | 1e-04 | 59% | <a href="#">XP_005660423.1</a> |
| <a href="#">PREDICTED: alpha-1-acid glycop</a>     | 48.1 | 48.1 | 86%  | 1e-04 | 64% | <a href="#">XP_006108237.1</a> |
| <a href="#">PREDICTED: alpha-1-acid glycop</a>     | 48.1 | 48.1 | 93%  | 1e-04 | 59% | <a href="#">XP_005660428.1</a> |
| <a href="#">Alpha-1-acid glycoprotein 1 [Heter</a> | 47.3 | 47.3 | 96%  | 2e-04 | 64% | <a href="#">EHB03307.1</a>     |
| <a href="#">PREDICTED: alpha-1-acid glycop</a>     | 47.3 | 47.3 | 96%  | 2e-04 | 64% | <a href="#">XP_004885278.1</a> |
| <a href="#">PREDICTED: alpha-1-acid glycop</a>     | 47.3 | 47.3 | 100% | 2e-04 | 59% | <a href="#">XP_007449796.1</a> |
| <a href="#">PREDICTED: alpha-1-acid glycop</a>     | 46.9 | 46.9 | 100% | 3e-04 | 62% | <a href="#">XP_006142835.1</a> |
| <a href="#">Alpha-1-acid glycoprotein 2 [Tupai</a> | 46.9 | 46.9 | 100% | 3e-04 | 62% | <a href="#">ELW70613.1</a>     |
| <a href="#">alpha-1-acid glycoprotein [Mus mu</a>  | 46.4 | 46.4 | 89%  | 3e-04 | 62% | <a href="#">AAA91745.1</a>     |
| <a href="#">alpha-1 acid glycoprotein [Capra h</a> | 46.4 | 46.4 | 100% | 4e-04 | 55% | <a href="#">CAL48252.1</a>     |

▶ NCBI/ BLAST/ blastp suite/ Formatting Results - B9PB9HTK01R

**i** Your search parameters were adjusted to search for a short input sequence.

[Edit and Resubmit](#) [Save Search Strategies](#) ▶ [Formatting options](#) ▶ [Download](#)

[YouTube](#) [How to read this page](#) [Blast report description](#)

## ORM1\_REYQTRQDQCIYNTTYLNVQRE\_NonMod

**RID** [B9PB9HTK01R](#) (Expires on 01-14 15:38 pm)

**Query ID** |cl|134291  
**Description** None  
**Molecule type** amino acid  
**Query Length** 22

**Database Name** nr  
**Description** All non-redundant GenBank CDS translations+PDB+SwissProt+PIR excluding environmental samples from WGS projects  
**Program** BLASTP 2.2.30+ ▶ [Citation](#)

Other reports: ▶ [Search Summary](#) [[Taxonomy reports](#)] [[Distance tree of results](#)] [[Multiple alignment](#)]

### **G** Graphic Summary

[Show Conserved Domains](#)

No putative conserved domains have been detected

Distribution of 100 Blast Hits on the Query Sequence



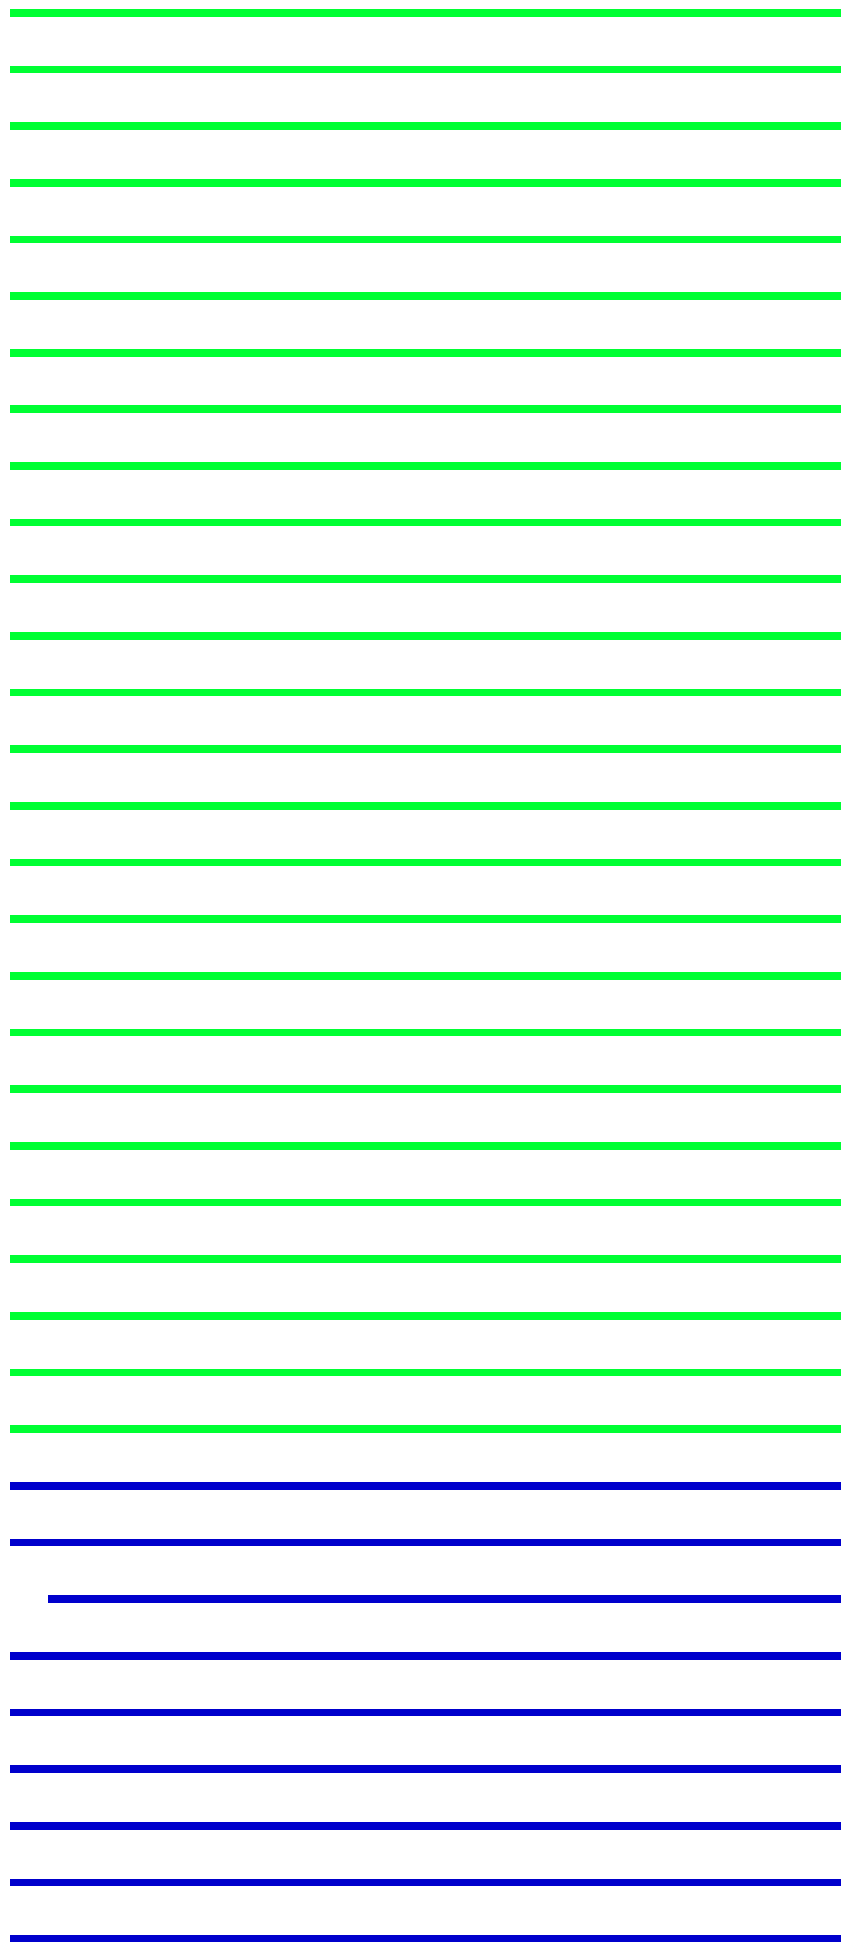

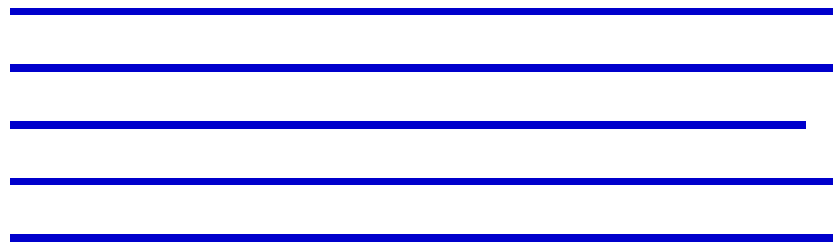

**Descriptions**

**Sequences producing significant alignments:**

Select: [All](#) [None](#) Selected:0

[↑](#) [Alignments](#)
[Download](#)
[GenPept](#)
[Graphics](#)
[Distance tree of results](#)
[Multiple alignment](#)

| Description                                                                           | Max score | Total score | Query cover | E value | Ident | Accession                                   |
|---------------------------------------------------------------------------------------|-----------|-------------|-------------|---------|-------|---------------------------------------------|
| <a href="#">protein.alpha1 acid glyco [Homo sapiens]</a>                              | 79.1      | 79.1        | 100%        | 2e-15   | 100%  | <a href="#">gij229386 Z20005A</a>           |
| <a href="#">Chain A, Crystal Structure Of Human Alpha1-Acid Glycoprotein [Ho</a>      | 79.1      | 79.1        | 100%        | 2e-15   | 100%  | <a href="#">gij285803540 3KQ0_A</a>         |
| <a href="#">Chain A, Crystal Structure Of Human Alpha 1 Acid Glycoprotein [Hc</a>     | 79.1      | 79.1        | 100%        | 2e-15   | 100%  | <a href="#">gij215794600 3BX6_A</a>         |
| <a href="#">ORM1 [synthetic construct]</a>                                            | 79.1      | 79.1        | 100%        | 2e-15   | 100%  | <a href="#">gij649120278 AIC54852.1</a>     |
| <a href="#">Orosomuroid 1 [Homo sapiens]</a>                                          | 79.1      | 79.1        | 100%        | 2e-15   | 100%  | <a href="#">gij219519923 AAI43315.1</a>     |
| <a href="#">alpha-1-acid glycoprotein 1 precursor [Homo sapiens]</a>                  | 79.1      | 79.1        | 100%        | 2e-15   | 100%  | <a href="#">gij1197209 CAA29229.1</a>       |
| <a href="#">RecName: Full=Alpha-1-acid glycoprotein 1; Short=AGP 1; AltNam</a>        | 79.1      | 79.1        | 100%        | 2e-15   | 100%  | <a href="#">gij112877 P02763.1</a>          |
| <a href="#">alpha-1-acid glycoprotein 1 precursor [Homo sapiens]</a>                  | 79.1      | 79.1        | 100%        | 2e-15   | 100%  | <a href="#">gij167857790 NP_000598.2</a>    |
| <a href="#">orosomuroid 1 [synthetic construct]</a>                                   | 79.1      | 79.1        | 100%        | 2e-15   | 100%  | <a href="#">gij54696406 AAV38575.1</a>      |
| <a href="#">orosomuroid 1 [synthetic construct]</a>                                   | 79.1      | 79.1        | 100%        | 2e-15   | 100%  | <a href="#">gij54696404 AAV38574.1</a>      |
| <a href="#">PREDICTED: alpha-1-acid glycoprotein 1-like [Gorilla gorilla gorilla]</a> | 74.9      | 74.9        | 100%        | 6e-14   | 95%   | <a href="#">gij426362801 XP_004048543.1</a> |
| <a href="#">PREDICTED: LOW QUALITY PROTEIN: alpha-1-acid glycoprotein</a>             | 74.9      | 74.9        | 100%        | 6e-14   | 95%   | <a href="#">gij694936727 XP_009455427.1</a> |
| <a href="#">PREDICTED: alpha-1-acid glycoprotein 1 isoform 1 [Nomascus leu</a>        | 74.9      | 74.9        | 100%        | 6e-14   | 95%   | <a href="#">gij332229827 XP_003264088.1</a> |
| <a href="#">PREDICTED: alpha-1-acid glycoprotein 1 [Pongo abelii]</a>                 | 74.9      | 74.9        | 100%        | 6e-14   | 95%   | <a href="#">gij297685191 XP_002820180.1</a> |
| <a href="#">PREDICTED: alpha-1-acid glycoprotein 1-like isoform 2 [Macaca m</a>       | 73.6      | 73.6        | 100%        | 2e-13   | 91%   | <a href="#">gij109110480 XP_001100289.1</a> |
| <a href="#">Alpha-1-acid glycoprotein 1 [Macaca mulatta]</a>                          | 73.6      | 73.6        | 100%        | 2e-13   | 91%   | <a href="#">gij355567499 EHH23840.1</a>     |
| <a href="#">PREDICTED: alpha-1-acid glycoprotein 1 [Chlorocebus sabaeus]</a>          | 73.6      | 73.6        | 100%        | 2e-13   | 91%   | <a href="#">gij635071762 XP_007966502.1</a> |
| <a href="#">PREDICTED: alpha-1-acid glycoprotein 1 isoform X3 [Macaca fasci</a>       | 70.6      | 70.6        | 100%        | 2e-12   | 86%   | <a href="#">gij544492702 XP_005581033.1</a> |
| <a href="#">PREDICTED: alpha-1-acid glycoprotein 1 isoform X2 [Macaca fasci</a>       | 70.6      | 70.6        | 100%        | 2e-12   | 86%   | <a href="#">gij544492700 XP_005581032.1</a> |
| <a href="#">PREDICTED: alpha-1-acid glycoprotein 1 isoform X1 [Macaca fasci</a>       | 70.6      | 70.6        | 100%        | 2e-12   | 86%   | <a href="#">gij544492698 XP_005581031.1</a> |
| <a href="#">PREDICTED: alpha-1-acid glycoprotein 1 [Papio anubis]</a>                 | 69.8      | 69.8        | 100%        | 3e-12   | 86%   | <a href="#">gij685591954 XP_009186482.1</a> |
| <a href="#">PREDICTED: alpha-1-acid glycoprotein 1 [Rhinopithecus roxellana]</a>      | 67.7      | 67.7        | 100%        | 2e-11   | 82%   | <a href="#">gij724859712 XP_010368793.1</a> |
| <a href="#">Chain A, Crystal Structure Of The A Variant Of Human Alpha1-Acid</a>      | 66.4      | 66.4        | 100%        | 5e-11   | 82%   | <a href="#">gij323714404 3APU_A</a>         |
| <a href="#">ORM2 [synthetic construct]</a>                                            | 66.4      | 66.4        | 100%        | 5e-11   | 82%   | <a href="#">gij649120282 AIC54853.1</a>     |
| <a href="#">alpha-1-acid glycoprotein 2 precursor [Homo sapiens]</a>                  | 66.4      | 66.4        | 100%        | 5e-11   | 82%   | <a href="#">gij29170378 CAA29873.2</a>      |
| <a href="#">alpha-1-acid glycoprotein 2 precursor [Homo sapiens]</a>                  | 66.4      | 66.4        | 100%        | 5e-11   | 82%   | <a href="#">gij4505529 NP_000599.1</a>      |
| <a href="#">PREDICTED: alpha-1-acid glycoprotein 1-like [Gorilla gorilla gorilla]</a> | 66.4      | 66.4        | 100%        | 5e-11   | 82%   | <a href="#">gij426362807 XP_004048546.1</a> |
| <a href="#">ORM2 [Homo sapiens]</a>                                                   | 66.4      | 66.4        | 100%        | 5e-11   | 82%   | <a href="#">gij48145977 CAG33211.1</a>      |

|                                                                                     |      |      |      |       |     |                                             |
|-------------------------------------------------------------------------------------|------|------|------|-------|-----|---------------------------------------------|
| <a href="#">PREDICTED: alpha-1-acid glycoprotein 2-like [Pan troglodytes]</a>       | 66.4 | 66.4 | 100% | 5e-11 | 82% | <a href="#">gij694988125 XP_520209.3</a>    |
| <a href="#">PREDICTED: LOW QUALITY PROTEIN: alpha-1-acid glycoprotein</a>           | 66.4 | 66.4 | 100% | 6e-11 | 82% | <a href="#">gij675802504 XP_008957108.1</a> |
| <a href="#">unnamed protein product [Homo sapiens]</a>                              | 63.8 | 63.8 | 100% | 4e-10 | 77% | <a href="#">gij189053338 BAG35159.1</a>     |
| <a href="#">PREDICTED: alpha-1-acid glycoprotein 1 [Callithrix jacchus]</a>         | 58.3 | 58.3 | 100% | 3e-08 | 77% | <a href="#">gij296229919 XP_002760492.1</a> |
| <a href="#">PREDICTED: alpha-1-acid glycoprotein 2-like [Galeopterus variega</a>    | 54.9 | 54.9 | 100% | 4e-07 | 73% | <a href="#">gij667321193 XP_008588097.1</a> |
| <a href="#">PREDICTED: alpha-1-acid glycoprotein 1 [Galeopterus variegatus]</a>     | 54.9 | 54.9 | 100% | 4e-07 | 73% | <a href="#">gij667321187 XP_008588094.1</a> |
| <a href="#">PREDICTED: alpha-1-acid glycoprotein 1 [Elephantulus edwardii]</a>      | 54.5 | 54.5 | 100% | 5e-07 | 73% | <a href="#">gij585676946 XP_006890779.1</a> |
| <a href="#">PREDICTED: alpha-1-acid glycoprotein 1 [Saimiri boliviensis bolivi</a>  | 54.1 | 54.1 | 100% | 7e-07 | 68% | <a href="#">gij403266135 XP_003925252.1</a> |
| <a href="#">PREDICTED: alpha-1-acid glycoprotein 2-like [Loxodonta africana]</a>    | 53.7 | 53.7 | 100% | 1e-06 | 73% | <a href="#">gij344271455 XP_003407553.1</a> |
| <a href="#">PREDICTED: alpha-1-acid glycoprotein 2 [Otolemur garnettii]</a>         | 52.0 | 52.0 | 100% | 4e-06 | 73% | <a href="#">gij395824383 XP_003785445.1</a> |
| <a href="#">PREDICTED: alpha-1-acid glycoprotein 1 [Orycteropus afer afer]</a>      | 51.1 | 51.1 | 100% | 7e-06 | 73% | <a href="#">gij634836563 XP_007934876.1</a> |
| <a href="#">hypothetical protein PANDA_003840 [Ailuropoda melanoleuca]</a>          | 50.3 | 50.3 | 100% | 1e-05 | 68% | <a href="#">gij281339921 EFB15505.1</a>     |
| <a href="#">PREDICTED: alpha-1-acid glycoprotein [Felis catus]</a>                  | 50.7 | 50.7 | 100% | 1e-05 | 68% | <a href="#">gij410978897 XP_003995824.1</a> |
| <a href="#">PREDICTED: alpha-1-acid glycoprotein-like [Ailuropoda melanoleu</a>     | 50.3 | 50.3 | 100% | 1e-05 | 68% | <a href="#">gij301760029 XP_002915823.1</a> |
| <a href="#">PREDICTED: alpha-1-acid glycoprotein 1 [Nannospalax galii]</a>          | 49.0 | 49.0 | 100% | 4e-05 | 68% | <a href="#">gij674051046 XP_008831764.1</a> |
| <a href="#">PREDICTED: alpha-1-acid glycoprotein 2 [Trichechus manatus latir</a>    | 49.0 | 49.0 | 100% | 4e-05 | 68% | <a href="#">gij471363692 XP_004372401.1</a> |
| <a href="#">PREDICTED: alpha-1-acid glycoprotein 2 [Chrysochloris asiatica]</a>     | 48.6 | 48.6 | 95%  | 5e-05 | 67% | <a href="#">gij586470389 XP_006865789.1</a> |
| <a href="#">PREDICTED: alpha-1-acid glycoprotein-like [Panthera tigris altaica]</a> | 48.1 | 48.1 | 100% | 7e-05 | 64% | <a href="#">gij591337606 XP_007094388.1</a> |
| <a href="#">PREDICTED: alpha-1-acid glycoprotein 1 isoform X2 [Canis lupus f</a>    | 47.3 | 47.3 | 100% | 1e-04 | 64% | <a href="#">gij545518002 XP_005627010.1</a> |
| <a href="#">PREDICTED: alpha-1-acid glycoprotein 1 isoform X1 [Canis lupus f</a>    | 47.3 | 47.3 | 100% | 1e-04 | 64% | <a href="#">gij345777714 XP_003431634.1</a> |
| <a href="#">PREDICTED: alpha-1-acid glycoprotein 2-like [Galeopterus variega</a>    | 46.9 | 46.9 | 100% | 2e-04 | 68% | <a href="#">gij667321190 XP_008588096.1</a> |
| <a href="#">Alpha-1-acid glycoprotein [Myotis davidii]</a>                          | 46.4 | 46.4 | 100% | 2e-04 | 68% | <a href="#">gij432095447 ELK26646.1</a>     |
| <a href="#">alpha-1-acid glycoprotein precursor [Rattus norvegicus]</a>             | 46.0 | 46.0 | 100% | 3e-04 | 68% | <a href="#">gij16757980 NP_445740.1</a>     |
| <a href="#">PREDICTED: alpha-1-acid glycoprotein 2-like [Trichechus manatus</a>     | 46.0 | 46.0 | 100% | 3e-04 | 64% | <a href="#">gij471419404 XP_004391192.1</a> |
| <a href="#">alpha-1-acid glycoprotein [Mus musculus]</a>                            | 45.6 | 45.6 | 100% | 4e-04 | 59% | <a href="#">gij387176 AAA91744.1</a>        |
| <a href="#">PREDICTED: alpha-1-acid glycoprotein 1 [Erinaceus europaeus]</a>        | 45.6 | 45.6 | 95%  | 5e-04 | 67% | <a href="#">gij617619058 XP_007526815.1</a> |
| <a href="#">alpha-1-acid glycoprotein (AGP) precursor [Mus caroli]</a>              | 45.6 | 45.6 | 100% | 5e-04 | 59% | <a href="#">gij309098 AAA37197.1</a>        |
| <a href="#">RecName: Full=Alpha-1-acid glycoprotein 1; Short=AGP 1; AltNam</a>      | 45.6 | 45.6 | 100% | 5e-04 | 59% | <a href="#">gij112879 P21350.1</a>          |
| <a href="#">alpha-1-acid glycoprotein 2 precursor [Mus musculus]</a>                | 45.6 | 45.6 | 100% | 5e-04 | 59% | <a href="#">gij6754950 NP_035146.1</a>      |
| <a href="#">PREDICTED: alpha-1-acid glycoprotein 1-like [Mustela putorius fur</a>   | 44.8 | 44.8 | 100% | 8e-04 | 64% | <a href="#">gij512022336 XP_004828368.1</a> |
| <a href="#">PREDICTED: alpha-1-acid glycoprotein 1-like [Echinops telfairi]</a>     | 44.8 | 44.8 | 100% | 9e-04 | 68% | <a href="#">gij507712754 XP_004718018.1</a> |
| <a href="#">PREDICTED: alpha-1-acid glycoprotein-like [Ursus maritimus]</a>         | 44.8 | 44.8 | 100% | 9e-04 | 64% | <a href="#">gij671034105 XP_008707882.1</a> |
| <a href="#">PREDICTED: alpha-1-acid glycoprotein-like [Ursus maritimus]</a>         | 44.8 | 44.8 | 100% | 9e-04 | 64% | <a href="#">gij671034103 XP_008707881.1</a> |
| <a href="#">PREDICTED: alpha-1-acid glycoprotein 1 [Echinops telfairi]</a>          | 44.8 | 44.8 | 100% | 9e-04 | 68% | <a href="#">gij507689354 XP_004712638.1</a> |
| <a href="#">Alpha-1-acid glycoprotein 1 [Cricetulus griseus]</a>                    | 43.9 | 43.9 | 95%  | 0.002 | 62% | <a href="#">gij344250545 EGW06649.1</a>     |
| <a href="#">PREDICTED: alpha-1-acid glycoprotein 1 [Cricetulus griseus]</a>         | 43.9 | 43.9 | 95%  | 0.002 | 62% | <a href="#">gij354482623 XP_003503497.1</a> |
| <a href="#">PREDICTED: alpha-1-acid glycoprotein 2-like [Loxodonta africana]</a>    | 43.9 | 43.9 | 100% | 0.002 | 59% | <a href="#">gij344271457 XP_003407554.1</a> |
| <a href="#">alpha-1-acid glycoprotein 1 [Cricetulus griseus]</a>                    | 43.9 | 43.9 | 95%  | 0.002 | 62% | <a href="#">gij537238399 ERE86355.1</a>     |
| <a href="#">alpha-1-acid glycoprotein 1 [Cricetulus griseus]</a>                    | 43.9 | 43.9 | 95%  | 0.002 | 62% | <a href="#">gij537238398 ERE86354.1</a>     |
| <a href="#">PREDICTED: LOW QUALITY PROTEIN: orosomuroid 1 [Myotis luc</a>           | 43.5 | 43.5 | 100% | 0.002 | 64% | <a href="#">gij558172686 XP_006109685.1</a> |
| <a href="#">PREDICTED: alpha-1-acid glycoprotein 2-like [Loxodonta africana]</a>    | 43.5 | 43.5 | 100% | 0.002 | 59% | <a href="#">gij731463853 XP_010586317.1</a> |
| <a href="#">alpha-1 acid glycoprotein [Sus scrofa]</a>                              | 42.6 | 42.6 | 100% | 0.004 | 64% | <a href="#">gij164302 AAA30983.1</a>        |
| <a href="#">PREDICTED: alpha-1-acid glycoprotein-like [Sus scrofa]</a>              | 42.6 | 42.6 | 100% | 0.004 | 64% | <a href="#">gij545804155 XP_005660423.1</a> |
| <a href="#">PREDICTED: alpha-1-acid glycoprotein 2-like [Loxodonta africana]</a>    | 42.6 | 42.6 | 100% | 0.004 | 68% | <a href="#">gij344271451 XP_003407551.1</a> |
| <a href="#">PREDICTED: alpha-1-acid glycoprotein isoform X1 [Sus scrofa]</a>        | 42.6 | 42.6 | 100% | 0.004 | 64% | <a href="#">gij545804166 XP_005660428.1</a> |

|                                                                                  |      |      |      |       |     |                                             |
|----------------------------------------------------------------------------------|------|------|------|-------|-----|---------------------------------------------|
| <a href="#">PREDICTED: alpha-1-acid glycoprotein 2-like [Myotis lucifugus]</a>   | 41.8 | 41.8 | 100% | 0.008 | 64% | <a href="#">gij558213870 XP_006108237.1</a> |
| <a href="#">PREDICTED: alpha-1-acid glycoprotein 2-like isoform X2 [Tupaia c</a> | 41.4 | 41.4 | 100% | 0.011 | 64% | <a href="#">gij562826345 XP_006142836.1</a> |
| <a href="#">PREDICTED: alpha-1-acid glycoprotein-like [Peromyscus manicula</a>   | 40.9 | 40.9 | 95%  | 0.015 | 62% | <a href="#">gij589933663 XP_006979617.1</a> |
| <a href="#">PREDICTED: alpha-1-acid glycoprotein-like [Microtus ochrogaster]</a> | 40.9 | 40.9 | 95%  | 0.015 | 62% | <a href="#">gij532017828 XP_005352666.1</a> |
| <a href="#">PREDICTED: alpha-1-acid glycoprotein 1-like [Myotis brandtii]</a>    | 40.5 | 40.5 | 100% | 0.018 | 64% | <a href="#">gij554578831 XP_005880983.1</a> |
| <a href="#">PREDICTED: alpha-1-acid glycoprotein-like [Trichechus manatus l</a>  | 40.5 | 40.5 | 100% | 0.021 | 59% | <a href="#">gij471419478 XP_004391229.1</a> |
| <a href="#">PREDICTED: alpha-1-acid glycoprotein-like [Myotis lucifugus]</a>     | 40.5 | 40.5 | 100% | 0.022 | 64% | <a href="#">gij558172690 XP_006099428.1</a> |
| <a href="#">PREDICTED: alpha-1-acid glycoprotein 2 [Pteropus alecto]</a>         | 40.1 | 40.1 | 100% | 0.029 | 59% | <a href="#">gij586524471 XP_006917195.1</a> |
| <a href="#">PREDICTED: alpha-1-acid glycoprotein 1 [Jaculus jaculus]</a>         | 39.7 | 39.7 | 95%  | 0.039 | 62% | <a href="#">gij507557995 XP_004662736.1</a> |
| <a href="#">PREDICTED: alpha-1-acid glycoprotein 2-like [Myotis lucifugus]</a>   | 39.7 | 39.7 | 100% | 0.039 | 64% | <a href="#">gij558172682 XP_006099427.1</a> |
| <a href="#">PREDICTED: alpha-1-acid glycoprotein 2-like [Myotis lucifugus]</a>   | 39.7 | 39.7 | 100% | 0.039 | 64% | <a href="#">gij558172624 XP_006099415.1</a> |
| <a href="#">PREDICTED: alpha-1-acid glycoprotein 2-like [Tarsius syrichta]</a>   | 39.2 | 39.2 | 100% | 0.053 | 64% | <a href="#">gij640798447 XP_008055404.1</a> |
| <a href="#">PREDICTED: alpha-1-acid glycoprotein 2-like [Equus caballus]</a>     | 38.8 | 38.8 | 100% | 0.073 | 59% | <a href="#">gij149738494 XP_001488199.1</a> |
| <a href="#">alpha-1 acid glycoprotein [Capra hircus]</a>                         | 38.4 | 38.4 | 86%  | 0.097 | 63% | <a href="#">gij123953929 CAL48252.1</a>     |
| <a href="#">PREDICTED: alpha-1-acid glycoprotein-like [Ovis aries]</a>           | 38.4 | 38.4 | 86%  | 0.100 | 63% | <a href="#">gij426219649 XP_004004031.1</a> |
| <a href="#">alpha 1 acid glycoprotein precursor [Capra hircus]</a>               | 38.4 | 38.4 | 86%  | 0.100 | 63% | <a href="#">gij550822232 NP_001272559.1</a> |
| <a href="#">PREDICTED: LOW QUALITY PROTEIN: alpha-1-acid glycoprotein</a>        | 38.4 | 38.4 | 100% | 0.10  | 68% | <a href="#">gij554578835 XP_005880984.1</a> |
| <a href="#">mCG7142_isoform CRA_b [Mus musculus]</a>                             | 38.0 | 38.0 | 100% | 0.13  | 64% | <a href="#">gij148699164 EDL31111.1</a>     |
| <a href="#">RecName: Full=Alpha-1-acid glycoprotein 3; Short=AGP 3; AltNam</a>   | 38.0 | 38.0 | 100% | 0.14  | 55% | <a href="#">gij2497693 Q63805.1</a>         |
| <a href="#">alpha-1-acid glycoprotein 3 precursor [Mus musculus]</a>             | 38.0 | 38.0 | 100% | 0.14  | 55% | <a href="#">gij62548316 NP_038651.2</a>     |
| <a href="#">alpha-1-acid glycoprotein precursor [Mus caroli]</a>                 | 38.0 | 38.0 | 100% | 0.14  | 64% | <a href="#">gij309100 AAB67844.1</a>        |
| <a href="#">alpha-1-acid glycoprotein 1 precursor [Mus musculus]</a>             | 38.0 | 38.0 | 100% | 0.14  | 64% | <a href="#">gij6679182 NP_032794.1</a>      |
| <a href="#">PREDICTED: alpha-1-acid glycoprotein 1 [Condylura cristata]</a>      | 38.0 | 38.0 | 90%  | 0.14  | 60% | <a href="#">gij507933524 XP_004677999.1</a> |
| <a href="#">RecName: Full=Alpha-1-acid glycoprotein 8; Short=AGP 8; AltNam</a>   | 38.0 | 38.0 | 100% | 0.14  | 64% | <a href="#">gij112883 P21352.1</a>          |
| <a href="#">Orosomucoid 1 [Mus musculus]</a>                                     | 38.0 | 38.0 | 100% | 0.14  | 64% | <a href="#">gij15215270 AAH12725.1</a>      |
| <a href="#">PREDICTED: alpha-1-acid glycoprotein 3 isoform X5 [Mus musculu</a>   | 38.0 | 38.0 | 100% | 0.14  | 55% | <a href="#">gij568926184 XP_006537733.1</a> |
| <a href="#">Orm3 protein [Mus musculus]</a>                                      | 38.0 | 38.0 | 100% | 0.14  | 55% | <a href="#">gij219519434 AAI45560.1</a>     |

## Alignments

[Download](#) [GenPept](#) [Graphics](#) ▼ Next ▲ Previous ▲ Descriptions

protein, alpha1 acid glyco

Sequence ID: [gij229386|prf|720005A](#) Length: 182 Number of Matches: 1

### Related Information

Range 1: 64 to 85 [GenPept](#) [Graphics](#) ▼ Next Match ▲ Previous Match

| Score          | Expect | Identities  | Positives   | Gaps     |
|----------------|--------|-------------|-------------|----------|
| 79.1 bits(179) | 2e-15  | 22/22(100%) | 22/22(100%) | 0/22(0%) |

Query 1 REYQTRQDQCIYNTTYLNVQRE 22  
 REYQTRQDQCIYNTTYLNVQRE  
 Sbjct 64 REYQTRQDQCIYNTTYLNVQRE 85

[Download](#) [GenPept](#) [Graphics](#) ▼ Next ▲ Previous ▲ Descriptions

Chain A, Crystal Structure Of Human Alpha1-Acid Glycoprotein

Sequence ID: [gij285803540|pdb|3KQ0|A](#) Length: 192 Number of Matches: 1

### Related Information

Range 1: 63 to 84 [GenPept](#) [Graphics](#) ▼ Next Match ▲ Previous Match

| Score          | Expect | Identities  | Positives   | Gaps     |
|----------------|--------|-------------|-------------|----------|
| 79.1 bits(179) | 2e-15  | 22/22(100%) | 22/22(100%) | 0/22(0%) |

Query 1 REYQTRQDQCIYNTTYLNVQRE 22

[Structure](#) - 3D structure displays

Sbjct 63 REYQTRQDQCIYNTTYLNVQRE 84

[Download](#) [GenPept](#) [Graphics](#)

[▼ Next](#) [▲ Previous](#) [▲ Descriptions](#)

**Chain A, Crystal Structure Of Human Alpha 1 Acid Glycoprotein**

Sequence ID: [gi|215794600|pdb|3BX6|A](#) Length: 192 Number of Matches: 1

**Related Information**

Range 1: 63 to 84 [GenPept](#) [Graphics](#) [▼ Next Match](#) [▲ Previous Match](#)

| Score          | Expect | Identities  | Positives   | Gaps     |
|----------------|--------|-------------|-------------|----------|
| 79.1 bits(179) | 2e-15  | 22/22(100%) | 22/22(100%) | 0/22(0%) |

Query 1 REYQTRQDQCIYNTTYLNVQRE 22  
 REYQTRQDQCIYNTTYLNVQRE  
 Sbjct 63 REYQTRQDQCIYNTTYLNVQRE 84

[Download](#) [GenPept](#) [Graphics](#)

[▼ Next](#) [▲ Previous](#) [▲ Descriptions](#)

**ORM1, partial [synthetic construct]**

Sequence ID: [gi|649120278|gb|AI54852.1](#) Length: 201 Number of Matches: 1

**Related Information**

Range 1: 81 to 102 [GenPept](#) [Graphics](#) [▼ Next Match](#) [▲ Previous Match](#)

| Score          | Expect | Identities  | Positives   | Gaps     |
|----------------|--------|-------------|-------------|----------|
| 79.1 bits(179) | 2e-15  | 22/22(100%) | 22/22(100%) | 0/22(0%) |

Query 1 REYQTRQDQCIYNTTYLNVQRE 22  
 REYQTRQDQCIYNTTYLNVQRE  
 Sbjct 81 REYQTRQDQCIYNTTYLNVQRE 102

[Download](#) [GenPept](#) [Graphics](#)

[▼ Next](#) [▲ Previous](#) [▲ Descriptions](#)

**Orosomucoid 1 [Homo sapiens]**

Sequence ID: [gi|219519923|gb|AA143315.1](#) Length: 201 Number of Matches: 1

**Related Information**

Range 1: 81 to 102 [GenPept](#) [Graphics](#) [▼ Next Match](#) [▲ Previous Match](#)

| Score          | Expect | Identities  | Positives   | Gaps     |
|----------------|--------|-------------|-------------|----------|
| 79.1 bits(179) | 2e-15  | 22/22(100%) | 22/22(100%) | 0/22(0%) |

Query 1 REYQTRQDQCIYNTTYLNVQRE 22  
 REYQTRQDQCIYNTTYLNVQRE  
 Sbjct 81 REYQTRQDQCIYNTTYLNVQRE 102

[Gene](#) - associated gene details

BLAST is a registered trademark of the National Library of Medicine.



NCBI/ BLAST/ blastp suite/ Formatting Results - B9PEWVX501R

**Your search parameters were adjusted to search for a short input sequence.**

[Edit and Resubmit](#) [Save Search Strategies](#) [Formatting options](#) [Download](#)

[YouTube](#) [How to read this page](#) [Blast report description](#)

## ORM1\_REYQTRQDQCIYNTTYLNVQRENGTISRY\_NonMod

**RID** [B9PEWVX501R](#) (Expires on 01-14 15:39 pm)

**Query ID** |cl|194606  
**Description** None  
**Molecule type** amino acid  
**Query Length** 29

**Database Name** nr  
**Description** All non-redundant GenBank CDS translations+PDB+SwissProt+PIR excluding environmental samples from WGS projects  
**Program** BLASTP 2.2.30+ [Citation](#)

Other reports: [Search Summary](#) [Taxonomy reports](#) [Distance tree of results](#) [Multiple alignment](#)

### Graphic Summary

[Show Conserved Domains](#)

No putative conserved domains have been detected

Distribution of 100 Blast Hits on the Query Sequence

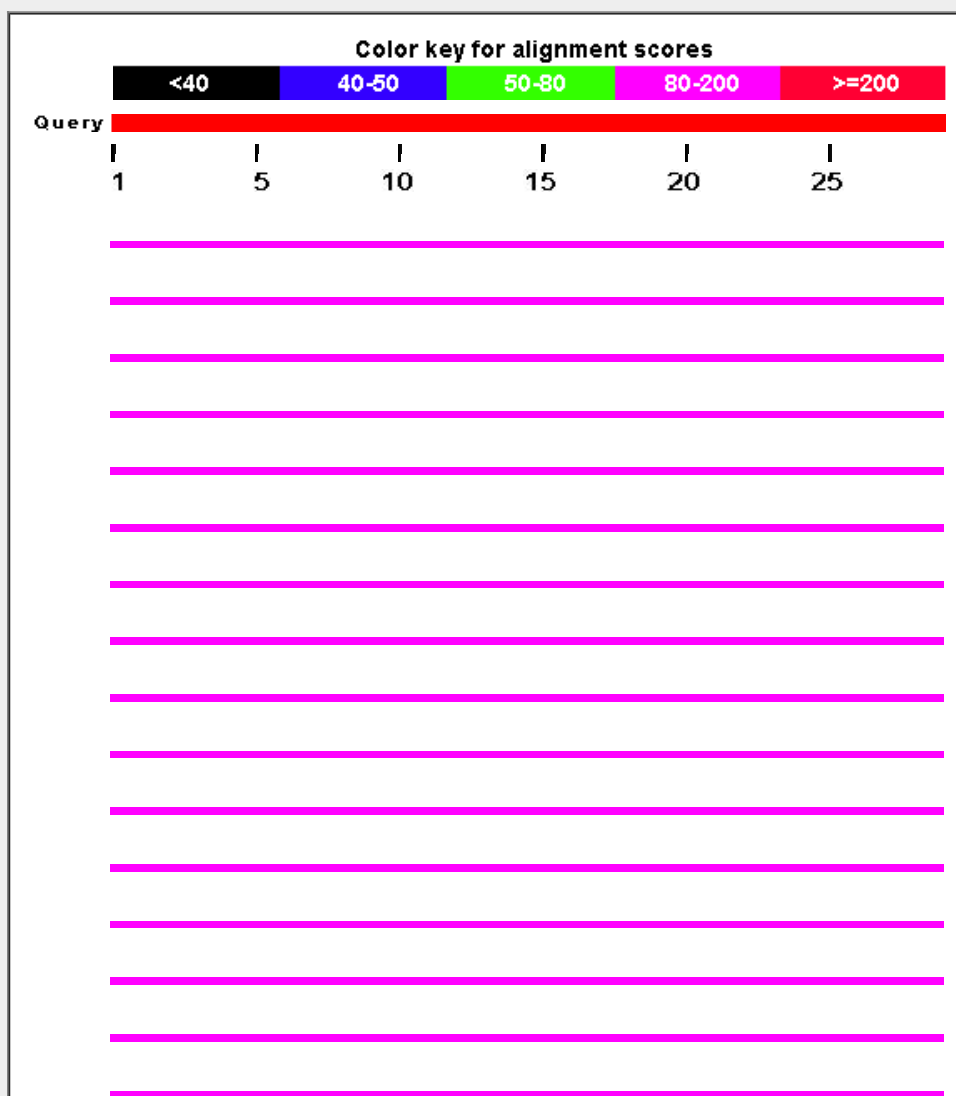

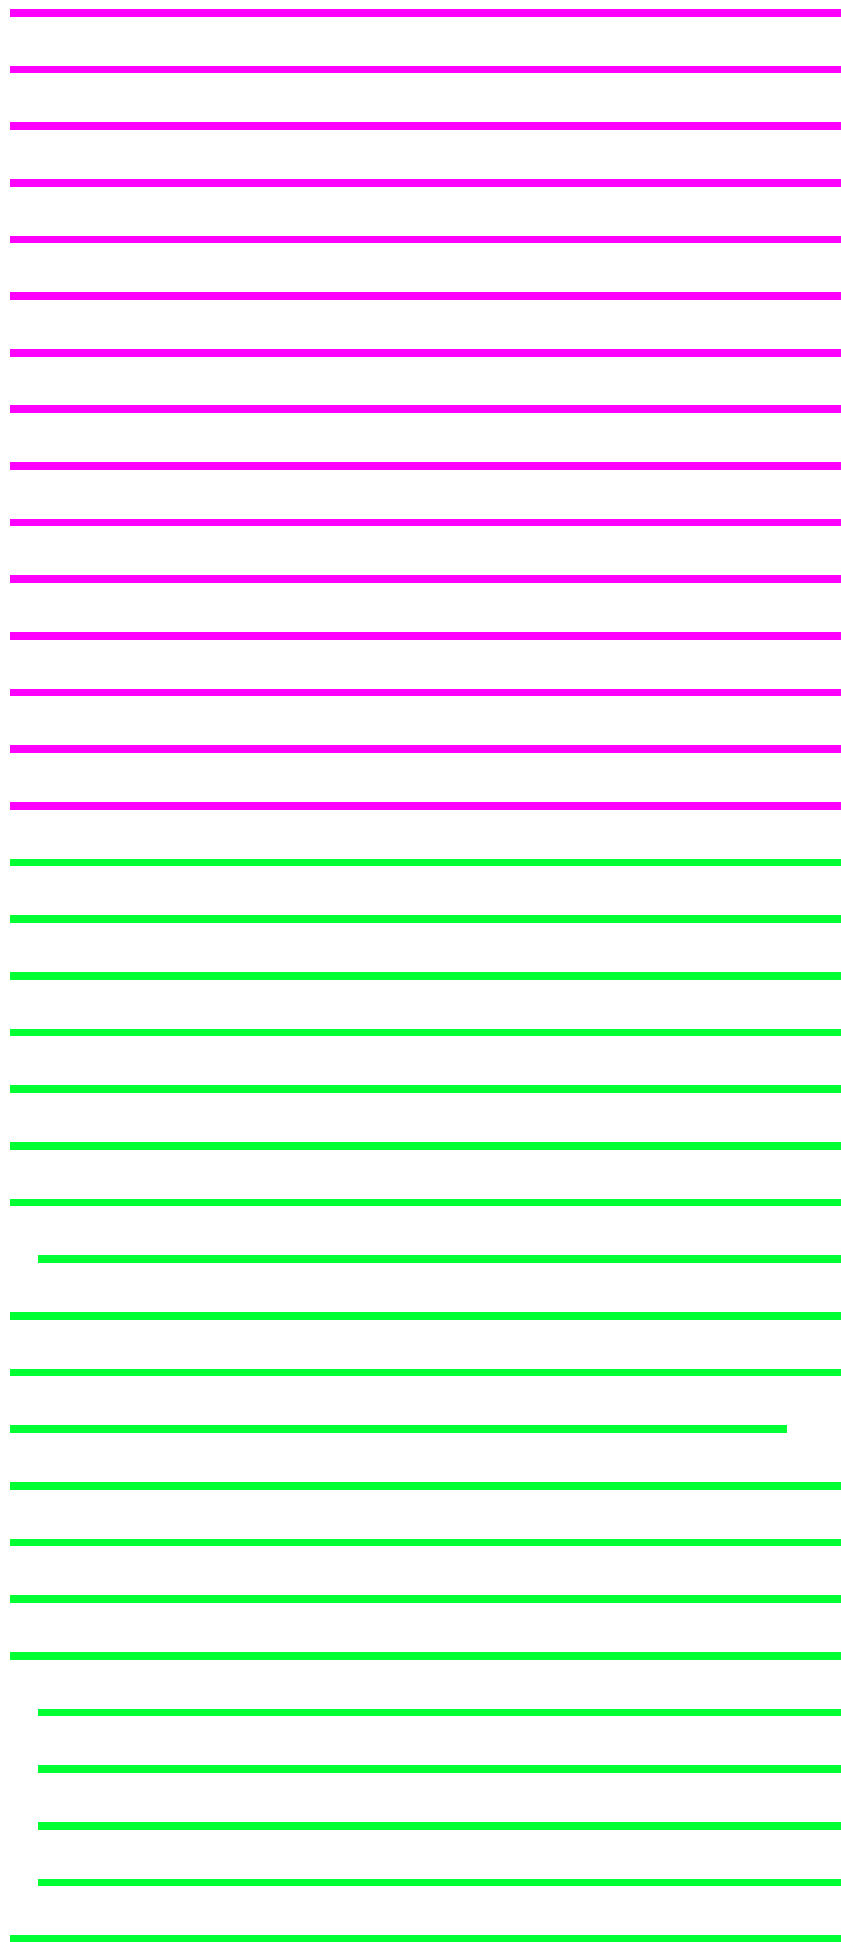



**Descriptions**

**Sequences producing significant alignments:**

Select: [All](#) [None](#) Selected:0

[↑](#) [Alignments](#)
[Download](#)
[GenPept](#)
[Graphics](#)
[Distance tree of results](#)
[Multiple alignment](#)
⚙

| Description                                                                           | Max score | Total score | Query cover | E value | Ident | Accession                                   |
|---------------------------------------------------------------------------------------|-----------|-------------|-------------|---------|-------|---------------------------------------------|
| <a href="#">protein.alpha1 acid glyco [Homo sapiens]</a>                              | 101       | 101         | 100%        | 7e-23   | 100%  | <a href="#">gij229386 720005A</a>           |
| <a href="#">Chain A, Crystal Structure Of Human Alpha1-Acid Glycoprotein [Ho</a>      | 101       | 101         | 100%        | 8e-23   | 100%  | <a href="#">gij285803540 3KQ0_A</a>         |
| <a href="#">Chain A, Crystal Structure Of Human Alpha 1 Acid Glycoprotein [Hc</a>     | 101       | 101         | 100%        | 8e-23   | 100%  | <a href="#">gij215794600 3BX6_A</a>         |
| <a href="#">ORM1 [synthetic construct]</a>                                            | 101       | 101         | 100%        | 8e-23   | 100%  | <a href="#">gij649120278 AIC54852.1</a>     |
| <a href="#">Orosomuroid 1 [Homo sapiens]</a>                                          | 101       | 101         | 100%        | 8e-23   | 100%  | <a href="#">gij219519923 AAI43315.1</a>     |
| <a href="#">alpha-1-acid glycoprotein 1 precursor [Homo sapiens]</a>                  | 101       | 101         | 100%        | 8e-23   | 100%  | <a href="#">gij1197209 CAA29229.1</a>       |
| <a href="#">RecName: Full=Alpha-1-acid glycoprotein 1; Short=AGP 1; AltNam</a>        | 101       | 101         | 100%        | 8e-23   | 100%  | <a href="#">gij112877 P02763.1</a>          |
| <a href="#">alpha-1-acid glycoprotein 1 precursor [Homo sapiens]</a>                  | 101       | 101         | 100%        | 8e-23   | 100%  | <a href="#">gij167857790 NP_000598.2</a>    |
| <a href="#">orosomuroid 1 [synthetic construct]</a>                                   | 101       | 101         | 100%        | 8e-23   | 100%  | <a href="#">gij54696406 AAV38575.1</a>      |
| <a href="#">orosomuroid 1 [synthetic construct]</a>                                   | 101       | 101         | 100%        | 8e-23   | 100%  | <a href="#">gij54696404 AAV38574.1</a>      |
| <a href="#">PREDICTED: alpha-1-acid glycoprotein 1-like [Gorilla gorilla gorilla]</a> | 97.3      | 97.3        | 100%        | 2e-21   | 97%   | <a href="#">gij426362801 XP_004048543.1</a> |
| <a href="#">PREDICTED: alpha-1-acid glycoprotein 1 [Pongo abelii]</a>                 | 97.3      | 97.3        | 100%        | 2e-21   | 97%   | <a href="#">gij297685191 XP_002820180.1</a> |
| <a href="#">PREDICTED: alpha-1-acid glycoprotein 1 [Chlorocebus sabaesus]</a>         | 96.1      | 96.1        | 100%        | 7e-21   | 93%   | <a href="#">gij635071762 XP_007966502.1</a> |
| <a href="#">PREDICTED: LOW QUALITY PROTEIN: alpha-1-acid glycoprotein</a>             | 94.8      | 94.8        | 100%        | 2e-20   | 93%   | <a href="#">gij694936727 XP_009455427.1</a> |
| <a href="#">PREDICTED: alpha-1-acid glycoprotein 1 isoform 1 [Nomascus leu</a>        | 94.8      | 94.8        | 100%        | 2e-20   | 93%   | <a href="#">gij332229827 XP_003264088.1</a> |
| <a href="#">PREDICTED: alpha-1-acid glycoprotein 1-like isoform 2 [Macaca m</a>       | 92.7      | 92.7        | 100%        | 1e-19   | 90%   | <a href="#">gij109110480 XP_001100289.1</a> |
| <a href="#">Alpha-1-acid glycoprotein 1 [Macaca mulatta]</a>                          | 92.7      | 92.7        | 100%        | 1e-19   | 90%   | <a href="#">gij355567499 EHH23840.1</a>     |
| <a href="#">PREDICTED: alpha-1-acid glycoprotein 1 isoform X3 [Macaca fasci</a>       | 89.7      | 89.7        | 100%        | 1e-18   | 86%   | <a href="#">gij544492702 XP_005581033.1</a> |
| <a href="#">PREDICTED: alpha-1-acid glycoprotein 1 isoform X2 [Macaca fasci</a>       | 89.7      | 89.7        | 100%        | 1e-18   | 86%   | <a href="#">gij544492700 XP_005581032.1</a> |
| <a href="#">PREDICTED: alpha-1-acid glycoprotein 1 isoform X1 [Macaca fasci</a>       | 89.7      | 89.7        | 100%        | 1e-18   | 86%   | <a href="#">gij544492698 XP_005581031.1</a> |
| <a href="#">PREDICTED: alpha-1-acid glycoprotein 1 [Papio anubis]</a>                 | 88.9      | 88.9        | 100%        | 2e-18   | 86%   | <a href="#">gij685591954 XP_009186482.1</a> |
| <a href="#">PREDICTED: alpha-1-acid glycoprotein 1 [Rhinopithecus roxellana]</a>      | 86.7      | 86.7        | 100%        | 1e-17   | 83%   | <a href="#">gij724859712 XP_010368793.1</a> |
| <a href="#">Chain A, Crystal Structure Of The A Variant Of Human Alpha1-Acid</a>      | 86.3      | 86.3        | 100%        | 2e-17   | 83%   | <a href="#">gij323714404 3APU_A</a>         |
| <a href="#">ORM2 [synthetic construct]</a>                                            | 86.3      | 86.3        | 100%        | 2e-17   | 83%   | <a href="#">gij649120282 AIC54853.1</a>     |
| <a href="#">alpha-1-acid glycoprotein 2 precursor [Homo sapiens]</a>                  | 86.3      | 86.3        | 100%        | 2e-17   | 83%   | <a href="#">gij29170378 CAA29873.2</a>      |
| <a href="#">alpha-1-acid glycoprotein 2 precursor [Homo sapiens]</a>                  | 86.3      | 86.3        | 100%        | 2e-17   | 83%   | <a href="#">gij4505529 NP_000599.1</a>      |
| <a href="#">PREDICTED: alpha-1-acid glycoprotein 1-like [Gorilla gorilla gorilla]</a> | 86.3      | 86.3        | 100%        | 2e-17   | 83%   | <a href="#">gij426362807 XP_004048546.1</a> |
| <a href="#">ORM2 [Homo sapiens]</a>                                                   | 86.3      | 86.3        | 100%        | 2e-17   | 83%   | <a href="#">gij48145977 CAG33211.1</a>      |

|                                                                                               |      |      |      |       |     |                                             |
|-----------------------------------------------------------------------------------------------|------|------|------|-------|-----|---------------------------------------------|
| <a href="#">PREDICTED: alpha-1-acid glycoprotein 2-like [Pan troglodytes]</a>                 | 86.3 | 86.3 | 100% | 2e-17 | 83% | <a href="#">gij694988125 XP_520209.3</a>    |
| <a href="#">PREDICTED: LOW QUALITY PROTEIN: alpha-1-acid glycoprotein</a>                     | 86.3 | 86.3 | 100% | 2e-17 | 83% | <a href="#">gij675802504 XP_008957108.1</a> |
| <a href="#">unnamed protein product [Homo sapiens]</a>                                        | 83.8 | 83.8 | 100% | 1e-16 | 79% | <a href="#">gij189053338 BAG35159.1</a>     |
| <a href="#">PREDICTED: alpha-1-acid glycoprotein 1 [Callithrix jacchus]</a>                   | 74.0 | 74.0 | 100% | 3e-13 | 76% | <a href="#">gij296229919 XP_002760492.1</a> |
| <a href="#">PREDICTED: alpha-1-acid glycoprotein 2 [Otolemur garnettii]</a>                   | 71.0 | 71.0 | 100% | 3e-12 | 76% | <a href="#">gij395824383 XP_003785445.1</a> |
| <a href="#">PREDICTED: alpha-1-acid glycoprotein 1 [Saimiri boliviensis boliviensis]</a>      | 69.8 | 69.8 | 100% | 8e-12 | 69% | <a href="#">gij403266135 XP_003925252.1</a> |
| <a href="#">PREDICTED: alpha-1-acid glycoprotein 2-like [Loxodonta africana]</a>              | 68.9 | 68.9 | 100% | 2e-11 | 72% | <a href="#">gij344271455 XP_003407553.1</a> |
| <a href="#">PREDICTED: alpha-1-acid glycoprotein 2 [Trichechus manatus latirostris]</a>       | 67.7 | 67.7 | 100% | 4e-11 | 72% | <a href="#">gij471363692 XP_004372401.1</a> |
| <a href="#">PREDICTED: alpha-1-acid glycoprotein 2-like [Galeopterus variegatus]</a>          | 67.2 | 67.2 | 100% | 5e-11 | 69% | <a href="#">gij667321193 XP_008588097.1</a> |
| <a href="#">PREDICTED: alpha-1-acid glycoprotein 1 [Galeopterus variegatus]</a>               | 67.2 | 67.2 | 100% | 6e-11 | 69% | <a href="#">gij667321187 XP_008588094.1</a> |
| <a href="#">PREDICTED: alpha-1-acid glycoprotein 2 [Chrysochloris asiatica]</a>               | 67.2 | 67.2 | 96%  | 6e-11 | 71% | <a href="#">gij586470389 XP_006865789.1</a> |
| <a href="#">hypothetical protein PANDA_003840 [Ailuropoda melanoleuca]</a>                    | 65.5 | 65.5 | 100% | 1e-10 | 69% | <a href="#">gij281339921 EFB15505.1</a>     |
| <a href="#">PREDICTED: alpha-1-acid glycoprotein 1 [Orycteropus afer afer]</a>                | 66.0 | 66.0 | 100% | 2e-10 | 72% | <a href="#">gij634836563 XP_007934876.1</a> |
| <a href="#">PREDICTED: alpha-1-acid glycoprotein 1 [Elephantulus edwardii]</a>                | 65.5 | 65.5 | 93%  | 2e-10 | 74% | <a href="#">gij585676946 XP_006890779.1</a> |
| <a href="#">PREDICTED: alpha-1-acid glycoprotein-like [Ailuropoda melanoleuca]</a>            | 65.5 | 65.5 | 100% | 2e-10 | 69% | <a href="#">gij301760029 XP_002915823.1</a> |
| <a href="#">PREDICTED: alpha-1-acid glycoprotein 2-like [Trichechus manatus latirostris]</a>  | 64.7 | 64.7 | 100% | 4e-10 | 69% | <a href="#">gij471419404 XP_004391192.1</a> |
| <a href="#">PREDICTED: alpha-1-acid glycoprotein 1 isoform X2 [Canis lupus familiaris]</a>    | 63.8 | 63.8 | 100% | 8e-10 | 66% | <a href="#">gij545518002 XP_005627010.1</a> |
| <a href="#">PREDICTED: alpha-1-acid glycoprotein 1 isoform X1 [Canis lupus familiaris]</a>    | 63.8 | 63.8 | 100% | 8e-10 | 66% | <a href="#">gij345777714 XP_003431634.1</a> |
| <a href="#">Alpha-1-acid glycoprotein 1 [Cricetulus griseus]</a>                              | 63.0 | 63.0 | 96%  | 2e-09 | 68% | <a href="#">gij344250545 EGW06649.1</a>     |
| <a href="#">PREDICTED: alpha-1-acid glycoprotein 1 [Cricetulus griseus]</a>                   | 63.0 | 63.0 | 96%  | 2e-09 | 68% | <a href="#">gij354482623 XP_003503497.1</a> |
| <a href="#">alpha-1-acid glycoprotein 1 [Cricetulus griseus]</a>                              | 63.0 | 63.0 | 96%  | 2e-09 | 68% | <a href="#">gij537238399 ERE86355.1</a>     |
| <a href="#">alpha-1-acid glycoprotein 1 [Cricetulus griseus]</a>                              | 63.0 | 63.0 | 96%  | 2e-09 | 68% | <a href="#">gij537238398 ERE86354.1</a>     |
| <a href="#">PREDICTED: alpha-1-acid glycoprotein-like [Ursus maritimus]</a>                   | 61.3 | 61.3 | 100% | 6e-09 | 66% | <a href="#">gij671034103 XP_008707881.1</a> |
| <a href="#">alpha-1-acid glycoprotein [Mus musculus]</a>                                      | 60.9 | 60.9 | 100% | 6e-09 | 62% | <a href="#">gij387176 AAA91744.1</a>        |
| <a href="#">PREDICTED: alpha-1-acid glycoprotein 1 [Nannospalax galii]</a>                    | 60.9 | 60.9 | 100% | 8e-09 | 66% | <a href="#">gij674051046 XP_008831764.1</a> |
| <a href="#">alpha-1-acid glycoprotein (AGP) precursor [Mus caroli]</a>                        | 60.9 | 60.9 | 100% | 8e-09 | 62% | <a href="#">gij309098 AAA37197.1</a>        |
| <a href="#">RecName: Full=Alpha-1-acid glycoprotein 1; Short=AGP 1; AltName=</a>              | 60.9 | 60.9 | 100% | 8e-09 | 62% | <a href="#">gij112879 P21350.1</a>          |
| <a href="#">alpha-1-acid glycoprotein 2 precursor [Mus musculus]</a>                          | 60.9 | 60.9 | 100% | 8e-09 | 62% | <a href="#">gij6754950 NP_035146.1</a>      |
| <a href="#">PREDICTED: alpha-1-acid glycoprotein 2-like isoform X2 [Tupaia chrysochloris]</a> | 60.4 | 60.4 | 100% | 1e-08 | 69% | <a href="#">gij562826345 XP_006142836.1</a> |
| <a href="#">PREDICTED: alpha-1-acid glycoprotein 1-like [Mustela putorius furo]</a>           | 60.0 | 60.0 | 100% | 1e-08 | 66% | <a href="#">gij512022336 XP_004828368.1</a> |
| <a href="#">PREDICTED: alpha-1-acid glycoprotein-like [Ursus maritimus]</a>                   | 60.0 | 60.0 | 100% | 2e-08 | 66% | <a href="#">gij671034105 XP_008707882.1</a> |
| <a href="#">PREDICTED: alpha-1-acid glycoprotein-like [Trichechus manatus latirostris]</a>    | 59.2 | 59.2 | 100% | 3e-08 | 66% | <a href="#">gij471419478 XP_004391229.1</a> |
| <a href="#">PREDICTED: alpha-1-acid glycoprotein 2-like [Loxodonta africana]</a>              | 59.2 | 59.2 | 100% | 3e-08 | 62% | <a href="#">gij344271457 XP_003407554.1</a> |
| <a href="#">Alpha-1-acid glycoprotein [Myotis davidii]</a>                                    | 58.3 | 58.3 | 100% | 4e-08 | 66% | <a href="#">gij432095447 ELK26646.1</a>     |
| <a href="#">PREDICTED: alpha-1-acid glycoprotein [Felis catus]</a>                            | 58.7 | 58.7 | 93%  | 4e-08 | 67% | <a href="#">gij410978897 XP_003995824.1</a> |
| <a href="#">PREDICTED: alpha-1-acid glycoprotein 2-like [Tarsius syrichta]</a>                | 57.9 | 57.9 | 100% | 8e-08 | 69% | <a href="#">gij640798447 XP_008055404.1</a> |
| <a href="#">alpha-1-acid glycoprotein precursor [Rattus norvegicus]</a>                       | 57.1 | 57.1 | 93%  | 1e-07 | 70% | <a href="#">gij16757980 NP_445740.1</a>     |
| <a href="#">PREDICTED: alpha-1-acid glycoprotein 1 [Mesocricetus auratus]</a>                 | 56.2 | 56.2 | 96%  | 3e-07 | 64% | <a href="#">gij524950349 XP_005075189.1</a> |
| <a href="#">PREDICTED: alpha-1-acid glycoprotein-like [Panthera tigris altaica]</a>           | 56.2 | 56.2 | 93%  | 3e-07 | 63% | <a href="#">gij591337606 XP_007094388.1</a> |
| <a href="#">PREDICTED: alpha-1-acid glycoprotein-like [Peromyscus maniculatus]</a>            | 55.8 | 55.8 | 89%  | 4e-07 | 69% | <a href="#">gij589933663 XP_006979617.1</a> |
| <a href="#">PREDICTED: LOW QUALITY PROTEIN: orosomucoid 1 [Myotis lucifugus]</a>              | 55.4 | 55.4 | 100% | 5e-07 | 62% | <a href="#">gij558172686 XP_006109685.1</a> |
| <a href="#">PREDICTED: alpha-1-acid glycoprotein 2 [Pteropus alecto]</a>                      | 54.9 | 54.9 | 100% | 7e-07 | 62% | <a href="#">gij586524471 XP_006917195.1</a> |
| <a href="#">PREDICTED: alpha-1-acid glycoprotein 2-like [Galeopterus variegatus]</a>          | 54.5 | 54.5 | 93%  | 1e-06 | 67% | <a href="#">gij667321190 XP_008588096.1</a> |
| <a href="#">PREDICTED: alpha-1-acid glycoprotein 2-like [Loxodonta africana]</a>              | 54.5 | 54.5 | 93%  | 1e-06 | 63% | <a href="#">gij731463853 XP_010586317.1</a> |
| <a href="#">PREDICTED: LOW QUALITY PROTEIN: alpha-1-acid glycoprotein</a>                     | 53.7 | 53.7 | 100% | 2e-06 | 69% | <a href="#">gij554578835 XP_005880984.1</a> |

|                                                                                  |      |      |      |       |     |                                             |
|----------------------------------------------------------------------------------|------|------|------|-------|-----|---------------------------------------------|
| <a href="#">PREDICTED: alpha-1-acid glycoprotein-like [Ochotona princeps]</a>    | 53.2 | 53.2 | 100% | 3e-06 | 62% | <a href="#">gil504170887 XP_004595034.1</a> |
| <a href="#">PREDICTED: alpha-1-acid glycoprotein 1-like [Echinops telfairi]</a>  | 52.8 | 52.8 | 96%  | 3e-06 | 68% | <a href="#">gil507712754 XP_004718018.1</a> |
| <a href="#">mCG7142, isoform CRA_b [Mus musculus]</a>                            | 52.8 | 52.8 | 100% | 3e-06 | 66% | <a href="#">gil148699164 EDL31111.1</a>     |
| <a href="#">PREDICTED: alpha-1-acid glycoprotein-like [Microtus ochrogaster]</a> | 52.8 | 52.8 | 96%  | 4e-06 | 61% | <a href="#">gil532017828 XP_005352666.1</a> |
| <a href="#">alpha-1-acid glycoprotein precursor [Mus caroli]</a>                 | 52.8 | 52.8 | 100% | 4e-06 | 66% | <a href="#">gil309100 AAB67844.1</a>        |
| <a href="#">alpha-1-acid glycoprotein 1 precursor [Mus musculus]</a>             | 52.8 | 52.8 | 100% | 4e-06 | 66% | <a href="#">gil6679182 NP_032794.1</a>      |
| <a href="#">PREDICTED: alpha-1-acid glycoprotein 1 [Echinops telfairi]</a>       | 52.8 | 52.8 | 96%  | 4e-06 | 68% | <a href="#">gil507689354 XP_004712638.1</a> |
| <a href="#">RecName: Full=Alpha-1-acid glycoprotein 8; Short=AGP 8; AltNam</a>   | 52.8 | 52.8 | 100% | 4e-06 | 66% | <a href="#">gil112883 P21352.1</a>          |
| <a href="#">Orosomucoid 1 [Mus musculus]</a>                                     | 52.8 | 52.8 | 100% | 4e-06 | 66% | <a href="#">gil15215270 AAH12725.1</a>      |
| <a href="#">mCG7142, isoform CRA_e [Mus musculus]</a>                            | 52.8 | 52.8 | 100% | 4e-06 | 66% | <a href="#">gil148699167 EDL31114.1</a>     |
| <a href="#">PREDICTED: alpha-1-acid glycoprotein-like [Camelus ferus]</a>        | 52.0 | 52.0 | 93%  | 7e-06 | 70% | <a href="#">gil560919741 XP_006186090.1</a> |
| <a href="#">PREDICTED: alpha-1-acid glycoprotein 2-like [Loxodonta africana]</a> | 52.0 | 52.0 | 93%  | 7e-06 | 67% | <a href="#">gil344271451 XP_003407551.1</a> |
| <a href="#">PREDICTED: alpha-1-acid glycoprotein 1-like [Myotis brandtii]</a>    | 51.5 | 51.5 | 93%  | 7e-06 | 67% | <a href="#">gil554578831 XP_005880983.1</a> |
| <a href="#">PREDICTED: alpha-1-acid glycoprotein 2-like [Myotis lucifugus]</a>   | 51.5 | 51.5 | 100% | 9e-06 | 62% | <a href="#">gil558172682 XP_006099427.1</a> |
| <a href="#">alpha-1 acid glycoprotein [Sus scrofa]</a>                           | 50.7 | 50.7 | 93%  | 2e-05 | 63% | <a href="#">gil164302 AAA30983.1</a>        |
| <a href="#">PREDICTED: alpha-1-acid glycoprotein-like [Sus scrofa]</a>           | 50.7 | 50.7 | 93%  | 2e-05 | 63% | <a href="#">gil545804155 XP_005660423.1</a> |
| <a href="#">PREDICTED: alpha-1-acid glycoprotein 2-like [Myotis lucifugus]</a>   | 50.7 | 50.7 | 86%  | 2e-05 | 68% | <a href="#">gil558213870 XP_006108237.1</a> |
| <a href="#">PREDICTED: alpha-1-acid glycoprotein isoform X1 [Sus scrofa]</a>     | 50.7 | 50.7 | 93%  | 2e-05 | 63% | <a href="#">gil545804166 XP_005660428.1</a> |
| <a href="#">Alpha-1-acid glycoprotein 1 [Heterocephalus glaber]</a>              | 49.8 | 49.8 | 96%  | 3e-05 | 68% | <a href="#">gil351700388 EHB03307.1</a>     |
| <a href="#">PREDICTED: alpha-1-acid glycoprotein 1 [Heterocephalus glaber]</a>   | 49.8 | 49.8 | 96%  | 3e-05 | 68% | <a href="#">gil512843596 XP_004885278.1</a> |
| <a href="#">PREDICTED: alpha-1-acid glycoprotein-like [Lipotes vexillifer]</a>   | 49.8 | 49.8 | 100% | 3e-05 | 62% | <a href="#">gil602728729 XP_007449796.1</a> |
| <a href="#">PREDICTED: alpha-1-acid glycoprotein 2-like isoform X1 [Tupaia c</a> | 49.4 | 49.4 | 100% | 4e-05 | 66% | <a href="#">gil562826343 XP_006142835.1</a> |
| <a href="#">Alpha-1-acid glycoprotein 2 [Tupaia chinensis]</a>                   | 49.4 | 49.4 | 100% | 4e-05 | 66% | <a href="#">gil444730223 ELW70613.1</a>     |
| <a href="#">alpha-1-acid glycoprotein [Mus musculus]</a>                         | 49.0 | 49.0 | 89%  | 5e-05 | 65% | <a href="#">gil553922 AAA91745.1</a>        |
| <a href="#">alpha-1 acid glycoprotein [Capra hircus]</a>                         | 49.0 | 49.0 | 100% | 6e-05 | 59% | <a href="#">gil123953929 CAL48252.1</a>     |
| <a href="#">PREDICTED: alpha-1-acid glycoprotein 1 [Jaculus jaculus]</a>         | 49.0 | 49.0 | 93%  | 6e-05 | 63% | <a href="#">gil507557995 XP_004662736.1</a> |
| <a href="#">alpha 1 acid glycoprotein precursor [Capra hircus]</a>               | 49.0 | 49.0 | 100% | 6e-05 | 59% | <a href="#">gil550822232 NP_001272559.1</a> |

## Alignments

[Download](#) [GenPept](#) [Graphics](#)

[Next](#) [Previous](#) [Descriptions](#)

protein, alpha1 acid glyco

Sequence ID: [gil229386|prf|720005A](#) Length: 182 Number of Matches: 1

**Related Information**

Range 1: 64 to 92 [GenPept](#) [Graphics](#)

[Next Match](#) [Previous Match](#)

| Score         | Expect | Identities  | Positives   | Gaps     |
|---------------|--------|-------------|-------------|----------|
| 101 bits(232) | 7e-23  | 29/29(100%) | 29/29(100%) | 0/29(0%) |

Query 1 REYQTRQDQCIYNTTYLVQRENGTISRY 29  
 REYQTRQDQCIYNTTYLVQRENGTISRY  
 Sbjct 64 REYQTRQDQCIYNTTYLVQRENGTISRY 92

[Download](#) [GenPept](#) [Graphics](#)

[Next](#) [Previous](#) [Descriptions](#)

Chain A, Crystal Structure Of Human Alpha1-Acid Glycoprotein

Sequence ID: [gil285803540|pdb|3KQ0|A](#) Length: 192 Number of Matches: 1

**Related Information**

Range 1: 63 to 91 [GenPept](#) [Graphics](#)

[Next Match](#) [Previous Match](#)

| Score         | Expect | Identities  | Positives   | Gaps     |
|---------------|--------|-------------|-------------|----------|
| 101 bits(232) | 8e-23  | 29/29(100%) | 29/29(100%) | 0/29(0%) |

Query 1 REYQTRQDQCIYNTTYLVQRENGTISRY 29

[Structure](#) - 3D structure displays

Sbjct 63 REYQTRQDQCIYNTTYLNVQRENGTISRY 91

[Download](#) [GenPept](#) [Graphics](#) [Next](#) [Previous](#) [Descriptions](#)

Chain A, Crystal Structure Of Human Alpha 1 Acid Glycoprotein

Sequence ID: [gi|215794600|pdb|3BX6|A](#) Length: 192 Number of Matches: 1

[Related Information](#)

Range 1: 63 to 91 [GenPept](#) [Graphics](#) [Next Match](#) [Previous Match](#)

| Score         | Expect | Identities  | Positives   | Gaps     |
|---------------|--------|-------------|-------------|----------|
| 101 bits(232) | 8e-23  | 29/29(100%) | 29/29(100%) | 0/29(0%) |

Query 1 REYQTRQDQCIYNTTYLNVQRENGTISRY 29  
 REYQTRQDQCIYNTTYLNVQRENGTISRY  
 Sbjct 63 REYQTRQDQCIYNTTYLNVQRENGTISRY 91

[Download](#) [GenPept](#) [Graphics](#) [Next](#) [Previous](#) [Descriptions](#)

ORM1, partial [synthetic construct]

Sequence ID: [gi|649120278|gb|AI54852.1](#) Length: 201 Number of Matches: 1

[Related Information](#)

Range 1: 81 to 109 [GenPept](#) [Graphics](#) [Next Match](#) [Previous Match](#)

| Score         | Expect | Identities  | Positives   | Gaps     |
|---------------|--------|-------------|-------------|----------|
| 101 bits(232) | 8e-23  | 29/29(100%) | 29/29(100%) | 0/29(0%) |

Query 1 REYQTRQDQCIYNTTYLNVQRENGTISRY 29  
 REYQTRQDQCIYNTTYLNVQRENGTISRY  
 Sbjct 81 REYQTRQDQCIYNTTYLNVQRENGTISRY 109

[Download](#) [GenPept](#) [Graphics](#) [Next](#) [Previous](#) [Descriptions](#)

Orosomucoid 1 [Homo sapiens]

Sequence ID: [gi|219519923|gb|AA143315.1](#) Length: 201 Number of Matches: 1

[Related Information](#)

Range 1: 81 to 109 [GenPept](#) [Graphics](#) [Next Match](#) [Previous Match](#)

| Score         | Expect | Identities  | Positives   | Gaps     |
|---------------|--------|-------------|-------------|----------|
| 101 bits(232) | 8e-23  | 29/29(100%) | 29/29(100%) | 0/29(0%) |

Query 1 REYQTRQDQCIYNTTYLNVQRENGTISRY 29  
 REYQTRQDQCIYNTTYLNVQRENGTISRY  
 Sbjct 81 REYQTRQDQCIYNTTYLNVQRENGTISRY 109

[Gene](#) - associated gene details

BLAST is a registered trademark of the National Library of Medicine.



NCBI/ BLAST/ blastp suite/ Formatting Results - BVJXPWWN01R

Your search parameters were adjusted to search for a short input sequence.

Edit and Resubmit Save Search Strategies Formatting options Download YouTube How to read this page Blast report description

ORM1\_RQDQCIYDTTYLNVQRE\_Mod

RID BVJXPWWN01R (Expires on 01-21 10:29 am)

Query ID Icl|240488
Description None
Molecule type amino acid
Query Length 17

Database Name nr
Description All non-redundant GenBank CDS translations+PDB+SwissProt+PIR+PRF excluding environmental samples from WGS projects
Program BLASTP 2.2.30+ Citation

Other reports: Search Summary Taxonomy reports Distance tree of results Related Structures Multiple alignment

Graphic Summary

Show Conserved Domains

No putative conserved domains have been detected

Distribution of 100 Blast Hits on the Query Sequence

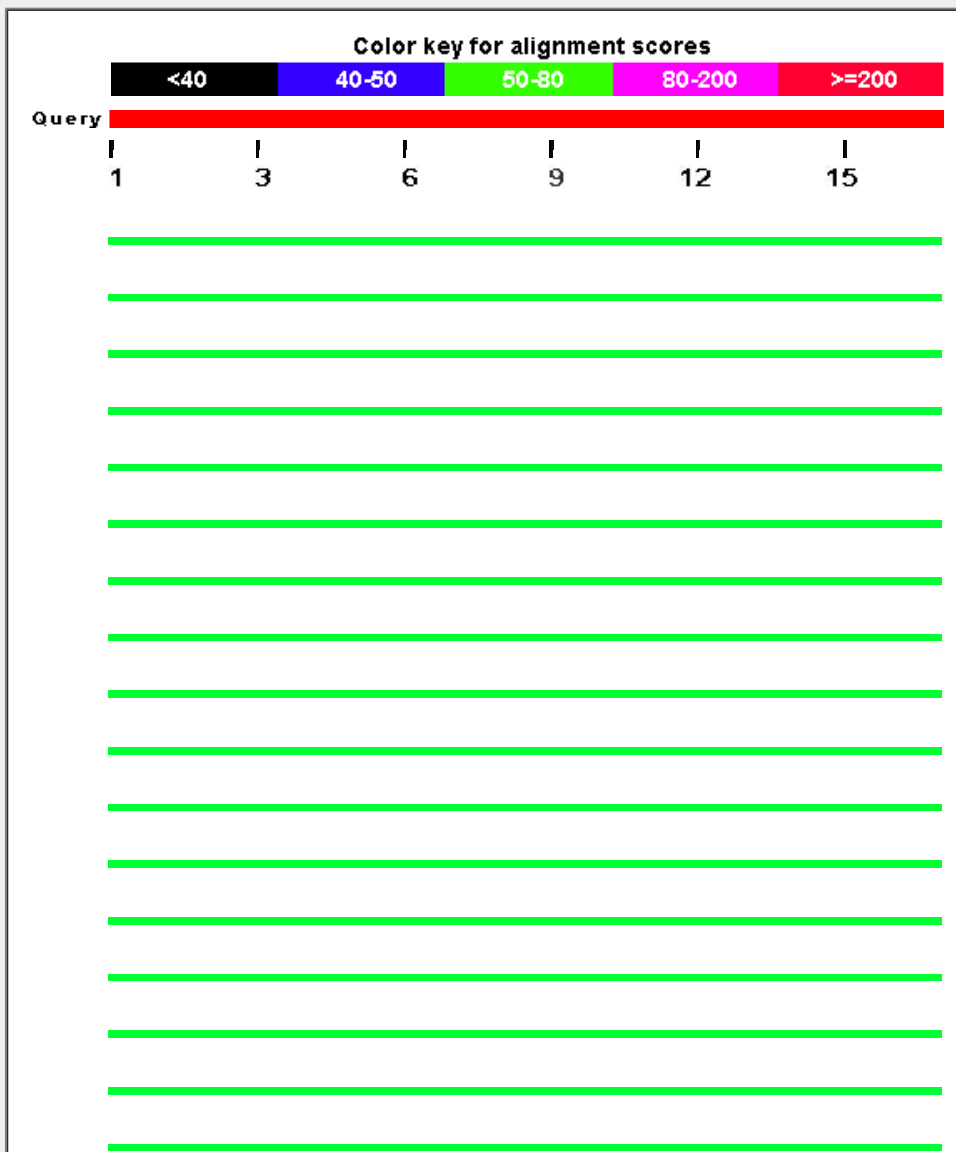

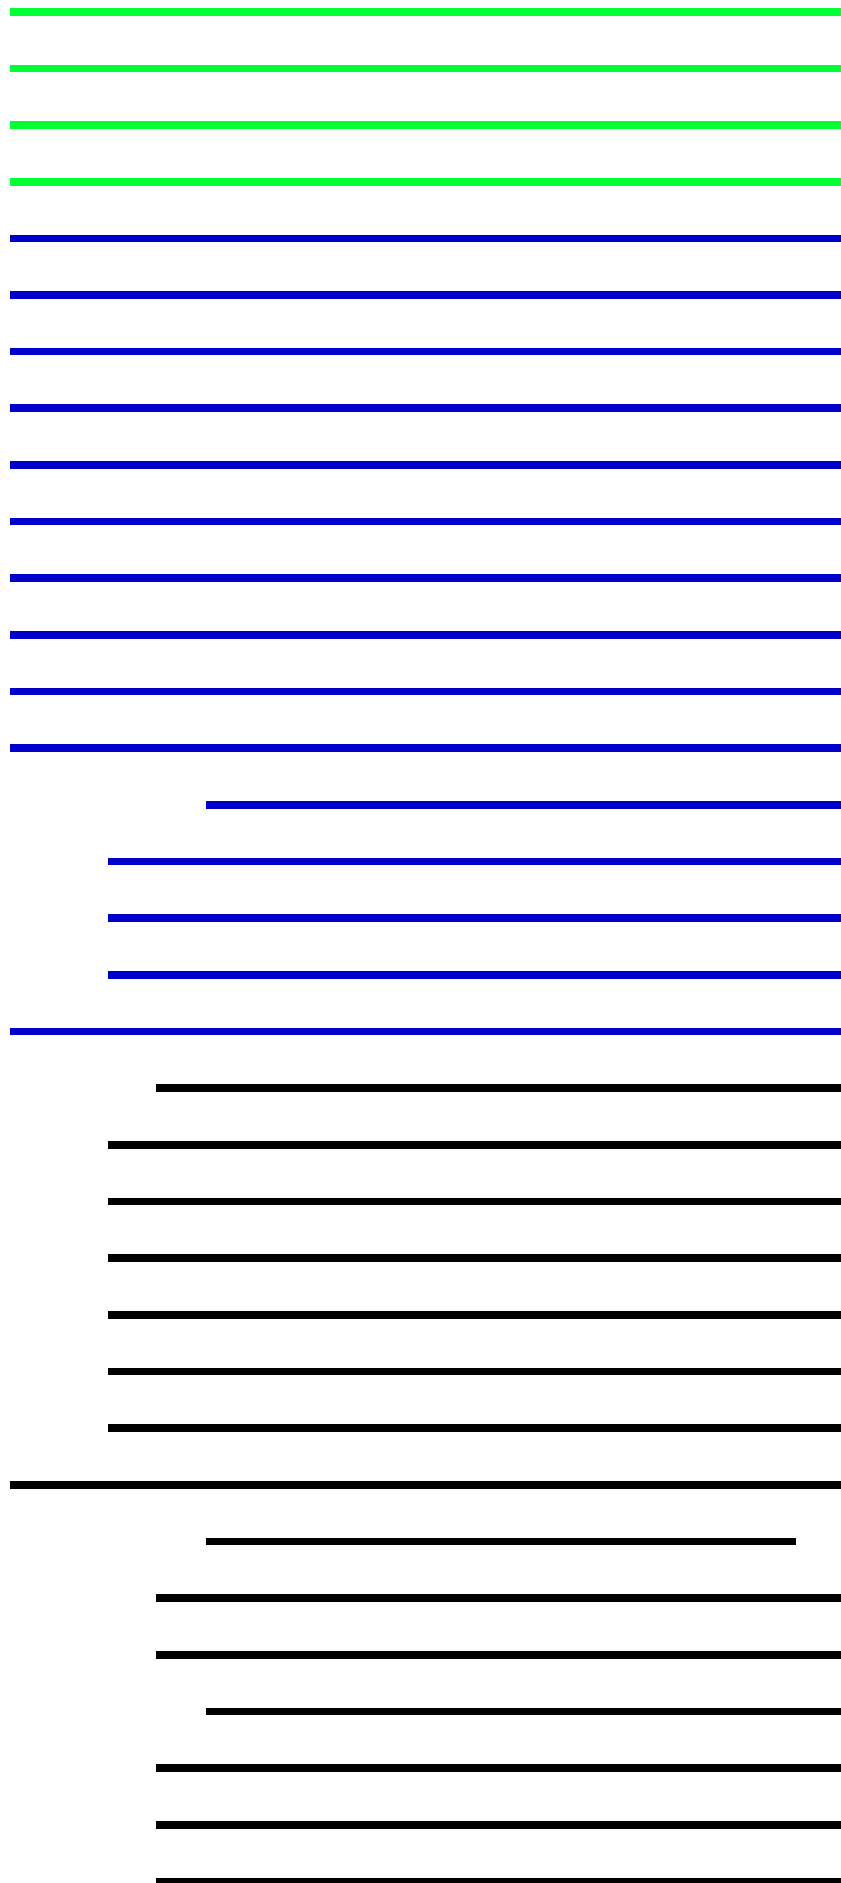



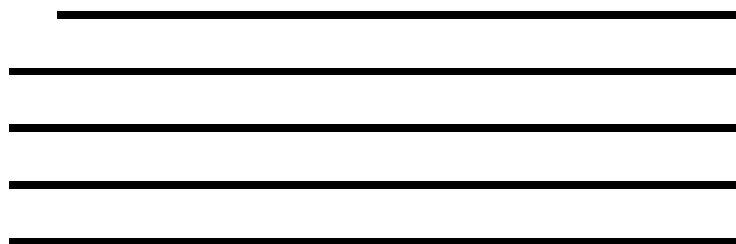

## Descriptions

### Sequences producing significant alignments:

Select: [All](#) [None](#) Selected:0

[Alignments](#)
[Download](#)
[GenPept](#)
[Graphics](#)
[Distance tree of results](#)
[Multiple alignment](#)


| Description                                                                                   | Max score | Total score | Query cover | E value | Ident | Accession                      |
|-----------------------------------------------------------------------------------------------|-----------|-------------|-------------|---------|-------|--------------------------------|
| <a href="#">protein.alpha1 acid glyco [Homo sapiens]</a>                                      | 59.2      | 59.2        | 100%        | 7e-09   | 94%   | <a href="#">720005A</a>        |
| <a href="#">Chain A, Crystal Structure Of Human Alpha1-Acid Glycoprotein [Homo sapien]</a>    | 59.2      | 59.2        | 100%        | 7e-09   | 94%   | <a href="#">3KQ0_A</a>         |
| <a href="#">Chain A, Crystal Structure Of Human Alpha 1 Acid Glycoprotein [Homo sapien]</a>   | 59.2      | 59.2        | 100%        | 7e-09   | 94%   | <a href="#">3BX6_A</a>         |
| <a href="#">ORM1 [synthetic construct]</a>                                                    | 59.2      | 59.2        | 100%        | 8e-09   | 94%   | <a href="#">AIC54852.1</a>     |
| <a href="#">Orosomuroid 1 [Homo sapiens]</a>                                                  | 59.2      | 59.2        | 100%        | 8e-09   | 94%   | <a href="#">AAI43315.1</a>     |
| <a href="#">alpha-1-acid glycoprotein 1 precursor [Homo sapiens]</a>                          | 59.2      | 59.2        | 100%        | 8e-09   | 94%   | <a href="#">CAA29229.1</a>     |
| <a href="#">RecName: Full=Alpha-1-acid glycoprotein 1; Short=AGP 1; AltName: Full=Orc</a>     | 59.2      | 59.2        | 100%        | 8e-09   | 94%   | <a href="#">P02763.1</a>       |
| <a href="#">alpha-1-acid glycoprotein 1 precursor [Homo sapiens]</a>                          | 59.2      | 59.2        | 100%        | 8e-09   | 94%   | <a href="#">NP_000598.2</a>    |
| <a href="#">orosomuroid 1 [synthetic construct]</a>                                           | 59.2      | 59.2        | 100%        | 8e-09   | 94%   | <a href="#">AAV38575.1</a>     |
| <a href="#">orosomuroid 1 [synthetic construct]</a>                                           | 59.2      | 59.2        | 100%        | 8e-09   | 94%   | <a href="#">AAV38574.1</a>     |
| <a href="#">PREDICTED: alpha-1-acid glycoprotein 1-like [Gorilla gorilla gorilla]</a>         | 54.9      | 54.9        | 100%        | 2e-07   | 88%   | <a href="#">XP_004048543.1</a> |
| <a href="#">PREDICTED: LOW QUALITY PROTEIN: alpha-1-acid glycoprotein 1 [Pan troglodytes]</a> | 54.9      | 54.9        | 100%        | 2e-07   | 88%   | <a href="#">XP_009455427.1</a> |
| <a href="#">PREDICTED: alpha-1-acid glycoprotein 1 isoform 1 [Nomascus leucogenys]</a>        | 54.9      | 54.9        | 100%        | 2e-07   | 88%   | <a href="#">XP_003264088.1</a> |
| <a href="#">PREDICTED: alpha-1-acid glycoprotein 1 [Pongo abelii]</a>                         | 54.9      | 54.9        | 100%        | 2e-07   | 88%   | <a href="#">XP_002820180.1</a> |
| <a href="#">PREDICTED: alpha-1-acid glycoprotein 1 isoform X3 [Macaca fascicularis]</a>       | 53.7      | 53.7        | 100%        | 6e-07   | 82%   | <a href="#">XP_005581033.1</a> |
| <a href="#">PREDICTED: alpha-1-acid glycoprotein 1-like isoform 2 [Macaca mulatta]</a>        | 53.7      | 53.7        | 100%        | 6e-07   | 82%   | <a href="#">XP_001100289.1</a> |
| <a href="#">Alpha-1-acid glycoprotein 1 [Macaca mulatta]</a>                                  | 53.7      | 53.7        | 100%        | 6e-07   | 82%   | <a href="#">EHH23840.1</a>     |
| <a href="#">PREDICTED: alpha-1-acid glycoprotein 1 [Chlorocebus sabaeus]</a>                  | 53.7      | 53.7        | 100%        | 6e-07   | 82%   | <a href="#">XP_007966502.1</a> |
| <a href="#">PREDICTED: alpha-1-acid glycoprotein 1 isoform X2 [Macaca fascicularis]</a>       | 53.7      | 53.7        | 100%        | 6e-07   | 82%   | <a href="#">XP_005581032.1</a> |
| <a href="#">PREDICTED: alpha-1-acid glycoprotein 1 isoform X1 [Macaca fascicularis]</a>       | 53.7      | 53.7        | 100%        | 6e-07   | 82%   | <a href="#">XP_005581031.1</a> |
| <a href="#">PREDICTED: alpha-1-acid glycoprotein 1 [Rhinopithecus roxellana]</a>              | 50.7      | 50.7        | 100%        | 6e-06   | 76%   | <a href="#">XP_010368793.1</a> |
| <a href="#">PREDICTED: alpha-1-acid glycoprotein 1 [Papio anubis]</a>                         | 49.8      | 49.8        | 100%        | 1e-05   | 76%   | <a href="#">XP_009186482.1</a> |
| <a href="#">Chain A, Crystal Structure Of The A Variant Of Human Alpha1-Acid Glycoprot</a>    | 46.4      | 46.4        | 100%        | 2e-04   | 71%   | <a href="#">3APU_A</a>         |
| <a href="#">ORM2 [synthetic construct]</a>                                                    | 46.4      | 46.4        | 100%        | 2e-04   | 71%   | <a href="#">AIC54853.1</a>     |
| <a href="#">alpha-1-acid glycoprotein 2 precursor [Homo sapiens]</a>                          | 46.4      | 46.4        | 100%        | 2e-04   | 71%   | <a href="#">CAA29873.2</a>     |
| <a href="#">alpha-1-acid glycoprotein 2 precursor [Homo sapiens]</a>                          | 46.4      | 46.4        | 100%        | 2e-04   | 71%   | <a href="#">NP_000599.1</a>    |
| <a href="#">PREDICTED: alpha-1-acid glycoprotein 1-like [Gorilla gorilla gorilla]</a>         | 46.4      | 46.4        | 100%        | 2e-04   | 71%   | <a href="#">XP_004048546.1</a> |
| <a href="#">ORM2 [Homo sapiens]</a>                                                           | 46.4      | 46.4        | 100%        | 2e-04   | 71%   | <a href="#">CAG33211.1</a>     |
| <a href="#">PREDICTED: alpha-1-acid glycoprotein 2-like [Pan troglodytes]</a>                 | 46.4      | 46.4        | 100%        | 2e-04   | 71%   | <a href="#">XP_520209.3</a>    |

|                                                                                              |      |      |      |       |     |                                |
|----------------------------------------------------------------------------------------------|------|------|------|-------|-----|--------------------------------|
| <a href="#">PREDICTED: LOW QUALITY PROTEIN: alpha-1-acid glycoprotein 2 [Pan pa</a>          | 46.4 | 46.4 | 100% | 2e-04 | 71% | <a href="#">XP_008957108.1</a> |
| <a href="#">unnamed protein product [Homo sapiens]</a>                                       | 43.9 | 43.9 | 100% | 0.001 | 65% | <a href="#">BAG35159.1</a>     |
| <a href="#">PREDICTED: alpha-1-acid glycoprotein 1 [Callithrix jacchus]</a>                  | 42.6 | 42.6 | 76%  | 0.003 | 85% | <a href="#">XP_002760492.1</a> |
| <a href="#">PREDICTED: alpha-1-acid glycoprotein 2-like [Loxodonta africana]</a>             | 41.8 | 41.8 | 88%  | 0.006 | 73% | <a href="#">XP_003407553.1</a> |
| <a href="#">PREDICTED: alpha-1-acid glycoprotein-like [Panthera tigris altaica]</a>          | 41.4 | 41.4 | 88%  | 0.008 | 67% | <a href="#">XP_007094388.1</a> |
| <a href="#">PREDICTED: alpha-1-acid glycoprotein [Felis catus]</a>                           | 41.4 | 41.4 | 88%  | 0.008 | 67% | <a href="#">XP_003995824.1</a> |
| <a href="#">Alpha-1-acid glycoprotein [Myotis davidii]</a>                                   | 40.5 | 40.5 | 100% | 0.013 | 59% | <a href="#">ELK26646.1</a>     |
| <a href="#">PREDICTED: alpha-1-acid glycoprotein 1 [Elephantulus edwardii]</a>               | 38.8 | 38.8 | 82%  | 0.054 | 71% | <a href="#">XP_006890779.1</a> |
| <a href="#">PREDICTED: alpha-1-acid glycoprotein 2-like [Galeopterus variegatus]</a>         | 38.0 | 38.0 | 88%  | 0.10  | 67% | <a href="#">XP_008588097.1</a> |
| <a href="#">PREDICTED: alpha-1-acid glycoprotein 2-like [Galeopterus variegatus]</a>         | 38.0 | 38.0 | 88%  | 0.10  | 67% | <a href="#">XP_008588096.1</a> |
| <a href="#">PREDICTED: alpha-1-acid glycoprotein 1 [Galeopterus variegatus]</a>              | 38.0 | 38.0 | 88%  | 0.10  | 67% | <a href="#">XP_008588094.1</a> |
| <a href="#">PREDICTED: alpha-1-acid glycoprotein 1 isoform X2 [Canis lupus familiaris]</a>   | 38.0 | 38.0 | 88%  | 0.10  | 60% | <a href="#">XP_005627010.1</a> |
| <a href="#">PREDICTED: alpha-1-acid glycoprotein 1 isoform X1 [Canis lupus familiaris]</a>   | 38.0 | 38.0 | 88%  | 0.10  | 60% | <a href="#">XP_003431634.1</a> |
| <a href="#">PREDICTED: alpha-1-acid glycoprotein 1 [Saimiri boliviensis boliviensis]</a>     | 37.5 | 37.5 | 88%  | 0.14  | 60% | <a href="#">XP_003925252.1</a> |
| <a href="#">PREDICTED: LOW QUALITY PROTEIN: orosomucoid 1 [Myotis lucifugus]</a>             | 37.5 | 37.5 | 100% | 0.14  | 55% | <a href="#">XP_006109685.1</a> |
| <a href="#">PREDICTED: alpha-1-acid glycoprotein 1 [Erinaceus europaeus]</a>                 | 36.7 | 36.7 | 70%  | 0.26  | 75% | <a href="#">XP_007526815.1</a> |
| <a href="#">PREDICTED: alpha-1-acid glycoprotein 2 [Chrysochloris asiatica]</a>              | 36.3 | 36.3 | 82%  | 0.36  | 64% | <a href="#">XP_006865789.1</a> |
| <a href="#">PREDICTED: alpha-1-acid glycoprotein 2-like [Loxodonta africana]</a>             | 36.3 | 36.3 | 82%  | 0.36  | 64% | <a href="#">XP_003407554.1</a> |
| <a href="#">PREDICTED: alpha-1-acid glycoprotein 1-like [Mustela putorius furo]</a>          | 35.8 | 35.8 | 76%  | 0.47  | 69% | <a href="#">XP_004828368.1</a> |
| <a href="#">PREDICTED: alpha-1-acid glycoprotein 1 [Orycteropus afer afer]</a>               | 35.8 | 35.8 | 82%  | 0.50  | 71% | <a href="#">XP_007934876.1</a> |
| <a href="#">PREDICTED: alpha-1-acid glycoprotein-like [Trichechus manatus latirostris]</a>   | 35.8 | 35.8 | 82%  | 0.50  | 64% | <a href="#">XP_004391229.1</a> |
| <a href="#">PREDICTED: alpha-1-acid glycoprotein 2-like [Trichechus manatus latirostris]</a> | 35.8 | 35.8 | 82%  | 0.50  | 64% | <a href="#">XP_004391192.1</a> |
| <a href="#">PREDICTED: alpha-1-acid glycoprotein 2 [Trichechus manatus latirostris]</a>      | 35.8 | 35.8 | 82%  | 0.50  | 64% | <a href="#">XP_004372401.1</a> |
| <a href="#">hypothetical protein PANDA_003840 [Ailuropoda melanoleuca]</a>                   | 35.4 | 35.4 | 88%  | 0.59  | 60% | <a href="#">EFB15505.1</a>     |
| <a href="#">PREDICTED: alpha-1-acid glycoprotein-like [Ursus maritimus]</a>                  | 35.4 | 35.4 | 88%  | 0.68  | 60% | <a href="#">XP_008707882.1</a> |
| <a href="#">PREDICTED: alpha-1-acid glycoprotein-like [Ursus maritimus]</a>                  | 35.4 | 35.4 | 88%  | 0.68  | 60% | <a href="#">XP_008707881.1</a> |
| <a href="#">PREDICTED: alpha-1-acid glycoprotein-like [Ailuropoda melanoleuca]</a>           | 35.4 | 35.4 | 88%  | 0.68  | 60% | <a href="#">XP_002915823.1</a> |
| <a href="#">PREDICTED: alpha-1-acid glycoprotein 2 [Otolemur garnettii]</a>                  | 35.4 | 35.4 | 88%  | 0.69  | 67% | <a href="#">XP_003785445.1</a> |
| <a href="#">PREDICTED: alpha-1-acid glycoprotein 1-like [Myotis brandtii]</a>                | 34.6 | 34.6 | 100% | 1.1   | 55% | <a href="#">XP_005880983.1</a> |
| <a href="#">PREDICTED: alpha-1-acid glycoprotein 2-like [Equus caballus]</a>                 | 34.6 | 34.6 | 88%  | 1.3   | 67% | <a href="#">XP_001488199.1</a> |
| <a href="#">PREDICTED: alpha-1-acid glycoprotein 2-like [Loxodonta africana]</a>             | 33.7 | 33.7 | 82%  | 2.4   | 71% | <a href="#">XP_003407551.1</a> |
| <a href="#">alpha-1-acid glycoprotein precursor [Rattus norvegicus]</a>                      | 32.9 | 32.9 | 88%  | 4.5   | 67% | <a href="#">NP_445740.1</a>    |
| <a href="#">PREDICTED: alpha-1-acid glycoprotein 2-like isoform X2 [Tupaia chinensis]</a>    | 32.5 | 32.5 | 88%  | 6.1   | 60% | <a href="#">XP_006142836.1</a> |
| <a href="#">PREDICTED: alpha-1-acid glycoprotein 1-like [Echinops telfairi]</a>              | 32.0 | 32.0 | 82%  | 8.1   | 71% | <a href="#">XP_004718018.1</a> |
| <a href="#">PREDICTED: alpha-1-acid glycoprotein 2-like [Myotis lucifugus]</a>               | 32.0 | 32.0 | 88%  | 8.3   | 60% | <a href="#">XP_006108237.1</a> |
| <a href="#">PREDICTED: alpha-1-acid glycoprotein 2-like [Myotis lucifugus]</a>               | 32.0 | 32.0 | 88%  | 8.3   | 67% | <a href="#">XP_006099427.1</a> |
| <a href="#">PREDICTED: alpha-1-acid glycoprotein 1 [Echinops telfairi]</a>                   | 32.0 | 32.0 | 82%  | 8.3   | 71% | <a href="#">XP_004712638.1</a> |
| <a href="#">PREDICTED: alpha-1-acid glycoprotein-like [Myotis lucifugus]</a>                 | 32.0 | 32.0 | 88%  | 8.5   | 60% | <a href="#">XP_006099428.1</a> |
| <a href="#">alpha-1-acid glycoprotein [Mus musculus]</a>                                     | 31.6 | 31.6 | 88%  | 11    | 53% | <a href="#">AAA91744.1</a>     |
| <a href="#">alpha-1-acid glycoprotein (AGP) precursor [Mus caroli]</a>                       | 31.6 | 31.6 | 88%  | 11    | 53% | <a href="#">AAA37197.1</a>     |
| <a href="#">RecName: Full=Alpha-1-acid glycoprotein 1; Short=AGP 1; AltName: Full=Orc</a>    | 31.6 | 31.6 | 88%  | 11    | 53% | <a href="#">P21350.1</a>       |
| <a href="#">alpha-1-acid glycoprotein 2 precursor [Mus musculus]</a>                         | 31.6 | 31.6 | 88%  | 11    | 53% | <a href="#">NP_035146.1</a>    |
| <a href="#">PREDICTED: LOW QUALITY PROTEIN: alpha-1-acid glycoprotein 1-like [My</a>         | 31.6 | 31.6 | 82%  | 11    | 71% | <a href="#">XP_005880984.1</a> |
| <a href="#">PREDICTED: alpha-1-acid glycoprotein 2-like [Loxodonta africana]</a>             | 31.6 | 31.6 | 82%  | 12    | 57% | <a href="#">XP_010586317.1</a> |
| <a href="#">hypothetical protein RMCBS344292_16064 [Rhizopus microsporus]</a>                | 31.6 | 31.6 | 88%  | 12    | 62% | <a href="#">CEJ02047.1</a>     |

|                                                                                             |      |      |      |    |     |                                |
|---------------------------------------------------------------------------------------------|------|------|------|----|-----|--------------------------------|
| <a href="#">hypothetical protein RO3G_15781 [Rhizopus delemar RA 99-880]</a>                | 31.6 | 31.6 | 88%  | 12 | 62% | <a href="#">EIF91070.1</a>     |
| <a href="#">hypothetical protein RMATCC62417_12957 [Rhizopus microsporus]</a>               | 31.6 | 31.6 | 88%  | 12 | 62% | <a href="#">CEG78329.1</a>     |
| <a href="#">hypothetical protein RMATCC62417_02511 [Rhizopus microsporus]</a>               | 31.6 | 31.6 | 88%  | 12 | 62% | <a href="#">CEG65807.1</a>     |
| <a href="#">hypothetical protein, conserved in Plasmodium species [Plasmodium knowlesi]</a> | 31.6 | 31.6 | 70%  | 12 | 75% | <a href="#">XP_002260651.1</a> |
| <a href="#">MerR family transcriptional regulator [Vibrio genomsp. F10]</a>                 | 31.2 | 31.2 | 82%  | 15 | 67% | <a href="#">WP_026026605.1</a> |
| <a href="#">hypothetical protein [Vibrio genomsp. F10]</a>                                  | 31.2 | 31.2 | 82%  | 15 | 67% | <a href="#">WP_017035912.1</a> |
| <a href="#">PREDICTED: alpha-1-acid glycoprotein 1 [Nannospalax galili]</a>                 | 31.2 | 31.2 | 94%  | 15 | 56% | <a href="#">XP_008831764.1</a> |
| <a href="#">PREDICTED: alpha-1-acid glycoprotein 2 [Pteropus alecto]</a>                    | 31.2 | 31.2 | 94%  | 15 | 50% | <a href="#">XP_006917195.1</a> |
| <a href="#">Alpha-1-acid glycoprotein [Pteropus alecto]</a>                                 | 31.2 | 31.2 | 94%  | 16 | 50% | <a href="#">ELK08232.1</a>     |
| <a href="#">PREDICTED: alpha-1-acid glycoprotein 2-like [Tarsius syrichta]</a>              | 30.8 | 30.8 | 88%  | 21 | 60% | <a href="#">XP_008055404.1</a> |
| <a href="#">PREDICTED: alpha-1-acid glycoprotein 2-like [Myotis lucifugus]</a>              | 30.8 | 30.8 | 88%  | 21 | 60% | <a href="#">XP_006108236.1</a> |
| <a href="#">PREDICTED: alpha-1-acid glycoprotein 2-like [Myotis lucifugus]</a>              | 30.8 | 30.8 | 88%  | 21 | 60% | <a href="#">XP_006099413.1</a> |
| <a href="#">alpha-1-acid glycoprotein [Mus musculus]</a>                                    | 30.3 | 30.3 | 88%  | 27 | 60% | <a href="#">AAA91745.1</a>     |
| <a href="#">mCG7142_isoform CRA_b [Mus musculus]</a>                                        | 30.3 | 30.3 | 88%  | 29 | 60% | <a href="#">EDL31111.1</a>     |
| <a href="#">alpha-1-acid glycoprotein precursor [Mus caroli]</a>                            | 30.3 | 30.3 | 88%  | 29 | 60% | <a href="#">AAB67844.1</a>     |
| <a href="#">alpha-1-acid glycoprotein 1 precursor [Mus musculus]</a>                        | 30.3 | 30.3 | 88%  | 29 | 60% | <a href="#">NP_032794.1</a>    |
| <a href="#">RecName: Full=Alpha-1-acid glycoprotein 8; Short=AGP 8; AltName: Full=Orc</a>   | 30.3 | 30.3 | 88%  | 29 | 60% | <a href="#">P21352.1</a>       |
| <a href="#">Orosomuroid 1 [Mus musculus]</a>                                                | 30.3 | 30.3 | 88%  | 29 | 60% | <a href="#">AAH12725.1</a>     |
| <a href="#">mCG7142_isoform CRA_e [Mus musculus]</a>                                        | 30.3 | 30.3 | 88%  | 29 | 60% | <a href="#">EDL31114.1</a>     |
| <a href="#">PREDICTED: alpha-1-acid glycoprotein 2-like [Myotis lucifugus]</a>              | 29.9 | 29.9 | 88%  | 40 | 60% | <a href="#">XP_006099415.1</a> |
| <a href="#">ribonuclease HII [Staphylococcus pseudintermedius]</a>                          | 29.9 | 29.9 | 88%  | 40 | 67% | <a href="#">WP_037543184.1</a> |
| <a href="#">ribonuclease HII [Staphylococcus pseudintermedius]</a>                          | 29.9 | 29.9 | 88%  | 40 | 67% | <a href="#">WP_014614093.1</a> |
| <a href="#">ribonuclease HII [Staphylococcus pseudintermedius]</a>                          | 29.9 | 29.9 | 88%  | 40 | 67% | <a href="#">WP_015729038.1</a> |
| <a href="#">hypothetical protein JCM19039_2109 [Geomicrobium sp. JCM 19039]</a>             | 29.9 | 29.9 | 70%  | 40 | 71% | <a href="#">GAK12341.1</a>     |
| <a href="#">hypothetical protein M437DRAFT_89004 [Aureobasidium melanogenum CBS]</a>        | 29.9 | 29.9 | 52%  | 41 | 89% | <a href="#">KEQ58021.1</a>     |
| <a href="#">PREDICTED: alpha-1-acid glycoprotein-like [Ceratotherium simum simum]</a>       | 29.5 | 29.5 | 100% | 54 | 41% | <a href="#">XP_004423793.1</a> |

## Alignments

Download GenPept Graphics

Next Previous Descriptions

protein,alpha1 acid glyco

Sequence ID: [prf|J20005A](#) Length: 182 Number of Matches: 1

Range 1: 69 to 85 GenPept Graphics

Next Match Previous Match

### Related Information

| Score          | Expect | Identities | Positives   | Gaps     |
|----------------|--------|------------|-------------|----------|
| 59.2 bits(132) | 7e-09  | 16/17(94%) | 17/17(100%) | 0/17(0%) |

Query 1 RQDQCIYDTTYLNVQRE 17  
 RQDQCIY+TTYLNVQRE  
 Sbjct 69 RQDQCIYNTTYLNVQRE 85

Download GenPept Graphics

Next Previous Descriptions

Chain A, Crystal Structure Of Human Alpha1-Acid Glycoprotein

Sequence ID: [pdb|3KQ0|A](#) Length: 192 Number of Matches: 1

Range 1: 68 to 84 GenPept Graphics

Next Match Previous Match

### Related Information

| Score          | Expect | Identities | Positives   | Gaps     |
|----------------|--------|------------|-------------|----------|
| 59.2 bits(132) | 7e-09  | 16/17(94%) | 17/17(100%) | 0/17(0%) |

[Structure](#) - 3D structure displays

Query 1 RQDQCIYDTTYLNQRE 17  
 RQDQCIY+TTYLNQRE  
 Sbjct 68 RQDQCIYNTTYLNQRE 84

Download [GenPept](#) [Graphics](#)

[▼ Next](#) [▲ Previous](#) [▲ Descriptions](#)

**Chain A, Crystal Structure Of Human Alpha 1 Acid Glycoprotein**

Sequence ID: [pdb|3BX6|A](#) Length: 192 Number of Matches: 1

Range 1: 68 to 84 [GenPept](#) [Graphics](#)

[▼ Next Match](#) [▲ Previous Match](#)

**Related Information**

| Score          | Expect | Identities | Positives   | Gaps     |
|----------------|--------|------------|-------------|----------|
| 59.2 bits(132) | 7e-09  | 16/17(94%) | 17/17(100%) | 0/17(0%) |

Query 1 RQDQCIYDTTYLNQRE 17  
 RQDQCIY+TTYLNQRE  
 Sbjct 68 RQDQCIYNTTYLNQRE 84

Download [GenPept](#) [Graphics](#)

[▼ Next](#) [▲ Previous](#) [▲ Descriptions](#)

**ORM1, partial [synthetic construct]**

Sequence ID: [gb|AIC54852.1|](#) Length: 201 Number of Matches: 1

Range 1: 86 to 102 [GenPept](#) [Graphics](#)

[▼ Next Match](#) [▲ Previous Match](#)

**Related Information**

| Score          | Expect | Identities | Positives   | Gaps     |
|----------------|--------|------------|-------------|----------|
| 59.2 bits(132) | 8e-09  | 16/17(94%) | 17/17(100%) | 0/17(0%) |

Query 1 RQDQCIYDTTYLNQRE 17  
 RQDQCIY+TTYLNQRE  
 Sbjct 86 RQDQCIYNTTYLNQRE 102

Download [GenPept](#) [Graphics](#)

[▼ Next](#) [▲ Previous](#) [▲ Descriptions](#)

**Orosomucoid 1 [Homo sapiens]**

Sequence ID: [gb|AAI43315.1|](#) Length: 201 Number of Matches: 1

Range 1: 86 to 102 [GenPept](#) [Graphics](#)

[▼ Next Match](#) [▲ Previous Match](#)

**Related Information**

[Gene](#) - associated gene details

| Score          | Expect | Identities | Positives   | Gaps     |
|----------------|--------|------------|-------------|----------|
| 59.2 bits(132) | 8e-09  | 16/17(94%) | 17/17(100%) | 0/17(0%) |

Query 1 RQDQCIYDTTYLNQRE 17  
 RQDQCIY+TTYLNQRE  
 Sbjct 86 RQDQCIYNTTYLNQRE 102

BLAST is a registered trademark of the National Library of Medicine.

▶ NCBI/ BLAST/ blastp suite/ Formatting Results - BVJY9U0K01R

**i** Your search parameters were adjusted to search for a short input sequence.

[Edit and Resubmit](#) [Save Search Strategies](#) ▶ [Formatting options](#) ▶ [Download](#) [YouTube](#) [How to read this page](#) [Blast report description](#)

## ORM1\_RQDQCIYDTTYLNVQREDGTISRY\_Mod

|                      |                                                         |                      |                                                                                                                    |
|----------------------|---------------------------------------------------------|----------------------|--------------------------------------------------------------------------------------------------------------------|
| <b>RID</b>           | <a href="#">BVJY9U0K01R</a> (Expires on 01-21 10:30 am) | <b>Database Name</b> | nr                                                                                                                 |
| <b>Query ID</b>      | lcl 247790                                              | <b>Description</b>   | All non-redundant GenBank CDS translations+PDB+SwissProt+PIR+PRF excluding environmental samples from WGS projects |
| <b>Description</b>   | None                                                    | <b>Program</b>       | BLASTP 2.2.30+ ▶ <a href="#">Citation</a>                                                                          |
| <b>Molecule type</b> | amino acid                                              |                      |                                                                                                                    |
| <b>Query Length</b>  | 24                                                      |                      |                                                                                                                    |

Other reports: ▶ [Search Summary](#) [[Taxonomy reports](#)] [[Distance tree of results](#)] [[Multiple alignment](#)]

### Graphic Summary

[Show Conserved Domains](#)

No putative conserved domains have been detected

Distribution of 100 Blast Hits on the Query Sequence

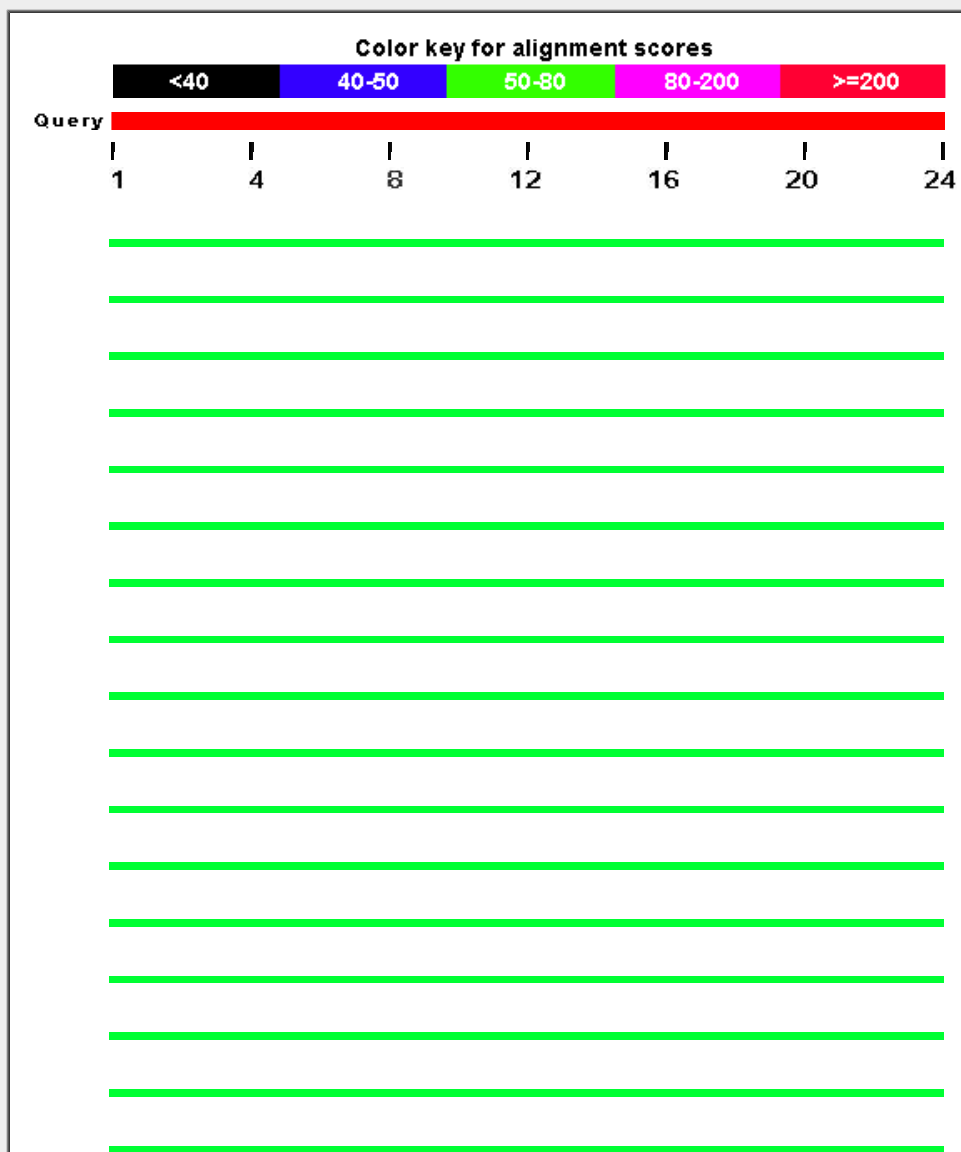

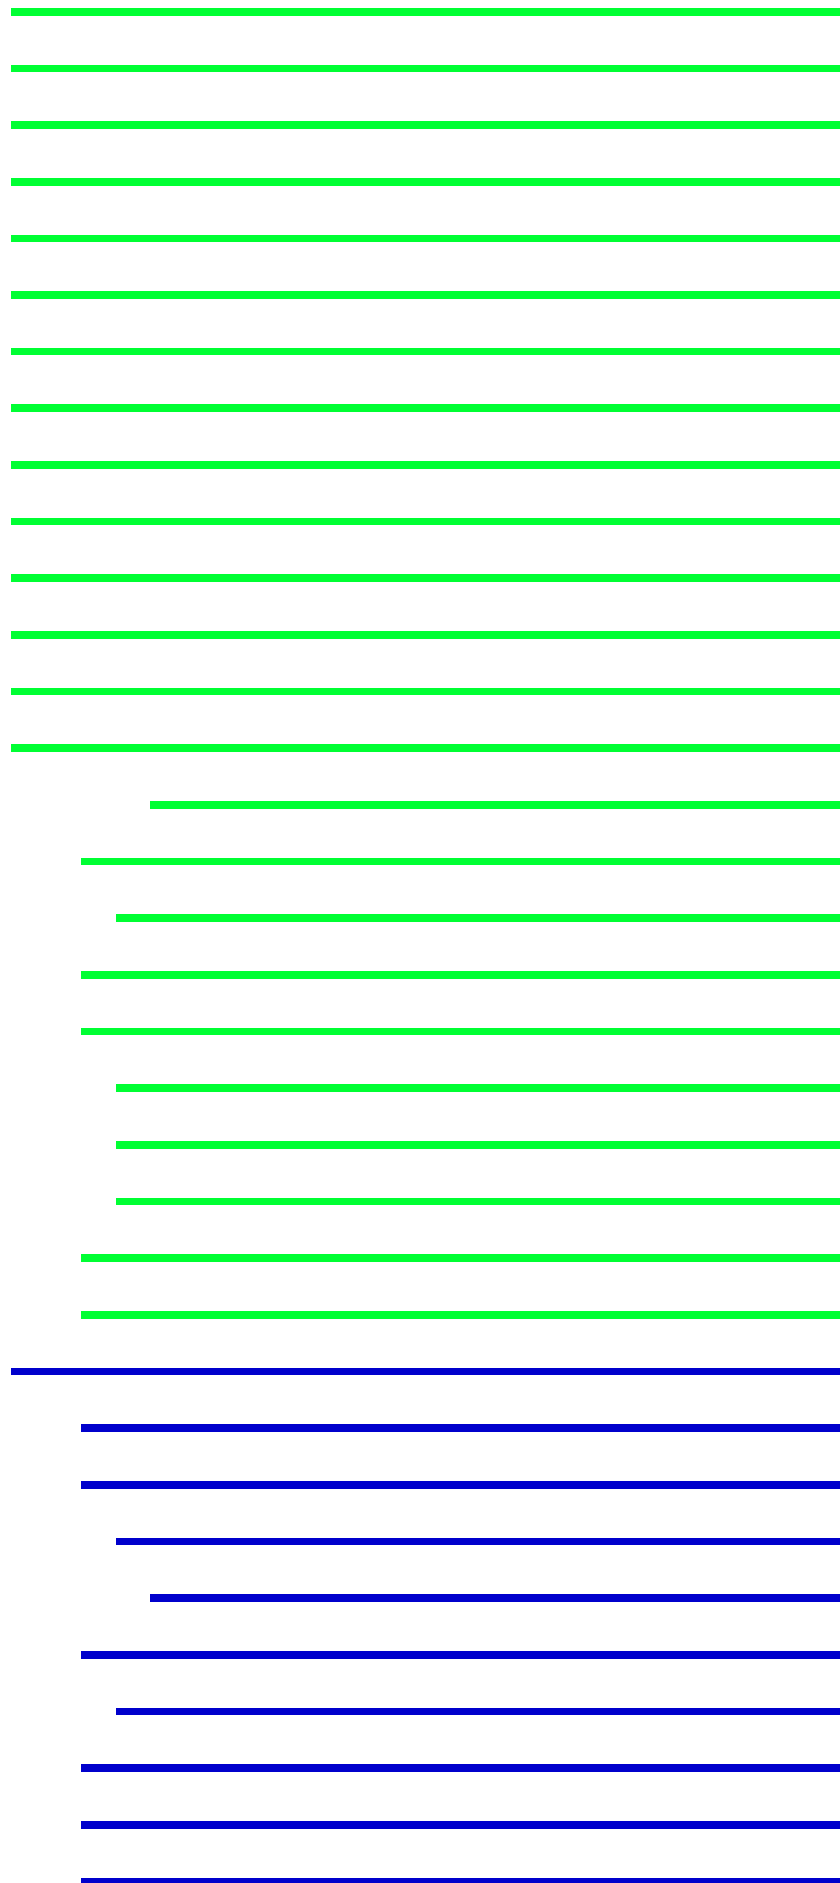

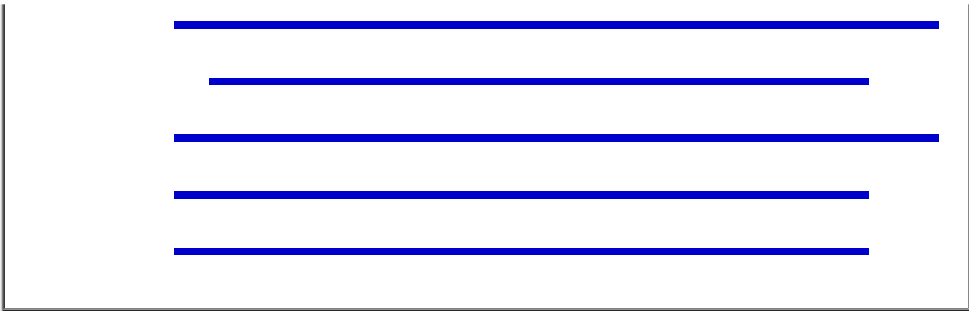

**Descriptions**

**Sequences producing significant alignments:**

Select: [All](#) [None](#) Selected:0

[Alignments](#)
[Download](#)
[GenPept](#)
[Graphics](#)
[Distance tree of results](#)
[Multiple alignment](#)
⚙

| Description                                                                                 | Max score | Total score | Query cover | E value | Ident | Accession                      |
|---------------------------------------------------------------------------------------------|-----------|-------------|-------------|---------|-------|--------------------------------|
| <a href="#">protein.alpha1 acid glyco [Homo sapiens]</a>                                    | 79.1      | 79.1        | 100%        | 3e-15   | 92%   | <a href="#">720005A</a>        |
| <a href="#">Chain A, Crystal Structure Of Human Alpha1-Acid Glycoprotein [Homo sapien]</a>  | 79.1      | 79.1        | 100%        | 3e-15   | 92%   | <a href="#">3KQ0_A</a>         |
| <a href="#">Chain A, Crystal Structure Of Human Alpha 1 Acid Glycoprotein [Homo sapier]</a> | 79.1      | 79.1        | 100%        | 3e-15   | 92%   | <a href="#">3BX6_A</a>         |
| <a href="#">ORM1 [synthetic construct]</a>                                                  | 79.1      | 79.1        | 100%        | 3e-15   | 92%   | <a href="#">AIC54852.1</a>     |
| <a href="#">Orosomuroid 1 [Homo sapiens]</a>                                                | 79.1      | 79.1        | 100%        | 3e-15   | 92%   | <a href="#">AAI43315.1</a>     |
| <a href="#">alpha-1-acid glycoprotein 1 precursor [Homo sapiens]</a>                        | 79.1      | 79.1        | 100%        | 3e-15   | 92%   | <a href="#">CAA29229.1</a>     |
| <a href="#">RecName: Full=Alpha-1-acid glycoprotein 1; Short=AGP 1; AltName: Full=Orc</a>   | 79.1      | 79.1        | 100%        | 3e-15   | 92%   | <a href="#">P02763.1</a>       |
| <a href="#">alpha-1-acid glycoprotein 1 precursor [Homo sapiens]</a>                        | 79.1      | 79.1        | 100%        | 3e-15   | 92%   | <a href="#">NP_000598.2</a>    |
| <a href="#">orosomuroid 1 [synthetic construct]</a>                                         | 79.1      | 79.1        | 100%        | 3e-15   | 92%   | <a href="#">AAV38575.1</a>     |
| <a href="#">orosomuroid 1 [synthetic construct]</a>                                         | 79.1      | 79.1        | 100%        | 3e-15   | 92%   | <a href="#">AAV38574.1</a>     |
| <a href="#">PREDICTED: alpha-1-acid glycoprotein 1-like [Gorilla gorilla gorilla]</a>       | 74.9      | 74.9        | 100%        | 8e-14   | 88%   | <a href="#">XP_004048543.1</a> |
| <a href="#">PREDICTED: alpha-1-acid glycoprotein 1 [Pongo abelii]</a>                       | 74.9      | 74.9        | 100%        | 8e-14   | 88%   | <a href="#">XP_002820180.1</a> |
| <a href="#">PREDICTED: alpha-1-acid glycoprotein 1 [Chlorocebus sabaeus]</a>                | 73.6      | 73.6        | 100%        | 2e-13   | 83%   | <a href="#">XP_007966502.1</a> |
| <a href="#">PREDICTED: LOW QUALITY PROTEIN: alpha-1-acid glycoprotein 1 [Pan tro]</a>       | 72.3      | 72.3        | 100%        | 6e-13   | 83%   | <a href="#">XP_009455427.1</a> |
| <a href="#">PREDICTED: alpha-1-acid glycoprotein 1 isoform 1 [Nomascus leucogenys]</a>      | 72.3      | 72.3        | 100%        | 6e-13   | 83%   | <a href="#">XP_003264088.1</a> |
| <a href="#">PREDICTED: alpha-1-acid glycoprotein 1 isoform X3 [Macaca fascicularis]</a>     | 70.2      | 70.2        | 100%        | 3e-12   | 79%   | <a href="#">XP_005581033.1</a> |
| <a href="#">PREDICTED: alpha-1-acid glycoprotein 1-like isoform 2 [Macaca mulatta]</a>      | 70.2      | 70.2        | 100%        | 3e-12   | 79%   | <a href="#">XP_001100289.1</a> |
| <a href="#">Alpha-1-acid glycoprotein 1 [Macaca mulatta]</a>                                | 70.2      | 70.2        | 100%        | 3e-12   | 79%   | <a href="#">EHH23840.1</a>     |
| <a href="#">PREDICTED: alpha-1-acid glycoprotein 1 isoform X2 [Macaca fascicularis]</a>     | 70.2      | 70.2        | 100%        | 3e-12   | 79%   | <a href="#">XP_005581032.1</a> |
| <a href="#">PREDICTED: alpha-1-acid glycoprotein 1 isoform X1 [Macaca fascicularis]</a>     | 70.2      | 70.2        | 100%        | 3e-12   | 79%   | <a href="#">XP_005581031.1</a> |
| <a href="#">PREDICTED: alpha-1-acid glycoprotein 1 [Rhinopithecus roxellana]</a>            | 67.2      | 67.2        | 100%        | 3e-11   | 75%   | <a href="#">XP_010368793.1</a> |
| <a href="#">PREDICTED: alpha-1-acid glycoprotein 1 [Papio anubis]</a>                       | 66.4      | 66.4        | 100%        | 7e-11   | 75%   | <a href="#">XP_009186482.1</a> |
| <a href="#">Chain A, Crystal Structure Of The A Variant Of Human Alpha1-Acid Glycoprot</a>  | 63.8      | 63.8        | 100%        | 5e-10   | 71%   | <a href="#">3APU_A</a>         |
| <a href="#">ORM2 [synthetic construct]</a>                                                  | 63.8      | 63.8        | 100%        | 5e-10   | 71%   | <a href="#">AIC54853.1</a>     |
| <a href="#">alpha-1-acid glycoprotein 2 precursor [Homo sapiens]</a>                        | 63.8      | 63.8        | 100%        | 5e-10   | 71%   | <a href="#">CAA29873.2</a>     |
| <a href="#">alpha-1-acid glycoprotein 2 precursor [Homo sapiens]</a>                        | 63.8      | 63.8        | 100%        | 5e-10   | 71%   | <a href="#">NP_000599.1</a>    |
| <a href="#">PREDICTED: alpha-1-acid glycoprotein 1-like [Gorilla gorilla gorilla]</a>       | 63.8      | 63.8        | 100%        | 5e-10   | 71%   | <a href="#">XP_004048546.1</a> |
| <a href="#">ORM2 [Homo sapiens]</a>                                                         | 63.8      | 63.8        | 100%        | 5e-10   | 71%   | <a href="#">CAG33211.1</a>     |
| <a href="#">PREDICTED: alpha-1-acid glycoprotein 2-like [Pan troglodytes]</a>               | 63.8      | 63.8        | 100%        | 5e-10   | 71%   | <a href="#">XP_520209.3</a>    |

|                                                                                              |      |      |      |       |     |                                |
|----------------------------------------------------------------------------------------------|------|------|------|-------|-----|--------------------------------|
| <a href="#">PREDICTED: LOW QUALITY PROTEIN: alpha-1-acid glycoprotein 2 [Pan pa</a>          | 63.8 | 63.8 | 100% | 6e-10 | 71% | <a href="#">XP_008957108.1</a> |
| <a href="#">unnamed protein product [Homo sapiens]</a>                                       | 61.3 | 61.3 | 100% | 4e-09 | 67% | <a href="#">BAG35159.1</a>     |
| <a href="#">PREDICTED: alpha-1-acid glycoprotein 1 [Callithrix jacchus]</a>                  | 55.8 | 55.8 | 83%  | 3e-07 | 75% | <a href="#">XP_002760492.1</a> |
| <a href="#">PREDICTED: alpha-1-acid glycoprotein 2-like [Loxodonta africana]</a>             | 54.5 | 54.5 | 91%  | 7e-07 | 68% | <a href="#">XP_003407553.1</a> |
| <a href="#">PREDICTED: alpha-1-acid glycoprotein 2 [Chrysochloris asiatica]</a>              | 52.4 | 52.4 | 87%  | 3e-06 | 67% | <a href="#">XP_006865789.1</a> |
| <a href="#">PREDICTED: alpha-1-acid glycoprotein 1 isoform X2 [Canis lupus familiaris]</a>   | 52.0 | 52.0 | 91%  | 5e-06 | 59% | <a href="#">XP_005627010.1</a> |
| <a href="#">PREDICTED: alpha-1-acid glycoprotein 1 isoform X1 [Canis lupus familiaris]</a>   | 52.0 | 52.0 | 91%  | 5e-06 | 59% | <a href="#">XP_003431634.1</a> |
| <a href="#">PREDICTED: alpha-1-acid glycoprotein-like [Trichechus manatus latirostris]</a>   | 52.0 | 52.0 | 87%  | 5e-06 | 67% | <a href="#">XP_004391229.1</a> |
| <a href="#">PREDICTED: alpha-1-acid glycoprotein 2-like [Trichechus manatus latirostris]</a> | 52.0 | 52.0 | 87%  | 5e-06 | 67% | <a href="#">XP_004391192.1</a> |
| <a href="#">PREDICTED: alpha-1-acid glycoprotein 2 [Trichechus manatus latirostris]</a>      | 52.0 | 52.0 | 87%  | 5e-06 | 67% | <a href="#">XP_004372401.1</a> |
| <a href="#">PREDICTED: alpha-1-acid glycoprotein 2 [Otolemur garnettii]</a>                  | 52.0 | 52.0 | 91%  | 5e-06 | 68% | <a href="#">XP_003785445.1</a> |
| <a href="#">PREDICTED: alpha-1-acid glycoprotein 1 [Saimiri boliviensis boliviensis]</a>     | 50.7 | 50.7 | 91%  | 1e-05 | 59% | <a href="#">XP_003925252.1</a> |
| <a href="#">Alpha-1-acid glycoprotein [Myotis davidii]</a>                                   | 49.8 | 49.8 | 100% | 2e-05 | 55% | <a href="#">ELK26646.1</a>     |
| <a href="#">PREDICTED: alpha-1-acid glycoprotein-like [Ursus maritimus]</a>                  | 49.4 | 49.4 | 91%  | 3e-05 | 59% | <a href="#">XP_008707881.1</a> |
| <a href="#">PREDICTED: alpha-1-acid glycoprotein 2-like isoform X2 [Tupaia chinensis]</a>    | 49.0 | 49.0 | 91%  | 5e-05 | 64% | <a href="#">XP_006142836.1</a> |
| <a href="#">PREDICTED: alpha-1-acid glycoprotein 2-like [Loxodonta africana]</a>             | 49.0 | 49.0 | 87%  | 5e-05 | 62% | <a href="#">XP_003407554.1</a> |
| <a href="#">PREDICTED: alpha-1-acid glycoprotein 1-like [Mustela putorius furo]</a>          | 48.6 | 48.6 | 83%  | 6e-05 | 65% | <a href="#">XP_004828368.1</a> |
| <a href="#">hypothetical protein PANDA_003840 [Ailuropoda melanoleuca]</a>                   | 48.1 | 48.1 | 91%  | 6e-05 | 59% | <a href="#">EFB15505.1</a>     |
| <a href="#">PREDICTED: alpha-1-acid glycoprotein 1 [Orycteropus afer afer]</a>               | 48.1 | 48.1 | 87%  | 9e-05 | 67% | <a href="#">XP_007934876.1</a> |
| <a href="#">PREDICTED: alpha-1-acid glycoprotein-like [Ursus maritimus]</a>                  | 48.1 | 48.1 | 91%  | 9e-05 | 59% | <a href="#">XP_008707882.1</a> |
| <a href="#">PREDICTED: alpha-1-acid glycoprotein-like [Ailuropoda melanoleuca]</a>           | 48.1 | 48.1 | 91%  | 9e-05 | 59% | <a href="#">XP_002915823.1</a> |
| <a href="#">PREDICTED: alpha-1-acid glycoprotein 2-like [Galeopterus variegatus]</a>         | 47.7 | 47.7 | 91%  | 1e-04 | 59% | <a href="#">XP_008588097.1</a> |
| <a href="#">PREDICTED: alpha-1-acid glycoprotein 1 [Galeopterus variegatus]</a>              | 47.7 | 47.7 | 91%  | 1e-04 | 59% | <a href="#">XP_008588094.1</a> |
| <a href="#">PREDICTED: alpha-1-acid glycoprotein 1 [Elephantulus edwardii]</a>               | 47.3 | 47.3 | 79%  | 2e-04 | 68% | <a href="#">XP_006890779.1</a> |
| <a href="#">PREDICTED: alpha-1-acid glycoprotein 2-like [Tarsius syrichta]</a>               | 46.9 | 46.9 | 91%  | 2e-04 | 64% | <a href="#">XP_008055404.1</a> |
| <a href="#">PREDICTED: alpha-1-acid glycoprotein-like [Panthera tigris altaica]</a>          | 46.9 | 46.9 | 83%  | 2e-04 | 60% | <a href="#">XP_007094388.1</a> |
| <a href="#">PREDICTED: alpha-1-acid glycoprotein [Felis catus]</a>                           | 46.9 | 46.9 | 83%  | 2e-04 | 60% | <a href="#">XP_003995824.1</a> |
| <a href="#">PREDICTED: LOW QUALITY PROTEIN: orosomucoid 1 [Myotis lucifugus]</a>             | 46.9 | 46.9 | 100% | 2e-04 | 52% | <a href="#">XP_006109685.1</a> |
| <a href="#">alpha-1-acid glycoprotein [Mus musculus]</a>                                     | 44.3 | 44.3 | 91%  | 0.001 | 55% | <a href="#">AAA91744.1</a>     |
| <a href="#">alpha-1-acid glycoprotein (AGP) precursor [Mus caroli]</a>                       | 44.3 | 44.3 | 91%  | 0.002 | 55% | <a href="#">AAA37197.1</a>     |
| <a href="#">RecName: Full=Alpha-1-acid glycoprotein 1; Short=AGP 1; AltName: Full=Orc</a>    | 44.3 | 44.3 | 91%  | 0.002 | 55% | <a href="#">P21350.1</a>       |
| <a href="#">alpha-1-acid glycoprotein 2 precursor [Mus musculus]</a>                         | 44.3 | 44.3 | 91%  | 0.002 | 55% | <a href="#">NP_035146.1</a>    |
| <a href="#">PREDICTED: LOW QUALITY PROTEIN: alpha-1-acid glycoprotein 1-like [My</a>         | 44.3 | 44.3 | 87%  | 0.002 | 67% | <a href="#">XP_005880984.1</a> |
| <a href="#">Alpha-1-acid glycoprotein 1 [Cricetulus griseus]</a>                             | 43.9 | 43.9 | 95%  | 0.002 | 57% | <a href="#">EGW06649.1</a>     |
| <a href="#">PREDICTED: alpha-1-acid glycoprotein 1 [Cricetulus griseus]</a>                  | 43.9 | 43.9 | 95%  | 0.002 | 57% | <a href="#">XP_003503497.1</a> |
| <a href="#">alpha-1-acid glycoprotein 1 [Cricetulus griseus]</a>                             | 43.9 | 43.9 | 95%  | 0.002 | 57% | <a href="#">ERE86355.1</a>     |
| <a href="#">alpha-1-acid glycoprotein 1 [Cricetulus griseus]</a>                             | 43.9 | 43.9 | 95%  | 0.002 | 57% | <a href="#">ERE86354.1</a>     |
| <a href="#">PREDICTED: alpha-1-acid glycoprotein 2 [Pteropus alecto]</a>                     | 43.5 | 43.5 | 95%  | 0.003 | 52% | <a href="#">XP_006917195.1</a> |
| <a href="#">Alpha-1-acid glycoprotein [Pteropus alecto]</a>                                  | 43.5 | 43.5 | 95%  | 0.003 | 52% | <a href="#">ELK08232.1</a>     |
| <a href="#">PREDICTED: alpha-1-acid glycoprotein 1-like [Myotis brandtii]</a>                | 43.1 | 43.1 | 91%  | 0.003 | 56% | <a href="#">XP_005880983.1</a> |
| <a href="#">PREDICTED: alpha-1-acid glycoprotein 2-like [Galeopterus variegatus]</a>         | 43.1 | 43.1 | 83%  | 0.004 | 60% | <a href="#">XP_008588096.1</a> |
| <a href="#">alpha-1-acid glycoprotein [Mus musculus]</a>                                     | 42.6 | 42.6 | 91%  | 0.004 | 59% | <a href="#">AAA91745.1</a>     |
| <a href="#">mCG7142, isoform CRA_b [Mus musculus]</a>                                        | 42.6 | 42.6 | 91%  | 0.005 | 59% | <a href="#">EDL31111.1</a>     |
| <a href="#">alpha-1-acid glycoprotein precursor [Mus caroli]</a>                             | 42.6 | 42.6 | 91%  | 0.005 | 59% | <a href="#">AAB67844.1</a>     |
| <a href="#">alpha-1-acid glycoprotein 1 precursor [Mus musculus]</a>                         | 42.6 | 42.6 | 91%  | 0.005 | 59% | <a href="#">NP_032794.1</a>    |



|                                                                                            |      |      |     |       |     |                                |
|--------------------------------------------------------------------------------------------|------|------|-----|-------|-----|--------------------------------|
| <a href="#">RecName: Full=Alpha-1-acid glycoprotein 8; Short=AGP 8; AltName: Full=Orc</a>  | 42.6 | 42.6 | 91% | 0.005 | 59% | <a href="#">P21352.1</a>       |
| <a href="#">Orosomuroid 1 [Mus musculus]</a>                                               | 42.6 | 42.6 | 91% | 0.005 | 59% | <a href="#">AAH12725.1</a>     |
| <a href="#">mCG7142, isoform CRA_e [Mus musculus]</a>                                      | 42.6 | 42.6 | 91% | 0.005 | 59% | <a href="#">EDL31114.1</a>     |
| <a href="#">PREDICTED: alpha-1-acid glycoprotein 1 [Mesocricetus auratus]</a>              | 42.2 | 42.2 | 83% | 0.007 | 60% | <a href="#">XP_005075189.1</a> |
| <a href="#">alpha-1-acid glycoprotein precursor [Rattus norvegicus]</a>                    | 41.4 | 41.4 | 83% | 0.013 | 65% | <a href="#">NP_445740.1</a>    |
| <a href="#">PREDICTED: alpha-1-acid glycoprotein 2-like [Myotis lucifugus]</a>             | 41.4 | 41.4 | 91% | 0.014 | 59% | <a href="#">XP_006099427.1</a> |
| <a href="#">PREDICTED: alpha-1-acid glycoprotein 1 [Nannospalax galili]</a>                | 40.5 | 40.5 | 95% | 0.025 | 52% | <a href="#">XP_008831764.1</a> |
| <a href="#">PREDICTED: alpha-1-acid glycoprotein 2-like [Equus caballus]</a>               | 40.5 | 40.5 | 83% | 0.025 | 65% | <a href="#">XP_001488199.1</a> |
| <a href="#">PREDICTED: alpha-1-acid glycoprotein 2-like [Loxodonta africana]</a>           | 40.5 | 40.5 | 79% | 0.025 | 63% | <a href="#">XP_003407551.1</a> |
| <a href="#">PREDICTED: alpha-1-acid glycoprotein 2-like [Loxodonta africana]</a>           | 40.1 | 40.1 | 79% | 0.036 | 58% | <a href="#">XP_010586317.1</a> |
| <a href="#">PREDICTED: alpha-1-acid glycoprotein-like [Camelus dromedarius]</a>            | 39.7 | 39.7 | 83% | 0.047 | 65% | <a href="#">XP_010995686.1</a> |
| <a href="#">PREDICTED: alpha-1-acid glycoprotein-like [Camelus ferus]</a>                  | 39.7 | 39.7 | 83% | 0.047 | 65% | <a href="#">XP_006186090.1</a> |
| <a href="#">PREDICTED: alpha-1-acid glycoprotein-like [Ochotona princeps]</a>              | 39.2 | 39.2 | 95% | 0.064 | 52% | <a href="#">XP_004595034.1</a> |
| <a href="#">PREDICTED: alpha-1-acid glycoprotein 2-like [Myotis lucifugus]</a>             | 39.2 | 39.2 | 83% | 0.064 | 60% | <a href="#">XP_006108236.1</a> |
| <a href="#">PREDICTED: alpha-1-acid glycoprotein 2-like [Myotis lucifugus]</a>             | 39.2 | 39.2 | 83% | 0.064 | 60% | <a href="#">XP_006099413.1</a> |
| <a href="#">PREDICTED: alpha-1-acid glycoprotein-like [Vicugna pacos]</a>                  | 38.8 | 38.8 | 79% | 0.087 | 68% | <a href="#">XP_006211428.1</a> |
| <a href="#">PREDICTED: alpha-1-acid glycoprotein-like [Peromyscus maniculatus bairdii]</a> | 38.4 | 38.4 | 87% | 0.12  | 57% | <a href="#">XP_006979617.1</a> |
| <a href="#">PREDICTED: alpha-1-acid glycoprotein 2-like [Myotis lucifugus]</a>             | 38.4 | 38.4 | 75% | 0.12  | 61% | <a href="#">XP_006108237.1</a> |
| <a href="#">Alpha-1-acid glycoprotein 1 [Heterocephalus glaber]</a>                        | 37.5 | 37.5 | 87% | 0.21  | 62% | <a href="#">EHB03307.1</a>     |
| <a href="#">PREDICTED: alpha-1-acid glycoprotein 1 [Heterocephalus glaber]</a>             | 37.5 | 37.5 | 87% | 0.21  | 62% | <a href="#">XP_004885278.1</a> |
| <a href="#">PREDICTED: alpha-1-acid glycoprotein 1-like [Echinops telfairi]</a>            | 37.5 | 37.5 | 83% | 0.22  | 65% | <a href="#">XP_004718018.1</a> |
| <a href="#">PREDICTED: alpha-1-acid glycoprotein 1 [Echinops telfairi]</a>                 | 37.5 | 37.5 | 83% | 0.22  | 65% | <a href="#">XP_004712638.1</a> |
| <a href="#">PREDICTED: alpha-1-acid glycoprotein 1 [Heterocephalus glaber]</a>             | 37.5 | 37.5 | 87% | 0.23  | 62% | <a href="#">XP_004849700.1</a> |
| <a href="#">PREDICTED: alpha-1-acid glycoprotein 1-like [Mustela putorius furo]</a>        | 37.1 | 37.1 | 83% | 0.28  | 55% | <a href="#">XP_004807875.1</a> |
| <a href="#">PREDICTED: alpha-1-acid glycoprotein 1 [Mustela putorius furo]</a>             | 37.1 | 37.1 | 83% | 0.29  | 55% | <a href="#">XP_004774102.1</a> |
| <a href="#">PREDICTED: alpha-1-acid glycoprotein 1 [Erinaceus europaeus]</a>               | 37.1 | 37.1 | 75% | 0.31  | 61% | <a href="#">XP_007526815.1</a> |

## Alignments

Download [GenPept](#) [Graphics](#)

[Next](#) [Previous](#) [Descriptions](#)

protein,alpha1 acid glyco

Sequence ID: [prf|J720005A](#) Length: 182 Number of Matches: 1

Range 1: 69 to 92 [GenPept](#) [Graphics](#)

[Next Match](#) [Previous Match](#)

### Related Information

| Score          | Expect | Identities | Positives   | Gaps     |
|----------------|--------|------------|-------------|----------|
| 79.1 bits(179) | 3e-15  | 22/24(92%) | 24/24(100%) | 0/24(0%) |

Query 1 RQDQCIYDTTYLNVQREDGTISRY 24  
 RQDQCIY+TTYLNVQRE+GTISRY  
 Sbjct 69 RQDQCIYNTTYLNVQRENGTISRY 92

Download [GenPept](#) [Graphics](#)

[Next](#) [Previous](#) [Descriptions](#)

Chain A, Crystal Structure Of Human Alpha1-Acid Glycoprotein

Sequence ID: [pdb|3KQ0|A](#) Length: 192 Number of Matches: 1

Range 1: 68 to 91 [GenPept](#) [Graphics](#)

[Next Match](#) [Previous Match](#)

### Related Information

| Score          | Expect | Identities | Positives   | Gaps     |
|----------------|--------|------------|-------------|----------|
| 79.1 bits(179) | 3e-15  | 22/24(92%) | 24/24(100%) | 0/24(0%) |

[Structure](#) - 3D structure displays

Query 1 RQDQCIYDTTYLNQVREDGTISRY 24  
 RQDQCIY+TTYLNQVRE+GTISRY  
 Sbjct 68 RQDQCIYNTTYLNQVRENGTISRY 91

[Download](#) [GenPept](#) [Graphics](#)

[▼ Next](#) [▲ Previous](#) [▲ Descriptions](#)

**Chain A, Crystal Structure Of Human Alpha 1 Acid Glycoprotein**

Sequence ID: [pdb|3BX6|A](#) Length: 192 Number of Matches: 1

Range 1: 68 to 91 [GenPept](#) [Graphics](#)

[▼ Next Match](#) [▲ Previous Match](#)

**Related Information**

| Score          | Expect | Identities | Positives   | Gaps     |
|----------------|--------|------------|-------------|----------|
| 79.1 bits(179) | 3e-15  | 22/24(92%) | 24/24(100%) | 0/24(0%) |

Query 1 RQDQCIYDTTYLNQVREDGTISRY 24  
 RQDQCIY+TTYLNQVRE+GTISRY  
 Sbjct 68 RQDQCIYNTTYLNQVRENGTISRY 91

[Download](#) [GenPept](#) [Graphics](#)

[▼ Next](#) [▲ Previous](#) [▲ Descriptions](#)

**ORM1, partial [synthetic construct]**

Sequence ID: [gb|AIC54852.1|](#) Length: 201 Number of Matches: 1

Range 1: 86 to 109 [GenPept](#) [Graphics](#)

[▼ Next Match](#) [▲ Previous Match](#)

**Related Information**

| Score          | Expect | Identities | Positives   | Gaps     |
|----------------|--------|------------|-------------|----------|
| 79.1 bits(179) | 3e-15  | 22/24(92%) | 24/24(100%) | 0/24(0%) |

Query 1 RQDQCIYDTTYLNQVREDGTISRY 24  
 RQDQCIY+TTYLNQVRE+GTISRY  
 Sbjct 86 RQDQCIYNTTYLNQVRENGTISRY 109

[Download](#) [GenPept](#) [Graphics](#)

[▼ Next](#) [▲ Previous](#) [▲ Descriptions](#)

**Orosomucoid 1 [Homo sapiens]**

Sequence ID: [gb|AAI43315.1|](#) Length: 201 Number of Matches: 1

Range 1: 86 to 109 [GenPept](#) [Graphics](#)

[▼ Next Match](#) [▲ Previous Match](#)

**Related Information**

[Gene](#) - associated gene details

| Score          | Expect | Identities | Positives   | Gaps     |
|----------------|--------|------------|-------------|----------|
| 79.1 bits(179) | 3e-15  | 22/24(92%) | 24/24(100%) | 0/24(0%) |

Query 1 RQDQCIYDTTYLNQVREDGTISRY 24  
 RQDQCIY+TTYLNQVRE+GTISRY  
 Sbjct 86 RQDQCIYNTTYLNQVRENGTISRY 109

BLAST is a registered trademark of the National Library of Medicine.

▶ NCBI/ BLAST/ blastp suite/ Formatting Results - BVJY0J8W01R

**i** Your search parameters were adjusted to search for a short input sequence.

[Edit and Resubmit](#) [Save Search Strategies](#) ▶ [Formatting options](#) ▶ [Download](#) [YouTube](#) [How to read this page](#) [Blast report description](#)

## ORM1\_RQDQCIYDTTYLNVQRENGTISRY\_Mod

RID [BVJY0J8W01R](#) (Expires on 01-21 10:30 am)

**Query ID** |cl|158570  
**Description** None  
**Molecule type** amino acid  
**Query Length** 24

**Database Name** nr  
**Description** All non-redundant GenBank CDS translations+PDB+SwissProt+PIR+PRF excluding environmental samples from WGS projects  
**Program** BLASTP 2.2.30+ ▶ [Citation](#)

Other reports: ▶ [Search Summary](#) [[Taxonomy reports](#)] [[Distance tree of results](#)] [[Multiple alignment](#)]

### Graphic Summary

[Show Conserved Domains](#)

No putative conserved domains have been detected

Distribution of 100 Blast Hits on the Query Sequence

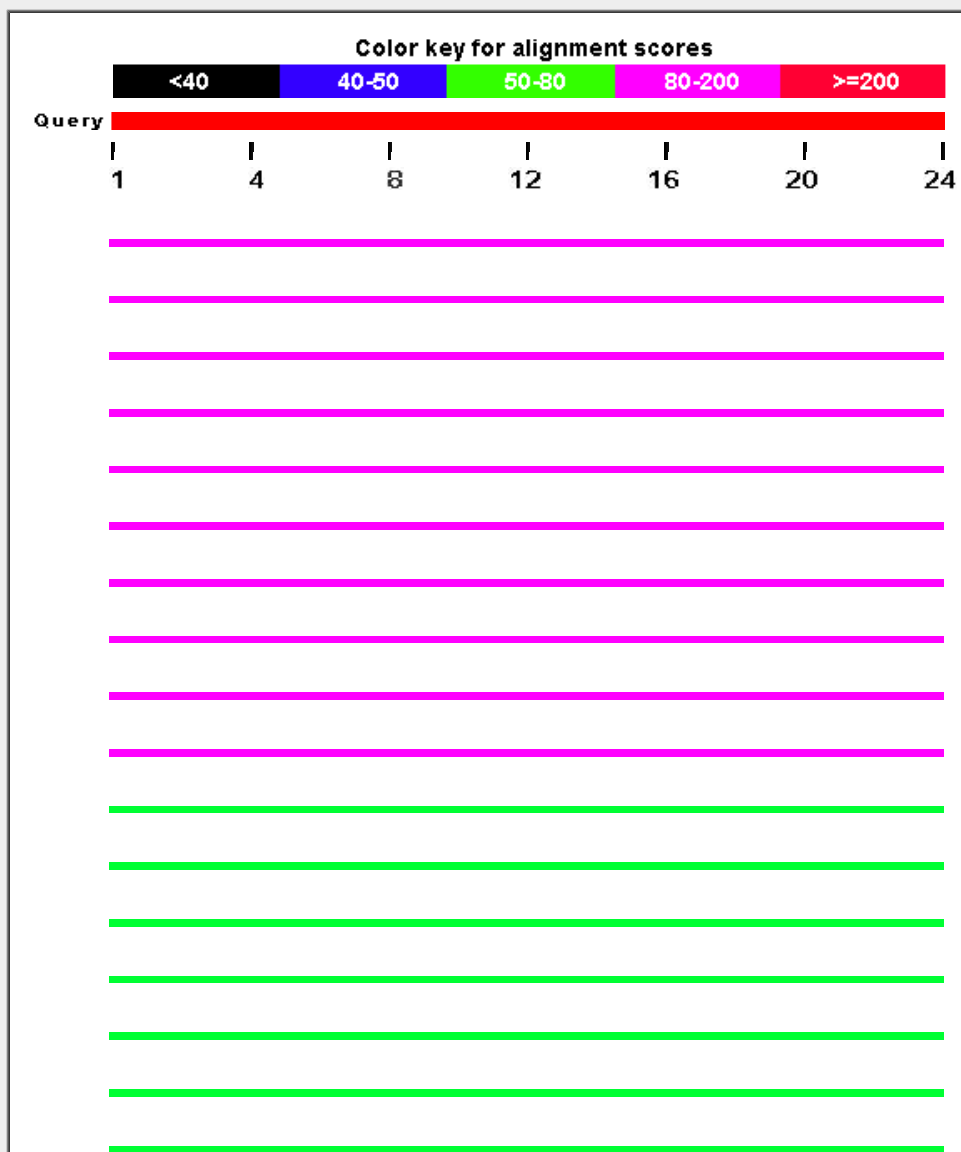

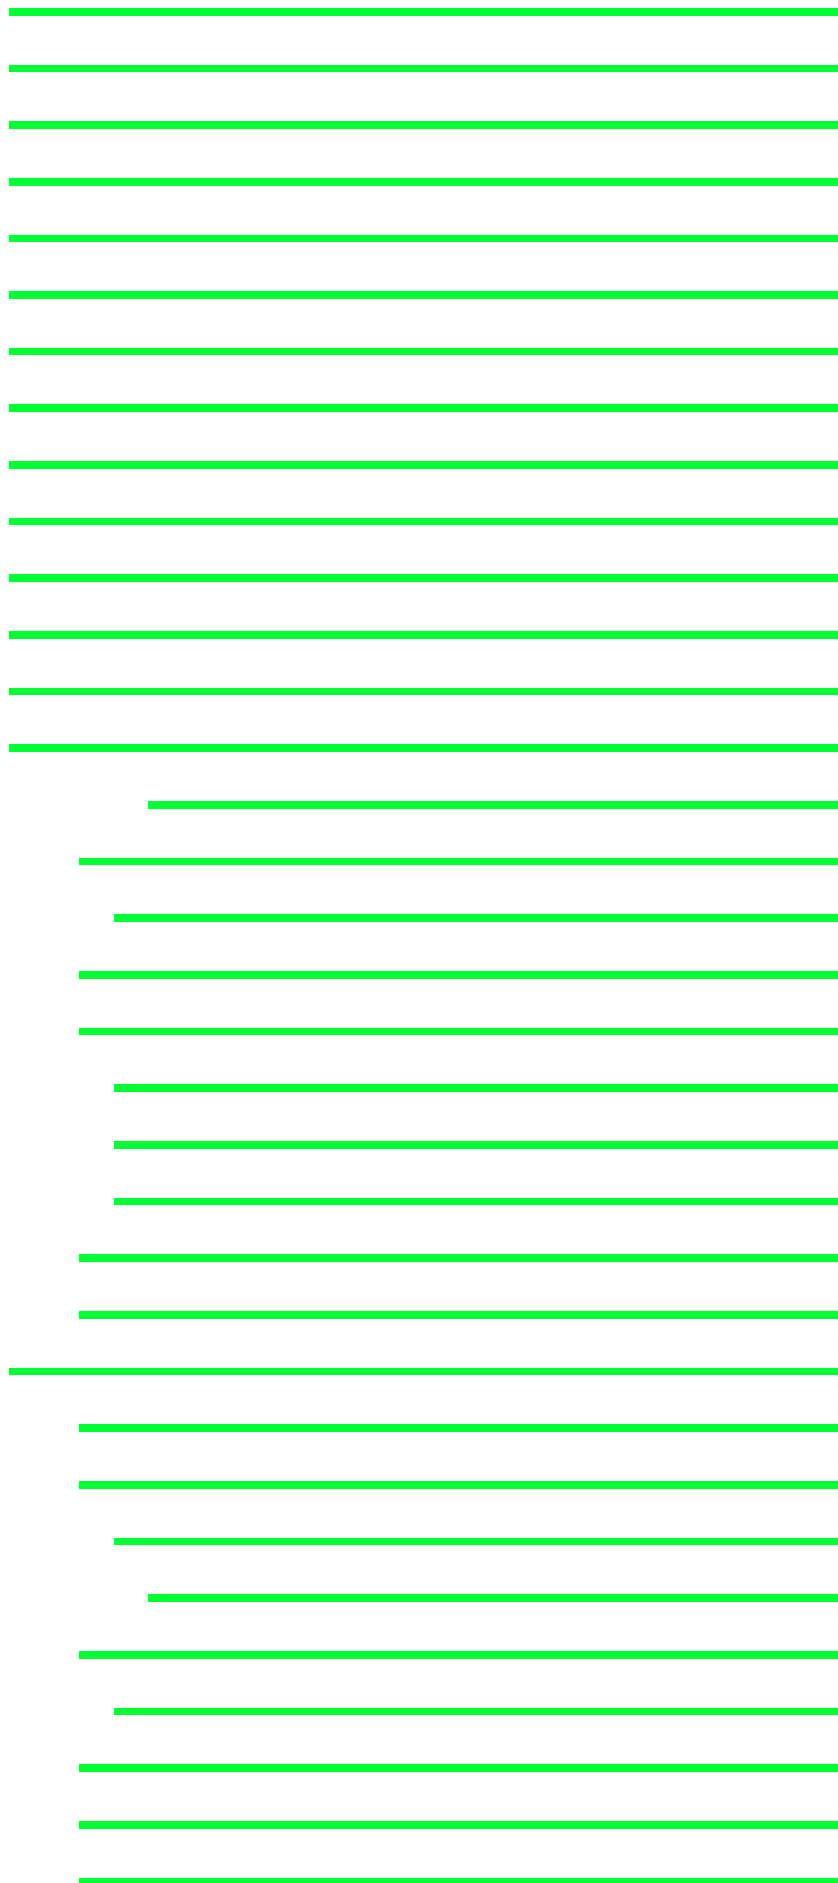

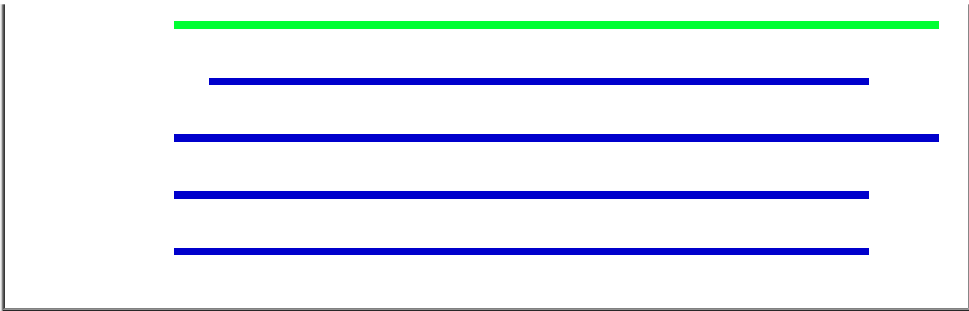

**Descriptions**

**Sequences producing significant alignments:**

Select: [All](#) [None](#) Selected:0

[Alignments](#)
[Download](#)
[GenPept](#)
[Graphics](#)
[Distance tree of results](#)
[Multiple alignment](#)
⚙

| Description                                                                                   | Max score | Total score | Query cover | E value | Ident | Accession                      |
|-----------------------------------------------------------------------------------------------|-----------|-------------|-------------|---------|-------|--------------------------------|
| <a href="#">protein.alpha1 acid glyco [Homo sapiens]</a>                                      | 81.7      | 81.7        | 100%        | 3e-16   | 96%   | <a href="#">Z20005A</a>        |
| <a href="#">Chain A, Crystal Structure Of Human Alpha1-Acid Glycoprotein [Homo sapien]</a>    | 81.7      | 81.7        | 100%        | 4e-16   | 96%   | <a href="#">3KQ0_A</a>         |
| <a href="#">Chain A, Crystal Structure Of Human Alpha 1 Acid Glycoprotein [Homo sapien]</a>   | 81.7      | 81.7        | 100%        | 4e-16   | 96%   | <a href="#">3BX6_A</a>         |
| <a href="#">ORM1 [synthetic construct]</a>                                                    | 81.7      | 81.7        | 100%        | 4e-16   | 96%   | <a href="#">AIC54852.1</a>     |
| <a href="#">Orosomuroid 1 [Homo sapiens]</a>                                                  | 81.7      | 81.7        | 100%        | 4e-16   | 96%   | <a href="#">AAI43315.1</a>     |
| <a href="#">alpha-1-acid glycoprotein 1 precursor [Homo sapiens]</a>                          | 81.7      | 81.7        | 100%        | 4e-16   | 96%   | <a href="#">CAA29229.1</a>     |
| <a href="#">RecName: Full=Alpha-1-acid glycoprotein 1; Short=AGP 1; AltName: Full=Orc</a>     | 81.7      | 81.7        | 100%        | 4e-16   | 96%   | <a href="#">P02763.1</a>       |
| <a href="#">alpha-1-acid glycoprotein 1 precursor [Homo sapiens]</a>                          | 81.7      | 81.7        | 100%        | 4e-16   | 96%   | <a href="#">NP_000598.2</a>    |
| <a href="#">orosomuroid 1 [synthetic construct]</a>                                           | 81.7      | 81.7        | 100%        | 4e-16   | 96%   | <a href="#">AAV38575.1</a>     |
| <a href="#">orosomuroid 1 [synthetic construct]</a>                                           | 81.7      | 81.7        | 100%        | 4e-16   | 96%   | <a href="#">AAV38574.1</a>     |
| <a href="#">PREDICTED: alpha-1-acid glycoprotein 1-like [Gorilla gorilla gorilla]</a>         | 77.4      | 77.4        | 100%        | 1e-14   | 92%   | <a href="#">XP_004048543.1</a> |
| <a href="#">PREDICTED: alpha-1-acid glycoprotein 1 [Pongo abelii]</a>                         | 77.4      | 77.4        | 100%        | 1e-14   | 92%   | <a href="#">XP_002820180.1</a> |
| <a href="#">PREDICTED: alpha-1-acid glycoprotein 1 [Chlorocebus sabaeus]</a>                  | 76.1      | 76.1        | 100%        | 3e-14   | 88%   | <a href="#">XP_007966502.1</a> |
| <a href="#">PREDICTED: LOW QUALITY PROTEIN: alpha-1-acid glycoprotein 1 [Pan troglodytes]</a> | 74.9      | 74.9        | 100%        | 8e-14   | 88%   | <a href="#">XP_009455427.1</a> |
| <a href="#">PREDICTED: alpha-1-acid glycoprotein 1 isoform 1 [Nomascus leucogenys]</a>        | 74.9      | 74.9        | 100%        | 8e-14   | 88%   | <a href="#">XP_003264088.1</a> |
| <a href="#">PREDICTED: alpha-1-acid glycoprotein 1 isoform X3 [Macaca fascicularis]</a>       | 72.7      | 72.7        | 100%        | 4e-13   | 83%   | <a href="#">XP_005581033.1</a> |
| <a href="#">PREDICTED: alpha-1-acid glycoprotein 1-like isoform 2 [Macaca mulatta]</a>        | 72.7      | 72.7        | 100%        | 4e-13   | 83%   | <a href="#">XP_001100289.1</a> |
| <a href="#">Alpha-1-acid glycoprotein 1 [Macaca mulatta]</a>                                  | 72.7      | 72.7        | 100%        | 4e-13   | 83%   | <a href="#">EHH23840.1</a>     |
| <a href="#">PREDICTED: alpha-1-acid glycoprotein 1 isoform X2 [Macaca fascicularis]</a>       | 72.7      | 72.7        | 100%        | 4e-13   | 83%   | <a href="#">XP_005581032.1</a> |
| <a href="#">PREDICTED: alpha-1-acid glycoprotein 1 isoform X1 [Macaca fascicularis]</a>       | 72.7      | 72.7        | 100%        | 5e-13   | 83%   | <a href="#">XP_005581031.1</a> |
| <a href="#">PREDICTED: alpha-1-acid glycoprotein 1 [Rhinopithecus roxellana]</a>              | 69.8      | 69.8        | 100%        | 5e-12   | 79%   | <a href="#">XP_010368793.1</a> |
| <a href="#">PREDICTED: alpha-1-acid glycoprotein 1 [Papio anubis]</a>                         | 68.9      | 68.9        | 100%        | 9e-12   | 79%   | <a href="#">XP_009186482.1</a> |
| <a href="#">Chain A, Crystal Structure Of The A Variant Of Human Alpha1-Acid Glycoprot</a>    | 66.4      | 66.4        | 100%        | 6e-11   | 75%   | <a href="#">3APU_A</a>         |
| <a href="#">ORM2 [synthetic construct]</a>                                                    | 66.4      | 66.4        | 100%        | 7e-11   | 75%   | <a href="#">AIC54853.1</a>     |
| <a href="#">alpha-1-acid glycoprotein 2 precursor [Homo sapiens]</a>                          | 66.4      | 66.4        | 100%        | 7e-11   | 75%   | <a href="#">CAA29873.2</a>     |
| <a href="#">alpha-1-acid glycoprotein 2 precursor [Homo sapiens]</a>                          | 66.4      | 66.4        | 100%        | 7e-11   | 75%   | <a href="#">NP_000599.1</a>    |
| <a href="#">PREDICTED: alpha-1-acid glycoprotein 1-like [Gorilla gorilla gorilla]</a>         | 66.4      | 66.4        | 100%        | 7e-11   | 75%   | <a href="#">XP_004048546.1</a> |
| <a href="#">ORM2 [Homo sapiens]</a>                                                           | 66.4      | 66.4        | 100%        | 7e-11   | 75%   | <a href="#">CAG33211.1</a>     |
| <a href="#">PREDICTED: alpha-1-acid glycoprotein 2-like [Pan troglodytes]</a>                 | 66.4      | 66.4        | 100%        | 7e-11   | 75%   | <a href="#">XP_520209.3</a>    |

|                                                                                              |      |      |      |       |     |                                |
|----------------------------------------------------------------------------------------------|------|------|------|-------|-----|--------------------------------|
| <a href="#">PREDICTED: LOW QUALITY PROTEIN: alpha-1-acid glycoprotein 2 [Pan pa</a>          | 66.4 | 66.4 | 100% | 8e-11 | 75% | <a href="#">XP_008957108.1</a> |
| <a href="#">unnamed protein product [Homo sapiens]</a>                                       | 63.8 | 63.8 | 100% | 5e-10 | 71% | <a href="#">BAG35159.1</a>     |
| <a href="#">PREDICTED: alpha-1-acid glycoprotein 1 [Callithrix jacchus]</a>                  | 58.3 | 58.3 | 83%  | 4e-08 | 80% | <a href="#">XP_002760492.1</a> |
| <a href="#">PREDICTED: alpha-1-acid glycoprotein 2-like [Loxodonta africana]</a>             | 57.1 | 57.1 | 91%  | 1e-07 | 73% | <a href="#">XP_003407553.1</a> |
| <a href="#">PREDICTED: alpha-1-acid glycoprotein 2 [Chrysochloris asiatica]</a>              | 54.9 | 54.9 | 87%  | 5e-07 | 71% | <a href="#">XP_006865789.1</a> |
| <a href="#">PREDICTED: alpha-1-acid glycoprotein 1 isoform X2 [Canis lupus familiaris]</a>   | 54.5 | 54.5 | 91%  | 7e-07 | 64% | <a href="#">XP_005627010.1</a> |
| <a href="#">PREDICTED: alpha-1-acid glycoprotein 1 isoform X1 [Canis lupus familiaris]</a>   | 54.5 | 54.5 | 91%  | 7e-07 | 64% | <a href="#">XP_003431634.1</a> |
| <a href="#">PREDICTED: alpha-1-acid glycoprotein-like [Trichechus manatus latirostris]</a>   | 54.5 | 54.5 | 87%  | 7e-07 | 71% | <a href="#">XP_004391229.1</a> |
| <a href="#">PREDICTED: alpha-1-acid glycoprotein 2-like [Trichechus manatus latirostris]</a> | 54.5 | 54.5 | 87%  | 7e-07 | 71% | <a href="#">XP_004391192.1</a> |
| <a href="#">PREDICTED: alpha-1-acid glycoprotein 2 [Trichechus manatus latirostris]</a>      | 54.5 | 54.5 | 87%  | 7e-07 | 71% | <a href="#">XP_004372401.1</a> |
| <a href="#">PREDICTED: alpha-1-acid glycoprotein 2 [Otolemur garnettii]</a>                  | 54.5 | 54.5 | 91%  | 7e-07 | 73% | <a href="#">XP_003785445.1</a> |
| <a href="#">PREDICTED: alpha-1-acid glycoprotein 1 [Saimiri boliviensis boliviensis]</a>     | 53.2 | 53.2 | 91%  | 2e-06 | 64% | <a href="#">XP_003925252.1</a> |
| <a href="#">Alpha-1-acid glycoprotein [Myotis davidii]</a>                                   | 52.4 | 52.4 | 100% | 3e-06 | 59% | <a href="#">ELK26646.1</a>     |
| <a href="#">PREDICTED: alpha-1-acid glycoprotein-like [Ursus maritimus]</a>                  | 52.0 | 52.0 | 91%  | 5e-06 | 64% | <a href="#">XP_008707881.1</a> |
| <a href="#">PREDICTED: alpha-1-acid glycoprotein 2-like isoform X2 [Tupaia chinensis]</a>    | 51.5 | 51.5 | 91%  | 7e-06 | 68% | <a href="#">XP_006142836.1</a> |
| <a href="#">PREDICTED: alpha-1-acid glycoprotein 2-like [Loxodonta africana]</a>             | 51.5 | 51.5 | 87%  | 7e-06 | 67% | <a href="#">XP_003407554.1</a> |
| <a href="#">PREDICTED: alpha-1-acid glycoprotein 1-like [Mustela putorius furo]</a>          | 51.1 | 51.1 | 83%  | 8e-06 | 70% | <a href="#">XP_004828368.1</a> |
| <a href="#">hypothetical protein PANDA_003840 [Ailuropoda melanoleuca]</a>                   | 50.7 | 50.7 | 91%  | 9e-06 | 64% | <a href="#">EFB15505.1</a>     |
| <a href="#">PREDICTED: alpha-1-acid glycoprotein 1 [Orycteropus afer afer]</a>               | 50.7 | 50.7 | 87%  | 1e-05 | 71% | <a href="#">XP_007934876.1</a> |
| <a href="#">PREDICTED: alpha-1-acid glycoprotein-like [Ursus maritimus]</a>                  | 50.7 | 50.7 | 91%  | 1e-05 | 64% | <a href="#">XP_008707882.1</a> |
| <a href="#">PREDICTED: alpha-1-acid glycoprotein-like [Ailuropoda melanoleuca]</a>           | 50.7 | 50.7 | 91%  | 1e-05 | 64% | <a href="#">XP_002915823.1</a> |
| <a href="#">PREDICTED: alpha-1-acid glycoprotein 2-like [Galeopterus variegatus]</a>         | 50.3 | 50.3 | 91%  | 2e-05 | 64% | <a href="#">XP_008588097.1</a> |
| <a href="#">PREDICTED: alpha-1-acid glycoprotein 1 [Galeopterus variegatus]</a>              | 50.3 | 50.3 | 91%  | 2e-05 | 64% | <a href="#">XP_008588094.1</a> |
| <a href="#">PREDICTED: alpha-1-acid glycoprotein 1 [Elephantulus edwardii]</a>               | 49.8 | 49.8 | 79%  | 2e-05 | 74% | <a href="#">XP_006890779.1</a> |
| <a href="#">PREDICTED: alpha-1-acid glycoprotein 2-like [Tarsius syrichta]</a>               | 49.4 | 49.4 | 91%  | 3e-05 | 68% | <a href="#">XP_008055404.1</a> |
| <a href="#">PREDICTED: alpha-1-acid glycoprotein-like [Panthera tigris altaica]</a>          | 49.4 | 49.4 | 83%  | 3e-05 | 65% | <a href="#">XP_007094388.1</a> |
| <a href="#">PREDICTED: alpha-1-acid glycoprotein [Felis catus]</a>                           | 49.4 | 49.4 | 83%  | 3e-05 | 65% | <a href="#">XP_003995824.1</a> |
| <a href="#">PREDICTED: LOW QUALITY PROTEIN: orosomucoid 1 [Myotis lucifugus]</a>             | 49.4 | 49.4 | 100% | 3e-05 | 55% | <a href="#">XP_006109685.1</a> |
| <a href="#">alpha-1-acid glycoprotein [Mus musculus]</a>                                     | 46.9 | 46.9 | 91%  | 2e-04 | 59% | <a href="#">AAA91744.1</a>     |
| <a href="#">alpha-1-acid glycoprotein (AGP) precursor [Mus caroli]</a>                       | 46.9 | 46.9 | 91%  | 2e-04 | 59% | <a href="#">AAA37197.1</a>     |
| <a href="#">RecName: Full=Alpha-1-acid glycoprotein 1; Short=AGP 1; AltName: Full=Orc</a>    | 46.9 | 46.9 | 91%  | 2e-04 | 59% | <a href="#">P21350.1</a>       |
| <a href="#">alpha-1-acid glycoprotein 2 precursor [Mus musculus]</a>                         | 46.9 | 46.9 | 91%  | 2e-04 | 59% | <a href="#">NP_035146.1</a>    |
| <a href="#">PREDICTED: LOW QUALITY PROTEIN: alpha-1-acid glycoprotein 1-like [My</a>         | 46.9 | 46.9 | 87%  | 2e-04 | 71% | <a href="#">XP_005880984.1</a> |
| <a href="#">Alpha-1-acid glycoprotein 1 [Cricetulus griseus]</a>                             | 46.4 | 46.4 | 95%  | 3e-04 | 61% | <a href="#">EGW06649.1</a>     |
| <a href="#">PREDICTED: alpha-1-acid glycoprotein 1 [Cricetulus griseus]</a>                  | 46.4 | 46.4 | 95%  | 3e-04 | 61% | <a href="#">XP_003503497.1</a> |
| <a href="#">alpha-1-acid glycoprotein 1 [Cricetulus griseus]</a>                             | 46.4 | 46.4 | 95%  | 3e-04 | 61% | <a href="#">ERE86355.1</a>     |
| <a href="#">alpha-1-acid glycoprotein 1 [Cricetulus griseus]</a>                             | 46.4 | 46.4 | 95%  | 3e-04 | 61% | <a href="#">ERE86354.1</a>     |
| <a href="#">PREDICTED: alpha-1-acid glycoprotein 2 [Pteropus alecto]</a>                     | 46.0 | 46.0 | 95%  | 4e-04 | 57% | <a href="#">XP_006917195.1</a> |
| <a href="#">Alpha-1-acid glycoprotein [Pteropus alecto]</a>                                  | 46.0 | 46.0 | 95%  | 4e-04 | 57% | <a href="#">ELK08232.1</a>     |
| <a href="#">PREDICTED: alpha-1-acid glycoprotein 1-like [Myotis brandtii]</a>                | 45.6 | 45.6 | 91%  | 5e-04 | 59% | <a href="#">XP_005880983.1</a> |
| <a href="#">PREDICTED: alpha-1-acid glycoprotein 2-like [Galeopterus variegatus]</a>         | 45.6 | 45.6 | 83%  | 6e-04 | 65% | <a href="#">XP_008588096.1</a> |
| <a href="#">alpha-1-acid glycoprotein [Mus musculus]</a>                                     | 45.2 | 45.2 | 91%  | 6e-04 | 64% | <a href="#">AAA91745.1</a>     |
| <a href="#">mCG7142, isoform CRA_b [Mus musculus]</a>                                        | 45.2 | 45.2 | 91%  | 8e-04 | 64% | <a href="#">EDL31111.1</a>     |
| <a href="#">alpha-1-acid glycoprotein precursor [Mus caroli]</a>                             | 45.2 | 45.2 | 91%  | 8e-04 | 64% | <a href="#">AAB67844.1</a>     |
| <a href="#">alpha-1-acid glycoprotein 1 precursor [Mus musculus]</a>                         | 45.2 | 45.2 | 91%  | 8e-04 | 64% | <a href="#">NP_032794.1</a>    |

|                                                                                            |      |      |     |       |     |                                |
|--------------------------------------------------------------------------------------------|------|------|-----|-------|-----|--------------------------------|
| <a href="#">RecName: Full=Alpha-1-acid glycoprotein 8; Short=AGP 8; AltName: Full=Orc</a>  | 45.2 | 45.2 | 91% | 8e-04 | 64% | <a href="#">P21352.1</a>       |
| <a href="#">Orosomuroid 1 [Mus musculus]</a>                                               | 45.2 | 45.2 | 91% | 8e-04 | 64% | <a href="#">AAH12725.1</a>     |
| <a href="#">mCG7142, isoform CRA_e [Mus musculus]</a>                                      | 45.2 | 45.2 | 91% | 8e-04 | 64% | <a href="#">EDL31114.1</a>     |
| <a href="#">PREDICTED: alpha-1-acid glycoprotein 1 [Mesocricetus auratus]</a>              | 44.8 | 44.8 | 83% | 0.001 | 65% | <a href="#">XP_005075189.1</a> |
| <a href="#">alpha-1-acid glycoprotein precursor [Rattus norvegicus]</a>                    | 43.9 | 43.9 | 83% | 0.002 | 70% | <a href="#">NP_445740.1</a>    |
| <a href="#">PREDICTED: alpha-1-acid glycoprotein 2-like [Myotis lucifugus]</a>             | 43.9 | 43.9 | 91% | 0.002 | 64% | <a href="#">XP_006099427.1</a> |
| <a href="#">PREDICTED: alpha-1-acid glycoprotein 1 [Nannospalax galii]</a>                 | 43.1 | 43.1 | 95% | 0.004 | 57% | <a href="#">XP_008831764.1</a> |
| <a href="#">PREDICTED: alpha-1-acid glycoprotein 2-like [Loxodonta africana]</a>           | 43.1 | 43.1 | 79% | 0.004 | 68% | <a href="#">XP_003407551.1</a> |
| <a href="#">PREDICTED: alpha-1-acid glycoprotein 2-like [Loxodonta africana]</a>           | 42.6 | 42.6 | 79% | 0.006 | 63% | <a href="#">XP_010586317.1</a> |
| <a href="#">PREDICTED: alpha-1-acid glycoprotein-like [Camelus dromedarius]</a>            | 42.2 | 42.2 | 83% | 0.007 | 70% | <a href="#">XP_010995686.1</a> |
| <a href="#">PREDICTED: alpha-1-acid glycoprotein-like [Camelus ferus]</a>                  | 42.2 | 42.2 | 83% | 0.007 | 70% | <a href="#">XP_006186090.1</a> |
| <a href="#">PREDICTED: alpha-1-acid glycoprotein-like [Ochotona princeps]</a>              | 41.8 | 41.8 | 95% | 0.010 | 57% | <a href="#">XP_004595034.1</a> |
| <a href="#">PREDICTED: alpha-1-acid glycoprotein 2-like [Equus caballus]</a>               | 41.8 | 41.8 | 83% | 0.010 | 65% | <a href="#">XP_001488199.1</a> |
| <a href="#">PREDICTED: alpha-1-acid glycoprotein 2-like [Myotis lucifugus]</a>             | 41.8 | 41.8 | 83% | 0.010 | 65% | <a href="#">XP_006108236.1</a> |
| <a href="#">PREDICTED: alpha-1-acid glycoprotein 2-like [Myotis lucifugus]</a>             | 41.8 | 41.8 | 83% | 0.010 | 65% | <a href="#">XP_006099413.1</a> |
| <a href="#">PREDICTED: alpha-1-acid glycoprotein-like [Vicugna pacos]</a>                  | 41.4 | 41.4 | 79% | 0.013 | 74% | <a href="#">XP_006211428.1</a> |
| <a href="#">PREDICTED: alpha-1-acid glycoprotein-like [Peromyscus maniculatus bairdii]</a> | 40.9 | 40.9 | 87% | 0.018 | 62% | <a href="#">XP_006979617.1</a> |
| <a href="#">PREDICTED: alpha-1-acid glycoprotein 2-like [Myotis lucifugus]</a>             | 40.9 | 40.9 | 75% | 0.018 | 67% | <a href="#">XP_006108237.1</a> |
| <a href="#">Alpha-1-acid glycoprotein 1 [Heterocephalus glaber]</a>                        | 40.1 | 40.1 | 87% | 0.031 | 67% | <a href="#">EHB03307.1</a>     |
| <a href="#">PREDICTED: alpha-1-acid glycoprotein 1 [Heterocephalus glaber]</a>             | 40.1 | 40.1 | 87% | 0.032 | 67% | <a href="#">XP_004885278.1</a> |
| <a href="#">PREDICTED: alpha-1-acid glycoprotein 1-like [Echinops telfairi]</a>            | 40.1 | 40.1 | 83% | 0.033 | 70% | <a href="#">XP_004718018.1</a> |
| <a href="#">PREDICTED: alpha-1-acid glycoprotein 1 [Echinops telfairi]</a>                 | 40.1 | 40.1 | 83% | 0.034 | 70% | <a href="#">XP_004712638.1</a> |
| <a href="#">PREDICTED: alpha-1-acid glycoprotein 1 [Heterocephalus glaber]</a>             | 40.1 | 40.1 | 87% | 0.035 | 67% | <a href="#">XP_004849700.1</a> |
| <a href="#">PREDICTED: alpha-1-acid glycoprotein 1-like [Mustela putorius furo]</a>        | 39.7 | 39.7 | 83% | 0.042 | 60% | <a href="#">XP_004807875.1</a> |
| <a href="#">PREDICTED: alpha-1-acid glycoprotein 1 [Mustela putorius furo]</a>             | 39.7 | 39.7 | 83% | 0.044 | 60% | <a href="#">XP_004774102.1</a> |
| <a href="#">PREDICTED: alpha-1-acid glycoprotein 1 [Erinaceus europaeus]</a>               | 39.7 | 39.7 | 75% | 0.047 | 67% | <a href="#">XP_007526815.1</a> |

## Alignments

Download GenPept Graphics

Next Previous Descriptions

protein,alpha1 acid glyco

Sequence ID: [prf|J720005A](#) Length: 182 Number of Matches: 1

Range 1: 69 to 92 GenPept Graphics

Next Match Previous Match

### Related Information

| Score          | Expect | Identities | Positives   | Gaps     |
|----------------|--------|------------|-------------|----------|
| 81.7 bits(185) | 3e-16  | 23/24(96%) | 24/24(100%) | 0/24(0%) |

Query 1 RQDQCIYDTTYLNVQRENGTISRY 24  
 RQDQCIY+TTYLNVQRENGTISRY  
 Sbjct 69 RQDQCIYNTTYLNVQRENGTISRY 92

Download GenPept Graphics

Next Previous Descriptions

Chain A, Crystal Structure Of Human Alpha1-Acid Glycoprotein

Sequence ID: [pdb|3KQ0|A](#) Length: 192 Number of Matches: 1

Range 1: 68 to 91 GenPept Graphics

Next Match Previous Match

### Related Information

| Score          | Expect | Identities | Positives   | Gaps     |
|----------------|--------|------------|-------------|----------|
| 81.7 bits(185) | 4e-16  | 23/24(96%) | 24/24(100%) | 0/24(0%) |

[Structure](#) - 3D structure displays

Query 1 RQDQCIYDITYLVQRENGTISRY 24  
 RQDQCIY+TYLVQRENGTISRY  
 Sbjct 68 RQDQCIYNTTYLVQRENGTISRY 91

Download [GenPept](#) [Graphics](#)

[▼ Next](#) [▲ Previous](#) [▲ Descriptions](#)

**Chain A, Crystal Structure Of Human Alpha 1 Acid Glycoprotein**

Sequence ID: [pdb|3BX6|A](#) Length: 192 Number of Matches: 1

Range 1: 68 to 91 [GenPept](#) [Graphics](#)

[▼ Next Match](#) [▲ Previous Match](#)

**Related Information**

| Score          | Expect | Identities | Positives   | Gaps     |
|----------------|--------|------------|-------------|----------|
| 81.7 bits(185) | 4e-16  | 23/24(96%) | 24/24(100%) | 0/24(0%) |

Query 1 RQDQCIYDITYLVQRENGTISRY 24  
 RQDQCIY+TYLVQRENGTISRY  
 Sbjct 68 RQDQCIYNTTYLVQRENGTISRY 91

Download [GenPept](#) [Graphics](#)

[▼ Next](#) [▲ Previous](#) [▲ Descriptions](#)

**ORM1, partial [synthetic construct]**

Sequence ID: [gb|AIC54852.1|](#) Length: 201 Number of Matches: 1

Range 1: 86 to 109 [GenPept](#) [Graphics](#)

[▼ Next Match](#) [▲ Previous Match](#)

**Related Information**

| Score          | Expect | Identities | Positives   | Gaps     |
|----------------|--------|------------|-------------|----------|
| 81.7 bits(185) | 4e-16  | 23/24(96%) | 24/24(100%) | 0/24(0%) |

Query 1 RQDQCIYDITYLVQRENGTISRY 24  
 RQDQCIY+TYLVQRENGTISRY  
 Sbjct 86 RQDQCIYNTTYLVQRENGTISRY 109

Download [GenPept](#) [Graphics](#)

[▼ Next](#) [▲ Previous](#) [▲ Descriptions](#)

**Orosomucoid 1 [Homo sapiens]**

Sequence ID: [gb|AAI43315.1|](#) Length: 201 Number of Matches: 1

Range 1: 86 to 109 [GenPept](#) [Graphics](#)

[▼ Next Match](#) [▲ Previous Match](#)

**Related Information**

[Gene](#) - associated gene details

| Score          | Expect | Identities | Positives   | Gaps     |
|----------------|--------|------------|-------------|----------|
| 81.7 bits(185) | 4e-16  | 23/24(96%) | 24/24(100%) | 0/24(0%) |

Query 1 RQDQCIYDITYLVQRENGTISRY 24  
 RQDQCIY+TYLVQRENGTISRY  
 Sbjct 86 RQDQCIYNTTYLVQRENGTISRY 109

BLAST is a registered trademark of the National Library of Medicine.



► [NCBI/ BLAST/ blastp suite/ Formatting Results - BBHJEEAU01R](#)

**i** Your search parameters were adjusted to search for a short input sequence.

[Edit and Resubmit](#) [Save Search Strategies](#) ► [Formatting options](#) ► [Download](#)

[YouTube](#) [How to read this page](#) [Blast report description](#)

**ORM1\_RQDQCIYNTTYLNVQRE\_NonMod**

**RID** [BBHJEEAU01R](#) (Expires on 01-15 08:28 am)

**Query ID** |c|199850  
**Description** None  
**Molecule type** amino acid  
**Query Length** 17

**Database Name** nr  
**Description** All non-redundant GenBank CDS translations+PDB+SwissProt+PIR excluding environmental samples from WGS projects  
**Program** BLASTP 2.2.30+ ► [Citation](#)

Other reports: ► [Search Summary](#) [[Taxonomy reports](#)] [[Distance tree of results](#)] [[Related Structures](#)] [[Multiple alignment](#)]

**Graphic Summary**

[Show Conserved Domains](#)

No putative conserved domains have been detected

Distribution of 100 Blast Hits on the Query Sequence

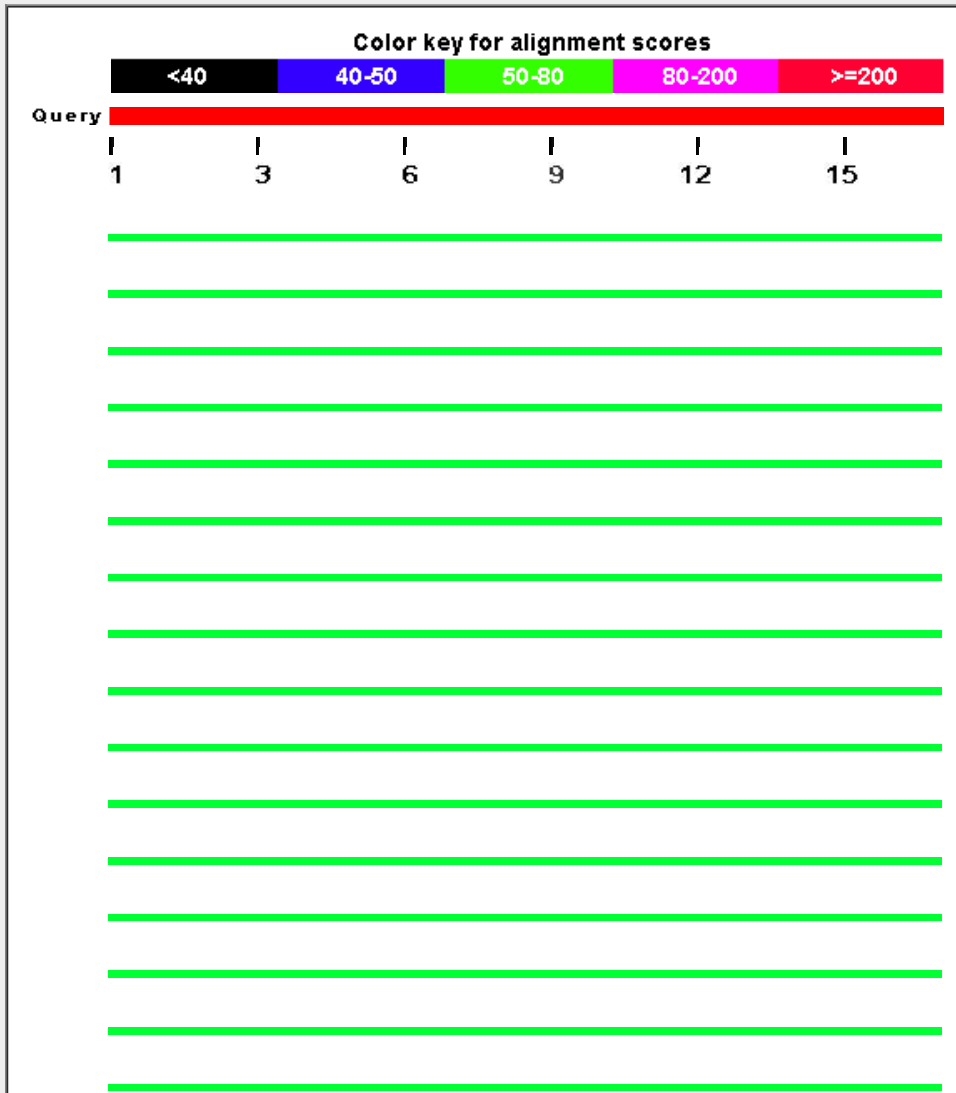

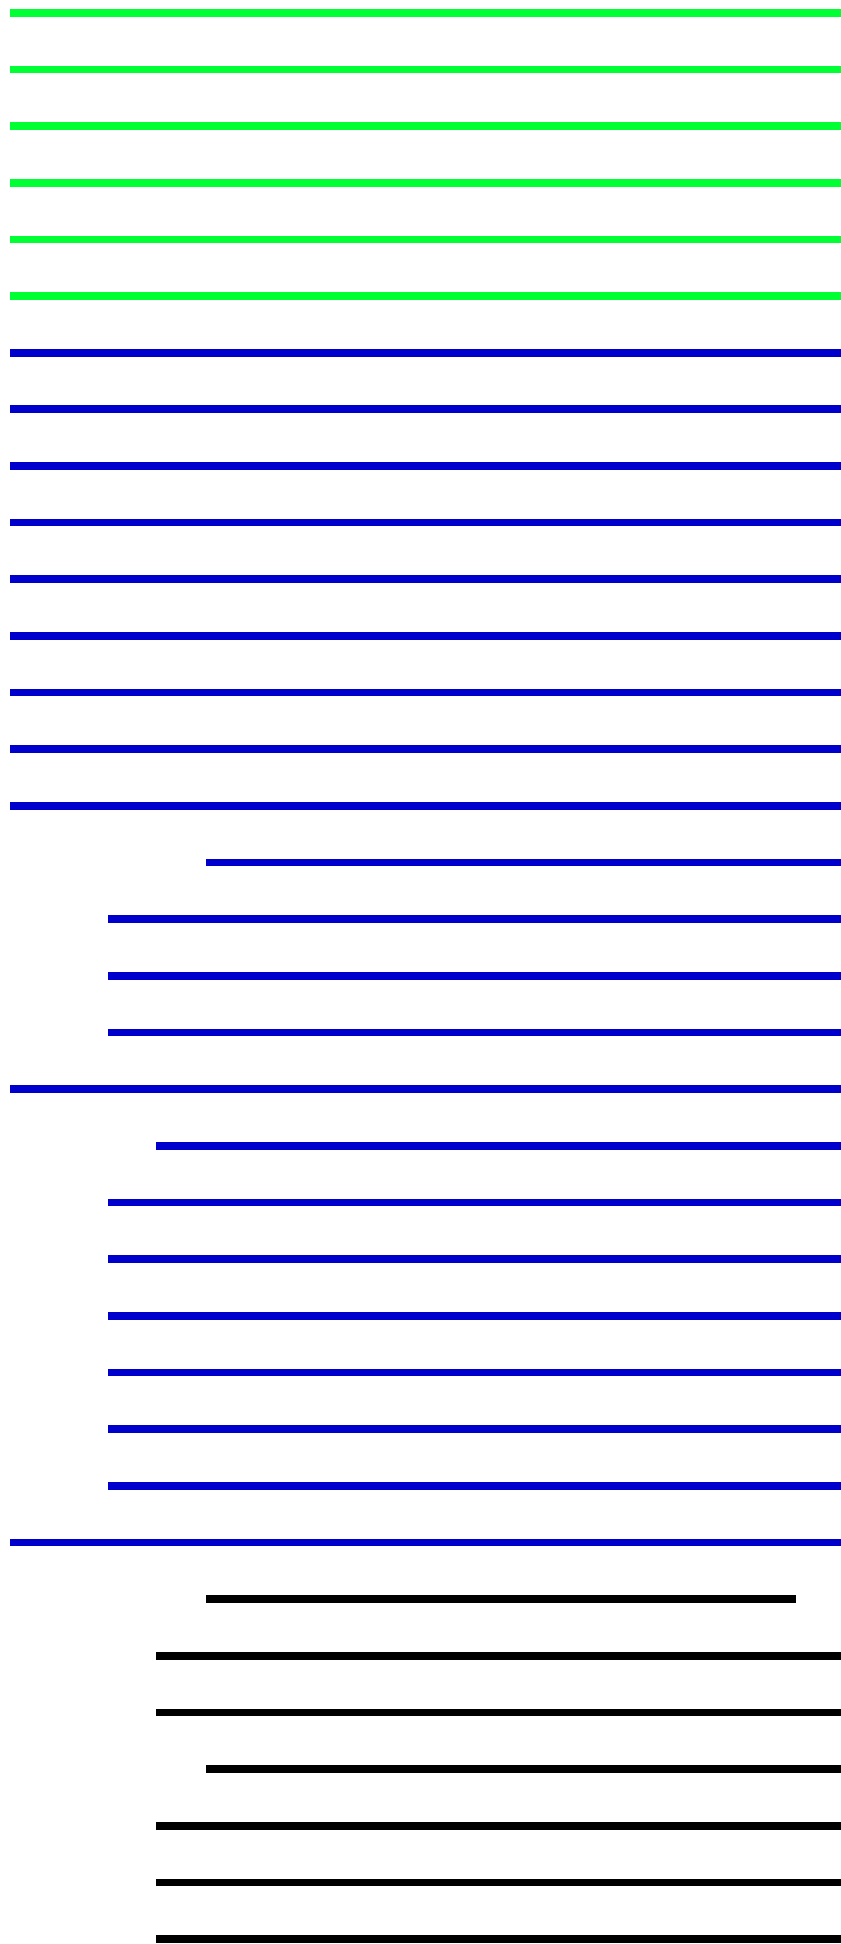

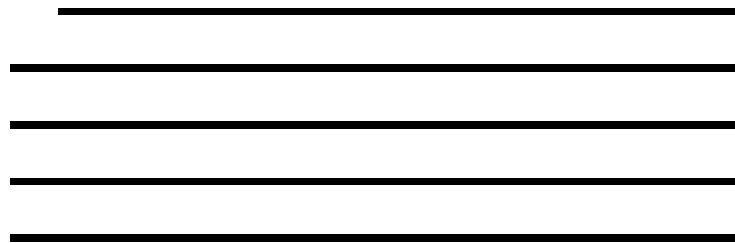

**Descriptions**

**Sequences producing significant alignments:**

Select: [All](#) [None](#) Selected:0

[Alignments](#)
[Download](#)
[GenPept](#)
[Graphics](#)
[Distance tree of results](#)
[Multiple alignment](#)

| Description                                                                           | Max score | Total score | Query cover | E value | Ident | Accession                                   |
|---------------------------------------------------------------------------------------|-----------|-------------|-------------|---------|-------|---------------------------------------------|
| <a href="#">protein.alpha1 acid glyco [Homo sapiens]</a>                              | 61.7      | 61.7        | 100%        | 9e-10   | 100%  | <a href="#">gij229386 720005A</a>           |
| <a href="#">Chain A, Crystal Structure Of Human Alpha1-Acid Glycoprotein [Ho</a>      | 61.7      | 61.7        | 100%        | 9e-10   | 100%  | <a href="#">gij285803540 3KQ0_A</a>         |
| <a href="#">Chain A, Crystal Structure Of Human Alpha 1 Acid Glycoprotein [Hc</a>     | 61.7      | 61.7        | 100%        | 9e-10   | 100%  | <a href="#">gij215794600 3BX6_A</a>         |
| <a href="#">ORM1 [synthetic construct]</a>                                            | 61.7      | 61.7        | 100%        | 1e-09   | 100%  | <a href="#">gij649120278 AIC54852.1</a>     |
| <a href="#">Orosomuroid 1 [Homo sapiens]</a>                                          | 61.7      | 61.7        | 100%        | 1e-09   | 100%  | <a href="#">gij219519923 AAI43315.1</a>     |
| <a href="#">alpha-1-acid glycoprotein 1 precursor [Homo sapiens]</a>                  | 61.7      | 61.7        | 100%        | 1e-09   | 100%  | <a href="#">gij1197209 CAA29229.1</a>       |
| <a href="#">RecName: Full=Alpha-1-acid glycoprotein 1; Short=AGP 1; AltNam</a>        | 61.7      | 61.7        | 100%        | 1e-09   | 100%  | <a href="#">gij112877 P02763.1</a>          |
| <a href="#">alpha-1-acid glycoprotein 1 precursor [Homo sapiens]</a>                  | 61.7      | 61.7        | 100%        | 1e-09   | 100%  | <a href="#">gij167857790 NP_000598.2</a>    |
| <a href="#">orosomuroid 1 [synthetic construct]</a>                                   | 61.7      | 61.7        | 100%        | 1e-09   | 100%  | <a href="#">gij54696406 AAV38575.1</a>      |
| <a href="#">orosomuroid 1 [synthetic construct]</a>                                   | 61.7      | 61.7        | 100%        | 1e-09   | 100%  | <a href="#">gij54696404 AAV38574.1</a>      |
| <a href="#">PREDICTED: alpha-1-acid glycoprotein 1-like [Gorilla gorilla gorilla]</a> | 57.5      | 57.5        | 100%        | 3e-08   | 94%   | <a href="#">gij426362801 XP_004048543.1</a> |
| <a href="#">PREDICTED: LOW QUALITY PROTEIN: alpha-1-acid glycoprotein</a>             | 57.5      | 57.5        | 100%        | 3e-08   | 94%   | <a href="#">gij694936727 XP_009455427.1</a> |
| <a href="#">PREDICTED: alpha-1-acid glycoprotein 1 isoform 1 [Nomascus leu</a>        | 57.5      | 57.5        | 100%        | 3e-08   | 94%   | <a href="#">gij332229827 XP_003264088.1</a> |
| <a href="#">PREDICTED: alpha-1-acid glycoprotein 1 [Pongo abelii]</a>                 | 57.5      | 57.5        | 100%        | 3e-08   | 94%   | <a href="#">gij297685191 XP_002820180.1</a> |
| <a href="#">PREDICTED: alpha-1-acid glycoprotein 1 isoform X3 [Macaca fasci</a>       | 56.2      | 56.2        | 100%        | 7e-08   | 88%   | <a href="#">gij544492702 XP_005581033.1</a> |
| <a href="#">PREDICTED: alpha-1-acid glycoprotein 1-like isoform 2 [Macaca m</a>       | 56.2      | 56.2        | 100%        | 7e-08   | 88%   | <a href="#">gij109110480 XP_001100289.1</a> |
| <a href="#">Alpha-1-acid glycoprotein 1 [Macaca mulatta]</a>                          | 56.2      | 56.2        | 100%        | 7e-08   | 88%   | <a href="#">gij355567499 EHH23840.1</a>     |
| <a href="#">PREDICTED: alpha-1-acid glycoprotein 1 [Chlorocebus sabaeus]</a>          | 56.2      | 56.2        | 100%        | 8e-08   | 88%   | <a href="#">gij635071762 XP_007966502.1</a> |
| <a href="#">PREDICTED: alpha-1-acid glycoprotein 1 isoform X2 [Macaca fasci</a>       | 56.2      | 56.2        | 100%        | 8e-08   | 88%   | <a href="#">gij544492700 XP_005581032.1</a> |
| <a href="#">PREDICTED: alpha-1-acid glycoprotein 1 isoform X1 [Macaca fasci</a>       | 56.2      | 56.2        | 100%        | 8e-08   | 88%   | <a href="#">gij544492698 XP_005581031.1</a> |
| <a href="#">PREDICTED: alpha-1-acid glycoprotein 1 [Rhinopithecus roxellana]</a>      | 53.2      | 53.2        | 100%        | 8e-07   | 82%   | <a href="#">gij724859712 XP_010368793.1</a> |
| <a href="#">PREDICTED: alpha-1-acid glycoprotein 1 [Papio anubis]</a>                 | 52.4      | 52.4        | 100%        | 2e-06   | 82%   | <a href="#">gij685591954 XP_009186482.1</a> |
| <a href="#">Chain A, Crystal Structure Of The A Variant Of Human Alpha1-Acid</a>      | 49.0      | 49.0        | 100%        | 2e-05   | 76%   | <a href="#">gij323714404 3APU_A</a>         |
| <a href="#">ORM2 [synthetic construct]</a>                                            | 49.0      | 49.0        | 100%        | 2e-05   | 76%   | <a href="#">gij649120282 AIC54853.1</a>     |
| <a href="#">alpha-1-acid glycoprotein 2 precursor [Homo sapiens]</a>                  | 49.0      | 49.0        | 100%        | 2e-05   | 76%   | <a href="#">gij29170378 CAA29873.2</a>      |
| <a href="#">alpha-1-acid glycoprotein 2 precursor [Homo sapiens]</a>                  | 49.0      | 49.0        | 100%        | 2e-05   | 76%   | <a href="#">gij4505529 NP_000599.1</a>      |
| <a href="#">PREDICTED: alpha-1-acid glycoprotein 1-like [Gorilla gorilla gorilla]</a> | 49.0      | 49.0        | 100%        | 2e-05   | 76%   | <a href="#">gij426362807 XP_004048546.1</a> |
| <a href="#">ORM2 [Homo sapiens]</a>                                                   | 49.0      | 49.0        | 100%        | 2e-05   | 76%   | <a href="#">gij48145977 CAG33211.1</a>      |

|                                                                     |      |      |      |       |     |                                             |
|---------------------------------------------------------------------|------|------|------|-------|-----|---------------------------------------------|
| PREDICTED: alpha-1-acid glycoprotein 2-like [Pan troglodytes]       | 49.0 | 49.0 | 100% | 2e-05 | 76% | <a href="#">gij694988125 XP_520209.3</a>    |
| PREDICTED: LOW QUALITY PROTEIN: alpha-1-acid glycoprotein           | 49.0 | 49.0 | 100% | 2e-05 | 76% | <a href="#">gij675802504 XP_008957108.1</a> |
| unnamed protein product [Homo sapiens]                              | 46.4 | 46.4 | 100% | 2e-04 | 71% | <a href="#">gij189053338 BAG35159.1</a>     |
| PREDICTED: alpha-1-acid glycoprotein 1 [Callithrix jacchus]         | 45.2 | 45.2 | 76%  | 4e-04 | 92% | <a href="#">gij296229919 XP_002760492.1</a> |
| PREDICTED: alpha-1-acid glycoprotein 2-like [Loxodonta africana]    | 44.3 | 44.3 | 88%  | 8e-04 | 80% | <a href="#">gij344271455 XP_003407553.1</a> |
| PREDICTED: alpha-1-acid glycoprotein-like [Panthera tigris altaica] | 43.9 | 43.9 | 88%  | 0.001 | 73% | <a href="#">gij591337606 XP_007094388.1</a> |
| PREDICTED: alpha-1-acid glycoprotein [Felis catus]                  | 43.9 | 43.9 | 88%  | 0.001 | 73% | <a href="#">gij410978897 XP_003995824.1</a> |
| Alpha-1-acid glycoprotein [Myotis davidii]                          | 43.1 | 43.1 | 100% | 0.002 | 64% | <a href="#">gij432095447 ELK26646.1</a>     |
| PREDICTED: alpha-1-acid glycoprotein 1 [Elephantulus edwardii]      | 41.4 | 41.4 | 82%  | 0.007 | 79% | <a href="#">gij585676946 XP_006890779.1</a> |
| PREDICTED: alpha-1-acid glycoprotein 2-like [Galeopterus variega    | 40.5 | 40.5 | 88%  | 0.014 | 73% | <a href="#">gij667321193 XP_008588097.1</a> |
| PREDICTED: alpha-1-acid glycoprotein 2-like [Galeopterus variega    | 40.5 | 40.5 | 88%  | 0.014 | 73% | <a href="#">gij667321190 XP_008588096.1</a> |
| PREDICTED: alpha-1-acid glycoprotein 1 [Galeopterus variegatus]     | 40.5 | 40.5 | 88%  | 0.014 | 73% | <a href="#">gij667321187 XP_008588094.1</a> |
| PREDICTED: alpha-1-acid glycoprotein 1 isoform X2 [Canis lupus f    | 40.5 | 40.5 | 88%  | 0.014 | 67% | <a href="#">gij545518002 XP_005627010.1</a> |
| PREDICTED: alpha-1-acid glycoprotein 1 isoform X1 [Canis lupus f    | 40.5 | 40.5 | 88%  | 0.014 | 67% | <a href="#">gij345777714 XP_003431634.1</a> |
| PREDICTED: alpha-1-acid glycoprotein 1 [Saimiri boliviensis bolivi  | 40.1 | 40.1 | 88%  | 0.020 | 67% | <a href="#">gij403266135 XP_003925252.1</a> |
| PREDICTED: LOW QUALITY PROTEIN: orosomucoid 1 [Myotis luc           | 40.1 | 40.1 | 100% | 0.020 | 59% | <a href="#">gij558172686 XP_006109685.1</a> |
| PREDICTED: alpha-1-acid glycoprotein 1 [Erinaceus europaeus]        | 39.2 | 39.2 | 70%  | 0.037 | 83% | <a href="#">gij617619058 XP_007526815.1</a> |
| PREDICTED: alpha-1-acid glycoprotein 2 [Chrysochloris asiatica]     | 38.8 | 38.8 | 82%  | 0.051 | 71% | <a href="#">gij586470389 XP_006865789.1</a> |
| PREDICTED: alpha-1-acid glycoprotein 2-like [Loxodonta africana]    | 38.8 | 38.8 | 82%  | 0.051 | 71% | <a href="#">gij344271457 XP_003407554.1</a> |
| PREDICTED: alpha-1-acid glycoprotein 1-like [Mustela putorius fur   | 38.4 | 38.4 | 76%  | 0.065 | 77% | <a href="#">gij512022336 XP_004828368.1</a> |
| PREDICTED: alpha-1-acid glycoprotein 1 [Orycteropus afer afer]      | 38.4 | 38.4 | 82%  | 0.070 | 79% | <a href="#">gij634836563 XP_007934876.1</a> |
| PREDICTED: alpha-1-acid glycoprotein-like [Trichechus manatus l     | 38.4 | 38.4 | 82%  | 0.071 | 71% | <a href="#">gij471419478 XP_004391229.1</a> |
| PREDICTED: alpha-1-acid glycoprotein 2-like [Trichechus manatus     | 38.4 | 38.4 | 82%  | 0.071 | 71% | <a href="#">gij471419404 XP_004391192.1</a> |
| PREDICTED: alpha-1-acid glycoprotein 2 [Trichechus manatus latir    | 38.4 | 38.4 | 82%  | 0.071 | 71% | <a href="#">gij471363692 XP_004372401.1</a> |
| hypothetical protein PANDA_003840 [Ailuropoda melanoleuca]          | 38.0 | 38.0 | 88%  | 0.081 | 67% | <a href="#">gij281339921 EFB15505.1</a>     |
| PREDICTED: alpha-1-acid glycoprotein-like [Ursus maritimus]         | 38.0 | 38.0 | 88%  | 0.097 | 67% | <a href="#">gij671034105 XP_008707882.1</a> |
| PREDICTED: alpha-1-acid glycoprotein-like [Ursus maritimus]         | 38.0 | 38.0 | 88%  | 0.097 | 67% | <a href="#">gij671034103 XP_008707881.1</a> |
| PREDICTED: alpha-1-acid glycoprotein-like [Ailuropoda melanoleu     | 38.0 | 38.0 | 88%  | 0.097 | 67% | <a href="#">gij301760029 XP_002915823.1</a> |
| PREDICTED: alpha-1-acid glycoprotein 2 [Otolemur garnettii]         | 38.0 | 38.0 | 88%  | 0.098 | 73% | <a href="#">gij395824383 XP_003785445.1</a> |
| PREDICTED: alpha-1-acid glycoprotein 1-like [Myotis brandtii]       | 37.1 | 37.1 | 100% | 0.16  | 59% | <a href="#">gij554578831 XP_005880983.1</a> |
| PREDICTED: alpha-1-acid glycoprotein 2-like [Loxodonta africana]    | 36.3 | 36.3 | 82%  | 0.34  | 79% | <a href="#">gij344271451 XP_003407551.1</a> |
| alpha-1-acid glycoprotein precursor [Rattus norvegicus]             | 35.4 | 35.4 | 88%  | 0.64  | 73% | <a href="#">gij16757980 NP_445740.1</a>     |
| PREDICTED: alpha-1-acid glycoprotein 2-like isoform X2 [Tupaia c    | 35.0 | 35.0 | 88%  | 0.88  | 67% | <a href="#">gij562826345 XP_006142836.1</a> |
| PREDICTED: alpha-1-acid glycoprotein 1-like [Echinops telfairi]     | 34.6 | 34.6 | 82%  | 1.2   | 79% | <a href="#">gij507712754 XP_004718018.1</a> |
| PREDICTED: alpha-1-acid glycoprotein 2-like [Myotis lucifugus]      | 34.6 | 34.6 | 88%  | 1.2   | 67% | <a href="#">gij558213870 XP_006108237.1</a> |
| PREDICTED: alpha-1-acid glycoprotein 1 [Echinops telfairi]          | 34.6 | 34.6 | 82%  | 1.2   | 79% | <a href="#">gij507689354 XP_004712638.1</a> |
| PREDICTED: alpha-1-acid glycoprotein-like [Myotis lucifugus]        | 34.6 | 34.6 | 88%  | 1.2   | 67% | <a href="#">gij558172690 XP_006099428.1</a> |
| alpha-1-acid glycoprotein [Mus musculus]                            | 34.1 | 34.1 | 88%  | 1.5   | 60% | <a href="#">gij387176 AAA91744.1</a>        |
| alpha-1-acid glycoprotein (AGP) precursor [Mus caroli]              | 34.1 | 34.1 | 88%  | 1.6   | 60% | <a href="#">gij309098 AAA37197.1</a>        |
| RecName: Full=Alpha-1-acid glycoprotein 1; Short=AGP 1; AltNam      | 34.1 | 34.1 | 88%  | 1.6   | 60% | <a href="#">gij112879 P21350.1</a>          |
| alpha-1-acid glycoprotein 2 precursor [Mus musculus]                | 34.1 | 34.1 | 88%  | 1.6   | 60% | <a href="#">gij6754950 NP_035146.1</a>      |
| PREDICTED: LOW QUALITY PROTEIN: alpha-1-acid glycoprotein           | 34.1 | 34.1 | 82%  | 1.6   | 79% | <a href="#">gij554578835 XP_005880984.1</a> |
| PREDICTED: alpha-1-acid glycoprotein 2-like [Loxodonta africana]    | 34.1 | 34.1 | 82%  | 1.7   | 64% | <a href="#">gij731463853 XP_010586317.1</a> |
| PREDICTED: alpha-1-acid glycoprotein 1 [Nannospalax gallii]         | 33.7 | 33.7 | 94%  | 2.2   | 63% | <a href="#">gij674051046 XP_008831764.1</a> |
| PREDICTED: alpha-1-acid glycoprotein 2 [Pteropus alecto]            | 33.7 | 33.7 | 94%  | 2.2   | 56% | <a href="#">gij586524471 XP_006917195.1</a> |

|                                                                                   |      |      |     |     |     |                                             |
|-----------------------------------------------------------------------------------|------|------|-----|-----|-----|---------------------------------------------|
| <a href="#">PREDICTED: alpha-1-acid glycoprotein 2-like [Myotis lucifugus]</a>    | 33.7 | 33.7 | 88% | 2.2 | 67% | <a href="#">gij558172682 XP_006099427.1</a> |
| <a href="#">Alpha-1-acid glycoprotein [Pteropus alecto]</a>                       | 33.7 | 33.7 | 94% | 2.3 | 56% | <a href="#">gij431900791 ELK08232.1</a>     |
| <a href="#">PREDICTED: alpha-1-acid glycoprotein 2-like [Tarsius syrichta]</a>    | 33.3 | 33.3 | 88% | 3.1 | 67% | <a href="#">gij640798447 XP_008055404.1</a> |
| <a href="#">PREDICTED: alpha-1-acid glycoprotein 2-like [Myotis lucifugus]</a>    | 33.3 | 33.3 | 88% | 3.1 | 67% | <a href="#">gij558213865 XP_006108236.1</a> |
| <a href="#">PREDICTED: alpha-1-acid glycoprotein 2-like [Myotis lucifugus]</a>    | 33.3 | 33.3 | 88% | 3.1 | 67% | <a href="#">gij558172615 XP_006099413.1</a> |
| <a href="#">alpha-1-acid glycoprotein [Mus musculus]</a>                          | 32.9 | 32.9 | 88% | 3.7 | 67% | <a href="#">gij553922 AAA91745.1</a>        |
| <a href="#">mCG7142, isoform CRA_b [Mus musculus]</a>                             | 32.9 | 32.9 | 88% | 4.1 | 67% | <a href="#">gij148699164 EDL31111.1</a>     |
| <a href="#">alpha-1-acid glycoprotein precursor [Mus caroli]</a>                  | 32.9 | 32.9 | 88% | 4.2 | 67% | <a href="#">gij309100 AAB67844.1</a>        |
| <a href="#">alpha-1-acid glycoprotein 1 precursor [Mus musculus]</a>              | 32.9 | 32.9 | 88% | 4.2 | 67% | <a href="#">gij6679182 NP_032794.1</a>      |
| <a href="#">RecName: Full=Alpha-1-acid glycoprotein 8; Short=AGP 8; AltNam</a>    | 32.9 | 32.9 | 88% | 4.2 | 67% | <a href="#">gij112883 P21352.1</a>          |
| <a href="#">Orosomuroid 1 [Mus musculus]</a>                                      | 32.9 | 32.9 | 88% | 4.2 | 67% | <a href="#">gij15215270 AAH12725.1</a>      |
| <a href="#">mCG7142, isoform CRA_e [Mus musculus]</a>                             | 32.9 | 32.9 | 88% | 4.2 | 67% | <a href="#">gij148699167 EDL31114.1</a>     |
| <a href="#">PREDICTED: alpha-1-acid glycoprotein 2-like [Myotis lucifugus]</a>    | 32.5 | 32.5 | 88% | 5.7 | 67% | <a href="#">gij558172624 XP_006099415.1</a> |
| <a href="#">PREDICTED: alpha-1-acid glycoprotein 2-like [Equus caballus]</a>      | 32.0 | 32.0 | 88% | 7.8 | 60% | <a href="#">gij149738494 XP_001488199.1</a> |
| <a href="#">Protein C44E4.1, isoform c [Caenorhabditis elegans]</a>               | 32.0 | 32.0 | 88% | 8.5 | 48% | <a href="#">gij25143932 NP_740838.1</a>     |
| <a href="#">protein C44E4.1a [imported] - Caenorhabditis elegans [Caenorhabd</a>  | 32.0 | 32.0 | 88% | 8.6 | 48% | <a href="#">gij25395263 D87757</a>          |
| <a href="#">Protein C44E4.1, isoform a [Caenorhabditis elegans]</a>               | 32.0 | 32.0 | 88% | 8.6 | 48% | <a href="#">gij453224247 NP_491407.2</a>    |
| <a href="#">PREDICTED: alpha-1-acid glycoprotein 1-like [Mustela putorius fur</a> | 31.2 | 31.2 | 88% | 14  | 60% | <a href="#">gij511980019 XP_004807875.1</a> |
| <a href="#">PREDICTED: alpha-1-acid glycoprotein 1 [Mustela putorius furo]</a>    | 31.2 | 31.2 | 88% | 14  | 60% | <a href="#">gij511909351 XP_004774102.1</a> |
| <a href="#">PREDICTED: alpha-1-acid glycoprotein-like [Odobenus rosmarus d</a>    | 30.8 | 30.8 | 70% | 20  | 69% | <a href="#">gij472354697 XP_004397008.1</a> |
| <a href="#">integrase [Metascardovia criceti]</a>                                 | 30.8 | 30.8 | 58% | 20  | 80% | <a href="#">gij516876710 WP_018142749.1</a> |
| <a href="#">hypothetical protein [Paenibacillus sp. PAMC 26794]</a>               | 30.8 | 30.8 | 70% | 21  | 75% | <a href="#">gij516288323 WP_017691630.1</a> |
| <a href="#">histidine kinase [Paenibacillus sp. FSL R5-192]</a>                   | 30.8 | 30.8 | 70% | 21  | 75% | <a href="#">gij573536452 ETT35445.1</a>     |
| <a href="#">histidine kinase [Paenibacillus sp. FSL H7-689]</a>                   | 30.8 | 30.8 | 70% | 21  | 75% | <a href="#">gij573550874 ETT49673.1</a>     |
| <a href="#">alpha-1 acid glycoprotein [Sus scrofa]</a>                            | 30.3 | 30.3 | 88% | 27  | 60% | <a href="#">gij164302 AAA30983.1</a>        |
| <a href="#">PREDICTED: alpha-1-acid glycoprotein-like [Sus scrofa]</a>            | 30.3 | 30.3 | 88% | 27  | 60% | <a href="#">gij545804155 XP_005660423.1</a> |
| <a href="#">PREDICTED: alpha-1-acid glycoprotein 1 [Sorex araneus]</a>            | 30.3 | 30.3 | 88% | 27  | 53% | <a href="#">gij505855571 XP_004621196.1</a> |

## Alignments

[Download](#) [GenPept](#) [Graphics](#)

[Next](#) [Previous](#) [Descriptions](#)

protein, alpha1 acid glyco

Sequence ID: [gij229386|prf|720005A](#) Length: 182 Number of Matches: 1

### Related Information

Range 1: 69 to 85 [GenPept](#) [Graphics](#)

[Next Match](#) [Previous Match](#)

| Score          | Expect | Identities  | Positives   | Gaps     |
|----------------|--------|-------------|-------------|----------|
| 61.7 bits(138) | 9e-10  | 17/17(100%) | 17/17(100%) | 0/17(0%) |

Query 1 RQDQCIYNTTYLNVQRE 17  
 RQDQCIYNTTYLNVQRE  
 Sbjct 69 RQDQCIYNTTYLNVQRE 85

[Download](#) [GenPept](#) [Graphics](#)

[Next](#) [Previous](#) [Descriptions](#)

Chain A, Crystal Structure Of Human Alpha1-Acid Glycoprotein

Sequence ID: [gij285803540|pdb|3KQ0|A](#) Length: 192 Number of Matches: 1

### Related Information

Range 1: 68 to 84 [GenPept](#) [Graphics](#)

[Next Match](#) [Previous Match](#)

| Score          | Expect | Identities  | Positives   | Gaps     |
|----------------|--------|-------------|-------------|----------|
| 61.7 bits(138) | 9e-10  | 17/17(100%) | 17/17(100%) | 0/17(0%) |

Query 1 RQDQCIYNTTYLNVQRE 17

[Structure](#) - 3D structure displays

Sbjct 68 RQDQCIYNTTYLNVQRE 84

[Download](#) [GenPept](#) [Graphics](#)

[Next](#) [Previous](#) [Descriptions](#)

Chain A, Crystal Structure Of Human Alpha 1 Acid Glycoprotein

Sequence ID: [gi|215794600|pdb|3BX6|A](#) Length: 192 Number of Matches: 1

**Related Information**

Range 1: 68 to 84 [GenPept](#) [Graphics](#) [Next Match](#) [Previous Match](#)

| Score          | Expect | Identities  | Positives   | Gaps     |
|----------------|--------|-------------|-------------|----------|
| 61.7 bits(138) | 9e-10  | 17/17(100%) | 17/17(100%) | 0/17(0%) |

Query 1 RQDQCIYNTTYLNVQRE 17  
 RQDQCIYNTTYLNVQRE  
 Sbjct 68 RQDQCIYNTTYLNVQRE 84

[Download](#) [GenPept](#) [Graphics](#)

[Next](#) [Previous](#) [Descriptions](#)

ORM1, partial [synthetic construct]

Sequence ID: [gi|649120278|gb|AI|C54852.1](#) Length: 201 Number of Matches: 1

**Related Information**

Range 1: 86 to 102 [GenPept](#) [Graphics](#) [Next Match](#) [Previous Match](#)

| Score          | Expect | Identities  | Positives   | Gaps     |
|----------------|--------|-------------|-------------|----------|
| 61.7 bits(138) | 1e-09  | 17/17(100%) | 17/17(100%) | 0/17(0%) |

Query 1 RQDQCIYNTTYLNVQRE 17  
 RQDQCIYNTTYLNVQRE  
 Sbjct 86 RQDQCIYNTTYLNVQRE 102

[Download](#) [GenPept](#) [Graphics](#)

[Next](#) [Previous](#) [Descriptions](#)

Orosomucoid 1 [Homo sapiens]

Sequence ID: [gi|219519923|gb|AA|43315.1](#) Length: 201 Number of Matches: 1

**Related Information**

Range 1: 86 to 102 [GenPept](#) [Graphics](#) [Next Match](#) [Previous Match](#)

| Score          | Expect | Identities  | Positives   | Gaps     |
|----------------|--------|-------------|-------------|----------|
| 61.7 bits(138) | 1e-09  | 17/17(100%) | 17/17(100%) | 0/17(0%) |

Query 1 RQDQCIYNTTYLNVQRE 17  
 RQDQCIYNTTYLNVQRE  
 Sbjct 86 RQDQCIYNTTYLNVQRE 102

[Gene](#) - associated gene details

BLAST is a registered trademark of the National Library of Medicine.



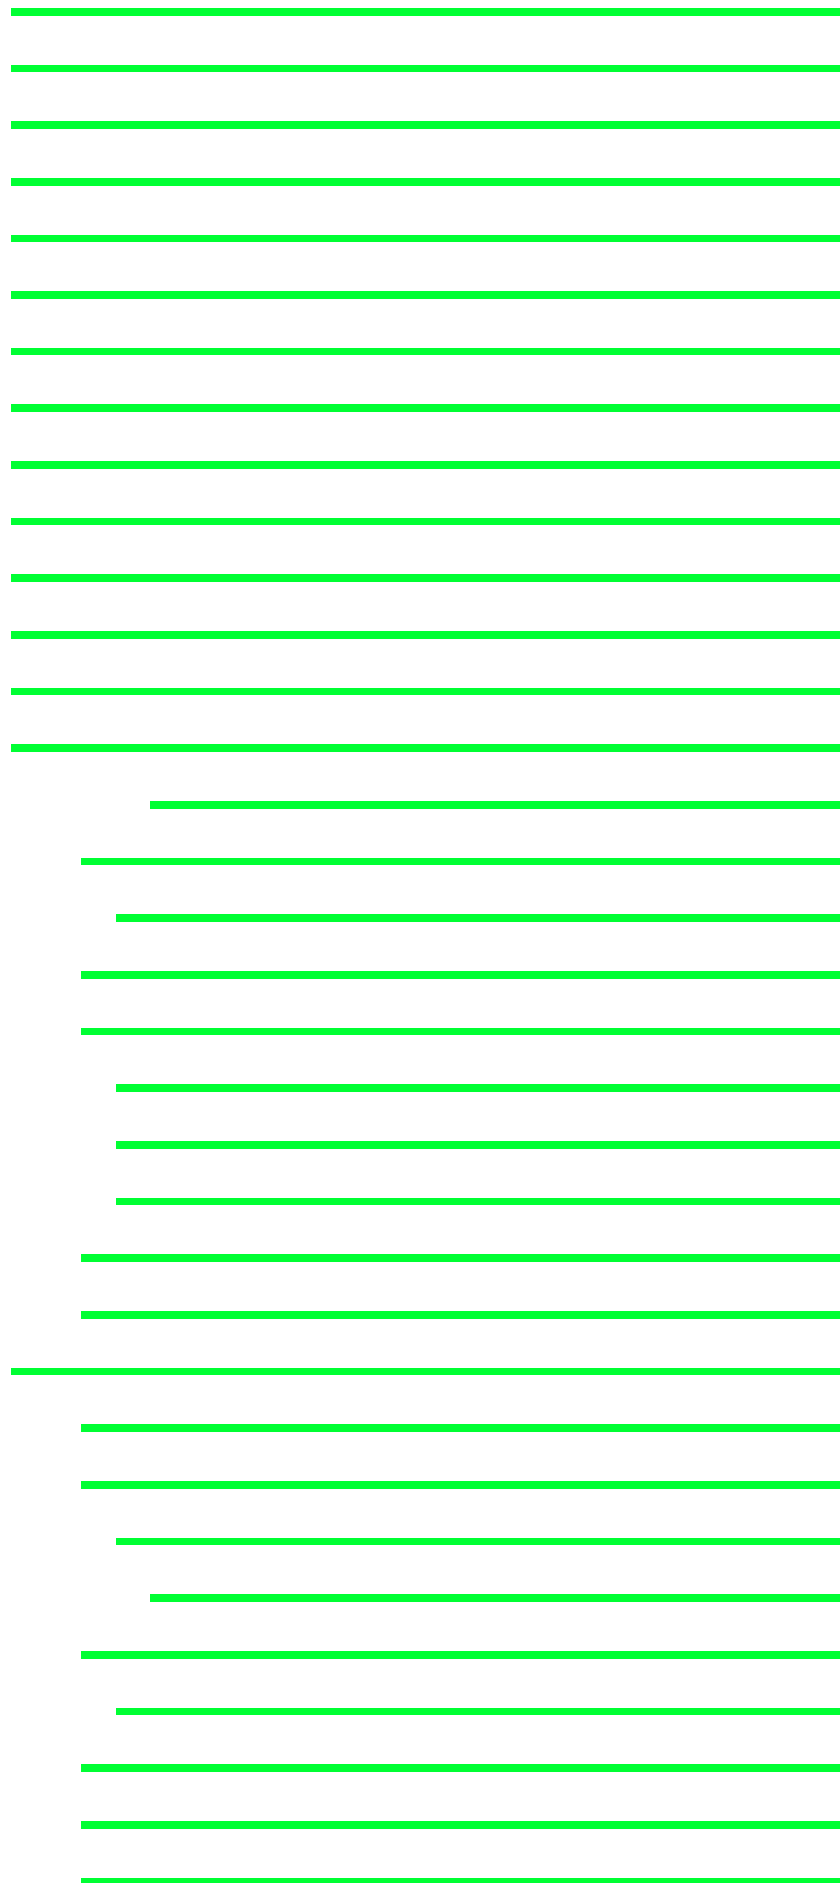





**Descriptions**

**Sequences producing significant alignments:**

Select: [All](#) [None](#) Selected:0

[Alignments](#)
[Download](#)
[GenPept](#)
[Graphics](#)
[Distance tree of results](#)
[Multiple alignment](#)
⚙

| Description                                                                                | Max score | Total score | Query cover | E value | Ident | Accession                      |
|--------------------------------------------------------------------------------------------|-----------|-------------|-------------|---------|-------|--------------------------------|
| <a href="#">protein.alpha1 acid glyco [Homo sapiens]</a>                                   | 81.7      | 81.7        | 100%        | 3e-16   | 96%   | <a href="#">720005A</a>        |
| <a href="#">Chain A, Crystal Structure Of Human Alpha1-Acid Glycoprotein [Homo sapien</a>  | 81.7      | 81.7        | 100%        | 4e-16   | 96%   | <a href="#">3KQ0_A</a>         |
| <a href="#">Chain A, Crystal Structure Of Human Alpha 1 Acid Glycoprotein [Homo sapier</a> | 81.7      | 81.7        | 100%        | 4e-16   | 96%   | <a href="#">3BX6_A</a>         |
| <a href="#">ORM1 [synthetic construct]</a>                                                 | 81.7      | 81.7        | 100%        | 4e-16   | 96%   | <a href="#">AIC54852.1</a>     |
| <a href="#">Orosomuroid 1 [Homo sapiens]</a>                                               | 81.7      | 81.7        | 100%        | 4e-16   | 96%   | <a href="#">AAI43315.1</a>     |
| <a href="#">alpha-1-acid glycoprotein 1 precursor [Homo sapiens]</a>                       | 81.7      | 81.7        | 100%        | 4e-16   | 96%   | <a href="#">CAA29229.1</a>     |
| <a href="#">RecName: Full=Alpha-1-acid glycoprotein 1; Short=AGP 1; AltName: Full=Orc</a>  | 81.7      | 81.7        | 100%        | 4e-16   | 96%   | <a href="#">P02763.1</a>       |
| <a href="#">alpha-1-acid glycoprotein 1 precursor [Homo sapiens]</a>                       | 81.7      | 81.7        | 100%        | 4e-16   | 96%   | <a href="#">NP_000598.2</a>    |
| <a href="#">orosomuroid 1 [synthetic construct]</a>                                        | 81.7      | 81.7        | 100%        | 4e-16   | 96%   | <a href="#">AAV38575.1</a>     |
| <a href="#">orosomuroid 1 [synthetic construct]</a>                                        | 81.7      | 81.7        | 100%        | 4e-16   | 96%   | <a href="#">AAV38574.1</a>     |
| <a href="#">PREDICTED: alpha-1-acid glycoprotein 1-like [Gorilla gorilla gorilla]</a>      | 77.4      | 77.4        | 100%        | 1e-14   | 92%   | <a href="#">XP_004048543.1</a> |
| <a href="#">PREDICTED: alpha-1-acid glycoprotein 1 [Pongo abelii]</a>                      | 77.4      | 77.4        | 100%        | 1e-14   | 92%   | <a href="#">XP_002820180.1</a> |
| <a href="#">PREDICTED: alpha-1-acid glycoprotein 1 [Chlorocebus sabaeus]</a>               | 76.1      | 76.1        | 100%        | 3e-14   | 88%   | <a href="#">XP_007966502.1</a> |
| <a href="#">PREDICTED: LOW QUALITY PROTEIN: alpha-1-acid glycoprotein 1 [Pan tro</a>       | 74.9      | 74.9        | 100%        | 8e-14   | 88%   | <a href="#">XP_009455427.1</a> |
| <a href="#">PREDICTED: alpha-1-acid glycoprotein 1 isoform 1 [Nomascus leucogenys]</a>     | 74.9      | 74.9        | 100%        | 8e-14   | 88%   | <a href="#">XP_003264088.1</a> |
| <a href="#">PREDICTED: alpha-1-acid glycoprotein 1 isoform X3 [Macaca fascicularis]</a>    | 72.7      | 72.7        | 100%        | 4e-13   | 83%   | <a href="#">XP_005581033.1</a> |
| <a href="#">PREDICTED: alpha-1-acid glycoprotein 1-like isoform 2 [Macaca mulatta]</a>     | 72.7      | 72.7        | 100%        | 4e-13   | 83%   | <a href="#">XP_001100289.1</a> |
| <a href="#">Alpha-1-acid glycoprotein 1 [Macaca mulatta]</a>                               | 72.7      | 72.7        | 100%        | 4e-13   | 83%   | <a href="#">EHH23840.1</a>     |
| <a href="#">PREDICTED: alpha-1-acid glycoprotein 1 isoform X2 [Macaca fascicularis]</a>    | 72.7      | 72.7        | 100%        | 4e-13   | 83%   | <a href="#">XP_005581032.1</a> |
| <a href="#">PREDICTED: alpha-1-acid glycoprotein 1 isoform X1 [Macaca fascicularis]</a>    | 72.7      | 72.7        | 100%        | 5e-13   | 83%   | <a href="#">XP_005581031.1</a> |
| <a href="#">PREDICTED: alpha-1-acid glycoprotein 1 [Rhinopithecus roxellana]</a>           | 69.8      | 69.8        | 100%        | 5e-12   | 79%   | <a href="#">XP_010368793.1</a> |
| <a href="#">PREDICTED: alpha-1-acid glycoprotein 1 [Papio anubis]</a>                      | 68.9      | 68.9        | 100%        | 9e-12   | 79%   | <a href="#">XP_009186482.1</a> |
| <a href="#">Chain A, Crystal Structure Of The A Variant Of Human Alpha1-Acid Glycoprot</a> | 66.4      | 66.4        | 100%        | 6e-11   | 75%   | <a href="#">3APU_A</a>         |
| <a href="#">ORM2 [synthetic construct]</a>                                                 | 66.4      | 66.4        | 100%        | 7e-11   | 75%   | <a href="#">AIC54853.1</a>     |
| <a href="#">alpha-1-acid glycoprotein 2 precursor [Homo sapiens]</a>                       | 66.4      | 66.4        | 100%        | 7e-11   | 75%   | <a href="#">CAA29873.2</a>     |
| <a href="#">alpha-1-acid glycoprotein 2 precursor [Homo sapiens]</a>                       | 66.4      | 66.4        | 100%        | 7e-11   | 75%   | <a href="#">NP_000599.1</a>    |
| <a href="#">PREDICTED: alpha-1-acid glycoprotein 1-like [Gorilla gorilla gorilla]</a>      | 66.4      | 66.4        | 100%        | 7e-11   | 75%   | <a href="#">XP_004048546.1</a> |
| <a href="#">ORM2 [Homo sapiens]</a>                                                        | 66.4      | 66.4        | 100%        | 7e-11   | 75%   | <a href="#">CAG33211.1</a>     |
| <a href="#">PREDICTED: alpha-1-acid glycoprotein 2-like [Pan troglodytes]</a>              | 66.4      | 66.4        | 100%        | 7e-11   | 75%   | <a href="#">XP_520209.3</a>    |

|                                                                                              |      |      |      |       |     |                                |
|----------------------------------------------------------------------------------------------|------|------|------|-------|-----|--------------------------------|
| <a href="#">PREDICTED: LOW QUALITY PROTEIN: alpha-1-acid glycoprotein 2 [Pan pa</a>          | 66.4 | 66.4 | 100% | 8e-11 | 75% | <a href="#">XP_008957108.1</a> |
| <a href="#">unnamed protein product [Homo sapiens]</a>                                       | 63.8 | 63.8 | 100% | 5e-10 | 71% | <a href="#">BAG35159.1</a>     |
| <a href="#">PREDICTED: alpha-1-acid glycoprotein 1 [Callithrix jacchus]</a>                  | 58.3 | 58.3 | 83%  | 4e-08 | 80% | <a href="#">XP_002760492.1</a> |
| <a href="#">PREDICTED: alpha-1-acid glycoprotein 2-like [Loxodonta africana]</a>             | 57.1 | 57.1 | 91%  | 1e-07 | 73% | <a href="#">XP_003407553.1</a> |
| <a href="#">PREDICTED: alpha-1-acid glycoprotein 2 [Chrysochloris asiatica]</a>              | 54.9 | 54.9 | 87%  | 5e-07 | 71% | <a href="#">XP_006865789.1</a> |
| <a href="#">PREDICTED: alpha-1-acid glycoprotein 1 isoform X2 [Canis lupus familiaris]</a>   | 54.5 | 54.5 | 91%  | 7e-07 | 64% | <a href="#">XP_005627010.1</a> |
| <a href="#">PREDICTED: alpha-1-acid glycoprotein 1 isoform X1 [Canis lupus familiaris]</a>   | 54.5 | 54.5 | 91%  | 7e-07 | 64% | <a href="#">XP_003431634.1</a> |
| <a href="#">PREDICTED: alpha-1-acid glycoprotein-like [Trichechus manatus latirostris]</a>   | 54.5 | 54.5 | 87%  | 7e-07 | 71% | <a href="#">XP_004391229.1</a> |
| <a href="#">PREDICTED: alpha-1-acid glycoprotein 2-like [Trichechus manatus latirostris]</a> | 54.5 | 54.5 | 87%  | 7e-07 | 71% | <a href="#">XP_004391192.1</a> |
| <a href="#">PREDICTED: alpha-1-acid glycoprotein 2 [Trichechus manatus latirostris]</a>      | 54.5 | 54.5 | 87%  | 7e-07 | 71% | <a href="#">XP_004372401.1</a> |
| <a href="#">PREDICTED: alpha-1-acid glycoprotein 2 [Otolemur garnettii]</a>                  | 54.5 | 54.5 | 91%  | 7e-07 | 73% | <a href="#">XP_003785445.1</a> |
| <a href="#">PREDICTED: alpha-1-acid glycoprotein 1 [Saimiri boliviensis boliviensis]</a>     | 53.2 | 53.2 | 91%  | 2e-06 | 64% | <a href="#">XP_003925252.1</a> |
| <a href="#">Alpha-1-acid glycoprotein [Myotis davidii]</a>                                   | 52.4 | 52.4 | 100% | 3e-06 | 59% | <a href="#">ELK26646.1</a>     |
| <a href="#">PREDICTED: alpha-1-acid glycoprotein-like [Ursus maritimus]</a>                  | 52.0 | 52.0 | 91%  | 5e-06 | 64% | <a href="#">XP_008707881.1</a> |
| <a href="#">PREDICTED: alpha-1-acid glycoprotein 2-like isoform X2 [Tupaia chinensis]</a>    | 51.5 | 51.5 | 91%  | 7e-06 | 68% | <a href="#">XP_006142836.1</a> |
| <a href="#">PREDICTED: alpha-1-acid glycoprotein 2-like [Loxodonta africana]</a>             | 51.5 | 51.5 | 87%  | 7e-06 | 67% | <a href="#">XP_003407554.1</a> |
| <a href="#">PREDICTED: alpha-1-acid glycoprotein 1-like [Mustela putorius furo]</a>          | 51.1 | 51.1 | 83%  | 8e-06 | 70% | <a href="#">XP_004828368.1</a> |
| <a href="#">hypothetical protein PANDA_003840 [Ailuropoda melanoleuca]</a>                   | 50.7 | 50.7 | 91%  | 9e-06 | 64% | <a href="#">EFB15505.1</a>     |
| <a href="#">PREDICTED: alpha-1-acid glycoprotein 1 [Orycteropus afer afer]</a>               | 50.7 | 50.7 | 87%  | 1e-05 | 71% | <a href="#">XP_007934876.1</a> |
| <a href="#">PREDICTED: alpha-1-acid glycoprotein-like [Ursus maritimus]</a>                  | 50.7 | 50.7 | 91%  | 1e-05 | 64% | <a href="#">XP_008707882.1</a> |
| <a href="#">PREDICTED: alpha-1-acid glycoprotein-like [Ailuropoda melanoleuca]</a>           | 50.7 | 50.7 | 91%  | 1e-05 | 64% | <a href="#">XP_002915823.1</a> |
| <a href="#">PREDICTED: alpha-1-acid glycoprotein 2-like [Galeopterus variegatus]</a>         | 50.3 | 50.3 | 91%  | 2e-05 | 64% | <a href="#">XP_008588097.1</a> |
| <a href="#">PREDICTED: alpha-1-acid glycoprotein 1 [Galeopterus variegatus]</a>              | 50.3 | 50.3 | 91%  | 2e-05 | 64% | <a href="#">XP_008588094.1</a> |
| <a href="#">PREDICTED: alpha-1-acid glycoprotein 1 [Elephantulus edwardii]</a>               | 49.8 | 49.8 | 79%  | 2e-05 | 74% | <a href="#">XP_006890779.1</a> |
| <a href="#">PREDICTED: alpha-1-acid glycoprotein 2-like [Tarsius syrichta]</a>               | 49.4 | 49.4 | 91%  | 3e-05 | 68% | <a href="#">XP_008055404.1</a> |
| <a href="#">PREDICTED: alpha-1-acid glycoprotein-like [Panthera tigris altaica]</a>          | 49.4 | 49.4 | 83%  | 3e-05 | 65% | <a href="#">XP_007094388.1</a> |
| <a href="#">PREDICTED: alpha-1-acid glycoprotein [Felis catus]</a>                           | 49.4 | 49.4 | 83%  | 3e-05 | 65% | <a href="#">XP_003995824.1</a> |
| <a href="#">PREDICTED: LOW QUALITY PROTEIN: orosomucoid 1 [Myotis lucifugus]</a>             | 49.4 | 49.4 | 100% | 3e-05 | 55% | <a href="#">XP_006109685.1</a> |
| <a href="#">alpha-1-acid glycoprotein [Mus musculus]</a>                                     | 46.9 | 46.9 | 91%  | 2e-04 | 59% | <a href="#">AAA91744.1</a>     |
| <a href="#">alpha-1-acid glycoprotein (AGP) precursor [Mus caroli]</a>                       | 46.9 | 46.9 | 91%  | 2e-04 | 59% | <a href="#">AAA37197.1</a>     |
| <a href="#">RecName: Full=Alpha-1-acid glycoprotein 1; Short=AGP 1; AltName: Full=Orc</a>    | 46.9 | 46.9 | 91%  | 2e-04 | 59% | <a href="#">P21350.1</a>       |
| <a href="#">alpha-1-acid glycoprotein 2 precursor [Mus musculus]</a>                         | 46.9 | 46.9 | 91%  | 2e-04 | 59% | <a href="#">NP_035146.1</a>    |
| <a href="#">PREDICTED: LOW QUALITY PROTEIN: alpha-1-acid glycoprotein 1-like [My</a>         | 46.9 | 46.9 | 87%  | 2e-04 | 71% | <a href="#">XP_005880984.1</a> |
| <a href="#">Alpha-1-acid glycoprotein 1 [Cricetulus griseus]</a>                             | 46.4 | 46.4 | 95%  | 3e-04 | 61% | <a href="#">EGW06649.1</a>     |
| <a href="#">PREDICTED: alpha-1-acid glycoprotein 1 [Cricetulus griseus]</a>                  | 46.4 | 46.4 | 95%  | 3e-04 | 61% | <a href="#">XP_003503497.1</a> |
| <a href="#">alpha-1-acid glycoprotein 1 [Cricetulus griseus]</a>                             | 46.4 | 46.4 | 95%  | 3e-04 | 61% | <a href="#">ERE86355.1</a>     |
| <a href="#">alpha-1-acid glycoprotein 1 [Cricetulus griseus]</a>                             | 46.4 | 46.4 | 95%  | 3e-04 | 61% | <a href="#">ERE86354.1</a>     |
| <a href="#">PREDICTED: alpha-1-acid glycoprotein 2 [Pteropus alecto]</a>                     | 46.0 | 46.0 | 95%  | 4e-04 | 57% | <a href="#">XP_006917195.1</a> |
| <a href="#">Alpha-1-acid glycoprotein [Pteropus alecto]</a>                                  | 46.0 | 46.0 | 95%  | 4e-04 | 57% | <a href="#">ELK08232.1</a>     |
| <a href="#">PREDICTED: alpha-1-acid glycoprotein 1-like [Myotis brandtii]</a>                | 45.6 | 45.6 | 91%  | 5e-04 | 59% | <a href="#">XP_005880983.1</a> |
| <a href="#">PREDICTED: alpha-1-acid glycoprotein 2-like [Galeopterus variegatus]</a>         | 45.6 | 45.6 | 83%  | 6e-04 | 65% | <a href="#">XP_008588096.1</a> |
| <a href="#">alpha-1-acid glycoprotein [Mus musculus]</a>                                     | 45.2 | 45.2 | 91%  | 6e-04 | 64% | <a href="#">AAA91745.1</a>     |
| <a href="#">mCG7142, isoform CRA_b [Mus musculus]</a>                                        | 45.2 | 45.2 | 91%  | 8e-04 | 64% | <a href="#">EDL31111.1</a>     |
| <a href="#">alpha-1-acid glycoprotein precursor [Mus caroli]</a>                             | 45.2 | 45.2 | 91%  | 8e-04 | 64% | <a href="#">AAB67844.1</a>     |
| <a href="#">alpha-1-acid glycoprotein 1 precursor [Mus musculus]</a>                         | 45.2 | 45.2 | 91%  | 8e-04 | 64% | <a href="#">NP_032794.1</a>    |

|                                                                                            |      |      |     |       |     |                                |
|--------------------------------------------------------------------------------------------|------|------|-----|-------|-----|--------------------------------|
| <a href="#">RecName: Full=Alpha-1-acid glycoprotein 8; Short=AGP 8; AltName: Full=Orc</a>  | 45.2 | 45.2 | 91% | 8e-04 | 64% | <a href="#">P21352.1</a>       |
| <a href="#">Orosomuroid 1 [Mus musculus]</a>                                               | 45.2 | 45.2 | 91% | 8e-04 | 64% | <a href="#">AAH12725.1</a>     |
| <a href="#">mCG7142, isoform CRA_e [Mus musculus]</a>                                      | 45.2 | 45.2 | 91% | 8e-04 | 64% | <a href="#">EDL31114.1</a>     |
| <a href="#">PREDICTED: alpha-1-acid glycoprotein 1 [Mesocricetus auratus]</a>              | 44.8 | 44.8 | 83% | 0.001 | 65% | <a href="#">XP_005075189.1</a> |
| <a href="#">alpha-1-acid glycoprotein precursor [Rattus norvegicus]</a>                    | 43.9 | 43.9 | 83% | 0.002 | 70% | <a href="#">NP_445740.1</a>    |
| <a href="#">PREDICTED: alpha-1-acid glycoprotein 1 [Nannospalax galii]</a>                 | 43.1 | 43.1 | 95% | 0.004 | 57% | <a href="#">XP_008831764.1</a> |
| <a href="#">PREDICTED: alpha-1-acid glycoprotein 2-like [Myotis lucifugus]</a>             | 43.1 | 43.1 | 91% | 0.004 | 59% | <a href="#">XP_006099427.1</a> |
| <a href="#">PREDICTED: alpha-1-acid glycoprotein 2-like [Loxodonta africana]</a>           | 43.1 | 43.1 | 79% | 0.004 | 68% | <a href="#">XP_003407551.1</a> |
| <a href="#">PREDICTED: alpha-1-acid glycoprotein 2-like [Loxodonta africana]</a>           | 42.6 | 42.6 | 79% | 0.006 | 63% | <a href="#">XP_010586317.1</a> |
| <a href="#">PREDICTED: alpha-1-acid glycoprotein-like [Camelus dromedarius]</a>            | 42.2 | 42.2 | 83% | 0.007 | 70% | <a href="#">XP_010995686.1</a> |
| <a href="#">PREDICTED: alpha-1-acid glycoprotein-like [Camelus ferus]</a>                  | 42.2 | 42.2 | 83% | 0.007 | 70% | <a href="#">XP_006186090.1</a> |
| <a href="#">PREDICTED: alpha-1-acid glycoprotein-like [Ochotona princeps]</a>              | 41.8 | 41.8 | 95% | 0.010 | 57% | <a href="#">XP_004595034.1</a> |
| <a href="#">PREDICTED: alpha-1-acid glycoprotein 2-like [Myotis lucifugus]</a>             | 41.8 | 41.8 | 83% | 0.010 | 65% | <a href="#">XP_006108236.1</a> |
| <a href="#">PREDICTED: alpha-1-acid glycoprotein 2-like [Myotis lucifugus]</a>             | 41.8 | 41.8 | 83% | 0.010 | 65% | <a href="#">XP_006099413.1</a> |
| <a href="#">PREDICTED: alpha-1-acid glycoprotein-like [Vicugna pacos]</a>                  | 41.4 | 41.4 | 79% | 0.013 | 74% | <a href="#">XP_006211428.1</a> |
| <a href="#">PREDICTED: alpha-1-acid glycoprotein-like [Peromyscus maniculatus bairdii]</a> | 40.9 | 40.9 | 87% | 0.018 | 62% | <a href="#">XP_006979617.1</a> |
| <a href="#">PREDICTED: alpha-1-acid glycoprotein 2-like [Myotis lucifugus]</a>             | 40.9 | 40.9 | 75% | 0.018 | 67% | <a href="#">XP_006108237.1</a> |
| <a href="#">Alpha-1-acid glycoprotein 1 [Heterocephalus glaber]</a>                        | 40.1 | 40.1 | 87% | 0.031 | 67% | <a href="#">EHB03307.1</a>     |
| <a href="#">PREDICTED: alpha-1-acid glycoprotein 1 [Heterocephalus glaber]</a>             | 40.1 | 40.1 | 87% | 0.032 | 67% | <a href="#">XP_004885278.1</a> |
| <a href="#">PREDICTED: alpha-1-acid glycoprotein 1-like [Echinops telfairi]</a>            | 40.1 | 40.1 | 83% | 0.033 | 70% | <a href="#">XP_004718018.1</a> |
| <a href="#">PREDICTED: alpha-1-acid glycoprotein 1 [Echinops telfairi]</a>                 | 40.1 | 40.1 | 83% | 0.034 | 70% | <a href="#">XP_004712638.1</a> |
| <a href="#">PREDICTED: alpha-1-acid glycoprotein 1 [Heterocephalus glaber]</a>             | 40.1 | 40.1 | 87% | 0.035 | 67% | <a href="#">XP_004849700.1</a> |
| <a href="#">PREDICTED: alpha-1-acid glycoprotein 1-like [Mustela putorius furo]</a>        | 39.7 | 39.7 | 83% | 0.042 | 60% | <a href="#">XP_004807875.1</a> |
| <a href="#">PREDICTED: alpha-1-acid glycoprotein 1 [Mustela putorius furo]</a>             | 39.7 | 39.7 | 83% | 0.044 | 60% | <a href="#">XP_004774102.1</a> |
| <a href="#">PREDICTED: alpha-1-acid glycoprotein 1 [Erinaceus europaeus]</a>               | 39.7 | 39.7 | 75% | 0.047 | 67% | <a href="#">XP_007526815.1</a> |
| <a href="#">PREDICTED: alpha-1-acid glycoprotein 2-like isoform X1 [Tupaia chinensis]</a>  | 39.7 | 39.7 | 91% | 0.047 | 64% | <a href="#">XP_006142835.1</a> |

## Alignments

[Download](#) [GenPept](#) [Graphics](#) [Next](#) [Previous](#) [Descriptions](#)

protein,alpha1 acid glyco

Sequence ID: [prf|J720005A](#) Length: 182 Number of Matches: 1

Range 1: 69 to 92 [GenPept](#) [Graphics](#) [Next Match](#) [Previous Match](#)

| Score          | Expect | Identities | Positives   | Gaps     |
|----------------|--------|------------|-------------|----------|
| 81.7 bits(185) | 3e-16  | 23/24(96%) | 24/24(100%) | 0/24(0%) |

Query 1 RQDQCIYNTTYLNVQREDGTISRY 24  
 RQDQCIYNTTYLNVQRE+GTISRY  
 Sbjct 69 RQDQCIYNTTYLNVQRENGTISRY 92

### Related Information

[Download](#) [GenPept](#) [Graphics](#) [Next](#) [Previous](#) [Descriptions](#)

Chain A, Crystal Structure Of Human Alpha1-Acid Glycoprotein

Sequence ID: [pdb|3KQ0|A](#) Length: 192 Number of Matches: 1

Range 1: 68 to 91 [GenPept](#) [Graphics](#) [Next Match](#) [Previous Match](#)

| Score          | Expect | Identities | Positives   | Gaps     |
|----------------|--------|------------|-------------|----------|
| 81.7 bits(185) | 4e-16  | 23/24(96%) | 24/24(100%) | 0/24(0%) |

### Related Information

[Structure](#) - 3D structure displays

Query 1 RQDQCIYNTTYLNVQREDGTISRY 24  
 RQDQCIYNTTYLNVQRE+GTISRY  
 Sbjct 68 RQDQCIYNTTYLNVQRENGTISRY 91

[Download](#) [GenPept](#) [Graphics](#)

[▼ Next](#) [▲ Previous](#) [▲ Descriptions](#)

Chain A, Crystal Structure Of Human Alpha 1 Acid Glycoprotein

Sequence ID: [pdb|3BX6|A](#) Length: 192 Number of Matches: 1

Range 1: 68 to 91 [GenPept](#) [Graphics](#)

[▼ Next Match](#) [▲ Previous Match](#)

**Related Information**

| Score          | Expect | Identities | Positives   | Gaps     |
|----------------|--------|------------|-------------|----------|
| 81.7 bits(185) | 4e-16  | 23/24(96%) | 24/24(100%) | 0/24(0%) |

Query 1 RQDQCIYNTTYLNVQREDGTISRY 24  
 RQDQCIYNTTYLNVQRE+GTISRY  
 Sbjct 68 RQDQCIYNTTYLNVQRENGTISRY 91

[Download](#) [GenPept](#) [Graphics](#)

[▼ Next](#) [▲ Previous](#) [▲ Descriptions](#)

ORM1, partial [synthetic construct]

Sequence ID: [gb|AIC54852.1](#) Length: 201 Number of Matches: 1

Range 1: 86 to 109 [GenPept](#) [Graphics](#)

[▼ Next Match](#) [▲ Previous Match](#)

**Related Information**

| Score          | Expect | Identities | Positives   | Gaps     |
|----------------|--------|------------|-------------|----------|
| 81.7 bits(185) | 4e-16  | 23/24(96%) | 24/24(100%) | 0/24(0%) |

Query 1 RQDQCIYNTTYLNVQREDGTISRY 24  
 RQDQCIYNTTYLNVQRE+GTISRY  
 Sbjct 86 RQDQCIYNTTYLNVQRENGTISRY 109

[Download](#) [GenPept](#) [Graphics](#)

[▼ Next](#) [▲ Previous](#) [▲ Descriptions](#)

Orosomucoid 1 [Homo sapiens]

Sequence ID: [gb|AAI43315.1](#) Length: 201 Number of Matches: 1

Range 1: 86 to 109 [GenPept](#) [Graphics](#)

[▼ Next Match](#) [▲ Previous Match](#)

**Related Information**

[Gene](#) - associated gene details

| Score          | Expect | Identities | Positives   | Gaps     |
|----------------|--------|------------|-------------|----------|
| 81.7 bits(185) | 4e-16  | 23/24(96%) | 24/24(100%) | 0/24(0%) |

Query 1 RQDQCIYNTTYLNVQREDGTISRY 24  
 RQDQCIYNTTYLNVQRE+GTISRY  
 Sbjct 86 RQDQCIYNTTYLNVQRENGTISRY 109

BLAST is a registered trademark of the National Library of Medicine.

▶ NCBI/ BLAST/ blastp suite/ Formatting Results - BBJ2CMB401R

**i** Your search parameters were adjusted to search for a short input sequence.

[Edit and Resubmit](#) [Save Search Strategies](#) ▶ [Formatting options](#) ▶ [Download](#)

[YouTube](#) [How to read this page](#) [Blast report description](#)

## ORM1\_RQDQCIYNTTYLNVQRENGTISRY\_NonMod

RID [BBJ2CMB401R](#) (Expires on 01-15 08:37 am)

**Query ID** |cl|218060  
**Description** None  
**Molecule type** amino acid  
**Query Length** 24

**Database Name** nr  
**Description** All non-redundant GenBank CDS translations+PDB+SwissProt+PIR excluding environmental samples from WGS projects  
**Program** BLASTP 2.2.30+ ▶ [Citation](#)

Other reports: ▶ [Search Summary](#) [[Taxonomy reports](#)] [[Distance tree of results](#)] [[Multiple alignment](#)]

### **G**raphic Summary

[Show Conserved Domains](#)

No putative conserved domains have been detected

Distribution of 100 Blast Hits on the Query Sequence

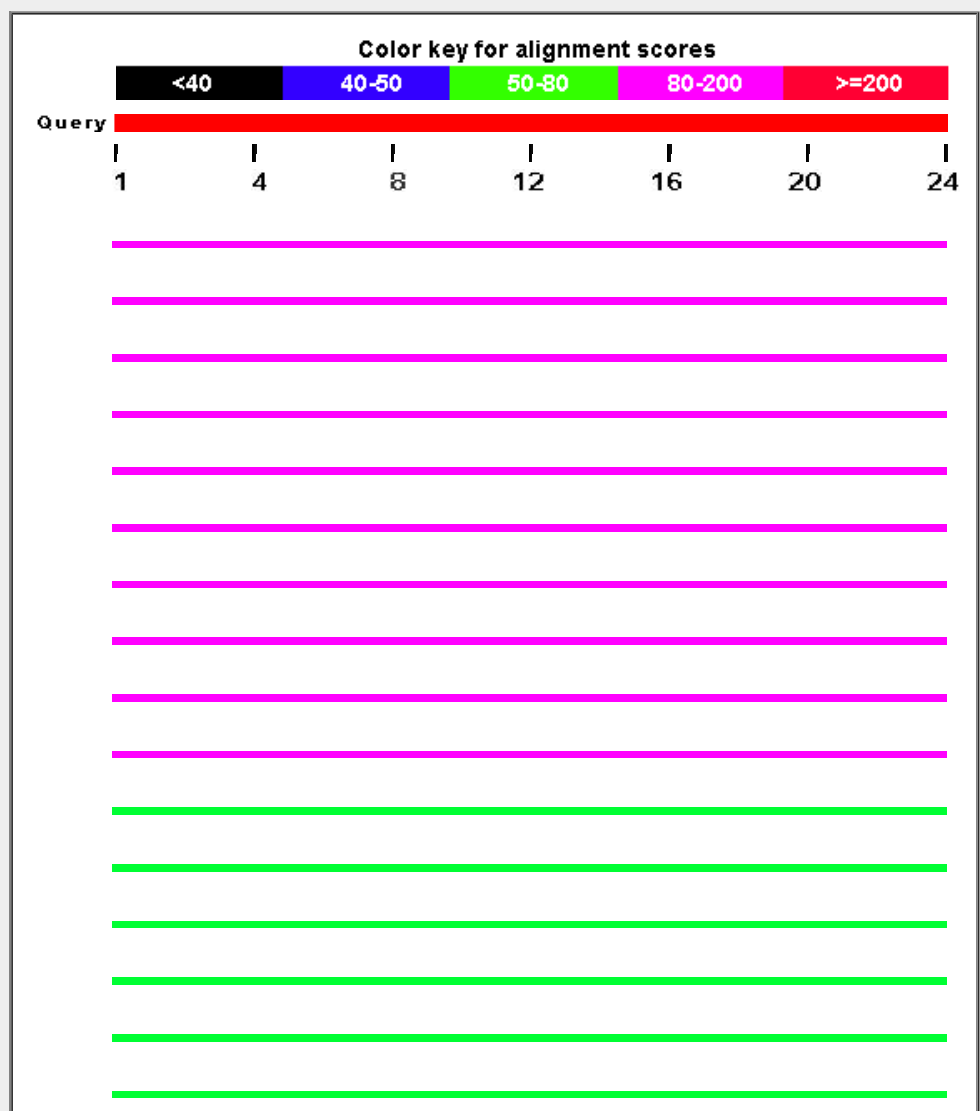

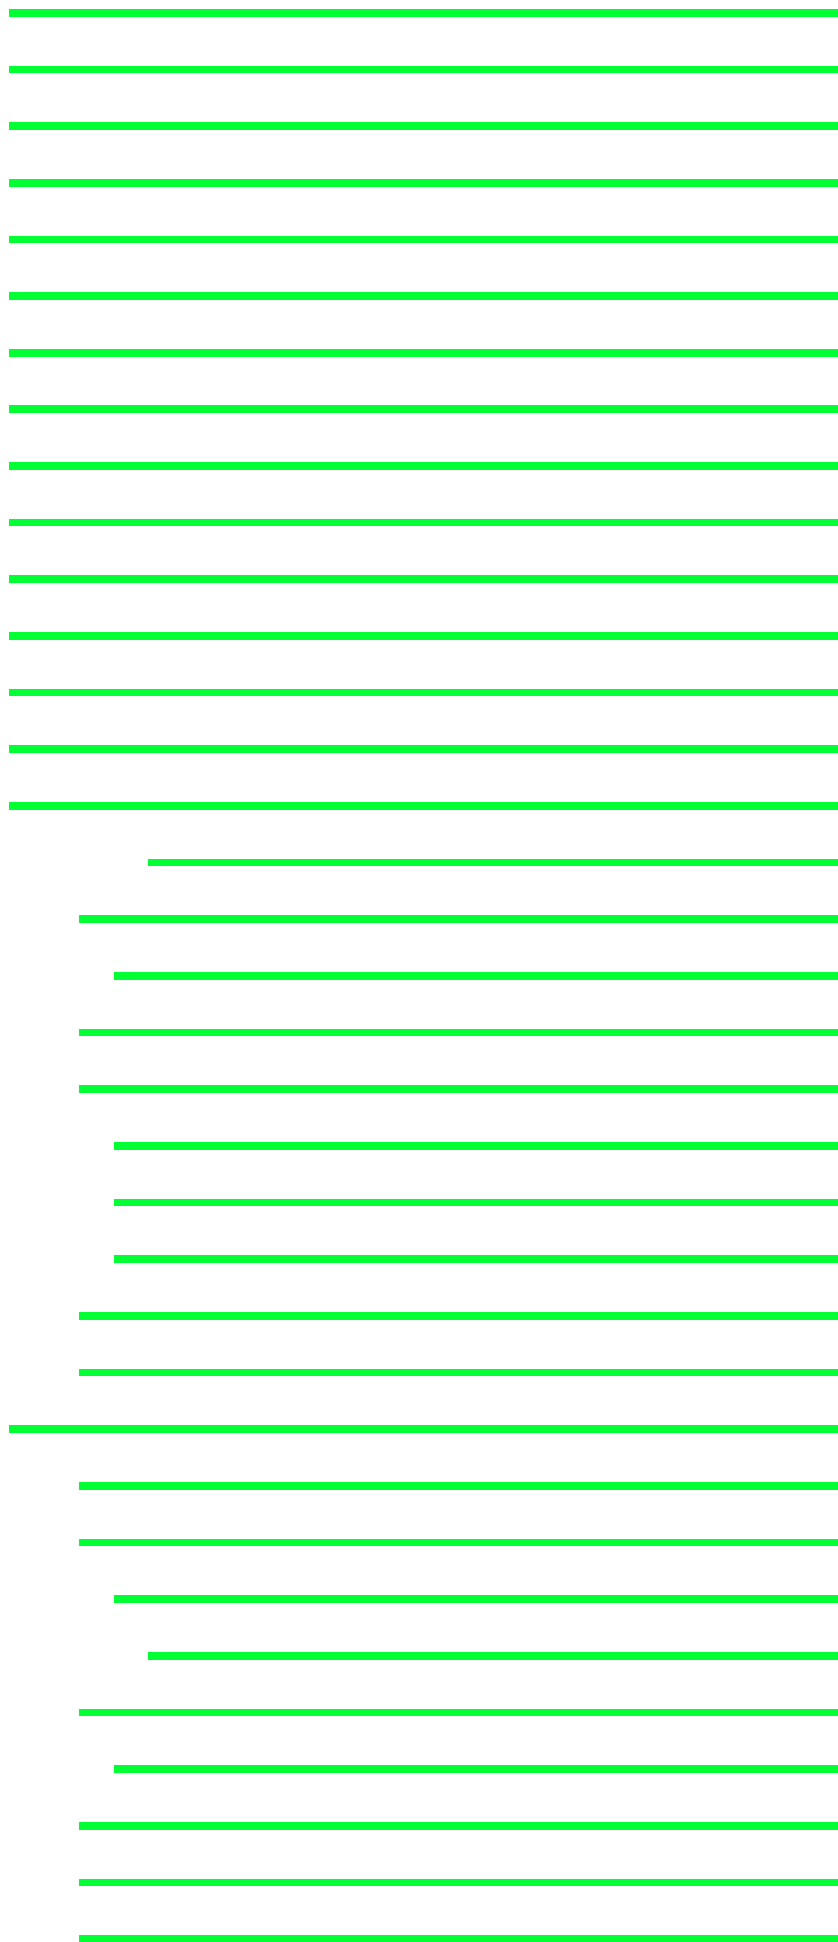

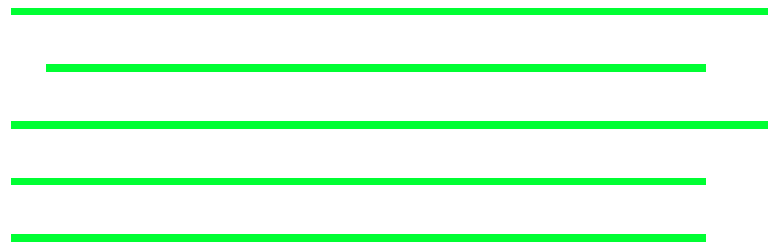

**Descriptions**

**Sequences producing significant alignments:**

Select: [All](#) [None](#) Selected:0

Alignments Download GenPept Graphics Distance tree of results Multiple alignment

| Description                                                                           | Max score | Total score | Query cover | E value | Ident | Accession                                   |
|---------------------------------------------------------------------------------------|-----------|-------------|-------------|---------|-------|---------------------------------------------|
| <a href="#">protein.alpha1 acid glyco [Homo sapiens]</a>                              | 84.2      | 84.2        | 100%        | 4e-17   | 100%  | <a href="#">gij229386 Z20005A</a>           |
| <a href="#">Chain A, Crystal Structure Of Human Alpha1-Acid Glycoprotein [Ho</a>      | 84.2      | 84.2        | 100%        | 4e-17   | 100%  | <a href="#">gij285803540 3KQ0_A</a>         |
| <a href="#">Chain A, Crystal Structure Of Human Alpha 1 Acid Glycoprotein [Hc</a>     | 84.2      | 84.2        | 100%        | 4e-17   | 100%  | <a href="#">gij215794600 3BX6_A</a>         |
| <a href="#">ORM1 [synthetic construct]</a>                                            | 84.2      | 84.2        | 100%        | 4e-17   | 100%  | <a href="#">gij649120278 AIC54852.1</a>     |
| <a href="#">Orosomuroid 1 [Homo sapiens]</a>                                          | 84.2      | 84.2        | 100%        | 4e-17   | 100%  | <a href="#">gij219519923 AAI43315.1</a>     |
| <a href="#">alpha-1-acid glycoprotein 1 precursor [Homo sapiens]</a>                  | 84.2      | 84.2        | 100%        | 4e-17   | 100%  | <a href="#">gij1197209 CAA29229.1</a>       |
| <a href="#">RecName: Full=Alpha-1-acid glycoprotein 1; Short=AGP 1; AltNam</a>        | 84.2      | 84.2        | 100%        | 4e-17   | 100%  | <a href="#">gij112877 P02763.1</a>          |
| <a href="#">alpha-1-acid glycoprotein 1 precursor [Homo sapiens]</a>                  | 84.2      | 84.2        | 100%        | 4e-17   | 100%  | <a href="#">gij167857790 NP_000598.2</a>    |
| <a href="#">orosomuroid 1 [synthetic construct]</a>                                   | 84.2      | 84.2        | 100%        | 4e-17   | 100%  | <a href="#">gij54696406 AAV38575.1</a>      |
| <a href="#">orosomuroid 1 [synthetic construct]</a>                                   | 84.2      | 84.2        | 100%        | 4e-17   | 100%  | <a href="#">gij54696404 AAV38574.1</a>      |
| <a href="#">PREDICTED: alpha-1-acid glycoprotein 1-like [Gorilla gorilla gorilla]</a> | 80.0      | 80.0        | 100%        | 1e-15   | 96%   | <a href="#">gij426362801 XP_004048543.1</a> |
| <a href="#">PREDICTED: alpha-1-acid glycoprotein 1 [Pongo abelii]</a>                 | 80.0      | 80.0        | 100%        | 1e-15   | 96%   | <a href="#">gij297685191 XP_002820180.1</a> |
| <a href="#">PREDICTED: alpha-1-acid glycoprotein 1 [Chlorocebus sabaeus]</a>          | 78.7      | 78.7        | 100%        | 4e-15   | 92%   | <a href="#">gij635071762 XP_007966502.1</a> |
| <a href="#">PREDICTED: LOW QUALITY PROTEIN: alpha-1-acid glycoprotein</a>             | 77.4      | 77.4        | 100%        | 1e-14   | 92%   | <a href="#">gij694936727 XP_009455427.1</a> |
| <a href="#">PREDICTED: alpha-1-acid glycoprotein 1 isoform 1 [Nomascus leu</a>        | 77.4      | 77.4        | 100%        | 1e-14   | 92%   | <a href="#">gij332229827 XP_003264088.1</a> |
| <a href="#">PREDICTED: alpha-1-acid glycoprotein 1 isoform X3 [Macaca fasci</a>       | 75.3      | 75.3        | 100%        | 5e-14   | 88%   | <a href="#">gij544492702 XP_005581033.1</a> |
| <a href="#">PREDICTED: alpha-1-acid glycoprotein 1-like isoform 2 [Macaca m</a>       | 75.3      | 75.3        | 100%        | 5e-14   | 88%   | <a href="#">gij109110480 XP_001100289.1</a> |
| <a href="#">Alpha-1-acid glycoprotein 1 [Macaca mulatta]</a>                          | 75.3      | 75.3        | 100%        | 5e-14   | 88%   | <a href="#">gij355567499 EHH23840.1</a>     |
| <a href="#">PREDICTED: alpha-1-acid glycoprotein 1 isoform X2 [Macaca fasci</a>       | 75.3      | 75.3        | 100%        | 6e-14   | 88%   | <a href="#">gij544492700 XP_005581032.1</a> |
| <a href="#">PREDICTED: alpha-1-acid glycoprotein 1 isoform X1 [Macaca fasci</a>       | 75.3      | 75.3        | 100%        | 6e-14   | 88%   | <a href="#">gij544492698 XP_005581031.1</a> |
| <a href="#">PREDICTED: alpha-1-acid glycoprotein 1 [Rhinopithecus roxellana]</a>      | 72.3      | 72.3        | 100%        | 6e-13   | 83%   | <a href="#">gij724859712 XP_010368793.1</a> |
| <a href="#">PREDICTED: alpha-1-acid glycoprotein 1 [Papio anubis]</a>                 | 71.5      | 71.5        | 100%        | 1e-12   | 83%   | <a href="#">gij685591954 XP_009186482.1</a> |
| <a href="#">Chain A, Crystal Structure Of The A Variant Of Human Alpha1-Acid</a>      | 68.9      | 68.9        | 100%        | 8e-12   | 79%   | <a href="#">gij323714404 3APU_A</a>         |
| <a href="#">ORM2 [synthetic construct]</a>                                            | 68.9      | 68.9        | 100%        | 8e-12   | 79%   | <a href="#">gij649120282 AIC54853.1</a>     |
| <a href="#">alpha-1-acid glycoprotein 2 precursor [Homo sapiens]</a>                  | 68.9      | 68.9        | 100%        | 8e-12   | 79%   | <a href="#">gij29170378 CAA29873.2</a>      |
| <a href="#">alpha-1-acid glycoprotein 2 precursor [Homo sapiens]</a>                  | 68.9      | 68.9        | 100%        | 8e-12   | 79%   | <a href="#">gij4505529 NP_000599.1</a>      |
| <a href="#">PREDICTED: alpha-1-acid glycoprotein 1-like [Gorilla gorilla gorilla]</a> | 68.9      | 68.9        | 100%        | 8e-12   | 79%   | <a href="#">gij426362807 XP_004048546.1</a> |
| <a href="#">ORM2 [Homo sapiens]</a>                                                   | 68.9      | 68.9        | 100%        | 8e-12   | 79%   | <a href="#">gij48145977 CAG33211.1</a>      |

|                                                                                     |      |      |      |       |     |                                             |
|-------------------------------------------------------------------------------------|------|------|------|-------|-----|---------------------------------------------|
| <a href="#">PREDICTED: alpha-1-acid glycoprotein 2-like [Pan troglodytes]</a>       | 68.9 | 68.9 | 100% | 8e-12 | 79% | <a href="#">gij694988125 XP_520209.3</a>    |
| <a href="#">PREDICTED: LOW QUALITY PROTEIN: alpha-1-acid glycoprotein</a>           | 68.9 | 68.9 | 100% | 1e-11 | 79% | <a href="#">gij675802504 XP_008957108.1</a> |
| <a href="#">unnamed protein product [Homo sapiens]</a>                              | 66.4 | 66.4 | 100% | 6e-11 | 75% | <a href="#">gij189053338 BAG35159.1</a>     |
| <a href="#">PREDICTED: alpha-1-acid glycoprotein 1 [Callithrix jacchus]</a>         | 60.9 | 60.9 | 83%  | 5e-09 | 85% | <a href="#">gij296229919 XP_002760492.1</a> |
| <a href="#">PREDICTED: alpha-1-acid glycoprotein 2-like [Loxodonta africana]</a>    | 59.6 | 59.6 | 91%  | 1e-08 | 77% | <a href="#">gij344271455 XP_003407553.1</a> |
| <a href="#">PREDICTED: alpha-1-acid glycoprotein 2 [Chrysochloris asiatica]</a>     | 57.5 | 57.5 | 87%  | 7e-08 | 76% | <a href="#">gij586470389 XP_006865789.1</a> |
| <a href="#">PREDICTED: alpha-1-acid glycoprotein 1 isoform X2 [Canis lupus f</a>    | 57.1 | 57.1 | 91%  | 9e-08 | 68% | <a href="#">gij545518002 XP_005627010.1</a> |
| <a href="#">PREDICTED: alpha-1-acid glycoprotein 1 isoform X1 [Canis lupus f</a>    | 57.1 | 57.1 | 91%  | 9e-08 | 68% | <a href="#">gij345777714 XP_003431634.1</a> |
| <a href="#">PREDICTED: alpha-1-acid glycoprotein-like [Trichechus manatus l</a>     | 57.1 | 57.1 | 87%  | 9e-08 | 76% | <a href="#">gij471419478 XP_004391229.1</a> |
| <a href="#">PREDICTED: alpha-1-acid glycoprotein 2-like [Trichechus manatus</a>     | 57.1 | 57.1 | 87%  | 9e-08 | 76% | <a href="#">gij471419404 XP_004391192.1</a> |
| <a href="#">PREDICTED: alpha-1-acid glycoprotein 2 [Trichechus manatus latir</a>    | 57.1 | 57.1 | 87%  | 9e-08 | 76% | <a href="#">gij471363692 XP_004372401.1</a> |
| <a href="#">PREDICTED: alpha-1-acid glycoprotein 2 [Otolemur garnettii]</a>         | 57.1 | 57.1 | 91%  | 9e-08 | 77% | <a href="#">gij395824383 XP_003785445.1</a> |
| <a href="#">PREDICTED: alpha-1-acid glycoprotein 1 [Saimiri boliviensis bolivi</a>  | 55.8 | 55.8 | 91%  | 2e-07 | 68% | <a href="#">gij403266135 XP_003925252.1</a> |
| <a href="#">Alpha-1-acid glycoprotein [Myotis davidii]</a>                          | 54.9 | 54.9 | 100% | 3e-07 | 62% | <a href="#">gij432095447 ELK26646.1</a>     |
| <a href="#">PREDICTED: alpha-1-acid glycoprotein-like [Ursus maritimus]</a>         | 54.5 | 54.5 | 91%  | 6e-07 | 68% | <a href="#">gij671034103 XP_008707881.1</a> |
| <a href="#">PREDICTED: alpha-1-acid glycoprotein 2-like isoform X2 [Tupaia c</a>    | 54.1 | 54.1 | 91%  | 9e-07 | 73% | <a href="#">gij562826345 XP_006142836.1</a> |
| <a href="#">PREDICTED: alpha-1-acid glycoprotein 2-like [Loxodonta africana]</a>    | 54.1 | 54.1 | 87%  | 9e-07 | 71% | <a href="#">gij344271457 XP_003407554.1</a> |
| <a href="#">PREDICTED: alpha-1-acid glycoprotein 1-like [Mustela putorius fur</a>   | 53.7 | 53.7 | 83%  | 1e-06 | 75% | <a href="#">gij512022336 XP_004828368.1</a> |
| <a href="#">hypothetical protein PANDA_003840 [Ailuropoda melanoleuca]</a>          | 53.2 | 53.2 | 91%  | 1e-06 | 68% | <a href="#">gij281339921 EFB15505.1</a>     |
| <a href="#">PREDICTED: alpha-1-acid glycoprotein 1 [Orycteropus afer afer]</a>      | 53.2 | 53.2 | 87%  | 2e-06 | 76% | <a href="#">gij634836563 XP_007934876.1</a> |
| <a href="#">PREDICTED: alpha-1-acid glycoprotein-like [Ursus maritimus]</a>         | 53.2 | 53.2 | 91%  | 2e-06 | 68% | <a href="#">gij671034105 XP_008707882.1</a> |
| <a href="#">PREDICTED: alpha-1-acid glycoprotein-like [Ailuropoda melanoleu</a>     | 53.2 | 53.2 | 91%  | 2e-06 | 68% | <a href="#">gij301760029 XP_002915823.1</a> |
| <a href="#">PREDICTED: alpha-1-acid glycoprotein 2-like [Galeopterus variega</a>    | 52.8 | 52.8 | 91%  | 2e-06 | 68% | <a href="#">gij667321193 XP_008588097.1</a> |
| <a href="#">PREDICTED: alpha-1-acid glycoprotein 1 [Galeopterus variegatus]</a>     | 52.8 | 52.8 | 91%  | 2e-06 | 68% | <a href="#">gij667321187 XP_008588094.1</a> |
| <a href="#">PREDICTED: alpha-1-acid glycoprotein 1 [Elephantulus edwardii]</a>      | 52.4 | 52.4 | 79%  | 3e-06 | 79% | <a href="#">gij585676946 XP_006890779.1</a> |
| <a href="#">PREDICTED: alpha-1-acid glycoprotein 2-like [Tarsius syrichta]</a>      | 52.0 | 52.0 | 91%  | 4e-06 | 73% | <a href="#">gij640798447 XP_008055404.1</a> |
| <a href="#">PREDICTED: alpha-1-acid glycoprotein-like [Panthera tigris altaica]</a> | 52.0 | 52.0 | 83%  | 4e-06 | 70% | <a href="#">gij591337606 XP_007094388.1</a> |
| <a href="#">PREDICTED: alpha-1-acid glycoprotein [Felis catus]</a>                  | 52.0 | 52.0 | 83%  | 4e-06 | 70% | <a href="#">gij410978897 XP_003995824.1</a> |
| <a href="#">PREDICTED: LOW QUALITY PROTEIN: orosomuoid 1 [Myotis luc</a>            | 52.0 | 52.0 | 100% | 5e-06 | 59% | <a href="#">gij558172686 XP_006109685.1</a> |
| <a href="#">alpha-1-acid glycoprotein [Mus musculus]</a>                            | 49.4 | 49.4 | 91%  | 3e-05 | 64% | <a href="#">gij387176 AAA91744.1</a>        |
| <a href="#">alpha-1-acid glycoprotein (AGP) precursor [Mus caroli]</a>              | 49.4 | 49.4 | 91%  | 3e-05 | 64% | <a href="#">gij309098 AAA37197.1</a>        |
| <a href="#">RecName: Full=Alpha-1-acid glycoprotein 1; Short=AGP 1; AltNam</a>      | 49.4 | 49.4 | 91%  | 3e-05 | 64% | <a href="#">gij112879 P21350.1</a>          |
| <a href="#">alpha-1-acid glycoprotein 2 precursor [Mus musculus]</a>                | 49.4 | 49.4 | 91%  | 3e-05 | 64% | <a href="#">gij6754950 NP_035146.1</a>      |
| <a href="#">PREDICTED: LOW QUALITY PROTEIN: alpha-1-acid glycoprotein</a>           | 49.4 | 49.4 | 87%  | 3e-05 | 76% | <a href="#">gij554578835 XP_005880984.1</a> |
| <a href="#">Alpha-1-acid glycoprotein 1 [Cricetulus griseus]</a>                    | 49.0 | 49.0 | 95%  | 4e-05 | 65% | <a href="#">gij344250545 EGW06649.1</a>     |
| <a href="#">PREDICTED: alpha-1-acid glycoprotein 1 [Cricetulus griseus]</a>         | 49.0 | 49.0 | 95%  | 4e-05 | 65% | <a href="#">gij354482623 XP_003503497.1</a> |
| <a href="#">alpha-1-acid glycoprotein 1 [Cricetulus griseus]</a>                    | 49.0 | 49.0 | 95%  | 4e-05 | 65% | <a href="#">gij537238399 ERE86355.1</a>     |
| <a href="#">alpha-1-acid glycoprotein 1 [Cricetulus griseus]</a>                    | 49.0 | 49.0 | 95%  | 4e-05 | 65% | <a href="#">gij537238398 ERE86354.1</a>     |
| <a href="#">PREDICTED: alpha-1-acid glycoprotein 2 [Pteropus alecto]</a>            | 48.6 | 48.6 | 95%  | 6e-05 | 61% | <a href="#">gij586524471 XP_006917195.1</a> |
| <a href="#">Alpha-1-acid glycoprotein [Pteropus alecto]</a>                         | 48.6 | 48.6 | 95%  | 6e-05 | 61% | <a href="#">gij431900791 ELK08232.1</a>     |
| <a href="#">PREDICTED: alpha-1-acid glycoprotein 1-like [Myotis brandtii]</a>       | 48.1 | 48.1 | 91%  | 6e-05 | 63% | <a href="#">gij554578831 XP_005880983.1</a> |
| <a href="#">PREDICTED: alpha-1-acid glycoprotein 2-like [Galeopterus variega</a>    | 48.1 | 48.1 | 83%  | 8e-05 | 70% | <a href="#">gij667321190 XP_008588096.1</a> |
| <a href="#">alpha-1-acid glycoprotein [Mus musculus]</a>                            | 47.7 | 47.7 | 91%  | 8e-05 | 68% | <a href="#">gij553922 AAA91745.1</a>        |
| <a href="#">mCG7142, isoform CRA_b [Mus musculus]</a>                               | 47.7 | 47.7 | 91%  | 1e-04 | 68% | <a href="#">gij148699164 EDL31111.1</a>     |
| <a href="#">alpha-1-acid glycoprotein precursor [Mus caroli]</a>                    | 47.7 | 47.7 | 91%  | 1e-04 | 68% | <a href="#">gij309100 AAB67844.1</a>        |



|                                                                                     |      |      |     |       |     |                                             |
|-------------------------------------------------------------------------------------|------|------|-----|-------|-----|---------------------------------------------|
| <a href="#">alpha-1-acid glycoprotein 1 precursor [Mus musculus]</a>                | 47.7 | 47.7 | 91% | 1e-04 | 68% | <a href="#">gij6679182 NP_032794.1</a>      |
| <a href="#">RecName: Full=Alpha-1-acid glycoprotein 8; Short=AGP 8; AltNam</a>      | 47.7 | 47.7 | 91% | 1e-04 | 68% | <a href="#">gij112883 P21352.1</a>          |
| <a href="#">Orosomuroid 1 [Mus musculus]</a>                                        | 47.7 | 47.7 | 91% | 1e-04 | 68% | <a href="#">gij15215270 AAH12725.1</a>      |
| <a href="#">mCG7142_isoform CRA_e [Mus musculus]</a>                                | 47.7 | 47.7 | 91% | 1e-04 | 68% | <a href="#">gij148699167 EDL31114.1</a>     |
| <a href="#">PREDICTED: alpha-1-acid glycoprotein 1 [Mesocricetus auratus]</a>       | 47.3 | 47.3 | 83% | 2e-04 | 70% | <a href="#">gij524950349 XP_005075189.1</a> |
| <a href="#">alpha-1-acid glycoprotein precursor [Rattus norvegicus]</a>             | 46.4 | 46.4 | 83% | 3e-04 | 75% | <a href="#">gij16757980 NP_445740.1</a>     |
| <a href="#">PREDICTED: alpha-1-acid glycoprotein 1 [Nannospalax galili]</a>         | 45.6 | 45.6 | 95% | 5e-04 | 61% | <a href="#">gij674051046 XP_008831764.1</a> |
| <a href="#">PREDICTED: alpha-1-acid glycoprotein 2-like [Myotis lucifugus]</a>      | 45.6 | 45.6 | 91% | 5e-04 | 64% | <a href="#">gij558172682 XP_006099427.1</a> |
| <a href="#">PREDICTED: alpha-1-acid glycoprotein 2-like [Loxodonta africana]</a>    | 45.6 | 45.6 | 79% | 6e-04 | 74% | <a href="#">gij344271451 XP_003407551.1</a> |
| <a href="#">PREDICTED: alpha-1-acid glycoprotein 2-like [Loxodonta africana]</a>    | 45.2 | 45.2 | 79% | 8e-04 | 68% | <a href="#">gij731463853 XP_010586317.1</a> |
| <a href="#">PREDICTED: alpha-1-acid glycoprotein-like [Camelus ferus]</a>           | 44.8 | 44.8 | 83% | 0.001 | 75% | <a href="#">gij560919741 XP_006186090.1</a> |
| <a href="#">PREDICTED: alpha-1-acid glycoprotein-like [Ochotona princeps]</a>       | 44.3 | 44.3 | 95% | 0.001 | 61% | <a href="#">gij504170887 XP_004595034.1</a> |
| <a href="#">PREDICTED: alpha-1-acid glycoprotein 2-like [Myotis lucifugus]</a>      | 44.3 | 44.3 | 83% | 0.001 | 70% | <a href="#">gij558213865 XP_006108236.1</a> |
| <a href="#">PREDICTED: alpha-1-acid glycoprotein 2-like [Myotis lucifugus]</a>      | 44.3 | 44.3 | 83% | 0.001 | 70% | <a href="#">gij558172615 XP_006099413.1</a> |
| <a href="#">PREDICTED: alpha-1-acid glycoprotein-like [Vicugna pacos]</a>           | 43.9 | 43.9 | 79% | 0.002 | 79% | <a href="#">gij560978319 XP_006211428.1</a> |
| <a href="#">PREDICTED: alpha-1-acid glycoprotein-like [Peromyscus manicula]</a>     | 43.5 | 43.5 | 87% | 0.003 | 67% | <a href="#">gij589933663 XP_006979617.1</a> |
| <a href="#">PREDICTED: alpha-1-acid glycoprotein 2-like [Myotis lucifugus]</a>      | 43.5 | 43.5 | 75% | 0.003 | 72% | <a href="#">gij558213870 XP_006108237.1</a> |
| <a href="#">Alpha-1-acid glycoprotein 1 [Heterocephalus glaber]</a>                 | 42.6 | 42.6 | 87% | 0.004 | 71% | <a href="#">gij351700388 EHB03307.1</a>     |
| <a href="#">PREDICTED: alpha-1-acid glycoprotein 1 [Heterocephalus glaber]</a>      | 42.6 | 42.6 | 87% | 0.005 | 71% | <a href="#">gij512843596 XP_004885278.1</a> |
| <a href="#">PREDICTED: alpha-1-acid glycoprotein 1-like [Echinops telfairi]</a>     | 42.6 | 42.6 | 83% | 0.005 | 75% | <a href="#">gij507712754 XP_004718018.1</a> |
| <a href="#">PREDICTED: alpha-1-acid glycoprotein 1 [Echinops telfairi]</a>          | 42.6 | 42.6 | 83% | 0.005 | 75% | <a href="#">gij507689354 XP_004712638.1</a> |
| <a href="#">PREDICTED: alpha-1-acid glycoprotein 1 [Heterocephalus glaber]</a>      | 42.6 | 42.6 | 87% | 0.005 | 71% | <a href="#">gij512975244 XP_004849700.1</a> |
| <a href="#">PREDICTED: alpha-1-acid glycoprotein 1-like [Mustela putorius furo]</a> | 42.2 | 42.2 | 83% | 0.006 | 65% | <a href="#">gij511980019 XP_004807875.1</a> |
| <a href="#">PREDICTED: alpha-1-acid glycoprotein 1 [Mustela putorius furo]</a>      | 42.2 | 42.2 | 83% | 0.006 | 65% | <a href="#">gij511909351 XP_004774102.1</a> |
| <a href="#">PREDICTED: alpha-1-acid glycoprotein 1 [Erinaceus europaeus]</a>        | 42.2 | 42.2 | 75% | 0.007 | 72% | <a href="#">gij617619058 XP_007526815.1</a> |
| <a href="#">PREDICTED: alpha-1-acid glycoprotein 2-like isoform X1 [Tupaia c</a>    | 42.2 | 42.2 | 91% | 0.007 | 68% | <a href="#">gij562826343 XP_006142835.1</a> |
| <a href="#">Alpha-1-acid glycoprotein 2 [Tupaia chinensis]</a>                      | 42.2 | 42.2 | 91% | 0.007 | 68% | <a href="#">gij444730223 ELW70613.1</a>     |

## Alignments

Download GenPept Graphics

Next Previous Descriptions

protein, alpha1 acid glyco

Sequence ID: [gij229386|prf|720005A](#) Length: 182 Number of Matches: 1

### Related Information

Range 1: 69 to 92 GenPept Graphics

Next Match Previous Match

| Score          | Expect | Identities  | Positives   | Gaps     |
|----------------|--------|-------------|-------------|----------|
| 84.2 bits(191) | 4e-17  | 24/24(100%) | 24/24(100%) | 0/24(0%) |

Query 1 RQDQCIYNTTYLNVQRENGTISRY 24  
 RQDQCIYNTTYLNVQRENGTISRY  
 Sbjct 69 RQDQCIYNTTYLNVQRENGTISRY 92

Download GenPept Graphics

Next Previous Descriptions

Chain A, Crystal Structure Of Human Alpha1-Acid Glycoprotein

Sequence ID: [gij285803540|pdb|3KQ0|A](#) Length: 192 Number of Matches: 1

### Related Information

Range 1: 68 to 91 GenPept Graphics

Next Match Previous Match

| Score          | Expect | Identities  | Positives   | Gaps     |
|----------------|--------|-------------|-------------|----------|
| 84.2 bits(191) | 4e-17  | 24/24(100%) | 24/24(100%) | 0/24(0%) |

Query 1 RQDQCIYNTTYLNVQRENGTISRY 24

[Structure](#) - 3D structure displays

Sbjct 68 RQDQCIYNTTYLNVQRENGTISRY 91

[Download](#) [GenPept](#) [Graphics](#)

[Next](#) [Previous](#) [Descriptions](#)

Chain A, Crystal Structure Of Human Alpha 1 Acid Glycoprotein

Sequence ID: [gi|215794600|pdb|3BX6|A](#) Length: 192 Number of Matches: 1

**Related Information**

Range 1: 68 to 91 [GenPept](#) [Graphics](#) [Next Match](#) [Previous Match](#)

| Score          | Expect | Identities  | Positives   | Gaps     |
|----------------|--------|-------------|-------------|----------|
| 84.2 bits(191) | 4e-17  | 24/24(100%) | 24/24(100%) | 0/24(0%) |

Query 1 RQDQCIYNTTYLNVQRENGTISRY 24  
 RQDQCIYNTTYLNVQRENGTISRY  
 Sbjct 68 RQDQCIYNTTYLNVQRENGTISRY 91

[Download](#) [GenPept](#) [Graphics](#)

[Next](#) [Previous](#) [Descriptions](#)

ORM1, partial [synthetic construct]

Sequence ID: [gi|649120278|gb|AI54852.1](#) Length: 201 Number of Matches: 1

**Related Information**

Range 1: 86 to 109 [GenPept](#) [Graphics](#) [Next Match](#) [Previous Match](#)

| Score          | Expect | Identities  | Positives   | Gaps     |
|----------------|--------|-------------|-------------|----------|
| 84.2 bits(191) | 4e-17  | 24/24(100%) | 24/24(100%) | 0/24(0%) |

Query 1 RQDQCIYNTTYLNVQRENGTISRY 24  
 RQDQCIYNTTYLNVQRENGTISRY  
 Sbjct 86 RQDQCIYNTTYLNVQRENGTISRY 109

[Download](#) [GenPept](#) [Graphics](#)

[Next](#) [Previous](#) [Descriptions](#)

Orosomucoid 1 [Homo sapiens]

Sequence ID: [gi|219519923|gb|AA143315.1](#) Length: 201 Number of Matches: 1

**Related Information**

Range 1: 86 to 109 [GenPept](#) [Graphics](#) [Next Match](#) [Previous Match](#)

| Score          | Expect | Identities  | Positives   | Gaps     |
|----------------|--------|-------------|-------------|----------|
| 84.2 bits(191) | 4e-17  | 24/24(100%) | 24/24(100%) | 0/24(0%) |

Query 1 RQDQCIYNTTYLNVQRENGTISRY 24  
 RQDQCIYNTTYLNVQRENGTISRY  
 Sbjct 86 RQDQCIYNTTYLNVQRENGTISRY 109

[Gene](#) - associated gene details

BLAST is a registered trademark of the National Library of Medicine.

NCBI/ BLAST/ blastp suite/ Formatting Results - BVK0FNEX01R

Your search parameters were adjusted to search for a short input sequence.

[Edit and Resubmit](#) [Save Search Strategies](#) [Formatting options](#) [Download](#) [YouTube](#) [How to read this page](#) [Blast report description](#)

PI16\_KSLPNFPDTSATADATGGRA\_Mod

RID [BVK0FNEX01R](#) (Expires on 01-21 10:31 am)

Query ID |cl|267278 Database Name nr

Description None Description All non-redundant GenBank CDS translations+PDB+SwissProt+PIR+PRF excluding environmental samples from WGS projects

Molecule type amino acid Program BLASTP 2.2.30+ [Citation](#)

Query Length 20

Other reports: [Search Summary](#) [Taxonomy reports](#) [Distance tree of results](#) [Related Structures](#) [Multiple alignment](#)

Graphic Summary

Show Conserved Domains

No putative conserved domains have been detected

Distribution of 100 Blast Hits on the Query Sequence

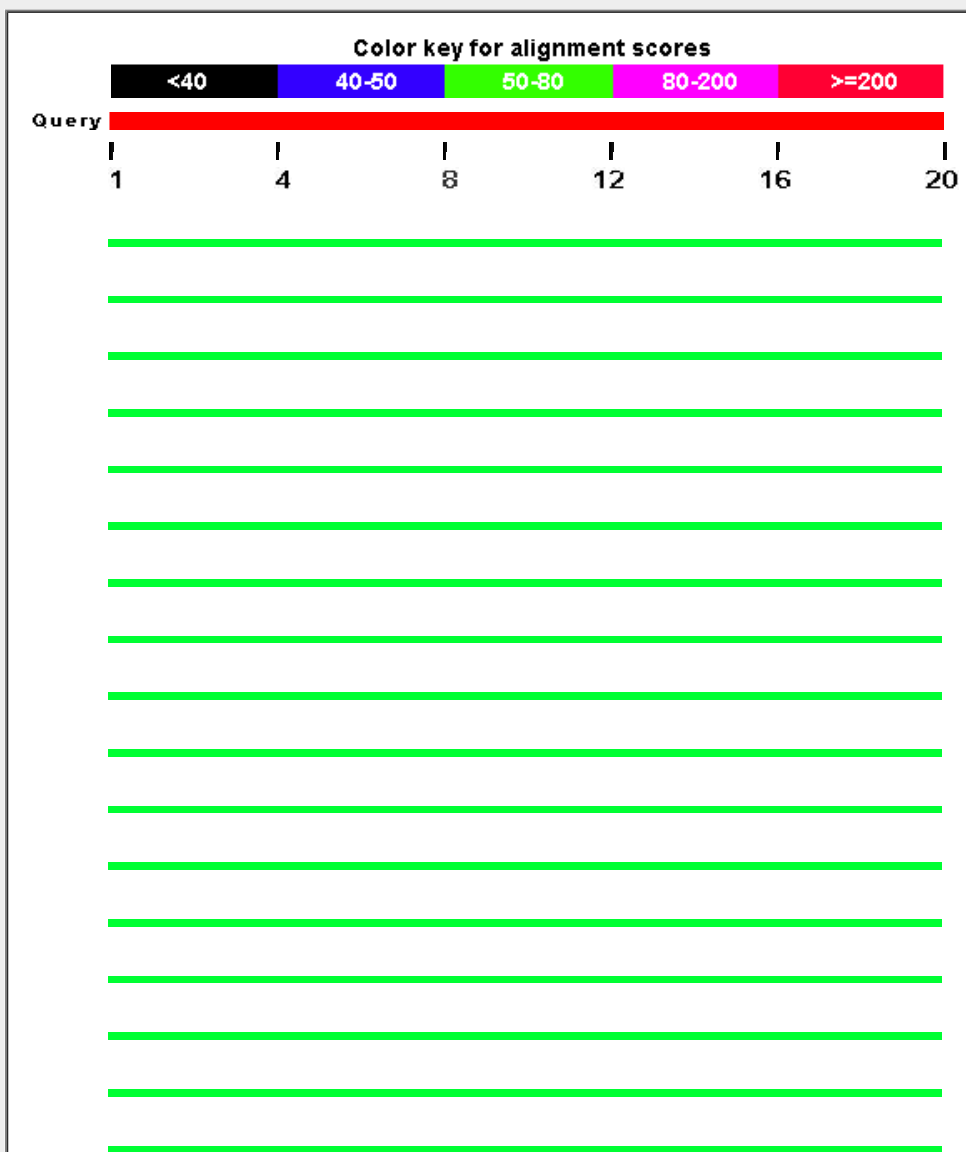

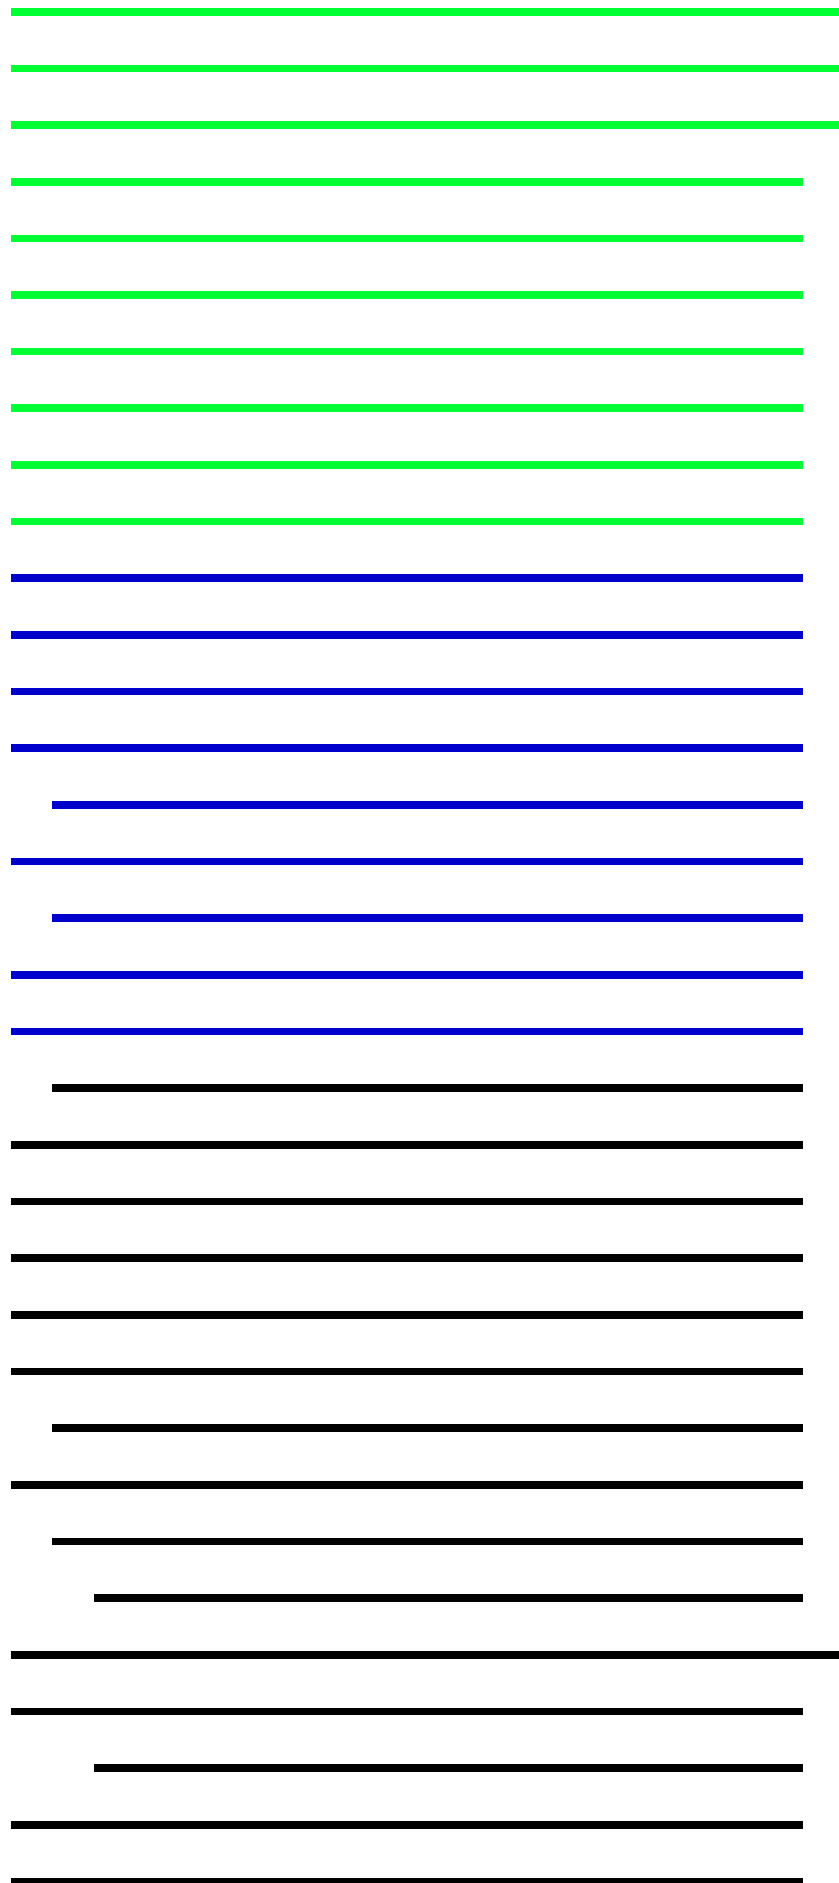

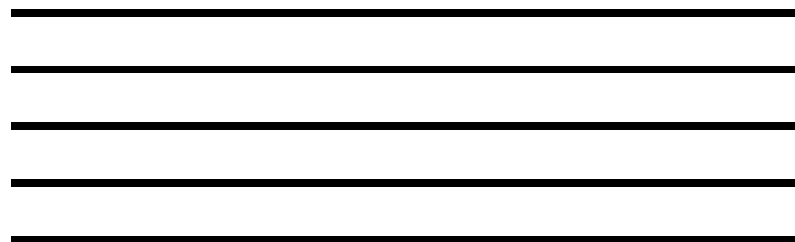

## Descriptions

### Sequences producing significant alignments:

Select: [All](#) [None](#) Selected:0

| <a href="#">Alignments</a> <a href="#">Download</a> <a href="#">GenPept</a> <a href="#">Graphics</a> <a href="#">Distance tree of results</a> <a href="#">Multiple alignment</a> |           |             |             |         |       |                                |  |
|----------------------------------------------------------------------------------------------------------------------------------------------------------------------------------|-----------|-------------|-------------|---------|-------|--------------------------------|--|
| Description                                                                                                                                                                      | Max score | Total score | Query cover | E value | Ident | Accession                      |  |
| <a href="#">unnamed protein product [Homo sapiens]</a>                                                                                                                           | 57.5      | 57.5        | 100%        | 5e-08   | 90%   | <a href="#">BAG63555.1</a>     |  |
| <a href="#">unnamed protein product [Homo sapiens]</a>                                                                                                                           | 57.5      | 57.5        | 100%        | 5e-08   | 90%   | <a href="#">BAG64856.1</a>     |  |
| <a href="#">unnamed protein product [Homo sapiens]</a>                                                                                                                           | 57.5      | 57.5        | 100%        | 5e-08   | 90%   | <a href="#">BAG35648.1</a>     |  |
| <a href="#">peptidase inhibitor 16 precursor [Homo sapiens]</a>                                                                                                                  | 57.5      | 57.5        | 100%        | 5e-08   | 90%   | <a href="#">NP_699201.2</a>    |  |
| <a href="#">PREDICTED: peptidase inhibitor 16 isoform 1 [Gorilla gorilla gorilla]</a>                                                                                            | 57.5      | 57.5        | 100%        | 5e-08   | 90%   | <a href="#">XP_004043978.1</a> |  |
| <a href="#">unnamed protein product [Homo sapiens]</a>                                                                                                                           | 57.5      | 57.5        | 100%        | 5e-08   | 90%   | <a href="#">BAC11640.1</a>     |  |
| <a href="#">PREDICTED: peptidase inhibitor 16 isoform X1 [Pan paniscus]</a>                                                                                                      | 57.5      | 57.5        | 100%        | 5e-08   | 90%   | <a href="#">XP_008970553.1</a> |  |
| <a href="#">PREDICTED: peptidase inhibitor 16 [Pongo abelii]</a>                                                                                                                 | 57.5      | 57.5        | 100%        | 5e-08   | 90%   | <a href="#">XP_003776875.1</a> |  |
| <a href="#">peptidase inhibitor 16 precursor [Pan troglodytes]</a>                                                                                                               | 57.5      | 57.5        | 100%        | 5e-08   | 90%   | <a href="#">NP_001267303.1</a> |  |
| <a href="#">Peptidase inhibitor 16 [Homo sapiens]</a>                                                                                                                            | 57.5      | 57.5        | 100%        | 5e-08   | 90%   | <a href="#">AAH35634.2</a>     |  |
| <a href="#">PREDICTED: peptidase inhibitor 16 isoform X1 [Pan troglodytes]</a>                                                                                                   | 57.5      | 57.5        | 100%        | 5e-08   | 90%   | <a href="#">XP_009449371.1</a> |  |
| <a href="#">peptidase inhibitor 16, isoform CRA_a [Homo sapiens]</a>                                                                                                             | 57.5      | 57.5        | 100%        | 5e-08   | 90%   | <a href="#">EAX03923.1</a>     |  |
| <a href="#">PREDICTED: peptidase inhibitor 16 isoform X3 [Chlorocebus sabaeus]</a>                                                                                               | 54.1      | 54.1        | 100%        | 7e-07   | 85%   | <a href="#">XP_007970953.1</a> |  |
| <a href="#">PREDICTED: peptidase inhibitor 16 isoform X1 [Chlorocebus sabaeus]</a>                                                                                               | 54.1      | 54.1        | 100%        | 7e-07   | 85%   | <a href="#">XP_007970951.1</a> |  |
| <a href="#">PREDICTED: peptidase inhibitor 16 [Nomascus leucogenys]</a>                                                                                                          | 53.2      | 53.2        | 100%        | 1e-06   | 85%   | <a href="#">XP_003276952.1</a> |  |
| <a href="#">PREDICTED: peptidase inhibitor 16 isoform X1 [Papio anubis]</a>                                                                                                      | 53.2      | 53.2        | 100%        | 1e-06   | 85%   | <a href="#">XP_009203298.1</a> |  |
| <a href="#">PREDICTED: peptidase inhibitor 16 [Rhinopithecus roxellana]</a>                                                                                                      | 52.8      | 52.8        | 100%        | 2e-06   | 85%   | <a href="#">XP_010388006.1</a> |  |
| <a href="#">PREDICTED: peptidase inhibitor 16 isoform X1 [Macaca fascicularis]</a>                                                                                               | 52.8      | 52.8        | 100%        | 2e-06   | 85%   | <a href="#">XP_005553197.1</a> |  |
| <a href="#">hypothetical protein EGK_14847 [Macaca mulatta]</a>                                                                                                                  | 52.8      | 52.8        | 100%        | 2e-06   | 85%   | <a href="#">EHH18280.1</a>     |  |
| <a href="#">peptidase inhibitor 16 precursor [Macaca mulatta]</a>                                                                                                                | 52.8      | 52.8        | 100%        | 2e-06   | 85%   | <a href="#">NP_001253247.1</a> |  |
| <a href="#">PREDICTED: LOW QUALITY PROTEIN: peptidase inhibitor 16 [Callithrix jacchus]</a>                                                                                      | 52.0      | 52.0        | 95%         | 4e-06   | 84%   | <a href="#">XP_008992599.1</a> |  |
| <a href="#">PREDICTED: peptidase inhibitor 16 isoform X1 [Saimiri boliviensis boliviensis]</a>                                                                                   | 52.0      | 52.0        | 95%         | 4e-06   | 84%   | <a href="#">XP_010332401.1</a> |  |
| <a href="#">PREDICTED: peptidase inhibitor 16 [Myotis davidii]</a>                                                                                                               | 51.5      | 51.5        | 95%         | 5e-06   | 89%   | <a href="#">XP_006759097.1</a> |  |
| <a href="#">Peptidase inhibitor 16 [Myotis brandtii]</a>                                                                                                                         | 50.3      | 50.3        | 95%         | 1e-05   | 84%   | <a href="#">EPQ01732.1</a>     |  |
| <a href="#">PREDICTED: peptidase inhibitor 16 [Myotis brandtii]</a>                                                                                                              | 50.3      | 50.3        | 95%         | 1e-05   | 84%   | <a href="#">XP_005856781.1</a> |  |
| <a href="#">PREDICTED: peptidase inhibitor 16 isoform X1 [Galeopterus variegatus]</a>                                                                                            | 50.3      | 50.3        | 95%         | 1e-05   | 84%   | <a href="#">XP_008566645.1</a> |  |
| <a href="#">PREDICTED: peptidase inhibitor 16 [Myotis lucifugus]</a>                                                                                                             | 50.3      | 50.3        | 95%         | 1e-05   | 84%   | <a href="#">XP_006107008.1</a> |  |
| <a href="#">PREDICTED: peptidase inhibitor 16 isoform X1 [Equus caballus]</a>                                                                                                    | 48.6      | 48.6        | 95%         | 5e-05   | 84%   | <a href="#">XP_001917971.2</a> |  |
| <a href="#">PREDICTED: peptidase inhibitor 16 [Eptesicus fuscus]</a>                                                                                                             | 47.7      | 47.7        | 95%         | 1e-04   | 79%   | <a href="#">XP_008150183.1</a> |  |

|                                                                                             |      |      |      |       |     |                                |
|---------------------------------------------------------------------------------------------|------|------|------|-------|-----|--------------------------------|
| <a href="#">PREDICTED: peptidase inhibitor 16 [Tarsius syrichta]</a>                        | 46.9 | 46.9 | 95%  | 2e-04 | 79% | <a href="#">XP_008062768.1</a> |
| <a href="#">PREDICTED: peptidase inhibitor 16 [Ceratotherium simum simum]</a>               | 43.9 | 43.9 | 95%  | 0.002 | 79% | <a href="#">XP_004424519.1</a> |
| <a href="#">PREDICTED: peptidase inhibitor 16 [Orycteropus afer afer]</a>                   | 41.8 | 41.8 | 90%  | 0.008 | 78% | <a href="#">XP_007937600.1</a> |
| <a href="#">PREDICTED: peptidase inhibitor 16 isoform X1 [Nannospalax gallii]</a>           | 40.9 | 40.9 | 95%  | 0.016 | 74% | <a href="#">XP_008838284.1</a> |
| <a href="#">PREDICTED: peptidase inhibitor 16 isoform X1 [Mesocricetus auratus]</a>         | 40.5 | 40.5 | 90%  | 0.021 | 78% | <a href="#">XP_005084971.1</a> |
| <a href="#">PREDICTED: LOW QUALITY PROTEIN: peptidase inhibitor 16 [Ursus maritimus]</a>    | 40.1 | 40.1 | 95%  | 0.029 | 74% | <a href="#">XP_008691702.1</a> |
| <a href="#">PREDICTED: peptidase inhibitor 16-like [Ailuropoda melanoleuca]</a>             | 40.1 | 40.1 | 95%  | 0.029 | 74% | <a href="#">XP_002930583.1</a> |
| <a href="#">PREDICTED: peptidase inhibitor 16 [Microtus ochrogaster]</a>                    | 39.7 | 39.7 | 90%  | 0.040 | 78% | <a href="#">XP_005360513.1</a> |
| <a href="#">PREDICTED: peptidase inhibitor 16-like [Leptonychotes weddellii]</a>            | 37.5 | 37.5 | 95%  | 0.18  | 74% | <a href="#">XP_006736333.1</a> |
| <a href="#">PREDICTED: peptidase inhibitor 16-like [Leptonychotes weddellii]</a>            | 37.5 | 37.5 | 95%  | 0.19  | 74% | <a href="#">XP_006736335.1</a> |
| <a href="#">PREDICTED: peptidase inhibitor 16 [Panthera tigris altaica]</a>                 | 37.5 | 37.5 | 95%  | 0.19  | 68% | <a href="#">XP_007085400.1</a> |
| <a href="#">PREDICTED: peptidase inhibitor 16 isoform X1 [Felis catus]</a>                  | 37.5 | 37.5 | 95%  | 0.19  | 68% | <a href="#">XP_006931722.1</a> |
| <a href="#">PREDICTED: peptidase inhibitor 16 [Odobenus rosmarus divergens]</a>             | 37.5 | 37.5 | 95%  | 0.19  | 74% | <a href="#">XP_004409837.1</a> |
| <a href="#">PREDICTED: peptidase inhibitor 16 [Otolemur garnettii]</a>                      | 37.5 | 37.5 | 90%  | 0.19  | 72% | <a href="#">XP_003789199.1</a> |
| <a href="#">PREDICTED: peptidase inhibitor 16 [Octodon degus]</a>                           | 37.1 | 37.1 | 95%  | 0.26  | 68% | <a href="#">XP_004624495.1</a> |
| <a href="#">PREDICTED: peptidase inhibitor 16 [Erinaceus europaeus]</a>                     | 35.4 | 35.4 | 90%  | 0.89  | 72% | <a href="#">XP_007517881.1</a> |
| <a href="#">rCG60935 [Rattus norvegicus]</a>                                                | 34.6 | 34.6 | 85%  | 1.6   | 71% | <a href="#">EDL96962.1</a>     |
| <a href="#">PREDICTED: peptidase inhibitor 16 isoform X1 [Tupaia chinensis]</a>             | 34.6 | 34.6 | 100% | 1.6   | 70% | <a href="#">XP_006148688.1</a> |
| <a href="#">PREDICTED: peptidase inhibitor 16 [Ochotona princeps]</a>                       | 34.6 | 34.6 | 95%  | 1.6   | 63% | <a href="#">XP_004590384.1</a> |
| <a href="#">peptidase inhibitor 16 precursor [Rattus norvegicus]</a>                        | 34.6 | 34.6 | 85%  | 1.7   | 71% | <a href="#">NP_001163952.1</a> |
| <a href="#">PREDICTED: peptidase inhibitor 16 isoform X2 [Bos taurus]</a>                   | 34.1 | 34.1 | 95%  | 2.2   | 68% | <a href="#">XP_010816416.1</a> |
| <a href="#">PREDICTED: peptidase inhibitor 16 isoform X1 [Bison bison bison]</a>            | 34.1 | 34.1 | 95%  | 2.2   | 68% | <a href="#">XP_010846978.1</a> |
| <a href="#">peptidase inhibitor 16 precursor [Bos taurus]</a>                               | 34.1 | 34.1 | 95%  | 2.2   | 68% | <a href="#">NP_001019658.1</a> |
| <a href="#">PREDICTED: peptidase inhibitor 16 [Bos mutus]</a>                               | 34.1 | 34.1 | 95%  | 2.2   | 68% | <a href="#">XP_005907794.1</a> |
| <a href="#">peptidase inhibitor 16 precursor [Camelus ferus]</a>                            | 33.7 | 33.7 | 95%  | 3.0   | 68% | <a href="#">EPY72881.1</a>     |
| <a href="#">PREDICTED: peptidase inhibitor 16 isoform X1 [Lipotes vexillifer]</a>           | 33.7 | 33.7 | 95%  | 3.1   | 68% | <a href="#">XP_007467342.1</a> |
| <a href="#">PREDICTED: peptidase inhibitor 16 [Vicugna pacos]</a>                           | 33.7 | 33.7 | 95%  | 3.1   | 68% | <a href="#">XP_006202118.1</a> |
| <a href="#">PREDICTED: peptidase inhibitor 16 isoform X1 [Camelus ferus]</a>                | 33.7 | 33.7 | 95%  | 3.1   | 68% | <a href="#">XP_006195354.1</a> |
| <a href="#">PREDICTED: peptidase inhibitor 16 isoform X1 [Balaenoptera acutorostrata s</a>  | 33.7 | 33.7 | 95%  | 3.1   | 68% | <a href="#">XP_007198004.1</a> |
| <a href="#">PREDICTED: peptidase inhibitor 16 [Physeter catodon]</a>                        | 33.7 | 33.7 | 95%  | 3.1   | 68% | <a href="#">XP_007105444.1</a> |
| <a href="#">PREDICTED: peptidase inhibitor 16 isoform 1 [Tursiops truncatus]</a>            | 33.7 | 33.7 | 95%  | 3.1   | 68% | <a href="#">XP_004324065.1</a> |
| <a href="#">PREDICTED: peptidase inhibitor 16 isoform 1 [Orcinus orca]</a>                  | 33.7 | 33.7 | 95%  | 3.1   | 68% | <a href="#">XP_004267706.1</a> |
| <a href="#">PREDICTED: peptidase inhibitor 16 [Chrysochloris asiatica]</a>                  | 33.7 | 33.7 | 90%  | 3.1   | 67% | <a href="#">XP_006860637.1</a> |
| <a href="#">peptidase inhibitor 16 [Mus musculus]</a>                                       | 32.9 | 32.9 | 90%  | 5.7   | 67% | <a href="#">EDL22615.1</a>     |
| <a href="#">peptidase inhibitor 16 precursor [Sus scrofa]</a>                               | 32.9 | 32.9 | 95%  | 5.7   | 68% | <a href="#">NP_001230456.1</a> |
| <a href="#">Pi16 protein [Mus musculus]</a>                                                 | 32.9 | 32.9 | 90%  | 5.7   | 67% | <a href="#">AAH39124.1</a>     |
| <a href="#">cysteine-rich protease inhibitor [Mus musculus]</a>                             | 32.9 | 32.9 | 90%  | 5.7   | 67% | <a href="#">BAB03398.1</a>     |
| <a href="#">RecName: Full=Peptidase inhibitor 16; Short=PI-16; AltName: Full=Cysteine-r</a> | 32.9 | 32.9 | 90%  | 5.7   | 67% | <a href="#">Q9ET66.1</a>       |
| <a href="#">peptidase inhibitor 16 precursor [Mus musculus]</a>                             | 32.9 | 32.9 | 90%  | 5.7   | 67% | <a href="#">NP_076223.3</a>    |
| <a href="#">PREDICTED: LOW QUALITY PROTEIN: peptidase inhibitor 16 [Cavia porcell</a>       | 32.9 | 32.9 | 95%  | 5.7   | 63% | <a href="#">XP_003473716.2</a> |
| <a href="#">NADH-quinone oxidoreductase subunit E [Hyphomonas polymorpha PS728]</a>         | 32.0 | 32.0 | 85%  | 10    | 63% | <a href="#">KCZ97754.1</a>     |
| <a href="#">hypothetical protein [Streptomyces exfoliatus]</a>                              | 31.6 | 31.6 | 75%  | 14    | 75% | <a href="#">WP_024758634.1</a> |
| <a href="#">hypothetical protein HMPREF1624_02308 [Sporothrix schenckii ATCC 58251]</a>     | 31.6 | 31.6 | 60%  | 15    | 83% | <a href="#">ERT01071.1</a>     |
| <a href="#">hypothetical protein [Deinococcus aquatilis]</a>                                | 31.6 | 31.6 | 65%  | 15    | 85% | <a href="#">WP_019009558.1</a> |
| <a href="#">PREDICTED: peptidase inhibitor 16 isoform X1 [Bubalus bubalis]</a>              | 31.2 | 31.2 | 95%  | 20    | 63% | <a href="#">XP_006050482.1</a> |

|                                                                                              |      |      |     |    |     |                                |
|----------------------------------------------------------------------------------------------|------|------|-----|----|-----|--------------------------------|
| <a href="#">N-succinyl diaminopimelate aminotransferase [Mycobacterium avium]</a>            | 30.8 | 30.8 | 70% | 23 | 73% | <a href="#">WP_033721577.1</a> |
| <a href="#">hypothetical protein [Xanthobacteraceae bacterium 501b]</a>                      | 30.8 | 30.8 | 75% | 26 | 65% | <a href="#">WP_018963918.1</a> |
| <a href="#">protein phnH [Ancylobacter sp. FA202]</a>                                        | 30.8 | 30.8 | 75% | 26 | 65% | <a href="#">WP_026221082.1</a> |
| <a href="#">possible N-succinyl diaminopimelate aminotransferase [Mycobacterium parasc]</a>  | 30.8 | 30.8 | 70% | 27 | 73% | <a href="#">WP_007168466.1</a> |
| <a href="#">PREDICTED: peptidase inhibitor 16 [Trichechus manatus latirostris]</a>           | 30.8 | 30.8 | 85% | 27 | 65% | <a href="#">XP_004379471.1</a> |
| <a href="#">hypothetical protein [Sphaerotilus natans]</a>                                   | 30.8 | 30.8 | 70% | 27 | 73% | <a href="#">WP_037483745.1</a> |
| <a href="#">PREDICTED: uncharacterized protein LOC101454915 [Ceratitis capitata]</a>         | 30.8 | 30.8 | 80% | 28 | 69% | <a href="#">XP_004526076.1</a> |
| <a href="#">hypothetical protein NEMVEDRAFT_v1g222466 [Nematostella vectensis]</a>           | 30.3 | 30.3 | 70% | 37 | 67% | <a href="#">XP_001621007.1</a> |
| <a href="#">hypothetical protein NEMVEDRAFT_v1g225176 [Nematostella vectensis]</a>           | 30.3 | 30.3 | 70% | 38 | 67% | <a href="#">XP_001618412.1</a> |
| <a href="#">PREDICTED: peptidase inhibitor 16 isoformX1 [Canis lupus familiaris]</a>         | 30.3 | 30.3 | 80% | 38 | 69% | <a href="#">XP_538890.2</a>    |
| <a href="#">PREDICTED: peptidase inhibitor 16 [Ictidomys tridecemlineatus]</a>               | 30.3 | 30.3 | 95% | 38 | 63% | <a href="#">XP_005318805.1</a> |
| <a href="#">hypothetical protein NEMVEDRAFT_v1g223650 [Nematostella vectensis]</a>           | 30.3 | 30.3 | 70% | 38 | 67% | <a href="#">XP_001619942.1</a> |
| <a href="#">predicted protein [Nematostella vectensis]</a>                                   | 30.3 | 30.3 | 70% | 38 | 67% | <a href="#">XP_001623494.1</a> |
| <a href="#">hypothetical protein NEMVEDRAFT_v1g222313 [Nematostella vectensis]</a>           | 30.3 | 30.3 | 70% | 38 | 67% | <a href="#">XP_001621153.1</a> |
| <a href="#">hypothetical protein L484_012927 [Morus notabilis]</a>                           | 30.3 | 30.3 | 70% | 38 | 73% | <a href="#">XP_010092586.1</a> |
| <a href="#">hypothetical protein NEMVEDRAFT_v1g222415 [Nematostella vectensis]</a>           | 30.3 | 30.3 | 70% | 38 | 67% | <a href="#">XP_001621055.1</a> |
| <a href="#">predicted protein [Nematostella vectensis]</a>                                   | 30.3 | 30.3 | 70% | 38 | 67% | <a href="#">XP_001623496.1</a> |
| <a href="#">predicted protein [Nematostella vectensis]</a>                                   | 30.3 | 30.3 | 70% | 38 | 67% | <a href="#">XP_001625772.1</a> |
| <a href="#">similar to DNA polymerase zeta catalytic subunit [Botryotinia fuckeliana T4]</a> | 30.3 | 30.3 | 70% | 38 | 71% | <a href="#">CCD54747.1</a>     |
| <a href="#">hypothetical protein BC1G_15151 [Botryotinia fuckeliana B05.10]</a>              | 30.3 | 30.3 | 70% | 38 | 71% | <a href="#">XP_001546441.1</a> |
| <a href="#">hypothetical protein [Curvibacter lanceolatus]</a>                               | 29.9 | 29.9 | 75% | 51 | 67% | <a href="#">WP_019578416.1</a> |
| <a href="#">PREDICTED: peptidase inhibitor 16 [Pantholops hodgsonii]</a>                     | 29.9 | 29.9 | 95% | 52 | 63% | <a href="#">XP_005964334.1</a> |
| <a href="#">PREDICTED: peptidase inhibitor 16 [Capra hircus]</a>                             | 29.9 | 29.9 | 95% | 52 | 63% | <a href="#">XP_005696333.1</a> |
| <a href="#">PREDICTED: peptidase inhibitor 16 isoform X1 [Chinchilla lanigera]</a>           | 29.9 | 29.9 | 95% | 52 | 63% | <a href="#">XP_005389688.1</a> |
| <a href="#">hypothetical protein NECHADRAFT_38494 [Nectria haematococca mpVI 77-1]</a>       | 29.9 | 29.9 | 55% | 52 | 83% | <a href="#">XP_003052195.1</a> |
| <a href="#">hypothetical protein [Halorubrum californiense]</a>                              | 29.5 | 29.5 | 50% | 71 | 90% | <a href="#">WP_008440609.1</a> |

## Alignments

Download  [GenPept](#) [Graphics](#) ▼ Next ▲ Previous ▲ Descriptions

unnamed protein product [Homo sapiens]

Sequence ID: [dbj|BAG63555.1](#) Length: 234 Number of Matches: 1

Range 1: 167 to 186 [GenPept](#) [Graphics](#) ▼ Next Match ▲ Previous Match

| Score          | Expect | Identities | Positives   | Gaps     |
|----------------|--------|------------|-------------|----------|
| 57.5 bits(128) | 5e-08  | 18/20(90%) | 20/20(100%) | 0/20(0%) |

Query 1 KSLPNFPDTSATADATGGRA 20  
 KSLPNFP+TSATA+ATGGRA  
 Sbjct 167 KSLPNFPNTSATANATGGRA 186

### Related Information

[Gene](#) - associated gene details

Download  [GenPept](#) [Graphics](#) ▼ Next ▲ Previous ▲ Descriptions

unnamed protein product [Homo sapiens]

Sequence ID: [dbj|BAG64856.1](#) Length: 315 Number of Matches: 1

Range 1: 248 to 267 [GenPept](#) [Graphics](#) ▼ Next Match ▲ Previous Match

| Score          | Expect | Identities | Positives   | Gaps     |
|----------------|--------|------------|-------------|----------|
| 57.5 bits(128) | 5e-08  | 18/20(90%) | 20/20(100%) | 0/20(0%) |

### Related Information

[Gene](#) - associated gene details

Query 1 KSLPNFPDTSATADATGGRA 20  
 KSLPNFP+TSATA+ATGGRA  
 Sbjct 248 KSLPNFPNTSATANATGGRA 267

Download [GenPept](#) [Graphics](#)

[▼ Next](#) [▲ Previous](#) [▲ Descriptions](#)

unnamed protein product [Homo sapiens]

Sequence ID: [dbj|BAG35648.1](#) Length: 428 Number of Matches: 1

Range 1: 361 to 380 [GenPept](#) [Graphics](#)

[▼ Next Match](#) [▲ Previous Match](#)

| Score          | Expect | Identities | Positives   | Gaps     |
|----------------|--------|------------|-------------|----------|
| 57.5 bits(128) | 5e-08  | 18/20(90%) | 20/20(100%) | 0/20(0%) |

Query 1 KSLPNFPDTSATADATGGRA 20  
 KSLPNFP+TSATA+ATGGRA  
 Sbjct 361 KSLPNFPNTSATANATGGRA 380

**Related Information**

[Gene](#) - associated gene details

Download [GenPept](#) [Graphics](#)

[▼ Next](#) [▲ Previous](#) [▲ Descriptions](#)

peptidase inhibitor 16 precursor [Homo sapiens]

Sequence ID: [ref|NP\\_699201.2](#) Length: 463 Number of Matches: 1

[▶ See 5 more title\(s\)](#)

Range 1: 396 to 415 [GenPept](#) [Graphics](#)

[▼ Next Match](#) [▲ Previous Match](#)

| Score          | Expect | Identities | Positives   | Gaps     |
|----------------|--------|------------|-------------|----------|
| 57.5 bits(128) | 5e-08  | 18/20(90%) | 20/20(100%) | 0/20(0%) |

Query 1 KSLPNFPDTSATADATGGRA 20  
 KSLPNFP+TSATA+ATGGRA  
 Sbjct 396 KSLPNFPNTSATANATGGRA 415

**Related Information**

[Gene](#) - associated gene details

[UniGene](#) - clustered expressed sequence tags

[Map Viewer](#) - aligned genomic context

[Identical Proteins](#) - Proteins

identical to the subject

Download [GenPept](#) [Graphics](#)

[▼ Next](#) [▲ Previous](#) [▲ Descriptions](#)

PREDICTED: peptidase inhibitor 16 isoform 1 [Gorilla gorilla gorilla]

Sequence ID: [ref|XP\\_004043978.1](#) Length: 463 Number of Matches: 1

[▶ See 1 more title\(s\)](#)

Range 1: 396 to 415 [GenPept](#) [Graphics](#)

[▼ Next Match](#) [▲ Previous Match](#)

| Score          | Expect | Identities | Positives   | Gaps     |
|----------------|--------|------------|-------------|----------|
| 57.5 bits(128) | 5e-08  | 18/20(90%) | 20/20(100%) | 0/20(0%) |

Query 1 KSLPNFPDTSATADATGGRA 20  
 KSLPNFP+TSATA+ATGGRA  
 Sbjct 396 KSLPNFPNTSATANATGGRA 415

**Related Information**

[Gene](#) - associated gene details

[Map Viewer](#) - aligned genomic context

[Identical Proteins](#) - Proteins

identical to the subject

BLAST is a registered trademark of the National Library of Medicine.



▶ NCBI/ BLAST/ blastp suite/ Formatting Results - BBJ6AW0P01R

**i** Your search parameters were adjusted to search for a short input sequence.

[Edit and Resubmit](#) [Save Search Strategies](#) ▶ [Formatting options](#) ▶ [Download](#)

[YouTube](#) [How to read this page](#) [Blast report description](#)

**PI16\_KSLPNFPNTSATANATGGRA\_NonMod**

RID [BBJ6AW0P01R](#) (Expires on 01-15 08:39 am)

**Query ID** |cl|257909  
**Description** None  
**Molecule type** amino acid  
**Query Length** 20

**Database Name** nr  
**Description** All non-redundant GenBank CDS translations+PDB+SwissProt+PIR excluding environmental samples from WGS projects  
**Program** BLASTP 2.2.30+ ▶ [Citation](#)

Other reports: ▶ [Search Summary](#) [[Taxonomy reports](#)] [[Distance tree of results](#)] [[Related Structures](#)] [[Multiple alignment](#)]

**Graphic Summary**

[Show Conserved Domains](#)

No putative conserved domains have been detected

Distribution of 100 Blast Hits on the Query Sequence



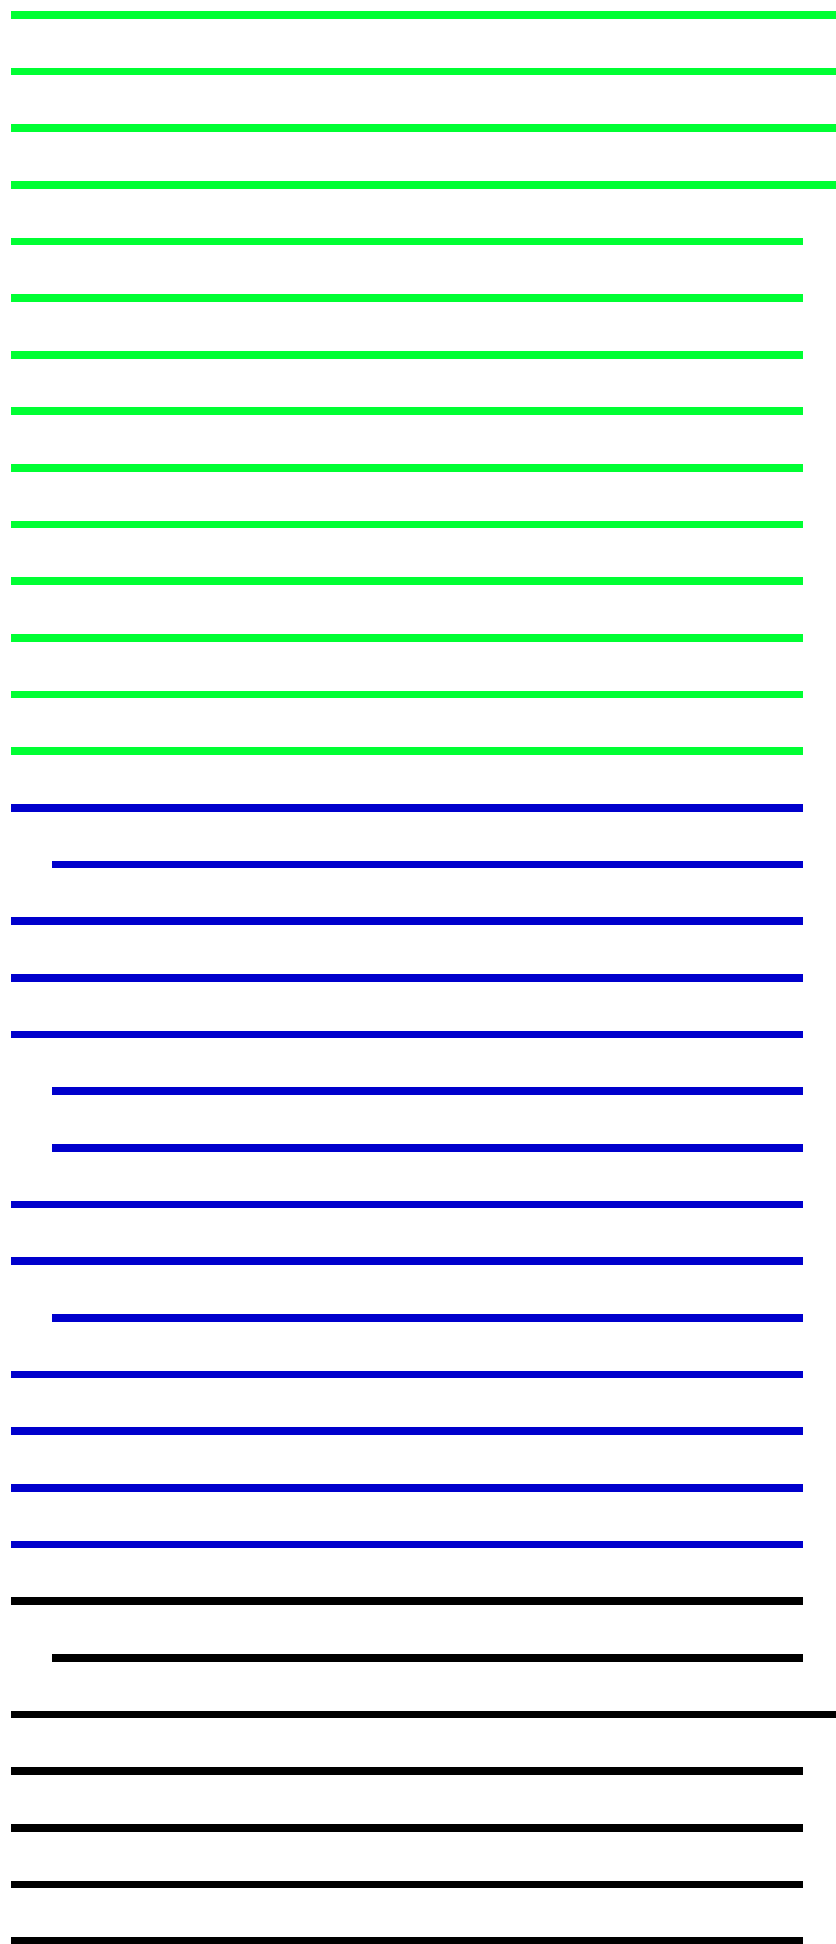

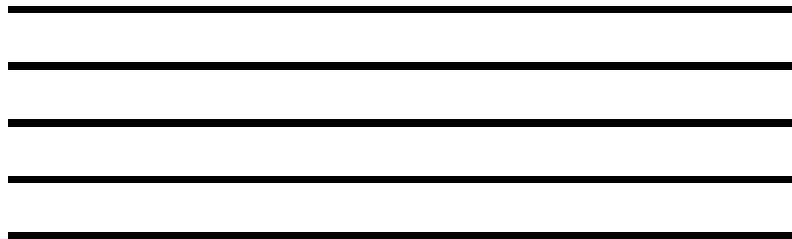

**Descriptions**

**Sequences producing significant alignments:**

Select: [All](#) [None](#) Selected:0

[↑](#) [Alignments](#)
[Download](#)
[GenPept](#)
[Graphics](#)
[Distance tree of results](#)
[Multiple alignment](#)

| Description                                                                                     | Max score | Total score | Query cover | E value | Ident | Accession                                   |
|-------------------------------------------------------------------------------------------------|-----------|-------------|-------------|---------|-------|---------------------------------------------|
| <a href="#">unnamed protein product [Homo sapiens]</a>                                          | 62.6      | 62.6        | 100%        | 8e-10   | 100%  | <a href="#">gil194378780 BAG63555.1</a>     |
| <a href="#">unnamed protein product [Homo sapiens]</a>                                          | 62.6      | 62.6        | 100%        | 9e-10   | 100%  | <a href="#">gil194384166 BAG64856.1</a>     |
| <a href="#">unnamed protein product [Homo sapiens]</a>                                          | 62.6      | 62.6        | 100%        | 9e-10   | 100%  | <a href="#">gil189053482 BAG35648.1</a>     |
| <a href="#">peptidase inhibitor 16 precursor [Homo sapiens]</a>                                 | 62.6      | 62.6        | 100%        | 9e-10   | 100%  | <a href="#">gil70780384 NP_699201.2</a>     |
| <a href="#">PREDICTED: peptidase inhibitor 16 isoform 1 [Gorilla gorilla gorilla]</a>           | 62.6      | 62.6        | 100%        | 9e-10   | 100%  | <a href="#">gil426352977 XP_004043978.1</a> |
| <a href="#">unnamed protein product [Homo sapiens]</a>                                          | 62.6      | 62.6        | 100%        | 9e-10   | 100%  | <a href="#">gil22761577 BAC11640.1</a>      |
| <a href="#">PREDICTED: peptidase inhibitor 16 isoform X1 [Pan paniscus]</a>                     | 62.6      | 62.6        | 100%        | 9e-10   | 100%  | <a href="#">gil675750658 XP_008970553.1</a> |
| <a href="#">PREDICTED: peptidase inhibitor 16 [Pongo abelii]</a>                                | 62.6      | 62.6        | 100%        | 9e-10   | 100%  | <a href="#">gil395737189 XP_003776875.1</a> |
| <a href="#">peptidase inhibitor 16 precursor [Pan troglodytes]</a>                              | 62.6      | 62.6        | 100%        | 9e-10   | 100%  | <a href="#">gil525342653 NP_001267303.1</a> |
| <a href="#">Peptidase inhibitor 16 [Homo sapiens]</a>                                           | 62.6      | 62.6        | 100%        | 9e-10   | 100%  | <a href="#">gil112180443 AAH35634.2</a>     |
| <a href="#">PREDICTED: peptidase inhibitor 16 isoform X1 [Pan troglodytes]</a>                  | 62.6      | 62.6        | 100%        | 9e-10   | 100%  | <a href="#">gil694916015 XP_009449371.1</a> |
| <a href="#">peptidase inhibitor 16 isoform CRA_a [Homo sapiens]</a>                             | 62.6      | 62.6        | 100%        | 9e-10   | 100%  | <a href="#">gil119624328 EAX03923.1</a>     |
| <a href="#">PREDICTED: peptidase inhibitor 16 isoform X3 [Chlorocebus sabaeus]</a>              | 59.2      | 59.2        | 100%        | 1e-08   | 95%   | <a href="#">gil635095459 XP_007970953.1</a> |
| <a href="#">PREDICTED: peptidase inhibitor 16 isoform X1 [Chlorocebus sabaeus]</a>              | 59.2      | 59.2        | 100%        | 1e-08   | 95%   | <a href="#">gil635095455 XP_007970951.1</a> |
| <a href="#">PREDICTED: peptidase inhibitor 16 [Nomascus leucogenys]</a>                         | 58.3      | 58.3        | 100%        | 3e-08   | 95%   | <a href="#">gil332255663 XP_003276952.1</a> |
| <a href="#">PREDICTED: peptidase inhibitor 16 isoform X1 [Papio anubis]</a>                     | 58.3      | 58.3        | 100%        | 3e-08   | 95%   | <a href="#">gil685536357 XP_009203298.1</a> |
| <a href="#">PREDICTED: peptidase inhibitor 16 [Rhinopithecus roxellana]</a>                     | 57.9      | 57.9        | 100%        | 4e-08   | 95%   | <a href="#">gil724947508 XP_010388006.1</a> |
| <a href="#">PREDICTED: peptidase inhibitor 16 isoform X1 [Macaca fascicularis]</a>              | 57.9      | 57.9        | 100%        | 4e-08   | 95%   | <a href="#">gil544428280 XP_005553197.1</a> |
| <a href="#">hypothetical protein EGK_14847 [Macaca mulatta]</a>                                 | 57.9      | 57.9        | 100%        | 4e-08   | 95%   | <a href="#">gil355561648 EHH18280.1</a>     |
| <a href="#">peptidase inhibitor 16 precursor [Macaca mulatta]</a>                               | 57.9      | 57.9        | 100%        | 4e-08   | 95%   | <a href="#">gil388453293 NP_001253247.1</a> |
| <a href="#">PREDICTED: LOW QUALITY PROTEIN: peptidase inhibitor 16 [Caenorhabditis elegans]</a> | 57.1      | 57.1        | 95%         | 7e-08   | 95%   | <a href="#">gil675652418 XP_008992599.1</a> |
| <a href="#">PREDICTED: peptidase inhibitor 16 isoform X1 [Saimiri boliviensis]</a>              | 57.1      | 57.1        | 95%         | 7e-08   | 95%   | <a href="#">gil725556967 XP_010332401.1</a> |
| <a href="#">Peptidase inhibitor 16 [Myotis brandtii]</a>                                        | 55.4      | 55.4        | 95%         | 3e-07   | 95%   | <a href="#">gil521019944 EPQ01732.1</a>     |
| <a href="#">PREDICTED: peptidase inhibitor 16 [Myotis brandtii]</a>                             | 55.4      | 55.4        | 95%         | 3e-07   | 95%   | <a href="#">gil554523779 XP_005856781.1</a> |
| <a href="#">PREDICTED: peptidase inhibitor 16 isoform X1 [Galeopterus variegatus]</a>           | 55.4      | 55.4        | 95%         | 3e-07   | 95%   | <a href="#">gil667258683 XP_008566645.1</a> |
| <a href="#">PREDICTED: peptidase inhibitor 16 [Myotis lucifugus]</a>                            | 55.4      | 55.4        | 95%         | 3e-07   | 95%   | <a href="#">gil558207906 XP_006107008.1</a> |
| <a href="#">PREDICTED: peptidase inhibitor 16 isoform X1 [Equus caballus]</a>                   | 53.7      | 53.7        | 95%         | 1e-06   | 95%   | <a href="#">gil545198103 XP_001917971.2</a> |
| <a href="#">PREDICTED: peptidase inhibitor 16 [Eptesicus fuscus]</a>                            | 52.8      | 52.8        | 95%         | 2e-06   | 89%   | <a href="#">gil641721000 XP_008150183.1</a> |

|                                                                                      |      |      |      |       |     |                                              |
|--------------------------------------------------------------------------------------|------|------|------|-------|-----|----------------------------------------------|
| <a href="#">PREDICTED: peptidase inhibitor 16 [Tarsius syrichta]</a>                 | 52.0 | 52.0 | 95%  | 4e-06 | 89% | <a href="#">gij640812236 XP_008062768.1</a>  |
| <a href="#">PREDICTED: peptidase inhibitor 16 [Myotis davidii]</a>                   | 51.5 | 51.5 | 95%  | 5e-06 | 89% | <a href="#">gij584077898 XP_006759097.1</a>  |
| <a href="#">PREDICTED: peptidase inhibitor 16 [Ceratotherium simum simum]</a>        | 49.0 | 49.0 | 95%  | 3e-05 | 89% | <a href="#">gij478500399 XP_004424519.1</a>  |
| <a href="#">PREDICTED: peptidase inhibitor 16 [Orycteropus afer afer]</a>            | 46.9 | 46.9 | 90%  | 2e-04 | 89% | <a href="#">gij634844182 XP_007937600.1</a>  |
| <a href="#">PREDICTED: LOW QUALITY PROTEIN: peptidase inhibitor 16 [Urs]</a>         | 45.2 | 45.2 | 95%  | 6e-04 | 84% | <a href="#">gij671001670 XP_008691702.1</a>  |
| <a href="#">PREDICTED: peptidase inhibitor 16-like [Ailuropoda melanoleuca]</a>      | 45.2 | 45.2 | 95%  | 6e-04 | 84% | <a href="#">gij301791231 XP_002930583.1</a>  |
| <a href="#">PREDICTED: peptidase inhibitor 16 isoform X1 [Nannospalax gallii]</a>    | 45.2 | 45.2 | 95%  | 6e-04 | 79% | <a href="#">gij674062972 XP_008838284.1</a>  |
| <a href="#">PREDICTED: peptidase inhibitor 16 isoform X1 [Mesocricetus auratus]</a>  | 44.8 | 44.8 | 90%  | 9e-04 | 83% | <a href="#">gij524970206 XP_005084971.1</a>  |
| <a href="#">PREDICTED: peptidase inhibitor 16 [Microtus ochrogaster]</a>             | 43.9 | 43.9 | 90%  | 0.002 | 83% | <a href="#">gij532035229 XP_005360513.1</a>  |
| <a href="#">PREDICTED: peptidase inhibitor 16 [Panthera tigris altaica]</a>          | 42.6 | 42.6 | 95%  | 0.004 | 79% | <a href="#">gij591318271 XP_007085400.1</a>  |
| <a href="#">PREDICTED: peptidase inhibitor 16 isoform X1 [Felis catus]</a>           | 42.6 | 42.6 | 95%  | 0.004 | 79% | <a href="#">gij586986384 XP_006931722.1</a>  |
| <a href="#">PREDICTED: peptidase inhibitor 16 [Otolemur garnettii]</a>               | 42.6 | 42.6 | 90%  | 0.004 | 83% | <a href="#">gij395832276 XP_003789199.1</a>  |
| <a href="#">PREDICTED: peptidase inhibitor 16-like [Leptonychotes weddellii]</a>     | 41.4 | 41.4 | 95%  | 0.010 | 79% | <a href="#">gij585168534 XP_006736333.1</a>  |
| <a href="#">PREDICTED: peptidase inhibitor 16-like [Leptonychotes weddellii]</a>     | 41.4 | 41.4 | 95%  | 0.010 | 79% | <a href="#">gij585168539 XP_006736335.1</a>  |
| <a href="#">PREDICTED: peptidase inhibitor 16 [Octodon degus]</a>                    | 41.4 | 41.4 | 95%  | 0.011 | 74% | <a href="#">gij507618080 XP_004624495.1</a>  |
| <a href="#">PREDICTED: peptidase inhibitor 16 [Odobenus rosmarus divergens]</a>      | 41.4 | 41.4 | 95%  | 0.011 | 79% | <a href="#">gij472380880 XP_004409837.1</a>  |
| <a href="#">PREDICTED: peptidase inhibitor 16 [Ochotona princeps]</a>                | 39.7 | 39.7 | 95%  | 0.038 | 74% | <a href="#">gij504157725 XP_004590384.1</a>  |
| <a href="#">PREDICTED: peptidase inhibitor 16 [Chrysochloris asiatica]</a>           | 38.8 | 38.8 | 90%  | 0.072 | 78% | <a href="#">gij586459954 XP_006860637.1</a>  |
| <a href="#">PREDICTED: peptidase inhibitor 16 isoform X1 [Tupaia chinensis]</a>      | 38.4 | 38.4 | 100% | 0.096 | 75% | <a href="#">gij562839023 XP_006148688.1</a>  |
| <a href="#">peptidase inhibitor 16 precursor [Bos taurus]</a>                        | 38.4 | 38.4 | 95%  | 0.096 | 74% | <a href="#">gij66792752 INP_001019658.1</a>  |
| <a href="#">PREDICTED: peptidase inhibitor 16 [Bos mutus]</a>                        | 38.4 | 38.4 | 95%  | 0.096 | 74% | <a href="#">gij555992031 XP_005907794.1</a>  |
| <a href="#">PREDICTED: peptidase inhibitor 16 isoform X1 [Bos taurus]</a>            | 38.4 | 38.4 | 95%  | 0.097 | 74% | <a href="#">gij529002755 XP_005223367.1</a>  |
| <a href="#">peptidase inhibitor 16 precursor [Camelus ferus]</a>                     | 38.0 | 38.0 | 95%  | 0.13  | 74% | <a href="#">gij528753222 EPY72881.1</a>      |
| <a href="#">PREDICTED: peptidase inhibitor 16 isoform X1 [Lipotes vexillifer]</a>    | 38.0 | 38.0 | 95%  | 0.13  | 74% | <a href="#">gij602714250 XP_007467342.1</a>  |
| <a href="#">PREDICTED: peptidase inhibitor 16 [Vicugna pacos]</a>                    | 38.0 | 38.0 | 95%  | 0.13  | 74% | <a href="#">gij560959329 XP_006202118.1</a>  |
| <a href="#">PREDICTED: peptidase inhibitor 16 isoform X1 [Camelus ferus]</a>         | 38.0 | 38.0 | 95%  | 0.13  | 74% | <a href="#">gij560939134 XP_006195354.1</a>  |
| <a href="#">PREDICTED: peptidase inhibitor 16 isoform X1 [Balaenoptera acuta]</a>    | 38.0 | 38.0 | 95%  | 0.13  | 74% | <a href="#">gij594626758 XP_007198004.1</a>  |
| <a href="#">PREDICTED: peptidase inhibitor 16 [Physeter catodon]</a>                 | 38.0 | 38.0 | 95%  | 0.13  | 74% | <a href="#">gij593718128 XP_007105444.1</a>  |
| <a href="#">PREDICTED: peptidase inhibitor 16 isoform 1 [Tursiops truncatus]</a>     | 38.0 | 38.0 | 95%  | 0.13  | 74% | <a href="#">gij470637507 XP_004324065.1</a>  |
| <a href="#">PREDICTED: peptidase inhibitor 16 isoform 1 [Orcinus orca]</a>           | 38.0 | 38.0 | 95%  | 0.13  | 74% | <a href="#">gij465996930 XP_004267706.1</a>  |
| <a href="#">rCG60935 [Rattus norvegicus]</a>                                         | 37.1 | 37.1 | 85%  | 0.24  | 76% | <a href="#">gij149043511 EDL96962.1</a>      |
| <a href="#">peptidase inhibitor 16 precursor [Rattus norvegicus]</a>                 | 37.1 | 37.1 | 85%  | 0.24  | 76% | <a href="#">gij281427227 INP_001163952.1</a> |
| <a href="#">PREDICTED: LOW QUALITY PROTEIN: peptidase inhibitor 16 [Ca]</a>          | 37.1 | 37.1 | 95%  | 0.25  | 68% | <a href="#">gij514468581 XP_003473716.2</a>  |
| <a href="#">PREDICTED: peptidase inhibitor 16 [Trichechus manatus latirostris]</a>   | 35.8 | 35.8 | 85%  | 0.61  | 76% | <a href="#">gij471388850 XP_004379471.1</a>  |
| <a href="#">peptidase inhibitor 16 [Mus musculus]</a>                                | 35.4 | 35.4 | 90%  | 0.83  | 72% | <a href="#">gij148690668 EDL22615.1</a>      |
| <a href="#">PREDICTED: peptidase inhibitor 16 [Erinaceus europaeus]</a>              | 35.4 | 35.4 | 90%  | 0.84  | 72% | <a href="#">gij617578354 XP_007517881.1</a>  |
| <a href="#">PREDICTED: peptidase inhibitor 16 [Ictidomys tridecemlineatus]</a>       | 35.4 | 35.4 | 95%  | 0.84  | 74% | <a href="#">gij532065895 XP_005318805.1</a>  |
| <a href="#">Pi16 protein [Mus musculus]</a>                                          | 35.4 | 35.4 | 90%  | 0.84  | 72% | <a href="#">gij24657486 AAH39124.1</a>       |
| <a href="#">cysteine-rich protease inhibitor [Mus musculus]</a>                      | 35.4 | 35.4 | 90%  | 0.84  | 72% | <a href="#">gij9558454 BAB03398.1</a>        |
| <a href="#">RecName: Full=Peptidase inhibitor 16; Short=PI-16; AltName: Full=</a>    | 35.4 | 35.4 | 90%  | 0.84  | 72% | <a href="#">gij81868436 Q9ET66.1</a>         |
| <a href="#">peptidase inhibitor 16 precursor [Mus musculus]</a>                      | 35.4 | 35.4 | 90%  | 0.84  | 72% | <a href="#">gij116089320 NP_076223.3</a>     |
| <a href="#">PREDICTED: peptidase inhibitor 16 isoform X1 [Bubalus bubalis]</a>       | 35.4 | 35.4 | 95%  | 0.84  | 68% | <a href="#">gij594052332 XP_006050482.1</a>  |
| <a href="#">PREDICTED: peptidase inhibitor 16 isoformX1 [Canis lupus familiaris]</a> | 34.1 | 34.1 | 80%  | 2.1   | 75% | <a href="#">gij73972735 XP_538890.2</a>      |
| <a href="#">PREDICTED: peptidase inhibitor 16 [Pantholops hodgsonii]</a>             | 34.1 | 34.1 | 95%  | 2.1   | 68% | <a href="#">gij556737488 XP_005964334.1</a>  |
| <a href="#">PREDICTED: peptidase inhibitor 16 [Capra hircus]</a>                     | 34.1 | 34.1 | 95%  | 2.1   | 68% | <a href="#">gij548516991 XP_005696333.1</a>  |

|                                                                                         |      |      |     |     |     |                                             |
|-----------------------------------------------------------------------------------------|------|------|-----|-----|-----|---------------------------------------------|
| <a href="#">PREDICTED: peptidase inhibitor 16 [Loxodonta africana]</a>                  | 34.1 | 34.1 | 90% | 2.1 | 72% | <a href="#">gil344264366 XP_003404263.1</a> |
| <a href="#">peptidase inhibitor 16 precursor [Sus scrofa]</a>                           | 33.7 | 33.7 | 95% | 2.9 | 68% | <a href="#">gil343488483 NP_001230456.1</a> |
| <a href="#">PREDICTED: peptidase inhibitor 16 isoform X1 [Chinchilla lanigera]</a>      | 32.5 | 32.5 | 95% | 7.3 | 68% | <a href="#">gil533150911 XP_005389688.1</a> |
| <a href="#">PREDICTED: peptidase inhibitor 16 [Jaculus jaculus]</a>                     | 32.0 | 32.0 | 80% | 10  | 63% | <a href="#">gil507531495 XP_004649825.1</a> |
| <a href="#">predicted protein [Trichoderma reesei QM6a]</a>                             | 30.8 | 30.8 | 60% | 26  | 83% | <a href="#">gil589097893 XP_006960969.1</a> |
| <a href="#">hypothetical protein M419DRAFT_93886 [Trichoderma reesei RUT]</a>           | 30.8 | 30.8 | 60% | 26  | 83% | <a href="#">gil572283336 ETS06310.1</a>     |
| <a href="#">PREDICTED: peptidase inhibitor 16 [Ovis aries]</a>                          | 30.8 | 30.8 | 95% | 26  | 63% | <a href="#">gil426250221 XP_004018836.1</a> |
| <a href="#">PREDICTED: uncharacterized protein LOC101454915 [Ceratitis car]</a>         | 30.8 | 30.8 | 80% | 26  | 69% | <a href="#">gil498967489 XP_004526076.1</a> |
| <a href="#">PREDICTED: uncharacterized protein LOC101174950 [Oryzias latir]</a>         | 30.8 | 30.8 | 70% | 26  | 79% | <a href="#">gil432916756 XP_004079368.1</a> |
| <a href="#">proline:sodium symporter [Butyrivibrio sp. XPD2006]</a>                     | 30.3 | 30.3 | 85% | 36  | 72% | <a href="#">gil551022094 WP_022766253.1</a> |
| <a href="#">PREDICTED: probable E3 ubiquitin-protein ligase DTX2 [Apalodem]</a>         | 29.9 | 29.9 | 60% | 48  | 75% | <a href="#">gil699615497 XP_009875239.1</a> |
| <a href="#">PREDICTED: zinc finger protein MAGPIE-like [Cucumis sativus]</a>            | 29.9 | 29.9 | 65% | 49  | 77% | <a href="#">gil449532260 XP_004173100.1</a> |
| <a href="#">PREDICTED: zinc finger protein MAGPIE-like [Cucumis sativus]</a>            | 29.9 | 29.9 | 65% | 49  | 77% | <a href="#">gil449462075 XP_004148767.1</a> |
| <a href="#">hypothetical protein BC1G_06910 [Botryotinia fuckeliana B05.10]</a>         | 29.9 | 29.9 | 80% | 49  | 57% | <a href="#">gil154309979 XP_001554322.1</a> |
| <a href="#">PREDICTED: peptidase inhibitor 16 isoform X5 [Mustela putorius fu]</a>      | 29.9 | 29.9 | 65% | 49  | 77% | <a href="#">gil511948881 XP_004792893.1</a> |
| <a href="#">PREDICTED: peptidase inhibitor 16 [Pteropus alecto]</a>                     | 29.9 | 29.9 | 65% | 49  | 77% | <a href="#">gil586544516 XP_006907375.1</a> |
| <a href="#">hypothetical protein SBOR_7154 [Sclerotinia borealis F-4157]</a>            | 29.9 | 29.9 | 80% | 49  | 57% | <a href="#">gil563292000 ESZ92459.1</a>     |
| <a href="#">similar to carboxylesterase (secreted protein) [Botryotinia fuckeliana]</a> | 29.9 | 29.9 | 80% | 49  | 57% | <a href="#">gil347836165 CCD50737.1</a>     |
| <a href="#">PREDICTED: peptidase inhibitor 16 isoform X1 [Mustela putorius fu]</a>      | 29.9 | 29.9 | 65% | 49  | 77% | <a href="#">gil511948873 XP_004792889.1</a> |
| <a href="#">missing-in-metastasis, isoform L [Drosophila melanogaster]</a>              | 29.9 | 29.9 | 65% | 50  | 69% | <a href="#">gil442622599 NP_001260748.1</a> |
| <a href="#">missing-in-metastasis, isoform J [Drosophila melanogaster]</a>              | 29.9 | 29.9 | 65% | 50  | 69% | <a href="#">gil386767186 NP_001246159.1</a> |
| <a href="#">missing-in-metastasis, isoform F [Drosophila melanogaster]</a>              | 29.9 | 29.9 | 65% | 50  | 69% | <a href="#">gil320543600 NP_001188869.1</a> |
| <a href="#">predicted protein [Fibroporia radiculosa]</a>                               | 29.5 | 29.5 | 80% | 65  | 63% | <a href="#">gil403411774 CCL98474.1</a>     |
| <a href="#">hypothetical protein [Rhizobium leguminosarum]</a>                          | 29.5 | 29.5 | 60% | 66  | 83% | <a href="#">gil489682491 WP_003586713.1</a> |
| <a href="#">hypothetical protein P656_3637 [Acinetobacter baumannii UH1620]</a>         | 29.5 | 29.5 | 55% | 67  | 82% | <a href="#">gil571654387 ETQ45334.1</a>     |
| <a href="#">hypothetical protein P647_3903 [Acinetobacter baumannii UH1220]</a>         | 29.5 | 29.5 | 55% | 67  | 82% | <a href="#">gil571613566 ETQ05804.1</a>     |
| <a href="#">hypothetical protein [Tannerella sp. 6_1_58FAA_CT1]</a>                     | 29.5 | 29.5 | 60% | 68  | 69% | <a href="#">gil496675283 WP_009317773.1</a> |

## Alignments

Download [GenPept](#) [Graphics](#)

Next Previous Descriptions

unnamed protein product [Homo sapiens]

Sequence ID: [gil194378780|dbj|BAG63555.1](#) Length: 234 Number of Matches: 1

Range 1: 167 to 186 [GenPept](#) [Graphics](#)

Next Match Previous Match

| Score          | Expect | Identities  | Positives   | Gaps     |
|----------------|--------|-------------|-------------|----------|
| 62.6 bits(140) | 8e-10  | 20/20(100%) | 20/20(100%) | 0/20(0%) |

Query 1 KSLPNFPNTSATANATGGRA 20  
 KSLPNFPNTSATANATGGRA  
 Sbjct 167 KSLPNFPNTSATANATGGRA 186

### Related Information

[Gene](#) - associated gene details

Download [GenPept](#) [Graphics](#)

Next Previous Descriptions

unnamed protein product [Homo sapiens]

Sequence ID: [gil194384166|dbj|BAG64856.1](#) Length: 315 Number of Matches: 1

Range 1: 248 to 267 [GenPept](#) [Graphics](#)

Next Match Previous Match

| Score          | Expect | Identities  | Positives   | Gaps     |
|----------------|--------|-------------|-------------|----------|
| 62.6 bits(140) | 9e-10  | 20/20(100%) | 20/20(100%) | 0/20(0%) |

Query 1 KSLPNFPNTSATANATGGRA 20

### Related Information

[Gene](#) - associated gene details

Sbjct 248 KSLPNFPNTSATANATGGRA 267

[Download](#) [GenPept](#) [Graphics](#)

[▼ Next](#) [▲ Previous](#) [▲ Descriptions](#)

unnamed protein product [Homo sapiens]

Sequence ID: [gi|189053482|dbj|BAG35648.1](#) Length: 428 Number of Matches: 1

Range 1: 361 to 380 [GenPept](#) [Graphics](#)

[▼ Next Match](#) [▲ Previous Match](#)

| Score          | Expect | Identities  | Positives   | Gaps     |
|----------------|--------|-------------|-------------|----------|
| 62.6 bits(140) | 9e-10  | 20/20(100%) | 20/20(100%) | 0/20(0%) |

Query 1 KSLPNFPNTSATANATGGRA 20  
KSLPNFPNTSATANATGGRA  
Sbjct 361 KSLPNFPNTSATANATGGRA 380

**Related Information**

[Gene](#) - associated gene details

[Download](#) [GenPept](#) [Graphics](#)

[▼ Next](#) [▲ Previous](#) [▲ Descriptions](#)

peptidase inhibitor 16 precursor [Homo sapiens]

Sequence ID: [gi|70780384|ref|NP\\_699201.2](#) Length: 463 Number of Matches: 1

[▶ See 5 more title\(s\)](#)

Range 1: 396 to 415 [GenPept](#) [Graphics](#)

[▼ Next Match](#) [▲ Previous Match](#)

| Score          | Expect | Identities  | Positives   | Gaps     |
|----------------|--------|-------------|-------------|----------|
| 62.6 bits(140) | 9e-10  | 20/20(100%) | 20/20(100%) | 0/20(0%) |

Query 1 KSLPNFPNTSATANATGGRA 20  
KSLPNFPNTSATANATGGRA  
Sbjct 396 KSLPNFPNTSATANATGGRA 415

**Related Information**

[Gene](#) - associated gene details

[UniGene](#) - clustered expressed sequence tags

[Map Viewer](#) - aligned genomic context

[Identical Proteins](#) - Proteins

identical to the subject

[Download](#) [GenPept](#) [Graphics](#)

[▼ Next](#) [▲ Previous](#) [▲ Descriptions](#)

PREDICTED: peptidase inhibitor 16 isoform 1 [Gorilla gorilla gorilla]

Sequence ID: [gi|426352977|ref|XP\\_004043978.1](#) Length: 463 Number of Matches: 1

[▶ See 1 more title\(s\)](#)

Range 1: 396 to 415 [GenPept](#) [Graphics](#)

[▼ Next Match](#) [▲ Previous Match](#)

| Score          | Expect | Identities  | Positives   | Gaps     |
|----------------|--------|-------------|-------------|----------|
| 62.6 bits(140) | 9e-10  | 20/20(100%) | 20/20(100%) | 0/20(0%) |

Query 1 KSLPNFPNTSATANATGGRA 20  
KSLPNFPNTSATANATGGRA  
Sbjct 396 KSLPNFPNTSATANATGGRA 415

**Related Information**

[Gene](#) - associated gene details

[Map Viewer](#) - aligned genomic context

[Identical Proteins](#) - Proteins

identical to the subject

BLAST is a registered trademark of the National Library of Medicine.

▶ NCBI/ BLAST/ blastp suite/ Formatting Results - BVKD2MV401R

[Edit and Resubmit](#) [Save Search Strategies](#) ▶ [Formatting options](#) ▶ [Download](#) [YouTube](#) [How to read this page](#) [Blast report description](#)

### PIGR\_KYAGRADLTNFPENGTFFVNVIAQLSQDDSGRY\_Mod

**RID** [BVKD2MV401R](#) (Expires on 01-21 10:38 am)

|                                 |                                                                                                                                       |
|---------------------------------|---------------------------------------------------------------------------------------------------------------------------------------|
| <b>Query ID</b>  cl 365699      | <b>Database Name</b> nr                                                                                                               |
| <b>Description</b> None         | <b>Description</b> All non-redundant GenBank CDS translations+PDB+SwissProt+PIR+PRF excluding environmental samples from WGS projects |
| <b>Molecule type</b> amino acid | <b>Program</b> BLASTP 2.2.30+ ▶ <a href="#">Citation</a>                                                                              |
| <b>Query Length</b> 32          |                                                                                                                                       |

Other reports: ▶ [Search Summary](#) [[Taxonomy reports](#)] [[Distance tree of results](#)] [[Multiple alignment](#)]

### Graphic Summary

Show Conserved Domains

Putative conserved domains have been detected, click on the image below for detailed results.

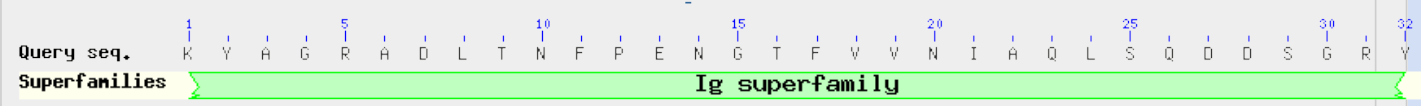

Distribution of 107 Blast Hits on the Query Sequence

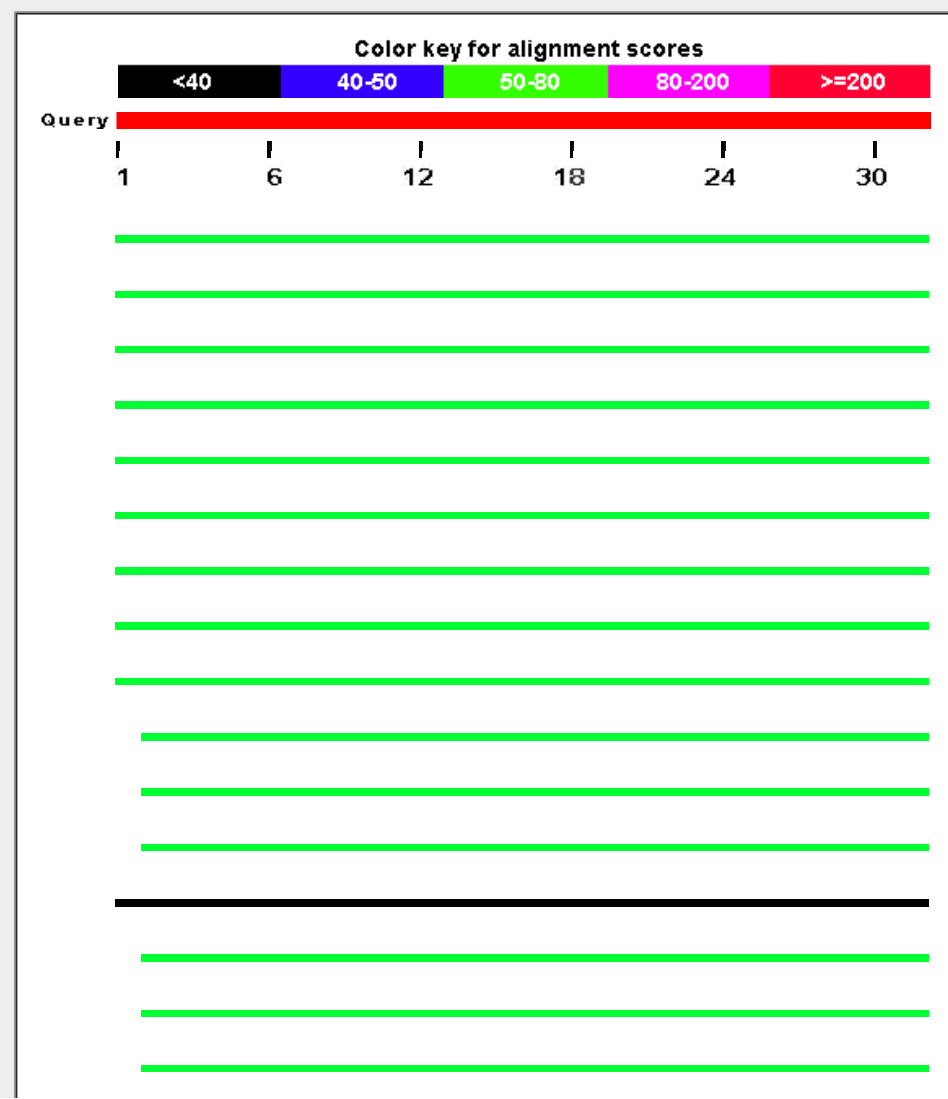

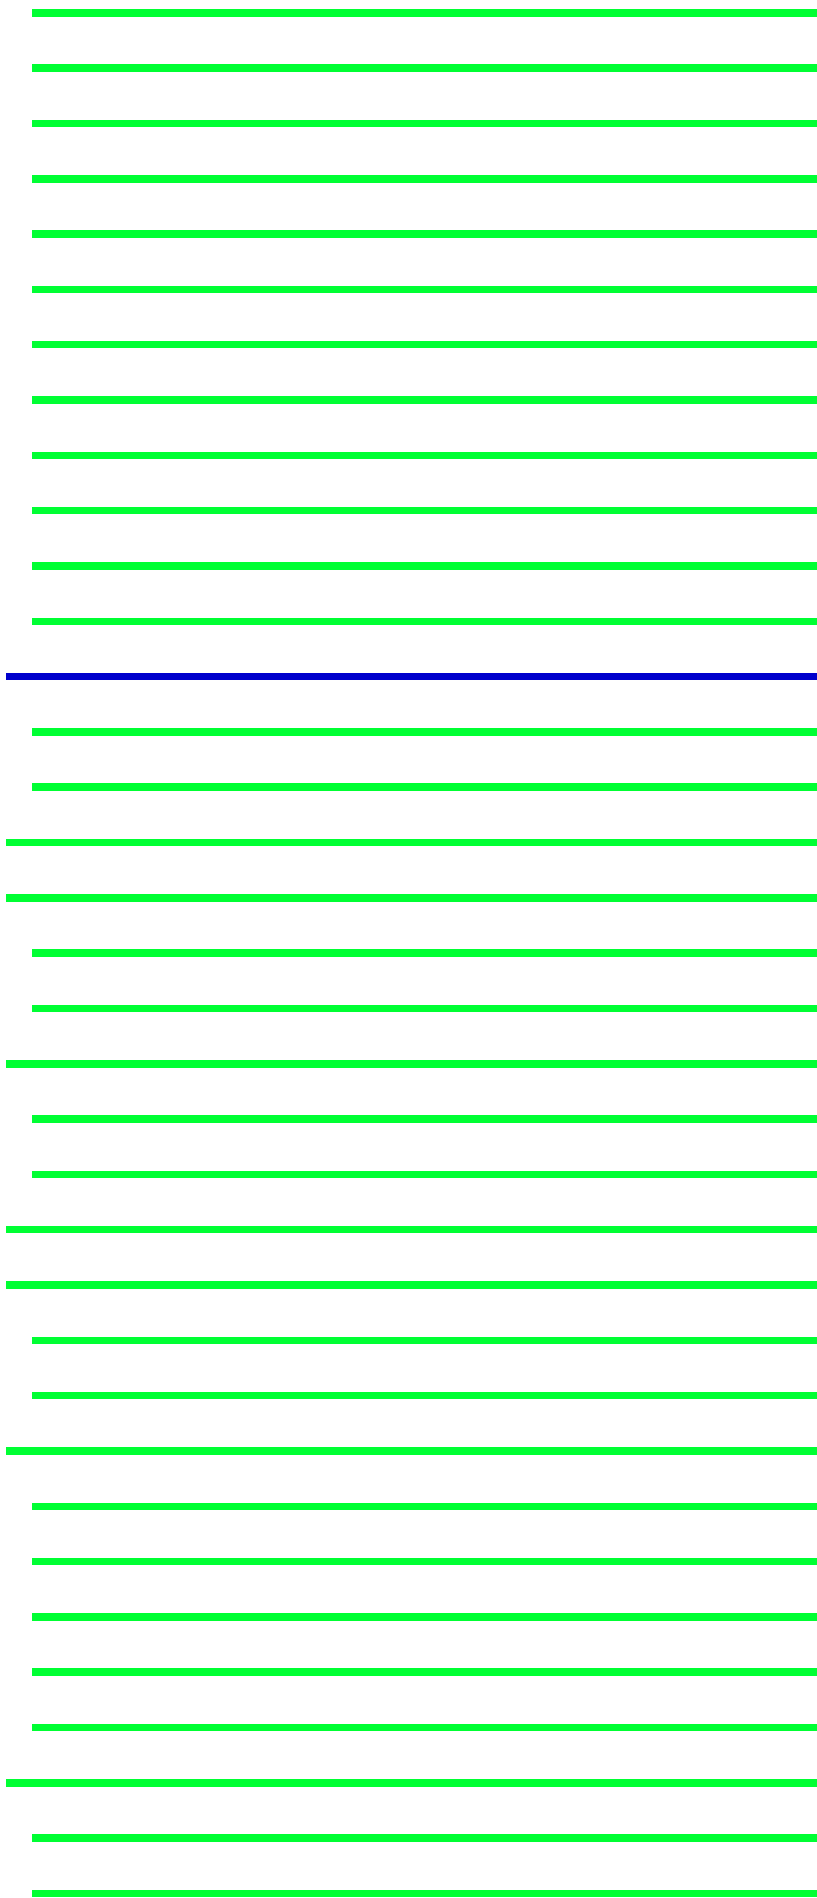



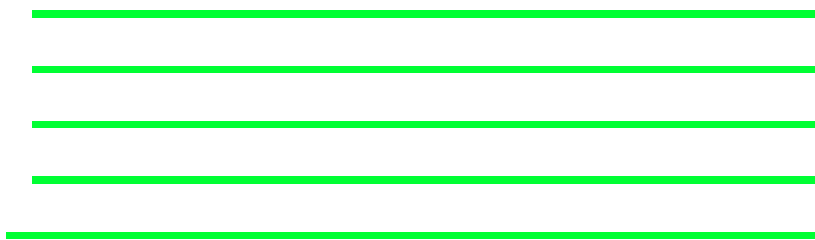

**Descriptions**

**Sequences producing significant alignments:**

Select: [All](#) [None](#) Selected:0

Alignments Download GenPept Graphics Distance tree of results Multiple alignment

| Description                                                                                 | Max score | Total score | Query cover | E value | Ident | Accession                      |
|---------------------------------------------------------------------------------------------|-----------|-------------|-------------|---------|-------|--------------------------------|
| <a href="#">Chain A. Crystal Structure Of A Ligand-Binding Domain Of The Human Polym</a>    | 68.6      | 68.6        | 100%        | 2e-13   | 97%   | <a href="#">1XED_A</a>         |
| <a href="#">PREDICTED: polymeric immunoglobulin receptor isoform 1 [Gorilla gorilla gor</a> | 68.2      | 68.2        | 100%        | 5e-12   | 97%   | <a href="#">XP_004028344.1</a> |
| <a href="#">transmembrane secretory component [Homo sapiens]</a>                            | 68.2      | 68.2        | 100%        | 5e-12   | 97%   | <a href="#">AAB20203.1</a>     |
| <a href="#">poly-Ig receptor [Homo sapiens]</a>                                             | 68.2      | 68.2        | 100%        | 5e-12   | 97%   | <a href="#">AAA36102.1</a>     |
| <a href="#">polymeric immunoglobulin receptor precursor [Homo sapiens]</a>                  | 68.2      | 68.2        | 100%        | 5e-12   | 97%   | <a href="#">NP_002635.2</a>    |
| <a href="#">PREDICTED: polymeric immunoglobulin receptor [Pan troglodytes]</a>              | 68.2      | 68.2        | 100%        | 6e-12   | 97%   | <a href="#">XP_514153.3</a>    |
| <a href="#">Chain A. Solution Structure Of Human Secretory Component [Homo sapiens]</a>     | 67.8      | 67.8        | 100%        | 6e-12   | 97%   | <a href="#">2OCW_A</a>         |
| <a href="#">PREDICTED: polymeric immunoglobulin receptor [Pan paniscus]</a>                 | 68.2      | 68.2        | 100%        | 6e-12   | 97%   | <a href="#">XP_003822957.1</a> |
| <a href="#">PREDICTED: polymeric immunoglobulin receptor isoform X1 [Homo sapiens]</a>      | 68.2      | 68.2        | 100%        | 6e-12   | 97%   | <a href="#">XP_005273220.1</a> |
| <a href="#">hypothetical protein [Pongo abelii]</a>                                         | 64.7      | 64.7        | 96%         | 1e-10   | 94%   | <a href="#">CAH91352.1</a>     |
| <a href="#">polymeric immunoglobulin receptor precursor [Pongo abelii]</a>                  | 64.7      | 64.7        | 96%         | 1e-10   | 94%   | <a href="#">NP_001125098.1</a> |
| <a href="#">PREDICTED: polymeric immunoglobulin receptor [Callithrix jacchus]</a>           | 62.8      | 62.8        | 96%         | 4e-10   | 90%   | <a href="#">XP_002760783.1</a> |
| <a href="#">PREDICTED: polymeric immunoglobulin receptor [Rhinopithecus roxellana]</a>      | 62.8      | 95.5        | 100%        | 5e-10   | 87%   | <a href="#">XP_010363960.1</a> |
| <a href="#">PREDICTED: polymeric immunoglobulin receptor [Chlorocebus sabaeus]</a>          | 62.4      | 62.4        | 96%         | 6e-10   | 90%   | <a href="#">XP_007986846.1</a> |
| <a href="#">PREDICTED: polymeric immunoglobulin receptor-like [Galeopterus variegatus]</a>  | 59.3      | 59.3        | 96%         | 6e-10   | 81%   | <a href="#">XP_008563367.1</a> |
| <a href="#">PREDICTED: polymeric immunoglobulin receptor [Papio anubis]</a>                 | 62.4      | 62.4        | 96%         | 6e-10   | 90%   | <a href="#">XP_003893238.1</a> |
| <a href="#">PREDICTED: polymeric immunoglobulin receptor isoform X2 [Macaca fascicu</a>     | 62.4      | 62.4        | 96%         | 6e-10   | 90%   | <a href="#">XP_005540721.1</a> |
| <a href="#">hypothetical protein EGM_01447 [Macaca fascicularis]</a>                        | 62.4      | 62.4        | 96%         | 6e-10   | 90%   | <a href="#">EHH50590.1</a>     |
| <a href="#">PREDICTED: polymeric immunoglobulin receptor [Macaca mulatta]</a>               | 62.4      | 62.4        | 96%         | 6e-10   | 90%   | <a href="#">XP_001083307.2</a> |
| <a href="#">hypothetical protein EGK_01717 [Macaca mulatta]</a>                             | 62.4      | 62.4        | 96%         | 6e-10   | 90%   | <a href="#">EHH15602.1</a>     |
| <a href="#">PREDICTED: polymeric immunoglobulin receptor isoform X1 [Macaca fascicu</a>     | 62.4      | 62.4        | 96%         | 7e-10   | 90%   | <a href="#">XP_005540720.1</a> |
| <a href="#">PREDICTED: polymeric immunoglobulin receptor isoform 1 [Nomascus leuco</a>      | 61.6      | 61.6        | 96%         | 1e-09   | 90%   | <a href="#">XP_003273022.1</a> |
| <a href="#">PREDICTED: polymeric immunoglobulin receptor [Saimiri boliviensis boliviens</a> | 60.8      | 60.8        | 96%         | 2e-09   | 87%   | <a href="#">XP_003930479.1</a> |
| <a href="#">PREDICTED: polymeric immunoglobulin receptor [Nannospalax galili]</a>           | 59.3      | 59.3        | 96%         | 8e-09   | 84%   | <a href="#">XP_008821506.1</a> |
| <a href="#">PREDICTED: polymeric immunoglobulin receptor [Otolemur garnettii]</a>           | 58.2      | 58.2        | 96%         | 2e-08   | 81%   | <a href="#">XP_003792254.1</a> |
| <a href="#">PREDICTED: polymeric immunoglobulin receptor isoform X2 [Ictidomys tridec</a>   | 57.4      | 57.4        | 96%         | 3e-08   | 81%   | <a href="#">XP_005329533.1</a> |
| <a href="#">PREDICTED: polymeric immunoglobulin receptor isoform X1 [Ictidomys tridec</a>   | 57.4      | 57.4        | 96%         | 3e-08   | 81%   | <a href="#">XP_005329532.1</a> |
| <a href="#">PREDICTED: polymeric immunoglobulin receptor [Camelus ferus]</a>                | 57.4      | 57.4        | 96%         | 4e-08   | 74%   | <a href="#">XP_006182326.1</a> |
| <a href="#">polymeric immunoglobulin receptor precursor [Camelus ferus]</a>                 | 57.4      | 101         | 100%        | 4e-08   | 74%   | <a href="#">EQB78114.1</a>     |
| <a href="#">PREDICTED: polymeric immunoglobulin receptor [Camelus bactrianus]</a>           | 57.0      | 57.0        | 96%         | 4e-08   | 74%   | <a href="#">XP_010961553.1</a> |

|                                                                                           |      |      |      |       |     |                                |
|-------------------------------------------------------------------------------------------|------|------|------|-------|-----|--------------------------------|
| <a href="#">PREDICTED: polymeric immunoglobulin receptor [Vicugna pacos]</a>              | 57.0 | 57.0 | 96%  | 5e-08 | 74% | <a href="#">XP_006215522.1</a> |
| <a href="#">Chain A. Crystal Structure Of The 1st Ig Domain From Mouse Polymeric Immu</a> | 53.5 | 53.5 | 100% | 6e-08 | 69% | <a href="#">4NOB_A</a>         |
| <a href="#">PREDICTED: polymeric immunoglobulin receptor [Microtus ochrogaster]</a>       | 56.6 | 56.6 | 100% | 7e-08 | 75% | <a href="#">XP_005348371.1</a> |
| <a href="#">PREDICTED: polymeric immunoglobulin receptor [Tarsius syrichta]</a>           | 55.8 | 55.8 | 96%  | 1e-07 | 77% | <a href="#">XP_008062620.1</a> |
| <a href="#">PREDICTED: polymeric immunoglobulin receptor [Leptonychotes weddellii]</a>    | 55.8 | 55.8 | 96%  | 1e-07 | 77% | <a href="#">XP_006730466.1</a> |
| <a href="#">PREDICTED: polymeric immunoglobulin receptor [Peromyscus maniculatus b</a>    | 55.5 | 55.5 | 100% | 2e-07 | 75% | <a href="#">XP_006996902.1</a> |
| <a href="#">PREDICTED: polymeric immunoglobulin receptor [Bubalus bubalis]</a>            | 54.7 | 54.7 | 96%  | 3e-07 | 74% | <a href="#">XP_006043871.1</a> |
| <a href="#">PREDICTED: polymeric immunoglobulin receptor [Tupaia chinensis]</a>           | 54.3 | 54.3 | 96%  | 4e-07 | 74% | <a href="#">XP_006159345.1</a> |
| <a href="#">polymeric immunoglobulin receptor [Mus musculus]</a>                          | 53.9 | 53.9 | 100% | 5e-07 | 69% | <a href="#">AAA67440.1</a>     |
| <a href="#">polymeric immunoglobulin receptor precursor [Mus musculus]</a>                | 53.9 | 53.9 | 100% | 5e-07 | 69% | <a href="#">NP_035212.2</a>    |
| <a href="#">PREDICTED: polymeric immunoglobulin receptor [Jaculus jaculus]</a>            | 53.5 | 53.5 | 96%  | 7e-07 | 71% | <a href="#">XP_004663511.1</a> |
| <a href="#">PREDICTED: polymeric immunoglobulin receptor isoform 1 [Ovis aries]</a>       | 53.5 | 53.5 | 96%  | 8e-07 | 71% | <a href="#">XP_004013622.1</a> |
| <a href="#">polymeric immunoglobulin receptor isoform 1 [Cricetulus griseus]</a>          | 53.5 | 94.3 | 100% | 8e-07 | 66% | <a href="#">ERE73918.1</a>     |
| <a href="#">PREDICTED: polymeric immunoglobulin receptor [Capra hircus]</a>               | 53.5 | 53.5 | 96%  | 8e-07 | 71% | <a href="#">XP_005690475.1</a> |
| <a href="#">PREDICTED: polymeric immunoglobulin receptor [Pantholops hodgsonii]</a>       | 53.5 | 53.5 | 96%  | 8e-07 | 71% | <a href="#">XP_005967001.1</a> |
| <a href="#">PREDICTED: polymeric immunoglobulin receptor isoform 2 [Ovis aries]</a>       | 53.5 | 53.5 | 96%  | 8e-07 | 71% | <a href="#">XP_004013623.1</a> |
| <a href="#">PREDICTED: polymeric immunoglobulin receptor [Felis catus]</a>                | 53.1 | 53.1 | 96%  | 9e-07 | 74% | <a href="#">XP_006943006.1</a> |
| <a href="#">PREDICTED: polymeric immunoglobulin receptor [Panthera tigris altaica]</a>    | 53.1 | 53.1 | 96%  | 1e-06 | 74% | <a href="#">XP_007096344.1</a> |
| <a href="#">PREDICTED: LOW QUALITY PROTEIN: polymeric immunoglobulin receptor i</a>       | 53.1 | 53.1 | 100% | 1e-06 | 66% | <a href="#">XP_007607970.1</a> |
| <a href="#">TPA: polymeric immunoglobulin receptor precursor [Bos taurus]</a>             | 53.1 | 53.1 | 96%  | 1e-06 | 71% | <a href="#">DAA21480.1</a>     |
| <a href="#">polymeric immunoglobulin receptor precursor [Bos taurus]</a>                  | 53.1 | 53.1 | 96%  | 1e-06 | 71% | <a href="#">NP_776568.1</a>    |
| <a href="#">PREDICTED: polymeric immunoglobulin receptor [Bison bison bison]</a>          | 53.1 | 53.1 | 96%  | 1e-06 | 71% | <a href="#">XP_010852516.1</a> |
| <a href="#">RecName: Full=Polymeric immunoglobulin receptor; Short=PIgR; Short=Poly-</a>  | 52.8 | 52.8 | 96%  | 1e-06 | 71% | <a href="#">P81265.1</a>       |
| <a href="#">PREDICTED: LOW QUALITY PROTEIN: polymeric immunoglobulin receptor  </a>       | 52.8 | 52.8 | 96%  | 1e-06 | 71% | <a href="#">XP_005891711.1</a> |
| <a href="#">PIGR protein [Bos taurus]</a>                                                 | 52.8 | 52.8 | 96%  | 1e-06 | 71% | <a href="#">AAI49033.1</a>     |
| <a href="#">PREDICTED: polymeric immunoglobulin receptor isoform X1 [Cricetulus grise</a> | 52.8 | 52.8 | 100% | 1e-06 | 66% | <a href="#">XP_003497773.1</a> |
| <a href="#">PREDICTED: polymeric immunoglobulin receptor isoform X2 [Mesocricetus ai</a>  | 52.8 | 52.8 | 100% | 2e-06 | 69% | <a href="#">XP_005079920.1</a> |
| <a href="#">PREDICTED: polymeric immunoglobulin receptor isoform X2 [Cricetulus grise</a> | 52.8 | 52.8 | 100% | 2e-06 | 66% | <a href="#">XP_003497772.1</a> |
| <a href="#">PREDICTED: polymeric immunoglobulin receptor isoform X1 [Mesocricetus ai</a>  | 52.8 | 52.8 | 100% | 2e-06 | 69% | <a href="#">XP_005079919.1</a> |
| <a href="#">Polymeric immunoglobulin receptor [Cricetulus griseus]</a>                    | 52.4 | 52.4 | 100% | 2e-06 | 66% | <a href="#">EGW00964.1</a>     |
| <a href="#">polymeric immunoglobulin receptor precursor [Rattus norvegicus]</a>           | 52.4 | 52.4 | 100% | 2e-06 | 66% | <a href="#">NP_036855.3</a>    |
| <a href="#">polymeric immunoglobulin receptor [Rattus norvegicus]</a>                     | 52.4 | 52.4 | 100% | 2e-06 | 66% | <a href="#">EDM09843.1</a>     |
| <a href="#">PREDICTED: polymeric immunoglobulin receptor [Ursus maritimus]</a>            | 51.2 | 51.2 | 96%  | 5e-06 | 71% | <a href="#">XP_008683298.1</a> |
| <a href="#">PREDICTED: polymeric immunoglobulin receptor [Ceratotherium simum simu</a>    | 51.2 | 51.2 | 96%  | 5e-06 | 71% | <a href="#">XP_004425146.1</a> |
| <a href="#">PREDICTED: polymeric immunoglobulin receptor [Lipotes vexillifer]</a>         | 50.8 | 50.8 | 96%  | 6e-06 | 68% | <a href="#">XP_007470777.1</a> |
| <a href="#">PREDICTED: polymeric immunoglobulin receptor isoform 1 [Dasypus novemc</a>    | 50.8 | 83.9 | 100% | 7e-06 | 68% | <a href="#">XP_004470111.1</a> |
| <a href="#">PREDICTED: polymeric immunoglobulin receptor [Physeter catodon]</a>           | 50.8 | 50.8 | 96%  | 7e-06 | 68% | <a href="#">XP_007105526.1</a> |
| <a href="#">polymeric immunoglobulin receptor precursor [Equus caballus]</a>              | 50.4 | 50.4 | 96%  | 8e-06 | 74% | <a href="#">NP_001271468.1</a> |
| <a href="#">PREDICTED: polymeric immunoglobulin receptor [Equus przewalskii]</a>          | 50.4 | 50.4 | 96%  | 8e-06 | 74% | <a href="#">XP_008539949.1</a> |
| <a href="#">PREDICTED: polymeric immunoglobulin receptor [Equus caballus]</a>             | 50.4 | 50.4 | 96%  | 8e-06 | 74% | <a href="#">XP_001492348.2</a> |
| <a href="#">PREDICTED: polymeric immunoglobulin receptor [Odobenus rosmarus diverg</a>    | 50.4 | 50.4 | 96%  | 1e-05 | 71% | <a href="#">XP_004415592.1</a> |
| <a href="#">PREDICTED: polymeric immunoglobulin receptor [Tursiops truncatus]</a>         | 50.4 | 50.4 | 96%  | 1e-05 | 68% | <a href="#">XP_004319136.1</a> |
| <a href="#">PREDICTED: polymeric immunoglobulin receptor [Orcinus orca]</a>               | 50.4 | 50.4 | 96%  | 1e-05 | 68% | <a href="#">XP_004282467.1</a> |
| <a href="#">polymeric immunoglobulin receptor [Canis lupus familiaris]</a>                | 49.7 | 49.7 | 96%  | 1e-05 | 65% | <a href="#">AAL91653.1</a>     |
| <a href="#">PREDICTED: polymeric immunoglobulin receptor [Balaenoptera acutorostrata</a>  | 50.1 | 50.1 | 96%  | 1e-05 | 68% | <a href="#">XP_007171624.1</a> |
| <a href="#">PREDICTED: polymeric immunoglobulin receptor isoform X2 [Orycteropus afe</a>  | 50.1 | 50.1 | 96%  | 1e-05 | 68% | <a href="#">XP_007951362.1</a> |

|                                                                                            |      |      |      |       |     |                                |
|--------------------------------------------------------------------------------------------|------|------|------|-------|-----|--------------------------------|
| <a href="#">PREDICTED: polymeric immunoglobulin receptor isoform X1 [Orycteropus afe</a>   | 50.1 | 50.1 | 96%  | 1e-05 | 68% | <a href="#">XP_007951355.1</a> |
| <a href="#">PREDICTED: polymeric immunoglobulin receptor [Elephantulus edwardii]</a>       | 49.7 | 49.7 | 96%  | 2e-05 | 68% | <a href="#">XP_006888060.1</a> |
| <a href="#">PREDICTED: polymeric immunoglobulin receptor isoform X2 [Mustela putorii</a>   | 49.7 | 49.7 | 96%  | 2e-05 | 71% | <a href="#">XP_004788608.1</a> |
| <a href="#">polymeric immunoglobulin receptor precursor [Canis lupus familiaris]</a>       | 49.3 | 49.3 | 96%  | 2e-05 | 65% | <a href="#">NP_001274081.1</a> |
| <a href="#">polymeric immunoglobulin receptor precursor [Sus scrofa]</a>                   | 49.3 | 49.3 | 96%  | 2e-05 | 68% | <a href="#">NP_999324.1</a>    |
| <a href="#">PREDICTED: polymeric immunoglobulin receptor [Mustela putorius furo]</a>       | 49.3 | 49.3 | 96%  | 2e-05 | 71% | <a href="#">XP_004756245.1</a> |
| <a href="#">Polymeric immunoglobulin receptor [Pteropus alecto]</a>                        | 48.5 | 48.5 | 96%  | 4e-05 | 65% | <a href="#">ELK03287.1</a>     |
| <a href="#">PREDICTED: polymeric immunoglobulin receptor [Pteropus alecto]</a>             | 48.5 | 87.8 | 96%  | 5e-05 | 65% | <a href="#">XP_006922980.1</a> |
| <a href="#">PREDICTED: polymeric immunoglobulin receptor [Octodon degus]</a>               | 47.8 | 47.8 | 96%  | 7e-05 | 65% | <a href="#">XP_004641251.1</a> |
| <a href="#">PREDICTED: polymeric immunoglobulin receptor [Echinops telfairii]</a>          | 48.1 | 48.1 | 100% | 7e-05 | 66% | <a href="#">XP_004700183.1</a> |
| <a href="#">PREDICTED: polymeric immunoglobulin receptor [Myotis davidii]</a>              | 47.8 | 47.8 | 96%  | 8e-05 | 61% | <a href="#">XP_006754443.1</a> |
| <a href="#">PREDICTED: polymeric immunoglobulin receptor [Erinaceus europaeus]</a>         | 47.4 | 47.4 | 96%  | 1e-04 | 65% | <a href="#">XP_007523168.1</a> |
| <a href="#">PREDICTED: polymeric immunoglobulin receptor [Eptesicus fuscus]</a>            | 47.4 | 47.4 | 96%  | 1e-04 | 61% | <a href="#">XP_008152394.1</a> |
| <a href="#">PREDICTED: polymeric immunoglobulin receptor [Chinchilla lanigera]</a>         | 46.6 | 46.6 | 96%  | 2e-04 | 65% | <a href="#">XP_005375465.1</a> |
| <a href="#">High affinity immunoglobulin alpha and immunoglobulin mu Fc receptor [Tupa</a> | 46.2 | 46.2 | 100% | 2e-04 | 59% | <a href="#">ELW47757.1</a>     |
| <a href="#">PREDICTED: LOW QUALITY PROTEIN: polymeric immunoglobulin receptor-</a>         | 46.6 | 46.6 | 96%  | 2e-04 | 65% | <a href="#">XP_004610232.1</a> |
| <a href="#">PREDICTED: polymeric immunoglobulin receptor [Monodelphis domestica]</a>       | 46.2 | 82.8 | 100% | 2e-04 | 56% | <a href="#">XP_007481356.1</a> |
| <a href="#">PREDICTED: polymeric immunoglobulin receptor [Sarcophilus harrisii]</a>        | 46.2 | 80.9 | 100% | 3e-04 | 53% | <a href="#">XP_003767679.1</a> |
| <a href="#">PREDICTED: high affinity immunoglobulin alpha and immunoglobulin mu Fc r</a>   | 45.8 | 45.8 | 100% | 3e-04 | 56% | <a href="#">XP_004425251.1</a> |
| <a href="#">PREDICTED: polymeric immunoglobulin receptor isoform X2 [Heterocephalus</a>    | 45.4 | 45.4 | 96%  | 4e-04 | 61% | <a href="#">XP_004862115.1</a> |
| <a href="#">Polymeric immunoglobulin receptor [Heterocephalus glaber]</a>                  | 45.4 | 45.4 | 96%  | 5e-04 | 61% | <a href="#">EHB11027.1</a>     |
| <a href="#">PREDICTED: high affinity immunoglobulin alpha and immunoglobulin mu Fc r</a>   | 45.1 | 45.1 | 100% | 5e-04 | 56% | <a href="#">XP_010961590.1</a> |
| <a href="#">PREDICTED: polymeric immunoglobulin receptor isoform X1 [Heterocephalus</a>    | 45.4 | 45.4 | 96%  | 5e-04 | 61% | <a href="#">XP_004862114.1</a> |
| <a href="#">PREDICTED: polymeric immunoglobulin receptor [Heterocephalus glaber]</a>       | 45.4 | 45.4 | 96%  | 5e-04 | 61% | <a href="#">XP_004897444.1</a> |

## Alignments

[Download](#) [GenPept](#) [Graphics](#)

[Next](#) [Previous](#) [Descriptions](#)

### Chain A, Crystal Structure Of A Ligand-Binding Domain Of The Human Polymeric Ig Receptor, Pigr

Sequence ID: [pdb|1XED|A](#) Length: 117 Number of Matches: 1

[See 5 more title\(s\)](#)

Range 1: 59 to 90 [GenPept](#) [Graphics](#)

[Next Match](#) [Previous Match](#)

| Score          | Expect | Method                   | Identities | Positives   | Gaps     |
|----------------|--------|--------------------------|------------|-------------|----------|
| 68.6 bits(166) | 2e-13  | Composition-based stats. | 31/32(97%) | 32/32(100%) | 0/32(0%) |

Query 1 KYAGRADLTNFPENGTFFVNNIAQLSQDDSGRY 32  
 KYAGRA+LTNFPENGTFFVNNIAQLSQDDSGRY  
 Sbjct 59 KYAGRANLTNFPENGTFFVNNIAQLSQDDSGRY 90

#### Related Information

[Structure](#) - 3D structure displays  
[Identical Proteins](#) - Proteins  
 identical to the subject

[Download](#) [GenPept](#) [Graphics](#)

[Next](#) [Previous](#) [Descriptions](#)

### PREDICTED: polymeric immunoglobulin receptor isoform 1 [Gorilla gorilla gorilla]

Sequence ID: [ref|XP\\_004028344.1|](#) Length: 764 Number of Matches: 1

[See 1 more title\(s\)](#)

Range 1: 77 to 108 [GenPept](#) [Graphics](#)

[Next Match](#) [Previous Match](#)

| Score          | Expect | Method                       | Identities | Positives   | Gaps     |
|----------------|--------|------------------------------|------------|-------------|----------|
| 68.2 bits(165) | 5e-12  | Compositional matrix adjust. | 31/32(97%) | 32/32(100%) | 0/32(0%) |

Query 1 KYAGRADLTNFPENGTFFVNNIAQLSQDDSGRY 32  
 KYAGRA+LTNFPENGTFFVNNIAQLSQDDSGRY  
 Sbjct 77 KYAGRANLTNFPENGTFFVNNIAQLSQDDSGRY 108

#### Related Information

[Gene](#) - associated gene details  
[Map Viewer](#) - aligned genomic  
 context  
[Identical Proteins](#) - Proteins  
 identical to the subject

Download [GenPept](#) [Graphics](#)

[▼ Next](#) [▲ Previous](#) [▲ Descriptions](#)

transmembrane secretory component [Homo sapiens]

Sequence ID: [gb|AAB20203.1|](#) Length: 764 Number of Matches: 1

[▶ See 3 more title\(s\)](#)

Range 1: 77 to 108 [GenPept](#) [Graphics](#)

[▼ Next Match](#) [▲ Previous Match](#)

| Score          | Expect                            | Method                       | Identities | Positives   | Gaps     |
|----------------|-----------------------------------|------------------------------|------------|-------------|----------|
| 68.2 bits(165) | 5e-12                             | Compositional matrix adjust. | 31/32(97%) | 32/32(100%) | 0/32(0%) |
| Query 1        | KYAGRADLTNFPENGTFFVFNIAQLSQDDSGRY |                              | 32         |             |          |
|                | KYAGRA+LTNFPENGTFFVFNIAQLSQDDSGRY |                              |            |             |          |
| Sbjct 77       | KYAGRANLTNFPENGTFFVFNIAQLSQDDSGRY |                              | 108        |             |          |

**Related Information**

[Gene](#) - associated gene details  
[Identical Proteins](#) - Proteins identical to the subject

Download [GenPept](#) [Graphics](#)

[▼ Next](#) [▲ Previous](#) [▲ Descriptions](#)

poly-Ig receptor, partial [Homo sapiens]

Sequence ID: [gb|AAA36102.1|](#) Length: 693 Number of Matches: 1

Range 1: 6 to 37 [GenPept](#) [Graphics](#)

[▼ Next Match](#) [▲ Previous Match](#)

| Score          | Expect                            | Method                       | Identities | Positives   | Gaps     |
|----------------|-----------------------------------|------------------------------|------------|-------------|----------|
| 68.2 bits(165) | 5e-12                             | Compositional matrix adjust. | 31/32(97%) | 32/32(100%) | 0/32(0%) |
| Query 1        | KYAGRADLTNFPENGTFFVFNIAQLSQDDSGRY |                              | 32         |             |          |
|                | KYAGRA+LTNFPENGTFFVFNIAQLSQDDSGRY |                              |            |             |          |
| Sbjct 6        | KYAGRANLTNFPENGTFFVFNIAQLSQDDSGRY |                              | 37         |             |          |

**Related Information**

[Gene](#) - associated gene details

Download [GenPept](#) [Graphics](#)

[▼ Next](#) [▲ Previous](#) [▲ Descriptions](#)

polymeric immunoglobulin receptor precursor [Homo sapiens]

Sequence ID: [ref|NP\\_002635.2|](#) Length: 764 Number of Matches: 1

[▶ See 8 more title\(s\)](#)

Range 1: 77 to 108 [GenPept](#) [Graphics](#)

[▼ Next Match](#) [▲ Previous Match](#)

| Score          | Expect                            | Method                       | Identities | Positives   | Gaps     |
|----------------|-----------------------------------|------------------------------|------------|-------------|----------|
| 68.2 bits(165) | 5e-12                             | Compositional matrix adjust. | 31/32(97%) | 32/32(100%) | 0/32(0%) |
| Query 1        | KYAGRADLTNFPENGTFFVFNIAQLSQDDSGRY |                              | 32         |             |          |
|                | KYAGRA+LTNFPENGTFFVFNIAQLSQDDSGRY |                              |            |             |          |
| Sbjct 77       | KYAGRANLTNFPENGTFFVFNIAQLSQDDSGRY |                              | 108        |             |          |

**Related Information**

[Gene](#) - associated gene details  
[UniGene](#) - clustered expressed sequence tags  
[Map Viewer](#) - aligned genomic context  
[Identical Proteins](#) - Proteins identical to the subject

BLAST is a registered trademark of the National Library of Medicine.

NCBI/ BLAST/ blastp suite/ Formatting Results - BBJ7M71J014

[Edit and Resubmit](#) [Save Search Strategies](#) [Formatting options](#) [Download](#)

[YouTube](#) [How to read this page](#) [Blast report description](#)

### PIGR\_KYAGRANLTNFPENGTFFVNVIAQLSQDDSGRY\_NonMod

**RID** [BBJ7M71J014](#) (Expires on 01-15 08:40 am)

**Query ID** |cl|96038      **Database Name** nr

**Description** None      **Description** All non-redundant GenBank CDS translations+PDB+SwissProt+PIR excluding environmental samples from WGS projects

**Molecule type** amino acid      **Program** BLASTP 2.2.30+ [Citation](#)

**Query Length** 32

Other reports: [Search Summary](#) [Taxonomy reports](#) [Distance tree of results](#) [Multiple alignment](#)

[New DELTA-BLAST](#) a more sensitive protein-protein search

### Graphic Summary

Show Conserved Domains

Putative conserved domains have been detected, click on the image below for detailed results.

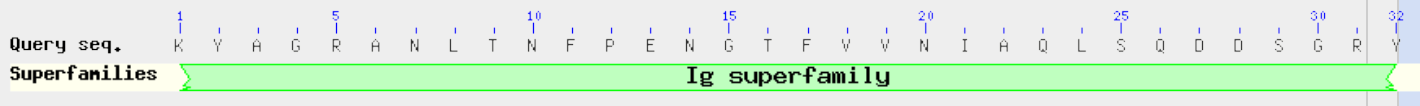

Distribution of 117 Blast Hits on the Query Sequence

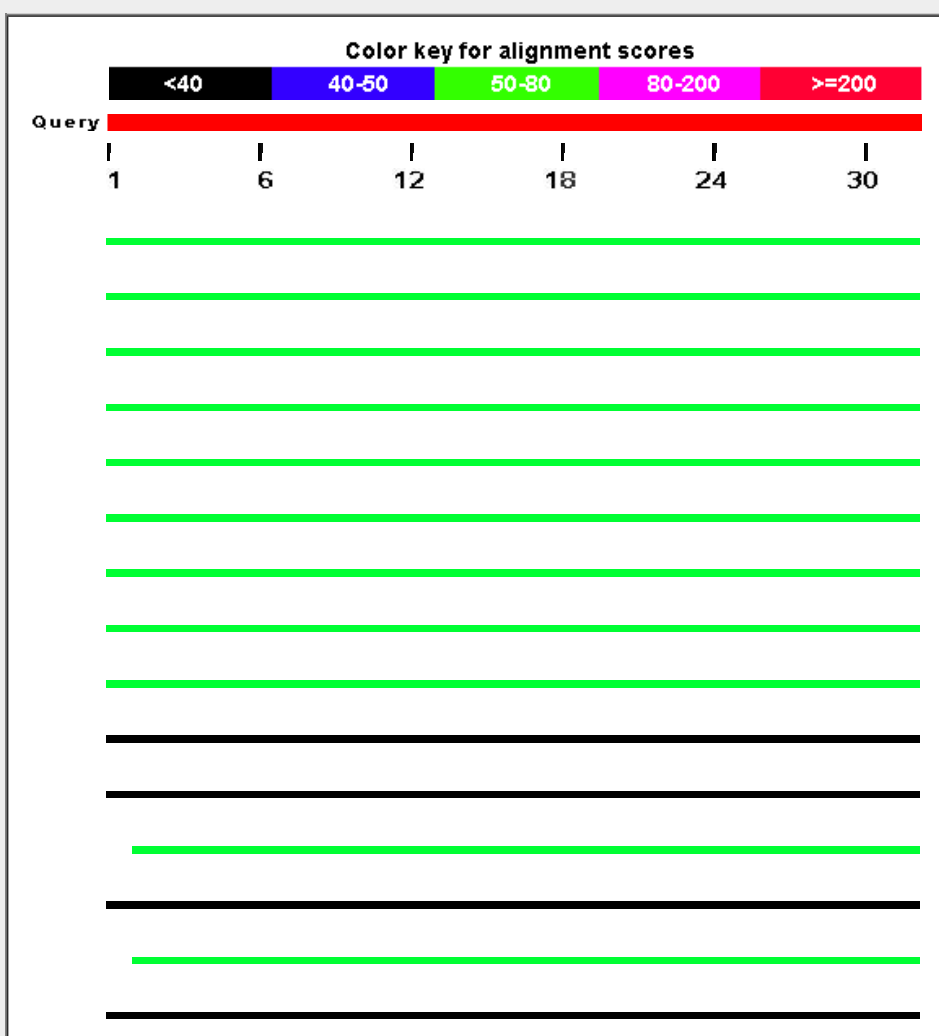

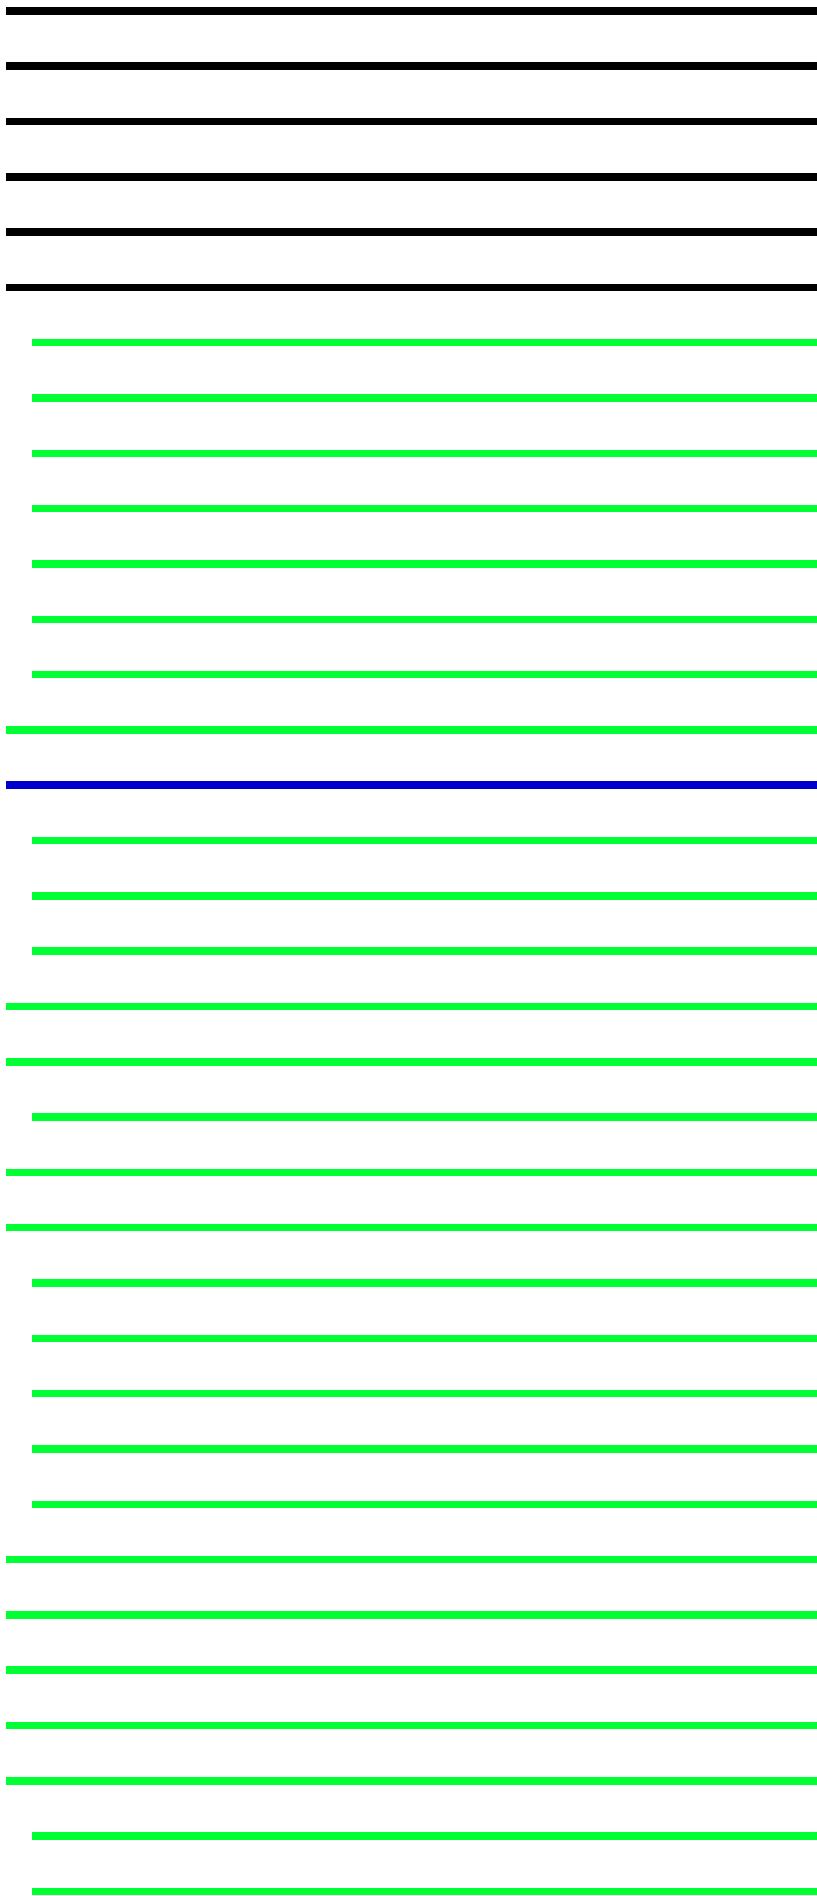

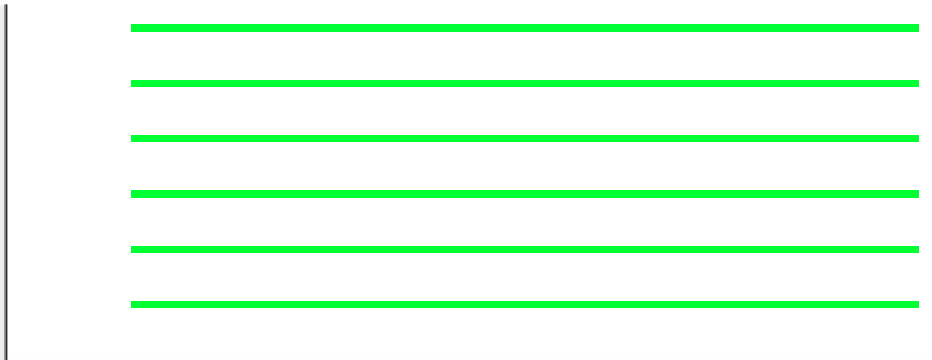

**Descriptions**

**Sequences producing significant alignments:**

Select: [All](#) [None](#) Selected:0

Alignments [Download](#) [GenPept](#) [Graphics](#) [Distance tree of results](#) [Multiple alignment](#)

| Description                                                                      | Max score | Total score | Query cover | E value | Ident | Accession                                   |
|----------------------------------------------------------------------------------|-----------|-------------|-------------|---------|-------|---------------------------------------------|
| <a href="#">Chain A, Crystal Structure Of A Ligand-Binding Domain Of The Hur</a> | 68.9      | 68.9        | 100%        | 1e-13   | 100%  | <a href="#">gi 56967075 1XED_A</a>          |
| <a href="#">Chain A, Solution Structure Of Human Secretory Component [Homo</a>   | 68.9      | 68.9        | 100%        | 2e-12   | 100%  | <a href="#">gi 146387599 2OCW_A</a>         |
| <a href="#">poly-Ig receptor [Homo sapiens]</a>                                  | 68.9      | 68.9        | 100%        | 3e-12   | 100%  | <a href="#">gi 514366 AAA36102.1</a>        |
| <a href="#">polymeric immunoglobulin receptor precursor [Homo sapiens]</a>       | 68.9      | 68.9        | 100%        | 3e-12   | 100%  | <a href="#">gi 31377806 NP_002635.2</a>     |
| <a href="#">PREDICTED: polymeric immunoglobulin receptor isoform 1 [Gorilla</a>  | 68.9      | 102         | 100%        | 3e-12   | 100%  | <a href="#">gi 426333562 XP_004028344.1</a> |
| <a href="#">transmembrane secretory component [Homo sapiens]</a>                 | 68.9      | 68.9        | 100%        | 3e-12   | 100%  | <a href="#">gi 238236 AAB20203.1</a>        |
| <a href="#">PREDICTED: polymeric immunoglobulin receptor [Pan paniscus]</a>      | 68.9      | 68.9        | 100%        | 3e-12   | 100%  | <a href="#">gi 397504777 XP_003822957.1</a> |
| <a href="#">PREDICTED: polymeric immunoglobulin receptor [Pan troglodytes]</a>   | 68.9      | 68.9        | 100%        | 3e-12   | 100%  | <a href="#">gi 332811741 XP_514153.3</a>    |
| <a href="#">PREDICTED: polymeric immunoglobulin receptor isoform X1 [Homo</a>    | 68.9      | 68.9        | 100%        | 3e-12   | 100%  | <a href="#">gi 530366266 XP_005273220.1</a> |
| <a href="#">hypothetical protein [Pongo abelii]</a>                              | 65.5      | 98.6        | 100%        | 5e-11   | 97%   | <a href="#">gi 55729233 CAH91352.1</a>      |
| <a href="#">polymeric immunoglobulin receptor precursor [Pongo abelii]</a>       | 65.5      | 98.6        | 100%        | 5e-11   | 97%   | <a href="#">gi 197102290 NP_001125098.1</a> |
| <a href="#">PREDICTED: polymeric immunoglobulin receptor [Callithrix jacchus</a> | 63.9      | 63.9        | 96%         | 2e-10   | 94%   | <a href="#">gi 296230617 XP_002760783.1</a> |
| <a href="#">PREDICTED: polymeric immunoglobulin receptor [Macaca mulatta]</a>    | 63.5      | 96.3        | 100%        | 2e-10   | 94%   | <a href="#">gi 297280921 XP_001083307.2</a> |
| <a href="#">PREDICTED: polymeric immunoglobulin receptor [Chlorocebus sab</a>    | 63.5      | 63.5        | 96%         | 2e-10   | 94%   | <a href="#">gi 635130940 XP_007986846.1</a> |
| <a href="#">PREDICTED: polymeric immunoglobulin receptor isoform X2 [Maca</a>    | 63.5      | 96.3        | 100%        | 2e-10   | 94%   | <a href="#">gi 544399911 XP_005540721.1</a> |
| <a href="#">PREDICTED: polymeric immunoglobulin receptor [Papio anubis]</a>      | 63.5      | 96.3        | 100%        | 2e-10   | 94%   | <a href="#">gi 402857385 XP_003893238.1</a> |
| <a href="#">hypothetical protein EGM_01447 [Macaca fascicularis]</a>             | 63.5      | 96.3        | 100%        | 2e-10   | 94%   | <a href="#">gi 355745965 EHH50590.1</a>     |
| <a href="#">hypothetical protein EGK_01717 [Macaca mulatta]</a>                  | 63.5      | 96.3        | 100%        | 2e-10   | 94%   | <a href="#">gi 355558822 EHH15602.1</a>     |
| <a href="#">PREDICTED: polymeric immunoglobulin receptor isoform X1 [Maca</a>    | 63.5      | 96.3        | 100%        | 2e-10   | 94%   | <a href="#">gi 544399909 XP_005540720.1</a> |
| <a href="#">PREDICTED: polymeric immunoglobulin receptor [Rhinopithecus ro</a>   | 63.2      | 95.9        | 100%        | 3e-10   | 90%   | <a href="#">gi 724836419 XP_010363960.1</a> |
| <a href="#">PREDICTED: polymeric immunoglobulin receptor isoform 1 [Nomas</a>    | 62.8      | 95.9        | 100%        | 4e-10   | 94%   | <a href="#">gi 332247745 XP_003273022.1</a> |
| <a href="#">PREDICTED: polymeric immunoglobulin receptor-like [Galeopterus</a>   | 58.9      | 58.9        | 96%         | 7e-10   | 84%   | <a href="#">gi 667345587 XP_008563367.1</a> |
| <a href="#">PREDICTED: polymeric immunoglobulin receptor [Saimiri boliviensi</a> | 61.2      | 61.2        | 96%         | 1e-09   | 90%   | <a href="#">gi 403277678 XP_003930479.1</a> |
| <a href="#">PREDICTED: polymeric immunoglobulin receptor [Nannospalax gal</a>    | 59.3      | 59.3        | 96%         | 7e-09   | 87%   | <a href="#">gi 674096299 XP_008821506.1</a> |
| <a href="#">PREDICTED: polymeric immunoglobulin receptor isoform X1 [Ictido</a>  | 58.2      | 58.2        | 96%         | 2e-08   | 84%   | <a href="#">gi 532087641 XP_005329532.1</a> |
| <a href="#">PREDICTED: polymeric immunoglobulin receptor isoform X2 [Ictido</a>  | 58.2      | 58.2        | 96%         | 2e-08   | 84%   | <a href="#">gi 532087643 XP_005329533.1</a> |
| <a href="#">PREDICTED: polymeric immunoglobulin receptor [Camelus ferus]</a>     | 57.8      | 57.8        | 96%         | 2e-08   | 77%   | <a href="#">gi 560912075 XP_006182326.1</a> |
| <a href="#">PREDICTED: polymeric immunoglobulin receptor [Vicugna pacos]</a>     | 57.8      | 57.8        | 96%         | 2e-08   | 77%   | <a href="#">gi 560986671 XP_006215522.1</a> |
| <a href="#">Chain A, Crystal Structure Of The 1st Ig Domain From Mouse Poly</a>  | 54.7      | 54.7        | 100%        | 3e-08   | 72%   | <a href="#">gi 563321008 4NOB_A</a>         |

|                                                                                   |      |      |      |       |     |                                             |
|-----------------------------------------------------------------------------------|------|------|------|-------|-----|---------------------------------------------|
| <a href="#">polymeric immunoglobulin receptor precursor [Camelus ferus]</a>       | 57.8 | 101  | 100% | 3e-08 | 77% | <a href="#">gij530667813 EQB78114.1</a>     |
| <a href="#">PREDICTED: polymeric immunoglobulin receptor [Tarsius syrichta]</a>   | 57.0 | 57.0 | 96%  | 4e-08 | 81% | <a href="#">gij640811957 XP_008062620.1</a> |
| <a href="#">PREDICTED: polymeric immunoglobulin receptor [Otolemur garneti]</a>   | 57.0 | 57.0 | 96%  | 4e-08 | 81% | <a href="#">gij395838714 XP_003792254.1</a> |
| <a href="#">PREDICTED: polymeric immunoglobulin receptor [Leptonychotes w</a>     | 56.6 | 56.6 | 96%  | 6e-08 | 81% | <a href="#">gij585156277 XP_006730466.1</a> |
| <a href="#">PREDICTED: polymeric immunoglobulin receptor [Peromyscus mar</a>      | 56.6 | 56.6 | 100% | 6e-08 | 78% | <a href="#">gij589968826 XP_006996902.1</a> |
| <a href="#">PREDICTED: polymeric immunoglobulin receptor [Microtus ochrog</a>     | 55.5 | 55.5 | 100% | 2e-07 | 75% | <a href="#">gij532009108 XP_005348371.1</a> |
| <a href="#">PREDICTED: polymeric immunoglobulin receptor [Bubalus bubalis]</a>    | 55.1 | 55.1 | 96%  | 2e-07 | 77% | <a href="#">gij594038508 XP_006043871.1</a> |
| <a href="#">polymeric immunoglobulin receptor [Mus musculus]</a>                  | 54.7 | 54.7 | 100% | 3e-07 | 72% | <a href="#">gij458422 AAA67440.1</a>        |
| <a href="#">polymeric immunoglobulin receptor precursor [Mus musculus]</a>        | 54.7 | 54.7 | 100% | 3e-07 | 72% | <a href="#">gij31981570 NP_035212.2</a>     |
| <a href="#">PREDICTED: polymeric immunoglobulin receptor [Tupaia chinensis</a>    | 54.7 | 54.7 | 96%  | 3e-07 | 77% | <a href="#">gij562862054 XP_006159345.1</a> |
| <a href="#">PREDICTED: polymeric immunoglobulin receptor [Pantholops hodg</a>     | 53.9 | 53.9 | 96%  | 5e-07 | 74% | <a href="#">gij556742966 XP_005967001.1</a> |
| <a href="#">PREDICTED: polymeric immunoglobulin receptor [Capra hircus]</a>       | 53.9 | 53.9 | 96%  | 5e-07 | 74% | <a href="#">gij548497730 XP_005690475.1</a> |
| <a href="#">PREDICTED: polymeric immunoglobulin receptor isoform 1 [Ovis a</a>    | 53.9 | 53.9 | 96%  | 5e-07 | 74% | <a href="#">gij426239425 XP_004013622.1</a> |
| <a href="#">PREDICTED: polymeric immunoglobulin receptor isoform 2 [Ovis a</a>    | 53.9 | 53.9 | 96%  | 5e-07 | 74% | <a href="#">gij426239427 XP_004013623.1</a> |
| <a href="#">PREDICTED: LOW QUALITY PROTEIN: polymeric immunoglobulin</a>          | 53.5 | 53.5 | 100% | 7e-07 | 69% | <a href="#">gij625233654 XP_007607970.1</a> |
| <a href="#">Polymeric immunoglobulin receptor [Cricetulus griseus]</a>            | 53.5 | 53.5 | 100% | 7e-07 | 69% | <a href="#">gij344244860 EGW00964.1</a>     |
| <a href="#">PREDICTED: polymeric immunoglobulin receptor isoform X1 [Crice</a>    | 53.5 | 53.5 | 100% | 7e-07 | 69% | <a href="#">gij354471083 XP_003497773.1</a> |
| <a href="#">PREDICTED: polymeric immunoglobulin receptor isoform X2 [Crice</a>    | 53.5 | 53.5 | 100% | 7e-07 | 69% | <a href="#">gij354471081 XP_003497772.1</a> |
| <a href="#">polymeric immunoglobulin receptor isoform 1 [Cricetulus griseus]</a>  | 53.5 | 93.6 | 100% | 8e-07 | 69% | <a href="#">gij537169305 ERE73918.1</a>     |
| <a href="#">PREDICTED: LOW QUALITY PROTEIN: polymeric immunoglobulin</a>          | 53.1 | 53.1 | 96%  | 1e-06 | 74% | <a href="#">gij555959201 XP_005891711.1</a> |
| <a href="#">TPA: polymeric immunoglobulin receptor precursor [Bos taurus]</a>     | 53.1 | 53.1 | 96%  | 1e-06 | 74% | <a href="#">gij296479365 DAA21480.1</a>     |
| <a href="#">polymeric immunoglobulin receptor precursor [Bos taurus]</a>          | 52.8 | 52.8 | 96%  | 1e-06 | 74% | <a href="#">gij32189338 NP_776568.1</a>     |
| <a href="#">RecName: Full=Polymeric immunoglobulin receptor; Short=PIgR; S</a>    | 52.8 | 52.8 | 96%  | 1e-06 | 74% | <a href="#">gij3914346 P81265.1</a>         |
| <a href="#">PIGR protein [Bos taurus]</a>                                         | 52.8 | 52.8 | 96%  | 1e-06 | 74% | <a href="#">gij151555693 AAI49033.1</a>     |
| <a href="#">PREDICTED: polymeric immunoglobulin receptor [Panthera tigris a</a>   | 52.4 | 52.4 | 96%  | 2e-06 | 74% | <a href="#">gij591341842 XP_007096344.1</a> |
| <a href="#">PREDICTED: polymeric immunoglobulin receptor [Felis catus]</a>        | 52.4 | 52.4 | 96%  | 2e-06 | 74% | <a href="#">gij587018664 XP_006943006.1</a> |
| <a href="#">PREDICTED: polymeric immunoglobulin receptor [Ursus maritimus]</a>    | 52.4 | 52.4 | 96%  | 2e-06 | 74% | <a href="#">gij670984407 XP_008683298.1</a> |
| <a href="#">PREDICTED: polymeric immunoglobulin receptor [Ceratotherium si</a>    | 52.4 | 52.4 | 96%  | 2e-06 | 74% | <a href="#">gij478501668 XP_004425146.1</a> |
| <a href="#">PREDICTED: polymeric immunoglobulin receptor [Lipotes vexillifer]</a> | 51.6 | 51.6 | 96%  | 3e-06 | 71% | <a href="#">gij602721248 XP_007470777.1</a> |
| <a href="#">PREDICTED: polymeric immunoglobulin receptor [Physeter catodo</a>     | 51.6 | 51.6 | 96%  | 3e-06 | 71% | <a href="#">gij593718296 XP_007105526.1</a> |
| <a href="#">PREDICTED: polymeric immunoglobulin receptor [Equus przewalsk</a>     | 51.6 | 51.6 | 96%  | 3e-06 | 77% | <a href="#">gij664764562 XP_008539949.1</a> |
| <a href="#">PREDICTED: polymeric immunoglobulin receptor [Equus caballus]</a>     | 51.6 | 51.6 | 96%  | 3e-06 | 77% | <a href="#">gij194210251 XP_001492348.2</a> |
| <a href="#">polymeric immunoglobulin receptor precursor [Equus caballus]</a>      | 51.6 | 51.6 | 96%  | 3e-06 | 77% | <a href="#">gij548961809 NP_001271468.1</a> |
| <a href="#">PREDICTED: polymeric immunoglobulin receptor isoform X2 [Mesc</a>     | 51.6 | 51.6 | 100% | 3e-06 | 69% | <a href="#">gij524959951 XP_005079920.1</a> |
| <a href="#">PREDICTED: polymeric immunoglobulin receptor isoform X1 [Mesc</a>     | 51.6 | 51.6 | 100% | 3e-06 | 69% | <a href="#">gij524959949 XP_005079919.1</a> |
| <a href="#">PREDICTED: polymeric immunoglobulin receptor [Tursiops truncat</a>    | 51.2 | 51.2 | 96%  | 4e-06 | 71% | <a href="#">gij470622594 XP_004319136.1</a> |
| <a href="#">PREDICTED: polymeric immunoglobulin receptor [Odobenus rosm</a>       | 51.2 | 51.2 | 96%  | 4e-06 | 74% | <a href="#">gij472392635 XP_004415592.1</a> |
| <a href="#">PREDICTED: polymeric immunoglobulin receptor isoform 1 [Dasyp</a>     | 51.2 | 83.9 | 100% | 4e-06 | 71% | <a href="#">gij488560131 XP_004470111.1</a> |
| <a href="#">PREDICTED: polymeric immunoglobulin receptor [Orcinus orca]</a>       | 51.2 | 51.2 | 96%  | 4e-06 | 71% | <a href="#">gij466071278 XP_004282467.1</a> |
| <a href="#">PREDICTED: polymeric immunoglobulin receptor [Balaenoptera ac</a>     | 51.2 | 51.2 | 96%  | 4e-06 | 71% | <a href="#">gij594636460 XP_007171624.1</a> |
| <a href="#">PREDICTED: polymeric immunoglobulin receptor [Jaculus jaculus]</a>    | 51.2 | 51.2 | 96%  | 4e-06 | 71% | <a href="#">gij507559576 XP_004663511.1</a> |
| <a href="#">polymeric immunoglobulin receptor precursor [Rattus norvegicus]</a>   | 51.2 | 51.2 | 100% | 4e-06 | 66% | <a href="#">gij501354879 NP_036855.3</a>    |
| <a href="#">polymeric immunoglobulin receptor [Rattus norvegicus]</a>             | 51.2 | 51.2 | 100% | 4e-06 | 66% | <a href="#">gij149058686 EDM09843.1</a>     |
| <a href="#">polymeric immunoglobulin receptor [Canis lupus familiaris]</a>        | 50.4 | 50.4 | 96%  | 5e-06 | 68% | <a href="#">gij19715659 AAL91653.1</a>      |
| <a href="#">PREDICTED: polymeric immunoglobulin receptor isoform X2 [Oryct</a>    | 50.8 | 50.8 | 96%  | 6e-06 | 71% | <a href="#">gij634826802 XP_007951362.1</a> |
| <a href="#">PREDICTED: polymeric immunoglobulin receptor isoform X1 [Oryct</a>    | 50.8 | 50.8 | 96%  | 6e-06 | 71% | <a href="#">gij634826799 XP_007951355.1</a> |



|                                                                                                            |      |      |      |       |     |                                             |
|------------------------------------------------------------------------------------------------------------|------|------|------|-------|-----|---------------------------------------------|
| <a href="#">polymeric immunoglobulin receptor precursor [Sus scrofa]</a>                                   | 50.4 | 50.4 | 96%  | 8e-06 | 71% | <a href="#">gi 47523406 NP_999324.1</a>     |
| <a href="#">polymeric immunoglobulin receptor precursor [Canis lupus familiaris]</a>                       | 50.4 | 50.4 | 96%  | 8e-06 | 68% | <a href="#">gi 560891934 NP_001274081.1</a> |
| <a href="#">PREDICTED: polymeric immunoglobulin receptor isoform X2 [Mustela putorius]</a>                 | 50.1 | 50.1 | 96%  | 1e-05 | 74% | <a href="#">gi 511939572 XP_004788608.1</a> |
| <a href="#">PREDICTED: polymeric immunoglobulin receptor [Mustela putorius]</a>                            | 50.1 | 50.1 | 96%  | 1e-05 | 74% | <a href="#">gi 511871244 XP_004756245.1</a> |
| <a href="#">PREDICTED: polymeric immunoglobulin receptor [Echinops telfairi]</a>                           | 49.3 | 49.3 | 100% | 2e-05 | 69% | <a href="#">gi 507635434 XP_004700183.1</a> |
| <a href="#">PREDICTED: polymeric immunoglobulin receptor [Elephantulus edwardsi]</a>                       | 48.5 | 48.5 | 96%  | 4e-05 | 68% | <a href="#">gi 585666892 XP_006888060.1</a> |
| <a href="#">Polymeric immunoglobulin receptor [Pteropus alecto]</a>                                        | 48.5 | 48.5 | 96%  | 4e-05 | 68% | <a href="#">gi 431892859 ELK03287.1</a>     |
| <a href="#">PREDICTED: polymeric immunoglobulin receptor [Pteropus alecto]</a>                             | 48.5 | 86.6 | 96%  | 4e-05 | 68% | <a href="#">gi 586536225 XP_006922980.1</a> |
| <a href="#">PREDICTED: polymeric immunoglobulin receptor [Chinchilla laniga]</a>                           | 48.1 | 48.1 | 96%  | 5e-05 | 68% | <a href="#">gi 533120059 XP_005375465.1</a> |
| <a href="#">PREDICTED: polymeric immunoglobulin receptor [Octodon degus]</a>                               | 47.8 | 47.8 | 96%  | 7e-05 | 65% | <a href="#">gi 507688344 XP_004641251.1</a> |
| <a href="#">PREDICTED: polymeric immunoglobulin receptor [Myotis davidii]</a>                              | 47.8 | 47.8 | 96%  | 7e-05 | 65% | <a href="#">gi 584068124 XP_006754443.1</a> |
| <a href="#">PREDICTED: polymeric immunoglobulin receptor [Sarcophilus harrisi]</a>                         | 47.4 | 81.2 | 100% | 9e-05 | 56% | <a href="#">gi 395531218 XP_003767679.1</a> |
| <a href="#">PREDICTED: polymeric immunoglobulin receptor [Monodelphis domestica]</a>                       | 47.4 | 83.9 | 100% | 9e-05 | 59% | <a href="#">gi 611989136 XP_007481356.1</a> |
| <a href="#">PREDICTED: polymeric immunoglobulin receptor [Eptesicus fuscus]</a>                            | 47.4 | 47.4 | 96%  | 9e-05 | 65% | <a href="#">gi 641724928 XP_008152394.1</a> |
| <a href="#">PREDICTED: polymeric immunoglobulin receptor isoform X2 [Heterocephalus glaber]</a>            | 47.0 | 47.0 | 96%  | 1e-04 | 65% | <a href="#">gi 513001195 XP_004862115.1</a> |
| <a href="#">PREDICTED: polymeric immunoglobulin receptor [Heterocephalus glaber]</a>                       | 47.0 | 47.0 | 96%  | 1e-04 | 65% | <a href="#">gi 512893082 XP_004897444.1</a> |
| <a href="#">Polymeric immunoglobulin receptor [Heterocephalus glaber]</a>                                  | 47.0 | 47.0 | 96%  | 1e-04 | 65% | <a href="#">gi 351708108 EHB11027.1</a>     |
| <a href="#">PREDICTED: polymeric immunoglobulin receptor isoform X1 [Heterocephalus glaber]</a>            | 47.0 | 47.0 | 96%  | 1e-04 | 65% | <a href="#">gi 513001193 XP_004862114.1</a> |
| <a href="#">PREDICTED: polymeric immunoglobulin receptor [Erinaceus europaeus]</a>                         | 46.6 | 46.6 | 96%  | 2e-04 | 65% | <a href="#">gi 617602067 XP_007523168.1</a> |
| <a href="#">PREDICTED: polymeric immunoglobulin receptor [Cavia porcellus]</a>                             | 46.6 | 46.6 | 96%  | 2e-04 | 71% | <a href="#">gi 348578097 XP_003474820.1</a> |
| <a href="#">PREDICTED: LOW QUALITY PROTEIN: polymeric immunoglobulin receptor [Chrysochloris asiatica]</a> | 45.8 | 45.8 | 96%  | 3e-04 | 65% | <a href="#">gi 505829866 XP_004610232.1</a> |
| <a href="#">PREDICTED: polymeric immunoglobulin receptor [Chrysochloris asiatica]</a>                      | 45.1 | 45.1 | 96%  | 6e-04 | 65% | <a href="#">gi 586450680 XP_006834271.1</a> |
| <a href="#">PREDICTED: polymeric immunoglobulin receptor [Trichechus manatus]</a>                          | 45.1 | 45.1 | 96%  | 6e-04 | 61% | <a href="#">gi 471369481 XP_004375257.1</a> |
| <a href="#">PREDICTED: polymeric immunoglobulin receptor [Myotis lucifugus]</a>                            | 44.3 | 44.3 | 96%  | 0.001 | 58% | <a href="#">gi 558152618 XP_006094928.1</a> |
| <a href="#">PREDICTED: polymeric immunoglobulin receptor [Myotis brandtii]</a>                             | 44.3 | 44.3 | 96%  | 0.001 | 58% | <a href="#">gi 554587770 XP_005885286.1</a> |

## Alignments

Download v [GenPept](#) [Graphics](#)

v Next ▲ Previous ▲ Descriptions

Chain A, Crystal Structure Of A Ligand-Binding Domain Of The Human Polymeric Ig Receptor, Pigr

Sequence ID: [gi|56967075|pdb|1XED|A](#) Length: 117 Number of Matches: 1

[▶ See 5 more title\(s\)](#)

Range 1: 59 to 90 [GenPept](#) [Graphics](#)

v Next Match ▲ Previous Match

| Score          | Expect | Identities  | Positives   | Gaps     |
|----------------|--------|-------------|-------------|----------|
| 68.9 bits(167) | 1e-13  | 32/32(100%) | 32/32(100%) | 0/32(0%) |

Query 1 KYAGRANLTNFPENGTFFVNNIAQLSQDDSGRY 32  
 KYAGRANLTNFPENGTFFVNNIAQLSQDDSGRY  
 Sbjct 59 KYAGRANLTNFPENGTFFVNNIAQLSQDDSGRY 90

### Related Information

[Structure](#) - 3D structure displays  
[Identical Proteins](#) - Proteins identical to the subject

Download v [GenPept](#) [Graphics](#)

v Next ▲ Previous ▲ Descriptions

Chain A, Solution Structure Of Human Secretory Component

Sequence ID: [gi|146387599|pdb|2OCW|A](#) Length: 585 Number of Matches: 1

[▶ See 2 more title\(s\)](#)

Range 1: 59 to 90 [GenPept](#) [Graphics](#)

v Next Match ▲ Previous Match

| Score          | Expect | Identities  | Positives   | Gaps     |
|----------------|--------|-------------|-------------|----------|
| 68.9 bits(167) | 2e-12  | 32/32(100%) | 32/32(100%) | 0/32(0%) |

Query 1 KYAGRANLTNFPENGTFFVNNIAQLSQDDSGRY 32  
 KYAGRANLTNFPENGTFFVNNIAQLSQDDSGRY  
 Sbjct 59 KYAGRANLTNFPENGTFFVNNIAQLSQDDSGRY 90

### Related Information

[Structure](#) - 3D structure displays  
[Identical Proteins](#) - Proteins identical to the subject

Download [GenPept](#) [Graphics](#) ▼ Next ▲ Previous ▲ Descriptions

poly-Ig receptor, partial [Homo sapiens]

Sequence ID: [gi|514366|gb|AAA36102.1](#) Length: 693 Number of Matches: 1

Range 1: 6 to 37 [GenPept](#) [Graphics](#) ▼ Next Match ▲ Previous Match

| Score          | Expect | Identities  | Positives   | Gaps     |
|----------------|--------|-------------|-------------|----------|
| 68.9 bits(167) | 3e-12  | 32/32(100%) | 32/32(100%) | 0/32(0%) |

Query 1 KYAGRANLTNFPENGTFFVNNIAQLSQDDSGRY 32  
 KYAGRANLTNFPENGTFFVNNIAQLSQDDSGRY  
 Sbjct 6 KYAGRANLTNFPENGTFFVNNIAQLSQDDSGRY 37

**Related Information**

[Gene](#) - associated gene details

Download [GenPept](#) [Graphics](#) ▼ Next ▲ Previous ▲ Descriptions

polymeric immunoglobulin receptor precursor [Homo sapiens]

Sequence ID: [gi|31377806|ref|NP\\_002635.2](#) Length: 764 Number of Matches: 1

▶ [See 8 more title\(s\)](#)

Range 1: 77 to 108 [GenPept](#) [Graphics](#) ▼ Next Match ▲ Previous Match

| Score          | Expect | Identities  | Positives   | Gaps     |
|----------------|--------|-------------|-------------|----------|
| 68.9 bits(167) | 3e-12  | 32/32(100%) | 32/32(100%) | 0/32(0%) |

Query 1 KYAGRANLTNFPENGTFFVNNIAQLSQDDSGRY 32  
 KYAGRANLTNFPENGTFFVNNIAQLSQDDSGRY  
 Sbjct 77 KYAGRANLTNFPENGTFFVNNIAQLSQDDSGRY 108

**Related Information**

[Gene](#) - associated gene details

[UniGene](#) - clustered expressed sequence tags

[Map Viewer](#) - aligned genomic context

[Identical Proteins](#) - Proteins

identical to the subject

Download [GenPept](#) [Graphics](#) Sort by: E value ▼ Next ▲ Previous ▲ Descriptions

PREDICTED: polymeric immunoglobulin receptor isoform 1 [Gorilla gorilla gorilla]

Sequence ID: [gi|426333562|ref|XP\\_004028344.1](#) Length: 764 Number of Matches: 2

▶ [See 1 more title\(s\)](#)

Range 1: 77 to 108 [GenPept](#) [Graphics](#) ▼ Next Match ▲ Previous Match

| Score          | Expect | Identities  | Positives   | Gaps     |
|----------------|--------|-------------|-------------|----------|
| 68.9 bits(167) | 3e-12  | 32/32(100%) | 32/32(100%) | 0/32(0%) |

Query 1 KYAGRANLTNFPENGTFFVNNIAQLSQDDSGRY 32  
 KYAGRANLTNFPENGTFFVNNIAQLSQDDSGRY  
 Sbjct 77 KYAGRANLTNFPENGTFFVNNIAQLSQDDSGRY 108

**Related Information**

[Gene](#) - associated gene details

[Map Viewer](#) - aligned genomic context

[Identical Proteins](#) - Proteins

identical to the subject

Range 2: 408 to 439 [GenPept](#) [Graphics](#) ▼ Next Match ▲ Previous Match ▲ First Match

| Score         | Expect | Identities | Positives  | Gaps     |
|---------------|--------|------------|------------|----------|
| 33.1 bits(74) | 6.6    | 15/32(47%) | 20/32(62%) | 0/32(0%) |

Query 1 KYAGRANLTNFPENGTFFVNNIAQLSQDDSGRY 32  
 +Y GR +L P NGTF V + QL+ D+G Y  
 Sbjct 408 QYEGRLSLLLEPENGTFVILNQLTSQDAGFY 439

BLAST is a registered trademark of the National Library of Medicine.

NCBI/ BLAST/ blastp suite/ Formatting Results - BVK220EV01R

Your search parameters were adjusted to search for a short input sequence.  
[Edit and Resubmit](#) [Save Search Strategies](#) [Formatting options](#) [Download](#) [YouTube](#) [How to read this page](#) [Blast report description](#)

### PIGR\_RANLTNFPEDGTFVFNIAQLSQDDSGRY\_Mod

**RID** [BVK220EV01R](#) (Expires on 01-21 10:32 am)

|                                 |                                                                                                                                       |
|---------------------------------|---------------------------------------------------------------------------------------------------------------------------------------|
| <b>Query ID</b>  cl 201803      | <b>Database Name</b> nr                                                                                                               |
| <b>Description</b> None         | <b>Description</b> All non-redundant GenBank CDS translations+PDB+SwissProt+PIR+PRF excluding environmental samples from WGS projects |
| <b>Molecule type</b> amino acid | <b>Program</b> BLASTP 2.2.30+ <a href="#">Citation</a>                                                                                |
| <b>Query Length</b> 28          |                                                                                                                                       |

Other reports: [Search Summary](#) [Taxonomy reports](#) [Distance tree of results](#) [Multiple alignment](#)

### Graphic Summary

Show Conserved Domains

Putative conserved domains have been detected, click on the image below for detailed results.

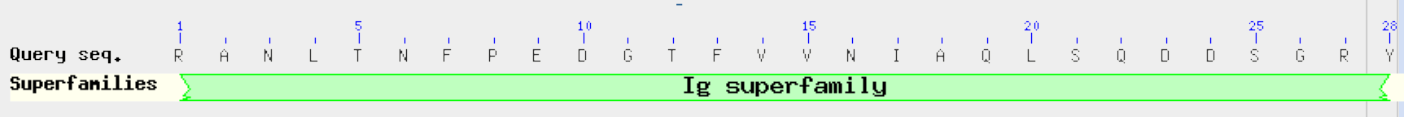

Distribution of 170 Blast Hits on the Query Sequence

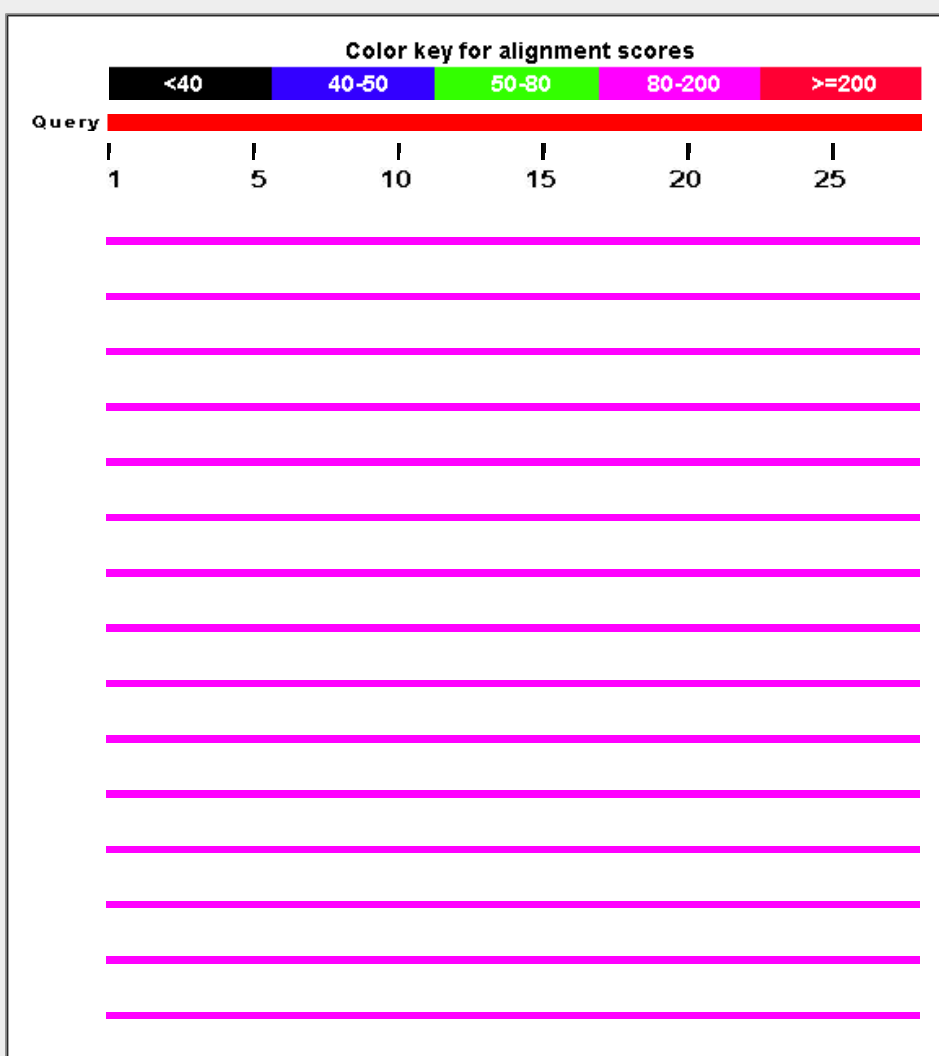

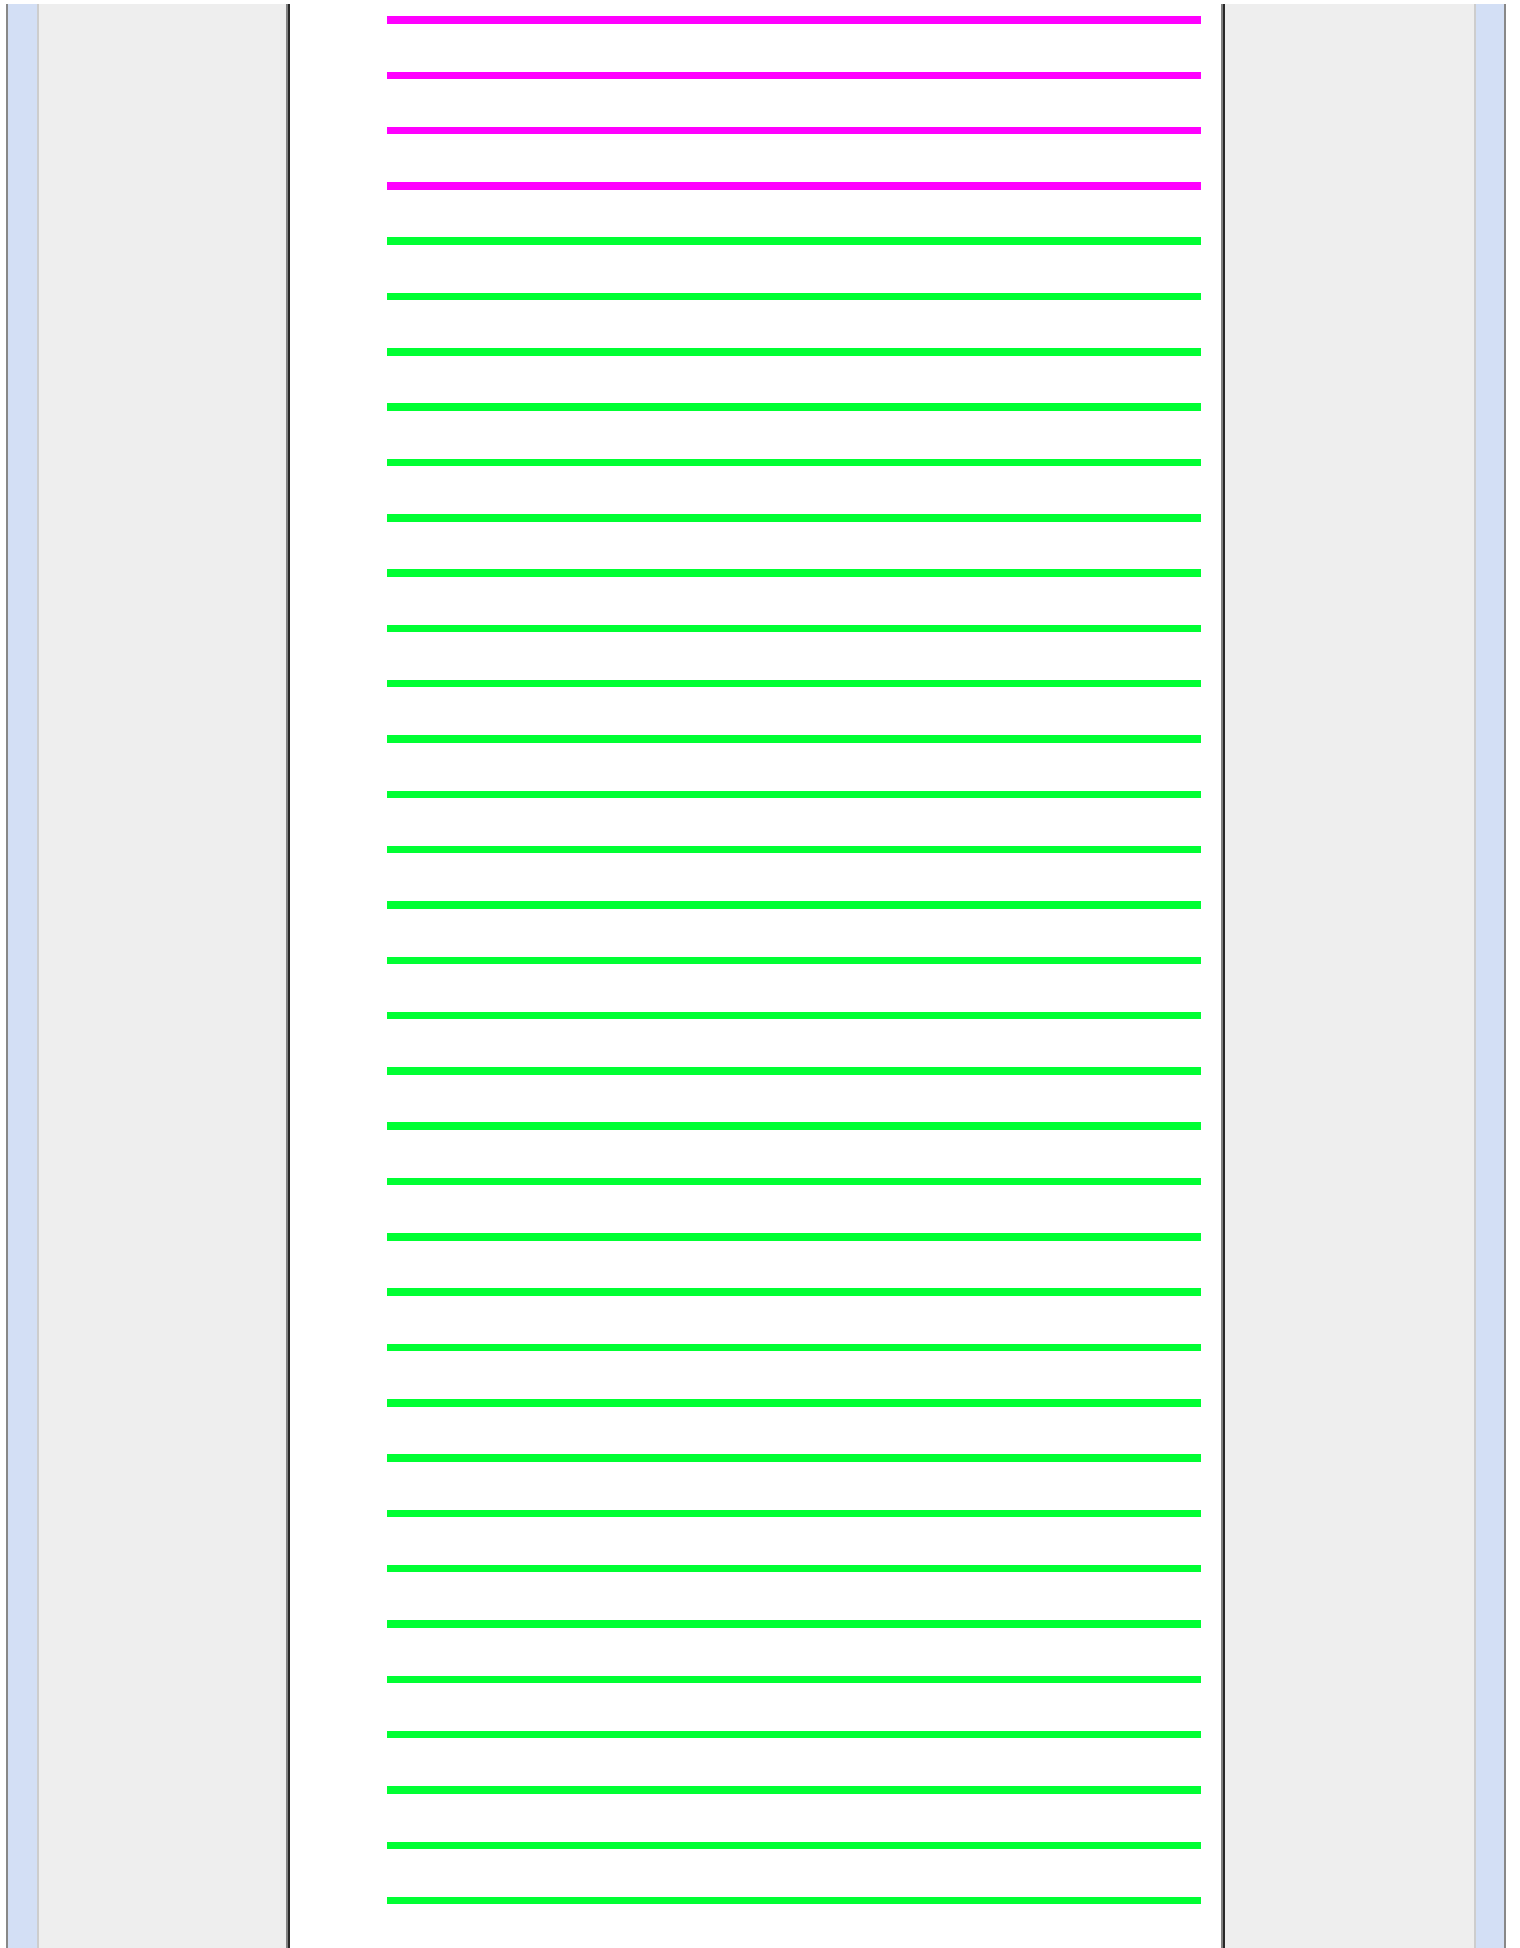

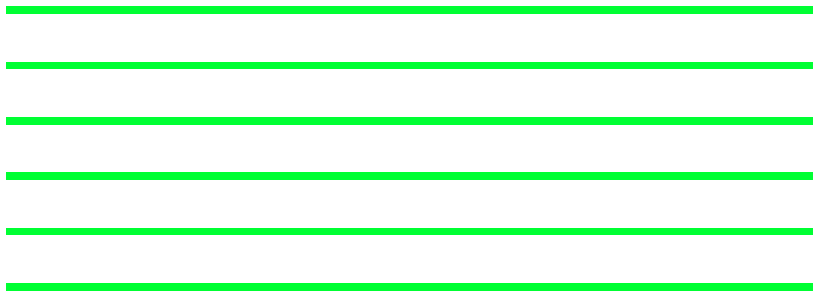

## Descriptions

### Sequences producing significant alignments:

Select: [All](#) [None](#) Selected:0

| Alignments                                                                                  | Download  | GenPept     | Graphics    | Distance tree of results | Multiple alignment |                                |  |
|---------------------------------------------------------------------------------------------|-----------|-------------|-------------|--------------------------|--------------------|--------------------------------|--|
| Description                                                                                 | Max score | Total score | Query cover | E value                  | Ident              | Accession                      |  |
| <a href="#">Chain A, Crystal Structure Of A Ligand-Binding Domain Of The Human Polym</a>    | 89.7      | 89.7        | 100%        | 5e-19                    | 96%                | <a href="#">1XED_A</a>         |  |
| <a href="#">Chain A, Solution Structure Of Human Secretory Component [Homo sapiens]</a>     | 89.7      | 114         | 100%        | 2e-18                    | 96%                | <a href="#">2OCW_A</a>         |  |
| <a href="#">poly-Ig receptor [Homo sapiens]</a>                                             | 89.7      | 114         | 100%        | 2e-18                    | 96%                | <a href="#">AAA36102.1</a>     |  |
| <a href="#">polymeric immunoglobulin receptor precursor [Homo sapiens]</a>                  | 89.7      | 114         | 100%        | 2e-18                    | 96%                | <a href="#">NP_002635.2</a>    |  |
| <a href="#">PREDICTED: polymeric immunoglobulin receptor isoform 1 [Gorilla gorilla gor</a> | 89.7      | 138         | 100%        | 2e-18                    | 96%                | <a href="#">XP_004028344.1</a> |  |
| <a href="#">transmembrane secretory component [Homo sapiens]</a>                            | 89.7      | 114         | 100%        | 2e-18                    | 96%                | <a href="#">AAB20203.1</a>     |  |
| <a href="#">PREDICTED: polymeric immunoglobulin receptor [Pan paniscus]</a>                 | 89.7      | 114         | 100%        | 2e-18                    | 96%                | <a href="#">XP_003822957.1</a> |  |
| <a href="#">PREDICTED: polymeric immunoglobulin receptor [Pan troglodytes]</a>              | 89.7      | 114         | 100%        | 2e-18                    | 96%                | <a href="#">XP_514153.3</a>    |  |
| <a href="#">PREDICTED: polymeric immunoglobulin receptor isoform X1 [Homo sapiens]</a>      | 89.7      | 114         | 100%        | 2e-18                    | 96%                | <a href="#">XP_005273220.1</a> |  |
| <a href="#">PREDICTED: polymeric immunoglobulin receptor [Callithrix jacchus]</a>           | 85.5      | 106         | 100%        | 5e-17                    | 93%                | <a href="#">XP_002760783.1</a> |  |
| <a href="#">hypothetical protein [Pongo abelii]</a>                                         | 85.5      | 134         | 100%        | 5e-17                    | 93%                | <a href="#">CAH91352.1</a>     |  |
| <a href="#">polymeric immunoglobulin receptor precursor [Pongo abelii]</a>                  | 85.5      | 134         | 100%        | 5e-17                    | 93%                | <a href="#">NP_001125098.1</a> |  |
| <a href="#">PREDICTED: polymeric immunoglobulin receptor [Macaca mulatta]</a>               | 81.2      | 126         | 100%        | 1e-15                    | 89%                | <a href="#">XP_001083307.2</a> |  |
| <a href="#">PREDICTED: polymeric immunoglobulin receptor [Chlorocebus sabaeus]</a>          | 81.2      | 126         | 100%        | 1e-15                    | 89%                | <a href="#">XP_007986846.1</a> |  |
| <a href="#">PREDICTED: polymeric immunoglobulin receptor isoform X2 [Macaca fascicu</a>     | 81.2      | 126         | 100%        | 1e-15                    | 89%                | <a href="#">XP_005540721.1</a> |  |
| <a href="#">PREDICTED: polymeric immunoglobulin receptor [Papio anubis]</a>                 | 81.2      | 126         | 100%        | 1e-15                    | 89%                | <a href="#">XP_003893238.1</a> |  |
| <a href="#">hypothetical protein EGM_01447 [Macaca fascicularis]</a>                        | 81.2      | 126         | 100%        | 1e-15                    | 89%                | <a href="#">EHH50590.1</a>     |  |
| <a href="#">hypothetical protein EGK_01717 [Macaca mulatta]</a>                             | 81.2      | 126         | 100%        | 1e-15                    | 89%                | <a href="#">EHH15602.1</a>     |  |
| <a href="#">PREDICTED: polymeric immunoglobulin receptor isoform X1 [Macaca fascicu</a>     | 81.2      | 126         | 100%        | 1e-15                    | 89%                | <a href="#">XP_005540720.1</a> |  |
| <a href="#">PREDICTED: polymeric immunoglobulin receptor isoform X1 [Ictidomys tridec</a>   | 79.5      | 79.5        | 100%        | 5e-15                    | 86%                | <a href="#">XP_005329532.1</a> |  |
| <a href="#">PREDICTED: polymeric immunoglobulin receptor isoform X2 [Ictidomys tridec</a>   | 79.5      | 79.5        | 100%        | 5e-15                    | 86%                | <a href="#">XP_005329533.1</a> |  |
| <a href="#">PREDICTED: polymeric immunoglobulin receptor-like [Galeopterus variegatus</a>   | 77.8      | 77.8        | 100%        | 8e-15                    | 86%                | <a href="#">XP_008563367.1</a> |  |
| <a href="#">PREDICTED: polymeric immunoglobulin receptor [Rhinopithecus roxellana]</a>      | 78.7      | 124         | 100%        | 1e-14                    | 86%                | <a href="#">XP_010363960.1</a> |  |
| <a href="#">PREDICTED: polymeric immunoglobulin receptor isoform 1 [Nomascus leucoq</a>     | 78.7      | 127         | 100%        | 1e-14                    | 89%                | <a href="#">XP_003273022.1</a> |  |
| <a href="#">PREDICTED: polymeric immunoglobulin receptor [Saimiri boliviensis boliviens</a> | 77.4      | 98.4        | 100%        | 3e-14                    | 86%                | <a href="#">XP_003930479.1</a> |  |
| <a href="#">PREDICTED: polymeric immunoglobulin receptor [Nannospalax galii]</a>            | 75.7      | 75.7        | 100%        | 1e-13                    | 82%                | <a href="#">XP_008821506.1</a> |  |
| <a href="#">PREDICTED: polymeric immunoglobulin receptor [Camelus bactrianus]</a>           | 74.0      | 74.0        | 100%        | 4e-13                    | 75%                | <a href="#">XP_010961553.1</a> |  |
| <a href="#">PREDICTED: polymeric immunoglobulin receptor [Camelus ferus]</a>                | 74.0      | 74.0        | 100%        | 4e-13                    | 75%                | <a href="#">XP_006182326.1</a> |  |
| <a href="#">PREDICTED: polymeric immunoglobulin receptor [Otolemur garnettii]</a>           | 74.0      | 74.0        | 100%        | 4e-13                    | 79%                | <a href="#">XP_003792254.1</a> |  |

|                                                                                                                   |      |      |      |       |     |                                |
|-------------------------------------------------------------------------------------------------------------------|------|------|------|-------|-----|--------------------------------|
| <a href="#">polymeric immunoglobulin receptor precursor [Camelus ferus]</a>                                       | 74.0 | 117  | 100% | 4e-13 | 75% | <a href="#">EQB78114.1</a>     |
| <a href="#">PREDICTED: polymeric immunoglobulin receptor [Vicugna pacos]</a>                                      | 73.2 | 95.9 | 100% | 7e-13 | 75% | <a href="#">XP_006215522.1</a> |
| <a href="#">PREDICTED: polymeric immunoglobulin receptor [Leptonychotes weddellii]</a>                            | 72.7 | 93.7 | 100% | 1e-12 | 79% | <a href="#">XP_006730466.1</a> |
| <a href="#">PREDICTED: polymeric immunoglobulin receptor [Bubalus bubalis]</a>                                    | 70.2 | 92.0 | 100% | 7e-12 | 79% | <a href="#">XP_006043871.1</a> |
| <a href="#">PREDICTED: polymeric immunoglobulin receptor [Pantholops hodgsonii]</a>                               | 69.8 | 69.8 | 100% | 1e-11 | 75% | <a href="#">XP_005967001.1</a> |
| <a href="#">PREDICTED: polymeric immunoglobulin receptor [Capra hircus]</a>                                       | 69.8 | 119  | 100% | 1e-11 | 75% | <a href="#">XP_005690475.1</a> |
| <a href="#">PREDICTED: polymeric immunoglobulin receptor isoform 1 [Ovis aries]</a>                               | 69.8 | 119  | 100% | 1e-11 | 75% | <a href="#">XP_004013622.1</a> |
| <a href="#">PREDICTED: polymeric immunoglobulin receptor isoform 2 [Ovis aries]</a>                               | 69.8 | 119  | 100% | 1e-11 | 75% | <a href="#">XP_004013623.1</a> |
| <a href="#">PREDICTED: polymeric immunoglobulin receptor [Tarsius syrichta]</a>                                   | 69.4 | 92.9 | 100% | 1e-11 | 75% | <a href="#">XP_008062620.1</a> |
| <a href="#">polymeric immunoglobulin receptor precursor [Bos taurus]</a>                                          | 68.5 | 89.9 | 100% | 3e-11 | 75% | <a href="#">NP_776568.1</a>    |
| <a href="#">RecName: Full=Polymeric immunoglobulin receptor; Short=PIgR; Short=Poly-PIGR protein [Bos taurus]</a> | 68.5 | 89.9 | 100% | 3e-11 | 75% | <a href="#">P81265.1</a>       |
| <a href="#">Chain A. Crystal Structure Of The 1st Ig Domain From Mouse Polymeric Imm</a>                          | 66.8 | 66.8 | 100% | 5e-11 | 71% | <a href="#">4NOB_A</a>         |
| <a href="#">PREDICTED: LOW QUALITY PROTEIN: polymeric immunoglobulin receptor  </a>                               | 67.2 | 88.7 | 100% | 7e-11 | 75% | <a href="#">XP_005891711.1</a> |
| <a href="#">TPA: polymeric immunoglobulin receptor precursor [Bos taurus]</a>                                     | 67.2 | 88.7 | 100% | 7e-11 | 75% | <a href="#">DAA21480.1</a>     |
| <a href="#">PREDICTED: polymeric immunoglobulin receptor [Jaculus jaculus]</a>                                    | 67.2 | 67.2 | 100% | 7e-11 | 71% | <a href="#">XP_004663511.1</a> |
| <a href="#">PREDICTED: polymeric immunoglobulin receptor [Bison bison bison]</a>                                  | 67.2 | 88.7 | 100% | 7e-11 | 75% | <a href="#">XP_010852516.1</a> |
| <a href="#">PREDICTED: polymeric immunoglobulin receptor [Panthera tigris altaica]</a>                            | 66.8 | 87.8 | 100% | 1e-10 | 71% | <a href="#">XP_007096344.1</a> |
| <a href="#">PREDICTED: polymeric immunoglobulin receptor [Peromyscus maniculatus b</a>                            | 66.8 | 66.8 | 100% | 1e-10 | 75% | <a href="#">XP_006996902.1</a> |
| <a href="#">PREDICTED: polymeric immunoglobulin receptor [Felis catus]</a>                                        | 66.8 | 87.8 | 100% | 1e-10 | 71% | <a href="#">XP_006943006.1</a> |
| <a href="#">polymeric immunoglobulin receptor [Mus musculus]</a>                                                  | 66.8 | 87.8 | 100% | 1e-10 | 71% | <a href="#">AAA67440.1</a>     |
| <a href="#">polymeric immunoglobulin receptor precursor [Mus musculus]</a>                                        | 66.8 | 87.8 | 100% | 1e-10 | 71% | <a href="#">NP_035212.2</a>    |
| <a href="#">PREDICTED: polymeric immunoglobulin receptor [Equus przewalskii]</a>                                  | 66.0 | 66.0 | 100% | 2e-10 | 79% | <a href="#">XP_008539949.1</a> |
| <a href="#">PREDICTED: polymeric immunoglobulin receptor [Equus caballus]</a>                                     | 66.0 | 66.0 | 100% | 2e-10 | 79% | <a href="#">XP_001492348.2</a> |
| <a href="#">polymeric immunoglobulin receptor precursor [Equus caballus]</a>                                      | 66.0 | 66.0 | 100% | 2e-10 | 79% | <a href="#">NP_001271468.1</a> |
| <a href="#">PREDICTED: polymeric immunoglobulin receptor [Microtus ochrogaster]</a>                               | 65.5 | 87.4 | 100% | 3e-10 | 71% | <a href="#">XP_005348371.1</a> |
| <a href="#">PREDICTED: polymeric immunoglobulin receptor [Ursus maritimus]</a>                                    | 64.7 | 85.7 | 100% | 5e-10 | 71% | <a href="#">XP_008683298.1</a> |
| <a href="#">PREDICTED: polymeric immunoglobulin receptor [Tupaia chinensis]</a>                                   | 64.7 | 64.7 | 100% | 5e-10 | 71% | <a href="#">XP_006159345.1</a> |
| <a href="#">PREDICTED: polymeric immunoglobulin receptor [Ceratotherium simu simu</a>                             | 63.8 | 63.8 | 92%  | 1e-09 | 77% | <a href="#">XP_004425146.1</a> |
| <a href="#">PREDICTED: polymeric immunoglobulin receptor isoform X2 [Mustela putoriu</a>                          | 63.4 | 85.3 | 100% | 1e-09 | 71% | <a href="#">XP_004788608.1</a> |
| <a href="#">PREDICTED: polymeric immunoglobulin receptor [Mustela putorius furo]</a>                              | 63.4 | 85.3 | 100% | 1e-09 | 71% | <a href="#">XP_004756245.1</a> |
| <a href="#">PREDICTED: polymeric immunoglobulin receptor [Odobenus rosmarus diverg</a>                            | 63.0 | 83.6 | 100% | 2e-09 | 71% | <a href="#">XP_004415592.1</a> |
| <a href="#">polymeric immunoglobulin receptor [Canis lupus familiaris]</a>                                        | 62.6 | 62.6 | 100% | 2e-09 | 68% | <a href="#">AAL91653.1</a>     |
| <a href="#">polymeric immunoglobulin receptor precursor [Canis lupus familiaris]</a>                              | 62.6 | 84.0 | 100% | 3e-09 | 68% | <a href="#">NP_001274081.1</a> |
| <a href="#">PREDICTED: polymeric immunoglobulin receptor [Lipotes vexillifer]</a>                                 | 62.1 | 84.0 | 100% | 4e-09 | 71% | <a href="#">XP_007470777.1</a> |
| <a href="#">PREDICTED: polymeric immunoglobulin receptor [Physeter catodon]</a>                                   | 62.1 | 62.1 | 100% | 4e-09 | 71% | <a href="#">XP_007105526.1</a> |
| <a href="#">PREDICTED: polymeric immunoglobulin receptor isoform X2 [Orycteropus afc</a>                          | 61.7 | 61.7 | 100% | 5e-09 | 68% | <a href="#">XP_007951362.1</a> |
| <a href="#">PREDICTED: polymeric immunoglobulin receptor isoform X1 [Orycteropus afc</a>                          | 61.7 | 61.7 | 100% | 5e-09 | 68% | <a href="#">XP_007951355.1</a> |
| <a href="#">polymeric immunoglobulin receptor precursor [Rattus norvegicus]</a>                                   | 61.7 | 61.7 | 100% | 5e-09 | 64% | <a href="#">NP_036855.3</a>    |
| <a href="#">polymeric immunoglobulin receptor [Rattus norvegicus]</a>                                             | 61.7 | 61.7 | 100% | 5e-09 | 64% | <a href="#">EDM09843.1</a>     |
| <a href="#">PREDICTED: polymeric immunoglobulin receptor [Tursiops truncatus]</a>                                 | 61.3 | 61.3 | 100% | 7e-09 | 71% | <a href="#">XP_004319136.1</a> |
| <a href="#">PREDICTED: polymeric immunoglobulin receptor [Orcinus orca]</a>                                       | 61.3 | 61.3 | 100% | 7e-09 | 71% | <a href="#">XP_004282467.1</a> |
| <a href="#">PREDICTED: polymeric immunoglobulin receptor [Balaenoptera acutorostrata</a>                          | 61.3 | 61.3 | 100% | 7e-09 | 71% | <a href="#">XP_007171624.1</a> |
| <a href="#">PREDICTED: polymeric immunoglobulin receptor [Echinops telfairii]</a>                                 | 60.4 | 81.0 | 100% | 1e-08 | 71% | <a href="#">XP_004700183.1</a> |
| <a href="#">PREDICTED: LOW QUALITY PROTEIN: polymeric immunoglobulin receptor i</a>                               | 60.0 | 60.0 | 100% | 2e-08 | 64% | <a href="#">XP_007607970.1</a> |
| <a href="#">PREDICTED: polymeric immunoglobulin receptor isoform X2 [Mesocricetus ai</a>                          | 60.0 | 81.4 | 100% | 2e-08 | 64% | <a href="#">XP_005079920.1</a> |

|                                                                                            |      |      |      |       |     |                                |
|--------------------------------------------------------------------------------------------|------|------|------|-------|-----|--------------------------------|
| <a href="#">Polymeric immunoglobulin receptor [Cricetulus griseus]</a>                     | 60.0 | 60.0 | 100% | 2e-08 | 64% | <a href="#">EGW00964.1</a>     |
| <a href="#">PREDICTED: polymeric immunoglobulin receptor isoform X1 [Mesocricetus a]</a>   | 60.0 | 81.4 | 100% | 2e-08 | 64% | <a href="#">XP_005079919.1</a> |
| <a href="#">PREDICTED: polymeric immunoglobulin receptor isoform X1 [Cricetulus grise]</a> | 60.0 | 60.0 | 100% | 2e-08 | 64% | <a href="#">XP_003497773.1</a> |
| <a href="#">PREDICTED: polymeric immunoglobulin receptor isoform X2 [Cricetulus grise]</a> | 60.0 | 60.0 | 100% | 2e-08 | 64% | <a href="#">XP_003497772.1</a> |
| <a href="#">polymeric immunoglobulin receptor isoform 1 [Cricetulus griseus]</a>           | 60.0 | 95.4 | 100% | 2e-08 | 64% | <a href="#">ERE73918.1</a>     |
| <a href="#">PREDICTED: polymeric immunoglobulin receptor [Elephantulus edwardii]</a>       | 59.6 | 83.1 | 100% | 3e-08 | 68% | <a href="#">XP_006888060.1</a> |
| <a href="#">polymeric immunoglobulin receptor precursor [Sus scrofa]</a>                   | 59.2 | 59.2 | 100% | 4e-08 | 68% | <a href="#">NP_999324.1</a>    |
| <a href="#">Polymeric immunoglobulin receptor [Pteropus alecto]</a>                        | 58.7 | 58.7 | 96%  | 5e-08 | 70% | <a href="#">ELK03287.1</a>     |
| <a href="#">PREDICTED: polymeric immunoglobulin receptor [Pteropus alecto]</a>             | 58.7 | 97.1 | 100% | 5e-08 | 70% | <a href="#">XP_006922980.1</a> |
| <a href="#">PREDICTED: polymeric immunoglobulin receptor [Loxodonta africana]</a>          | 57.5 | 57.5 | 100% | 1e-07 | 68% | <a href="#">XP_010588572.1</a> |
| <a href="#">PREDICTED: polymeric immunoglobulin receptor isoform 1 [Dasypus novemc]</a>    | 57.5 | 78.9 | 100% | 1e-07 | 68% | <a href="#">XP_004470111.1</a> |
| <a href="#">PREDICTED: polymeric immunoglobulin receptor [Cavia porcellus]</a>             | 56.6 | 56.6 | 100% | 2e-07 | 69% | <a href="#">XP_003474820.1</a> |
| <a href="#">PREDICTED: polymeric immunoglobulin receptor [Chinchilla lanigera]</a>         | 56.2 | 82.3 | 100% | 3e-07 | 68% | <a href="#">XP_005375465.1</a> |
| <a href="#">PREDICTED: polymeric immunoglobulin receptor [Octodon degus]</a>               | 55.8 | 55.8 | 100% | 5e-07 | 64% | <a href="#">XP_004641251.1</a> |
| <a href="#">PREDICTED: polymeric immunoglobulin receptor [Chrysochloris asiatica]</a>      | 55.4 | 81.0 | 100% | 6e-07 | 68% | <a href="#">XP_006834271.1</a> |
| <a href="#">PREDICTED: polymeric immunoglobulin receptor [Trichechus manatus latiros]</a>  | 55.4 | 55.4 | 100% | 6e-07 | 68% | <a href="#">XP_004375257.1</a> |
| <a href="#">PREDICTED: polymeric immunoglobulin receptor [Eptesicus fuscus]</a>            | 54.5 | 54.5 | 100% | 1e-06 | 61% | <a href="#">XP_008152394.1</a> |
| <a href="#">PREDICTED: polymeric immunoglobulin receptor [Myotis davidii]</a>              | 54.5 | 54.5 | 100% | 1e-06 | 64% | <a href="#">XP_006754443.1</a> |
| <a href="#">PREDICTED: polymeric immunoglobulin receptor [Erinaceus europaeus]</a>         | 54.1 | 54.1 | 100% | 2e-06 | 61% | <a href="#">XP_007523168.1</a> |
| <a href="#">PREDICTED: LOW QUALITY PROTEIN: polymeric immunoglobulin receptor-</a>         | 53.7 | 53.7 | 100% | 2e-06 | 64% | <a href="#">XP_004610232.1</a> |
| <a href="#">PREDICTED: polymeric immunoglobulin receptor isoform X2 [Heterocephalus]</a>   | 52.4 | 52.4 | 100% | 6e-06 | 64% | <a href="#">XP_004862115.1</a> |
| <a href="#">PREDICTED: polymeric immunoglobulin receptor [Heterocephalus glaber]</a>       | 52.4 | 52.4 | 100% | 6e-06 | 64% | <a href="#">XP_004897444.1</a> |
| <a href="#">Polymeric immunoglobulin receptor [Heterocephalus glaber]</a>                  | 52.4 | 52.4 | 100% | 6e-06 | 64% | <a href="#">EHB11027.1</a>     |
| <a href="#">PREDICTED: polymeric immunoglobulin receptor isoform X1 [Heterocephalus]</a>   | 52.4 | 52.4 | 100% | 6e-06 | 64% | <a href="#">XP_004862114.1</a> |
| <a href="#">PREDICTED: polymeric immunoglobulin receptor [Myotis lucifugus]</a>            | 52.0 | 52.0 | 100% | 8e-06 | 57% | <a href="#">XP_006094928.1</a> |

## Alignments

Download [GenPept](#) [Graphics](#)

Next Previous Descriptions

Chain A, Crystal Structure Of A Ligand-Binding Domain Of The Human Polymeric Ig Receptor, Pigr

Sequence ID: [pdb|1XED|A](#) Length: 117 Number of Matches: 1

See 5 more title(s)

Range 1: 63 to 90 [GenPept](#) [Graphics](#)

Next Match Previous Match

| Score          | Expect | Identities | Positives   | Gaps     |
|----------------|--------|------------|-------------|----------|
| 89.7 bits(204) | 5e-19  | 27/28(96%) | 28/28(100%) | 0/28(0%) |

Query 1 RANLTFNPEDGTFVFNIAQLSQDDSGRY 28  
RANLTFNFFE+GTFVFNIAQLSQDDSGRY  
Sbjct 63 RANLTFNPENGTFFVFNIAQLSQDDSGRY 90

### Related Information

[Structure](#) - 3D structure displays  
[Identical Proteins](#) - Proteins  
identical to the subject

Download [GenPept](#) [Graphics](#) Sort by: E value

Next Previous Descriptions

Chain A, Solution Structure Of Human Secretory Component

Sequence ID: [pdb|2OCW|A](#) Length: 585 Number of Matches: 2

See 2 more title(s)

Range 1: 63 to 90 [GenPept](#) [Graphics](#)

Next Match Previous Match

| Score          | Expect | Identities | Positives   | Gaps     |
|----------------|--------|------------|-------------|----------|
| 89.7 bits(204) | 2e-18  | 27/28(96%) | 28/28(100%) | 0/28(0%) |

Query 1 RANLTFNPEDGTFVFNIAQLSQDDSGRY 28  
RANLTFNFFE+GTFVFNIAQLSQDDSGRY

### Related Information

[Structure](#) - 3D structure displays  
[Identical Proteins](#) - Proteins  
identical to the subject

Sbjct 63 RANLTFNPEDGTFVVNIAQLSQDDSGRY 90

Range 2: 287 to 305 [GenPept](#) [Graphics](#) [Next Match](#) [Previous Match](#) [First Match](#)

| Score         | Expect | Identities | Positives  | Gaps      |
|---------------|--------|------------|------------|-----------|
| 25.2 bits(52) | 5287   | 11/20(55%) | 12/20(60%) | 2/20(10%) |

Query 10 DGTF-VVNIAQLSQDDSGRY 28  
 DG F VV I L +D GRY  
 Sbjct 287 DGSFVSVV-ITGLRKEDAGRY 305

[Download](#) [GenPept](#) [Graphics](#) Sort by: E value [Next](#) [Previous](#) [Descriptions](#)

poly-Ig receptor, partial [Homo sapiens]  
 Sequence ID: [gb|AAA36102.1|](#) Length: 693 Number of Matches: 2

Range 1: 10 to 37 [GenPept](#) [Graphics](#) [Next Match](#) [Previous Match](#)

| Score          | Expect | Identities | Positives   | Gaps     |
|----------------|--------|------------|-------------|----------|
| 89.7 bits(204) | 2e-18  | 27/28(96%) | 28/28(100%) | 0/28(0%) |

Query 1 RANLTFNPEDGTFVVNIAQLSQDDSGRY 28  
 RANLTFNPE+GTFVVNIAQLSQDDSGRY  
 Sbjct 10 RANLTFNPEDGTFVVNIAQLSQDDSGRY 37

**Related Information**  
[Gene](#) - associated gene details

Range 2: 234 to 252 [GenPept](#) [Graphics](#) [Next Match](#) [Previous Match](#) [First Match](#)

| Score         | Expect | Identities | Positives  | Gaps      |
|---------------|--------|------------|------------|-----------|
| 25.2 bits(52) | 5301   | 11/20(55%) | 12/20(60%) | 2/20(10%) |

Query 10 DGTF-VVNIAQLSQDDSGRY 28  
 DG F VV I L +D GRY  
 Sbjct 234 DGSFVSVV-ITGLRKEDAGRY 252

[Download](#) [GenPept](#) [Graphics](#) Sort by: E value [Next](#) [Previous](#) [Descriptions](#)

polymeric immunoglobulin receptor precursor [Homo sapiens]  
 Sequence ID: [ref|NP\\_002635.2|](#) Length: 764 Number of Matches: 2

[See 8 more title\(s\)](#)

Range 1: 81 to 108 [GenPept](#) [Graphics](#) [Next Match](#) [Previous Match](#)

| Score          | Expect | Identities | Positives   | Gaps     |
|----------------|--------|------------|-------------|----------|
| 89.7 bits(204) | 2e-18  | 27/28(96%) | 28/28(100%) | 0/28(0%) |

Query 1 RANLTFNPEDGTFVVNIAQLSQDDSGRY 28  
 RANLTFNPE+GTFVVNIAQLSQDDSGRY  
 Sbjct 81 RANLTFNPEDGTFVVNIAQLSQDDSGRY 108

**Related Information**  
[Gene](#) - associated gene details  
[UniGene](#) - clustered expressed sequence tags  
[Map Viewer](#) - aligned genomic context  
[Identical Proteins](#) - Proteins identical to the subject

Range 2: 305 to 323 [GenPept](#) [Graphics](#) [Next Match](#) [Previous Match](#) [First Match](#)

| Score         | Expect | Identities | Positives  | Gaps      |
|---------------|--------|------------|------------|-----------|
| 25.2 bits(52) | 5308   | 11/20(55%) | 12/20(60%) | 2/20(10%) |

Query 10 DGTF-VVNIAQLSQDDSGRY 28  
 DG F VV I L +D GRY  
 Sbjct 305 DGSFVSVV-ITGLRKEDAGRY 323

[Download](#) [GenPept](#) [Graphics](#) Sort by: E value [Next](#) [Previous](#) [Descriptions](#)

PREDICTED: polymeric immunoglobulin receptor isoform 1 [Gorilla gorilla gorilla]  
 Sequence ID: [ref|XP\\_004028344.1|](#) Length: 764 Number of Matches: 3

[See 1 more title\(s\)](#)

Range 1: 81 to 108 [GenPept](#) [Graphics](#) [Next Match](#) [Previous Match](#)

| Score          | Expect | Identities | Positives   | Gaps     |
|----------------|--------|------------|-------------|----------|
| 89.7 bits(204) | 2e-18  | 27/28(96%) | 28/28(100%) | 0/28(0%) |

Query 1 RANLTFNPEDGTFVVNIAQLSQDDSGRY 28  
 RANLTFNPE+GTFVVNIAQLSQDDSGRY  
 Sbjct 81 RANLTFNPEDGTFVVNIAQLSQDDSGRY 108

**Related Information**  
[Gene](#) - associated gene details  
[Map Viewer](#) - aligned genomic context  
[Identical Proteins](#) - Proteins identical to the subject

Range 2: 305 to 323 [GenPept](#) [Graphics](#) [Next Match](#) [Previous Match](#) [First Match](#)

| Score         | Expect | Identities | Positives  | Gaps      |
|---------------|--------|------------|------------|-----------|
| 25.2 bits(52) | 5308   | 11/20(55%) | 12/20(60%) | 2/20(10%) |

Query 10 DGTF-VVNIAQLSQDDSGRY 28  
 DG F VV I L +D GRY  
 Sbjct 305 DGSFVSVV-ITGLRKEDAGRY 323

Range 3: 419 to 435 [GenPept](#) [Graphics](#) [Next Match](#) [Previous Match](#) [First Match](#)



| Score         | Expect | Identities | Positives  | Gaps     |
|---------------|--------|------------|------------|----------|
| 24.0 bits(49) | 14270  | 10/17(59%) | 11/17(64%) | 1/17(5%) |

|       |     |                   |     |
|-------|-----|-------------------|-----|
| Query | 8   | PEDGTFVVNIAQL-SQD | 23  |
|       |     | P +GTF V QL SQD   |     |
| Sbjct | 419 | PGNGTFTVILNQLTSQD | 435 |

BLAST is a registered trademark of the National Library of Medicine.

[Copyright](#) | [Disclaimer](#) | [Privacy](#) | [Accessibility](#) | [Contact](#) | [Send feedback](#)

[NCBI](#) | [NLM](#) | [NIH](#) | [DHHS](#)

▶ NCBI/ BLAST/ blastp suite/ Formatting Results - BBJ8VJ0401R

**i** Your search parameters were adjusted to search for a short input sequence.

[Edit and Resubmit](#) [Save Search Strategies](#) ▶ [Formatting options](#) ▶ [Download](#)

[YouTube](#) [How to read this page](#) [Blast report description](#)

**PIGR\_RANLTNFPENGTFVFNIAQLSQDDSGRY\_NonMod**

|                                                                    |                                                                                                                                   |
|--------------------------------------------------------------------|-----------------------------------------------------------------------------------------------------------------------------------|
| <b>RID</b> <a href="#">BBJ8VJ0401R</a> (Expires on 01-15 08:40 am) | <b>Database Name</b> nr                                                                                                           |
| <b>Query ID</b> lcl 375017                                         | <b>Description</b> All non-redundant GenBank CDS translations+PDB+SwissProt+PIR excluding environmental samples from WGS projects |
| <b>Description</b> None                                            | <b>Program</b> BLASTP 2.2.30+ ▶ <a href="#">Citation</a>                                                                          |
| <b>Molecule type</b> amino acid                                    |                                                                                                                                   |
| <b>Query Length</b> 28                                             |                                                                                                                                   |

Other reports: ▶ [Search Summary](#) [[Taxonomy reports](#)] [[Distance tree of results](#)] [[Multiple alignment](#)]

**Graphic Summary**

Show Conserved Domains

Putative conserved domains have been detected, click on the image below for detailed results.

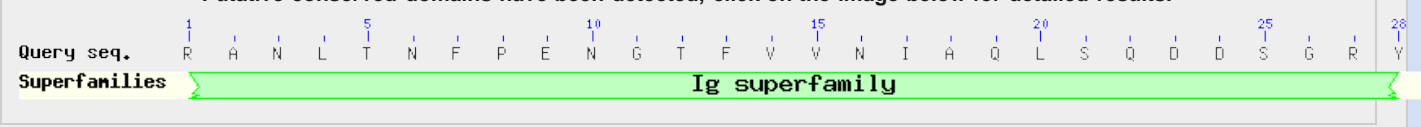

Distribution of 201 Blast Hits on the Query Sequence



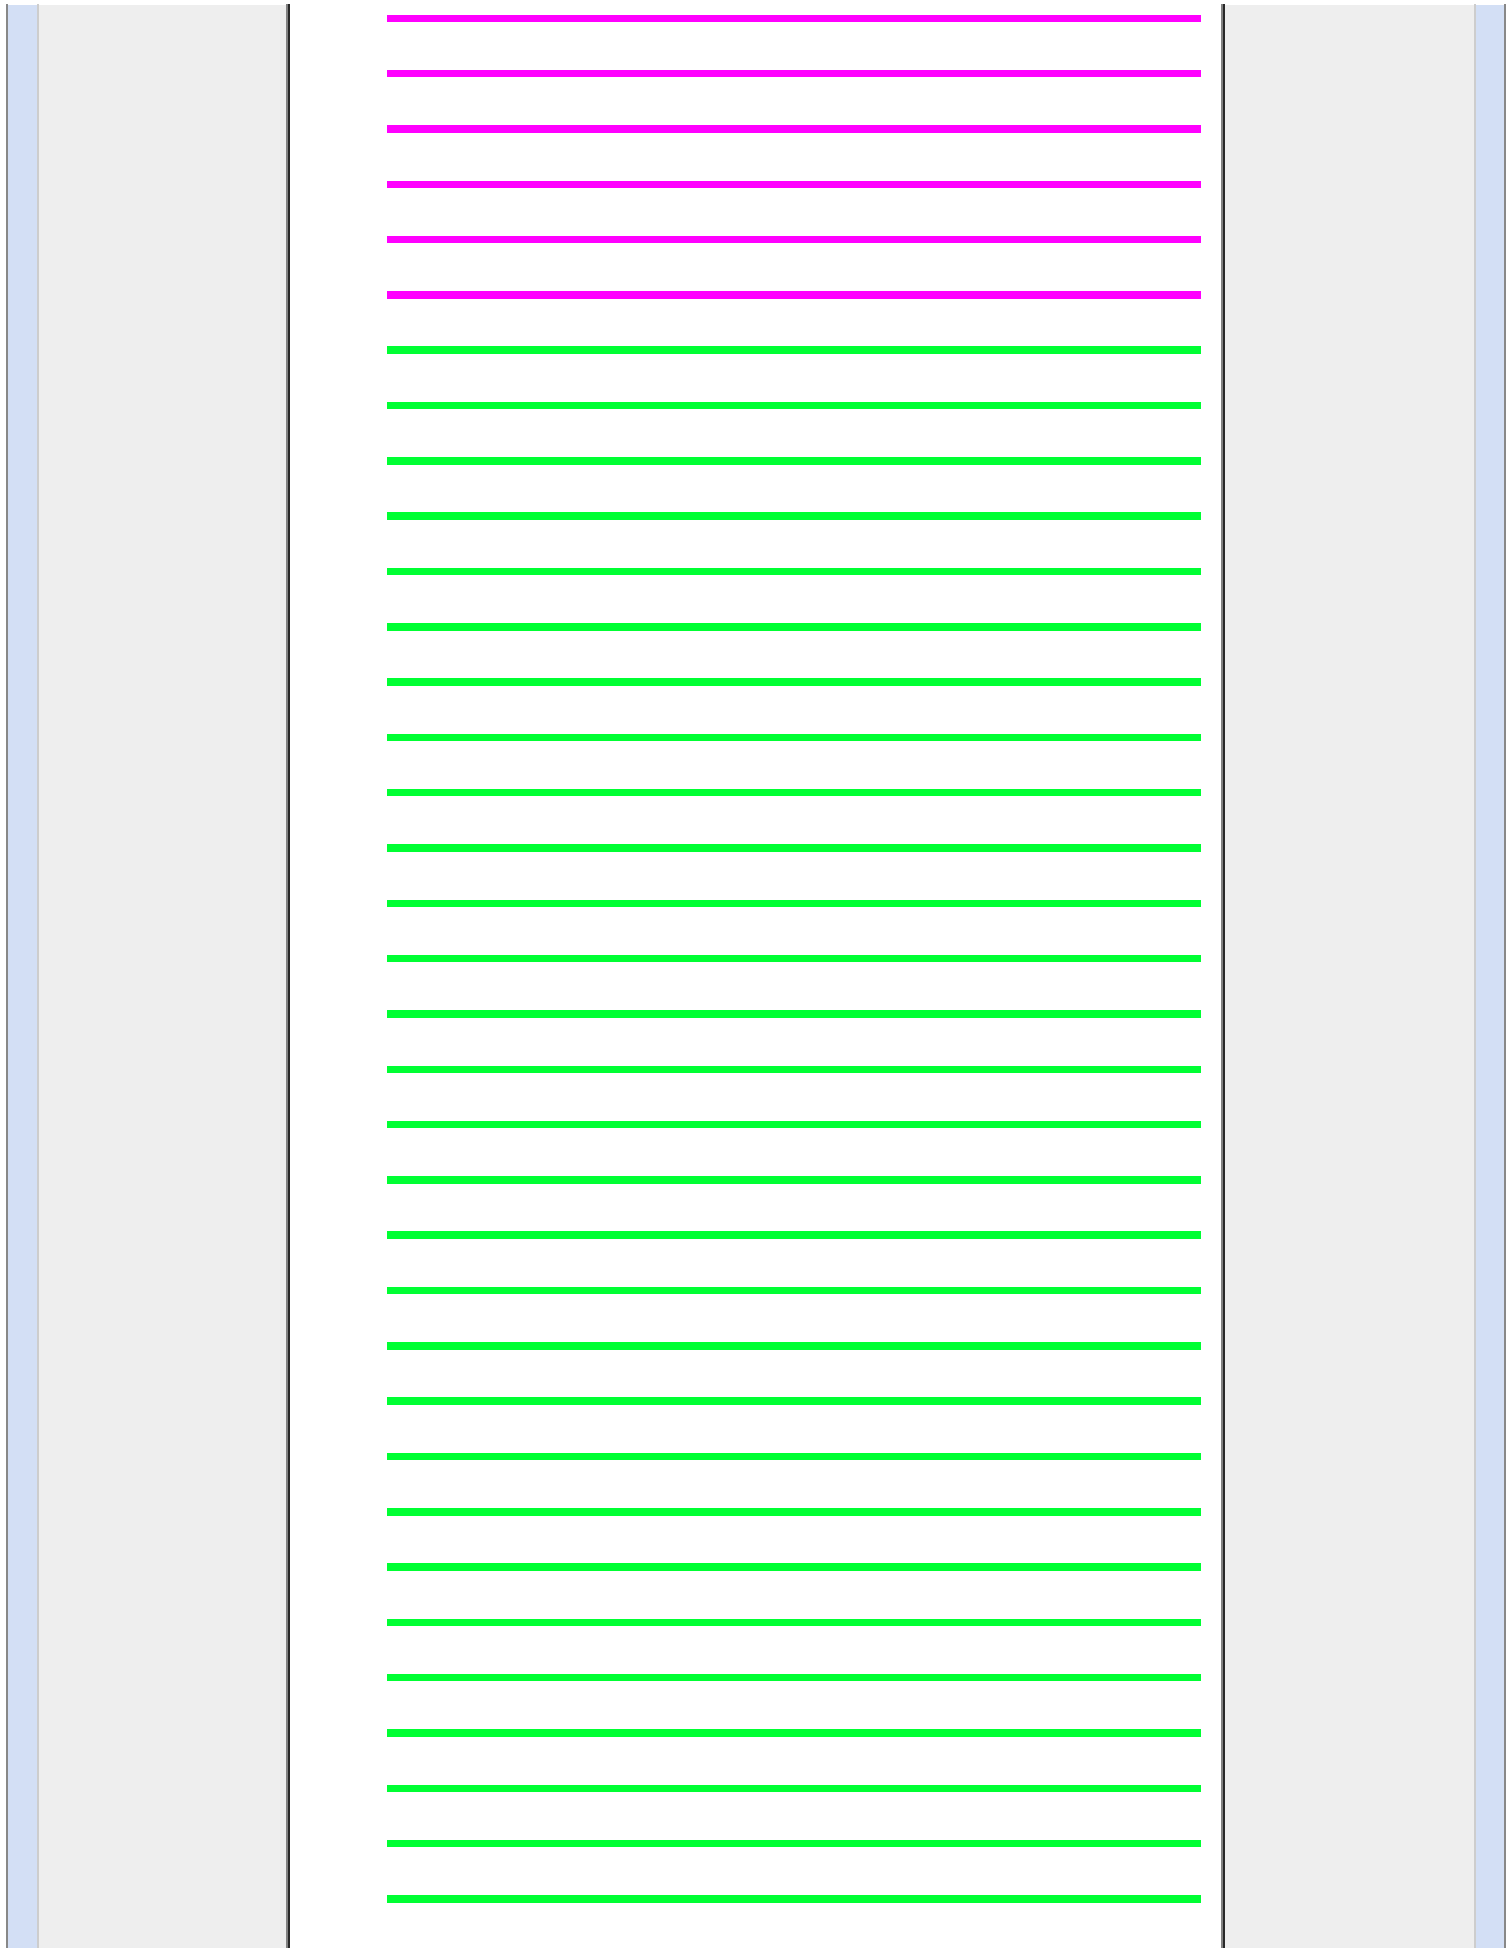

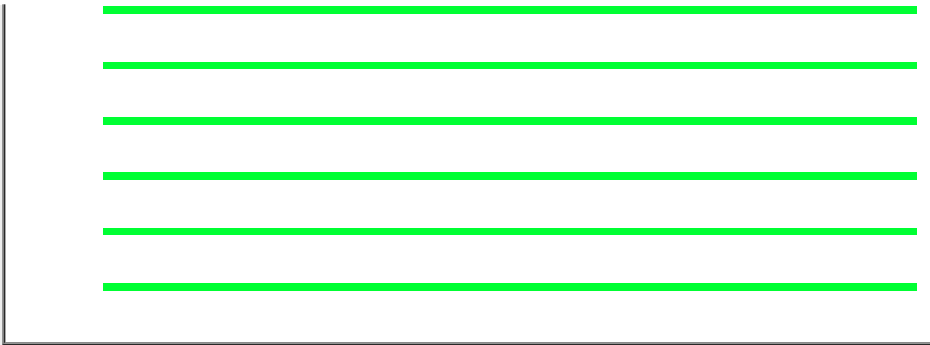

**Descriptions**

**Sequences producing significant alignments:**

Select: [All](#) [None](#) Selected:0

Alignments Download GenPept Graphics Distance tree of results Multiple alignment

| Description                                                                      | Max score | Total score | Query cover | E value | Ident | Accession                                   |
|----------------------------------------------------------------------------------|-----------|-------------|-------------|---------|-------|---------------------------------------------|
| <a href="#">Chain A, Crystal Structure Of A Ligand-Binding Domain Of The Hur</a> | 92.3      | 92.3        | 100%        | 5e-20   | 100%  | <a href="#">gij56967075 1XED_A</a>          |
| <a href="#">Chain A, Solution Structure Of Human Secretory Component [Homo</a>   | 92.3      | 114         | 100%        | 2e-19   | 100%  | <a href="#">gij146387599 2OCW_A</a>         |
| <a href="#">poly-Ig receptor [Homo sapiens]</a>                                  | 92.3      | 114         | 100%        | 2e-19   | 100%  | <a href="#">gij514366 AAA36102.1</a>        |
| <a href="#">polymeric immunoglobulin receptor precursor [Homo sapiens]</a>       | 92.3      | 114         | 100%        | 2e-19   | 100%  | <a href="#">gij31377806 NP_002635.2</a>     |
| <a href="#">PREDICTED: polymeric immunoglobulin receptor isoform 1 [Gorilla</a>  | 92.3      | 118         | 100%        | 2e-19   | 100%  | <a href="#">gij426333562 XP_004028344.1</a> |
| <a href="#">transmembrane secretory component [Homo sapiens]</a>                 | 92.3      | 114         | 100%        | 2e-19   | 100%  | <a href="#">gij238236 AAB20203.1</a>        |
| <a href="#">PREDICTED: polymeric immunoglobulin receptor [Pan paniscus]</a>      | 92.3      | 114         | 100%        | 2e-19   | 100%  | <a href="#">gij397504777 XP_003822957.1</a> |
| <a href="#">PREDICTED: polymeric immunoglobulin receptor [Pan troglodytes]</a>   | 92.3      | 114         | 100%        | 2e-19   | 100%  | <a href="#">gij332811741 XP_514153.3</a>    |
| <a href="#">PREDICTED: polymeric immunoglobulin receptor isoform X1 [Homo</a>    | 92.3      | 114         | 100%        | 2e-19   | 100%  | <a href="#">gij530366266 XP_005273220.1</a> |
| <a href="#">PREDICTED: polymeric immunoglobulin receptor [Callithrix jacchus</a> | 88.0      | 111         | 100%        | 6e-18   | 96%   | <a href="#">gij296230617 XP_002760783.1</a> |
| <a href="#">hypothetical protein [Pongo abelii]</a>                              | 88.0      | 114         | 100%        | 6e-18   | 96%   | <a href="#">gij55729233 CAH91352.1</a>      |
| <a href="#">polymeric immunoglobulin receptor precursor [Pongo abelii]</a>       | 88.0      | 114         | 100%        | 6e-18   | 96%   | <a href="#">gij197102290 NP_001125098.1</a> |
| <a href="#">PREDICTED: polymeric immunoglobulin receptor [Macaca mulatta]</a>    | 83.8      | 108         | 100%        | 2e-16   | 93%   | <a href="#">gij297280921 XP_001083307.2</a> |
| <a href="#">PREDICTED: polymeric immunoglobulin receptor [Chlorocebus sab</a>    | 83.8      | 108         | 100%        | 2e-16   | 93%   | <a href="#">gij635130940 XP_007986846.1</a> |
| <a href="#">PREDICTED: polymeric immunoglobulin receptor isoform X2 [Maca</a>    | 83.8      | 108         | 100%        | 2e-16   | 93%   | <a href="#">gij544399911 XP_005540721.1</a> |
| <a href="#">PREDICTED: polymeric immunoglobulin receptor [Papio anubis]</a>      | 83.8      | 108         | 100%        | 2e-16   | 93%   | <a href="#">gij402857385 XP_003893238.1</a> |
| <a href="#">hypothetical protein EGM_01447 [Macaca fascicularis]</a>             | 83.8      | 108         | 100%        | 2e-16   | 93%   | <a href="#">gij355745965 EHH50590.1</a>     |
| <a href="#">hypothetical protein EGK_01717 [Macaca mulatta]</a>                  | 83.8      | 108         | 100%        | 2e-16   | 93%   | <a href="#">gij355558822 EHH15602.1</a>     |
| <a href="#">PREDICTED: polymeric immunoglobulin receptor isoform X1 [Maca</a>    | 83.8      | 108         | 100%        | 2e-16   | 93%   | <a href="#">gij544399909 XP_005540720.1</a> |
| <a href="#">PREDICTED: polymeric immunoglobulin receptor [Rhinopithecus rc</a>   | 81.2      | 106         | 100%        | 1e-15   | 89%   | <a href="#">gij724836419 XP_010363960.1</a> |
| <a href="#">PREDICTED: polymeric immunoglobulin receptor isoform 1 [Nomas</a>    | 81.2      | 107         | 100%        | 1e-15   | 93%   | <a href="#">gij332247745 XP_003273022.1</a> |
| <a href="#">PREDICTED: polymeric immunoglobulin receptor-like [Galeopterus</a>   | 79.5      | 79.5        | 100%        | 2e-15   | 86%   | <a href="#">gij667345587 XP_008563367.1</a> |
| <a href="#">PREDICTED: polymeric immunoglobulin receptor [Saimiri boliviensi</a> | 80.0      | 103         | 100%        | 3e-15   | 89%   | <a href="#">gij403277678 XP_003930479.1</a> |
| <a href="#">PREDICTED: polymeric immunoglobulin receptor [Nannospalax gal</a>    | 78.3      | 100         | 100%        | 1e-14   | 86%   | <a href="#">gij674096299 XP_008821506.1</a> |
| <a href="#">PREDICTED: polymeric immunoglobulin receptor isoform X1 [Ictido</a>  | 77.8      | 99.7        | 100%        | 2e-14   | 86%   | <a href="#">gij532087641 XP_005329532.1</a> |
| <a href="#">PREDICTED: polymeric immunoglobulin receptor isoform X2 [Ictido</a>  | 77.8      | 99.7        | 100%        | 2e-14   | 86%   | <a href="#">gij532087643 XP_005329533.1</a> |
| <a href="#">PREDICTED: polymeric immunoglobulin receptor [Camelus ferus]</a>     | 76.6      | 76.6        | 100%        | 5e-14   | 79%   | <a href="#">gij560912075 XP_006182326.1</a> |
| <a href="#">PREDICTED: polymeric immunoglobulin receptor [Otolemur garneti</a>   | 76.6      | 99.3        | 100%        | 5e-14   | 82%   | <a href="#">gij395838714 XP_003792254.1</a> |
| <a href="#">polymeric immunoglobulin receptor precursor [Camelus ferus]</a>      | 76.6      | 121         | 100%        | 5e-14   | 79%   | <a href="#">gij530667813 EQB78114.1</a>     |

|                                                                                     |      |      |      |       |     |                                             |
|-------------------------------------------------------------------------------------|------|------|------|-------|-----|---------------------------------------------|
| <a href="#">PREDICTED: polymeric immunoglobulin receptor [Vicugna pacos]</a>        | 75.7 | 98.4 | 100% | 9e-14 | 79% | <a href="#">gij560986671 XP_006215522.1</a> |
| <a href="#">PREDICTED: polymeric immunoglobulin receptor [Leptonychotes w</a>       | 75.3 | 98.8 | 100% | 1e-13 | 82% | <a href="#">gij585156277 XP_006730466.1</a> |
| <a href="#">PREDICTED: polymeric immunoglobulin receptor [Tarsius syrichta]</a>     | 71.9 | 120  | 100% | 2e-12 | 79% | <a href="#">gij640811957 XP_008062620.1</a> |
| <a href="#">PREDICTED: polymeric immunoglobulin receptor [Bubalus bubalis]</a>      | 71.9 | 96.3 | 100% | 2e-12 | 79% | <a href="#">gij594038508 XP_006043871.1</a> |
| <a href="#">PREDICTED: polymeric immunoglobulin receptor [Pantholops hodg</a>       | 71.5 | 122  | 100% | 3e-12 | 75% | <a href="#">gij556742966 XP_005967001.1</a> |
| <a href="#">PREDICTED: polymeric immunoglobulin receptor [Capra hircus]</a>         | 71.5 | 126  | 100% | 3e-12 | 75% | <a href="#">gij548497730 XP_005690475.1</a> |
| <a href="#">PREDICTED: polymeric immunoglobulin receptor isoform 1 [Ovis a</a>      | 71.5 | 126  | 100% | 3e-12 | 75% | <a href="#">gij426239425 XP_004013622.1</a> |
| <a href="#">PREDICTED: polymeric immunoglobulin receptor isoform 2 [Ovis a</a>      | 71.5 | 126  | 100% | 3e-12 | 75% | <a href="#">gij426239427 XP_004013623.1</a> |
| <a href="#">Chain A, Crystal Structure Of The 1st Ig Domain From Mouse Poly</a>     | 69.4 | 69.4 | 100% | 7e-12 | 75% | <a href="#">gij563321008 4NOB_A</a>         |
| <a href="#">polymeric immunoglobulin receptor precursor [Bos taurus]</a>            | 70.2 | 122  | 100% | 7e-12 | 75% | <a href="#">gij32189338 NP_776568.1</a>     |
| <a href="#">RecName: Full=Polymeric immunoglobulin receptor; Short=PIgR; S</a>      | 70.2 | 122  | 100% | 7e-12 | 75% | <a href="#">gij3914346 P81265.1</a>         |
| <a href="#">PIGR protein [Bos taurus]</a>                                           | 70.2 | 122  | 100% | 7e-12 | 75% | <a href="#">gij151555693 AAI49033.1</a>     |
| <a href="#">PREDICTED: polymeric immunoglobulin receptor [Panthera tigris a</a>     | 69.4 | 92.9 | 100% | 1e-11 | 75% | <a href="#">gij591341842 XP_007096344.1</a> |
| <a href="#">PREDICTED: polymeric immunoglobulin receptor [Peromyscus mar</a>        | 69.4 | 90.8 | 100% | 1e-11 | 79% | <a href="#">gij589968826 XP_006996902.1</a> |
| <a href="#">PREDICTED: polymeric immunoglobulin receptor [Felis catus]</a>          | 69.4 | 92.9 | 100% | 1e-11 | 75% | <a href="#">gij587018664 XP_006943006.1</a> |
| <a href="#">polymeric immunoglobulin receptor [Mus musculus]</a>                    | 69.4 | 92.9 | 100% | 1e-11 | 75% | <a href="#">gij458422 AAA67440.1</a>        |
| <a href="#">polymeric immunoglobulin receptor precursor [Mus musculus]</a>          | 69.4 | 92.9 | 100% | 1e-11 | 75% | <a href="#">gij31981570 NP_035212.2</a>     |
| <a href="#">PREDICTED: LOW QUALITY PROTEIN: polymeric immunoglobulin</a>            | 68.9 | 121  | 100% | 2e-11 | 75% | <a href="#">gij555959201 XP_005891711.1</a> |
| <a href="#">TPA: polymeric immunoglobulin receptor precursor [Bos taurus]</a>       | 68.9 | 121  | 100% | 2e-11 | 75% | <a href="#">gij296479365 DAA21480.1</a>     |
| <a href="#">PREDICTED: polymeric immunoglobulin receptor [Microtus ochrog</a>       | 68.1 | 68.1 | 100% | 4e-11 | 75% | <a href="#">gij532009108 XP_005348371.1</a> |
| <a href="#">PREDICTED: polymeric immunoglobulin receptor [Equus przewalsk</a>       | 67.7 | 89.9 | 100% | 5e-11 | 79% | <a href="#">gij664764562 XP_008539949.1</a> |
| <a href="#">PREDICTED: polymeric immunoglobulin receptor [Equus caballus]</a>       | 67.7 | 89.9 | 100% | 5e-11 | 79% | <a href="#">gij194210251 XP_001492348.2</a> |
| <a href="#">polymeric immunoglobulin receptor precursor [Equus caballus]</a>        | 67.7 | 89.9 | 100% | 5e-11 | 79% | <a href="#">gij548961809 NP_001271468.1</a> |
| <a href="#">PREDICTED: polymeric immunoglobulin receptor [Ursus maritimus]</a>      | 67.2 | 90.8 | 100% | 7e-11 | 75% | <a href="#">gij670984407 XP_008683298.1</a> |
| <a href="#">PREDICTED: polymeric immunoglobulin receptor [Tupaia chinensis</a>      | 67.2 | 113  | 100% | 7e-11 | 75% | <a href="#">gij562862054 XP_006159345.1</a> |
| <a href="#">PREDICTED: polymeric immunoglobulin receptor isoform X2 [Mustu</a>      | 66.0 | 90.4 | 100% | 2e-10 | 75% | <a href="#">gij511939572 XP_004788608.1</a> |
| <a href="#">PREDICTED: polymeric immunoglobulin receptor [Mustela putorius</a>      | 66.0 | 90.4 | 100% | 2e-10 | 75% | <a href="#">gij511871244 XP_004756245.1</a> |
| <a href="#">PREDICTED: polymeric immunoglobulin receptor [Odobenus rosm</a>         | 65.5 | 88.7 | 100% | 3e-10 | 75% | <a href="#">gij472392635 XP_004415592.1</a> |
| <a href="#">PREDICTED: polymeric immunoglobulin receptor [Ceratotherium si</a>      | 65.5 | 87.8 | 100% | 3e-10 | 77% | <a href="#">gij478501668 XP_004425146.1</a> |
| <a href="#">PREDICTED: polymeric immunoglobulin receptor [Jaculus jaculus]</a>      | 64.7 | 87.0 | 100% | 5e-10 | 68% | <a href="#">gij507559576 XP_004663511.1</a> |
| <a href="#">polymeric immunoglobulin receptor [Canis lupus familiaris]</a>          | 64.3 | 64.3 | 100% | 6e-10 | 68% | <a href="#">gij19715659 AAL91653.1</a>      |
| <a href="#">PREDICTED: polymeric immunoglobulin receptor isoform X2 [Oryct</a>      | 64.3 | 108  | 100% | 7e-10 | 71% | <a href="#">gij634826802 XP_007951362.1</a> |
| <a href="#">PREDICTED: polymeric immunoglobulin receptor isoform X1 [Oryct</a>      | 64.3 | 108  | 100% | 7e-10 | 71% | <a href="#">gij634826799 XP_007951355.1</a> |
| <a href="#">polymeric immunoglobulin receptor precursor [Canis lupus familiaris</a> | 64.3 | 88.2 | 100% | 7e-10 | 68% | <a href="#">gij560891934 NP_001274081.1</a> |
| <a href="#">polymeric immunoglobulin receptor precursor [Rattus norvegicus]</a>     | 64.3 | 64.3 | 100% | 7e-10 | 68% | <a href="#">gij501354879 NP_036855.3</a>    |
| <a href="#">polymeric immunoglobulin receptor [Rattus norvegicus]</a>               | 64.3 | 64.3 | 100% | 7e-10 | 68% | <a href="#">gij149058686 EDM09843.1</a>     |
| <a href="#">PREDICTED: polymeric immunoglobulin receptor [Lipotes vexillifer]</a>   | 63.8 | 88.2 | 100% | 9e-10 | 71% | <a href="#">gij602721248 XP_007470777.1</a> |
| <a href="#">PREDICTED: polymeric immunoglobulin receptor [Physeter catodo</a>       | 63.8 | 85.7 | 100% | 9e-10 | 71% | <a href="#">gij593718296 XP_007105526.1</a> |
| <a href="#">PREDICTED: polymeric immunoglobulin receptor [Tursiops truncat</a>      | 63.0 | 84.8 | 100% | 2e-09 | 71% | <a href="#">gij470622594 XP_004319136.1</a> |
| <a href="#">PREDICTED: polymeric immunoglobulin receptor [Orcinus orca]</a>         | 63.0 | 84.8 | 100% | 2e-09 | 71% | <a href="#">gij466071278 XP_004282467.1</a> |
| <a href="#">PREDICTED: polymeric immunoglobulin receptor [Balaenoptera ac</a>       | 63.0 | 85.7 | 100% | 2e-09 | 71% | <a href="#">gij594636460 XP_007171624.1</a> |
| <a href="#">PREDICTED: LOW QUALITY PROTEIN: polymeric immunoglobulin</a>            | 62.6 | 84.0 | 100% | 3e-09 | 68% | <a href="#">gij625233654 XP_007607970.1</a> |
| <a href="#">PREDICTED: polymeric immunoglobulin receptor isoform X2 [Mesc</a>       | 62.6 | 86.5 | 100% | 3e-09 | 68% | <a href="#">gij524959951 XP_005079920.1</a> |
| <a href="#">Polymeric immunoglobulin receptor [Cricetulus griseus]</a>              | 62.6 | 84.0 | 100% | 3e-09 | 68% | <a href="#">gij344244860 EGW00964.1</a>     |
| <a href="#">PREDICTED: polymeric immunoglobulin receptor isoform X1 [Mesc</a>       | 62.6 | 86.5 | 100% | 3e-09 | 68% | <a href="#">gij524959949 XP_005079919.1</a> |
| <a href="#">PREDICTED: polymeric immunoglobulin receptor isoform X1 [Crice</a>      | 62.6 | 84.0 | 100% | 3e-09 | 68% | <a href="#">gij354471083 XP_003497773.1</a> |

|                                                                                  |      |      |      |       |     |                                             |
|----------------------------------------------------------------------------------|------|------|------|-------|-----|---------------------------------------------|
| <a href="#">PREDICTED: polymeric immunoglobulin receptor isoform X2 [Crice</a>   | 62.6 | 84.0 | 100% | 3e-09 | 68% | <a href="#">gij354471081 XP_003497772.1</a> |
| <a href="#">polymeric immunoglobulin receptor isoform 1 [Cricetulus griseus]</a> | 62.6 | 121  | 100% | 3e-09 | 68% | <a href="#">gij537169305 ERE73918.1</a>     |
| <a href="#">polymeric immunoglobulin receptor precursor [Sus scrofa]</a>         | 61.7 | 84.0 | 100% | 5e-09 | 71% | <a href="#">gij47523406 NP_999324.1</a>     |
| <a href="#">Polymeric immunoglobulin receptor [Pteropus alecto]</a>              | 60.4 | 82.3 | 96%  | 1e-08 | 70% | <a href="#">gij431892859 ELK03287.1</a>     |
| <a href="#">PREDICTED: polymeric immunoglobulin receptor [Pteropus alecto]</a>   | 60.4 | 123  | 100% | 1e-08 | 70% | <a href="#">gij586536225 XP_006922980.1</a> |
| <a href="#">PREDICTED: polymeric immunoglobulin receptor isoform 1 [Dasyp</a>    | 59.2 | 83.1 | 100% | 3e-08 | 68% | <a href="#">gij488560131 XP_004470111.1</a> |
| <a href="#">PREDICTED: polymeric immunoglobulin receptor [Echinops telfairi]</a> | 58.7 | 101  | 100% | 5e-08 | 71% | <a href="#">gij507635434 XP_004700183.1</a> |
| <a href="#">PREDICTED: polymeric immunoglobulin receptor [Chinchilla lanige</a>  | 58.3 | 84.4 | 100% | 6e-08 | 68% | <a href="#">gij533120059 XP_005375465.1</a> |
| <a href="#">PREDICTED: polymeric immunoglobulin receptor [Octodon degus]</a>     | 57.9 | 57.9 | 100% | 9e-08 | 64% | <a href="#">gij507688344 XP_004641251.1</a> |
| <a href="#">PREDICTED: polymeric immunoglobulin receptor [Cavia porcellus]</a>   | 57.5 | 57.5 | 100% | 1e-07 | 68% | <a href="#">gij348578097 XP_003474820.1</a> |
| <a href="#">PREDICTED: polymeric immunoglobulin receptor [Elephantulus ed</a>    | 57.1 | 78.1 | 100% | 2e-07 | 64% | <a href="#">gij585666892 XP_006888060.1</a> |
| <a href="#">PREDICTED: polymeric immunoglobulin receptor [Chrysochloris as</a>   | 57.1 | 107  | 100% | 2e-07 | 68% | <a href="#">gij586450680 XP_006834271.1</a> |
| <a href="#">PREDICTED: polymeric immunoglobulin receptor [Erinaceus europ</a>    | 56.6 | 56.6 | 100% | 2e-07 | 64% | <a href="#">gij617602067 XP_007523168.1</a> |
| <a href="#">PREDICTED: polymeric immunoglobulin receptor [Eptesicus fuscus</a>   | 56.2 | 77.2 | 100% | 3e-07 | 61% | <a href="#">gij641724928 XP_008152394.1</a> |
| <a href="#">PREDICTED: polymeric immunoglobulin receptor [Myotis davidii]</a>    | 56.2 | 77.2 | 100% | 3e-07 | 64% | <a href="#">gij584068124 XP_006754443.1</a> |
| <a href="#">PREDICTED: LOW QUALITY PROTEIN: polymeric immunoglobulin</a>         | 55.4 | 55.4 | 100% | 6e-07 | 64% | <a href="#">gij505829866 XP_004610232.1</a> |
| <a href="#">PREDICTED: polymeric immunoglobulin receptor [Loxodonta africa</a>   | 54.9 | 54.9 | 100% | 8e-07 | 64% | <a href="#">gij731475646 XP_010588572.1</a> |
| <a href="#">PREDICTED: polymeric immunoglobulin receptor [Monodelphis dor</a>    | 54.1 | 84.4 | 100% | 2e-06 | 64% | <a href="#">gij611989136 XP_007481356.1</a> |
| <a href="#">PREDICTED: polymeric immunoglobulin receptor [Myotis lucifugus]</a>  | 53.7 | 74.7 | 100% | 2e-06 | 57% | <a href="#">gij558152618 XP_006094928.1</a> |
| <a href="#">PREDICTED: polymeric immunoglobulin receptor [Myotis brandtii]</a>   | 53.7 | 74.7 | 100% | 2e-06 | 57% | <a href="#">gij554587770 XP_005885286.1</a> |
| <a href="#">Polymeric immunoglobulin receptor [Myotis brandtii]</a>              | 53.7 | 95.7 | 100% | 2e-06 | 57% | <a href="#">gij521037818 EPQ19595.1</a>     |
| <a href="#">PREDICTED: polymeric immunoglobulin receptor isoform X2 [Heter</a>   | 53.2 | 53.2 | 100% | 3e-06 | 64% | <a href="#">gij513001195 XP_004862115.1</a> |
| <a href="#">PREDICTED: polymeric immunoglobulin receptor [Heterocephalus</a>     | 53.2 | 53.2 | 100% | 3e-06 | 64% | <a href="#">gij512893082 XP_004897444.1</a> |
| <a href="#">Polymeric immunoglobulin receptor [Heterocephalus glaber]</a>        | 53.2 | 53.2 | 100% | 3e-06 | 64% | <a href="#">gij351708108 EHB11027.1</a>     |
| <a href="#">PREDICTED: polymeric immunoglobulin receptor isoform X1 [Heter</a>   | 53.2 | 53.2 | 100% | 3e-06 | 64% | <a href="#">gij513001193 XP_004862114.1</a> |

## Alignments

Download [GenPept](#) [Graphics](#)

Next Previous Descriptions

Chain A, Crystal Structure Of A Ligand-Binding Domain Of The Human Polymeric Ig Receptor, Pigr

Sequence ID: [gij56967075|pdb|1XED|A](#) Length: 117 Number of Matches: 1

[See 5 more title\(s\)](#)

Range 1: 63 to 90 [GenPept](#) [Graphics](#)

Next Match Previous Match

| Score          | Expect | Identities  | Positives   | Gaps     |
|----------------|--------|-------------|-------------|----------|
| 92.3 bits(210) | 5e-20  | 28/28(100%) | 28/28(100%) | 0/28(0%) |

Query 1 RANLTNFPENGTFFVFNIAQLSQDDSGRY 28  
 RANLTNFPENGTFFVFNIAQLSQDDSGRY  
 Sbjct 63 RANLTNFPENGTFFVFNIAQLSQDDSGRY 90

### Related Information

[Structure](#) - 3D structure displays  
[Identical Proteins](#) - Proteins  
 identical to the subject

Download [GenPept](#) [Graphics](#)

Sort by: E value

Next Previous Descriptions

Chain A, Solution Structure Of Human Secretory Component

Sequence ID: [gij146387599|pdb|2OCW|A](#) Length: 585 Number of Matches: 2

[See 2 more title\(s\)](#)

Range 1: 63 to 90 [GenPept](#) [Graphics](#)

Next Match Previous Match

| Score          | Expect | Identities  | Positives   | Gaps     |
|----------------|--------|-------------|-------------|----------|
| 92.3 bits(210) | 2e-19  | 28/28(100%) | 28/28(100%) | 0/28(0%) |

Query 1 RANLTNFPENGTFFVFNIAQLSQDDSGRY 28  
 RANLTNFPENGTFFVFNIAQLSQDDSGRY  
 Sbjct 63 RANLTNFPENGTFFVFNIAQLSQDDSGRY 90

### Related Information

[Structure](#) - 3D structure displays  
[Identical Proteins](#) - Proteins  
 identical to the subject

Range 2: 401 to 417 [GenPept](#) [Graphics](#) [Next Match](#) [Previous Match](#) [First Match](#)

| Score         | Expect | Identities | Positives  | Gaps     |
|---------------|--------|------------|------------|----------|
| 22.3 bits(45) | 49173  | 10/17(59%) | 10/17(58%) | 1/17(5%) |

Query 8 PENGTFVFNIAQL-SQD 23  
 P NGTF V QL S D  
 Sbjct 401 PNGTFTVILNQLTSRD 417

[Download](#) [GenPept](#) [Graphics](#) Sort by: E value [Next](#) [Previous](#) [Descriptions](#)

poly-Ig receptor, partial [Homo sapiens]  
 Sequence ID: [gi|514366|gb|AAA36102.1](#) Length: 693 Number of Matches: 2

Range 1: 10 to 37 [GenPept](#) [Graphics](#) [Next Match](#) [Previous Match](#)

| Score          | Expect | Identities  | Positives   | Gaps     |
|----------------|--------|-------------|-------------|----------|
| 92.3 bits(210) | 2e-19  | 28/28(100%) | 28/28(100%) | 0/28(0%) |

Query 1 RANLTNFPENGTFFVFNIAQLSQDDSGRY 28  
 RANLTNFPENGTFFVFNIAQLSQDDSGRY  
 Sbjct 10 RANLTNFPENGTFFVFNIAQLSQDDSGRY 37

**Related Information**  
[Gene](#) - associated gene details

Range 2: 348 to 364 [GenPept](#) [Graphics](#) [Next Match](#) [Previous Match](#) [First Match](#)

| Score         | Expect | Identities | Positives  | Gaps     |
|---------------|--------|------------|------------|----------|
| 22.3 bits(45) | 49301  | 10/17(59%) | 10/17(58%) | 1/17(5%) |

Query 8 PENGTFVFNIAQL-SQD 23  
 P NGTF V QL S D  
 Sbjct 348 PNGTFTVILNQLTSRD 364

[Download](#) [GenPept](#) [Graphics](#) Sort by: E value [Next](#) [Previous](#) [Descriptions](#)

polymeric immunoglobulin receptor precursor [Homo sapiens]  
 Sequence ID: [gi|31377806|ref|NP\\_002635.2](#) Length: 764 Number of Matches: 2  
[See 8 more title\(s\)](#)

Range 1: 81 to 108 [GenPept](#) [Graphics](#) [Next Match](#) [Previous Match](#)

| Score          | Expect | Identities  | Positives   | Gaps     |
|----------------|--------|-------------|-------------|----------|
| 92.3 bits(210) | 2e-19  | 28/28(100%) | 28/28(100%) | 0/28(0%) |

Query 1 RANLTNFPENGTFFVFNIAQLSQDDSGRY 28  
 RANLTNFPENGTFFVFNIAQLSQDDSGRY  
 Sbjct 81 RANLTNFPENGTFFVFNIAQLSQDDSGRY 108

**Related Information**  
[Gene](#) - associated gene details  
[UniGene](#) - clustered expressed sequence tags  
[Map Viewer](#) - aligned genomic context  
[Identical Proteins](#) - Proteins identical to the subject

Range 2: 419 to 435 [GenPept](#) [Graphics](#) [Next Match](#) [Previous Match](#) [First Match](#)

| Score         | Expect | Identities | Positives  | Gaps     |
|---------------|--------|------------|------------|----------|
| 22.3 bits(45) | 49365  | 10/17(59%) | 10/17(58%) | 1/17(5%) |

Query 8 PENGTFVFNIAQL-SQD 23  
 P NGTF V QL S D  
 Sbjct 419 PNGTFTVILNQLTSRD 435

[Download](#) [GenPept](#) [Graphics](#) Sort by: E value [Next](#) [Previous](#) [Descriptions](#)

PREDICTED: polymeric immunoglobulin receptor isoform 1 [Gorilla gorilla gorilla]  
 Sequence ID: [gi|426333562|ref|XP\\_004028344.1](#) Length: 764 Number of Matches: 2  
[See 1 more title\(s\)](#)

Range 1: 81 to 108 [GenPept](#) [Graphics](#) [Next Match](#) [Previous Match](#)

| Score          | Expect | Identities  | Positives   | Gaps     |
|----------------|--------|-------------|-------------|----------|
| 92.3 bits(210) | 2e-19  | 28/28(100%) | 28/28(100%) | 0/28(0%) |

Query 1 RANLTNFPENGTFFVFNIAQLSQDDSGRY 28  
 RANLTNFPENGTFFVFNIAQLSQDDSGRY  
 Sbjct 81 RANLTNFPENGTFFVFNIAQLSQDDSGRY 108

**Related Information**  
[Gene](#) - associated gene details  
[Map Viewer](#) - aligned genomic context  
[Identical Proteins](#) - Proteins identical to the subject

Range 2: 419 to 435 [GenPept](#) [Graphics](#) [Next Match](#) [Previous Match](#) [First Match](#)

| Score         | Expect | Identities | Positives  | Gaps     |
|---------------|--------|------------|------------|----------|
| 26.5 bits(55) | 1836   | 11/17(65%) | 11/17(64%) | 1/17(5%) |

Query 8 PENGTFVFNIAQL-SQD 23  
 P NGTF V QL SQD  
 Sbjct 419 PNGTFTVILNQLTSQD 435





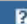

▶ NCBI/ BLAST/ blastp suite/ Formatting Results - BVK2V5KM01R

**i** Your search parameters were adjusted to search for a short input sequence.

[Edit and Resubmit](#) [Save Search Strategies](#) ▶ [Formatting options](#) ▶ [Download](#)

[YouTube](#) [How to read this page](#) [Blast report description](#)

PLTP\_KVSDVSCQASVSRM\_Mod

RID [BVK2V5KM01R](#) (Expires on 01-21 10:32 am)

**Query ID** |cl|209639  
**Description** None  
**Molecule type** amino acid  
**Query Length** 14

**Database Name** nr  
**Description** All non-redundant GenBank CDS translations+PDB+SwissProt+PIR+PRF excluding environmental samples from WGS projects  
**Program** BLASTP 2.2.30+ ▶ [Citation](#)

Other reports: ▶ [Search Summary](#) [[Taxonomy reports](#)] [[Distance tree of results](#)] [[Multiple alignment](#)]

**Graphic Summary**

[Show Conserved Domains](#)

No putative conserved domains have been detected

Distribution of 100 Blast Hits on the Query Sequence

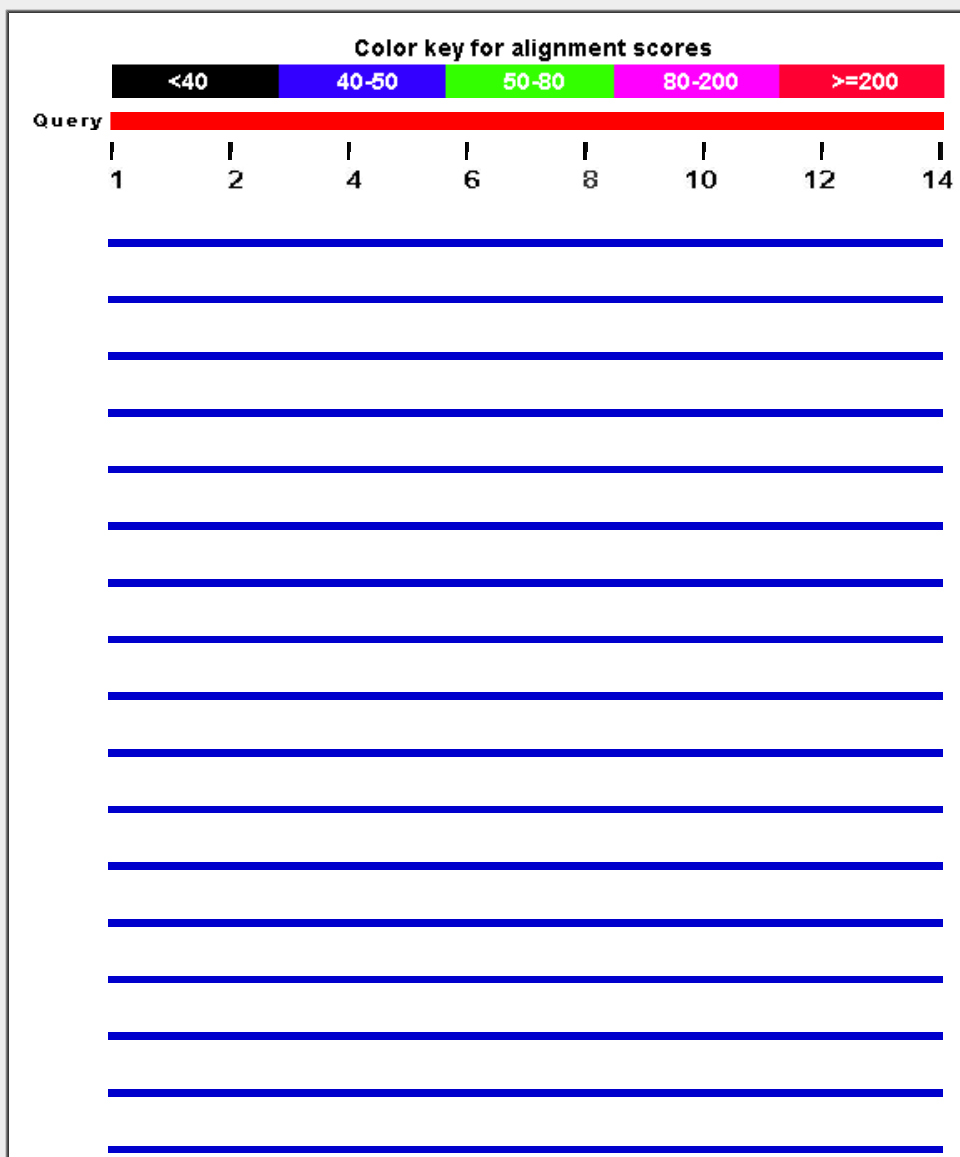

The image shows a table with 30 rows. Each row contains a single blue horizontal line, which appears to be a placeholder for data. The table is centered on the page and is flanked by light gray vertical bars on both sides.

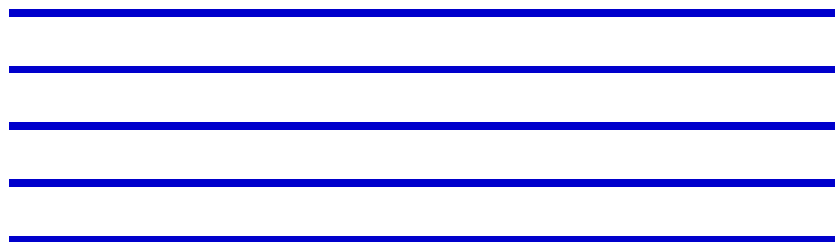

## Descriptions

### Sequences producing significant alignments:

Select: [All](#) [None](#) Selected:0

[Alignments](#)
[Download](#)
[GenPept](#)
[Graphics](#)
[Distance tree of results](#)
[Multiple alignment](#)


| Description                                                                                 | Max score | Total score | Query cover | E value | Ident | Accession                      |
|---------------------------------------------------------------------------------------------|-----------|-------------|-------------|---------|-------|--------------------------------|
| <a href="#">PLTP-like protein [Bos taurus]</a>                                              | 44.3      | 44.3        | 100%        | 5e-04   | 93%   | <a href="#">AAW21227.1</a>     |
| <a href="#">PREDICTED: phospholipid transfer protein-like isoform X1 [Sus scrofa]</a>       | 44.3      | 44.3        | 100%        | 5e-04   | 93%   | <a href="#">XP_005673034.1</a> |
| <a href="#">PREDICTED: phospholipid transfer protein-like [Leptonychotes weddellii]</a>     | 44.3      | 44.3        | 100%        | 6e-04   | 93%   | <a href="#">XP_006739837.1</a> |
| <a href="#">PREDICTED: phospholipid transfer protein isoform X3 [Pan troglodytes]</a>       | 44.3      | 44.3        | 100%        | 7e-04   | 93%   | <a href="#">XP_009435596.1</a> |
| <a href="#">PREDICTED: phospholipid transfer protein isoform X2 [Tarsius syrichta]</a>      | 44.3      | 44.3        | 100%        | 7e-04   | 93%   | <a href="#">XP_008056109.1</a> |
| <a href="#">PREDICTED: phospholipid transfer protein isoform X3 [Chlorocebus sabaeus]</a>   | 44.3      | 44.3        | 100%        | 7e-04   | 93%   | <a href="#">XP_008013799.1</a> |
| <a href="#">unnamed protein product [Homo sapiens]</a>                                      | 44.3      | 44.3        | 100%        | 7e-04   | 93%   | <a href="#">BAG56696.1</a>     |
| <a href="#">PREDICTED: phospholipid transfer protein isoform X6 [Macaca fascicularis]</a>   | 44.3      | 44.3        | 100%        | 7e-04   | 93%   | <a href="#">XP_005569256.1</a> |
| <a href="#">phospholipid transfer protein precursor [Pan troglodytes]</a>                   | 44.3      | 44.3        | 100%        | 7e-04   | 93%   | <a href="#">BAK62129.1</a>     |
| <a href="#">phospholipid transfer protein isoform d [Homo sapiens]</a>                      | 44.3      | 44.3        | 100%        | 7e-04   | 93%   | <a href="#">NP_001229850.1</a> |
| <a href="#">unnamed protein product [Macaca fascicularis]</a>                               | 44.3      | 44.3        | 100%        | 7e-04   | 93%   | <a href="#">BAE00639.1</a>     |
| <a href="#">PREDICTED: phospholipid transfer protein isoform X4 [Vicugna pacos]</a>         | 44.3      | 44.3        | 100%        | 7e-04   | 93%   | <a href="#">XP_006202544.1</a> |
| <a href="#">PREDICTED: phospholipid transfer protein isoform X4 [Camelus ferus]</a>         | 44.3      | 44.3        | 100%        | 7e-04   | 93%   | <a href="#">XP_006187692.1</a> |
| <a href="#">PREDICTED: phospholipid transfer protein isoform 4 [Ceratotherium simum si]</a> | 44.3      | 44.3        | 100%        | 7e-04   | 93%   | <a href="#">XP_004430381.1</a> |
| <a href="#">PREDICTED: phospholipid transfer protein isoform X1 [Condylura cristata]</a>    | 44.3      | 44.3        | 100%        | 7e-04   | 93%   | <a href="#">XP_004687488.1</a> |
| <a href="#">PREDICTED: phospholipid transfer protein isoform 4 [Orcinus orca]</a>           | 44.3      | 44.3        | 100%        | 7e-04   | 93%   | <a href="#">XP_004272968.1</a> |
| <a href="#">PREDICTED: phospholipid transfer protein [Callithrix jacchus]</a>               | 44.3      | 44.3        | 100%        | 7e-04   | 93%   | <a href="#">XP_008994362.1</a> |
| <a href="#">phospholipid transfer protein, isoform CRA_d [Homo sapiens]</a>                 | 44.3      | 44.3        | 100%        | 7e-04   | 93%   | <a href="#">EAW75786.1</a>     |
| <a href="#">PREDICTED: phospholipid transfer protein [Capra hircus]</a>                     | 44.3      | 44.3        | 100%        | 7e-04   | 93%   | <a href="#">XP_005688777.1</a> |
| <a href="#">PREDICTED: phospholipid transfer protein isoform 1 [Ovis aries]</a>             | 44.3      | 44.3        | 100%        | 7e-04   | 93%   | <a href="#">XP_004014658.1</a> |
| <a href="#">PREDICTED: LOW QUALITY PROTEIN: phospholipid transfer protein [Came]</a>        | 44.3      | 44.3        | 100%        | 7e-04   | 93%   | <a href="#">XP_010956961.1</a> |
| <a href="#">PREDICTED: LOW QUALITY PROTEIN: phospholipid transfer protein [Came]</a>        | 44.3      | 44.3        | 100%        | 7e-04   | 93%   | <a href="#">XP_010976914.1</a> |
| <a href="#">PREDICTED: LOW QUALITY PROTEIN: phospholipid transfer protein [Bos m]</a>       | 44.3      | 44.3        | 100%        | 7e-04   | 93%   | <a href="#">XP_005897642.1</a> |
| <a href="#">PREDICTED: phospholipid transfer protein isoform X2 [Pan troglodytes]</a>       | 44.3      | 44.3        | 100%        | 7e-04   | 93%   | <a href="#">XP_009435595.1</a> |
| <a href="#">PREDICTED: phospholipid transfer protein [Rhinopithecus roxellana]</a>          | 44.3      | 44.3        | 100%        | 7e-04   | 93%   | <a href="#">XP_010382500.1</a> |
| <a href="#">PREDICTED: phospholipid transfer protein isoform X2 [Chlorocebus sabaeus]</a>   | 44.3      | 44.3        | 100%        | 7e-04   | 93%   | <a href="#">XP_008013795.1</a> |
| <a href="#">Phospholipid transfer protein [Homo sapiens]</a>                                | 44.3      | 44.3        | 100%        | 7e-04   | 93%   | <a href="#">AAH19847.1</a>     |
| <a href="#">PREDICTED: phospholipid transfer protein isoform X2 [Macaca fascicularis]</a>   | 44.3      | 44.3        | 100%        | 7e-04   | 93%   | <a href="#">XP_005569252.1</a> |
| <a href="#">PREDICTED: phospholipid transfer protein [Gorilla gorilla gorilla]</a>          | 44.3      | 44.3        | 100%        | 7e-04   | 93%   | <a href="#">XP_004062321.1</a> |

|                                                                                              |      |      |      |       |     |                                |
|----------------------------------------------------------------------------------------------|------|------|------|-------|-----|--------------------------------|
| <a href="#">phospholipid transfer protein isoform a precursor [Homo sapiens]</a>             | 44.3 | 44.3 | 100% | 7e-04 | 93% | <a href="#">NP_006218.1</a>    |
| <a href="#">PREDICTED: phospholipid transfer protein [Saimiri boliviensis boliviensis]</a>   | 44.3 | 44.3 | 100% | 7e-04 | 93% | <a href="#">XP_003936508.1</a> |
| <a href="#">PREDICTED: LOW QUALITY PROTEIN: phospholipid transfer protein [Papio]</a>        | 44.3 | 44.3 | 100% | 7e-04 | 93% | <a href="#">XP_003904720.1</a> |
| <a href="#">PREDICTED: phospholipid transfer protein isoform X1 [Pan paniscus]</a>           | 44.3 | 44.3 | 100% | 7e-04 | 93% | <a href="#">XP_008949625.1</a> |
| <a href="#">Lipid transfer protein II [Macaca mulatta]</a>                                   | 44.3 | 44.3 | 100% | 7e-04 | 93% | <a href="#">EHH19636.1</a>     |
| <a href="#">PREDICTED: phospholipid transfer protein [Nomascus leucogenys]</a>               | 44.3 | 44.3 | 100% | 7e-04 | 93% | <a href="#">XP_003253705.1</a> |
| <a href="#">PREDICTED: phospholipid transfer protein-like [Macaca mulatta]</a>               | 44.3 | 44.3 | 100% | 7e-04 | 93% | <a href="#">XP_002798159.1</a> |
| <a href="#">PREDICTED: phospholipid transfer protein isoform X1 [Pan troglodytes]</a>        | 44.3 | 44.3 | 100% | 7e-04 | 93% | <a href="#">XP_001158846.2</a> |
| <a href="#">phospholipid transfer protein isoform a precursor variant [Homo sapiens]</a>     | 44.3 | 44.3 | 100% | 7e-04 | 93% | <a href="#">BAD96410.1</a>     |
| <a href="#">PREDICTED: phospholipid transfer protein [Heterocephalus glaber]</a>             | 44.3 | 44.3 | 100% | 7e-04 | 93% | <a href="#">XP_004888423.1</a> |
| <a href="#">PREDICTED: phospholipid transfer protein isoform 2 [Ovis aries]</a>              | 44.3 | 44.3 | 100% | 7e-04 | 93% | <a href="#">XP_004014659.1</a> |
| <a href="#">PREDICTED: phospholipid transfer protein [Ursus maritimus]</a>                   | 44.3 | 44.3 | 100% | 7e-04 | 93% | <a href="#">XP_008696270.1</a> |
| <a href="#">hypothetical protein PANDA_018015 [Ailuropoda melanoleuca]</a>                   | 44.3 | 44.3 | 100% | 7e-04 | 93% | <a href="#">EFB21975.1</a>     |
| <a href="#">PREDICTED: phospholipid transfer protein isoform X3 [Canis lupus familiaris]</a> | 44.3 | 44.3 | 100% | 7e-04 | 93% | <a href="#">XP_543027.2</a>    |
| <a href="#">PREDICTED: phospholipid transfer protein isoform 1 [Otolemur garnettii]</a>      | 44.3 | 44.3 | 100% | 7e-04 | 93% | <a href="#">XP_003787705.1</a> |
| <a href="#">phospholipid transfer protein precursor [Sus scrofa]</a>                         | 44.3 | 44.3 | 100% | 7e-04 | 93% | <a href="#">NP_999448.1</a>    |
| <a href="#">PREDICTED: phospholipid transfer protein isoform X1 [Erinaceus europaeus]</a>    | 44.3 | 44.3 | 100% | 7e-04 | 93% | <a href="#">XP_007533119.1</a> |
| <a href="#">PREDICTED: phospholipid transfer protein [Balaenoptera acutorostrata scam]</a>   | 44.3 | 44.3 | 100% | 7e-04 | 93% | <a href="#">XP_007185441.1</a> |
| <a href="#">PREDICTED: phospholipid transfer protein isoform X1 [Bubalus bubalis]</a>        | 44.3 | 44.3 | 100% | 7e-04 | 93% | <a href="#">XP_006051425.1</a> |
| <a href="#">PREDICTED: phospholipid transfer protein [Physeter catodon]</a>                  | 44.3 | 44.3 | 100% | 7e-04 | 93% | <a href="#">XP_007115580.1</a> |
| <a href="#">PREDICTED: phospholipid transfer protein isoform X2 [Tupaia chinensis]</a>       | 44.3 | 44.3 | 100% | 7e-04 | 93% | <a href="#">XP_006158592.1</a> |
| <a href="#">PREDICTED: phospholipid transfer protein isoform X1 [Vicugna pacos]</a>          | 44.3 | 44.3 | 100% | 7e-04 | 93% | <a href="#">XP_006202541.1</a> |
| <a href="#">PREDICTED: phospholipid transfer protein isoform X1 [Camelus ferus]</a>          | 44.3 | 44.3 | 100% | 7e-04 | 93% | <a href="#">XP_006187689.1</a> |
| <a href="#">PREDICTED: phospholipid transfer protein isoform X1 [Bos taurus]</a>             | 44.3 | 44.3 | 100% | 7e-04 | 93% | <a href="#">XP_005214615.1</a> |
| <a href="#">PREDICTED: LOW QUALITY PROTEIN: phospholipid transfer protein [Muste]</a>        | 44.3 | 44.3 | 100% | 7e-04 | 93% | <a href="#">XP_004746370.1</a> |
| <a href="#">PREDICTED: phospholipid transfer protein isoform 1 [Ceratotherium simum si]</a>  | 44.3 | 44.3 | 100% | 7e-04 | 93% | <a href="#">XP_004430378.1</a> |
| <a href="#">PREDICTED: LOW QUALITY PROTEIN: phospholipid transfer protein [Tursio]</a>       | 44.3 | 44.3 | 100% | 7e-04 | 93% | <a href="#">XP_004319149.1</a> |
| <a href="#">PREDICTED: phospholipid transfer protein isoform 1 [Orcinus orca]</a>            | 44.3 | 44.3 | 100% | 7e-04 | 93% | <a href="#">XP_004272965.1</a> |
| <a href="#">PREDICTED: phospholipid transfer protein-like [Ailuropoda melanoleuca]</a>       | 44.3 | 44.3 | 100% | 7e-04 | 93% | <a href="#">XP_002928111.1</a> |
| <a href="#">PREDICTED: LOW QUALITY PROTEIN: phospholipid transfer protein [Lipote]</a>       | 44.3 | 44.3 | 100% | 7e-04 | 93% | <a href="#">XP_007451697.1</a> |
| <a href="#">Phospholipid transfer protein [Tupaia chinensis]</a>                             | 44.3 | 44.3 | 100% | 7e-04 | 93% | <a href="#">ELW48240.1</a>     |
| <a href="#">PREDICTED: phospholipid transfer protein [Bison bison bison]</a>                 | 44.3 | 44.3 | 100% | 7e-04 | 93% | <a href="#">XP_010833341.1</a> |
| <a href="#">PREDICTED: phospholipid transfer protein isoform X1 [Tupaia chinensis]</a>       | 44.3 | 44.3 | 100% | 7e-04 | 93% | <a href="#">XP_006158591.1</a> |
| <a href="#">PREDICTED: LOW QUALITY PROTEIN: phospholipid transfer protein [Panther]</a>      | 44.3 | 44.3 | 100% | 7e-04 | 93% | <a href="#">XP_005954715.1</a> |
| <a href="#">phospholipid transfer protein precursor [Bos taurus]</a>                         | 44.3 | 44.3 | 100% | 7e-04 | 93% | <a href="#">NP_001030199.1</a> |
| <a href="#">PREDICTED: phospholipid transfer protein isoform X1 [Chlorocebus sabaeus]</a>    | 44.3 | 44.3 | 100% | 7e-04 | 93% | <a href="#">XP_008013792.1</a> |
| <a href="#">PREDICTED: phospholipid transfer protein isoform X1 [Macaca fascicularis]</a>    | 44.3 | 44.3 | 100% | 7e-04 | 93% | <a href="#">XP_005569251.1</a> |
| <a href="#">PREDICTED: phospholipid transfer protein isoform X1 [Homo sapiens]</a>           | 44.3 | 44.3 | 100% | 7e-04 | 93% | <a href="#">XP_005260496.1</a> |
| <a href="#">PREDICTED: phospholipid transfer protein isoform X1 [Ictidomys tridecemline]</a> | 44.3 | 44.3 | 100% | 7e-04 | 93% | <a href="#">XP_005325306.1</a> |
| <a href="#">Phospholipid transfer protein [Heterocephalus glaber]</a>                        | 44.3 | 44.3 | 100% | 7e-04 | 93% | <a href="#">EHB05309.1</a>     |
| <a href="#">phospholipid transfer protein isoform 3 [Camelus ferus]</a>                      | 44.3 | 44.3 | 100% | 7e-04 | 93% | <a href="#">EPY78753.1</a>     |
| <a href="#">PREDICTED: phospholipid transfer protein isoform X4 [Canis lupus familiaris]</a> | 44.3 | 44.3 | 100% | 7e-04 | 93% | <a href="#">XP_005635182.1</a> |
| <a href="#">PREDICTED: phospholipid transfer protein [Chrysochloris asiatica]</a>            | 42.2 | 42.2 | 100% | 0.003 | 86% | <a href="#">XP_006839396.1</a> |
| <a href="#">phospholipid transfer protein precursor [Pongo abelii]</a>                       | 42.2 | 42.2 | 100% | 0.003 | 86% | <a href="#">NP_001127290.1</a> |
| <a href="#">PREDICTED: phospholipid transfer protein [Equus przewalskii]</a>                 | 41.8 | 41.8 | 100% | 0.005 | 86% | <a href="#">XP_008519895.1</a> |

|                                                                                            |      |      |      |       |     |                                |
|--------------------------------------------------------------------------------------------|------|------|------|-------|-----|--------------------------------|
| <a href="#">PREDICTED: phospholipid transfer protein isoform X3 [Galeopterus variegatu</a> | 41.8 | 41.8 | 100% | 0.005 | 86% | <a href="#">XP_008569812.1</a> |
| <a href="#">PREDICTED: phospholipid transfer protein isoform X2 [Galeopterus variegatu</a> | 41.8 | 41.8 | 100% | 0.005 | 86% | <a href="#">XP_008569811.1</a> |
| <a href="#">PREDICTED: phospholipid transfer protein isoformX1 [Equus caballus]</a>        | 41.8 | 41.8 | 100% | 0.005 | 86% | <a href="#">XP_001503419.1</a> |
| <a href="#">PREDICTED: phospholipid transfer protein isoform X1 [Galeopterus variegatu</a> | 41.8 | 41.8 | 100% | 0.005 | 86% | <a href="#">XP_008569810.1</a> |
| <a href="#">PREDICTED: phospholipid transfer protein [Nannospalax galii]</a>               | 41.4 | 41.4 | 100% | 0.006 | 86% | <a href="#">XP_008835992.1</a> |
| <a href="#">PREDICTED: phospholipid transfer protein [Jaculus jaculus]</a>                 | 41.4 | 41.4 | 100% | 0.007 | 86% | <a href="#">XP_004663955.1</a> |
| <a href="#">PREDICTED: phospholipid transfer protein isoform X2 [Fukomys damarensis]</a>   | 40.9 | 40.9 | 100% | 0.009 | 86% | <a href="#">XP_010624498.1</a> |
| <a href="#">PREDICTED: phospholipid transfer protein isoform X1 [Fukomys damarensis]</a>   | 40.9 | 40.9 | 100% | 0.009 | 86% | <a href="#">XP_010624497.1</a> |
| <a href="#">phospholipid transfer protein [Cricetulus griseus]</a>                         | 40.1 | 40.1 | 100% | 0.017 | 86% | <a href="#">ERE71590.1</a>     |
| <a href="#">PREDICTED: phospholipid transfer protein isoform X2 [Cricetulus griseus]</a>   | 40.1 | 40.1 | 100% | 0.017 | 86% | <a href="#">XP_007608544.1</a> |
| <a href="#">PREDICTED: phospholipid transfer protein [Mesocricetus auratus]</a>            | 40.1 | 40.1 | 100% | 0.017 | 86% | <a href="#">XP_005085047.1</a> |
| <a href="#">PREDICTED: phospholipid transfer protein isoform X2 [Cricetulus griseus]</a>   | 40.1 | 40.1 | 100% | 0.017 | 86% | <a href="#">XP_003500579.1</a> |
| <a href="#">phospholipid transfer protein [Cricetulus griseus]</a>                         | 40.1 | 40.1 | 100% | 0.017 | 86% | <a href="#">ERE71588.1</a>     |
| <a href="#">PREDICTED: phospholipid transfer protein isoform X1 [Cricetulus griseus]</a>   | 40.1 | 40.1 | 100% | 0.017 | 86% | <a href="#">XP_007608543.1</a> |
| <a href="#">phospholipid transfer protein [Cricetulus griseus]</a>                         | 40.1 | 40.1 | 100% | 0.017 | 86% | <a href="#">ERE71587.1</a>     |
| <a href="#">PREDICTED: phospholipid transfer protein isoform 2 [Dasypus novemcinctus]</a>  | 39.2 | 39.2 | 100% | 0.033 | 86% | <a href="#">XP_004469931.1</a> |
| <a href="#">PREDICTED: phospholipid transfer protein isoform 1 [Dasypus novemcinctus]</a>  | 39.2 | 39.2 | 100% | 0.033 | 86% | <a href="#">XP_004469930.1</a> |
| <a href="#">PREDICTED: phospholipid transfer protein [Peromyscus maniculatus bairdii]</a>  | 38.8 | 38.8 | 100% | 0.045 | 79% | <a href="#">XP_006971038.1</a> |
| <a href="#">PREDICTED: phospholipid transfer protein [Panthera tigris altaica]</a>         | 38.4 | 38.4 | 100% | 0.063 | 86% | <a href="#">XP_007077837.1</a> |
| <a href="#">PREDICTED: phospholipid transfer protein [Felis catus]</a>                     | 38.4 | 38.4 | 100% | 0.063 | 86% | <a href="#">XP_006929771.1</a> |
| <a href="#">unnamed protein product [Mus musculus]</a>                                     | 38.0 | 38.0 | 100% | 0.084 | 79% | <a href="#">BAE29052.1</a>     |
| <a href="#">PREDICTED: phospholipid transfer protein [Ochotona princeps]</a>               | 38.0 | 38.0 | 100% | 0.086 | 86% | <a href="#">XP_004586137.1</a> |
| <a href="#">plasma phospholipid transfer protein [Mus musculus]</a>                        | 38.0 | 38.0 | 100% | 0.086 | 79% | <a href="#">AAA87943.1</a>     |
| <a href="#">Phospholipid transfer protein [Mus musculus]</a>                               | 38.0 | 38.0 | 100% | 0.086 | 79% | <a href="#">AAH03782.1</a>     |
| <a href="#">PREDICTED: phospholipid transfer protein [Microtus ochrogaster]</a>            | 38.0 | 38.0 | 100% | 0.086 | 79% | <a href="#">XP_005362957.1</a> |
| <a href="#">phospholipid transfer protein precursor [Mus musculus]</a>                     | 38.0 | 38.0 | 100% | 0.086 | 79% | <a href="#">NP_035255.1</a>    |

## Alignments

Download [GenPept](#) [Graphics](#)

[Next](#) [Previous](#) [Descriptions](#)

PLTP-like protein [Bos taurus]

Sequence ID: [gb|AAW21227.1](#) Length: 127 Number of Matches: 1

Range 1: 106 to 119 [GenPept](#) [Graphics](#)

[Next Match](#) [Previous Match](#)

| Score         | Expect | Identities | Positives   | Gaps     |
|---------------|--------|------------|-------------|----------|
| 44.3 bits(97) | 5e-04  | 13/14(93%) | 14/14(100%) | 0/14(0%) |

Query 1 KVSDVSCQASVSRM 14  
KVS+VSCQASVSRM  
Sbjct 106 KVSNVSCQASVSRM 119

### Related Information

[Gene](#) - associated gene details

Download [GenPept](#) [Graphics](#)

[Next](#) [Previous](#) [Descriptions](#)

PREDICTED: phospholipid transfer protein-like isoform X1 [Sus scrofa]

Sequence ID: [ref|XP\\_005673034.1](#) Length: 162 Number of Matches: 1

[See 1 more title\(s\)](#)

Range 1: 140 to 153 [GenPept](#) [Graphics](#)

[Next Match](#) [Previous Match](#)

| Score         | Expect | Identities | Positives   | Gaps     |
|---------------|--------|------------|-------------|----------|
| 44.3 bits(97) | 5e-04  | 13/14(93%) | 14/14(100%) | 0/14(0%) |

### Related Information

[Gene](#) - associated gene details

[Identical Proteins](#) - Proteins

identical to the subject

Query 1 KVSDVSCQASVSRM 14  
 KVS+VSCQASVSRM  
 Sbjct 140 KVSINVSCQASVSRM 153

[Download](#) [GenPept](#) [Graphics](#)

[Next](#) [Previous](#) [Descriptions](#)

**PREDICTED: phospholipid transfer protein-like [Leptonychotes weddellii]**

Sequence ID: [ref|XP\\_006739837.1|](#) Length: 246 Number of Matches: 1

Range 1: 140 to 153 [GenPept](#) [Graphics](#)

[Next Match](#) [Previous Match](#)

| Score         | Expect | Identities | Positives   | Gaps     |
|---------------|--------|------------|-------------|----------|
| 44.3 bits(97) | 6e-04  | 13/14(93%) | 14/14(100%) | 0/14(0%) |

Query 1 KVSDVSCQASVSRM 14  
 KVS+VSCQASVSRM  
 Sbjct 140 KVSINVSCQASVSRM 153

**Related Information**

[Gene](#) - associated gene details  
[Map Viewer](#) - aligned genomic context

[Download](#) [GenPept](#) [Graphics](#)

[Next](#) [Previous](#) [Descriptions](#)

**PREDICTED: phospholipid transfer protein isoform X3 [Pan troglodytes]**

Sequence ID: [ref|XP\\_009435596.1|](#) Length: 405 Number of Matches: 1

Range 1: 52 to 65 [GenPept](#) [Graphics](#)

[Next Match](#) [Previous Match](#)

| Score         | Expect | Identities | Positives   | Gaps     |
|---------------|--------|------------|-------------|----------|
| 44.3 bits(97) | 7e-04  | 13/14(93%) | 14/14(100%) | 0/14(0%) |

Query 1 KVSDVSCQASVSRM 14  
 KVS+VSCQASVSRM  
 Sbjct 52 KVSINVSCQASVSRM 65

**Related Information**

[Gene](#) - associated gene details

[Download](#) [GenPept](#) [Graphics](#)

[Next](#) [Previous](#) [Descriptions](#)

**PREDICTED: phospholipid transfer protein isoform X2 [Tarsius syrichta]**

Sequence ID: [ref|XP\\_008056109.1|](#) Length: 405 Number of Matches: 1

Range 1: 52 to 65 [GenPept](#) [Graphics](#)

[Next Match](#) [Previous Match](#)

| Score         | Expect | Identities | Positives   | Gaps     |
|---------------|--------|------------|-------------|----------|
| 44.3 bits(97) | 7e-04  | 13/14(93%) | 14/14(100%) | 0/14(0%) |

Query 1 KVSDVSCQASVSRM 14  
 KVS+VSCQASVSRM  
 Sbjct 52 KVSINVSCQASVSRM 65

**Related Information**

[Gene](#) - associated gene details  
[Map Viewer](#) - aligned genomic context

BLAST is a registered trademark of the National Library of Medicine.

NCBI/ BLAST/ blastp suite/ Formatting Results - BBJA8X3K015

Your search parameters were adjusted to search for a short input sequence.

[Edit and Resubmit](#) [Save Search Strategies](#) [Formatting options](#) [Download](#)

[YouTube](#) [How to read this page](#) [Blast report description](#)

### PLTP\_KVSNVSCQASVSRM\_NonMod

RID [BBJA8X3K015](#) (Expires on 01-15 08:41 am)

Query ID |cl|69692  
 Description None  
 Molecule type amino acid  
 Query Length 14

Database Name nr  
 Description All non-redundant GenBank CDS translations+PDB+SwissProt+PIR excluding environmental samples from WGS projects  
 Program BLASTP 2.2.30+ [Citation](#)

Other reports: [Search Summary](#) [Taxonomy reports](#) [Distance tree of results](#) [Multiple alignment](#)

### Graphic Summary

[Show Conserved Domains](#)

No putative conserved domains have been detected

Distribution of 100 Blast Hits on the Query Sequence



The image shows a table with 30 rows. Each row contains a single blue horizontal line, which appears to be a placeholder for data. The table is centered on the page and is flanked by light gray vertical bars on both sides.



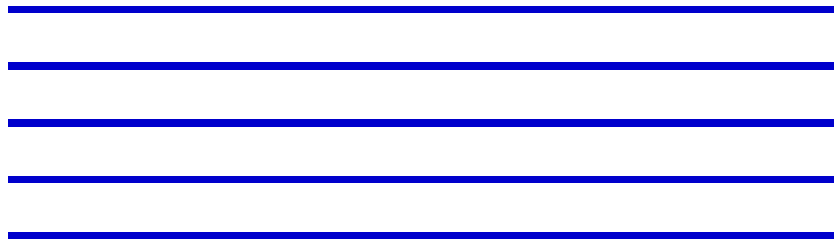

**Descriptions**

**Sequences producing significant alignments:**

Select: [All](#) [None](#) Selected:0

Alignments Download GenPept Graphics Distance tree of results Multiple alignment

| Description                                                                        | Max score | Total score | Query cover | E value | Ident | Accession                                   |
|------------------------------------------------------------------------------------|-----------|-------------|-------------|---------|-------|---------------------------------------------|
| <a href="#">PLTP-like protein [Bos taurus]</a>                                     | 46.9      | 46.9        | 100%        | 6e-05   | 100%  | <a href="#">gij56681181 AAW21227.1</a>      |
| <a href="#">PREDICTED: phospholipid transfer protein-like isoform X1 [Sus scr</a>  | 46.9      | 46.9        | 100%        | 7e-05   | 100%  | <a href="#">gij545880919 XP_005673034.1</a> |
| <a href="#">PREDICTED: phospholipid transfer protein-like [Leptonychotes wec</a>   | 46.9      | 46.9        | 100%        | 8e-05   | 100%  | <a href="#">gij585176105 XP_006739837.1</a> |
| <a href="#">PREDICTED: phospholipid transfer protein isoform X3 [Pan troglody</a>  | 46.9      | 46.9        | 100%        | 9e-05   | 100%  | <a href="#">gij694979328 XP_009435596.1</a> |
| <a href="#">PREDICTED: phospholipid transfer protein isoform X2 [Tarsius syri</a>  | 46.9      | 46.9        | 100%        | 9e-05   | 100%  | <a href="#">gij640799767 XP_008056109.1</a> |
| <a href="#">PREDICTED: phospholipid transfer protein isoform X3 [Chlorocebus</a>   | 46.9      | 46.9        | 100%        | 9e-05   | 100%  | <a href="#">gij635020540 XP_008013799.1</a> |
| <a href="#">unnamed protein product [Homo sapiens]</a>                             | 46.9      | 46.9        | 100%        | 9e-05   | 100%  | <a href="#">gij194375502 BAG56696.1</a>     |
| <a href="#">PREDICTED: phospholipid transfer protein isoform X6 [Macaca fas</a>    | 46.9      | 46.9        | 100%        | 9e-05   | 100%  | <a href="#">gij544466131 XP_005569256.1</a> |
| <a href="#">phospholipid transfer protein precursor [Pan troglodytes]</a>          | 46.9      | 46.9        | 100%        | 9e-05   | 100%  | <a href="#">gij343961079 BAK62129.1</a>     |
| <a href="#">phospholipid transfer protein isoform d [Homo sapiens]</a>             | 46.9      | 46.9        | 100%        | 9e-05   | 100%  | <a href="#">gij339275810 NP_001229850.1</a> |
| <a href="#">unnamed protein product [Macaca fascicularis]</a>                      | 46.9      | 46.9        | 100%        | 9e-05   | 100%  | <a href="#">gij67968557 BAE00639.1</a>      |
| <a href="#">PREDICTED: phospholipid transfer protein isoform X4 [Vicugna pac</a>   | 46.9      | 46.9        | 100%        | 9e-05   | 100%  | <a href="#">gij560960187 XP_006202544.1</a> |
| <a href="#">PREDICTED: phospholipid transfer protein isoform X4 [Camelus fer</a>   | 46.9      | 46.9        | 100%        | 9e-05   | 100%  | <a href="#">gij560922989 XP_006187692.1</a> |
| <a href="#">PREDICTED: phospholipid transfer protein isoform 4 [Ceratotherium</a>  | 46.9      | 46.9        | 100%        | 9e-05   | 100%  | <a href="#">gij478512237 XP_004430381.1</a> |
| <a href="#">PREDICTED: phospholipid transfer protein isoform X1 [Condylura c</a>   | 46.9      | 46.9        | 100%        | 9e-05   | 100%  | <a href="#">gij507961913 XP_004687488.1</a> |
| <a href="#">PREDICTED: phospholipid transfer protein isoform 4 [Orcinus orca]</a>  | 46.9      | 46.9        | 100%        | 9e-05   | 100%  | <a href="#">gij466024688 XP_004272968.1</a> |
| <a href="#">PREDICTED: phospholipid transfer protein [Callithrix jacchus]</a>      | 46.9      | 46.9        | 100%        | 9e-05   | 100%  | <a href="#">gij675657086 XP_008994362.1</a> |
| <a href="#">phospholipid transfer protein, isoform CRA_d [Homo sapiens]</a>        | 46.9      | 46.9        | 100%        | 9e-05   | 100%  | <a href="#">gij119596192 EAW75786.1</a>     |
| <a href="#">PREDICTED: phospholipid transfer protein [Capra hircus]</a>            | 46.9      | 46.9        | 100%        | 9e-05   | 100%  | <a href="#">gij548491933 XP_005688777.1</a> |
| <a href="#">PREDICTED: phospholipid transfer protein isoform 1 [Ovis aries]</a>    | 46.9      | 46.9        | 100%        | 9e-05   | 100%  | <a href="#">gij426241561 XP_004014658.1</a> |
| <a href="#">PREDICTED: LOW QUALITY PROTEIN: phospholipid transfer prot</a>         | 46.9      | 46.9        | 100%        | 9e-05   | 100%  | <a href="#">gij555971257 XP_005897642.1</a> |
| <a href="#">PREDICTED: phospholipid transfer protein isoform X2 [Pan troglody</a>  | 46.9      | 46.9        | 100%        | 9e-05   | 100%  | <a href="#">gij694979326 XP_009435595.1</a> |
| <a href="#">PREDICTED: phospholipid transfer protein [Rhinopithecus roxellan</a>   | 46.9      | 46.9        | 100%        | 9e-05   | 100%  | <a href="#">gij724927761 XP_010382500.1</a> |
| <a href="#">PREDICTED: phospholipid transfer protein isoform X2 [Chlorocebus</a>   | 46.9      | 46.9        | 100%        | 9e-05   | 100%  | <a href="#">gij635020538 XP_008013795.1</a> |
| <a href="#">Phospholipid transfer protein [Homo sapiens]</a>                       | 46.9      | 46.9        | 100%        | 9e-05   | 100%  | <a href="#">gij18044721 AAH19847.1</a>      |
| <a href="#">PREDICTED: phospholipid transfer protein isoform X2 [Macaca fas</a>    | 46.9      | 46.9        | 100%        | 9e-05   | 100%  | <a href="#">gij544466123 XP_005569252.1</a> |
| <a href="#">PREDICTED: phospholipid transfer protein [Gorilla gorilla gorilla]</a> | 46.9      | 46.9        | 100%        | 9e-05   | 100%  | <a href="#">gij426391940 XP_004062321.1</a> |
| <a href="#">phospholipid transfer protein isoform a precursor [Homo sapiens]</a>   | 46.9      | 46.9        | 100%        | 9e-05   | 100%  | <a href="#">gij5453914 NP_006218.1</a>      |

|                                                                     |      |      |      |       |      |                                             |
|---------------------------------------------------------------------|------|------|------|-------|------|---------------------------------------------|
| PREDICTED: phospholipid transfer protein [Saimiri boliviensis boliv | 46.9 | 46.9 | 100% | 9e-05 | 100% | <a href="#">gij403290826 XP_003936508.1</a> |
| PREDICTED: LOW QUALITY PROTEIN: phospholipid transfer prot          | 46.9 | 46.9 | 100% | 9e-05 | 100% | <a href="#">gij402882376 XP_003904720.1</a> |
| PREDICTED: phospholipid transfer protein isoform X1 [Pan paniscu    | 46.9 | 46.9 | 100% | 9e-05 | 100% | <a href="#">gij675783669 XP_008949625.1</a> |
| Lipid transfer protein II [Macaca mulatta]                          | 46.9 | 46.9 | 100% | 9e-05 | 100% | <a href="#">gij355563074 EHH19636.1</a>     |
| PREDICTED: phospholipid transfer protein [Nomascus leucogenys]      | 46.9 | 46.9 | 100% | 9e-05 | 100% | <a href="#">gij332209213 XP_003253705.1</a> |
| PREDICTED: phospholipid transfer protein-like [Macaca mulatta]      | 46.9 | 46.9 | 100% | 9e-05 | 100% | <a href="#">gij297259688 XP_002798159.1</a> |
| PREDICTED: phospholipid transfer protein isoform X1 [Pan troglody   | 46.9 | 46.9 | 100% | 9e-05 | 100% | <a href="#">gij332858594 XP_001158846.2</a> |
| phospholipid transfer protein isoform a precursor variant [Homo sap | 46.9 | 46.9 | 100% | 9e-05 | 100% | <a href="#">gij62896939 BAD96410.1</a>      |
| PREDICTED: phospholipid transfer protein [Heterocephalus glaber]    | 46.9 | 46.9 | 100% | 9e-05 | 100% | <a href="#">gij512855805 XP_004888423.1</a> |
| PREDICTED: phospholipid transfer protein isoform 2 [Ovis aries]     | 46.9 | 46.9 | 100% | 9e-05 | 100% | <a href="#">gij426241563 XP_004014659.1</a> |
| PREDICTED: phospholipid transfer protein [Ursus maritimus]          | 46.9 | 46.9 | 100% | 9e-05 | 100% | <a href="#">gij671010882 XP_008696270.1</a> |
| hypothetical protein PANDA_018015 [Ailuropoda melanoleuca]          | 46.9 | 46.9 | 100% | 9e-05 | 100% | <a href="#">gij281346391 EFB21975.1</a>     |
| PREDICTED: phospholipid transfer protein isoformX3 [Canis lupus     | 46.9 | 46.9 | 100% | 9e-05 | 100% | <a href="#">gij73992532 XP_543027.2</a>     |
| PREDICTED: phospholipid transfer protein isoform 1 [Otolemur gar    | 46.9 | 46.9 | 100% | 9e-05 | 100% | <a href="#">gij395829113 XP_003787705.1</a> |
| phospholipid transfer protein precursor [Sus scrofa]                | 46.9 | 46.9 | 100% | 9e-05 | 100% | <a href="#">gij47523640 NP_999448.1</a>     |
| PREDICTED: phospholipid transfer protein isoform X1 [Erinaceus e    | 46.9 | 46.9 | 100% | 9e-05 | 100% | <a href="#">gij617646971 XP_007533119.1</a> |
| PREDICTED: phospholipid transfer protein [Balaenoptera acutorost    | 46.9 | 46.9 | 100% | 9e-05 | 100% | <a href="#">gij594675219 XP_007185441.1</a> |
| PREDICTED: phospholipid transfer protein isoform X1 [Bubalus bub    | 46.9 | 46.9 | 100% | 9e-05 | 100% | <a href="#">gij594054314 XP_006051425.1</a> |
| PREDICTED: phospholipid transfer protein [Physeter catodon]         | 46.9 | 46.9 | 100% | 9e-05 | 100% | <a href="#">gij593753347 XP_007115580.1</a> |
| PREDICTED: phospholipid transfer protein isoform X2 [Tupaia chin    | 46.9 | 46.9 | 100% | 9e-05 | 100% | <a href="#">gij562860414 XP_006158592.1</a> |
| PREDICTED: phospholipid transfer protein isoform X1 [Vicugna pac    | 46.9 | 46.9 | 100% | 9e-05 | 100% | <a href="#">gij560960181 XP_006202541.1</a> |
| PREDICTED: phospholipid transfer protein isoform X1 [Camelus fer    | 46.9 | 46.9 | 100% | 9e-05 | 100% | <a href="#">gij560922983 XP_006187689.1</a> |
| PREDICTED: phospholipid transfer protein isoform X1 [Bos taurus]    | 46.9 | 46.9 | 100% | 9e-05 | 100% | <a href="#">gij528973460 XP_005214615.1</a> |
| PREDICTED: LOW QUALITY PROTEIN: phospholipid transfer prot          | 46.9 | 46.9 | 100% | 9e-05 | 100% | <a href="#">gij511843869 XP_004746370.1</a> |
| PREDICTED: phospholipid transfer protein isoform 1 [Ceratotheriu    | 46.9 | 46.9 | 100% | 9e-05 | 100% | <a href="#">gij478512231 XP_004430378.1</a> |
| PREDICTED: LOW QUALITY PROTEIN: phospholipid transfer prot          | 46.9 | 46.9 | 100% | 9e-05 | 100% | <a href="#">gij470622636 XP_004319149.1</a> |
| PREDICTED: phospholipid transfer protein isoform 1 [Orcinus orca]   | 46.9 | 46.9 | 100% | 9e-05 | 100% | <a href="#">gij466024672 XP_004272965.1</a> |
| PREDICTED: phospholipid transfer protein-like [Ailuropoda melano    | 46.9 | 46.9 | 100% | 9e-05 | 100% | <a href="#">gij301785379 XP_002928111.1</a> |
| PREDICTED: LOW QUALITY PROTEIN: phospholipid transfer prot          | 46.9 | 46.9 | 100% | 9e-05 | 100% | <a href="#">gij602732607 XP_007451697.1</a> |
| Phospholipid transfer protein [Tupaia chinensis]                    | 46.9 | 46.9 | 100% | 9e-05 | 100% | <a href="#">gij444706925 ELW48240.1</a>     |
| PREDICTED: phospholipid transfer protein isoform X1 [Tupaia chin    | 46.9 | 46.9 | 100% | 9e-05 | 100% | <a href="#">gij562860412 XP_006158591.1</a> |
| PREDICTED: LOW QUALITY PROTEIN: phospholipid transfer prot          | 46.9 | 46.9 | 100% | 9e-05 | 100% | <a href="#">gij556717613 XP_005954715.1</a> |
| phospholipid transfer protein precursor [Bos taurus]                | 46.9 | 46.9 | 100% | 9e-05 | 100% | <a href="#">gij78042516 NP_001030199.1</a>  |
| PREDICTED: phospholipid transfer protein isoform X1 [Chlorocebus    | 46.9 | 46.9 | 100% | 9e-05 | 100% | <a href="#">gij635020536 XP_008013792.1</a> |
| PREDICTED: phospholipid transfer protein isoform X1 [Macaca fas     | 46.9 | 46.9 | 100% | 9e-05 | 100% | <a href="#">gij544466121 XP_005569251.1</a> |
| PREDICTED: phospholipid transfer protein isoform X1 [Homo sapie     | 46.9 | 46.9 | 100% | 9e-05 | 100% | <a href="#">gij530418164 XP_005260496.1</a> |
| PREDICTED: phospholipid transfer protein isoform X1 [Ictidomys tri  | 46.9 | 46.9 | 100% | 9e-05 | 100% | <a href="#">gij532079075 XP_005325306.1</a> |
| Phospholipid transfer protein [Heterocephalus glaber]               | 46.9 | 46.9 | 100% | 9e-05 | 100% | <a href="#">gij351702390 EHB05309.1</a>     |
| phospholipid transfer protein isoform 3 [Camelus ferus]             | 46.9 | 46.9 | 100% | 9e-05 | 100% | <a href="#">gij528759094 EPY78753.1</a>     |
| PREDICTED: phospholipid transfer protein isoform X4 [Canis lupus    | 46.9 | 46.9 | 100% | 9e-05 | 100% | <a href="#">gij545540927 XP_005635182.1</a> |
| PREDICTED: phospholipid transfer protein [Chrysochloris asiatica]   | 44.8 | 44.8 | 100% | 5e-04 | 93%  | <a href="#">gij586455144 XP_006839396.1</a> |
| phospholipid transfer protein precursor [Pongo abelii]              | 44.8 | 44.8 | 100% | 5e-04 | 93%  | <a href="#">gij197100925 NP_001127290.1</a> |
| PREDICTED: phospholipid transfer protein [Equus przewalskii]        | 44.3 | 44.3 | 100% | 6e-04 | 93%  | <a href="#">gij664725512 XP_008519895.1</a> |
| PREDICTED: phospholipid transfer protein isoform X3 [Galeopterus    | 44.3 | 44.3 | 100% | 6e-04 | 93%  | <a href="#">gij667267881 XP_008569812.1</a> |
| PREDICTED: phospholipid transfer protein isoform X2 [Galeopterus    | 44.3 | 44.3 | 100% | 6e-04 | 93%  | <a href="#">gij667267878 XP_008569811.1</a> |

|                                                                                                 |      |      |      |       |     |                                             |
|-------------------------------------------------------------------------------------------------|------|------|------|-------|-----|---------------------------------------------|
| <a href="#">PREDICTED: phospholipid transfer protein isoformX1 [Equus caballus]</a>             | 44.3 | 44.3 | 100% | 6e-04 | 93% | <a href="#">gi 149733315 XP_001503419.1</a> |
| <a href="#">PREDICTED: phospholipid transfer protein isoform X1 [Galeopterus variegatus]</a>    | 44.3 | 44.3 | 100% | 6e-04 | 93% | <a href="#">gi 667267875 XP_008569810.1</a> |
| <a href="#">PREDICTED: phospholipid transfer protein [Nannospalax galili]</a>                   | 43.9 | 43.9 | 100% | 9e-04 | 93% | <a href="#">gi 674058816 XP_008835992.1</a> |
| <a href="#">PREDICTED: phospholipid transfer protein [Jaculus jaculus]</a>                      | 43.9 | 43.9 | 100% | 9e-04 | 93% | <a href="#">gi 507560498 XP_004663955.1</a> |
| <a href="#">PREDICTED: phospholipid transfer protein isoform X2 [Fukomys damaliensis]</a>       | 43.5 | 43.5 | 100% | 0.001 | 93% | <a href="#">gi 731220560 XP_010624498.1</a> |
| <a href="#">PREDICTED: phospholipid transfer protein isoform X1 [Fukomys damaliensis]</a>       | 43.5 | 43.5 | 100% | 0.001 | 93% | <a href="#">gi 731220558 XP_010624497.1</a> |
| <a href="#">phospholipid transfer protein [Cricetulus griseus]</a>                              | 42.6 | 42.6 | 100% | 0.002 | 93% | <a href="#">gi 537151313 ERE71590.1</a>     |
| <a href="#">PREDICTED: phospholipid transfer protein isoform X2 [Cricetulus griseus]</a>        | 42.6 | 42.6 | 100% | 0.002 | 93% | <a href="#">gi 625234759 XP_007608544.1</a> |
| <a href="#">PREDICTED: phospholipid transfer protein [Mesocricetus auratus]</a>                 | 42.6 | 42.6 | 100% | 0.002 | 93% | <a href="#">gi 524970358 XP_005085047.1</a> |
| <a href="#">PREDICTED: phospholipid transfer protein isoform X2 [Cricetulus griseus]</a>        | 42.6 | 42.6 | 100% | 0.002 | 93% | <a href="#">gi 354476736 XP_003500579.1</a> |
| <a href="#">phospholipid transfer protein [Cricetulus griseus]</a>                              | 42.6 | 42.6 | 100% | 0.002 | 93% | <a href="#">gi 537151311 ERE71588.1</a>     |
| <a href="#">PREDICTED: phospholipid transfer protein isoform X1 [Cricetulus griseus]</a>        | 42.6 | 42.6 | 100% | 0.002 | 93% | <a href="#">gi 625234757 XP_007608543.1</a> |
| <a href="#">phospholipid transfer protein [Cricetulus griseus]</a>                              | 42.6 | 42.6 | 100% | 0.002 | 93% | <a href="#">gi 537151310 ERE71587.1</a>     |
| <a href="#">PREDICTED: phospholipid transfer protein isoform 2 [Dasyprocta novaeboracensis]</a> | 41.8 | 41.8 | 100% | 0.004 | 93% | <a href="#">gi 488559570 XP_004469931.1</a> |
| <a href="#">PREDICTED: phospholipid transfer protein isoform 1 [Dasyprocta novaeboracensis]</a> | 41.8 | 41.8 | 100% | 0.004 | 93% | <a href="#">gi 488559567 XP_004469930.1</a> |
| <a href="#">PREDICTED: phospholipid transfer protein [Peromyscus maniculatus]</a>               | 41.4 | 41.4 | 100% | 0.006 | 86% | <a href="#">gi 589915411 XP_006971038.1</a> |
| <a href="#">PREDICTED: phospholipid transfer protein [Panthera tigris altaica]</a>              | 40.9 | 40.9 | 100% | 0.009 | 93% | <a href="#">gi 591301856 XP_007077837.1</a> |
| <a href="#">PREDICTED: phospholipid transfer protein [Felis catus]</a>                          | 40.9 | 40.9 | 100% | 0.009 | 93% | <a href="#">gi 586980550 XP_006929771.1</a> |
| <a href="#">unnamed protein product [Mus musculus]</a>                                          | 40.5 | 40.5 | 100% | 0.011 | 86% | <a href="#">gi 74207827 BAE29052.1</a>      |
| <a href="#">plasma phospholipid transfer protein [Mus musculus]</a>                             | 40.5 | 40.5 | 100% | 0.012 | 86% | <a href="#">gi 902888 AAA87943.1</a>        |
| <a href="#">Phospholipid transfer protein [Mus musculus]</a>                                    | 40.5 | 40.5 | 100% | 0.012 | 86% | <a href="#">gi 13277783 AAH03782.1</a>      |
| <a href="#">PREDICTED: phospholipid transfer protein [Microtus ochrogaster]</a>                 | 40.5 | 40.5 | 100% | 0.012 | 86% | <a href="#">gi 532040209 XP_005362957.1</a> |
| <a href="#">phospholipid transfer protein precursor [Mus musculus]</a>                          | 40.5 | 40.5 | 100% | 0.012 | 86% | <a href="#">gi 6755112 NP_035255.1</a>      |
| <a href="#">PREDICTED: phospholipid transfer protein [Trichechus manatus latirostris]</a>       | 40.5 | 40.5 | 100% | 0.012 | 93% | <a href="#">gi 471360078 XP_004370611.1</a> |
| <a href="#">PREDICTED: phospholipid transfer protein [Oryzteropus afer afer]</a>                | 40.1 | 40.1 | 92%  | 0.016 | 92% | <a href="#">gi 634841511 XP_007936631.1</a> |
| <a href="#">PREDICTED: phospholipid transfer protein isoform X1 [Myotis daubentonii]</a>        | 40.1 | 40.1 | 100% | 0.016 | 86% | <a href="#">gi 584058185 XP_006773605.1</a> |
| <a href="#">PREDICTED: phospholipid transfer protein [Octodon degus]</a>                        | 39.2 | 39.2 | 100% | 0.031 | 86% | <a href="#">gi 507663922 XP_004636143.1</a> |

## Alignments

[Download](#) [GenPept](#) [Graphics](#)

[Next](#) [Previous](#) [Descriptions](#)

PLTP-like protein [Bos taurus]

Sequence ID: [gi|56681181|gb|AAW21227.1](#) Length: 127 Number of Matches: 1

Range 1: 106 to 119 [GenPept](#) [Graphics](#)

[Next Match](#) [Previous Match](#)

| Score          | Expect | Identities  | Positives   | Gaps     |
|----------------|--------|-------------|-------------|----------|
| 46.9 bits(103) | 6e-05  | 14/14(100%) | 14/14(100%) | 0/14(0%) |

Query 1 KVSNVSCQASVSRM 14  
KVSNVSCQASVSRM  
Sbjct 106 KVSNVSCQASVSRM 119

### Related Information

[Gene](#) - associated gene details

[Download](#) [GenPept](#) [Graphics](#)

[Next](#) [Previous](#) [Descriptions](#)

PREDICTED: phospholipid transfer protein-like isoform X1 [Sus scrofa]

Sequence ID: [gi|545880919|ref|XP\\_005673034.1](#) Length: 162 Number of Matches: 1

[See 1 more title\(s\)](#)

Range 1: 140 to 153 [GenPept](#) [Graphics](#)

[Next Match](#) [Previous Match](#)

| Score          | Expect | Identities  | Positives   | Gaps     |
|----------------|--------|-------------|-------------|----------|
| 46.9 bits(103) | 7e-05  | 14/14(100%) | 14/14(100%) | 0/14(0%) |

### Related Information

[Gene](#) - associated gene details

[Identical Proteins](#) - Proteins

identical to the subject

Query 1 KVSNVSCQASVSRM 14  
 Sbjct 140 KVSNVSCQASVSRM 153

[Download](#) [GenPept](#) [Graphics](#)

[Next](#) [Previous](#) [Descriptions](#)

PREDICTED: phospholipid transfer protein-like [Leptonychotes weddellii]

Sequence ID: [gi|585176105|ref|XP\\_006739837.1|](#) Length: 246 Number of Matches: 1

Range 1: 140 to 153 [GenPept](#) [Graphics](#)

[Next Match](#) [Previous Match](#)

| Score          | Expect | Identities  | Positives   | Gaps     |
|----------------|--------|-------------|-------------|----------|
| 46.9 bits(103) | 8e-05  | 14/14(100%) | 14/14(100%) | 0/14(0%) |

Query 1 KVSNVSCQASVSRM 14  
 Sbjct 140 KVSNVSCQASVSRM 153

**Related Information**

[Gene](#) - associated gene details  
[Map Viewer](#) - aligned genomic context

[Download](#) [GenPept](#) [Graphics](#)

[Next](#) [Previous](#) [Descriptions](#)

PREDICTED: phospholipid transfer protein isoform X3 [Pan troglodytes]

Sequence ID: [gi|694979328|ref|XP\\_009435596.1|](#) Length: 405 Number of Matches: 1

Range 1: 52 to 65 [GenPept](#) [Graphics](#)

[Next Match](#) [Previous Match](#)

| Score          | Expect | Identities  | Positives   | Gaps     |
|----------------|--------|-------------|-------------|----------|
| 46.9 bits(103) | 9e-05  | 14/14(100%) | 14/14(100%) | 0/14(0%) |

Query 1 KVSNVSCQASVSRM 14  
 Sbjct 52 KVSNVSCQASVSRM 65

**Related Information**

[Gene](#) - associated gene details

[Download](#) [GenPept](#) [Graphics](#)

[Next](#) [Previous](#) [Descriptions](#)

PREDICTED: phospholipid transfer protein isoform X2 [Tarsius syrichta]

Sequence ID: [gi|640799767|ref|XP\\_008056109.1|](#) Length: 405 Number of Matches: 1

Range 1: 52 to 65 [GenPept](#) [Graphics](#)

[Next Match](#) [Previous Match](#)

| Score          | Expect | Identities  | Positives   | Gaps     |
|----------------|--------|-------------|-------------|----------|
| 46.9 bits(103) | 9e-05  | 14/14(100%) | 14/14(100%) | 0/14(0%) |

Query 1 KVSNVSCQASVSRM 14  
 Sbjct 52 KVSNVSCQASVSRM 65

**Related Information**

[Gene](#) - associated gene details  
[Map Viewer](#) - aligned genomic context

BLAST is a registered trademark of the National Library of Medicine.



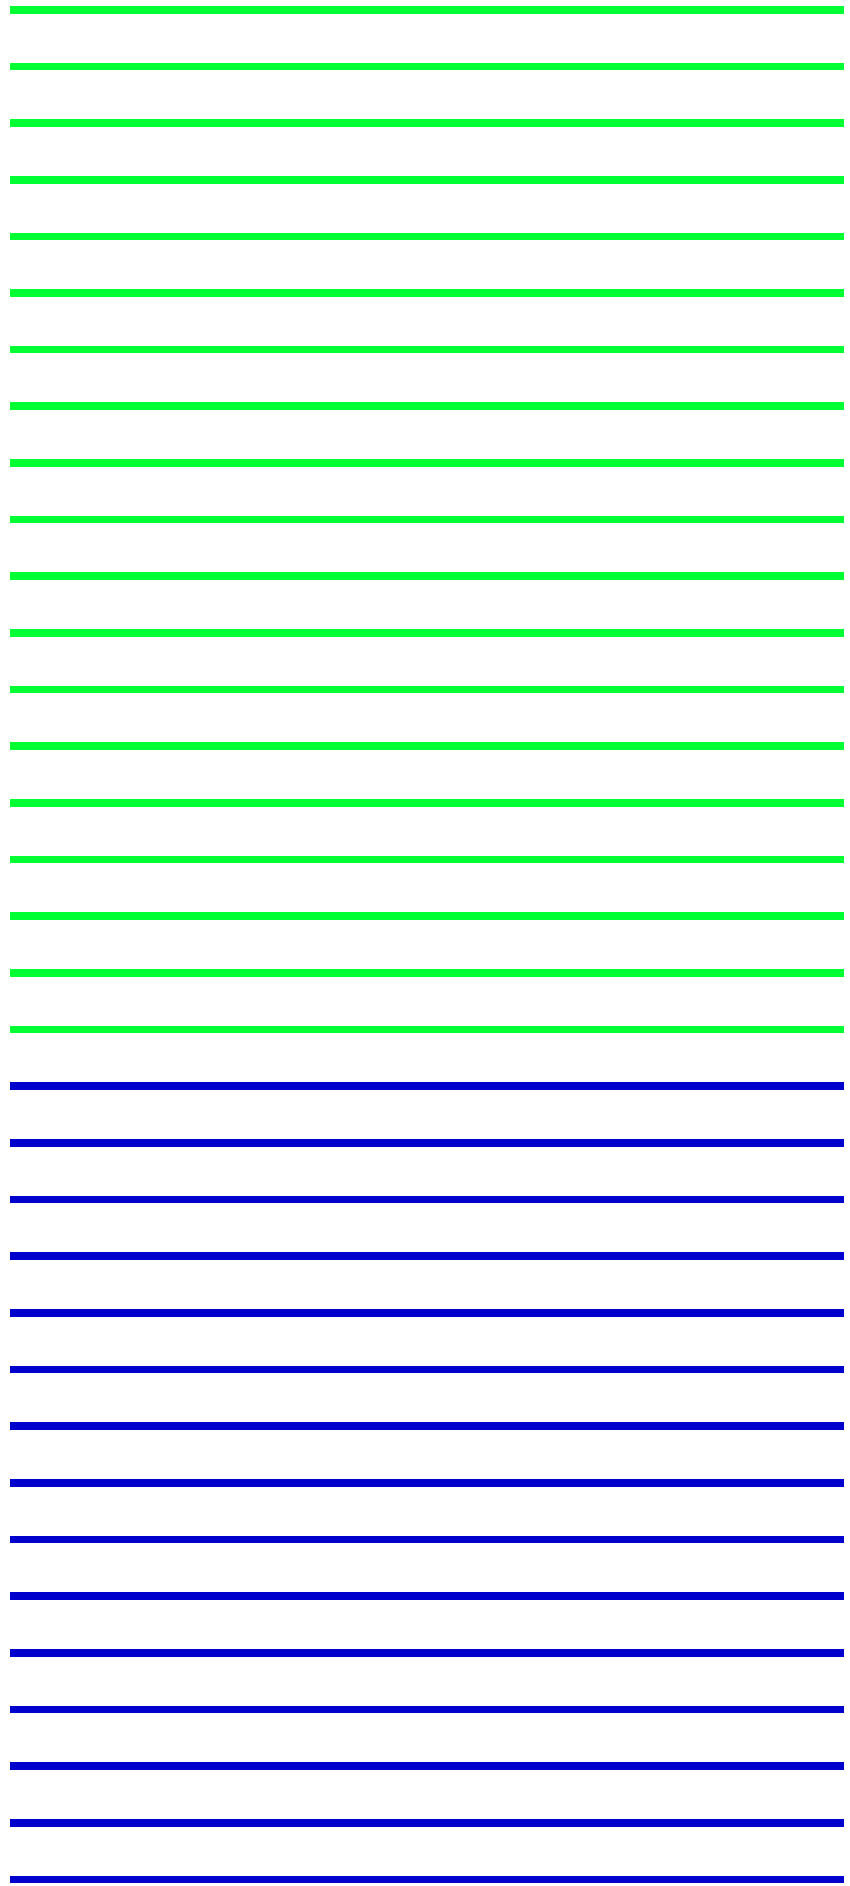



## Descriptions

### Sequences producing significant alignments:

Select: [All](#) [None](#) Selected:0

[Alignments](#)
[Download](#)
[GenPept](#)
[Graphics](#)
[Distance tree of results](#)
[Multiple alignment](#)


| Description                                                                                | Max score | Total score | Query cover | E value | Ident | Accession                      |
|--------------------------------------------------------------------------------------------|-----------|-------------|-------------|---------|-------|--------------------------------|
| <a href="#">PREDICTED: phospholipid transfer protein isoform X3 [Pan troglodytes]</a>      | 52.4      | 52.4        | 100%        | 2e-06   | 94%   | <a href="#">XP_009435596.1</a> |
| <a href="#">PREDICTED: phospholipid transfer protein isoform X2 [Tarsius syrichta]</a>     | 52.4      | 52.4        | 100%        | 2e-06   | 94%   | <a href="#">XP_008056109.1</a> |
| <a href="#">PREDICTED: phospholipid transfer protein isoform X3 [Chlorocebus sabaeus]</a>  | 52.4      | 52.4        | 100%        | 2e-06   | 94%   | <a href="#">XP_008013799.1</a> |
| <a href="#">unnamed protein product [Homo sapiens]</a>                                     | 52.4      | 52.4        | 100%        | 2e-06   | 94%   | <a href="#">BAG56696.1</a>     |
| <a href="#">PREDICTED: phospholipid transfer protein isoform X6 [Macaca fascicularis]</a>  | 52.4      | 52.4        | 100%        | 2e-06   | 94%   | <a href="#">XP_005569256.1</a> |
| <a href="#">phospholipid transfer protein precursor [Pan troglodytes]</a>                  | 52.4      | 52.4        | 100%        | 2e-06   | 94%   | <a href="#">BAK62129.1</a>     |
| <a href="#">phospholipid transfer protein isoform d [Homo sapiens]</a>                     | 52.4      | 52.4        | 100%        | 2e-06   | 94%   | <a href="#">NP_001229850.1</a> |
| <a href="#">unnamed protein product [Macaca fascicularis]</a>                              | 52.4      | 52.4        | 100%        | 2e-06   | 94%   | <a href="#">BAE00639.1</a>     |
| <a href="#">PREDICTED: phospholipid transfer protein [Callithrix jacchus]</a>              | 52.4      | 52.4        | 100%        | 2e-06   | 94%   | <a href="#">XP_008994362.1</a> |
| <a href="#">phospholipid transfer protein, isoform CRA_d [Homo sapiens]</a>                | 52.4      | 52.4        | 100%        | 2e-06   | 94%   | <a href="#">EAW75786.1</a>     |
| <a href="#">PREDICTED: phospholipid transfer protein isoform X2 [Pan troglodytes]</a>      | 52.4      | 52.4        | 100%        | 2e-06   | 94%   | <a href="#">XP_009435595.1</a> |
| <a href="#">PREDICTED: phospholipid transfer protein [Rhinopithecus roxellana]</a>         | 52.4      | 52.4        | 100%        | 2e-06   | 94%   | <a href="#">XP_010382500.1</a> |
| <a href="#">PREDICTED: phospholipid transfer protein isoform X2 [Chlorocebus sabaeus]</a>  | 52.4      | 52.4        | 100%        | 2e-06   | 94%   | <a href="#">XP_008013795.1</a> |
| <a href="#">Phospholipid transfer protein [Homo sapiens]</a>                               | 52.4      | 52.4        | 100%        | 2e-06   | 94%   | <a href="#">AAH19847.1</a>     |
| <a href="#">PREDICTED: phospholipid transfer protein isoform X2 [Macaca fascicularis]</a>  | 52.4      | 52.4        | 100%        | 2e-06   | 94%   | <a href="#">XP_005569252.1</a> |
| <a href="#">PREDICTED: phospholipid transfer protein [Gorilla gorilla gorilla]</a>         | 52.4      | 52.4        | 100%        | 2e-06   | 94%   | <a href="#">XP_004062321.1</a> |
| <a href="#">phospholipid transfer protein isoform a precursor [Homo sapiens]</a>           | 52.4      | 52.4        | 100%        | 2e-06   | 94%   | <a href="#">NP_006218.1</a>    |
| <a href="#">PREDICTED: phospholipid transfer protein [Saimiri boliviensis boliviensis]</a> | 52.4      | 52.4        | 100%        | 2e-06   | 94%   | <a href="#">XP_003936508.1</a> |
| <a href="#">PREDICTED: LOW QUALITY PROTEIN: phospholipid transfer protein [Papio]</a>      | 52.4      | 52.4        | 100%        | 2e-06   | 94%   | <a href="#">XP_003904720.1</a> |
| <a href="#">PREDICTED: phospholipid transfer protein isoform X1 [Pan paniscus]</a>         | 52.4      | 52.4        | 100%        | 2e-06   | 94%   | <a href="#">XP_008949625.1</a> |
| <a href="#">Lipid transfer protein II [Macaca mulatta]</a>                                 | 52.4      | 52.4        | 100%        | 2e-06   | 94%   | <a href="#">EHH19636.1</a>     |
| <a href="#">PREDICTED: phospholipid transfer protein [Nomascus leucogenys]</a>             | 52.4      | 52.4        | 100%        | 2e-06   | 94%   | <a href="#">XP_003253705.1</a> |
| <a href="#">PREDICTED: phospholipid transfer protein-like [Macaca mulatta]</a>             | 52.4      | 52.4        | 100%        | 2e-06   | 94%   | <a href="#">XP_002798159.1</a> |
| <a href="#">PREDICTED: phospholipid transfer protein isoform X1 [Pan troglodytes]</a>      | 52.4      | 52.4        | 100%        | 2e-06   | 94%   | <a href="#">XP_001158846.2</a> |
| <a href="#">phospholipid transfer protein isoform a precursor variant [Homo sapiens]</a>   | 52.4      | 52.4        | 100%        | 2e-06   | 94%   | <a href="#">BAD96410.1</a>     |
| <a href="#">PREDICTED: phospholipid transfer protein [Heterocephalus glaber]</a>           | 52.4      | 52.4        | 100%        | 2e-06   | 94%   | <a href="#">XP_004888423.1</a> |
| <a href="#">PREDICTED: phospholipid transfer protein [Physeter catodon]</a>                | 52.4      | 52.4        | 100%        | 2e-06   | 94%   | <a href="#">XP_007115580.1</a> |
| <a href="#">PREDICTED: phospholipid transfer protein isoform X2 [Tupaia chinensis]</a>     | 52.4      | 52.4        | 100%        | 2e-06   | 94%   | <a href="#">XP_006158592.1</a> |
| <a href="#">Phospholipid transfer protein [Tupaia chinensis]</a>                           | 52.4      | 52.4        | 100%        | 2e-06   | 94%   | <a href="#">ELW48240.1</a>     |

|                                                                                             |      |      |      |       |     |                                |
|---------------------------------------------------------------------------------------------|------|------|------|-------|-----|--------------------------------|
| <a href="#">PREDICTED: phospholipid transfer protein isoform X1 [Tupaia chinensis]</a>      | 52.4 | 52.4 | 100% | 2e-06 | 94% | <a href="#">XP_006158591.1</a> |
| <a href="#">PREDICTED: phospholipid transfer protein isoform X1 [Chlorocebus sabaeus]</a>   | 52.4 | 52.4 | 100% | 2e-06 | 94% | <a href="#">XP_008013792.1</a> |
| <a href="#">PREDICTED: phospholipid transfer protein isoform X1 [Macaca fascicularis]</a>   | 52.4 | 52.4 | 100% | 2e-06 | 94% | <a href="#">XP_005569251.1</a> |
| <a href="#">PREDICTED: phospholipid transfer protein isoform X1 [Homo sapiens]</a>          | 52.4 | 52.4 | 100% | 2e-06 | 94% | <a href="#">XP_005260496.1</a> |
| <a href="#">PREDICTED: phospholipid transfer protein isoform X1 [Ictidomys tridecemline</a> | 52.4 | 52.4 | 100% | 2e-06 | 94% | <a href="#">XP_005325306.1</a> |
| <a href="#">Phospholipid transfer protein [Heterocephalus glaber]</a>                       | 52.4 | 52.4 | 100% | 2e-06 | 94% | <a href="#">EHB05309.1</a>     |
| <a href="#">phospholipid transfer protein precursor [Pongo abelii]</a>                      | 50.3 | 50.3 | 100% | 9e-06 | 88% | <a href="#">NP_001127290.1</a> |
| <a href="#">PREDICTED: phospholipid transfer protein isoform X3 [Galeopterus variegatu</a>  | 49.8 | 49.8 | 100% | 1e-05 | 88% | <a href="#">XP_008569812.1</a> |
| <a href="#">PREDICTED: phospholipid transfer protein isoform X2 [Galeopterus variegatu</a>  | 49.8 | 49.8 | 100% | 1e-05 | 88% | <a href="#">XP_008569811.1</a> |
| <a href="#">PREDICTED: phospholipid transfer protein isoform X1 [Galeopterus variegatu</a>  | 49.8 | 49.8 | 100% | 1e-05 | 88% | <a href="#">XP_008569810.1</a> |
| <a href="#">PREDICTED: phospholipid transfer protein [Jaculus jaculus]</a>                  | 49.4 | 49.4 | 100% | 2e-05 | 88% | <a href="#">XP_004663955.1</a> |
| <a href="#">PREDICTED: phospholipid transfer protein isoform X2 [Fukomys damarensis]</a>    | 49.0 | 49.0 | 100% | 2e-05 | 88% | <a href="#">XP_010624498.1</a> |
| <a href="#">PREDICTED: phospholipid transfer protein isoform X1 [Fukomys damarensis]</a>    | 49.0 | 49.0 | 100% | 2e-05 | 88% | <a href="#">XP_010624497.1</a> |
| <a href="#">PLTP-like protein [Bos taurus]</a>                                              | 47.3 | 47.3 | 100% | 6e-05 | 88% | <a href="#">AAW21227.1</a>     |
| <a href="#">PREDICTED: phospholipid transfer protein-like isoform X1 [Sus scrofa]</a>       | 47.3 | 47.3 | 100% | 7e-05 | 88% | <a href="#">XP_005673034.1</a> |
| <a href="#">PREDICTED: phospholipid transfer protein-like [Leptonychotes weddellii]</a>     | 47.3 | 47.3 | 100% | 8e-05 | 88% | <a href="#">XP_006739837.1</a> |
| <a href="#">PREDICTED: phospholipid transfer protein isoform X4 [Vicugna pacos]</a>         | 47.3 | 47.3 | 100% | 8e-05 | 88% | <a href="#">XP_006202544.1</a> |
| <a href="#">PREDICTED: phospholipid transfer protein isoform X4 [Camelus ferus]</a>         | 47.3 | 47.3 | 100% | 8e-05 | 88% | <a href="#">XP_006187692.1</a> |
| <a href="#">PREDICTED: phospholipid transfer protein isoform 4 [Ceratotherium simum si</a>  | 47.3 | 47.3 | 100% | 8e-05 | 88% | <a href="#">XP_004430381.1</a> |
| <a href="#">PREDICTED: phospholipid transfer protein isoform X1 [Condylura cristata]</a>    | 47.3 | 47.3 | 100% | 9e-05 | 88% | <a href="#">XP_004687488.1</a> |
| <a href="#">PREDICTED: phospholipid transfer protein isoform 4 [Orcinus orca]</a>           | 47.3 | 47.3 | 100% | 9e-05 | 88% | <a href="#">XP_004272968.1</a> |
| <a href="#">PREDICTED: phospholipid transfer protein [Capra hircus]</a>                     | 47.3 | 47.3 | 100% | 9e-05 | 88% | <a href="#">XP_005688777.1</a> |
| <a href="#">PREDICTED: phospholipid transfer protein isoform 1 [Ovis aries]</a>             | 47.3 | 47.3 | 100% | 9e-05 | 88% | <a href="#">XP_004014658.1</a> |
| <a href="#">PREDICTED: LOW QUALITY PROTEIN: phospholipid transfer protein [Came]</a>        | 47.3 | 47.3 | 100% | 9e-05 | 88% | <a href="#">XP_010956961.1</a> |
| <a href="#">PREDICTED: LOW QUALITY PROTEIN: phospholipid transfer protein [Came]</a>        | 47.3 | 47.3 | 100% | 9e-05 | 88% | <a href="#">XP_010976914.1</a> |
| <a href="#">PREDICTED: LOW QUALITY PROTEIN: phospholipid transfer protein [Bos m</a>        | 47.3 | 47.3 | 100% | 9e-05 | 88% | <a href="#">XP_005897642.1</a> |
| <a href="#">PREDICTED: phospholipid transfer protein isoform 2 [Ovis aries]</a>             | 47.3 | 47.3 | 100% | 9e-05 | 88% | <a href="#">XP_004014659.1</a> |
| <a href="#">PREDICTED: phospholipid transfer protein [Ursus maritimus]</a>                  | 47.3 | 47.3 | 100% | 9e-05 | 88% | <a href="#">XP_008696270.1</a> |
| <a href="#">hypothetical protein PANDA_018015 [Ailuropoda melanoleuca]</a>                  | 47.3 | 47.3 | 100% | 9e-05 | 88% | <a href="#">EFB21975.1</a>     |
| <a href="#">PREDICTED: phospholipid transfer protein isoformX3 [Canis lupus familiaris]</a> | 47.3 | 47.3 | 100% | 9e-05 | 88% | <a href="#">XP_543027.2</a>    |
| <a href="#">PREDICTED: phospholipid transfer protein isoform 1 [Otolemur garnettii]</a>     | 47.3 | 47.3 | 100% | 9e-05 | 88% | <a href="#">XP_003787705.1</a> |
| <a href="#">phospholipid transfer protein precursor [Sus scrofa]</a>                        | 47.3 | 47.3 | 100% | 9e-05 | 88% | <a href="#">NP_999448.1</a>    |
| <a href="#">PREDICTED: phospholipid transfer protein isoform X1 [Erinaceus europaeus]</a>   | 47.3 | 47.3 | 100% | 9e-05 | 88% | <a href="#">XP_007533119.1</a> |
| <a href="#">PREDICTED: phospholipid transfer protein [Balaenoptera acutorostrata scam]</a>  | 47.3 | 47.3 | 100% | 9e-05 | 88% | <a href="#">XP_007185441.1</a> |
| <a href="#">PREDICTED: phospholipid transfer protein isoform X1 [Bubalus bubalis]</a>       | 47.3 | 47.3 | 100% | 9e-05 | 88% | <a href="#">XP_006051425.1</a> |
| <a href="#">PREDICTED: phospholipid transfer protein isoform X1 [Vicugna pacos]</a>         | 47.3 | 47.3 | 100% | 9e-05 | 88% | <a href="#">XP_006202541.1</a> |
| <a href="#">PREDICTED: phospholipid transfer protein isoform X1 [Camelus ferus]</a>         | 47.3 | 47.3 | 100% | 9e-05 | 88% | <a href="#">XP_006187689.1</a> |
| <a href="#">PREDICTED: phospholipid transfer protein isoform X1 [Bos taurus]</a>            | 47.3 | 47.3 | 100% | 9e-05 | 88% | <a href="#">XP_005214615.1</a> |
| <a href="#">PREDICTED: LOW QUALITY PROTEIN: phospholipid transfer protein [Muste</a>        | 47.3 | 47.3 | 100% | 9e-05 | 88% | <a href="#">XP_004746370.1</a> |
| <a href="#">PREDICTED: phospholipid transfer protein isoform 1 [Ceratotherium simum si</a>  | 47.3 | 47.3 | 100% | 9e-05 | 88% | <a href="#">XP_004430378.1</a> |
| <a href="#">PREDICTED: LOW QUALITY PROTEIN: phospholipid transfer protein [Tursio</a>       | 47.3 | 47.3 | 100% | 9e-05 | 88% | <a href="#">XP_004319149.1</a> |
| <a href="#">PREDICTED: phospholipid transfer protein isoform 1 [Orcinus orca]</a>           | 47.3 | 47.3 | 100% | 9e-05 | 88% | <a href="#">XP_004272965.1</a> |
| <a href="#">PREDICTED: phospholipid transfer protein-like [Ailuropoda melanoleuca]</a>      | 47.3 | 47.3 | 100% | 9e-05 | 88% | <a href="#">XP_002928111.1</a> |
| <a href="#">PREDICTED: LOW QUALITY PROTEIN: phospholipid transfer protein [Lipote</a>       | 47.3 | 47.3 | 100% | 9e-05 | 88% | <a href="#">XP_007451697.1</a> |
| <a href="#">PREDICTED: phospholipid transfer protein [Bison bison bison]</a>                | 47.3 | 47.3 | 100% | 9e-05 | 88% | <a href="#">XP_010833341.1</a> |



|                                                                                              |      |      |      |       |     |                                |
|----------------------------------------------------------------------------------------------|------|------|------|-------|-----|--------------------------------|
| <a href="#">PREDICTED: LOW QUALITY PROTEIN: phospholipid transfer protein [Panth</a>         | 47.3 | 47.3 | 100% | 9e-05 | 88% | <a href="#">XP_005954715.1</a> |
| <a href="#">phospholipid transfer protein precursor [Bos taurus]</a>                         | 47.3 | 47.3 | 100% | 9e-05 | 88% | <a href="#">NP_001030199.1</a> |
| <a href="#">phospholipid transfer protein isoform 3 [Camelus ferus]</a>                      | 47.3 | 47.3 | 100% | 9e-05 | 88% | <a href="#">EPY78753.1</a>     |
| <a href="#">PREDICTED: phospholipid transfer protein isoform X4 [Canis lupus familiaris]</a> | 47.3 | 47.3 | 100% | 9e-05 | 88% | <a href="#">XP_005635182.1</a> |
| <a href="#">PREDICTED: phospholipid transfer protein [Ochotona princeps]</a>                 | 46.0 | 46.0 | 100% | 2e-04 | 88% | <a href="#">XP_004586137.1</a> |
| <a href="#">PREDICTED: phospholipid transfer protein [Equus przewalskii]</a>                 | 44.8 | 44.8 | 100% | 6e-04 | 81% | <a href="#">XP_008519895.1</a> |
| <a href="#">PREDICTED: phospholipid transfer protein [Octodon degus]</a>                     | 44.8 | 44.8 | 100% | 6e-04 | 81% | <a href="#">XP_004636143.1</a> |
| <a href="#">PREDICTED: phospholipid transfer protein isoform X1 [Equus caballus]</a>         | 44.8 | 44.8 | 100% | 6e-04 | 81% | <a href="#">XP_001503419.1</a> |
| <a href="#">PREDICTED: phospholipid transfer protein [Nannospalax galii]</a>                 | 44.3 | 44.3 | 100% | 8e-04 | 81% | <a href="#">XP_008835992.1</a> |
| <a href="#">PREDICTED: phospholipid transfer protein [Chinchilla lanigera]</a>               | 43.9 | 43.9 | 100% | 0.001 | 81% | <a href="#">XP_005392459.1</a> |
| <a href="#">PREDICTED: phospholipid transfer protein isoform X1 [Cavia porcellus]</a>        | 43.5 | 43.5 | 100% | 0.002 | 81% | <a href="#">XP_003467746.1</a> |
| <a href="#">phospholipid transfer protein [Cricetulus griseus]</a>                           | 43.1 | 43.1 | 100% | 0.002 | 81% | <a href="#">ERE71590.1</a>     |
| <a href="#">Phospholipid transfer protein [Pteropus alecto]</a>                              | 43.1 | 43.1 | 100% | 0.002 | 75% | <a href="#">ELK04252.1</a>     |
| <a href="#">PREDICTED: phospholipid transfer protein isoform X2 [Cricetulus griseus]</a>     | 43.1 | 43.1 | 100% | 0.002 | 81% | <a href="#">XP_007608544.1</a> |
| <a href="#">PREDICTED: phospholipid transfer protein [Mesocricetus auratus]</a>              | 43.1 | 43.1 | 100% | 0.002 | 81% | <a href="#">XP_005085047.1</a> |
| <a href="#">PREDICTED: phospholipid transfer protein isoform X2 [Cricetulus griseus]</a>     | 43.1 | 43.1 | 100% | 0.002 | 81% | <a href="#">XP_003500579.1</a> |
| <a href="#">PREDICTED: phospholipid transfer protein [Pteropus alecto]</a>                   | 43.1 | 43.1 | 100% | 0.002 | 75% | <a href="#">XP_006921934.1</a> |
| <a href="#">phospholipid transfer protein [Cricetulus griseus]</a>                           | 43.1 | 43.1 | 100% | 0.002 | 81% | <a href="#">ERE71588.1</a>     |
| <a href="#">PREDICTED: phospholipid transfer protein isoform X1 [Cricetulus griseus]</a>     | 43.1 | 43.1 | 100% | 0.002 | 81% | <a href="#">XP_007608543.1</a> |
| <a href="#">phospholipid transfer protein [Cricetulus griseus]</a>                           | 43.1 | 43.1 | 100% | 0.002 | 81% | <a href="#">ERE71587.1</a>     |
| <a href="#">PREDICTED: phospholipid transfer protein [Sarcophilus harrisi]</a>               | 42.6 | 42.6 | 100% | 0.003 | 81% | <a href="#">XP_003757387.1</a> |
| <a href="#">PREDICTED: phospholipid transfer protein [Chrysochloris asiatica]</a>            | 42.2 | 42.2 | 87%  | 0.004 | 86% | <a href="#">XP_006839396.1</a> |
| <a href="#">PREDICTED: phospholipid transfer protein [Peromyscus maniculatus bairdii]</a>    | 41.8 | 41.8 | 100% | 0.006 | 75% | <a href="#">XP_006971038.1</a> |
| <a href="#">PREDICTED: phospholipid transfer protein [Panthera tigris altaica]</a>           | 41.4 | 41.4 | 100% | 0.008 | 81% | <a href="#">XP_007077837.1</a> |
| <a href="#">PREDICTED: phospholipid transfer protein [Felis catus]</a>                       | 41.4 | 41.4 | 100% | 0.008 | 81% | <a href="#">XP_006929771.1</a> |
| <a href="#">unnamed protein product [Mus musculus]</a>                                       | 40.9 | 40.9 | 100% | 0.011 | 75% | <a href="#">BAE29052.1</a>     |

## Alignments

Download GenPept Graphics

Next Previous Descriptions

PREDICTED: phospholipid transfer protein isoform X3 [Pan troglodytes]

Sequence ID: [ref|XP\\_009433596.1|](#) Length: 405 Number of Matches: 1

Range 1: 50 to 65 GenPept Graphics

Next Match Previous Match

| Score          | Expect | Identities | Positives   | Gaps     |
|----------------|--------|------------|-------------|----------|
| 52.4 bits(116) | 2e-06  | 15/16(94%) | 16/16(100%) | 0/16(0%) |

Query 1 RMKVSDVSCQASVSRM 16  
 RMKVS+VSCQASVSRM  
 Sbjct 50 RMKVSNVSCQASVSRM 65

### Related Information

[Gene](#) - associated gene details

Download GenPept Graphics

Next Previous Descriptions

PREDICTED: phospholipid transfer protein isoform X2 [Tarsius syrichta]

Sequence ID: [ref|XP\\_008056109.1|](#) Length: 405 Number of Matches: 1

Range 1: 50 to 65 GenPept Graphics

Next Match Previous Match

| Score          | Expect | Identities | Positives   | Gaps     |
|----------------|--------|------------|-------------|----------|
| 52.4 bits(116) | 2e-06  | 15/16(94%) | 16/16(100%) | 0/16(0%) |

### Related Information

[Gene](#) - associated gene details

[Map Viewer](#) - aligned genomic context

Query 1 RMKVSDVSCQASVSRM 16  
 RMKVS+VSCQASVSRM  
 Sbjct 50 RMKVSINVSCQASVSRM 65

Download [GenPept](#) [Graphics](#)

[▼ Next](#) [▲ Previous](#) [▲ Descriptions](#)

PREDICTED: phospholipid transfer protein isoform X3 [Chlorocebus sabaeus]

Sequence ID: [ref|XP\\_008013799.1|](#) Length: 405 Number of Matches: 1

Range 1: 50 to 65 [GenPept](#) [Graphics](#)

[▼ Next Match](#) [▲ Previous Match](#)

| Score          | Expect | Identities | Positives   | Gaps     |
|----------------|--------|------------|-------------|----------|
| 52.4 bits(116) | 2e-06  | 15/16(94%) | 16/16(100%) | 0/16(0%) |

Query 1 RMKVSDVSCQASVSRM 16  
 RMKVS+VSCQASVSRM  
 Sbjct 50 RMKVSINVSCQASVSRM 65

**Related Information**

[Gene](#) - associated gene details  
[Map Viewer](#) - aligned genomic context

Download [GenPept](#) [Graphics](#)

[▼ Next](#) [▲ Previous](#) [▲ Descriptions](#)

unnamed protein product [Homo sapiens]

Sequence ID: [dbj|BAG56696.1|](#) Length: 405 Number of Matches: 1

Range 1: 50 to 65 [GenPept](#) [Graphics](#)

[▼ Next Match](#) [▲ Previous Match](#)

| Score          | Expect | Identities | Positives   | Gaps     |
|----------------|--------|------------|-------------|----------|
| 52.4 bits(116) | 2e-06  | 15/16(94%) | 16/16(100%) | 0/16(0%) |

Query 1 RMKVSDVSCQASVSRM 16  
 RMKVS+VSCQASVSRM  
 Sbjct 50 RMKVSINVSCQASVSRM 65

**Related Information**

[Gene](#) - associated gene details

Download [GenPept](#) [Graphics](#)

[▼ Next](#) [▲ Previous](#) [▲ Descriptions](#)

PREDICTED: phospholipid transfer protein isoform X6 [Macaca fascicularis]

Sequence ID: [ref|XP\\_005569256.1|](#) Length: 405 Number of Matches: 1

Range 1: 50 to 65 [GenPept](#) [Graphics](#)

[▼ Next Match](#) [▲ Previous Match](#)

| Score          | Expect | Identities | Positives   | Gaps     |
|----------------|--------|------------|-------------|----------|
| 52.4 bits(116) | 2e-06  | 15/16(94%) | 16/16(100%) | 0/16(0%) |

Query 1 RMKVSDVSCQASVSRM 16  
 RMKVS+VSCQASVSRM  
 Sbjct 50 RMKVSINVSCQASVSRM 65

**Related Information**

[Gene](#) - associated gene details

BLAST is a registered trademark of the National Library of Medicine.

NCBI/ BLAST/ blastp suite/ Formatting Results - BE7CDYF6015

Your search parameters were adjusted to search for a short input sequence.

[Edit and Resubmit](#) [Save Search Strategies](#) [Formatting options](#) [Download](#)

[YouTube](#) [How to read this page](#) [Blast report description](#)

### PLTP\_RMKVSNVSCQASVSRM\_NonMod

RID [BE7CDYF6015](#) (Expires on 01-16 08:53 am)

Query ID |cl|54782  
 Description None  
 Molecule type amino acid  
 Query Length 16

Database Name nr  
 Description All non-redundant GenBank CDS translations+PDB+SwissProt+PIR excluding environmental samples from WGS projects  
 Program BLASTP 2.2.30+ [Citation](#)

Other reports: [Search Summary](#) [Taxonomy reports](#) [Distance tree of results](#) [Multiple alignment](#)

### Graphic Summary

Show Conserved Domains

No putative conserved domains have been detected

Distribution of 100 Blast Hits on the Query Sequence

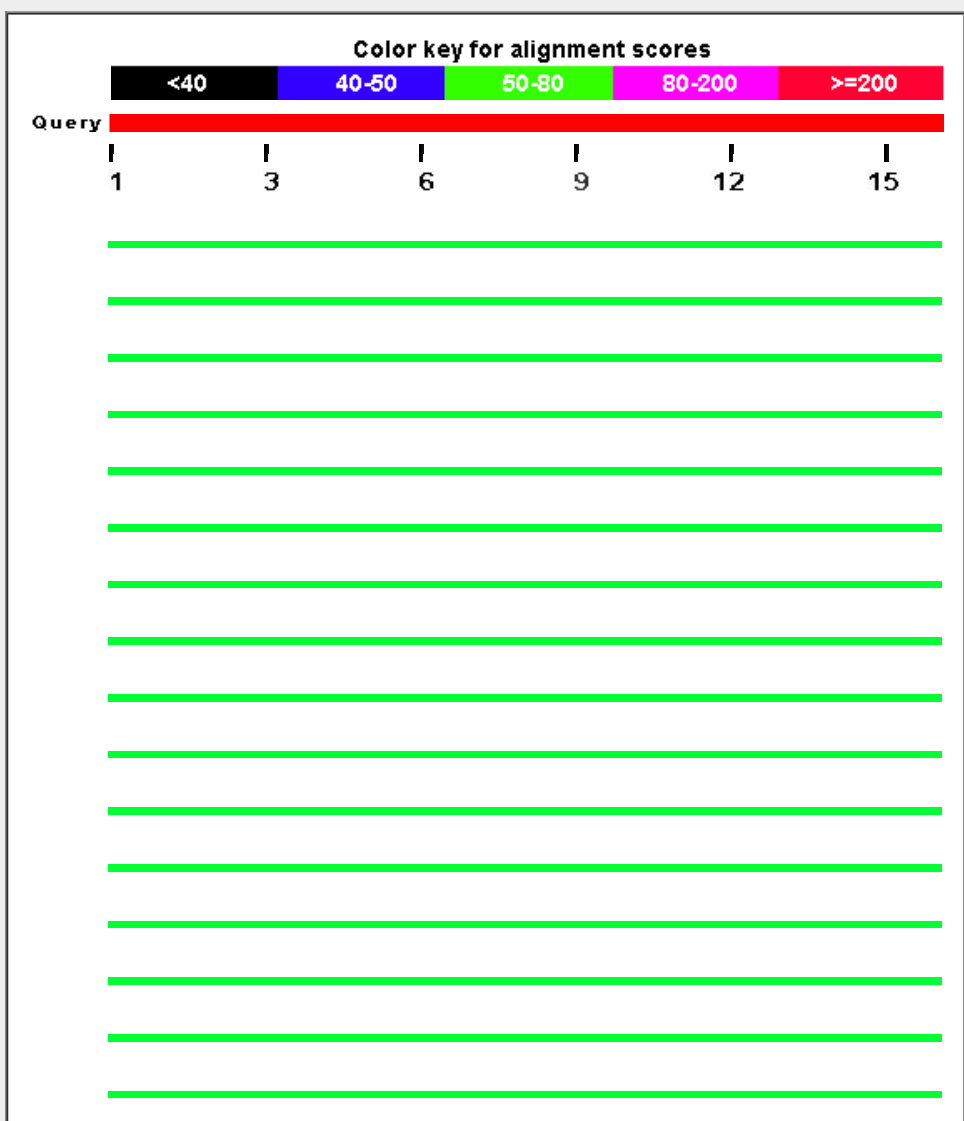

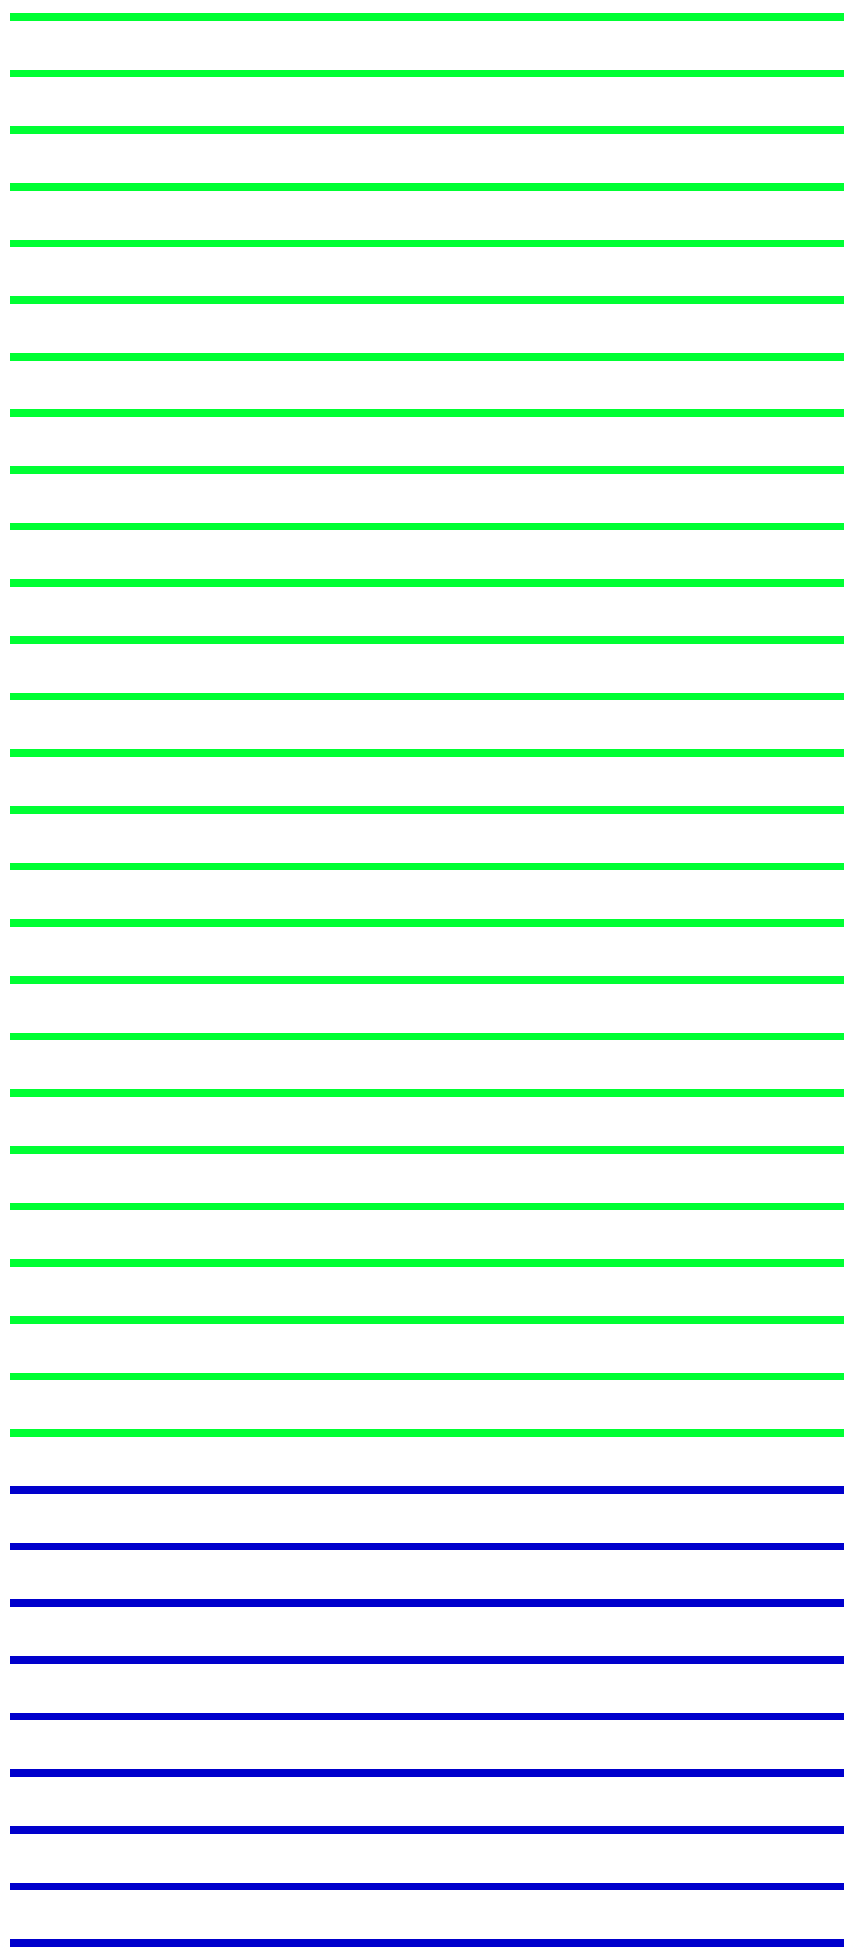



## Descriptions

### Sequences producing significant alignments:

Select: [All](#) [None](#) Selected:0

| <a href="#">↑</a> Alignments <a href="#">Download</a> <a href="#">GenPept</a> <a href="#">Graphics</a> <a href="#">Distance tree of results</a> <a href="#">Multiple alignment</a>  |           |             |             |         |       |                                             |  |
|------------------------------------------------------------------------------------------------------------------------------------------------------------------------------------------------------------------------------------------------------------------------|-----------|-------------|-------------|---------|-------|---------------------------------------------|--|
| Description                                                                                                                                                                                                                                                            | Max score | Total score | Query cover | E value | Ident | Accession                                   |  |
| <a href="#">PREDICTED: phospholipid transfer protein isoform X3 [Pan troglodytes]</a>                                                                                                                                                                                  | 54.9      | 54.9        | 100%        | 2e-07   | 100%  | <a href="#">gi 694979328 XP_009435596.1</a> |  |
| <a href="#">PREDICTED: phospholipid transfer protein isoform X2 [Tarsius syriacus]</a>                                                                                                                                                                                 | 54.9      | 54.9        | 100%        | 2e-07   | 100%  | <a href="#">gi 640799767 XP_008056109.1</a> |  |
| <a href="#">PREDICTED: phospholipid transfer protein isoform X3 [Chlorocebus unnae]</a>                                                                                                                                                                                | 54.9      | 54.9        | 100%        | 2e-07   | 100%  | <a href="#">gi 635020540 XP_008013799.1</a> |  |
| <a href="#">unnamed protein product [Homo sapiens]</a>                                                                                                                                                                                                                 | 54.9      | 54.9        | 100%        | 2e-07   | 100%  | <a href="#">gi 194375502 BAG56696.1</a>     |  |
| <a href="#">PREDICTED: phospholipid transfer protein isoform X6 [Macaca fascicularis]</a>                                                                                                                                                                              | 54.9      | 54.9        | 100%        | 2e-07   | 100%  | <a href="#">gi 544466131 XP_005569256.1</a> |  |
| <a href="#">phospholipid transfer protein precursor [Pan troglodytes]</a>                                                                                                                                                                                              | 54.9      | 54.9        | 100%        | 2e-07   | 100%  | <a href="#">gi 343961079 BAK62129.1</a>     |  |
| <a href="#">phospholipid transfer protein isoform d [Homo sapiens]</a>                                                                                                                                                                                                 | 54.9      | 54.9        | 100%        | 2e-07   | 100%  | <a href="#">gi 339275810 NP_001229850.1</a> |  |
| <a href="#">unnamed protein product [Macaca fascicularis]</a>                                                                                                                                                                                                          | 54.9      | 54.9        | 100%        | 2e-07   | 100%  | <a href="#">gi 67968557 BAE00639.1</a>      |  |
| <a href="#">PREDICTED: phospholipid transfer protein [Callithrix jacchus]</a>                                                                                                                                                                                          | 54.9      | 54.9        | 100%        | 2e-07   | 100%  | <a href="#">gi 675657086 XP_008994362.1</a> |  |
| <a href="#">phospholipid transfer protein, isoform CRA_d [Homo sapiens]</a>                                                                                                                                                                                            | 54.9      | 54.9        | 100%        | 2e-07   | 100%  | <a href="#">gi 119596192 EAW75786.1</a>     |  |
| <a href="#">PREDICTED: phospholipid transfer protein isoform X2 [Pan troglodytes]</a>                                                                                                                                                                                  | 54.9      | 54.9        | 100%        | 2e-07   | 100%  | <a href="#">gi 694979326 XP_009435595.1</a> |  |
| <a href="#">PREDICTED: phospholipid transfer protein [Rhinopithecus roxellana]</a>                                                                                                                                                                                     | 54.9      | 54.9        | 100%        | 2e-07   | 100%  | <a href="#">gi 724927761 XP_010382500.1</a> |  |
| <a href="#">PREDICTED: phospholipid transfer protein isoform X2 [Chlorocebus unnae]</a>                                                                                                                                                                                | 54.9      | 54.9        | 100%        | 2e-07   | 100%  | <a href="#">gi 635020538 XP_008013795.1</a> |  |
| <a href="#">Phospholipid transfer protein [Homo sapiens]</a>                                                                                                                                                                                                           | 54.9      | 54.9        | 100%        | 2e-07   | 100%  | <a href="#">gi 18044721 AAH19847.1</a>      |  |
| <a href="#">PREDICTED: phospholipid transfer protein isoform X2 [Macaca fascicularis]</a>                                                                                                                                                                              | 54.9      | 54.9        | 100%        | 2e-07   | 100%  | <a href="#">gi 544466123 XP_005569252.1</a> |  |
| <a href="#">PREDICTED: phospholipid transfer protein [Gorilla gorilla gorilla]</a>                                                                                                                                                                                     | 54.9      | 54.9        | 100%        | 2e-07   | 100%  | <a href="#">gi 426391940 XP_004062321.1</a> |  |
| <a href="#">phospholipid transfer protein isoform a precursor [Homo sapiens]</a>                                                                                                                                                                                       | 54.9      | 54.9        | 100%        | 2e-07   | 100%  | <a href="#">gi 5453914 NP_006218.1</a>      |  |
| <a href="#">PREDICTED: phospholipid transfer protein [Saimiri boliviensis boliviensis]</a>                                                                                                                                                                             | 54.9      | 54.9        | 100%        | 2e-07   | 100%  | <a href="#">gi 403290826 XP_003936508.1</a> |  |
| <a href="#">PREDICTED: LOW QUALITY PROTEIN: phospholipid transfer protein [Homo sapiens]</a>                                                                                                                                                                           | 54.9      | 54.9        | 100%        | 2e-07   | 100%  | <a href="#">gi 402882376 XP_003904720.1</a> |  |
| <a href="#">PREDICTED: phospholipid transfer protein isoform X1 [Pan paniscus]</a>                                                                                                                                                                                     | 54.9      | 54.9        | 100%        | 2e-07   | 100%  | <a href="#">gi 675783669 XP_008949625.1</a> |  |
| <a href="#">Lipid transfer protein II [Macaca mulatta]</a>                                                                                                                                                                                                             | 54.9      | 54.9        | 100%        | 2e-07   | 100%  | <a href="#">gi 355563074 EHH19636.1</a>     |  |
| <a href="#">PREDICTED: phospholipid transfer protein [Nomascus leucogenys]</a>                                                                                                                                                                                         | 54.9      | 54.9        | 100%        | 2e-07   | 100%  | <a href="#">gi 332209213 XP_003253705.1</a> |  |
| <a href="#">PREDICTED: phospholipid transfer protein-like [Macaca mulatta]</a>                                                                                                                                                                                         | 54.9      | 54.9        | 100%        | 2e-07   | 100%  | <a href="#">gi 297259688 XP_002798159.1</a> |  |
| <a href="#">PREDICTED: phospholipid transfer protein isoform X1 [Pan troglodytes]</a>                                                                                                                                                                                  | 54.9      | 54.9        | 100%        | 2e-07   | 100%  | <a href="#">gi 332858594 XP_001158846.2</a> |  |
| <a href="#">phospholipid transfer protein isoform a precursor variant [Homo sapiens]</a>                                                                                                                                                                               | 54.9      | 54.9        | 100%        | 2e-07   | 100%  | <a href="#">gi 62896939 BAD96410.1</a>      |  |
| <a href="#">PREDICTED: phospholipid transfer protein [Heterocephalus glaber]</a>                                                                                                                                                                                       | 54.9      | 54.9        | 100%        | 2e-07   | 100%  | <a href="#">gi 512855805 XP_004888423.1</a> |  |
| <a href="#">PREDICTED: phospholipid transfer protein [Physeter catodon]</a>                                                                                                                                                                                            | 54.9      | 54.9        | 100%        | 2e-07   | 100%  | <a href="#">gi 593753347 XP_007115580.1</a> |  |
| <a href="#">PREDICTED: phospholipid transfer protein isoform X2 [Tupaia chinensis]</a>                                                                                                                                                                                 | 54.9      | 54.9        | 100%        | 2e-07   | 100%  | <a href="#">gi 562860414 XP_006158592.1</a> |  |

|                                                                                           |      |      |      |       |      |                                              |
|-------------------------------------------------------------------------------------------|------|------|------|-------|------|----------------------------------------------|
| Phospholipid transfer protein [Tupaia chinensis]                                          | 54.9 | 54.9 | 100% | 2e-07 | 100% | <a href="#">gij444706925 ELW48240.1</a>      |
| <a href="#">PREDICTED: phospholipid transfer protein isoform X1 [Tupaia chinensis]</a>    | 54.9 | 54.9 | 100% | 2e-07 | 100% | <a href="#">gij562860412 XP_006158591.1</a>  |
| <a href="#">PREDICTED: phospholipid transfer protein isoform X1 [Chlorocebus</a>          | 54.9 | 54.9 | 100% | 2e-07 | 100% | <a href="#">gij635020536 XP_008013792.1</a>  |
| <a href="#">PREDICTED: phospholipid transfer protein isoform X1 [Macaca fascicularis]</a> | 54.9 | 54.9 | 100% | 2e-07 | 100% | <a href="#">gij5444466121 XP_005569251.1</a> |
| <a href="#">PREDICTED: phospholipid transfer protein isoform X1 [Homo sapiens]</a>        | 54.9 | 54.9 | 100% | 2e-07 | 100% | <a href="#">gij530418164 XP_005260496.1</a>  |
| <a href="#">PREDICTED: phospholipid transfer protein isoform X1 [Ictidomys tri</a>        | 54.9 | 54.9 | 100% | 2e-07 | 100% | <a href="#">gij532079075 XP_005325306.1</a>  |
| <a href="#">Phospholipid transfer protein [Heterocephalus glaber]</a>                     | 54.9 | 54.9 | 100% | 2e-07 | 100% | <a href="#">gij351702390 EHB05309.1</a>      |
| <a href="#">phospholipid transfer protein precursor [Pongo abelii]</a>                    | 52.8 | 52.8 | 100% | 1e-06 | 94%  | <a href="#">gij197100925 NP_001127290.1</a>  |
| <a href="#">PREDICTED: phospholipid transfer protein isoform X3 [Galeopterus</a>          | 52.4 | 52.4 | 100% | 2e-06 | 94%  | <a href="#">gij667267881 XP_008569812.1</a>  |
| <a href="#">PREDICTED: phospholipid transfer protein isoform X2 [Galeopterus</a>          | 52.4 | 52.4 | 100% | 2e-06 | 94%  | <a href="#">gij667267878 XP_008569811.1</a>  |
| <a href="#">PREDICTED: phospholipid transfer protein isoform X1 [Galeopterus</a>          | 52.4 | 52.4 | 100% | 2e-06 | 94%  | <a href="#">gij667267875 XP_008569810.1</a>  |
| <a href="#">PREDICTED: phospholipid transfer protein [Jaculus jaculus]</a>                | 52.0 | 52.0 | 100% | 2e-06 | 94%  | <a href="#">gij507560498 XP_004663955.1</a>  |
| <a href="#">PREDICTED: phospholipid transfer protein isoform X2 [Fukomys da</a>           | 51.5 | 51.5 | 100% | 3e-06 | 94%  | <a href="#">gij731220560 XP_010624498.1</a>  |
| <a href="#">PREDICTED: phospholipid transfer protein isoform X1 [Fukomys da</a>           | 51.5 | 51.5 | 100% | 3e-06 | 94%  | <a href="#">gij731220558 XP_010624497.1</a>  |
| <a href="#">PLTP-like protein [Bos taurus]</a>                                            | 49.8 | 49.8 | 100% | 8e-06 | 94%  | <a href="#">gij56681181 AAW21227.1</a>       |
| <a href="#">PREDICTED: phospholipid transfer protein-like isoform X1 [Sus scrofa]</a>     | 49.8 | 49.8 | 100% | 9e-06 | 94%  | <a href="#">gij545880919 XP_005673034.1</a>  |
| <a href="#">PREDICTED: phospholipid transfer protein-like [Leptonyxochotes wec</a>        | 49.8 | 49.8 | 100% | 1e-05 | 94%  | <a href="#">gij585176105 XP_006739837.1</a>  |
| <a href="#">PREDICTED: phospholipid transfer protein isoform X4 [Vicugna pac</a>          | 49.8 | 49.8 | 100% | 1e-05 | 94%  | <a href="#">gij560960187 XP_006202544.1</a>  |
| <a href="#">PREDICTED: phospholipid transfer protein isoform X4 [Camelus fer</a>          | 49.8 | 49.8 | 100% | 1e-05 | 94%  | <a href="#">gij560922989 XP_006187692.1</a>  |
| <a href="#">PREDICTED: phospholipid transfer protein isoform 4 [Ceratotherium</a>         | 49.8 | 49.8 | 100% | 1e-05 | 94%  | <a href="#">gij478512237 XP_004430381.1</a>  |
| <a href="#">PREDICTED: phospholipid transfer protein isoform X1 [Condylura c</a>          | 49.8 | 49.8 | 100% | 1e-05 | 94%  | <a href="#">gij507961913 XP_004687488.1</a>  |
| <a href="#">PREDICTED: phospholipid transfer protein isoform 4 [Orcinus orca]</a>         | 49.8 | 49.8 | 100% | 1e-05 | 94%  | <a href="#">gij466024688 XP_004272968.1</a>  |
| <a href="#">PREDICTED: phospholipid transfer protein [Capra hircus]</a>                   | 49.8 | 49.8 | 100% | 1e-05 | 94%  | <a href="#">gij548491933 XP_005688777.1</a>  |
| <a href="#">PREDICTED: phospholipid transfer protein isoform 1 [Ovis aries]</a>           | 49.8 | 49.8 | 100% | 1e-05 | 94%  | <a href="#">gij426241561 XP_004014658.1</a>  |
| <a href="#">PREDICTED: LOW QUALITY PROTEIN: phospholipid transfer prot</a>                | 49.8 | 49.8 | 100% | 1e-05 | 94%  | <a href="#">gij743725982 XP_010956961.1</a>  |
| <a href="#">PREDICTED: LOW QUALITY PROTEIN: phospholipid transfer prot</a>                | 49.8 | 49.8 | 100% | 1e-05 | 94%  | <a href="#">gij744560326 XP_010976914.1</a>  |
| <a href="#">PREDICTED: LOW QUALITY PROTEIN: phospholipid transfer prot</a>                | 49.8 | 49.8 | 100% | 1e-05 | 94%  | <a href="#">gij555971257 XP_005897642.1</a>  |
| <a href="#">PREDICTED: phospholipid transfer protein isoform 2 [Ovis aries]</a>           | 49.8 | 49.8 | 100% | 1e-05 | 94%  | <a href="#">gij426241563 XP_004014659.1</a>  |
| <a href="#">PREDICTED: phospholipid transfer protein [Ursus maritimus]</a>                | 49.8 | 49.8 | 100% | 1e-05 | 94%  | <a href="#">gij671010882 XP_008696270.1</a>  |
| <a href="#">hypothetical protein PANDA_018015 [Ailuropoda melanoleuca]</a>                | 49.8 | 49.8 | 100% | 1e-05 | 94%  | <a href="#">gij281346391 EFB21975.1</a>      |
| <a href="#">PREDICTED: phospholipid transfer protein isoformX3 [Canis lupus]</a>          | 49.8 | 49.8 | 100% | 1e-05 | 94%  | <a href="#">gij73992532 XP_543027.2</a>      |
| <a href="#">PREDICTED: phospholipid transfer protein isoform 1 [Otolemur gar</a>          | 49.8 | 49.8 | 100% | 1e-05 | 94%  | <a href="#">gij395829113 XP_003787705.1</a>  |
| <a href="#">phospholipid transfer protein precursor [Sus scrofa]</a>                      | 49.8 | 49.8 | 100% | 1e-05 | 94%  | <a href="#">gij47523640 NP_999448.1</a>      |
| <a href="#">PREDICTED: phospholipid transfer protein isoform X1 [Erinaceus e</a>          | 49.8 | 49.8 | 100% | 1e-05 | 94%  | <a href="#">gij617646971 XP_007533119.1</a>  |
| <a href="#">PREDICTED: phospholipid transfer protein [Balaenoptera acutorost</a>          | 49.8 | 49.8 | 100% | 1e-05 | 94%  | <a href="#">gij594675219 XP_007185441.1</a>  |
| <a href="#">PREDICTED: phospholipid transfer protein isoform X1 [Bubalus bu</a>           | 49.8 | 49.8 | 100% | 1e-05 | 94%  | <a href="#">gij594054314 XP_006051425.1</a>  |
| <a href="#">PREDICTED: phospholipid transfer protein isoform X1 [Vicugna pac</a>          | 49.8 | 49.8 | 100% | 1e-05 | 94%  | <a href="#">gij560960181 XP_006202541.1</a>  |
| <a href="#">PREDICTED: phospholipid transfer protein isoform X1 [Camelus fer</a>          | 49.8 | 49.8 | 100% | 1e-05 | 94%  | <a href="#">gij560922983 XP_006187689.1</a>  |
| <a href="#">PREDICTED: phospholipid transfer protein isoform X1 [Bos taurus]</a>          | 49.8 | 49.8 | 100% | 1e-05 | 94%  | <a href="#">gij528973460 XP_005214615.1</a>  |
| <a href="#">PREDICTED: LOW QUALITY PROTEIN: phospholipid transfer prot</a>                | 49.8 | 49.8 | 100% | 1e-05 | 94%  | <a href="#">gij511843869 XP_004746370.1</a>  |
| <a href="#">PREDICTED: phospholipid transfer protein isoform 1 [Ceratotherium</a>         | 49.8 | 49.8 | 100% | 1e-05 | 94%  | <a href="#">gij478512231 XP_004430378.1</a>  |
| <a href="#">PREDICTED: LOW QUALITY PROTEIN: phospholipid transfer prot</a>                | 49.8 | 49.8 | 100% | 1e-05 | 94%  | <a href="#">gij470622636 XP_004319149.1</a>  |
| <a href="#">PREDICTED: phospholipid transfer protein isoform 1 [Orcinus orca]</a>         | 49.8 | 49.8 | 100% | 1e-05 | 94%  | <a href="#">gij466024672 XP_004272965.1</a>  |
| <a href="#">PREDICTED: phospholipid transfer protein-like [Ailuropoda melano</a>          | 49.8 | 49.8 | 100% | 1e-05 | 94%  | <a href="#">gij301785379 XP_002928111.1</a>  |
| <a href="#">PREDICTED: LOW QUALITY PROTEIN: phospholipid transfer prot</a>                | 49.8 | 49.8 | 100% | 1e-05 | 94%  | <a href="#">gij602732607 XP_007451697.1</a>  |

|                                                                                    |      |      |      |       |     |                                             |
|------------------------------------------------------------------------------------|------|------|------|-------|-----|---------------------------------------------|
| <a href="#">PREDICTED: phospholipid transfer protein [Bison bison bison]</a>       | 49.8 | 49.8 | 100% | 1e-05 | 94% | <a href="#">gil742097445 XP_010833341.1</a> |
| <a href="#">PREDICTED: LOW QUALITY PROTEIN: phospholipid transfer prot</a>         | 49.8 | 49.8 | 100% | 1e-05 | 94% | <a href="#">gil556717613 XP_005954715.1</a> |
| <a href="#">phospholipid transfer protein precursor [Bos taurus]</a>               | 49.8 | 49.8 | 100% | 1e-05 | 94% | <a href="#">gil78042516 NP_001030199.1</a>  |
| <a href="#">phospholipid transfer protein isoform 3 [Camelus ferus]</a>            | 49.8 | 49.8 | 100% | 1e-05 | 94% | <a href="#">gil528759094 EPY78753.1</a>     |
| <a href="#">PREDICTED: phospholipid transfer protein isoform X4 [Canis lupus</a>   | 49.8 | 49.8 | 100% | 1e-05 | 94% | <a href="#">gil545540927 XP_005635182.1</a> |
| <a href="#">PREDICTED: phospholipid transfer protein [Equus przewalskii]</a>       | 47.3 | 47.3 | 100% | 8e-05 | 88% | <a href="#">gil664725512 XP_008519895.1</a> |
| <a href="#">PREDICTED: phospholipid transfer protein [Octodon degus]</a>           | 47.3 | 47.3 | 100% | 9e-05 | 88% | <a href="#">gil507663922 XP_004636143.1</a> |
| <a href="#">PREDICTED: phospholipid transfer protein isoformX1 [Equus cabal</a>    | 47.3 | 47.3 | 100% | 9e-05 | 88% | <a href="#">gil149733315 XP_001503419.1</a> |
| <a href="#">PREDICTED: phospholipid transfer protein [Nannospalax galii]</a>       | 46.9 | 46.9 | 100% | 1e-04 | 88% | <a href="#">gil674058816 XP_008835992.1</a> |
| <a href="#">PREDICTED: phospholipid transfer protein [Chinchilla lanigera]</a>     | 46.4 | 46.4 | 100% | 2e-04 | 88% | <a href="#">gil533156934 XP_005392459.1</a> |
| <a href="#">PREDICTED: phospholipid transfer protein isoform X1 [Cavia porce</a>   | 46.0 | 46.0 | 100% | 2e-04 | 88% | <a href="#">gil348563903 XP_003467746.1</a> |
| <a href="#">phospholipid transfer protein [Cricetulus griseus]</a>                 | 45.6 | 45.6 | 100% | 3e-04 | 88% | <a href="#">gil537151313 ERE71590.1</a>     |
| <a href="#">Phospholipid transfer protein [Pteropus alecto]</a>                    | 45.6 | 45.6 | 100% | 3e-04 | 81% | <a href="#">gil431894452 ELK04252.1</a>     |
| <a href="#">PREDICTED: phospholipid transfer protein isoform X2 [Cricetulus g</a>  | 45.6 | 45.6 | 100% | 3e-04 | 88% | <a href="#">gil625234759 XP_007608544.1</a> |
| <a href="#">PREDICTED: phospholipid transfer protein [Mesocricetus auratus]</a>    | 45.6 | 45.6 | 100% | 3e-04 | 88% | <a href="#">gil524970358 XP_005085047.1</a> |
| <a href="#">PREDICTED: phospholipid transfer protein isoform X2 [Cricetulus g</a>  | 45.6 | 45.6 | 100% | 3e-04 | 88% | <a href="#">gil354476736 XP_003500579.1</a> |
| <a href="#">PREDICTED: phospholipid transfer protein [Pteropus alecto]</a>         | 45.6 | 45.6 | 100% | 3e-04 | 81% | <a href="#">gil586534094 XP_006921934.1</a> |
| <a href="#">phospholipid transfer protein [Cricetulus griseus]</a>                 | 45.6 | 45.6 | 100% | 3e-04 | 88% | <a href="#">gil537151311 ERE71588.1</a>     |
| <a href="#">PREDICTED: phospholipid transfer protein isoform X1 [Cricetulus g</a>  | 45.6 | 45.6 | 100% | 3e-04 | 88% | <a href="#">gil625234757 XP_007608543.1</a> |
| <a href="#">phospholipid transfer protein [Cricetulus griseus]</a>                 | 45.6 | 45.6 | 100% | 3e-04 | 88% | <a href="#">gil537151310 ERE71587.1</a>     |
| <a href="#">PREDICTED: phospholipid transfer protein [Sarcophilus harrisi]</a>     | 45.2 | 45.2 | 100% | 4e-04 | 88% | <a href="#">gil395506127 XP_003757387.1</a> |
| <a href="#">PREDICTED: phospholipid transfer protein [Chrysochloris asiatica]</a>  | 44.8 | 44.8 | 87%  | 6e-04 | 93% | <a href="#">gil586455144 XP_006839396.1</a> |
| <a href="#">PREDICTED: phospholipid transfer protein [Peromyscus maniculatu</a>    | 44.3 | 44.3 | 100% | 8e-04 | 81% | <a href="#">gil589915411 XP_006971038.1</a> |
| <a href="#">PREDICTED: phospholipid transfer protein [Panthera tigris altaica]</a> | 43.9 | 43.9 | 100% | 0.001 | 88% | <a href="#">gil591301856 XP_007077837.1</a> |
| <a href="#">PREDICTED: phospholipid transfer protein [Felis catus]</a>             | 43.9 | 43.9 | 100% | 0.001 | 88% | <a href="#">gil586980550 XP_006929771.1</a> |
| <a href="#">unnamed protein product [Mus musculus]</a>                             | 43.5 | 43.5 | 100% | 0.002 | 81% | <a href="#">gil74207827 BAE29052.1</a>      |
| <a href="#">PREDICTED: phospholipid transfer protein [Ochotona princeps]</a>       | 43.5 | 43.5 | 100% | 0.002 | 81% | <a href="#">gil504147446 XP_004586137.1</a> |

## Alignments

Download [GenPept](#) [Graphics](#)

[Next](#) [Previous](#) [Descriptions](#)

**PREDICTED: phospholipid transfer protein isoform X3 [Pan troglodytes]**

Sequence ID: [gil694979328|ref|XP\\_009435596.1](#) Length: 405 Number of Matches: 1

Range 1: 50 to 65 [GenPept](#) [Graphics](#)

[Next Match](#) [Previous Match](#)

| Score          | Expect | Identities  | Positives   | Gaps     |
|----------------|--------|-------------|-------------|----------|
| 54.9 bits(122) | 2e-07  | 16/16(100%) | 16/16(100%) | 0/16(0%) |

Query 1 RMKVSNVSCQASVSRM 16  
 Sbjct 50 RMKVSNVSCQASVSRM 65

### Related Information

[Gene](#) - associated gene details

Download [GenPept](#) [Graphics](#)

[Next](#) [Previous](#) [Descriptions](#)

**PREDICTED: phospholipid transfer protein isoform X2 [Tarsius syrichta]**

Sequence ID: [gil640799767|ref|XP\\_008056109.1](#) Length: 405 Number of Matches: 1

Range 1: 50 to 65 [GenPept](#) [Graphics](#)

[Next Match](#) [Previous Match](#)

| Score          | Expect | Identities  | Positives   | Gaps     |
|----------------|--------|-------------|-------------|----------|
| 54.9 bits(122) | 2e-07  | 16/16(100%) | 16/16(100%) | 0/16(0%) |

Query 1 RMKVSNVSCQASVSRM 16

### Related Information

[Gene](#) - associated gene details

[Map Viewer](#) - aligned genomic context

Sbjct 50 RMKVSNVSCQASVSRM 65

[Download](#) [GenPept](#) [Graphics](#)

[Next](#) [Previous](#) [Descriptions](#)

**PREDICTED: phospholipid transfer protein isoform X3 [Chlorocebus sabaeus]**

Sequence ID: [gi|635020540|ref|XP\\_008013799.1](#) Length: 405 Number of Matches: 1

Range 1: 50 to 65 [GenPept](#) [Graphics](#)

[Next Match](#) [Previous Match](#)

| Score          | Expect | Identities  | Positives   | Gaps     |
|----------------|--------|-------------|-------------|----------|
| 54.9 bits(122) | 2e-07  | 16/16(100%) | 16/16(100%) | 0/16(0%) |

Query 1 RMKVSNVSCQASVSRM 16  
 RMKVSNVSCQASVSRM  
 Sbjct 50 RMKVSNVSCQASVSRM 65

**Related Information**

[Gene](#) - associated gene details  
[Map Viewer](#) - aligned genomic context

[Download](#) [GenPept](#) [Graphics](#)

[Next](#) [Previous](#) [Descriptions](#)

**unnamed protein product [Homo sapiens]**

Sequence ID: [gi|194375502|dbj|BAG56696.1](#) Length: 405 Number of Matches: 1

Range 1: 50 to 65 [GenPept](#) [Graphics](#)

[Next Match](#) [Previous Match](#)

| Score          | Expect | Identities  | Positives   | Gaps     |
|----------------|--------|-------------|-------------|----------|
| 54.9 bits(122) | 2e-07  | 16/16(100%) | 16/16(100%) | 0/16(0%) |

Query 1 RMKVSNVSCQASVSRM 16  
 RMKVSNVSCQASVSRM  
 Sbjct 50 RMKVSNVSCQASVSRM 65

**Related Information**

[Gene](#) - associated gene details

[Download](#) [GenPept](#) [Graphics](#)

[Next](#) [Previous](#) [Descriptions](#)

**PREDICTED: phospholipid transfer protein isoform X6 [Macaca fascicularis]**

Sequence ID: [gi|544466131|ref|XP\\_005569256.1](#) Length: 405 Number of Matches: 1

Range 1: 50 to 65 [GenPept](#) [Graphics](#)

[Next Match](#) [Previous Match](#)

| Score          | Expect | Identities  | Positives   | Gaps     |
|----------------|--------|-------------|-------------|----------|
| 54.9 bits(122) | 2e-07  | 16/16(100%) | 16/16(100%) | 0/16(0%) |

Query 1 RMKVSNVSCQASVSRM 16  
 RMKVSNVSCQASVSRM  
 Sbjct 50 RMKVSNVSCQASVSRM 65

**Related Information**

[Gene](#) - associated gene details

BLAST is a registered trademark of the National Library of Medicine.



▶ [NCBI/ BLAST/ blastp suite/ Formatting Results - BVK51HBY01R](#)

**i** Your search parameters were adjusted to search for a short input sequence.

[Edit and Resubmit](#) | [Save Search Strategies](#) | [▶ Formatting options](#) | [▶ Download](#)

[YouTube](#) | [How to read this page](#) | [Blast report description](#)

### PON3\_RVSTVYANDGSLVQGTSVASVYHGKI\_Mod

**RID** [BVK51HBY01R](#) (Expires on 01-21 10:33 am)

**Query ID** |cl|296963  
**Description** |None  
**Molecule type** |amino acid  
**Query Length** |26

**Database Name** |nr  
**Description** |All non-redundant GenBank CDS translations+PDB+SwissProt+PIR+PRF excluding environmental samples from WGS projects  
**Program** |BLASTP 2.2.30+ [▶ Citation](#)

Other reports: [▶ Search Summary](#) [[Taxonomy reports](#)] [[Distance tree of results](#)] [[Multiple alignment](#)]

### **[-]** Graphic Summary

**[-]** [Show Conserved Domains](#)

No putative conserved domains have been detected

Distribution of 100 Blast Hits on the Query Sequence 

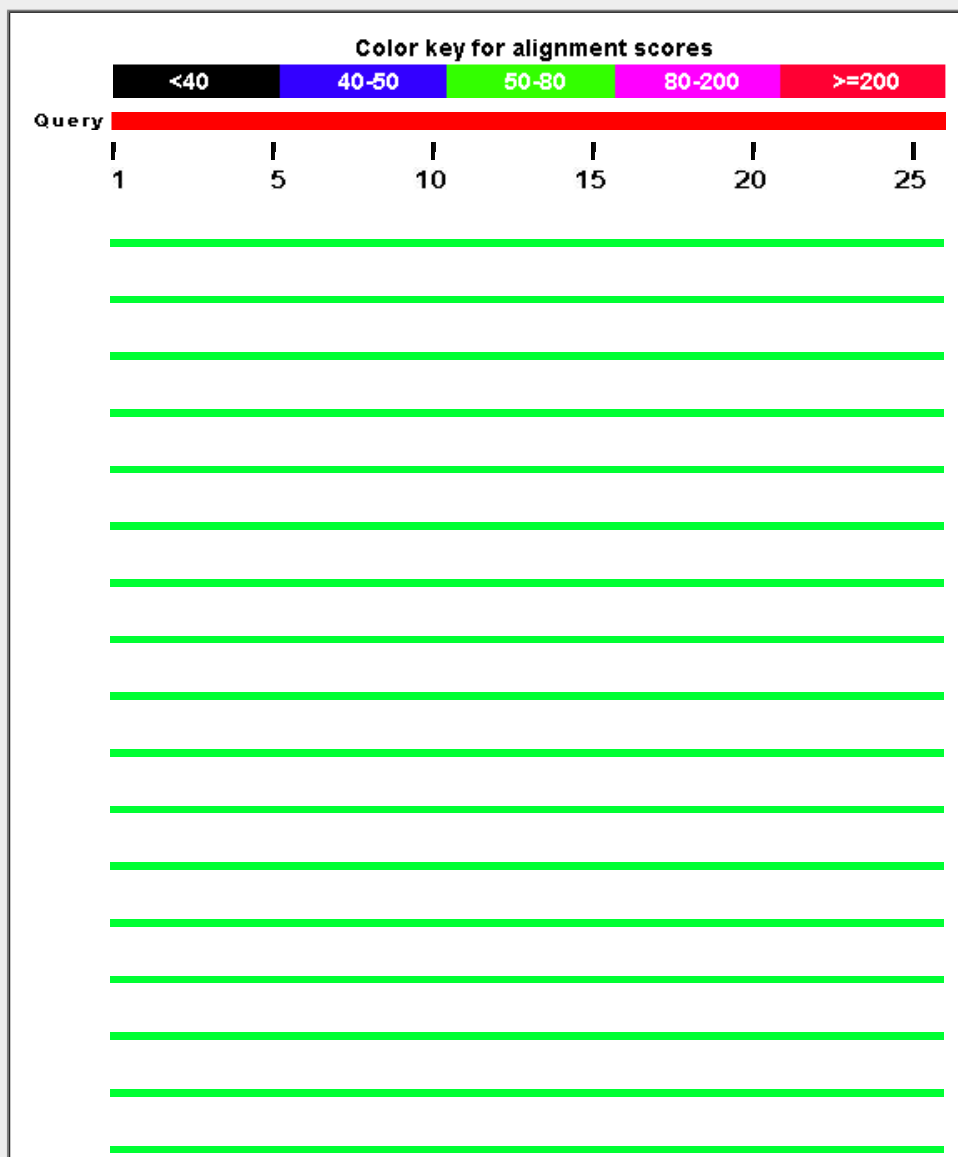

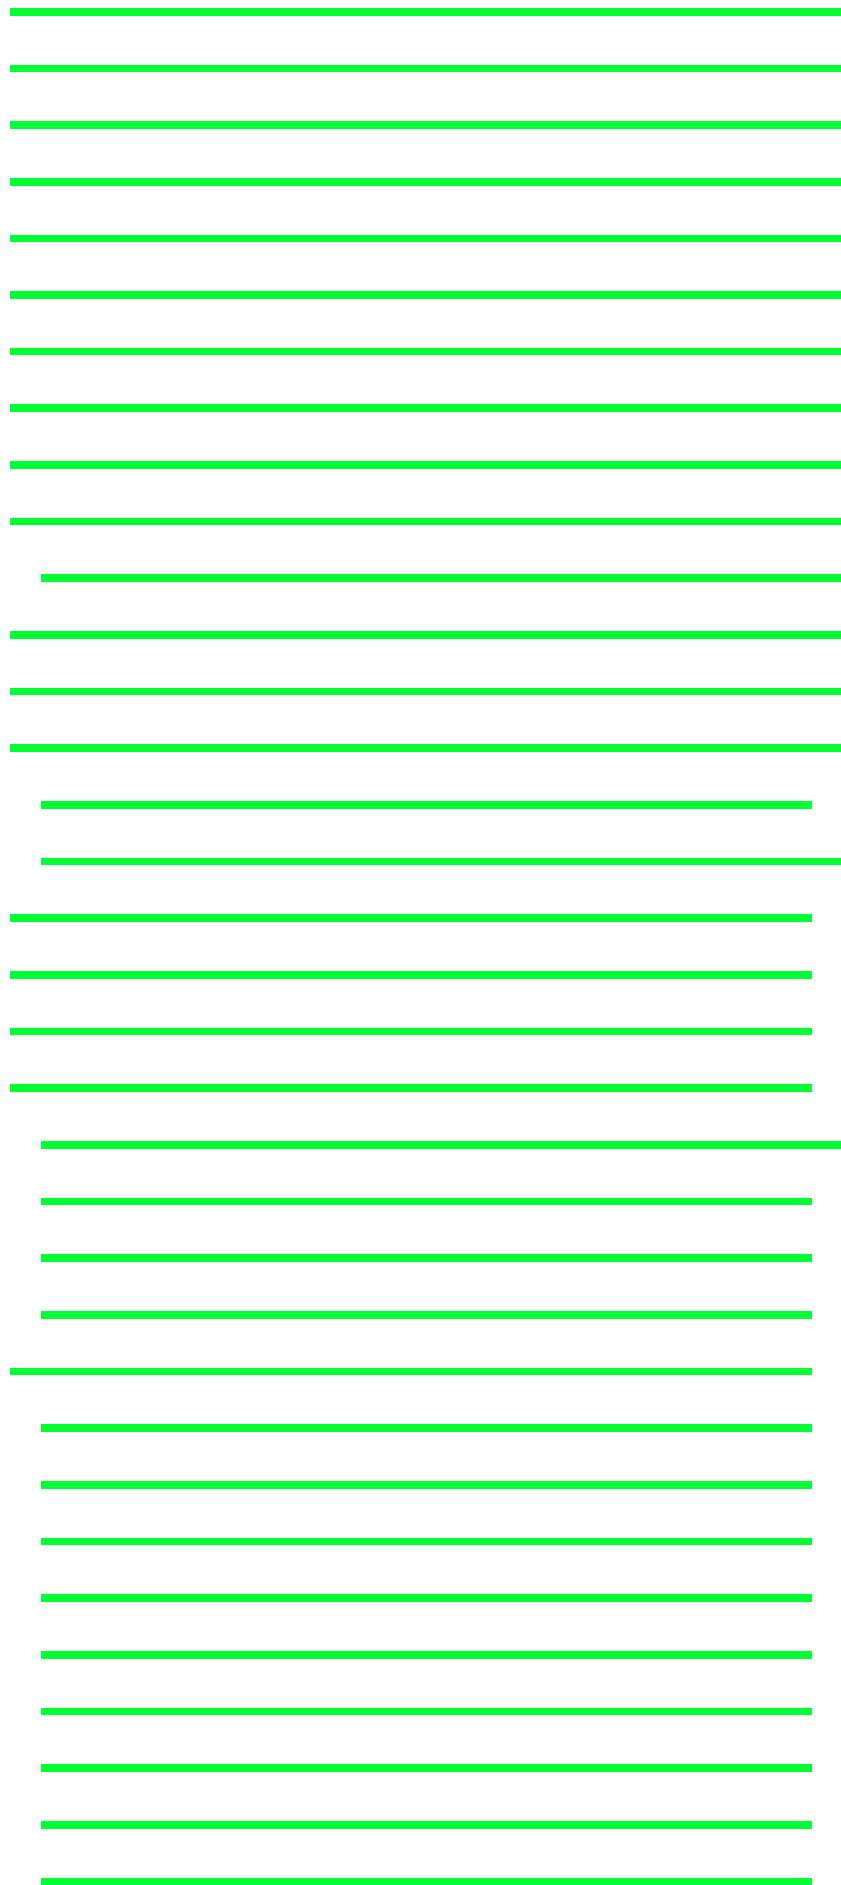

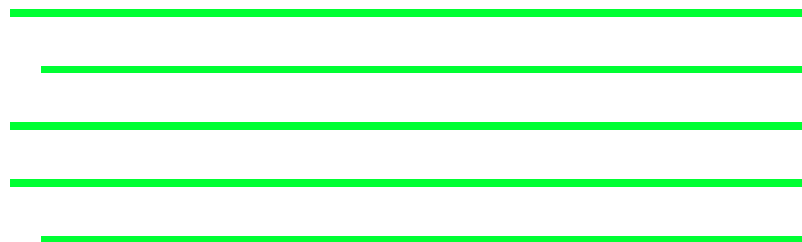

## Descriptions

### Sequences producing significant alignments:

Select: [All](#) [None](#) Selected: 0

| <a href="#">Alignments</a> <a href="#">Download</a> <a href="#">GenPept</a> <a href="#">Graphics</a> <a href="#">Distance tree of results</a> <a href="#">Multiple alignment</a>  |           |             |             |         |       |                                |  |
|----------------------------------------------------------------------------------------------------------------------------------------------------------------------------------------------------------------------------------------------------------------------|-----------|-------------|-------------|---------|-------|--------------------------------|--|
| Description                                                                                                                                                                                                                                                          | Max score | Total score | Query cover | E value | Ident | Accession                      |  |
| <a href="#">PREDICTED: serum paraoxonase/lactonase 3 isoform X2 [Macaca fasciculari paraoxonase-3 [Homo sapiens]</a>                                                                                                                                                 | 79.5      | 79.5        | 100%        | 3e-15   | 96%   | <a href="#">XP_005550232.1</a> |  |
| <a href="#">Paraoxonase 3 [Homo sapiens]</a>                                                                                                                                                                                                                         | 79.5      | 79.5        | 100%        | 3e-15   | 96%   | <a href="#">AAC41996.1</a>     |  |
| <a href="#">paraoxonase PON3 variant G3G3 [synthetic construct]</a>                                                                                                                                                                                                  | 79.5      | 79.5        | 100%        | 3e-15   | 96%   | <a href="#">AAH70374.1</a>     |  |
| <a href="#">paraoxanase-3 [Homo sapiens]</a>                                                                                                                                                                                                                         | 79.5      | 79.5        | 100%        | 3e-15   | 96%   | <a href="#">AAR95991.1</a>     |  |
| <a href="#">PREDICTED: serum paraoxonase/lactonase 3 [Gorilla gorilla gorilla]</a>                                                                                                                                                                                   | 79.5      | 79.5        | 100%        | 3e-15   | 96%   | <a href="#">AAK07629.1</a>     |  |
| <a href="#">PREDICTED: serum paraoxonase/lactonase 3 [Nomascus leucogenys]</a>                                                                                                                                                                                       | 79.5      | 79.5        | 100%        | 3e-15   | 96%   | <a href="#">XP_004045826.1</a> |  |
| <a href="#">PREDICTED: serum paraoxonase/lactonase 3 [Pongo abelii]</a>                                                                                                                                                                                              | 79.5      | 79.5        | 100%        | 3e-15   | 96%   | <a href="#">XP_002818287.1</a> |  |
| <a href="#">PREDICTED: serum paraoxonase/lactonase 3-like [Macaca mulatta]</a>                                                                                                                                                                                       | 79.5      | 79.5        | 100%        | 3e-15   | 96%   | <a href="#">XP_001095770.1</a> |  |
| <a href="#">serum paraoxonase/lactonase 3 [Homo sapiens]</a>                                                                                                                                                                                                         | 79.5      | 79.5        | 100%        | 3e-15   | 96%   | <a href="#">NP_000931.1</a>    |  |
| <a href="#">hCG2023324, isoform CRA_c [Homo sapiens]</a>                                                                                                                                                                                                             | 79.5      | 79.5        | 100%        | 3e-15   | 96%   | <a href="#">EAW76770.1</a>     |  |
| <a href="#">PREDICTED: serum paraoxonase/lactonase 3 [Ictidomys tridecemlineatus]</a>                                                                                                                                                                                | 77.4      | 77.4        | 100%        | 2e-14   | 92%   | <a href="#">XP_005331867.1</a> |  |
| <a href="#">PREDICTED: serum paraoxonase/lactonase 3 isoform X3 [Callithrix jacchus]</a>                                                                                                                                                                             | 76.1      | 76.1        | 100%        | 5e-14   | 92%   | <a href="#">XP_009000653.1</a> |  |
| <a href="#">PREDICTED: serum paraoxonase/lactonase 3 isoform X2 [Callithrix jacchus]</a>                                                                                                                                                                             | 76.1      | 76.1        | 100%        | 5e-14   | 92%   | <a href="#">XP_002751633.1</a> |  |
| <a href="#">PREDICTED: serum paraoxonase/lactonase 3 [Saimiri boliviensis boliviensis]</a>                                                                                                                                                                           | 76.1      | 76.1        | 100%        | 5e-14   | 92%   | <a href="#">XP_003921270.1</a> |  |
| <a href="#">PREDICTED: serum paraoxonase/lactonase 3 isoform X1 [Callithrix jacchus]</a>                                                                                                                                                                             | 76.1      | 76.1        | 100%        | 5e-14   | 92%   | <a href="#">XP_009000652.1</a> |  |
| <a href="#">paraoxonase PON3 variant G3A5 [synthetic construct]</a>                                                                                                                                                                                                  | 75.7      | 75.7        | 100%        | 7e-14   | 92%   | <a href="#">AAR95990.1</a>     |  |
| <a href="#">paraoxonase PON3 variant G3H9 [synthetic construct]</a>                                                                                                                                                                                                  | 75.7      | 75.7        | 100%        | 7e-14   | 92%   | <a href="#">AAR95992.1</a>     |  |
| <a href="#">paraoxonase PON3 variant G1A7 [synthetic construct]</a>                                                                                                                                                                                                  | 75.7      | 75.7        | 100%        | 7e-14   | 92%   | <a href="#">AAR95987.1</a>     |  |
| <a href="#">paraoxonase PON3 variant G2C2 [synthetic construct]</a>                                                                                                                                                                                                  | 75.7      | 75.7        | 100%        | 7e-14   | 92%   | <a href="#">AAR95989.1</a>     |  |
| <a href="#">PREDICTED: serum paraoxonase/lactonase 3 isoform X2 [Papio anubis]</a>                                                                                                                                                                                   | 74.9      | 74.9        | 100%        | 1e-13   | 92%   | <a href="#">AAR95988.1</a>     |  |
| <a href="#">PREDICTED: serum paraoxonase/lactonase 3 [Rhinopithecus roxellana]</a>                                                                                                                                                                                   | 74.9      | 74.9        | 100%        | 1e-13   | 92%   | <a href="#">XP_009201642.1</a> |  |
| <a href="#">PREDICTED: serum paraoxonase/lactonase 3 isoform X1 [Chlorocebus saba]</a>                                                                                                                                                                               | 74.9      | 74.9        | 100%        | 1e-13   | 92%   | <a href="#">XP_010354563.1</a> |  |
| <a href="#">PREDICTED: serum paraoxonase/lactonase 3 isoform X1 [Papio anubis]</a>                                                                                                                                                                                   | 74.9      | 74.9        | 100%        | 1e-13   | 92%   | <a href="#">XP_007980302.1</a> |  |
| <a href="#">Serum paraoxonase/lactonase 3 [Tupaia chinensis]</a>                                                                                                                                                                                                     | 74.9      | 74.9        | 100%        | 1e-13   | 92%   | <a href="#">XP_003896353.1</a> |  |
| <a href="#">PREDICTED: LOW QUALITY PROTEIN: serum paraoxonase/lactonase 3 [Tu]</a>                                                                                                                                                                                   | 74.0      | 74.0        | 100%        | 3e-13   | 88%   | <a href="#">ELW49134.1</a>     |  |
| <a href="#">PREDICTED: serum paraoxonase/lactonase 3 [Fukomys damarensis]</a>                                                                                                                                                                                        | 74.0      | 74.0        | 100%        | 3e-13   | 88%   | <a href="#">XP_006157556.1</a> |  |
| <a href="#">PREDICTED: serum paraoxonase/lactonase 3 [Heterocephalus glaber]</a>                                                                                                                                                                                     | 71.5      | 71.5        | 100%        | 2e-12   | 85%   | <a href="#">XP_010601717.1</a> |  |
| <a href="#">paraoxonase PON3 variant G1B11 [synthetic construct]</a>                                                                                                                                                                                                 | 71.5      | 71.5        | 96%         | 2e-12   | 88%   | <a href="#">XP_004875782.1</a> |  |
| <a href="#">paraoxonase PON3 variant G1B11 [synthetic construct]</a>                                                                                                                                                                                                 | 70.6      | 70.6        | 100%        | 4e-12   | 85%   | <a href="#">AAR95988.1</a>     |  |

|                                                                                             |      |      |      |       |     |                                |
|---------------------------------------------------------------------------------------------|------|------|------|-------|-----|--------------------------------|
| <a href="#">PREDICTED: serum paraoxonase/lactonase 3 [Tarsius syrichta]</a>                 | 70.2 | 70.2 | 100% | 5e-12 | 88% | <a href="#">XP_008061715.1</a> |
| <a href="#">serum paraoxonase/lactonase 3 precursor [Oryctolagus cuniculus]</a>             | 70.2 | 70.2 | 100% | 5e-12 | 85% | <a href="#">NP_001075547.1</a> |
| <a href="#">PREDICTED: serum paraoxonase/lactonase 3 [Trichechus manatus latirostris]</a>   | 69.8 | 69.8 | 92%  | 7e-12 | 92% | <a href="#">XP_004386195.1</a> |
| <a href="#">PREDICTED: serum paraoxonase/lactonase 3 [Chinchilla lanigera]</a>              | 68.9 | 68.9 | 96%  | 1e-11 | 88% | <a href="#">XP_005388120.1</a> |
| <a href="#">PREDICTED: serum paraoxonase/lactonase 3 [Echinops telfairi]</a>                | 67.2 | 67.2 | 96%  | 5e-11 | 84% | <a href="#">XP_004702728.1</a> |
| <a href="#">PREDICTED: serum paraoxonase/lactonase 3 [Otolemur garnettii]</a>               | 67.2 | 67.2 | 96%  | 5e-11 | 88% | <a href="#">XP_003782731.1</a> |
| <a href="#">PREDICTED: serum paraoxonase/lactonase 3 [Nannospalax galii]</a>                | 66.8 | 66.8 | 96%  | 7e-11 | 84% | <a href="#">XP_008820796.1</a> |
| <a href="#">PREDICTED: serum paraoxonase/lactonase 3 [Mesocricetus auratus]</a>             | 66.8 | 66.8 | 96%  | 7e-11 | 84% | <a href="#">XP_005082968.1</a> |
| <a href="#">PREDICTED: serum paraoxonase/lactonase 3 [Cavia porcellus]</a>                  | 66.8 | 66.8 | 96%  | 7e-11 | 84% | <a href="#">XP_003475052.2</a> |
| <a href="#">PREDICTED: serum paraoxonase/lactonase 3 [Galeopterus variegatus]</a>           | 66.4 | 66.4 | 92%  | 1e-10 | 88% | <a href="#">XP_008577501.1</a> |
| <a href="#">PREDICTED: serum paraoxonase/lactonase 3 [Dasypus novemcinctus]</a>             | 66.4 | 66.4 | 92%  | 1e-10 | 88% | <a href="#">XP_004470801.1</a> |
| <a href="#">PREDICTED: serum paraoxonase/arylesterase 2 isoform X2 [Cavia porcellus]</a>    | 64.7 | 64.7 | 92%  | 4e-10 | 88% | <a href="#">XP_005006096.1</a> |
| <a href="#">PREDICTED: serum paraoxonase/lactonase 3 [Microtus ochrogaster]</a>             | 64.7 | 64.7 | 96%  | 4e-10 | 84% | <a href="#">XP_005363748.1</a> |
| <a href="#">PREDICTED: serum paraoxonase/arylesterase 2 isoform X1 [Cavia porcellus]</a>    | 64.7 | 64.7 | 92%  | 4e-10 | 88% | <a href="#">XP_003475053.2</a> |
| <a href="#">PREDICTED: serum paraoxonase/arylesterase 2 [Chinchilla lanigera]</a>           | 64.3 | 64.3 | 92%  | 5e-10 | 88% | <a href="#">XP_005388121.1</a> |
| <a href="#">PREDICTED: serum paraoxonase/arylesterase 2 [Octodon degus]</a>                 | 64.3 | 64.3 | 92%  | 5e-10 | 88% | <a href="#">XP_004632673.1</a> |
| <a href="#">PREDICTED: serum paraoxonase/arylesterase 1-like isoform X3 [Chrysochloris</a>  | 63.8 | 63.8 | 92%  | 7e-10 | 83% | <a href="#">XP_006834338.1</a> |
| <a href="#">Serum paraoxonase/arylesterase 2 [Fukomys damarensis]</a>                       | 63.4 | 63.4 | 92%  | 1e-09 | 83% | <a href="#">KFO23896.1</a>     |
| <a href="#">PREDICTED: serum paraoxonase/arylesterase 2 isoform X2 [Fukomys damar</a>       | 63.4 | 63.4 | 92%  | 1e-09 | 83% | <a href="#">XP_010601716.1</a> |
| <a href="#">PREDICTED: serum paraoxonase/arylesterase 2 isoform X1 [Fukomys damar</a>       | 63.4 | 63.4 | 92%  | 1e-09 | 83% | <a href="#">XP_010601714.1</a> |
| <a href="#">PREDICTED: serum paraoxonase/lactonase 3 [Panthera tigris altaica]</a>          | 63.4 | 63.4 | 92%  | 1e-09 | 83% | <a href="#">XP_007076752.1</a> |
| <a href="#">PREDICTED: serum paraoxonase/arylesterase 2 [Heterocephalus glaber]</a>         | 63.4 | 63.4 | 92%  | 1e-09 | 83% | <a href="#">XP_004875781.1</a> |
| <a href="#">PREDICTED: serum paraoxonase/lactonase 3 [Loxodonta africana]</a>               | 63.0 | 63.0 | 96%  | 1e-09 | 80% | <a href="#">XP_003407179.1</a> |
| <a href="#">PREDICTED: serum paraoxonase/lactonase 3 [Jaculus jaculus]</a>                  | 62.6 | 62.6 | 92%  | 2e-09 | 83% | <a href="#">XP_004656265.1</a> |
| <a href="#">PREDICTED: serum paraoxonase/lactonase 3-like [Lipotes vexillifer]</a>          | 62.1 | 62.1 | 96%  | 2e-09 | 80% | <a href="#">XP_007467394.1</a> |
| <a href="#">PREDICTED: serum paraoxonase/lactonase 3 [Tursiops truncatus]</a>               | 62.1 | 62.1 | 96%  | 3e-09 | 80% | <a href="#">XP_004328323.1</a> |
| <a href="#">PREDICTED: serum paraoxonase/lactonase 3 isoform X3 [Ursus maritimus]</a>       | 62.1 | 62.1 | 92%  | 3e-09 | 83% | <a href="#">XP_008684490.1</a> |
| <a href="#">PREDICTED: serum paraoxonase/lactonase 3 [Physeter catodon]</a>                 | 62.1 | 62.1 | 96%  | 3e-09 | 80% | <a href="#">XP_007117402.1</a> |
| <a href="#">PREDICTED: serum paraoxonase/lactonase 3 isoform X1 [Ursus maritimus]</a>       | 62.1 | 62.1 | 92%  | 3e-09 | 83% | <a href="#">XP_008684487.1</a> |
| <a href="#">PREDICTED: serum paraoxonase/lactonase 3 [Lipotes vexillifer]</a>               | 62.1 | 62.1 | 96%  | 3e-09 | 80% | <a href="#">XP_007450717.1</a> |
| <a href="#">PREDICTED: serum paraoxonase/lactonase 3 [Orcinus orca]</a>                     | 62.1 | 62.1 | 96%  | 3e-09 | 80% | <a href="#">XP_004265625.1</a> |
| <a href="#">Pon3 protein [Mus musculus]</a>                                                 | 61.3 | 61.3 | 88%  | 3e-09 | 83% | <a href="#">AAH05714.1</a>     |
| <a href="#">PREDICTED: serum paraoxonase/arylesterase 2-like isoform 2 [Gorilla gorilla</a> | 61.7 | 61.7 | 92%  | 3e-09 | 83% | <a href="#">XP_004045830.1</a> |
| <a href="#">paraoxonase 2, isoform CRA_d [Homo sapiens]</a>                                 | 61.7 | 61.7 | 92%  | 4e-09 | 83% | <a href="#">EAW76766.1</a>     |
| <a href="#">PREDICTED: serum paraoxonase/arylesterase 2-like isoform 1 [Gorilla gorilla</a> | 61.7 | 61.7 | 92%  | 4e-09 | 83% | <a href="#">XP_004045829.1</a> |
| <a href="#">PREDICTED: serum paraoxonase/arylesterase 2 isoform X2 [Homo sapiens]</a>       | 61.7 | 61.7 | 92%  | 4e-09 | 83% | <a href="#">XP_005250511.1</a> |
| <a href="#">PREDICTED: serum paraoxonase/arylesterase 2 isoform X2 [Pongo abelii]</a>       | 61.7 | 61.7 | 92%  | 4e-09 | 83% | <a href="#">XP_009241272.1</a> |
| <a href="#">PREDICTED: serum paraoxonase/arylesterase 2 isoform X1 [Homo sapiens]</a>       | 61.7 | 61.7 | 92%  | 4e-09 | 83% | <a href="#">XP_005250510.1</a> |
| <a href="#">PREDICTED: serum paraoxonase/arylesterase 2 isoform X3 [Galeopterus var</a>     | 61.7 | 61.7 | 92%  | 4e-09 | 83% | <a href="#">XP_008577500.1</a> |
| <a href="#">PREDICTED: serum paraoxonase/arylesterase 2 isoform X2 [Orycteropus afe</a>     | 61.7 | 61.7 | 92%  | 4e-09 | 83% | <a href="#">XP_007937984.1</a> |
| <a href="#">unnamed protein product [Homo sapiens]</a>                                      | 61.7 | 61.7 | 92%  | 4e-09 | 83% | <a href="#">BAG58797.1</a>     |
| <a href="#">serum paraoxonase/arylesterase 2 isoform 2 [Homo sapiens]</a>                   | 61.7 | 61.7 | 92%  | 4e-09 | 83% | <a href="#">NP_001018171.1</a> |
| <a href="#">paraoxonase nirs variant 1 [Homo sapiens]</a>                                   | 61.7 | 61.7 | 92%  | 4e-09 | 83% | <a href="#">BAD89420.1</a>     |
| <a href="#">PREDICTED: serum paraoxonase/lactonase 3 [Octodon degus]</a>                    | 61.7 | 61.7 | 84%  | 4e-09 | 86% | <a href="#">XP_004632934.1</a> |
| <a href="#">PREDICTED: serum paraoxonase/arylesterase 2 [Loxodonta africana]</a>            | 61.7 | 61.7 | 92%  | 4e-09 | 83% | <a href="#">XP_010585559.1</a> |

|                                                                                             |      |      |     |       |     |                                |
|---------------------------------------------------------------------------------------------|------|------|-----|-------|-----|--------------------------------|
| <a href="#">PREDICTED: serum paraoxonase/arylesterase 2 isoform X2 [Galeopterus var</a>     | 61.7 | 61.7 | 92% | 4e-09 | 83% | <a href="#">XP_008577499.1</a> |
| <a href="#">PREDICTED: serum paraoxonase/arylesterase 2 isoform X1 [Orycteropus afe</a>     | 61.7 | 61.7 | 92% | 4e-09 | 83% | <a href="#">XP_007937983.1</a> |
| <a href="#">PREDICTED: serum paraoxonase/arylesterase 2 [Oryctolagus cuniculus]</a>         | 61.7 | 61.7 | 92% | 4e-09 | 83% | <a href="#">XP_002713838.1</a> |
| <a href="#">unnamed protein product [Homo sapiens]</a>                                      | 61.7 | 61.7 | 92% | 4e-09 | 83% | <a href="#">BAG37646.1</a>     |
| <a href="#">paraoxonase [Homo sapiens]</a>                                                  | 61.7 | 61.7 | 92% | 4e-09 | 83% | <a href="#">AAC27944.1</a>     |
| <a href="#">paraoxonase 2 [Homo sapiens]</a>                                                | 61.7 | 61.7 | 92% | 4e-09 | 83% | <a href="#">AAC41995.1</a>     |
| <a href="#">PREDICTED: serum paraoxonase/lactonase 3 [Erinaceus europaeus]</a>              | 61.7 | 61.7 | 84% | 4e-09 | 86% | <a href="#">XP_007538317.1</a> |
| <a href="#">RecName: Full=Serum paraoxonase/arylesterase 2; Short=PON 2; AltName: I</a>     | 61.7 | 61.7 | 92% | 4e-09 | 83% | <a href="#">Q15165.3</a>       |
| <a href="#">serum paraoxonase/arylesterase 2 precursor [Sus scrofa]</a>                     | 61.7 | 61.7 | 92% | 4e-09 | 83% | <a href="#">NP_001116695.1</a> |
| <a href="#">serum paraoxonase/arylesterase 2 isoform 1 [Homo sapiens]</a>                   | 61.7 | 61.7 | 92% | 4e-09 | 83% | <a href="#">NP_000296.2</a>    |
| <a href="#">PREDICTED: serum paraoxonase/arylesterase 2 isoform X1 [Galeopterus var</a>     | 61.7 | 61.7 | 92% | 4e-09 | 83% | <a href="#">XP_008577498.1</a> |
| <a href="#">PREDICTED: serum paraoxonase/arylesterase 2 isoform X2 [Callithrix jacchu</a>   | 61.7 | 61.7 | 92% | 4e-09 | 83% | <a href="#">XP_002751632.1</a> |
| <a href="#">unnamed protein product [Homo sapiens]</a>                                      | 61.7 | 61.7 | 92% | 4e-09 | 83% | <a href="#">BAG59238.1</a>     |
| <a href="#">PREDICTED: serum paraoxonase/arylesterase 2 isoform 2 [Gorilla gorilla gori</a> | 61.7 | 61.7 | 92% | 4e-09 | 83% | <a href="#">XP_004045828.1</a> |
| <a href="#">PREDICTED: serum paraoxonase/arylesterase 2 isoform X2 [Macaca fascicu</a>      | 61.7 | 61.7 | 92% | 4e-09 | 83% | <a href="#">XP_005550230.1</a> |
| <a href="#">PREDICTED: serum paraoxonase/arylesterase 2 isoform X2 [Pan paniscus]</a>       | 61.7 | 61.7 | 92% | 4e-09 | 83% | <a href="#">XP_003809758.1</a> |
| <a href="#">PREDICTED: serum paraoxonase/arylesterase 2 isoform X2 [Pan troglodytes</a>     | 61.7 | 61.7 | 92% | 4e-09 | 83% | <a href="#">XP_001170049.2</a> |
| <a href="#">PREDICTED: serum paraoxonase/arylesterase 2 isoform 2 [Nomascus leuco</a>       | 61.7 | 61.7 | 92% | 4e-09 | 83% | <a href="#">XP_003252566.1</a> |
| <a href="#">PREDICTED: serum paraoxonase/arylesterase 2-like isoform 1 [Macaca mula</a>     | 61.7 | 61.7 | 92% | 4e-09 | 83% | <a href="#">XP_001094896.2</a> |
| <a href="#">paraoxonase 2, isoform CRA_b [Homo sapiens]</a>                                 | 61.7 | 61.7 | 92% | 4e-09 | 83% | <a href="#">EAW76764.1</a>     |
| <a href="#">PREDICTED: serum paraoxonase/arylesterase 2 [Rhinopithecus roxellana]</a>       | 61.7 | 61.7 | 92% | 4e-09 | 83% | <a href="#">XP_010354564.1</a> |
| <a href="#">PREDICTED: serum paraoxonase/arylesterase 2 [Chlorocebus sabaeus]</a>           | 61.7 | 61.7 | 92% | 4e-09 | 83% | <a href="#">XP_007980304.1</a> |
| <a href="#">PREDICTED: serum paraoxonase/arylesterase 2 isoform 1 [Gorilla gorilla gori</a> | 61.7 | 61.7 | 92% | 4e-09 | 83% | <a href="#">XP_004045827.1</a> |
| <a href="#">PREDICTED: serum paraoxonase/arylesterase 2 [Saimiri boliviensis boliviens</a>  | 61.7 | 61.7 | 92% | 4e-09 | 83% | <a href="#">XP_003921271.1</a> |
| <a href="#">PREDICTED: serum paraoxonase/arylesterase 2 isoform X1 [Pan paniscus]</a>       | 61.7 | 61.7 | 92% | 4e-09 | 83% | <a href="#">XP_003809757.1</a> |
| <a href="#">hypothetical protein EGM_12758 [Macaca fascicularis]</a>                        | 61.7 | 61.7 | 92% | 4e-09 | 83% | <a href="#">EHH52331.1</a>     |

## Alignments

[Download](#) [GenPept](#) [Graphics](#)

[Next](#) [Previous](#) [Descriptions](#)

PREDICTED: serum paraoxonase/lactonase 3 isoform X2 [Macaca fascicularis]

Sequence ID: [ref|XP\\_005550232.1|](#) Length: 327 Number of Matches: 1

Range 1: 288 to 313 [GenPept](#) [Graphics](#)

[Next Match](#) [Previous Match](#)

| Score          | Expect | Identities | Positives   | Gaps     |
|----------------|--------|------------|-------------|----------|
| 79.5 bits(180) | 3e-15  | 25/26(96%) | 26/26(100%) | 0/26(0%) |

Query 1 RVSTVYANDGSVLQGTSVASVYHGKI 26  
 RVSTVYAN+GSVLQGTSVASVYHGKI  
 Sbjct 288 RVSTVYANNNGSVLQGTSVASVYHGKI 313

### Related Information

[Gene](#) - associated gene details

[Download](#) [GenPept](#) [Graphics](#)

[Next](#) [Previous](#) [Descriptions](#)

paraoxonase-3, partial [Homo sapiens]

Sequence ID: [gb|AAC41996.1|](#) Length: 341 Number of Matches: 1

Range 1: 302 to 327 [GenPept](#) [Graphics](#)

[Next Match](#) [Previous Match](#)

| Score          | Expect | Identities | Positives   | Gaps     |
|----------------|--------|------------|-------------|----------|
| 79.5 bits(180) | 3e-15  | 25/26(96%) | 26/26(100%) | 0/26(0%) |

### Related Information

[Gene](#) - associated gene details

Query 1 RVSTVYANDGSLVQGTSVASVYHGKI 26  
 RVSTVYAN+GSLVQGTSVASVYHGKI  
 Sbjct 302 RVSTVYANNGSLVQGTSVASVYHGKI 327

Download [GenPept](#) [Graphics](#)

[▼ Next](#) [▲ Previous](#) [▲ Descriptions](#)

**Paraoxonase 3 [Homo sapiens]**

Sequence ID: [gb|AAH70374.1](#) Length: 354 Number of Matches: 1

[▶ See 1 more title\(s\)](#)

Range 1: 315 to 340 [GenPept](#) [Graphics](#)

[▼ Next Match](#) [▲ Previous Match](#)

| Score          | Expect | Identities | Positives   | Gaps     |
|----------------|--------|------------|-------------|----------|
| 79.5 bits(180) | 3e-15  | 25/26(96%) | 26/26(100%) | 0/26(0%) |

Query 1 RVSTVYANDGSLVQGTSVASVYHGKI 26  
 RVSTVYAN+GSLVQGTSVASVYHGKI  
 Sbjct 315 RVSTVYANNGSLVQGTSVASVYHGKI 340

**Related Information**

[Gene](#) - associated gene details  
[Identical Proteins](#) - Proteins identical to the subject

Download [GenPept](#) [Graphics](#)

[▼ Next](#) [▲ Previous](#) [▲ Descriptions](#)

**paraoxonase PON3 variant G3G3, partial [synthetic construct]**

Sequence ID: [gb|AAR95991.1](#) Length: 354 Number of Matches: 1

Range 1: 315 to 340 [GenPept](#) [Graphics](#)

[▼ Next Match](#) [▲ Previous Match](#)

| Score          | Expect | Identities | Positives   | Gaps     |
|----------------|--------|------------|-------------|----------|
| 79.5 bits(180) | 3e-15  | 25/26(96%) | 26/26(100%) | 0/26(0%) |

Query 1 RVSTVYANDGSLVQGTSVASVYHGKI 26  
 RVSTVYAN+GSLVQGTSVASVYHGKI  
 Sbjct 315 RVSTVYANNGSLVQGTSVASVYHGKI 340

**Related Information**

[Gene](#) - associated gene details

Download [GenPept](#) [Graphics](#)

[▼ Next](#) [▲ Previous](#) [▲ Descriptions](#)

**paraoxanase-3 [Homo sapiens]**

Sequence ID: [gb|AAK07629.1](#) Length: 354 Number of Matches: 1

Range 1: 315 to 340 [GenPept](#) [Graphics](#)

[▼ Next Match](#) [▲ Previous Match](#)

| Score          | Expect | Identities | Positives   | Gaps     |
|----------------|--------|------------|-------------|----------|
| 79.5 bits(180) | 3e-15  | 25/26(96%) | 26/26(100%) | 0/26(0%) |

Query 1 RVSTVYANDGSLVQGTSVASVYHGKI 26  
 RVSTVYAN+GSLVQGTSVASVYHGKI  
 Sbjct 315 RVSTVYANNGSLVQGTSVASVYHGKI 340

**Related Information**

[Gene](#) - associated gene details

BLAST is a registered trademark of the National Library of Medicine.

NCBI/ BLAST/ blastp suite/ Formatting Results - BE879JR0014

Your search parameters were adjusted to search for a short input sequence.

[Edit and Resubmit](#) [Save Search Strategies](#) [Formatting options](#) [Download](#)

[YouTube](#) [How to read this page](#) [Blast report description](#)

### PON3\_RVSTVYANNGSVLQGTSVASVYHGKI\_NonMod

RID [BE879JR0014](#) (Expires on 01-16 09:07 am)

Query ID |cl|34172  
 Description None  
 Molecule type amino acid  
 Query Length 26

Database Name nr  
 Description All non-redundant GenBank CDS translations+PDB+SwissProt+PIR excluding environmental samples from WGS projects  
 Program BLASTP 2.2.30+ [Citation](#)

Other reports: [Search Summary](#) [Taxonomy reports](#) [Distance tree of results](#) [Multiple alignment](#)

### Graphic Summary

[Show Conserved Domains](#)

No putative conserved domains have been detected

Distribution of 100 Blast Hits on the Query Sequence

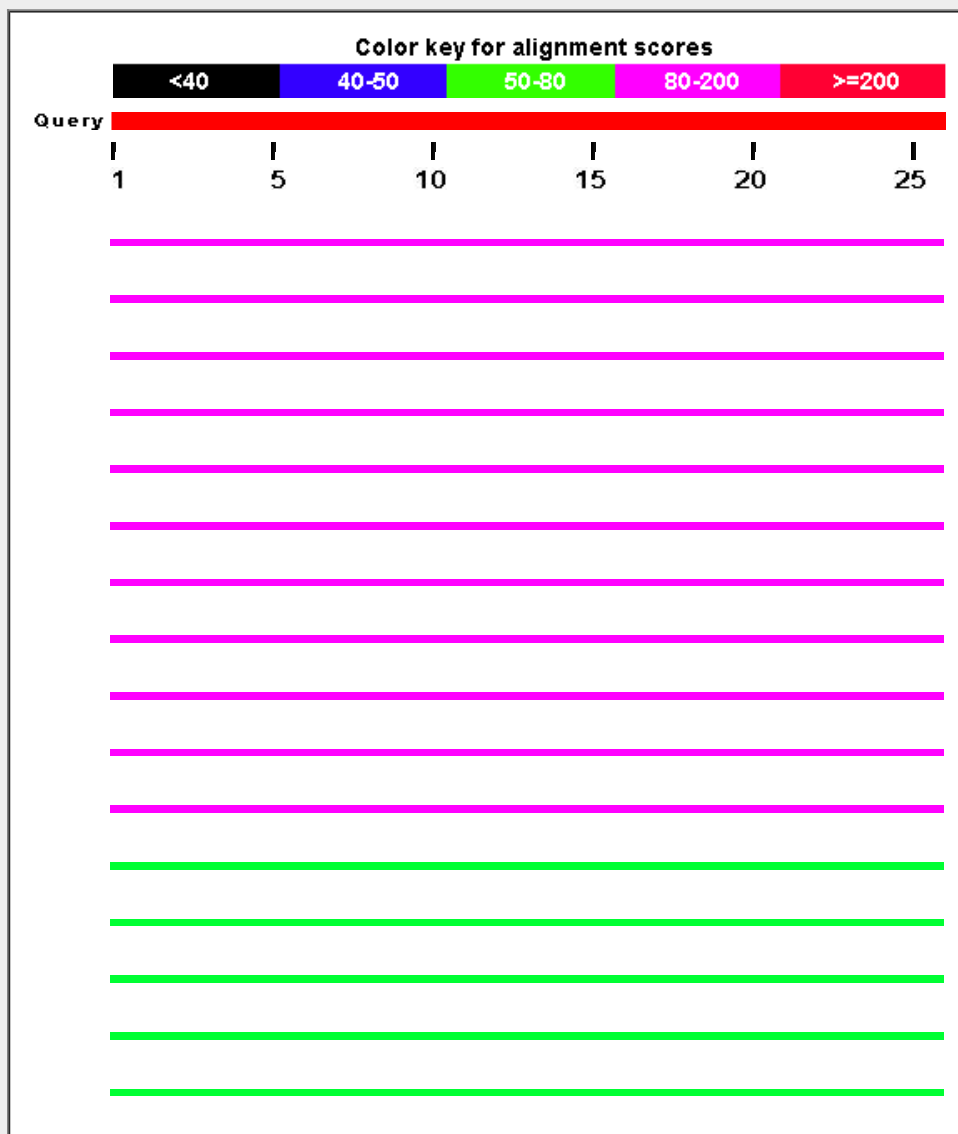

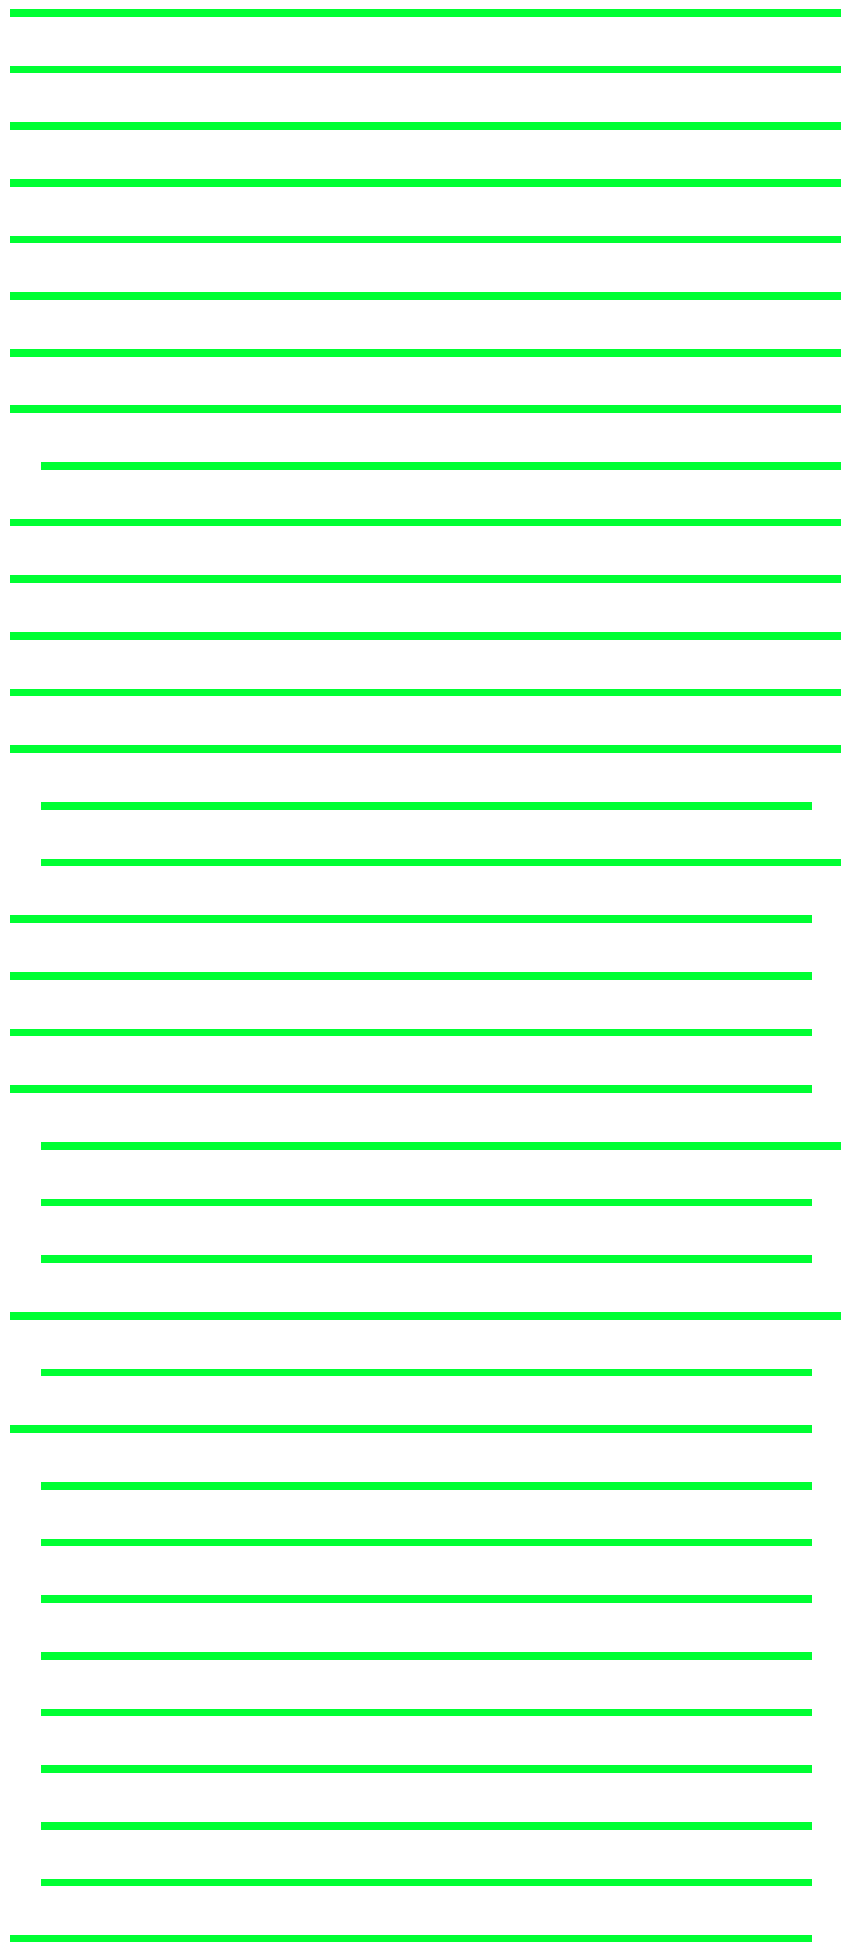



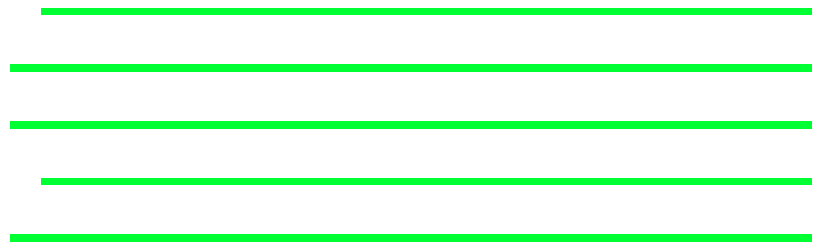

**Descriptions**

**Sequences producing significant alignments:**

Select: [All](#) [None](#) Selected:0

[Alignments](#)
[Download](#)
[GenPept](#)
[Graphics](#)
[Distance tree of results](#)
[Multiple alignment](#)

| Description                                                                                              | Max score | Total score | Query cover | E value | Ident | Accession                                   |
|----------------------------------------------------------------------------------------------------------|-----------|-------------|-------------|---------|-------|---------------------------------------------|
| <a href="#">PREDICTED: serum paraoxonase/lactonase 3 isoform X2 [Macaca paraoxonase-3 [Homo sapiens]</a> | 82.1      | 82.1        | 100%        | 4e-16   | 100%  | <a href="#">gij544421401 XP_005550232.1</a> |
| <a href="#">Paraoxonase 3 [Homo sapiens]</a>                                                             | 82.1      | 82.1        | 100%        | 4e-16   | 100%  | <a href="#">gij1333634 AAC41996.1</a>       |
| <a href="#">paraoxonase PON3 variant G3G3 [synthetic construct]</a>                                      | 82.1      | 82.1        | 100%        | 4e-16   | 100%  | <a href="#">gij47682431 AAH70374.1</a>      |
| <a href="#">paraoxanase-3 [Homo sapiens]</a>                                                             | 82.1      | 82.1        | 100%        | 4e-16   | 100%  | <a href="#">gij40850554 AAR95991.1</a>      |
| <a href="#">paraoxanase-3 [Homo sapiens]</a>                                                             | 82.1      | 82.1        | 100%        | 4e-16   | 100%  | <a href="#">gij12751374 AAK07629.1</a>      |
| <a href="#">PREDICTED: serum paraoxonase/lactonase 3 [Gorilla gorilla gorilla]</a>                       | 82.1      | 82.1        | 100%        | 4e-16   | 100%  | <a href="#">gij426356977 XP_004045826.1</a> |
| <a href="#">PREDICTED: serum paraoxonase/lactonase 3 [Nomascus leucogae]</a>                             | 82.1      | 82.1        | 100%        | 4e-16   | 100%  | <a href="#">gij332206964 XP_003252564.1</a> |
| <a href="#">PREDICTED: serum paraoxonase/lactonase 3 [Pongo abelii]</a>                                  | 82.1      | 82.1        | 100%        | 4e-16   | 100%  | <a href="#">gij297681036 XP_002818287.1</a> |
| <a href="#">PREDICTED: serum paraoxonase/lactonase 3-like [Macaca mulatta]</a>                           | 82.1      | 82.1        | 100%        | 4e-16   | 100%  | <a href="#">gij109067456 XP_001095770.1</a> |
| <a href="#">serum paraoxonase/lactonase 3 [Homo sapiens]</a>                                             | 82.1      | 82.1        | 100%        | 4e-16   | 100%  | <a href="#">gij29788996 NP_000931.1</a>     |
| <a href="#">hCG2023324, isoform CRA_c [Homo sapiens]</a>                                                 | 82.1      | 82.1        | 100%        | 5e-16   | 100%  | <a href="#">gij119597176 EAW76770.1</a>     |
| <a href="#">PREDICTED: serum paraoxonase/lactonase 3 [Ictidomys tridecemlineatus]</a>                    | 80.0      | 80.0        | 100%        | 2e-15   | 96%   | <a href="#">gij532092367 XP_005331867.1</a> |
| <a href="#">PREDICTED: serum paraoxonase/lactonase 3 isoform X3 [Callithrix jacchus]</a>                 | 78.7      | 78.7        | 100%        | 6e-15   | 96%   | <a href="#">gij675673198 XP_009000653.1</a> |
| <a href="#">PREDICTED: serum paraoxonase/lactonase 3 isoform X2 [Callithrix jacchus]</a>                 | 78.7      | 78.7        | 100%        | 6e-15   | 96%   | <a href="#">gij296209660 XP_002751633.1</a> |
| <a href="#">PREDICTED: serum paraoxonase/lactonase 3 [Saimiri boliviensis boliviensis]</a>               | 78.7      | 78.7        | 100%        | 6e-15   | 96%   | <a href="#">gij403257318 XP_003921270.1</a> |
| <a href="#">PREDICTED: serum paraoxonase/lactonase 3 isoform X1 [Callithrix jacchus]</a>                 | 78.7      | 78.7        | 100%        | 7e-15   | 96%   | <a href="#">gij675673195 XP_009000652.1</a> |
| <a href="#">paraoxonase PON3 variant G1A7 [synthetic construct]</a>                                      | 78.3      | 78.3        | 100%        | 9e-15   | 96%   | <a href="#">gij40850546 AAR95987.1</a>      |
| <a href="#">PREDICTED: serum paraoxonase/lactonase 3 isoform X2 [Papio anubis]</a>                       | 77.4      | 77.4        | 100%        | 2e-14   | 96%   | <a href="#">gij685532002 XP_009201642.1</a> |
| <a href="#">PREDICTED: serum paraoxonase/lactonase 3 [Rhinopithecus roxellana]</a>                       | 77.4      | 77.4        | 100%        | 2e-14   | 96%   | <a href="#">gij724960789 XP_010354563.1</a> |
| <a href="#">PREDICTED: serum paraoxonase/lactonase 3 isoform X1 [Chlorocebus sabaeus]</a>                | 77.4      | 77.4        | 100%        | 2e-14   | 96%   | <a href="#">gij635114722 XP_007980302.1</a> |
| <a href="#">PREDICTED: serum paraoxonase/lactonase 3 isoform X1 [Papio anubis]</a>                       | 77.4      | 77.4        | 100%        | 2e-14   | 96%   | <a href="#">gij402864178 XP_003896353.1</a> |
| <a href="#">Serum paraoxonase/lactonase 3 [Tupaia chinensis]</a>                                         | 76.6      | 76.6        | 100%        | 3e-14   | 92%   | <a href="#">gij444708006 ELW49134.1</a>     |
| <a href="#">PREDICTED: LOW QUALITY PROTEIN: serum paraoxonase/lactonase 3 [Homo sapiens]</a>             | 76.6      | 76.6        | 100%        | 3e-14   | 92%   | <a href="#">gij562858158 XP_006157556.1</a> |
| <a href="#">PREDICTED: serum paraoxonase/lactonase 3 [Fukomys damarensis]</a>                            | 74.0      | 74.0        | 100%        | 3e-13   | 88%   | <a href="#">gij731264517 XP_010601717.1</a> |
| <a href="#">PREDICTED: serum paraoxonase/lactonase 3 [Heterocephalus glaberrimus]</a>                    | 74.0      | 74.0        | 96%         | 3e-13   | 92%   | <a href="#">gij512808025 XP_004875782.1</a> |
| <a href="#">paraoxonase PON3 variant G3A5 [synthetic construct]</a>                                      | 73.2      | 73.2        | 100%        | 5e-13   | 88%   | <a href="#">gij40850552 AAR95990.1</a>      |
| <a href="#">paraoxonase PON3 variant G3H9 [synthetic construct]</a>                                      | 73.2      | 73.2        | 100%        | 5e-13   | 88%   | <a href="#">gij40850556 AAR95992.1</a>      |
| <a href="#">paraoxonase PON3 variant G1B11 [synthetic construct]</a>                                     | 73.2      | 73.2        | 100%        | 5e-13   | 88%   | <a href="#">gij40850548 AAR95988.1</a>      |

|                                                                                                |      |      |      |       |     |                                             |
|------------------------------------------------------------------------------------------------|------|------|------|-------|-----|---------------------------------------------|
| paraoxonase PON3 variant G2C2 [synthetic construct]                                            | 73.2 | 73.2 | 100% | 5e-13 | 88% | <a href="#">gij40850550 AAR95989.1</a>      |
| <a href="#">PREDICTED: serum paraoxonase/lactonase 3 [Tarsius syrichta]</a>                    | 72.7 | 72.7 | 100% | 7e-13 | 92% | <a href="#">gij640810272 XP_008061715.1</a> |
| <a href="#">PREDICTED: serum paraoxonase/lactonase 3 [Trichechus manatus]</a>                  | 72.3 | 72.3 | 92%  | 1e-12 | 96% | <a href="#">gij471409235 XP_004386195.1</a> |
| <a href="#">PREDICTED: serum paraoxonase/lactonase 3 [Chinchilla lanigera]</a>                 | 71.5 | 71.5 | 96%  | 2e-12 | 92% | <a href="#">gij533147430 XP_005388120.1</a> |
| <a href="#">PREDICTED: serum paraoxonase/lactonase 3 [Echinops telfairii]</a>                  | 69.8 | 69.8 | 96%  | 7e-12 | 88% | <a href="#">gij507645867 XP_004702728.1</a> |
| <a href="#">PREDICTED: serum paraoxonase/lactonase 3 [Otolemur garnettii]</a>                  | 69.8 | 69.8 | 96%  | 7e-12 | 92% | <a href="#">gij395818644 XP_003782731.1</a> |
| <a href="#">PREDICTED: serum paraoxonase/lactonase 3 [Nannospalax galii]</a>                   | 69.4 | 69.4 | 96%  | 1e-11 | 88% | <a href="#">gij674094968 XP_008820796.1</a> |
| <a href="#">PREDICTED: serum paraoxonase/lactonase 3 [Mesocricetus auratus]</a>                | 69.4 | 69.4 | 96%  | 1e-11 | 88% | <a href="#">gij524966130 XP_005082968.1</a> |
| <a href="#">PREDICTED: serum paraoxonase/lactonase 3 [Cavia porcellus]</a>                     | 69.4 | 69.4 | 96%  | 1e-11 | 88% | <a href="#">gij514471180 XP_003475052.2</a> |
| <a href="#">PREDICTED: serum paraoxonase/lactonase 3 [Galeopterus variegatus]</a>              | 68.9 | 68.9 | 92%  | 1e-11 | 92% | <a href="#">gij667290365 XP_008577501.1</a> |
| <a href="#">PREDICTED: serum paraoxonase/lactonase 3 [Dasypus novemcinctus]</a>                | 68.9 | 68.9 | 92%  | 1e-11 | 92% | <a href="#">gij488562159 XP_004470801.1</a> |
| <a href="#">serum paraoxonase/lactonase 3 precursor [Oryctolagus cuniculus]</a>                | 67.7 | 67.7 | 100% | 4e-11 | 81% | <a href="#">gij126723032 NP_001075547.1</a> |
| <a href="#">PREDICTED: serum paraoxonase/arylesterase 2 isoform X2 [Cavia porcellus]</a>       | 67.2 | 67.2 | 92%  | 5e-11 | 92% | <a href="#">gij514471184 XP_005006096.1</a> |
| <a href="#">PREDICTED: serum paraoxonase/lactonase 3 [Microtus ochrogaster]</a>                | 67.2 | 67.2 | 96%  | 5e-11 | 88% | <a href="#">gij532041816 XP_005363748.1</a> |
| <a href="#">PREDICTED: serum paraoxonase/arylesterase 2 isoform X1 [Cavia porcellus]</a>       | 67.2 | 67.2 | 92%  | 5e-11 | 92% | <a href="#">gij514471182 XP_003475053.2</a> |
| <a href="#">PREDICTED: serum paraoxonase/arylesterase 2 [Chinchilla lanigera]</a>              | 66.8 | 66.8 | 92%  | 7e-11 | 92% | <a href="#">gij533147432 XP_005388121.1</a> |
| <a href="#">PREDICTED: serum paraoxonase/arylesterase 2 [Octodon degus]</a>                    | 66.8 | 66.8 | 92%  | 7e-11 | 92% | <a href="#">gij507650678 XP_004632673.1</a> |
| <a href="#">Serum paraoxonase/arylesterase 2 [Fukomys damarensis]</a>                          | 66.0 | 66.0 | 92%  | 1e-10 | 88% | <a href="#">gij676268318 KFO23896.1</a>     |
| <a href="#">PREDICTED: serum paraoxonase/arylesterase 2 isoform X2 [Fukomys damarensis]</a>    | 66.0 | 66.0 | 92%  | 1e-10 | 88% | <a href="#">gij731264515 XP_010601716.1</a> |
| <a href="#">PREDICTED: serum paraoxonase/arylesterase 2 isoform X1 [Fukomys damarensis]</a>    | 66.0 | 66.0 | 92%  | 1e-10 | 88% | <a href="#">gij731264513 XP_010601714.1</a> |
| <a href="#">PREDICTED: serum paraoxonase/lactonase 3 [Panthera tigris altaica]</a>             | 66.0 | 66.0 | 92%  | 1e-10 | 88% | <a href="#">gij591299463 XP_007076752.1</a> |
| <a href="#">PREDICTED: serum paraoxonase/arylesterase 2 [Heterocephalus glaber]</a>            | 66.0 | 66.0 | 92%  | 1e-10 | 88% | <a href="#">gij512808023 XP_004875781.1</a> |
| <a href="#">PREDICTED: serum paraoxonase/lactonase 3 [Loxodonta africana]</a>                  | 65.5 | 65.5 | 96%  | 2e-10 | 84% | <a href="#">gij344270695 XP_003407179.1</a> |
| <a href="#">PREDICTED: serum paraoxonase/lactonase 3 [Jaculus jaculus]</a>                     | 65.1 | 65.1 | 92%  | 3e-10 | 88% | <a href="#">gij507544585 XP_004656265.1</a> |
| <a href="#">PREDICTED: serum paraoxonase/lactonase 3-like [Lipotes vexillifer]</a>             | 64.7 | 64.7 | 96%  | 3e-10 | 84% | <a href="#">gij602714358 XP_007467394.1</a> |
| <a href="#">PREDICTED: serum paraoxonase/lactonase 3 [Tursiops truncatus]</a>                  | 64.7 | 64.7 | 96%  | 4e-10 | 84% | <a href="#">gij470649612 XP_004328323.1</a> |
| <a href="#">PREDICTED: serum paraoxonase/lactonase 3 isoform X3 [Ursus maritimus]</a>          | 64.7 | 64.7 | 92%  | 4e-10 | 88% | <a href="#">gij670986874 XP_008684490.1</a> |
| <a href="#">PREDICTED: serum paraoxonase/lactonase 3 [Physeter catodon]</a>                    | 64.7 | 64.7 | 96%  | 4e-10 | 84% | <a href="#">gij593757173 XP_007117402.1</a> |
| <a href="#">PREDICTED: serum paraoxonase/lactonase 3 isoform X1 [Ursus maritimus]</a>          | 64.7 | 64.7 | 92%  | 4e-10 | 88% | <a href="#">gij670986870 XP_008684487.1</a> |
| <a href="#">PREDICTED: serum paraoxonase/lactonase 3 [Lipotes vexillifer]</a>                  | 64.7 | 64.7 | 96%  | 4e-10 | 84% | <a href="#">gij602730612 XP_007450717.1</a> |
| <a href="#">PREDICTED: serum paraoxonase/lactonase 3 [Orcinus orca]</a>                        | 64.7 | 64.7 | 96%  | 4e-10 | 84% | <a href="#">gij465984490 XP_004265625.1</a> |
| <a href="#">Pon3 protein [Mus musculus]</a>                                                    | 63.8 | 63.8 | 88%  | 4e-10 | 87% | <a href="#">gij13543076 AAH05714.1</a>      |
| <a href="#">PREDICTED: serum paraoxonase/arylesterase 2-like isoform 2 [Gorilla gorilla]</a>   | 64.3 | 64.3 | 92%  | 5e-10 | 88% | <a href="#">gij426356985 XP_004045830.1</a> |
| <a href="#">paraoxonase 2, isoform CRA_d [Homo sapiens]</a>                                    | 64.3 | 64.3 | 92%  | 5e-10 | 88% | <a href="#">gij119597172 EAW76766.1</a>     |
| <a href="#">PREDICTED: serum paraoxonase/arylesterase 2-like isoform 1 [Gorilla gorilla]</a>   | 64.3 | 64.3 | 92%  | 5e-10 | 88% | <a href="#">gij426356983 XP_004045829.1</a> |
| <a href="#">PREDICTED: serum paraoxonase/arylesterase 2 isoform X2 [Homo sapiens]</a>          | 64.3 | 64.3 | 92%  | 5e-10 | 88% | <a href="#">gij530386130 XP_005250511.1</a> |
| <a href="#">PREDICTED: serum paraoxonase/arylesterase 2 isoform X2 [Pongo pygmaeus]</a>        | 64.3 | 64.3 | 92%  | 5e-10 | 88% | <a href="#">gij686725757 XP_009241272.1</a> |
| <a href="#">PREDICTED: serum paraoxonase/arylesterase 2 isoform X1 [Homo sapiens]</a>          | 64.3 | 64.3 | 92%  | 5e-10 | 88% | <a href="#">gij530386128 XP_005250510.1</a> |
| <a href="#">PREDICTED: serum paraoxonase/arylesterase 2 isoform X3 [Galea mustelina]</a>       | 64.3 | 64.3 | 92%  | 5e-10 | 88% | <a href="#">gij667290361 XP_008577500.1</a> |
| <a href="#">PREDICTED: serum paraoxonase/arylesterase 2 isoform X2 [Oryctolagus cuniculus]</a> | 64.3 | 64.3 | 92%  | 5e-10 | 88% | <a href="#">gij634845273 XP_007937984.1</a> |
| <a href="#">unnamed protein product [Homo sapiens]</a>                                         | 64.3 | 64.3 | 92%  | 5e-10 | 88% | <a href="#">gij194382084 BAG58797.1</a>     |
| <a href="#">serum paraoxonase/arylesterase 2 isoform 2 [Homo sapiens]</a>                      | 64.3 | 64.3 | 92%  | 5e-10 | 88% | <a href="#">gij66529396 NP_001018171.1</a>  |
| <a href="#">paraoxonase nirs variant 1 [Homo sapiens]</a>                                      | 64.3 | 64.3 | 92%  | 5e-10 | 88% | <a href="#">gij58737023 BAD89420.1</a>      |
| <a href="#">PREDICTED: serum paraoxonase/lactonase 3 [Octodon degus]</a>                       | 64.3 | 64.3 | 84%  | 5e-10 | 91% | <a href="#">gij507651723 XP_004632934.1</a> |
| <a href="#">PREDICTED: serum paraoxonase/arylesterase 2 [Loxodonta africana]</a>               | 64.3 | 64.3 | 92%  | 5e-10 | 88% | <a href="#">gij731461644 XP_010585559.1</a> |

|                                                                                 |      |      |     |       |     |                                             |
|---------------------------------------------------------------------------------|------|------|-----|-------|-----|---------------------------------------------|
| <a href="#">PREDICTED: serum paraoxonase/arylesterase 2 isoform X2 [Galec</a>   | 64.3 | 64.3 | 92% | 5e-10 | 88% | <a href="#">gij667290358 XP_008577499.1</a> |
| <a href="#">PREDICTED: serum paraoxonase/arylesterase 2 isoform X1 [Oryct</a>   | 64.3 | 64.3 | 92% | 5e-10 | 88% | <a href="#">gij634845270 XP_007937983.1</a> |
| <a href="#">PREDICTED: serum paraoxonase/arylesterase 2 [Oryctolagus cuni</a>   | 64.3 | 64.3 | 92% | 5e-10 | 88% | <a href="#">gij291394781 XP_002713838.1</a> |
| <a href="#">unnamed protein product [Homo sapiens]</a>                          | 64.3 | 64.3 | 92% | 5e-10 | 88% | <a href="#">gij189054815 BAG37646.1</a>     |
| <a href="#">paraoxonase [Homo sapiens]</a>                                      | 64.3 | 64.3 | 92% | 5e-10 | 88% | <a href="#">gij2228775 AAC27944.1</a>       |
| <a href="#">paraoxonase 2 [Homo sapiens]</a>                                    | 64.3 | 64.3 | 92% | 5e-10 | 88% | <a href="#">gij1333632 AAC41995.1</a>       |
| <a href="#">RecName: Full=Serum paraoxonase/arylesterase 2; Short=PON 2;</a>    | 64.3 | 64.3 | 92% | 5e-10 | 88% | <a href="#">gij325511384 Q15165.3</a>       |
| <a href="#">serum paraoxonase/arylesterase 2 precursor [Sus scrofa]</a>         | 64.3 | 64.3 | 92% | 5e-10 | 88% | <a href="#">gij178056462 NP_001116695.1</a> |
| <a href="#">serum paraoxonase/arylesterase 2 isoform 1 [Homo sapiens]</a>       | 64.3 | 64.3 | 92% | 5e-10 | 88% | <a href="#">gij66529294 NP_000296.2</a>     |
| <a href="#">PREDICTED: serum paraoxonase/arylesterase 2 isoform X1 [Galec</a>   | 64.3 | 64.3 | 92% | 5e-10 | 88% | <a href="#">gij667290354 XP_008577498.1</a> |
| <a href="#">PREDICTED: serum paraoxonase/arylesterase 2 isoform X2 [Callit</a>  | 64.3 | 64.3 | 92% | 5e-10 | 88% | <a href="#">gij296209658 XP_002751632.1</a> |
| <a href="#">unnamed protein product [Homo sapiens]</a>                          | 64.3 | 64.3 | 92% | 5e-10 | 88% | <a href="#">gij194383760 BAG59238.1</a>     |
| <a href="#">PREDICTED: serum paraoxonase/arylesterase 2 isoform 2 [Gorilla</a>  | 64.3 | 64.3 | 92% | 5e-10 | 88% | <a href="#">gij426356981 XP_004045828.1</a> |
| <a href="#">PREDICTED: serum paraoxonase/arylesterase 2 isoform X2 [Maca</a>    | 64.3 | 64.3 | 92% | 5e-10 | 88% | <a href="#">gij544421397 XP_005550230.1</a> |
| <a href="#">PREDICTED: serum paraoxonase/arylesterase 2 isoform X2 [Pan p</a>   | 64.3 | 64.3 | 92% | 5e-10 | 88% | <a href="#">gij397476756 XP_003809758.1</a> |
| <a href="#">PREDICTED: serum paraoxonase/arylesterase 2 isoform X2 [Pan t</a>   | 64.3 | 64.3 | 92% | 5e-10 | 88% | <a href="#">gij332866740 XP_001170049.2</a> |
| <a href="#">PREDICTED: serum paraoxonase/arylesterase 2 isoform 2 [Nomas</a>    | 64.3 | 64.3 | 92% | 5e-10 | 88% | <a href="#">gij332206968 XP_003252566.1</a> |
| <a href="#">PREDICTED: serum paraoxonase/arylesterase 2-like isoform 1 [Ma</a>  | 64.3 | 64.3 | 92% | 5e-10 | 88% | <a href="#">gij297288859 XP_001094896.2</a> |
| <a href="#">paraoxonase 2, isoform CRA_b [Homo sapiens]</a>                     | 64.3 | 64.3 | 92% | 5e-10 | 88% | <a href="#">gij119597170 EAW76764.1</a>     |
| <a href="#">PREDICTED: serum paraoxonase/arylesterase 2 [Rhinopithecus ro</a>   | 64.3 | 64.3 | 92% | 5e-10 | 88% | <a href="#">gij724960791 XP_010354564.1</a> |
| <a href="#">PREDICTED: serum paraoxonase/arylesterase 2 [Chlorocebus sab</a>    | 64.3 | 64.3 | 92% | 5e-10 | 88% | <a href="#">gij635114726 XP_007980304.1</a> |
| <a href="#">PREDICTED: serum paraoxonase/arylesterase 2 isoform 1 [Gorilla</a>  | 64.3 | 64.3 | 92% | 5e-10 | 88% | <a href="#">gij426356979 XP_004045827.1</a> |
| <a href="#">PREDICTED: serum paraoxonase/arylesterase 2 [Saimiri boliviensi</a> | 64.3 | 64.3 | 92% | 5e-10 | 88% | <a href="#">gij403257320 XP_003921271.1</a> |
| <a href="#">PREDICTED: serum paraoxonase/arylesterase 2 isoform X1 [Pan p</a>   | 64.3 | 64.3 | 92% | 5e-10 | 88% | <a href="#">gij397476754 XP_003809757.1</a> |
| <a href="#">hypothetical protein EGM_12758 [Macaca fascicularis]</a>            | 64.3 | 64.3 | 92% | 5e-10 | 88% | <a href="#">gij355747834 EHH52331.1</a>     |
| <a href="#">PREDICTED: serum paraoxonase/arylesterase 2 isoform 1 [Nomas</a>    | 64.3 | 64.3 | 92% | 5e-10 | 88% | <a href="#">gij332206966 XP_003252565.1</a> |
| <a href="#">PREDICTED: serum paraoxonase/arylesterase 2 isoform X1 [Pong</a>    | 64.3 | 64.3 | 92% | 5e-10 | 88% | <a href="#">gij297681032 XP_002818289.1</a> |

## Alignments

Download [GenPept](#) [Graphics](#) ▼ Next ▲ Previous ▲ Descriptions

**PREDICTED: serum paraoxonase/lactonase 3 isoform X2 [Macaca fascicularis]**

Sequence ID: [gij544421401|ref|XP\\_005550232.1](#) Length: 327 Number of Matches: 1

Range 1: 288 to 313 [GenPept](#) [Graphics](#) ▼ Next Match ▲ Previous Match

| Score          | Expect | Identities  | Positives   | Gaps     |
|----------------|--------|-------------|-------------|----------|
| 82.1 bits(186) | 4e-16  | 26/26(100%) | 26/26(100%) | 0/26(0%) |

Query 1 RVSTVYANNGSVLQGTSVASVYHGKI 26  
 RVSTVYANNGSVLQGTSVASVYHGKI  
 Sbjct 288 RVSTVYANNGSVLQGTSVASVYHGKI 313

### Related Information

[Gene](#) - associated gene details

Download [GenPept](#) [Graphics](#) ▼ Next ▲ Previous ▲ Descriptions

**paraoxonase-3, partial [Homo sapiens]**

Sequence ID: [gij1333634|gb|AAC41996.1](#) Length: 341 Number of Matches: 1

Range 1: 302 to 327 [GenPept](#) [Graphics](#) ▼ Next Match ▲ Previous Match

| Score          | Expect | Identities  | Positives   | Gaps     |
|----------------|--------|-------------|-------------|----------|
| 82.1 bits(186) | 4e-16  | 26/26(100%) | 26/26(100%) | 0/26(0%) |

Query 1 RVSTVYANNGSVLQGTSVASVYHGKI 26

### Related Information

[Gene](#) - associated gene details

Sbjct 302 RVSTVYANNGSVLQGTSVASVYHGKI 327

[Download](#) [GenPept](#) [Graphics](#)

[▼ Next](#) [▲ Previous](#) [▲ Descriptions](#)

**Paraoxonase 3 [Homo sapiens]**

Sequence ID: [gi|47682431|gb|AAH70374.1](#) Length: 354 Number of Matches: 1

[▶ See 1 more title\(s\)](#)

Range 1: 315 to 340 [GenPept](#) [Graphics](#)

[▼ Next Match](#) [▲ Previous Match](#)

| Score          | Expect | Identities  | Positives   | Gaps     |
|----------------|--------|-------------|-------------|----------|
| 82.1 bits(186) | 4e-16  | 26/26(100%) | 26/26(100%) | 0/26(0%) |

Query 1 RVSTVYANNGSVLQGTSVASVYHGKI 26  
 RVSTVYANNGSVLQGTSVASVYHGKI  
 Sbjct 315 RVSTVYANNGSVLQGTSVASVYHGKI 340

**Related Information**

[Gene](#) - associated gene details  
[Identical Proteins](#) - Proteins identical to the subject

[Download](#) [GenPept](#) [Graphics](#)

[▼ Next](#) [▲ Previous](#) [▲ Descriptions](#)

**paraoxonase PON3 variant G3G3, partial [synthetic construct]**

Sequence ID: [gi|40850554|gb|AAR95991.1](#) Length: 354 Number of Matches: 1

Range 1: 315 to 340 [GenPept](#) [Graphics](#)

[▼ Next Match](#) [▲ Previous Match](#)

| Score          | Expect | Identities  | Positives   | Gaps     |
|----------------|--------|-------------|-------------|----------|
| 82.1 bits(186) | 4e-16  | 26/26(100%) | 26/26(100%) | 0/26(0%) |

Query 1 RVSTVYANNGSVLQGTSVASVYHGKI 26  
 RVSTVYANNGSVLQGTSVASVYHGKI  
 Sbjct 315 RVSTVYANNGSVLQGTSVASVYHGKI 340

**Related Information**

[Gene](#) - associated gene details

[Download](#) [GenPept](#) [Graphics](#)

[▼ Next](#) [▲ Previous](#) [▲ Descriptions](#)

**paraoxanase-3 [Homo sapiens]**

Sequence ID: [gi|12751374|gb|AAK07629.1](#) Length: 354 Number of Matches: 1

Range 1: 315 to 340 [GenPept](#) [Graphics](#)

[▼ Next Match](#) [▲ Previous Match](#)

| Score          | Expect | Identities  | Positives   | Gaps     |
|----------------|--------|-------------|-------------|----------|
| 82.1 bits(186) | 4e-16  | 26/26(100%) | 26/26(100%) | 0/26(0%) |

Query 1 RVSTVYANNGSVLQGTSVASVYHGKI 26  
 RVSTVYANNGSVLQGTSVASVYHGKI  
 Sbjct 315 RVSTVYANNGSVLQGTSVASVYHGKI 340

**Related Information**

[Gene](#) - associated gene details

BLAST is a registered trademark of the National Library of Medicine.

[Copyright](#) | [Disclaimer](#) | [Privacy](#) | [Accessibility](#) | [Contact](#) | [Send feedback](#)

[NCBI](#) | [NLM](#) | [NIH](#) | [DHHS](#)

NCBI/ BLAST/ blastp suite/ Formatting Results - BVKF5JS001R

Your search parameters were adjusted to search for a short input sequence.

[Edit and Resubmit](#) [Save Search Strategies](#) [Formatting options](#) [Download](#) [YouTube](#) [How to read this page](#) [Blast report description](#)

### SELL\_KIGGIWTWVGTDKS\_Mod

RID [BVKF5JS001R](#) (Expires on 01-21 10:39 am)

Query ID [Ic|320009](#) Database Name [nr](#)

Description [None](#) Description [All non-redundant GenBank CDS translations+PDB+SwissProt+PIR+PRF excluding environmental samples from WGS projects](#)

Molecule type [amino acid](#) Program [BLASTP 2.2.30+](#) [Citation](#)

Query Length [14](#)

Other reports: [Search Summary](#) [Taxonomy reports](#) [Distance tree of results](#) [Multiple alignment](#)

### Graphic Summary

Show Conserved Domains

No putative conserved domains have been detected

Distribution of 105 Blast Hits on the Query Sequence

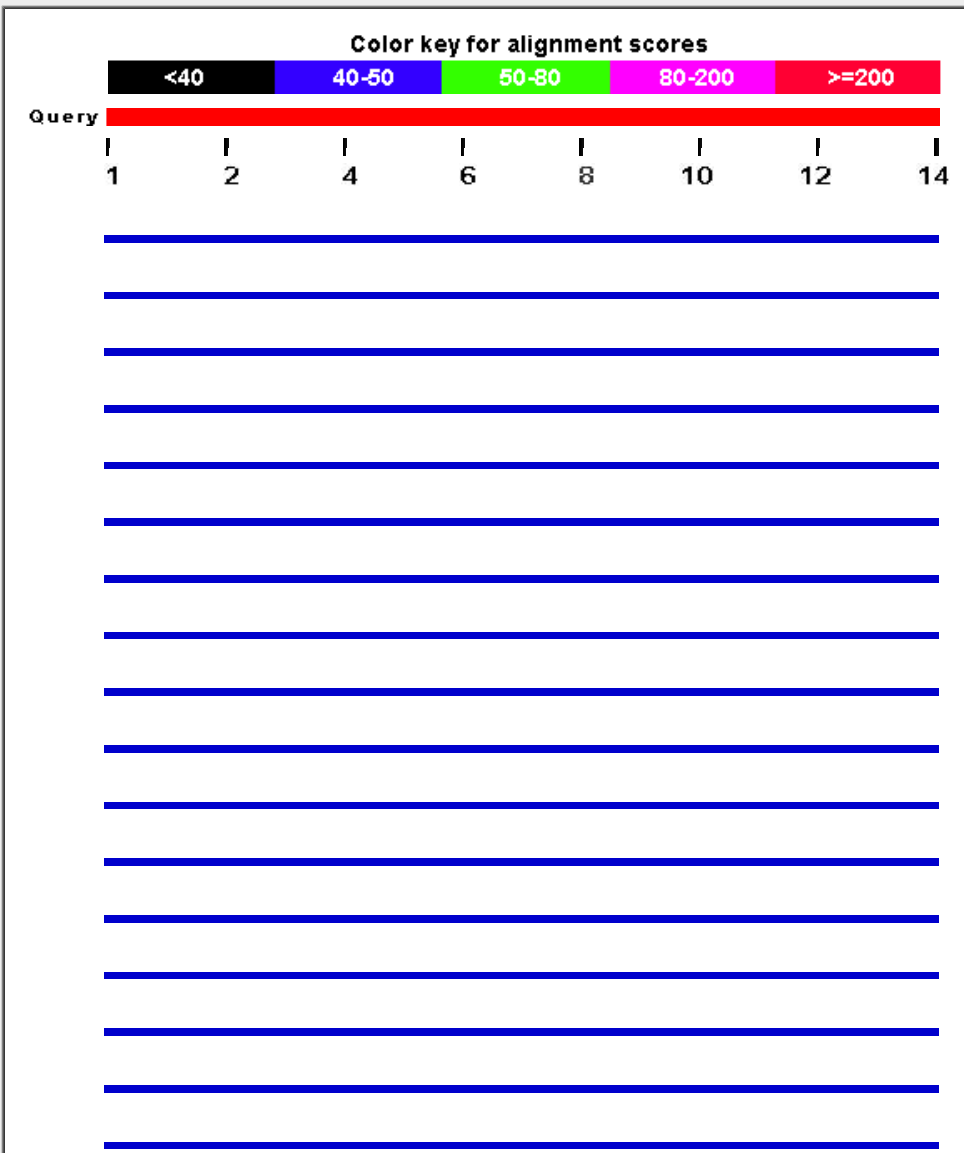

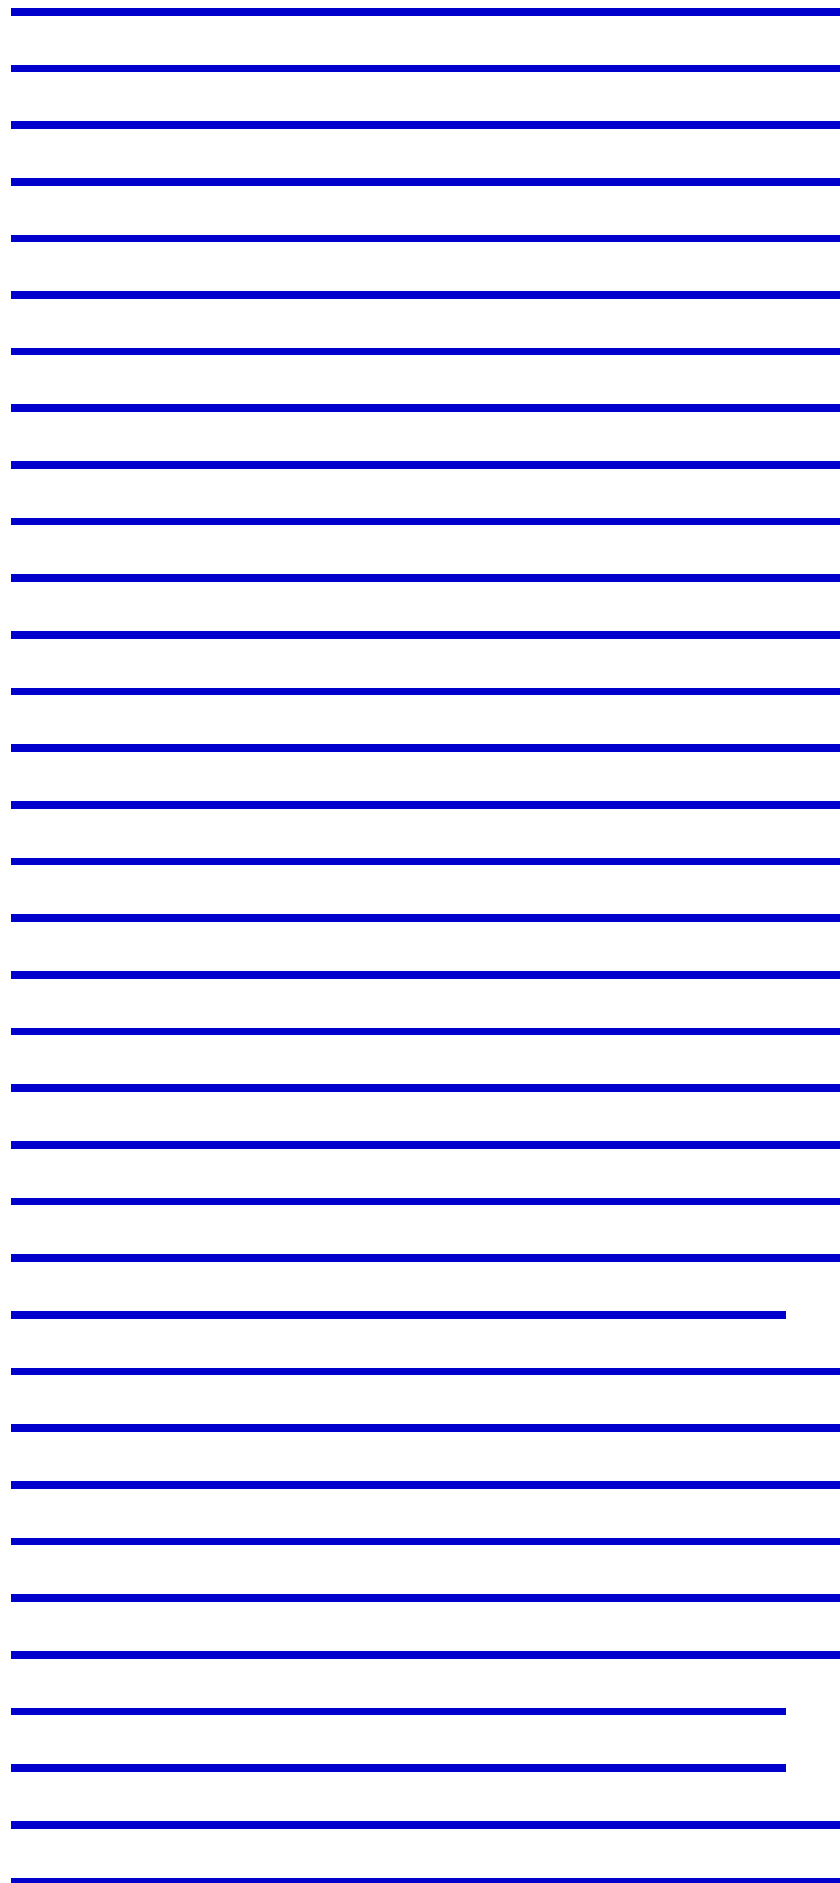

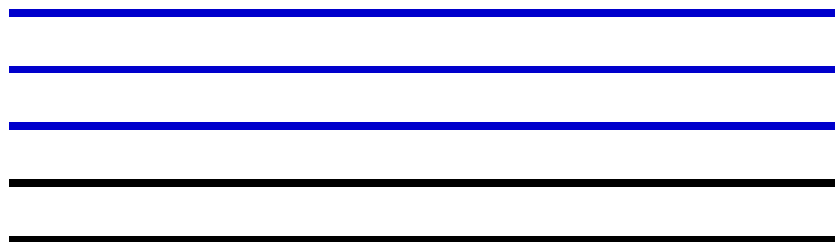

## Descriptions

### Sequences producing significant alignments:

Select: [All](#) [None](#) Selected:0

[Alignments](#)
[Download](#)
[GenPept](#)
[Graphics](#)
[Distance tree of results](#)
[Multiple alignment](#)


| Description                                                                                | Max score | Total score | Query cover | E value | Ident | Accession                      |
|--------------------------------------------------------------------------------------------|-----------|-------------|-------------|---------|-------|--------------------------------|
| <a href="#">Chain A, L-selectin Lectin And Egf Domains [Homo sapiens]</a>                  | 46.9      | 46.9        | 100%        | 8e-05   | 93%   | <a href="#">3CFW_A</a>         |
| <a href="#">selectin L (lymphocyte adhesion molecule 1), isoform CRA_c [Homo sapiens]</a>  | 46.9      | 46.9        | 100%        | 9e-05   | 93%   | <a href="#">EAW90857.1</a>     |
| <a href="#">PREDICTED: L-selectin isoform X2 [Macaca fascicularis]</a>                     | 46.9      | 46.9        | 100%        | 9e-05   | 93%   | <a href="#">XP_005539997.1</a> |
| <a href="#">unnamed protein product [Homo sapiens]</a>                                     | 46.9      | 46.9        | 100%        | 9e-05   | 93%   | <a href="#">BAG60862.1</a>     |
| <a href="#">PREDICTED: LOW QUALITY PROTEIN: L-selectin [Tarsius syrichta]</a>              | 46.9      | 46.9        | 100%        | 9e-05   | 93%   | <a href="#">XP_008059542.1</a> |
| <a href="#">Leu-8 antigen short form [Homo sapiens]</a>                                    | 46.9      | 46.9        | 100%        | 9e-05   | 93%   | <a href="#">CAB43537.1</a>     |
| <a href="#">PREDICTED: L-selectin isoform X2 [Ursus maritimus]</a>                         | 46.9      | 46.9        | 100%        | 9e-05   | 93%   | <a href="#">XP_008694116.1</a> |
| <a href="#">lymph node homing receptor precursor [Homo sapiens]</a>                        | 46.9      | 46.9        | 100%        | 9e-05   | 93%   | <a href="#">AAC63053.1</a>     |
| <a href="#">L-selectin precursor [Pan troglodytes]</a>                                     | 46.9      | 46.9        | 100%        | 9e-05   | 93%   | <a href="#">NP_001009074.1</a> |
| <a href="#">unnamed protein product [Homo sapiens]</a>                                     | 46.9      | 46.9        | 100%        | 9e-05   | 93%   | <a href="#">CAA34275.1</a>     |
| <a href="#">pln homing receptor [Homo sapiens]</a>                                         | 46.9      | 46.9        | 100%        | 9e-05   | 93%   | <a href="#">CAA34203.1</a>     |
| <a href="#">L-selectin [Papio anubis]</a>                                                  | 46.9      | 46.9        | 100%        | 9e-05   | 93%   | <a href="#">NP_001106096.1</a> |
| <a href="#">RecName: Full=L-selectin; AltName: Full=CD62 antigen-like family member L;</a> | 46.9      | 46.9        | 100%        | 9e-05   | 93%   | <a href="#">P14151.2</a>       |
| <a href="#">L-selectin precursor [Macaca mulatta]</a>                                      | 46.9      | 46.9        | 100%        | 9e-05   | 93%   | <a href="#">NP_001036228.1</a> |
| <a href="#">RecName: Full=L-selectin; AltName: Full=CD62 antigen-like family member L;</a> | 46.9      | 46.9        | 100%        | 9e-05   | 93%   | <a href="#">Q95235.1</a>       |
| <a href="#">selectin L (lymphocyte adhesion molecule 1), isoform CRA_a [Homo sapiens]</a>  | 46.9      | 46.9        | 100%        | 9e-05   | 93%   | <a href="#">EAW90855.1</a>     |
| <a href="#">SELL [synthetic construct]</a>                                                 | 46.9      | 46.9        | 100%        | 9e-05   | 93%   | <a href="#">AIC62025.1</a>     |
| <a href="#">Lymph node homing receptor [Macaca mulatta]</a>                                | 46.9      | 46.9        | 100%        | 9e-05   | 93%   | <a href="#">EHH15803.1</a>     |
| <a href="#">SELL protein [Homo sapiens]</a>                                                | 46.9      | 46.9        | 100%        | 9e-05   | 93%   | <a href="#">AAH20758.1</a>     |
| <a href="#">PREDICTED: L-selectin isoform X1 [Ursus maritimus]</a>                         | 46.9      | 46.9        | 100%        | 9e-05   | 93%   | <a href="#">XP_008694111.1</a> |
| <a href="#">PREDICTED: L-selectin [Rhinopithecus roxellana]</a>                            | 46.9      | 46.9        | 100%        | 9e-05   | 93%   | <a href="#">XP_010359291.1</a> |
| <a href="#">PREDICTED: L-selectin [Chlorocebus sabaeus]</a>                                | 46.9      | 46.9        | 100%        | 9e-05   | 93%   | <a href="#">XP_007987763.1</a> |
| <a href="#">PREDICTED: L-selectin [Callithrix jacchus]</a>                                 | 46.9      | 46.9        | 100%        | 9e-05   | 93%   | <a href="#">XP_002760427.1</a> |
| <a href="#">PREDICTED: L-selectin isoform X1 [Macaca fascicularis]</a>                     | 46.9      | 46.9        | 100%        | 9e-05   | 93%   | <a href="#">XP_005539996.1</a> |
| <a href="#">PREDICTED: L-selectin [Gorilla gorilla gorilla]</a>                            | 46.9      | 46.9        | 100%        | 9e-05   | 93%   | <a href="#">XP_004027917.1</a> |
| <a href="#">unnamed protein product [Homo sapiens]</a>                                     | 46.9      | 46.9        | 100%        | 9e-05   | 93%   | <a href="#">CAB43536.1</a>     |
| <a href="#">PREDICTED: L-selectin [Pan paniscus]</a>                                       | 46.9      | 46.9        | 100%        | 9e-05   | 93%   | <a href="#">XP_003824676.1</a> |
| <a href="#">PREDICTED: L-selectin [Pongo abelii]</a>                                       | 46.9      | 46.9        | 100%        | 9e-05   | 93%   | <a href="#">XP_002809857.2</a> |
| <a href="#">PREDICTED: L-selectin [Nomascus leucogenys]</a>                                | 46.9      | 46.9        | 100%        | 9e-05   | 93%   | <a href="#">XP_003258894.1</a> |

|                                                                                         |      |      |      |       |     |                                |
|-----------------------------------------------------------------------------------------|------|------|------|-------|-----|--------------------------------|
| <a href="#">L-selectin precursor [Homo sapiens]</a>                                     | 46.9 | 46.9 | 100% | 9e-05 | 93% | <a href="#">NP_000646.2</a>    |
| <a href="#">PREDICTED: L-selectin-like [Leptonychotes weddellii]</a>                    | 44.3 | 44.3 | 100% | 6e-04 | 86% | <a href="#">XP_006739818.1</a> |
| <a href="#">hypothetical protein PANDA_007106 [Ailuropoda melanoleuca]</a>              | 44.3 | 44.3 | 100% | 6e-04 | 86% | <a href="#">EFB23838.1</a>     |
| <a href="#">PREDICTED: L-selectin isoform X2 [Canis lupus familiaris]</a>               | 44.3 | 44.3 | 100% | 6e-04 | 86% | <a href="#">XP_005622604.1</a> |
| <a href="#">PREDICTED: L-selectin isoform X1 [Canis lupus familiaris]</a>               | 44.3 | 44.3 | 100% | 6e-04 | 86% | <a href="#">XP_537201.2</a>    |
| <a href="#">PREDICTED: L-selectin [Ceratotherium simum simum]</a>                       | 44.3 | 44.3 | 100% | 6e-04 | 86% | <a href="#">XP_004425116.1</a> |
| <a href="#">PREDICTED: L-selectin [Odobenus rosmarus divergens]</a>                     | 44.3 | 44.3 | 100% | 6e-04 | 86% | <a href="#">XP_004408944.1</a> |
| <a href="#">PREDICTED: L-selectin [Trichechus manatus latirostris]</a>                  | 44.3 | 44.3 | 100% | 6e-04 | 86% | <a href="#">XP_004384151.1</a> |
| <a href="#">PREDICTED: L-selectin [Saimiri boliviensis boliviensis]</a>                 | 44.3 | 44.3 | 100% | 7e-04 | 86% | <a href="#">XP_003925442.1</a> |
| <a href="#">PREDICTED: L-selectin-like [Ailuropoda melanoleuca]</a>                     | 44.3 | 44.3 | 100% | 7e-04 | 86% | <a href="#">XP_002918625.1</a> |
| <a href="#">L-selectin precursor [Orctolagus cuniculus]</a>                             | 43.1 | 43.1 | 100% | 0.002 | 86% | <a href="#">NP_001075821.1</a> |
| <a href="#">PREDICTED: L-selectin [Sarcophilus harrisii]</a>                            | 41.8 | 41.8 | 92%  | 0.005 | 85% | <a href="#">XP_003767474.1</a> |
| <a href="#">PREDICTED: L-selectin [Erinaceus europaeus]</a>                             | 41.8 | 41.8 | 100% | 0.005 | 79% | <a href="#">XP_007531867.1</a> |
| <a href="#">PREDICTED: L-selectin [Elephantulus edwardii]</a>                           | 41.4 | 41.4 | 100% | 0.006 | 86% | <a href="#">XP_006887476.1</a> |
| <a href="#">PREDICTED: L-selectin [Galeopterus variegatus]</a>                          | 41.4 | 41.4 | 100% | 0.006 | 86% | <a href="#">XP_008589968.1</a> |
| <a href="#">PREDICTED: L-selectin isoform X2 [Ornithorhynchus anatinus]</a>             | 41.4 | 41.4 | 100% | 0.006 | 86% | <a href="#">XP_007667058.1</a> |
| <a href="#">PREDICTED: L-selectin isoform X1 [Ornithorhynchus anatinus]</a>             | 41.4 | 41.4 | 100% | 0.006 | 86% | <a href="#">XP_007667057.1</a> |
| <a href="#">PREDICTED: L-selectin [Chrysochloris asiatica]</a>                          | 40.9 | 59.8 | 100% | 0.009 | 79% | <a href="#">XP_006872694.1</a> |
| <a href="#">PREDICTED: L-selectin [Ictidomys tridecemlineatus]</a>                      | 40.5 | 40.5 | 92%  | 0.012 | 85% | <a href="#">XP_005319885.1</a> |
| <a href="#">LECAM-1 [Sigmodon hispidus]</a>                                             | 40.5 | 40.5 | 92%  | 0.012 | 85% | <a href="#">AAN87893.1</a>     |
| <a href="#">PREDICTED: L-selectin [Ochotona princeps]</a>                               | 40.5 | 40.5 | 100% | 0.012 | 79% | <a href="#">XP_004589372.1</a> |
| <a href="#">PREDICTED: LOW QUALITY PROTEIN: L-selectin [Mustela putorius furo]</a>      | 40.1 | 40.1 | 100% | 0.017 | 79% | <a href="#">XP_004756722.1</a> |
| <a href="#">PREDICTED: L-selectin [Panthera tigris altaica]</a>                         | 40.1 | 40.1 | 100% | 0.017 | 79% | <a href="#">XP_007077079.1</a> |
| <a href="#">L-selectin [Felis catus]</a>                                                | 40.1 | 40.1 | 100% | 0.017 | 79% | <a href="#">NP_001082779.1</a> |
| <a href="#">PREDICTED: LOW QUALITY PROTEIN: L-selectin [Mustela putorius furo]</a>      | 40.1 | 40.1 | 100% | 0.017 | 79% | <a href="#">XP_004799211.1</a> |
| <a href="#">PREDICTED: L-selectin isoform X2 [Balaenoptera acutorostrata scammonii]</a> | 38.8 | 38.8 | 100% | 0.043 | 79% | <a href="#">XP_007172554.1</a> |
| <a href="#">PREDICTED: L-selectin [Lipotes vexillifer]</a>                              | 38.8 | 38.8 | 100% | 0.044 | 79% | <a href="#">XP_007458185.1</a> |
| <a href="#">PREDICTED: L-selectin isoform X1 [Balaenoptera acutorostrata scammonii]</a> | 38.8 | 38.8 | 100% | 0.044 | 79% | <a href="#">XP_007172553.1</a> |
| <a href="#">PREDICTED: L-selectin [Physeter catodon]</a>                                | 38.8 | 38.8 | 100% | 0.044 | 79% | <a href="#">XP_007102109.1</a> |
| <a href="#">PREDICTED: L-selectin [Orcinus orca]</a>                                    | 38.8 | 38.8 | 100% | 0.044 | 79% | <a href="#">XP_004269787.1</a> |
| <a href="#">PREDICTED: L-selectin isoform X2 [Monodelphis domestica]</a>                | 38.8 | 38.8 | 92%  | 0.045 | 85% | <a href="#">XP_007480808.1</a> |
| <a href="#">PREDICTED: L-selectin isoform X1 [Monodelphis domestica]</a>                | 38.8 | 38.8 | 92%  | 0.045 | 85% | <a href="#">XP_007480807.1</a> |
| <a href="#">PREDICTED: E-selectin [Ornithorhynchus anatinus]</a>                        | 38.8 | 38.8 | 100% | 0.046 | 79% | <a href="#">XP_007667059.1</a> |
| <a href="#">PREDICTED: L-selectin [Camelus dromedarius]</a>                             | 38.4 | 38.4 | 100% | 0.060 | 71% | <a href="#">XP_010982785.1</a> |
| <a href="#">PREDICTED: L-selectin [Camelus bactrianus]</a>                              | 38.4 | 38.4 | 100% | 0.060 | 71% | <a href="#">XP_010952144.1</a> |
| <a href="#">PREDICTED: L-selectin [Myotis brandtii]</a>                                 | 38.4 | 38.4 | 100% | 0.060 | 71% | <a href="#">XP_005861291.1</a> |
| <a href="#">PREDICTED: L-selectin [Echinops telfairi]</a>                               | 38.4 | 38.4 | 100% | 0.061 | 71% | <a href="#">XP_004706892.1</a> |
| <a href="#">PREDICTED: L-selectin isoform X2 [Vicugna pacos]</a>                        | 38.4 | 38.4 | 100% | 0.061 | 71% | <a href="#">XP_006211162.1</a> |
| <a href="#">PREDICTED: L-selectin isoform X1 [Vicugna pacos]</a>                        | 38.4 | 38.4 | 100% | 0.061 | 71% | <a href="#">XP_006211161.1</a> |
| <a href="#">PREDICTED: L-selectin [Myotis davidii]</a>                                  | 38.4 | 38.4 | 100% | 0.061 | 71% | <a href="#">XP_006764234.1</a> |
| <a href="#">PREDICTED: L-selectin [Camelus ferus]</a>                                   | 38.4 | 38.4 | 100% | 0.061 | 71% | <a href="#">XP_006173301.1</a> |
| <a href="#">L-selectin [Myotis davidii]</a>                                             | 38.4 | 38.4 | 100% | 0.062 | 71% | <a href="#">ELK29869.1</a>     |
| <a href="#">PREDICTED: L-selectin [Myotis lucifugus]</a>                                | 38.4 | 38.4 | 100% | 0.063 | 71% | <a href="#">XP_006099687.1</a> |
| <a href="#">PREDICTED: E-selectin-like [Serinus canaria]</a>                            | 38.4 | 38.4 | 92%  | 0.064 | 85% | <a href="#">XP_009097829.1</a> |
| <a href="#">PREDICTED: P-selectin-like [Geospiza fortis]</a>                            | 38.4 | 38.4 | 92%  | 0.064 | 85% | <a href="#">XP_005426754.1</a> |



|                                                                               |      |      |      |       |     |                                |
|-------------------------------------------------------------------------------|------|------|------|-------|-----|--------------------------------|
| <a href="#">PREDICTED: E-selectin [Eptesicus fuscus]</a>                      | 38.4 | 60.7 | 100% | 0.065 | 71% | <a href="#">XP_008151404.1</a> |
| <a href="#">E-selectin [Myotis brandtii]</a>                                  | 38.4 | 60.7 | 100% | 0.065 | 71% | <a href="#">EPQ04591.1</a>     |
| <a href="#">hypothetical protein CB1_000094012 [Camelus ferus]</a>            | 38.4 | 93.5 | 100% | 0.066 | 71% | <a href="#">EPY89559.1</a>     |
| <a href="#">PREDICTED: L-selectin [Loxodonta africana]</a>                    | 38.0 | 38.0 | 100% | 0.084 | 79% | <a href="#">XP_010593279.1</a> |
| <a href="#">P-selectin [Merops nubicus]</a>                                   | 38.0 | 38.0 | 92%  | 0.087 | 85% | <a href="#">KFQ34721.1</a>     |
| <a href="#">PREDICTED: E-selectin [Poecilia formosa]</a>                      | 38.0 | 38.0 | 100% | 0.088 | 71% | <a href="#">XP_007558781.1</a> |
| <a href="#">PREDICTED: P-selectin [Merops nubicus]</a>                        | 38.0 | 38.0 | 92%  | 0.088 | 85% | <a href="#">XP_008943868.1</a> |
| <a href="#">PREDICTED: LOW QUALITY PROTEIN: P-selectin [Egretta garzetta]</a> | 38.0 | 38.0 | 92%  | 0.089 | 85% | <a href="#">XP_009643678.1</a> |
| <a href="#">PREDICTED: L-selectin isoform X2 [Bison bison bison]</a>          | 37.5 | 37.5 | 100% | 0.11  | 71% | <a href="#">XP_010835001.1</a> |
| <a href="#">PREDICTED: L-selectin isoform X3 [Capra hircus]</a>               | 37.5 | 37.5 | 100% | 0.11  | 71% | <a href="#">XP_005690682.1</a> |
| <a href="#">PREDICTED: L-selectin isoform X4 [Bubalus bubalis]</a>            | 37.5 | 37.5 | 100% | 0.11  | 71% | <a href="#">XP_006073161.1</a> |
| <a href="#">PREDICTED: L-selectin isoform X2 [Capra hircus]</a>               | 37.5 | 37.5 | 100% | 0.12  | 71% | <a href="#">XP_005690681.1</a> |
| <a href="#">L-selectin [Bos mutus]</a>                                        | 37.5 | 37.5 | 100% | 0.12  | 71% | <a href="#">ELR51562.1</a>     |
| <a href="#">PREDICTED: L-selectin isoform X3 [Bubalus bubalis]</a>            | 37.5 | 37.5 | 100% | 0.12  | 71% | <a href="#">XP_006073160.1</a> |
| <a href="#">L-selectin precursor [Bos taurus]</a>                             | 37.5 | 37.5 | 100% | 0.12  | 71% | <a href="#">NP_776607.1</a>    |
| <a href="#">TPA: L-selectin [Bos taurus]</a>                                  | 37.5 | 37.5 | 100% | 0.12  | 71% | <a href="#">DAA21340.1</a>     |
| <a href="#">PREDICTED: L-selectin isoform X1 [Capra hircus]</a>               | 37.5 | 37.5 | 100% | 0.12  | 71% | <a href="#">XP_005690680.1</a> |
| <a href="#">PREDICTED: L-selectin [Ovis aries]</a>                            | 37.5 | 37.5 | 100% | 0.12  | 71% | <a href="#">XP_004013726.1</a> |
| <a href="#">L-selectin precursor [Sus scrofa]</a>                             | 37.5 | 37.5 | 100% | 0.12  | 71% | <a href="#">NP_001106148.1</a> |
| <a href="#">PREDICTED: L-selectin isoform X1 [Bison bison bison]</a>          | 37.5 | 37.5 | 100% | 0.12  | 71% | <a href="#">XP_010835000.1</a> |
| <a href="#">PREDICTED: L-selectin [Pantholops hodgsonii]</a>                  | 37.5 | 37.5 | 100% | 0.12  | 71% | <a href="#">XP_005973458.1</a> |
| <a href="#">PREDICTED: L-selectin [Bos mutus]</a>                             | 37.5 | 37.5 | 100% | 0.12  | 71% | <a href="#">XP_005902444.1</a> |
| <a href="#">PREDICTED: L-selectin isoform X1 [Bos taurus]</a>                 | 37.5 | 37.5 | 100% | 0.12  | 71% | <a href="#">XP_005216937.1</a> |
| <a href="#">PREDICTED: L-selectin [Orycteropus afer afer]</a>                 | 37.5 | 37.5 | 100% | 0.12  | 71% | <a href="#">XP_007935972.1</a> |
| <a href="#">PREDICTED: L-selectin isoform X2 [Bubalus bubalis]</a>            | 37.5 | 37.5 | 100% | 0.12  | 71% | <a href="#">XP_006073159.1</a> |
| <a href="#">PREDICTED: L-selectin isoform X1 [Bubalus bubalis]</a>            | 37.5 | 37.5 | 100% | 0.12  | 71% | <a href="#">XP_006073158.1</a> |

## Alignments

Download v [GenPept](#) [Graphics](#)

v Next ▲ Previous ▲ Descriptions

### Chain A, L-selectin Lectin And Egf Domains

Sequence ID: [pdb|3CFW|A](#) Length: 164 Number of Matches: 1

Range 1: 55 to 68 [GenPept](#) [Graphics](#)

v Next Match ▲ Previous Match

| Score          | Expect | Identities | Positives   | Gaps     |
|----------------|--------|------------|-------------|----------|
| 46.9 bits(103) | 8e-05  | 13/14(93%) | 14/14(100%) | 0/14(0%) |

Query 1 KIGGIWTWVGTDKS 14  
KIGGIWTWVT+KS  
Sbjct 55 KIGGIWTWVTNKS 68

#### Related Information

[Structure](#) - 3D structure displays

Download v [GenPept](#) [Graphics](#)

v Next ▲ Previous ▲ Descriptions

### selectin L (lymphocyte adhesion molecule 1), isoform CRA\_c [Homo sapiens]

Sequence ID: [gb|EAW90857.1|](#) Length: 320 Number of Matches: 1

Range 1: 106 to 119 [GenPept](#) [Graphics](#)

v Next Match ▲ Previous Match

| Score          | Expect | Identities | Positives   | Gaps     |
|----------------|--------|------------|-------------|----------|
| 46.9 bits(103) | 9e-05  | 13/14(93%) | 14/14(100%) | 0/14(0%) |

#### Related Information

[Gene](#) - associated gene details

Query 1 KIGGIWTWVGTDKS 14  
 KIGGIWTWVGT+KS  
 Sbjct 106 KIGGIWTWVGTNKS 119

[Download](#) [GenPept](#) [Graphics](#)

[▼ Next](#) [▲ Previous](#) [▲ Descriptions](#)

**PREDICTED: L-selectin isoform X2 [Macaca fascicularis]**

Sequence ID: [ref|XP\\_005539997.1|](#) Length: 323 Number of Matches: 1

Range 1: 106 to 119 [GenPept](#) [Graphics](#)

[▼ Next Match](#) [▲ Previous Match](#)

| Score          | Expect | Identities | Positives   | Gaps     |
|----------------|--------|------------|-------------|----------|
| 46.9 bits(103) | 9e-05  | 13/14(93%) | 14/14(100%) | 0/14(0%) |

Query 1 KIGGIWTWVGTDKS 14  
 KIGGIWTWVGT+KS  
 Sbjct 106 KIGGIWTWVGTNKS 119

**Related Information**

[Gene](#) - associated gene details

[Download](#) [GenPept](#) [Graphics](#)

[▼ Next](#) [▲ Previous](#) [▲ Descriptions](#)

**unnamed protein product [Homo sapiens]**

Sequence ID: [dbj|BAG60862.1|](#) Length: 325 Number of Matches: 1

Range 1: 46 to 59 [GenPept](#) [Graphics](#)

[▼ Next Match](#) [▲ Previous Match](#)

| Score          | Expect | Identities | Positives   | Gaps     |
|----------------|--------|------------|-------------|----------|
| 46.9 bits(103) | 9e-05  | 13/14(93%) | 14/14(100%) | 0/14(0%) |

Query 1 KIGGIWTWVGTDKS 14  
 KIGGIWTWVGT+KS  
 Sbjct 46 KIGGIWTWVGTNKS 59

**Related Information**

[Gene](#) - associated gene details

[Download](#) [GenPept](#) [Graphics](#)

[▼ Next](#) [▲ Previous](#) [▲ Descriptions](#)

**PREDICTED: LOW QUALITY PROTEIN: L-selectin [Tarsius syrichta]**

Sequence ID: [ref|XP\\_008059542.1|](#) Length: 362 Number of Matches: 1

Range 1: 93 to 106 [GenPept](#) [Graphics](#)

[▼ Next Match](#) [▲ Previous Match](#)

| Score          | Expect | Identities | Positives   | Gaps     |
|----------------|--------|------------|-------------|----------|
| 46.9 bits(103) | 9e-05  | 13/14(93%) | 14/14(100%) | 0/14(0%) |

Query 1 KIGGIWTWVGTDKS 14  
 KIGGIWTWVGT+KS  
 Sbjct 93 KIGGIWTWVGTNKS 106

**Related Information**

[Gene](#) - associated gene details

[Map Viewer](#) - aligned genomic context

BLAST is a registered trademark of the National Library of Medicine.

NCBI/ BLAST/ blastp suite/ Formatting Results - BE83R5AU015

Your search parameters were adjusted to search for a short input sequence.

[Edit and Resubmit](#) [Save Search Strategies](#) [Formatting options](#) [Download](#)

[YouTube](#) [How to read this page](#) [Blast report description](#)

### SELL\_KIGGIWTWVGTNKS\_NonMod

RID [BE83R5AU015](#) (Expires on 01-16 09:05 am)

Query ID [Icl|60737](#)  
 Description None  
 Molecule type amino acid  
 Query Length 14

Database Name nr  
 Description All non-redundant GenBank CDS translations+PDB+SwissProt+PIR excluding environmental samples from WGS projects  
 Program BLASTP 2.2.30+ [Citation](#)

Other reports: [Search Summary](#) [Taxonomy reports](#) [Distance tree of results](#) [Multiple alignment](#)

### Graphic Summary

[Show Conserved Domains](#)

No putative conserved domains have been detected

Distribution of 105 Blast Hits on the Query Sequence



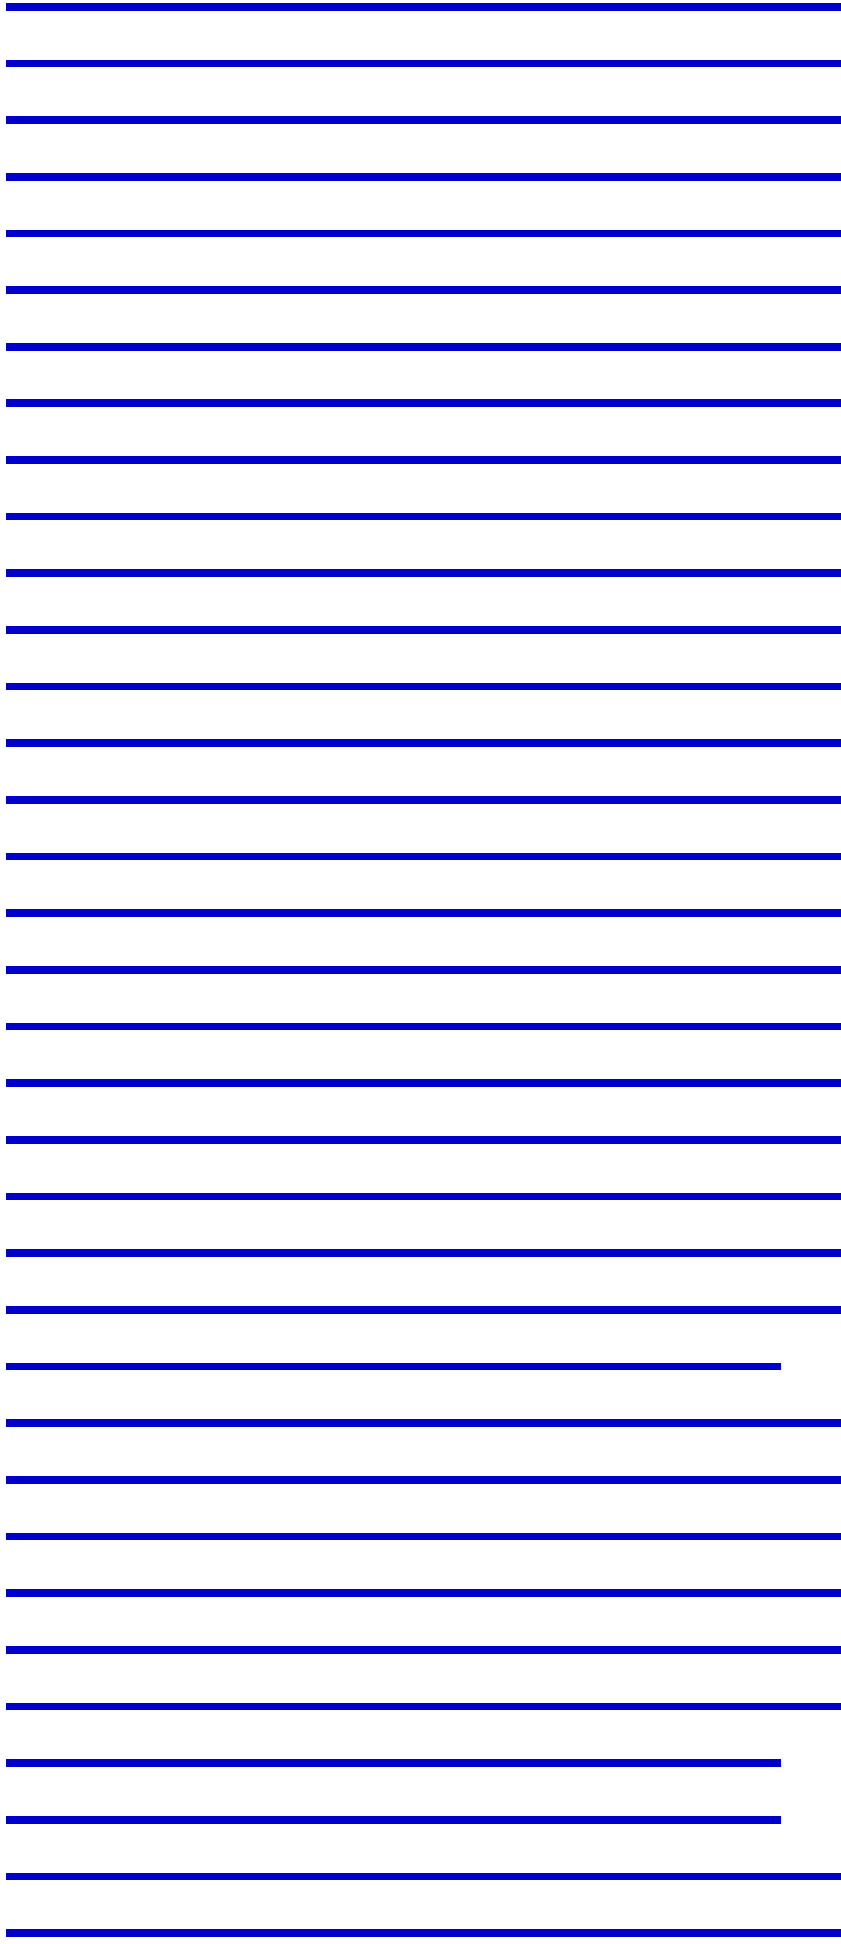



**Descriptions**

**Sequences producing significant alignments:**

Select: [All](#) [None](#) Selected:0

[Alignments](#)
[Download](#)
[GenPept](#)
[Graphics](#)
[Distance tree of results](#)
[Multiple alignment](#)

| Description                                                                               | Max score | Total score | Query cover | E value | Ident | Accession                                   |
|-------------------------------------------------------------------------------------------|-----------|-------------|-------------|---------|-------|---------------------------------------------|
| <a href="#">Chain A, L-selectin Lectin And Egf Domains [Homo sapiens]</a>                 | 49.4      | 49.4        | 100%        | 1e-05   | 100%  | <a href="#">gij170292544 3CFW_A</a>         |
| <a href="#">selectin L (lymphocyte adhesion molecule 1), isoform CRA_c [Homo sapiens]</a> | 49.4      | 49.4        | 100%        | 1e-05   | 100%  | <a href="#">gij119611263 EAW90857.1</a>     |
| <a href="#">PREDICTED: L-selectin isoform X2 [Macaca fascicularis]</a>                    | 49.4      | 49.4        | 100%        | 1e-05   | 100%  | <a href="#">gij544398261 XP_005539997.1</a> |
| <a href="#">unnamed protein product [Homo sapiens]</a>                                    | 49.4      | 49.4        | 100%        | 1e-05   | 100%  | <a href="#">gij194384912 BAG60862.1</a>     |
| <a href="#">PREDICTED: LOW QUALITY PROTEIN: L-selectin [Tarsius syrichta]</a>             | 49.4      | 49.4        | 100%        | 1e-05   | 100%  | <a href="#">gij640806175 XP_008059542.1</a> |
| <a href="#">Leu-8 antigen short form [Homo sapiens]</a>                                   | 49.4      | 49.4        | 100%        | 1e-05   | 100%  | <a href="#">gij4902830 CAB43537.1</a>       |
| <a href="#">PREDICTED: L-selectin isoform X2 [Ursus maritimus]</a>                        | 49.4      | 49.4        | 100%        | 1e-05   | 100%  | <a href="#">gij670979215 XP_008694116.1</a> |
| <a href="#">lymph node homing receptor precursor [Homo sapiens]</a>                       | 49.4      | 49.4        | 100%        | 1e-05   | 100%  | <a href="#">gij307134 AAC63053.1</a>        |
| <a href="#">L-selectin precursor [Pan troglodytes]</a>                                    | 49.4      | 49.4        | 100%        | 1e-05   | 100%  | <a href="#">gij57114019 NP_001009074.1</a>  |
| <a href="#">unnamed protein product [Homo sapiens]</a>                                    | 49.4      | 49.4        | 100%        | 1e-05   | 100%  | <a href="#">gij34429 CAA34275.1</a>         |
| <a href="#">pIn homing receptor [Homo sapiens]</a>                                        | 49.4      | 49.4        | 100%        | 1e-05   | 100%  | <a href="#">gij38093 CAA34203.1</a>         |
| <a href="#">L-selectin [Papio anubis]</a>                                                 | 49.4      | 49.4        | 100%        | 1e-05   | 100%  | <a href="#">gij162951976 NP_001106096.1</a> |
| <a href="#">RecName: Full=L-selectin; AltName: Full=CD62 antigen-like family</a>          | 49.4      | 49.4        | 100%        | 1e-05   | 100%  | <a href="#">gij126178 P14151.2</a>          |
| <a href="#">L-selectin precursor [Macaca mulatta]</a>                                     | 49.4      | 49.4        | 100%        | 1e-05   | 100%  | <a href="#">gij112363117 NP_001036228.1</a> |
| <a href="#">RecName: Full=L-selectin; AltName: Full=CD62 antigen-like family</a>          | 49.4      | 49.4        | 100%        | 1e-05   | 100%  | <a href="#">gij2497646 Q95235.1</a>         |
| <a href="#">selectin L (lymphocyte adhesion molecule 1), isoform CRA_a [Homo sapiens]</a> | 49.4      | 49.4        | 100%        | 1e-05   | 100%  | <a href="#">gij119611261 EAW90855.1</a>     |
| <a href="#">SELL [synthetic construct]</a>                                                | 49.4      | 49.4        | 100%        | 1e-05   | 100%  | <a href="#">gij649149084 AIC62025.1</a>     |
| <a href="#">Lymph node homing receptor [Macaca mulatta]</a>                               | 49.4      | 49.4        | 100%        | 1e-05   | 100%  | <a href="#">gij355559023 EHH15803.1</a>     |
| <a href="#">SELL protein [Homo sapiens]</a>                                               | 49.4      | 49.4        | 100%        | 1e-05   | 100%  | <a href="#">gij18088808 AAH20758.1</a>      |
| <a href="#">PREDICTED: L-selectin isoform X1 [Ursus maritimus]</a>                        | 49.4      | 49.4        | 100%        | 1e-05   | 100%  | <a href="#">gij670979213 XP_008694111.1</a> |
| <a href="#">PREDICTED: L-selectin [Rhinopithecus roxellana]</a>                           | 49.4      | 49.4        | 100%        | 1e-05   | 100%  | <a href="#">gij724796904 XP_010359291.1</a> |
| <a href="#">PREDICTED: L-selectin [Chlorocebus sabaeus]</a>                               | 49.4      | 49.4        | 100%        | 1e-05   | 100%  | <a href="#">gij635132726 XP_007987763.1</a> |
| <a href="#">PREDICTED: L-selectin [Callithrix jacchus]</a>                                | 49.4      | 49.4        | 100%        | 1e-05   | 100%  | <a href="#">gij296229840 XP_002760427.1</a> |
| <a href="#">PREDICTED: L-selectin isoform X1 [Macaca fascicularis]</a>                    | 49.4      | 49.4        | 100%        | 1e-05   | 100%  | <a href="#">gij544398259 XP_005539996.1</a> |
| <a href="#">PREDICTED: L-selectin [Gorilla gorilla gorilla]</a>                           | 49.4      | 49.4        | 100%        | 1e-05   | 100%  | <a href="#">gij426332662 XP_004027917.1</a> |
| <a href="#">unnamed protein product [Homo sapiens]</a>                                    | 49.4      | 49.4        | 100%        | 1e-05   | 100%  | <a href="#">gij4902829 CAB43536.1</a>       |
| <a href="#">PREDICTED: L-selectin [Pan paniscus]</a>                                      | 49.4      | 49.4        | 100%        | 1e-05   | 100%  | <a href="#">gij397508469 XP_003824676.1</a> |
| <a href="#">PREDICTED: L-selectin [Pongo abelii]</a>                                      | 49.4      | 49.4        | 100%        | 1e-05   | 100%  | <a href="#">gij395729434 XP_002809857.2</a> |

|                                                                                     |      |      |      |       |      |                                             |
|-------------------------------------------------------------------------------------|------|------|------|-------|------|---------------------------------------------|
| PREDICTED: L-selectin [ <i>Nomascus leucogenys</i> ]                                | 49.4 | 49.4 | 100% | 1e-05 | 100% | <a href="#">gij332219505 XP_003258894.1</a> |
| <a href="#">L-selectin precursor [<i>Homo sapiens</i>]</a>                          | 49.4 | 49.4 | 100% | 1e-05 | 100% | <a href="#">gij262206315 NP_000646.2</a>    |
| PREDICTED: L-selectin-like [ <i>Leptonychotes weddellii</i> ]                       | 46.9 | 46.9 | 100% | 8e-05 | 93%  | <a href="#">gij585176064 XP_006739818.1</a> |
| <a href="#">hypothetical protein PANDA_007106 [<i>Ailurogobius melanoleuca</i>]</a> | 46.9 | 46.9 | 100% | 9e-05 | 93%  | <a href="#">gij281348254 EFB23838.1</a>     |
| PREDICTED: L-selectin isoform X2 [ <i>Canis lupus familiaris</i> ]                  | 46.9 | 46.9 | 100% | 9e-05 | 93%  | <a href="#">gij545504917 XP_005622604.1</a> |
| PREDICTED: L-selectin isoform X1 [ <i>Canis lupus familiaris</i> ]                  | 46.9 | 46.9 | 100% | 9e-05 | 93%  | <a href="#">gij73960664 XP_537201.2</a>     |
| PREDICTED: L-selectin [ <i>Ceratotherium simum simum</i> ]                          | 46.9 | 46.9 | 100% | 9e-05 | 93%  | <a href="#">gij478501608 XP_004425116.1</a> |
| PREDICTED: L-selectin [ <i>Odobenus rosmarus divergens</i> ]                        | 46.9 | 46.9 | 100% | 9e-05 | 93%  | <a href="#">gij472379056 XP_004408944.1</a> |
| PREDICTED: L-selectin [ <i>Trichechus manatus latirostris</i> ]                     | 46.9 | 46.9 | 100% | 9e-05 | 93%  | <a href="#">gij471403937 XP_004384151.1</a> |
| PREDICTED: L-selectin [ <i>Saimiri boliviensis boliviensis</i> ]                    | 46.9 | 46.9 | 100% | 9e-05 | 93%  | <a href="#">gij403266555 XP_003925442.1</a> |
| PREDICTED: L-selectin-like [ <i>Ailurogobius melanoleuca</i> ]                      | 46.9 | 46.9 | 100% | 9e-05 | 93%  | <a href="#">gij301766396 XP_002918625.1</a> |
| <a href="#">L-selectin precursor [<i>Oryctolagus cuniculus</i>]</a>                 | 45.6 | 45.6 | 100% | 2e-04 | 93%  | <a href="#">gij126723231 NP_001075821.1</a> |
| PREDICTED: L-selectin [ <i>Sarcophilus harrisii</i> ]                               | 44.3 | 44.3 | 92%  | 6e-04 | 92%  | <a href="#">gij395530797 XP_003767474.1</a> |
| PREDICTED: L-selectin [ <i>Erinaceus europaeus</i> ]                                | 44.3 | 44.3 | 100% | 6e-04 | 86%  | <a href="#">gij617641767 XP_007531867.1</a> |
| PREDICTED: L-selectin [ <i>Elephantulus edwardii</i> ]                              | 43.9 | 43.9 | 100% | 9e-04 | 93%  | <a href="#">gij585664723 XP_006887476.1</a> |
| PREDICTED: L-selectin [ <i>Galeopterus variegatus</i> ]                             | 43.9 | 43.9 | 100% | 9e-04 | 93%  | <a href="#">gij667326711 XP_008589968.1</a> |
| PREDICTED: L-selectin isoform X2 [ <i>Ornithorhynchus anatinus</i> ]                | 43.9 | 43.9 | 100% | 9e-04 | 93%  | <a href="#">gij620963547 XP_007667058.1</a> |
| PREDICTED: L-selectin isoform X1 [ <i>Ornithorhynchus anatinus</i> ]                | 43.9 | 43.9 | 100% | 0.001 | 93%  | <a href="#">gij620963545 XP_007667057.1</a> |
| PREDICTED: L-selectin [ <i>Chrysochloris asiatica</i> ]                             | 43.5 | 43.5 | 100% | 0.001 | 86%  | <a href="#">gij586484387 XP_006872694.1</a> |
| PREDICTED: L-selectin [ <i>Ictidomys tridecemlineatus</i> ]                         | 43.1 | 43.1 | 92%  | 0.002 | 92%  | <a href="#">gij532068085 XP_005319885.1</a> |
| <a href="#">LECAM-1 [<i>Sigmodon hispidus</i>]</a>                                  | 43.1 | 43.1 | 92%  | 0.002 | 92%  | <a href="#">gij27372091 AAN87893.1</a>      |
| PREDICTED: L-selectin [ <i>Ochotona princeps</i> ]                                  | 43.1 | 43.1 | 100% | 0.002 | 86%  | <a href="#">gij504154850 XP_004589372.1</a> |
| PREDICTED: LOW QUALITY PROTEIN: L-selectin [ <i>Mustela putorius</i> ]              | 42.6 | 42.6 | 100% | 0.002 | 86%  | <a href="#">gij511872755 XP_004756722.1</a> |
| PREDICTED: L-selectin [ <i>Panthera tigris altaica</i> ]                            | 42.6 | 42.6 | 100% | 0.002 | 86%  | <a href="#">gij591300224 XP_007077079.1</a> |
| <a href="#">L-selectin [<i>Felis catus</i>]</a>                                     | 42.6 | 42.6 | 100% | 0.002 | 86%  | <a href="#">gij148234680 NP_001082779.1</a> |
| PREDICTED: LOW QUALITY PROTEIN: L-selectin [ <i>Mustela putorius</i> ]              | 42.6 | 42.6 | 100% | 0.002 | 86%  | <a href="#">gij511962048 XP_004799211.1</a> |
| PREDICTED: L-selectin isoform X2 [ <i>Balaenoptera acutorostrata scabra</i> ]       | 41.4 | 41.4 | 100% | 0.006 | 86%  | <a href="#">gij594638526 XP_007172554.1</a> |
| PREDICTED: L-selectin [ <i>Lipotes vexillifer</i> ]                                 | 41.4 | 41.4 | 100% | 0.006 | 86%  | <a href="#">gij602692142 XP_007458185.1</a> |
| PREDICTED: L-selectin isoform X1 [ <i>Balaenoptera acutorostrata scabra</i> ]       | 41.4 | 41.4 | 100% | 0.006 | 86%  | <a href="#">gij594638524 XP_007172553.1</a> |
| PREDICTED: L-selectin [ <i>Physeter catodon</i> ]                                   | 41.4 | 41.4 | 100% | 0.006 | 86%  | <a href="#">gij593711089 XP_007102109.1</a> |
| PREDICTED: L-selectin [ <i>Orcinus orca</i> ]                                       | 41.4 | 41.4 | 100% | 0.006 | 86%  | <a href="#">gij466008816 XP_004269787.1</a> |
| PREDICTED: L-selectin isoform X2 [ <i>Monodelphis domestica</i> ]                   | 41.4 | 41.4 | 92%  | 0.006 | 92%  | <a href="#">gij611987525 XP_007480808.1</a> |
| PREDICTED: L-selectin isoform X1 [ <i>Monodelphis domestica</i> ]                   | 41.4 | 41.4 | 92%  | 0.006 | 92%  | <a href="#">gij611987523 XP_007480807.1</a> |
| PREDICTED: L-selectin [ <i>Camelus dromedarius</i> ]                                | 40.9 | 40.9 | 100% | 0.009 | 79%  | <a href="#">gij744577738 XP_010982785.1</a> |
| PREDICTED: L-selectin [ <i>Camelus bactrianus</i> ]                                 | 40.9 | 40.9 | 100% | 0.009 | 79%  | <a href="#">gij743716948 XP_010952144.1</a> |
| PREDICTED: L-selectin [ <i>Myotis brandtii</i> ]                                    | 40.9 | 40.9 | 100% | 0.009 | 79%  | <a href="#">gij554533070 XP_005861291.1</a> |
| PREDICTED: L-selectin [ <i>Echinops telfairi</i> ]                                  | 40.9 | 40.9 | 100% | 0.009 | 79%  | <a href="#">gij507663676 XP_004706892.1</a> |
| PREDICTED: L-selectin isoform X2 [ <i>Vicugna pacos</i> ]                           | 40.9 | 40.9 | 100% | 0.009 | 79%  | <a href="#">gij560977773 XP_006211162.1</a> |
| PREDICTED: L-selectin isoform X1 [ <i>Vicugna pacos</i> ]                           | 40.9 | 40.9 | 100% | 0.009 | 79%  | <a href="#">gij560977771 XP_006211161.1</a> |
| PREDICTED: L-selectin [ <i>Myotis davidii</i> ]                                     | 40.9 | 40.9 | 100% | 0.009 | 79%  | <a href="#">gij584089194 XP_006764234.1</a> |
| PREDICTED: L-selectin [ <i>Camelus ferus</i> ]                                      | 40.9 | 40.9 | 100% | 0.009 | 79%  | <a href="#">gij560893596 XP_006173301.1</a> |
| <a href="#">L-selectin [<i>Myotis davidii</i>]</a>                                  | 40.9 | 40.9 | 100% | 0.009 | 79%  | <a href="#">gij432102050 ELK29869.1</a>     |
| PREDICTED: L-selectin [ <i>Myotis lucifugus</i> ]                                   | 40.9 | 40.9 | 100% | 0.009 | 79%  | <a href="#">gij558173845 XP_006099687.1</a> |
| PREDICTED: E-selectin [ <i>Eptesicus fuscus</i> ]                                   | 40.9 | 63.2 | 100% | 0.009 | 79%  | <a href="#">gij641723183 XP_008151404.1</a> |
| <a href="#">E-selectin [<i>Myotis brandtii</i>]</a>                                 | 40.9 | 63.2 | 100% | 0.009 | 79%  | <a href="#">gij521022803 EPQ04591.1</a>     |

|                                                                       |      |      |      |       |     |                                             |
|-----------------------------------------------------------------------|------|------|------|-------|-----|---------------------------------------------|
| <a href="#">hypothetical protein CB1_000094012 [Camelus ferus]</a>    | 40.9 | 96.9 | 100% | 0.009 | 79% | <a href="#">gij528769900 EPY89559.1</a>     |
| <a href="#">PREDICTED: L-selectin [Loxodonta africana]</a>            | 40.5 | 40.5 | 100% | 0.012 | 86% | <a href="#">gij731497014 XP_010593279.1</a> |
| <a href="#">PREDICTED: E-selectin [Poecilia formosa]</a>              | 40.5 | 40.5 | 100% | 0.013 | 79% | <a href="#">gij617421905 XP_007558781.1</a> |
| <a href="#">PREDICTED: L-selectin isoform X2 [Bison bison bison]</a>  | 40.1 | 40.1 | 100% | 0.016 | 79% | <a href="#">gij742104371 XP_010835001.1</a> |
| <a href="#">PREDICTED: L-selectin isoform X3 [Capra hircus]</a>       | 40.1 | 40.1 | 100% | 0.016 | 79% | <a href="#">gij548498158 XP_005690682.1</a> |
| <a href="#">PREDICTED: L-selectin isoform X4 [Bubalus bubalis]</a>    | 40.1 | 40.1 | 100% | 0.017 | 79% | <a href="#">gij594100108 XP_006073161.1</a> |
| <a href="#">PREDICTED: L-selectin isoform X2 [Capra hircus]</a>       | 40.1 | 40.1 | 100% | 0.017 | 79% | <a href="#">gij548498156 XP_005690681.1</a> |
| <a href="#">L-selectin [Bos mutus]</a>                                | 40.1 | 40.1 | 100% | 0.017 | 79% | <a href="#">gij440900418 ELR51562.1</a>     |
| <a href="#">PREDICTED: L-selectin isoform X3 [Bubalus bubalis]</a>    | 40.1 | 40.1 | 100% | 0.017 | 79% | <a href="#">gij594100106 XP_006073160.1</a> |
| <a href="#">L-selectin precursor [Bos taurus]</a>                     | 40.1 | 40.1 | 100% | 0.017 | 79% | <a href="#">gij27901801 NP_776607.1</a>     |
| <a href="#">TPA: L-selectin [Bos taurus]</a>                          | 40.1 | 40.1 | 100% | 0.017 | 79% | <a href="#">gij296479225 DAA21340.1</a>     |
| <a href="#">PREDICTED: L-selectin isoform X1 [Capra hircus]</a>       | 40.1 | 40.1 | 100% | 0.017 | 79% | <a href="#">gij548498154 XP_005690680.1</a> |
| <a href="#">PREDICTED: L-selectin [Ovis aries]</a>                    | 40.1 | 40.1 | 100% | 0.017 | 79% | <a href="#">gij426239637 XP_004013726.1</a> |
| <a href="#">L-selectin precursor [Sus scrofa]</a>                     | 40.1 | 40.1 | 100% | 0.017 | 79% | <a href="#">gij162952046 NP_001106148.1</a> |
| <a href="#">PREDICTED: L-selectin isoform X1 [Bison bison bison]</a>  | 40.1 | 40.1 | 100% | 0.017 | 79% | <a href="#">gij742104367 XP_010835000.1</a> |
| <a href="#">PREDICTED: L-selectin [Pantholops hodgsonii]</a>          | 40.1 | 40.1 | 100% | 0.017 | 79% | <a href="#">gij556756215 XP_005973458.1</a> |
| <a href="#">PREDICTED: L-selectin [Bos mutus]</a>                     | 40.1 | 40.1 | 100% | 0.017 | 79% | <a href="#">gij555981044 XP_005902444.1</a> |
| <a href="#">PREDICTED: L-selectin isoform X1 [Bos taurus]</a>         | 40.1 | 40.1 | 100% | 0.017 | 79% | <a href="#">gij528979726 XP_005216937.1</a> |
| <a href="#">PREDICTED: L-selectin [Orycteropus afer afer]</a>         | 40.1 | 40.1 | 100% | 0.017 | 79% | <a href="#">gij634839634 XP_007935972.1</a> |
| <a href="#">PREDICTED: L-selectin isoform X2 [Bubalus bubalis]</a>    | 40.1 | 40.1 | 100% | 0.017 | 79% | <a href="#">gij594100104 XP_006073159.1</a> |
| <a href="#">PREDICTED: L-selectin isoform X1 [Bubalus bubalis]</a>    | 40.1 | 40.1 | 100% | 0.017 | 79% | <a href="#">gij594100102 XP_006073158.1</a> |
| <a href="#">PREDICTED: L-selectin isoform X2 [Cricetulus griseus]</a> | 39.7 | 39.7 | 100% | 0.023 | 86% | <a href="#">gij625273173 XP_007628167.1</a> |
| <a href="#">PREDICTED: L-selectin isoform X1 [Cricetulus griseus]</a> | 39.7 | 39.7 | 100% | 0.023 | 86% | <a href="#">gij625212795 XP_007647090.1</a> |
| <a href="#">E-selectin [Odocoileus hemionus]</a>                      | 39.7 | 39.7 | 100% | 0.024 | 79% | <a href="#">gij13898376 AAK48710.1</a>      |
| <a href="#">P-selectin-like protein [Cricetulus griseus]</a>          | 39.7 | 73.0 | 100% | 0.025 | 86% | <a href="#">gij537153471 ERE72501.1</a>     |
| <a href="#">unnamed protein product [Tetraodon nigroviridis]</a>      | 39.2 | 39.2 | 92%  | 0.028 | 85% | <a href="#">gij47179328 CAG13395.1</a>      |
| <a href="#">PREDICTED: L-selectin [Microtus ochrogaster]</a>          | 39.2 | 39.2 | 92%  | 0.032 | 85% | <a href="#">gij532042485 XP_005364074.1</a> |

## Alignments

Download [GenPept](#) [Graphics](#) ▼ Next ▲ Previous ▲ Descriptions

### Chain A, L-selectin Lectin And Egf Domains

Sequence ID: [gij170292544|pdb|3CFW|A](#) Length: 164 Number of Matches: 1

Range 1: 55 to 68 [GenPept](#) [Graphics](#) ▼ Next Match ▲ Previous Match

| Score          | Expect | Identities  | Positives   | Gaps     |
|----------------|--------|-------------|-------------|----------|
| 49.4 bits(109) | 1e-05  | 14/14(100%) | 14/14(100%) | 0/14(0%) |

Query 1 KIGGIWTWVGTNKS 14  
 KIGGIWTWVGTNKS  
 Sbjct 55 KIGGIWTWVGTNKS 68

#### Related Information

[Structure](#) - 3D structure displays

Download [GenPept](#) [Graphics](#) ▼ Next ▲ Previous ▲ Descriptions

### selectin L (lymphocyte adhesion molecule 1), isoform CRA\_c [Homo sapiens]

Sequence ID: [gij119611263|gb|EAW90857.1](#) Length: 320 Number of Matches: 1

Range 1: 106 to 119 [GenPept](#) [Graphics](#) ▼ Next Match ▲ Previous Match

| Score          | Expect | Identities  | Positives   | Gaps     |
|----------------|--------|-------------|-------------|----------|
| 49.4 bits(109) | 1e-05  | 14/14(100%) | 14/14(100%) | 0/14(0%) |

Query 1 KIGGIWTWVGTNKS 14

#### Related Information

[Gene](#) - associated gene details

Sbjct 106 KIGGIWTWVGTNKS 119

[Download](#) [GenPept](#) [Graphics](#) [Next](#) [Previous](#) [Descriptions](#)

**PREDICTED: L-selectin isoform X2 [Macaca fascicularis]**

Sequence ID: [gi|544398261|ref|XP\\_005539997.1|](#) Length: 323 Number of Matches: 1

Range 1: 106 to 119 [GenPept](#) [Graphics](#) [Next Match](#) [Previous Match](#)

| Score          | Expect | Identities  | Positives   | Gaps     |
|----------------|--------|-------------|-------------|----------|
| 49.4 bits(109) | 1e-05  | 14/14(100%) | 14/14(100%) | 0/14(0%) |

Query 1 KIGGIWTWVGTNKS 14  
 KIGGIWTWVGTNKS  
 Sbjct 106 KIGGIWTWVGTNKS 119

**Related Information**

[Gene](#) - associated gene details

[Download](#) [GenPept](#) [Graphics](#) [Next](#) [Previous](#) [Descriptions](#)

**unnamed protein product [Homo sapiens]**

Sequence ID: [gi|194384912|dbj|BAG60862.1|](#) Length: 325 Number of Matches: 1

Range 1: 46 to 59 [GenPept](#) [Graphics](#) [Next Match](#) [Previous Match](#)

| Score          | Expect | Identities  | Positives   | Gaps     |
|----------------|--------|-------------|-------------|----------|
| 49.4 bits(109) | 1e-05  | 14/14(100%) | 14/14(100%) | 0/14(0%) |

Query 1 KIGGIWTWVGTNKS 14  
 KIGGIWTWVGTNKS  
 Sbjct 46 KIGGIWTWVGTNKS 59

**Related Information**

[Gene](#) - associated gene details

[Download](#) [GenPept](#) [Graphics](#) [Next](#) [Previous](#) [Descriptions](#)

**PREDICTED: LOW QUALITY PROTEIN: L-selectin [Tarsius syrichta]**

Sequence ID: [gi|640806175|ref|XP\\_008059542.1|](#) Length: 362 Number of Matches: 1

Range 1: 93 to 106 [GenPept](#) [Graphics](#) [Next Match](#) [Previous Match](#)

| Score          | Expect | Identities  | Positives   | Gaps     |
|----------------|--------|-------------|-------------|----------|
| 49.4 bits(109) | 1e-05  | 14/14(100%) | 14/14(100%) | 0/14(0%) |

Query 1 KIGGIWTWVGTNKS 14  
 KIGGIWTWVGTNKS  
 Sbjct 93 KIGGIWTWVGTNKS 106

**Related Information**

[Gene](#) - associated gene details  
[Map Viewer](#) - aligned genomic context

BLAST is a registered trademark of the National Library of Medicine.



NCBI/ BLAST/ blastp suite/ Formatting Results - BVKFGK9801R

Your search parameters were adjusted to search for a short input sequence.

[Edit and Resubmit](#) [Save Search Strategies](#) [Formatting options](#) [Download](#) [YouTube](#) [How to read this page](#) [Blast report description](#)

### SELL\_RFCRDDYTDLVAIQNKA\_Mod

RID [BVKFGK9801R](#) (Expires on 01-21 10:39 am)

Query ID |cl|322106 Database Name nr  
 Description None Description All non-redundant GenBank CDS translations+PDB+SwissProt+PIR+PRF excluding environmental samples from WGS projects  
 Molecule type amino acid Program BLASTP 2.2.30+ [Citation](#)  
 Query Length 17

Other reports: [Search Summary](#) [Taxonomy reports](#) [Distance tree of results](#) [Multiple alignment](#)

### Graphic Summary

[Show Conserved Domains](#)

No putative conserved domains have been detected

Distribution of 107 Blast Hits on the Query Sequence



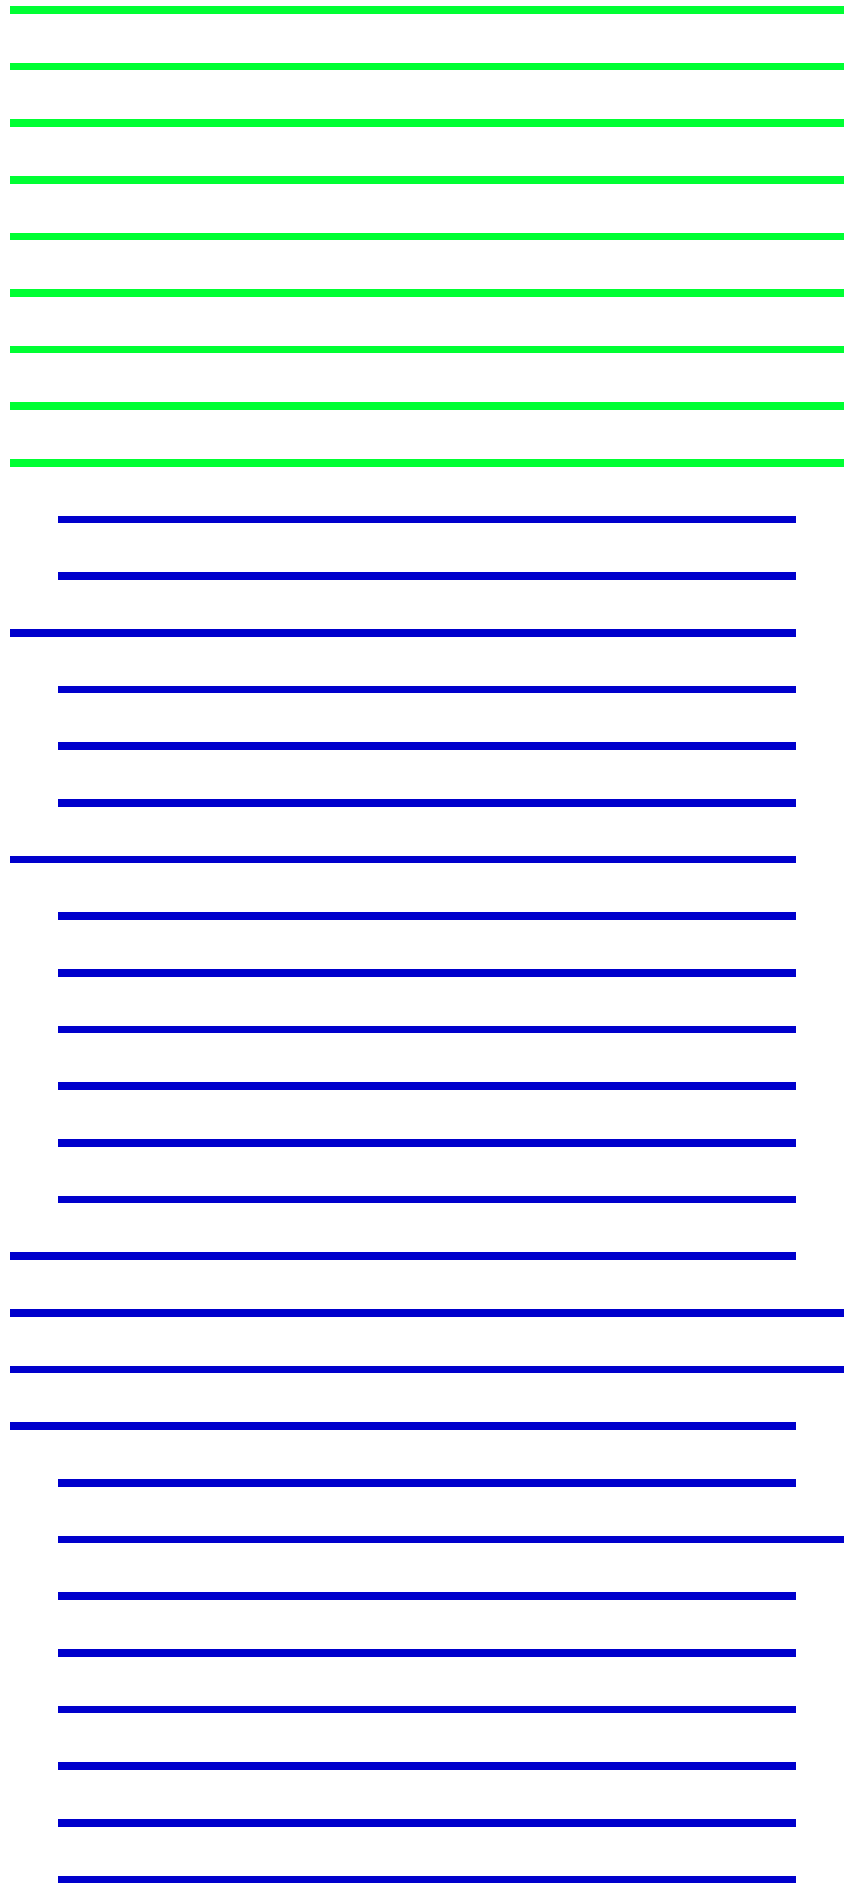

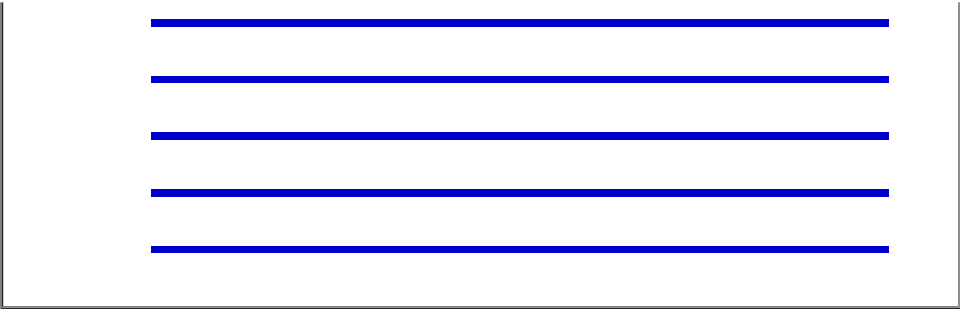

**Descriptions**

**Sequences producing significant alignments:**

Select: [All](#) [None](#) Selected:0

[Alignments](#)
[Download](#)
[GenPept](#)
[Graphics](#)
[Distance tree of results](#)
[Multiple alignment](#)


| Description                                                                                | Max score | Total score | Query cover | E value | Ident | Accession                      |
|--------------------------------------------------------------------------------------------|-----------|-------------|-------------|---------|-------|--------------------------------|
| <a href="#">Chain A, L-selectin Lectin And Egf Domains [Homo sapiens]</a>                  | 57.1      | 57.1        | 100%        | 4e-08   | 94%   | <a href="#">3CFW_A</a>         |
| <a href="#">selectin L (lymphocyte adhesion molecule 1), isoform CRA_c [Homo sapiens]</a>  | 57.1      | 57.1        | 100%        | 5e-08   | 94%   | <a href="#">EAW90857.1</a>     |
| <a href="#">unnamed protein product [Homo sapiens]</a>                                     | 57.1      | 57.1        | 100%        | 5e-08   | 94%   | <a href="#">BAG60862.1</a>     |
| <a href="#">Leu-8 antigen short form [Homo sapiens]</a>                                    | 57.1      | 57.1        | 100%        | 5e-08   | 94%   | <a href="#">CAB43537.1</a>     |
| <a href="#">lymph node homing receptor precursor [Homo sapiens]</a>                        | 57.1      | 57.1        | 100%        | 5e-08   | 94%   | <a href="#">AAC63053.1</a>     |
| <a href="#">L-selectin precursor [Pan troglodytes]</a>                                     | 57.1      | 57.1        | 100%        | 5e-08   | 94%   | <a href="#">NP_001009074.1</a> |
| <a href="#">unnamed protein product [Homo sapiens]</a>                                     | 57.1      | 57.1        | 100%        | 5e-08   | 94%   | <a href="#">CAA34275.1</a>     |
| <a href="#">pln homing receptor [Homo sapiens]</a>                                         | 57.1      | 57.1        | 100%        | 5e-08   | 94%   | <a href="#">CAA34203.1</a>     |
| <a href="#">RecName: Full=L-selectin; AltName: Full=CD62 antigen-like family member L;</a> | 57.1      | 57.1        | 100%        | 5e-08   | 94%   | <a href="#">P14151.2</a>       |
| <a href="#">selectin L (lymphocyte adhesion molecule 1), isoform CRA_a [Homo sapiens]</a>  | 57.1      | 57.1        | 100%        | 5e-08   | 94%   | <a href="#">EAW90855.1</a>     |
| <a href="#">SELL [synthetic construct]</a>                                                 | 57.1      | 57.1        | 100%        | 5e-08   | 94%   | <a href="#">AIC62025.1</a>     |
| <a href="#">SELL protein [Homo sapiens]</a>                                                | 57.1      | 57.1        | 100%        | 5e-08   | 94%   | <a href="#">AAH20758.1</a>     |
| <a href="#">PREDICTED: L-selectin [Gorilla gorilla gorilla]</a>                            | 57.1      | 57.1        | 100%        | 5e-08   | 94%   | <a href="#">XP_004027917.1</a> |
| <a href="#">unnamed protein product [Homo sapiens]</a>                                     | 57.1      | 57.1        | 100%        | 5e-08   | 94%   | <a href="#">CAB43536.1</a>     |
| <a href="#">PREDICTED: L-selectin [Pan paniscus]</a>                                       | 57.1      | 57.1        | 100%        | 5e-08   | 94%   | <a href="#">XP_003824676.1</a> |
| <a href="#">L-selectin precursor [Homo sapiens]</a>                                        | 57.1      | 57.1        | 100%        | 5e-08   | 94%   | <a href="#">NP_000646.2</a>    |
| <a href="#">PREDICTED: L-selectin isoform X2 [Macaca fascicularis]</a>                     | 54.5      | 54.5        | 100%        | 3e-07   | 88%   | <a href="#">XP_005539997.1</a> |
| <a href="#">L-selectin [Papio anubis]</a>                                                  | 54.5      | 54.5        | 100%        | 3e-07   | 88%   | <a href="#">NP_001106096.1</a> |
| <a href="#">L-selectin precursor [Macaca mulatta]</a>                                      | 54.5      | 54.5        | 100%        | 3e-07   | 88%   | <a href="#">NP_001036228.1</a> |
| <a href="#">RecName: Full=L-selectin; AltName: Full=CD62 antigen-like family member L;</a> | 54.5      | 54.5        | 100%        | 3e-07   | 88%   | <a href="#">Q95235.1</a>       |
| <a href="#">Lymph node homing receptor [Macaca mulatta]</a>                                | 54.5      | 54.5        | 100%        | 4e-07   | 88%   | <a href="#">EHH15803.1</a>     |
| <a href="#">PREDICTED: L-selectin [Rhinopithecus roxellana]</a>                            | 54.5      | 54.5        | 100%        | 4e-07   | 88%   | <a href="#">XP_010359291.1</a> |
| <a href="#">PREDICTED: L-selectin [Chlorocebus sabaeus]</a>                                | 54.5      | 54.5        | 100%        | 4e-07   | 88%   | <a href="#">XP_007987763.1</a> |
| <a href="#">PREDICTED: L-selectin isoform X1 [Macaca fascicularis]</a>                     | 54.5      | 54.5        | 100%        | 4e-07   | 88%   | <a href="#">XP_005539996.1</a> |
| <a href="#">PREDICTED: L-selectin [Pongo abelii]</a>                                       | 54.5      | 54.5        | 100%        | 4e-07   | 88%   | <a href="#">XP_002809857.2</a> |
| <a href="#">PREDICTED: L-selectin [Nomascus leucogenys]</a>                                | 54.5      | 54.5        | 100%        | 4e-07   | 88%   | <a href="#">XP_003258894.1</a> |
| <a href="#">PREDICTED: L-selectin-like [Peromyscus maniculatus bairdii]</a>                | 48.6      | 48.6        | 88%         | 3e-05   | 87%   | <a href="#">XP_006974839.1</a> |
| <a href="#">PREDICTED: L-selectin isoform X2 [Bison bison bison]</a>                       | 48.6      | 48.6        | 88%         | 3e-05   | 87%   | <a href="#">XP_010835001.1</a> |
| <a href="#">PREDICTED: L-selectin isoform X2 [Canis lupus familiaris]</a>                  | 48.6      | 48.6        | 94%         | 4e-05   | 81%   | <a href="#">XP_005622604.1</a> |

|                                                                                        |      |      |      |       |     |                                |
|----------------------------------------------------------------------------------------|------|------|------|-------|-----|--------------------------------|
| <a href="#">L-selectin [Bos mutus]</a>                                                 | 48.6 | 48.6 | 88%  | 4e-05 | 87% | <a href="#">ELR51562.1</a>     |
| <a href="#">L-selectin precursor [Bos taurus]</a>                                      | 48.6 | 48.6 | 88%  | 4e-05 | 87% | <a href="#">NP_776607.1</a>    |
| <a href="#">TPA: L-selectin [Bos taurus]</a>                                           | 48.6 | 48.6 | 88%  | 4e-05 | 87% | <a href="#">DAA21340.1</a>     |
| <a href="#">PREDICTED: L-selectin isoform X1 [Canis lupus familiaris]</a>              | 48.6 | 48.6 | 94%  | 4e-05 | 81% | <a href="#">XP_537201.2</a>    |
| <a href="#">PREDICTED: L-selectin-like isoform X2 [Peromyscus maniculatus bairdii]</a> | 48.6 | 48.6 | 88%  | 4e-05 | 87% | <a href="#">XP_006974823.1</a> |
| <a href="#">PREDICTED: L-selectin isoform X1 [Bison bison bison]</a>                   | 48.6 | 48.6 | 88%  | 4e-05 | 87% | <a href="#">XP_010835000.1</a> |
| <a href="#">PREDICTED: L-selectin [Bos mutus]</a>                                      | 48.6 | 48.6 | 88%  | 4e-05 | 87% | <a href="#">XP_005902444.1</a> |
| <a href="#">PREDICTED: L-selectin isoform X1 [Bos taurus]</a>                          | 48.6 | 48.6 | 88%  | 4e-05 | 87% | <a href="#">XP_005216937.1</a> |
| <a href="#">L-selectin precursor [Oryctolagus cuniculus]</a>                           | 48.6 | 48.6 | 88%  | 4e-05 | 87% | <a href="#">NP_001075821.1</a> |
| <a href="#">PREDICTED: L-selectin-like isoform X1 [Peromyscus maniculatus bairdii]</a> | 48.6 | 48.6 | 88%  | 4e-05 | 87% | <a href="#">XP_006974822.1</a> |
| <a href="#">PREDICTED: L-selectin [Galeopterus variegatus]</a>                         | 47.7 | 47.7 | 94%  | 7e-05 | 81% | <a href="#">XP_008589968.1</a> |
| <a href="#">PREDICTED: L-selectin [Callithrix jacchus]</a>                             | 47.7 | 47.7 | 100% | 7e-05 | 82% | <a href="#">XP_002760427.1</a> |
| <a href="#">PREDICTED: L-selectin [Saimiri boliviensis boliviensis]</a>                | 47.7 | 47.7 | 100% | 7e-05 | 82% | <a href="#">XP_003925442.1</a> |
| <a href="#">PREDICTED: L-selectin-like [Leptonychotes weddellii]</a>                   | 47.3 | 47.3 | 94%  | 8e-05 | 81% | <a href="#">XP_006739818.1</a> |
| <a href="#">PREDICTED: L-selectin isoform X2 [Ursus maritimus]</a>                     | 46.9 | 46.9 | 88%  | 1e-04 | 87% | <a href="#">XP_008694116.1</a> |
| <a href="#">PREDICTED: L-selectin [Ceratotherium simum simum]</a>                      | 46.9 | 46.9 | 94%  | 1e-04 | 81% | <a href="#">XP_004425116.1</a> |
| <a href="#">PREDICTED: L-selectin isoform X1 [Ursus maritimus]</a>                     | 46.9 | 46.9 | 88%  | 1e-04 | 87% | <a href="#">XP_008694111.1</a> |
| <a href="#">PREDICTED: L-selectin [Panthera tigris altaica]</a>                        | 46.9 | 46.9 | 88%  | 1e-04 | 87% | <a href="#">XP_007077079.1</a> |
| <a href="#">PREDICTED: L-selectin isoform X4 [Bubalus bubalis]</a>                     | 46.4 | 46.4 | 88%  | 2e-04 | 87% | <a href="#">XP_006073161.1</a> |
| <a href="#">PREDICTED: L-selectin isoform X3 [Bubalus bubalis]</a>                     | 46.4 | 46.4 | 88%  | 2e-04 | 87% | <a href="#">XP_006073160.1</a> |
| <a href="#">PREDICTED: L-selectin isoform X2 [Bubalus bubalis]</a>                     | 46.4 | 46.4 | 88%  | 2e-04 | 87% | <a href="#">XP_006073159.1</a> |
| <a href="#">PREDICTED: L-selectin isoform X1 [Bubalus bubalis]</a>                     | 46.4 | 46.4 | 88%  | 2e-04 | 87% | <a href="#">XP_006073158.1</a> |
| <a href="#">PREDICTED: L-selectin isoform X2 [Balaenoptera acutorostrata scammoni]</a> | 46.0 | 46.0 | 88%  | 2e-04 | 87% | <a href="#">XP_007172554.1</a> |
| <a href="#">PREDICTED: L-selectin [Camelus dromedarius]</a>                            | 46.0 | 46.0 | 88%  | 2e-04 | 87% | <a href="#">XP_010982785.1</a> |
| <a href="#">PREDICTED: L-selectin [Camelus bactrianus]</a>                             | 46.0 | 46.0 | 88%  | 2e-04 | 87% | <a href="#">XP_010952144.1</a> |
| <a href="#">PREDICTED: L-selectin isoform X2 [Vicugna pacos]</a>                       | 46.0 | 46.0 | 88%  | 2e-04 | 87% | <a href="#">XP_006211162.1</a> |
| <a href="#">PREDICTED: L-selectin isoform X1 [Vicugna pacos]</a>                       | 46.0 | 46.0 | 88%  | 2e-04 | 87% | <a href="#">XP_006211161.1</a> |
| <a href="#">PREDICTED: L-selectin [Pteropus alecto]</a>                                | 46.0 | 46.0 | 94%  | 2e-04 | 81% | <a href="#">XP_006907882.1</a> |
| <a href="#">PREDICTED: L-selectin [Camelus ferus]</a>                                  | 46.0 | 46.0 | 88%  | 3e-04 | 87% | <a href="#">XP_006173301.1</a> |
| <a href="#">PREDICTED: L-selectin [Lipotes vexillifer]</a>                             | 46.0 | 46.0 | 88%  | 3e-04 | 87% | <a href="#">XP_007458185.1</a> |
| <a href="#">PREDICTED: L-selectin isoform X1 [Balaenoptera acutorostrata scammoni]</a> | 46.0 | 46.0 | 88%  | 3e-04 | 87% | <a href="#">XP_007172553.1</a> |
| <a href="#">PREDICTED: L-selectin [Physeter catodon]</a>                               | 46.0 | 46.0 | 88%  | 3e-04 | 87% | <a href="#">XP_007102109.1</a> |
| <a href="#">PREDICTED: L-selectin [Tursiops truncatus]</a>                             | 46.0 | 46.0 | 88%  | 3e-04 | 87% | <a href="#">XP_004319819.1</a> |
| <a href="#">PREDICTED: L-selectin [Orcinus orca]</a>                                   | 46.0 | 46.0 | 88%  | 3e-04 | 87% | <a href="#">XP_004269787.1</a> |
| <a href="#">PREDICTED: E-selectin [Eptesicus fuscus]</a>                               | 46.0 | 75.1 | 94%  | 3e-04 | 81% | <a href="#">XP_008151404.1</a> |
| <a href="#">E-selectin [Pteropus alecto]</a>                                           | 46.0 | 107  | 94%  | 3e-04 | 81% | <a href="#">ELK16299.1</a>     |
| <a href="#">hypothetical protein CB1_000094012 [Camelus ferus]</a>                     | 46.0 | 105  | 94%  | 3e-04 | 87% | <a href="#">EPY89559.1</a>     |
| <a href="#">PREDICTED: L-selectin [Trichechus manatus latirostris]</a>                 | 45.6 | 45.6 | 94%  | 3e-04 | 75% | <a href="#">XP_004384151.1</a> |
| <a href="#">PREDICTED: L-selectin isoform X2 [Cricetulus griseus]</a>                  | 45.2 | 45.2 | 88%  | 5e-04 | 80% | <a href="#">XP_007628167.1</a> |
| <a href="#">LECAM-1 [Sigmodon hispidus]</a>                                            | 45.2 | 45.2 | 88%  | 5e-04 | 80% | <a href="#">AAN87893.1</a>     |
| <a href="#">PREDICTED: L-selectin isoform X1 [Cricetulus griseus]</a>                  | 45.2 | 45.2 | 88%  | 5e-04 | 80% | <a href="#">XP_007647090.1</a> |
| <a href="#">PREDICTED: L-selectin [Microtus ochrogaster]</a>                           | 45.2 | 45.2 | 88%  | 5e-04 | 80% | <a href="#">XP_005364074.1</a> |
| <a href="#">PREDICTED: L-selectin [Mesocricetus auratus]</a>                           | 45.2 | 45.2 | 88%  | 5e-04 | 80% | <a href="#">XP_005071531.1</a> |
| <a href="#">PREDICTED: L-selectin [Octodon degus]</a>                                  | 45.2 | 45.2 | 94%  | 5e-04 | 81% | <a href="#">XP_004648568.1</a> |
| <a href="#">P-selectin-like protein [Cricetulus griseus]</a>                           | 45.2 | 81.0 | 88%  | 5e-04 | 80% | <a href="#">ERE72501.1</a>     |

|                                                                                    |      |      |     |       |     |                                |
|------------------------------------------------------------------------------------|------|------|-----|-------|-----|--------------------------------|
| <a href="#">PREDICTED: LOW QUALITY PROTEIN: L-selectin [Mustela putorius furo]</a> | 44.8 | 44.8 | 94% | 7e-04 | 75% | <a href="#">XP_004756722.1</a> |
| <a href="#">PREDICTED: LOW QUALITY PROTEIN: L-selectin [Mustela putorius furo]</a> | 44.8 | 44.8 | 94% | 7e-04 | 75% | <a href="#">XP_004799211.1</a> |
| <a href="#">PREDICTED: L-selectin isoform X3 [Fukomys damarensis]</a>              | 44.3 | 44.3 | 88% | 0.001 | 80% | <a href="#">XP_010632293.1</a> |
| <a href="#">PREDICTED: L-selectin [Elephantulus edwardii]</a>                      | 44.3 | 44.3 | 88% | 0.001 | 80% | <a href="#">XP_006887476.1</a> |
| <a href="#">hypothetical protein PANDA_007106 [Ailuropoda melanoleuca]</a>         | 44.3 | 44.3 | 88% | 0.001 | 80% | <a href="#">EFB23838.1</a>     |
| <a href="#">PREDICTED: L-selectin isoform X2 [Fukomys damarensis]</a>              | 44.3 | 44.3 | 88% | 0.001 | 80% | <a href="#">XP_010632292.1</a> |
| <a href="#">PREDICTED: L-selectin isoform 4 [Dasypus novemcinctus]</a>             | 44.3 | 44.3 | 88% | 0.001 | 80% | <a href="#">XP_004464223.1</a> |
| <a href="#">PREDICTED: LOW QUALITY PROTEIN: L-selectin [Tarsius syrichta]</a>      | 44.3 | 44.3 | 88% | 0.001 | 80% | <a href="#">XP_008059542.1</a> |
| <a href="#">PREDICTED: L-selectin isoform 5 [Dasypus novemcinctus]</a>             | 44.3 | 44.3 | 88% | 0.001 | 80% | <a href="#">XP_004464224.1</a> |
| <a href="#">PREDICTED: L-selectin isoform 3 [Dasypus novemcinctus]</a>             | 44.3 | 44.3 | 88% | 0.001 | 80% | <a href="#">XP_004464222.1</a> |
| <a href="#">PREDICTED: L-selectin [Nannospalax galii]</a>                          | 44.3 | 44.3 | 88% | 0.001 | 80% | <a href="#">XP_008823120.1</a> |
| <a href="#">PREDICTED: L-selectin isoform X1 [Fukomys damarensis]</a>              | 44.3 | 44.3 | 88% | 0.001 | 80% | <a href="#">XP_010632291.1</a> |
| <a href="#">PREDICTED: L-selectin isoform 2 [Dasypus novemcinctus]</a>             | 44.3 | 44.3 | 88% | 0.001 | 80% | <a href="#">XP_004464221.1</a> |
| <a href="#">L-selectin precursor [Sus scrofa]</a>                                  | 44.3 | 44.3 | 88% | 0.001 | 80% | <a href="#">NP_001106148.1</a> |
| <a href="#">L-selectin [Felis catus]</a>                                           | 44.3 | 44.3 | 88% | 0.001 | 80% | <a href="#">NP_001082779.1</a> |
| <a href="#">PREDICTED: L-selectin isoform 1 [Dasypus novemcinctus]</a>             | 44.3 | 44.3 | 88% | 0.001 | 80% | <a href="#">XP_004464220.1</a> |
| <a href="#">PREDICTED: L-selectin [Jaculus jaculus]</a>                            | 44.3 | 44.3 | 88% | 0.001 | 80% | <a href="#">XP_004658951.1</a> |
| <a href="#">PREDICTED: L-selectin-like [Ailuropoda melanoleuca]</a>                | 44.3 | 44.3 | 88% | 0.001 | 80% | <a href="#">XP_002918625.1</a> |
| <a href="#">PREDICTED: L-selectin [Ochotona princeps]</a>                          | 44.3 | 44.3 | 88% | 0.001 | 80% | <a href="#">XP_004589372.1</a> |
| <a href="#">PREDICTED: L-selectin isoform X3 [Equus przewalskii]</a>               | 44.3 | 44.3 | 88% | 0.001 | 80% | <a href="#">XP_008523771.1</a> |
| <a href="#">PREDICTED: L-selectin isoform X3 [Equus caballus]</a>                  | 44.3 | 44.3 | 88% | 0.001 | 80% | <a href="#">XP_005609701.1</a> |
| <a href="#">PREDICTED: L-selectin isoform X2 [Equus przewalskii]</a>               | 44.3 | 44.3 | 88% | 0.001 | 80% | <a href="#">XP_008523770.1</a> |
| <a href="#">PREDICTED: L-selectin isoform X2 [Equus caballus]</a>                  | 44.3 | 44.3 | 88% | 0.001 | 80% | <a href="#">XP_005609700.1</a> |
| <a href="#">PREDICTED: L-selectin isoform X1 [Equus przewalskii]</a>               | 44.3 | 44.3 | 88% | 0.001 | 80% | <a href="#">XP_008523769.1</a> |
| <a href="#">PREDICTED: L-selectin isoform X1 [Equus caballus]</a>                  | 44.3 | 44.3 | 88% | 0.001 | 80% | <a href="#">XP_005609699.1</a> |
| <a href="#">E-selectin [Fukomys damarensis]</a>                                    | 44.3 | 76.4 | 88% | 0.001 | 80% | <a href="#">KFO29135.1</a>     |

## Alignments

Download GenPept Graphics

Next Previous Descriptions

### Chain A, L-selectin Lectin And Egf Domains

Sequence ID: [pdb|3CFW|A](#) Length: 164 Number of Matches: 1

Range 1: 17 to 33 GenPept Graphics

Next Match Previous Match

| Score          | Expect | Identities | Positives   | Gaps     |
|----------------|--------|------------|-------------|----------|
| 57.1 bits(127) | 4e-08  | 16/17(94%) | 17/17(100%) | 0/17(0%) |

Query 1 RFCRDDYTDLVAIQNKA 17  
 RFCRD+YTDLVAIQNKA  
 Sbjct 17 RFCRDNYTDLVAIQNKA 33

#### Related Information

[Structure](#) - 3D structure displays

Download GenPept Graphics

Next Previous Descriptions

### selectin L (lymphocyte adhesion molecule 1), isoform CRA\_c [Homo sapiens]

Sequence ID: [gb|EAW90857.1|](#) Length: 320 Number of Matches: 1

Range 1: 68 to 84 GenPept Graphics

Next Match Previous Match

| Score          | Expect | Identities | Positives   | Gaps     |
|----------------|--------|------------|-------------|----------|
| 57.1 bits(127) | 5e-08  | 16/17(94%) | 17/17(100%) | 0/17(0%) |

#### Related Information

[Gene](#) - associated gene details

Query 1 RFCRDDYTDLVAIQNKA 17  
 RFCRD+YDDLVAIQNKA  
 Sbjct 68 RFCRDNYDDLVAIQNKA 84

Download [GenPept](#) [Graphics](#)

[▼ Next](#) [▲ Previous](#) [▲ Descriptions](#)

unnamed protein product [Homo sapiens]

Sequence ID: [dbj|BAG60862.1|](#) Length: 325 Number of Matches: 1

Range 1: 8 to 24 [GenPept](#) [Graphics](#)

[▼ Next Match](#) [▲ Previous Match](#)

| Score          | Expect | Identities | Positives   | Gaps     |
|----------------|--------|------------|-------------|----------|
| 57.1 bits(127) | 5e-08  | 16/17(94%) | 17/17(100%) | 0/17(0%) |

Query 1 RFCRDDYTDLVAIQNKA 17  
 RFCRD+YDDLVAIQNKA  
 Sbjct 8 RFCRDNYDDLVAIQNKA 24

**Related Information**

[Gene](#) - associated gene details

Download [GenPept](#) [Graphics](#)

[▼ Next](#) [▲ Previous](#) [▲ Descriptions](#)

Leu-8 antigen short form [Homo sapiens]

Sequence ID: [emb|CAB43537.1|](#) Length: 363 Number of Matches: 1

[▶ See 1 more title\(s\)](#)

Range 1: 68 to 84 [GenPept](#) [Graphics](#)

[▼ Next Match](#) [▲ Previous Match](#)

| Score          | Expect | Identities | Positives   | Gaps     |
|----------------|--------|------------|-------------|----------|
| 57.1 bits(127) | 5e-08  | 16/17(94%) | 17/17(100%) | 0/17(0%) |

Query 1 RFCRDDYTDLVAIQNKA 17  
 RFCRD+YDDLVAIQNKA  
 Sbjct 68 RFCRDNYDDLVAIQNKA 84

**Related Information**

[Gene](#) - associated gene details

[Identical Proteins](#) - Proteins identical to the subject

Download [GenPept](#) [Graphics](#)

[▼ Next](#) [▲ Previous](#) [▲ Descriptions](#)

lymph node homing receptor precursor [Homo sapiens]

Sequence ID: [gb|AAC63053.1|](#) Length: 372 Number of Matches: 1

Range 1: 55 to 71 [GenPept](#) [Graphics](#)

[▼ Next Match](#) [▲ Previous Match](#)

| Score          | Expect | Identities | Positives   | Gaps     |
|----------------|--------|------------|-------------|----------|
| 57.1 bits(127) | 5e-08  | 16/17(94%) | 17/17(100%) | 0/17(0%) |

Query 1 RFCRDDYTDLVAIQNKA 17  
 RFCRD+YDDLVAIQNKA  
 Sbjct 55 RFCRDNYDDLVAIQNKA 71

**Related Information**

[Gene](#) - associated gene details

BLAST is a registered trademark of the National Library of Medicine.

NCBI/ BLAST/ blastp suite/ Formatting Results - BE841U92014

Your search parameters were adjusted to search for a short input sequence.

[Edit and Resubmit](#) [Save Search Strategies](#) [Formatting options](#) [Download](#)

[YouTube](#) [How to read this page](#) [Blast report description](#)

SELL\_RFCRDNYTDLVAIQNKA\_NonMod

RID [BE841U92014](#) (Expires on 01-16 09:05 am)

Query ID |c|77738

Description None

Molecule type amino acid

Query Length 17

Database Name nr

Description All non-redundant GenBank CDS translations+PDB+SwissProt+PIR excluding environmental samples from WGS projects

Program BLASTP 2.2.30+ [Citation](#)

Other reports: [Search Summary](#) [Taxonomy reports](#) [Distance tree of results](#) [Multiple alignment](#)

[New DELTA-BLAST](#) a more sensitive protein-protein search

Graphic Summary

Show Conserved Domains

Putative conserved domains have been detected, click on the image below for detailed results.

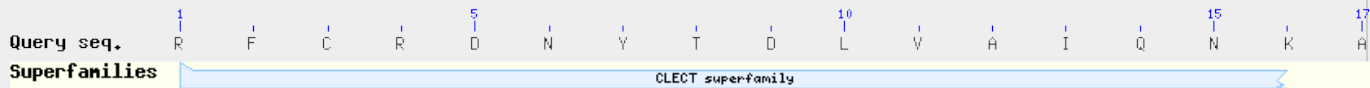

Distribution of 106 Blast Hits on the Query Sequence

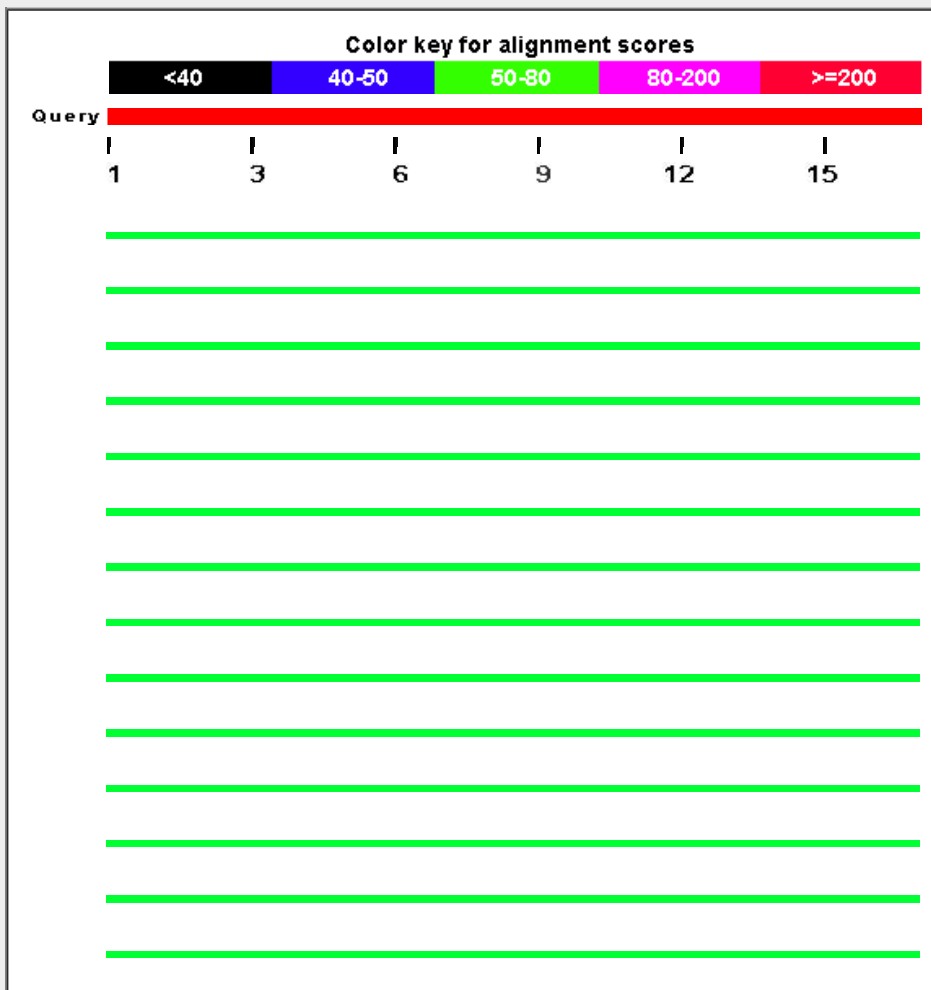

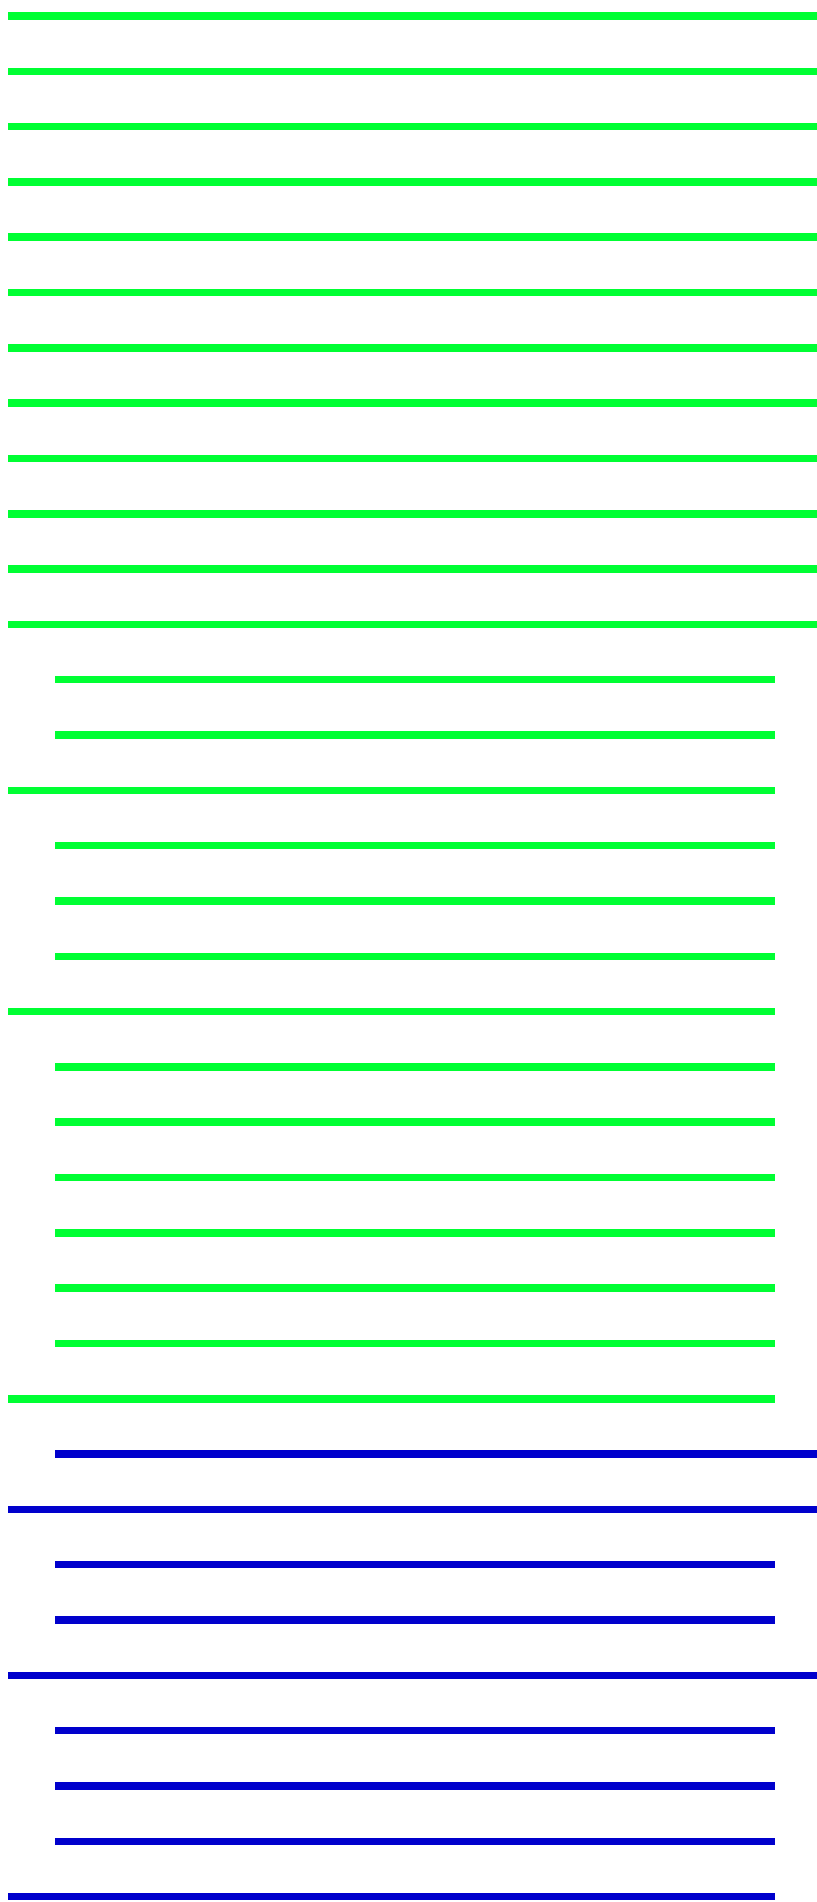



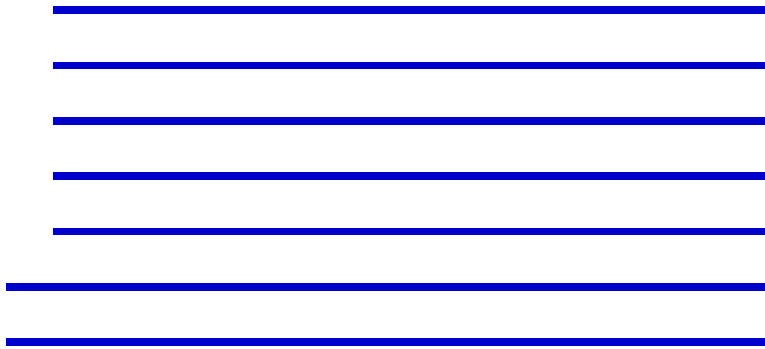

**Descriptions**

**Sequences producing significant alignments:**

Select: [All](#) [None](#) Selected:0

Alignments [Download](#) [GenPept](#) [Graphics](#) [Distance tree of results](#) [Multiple alignment](#)

| Description                                                                               | Max score | Total score | Query cover | E value | Ident | Accession                                   |
|-------------------------------------------------------------------------------------------|-----------|-------------|-------------|---------|-------|---------------------------------------------|
| <a href="#">Chain A. L-selectin Lectin And Egf Domains [Homo sapiens]</a>                 | 59.6      | 59.6        | 100%        | 5e-09   | 100%  | <a href="#">gi 170292544 3CFW_A</a>         |
| <a href="#">selectin L (lymphocyte adhesion molecule 1), isoform CRA_c [Homo sapiens]</a> | 59.6      | 59.6        | 100%        | 6e-09   | 100%  | <a href="#">gi 119611263 EAW90857.1</a>     |
| <a href="#">unnamed protein product [Homo sapiens]</a>                                    | 59.6      | 59.6        | 100%        | 6e-09   | 100%  | <a href="#">gi 194384912 BAG60862.1</a>     |
| <a href="#">Leu-8 antigen short form [Homo sapiens]</a>                                   | 59.6      | 59.6        | 100%        | 6e-09   | 100%  | <a href="#">gi 4902830 CAB43537.1</a>       |
| <a href="#">lymph node homing receptor precursor [Homo sapiens]</a>                       | 59.6      | 59.6        | 100%        | 6e-09   | 100%  | <a href="#">gi 307134 AAC63053.1</a>        |
| <a href="#">L-selectin precursor [Pan troglodytes]</a>                                    | 59.6      | 59.6        | 100%        | 6e-09   | 100%  | <a href="#">gi 57114019 NP_001009074.1</a>  |
| <a href="#">unnamed protein product [Homo sapiens]</a>                                    | 59.6      | 59.6        | 100%        | 6e-09   | 100%  | <a href="#">gi 34429 CAA34275.1</a>         |
| <a href="#">pln homing receptor [Homo sapiens]</a>                                        | 59.6      | 59.6        | 100%        | 6e-09   | 100%  | <a href="#">gi 38093 CAA34203.1</a>         |
| <a href="#">RecName: Full=L-selectin; AltName: Full=CD62 antigen-like family</a>          | 59.6      | 59.6        | 100%        | 6e-09   | 100%  | <a href="#">gi 126178 P14151.2</a>          |
| <a href="#">selectin L (lymphocyte adhesion molecule 1), isoform CRA_a [Homo sapiens]</a> | 59.6      | 59.6        | 100%        | 6e-09   | 100%  | <a href="#">gi 119611261 EAW90855.1</a>     |
| <a href="#">SELL [synthetic construct]</a>                                                | 59.6      | 59.6        | 100%        | 6e-09   | 100%  | <a href="#">gi 649149084 AIC62025.1</a>     |
| <a href="#">SELL protein [Homo sapiens]</a>                                               | 59.6      | 59.6        | 100%        | 6e-09   | 100%  | <a href="#">gi 18088808 AAH20758.1</a>      |
| <a href="#">PREDICTED: L-selectin [Gorilla gorilla gorilla]</a>                           | 59.6      | 59.6        | 100%        | 6e-09   | 100%  | <a href="#">gi 426332662 XP_004027917.1</a> |
| <a href="#">unnamed protein product [Homo sapiens]</a>                                    | 59.6      | 59.6        | 100%        | 6e-09   | 100%  | <a href="#">gi 4902829 CAB43536.1</a>       |
| <a href="#">PREDICTED: L-selectin [Pan paniscus]</a>                                      | 59.6      | 59.6        | 100%        | 6e-09   | 100%  | <a href="#">gi 397508469 XP_003824676.1</a> |
| <a href="#">L-selectin precursor [Homo sapiens]</a>                                       | 59.6      | 59.6        | 100%        | 6e-09   | 100%  | <a href="#">gi 262206315 NP_000646.2</a>    |
| <a href="#">PREDICTED: L-selectin isoform X2 [Macaca fascicularis]</a>                    | 57.1      | 57.1        | 100%        | 5e-08   | 94%   | <a href="#">gi 544398261 XP_005539997.1</a> |
| <a href="#">L-selectin [Papio anubis]</a>                                                 | 57.1      | 57.1        | 100%        | 5e-08   | 94%   | <a href="#">gi 162951976 NP_001106096.1</a> |
| <a href="#">L-selectin precursor [Macaca mulatta]</a>                                     | 57.1      | 57.1        | 100%        | 5e-08   | 94%   | <a href="#">gi 112363117 NP_001036228.1</a> |
| <a href="#">RecName: Full=L-selectin; AltName: Full=CD62 antigen-like family</a>          | 57.1      | 57.1        | 100%        | 5e-08   | 94%   | <a href="#">gi 2497646 Q95235.1</a>         |
| <a href="#">Lymph node homing receptor [Macaca mulatta]</a>                               | 57.1      | 57.1        | 100%        | 5e-08   | 94%   | <a href="#">gi 355559023 EHH15803.1</a>     |
| <a href="#">PREDICTED: L-selectin [Rhinopithecus roxellana]</a>                           | 57.1      | 57.1        | 100%        | 5e-08   | 94%   | <a href="#">gi 724796904 XP_010359291.1</a> |
| <a href="#">PREDICTED: L-selectin [Chlorocebus sabaeus]</a>                               | 57.1      | 57.1        | 100%        | 5e-08   | 94%   | <a href="#">gi 635132726 XP_007987763.1</a> |
| <a href="#">PREDICTED: L-selectin isoform X1 [Macaca fascicularis]</a>                    | 57.1      | 57.1        | 100%        | 5e-08   | 94%   | <a href="#">gi 544398259 XP_005539996.1</a> |
| <a href="#">PREDICTED: L-selectin [Pongo abelii]</a>                                      | 57.1      | 57.1        | 100%        | 5e-08   | 94%   | <a href="#">gi 395729434 XP_002809857.2</a> |
| <a href="#">PREDICTED: L-selectin [Nomascus leucogenys]</a>                               | 57.1      | 57.1        | 100%        | 5e-08   | 94%   | <a href="#">gi 332219505 XP_003258894.1</a> |
| <a href="#">PREDICTED: L-selectin-like [Peromyscus maniculatus bairdii]</a>               | 51.1      | 51.1        | 88%         | 4e-06   | 93%   | <a href="#">gi 589923917 XP_006974839.1</a> |
| <a href="#">PREDICTED: L-selectin isoform X2 [Bison bison bison]</a>                      | 51.1      | 51.1        | 88%         | 5e-06   | 93%   | <a href="#">gi 742104371 XP_010835001.1</a> |

|                                                                                  |      |      |      |       |     |                                              |
|----------------------------------------------------------------------------------|------|------|------|-------|-----|----------------------------------------------|
| <a href="#">PREDICTED: L-selectin isoform X2 [Canis lupus familiaris]</a>        | 51.1 | 51.1 | 94%  | 5e-06 | 88% | <a href="#">gij545504917 XP_005622604.1</a>  |
| <a href="#">L-selectin [Bos mutus]</a>                                           | 51.1 | 51.1 | 88%  | 5e-06 | 93% | <a href="#">gij440900418 ELR51562.1</a>      |
| <a href="#">L-selectin precursor [Bos taurus]</a>                                | 51.1 | 51.1 | 88%  | 5e-06 | 93% | <a href="#">gij27901801 INP_776607.1</a>     |
| <a href="#">TPA: L-selectin [Bos taurus]</a>                                     | 51.1 | 51.1 | 88%  | 5e-06 | 93% | <a href="#">gij296479225 IDAA21340.1</a>     |
| <a href="#">PREDICTED: L-selectin isoform X1 [Canis lupus familiaris]</a>        | 51.1 | 51.1 | 94%  | 5e-06 | 88% | <a href="#">gij73960664 XP_537201.2</a>      |
| <a href="#">PREDICTED: L-selectin-like isoform X2 [Peromyscus maniculatus t]</a> | 51.1 | 51.1 | 88%  | 5e-06 | 93% | <a href="#">gij589923885 XP_006974823.1</a>  |
| <a href="#">PREDICTED: L-selectin isoform X1 [Bison bison bison]</a>             | 51.1 | 51.1 | 88%  | 5e-06 | 93% | <a href="#">gij742104367 XP_010835000.1</a>  |
| <a href="#">PREDICTED: L-selectin [Bos mutus]</a>                                | 51.1 | 51.1 | 88%  | 5e-06 | 93% | <a href="#">gij555981044 XP_005902444.1</a>  |
| <a href="#">PREDICTED: L-selectin isoform X1 [Bos taurus]</a>                    | 51.1 | 51.1 | 88%  | 5e-06 | 93% | <a href="#">gij528979726 XP_005216937.1</a>  |
| <a href="#">L-selectin precursor [Oryctolagus cuniculus]</a>                     | 51.1 | 51.1 | 88%  | 5e-06 | 93% | <a href="#">gij126723231 INP_001075821.1</a> |
| <a href="#">PREDICTED: L-selectin-like isoform X1 [Peromyscus maniculatus t]</a> | 51.1 | 51.1 | 88%  | 5e-06 | 93% | <a href="#">gij589923883 XP_006974822.1</a>  |
| <a href="#">PREDICTED: L-selectin [Galeopterus variegatus]</a>                   | 50.3 | 50.3 | 94%  | 9e-06 | 88% | <a href="#">gij667326711 XP_008589968.1</a>  |
| <a href="#">PREDICTED: L-selectin [Ceratotherium simum simum]</a>                | 49.4 | 49.4 | 94%  | 2e-05 | 88% | <a href="#">gij478501608 XP_004425116.1</a>  |
| <a href="#">PREDICTED: L-selectin [Callithrix jacchus]</a>                       | 49.4 | 49.4 | 100% | 2e-05 | 82% | <a href="#">gij296229840 XP_002760427.1</a>  |
| <a href="#">PREDICTED: L-selectin isoform X4 [Bubalus bubalis]</a>               | 49.0 | 49.0 | 88%  | 2e-05 | 93% | <a href="#">gij594100108 XP_006073161.1</a>  |
| <a href="#">PREDICTED: L-selectin isoform X3 [Bubalus bubalis]</a>               | 49.0 | 49.0 | 88%  | 3e-05 | 93% | <a href="#">gij594100106 XP_006073160.1</a>  |
| <a href="#">PREDICTED: L-selectin [Saimiri boliviensis boliviensis]</a>          | 49.0 | 49.0 | 100% | 3e-05 | 82% | <a href="#">gij403266555 XP_003925442.1</a>  |
| <a href="#">PREDICTED: L-selectin isoform X2 [Bubalus bubalis]</a>               | 49.0 | 49.0 | 88%  | 3e-05 | 93% | <a href="#">gij594100104 XP_006073159.1</a>  |
| <a href="#">PREDICTED: L-selectin isoform X1 [Bubalus bubalis]</a>               | 49.0 | 49.0 | 88%  | 3e-05 | 93% | <a href="#">gij594100102 XP_006073158.1</a>  |
| <a href="#">PREDICTED: L-selectin isoform X2 [Balaenoptera acutorostrata sc]</a> | 48.6 | 48.6 | 88%  | 3e-05 | 93% | <a href="#">gij594638526 XP_007172554.1</a>  |
| <a href="#">PREDICTED: L-selectin [Pteropus alecto]</a>                          | 48.6 | 48.6 | 94%  | 4e-05 | 88% | <a href="#">gij586545543 XP_006907882.1</a>  |
| <a href="#">PREDICTED: L-selectin [Lipotes vexillifer]</a>                       | 48.6 | 48.6 | 88%  | 4e-05 | 93% | <a href="#">gij602692142 XP_007458185.1</a>  |
| <a href="#">PREDICTED: L-selectin isoform X1 [Balaenoptera acutorostrata sc]</a> | 48.6 | 48.6 | 88%  | 4e-05 | 93% | <a href="#">gij594638524 XP_007172553.1</a>  |
| <a href="#">PREDICTED: L-selectin [Physeter catodon]</a>                         | 48.6 | 48.6 | 88%  | 4e-05 | 93% | <a href="#">gij593711089 XP_007102109.1</a>  |
| <a href="#">PREDICTED: L-selectin [Tursiops truncatus]</a>                       | 48.6 | 48.6 | 88%  | 4e-05 | 93% | <a href="#">gij470624768 XP_004319819.1</a>  |
| <a href="#">PREDICTED: L-selectin [Orcinus orca]</a>                             | 48.6 | 48.6 | 88%  | 4e-05 | 93% | <a href="#">gij466008816 XP_004269787.1</a>  |
| <a href="#">PREDICTED: E-selectin [Eptesicus fuscus]</a>                         | 48.6 | 79.3 | 94%  | 4e-05 | 88% | <a href="#">gij641723183 XP_008151404.1</a>  |
| <a href="#">E-selectin [Pteropus alecto]</a>                                     | 48.6 | 114  | 94%  | 4e-05 | 88% | <a href="#">gij431916045 ELK16299.1</a>      |
| <a href="#">PREDICTED: L-selectin [Trichechus manatus latirostris]</a>           | 48.1 | 48.1 | 94%  | 5e-05 | 81% | <a href="#">gij471403937 XP_004384151.1</a>  |
| <a href="#">PREDICTED: L-selectin [Camelus dromedarius]</a>                      | 47.7 | 47.7 | 88%  | 7e-05 | 87% | <a href="#">gij744577738 XP_010982785.1</a>  |
| <a href="#">PREDICTED: L-selectin [Camelus bactrianus]</a>                       | 47.7 | 47.7 | 88%  | 7e-05 | 87% | <a href="#">gij743716948 XP_010952144.1</a>  |
| <a href="#">PREDICTED: L-selectin isoform X2 [Vicugna pacos]</a>                 | 47.7 | 47.7 | 88%  | 7e-05 | 87% | <a href="#">gij560977773 XP_006211162.1</a>  |
| <a href="#">PREDICTED: L-selectin isoform X1 [Vicugna pacos]</a>                 | 47.7 | 47.7 | 88%  | 7e-05 | 87% | <a href="#">gij560977771 XP_006211161.1</a>  |
| <a href="#">PREDICTED: L-selectin [Camelus ferus]</a>                            | 47.7 | 47.7 | 88%  | 7e-05 | 87% | <a href="#">gij560893596 XP_006173301.1</a>  |
| <a href="#">PREDICTED: L-selectin isoform X2 [Cricetulus griseus]</a>            | 47.7 | 47.7 | 88%  | 7e-05 | 87% | <a href="#">gij625273173 XP_007628167.1</a>  |
| <a href="#">LECAM-1 [Sigmodon hispidus]</a>                                      | 47.7 | 47.7 | 88%  | 7e-05 | 87% | <a href="#">gij27372091 AAN87893.1</a>       |
| <a href="#">PREDICTED: L-selectin isoform X1 [Cricetulus griseus]</a>            | 47.7 | 47.7 | 88%  | 7e-05 | 87% | <a href="#">gij625212795 XP_007647090.1</a>  |
| <a href="#">PREDICTED: L-selectin [Microtus ochrogaster]</a>                     | 47.7 | 47.7 | 88%  | 7e-05 | 87% | <a href="#">gij532042485 XP_005364074.1</a>  |
| <a href="#">PREDICTED: L-selectin [Mesocricetus auratus]</a>                     | 47.7 | 47.7 | 88%  | 7e-05 | 87% | <a href="#">gij524937978 XP_005071531.1</a>  |
| <a href="#">PREDICTED: L-selectin [Octodon degus]</a>                            | 47.7 | 47.7 | 94%  | 7e-05 | 88% | <a href="#">gij507715087 XP_004648568.1</a>  |
| <a href="#">P-selectin-like protein [Cricetulus griseus]</a>                     | 47.7 | 85.3 | 88%  | 7e-05 | 87% | <a href="#">gij537153471 ERE72501.1</a>      |
| <a href="#">hypothetical protein CB1_000094012 [Camelus ferus]</a>               | 47.7 | 107  | 88%  | 7e-05 | 87% | <a href="#">gij528769900 EPY89559.1</a>      |
| <a href="#">PREDICTED: LOW QUALITY PROTEIN: L-selectin [Mustela putorii]</a>     | 47.3 | 47.3 | 94%  | 9e-05 | 81% | <a href="#">gij511872755 XP_004756722.1</a>  |
| <a href="#">PREDICTED: LOW QUALITY PROTEIN: L-selectin [Mustela putorii]</a>     | 47.3 | 47.3 | 94%  | 9e-05 | 81% | <a href="#">gij511962048 XP_004799211.1</a>  |
| <a href="#">PREDICTED: L-selectin isoform X3 [Fukomys damarensis]</a>            | 46.9 | 46.9 | 88%  | 1e-04 | 87% | <a href="#">gij731237513 XP_010632293.1</a>  |
| <a href="#">PREDICTED: L-selectin [Elephantulus edwardii]</a>                    | 46.9 | 46.9 | 88%  | 1e-04 | 87% | <a href="#">gij585664723 XP_006887476.1</a>  |

|                                                                               |      |      |     |       |     |                                             |
|-------------------------------------------------------------------------------|------|------|-----|-------|-----|---------------------------------------------|
| <a href="#">hypothetical protein PANDA_007106 [Ailuropoda melanoleuca]</a>    | 46.9 | 46.9 | 88% | 1e-04 | 87% | <a href="#">gij281348254 EFB23838.1</a>     |
| <a href="#">PREDICTED: L-selectin isoform X2 [Fukomys damarensis]</a>         | 46.9 | 46.9 | 88% | 1e-04 | 87% | <a href="#">gij731237511 XP_010632292.1</a> |
| <a href="#">PREDICTED: L-selectin isoform 4 [Dasypus novemcinctus]</a>        | 46.9 | 46.9 | 88% | 1e-04 | 87% | <a href="#">gij488545385 XP_004464223.1</a> |
| <a href="#">PREDICTED: LOW QUALITY PROTEIN: L-selectin [Tarsius syrichta]</a> | 46.9 | 46.9 | 88% | 1e-04 | 87% | <a href="#">gij640806175 XP_008059542.1</a> |
| <a href="#">PREDICTED: L-selectin isoform 5 [Dasypus novemcinctus]</a>        | 46.9 | 46.9 | 88% | 1e-04 | 87% | <a href="#">gij488545387 XP_004464224.1</a> |
| <a href="#">PREDICTED: L-selectin isoform 3 [Dasypus novemcinctus]</a>        | 46.9 | 46.9 | 88% | 1e-04 | 87% | <a href="#">gij488545383 XP_004464222.1</a> |
| <a href="#">PREDICTED: L-selectin [Nannospalax galii]</a>                     | 46.9 | 46.9 | 88% | 1e-04 | 87% | <a href="#">gij674099452 XP_008823120.1</a> |
| <a href="#">PREDICTED: L-selectin isoform X1 [Fukomys damarensis]</a>         | 46.9 | 46.9 | 88% | 1e-04 | 87% | <a href="#">gij731237509 XP_010632291.1</a> |
| <a href="#">PREDICTED: L-selectin isoform 2 [Dasypus novemcinctus]</a>        | 46.9 | 46.9 | 88% | 1e-04 | 87% | <a href="#">gij488545381 XP_004464221.1</a> |
| <a href="#">L-selectin precursor [Sus scrofa]</a>                             | 46.9 | 46.9 | 88% | 1e-04 | 87% | <a href="#">gij162952046 NP_001106148.1</a> |
| <a href="#">L-selectin [Felis catus]</a>                                      | 46.9 | 46.9 | 88% | 1e-04 | 87% | <a href="#">gij148234680 NP_001082779.1</a> |
| <a href="#">PREDICTED: L-selectin isoform X2 [Ornithorhynchus anatinus]</a>   | 46.9 | 46.9 | 94% | 1e-04 | 88% | <a href="#">gij620963547 XP_007667058.1</a> |
| <a href="#">PREDICTED: L-selectin isoform 1 [Dasypus novemcinctus]</a>        | 46.9 | 46.9 | 88% | 1e-04 | 87% | <a href="#">gij488545379 XP_004464220.1</a> |
| <a href="#">PREDICTED: L-selectin [Jaculus jaculus]</a>                       | 46.9 | 46.9 | 88% | 1e-04 | 87% | <a href="#">gij507550287 XP_004658951.1</a> |
| <a href="#">PREDICTED: L-selectin-like [Ailuropoda melanoleuca]</a>           | 46.9 | 46.9 | 88% | 1e-04 | 87% | <a href="#">gij301766396 XP_002918625.1</a> |
| <a href="#">PREDICTED: L-selectin isoform X1 [Ornithorhynchus anatinus]</a>   | 46.9 | 46.9 | 94% | 1e-04 | 88% | <a href="#">gij620963545 XP_007667057.1</a> |
| <a href="#">PREDICTED: L-selectin [Ochotona princeps]</a>                     | 46.9 | 46.9 | 88% | 1e-04 | 87% | <a href="#">gij504154850 XP_004589372.1</a> |
| <a href="#">PREDICTED: L-selectin isoform X3 [Equus przewalskii]</a>          | 46.9 | 46.9 | 88% | 1e-04 | 87% | <a href="#">gij664733114 XP_008523771.1</a> |
| <a href="#">PREDICTED: L-selectin isoform X3 [Equus caballus]</a>             | 46.9 | 46.9 | 88% | 1e-04 | 87% | <a href="#">gij545215476 XP_005609701.1</a> |
| <a href="#">PREDICTED: L-selectin isoform X2 [Equus przewalskii]</a>          | 46.9 | 46.9 | 88% | 1e-04 | 87% | <a href="#">gij664733112 XP_008523770.1</a> |
| <a href="#">PREDICTED: L-selectin isoform X2 [Equus caballus]</a>             | 46.9 | 46.9 | 88% | 1e-04 | 87% | <a href="#">gij545215474 XP_005609700.1</a> |
| <a href="#">PREDICTED: L-selectin isoform X1 [Equus przewalskii]</a>          | 46.9 | 46.9 | 88% | 1e-04 | 87% | <a href="#">gij664733110 XP_008523769.1</a> |
| <a href="#">PREDICTED: L-selectin isoform X1 [Equus caballus]</a>             | 46.9 | 46.9 | 88% | 1e-04 | 87% | <a href="#">gij545215472 XP_005609699.1</a> |
| <a href="#">E-selectin [Fukomys damarensis]</a>                               | 46.9 | 80.2 | 88% | 1e-04 | 87% | <a href="#">gij676274615 KFO29135.1</a>     |
| <a href="#">PREDICTED: L-selectin isoform X3 [Capra hircus]</a>               | 46.0 | 46.0 | 88% | 2e-04 | 93% | <a href="#">gij548498158 XP_005690682.1</a> |

## Alignments

Download v [GenPept](#) [Graphics](#)

v Next ▲ Previous ▲ Descriptions

### Chain A, L-selectin Lectin And Egf Domains

Sequence ID: [gij170292544|pdb|3CFW|A](#) Length: 164 Number of Matches: 1

Range 1: 17 to 33 [GenPept](#) [Graphics](#)

v Next Match ▲ Previous Match

| Score          | Expect | Identities  | Positives   | Gaps     |
|----------------|--------|-------------|-------------|----------|
| 59.6 bits(133) | 5e-09  | 17/17(100%) | 17/17(100%) | 0/17(0%) |

Query 1 RFCRDNYTDLVAIQNKA 17  
 RFCRDNYTDLVAIQNKA  
 Sbjct 17 RFCRDNYTDLVAIQNKA 33

#### Related Information

[Structure](#) - 3D structure displays

Download v [GenPept](#) [Graphics](#)

v Next ▲ Previous ▲ Descriptions

### selectin L (lymphocyte adhesion molecule 1), isoform CRA\_c [Homo sapiens]

Sequence ID: [gij119611263|gb|EAW90857.1](#) Length: 320 Number of Matches: 1

Range 1: 68 to 84 [GenPept](#) [Graphics](#)

v Next Match ▲ Previous Match

| Score          | Expect | Identities  | Positives   | Gaps     |
|----------------|--------|-------------|-------------|----------|
| 59.6 bits(133) | 6e-09  | 17/17(100%) | 17/17(100%) | 0/17(0%) |

Query 1 RFCRDNYTDLVAIQNKA 17  
 RFCRDNYTDLVAIQNKA  
 Sbjct 68 RFCRDNYTDLVAIQNKA 84

#### Related Information

[Gene](#) - associated gene details

Download v [GenPept](#) [Graphics](#)

v Next ▲ Previous ▲ Descriptions

unnamed protein product [Homo sapiens]

Sequence ID: [gi|194384912|dbj|BAG60862.1](#) Length: 325 Number of Matches: 1

Range 1: 8 to 24 [GenPept](#) [Graphics](#)

▼ Next Match ▲ Previous Match

| Score          | Expect | Identities  | Positives   | Gaps     |
|----------------|--------|-------------|-------------|----------|
| 59.6 bits(133) | 6e-09  | 17/17(100%) | 17/17(100%) | 0/17(0%) |

Query 1 RFCRDNYTDLVAIQNKA 17  
 RFCRDNYTDLVAIQNKA  
 Sbjct 8 RFCRDNYTDLVAIQNKA 24

**Related Information**

[Gene](#) - associated gene details

Download ▼ [GenPept](#) [Graphics](#)

▼ Next ▲ Previous ▲ Descriptions

Leu-8 antigen short form [Homo sapiens]

Sequence ID: [gi|4902830|emb|CAB43537.1](#) Length: 363 Number of Matches: 1

▶ [See 1 more title\(s\)](#)

Range 1: 68 to 84 [GenPept](#) [Graphics](#)

▼ Next Match ▲ Previous Match

| Score          | Expect | Identities  | Positives   | Gaps     |
|----------------|--------|-------------|-------------|----------|
| 59.6 bits(133) | 6e-09  | 17/17(100%) | 17/17(100%) | 0/17(0%) |

Query 1 RFCRDNYTDLVAIQNKA 17  
 RFCRDNYTDLVAIQNKA  
 Sbjct 68 RFCRDNYTDLVAIQNKA 84

**Related Information**

[Gene](#) - associated gene details

[Identical Proteins](#) - Proteins identical to the subject

Download ▼ [GenPept](#) [Graphics](#)

▼ Next ▲ Previous ▲ Descriptions

lymph node homing receptor precursor [Homo sapiens]

Sequence ID: [gi|307134|gb|AAC63053.1](#) Length: 372 Number of Matches: 1

Range 1: 55 to 71 [GenPept](#) [Graphics](#)

▼ Next Match ▲ Previous Match

| Score          | Expect | Identities  | Positives   | Gaps     |
|----------------|--------|-------------|-------------|----------|
| 59.6 bits(133) | 6e-09  | 17/17(100%) | 17/17(100%) | 0/17(0%) |

Query 1 RFCRDNYTDLVAIQNKA 17  
 RFCRDNYTDLVAIQNKA  
 Sbjct 55 RFCRDNYTDLVAIQNKA 71

**Related Information**

[Gene](#) - associated gene details

BLAST is a registered trademark of the National Library of Medicine.

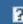

NCBI/ BLAST/ blastp suite/ Formatting Results - BVKG2GA501R

Your search parameters were adjusted to search for a short input sequence.

Edit and Resubmit Save Search Strategies Formatting options Download

YouTube How to read this page Blast report description

SELL\_RRFCRDDYTDLVAIQNKA\_Mod

RID BVKG2GA501R (Expires on 01-21 10:39 am)

Query ID lcl|383567
Description None
Molecule type amino acid
Query Length 18

Database Name nr
Description All non-redundant GenBank CDS translations+PDB+SwissProt+PIR+PRF excluding environmental samples from WGS projects
Program BLASTP 2.2.30+ Citation

Other reports: Search Summary Taxonomy reports Distance tree of results Multiple alignment

Graphic Summary

Show Conserved Domains

Putative conserved domains have been detected, click on the image below for detailed results.

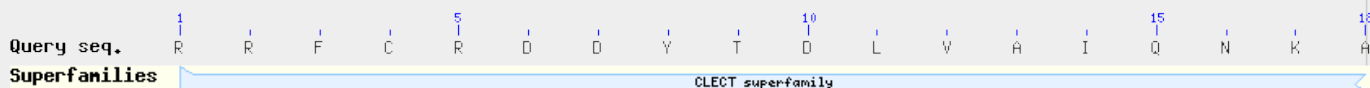

Distribution of 105 Blast Hits on the Query Sequence

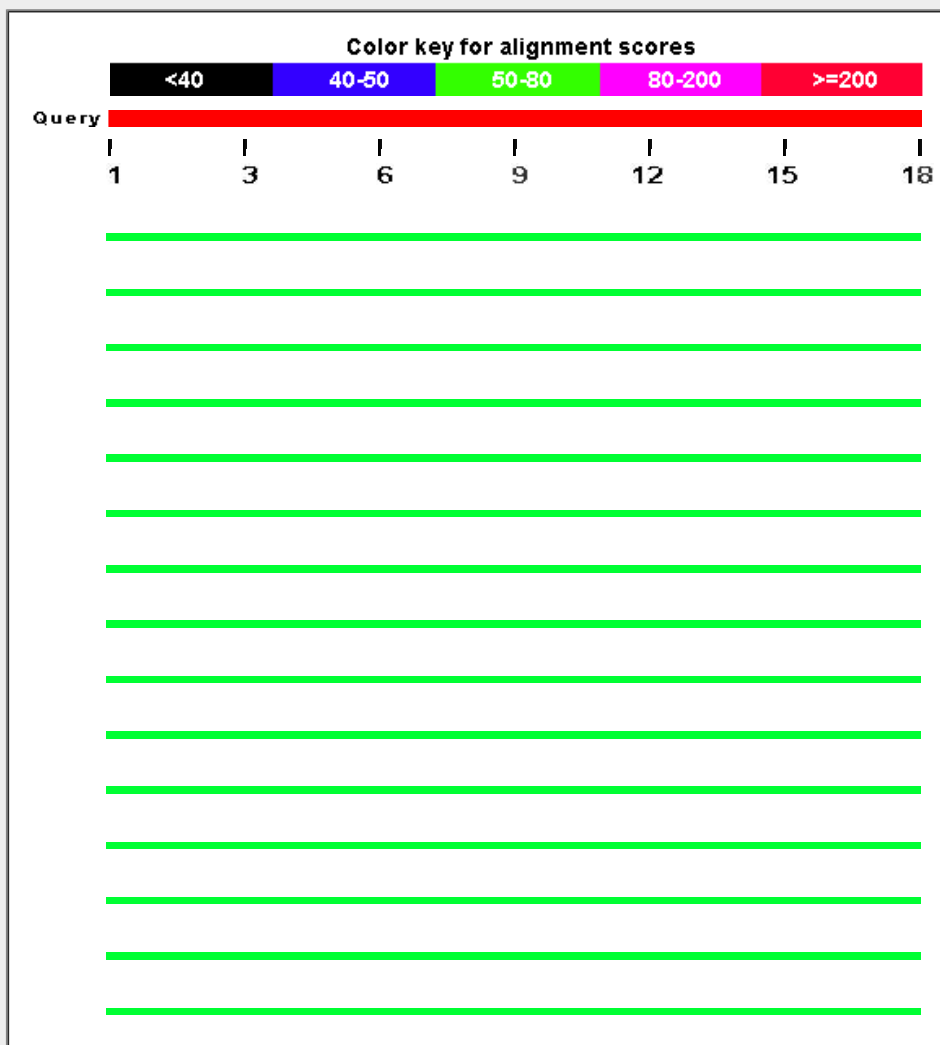

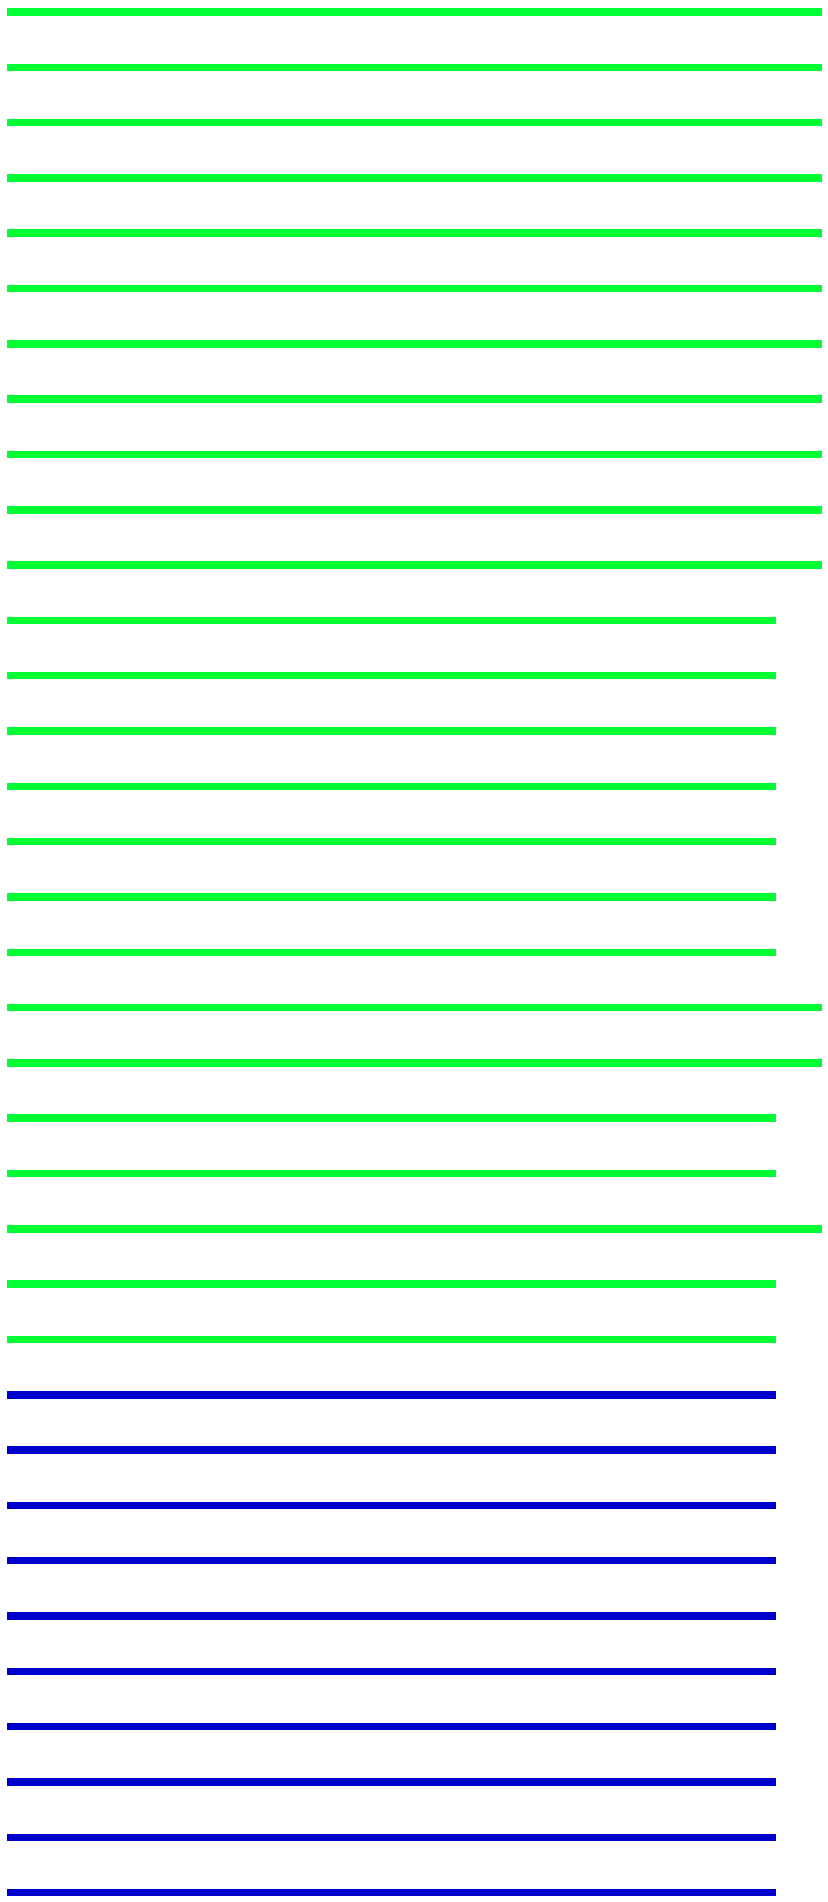

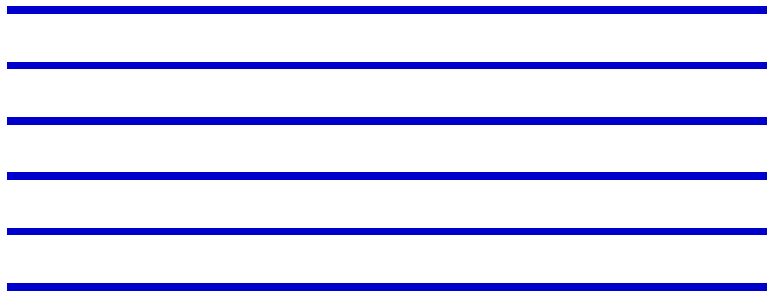

## Descriptions

### Sequences producing significant alignments:

Select: [All](#) [None](#) Selected:0

| <a href="#">Alignments</a> <a href="#">Download</a> <a href="#">GenPept</a> <a href="#">Graphics</a> <a href="#">Distance tree of results</a> <a href="#">Multiple alignment</a> |           |             |             |         |       |                                |  |
|----------------------------------------------------------------------------------------------------------------------------------------------------------------------------------|-----------|-------------|-------------|---------|-------|--------------------------------|--|
| Description                                                                                                                                                                      | Max score | Total score | Query cover | E value | Ident | Accession                      |  |
| <a href="#">Chain A, L-selectin Lectin And Egf Domains [Homo sapiens]</a>                                                                                                        | 60.4      | 60.4        | 100%        | 3e-09   | 94%   | <a href="#">3CFW_A</a>         |  |
| <a href="#">selectin L (lymphocyte adhesion molecule 1), isoform CRA_c [Homo sapiens]</a>                                                                                        | 60.4      | 60.4        | 100%        | 4e-09   | 94%   | <a href="#">EAW90857.1</a>     |  |
| <a href="#">unnamed protein product [Homo sapiens]</a>                                                                                                                           | 60.4      | 60.4        | 100%        | 4e-09   | 94%   | <a href="#">BAG60862.1</a>     |  |
| <a href="#">Leu-8 antigen short form [Homo sapiens]</a>                                                                                                                          | 60.4      | 60.4        | 100%        | 4e-09   | 94%   | <a href="#">CAB43537.1</a>     |  |
| <a href="#">lymph node homing receptor precursor [Homo sapiens]</a>                                                                                                              | 60.4      | 60.4        | 100%        | 4e-09   | 94%   | <a href="#">AAC63053.1</a>     |  |
| <a href="#">L-selectin precursor [Pan troglodytes]</a>                                                                                                                           | 60.4      | 60.4        | 100%        | 4e-09   | 94%   | <a href="#">NP_001009074.1</a> |  |
| <a href="#">unnamed protein product [Homo sapiens]</a>                                                                                                                           | 60.4      | 60.4        | 100%        | 4e-09   | 94%   | <a href="#">CAA34275.1</a>     |  |
| <a href="#">pIn homing receptor [Homo sapiens]</a>                                                                                                                               | 60.4      | 60.4        | 100%        | 4e-09   | 94%   | <a href="#">CAA34203.1</a>     |  |
| <a href="#">RecName: Full=L-selectin; AltName: Full=CD62 antigen-like family member L:</a>                                                                                       | 60.4      | 60.4        | 100%        | 4e-09   | 94%   | <a href="#">P14151.2</a>       |  |
| <a href="#">selectin L (lymphocyte adhesion molecule 1), isoform CRA_a [Homo sapiens]</a>                                                                                        | 60.4      | 60.4        | 100%        | 4e-09   | 94%   | <a href="#">EAW90855.1</a>     |  |
| <a href="#">SELL [synthetic construct]</a>                                                                                                                                       | 60.4      | 60.4        | 100%        | 4e-09   | 94%   | <a href="#">AIC62025.1</a>     |  |
| <a href="#">SELL protein [Homo sapiens]</a>                                                                                                                                      | 60.4      | 60.4        | 100%        | 4e-09   | 94%   | <a href="#">AAH20758.1</a>     |  |
| <a href="#">PREDICTED: L-selectin [Gorilla gorilla gorilla]</a>                                                                                                                  | 60.4      | 60.4        | 100%        | 4e-09   | 94%   | <a href="#">XP_004027917.1</a> |  |
| <a href="#">unnamed protein product [Homo sapiens]</a>                                                                                                                           | 60.4      | 60.4        | 100%        | 4e-09   | 94%   | <a href="#">CAB43536.1</a>     |  |
| <a href="#">PREDICTED: L-selectin [Pan paniscus]</a>                                                                                                                             | 60.4      | 60.4        | 100%        | 4e-09   | 94%   | <a href="#">XP_003824676.1</a> |  |
| <a href="#">L-selectin precursor [Homo sapiens]</a>                                                                                                                              | 60.4      | 60.4        | 100%        | 4e-09   | 94%   | <a href="#">NP_000646.2</a>    |  |
| <a href="#">PREDICTED: L-selectin isoform X2 [Macaca fascicularis]</a>                                                                                                           | 57.9      | 57.9        | 100%        | 3e-08   | 89%   | <a href="#">XP_005539997.1</a> |  |
| <a href="#">L-selectin [Papio anubis]</a>                                                                                                                                        | 57.9      | 57.9        | 100%        | 3e-08   | 89%   | <a href="#">NP_001106096.1</a> |  |
| <a href="#">L-selectin precursor [Macaca mulatta]</a>                                                                                                                            | 57.9      | 57.9        | 100%        | 3e-08   | 89%   | <a href="#">NP_001036228.1</a> |  |
| <a href="#">RecName: Full=L-selectin; AltName: Full=CD62 antigen-like family member L:</a>                                                                                       | 57.9      | 57.9        | 100%        | 3e-08   | 89%   | <a href="#">Q95235.1</a>       |  |
| <a href="#">Lymph node homing receptor [Macaca mulatta]</a>                                                                                                                      | 57.9      | 57.9        | 100%        | 3e-08   | 89%   | <a href="#">EHH15803.1</a>     |  |
| <a href="#">PREDICTED: L-selectin [Rhinopithecus roxellana]</a>                                                                                                                  | 57.9      | 57.9        | 100%        | 3e-08   | 89%   | <a href="#">XP_010359291.1</a> |  |
| <a href="#">PREDICTED: L-selectin [Chlorocebus sabaeus]</a>                                                                                                                      | 57.9      | 57.9        | 100%        | 3e-08   | 89%   | <a href="#">XP_007987763.1</a> |  |
| <a href="#">PREDICTED: L-selectin isoform X1 [Macaca fascicularis]</a>                                                                                                           | 57.9      | 57.9        | 100%        | 3e-08   | 89%   | <a href="#">XP_005539996.1</a> |  |
| <a href="#">PREDICTED: L-selectin [Pongo abelii]</a>                                                                                                                             | 57.9      | 57.9        | 100%        | 3e-08   | 89%   | <a href="#">XP_002809857.2</a> |  |
| <a href="#">PREDICTED: L-selectin [Nomascus leucogenys]</a>                                                                                                                      | 57.9      | 57.9        | 100%        | 3e-08   | 89%   | <a href="#">XP_003258894.1</a> |  |
| <a href="#">PREDICTED: L-selectin-like [Peromyscus maniculatus bairdii]</a>                                                                                                      | 52.0      | 52.0        | 94%         | 3e-06   | 82%   | <a href="#">XP_006974839.1</a> |  |
| <a href="#">PREDICTED: L-selectin isoform X2 [Canis lupus familiaris]</a>                                                                                                        | 52.0      | 52.0        | 94%         | 3e-06   | 82%   | <a href="#">XP_005622604.1</a> |  |
| <a href="#">PREDICTED: L-selectin isoform X1 [Canis lupus familiaris]</a>                                                                                                        | 52.0      | 52.0        | 94%         | 3e-06   | 82%   | <a href="#">XP_537201.2</a>    |  |

|                                                                                        |      |      |      |       |     |                                |
|----------------------------------------------------------------------------------------|------|------|------|-------|-----|--------------------------------|
| <a href="#">PREDICTED: L-selectin-like isoform X2 [Peromyscus maniculatus bairdii]</a> | 52.0 | 52.0 | 94%  | 3e-06 | 82% | <a href="#">XP_006974823.1</a> |
| <a href="#">L-selectin precursor [Oryctolagus cuniculus]</a>                           | 52.0 | 52.0 | 94%  | 3e-06 | 82% | <a href="#">NP_001075821.1</a> |
| <a href="#">PREDICTED: L-selectin-like isoform X1 [Peromyscus maniculatus bairdii]</a> | 52.0 | 52.0 | 94%  | 3e-06 | 82% | <a href="#">XP_006974822.1</a> |
| <a href="#">PREDICTED: L-selectin [Galeopterus variegatus]</a>                         | 51.1 | 51.1 | 94%  | 6e-06 | 82% | <a href="#">XP_008589968.1</a> |
| <a href="#">PREDICTED: L-selectin [Callithrix jacchus]</a>                             | 51.1 | 51.1 | 100% | 6e-06 | 83% | <a href="#">XP_002760427.1</a> |
| <a href="#">PREDICTED: L-selectin [Saimiri boliviensis boliviensis]</a>                | 51.1 | 51.1 | 100% | 6e-06 | 83% | <a href="#">XP_003925442.1</a> |
| <a href="#">PREDICTED: L-selectin-like [Leptonychotes weddellii]</a>                   | 50.7 | 50.7 | 94%  | 6e-06 | 82% | <a href="#">XP_006739818.1</a> |
| <a href="#">PREDICTED: L-selectin isoform X2 [Ursus maritimus]</a>                     | 50.3 | 50.3 | 94%  | 1e-05 | 82% | <a href="#">XP_008694116.1</a> |
| <a href="#">PREDICTED: L-selectin [Ceratotherium simum simum]</a>                      | 50.3 | 50.3 | 100% | 1e-05 | 78% | <a href="#">XP_004425116.1</a> |
| <a href="#">PREDICTED: L-selectin isoform X1 [Ursus maritimus]</a>                     | 50.3 | 50.3 | 94%  | 1e-05 | 82% | <a href="#">XP_008694111.1</a> |
| <a href="#">PREDICTED: L-selectin [Panthera tigris altaica]</a>                        | 50.3 | 50.3 | 94%  | 1e-05 | 82% | <a href="#">XP_007077079.1</a> |
| <a href="#">PREDICTED: L-selectin [Pteropus alecto]</a>                                | 49.4 | 49.4 | 94%  | 2e-05 | 82% | <a href="#">XP_006907882.1</a> |
| <a href="#">PREDICTED: E-selectin [Eptesicus fuscus]</a>                               | 49.4 | 78.5 | 94%  | 2e-05 | 82% | <a href="#">XP_008151404.1</a> |
| <a href="#">E-selectin [Pteropus alecto]</a>                                           | 49.4 | 111  | 94%  | 2e-05 | 82% | <a href="#">ELK16299.1</a>     |
| <a href="#">PREDICTED: L-selectin isoform X2 [Bison bison bison]</a>                   | 49.0 | 49.0 | 94%  | 3e-05 | 82% | <a href="#">XP_010835001.1</a> |
| <a href="#">L-selectin [Bos mutus]</a>                                                 | 49.0 | 49.0 | 94%  | 3e-05 | 82% | <a href="#">ELR51562.1</a>     |
| <a href="#">L-selectin precursor [Bos taurus]</a>                                      | 49.0 | 49.0 | 94%  | 3e-05 | 82% | <a href="#">NP_776607.1</a>    |
| <a href="#">TPA: L-selectin [Bos taurus]</a>                                           | 49.0 | 49.0 | 94%  | 3e-05 | 82% | <a href="#">DAA21340.1</a>     |
| <a href="#">PREDICTED: L-selectin [Trichechus manatus latirostris]</a>                 | 49.0 | 49.0 | 94%  | 3e-05 | 76% | <a href="#">XP_004384151.1</a> |
| <a href="#">PREDICTED: L-selectin isoform X1 [Bison bison bison]</a>                   | 49.0 | 49.0 | 94%  | 3e-05 | 82% | <a href="#">XP_010835000.1</a> |
| <a href="#">PREDICTED: L-selectin [Bos mutus]</a>                                      | 49.0 | 49.0 | 94%  | 3e-05 | 82% | <a href="#">XP_005902444.1</a> |
| <a href="#">PREDICTED: L-selectin isoform X1 [Bos taurus]</a>                          | 49.0 | 49.0 | 94%  | 3e-05 | 82% | <a href="#">XP_005216937.1</a> |
| <a href="#">PREDICTED: L-selectin isoform X2 [Cricetulus griseus]</a>                  | 48.6 | 48.6 | 94%  | 4e-05 | 76% | <a href="#">XP_007628167.1</a> |
| <a href="#">LECAM-1 [Sigmodon hispidus]</a>                                            | 48.6 | 48.6 | 94%  | 4e-05 | 76% | <a href="#">AAN87893.1</a>     |
| <a href="#">PREDICTED: L-selectin isoform X1 [Cricetulus griseus]</a>                  | 48.6 | 48.6 | 94%  | 4e-05 | 76% | <a href="#">XP_007647090.1</a> |
| <a href="#">PREDICTED: L-selectin [Microtus ochrogaster]</a>                           | 48.6 | 48.6 | 94%  | 4e-05 | 76% | <a href="#">XP_005364074.1</a> |
| <a href="#">PREDICTED: L-selectin [Mesocricetus auratus]</a>                           | 48.6 | 48.6 | 94%  | 4e-05 | 76% | <a href="#">XP_005071531.1</a> |
| <a href="#">PREDICTED: L-selectin [Octodon degus]</a>                                  | 48.6 | 48.6 | 94%  | 4e-05 | 82% | <a href="#">XP_004648568.1</a> |
| <a href="#">P-selectin-like protein [Cricetulus griseus]</a>                           | 48.6 | 84.8 | 94%  | 4e-05 | 76% | <a href="#">ERE72501.1</a>     |
| <a href="#">PREDICTED: LOW QUALITY PROTEIN: L-selectin [Mustela putorius furo]</a>     | 48.1 | 48.1 | 94%  | 5e-05 | 76% | <a href="#">XP_004756722.1</a> |
| <a href="#">PREDICTED: LOW QUALITY PROTEIN: L-selectin [Mustela putorius furo]</a>     | 48.1 | 48.1 | 94%  | 6e-05 | 76% | <a href="#">XP_004799211.1</a> |
| <a href="#">PREDICTED: L-selectin isoform X2 [Balaenoptera acutorostrata scammoni]</a> | 47.7 | 47.7 | 94%  | 7e-05 | 82% | <a href="#">XP_007172554.1</a> |
| <a href="#">PREDICTED: L-selectin isoform X3 [Fukomys damarensis]</a>                  | 47.7 | 47.7 | 94%  | 7e-05 | 76% | <a href="#">XP_010632293.1</a> |
| <a href="#">PREDICTED: L-selectin [Elephantulus edwardii]</a>                          | 47.7 | 47.7 | 94%  | 7e-05 | 76% | <a href="#">XP_006887476.1</a> |
| <a href="#">hypothetical protein PANDA_007106 [Ailuropoda melanoleuca]</a>             | 47.7 | 47.7 | 94%  | 7e-05 | 76% | <a href="#">EFB23838.1</a>     |
| <a href="#">PREDICTED: L-selectin isoform X2 [Fukomys damarensis]</a>                  | 47.7 | 47.7 | 94%  | 8e-05 | 76% | <a href="#">XP_010632292.1</a> |
| <a href="#">PREDICTED: LOW QUALITY PROTEIN: L-selectin [Tarsius syrichta]</a>          | 47.7 | 47.7 | 94%  | 8e-05 | 76% | <a href="#">XP_008059542.1</a> |
| <a href="#">PREDICTED: L-selectin [Nannospalax galii]</a>                              | 47.7 | 47.7 | 94%  | 8e-05 | 76% | <a href="#">XP_008823120.1</a> |
| <a href="#">PREDICTED: L-selectin isoform X1 [Fukomys damarensis]</a>                  | 47.7 | 47.7 | 94%  | 8e-05 | 76% | <a href="#">XP_010632291.1</a> |
| <a href="#">PREDICTED: L-selectin [Lipotés vexillifer]</a>                             | 47.7 | 47.7 | 94%  | 8e-05 | 82% | <a href="#">XP_007458185.1</a> |
| <a href="#">PREDICTED: L-selectin isoform X1 [Balaenoptera acutorostrata scammoni]</a> | 47.7 | 47.7 | 94%  | 8e-05 | 82% | <a href="#">XP_007172553.1</a> |
| <a href="#">PREDICTED: L-selectin [Physeter catodon]</a>                               | 47.7 | 47.7 | 94%  | 8e-05 | 82% | <a href="#">XP_007102109.1</a> |
| <a href="#">PREDICTED: L-selectin [Tursiops truncatus]</a>                             | 47.7 | 47.7 | 94%  | 8e-05 | 82% | <a href="#">XP_004319819.1</a> |
| <a href="#">PREDICTED: L-selectin [Orcinus orca]</a>                                   | 47.7 | 47.7 | 94%  | 8e-05 | 82% | <a href="#">XP_004269787.1</a> |
| <a href="#">L-selectin precursor [Sus scrofa]</a>                                      | 47.7 | 47.7 | 94%  | 8e-05 | 76% | <a href="#">NP_001106148.1</a> |
| <a href="#">L-selectin [Felis catus]</a>                                               | 47.7 | 47.7 | 94%  | 8e-05 | 76% | <a href="#">NP_001082779.1</a> |



|                                                                             |      |      |     |       |     |                                |
|-----------------------------------------------------------------------------|------|------|-----|-------|-----|--------------------------------|
| <a href="#">PREDICTED: L-selectin [Jaculus jaculus]</a>                     | 47.7 | 47.7 | 94% | 8e-05 | 76% | <a href="#">XP_004658951.1</a> |
| <a href="#">PREDICTED: l-selectin-like [Ailuropoda melanoleuca]</a>         | 47.7 | 47.7 | 94% | 8e-05 | 76% | <a href="#">XP_002918625.1</a> |
| <a href="#">PREDICTED: L-selectin [Ochotona princeps]</a>                   | 47.7 | 47.7 | 94% | 8e-05 | 76% | <a href="#">XP_004589372.1</a> |
| <a href="#">PREDICTED: L-selectin isoform X3 [Equus przewalskii]</a>        | 47.7 | 47.7 | 94% | 8e-05 | 76% | <a href="#">XP_008523771.1</a> |
| <a href="#">PREDICTED: L-selectin isoform X3 [Equus caballus]</a>           | 47.7 | 47.7 | 94% | 8e-05 | 76% | <a href="#">XP_005609701.1</a> |
| <a href="#">PREDICTED: L-selectin isoform X2 [Equus przewalskii]</a>        | 47.7 | 47.7 | 94% | 8e-05 | 76% | <a href="#">XP_008523770.1</a> |
| <a href="#">PREDICTED: L-selectin isoform X2 [Equus caballus]</a>           | 47.7 | 47.7 | 94% | 8e-05 | 76% | <a href="#">XP_005609700.1</a> |
| <a href="#">PREDICTED: L-selectin isoform X1 [Equus przewalskii]</a>        | 47.7 | 47.7 | 94% | 8e-05 | 76% | <a href="#">XP_008523769.1</a> |
| <a href="#">PREDICTED: L-selectin isoform X1 [Equus caballus]</a>           | 47.7 | 47.7 | 94% | 8e-05 | 76% | <a href="#">XP_005609699.1</a> |
| <a href="#">E-selectin [Fukomys damarensis]</a>                             | 47.7 | 80.2 | 94% | 8e-05 | 76% | <a href="#">KFO29135.1</a>     |
| <a href="#">PREDICTED: L-selectin isoform X2 [Ornithorhynchus anatinus]</a> | 47.3 | 47.3 | 94% | 1e-04 | 88% | <a href="#">XP_007667058.1</a> |
| <a href="#">PREDICTED: L-selectin isoform X1 [Ornithorhynchus anatinus]</a> | 47.3 | 47.3 | 94% | 1e-04 | 88% | <a href="#">XP_007667057.1</a> |
| <a href="#">PREDICTED: L-selectin isoform X3 [Mus musculus]</a>             | 46.9 | 46.9 | 94% | 1e-04 | 76% | <a href="#">XP_006496781.1</a> |
| <a href="#">PREDICTED: L-selectin isoform X4 [Bubalus bubalis]</a>          | 46.9 | 46.9 | 94% | 1e-04 | 82% | <a href="#">XP_006073161.1</a> |
| <a href="#">L-selectin isoform 2 precursor [Mus musculus]</a>               | 46.9 | 46.9 | 94% | 1e-04 | 76% | <a href="#">NP_001157531.1</a> |
| <a href="#">lymphocyte homing receptor [Mus musculus]</a>                   | 46.9 | 46.9 | 94% | 1e-04 | 76% | <a href="#">AAA75651.1</a>     |
| <a href="#">PREDICTED: L-selectin isoform X3 [Bubalus bubalis]</a>          | 46.9 | 46.9 | 94% | 1e-04 | 82% | <a href="#">XP_006073160.1</a> |
| <a href="#">L-selectin isoform 1 precursor [Mus musculus]</a>               | 46.9 | 46.9 | 94% | 1e-04 | 76% | <a href="#">NP_035476.1</a>    |
| <a href="#">unnamed protein product [Mus musculus]</a>                      | 46.9 | 46.9 | 94% | 1e-04 | 76% | <a href="#">BAE36559.1</a>     |
| <a href="#">unnamed protein product [Mus musculus]</a>                      | 46.9 | 46.9 | 94% | 1e-04 | 76% | <a href="#">BAE42834.1</a>     |
| <a href="#">PREDICTED: L-selectin isoform X2 [Mus musculus]</a>             | 46.9 | 46.9 | 94% | 1e-04 | 76% | <a href="#">XP_006496780.1</a> |
| <a href="#">PREDICTED: L-selectin isoform X1 [Mus musculus]</a>             | 46.9 | 46.9 | 94% | 1e-04 | 76% | <a href="#">XP_006496779.1</a> |
| <a href="#">PREDICTED: L-selectin isoform X2 [Bubalus bubalis]</a>          | 46.9 | 46.9 | 94% | 1e-04 | 82% | <a href="#">XP_006073159.1</a> |
| <a href="#">PREDICTED: L-selectin isoform X1 [Bubalus bubalis]</a>          | 46.9 | 46.9 | 94% | 1e-04 | 82% | <a href="#">XP_006073158.1</a> |
| <a href="#">PREDICTED: L-selectin [Myotis brandtii]</a>                     | 46.4 | 46.4 | 94% | 2e-04 | 76% | <a href="#">XP_005861291.1</a> |

## Alignments

Download [GenPept](#) [Graphics](#)

[Next](#) [Previous](#) [Descriptions](#)

Chain A, L-selectin Lectin And Egf Domains

Sequence ID: [pdb|3CFW|A](#) Length: 164 Number of Matches: 1

Range 1: 16 to 33 [GenPept](#) [Graphics](#)

[Next Match](#) [Previous Match](#)

| Score          | Expect | Identities | Positives   | Gaps     |
|----------------|--------|------------|-------------|----------|
| 60.4 bits(135) | 3e-09  | 17/18(94%) | 18/18(100%) | 0/18(0%) |

```
Query 1 RRFCRDDYTDLVAIQNKA 18
      RRFCRD+YTDLVAIQNKA
Sbjct 16 RRFCRDNYTDLVAIQNKA 33
```

### Related Information

[Structure](#) - 3D structure displays

Download [GenPept](#) [Graphics](#)

[Next](#) [Previous](#) [Descriptions](#)

selectin L (lymphocyte adhesion molecule 1), isoform CRA\_c [Homo sapiens]

Sequence ID: [gb|EAW90857.1](#) Length: 320 Number of Matches: 1

Range 1: 67 to 84 [GenPept](#) [Graphics](#)

[Next Match](#) [Previous Match](#)

| Score          | Expect | Identities | Positives   | Gaps     |
|----------------|--------|------------|-------------|----------|
| 60.4 bits(135) | 4e-09  | 17/18(94%) | 18/18(100%) | 0/18(0%) |

```
Query 1 RRFCRDDYTDLVAIQNKA 18
      RRFCRD+YTDLVAIQNKA
Sbjct 67 RRFCRDNYTDLVAIQNKA 84
```

### Related Information

[Gene](#) - associated gene details

Download [GenPept](#) [Graphics](#)

▼ Next ▲ Previous ▲ Descriptions

unnamed protein product [Homo sapiens]

Sequence ID: [dbj|BAG60862.1](#) Length: 325 Number of Matches: 1

Range 1: 7 to 24 [GenPept](#) [Graphics](#)

▼ Next Match ▲ Previous Match

| Score          | Expect | Identities | Positives   | Gaps     |
|----------------|--------|------------|-------------|----------|
| 60.4 bits(135) | 4e-09  | 17/18(94%) | 18/18(100%) | 0/18(0%) |

Query 1 RRFCRDDYTDLVAIQNKA 18  
 RRFCRD+YTDLVAIQNKA  
 Sbjct 7 RRFCRDNYTDLVAIQNKA 24

**Related Information**

[Gene](#) - associated gene details

Download [GenPept](#) [Graphics](#)

▼ Next ▲ Previous ▲ Descriptions

Leu-8 antigen short form [Homo sapiens]

Sequence ID: [embj|CAB43537.1](#) Length: 363 Number of Matches: 1

▶ [See 1 more title\(s\)](#)

Range 1: 67 to 84 [GenPept](#) [Graphics](#)

▼ Next Match ▲ Previous Match

| Score          | Expect | Identities | Positives   | Gaps     |
|----------------|--------|------------|-------------|----------|
| 60.4 bits(135) | 4e-09  | 17/18(94%) | 18/18(100%) | 0/18(0%) |

Query 1 RRFCRDDYTDLVAIQNKA 18  
 RRFCRD+YTDLVAIQNKA  
 Sbjct 67 RRFCRDNYTDLVAIQNKA 84

**Related Information**

[Gene](#) - associated gene details

[Identical Proteins](#) - Proteins identical to the subject

Download [GenPept](#) [Graphics](#)

▼ Next ▲ Previous ▲ Descriptions

lymph node homing receptor precursor [Homo sapiens]

Sequence ID: [gb|AAC63053.1](#) Length: 372 Number of Matches: 1

Range 1: 54 to 71 [GenPept](#) [Graphics](#)

▼ Next Match ▲ Previous Match

| Score          | Expect | Identities | Positives   | Gaps     |
|----------------|--------|------------|-------------|----------|
| 60.4 bits(135) | 4e-09  | 17/18(94%) | 18/18(100%) | 0/18(0%) |

Query 1 RRFCRDDYTDLVAIQNKA 18  
 RRFCRD+YTDLVAIQNKA  
 Sbjct 54 RRFCRDNYTDLVAIQNKA 71

**Related Information**

[Gene](#) - associated gene details

BLAST is a registered trademark of the National Library of Medicine.

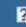

NCBI/ BLAST/ blastp suite/ Formatting Results - BE84AXZD014

Your search parameters were adjusted to search for a short input sequence.

Edit and Resubmit Save Search Strategies Formatting options Download

YouTube How to read this page Blast report description

SELL\_RRFCDNYTDLVAIQNKA\_NonMod

RID BE84AXZD014 (Expires on 01-16 09:06 am)
Query ID Icl|10478
Description None
Molecule type amino acid
Query Length 18

Database Name nr
Description All non-redundant GenBank CDS translations+PDB+SwissProt+PIR excluding environmental samples from WGS projects
Program BLASTP 2.2.30+ Citation

Other reports: Search Summary Taxonomy reports Distance tree of results Multiple alignment

New DELTA-BLAST a more sensitive protein-protein search

Graphic Summary

Show Conserved Domains

Putative conserved domains have been detected, click on the image below for detailed results.

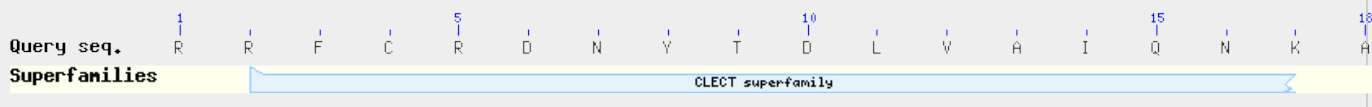

Distribution of 105 Blast Hits on the Query Sequence

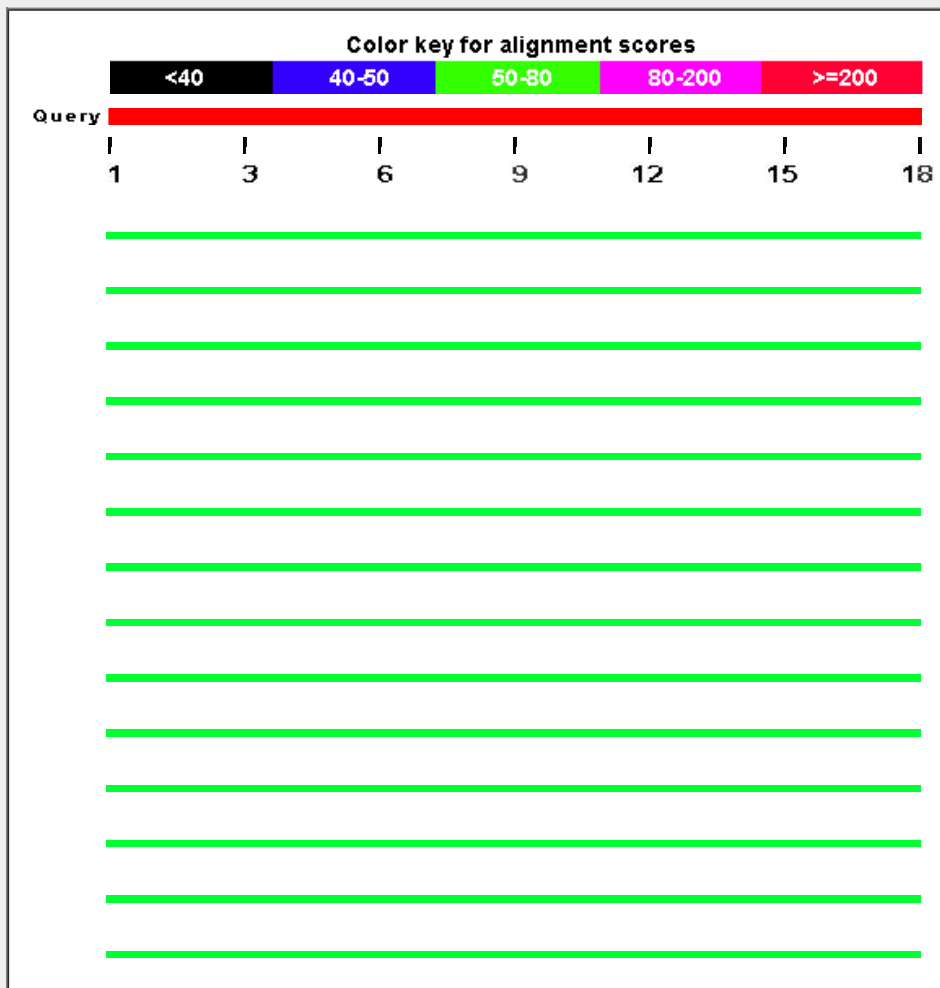

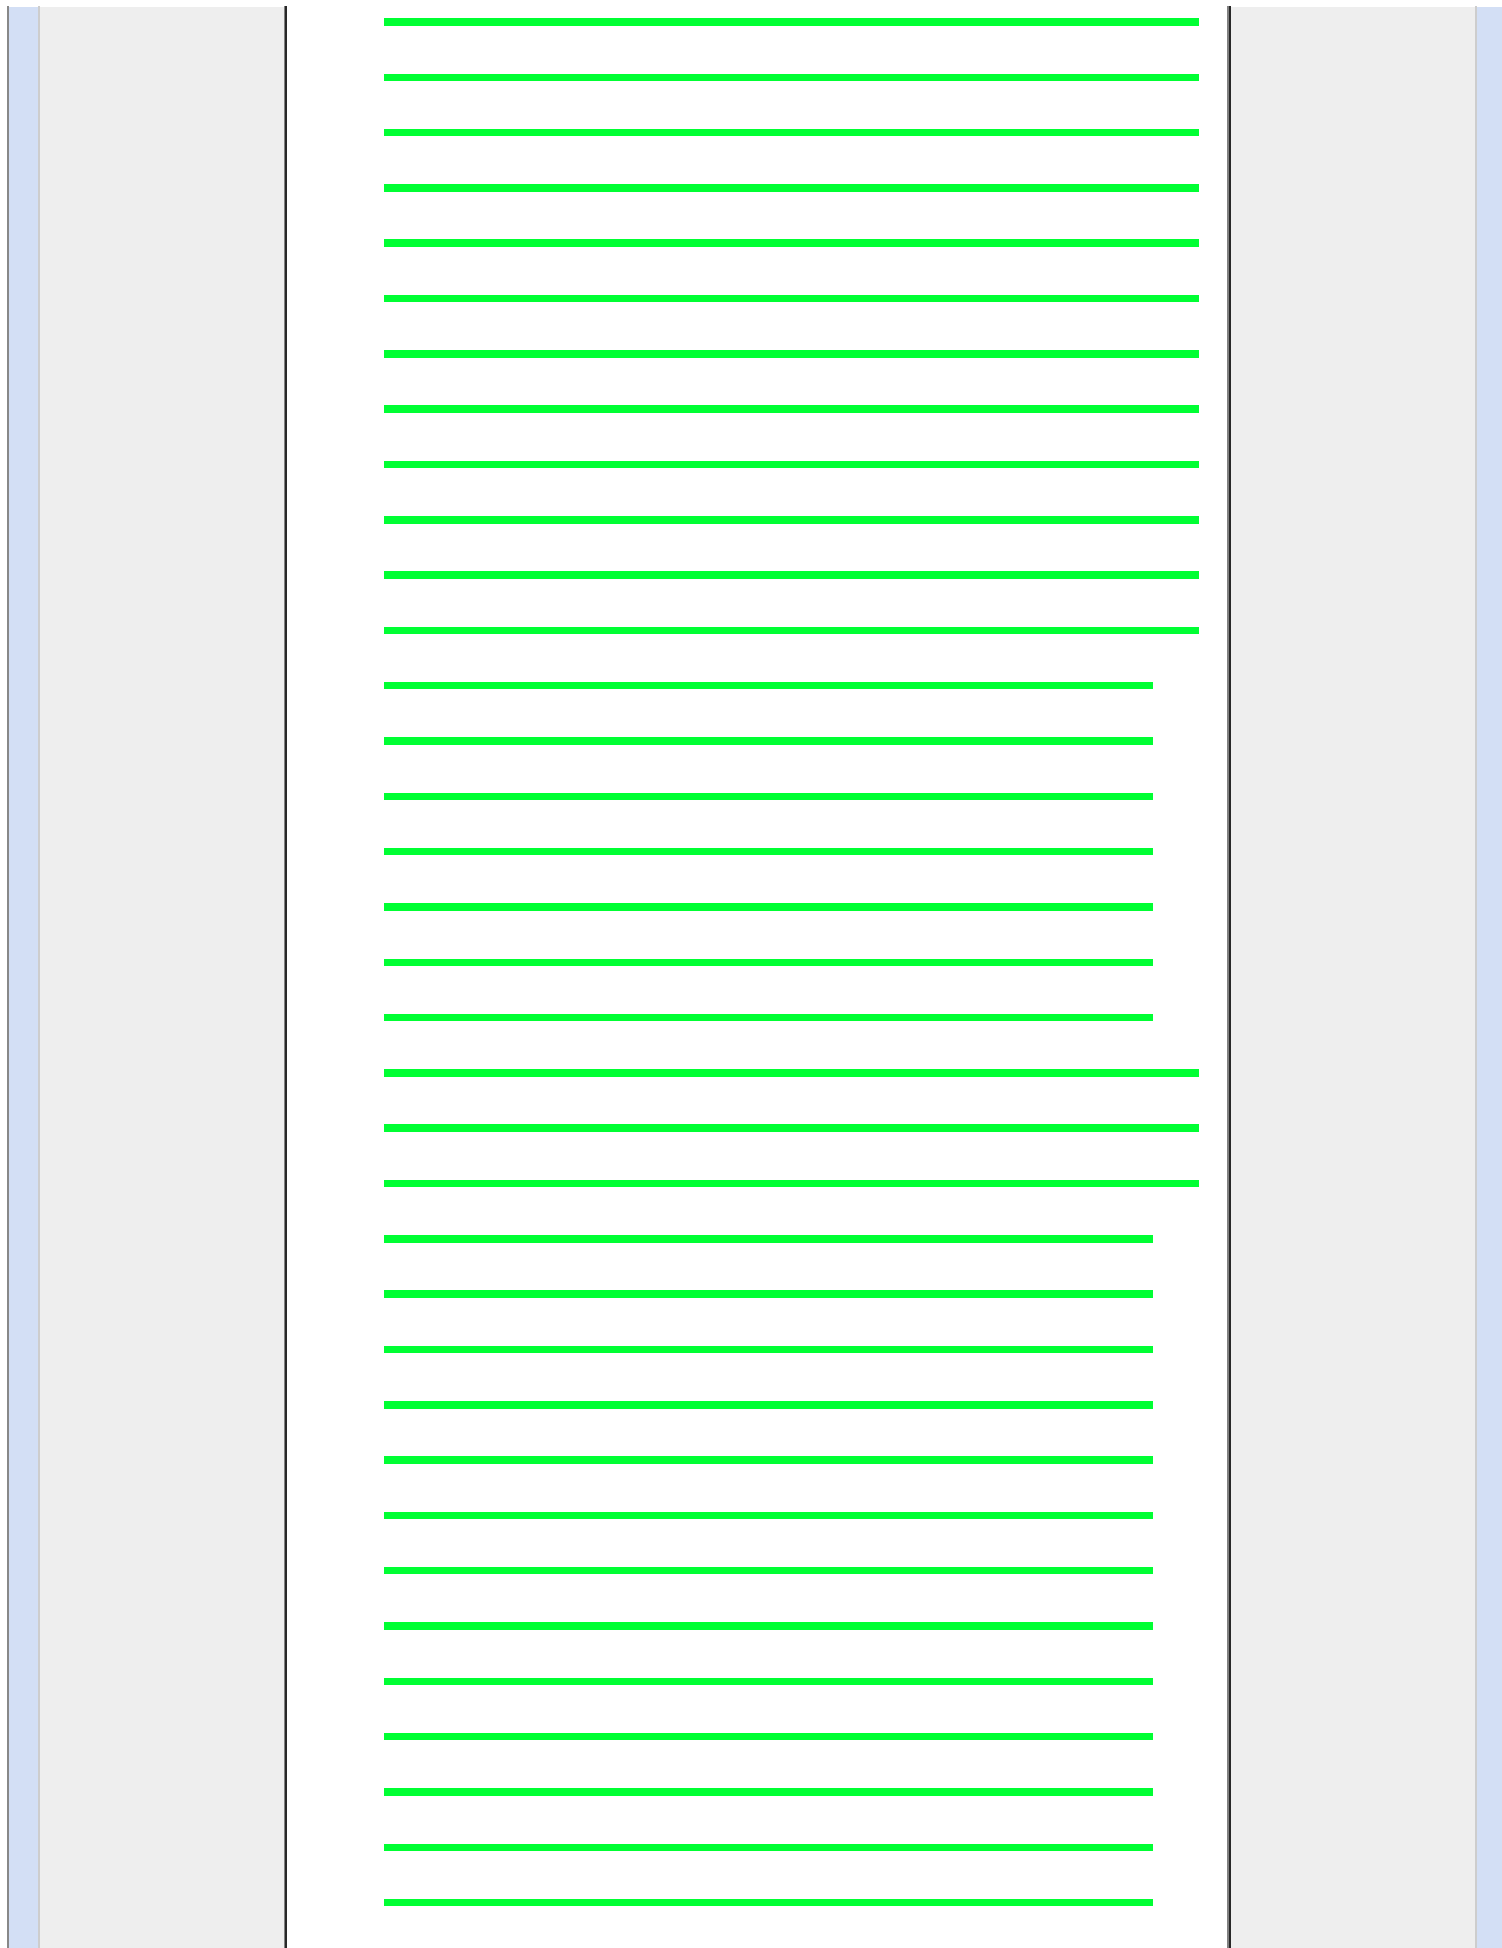

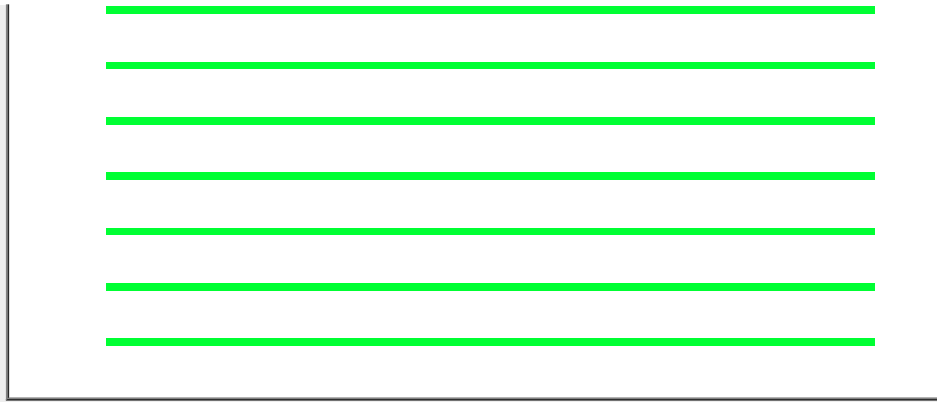

**Descriptions**

**Sequences producing significant alignments:**

Select: [All](#) [None](#) Selected:0

Alignments [Download](#) [GenPept](#) [Graphics](#) [Distance tree of results](#) [Multiple alignment](#)

| Description                                                                               | Max score | Total score | Query cover | E value | Ident | Accession                                   |
|-------------------------------------------------------------------------------------------|-----------|-------------|-------------|---------|-------|---------------------------------------------|
| <a href="#">Chain A. L-selectin Lectin And Egf Domains [Homo sapiens]</a>                 | 63.0      | 63.0        | 100%        | 4e-10   | 100%  | <a href="#">gi 170292544 3CFW_A</a>         |
| <a href="#">selectin L (lymphocyte adhesion molecule 1), isoform CRA_c [Homo sapiens]</a> | 63.0      | 63.0        | 100%        | 5e-10   | 100%  | <a href="#">gi 119611263 EAW90857.1</a>     |
| <a href="#">unnamed protein product [Homo sapiens]</a>                                    | 63.0      | 63.0        | 100%        | 5e-10   | 100%  | <a href="#">gi 194384912 BAG60862.1</a>     |
| <a href="#">Leu-8 antigen short form [Homo sapiens]</a>                                   | 63.0      | 63.0        | 100%        | 5e-10   | 100%  | <a href="#">gi 4902830 CAB43537.1</a>       |
| <a href="#">lymph node homing receptor precursor [Homo sapiens]</a>                       | 63.0      | 63.0        | 100%        | 5e-10   | 100%  | <a href="#">gi 307134 AAC63053.1</a>        |
| <a href="#">L-selectin precursor [Pan troglodytes]</a>                                    | 63.0      | 63.0        | 100%        | 5e-10   | 100%  | <a href="#">gi 57114019 NP_001009074.1</a>  |
| <a href="#">unnamed protein product [Homo sapiens]</a>                                    | 63.0      | 63.0        | 100%        | 5e-10   | 100%  | <a href="#">gi 34429 CAA34275.1</a>         |
| <a href="#">pln homing receptor [Homo sapiens]</a>                                        | 63.0      | 63.0        | 100%        | 5e-10   | 100%  | <a href="#">gi 38093 CAA34203.1</a>         |
| <a href="#">RecName: Full=L-selectin; AltName: Full=CD62 antigen-like family</a>          | 63.0      | 63.0        | 100%        | 5e-10   | 100%  | <a href="#">gi 126178 P14151.2</a>          |
| <a href="#">selectin L (lymphocyte adhesion molecule 1), isoform CRA_a [Homo sapiens]</a> | 63.0      | 63.0        | 100%        | 5e-10   | 100%  | <a href="#">gi 119611261 EAW90855.1</a>     |
| <a href="#">SELL [synthetic construct]</a>                                                | 63.0      | 63.0        | 100%        | 5e-10   | 100%  | <a href="#">gi 649149084 AIC62025.1</a>     |
| <a href="#">SELL protein [Homo sapiens]</a>                                               | 63.0      | 63.0        | 100%        | 5e-10   | 100%  | <a href="#">gi 18088808 AAH20758.1</a>      |
| <a href="#">PREDICTED: L-selectin [Gorilla gorilla gorilla]</a>                           | 63.0      | 63.0        | 100%        | 5e-10   | 100%  | <a href="#">gi 426332662 XP_004027917.1</a> |
| <a href="#">unnamed protein product [Homo sapiens]</a>                                    | 63.0      | 63.0        | 100%        | 5e-10   | 100%  | <a href="#">gi 4902829 CAB43536.1</a>       |
| <a href="#">PREDICTED: L-selectin [Pan paniscus]</a>                                      | 63.0      | 63.0        | 100%        | 5e-10   | 100%  | <a href="#">gi 397508469 XP_003824676.1</a> |
| <a href="#">L-selectin precursor [Homo sapiens]</a>                                       | 63.0      | 63.0        | 100%        | 5e-10   | 100%  | <a href="#">gi 262206315 NP_000646.2</a>    |
| <a href="#">PREDICTED: L-selectin isoform X2 [Macaca fascicularis]</a>                    | 60.4      | 60.4        | 100%        | 4e-09   | 94%   | <a href="#">gi 544398261 XP_005539997.1</a> |
| <a href="#">L-selectin [Papio anubis]</a>                                                 | 60.4      | 60.4        | 100%        | 4e-09   | 94%   | <a href="#">gi 162951976 NP_001106096.1</a> |
| <a href="#">L-selectin precursor [Macaca mulatta]</a>                                     | 60.4      | 60.4        | 100%        | 4e-09   | 94%   | <a href="#">gi 112363117 NP_001036228.1</a> |
| <a href="#">RecName: Full=L-selectin; AltName: Full=CD62 antigen-like family</a>          | 60.4      | 60.4        | 100%        | 4e-09   | 94%   | <a href="#">gi 2497646 Q95235.1</a>         |
| <a href="#">Lymph node homing receptor [Macaca mulatta]</a>                               | 60.4      | 60.4        | 100%        | 4e-09   | 94%   | <a href="#">gi 355559023 EHH15803.1</a>     |
| <a href="#">PREDICTED: L-selectin [Rhinopithecus roxellana]</a>                           | 60.4      | 60.4        | 100%        | 4e-09   | 94%   | <a href="#">gi 724796904 XP_010359291.1</a> |
| <a href="#">PREDICTED: L-selectin [Chlorocebus sabaeus]</a>                               | 60.4      | 60.4        | 100%        | 4e-09   | 94%   | <a href="#">gi 635132726 XP_007987763.1</a> |
| <a href="#">PREDICTED: L-selectin isoform X1 [Macaca fascicularis]</a>                    | 60.4      | 60.4        | 100%        | 4e-09   | 94%   | <a href="#">gi 544398259 XP_005539996.1</a> |
| <a href="#">PREDICTED: L-selectin [Pongo abelii]</a>                                      | 60.4      | 60.4        | 100%        | 4e-09   | 94%   | <a href="#">gi 395729434 XP_002809857.2</a> |
| <a href="#">PREDICTED: L-selectin [Nomascus leucogenys]</a>                               | 60.4      | 60.4        | 100%        | 4e-09   | 94%   | <a href="#">gi 332219505 XP_003258894.1</a> |
| <a href="#">PREDICTED: L-selectin-like [Peromyscus maniculatus bairdii]</a>               | 54.5      | 54.5        | 94%         | 3e-07   | 88%   | <a href="#">gi 589923917 XP_006974839.1</a> |
| <a href="#">PREDICTED: L-selectin isoform X2 [Canis lupus familiaris]</a>                 | 54.5      | 54.5        | 94%         | 4e-07   | 88%   | <a href="#">gi 545504917 XP_005622604.1</a> |

|                                                                                 |      |      |      |       |     |                                             |
|---------------------------------------------------------------------------------|------|------|------|-------|-----|---------------------------------------------|
| <a href="#">PREDICTED: L-selectin isoform X1 [Canis lupus familiaris]</a>       | 54.5 | 54.5 | 94%  | 4e-07 | 88% | <a href="#">gij73960664 XP_537201.2</a>     |
| <a href="#">PREDICTED: L-selectin-like isoform X2 [Peromyscus maniculatus t</a> | 54.5 | 54.5 | 94%  | 4e-07 | 88% | <a href="#">gij589923885 XP_006974823.1</a> |
| <a href="#">L-selectin precursor [Oryctolagus cuniculus]</a>                    | 54.5 | 54.5 | 94%  | 4e-07 | 88% | <a href="#">gij126723231 NP_001075821.1</a> |
| <a href="#">PREDICTED: L-selectin-like isoform X1 [Peromyscus maniculatus t</a> | 54.5 | 54.5 | 94%  | 4e-07 | 88% | <a href="#">gij589923883 XP_006974822.1</a> |
| <a href="#">PREDICTED: L-selectin [Galeopterus variegatus]</a>                  | 53.7 | 53.7 | 94%  | 8e-07 | 88% | <a href="#">gij667326711 XP_008589968.1</a> |
| <a href="#">PREDICTED: L-selectin [Ceratotherium simum simum]</a>               | 52.8 | 52.8 | 100% | 1e-06 | 83% | <a href="#">gij478501608 XP_004425116.1</a> |
| <a href="#">PREDICTED: L-selectin [Callithrix jacchus]</a>                      | 52.8 | 52.8 | 100% | 1e-06 | 83% | <a href="#">gij296229840 XP_002760427.1</a> |
| <a href="#">PREDICTED: L-selectin [Saimiri boliviensis boliviensis]</a>         | 52.4 | 52.4 | 100% | 2e-06 | 83% | <a href="#">gij403266555 XP_003925442.1</a> |
| <a href="#">PREDICTED: L-selectin [Pteropus alecto]</a>                         | 52.0 | 52.0 | 94%  | 3e-06 | 88% | <a href="#">gij586545543 XP_006907882.1</a> |
| <a href="#">PREDICTED: E-selectin [Eptesicus fuscus]</a>                        | 52.0 | 82.7 | 94%  | 3e-06 | 88% | <a href="#">gij641723183 XP_008151404.1</a> |
| <a href="#">E-selectin [Pteropus alecto]</a>                                    | 52.0 | 118  | 94%  | 3e-06 | 88% | <a href="#">gij431916045 ELK16299.1</a>     |
| <a href="#">PREDICTED: L-selectin isoform X2 [Bison bison bison]</a>            | 51.5 | 51.5 | 94%  | 4e-06 | 88% | <a href="#">gij742104371 XP_010835001.1</a> |
| <a href="#">L-selectin [Bos mutus]</a>                                          | 51.5 | 51.5 | 94%  | 4e-06 | 88% | <a href="#">gij440900418 ELR51562.1</a>     |
| <a href="#">L-selectin precursor [Bos taurus]</a>                               | 51.5 | 51.5 | 94%  | 4e-06 | 88% | <a href="#">gij27901801 NP_776607.1</a>     |
| <a href="#">TPA: L-selectin [Bos taurus]</a>                                    | 51.5 | 51.5 | 94%  | 4e-06 | 88% | <a href="#">gij296479225 DAA21340.1</a>     |
| <a href="#">PREDICTED: L-selectin [Trichechus manatus latirostris]</a>          | 51.5 | 51.5 | 94%  | 4e-06 | 82% | <a href="#">gij471403937 XP_004384151.1</a> |
| <a href="#">PREDICTED: L-selectin isoform X1 [Bison bison bison]</a>            | 51.5 | 51.5 | 94%  | 4e-06 | 88% | <a href="#">gij742104367 XP_010835000.1</a> |
| <a href="#">PREDICTED: L-selectin [Bos mutus]</a>                               | 51.5 | 51.5 | 94%  | 4e-06 | 88% | <a href="#">gij555981044 XP_005902444.1</a> |
| <a href="#">PREDICTED: L-selectin isoform X1 [Bos taurus]</a>                   | 51.5 | 51.5 | 94%  | 4e-06 | 88% | <a href="#">gij528979726 XP_005216937.1</a> |
| <a href="#">PREDICTED: L-selectin isoform X2 [Cricetulus griseus]</a>           | 51.1 | 51.1 | 94%  | 6e-06 | 82% | <a href="#">gij625273173 XP_007628167.1</a> |
| <a href="#">LECAM-1 [Sigmodon hispidus]</a>                                     | 51.1 | 51.1 | 94%  | 6e-06 | 82% | <a href="#">gij27372091 AAN87893.1</a>      |
| <a href="#">PREDICTED: L-selectin isoform X1 [Cricetulus griseus]</a>           | 51.1 | 51.1 | 94%  | 6e-06 | 82% | <a href="#">gij625212795 XP_007647090.1</a> |
| <a href="#">PREDICTED: L-selectin [Microtus ochrogaster]</a>                    | 51.1 | 51.1 | 94%  | 6e-06 | 82% | <a href="#">gij532042485 XP_005364074.1</a> |
| <a href="#">PREDICTED: L-selectin [Mesocricetus auratus]</a>                    | 51.1 | 51.1 | 94%  | 6e-06 | 82% | <a href="#">gij524937978 XP_005071531.1</a> |
| <a href="#">PREDICTED: L-selectin [Octodon degus]</a>                           | 51.1 | 51.1 | 94%  | 6e-06 | 88% | <a href="#">gij507715087 XP_004648568.1</a> |
| <a href="#">P-selectin-like protein [Cricetulus griseus]</a>                    | 51.1 | 89.1 | 94%  | 6e-06 | 82% | <a href="#">gij537153471 ERE72501.1</a>     |
| <a href="#">PREDICTED: LOW QUALITY PROTEIN: L-selectin [Mustela putorii</a>     | 50.7 | 50.7 | 94%  | 8e-06 | 82% | <a href="#">gij511872755 XP_004756722.1</a> |
| <a href="#">PREDICTED: LOW QUALITY PROTEIN: L-selectin [Mustela putorii</a>     | 50.7 | 50.7 | 94%  | 8e-06 | 82% | <a href="#">gij511962048 XP_004799211.1</a> |
| <a href="#">PREDICTED: L-selectin isoform X2 [Balaenoptera acutorostrata sc</a> | 50.3 | 50.3 | 94%  | 1e-05 | 88% | <a href="#">gij594638526 XP_007172554.1</a> |
| <a href="#">PREDICTED: L-selectin isoform X3 [Fukomys damarensis]</a>           | 50.3 | 50.3 | 94%  | 1e-05 | 82% | <a href="#">gij731237513 XP_010632293.1</a> |
| <a href="#">PREDICTED: L-selectin [Elephantulus edwardii]</a>                   | 50.3 | 50.3 | 94%  | 1e-05 | 82% | <a href="#">gij585664723 XP_006887476.1</a> |
| <a href="#">hypothetical protein PANDA_007106 [Ailuropoda melanoleuca]</a>      | 50.3 | 50.3 | 94%  | 1e-05 | 82% | <a href="#">gij281348254 EFB23838.1</a>     |
| <a href="#">PREDICTED: L-selectin isoform X2 [Fukomys damarensis]</a>           | 50.3 | 50.3 | 94%  | 1e-05 | 82% | <a href="#">gij731237511 XP_010632292.1</a> |
| <a href="#">PREDICTED: LOW QUALITY PROTEIN: L-selectin [Tarsius syricht</a>     | 50.3 | 50.3 | 94%  | 1e-05 | 82% | <a href="#">gij640806175 XP_008059542.1</a> |
| <a href="#">PREDICTED: L-selectin [Nannospalax galili]</a>                      | 50.3 | 50.3 | 94%  | 1e-05 | 82% | <a href="#">gij674099452 XP_008823120.1</a> |
| <a href="#">PREDICTED: L-selectin isoform X1 [Fukomys damarensis]</a>           | 50.3 | 50.3 | 94%  | 1e-05 | 82% | <a href="#">gij731237509 XP_010632291.1</a> |
| <a href="#">PREDICTED: L-selectin [Lipotes vexillifer]</a>                      | 50.3 | 50.3 | 94%  | 1e-05 | 88% | <a href="#">gij602692142 XP_007458185.1</a> |
| <a href="#">PREDICTED: L-selectin isoform X1 [Balaenoptera acutorostrata sc</a> | 50.3 | 50.3 | 94%  | 1e-05 | 88% | <a href="#">gij594638524 XP_007172553.1</a> |
| <a href="#">PREDICTED: L-selectin [Physeter catodon]</a>                        | 50.3 | 50.3 | 94%  | 1e-05 | 88% | <a href="#">gij593711089 XP_007102109.1</a> |
| <a href="#">PREDICTED: L-selectin [Tursiops truncatus]</a>                      | 50.3 | 50.3 | 94%  | 1e-05 | 88% | <a href="#">gij470624768 XP_004319819.1</a> |
| <a href="#">PREDICTED: L-selectin [Orcinus orca]</a>                            | 50.3 | 50.3 | 94%  | 1e-05 | 88% | <a href="#">gij466008816 XP_004269787.1</a> |
| <a href="#">L-selectin precursor [Sus scrofa]</a>                               | 50.3 | 50.3 | 94%  | 1e-05 | 82% | <a href="#">gij162952046 NP_001106148.1</a> |
| <a href="#">L-selectin [Felis catus]</a>                                        | 50.3 | 50.3 | 94%  | 1e-05 | 82% | <a href="#">gij148234680 NP_001082779.1</a> |
| <a href="#">PREDICTED: L-selectin isoform X2 [Ornithorhynchus anatinus]</a>     | 50.3 | 50.3 | 94%  | 1e-05 | 88% | <a href="#">gij620963547 XP_007667058.1</a> |
| <a href="#">PREDICTED: L-selectin [Jaculus jaculus]</a>                         | 50.3 | 50.3 | 94%  | 1e-05 | 82% | <a href="#">gij507550287 XP_004658951.1</a> |
| <a href="#">PREDICTED: L-selectin-like [Ailuropoda melanoleuca]</a>             | 50.3 | 50.3 | 94%  | 1e-05 | 82% | <a href="#">gij301766396 XP_002918625.1</a> |

|                                                                             |      |      |     |       |     |                                             |
|-----------------------------------------------------------------------------|------|------|-----|-------|-----|---------------------------------------------|
| <a href="#">PREDICTED: L-selectin isoform X1 [Ornithorhynchus anatinus]</a> | 50.3 | 50.3 | 94% | 1e-05 | 88% | <a href="#">gij620963545 XP_007667057.1</a> |
| <a href="#">PREDICTED: L-selectin [Ochotona princeps]</a>                   | 50.3 | 50.3 | 94% | 1e-05 | 82% | <a href="#">gij504154850 XP_004589372.1</a> |
| <a href="#">PREDICTED: L-selectin isoform X3 [Equus przewalskii]</a>        | 50.3 | 50.3 | 94% | 1e-05 | 82% | <a href="#">gij664733114 XP_008523771.1</a> |
| <a href="#">PREDICTED: L-selectin isoform X3 [Equus caballus]</a>           | 50.3 | 50.3 | 94% | 1e-05 | 82% | <a href="#">gij545215476 XP_005609701.1</a> |
| <a href="#">PREDICTED: L-selectin isoform X2 [Equus przewalskii]</a>        | 50.3 | 50.3 | 94% | 1e-05 | 82% | <a href="#">gij664733112 XP_008523770.1</a> |
| <a href="#">PREDICTED: L-selectin isoform X2 [Equus caballus]</a>           | 50.3 | 50.3 | 94% | 1e-05 | 82% | <a href="#">gij545215474 XP_005609700.1</a> |
| <a href="#">PREDICTED: L-selectin isoform X1 [Equus przewalskii]</a>        | 50.3 | 50.3 | 94% | 1e-05 | 82% | <a href="#">gij664733110 XP_008523769.1</a> |
| <a href="#">PREDICTED: L-selectin isoform X1 [Equus caballus]</a>           | 50.3 | 50.3 | 94% | 1e-05 | 82% | <a href="#">gij545215472 XP_005609699.1</a> |
| <a href="#">E-selectin [Fukomys damarensis]</a>                             | 50.3 | 84.0 | 94% | 1e-05 | 82% | <a href="#">gij676274615 KFO29135.1</a>     |
| <a href="#">PREDICTED: L-selectin isoform X3 [Mus musculus]</a>             | 49.4 | 49.4 | 94% | 2e-05 | 82% | <a href="#">gij568910596 XP_006496781.1</a> |
| <a href="#">PREDICTED: L-selectin isoform X4 [Bubalus bubalis]</a>          | 49.4 | 49.4 | 94% | 2e-05 | 88% | <a href="#">gij594100108 XP_006073161.1</a> |
| <a href="#">L-selectin isoform 2 precursor [Mus musculus]</a>               | 49.4 | 49.4 | 94% | 2e-05 | 82% | <a href="#">gij255708471 NP_001157531.1</a> |
| <a href="#">lymphocyte homing receptor [Mus musculus]</a>                   | 49.4 | 49.4 | 94% | 2e-05 | 82% | <a href="#">gij554190 AAA75651.1</a>        |
| <a href="#">PREDICTED: L-selectin isoform X3 [Bubalus bubalis]</a>          | 49.4 | 49.4 | 94% | 2e-05 | 88% | <a href="#">gij594100106 XP_006073160.1</a> |
| <a href="#">L-selectin isoform 1 precursor [Mus musculus]</a>               | 49.4 | 49.4 | 94% | 2e-05 | 82% | <a href="#">gij6755454 NP_035476.1</a>      |
| <a href="#">unnamed protein product [Mus musculus]</a>                      | 49.4 | 49.4 | 94% | 2e-05 | 82% | <a href="#">gij74180049 BAE36559.1</a>      |
| <a href="#">unnamed protein product [Mus musculus]</a>                      | 49.4 | 49.4 | 94% | 2e-05 | 82% | <a href="#">gij74182394 BAE42834.1</a>      |
| <a href="#">PREDICTED: L-selectin isoform X2 [Mus musculus]</a>             | 49.4 | 49.4 | 94% | 2e-05 | 82% | <a href="#">gij568910594 XP_006496780.1</a> |
| <a href="#">PREDICTED: L-selectin isoform X1 [Mus musculus]</a>             | 49.4 | 49.4 | 94% | 2e-05 | 82% | <a href="#">gij568910592 XP_006496779.1</a> |
| <a href="#">PREDICTED: L-selectin isoform X2 [Bubalus bubalis]</a>          | 49.4 | 49.4 | 94% | 2e-05 | 88% | <a href="#">gij594100104 XP_006073159.1</a> |
| <a href="#">PREDICTED: L-selectin isoform X1 [Bubalus bubalis]</a>          | 49.4 | 49.4 | 94% | 2e-05 | 88% | <a href="#">gij594100102 XP_006073158.1</a> |
| <a href="#">PREDICTED: L-selectin [Myotis brandtii]</a>                     | 49.0 | 49.0 | 94% | 3e-05 | 82% | <a href="#">gij554533070 XP_005861291.1</a> |
| <a href="#">PREDICTED: L-selectin [Myotis davidii]</a>                      | 49.0 | 49.0 | 94% | 3e-05 | 82% | <a href="#">gij584089194 XP_006764234.1</a> |
| <a href="#">L-selectin [Myotis davidii]</a>                                 | 49.0 | 49.0 | 94% | 3e-05 | 82% | <a href="#">gij432102050 ELK29869.1</a>     |
| <a href="#">E-selectin [Myotis brandtii]</a>                                | 49.0 | 79.7 | 94% | 3e-05 | 82% | <a href="#">gij521022803 EPQ04591.1</a>     |

## Alignments

Download [GenPept](#) [Graphics](#)

[Next](#) [Previous](#) [Descriptions](#)

### Chain A, L-selectin Lectin And Egf Domains

Sequence ID: [gij170292544|pdb|3CFW|A](#) Length: 164 Number of Matches: 1

Range 1: 16 to 33 [GenPept](#) [Graphics](#)

[Next Match](#) [Previous Match](#)

| Score          | Expect | Identities  | Positives   | Gaps     |
|----------------|--------|-------------|-------------|----------|
| 63.0 bits(141) | 4e-10  | 18/18(100%) | 18/18(100%) | 0/18(0%) |

Query 1 RRFCRDNYTDLVAIQNKA 18  
 Sbjct 16 RRFCRDNYTDLVAIQNKA 33

#### Related Information

[Structure](#) - 3D structure displays

Download [GenPept](#) [Graphics](#)

[Next](#) [Previous](#) [Descriptions](#)

### selectin L (lymphocyte adhesion molecule 1), isoform CRA\_c [Homo sapiens]

Sequence ID: [gij119611263|gb|EAW90857.1](#) Length: 320 Number of Matches: 1

Range 1: 67 to 84 [GenPept](#) [Graphics](#)

[Next Match](#) [Previous Match](#)

| Score          | Expect | Identities  | Positives   | Gaps     |
|----------------|--------|-------------|-------------|----------|
| 63.0 bits(141) | 5e-10  | 18/18(100%) | 18/18(100%) | 0/18(0%) |

Query 1 RRFCRDNYTDLVAIQNKA 18  
 Sbjct 67 RRFCRDNYTDLVAIQNKA 84

#### Related Information

[Gene](#) - associated gene details

Download [GenPept](#) [Graphics](#)

[Next](#) [Previous](#) [Descriptions](#)

unnamed protein product [Homo sapiens]

Sequence ID: [gi|194384912|dbj|BAG60862.1](#) Length: 325 Number of Matches: 1

Range 1: 7 to 24 [GenPept](#) [Graphics](#)

▼ Next Match ▲ Previous Match

| Score          | Expect | Identities  | Positives   | Gaps     |
|----------------|--------|-------------|-------------|----------|
| 63.0 bits(141) | 5e-10  | 18/18(100%) | 18/18(100%) | 0/18(0%) |

Query 1 RRFCDNYTDLVAIQNKA 18  
 RRFCDNYTDLVAIQNKA  
 Sbjct 7 RRFCDNYTDLVAIQNKA 24

**Related Information**

[Gene](#) - associated gene details

Download ▼ [GenPept](#) [Graphics](#)

▼ Next ▲ Previous ▲ Descriptions

Leu-8 antigen short form [Homo sapiens]

Sequence ID: [gi|4902830|emb|CAB43537.1](#) Length: 363 Number of Matches: 1

▶ [See 1 more title\(s\)](#)

Range 1: 67 to 84 [GenPept](#) [Graphics](#)

▼ Next Match ▲ Previous Match

| Score          | Expect | Identities  | Positives   | Gaps     |
|----------------|--------|-------------|-------------|----------|
| 63.0 bits(141) | 5e-10  | 18/18(100%) | 18/18(100%) | 0/18(0%) |

Query 1 RRFCDNYTDLVAIQNKA 18  
 RRFCDNYTDLVAIQNKA  
 Sbjct 67 RRFCDNYTDLVAIQNKA 84

**Related Information**

[Gene](#) - associated gene details

[Identical Proteins](#) - Proteins identical to the subject

Download ▼ [GenPept](#) [Graphics](#)

▼ Next ▲ Previous ▲ Descriptions

lymph node homing receptor precursor [Homo sapiens]

Sequence ID: [gi|307134|gb|AAC63053.1](#) Length: 372 Number of Matches: 1

Range 1: 54 to 71 [GenPept](#) [Graphics](#)

▼ Next Match ▲ Previous Match

| Score          | Expect | Identities  | Positives   | Gaps     |
|----------------|--------|-------------|-------------|----------|
| 63.0 bits(141) | 5e-10  | 18/18(100%) | 18/18(100%) | 0/18(0%) |

Query 1 RRFCDNYTDLVAIQNKA 18  
 RRFCDNYTDLVAIQNKA  
 Sbjct 54 RRFCDNYTDLVAIQNKA 71

**Related Information**

[Gene](#) - associated gene details

BLAST is a registered trademark of the National Library of Medicine.



NCBI/ BLAST/ blastp suite/ Formatting Results - BVKGDS9Z01R

Your search parameters were adjusted to search for a short input sequence.

[Edit and Resubmit](#) [Save Search Strategies](#) [Formatting options](#) [Download](#) [YouTube](#) [How to read this page](#) [Blast report description](#)

### SEPP1\_KCGDCSLTTLKDEDFCKR\_Mod

|                                                                    |                                                                                                                                       |
|--------------------------------------------------------------------|---------------------------------------------------------------------------------------------------------------------------------------|
| <b>RID</b> <a href="#">BVKGDS9Z01R</a> (Expires on 01-21 10:39 am) | <b>Database Name</b> nr                                                                                                               |
| <b>Query ID</b> lcl 387095                                         | <b>Description</b> All non-redundant GenBank CDS translations+PDB+SwissProt+PIR+PRF excluding environmental samples from WGS projects |
| <b>Description</b> None                                            | <b>Program</b> BLASTP 2.2.30+ <a href="#">Citation</a>                                                                                |
| <b>Molecule type</b> amino acid                                    |                                                                                                                                       |
| <b>Query Length</b> 18                                             |                                                                                                                                       |

Other reports: [Search Summary](#) [Taxonomy reports](#) [Distance tree of results](#) [Multiple alignment](#)

### Graphic Summary

Show Conserved Domains

Putative conserved domains have been detected, click on the image below for detailed results.

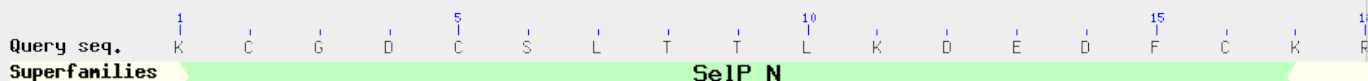

Distribution of 100 Blast Hits on the Query Sequence

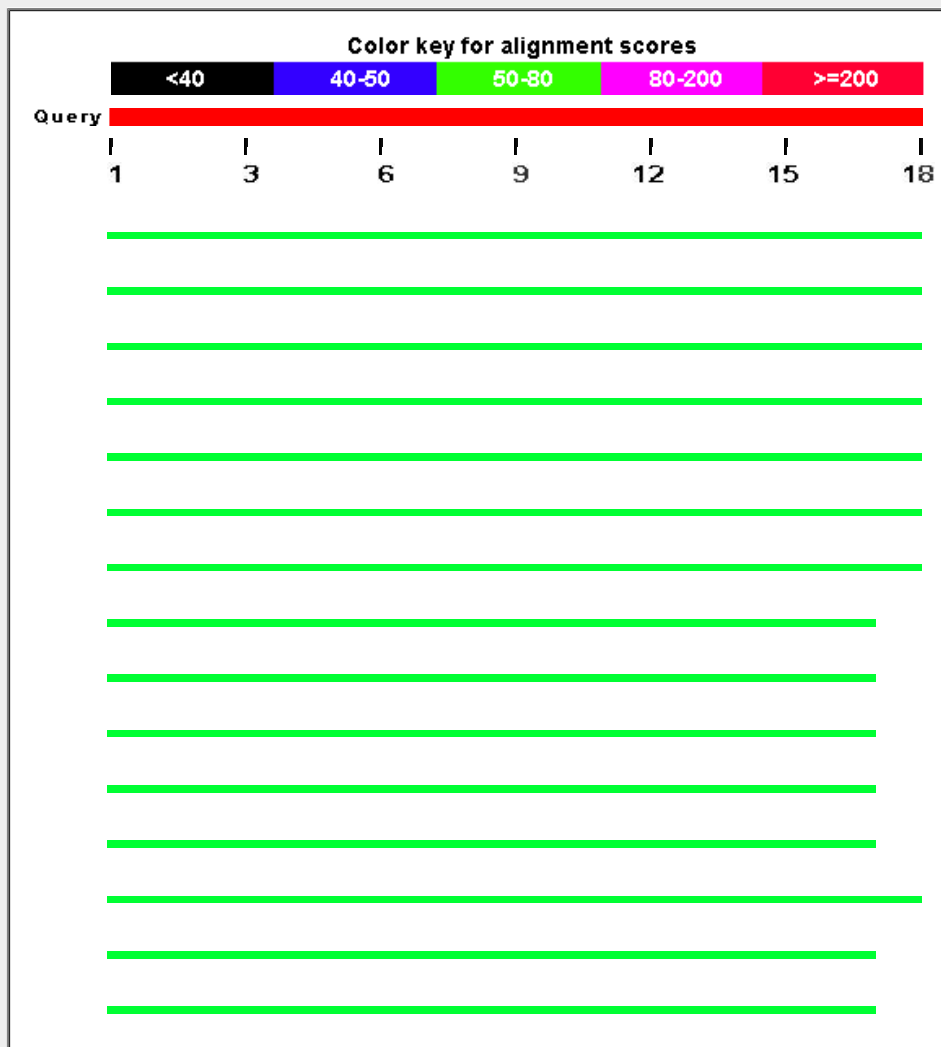

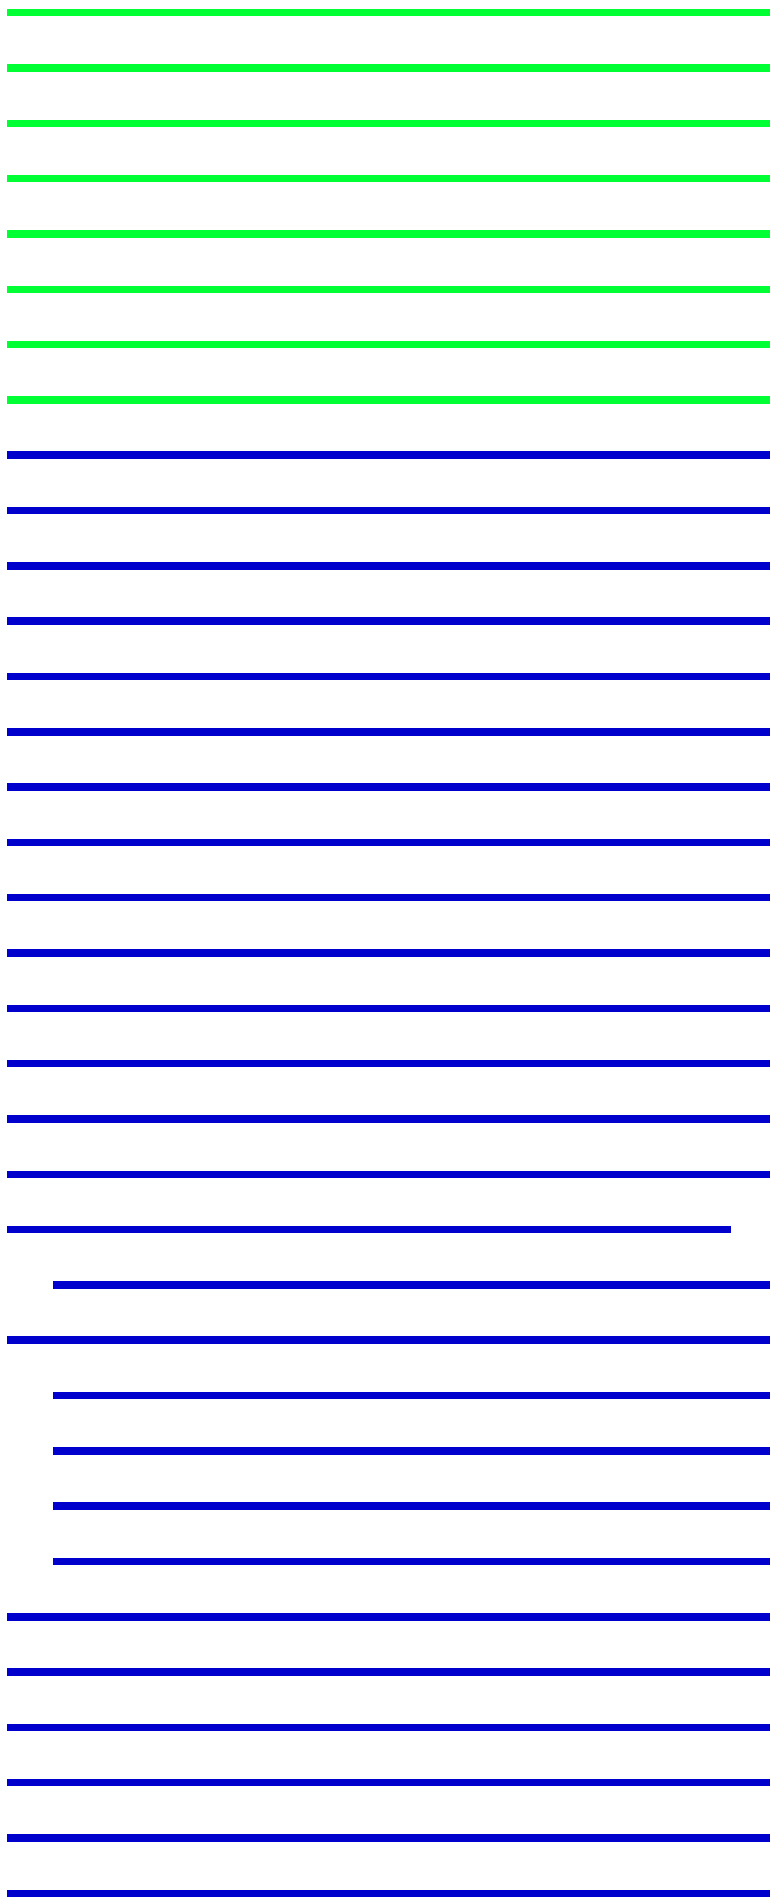

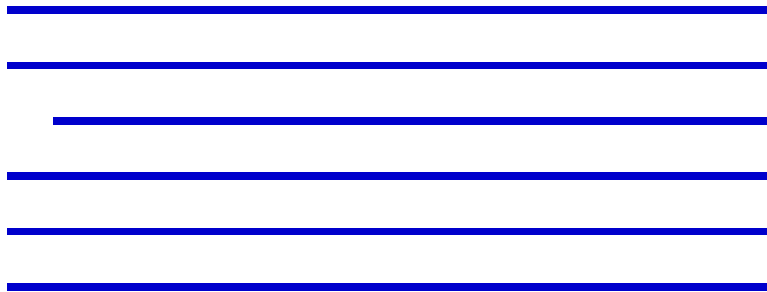

## Descriptions

### Sequences producing significant alignments:

Select: [All](#) [None](#) Selected:0

| <a href="#">Alignments</a> <a href="#">Download</a> <a href="#">GenPept</a> <a href="#">Graphics</a> <a href="#">Distance tree of results</a> <a href="#">Multiple alignment</a> |           |             |             |         |       |                                |  |
|----------------------------------------------------------------------------------------------------------------------------------------------------------------------------------|-----------|-------------|-------------|---------|-------|--------------------------------|--|
| Description                                                                                                                                                                      | Max score | Total score | Query cover | E value | Ident | Accession                      |  |
| <a href="#">PREDICTED: LOW QUALITY PROTEIN: selenoprotein P [Pan paniscus]</a>                                                                                                   | 60.0      | 60.0        | 100%        | 5e-09   | 94%   | <a href="#">XP_008961588.1</a> |  |
| <a href="#">Selenoprotein P, plasma, 1 [Homo sapiens]</a>                                                                                                                        | 60.0      | 60.0        | 100%        | 5e-09   | 94%   | <a href="#">AAH46152.1</a>     |  |
| <a href="#">selenoprotein P isoform 1 precursor [Homo sapiens]</a>                                                                                                               | 60.0      | 60.0        | 100%        | 5e-09   | 94%   | <a href="#">NP_005401.3</a>    |  |
| <a href="#">Selenoprotein P, plasma, 1 [Homo sapiens]</a>                                                                                                                        | 60.0      | 60.0        | 100%        | 5e-09   | 94%   | <a href="#">AAH58919.1</a>     |  |
| <a href="#">selenoprotein P [Homo sapiens]</a>                                                                                                                                   | 60.0      | 60.0        | 100%        | 5e-09   | 94%   | <a href="#">CAA77836.2</a>     |  |
| <a href="#">selenoprotein P precursor [Pan troglodytes]</a>                                                                                                                      | 60.0      | 60.0        | 100%        | 5e-09   | 94%   | <a href="#">NP_001108587.1</a> |  |
| <a href="#">selenoprotein P isoform 2 [Homo sapiens]</a>                                                                                                                         | 60.0      | 60.0        | 100%        | 5e-09   | 94%   | <a href="#">NP_001087195.1</a> |  |
| <a href="#">PREDICTED: LOW QUALITY PROTEIN: selenoprotein P [Saimiri boliviensis]</a>                                                                                            | 56.6      | 56.6        | 94%         | 8e-08   | 94%   | <a href="#">XP_003925940.2</a> |  |
| <a href="#">PREDICTED: LOW QUALITY PROTEIN: selenoprotein P [Rhinopithecus roxellana]</a>                                                                                        | 56.6      | 56.6        | 94%         | 8e-08   | 94%   | <a href="#">XP_010372696.1</a> |  |
| <a href="#">PREDICTED: LOW QUALITY PROTEIN: selenoprotein P [Papio anubis]</a>                                                                                                   | 56.6      | 56.6        | 94%         | 8e-08   | 94%   | <a href="#">XP_009206607.1</a> |  |
| <a href="#">PREDICTED: LOW QUALITY PROTEIN: selenoprotein P [Chlorocebus sabaeus]</a>                                                                                            | 56.6      | 56.6        | 94%         | 8e-08   | 94%   | <a href="#">XP_007959679.1</a> |  |
| <a href="#">selenoprotein P precursor [Macaca mulatta]</a>                                                                                                                       | 56.6      | 56.6        | 94%         | 8e-08   | 94%   | <a href="#">NP_001152962.1</a> |  |
| <a href="#">Selenoprotein P, plasma, 1 [Homo sapiens]</a>                                                                                                                        | 55.4      | 55.4        | 100%        | 2e-07   | 89%   | <a href="#">AAH15875.1</a>     |  |
| <a href="#">selenoprotein P precursor [Sus scrofa]</a>                                                                                                                           | 52.4      | 52.4        | 94%         | 2e-06   | 88%   | <a href="#">NP_001128295.1</a> |  |
| <a href="#">PREDICTED: LOW QUALITY PROTEIN: selenoprotein P [Myotis davidii]</a>                                                                                                 | 52.0      | 52.0        | 94%         | 3e-06   | 88%   | <a href="#">XP_006774623.1</a> |  |
| <a href="#">PREDICTED: LOW QUALITY PROTEIN: selenoprotein P [Myotis lucifugus]</a>                                                                                               | 52.0      | 52.0        | 94%         | 3e-06   | 88%   | <a href="#">XP_006106371.1</a> |  |
| <a href="#">PREDICTED: LOW QUALITY PROTEIN: selenoprotein P [Eptesicus fuscus]</a>                                                                                               | 52.0      | 52.0        | 94%         | 3e-06   | 88%   | <a href="#">XP_008153843.1</a> |  |
| <a href="#">PREDICTED: LOW QUALITY PROTEIN: selenoprotein P [Trichechus manatus]</a>                                                                                             | 52.0      | 52.0        | 94%         | 3e-06   | 88%   | <a href="#">XP_004388500.1</a> |  |
| <a href="#">PREDICTED: LOW QUALITY PROTEIN: selenoprotein P [Myotis brandtii]</a>                                                                                                | 52.0      | 52.0        | 94%         | 3e-06   | 88%   | <a href="#">XP_005876061.1</a> |  |
| <a href="#">PREDICTED: LOW QUALITY PROTEIN: selenoprotein P [Tupaia chinensis]</a>                                                                                               | 51.5      | 51.5        | 94%         | 4e-06   | 88%   | <a href="#">XP_006167023.1</a> |  |
| <a href="#">PREDICTED: selenoprotein P [Otolemur garnettii]</a>                                                                                                                  | 51.1      | 51.1        | 94%         | 5e-06   | 88%   | <a href="#">XP_003793045.1</a> |  |
| <a href="#">selenoprotein P precursor [Pongo abelii]</a>                                                                                                                         | 51.1      | 51.1        | 94%         | 6e-06   | 94%   | <a href="#">NP_001127462.1</a> |  |
| <a href="#">PREDICTED: LOW QUALITY PROTEIN: selenoprotein P [Nomascus leucogenus]</a>                                                                                            | 50.7      | 50.7        | 94%         | 8e-06   | 88%   | <a href="#">XP_003274442.1</a> |  |
| <a href="#">selenoprotein P precursor [Callithrix jacchus]</a>                                                                                                                   | 49.8      | 49.8        | 94%         | 1e-05   | 82%   | <a href="#">NP_001186857.1</a> |  |
| <a href="#">PREDICTED: LOW QUALITY PROTEIN: selenoprotein P [Tarsius syrichta]</a>                                                                                               | 49.4      | 49.4        | 94%         | 2e-05   | 82%   | <a href="#">XP_008050904.1</a> |  |
| <a href="#">PREDICTED: LOW QUALITY PROTEIN: selenoprotein P [Ceratotherium simum]</a>                                                                                            | 49.4      | 49.4        | 94%         | 2e-05   | 88%   | <a href="#">XP_004422836.1</a> |  |
| <a href="#">PREDICTED: LOW QUALITY PROTEIN: selenoprotein P [Sorex araneus]</a>                                                                                                  | 49.0      | 49.0        | 94%         | 3e-05   | 82%   | <a href="#">XP_004605590.1</a> |  |
| <a href="#">PREDICTED: LOW QUALITY PROTEIN: selenoprotein P [Peromyscus maniculatus]</a>                                                                                         | 49.0      | 49.0        | 94%         | 3e-05   | 82%   | <a href="#">XP_006997157.1</a> |  |
| <a href="#">PREDICTED: LOW QUALITY PROTEIN: selenoprotein P [Chinchilla lanigera]</a>                                                                                            | 47.7      | 47.7        | 94%         | 8e-05   | 82%   | <a href="#">XP_005386312.1</a> |  |

|                                                                                             |      |      |     |       |     |                                |
|---------------------------------------------------------------------------------------------|------|------|-----|-------|-----|--------------------------------|
| <a href="#">PREDICTED: LOW QUALITY PROTEIN: selenoprotein P [Equus przewalskii]</a>         | 47.3 | 47.3 | 94% | 1e-04 | 82% | <a href="#">XP_008522793.1</a> |
| <a href="#">selenoprotein P precursor [Equus caballus]</a>                                  | 47.3 | 47.3 | 94% | 1e-04 | 82% | <a href="#">NP_001129077.1</a> |
| <a href="#">Selenoprotein P [Heterocephalus glaber]</a>                                     | 46.4 | 46.4 | 94% | 2e-04 | 82% | <a href="#">EHA98867.1</a>     |
| <a href="#">PREDICTED: LOW QUALITY PROTEIN: selenoprotein P [Fukomys damarensis]</a>        | 46.4 | 46.4 | 94% | 2e-04 | 82% | <a href="#">XP_010632183.1</a> |
| <a href="#">PREDICTED: LOW QUALITY PROTEIN: selenoprotein P [Microtus ochrogastri]</a>      | 46.4 | 46.4 | 94% | 2e-04 | 76% | <a href="#">XP_005369861.1</a> |
| <a href="#">PREDICTED: LOW QUALITY PROTEIN: selenoprotein P [Heterocephalus glaber]</a>     | 46.4 | 46.4 | 94% | 2e-04 | 82% | <a href="#">XP_004848622.1</a> |
| <a href="#">PREDICTED: LOW QUALITY PROTEIN: selenoprotein P [Heterocephalus glaber]</a>     | 46.4 | 46.4 | 94% | 2e-04 | 82% | <a href="#">XP_004878213.1</a> |
| <a href="#">selenoprotein P precursor [Cricetulus griseus]</a>                              | 44.8 | 44.8 | 94% | 7e-04 | 76% | <a href="#">ERE84145.1</a>     |
| <a href="#">PREDICTED: LOW QUALITY PROTEIN: selenoprotein P [Nannospalax galii]</a>         | 43.9 | 43.9 | 88% | 0.001 | 88% | <a href="#">XP_008840327.1</a> |
| <a href="#">selenoprotein P, plasma, 1, isoform CRA_a [Mus musculus]</a>                    | 43.5 | 43.5 | 88% | 0.002 | 75% | <a href="#">EDL03405.1</a>     |
| <a href="#">PREDICTED: LOW QUALITY PROTEIN: selenoprotein P [Octodon degus]</a>             | 43.5 | 43.5 | 94% | 0.002 | 76% | <a href="#">XP_004641866.1</a> |
| <a href="#">Selenoprotein P, plasma, 1 [Mus musculus]</a>                                   | 43.5 | 43.5 | 88% | 0.002 | 75% | <a href="#">AAH01991.2</a>     |
| <a href="#">plasma selenoprotein P [Mus musculus]</a>                                       | 43.5 | 43.5 | 88% | 0.002 | 75% | <a href="#">AAD01684.1</a>     |
| <a href="#">unnamed protein product [Mus musculus]</a>                                      | 43.5 | 43.5 | 88% | 0.002 | 75% | <a href="#">BAE34948.1</a>     |
| <a href="#">selenoprotein P precursor [Mus musculus]</a>                                    | 43.5 | 43.5 | 88% | 0.002 | 75% | <a href="#">NP_033181.3</a>    |
| <a href="#">PREDICTED: LOW QUALITY PROTEIN: selenoprotein P [Balaenoptera acutirostris]</a> | 43.1 | 43.1 | 94% | 0.003 | 76% | <a href="#">XP_007195596.1</a> |
| <a href="#">PREDICTED: LOW QUALITY PROTEIN: selenoprotein P [Lipotes vexillifer]</a>        | 43.1 | 43.1 | 94% | 0.003 | 76% | <a href="#">XP_007447694.1</a> |
| <a href="#">PREDICTED: LOW QUALITY PROTEIN: selenoprotein P [Physeter catodon]</a>          | 43.1 | 43.1 | 94% | 0.003 | 76% | <a href="#">XP_007119423.1</a> |
| <a href="#">PREDICTED: LOW QUALITY PROTEIN: selenoprotein P [Bubalus bubalis]</a>           | 43.1 | 43.1 | 94% | 0.003 | 76% | <a href="#">XP_006067130.1</a> |
| <a href="#">membrane selenoprotein P [Capra hircus]</a>                                     | 42.6 | 42.6 | 94% | 0.003 | 76% | <a href="#">AAF67201.1</a>     |
| <a href="#">selenoprotein P, plasma, 1 precursor [Capra hircus]</a>                         | 42.6 | 42.6 | 94% | 0.004 | 76% | <a href="#">NP_001272511.1</a> |
| <a href="#">PREDICTED: LOW QUALITY PROTEIN: selenoprotein P [Ovis aries]</a>                | 42.6 | 42.6 | 94% | 0.004 | 76% | <a href="#">XP_004017062.1</a> |
| <a href="#">PREDICTED: LOW QUALITY PROTEIN: selenoprotein P [Galeopterus variegatus]</a>    | 41.8 | 41.8 | 94% | 0.007 | 76% | <a href="#">XP_008564915.1</a> |
| <a href="#">PREDICTED: LOW QUALITY PROTEIN: selenoprotein P [Odobenus rosmarus]</a>         | 41.8 | 41.8 | 88% | 0.007 | 81% | <a href="#">XP_004409206.1</a> |
| <a href="#">selenoprotein P precursor [Cavia porcellus]</a>                                 | 41.4 | 41.4 | 94% | 0.010 | 71% | <a href="#">NP_001244936.1</a> |
| <a href="#">PREDICTED: LOW QUALITY PROTEIN: selenoprotein P [Loxodonta africana]</a>        | 41.4 | 41.4 | 94% | 0.010 | 76% | <a href="#">XP_010586424.1</a> |
| <a href="#">PREDICTED: LOW QUALITY PROTEIN: selenoprotein P [Panthera tigris altaica]</a>   | 41.4 | 41.4 | 94% | 0.010 | 76% | <a href="#">XP_007095490.1</a> |
| <a href="#">PREDICTED: LOW QUALITY PROTEIN: selenoprotein P [Jaculus jaculus]</a>           | 39.7 | 39.7 | 94% | 0.034 | 76% | <a href="#">XP_004652550.1</a> |
| <a href="#">PREDICTED: LOW QUALITY PROTEIN: selenoprotein P [Orcinus orca]</a>              | 39.7 | 39.7 | 94% | 0.034 | 76% | <a href="#">XP_004266005.1</a> |
| <a href="#">PREDICTED: LOW QUALITY PROTEIN: selenoprotein P [Tursiops truncatus]</a>        | 39.7 | 39.7 | 94% | 0.034 | 76% | <a href="#">XP_004320390.1</a> |
| <a href="#">PREDICTED: LOW QUALITY PROTEIN: selenoprotein P [Mustela putorius furo]</a>     | 39.2 | 39.2 | 88% | 0.047 | 75% | <a href="#">XP_004738001.1</a> |
| <a href="#">PREDICTED: LOW QUALITY PROTEIN: selenoprotein P [Monodelphis domestica]</a>     | 38.4 | 38.4 | 88% | 0.087 | 75% | <a href="#">XP_003340675.2</a> |
| <a href="#">PREDICTED: LOW QUALITY PROTEIN: selenoprotein P [Elephantulus edwardsi]</a>     | 38.4 | 38.4 | 88% | 0.088 | 75% | <a href="#">XP_006889619.1</a> |
| <a href="#">selenoprotein P precursor [Cricetulus griseus]</a>                              | 38.4 | 38.4 | 94% | 0.088 | 71% | <a href="#">NP_001243807.1</a> |
| <a href="#">selenoprotein P precursor [Canis lupus familiaris]</a>                          | 38.0 | 38.0 | 94% | 0.12  | 71% | <a href="#">NP_001108590.1</a> |
| <a href="#">PREDICTED: selenoprotein P-like [Ailuropoda melanoleuca]</a>                    | 37.5 | 37.5 | 94% | 0.15  | 71% | <a href="#">XP_002921760.1</a> |
| <a href="#">unnamed protein product [Mus musculus]</a>                                      | 37.5 | 37.5 | 88% | 0.16  | 69% | <a href="#">BAE39664.1</a>     |
| <a href="#">PREDICTED: LOW QUALITY PROTEIN: selenoprotein P [Camelus dromedarius]</a>       | 37.5 | 37.5 | 94% | 0.16  | 71% | <a href="#">XP_010999134.1</a> |
| <a href="#">PREDICTED: LOW QUALITY PROTEIN: selenoprotein P [Camelus ferus]</a>             | 37.5 | 37.5 | 94% | 0.16  | 71% | <a href="#">XP_006191986.1</a> |
| <a href="#">PREDICTED: LOW QUALITY PROTEIN: selenoprotein P [Vicugna pacos]</a>             | 37.5 | 37.5 | 94% | 0.16  | 71% | <a href="#">XP_006207756.1</a> |
| <a href="#">PREDICTED: LOW QUALITY PROTEIN: selenoprotein P [Ursus maritimus]</a>           | 37.5 | 37.5 | 94% | 0.17  | 71% | <a href="#">XP_008690806.1</a> |
| <a href="#">selenoprotein P precursor [Rattus norvegicus]</a>                               | 37.1 | 37.1 | 88% | 0.22  | 69% | <a href="#">NP_062065.2</a>    |
| <a href="#">PREDICTED: LOW QUALITY PROTEIN: selenoprotein P [Bison bison bison]</a>         | 37.1 | 37.1 | 94% | 0.22  | 71% | <a href="#">XP_010831114.1</a> |
| <a href="#">selenoprotein P [Bos taurus]</a>                                                | 37.1 | 37.1 | 94% | 0.22  | 71% | <a href="#">BAA84781.1</a>     |
| <a href="#">PREDICTED: LOW QUALITY PROTEIN: selenoprotein P [Bos mutus]</a>                 | 37.1 | 37.1 | 94% | 0.22  | 71% | <a href="#">XP_005894930.1</a> |
| <a href="#">selenoprotein P precursor [Bos taurus]</a>                                      | 37.1 | 37.1 | 94% | 0.22  | 71% | <a href="#">NP_776884.2</a>    |

|                                                                                                 |      |      |     |      |      |                                |
|-------------------------------------------------------------------------------------------------|------|------|-----|------|------|--------------------------------|
| <a href="#">selenoprotein P [Bubalus bubalis]</a>                                               | 37.1 | 37.1 | 94% | 0.22 | 71%  | <a href="#">AFM77782.2</a>     |
| PREDICTED: LOW QUALITY PROTEIN: <a href="#">selenoprotein P [Gorilla gorilla gorilla]</a>       | 36.7 | 36.7 | 55% | 0.29 | 100% | <a href="#">XP_004065356.1</a> |
| PREDICTED: LOW QUALITY PROTEIN: <a href="#">selenoprotein P [Orycteropus afer africanus]</a>    | 36.3 | 36.3 | 94% | 0.41 | 71%  | <a href="#">XP_007952213.1</a> |
| PREDICTED: LOW QUALITY PROTEIN: <a href="#">selenoprotein P [Erinaceus europaeus]</a>           | 36.3 | 36.3 | 88% | 0.42 | 69%  | <a href="#">XP_007517681.1</a> |
| <a href="#">unnamed protein product [Mus musculus]</a>                                          | 35.4 | 35.4 | 88% | 0.78 | 69%  | <a href="#">BAC55264.3</a>     |
| PREDICTED: LOW QUALITY PROTEIN: <a href="#">selenoprotein P [Dasypus novemcinctus]</a>          | 35.0 | 35.0 | 94% | 1.1  | 71%  | <a href="#">XP_004448278.1</a> |
| PREDICTED: <a href="#">selenoprotein P [Sarcophilus harrisii]</a>                               | 34.6 | 34.6 | 88% | 1.4  | 69%  | <a href="#">XP_003759960.1</a> |
| PREDICTED: LOW QUALITY PROTEIN: <a href="#">selenoprotein P [Condylura cristata]</a>            | 34.6 | 34.6 | 94% | 1.4  | 71%  | <a href="#">XP_004678402.1</a> |
| <a href="#">selenoprotein P precursor [Oryctolagus cuniculus]</a>                               | 33.3 | 33.3 | 88% | 3.7  | 69%  | <a href="#">NP_001186775.1</a> |
| <a href="#">RNA-binding protein (NOP10, NOLA3) [uncultured marine thaumarchaeote K1]</a>        | 32.5 | 32.5 | 94% | 4.6  | 65%  | <a href="#">AIF05018.1</a>     |
| PREDICTED: LOW QUALITY PROTEIN: <a href="#">selenoprotein P [Ochotona princeps]</a>             | 32.9 | 32.9 | 88% | 5.0  | 69%  | <a href="#">XP_004583736.1</a> |
| <a href="#">predicted protein [Phaeodactylum tricornutum CCAP 1055/1]</a>                       | 32.0 | 32.0 | 61% | 9.6  | 82%  | <a href="#">XP_002178290.1</a> |
| <a href="#">hypothetical protein [Coraliomargarita akajimensis]</a>                             | 31.6 | 31.6 | 72% | 11   | 71%  | <a href="#">WP_013044828.1</a> |
| <a href="#">hypothetical protein [Sorangium cellulosum]</a>                                     | 31.6 | 31.6 | 88% | 12   | 61%  | <a href="#">WP_012240780.1</a> |
| PREDICTED: LOW QUALITY PROTEIN: <a href="#">selenoprotein P [Echinops telfairi]</a>             | 31.6 | 31.6 | 94% | 13   | 65%  | <a href="#">XP_004716992.1</a> |
| <a href="#">dihydroxy-acid dehydratase [Campylobacter sp. FOBRC14]</a>                          | 31.2 | 31.2 | 66% | 17   | 73%  | <a href="#">WP_009649466.1</a> |
| <a href="#">putative ATP-dependent RNA helicase DDX60-like protein [Cricetulus griseus]</a>     | 31.2 | 31.2 | 83% | 18   | 75%  | <a href="#">ERE91786.1</a>     |
| PREDICTED: probable ATP-dependent RNA helicase DDX60 [Cricetulus griseus]                       | 31.2 | 31.2 | 83% | 18   | 75%  | <a href="#">XP_003498842.2</a> |
| <a href="#">selenoprotein P-like protein [Bos taurus]</a>                                       | 30.8 | 30.8 | 94% | 22   | 65%  | <a href="#">BAB39395.1</a>     |
| <a href="#">selenoprotein P-like protein [Bos taurus]</a>                                       | 30.8 | 30.8 | 94% | 22   | 65%  | <a href="#">BAB39394.1</a>     |
| <a href="#">selenoprotein P-like protein [Bos taurus]</a>                                       | 30.8 | 30.8 | 94% | 22   | 65%  | <a href="#">BAB39393.1</a>     |
| <a href="#">selenoprotein P-like protein [Bos taurus]</a>                                       | 30.8 | 30.8 | 94% | 22   | 65%  | <a href="#">BAB39392.1</a>     |
| <a href="#">2-oxoglutarate ferredoxin oxidoreductase beta subunit [Legionella fallonii LLA]</a> | 30.8 | 30.8 | 50% | 23   | 89%  | <a href="#">CEG56463.1</a>     |
| <a href="#">hypothetical protein ACD_69C00091G0003 [uncultured bacterium]</a>                   | 30.8 | 30.8 | 88% | 23   | 63%  | <a href="#">EKD45887.1</a>     |
| <a href="#">selenoprotein P like protein [Bos taurus]</a>                                       | 30.8 | 30.8 | 94% | 24   | 65%  | <a href="#">BAA04949.2</a>     |

## Alignments

Download v [GenPept](#) [Graphics](#)

v Next ▲ Previous ▲ Descriptions

PREDICTED: LOW QUALITY PROTEIN: [selenoprotein P \[Pan paniscus\]](#)

Sequence ID: [ref|XP\\_008961588.1|](#) Length: 381 Number of Matches: 1

Range 1: 171 to 188 [GenPept](#) [Graphics](#)

v Next Match ▲ Previous Match

| Score          | Expect | Identities | Positives   | Gaps     |
|----------------|--------|------------|-------------|----------|
| 60.0 bits(134) | 5e-09  | 17/18(94%) | 18/18(100%) | 0/18(0%) |

Query 1 KCGDCSLTTLKDEDFCKR 18  
 KCG+CSLTTLKDEDFCKR  
 Sbjct 171 KCGNCSLTTLKDEDFCKR 188

### Related Information

[Gene](#) - associated gene details  
[Map Viewer](#) - aligned genomic context

Download v [GenPept](#) [Graphics](#)

v Next ▲ Previous ▲ Descriptions

Selenoprotein P, plasma, 1 [Homo sapiens]

Sequence ID: [gb|AAH46152.1|](#) Length: 381 Number of Matches: 1

Range 1: 171 to 188 [GenPept](#) [Graphics](#)

v Next Match ▲ Previous Match

| Score          | Expect | Identities | Positives   | Gaps     |
|----------------|--------|------------|-------------|----------|
| 60.0 bits(134) | 5e-09  | 17/18(94%) | 18/18(100%) | 0/18(0%) |

Query 1 KCGDCSLTTLKDEDFCKR 18  
 KCG+CSLTTLKDEDFCKR  
 Sbjct 171 KCGNCSLTTLKDEDFCKR 188

### Related Information

[Gene](#) - associated gene details

Download [GenPept](#) [Graphics](#)

Next Previous Descriptions

selenoprotein P isoform 1 precursor [Homo sapiens]

Sequence ID: [ref|NP\\_005401.3|](#) Length: 381 Number of Matches: 1

See 4 more title(s)

Range 1: 171 to 188 [GenPept](#) [Graphics](#)

Next Match Previous Match

| Score          | Expect | Identities | Positives   | Gaps     |
|----------------|--------|------------|-------------|----------|
| 60.0 bits(134) | 5e-09  | 17/18(94%) | 18/18(100%) | 0/18(0%) |

Query 1 KCGDCSLTTLKDEDFCKR 18  
 KCG+CSLTTLKDEDFCKR  
 Sbjct 171 KCGNCSLTTLKDEDFCKR 188

**Related Information**

- [Gene](#) - associated gene details
- [UniGene](#) - clustered expressed sequence tags
- [Map Viewer](#) - aligned genomic context
- [Identical Proteins](#) - Proteins identical to the subject

Download [GenPept](#) [Graphics](#)

Next Previous Descriptions

Selenoprotein P, plasma, 1 [Homo sapiens]

Sequence ID: [gb|AAH58919.1|](#) Length: 381 Number of Matches: 1

Range 1: 171 to 188 [GenPept](#) [Graphics](#)

Next Match Previous Match

| Score          | Expect | Identities | Positives   | Gaps     |
|----------------|--------|------------|-------------|----------|
| 60.0 bits(134) | 5e-09  | 17/18(94%) | 18/18(100%) | 0/18(0%) |

Query 1 KCGDCSLTTLKDEDFCKR 18  
 KCG+CSLTTLKDEDFCKR  
 Sbjct 171 KCGNCSLTTLKDEDFCKR 188

**Related Information**

- [Gene](#) - associated gene details

Download [GenPept](#) [Graphics](#)

Next Previous Descriptions

selenoprotein P [Homo sapiens]

Sequence ID: [emb|CAA77836.2|](#) Length: 381 Number of Matches: 1

Range 1: 171 to 188 [GenPept](#) [Graphics](#)

Next Match Previous Match

| Score          | Expect | Identities | Positives   | Gaps     |
|----------------|--------|------------|-------------|----------|
| 60.0 bits(134) | 5e-09  | 17/18(94%) | 18/18(100%) | 0/18(0%) |

Query 1 KCGDCSLTTLKDEDFCKR 18  
 KCG+CSLTTLKDEDFCKR  
 Sbjct 171 KCGNCSLTTLKDEDFCKR 188

**Related Information**

- [Gene](#) - associated gene details

BLAST is a registered trademark of the National Library of Medicine.

NCBI/ BLAST/ blastp suite/ Formatting Results - BVKGR72V01R

Your search parameters were adjusted to search for a short input sequence.

[Edit and Resubmit](#) [Save Search Strategies](#) [Formatting options](#) [Download](#) [YouTube](#) [How to read this page](#) [Blast report description](#)

### SEPP1\_KCGDCSLTTLKDEDFCKRV\_Mod

|                                                                    |                                                                                                                                       |
|--------------------------------------------------------------------|---------------------------------------------------------------------------------------------------------------------------------------|
| <b>RID</b> <a href="#">BVKGR72V01R</a> (Expires on 01-21 10:40 am) | <b>Database Name</b> nr                                                                                                               |
| <b>Query ID</b> lcl 391100                                         | <b>Description</b> All non-redundant GenBank CDS translations+PDB+SwissProt+PIR+PRF excluding environmental samples from WGS projects |
| <b>Description</b> None                                            | <b>Program</b> BLASTP 2.2.30+ <a href="#">Citation</a>                                                                                |
| <b>Molecule type</b> amino acid                                    |                                                                                                                                       |
| <b>Query Length</b> 19                                             |                                                                                                                                       |

Other reports: [Search Summary](#) [Taxonomy reports](#) [Distance tree of results](#) [Multiple alignment](#)

### Graphic Summary

Show Conserved Domains

Putative conserved domains have been detected, click on the image below for detailed results.

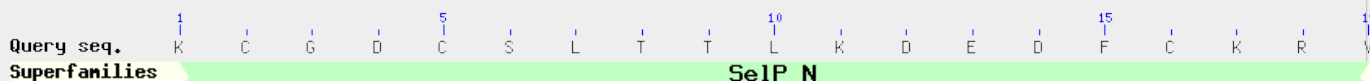

Distribution of 100 Blast Hits on the Query Sequence

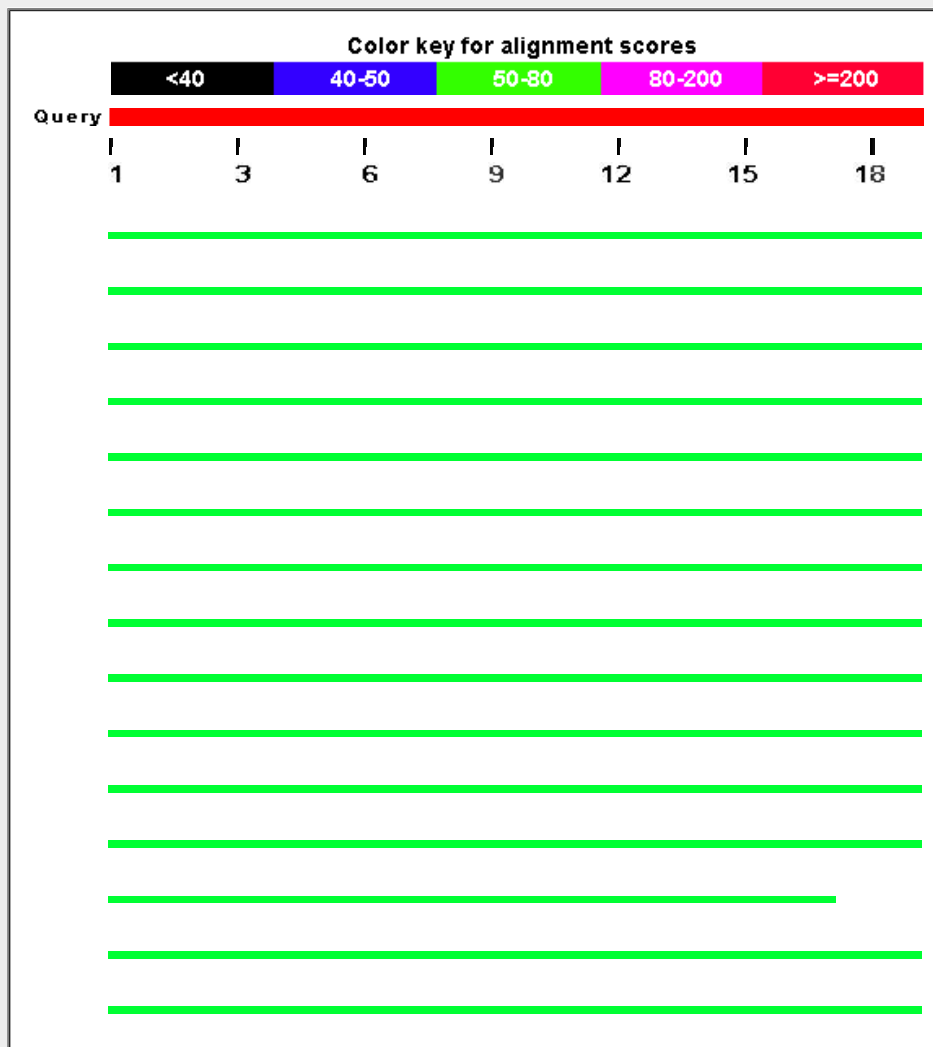

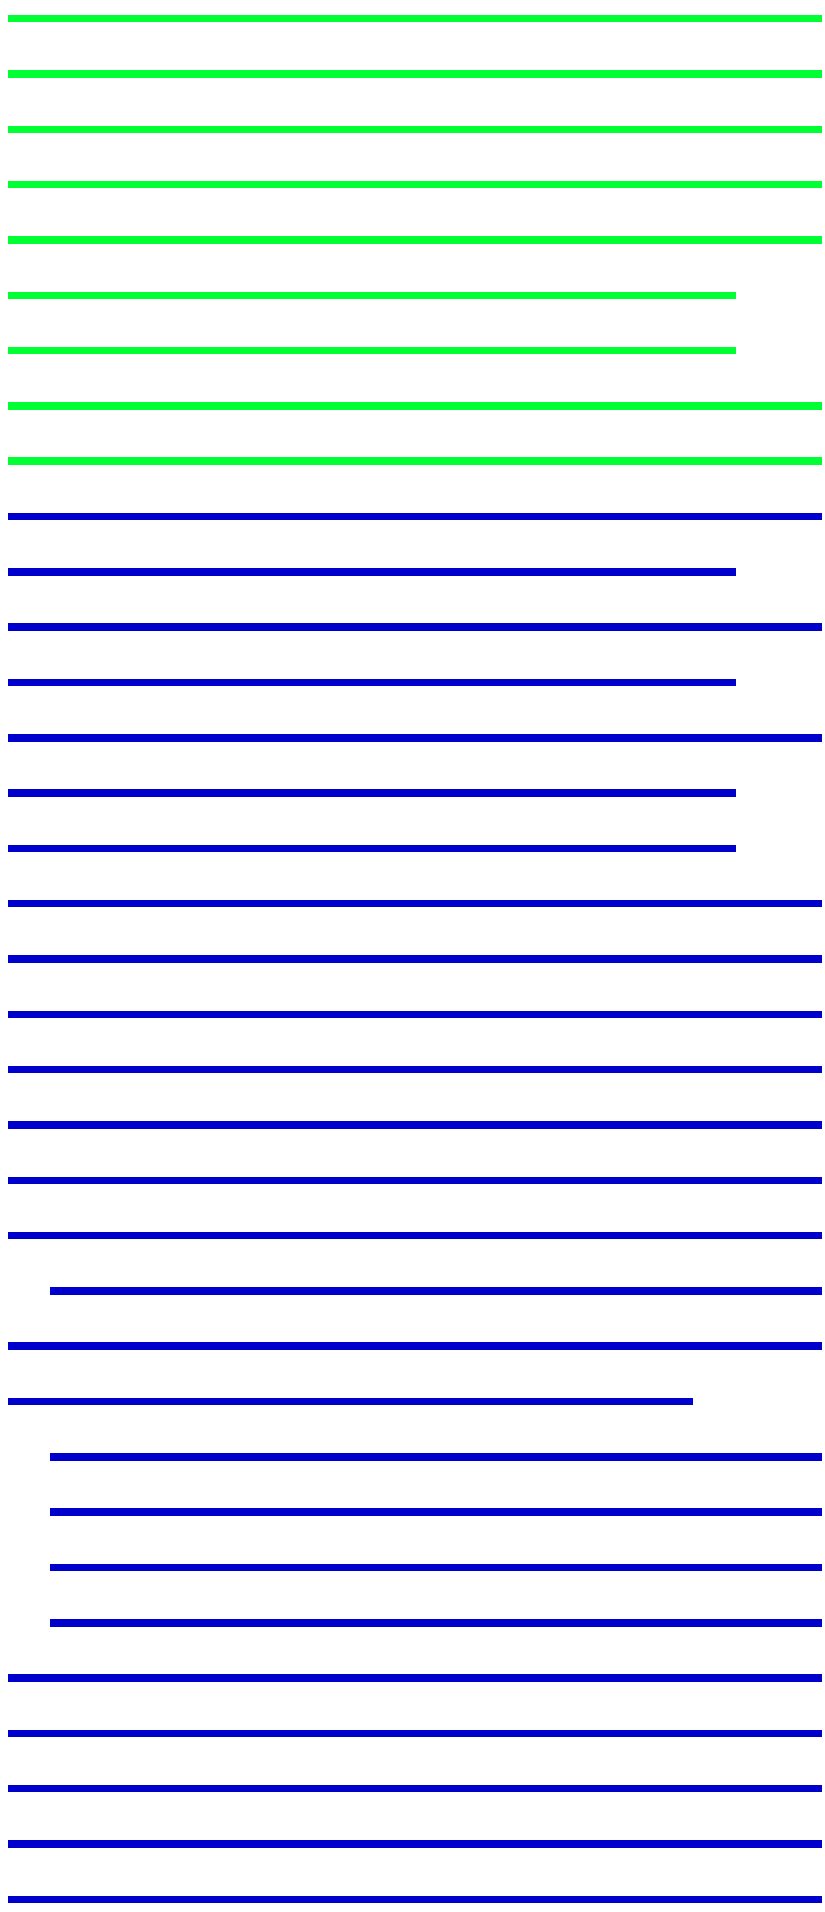



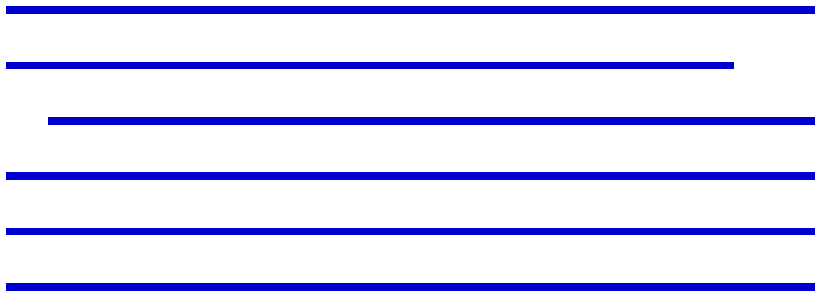

## Descriptions

### Sequences producing significant alignments:

Select: [All](#) [None](#) Selected:0

| <a href="#">Alignments</a> <a href="#">Download</a> <a href="#">GenPept</a> <a href="#">Graphics</a> <a href="#">Distance tree of results</a> <a href="#">Multiple alignment</a> |           |             |             |         |       |                                |  |
|----------------------------------------------------------------------------------------------------------------------------------------------------------------------------------|-----------|-------------|-------------|---------|-------|--------------------------------|--|
| Description                                                                                                                                                                      | Max score | Total score | Query cover | E value | Ident | Accession                      |  |
| <a href="#">PREDICTED: LOW QUALITY PROTEIN: selenoprotein P [Pan paniscus]</a>                                                                                                   | 63.0      | 63.0        | 100%        | 6e-10   | 95%   | <a href="#">XP_008961588.1</a> |  |
| <a href="#">Selenoprotein P, plasma, 1 [Homo sapiens]</a>                                                                                                                        | 63.0      | 63.0        | 100%        | 6e-10   | 95%   | <a href="#">AAH46152.1</a>     |  |
| <a href="#">selenoprotein P isoform 1 precursor [Homo sapiens]</a>                                                                                                               | 63.0      | 63.0        | 100%        | 6e-10   | 95%   | <a href="#">NP_005401.3</a>    |  |
| <a href="#">Selenoprotein P, plasma, 1 [Homo sapiens]</a>                                                                                                                        | 63.0      | 63.0        | 100%        | 6e-10   | 95%   | <a href="#">AAH58919.1</a>     |  |
| <a href="#">selenoprotein P [Homo sapiens]</a>                                                                                                                                   | 63.0      | 63.0        | 100%        | 6e-10   | 95%   | <a href="#">CAA77836.2</a>     |  |
| <a href="#">selenoprotein P precursor [Pan troglodytes]</a>                                                                                                                      | 63.0      | 63.0        | 100%        | 6e-10   | 95%   | <a href="#">NP_001108587.1</a> |  |
| <a href="#">selenoprotein P isoform 2 [Homo sapiens]</a>                                                                                                                         | 63.0      | 63.0        | 100%        | 6e-10   | 95%   | <a href="#">NP_001087195.1</a> |  |
| <a href="#">PREDICTED: LOW QUALITY PROTEIN: selenoprotein P [Papio anubis]</a>                                                                                                   | 58.3      | 58.3        | 100%        | 2e-08   | 89%   | <a href="#">XP_009206607.1</a> |  |
| <a href="#">PREDICTED: LOW QUALITY PROTEIN: selenoprotein P [Chlorocebus sabaeus]</a>                                                                                            | 58.3      | 58.3        | 100%        | 2e-08   | 89%   | <a href="#">XP_007959679.1</a> |  |
| <a href="#">Selenoprotein P, plasma, 1 [Homo sapiens]</a>                                                                                                                        | 58.3      | 58.3        | 100%        | 2e-08   | 89%   | <a href="#">AAH15875.1</a>     |  |
| <a href="#">selenoprotein P precursor [Macaca mulatta]</a>                                                                                                                       | 58.3      | 58.3        | 100%        | 2e-08   | 89%   | <a href="#">NP_001152962.1</a> |  |
| <a href="#">PREDICTED: LOW QUALITY PROTEIN: selenoprotein P [Saimiri boliviensis]</a>                                                                                            | 57.1      | 57.1        | 100%        | 6e-08   | 89%   | <a href="#">XP_003925940.2</a> |  |
| <a href="#">PREDICTED: LOW QUALITY PROTEIN: selenoprotein P [Rhinopithecus roxellana]</a>                                                                                        | 56.6      | 56.6        | 89%         | 9e-08   | 94%   | <a href="#">XP_010372696.1</a> |  |
| <a href="#">selenoprotein P precursor [Pongo abelii]</a>                                                                                                                         | 52.8      | 52.8        | 100%        | 2e-06   | 89%   | <a href="#">NP_001127462.1</a> |  |
| <a href="#">selenoprotein P precursor [Sus scrofa]</a>                                                                                                                           | 52.8      | 52.8        | 100%        | 2e-06   | 84%   | <a href="#">NP_001128295.1</a> |  |
| <a href="#">PREDICTED: LOW QUALITY PROTEIN: selenoprotein P [Myotis davidii]</a>                                                                                                 | 52.4      | 52.4        | 100%        | 2e-06   | 84%   | <a href="#">XP_006774623.1</a> |  |
| <a href="#">PREDICTED: LOW QUALITY PROTEIN: selenoprotein P [Eptesicus fuscus]</a>                                                                                               | 52.4      | 52.4        | 100%        | 2e-06   | 84%   | <a href="#">XP_008153843.1</a> |  |
| <a href="#">PREDICTED: LOW QUALITY PROTEIN: selenoprotein P [Myotis brandtii]</a>                                                                                                | 52.4      | 52.4        | 100%        | 2e-06   | 84%   | <a href="#">XP_005876061.1</a> |  |
| <a href="#">PREDICTED: LOW QUALITY PROTEIN: selenoprotein P [Nomascus leucogenus]</a>                                                                                            | 52.4      | 52.4        | 100%        | 2e-06   | 84%   | <a href="#">XP_003274442.1</a> |  |
| <a href="#">PREDICTED: LOW QUALITY PROTEIN: selenoprotein P [Tupaia chinensis]</a>                                                                                               | 52.0      | 52.0        | 100%        | 3e-06   | 84%   | <a href="#">XP_006167023.1</a> |  |
| <a href="#">PREDICTED: LOW QUALITY PROTEIN: selenoprotein P [Myotis lucifugus]</a>                                                                                               | 52.0      | 52.0        | 89%         | 3e-06   | 88%   | <a href="#">XP_006106371.1</a> |  |
| <a href="#">PREDICTED: LOW QUALITY PROTEIN: selenoprotein P [Trichechus manatus]</a>                                                                                             | 52.0      | 52.0        | 89%         | 3e-06   | 88%   | <a href="#">XP_004388500.1</a> |  |
| <a href="#">PREDICTED: selenoprotein P [Otolemur garnettii]</a>                                                                                                                  | 51.5      | 51.5        | 100%        | 4e-06   | 84%   | <a href="#">XP_003793045.1</a> |  |
| <a href="#">selenoprotein P precursor [Callithrix jacchus]</a>                                                                                                                   | 50.3      | 50.3        | 100%        | 1e-05   | 79%   | <a href="#">NP_001186857.1</a> |  |
| <a href="#">PREDICTED: LOW QUALITY PROTEIN: selenoprotein P [Tarsius syrichta]</a>                                                                                               | 49.8      | 49.8        | 100%        | 2e-05   | 79%   | <a href="#">XP_008050904.1</a> |  |
| <a href="#">PREDICTED: LOW QUALITY PROTEIN: selenoprotein P [Ceratotherium simum]</a>                                                                                            | 49.4      | 49.4        | 89%         | 2e-05   | 88%   | <a href="#">XP_004422836.1</a> |  |
| <a href="#">PREDICTED: LOW QUALITY PROTEIN: selenoprotein P [Peromyscus maniculatus]</a>                                                                                         | 49.4      | 49.4        | 100%        | 2e-05   | 79%   | <a href="#">XP_006997157.1</a> |  |
| <a href="#">PREDICTED: LOW QUALITY PROTEIN: selenoprotein P [Sorex araneus]</a>                                                                                                  | 49.0      | 49.0        | 89%         | 3e-05   | 82%   | <a href="#">XP_004605590.1</a> |  |
| <a href="#">PREDICTED: LOW QUALITY PROTEIN: selenoprotein P [Chinchilla lanigera]</a>                                                                                            | 48.1      | 48.1        | 100%        | 6e-05   | 79%   | <a href="#">XP_005386312.1</a> |  |

|                                                                                             |      |      |      |       |      |                                |
|---------------------------------------------------------------------------------------------|------|------|------|-------|------|--------------------------------|
| <a href="#">PREDICTED: LOW QUALITY PROTEIN: selenoprotein P [Equus przewalskii]</a>         | 47.3 | 47.3 | 89%  | 1e-04 | 82%  | <a href="#">XP_008522793.1</a> |
| <a href="#">selenoprotein P precursor [Equus caballus]</a>                                  | 47.3 | 47.3 | 89%  | 1e-04 | 82%  | <a href="#">NP_001129077.1</a> |
| <a href="#">Selenoprotein P [Heterocephalus glaber]</a>                                     | 46.9 | 46.9 | 100% | 2e-04 | 79%  | <a href="#">EHA98867.1</a>     |
| <a href="#">PREDICTED: LOW QUALITY PROTEIN: selenoprotein P [Fukomys damarensis]</a>        | 46.9 | 46.9 | 100% | 2e-04 | 79%  | <a href="#">XP_010632183.1</a> |
| <a href="#">PREDICTED: LOW QUALITY PROTEIN: selenoprotein P [Microtus ochrogastri]</a>      | 46.9 | 46.9 | 100% | 2e-04 | 74%  | <a href="#">XP_005369861.1</a> |
| <a href="#">PREDICTED: LOW QUALITY PROTEIN: selenoprotein P [Heterocephalus glaber]</a>     | 46.9 | 46.9 | 100% | 2e-04 | 79%  | <a href="#">XP_004848622.1</a> |
| <a href="#">PREDICTED: LOW QUALITY PROTEIN: selenoprotein P [Heterocephalus glaber]</a>     | 46.9 | 46.9 | 100% | 2e-04 | 79%  | <a href="#">XP_004878213.1</a> |
| <a href="#">selenoprotein P precursor [Cricetulus griseus]</a>                              | 45.2 | 45.2 | 100% | 6e-04 | 74%  | <a href="#">ERE84145.1</a>     |
| <a href="#">PREDICTED: LOW QUALITY PROTEIN: selenoprotein P [Loxodonta africana]</a>        | 44.3 | 44.3 | 100% | 0.001 | 74%  | <a href="#">XP_010586424.1</a> |
| <a href="#">selenoprotein P, plasma, 1, isoform CRA_a [Mus musculus]</a>                    | 43.9 | 43.9 | 94%  | 0.001 | 72%  | <a href="#">EDL03405.1</a>     |
| <a href="#">PREDICTED: LOW QUALITY PROTEIN: selenoprotein P [Octodon degus]</a>             | 43.9 | 43.9 | 100% | 0.002 | 74%  | <a href="#">XP_004641866.1</a> |
| <a href="#">PREDICTED: LOW QUALITY PROTEIN: selenoprotein P [Nannospalax galii]</a>         | 43.9 | 43.9 | 84%  | 0.002 | 88%  | <a href="#">XP_008840327.1</a> |
| <a href="#">Selenoprotein P, plasma, 1 [Mus musculus]</a>                                   | 43.9 | 43.9 | 94%  | 0.002 | 72%  | <a href="#">AAH01991.2</a>     |
| <a href="#">plasma selenoprotein P [Mus musculus]</a>                                       | 43.9 | 43.9 | 94%  | 0.002 | 72%  | <a href="#">AAD01684.1</a>     |
| <a href="#">unnamed protein product [Mus musculus]</a>                                      | 43.9 | 43.9 | 94%  | 0.002 | 72%  | <a href="#">BAE34948.1</a>     |
| <a href="#">selenoprotein P precursor [Mus musculus]</a>                                    | 43.9 | 43.9 | 94%  | 0.002 | 72%  | <a href="#">NP_033181.3</a>    |
| <a href="#">PREDICTED: LOW QUALITY PROTEIN: selenoprotein P [Balaenoptera acutirostris]</a> | 43.5 | 43.5 | 100% | 0.002 | 74%  | <a href="#">XP_007195596.1</a> |
| <a href="#">PREDICTED: LOW QUALITY PROTEIN: selenoprotein P [Physeter catodon]</a>          | 43.5 | 43.5 | 100% | 0.002 | 74%  | <a href="#">XP_007119423.1</a> |
| <a href="#">PREDICTED: LOW QUALITY PROTEIN: selenoprotein P [Bubalus bubalis]</a>           | 43.5 | 43.5 | 100% | 0.002 | 74%  | <a href="#">XP_006067130.1</a> |
| <a href="#">membrane selenoprotein P [Capra hircus]</a>                                     | 43.1 | 43.1 | 100% | 0.003 | 74%  | <a href="#">AAF67201.1</a>     |
| <a href="#">selenoprotein P, plasma, 1 precursor [Capra hircus]</a>                         | 43.1 | 43.1 | 100% | 0.003 | 74%  | <a href="#">NP_001272511.1</a> |
| <a href="#">PREDICTED: LOW QUALITY PROTEIN: selenoprotein P [Ovis aries]</a>                | 43.1 | 43.1 | 100% | 0.003 | 74%  | <a href="#">XP_004017062.1</a> |
| <a href="#">PREDICTED: LOW QUALITY PROTEIN: selenoprotein P [Lipotes vexillifer]</a>        | 43.1 | 43.1 | 89%  | 0.003 | 76%  | <a href="#">XP_007447694.1</a> |
| <a href="#">PREDICTED: LOW QUALITY PROTEIN: selenoprotein P [Odobenus rosmarus]</a>         | 43.1 | 43.1 | 94%  | 0.003 | 78%  | <a href="#">XP_004409206.1</a> |
| <a href="#">PREDICTED: LOW QUALITY PROTEIN: selenoprotein P [Galeopterus variegatus]</a>    | 42.2 | 42.2 | 100% | 0.006 | 74%  | <a href="#">XP_008564915.1</a> |
| <a href="#">PREDICTED: LOW QUALITY PROTEIN: selenoprotein P [Panthera tigris altaica]</a>   | 42.2 | 42.2 | 100% | 0.006 | 74%  | <a href="#">XP_007095490.1</a> |
| <a href="#">selenoprotein P precursor [Cavia porcellus]</a>                                 | 41.8 | 41.8 | 100% | 0.008 | 68%  | <a href="#">NP_001244936.1</a> |
| <a href="#">PREDICTED: LOW QUALITY PROTEIN: selenoprotein P [Orcinus orca]</a>              | 40.1 | 40.1 | 100% | 0.027 | 74%  | <a href="#">XP_004266005.1</a> |
| <a href="#">PREDICTED: LOW QUALITY PROTEIN: selenoprotein P [Tursiops truncatus]</a>        | 40.1 | 40.1 | 100% | 0.027 | 74%  | <a href="#">XP_004320390.1</a> |
| <a href="#">PREDICTED: LOW QUALITY PROTEIN: selenoprotein P [Gorilla gorilla gorilla]</a>   | 39.7 | 39.7 | 57%  | 0.035 | 100% | <a href="#">XP_004065356.1</a> |
| <a href="#">PREDICTED: LOW QUALITY PROTEIN: selenoprotein P [Jaculus jaculus]</a>           | 39.7 | 39.7 | 89%  | 0.037 | 76%  | <a href="#">XP_004652550.1</a> |
| <a href="#">PREDICTED: LOW QUALITY PROTEIN: selenoprotein P [Mustela putorius furo]</a>     | 39.2 | 39.2 | 84%  | 0.050 | 75%  | <a href="#">XP_004738001.1</a> |
| <a href="#">PREDICTED: LOW QUALITY PROTEIN: selenoprotein P [Camelus dromedarius]</a>       | 39.2 | 39.2 | 100% | 0.050 | 68%  | <a href="#">XP_010999134.1</a> |
| <a href="#">PREDICTED: LOW QUALITY PROTEIN: selenoprotein P [Camelus ferus]</a>             | 39.2 | 39.2 | 100% | 0.050 | 68%  | <a href="#">XP_006191986.1</a> |
| <a href="#">selenoprotein P precursor [Canis lupus familiaris]</a>                          | 39.2 | 39.2 | 100% | 0.050 | 68%  | <a href="#">NP_001108590.1</a> |
| <a href="#">PREDICTED: selenoprotein P-like [Ailuropoda melanoleuca]</a>                    | 38.8 | 38.8 | 100% | 0.061 | 68%  | <a href="#">XP_002921760.1</a> |
| <a href="#">PREDICTED: LOW QUALITY PROTEIN: selenoprotein P [Monodelphis domestica]</a>     | 38.8 | 38.8 | 94%  | 0.069 | 72%  | <a href="#">XP_003340675.2</a> |
| <a href="#">selenoprotein P precursor [Cricetulus griseus]</a>                              | 38.8 | 38.8 | 100% | 0.069 | 68%  | <a href="#">NP_001243807.1</a> |
| <a href="#">PREDICTED: LOW QUALITY PROTEIN: selenoprotein P [Ursus maritimus]</a>           | 38.8 | 38.8 | 100% | 0.069 | 68%  | <a href="#">XP_008690806.1</a> |
| <a href="#">PREDICTED: LOW QUALITY PROTEIN: selenoprotein P [Elephantulus edwardsi]</a>     | 38.4 | 38.4 | 84%  | 0.094 | 75%  | <a href="#">XP_006889619.1</a> |
| <a href="#">unnamed protein product [Mus musculus]</a>                                      | 38.0 | 38.0 | 94%  | 0.13  | 67%  | <a href="#">BAE39664.1</a>     |
| <a href="#">PREDICTED: LOW QUALITY PROTEIN: selenoprotein P [Vicugna pacos]</a>             | 38.0 | 38.0 | 100% | 0.13  | 68%  | <a href="#">XP_006207756.1</a> |
| <a href="#">selenoprotein P precursor [Rattus norvegicus]</a>                               | 37.5 | 37.5 | 94%  | 0.18  | 67%  | <a href="#">NP_062065.2</a>    |
| <a href="#">PREDICTED: LOW QUALITY PROTEIN: selenoprotein P [Bison bison bison]</a>         | 37.5 | 37.5 | 100% | 0.18  | 68%  | <a href="#">XP_010831114.1</a> |
| <a href="#">selenoprotein P [Bos taurus]</a>                                                | 37.5 | 37.5 | 100% | 0.18  | 68%  | <a href="#">BAA84781.1</a>     |
| <a href="#">PREDICTED: LOW QUALITY PROTEIN: selenoprotein P [Bos mutus]</a>                 | 37.5 | 37.5 | 100% | 0.18  | 68%  | <a href="#">XP_005894930.1</a> |

|                                                                                         |      |      |      |      |     |                                |
|-----------------------------------------------------------------------------------------|------|------|------|------|-----|--------------------------------|
| <a href="#">selenoprotein P precursor [Bos taurus]</a>                                  | 37.5 | 37.5 | 100% | 0.18 | 68% | <a href="#">NP_776884.2</a>    |
| <a href="#">selenoprotein P [Bubalus bubalis]</a>                                       | 37.5 | 37.5 | 100% | 0.18 | 68% | <a href="#">AFM77782.2</a>     |
| <a href="#">PREDICTED: LOW QUALITY PROTEIN: selenoprotein P [Orycteropus afer al</a>    | 36.3 | 36.3 | 89%  | 0.44 | 71% | <a href="#">XP_007952213.1</a> |
| <a href="#">PREDICTED: LOW QUALITY PROTEIN: selenoprotein P [Erinaceus europae</a>      | 36.3 | 36.3 | 84%  | 0.44 | 69% | <a href="#">XP_007517681.1</a> |
| <a href="#">unnamed protein product [Mus musculus]</a>                                  | 35.8 | 35.8 | 94%  | 0.61 | 67% | <a href="#">BAC55264.3</a>     |
| <a href="#">PREDICTED: LOW QUALITY PROTEIN: selenoprotein P [Dasypus novemcin</a>       | 35.0 | 35.0 | 89%  | 1.1  | 71% | <a href="#">XP_004448278.1</a> |
| <a href="#">PREDICTED: selenoprotein P [Sarcophilus harrisii]</a>                       | 34.6 | 34.6 | 84%  | 1.5  | 69% | <a href="#">XP_003759960.1</a> |
| <a href="#">PREDICTED: LOW QUALITY PROTEIN: selenoprotein P [Condylura cristata]</a>    | 34.6 | 34.6 | 89%  | 1.5  | 71% | <a href="#">XP_004678402.1</a> |
| <a href="#">selenoprotein P precursor [Oryctolagus cuniculus]</a>                       | 33.7 | 33.7 | 94%  | 2.9  | 67% | <a href="#">NP_001186775.1</a> |
| <a href="#">PREDICTED: LOW QUALITY PROTEIN: selenoprotein P [Ochotona princeps</a>      | 33.3 | 33.3 | 94%  | 3.9  | 67% | <a href="#">XP_004583736.1</a> |
| <a href="#">RNA-binding protein (NOP10, NOLA3) [uncultured marine thaumarchaeote K1</a> | 32.5 | 32.5 | 89%  | 5.1  | 65% | <a href="#">AIF05018.1</a>     |
| <a href="#">predicted protein [Phaeodactylum tricornutum CCAP 1055/1]</a>               | 32.0 | 32.0 | 57%  | 10   | 82% | <a href="#">XP_002178290.1</a> |
| <a href="#">hypothetical protein [Coraliomargarita akajimensis]</a>                     | 31.6 | 31.6 | 68%  | 12   | 71% | <a href="#">WP_013044828.1</a> |
| <a href="#">hypothetical protein [Sorangium cellulosum]</a>                             | 31.6 | 31.6 | 84%  | 13   | 61% | <a href="#">WP_012240780.1</a> |
| <a href="#">PREDICTED: LOW QUALITY PROTEIN: selenoprotein P [Echinops telfairi]</a>     | 31.6 | 31.6 | 89%  | 13   | 65% | <a href="#">XP_004716992.1</a> |
| <a href="#">selenoprotein P-like protein [Bos taurus]</a>                               | 31.2 | 31.2 | 100% | 17   | 63% | <a href="#">BAB39395.1</a>     |
| <a href="#">selenoprotein P-like protein [Bos taurus]</a>                               | 31.2 | 31.2 | 100% | 17   | 63% | <a href="#">BAB39394.1</a>     |
| <a href="#">selenoprotein P-like protein [Bos taurus]</a>                               | 31.2 | 31.2 | 100% | 17   | 63% | <a href="#">BAB39393.1</a>     |
| <a href="#">selenoprotein P-like protein [Bos taurus]</a>                               | 31.2 | 31.2 | 100% | 17   | 63% | <a href="#">BAB39392.1</a>     |
| <a href="#">selenoprotein P-like protein [Bos taurus]</a>                               | 31.2 | 31.2 | 100% | 18   | 63% | <a href="#">2117379A</a>       |
| <a href="#">selenoprotein P like protein [Bos taurus]</a>                               | 31.2 | 31.2 | 100% | 18   | 63% | <a href="#">BAA04949.2</a>     |
| <a href="#">radical SAM protein [Blautia producta]</a>                                  | 31.2 | 31.2 | 84%  | 19   | 58% | <a href="#">WP_018593457.1</a> |
| <a href="#">dihydroxy-acid dehydratase [Campylobacter sp. FOBR14]</a>                   | 31.2 | 31.2 | 63%  | 19   | 73% | <a href="#">WP_009649466.1</a> |
| <a href="#">rhUL97 [Macacine herpesvirus 3]</a>                                         | 31.2 | 31.2 | 47%  | 19   | 89% | <a href="#">AAZ80638.1</a>     |
| <a href="#">tegument protein UL97 [Cynomolgus macaque cytomegalovirus strain Ottawa</a> | 31.2 | 31.2 | 47%  | 19   | 89% | <a href="#">YP_004933873.1</a> |

## Alignments

Download [GenPept](#) [Graphics](#)

[Next](#) [Previous](#) [Descriptions](#)

PREDICTED: LOW QUALITY PROTEIN: selenoprotein P [Pan paniscus]

Sequence ID: [ref|XP\\_008961588.1|](#) Length: 381 Number of Matches: 1

Range 1: 171 to 189 [GenPept](#) [Graphics](#)

[Next Match](#) [Previous Match](#)

| Score          | Expect | Identities | Positives   | Gaps     |
|----------------|--------|------------|-------------|----------|
| 63.0 bits(141) | 6e-10  | 18/19(95%) | 19/19(100%) | 0/19(0%) |

Query 1 KCGDCSLTTLKDEDFCKRV 19  
 KCG+CSLTLKDEDFCKRV  
 Sbjct 171 KCGNCSLTLKDEDFCKRV 189

### Related Information

[Gene](#) - associated gene details  
[Map Viewer](#) - aligned genomic context

Download [GenPept](#) [Graphics](#)

[Next](#) [Previous](#) [Descriptions](#)

Selenoprotein P, plasma, 1 [Homo sapiens]

Sequence ID: [gb|AAH46152.1|](#) Length: 381 Number of Matches: 1

Range 1: 171 to 189 [GenPept](#) [Graphics](#)

[Next Match](#) [Previous Match](#)

| Score          | Expect | Identities | Positives   | Gaps     |
|----------------|--------|------------|-------------|----------|
| 63.0 bits(141) | 6e-10  | 18/19(95%) | 19/19(100%) | 0/19(0%) |

Query 1 KCGDCSLTTLKDEDFCKRV 19  
 KCG+CSLTLKDEDFCKRV  
 Sbjct 171 KCGNCSLTLKDEDFCKRV 189

### Related Information

[Gene](#) - associated gene details

Download [GenPept](#) [Graphics](#)

Next Previous Descriptions

selenoprotein P isoform 1 precursor [Homo sapiens]

Sequence ID: [ref|NP\\_005401.3|](#) Length: 381 Number of Matches: 1

See 4 more title(s)

Range 1: 171 to 189 [GenPept](#) [Graphics](#)

Next Match Previous Match

| Score          | Expect | Identities | Positives   | Gaps     |
|----------------|--------|------------|-------------|----------|
| 63.0 bits(141) | 6e-10  | 18/19(95%) | 19/19(100%) | 0/19(0%) |

Query 1 KCGDCSLTTLKDEDFCKRV 19  
 KCG+CSLTTLKDEDFCKRV  
 Sbjct 171 KCGNCSLTTLKDEDFCKRV 189

**Related Information**

- [Gene](#) - associated gene details
- [UniGene](#) - clustered expressed sequence tags
- [Map Viewer](#) - aligned genomic context
- [Identical Proteins](#) - Proteins identical to the subject

Download [GenPept](#) [Graphics](#)

Next Previous Descriptions

Selenoprotein P, plasma, 1 [Homo sapiens]

Sequence ID: [gb|AAH58919.1|](#) Length: 381 Number of Matches: 1

Range 1: 171 to 189 [GenPept](#) [Graphics](#)

Next Match Previous Match

| Score          | Expect | Identities | Positives   | Gaps     |
|----------------|--------|------------|-------------|----------|
| 63.0 bits(141) | 6e-10  | 18/19(95%) | 19/19(100%) | 0/19(0%) |

Query 1 KCGDCSLTTLKDEDFCKRV 19  
 KCG+CSLTTLKDEDFCKRV  
 Sbjct 171 KCGNCSLTTLKDEDFCKRV 189

**Related Information**

- [Gene](#) - associated gene details

Download [GenPept](#) [Graphics](#)

Next Previous Descriptions

selenoprotein P [Homo sapiens]

Sequence ID: [emb|CAA77836.2|](#) Length: 381 Number of Matches: 1

Range 1: 171 to 189 [GenPept](#) [Graphics](#)

Next Match Previous Match

| Score          | Expect | Identities | Positives   | Gaps     |
|----------------|--------|------------|-------------|----------|
| 63.0 bits(141) | 6e-10  | 18/19(95%) | 19/19(100%) | 0/19(0%) |

Query 1 KCGDCSLTTLKDEDFCKRV 19  
 KCG+CSLTTLKDEDFCKRV  
 Sbjct 171 KCGNCSLTTLKDEDFCKRV 189

**Related Information**

- [Gene](#) - associated gene details

BLAST is a registered trademark of the National Library of Medicine.

NCBI/ BLAST/ blastp suite/ Formatting Results - BE84P2KH015

**ⓘ** Your search parameters were adjusted to search for a short input sequence.

[Edit and Resubmit](#) [Save Search Strategies](#) [▶ Formatting options](#) [▶ Download](#)

[YouTube](#) [How to read this page](#) [Blast report description](#)

### SEPP1\_KCGNCSLTTLKDEDFCKR\_NonMod

|                      |                                                         |                      |                                                                                                                |
|----------------------|---------------------------------------------------------|----------------------|----------------------------------------------------------------------------------------------------------------|
| <b>RID</b>           | <a href="#">BE84P2KH015</a> (Expires on 01-16 09:06 am) | <b>Database Name</b> | nr                                                                                                             |
| <b>Query ID</b>      | lcl 18695                                               | <b>Description</b>   | All non-redundant GenBank CDS translations+PDB+SwissProt+PIR excluding environmental samples from WGS projects |
| <b>Description</b>   | None                                                    | <b>Program</b>       | BLASTP 2.2.30+ <a href="#">▶ Citation</a>                                                                      |
| <b>Molecule type</b> | amino acid                                              |                      |                                                                                                                |
| <b>Query Length</b>  | 18                                                      |                      |                                                                                                                |

Other reports: [▶ Search Summary](#) [\[Taxonomy reports\]](#) [\[Distance tree of results\]](#) [\[Multiple alignment\]](#)

[New](#) DELTA-BLAST a more sensitive protein-protein search

### Graphic Summary

Show Conserved Domains

Putative conserved domains have been detected, click on the image below for detailed results.

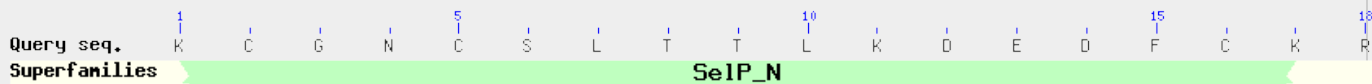

Distribution of 100 Blast Hits on the Query Sequence

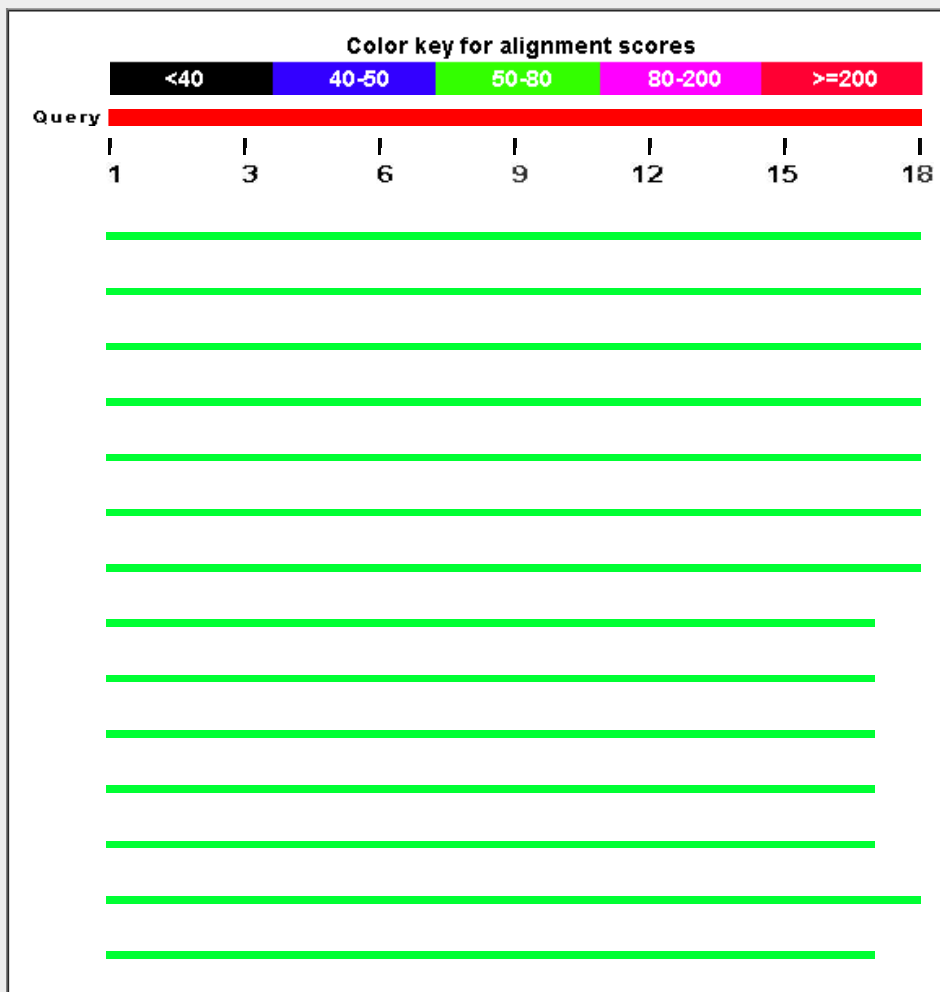

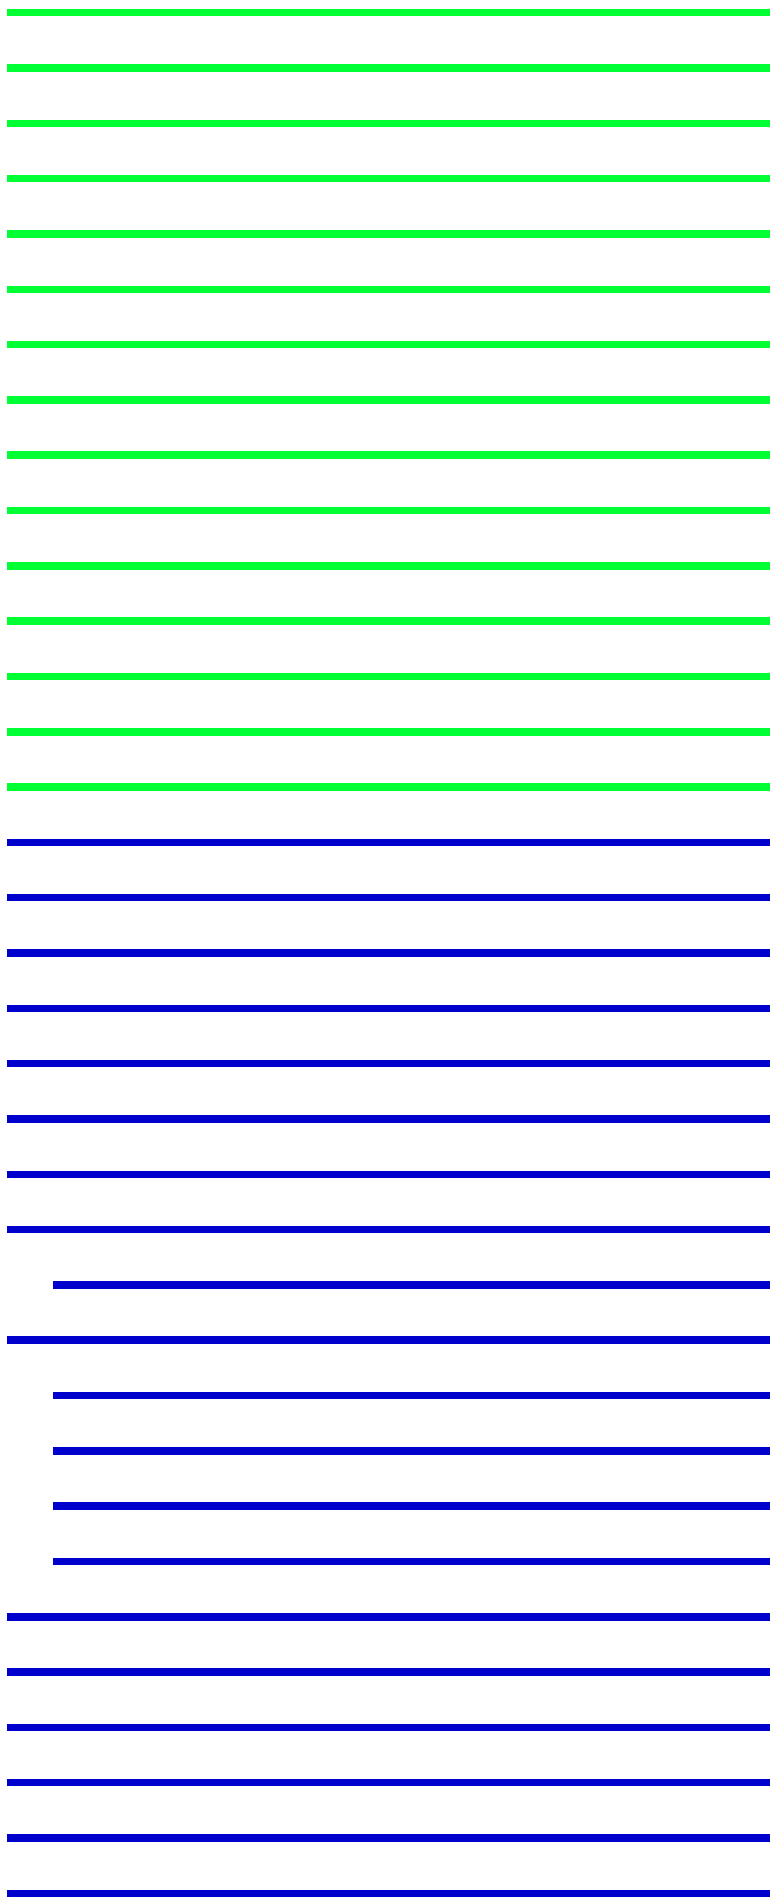

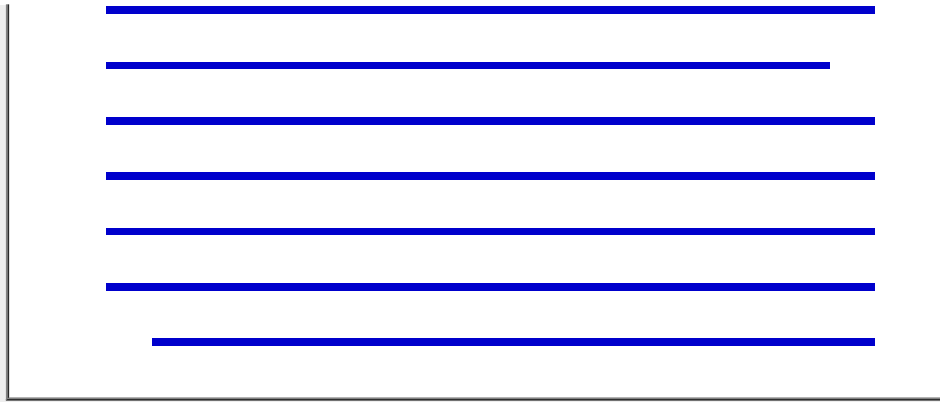

**Descriptions**

**Sequences producing significant alignments:**

Select: [All](#) [None](#) Selected:0

Alignments [Download](#) [GenPept](#) [Graphics](#) [Distance tree of results](#) [Multiple alignment](#)

| Description                                                                 | Max score | Total score | Query cover | E value | Ident | Accession                                   |
|-----------------------------------------------------------------------------|-----------|-------------|-------------|---------|-------|---------------------------------------------|
| <a href="#">PREDICTED: LOW QUALITY PROTEIN: selenoprotein P [Pan pan]</a>   | 62.6      | 62.6        | 100%        | 7e-10   | 100%  | <a href="#">gi 675710689 XP_008961588.1</a> |
| <a href="#">Selenoprotein P, plasma, 1 [Homo sapiens]</a>                   | 62.6      | 62.6        | 100%        | 7e-10   | 100%  | <a href="#">gi 34783648 AAH46152.1</a>      |
| <a href="#">selenoprotein P isoform 1 precursor [Homo sapiens]</a>          | 62.6      | 62.6        | 100%        | 7e-10   | 100%  | <a href="#">gi 62530391 NP_005401.3</a>     |
| <a href="#">Selenoprotein P, plasma, 1 [Homo sapiens]</a>                   | 62.6      | 62.6        | 100%        | 7e-10   | 100%  | <a href="#">gi 37596694 AAH58919.1</a>      |
| <a href="#">selenoprotein P [Homo sapiens]</a>                              | 62.6      | 62.6        | 100%        | 7e-10   | 100%  | <a href="#">gi 312004116 CAA77836.2</a>     |
| <a href="#">selenoprotein P precursor [Pan troglodytes]</a>                 | 62.6      | 62.6        | 100%        | 7e-10   | 100%  | <a href="#">gi 169403955 NP_001108587.1</a> |
| <a href="#">selenoprotein P isoform 2 [Homo sapiens]</a>                    | 62.6      | 62.6        | 100%        | 7e-10   | 100%  | <a href="#">gi 148277022 NP_001087195.1</a> |
| <a href="#">PREDICTED: LOW QUALITY PROTEIN: selenoprotein P [Saimiri b]</a> | 59.2      | 59.2        | 94%         | 1e-08   | 100%  | <a href="#">gi 725563213 XP_003925940.2</a> |
| <a href="#">PREDICTED: LOW QUALITY PROTEIN: selenoprotein P [Rhinopit]</a>  | 59.2      | 59.2        | 94%         | 1e-08   | 100%  | <a href="#">gi 724878613 XP_010372696.1</a> |
| <a href="#">PREDICTED: LOW QUALITY PROTEIN: selenoprotein P [Papio ar]</a>  | 59.2      | 59.2        | 94%         | 1e-08   | 100%  | <a href="#">gi 685545348 XP_009206607.1</a> |
| <a href="#">PREDICTED: LOW QUALITY PROTEIN: selenoprotein P [Chloroc</a>    | 59.2      | 59.2        | 94%         | 1e-08   | 100%  | <a href="#">gi 635028004 XP_007959679.1</a> |
| <a href="#">selenoprotein P precursor [Macaca mulatta]</a>                  | 59.2      | 59.2        | 94%         | 1e-08   | 100%  | <a href="#">gi 226958322 NP_001152962.1</a> |
| <a href="#">Selenoprotein P, plasma, 1 [Homo sapiens]</a>                   | 57.9      | 57.9        | 100%        | 3e-08   | 94%   | <a href="#">gi 34783164 AAH15875.1</a>      |
| <a href="#">selenoprotein P precursor [Sus scrofa]</a>                      | 54.9      | 54.9        | 94%         | 3e-07   | 94%   | <a href="#">gi 198282079 NP_001128295.1</a> |
| <a href="#">PREDICTED: LOW QUALITY PROTEIN: selenoprotein P [Myotis d</a>   | 54.5      | 54.5        | 94%         | 4e-07   | 94%   | <a href="#">gi 584060316 XP_006774623.1</a> |
| <a href="#">PREDICTED: LOW QUALITY PROTEIN: selenoprotein P [Myotis l]</a>  | 54.5      | 54.5        | 94%         | 4e-07   | 94%   | <a href="#">gi 558205011 XP_006106371.1</a> |
| <a href="#">PREDICTED: LOW QUALITY PROTEIN: selenoprotein P [Eptesicu</a>   | 54.5      | 54.5        | 94%         | 4e-07   | 94%   | <a href="#">gi 641727491 XP_008153843.1</a> |
| <a href="#">PREDICTED: LOW QUALITY PROTEIN: selenoprotein P [Trichech</a>   | 54.5      | 54.5        | 94%         | 4e-07   | 94%   | <a href="#">gi 471413922 XP_004388500.1</a> |
| <a href="#">PREDICTED: LOW QUALITY PROTEIN: selenoprotein P [Myotis b</a>   | 54.5      | 54.5        | 94%         | 4e-07   | 94%   | <a href="#">gi 554563465 XP_005876061.1</a> |
| <a href="#">PREDICTED: LOW QUALITY PROTEIN: selenoprotein P [Tupaia c</a>   | 54.1      | 54.1        | 94%         | 6e-07   | 94%   | <a href="#">gi 562878609 XP_006167023.1</a> |
| <a href="#">selenoprotein P precursor [Pongo abelii]</a>                    | 54.1      | 54.1        | 94%         | 6e-07   | 94%   | <a href="#">gi 197101233 NP_001127462.1</a> |
| <a href="#">PREDICTED: selenoprotein P [Otolemur garnettii]</a>             | 53.7      | 53.7        | 94%         | 7e-07   | 94%   | <a href="#">gi 395840394 XP_003793045.1</a> |
| <a href="#">PREDICTED: LOW QUALITY PROTEIN: selenoprotein P [Nomasc</a>     | 53.2      | 53.2        | 94%         | 1e-06   | 94%   | <a href="#">gi 332250603 XP_003274442.1</a> |
| <a href="#">selenoprotein P precursor [Callithrix jacchus]</a>              | 52.4      | 52.4        | 94%         | 2e-06   | 88%   | <a href="#">gi 315630400 NP_001186857.1</a> |
| <a href="#">PREDICTED: LOW QUALITY PROTEIN: selenoprotein P [Tarsius s</a>  | 52.0      | 52.0        | 94%         | 3e-06   | 88%   | <a href="#">gi 640790108 XP_008050904.1</a> |
| <a href="#">PREDICTED: LOW QUALITY PROTEIN: selenoprotein P [Sorex ar</a>   | 51.5      | 51.5        | 94%         | 4e-06   | 88%   | <a href="#">gi 505790024 XP_004605590.1</a> |
| <a href="#">PREDICTED: LOW QUALITY PROTEIN: selenoprotein P [Peromys</a>    | 51.5      | 51.5        | 94%         | 4e-06   | 88%   | <a href="#">gi 589969345 XP_006997157.1</a> |
| <a href="#">PREDICTED: LOW QUALITY PROTEIN: selenoprotein P [Ceratoth</a>   | 50.7      | 50.7        | 94%         | 8e-06   | 88%   | <a href="#">gi 478496995 XP_004422836.1</a> |

|                                                                            |      |      |     |       |     |                                             |
|----------------------------------------------------------------------------|------|------|-----|-------|-----|---------------------------------------------|
| <a href="#">PREDICTED: LOW QUALITY PROTEIN: selenoprotein P [Chinchill</a> | 50.3 | 50.3 | 94% | 1e-05 | 88% | <a href="#">gij533143496 XP_005386312.1</a> |
| <a href="#">PREDICTED: LOW QUALITY PROTEIN: selenoprotein P [Equus p</a>   | 49.8 | 49.8 | 94% | 1e-05 | 88% | <a href="#">gij664731166 XP_008522793.1</a> |
| <a href="#">selenoprotein P precursor [Equus caballus]</a>                 | 49.8 | 49.8 | 94% | 1e-05 | 88% | <a href="#">gij208022673 NP_001129077.1</a> |
| <a href="#">Selenoprotein P [Heterocephalus glaber]</a>                    | 49.0 | 49.0 | 94% | 3e-05 | 88% | <a href="#">gij351695949 EHA98867.1</a>     |
| <a href="#">PREDICTED: LOW QUALITY PROTEIN: selenoprotein P [Fukomys</a>   | 49.0 | 49.0 | 94% | 3e-05 | 88% | <a href="#">gij731237262 XP_010632183.1</a> |
| <a href="#">PREDICTED: LOW QUALITY PROTEIN: selenoprotein P [Microtus</a>  | 49.0 | 49.0 | 94% | 3e-05 | 82% | <a href="#">gij532054271 XP_005369861.1</a> |
| <a href="#">PREDICTED: LOW QUALITY PROTEIN: selenoprotein P [Heteroc</a>   | 49.0 | 49.0 | 94% | 3e-05 | 88% | <a href="#">gij512973043 XP_004848622.1</a> |
| <a href="#">PREDICTED: LOW QUALITY PROTEIN: selenoprotein P [Heteroc</a>   | 49.0 | 49.0 | 94% | 3e-05 | 88% | <a href="#">gij512816050 XP_004878213.1</a> |
| <a href="#">selenoprotein P precursor [Cricetulus griseus]</a>             | 47.3 | 47.3 | 94% | 1e-04 | 82% | <a href="#">gij537231220 ERE84145.1</a>     |
| <a href="#">selenoprotein P. plasma. 1. isoform CRA_a [Mus musculus]</a>   | 46.0 | 46.0 | 88% | 2e-04 | 81% | <a href="#">gij148671458 EDL03405.1</a>     |
| <a href="#">PREDICTED: LOW QUALITY PROTEIN: selenoprotein P [Octodon</a>   | 46.0 | 46.0 | 94% | 3e-04 | 82% | <a href="#">gij507690845 XP_004641866.1</a> |
| <a href="#">Selenoprotein P. plasma. 1 [Mus musculus]</a>                  | 46.0 | 46.0 | 88% | 3e-04 | 81% | <a href="#">gij34809553 AAH01991.2</a>      |
| <a href="#">plasma selenoprotein P [Mus musculus]</a>                      | 46.0 | 46.0 | 88% | 3e-04 | 81% | <a href="#">gij4103142 AAD01684.1</a>       |
| <a href="#">unnamed protein product [Mus musculus]</a>                     | 46.0 | 46.0 | 88% | 3e-04 | 81% | <a href="#">gij74192879 BAE34948.1</a>      |
| <a href="#">selenoprotein P precursor [Mus musculus]</a>                   | 46.0 | 46.0 | 88% | 3e-04 | 81% | <a href="#">gij74271806 NP_033181.3</a>     |
| <a href="#">PREDICTED: LOW QUALITY PROTEIN: selenoprotein P [Balaeno</a>   | 45.6 | 45.6 | 94% | 4e-04 | 82% | <a href="#">gij594696840 XP_007195596.1</a> |
| <a href="#">PREDICTED: LOW QUALITY PROTEIN: selenoprotein P [Lipotes \</a> | 45.6 | 45.6 | 94% | 4e-04 | 82% | <a href="#">gij602724444 XP_007447694.1</a> |
| <a href="#">PREDICTED: LOW QUALITY PROTEIN: selenoprotein P [Physeter</a>  | 45.6 | 45.6 | 94% | 4e-04 | 82% | <a href="#">gij593761497 XP_007119423.1</a> |
| <a href="#">PREDICTED: LOW QUALITY PROTEIN: selenoprotein P [Bubalus</a>   | 45.6 | 45.6 | 94% | 4e-04 | 82% | <a href="#">gij594087306 XP_006067130.1</a> |
| <a href="#">membrane selenoprotein P [Capra hircus]</a>                    | 45.2 | 45.2 | 94% | 5e-04 | 82% | <a href="#">gij7677620 AAF67201.1</a>       |
| <a href="#">selenoprotein P. plasma. 1 precursor [Capra hircus]</a>        | 45.2 | 45.2 | 94% | 5e-04 | 82% | <a href="#">gij550822255 NP_001272511.1</a> |
| <a href="#">PREDICTED: LOW QUALITY PROTEIN: selenoprotein P [Ovis arie</a> | 45.2 | 45.2 | 94% | 5e-04 | 82% | <a href="#">gij426246564 XP_004017062.1</a> |
| <a href="#">PREDICTED: LOW QUALITY PROTEIN: selenoprotein P [Nannosp</a>   | 44.8 | 44.8 | 88% | 7e-04 | 88% | <a href="#">gij674066756 XP_008840327.1</a> |
| <a href="#">PREDICTED: LOW QUALITY PROTEIN: selenoprotein P [Galeopt</a>   | 44.3 | 44.3 | 94% | 0.001 | 82% | <a href="#">gij667253652 XP_008564915.1</a> |
| <a href="#">selenoprotein P precursor [Cavia porcellus]</a>                | 43.9 | 43.9 | 94% | 0.001 | 76% | <a href="#">gij384367995 NP_001244936.1</a> |
| <a href="#">PREDICTED: LOW QUALITY PROTEIN: selenoprotein P [Loxodon</a>   | 43.9 | 43.9 | 94% | 0.001 | 82% | <a href="#">gij731464182 XP_010586424.1</a> |
| <a href="#">PREDICTED: LOW QUALITY PROTEIN: selenoprotein P [Panther</a>   | 43.9 | 43.9 | 94% | 0.001 | 82% | <a href="#">gij591339998 XP_007095490.1</a> |
| <a href="#">PREDICTED: LOW QUALITY PROTEIN: selenoprotein P [Odobon</a>    | 43.5 | 43.5 | 88% | 0.002 | 81% | <a href="#">gij472379594 XP_004409206.1</a> |
| <a href="#">PREDICTED: LOW QUALITY PROTEIN: selenoprotein P [Jaculus ]</a> | 42.2 | 42.2 | 94% | 0.005 | 82% | <a href="#">gij507537041 XP_004652550.1</a> |
| <a href="#">PREDICTED: LOW QUALITY PROTEIN: selenoprotein P [Orcinus ]</a> | 42.2 | 42.2 | 94% | 0.005 | 82% | <a href="#">gij465986750 XP_004266005.1</a> |
| <a href="#">PREDICTED: LOW QUALITY PROTEIN: selenoprotein P [Tursiops</a>  | 42.2 | 42.2 | 94% | 0.005 | 82% | <a href="#">gij470626535 XP_004320390.1</a> |
| <a href="#">PREDICTED: LOW QUALITY PROTEIN: selenoprotein P [Mustela</a>   | 41.8 | 41.8 | 88% | 0.007 | 81% | <a href="#">gij511826454 XP_004738001.1</a> |
| <a href="#">PREDICTED: LOW QUALITY PROTEIN: selenoprotein P [Monodel</a>   | 40.9 | 40.9 | 88% | 0.013 | 81% | <a href="#">gij612006645 XP_003340675.2</a> |
| <a href="#">PREDICTED: LOW QUALITY PROTEIN: selenoprotein P [Elephan</a>   | 40.9 | 40.9 | 88% | 0.013 | 81% | <a href="#">gij585672710 XP_006889619.1</a> |
| <a href="#">selenoprotein P precursor [Cricetulus griseus]</a>             | 40.9 | 40.9 | 94% | 0.013 | 76% | <a href="#">gij379056379 NP_001243807.1</a> |
| <a href="#">selenoprotein P precursor [Canis lupus familiaris]</a>         | 40.5 | 40.5 | 94% | 0.018 | 76% | <a href="#">gij169403968 NP_001108590.1</a> |
| <a href="#">PREDICTED: selenoprotein P-like [Ailuropoda melanoleuca]</a>   | 40.1 | 40.1 | 94% | 0.022 | 76% | <a href="#">gij301772662 XP_002921760.1</a> |
| <a href="#">unnamed protein product [Mus musculus]</a>                     | 40.1 | 40.1 | 88% | 0.025 | 75% | <a href="#">gij74198358 BAE39664.1</a>      |
| <a href="#">PREDICTED: LOW QUALITY PROTEIN: selenoprotein P [Camelus</a>   | 40.1 | 40.1 | 94% | 0.025 | 76% | <a href="#">gij744538058 XP_010999134.1</a> |
| <a href="#">PREDICTED: LOW QUALITY PROTEIN: selenoprotein P [Camelus</a>   | 40.1 | 40.1 | 94% | 0.025 | 76% | <a href="#">gij560931717 XP_006191986.1</a> |
| <a href="#">PREDICTED: LOW QUALITY PROTEIN: selenoprotein P [Vicugna</a>   | 40.1 | 40.1 | 94% | 0.025 | 76% | <a href="#">gij560970802 XP_006207756.1</a> |
| <a href="#">PREDICTED: LOW QUALITY PROTEIN: selenoprotein P [Ursus m</a>   | 40.1 | 40.1 | 94% | 0.025 | 76% | <a href="#">gij670999853 XP_008690806.1</a> |
| <a href="#">selenoprotein P precursor [Rattus norvegicus]</a>              | 39.7 | 39.7 | 88% | 0.034 | 75% | <a href="#">gij15011857 NP_062065.2</a>     |
| <a href="#">PREDICTED: LOW QUALITY PROTEIN: selenoprotein P [Bison bis</a> | 39.7 | 39.7 | 94% | 0.034 | 76% | <a href="#">gij742088280 XP_010831114.1</a> |
| <a href="#">selenoprotein P [Bos taurus]</a>                               | 39.7 | 39.7 | 94% | 0.034 | 76% | <a href="#">gij6006351 BAA84781.1</a>       |
| <a href="#">PREDICTED: LOW QUALITY PROTEIN: selenoprotein P [Bos mut</a>   | 39.7 | 39.7 | 94% | 0.034 | 76% | <a href="#">gij555965745 XP_005894930.1</a> |



|                                                                                  |      |      |     |       |      |                                             |
|----------------------------------------------------------------------------------|------|------|-----|-------|------|---------------------------------------------|
| <a href="#">selenoprotein P precursor [Bos taurus]</a>                           | 39.7 | 39.7 | 94% | 0.034 | 76%  | <a href="#">gij156631001 NP_776884.2</a>    |
| <a href="#">selenoprotein P [Bubalus bubalis]</a>                                | 39.7 | 39.7 | 94% | 0.034 | 76%  | <a href="#">gij430001945 AFM77782.2</a>     |
| <a href="#">PREDICTED: LOW QUALITY PROTEIN: selenoprotein P [Oryctero]</a>       | 38.8 | 38.8 | 94% | 0.063 | 76%  | <a href="#">gij634885032 XP_007952213.1</a> |
| <a href="#">PREDICTED: LOW QUALITY PROTEIN: selenoprotein P [Erinaceu]</a>       | 38.8 | 38.8 | 88% | 0.063 | 75%  | <a href="#">gij617575753 XP_007517681.1</a> |
| <a href="#">unnamed protein product [Mus musculus]</a>                           | 38.0 | 38.0 | 88% | 0.12  | 75%  | <a href="#">gij74213751 BAC55264.3</a>      |
| <a href="#">PREDICTED: LOW QUALITY PROTEIN: selenoprotein P [Dasypus]</a>        | 37.5 | 37.5 | 94% | 0.16  | 76%  | <a href="#">gij488512454 XP_004448278.1</a> |
| <a href="#">PREDICTED: selenoprotein P [Sarcophilus harrisii]</a>                | 37.1 | 37.1 | 88% | 0.21  | 75%  | <a href="#">gij395511426 XP_003759960.1</a> |
| <a href="#">PREDICTED: LOW QUALITY PROTEIN: selenoprotein P [Gorilla g]</a>      | 36.7 | 36.7 | 55% | 0.29  | 100% | <a href="#">gij426384833 XP_004065356.1</a> |
| <a href="#">PREDICTED: LOW QUALITY PROTEIN: selenoprotein P [Condylu]</a>        | 36.3 | 36.3 | 94% | 0.42  | 71%  | <a href="#">gij507934338 XP_004678402.1</a> |
| <a href="#">selenoprotein P precursor [Oryctolagus cuniculus]</a>                | 35.8 | 35.8 | 88% | 0.57  | 75%  | <a href="#">gij315434200 NP_001186775.1</a> |
| <a href="#">PREDICTED: LOW QUALITY PROTEIN: selenoprotein P [Ochoton]</a>        | 35.4 | 35.4 | 88% | 0.77  | 75%  | <a href="#">gij504142600 XP_004583736.1</a> |
| <a href="#">PREDICTED: LOW QUALITY PROTEIN: selenoprotein P [Echinop]</a>        | 34.1 | 34.1 | 94% | 2.0   | 71%  | <a href="#">gij507708621 XP_004716992.1</a> |
| <a href="#">putative ATP-dependent RNA helicase DDX60-like protein [Cricetu]</a> | 33.7 | 33.7 | 83% | 2.8   | 81%  | <a href="#">gij537270315 ERE91786.1</a>     |
| <a href="#">PREDICTED: probable ATP-dependent RNA helicase DDX60 [Crici]</a>     | 33.7 | 33.7 | 83% | 2.8   | 81%  | <a href="#">gij625189695 XP_003498842.2</a> |
| <a href="#">selenoprotein P-like protein [Bos taurus]</a>                        | 33.3 | 33.3 | 94% | 3.2   | 71%  | <a href="#">gij13366148 BAB39395.1</a>      |
| <a href="#">selenoprotein P-like protein [Bos taurus]</a>                        | 33.3 | 33.3 | 94% | 3.2   | 71%  | <a href="#">gij13366146 BAB39394.1</a>      |
| <a href="#">selenoprotein P-like protein [Bos taurus]</a>                        | 33.3 | 33.3 | 94% | 3.3   | 71%  | <a href="#">gij13366144 BAB39393.1</a>      |
| <a href="#">selenoprotein P-like protein [Bos taurus]</a>                        | 33.3 | 33.3 | 94% | 3.3   | 71%  | <a href="#">gij13366142 BAB39392.1</a>      |
| <a href="#">selenoprotein P-like protein [Bos taurus]</a>                        | 33.3 | 33.3 | 94% | 3.6   | 71%  | <a href="#">gij1582026 2117379A</a>         |
| <a href="#">selenoprotein P like protein [Bos taurus]</a>                        | 33.3 | 33.3 | 94% | 3.6   | 71%  | <a href="#">gij14970947 BAA04949.2</a>      |
| <a href="#">PREDICTED: LOW QUALITY PROTEIN: selenoprotein P [Ictidomy]</a>       | 31.2 | 31.2 | 83% | 17    | 67%  | <a href="#">gij532079811 XP_005325668.1</a> |
| <a href="#">PREDICTED: LOW QUALITY PROTEIN: selenoprotein P [Leptonyc]</a>       | 31.2 | 31.2 | 94% | 17    | 65%  | <a href="#">gij585192742 XP_006747601.1</a> |
| <a href="#">dihydroxy-acid dehydratase [Campylobacter sp. FOBRC14]</a>           | 31.2 | 31.2 | 66% | 17    | 73%  | <a href="#">gij497335253 WP_009649466.1</a> |
| <a href="#">unnamed protein product [Mus musculus]</a>                           | 31.2 | 31.2 | 77% | 17    | 80%  | <a href="#">gij26331444 BAC29452.1</a>      |
| <a href="#">Ddx60 protein [Mus musculus]</a>                                     | 31.2 | 31.2 | 77% | 17    | 80%  | <a href="#">gij27696190 AAH43663.1</a>      |
| <a href="#">RNA-binding protein (NOP10, NOLA3) [uncultured marine thaumar]</a>   | 30.8 | 30.8 | 94% | 18    | 65%  | <a href="#">gij663514510 AIF05018.1</a>     |

## Alignments

Download [GenPept](#) [Graphics](#)

[Next](#) [Previous](#) [Descriptions](#)

PREDICTED: LOW QUALITY PROTEIN: selenoprotein P [Pan paniscus]

Sequence ID: [gij675710689|ref|XP\\_008961588.1](#) Length: 381 Number of Matches: 1

Range 1: 171 to 188 [GenPept](#) [Graphics](#)

[Next Match](#) [Previous Match](#)

| Score          | Expect | Identities  | Positives   | Gaps     |
|----------------|--------|-------------|-------------|----------|
| 62.6 bits(140) | 7e-10  | 18/18(100%) | 18/18(100%) | 0/18(0%) |

```

Query 1   KCGNCSLTTLKDEDFCKR 18
          KCGNCSLTTLKDEDFCKR
Sbjct 171 KCGNCSLTTLKDEDFCKR 188
    
```

### Related Information

[Gene](#) - associated gene details  
[Map Viewer](#) - aligned genomic context

Download [GenPept](#) [Graphics](#)

[Next](#) [Previous](#) [Descriptions](#)

Selenoprotein P, plasma, 1 [Homo sapiens]

Sequence ID: [gij34783648|gb|AAH46152.1](#) Length: 381 Number of Matches: 1

Range 1: 171 to 188 [GenPept](#) [Graphics](#)

[Next Match](#) [Previous Match](#)

| Score          | Expect | Identities  | Positives   | Gaps     |
|----------------|--------|-------------|-------------|----------|
| 62.6 bits(140) | 7e-10  | 18/18(100%) | 18/18(100%) | 0/18(0%) |

```

Query 1   KCGNCSLTTLKDEDFCKR 18
          KCGNCSLTTLKDEDFCKR
Sbjct 171 KCGNCSLTTLKDEDFCKR 188
    
```

### Related Information

[Gene](#) - associated gene details

Download [GenPept](#) [Graphics](#)

▼ Next ▲ Previous ▲ Descriptions

selenoprotein P isoform 1 precursor [Homo sapiens]

Sequence ID: [gi|62530391|ref|NP\\_005401.3|](#) Length: 381 Number of Matches: 1

▶ [See 4 more title\(s\)](#)

Range 1: 171 to 188 [GenPept](#) [Graphics](#)

▼ Next Match ▲ Previous Match

| Score          | Expect | Identities  | Positives   | Gaps     |
|----------------|--------|-------------|-------------|----------|
| 62.6 bits(140) | 7e-10  | 18/18(100%) | 18/18(100%) | 0/18(0%) |

Query 1 KCGNCSLTTLKDEDFCKR 18  
 KCGNCSLTTLKDEDFCKR  
 Sbjct 171 KCGNCSLTTLKDEDFCKR 188

**Related Information**

[Gene](#) - associated gene details  
[UniGene](#) - clustered expressed sequence tags  
[Map Viewer](#) - aligned genomic context  
[Identical Proteins](#) - Proteins identical to the subject

Download [GenPept](#) [Graphics](#)

▼ Next ▲ Previous ▲ Descriptions

Selenoprotein P, plasma, 1 [Homo sapiens]

Sequence ID: [gi|37596694|gb|AAH58919.1|](#) Length: 381 Number of Matches: 1

Range 1: 171 to 188 [GenPept](#) [Graphics](#)

▼ Next Match ▲ Previous Match

| Score          | Expect | Identities  | Positives   | Gaps     |
|----------------|--------|-------------|-------------|----------|
| 62.6 bits(140) | 7e-10  | 18/18(100%) | 18/18(100%) | 0/18(0%) |

Query 1 KCGNCSLTTLKDEDFCKR 18  
 KCGNCSLTTLKDEDFCKR  
 Sbjct 171 KCGNCSLTTLKDEDFCKR 188

**Related Information**

[Gene](#) - associated gene details

Download [GenPept](#) [Graphics](#)

▼ Next ▲ Previous ▲ Descriptions

selenoprotein P [Homo sapiens]

Sequence ID: [gi|312004116|emb|CAA77836.2|](#) Length: 381 Number of Matches: 1

Range 1: 171 to 188 [GenPept](#) [Graphics](#)

▼ Next Match ▲ Previous Match

| Score          | Expect | Identities  | Positives   | Gaps     |
|----------------|--------|-------------|-------------|----------|
| 62.6 bits(140) | 7e-10  | 18/18(100%) | 18/18(100%) | 0/18(0%) |

Query 1 KCGNCSLTTLKDEDFCKR 18  
 KCGNCSLTTLKDEDFCKR  
 Sbjct 171 KCGNCSLTTLKDEDFCKR 188

**Related Information**

[Gene](#) - associated gene details

BLAST is a registered trademark of the National Library of Medicine.

NCBI/ BLAST/ blastp suite/ Formatting Results - BE84ZGUS014

**Your search parameters were adjusted to search for a short input sequence.**

[Edit and Resubmit](#) [Save Search Strategies](#) [Formatting options](#) [Download](#)

[YouTube](#) [How to read this page](#) [Blast report description](#)

### SEPP1\_KCGNCSLTTLKDEDFCKRV\_NonMod

**RID** [BE84ZGUS014](#) (Expires on 01-16 09:06 am)

**Query ID** lcl|87215 **Database Name** nr

**Description** None **Description** All non-redundant GenBank CDS translations+PDB+SwissProt+PIR excluding environmental samples from WGS projects

**Molecule type** amino acid **Program** BLASTP 2.2.30+ [Citation](#)

**Query Length** 19

Other reports: [Search Summary](#) [\[Taxonomy reports\]](#) [\[Distance tree of results\]](#) [\[Multiple alignment\]](#)

[New](#) DELTA-BLAST a more sensitive protein-protein search

### Graphic Summary

Show Conserved Domains

Putative conserved domains have been detected, click on the image below for detailed results.

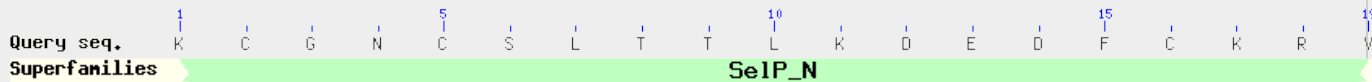

Distribution of 100 Blast Hits on the Query Sequence

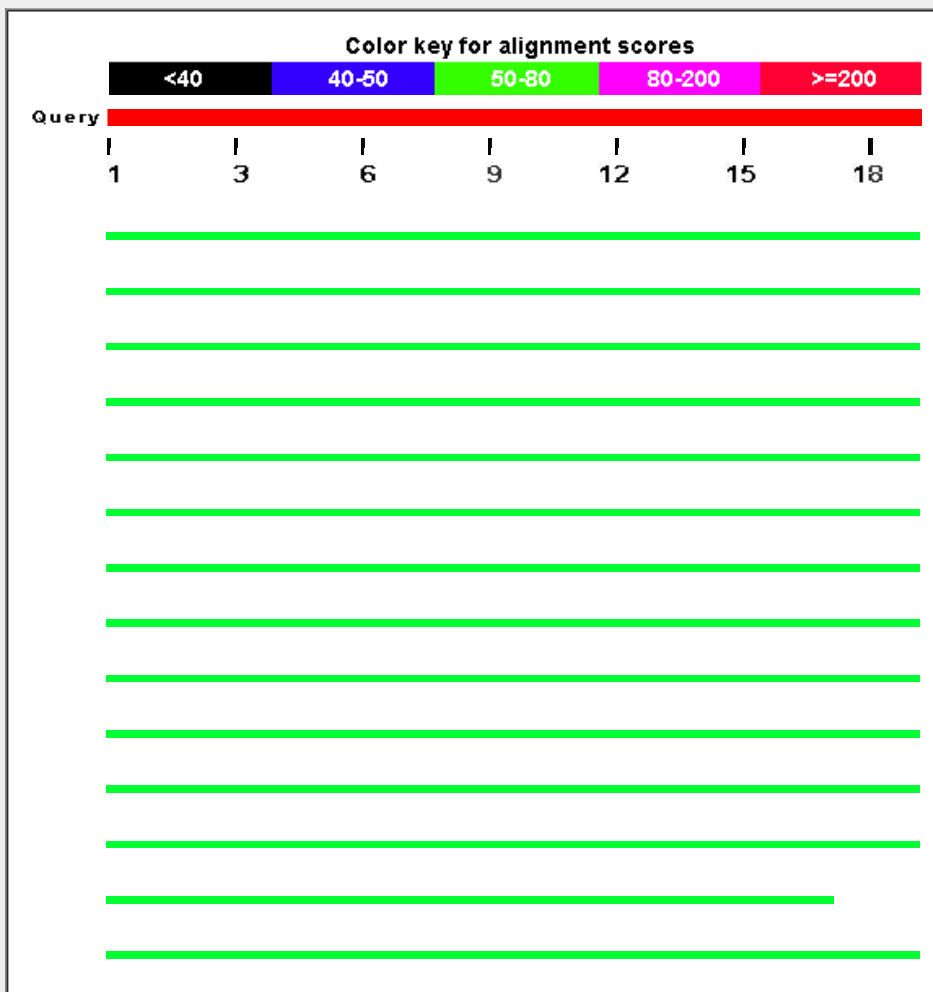

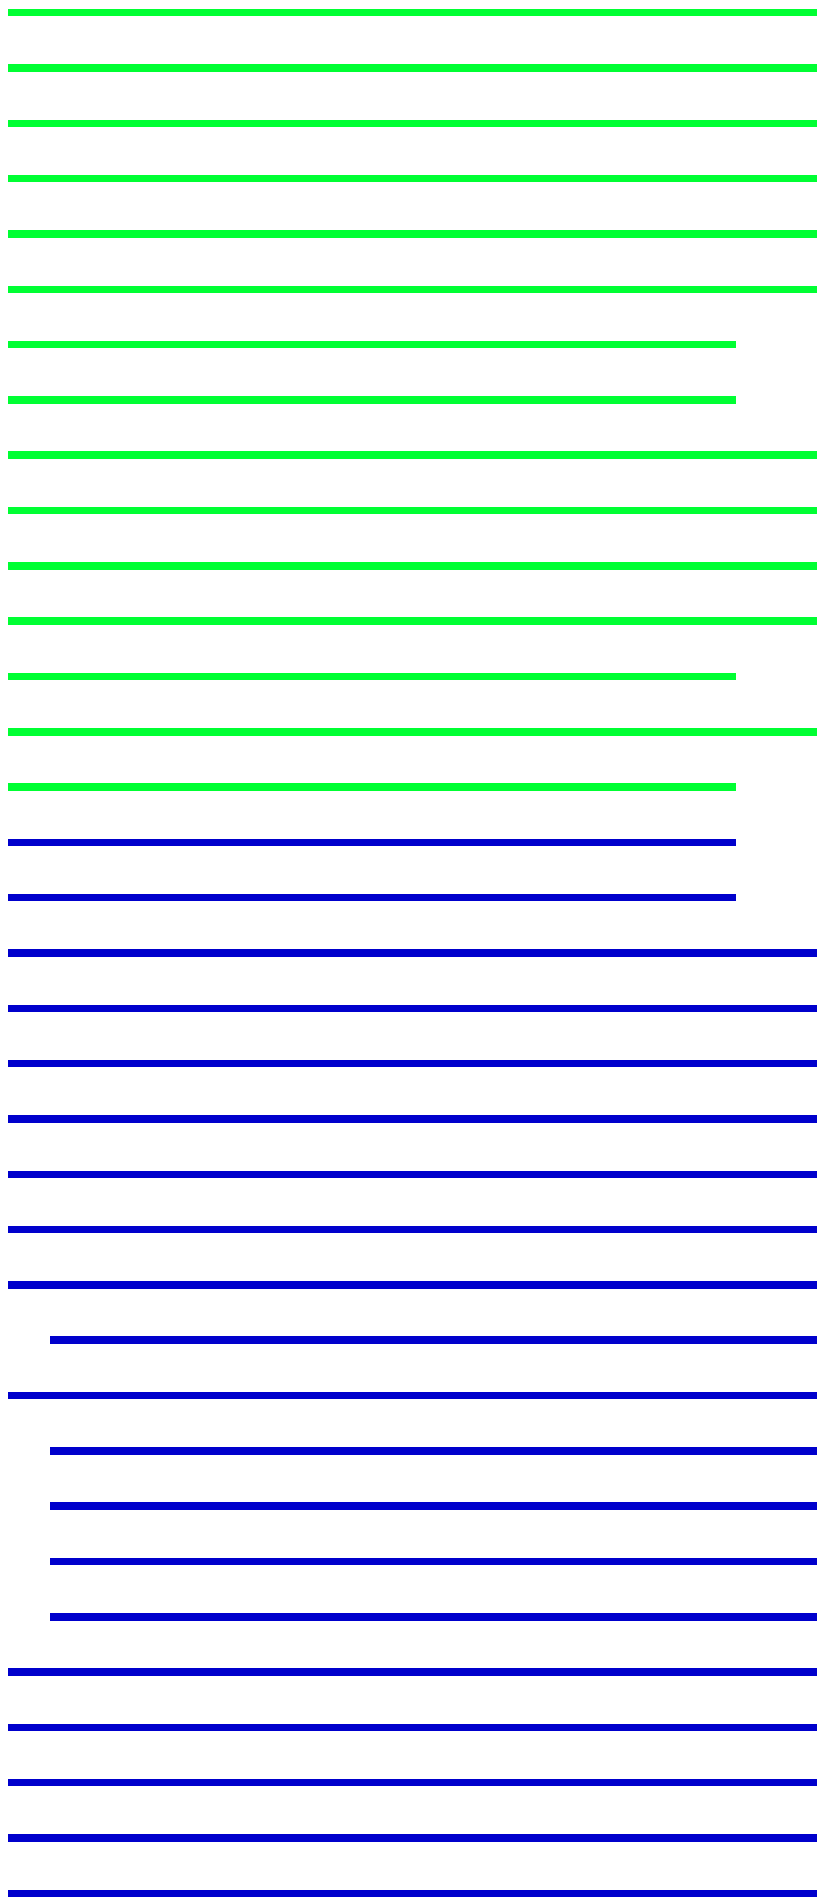

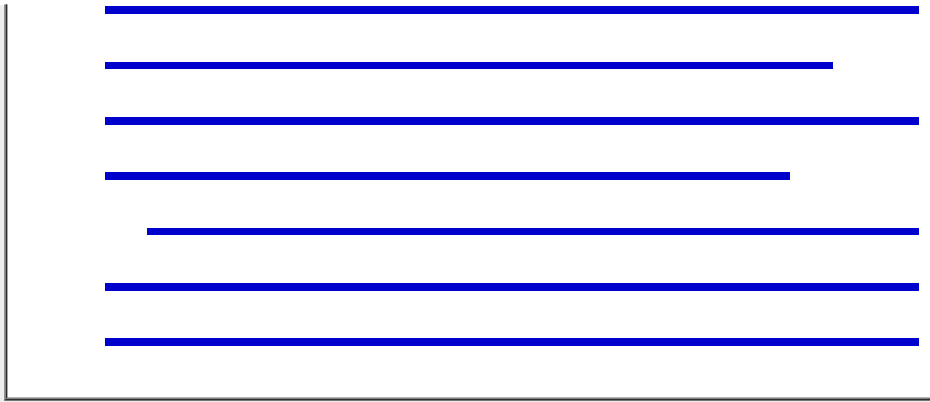

**Descriptions**

**Sequences producing significant alignments:**

Select: [All](#) [None](#) Selected:0

[Alignments](#)
[Download](#)
[GenPept](#)
[Graphics](#)
[Distance tree of results](#)
[Multiple alignment](#)

| Description                                                                | Max score | Total score | Query cover | E value | Ident | Accession                                   |
|----------------------------------------------------------------------------|-----------|-------------|-------------|---------|-------|---------------------------------------------|
| <a href="#">PREDICTED: LOW QUALITY PROTEIN: selenoprotein P [Pan pan]</a>  | 65.5      | 65.5        | 100%        | 8e-11   | 100%  | <a href="#">gi 675710689 XP_008961588.1</a> |
| <a href="#">Selenoprotein P, plasma, 1 [Homo sapiens]</a>                  | 65.5      | 65.5        | 100%        | 8e-11   | 100%  | <a href="#">gi 34783648 AAH46152.1</a>      |
| <a href="#">selenoprotein P isoform 1 precursor [Homo sapiens]</a>         | 65.5      | 65.5        | 100%        | 8e-11   | 100%  | <a href="#">gi 62530391 NP_005401.3</a>     |
| <a href="#">Selenoprotein P, plasma, 1 [Homo sapiens]</a>                  | 65.5      | 65.5        | 100%        | 8e-11   | 100%  | <a href="#">gi 37596694 AAH58919.1</a>      |
| <a href="#">selenoprotein P [Homo sapiens]</a>                             | 65.5      | 65.5        | 100%        | 8e-11   | 100%  | <a href="#">gi 312004116 CAA77836.2</a>     |
| <a href="#">selenoprotein P precursor [Pan troglodytes]</a>                | 65.5      | 65.5        | 100%        | 8e-11   | 100%  | <a href="#">gi 169403955 NP_001108587.1</a> |
| <a href="#">selenoprotein P isoform 2 [Homo sapiens]</a>                   | 65.5      | 65.5        | 100%        | 8e-11   | 100%  | <a href="#">gi 148277022 NP_001087195.1</a> |
| <a href="#">PREDICTED: LOW QUALITY PROTEIN: selenoprotein P [Papio ar]</a> | 60.9      | 60.9        | 100%        | 3e-09   | 95%   | <a href="#">gi 685545348 XP_009206607.1</a> |
| <a href="#">PREDICTED: LOW QUALITY PROTEIN: selenoprotein P [Chloroce</a>  | 60.9      | 60.9        | 100%        | 3e-09   | 95%   | <a href="#">gi 635028004 XP_007959679.1</a> |
| <a href="#">Selenoprotein P, plasma, 1 [Homo sapiens]</a>                  | 60.9      | 60.9        | 100%        | 3e-09   | 95%   | <a href="#">gi 34783164 AAH15875.1</a>      |
| <a href="#">selenoprotein P precursor [Macaca mulatta]</a>                 | 60.9      | 60.9        | 100%        | 3e-09   | 95%   | <a href="#">gi 226958322 NP_001152962.1</a> |
| <a href="#">PREDICTED: LOW QUALITY PROTEIN: selenoprotein P [Saimiri b</a> | 59.6      | 59.6        | 100%        | 8e-09   | 95%   | <a href="#">gi 725563213 XP_003925940.2</a> |
| <a href="#">PREDICTED: LOW QUALITY PROTEIN: selenoprotein P [Rhinopit]</a> | 59.2      | 59.2        | 89%         | 1e-08   | 100%  | <a href="#">gi 724878613 XP_010372696.1</a> |
| <a href="#">selenoprotein P precursor [Pongo abelii]</a>                   | 55.8      | 55.8        | 100%        | 2e-07   | 89%   | <a href="#">gi 197101233 NP_001127462.1</a> |
| <a href="#">selenoprotein P precursor [Sus scrofa]</a>                     | 55.4      | 55.4        | 100%        | 2e-07   | 89%   | <a href="#">gi 198282079 NP_001128295.1</a> |
| <a href="#">PREDICTED: LOW QUALITY PROTEIN: selenoprotein P [Myotis d</a>  | 54.9      | 54.9        | 100%        | 3e-07   | 89%   | <a href="#">gi 584060316 XP_006774623.1</a> |
| <a href="#">PREDICTED: LOW QUALITY PROTEIN: selenoprotein P [Eptesicu</a>  | 54.9      | 54.9        | 100%        | 3e-07   | 89%   | <a href="#">gi 641727491 XP_008153843.1</a> |
| <a href="#">PREDICTED: LOW QUALITY PROTEIN: selenoprotein P [Myotis b</a>  | 54.9      | 54.9        | 100%        | 3e-07   | 89%   | <a href="#">gi 554563465 XP_005876061.1</a> |
| <a href="#">PREDICTED: LOW QUALITY PROTEIN: selenoprotein P [Nomasci</a>   | 54.9      | 54.9        | 100%        | 3e-07   | 89%   | <a href="#">gi 332250603 XP_003274442.1</a> |
| <a href="#">PREDICTED: LOW QUALITY PROTEIN: selenoprotein P [Tupaia c</a>  | 54.5      | 54.5        | 100%        | 4e-07   | 89%   | <a href="#">gi 562878609 XP_006167023.1</a> |
| <a href="#">PREDICTED: LOW QUALITY PROTEIN: selenoprotein P [Myotis lu</a> | 54.5      | 54.5        | 89%         | 4e-07   | 94%   | <a href="#">gi 558205011 XP_006106371.1</a> |
| <a href="#">PREDICTED: LOW QUALITY PROTEIN: selenoprotein P [Trichech</a>  | 54.5      | 54.5        | 89%         | 4e-07   | 94%   | <a href="#">gi 471413922 XP_004388500.1</a> |
| <a href="#">PREDICTED: selenoprotein P [Otolemur garnettii]</a>            | 54.1      | 54.1        | 100%        | 6e-07   | 89%   | <a href="#">gi 395840394 XP_003793045.1</a> |
| <a href="#">selenoprotein P precursor [Callithrix jacchus]</a>             | 52.8      | 52.8        | 100%        | 2e-06   | 84%   | <a href="#">gi 315630400 NP_001186857.1</a> |
| <a href="#">PREDICTED: LOW QUALITY PROTEIN: selenoprotein P [Tarsius s</a> | 52.4      | 52.4        | 100%        | 2e-06   | 84%   | <a href="#">gi 640790108 XP_008050904.1</a> |
| <a href="#">PREDICTED: LOW QUALITY PROTEIN: selenoprotein P [Peromys</a>   | 52.0      | 52.0        | 100%        | 3e-06   | 84%   | <a href="#">gi 589969345 XP_006997157.1</a> |
| <a href="#">PREDICTED: LOW QUALITY PROTEIN: selenoprotein P [Sorex ar</a>  | 51.5      | 51.5        | 89%         | 4e-06   | 88%   | <a href="#">gi 505790024 XP_004605590.1</a> |
| <a href="#">PREDICTED: LOW QUALITY PROTEIN: selenoprotein P [Chinchill</a> | 50.7      | 50.7        | 100%        | 9e-06   | 84%   | <a href="#">gi 533143496 XP_005386312.1</a> |

|                                                            |      |      |      |       |     |                                             |
|------------------------------------------------------------|------|------|------|-------|-----|---------------------------------------------|
| PREDICTED: LOW QUALITY PROTEIN: selenoprotein P [Ceratoth  | 50.7 | 50.7 | 89%  | 9e-06 | 88% | <a href="#">gij478496995 XP_004422836.1</a> |
| PREDICTED: LOW QUALITY PROTEIN: selenoprotein P [Equus p   | 49.8 | 49.8 | 89%  | 2e-05 | 88% | <a href="#">gij664731166 XP_008522793.1</a> |
| selenoprotein P precursor [Equus caballus]                 | 49.8 | 49.8 | 89%  | 2e-05 | 88% | <a href="#">gij208022673 NP_001129077.1</a> |
| Selenoprotein P [Heterocephalus glaber]                    | 49.4 | 49.4 | 100% | 2e-05 | 84% | <a href="#">gij351695949 EHA98867.1</a>     |
| PREDICTED: LOW QUALITY PROTEIN: selenoprotein P [Fukomys   | 49.4 | 49.4 | 100% | 2e-05 | 84% | <a href="#">gij731237262 XP_010632183.1</a> |
| PREDICTED: LOW QUALITY PROTEIN: selenoprotein P [Microtus  | 49.4 | 49.4 | 100% | 2e-05 | 79% | <a href="#">gij532054271 XP_005369861.1</a> |
| PREDICTED: LOW QUALITY PROTEIN: selenoprotein P [Heteroc   | 49.4 | 49.4 | 100% | 2e-05 | 84% | <a href="#">gij512973043 XP_004848622.1</a> |
| PREDICTED: LOW QUALITY PROTEIN: selenoprotein P [Heteroc   | 49.4 | 49.4 | 100% | 2e-05 | 84% | <a href="#">gij512816050 XP_004878213.1</a> |
| selenoprotein P precursor [Cricetulus griseus]             | 47.7 | 47.7 | 100% | 8e-05 | 79% | <a href="#">gij537231220 ERE84145.1</a>     |
| PREDICTED: LOW QUALITY PROTEIN: selenoprotein P [Loxodon   | 46.9 | 46.9 | 100% | 2e-04 | 79% | <a href="#">gij731464182 XP_010586424.1</a> |
| selenoprotein P, plasma, 1, isoform CRA_a [Mus musculus]   | 46.4 | 46.4 | 94%  | 2e-04 | 78% | <a href="#">gij148671458 EDL03405.1</a>     |
| PREDICTED: LOW QUALITY PROTEIN: selenoprotein P [Octodon   | 46.4 | 46.4 | 100% | 2e-04 | 79% | <a href="#">gij507690845 XP_004641866.1</a> |
| Selenoprotein P, plasma, 1 [Mus musculus]                  | 46.4 | 46.4 | 94%  | 2e-04 | 78% | <a href="#">gij34809553 AAH01991.2</a>      |
| plasma selenoprotein P [Mus musculus]                      | 46.4 | 46.4 | 94%  | 2e-04 | 78% | <a href="#">gij4103142 AAD01684.1</a>       |
| unnamed protein product [Mus musculus]                     | 46.4 | 46.4 | 94%  | 2e-04 | 78% | <a href="#">gij74192879 BAE34948.1</a>      |
| selenoprotein P precursor [Mus musculus]                   | 46.4 | 46.4 | 94%  | 2e-04 | 78% | <a href="#">gij74271806 NP_033181.3</a>     |
| PREDICTED: LOW QUALITY PROTEIN: selenoprotein P [Balaenoi  | 46.0 | 46.0 | 100% | 3e-04 | 79% | <a href="#">gij594696840 XP_007195596.1</a> |
| PREDICTED: LOW QUALITY PROTEIN: selenoprotein P [Physeter  | 46.0 | 46.0 | 100% | 3e-04 | 79% | <a href="#">gij593761497 XP_007119423.1</a> |
| PREDICTED: LOW QUALITY PROTEIN: selenoprotein P [Bubalus   | 46.0 | 46.0 | 100% | 3e-04 | 79% | <a href="#">gij594087306 XP_006067130.1</a> |
| membrane selenoprotein P [Capra hircus]                    | 45.6 | 45.6 | 100% | 4e-04 | 79% | <a href="#">gij7677620 AAF67201.1</a>       |
| selenoprotein P, plasma, 1 precursor [Capra hircus]        | 45.6 | 45.6 | 100% | 4e-04 | 79% | <a href="#">gij550822255 NP_001272511.1</a> |
| PREDICTED: LOW QUALITY PROTEIN: selenoprotein P [Ovis arie | 45.6 | 45.6 | 100% | 4e-04 | 79% | <a href="#">gij426246564 XP_004017062.1</a> |
| PREDICTED: LOW QUALITY PROTEIN: selenoprotein P [Lipotes \ | 45.6 | 45.6 | 89%  | 4e-04 | 82% | <a href="#">gij602724444 XP_007447694.1</a> |
| PREDICTED: LOW QUALITY PROTEIN: selenoprotein P [Galeopte  | 44.8 | 44.8 | 100% | 8e-04 | 79% | <a href="#">gij667253652 XP_008564915.1</a> |
| PREDICTED: LOW QUALITY PROTEIN: selenoprotein P [Nannosp   | 44.8 | 44.8 | 84%  | 8e-04 | 88% | <a href="#">gij674066756 XP_008840327.1</a> |
| PREDICTED: LOW QUALITY PROTEIN: selenoprotein P [Qodoben   | 44.8 | 44.8 | 94%  | 8e-04 | 78% | <a href="#">gij472379594 XP_004409206.1</a> |
| PREDICTED: LOW QUALITY PROTEIN: selenoprotein P [Panther   | 44.8 | 44.8 | 100% | 8e-04 | 79% | <a href="#">gij591339998 XP_007095490.1</a> |
| selenoprotein P precursor [Cavia porcellus]                | 44.3 | 44.3 | 100% | 0.001 | 74% | <a href="#">gij384367995 NP_001244936.1</a> |
| PREDICTED: LOW QUALITY PROTEIN: selenoprotein P [Orcinus ] | 42.6 | 42.6 | 100% | 0.004 | 79% | <a href="#">gij465986750 XP_004266005.1</a> |
| PREDICTED: LOW QUALITY PROTEIN: selenoprotein P [Tursiops  | 42.6 | 42.6 | 100% | 0.004 | 79% | <a href="#">gij470626535 XP_004320390.1</a> |
| PREDICTED: LOW QUALITY PROTEIN: selenoprotein P [Jaculus ] | 42.2 | 42.2 | 89%  | 0.005 | 82% | <a href="#">gij507537041 XP_004652550.1</a> |
| PREDICTED: LOW QUALITY PROTEIN: selenoprotein P [Mustela   | 41.8 | 41.8 | 84%  | 0.008 | 81% | <a href="#">gij511826454 XP_004738001.1</a> |
| PREDICTED: LOW QUALITY PROTEIN: selenoprotein P [Camelus   | 41.8 | 41.8 | 100% | 0.008 | 74% | <a href="#">gij744538058 XP_010999134.1</a> |
| PREDICTED: LOW QUALITY PROTEIN: selenoprotein P [Camelus   | 41.8 | 41.8 | 100% | 0.008 | 74% | <a href="#">gij560931717 XP_006191986.1</a> |
| selenoprotein P precursor [Canis lupus familiaris]         | 41.8 | 41.8 | 100% | 0.008 | 74% | <a href="#">gij169403968 NP_001108590.1</a> |
| PREDICTED: selenoprotein P-like [Ailuropoda melanoleuca]   | 41.4 | 41.4 | 100% | 0.009 | 74% | <a href="#">gij301772662 XP_002921760.1</a> |
| PREDICTED: LOW QUALITY PROTEIN: selenoprotein P [Monodel   | 41.4 | 41.4 | 94%  | 0.010 | 78% | <a href="#">gij612006645 XP_003340675.2</a> |
| selenoprotein P precursor [Cricetulus griseus]             | 41.4 | 41.4 | 100% | 0.010 | 74% | <a href="#">gij379056379 NP_001243807.1</a> |
| PREDICTED: LOW QUALITY PROTEIN: selenoprotein P [Ursus m   | 41.4 | 41.4 | 100% | 0.010 | 74% | <a href="#">gij670999853 XP_008690806.1</a> |
| PREDICTED: LOW QUALITY PROTEIN: selenoprotein P [Elephan   | 40.9 | 40.9 | 84%  | 0.014 | 81% | <a href="#">gij585672710 XP_006889619.1</a> |
| unnamed protein product [Mus musculus]                     | 40.5 | 40.5 | 94%  | 0.019 | 72% | <a href="#">gij74198358 BAE39664.1</a>      |
| PREDICTED: LOW QUALITY PROTEIN: selenoprotein P [Vicugna   | 40.5 | 40.5 | 100% | 0.019 | 74% | <a href="#">gij560970802 XP_006207756.1</a> |
| selenoprotein P precursor [Rattus norvegicus]              | 40.1 | 40.1 | 94%  | 0.027 | 72% | <a href="#">gij15011857 NP_062065.2</a>     |
| PREDICTED: LOW QUALITY PROTEIN: selenoprotein P [Bison bis | 40.1 | 40.1 | 100% | 0.027 | 74% | <a href="#">gij742088280 XP_010831114.1</a> |
| selenoprotein P [Bos taurus]                               | 40.1 | 40.1 | 100% | 0.027 | 74% | <a href="#">gij6006351 BAA84781.1</a>       |
| PREDICTED: LOW QUALITY PROTEIN: selenoprotein P [Bos mut   | 40.1 | 40.1 | 100% | 0.027 | 74% | <a href="#">gij555965745 XP_005894930.1</a> |

|                                                                                 |      |      |      |       |      |                                             |
|---------------------------------------------------------------------------------|------|------|------|-------|------|---------------------------------------------|
| <a href="#">selenoprotein P precursor [Bos taurus]</a>                          | 40.1 | 40.1 | 100% | 0.027 | 74%  | <a href="#">gi 156631001 NP_776884.2</a>    |
| <a href="#">selenoprotein P [Bubalus bubalis]</a>                               | 40.1 | 40.1 | 100% | 0.027 | 74%  | <a href="#">gi 430001945 AFM77782.2</a>     |
| <a href="#">PREDICTED: LOW QUALITY PROTEIN: selenoprotein P [Gorilla g</a>      | 39.7 | 39.7 | 57%  | 0.034 | 100% | <a href="#">gi 426384833 XP_004065356.1</a> |
| <a href="#">PREDICTED: LOW QUALITY PROTEIN: selenoprotein P [Oryctero</a>       | 38.8 | 38.8 | 89%  | 0.067 | 76%  | <a href="#">gi 634885032 XP_007952213.1</a> |
| <a href="#">PREDICTED: LOW QUALITY PROTEIN: selenoprotein P [Erinaceu</a>       | 38.8 | 38.8 | 84%  | 0.068 | 75%  | <a href="#">gi 617575753 XP_007517681.1</a> |
| <a href="#">unnamed protein product [Mus musculus]</a>                          | 38.4 | 38.4 | 94%  | 0.093 | 72%  | <a href="#">gi 74213751 BAC55264.3</a>      |
| <a href="#">PREDICTED: LOW QUALITY PROTEIN: selenoprotein P [Dasypus</a>        | 37.5 | 37.5 | 89%  | 0.17  | 76%  | <a href="#">gi 488512454 XP_004448278.1</a> |
| <a href="#">PREDICTED: selenoprotein P [Sarcophilus harrisii]</a>               | 37.1 | 37.1 | 84%  | 0.23  | 75%  | <a href="#">gi 395511426 XP_003759960.1</a> |
| <a href="#">selenoprotein P precursor [Oryctolagus cuniculus]</a>               | 36.3 | 36.3 | 94%  | 0.44  | 72%  | <a href="#">gi 315434200 NP_001186775.1</a> |
| <a href="#">PREDICTED: LOW QUALITY PROTEIN: selenoprotein P [Condylu</a>        | 36.3 | 36.3 | 89%  | 0.44  | 71%  | <a href="#">gi 507934338 XP_004678402.1</a> |
| <a href="#">PREDICTED: LOW QUALITY PROTEIN: selenoprotein P [Ochoton</a>        | 35.8 | 35.8 | 94%  | 0.60  | 72%  | <a href="#">gi 504142600 XP_004583736.1</a> |
| <a href="#">PREDICTED: LOW QUALITY PROTEIN: selenoprotein P [Echinop</a>        | 34.1 | 34.1 | 89%  | 2.1   | 71%  | <a href="#">gi 507708621 XP_004716992.1</a> |
| <a href="#">selenoprotein P-like protein [Bos taurus]</a>                       | 33.7 | 33.7 | 100% | 2.5   | 68%  | <a href="#">gi 13366148 BAB39395.1</a>      |
| <a href="#">selenoprotein P-like protein [Bos taurus]</a>                       | 33.7 | 33.7 | 100% | 2.5   | 68%  | <a href="#">gi 13366146 BAB39394.1</a>      |
| <a href="#">selenoprotein P-like protein [Bos taurus]</a>                       | 33.7 | 33.7 | 100% | 2.6   | 68%  | <a href="#">gi 13366144 BAB39393.1</a>      |
| <a href="#">selenoprotein P-like protein [Bos taurus]</a>                       | 33.7 | 33.7 | 100% | 2.6   | 68%  | <a href="#">gi 13366142 BAB39392.1</a>      |
| <a href="#">selenoprotein P-like protein [Bos taurus]</a>                       | 33.7 | 33.7 | 100% | 2.8   | 68%  | <a href="#">gi 1582026 2117379A</a>         |
| <a href="#">selenoprotein P like protein [Bos taurus]</a>                       | 33.7 | 33.7 | 100% | 2.8   | 68%  | <a href="#">gi 14970947 BAA04949.2</a>      |
| <a href="#">putative ATP-dependent RNA helicase DDX60-like protein [Cricetu</a> | 33.7 | 33.7 | 78%  | 3.0   | 81%  | <a href="#">gi 537270315 ERE91786.1</a>     |
| <a href="#">PREDICTED: probable ATP-dependent RNA helicase DDX60 [Cric</a>      | 33.7 | 33.7 | 78%  | 3.0   | 81%  | <a href="#">gi 625189695 XP_003498842.2</a> |
| <a href="#">PREDICTED: LOW QUALITY PROTEIN: selenoprotein P [Leptonyc</a>       | 32.5 | 32.5 | 100% | 7.2   | 63%  | <a href="#">gi 585192742 XP_006747601.1</a> |
| <a href="#">PREDICTED: LOW QUALITY PROTEIN: selenoprotein P [Ictidomy</a>       | 31.6 | 31.6 | 94%  | 13    | 61%  | <a href="#">gi 532079811 XP_005325668.1</a> |
| <a href="#">dihydroxy-acid dehydratase [Campylobacter sp. FOBRC14]</a>          | 31.2 | 31.2 | 63%  | 19    | 73%  | <a href="#">gi 497335253 WP_009649466.1</a> |
| <a href="#">unnamed protein product [Mus musculus]</a>                          | 31.2 | 31.2 | 73%  | 19    | 80%  | <a href="#">gi 26331444 BAC29452.1</a>      |
| <a href="#">Ddx60 protein [Mus musculus]</a>                                    | 31.2 | 31.2 | 73%  | 19    | 80%  | <a href="#">gi 27696190 AAH43663.1</a>      |
| <a href="#">probable ATP-dependent RNA helicase DDX60 [Mus musculus]</a>        | 31.2 | 31.2 | 73%  | 19    | 80%  | <a href="#">gi 657940862 NP_001280712.1</a> |

## Alignments

Download GenPept Graphics

Next Previous Descriptions

PREDICTED: LOW QUALITY PROTEIN: selenoprotein P [Pan paniscus]

Sequence ID: [gi|675710689|ref|XP\\_008961588.1](#) Length: 381 Number of Matches: 1

Range 1: 171 to 189 GenPept Graphics

Next Match Previous Match

| Score          | Expect | Identities  | Positives   | Gaps     |
|----------------|--------|-------------|-------------|----------|
| 65.5 bits(147) | 8e-11  | 19/19(100%) | 19/19(100%) | 0/19(0%) |

Query 1 KCGNCSLTTLKDEDFCKRV 19  
 KCGNCSLTTLKDEDFCKRV  
 Sbjct 171 KCGNCSLTTLKDEDFCKRV 189

### Related Information

[Gene](#) - associated gene details  
[Map Viewer](#) - aligned genomic context

Download GenPept Graphics

Next Previous Descriptions

Selenoprotein P, plasma, 1 [Homo sapiens]

Sequence ID: [gi|34783648|gb|AAH46152.1](#) Length: 381 Number of Matches: 1

Range 1: 171 to 189 GenPept Graphics

Next Match Previous Match

| Score          | Expect | Identities  | Positives   | Gaps     |
|----------------|--------|-------------|-------------|----------|
| 65.5 bits(147) | 8e-11  | 19/19(100%) | 19/19(100%) | 0/19(0%) |

Query 1 KCGNCSLTTLKDEDFCKRV 19  
 KCGNCSLTTLKDEDFCKRV  
 Sbjct 171 KCGNCSLTTLKDEDFCKRV 189

### Related Information

[Gene](#) - associated gene details

[Download](#) [GenPept](#) [Graphics](#)

[Next](#) [Previous](#) [Descriptions](#)

selenoprotein P isoform 1 precursor [Homo sapiens]

Sequence ID: [gi|62530391|ref|NP\\_005401.3|](#) Length: 381 Number of Matches: 1

[See 4 more title\(s\)](#)

Range 1: 171 to 189 [GenPept](#) [Graphics](#)

[Next Match](#) [Previous Match](#)

| Score          | Expect | Identities  | Positives   | Gaps     |
|----------------|--------|-------------|-------------|----------|
| 65.5 bits(147) | 8e-11  | 19/19(100%) | 19/19(100%) | 0/19(0%) |

Query 1 KCGNCSLTTLKDEDFCKRV 19  
 KCGNCSLTTLKDEDFCKRV  
 Sbjct 171 KCGNCSLTTLKDEDFCKRV 189

**Related Information**

[Gene](#) - associated gene details  
[UniGene](#) - clustered expressed sequence tags  
[Map Viewer](#) - aligned genomic context  
[Identical Proteins](#) - Proteins identical to the subject

[Download](#) [GenPept](#) [Graphics](#)

[Next](#) [Previous](#) [Descriptions](#)

Selenoprotein P, plasma, 1 [Homo sapiens]

Sequence ID: [gi|37596694|gb|AAH58919.1|](#) Length: 381 Number of Matches: 1

Range 1: 171 to 189 [GenPept](#) [Graphics](#)

[Next Match](#) [Previous Match](#)

| Score          | Expect | Identities  | Positives   | Gaps     |
|----------------|--------|-------------|-------------|----------|
| 65.5 bits(147) | 8e-11  | 19/19(100%) | 19/19(100%) | 0/19(0%) |

Query 1 KCGNCSLTTLKDEDFCKRV 19  
 KCGNCSLTTLKDEDFCKRV  
 Sbjct 171 KCGNCSLTTLKDEDFCKRV 189

**Related Information**

[Gene](#) - associated gene details

[Download](#) [GenPept](#) [Graphics](#)

[Next](#) [Previous](#) [Descriptions](#)

selenoprotein P [Homo sapiens]

Sequence ID: [gi|312004116|emb|CAA77836.2|](#) Length: 381 Number of Matches: 1

Range 1: 171 to 189 [GenPept](#) [Graphics](#)

[Next Match](#) [Previous Match](#)

| Score          | Expect | Identities  | Positives   | Gaps     |
|----------------|--------|-------------|-------------|----------|
| 65.5 bits(147) | 8e-11  | 19/19(100%) | 19/19(100%) | 0/19(0%) |

Query 1 KCGNCSLTTLKDEDFCKRV 19  
 KCGNCSLTTLKDEDFCKRV  
 Sbjct 171 KCGNCSLTTLKDEDFCKRV 189

**Related Information**

[Gene](#) - associated gene details

BLAST is a registered trademark of the National Library of Medicine.



NCBI/ BLAST/ blastp suite/ Formatting Results - BVKRP2S601R

Your search parameters were adjusted to search for a short input sequence.

Edit and Resubmit Save Search Strategies Formatting options Download YouTube How to read this page Blast report description

SEPP1\_KEGYSDISYIVVNHQGISSL\_Mod

RID BVKRP2S601R (Expires on 01-21 10:43 am)

Query ID Icl|379850
Description None
Molecule type amino acid
Query Length 21

Database Name nr
Description All non-redundant GenBank CDS translations+PDB+SwissProt+PIR+PRF excluding environmental samples from WGS projects
Program BLASTP 2.2.30+ Citation

Other reports: Search Summary Taxonomy reports Distance tree of results Multiple alignment

Graphic Summary

Show Conserved Domains

Putative conserved domains have been detected, click on the image below for detailed results.

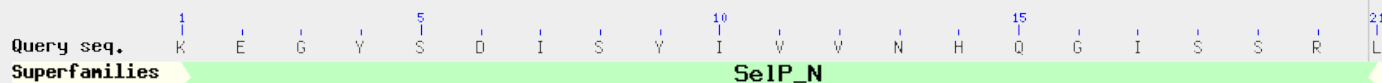

Distribution of 100 Blast Hits on the Query Sequence

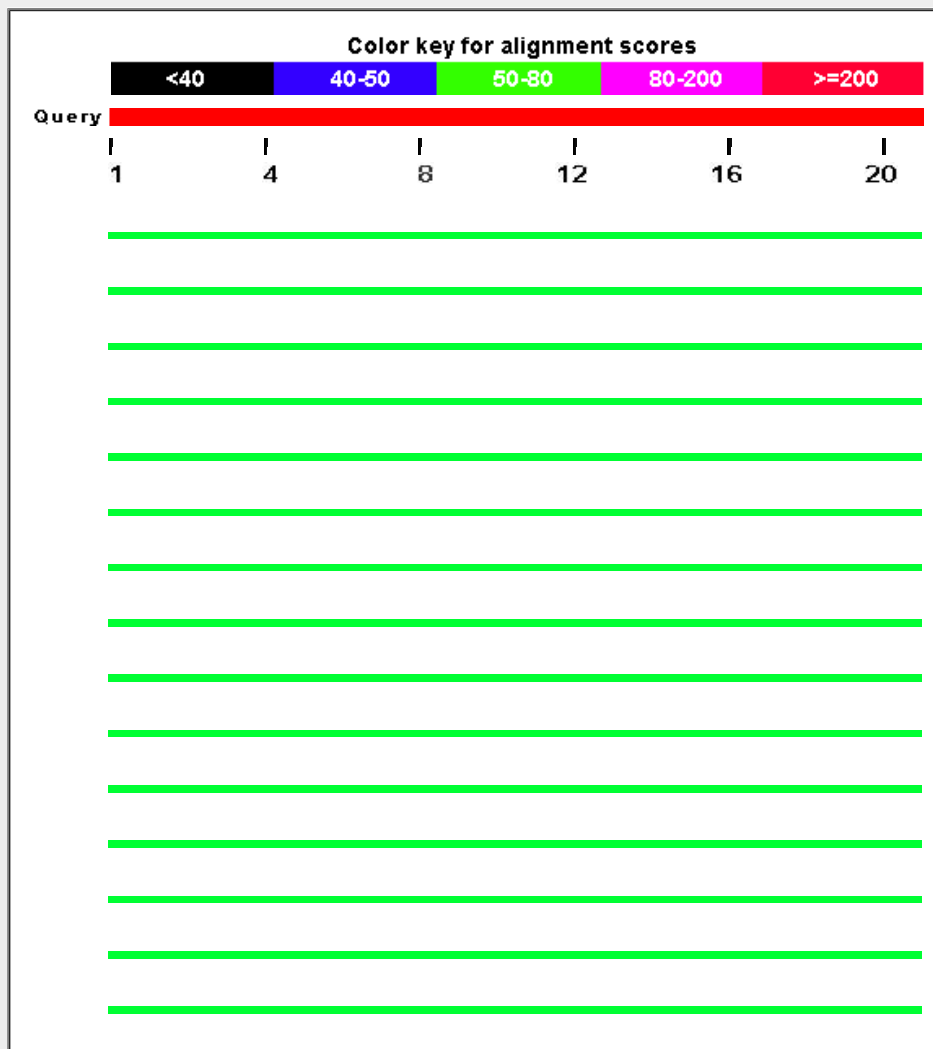

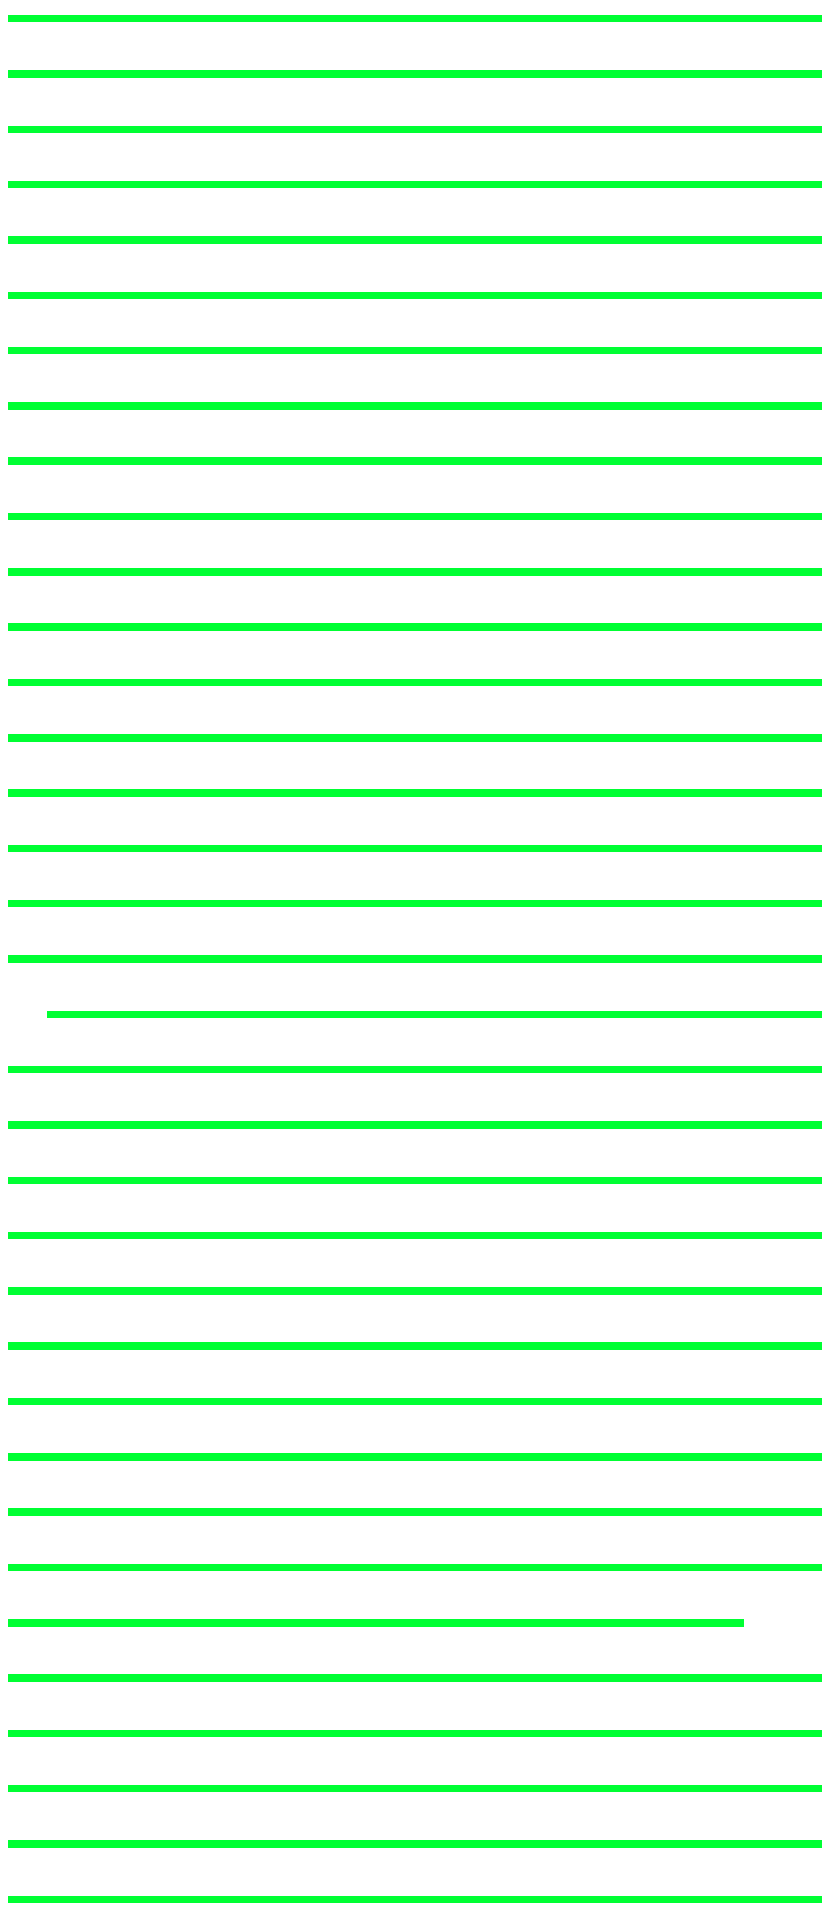

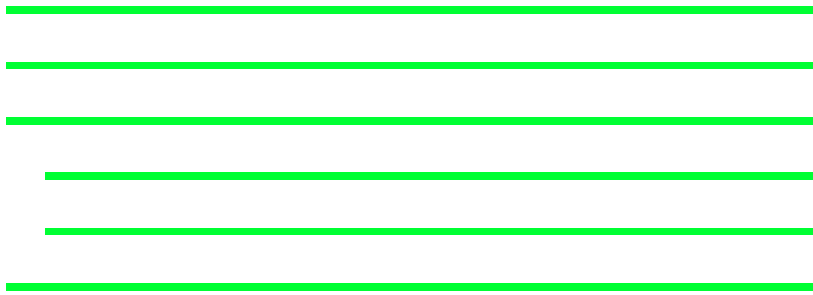

## Descriptions

### Sequences producing significant alignments:

Select: [All](#) [None](#) Selected:0

| <a href="#">Alignments</a> <a href="#">Download</a> <a href="#">GenPept</a> <a href="#">Graphics</a> <a href="#">Distance tree of results</a> <a href="#">Multiple alignment</a> |           |             |             |         |       |                                |  |
|----------------------------------------------------------------------------------------------------------------------------------------------------------------------------------|-----------|-------------|-------------|---------|-------|--------------------------------|--|
| Description                                                                                                                                                                      | Max score | Total score | Query cover | E value | Ident | Accession                      |  |
| <a href="#">PREDICTED: LOW QUALITY PROTEIN: selenoprotein P [Rhinopithecus rox</a>                                                                                               | 67.2      | 67.2        | 100%        | 3e-11   | 95%   | <a href="#">XP_010372696.1</a> |  |
| <a href="#">PREDICTED: LOW QUALITY PROTEIN: selenoprotein P [Papio anubis]</a>                                                                                                   | 67.2      | 67.2        | 100%        | 3e-11   | 95%   | <a href="#">XP_009206607.1</a> |  |
| <a href="#">PREDICTED: LOW QUALITY PROTEIN: selenoprotein P [Pan paniscus]</a>                                                                                                   | 67.2      | 67.2        | 100%        | 3e-11   | 95%   | <a href="#">XP_008961588.1</a> |  |
| <a href="#">PREDICTED: LOW QUALITY PROTEIN: selenoprotein P [Chlorocebus sabae</a>                                                                                               | 67.2      | 67.2        | 100%        | 3e-11   | 95%   | <a href="#">XP_007959679.1</a> |  |
| <a href="#">Selenoprotein P, plasma, 1 [Homo sapiens]</a>                                                                                                                        | 67.2      | 67.2        | 100%        | 3e-11   | 95%   | <a href="#">AAH46152.1</a>     |  |
| <a href="#">Selenoprotein P, plasma, 1 [Homo sapiens]</a>                                                                                                                        | 67.2      | 67.2        | 100%        | 3e-11   | 95%   | <a href="#">AAH15875.1</a>     |  |
| <a href="#">selenoprotein P isoform 1 precursor [Homo sapiens]</a>                                                                                                               | 67.2      | 67.2        | 100%        | 3e-11   | 95%   | <a href="#">NP_005401.3</a>    |  |
| <a href="#">Selenoprotein P, plasma, 1 [Homo sapiens]</a>                                                                                                                        | 67.2      | 67.2        | 100%        | 3e-11   | 95%   | <a href="#">AAH58919.1</a>     |  |
| <a href="#">PREDICTED: LOW QUALITY PROTEIN: selenoprotein P [Nomascus leucoge</a>                                                                                                | 67.2      | 67.2        | 100%        | 3e-11   | 95%   | <a href="#">XP_003274442.1</a> |  |
| <a href="#">selenoprotein P [Homo sapiens]</a>                                                                                                                                   | 67.2      | 67.2        | 100%        | 3e-11   | 95%   | <a href="#">CAA77836.2</a>     |  |
| <a href="#">selenoprotein P precursor [Macaca mulatta]</a>                                                                                                                       | 67.2      | 67.2        | 100%        | 3e-11   | 95%   | <a href="#">NP_001152962.1</a> |  |
| <a href="#">selenoprotein P precursor [Pan troglodytes]</a>                                                                                                                      | 67.2      | 67.2        | 100%        | 3e-11   | 95%   | <a href="#">NP_001108587.1</a> |  |
| <a href="#">selenoprotein P isoform 2 [Homo sapiens]</a>                                                                                                                         | 67.2      | 67.2        | 100%        | 3e-11   | 95%   | <a href="#">NP_001087195.1</a> |  |
| <a href="#">PREDICTED: LOW QUALITY PROTEIN: selenoprotein P [Balaenoptera acut</a>                                                                                               | 64.7      | 64.7        | 100%        | 2e-10   | 90%   | <a href="#">XP_007195596.1</a> |  |
| <a href="#">PREDICTED: LOW QUALITY PROTEIN: selenoprotein P [Lipotes vexillifer]</a>                                                                                             | 64.7      | 64.7        | 100%        | 2e-10   | 90%   | <a href="#">XP_007447694.1</a> |  |
| <a href="#">PREDICTED: LOW QUALITY PROTEIN: selenoprotein P [Orcinus orca]</a>                                                                                                   | 64.7      | 64.7        | 100%        | 2e-10   | 90%   | <a href="#">XP_004266005.1</a> |  |
| <a href="#">PREDICTED: LOW QUALITY PROTEIN: selenoprotein P [Physeter catodon]</a>                                                                                               | 64.7      | 64.7        | 100%        | 2e-10   | 90%   | <a href="#">XP_007119423.1</a> |  |
| <a href="#">PREDICTED: LOW QUALITY PROTEIN: selenoprotein P [Tursiops truncatus]</a>                                                                                             | 64.7      | 64.7        | 100%        | 2e-10   | 90%   | <a href="#">XP_004320390.1</a> |  |
| <a href="#">PREDICTED: LOW QUALITY PROTEIN: selenoprotein P [Bison bison bison]</a>                                                                                              | 64.7      | 64.7        | 100%        | 2e-10   | 90%   | <a href="#">XP_010831114.1</a> |  |
| <a href="#">selenoprotein P [Bos taurus]</a>                                                                                                                                     | 64.7      | 64.7        | 100%        | 2e-10   | 90%   | <a href="#">BAA84781.1</a>     |  |
| <a href="#">PREDICTED: LOW QUALITY PROTEIN: selenoprotein P [Bos mutus]</a>                                                                                                      | 64.7      | 64.7        | 100%        | 2e-10   | 90%   | <a href="#">XP_005894930.1</a> |  |
| <a href="#">selenoprotein P-like protein [Bos taurus]</a>                                                                                                                        | 64.7      | 64.7        | 100%        | 2e-10   | 90%   | <a href="#">2117379A</a>       |  |
| <a href="#">selenoprotein P like protein [Bos taurus]</a>                                                                                                                        | 64.7      | 64.7        | 100%        | 2e-10   | 90%   | <a href="#">BAA04949.2</a>     |  |
| <a href="#">selenoprotein P precursor [Bos taurus]</a>                                                                                                                           | 64.7      | 64.7        | 100%        | 2e-10   | 90%   | <a href="#">NP_776884.2</a>    |  |
| <a href="#">PREDICTED: selenoprotein P [Otolemur garnettii]</a>                                                                                                                  | 63.0      | 63.0        | 100%        | 7e-10   | 90%   | <a href="#">XP_003793045.1</a> |  |
| <a href="#">PREDICTED: LOW QUALITY PROTEIN: selenoprotein P [Ictidomys tridecem</a>                                                                                              | 63.0      | 63.0        | 100%        | 8e-10   | 90%   | <a href="#">XP_005325668.1</a> |  |
| <a href="#">selenoprotein P precursor [Pongo abelii]</a>                                                                                                                         | 61.7      | 61.7        | 100%        | 2e-09   | 90%   | <a href="#">NP_001127462.1</a> |  |
| <a href="#">membrane selenoprotein P [Capra hircus]</a>                                                                                                                          | 60.4      | 60.4        | 100%        | 5e-09   | 86%   | <a href="#">AAF67201.1</a>     |  |
| <a href="#">selenoprotein P, plasma, 1 precursor [Capra hircus]</a>                                                                                                              | 60.4      | 60.4        | 100%        | 6e-09   | 86%   | <a href="#">NP_001272511.1</a> |  |

|                                                                                        |      |      |      |       |     |                                |
|----------------------------------------------------------------------------------------|------|------|------|-------|-----|--------------------------------|
| <a href="#">PREDICTED: LOW QUALITY PROTEIN: selenoprotein P [Ovis aries]</a>           | 60.4 | 60.4 | 100% | 6e-09 | 86% | <a href="#">XP_004017062.1</a> |
| <a href="#">PREDICTED: LOW QUALITY PROTEIN: selenoprotein P [Nannospalax galii]</a>    | 60.4 | 60.4 | 100% | 6e-09 | 86% | <a href="#">XP_008840327.1</a> |
| <a href="#">PREDICTED: LOW QUALITY PROTEIN: selenoprotein P [Ceratherium sim]</a>      | 60.4 | 60.4 | 100% | 6e-09 | 86% | <a href="#">XP_004422836.1</a> |
| <a href="#">selenoprotein P precursor [Sus scrofa]</a>                                 | 60.4 | 60.4 | 100% | 6e-09 | 86% | <a href="#">NP_001128295.1</a> |
| <a href="#">PREDICTED: LOW QUALITY PROTEIN: selenoprotein P [Jaculus jaculus]</a>      | 60.0 | 60.0 | 95%  | 8e-09 | 90% | <a href="#">XP_004652550.1</a> |
| <a href="#">PREDICTED: LOW QUALITY PROTEIN: selenoprotein P [Bubalus bubalis]</a>      | 59.6 | 59.6 | 100% | 1e-08 | 81% | <a href="#">XP_006067130.1</a> |
| <a href="#">PREDICTED: LOW QUALITY PROTEIN: selenoprotein P [Equus przewalskii]</a>    | 57.9 | 57.9 | 100% | 4e-08 | 81% | <a href="#">XP_008522793.1</a> |
| <a href="#">selenoprotein P precursor [Equus caballus]</a>                             | 57.9 | 57.9 | 100% | 4e-08 | 81% | <a href="#">NP_001129077.1</a> |
| <a href="#">PREDICTED: LOW QUALITY PROTEIN: selenoprotein P [Saimiri boliviensis ]</a> | 57.1 | 57.1 | 100% | 8e-08 | 81% | <a href="#">XP_003925940.2</a> |
| <a href="#">selenoprotein P precursor [Callithrix jacchus]</a>                         | 57.1 | 57.1 | 100% | 8e-08 | 81% | <a href="#">NP_001186857.1</a> |
| <a href="#">selenoprotein P [Bubalus bubalis]</a>                                      | 57.1 | 57.1 | 100% | 8e-08 | 81% | <a href="#">AFM77782.2</a>     |
| <a href="#">PREDICTED: LOW QUALITY PROTEIN: selenoprotein P [Ochotona princeps]</a>    | 56.2 | 56.2 | 100% | 2e-07 | 81% | <a href="#">XP_004583736.1</a> |
| <a href="#">PREDICTED: LOW QUALITY PROTEIN: selenoprotein P [Tarsius syrichta]</a>     | 55.8 | 55.8 | 100% | 2e-07 | 76% | <a href="#">XP_008050904.1</a> |
| <a href="#">PREDICTED: LOW QUALITY PROTEIN: selenoprotein P [Tupaia chinensis]</a>     | 55.4 | 55.4 | 100% | 3e-07 | 81% | <a href="#">XP_006167023.1</a> |
| <a href="#">PREDICTED: LOW QUALITY PROTEIN: selenoprotein P [Vicugna pacos]</a>        | 54.9 | 54.9 | 100% | 4e-07 | 76% | <a href="#">XP_006207756.1</a> |
| <a href="#">PREDICTED: LOW QUALITY PROTEIN: selenoprotein P [Octodon degus]</a>        | 54.5 | 54.5 | 90%  | 6e-07 | 84% | <a href="#">XP_004641866.1</a> |
| <a href="#">PREDICTED: LOW QUALITY PROTEIN: selenoprotein P [Orycteropus afer a]</a>   | 54.1 | 54.1 | 100% | 8e-07 | 76% | <a href="#">XP_007952213.1</a> |
| <a href="#">PREDICTED: LOW QUALITY PROTEIN: selenoprotein P [Myotis brandtii]</a>      | 54.1 | 54.1 | 100% | 8e-07 | 76% | <a href="#">XP_005876061.1</a> |
| <a href="#">PREDICTED: LOW QUALITY PROTEIN: selenoprotein P [Chinchilla lanigera]</a>  | 54.1 | 54.1 | 100% | 8e-07 | 76% | <a href="#">XP_005386312.1</a> |
| <a href="#">selenoprotein P precursor [Oryctolagus cuniculus]</a>                      | 54.1 | 54.1 | 100% | 8e-07 | 76% | <a href="#">NP_001186775.1</a> |
| <a href="#">PREDICTED: LOW QUALITY PROTEIN: selenoprotein P [Elephantulus edwa]</a>    | 53.7 | 53.7 | 100% | 1e-06 | 76% | <a href="#">XP_006889619.1</a> |
| <a href="#">PREDICTED: LOW QUALITY PROTEIN: selenoprotein P [Dasypus novemcin]</a>     | 52.8 | 52.8 | 100% | 2e-06 | 76% | <a href="#">XP_004448278.1</a> |
| <a href="#">PREDICTED: LOW QUALITY PROTEIN: selenoprotein P [Camelus dromedar]</a>     | 52.4 | 52.4 | 100% | 3e-06 | 76% | <a href="#">XP_010999134.1</a> |
| <a href="#">PREDICTED: LOW QUALITY PROTEIN: selenoprotein P [Camelus ferus]</a>        | 52.4 | 52.4 | 100% | 3e-06 | 76% | <a href="#">XP_006191986.1</a> |
| <a href="#">PREDICTED: LOW QUALITY PROTEIN: selenoprotein P [Peromyscus manic]</a>     | 51.1 | 51.1 | 95%  | 8e-06 | 80% | <a href="#">XP_006997157.1</a> |
| <a href="#">PREDICTED: LOW QUALITY PROTEIN: selenoprotein P [Ornithorhynchus ar]</a>   | 50.7 | 50.7 | 95%  | 1e-05 | 75% | <a href="#">XP_007654576.1</a> |
| <a href="#">PREDICTED: LOW QUALITY PROTEIN: selenoprotein P [Fukomys damaren:</a>      | 50.7 | 50.7 | 100% | 1e-05 | 76% | <a href="#">XP_010632183.1</a> |
| <a href="#">PREDICTED: LOW QUALITY PROTEIN: selenoprotein P [Myotis lucifugus]</a>     | 50.7 | 50.7 | 100% | 1e-05 | 76% | <a href="#">XP_006106371.1</a> |
| <a href="#">PREDICTED: LOW QUALITY PROTEIN: selenoprotein P [Mustela putorius fu]</a>  | 50.7 | 50.7 | 100% | 1e-05 | 76% | <a href="#">XP_004738001.1</a> |
| <a href="#">PREDICTED: LOW QUALITY PROTEIN: selenoprotein P [Leptonychotes wec]</a>    | 50.7 | 50.7 | 100% | 1e-05 | 76% | <a href="#">XP_006747601.1</a> |
| <a href="#">PREDICTED: LOW QUALITY PROTEIN: selenoprotein P [Odobenus rosmaru</a>      | 50.7 | 50.7 | 100% | 1e-05 | 76% | <a href="#">XP_004409206.1</a> |
| <a href="#">Selenoprotein P [Heterocephalus glaber]</a>                                | 50.3 | 50.3 | 100% | 1e-05 | 71% | <a href="#">EHA98867.1</a>     |
| <a href="#">PREDICTED: LOW QUALITY PROTEIN: selenoprotein P [Galeopterus varieg</a>    | 50.3 | 50.3 | 100% | 1e-05 | 76% | <a href="#">XP_008564915.1</a> |
| <a href="#">PREDICTED: LOW QUALITY PROTEIN: selenoprotein P [Eptesicus fuscus]</a>     | 50.3 | 50.3 | 100% | 1e-05 | 71% | <a href="#">XP_008153843.1</a> |
| <a href="#">PREDICTED: LOW QUALITY PROTEIN: selenoprotein P [Trichechus manatu</a>     | 50.3 | 50.3 | 100% | 1e-05 | 76% | <a href="#">XP_004388500.1</a> |
| <a href="#">PREDICTED: LOW QUALITY PROTEIN: selenoprotein P [Monodelphis dome</a>      | 50.3 | 50.3 | 95%  | 1e-05 | 75% | <a href="#">XP_003340675.2</a> |
| <a href="#">PREDICTED: LOW QUALITY PROTEIN: selenoprotein P [Heterocephalus gl</a>     | 50.3 | 50.3 | 100% | 1e-05 | 71% | <a href="#">XP_004848622.1</a> |
| <a href="#">PREDICTED: LOW QUALITY PROTEIN: selenoprotein P [Heterocephalus gl</a>     | 50.3 | 50.3 | 100% | 1e-05 | 71% | <a href="#">XP_004878213.1</a> |
| <a href="#">PREDICTED: LOW QUALITY PROTEIN: selenoprotein P [Loxodonta africana</a>    | 49.8 | 49.8 | 100% | 2e-05 | 67% | <a href="#">XP_010586424.1</a> |
| <a href="#">PREDICTED: LOW QUALITY PROTEIN: selenoprotein P [Myotis davidii]</a>       | 49.0 | 49.0 | 100% | 4e-05 | 71% | <a href="#">XP_006774623.1</a> |
| <a href="#">PREDICTED: LOW QUALITY PROTEIN: selenoprotein P [Felis catus]</a>          | 48.6 | 48.6 | 90%  | 5e-05 | 79% | <a href="#">XP_006928143.1</a> |
| <a href="#">PREDICTED: LOW QUALITY PROTEIN: selenoprotein P [Panthera tigris alta</a>  | 48.6 | 48.6 | 90%  | 5e-05 | 79% | <a href="#">XP_007095490.1</a> |
| <a href="#">PREDICTED: selenoprotein P [Sarcophilus harrisii]</a>                      | 47.7 | 47.7 | 95%  | 1e-04 | 75% | <a href="#">XP_003759960.1</a> |
| <a href="#">PREDICTED: LOW QUALITY PROTEIN: selenoprotein P [Condylura cristata]</a>   | 47.7 | 47.7 | 76%  | 1e-04 | 81% | <a href="#">XP_004678402.1</a> |
| <a href="#">PREDICTED: LOW QUALITY PROTEIN: selenoprotein P [Microtus ochrogast</a>    | 47.3 | 47.3 | 95%  | 1e-04 | 75% | <a href="#">XP_005369861.1</a> |
| <a href="#">selenoprotein P precursor [Canis lupus familiaris]</a>                     | 47.3 | 47.3 | 100% | 1e-04 | 71% | <a href="#">NP_001108590.1</a> |

|                                                                                              |      |      |      |       |     |                                |
|----------------------------------------------------------------------------------------------|------|------|------|-------|-----|--------------------------------|
| <a href="#">PREDICTED: LOW QUALITY PROTEIN: selenoprotein P [Ursus maritimus]</a>            | 47.3 | 47.3 | 100% | 1e-04 | 71% | <a href="#">XP_008690806.1</a> |
| <a href="#">PREDICTED: LOW QUALITY PROTEIN: selenoprotein P [Erinaceus europae]</a>          | 46.9 | 46.9 | 100% | 2e-04 | 71% | <a href="#">XP_007517681.1</a> |
| <a href="#">PREDICTED: LOW QUALITY PROTEIN: selenoprotein P [Sorex araneus]</a>              | 46.0 | 46.0 | 95%  | 4e-04 | 70% | <a href="#">XP_004605590.1</a> |
| <a href="#">PREDICTED: LOW QUALITY PROTEIN: selenoprotein P [Echinops telfairi]</a>          | 46.0 | 46.0 | 100% | 4e-04 | 67% | <a href="#">XP_004716992.1</a> |
| <a href="#">Selenoprotein P [Cricetulus griseus]</a>                                         | 45.2 | 45.2 | 95%  | 6e-04 | 70% | <a href="#">EGW04040.1</a>     |
| <a href="#">selenoprotein P precursor [Cricetulus griseus]</a>                               | 45.2 | 45.2 | 95%  | 7e-04 | 70% | <a href="#">ERE84145.1</a>     |
| <a href="#">selenoprotein P precursor [Cricetulus griseus]</a>                               | 45.2 | 45.2 | 95%  | 7e-04 | 70% | <a href="#">NP_001243807.1</a> |
| <a href="#">PREDICTED: LOW QUALITY PROTEIN: selenoprotein P, plasma, 1 [Mesocri]</a>         | 44.3 | 44.3 | 95%  | 0.001 | 75% | <a href="#">XP_005139283.1</a> |
| <a href="#">PREDICTED: LOW QUALITY PROTEIN: selenoprotein P [Chrysochloris asiaticus]</a>    | 43.9 | 43.9 | 100% | 0.002 | 67% | <a href="#">XP_006877364.1</a> |
| <a href="#">PREDICTED: LOW QUALITY PROTEIN: selenoprotein P [Pelodiscus sinensis]</a>        | 43.1 | 43.1 | 85%  | 0.003 | 78% | <a href="#">XP_006139560.1</a> |
| <a href="#">selenoprotein P, plasma, 1, isoform CRA_a [Mus musculus]</a>                     | 42.2 | 42.2 | 95%  | 0.006 | 70% | <a href="#">EDL03405.1</a>     |
| <a href="#">Selenoprotein P, plasma, 1 [Mus musculus]</a>                                    | 42.2 | 42.2 | 95%  | 0.006 | 70% | <a href="#">AAH01991.2</a>     |
| <a href="#">plasma selenoprotein P [Mus musculus]</a>                                        | 42.2 | 42.2 | 95%  | 0.006 | 70% | <a href="#">AAD01684.1</a>     |
| <a href="#">unnamed protein product [Mus musculus]</a>                                       | 42.2 | 42.2 | 95%  | 0.006 | 70% | <a href="#">BAE39664.1</a>     |
| <a href="#">unnamed protein product [Mus musculus]</a>                                       | 42.2 | 42.2 | 95%  | 0.006 | 70% | <a href="#">BAE34948.1</a>     |
| <a href="#">selenoprotein P precursor [Mus musculus]</a>                                     | 42.2 | 42.2 | 95%  | 0.006 | 70% | <a href="#">NP_033181.3</a>    |
| <a href="#">unnamed protein product [Mus musculus]</a>                                       | 42.2 | 42.2 | 95%  | 0.006 | 70% | <a href="#">BAC55264.3</a>     |
| <a href="#">selenoprotein P precursor [Rattus norvegicus]</a>                                | 42.2 | 42.2 | 95%  | 0.006 | 70% | <a href="#">NP_062065.2</a>    |
| <a href="#">PREDICTED: LOW QUALITY PROTEIN: selenoprotein P [Opisthocomus hoastri]</a>       | 39.7 | 39.7 | 90%  | 0.042 | 74% | <a href="#">XP_009941970.1</a> |
| <a href="#">selenoprotein P precursor [Taeniopygia guttata]</a>                              | 39.2 | 39.2 | 90%  | 0.058 | 68% | <a href="#">NP_001257806.1</a> |
| <a href="#">PREDICTED: LOW QUALITY PROTEIN: selenoprotein P [Alligator sinensis]</a>         | 38.8 | 38.8 | 66%  | 0.078 | 79% | <a href="#">XP_006026767.1</a> |
| <a href="#">PREDICTED: LOW QUALITY PROTEIN: selenoprotein P [Phalacrocorax carolinensis]</a> | 38.8 | 38.8 | 85%  | 0.078 | 72% | <a href="#">XP_009511852.1</a> |
| <a href="#">PREDICTED: LOW QUALITY PROTEIN: selenoprotein P [Phaethon lepturus]</a>          | 38.8 | 38.8 | 85%  | 0.078 | 72% | <a href="#">XP_010284851.1</a> |
| <a href="#">PREDICTED: LOW QUALITY PROTEIN: selenoprotein P [Gavia stellata]</a>             | 38.8 | 38.8 | 85%  | 0.078 | 72% | <a href="#">XP_009818154.1</a> |
| <a href="#">PREDICTED: LOW QUALITY PROTEIN: selenoprotein P [Caprimulgus carolinensis]</a>   | 38.8 | 38.8 | 85%  | 0.079 | 72% | <a href="#">XP_010164847.1</a> |

## Alignments

Download [GenPept](#) [Graphics](#)

[Next](#) [Previous](#) [Descriptions](#)

PREDICTED: LOW QUALITY PROTEIN: selenoprotein P [Rhinopithecus roxellana]

Sequence ID: [ref|XP\\_010372696.1|](#) Length: 381 Number of Matches: 1

Range 1: 78 to 98 [GenPept](#) [Graphics](#)

[Next Match](#) [Previous Match](#)

| Score          | Expect | Identities | Positives   | Gaps     |
|----------------|--------|------------|-------------|----------|
| 67.2 bits(151) | 3e-11  | 20/21(95%) | 21/21(100%) | 0/21(0%) |

Query 1 KEGYSDISYIVVNHQGISSRL 21  
 KEGYS+ISYIVVNHQGISSRL  
 Sbjct 78 KEGYSNISYIVVNHQGISSRL 98

### Related Information

[Gene](#) - associated gene details  
[Map Viewer](#) - aligned genomic context

Download [GenPept](#) [Graphics](#)

[Next](#) [Previous](#) [Descriptions](#)

PREDICTED: LOW QUALITY PROTEIN: selenoprotein P [Papio anubis]

Sequence ID: [ref|XP\\_009206607.1|](#) Length: 381 Number of Matches: 1

Range 1: 78 to 98 [GenPept](#) [Graphics](#)

[Next Match](#) [Previous Match](#)

| Score          | Expect | Identities | Positives   | Gaps     |
|----------------|--------|------------|-------------|----------|
| 67.2 bits(151) | 3e-11  | 20/21(95%) | 21/21(100%) | 0/21(0%) |

Query 1 KEGYSDISYIVVNHQGISSRL 21  
 KEGYS+ISYIVVNHQGISSRL  
 Sbjct 78 KEGYSNISYIVVNHQGISSRL 98

### Related Information

[Gene](#) - associated gene details  
[Map Viewer](#) - aligned genomic context

Download [GenPept](#) [Graphics](#)

▼ Next ▲ Previous ▲ Descriptions

**PREDICTED: LOW QUALITY PROTEIN: selenoprotein P [Pan paniscus]**

Sequence ID: [ref|XP\\_008961588.1|](#) Length: 381 Number of Matches: 1

Range 1: 78 to 98 [GenPept](#) [Graphics](#)

▼ Next Match ▲ Previous Match

| Score          | Expect | Identities | Positives   | Gaps     |
|----------------|--------|------------|-------------|----------|
| 67.2 bits(151) | 3e-11  | 20/21(95%) | 21/21(100%) | 0/21(0%) |

Query 1 KEGYSDISYIVVNHQGISSRL 21  
 KEGYS+ISYIVVNHQGISSRL  
 Sbjct 78 KEGYSNISYIVVNHQGISSRL 98

**Related Information**

[Gene](#) - associated gene details  
[Map Viewer](#) - aligned genomic context

Download [GenPept](#) [Graphics](#)

▼ Next ▲ Previous ▲ Descriptions

**PREDICTED: LOW QUALITY PROTEIN: selenoprotein P [Chlorocebus sabaesus]**

Sequence ID: [ref|XP\\_007959679.1|](#) Length: 381 Number of Matches: 1

Range 1: 78 to 98 [GenPept](#) [Graphics](#)

▼ Next Match ▲ Previous Match

| Score          | Expect | Identities | Positives   | Gaps     |
|----------------|--------|------------|-------------|----------|
| 67.2 bits(151) | 3e-11  | 20/21(95%) | 21/21(100%) | 0/21(0%) |

Query 1 KEGYSDISYIVVNHQGISSRL 21  
 KEGYS+ISYIVVNHQGISSRL  
 Sbjct 78 KEGYSNISYIVVNHQGISSRL 98

**Related Information**

[Gene](#) - associated gene details  
[Map Viewer](#) - aligned genomic context

Download [GenPept](#) [Graphics](#)

▼ Next ▲ Previous ▲ Descriptions

**Selenoprotein P, plasma, 1 [Homo sapiens]**

Sequence ID: [gb|AAH46152.1|](#) Length: 381 Number of Matches: 1

Range 1: 78 to 98 [GenPept](#) [Graphics](#)

▼ Next Match ▲ Previous Match

| Score          | Expect | Identities | Positives   | Gaps     |
|----------------|--------|------------|-------------|----------|
| 67.2 bits(151) | 3e-11  | 20/21(95%) | 21/21(100%) | 0/21(0%) |

Query 1 KEGYSDISYIVVNHQGISSRL 21  
 KEGYS+ISYIVVNHQGISSRL  
 Sbjct 78 KEGYSNISYIVVNHQGISSRL 98

**Related Information**

[Gene](#) - associated gene details

BLAST is a registered trademark of the National Library of Medicine.

▶ NCBI/ BLAST/ blastp suite/ Formatting Results - BE8859NX015

**ⓘ** Your search parameters were adjusted to search for a short input sequence.

[Edit and Resubmit](#) [Save Search Strategies](#) ▶ [Formatting options](#) ▶ [Download](#)

[YouTube](#) [How to read this page](#) [Blast report description](#)

### SEPP1\_KEGYSNISYIVVNHQGISSRL\_NonMod

**RID** [BE8859NX015](#) (Expires on 01-16 09:08 am)

**Query ID** lcl|50687

**Description** None

**Molecule type** amino acid

**Query Length** 21

**Database Name** nr

**Description** All non-redundant GenBank CDS translations+PDB+SwissProt+PIR excluding environmental samples from WGS projects

**Program** BLASTP 2.2.30+ ▶ [Citation](#)

Other reports: ▶ [Search Summary](#) [[Taxonomy reports](#)] [[Distance tree of results](#)] [[Multiple alignment](#)]

[New](#) **DELTA-BLAST** a more sensitive protein-protein search

### Graphic Summary

Show Conserved Domains

Putative conserved domains have been detected, click on the image below for detailed results.

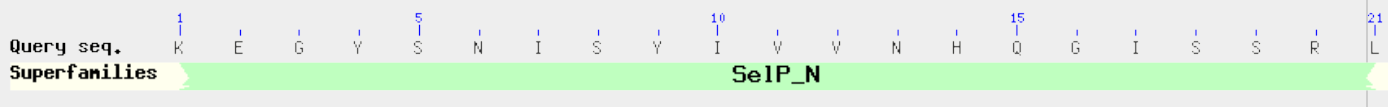

Distribution of 100 Blast Hits on the Query Sequence

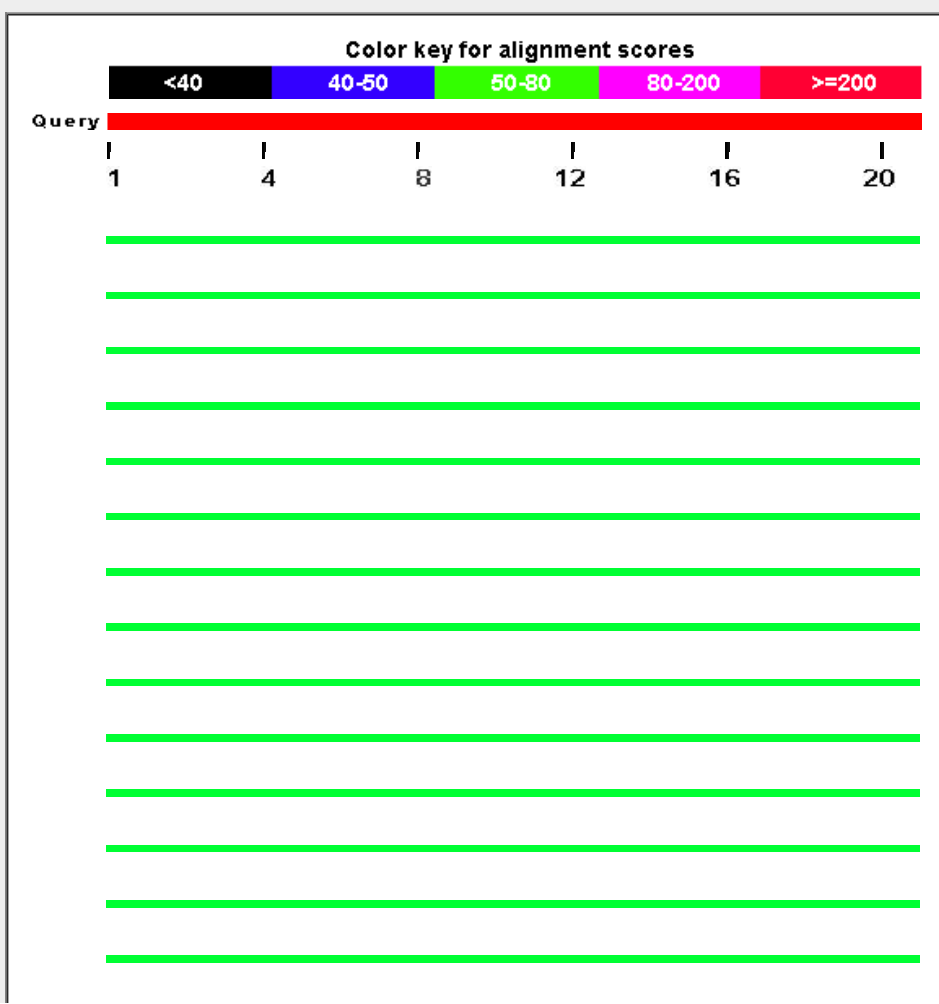

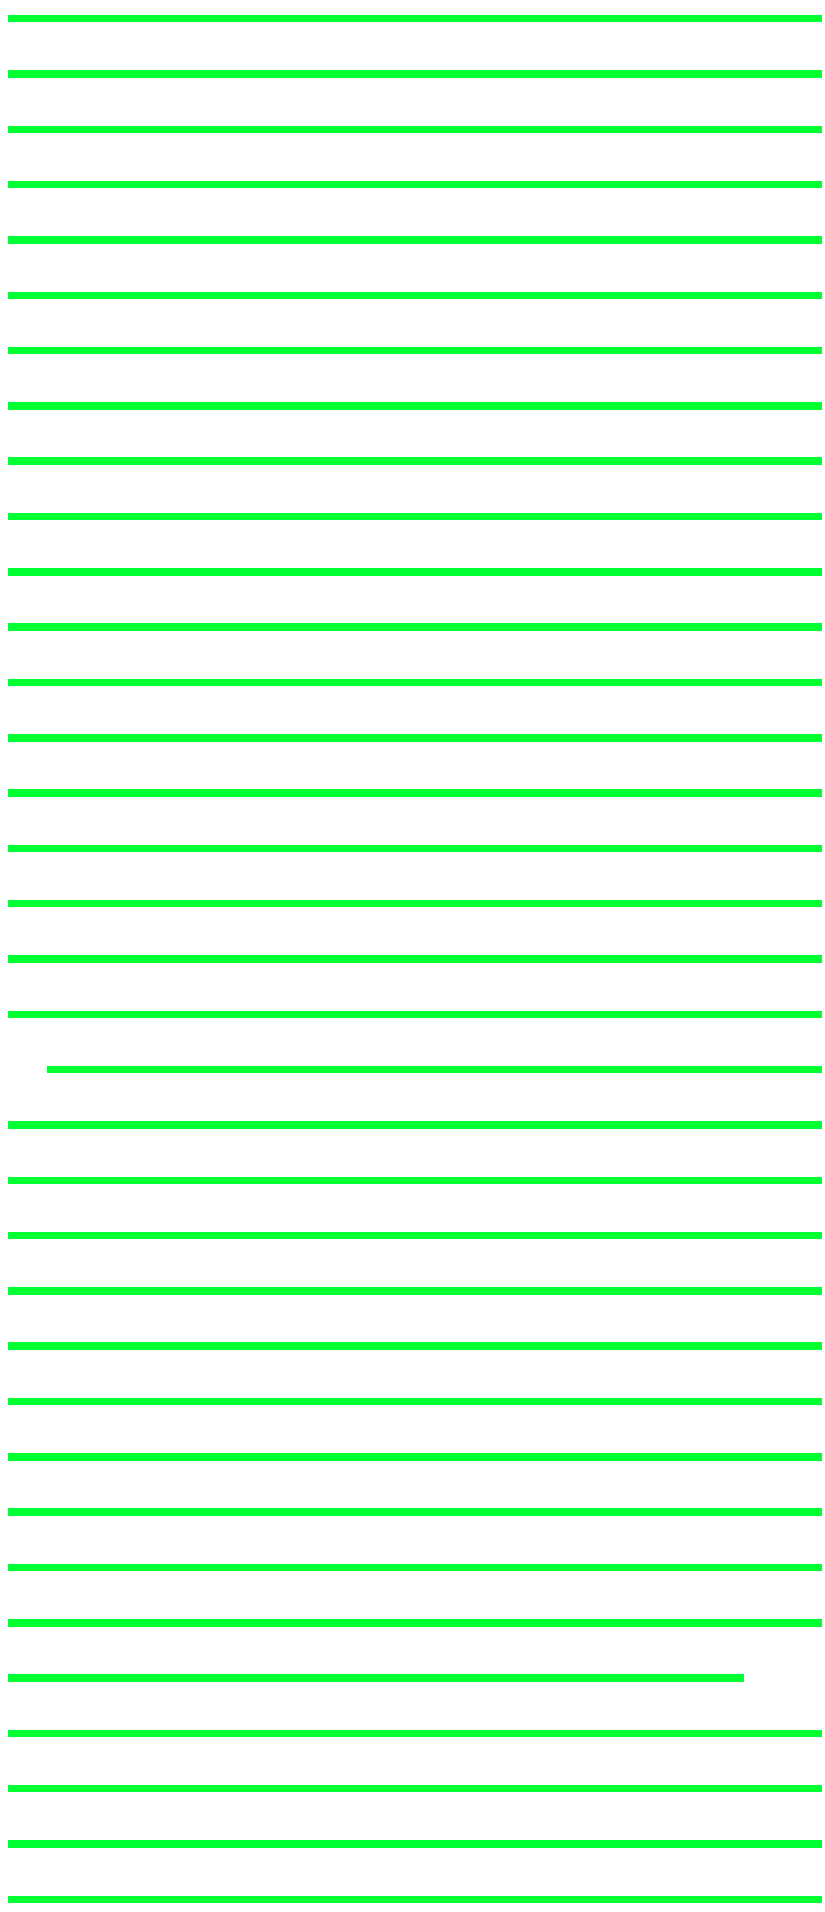



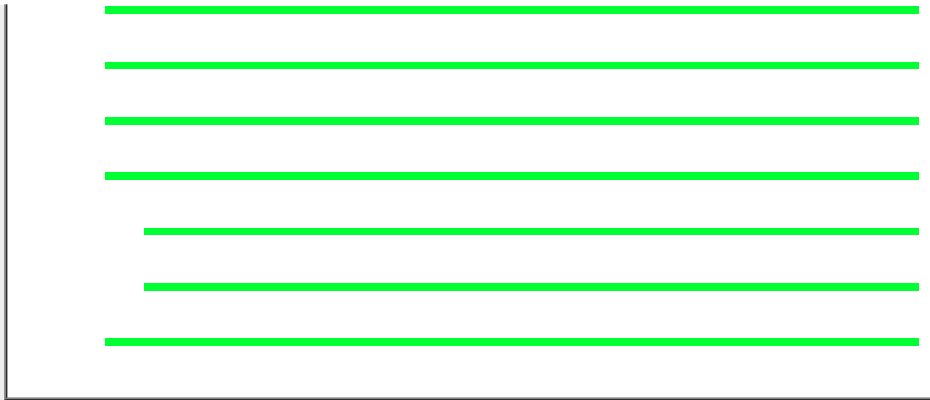

**Descriptions**

**Sequences producing significant alignments:**

Select: [All](#) [None](#) Selected:0

Alignments Download GenPept Graphics Distance tree of results Multiple alignment

| Description                                                                 | Max score | Total score | Query cover | E value | Ident | Accession                                   |
|-----------------------------------------------------------------------------|-----------|-------------|-------------|---------|-------|---------------------------------------------|
| <a href="#">PREDICTED: LOW QUALITY PROTEIN: selenoprotein P [Rhinopitil</a> | 69.8      | 69.8        | 100%        | 4e-12   | 100%  | <a href="#">gij724878613 XP_010372696.1</a> |
| <a href="#">PREDICTED: LOW QUALITY PROTEIN: selenoprotein P [Papio ar</a>   | 69.8      | 69.8        | 100%        | 4e-12   | 100%  | <a href="#">gij685545348 XP_009206607.1</a> |
| <a href="#">PREDICTED: LOW QUALITY PROTEIN: selenoprotein P [Pan pan</a>    | 69.8      | 69.8        | 100%        | 4e-12   | 100%  | <a href="#">gij675710689 XP_008961588.1</a> |
| <a href="#">PREDICTED: LOW QUALITY PROTEIN: selenoprotein P [Chloroce</a>   | 69.8      | 69.8        | 100%        | 4e-12   | 100%  | <a href="#">gij635028004 XP_007959679.1</a> |
| <a href="#">Selenoprotein P, plasma, 1 [Homo sapiens]</a>                   | 69.8      | 69.8        | 100%        | 4e-12   | 100%  | <a href="#">gij34783648 AAH46152.1</a>      |
| <a href="#">Selenoprotein P, plasma, 1 [Homo sapiens]</a>                   | 69.8      | 69.8        | 100%        | 4e-12   | 100%  | <a href="#">gij34783164 AAH15875.1</a>      |
| <a href="#">selenoprotein P isoform 1 precursor [Homo sapiens]</a>          | 69.8      | 69.8        | 100%        | 4e-12   | 100%  | <a href="#">gij62530391 NP_005401.3</a>     |
| <a href="#">Selenoprotein P, plasma, 1 [Homo sapiens]</a>                   | 69.8      | 69.8        | 100%        | 4e-12   | 100%  | <a href="#">gij37596694 AAH58919.1</a>      |
| <a href="#">PREDICTED: LOW QUALITY PROTEIN: selenoprotein P [Nomasci</a>    | 69.8      | 69.8        | 100%        | 4e-12   | 100%  | <a href="#">gij332250603 XP_003274442.1</a> |
| <a href="#">selenoprotein P [Homo sapiens]</a>                              | 69.8      | 69.8        | 100%        | 4e-12   | 100%  | <a href="#">gij312004116 CAA77836.2</a>     |
| <a href="#">selenoprotein P precursor [Macaca mulatta]</a>                  | 69.8      | 69.8        | 100%        | 4e-12   | 100%  | <a href="#">gij226958322 NP_001152962.1</a> |
| <a href="#">selenoprotein P precursor [Pan troglodytes]</a>                 | 69.8      | 69.8        | 100%        | 4e-12   | 100%  | <a href="#">gij169403955 NP_001108587.1</a> |
| <a href="#">selenoprotein P isoform 2 [Homo sapiens]</a>                    | 69.8      | 69.8        | 100%        | 4e-12   | 100%  | <a href="#">gij148277022 NP_001087195.1</a> |
| <a href="#">PREDICTED: LOW QUALITY PROTEIN: selenoprotein P [Balaeno</a>    | 67.2      | 67.2        | 100%        | 3e-11   | 95%   | <a href="#">gij594696840 XP_007195596.1</a> |
| <a href="#">PREDICTED: LOW QUALITY PROTEIN: selenoprotein P [Lipotes \</a>  | 67.2      | 67.2        | 100%        | 3e-11   | 95%   | <a href="#">gij602724444 XP_007447694.1</a> |
| <a href="#">PREDICTED: LOW QUALITY PROTEIN: selenoprotein P [Orcinus \</a>  | 67.2      | 67.2        | 100%        | 3e-11   | 95%   | <a href="#">gij465986750 XP_004266005.1</a> |
| <a href="#">PREDICTED: LOW QUALITY PROTEIN: selenoprotein P [Physeter</a>   | 67.2      | 67.2        | 100%        | 3e-11   | 95%   | <a href="#">gij593761497 XP_007119423.1</a> |
| <a href="#">PREDICTED: LOW QUALITY PROTEIN: selenoprotein P [Tursiops</a>   | 67.2      | 67.2        | 100%        | 3e-11   | 95%   | <a href="#">gij470626535 XP_004320390.1</a> |
| <a href="#">PREDICTED: LOW QUALITY PROTEIN: selenoprotein P [Bison bis</a>  | 67.2      | 67.2        | 100%        | 3e-11   | 95%   | <a href="#">gij742088280 XP_010831114.1</a> |
| <a href="#">selenoprotein P [Bos taurus]</a>                                | 67.2      | 67.2        | 100%        | 3e-11   | 95%   | <a href="#">gij6006351 BAA84781.1</a>       |
| <a href="#">PREDICTED: LOW QUALITY PROTEIN: selenoprotein P [Bos mut</a>    | 67.2      | 67.2        | 100%        | 3e-11   | 95%   | <a href="#">gij555965745 XP_005894930.1</a> |
| <a href="#">selenoprotein P-like protein [Bos taurus]</a>                   | 67.2      | 67.2        | 100%        | 3e-11   | 95%   | <a href="#">gij1582026 2117379A</a>         |
| <a href="#">selenoprotein P like protein [Bos taurus]</a>                   | 67.2      | 67.2        | 100%        | 3e-11   | 95%   | <a href="#">gij14970947 BAA04949.2</a>      |
| <a href="#">selenoprotein P precursor [Bos taurus]</a>                      | 67.2      | 67.2        | 100%        | 3e-11   | 95%   | <a href="#">gij156631001 NP_776884.2</a>    |
| <a href="#">PREDICTED: selenoprotein P [Otolemur garnettii]</a>             | 65.5      | 65.5        | 100%        | 9e-11   | 95%   | <a href="#">gij395840394 XP_003793045.1</a> |
| <a href="#">PREDICTED: LOW QUALITY PROTEIN: selenoprotein P [Ictidomy</a>   | 65.5      | 65.5        | 100%        | 1e-10   | 95%   | <a href="#">gij532079811 XP_005325668.1</a> |
| <a href="#">selenoprotein P precursor [Pongo abelii]</a>                    | 64.3      | 64.3        | 100%        | 3e-10   | 95%   | <a href="#">gij197101233 NP_001127462.1</a> |
| <a href="#">membrane selenoprotein P [Capra hircus]</a>                     | 63.0      | 63.0        | 100%        | 6e-10   | 90%   | <a href="#">gij7677620 AAF67201.1</a>       |

|                                                                             |      |      |      |       |     |                                             |
|-----------------------------------------------------------------------------|------|------|------|-------|-----|---------------------------------------------|
| <a href="#">selenoprotein P, plasma, 1 precursor [Capra hircus]</a>         | 63.0 | 63.0 | 100% | 8e-10 | 90% | <a href="#">gij550822255 NP_001272511.1</a> |
| PREDICTED: LOW QUALITY PROTEIN: <a href="#">selenoprotein P [Ovis arie]</a> | 63.0 | 63.0 | 100% | 8e-10 | 90% | <a href="#">gij426246564 XP_004017062.1</a> |
| PREDICTED: LOW QUALITY PROTEIN: <a href="#">selenoprotein P [Nannosq]</a>   | 63.0 | 63.0 | 100% | 8e-10 | 90% | <a href="#">gij674066756 XP_008840327.1</a> |
| PREDICTED: LOW QUALITY PROTEIN: <a href="#">selenoprotein P [Ceratoth]</a>  | 63.0 | 63.0 | 100% | 8e-10 | 90% | <a href="#">gij478496995 XP_004422836.1</a> |
| <a href="#">selenoprotein P precursor [Sus scrofa]</a>                      | 63.0 | 63.0 | 100% | 8e-10 | 90% | <a href="#">gij198282079 NP_001128295.1</a> |
| PREDICTED: LOW QUALITY PROTEIN: <a href="#">selenoprotein P [Jaculus]</a>   | 62.6 | 62.6 | 95%  | 1e-09 | 95% | <a href="#">gij507537041 XP_004652550.1</a> |
| PREDICTED: LOW QUALITY PROTEIN: <a href="#">selenoprotein P [Bubalus]</a>   | 62.1 | 62.1 | 100% | 2e-09 | 86% | <a href="#">gij594087306 XP_006067130.1</a> |
| PREDICTED: LOW QUALITY PROTEIN: <a href="#">selenoprotein P [Equus p]</a>   | 60.4 | 60.4 | 100% | 6e-09 | 86% | <a href="#">gij664731166 XP_008522793.1</a> |
| <a href="#">selenoprotein P precursor [Equus caballus]</a>                  | 60.4 | 60.4 | 100% | 6e-09 | 86% | <a href="#">gij208022673 NP_001129077.1</a> |
| PREDICTED: LOW QUALITY PROTEIN: <a href="#">selenoprotein P [Saimiri b]</a> | 59.6 | 59.6 | 100% | 1e-08 | 86% | <a href="#">gij725563213 XP_003925940.2</a> |
| <a href="#">selenoprotein P precursor [Callithrix jacchus]</a>              | 59.6 | 59.6 | 100% | 1e-08 | 86% | <a href="#">gij315630400 NP_001186857.1</a> |
| <a href="#">selenoprotein P [Bubalus bubalis]</a>                           | 59.6 | 59.6 | 100% | 1e-08 | 86% | <a href="#">gij430001945 AFM77782.2</a>     |
| PREDICTED: LOW QUALITY PROTEIN: <a href="#">selenoprotein P [Ochoton]</a>   | 58.7 | 58.7 | 100% | 2e-08 | 86% | <a href="#">gij504142600 XP_004583736.1</a> |
| PREDICTED: LOW QUALITY PROTEIN: <a href="#">selenoprotein P [Tarsius s]</a> | 58.3 | 58.3 | 100% | 3e-08 | 81% | <a href="#">gij640790108 XP_008050904.1</a> |
| PREDICTED: LOW QUALITY PROTEIN: <a href="#">selenoprotein P [Tupaia c]</a>  | 57.9 | 57.9 | 100% | 4e-08 | 86% | <a href="#">gij562878609 XP_006167023.1</a> |
| PREDICTED: LOW QUALITY PROTEIN: <a href="#">selenoprotein P [Vicugna]</a>   | 57.5 | 57.5 | 100% | 6e-08 | 81% | <a href="#">gij560970802 XP_006207756.1</a> |
| PREDICTED: LOW QUALITY PROTEIN: <a href="#">selenoprotein P [Octodon]</a>   | 57.1 | 57.1 | 90%  | 8e-08 | 89% | <a href="#">gij507690845 XP_004641866.1</a> |
| PREDICTED: LOW QUALITY PROTEIN: <a href="#">selenoprotein P [Oryctero]</a>  | 56.6 | 56.6 | 100% | 1e-07 | 81% | <a href="#">gij634885032 XP_007952213.1</a> |
| PREDICTED: LOW QUALITY PROTEIN: <a href="#">selenoprotein P [Myotis b]</a>  | 56.6 | 56.6 | 100% | 1e-07 | 81% | <a href="#">gij554563465 XP_005876061.1</a> |
| PREDICTED: LOW QUALITY PROTEIN: <a href="#">selenoprotein P [Chinchill]</a> | 56.6 | 56.6 | 100% | 1e-07 | 81% | <a href="#">gij533143496 XP_005386312.1</a> |
| <a href="#">selenoprotein P precursor [Oryctolagus cuniculus]</a>           | 56.6 | 56.6 | 100% | 1e-07 | 81% | <a href="#">gij315434200 NP_001186775.1</a> |
| PREDICTED: LOW QUALITY PROTEIN: <a href="#">selenoprotein P [Elephan]</a>   | 56.2 | 56.2 | 100% | 2e-07 | 81% | <a href="#">gij585672710 XP_006889619.1</a> |
| PREDICTED: LOW QUALITY PROTEIN: <a href="#">selenoprotein P [Dasypus]</a>   | 55.4 | 55.4 | 100% | 3e-07 | 81% | <a href="#">gij488512454 XP_004448278.1</a> |
| PREDICTED: LOW QUALITY PROTEIN: <a href="#">selenoprotein P [Camelus]</a>   | 54.9 | 54.9 | 100% | 4e-07 | 81% | <a href="#">gij744538058 XP_010999134.1</a> |
| PREDICTED: LOW QUALITY PROTEIN: <a href="#">selenoprotein P [Camelus]</a>   | 54.9 | 54.9 | 100% | 4e-07 | 81% | <a href="#">gij560931717 XP_006191986.1</a> |
| PREDICTED: LOW QUALITY PROTEIN: <a href="#">selenoprotein P [Peromys]</a>   | 53.7 | 53.7 | 95%  | 1e-06 | 85% | <a href="#">gij589969345 XP_006997157.1</a> |
| PREDICTED: LOW QUALITY PROTEIN: <a href="#">selenoprotein P [Ornithor]</a>  | 53.2 | 53.2 | 95%  | 1e-06 | 80% | <a href="#">gij620968705 XP_007654576.1</a> |
| PREDICTED: LOW QUALITY PROTEIN: <a href="#">selenoprotein P [Myotis l]</a>  | 53.2 | 53.2 | 100% | 2e-06 | 81% | <a href="#">gij558205011 XP_006106371.1</a> |
| PREDICTED: LOW QUALITY PROTEIN: <a href="#">selenoprotein P [Mustela]</a>   | 53.2 | 53.2 | 100% | 2e-06 | 81% | <a href="#">gij511826454 XP_004738001.1</a> |
| PREDICTED: LOW QUALITY PROTEIN: <a href="#">selenoprotein P [Leptony]</a>   | 53.2 | 53.2 | 100% | 2e-06 | 81% | <a href="#">gij585192742 XP_006747601.1</a> |
| PREDICTED: LOW QUALITY PROTEIN: <a href="#">selenoprotein P [Odobent]</a>   | 53.2 | 53.2 | 100% | 2e-06 | 81% | <a href="#">gij472379594 XP_004409206.1</a> |
| <a href="#">Selenoprotein P [Heterocephalus glaber]</a>                     | 52.8 | 52.8 | 100% | 2e-06 | 76% | <a href="#">gij351695949 EHA98867.1</a>     |
| PREDICTED: LOW QUALITY PROTEIN: <a href="#">selenoprotein P [Galeopte]</a>  | 52.8 | 52.8 | 100% | 2e-06 | 81% | <a href="#">gij667253652 XP_008564915.1</a> |
| PREDICTED: LOW QUALITY PROTEIN: <a href="#">selenoprotein P [Eptesicu]</a>  | 52.8 | 52.8 | 100% | 2e-06 | 76% | <a href="#">gij641727491 XP_008153843.1</a> |
| PREDICTED: LOW QUALITY PROTEIN: <a href="#">selenoprotein P [Monodel]</a>   | 52.8 | 52.8 | 95%  | 2e-06 | 80% | <a href="#">gij612006645 XP_003340675.2</a> |
| PREDICTED: LOW QUALITY PROTEIN: <a href="#">selenoprotein P [Heteroce]</a>  | 52.8 | 52.8 | 100% | 2e-06 | 76% | <a href="#">gij512973043 XP_004848622.1</a> |
| PREDICTED: LOW QUALITY PROTEIN: <a href="#">selenoprotein P [Heteroce]</a>  | 52.8 | 52.8 | 100% | 2e-06 | 76% | <a href="#">gij512816050 XP_004878213.1</a> |
| PREDICTED: LOW QUALITY PROTEIN: <a href="#">selenoprotein P [Fukomys]</a>   | 52.4 | 52.4 | 100% | 3e-06 | 76% | <a href="#">gij731237262 XP_010632183.1</a> |
| PREDICTED: LOW QUALITY PROTEIN: <a href="#">selenoprotein P [Loxodon]</a>   | 52.4 | 52.4 | 100% | 3e-06 | 71% | <a href="#">gij731464182 XP_010586424.1</a> |
| PREDICTED: LOW QUALITY PROTEIN: <a href="#">selenoprotein P [Trichech]</a>  | 52.0 | 52.0 | 100% | 4e-06 | 76% | <a href="#">gij471413922 XP_004388500.1</a> |
| PREDICTED: LOW QUALITY PROTEIN: <a href="#">selenoprotein P [Felis cat]</a> | 51.1 | 51.1 | 90%  | 7e-06 | 84% | <a href="#">gij586975923 XP_006928143.1</a> |
| PREDICTED: LOW QUALITY PROTEIN: <a href="#">selenoprotein P [Panthera]</a>  | 51.1 | 51.1 | 90%  | 8e-06 | 84% | <a href="#">gij591339998 XP_007095490.1</a> |
| PREDICTED: LOW QUALITY PROTEIN: <a href="#">selenoprotein P [Myotis d]</a>  | 50.7 | 50.7 | 100% | 1e-05 | 71% | <a href="#">gij584060316 XP_006774623.1</a> |
| PREDICTED: <a href="#">selenoprotein P [Sarcophilus harrisii]</a>           | 50.3 | 50.3 | 95%  | 1e-05 | 80% | <a href="#">gij395511426 XP_003759960.1</a> |
| PREDICTED: LOW QUALITY PROTEIN: <a href="#">selenoprotein P [Condylu]</a>   | 50.3 | 50.3 | 76%  | 1e-05 | 88% | <a href="#">gij507934338 XP_004678402.1</a> |
| PREDICTED: LOW QUALITY PROTEIN: <a href="#">selenoprotein P [Microtus]</a>  | 49.8 | 49.8 | 95%  | 2e-05 | 80% | <a href="#">gij532054271 XP_005369861.1</a> |

|                                                                            |      |      |      |       |     |                                             |
|----------------------------------------------------------------------------|------|------|------|-------|-----|---------------------------------------------|
| <a href="#">selenoprotein P precursor [Canis lupus familiaris]</a>         | 49.8 | 49.8 | 100% | 2e-05 | 76% | <a href="#">gij169403968 NP_001108590.1</a> |
| PREDICTED: LOW QUALITY PROTEIN: <a href="#">selenoprotein P [Ursus m</a>   | 49.8 | 49.8 | 100% | 2e-05 | 76% | <a href="#">gij670999853 XP_008690806.1</a> |
| PREDICTED: LOW QUALITY PROTEIN: <a href="#">selenoprotein P [Sorex ar</a>  | 48.6 | 48.6 | 95%  | 5e-05 | 75% | <a href="#">gij505790024 XP_004605590.1</a> |
| PREDICTED: LOW QUALITY PROTEIN: <a href="#">selenoprotein P [Echinop</a>   | 48.6 | 48.6 | 100% | 5e-05 | 71% | <a href="#">gij507708621 XP_004716992.1</a> |
| PREDICTED: LOW QUALITY PROTEIN: <a href="#">selenoprotein P [Erinaceu</a>  | 48.1 | 48.1 | 100% | 7e-05 | 71% | <a href="#">gij617575753 XP_007517681.1</a> |
| <a href="#">Selenoprotein P [Cricetulus griseus]</a>                       | 47.7 | 47.7 | 95%  | 9e-05 | 75% | <a href="#">gij344247936 EGW04040.1</a>     |
| <a href="#">selenoprotein P precursor [Cricetulus griseus]</a>             | 47.7 | 47.7 | 95%  | 1e-04 | 75% | <a href="#">gij537231220 ERE84145.1</a>     |
| <a href="#">selenoprotein P precursor [Cricetulus griseus]</a>             | 47.7 | 47.7 | 95%  | 1e-04 | 75% | <a href="#">gij379056379 NP_001243807.1</a> |
| PREDICTED: LOW QUALITY PROTEIN: <a href="#">selenoprotein P. plasma.</a>   | 46.9 | 46.9 | 95%  | 2e-04 | 80% | <a href="#">gij524973435 XP_005139283.1</a> |
| PREDICTED: LOW QUALITY PROTEIN: <a href="#">selenoprotein P [Chrysol</a>   | 46.4 | 46.4 | 100% | 3e-04 | 71% | <a href="#">gij586493836 XP_006877364.1</a> |
| PREDICTED: LOW QUALITY PROTEIN: <a href="#">selenoprotein P [Pelodisc</a>  | 45.6 | 45.6 | 85%  | 5e-04 | 83% | <a href="#">gij558231946 XP_006139560.1</a> |
| <a href="#">selenoprotein P. plasma. 1. isoform CRA_a [Mus musculus]</a>   | 44.8 | 44.8 | 95%  | 9e-04 | 75% | <a href="#">gij148671458 EDL03405.1</a>     |
| <a href="#">Selenoprotein P. plasma. 1 [Mus musculus]</a>                  | 44.8 | 44.8 | 95%  | 0.001 | 75% | <a href="#">gij34809553 AAH01991.2</a>      |
| <a href="#">plasma selenoprotein P [Mus musculus]</a>                      | 44.8 | 44.8 | 95%  | 0.001 | 75% | <a href="#">gij4103142 AAD01684.1</a>       |
| <a href="#">unnamed protein product [Mus musculus]</a>                     | 44.8 | 44.8 | 95%  | 0.001 | 75% | <a href="#">gij74198358 BAE39664.1</a>      |
| <a href="#">unnamed protein product [Mus musculus]</a>                     | 44.8 | 44.8 | 95%  | 0.001 | 75% | <a href="#">gij74192879 BAE34948.1</a>      |
| <a href="#">selenoprotein P precursor [Mus musculus]</a>                   | 44.8 | 44.8 | 95%  | 0.001 | 75% | <a href="#">gij74271806 NP_033181.3</a>     |
| <a href="#">unnamed protein product [Mus musculus]</a>                     | 44.8 | 44.8 | 95%  | 0.001 | 75% | <a href="#">gij74213751 BAC55264.3</a>      |
| <a href="#">selenoprotein P precursor [Rattus norvegicus]</a>              | 44.8 | 44.8 | 95%  | 0.001 | 75% | <a href="#">gij15011857 NP_062065.2</a>     |
| PREDICTED: LOW QUALITY PROTEIN: <a href="#">selenoprotein P [Opisthoc</a>  | 42.2 | 42.2 | 90%  | 0.006 | 79% | <a href="#">gij700402061 XP_009941970.1</a> |
| <a href="#">selenoprotein P precursor [Taeniopygia guttata]</a>            | 41.8 | 41.8 | 90%  | 0.009 | 74% | <a href="#">gij399567825 NP_001257806.1</a> |
| PREDICTED: LOW QUALITY PROTEIN: <a href="#">selenoprotein P [Alligator</a> | 41.4 | 41.4 | 66%  | 0.012 | 86% | <a href="#">gij557288151 XP_006026767.1</a> |
| PREDICTED: LOW QUALITY PROTEIN: <a href="#">selenoprotein P [Phalacro</a>  | 41.4 | 41.4 | 85%  | 0.012 | 78% | <a href="#">gij695138937 XP_009511852.1</a> |
| PREDICTED: LOW QUALITY PROTEIN: <a href="#">selenoprotein P [Phaetho</a>   | 41.4 | 41.4 | 85%  | 0.012 | 78% | <a href="#">gij723136355 XP_010284851.1</a> |
| PREDICTED: LOW QUALITY PROTEIN: <a href="#">selenoprotein P [Gavia st</a>  | 41.4 | 41.4 | 85%  | 0.012 | 78% | <a href="#">gij698446985 XP_009818154.1</a> |
| PREDICTED: LOW QUALITY PROTEIN: <a href="#">selenoprotein P [Caprimu</a>   | 41.4 | 41.4 | 85%  | 0.012 | 78% | <a href="#">gij704307382 XP_010164847.1</a> |

## Alignments

Download GenPept Graphics

Next Previous Descriptions

PREDICTED: LOW QUALITY PROTEIN: [selenoprotein P \[Rhinopithecus roxellana\]](#)

Sequence ID: [gij724878613|ref|XP\\_010372696.1](#) Length: 381 Number of Matches: 1

Range 1: 78 to 98 GenPept Graphics

Next Match Previous Match

| Score          | Expect | Identities  | Positives   | Gaps     |
|----------------|--------|-------------|-------------|----------|
| 69.8 bits(157) | 4e-12  | 21/21(100%) | 21/21(100%) | 0/21(0%) |

Query 1 KEGYSNISYIVVNHQGISSRL 21  
KEGYSNISYIVVNHQGISSRL  
Sbjct 78 KEGYSNISYIVVNHQGISSRL 98

### Related Information

[Gene](#) - associated gene details  
[Map Viewer](#) - aligned genomic context

Download GenPept Graphics

Next Previous Descriptions

PREDICTED: LOW QUALITY PROTEIN: [selenoprotein P \[Papio anubis\]](#)

Sequence ID: [gij685545348|ref|XP\\_009206607.1](#) Length: 381 Number of Matches: 1

Range 1: 78 to 98 GenPept Graphics

Next Match Previous Match

| Score          | Expect | Identities  | Positives   | Gaps     |
|----------------|--------|-------------|-------------|----------|
| 69.8 bits(157) | 4e-12  | 21/21(100%) | 21/21(100%) | 0/21(0%) |

Query 1 KEGYSNISYIVVNHQGISSRL 21  
KEGYSNISYIVVNHQGISSRL  
Sbjct 78 KEGYSNISYIVVNHQGISSRL 98

### Related Information

[Gene](#) - associated gene details  
[Map Viewer](#) - aligned genomic context

Download [GenPept](#) [Graphics](#)

▼ Next ▲ Previous ▲ Descriptions

**PREDICTED: LOW QUALITY PROTEIN: selenoprotein P [Pan paniscus]**

Sequence ID: [gi|675710689|ref|XP\\_008961588.1](#) Length: 381 Number of Matches: 1

Range 1: 78 to 98 [GenPept](#) [Graphics](#) ▼ Next Match ▲ Previous Match

| Score          | Expect | Identities  | Positives   | Gaps     |
|----------------|--------|-------------|-------------|----------|
| 69.8 bits(157) | 4e-12  | 21/21(100%) | 21/21(100%) | 0/21(0%) |

Query 1 KEGYSNISYIVVNHQGISSRL 21  
 KEGYSNISYIVVNHQGISSRL  
 Sbjct 78 KEGYSNISYIVVNHQGISSRL 98

**Related Information**

[Gene](#) - associated gene details  
[Map Viewer](#) - aligned genomic context

Download [GenPept](#) [Graphics](#)

▼ Next ▲ Previous ▲ Descriptions

**PREDICTED: LOW QUALITY PROTEIN: selenoprotein P [Chlorocebus sabaesus]**

Sequence ID: [gi|635028004|ref|XP\\_007959679.1](#) Length: 381 Number of Matches: 1

Range 1: 78 to 98 [GenPept](#) [Graphics](#) ▼ Next Match ▲ Previous Match

| Score          | Expect | Identities  | Positives   | Gaps     |
|----------------|--------|-------------|-------------|----------|
| 69.8 bits(157) | 4e-12  | 21/21(100%) | 21/21(100%) | 0/21(0%) |

Query 1 KEGYSNISYIVVNHQGISSRL 21  
 KEGYSNISYIVVNHQGISSRL  
 Sbjct 78 KEGYSNISYIVVNHQGISSRL 98

**Related Information**

[Gene](#) - associated gene details  
[Map Viewer](#) - aligned genomic context

Download [GenPept](#) [Graphics](#)

▼ Next ▲ Previous ▲ Descriptions

**Selenoprotein P, plasma, 1 [Homo sapiens]**

Sequence ID: [gi|34783648|gb|AAH46152.1](#) Length: 381 Number of Matches: 1

Range 1: 78 to 98 [GenPept](#) [Graphics](#) ▼ Next Match ▲ Previous Match

| Score          | Expect | Identities  | Positives   | Gaps     |
|----------------|--------|-------------|-------------|----------|
| 69.8 bits(157) | 4e-12  | 21/21(100%) | 21/21(100%) | 0/21(0%) |

Query 1 KEGYSNISYIVVNHQGISSRL 21  
 KEGYSNISYIVVNHQGISSRL  
 Sbjct 78 KEGYSNISYIVVNHQGISSRL 98

**Related Information**

[Gene](#) - associated gene details

BLAST is a registered trademark of the National Library of Medicine.

▶ NCBI/ BLAST/ blastp suite/ Formatting Results - BVKHEDWT01R

**i** Your search parameters were adjusted to search for a short input sequence.

[Edit and Resubmit](#) [Save Search Strategies](#) ▶ [Formatting options](#) ▶ [Download](#) [YouTube](#) [How to read this page](#) [Blast report description](#)

### SEPP1\_KKCGDCSLTLKD\_Mod

RID [BVKHEDWT01R](#) (Expires on 01-21 10:40 am)

**Query ID** |cl|337286  
**Description** None  
**Molecule type** amino acid  
**Query Length** 13

**Database Name** nr  
**Description** All non-redundant GenBank CDS translations+PDB+SwissProt+PIR+PRF excluding environmental samples from WGS projects  
**Program** BLASTP 2.2.30+ ▶ [Citation](#)

Other reports: ▶ [Search Summary](#) [[Taxonomy reports](#)] [[Distance tree of results](#)] [[Related Structures](#)] [[Multiple alignment](#)]

### **[-]** Graphic Summary

**[-]** [Show Conserved Domains](#)

No putative conserved domains have been detected

Distribution of 100 Blast Hits on the Query Sequence

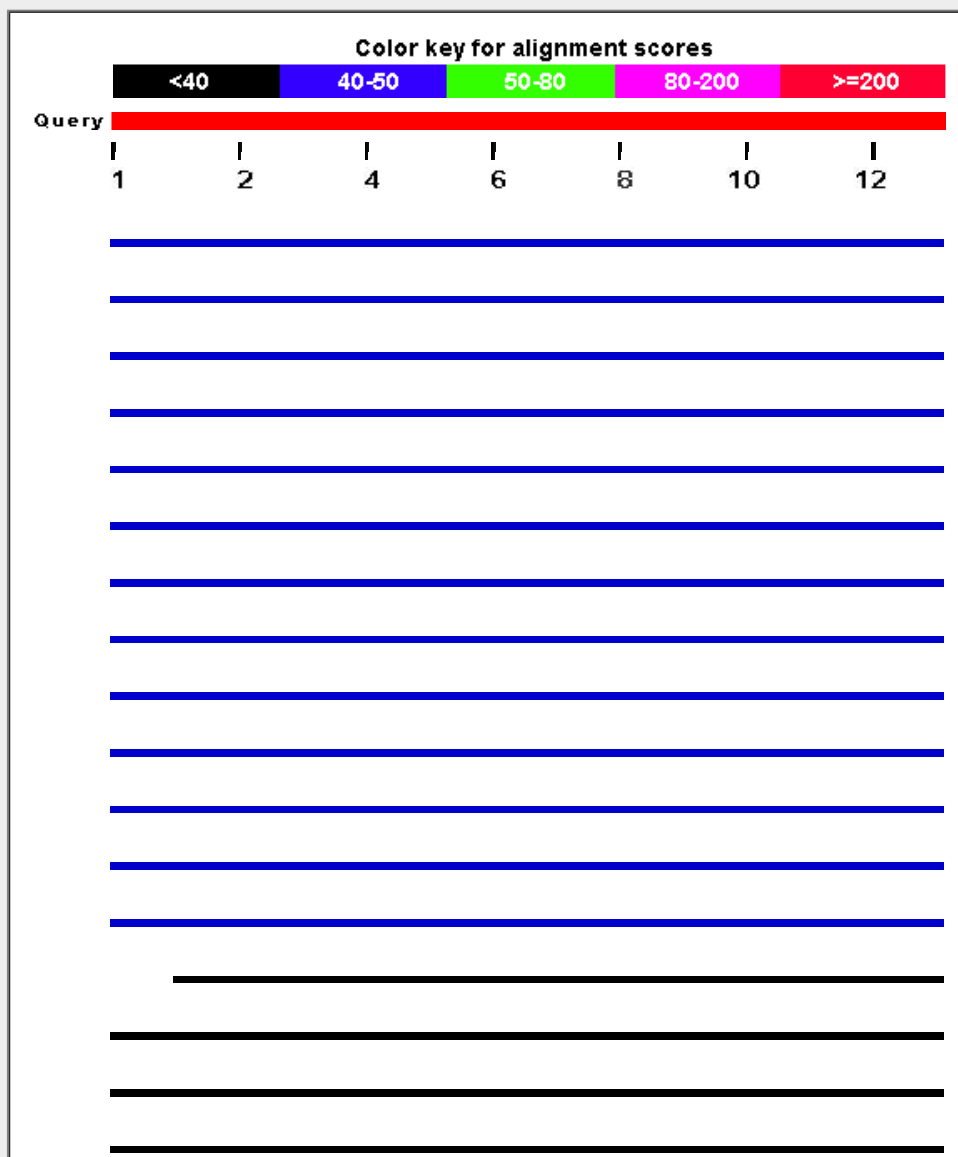

[Redacted content]

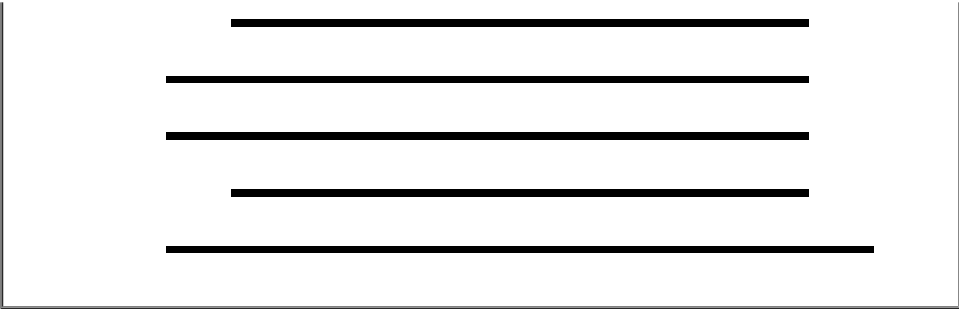

**Descriptions**

**Sequences producing significant alignments:**

Select: [All](#) [None](#) Selected:0

[Alignments](#)
[Download](#)
[GenPept](#)
[Graphics](#)
[Distance tree of results](#)
[Multiple alignment](#)

| Description                                                                            | Max score | Total score | Query cover | E value | Ident | Accession                      |
|----------------------------------------------------------------------------------------|-----------|-------------|-------------|---------|-------|--------------------------------|
| <a href="#">PREDICTED: LOW QUALITY PROTEIN: selenoprotein P [Saimiri boliviensis t</a> | 41.8      | 41.8        | 100%        | 0.004   | 92%   | <a href="#">XP_003925940.2</a> |
| <a href="#">PREDICTED: LOW QUALITY PROTEIN: selenoprotein P [Rhinopithecus roxe</a>    | 41.8      | 41.8        | 100%        | 0.004   | 92%   | <a href="#">XP_010372696.1</a> |
| <a href="#">PREDICTED: LOW QUALITY PROTEIN: selenoprotein P [Papio anubis]</a>         | 41.8      | 41.8        | 100%        | 0.004   | 92%   | <a href="#">XP_009206607.1</a> |
| <a href="#">PREDICTED: LOW QUALITY PROTEIN: selenoprotein P [Pan paniscus]</a>         | 41.8      | 41.8        | 100%        | 0.004   | 92%   | <a href="#">XP_008961588.1</a> |
| <a href="#">PREDICTED: LOW QUALITY PROTEIN: selenoprotein P [Chlorocebus sabae</a>     | 41.8      | 41.8        | 100%        | 0.004   | 92%   | <a href="#">XP_007959679.1</a> |
| <a href="#">Selenoprotein P, plasma, 1 [Homo sapiens]</a>                              | 41.8      | 41.8        | 100%        | 0.004   | 92%   | <a href="#">AAH46152.1</a>     |
| <a href="#">Selenoprotein P, plasma, 1 [Homo sapiens]</a>                              | 41.8      | 41.8        | 100%        | 0.004   | 92%   | <a href="#">AAH15875.1</a>     |
| <a href="#">selenoprotein P isoform 1 precursor [Homo sapiens]</a>                     | 41.8      | 41.8        | 100%        | 0.004   | 92%   | <a href="#">NP_005401.3</a>    |
| <a href="#">Selenoprotein P, plasma, 1 [Homo sapiens]</a>                              | 41.8      | 41.8        | 100%        | 0.004   | 92%   | <a href="#">AAH58919.1</a>     |
| <a href="#">selenoprotein P [Homo sapiens]</a>                                         | 41.8      | 41.8        | 100%        | 0.004   | 92%   | <a href="#">CAA77836.2</a>     |
| <a href="#">selenoprotein P precursor [Macaca mulatta]</a>                             | 41.8      | 41.8        | 100%        | 0.004   | 92%   | <a href="#">NP_001152962.1</a> |
| <a href="#">selenoprotein P precursor [Pan troglodytes]</a>                            | 41.8      | 41.8        | 100%        | 0.004   | 92%   | <a href="#">NP_001108587.1</a> |
| <a href="#">selenoprotein P isoform 2 [Homo sapiens]</a>                               | 41.8      | 41.8        | 100%        | 0.004   | 92%   | <a href="#">NP_001087195.1</a> |
| <a href="#">PREDICTED: LOW QUALITY PROTEIN: selenoprotein P [Tupaia chinensis]</a>     | 38.8      | 38.8        | 92%         | 0.040   | 92%   | <a href="#">XP_006167023.1</a> |
| <a href="#">PREDICTED: LOW QUALITY PROTEIN: selenoprotein P [Tarsius syrichta]</a>     | 37.1      | 37.1        | 100%        | 0.14    | 85%   | <a href="#">XP_008050904.1</a> |
| <a href="#">PREDICTED: LOW QUALITY PROTEIN: selenoprotein P [Trichechus manatu</a>     | 37.1      | 37.1        | 100%        | 0.14    | 85%   | <a href="#">XP_004388500.1</a> |
| <a href="#">PREDICTED: selenoprotein P [Otolemur garnettii]</a>                        | 36.3      | 36.3        | 100%        | 0.26    | 85%   | <a href="#">XP_003793045.1</a> |
| <a href="#">selenoprotein P precursor [Pongo abelii]</a>                               | 36.3      | 36.3        | 100%        | 0.27    | 92%   | <a href="#">NP_001127462.1</a> |
| <a href="#">PREDICTED: LOW QUALITY PROTEIN: selenoprotein P [Nomascus leucoge</a>      | 35.8      | 35.8        | 100%        | 0.38    | 85%   | <a href="#">XP_003274442.1</a> |
| <a href="#">PREDICTED: LOW QUALITY PROTEIN: selenoprotein P [Sorex araneus]</a>        | 35.4      | 35.4        | 84%         | 0.52    | 91%   | <a href="#">XP_004605590.1</a> |
| <a href="#">selenoprotein P precursor [Callithrix jacchus]</a>                         | 35.0      | 35.0        | 100%        | 0.72    | 77%   | <a href="#">NP_001186857.1</a> |
| <a href="#">PREDICTED: LOW QUALITY PROTEIN: selenoprotein P [Ceratotherium simu</a>    | 34.6      | 34.6        | 100%        | 0.98    | 85%   | <a href="#">XP_004422836.1</a> |
| <a href="#">selenoprotein P precursor [Sus scrofa]</a>                                 | 34.6      | 34.6        | 92%         | 0.98    | 83%   | <a href="#">NP_001128295.1</a> |
| <a href="#">PREDICTED: LOW QUALITY PROTEIN: selenoprotein P [Myotis davidii]</a>       | 34.1      | 34.1        | 92%         | 1.3     | 83%   | <a href="#">XP_006774623.1</a> |
| <a href="#">PREDICTED: LOW QUALITY PROTEIN: selenoprotein P [Myotis lucifugus]</a>     | 34.1      | 34.1        | 92%         | 1.3     | 83%   | <a href="#">XP_006106371.1</a> |
| <a href="#">PREDICTED: LOW QUALITY PROTEIN: selenoprotein P [Eptesicus fuscus]</a>     | 34.1      | 34.1        | 92%         | 1.3     | 83%   | <a href="#">XP_008153843.1</a> |
| <a href="#">PREDICTED: LOW QUALITY PROTEIN: selenoprotein P [Myotis brandtii]</a>      | 34.1      | 34.1        | 92%         | 1.3     | 83%   | <a href="#">XP_005876061.1</a> |
| <a href="#">PREDICTED: LOW QUALITY PROTEIN: selenoprotein P [Mustela putorius fu</a>   | 34.1      | 34.1        | 92%         | 1.3     | 79%   | <a href="#">XP_004738001.1</a> |
| <a href="#">PREDICTED: LOW QUALITY PROTEIN: selenoprotein P [Elephantulus edwa</a>     | 32.9      | 32.9        | 100%        | 3.5     | 77%   | <a href="#">XP_006889619.1</a> |

|                                                                                                  |      |      |      |     |     |                                |
|--------------------------------------------------------------------------------------------------|------|------|------|-----|-----|--------------------------------|
| <a href="#">PREDICTED: LOW QUALITY PROTEIN: selenoprotein P [Equus przewalskii]</a>              | 32.5 | 32.5 | 100% | 4.8 | 77% | <a href="#">XP_008522793.1</a> |
| <a href="#">selenoprotein P precursor [Equus caballus]</a>                                       | 32.5 | 32.5 | 100% | 4.8 | 77% | <a href="#">NP_001129077.1</a> |
| <a href="#">PREDICTED: LOW QUALITY PROTEIN: selenoprotein P [Microtus ochrogast]</a>             | 31.2 | 31.2 | 92%  | 12  | 75% | <a href="#">XP_005369861.1</a> |
| <a href="#">PREDICTED: LOW QUALITY PROTEIN: selenoprotein P [Peromyscus manic]</a>               | 31.2 | 31.2 | 92%  | 12  | 75% | <a href="#">XP_006997157.1</a> |
| <a href="#">methylthioribose kinase [Blautia sp. CAG:257]</a>                                    | 30.3 | 30.3 | 100% | 23  | 77% | <a href="#">WP_022068881.1</a> |
| <a href="#">selenoprotein P precursor [Cricetulus griseus]</a>                                   | 29.9 | 29.9 | 100% | 30  | 69% | <a href="#">ERE84145.1</a>     |
| <a href="#">PREDICTED: LOW QUALITY PROTEIN: selenoprotein P [Balaenoptera acut]</a>              | 29.9 | 29.9 | 92%  | 31  | 75% | <a href="#">XP_007195596.1</a> |
| <a href="#">PREDICTED: LOW QUALITY PROTEIN: selenoprotein P [Lipotes vexillifer]</a>             | 29.9 | 29.9 | 92%  | 31  | 75% | <a href="#">XP_007447694.1</a> |
| <a href="#">PREDICTED: LOW QUALITY PROTEIN: selenoprotein P [Physeter catodon]</a>               | 29.9 | 29.9 | 92%  | 31  | 75% | <a href="#">XP_007119423.1</a> |
| <a href="#">PREDICTED: LOW QUALITY PROTEIN: selenoprotein P [Chinchilla lanigera]</a>            | 29.9 | 29.9 | 92%  | 31  | 75% | <a href="#">XP_005386312.1</a> |
| <a href="#">PREDICTED: LOW QUALITY PROTEIN: selenoprotein P [Bubalus bubalis]</a>                | 29.9 | 29.9 | 92%  | 31  | 75% | <a href="#">XP_006067130.1</a> |
| <a href="#">selenoprotein P precursor [Canis lupus familiaris]</a>                               | 29.9 | 29.9 | 92%  | 31  | 75% | <a href="#">NP_001108590.1</a> |
| <a href="#">5-methylthioribose kinase [Blautia wexlerae]</a>                                     | 29.9 | 29.9 | 100% | 31  | 77% | <a href="#">WP_026649811.1</a> |
| <a href="#">hypothetical protein [Coraliomargarita akajimensis]</a>                              | 29.1 | 29.1 | 84%  | 49  | 73% | <a href="#">WP_013044828.1</a> |
| <a href="#">PREDICTED: LOW QUALITY PROTEIN: selenoprotein P [Nannospalax galii]</a>              | 29.1 | 29.1 | 92%  | 58  | 83% | <a href="#">XP_008840327.1</a> |
| <a href="#">Selenoprotein P [Heterocephalus glaber]</a>                                          | 28.6 | 28.6 | 92%  | 77  | 75% | <a href="#">EHA98867.1</a>     |
| <a href="#">PREDICTED: LOW QUALITY PROTEIN: selenoprotein P [Fukomys damarensis]</a>             | 28.6 | 28.6 | 92%  | 78  | 75% | <a href="#">XP_010632183.1</a> |
| <a href="#">PREDICTED: LOW QUALITY PROTEIN: selenoprotein P [Heterocephalus glaber]</a>          | 28.6 | 28.6 | 92%  | 79  | 75% | <a href="#">XP_004848622.1</a> |
| <a href="#">PREDICTED: LOW QUALITY PROTEIN: selenoprotein P [Heterocephalus glaber]</a>          | 28.6 | 28.6 | 92%  | 79  | 75% | <a href="#">XP_004878213.1</a> |
| <a href="#">PREDICTED: LOW QUALITY PROTEIN: selenoprotein P [Echinops telfairi]</a>              | 28.6 | 28.6 | 100% | 79  | 69% | <a href="#">XP_004716992.1</a> |
| <a href="#">hypothetical protein [Ruminococcus sp. JC304]</a>                                    | 28.6 | 28.6 | 100% | 79  | 77% | <a href="#">WP_019162697.1</a> |
| <a href="#">uncharacterized protein [Bacteroides sp. CAG:20]</a>                                 | 28.2 | 28.2 | 69%  | 106 | 89% | <a href="#">WP_021891142.1</a> |
| <a href="#">hypothetical protein [Barnesiella intestinihominis]</a>                              | 28.2 | 28.2 | 69%  | 106 | 89% | <a href="#">WP_008862596.1</a> |
| <a href="#">PREDICTED: LOW QUALITY PROTEIN: selenoprotein P [Orcinus orca]</a>                   | 28.2 | 28.2 | 76%  | 107 | 80% | <a href="#">XP_004266005.1</a> |
| <a href="#">PREDICTED: LOW QUALITY PROTEIN: selenoprotein P [Tursiops truncatus]</a>             | 28.2 | 28.2 | 76%  | 107 | 80% | <a href="#">XP_004320390.1</a> |
| <a href="#">hypothetical protein Esi_0352_0027 [Ectocarpus siliculosus]</a>                      | 28.2 | 28.2 | 69%  | 109 | 89% | <a href="#">CBJ32646.1</a>     |
| <a href="#">zinc finger protein [Loa loa]</a>                                                    | 28.2 | 28.2 | 84%  | 109 | 73% | <a href="#">XP_003137480.1</a> |
| <a href="#">PREDICTED: LOW QUALITY PROTEIN: selenoprotein P [Panthera tigris altaica]</a>        | 27.8 | 27.8 | 76%  | 146 | 80% | <a href="#">XP_007095490.1</a> |
| <a href="#">hypothetical protein [Butyrivibrio sp. XPD2002]</a>                                  | 27.8 | 27.8 | 84%  | 146 | 75% | <a href="#">WP_026491875.1</a> |
| <a href="#">dNA internalization-related competence protein ComEC/Rec2 [Firmicutes bacterium]</a> | 27.8 | 27.8 | 76%  | 149 | 80% | <a href="#">WP_022367536.1</a> |
| <a href="#">hypothetical protein M438DRAFT_345168 [Aureobasidium pullulans EXF-150]</a>          | 27.4 | 27.4 | 76%  | 197 | 80% | <a href="#">KEQ84957.1</a>     |
| <a href="#">PREDICTED: uncharacterized protein LOC102600716 [Solanum tuberosum]</a>              | 27.4 | 27.4 | 76%  | 198 | 80% | <a href="#">XP_006356388.1</a> |
| <a href="#">PREDICTED: oocyte zinc finger protein XICOF6-like [Erinaceus europaeus]</a>          | 27.4 | 27.4 | 76%  | 202 | 75% | <a href="#">XP_007538022.1</a> |
| <a href="#">leucyl-tRNA synthetase [Candidatus Portiera aleyrodidarum]</a>                       | 27.4 | 27.4 | 84%  | 202 | 73% | <a href="#">WP_014943273.1</a> |
| <a href="#">leucyl-tRNA synthetase [Candidatus Portiera aleyrodidarum]</a>                       | 27.4 | 27.4 | 84%  | 202 | 73% | <a href="#">WP_014895123.1</a> |
| <a href="#">PREDICTED: LOW QUALITY PROTEIN: selenoprotein P [Galeopterus variegatus]</a>         | 26.9 | 26.9 | 100% | 269 | 69% | <a href="#">XP_008564915.1</a> |
| <a href="#">selenoprotein P precursor [Rattus norvegicus]</a>                                    | 26.9 | 26.9 | 100% | 270 | 62% | <a href="#">NP_062065.2</a>    |
| <a href="#">PREDICTED: LOW QUALITY PROTEIN: selenoprotein P [Odobenus rosmarus]</a>              | 26.9 | 26.9 | 69%  | 270 | 89% | <a href="#">XP_004409206.1</a> |
| <a href="#">PREDICTED: neurogenic locus notch homolog protein 2 [Callorhinchus milii]</a>        | 26.9 | 26.9 | 76%  | 278 | 90% | <a href="#">XP_007901212.1</a> |
| <a href="#">RNA-binding protein (NOP10, NOLA3) [uncultured marine thaumarchaeote K1]</a>         | 26.5 | 26.5 | 92%  | 287 | 67% | <a href="#">AIF05018.1</a>     |
| <a href="#">Neuroparsin-A [Zootermopsis nevadensis]</a>                                          | 26.5 | 26.5 | 76%  | 335 | 80% | <a href="#">KDR17790.1</a>     |
| <a href="#">MULTISPECIES: fimbria A protein [Serratia]</a>                                       | 26.5 | 26.5 | 69%  | 352 | 78% | <a href="#">WP_013814891.1</a> |
| <a href="#">aminobenzoate synthetase [Helicobacter bilis]</a>                                    | 26.5 | 26.5 | 69%  | 354 | 89% | <a href="#">WP_034564808.1</a> |
| <a href="#">PREDICTED: LOW QUALITY PROTEIN: selenoprotein P [Felis catus]</a>                    | 26.5 | 26.5 | 61%  | 355 | 88% | <a href="#">XP_006928143.1</a> |
| <a href="#">ferric iron reductase [Saccharothrix syringae]</a>                                   | 26.5 | 26.5 | 61%  | 358 | 88% | <a href="#">WP_033434995.1</a> |



|                                                                                        |      |      |     |     |     |                                |
|----------------------------------------------------------------------------------------|------|------|-----|-----|-----|--------------------------------|
| <a href="#">Deoxyribonuclease, TatD family [Giardia lamblia ATCC 50803]</a>            | 26.5 | 26.5 | 61% | 365 | 88% | <a href="#">XP_001704151.1</a> |
| <a href="#">Putative DNase, TatD family protein [Giardia intestinalis]</a>             | 26.5 | 26.5 | 61% | 365 | 88% | <a href="#">ESU35103.1</a>     |
| <a href="#">PREDICTED: LOW QUALITY PROTEIN: selenoprotein P [Bison bison bison]</a>    | 26.5 | 26.5 | 92% | 367 | 67% | <a href="#">XP_010831114.1</a> |
| <a href="#">selenoprotein P [Bos taurus]</a>                                           | 26.5 | 26.5 | 92% | 367 | 67% | <a href="#">BAA84781.1</a>     |
| <a href="#">PREDICTED: LOW QUALITY PROTEIN: selenoprotein P [Bos mutus]</a>            | 26.5 | 26.5 | 92% | 367 | 67% | <a href="#">XP_005894930.1</a> |
| <a href="#">selenoprotein P precursor [Bos taurus]</a>                                 | 26.5 | 26.5 | 92% | 368 | 67% | <a href="#">NP_776884.2</a>    |
| <a href="#">selenoprotein P [Bubalus bubalis]</a>                                      | 26.5 | 26.5 | 92% | 368 | 67% | <a href="#">AFM77782.2</a>     |
| <a href="#">mur ligase middle domain protein [Clostridium sp. CAG:217]</a>             | 26.5 | 26.5 | 69% | 368 | 90% | <a href="#">WP_022194186.1</a> |
| <a href="#">hypothetical protein AMTR_s00056p00139340 [Amborella trichopoda]</a>       | 26.5 | 26.5 | 84% | 368 | 64% | <a href="#">XP_006853693.1</a> |
| <a href="#">ATPase AAA [Methylovorus glucosotrophus]</a>                               | 26.5 | 26.5 | 76% | 370 | 80% | <a href="#">WP_015830617.1</a> |
| <a href="#">cyanophycinase [Pseudoalteromonas sp. BSI20439]</a>                        | 26.5 | 26.5 | 84% | 371 | 82% | <a href="#">WP_008468441.1</a> |
| <a href="#">hypothetical protein WUBG_06014 [Wuchereria bancrofti]</a>                 | 26.5 | 26.5 | 76% | 371 | 69% | <a href="#">EJW83076.1</a>     |
| <a href="#">Leucine Rich Repeat family protein [Brugia malayi]</a>                     | 26.5 | 26.5 | 76% | 373 | 69% | <a href="#">XP_001896206.1</a> |
| <a href="#">Protein Bm3117, isoform b [Brugia malayi]</a>                              | 26.5 | 26.5 | 76% | 373 | 69% | <a href="#">CDP97463.1</a>     |
| <a href="#">hypothetical protein [Kluyvera ascorbata]</a>                              | 26.5 | 26.5 | 76% | 374 | 80% | <a href="#">WP_035895790.1</a> |
| <a href="#">hypothetical protein [Buttiauxella agrestis]</a>                           | 26.5 | 26.5 | 76% | 374 | 80% | <a href="#">WP_034495237.1</a> |
| <a href="#">coppertranslocating P-type ATPase [Acanthamoeba castellanii str. Neff]</a> | 26.5 | 26.5 | 76% | 375 | 69% | <a href="#">XP_004339167.1</a> |
| <a href="#">PREDICTED: A-kinase anchor protein 9 [Larimichthys crocea]</a>             | 26.5 | 26.5 | 69% | 378 | 89% | <a href="#">XP_010740000.1</a> |
| <a href="#">hypothetical protein [Niastella koreensis]</a>                             | 26.1 | 26.1 | 76% | 470 | 70% | <a href="#">WP_014220009.1</a> |
| <a href="#">Zinc uptake regulation protein ZUR [Legionella pneumophila]</a>            | 26.1 | 26.1 | 84% | 474 | 64% | <a href="#">WP_015444909.1</a> |
| <a href="#">transcriptional regulator [Legionella pneumophila]</a>                     | 26.1 | 26.1 | 84% | 475 | 64% | <a href="#">WP_027227933.1</a> |
| <a href="#">transcriptional regulator [Legionella pneumophila]</a>                     | 26.1 | 26.1 | 84% | 475 | 64% | <a href="#">WP_011212926.1</a> |
| <a href="#">transcriptional regulator [Legionella pneumophila]</a>                     | 26.1 | 26.1 | 84% | 475 | 64% | <a href="#">WP_025862461.1</a> |
| <a href="#">transcriptional regulator [Legionella pneumophila]</a>                     | 26.1 | 26.1 | 84% | 482 | 64% | <a href="#">WP_010945993.1</a> |
| <a href="#">transcriptional regulator [Legionella pneumophila]</a>                     | 26.1 | 26.1 | 84% | 482 | 64% | <a href="#">WP_011945474.1</a> |
| <a href="#">transcriptional regulator [Legionella pneumophila]</a>                     | 26.1 | 26.1 | 84% | 482 | 64% | <a href="#">WP_014326617.1</a> |

## Alignments

Download v [GenPept](#) [Graphics](#)

v Next ▲ Previous ▲ Descriptions

PREDICTED: LOW QUALITY PROTEIN: selenoprotein P [Saimiri boliviensis boliviensis]

Sequence ID: [ref|XP\\_003925940.2|](#) Length: 381 Number of Matches: 1

Range 1: 170 to 182 [GenPept](#) [Graphics](#)

v Next Match ▲ Previous Match

| Score         | Expect | Identities | Positives   | Gaps     |
|---------------|--------|------------|-------------|----------|
| 41.8 bits(91) | 0.004  | 12/13(92%) | 13/13(100%) | 0/13(0%) |

Query 1 KKCGDCSLTTLKD 13  
 KKCG+CSLTTLKD  
 Sbjct 170 KKCGNCSLTTLKD 182

### Related Information

[Gene](#) - associated gene details  
[Map Viewer](#) - aligned genomic context

Download v [GenPept](#) [Graphics](#)

v Next ▲ Previous ▲ Descriptions

PREDICTED: LOW QUALITY PROTEIN: selenoprotein P [Rhinopithecus roxellana]

Sequence ID: [ref|XP\\_010372696.1|](#) Length: 381 Number of Matches: 1

Range 1: 170 to 182 [GenPept](#) [Graphics](#)

v Next Match ▲ Previous Match

| Score         | Expect | Identities | Positives   | Gaps     |
|---------------|--------|------------|-------------|----------|
| 41.8 bits(91) | 0.004  | 12/13(92%) | 13/13(100%) | 0/13(0%) |

### Related Information

[Gene](#) - associated gene details  
[Map Viewer](#) - aligned genomic context

Query 1 KKCGDCSLTTLKD 13  
 KKCG+CSLTTLKD  
 Sbjct 170 KKCGNCSLTTLKD 182

[Download](#) [GenPept](#) [Graphics](#)

[Next](#) [Previous](#) [Descriptions](#)

PREDICTED: LOW QUALITY PROTEIN: selenoprotein P [Papio anubis]

Sequence ID: [ref|XP\\_009206607.1|](#) Length: 381 Number of Matches: 1

Range 1: 170 to 182 [GenPept](#) [Graphics](#)

[Next Match](#) [Previous Match](#)

| Score         | Expect | Identities | Positives   | Gaps     |
|---------------|--------|------------|-------------|----------|
| 41.8 bits(91) | 0.004  | 12/13(92%) | 13/13(100%) | 0/13(0%) |

Query 1 KKCGDCSLTTLKD 13  
 KKCG+CSLTTLKD  
 Sbjct 170 KKCGNCSLTTLKD 182

**Related Information**

[Gene](#) - associated gene details  
[Map Viewer](#) - aligned genomic context

[Download](#) [GenPept](#) [Graphics](#)

[Next](#) [Previous](#) [Descriptions](#)

PREDICTED: LOW QUALITY PROTEIN: selenoprotein P [Pan paniscus]

Sequence ID: [ref|XP\\_008961588.1|](#) Length: 381 Number of Matches: 1

Range 1: 170 to 182 [GenPept](#) [Graphics](#)

[Next Match](#) [Previous Match](#)

| Score         | Expect | Identities | Positives   | Gaps     |
|---------------|--------|------------|-------------|----------|
| 41.8 bits(91) | 0.004  | 12/13(92%) | 13/13(100%) | 0/13(0%) |

Query 1 KKCGDCSLTTLKD 13  
 KKCG+CSLTTLKD  
 Sbjct 170 KKCGNCSLTTLKD 182

**Related Information**

[Gene](#) - associated gene details  
[Map Viewer](#) - aligned genomic context

[Download](#) [GenPept](#) [Graphics](#)

[Next](#) [Previous](#) [Descriptions](#)

PREDICTED: LOW QUALITY PROTEIN: selenoprotein P [Chlorocebus sabaeus]

Sequence ID: [ref|XP\\_007959679.1|](#) Length: 381 Number of Matches: 1

Range 1: 170 to 182 [GenPept](#) [Graphics](#)

[Next Match](#) [Previous Match](#)

| Score         | Expect | Identities | Positives   | Gaps     |
|---------------|--------|------------|-------------|----------|
| 41.8 bits(91) | 0.004  | 12/13(92%) | 13/13(100%) | 0/13(0%) |

Query 1 KKCGDCSLTTLKD 13  
 KKCG+CSLTTLKD  
 Sbjct 170 KKCGNCSLTTLKD 182

**Related Information**

[Gene](#) - associated gene details  
[Map Viewer](#) - aligned genomic context

BLAST is a registered trademark of the National Library of Medicine.

NCBI/ BLAST/ blastp suite/ Formatting Results - BVKYZVRR01R

Your search parameters were adjusted to search for a short input sequence.

[Edit and Resubmit](#) [Save Search Strategies](#) [Formatting options](#) [Download](#) [YouTube](#) [How to read this page](#) [Blast report description](#)

### SEPP1\_KKCGDCSLTTLKDEDFCKR\_Mod

|                      |                                         |                      |                                                                                                                    |
|----------------------|-----------------------------------------|----------------------|--------------------------------------------------------------------------------------------------------------------|
| <b>RID</b>           | BVKYZVRR01R (Expires on 01-21 10:47 am) | <b>Database Name</b> | nr                                                                                                                 |
| <b>Query ID</b>      | lcl 120308                              | <b>Description</b>   | All non-redundant GenBank CDS translations+PDB+SwissProt+PIR+PRF excluding environmental samples from WGS projects |
| <b>Description</b>   | None                                    | <b>Program</b>       | BLASTP 2.2.30+ <a href="#">Citation</a>                                                                            |
| <b>Molecule type</b> | amino acid                              |                      |                                                                                                                    |
| <b>Query Length</b>  | 19                                      |                      |                                                                                                                    |

Other reports: [Search Summary](#) [Taxonomy reports](#) [Distance tree of results](#) [Multiple alignment](#)

### Graphic Summary

Show Conserved Domains

Putative conserved domains have been detected, click on the image below for detailed results.

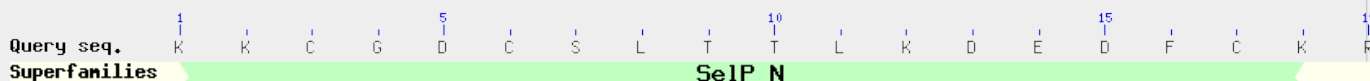

Distribution of 100 Blast Hits on the Query Sequence

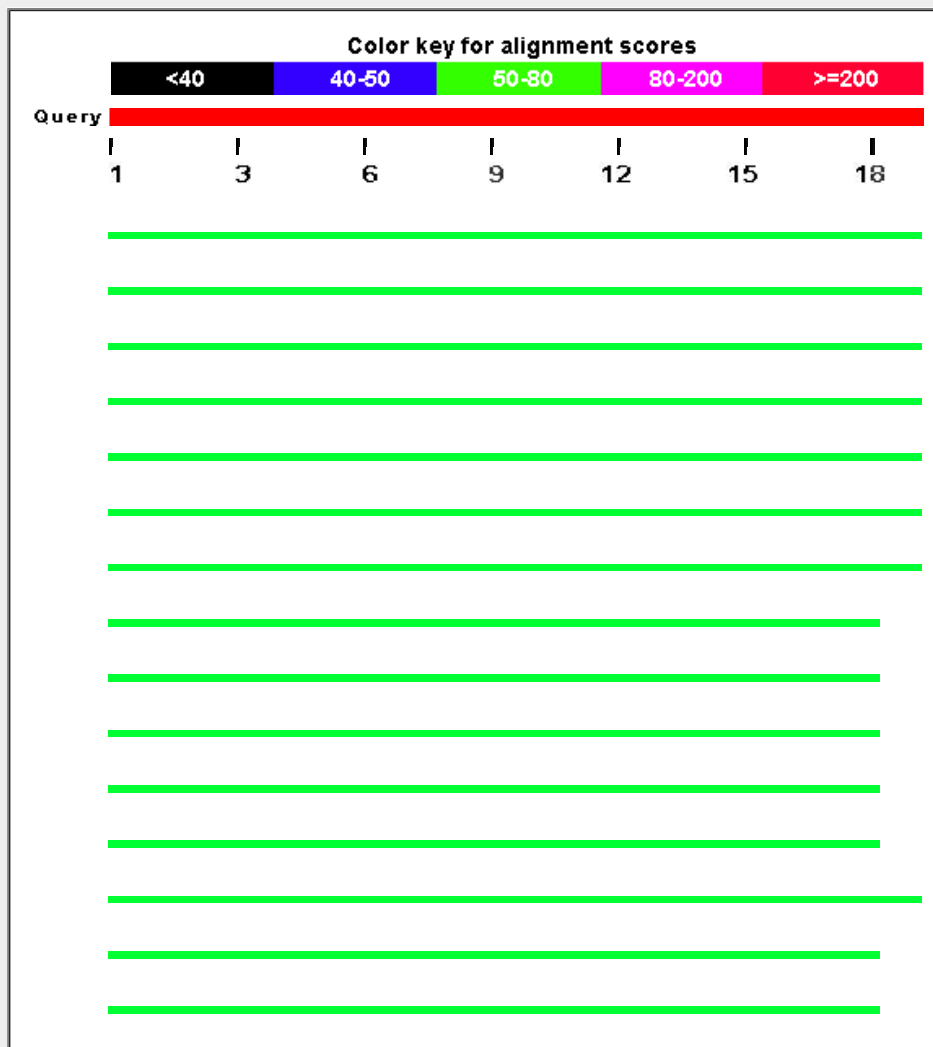

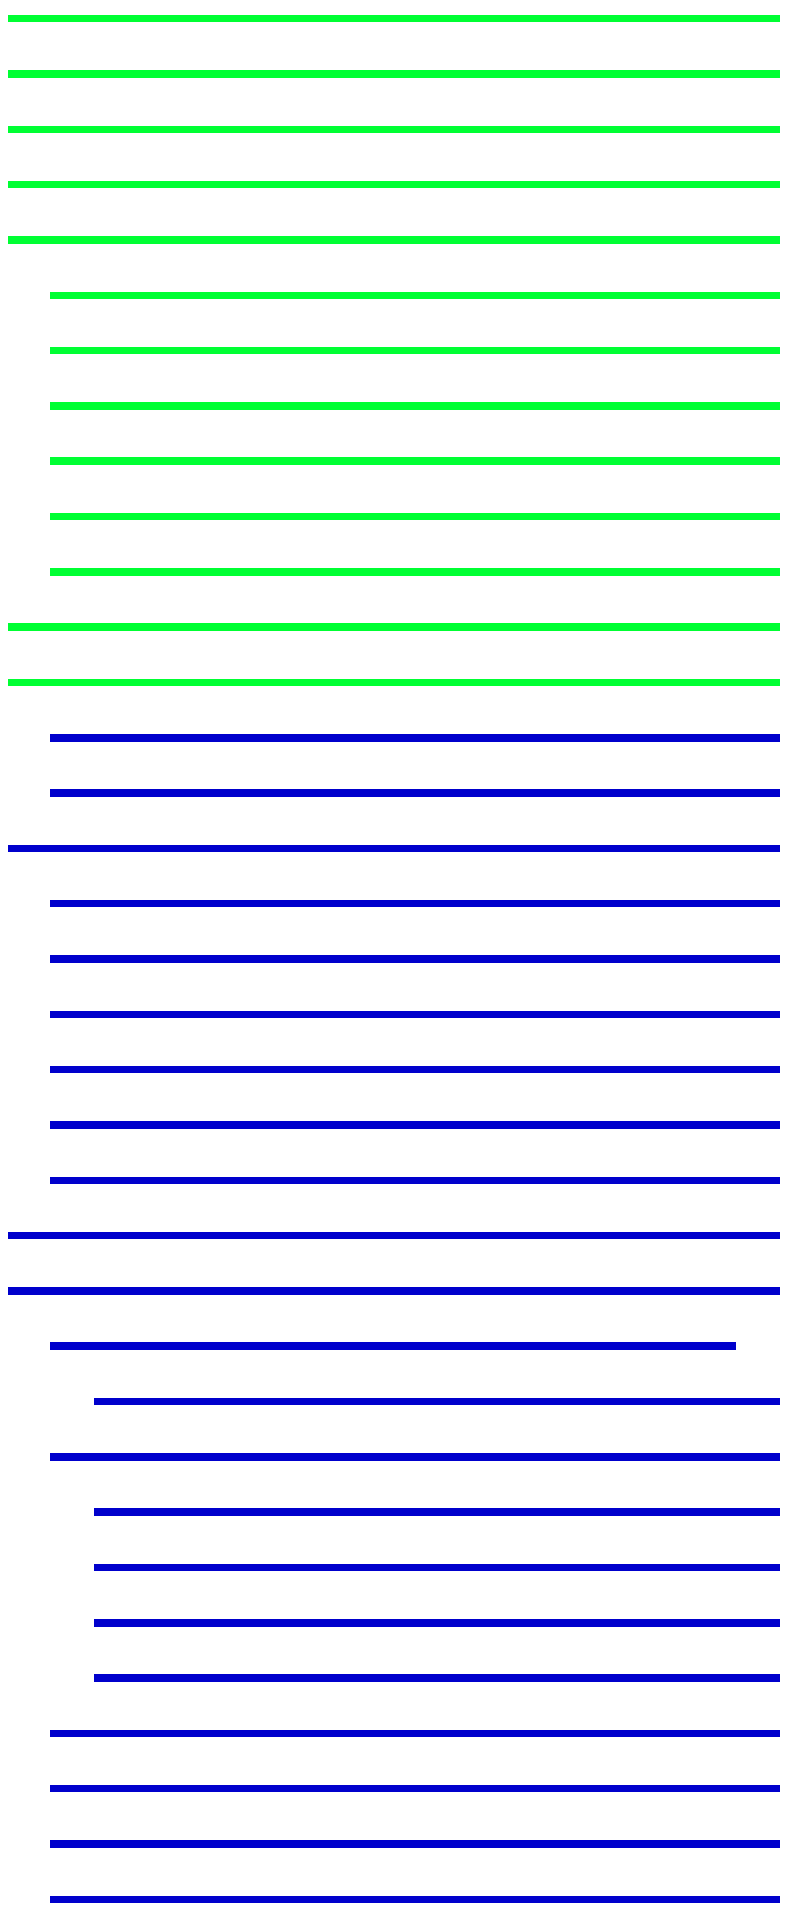

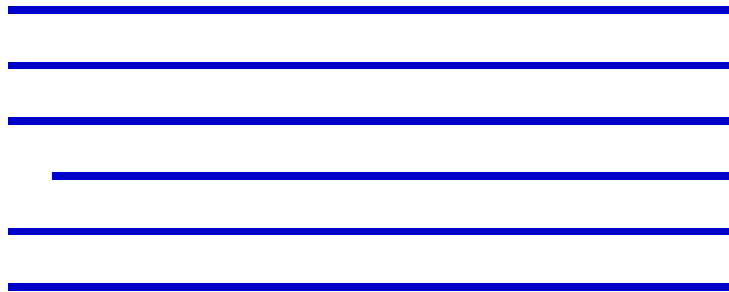

## Descriptions

### Sequences producing significant alignments:

Select: [All](#) [None](#) Selected:0

| <a href="#">Alignments</a> <a href="#">Download</a> <a href="#">GenPept</a> <a href="#">Graphics</a> <a href="#">Distance tree of results</a> <a href="#">Multiple alignment</a> |           |             |             |         |       |                                |  |
|----------------------------------------------------------------------------------------------------------------------------------------------------------------------------------|-----------|-------------|-------------|---------|-------|--------------------------------|--|
| Description                                                                                                                                                                      | Max score | Total score | Query cover | E value | Ident | Accession                      |  |
| <a href="#">PREDICTED: LOW QUALITY PROTEIN: selenoprotein P [Pan paniscus]</a>                                                                                                   | 63.0      | 63.0        | 100%        | 6e-10   | 95%   | <a href="#">XP_008961588.1</a> |  |
| <a href="#">Selenoprotein P, plasma, 1 [Homo sapiens]</a>                                                                                                                        | 63.0      | 63.0        | 100%        | 6e-10   | 95%   | <a href="#">AAH46152.1</a>     |  |
| <a href="#">selenoprotein P isoform 1 precursor [Homo sapiens]</a>                                                                                                               | 63.0      | 63.0        | 100%        | 6e-10   | 95%   | <a href="#">NP_005401.3</a>    |  |
| <a href="#">Selenoprotein P, plasma, 1 [Homo sapiens]</a>                                                                                                                        | 63.0      | 63.0        | 100%        | 6e-10   | 95%   | <a href="#">AAH58919.1</a>     |  |
| <a href="#">selenoprotein P [Homo sapiens]</a>                                                                                                                                   | 63.0      | 63.0        | 100%        | 6e-10   | 95%   | <a href="#">CAA77836.2</a>     |  |
| <a href="#">selenoprotein P precursor [Pan troglodytes]</a>                                                                                                                      | 63.0      | 63.0        | 100%        | 6e-10   | 95%   | <a href="#">NP_001108587.1</a> |  |
| <a href="#">selenoprotein P isoform 2 [Homo sapiens]</a>                                                                                                                         | 63.0      | 63.0        | 100%        | 6e-10   | 95%   | <a href="#">NP_001087195.1</a> |  |
| <a href="#">PREDICTED: LOW QUALITY PROTEIN: selenoprotein P [Saimiri boliviensis]</a>                                                                                            | 59.6      | 59.6        | 94%         | 9e-09   | 94%   | <a href="#">XP_003925940.2</a> |  |
| <a href="#">PREDICTED: LOW QUALITY PROTEIN: selenoprotein P [Rhinopithecus roxellana]</a>                                                                                        | 59.6      | 59.6        | 94%         | 9e-09   | 94%   | <a href="#">XP_010372696.1</a> |  |
| <a href="#">PREDICTED: LOW QUALITY PROTEIN: selenoprotein P [Papio anubis]</a>                                                                                                   | 59.6      | 59.6        | 94%         | 9e-09   | 94%   | <a href="#">XP_009206607.1</a> |  |
| <a href="#">PREDICTED: LOW QUALITY PROTEIN: selenoprotein P [Chlorocebus sabaeus]</a>                                                                                            | 59.6      | 59.6        | 94%         | 9e-09   | 94%   | <a href="#">XP_007959679.1</a> |  |
| <a href="#">selenoprotein P precursor [Macaca mulatta]</a>                                                                                                                       | 59.6      | 59.6        | 94%         | 9e-09   | 94%   | <a href="#">NP_001152962.1</a> |  |
| <a href="#">Selenoprotein P, plasma, 1 [Homo sapiens]</a>                                                                                                                        | 58.3      | 58.3        | 100%        | 2e-08   | 89%   | <a href="#">AAH15875.1</a>     |  |
| <a href="#">PREDICTED: LOW QUALITY PROTEIN: selenoprotein P [Trichechus manatus]</a>                                                                                             | 54.9      | 54.9        | 94%         | 3e-07   | 89%   | <a href="#">XP_004388500.1</a> |  |
| <a href="#">PREDICTED: selenoprotein P [Otolemur garnettii]</a>                                                                                                                  | 54.1      | 54.1        | 94%         | 6e-07   | 89%   | <a href="#">XP_003793045.1</a> |  |
| <a href="#">selenoprotein P precursor [Pongo abelii]</a>                                                                                                                         | 54.1      | 54.1        | 94%         | 6e-07   | 94%   | <a href="#">NP_001127462.1</a> |  |
| <a href="#">PREDICTED: LOW QUALITY PROTEIN: selenoprotein P [Nomascus leucogenus]</a>                                                                                            | 53.7      | 53.7        | 94%         | 9e-07   | 89%   | <a href="#">XP_003274442.1</a> |  |
| <a href="#">selenoprotein P precursor [Callithrix jacchus]</a>                                                                                                                   | 52.8      | 52.8        | 94%         | 2e-06   | 83%   | <a href="#">NP_001186857.1</a> |  |
| <a href="#">PREDICTED: LOW QUALITY PROTEIN: selenoprotein P [Tarsius syrichta]</a>                                                                                               | 52.4      | 52.4        | 94%         | 2e-06   | 83%   | <a href="#">XP_008050904.1</a> |  |
| <a href="#">PREDICTED: LOW QUALITY PROTEIN: selenoprotein P [Ceratotherium simum]</a>                                                                                            | 52.4      | 52.4        | 94%         | 2e-06   | 89%   | <a href="#">XP_004422836.1</a> |  |
| <a href="#">selenoprotein P precursor [Sus scrofa]</a>                                                                                                                           | 52.4      | 52.4        | 89%         | 2e-06   | 88%   | <a href="#">NP_001128295.1</a> |  |
| <a href="#">PREDICTED: LOW QUALITY PROTEIN: selenoprotein P [Myotis davidii]</a>                                                                                                 | 52.0      | 52.0        | 89%         | 3e-06   | 88%   | <a href="#">XP_006774623.1</a> |  |
| <a href="#">PREDICTED: LOW QUALITY PROTEIN: selenoprotein P [Myotis lucifugus]</a>                                                                                               | 52.0      | 52.0        | 89%         | 3e-06   | 88%   | <a href="#">XP_006106371.1</a> |  |
| <a href="#">PREDICTED: LOW QUALITY PROTEIN: selenoprotein P [Eptesicus fuscus]</a>                                                                                               | 52.0      | 52.0        | 89%         | 3e-06   | 88%   | <a href="#">XP_008153843.1</a> |  |
| <a href="#">PREDICTED: LOW QUALITY PROTEIN: selenoprotein P [Myotis brandtii]</a>                                                                                                | 52.0      | 52.0        | 89%         | 3e-06   | 88%   | <a href="#">XP_005876061.1</a> |  |
| <a href="#">PREDICTED: LOW QUALITY PROTEIN: selenoprotein P [Tupaia chinensis]</a>                                                                                               | 51.5      | 51.5        | 89%         | 5e-06   | 88%   | <a href="#">XP_006167023.1</a> |  |
| <a href="#">PREDICTED: LOW QUALITY PROTEIN: selenoprotein P [Equus przewalskii]</a>                                                                                              | 50.3      | 50.3        | 94%         | 1e-05   | 83%   | <a href="#">XP_008522793.1</a> |  |
| <a href="#">selenoprotein P precursor [Equus caballus]</a>                                                                                                                       | 50.3      | 50.3        | 94%         | 1e-05   | 83%   | <a href="#">NP_001129077.1</a> |  |
| <a href="#">PREDICTED: LOW QUALITY PROTEIN: selenoprotein P [Sorex araneus]</a>                                                                                                  | 49.0      | 49.0        | 89%         | 3e-05   | 82%   | <a href="#">XP_004605590.1</a> |  |

|                                                                                              |      |      |     |       |     |                                |
|----------------------------------------------------------------------------------------------|------|------|-----|-------|-----|--------------------------------|
| <a href="#">PREDICTED: LOW QUALITY PROTEIN: selenoprotein P [Peromyscus maniculatus]</a>     | 49.0 | 49.0 | 89% | 3e-05 | 82% | <a href="#">XP_006997157.1</a> |
| <a href="#">selenoprotein P precursor [Cricetulus griseus]</a>                               | 47.7 | 47.7 | 94% | 8e-05 | 78% | <a href="#">ERE84145.1</a>     |
| <a href="#">PREDICTED: LOW QUALITY PROTEIN: selenoprotein P [Chinchilla lanigera]</a>        | 47.7 | 47.7 | 89% | 8e-05 | 82% | <a href="#">XP_005386312.1</a> |
| <a href="#">Selenoprotein P [Heterocephalus glaber]</a>                                      | 46.4 | 46.4 | 89% | 2e-04 | 82% | <a href="#">EHA98867.1</a>     |
| <a href="#">PREDICTED: LOW QUALITY PROTEIN: selenoprotein P [Fukomys damarensis]</a>         | 46.4 | 46.4 | 89% | 2e-04 | 82% | <a href="#">XP_010632183.1</a> |
| <a href="#">PREDICTED: LOW QUALITY PROTEIN: selenoprotein P [Microtus ochrogastri]</a>       | 46.4 | 46.4 | 89% | 2e-04 | 76% | <a href="#">XP_005369861.1</a> |
| <a href="#">PREDICTED: LOW QUALITY PROTEIN: selenoprotein P [Heterocephalus glaber]</a>      | 46.4 | 46.4 | 89% | 2e-04 | 82% | <a href="#">XP_004848622.1</a> |
| <a href="#">PREDICTED: LOW QUALITY PROTEIN: selenoprotein P [Heterocephalus glaber]</a>      | 46.4 | 46.4 | 89% | 2e-04 | 82% | <a href="#">XP_004878213.1</a> |
| <a href="#">PREDICTED: LOW QUALITY PROTEIN: selenoprotein P [Galeopterus variegatus]</a>     | 44.8 | 44.8 | 94% | 8e-04 | 78% | <a href="#">XP_008564915.1</a> |
| <a href="#">PREDICTED: LOW QUALITY PROTEIN: selenoprotein P [Panthera tigris altaica]</a>    | 44.3 | 44.3 | 94% | 0.001 | 78% | <a href="#">XP_007095490.1</a> |
| <a href="#">PREDICTED: LOW QUALITY PROTEIN: selenoprotein P [Nannospalax galili]</a>         | 43.9 | 43.9 | 84% | 0.002 | 88% | <a href="#">XP_008840327.1</a> |
| <a href="#">selenoprotein P, plasma, 1, isoform CRA_a [Mus musculus]</a>                     | 43.5 | 43.5 | 84% | 0.002 | 75% | <a href="#">EDL03405.1</a>     |
| <a href="#">PREDICTED: LOW QUALITY PROTEIN: selenoprotein P [Octodon degus]</a>              | 43.5 | 43.5 | 89% | 0.002 | 76% | <a href="#">XP_004641866.1</a> |
| <a href="#">Selenoprotein P, plasma, 1 [Mus musculus]</a>                                    | 43.5 | 43.5 | 84% | 0.002 | 75% | <a href="#">AAH01991.2</a>     |
| <a href="#">plasma selenoprotein P [Mus musculus]</a>                                        | 43.5 | 43.5 | 84% | 0.002 | 75% | <a href="#">AAD01684.1</a>     |
| <a href="#">unnamed protein product [Mus musculus]</a>                                       | 43.5 | 43.5 | 84% | 0.002 | 75% | <a href="#">BAE34948.1</a>     |
| <a href="#">selenoprotein P precursor [Mus musculus]</a>                                     | 43.5 | 43.5 | 84% | 0.002 | 75% | <a href="#">NP_033181.3</a>    |
| <a href="#">PREDICTED: LOW QUALITY PROTEIN: selenoprotein P [Balaenoptera acutirostris]</a>  | 43.1 | 43.1 | 89% | 0.003 | 76% | <a href="#">XP_007195596.1</a> |
| <a href="#">PREDICTED: LOW QUALITY PROTEIN: selenoprotein P [Lipotes vexillifer]</a>         | 43.1 | 43.1 | 89% | 0.003 | 76% | <a href="#">XP_007447694.1</a> |
| <a href="#">PREDICTED: LOW QUALITY PROTEIN: selenoprotein P [Physeter catodon]</a>           | 43.1 | 43.1 | 89% | 0.003 | 76% | <a href="#">XP_007119423.1</a> |
| <a href="#">PREDICTED: LOW QUALITY PROTEIN: selenoprotein P [Bubalus bubalis]</a>            | 43.1 | 43.1 | 89% | 0.003 | 76% | <a href="#">XP_006067130.1</a> |
| <a href="#">membrane selenoprotein P [Capra hircus]</a>                                      | 42.6 | 42.6 | 89% | 0.004 | 76% | <a href="#">AAF67201.1</a>     |
| <a href="#">selenoprotein P, plasma, 1 precursor [Capra hircus]</a>                          | 42.6 | 42.6 | 89% | 0.004 | 76% | <a href="#">NP_001272511.1</a> |
| <a href="#">PREDICTED: LOW QUALITY PROTEIN: selenoprotein P [Ovis aries]</a>                 | 42.6 | 42.6 | 89% | 0.004 | 76% | <a href="#">XP_004017062.1</a> |
| <a href="#">PREDICTED: LOW QUALITY PROTEIN: selenoprotein P [Odobenus rosmarus]</a>          | 41.8 | 41.8 | 84% | 0.008 | 81% | <a href="#">XP_004409206.1</a> |
| <a href="#">selenoprotein P precursor [Cavia porcellus]</a>                                  | 41.4 | 41.4 | 89% | 0.010 | 71% | <a href="#">NP_001244936.1</a> |
| <a href="#">PREDICTED: LOW QUALITY PROTEIN: selenoprotein P [Loxodonta africana]</a>         | 41.4 | 41.4 | 89% | 0.010 | 76% | <a href="#">XP_010586424.1</a> |
| <a href="#">PREDICTED: LOW QUALITY PROTEIN: selenoprotein P [Elephantulus edwardsi]</a>      | 41.4 | 41.4 | 89% | 0.010 | 76% | <a href="#">XP_006889619.1</a> |
| <a href="#">selenoprotein P precursor [Cricetulus griseus]</a>                               | 41.4 | 41.4 | 94% | 0.010 | 72% | <a href="#">NP_001243807.1</a> |
| <a href="#">selenoprotein P precursor [Rattus norvegicus]</a>                                | 40.1 | 40.1 | 94% | 0.027 | 67% | <a href="#">NP_062065.2</a>    |
| <a href="#">PREDICTED: LOW QUALITY PROTEIN: selenoprotein P [Jaculus jaculus]</a>            | 39.7 | 39.7 | 89% | 0.037 | 76% | <a href="#">XP_004652550.1</a> |
| <a href="#">PREDICTED: LOW QUALITY PROTEIN: selenoprotein P [Orcinus orca]</a>               | 39.7 | 39.7 | 89% | 0.037 | 76% | <a href="#">XP_004266005.1</a> |
| <a href="#">PREDICTED: LOW QUALITY PROTEIN: selenoprotein P [Tursiops truncatus]</a>         | 39.7 | 39.7 | 89% | 0.037 | 76% | <a href="#">XP_004320390.1</a> |
| <a href="#">PREDICTED: LOW QUALITY PROTEIN: selenoprotein P [Orycteropus afer africanus]</a> | 39.2 | 39.2 | 94% | 0.050 | 72% | <a href="#">XP_007952213.1</a> |
| <a href="#">PREDICTED: LOW QUALITY PROTEIN: selenoprotein P [Mustela putorius furo]</a>      | 39.2 | 39.2 | 84% | 0.050 | 75% | <a href="#">XP_004738001.1</a> |
| <a href="#">PREDICTED: LOW QUALITY PROTEIN: selenoprotein P [Monodelphis domestica]</a>      | 38.4 | 38.4 | 84% | 0.094 | 75% | <a href="#">XP_003340675.2</a> |
| <a href="#">PREDICTED: LOW QUALITY PROTEIN: selenoprotein P [Erinaceus europaeus]</a>        | 38.0 | 38.0 | 94% | 0.13  | 67% | <a href="#">XP_007517681.1</a> |
| <a href="#">selenoprotein P precursor [Canis lupus familiaris]</a>                           | 38.0 | 38.0 | 89% | 0.13  | 71% | <a href="#">NP_001108590.1</a> |
| <a href="#">PREDICTED: selenoprotein P-like [Ailuropoda melanoleuca]</a>                     | 37.5 | 37.5 | 89% | 0.16  | 71% | <a href="#">XP_002921760.1</a> |
| <a href="#">unnamed protein product [Mus musculus]</a>                                       | 37.5 | 37.5 | 84% | 0.18  | 69% | <a href="#">BAE39664.1</a>     |
| <a href="#">PREDICTED: LOW QUALITY PROTEIN: selenoprotein P [Camelus dromedarius]</a>        | 37.5 | 37.5 | 89% | 0.18  | 71% | <a href="#">XP_010999134.1</a> |
| <a href="#">PREDICTED: LOW QUALITY PROTEIN: selenoprotein P [Camelus ferus]</a>              | 37.5 | 37.5 | 89% | 0.18  | 71% | <a href="#">XP_006191986.1</a> |
| <a href="#">PREDICTED: LOW QUALITY PROTEIN: selenoprotein P [Vicugna pacos]</a>              | 37.5 | 37.5 | 89% | 0.18  | 71% | <a href="#">XP_006207756.1</a> |
| <a href="#">PREDICTED: LOW QUALITY PROTEIN: selenoprotein P [Condylura cristata]</a>         | 37.5 | 37.5 | 94% | 0.18  | 72% | <a href="#">XP_004678402.1</a> |
| <a href="#">PREDICTED: LOW QUALITY PROTEIN: selenoprotein P [Ursus maritimus]</a>            | 37.5 | 37.5 | 89% | 0.18  | 71% | <a href="#">XP_008690806.1</a> |
| <a href="#">PREDICTED: LOW QUALITY PROTEIN: selenoprotein P [Bison bison bison]</a>          | 37.1 | 37.1 | 89% | 0.24  | 71% | <a href="#">XP_010831114.1</a> |

|                                                                                                 |      |      |     |      |      |                                |
|-------------------------------------------------------------------------------------------------|------|------|-----|------|------|--------------------------------|
| <a href="#">selenoprotein P [Bos taurus]</a>                                                    | 37.1 | 37.1 | 89% | 0.24 | 71%  | <a href="#">BAA84781.1</a>     |
| <a href="#">PREDICTED: LOW QUALITY PROTEIN: selenoprotein P [Bos mutus]</a>                     | 37.1 | 37.1 | 89% | 0.24 | 71%  | <a href="#">XP_005894930.1</a> |
| <a href="#">selenoprotein P precursor [Bos taurus]</a>                                          | 37.1 | 37.1 | 89% | 0.24 | 71%  | <a href="#">NP_776884.2</a>    |
| <a href="#">selenoprotein P [Bubalus bubalis]</a>                                               | 37.1 | 37.1 | 89% | 0.24 | 71%  | <a href="#">AFM77782.2</a>     |
| <a href="#">PREDICTED: LOW QUALITY PROTEIN: selenoprotein P [Gorilla gorilla gorilla]</a>       | 36.7 | 36.7 | 52% | 0.31 | 100% | <a href="#">XP_004065356.1</a> |
| <a href="#">PREDICTED: selenoprotein P [Sarcophilus harrisii]</a>                               | 35.8 | 35.8 | 94% | 0.58 | 67%  | <a href="#">XP_003759960.1</a> |
| <a href="#">unnamed protein product [Mus musculus]</a>                                          | 35.4 | 35.4 | 84% | 0.83 | 69%  | <a href="#">BAC55264.3</a>     |
| <a href="#">PREDICTED: LOW QUALITY PROTEIN: selenoprotein P [Dasypus novemcinctus]</a>          | 35.0 | 35.0 | 89% | 1.1  | 71%  | <a href="#">XP_004448278.1</a> |
| <a href="#">PREDICTED: LOW QUALITY PROTEIN: selenoprotein P [Echinops telfairii]</a>            | 34.6 | 34.6 | 94% | 1.5  | 67%  | <a href="#">XP_004716992.1</a> |
| <a href="#">selenoprotein P precursor [Oryctolagus cuniculus]</a>                               | 33.3 | 33.3 | 84% | 3.9  | 69%  | <a href="#">NP_001186775.1</a> |
| <a href="#">RNA-binding protein (NOP10, NOLA3) [uncultured marine thaumarchaeote K1]</a>        | 32.5 | 32.5 | 89% | 5.1  | 65%  | <a href="#">AIF05018.1</a>     |
| <a href="#">PREDICTED: LOW QUALITY PROTEIN: selenoprotein P [Ochotona princeps]</a>             | 32.9 | 32.9 | 84% | 5.3  | 69%  | <a href="#">XP_004583736.1</a> |
| <a href="#">predicted protein [Phaeodactylum tricorutum CCAP 1055/1]</a>                        | 32.0 | 32.0 | 57% | 10   | 82%  | <a href="#">XP_002178290.1</a> |
| <a href="#">hypothetical protein [Coraliomargarita akajimensis]</a>                             | 31.6 | 31.6 | 68% | 12   | 71%  | <a href="#">WP_013044828.1</a> |
| <a href="#">hypothetical protein [Sorangium cellulosum]</a>                                     | 31.6 | 31.6 | 84% | 13   | 61%  | <a href="#">WP_012240780.1</a> |
| <a href="#">dihydroxy-acid dehydratase [Campylobacter sp. FOBRC14]</a>                          | 31.2 | 31.2 | 63% | 19   | 73%  | <a href="#">WP_009649466.1</a> |
| <a href="#">putative ATP-dependent RNA helicase DDX60-like protein [Cricetulus griseus]</a>     | 31.2 | 31.2 | 78% | 19   | 75%  | <a href="#">ERE91786.1</a>     |
| <a href="#">PREDICTED: probable ATP-dependent RNA helicase DDX60 [Cricetulus griseus]</a>       | 31.2 | 31.2 | 78% | 19   | 75%  | <a href="#">XP_003498842.2</a> |
| <a href="#">selenoprotein P-like protein [Bos taurus]</a>                                       | 30.8 | 30.8 | 89% | 23   | 65%  | <a href="#">BAB39395.1</a>     |
| <a href="#">selenoprotein P-like protein [Bos taurus]</a>                                       | 30.8 | 30.8 | 89% | 23   | 65%  | <a href="#">BAB39394.1</a>     |
| <a href="#">selenoprotein P-like protein [Bos taurus]</a>                                       | 30.8 | 30.8 | 89% | 24   | 65%  | <a href="#">BAB39393.1</a>     |
| <a href="#">selenoprotein P-like protein [Bos taurus]</a>                                       | 30.8 | 30.8 | 89% | 24   | 65%  | <a href="#">BAB39392.1</a>     |
| <a href="#">2-oxoglutarate ferredoxin oxidoreductase beta subunit [Legionella fallonii LLA]</a> | 30.8 | 30.8 | 47% | 25   | 89%  | <a href="#">CEG56463.1</a>     |
| <a href="#">hypothetical protein ACD_69C00091G0003 [uncultured bacterium]</a>                   | 30.8 | 30.8 | 84% | 25   | 63%  | <a href="#">EKD45887.1</a>     |
| <a href="#">selenoprotein P like protein [Bos taurus]</a>                                       | 30.8 | 30.8 | 89% | 25   | 65%  | <a href="#">BAA04949.2</a>     |

BLAST is a registered trademark of the National Library of Medicine.

[Copyright](#) | [Disclaimer](#) | [Privacy](#) | [Accessibility](#) | [Contact](#) | [Send feedback](#)[NCBI](#) | [NLM](#) | [NIH](#) | [DHHS](#)



NCBI/ BLAST/ blastp suite/ Formatting Results - BE88JH4F015

Your search parameters were adjusted to search for a short input sequence.

Edit and Resubmit Save Search Strategies Formatting options Download

YouTube How to read this page Blast report description

SEPP1\_KKCGNCSLTLKD\_NonMod

RID BE88JH4F015 (Expires on 01-16 09:08 am)

Query ID Icl|59387
Description None
Molecule type amino acid
Query Length 13

Database Name nr
Description All non-redundant GenBank CDS translations+PDB+SwissProt+PIR excluding environmental samples from WGS projects
Program BLASTP 2.2.30+ Citation

Other reports: Search Summary Taxonomy reports Distance tree of results Related Structures Multiple alignment

Graphic Summary

Show Conserved Domains

No putative conserved domains have been detected

Distribution of 100 Blast Hits on the Query Sequence

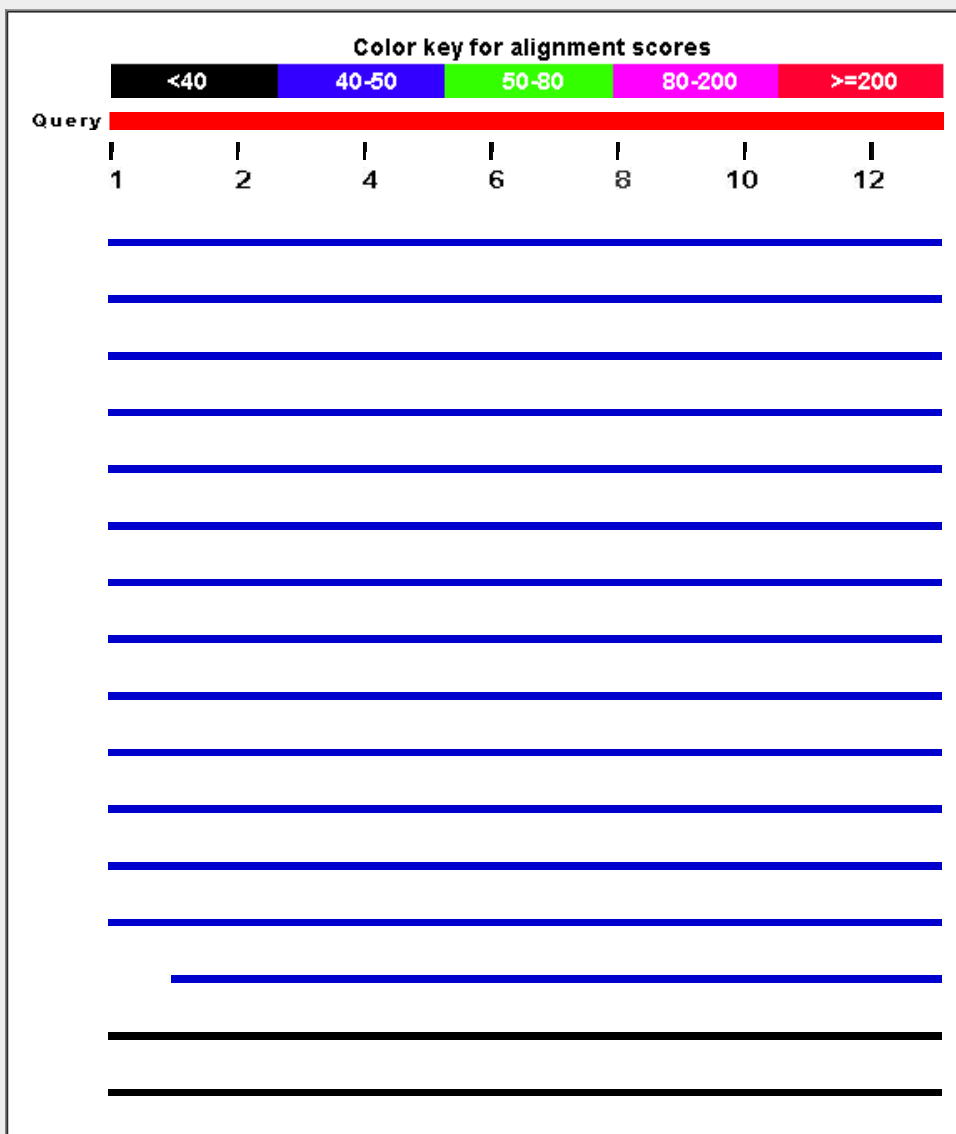



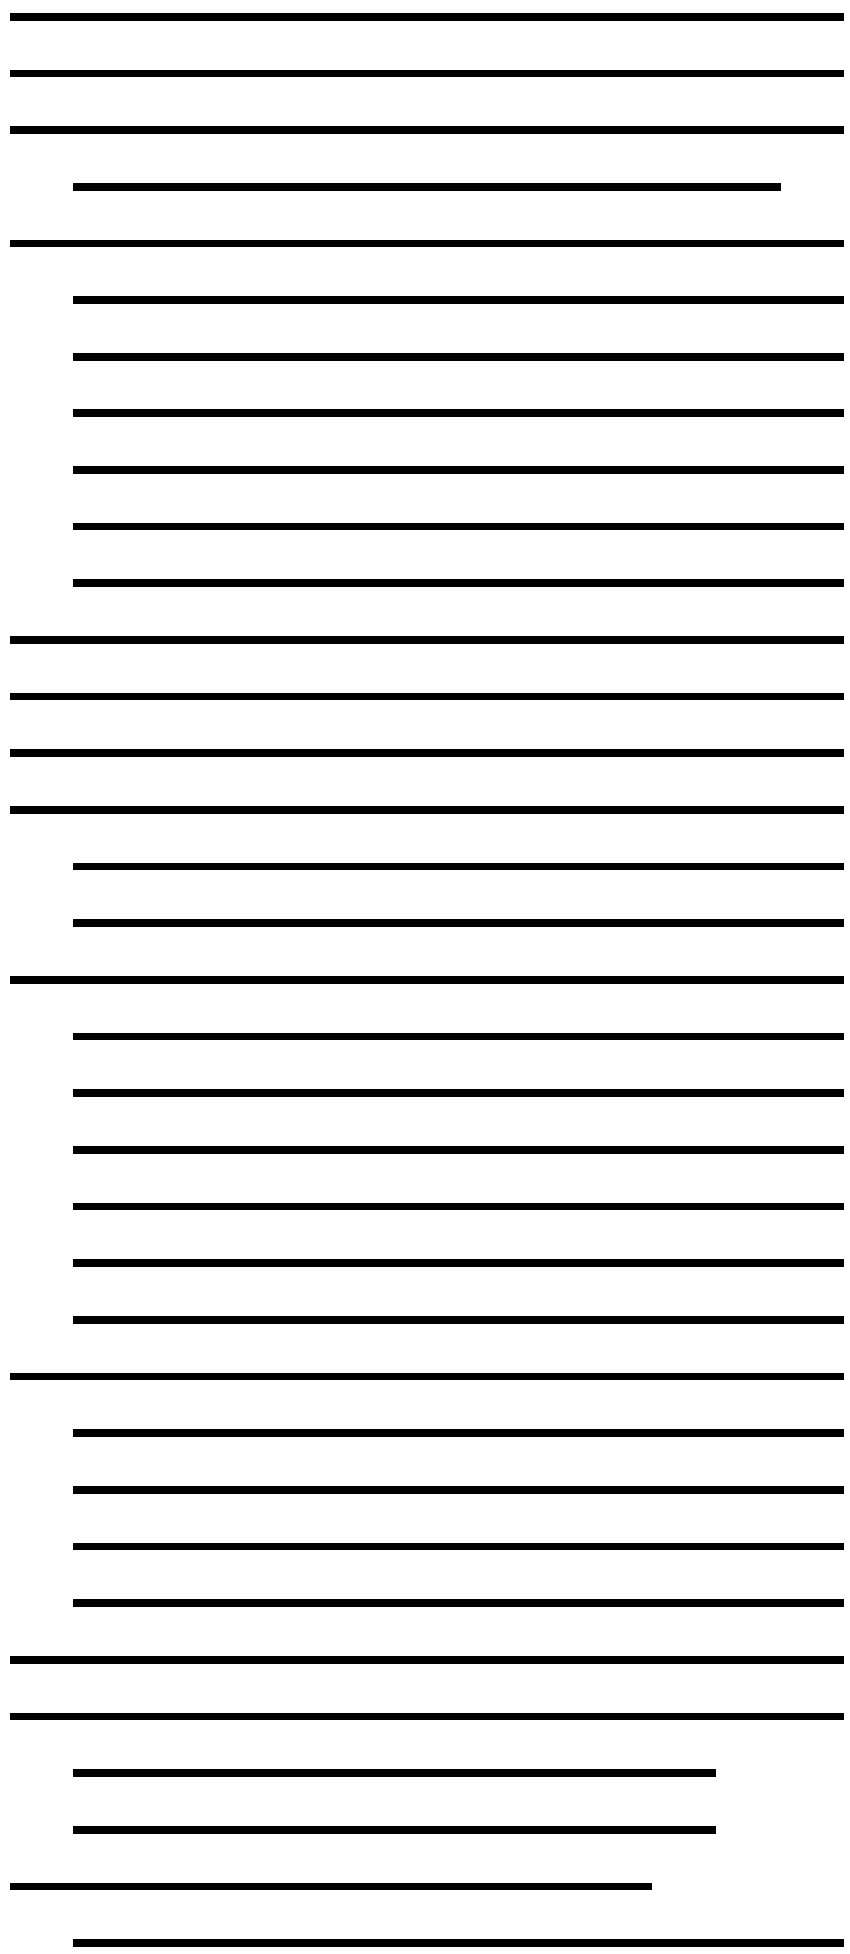

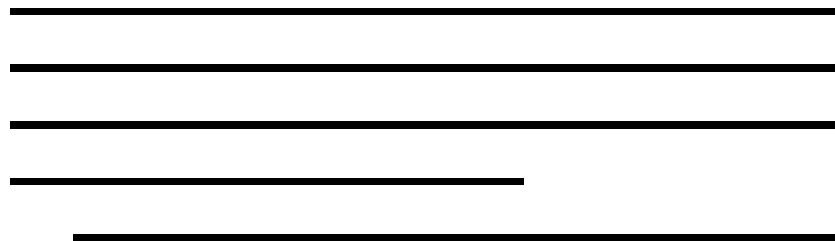

## Descriptions

### Sequences producing significant alignments:

Select: [All](#) [None](#) Selected:0

[Alignments](#)
[Download](#)
[GenPept](#)
[Graphics](#)
[Distance tree of results](#)
[Multiple alignment](#)

| Description                                                                | Max score | Total score | Query cover | E value | Ident | Accession                                    |
|----------------------------------------------------------------------------|-----------|-------------|-------------|---------|-------|----------------------------------------------|
| <a href="#">PREDICTED: LOW QUALITY PROTEIN: selenoprotein P [Saimiri b</a> | 44.3      | 44.3        | 100%        | 6e-04   | 100%  | <a href="#">gij 725563213 XP_003925940.2</a> |
| <a href="#">PREDICTED: LOW QUALITY PROTEIN: selenoprotein P [Rhinopitl</a> | 44.3      | 44.3        | 100%        | 6e-04   | 100%  | <a href="#">gij 724878613 XP_010372696.1</a> |
| <a href="#">PREDICTED: LOW QUALITY PROTEIN: selenoprotein P [Papio an</a>  | 44.3      | 44.3        | 100%        | 6e-04   | 100%  | <a href="#">gij 685545348 XP_009206607.1</a> |
| <a href="#">PREDICTED: LOW QUALITY PROTEIN: selenoprotein P [Pan pani</a>  | 44.3      | 44.3        | 100%        | 6e-04   | 100%  | <a href="#">gij 675710689 XP_008961588.1</a> |
| <a href="#">PREDICTED: LOW QUALITY PROTEIN: selenoprotein P [Chloroce</a>  | 44.3      | 44.3        | 100%        | 6e-04   | 100%  | <a href="#">gij 635028004 XP_007959679.1</a> |
| <a href="#">Selenoprotein P, plasma, 1 [Homo sapiens]</a>                  | 44.3      | 44.3        | 100%        | 6e-04   | 100%  | <a href="#">gij 34783648 AAH46152.1</a>      |
| <a href="#">Selenoprotein P, plasma, 1 [Homo sapiens]</a>                  | 44.3      | 44.3        | 100%        | 6e-04   | 100%  | <a href="#">gij 34783164 AAH15875.1</a>      |
| <a href="#">selenoprotein P isoform 1 precursor [Homo sapiens]</a>         | 44.3      | 44.3        | 100%        | 6e-04   | 100%  | <a href="#">gij 62530391 NP_005401.3</a>     |
| <a href="#">Selenoprotein P, plasma, 1 [Homo sapiens]</a>                  | 44.3      | 44.3        | 100%        | 6e-04   | 100%  | <a href="#">gij 37596694 AAH58919.1</a>      |
| <a href="#">selenoprotein P [Homo sapiens]</a>                             | 44.3      | 44.3        | 100%        | 6e-04   | 100%  | <a href="#">gij 312004116 CAA77836.2</a>     |
| <a href="#">selenoprotein P precursor [Macaca mulatta]</a>                 | 44.3      | 44.3        | 100%        | 6e-04   | 100%  | <a href="#">gij 226958322 NP_001152962.1</a> |
| <a href="#">selenoprotein P precursor [Pan troglodytes]</a>                | 44.3      | 44.3        | 100%        | 6e-04   | 100%  | <a href="#">gij 169403955 NP_001108587.1</a> |
| <a href="#">selenoprotein P isoform 2 [Homo sapiens]</a>                   | 44.3      | 44.3        | 100%        | 6e-04   | 100%  | <a href="#">gij 148277022 NP_001087195.1</a> |
| <a href="#">PREDICTED: LOW QUALITY PROTEIN: selenoprotein P [Tupaia c</a>  | 41.4      | 41.4        | 92%         | 0.006   | 100%  | <a href="#">gij 562878609 XP_006167023.1</a> |
| <a href="#">PREDICTED: LOW QUALITY PROTEIN: selenoprotein P [Tarsius s</a> | 39.7      | 39.7        | 100%        | 0.021   | 92%   | <a href="#">gij 640790108 XP_008050904.1</a> |
| <a href="#">PREDICTED: LOW QUALITY PROTEIN: selenoprotein P [Trichech</a>  | 39.7      | 39.7        | 100%        | 0.021   | 92%   | <a href="#">gij 471413922 XP_004388500.1</a> |
| <a href="#">selenoprotein P precursor [Pongo abelii]</a>                   | 39.2      | 39.2        | 100%        | 0.029   | 92%   | <a href="#">gij 197101233 NP_001127462.1</a> |
| <a href="#">PREDICTED: selenoprotein P [Otolemur garnettii]</a>            | 38.8      | 38.8        | 100%        | 0.037   | 92%   | <a href="#">gij 395840394 XP_003793045.1</a> |
| <a href="#">PREDICTED: LOW QUALITY PROTEIN: selenoprotein P [Nomasci</a>   | 38.4      | 38.4        | 100%        | 0.055   | 92%   | <a href="#">gij 332250603 XP_003274442.1</a> |
| <a href="#">PREDICTED: LOW QUALITY PROTEIN: selenoprotein P [Sorex ar</a>  | 38.0      | 38.0        | 84%         | 0.075   | 100%  | <a href="#">gij 505790024 XP_004605590.1</a> |
| <a href="#">selenoprotein P precursor [Callithrix jacchus]</a>             | 37.5      | 37.5        | 100%        | 0.10    | 85%   | <a href="#">gij 315630400 NP_001186857.1</a> |
| <a href="#">selenoprotein P precursor [Sus scrofa]</a>                     | 37.1      | 37.1        | 92%         | 0.14    | 92%   | <a href="#">gij 198282079 NP_001128295.1</a> |
| <a href="#">PREDICTED: LOW QUALITY PROTEIN: selenoprotein P [Myotis d</a>  | 36.7      | 36.7        | 92%         | 0.20    | 92%   | <a href="#">gij 584060316 XP_006774623.1</a> |
| <a href="#">PREDICTED: LOW QUALITY PROTEIN: selenoprotein P [Myotis lu</a> | 36.7      | 36.7        | 92%         | 0.20    | 92%   | <a href="#">gij 558205011 XP_006106371.1</a> |
| <a href="#">PREDICTED: LOW QUALITY PROTEIN: selenoprotein P [Eptesicu</a>  | 36.7      | 36.7        | 92%         | 0.20    | 92%   | <a href="#">gij 641727491 XP_008153843.1</a> |
| <a href="#">PREDICTED: LOW QUALITY PROTEIN: selenoprotein P [Myotis b</a>  | 36.7      | 36.7        | 92%         | 0.20    | 92%   | <a href="#">gij 554563465 XP_005876061.1</a> |
| <a href="#">PREDICTED: LOW QUALITY PROTEIN: selenoprotein P [Mustela</a>   | 36.7      | 36.7        | 92%         | 0.20    | 86%   | <a href="#">gij 511826454 XP_004738001.1</a> |
| <a href="#">PREDICTED: LOW QUALITY PROTEIN: selenoprotein P [Ceratoth</a>  | 35.8      | 35.8        | 100%        | 0.38    | 85%   | <a href="#">gij 478496995 XP_004422836.1</a> |

|                                                                     |      |      |      |      |      |                                             |
|---------------------------------------------------------------------|------|------|------|------|------|---------------------------------------------|
| PREDICTED: LOW QUALITY PROTEIN: selenoprotein P [Elephant           | 35.4 | 35.4 | 100% | 0.52 | 85%  | <a href="#">gij585672710 XP_006889619.1</a> |
| PREDICTED: LOW QUALITY PROTEIN: selenoprotein P [Equus p            | 35.0 | 35.0 | 100% | 0.71 | 85%  | <a href="#">gij664731166 XP_008522793.1</a> |
| selenoprotein P precursor [Equus caballus]                          | 35.0 | 35.0 | 100% | 0.71 | 85%  | <a href="#">gij208022673 NP_001129077.1</a> |
| PREDICTED: LOW QUALITY PROTEIN: selenoprotein P [Microtus           | 33.7 | 33.7 | 92%  | 1.8  | 83%  | <a href="#">gij532054271 XP_005369861.1</a> |
| PREDICTED: LOW QUALITY PROTEIN: selenoprotein P [Peromys            | 33.7 | 33.7 | 92%  | 1.8  | 83%  | <a href="#">gij589969345 XP_006997157.1</a> |
| selenoprotein P precursor [Cricetulus griseus]                      | 32.5 | 32.5 | 100% | 4.6  | 77%  | <a href="#">gij537231220 ERE84145.1</a>     |
| PREDICTED: LOW QUALITY PROTEIN: selenoprotein P [Balaeno            | 32.5 | 32.5 | 92%  | 4.7  | 83%  | <a href="#">gij594696840 XP_007195596.1</a> |
| PREDICTED: LOW QUALITY PROTEIN: selenoprotein P [Lipotes v          | 32.5 | 32.5 | 92%  | 4.7  | 83%  | <a href="#">gij602724444 XP_007447694.1</a> |
| PREDICTED: LOW QUALITY PROTEIN: selenoprotein P [Physeter           | 32.5 | 32.5 | 92%  | 4.7  | 83%  | <a href="#">gij593761497 XP_007119423.1</a> |
| PREDICTED: LOW QUALITY PROTEIN: selenoprotein P [Chinchill          | 32.5 | 32.5 | 92%  | 4.7  | 83%  | <a href="#">gij533143496 XP_005386312.1</a> |
| PREDICTED: LOW QUALITY PROTEIN: selenoprotein P [Bubalus            | 32.5 | 32.5 | 92%  | 4.7  | 83%  | <a href="#">gij594087306 XP_006067130.1</a> |
| selenoprotein P precursor [Canis lupus familiaris]                  | 32.5 | 32.5 | 92%  | 4.7  | 83%  | <a href="#">gij169403968 NP_001108590.1</a> |
| methylthioribose kinase [Blautia sp. CAG:257]                       | 31.6 | 31.6 | 100% | 8.9  | 77%  | <a href="#">gij547449133 WP_022068881.1</a> |
| Selenoprotein P [Heterocephalus glaber]                             | 31.2 | 31.2 | 92%  | 12   | 83%  | <a href="#">gij351695949 EHA98867.1</a>     |
| PREDICTED: LOW QUALITY PROTEIN: selenoprotein P [Fukomys            | 31.2 | 31.2 | 92%  | 12   | 83%  | <a href="#">gij731237262 XP_010632183.1</a> |
| PREDICTED: LOW QUALITY PROTEIN: selenoprotein P [Heteroce           | 31.2 | 31.2 | 92%  | 12   | 83%  | <a href="#">gij512973043 XP_004848622.1</a> |
| PREDICTED: LOW QUALITY PROTEIN: selenoprotein P [Heteroce           | 31.2 | 31.2 | 92%  | 12   | 83%  | <a href="#">gij512816050 XP_004878213.1</a> |
| PREDICTED: LOW QUALITY PROTEIN: selenoprotein P [Echinops           | 31.2 | 31.2 | 100% | 12   | 77%  | <a href="#">gij507708621 XP_004716992.1</a> |
| 5-methylthioribose kinase [Blautia wexlerae]                        | 31.2 | 31.2 | 100% | 12   | 77%  | <a href="#">gij651890337 WP_026649811.1</a> |
| PREDICTED: LOW QUALITY PROTEIN: selenoprotein P [Orcinus v          | 30.8 | 30.8 | 76%  | 17   | 90%  | <a href="#">gij465986750 XP_004266005.1</a> |
| PREDICTED: LOW QUALITY PROTEIN: selenoprotein P [Tursiops           | 30.8 | 30.8 | 76%  | 17   | 90%  | <a href="#">gij470626535 XP_004320390.1</a> |
| PREDICTED: LOW QUALITY PROTEIN: selenoprotein P [Panthera           | 30.3 | 30.3 | 76%  | 23   | 90%  | <a href="#">gij591339998 XP_007095490.1</a> |
| PREDICTED: LOW QUALITY PROTEIN: selenoprotein P [Nannosp            | 29.9 | 29.9 | 92%  | 31   | 83%  | <a href="#">gij674066756 XP_008840327.1</a> |
| hypothetical protein [Ruminococcus sp. JC304]                       | 29.9 | 29.9 | 100% | 31   | 77%  | <a href="#">gij517992489 WP_019162697.1</a> |
| PREDICTED: LOW QUALITY PROTEIN: selenoprotein P [Galeopte           | 29.5 | 29.5 | 100% | 42   | 77%  | <a href="#">gij667253652 XP_008564915.1</a> |
| selenoprotein P precursor [Rattus norvegicus]                       | 29.5 | 29.5 | 100% | 42   | 69%  | <a href="#">gij15011857 NP_062065.2</a>     |
| PREDICTED: LOW QUALITY PROTEIN: selenoprotein P [Felis cati         | 29.1 | 29.1 | 61%  | 55   | 100% | <a href="#">gij586975923 XP_006928143.1</a> |
| PREDICTED: LOW QUALITY PROTEIN: selenoprotein P [Bison bis          | 29.1 | 29.1 | 92%  | 57   | 75%  | <a href="#">gij742088280 XP_010831114.1</a> |
| selenoprotein P [Bos taurus]                                        | 29.1 | 29.1 | 92%  | 57   | 75%  | <a href="#">gij6006351 BAA84781.1</a>       |
| PREDICTED: LOW QUALITY PROTEIN: selenoprotein P [Bos mutu           | 29.1 | 29.1 | 92%  | 57   | 75%  | <a href="#">gij555965745 XP_005894930.1</a> |
| selenoprotein P precursor [Bos taurus]                              | 29.1 | 29.1 | 92%  | 57   | 75%  | <a href="#">gij156631001 NP_776884.2</a>    |
| selenoprotein P [Bubalus bubalis]                                   | 29.1 | 29.1 | 92%  | 57   | 75%  | <a href="#">gij430001945 AFM77782.2</a>     |
| selenoprotein P precursor [Cavia porcellus]                         | 28.6 | 28.6 | 92%  | 78   | 75%  | <a href="#">gij384367995 NP_001244936.1</a> |
| PREDICTED: LOW QUALITY PROTEIN: selenoprotein P [Odobenu            | 28.6 | 28.6 | 69%  | 78   | 89%  | <a href="#">gij472379594 XP_004409206.1</a> |
| leucyl-tRNA synthetase [Candidatus Portiera aleyrodidarum]          | 28.6 | 28.6 | 84%  | 80   | 73%  | <a href="#">gij504756171 WP_014943273.1</a> |
| leucyl-tRNA synthetase [Candidatus Portiera aleyrodidarum]          | 28.6 | 28.6 | 84%  | 80   | 73%  | <a href="#">gij504708021 WP_014895123.1</a> |
| selenoprotein P, plasma, 1, isoform CRA a [Mus musculus]            | 28.2 | 28.2 | 84%  | 102  | 73%  | <a href="#">gij148671458 EDL03405.1</a>     |
| SJCHGC06731 protein [Schistosoma japonicum]                         | 28.2 | 28.2 | 61%  | 103  | 100% | <a href="#">gij56759152 AAW27716.1</a>      |
| PREDICTED: uncharacterized protein LOC102703395 [Oryza bract        | 28.2 | 28.2 | 61%  | 105  | 100% | <a href="#">gij573942981 XP_006653873.1</a> |
| PREDICTED: LOW QUALITY PROTEIN: selenoprotein P [Octodon            | 28.2 | 28.2 | 92%  | 106  | 75%  | <a href="#">gij507690845 XP_004641866.1</a> |
| PREDICTED: LOW QUALITY PROTEIN: selenoprotein P [Erinaceu           | 28.2 | 28.2 | 84%  | 106  | 82%  | <a href="#">gij617575753 XP_007517681.1</a> |
| probable bacteriophage tail fiber protein [Fusobacterium sp. CAG:4' | 28.2 | 28.2 | 61%  | 106  | 100% | <a href="#">gij548239104 WP_022457330.1</a> |
| Selenoprotein P, plasma, 1 [Mus musculus]                           | 28.2 | 28.2 | 84%  | 106  | 73%  | <a href="#">gij34809553 AAH01991.2</a>      |
| plasma selenoprotein P [Mus musculus]                               | 28.2 | 28.2 | 84%  | 106  | 73%  | <a href="#">gij4103142 AAD01684.1</a>       |
| unnamed protein product [Mus musculus]                              | 28.2 | 28.2 | 84%  | 106  | 73%  | <a href="#">gij74192879 BAE34948.1</a>      |

|                                                                                |      |      |      |     |     |                                             |
|--------------------------------------------------------------------------------|------|------|------|-----|-----|---------------------------------------------|
| <a href="#">selenoprotein P precursor [Mus musculus]</a>                       | 28.2 | 28.2 | 84%  | 106 | 73% | <a href="#">gil74271806 NP_033181.3</a>     |
| <a href="#">unnamed protein product [Mus musculus]</a>                         | 28.2 | 28.2 | 84%  | 106 | 73% | <a href="#">gil74213751 BAC55264.3</a>      |
| <a href="#">ATPase AAA [Methylovorus glucosotrophus]</a>                       | 28.2 | 28.2 | 76%  | 107 | 80% | <a href="#">gil506310842 WP_015830617.1</a> |
| <a href="#">membrane selenoprotein P [Capra hircus]</a>                        | 27.8 | 27.8 | 69%  | 139 | 89% | <a href="#">gil7677620 AAF67201.1</a>       |
| <a href="#">hypothetical protein [Bifidobacterium longum]</a>                  | 27.8 | 27.8 | 84%  | 141 | 75% | <a href="#">gil695759205 WP_032682416.1</a> |
| <a href="#">hypothetical protein [Anaerostipes hadrus]</a>                     | 27.8 | 27.8 | 84%  | 141 | 75% | <a href="#">gil496495012 WP_009203548.1</a> |
| <a href="#">MULTISPECIES: hypothetical protein [Clostridiales]</a>             | 27.8 | 27.8 | 84%  | 141 | 75% | <a href="#">gil489600928 WP_003505369.1</a> |
| <a href="#">selenoprotein P, plasma, 1 precursor [Capra hircus]</a>            | 27.8 | 27.8 | 69%  | 144 | 89% | <a href="#">gil550822255 NP_001272511.1</a> |
| <a href="#">PREDICTED: LOW QUALITY PROTEIN: selenoprotein P [Jaculus j]</a>    | 27.8 | 27.8 | 69%  | 144 | 89% | <a href="#">gil507537041 XP_004652550.1</a> |
| <a href="#">PREDICTED: LOW QUALITY PROTEIN: selenoprotein P [Ovis arie]</a>    | 27.8 | 27.8 | 69%  | 144 | 89% | <a href="#">gil426246564 XP_004017062.1</a> |
| <a href="#">PREDICTED: LOW QUALITY PROTEIN: selenoprotein P [Monodel]</a>      | 27.8 | 27.8 | 84%  | 144 | 82% | <a href="#">gil612006645 XP_003340675.2</a> |
| <a href="#">PREDICTED: LOW QUALITY PROTEIN: selenoprotein P [Camelus]</a>      | 27.8 | 27.8 | 69%  | 144 | 89% | <a href="#">gil744538058 XP_010999134.1</a> |
| <a href="#">PREDICTED: LOW QUALITY PROTEIN: selenoprotein P [Camelus]</a>      | 27.8 | 27.8 | 69%  | 145 | 89% | <a href="#">gil560931717 XP_006191986.1</a> |
| <a href="#">PREDICTED: LOW QUALITY PROTEIN: selenoprotein P [Vicugna]</a>      | 27.8 | 27.8 | 69%  | 145 | 89% | <a href="#">gil560970802 XP_006207756.1</a> |
| <a href="#">hypothetical protein [Dyadobacter crusticola]</a>                  | 27.8 | 27.8 | 69%  | 145 | 89% | <a href="#">gil737351556 WP_035333761.1</a> |
| <a href="#">hypothetical protein [Corallocooccus coralloides]</a>              | 27.8 | 27.8 | 84%  | 148 | 75% | <a href="#">gil504210603 WP_014397705.1</a> |
| <a href="#">hypothetical protein [Coralimargarita akajimensis]</a>             | 27.4 | 27.4 | 84%  | 174 | 73% | <a href="#">gil502809852 WP_013044828.1</a> |
| <a href="#">PREDICTED: selenoprotein P-like [Ailuropoda melanoleuca]</a>       | 27.4 | 27.4 | 69%  | 187 | 89% | <a href="#">gil301772662 XP_002921760.1</a> |
| <a href="#">hypothetical protein [Leptospirillum ferrooxidans]</a>             | 27.4 | 27.4 | 69%  | 188 | 82% | <a href="#">gil504262968 WP_014450070.1</a> |
| <a href="#">PREDICTED: LOW QUALITY PROTEIN: selenoprotein P [Loxodon]</a>      | 27.4 | 27.4 | 69%  | 197 | 89% | <a href="#">gil731464182 XP_010586424.1</a> |
| <a href="#">glycosyl transferase family 1 [Ilyobacter polytropus]</a>          | 27.4 | 27.4 | 100% | 197 | 71% | <a href="#">gil503154435 WP_013389096.1</a> |
| <a href="#">PREDICTED: LOW QUALITY PROTEIN: selenoprotein P [Ursus m]</a>      | 27.4 | 27.4 | 69%  | 198 | 89% | <a href="#">gil670999853 XP_008690806.1</a> |
| <a href="#">PREDICTED: chloride channel protein ClC-Ka isoform X2 [Peromys</a> | 27.4 | 27.4 | 69%  | 200 | 90% | <a href="#">gil589925330 XP_006975530.1</a> |
| <a href="#">PREDICTED: chloride channel protein ClC-Ka isoform X1 [Peromys</a> | 27.4 | 27.4 | 69%  | 200 | 90% | <a href="#">gil589925328 XP_006975529.1</a> |
| <a href="#">PREDICTED: macoilin-1-like [Apis florea]</a>                       | 26.9 | 26.9 | 84%  | 261 | 82% | <a href="#">gil380022212 XP_003694946.1</a> |
| <a href="#">PREDICTED: LOW QUALITY PROTEIN: selenoprotein P [Leptonyx</a>      | 26.9 | 26.9 | 76%  | 268 | 80% | <a href="#">gil585192742 XP_006747601.1</a> |
| <a href="#">PREDICTED: ribonuclease inhibitor-like [Pundamilia nyererei]</a>   | 26.9 | 26.9 | 69%  | 268 | 82% | <a href="#">gil548543470 XP_005753681.1</a> |

## Alignments

Download [GenPept](#) [Graphics](#)

Next Previous Descriptions

PREDICTED: LOW QUALITY PROTEIN: selenoprotein P [Saimiri boliviensis boliviensis]

Sequence ID: [gil725563213|ref|XP\\_003925940.2](#) Length: 381 Number of Matches: 1

Range 1: 170 to 182 [GenPept](#) [Graphics](#)

Next Match Previous Match

| Score         | Expect | Identities  | Positives   | Gaps     |
|---------------|--------|-------------|-------------|----------|
| 44.3 bits(97) | 6e-04  | 13/13(100%) | 13/13(100%) | 0/13(0%) |

Query 1 KKCGNCSLTLTKD 13  
 KKCGNCSLTLTKD  
 Sbjct 170 KKCGNCSLTLTKD 182

### Related Information

[Gene](#) - associated gene details  
[Map Viewer](#) - aligned genomic context

Download [GenPept](#) [Graphics](#)

Next Previous Descriptions

PREDICTED: LOW QUALITY PROTEIN: selenoprotein P [Rhinopithecus roxellana]

Sequence ID: [gil724878613|ref|XP\\_010372696.1](#) Length: 381 Number of Matches: 1

Range 1: 170 to 182 [GenPept](#) [Graphics](#)

Next Match Previous Match

| Score         | Expect | Identities  | Positives   | Gaps     |
|---------------|--------|-------------|-------------|----------|
| 44.3 bits(97) | 6e-04  | 13/13(100%) | 13/13(100%) | 0/13(0%) |

Query 1 KKCGNCSLTLTKD 13

### Related Information

[Gene](#) - associated gene details  
[Map Viewer](#) - aligned genomic context

Sbjct 170 KKCGNCSLTTLKD 182

[Download](#) [GenPept](#) [Graphics](#)

[Next](#) [Previous](#) [Descriptions](#)

PREDICTED: LOW QUALITY PROTEIN: selenoprotein P [Papio anubis]

Sequence ID: [gi|685545348|ref|XP\\_009206607.1|](#) Length: 381 Number of Matches: 1

Range 1: 170 to 182 [GenPept](#) [Graphics](#)

[Next Match](#) [Previous Match](#)

| Score         | Expect | Identities  | Positives   | Gaps     |
|---------------|--------|-------------|-------------|----------|
| 44.3 bits(97) | 6e-04  | 13/13(100%) | 13/13(100%) | 0/13(0%) |

Query 1 KKCGNCSLTTLKD 13  
 KKCGNCSLTTLKD  
 Sbjct 170 KKCGNCSLTTLKD 182

**Related Information**

[Gene](#) - associated gene details  
[Map Viewer](#) - aligned genomic context

[Download](#) [GenPept](#) [Graphics](#)

[Next](#) [Previous](#) [Descriptions](#)

PREDICTED: LOW QUALITY PROTEIN: selenoprotein P [Pan paniscus]

Sequence ID: [gi|675710689|ref|XP\\_008961588.1|](#) Length: 381 Number of Matches: 1

Range 1: 170 to 182 [GenPept](#) [Graphics](#)

[Next Match](#) [Previous Match](#)

| Score         | Expect | Identities  | Positives   | Gaps     |
|---------------|--------|-------------|-------------|----------|
| 44.3 bits(97) | 6e-04  | 13/13(100%) | 13/13(100%) | 0/13(0%) |

Query 1 KKCGNCSLTTLKD 13  
 KKCGNCSLTTLKD  
 Sbjct 170 KKCGNCSLTTLKD 182

**Related Information**

[Gene](#) - associated gene details  
[Map Viewer](#) - aligned genomic context

[Download](#) [GenPept](#) [Graphics](#)

[Next](#) [Previous](#) [Descriptions](#)

PREDICTED: LOW QUALITY PROTEIN: selenoprotein P [Chlorocebus sabaeus]

Sequence ID: [gi|635028004|ref|XP\\_007959679.1|](#) Length: 381 Number of Matches: 1

Range 1: 170 to 182 [GenPept](#) [Graphics](#)

[Next Match](#) [Previous Match](#)

| Score         | Expect | Identities  | Positives   | Gaps     |
|---------------|--------|-------------|-------------|----------|
| 44.3 bits(97) | 6e-04  | 13/13(100%) | 13/13(100%) | 0/13(0%) |

Query 1 KKCGNCSLTTLKD 13  
 KKCGNCSLTTLKD  
 Sbjct 170 KKCGNCSLTTLKD 182

**Related Information**

[Gene](#) - associated gene details  
[Map Viewer](#) - aligned genomic context

BLAST is a registered trademark of the National Library of Medicine.

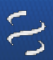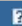

NCBI/ BLAST/ blastp suite/ Formatting Results - BE88U4J0015

Your search parameters were adjusted to search for a short input sequence.

[Edit and Resubmit](#) [Save Search Strategies](#) [Formatting options](#) [Download](#)

[YouTube](#) [How to read this page](#) [Blast report description](#)

### SEPP1\_KKCGNCSLTLTKDEDFCKR\_NonMod

RID [BE88U4J0015](#) (Expires on 01-16 09:08 am)

Query ID |cl|65177  
Description None  
Molecule type amino acid  
Query Length 19

Database Name nr  
Description All non-redundant GenBank CDS translations+PDB+SwissProt+PIR excluding environmental samples from WGS projects  
Program BLASTP 2.2.30+ [Citation](#)

Other reports: [Search Summary](#) [\[Taxonomy reports\]](#) [\[Distance tree of results\]](#) [\[Related Structures\]](#) [\[Multiple alignment\]](#)

[New](#) DELTA-BLAST a more sensitive protein-protein search

### Graphic Summary

Show Conserved Domains

Putative conserved domains have been detected, click on the image below for detailed results.

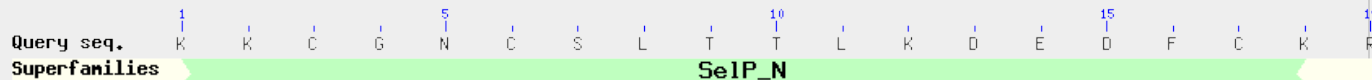

Distribution of 100 Blast Hits on the Query Sequence

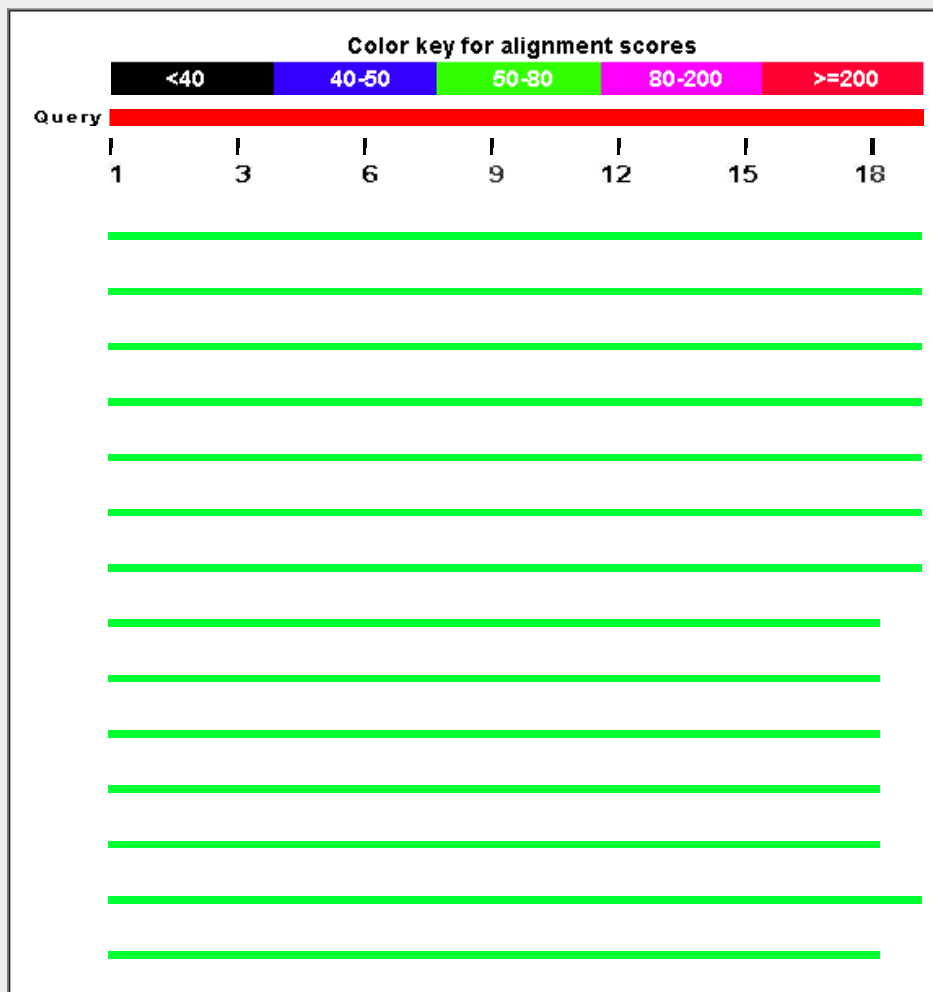

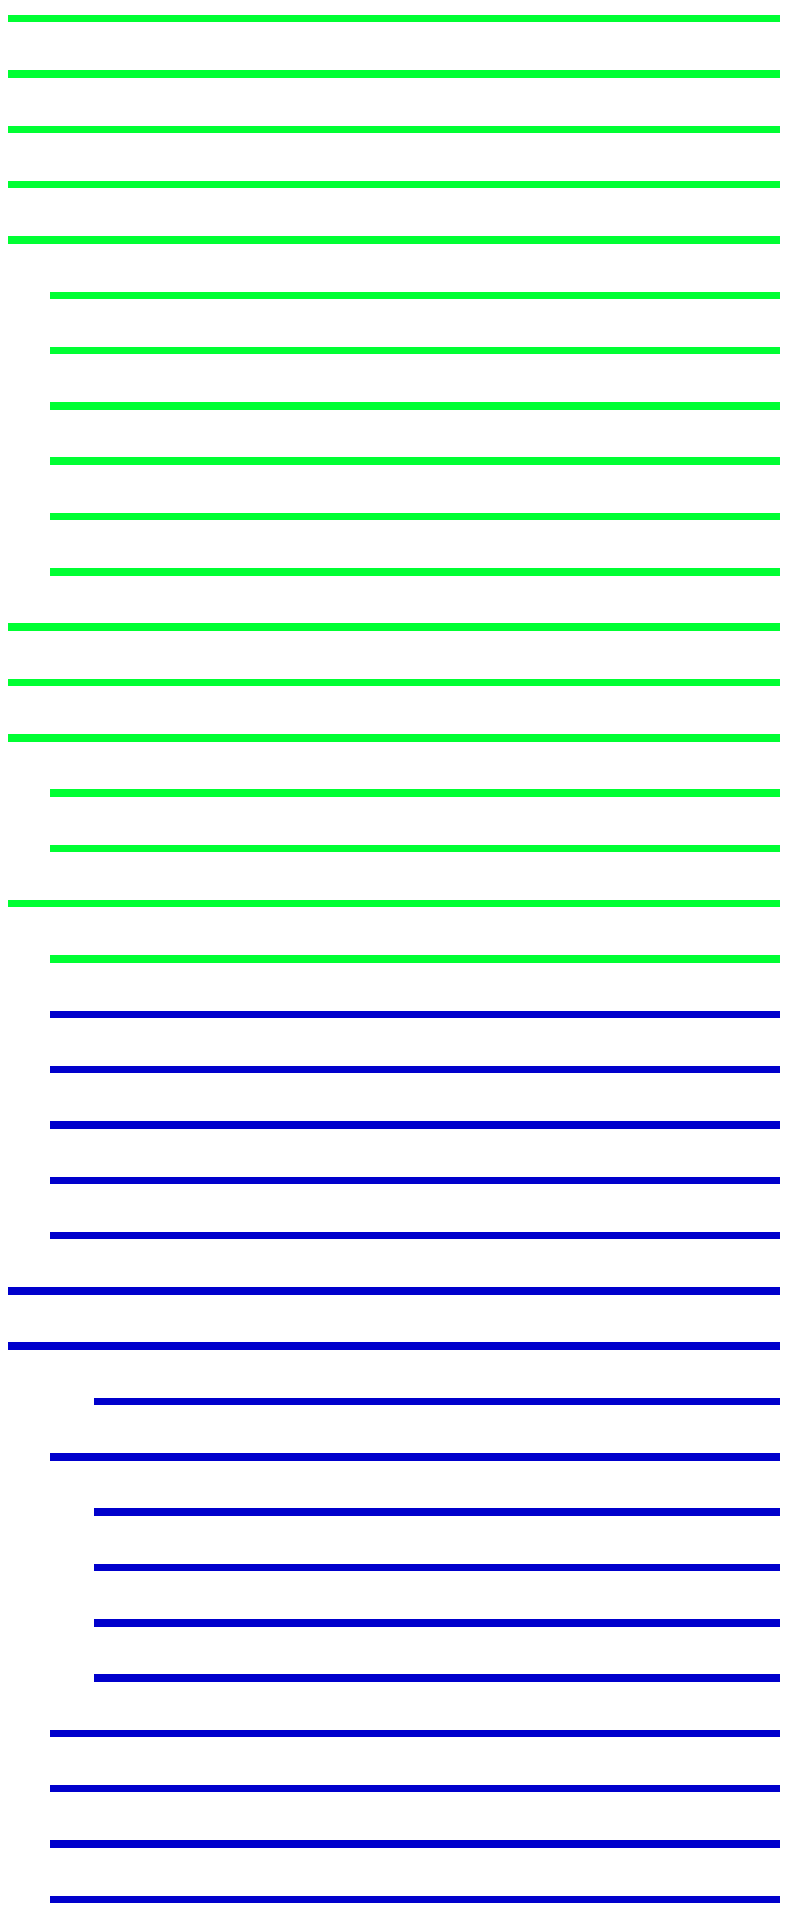

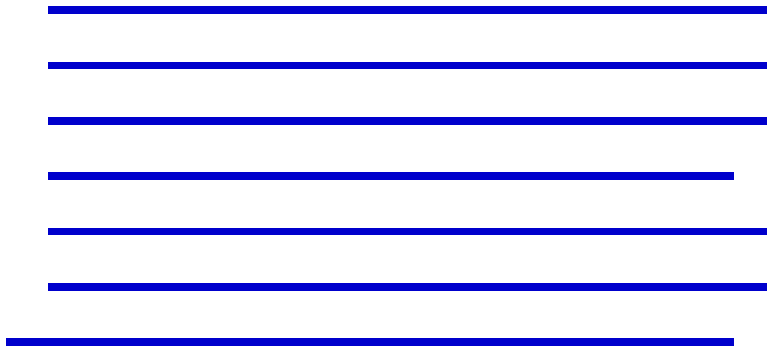

**Descriptions**

**Sequences producing significant alignments:**

Select: [All](#) [None](#) Selected:0

Alignments [Download](#) [GenPept](#) [Graphics](#) [Distance tree of results](#) [Multiple alignment](#)

| Description                                                                 | Max score | Total score | Query cover | E value | Ident | Accession                                   |
|-----------------------------------------------------------------------------|-----------|-------------|-------------|---------|-------|---------------------------------------------|
| <a href="#">PREDICTED: LOW QUALITY PROTEIN: selenoprotein P [Pan pan]</a>   | 65.5      | 65.5        | 100%        | 8e-11   | 100%  | <a href="#">gi 675710689 XP_008961588.1</a> |
| <a href="#">Selenoprotein P, plasma, 1 [Homo sapiens]</a>                   | 65.5      | 65.5        | 100%        | 8e-11   | 100%  | <a href="#">gi 34783648 AAH46152.1</a>      |
| <a href="#">selenoprotein P isoform 1 precursor [Homo sapiens]</a>          | 65.5      | 65.5        | 100%        | 8e-11   | 100%  | <a href="#">gi 62530391 NP_005401.3</a>     |
| <a href="#">Selenoprotein P, plasma, 1 [Homo sapiens]</a>                   | 65.5      | 65.5        | 100%        | 8e-11   | 100%  | <a href="#">gi 37596694 AAH58919.1</a>      |
| <a href="#">selenoprotein P [Homo sapiens]</a>                              | 65.5      | 65.5        | 100%        | 8e-11   | 100%  | <a href="#">gi 312004116 CAA77836.2</a>     |
| <a href="#">selenoprotein P precursor [Pan troglodytes]</a>                 | 65.5      | 65.5        | 100%        | 8e-11   | 100%  | <a href="#">gi 169403955 NP_001108587.1</a> |
| <a href="#">selenoprotein P isoform 2 [Homo sapiens]</a>                    | 65.5      | 65.5        | 100%        | 8e-11   | 100%  | <a href="#">gi 148277022 NP_001087195.1</a> |
| <a href="#">PREDICTED: LOW QUALITY PROTEIN: selenoprotein P [Saimiri b]</a> | 62.1      | 62.1        | 94%         | 1e-09   | 100%  | <a href="#">gi 725563213 XP_003925940.2</a> |
| <a href="#">PREDICTED: LOW QUALITY PROTEIN: selenoprotein P [Rhinopit]</a>  | 62.1      | 62.1        | 94%         | 1e-09   | 100%  | <a href="#">gi 724878613 XP_010372696.1</a> |
| <a href="#">PREDICTED: LOW QUALITY PROTEIN: selenoprotein P [Papio ar]</a>  | 62.1      | 62.1        | 94%         | 1e-09   | 100%  | <a href="#">gi 685545348 XP_009206607.1</a> |
| <a href="#">PREDICTED: LOW QUALITY PROTEIN: selenoprotein P [Chloroce]</a>  | 62.1      | 62.1        | 94%         | 1e-09   | 100%  | <a href="#">gi 635028004 XP_007959679.1</a> |
| <a href="#">selenoprotein P precursor [Macaca mulatta]</a>                  | 62.1      | 62.1        | 94%         | 1e-09   | 100%  | <a href="#">gi 226958322 NP_001152962.1</a> |
| <a href="#">Selenoprotein P, plasma, 1 [Homo sapiens]</a>                   | 60.9      | 60.9        | 100%        | 3e-09   | 95%   | <a href="#">gi 34783164 AAH15875.1</a>      |
| <a href="#">PREDICTED: LOW QUALITY PROTEIN: selenoprotein P [Trichech]</a>  | 57.5      | 57.5        | 94%         | 4e-08   | 94%   | <a href="#">gi 471413922 XP_004388500.1</a> |
| <a href="#">selenoprotein P precursor [Pongo abelii]</a>                    | 57.1      | 57.1        | 94%         | 6e-08   | 94%   | <a href="#">gi 197101233 NP_001127462.1</a> |
| <a href="#">PREDICTED: selenoprotein P [Otolemur garnettii]</a>             | 56.6      | 56.6        | 94%         | 8e-08   | 94%   | <a href="#">gi 395840394 XP_003793045.1</a> |
| <a href="#">PREDICTED: LOW QUALITY PROTEIN: selenoprotein P [Nomasc]</a>    | 56.2      | 56.2        | 94%         | 1e-07   | 94%   | <a href="#">gi 332250603 XP_003274442.1</a> |
| <a href="#">selenoprotein P precursor [Callithrix jacchus]</a>              | 55.4      | 55.4        | 94%         | 2e-07   | 89%   | <a href="#">gi 315630400 NP_001186857.1</a> |
| <a href="#">PREDICTED: LOW QUALITY PROTEIN: selenoprotein P [Tarsius s]</a> | 54.9      | 54.9        | 94%         | 3e-07   | 89%   | <a href="#">gi 640790108 XP_008050904.1</a> |
| <a href="#">selenoprotein P precursor [Sus scrofa]</a>                      | 54.9      | 54.9        | 89%         | 3e-07   | 94%   | <a href="#">gi 198282079 NP_001128295.1</a> |
| <a href="#">PREDICTED: LOW QUALITY PROTEIN: selenoprotein P [Myotis d]</a>  | 54.5      | 54.5        | 89%         | 4e-07   | 94%   | <a href="#">gi 584060316 XP_006774623.1</a> |
| <a href="#">PREDICTED: LOW QUALITY PROTEIN: selenoprotein P [Myotis l]</a>  | 54.5      | 54.5        | 89%         | 4e-07   | 94%   | <a href="#">gi 558205011 XP_006106371.1</a> |
| <a href="#">PREDICTED: LOW QUALITY PROTEIN: selenoprotein P [Eptesicu]</a>  | 54.5      | 54.5        | 89%         | 4e-07   | 94%   | <a href="#">gi 641727491 XP_008153843.1</a> |
| <a href="#">PREDICTED: LOW QUALITY PROTEIN: selenoprotein P [Myotis b]</a>  | 54.5      | 54.5        | 89%         | 4e-07   | 94%   | <a href="#">gi 554563465 XP_005876061.1</a> |
| <a href="#">PREDICTED: LOW QUALITY PROTEIN: selenoprotein P [Tupaia c]</a>  | 54.1      | 54.1        | 89%         | 6e-07   | 94%   | <a href="#">gi 562878609 XP_006167023.1</a> |
| <a href="#">PREDICTED: LOW QUALITY PROTEIN: selenoprotein P [Ceratoth]</a>  | 53.7      | 53.7        | 94%         | 9e-07   | 89%   | <a href="#">gi 478496995 XP_004422836.1</a> |
| <a href="#">PREDICTED: LOW QUALITY PROTEIN: selenoprotein P [Equus p]</a>   | 52.8      | 52.8        | 94%         | 2e-06   | 89%   | <a href="#">gi 664731166 XP_008522793.1</a> |
| <a href="#">selenoprotein P precursor [Equus caballus]</a>                  | 52.8      | 52.8        | 94%         | 2e-06   | 89%   | <a href="#">gi 208022673 NP_001129077.1</a> |



|                                                            |      |      |     |       |     |                                             |
|------------------------------------------------------------|------|------|-----|-------|-----|---------------------------------------------|
| PREDICTED: LOW QUALITY PROTEIN: selenoprotein P [Sorex ar  | 51.5 | 51.5 | 89% | 4e-06 | 88% | <a href="#">gij505790024 XP_004605590.1</a> |
| PREDICTED: LOW QUALITY PROTEIN: selenoprotein P [Peromys   | 51.5 | 51.5 | 89% | 5e-06 | 88% | <a href="#">gij589969345 XP_006997157.1</a> |
| selenoprotein P precursor [Cricetulus griseus]             | 50.3 | 50.3 | 94% | 1e-05 | 83% | <a href="#">gij537231220 ERE84145.1</a>     |
| PREDICTED: LOW QUALITY PROTEIN: selenoprotein P [Chinchill | 50.3 | 50.3 | 89% | 1e-05 | 88% | <a href="#">gij533143496 XP_005386312.1</a> |
| Selenoprotein P [Heterocephalus glaber]                    | 49.0 | 49.0 | 89% | 3e-05 | 88% | <a href="#">gij351695949 EHA98867.1</a>     |
| PREDICTED: LOW QUALITY PROTEIN: selenoprotein P [Fukomys   | 49.0 | 49.0 | 89% | 3e-05 | 88% | <a href="#">gij731237262 XP_010632183.1</a> |
| PREDICTED: LOW QUALITY PROTEIN: selenoprotein P [Microtus  | 49.0 | 49.0 | 89% | 3e-05 | 82% | <a href="#">gij532054271 XP_005369861.1</a> |
| PREDICTED: LOW QUALITY PROTEIN: selenoprotein P [Heteroce  | 49.0 | 49.0 | 89% | 3e-05 | 88% | <a href="#">gij512973043 XP_004848622.1</a> |
| PREDICTED: LOW QUALITY PROTEIN: selenoprotein P [Heteroce  | 49.0 | 49.0 | 89% | 3e-05 | 88% | <a href="#">gij512816050 XP_004878213.1</a> |
| PREDICTED: LOW QUALITY PROTEIN: selenoprotein P [Galeopte  | 47.3 | 47.3 | 94% | 1e-04 | 83% | <a href="#">gij667253652 XP_008564915.1</a> |
| PREDICTED: LOW QUALITY PROTEIN: selenoprotein P [Pantherz  | 46.9 | 46.9 | 94% | 2e-04 | 83% | <a href="#">gij591339998 XP_007095490.1</a> |
| selenoprotein P, plasma, 1, isoform CRA_a [Mus musculus]   | 46.0 | 46.0 | 84% | 3e-04 | 81% | <a href="#">gij148671458 EDL03405.1</a>     |
| PREDICTED: LOW QUALITY PROTEIN: selenoprotein P [Octodon   | 46.0 | 46.0 | 89% | 3e-04 | 82% | <a href="#">gij507690845 XP_004641866.1</a> |
| Selenoprotein P, plasma, 1 [Mus musculus]                  | 46.0 | 46.0 | 84% | 3e-04 | 81% | <a href="#">gij34809553 AAH01991.2</a>      |
| plasma selenoprotein P [Mus musculus]                      | 46.0 | 46.0 | 84% | 3e-04 | 81% | <a href="#">gij4103142 AAD01684.1</a>       |
| unnamed protein product [Mus musculus]                     | 46.0 | 46.0 | 84% | 3e-04 | 81% | <a href="#">gij74192879 BAE34948.1</a>      |
| selenoprotein P precursor [Mus musculus]                   | 46.0 | 46.0 | 84% | 3e-04 | 81% | <a href="#">gij74271806 NP_033181.3</a>     |
| PREDICTED: LOW QUALITY PROTEIN: selenoprotein P [Balaeno   | 45.6 | 45.6 | 89% | 4e-04 | 82% | <a href="#">gij594696840 XP_007195596.1</a> |
| PREDICTED: LOW QUALITY PROTEIN: selenoprotein P [Lipotes \ | 45.6 | 45.6 | 89% | 4e-04 | 82% | <a href="#">gij602724444 XP_007447694.1</a> |
| PREDICTED: LOW QUALITY PROTEIN: selenoprotein P [Physeter  | 45.6 | 45.6 | 89% | 4e-04 | 82% | <a href="#">gij593761497 XP_007119423.1</a> |
| PREDICTED: LOW QUALITY PROTEIN: selenoprotein P [Bubalus   | 45.6 | 45.6 | 89% | 4e-04 | 82% | <a href="#">gij594087306 XP_006067130.1</a> |
| membrane selenoprotein P [Capra hircus]                    | 45.2 | 45.2 | 89% | 5e-04 | 82% | <a href="#">gij7677620 AAF67201.1</a>       |
| selenoprotein P, plasma, 1 precursor [Capra hircus]        | 45.2 | 45.2 | 89% | 6e-04 | 82% | <a href="#">gij550822255 NP_001272511.1</a> |
| PREDICTED: LOW QUALITY PROTEIN: selenoprotein P [Ovis arie | 45.2 | 45.2 | 89% | 6e-04 | 82% | <a href="#">gij426246564 XP_004017062.1</a> |
| PREDICTED: LOW QUALITY PROTEIN: selenoprotein P [Nannosp   | 44.8 | 44.8 | 84% | 8e-04 | 88% | <a href="#">gij674066756 XP_008840327.1</a> |
| selenoprotein P precursor [Cavia porcellus]                | 43.9 | 43.9 | 89% | 0.002 | 76% | <a href="#">gij384367995 NP_001244936.1</a> |
| PREDICTED: LOW QUALITY PROTEIN: selenoprotein P [Loxodon   | 43.9 | 43.9 | 89% | 0.002 | 82% | <a href="#">gij731464182 XP_010586424.1</a> |
| PREDICTED: LOW QUALITY PROTEIN: selenoprotein P [Elephan   | 43.9 | 43.9 | 89% | 0.002 | 82% | <a href="#">gij585672710 XP_006889619.1</a> |
| selenoprotein P precursor [Cricetulus griseus]             | 43.9 | 43.9 | 94% | 0.002 | 78% | <a href="#">gij379056379 NP_001243807.1</a> |
| PREDICTED: LOW QUALITY PROTEIN: selenoprotein P [Odobeni   | 43.5 | 43.5 | 84% | 0.002 | 81% | <a href="#">gij472379594 XP_004409206.1</a> |
| selenoprotein P precursor [Rattus norvegicus]              | 42.6 | 42.6 | 94% | 0.004 | 72% | <a href="#">gij15011857 NP_062065.2</a>     |
| PREDICTED: LOW QUALITY PROTEIN: selenoprotein P [Jaculus ] | 42.2 | 42.2 | 89% | 0.005 | 82% | <a href="#">gij507537041 XP_004652550.1</a> |
| PREDICTED: LOW QUALITY PROTEIN: selenoprotein P [Orcinus ] | 42.2 | 42.2 | 89% | 0.005 | 82% | <a href="#">gij465986750 XP_004266005.1</a> |
| PREDICTED: LOW QUALITY PROTEIN: selenoprotein P [Tursiops  | 42.2 | 42.2 | 89% | 0.005 | 82% | <a href="#">gij470626535 XP_004320390.1</a> |
| PREDICTED: LOW QUALITY PROTEIN: selenoprotein P [Oryctero  | 41.8 | 41.8 | 94% | 0.007 | 78% | <a href="#">gij634885032 XP_007952213.1</a> |
| PREDICTED: LOW QUALITY PROTEIN: selenoprotein P [Mustela   | 41.8 | 41.8 | 84% | 0.008 | 81% | <a href="#">gij511826454 XP_004738001.1</a> |
| PREDICTED: LOW QUALITY PROTEIN: selenoprotein P [Monodel   | 40.9 | 40.9 | 84% | 0.014 | 81% | <a href="#">gij612006645 XP_003340675.2</a> |
| PREDICTED: LOW QUALITY PROTEIN: selenoprotein P [Erinaceu  | 40.5 | 40.5 | 94% | 0.019 | 72% | <a href="#">gij617575753 XP_007517681.1</a> |
| selenoprotein P precursor [Canis lupus familiaris]         | 40.5 | 40.5 | 89% | 0.019 | 76% | <a href="#">gij169403968 NP_001108590.1</a> |
| PREDICTED: selenoprotein P-like [Ailuropoda melanoleuca]   | 40.1 | 40.1 | 89% | 0.023 | 76% | <a href="#">gij301772662 XP_002921760.1</a> |
| unnamed protein product [Mus musculus]                     | 40.1 | 40.1 | 84% | 0.027 | 75% | <a href="#">gij74198358 BAE39664.1</a>      |
| PREDICTED: LOW QUALITY PROTEIN: selenoprotein P [Camelus   | 40.1 | 40.1 | 89% | 0.027 | 76% | <a href="#">gij744538058 XP_010999134.1</a> |
| PREDICTED: LOW QUALITY PROTEIN: selenoprotein P [Camelus   | 40.1 | 40.1 | 89% | 0.027 | 76% | <a href="#">gij560931717 XP_006191986.1</a> |
| PREDICTED: LOW QUALITY PROTEIN: selenoprotein P [Vicugna   | 40.1 | 40.1 | 89% | 0.027 | 76% | <a href="#">gij560970802 XP_006207756.1</a> |
| PREDICTED: LOW QUALITY PROTEIN: selenoprotein P [Ursus m   | 40.1 | 40.1 | 89% | 0.027 | 76% | <a href="#">gij670999853 XP_008690806.1</a> |
| PREDICTED: LOW QUALITY PROTEIN: selenoprotein P [Bison bis | 39.7 | 39.7 | 89% | 0.037 | 76% | <a href="#">gij742088280 XP_010831114.1</a> |

|                                                                                  |      |      |     |       |      |                                             |
|----------------------------------------------------------------------------------|------|------|-----|-------|------|---------------------------------------------|
| <a href="#">selenoprotein P [Bos taurus]</a>                                     | 39.7 | 39.7 | 89% | 0.037 | 76%  | <a href="#">gij6006351 BAA84781.1</a>       |
| PREDICTED: LOW QUALITY PROTEIN: <a href="#">selenoprotein P [Bos mut]</a>        | 39.7 | 39.7 | 89% | 0.037 | 76%  | <a href="#">gij555965745 XP_005894930.1</a> |
| <a href="#">selenoprotein P precursor [Bos taurus]</a>                           | 39.7 | 39.7 | 89% | 0.037 | 76%  | <a href="#">gij156631001 NP_776884.2</a>    |
| <a href="#">selenoprotein P [Bubalus bubalis]</a>                                | 39.7 | 39.7 | 89% | 0.037 | 76%  | <a href="#">gij430001945 AFM77782.2</a>     |
| PREDICTED: LOW QUALITY PROTEIN: <a href="#">selenoprotein P [Condylur]</a>       | 39.2 | 39.2 | 94% | 0.050 | 72%  | <a href="#">gij507934338 XP_004678402.1</a> |
| PREDICTED: <a href="#">selenoprotein P [Sarcophilus harrisii]</a>                | 38.4 | 38.4 | 94% | 0.089 | 72%  | <a href="#">gij395511426 XP_003759960.1</a> |
| <a href="#">unnamed protein product [Mus musculus]</a>                           | 38.0 | 38.0 | 84% | 0.13  | 75%  | <a href="#">gij74213751 BAC55264.3</a>      |
| PREDICTED: LOW QUALITY PROTEIN: <a href="#">selenoprotein P [Dasypus]</a>        | 37.5 | 37.5 | 89% | 0.17  | 76%  | <a href="#">gij488512454 XP_004448278.1</a> |
| PREDICTED: LOW QUALITY PROTEIN: <a href="#">selenoprotein P [Echinop]</a>        | 37.1 | 37.1 | 94% | 0.24  | 72%  | <a href="#">gij507708621 XP_004716992.1</a> |
| PREDICTED: LOW QUALITY PROTEIN: <a href="#">selenoprotein P [Gorilla g]</a>      | 36.7 | 36.7 | 52% | 0.31  | 100% | <a href="#">gij426384833 XP_004065356.1</a> |
| <a href="#">selenoprotein P precursor [Oryctolagus cuniculus]</a>                | 35.8 | 35.8 | 84% | 0.60  | 75%  | <a href="#">gij315434200 NP_001186775.1</a> |
| PREDICTED: LOW QUALITY PROTEIN: <a href="#">selenoprotein P [Ochoton]</a>        | 35.4 | 35.4 | 84% | 0.82  | 75%  | <a href="#">gij504142600 XP_004583736.1</a> |
| <a href="#">putative ATP-dependent RNA helicase DDX60-like protein [Cricetu]</a> | 33.7 | 33.7 | 78% | 3.0   | 81%  | <a href="#">gij537270315 ERE91786.1</a>     |
| PREDICTED: probable ATP-dependent RNA helicase DDX60 [Crici]                     | 33.7 | 33.7 | 78% | 3.0   | 81%  | <a href="#">gij625189695 XP_003498842.2</a> |
| <a href="#">selenoprotein P-like protein [Bos taurus]</a>                        | 33.3 | 33.3 | 89% | 3.5   | 71%  | <a href="#">gij13366148 BAB39395.1</a>      |
| <a href="#">selenoprotein P-like protein [Bos taurus]</a>                        | 33.3 | 33.3 | 89% | 3.5   | 71%  | <a href="#">gij13366146 BAB39394.1</a>      |
| <a href="#">selenoprotein P-like protein [Bos taurus]</a>                        | 33.3 | 33.3 | 89% | 3.5   | 71%  | <a href="#">gij13366144 BAB39393.1</a>      |
| <a href="#">selenoprotein P-like protein [Bos taurus]</a>                        | 33.3 | 33.3 | 89% | 3.5   | 71%  | <a href="#">gij13366142 BAB39392.1</a>      |
| <a href="#">selenoprotein P-like protein [Bos taurus]</a>                        | 33.3 | 33.3 | 89% | 3.9   | 71%  | <a href="#">gij1582026 2117379A</a>         |
| <a href="#">selenoprotein P like protein [Bos taurus]</a>                        | 33.3 | 33.3 | 89% | 3.9   | 71%  | <a href="#">gij14970947 BAA04949.2</a>      |
| <a href="#">methylthioribose kinase [Blautia sp. CAG:257]</a>                    | 31.6 | 31.6 | 68% | 13    | 77%  | <a href="#">gij547449133 WP_022068881.1</a> |
| PREDICTED: LOW QUALITY PROTEIN: <a href="#">selenoprotein P [Ictidomy]</a>       | 31.2 | 31.2 | 78% | 18    | 67%  | <a href="#">gij532079811 XP_005325668.1</a> |
| PREDICTED: LOW QUALITY PROTEIN: <a href="#">selenoprotein P [Leptonyc]</a>       | 31.2 | 31.2 | 89% | 18    | 65%  | <a href="#">gij585192742 XP_006747601.1</a> |
| <a href="#">5-methylthioribose kinase [Blautia wexlerae]</a>                     | 31.2 | 31.2 | 68% | 18    | 77%  | <a href="#">gij651890337 WP_026649811.1</a> |
| <a href="#">dihydroxy-acid dehydratase [Campylobacter sp. FOBRC14]</a>           | 31.2 | 31.2 | 63% | 19    | 73%  | <a href="#">gij497335253 WP_009649466.1</a> |
| <a href="#">unnamed protein product [Mus musculus]</a>                           | 31.2 | 31.2 | 73% | 19    | 80%  | <a href="#">gij26331444 BAC29452.1</a>      |

## Alignments

Download [GenPept](#) [Graphics](#)

Next Previous Descriptions

PREDICTED: LOW QUALITY PROTEIN: [selenoprotein P \[Pan paniscus\]](#)

Sequence ID: [gij675710689|ref|XP\\_008961588.1](#) Length: 381 Number of Matches: 1

Range 1: 170 to 188 [GenPept](#) [Graphics](#)

Next Match Previous Match

| Score          | Expect | Identities  | Positives   | Gaps     |
|----------------|--------|-------------|-------------|----------|
| 65.5 bits(147) | 8e-11  | 19/19(100%) | 19/19(100%) | 0/19(0%) |

Query 1 KKCGNCSLTTLKDEDFCKR 19  
 KKCGNCSLTTLKDEDFCKR  
 Sbjct 170 KKCGNCSLTTLKDEDFCKR 188

### Related Information

[Gene](#) - associated gene details  
[Map Viewer](#) - aligned genomic context

Download [GenPept](#) [Graphics](#)

Next Previous Descriptions

Selenoprotein P, plasma, 1 [Homo sapiens]

Sequence ID: [gij34783648|gb|AAH46152.1](#) Length: 381 Number of Matches: 1

Range 1: 170 to 188 [GenPept](#) [Graphics](#)

Next Match Previous Match

| Score          | Expect | Identities  | Positives   | Gaps     |
|----------------|--------|-------------|-------------|----------|
| 65.5 bits(147) | 8e-11  | 19/19(100%) | 19/19(100%) | 0/19(0%) |

Query 1 KKCGNCSLTTLKDEDFCKR 19  
 KKCGNCSLTTLKDEDFCKR  
 Sbjct 170 KKCGNCSLTTLKDEDFCKR 188

### Related Information

[Gene](#) - associated gene details

Download [GenPept](#) [Graphics](#)

▼ Next ▲ Previous ▲ Descriptions

selenoprotein P isoform 1 precursor [Homo sapiens]

Sequence ID: [gi|62530391|ref|NP\\_005401.3|](#) Length: 381 Number of Matches: 1

▶ [See 4 more title\(s\)](#)

Range 1: 170 to 188 [GenPept](#) [Graphics](#)

▼ Next Match ▲ Previous Match

| Score          | Expect | Identities  | Positives   | Gaps     |
|----------------|--------|-------------|-------------|----------|
| 65.5 bits(147) | 8e-11  | 19/19(100%) | 19/19(100%) | 0/19(0%) |

Query 1 KKCGNCSLTTLKDEDFCKR 19  
 KKCGNCSLTTLKDEDFCKR  
 Sbjct 170 KKCGNCSLTTLKDEDFCKR 188

**Related Information**

[Gene](#) - associated gene details  
[UniGene](#) - clustered expressed sequence tags  
[Map Viewer](#) - aligned genomic context  
[Identical Proteins](#) - Proteins identical to the subject

Download [GenPept](#) [Graphics](#)

▼ Next ▲ Previous ▲ Descriptions

Selenoprotein P, plasma, 1 [Homo sapiens]

Sequence ID: [gi|37596694|gb|AAH58919.1|](#) Length: 381 Number of Matches: 1

Range 1: 170 to 188 [GenPept](#) [Graphics](#)

▼ Next Match ▲ Previous Match

| Score          | Expect | Identities  | Positives   | Gaps     |
|----------------|--------|-------------|-------------|----------|
| 65.5 bits(147) | 8e-11  | 19/19(100%) | 19/19(100%) | 0/19(0%) |

Query 1 KKCGNCSLTTLKDEDFCKR 19  
 KKCGNCSLTTLKDEDFCKR  
 Sbjct 170 KKCGNCSLTTLKDEDFCKR 188

**Related Information**

[Gene](#) - associated gene details

Download [GenPept](#) [Graphics](#)

▼ Next ▲ Previous ▲ Descriptions

selenoprotein P [Homo sapiens]

Sequence ID: [gi|312004116|emb|CAA77836.2|](#) Length: 381 Number of Matches: 1

Range 1: 170 to 188 [GenPept](#) [Graphics](#)

▼ Next Match ▲ Previous Match

| Score          | Expect | Identities  | Positives   | Gaps     |
|----------------|--------|-------------|-------------|----------|
| 65.5 bits(147) | 8e-11  | 19/19(100%) | 19/19(100%) | 0/19(0%) |

Query 1 KKCGNCSLTTLKDEDFCKR 19  
 KKCGNCSLTTLKDEDFCKR  
 Sbjct 170 KKCGNCSLTTLKDEDFCKR 188

**Related Information**

[Gene](#) - associated gene details

BLAST is a registered trademark of the National Library of Medicine.

NCBI/ BLAST/ blastp suite/ Formatting Results - BVM8196401R

Your search parameters were adjusted to search for a short input sequence.  
[Edit and Resubmit](#) [Save Search Strategies](#) [Formatting options](#) [Download](#) [YouTube](#) [How to read this page](#) [Blast report description](#)

### SEPP1\_KLKKEGYSDISYIVVNHQGISSRL\_Mod

RID [BVM8196401R](#) (Expires on 01-21 10:52 am)

|                                 |                                                                                                                                       |
|---------------------------------|---------------------------------------------------------------------------------------------------------------------------------------|
| <b>Query ID</b> lcl 220784      | <b>Database Name</b> nr                                                                                                               |
| <b>Description</b> None         | <b>Description</b> All non-redundant GenBank CDS translations+PDB+SwissProt+PIR+PRF excluding environmental samples from WGS projects |
| <b>Molecule type</b> amino acid | <b>Program</b> BLASTP 2.2.30+ <a href="#">Citation</a>                                                                                |
| <b>Query Length</b> 24          |                                                                                                                                       |

Other reports: [Search Summary](#) [Taxonomy reports](#) [Distance tree of results](#) [Multiple alignment](#)

### Graphic Summary

Show Conserved Domains

Putative conserved domains have been detected, click on the image below for detailed results.

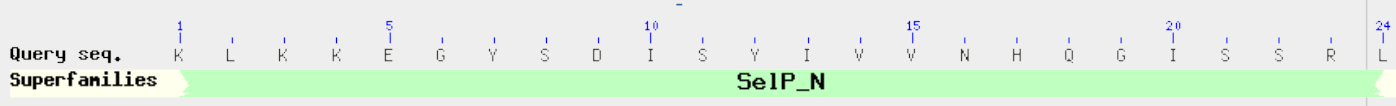

Distribution of 100 Blast Hits on the Query Sequence

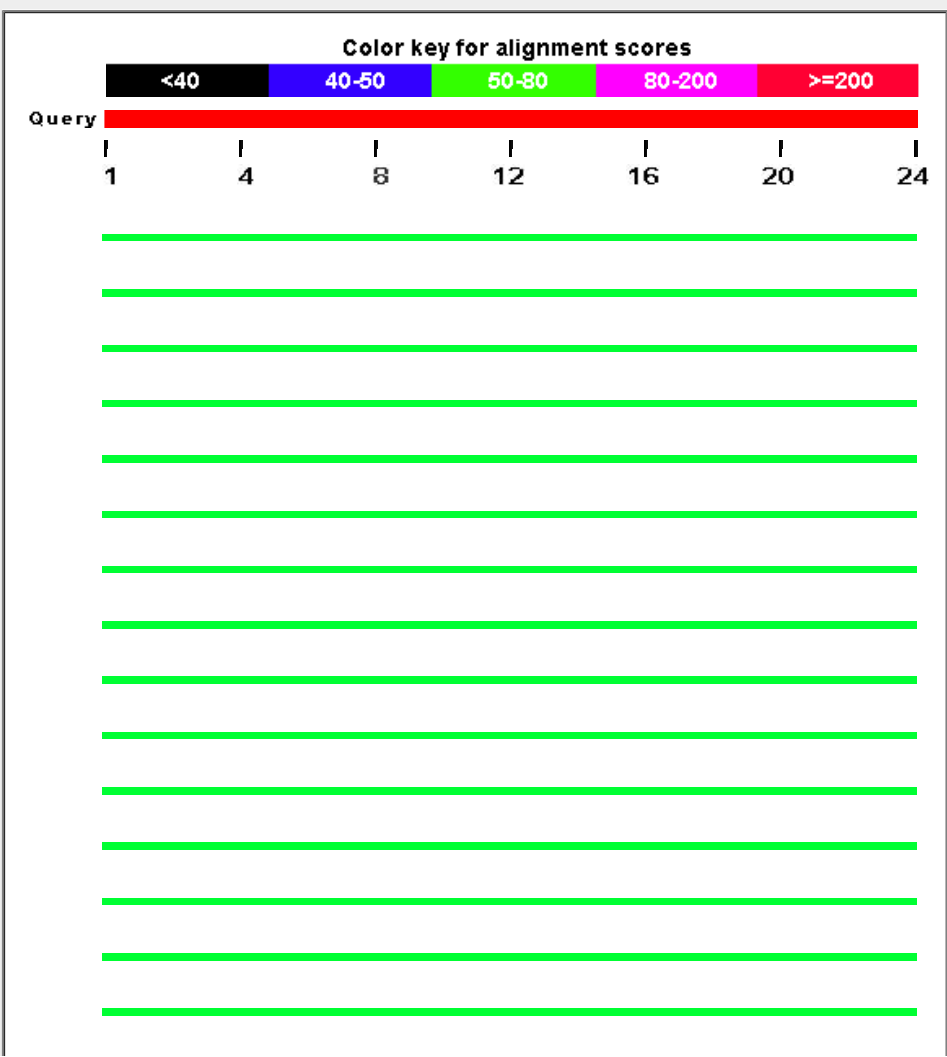

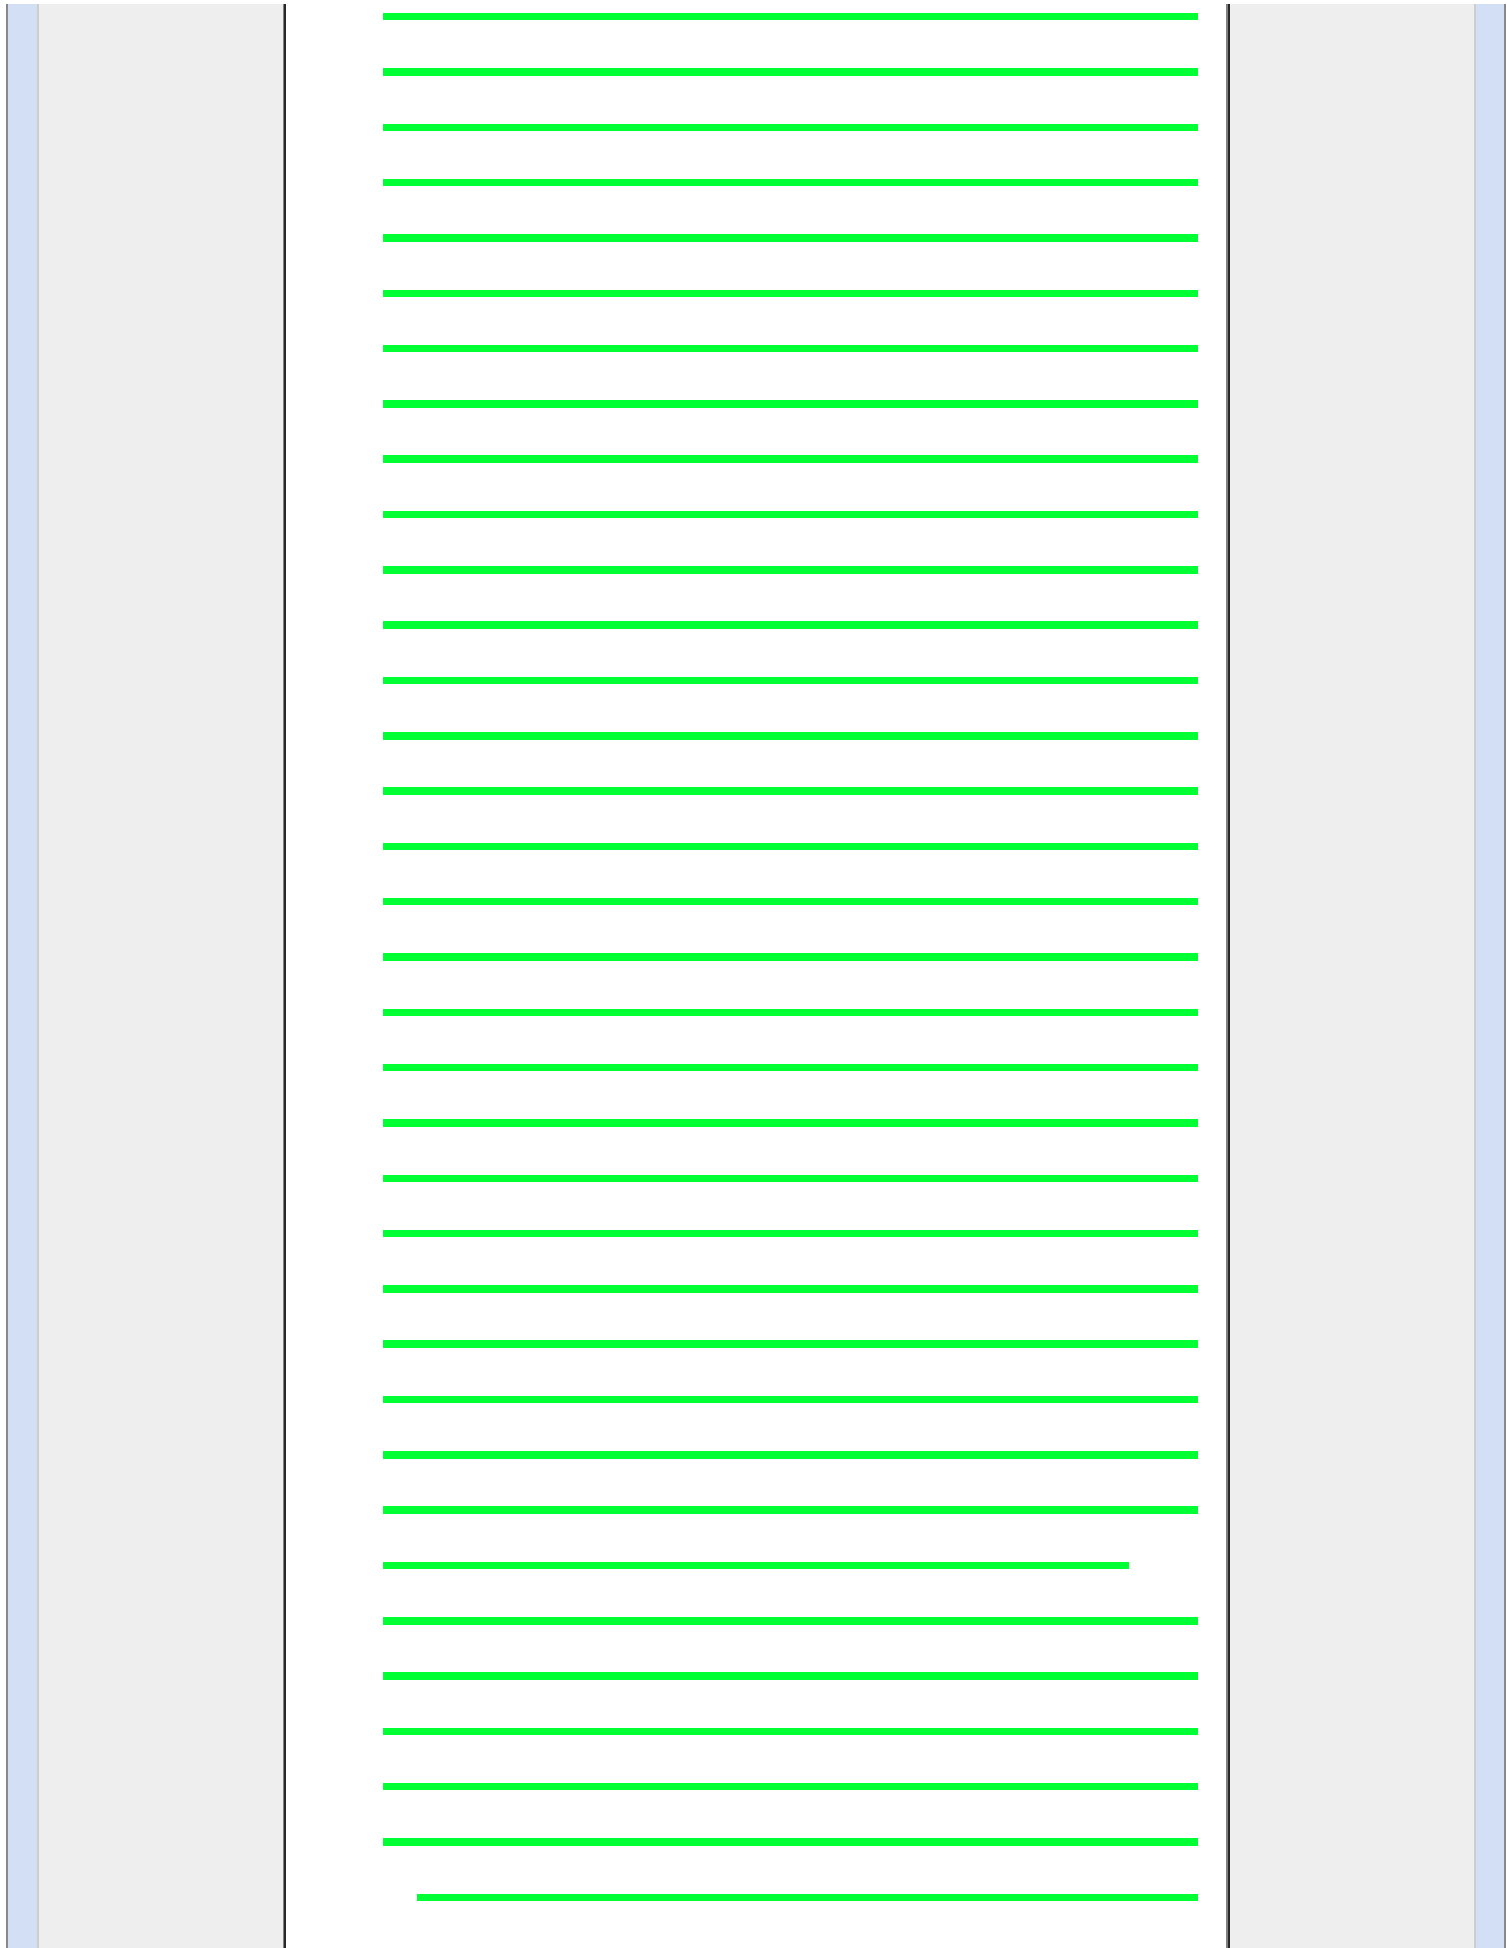

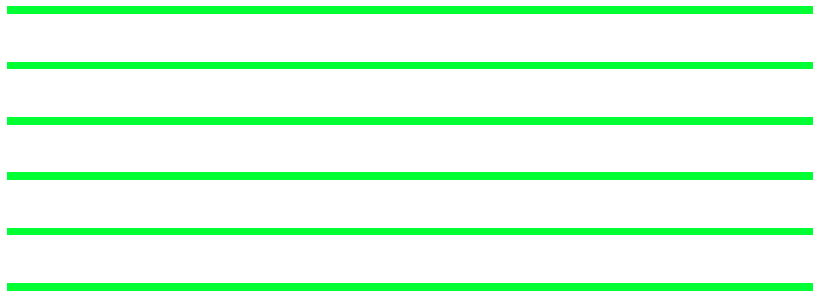

## Descriptions

### Sequences producing significant alignments:

Select: [All](#) [None](#) Selected:0

| <a href="#">Alignments</a> <a href="#">Download</a> <a href="#">GenPept</a> <a href="#">Graphics</a> <a href="#">Distance tree of results</a> <a href="#">Multiple alignment</a> |           |             |             |         |       |                                |  |
|----------------------------------------------------------------------------------------------------------------------------------------------------------------------------------|-----------|-------------|-------------|---------|-------|--------------------------------|--|
| Description                                                                                                                                                                      | Max score | Total score | Query cover | E value | Ident | Accession                      |  |
| <a href="#">PREDICTED: LOW QUALITY PROTEIN: selenoprotein P [Pan paniscus]</a>                                                                                                   | 76.1      | 76.1        | 100%        | 4e-14   | 96%   | <a href="#">XP_008961588.1</a> |  |
| <a href="#">Selenoprotein P, plasma, 1 [Homo sapiens]</a>                                                                                                                        | 76.1      | 76.1        | 100%        | 4e-14   | 96%   | <a href="#">AAH46152.1</a>     |  |
| <a href="#">Selenoprotein P, plasma, 1 [Homo sapiens]</a>                                                                                                                        | 76.1      | 76.1        | 100%        | 4e-14   | 96%   | <a href="#">AAH15875.1</a>     |  |
| <a href="#">selenoprotein P isoform 1 precursor [Homo sapiens]</a>                                                                                                               | 76.1      | 76.1        | 100%        | 4e-14   | 96%   | <a href="#">NP_005401.3</a>    |  |
| <a href="#">Selenoprotein P, plasma, 1 [Homo sapiens]</a>                                                                                                                        | 76.1      | 76.1        | 100%        | 4e-14   | 96%   | <a href="#">AAH58919.1</a>     |  |
| <a href="#">PREDICTED: LOW QUALITY PROTEIN: selenoprotein P [Nomascus leucogae]</a>                                                                                              | 76.1      | 76.1        | 100%        | 4e-14   | 96%   | <a href="#">XP_003274442.1</a> |  |
| <a href="#">selenoprotein P [Homo sapiens]</a>                                                                                                                                   | 76.1      | 76.1        | 100%        | 4e-14   | 96%   | <a href="#">CAA77836.2</a>     |  |
| <a href="#">selenoprotein P precursor [Pan troglodytes]</a>                                                                                                                      | 76.1      | 76.1        | 100%        | 4e-14   | 96%   | <a href="#">NP_001108587.1</a> |  |
| <a href="#">selenoprotein P isoform 2 [Homo sapiens]</a>                                                                                                                         | 76.1      | 76.1        | 100%        | 4e-14   | 96%   | <a href="#">NP_001087195.1</a> |  |
| <a href="#">PREDICTED: LOW QUALITY PROTEIN: selenoprotein P [Rhinopithecus roxae]</a>                                                                                            | 71.5      | 71.5        | 100%        | 1e-12   | 92%   | <a href="#">XP_010372696.1</a> |  |
| <a href="#">PREDICTED: LOW QUALITY PROTEIN: selenoprotein P [Papio anubis]</a>                                                                                                   | 71.5      | 71.5        | 100%        | 1e-12   | 92%   | <a href="#">XP_009206607.1</a> |  |
| <a href="#">PREDICTED: LOW QUALITY PROTEIN: selenoprotein P [Chlorocebus sabaeus]</a>                                                                                            | 71.5      | 71.5        | 100%        | 1e-12   | 92%   | <a href="#">XP_007959679.1</a> |  |
| <a href="#">selenoprotein P precursor [Macaca mulatta]</a>                                                                                                                       | 71.5      | 71.5        | 100%        | 1e-12   | 92%   | <a href="#">NP_001152962.1</a> |  |
| <a href="#">selenoprotein P precursor [Pongo abelii]</a>                                                                                                                         | 70.6      | 70.6        | 100%        | 3e-12   | 92%   | <a href="#">NP_001127462.1</a> |  |
| <a href="#">PREDICTED: LOW QUALITY PROTEIN: selenoprotein P [Balaenoptera acuta]</a>                                                                                             | 68.9      | 68.9        | 100%        | 1e-11   | 88%   | <a href="#">XP_007195596.1</a> |  |
| <a href="#">PREDICTED: LOW QUALITY PROTEIN: selenoprotein P [Lipotes vexillifer]</a>                                                                                             | 68.9      | 68.9        | 100%        | 1e-11   | 88%   | <a href="#">XP_007447694.1</a> |  |
| <a href="#">PREDICTED: LOW QUALITY PROTEIN: selenoprotein P [Orcinus orca]</a>                                                                                                   | 68.9      | 68.9        | 100%        | 1e-11   | 88%   | <a href="#">XP_004266005.1</a> |  |
| <a href="#">PREDICTED: LOW QUALITY PROTEIN: selenoprotein P [Physeter catodon]</a>                                                                                               | 68.9      | 68.9        | 100%        | 1e-11   | 88%   | <a href="#">XP_007119423.1</a> |  |
| <a href="#">PREDICTED: LOW QUALITY PROTEIN: selenoprotein P [Tursiops truncatus]</a>                                                                                             | 68.9      | 68.9        | 100%        | 1e-11   | 88%   | <a href="#">XP_004320390.1</a> |  |
| <a href="#">PREDICTED: LOW QUALITY PROTEIN: selenoprotein P [Bison bison bison]</a>                                                                                              | 68.9      | 68.9        | 100%        | 1e-11   | 88%   | <a href="#">XP_010831114.1</a> |  |
| <a href="#">selenoprotein P [Bos taurus]</a>                                                                                                                                     | 68.9      | 68.9        | 100%        | 1e-11   | 88%   | <a href="#">BAA84781.1</a>     |  |
| <a href="#">PREDICTED: LOW QUALITY PROTEIN: selenoprotein P [Bos mutus]</a>                                                                                                      | 68.9      | 68.9        | 100%        | 1e-11   | 88%   | <a href="#">XP_005894930.1</a> |  |
| <a href="#">selenoprotein P-like protein [Bos taurus]</a>                                                                                                                        | 68.9      | 68.9        | 100%        | 1e-11   | 88%   | <a href="#">2117379A</a>       |  |
| <a href="#">selenoprotein P like protein [Bos taurus]</a>                                                                                                                        | 68.9      | 68.9        | 100%        | 1e-11   | 88%   | <a href="#">BAA04949.2</a>     |  |
| <a href="#">selenoprotein P precursor [Bos taurus]</a>                                                                                                                           | 68.9      | 68.9        | 100%        | 1e-11   | 88%   | <a href="#">NP_776884.2</a>    |  |
| <a href="#">PREDICTED: selenoprotein P [Otolemur garnettii]</a>                                                                                                                  | 67.2      | 67.2        | 100%        | 4e-11   | 88%   | <a href="#">XP_003793045.1</a> |  |
| <a href="#">PREDICTED: LOW QUALITY PROTEIN: selenoprotein P [Ictidomys tridecemlineatus]</a>                                                                                     | 67.2      | 67.2        | 100%        | 4e-11   | 88%   | <a href="#">XP_005325668.1</a> |  |
| <a href="#">membrane selenoprotein P [Capra hircus]</a>                                                                                                                          | 64.7      | 64.7        | 100%        | 3e-10   | 83%   | <a href="#">AAF67201.1</a>     |  |
| <a href="#">selenoprotein P, plasma, 1 precursor [Capra hircus]</a>                                                                                                              | 64.7      | 64.7        | 100%        | 3e-10   | 83%   | <a href="#">NP_001272511.1</a> |  |

|                                                                                        |      |      |      |       |     |                                |
|----------------------------------------------------------------------------------------|------|------|------|-------|-----|--------------------------------|
| <a href="#">PREDICTED: LOW QUALITY PROTEIN: selenoprotein P [Ovis aries]</a>           | 64.7 | 64.7 | 100% | 3e-10 | 83% | <a href="#">XP_004017062.1</a> |
| <a href="#">PREDICTED: LOW QUALITY PROTEIN: selenoprotein P [Nannospalax galii]</a>    | 64.7 | 64.7 | 100% | 3e-10 | 83% | <a href="#">XP_008840327.1</a> |
| <a href="#">PREDICTED: LOW QUALITY PROTEIN: selenoprotein P [Ceratherium sim]</a>      | 64.7 | 64.7 | 100% | 3e-10 | 83% | <a href="#">XP_004422836.1</a> |
| <a href="#">selenoprotein P precursor [Sus scrofa]</a>                                 | 64.7 | 64.7 | 100% | 3e-10 | 83% | <a href="#">NP_001128295.1</a> |
| <a href="#">PREDICTED: LOW QUALITY PROTEIN: selenoprotein P [Jaculus jaculus]</a>      | 63.8 | 63.8 | 100% | 6e-10 | 83% | <a href="#">XP_004652550.1</a> |
| <a href="#">PREDICTED: LOW QUALITY PROTEIN: selenoprotein P [Bubalus bubalis]</a>      | 63.8 | 63.8 | 100% | 6e-10 | 79% | <a href="#">XP_006067130.1</a> |
| <a href="#">PREDICTED: LOW QUALITY PROTEIN: selenoprotein P [Equus przewalskii]</a>    | 62.1 | 62.1 | 100% | 2e-09 | 79% | <a href="#">XP_008522793.1</a> |
| <a href="#">selenoprotein P precursor [Equus caballus]</a>                             | 62.1 | 62.1 | 100% | 2e-09 | 79% | <a href="#">NP_001129077.1</a> |
| <a href="#">PREDICTED: LOW QUALITY PROTEIN: selenoprotein P [Saimiri boliviensis ]</a> | 61.3 | 61.3 | 100% | 4e-09 | 79% | <a href="#">XP_003925940.2</a> |
| <a href="#">selenoprotein P precursor [Callithrix jacchus]</a>                         | 61.3 | 61.3 | 100% | 4e-09 | 79% | <a href="#">NP_001186857.1</a> |
| <a href="#">selenoprotein P [Bubalus bubalis]</a>                                      | 61.3 | 61.3 | 100% | 4e-09 | 79% | <a href="#">AFM77782.2</a>     |
| <a href="#">PREDICTED: LOW QUALITY PROTEIN: selenoprotein P [Ochotona princeps]</a>    | 60.4 | 60.4 | 100% | 8e-09 | 79% | <a href="#">XP_004583736.1</a> |
| <a href="#">PREDICTED: LOW QUALITY PROTEIN: selenoprotein P [Tupaia chinensis]</a>     | 59.6 | 59.6 | 100% | 2e-08 | 79% | <a href="#">XP_006167023.1</a> |
| <a href="#">PREDICTED: LOW QUALITY PROTEIN: selenoprotein P [Vicugna pacos]</a>        | 59.2 | 59.2 | 100% | 2e-08 | 75% | <a href="#">XP_006207756.1</a> |
| <a href="#">PREDICTED: LOW QUALITY PROTEIN: selenoprotein P [Octodon degus]</a>        | 58.7 | 58.7 | 91%  | 3e-08 | 82% | <a href="#">XP_004641866.1</a> |
| <a href="#">PREDICTED: LOW QUALITY PROTEIN: selenoprotein P [Orycteropus afer af]</a>  | 58.3 | 58.3 | 100% | 4e-08 | 75% | <a href="#">XP_007952213.1</a> |
| <a href="#">PREDICTED: LOW QUALITY PROTEIN: selenoprotein P [Myotis brandtii]</a>      | 58.3 | 58.3 | 100% | 4e-08 | 75% | <a href="#">XP_005876061.1</a> |
| <a href="#">PREDICTED: LOW QUALITY PROTEIN: selenoprotein P [Chinchilla lanigera]</a>  | 58.3 | 58.3 | 100% | 4e-08 | 75% | <a href="#">XP_005386312.1</a> |
| <a href="#">selenoprotein P precursor [Oryctolagus cuniculus]</a>                      | 58.3 | 58.3 | 100% | 4e-08 | 75% | <a href="#">NP_001186775.1</a> |
| <a href="#">PREDICTED: LOW QUALITY PROTEIN: selenoprotein P [Elephantulus edwa]</a>    | 57.9 | 57.9 | 100% | 6e-08 | 75% | <a href="#">XP_006889619.1</a> |
| <a href="#">PREDICTED: LOW QUALITY PROTEIN: selenoprotein P [Tarsius syrichta]</a>     | 57.1 | 57.1 | 95%  | 1e-07 | 74% | <a href="#">XP_008050904.1</a> |
| <a href="#">PREDICTED: LOW QUALITY PROTEIN: selenoprotein P [Dasypus novemcin]</a>     | 57.1 | 57.1 | 100% | 1e-07 | 75% | <a href="#">XP_004448278.1</a> |
| <a href="#">PREDICTED: LOW QUALITY PROTEIN: selenoprotein P [Camelus dromedar]</a>     | 56.6 | 56.6 | 100% | 2e-07 | 75% | <a href="#">XP_010999134.1</a> |
| <a href="#">PREDICTED: LOW QUALITY PROTEIN: selenoprotein P [Camelus ferus]</a>        | 56.6 | 56.6 | 100% | 2e-07 | 75% | <a href="#">XP_006191986.1</a> |
| <a href="#">PREDICTED: LOW QUALITY PROTEIN: selenoprotein P [Fukomys damaren]</a>      | 54.9 | 54.9 | 100% | 6e-07 | 75% | <a href="#">XP_010632183.1</a> |
| <a href="#">PREDICTED: LOW QUALITY PROTEIN: selenoprotein P [Myotis lucifugus]</a>     | 54.9 | 54.9 | 100% | 6e-07 | 75% | <a href="#">XP_006106371.1</a> |
| <a href="#">PREDICTED: LOW QUALITY PROTEIN: selenoprotein P [Mustela putorius fu]</a>  | 54.9 | 54.9 | 100% | 6e-07 | 75% | <a href="#">XP_004738001.1</a> |
| <a href="#">PREDICTED: LOW QUALITY PROTEIN: selenoprotein P [Leptonychotes wec]</a>    | 54.9 | 54.9 | 100% | 6e-07 | 75% | <a href="#">XP_006747601.1</a> |
| <a href="#">PREDICTED: LOW QUALITY PROTEIN: selenoprotein P [Odobenus rosmaru]</a>     | 54.9 | 54.9 | 100% | 6e-07 | 75% | <a href="#">XP_004409206.1</a> |
| <a href="#">PREDICTED: LOW QUALITY PROTEIN: selenoprotein P [Peromyscus manic]</a>     | 54.9 | 54.9 | 100% | 6e-07 | 75% | <a href="#">XP_006997157.1</a> |
| <a href="#">Selenoprotein P [Heterocephalus glaber]</a>                                | 54.5 | 54.5 | 100% | 7e-07 | 71% | <a href="#">EHA98867.1</a>     |
| <a href="#">PREDICTED: LOW QUALITY PROTEIN: selenoprotein P [Ornithorhynchus ar]</a>   | 54.5 | 54.5 | 100% | 7e-07 | 71% | <a href="#">XP_007654576.1</a> |
| <a href="#">PREDICTED: LOW QUALITY PROTEIN: selenoprotein P [Galeopterus varieg]</a>   | 54.5 | 54.5 | 100% | 8e-07 | 75% | <a href="#">XP_008564915.1</a> |
| <a href="#">PREDICTED: LOW QUALITY PROTEIN: selenoprotein P [Eptesicus fuscus]</a>     | 54.5 | 54.5 | 100% | 8e-07 | 71% | <a href="#">XP_008153843.1</a> |
| <a href="#">PREDICTED: LOW QUALITY PROTEIN: selenoprotein P [Trichechus manatu]</a>    | 54.5 | 54.5 | 100% | 8e-07 | 75% | <a href="#">XP_004388500.1</a> |
| <a href="#">PREDICTED: LOW QUALITY PROTEIN: selenoprotein P [Monodelphis dome]</a>     | 54.5 | 54.5 | 100% | 8e-07 | 71% | <a href="#">XP_003340675.2</a> |
| <a href="#">PREDICTED: LOW QUALITY PROTEIN: selenoprotein P [Heterocephalus glab]</a>  | 54.5 | 54.5 | 100% | 8e-07 | 71% | <a href="#">XP_004848622.1</a> |
| <a href="#">PREDICTED: LOW QUALITY PROTEIN: selenoprotein P [Heterocephalus glab]</a>  | 54.5 | 54.5 | 100% | 8e-07 | 71% | <a href="#">XP_004878213.1</a> |
| <a href="#">PREDICTED: LOW QUALITY PROTEIN: selenoprotein P [Loxodonta africana]</a>   | 54.1 | 54.1 | 100% | 1e-06 | 67% | <a href="#">XP_010586424.1</a> |
| <a href="#">PREDICTED: LOW QUALITY PROTEIN: selenoprotein P [Myotis davidii]</a>       | 53.2 | 53.2 | 100% | 2e-06 | 71% | <a href="#">XP_006774623.1</a> |
| <a href="#">PREDICTED: selenoprotein P [Sarcophilus harrisii]</a>                      | 52.0 | 52.0 | 100% | 5e-06 | 71% | <a href="#">XP_003759960.1</a> |
| <a href="#">PREDICTED: LOW QUALITY PROTEIN: selenoprotein P [Condylura cristata]</a>   | 52.0 | 52.0 | 79%  | 5e-06 | 79% | <a href="#">XP_004678402.1</a> |
| <a href="#">selenoprotein P precursor [Canis lupus familiaris]</a>                     | 51.5 | 51.5 | 100% | 8e-06 | 71% | <a href="#">NP_001108590.1</a> |
| <a href="#">PREDICTED: LOW QUALITY PROTEIN: selenoprotein P [Ursus maritimus]</a>      | 51.5 | 51.5 | 100% | 8e-06 | 71% | <a href="#">XP_008690806.1</a> |
| <a href="#">PREDICTED: LOW QUALITY PROTEIN: selenoprotein P [Erinaceus europae]</a>    | 51.1 | 51.1 | 100% | 1e-05 | 71% | <a href="#">XP_007517681.1</a> |
| <a href="#">PREDICTED: LOW QUALITY PROTEIN: selenoprotein P [Felis catus]</a>          | 50.7 | 50.7 | 100% | 1e-05 | 71% | <a href="#">XP_006928143.1</a> |

|                                                                                                   |      |      |      |       |     |                                |
|---------------------------------------------------------------------------------------------------|------|------|------|-------|-----|--------------------------------|
| <a href="#">PREDICTED: LOW QUALITY PROTEIN: selenoprotein P [Panthera tigris alta]</a>            | 50.7 | 50.7 | 100% | 1e-05 | 71% | <a href="#">XP_007095490.1</a> |
| <a href="#">PREDICTED: LOW QUALITY PROTEIN: selenoprotein P [Echinops telfairi]</a>               | 50.3 | 50.3 | 100% | 2e-05 | 67% | <a href="#">XP_004716992.1</a> |
| <a href="#">Selenoprotein P [Cricetulus griseus]</a>                                              | 49.0 | 49.0 | 100% | 4e-05 | 67% | <a href="#">EGW04040.1</a>     |
| <a href="#">selenoprotein P precursor [Cricetulus griseus]</a>                                    | 49.0 | 49.0 | 100% | 5e-05 | 67% | <a href="#">ERE84145.1</a>     |
| <a href="#">PREDICTED: LOW QUALITY PROTEIN: selenoprotein P [Microtus ochrogast]</a>              | 49.0 | 49.0 | 100% | 5e-05 | 71% | <a href="#">XP_005369861.1</a> |
| <a href="#">selenoprotein P precursor [Cricetulus griseus]</a>                                    | 49.0 | 49.0 | 100% | 5e-05 | 67% | <a href="#">NP_001243807.1</a> |
| <a href="#">PREDICTED: LOW QUALITY PROTEIN: selenoprotein P [Sorex araneus]</a>                   | 48.6 | 48.6 | 100% | 7e-05 | 67% | <a href="#">XP_004605590.1</a> |
| <a href="#">PREDICTED: LOW QUALITY PROTEIN: selenoprotein P, plasma, 1 [Mesocricetus auratus]</a> | 48.1 | 48.1 | 100% | 8e-05 | 71% | <a href="#">XP_005139283.1</a> |
| <a href="#">PREDICTED: LOW QUALITY PROTEIN: selenoprotein P [Chrysochloris asiatica]</a>          | 48.1 | 48.1 | 100% | 9e-05 | 67% | <a href="#">XP_006877364.1</a> |
| <a href="#">selenoprotein P precursor [Rattus norvegicus]</a>                                     | 46.0 | 46.0 | 100% | 5e-04 | 67% | <a href="#">NP_062065.2</a>    |
| <a href="#">selenoprotein P, plasma, 1, isoform CRA_a [Mus musculus]</a>                          | 44.8 | 44.8 | 100% | 0.001 | 67% | <a href="#">EDL03405.1</a>     |
| <a href="#">Selenoprotein P, plasma, 1 [Mus musculus]</a>                                         | 44.8 | 44.8 | 100% | 0.001 | 67% | <a href="#">AAH01991.2</a>     |
| <a href="#">plasma selenoprotein P [Mus musculus]</a>                                             | 44.8 | 44.8 | 100% | 0.001 | 67% | <a href="#">AAD01684.1</a>     |
| <a href="#">unnamed protein product [Mus musculus]</a>                                            | 44.8 | 44.8 | 100% | 0.001 | 67% | <a href="#">BAE39664.1</a>     |
| <a href="#">unnamed protein product [Mus musculus]</a>                                            | 44.8 | 44.8 | 100% | 0.001 | 67% | <a href="#">BAE34948.1</a>     |
| <a href="#">selenoprotein P precursor [Mus musculus]</a>                                          | 44.8 | 44.8 | 100% | 0.001 | 67% | <a href="#">NP_033181.3</a>    |
| <a href="#">unnamed protein product [Mus musculus]</a>                                            | 44.8 | 44.8 | 100% | 0.001 | 67% | <a href="#">BAC55264.3</a>     |
| <a href="#">PREDICTED: LOW QUALITY PROTEIN: selenoprotein P [Pelodiscus sinensis]</a>             | 44.3 | 44.3 | 91%  | 0.002 | 73% | <a href="#">XP_006139560.1</a> |
| <a href="#">selenoprotein P precursor [Cavia porcellus]</a>                                       | 43.1 | 43.1 | 66%  | 0.004 | 81% | <a href="#">NP_001244936.1</a> |
| <a href="#">PREDICTED: LOW QUALITY PROTEIN: selenoprotein P [Phaethon lepturus]</a>               | 43.1 | 43.1 | 91%  | 0.004 | 68% | <a href="#">XP_010284851.1</a> |
| <a href="#">selenoprotein P precursor [Taeniopygia guttata]</a>                                   | 43.1 | 43.1 | 95%  | 0.004 | 65% | <a href="#">NP_001257806.1</a> |
| <a href="#">PREDICTED: LOW QUALITY PROTEIN: selenoprotein P [Phalacrocorax carolinensis]</a>      | 42.6 | 42.6 | 91%  | 0.006 | 68% | <a href="#">XP_009511852.1</a> |
| <a href="#">PREDICTED: LOW QUALITY PROTEIN: selenoprotein P [Gavia stellata]</a>                  | 42.6 | 42.6 | 91%  | 0.006 | 68% | <a href="#">XP_009818154.1</a> |
| <a href="#">PREDICTED: LOW QUALITY PROTEIN: selenoprotein P [Caprimulgus carolinensis]</a>        | 42.6 | 42.6 | 91%  | 0.006 | 68% | <a href="#">XP_010164847.1</a> |
| <a href="#">PREDICTED: LOW QUALITY PROTEIN: selenoprotein P [Tauraco erythrolophus]</a>           | 42.6 | 42.6 | 91%  | 0.006 | 68% | <a href="#">XP_009979695.1</a> |

## Alignments

[Download](#) [GenPept](#) [Graphics](#)

[Next](#) [Previous](#) [Descriptions](#)

PREDICTED: LOW QUALITY PROTEIN: selenoprotein P [Pan paniscus]

Sequence ID: [ref|XP\\_008961588.1|](#) Length: 381 Number of Matches: 1

Range 1: 75 to 98 [GenPept](#) [Graphics](#)

[Next Match](#) [Previous Match](#)

| Score          | Expect | Identities | Positives   | Gaps     |
|----------------|--------|------------|-------------|----------|
| 76.1 bits(172) | 4e-14  | 23/24(96%) | 24/24(100%) | 0/24(0%) |

Query 1 KLKKEGYSDISYIVVNHQGISSRL 24  
 KLKKEGYS+ISYIVVNHQGISSRL  
 Sbjct 75 KLKKEGYSNISYIVVNHQGISSRL 98

### Related Information

[Gene](#) - associated gene details  
[Map Viewer](#) - aligned genomic context

[Download](#) [GenPept](#) [Graphics](#)

[Next](#) [Previous](#) [Descriptions](#)

Selenoprotein P, plasma, 1 [Homo sapiens]

Sequence ID: [gb|AAH46152.1|](#) Length: 381 Number of Matches: 1

Range 1: 75 to 98 [GenPept](#) [Graphics](#)

[Next Match](#) [Previous Match](#)

| Score          | Expect | Identities | Positives   | Gaps     |
|----------------|--------|------------|-------------|----------|
| 76.1 bits(172) | 4e-14  | 23/24(96%) | 24/24(100%) | 0/24(0%) |

Query 1 KLKKEGYSDISYIVVNHQGISSRL 24  
 KLKKEGYS+ISYIVVNHQGISSRL  
 Sbjct 75 KLKKEGYSNISYIVVNHQGISSRL 98

### Related Information

[Gene](#) - associated gene details



Download ▾ [GenPept](#) [Graphics](#)

▼ Next ▲ Previous ▲ Descriptions

Selenoprotein P, plasma, 1 [Homo sapiens]

Sequence ID: [gb|AAH15875.1](#) Length: 381 Number of Matches: 1

Range 1: 75 to 98 [GenPept](#) [Graphics](#)

▼ Next Match ▲ Previous Match

| Score          | Expect | Identities | Positives   | Gaps     |
|----------------|--------|------------|-------------|----------|
| 76.1 bits(172) | 4e-14  | 23/24(96%) | 24/24(100%) | 0/24(0%) |

Query 1 KLKKEGYSDISYIVVNHQGISSRL 24  
 KLKKEGYS+ISYIVVNHQGISSRL  
 Sbjct 75 KLKKEGYSNISYIVVNHQGISSRL 98

**Related Information**

[Gene](#) - associated gene details

Download ▾ [GenPept](#) [Graphics](#)

▼ Next ▲ Previous ▲ Descriptions

selenoprotein P isoform 1 precursor [Homo sapiens]

Sequence ID: [ref|NP\\_005401.3](#) Length: 381 Number of Matches: 1

▶ [See 4 more title\(s\)](#)

Range 1: 75 to 98 [GenPept](#) [Graphics](#)

▼ Next Match ▲ Previous Match

| Score          | Expect | Identities | Positives   | Gaps     |
|----------------|--------|------------|-------------|----------|
| 76.1 bits(172) | 4e-14  | 23/24(96%) | 24/24(100%) | 0/24(0%) |

Query 1 KLKKEGYSDISYIVVNHQGISSRL 24  
 KLKKEGYS+ISYIVVNHQGISSRL  
 Sbjct 75 KLKKEGYSNISYIVVNHQGISSRL 98

**Related Information**

[Gene](#) - associated gene details

[UniGene](#) - clustered expressed sequence tags

[Map Viewer](#) - aligned genomic context

[Identical Proteins](#) - Proteins identical to the subject

Download ▾ [GenPept](#) [Graphics](#)

▼ Next ▲ Previous ▲ Descriptions

Selenoprotein P, plasma, 1 [Homo sapiens]

Sequence ID: [gb|AAH58919.1](#) Length: 381 Number of Matches: 1

Range 1: 75 to 98 [GenPept](#) [Graphics](#)

▼ Next Match ▲ Previous Match

| Score          | Expect | Identities | Positives   | Gaps     |
|----------------|--------|------------|-------------|----------|
| 76.1 bits(172) | 4e-14  | 23/24(96%) | 24/24(100%) | 0/24(0%) |

Query 1 KLKKEGYSDISYIVVNHQGISSRL 24  
 KLKKEGYS+ISYIVVNHQGISSRL  
 Sbjct 75 KLKKEGYSNISYIVVNHQGISSRL 98

**Related Information**

[Gene](#) - associated gene details

BLAST is a registered trademark of the National Library of Medicine.

▶ NCBI/ BLAST/ blastp suite/ Formatting Results - BE892RPB015

**ⓘ** Your search parameters were adjusted to search for a short input sequence.  
[Edit and Resubmit](#) [Save Search Strategies](#) ▶ [Formatting options](#) ▶ [Download](#)

**SEPP1\_KLKKEGYSNISIVVNHQGISSRL\_NonMod** [YouTube](#) [How to read this page](#) [Blast report description](#)

**RID** [BE892RPB015](#) (Expires on 01-16 09:08 am)

|                                 |                                                                                                                                   |
|---------------------------------|-----------------------------------------------------------------------------------------------------------------------------------|
| <b>Query ID</b>  cl 72485       | <b>Database Name</b> nr                                                                                                           |
| <b>Description</b> None         | <b>Description</b> All non-redundant GenBank CDS translations+PDB+SwissProt+PIR excluding environmental samples from WGS projects |
| <b>Molecule type</b> amino acid | <b>Program</b> BLASTP 2.2.30+ <a href="#">▶ Citation</a>                                                                          |
| <b>Query Length</b> 24          |                                                                                                                                   |

Other reports: [▶ Search Summary](#) [[Taxonomy reports](#)] [[Distance tree of results](#)] [[Multiple alignment](#)]

[New](#) DELTA-BLAST a more sensitive protein-protein search

**Graphic Summary**

Show Conserved Domains

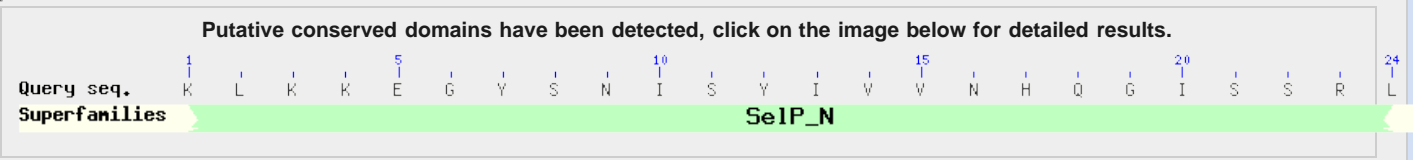

Distribution of 100 Blast Hits on the Query Sequence

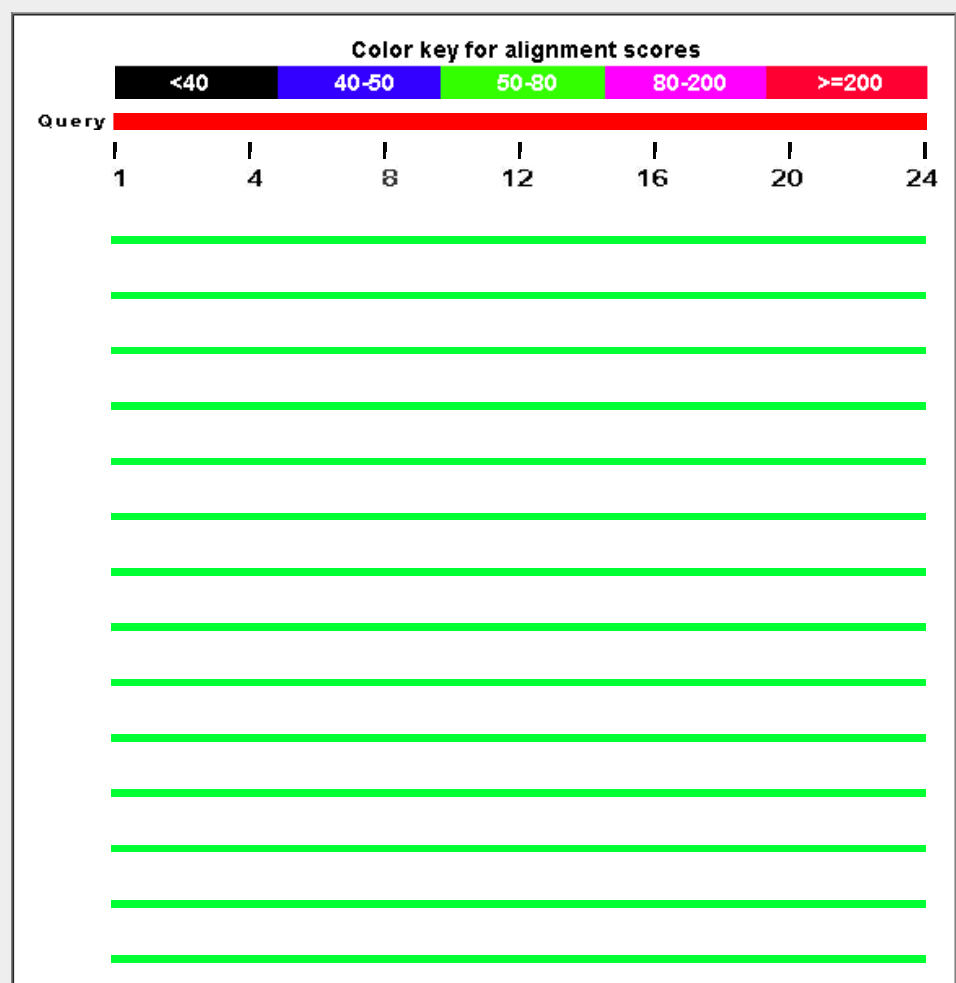

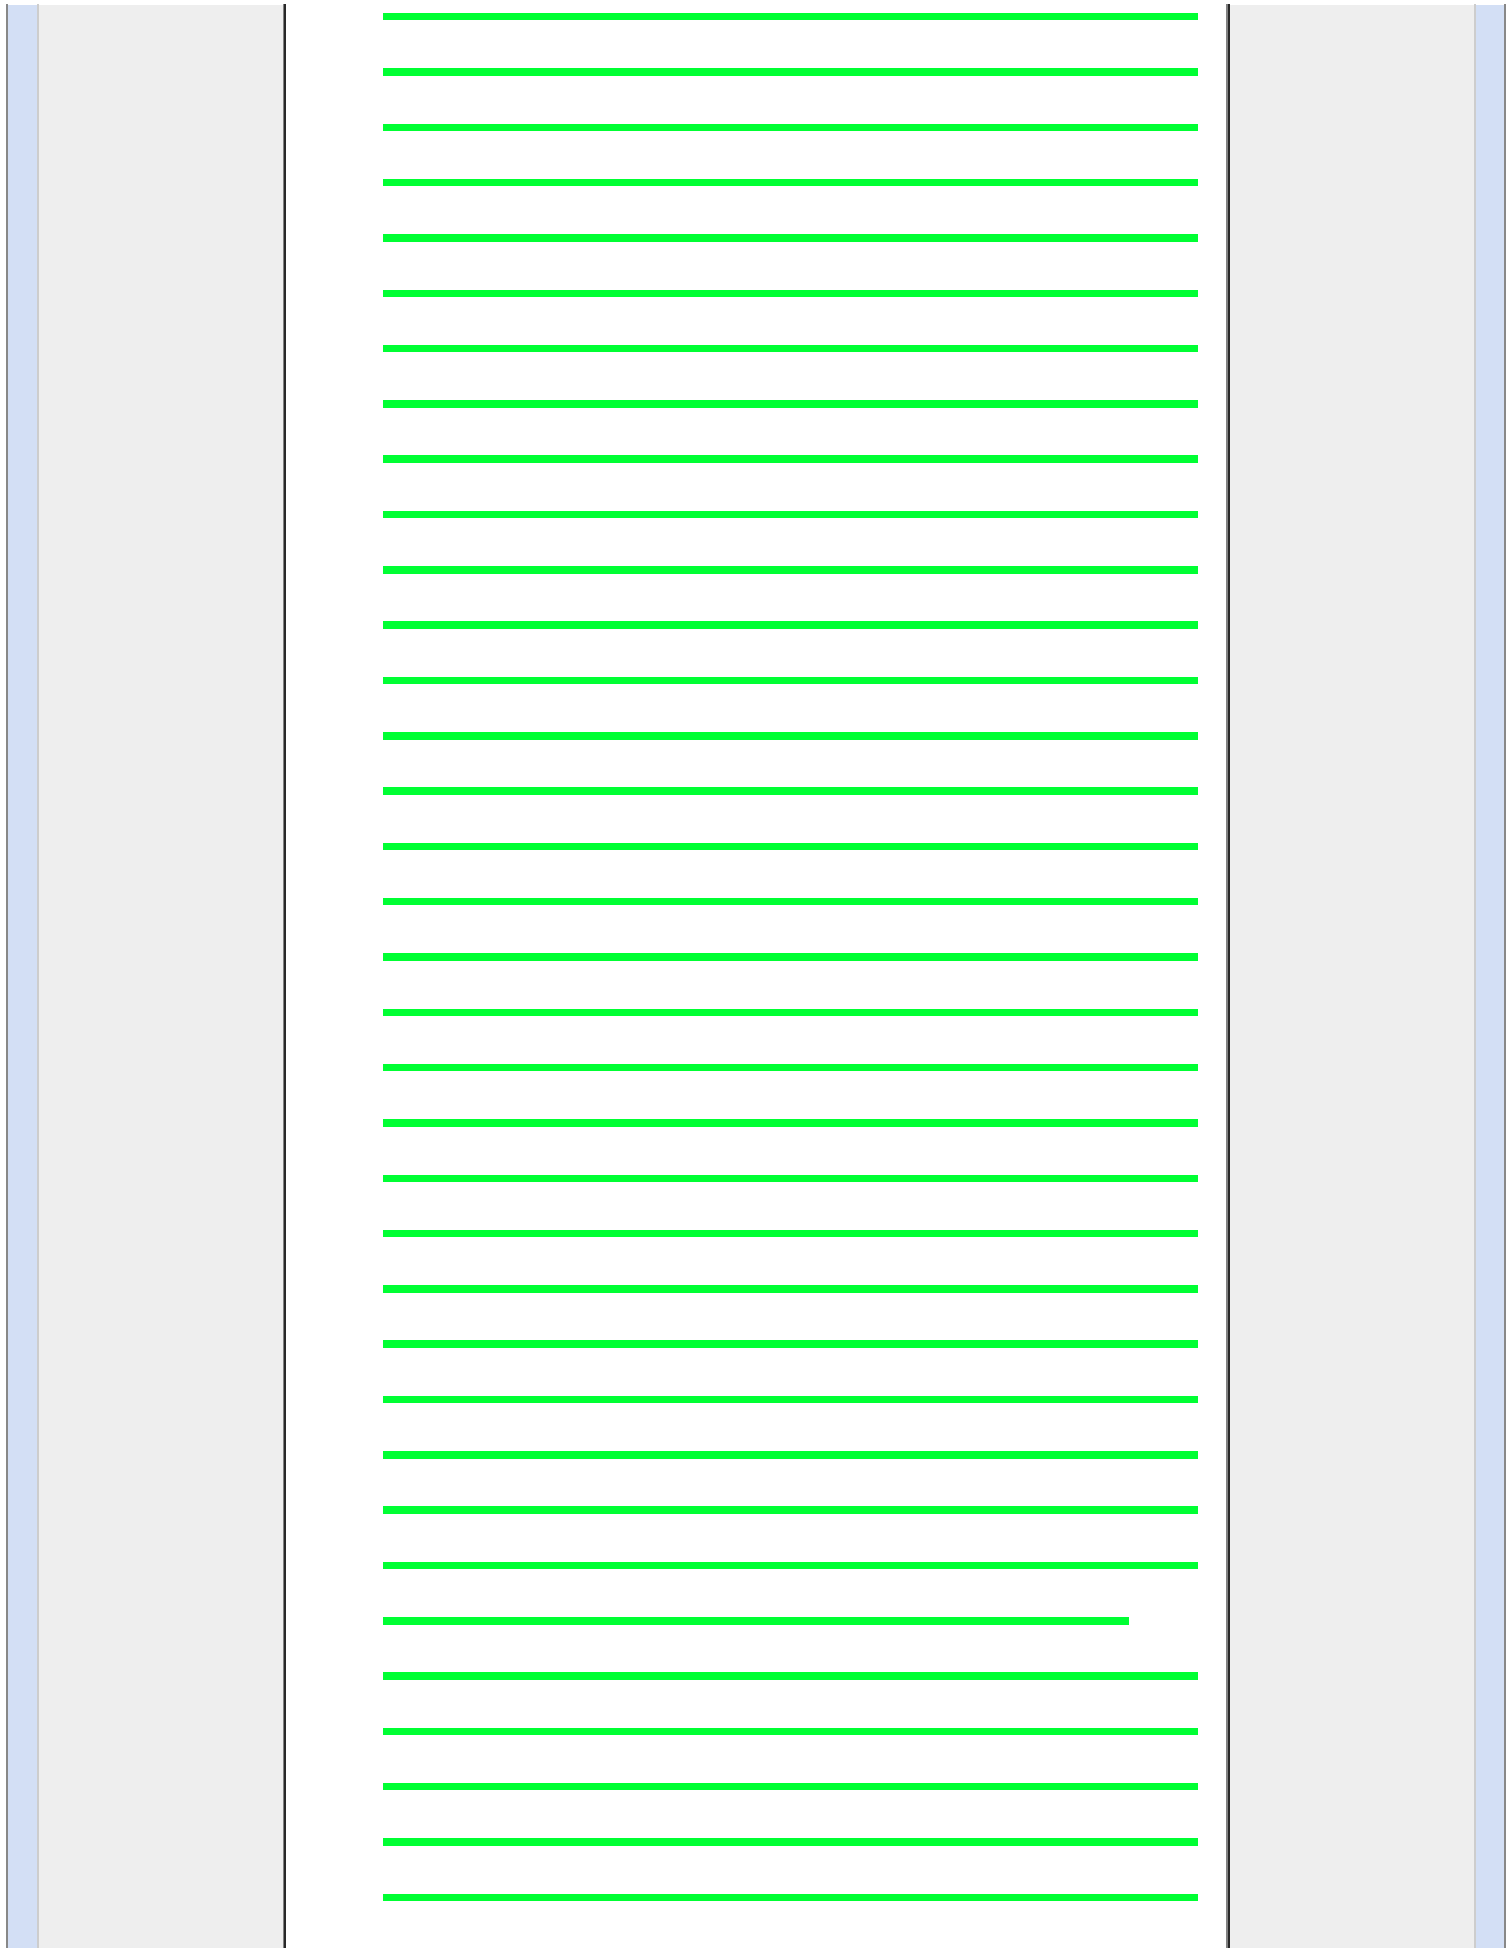

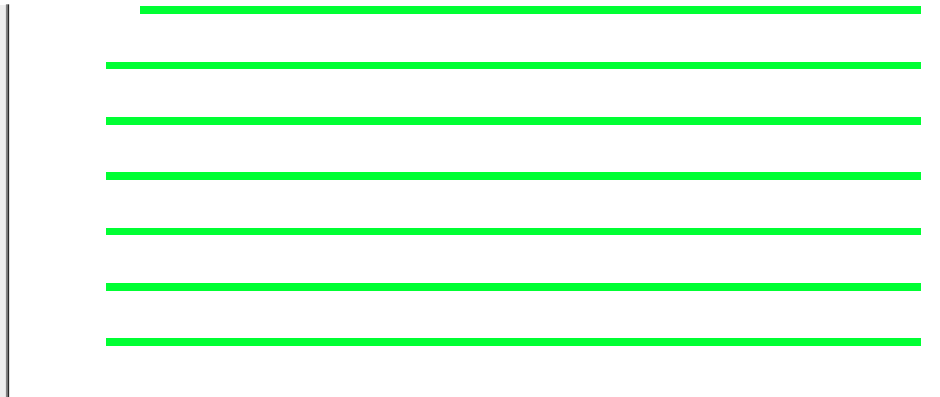

**Descriptions**

**Sequences producing significant alignments:**

Select: [All](#) [None](#) Selected:0

Alignments [Download](#) [GenPept](#) [Graphics](#) [Distance tree of results](#) [Multiple alignment](#)

| Description                                                                 | Max score | Total score | Query cover | E value | Ident | Accession                                   |
|-----------------------------------------------------------------------------|-----------|-------------|-------------|---------|-------|---------------------------------------------|
| <a href="#">PREDICTED: LOW QUALITY PROTEIN: selenoprotein P [Pan pan]</a>   | 78.7      | 78.7        | 100%        | 5e-15   | 100%  | <a href="#">gi 675710689 XP_008961588.1</a> |
| <a href="#">Selenoprotein P, plasma, 1 [Homo sapiens]</a>                   | 78.7      | 78.7        | 100%        | 5e-15   | 100%  | <a href="#">gi 34783648 AAH46152.1</a>      |
| <a href="#">Selenoprotein P, plasma, 1 [Homo sapiens]</a>                   | 78.7      | 78.7        | 100%        | 5e-15   | 100%  | <a href="#">gi 34783164 AAH15875.1</a>      |
| <a href="#">selenoprotein P isoform 1 precursor [Homo sapiens]</a>          | 78.7      | 78.7        | 100%        | 5e-15   | 100%  | <a href="#">gi 62530391 NP_005401.3</a>     |
| <a href="#">Selenoprotein P, plasma, 1 [Homo sapiens]</a>                   | 78.7      | 78.7        | 100%        | 5e-15   | 100%  | <a href="#">gi 37596694 AAH58919.1</a>      |
| <a href="#">PREDICTED: LOW QUALITY PROTEIN: selenoprotein P [Nomasci]</a>   | 78.7      | 78.7        | 100%        | 5e-15   | 100%  | <a href="#">gi 332250603 XP_003274442.1</a> |
| <a href="#">selenoprotein P [Homo sapiens]</a>                              | 78.7      | 78.7        | 100%        | 5e-15   | 100%  | <a href="#">gi 312004116 CAA77836.2</a>     |
| <a href="#">selenoprotein P precursor [Pan troglodytes]</a>                 | 78.7      | 78.7        | 100%        | 5e-15   | 100%  | <a href="#">gi 169403955 NP_001108587.1</a> |
| <a href="#">selenoprotein P isoform 2 [Homo sapiens]</a>                    | 78.7      | 78.7        | 100%        | 5e-15   | 100%  | <a href="#">gi 148277022 NP_001087195.1</a> |
| <a href="#">PREDICTED: LOW QUALITY PROTEIN: selenoprotein P [Rhinopit]</a>  | 74.0      | 74.0        | 100%        | 2e-13   | 96%   | <a href="#">gi 724878613 XP_010372696.1</a> |
| <a href="#">PREDICTED: LOW QUALITY PROTEIN: selenoprotein P [Papio ar]</a>  | 74.0      | 74.0        | 100%        | 2e-13   | 96%   | <a href="#">gi 685545348 XP_009206607.1</a> |
| <a href="#">PREDICTED: LOW QUALITY PROTEIN: selenoprotein P [Chloroce]</a>  | 74.0      | 74.0        | 100%        | 2e-13   | 96%   | <a href="#">gi 635028004 XP_007959679.1</a> |
| <a href="#">selenoprotein P precursor [Macaca mulatta]</a>                  | 74.0      | 74.0        | 100%        | 2e-13   | 96%   | <a href="#">gi 226958322 NP_001152962.1</a> |
| <a href="#">selenoprotein P precursor [Pongo abelii]</a>                    | 73.2      | 73.2        | 100%        | 4e-13   | 96%   | <a href="#">gi 197101233 NP_001127462.1</a> |
| <a href="#">PREDICTED: LOW QUALITY PROTEIN: selenoprotein P [Balaeno]</a>   | 71.5      | 71.5        | 100%        | 1e-12   | 92%   | <a href="#">gi 594696840 XP_007195596.1</a> |
| <a href="#">PREDICTED: LOW QUALITY PROTEIN: selenoprotein P [Lipotes \</a>  | 71.5      | 71.5        | 100%        | 1e-12   | 92%   | <a href="#">gi 602724444 XP_007447694.1</a> |
| <a href="#">PREDICTED: LOW QUALITY PROTEIN: selenoprotein P [Orcinus \</a>  | 71.5      | 71.5        | 100%        | 1e-12   | 92%   | <a href="#">gi 465986750 XP_004266005.1</a> |
| <a href="#">PREDICTED: LOW QUALITY PROTEIN: selenoprotein P [Physeter]</a>  | 71.5      | 71.5        | 100%        | 1e-12   | 92%   | <a href="#">gi 593761497 XP_007119423.1</a> |
| <a href="#">PREDICTED: LOW QUALITY PROTEIN: selenoprotein P [Tursiops]</a>  | 71.5      | 71.5        | 100%        | 1e-12   | 92%   | <a href="#">gi 470626535 XP_004320390.1</a> |
| <a href="#">PREDICTED: LOW QUALITY PROTEIN: selenoprotein P [Bison bis]</a> | 71.5      | 71.5        | 100%        | 1e-12   | 92%   | <a href="#">gi 742088280 XP_010831114.1</a> |
| <a href="#">selenoprotein P [Bos taurus]</a>                                | 71.5      | 71.5        | 100%        | 1e-12   | 92%   | <a href="#">gi 6006351 BAA84781.1</a>       |
| <a href="#">PREDICTED: LOW QUALITY PROTEIN: selenoprotein P [Bos mut]</a>   | 71.5      | 71.5        | 100%        | 1e-12   | 92%   | <a href="#">gi 555965745 XP_005894930.1</a> |
| <a href="#">selenoprotein P-like protein [Bos taurus]</a>                   | 71.5      | 71.5        | 100%        | 1e-12   | 92%   | <a href="#">gi 1582026 2117379A</a>         |
| <a href="#">selenoprotein P like protein [Bos taurus]</a>                   | 71.5      | 71.5        | 100%        | 1e-12   | 92%   | <a href="#">gi 14970947 BAA04949.2</a>      |
| <a href="#">selenoprotein P precursor [Bos taurus]</a>                      | 71.5      | 71.5        | 100%        | 1e-12   | 92%   | <a href="#">gi 156631001 NP_776884.2</a>    |
| <a href="#">PREDICTED: selenoprotein P [Otolemur garnettii]</a>             | 69.8      | 69.8        | 100%        | 5e-12   | 92%   | <a href="#">gi 395840394 XP_003793045.1</a> |
| <a href="#">PREDICTED: LOW QUALITY PROTEIN: selenoprotein P [Ictidomy]</a>  | 69.8      | 69.8        | 100%        | 6e-12   | 92%   | <a href="#">gi 532079811 XP_005325668.1</a> |
| <a href="#">membrane selenoprotein P [Capra hircus]</a>                     | 67.2      | 67.2        | 100%        | 3e-11   | 88%   | <a href="#">gi 7677620 AAF67201.1</a>       |

|                                                                             |      |      |      |       |     |                                             |
|-----------------------------------------------------------------------------|------|------|------|-------|-----|---------------------------------------------|
| <a href="#">selenoprotein P, plasma, 1 precursor [Capra hircus]</a>         | 67.2 | 67.2 | 100% | 4e-11 | 88% | <a href="#">gij550822255 NP_001272511.1</a> |
| PREDICTED: LOW QUALITY PROTEIN: <a href="#">selenoprotein P [Ovis arie]</a> | 67.2 | 67.2 | 100% | 4e-11 | 88% | <a href="#">gij426246564 XP_004017062.1</a> |
| PREDICTED: LOW QUALITY PROTEIN: <a href="#">selenoprotein P [Nannosq]</a>   | 67.2 | 67.2 | 100% | 4e-11 | 88% | <a href="#">gij674066756 XP_008840327.1</a> |
| PREDICTED: LOW QUALITY PROTEIN: <a href="#">selenoprotein P [Ceratoth]</a>  | 67.2 | 67.2 | 100% | 4e-11 | 88% | <a href="#">gij478496995 XP_004422836.1</a> |
| <a href="#">selenoprotein P precursor [Sus scrofa]</a>                      | 67.2 | 67.2 | 100% | 4e-11 | 88% | <a href="#">gij198282079 NP_001128295.1</a> |
| PREDICTED: LOW QUALITY PROTEIN: <a href="#">selenoprotein P [Jaculus j]</a> | 66.4 | 66.4 | 100% | 8e-11 | 88% | <a href="#">gij507537041 XP_004652550.1</a> |
| PREDICTED: LOW QUALITY PROTEIN: <a href="#">selenoprotein P [Bubalus]</a>   | 66.4 | 66.4 | 100% | 8e-11 | 83% | <a href="#">gij594087306 XP_006067130.1</a> |
| PREDICTED: LOW QUALITY PROTEIN: <a href="#">selenoprotein P [Equus p]</a>   | 64.7 | 64.7 | 100% | 3e-10 | 83% | <a href="#">gij664731166 XP_008522793.1</a> |
| <a href="#">selenoprotein P precursor [Equus caballus]</a>                  | 64.7 | 64.7 | 100% | 3e-10 | 83% | <a href="#">gij208022673 NP_001129077.1</a> |
| PREDICTED: LOW QUALITY PROTEIN: <a href="#">selenoprotein P [Saimiri b]</a> | 63.8 | 63.8 | 100% | 6e-10 | 83% | <a href="#">gij725563213 XP_003925940.2</a> |
| <a href="#">selenoprotein P precursor [Callithrix jacchus]</a>              | 63.8 | 63.8 | 100% | 6e-10 | 83% | <a href="#">gij315630400 NP_001186857.1</a> |
| <a href="#">selenoprotein P [Bubalus bubalis]</a>                           | 63.8 | 63.8 | 100% | 6e-10 | 83% | <a href="#">gij430001945 AFM77782.2</a>     |
| PREDICTED: LOW QUALITY PROTEIN: <a href="#">selenoprotein P [Ochoton]</a>   | 63.0 | 63.0 | 100% | 1e-09 | 83% | <a href="#">gij504142600 XP_004583736.1</a> |
| PREDICTED: LOW QUALITY PROTEIN: <a href="#">selenoprotein P [Tupaia c]</a>  | 62.1 | 62.1 | 100% | 2e-09 | 83% | <a href="#">gij562878609 XP_006167023.1</a> |
| PREDICTED: LOW QUALITY PROTEIN: <a href="#">selenoprotein P [Vicugna]</a>   | 61.7 | 61.7 | 100% | 3e-09 | 79% | <a href="#">gij560970802 XP_006207756.1</a> |
| PREDICTED: LOW QUALITY PROTEIN: <a href="#">selenoprotein P [Octodon]</a>   | 61.3 | 61.3 | 91%  | 4e-09 | 86% | <a href="#">gij507690845 XP_004641866.1</a> |
| PREDICTED: LOW QUALITY PROTEIN: <a href="#">selenoprotein P [Oryctero]</a>  | 60.9 | 60.9 | 100% | 6e-09 | 79% | <a href="#">gij634885032 XP_007952213.1</a> |
| PREDICTED: LOW QUALITY PROTEIN: <a href="#">selenoprotein P [Myotis b]</a>  | 60.9 | 60.9 | 100% | 6e-09 | 79% | <a href="#">gij554563465 XP_005876061.1</a> |
| PREDICTED: LOW QUALITY PROTEIN: <a href="#">selenoprotein P [Chinchill]</a> | 60.9 | 60.9 | 100% | 6e-09 | 79% | <a href="#">gij533143496 XP_005386312.1</a> |
| <a href="#">selenoprotein P precursor [Oryctolagus cuniculus]</a>           | 60.9 | 60.9 | 100% | 6e-09 | 79% | <a href="#">gij315434200 NP_001186775.1</a> |
| PREDICTED: LOW QUALITY PROTEIN: <a href="#">selenoprotein P [Elephan]</a>   | 60.4 | 60.4 | 100% | 8e-09 | 79% | <a href="#">gij585672710 XP_006889619.1</a> |
| PREDICTED: LOW QUALITY PROTEIN: <a href="#">selenoprotein P [Tarsius s]</a> | 59.6 | 59.6 | 95%  | 2e-08 | 78% | <a href="#">gij640790108 XP_008050904.1</a> |
| PREDICTED: LOW QUALITY PROTEIN: <a href="#">selenoprotein P [Dasypus]</a>   | 59.6 | 59.6 | 100% | 2e-08 | 79% | <a href="#">gij488512454 XP_004448278.1</a> |
| PREDICTED: LOW QUALITY PROTEIN: <a href="#">selenoprotein P [Camelus]</a>   | 59.2 | 59.2 | 100% | 2e-08 | 79% | <a href="#">gij744538058 XP_010999134.1</a> |
| PREDICTED: LOW QUALITY PROTEIN: <a href="#">selenoprotein P [Camelus]</a>   | 59.2 | 59.2 | 100% | 2e-08 | 79% | <a href="#">gij560931717 XP_006191986.1</a> |
| PREDICTED: LOW QUALITY PROTEIN: <a href="#">selenoprotein P [Myotis l]</a>  | 57.5 | 57.5 | 100% | 8e-08 | 79% | <a href="#">gij558205011 XP_006106371.1</a> |
| PREDICTED: LOW QUALITY PROTEIN: <a href="#">selenoprotein P [Mustela]</a>   | 57.5 | 57.5 | 100% | 8e-08 | 79% | <a href="#">gij511826454 XP_004738001.1</a> |
| PREDICTED: LOW QUALITY PROTEIN: <a href="#">selenoprotein P [Leptonyc]</a>  | 57.5 | 57.5 | 100% | 8e-08 | 79% | <a href="#">gij585192742 XP_006747601.1</a> |
| PREDICTED: LOW QUALITY PROTEIN: <a href="#">selenoprotein P [Odoben]</a>    | 57.5 | 57.5 | 100% | 8e-08 | 79% | <a href="#">gij472379594 XP_004409206.1</a> |
| PREDICTED: LOW QUALITY PROTEIN: <a href="#">selenoprotein P [Peromys]</a>   | 57.5 | 57.5 | 100% | 8e-08 | 79% | <a href="#">gij589969345 XP_006997157.1</a> |
| <a href="#">Selenoprotein P [Heterocephalus glaber]</a>                     | 57.1 | 57.1 | 100% | 1e-07 | 75% | <a href="#">gij351695949 EHA98867.1</a>     |
| PREDICTED: LOW QUALITY PROTEIN: <a href="#">selenoprotein P [Ornithor]</a>  | 57.1 | 57.1 | 100% | 1e-07 | 75% | <a href="#">gij620968705 XP_007654576.1</a> |
| PREDICTED: LOW QUALITY PROTEIN: <a href="#">selenoprotein P [Galeopte]</a>  | 57.1 | 57.1 | 100% | 1e-07 | 79% | <a href="#">gij667253652 XP_008564915.1</a> |
| PREDICTED: LOW QUALITY PROTEIN: <a href="#">selenoprotein P [Eptesicu]</a>  | 57.1 | 57.1 | 100% | 1e-07 | 75% | <a href="#">gij641727491 XP_008153843.1</a> |
| PREDICTED: LOW QUALITY PROTEIN: <a href="#">selenoprotein P [Monodel]</a>   | 57.1 | 57.1 | 100% | 1e-07 | 75% | <a href="#">gij612006645 XP_003340675.2</a> |
| PREDICTED: LOW QUALITY PROTEIN: <a href="#">selenoprotein P [Heteroce]</a>  | 57.1 | 57.1 | 100% | 1e-07 | 75% | <a href="#">gij512973043 XP_004848622.1</a> |
| PREDICTED: LOW QUALITY PROTEIN: <a href="#">selenoprotein P [Heteroce]</a>  | 57.1 | 57.1 | 100% | 1e-07 | 75% | <a href="#">gij512816050 XP_004878213.1</a> |
| PREDICTED: LOW QUALITY PROTEIN: <a href="#">selenoprotein P [Fukomys]</a>   | 56.6 | 56.6 | 100% | 2e-07 | 75% | <a href="#">gij731237262 XP_010632183.1</a> |
| PREDICTED: LOW QUALITY PROTEIN: <a href="#">selenoprotein P [Loxodon]</a>   | 56.6 | 56.6 | 100% | 2e-07 | 71% | <a href="#">gij731464182 XP_010586424.1</a> |
| PREDICTED: LOW QUALITY PROTEIN: <a href="#">selenoprotein P [Trichech]</a>  | 56.2 | 56.2 | 100% | 2e-07 | 75% | <a href="#">gij471413922 XP_004388500.1</a> |
| PREDICTED: LOW QUALITY PROTEIN: <a href="#">selenoprotein P [Myotis d]</a>  | 54.9 | 54.9 | 100% | 6e-07 | 71% | <a href="#">gij584060316 XP_006774623.1</a> |
| PREDICTED: <a href="#">selenoprotein P [Sarcophilus harrisii]</a>           | 54.5 | 54.5 | 100% | 7e-07 | 75% | <a href="#">gij395511426 XP_003759960.1</a> |
| PREDICTED: LOW QUALITY PROTEIN: <a href="#">selenoprotein P [Condylu]</a>   | 54.5 | 54.5 | 79%  | 8e-07 | 84% | <a href="#">gij507934338 XP_004678402.1</a> |
| <a href="#">selenoprotein P precursor [Canis lupus familiaris]</a>          | 54.1 | 54.1 | 100% | 1e-06 | 75% | <a href="#">gij169403968 NP_001108590.1</a> |
| PREDICTED: LOW QUALITY PROTEIN: <a href="#">selenoprotein P [Ursus m]</a>   | 54.1 | 54.1 | 100% | 1e-06 | 75% | <a href="#">gij670999853 XP_008690806.1</a> |
| PREDICTED: LOW QUALITY PROTEIN: <a href="#">selenoprotein P [Felis cat]</a> | 53.2 | 53.2 | 100% | 2e-06 | 75% | <a href="#">gij586975923 XP_006928143.1</a> |

|                                                           |      |      |      |       |     |                                             |
|-----------------------------------------------------------|------|------|------|-------|-----|---------------------------------------------|
| PREDICTED: LOW QUALITY PROTEIN: selenoprotein P [Panther  | 53.2 | 53.2 | 100% | 2e-06 | 75% | <a href="#">gij591339998 XP_007095490.1</a> |
| PREDICTED: LOW QUALITY PROTEIN: selenoprotein P [Echinop  | 52.8 | 52.8 | 100% | 3e-06 | 71% | <a href="#">gij507708621 XP_004716992.1</a> |
| PREDICTED: LOW QUALITY PROTEIN: selenoprotein P [Erinaceu | 52.4 | 52.4 | 100% | 4e-06 | 71% | <a href="#">gij617575753 XP_007517681.1</a> |
| Selenoprotein P [Cricetulus griseus]                      | 51.5 | 51.5 | 100% | 6e-06 | 71% | <a href="#">gij344247936 EGW04040.1</a>     |
| selenoprotein P precursor [Cricetulus griseus]            | 51.5 | 51.5 | 100% | 7e-06 | 71% | <a href="#">gij537231220 ERE84145.1</a>     |
| PREDICTED: LOW QUALITY PROTEIN: selenoprotein P [Microtus | 51.5 | 51.5 | 100% | 7e-06 | 75% | <a href="#">gij532054271 XP_005369861.1</a> |
| selenoprotein P precursor [Cricetulus griseus]            | 51.5 | 51.5 | 100% | 7e-06 | 71% | <a href="#">gij379056379 NP_001243807.1</a> |
| PREDICTED: LOW QUALITY PROTEIN: selenoprotein P [Sorex ar | 51.1 | 51.1 | 100% | 1e-05 | 71% | <a href="#">gij505790024 XP_004605590.1</a> |
| PREDICTED: LOW QUALITY PROTEIN: selenoprotein P, plasma,  | 50.7 | 50.7 | 100% | 1e-05 | 75% | <a href="#">gij524973435 XP_005139283.1</a> |
| PREDICTED: LOW QUALITY PROTEIN: selenoprotein P [Chrysol  | 50.7 | 50.7 | 100% | 1e-05 | 71% | <a href="#">gij586493836 XP_006877364.1</a> |
| selenoprotein P precursor [Rattus norvegicus]             | 48.6 | 48.6 | 100% | 7e-05 | 71% | <a href="#">gij15011857 NP_062065.2</a>     |
| selenoprotein P, plasma, 1, isoform CRA_a [Mus musculus]  | 47.3 | 47.3 | 100% | 2e-04 | 71% | <a href="#">gij148671458 EDL03405.1</a>     |
| Selenoprotein P, plasma, 1 [Mus musculus]                 | 47.3 | 47.3 | 100% | 2e-04 | 71% | <a href="#">gij34809553 AAH01991.2</a>      |
| plasma selenoprotein P [Mus musculus]                     | 47.3 | 47.3 | 100% | 2e-04 | 71% | <a href="#">gij4103142 AAD01684.1</a>       |
| unnamed protein product [Mus musculus]                    | 47.3 | 47.3 | 100% | 2e-04 | 71% | <a href="#">gij74198358 BAE39664.1</a>      |
| unnamed protein product [Mus musculus]                    | 47.3 | 47.3 | 100% | 2e-04 | 71% | <a href="#">gij74192879 BAE34948.1</a>      |
| selenoprotein P precursor [Mus musculus]                  | 47.3 | 47.3 | 100% | 2e-04 | 71% | <a href="#">gij74271806 NP_033181.3</a>     |
| unnamed protein product [Mus musculus]                    | 47.3 | 47.3 | 100% | 2e-04 | 71% | <a href="#">gij74213751 BAC55264.3</a>      |
| PREDICTED: LOW QUALITY PROTEIN: selenoprotein P [Pelodisc | 46.9 | 46.9 | 91%  | 2e-04 | 77% | <a href="#">gij558231946 XP_006139560.1</a> |
| selenoprotein P precursor [Cavia porcellus]               | 45.6 | 45.6 | 66%  | 6e-04 | 88% | <a href="#">gij384367995 NP_001244936.1</a> |
| PREDICTED: LOW QUALITY PROTEIN: selenoprotein P [Phaetho  | 45.6 | 45.6 | 91%  | 6e-04 | 73% | <a href="#">gij723136355 XP_010284851.1</a> |
| selenoprotein P precursor [Taeniopygia guttata]           | 45.6 | 45.6 | 95%  | 6e-04 | 70% | <a href="#">gij399567825 NP_001257806.1</a> |
| PREDICTED: LOW QUALITY PROTEIN: selenoprotein P [Phalacro | 45.2 | 45.2 | 91%  | 9e-04 | 73% | <a href="#">gij695138937 XP_009511852.1</a> |
| PREDICTED: LOW QUALITY PROTEIN: selenoprotein P [Gavia st | 45.2 | 45.2 | 91%  | 9e-04 | 73% | <a href="#">gij698446985 XP_009818154.1</a> |
| PREDICTED: LOW QUALITY PROTEIN: selenoprotein P [Caprimu  | 45.2 | 45.2 | 91%  | 9e-04 | 73% | <a href="#">gij704307382 XP_010164847.1</a> |
| PREDICTED: LOW QUALITY PROTEIN: selenoprotein P [Tauraco  | 45.2 | 45.2 | 91%  | 9e-04 | 73% | <a href="#">gij701334103 XP_009979695.1</a> |

## Alignments

Download [GenPept](#) [Graphics](#)

[Next](#) [Previous](#) [Descriptions](#)

PREDICTED: LOW QUALITY PROTEIN: selenoprotein P [Pan paniscus]

Sequence ID: [gij675710689|ref|XP\\_008961588.1](#) Length: 381 Number of Matches: 1

Range 1: 75 to 98 [GenPept](#) [Graphics](#)

[Next Match](#) [Previous Match](#)

| Score          | Expect | Identities  | Positives   | Gaps     |
|----------------|--------|-------------|-------------|----------|
| 78.7 bits(178) | 5e-15  | 24/24(100%) | 24/24(100%) | 0/24(0%) |

Query 1 KLKKEGYSNISYIVVNHQGISSRL 24  
 KLKKEGYSNISYIVVNHQGISSRL  
 Sbjct 75 KLKKEGYSNISYIVVNHQGISSRL 98

### Related Information

[Gene](#) - associated gene details  
[Map Viewer](#) - aligned genomic context

Download [GenPept](#) [Graphics](#)

[Next](#) [Previous](#) [Descriptions](#)

Selenoprotein P, plasma, 1 [Homo sapiens]

Sequence ID: [gij34783648|gb|AAH46152.1](#) Length: 381 Number of Matches: 1

Range 1: 75 to 98 [GenPept](#) [Graphics](#)

[Next Match](#) [Previous Match](#)

| Score          | Expect | Identities  | Positives   | Gaps     |
|----------------|--------|-------------|-------------|----------|
| 78.7 bits(178) | 5e-15  | 24/24(100%) | 24/24(100%) | 0/24(0%) |

Query 1 KLKKEGYSNISYIVVNHQGISSRL 24  
 KLKKEGYSNISYIVVNHQGISSRL  
 Sbjct 75 KLKKEGYSNISYIVVNHQGISSRL 98

### Related Information

[Gene](#) - associated gene details

Download [GenPept](#) [Graphics](#)

▼ Next ▲ Previous ▲ Descriptions

Selenoprotein P, plasma, 1 [Homo sapiens]

Sequence ID: [gi|34783164|gb|AAH15875.1](#) Length: 381 Number of Matches: 1

Range 1: 75 to 98 [GenPept](#) [Graphics](#) ▼ Next Match ▲ Previous Match

| Score          | Expect | Identities  | Positives   | Gaps     |
|----------------|--------|-------------|-------------|----------|
| 78.7 bits(178) | 5e-15  | 24/24(100%) | 24/24(100%) | 0/24(0%) |

Query 1 KLKKEGYSNISYIVVNHQGISSRL 24  
 KLKKEGYSNISYIVVNHQGISSRL  
 Sbjct 75 KLKKEGYSNISYIVVNHQGISSRL 98

**Related Information**

[Gene](#) - associated gene details

Download [GenPept](#) [Graphics](#)

▼ Next ▲ Previous ▲ Descriptions

selenoprotein P isoform 1 precursor [Homo sapiens]

Sequence ID: [gi|62530391|ref|NP\\_005401.3](#) Length: 381 Number of Matches: 1

▶ [See 4 more title\(s\)](#)

Range 1: 75 to 98 [GenPept](#) [Graphics](#) ▼ Next Match ▲ Previous Match

| Score          | Expect | Identities  | Positives   | Gaps     |
|----------------|--------|-------------|-------------|----------|
| 78.7 bits(178) | 5e-15  | 24/24(100%) | 24/24(100%) | 0/24(0%) |

Query 1 KLKKEGYSNISYIVVNHQGISSRL 24  
 KLKKEGYSNISYIVVNHQGISSRL  
 Sbjct 75 KLKKEGYSNISYIVVNHQGISSRL 98

**Related Information**

[Gene](#) - associated gene details

[UniGene](#) - clustered expressed sequence tags

[Map Viewer](#) - aligned genomic context

[Identical Proteins](#) - Proteins identical to the subject

Download [GenPept](#) [Graphics](#)

▼ Next ▲ Previous ▲ Descriptions

Selenoprotein P, plasma, 1 [Homo sapiens]

Sequence ID: [gi|37596694|gb|AAH58919.1](#) Length: 381 Number of Matches: 1

Range 1: 75 to 98 [GenPept](#) [Graphics](#) ▼ Next Match ▲ Previous Match

| Score          | Expect | Identities  | Positives   | Gaps     |
|----------------|--------|-------------|-------------|----------|
| 78.7 bits(178) | 5e-15  | 24/24(100%) | 24/24(100%) | 0/24(0%) |

Query 1 KLKKEGYSNISYIVVNHQGISSRL 24  
 KLKKEGYSNISYIVVNHQGISSRL  
 Sbjct 75 KLKKEGYSNISYIVVNHQGISSRL 98

**Related Information**

[Gene](#) - associated gene details

BLAST is a registered trademark of the National Library of Medicine.





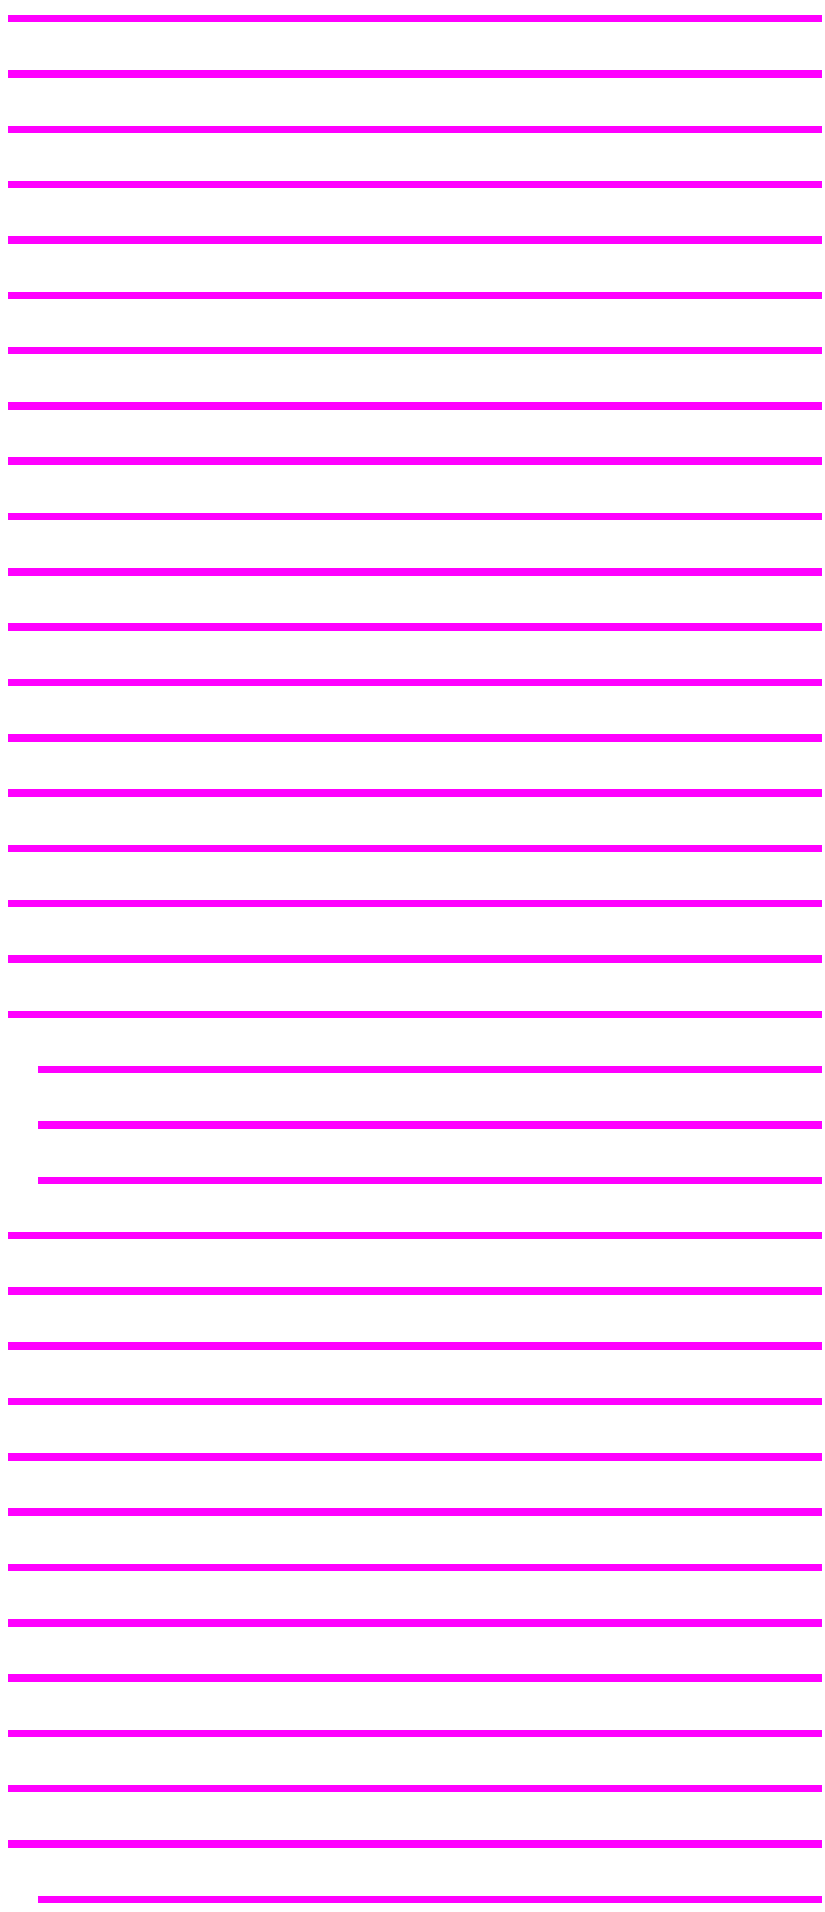

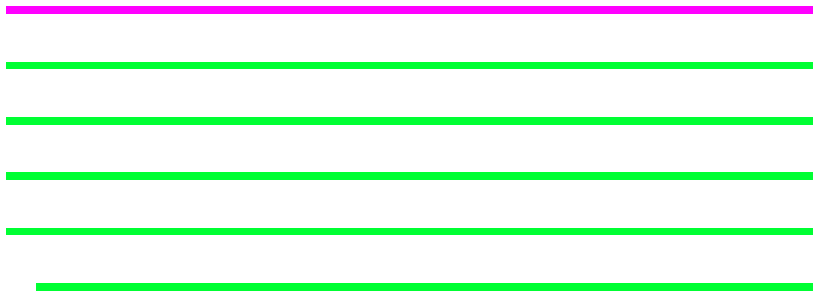

## Descriptions

### Sequences producing significant alignments:

Select: [All](#) [None](#) Selected:0

| <a href="#">Alignments</a> <a href="#">Download</a> <a href="#">GenPept</a> <a href="#">Graphics</a> <a href="#">Distance tree of results</a> <a href="#">Multiple alignment</a> |           |             |             |         |       |                                |  |
|----------------------------------------------------------------------------------------------------------------------------------------------------------------------------------|-----------|-------------|-------------|---------|-------|--------------------------------|--|
| Description                                                                                                                                                                      | Max score | Total score | Query cover | E value | Ident | Accession                      |  |
| <a href="#">PREDICTED: LOW QUALITY PROTEIN: selenoprotein P [Tarsius syrichta]</a>                                                                                               | 89.3      | 89.3        | 100%        | 2e-18   | 96%   | <a href="#">XP_008050904.1</a> |  |
| <a href="#">PREDICTED: LOW QUALITY PROTEIN: selenoprotein P [Rhinopithecus roxe]</a>                                                                                             | 89.3      | 89.3        | 100%        | 2e-18   | 96%   | <a href="#">XP_010372696.1</a> |  |
| <a href="#">PREDICTED: LOW QUALITY PROTEIN: selenoprotein P [Papio anubis]</a>                                                                                                   | 89.3      | 89.3        | 100%        | 2e-18   | 96%   | <a href="#">XP_009206607.1</a> |  |
| <a href="#">PREDICTED: LOW QUALITY PROTEIN: selenoprotein P [Pan paniscus]</a>                                                                                                   | 89.3      | 89.3        | 100%        | 2e-18   | 96%   | <a href="#">XP_008961588.1</a> |  |
| <a href="#">PREDICTED: LOW QUALITY PROTEIN: selenoprotein P [Chlorocebus sabaeus]</a>                                                                                            | 89.3      | 89.3        | 100%        | 2e-18   | 96%   | <a href="#">XP_007959679.1</a> |  |
| <a href="#">Selenoprotein P, plasma, 1 [Homo sapiens]</a>                                                                                                                        | 89.3      | 89.3        | 100%        | 2e-18   | 96%   | <a href="#">AAH46152.1</a>     |  |
| <a href="#">Selenoprotein P, plasma, 1 [Homo sapiens]</a>                                                                                                                        | 89.3      | 89.3        | 100%        | 2e-18   | 96%   | <a href="#">AAH15875.1</a>     |  |
| <a href="#">selenoprotein P isoform 1 precursor [Homo sapiens]</a>                                                                                                               | 89.3      | 89.3        | 100%        | 2e-18   | 96%   | <a href="#">NP_005401.3</a>    |  |
| <a href="#">Selenoprotein P, plasma, 1 [Homo sapiens]</a>                                                                                                                        | 89.3      | 89.3        | 100%        | 2e-18   | 96%   | <a href="#">AAH58919.1</a>     |  |
| <a href="#">selenoprotein P precursor [Pongo abelii]</a>                                                                                                                         | 89.3      | 89.3        | 100%        | 2e-18   | 96%   | <a href="#">NP_001127462.1</a> |  |
| <a href="#">PREDICTED: LOW QUALITY PROTEIN: selenoprotein P [Nomascus leucogenus]</a>                                                                                            | 89.3      | 89.3        | 100%        | 2e-18   | 96%   | <a href="#">XP_003274442.1</a> |  |
| <a href="#">selenoprotein P [Homo sapiens]</a>                                                                                                                                   | 89.3      | 89.3        | 100%        | 2e-18   | 96%   | <a href="#">CAA77836.2</a>     |  |
| <a href="#">selenoprotein P precursor [Macaca mulatta]</a>                                                                                                                       | 89.3      | 89.3        | 100%        | 2e-18   | 96%   | <a href="#">NP_001152962.1</a> |  |
| <a href="#">selenoprotein P precursor [Pan troglodytes]</a>                                                                                                                      | 89.3      | 89.3        | 100%        | 2e-18   | 96%   | <a href="#">NP_001108587.1</a> |  |
| <a href="#">selenoprotein P isoform 2 [Homo sapiens]</a>                                                                                                                         | 89.3      | 89.3        | 100%        | 2e-18   | 96%   | <a href="#">NP_001087195.1</a> |  |
| <a href="#">PREDICTED: LOW QUALITY PROTEIN: selenoprotein P [Chrysochloris asiatica]</a>                                                                                         | 86.7      | 86.7        | 100%        | 1e-17   | 93%   | <a href="#">XP_006877364.1</a> |  |
| <a href="#">PREDICTED: LOW QUALITY PROTEIN: selenoprotein P [Tupaia chinensis]</a>                                                                                               | 86.7      | 86.7        | 100%        | 1e-17   | 93%   | <a href="#">XP_006167023.1</a> |  |
| <a href="#">PREDICTED: LOW QUALITY PROTEIN: selenoprotein P [Balaenoptera acuta]</a>                                                                                             | 86.7      | 86.7        | 100%        | 1e-17   | 93%   | <a href="#">XP_007195596.1</a> |  |
| <a href="#">PREDICTED: LOW QUALITY PROTEIN: selenoprotein P [Myotis lucifugus]</a>                                                                                               | 86.7      | 86.7        | 100%        | 1e-17   | 93%   | <a href="#">XP_006106371.1</a> |  |
| <a href="#">PREDICTED: LOW QUALITY PROTEIN: selenoprotein P [Orcinus orca]</a>                                                                                                   | 86.7      | 86.7        | 100%        | 1e-17   | 93%   | <a href="#">XP_004266005.1</a> |  |
| <a href="#">PREDICTED: LOW QUALITY PROTEIN: selenoprotein P [Camelus dromedarius]</a>                                                                                            | 86.7      | 86.7        | 100%        | 1e-17   | 93%   | <a href="#">XP_010999134.1</a> |  |
| <a href="#">PREDICTED: LOW QUALITY PROTEIN: selenoprotein P [Loxodonta africana]</a>                                                                                             | 86.7      | 86.7        | 100%        | 1e-17   | 93%   | <a href="#">XP_010586424.1</a> |  |
| <a href="#">PREDICTED: LOW QUALITY PROTEIN: selenoprotein P [Elephantulus edwardsi]</a>                                                                                          | 86.7      | 86.7        | 100%        | 1e-17   | 93%   | <a href="#">XP_006889619.1</a> |  |
| <a href="#">PREDICTED: LOW QUALITY PROTEIN: selenoprotein P [Tursiops truncatus]</a>                                                                                             | 86.7      | 86.7        | 100%        | 1e-17   | 93%   | <a href="#">XP_004320390.1</a> |  |
| <a href="#">PREDICTED: LOW QUALITY PROTEIN: selenoprotein P [Camelus ferus]</a>                                                                                                  | 86.7      | 86.7        | 100%        | 1e-17   | 93%   | <a href="#">XP_006191986.1</a> |  |
| <a href="#">selenoprotein P precursor [Sus scrofa]</a>                                                                                                                           | 86.7      | 86.7        | 100%        | 1e-17   | 93%   | <a href="#">NP_001128295.1</a> |  |
| <a href="#">PREDICTED: LOW QUALITY PROTEIN: selenoprotein P [Vicugna pacos]</a>                                                                                                  | 86.7      | 86.7        | 100%        | 1e-17   | 93%   | <a href="#">XP_006207756.1</a> |  |
| <a href="#">PREDICTED: selenoprotein P-like [Ailuropoda melanoleuca]</a>                                                                                                         | 85.0      | 85.0        | 100%        | 3e-17   | 93%   | <a href="#">XP_002921760.1</a> |  |
| <a href="#">PREDICTED: LOW QUALITY PROTEIN: selenoprotein P [Lipotes vexillifer]</a>                                                                                             | 85.0      | 85.0        | 100%        | 5e-17   | 93%   | <a href="#">XP_007447694.1</a> |  |

|                                                                                       |      |      |      |       |     |                                |
|---------------------------------------------------------------------------------------|------|------|------|-------|-----|--------------------------------|
| <a href="#">PREDICTED: LOW QUALITY PROTEIN: selenoprotein P [Mustela putorius fu</a>  | 85.0 | 85.0 | 100% | 5e-17 | 93% | <a href="#">XP_004738001.1</a> |
| <a href="#">PREDICTED: LOW QUALITY PROTEIN: selenoprotein P [Physeter catodon]</a>    | 85.0 | 85.0 | 100% | 5e-17 | 93% | <a href="#">XP_007119423.1</a> |
| <a href="#">selenoprotein P precursor [Canis lupus familiaris]</a>                    | 85.0 | 85.0 | 100% | 5e-17 | 93% | <a href="#">NP_001108590.1</a> |
| <a href="#">PREDICTED: LOW QUALITY PROTEIN: selenoprotein P [Ursus maritimus]</a>     | 85.0 | 85.0 | 100% | 5e-17 | 93% | <a href="#">XP_008690806.1</a> |
| <a href="#">PREDICTED: LOW QUALITY PROTEIN: selenoprotein P [Ovis aries]</a>          | 84.6 | 84.6 | 100% | 7e-17 | 93% | <a href="#">XP_004017062.1</a> |
| <a href="#">PREDICTED: selenoprotein P [Otolemur garnettii]</a>                       | 83.8 | 83.8 | 96%  | 1e-16 | 92% | <a href="#">XP_003793045.1</a> |
| <a href="#">PREDICTED: LOW QUALITY PROTEIN: selenoprotein P [Eptesicus fuscus]</a>    | 83.8 | 83.8 | 96%  | 1e-16 | 92% | <a href="#">XP_008153843.1</a> |
| <a href="#">PREDICTED: LOW QUALITY PROTEIN: selenoprotein P [Myotis brandtii]</a>     | 83.8 | 104  | 96%  | 1e-16 | 92% | <a href="#">XP_005876061.1</a> |
| <a href="#">PREDICTED: LOW QUALITY PROTEIN: selenoprotein P [Orycteropus afer af</a>  | 82.9 | 82.9 | 100% | 3e-16 | 93% | <a href="#">XP_007952213.1</a> |
| <a href="#">PREDICTED: LOW QUALITY PROTEIN: selenoprotein P [Felis catus]</a>         | 82.1 | 82.1 | 100% | 4e-16 | 89% | <a href="#">XP_006928143.1</a> |
| <a href="#">membrane selenoprotein P [Capra hircus]</a>                               | 82.1 | 82.1 | 100% | 4e-16 | 89% | <a href="#">AAF67201.1</a>     |
| <a href="#">selenoprotein P. plasma. 1 precursor [Capra hircus]</a>                   | 82.1 | 82.1 | 100% | 5e-16 | 89% | <a href="#">NP_001272511.1</a> |
| <a href="#">PREDICTED: LOW QUALITY PROTEIN: selenoprotein P [Bubalus bubalis]</a>     | 82.1 | 82.1 | 100% | 5e-16 | 89% | <a href="#">XP_006067130.1</a> |
| <a href="#">selenoprotein P [Bos taurus]</a>                                          | 82.1 | 82.1 | 100% | 5e-16 | 89% | <a href="#">BAA84781.1</a>     |
| <a href="#">PREDICTED: LOW QUALITY PROTEIN: selenoprotein P [Panthera tigris alta</a> | 82.1 | 82.1 | 100% | 5e-16 | 89% | <a href="#">XP_007095490.1</a> |
| <a href="#">PREDICTED: LOW QUALITY PROTEIN: selenoprotein P [Bos mutus]</a>           | 82.1 | 82.1 | 100% | 5e-16 | 89% | <a href="#">XP_005894930.1</a> |
| <a href="#">selenoprotein P-like protein [Bos taurus]</a>                             | 82.1 | 82.1 | 100% | 5e-16 | 89% | <a href="#">2117379A</a>       |
| <a href="#">selenoprotein P like protein [Bos taurus]</a>                             | 82.1 | 82.1 | 100% | 5e-16 | 89% | <a href="#">BAA04949.2</a>     |
| <a href="#">selenoprotein P precursor [Bos taurus]</a>                                | 82.1 | 82.1 | 100% | 5e-16 | 89% | <a href="#">NP_776884.2</a>    |
| <a href="#">selenoprotein P [Bubalus bubalis]</a>                                     | 82.1 | 82.1 | 100% | 5e-16 | 89% | <a href="#">AFM77782.2</a>     |
| <a href="#">PREDICTED: LOW QUALITY PROTEIN: selenoprotein P [Sorex araneus]</a>       | 81.7 | 81.7 | 96%  | 7e-16 | 88% | <a href="#">XP_004605590.1</a> |
| <a href="#">PREDICTED: LOW QUALITY PROTEIN: selenoprotein P [Ictidomys tridecem</a>   | 81.2 | 81.2 | 100% | 1e-15 | 89% | <a href="#">XP_005325668.1</a> |
| <a href="#">PREDICTED: LOW QUALITY PROTEIN: selenoprotein P [Ceratotherium simi</a>   | 80.0 | 80.0 | 100% | 3e-15 | 89% | <a href="#">XP_004422836.1</a> |
| <a href="#">PREDICTED: LOW QUALITY PROTEIN: selenoprotein P [Galeopterus varieg</a>   | 79.5 | 79.5 | 100% | 4e-15 | 89% | <a href="#">XP_008564915.1</a> |
| <a href="#">PREDICTED: LOW QUALITY PROTEIN: selenoprotein P [Nannospalax galili]</a>  | 79.5 | 79.5 | 100% | 4e-15 | 85% | <a href="#">XP_008840327.1</a> |
| <a href="#">PREDICTED: LOW QUALITY PROTEIN: selenoprotein P [Bison bison bison]</a>   | 79.5 | 79.5 | 100% | 4e-15 | 85% | <a href="#">XP_010831114.1</a> |
| <a href="#">PREDICTED: LOW QUALITY PROTEIN: selenoprotein P [Dasypus novemcin</a>     | 79.5 | 79.5 | 96%  | 4e-15 | 88% | <a href="#">XP_004448278.1</a> |
| <a href="#">PREDICTED: LOW QUALITY PROTEIN: selenoprotein P [Trichechus manatu</a>    | 79.1 | 79.1 | 96%  | 5e-15 | 88% | <a href="#">XP_004388500.1</a> |
| <a href="#">selenoprotein P precursor [Callithrix jacchus]</a>                        | 79.1 | 79.1 | 96%  | 5e-15 | 88% | <a href="#">NP_001186857.1</a> |
| <a href="#">PREDICTED: LOW QUALITY PROTEIN: selenoprotein P [Myotis davidii]</a>      | 78.7 | 100  | 96%  | 8e-15 | 88% | <a href="#">XP_006774623.1</a> |
| <a href="#">PREDICTED: LOW QUALITY PROTEIN: selenoprotein P [Chinchilla lanigera]</a> | 78.7 | 78.7 | 96%  | 8e-15 | 88% | <a href="#">XP_005386312.1</a> |
| <a href="#">PREDICTED: LOW QUALITY PROTEIN: selenoprotein P [Condylura cristata]</a>  | 78.7 | 78.7 | 96%  | 8e-15 | 88% | <a href="#">XP_004678402.1</a> |
| <a href="#">PREDICTED: LOW QUALITY PROTEIN: selenoprotein P [Equus przewalskii]</a>   | 77.8 | 77.8 | 100% | 1e-14 | 85% | <a href="#">XP_008522793.1</a> |
| <a href="#">selenoprotein P precursor [Equus caballus]</a>                            | 77.8 | 77.8 | 100% | 1e-14 | 85% | <a href="#">NP_001129077.1</a> |
| <a href="#">Selenoprotein P [Heterocephalus glaber]</a>                               | 75.7 | 75.7 | 96%  | 7e-14 | 85% | <a href="#">EHA98867.1</a>     |
| <a href="#">PREDICTED: LOW QUALITY PROTEIN: selenoprotein P [Saimiri boliviensis]</a> | 75.7 | 75.7 | 96%  | 8e-14 | 85% | <a href="#">XP_003925940.2</a> |
| <a href="#">PREDICTED: LOW QUALITY PROTEIN: selenoprotein P [Heterocephalus glab</a>  | 75.7 | 75.7 | 96%  | 8e-14 | 85% | <a href="#">XP_004848622.1</a> |
| <a href="#">PREDICTED: LOW QUALITY PROTEIN: selenoprotein P [Heterocephalus glab</a>  | 75.7 | 75.7 | 96%  | 8e-14 | 85% | <a href="#">XP_004878213.1</a> |
| <a href="#">PREDICTED: LOW QUALITY PROTEIN: selenoprotein P [Leptonychotes wec</a>    | 75.3 | 75.3 | 100% | 1e-13 | 85% | <a href="#">XP_006747601.1</a> |
| <a href="#">PREDICTED: LOW QUALITY PROTEIN: selenoprotein P [Echinops telfairi]</a>   | 74.9 | 74.9 | 96%  | 2e-13 | 85% | <a href="#">XP_004716992.1</a> |
| <a href="#">PREDICTED: LOW QUALITY PROTEIN: selenoprotein P [Fukomys damaren</a>      | 74.4 | 74.4 | 96%  | 2e-13 | 85% | <a href="#">XP_010632183.1</a> |
| <a href="#">PREDICTED: LOW QUALITY PROTEIN: selenoprotein P [Ochotona princeps</a>    | 74.4 | 74.4 | 100% | 2e-13 | 85% | <a href="#">XP_004583736.1</a> |
| <a href="#">selenoprotein P precursor [Oryctolagus cuniculus]</a>                     | 73.6 | 73.6 | 100% | 4e-13 | 85% | <a href="#">NP_001186775.1</a> |
| <a href="#">selenoprotein P. plasma. 1 precursor [Xenopus laevis]</a>                 | 73.6 | 73.6 | 100% | 4e-13 | 81% | <a href="#">NP_001186825.1</a> |
| <a href="#">PREDICTED: LOW QUALITY PROTEIN: selenoprotein P [Odobenus rosmaru</a>     | 73.2 | 73.2 | 100% | 6e-13 | 81% | <a href="#">XP_004409206.1</a> |
| <a href="#">PREDICTED: LOW QUALITY PROTEIN: selenoprotein P [Erinaceus europae</a>    | 72.3 | 72.3 | 96%  | 1e-12 | 85% | <a href="#">XP_007517681.1</a> |

|                                                                                       |      |      |      |       |     |                                |
|---------------------------------------------------------------------------------------|------|------|------|-------|-----|--------------------------------|
| <a href="#">PREDICTED: LOW QUALITY PROTEIN: selenoprotein P [Peromyscus manic</a>     | 70.2 | 70.2 | 96%  | 6e-12 | 81% | <a href="#">XP_006997157.1</a> |
| <a href="#">PREDICTED: LOW QUALITY PROTEIN: selenoprotein P [Ornithorhynchus ar</a>   | 68.9 | 68.9 | 100% | 1e-11 | 78% | <a href="#">XP_007654576.1</a> |
| <a href="#">PREDICTED: LOW QUALITY PROTEIN: selenoprotein P [Jaculus jaculus]</a>     | 68.9 | 68.9 | 100% | 2e-11 | 81% | <a href="#">XP_004652550.1</a> |
| <a href="#">selenoprotein P, plasma, 1 precursor [Xenopus (Silurana) tropicalis]</a>  | 68.1 | 68.1 | 100% | 3e-11 | 81% | <a href="#">NP_001186813.1</a> |
| <a href="#">selenoprotein P, plasma, 1, isoform CRA_a [Mus musculus]</a>              | 67.7 | 67.7 | 96%  | 3e-11 | 81% | <a href="#">EDL03405.1</a>     |
| <a href="#">PREDICTED: selenoprotein P [Chelonia mydas]</a>                           | 67.7 | 67.7 | 100% | 3e-11 | 78% | <a href="#">XP_007052890.1</a> |
| <a href="#">Selenoprotein P, plasma, 1 [Mus musculus]</a>                             | 67.7 | 67.7 | 96%  | 4e-11 | 81% | <a href="#">AAH01991.2</a>     |
| <a href="#">plasma selenoprotein P [Mus musculus]</a>                                 | 67.7 | 67.7 | 96%  | 4e-11 | 81% | <a href="#">AAD01684.1</a>     |
| <a href="#">unnamed protein product [Mus musculus]</a>                                | 67.7 | 67.7 | 96%  | 4e-11 | 81% | <a href="#">BAE39664.1</a>     |
| <a href="#">unnamed protein product [Mus musculus]</a>                                | 67.7 | 67.7 | 96%  | 4e-11 | 81% | <a href="#">BAE34948.1</a>     |
| <a href="#">selenoprotein P precursor [Mus musculus]</a>                              | 67.7 | 67.7 | 96%  | 4e-11 | 81% | <a href="#">NP_033181.3</a>    |
| <a href="#">unnamed protein product [Mus musculus]</a>                                | 67.7 | 67.7 | 96%  | 4e-11 | 81% | <a href="#">BAC55264.3</a>     |
| <a href="#">selenoprotein P precursor [Rattus norvegicus]</a>                         | 67.7 | 67.7 | 96%  | 4e-11 | 77% | <a href="#">NP_062065.2</a>    |
| <a href="#">PREDICTED: LOW QUALITY PROTEIN: selenoprotein P [Chrysemys picta br</a>   | 67.7 | 67.7 | 100% | 4e-11 | 78% | <a href="#">XP_005282265.1</a> |
| <a href="#">PREDICTED: LOW QUALITY PROTEIN: selenoprotein P, plasma, 1 [Mesocri</a>   | 66.8 | 66.8 | 96%  | 5e-11 | 77% | <a href="#">XP_005139283.1</a> |
| <a href="#">PREDICTED: LOW QUALITY PROTEIN: selenoprotein P [Falco cherrug]</a>       | 67.2 | 67.2 | 96%  | 6e-11 | 81% | <a href="#">XP_005433806.1</a> |
| <a href="#">PREDICTED: LOW QUALITY PROTEIN: selenoprotein P [Falco peregrinus]</a>    | 67.2 | 67.2 | 96%  | 6e-11 | 81% | <a href="#">XP_005242025.1</a> |
| <a href="#">Selenoprotein P [Cricetulus griseus]</a>                                  | 66.8 | 66.8 | 96%  | 7e-11 | 77% | <a href="#">EGW04040.1</a>     |
| <a href="#">selenoprotein P precursor [Cricetulus griseus]</a>                        | 66.8 | 66.8 | 96%  | 8e-11 | 77% | <a href="#">ERE84145.1</a>     |
| <a href="#">selenoprotein P precursor [Cricetulus griseus]</a>                        | 66.8 | 66.8 | 96%  | 8e-11 | 77% | <a href="#">NP_001243807.1</a> |
| <a href="#">PREDICTED: LOW QUALITY PROTEIN: selenoprotein P [Mesitornis unicolor</a>  | 66.0 | 66.0 | 96%  | 2e-10 | 81% | <a href="#">XP_010190708.1</a> |
| <a href="#">PREDICTED: selenoprotein P [Sarcophilus harrisii]</a>                     | 65.5 | 65.5 | 100% | 2e-10 | 78% | <a href="#">XP_003759960.1</a> |
| <a href="#">PREDICTED: LOW QUALITY PROTEIN: selenoprotein P [Microtus ochrogast</a>   | 65.1 | 65.1 | 96%  | 3e-10 | 77% | <a href="#">XP_005369861.1</a> |
| <a href="#">PREDICTED: LOW QUALITY PROTEIN: selenoprotein P [Alligator mississipp</a> | 64.7 | 64.7 | 96%  | 4e-10 | 77% | <a href="#">XP_006268971.1</a> |
| <a href="#">PREDICTED: LOW QUALITY PROTEIN: selenoprotein P [Alligator sinensis]</a>  | 64.7 | 64.7 | 96%  | 4e-10 | 77% | <a href="#">XP_006026767.1</a> |

## Alignments

Download v [GenPept](#) [Graphics](#)

v Next ▲ Previous ▲ Descriptions

PREDICTED: LOW QUALITY PROTEIN: selenoprotein P [Tarsius syrichta]

Sequence ID: [ref|XP\\_008050904.1|](#) Length: 377 Number of Matches: 1

Range 1: 106 to 132 [GenPept](#) [Graphics](#)

v Next Match ▲ Previous Match

| Score          | Expect | Identities | Positives   | Gaps     |
|----------------|--------|------------|-------------|----------|
| 89.3 bits(203) | 2e-18  | 26/27(96%) | 27/27(100%) | 0/27(0%) |

```
Query 1 KVSEHIPVYQQEEDQTDVWTLNLSKD 27
KVSEHIPVYQQEE+QTDVWTLNLSKD
Sbjct 106 KVSEHIPVYQQEENQTDVWTLNLSKD 132
```

### Related Information

[Gene](#) - associated gene details  
[Map Viewer](#) - aligned genomic context

Download v [GenPept](#) [Graphics](#)

v Next ▲ Previous ▲ Descriptions

PREDICTED: LOW QUALITY PROTEIN: selenoprotein P [Rhinopithecus roxellana]

Sequence ID: [ref|XP\\_010372696.1|](#) Length: 381 Number of Matches: 1

Range 1: 106 to 132 [GenPept](#) [Graphics](#)

v Next Match ▲ Previous Match

| Score          | Expect | Identities | Positives   | Gaps     |
|----------------|--------|------------|-------------|----------|
| 89.3 bits(203) | 2e-18  | 26/27(96%) | 27/27(100%) | 0/27(0%) |

```
Query 1 KVSEHIPVYQQEEDQTDVWTLNLSKD 27
KVSEHIPVYQQEE+QTDVWTLNLSKD
Sbjct 106 KVSEHIPVYQQEENQTDVWTLNLSKD 132
```

### Related Information

[Gene](#) - associated gene details  
[Map Viewer](#) - aligned genomic context

[Download](#) [GenPept](#) [Graphics](#)

[Next](#) [Previous](#) [Descriptions](#)

**PREDICTED: LOW QUALITY PROTEIN: selenoprotein P [Papio anubis]**

Sequence ID: [ref|XP\\_009206607.1|](#) Length: 381 Number of Matches: 1

Range 1: 106 to 132 [GenPept](#) [Graphics](#)

[Next Match](#) [Previous Match](#)

| Score          | Expect | Identities | Positives   | Gaps     |
|----------------|--------|------------|-------------|----------|
| 89.3 bits(203) | 2e-18  | 26/27(96%) | 27/27(100%) | 0/27(0%) |

Query 1 KVSEHIPVYQQEEDQTDVWTLNLSKD 27  
 KVSEHIPVYQQEE+QTDVWTLNLSKD  
 Sbjct 106 KVSEHIPVYQQEENQTDVWTLNLSKD 132

**Related Information**

[Gene](#) - associated gene details  
[Map Viewer](#) - aligned genomic context

[Download](#) [GenPept](#) [Graphics](#)

[Next](#) [Previous](#) [Descriptions](#)

**PREDICTED: LOW QUALITY PROTEIN: selenoprotein P [Pan paniscus]**

Sequence ID: [ref|XP\\_008961588.1|](#) Length: 381 Number of Matches: 1

Range 1: 106 to 132 [GenPept](#) [Graphics](#)

[Next Match](#) [Previous Match](#)

| Score          | Expect | Identities | Positives   | Gaps     |
|----------------|--------|------------|-------------|----------|
| 89.3 bits(203) | 2e-18  | 26/27(96%) | 27/27(100%) | 0/27(0%) |

Query 1 KVSEHIPVYQQEEDQTDVWTLNLSKD 27  
 KVSEHIPVYQQEE+QTDVWTLNLSKD  
 Sbjct 106 KVSEHIPVYQQEENQTDVWTLNLSKD 132

**Related Information**

[Gene](#) - associated gene details  
[Map Viewer](#) - aligned genomic context

[Download](#) [GenPept](#) [Graphics](#)

[Next](#) [Previous](#) [Descriptions](#)

**PREDICTED: LOW QUALITY PROTEIN: selenoprotein P [Chlorocebus sabaeus]**

Sequence ID: [ref|XP\\_007959679.1|](#) Length: 381 Number of Matches: 1

Range 1: 106 to 132 [GenPept](#) [Graphics](#)

[Next Match](#) [Previous Match](#)

| Score          | Expect | Identities | Positives   | Gaps     |
|----------------|--------|------------|-------------|----------|
| 89.3 bits(203) | 2e-18  | 26/27(96%) | 27/27(100%) | 0/27(0%) |

Query 1 KVSEHIPVYQQEEDQTDVWTLNLSKD 27  
 KVSEHIPVYQQEE+QTDVWTLNLSKD  
 Sbjct 106 KVSEHIPVYQQEENQTDVWTLNLSKD 132

**Related Information**

[Gene](#) - associated gene details  
[Map Viewer](#) - aligned genomic context

BLAST is a registered trademark of the National Library of Medicine.

▶ NCBI/ BLAST/ blastp suite/ Formatting Results - BVKYM6E401R

[Edit and Resubmit](#) [Save Search Strategies](#) ▶ [Formatting options](#) ▶ [Download](#) [YouTube](#) [How to read this page](#) [Blast report description](#)

### SEPP1\_KVSEHIPVYQEEENQTDVWTLDDGSKDDFLIYDRC\_Mod

**RID** [BVKYM6E401R](#) (Expires on 01-21 10:47 am)

**Query ID** |cl|49313  
**Description** None  
**Molecule type** amino acid  
**Query Length** 35

**Database Name** nr  
**Description** All non-redundant GenBank CDS translations+PDB+SwissProt+PIR+PRF excluding environmental samples from WGS projects  
**Program** BLASTP 2.2.30+ ▶ [Citation](#)

Other reports: ▶ [Search Summary](#) [[Taxonomy reports](#)] [[Distance tree of results](#)] [[Multiple alignment](#)]

### Graphic Summary

Show Conserved Domains

Putative conserved domains have been detected, click on the image below for detailed results.

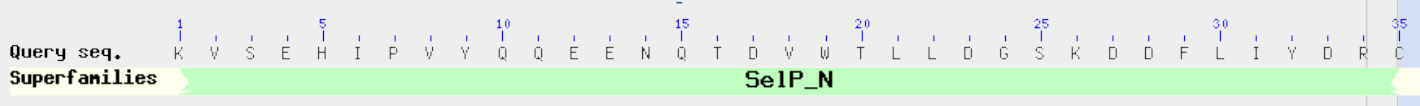

Distribution of 100 Blast Hits on the Query Sequence

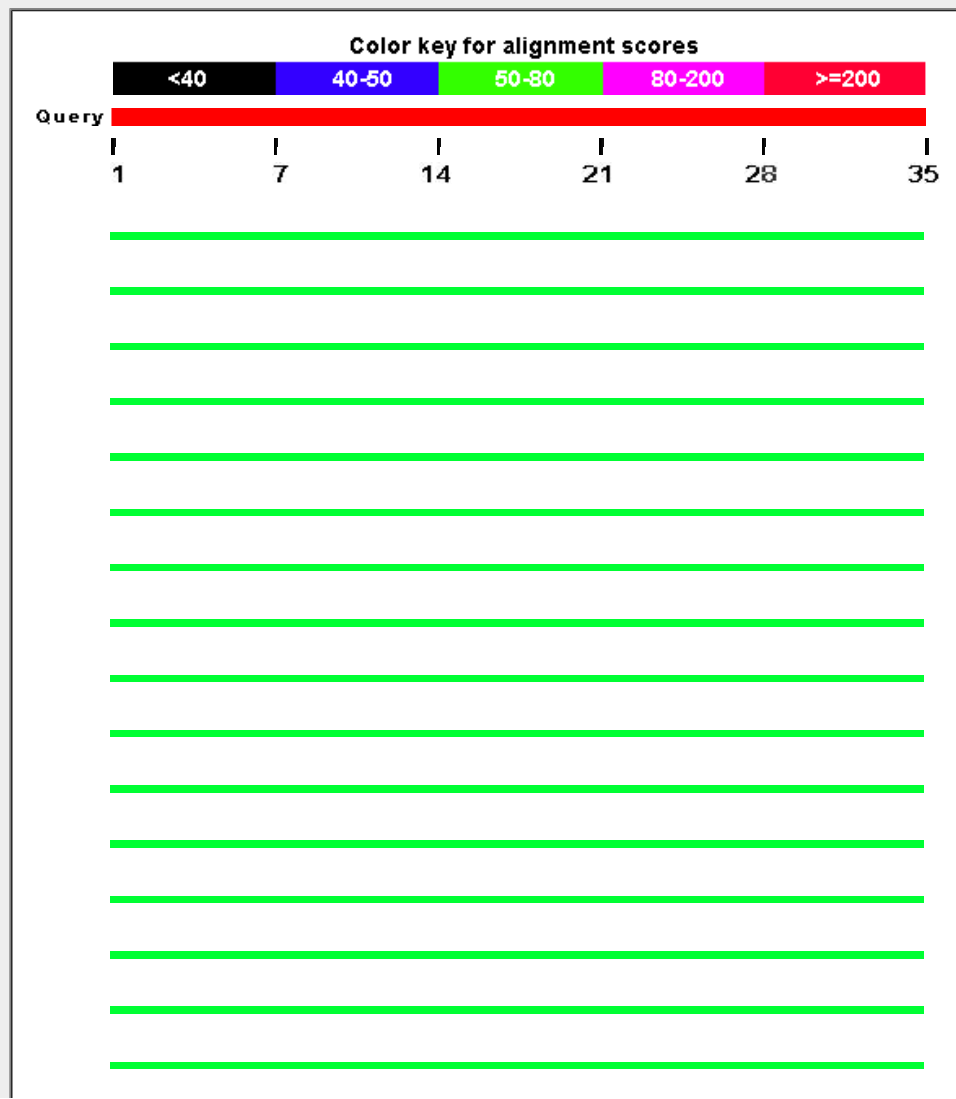

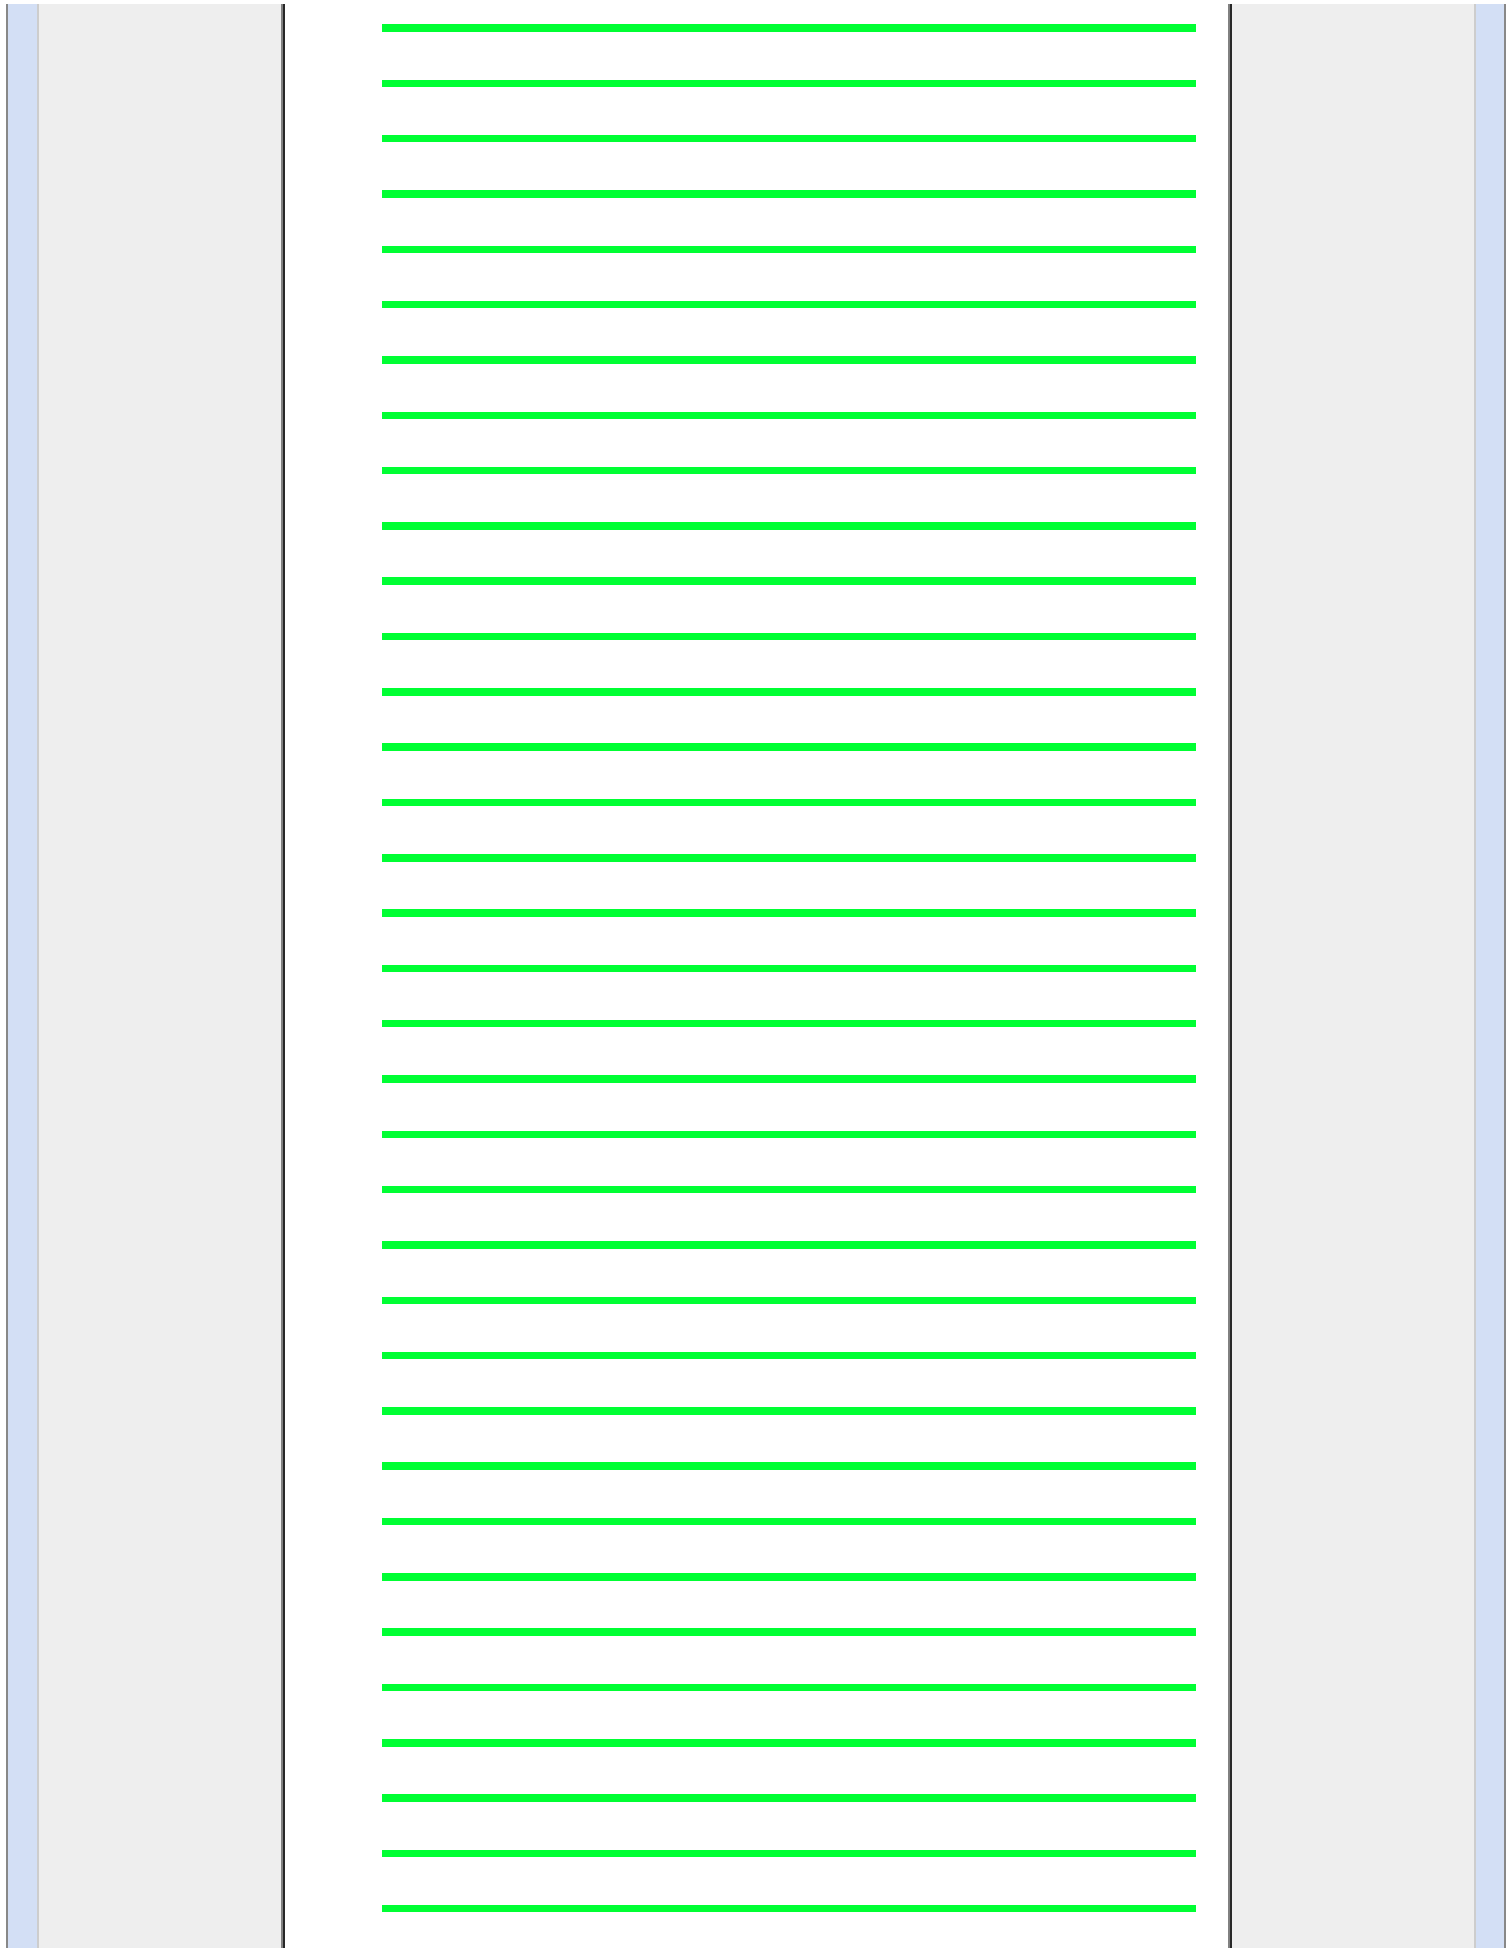

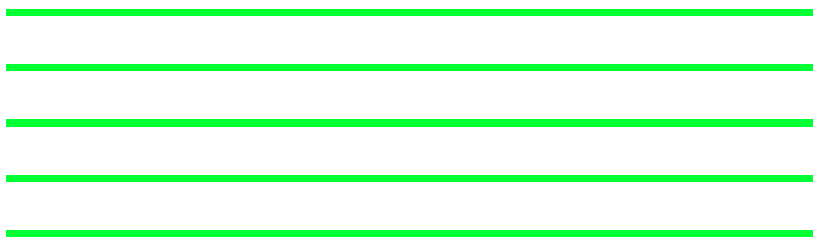

## Descriptions

### Sequences producing significant alignments:

Select: [All](#) [None](#) Selected:0

| <a href="#">Alignments</a> <a href="#">Download</a> <a href="#">GenPept</a> <a href="#">Graphics</a> <a href="#">Distance tree of results</a> <a href="#">Multiple alignment</a> |           |             |             |         |       |                                |  |
|----------------------------------------------------------------------------------------------------------------------------------------------------------------------------------|-----------|-------------|-------------|---------|-------|--------------------------------|--|
| Description                                                                                                                                                                      | Max score | Total score | Query cover | E value | Ident | Accession                      |  |
| <a href="#">PREDICTED: LOW QUALITY PROTEIN: selenoprotein P [Myotis lucifugus]</a>                                                                                               | 78.2      | 78.2        | 100%        | 6e-16   | 94%   | <a href="#">XP_006106371.1</a> |  |
| <a href="#">selenoprotein P isoform 2 [Homo sapiens]</a>                                                                                                                         | 78.6      | 78.6        | 100%        | 7e-16   | 97%   | <a href="#">NP_001087195.1</a> |  |
| <a href="#">PREDICTED: LOW QUALITY PROTEIN: selenoprotein P [Tarsius syrichta]</a>                                                                                               | 77.8      | 77.8        | 100%        | 8e-16   | 97%   | <a href="#">XP_008050904.1</a> |  |
| <a href="#">selenoprotein P isoform 1 precursor [Homo sapiens]</a>                                                                                                               | 77.4      | 77.4        | 100%        | 1e-15   | 97%   | <a href="#">NP_005401.3</a>    |  |
| <a href="#">selenoprotein P [Homo sapiens]</a>                                                                                                                                   | 77.4      | 77.4        | 100%        | 1e-15   | 97%   | <a href="#">CAA77836.2</a>     |  |
| <a href="#">selenoprotein P precursor [Pongo abelii]</a>                                                                                                                         | 77.4      | 77.4        | 100%        | 1e-15   | 97%   | <a href="#">NP_001127462.1</a> |  |
| <a href="#">Selenoprotein P, plasma, 1 [Homo sapiens]</a>                                                                                                                        | 77.4      | 77.4        | 100%        | 1e-15   | 97%   | <a href="#">AAH46152.1</a>     |  |
| <a href="#">Selenoprotein P, plasma, 1 [Homo sapiens]</a>                                                                                                                        | 77.4      | 77.4        | 100%        | 1e-15   | 97%   | <a href="#">AAH15875.1</a>     |  |
| <a href="#">Selenoprotein P, plasma, 1 [Homo sapiens]</a>                                                                                                                        | 77.4      | 77.4        | 100%        | 1e-15   | 97%   | <a href="#">AAH58919.1</a>     |  |
| <a href="#">PREDICTED: LOW QUALITY PROTEIN: selenoprotein P [Nomascus leucoge]</a>                                                                                               | 77.4      | 77.4        | 100%        | 1e-15   | 97%   | <a href="#">XP_003274442.1</a> |  |
| <a href="#">PREDICTED: LOW QUALITY PROTEIN: selenoprotein P [Pan paniscus]</a>                                                                                                   | 77.0      | 77.0        | 100%        | 2e-15   | 97%   | <a href="#">XP_008961588.1</a> |  |
| <a href="#">selenoprotein P precursor [Macaca mulatta]</a>                                                                                                                       | 77.0      | 77.0        | 100%        | 2e-15   | 97%   | <a href="#">NP_001152962.1</a> |  |
| <a href="#">selenoprotein P precursor [Pan troglodytes]</a>                                                                                                                      | 77.0      | 77.0        | 100%        | 2e-15   | 97%   | <a href="#">NP_001108587.1</a> |  |
| <a href="#">PREDICTED: LOW QUALITY PROTEIN: selenoprotein P [Mustela putorius fu]</a>                                                                                            | 76.6      | 76.6        | 100%        | 2e-15   | 94%   | <a href="#">XP_004738001.1</a> |  |
| <a href="#">PREDICTED: LOW QUALITY PROTEIN: selenoprotein P [Chlorocebus sabae]</a>                                                                                              | 76.6      | 76.6        | 100%        | 2e-15   | 97%   | <a href="#">XP_007959679.1</a> |  |
| <a href="#">PREDICTED: LOW QUALITY PROTEIN: selenoprotein P [Papio anubis]</a>                                                                                                   | 76.6      | 76.6        | 100%        | 2e-15   | 97%   | <a href="#">XP_009206607.1</a> |  |
| <a href="#">PREDICTED: LOW QUALITY PROTEIN: selenoprotein P [Eptesicus fuscus]</a>                                                                                               | 76.6      | 76.6        | 100%        | 2e-15   | 91%   | <a href="#">XP_008153843.1</a> |  |
| <a href="#">PREDICTED: LOW QUALITY PROTEIN: selenoprotein P [Rhinopithecus roxe]</a>                                                                                             | 76.6      | 76.6        | 100%        | 3e-15   | 97%   | <a href="#">XP_010372696.1</a> |  |
| <a href="#">PREDICTED: selenoprotein P-like [Ailuropoda melanoleuca]</a>                                                                                                         | 74.3      | 74.3        | 100%        | 3e-15   | 91%   | <a href="#">XP_002921760.1</a> |  |
| <a href="#">PREDICTED: LOW QUALITY PROTEIN: selenoprotein P [Ursus maritimus]</a>                                                                                                | 76.6      | 76.6        | 100%        | 3e-15   | 91%   | <a href="#">XP_008690806.1</a> |  |
| <a href="#">PREDICTED: LOW QUALITY PROTEIN: selenoprotein P [Myotis brandtii]</a>                                                                                                | 76.3      | 76.3        | 100%        | 3e-15   | 91%   | <a href="#">XP_005876061.1</a> |  |
| <a href="#">PREDICTED: LOW QUALITY PROTEIN: selenoprotein P [Balaenoptera acutr]</a>                                                                                             | 75.9      | 75.9        | 100%        | 4e-15   | 94%   | <a href="#">XP_007195596.1</a> |  |
| <a href="#">PREDICTED: LOW QUALITY PROTEIN: selenoprotein P [Orcinus orca]</a>                                                                                                   | 75.5      | 75.5        | 100%        | 6e-15   | 94%   | <a href="#">XP_004266005.1</a> |  |
| <a href="#">PREDICTED: LOW QUALITY PROTEIN: selenoprotein P [Elephantulus edwa]</a>                                                                                              | 75.5      | 75.5        | 100%        | 7e-15   | 94%   | <a href="#">XP_006889619.1</a> |  |
| <a href="#">PREDICTED: LOW QUALITY PROTEIN: selenoprotein P [Camelus dromedar]</a>                                                                                               | 75.5      | 75.5        | 100%        | 7e-15   | 94%   | <a href="#">XP_010999134.1</a> |  |
| <a href="#">selenoprotein P precursor [Sus scrofa]</a>                                                                                                                           | 75.5      | 75.5        | 100%        | 7e-15   | 94%   | <a href="#">NP_001128295.1</a> |  |
| <a href="#">PREDICTED: LOW QUALITY PROTEIN: selenoprotein P [Vicugna pacos]</a>                                                                                                  | 75.5      | 75.5        | 100%        | 7e-15   | 94%   | <a href="#">XP_006207756.1</a> |  |
| <a href="#">PREDICTED: LOW QUALITY PROTEIN: selenoprotein P [Camelus ferus]</a>                                                                                                  | 75.5      | 75.5        | 100%        | 7e-15   | 94%   | <a href="#">XP_006191986.1</a> |  |
| <a href="#">PREDICTED: LOW QUALITY PROTEIN: selenoprotein P [Tursiops truncatus]</a>                                                                                             | 75.5      | 75.5        | 100%        | 7e-15   | 94%   | <a href="#">XP_004320390.1</a> |  |
| <a href="#">PREDICTED: LOW QUALITY PROTEIN: selenoprotein P [Loxodonta africana]</a>                                                                                             | 75.5      | 75.5        | 100%        | 8e-15   | 94%   | <a href="#">XP_010586424.1</a> |  |



|                                                                                              |      |      |      |       |     |                                |
|----------------------------------------------------------------------------------------------|------|------|------|-------|-----|--------------------------------|
| <a href="#">PREDICTED: LOW QUALITY PROTEIN: selenoprotein P [Lipotes vexillifer]</a>         | 75.1 | 75.1 | 100% | 8e-15 | 94% | <a href="#">XP_007447694.1</a> |
| <a href="#">PREDICTED: LOW QUALITY PROTEIN: selenoprotein P [Physeter catodon]</a>           | 75.1 | 75.1 | 100% | 8e-15 | 94% | <a href="#">XP_007119423.1</a> |
| <a href="#">PREDICTED: selenoprotein P [Otolemur garnettii]</a>                              | 73.6 | 73.6 | 100% | 9e-15 | 91% | <a href="#">XP_003793045.1</a> |
| <a href="#">PREDICTED: LOW QUALITY PROTEIN: selenoprotein P [Tupaia chinensis]</a>           | 75.1 | 75.1 | 100% | 9e-15 | 94% | <a href="#">XP_006167023.1</a> |
| <a href="#">PREDICTED: LOW QUALITY PROTEIN: selenoprotein P [Chrysochloris asiatica]</a>     | 74.3 | 74.3 | 100% | 9e-15 | 91% | <a href="#">XP_006877364.1</a> |
| <a href="#">selenoprotein P precursor [Canis lupus familiaris]</a>                           | 74.7 | 74.7 | 100% | 1e-14 | 94% | <a href="#">NP_001108590.1</a> |
| <a href="#">PREDICTED: LOW QUALITY PROTEIN: selenoprotein P [Sorex araneus]</a>              | 74.3 | 74.3 | 100% | 2e-14 | 86% | <a href="#">XP_004605590.1</a> |
| <a href="#">PREDICTED: LOW QUALITY PROTEIN: selenoprotein P [Erinaceus europaeus]</a>        | 73.6 | 73.6 | 100% | 3e-14 | 89% | <a href="#">XP_007517681.1</a> |
| <a href="#">selenoprotein P-like protein [Bos taurus]</a>                                    | 73.9 | 73.9 | 100% | 3e-14 | 91% | <a href="#">2117379A</a>       |
| <a href="#">PREDICTED: LOW QUALITY PROTEIN: selenoprotein P [Bubalus bubalis]</a>            | 73.2 | 73.2 | 100% | 4e-14 | 91% | <a href="#">XP_006067130.1</a> |
| <a href="#">selenoprotein P [Bos taurus]</a>                                                 | 73.2 | 73.2 | 100% | 4e-14 | 91% | <a href="#">BAA84781.1</a>     |
| <a href="#">PREDICTED: LOW QUALITY PROTEIN: selenoprotein P [Bos mutus]</a>                  | 73.2 | 73.2 | 100% | 5e-14 | 91% | <a href="#">XP_005894930.1</a> |
| <a href="#">selenoprotein P precursor [Bos taurus]</a>                                       | 73.2 | 73.2 | 100% | 5e-14 | 91% | <a href="#">NP_776884.2</a>    |
| <a href="#">PREDICTED: LOW QUALITY PROTEIN: selenoprotein P [Myotis davidii]</a>             | 72.8 | 72.8 | 100% | 5e-14 | 89% | <a href="#">XP_006774623.1</a> |
| <a href="#">selenoprotein P like protein [Bos taurus]</a>                                    | 73.2 | 73.2 | 100% | 5e-14 | 91% | <a href="#">BAA04949.2</a>     |
| <a href="#">PREDICTED: LOW QUALITY PROTEIN: selenoprotein P [Panthera tigris alta]</a>       | 73.2 | 73.2 | 100% | 5e-14 | 89% | <a href="#">XP_007095490.1</a> |
| <a href="#">selenoprotein P [Bubalus bubalis]</a>                                            | 73.2 | 73.2 | 100% | 6e-14 | 91% | <a href="#">AFM77782.2</a>     |
| <a href="#">PREDICTED: LOW QUALITY PROTEIN: selenoprotein P [Orycteropus afer]</a>           | 72.0 | 72.0 | 100% | 7e-14 | 94% | <a href="#">XP_007952213.1</a> |
| <a href="#">PREDICTED: LOW QUALITY PROTEIN: selenoprotein P [Dasypus novemcinctus]</a>       | 72.8 | 72.8 | 100% | 8e-14 | 89% | <a href="#">XP_004448278.1</a> |
| <a href="#">PREDICTED: LOW QUALITY PROTEIN: selenoprotein P [Felis catus]</a>                | 70.9 | 70.9 | 100% | 8e-14 | 86% | <a href="#">XP_006928143.1</a> |
| <a href="#">PREDICTED: LOW QUALITY PROTEIN: selenoprotein P [Ictidomys tridecemlineatus]</a> | 72.4 | 72.4 | 100% | 8e-14 | 91% | <a href="#">XP_005325668.1</a> |
| <a href="#">PREDICTED: LOW QUALITY PROTEIN: selenoprotein P [Leptonychotes weddellii]</a>    | 72.0 | 72.0 | 100% | 1e-13 | 89% | <a href="#">XP_006747601.1</a> |
| <a href="#">PREDICTED: LOW QUALITY PROTEIN: selenoprotein P [Galeopterus variegatus]</a>     | 72.0 | 72.0 | 100% | 1e-13 | 89% | <a href="#">XP_008564915.1</a> |
| <a href="#">PREDICTED: LOW QUALITY PROTEIN: selenoprotein P [Echinops telfairii]</a>         | 72.0 | 72.0 | 100% | 1e-13 | 91% | <a href="#">XP_004716992.1</a> |
| <a href="#">selenoprotein P precursor [Callithrix jacchus]</a>                               | 72.0 | 72.0 | 100% | 1e-13 | 89% | <a href="#">NP_001186857.1</a> |
| <a href="#">PREDICTED: LOW QUALITY PROTEIN: selenoprotein P [Bison bison]</a>                | 71.6 | 71.6 | 100% | 2e-13 | 89% | <a href="#">XP_010831114.1</a> |
| <a href="#">PREDICTED: LOW QUALITY PROTEIN: selenoprotein P [Condylura cristata]</a>         | 71.6 | 71.6 | 100% | 2e-13 | 89% | <a href="#">XP_004678402.1</a> |
| <a href="#">PREDICTED: LOW QUALITY PROTEIN: selenoprotein P [Trichechus manatus]</a>         | 71.6 | 71.6 | 100% | 2e-13 | 89% | <a href="#">XP_004388500.1</a> |
| <a href="#">PREDICTED: LOW QUALITY PROTEIN: selenoprotein P [Ceratottherium simum]</a>       | 71.2 | 71.2 | 100% | 3e-13 | 89% | <a href="#">XP_004422836.1</a> |
| <a href="#">PREDICTED: LOW QUALITY PROTEIN: selenoprotein P [Nannospalax galii]</a>          | 70.9 | 70.9 | 100% | 3e-13 | 86% | <a href="#">XP_008840327.1</a> |
| <a href="#">PREDICTED: LOW QUALITY PROTEIN: selenoprotein P [Ochotona princeps]</a>          | 70.9 | 70.9 | 100% | 3e-13 | 89% | <a href="#">XP_004583736.1</a> |
| <a href="#">PREDICTED: LOW QUALITY PROTEIN: selenoprotein P [Ovis aries]</a>                 | 70.9 | 70.9 | 100% | 3e-13 | 89% | <a href="#">XP_004017062.1</a> |
| <a href="#">selenoprotein P precursor [Oryctolagus cuniculus]</a>                            | 70.9 | 70.9 | 100% | 4e-13 | 91% | <a href="#">NP_001186775.1</a> |
| <a href="#">PREDICTED: LOW QUALITY PROTEIN: selenoprotein P [Heterocephalus glaber]</a>      | 70.5 | 70.5 | 100% | 4e-13 | 83% | <a href="#">XP_004848622.1</a> |
| <a href="#">PREDICTED: LOW QUALITY PROTEIN: selenoprotein P [Heterocephalus glaber]</a>      | 70.5 | 70.5 | 100% | 4e-13 | 83% | <a href="#">XP_004878213.1</a> |
| <a href="#">selenoprotein P precursor [Equus caballus]</a>                                   | 70.5 | 70.5 | 100% | 5e-13 | 89% | <a href="#">NP_001129077.1</a> |
| <a href="#">PREDICTED: LOW QUALITY PROTEIN: selenoprotein P [Saimiri boliviensis]</a>        | 70.5 | 70.5 | 100% | 5e-13 | 86% | <a href="#">XP_003925940.2</a> |
| <a href="#">PREDICTED: LOW QUALITY PROTEIN: selenoprotein P [Equus przewalskii]</a>          | 70.5 | 70.5 | 100% | 5e-13 | 89% | <a href="#">XP_008522793.1</a> |
| <a href="#">Selenoprotein P [Heterocephalus glaber]</a>                                      | 68.6 | 68.6 | 100% | 5e-13 | 83% | <a href="#">EHA98867.1</a>     |
| <a href="#">membrane selenoprotein P [Capra hircus]</a>                                      | 68.2 | 68.2 | 100% | 6e-13 | 86% | <a href="#">AAF67201.1</a>     |
| <a href="#">PREDICTED: LOW QUALITY PROTEIN: selenoprotein P [Ornithorhynchus anatinus]</a>   | 68.6 | 68.6 | 100% | 9e-13 | 83% | <a href="#">XP_007654576.1</a> |
| <a href="#">selenoprotein P, plasma, 1 precursor [Capra hircus]</a>                          | 69.3 | 69.3 | 100% | 1e-12 | 86% | <a href="#">NP_001272511.1</a> |
| <a href="#">PREDICTED: LOW QUALITY PROTEIN: selenoprotein P [Odobenus rosmarus]</a>          | 68.9 | 68.9 | 100% | 2e-12 | 86% | <a href="#">XP_004409206.1</a> |
| <a href="#">PREDICTED: LOW QUALITY PROTEIN: selenoprotein P [Fukomys damarensis]</a>         | 68.9 | 68.9 | 100% | 2e-12 | 83% | <a href="#">XP_010632183.1</a> |
| <a href="#">PREDICTED: LOW QUALITY PROTEIN: selenoprotein P [Chinchilla lanigera]</a>        | 68.6 | 68.6 | 100% | 2e-12 | 83% | <a href="#">XP_005386312.1</a> |
| <a href="#">PREDICTED: LOW QUALITY PROTEIN: selenoprotein P [Peromyscus maniculatus]</a>     | 68.6 | 68.6 | 100% | 2e-12 | 80% | <a href="#">XP_006997157.1</a> |

|                                                                                      |      |      |      |       |     |                                |
|--------------------------------------------------------------------------------------|------|------|------|-------|-----|--------------------------------|
| <a href="#">selenoprotein P, plasma, 1 precursor [Xenopus laevis]</a>                | 68.2 | 68.2 | 100% | 3e-12 | 86% | <a href="#">NP_001186825.1</a> |
| <b>PREDICTED: LOW QUALITY PROTEIN: selenoprotein P [Jaculus jaculus]</b>             | 67.8 | 67.8 | 100% | 4e-12 | 83% | <a href="#">XP_004652550.1</a> |
| <a href="#">selenoprotein P precursor [Rattus norvegicus]</a>                        | 66.6 | 66.6 | 100% | 1e-11 | 77% | <a href="#">NP_062065.2</a>    |
| <b>PREDICTED: selenoprotein P [Chelonia mydas]</b>                                   | 64.3 | 64.3 | 100% | 2e-11 | 83% | <a href="#">XP_007052890.1</a> |
| <a href="#">Selenoprotein P [Cricetulus griseus]</a>                                 | 63.5 | 63.5 | 97%  | 3e-11 | 79% | <a href="#">EGW04040.1</a>     |
| <b>PREDICTED: selenoprotein P [Sarcophilus harrisi]</b>                              | 63.5 | 63.5 | 100% | 4e-11 | 83% | <a href="#">XP_003759960.1</a> |
| <a href="#">selenoprotein P, plasma, 1 precursor [Xenopus (Silurana) tropicalis]</a> | 65.1 | 65.1 | 100% | 5e-11 | 80% | <a href="#">NP_001186813.1</a> |
| <b>PREDICTED: LOW QUALITY PROTEIN: selenoprotein P [Chrysemys picta b]</b>           | 64.7 | 64.7 | 100% | 6e-11 | 83% | <a href="#">XP_005282265.1</a> |
| <b>PREDICTED: LOW QUALITY PROTEIN: selenoprotein P [Microtus ochrogast</b>           | 64.3 | 64.3 | 100% | 7e-11 | 77% | <a href="#">XP_005369861.1</a> |
| <b>PREDICTED: LOW QUALITY PROTEIN: selenoprotein P [Alligator sinensis]</b>          | 64.3 | 64.3 | 100% | 8e-11 | 80% | <a href="#">XP_006026767.1</a> |
| <a href="#">unnamed protein product [Mus musculus]</a>                               | 63.9 | 63.9 | 100% | 9e-11 | 77% | <a href="#">BAC55264.3</a>     |
| <a href="#">unnamed protein product [Mus musculus]</a>                               | 63.9 | 63.9 | 100% | 1e-10 | 77% | <a href="#">BAE34948.1</a>     |
| <a href="#">selenoprotein P precursor [Mus musculus]</a>                             | 63.9 | 63.9 | 100% | 1e-10 | 77% | <a href="#">NP_033181.3</a>    |
| <a href="#">unnamed protein product [Mus musculus]</a>                               | 63.9 | 63.9 | 100% | 1e-10 | 77% | <a href="#">BAE39664.1</a>     |
| <a href="#">Selenoprotein P, plasma, 1 [Mus musculus]</a>                            | 63.9 | 63.9 | 100% | 1e-10 | 77% | <a href="#">AAH01991.2</a>     |
| <a href="#">selenoprotein P, plasma, 1, isoform CRA_a [Mus musculus]</a>             | 62.0 | 62.0 | 100% | 1e-10 | 77% | <a href="#">EDL03405.1</a>     |
| <a href="#">plasma selenoprotein P [Mus musculus]</a>                                | 63.9 | 63.9 | 100% | 1e-10 | 77% | <a href="#">AAD01684.1</a>     |
| <a href="#">selenoprotein P precursor [Cricetulus griseus]</a>                       | 63.9 | 63.9 | 97%  | 1e-10 | 79% | <a href="#">NP_001243807.1</a> |
| <b>PREDICTED: LOW QUALITY PROTEIN: selenoprotein P [Alligator mississipp</b>         | 63.5 | 63.5 | 100% | 1e-10 | 80% | <a href="#">XP_006268971.1</a> |
| <b>PREDICTED: LOW QUALITY PROTEIN: selenoprotein P-like [Anolis caroline</b>         | 62.0 | 62.0 | 100% | 2e-10 | 74% | <a href="#">XP_003216248.2</a> |
| <a href="#">selenoprotein P precursor [Cricetulus griseus]</a>                       | 62.0 | 62.0 | 97%  | 2e-10 | 79% | <a href="#">ERE84145.1</a>     |
| <b>PREDICTED: LOW QUALITY PROTEIN: selenoprotein P [Falco cherrug]</b>               | 62.8 | 62.8 | 97%  | 3e-10 | 82% | <a href="#">XP_005433806.1</a> |
| <b>PREDICTED: LOW QUALITY PROTEIN: selenoprotein P [Falco peregrinus]</b>            | 62.8 | 62.8 | 97%  | 3e-10 | 82% | <a href="#">XP_005242025.1</a> |
| <b>PREDICTED: LOW QUALITY PROTEIN: selenoprotein P [Mesitornis unicolor</b>          | 62.8 | 62.8 | 97%  | 3e-10 | 82% | <a href="#">XP_010190708.1</a> |

## Alignments

Download [GenPept](#) [Graphics](#)

[Next](#) [Previous](#) [Descriptions](#)

**PREDICTED: LOW QUALITY PROTEIN: selenoprotein P [Myotis lucifugus]**

Sequence ID: [ref|XP\\_006106371.1|](#) Length: 375 Number of Matches: 1

Range 1: 103 to 137 [GenPept](#) [Graphics](#)

[Next Match](#) [Previous Match](#)

| Score          | Expect | Method                   | Identities | Positives   | Gaps     |
|----------------|--------|--------------------------|------------|-------------|----------|
| 78.2 bits(191) | 6e-16  | Composition-based stats. | 33/35(94%) | 35/35(100%) | 0/35(0%) |

|       |     |                                     |     |
|-------|-----|-------------------------------------|-----|
| Query | 1   | KVSEHIPVYQEEENQTDVWTLDDGSKDDFLIYDRC | 35  |
|       |     | KVSEHIPVYQEEENQTDVWTLG+KDDFLIYDRC   |     |
| Sbjct | 103 | KVSEHIPVYQEEENQTDVWTLNNGKDDFLIYDRC  | 137 |

### Related Information

[Gene](#) - associated gene details

Download [GenPept](#) [Graphics](#)

[Next](#) [Previous](#) [Descriptions](#)

**selenoprotein P isoform 2 [Homo sapiens]**

Sequence ID: [ref|NP\\_001087195.1|](#) Length: 411 Number of Matches: 1

Range 1: 136 to 170 [GenPept](#) [Graphics](#)

[Next Match](#) [Previous Match](#)

| Score          | Expect | Method                   | Identities | Positives   | Gaps     |
|----------------|--------|--------------------------|------------|-------------|----------|
| 78.6 bits(192) | 7e-16  | Composition-based stats. | 34/35(97%) | 35/35(100%) | 0/35(0%) |

|       |     |                                     |     |
|-------|-----|-------------------------------------|-----|
| Query | 1   | KVSEHIPVYQEEENQTDVWTLDDGSKDDFLIYDRC | 35  |
|       |     | KVSEHIPVYQEEENQTDVWTLG+GSKDDFLIYDRC |     |
| Sbjct | 136 | KVSEHIPVYQEEENQTDVWTLNNGKDDFLIYDRC  | 170 |

### Related Information

[Gene](#) - associated gene details

[Map Viewer](#) - aligned genomic context

Download [GenPept](#) [Graphics](#)

[Next](#) [Previous](#) [Descriptions](#)

**PREDICTED: LOW QUALITY PROTEIN: selenoprotein P [Tarsius syrichta]**

Sequence ID: [ref|XP\\_008050904.1|](#) Length: 377 Number of Matches: 1

Range 1: 106 to 140 [GenPept](#) [Graphics](#)

[▼ Next Match](#) [▲ Previous Match](#)

| Score          | Expect | Method                   | Identities | Positives   | Gaps     |
|----------------|--------|--------------------------|------------|-------------|----------|
| 77.8 bits(190) | 8e-16  | Composition-based stats. | 34/35(97%) | 35/35(100%) | 0/35(0%) |

Query 1 KVSEHIPVYQQEENQTDVWTLDDGSKDDFLIYDRC 35  
 KVSEHIPVYQQEENQTDVWTL+GSKDDFLIYDRC  
 Sbjct 106 KVSEHIPVYQQEENQTDVWTLNNGSKDDFLIYDRC 140

**Related Information**

[Gene](#) - associated gene details  
[Map Viewer](#) - aligned genomic context

[Download](#) [▼ GenPept](#) [Graphics](#)

[▼ Next](#) [▲ Previous](#) [▲ Descriptions](#)

**selenoprotein P isoform 1 precursor [Homo sapiens]**

Sequence ID: [ref|NP\\_005401.3|](#) Length: 381 Number of Matches: 1

[▶ See 4 more title\(s\)](#)

Range 1: 106 to 140 [GenPept](#) [Graphics](#)

[▼ Next Match](#) [▲ Previous Match](#)

| Score          | Expect | Method                   | Identities | Positives   | Gaps     |
|----------------|--------|--------------------------|------------|-------------|----------|
| 77.4 bits(189) | 1e-15  | Composition-based stats. | 34/35(97%) | 35/35(100%) | 0/35(0%) |

Query 1 KVSEHIPVYQQEENQTDVWTLDDGSKDDFLIYDRC 35  
 KVSEHIPVYQQEENQTDVWTL+GSKDDFLIYDRC  
 Sbjct 106 KVSEHIPVYQQEENQTDVWTLNNGSKDDFLIYDRC 140

**Related Information**

[Gene](#) - associated gene details  
[UniGene](#) - clustered expressed sequence tags  
[Map Viewer](#) - aligned genomic context  
[Identical Proteins](#) - Proteins identical to the subject

[Download](#) [▼ GenPept](#) [Graphics](#)

[▼ Next](#) [▲ Previous](#) [▲ Descriptions](#)

**selenoprotein P [Homo sapiens]**

Sequence ID: [emb|CAA77836.2|](#) Length: 381 Number of Matches: 1

Range 1: 106 to 140 [GenPept](#) [Graphics](#)

[▼ Next Match](#) [▲ Previous Match](#)

| Score          | Expect | Method                   | Identities | Positives   | Gaps     |
|----------------|--------|--------------------------|------------|-------------|----------|
| 77.4 bits(189) | 1e-15  | Composition-based stats. | 34/35(97%) | 35/35(100%) | 0/35(0%) |

Query 1 KVSEHIPVYQQEENQTDVWTLDDGSKDDFLIYDRC 35  
 KVSEHIPVYQQEENQTDVWTL+GSKDDFLIYDRC  
 Sbjct 106 KVSEHIPVYQQEENQTDVWTLNNGSKDDFLIYDRC 140

**Related Information**

[Gene](#) - associated gene details

BLAST is a registered trademark of the National Library of Medicine.

NCBI/ BLAST/ blastp suite/ Formatting Results - BE8HJVGN015

**Your search parameters were adjusted to search for a short input sequence.**

[Edit and Resubmit](#) [Save Search Strategies](#) [Formatting options](#) [Download](#) [YouTube](#) [How to read this page](#) [Blast report description](#)

### SEPP1\_KVSEHIPVYQQEENQTDVWTLNLSKD\_NonMod

**RID** [BE8HJVGN015](#) (Expires on 01-16 09:13 am)

|                                 |                                                                                                                                   |
|---------------------------------|-----------------------------------------------------------------------------------------------------------------------------------|
| <b>Query ID</b>  cl 56300       | <b>Database Name</b> nr                                                                                                           |
| <b>Description</b> None         | <b>Description</b> All non-redundant GenBank CDS translations+PDB+SwissProt+PIR excluding environmental samples from WGS projects |
| <b>Molecule type</b> amino acid | <b>Program</b> BLASTP 2.2.30+ <a href="#">Citation</a>                                                                            |
| <b>Query Length</b> 27          |                                                                                                                                   |

Other reports: [Search Summary](#) [\[Taxonomy reports\]](#) [\[Distance tree of results\]](#) [\[Multiple alignment\]](#)

[New](#) DELTA-BLAST a more sensitive protein-protein search

### Graphic Summary

Show Conserved Domains

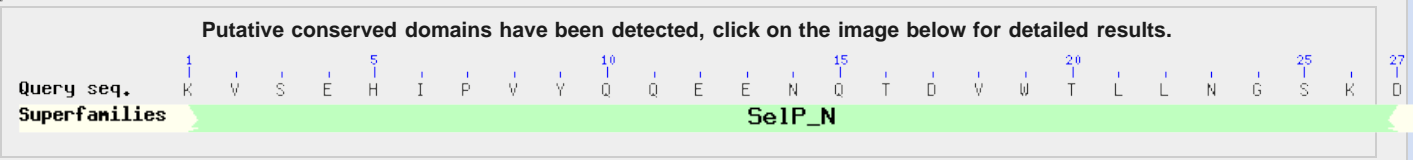

Distribution of 101 Blast Hits on the Query Sequence

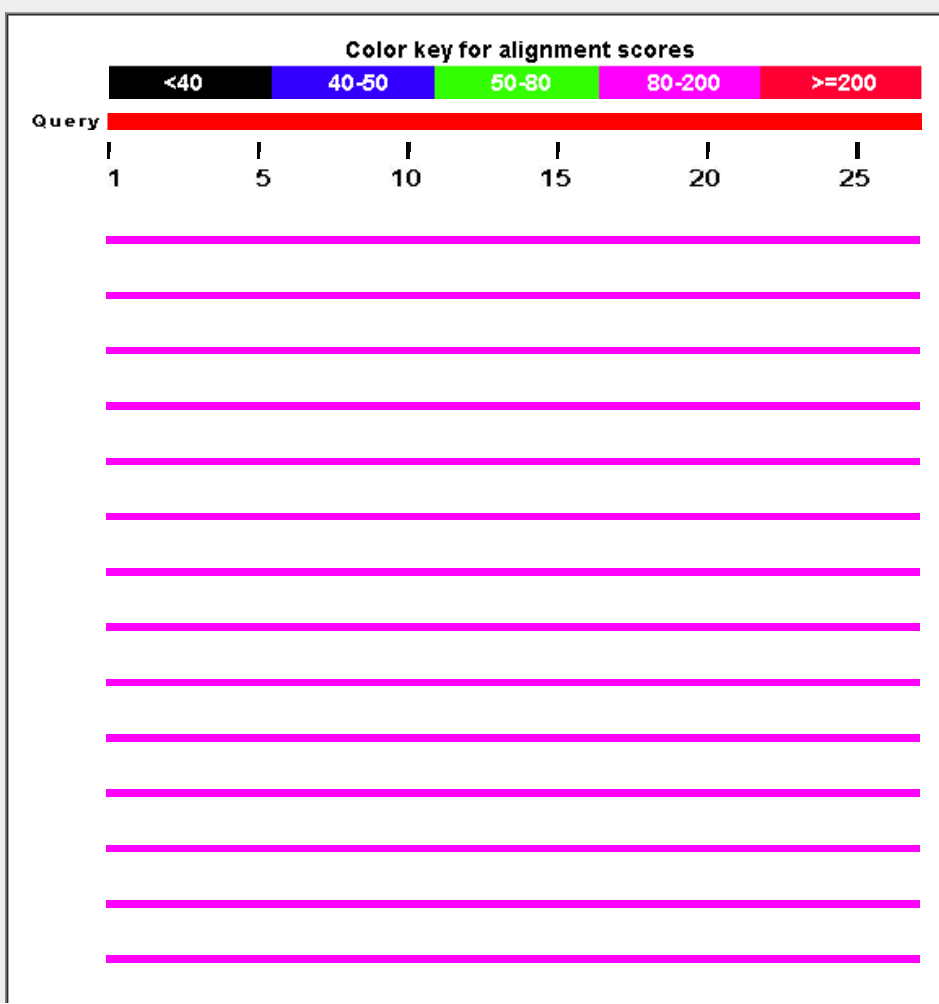

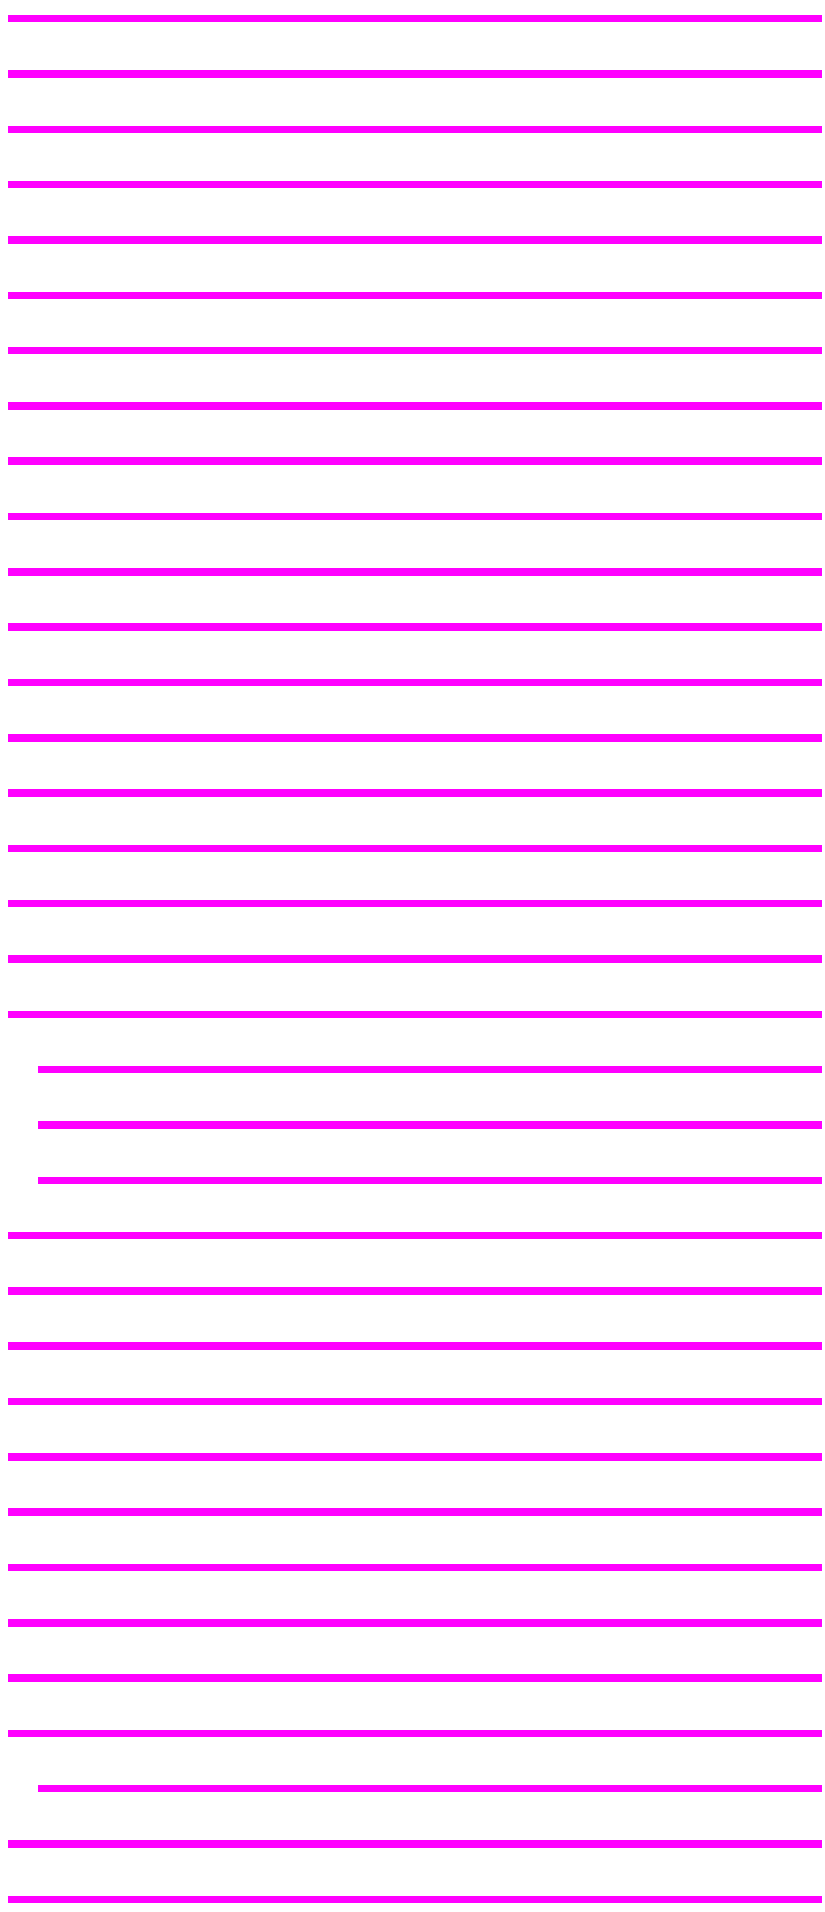

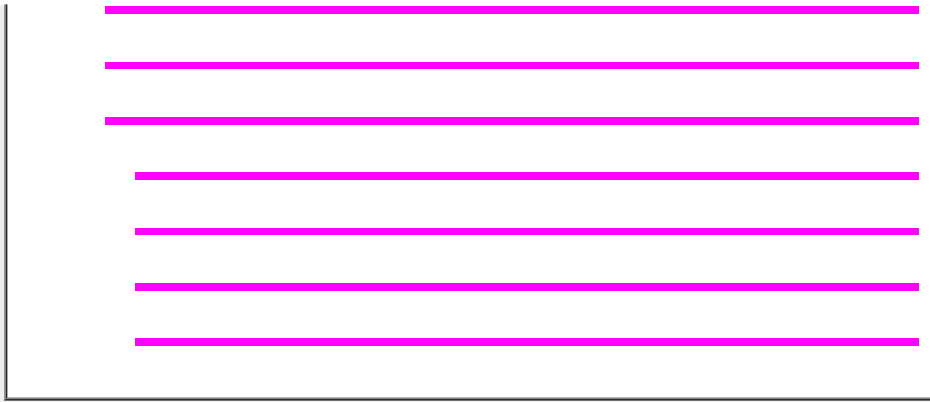

**Descriptions**

**Sequences producing significant alignments:**

Select: [All](#) [None](#) Selected:0

Alignments [Download](#) [GenPept](#) [Graphics](#) [Distance tree of results](#) [Multiple alignment](#)

| Description                                                                 | Max score | Total score | Query cover | E value | Ident | Accession                                   |
|-----------------------------------------------------------------------------|-----------|-------------|-------------|---------|-------|---------------------------------------------|
| <a href="#">PREDICTED: LOW QUALITY PROTEIN: selenoprotein P [Tarsius s</a>  | 91.8      | 91.8        | 100%        | 2e-19   | 100%  | <a href="#">gi 640790108 XP_008050904.1</a> |
| <a href="#">PREDICTED: LOW QUALITY PROTEIN: selenoprotein P [Rhinopitil</a> | 91.8      | 91.8        | 100%        | 2e-19   | 100%  | <a href="#">gi 724878613 XP_010372696.1</a> |
| <a href="#">PREDICTED: LOW QUALITY PROTEIN: selenoprotein P [Papio ar</a>   | 91.8      | 91.8        | 100%        | 2e-19   | 100%  | <a href="#">gi 685545348 XP_009206607.1</a> |
| <a href="#">PREDICTED: LOW QUALITY PROTEIN: selenoprotein P [Pan pani</a>   | 91.8      | 91.8        | 100%        | 2e-19   | 100%  | <a href="#">gi 675710689 XP_008961588.1</a> |
| <a href="#">PREDICTED: LOW QUALITY PROTEIN: selenoprotein P [Chloroce</a>   | 91.8      | 91.8        | 100%        | 2e-19   | 100%  | <a href="#">gi 635028004 XP_007959679.1</a> |
| <a href="#">Selenoprotein P, plasma, 1 [Homo sapiens]</a>                   | 91.8      | 91.8        | 100%        | 2e-19   | 100%  | <a href="#">gi 34783648 AAH46152.1</a>      |
| <a href="#">Selenoprotein P, plasma, 1 [Homo sapiens]</a>                   | 91.8      | 91.8        | 100%        | 2e-19   | 100%  | <a href="#">gi 34783164 AAH15875.1</a>      |
| <a href="#">selenoprotein P isoform 1 precursor [Homo sapiens]</a>          | 91.8      | 91.8        | 100%        | 2e-19   | 100%  | <a href="#">gi 62530391 NP_005401.3</a>     |
| <a href="#">Selenoprotein P, plasma, 1 [Homo sapiens]</a>                   | 91.8      | 91.8        | 100%        | 2e-19   | 100%  | <a href="#">gi 37596694 AAH58919.1</a>      |
| <a href="#">selenoprotein P precursor [Pongo abelii]</a>                    | 91.8      | 91.8        | 100%        | 2e-19   | 100%  | <a href="#">gi 197101233 NP_001127462.1</a> |
| <a href="#">PREDICTED: LOW QUALITY PROTEIN: selenoprotein P [Nomasci</a>    | 91.8      | 91.8        | 100%        | 2e-19   | 100%  | <a href="#">gi 332250603 XP_003274442.1</a> |
| <a href="#">selenoprotein P [Homo sapiens]</a>                              | 91.8      | 91.8        | 100%        | 2e-19   | 100%  | <a href="#">gi 312004116 CAA77836.2</a>     |
| <a href="#">selenoprotein P precursor [Macaca mulatta]</a>                  | 91.8      | 91.8        | 100%        | 2e-19   | 100%  | <a href="#">gi 226958322 NP_001152962.1</a> |
| <a href="#">selenoprotein P precursor [Pan troglodytes]</a>                 | 91.8      | 91.8        | 100%        | 2e-19   | 100%  | <a href="#">gi 169403955 NP_001108587.1</a> |
| <a href="#">selenoprotein P isoform 2 [Homo sapiens]</a>                    | 91.8      | 91.8        | 100%        | 2e-19   | 100%  | <a href="#">gi 148277022 NP_001087195.1</a> |
| <a href="#">PREDICTED: LOW QUALITY PROTEIN: selenoprotein P [Chrysoci</a>   | 89.3      | 89.3        | 100%        | 2e-18   | 96%   | <a href="#">gi 586493836 XP_006877364.1</a> |
| <a href="#">PREDICTED: LOW QUALITY PROTEIN: selenoprotein P [Tupaia c</a>   | 89.3      | 89.3        | 100%        | 2e-18   | 96%   | <a href="#">gi 562878609 XP_006167023.1</a> |
| <a href="#">PREDICTED: LOW QUALITY PROTEIN: selenoprotein P [Balaeno]</a>   | 89.3      | 89.3        | 100%        | 2e-18   | 96%   | <a href="#">gi 594696840 XP_007195596.1</a> |
| <a href="#">PREDICTED: LOW QUALITY PROTEIN: selenoprotein P [Myotis l</a>   | 89.3      | 89.3        | 100%        | 2e-18   | 96%   | <a href="#">gi 558205011 XP_006106371.1</a> |
| <a href="#">PREDICTED: LOW QUALITY PROTEIN: selenoprotein P [Orcinus ]</a>  | 89.3      | 89.3        | 100%        | 2e-18   | 96%   | <a href="#">gi 465986750 XP_004266005.1</a> |
| <a href="#">PREDICTED: LOW QUALITY PROTEIN: selenoprotein P [Camelus</a>    | 89.3      | 89.3        | 100%        | 2e-18   | 96%   | <a href="#">gi 744538058 XP_010999134.1</a> |
| <a href="#">PREDICTED: LOW QUALITY PROTEIN: selenoprotein P [Loxodon</a>    | 89.3      | 89.3        | 100%        | 2e-18   | 96%   | <a href="#">gi 731464182 XP_010586424.1</a> |
| <a href="#">PREDICTED: LOW QUALITY PROTEIN: selenoprotein P [Elephan]</a>   | 89.3      | 89.3        | 100%        | 2e-18   | 96%   | <a href="#">gi 585672710 XP_006889619.1</a> |
| <a href="#">PREDICTED: LOW QUALITY PROTEIN: selenoprotein P [Tursiops</a>   | 89.3      | 89.3        | 100%        | 2e-18   | 96%   | <a href="#">gi 470626535 XP_004320390.1</a> |
| <a href="#">PREDICTED: LOW QUALITY PROTEIN: selenoprotein P [Camelus</a>    | 89.3      | 89.3        | 100%        | 2e-18   | 96%   | <a href="#">gi 560931717 XP_006191986.1</a> |
| <a href="#">selenoprotein P precursor [Sus scrofa]</a>                      | 89.3      | 89.3        | 100%        | 2e-18   | 96%   | <a href="#">gi 198282079 NP_001128295.1</a> |
| <a href="#">PREDICTED: LOW QUALITY PROTEIN: selenoprotein P [Vicugna</a>    | 89.3      | 89.3        | 100%        | 2e-18   | 96%   | <a href="#">gi 560970802 XP_006207756.1</a> |
| <a href="#">PREDICTED: selenoprotein P-like [Ailuropoda melanoleuca]</a>    | 87.6      | 87.6        | 100%        | 4e-18   | 96%   | <a href="#">gi 301772662 XP_002921760.1</a> |

|                                                                            |      |      |      |       |     |                                             |
|----------------------------------------------------------------------------|------|------|------|-------|-----|---------------------------------------------|
| <a href="#">PREDICTED: LOW QUALITY PROTEIN: selenoprotein P [Lipotes</a>   | 87.6 | 87.6 | 100% | 7e-18 | 96% | <a href="#">gij602724444 XP_007447694.1</a> |
| <a href="#">PREDICTED: LOW QUALITY PROTEIN: selenoprotein P [Mustela</a>   | 87.6 | 87.6 | 100% | 7e-18 | 96% | <a href="#">gij511826454 XP_004738001.1</a> |
| <a href="#">PREDICTED: LOW QUALITY PROTEIN: selenoprotein P [Physete</a>   | 87.6 | 87.6 | 100% | 7e-18 | 96% | <a href="#">gij593761497 XP_007119423.1</a> |
| <a href="#">selenoprotein P precursor [Canis lupus familiaris]</a>         | 87.6 | 87.6 | 100% | 7e-18 | 96% | <a href="#">gij169403968 NP_001108590.1</a> |
| <a href="#">PREDICTED: LOW QUALITY PROTEIN: selenoprotein P [Ursus m</a>   | 87.6 | 87.6 | 100% | 7e-18 | 96% | <a href="#">gij670999853 XP_008690806.1</a> |
| <a href="#">PREDICTED: selenoprotein P [Otolemur garnettii]</a>            | 86.3 | 86.3 | 96%  | 1e-17 | 96% | <a href="#">gij395840394 XP_003793045.1</a> |
| <a href="#">PREDICTED: LOW QUALITY PROTEIN: selenoprotein P [Eptesicu</a>  | 86.3 | 107  | 96%  | 2e-17 | 96% | <a href="#">gij641727491 XP_008153843.1</a> |
| <a href="#">PREDICTED: LOW QUALITY PROTEIN: selenoprotein P [Myotis b</a>  | 86.3 | 86.3 | 96%  | 2e-17 | 96% | <a href="#">gij554563465 XP_005876061.1</a> |
| <a href="#">PREDICTED: LOW QUALITY PROTEIN: selenoprotein P [Oryctero</a>  | 85.5 | 85.5 | 100% | 3e-17 | 96% | <a href="#">gij634885032 XP_007952213.1</a> |
| <a href="#">PREDICTED: LOW QUALITY PROTEIN: selenoprotein P [Felis cat</a> | 84.6 | 84.6 | 100% | 5e-17 | 93% | <a href="#">gij586975923 XP_006928143.1</a> |
| <a href="#">PREDICTED: LOW QUALITY PROTEIN: selenoprotein P [Bubalus</a>   | 84.6 | 84.6 | 100% | 7e-17 | 93% | <a href="#">gij594087306 XP_006067130.1</a> |
| <a href="#">selenoprotein P [Bos taurus]</a>                               | 84.6 | 84.6 | 100% | 7e-17 | 93% | <a href="#">gij6006351 BAA84781.1</a>       |
| <a href="#">PREDICTED: LOW QUALITY PROTEIN: selenoprotein P [Panthera</a>  | 84.6 | 84.6 | 100% | 7e-17 | 93% | <a href="#">gij591339998 XP_007095490.1</a> |
| <a href="#">PREDICTED: LOW QUALITY PROTEIN: selenoprotein P [Bos mut</a>   | 84.6 | 84.6 | 100% | 7e-17 | 93% | <a href="#">gij555965745 XP_005894930.1</a> |
| <a href="#">selenoprotein P-like protein [Bos taurus]</a>                  | 84.6 | 84.6 | 100% | 7e-17 | 93% | <a href="#">gij1582026 2117379A</a>         |
| <a href="#">selenoprotein P like protein [Bos taurus]</a>                  | 84.6 | 84.6 | 100% | 7e-17 | 93% | <a href="#">gij14970947 BAA04949.2</a>      |
| <a href="#">selenoprotein P precursor [Bos taurus]</a>                     | 84.6 | 84.6 | 100% | 7e-17 | 93% | <a href="#">gij156631001 NP_776884.2</a>    |
| <a href="#">selenoprotein P [Bubalus bubalis]</a>                          | 84.6 | 84.6 | 100% | 7e-17 | 93% | <a href="#">gij430001945 AFM77782.2</a>     |
| <a href="#">PREDICTED: LOW QUALITY PROTEIN: selenoprotein P [Sorex ar</a>  | 84.2 | 84.2 | 96%  | 1e-16 | 92% | <a href="#">gij505790024 XP_004605590.1</a> |
| <a href="#">PREDICTED: LOW QUALITY PROTEIN: selenoprotein P [Ictidomy</a>  | 83.8 | 83.8 | 100% | 1e-16 | 93% | <a href="#">gij532079811 XP_005325668.1</a> |
| <a href="#">PREDICTED: LOW QUALITY PROTEIN: selenoprotein P [Ceratoth</a>  | 82.5 | 82.5 | 100% | 4e-16 | 93% | <a href="#">gij478496995 XP_004422836.1</a> |
| <a href="#">PREDICTED: LOW QUALITY PROTEIN: selenoprotein P [Ovis arie</a> | 82.1 | 82.1 | 100% | 5e-16 | 89% | <a href="#">gij426246564 XP_004017062.1</a> |
| <a href="#">PREDICTED: LOW QUALITY PROTEIN: selenoprotein P [Nannosp</a>   | 82.1 | 82.1 | 100% | 5e-16 | 89% | <a href="#">gij674066756 XP_008840327.1</a> |
| <a href="#">PREDICTED: LOW QUALITY PROTEIN: selenoprotein P [Bison bis</a> | 82.1 | 82.1 | 100% | 5e-16 | 89% | <a href="#">gij742088280 XP_010831114.1</a> |
| <a href="#">PREDICTED: LOW QUALITY PROTEIN: selenoprotein P [Dasypus</a>   | 82.1 | 82.1 | 96%  | 5e-16 | 92% | <a href="#">gij488512454 XP_004448278.1</a> |
| <a href="#">PREDICTED: LOW QUALITY PROTEIN: selenoprotein P [Trichech</a>  | 81.7 | 81.7 | 96%  | 7e-16 | 92% | <a href="#">gij471413922 XP_004388500.1</a> |
| <a href="#">selenoprotein P precursor [Callithrix jacchus]</a>             | 81.7 | 81.7 | 96%  | 7e-16 | 92% | <a href="#">gij315630400 NP_001186857.1</a> |
| <a href="#">PREDICTED: LOW QUALITY PROTEIN: selenoprotein P [Myotis d</a>  | 81.2 | 81.2 | 96%  | 1e-15 | 92% | <a href="#">gij584060316 XP_006774623.1</a> |
| <a href="#">PREDICTED: LOW QUALITY PROTEIN: selenoprotein P [Condylu</a>   | 81.2 | 81.2 | 96%  | 1e-15 | 92% | <a href="#">gij507934338 XP_004678402.1</a> |
| <a href="#">PREDICTED: LOW QUALITY PROTEIN: selenoprotein P [Galeopte</a>  | 80.8 | 80.8 | 100% | 1e-15 | 89% | <a href="#">gij667253652 XP_008564915.1</a> |
| <a href="#">PREDICTED: LOW QUALITY PROTEIN: selenoprotein P [Chinchill</a> | 80.4 | 80.4 | 96%  | 2e-15 | 88% | <a href="#">gij533143496 XP_005386312.1</a> |
| <a href="#">PREDICTED: LOW QUALITY PROTEIN: selenoprotein P [Equus p</a>   | 80.4 | 80.4 | 100% | 2e-15 | 89% | <a href="#">gij664731166 XP_008522793.1</a> |
| <a href="#">selenoprotein P precursor [Equus caballus]</a>                 | 80.4 | 80.4 | 100% | 2e-15 | 89% | <a href="#">gij208022673 NP_001129077.1</a> |
| <a href="#">membrane selenoprotein P [Capra hircus]</a>                    | 79.5 | 79.5 | 100% | 3e-15 | 85% | <a href="#">gij7677620 AAF67201.1</a>       |
| <a href="#">selenoprotein P. plasma. 1 precursor [Capra hircus]</a>        | 79.5 | 79.5 | 100% | 4e-15 | 85% | <a href="#">gij550822255 NP_001272511.1</a> |
| <a href="#">PREDICTED: LOW QUALITY PROTEIN: selenoprotein P [Saimiri b</a> | 78.3 | 78.3 | 96%  | 1e-14 | 88% | <a href="#">gij725563213 XP_003925940.2</a> |
| <a href="#">PREDICTED: LOW QUALITY PROTEIN: selenoprotein P [Leptonyc</a>  | 77.8 | 77.8 | 100% | 1e-14 | 89% | <a href="#">gij585192742 XP_006747601.1</a> |
| <a href="#">Selenoprotein P [Heterocephalus glaber]</a>                    | 77.4 | 77.4 | 96%  | 2e-14 | 85% | <a href="#">gij351695949 EHA98867.1</a>     |
| <a href="#">PREDICTED: LOW QUALITY PROTEIN: selenoprotein P [Heteroce</a>  | 77.4 | 77.4 | 96%  | 2e-14 | 85% | <a href="#">gij512973043 XP_004848622.1</a> |
| <a href="#">PREDICTED: LOW QUALITY PROTEIN: selenoprotein P [Heteroce</a>  | 77.4 | 77.4 | 96%  | 2e-14 | 85% | <a href="#">gij512816050 XP_004878213.1</a> |
| <a href="#">PREDICTED: LOW QUALITY PROTEIN: selenoprotein P [Echinop</a>   | 77.4 | 77.4 | 96%  | 2e-14 | 88% | <a href="#">gij507708621 XP_004716992.1</a> |
| <a href="#">PREDICTED: LOW QUALITY PROTEIN: selenoprotein P [Fukomys</a>   | 76.1 | 76.1 | 96%  | 6e-14 | 85% | <a href="#">gij731237262 XP_010632183.1</a> |
| <a href="#">selenoprotein P precursor [Oryctolagus cuniculus]</a>          | 76.1 | 76.1 | 100% | 6e-14 | 89% | <a href="#">gij315434200 NP_001186775.1</a> |
| <a href="#">PREDICTED: LOW QUALITY PROTEIN: selenoprotein P [Ochoton</a>   | 76.1 | 76.1 | 100% | 6e-14 | 85% | <a href="#">gij504142600 XP_004583736.1</a> |
| <a href="#">selenoprotein P. plasma. 1 precursor [Xenopus laevis]</a>      | 76.1 | 76.1 | 100% | 6e-14 | 85% | <a href="#">gij315570276 NP_001186825.1</a> |
| <a href="#">PREDICTED: LOW QUALITY PROTEIN: selenoprotein P [Qodoben</a>   | 75.7 | 75.7 | 100% | 8e-14 | 85% | <a href="#">gij472379594 XP_004409206.1</a> |

|                                                                                     |      |      |      |       |     |                                             |
|-------------------------------------------------------------------------------------|------|------|------|-------|-----|---------------------------------------------|
| <a href="#">PREDICTED: LOW QUALITY PROTEIN: selenoprotein P [Erinaceu</a>           | 74.9 | 74.9 | 96%  | 2e-13 | 88% | <a href="#">gij617575753 XP_007517681.1</a> |
| <a href="#">PREDICTED: LOW QUALITY PROTEIN: selenoprotein P [Peromys</a>            | 71.9 | 71.9 | 96%  | 2e-12 | 81% | <a href="#">gij589969345 XP_006997157.1</a> |
| <a href="#">selenoprotein P, plasma, 1 precursor [Xenopus (Silurana) tropicalis</a> | 71.0 | 71.0 | 100% | 3e-12 | 81% | <a href="#">gij315467861 NP_001186813.1</a> |
| <a href="#">PREDICTED: LOW QUALITY PROTEIN: selenoprotein P [Jaculus ]</a>          | 70.6 | 70.6 | 100% | 4e-12 | 81% | <a href="#">gij507537041 XP_004652550.1</a> |
| <a href="#">PREDICTED: selenoprotein P [Chelonia mydas]</a>                         | 70.2 | 70.2 | 100% | 5e-12 | 81% | <a href="#">gij591359813 XP_007052890.1</a> |
| <a href="#">PREDICTED: LOW QUALITY PROTEIN: selenoprotein P [Ornithor</a>           | 70.2 | 70.2 | 100% | 5e-12 | 78% | <a href="#">gij620968705 XP_007654576.1</a> |
| <a href="#">PREDICTED: LOW QUALITY PROTEIN: selenoprotein P [Chryser</a>            | 70.2 | 70.2 | 100% | 6e-12 | 81% | <a href="#">gij530576591 XP_005282265.1</a> |
| <a href="#">selenoprotein P precursor [Rattus norvegicus]</a>                       | 69.4 | 69.4 | 96%  | 1e-11 | 77% | <a href="#">gij15011857 NP_062065.2</a>     |
| <a href="#">PREDICTED: LOW QUALITY PROTEIN: selenoprotein P, plasma, _</a>          | 68.5 | 68.5 | 96%  | 1e-11 | 77% | <a href="#">gij524973435 XP_005139283.1</a> |
| <a href="#">Selenoprotein P [Cricetulus griseus]</a>                                | 68.5 | 68.5 | 96%  | 2e-11 | 77% | <a href="#">gij344247936 EGW04040.1</a>     |
| <a href="#">selenoprotein P precursor [Cricetulus griseus]</a>                      | 68.5 | 68.5 | 96%  | 2e-11 | 77% | <a href="#">gij537231220 ERE84145.1</a>     |
| <a href="#">selenoprotein P precursor [Cricetulus griseus]</a>                      | 68.5 | 68.5 | 96%  | 2e-11 | 77% | <a href="#">gij379056379 NP_001243807.1</a> |
| <a href="#">PREDICTED: selenoprotein P [Sarcophilus harrisii]</a>                   | 68.1 | 68.1 | 100% | 3e-11 | 81% | <a href="#">gij395511426 XP_003759960.1</a> |
| <a href="#">PREDICTED: LOW QUALITY PROTEIN: selenoprotein P [Alligator</a>          | 67.2 | 67.2 | 96%  | 6e-11 | 81% | <a href="#">gij564260109 XP_006268971.1</a> |
| <a href="#">PREDICTED: LOW QUALITY PROTEIN: selenoprotein P [Alligator</a>          | 67.2 | 67.2 | 96%  | 6e-11 | 81% | <a href="#">gij557288151 XP_006026767.1</a> |
| <a href="#">PREDICTED: LOW QUALITY PROTEIN: selenoprotein P [Falco ch</a>           | 67.2 | 67.2 | 96%  | 6e-11 | 81% | <a href="#">gij541955801 XP_005433806.1</a> |
| <a href="#">PREDICTED: LOW QUALITY PROTEIN: selenoprotein P [Falco pe</a>           | 67.2 | 67.2 | 96%  | 6e-11 | 81% | <a href="#">gij529444627 XP_005242025.1</a> |
| <a href="#">PREDICTED: LOW QUALITY PROTEIN: selenoprotein P [Microtus</a>           | 66.8 | 66.8 | 96%  | 8e-11 | 77% | <a href="#">gij532054271 XP_005369861.1</a> |
| <a href="#">PREDICTED: LOW QUALITY PROTEIN: selenoprotein P [Octodon</a>            | 65.5 | 65.5 | 96%  | 2e-10 | 73% | <a href="#">gij507690845 XP_004641866.1</a> |
| <a href="#">PREDICTED: LOW QUALITY PROTEIN: selenoprotein P [Mesitorn</a>           | 65.5 | 65.5 | 96%  | 2e-10 | 81% | <a href="#">gij704588487 XP_010190708.1</a> |
| <a href="#">selenoprotein P, plasma, 1, isoform CRA_a [Mus musculus]</a>            | 65.1 | 65.1 | 96%  | 3e-10 | 77% | <a href="#">gij148671458 EDL03405.1</a>     |
| <a href="#">Selenoprotein P, plasma, 1 [Mus musculus]</a>                           | 65.1 | 65.1 | 96%  | 3e-10 | 77% | <a href="#">gij34809553 AAH01991.2</a>      |
| <a href="#">unnamed protein product [Mus musculus]</a>                              | 65.1 | 65.1 | 96%  | 3e-10 | 77% | <a href="#">gij74198358 BAE39664.1</a>      |
| <a href="#">unnamed protein product [Mus musculus]</a>                              | 65.1 | 65.1 | 96%  | 3e-10 | 77% | <a href="#">gij74192879 BAE34948.1</a>      |
| <a href="#">selenoprotein P precursor [Mus musculus]</a>                            | 65.1 | 65.1 | 96%  | 3e-10 | 77% | <a href="#">gij74271806 NP_033181.3</a>     |
| <a href="#">unnamed protein product [Mus musculus]</a>                              | 65.1 | 65.1 | 96%  | 3e-10 | 77% | <a href="#">gij74213751 BAC55264.3</a>      |

## Alignments

Download [GenPept](#) [Graphics](#)

[Next](#) [Previous](#) [Descriptions](#)

PREDICTED: LOW QUALITY PROTEIN: selenoprotein P [Tarsius syrichta]

Sequence ID: [gij640790108|ref|XP\\_008050904.1](#) Length: 377 Number of Matches: 1

Range 1: 106 to 132 [GenPept](#) [Graphics](#)

[Next Match](#) [Previous Match](#)

| Score          | Expect | Identities  | Positives   | Gaps     |
|----------------|--------|-------------|-------------|----------|
| 91.8 bits(209) | 2e-19  | 27/27(100%) | 27/27(100%) | 0/27(0%) |

Query 1 KVSEHIPVYQQEENQTDVWTLNLSKD 27  
KVSEHIPVYQQEENQTDVWTLNLSKD  
Sbjct 106 KVSEHIPVYQQEENQTDVWTLNLSKD 132

### Related Information

[Gene](#) - associated gene details  
[Map Viewer](#) - aligned genomic context

Download [GenPept](#) [Graphics](#)

[Next](#) [Previous](#) [Descriptions](#)

PREDICTED: LOW QUALITY PROTEIN: selenoprotein P [Rhinopithecus roxellana]

Sequence ID: [gij724878613|ref|XP\\_010372696.1](#) Length: 381 Number of Matches: 1

Range 1: 106 to 132 [GenPept](#) [Graphics](#)

[Next Match](#) [Previous Match](#)

| Score          | Expect | Identities  | Positives   | Gaps     |
|----------------|--------|-------------|-------------|----------|
| 91.8 bits(209) | 2e-19  | 27/27(100%) | 27/27(100%) | 0/27(0%) |

Query 1 KVSEHIPVYQQEENQTDVWTLNLSKD 27  
KVSEHIPVYQQEENQTDVWTLNLSKD  
Sbjct 106 KVSEHIPVYQQEENQTDVWTLNLSKD 132

### Related Information

[Gene](#) - associated gene details  
[Map Viewer](#) - aligned genomic context



Download [GenPept](#) [Graphics](#)

▼ Next ▲ Previous ▲ Descriptions

**PREDICTED: LOW QUALITY PROTEIN: selenoprotein P [Papio anubis]**

Sequence ID: [gi|685545348|ref|XP\\_009206607.1](#) Length: 381 Number of Matches: 1

Range 1: 106 to 132 [GenPept](#) [Graphics](#)

▼ Next Match ▲ Previous Match

| Score          | Expect | Identities  | Positives   | Gaps     |
|----------------|--------|-------------|-------------|----------|
| 91.8 bits(209) | 2e-19  | 27/27(100%) | 27/27(100%) | 0/27(0%) |

Query 1 KVSEHIPVYQQEENQTDVWTLNLSKD 27  
 KVSEHIPVYQQEENQTDVWTLNLSKD  
 Sbjct 106 KVSEHIPVYQQEENQTDVWTLNLSKD 132

**Related Information**

[Gene](#) - associated gene details  
[Map Viewer](#) - aligned genomic context

Download [GenPept](#) [Graphics](#)

▼ Next ▲ Previous ▲ Descriptions

**PREDICTED: LOW QUALITY PROTEIN: selenoprotein P [Pan paniscus]**

Sequence ID: [gi|675710689|ref|XP\\_008961588.1](#) Length: 381 Number of Matches: 1

Range 1: 106 to 132 [GenPept](#) [Graphics](#)

▼ Next Match ▲ Previous Match

| Score          | Expect | Identities  | Positives   | Gaps     |
|----------------|--------|-------------|-------------|----------|
| 91.8 bits(209) | 2e-19  | 27/27(100%) | 27/27(100%) | 0/27(0%) |

Query 1 KVSEHIPVYQQEENQTDVWTLNLSKD 27  
 KVSEHIPVYQQEENQTDVWTLNLSKD  
 Sbjct 106 KVSEHIPVYQQEENQTDVWTLNLSKD 132

**Related Information**

[Gene](#) - associated gene details  
[Map Viewer](#) - aligned genomic context

Download [GenPept](#) [Graphics](#)

▼ Next ▲ Previous ▲ Descriptions

**PREDICTED: LOW QUALITY PROTEIN: selenoprotein P [Chlorocebus sabaeus]**

Sequence ID: [gi|635028004|ref|XP\\_007959679.1](#) Length: 381 Number of Matches: 1

Range 1: 106 to 132 [GenPept](#) [Graphics](#)

▼ Next Match ▲ Previous Match

| Score          | Expect | Identities  | Positives   | Gaps     |
|----------------|--------|-------------|-------------|----------|
| 91.8 bits(209) | 2e-19  | 27/27(100%) | 27/27(100%) | 0/27(0%) |

Query 1 KVSEHIPVYQQEENQTDVWTLNLSKD 27  
 KVSEHIPVYQQEENQTDVWTLNLSKD  
 Sbjct 106 KVSEHIPVYQQEENQTDVWTLNLSKD 132

**Related Information**

[Gene](#) - associated gene details  
[Map Viewer](#) - aligned genomic context

BLAST is a registered trademark of the National Library of Medicine.

NCBI/ BLAST/ blastp suite/ Formatting Results - BEB793EN014

Edit and Resubmit Save Search Strategies Formatting options Download

YouTube How to read this page Blast report description

SEPP1\_KVSEHIPVYQEEENQTDVWTLNLSKDDFLIYDRC\_NonMod

RID BEB793EN014 (Expires on 01-16 09:58 am)

Query ID lcl|93014
Description None
Molecule type amino acid
Query Length 35

Database Name nr
Description All non-redundant GenBank CDS translations+PDB+SwissProt+PIR excluding environmental samples from WGS projects
Program BLASTP 2.2.30+ Citation

Other reports: Search Summary Taxonomy reports Distance tree of results Multiple alignment

DELTA-BLAST a more sensitive protein-protein search

Graphic Summary

Show Conserved Domains

Putative conserved domains have been detected, click on the image below for detailed results.

Query seq. K V S E H I P V Y Q Q E E N Q T D V W T L L N G S K D D F L I Y D R C
Superfamilies SeIP\_N

Distribution of 100 Blast Hits on the Query Sequence

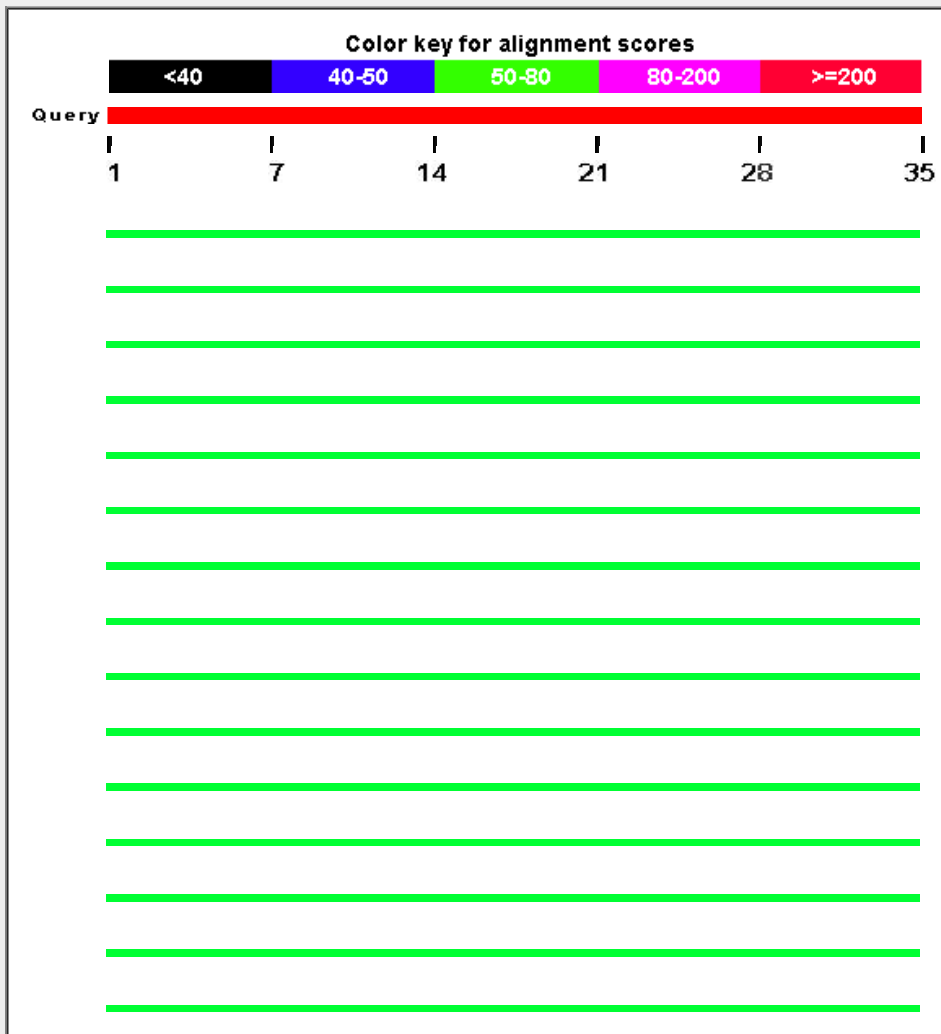

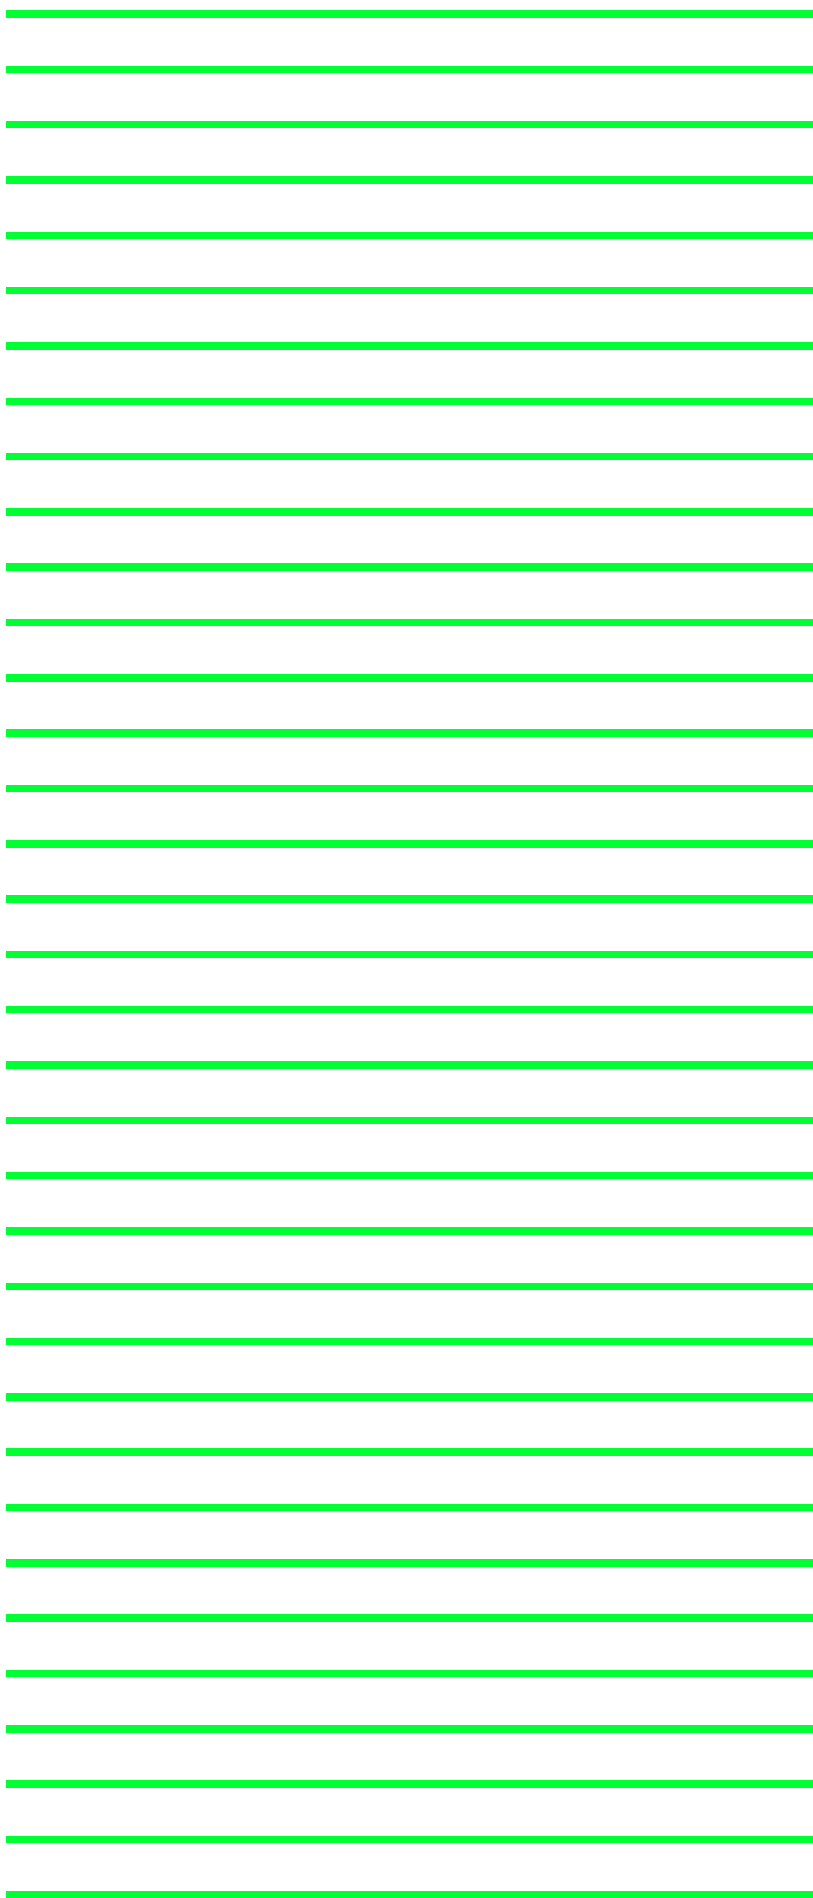

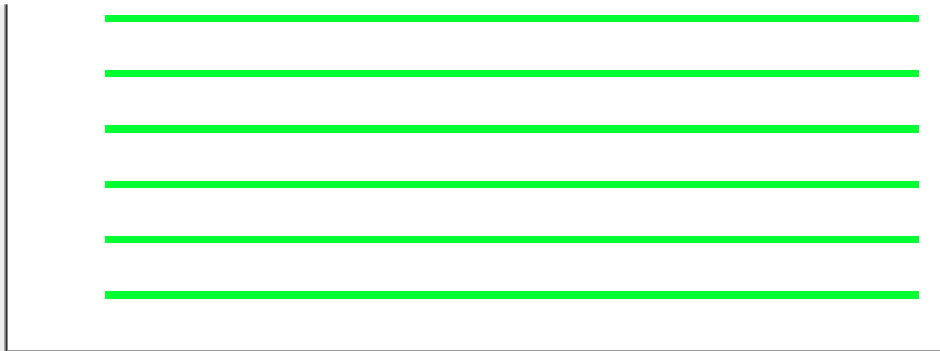

**Descriptions**

**Sequences producing significant alignments:**

Select: [All](#) [None](#) Selected:0

Alignments Download GenPept Graphics Distance tree of results Multiple alignment

| Description                                                                 | Max score | Total score | Query cover | E value | Ident | Accession                                   |
|-----------------------------------------------------------------------------|-----------|-------------|-------------|---------|-------|---------------------------------------------|
| <a href="#">PREDICTED: selenoprotein P-like [Ailuropoda melanoleuca]</a>    | 76.6      | 76.6        | 100%        | 4e-16   | 94%   | <a href="#">gij301772662 XP_002921760.1</a> |
| <a href="#">PREDICTED: LOW QUALITY PROTEIN: selenoprotein P [Tarsius s</a>  | 78.6      | 78.6        | 100%        | 4e-16   | 100%  | <a href="#">gij640790108 XP_008050904.1</a> |
| <a href="#">PREDICTED: LOW QUALITY PROTEIN: selenoprotein P [Rhinopitil</a> | 78.6      | 78.6        | 100%        | 5e-16   | 100%  | <a href="#">gij724878613 XP_010372696.1</a> |
| <a href="#">PREDICTED: LOW QUALITY PROTEIN: selenoprotein P [Papio ar</a>   | 78.6      | 78.6        | 100%        | 5e-16   | 100%  | <a href="#">gij685545348 XP_009206607.1</a> |
| <a href="#">PREDICTED: LOW QUALITY PROTEIN: selenoprotein P [Pan pani</a>   | 78.6      | 78.6        | 100%        | 5e-16   | 100%  | <a href="#">gij675710689 XP_008961588.1</a> |
| <a href="#">PREDICTED: LOW QUALITY PROTEIN: selenoprotein P [Chloroce</a>   | 78.6      | 78.6        | 100%        | 5e-16   | 100%  | <a href="#">gij635028004 XP_007959679.1</a> |
| <a href="#">Selenoprotein P, plasma, 1 [Homo sapiens]</a>                   | 78.6      | 78.6        | 100%        | 5e-16   | 100%  | <a href="#">gij34783648 AAH46152.1</a>      |
| <a href="#">Selenoprotein P, plasma, 1 [Homo sapiens]</a>                   | 78.6      | 78.6        | 100%        | 5e-16   | 100%  | <a href="#">gij34783164 AAH15875.1</a>      |
| <a href="#">selenoprotein P isoform 1 precursor [Homo sapiens]</a>          | 78.6      | 78.6        | 100%        | 5e-16   | 100%  | <a href="#">gij62530391 NP_005401.3</a>     |
| <a href="#">Selenoprotein P, plasma, 1 [Homo sapiens]</a>                   | 78.6      | 78.6        | 100%        | 5e-16   | 100%  | <a href="#">gij37596694 AAH58919.1</a>      |
| <a href="#">selenoprotein P precursor [Pongo abelii]</a>                    | 78.6      | 78.6        | 100%        | 5e-16   | 100%  | <a href="#">gij197101233 NP_001127462.1</a> |
| <a href="#">PREDICTED: LOW QUALITY PROTEIN: selenoprotein P [Nomascu</a>    | 78.6      | 78.6        | 100%        | 5e-16   | 100%  | <a href="#">gij332250603 XP_003274442.1</a> |
| <a href="#">selenoprotein P [Homo sapiens]</a>                              | 78.6      | 78.6        | 100%        | 5e-16   | 100%  | <a href="#">gij312004116 CAA77836.2</a>     |
| <a href="#">selenoprotein P precursor [Macaca mulatta]</a>                  | 78.6      | 78.6        | 100%        | 5e-16   | 100%  | <a href="#">gij226958322 NP_001152962.1</a> |
| <a href="#">selenoprotein P precursor [Pan troglodytes]</a>                 | 78.6      | 78.6        | 100%        | 5e-16   | 100%  | <a href="#">gij169403955 NP_001108587.1</a> |
| <a href="#">selenoprotein P isoform 2 [Homo sapiens]</a>                    | 78.6      | 78.6        | 100%        | 6e-16   | 100%  | <a href="#">gij148277022 NP_001087195.1</a> |
| <a href="#">PREDICTED: LOW QUALITY PROTEIN: selenoprotein P [Chrysoc</a>    | 77.0      | 77.0        | 100%        | 8e-16   | 94%   | <a href="#">gij586493836 XP_006877364.1</a> |
| <a href="#">PREDICTED: LOW QUALITY PROTEIN: selenoprotein P [Tupaia c</a>   | 77.4      | 77.4        | 100%        | 1e-15   | 97%   | <a href="#">gij562878609 XP_006167023.1</a> |
| <a href="#">PREDICTED: LOW QUALITY PROTEIN: selenoprotein P [Balaeno</a>    | 77.4      | 77.4        | 100%        | 1e-15   | 97%   | <a href="#">gij594696840 XP_007195596.1</a> |
| <a href="#">PREDICTED: LOW QUALITY PROTEIN: selenoprotein P [Myotis l</a>   | 77.4      | 77.4        | 100%        | 1e-15   | 97%   | <a href="#">gij558205011 XP_006106371.1</a> |
| <a href="#">PREDICTED: LOW QUALITY PROTEIN: selenoprotein P [Orcinus</a>    | 77.4      | 77.4        | 100%        | 1e-15   | 97%   | <a href="#">gij465986750 XP_004266005.1</a> |
| <a href="#">PREDICTED: LOW QUALITY PROTEIN: selenoprotein P [Camelus</a>    | 77.4      | 77.4        | 100%        | 1e-15   | 97%   | <a href="#">gij744538058 XP_010999134.1</a> |
| <a href="#">PREDICTED: LOW QUALITY PROTEIN: selenoprotein P [Loxodon</a>    | 77.4      | 77.4        | 100%        | 1e-15   | 97%   | <a href="#">gij731464182 XP_010586424.1</a> |
| <a href="#">PREDICTED: LOW QUALITY PROTEIN: selenoprotein P [Elephan</a>    | 77.4      | 77.4        | 100%        | 1e-15   | 97%   | <a href="#">gij585672710 XP_006889619.1</a> |
| <a href="#">PREDICTED: LOW QUALITY PROTEIN: selenoprotein P [Tursiops</a>   | 77.4      | 77.4        | 100%        | 1e-15   | 97%   | <a href="#">gij470626535 XP_004320390.1</a> |
| <a href="#">PREDICTED: selenoprotein P [Otolemur garnettii]</a>             | 75.9      | 75.9        | 100%        | 1e-15   | 94%   | <a href="#">gij395840394 XP_003793045.1</a> |
| <a href="#">PREDICTED: LOW QUALITY PROTEIN: selenoprotein P [Camelus</a>    | 77.4      | 77.4        | 100%        | 1e-15   | 97%   | <a href="#">gij560931717 XP_006191986.1</a> |
| <a href="#">selenoprotein P precursor [Sus scrofa]</a>                      | 77.4      | 77.4        | 100%        | 1e-15   | 97%   | <a href="#">gij198282079 NP_001128295.1</a> |
| <a href="#">PREDICTED: LOW QUALITY PROTEIN: selenoprotein P [Vicugna</a>    | 77.4      | 77.4        | 100%        | 1e-15   | 97%   | <a href="#">gij560970802 XP_006207756.1</a> |

|                                                            |      |      |      |       |     |                                             |
|------------------------------------------------------------|------|------|------|-------|-----|---------------------------------------------|
| PREDICTED: LOW QUALITY PROTEIN: selenoprotein P [Lipotes   | 77.0 | 77.0 | 100% | 2e-15 | 97% | <a href="#">gij602724444 XP_007447694.1</a> |
| PREDICTED: LOW QUALITY PROTEIN: selenoprotein P [Mustela   | 77.0 | 77.0 | 100% | 2e-15 | 97% | <a href="#">gij511826454 XP_004738001.1</a> |
| PREDICTED: LOW QUALITY PROTEIN: selenoprotein P [Physeter  | 77.0 | 77.0 | 100% | 2e-15 | 97% | <a href="#">gij593761497 XP_007119423.1</a> |
| selenoprotein P precursor [Canis lupus familiaris]         | 77.0 | 77.0 | 100% | 2e-15 | 97% | <a href="#">gij169403968 NP_001108590.1</a> |
| PREDICTED: LOW QUALITY PROTEIN: selenoprotein P [Ursus m   | 76.6 | 76.6 | 100% | 4e-15 | 94% | <a href="#">gij670999853 XP_008690806.1</a> |
| PREDICTED: LOW QUALITY PROTEIN: selenoprotein P [Eptesicu  | 75.9 | 75.9 | 100% | 4e-15 | 94% | <a href="#">gij641727491 XP_008153843.1</a> |
| PREDICTED: LOW QUALITY PROTEIN: selenoprotein P [Myotis b  | 75.9 | 75.9 | 100% | 4e-15 | 94% | <a href="#">gij554563465 XP_005876061.1</a> |
| PREDICTED: LOW QUALITY PROTEIN: selenoprotein P [Felis cat | 73.9 | 73.9 | 100% | 5e-15 | 89% | <a href="#">gij586975923 XP_006928143.1</a> |
| PREDICTED: LOW QUALITY PROTEIN: selenoprotein P [Sorex ar  | 75.1 | 75.1 | 100% | 7e-15 | 89% | <a href="#">gij505790024 XP_004605590.1</a> |
| PREDICTED: LOW QUALITY PROTEIN: selenoprotein P [Oryctero  | 74.7 | 74.7 | 100% | 8e-15 | 97% | <a href="#">gij634885032 XP_007952213.1</a> |
| PREDICTED: LOW QUALITY PROTEIN: selenoprotein P [Ictidomy  | 75.1 | 75.1 | 100% | 8e-15 | 94% | <a href="#">gij532079811 XP_005325668.1</a> |
| PREDICTED: LOW QUALITY PROTEIN: selenoprotein P [Bubalus   | 75.1 | 75.1 | 100% | 9e-15 | 94% | <a href="#">gij594087306 XP_006067130.1</a> |
| selenoprotein P [Bos taurus]                               | 75.1 | 75.1 | 100% | 9e-15 | 94% | <a href="#">gij6006351 BAA84781.1</a>       |
| PREDICTED: LOW QUALITY PROTEIN: selenoprotein P [Bos mut   | 75.1 | 75.1 | 100% | 9e-15 | 94% | <a href="#">gij555965745 XP_005894930.1</a> |
| selenoprotein P-like protein [Bos taurus]                  | 75.1 | 75.1 | 100% | 1e-14 | 94% | <a href="#">gij1582026 2117379A</a>         |
| selenoprotein P like protein [Bos taurus]                  | 75.1 | 75.1 | 100% | 1e-14 | 94% | <a href="#">gij14970947 BAA04949.2</a>      |
| selenoprotein P precursor [Bos taurus]                     | 75.1 | 75.1 | 100% | 1e-14 | 94% | <a href="#">gij156631001 NP_776884.2</a>    |
| selenoprotein P [Bubalus bubalis]                          | 75.1 | 75.1 | 100% | 1e-14 | 94% | <a href="#">gij430001945 AFM77782.2</a>     |
| PREDICTED: LOW QUALITY PROTEIN: selenoprotein P [Ceratoth  | 74.3 | 74.3 | 100% | 2e-14 | 91% | <a href="#">gij478496995 XP_004422836.1</a> |
| PREDICTED: LOW QUALITY PROTEIN: selenoprotein P [Panthera  | 74.3 | 74.3 | 100% | 2e-14 | 91% | <a href="#">gij591339998 XP_007095490.1</a> |
| PREDICTED: LOW QUALITY PROTEIN: selenoprotein P [Condylu   | 74.3 | 74.3 | 100% | 2e-14 | 91% | <a href="#">gij507934338 XP_004678402.1</a> |
| membrane selenoprotein P [Capra hircus]                    | 72.0 | 72.0 | 100% | 3e-14 | 89% | <a href="#">gij7677620 AAF67201.1</a>       |
| PREDICTED: LOW QUALITY PROTEIN: selenoprotein P [Trichech  | 73.6 | 73.6 | 100% | 3e-14 | 91% | <a href="#">gij471413922 XP_004388500.1</a> |
| PREDICTED: LOW QUALITY PROTEIN: selenoprotein P [Nannosq   | 73.6 | 73.6 | 100% | 3e-14 | 89% | <a href="#">gij674066756 XP_008840327.1</a> |
| selenoprotein P precursor [Callithrix jacchus]             | 73.6 | 73.6 | 100% | 3e-14 | 91% | <a href="#">gij315630400 NP_001186857.1</a> |
| PREDICTED: LOW QUALITY PROTEIN: selenoprotein P [Bison bis | 73.6 | 73.6 | 100% | 3e-14 | 91% | <a href="#">gij742088280 XP_010831114.1</a> |
| PREDICTED: LOW QUALITY PROTEIN: selenoprotein P [Ovis arie | 73.2 | 73.2 | 100% | 4e-14 | 91% | <a href="#">gij426246564 XP_004017062.1</a> |
| PREDICTED: LOW QUALITY PROTEIN: selenoprotein P [Myotis d  | 72.8 | 72.8 | 100% | 6e-14 | 91% | <a href="#">gij584060316 XP_006774623.1</a> |
| PREDICTED: LOW QUALITY PROTEIN: selenoprotein P [Galeopte  | 72.8 | 72.8 | 100% | 6e-14 | 91% | <a href="#">gij667253652 XP_008564915.1</a> |
| Selenoprotein P [Heterocephalus glaber]                    | 71.2 | 71.2 | 100% | 6e-14 | 86% | <a href="#">gij351695949 EHA98867.1</a>     |
| PREDICTED: LOW QUALITY PROTEIN: selenoprotein P [Equus p   | 72.8 | 72.8 | 100% | 6e-14 | 91% | <a href="#">gij664731166 XP_008522793.1</a> |
| selenoprotein P precursor [Equus caballus]                 | 72.8 | 72.8 | 100% | 6e-14 | 91% | <a href="#">gij208022673 NP_001129077.1</a> |
| PREDICTED: LOW QUALITY PROTEIN: selenoprotein P [Dasypus   | 72.8 | 72.8 | 100% | 7e-14 | 91% | <a href="#">gij488512454 XP_004448278.1</a> |
| PREDICTED: LOW QUALITY PROTEIN: selenoprotein P [Leptonyc  | 72.4 | 72.4 | 100% | 9e-14 | 91% | <a href="#">gij585192742 XP_006747601.1</a> |
| selenoprotein P. plasma. 1 precursor [Capra hircus]        | 72.0 | 72.0 | 100% | 9e-14 | 89% | <a href="#">gij550822255 NP_001272511.1</a> |
| PREDICTED: LOW QUALITY PROTEIN: selenoprotein P [Saimiri b | 71.6 | 71.6 | 100% | 2e-13 | 89% | <a href="#">gij725563213 XP_003925940.2</a> |
| PREDICTED: LOW QUALITY PROTEIN: selenoprotein P [Erinaceu  | 71.2 | 71.2 | 100% | 2e-13 | 89% | <a href="#">gij617575753 XP_007517681.1</a> |
| PREDICTED: LOW QUALITY PROTEIN: selenoprotein P [Chinchill | 71.2 | 71.2 | 100% | 2e-13 | 86% | <a href="#">gij533143496 XP_005386312.1</a> |
| PREDICTED: LOW QUALITY PROTEIN: selenoprotein P [Heteroce  | 71.2 | 71.2 | 100% | 2e-13 | 86% | <a href="#">gij512973043 XP_004848622.1</a> |
| PREDICTED: LOW QUALITY PROTEIN: selenoprotein P [Heteroce  | 71.2 | 71.2 | 100% | 2e-13 | 86% | <a href="#">gij512816050 XP_004878213.1</a> |
| PREDICTED: LOW QUALITY PROTEIN: selenoprotein P [Ochoton   | 71.2 | 71.2 | 100% | 2e-13 | 89% | <a href="#">gij504142600 XP_004583736.1</a> |
| selenoprotein P precursor [Oryctolagus cuniculus]          | 70.5 | 70.5 | 100% | 4e-13 | 91% | <a href="#">gij315434200 NP_001186775.1</a> |
| PREDICTED: LOW QUALITY PROTEIN: selenoprotein P [Fukomys   | 70.1 | 70.1 | 100% | 6e-13 | 86% | <a href="#">gij731237262 XP_010632183.1</a> |
| PREDICTED: LOW QUALITY PROTEIN: selenoprotein P [Odobent   | 70.1 | 70.1 | 100% | 6e-13 | 89% | <a href="#">gij472379594 XP_004409206.1</a> |
| PREDICTED: LOW QUALITY PROTEIN: selenoprotein P [Jaculus j | 69.7 | 69.7 | 100% | 8e-13 | 86% | <a href="#">gij507537041 XP_004652550.1</a> |
| PREDICTED: selenoprotein P [Chelonia mydas]                | 67.8 | 67.8 | 100% | 9e-13 | 86% | <a href="#">gij591359813 XP_007052890.1</a> |

|                                                                                     |      |      |      |       |     |                                             |
|-------------------------------------------------------------------------------------|------|------|------|-------|-----|---------------------------------------------|
| <a href="#">PREDICTED: LOW QUALITY PROTEIN: selenoprotein P [Ornithor</a>           | 68.2 | 68.2 | 100% | 1e-12 | 83% | <a href="#">gij620968705 XP_007654576.1</a> |
| <a href="#">PREDICTED: LOW QUALITY PROTEIN: selenoprotein P [Echinop:</a>           | 69.3 | 69.3 | 100% | 1e-12 | 89% | <a href="#">gij507708621 XP_004716992.1</a> |
| <a href="#">selenoprotein P, plasma, 1 precursor [Xenopus laevis]</a>               | 69.3 | 69.3 | 100% | 1e-12 | 86% | <a href="#">gij315570276 NP_001186825.1</a> |
| <a href="#">PREDICTED: selenoprotein P [Sarcophilus harrisi]</a>                    | 66.6 | 66.6 | 100% | 3e-12 | 86% | <a href="#">gij395511426 XP_003759960.1</a> |
| <a href="#">PREDICTED: LOW QUALITY PROTEIN: selenoprotein P [Peromys</a>            | 68.2 | 68.2 | 100% | 3e-12 | 83% | <a href="#">gij589969345 XP_006997157.1</a> |
| <a href="#">PREDICTED: LOW QUALITY PROTEIN: selenoprotein P [Chryser</a>            | 67.8 | 67.8 | 100% | 5e-12 | 86% | <a href="#">gij530576591 XP_005282265.1</a> |
| <a href="#">PREDICTED: LOW QUALITY PROTEIN: selenoprotein P [Alligator</a>          | 67.0 | 67.0 | 100% | 7e-12 | 83% | <a href="#">gij564260109 XP_006268971.1</a> |
| <a href="#">PREDICTED: LOW QUALITY PROTEIN: selenoprotein P [Alligator</a>          | 67.0 | 67.0 | 100% | 7e-12 | 83% | <a href="#">gij557288151 XP_006026767.1</a> |
| <a href="#">selenoprotein P precursor [Rattus norvegicus]</a>                       | 67.0 | 67.0 | 100% | 8e-12 | 80% | <a href="#">gij15011857 NP_062065.2</a>     |
| <a href="#">Selenoprotein P [Cricetulus griseus]</a>                                | 64.7 | 64.7 | 97%  | 1e-11 | 82% | <a href="#">gij344247936 EGW04040.1</a>     |
| <a href="#">selenoprotein P, plasma, 1, isoform CRA_a [Mus musculus]</a>            | 64.3 | 64.3 | 100% | 2e-11 | 80% | <a href="#">gij148671458 EDL03405.1</a>     |
| <a href="#">PREDICTED: LOW QUALITY PROTEIN: selenoprotein P-like [Ano]</a>          | 64.7 | 64.7 | 100% | 2e-11 | 77% | <a href="#">gij637259117 XP_003216248.2</a> |
| <a href="#">PREDICTED: LOW QUALITY PROTEIN: selenoprotein P [Mesitorn</a>           | 65.9 | 65.9 | 97%  | 2e-11 | 85% | <a href="#">gij704588487 XP_010190708.1</a> |
| <a href="#">selenoprotein P, plasma, 1 precursor [Xenopus (Silurana) tropicalis</a> | 65.9 | 65.9 | 100% | 2e-11 | 80% | <a href="#">gij315467861 NP_001186813.1</a> |
| <a href="#">selenoprotein P precursor [Cricetulus griseus]</a>                      | 64.7 | 64.7 | 97%  | 2e-11 | 82% | <a href="#">gij537231220 ERE84145.1</a>     |
| <a href="#">PREDICTED: LOW QUALITY PROTEIN: selenoprotein P [Falco ch</a>           | 65.5 | 65.5 | 97%  | 3e-11 | 85% | <a href="#">gij541955801 XP_005433806.1</a> |
| <a href="#">PREDICTED: LOW QUALITY PROTEIN: selenoprotein P [Falco pe</a>           | 65.5 | 65.5 | 97%  | 3e-11 | 85% | <a href="#">gij529444627 XP_005242025.1</a> |
| <a href="#">PREDICTED: LOW QUALITY PROTEIN: selenoprotein P [Meleagri</a>           | 63.2 | 63.2 | 97%  | 4e-11 | 76% | <a href="#">gij733924998 XP_010723689.1</a> |
| <a href="#">selenoprotein P precursor [Cricetulus griseus]</a>                      | 64.7 | 64.7 | 97%  | 5e-11 | 82% | <a href="#">gij379056379 NP_001243807.1</a> |
| <a href="#">Selenoprotein P, plasma, 1 [Mus musculus]</a>                           | 64.3 | 64.3 | 100% | 7e-11 | 80% | <a href="#">gij34809553 AAH01991.2</a>      |
| <a href="#">plasma selenoprotein P [Mus musculus]</a>                               | 64.3 | 64.3 | 100% | 7e-11 | 80% | <a href="#">gij4103142 AAD01684.1</a>       |
| <a href="#">unnamed protein product [Mus musculus]</a>                              | 64.3 | 64.3 | 100% | 7e-11 | 80% | <a href="#">gij74198358 BAE39664.1</a>      |
| <a href="#">unnamed protein product [Mus musculus]</a>                              | 64.3 | 64.3 | 100% | 7e-11 | 80% | <a href="#">gij74192879 BAE34948.1</a>      |
| <a href="#">selenoprotein P precursor [Mus musculus]</a>                            | 64.3 | 64.3 | 100% | 7e-11 | 80% | <a href="#">gij74271806 NP_033181.3</a>     |
| <a href="#">unnamed protein product [Mus musculus]</a>                              | 64.3 | 64.3 | 100% | 7e-11 | 80% | <a href="#">gij74213751 BAC55264.3</a>      |

## Alignments

Download [GenPept](#) [Graphics](#)

[Next](#) [Previous](#) [Descriptions](#)

PREDICTED: selenoprotein P-like [Ailuropoda melanoleuca]

Sequence ID: [gij301772662|ref|XP\\_002921760.1](#) Length: 166 Number of Matches: 1

Range 1: 6 to 40 [GenPept](#) [Graphics](#)

[Next Match](#) [Previous Match](#)

| Score          | Expect | Identities | Positives  | Gaps     |
|----------------|--------|------------|------------|----------|
| 76.6 bits(187) | 4e-16  | 33/35(94%) | 34/35(97%) | 0/35(0%) |

Query 1 KVSEHIPVYQQEENQTDVWTLNLSKDDFLIYDRC 35  
 Sbjct 6 KVSEHIPVYQQEENQTDVWTLNLSKDDFLIYDRC 40

### Related Information

[Gene](#) - associated gene details

Download [GenPept](#) [Graphics](#)

[Next](#) [Previous](#) [Descriptions](#)

PREDICTED: LOW QUALITY PROTEIN: selenoprotein P [Tarsius syrichta]

Sequence ID: [gij640790108|ref|XP\\_008050904.1](#) Length: 377 Number of Matches: 1

Range 1: 106 to 140 [GenPept](#) [Graphics](#)

[Next Match](#) [Previous Match](#)

| Score          | Expect | Identities  | Positives   | Gaps     |
|----------------|--------|-------------|-------------|----------|
| 78.6 bits(192) | 4e-16  | 35/35(100%) | 35/35(100%) | 0/35(0%) |

Query 1 KVSEHIPVYQQEENQTDVWTLNLSKDDFLIYDRC 35  
 Sbjct 106 KVSEHIPVYQQEENQTDVWTLNLSKDDFLIYDRC 140

### Related Information

[Gene](#) - associated gene details

[Map Viewer](#) - aligned genomic context

Download [GenPept](#) [Graphics](#)

[Next](#) [Previous](#) [Descriptions](#)

**PREDICTED: LOW QUALITY PROTEIN: selenoprotein P [Rhinopithecus roxellana]**

Sequence ID: [gi|724878613|ref|XP\\_010372696.1|](#) Length: 381 Number of Matches: 1

Range 1: 106 to 140 [GenPept](#) [Graphics](#)

[Next Match](#) [Previous Match](#)

| Score          | Expect | Identities  | Positives   | Gaps     |
|----------------|--------|-------------|-------------|----------|
| 78.6 bits(192) | 5e-16  | 35/35(100%) | 35/35(100%) | 0/35(0%) |

Query 1 KVSEHIPVYQQEENQTDVWTLNLSKDDFLIYDRC 35  
 KVSEHIPVYQQEENQTDVWTLNLSKDDFLIYDRC  
 Sbjct 106 KVSEHIPVYQQEENQTDVWTLNLSKDDFLIYDRC 140

**Related Information**

[Gene](#) - associated gene details  
[Map Viewer](#) - aligned genomic context

[Download](#) [GenPept](#) [Graphics](#)

[Next](#) [Previous](#) [Descriptions](#)

**PREDICTED: LOW QUALITY PROTEIN: selenoprotein P [Papio anubis]**

Sequence ID: [gi|685545348|ref|XP\\_009206607.1|](#) Length: 381 Number of Matches: 1

Range 1: 106 to 140 [GenPept](#) [Graphics](#)

[Next Match](#) [Previous Match](#)

| Score          | Expect | Identities  | Positives   | Gaps     |
|----------------|--------|-------------|-------------|----------|
| 78.6 bits(192) | 5e-16  | 35/35(100%) | 35/35(100%) | 0/35(0%) |

Query 1 KVSEHIPVYQQEENQTDVWTLNLSKDDFLIYDRC 35  
 KVSEHIPVYQQEENQTDVWTLNLSKDDFLIYDRC  
 Sbjct 106 KVSEHIPVYQQEENQTDVWTLNLSKDDFLIYDRC 140

**Related Information**

[Gene](#) - associated gene details  
[Map Viewer](#) - aligned genomic context

[Download](#) [GenPept](#) [Graphics](#)

[Next](#) [Previous](#) [Descriptions](#)

**PREDICTED: LOW QUALITY PROTEIN: selenoprotein P [Pan paniscus]**

Sequence ID: [gi|675710689|ref|XP\\_008961588.1|](#) Length: 381 Number of Matches: 1

Range 1: 106 to 140 [GenPept](#) [Graphics](#)

[Next Match](#) [Previous Match](#)

| Score          | Expect | Identities  | Positives   | Gaps     |
|----------------|--------|-------------|-------------|----------|
| 78.6 bits(192) | 5e-16  | 35/35(100%) | 35/35(100%) | 0/35(0%) |

Query 1 KVSEHIPVYQQEENQTDVWTLNLSKDDFLIYDRC 35  
 KVSEHIPVYQQEENQTDVWTLNLSKDDFLIYDRC  
 Sbjct 106 KVSEHIPVYQQEENQTDVWTLNLSKDDFLIYDRC 140

**Related Information**

[Gene](#) - associated gene details  
[Map Viewer](#) - aligned genomic context

BLAST is a registered trademark of the National Library of Medicine.



NCBI/ BLAST/ blastp suite/ Formatting Results - BVMAEDJH01R

Your search parameters were adjusted to search for a short input sequence.

Edit and Resubmit Save Search Strategies Formatting options Download YouTube How to read this page Blast report description

SHBG\_RLDVDQALDRS\_Mod

RID BVMAEDJH01R (Expires on 01-21 10:53 am)

Query ID lcl|256865
Description None
Molecule type amino acid
Query Length 11

Database Name nr
Description All non-redundant GenBank CDS translations+PDB+SwissProt+PIR+PRF excluding environmental samples from WGS projects
Program BLASTP 2.2.30+ Citation

Other reports: Search Summary Taxonomy reports Distance tree of results Related Structures Multiple alignment

Graphic Summary

Show Conserved Domains

No putative conserved domains have been detected

Distribution of 100 Blast Hits on the Query Sequence

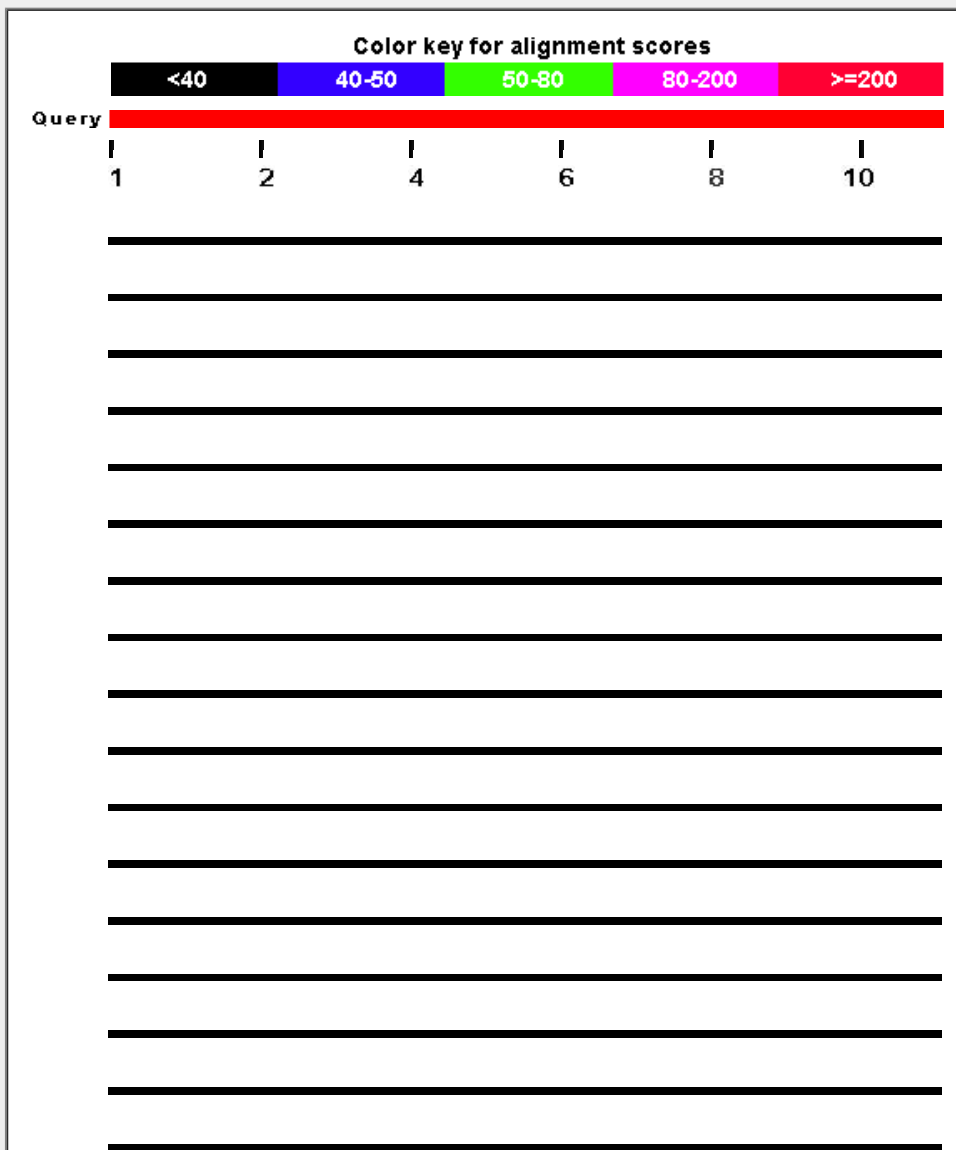



[Redacted content consisting of multiple horizontal black bars]

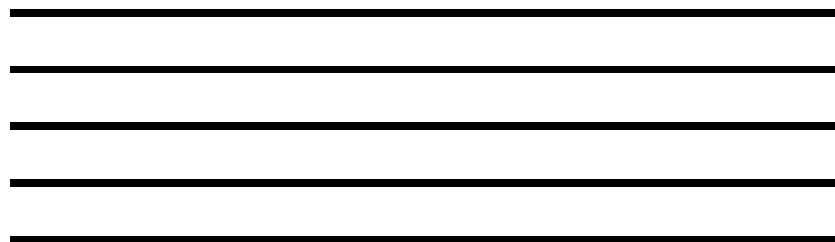

## Descriptions

### Sequences producing significant alignments:

Select: [All](#) [None](#) Selected:0

[Alignments](#)
[Download](#)
[GenPept](#)
[Graphics](#)
[Distance tree of results](#)
[Multiple alignment](#)


| Description                                                                                 | Max score | Total score | Query cover | E value | Ident | Accession                      |
|---------------------------------------------------------------------------------------------|-----------|-------------|-------------|---------|-------|--------------------------------|
| <a href="#">sex hormone binding globulin [Homo sapiens]</a>                                 | 35.0      | 35.0        | 100%        | 0.54    | 91%   | <a href="#">ABY68001.1</a>     |
| <a href="#">PREDICTED: sex hormone-binding globulin isoform X6 [Homo sapiens]</a>           | 35.0      | 35.0        | 100%        | 0.55    | 91%   | <a href="#">XP_005256822.1</a> |
| <a href="#">sex hormone binding globulin [Homo sapiens]</a>                                 | 35.0      | 35.0        | 100%        | 0.56    | 91%   | <a href="#">ABY67999.1</a>     |
| <a href="#">sex steroid-binding protein [Homo sapiens]</a>                                  | 35.0      | 35.0        | 100%        | 0.56    | 91%   | <a href="#">CAA29234.1</a>     |
| <a href="#">PREDICTED: sex hormone-binding globulin isoform X6 [Pan paniscus]</a>           | 35.0      | 35.0        | 100%        | 0.56    | 91%   | <a href="#">XP_008960682.1</a> |
| <a href="#">PREDICTED: sex hormone-binding globulin isoform X6 [Chlorocebus sabaueu]</a>    | 35.0      | 35.0        | 100%        | 0.56    | 91%   | <a href="#">XP_008008379.1</a> |
| <a href="#">sex hormone-binding globulin isoform 7 [Homo sapiens]</a>                       | 35.0      | 35.0        | 100%        | 0.56    | 91%   | <a href="#">NP_001276045.1</a> |
| <a href="#">PREDICTED: sex hormone-binding globulin isoform X3 [Pan paniscus]</a>           | 35.0      | 35.0        | 100%        | 0.56    | 91%   | <a href="#">XP_003810122.1</a> |
| <a href="#">sex hormone-binding globulin isoform 4 precursor [Homo sapiens]</a>             | 35.0      | 35.0        | 100%        | 0.56    | 91%   | <a href="#">NP_001139753.1</a> |
| <a href="#">PREDICTED: sex hormone-binding globulin isoform 4 [Gorilla gorilla gorilla]</a> | 35.0      | 35.0        | 100%        | 0.56    | 91%   | <a href="#">XP_004058549.1</a> |
| <a href="#">PREDICTED: sex hormone-binding globulin isoform X4 [Pan paniscus]</a>           | 35.0      | 35.0        | 100%        | 0.57    | 91%   | <a href="#">XP_008960680.1</a> |
| <a href="#">sex hormone-binding globulin isoform 5 [Homo sapiens]</a>                       | 35.0      | 35.0        | 100%        | 0.57    | 91%   | <a href="#">NP_001276042.1</a> |
| <a href="#">PREDICTED: sex hormone-binding globulin isoform X5 [Chlorocebus sabaueu]</a>    | 35.0      | 35.0        | 100%        | 0.57    | 91%   | <a href="#">XP_008008377.1</a> |
| <a href="#">PREDICTED: sex hormone-binding globulin isoform X7 [Homo sapiens]</a>           | 35.0      | 35.0        | 100%        | 0.57    | 91%   | <a href="#">XP_006721632.1</a> |
| <a href="#">unnamed protein product [Homo sapiens]</a>                                      | 35.0      | 35.0        | 100%        | 0.58    | 91%   | <a href="#">CAA29309.1</a>     |
| <a href="#">unnamed protein product [Homo sapiens]</a>                                      | 35.0      | 35.0        | 100%        | 0.58    | 91%   | <a href="#">CAA28987.1</a>     |
| <a href="#">sex hormone-binding globulin isoform 2 precursor [Homo sapiens]</a>             | 35.0      | 35.0        | 100%        | 0.58    | 91%   | <a href="#">NP_001139751.1</a> |
| <a href="#">PREDICTED: sex hormone-binding globulin isoform X4 [Chlorocebus sabaueu]</a>    | 35.0      | 35.0        | 100%        | 0.58    | 91%   | <a href="#">XP_008008372.1</a> |
| <a href="#">PREDICTED: sex hormone-binding globulin isoform 3 [Gorilla gorilla gorilla]</a> | 35.0      | 35.0        | 100%        | 0.58    | 91%   | <a href="#">XP_004058548.1</a> |
| <a href="#">SHBG protein [Homo sapiens]</a>                                                 | 35.0      | 35.0        | 100%        | 0.58    | 91%   | <a href="#">AAH69597.1</a>     |
| <a href="#">sex hormone-binding globulin [Homo sapiens]</a>                                 | 35.0      | 35.0        | 100%        | 0.58    | 91%   | <a href="#">AAC18778.1</a>     |
| <a href="#">sex hormone-binding globulin isoform 1 precursor [Homo sapiens]</a>             | 35.0      | 35.0        | 100%        | 0.58    | 91%   | <a href="#">NP_001031.2</a>    |
| <a href="#">PREDICTED: sex hormone-binding globulin isoform X1 [Pan paniscus]</a>           | 35.0      | 35.0        | 100%        | 0.58    | 91%   | <a href="#">XP_003810120.1</a> |
| <a href="#">PREDICTED: sex hormone-binding globulin isoform X3 [Chlorocebus sabaueu]</a>    | 35.0      | 35.0        | 100%        | 0.58    | 91%   | <a href="#">XP_008008371.1</a> |
| <a href="#">PREDICTED: sex hormone-binding globulin isoform 1 [Gorilla gorilla gorilla]</a> | 35.0      | 35.0        | 100%        | 0.58    | 91%   | <a href="#">XP_004058546.1</a> |
| <a href="#">PREDICTED: LOW QUALITY PROTEIN: sex hormone-binding globulin [Micrc</a>         | 35.0      | 35.0        | 100%        | 0.58    | 91%   | <a href="#">XP_005350335.1</a> |
| <a href="#">PREDICTED: sex hormone-binding globulin isoform X2 [Chlorocebus sabaueu]</a>    | 35.0      | 35.0        | 100%        | 0.59    | 91%   | <a href="#">XP_008008369.1</a> |
| <a href="#">PREDICTED: sex hormone-binding globulin isoform X1 [Chlorocebus sabaueu]</a>    | 35.0      | 35.0        | 100%        | 0.59    | 91%   | <a href="#">XP_008008368.1</a> |
| <a href="#">PREDICTED: sex hormone-binding globulin [Cricetulus griseus]</a>                | 32.9      | 32.9        | 100%        | 2.9     | 82%   | <a href="#">XP_003497225.1</a> |

|                                                                                                                                                      |      |      |      |     |     |                                |
|------------------------------------------------------------------------------------------------------------------------------------------------------|------|------|------|-----|-----|--------------------------------|
| <a href="#">androgen-binding protein [Phodopus sungorus]</a>                                                                                         | 32.9 | 32.9 | 100% | 2.9 | 82% | <a href="#">AAB41681.1</a>     |
| <a href="#">RecName: Full=Sex hormone-binding globulin; Short=SHBG; AltName: Full=Sex hormone-binding globulin-like protein [Cricetulus griseus]</a> | 32.9 | 32.9 | 100% | 2.9 | 82% | <a href="#">Q62588.1</a>       |
| <a href="#">sex hormone-binding globulin-like protein [Cricetulus griseus]</a>                                                                       | 32.9 | 32.9 | 100% | 2.9 | 82% | <a href="#">ERE69391.1</a>     |
| <a href="#">PREDICTED: sex hormone-binding globulin [Trichechus manatus latirostris]</a>                                                             | 32.5 | 32.5 | 100% | 3.9 | 91% | <a href="#">XP_004376080.1</a> |
| <a href="#">PREDICTED: sex hormone-binding globulin [Orycteropus afer afer]</a>                                                                      | 31.6 | 31.6 | 100% | 7.3 | 82% | <a href="#">XP_007950448.1</a> |
| <a href="#">sex hormone-binding globulin [synthetic construct]</a>                                                                                   | 31.6 | 31.6 | 100% | 7.5 | 82% | <a href="#">AAX36263.1</a>     |
| <a href="#">lantibiotic dehydratase [Micromonospora aurantiaca]</a>                                                                                  | 31.2 | 31.2 | 100% | 11  | 82% | <a href="#">WP_013287251.1</a> |
| <a href="#">PREDICTED: sex hormone-binding globulin isoform X2 [Saimiri boliviensis boliviensis]</a>                                                 | 30.8 | 30.8 | 100% | 14  | 82% | <a href="#">XP_010338103.1</a> |
| <a href="#">PREDICTED: sex hormone-binding globulin isoform X5 [Rhinopithecus roxellae]</a>                                                          | 30.8 | 30.8 | 100% | 14  | 82% | <a href="#">XP_010360686.1</a> |
| <a href="#">PREDICTED: sex hormone-binding globulin isoform X3 [Papio anubis]</a>                                                                    | 30.8 | 30.8 | 100% | 14  | 82% | <a href="#">XP_009187837.1</a> |
| <a href="#">PREDICTED: sex hormone-binding globulin isoform X3 [Callithrix jacchus]</a>                                                              | 30.8 | 30.8 | 100% | 14  | 82% | <a href="#">XP_008994833.1</a> |
| <a href="#">PREDICTED: sex hormone-binding globulin isoform X4 [Rhinopithecus roxellae]</a>                                                          | 30.8 | 30.8 | 100% | 14  | 82% | <a href="#">XP_010360685.1</a> |
| <a href="#">PREDICTED: sex hormone-binding globulin isoform X2 [Callithrix jacchus]</a>                                                              | 30.8 | 30.8 | 100% | 14  | 82% | <a href="#">XP_008994832.1</a> |
| <a href="#">PREDICTED: sex hormone-binding globulin isoform X3 [Rhinopithecus roxellae]</a>                                                          | 30.8 | 30.8 | 100% | 14  | 82% | <a href="#">XP_010360684.1</a> |
| <a href="#">PREDICTED: sex hormone-binding globulin isoform X1 [Callithrix jacchus]</a>                                                              | 30.8 | 30.8 | 100% | 14  | 82% | <a href="#">XP_002747998.1</a> |
| <a href="#">PREDICTED: sex hormone-binding globulin isoform X2 [Rhinopithecus roxellae]</a>                                                          | 30.8 | 30.8 | 100% | 14  | 82% | <a href="#">XP_010360683.1</a> |
| <a href="#">PREDICTED: sex hormone-binding globulin isoform X2 [Papio anubis]</a>                                                                    | 30.8 | 30.8 | 100% | 14  | 82% | <a href="#">XP_009187836.1</a> |
| <a href="#">Sex hormone-binding globulin [Macaca mulatta]</a>                                                                                        | 30.8 | 30.8 | 100% | 14  | 82% | <a href="#">EHH24482.1</a>     |
| <a href="#">PREDICTED: sex hormone-binding globulin isoform X1 [Rhinopithecus roxellae]</a>                                                          | 30.8 | 30.8 | 100% | 14  | 82% | <a href="#">XP_010360681.1</a> |
| <a href="#">PREDICTED: sex hormone-binding globulin isoform X1 [Papio anubis]</a>                                                                    | 30.8 | 30.8 | 100% | 14  | 82% | <a href="#">XP_009187834.1</a> |
| <a href="#">antibiotic ABC transporter [Burkholderia cepacia]</a>                                                                                    | 30.8 | 30.8 | 90%  | 14  | 90% | <a href="#">WP_034209699.1</a> |
| <a href="#">PREDICTED: sex hormone-binding globulin isoform X1 [Saimiri boliviensis boliviensis]</a>                                                 | 30.8 | 30.8 | 100% | 14  | 82% | <a href="#">XP_003929225.1</a> |
| <a href="#">PREDICTED: LOW QUALITY PROTEIN: sex hormone-binding globulin-like [Macaca fascicularis]</a>                                              | 30.8 | 30.8 | 100% | 14  | 82% | <a href="#">XP_002808160.1</a> |
| <a href="#">uncharacterized protein LOC101864774 [Macaca fascicularis]</a>                                                                           | 30.8 | 30.8 | 100% | 14  | 82% | <a href="#">NP_001270513.1</a> |
| <a href="#">hypothetical protein [Streptomyces albus]</a>                                                                                            | 30.3 | 30.3 | 100% | 18  | 82% | <a href="#">WP_037678548.1</a> |
| <a href="#">PREDICTED: sex hormone-binding globulin isoform X3 [Jaculus jaculus]</a>                                                                 | 30.3 | 30.3 | 100% | 19  | 82% | <a href="#">XP_004669275.1</a> |
| <a href="#">PREDICTED: sex hormone-binding globulin isoform X2 [Jaculus jaculus]</a>                                                                 | 30.3 | 30.3 | 100% | 19  | 82% | <a href="#">XP_004669274.1</a> |
| <a href="#">PREDICTED: sex hormone-binding globulin isoform X1 [Jaculus jaculus]</a>                                                                 | 30.3 | 30.3 | 100% | 19  | 82% | <a href="#">XP_004669273.1</a> |
| <a href="#">sex hormone-binding globulin precursor [Mus musculus]</a>                                                                                | 30.3 | 30.3 | 100% | 19  | 82% | <a href="#">NP_035497.1</a>    |
| <a href="#">PREDICTED: sex hormone-binding globulin [Condylura cristata]</a>                                                                         | 29.5 | 29.5 | 90%  | 36  | 80% | <a href="#">XP_004684701.1</a> |
| <a href="#">PREDICTED: LOW QUALITY PROTEIN: sex hormone-binding globulin [Pongo pygmaeus]</a>                                                        | 29.5 | 29.5 | 100% | 36  | 82% | <a href="#">XP_009249533.1</a> |
| <a href="#">hypothetical protein [Streptomyces carneus]</a>                                                                                          | 29.5 | 29.5 | 81%  | 37  | 89% | <a href="#">WP_033243727.1</a> |
| <a href="#">hypothetical protein PHYSODRAFT_293694 [Phytophthora sojae]</a>                                                                          | 29.5 | 29.5 | 100% | 37  | 82% | <a href="#">XP_009515333.1</a> |
| <a href="#">PREDICTED: LOW QUALITY PROTEIN: sex hormone-binding globulin [Sarcoptes scabiei]</a>                                                     | 29.1 | 29.1 | 90%  | 48  | 90% | <a href="#">XP_003768811.1</a> |
| <a href="#">phosphoenolpyruvate phosphomutase [Streptomyces sp. NRRL S-384]</a>                                                                      | 29.1 | 29.1 | 81%  | 48  | 89% | <a href="#">WP_037876888.1</a> |
| <a href="#">putative uncharacterized protein [Paraprevotella clara CAG:116]</a>                                                                      | 29.1 | 29.1 | 81%  | 49  | 89% | <a href="#">WP_021979896.1</a> |
| <a href="#">hypothetical protein [Paraprevotella clara]</a>                                                                                          | 29.1 | 29.1 | 81%  | 49  | 89% | <a href="#">WP_008617140.1</a> |
| <a href="#">PREDICTED: sex hormone-binding globulin isoform 3 [Dasyurus novemcinctus]</a>                                                            | 29.1 | 29.1 | 90%  | 49  | 90% | <a href="#">XP_004468805.1</a> |
| <a href="#">PREDICTED: LOW QUALITY PROTEIN: sex hormone-binding globulin [Cavius cavius]</a>                                                         | 29.1 | 29.1 | 90%  | 49  | 90% | <a href="#">XP_003466296.1</a> |
| <a href="#">PREDICTED: sex hormone-binding globulin isoform 1 [Dasyurus novemcinctus]</a>                                                            | 29.1 | 29.1 | 90%  | 50  | 90% | <a href="#">XP_004468803.1</a> |
| <a href="#">hypothetical protein MGL_0571 [Malassezia globosa CBS 7966]</a>                                                                          | 29.1 | 29.1 | 81%  | 50  | 89% | <a href="#">XP_001732796.1</a> |
| <a href="#">hypothetical protein M437DRAFT_51343 [Aureobasidium melanogenum CBS 10402]</a>                                                           | 29.1 | 29.1 | 100% | 50  | 50% | <a href="#">KEQ61742.1</a>     |
| <a href="#">unnamed protein product [Malassezia sympodialis ATCC 42132]</a>                                                                          | 29.1 | 29.1 | 81%  | 50  | 89% | <a href="#">CCV00735.1</a>     |
| <a href="#">hypothetical protein [Marinobacter hydrocarbonoclasticus]</a>                                                                            | 29.1 | 29.1 | 81%  | 50  | 89% | <a href="#">WP_011786349.1</a> |
| <a href="#">hypothetical protein [Marinobacter sp. C1S70]</a>                                                                                        | 29.1 | 29.1 | 81%  | 50  | 89% | <a href="#">WP_022991504.1</a> |

|                                                                                               |      |      |      |    |      |                                |
|-----------------------------------------------------------------------------------------------|------|------|------|----|------|--------------------------------|
| <a href="#">hypothetical protein [Marinobacter sp. EN3]</a>                                   | 29.1 | 29.1 | 81%  | 50 | 89%  | <a href="#">WP_023011180.1</a> |
| <a href="#">hypothetical protein [Marinobacter hydrocarbonoclasticus]</a>                     | 29.1 | 29.1 | 81%  | 50 | 89%  | <a href="#">WP_014422263.1</a> |
| <a href="#">hypothetical protein [Streptomyces aureocirculatus]</a>                           | 28.6 | 28.6 | 81%  | 62 | 89%  | <a href="#">WP_030573048.1</a> |
| <a href="#">nUDIX hydrolase [Eubacterium sp. CAG:251]</a>                                     | 28.6 | 28.6 | 90%  | 62 | 80%  | <a href="#">WP_022259296.1</a> |
| <a href="#">hypothetical protein [Geobacillus thermodenitrificans]</a>                        | 28.6 | 28.6 | 90%  | 63 | 80%  | <a href="#">WP_029760946.1</a> |
| <a href="#">hypothetical protein [Geobacillus sp. G11MC16]</a>                                | 28.6 | 28.6 | 90%  | 63 | 80%  | <a href="#">WP_008879469.1</a> |
| <a href="#">hypothetical protein [Geobacillus thermodenitrificans]</a>                        | 28.6 | 28.6 | 90%  | 63 | 80%  | <a href="#">WP_011887232.1</a> |
| <a href="#">TetR family transcriptional regulator [Anaeromyxobacter sp. Fw109-5]</a>          | 28.6 | 28.6 | 72%  | 65 | 100% | <a href="#">WP_012098065.1</a> |
| <a href="#">hypothetical protein HMPREF1544_07665 [Mucor circinelloides f. circinelloide]</a> | 28.6 | 28.6 | 90%  | 66 | 80%  | <a href="#">EPB85576.1</a>     |
| <a href="#">hypothetical protein [Thiobacillus prosperus]</a>                                 | 28.6 | 28.6 | 90%  | 66 | 80%  | <a href="#">WP_038092651.1</a> |
| <a href="#">Protein YicC [Thioalkalivibrio nitratireducens]</a>                               | 28.6 | 28.6 | 90%  | 66 | 80%  | <a href="#">WP_015260324.1</a> |
| <a href="#">putative stress-induced protein [Thiobacillus prosperus]</a>                      | 28.6 | 28.6 | 90%  | 66 | 80%  | <a href="#">KFZ89319.1</a>     |
| <a href="#">hypothetical protein [Thioalkalivibrio sp. ALJ17]</a>                             | 28.6 | 28.6 | 90%  | 66 | 80%  | <a href="#">WP_026289603.1</a> |
| <a href="#">hypothetical protein [Lamprocystis purpurea]</a>                                  | 28.6 | 28.6 | 90%  | 66 | 80%  | <a href="#">WP_026199839.1</a> |
| <a href="#">hypothetical protein [Thioalkalivibrio sulfidophilus]</a>                         | 28.6 | 28.6 | 90%  | 66 | 80%  | <a href="#">WP_012639494.1</a> |
| <a href="#">hypothetical protein [Candidatus Contendobacter odensis]</a>                      | 28.6 | 28.6 | 90%  | 66 | 80%  | <a href="#">WP_034434520.1</a> |
| <a href="#">hypothetical protein [Thioalkalivibrio thiocyanodenitrificans]</a>                | 28.6 | 28.6 | 90%  | 66 | 80%  | <a href="#">WP_018232780.1</a> |
| <a href="#">hypothetical protein [Thiothrix nivea]</a>                                        | 28.6 | 28.6 | 90%  | 66 | 80%  | <a href="#">WP_002709580.1</a> |
| <a href="#">hypothetical protein THITH_01470 [Thioalkalivibrio thiocyanoxidans ARh 4]</a>     | 28.6 | 28.6 | 90%  | 66 | 80%  | <a href="#">AHE97167.1</a>     |
| <a href="#">hypothetical protein [Allochromatium vinosum]</a>                                 | 28.6 | 28.6 | 90%  | 66 | 80%  | <a href="#">WP_012972150.1</a> |
| <a href="#">glutamine amidotransferase [Ahrensia sp. R2A130]</a>                              | 28.6 | 28.6 | 90%  | 66 | 80%  | <a href="#">WP_009758020.1</a> |
| <a href="#">hydrolase [Clostridiales bacterium VE202-28]</a>                                  | 28.6 | 28.6 | 81%  | 66 | 89%  | <a href="#">WP_025485368.1</a> |
| <a href="#">hydrolase [Clostridiales bacterium 1_7_47FAA]</a>                                 | 28.6 | 28.6 | 81%  | 66 | 89%  | <a href="#">WP_008720076.1</a> |
| <a href="#">hypothetical protein [Janibacter sp. HTCC2649]</a>                                | 28.6 | 28.6 | 72%  | 67 | 100% | <a href="#">WP_009776442.1</a> |
| <a href="#">PREDICTED: sex hormone-binding globulin isoform X2 [Peromyscus maniculatus]</a>   | 28.6 | 28.6 | 100% | 67 | 73%  | <a href="#">XP_006973508.1</a> |
| <a href="#">PREDICTED: sex hormone-binding globulin isoform X1 [Peromyscus maniculatus]</a>   | 28.6 | 28.6 | 100% | 67 | 73%  | <a href="#">XP_006973507.1</a> |

## Alignments

Download v [GenPept](#) [Graphics](#) ▼ Next ▲ Previous ▲ Descriptions

sex hormone binding globulin [Homo sapiens]

Sequence ID: [gb|ABY68001.1](#) Length: 206 Number of Matches: 1

Range 1: 176 to 186 [GenPept](#) [Graphics](#) ▼ Next Match ▲ Previous Match

| Score         | Expect | Identities | Positives   | Gaps     |
|---------------|--------|------------|-------------|----------|
| 35.0 bits(75) | 0.54   | 10/11(91%) | 11/11(100%) | 0/11(0%) |

Query 1 RLDVDQALDRS 11  
 RLDVDQAL+RS  
 Sbjct 176 RLDVDQALNRS 186

### Related Information

[Gene](#) - associated gene details

Download v [GenPept](#) [Graphics](#) ▼ Next ▲ Previous ▲ Descriptions

PREDICTED: sex hormone-binding globulin isoform X6 [Homo sapiens]

Sequence ID: [ref|XP\\_005256822.1](#) Length: 233 Number of Matches: 1

Range 1: 203 to 213 [GenPept](#) [Graphics](#) ▼ Next Match ▲ Previous Match

| Score         | Expect | Identities | Positives   | Gaps     |
|---------------|--------|------------|-------------|----------|
| 35.0 bits(75) | 0.55   | 10/11(91%) | 11/11(100%) | 0/11(0%) |

### Related Information

[Gene](#) - associated gene details

Query 1 RLDVDQALDRS 11  
 RLDVDQAL+RS  
 Sbjct 203 RLDVDQALNRS 213

[Download](#) [GenPept](#) [Graphics](#)

[Next](#) [Previous](#) [Descriptions](#)

sex hormone binding globulin [Homo sapiens]

Sequence ID: [gb|ABY67999.1](#) Length: 260 Number of Matches: 1

Range 1: 230 to 240 [GenPept](#) [Graphics](#)

[Next Match](#) [Previous Match](#)

| Score         | Expect | Identities | Positives   | Gaps     |
|---------------|--------|------------|-------------|----------|
| 35.0 bits(75) | 0.56   | 10/11(91%) | 11/11(100%) | 0/11(0%) |

Query 1 RLDVDQALDRS 11  
 RLDVDQAL+RS  
 Sbjct 230 RLDVDQALNRS 240

**Related Information**

[Gene](#) - associated gene details

[Download](#) [GenPept](#) [Graphics](#)

[Next](#) [Previous](#) [Descriptions](#)

sex steroid-binding protein [Homo sapiens]

Sequence ID: [emb|CAA29234.1](#) Length: 282 Number of Matches: 1

Range 1: 252 to 262 [GenPept](#) [Graphics](#)

[Next Match](#) [Previous Match](#)

| Score         | Expect | Identities | Positives   | Gaps     |
|---------------|--------|------------|-------------|----------|
| 35.0 bits(75) | 0.56   | 10/11(91%) | 11/11(100%) | 0/11(0%) |

Query 1 RLDVDQALDRS 11  
 RLDVDQAL+RS  
 Sbjct 252 RLDVDQALNRS 262

**Related Information**

[Gene](#) - associated gene details

[Download](#) [GenPept](#) [Graphics](#)

[Next](#) [Previous](#) [Descriptions](#)

PREDICTED: sex hormone-binding globulin isoform X6 [Pan paniscus]

Sequence ID: [ref|XP\\_008960682.1](#) Length: 286 Number of Matches: 1

Range 1: 256 to 266 [GenPept](#) [Graphics](#)

[Next Match](#) [Previous Match](#)

| Score         | Expect | Identities | Positives   | Gaps     |
|---------------|--------|------------|-------------|----------|
| 35.0 bits(75) | 0.56   | 10/11(91%) | 11/11(100%) | 0/11(0%) |

Query 1 RLDVDQALDRS 11  
 RLDVDQAL+RS  
 Sbjct 256 RLDVDQALNRS 266

**Related Information**

[Gene](#) - associated gene details

[Map Viewer](#) - aligned genomic context

BLAST is a registered trademark of the National Library of Medicine.

NCBI/ BLAST/ blastp suite/ Formatting Results - BE89Y3M7015

Your search parameters were adjusted to search for a short input sequence.

[Edit and Resubmit](#) [Save Search Strategies](#) [Formatting options](#) [Download](#)

[YouTube](#) [How to read this page](#) [Blast report description](#)

### SHBG\_RLDVDQALNRS\_NonMod

RID [BE89Y3M7015](#) (Expires on 01-16 09:09 am)

Query ID [Icl|91730](#)  
 Description None  
 Molecule type amino acid  
 Query Length 11

Database Name nr  
 Description All non-redundant GenBank CDS translations+PDB+SwissProt+PIR excluding environmental samples from WGS projects  
 Program BLASTP 2.2.30+ [Citation](#)

Other reports: [Search Summary](#) [Taxonomy reports](#) [Distance tree of results](#) [Related Structures](#) [Multiple alignment](#)

### Graphic Summary

Show Conserved Domains

No putative conserved domains have been detected

Distribution of 100 Blast Hits on the Query Sequence





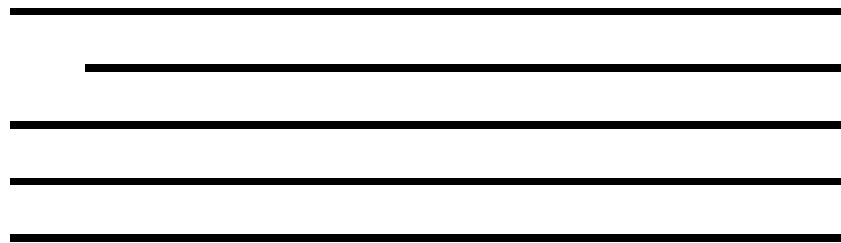

**Descriptions**

**Sequences producing significant alignments:**

Select: [All](#) [None](#) Selected:0

[↑](#) [Alignments](#)
[Download](#)
[GenPept](#)
[Graphics](#)
[Distance tree of results](#)
[Multiple alignment](#)
⚙

| Description                                                                         | Max score | Total score | Query cover | E value | Ident | Accession                                   |
|-------------------------------------------------------------------------------------|-----------|-------------|-------------|---------|-------|---------------------------------------------|
| <a href="#">sex hormone binding globulin [Homo sapiens]</a>                         | 37.5      | 37.5        | 100%        | 0.076   | 100%  | <a href="#">gi 165873764 ABY68001.1</a>     |
| <a href="#">PREDICTED: sex hormone-binding globulin isoform X6 [Homo sapiens]</a>   | 37.5      | 37.5        | 100%        | 0.078   | 100%  | <a href="#">gi 530410575 XP_005256822.1</a> |
| <a href="#">sex hormone binding globulin [Homo sapiens]</a>                         | 37.5      | 37.5        | 100%        | 0.079   | 100%  | <a href="#">gi 165873760 ABY67999.1</a>     |
| <a href="#">sex steroid-binding protein [Homo sapiens]</a>                          | 37.5      | 37.5        | 100%        | 0.080   | 100%  | <a href="#">gi 825718 CAA29234.1</a>        |
| <a href="#">PREDICTED: sex hormone-binding globulin isoform X6 [Pan paniscus]</a>   | 37.5      | 37.5        | 100%        | 0.080   | 100%  | <a href="#">gi 675705950 XP_008960682.1</a> |
| <a href="#">PREDICTED: sex hormone-binding globulin isoform X6 [Chlorocebus]</a>    | 37.5      | 37.5        | 100%        | 0.080   | 100%  | <a href="#">gi 635087572 XP_008008379.1</a> |
| <a href="#">sex hormone-binding globulin isoform 7 [Homo sapiens]</a>               | 37.5      | 37.5        | 100%        | 0.080   | 100%  | <a href="#">gi 574288369 NP_001276045.1</a> |
| <a href="#">PREDICTED: sex hormone-binding globulin isoform X3 [Pan paniscus]</a>   | 37.5      | 37.5        | 100%        | 0.080   | 100%  | <a href="#">gi 397477529 XP_003810122.1</a> |
| <a href="#">sex hormone-binding globulin isoform 4 precursor [Homo sapiens]</a>     | 37.5      | 37.5        | 100%        | 0.080   | 100%  | <a href="#">gi 226371613 NP_001139753.1</a> |
| <a href="#">PREDICTED: sex hormone-binding globulin isoform 4 [Gorilla gorilla]</a> | 37.5      | 37.5        | 100%        | 0.080   | 100%  | <a href="#">gi 426383969 XP_004058549.1</a> |
| <a href="#">PREDICTED: sex hormone-binding globulin isoform X4 [Pan paniscus]</a>   | 37.5      | 37.5        | 100%        | 0.082   | 100%  | <a href="#">gi 675705940 XP_008960680.1</a> |
| <a href="#">sex hormone-binding globulin isoform 5 [Homo sapiens]</a>               | 37.5      | 37.5        | 100%        | 0.082   | 100%  | <a href="#">gi 574287849 NP_001276042.1</a> |
| <a href="#">PREDICTED: sex hormone-binding globulin isoform X5 [Chlorocebus]</a>    | 37.5      | 37.5        | 100%        | 0.082   | 100%  | <a href="#">gi 635087568 XP_008008377.1</a> |
| <a href="#">PREDICTED: sex hormone-binding globulin isoform X7 [Homo sapiens]</a>   | 37.5      | 37.5        | 100%        | 0.082   | 100%  | <a href="#">gi 578830017 XP_006721632.1</a> |
| <a href="#">unnamed protein product [Homo sapiens]</a>                              | 37.5      | 37.5        | 100%        | 0.082   | 100%  | <a href="#">gi 1335306 CAA29309.1</a>       |
| <a href="#">unnamed protein product [Homo sapiens]</a>                              | 37.5      | 37.5        | 100%        | 0.082   | 100%  | <a href="#">gi 36448 CAA28987.1</a>         |
| <a href="#">sex hormone-binding globulin isoform 2 precursor [Homo sapiens]</a>     | 37.5      | 37.5        | 100%        | 0.082   | 100%  | <a href="#">gi 226371775 NP_001139751.1</a> |
| <a href="#">PREDICTED: sex hormone-binding globulin isoform X4 [Chlorocebus]</a>    | 37.5      | 37.5        | 100%        | 0.082   | 100%  | <a href="#">gi 635087558 XP_008008372.1</a> |
| <a href="#">PREDICTED: sex hormone-binding globulin isoform 3 [Gorilla gorilla]</a> | 37.5      | 37.5        | 100%        | 0.082   | 100%  | <a href="#">gi 426383967 XP_004058548.1</a> |
| <a href="#">SHBG protein [Homo sapiens]</a>                                         | 37.5      | 37.5        | 100%        | 0.083   | 100%  | <a href="#">gi 47479685 AAH69597.1</a>      |
| <a href="#">sex hormone-binding globulin [Homo sapiens]</a>                         | 37.5      | 37.5        | 100%        | 0.083   | 100%  | <a href="#">gi 338075 AAC18778.1</a>        |
| <a href="#">sex hormone-binding globulin isoform 1 precursor [Homo sapiens]</a>     | 37.5      | 37.5        | 100%        | 0.083   | 100%  | <a href="#">gi 7382460 NP_001031.2</a>      |
| <a href="#">PREDICTED: sex hormone-binding globulin isoform X1 [Pan paniscus]</a>   | 37.5      | 37.5        | 100%        | 0.083   | 100%  | <a href="#">gi 397477525 XP_003810120.1</a> |
| <a href="#">PREDICTED: sex hormone-binding globulin isoform X3 [Chlorocebus]</a>    | 37.5      | 37.5        | 100%        | 0.083   | 100%  | <a href="#">gi 635087556 XP_008008371.1</a> |
| <a href="#">PREDICTED: sex hormone-binding globulin isoform 1 [Gorilla gorilla]</a> | 37.5      | 37.5        | 100%        | 0.083   | 100%  | <a href="#">gi 426383963 XP_004058546.1</a> |
| <a href="#">PREDICTED: LOW QUALITY PROTEIN: sex hormone-binding globulin</a>        | 37.5      | 37.5        | 100%        | 0.083   | 100%  | <a href="#">gi 532013105 XP_005350335.1</a> |
| <a href="#">PREDICTED: sex hormone-binding globulin isoform X2 [Chlorocebus]</a>    | 37.5      | 37.5        | 100%        | 0.084   | 100%  | <a href="#">gi 635087554 XP_008008369.1</a> |
| <a href="#">PREDICTED: sex hormone-binding globulin isoform X1 [Chlorocebus]</a>    | 37.5      | 37.5        | 100%        | 0.084   | 100%  | <a href="#">gi 635087552 XP_008008368.1</a> |



|                                                                                   |      |      |      |      |      |                                             |
|-----------------------------------------------------------------------------------|------|------|------|------|------|---------------------------------------------|
| <a href="#">PREDICTED: sex hormone-binding globulin [Cricetulus griseus]</a>      | 35.4 | 35.4 | 100% | 0.42 | 91%  | <a href="#">gij354469621 XP_003497225.1</a> |
| <a href="#">androgen-binding protein [Phodopus sungorus]</a>                      | 35.4 | 35.4 | 100% | 0.42 | 91%  | <a href="#">gij1813476 AAB41681.1</a>       |
| <a href="#">RecName: Full=Sex hormone-binding globulin; Short=SHBG; AltNa</a>     | 35.4 | 35.4 | 100% | 0.42 | 91%  | <a href="#">gij6174979 Q62588.1</a>         |
| <a href="#">sex hormone-binding globulin-like protein [Cricetulus griseus]</a>    | 35.4 | 35.4 | 100% | 0.42 | 91%  | <a href="#">gij537145458 ERE69391.1</a>     |
| <a href="#">PREDICTED: sex hormone-binding globulin [Orycteropus afer afer]</a>   | 34.1 | 34.1 | 100% | 1.1  | 91%  | <a href="#">gij634880093 XP_007950448.1</a> |
| <a href="#">PREDICTED: sex hormone-binding globulin [Trichechus manatus le</a>    | 34.1 | 34.1 | 100% | 1.1  | 91%  | <a href="#">gij471371144 XP_004376080.1</a> |
| <a href="#">sex hormone-binding globulin [synthetic construct]</a>                | 34.1 | 34.1 | 100% | 1.1  | 91%  | <a href="#">gij60813500 AAX36263.1</a>      |
| <a href="#">PREDICTED: sex hormone-binding globulin isoform X2 [Saimiri boli</a>  | 33.3 | 33.3 | 100% | 2.0  | 91%  | <a href="#">gij725571085 XP_010338103.1</a> |
| <a href="#">PREDICTED: sex hormone-binding globulin isoform X5 [Rhinopithe</a>    | 33.3 | 33.3 | 100% | 2.0  | 91%  | <a href="#">gij724818518 XP_010360686.1</a> |
| <a href="#">PREDICTED: sex hormone-binding globulin isoform X3 [Papio anu</a>     | 33.3 | 33.3 | 100% | 2.0  | 91%  | <a href="#">gij685595645 XP_009187837.1</a> |
| <a href="#">PREDICTED: sex hormone-binding globulin isoform X3 [Callithrix ja</a> | 33.3 | 33.3 | 100% | 2.0  | 91%  | <a href="#">gij675658295 XP_008994833.1</a> |
| <a href="#">PREDICTED: sex hormone-binding globulin isoform X4 [Rhinopithe</a>    | 33.3 | 33.3 | 100% | 2.1  | 91%  | <a href="#">gij724818515 XP_010360685.1</a> |
| <a href="#">PREDICTED: sex hormone-binding globulin isoform X2 [Callithrix ja</a> | 33.3 | 33.3 | 100% | 2.1  | 91%  | <a href="#">gij675658293 XP_008994832.1</a> |
| <a href="#">PREDICTED: sex hormone-binding globulin isoform X3 [Rhinopithe</a>    | 33.3 | 33.3 | 100% | 2.1  | 91%  | <a href="#">gij724818512 XP_010360684.1</a> |
| <a href="#">PREDICTED: sex hormone-binding globulin isoform X1 [Callithrix ja</a> | 33.3 | 33.3 | 100% | 2.1  | 91%  | <a href="#">gij296201365 XP_002747998.1</a> |
| <a href="#">PREDICTED: sex hormone-binding globulin isoform X2 [Rhinopithe</a>    | 33.3 | 33.3 | 100% | 2.1  | 91%  | <a href="#">gij724818509 XP_010360683.1</a> |
| <a href="#">PREDICTED: sex hormone-binding globulin isoform X2 [Papio anu</a>     | 33.3 | 33.3 | 100% | 2.1  | 91%  | <a href="#">gij685595643 XP_009187836.1</a> |
| <a href="#">Sex hormone-binding globulin [Macaca mulatta]</a>                     | 33.3 | 33.3 | 100% | 2.1  | 91%  | <a href="#">gij355568201 EHH24482.1</a>     |
| <a href="#">PREDICTED: sex hormone-binding globulin isoform X1 [Rhinopithe</a>    | 33.3 | 33.3 | 100% | 2.1  | 91%  | <a href="#">gij724818503 XP_010360681.1</a> |
| <a href="#">PREDICTED: sex hormone-binding globulin isoform X1 [Papio anu</a>     | 33.3 | 33.3 | 100% | 2.1  | 91%  | <a href="#">gij685595639 XP_009187834.1</a> |
| <a href="#">PREDICTED: sex hormone-binding globulin isoform X1 [Saimiri boli</a>  | 33.3 | 33.3 | 100% | 2.1  | 91%  | <a href="#">gij403274954 XP_003929225.1</a> |
| <a href="#">PREDICTED: LOW QUALITY PROTEIN: sex hormone-binding glob</a>          | 33.3 | 33.3 | 100% | 2.1  | 91%  | <a href="#">gij297271824 XP_002808160.1</a> |
| <a href="#">uncharacterized protein LOC101864774 [Macaca fascicularis]</a>        | 33.3 | 33.3 | 100% | 2.1  | 91%  | <a href="#">gij545686862 NP_001270513.1</a> |
| <a href="#">PREDICTED: sex hormone-binding globulin isoform X3 [Jaculus jac</a>   | 32.0 | 32.0 | 100% | 5.3  | 82%  | <a href="#">gij507571348 XP_004669275.1</a> |
| <a href="#">PREDICTED: sex hormone-binding globulin [Condylura cristata]</a>      | 32.0 | 32.0 | 90%  | 5.4  | 90%  | <a href="#">gij507953792 XP_004684701.1</a> |
| <a href="#">PREDICTED: sex hormone-binding globulin isoform X2 [Jaculus jac</a>   | 32.0 | 32.0 | 100% | 5.4  | 82%  | <a href="#">gij507571346 XP_004669274.1</a> |
| <a href="#">PREDICTED: sex hormone-binding globulin isoform X1 [Jaculus jac</a>   | 32.0 | 32.0 | 100% | 5.4  | 82%  | <a href="#">gij507571344 XP_004669273.1</a> |
| <a href="#">sex hormone-binding globulin precursor [Mus musculus]</a>             | 32.0 | 32.0 | 100% | 5.4  | 82%  | <a href="#">gij6755506 NP_035497.1</a>      |
| <a href="#">PREDICTED: LOW QUALITY PROTEIN: sex hormone-binding glob</a>          | 32.0 | 32.0 | 100% | 5.4  | 91%  | <a href="#">gij686752223 XP_009249533.1</a> |
| <a href="#">hypothetical protein [Marinobacter hydrocarbonoclasticus]</a>         | 31.6 | 31.6 | 81%  | 7.6  | 100% | <a href="#">gij500110344 WP_011786349.1</a> |
| <a href="#">hypothetical protein [Marinobacter sp. C1S70]</a>                     | 31.6 | 31.6 | 81%  | 7.6  | 100% | <a href="#">gij552452853 WP_022991504.1</a> |
| <a href="#">hypothetical protein [Marinobacter sp. EN3]</a>                       | 31.6 | 31.6 | 81%  | 7.6  | 100% | <a href="#">gij552558269 WP_023011180.1</a> |
| <a href="#">hypothetical protein [Marinobacter hydrocarbonoclasticus]</a>         | 31.6 | 31.6 | 81%  | 7.6  | 100% | <a href="#">gij504235161 WP_014422263.1</a> |
| <a href="#">nUDIX hydrolase [Eubacterium sp. CAG:251]</a>                         | 31.2 | 31.2 | 90%  | 9.2  | 90%  | <a href="#">gij547852293 WP_022259296.1</a> |
| <a href="#">PREDICTED: sex hormone-binding globulin isoform X2 [Peromyscu</a>     | 31.2 | 31.2 | 100% | 10   | 82%  | <a href="#">gij589921045 XP_006973508.1</a> |
| <a href="#">PREDICTED: sex hormone-binding globulin isoform X1 [Peromyscu</a>     | 31.2 | 31.2 | 100% | 10   | 82%  | <a href="#">gij589921043 XP_006973507.1</a> |
| <a href="#">PREDICTED: LOW QUALITY PROTEIN: sex hormone-binding glob</a>          | 30.8 | 30.8 | 90%  | 14   | 90%  | <a href="#">gij395533530 XP_003768811.1</a> |
| <a href="#">PREDICTED: sex hormone-binding globulin isoform 3 [Dasypus no</a>     | 30.8 | 30.8 | 90%  | 14   | 90%  | <a href="#">gij488556028 XP_004468805.1</a> |
| <a href="#">PREDICTED: LOW QUALITY PROTEIN: sex hormone-binding glob</a>          | 30.8 | 30.8 | 90%  | 14   | 90%  | <a href="#">gij348560991 XP_003466296.1</a> |
| <a href="#">PREDICTED: sex hormone-binding globulin isoform 1 [Dasypus no</a>     | 30.8 | 30.8 | 90%  | 14   | 90%  | <a href="#">gij488556022 XP_004468803.1</a> |
| <a href="#">PREDICTED: sex hormone-binding globulin isoform X2 [Balaenopte</a>    | 29.9 | 29.9 | 100% | 26   | 82%  | <a href="#">gij594623652 XP_007166454.1</a> |
| <a href="#">PREDICTED: sex hormone-binding globulin isoform X1 [Balaenopte</a>    | 29.9 | 29.9 | 100% | 26   | 82%  | <a href="#">gij594623650 XP_007166453.1</a> |
| <a href="#">PREDICTED: LOW QUALITY PROTEIN: sex hormone-binding glob</a>          | 29.9 | 29.9 | 100% | 26   | 82%  | <a href="#">gij395836756 XP_003791316.1</a> |
| <a href="#">N-formylglutamate amidohydrolase [Afipia clevelandensis]</a>          | 29.5 | 29.5 | 90%  | 35   | 80%  | <a href="#">gij488800992 WP_002713398.1</a> |
| <a href="#">unknown [Picea sitchensis]</a>                                        | 28.6 | 28.6 | 81%  | 60   | 89%  | <a href="#">gij116781465 ABK22110.1</a>     |

|                                                                                    |      |      |      |    |      |                                             |
|------------------------------------------------------------------------------------|------|------|------|----|------|---------------------------------------------|
| <a href="#">hypothetical protein [Oceanobacillus iheyensis]</a>                    | 28.6 | 28.6 | 72%  | 61 | 100% | <a href="#">gil499378681 WP_011066259.1</a> |
| <a href="#">formaldehyde:ferredoxin oxidoreductase [Thermofilum sp. 1505]</a>      | 28.6 | 28.6 | 72%  | 68 | 100% | <a href="#">gil742685993 AJB42273.1</a>     |
| <a href="#">lantibiotic dehydratase [Micromonospora aurantiaca]</a>                | 28.6 | 28.6 | 100% | 69 | 73%  | <a href="#">gil503052275 WP_013287251.1</a> |
| <a href="#">RNA polymerase sigma factor SigM [Intrasporangium chromatiredu]</a>    | 28.2 | 28.2 | 90%  | 86 | 80%  | <a href="#">gil736717491 WP_034722165.1</a> |
| <a href="#">phosphate transport system regulatory protein PhoU [Acinetobacter]</a> | 28.2 | 28.2 | 72%  | 88 | 100% | <a href="#">gil491154937 WP_005013328.1</a> |
| <a href="#">MULTISPECIES: transcriptional regulator [Acinetobacter]</a>            | 28.2 | 28.2 | 72%  | 88 | 100% | <a href="#">gil490407564 WP_004281079.1</a> |
| <a href="#">transcriptional regulator PhoU [Acinetobacter baumannii]</a>           | 28.2 | 28.2 | 72%  | 88 | 100% | <a href="#">gil736699858 WP_034705351.1</a> |
| <a href="#">MULTISPECIES: phosphate transport system regulatory protein Ph</a>     | 28.2 | 28.2 | 72%  | 88 | 100% | <a href="#">gil491236189 WP_005094412.1</a> |
| <a href="#">phosphate transport system regulatory protein PhoU [Acinetobacter]</a> | 28.2 | 28.2 | 72%  | 88 | 100% | <a href="#">gil491243247 WP_005101453.1</a> |
| <a href="#">MULTISPECIES: phosphate transport system regulatory protein Ph</a>     | 28.2 | 28.2 | 72%  | 88 | 100% | <a href="#">gil490925375 WP_004787240.1</a> |
| <a href="#">phosphate transport system regulatory protein PhoU [Acinetobacter]</a> | 28.2 | 28.2 | 72%  | 88 | 100% | <a href="#">gil490787882 WP_004650040.1</a> |
| <a href="#">MULTISPECIES: phosphate transport system regulatory protein Ph</a>     | 28.2 | 28.2 | 72%  | 88 | 100% | <a href="#">gil491250273 WP_005108465.1</a> |
| <a href="#">transcriptional regulator [Acinetobacter junii]</a>                    | 28.2 | 28.2 | 72%  | 88 | 100% | <a href="#">gil491055341 WP_004916988.1</a> |
| <a href="#">transcriptional regulator [Acinetobacter sp. MDS7A]</a>                | 28.2 | 28.2 | 72%  | 88 | 100% | <a href="#">gil518676428 WP_019838121.1</a> |
| <a href="#">transcriptional regulator [Acinetobacter tjernbergiae]</a>             | 28.2 | 28.2 | 72%  | 88 | 100% | <a href="#">gil517508950 WP_018679158.1</a> |
| <a href="#">phosphate transport system regulatory protein PhoU [Acinetobacter]</a> | 28.2 | 28.2 | 72%  | 88 | 100% | <a href="#">gil514971404 WP_016659690.1</a> |
| <a href="#">phosphate transport system regulatory protein PhoU [Acinetobacter]</a> | 28.2 | 28.2 | 72%  | 88 | 100% | <a href="#">gil507097828 WP_016168465.1</a> |
| <a href="#">phosphate transport system regulatory protein PhoU [Acinetobacter]</a> | 28.2 | 28.2 | 72%  | 88 | 100% | <a href="#">gil491323653 WP_005181619.1</a> |
| <a href="#">phosphate transport system regulatory protein PhoU [Acinetobacter]</a> | 28.2 | 28.2 | 72%  | 88 | 100% | <a href="#">gil491192511 WP_005050862.1</a> |
| <a href="#">phosphate transport system regulatory protein PhoU [Acinetobacter]</a> | 28.2 | 28.2 | 72%  | 88 | 100% | <a href="#">gil491202618 WP_005060960.1</a> |
| <a href="#">phosphate transport system regulatory protein PhoU [Acinetobacter]</a> | 28.2 | 28.2 | 72%  | 88 | 100% | <a href="#">gil491117281 WP_004975736.1</a> |
| <a href="#">phosphate transport system regulatory protein PhoU [Acinetobacter]</a> | 28.2 | 28.2 | 72%  | 88 | 100% | <a href="#">gil490938492 WP_004800329.1</a> |
| <a href="#">phosphate transport system regulatory protein PhoU [Acinetobacter]</a> | 28.2 | 28.2 | 72%  | 88 | 100% | <a href="#">gil490900413 WP_004762350.1</a> |
| <a href="#">phosphate transport system regulatory protein PhoU [Acinetobacter]</a> | 28.2 | 28.2 | 72%  | 88 | 100% | <a href="#">gil490812193 WP_004674307.1</a> |
| <a href="#">MULTISPECIES: phosphate transport system regulatory protein Ph</a>     | 28.2 | 28.2 | 72%  | 88 | 100% | <a href="#">gil490806115 WP_004668238.1</a> |
| <a href="#">MULTISPECIES: transcriptional regulator [Acinetobacter]</a>            | 28.2 | 28.2 | 72%  | 88 | 100% | <a href="#">gil490818655 WP_004680754.1</a> |
| <a href="#">MULTISPECIES: transcriptional regulator [Acinetobacter]</a>            | 28.2 | 28.2 | 72%  | 88 | 100% | <a href="#">gil491014672 WP_004876380.1</a> |

## Alignments

Download [GenPept](#) [Graphics](#)

Next Previous Descriptions

sex hormone binding globulin [Homo sapiens]

Sequence ID: [gil165873764|gb|ABY68001.1](#) Length: 206 Number of Matches: 1

Range 1: 176 to 186 [GenPept](#) [Graphics](#)

Next Match Previous Match

| Score         | Expect | Identities  | Positives   | Gaps     |
|---------------|--------|-------------|-------------|----------|
| 37.5 bits(81) | 0.076  | 11/11(100%) | 11/11(100%) | 0/11(0%) |

Query 1 RLDVDQALNRS 11  
 Sbjct 176 RLDVDQALNRS 186

### Related Information

[Gene](#) - associated gene details

Download [GenPept](#) [Graphics](#)

Next Previous Descriptions

PREDICTED: sex hormone-binding globulin isoform X6 [Homo sapiens]

Sequence ID: [gil530410575|ref|XP\\_005256822.1](#) Length: 233 Number of Matches: 1

Range 1: 203 to 213 [GenPept](#) [Graphics](#)

Next Match Previous Match

| Score         | Expect | Identities  | Positives   | Gaps     |
|---------------|--------|-------------|-------------|----------|
| 37.5 bits(81) | 0.078  | 11/11(100%) | 11/11(100%) | 0/11(0%) |

Query 1 RLDVDQALNRS 11

### Related Information

[Gene](#) - associated gene details

Sbjct 203 RLDVDQALNRS 213

[Download](#) [GenPept](#) [Graphics](#) [Next](#) [Previous](#) [Descriptions](#)

sex hormone binding globulin [Homo sapiens]

Sequence ID: [gi|165873760|gb|ABY67999.1](#) Length: 260 Number of Matches: 1

Range 1: 230 to 240 [GenPept](#) [Graphics](#) [Next Match](#) [Previous Match](#)

| Score         | Expect | Identities  | Positives   | Gaps     |
|---------------|--------|-------------|-------------|----------|
| 37.5 bits(81) | 0.079  | 11/11(100%) | 11/11(100%) | 0/11(0%) |

Query 1 RLDVDQALNRS 11  
 RLDVDQALNRS  
 Sbjct 230 RLDVDQALNRS 240

**Related Information**

[Gene](#) - associated gene details

[Download](#) [GenPept](#) [Graphics](#) [Next](#) [Previous](#) [Descriptions](#)

sex steroid-binding protein [Homo sapiens]

Sequence ID: [gi|825718|emb|CAA29234.1](#) Length: 282 Number of Matches: 1

Range 1: 252 to 262 [GenPept](#) [Graphics](#) [Next Match](#) [Previous Match](#)

| Score         | Expect | Identities  | Positives   | Gaps     |
|---------------|--------|-------------|-------------|----------|
| 37.5 bits(81) | 0.080  | 11/11(100%) | 11/11(100%) | 0/11(0%) |

Query 1 RLDVDQALNRS 11  
 RLDVDQALNRS  
 Sbjct 252 RLDVDQALNRS 262

**Related Information**

[Gene](#) - associated gene details

[Download](#) [GenPept](#) [Graphics](#) [Next](#) [Previous](#) [Descriptions](#)

PREDICTED: sex hormone-binding globulin isoform X6 [Pan paniscus]

Sequence ID: [gi|675705950|ref|XP\\_008960682.1](#) Length: 286 Number of Matches: 1

Range 1: 256 to 266 [GenPept](#) [Graphics](#) [Next Match](#) [Previous Match](#)

| Score         | Expect | Identities  | Positives   | Gaps     |
|---------------|--------|-------------|-------------|----------|
| 37.5 bits(81) | 0.080  | 11/11(100%) | 11/11(100%) | 0/11(0%) |

Query 1 RLDVDQALNRS 11  
 RLDVDQALNRS  
 Sbjct 256 RLDVDQALNRS 266

**Related Information**

[Gene](#) - associated gene details  
[Map Viewer](#) - aligned genomic context

BLAST is a registered trademark of the National Library of Medicine.

NCBI/ BLAST/ blastp suite/ Formatting Results - BVM4P9BC01R

Your search parameters were adjusted to search for a short input sequence.

[Edit and Resubmit](#) [Save Search Strategies](#) [Formatting options](#) [Download](#) [YouTube](#) [How to read this page](#) [Blast report description](#)

### SHBG\_RSHEIWITHSCPQSPGDGTDASH\_Mod

RID [BVM4P9BC01R](#) (Expires on 01-21 10:50 am)

**Query ID** |cl|179996  
**Description** None  
**Molecule type** amino acid  
**Query Length** 22

**Database Name** nr  
**Description** All non-redundant GenBank CDS translations+PDB+SwissProt+PIR+PRF excluding environmental samples from WGS projects  
**Program** BLASTP 2.2.30+ [Citation](#)

Other reports: [Search Summary](#) [Taxonomy reports](#) [Distance tree of results](#) [Multiple alignment](#)

### Graphic Summary

[Show Conserved Domains](#)

No putative conserved domains have been detected

Distribution of 100 Blast Hits on the Query Sequence

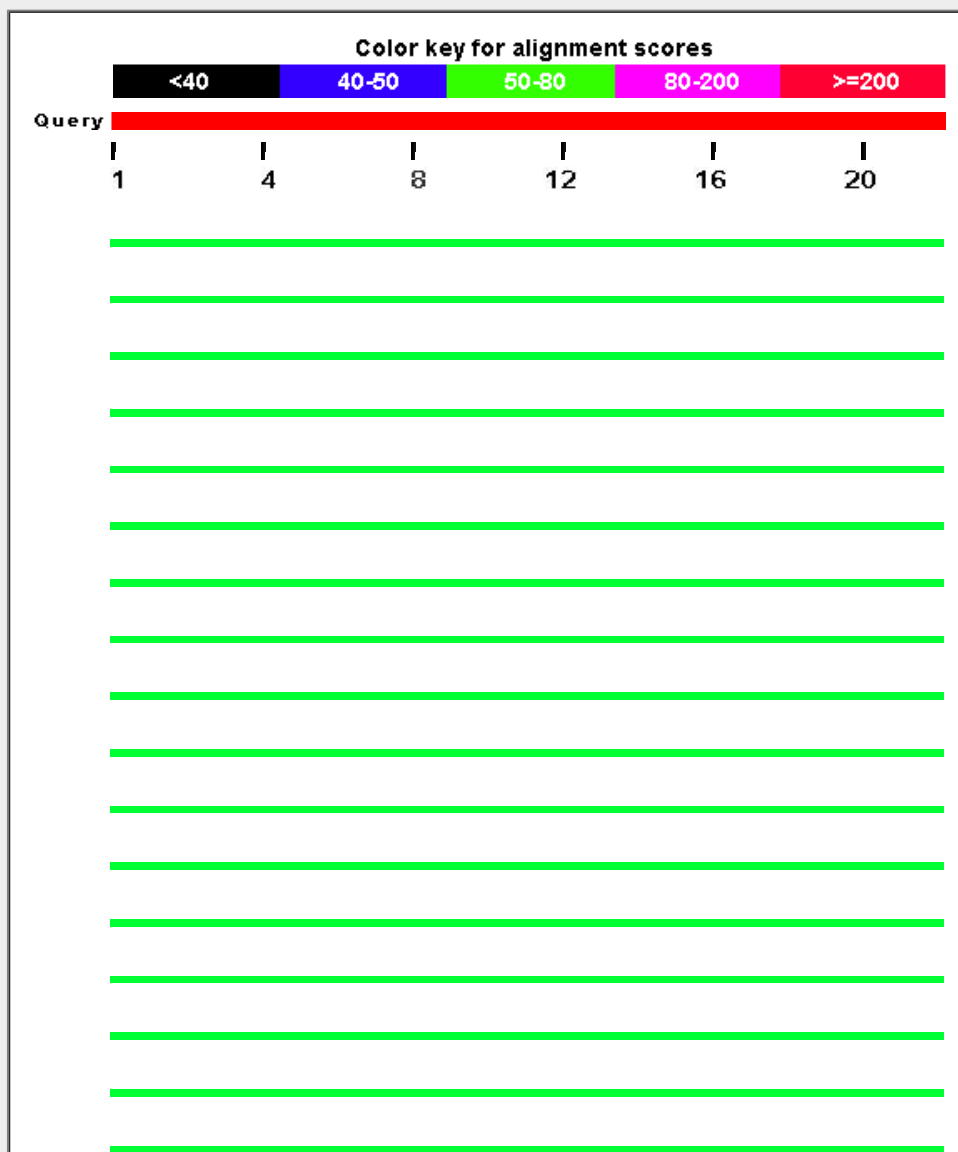

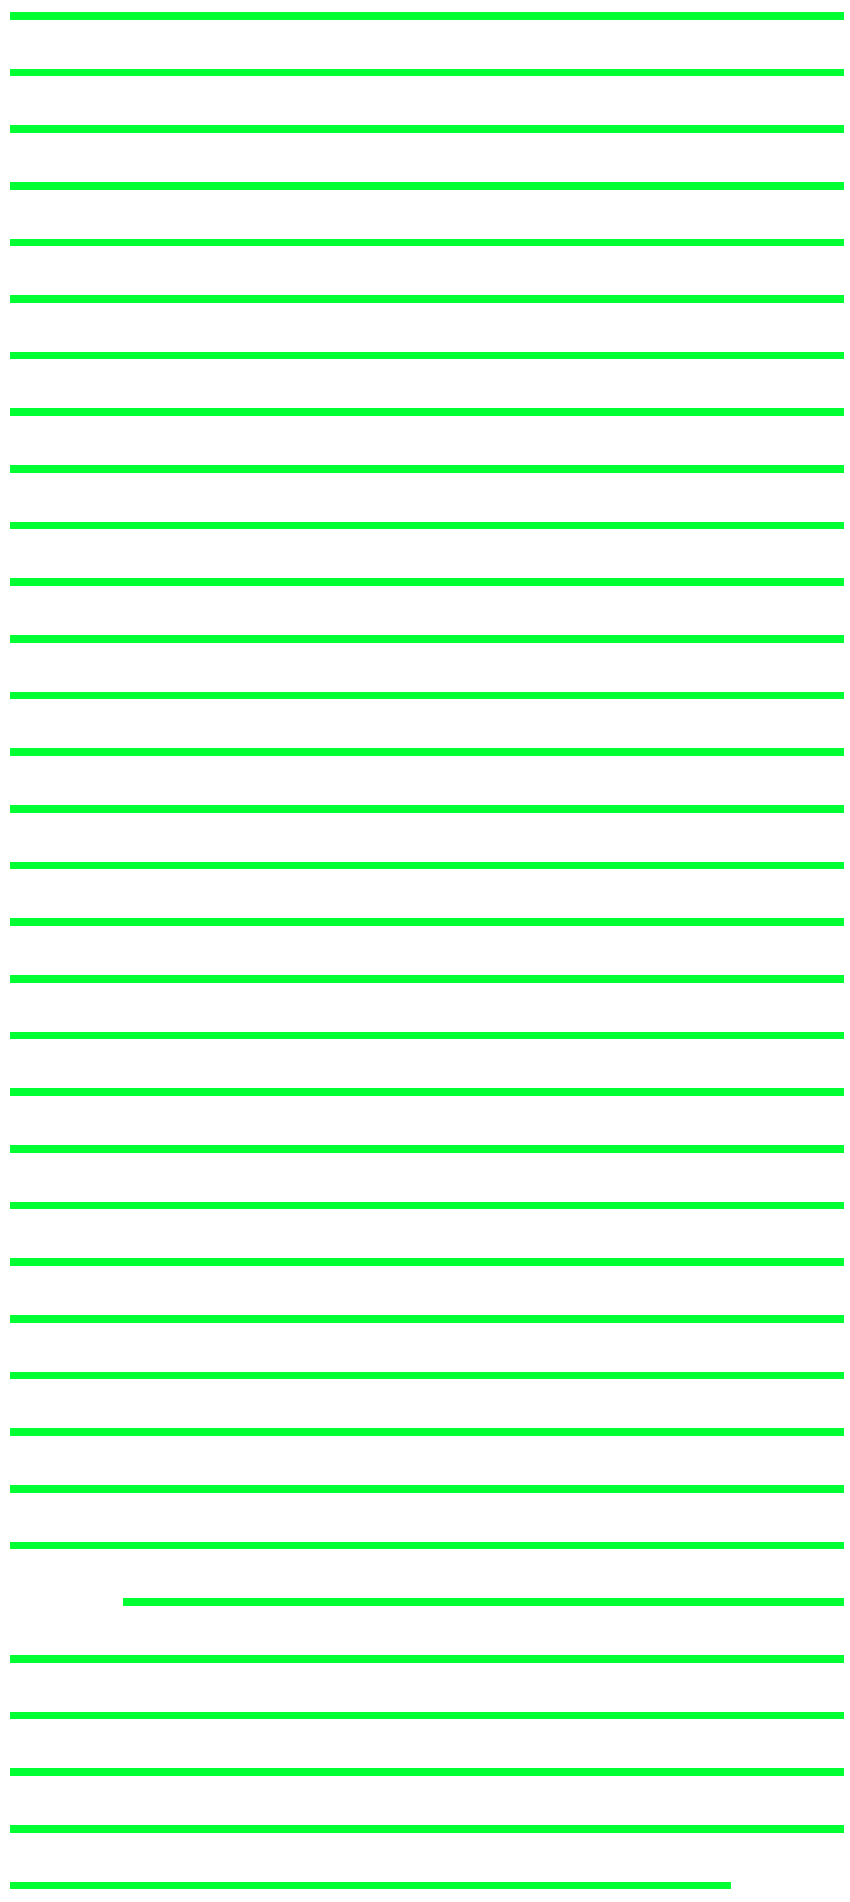

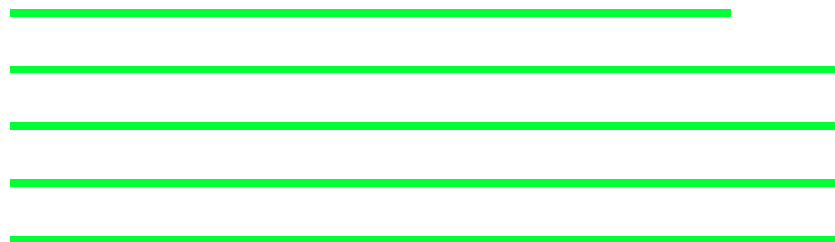

## Descriptions

### Sequences producing significant alignments:

Select: [All](#) [None](#) Selected:0

[Alignments](#)
[Download](#)
[GenPept](#)
[Graphics](#)
[Distance tree of results](#)
[Multiple alignment](#)

| Description                                                                                 | Max score | Total score | Query cover | E value | Ident | Accession                      |
|---------------------------------------------------------------------------------------------|-----------|-------------|-------------|---------|-------|--------------------------------|
| <a href="#">sex hormone binding globulin [Homo sapiens]</a>                                 | 72.7      | 72.7        | 100%        | 3e-13   | 95%   | <a href="#">ABY68001.1</a>     |
| <a href="#">PREDICTED: sex hormone-binding globulin isoform X6 [Homo sapiens]</a>           | 72.7      | 72.7        | 100%        | 4e-13   | 95%   | <a href="#">XP_005256822.1</a> |
| <a href="#">sex hormone binding globulin [Homo sapiens]</a>                                 | 72.7      | 72.7        | 100%        | 4e-13   | 95%   | <a href="#">ABY67999.1</a>     |
| <a href="#">sex steroid-binding protein [Homo sapiens]</a>                                  | 72.7      | 72.7        | 100%        | 4e-13   | 95%   | <a href="#">CAA29234.1</a>     |
| <a href="#">PREDICTED: sex hormone-binding globulin isoform X5 [Rhinopithecus roxellae]</a> | 72.7      | 72.7        | 100%        | 4e-13   | 95%   | <a href="#">XP_010360686.1</a> |
| <a href="#">PREDICTED: sex hormone-binding globulin isoform X3 [Papio anubis]</a>           | 72.7      | 72.7        | 100%        | 4e-13   | 95%   | <a href="#">XP_009187837.1</a> |
| <a href="#">PREDICTED: sex hormone-binding globulin isoform X6 [Pan paniscus]</a>           | 72.7      | 72.7        | 100%        | 4e-13   | 95%   | <a href="#">XP_008960682.1</a> |
| <a href="#">PREDICTED: sex hormone-binding globulin isoform X6 [Chlorocebus sabaeus]</a>    | 72.7      | 72.7        | 100%        | 4e-13   | 95%   | <a href="#">XP_008008379.1</a> |
| <a href="#">sex hormone-binding globulin isoform 7 [Homo sapiens]</a>                       | 72.7      | 72.7        | 100%        | 4e-13   | 95%   | <a href="#">NP_001276045.1</a> |
| <a href="#">PREDICTED: sex hormone-binding globulin isoform X3 [Pan paniscus]</a>           | 72.7      | 72.7        | 100%        | 4e-13   | 95%   | <a href="#">XP_003810122.1</a> |
| <a href="#">sex hormone-binding globulin isoform 4 precursor [Homo sapiens]</a>             | 72.7      | 72.7        | 100%        | 4e-13   | 95%   | <a href="#">NP_001139753.1</a> |
| <a href="#">PREDICTED: sex hormone-binding globulin isoform X4 [Rhinopithecus roxellae]</a> | 72.7      | 72.7        | 100%        | 4e-13   | 95%   | <a href="#">XP_010360685.1</a> |
| <a href="#">PREDICTED: sex hormone-binding globulin isoform X4 [Pan paniscus]</a>           | 72.7      | 72.7        | 100%        | 4e-13   | 95%   | <a href="#">XP_008960680.1</a> |
| <a href="#">sex hormone-binding globulin isoform 5 [Homo sapiens]</a>                       | 72.7      | 72.7        | 100%        | 4e-13   | 95%   | <a href="#">NP_001276042.1</a> |
| <a href="#">PREDICTED: sex hormone-binding globulin isoform X3 [Rhinopithecus roxellae]</a> | 72.7      | 72.7        | 100%        | 4e-13   | 95%   | <a href="#">XP_010360684.1</a> |
| <a href="#">PREDICTED: sex hormone-binding globulin isoform X5 [Chlorocebus sabaeus]</a>    | 72.7      | 72.7        | 100%        | 4e-13   | 95%   | <a href="#">XP_008008377.1</a> |
| <a href="#">PREDICTED: sex hormone-binding globulin isoform X7 [Homo sapiens]</a>           | 72.7      | 72.7        | 100%        | 4e-13   | 95%   | <a href="#">XP_006721632.1</a> |
| <a href="#">unnamed protein product [Homo sapiens]</a>                                      | 72.7      | 72.7        | 100%        | 4e-13   | 95%   | <a href="#">CAA29309.1</a>     |
| <a href="#">unnamed protein product [Homo sapiens]</a>                                      | 72.7      | 72.7        | 100%        | 4e-13   | 95%   | <a href="#">CAA28987.1</a>     |
| <a href="#">sex hormone-binding globulin isoform 2 precursor [Homo sapiens]</a>             | 72.7      | 72.7        | 100%        | 4e-13   | 95%   | <a href="#">NP_001139751.1</a> |
| <a href="#">PREDICTED: sex hormone-binding globulin isoform X4 [Chlorocebus sabaeus]</a>    | 72.7      | 72.7        | 100%        | 4e-13   | 95%   | <a href="#">XP_008008372.1</a> |
| <a href="#">SHBG protein [Homo sapiens]</a>                                                 | 72.7      | 72.7        | 100%        | 4e-13   | 95%   | <a href="#">AAH69597.1</a>     |
| <a href="#">PREDICTED: sex hormone-binding globulin isoform X2 [Rhinopithecus roxellae]</a> | 72.7      | 72.7        | 100%        | 4e-13   | 95%   | <a href="#">XP_010360683.1</a> |
| <a href="#">PREDICTED: sex hormone-binding globulin isoform X2 [Papio anubis]</a>           | 72.7      | 72.7        | 100%        | 4e-13   | 95%   | <a href="#">XP_009187836.1</a> |
| <a href="#">sex hormone-binding globulin [synthetic construct]</a>                          | 72.7      | 72.7        | 100%        | 4e-13   | 95%   | <a href="#">AAX36263.1</a>     |
| <a href="#">sex hormone-binding globulin [Homo sapiens]</a>                                 | 72.7      | 72.7        | 100%        | 4e-13   | 95%   | <a href="#">AAC18778.1</a>     |
| <a href="#">sex hormone-binding globulin isoform 1 precursor [Homo sapiens]</a>             | 72.7      | 72.7        | 100%        | 4e-13   | 95%   | <a href="#">NP_001031.2</a>    |
| <a href="#">PREDICTED: sex hormone-binding globulin isoform X1 [Pan paniscus]</a>           | 72.7      | 72.7        | 100%        | 4e-13   | 95%   | <a href="#">XP_003810120.1</a> |
| <a href="#">Sex hormone-binding globulin [Macaca mulatta]</a>                               | 72.7      | 72.7        | 100%        | 4e-13   | 95%   | <a href="#">EHH24482.1</a>     |

|                                                                                                                                               |      |      |      |       |     |                                |
|-----------------------------------------------------------------------------------------------------------------------------------------------|------|------|------|-------|-----|--------------------------------|
| <a href="#">PREDICTED: sex hormone-binding globulin isoform X1 [Rhinopithecus roxelle]</a>                                                    | 72.7 | 72.7 | 100% | 4e-13 | 95% | <a href="#">XP_010360681.1</a> |
| <a href="#">PREDICTED: sex hormone-binding globulin isoform X1 [Papio anubis]</a>                                                             | 72.7 | 72.7 | 100% | 4e-13 | 95% | <a href="#">XP_009187834.1</a> |
| <a href="#">PREDICTED: sex hormone-binding globulin isoform X3 [Chlorocebus sabaeus]</a>                                                      | 72.7 | 72.7 | 100% | 4e-13 | 95% | <a href="#">XP_008008371.1</a> |
| <a href="#">PREDICTED: LOW QUALITY PROTEIN: sex hormone-binding globulin-like [Uncharacterized protein LOC101864774 [Macaca fascicularis]</a> | 72.7 | 72.7 | 100% | 4e-13 | 95% | <a href="#">XP_002808160.1</a> |
| <a href="#">PREDICTED: sex hormone-binding globulin isoform X2 [Chlorocebus sabaeus]</a>                                                      | 72.7 | 72.7 | 100% | 4e-13 | 95% | <a href="#">XP_008008369.1</a> |
| <a href="#">PREDICTED: sex hormone-binding globulin isoform X1 [Chlorocebus sabaeus]</a>                                                      | 72.7 | 72.7 | 100% | 4e-13 | 95% | <a href="#">XP_008008368.1</a> |
| <a href="#">PREDICTED: sex hormone-binding globulin isoform 4 [Gorilla gorilla gorilla]</a>                                                   | 69.8 | 69.8 | 100% | 4e-12 | 91% | <a href="#">XP_004058549.1</a> |
| <a href="#">PREDICTED: sex hormone-binding globulin isoform 3 [Gorilla gorilla gorilla]</a>                                                   | 69.8 | 69.8 | 100% | 4e-12 | 91% | <a href="#">XP_004058548.1</a> |
| <a href="#">PREDICTED: sex hormone-binding globulin isoform 1 [Gorilla gorilla gorilla]</a>                                                   | 69.8 | 69.8 | 100% | 4e-12 | 91% | <a href="#">XP_004058546.1</a> |
| <a href="#">PREDICTED: LOW QUALITY PROTEIN: sex hormone-binding globulin [Pong]</a>                                                           | 68.1 | 68.1 | 100% | 2e-11 | 91% | <a href="#">XP_009249533.1</a> |
| <a href="#">PREDICTED: sex hormone-binding globulin isoform X2 [Saimiri boliviensis boliviensis]</a>                                          | 67.7 | 67.7 | 100% | 2e-11 | 86% | <a href="#">XP_010338103.1</a> |
| <a href="#">PREDICTED: sex hormone-binding globulin isoform X3 [Callithrix jacchus]</a>                                                       | 67.7 | 67.7 | 100% | 2e-11 | 86% | <a href="#">XP_008994833.1</a> |
| <a href="#">PREDICTED: sex hormone-binding globulin isoform X2 [Callithrix jacchus]</a>                                                       | 67.7 | 67.7 | 100% | 2e-11 | 86% | <a href="#">XP_008994832.1</a> |
| <a href="#">PREDICTED: sex hormone-binding globulin isoform X1 [Callithrix jacchus]</a>                                                       | 67.7 | 67.7 | 100% | 2e-11 | 86% | <a href="#">XP_002747998.1</a> |
| <a href="#">PREDICTED: sex hormone-binding globulin isoform X1 [Saimiri boliviensis boliviensis]</a>                                          | 67.7 | 67.7 | 100% | 2e-11 | 86% | <a href="#">XP_003929225.1</a> |
| <a href="#">PREDICTED: LOW QUALITY PROTEIN: sex hormone-binding globulin [Nomascus leucogenus]</a>                                            | 63.0 | 63.0 | 86%  | 9e-10 | 95% | <a href="#">XP_004091565.1</a> |
| <a href="#">PREDICTED: sex hormone-binding globulin isoform X2 [Balaenoptera acutoris leucorhynchus]</a>                                      | 58.7 | 58.7 | 100% | 2e-08 | 77% | <a href="#">XP_007166454.1</a> |
| <a href="#">PREDICTED: sex hormone-binding globulin isoform X1 [Balaenoptera acutoris leucorhynchus]</a>                                      | 58.7 | 58.7 | 100% | 2e-08 | 77% | <a href="#">XP_007166453.1</a> |
| <a href="#">sex hormone-binding globulin precursor [Orctolagus cuniculus]</a>                                                                 | 58.3 | 58.3 | 100% | 3e-08 | 77% | <a href="#">NP_001075839.1</a> |
| <a href="#">PREDICTED: LOW QUALITY PROTEIN: sex hormone-binding globulin [Otoloniscus chrysocephalus]</a>                                     | 58.3 | 58.3 | 100% | 3e-08 | 77% | <a href="#">XP_003791316.1</a> |
| <a href="#">PREDICTED: LOW QUALITY PROTEIN: sex hormone-binding globulin [Physalis peruviana]</a>                                             | 57.9 | 57.9 | 86%  | 5e-08 | 84% | <a href="#">XP_007131043.1</a> |
| <a href="#">PREDICTED: LOW QUALITY PROTEIN: sex hormone-binding globulin [Orcinotriton carolinianus]</a>                                      | 57.9 | 57.9 | 86%  | 5e-08 | 84% | <a href="#">XP_004266952.1</a> |
| <a href="#">PREDICTED: sex hormone-binding globulin isoform X5 [Loxodonta africana]</a>                                                       | 57.5 | 57.5 | 100% | 6e-08 | 77% | <a href="#">XP_010594887.1</a> |
| <a href="#">PREDICTED: sex hormone-binding globulin isoform X4 [Tarsius syrichta]</a>                                                         | 57.5 | 57.5 | 100% | 6e-08 | 73% | <a href="#">XP_008060529.1</a> |
| <a href="#">PREDICTED: sex hormone-binding globulin isoform X1 [Loxodonta africana]</a>                                                       | 57.5 | 57.5 | 100% | 6e-08 | 77% | <a href="#">XP_010594883.1</a> |
| <a href="#">PREDICTED: sex hormone-binding globulin isoform X4 [Loxodonta africana]</a>                                                       | 57.5 | 57.5 | 100% | 6e-08 | 77% | <a href="#">XP_010594886.1</a> |
| <a href="#">PREDICTED: sex hormone-binding globulin isoform X3 [Loxodonta africana]</a>                                                       | 57.5 | 57.5 | 100% | 6e-08 | 77% | <a href="#">XP_010594885.1</a> |
| <a href="#">PREDICTED: sex hormone-binding globulin [Trichechus manatus latirostris]</a>                                                      | 57.5 | 57.5 | 100% | 6e-08 | 77% | <a href="#">XP_004376080.1</a> |
| <a href="#">PREDICTED: sex hormone-binding globulin isoform X2 [Tarsius syrichta]</a>                                                         | 57.5 | 57.5 | 100% | 6e-08 | 73% | <a href="#">XP_008060527.1</a> |
| <a href="#">PREDICTED: sex hormone-binding globulin isoform X1 [Tarsius syrichta]</a>                                                         | 57.5 | 57.5 | 100% | 7e-08 | 73% | <a href="#">XP_008060526.1</a> |
| <a href="#">PREDICTED: sex hormone-binding globulin isoform X3 [Jaculus jaculus]</a>                                                          | 55.8 | 55.8 | 95%  | 2e-07 | 76% | <a href="#">XP_004669275.1</a> |
| <a href="#">PREDICTED: sex hormone-binding globulin isoform X2 [Jaculus jaculus]</a>                                                          | 55.8 | 55.8 | 95%  | 2e-07 | 76% | <a href="#">XP_004669274.1</a> |
| <a href="#">PREDICTED: sex hormone-binding globulin isoform X1 [Jaculus jaculus]</a>                                                          | 55.8 | 55.8 | 95%  | 2e-07 | 76% | <a href="#">XP_004669273.1</a> |
| <a href="#">PREDICTED: sex hormone-binding globulin isoform X5 [Eptesicus fuscus]</a>                                                         | 55.4 | 55.4 | 100% | 3e-07 | 68% | <a href="#">XP_008151730.1</a> |
| <a href="#">PREDICTED: sex hormone-binding globulin isoform X2 [Myotis davidii]</a>                                                           | 55.4 | 55.4 | 100% | 3e-07 | 68% | <a href="#">XP_006761714.1</a> |
| <a href="#">PREDICTED: sex hormone-binding globulin isoform X2 [Eptesicus fuscus]</a>                                                         | 55.4 | 55.4 | 100% | 3e-07 | 68% | <a href="#">XP_008151727.1</a> |
| <a href="#">PREDICTED: sex hormone-binding globulin isoform X4 [Myotis lucifugus]</a>                                                         | 55.4 | 55.4 | 100% | 3e-07 | 68% | <a href="#">XP_006107895.1</a> |
| <a href="#">PREDICTED: sex hormone-binding globulin isoform X2 [Lipotes vexillifer]</a>                                                       | 55.4 | 55.4 | 86%  | 3e-07 | 79% | <a href="#">XP_007457850.1</a> |
| <a href="#">PREDICTED: sex hormone-binding globulin isoform X1 [Eptesicus fuscus]</a>                                                         | 55.4 | 55.4 | 100% | 3e-07 | 68% | <a href="#">XP_008151725.1</a> |
| <a href="#">PREDICTED: sex hormone-binding globulin isoform X3 [Myotis lucifugus]</a>                                                         | 55.4 | 55.4 | 100% | 3e-07 | 68% | <a href="#">XP_006107894.1</a> |
| <a href="#">Sex hormone-binding globulin [Myotis brandtii]</a>                                                                                | 55.4 | 55.4 | 100% | 3e-07 | 68% | <a href="#">EPQ15483.1</a>     |
| <a href="#">PREDICTED: sex hormone-binding globulin isoform X4 [Eptesicus fuscus]</a>                                                         | 55.4 | 55.4 | 100% | 3e-07 | 68% | <a href="#">XP_008151729.1</a> |
| <a href="#">PREDICTED: sex hormone-binding globulin isoform X2 [Myotis lucifugus]</a>                                                         | 55.4 | 55.4 | 100% | 3e-07 | 68% | <a href="#">XP_006107893.1</a> |
| <a href="#">PREDICTED: sex hormone-binding globulin isoform X1 [Lipotes vexillifer]</a>                                                       | 55.4 | 55.4 | 86%  | 3e-07 | 79% | <a href="#">XP_007457849.1</a> |

|                                                                                             |      |      |      |       |     |                                |
|---------------------------------------------------------------------------------------------|------|------|------|-------|-----|--------------------------------|
| <a href="#">PREDICTED: sex hormone-binding globulin [Tursiops truncatus]</a>                | 55.4 | 55.4 | 86%  | 3e-07 | 79% | <a href="#">XP_004310675.1</a> |
| <a href="#">Sex hormone-binding globulin [Myotis davidii]</a>                               | 55.4 | 55.4 | 100% | 3e-07 | 68% | <a href="#">ELK31809.1</a>     |
| <a href="#">PREDICTED: sex hormone-binding globulin isoform X1 [Myotis lucifugus]</a>       | 55.4 | 55.4 | 100% | 3e-07 | 68% | <a href="#">XP_006107892.1</a> |
| <a href="#">PREDICTED: sex hormone-binding globulin-like isoform X4 [Myotis brandtii]</a>   | 55.4 | 55.4 | 100% | 3e-07 | 68% | <a href="#">XP_005878824.1</a> |
| <a href="#">PREDICTED: sex hormone-binding globulin isoform X1 [Galeopterus variegat]</a>   | 54.9 | 54.9 | 100% | 4e-07 | 73% | <a href="#">XP_008572063.1</a> |
| <a href="#">PREDICTED: LOW QUALITY PROTEIN: sex hormone-binding globulin [Ptero</a>         | 54.5 | 54.5 | 81%  | 6e-07 | 83% | <a href="#">XP_006927039.1</a> |
| <a href="#">PREDICTED: LOW QUALITY PROTEIN: sex hormone-binding globulin [Sus s</a>         | 54.1 | 54.1 | 100% | 9e-07 | 73% | <a href="#">XP_005669285.1</a> |
| <a href="#">PREDICTED: sex hormone-binding globulin-like isoform 2 [Ailuropoda melanc</a>   | 54.1 | 54.1 | 100% | 9e-07 | 68% | <a href="#">XP_002924481.1</a> |
| <a href="#">PREDICTED: sex hormone-binding globulin [Ursus maritimus]</a>                   | 54.1 | 54.1 | 100% | 9e-07 | 68% | <a href="#">XP_008686192.1</a> |
| <a href="#">PREDICTED: sex hormone-binding globulin-like isoform 1 [Ailuropoda melanc</a>   | 54.1 | 54.1 | 100% | 9e-07 | 68% | <a href="#">XP_002924480.1</a> |
| <a href="#">PREDICTED: sex hormone-binding globulin [Orycteropus afer afer]</a>             | 53.7 | 53.7 | 100% | 1e-06 | 77% | <a href="#">XP_007950448.1</a> |
| <a href="#">PREDICTED: sex hormone-binding globulin isoform X3 [Ictidomys tridecemlin</a>   | 53.7 | 53.7 | 100% | 1e-06 | 73% | <a href="#">XP_005332872.1</a> |
| <a href="#">PREDICTED: sex hormone-binding globulin isoform X2 [Ictidomys tridecemlin</a>   | 53.7 | 53.7 | 100% | 1e-06 | 73% | <a href="#">XP_005332871.1</a> |
| <a href="#">PREDICTED: sex hormone-binding globulin isoform X1 [Ictidomys tridecemlin</a>   | 53.7 | 53.7 | 100% | 1e-06 | 73% | <a href="#">XP_005332870.1</a> |
| <a href="#">PREDICTED: sex hormone-binding globulin isoform X1 [Canis lupus familiaris]</a> | 52.4 | 52.4 | 100% | 3e-06 | 68% | <a href="#">XP_003639094.1</a> |
| <a href="#">PREDICTED: sex hormone-binding globulin isoform X4 [Camelus dromedariu:</a>     | 52.0 | 52.0 | 86%  | 4e-06 | 74% | <a href="#">XP_010994821.1</a> |
| <a href="#">PREDICTED: sex hormone-binding globulin isoform X4 [Camelus bactrianus]</a>     | 52.0 | 52.0 | 86%  | 4e-06 | 74% | <a href="#">XP_010964222.1</a> |
| <a href="#">PREDICTED: sex hormone-binding globulin isoform X3 [Camelus dromedariu:</a>     | 52.0 | 52.0 | 86%  | 4e-06 | 74% | <a href="#">XP_010994820.1</a> |
| <a href="#">PREDICTED: sex hormone-binding globulin isoform X3 [Camelus bactrianus]</a>     | 52.0 | 52.0 | 86%  | 4e-06 | 74% | <a href="#">XP_010964221.1</a> |
| <a href="#">PREDICTED: sex hormone-binding globulin isoform X3 [Camelus ferus]</a>          | 52.0 | 52.0 | 86%  | 4e-06 | 74% | <a href="#">XP_006175877.1</a> |
| <a href="#">PREDICTED: sex hormone-binding globulin [Vicugna pacos]</a>                     | 52.0 | 52.0 | 86%  | 4e-06 | 74% | <a href="#">XP_006218840.1</a> |
| <a href="#">PREDICTED: sex hormone-binding globulin isoform X2 [Camelus dromedariu:</a>     | 52.0 | 52.0 | 86%  | 5e-06 | 74% | <a href="#">XP_010994819.1</a> |
| <a href="#">PREDICTED: sex hormone-binding globulin isoform X2 [Camelus bactrianus]</a>     | 52.0 | 52.0 | 86%  | 5e-06 | 74% | <a href="#">XP_010964220.1</a> |
| <a href="#">PREDICTED: sex hormone-binding globulin isoform X2 [Camelus ferus]</a>          | 52.0 | 52.0 | 86%  | 5e-06 | 74% | <a href="#">XP_006175876.1</a> |
| <a href="#">PREDICTED: sex hormone-binding globulin isoform X1 [Camelus dromedariu:</a>     | 52.0 | 52.0 | 86%  | 5e-06 | 74% | <a href="#">XP_010994818.1</a> |
| <a href="#">PREDICTED: sex hormone-binding globulin isoform X1 [Camelus bactrianus]</a>     | 52.0 | 52.0 | 86%  | 5e-06 | 74% | <a href="#">XP_010964219.1</a> |

## Alignments

Download GenPept Graphics

Next Previous Descriptions

sex hormone binding globulin [Homo sapiens]

Sequence ID: [gb|ABY68001.1](#) Length: 206 Number of Matches: 1

Range 1: 185 to 206 GenPept Graphics

Next Match Previous Match

| Score          | Expect | Identities | Positives   | Gaps     |
|----------------|--------|------------|-------------|----------|
| 72.7 bits(164) | 3e-13  | 21/22(95%) | 22/22(100%) | 0/22(0%) |

|       |     |                         |     |
|-------|-----|-------------------------|-----|
| Query | 1   | RSHEIWITHSCPSQSPGDTDASH | 22  |
|       |     | RSHEIWITHSCPSPG+GTDASH  |     |
| Sbjct | 185 | RSHEIWITHSCPSPGNGTDASH  | 206 |

### Related Information

[Gene](#) - associated gene details

Download GenPept Graphics

Next Previous Descriptions

PREDICTED: sex hormone-binding globulin isoform X6 [Homo sapiens]

Sequence ID: [ref|XP\\_005256822.1](#) Length: 233 Number of Matches: 1

Range 1: 212 to 233 GenPept Graphics

Next Match Previous Match

| Score          | Expect | Identities | Positives   | Gaps     |
|----------------|--------|------------|-------------|----------|
| 72.7 bits(164) | 4e-13  | 21/22(95%) | 22/22(100%) | 0/22(0%) |

### Related Information

[Gene](#) - associated gene details



Query 1 RSHEIWITHSCPQSPGDTDASH 22  
 RSHEIWITHSCPQSPG+GTDASH  
 Sbjct 212 RSHEIWITHSCPQSPGNGTDASH 233

Download [GenPept](#) [Graphics](#)

[▼ Next](#) [▲ Previous](#) [▲ Descriptions](#)

sex hormone binding globulin [Homo sapiens]

Sequence ID: [gb|ABY67999.1](#) Length: 260 Number of Matches: 1

Range 1: 239 to 260 [GenPept](#) [Graphics](#)

[▼ Next Match](#) [▲ Previous Match](#)

| Score          | Expect | Identities | Positives   | Gaps     |
|----------------|--------|------------|-------------|----------|
| 72.7 bits(164) | 4e-13  | 21/22(95%) | 22/22(100%) | 0/22(0%) |

Query 1 RSHEIWITHSCPQSPGDTDASH 22  
 RSHEIWITHSCPQSPG+GTDASH  
 Sbjct 239 RSHEIWITHSCPQSPGNGTDASH 260

**Related Information**

[Gene](#) - associated gene details

Download [GenPept](#) [Graphics](#)

[▼ Next](#) [▲ Previous](#) [▲ Descriptions](#)

sex steroid-binding protein [Homo sapiens]

Sequence ID: [emb|CAA29234.1](#) Length: 282 Number of Matches: 1

Range 1: 261 to 282 [GenPept](#) [Graphics](#)

[▼ Next Match](#) [▲ Previous Match](#)

| Score          | Expect | Identities | Positives   | Gaps     |
|----------------|--------|------------|-------------|----------|
| 72.7 bits(164) | 4e-13  | 21/22(95%) | 22/22(100%) | 0/22(0%) |

Query 1 RSHEIWITHSCPQSPGDTDASH 22  
 RSHEIWITHSCPQSPG+GTDASH  
 Sbjct 261 RSHEIWITHSCPQSPGNGTDASH 282

**Related Information**

[Gene](#) - associated gene details

Download [GenPept](#) [Graphics](#)

[▼ Next](#) [▲ Previous](#) [▲ Descriptions](#)

PREDICTED: sex hormone-binding globulin isoform X5 [Rhinopithecus roxellana]

Sequence ID: [ref|XP\\_010360686.1](#) Length: 286 Number of Matches: 1

Range 1: 265 to 286 [GenPept](#) [Graphics](#)

[▼ Next Match](#) [▲ Previous Match](#)

| Score          | Expect | Identities | Positives   | Gaps     |
|----------------|--------|------------|-------------|----------|
| 72.7 bits(164) | 4e-13  | 21/22(95%) | 22/22(100%) | 0/22(0%) |

Query 1 RSHEIWITHSCPQSPGDTDASH 22  
 RSHEIWITHSCPQSPG+GTDASH  
 Sbjct 265 RSHEIWITHSCPQSPGNGTDASH 286

**Related Information**

[Gene](#) - associated gene details

[Map Viewer](#) - aligned genomic context

BLAST is a registered trademark of the National Library of Medicine.

NCBI/ BLAST/ blastp suite/ Formatting Results - BE8A8FGM015

**i** Your search parameters were adjusted to search for a short input sequence.

[Edit and Resubmit](#) [Save Search Strategies](#) [▶ Formatting options](#) [▶ Download](#)

[YouTube](#) [How to read this page](#) [Blast report description](#)

### SHBG\_RSHEIWITHSCPQSPGNGTDASH\_NonMod

RID [BE8A8FGM015](#) (Expires on 01-16 09:09 am)

**Query ID** |cl|1124  
**Description** None  
**Molecule type** amino acid  
**Query Length** 22

**Database Name** nr  
**Description** All non-redundant GenBank CDS translations+PDB+SwissProt+PIR excluding environmental samples from WGS projects  
**Program** BLASTP 2.2.30+ [▶ Citation](#)

Other reports: [▶ Search Summary](#) [\[Taxonomy reports\]](#) [\[Distance tree of results\]](#) [\[Multiple alignment\]](#)

### **[-]** Graphic Summary

**[-]** [Show Conserved Domains](#)

No putative conserved domains have been detected

Distribution of 100 Blast Hits on the Query Sequence



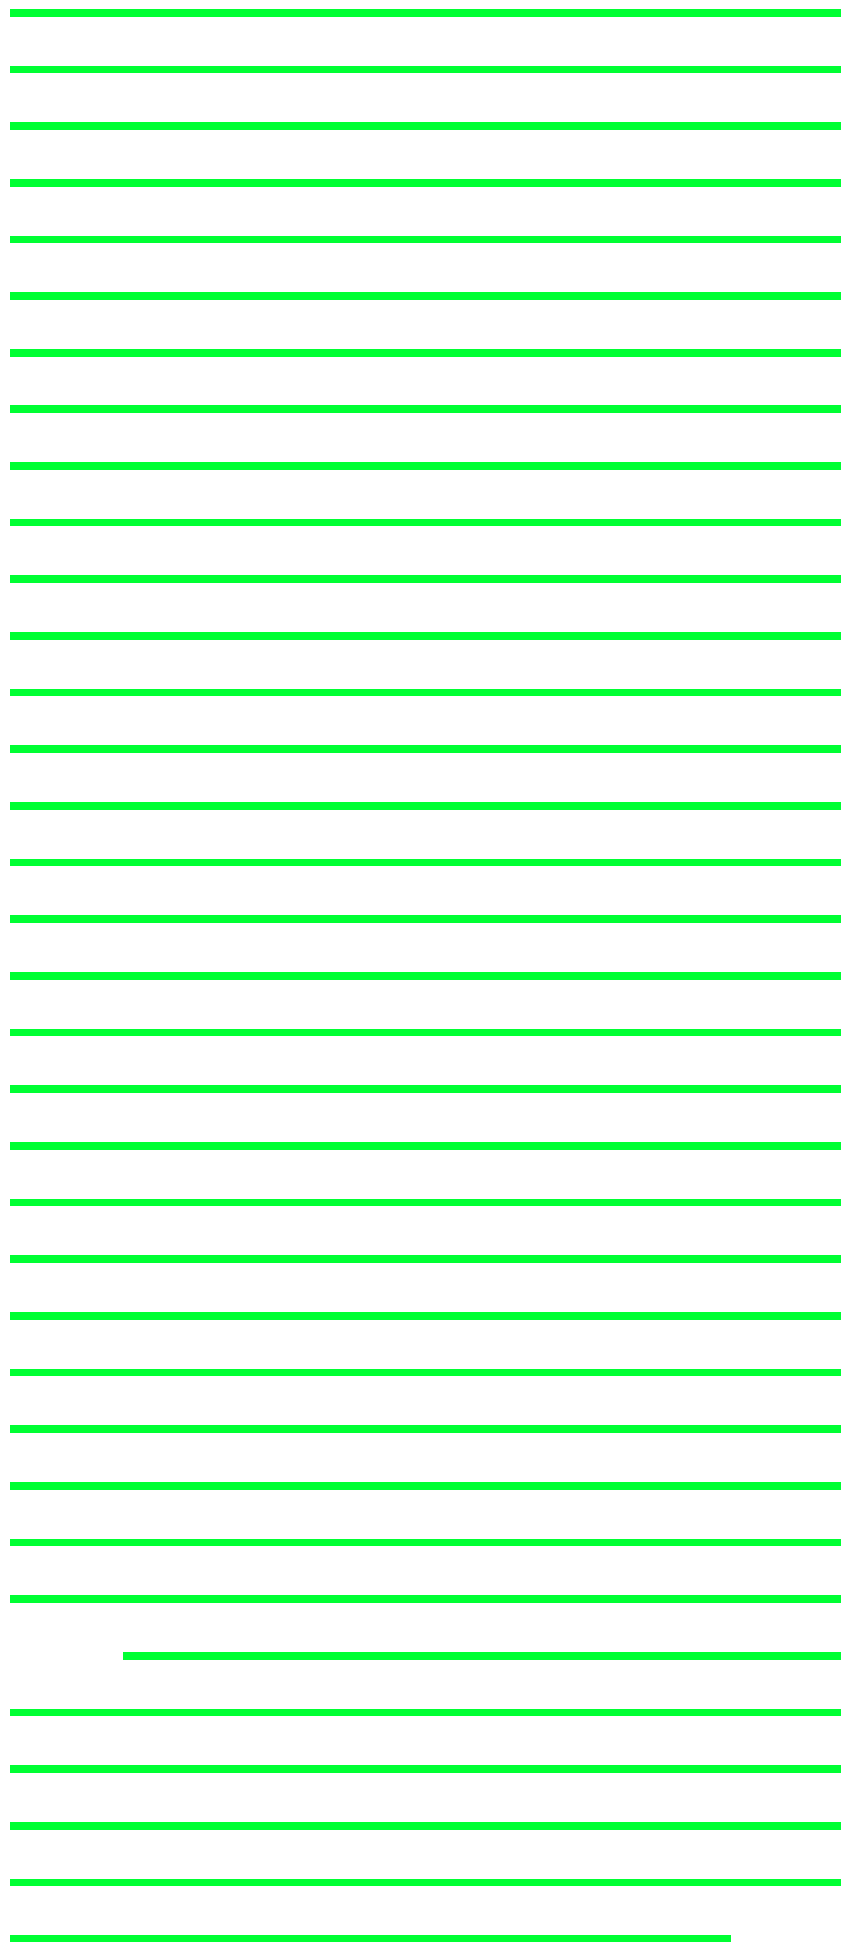

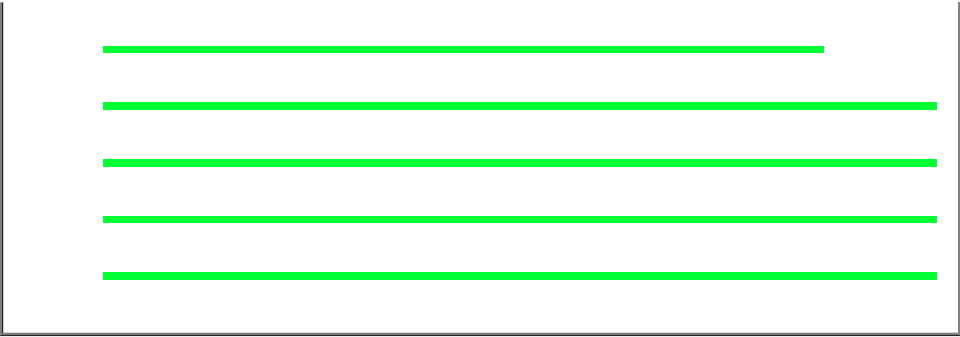

**Descriptions**

**Sequences producing significant alignments:**

Select: [All](#) [None](#) Selected:0

[Alignments](#)
[Download](#)
[GenPept](#)
[Graphics](#)
[Distance tree of results](#)
[Multiple alignment](#)

| Description                                                                        | Max score | Total score | Query cover | E value | Ident | Accession                                   |
|------------------------------------------------------------------------------------|-----------|-------------|-------------|---------|-------|---------------------------------------------|
| <a href="#">sex hormone binding globulin [Homo sapiens]</a>                        | 75.3      | 75.3        | 100%        | 4e-14   | 100%  | <a href="#">gi 165873764 ABY68001.1</a>     |
| <a href="#">PREDICTED: sex hormone-binding globulin isoform X6 [Homo sapiens]</a>  | 75.3      | 75.3        | 100%        | 5e-14   | 100%  | <a href="#">gi 530410575 XP_005256822.1</a> |
| <a href="#">sex hormone binding globulin [Homo sapiens]</a>                        | 75.3      | 75.3        | 100%        | 5e-14   | 100%  | <a href="#">gi 165873760 ABY67999.1</a>     |
| <a href="#">sex steroid-binding protein [Homo sapiens]</a>                         | 75.3      | 75.3        | 100%        | 5e-14   | 100%  | <a href="#">gi 825718 CAA29234.1</a>        |
| <a href="#">PREDICTED: sex hormone-binding globulin isoform X5 [Rhinopithecus]</a> | 75.3      | 75.3        | 100%        | 5e-14   | 100%  | <a href="#">gi 724818518 XP_010360686.1</a> |
| <a href="#">PREDICTED: sex hormone-binding globulin isoform X3 [Papio anubis]</a>  | 75.3      | 75.3        | 100%        | 5e-14   | 100%  | <a href="#">gi 685595645 XP_009187837.1</a> |
| <a href="#">PREDICTED: sex hormone-binding globulin isoform X6 [Pan paniscus]</a>  | 75.3      | 75.3        | 100%        | 5e-14   | 100%  | <a href="#">gi 675705950 XP_008960682.1</a> |
| <a href="#">PREDICTED: sex hormone-binding globulin isoform X6 [Chlorocebus]</a>   | 75.3      | 75.3        | 100%        | 5e-14   | 100%  | <a href="#">gi 635087572 XP_008008379.1</a> |
| <a href="#">sex hormone-binding globulin isoform 7 [Homo sapiens]</a>              | 75.3      | 75.3        | 100%        | 5e-14   | 100%  | <a href="#">gi 574288369 NP_001276045.1</a> |
| <a href="#">PREDICTED: sex hormone-binding globulin isoform X3 [Pan paniscus]</a>  | 75.3      | 75.3        | 100%        | 5e-14   | 100%  | <a href="#">gi 397477529 XP_003810122.1</a> |
| <a href="#">sex hormone-binding globulin isoform 4 precursor [Homo sapiens]</a>    | 75.3      | 75.3        | 100%        | 5e-14   | 100%  | <a href="#">gi 226371613 NP_001139753.1</a> |
| <a href="#">PREDICTED: sex hormone-binding globulin isoform X4 [Rhinopithecus]</a> | 75.3      | 75.3        | 100%        | 5e-14   | 100%  | <a href="#">gi 724818515 XP_010360685.1</a> |
| <a href="#">PREDICTED: sex hormone-binding globulin isoform X4 [Pan paniscus]</a>  | 75.3      | 75.3        | 100%        | 5e-14   | 100%  | <a href="#">gi 675705940 XP_008960680.1</a> |
| <a href="#">sex hormone-binding globulin isoform 5 [Homo sapiens]</a>              | 75.3      | 75.3        | 100%        | 5e-14   | 100%  | <a href="#">gi 574287849 NP_001276042.1</a> |
| <a href="#">PREDICTED: sex hormone-binding globulin isoform X3 [Rhinopithecus]</a> | 75.3      | 75.3        | 100%        | 5e-14   | 100%  | <a href="#">gi 724818512 XP_010360684.1</a> |
| <a href="#">PREDICTED: sex hormone-binding globulin isoform X5 [Chlorocebus]</a>   | 75.3      | 75.3        | 100%        | 5e-14   | 100%  | <a href="#">gi 635087568 XP_008008377.1</a> |
| <a href="#">PREDICTED: sex hormone-binding globulin isoform X7 [Homo sapiens]</a>  | 75.3      | 75.3        | 100%        | 5e-14   | 100%  | <a href="#">gi 578830017 XP_006721632.1</a> |
| <a href="#">unnamed protein product [Homo sapiens]</a>                             | 75.3      | 75.3        | 100%        | 5e-14   | 100%  | <a href="#">gi 1335306 CAA29309.1</a>       |
| <a href="#">unnamed protein product [Homo sapiens]</a>                             | 75.3      | 75.3        | 100%        | 6e-14   | 100%  | <a href="#">gi 36448 CAA28987.1</a>         |
| <a href="#">sex hormone-binding globulin isoform 2 precursor [Homo sapiens]</a>    | 75.3      | 75.3        | 100%        | 6e-14   | 100%  | <a href="#">gi 226371775 NP_001139751.1</a> |
| <a href="#">PREDICTED: sex hormone-binding globulin isoform X4 [Chlorocebus]</a>   | 75.3      | 75.3        | 100%        | 6e-14   | 100%  | <a href="#">gi 635087558 XP_008008372.1</a> |
| <a href="#">SHBG protein [Homo sapiens]</a>                                        | 75.3      | 75.3        | 100%        | 6e-14   | 100%  | <a href="#">gi 47479685 AAH69597.1</a>      |
| <a href="#">PREDICTED: sex hormone-binding globulin isoform X2 [Rhinopithecus]</a> | 75.3      | 75.3        | 100%        | 6e-14   | 100%  | <a href="#">gi 724818509 XP_010360683.1</a> |
| <a href="#">PREDICTED: sex hormone-binding globulin isoform X2 [Papio anubis]</a>  | 75.3      | 75.3        | 100%        | 6e-14   | 100%  | <a href="#">gi 685595643 XP_009187836.1</a> |
| <a href="#">sex hormone-binding globulin [synthetic construct]</a>                 | 75.3      | 75.3        | 100%        | 6e-14   | 100%  | <a href="#">gi 60813500 AA36263.1</a>       |
| <a href="#">sex hormone-binding globulin [Homo sapiens]</a>                        | 75.3      | 75.3        | 100%        | 6e-14   | 100%  | <a href="#">gi 338075 AAC18778.1</a>        |
| <a href="#">sex hormone-binding globulin isoform 1 precursor [Homo sapiens]</a>    | 75.3      | 75.3        | 100%        | 6e-14   | 100%  | <a href="#">gi 7382460 NP_001031.2</a>      |
| <a href="#">PREDICTED: sex hormone-binding globulin isoform X1 [Pan paniscus]</a>  | 75.3      | 75.3        | 100%        | 6e-14   | 100%  | <a href="#">gi 397477525 XP_003810120.1</a> |

|                                                                                    |      |      |      |       |      |                                             |
|------------------------------------------------------------------------------------|------|------|------|-------|------|---------------------------------------------|
| Sex hormone-binding globulin [Macaca mulatta]                                      | 75.3 | 75.3 | 100% | 6e-14 | 100% | <a href="#">gij355568201 EHH24482.1</a>     |
| <a href="#">PREDICTED: sex hormone-binding globulin isoform X1 [Rhinopithe</a>     | 75.3 | 75.3 | 100% | 6e-14 | 100% | <a href="#">gij724818503 XP_010360681.1</a> |
| <a href="#">PREDICTED: sex hormone-binding globulin isoform X1 [Papio anu</a>      | 75.3 | 75.3 | 100% | 6e-14 | 100% | <a href="#">gij685595639 XP_009187834.1</a> |
| <a href="#">PREDICTED: sex hormone-binding globulin isoform X3 [Chlorocebu</a>     | 75.3 | 75.3 | 100% | 6e-14 | 100% | <a href="#">gij635087556 XP_008008371.1</a> |
| <a href="#">PREDICTED: LOW QUALITY PROTEIN: sex hormone-binding glob</a>           | 75.3 | 75.3 | 100% | 6e-14 | 100% | <a href="#">gij297271824 XP_002808160.1</a> |
| <a href="#">uncharacterized protein LOC101864774 [Macaca fascicularis]</a>         | 75.3 | 75.3 | 100% | 6e-14 | 100% | <a href="#">gij545686862 NP_001270513.1</a> |
| <a href="#">PREDICTED: sex hormone-binding globulin isoform X2 [Chlorocebu</a>     | 75.3 | 75.3 | 100% | 6e-14 | 100% | <a href="#">gij635087554 XP_008008369.1</a> |
| <a href="#">PREDICTED: sex hormone-binding globulin isoform X1 [Chlorocebu</a>     | 75.3 | 75.3 | 100% | 6e-14 | 100% | <a href="#">gij635087552 XP_008008368.1</a> |
| <a href="#">PREDICTED: sex hormone-binding globulin isoform 4 [Gorilla gorill:</a> | 72.3 | 72.3 | 100% | 5e-13 | 95%  | <a href="#">gij426383969 XP_004058549.1</a> |
| <a href="#">PREDICTED: sex hormone-binding globulin isoform 3 [Gorilla gorill:</a> | 72.3 | 72.3 | 100% | 6e-13 | 95%  | <a href="#">gij426383967 XP_004058548.1</a> |
| <a href="#">PREDICTED: sex hormone-binding globulin isoform 1 [Gorilla gorill:</a> | 72.3 | 72.3 | 100% | 6e-13 | 95%  | <a href="#">gij426383963 XP_004058546.1</a> |
| <a href="#">PREDICTED: LOW QUALITY PROTEIN: sex hormone-binding glob</a>           | 70.6 | 70.6 | 100% | 2e-12 | 95%  | <a href="#">gij686752223 XP_009249533.1</a> |
| <a href="#">PREDICTED: sex hormone-binding globulin isoform X2 [Saimiri boli</a>   | 70.2 | 70.2 | 100% | 3e-12 | 91%  | <a href="#">gij725571085 XP_010338103.1</a> |
| <a href="#">PREDICTED: sex hormone-binding globulin isoform X3 [Callithrix ja</a>  | 70.2 | 70.2 | 100% | 3e-12 | 91%  | <a href="#">gij675658295 XP_008994833.1</a> |
| <a href="#">PREDICTED: sex hormone-binding globulin isoform X2 [Callithrix ja</a>  | 70.2 | 70.2 | 100% | 3e-12 | 91%  | <a href="#">gij675658293 XP_008994832.1</a> |
| <a href="#">PREDICTED: sex hormone-binding globulin isoform X1 [Callithrix ja</a>  | 70.2 | 70.2 | 100% | 3e-12 | 91%  | <a href="#">gij296201365 XP_002747998.1</a> |
| <a href="#">PREDICTED: sex hormone-binding globulin isoform X1 [Saimiri boli</a>   | 70.2 | 70.2 | 100% | 3e-12 | 91%  | <a href="#">gij403274954 XP_003929225.1</a> |
| <a href="#">PREDICTED: LOW QUALITY PROTEIN: sex hormone-binding glob</a>           | 65.5 | 65.5 | 86%  | 1e-10 | 100% | <a href="#">gij441662099 XP_004091565.1</a> |
| <a href="#">PREDICTED: sex hormone-binding globulin isoform X2 [Balaenopte</a>     | 61.3 | 61.3 | 100% | 3e-09 | 82%  | <a href="#">gij594623652 XP_007166454.1</a> |
| <a href="#">PREDICTED: sex hormone-binding globulin isoform X1 [Balaenopte</a>     | 61.3 | 61.3 | 100% | 3e-09 | 82%  | <a href="#">gij594623650 XP_007166453.1</a> |
| <a href="#">sex hormone-binding globulin precursor [Oryctolagus cuniculus]</a>     | 60.9 | 60.9 | 100% | 5e-09 | 82%  | <a href="#">gij126723743 NP_001075839.1</a> |
| <a href="#">PREDICTED: LOW QUALITY PROTEIN: sex hormone-binding glob</a>           | 60.9 | 60.9 | 100% | 5e-09 | 82%  | <a href="#">gij395836756 XP_003791316.1</a> |
| <a href="#">PREDICTED: LOW QUALITY PROTEIN: sex hormone-binding glob</a>           | 60.4 | 60.4 | 86%  | 6e-09 | 89%  | <a href="#">gij593708274 XP_007131043.1</a> |
| <a href="#">PREDICTED: LOW QUALITY PROTEIN: sex hormone-binding glob</a>           | 60.4 | 60.4 | 86%  | 6e-09 | 89%  | <a href="#">gij465992477 XP_004266952.1</a> |
| <a href="#">PREDICTED: sex hormone-binding globulin isoform X5 [Loxodonta</a>      | 60.0 | 60.0 | 100% | 8e-09 | 82%  | <a href="#">gij731501491 XP_010594887.1</a> |
| <a href="#">PREDICTED: sex hormone-binding globulin isoform X4 [Tarsius syr</a>    | 60.0 | 60.0 | 100% | 8e-09 | 77%  | <a href="#">gij640808027 XP_008060529.1</a> |
| <a href="#">PREDICTED: sex hormone-binding globulin isoform X1 [Loxodonta</a>      | 60.0 | 60.0 | 100% | 8e-09 | 82%  | <a href="#">gij731501482 XP_010594883.1</a> |
| <a href="#">PREDICTED: sex hormone-binding globulin isoform X4 [Loxodonta</a>      | 60.0 | 60.0 | 100% | 9e-09 | 82%  | <a href="#">gij731501488 XP_010594886.1</a> |
| <a href="#">PREDICTED: sex hormone-binding globulin isoform X3 [Loxodonta</a>      | 60.0 | 60.0 | 100% | 9e-09 | 82%  | <a href="#">gij731501486 XP_010594885.1</a> |
| <a href="#">PREDICTED: sex hormone-binding globulin [Trichechus manatus le</a>     | 60.0 | 60.0 | 100% | 9e-09 | 82%  | <a href="#">gij471371144 XP_004376080.1</a> |
| <a href="#">PREDICTED: sex hormone-binding globulin isoform X2 [Tarsius syr</a>    | 60.0 | 60.0 | 100% | 9e-09 | 77%  | <a href="#">gij640808023 XP_008060527.1</a> |
| <a href="#">PREDICTED: sex hormone-binding globulin isoform X1 [Tarsius syr</a>    | 60.0 | 60.0 | 100% | 9e-09 | 77%  | <a href="#">gij640808021 XP_008060526.1</a> |
| <a href="#">PREDICTED: sex hormone-binding globulin isoform X3 [Jaculus jac</a>    | 58.3 | 58.3 | 95%  | 3e-08 | 81%  | <a href="#">gij507571348 XP_004669275.1</a> |
| <a href="#">PREDICTED: sex hormone-binding globulin isoform X2 [Jaculus jac</a>    | 58.3 | 58.3 | 95%  | 3e-08 | 81%  | <a href="#">gij507571346 XP_004669274.1</a> |
| <a href="#">PREDICTED: sex hormone-binding globulin isoform X1 [Jaculus jac</a>    | 58.3 | 58.3 | 95%  | 3e-08 | 81%  | <a href="#">gij507571344 XP_004669273.1</a> |
| <a href="#">PREDICTED: sex hormone-binding globulin isoform X5 [Eptesicus f</a>    | 57.9 | 57.9 | 100% | 4e-08 | 73%  | <a href="#">gij641723756 XP_008151730.1</a> |
| <a href="#">PREDICTED: sex hormone-binding globulin isoform X2 [Myotis dav</a>     | 57.9 | 57.9 | 100% | 4e-08 | 73%  | <a href="#">gij584083885 XP_006761714.1</a> |
| <a href="#">PREDICTED: sex hormone-binding globulin isoform X2 [Eptesicus f</a>    | 57.9 | 57.9 | 100% | 4e-08 | 73%  | <a href="#">gij641723750 XP_008151727.1</a> |
| <a href="#">PREDICTED: sex hormone-binding globulin isoform X4 [Myotis luci</a>    | 57.9 | 57.9 | 100% | 4e-08 | 73%  | <a href="#">gij558212270 XP_006107895.1</a> |
| <a href="#">PREDICTED: sex hormone-binding globulin isoform X2 [Lipotes ve</a>     | 57.9 | 57.9 | 86%  | 4e-08 | 84%  | <a href="#">gij602691440 XP_007457850.1</a> |
| <a href="#">PREDICTED: sex hormone-binding globulin isoform X1 [Eptesicus f</a>    | 57.9 | 57.9 | 100% | 4e-08 | 73%  | <a href="#">gij641723748 XP_008151725.1</a> |
| <a href="#">PREDICTED: sex hormone-binding globulin isoform X3 [Myotis luci</a>    | 57.9 | 57.9 | 100% | 5e-08 | 73%  | <a href="#">gij558212266 XP_006107894.1</a> |
| Sex hormone-binding globulin [Myotis brandtii]                                     | 57.9 | 57.9 | 100% | 5e-08 | 73%  | <a href="#">gij521033698 EPQ15483.1</a>     |
| <a href="#">PREDICTED: sex hormone-binding globulin isoform X4 [Eptesicus f</a>    | 57.9 | 57.9 | 100% | 5e-08 | 73%  | <a href="#">gij641723754 XP_008151729.1</a> |
| <a href="#">PREDICTED: sex hormone-binding globulin isoform X2 [Myotis luci</a>    | 57.9 | 57.9 | 100% | 5e-08 | 73%  | <a href="#">gij558212261 XP_006107893.1</a> |

|                                                                                  |      |      |      |       |     |                                             |
|----------------------------------------------------------------------------------|------|------|------|-------|-----|---------------------------------------------|
| <a href="#">PREDICTED: sex hormone-binding globulin isoform X1 [Lipotes ve]</a>  | 57.9 | 57.9 | 86%  | 5e-08 | 84% | <a href="#">gil602691438 XP_007457849.1</a> |
| <a href="#">PREDICTED: sex hormone-binding globulin [Tursiops truncatus]</a>     | 57.9 | 57.9 | 86%  | 5e-08 | 84% | <a href="#">gil470595418 XP_004310675.1</a> |
| <a href="#">Sex hormone-binding globulin [Myotis davidii]</a>                    | 57.9 | 57.9 | 100% | 5e-08 | 73% | <a href="#">gil432105615 ELK31809.1</a>     |
| <a href="#">PREDICTED: sex hormone-binding globulin isoform X1 [Myotis luci]</a> | 57.9 | 57.9 | 100% | 5e-08 | 73% | <a href="#">gil558212256 XP_006107892.1</a> |
| <a href="#">PREDICTED: sex hormone-binding globulin-like isoform X4 [Myotis]</a> | 57.9 | 57.9 | 100% | 5e-08 | 73% | <a href="#">gil554569120 XP_005878824.1</a> |
| <a href="#">PREDICTED: LOW QUALITY PROTEIN: sex hormone-binding glob</a>         | 57.1 | 57.1 | 81%  | 9e-08 | 89% | <a href="#">gil586535218 XP_006927039.1</a> |
| <a href="#">PREDICTED: LOW QUALITY PROTEIN: sex hormone-binding glob</a>         | 56.6 | 56.6 | 100% | 1e-07 | 77% | <a href="#">gil545860218 XP_005669285.1</a> |
| <a href="#">PREDICTED: sex hormone-binding globulin-like isoform 2 [Ailuropo</a> | 56.6 | 56.6 | 100% | 1e-07 | 73% | <a href="#">gil301778205 XP_002924481.1</a> |
| <a href="#">PREDICTED: sex hormone-binding globulin [Ursus maritimus]</a>        | 56.6 | 56.6 | 100% | 1e-07 | 73% | <a href="#">gil670990414 XP_008686192.1</a> |
| <a href="#">PREDICTED: sex hormone-binding globulin-like isoform 1 [Ailuropo</a> | 56.6 | 56.6 | 100% | 1e-07 | 73% | <a href="#">gil301778203 XP_002924480.1</a> |
| <a href="#">PREDICTED: sex hormone-binding globulin isoform X1 [Galeopteru</a>   | 56.2 | 56.2 | 100% | 2e-07 | 73% | <a href="#">gil667274663 XP_008572063.1</a> |
| <a href="#">PREDICTED: sex hormone-binding globulin isoform X3 [Ictidomys t</a>  | 56.2 | 56.2 | 100% | 2e-07 | 77% | <a href="#">gil532094390 XP_005332872.1</a> |
| <a href="#">PREDICTED: sex hormone-binding globulin isoform X2 [Ictidomys t</a>  | 56.2 | 56.2 | 100% | 2e-07 | 77% | <a href="#">gil532094388 XP_005332871.1</a> |
| <a href="#">PREDICTED: sex hormone-binding globulin isoform X1 [Ictidomys t</a>  | 56.2 | 56.2 | 100% | 2e-07 | 77% | <a href="#">gil532094386 XP_005332870.1</a> |
| <a href="#">PREDICTED: sex hormone-binding globulin [Orycteropus afer afer]</a>  | 55.4 | 55.4 | 100% | 3e-07 | 77% | <a href="#">gil634880093 XP_007950448.1</a> |
| <a href="#">PREDICTED: sex hormone-binding globulin isoformX1 [Canis lupus</a>   | 54.9 | 54.9 | 100% | 5e-07 | 73% | <a href="#">gil359319496 XP_003639094.1</a> |
| <a href="#">PREDICTED: sex hormone-binding globulin isoform X4 [Camelus d</a>    | 54.5 | 54.5 | 86%  | 6e-07 | 79% | <a href="#">gil744613691 XP_010994821.1</a> |
| <a href="#">PREDICTED: sex hormone-binding globulin isoform X4 [Camelus b</a>    | 54.5 | 54.5 | 86%  | 6e-07 | 79% | <a href="#">gil743739556 XP_010964222.1</a> |
| <a href="#">PREDICTED: sex hormone-binding globulin isoform X3 [Camelus d</a>    | 54.5 | 54.5 | 86%  | 6e-07 | 79% | <a href="#">gil744613688 XP_010994820.1</a> |
| <a href="#">PREDICTED: sex hormone-binding globulin isoform X3 [Camelus b</a>    | 54.5 | 54.5 | 86%  | 6e-07 | 79% | <a href="#">gil743739554 XP_010964221.1</a> |
| <a href="#">PREDICTED: sex hormone-binding globulin isoform X3 [Camelus fe</a>   | 54.5 | 54.5 | 86%  | 6e-07 | 79% | <a href="#">gil560898873 XP_006175877.1</a> |
| <a href="#">PREDICTED: sex hormone-binding globulin [Vicugna pacos]</a>          | 54.5 | 54.5 | 86%  | 6e-07 | 79% | <a href="#">gil560993445 XP_006218840.1</a> |
| <a href="#">PREDICTED: sex hormone-binding globulin isoform X2 [Camelus d</a>    | 54.5 | 54.5 | 86%  | 6e-07 | 79% | <a href="#">gil744613685 XP_010994819.1</a> |
| <a href="#">PREDICTED: sex hormone-binding globulin isoform X2 [Camelus b</a>    | 54.5 | 54.5 | 86%  | 6e-07 | 79% | <a href="#">gil743739552 XP_010964220.1</a> |
| <a href="#">PREDICTED: sex hormone-binding globulin isoform X2 [Camelus fe</a>   | 54.5 | 54.5 | 86%  | 6e-07 | 79% | <a href="#">gil560898871 XP_006175876.1</a> |
| <a href="#">PREDICTED: sex hormone-binding globulin isoform X1 [Camelus d</a>    | 54.5 | 54.5 | 86%  | 6e-07 | 79% | <a href="#">gil744613682 XP_010994818.1</a> |
| <a href="#">PREDICTED: sex hormone-binding globulin isoform X1 [Camelus b</a>    | 54.5 | 54.5 | 86%  | 6e-07 | 79% | <a href="#">gil743739550 XP_010964219.1</a> |

## Alignments

Download GenPept Graphics

Next Previous Descriptions

sex hormone binding globulin [Homo sapiens]

Sequence ID: [gil165873764|gb|ABY68001.1](#) Length: 206 Number of Matches: 1

Range 1: 185 to 206 GenPept Graphics

Next Match Previous Match

| Score          | Expect | Identities  | Positives   | Gaps     |
|----------------|--------|-------------|-------------|----------|
| 75.3 bits(170) | 4e-14  | 22/22(100%) | 22/22(100%) | 0/22(0%) |

Query 1 RSHEIWITHSCPSPGNGTDASH 22  
 RSHEIWITHSCPSPGNGTDASH  
 Sbjct 185 RSHEIWITHSCPSPGNGTDASH 206

### Related Information

[Gene](#) - associated gene details

Download GenPept Graphics

Next Previous Descriptions

PREDICTED: sex hormone-binding globulin isoform X6 [Homo sapiens]

Sequence ID: [gil530410575|ref|XP\\_005256822.1](#) Length: 233 Number of Matches: 1

Range 1: 212 to 233 GenPept Graphics

Next Match Previous Match

| Score          | Expect | Identities  | Positives   | Gaps     |
|----------------|--------|-------------|-------------|----------|
| 75.3 bits(170) | 5e-14  | 22/22(100%) | 22/22(100%) | 0/22(0%) |

Query 1 RSHEIWITHSCPSPGNGTDASH 22

### Related Information

[Gene](#) - associated gene details

Sbjct 212 RSHEIWITHSCPSPGNGTDASH 233  
 RSHEIWITHSCPSPGNGTDASH

[Download](#) [GenPept](#) [Graphics](#) [Next](#) [Previous](#) [Descriptions](#)

sex hormone binding globulin [Homo sapiens]

Sequence ID: [gi|165873760|gb|ABY67999.1](#) Length: 260 Number of Matches: 1

Range 1: 239 to 260 [GenPept](#) [Graphics](#) [Next Match](#) [Previous Match](#)

| Score          | Expect | Identities  | Positives   | Gaps     |
|----------------|--------|-------------|-------------|----------|
| 75.3 bits(170) | 5e-14  | 22/22(100%) | 22/22(100%) | 0/22(0%) |

Query 1 RSHEIWITHSCPSPGNGTDASH 22  
 RSHEIWITHSCPSPGNGTDASH  
 Sbjct 239 RSHEIWITHSCPSPGNGTDASH 260

**Related Information**

[Gene](#) - associated gene details

[Download](#) [GenPept](#) [Graphics](#) [Next](#) [Previous](#) [Descriptions](#)

sex steroid-binding protein [Homo sapiens]

Sequence ID: [gi|825718|emb|CAA29234.1](#) Length: 282 Number of Matches: 1

Range 1: 261 to 282 [GenPept](#) [Graphics](#) [Next Match](#) [Previous Match](#)

| Score          | Expect | Identities  | Positives   | Gaps     |
|----------------|--------|-------------|-------------|----------|
| 75.3 bits(170) | 5e-14  | 22/22(100%) | 22/22(100%) | 0/22(0%) |

Query 1 RSHEIWITHSCPSPGNGTDASH 22  
 RSHEIWITHSCPSPGNGTDASH  
 Sbjct 261 RSHEIWITHSCPSPGNGTDASH 282

**Related Information**

[Gene](#) - associated gene details

[Download](#) [GenPept](#) [Graphics](#) [Next](#) [Previous](#) [Descriptions](#)

PREDICTED: sex hormone-binding globulin isoform X5 [Rhinopithecus roxellana]

Sequence ID: [gi|724818518|ref|XP\\_010360686.1](#) Length: 286 Number of Matches: 1

Range 1: 265 to 286 [GenPept](#) [Graphics](#) [Next Match](#) [Previous Match](#)

| Score          | Expect | Identities  | Positives   | Gaps     |
|----------------|--------|-------------|-------------|----------|
| 75.3 bits(170) | 5e-14  | 22/22(100%) | 22/22(100%) | 0/22(0%) |

Query 1 RSHEIWITHSCPSPGNGTDASH 22  
 RSHEIWITHSCPSPGNGTDASH  
 Sbjct 265 RSHEIWITHSCPSPGNGTDASH 286

**Related Information**

[Gene](#) - associated gene details  
[Map Viewer](#) - aligned genomic context

BLAST is a registered trademark of the National Library of Medicine.

▶ NCBI/ BLAST/ blastp suite/ Formatting Results - BVM52HEP01R

**i** Your search parameters were adjusted to search for a short input sequence.

[Edit and Resubmit](#) [Save Search Strategies](#) ▶ [Formatting options](#) ▶ [Download](#) [YouTube](#) [How to read this page](#) [Blast report description](#)

### THBS1\_KKVSCPIMPCSDATVPDGECCPRC\_Mod

|                      |                                                         |                      |                                                                                                                    |
|----------------------|---------------------------------------------------------|----------------------|--------------------------------------------------------------------------------------------------------------------|
| <b>RID</b>           | <a href="#">BVM52HEP01R</a> (Expires on 01-21 10:50 am) | <b>Database Name</b> | nr                                                                                                                 |
| <b>Query ID</b>      | lcl 115247                                              | <b>Description</b>   | All non-redundant GenBank CDS translations+PDB+SwissProt+PIR+PRF excluding environmental samples from WGS projects |
| <b>Description</b>   | None                                                    | <b>Program</b>       | BLASTP 2.2.30+ ▶ <a href="#">Citation</a>                                                                          |
| <b>Molecule type</b> | amino acid                                              |                      |                                                                                                                    |
| <b>Query Length</b>  | 24                                                      |                      |                                                                                                                    |

Other reports: ▶ [Search Summary](#) [[Taxonomy reports](#)] [[Distance tree of results](#)] [[Multiple alignment](#)]

### Graphic Summary

[Show Conserved Domains](#)

No putative conserved domains have been detected

Distribution of 100 Blast Hits on the Query Sequence

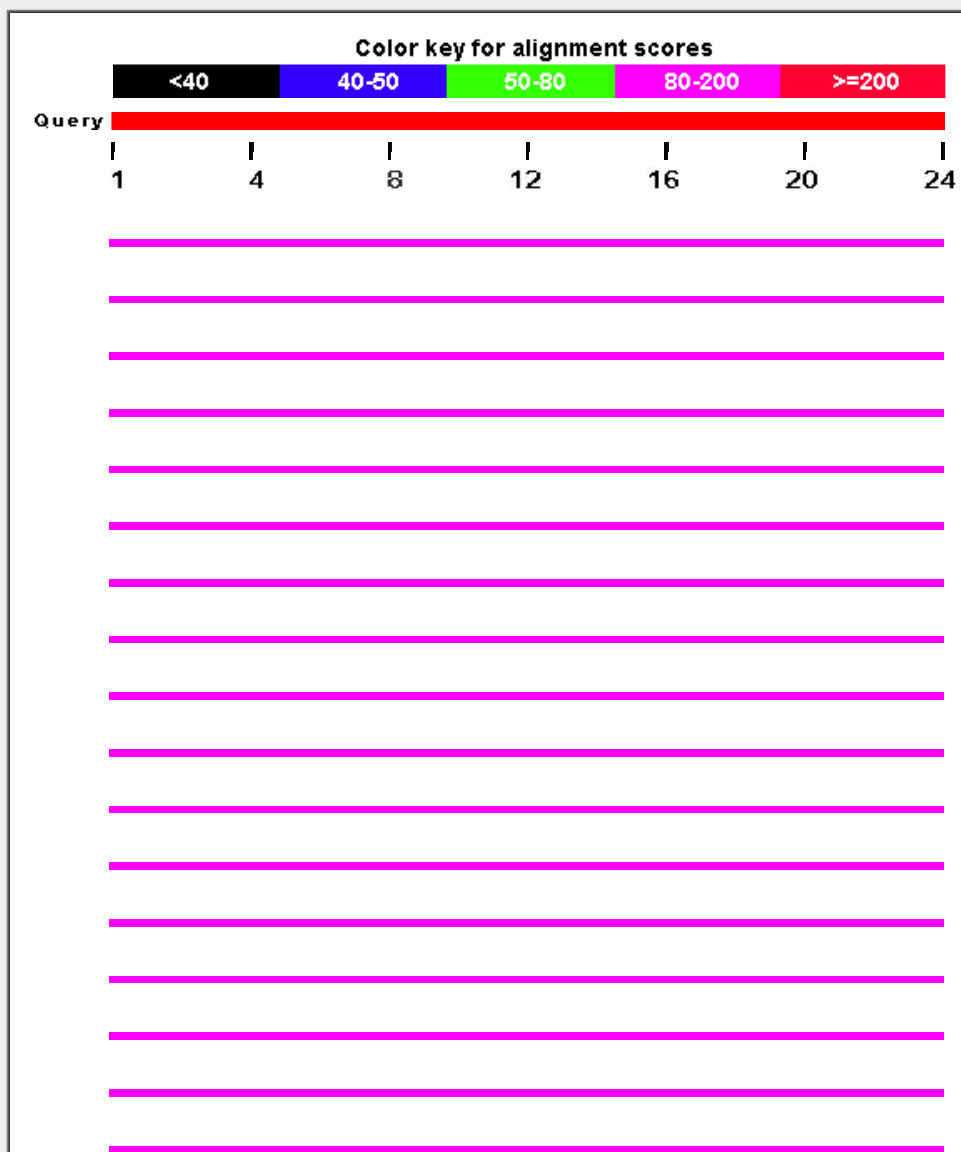



The image shows a table with 30 rows. Each row contains a single horizontal pink line. The table is centered on the page and is flanked by two vertical grey bars, one on the left and one on the right. The pink lines are evenly spaced and extend across most of the width of the table area.

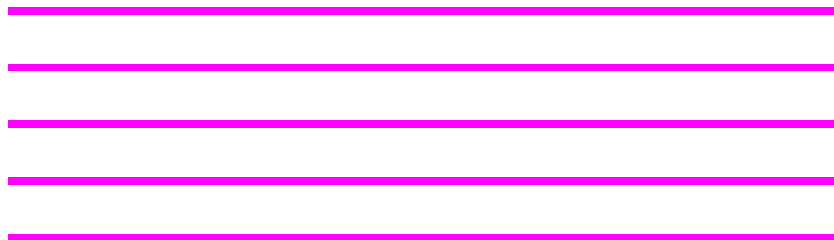

## Descriptions

### Sequences producing significant alignments:

Select: [All](#) [None](#) Selected:0

[Alignments](#)
[Download](#)
[GenPept](#)
[Graphics](#)
[Distance tree of results](#)
[Multiple alignment](#)


| Description                                                                        | Max score | Total score | Query cover | E value | Ident | Accession                      |
|------------------------------------------------------------------------------------|-----------|-------------|-------------|---------|-------|--------------------------------|
| <a href="#">thrombospondin 1 [Sus scrofa]</a>                                      | 82.1      | 82.1        | 100%        | 3e-16   | 96%   | <a href="#">AAV38110.1</a>     |
| <a href="#">Thrombospondin [Homo sapiens]</a>                                      | 82.1      | 82.1        | 100%        | 3e-16   | 96%   | <a href="#">AAA61237.1</a>     |
| <a href="#">thrombospondin [Homo sapiens]</a>                                      | 82.1      | 82.1        | 100%        | 3e-16   | 96%   | <a href="#">AAA36741.1</a>     |
| <a href="#">THBS1 protein [Homo sapiens]</a>                                       | 82.1      | 82.1        | 100%        | 4e-16   | 96%   | <a href="#">AAH28145.1</a>     |
| <a href="#">thrombospondin [Mus musculus domesticus]</a>                           | 82.1      | 82.1        | 100%        | 4e-16   | 96%   | <a href="#">AAA40431.1</a>     |
| <a href="#">thrombospondin 1 [Rattus norvegicus]</a>                               | 82.1      | 82.1        | 100%        | 4e-16   | 96%   | <a href="#">EDL79850.1</a>     |
| <a href="#">thrombospondin 1, isoform CRA_a [Mus musculus]</a>                     | 82.1      | 82.1        | 100%        | 4e-16   | 96%   | <a href="#">EDL27901.1</a>     |
| <a href="#">PREDICTED: thrombospondin-1 isoform X2 [Eptesicus fuscus]</a>          | 82.1      | 82.1        | 100%        | 4e-16   | 96%   | <a href="#">XP_008141208.1</a> |
| <a href="#">PREDICTED: thrombospondin-1 isoform X2 [Orycteropus afer afer]</a>     | 82.1      | 82.1        | 100%        | 4e-16   | 96%   | <a href="#">XP_007938654.1</a> |
| <a href="#">unnamed protein product [Homo sapiens]</a>                             | 82.1      | 82.1        | 100%        | 4e-16   | 96%   | <a href="#">BAG65509.1</a>     |
| <a href="#">PREDICTED: thrombospondin-1 isoform X2 [Leptonychotes weddellii]</a>   | 82.1      | 82.1        | 100%        | 4e-16   | 96%   | <a href="#">XP_006742087.1</a> |
| <a href="#">PREDICTED: thrombospondin-1 isoform X2 [Pantholops hodgsonii]</a>      | 82.1      | 82.1        | 100%        | 4e-16   | 96%   | <a href="#">XP_005978527.1</a> |
| <a href="#">PREDICTED: thrombospondin-1 isoform 2 [Ovis aries]</a>                 | 82.1      | 82.1        | 100%        | 4e-16   | 96%   | <a href="#">XP_004010485.1</a> |
| <a href="#">PREDICTED: thrombospondin-1 [Macaca mulatta]</a>                       | 82.1      | 82.1        | 100%        | 4e-16   | 96%   | <a href="#">XP_001093770.2</a> |
| <a href="#">Thrombospondin-1 [Bos mutus]</a>                                       | 82.1      | 82.1        | 100%        | 4e-16   | 96%   | <a href="#">ELR61299.1</a>     |
| <a href="#">thrombospondin 1, isoform CRA_b [Mus musculus]</a>                     | 82.1      | 82.1        | 100%        | 4e-16   | 96%   | <a href="#">EDL27902.1</a>     |
| <a href="#">PREDICTED: LOW QUALITY PROTEIN: thrombospondin-1 [Camelus bactria]</a> | 82.1      | 82.1        | 100%        | 4e-16   | 96%   | <a href="#">XP_010963427.1</a> |
| <a href="#">PREDICTED: thrombospondin-1 [Equus przewalskii]</a>                    | 82.1      | 82.1        | 100%        | 4e-16   | 96%   | <a href="#">XP_008527173.1</a> |
| <a href="#">PREDICTED: thrombospondin-1 [Camelus dromedarius]</a>                  | 82.1      | 82.1        | 100%        | 4e-16   | 96%   | <a href="#">XP_010987639.1</a> |
| <a href="#">PREDICTED: thrombospondin-1 [Bos mutus]</a>                            | 82.1      | 82.1        | 100%        | 4e-16   | 96%   | <a href="#">XP_005889010.1</a> |
| <a href="#">PREDICTED: thrombospondin-1 [Myotis davidii]</a>                       | 82.1      | 82.1        | 100%        | 4e-16   | 96%   | <a href="#">XP_006778160.1</a> |
| <a href="#">PREDICTED: thrombospondin-1 [Sorex araneus]</a>                        | 82.1      | 82.1        | 100%        | 4e-16   | 96%   | <a href="#">XP_004609618.1</a> |
| <a href="#">PREDICTED: LOW QUALITY PROTEIN: thrombospondin-1 [Ursus maritimus]</a> | 82.1      | 82.1        | 100%        | 4e-16   | 96%   | <a href="#">XP_008700482.1</a> |
| <a href="#">hypothetical protein PANDA_001089 [Ailuropoda melanoleuca]</a>         | 82.1      | 82.1        | 100%        | 4e-16   | 96%   | <a href="#">EFB13827.1</a>     |
| <a href="#">PREDICTED: thrombospondin-1 [Ochotona princeps]</a>                    | 82.1      | 82.1        | 100%        | 4e-16   | 96%   | <a href="#">XP_004578240.1</a> |
| <a href="#">Thrombospondin-1 [Macaca fascicularis]</a>                             | 82.1      | 82.1        | 100%        | 4e-16   | 96%   | <a href="#">EHH62970.1</a>     |
| <a href="#">PREDICTED: thrombospondin-1 [Loxodonta africana]</a>                   | 82.1      | 82.1        | 100%        | 4e-16   | 96%   | <a href="#">XP_010596632.1</a> |
| <a href="#">PREDICTED: thrombospondin-1 [Galeopterus variegatus]</a>               | 82.1      | 82.1        | 100%        | 4e-16   | 96%   | <a href="#">XP_008564332.1</a> |
| <a href="#">PREDICTED: thrombospondin-1 isoform X4 [Cricetulus griseus]</a>        | 82.1      | 82.1        | 100%        | 4e-16   | 96%   | <a href="#">XP_007627125.1</a> |

|                                                                                          |      |      |      |       |     |                                |
|------------------------------------------------------------------------------------------|------|------|------|-------|-----|--------------------------------|
| <a href="#">PREDICTED: thrombospondin-1 [Bison bison bison]</a>                          | 82.1 | 82.1 | 100% | 4e-16 | 96% | <a href="#">XP_010846231.1</a> |
| <a href="#">PREDICTED: thrombospondin-1 [Rhinopithecus roxellana]</a>                    | 82.1 | 82.1 | 100% | 4e-16 | 96% | <a href="#">XP_010358095.1</a> |
| <a href="#">PREDICTED: thrombospondin-1 isoform X1 [Eptesicus fuscus]</a>                | 82.1 | 82.1 | 100% | 4e-16 | 96% | <a href="#">XP_008141207.1</a> |
| <a href="#">PREDICTED: thrombospondin-1 isoform X2 [Tarsius syrichta]</a>                | 82.1 | 82.1 | 100% | 4e-16 | 96% | <a href="#">XP_008051911.1</a> |
| <a href="#">PREDICTED: thrombospondin-1 [Chlorocebus sabaeus]</a>                        | 82.1 | 82.1 | 100% | 4e-16 | 96% | <a href="#">XP_008015274.1</a> |
| <a href="#">PREDICTED: thrombospondin-1 isoform X1 [Orycteropus afer afer]</a>           | 82.1 | 82.1 | 100% | 4e-16 | 96% | <a href="#">XP_007938653.1</a> |
| <a href="#">PREDICTED: thrombospondin-1 [Callithrix jacchus]</a>                         | 82.1 | 82.1 | 100% | 4e-16 | 96% | <a href="#">XP_002753603.1</a> |
| <a href="#">thrombospondin 1 precursor [Sus scrofa]</a>                                  | 82.1 | 82.1 | 100% | 4e-16 | 96% | <a href="#">NP_001231465.1</a> |
| <a href="#">thrombospondin 1 [Mus musculus]</a>                                          | 82.1 | 82.1 | 100% | 4e-16 | 96% | <a href="#">AAA53063.1</a>     |
| <a href="#">PREDICTED: thrombospondin-1 isoform X3 [Cricetulus griseus]</a>              | 82.1 | 82.1 | 100% | 4e-16 | 96% | <a href="#">XP_007627124.1</a> |
| <a href="#">PREDICTED: thrombospondin-1 [Lipotes vexillifer]</a>                         | 82.1 | 82.1 | 100% | 4e-16 | 96% | <a href="#">XP_007460252.1</a> |
| <a href="#">PREDICTED: thrombospondin-1 isoform X1 [Balaenoptera acutorostrata scan]</a> | 82.1 | 82.1 | 100% | 4e-16 | 96% | <a href="#">XP_007180483.1</a> |
| <a href="#">PREDICTED: thrombospondin-1 [Physeter catodon]</a>                           | 82.1 | 82.1 | 100% | 4e-16 | 96% | <a href="#">XP_007103269.1</a> |
| <a href="#">PREDICTED: LOW QUALITY PROTEIN: thrombospondin-1 [Panthera tigris a]</a>     | 82.1 | 82.1 | 100% | 4e-16 | 96% | <a href="#">XP_007081705.1</a> |
| <a href="#">PREDICTED: thrombospondin-1 [Pteropus alecto]</a>                            | 82.1 | 82.1 | 100% | 4e-16 | 96% | <a href="#">XP_006920568.1</a> |
| <a href="#">PREDICTED: thrombospondin-1 isoform X1 [Leptonychotes weddellii]</a>         | 82.1 | 82.1 | 100% | 4e-16 | 96% | <a href="#">XP_006742086.1</a> |
| <a href="#">unnamed protein product [Homo sapiens]</a>                                   | 82.1 | 82.1 | 100% | 4e-16 | 96% | <a href="#">CAA28370.1</a>     |
| <a href="#">PREDICTED: thrombospondin-1 [Vicugna pacos]</a>                              | 82.1 | 82.1 | 100% | 4e-16 | 96% | <a href="#">XP_006201694.1</a> |
| <a href="#">PREDICTED: thrombospondin-1 [Camelus ferus]</a>                              | 82.1 | 82.1 | 100% | 4e-16 | 96% | <a href="#">XP_006176662.1</a> |
| <a href="#">PREDICTED: thrombospondin-1 [Myotis lucifugus]</a>                           | 82.1 | 82.1 | 100% | 4e-16 | 96% | <a href="#">XP_006087569.1</a> |
| <a href="#">PREDICTED: thrombospondin-1 isoform X1 [Pantholops hodgsonii]</a>            | 82.1 | 82.1 | 100% | 4e-16 | 96% | <a href="#">XP_005978526.1</a> |
| <a href="#">PREDICTED: thrombospondin-1 [Myotis brandtii]</a>                            | 82.1 | 82.1 | 100% | 4e-16 | 96% | <a href="#">XP_005860295.1</a> |
| <a href="#">PREDICTED: thrombospondin-1 [Macaca fascicularis]</a>                        | 82.1 | 82.1 | 100% | 4e-16 | 96% | <a href="#">XP_005559204.1</a> |
| <a href="#">PREDICTED: thrombospondin-1 [Ictidomys tridecemlineatus]</a>                 | 82.1 | 82.1 | 100% | 4e-16 | 96% | <a href="#">XP_005316445.1</a> |
| <a href="#">PREDICTED: thrombospondin-1 [Mustela putorius furo]</a>                      | 82.1 | 82.1 | 100% | 4e-16 | 96% | <a href="#">XP_004751131.1</a> |
| <a href="#">PREDICTED: thrombospondin-1 [Dasypus novemcinctus]</a>                       | 82.1 | 82.1 | 100% | 4e-16 | 96% | <a href="#">XP_004481433.1</a> |
| <a href="#">PREDICTED: thrombospondin-1 [Ceratotherium simum simum]</a>                  | 82.1 | 82.1 | 100% | 4e-16 | 96% | <a href="#">XP_004421456.1</a> |
| <a href="#">PREDICTED: thrombospondin-1 [Odobenus rosmarus divergens]</a>                | 82.1 | 82.1 | 100% | 4e-16 | 96% | <a href="#">XP_004400502.1</a> |
| <a href="#">PREDICTED: thrombospondin-1 [Orcinus orca]</a>                               | 82.1 | 82.1 | 100% | 4e-16 | 96% | <a href="#">XP_004274061.1</a> |
| <a href="#">PREDICTED: thrombospondin-1 [Gorilla gorilla gorilla]</a>                    | 82.1 | 82.1 | 100% | 4e-16 | 96% | <a href="#">XP_004056005.1</a> |
| <a href="#">PREDICTED: thrombospondin-1 isoform 1 [Ovis aries]</a>                       | 82.1 | 82.1 | 100% | 4e-16 | 96% | <a href="#">XP_004010484.1</a> |
| <a href="#">PREDICTED: thrombospondin-1 isoform X1 [Mus musculus]</a>                    | 82.1 | 82.1 | 100% | 4e-16 | 96% | <a href="#">XP_006499215.1</a> |
| <a href="#">RecName: Full=Thrombospondin-1; Flags: Precursor [Mus musculus]</a>          | 82.1 | 82.1 | 100% | 4e-16 | 96% | <a href="#">P35441.1</a>       |
| <a href="#">precursor polypeptide (AA -31 to 1139) [Homo sapiens]</a>                    | 82.1 | 82.1 | 100% | 4e-16 | 96% | <a href="#">CAA32889.1</a>     |
| <a href="#">thrombospondin-1 precursor [Bos taurus]</a>                                  | 82.1 | 82.1 | 100% | 4e-16 | 96% | <a href="#">NP_776621.1</a>    |
| <a href="#">PREDICTED: thrombospondin-1 [Felis catus]</a>                                | 82.1 | 82.1 | 100% | 4e-16 | 96% | <a href="#">XP_003987333.1</a> |
| <a href="#">PREDICTED: thrombospondin-1 [Saimiri boliviensis boliviensis]</a>            | 82.1 | 82.1 | 100% | 4e-16 | 96% | <a href="#">XP_003935780.1</a> |
| <a href="#">PREDICTED: thrombospondin-1 [Papio anubis]</a>                               | 82.1 | 82.1 | 100% | 4e-16 | 96% | <a href="#">XP_003900802.1</a> |
| <a href="#">PREDICTED: thrombospondin-1 [Pan paniscus]</a>                               | 82.1 | 82.1 | 100% | 4e-16 | 96% | <a href="#">XP_003826603.1</a> |
| <a href="#">PREDICTED: thrombospondin-1 [Otolemur garnettii]</a>                         | 82.1 | 82.1 | 100% | 4e-16 | 96% | <a href="#">XP_003791750.1</a> |
| <a href="#">PREDICTED: thrombospondin-1 [Canis lupus familiaris]</a>                     | 82.1 | 82.1 | 100% | 4e-16 | 96% | <a href="#">XP_544610.3</a>    |
| <a href="#">PREDICTED: thrombospondin-1 [Pan troglodytes]</a>                            | 82.1 | 82.1 | 100% | 4e-16 | 96% | <a href="#">XP_510294.3</a>    |
| <a href="#">PREDICTED: thrombospondin-1 isoform 1 [Nomascus leucogenys]</a>              | 82.1 | 82.1 | 100% | 4e-16 | 96% | <a href="#">XP_003266759.1</a> |
| <a href="#">PREDICTED: thrombospondin-1-like [Ailuropoda melanoleuca]</a>                | 82.1 | 82.1 | 100% | 4e-16 | 96% | <a href="#">XP_002913278.1</a> |
| <a href="#">PREDICTED: thrombospondin-1 [Pongo abelii]</a>                               | 82.1 | 82.1 | 100% | 4e-16 | 96% | <a href="#">XP_002825327.1</a> |

|                                                                                     |      |      |      |       |     |                                |
|-------------------------------------------------------------------------------------|------|------|------|-------|-----|--------------------------------|
| <a href="#">TPA: thrombospondin 1 precursor [Bos taurus]</a>                        | 82.1 | 82.1 | 100% | 4e-16 | 96% | <a href="#">DAA25420.1</a>     |
| <a href="#">thrombospondin-1 precursor [synthetic construct]</a>                    | 82.1 | 82.1 | 100% | 4e-16 | 96% | <a href="#">BAG10999.1</a>     |
| <a href="#">unnamed protein product [Homo sapiens]</a>                              | 82.1 | 82.1 | 100% | 4e-16 | 96% | <a href="#">BAF84328.1</a>     |
| <a href="#">PREDICTED: thrombospondin-1 [Equus caballus]</a>                        | 82.1 | 82.1 | 100% | 4e-16 | 96% | <a href="#">XP_001503649.1</a> |
| <a href="#">thrombospondin-1 precursor [Homo sapiens]</a>                           | 82.1 | 82.1 | 100% | 4e-16 | 96% | <a href="#">NP_003237.2</a>    |
| <a href="#">thrombospondin-1 precursor [Rattus norvegicus]</a>                      | 82.1 | 82.1 | 100% | 4e-16 | 96% | <a href="#">NP_001013080.1</a> |
| <a href="#">PREDICTED: thrombospondin-1 isoform X1 [Bos taurus]</a>                 | 82.1 | 82.1 | 100% | 4e-16 | 96% | <a href="#">XP_010807460.1</a> |
| <a href="#">PREDICTED: thrombospondin-1 [Fukomys damarensis]</a>                    | 82.1 | 82.1 | 100% | 4e-16 | 96% | <a href="#">XP_010622953.1</a> |
| <a href="#">PREDICTED: thrombospondin-1 [Nannospalax galilii]</a>                   | 82.1 | 82.1 | 100% | 4e-16 | 96% | <a href="#">XP_008823512.1</a> |
| <a href="#">PREDICTED: thrombospondin-1-like [Oryctolagus cuniculus]</a>            | 82.1 | 82.1 | 100% | 4e-16 | 96% | <a href="#">XP_008250683.1</a> |
| <a href="#">PREDICTED: thrombospondin-1 [Oryctolagus cuniculus]</a>                 | 82.1 | 82.1 | 100% | 4e-16 | 96% | <a href="#">XP_002717845.1</a> |
| <a href="#">thrombospondin-1 precursor [Mus musculus]</a>                           | 82.1 | 82.1 | 100% | 4e-16 | 96% | <a href="#">NP_035710.2</a>    |
| <a href="#">PREDICTED: thrombospondin-1 [Erinaceus europaeus]</a>                   | 82.1 | 82.1 | 100% | 4e-16 | 96% | <a href="#">XP_007528982.1</a> |
| <a href="#">PREDICTED: thrombospondin-1 [Elephantulus edwardii]</a>                 | 82.1 | 82.1 | 100% | 4e-16 | 96% | <a href="#">XP_006883092.1</a> |
| <a href="#">PREDICTED: thrombospondin-1 [Microtus ochrogaster]</a>                  | 82.1 | 82.1 | 100% | 4e-16 | 96% | <a href="#">XP_005364295.1</a> |
| <a href="#">PREDICTED: thrombospondin-1 isoform X1 [Heterocephalus glaber]</a>      | 82.1 | 82.1 | 100% | 4e-16 | 96% | <a href="#">XP_004896133.1</a> |
| <a href="#">PREDICTED: thrombospondin-1 [Octodon degus]</a>                         | 82.1 | 82.1 | 100% | 4e-16 | 96% | <a href="#">XP_004623473.1</a> |
| <a href="#">PREDICTED: thrombospondin-1 [Jaculus jaculus]</a>                       | 82.1 | 82.1 | 100% | 4e-16 | 96% | <a href="#">XP_004660826.1</a> |
| <a href="#">Thrombospondin 1 [Mus musculus]</a>                                     | 82.1 | 82.1 | 100% | 4e-16 | 96% | <a href="#">AAH42422.1</a>     |
| <a href="#">PREDICTED: LOW QUALITY PROTEIN: thrombospondin-1 [Peromyscus ma]</a>    | 82.1 | 82.1 | 100% | 4e-16 | 96% | <a href="#">XP_006979294.1</a> |
| <a href="#">PREDICTED: LOW QUALITY PROTEIN: thrombospondin-1 [Tupaia chinensis]</a> | 82.1 | 82.1 | 100% | 4e-16 | 96% | <a href="#">XP_006158770.1</a> |
| <a href="#">PREDICTED: thrombospondin-1 [Mesocricetus auratus]</a>                  | 82.1 | 82.1 | 100% | 4e-16 | 96% | <a href="#">XP_005064576.1</a> |
| <a href="#">Thrombospondin-1 [Tupaia chinensis]</a>                                 | 82.1 | 82.1 | 100% | 4e-16 | 96% | <a href="#">ELW48182.1</a>     |
| <a href="#">PREDICTED: thrombospondin-1 isoform X3 [Mustela putorius furo]</a>      | 82.1 | 82.1 | 100% | 4e-16 | 96% | <a href="#">XP_004796564.1</a> |
| <a href="#">PREDICTED: thrombospondin-1 isoform X1 [Tarsius syrichta]</a>           | 82.1 | 82.1 | 100% | 4e-16 | 96% | <a href="#">XP_008051910.1</a> |
| <a href="#">Thrombospondin-1 [Pteropus alecto]</a>                                  | 82.1 | 82.1 | 100% | 4e-16 | 96% | <a href="#">ELK05556.1</a>     |

## Alignments

Download [GenPept](#) [Graphics](#)

[▼ Next](#) [▲ Previous](#) [▲ Descriptions](#)

thrombospondin 1 [Sus scrofa]

Sequence ID: [gb|AAV38110.1](#) Length: 249 Number of Matches: 1

Range 1: 141 to 164 [GenPept](#) [Graphics](#)

[▼ Next Match](#) [▲ Previous Match](#)

| Score          | Expect | Identities | Positives   | Gaps     |
|----------------|--------|------------|-------------|----------|
| 82.1 bits(186) | 3e-16  | 23/24(96%) | 24/24(100%) | 0/24(0%) |

Query 1 KKVSCPIMPSCSDATVPDGECPCRC 24  
 KKVSCPIMPSCS+ATVPDGECPCRC  
 Sbjct 141 KKVSCPIMPSCSNATVPDGECPCRC 164

### Related Information

[Gene](#) - associated gene details  
[Map Viewer](#) - aligned genomic context

Download [GenPept](#) [Graphics](#)

[▼ Next](#) [▲ Previous](#) [▲ Descriptions](#)

Thrombospondin, partial [Homo sapiens]

Sequence ID: [gb|AAA61237.1](#) Length: 376 Number of Matches: 1

Range 1: 349 to 372 [GenPept](#) [Graphics](#)

[▼ Next Match](#) [▲ Previous Match](#)

| Score          | Expect | Identities | Positives   | Gaps     |
|----------------|--------|------------|-------------|----------|
| 82.1 bits(186) | 3e-16  | 23/24(96%) | 24/24(100%) | 0/24(0%) |

### Related Information

[Gene](#) - associated gene details

Query 1 KKVSCPIMPSCSDATVPDGECCPRC 24  
 KKVSCPIMPSCS+ATVPDGECCPRC  
 Sbjct 349 KKVSCPIMPSCSNATVPDGECCPRC 372

[Download](#) [GenPept](#) [Graphics](#)

[▼ Next](#) [▲ Previous](#) [▲ Descriptions](#)

thrombospondin, partial [Homo sapiens]

Sequence ID: [gb|AAA36741.1](#) Length: 397 Number of Matches: 1

Range 1: 349 to 372 [GenPept](#) [Graphics](#)

[▼ Next Match](#) [▲ Previous Match](#)

| Score          | Expect | Identities | Positives   | Gaps     |
|----------------|--------|------------|-------------|----------|
| 82.1 bits(186) | 3e-16  | 23/24(96%) | 24/24(100%) | 0/24(0%) |

Query 1 KKVSCPIMPSCSDATVPDGECCPRC 24  
 KKVSCPIMPSCS+ATVPDGECCPRC  
 Sbjct 349 KKVSCPIMPSCSNATVPDGECCPRC 372

**Related Information**

[Gene](#) - associated gene details

[Download](#) [GenPept](#) [Graphics](#)

[▼ Next](#) [▲ Previous](#) [▲ Descriptions](#)

THBS1 protein, partial [Homo sapiens]

Sequence ID: [gb|AAH28145.1](#) Length: 401 Number of Matches: 1

Range 1: 349 to 372 [GenPept](#) [Graphics](#)

[▼ Next Match](#) [▲ Previous Match](#)

| Score          | Expect | Identities | Positives   | Gaps     |
|----------------|--------|------------|-------------|----------|
| 82.1 bits(186) | 4e-16  | 23/24(96%) | 24/24(100%) | 0/24(0%) |

Query 1 KKVSCPIMPSCSDATVPDGECCPRC 24  
 KKVSCPIMPSCS+ATVPDGECCPRC  
 Sbjct 349 KKVSCPIMPSCSNATVPDGECCPRC 372

**Related Information**

[Gene](#) - associated gene details

[Download](#) [GenPept](#) [Graphics](#)

[▼ Next](#) [▲ Previous](#) [▲ Descriptions](#)

thrombospondin, partial [Mus musculus domesticus]

Sequence ID: [gb|AAA40431.1](#) Length: 490 Number of Matches: 1

Range 1: 349 to 372 [GenPept](#) [Graphics](#)

[▼ Next Match](#) [▲ Previous Match](#)

| Score          | Expect | Identities | Positives   | Gaps     |
|----------------|--------|------------|-------------|----------|
| 82.1 bits(186) | 4e-16  | 23/24(96%) | 24/24(100%) | 0/24(0%) |

Query 1 KKVSCPIMPSCSDATVPDGECCPRC 24  
 KKVSCPIMPSCS+ATVPDGECCPRC  
 Sbjct 349 KKVSCPIMPSCSNATVPDGECCPRC 372

**Related Information**

[Gene](#) - associated gene details

BLAST is a registered trademark of the National Library of Medicine.

▶ NCBI/ BLAST/ blastp suite/ Formatting Results - BE8AGHTS015

**i** Your search parameters were adjusted to search for a short input sequence.

[Edit and Resubmit](#) [Save Search Strategies](#) ▶ [Formatting options](#) ▶ [Download](#)

[YouTube](#) [How to read this page](#) [Blast report description](#)

### THBS1\_KKVSCPIMPCSNATVPDGECCPRC\_NonMod

RID [BE8AGHTS015](#) (Expires on 01-16 09:09 am)

**Query ID** |cl|7223  
**Description** None  
**Molecule type** amino acid  
**Query Length** 24

**Database Name** nr  
**Description** All non-redundant GenBank CDS translations+PDB+SwissProt+PIR excluding environmental samples from WGS projects  
**Program** BLASTP 2.2.30+ ▶ [Citation](#)

Other reports: ▶ [Search Summary](#) [[Taxonomy reports](#)] [[Distance tree of results](#)] [[Multiple alignment](#)]

### **G**raphic Summary

[Show Conserved Domains](#)

No putative conserved domains have been detected

Distribution of 100 Blast Hits on the Query Sequence

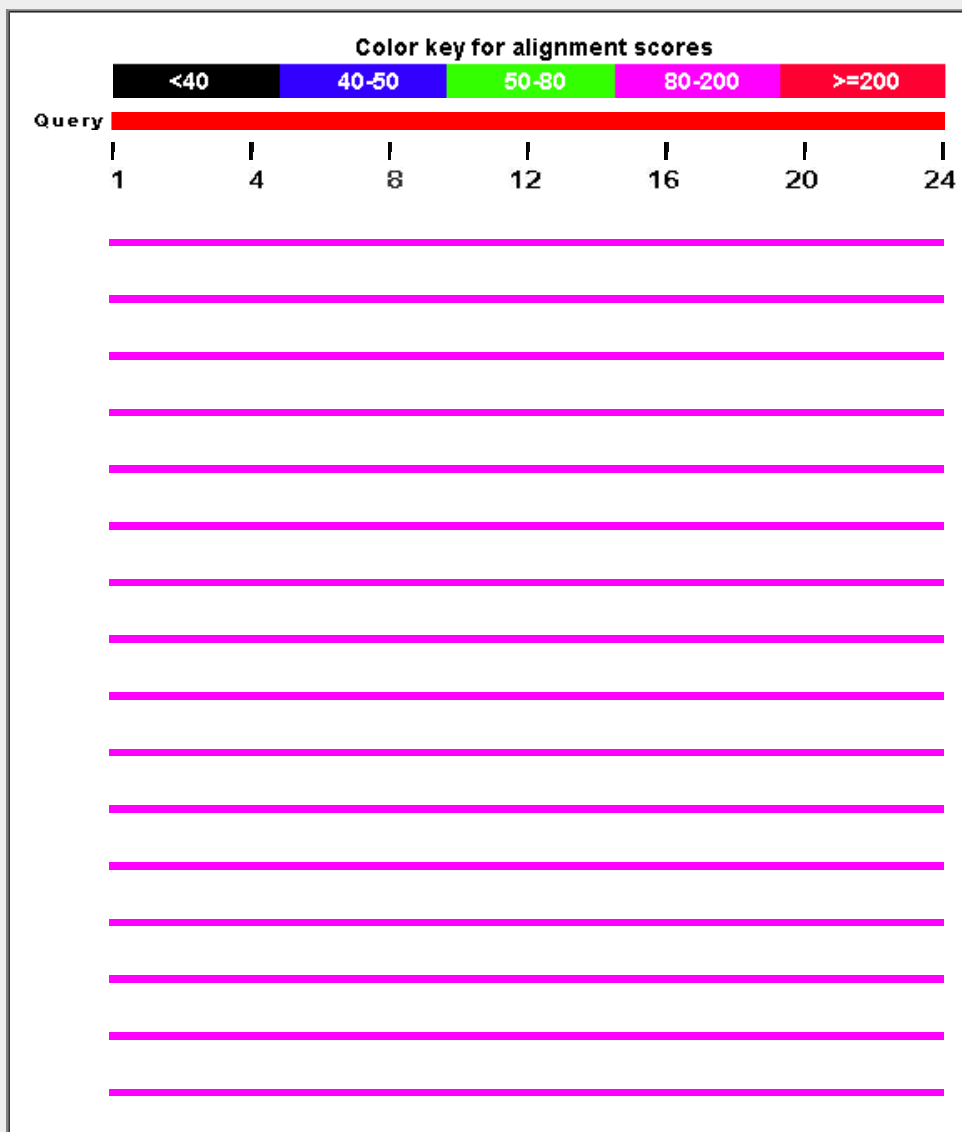

The table consists of 30 rows, each containing a single horizontal magenta line. The lines are evenly spaced and extend across the width of the table area. The table is flanked by light blue vertical bars on both sides.

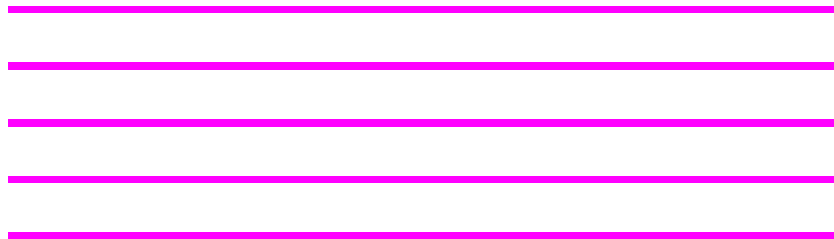

## Descriptions

### Sequences producing significant alignments:

Select: [All](#) [None](#) Selected:0

| <a href="#">Alignments</a> <a href="#">Download</a> <a href="#">GenPept</a> <a href="#">Graphics</a> <a href="#">Distance tree of results</a> <a href="#">Multiple alignment</a> |           |             |             |         |       |                                             |
|----------------------------------------------------------------------------------------------------------------------------------------------------------------------------------|-----------|-------------|-------------|---------|-------|---------------------------------------------|
| Description                                                                                                                                                                      | Max score | Total score | Query cover | E value | Ident | Accession                                   |
| <a href="#">thrombospondin 1 [Sus scrofa]</a>                                                                                                                                    | 84.6      | 84.6        | 100%        | 4e-17   | 100%  | <a href="#">gi 54694859 AAV38110.1</a>      |
| <a href="#">Thrombospondin [Homo sapiens]</a>                                                                                                                                    | 84.6      | 84.6        | 100%        | 5e-17   | 100%  | <a href="#">gi 553801 AAA61237.1</a>        |
| <a href="#">thrombospondin [Homo sapiens]</a>                                                                                                                                    | 84.6      | 84.6        | 100%        | 5e-17   | 100%  | <a href="#">gi 538354 AAA36741.1</a>        |
| <a href="#">THBS1 protein [Homo sapiens]</a>                                                                                                                                     | 84.6      | 84.6        | 100%        | 5e-17   | 100%  | <a href="#">gi 118600432 AAH28145.1</a>     |
| <a href="#">thrombospondin [Mus musculus domesticus]</a>                                                                                                                         | 84.6      | 84.6        | 100%        | 5e-17   | 100%  | <a href="#">gi 554390 AAA40431.1</a>        |
| <a href="#">thrombospondin 1 [Rattus norvegicus]</a>                                                                                                                             | 84.6      | 84.6        | 100%        | 5e-17   | 100%  | <a href="#">gi 149022956 EDL79850.1</a>     |
| <a href="#">thrombospondin 1, isoform CRA_a [Mus musculus]</a>                                                                                                                   | 84.6      | 84.6        | 100%        | 5e-17   | 100%  | <a href="#">gi 148695954 EDL27901.1</a>     |
| <a href="#">PREDICTED: thrombospondin-1 isoform X2 [Eptesicus fuscus]</a>                                                                                                        | 84.6      | 84.6        | 100%        | 5e-17   | 100%  | <a href="#">gi 641704796 XP_008141208.1</a> |
| <a href="#">PREDICTED: thrombospondin-1 isoform X2 [Orycteropus afer afer]</a>                                                                                                   | 84.6      | 84.6        | 100%        | 5e-17   | 100%  | <a href="#">gi 634847136 XP_007938654.1</a> |
| <a href="#">unnamed protein product [Homo sapiens]</a>                                                                                                                           | 84.6      | 84.6        | 100%        | 5e-17   | 100%  | <a href="#">gi 194388250 BAG65509.1</a>     |
| <a href="#">PREDICTED: thrombospondin-1 isoform X2 [Leptonychotes wedde]</a>                                                                                                     | 84.6      | 84.6        | 100%        | 5e-17   | 100%  | <a href="#">gi 585180878 XP_006742087.1</a> |
| <a href="#">PREDICTED: thrombospondin-1 isoform X2 [Pantholops hodgsonii]</a>                                                                                                    | 84.6      | 84.6        | 100%        | 5e-17   | 100%  | <a href="#">gi 556766553 XP_005978527.1</a> |
| <a href="#">PREDICTED: thrombospondin-1 isoform 2 [Ovis aries]</a>                                                                                                               | 84.6      | 84.6        | 100%        | 5e-17   | 100%  | <a href="#">gi 426232960 XP_004010485.1</a> |
| <a href="#">PREDICTED: thrombospondin-1 [Macaca mulatta]</a>                                                                                                                     | 84.6      | 84.6        | 100%        | 5e-17   | 100%  | <a href="#">gi 297296130 XP_001093770.2</a> |
| <a href="#">Thrombospondin-1 [Bos mutus]</a>                                                                                                                                     | 84.6      | 84.6        | 100%        | 5e-17   | 100%  | <a href="#">gi 440911658 ELR61299.1</a>     |
| <a href="#">thrombospondin 1, isoform CRA_b [Mus musculus]</a>                                                                                                                   | 84.6      | 84.6        | 100%        | 5e-17   | 100%  | <a href="#">gi 148695955 EDL27902.1</a>     |
| <a href="#">PREDICTED: LOW QUALITY PROTEIN: thrombospondin-1 [Came]</a>                                                                                                          | 84.6      | 84.6        | 100%        | 5e-17   | 100%  | <a href="#">gi 743738078 XP_010963427.1</a> |
| <a href="#">PREDICTED: thrombospondin-1 [Equus przewalskii]</a>                                                                                                                  | 84.6      | 84.6        | 100%        | 5e-17   | 100%  | <a href="#">gi 664739742 XP_008527173.1</a> |
| <a href="#">PREDICTED: thrombospondin-1 [Camelus dromedarius]</a>                                                                                                                | 84.6      | 84.6        | 100%        | 5e-17   | 100%  | <a href="#">gi 744592369 XP_010987639.1</a> |
| <a href="#">PREDICTED: thrombospondin-1 [Bos mutus]</a>                                                                                                                          | 84.6      | 84.6        | 100%        | 5e-17   | 100%  | <a href="#">gi 555953675 XP_005889010.1</a> |
| <a href="#">PREDICTED: thrombospondin-1 [Myotis davidii]</a>                                                                                                                     | 84.6      | 84.6        | 100%        | 5e-17   | 100%  | <a href="#">gi 584039099 XP_006778160.1</a> |
| <a href="#">PREDICTED: thrombospondin-1 [Sorex araneus]</a>                                                                                                                      | 84.6      | 84.6        | 100%        | 5e-17   | 100%  | <a href="#">gi 505828620 XP_004609618.1</a> |
| <a href="#">PREDICTED: LOW QUALITY PROTEIN: thrombospondin-1 [Ursus]</a>                                                                                                         | 84.6      | 84.6        | 100%        | 5e-17   | 100%  | <a href="#">gi 671019315 XP_008700482.1</a> |
| <a href="#">hypothetical protein PANDA_001089 [Ailuropoda melanoleuca]</a>                                                                                                       | 84.6      | 84.6        | 100%        | 5e-17   | 100%  | <a href="#">gi 281338243 EFB13827.1</a>     |
| <a href="#">PREDICTED: thrombospondin-1 [Ochotona princeps]</a>                                                                                                                  | 84.6      | 84.6        | 100%        | 5e-17   | 100%  | <a href="#">gi 504130905 XP_004578240.1</a> |
| <a href="#">Thrombospondin-1 [Macaca fascicularis]</a>                                                                                                                           | 84.6      | 84.6        | 100%        | 5e-17   | 100%  | <a href="#">gi 355777934 EHH62970.1</a>     |
| <a href="#">PREDICTED: thrombospondin-1 [Loxodonta africana]</a>                                                                                                                 | 84.6      | 84.6        | 100%        | 5e-17   | 100%  | <a href="#">gi 731505698 XP_010596632.1</a> |
| <a href="#">PREDICTED: thrombospondin-1 [Galeopterus variegatus]</a>                                                                                                             | 84.6      | 84.6        | 100%        | 5e-17   | 100%  | <a href="#">gi 667251967 XP_008564332.1</a> |



|                                                                                  |      |      |      |       |      |                                             |
|----------------------------------------------------------------------------------|------|------|------|-------|------|---------------------------------------------|
| <a href="#">PREDICTED: thrombospondin-1 isoform X4 [Cricetulus griseus]</a>      | 84.6 | 84.6 | 100% | 5e-17 | 100% | <a href="#">gij625271143 XP_007627125.1</a> |
| <a href="#">PREDICTED: thrombospondin-1 [Bison bison bison]</a>                  | 84.6 | 84.6 | 100% | 5e-17 | 100% | <a href="#">gij742157428 XP_010846231.1</a> |
| <a href="#">PREDICTED: thrombospondin-1 [Rhinopithecus roxellana]</a>            | 84.6 | 84.6 | 100% | 5e-17 | 100% | <a href="#">gij724808372 XP_010358095.1</a> |
| <a href="#">PREDICTED: thrombospondin-1 isoform X1 [Eptesicus fuscus]</a>        | 84.6 | 84.6 | 100% | 5e-17 | 100% | <a href="#">gij641704794 XP_008141207.1</a> |
| <a href="#">PREDICTED: thrombospondin-1 isoform X2 [Tarsius syrichta]</a>        | 84.6 | 84.6 | 100% | 5e-17 | 100% | <a href="#">gij640792006 XP_008051911.1</a> |
| <a href="#">PREDICTED: thrombospondin-1 [Chlorocebus sabaeus]</a>                | 84.6 | 84.6 | 100% | 5e-17 | 100% | <a href="#">gij635136734 XP_008015274.1</a> |
| <a href="#">PREDICTED: thrombospondin-1 isoform X1 [Orycteropus afer afer]</a>   | 84.6 | 84.6 | 100% | 5e-17 | 100% | <a href="#">gij634847133 XP_007938653.1</a> |
| <a href="#">PREDICTED: thrombospondin-1 [Callithrix jacchus]</a>                 | 84.6 | 84.6 | 100% | 5e-17 | 100% | <a href="#">gij296214225 XP_002753603.1</a> |
| <a href="#">thrombospondin 1 precursor [Sus scrofa]</a>                          | 84.6 | 84.6 | 100% | 5e-17 | 100% | <a href="#">gij347300340 NP_001231465.1</a> |
| <a href="#">thrombospondin 1 [Mus musculus]</a>                                  | 84.6 | 84.6 | 100% | 5e-17 | 100% | <a href="#">gij567240 AAA53063.1</a>        |
| <a href="#">PREDICTED: thrombospondin-1 isoform X3 [Cricetulus griseus]</a>      | 84.6 | 84.6 | 100% | 5e-17 | 100% | <a href="#">gij625271141 XP_007627124.1</a> |
| <a href="#">PREDICTED: thrombospondin-1 [Lipotes vexillifer]</a>                 | 84.6 | 84.6 | 100% | 5e-17 | 100% | <a href="#">gij602696403 XP_007460252.1</a> |
| <a href="#">PREDICTED: thrombospondin-1 isoform X1 [Balaenoptera acutoros]</a>   | 84.6 | 84.6 | 100% | 5e-17 | 100% | <a href="#">gij594664699 XP_007180483.1</a> |
| <a href="#">PREDICTED: thrombospondin-1 [Physeter catodon]</a>                   | 84.6 | 84.6 | 100% | 5e-17 | 100% | <a href="#">gij593713526 XP_007103269.1</a> |
| <a href="#">PREDICTED: LOW QUALITY PROTEIN: thrombospondin-1 [Panthera leo]</a>  | 84.6 | 84.6 | 100% | 5e-17 | 100% | <a href="#">gij591310271 XP_007081705.1</a> |
| <a href="#">PREDICTED: thrombospondin-1 [Pteropus alecto]</a>                    | 84.6 | 84.6 | 100% | 5e-17 | 100% | <a href="#">gij586531321 XP_006920568.1</a> |
| <a href="#">PREDICTED: thrombospondin-1 isoform X1 [Leptonychotes weddellii]</a> | 84.6 | 84.6 | 100% | 5e-17 | 100% | <a href="#">gij585180876 XP_006742086.1</a> |
| <a href="#">unnamed protein product [Homo sapiens]</a>                           | 84.6 | 84.6 | 100% | 5e-17 | 100% | <a href="#">gij37138 CAA28370.1</a>         |
| <a href="#">PREDICTED: thrombospondin-1 [Vicugna pacos]</a>                      | 84.6 | 84.6 | 100% | 5e-17 | 100% | <a href="#">gij560958468 XP_006201694.1</a> |
| <a href="#">PREDICTED: thrombospondin-1 [Camelus ferus]</a>                      | 84.6 | 84.6 | 100% | 5e-17 | 100% | <a href="#">gij560900504 XP_006176662.1</a> |
| <a href="#">PREDICTED: thrombospondin-1 [Myotis lucifugus]</a>                   | 84.6 | 84.6 | 100% | 5e-17 | 100% | <a href="#">gij558119542 XP_006087569.1</a> |
| <a href="#">PREDICTED: thrombospondin-1 isoform X1 [Pantholops hodgsonii]</a>    | 84.6 | 84.6 | 100% | 5e-17 | 100% | <a href="#">gij556766551 XP_005978526.1</a> |
| <a href="#">PREDICTED: thrombospondin-1 [Myotis brandtii]</a>                    | 84.6 | 84.6 | 100% | 5e-17 | 100% | <a href="#">gij554531033 XP_005860295.1</a> |
| <a href="#">PREDICTED: thrombospondin-1 [Macaca fascicularis]</a>                | 84.6 | 84.6 | 100% | 5e-17 | 100% | <a href="#">gij544442455 XP_005559204.1</a> |
| <a href="#">PREDICTED: thrombospondin-1 [Ictidomys tridecemlineatus]</a>         | 84.6 | 84.6 | 100% | 5e-17 | 100% | <a href="#">gij532061120 XP_005316445.1</a> |
| <a href="#">PREDICTED: thrombospondin-1 [Mustela putorius furo]</a>              | 84.6 | 84.6 | 100% | 5e-17 | 100% | <a href="#">gij511854421 XP_004751131.1</a> |
| <a href="#">PREDICTED: thrombospondin-1 [Dasypus novemcinctus]</a>               | 84.6 | 84.6 | 100% | 5e-17 | 100% | <a href="#">gij488592374 XP_004481433.1</a> |
| <a href="#">PREDICTED: thrombospondin-1 [Ceratotherium simum simum]</a>          | 84.6 | 84.6 | 100% | 5e-17 | 100% | <a href="#">gij478494216 XP_004421456.1</a> |
| <a href="#">PREDICTED: thrombospondin-1 [Odobenus rosmarus divergens]</a>        | 84.6 | 84.6 | 100% | 5e-17 | 100% | <a href="#">gij472361819 XP_004400502.1</a> |
| <a href="#">PREDICTED: thrombospondin-1 [Orcinus orca]</a>                       | 84.6 | 84.6 | 100% | 5e-17 | 100% | <a href="#">gij466029792 XP_004274061.1</a> |
| <a href="#">PREDICTED: thrombospondin-1 [Gorilla gorilla gorilla]</a>            | 84.6 | 84.6 | 100% | 5e-17 | 100% | <a href="#">gij426378604 XP_004056005.1</a> |
| <a href="#">PREDICTED: thrombospondin-1 isoform 1 [Ovis aries]</a>               | 84.6 | 84.6 | 100% | 5e-17 | 100% | <a href="#">gij426232958 XP_004010484.1</a> |
| <a href="#">PREDICTED: thrombospondin-1 isoform X1 [Mus musculus]</a>            | 84.6 | 84.6 | 100% | 5e-17 | 100% | <a href="#">gij568916267 XP_006499215.1</a> |
| <a href="#">RecName: Full=Thrombospondin-1; Flags: Precursor [Mus musculus]</a>  | 84.6 | 84.6 | 100% | 5e-17 | 100% | <a href="#">gij549134 P35441.1</a>          |
| <a href="#">precursor polypeptide (AA -31 to 1139) [Homo sapiens]</a>            | 84.6 | 84.6 | 100% | 5e-17 | 100% | <a href="#">gij37465 CAA32889.1</a>         |
| <a href="#">thrombospondin-1 precursor [Bos taurus]</a>                          | 84.6 | 84.6 | 100% | 5e-17 | 100% | <a href="#">gij41386685 NP_776621.1</a>     |
| <a href="#">PREDICTED: thrombospondin-1 [Felis catus]</a>                        | 84.6 | 84.6 | 100% | 5e-17 | 100% | <a href="#">gij410961529 XP_003987333.1</a> |
| <a href="#">PREDICTED: thrombospondin-1 [Saimiri boliviensis boliviensis]</a>    | 84.6 | 84.6 | 100% | 5e-17 | 100% | <a href="#">gij403289260 XP_003935780.1</a> |
| <a href="#">PREDICTED: thrombospondin-1 [Papio anubis]</a>                       | 84.6 | 84.6 | 100% | 5e-17 | 100% | <a href="#">gij402873929 XP_003900802.1</a> |
| <a href="#">PREDICTED: thrombospondin-1 [Pan paniscus]</a>                       | 84.6 | 84.6 | 100% | 5e-17 | 100% | <a href="#">gij397512548 XP_003826603.1</a> |
| <a href="#">PREDICTED: thrombospondin-1 [Otolemur garnettii]</a>                 | 84.6 | 84.6 | 100% | 5e-17 | 100% | <a href="#">gij395837664 XP_003791750.1</a> |
| <a href="#">PREDICTED: thrombospondin-1 [Canis lupus familiaris]</a>             | 84.6 | 84.6 | 100% | 5e-17 | 100% | <a href="#">gij345794639 XP_544610.3</a>    |
| <a href="#">PREDICTED: thrombospondin-1 [Pan troglodytes]</a>                    | 84.6 | 84.6 | 100% | 5e-17 | 100% | <a href="#">gij332843483 XP_510294.3</a>    |
| <a href="#">PREDICTED: thrombospondin-1 isoform 1 [Nomascus leucogenys]</a>      | 84.6 | 84.6 | 100% | 5e-17 | 100% | <a href="#">gij332235127 XP_003266759.1</a> |
| <a href="#">PREDICTED: thrombospondin-1-like [Ailuropoda melanoleuca]</a>        | 84.6 | 84.6 | 100% | 5e-17 | 100% | <a href="#">gij301754930 XP_002913278.1</a> |

|                                                                                           |      |      |      |       |      |                                             |
|-------------------------------------------------------------------------------------------|------|------|------|-------|------|---------------------------------------------|
| <a href="#">PREDICTED: thrombospondin-1 [Pongo abelii]</a>                                | 84.6 | 84.6 | 100% | 5e-17 | 100% | <a href="#">gij297696281 XP_002825327.1</a> |
| <a href="#">TPA: thrombospondin 1 precursor [Bos taurus]</a>                              | 84.6 | 84.6 | 100% | 5e-17 | 100% | <a href="#">gij296483305 DAA25420.1</a>     |
| <a href="#">thrombospondin-1 precursor [synthetic construct]</a>                          | 84.6 | 84.6 | 100% | 5e-17 | 100% | <a href="#">gij168278042 BAG10999.1</a>     |
| <a href="#">unnamed protein product [Homo sapiens]</a>                                    | 84.6 | 84.6 | 100% | 5e-17 | 100% | <a href="#">gij158256710 BAF84328.1</a>     |
| <a href="#">PREDICTED: thrombospondin-1 [Equus caballus]</a>                              | 84.6 | 84.6 | 100% | 5e-17 | 100% | <a href="#">gij149692076 XP_001503649.1</a> |
| <a href="#">thrombospondin-1 precursor [Homo sapiens]</a>                                 | 84.6 | 84.6 | 100% | 5e-17 | 100% | <a href="#">gij40317626 NP_003237.2</a>     |
| <a href="#">thrombospondin-1 precursor [Rattus norvegicus]</a>                            | 84.6 | 84.6 | 100% | 5e-17 | 100% | <a href="#">gij61556835 NP_001013080.1</a>  |
| <a href="#">PREDICTED: thrombospondin-1 isoform X1 [Bos taurus]</a>                       | 84.6 | 84.6 | 100% | 5e-17 | 100% | <a href="#">gij741940058 XP_010807460.1</a> |
| <a href="#">PREDICTED: thrombospondin-1 [Fukomys damarensis]</a>                          | 84.6 | 84.6 | 100% | 5e-17 | 100% | <a href="#">gij731217228 XP_010622953.1</a> |
| <a href="#">PREDICTED: thrombospondin-1 [Nannospalax galili]</a>                          | 84.6 | 84.6 | 100% | 5e-17 | 100% | <a href="#">gij674104645 XP_008823512.1</a> |
| <a href="#">PREDICTED: thrombospondin-1-like [Oryctolagus cuniculus]</a>                  | 84.6 | 84.6 | 100% | 5e-17 | 100% | <a href="#">gij655897852 XP_008250683.1</a> |
| <a href="#">PREDICTED: thrombospondin-1 [Oryctolagus cuniculus]</a>                       | 84.6 | 84.6 | 100% | 5e-17 | 100% | <a href="#">gij291403258 XP_002717845.1</a> |
| <a href="#">thrombospondin-1 precursor [Mus musculus]</a>                                 | 84.6 | 84.6 | 100% | 5e-17 | 100% | <a href="#">gij47059073 NP_035710.2</a>     |
| <a href="#">PREDICTED: thrombospondin-1 [Erinaceus europaeus]</a>                         | 84.6 | 84.6 | 100% | 5e-17 | 100% | <a href="#">gij617628577 XP_007528982.1</a> |
| <a href="#">PREDICTED: thrombospondin-1 [Elephantulus edwardii]</a>                       | 84.6 | 84.6 | 100% | 5e-17 | 100% | <a href="#">gij585648801 XP_006883092.1</a> |
| <a href="#">PREDICTED: thrombospondin-1 [Microtus ochrogaster]</a>                        | 84.6 | 84.6 | 100% | 5e-17 | 100% | <a href="#">gij532042932 XP_005364295.1</a> |
| <a href="#">PREDICTED: thrombospondin-1 isoform X1 [Heterocephalus glabe]</a>             | 84.6 | 84.6 | 100% | 5e-17 | 100% | <a href="#">gij512885023 XP_004896133.1</a> |
| <a href="#">PREDICTED: thrombospondin-1 [Octodon degus]</a>                               | 84.6 | 84.6 | 100% | 5e-17 | 100% | <a href="#">gij507615991 XP_004623473.1</a> |
| <a href="#">PREDICTED: thrombospondin-1 [Jaculus jaculus]</a>                             | 84.6 | 84.6 | 100% | 5e-17 | 100% | <a href="#">gij507554090 XP_004660826.1</a> |
| <a href="#">Thrombospondin 1 [Mus musculus]</a>                                           | 84.6 | 84.6 | 100% | 5e-17 | 100% | <a href="#">gij27502731 AAH42422.1</a>      |
| <a href="#">PREDICTED: LOW QUALITY PROTEIN: thrombospondin-1 [Peromyscus maniculatus]</a> | 84.6 | 84.6 | 100% | 5e-17 | 100% | <a href="#">gij589933009 XP_006979294.1</a> |
| <a href="#">PREDICTED: LOW QUALITY PROTEIN: thrombospondin-1 [Tupaia chinensis]</a>       | 84.6 | 84.6 | 100% | 5e-17 | 100% | <a href="#">gij562860786 XP_006158770.1</a> |
| <a href="#">PREDICTED: thrombospondin-1 [Mesocricetus auratus]</a>                        | 84.6 | 84.6 | 100% | 5e-17 | 100% | <a href="#">gij524920590 XP_005064576.1</a> |
| <a href="#">Thrombospondin-1 [Tupaia chinensis]</a>                                       | 84.6 | 84.6 | 100% | 5e-17 | 100% | <a href="#">gij444706864 ELW48182.1</a>     |
| <a href="#">PREDICTED: thrombospondin-1 isoform X3 [Mustela putorius furo]</a>            | 84.6 | 84.6 | 100% | 5e-17 | 100% | <a href="#">gij511956507 XP_004796564.1</a> |
| <a href="#">PREDICTED: thrombospondin-1 isoform X1 [Tarsius syrichta]</a>                 | 84.6 | 84.6 | 100% | 5e-17 | 100% | <a href="#">gij640792004 XP_008051910.1</a> |
| <a href="#">Thrombospondin-1 [Pteropus alecto]</a>                                        | 84.6 | 84.6 | 100% | 5e-17 | 100% | <a href="#">gij431896138 ELK05556.1</a>     |

## Alignments

Download GenPept Graphics

Next Previous Descriptions

thrombospondin 1 [Sus scrofa]

Sequence ID: [gij54694859|gb|AAV38110.1](#) Length: 249 Number of Matches: 1

Range 1: 141 to 164 GenPept Graphics

Next Match Previous Match

| Score          | Expect | Identities  | Positives   | Gaps     |
|----------------|--------|-------------|-------------|----------|
| 84.6 bits(192) | 4e-17  | 24/24(100%) | 24/24(100%) | 0/24(0%) |

Query 1 KKVSCPIMPCSNATVPDGECPCRC 24  
 KKVSCPIMPCSNATVPDGECPCRC  
 Sbjct 141 KKVSCPIMPCSNATVPDGECPCRC 164

### Related Information

[Gene](#) - associated gene details  
[Map Viewer](#) - aligned genomic context

Download GenPept Graphics

Next Previous Descriptions

Thrombospondin, partial [Homo sapiens]

Sequence ID: [gij553801|gb|AAA61237.1](#) Length: 376 Number of Matches: 1

Range 1: 349 to 372 GenPept Graphics

Next Match Previous Match

| Score          | Expect | Identities  | Positives   | Gaps     |
|----------------|--------|-------------|-------------|----------|
| 84.6 bits(192) | 5e-17  | 24/24(100%) | 24/24(100%) | 0/24(0%) |

Query 1 KKVSCPIMPCSNATVPDGECPCRC 24

### Related Information

[Gene](#) - associated gene details

Sbjct 349 KKVSCPIMPCSNATVPDGECCPRC 372

[Download](#) [GenPept](#) [Graphics](#)

[▼ Next](#) [▲ Previous](#) [▲ Descriptions](#)

thrombospondin, partial [Homo sapiens]

Sequence ID: [gi|538354|gb|AAA36741.1](#) Length: 397 Number of Matches: 1

Range 1: 349 to 372 [GenPept](#) [Graphics](#)

[▼ Next Match](#) [▲ Previous Match](#)

| Score          | Expect | Identities  | Positives   | Gaps     |
|----------------|--------|-------------|-------------|----------|
| 84.6 bits(192) | 5e-17  | 24/24(100%) | 24/24(100%) | 0/24(0%) |

Query 1 KKVSCPIMPCSNATVPDGECCPRC 24  
 KKVSCPIMPCSNATVPDGECCPRC  
 Sbjct 349 KKVSCPIMPCSNATVPDGECCPRC 372

**Related Information**

[Gene](#) - associated gene details

[Download](#) [GenPept](#) [Graphics](#)

[▼ Next](#) [▲ Previous](#) [▲ Descriptions](#)

THBS1 protein, partial [Homo sapiens]

Sequence ID: [gi|118600432|gb|AAH28145.1](#) Length: 401 Number of Matches: 1

Range 1: 349 to 372 [GenPept](#) [Graphics](#)

[▼ Next Match](#) [▲ Previous Match](#)

| Score          | Expect | Identities  | Positives   | Gaps     |
|----------------|--------|-------------|-------------|----------|
| 84.6 bits(192) | 5e-17  | 24/24(100%) | 24/24(100%) | 0/24(0%) |

Query 1 KKVSCPIMPCSNATVPDGECCPRC 24  
 KKVSCPIMPCSNATVPDGECCPRC  
 Sbjct 349 KKVSCPIMPCSNATVPDGECCPRC 372

**Related Information**

[Gene](#) - associated gene details

[Download](#) [GenPept](#) [Graphics](#)

[▼ Next](#) [▲ Previous](#) [▲ Descriptions](#)

thrombospondin, partial [Mus musculus domesticus]

Sequence ID: [gi|554390|gb|AAA40431.1](#) Length: 490 Number of Matches: 1

Range 1: 349 to 372 [GenPept](#) [Graphics](#)

[▼ Next Match](#) [▲ Previous Match](#)

| Score          | Expect | Identities  | Positives   | Gaps     |
|----------------|--------|-------------|-------------|----------|
| 84.6 bits(192) | 5e-17  | 24/24(100%) | 24/24(100%) | 0/24(0%) |

Query 1 KKVSCPIMPCSNATVPDGECCPRC 24  
 KKVSCPIMPCSNATVPDGECCPRC  
 Sbjct 349 KKVSCPIMPCSNATVPDGECCPRC 372

**Related Information**

[Gene](#) - associated gene details

BLAST is a registered trademark of the National Library of Medicine.



Your search parameters were adjusted to search for a short input sequence.

Edit and Resubmit Save Search Strategies Formatting options Download

YouTube How to read this page Blast report description

THBS1\_KVVDSTTGPEHLRN\_Mod

RID BVM5BJ6801R (Expires on 01-21 10:51 am)

Query ID lcl|118520
Description None
Molecule type amino acid
Query Length 15

Database Name nr
Description All non-redundant GenBank CDS translations+PDB+SwissProt+PIR+PRF excluding environmental samples from WGS projects
Program BLASTP 2.2.30+ Citation

Other reports: Search Summary Taxonomy reports Distance tree of results Multiple alignment

Graphic Summary

Show Conserved Domains

Putative conserved domains have been detected, click on the image below for detailed results.

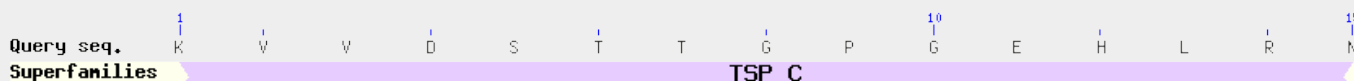

Distribution of 100 Blast Hits on the Query Sequence

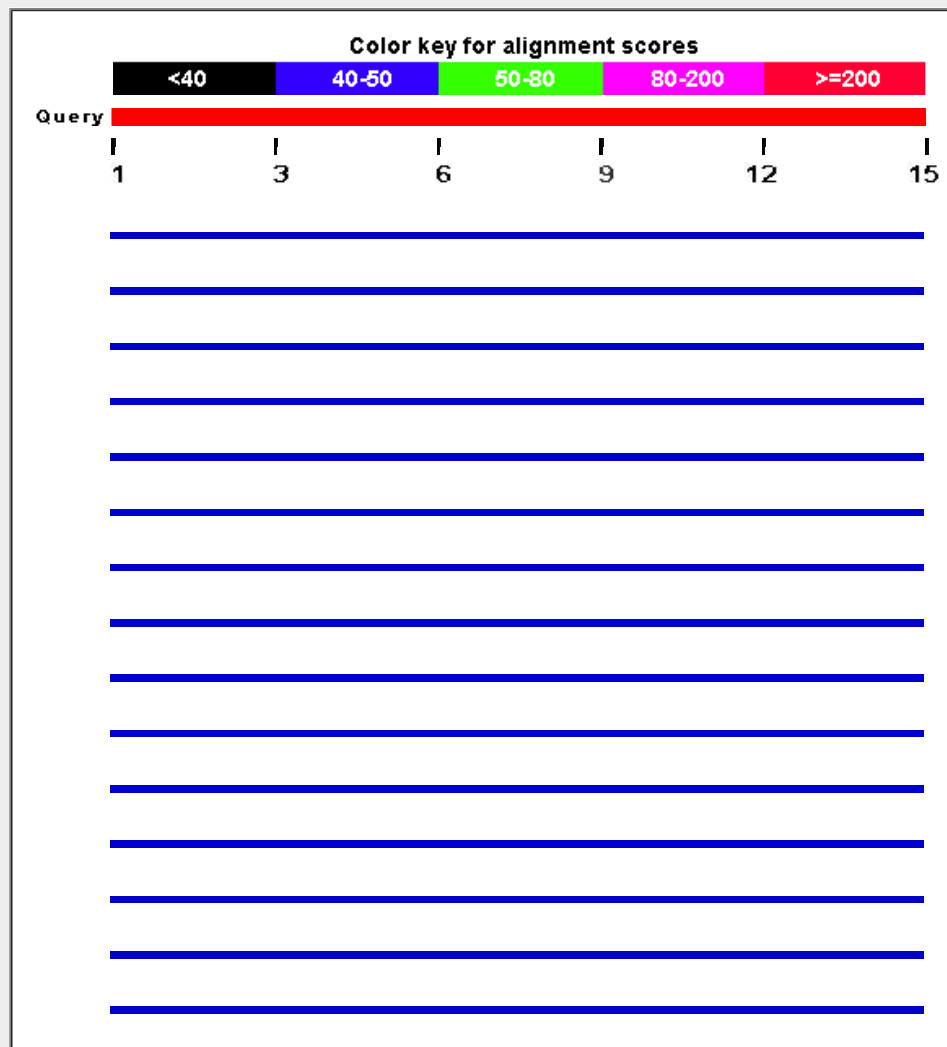

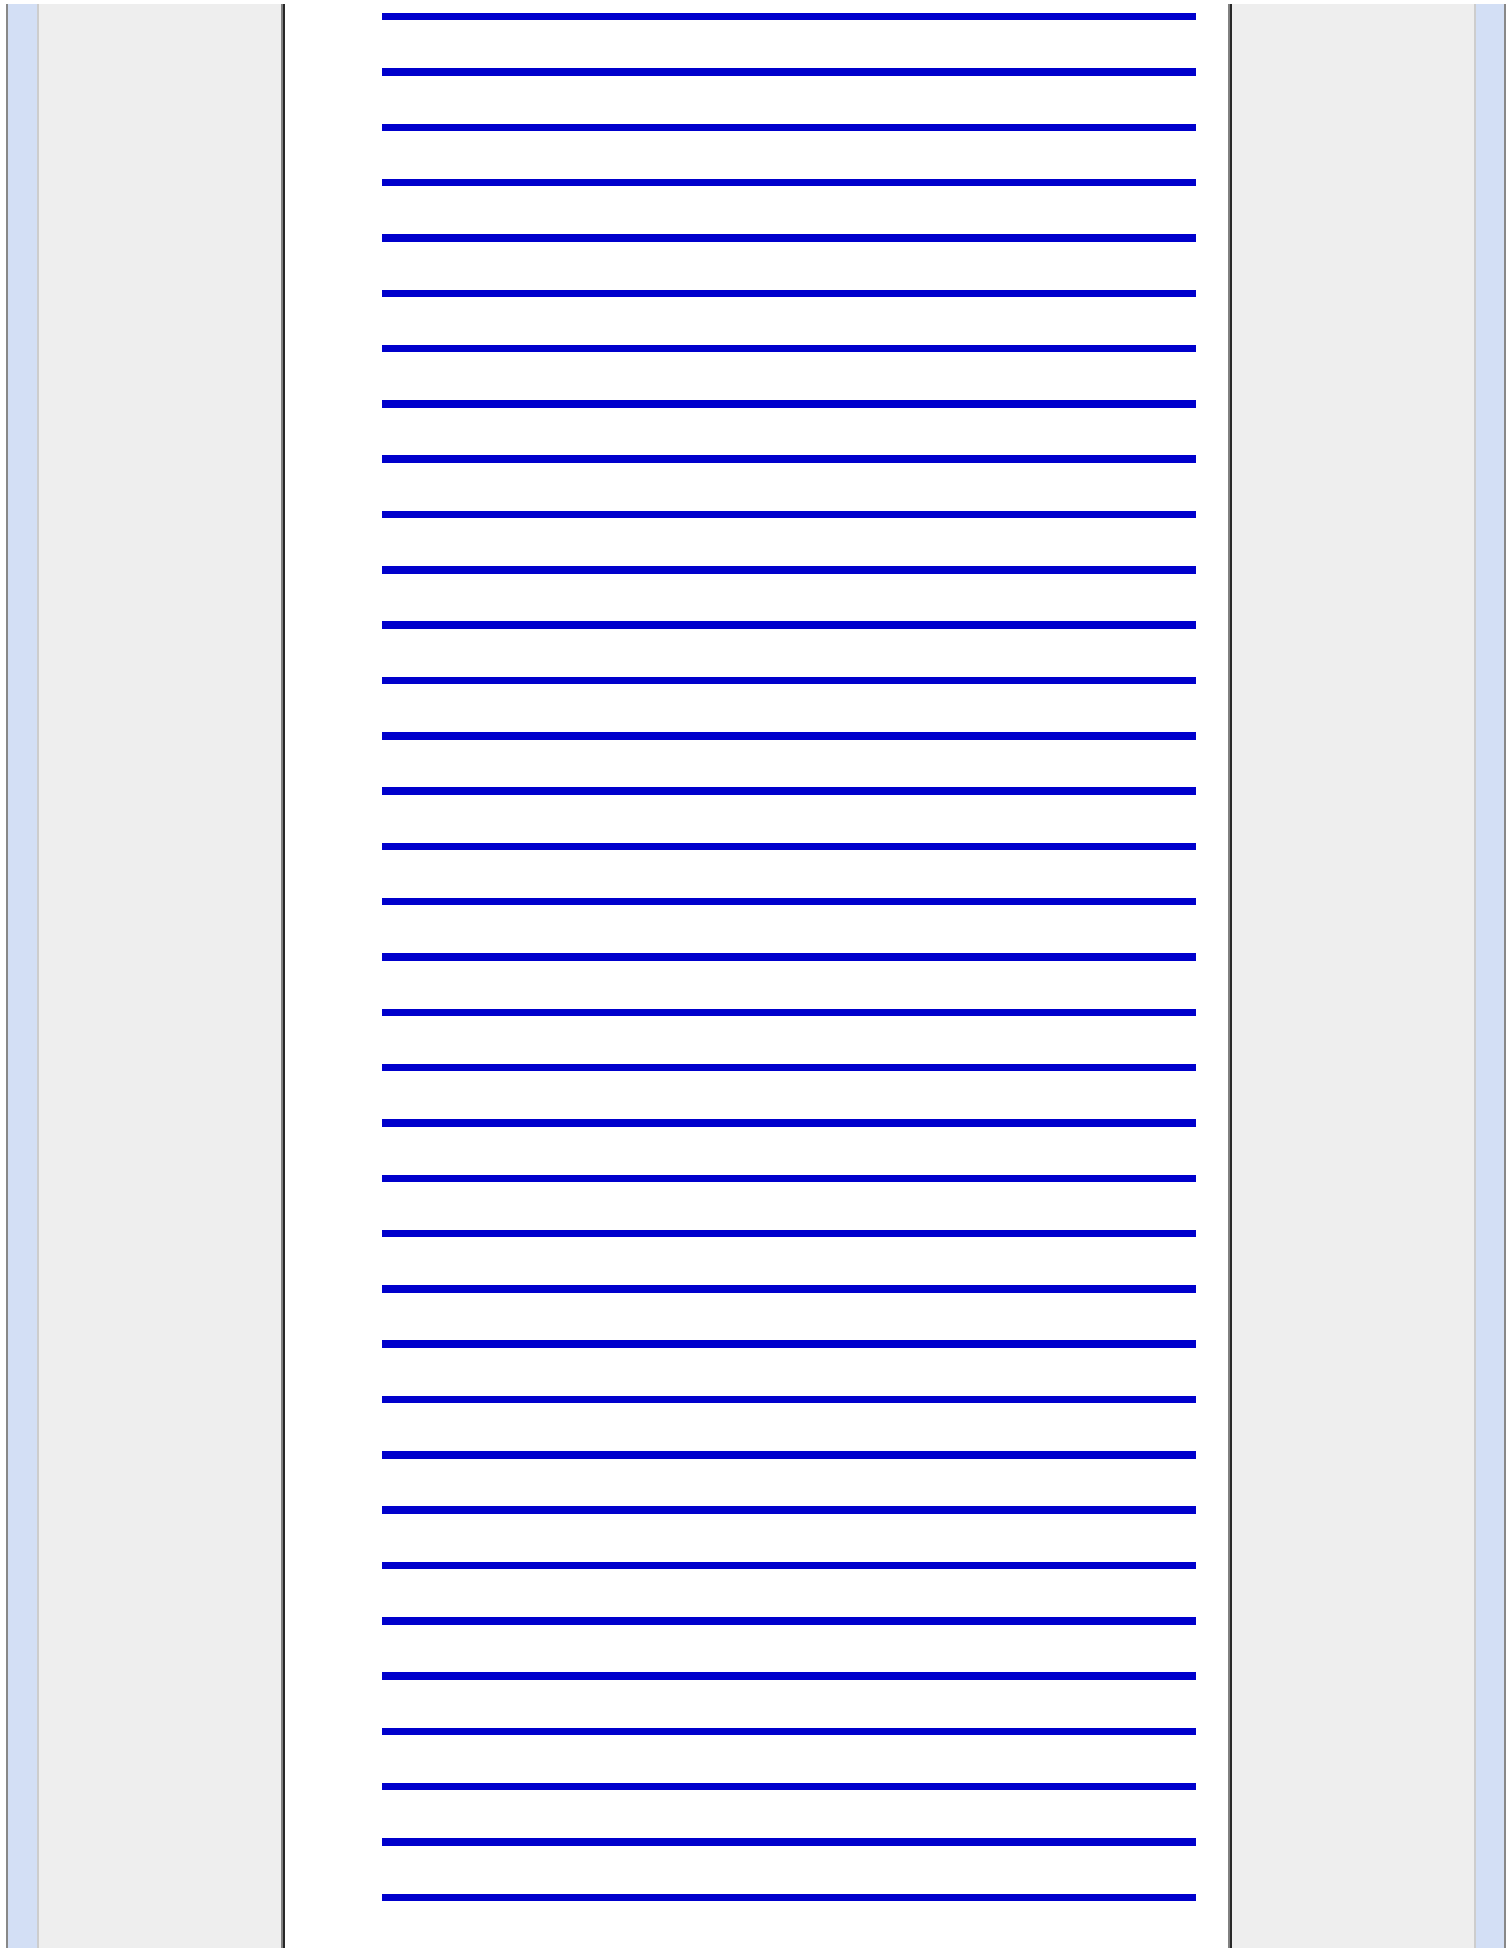

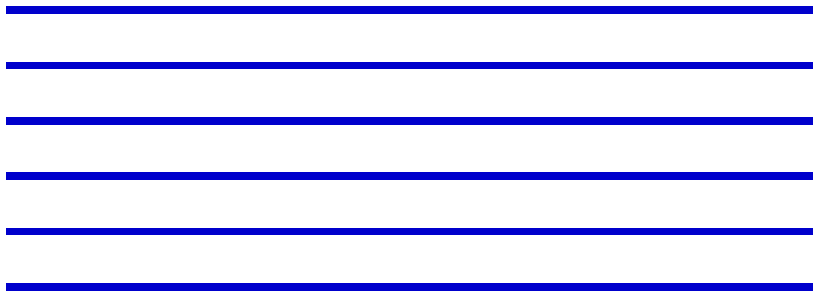

## Descriptions

### Sequences producing significant alignments:

Select: [All](#) [None](#) Selected:0

| <a href="#">Alignments</a> <a href="#">Download</a> <a href="#">GenPept</a> <a href="#">Graphics</a> <a href="#">Distance tree of results</a> <a href="#">Multiple alignment</a> |           |             |             |         |       |                                |  |
|----------------------------------------------------------------------------------------------------------------------------------------------------------------------------------|-----------|-------------|-------------|---------|-------|--------------------------------|--|
| Description                                                                                                                                                                      | Max score | Total score | Query cover | E value | Ident | Accession                      |  |
| <a href="#">thrombospondin [Homo sapiens]</a>                                                                                                                                    | 46.9      | 46.9        | 100%        | 8e-05   | 93%   | <a href="#">AAB59366.1</a>     |  |
| <a href="#">Thrombospondin-1 [Calypte anna]</a>                                                                                                                                  | 46.9      | 46.9        | 100%        | 9e-05   | 93%   | <a href="#">KFO95071.1</a>     |  |
| <a href="#">PREDICTED: thrombospondin-1-like [Taeniopygia guttata]</a>                                                                                                           | 46.9      | 46.9        | 100%        | 1e-04   | 93%   | <a href="#">XP_002188235.2</a> |  |
| <a href="#">unnamed protein product [Mus musculus]</a>                                                                                                                           | 46.9      | 46.9        | 100%        | 1e-04   | 93%   | <a href="#">BAE37804.1</a>     |  |
| <a href="#">unnamed protein product [Mus musculus]</a>                                                                                                                           | 46.9      | 46.9        | 100%        | 1e-04   | 93%   | <a href="#">BAE37878.1</a>     |  |
| <a href="#">unnamed protein product [Oncorhynchus mykiss]</a>                                                                                                                    | 46.9      | 46.9        | 100%        | 1e-04   | 93%   | <a href="#">CDQ99562.1</a>     |  |
| <a href="#">unnamed protein product [Oncorhynchus mykiss]</a>                                                                                                                    | 46.9      | 46.9        | 100%        | 1e-04   | 93%   | <a href="#">CDQ96481.1</a>     |  |
| <a href="#">thrombospondin [Bos taurus]</a>                                                                                                                                      | 46.9      | 46.9        | 100%        | 1e-04   | 93%   | <a href="#">CAA60950.1</a>     |  |
| <a href="#">Thrombospondin-1 [Cricetulus griseus]</a>                                                                                                                            | 46.9      | 46.9        | 100%        | 1e-04   | 93%   | <a href="#">EGW04306.1</a>     |  |
| <a href="#">PREDICTED: thrombospondin-1-like [Danio rerio]</a>                                                                                                                   | 46.9      | 46.9        | 100%        | 1e-04   | 93%   | <a href="#">XP_002667003.3</a> |  |
| <a href="#">PREDICTED: thrombospondin-1-like [Xiphophorus maculatus]</a>                                                                                                         | 46.9      | 46.9        | 100%        | 1e-04   | 93%   | <a href="#">XP_005805261.1</a> |  |
| <a href="#">PREDICTED: thrombospondin-1 isoform X2 [Latimeria chalumnae]</a>                                                                                                     | 46.9      | 46.9        | 100%        | 1e-04   | 93%   | <a href="#">XP_005988415.1</a> |  |
| <a href="#">PREDICTED: thrombospondin-1-like [Poecilia reticulata]</a>                                                                                                           | 46.9      | 46.9        | 100%        | 1e-04   | 93%   | <a href="#">XP_008396149.1</a> |  |
| <a href="#">PREDICTED: thrombospondin-1 [Ornithorhynchus anatinus]</a>                                                                                                           | 46.9      | 46.9        | 100%        | 1e-04   | 93%   | <a href="#">XP_007664158.1</a> |  |
| <a href="#">thrombospondin 1, isoform CRA_a [Mus musculus]</a>                                                                                                                   | 46.9      | 46.9        | 100%        | 1e-04   | 93%   | <a href="#">EDL27901.1</a>     |  |
| <a href="#">PREDICTED: thrombospondin-1 isoform X2 [Eptesicus fuscus]</a>                                                                                                        | 46.9      | 46.9        | 100%        | 1e-04   | 93%   | <a href="#">XP_008141208.1</a> |  |
| <a href="#">PREDICTED: thrombospondin-1 isoform X2 [Orycteropus afer afer]</a>                                                                                                   | 46.9      | 46.9        | 100%        | 1e-04   | 93%   | <a href="#">XP_007938654.1</a> |  |
| <a href="#">unnamed protein product [Homo sapiens]</a>                                                                                                                           | 46.9      | 46.9        | 100%        | 1e-04   | 93%   | <a href="#">BAG65509.1</a>     |  |
| <a href="#">PREDICTED: thrombospondin-1 isoform X2 [Leptonychotes weddellii]</a>                                                                                                 | 46.9      | 46.9        | 100%        | 1e-04   | 93%   | <a href="#">XP_006742087.1</a> |  |
| <a href="#">PREDICTED: thrombospondin-1 isoform X2 [Pantholops hodgsonii]</a>                                                                                                    | 46.9      | 46.9        | 100%        | 1e-04   | 93%   | <a href="#">XP_005978527.1</a> |  |
| <a href="#">PREDICTED: thrombospondin-1 isoform 2 [Ovis aries]</a>                                                                                                               | 46.9      | 46.9        | 100%        | 1e-04   | 93%   | <a href="#">XP_004010485.1</a> |  |
| <a href="#">PREDICTED: thrombospondin-1 [Macaca mulatta]</a>                                                                                                                     | 46.9      | 46.9        | 100%        | 1e-04   | 93%   | <a href="#">XP_001093770.2</a> |  |
| <a href="#">PREDICTED: thrombospondin-1-like [Alligator mississippiensis]</a>                                                                                                    | 46.9      | 46.9        | 100%        | 1e-04   | 93%   | <a href="#">XP_006265214.1</a> |  |
| <a href="#">Thrombospondin-1 [Corvus brachyrhynchos]</a>                                                                                                                         | 46.9      | 46.9        | 100%        | 1e-04   | 93%   | <a href="#">KFO63667.1</a>     |  |
| <a href="#">Thrombospondin-1 [Buceros rhinoceros silvestris]</a>                                                                                                                 | 46.9      | 46.9        | 100%        | 1e-04   | 93%   | <a href="#">KFO88878.1</a>     |  |
| <a href="#">Thrombospondin-1 [Calypte anna]</a>                                                                                                                                  | 46.9      | 46.9        | 100%        | 1e-04   | 93%   | <a href="#">KFO96190.1</a>     |  |
| <a href="#">Thrombospondin-1 [Nestor notabilis]</a>                                                                                                                              | 46.9      | 46.9        | 100%        | 1e-04   | 93%   | <a href="#">KFQ42080.1</a>     |  |
| <a href="#">Thrombospondin-1 [Apaloderma vittatum]</a>                                                                                                                           | 46.9      | 46.9        | 100%        | 1e-04   | 93%   | <a href="#">KFP81422.1</a>     |  |
| <a href="#">Thrombospondin-1 [Charadrius vociferus]</a>                                                                                                                          | 46.9      | 46.9        | 100%        | 1e-04   | 93%   | <a href="#">KGL92027.1</a>     |  |

|                                                                                     |      |      |      |       |     |                                |
|-------------------------------------------------------------------------------------|------|------|------|-------|-----|--------------------------------|
| <a href="#">Thrombospondin-1 [Manacus vitellinus]</a>                               | 46.9 | 46.9 | 100% | 1e-04 | 93% | <a href="#">KFW75047.1</a>     |
| <a href="#">Thrombospondin-1 [Fulmarus glacialis]</a>                               | 46.9 | 46.9 | 100% | 1e-04 | 93% | <a href="#">KFW92396.1</a>     |
| <a href="#">Thrombospondin-1 [Acanthisitta chloris]</a>                             | 46.9 | 46.9 | 100% | 1e-04 | 93% | <a href="#">KFP86921.1</a>     |
| <a href="#">Thrombospondin-1 [Podiceps cristatus]</a>                               | 46.9 | 46.9 | 100% | 1e-04 | 93% | <a href="#">KFZ68358.1</a>     |
| <a href="#">Thrombospondin-1 [Phalacrocorax carbo]</a>                              | 46.9 | 46.9 | 100% | 1e-04 | 93% | <a href="#">KFW95848.1</a>     |
| <a href="#">Thrombospondin-1 [Pygoscelis adeliae]</a>                               | 46.9 | 46.9 | 100% | 1e-04 | 93% | <a href="#">KFW65009.1</a>     |
| <a href="#">Thrombospondin-1 [Eurypyga helias]</a>                                  | 46.9 | 46.9 | 100% | 1e-04 | 93% | <a href="#">KFW04094.1</a>     |
| <a href="#">Thrombospondin-1 [Struthio camelus australis]</a>                       | 46.9 | 46.9 | 100% | 1e-04 | 93% | <a href="#">KFW78213.1</a>     |
| <a href="#">Thrombospondin-1 [Gavia stellata]</a>                                   | 46.9 | 46.9 | 100% | 1e-04 | 93% | <a href="#">KFW55243.1</a>     |
| <a href="#">Thrombospondin-1 [Tyto alba]</a>                                        | 46.9 | 46.9 | 100% | 1e-04 | 93% | <a href="#">KFW42717.1</a>     |
| <a href="#">Thrombospondin-1 [Tauraco erythrolophus]</a>                            | 46.9 | 46.9 | 100% | 1e-04 | 93% | <a href="#">KFU99322.1</a>     |
| <a href="#">Thrombospondin-1 [Pterocles gutturalis]</a>                             | 46.9 | 46.9 | 100% | 1e-04 | 93% | <a href="#">KFU96792.1</a>     |
| <a href="#">Thrombospondin-1 [Chaetura pelagica]</a>                                | 46.9 | 46.9 | 100% | 1e-04 | 93% | <a href="#">KFU85223.1</a>     |
| <a href="#">Thrombospondin-1 [Nipponia nippon]</a>                                  | 46.9 | 46.9 | 100% | 1e-04 | 93% | <a href="#">KFR07154.1</a>     |
| <a href="#">Thrombospondin-1 [Opisthocomus hoazin]</a>                              | 46.9 | 46.9 | 100% | 1e-04 | 93% | <a href="#">KFR07008.1</a>     |
| <a href="#">Thrombospondin-1 [Pelecanus crispus]</a>                                | 46.9 | 46.9 | 100% | 1e-04 | 93% | <a href="#">KFQ61165.1</a>     |
| <a href="#">Thrombospondin-1 [Merops nubicus]</a>                                   | 46.9 | 46.9 | 100% | 1e-04 | 93% | <a href="#">KFQ17938.1</a>     |
| <a href="#">Thrombospondin-1 [Leptosomus discolor]</a>                              | 46.9 | 46.9 | 100% | 1e-04 | 93% | <a href="#">KFQ12753.1</a>     |
| <a href="#">Thrombospondin-1 [Haliaeetus albicilla]</a>                             | 46.9 | 46.9 | 100% | 1e-04 | 93% | <a href="#">KFQ05795.1</a>     |
| <a href="#">Thrombospondin-1 [Cariama cristata]</a>                                 | 46.9 | 46.9 | 100% | 1e-04 | 93% | <a href="#">KFP58732.1</a>     |
| <a href="#">Thrombospondin-1 [Cathartes aura]</a>                                   | 46.9 | 46.9 | 100% | 1e-04 | 93% | <a href="#">KFP57718.1</a>     |
| <a href="#">Thrombospondin-1 [Colius striatus]</a>                                  | 46.9 | 46.9 | 100% | 1e-04 | 93% | <a href="#">KFP29490.1</a>     |
| <a href="#">Thrombospondin-1 [Egretta garzetta]</a>                                 | 46.9 | 46.9 | 100% | 1e-04 | 93% | <a href="#">KFP12089.1</a>     |
| <a href="#">Thrombospondin-1 [Balearica pavonina gibbericeps]</a>                   | 46.9 | 46.9 | 100% | 1e-04 | 93% | <a href="#">KFO12753.1</a>     |
| <a href="#">Thrombospondin-1 [Tinamus guttatus]</a>                                 | 46.9 | 46.9 | 100% | 1e-04 | 93% | <a href="#">KGL85097.1</a>     |
| <a href="#">Thrombospondin-1 [Phaethon lepturus]</a>                                | 46.9 | 46.9 | 100% | 1e-04 | 93% | <a href="#">KFQ75928.1</a>     |
| <a href="#">Thrombospondin-1 [Mesitornis unicolor]</a>                              | 46.9 | 46.9 | 100% | 1e-04 | 93% | <a href="#">KFQ33396.1</a>     |
| <a href="#">Thrombospondin-1 [Chlamydotis undulata macqueenii]</a>                  | 46.9 | 46.9 | 100% | 1e-04 | 93% | <a href="#">KFP35274.1</a>     |
| <a href="#">Thrombospondin-1 [Caprimulgus carolinensis]</a>                         | 46.9 | 46.9 | 100% | 1e-04 | 93% | <a href="#">KFZ56796.1</a>     |
| <a href="#">Thrombospondin-1 [Cuculus canorus]</a>                                  | 46.9 | 46.9 | 100% | 1e-04 | 93% | <a href="#">KFO70201.1</a>     |
| <a href="#">Thrombospondin-1 [Aptenodytes forsteri]</a>                             | 46.9 | 46.9 | 100% | 1e-04 | 93% | <a href="#">KFM10485.1</a>     |
| <a href="#">Thrombospondin-1 [Anas platyrhynchos]</a>                               | 46.9 | 46.9 | 100% | 1e-04 | 93% | <a href="#">EOB08499.1</a>     |
| <a href="#">Thrombospondin-1 [Bos mutus]</a>                                        | 46.9 | 46.9 | 100% | 1e-04 | 93% | <a href="#">ELR61299.1</a>     |
| <a href="#">thrombospondin_1_isoform CRA_b [Mus musculus]</a>                       | 46.9 | 46.9 | 100% | 1e-04 | 93% | <a href="#">EDL27902.1</a>     |
| <a href="#">PREDICTED: LOW QUALITY PROTEIN: thrombospondin-1 [Camelus bactria]</a>  | 46.9 | 46.9 | 100% | 1e-04 | 93% | <a href="#">XP_010963427.1</a> |
| <a href="#">PREDICTED: thrombospondin-1 [Equus przewalskii]</a>                     | 46.9 | 46.9 | 100% | 1e-04 | 93% | <a href="#">XP_008527173.1</a> |
| <a href="#">PREDICTED: thrombospondin-1 [Acanthisitta chloris]</a>                  | 46.9 | 46.9 | 100% | 1e-04 | 93% | <a href="#">XP_009079349.1</a> |
| <a href="#">PREDICTED: thrombospondin-1 [Corvus brachyrhynchos]</a>                 | 46.9 | 46.9 | 100% | 1e-04 | 93% | <a href="#">XP_008637956.1</a> |
| <a href="#">PREDICTED: thrombospondin-1 [Camelus dromedarius]</a>                   | 46.9 | 46.9 | 100% | 1e-04 | 93% | <a href="#">XP_010987639.1</a> |
| <a href="#">PREDICTED: thrombospondin-1 [Bos mutus]</a>                             | 46.9 | 46.9 | 100% | 1e-04 | 93% | <a href="#">XP_005889010.1</a> |
| <a href="#">Thrombospondin-1 [Chelonia mydas]</a>                                   | 46.9 | 46.9 | 100% | 1e-04 | 93% | <a href="#">EMP26772.1</a>     |
| <a href="#">PREDICTED: LOW QUALITY PROTEIN: thrombospondin-1-like [Cynoglossus]</a> | 46.9 | 46.9 | 100% | 1e-04 | 93% | <a href="#">XP_008311728.1</a> |
| <a href="#">PREDICTED: thrombospondin-1 [Echinops telfairi]</a>                     | 46.9 | 46.9 | 100% | 1e-04 | 93% | <a href="#">XP_004712753.1</a> |
| <a href="#">PREDICTED: thrombospondin-1 [Tinamus guttatus]</a>                      | 46.9 | 46.9 | 100% | 1e-04 | 93% | <a href="#">XP_010224375.1</a> |
| <a href="#">PREDICTED: thrombospondin-1 [Chlamydotis undulata macqueenii]</a>       | 46.9 | 46.9 | 100% | 1e-04 | 93% | <a href="#">XP_010113973.1</a> |
| <a href="#">PREDICTED: thrombospondin-1 [Myotis davidii]</a>                        | 46.9 | 46.9 | 100% | 1e-04 | 93% | <a href="#">XP_006778160.1</a> |

|                                                                                    |      |      |      |       |     |                                |
|------------------------------------------------------------------------------------|------|------|------|-------|-----|--------------------------------|
| <a href="#">PREDICTED: LOW QUALITY PROTEIN: thrombospondin-1 [Columba livia]</a>   | 46.9 | 46.9 | 100% | 1e-04 | 93% | <a href="#">XP_005502344.1</a> |
| <a href="#">PREDICTED: thrombospondin-1 [Sorex araneus]</a>                        | 46.9 | 46.9 | 100% | 1e-04 | 93% | <a href="#">XP_004609618.1</a> |
| <a href="#">PREDICTED: LOW QUALITY PROTEIN: thrombospondin-1 [Ursus maritimus]</a> | 46.9 | 46.9 | 100% | 1e-04 | 93% | <a href="#">XP_008700482.1</a> |
| <a href="#">PREDICTED: thrombospondin-1 [Callorhinchus milii]</a>                  | 46.9 | 46.9 | 100% | 1e-04 | 93% | <a href="#">XP_007886260.1</a> |
| <a href="#">hypothetical protein PANDA_001089 [Ailuropoda melanoleuca]</a>         | 46.9 | 46.9 | 100% | 1e-04 | 93% | <a href="#">EFB13827.1</a>     |
| <a href="#">PREDICTED: thrombospondin-1-like [Neolamprologus brichardi]</a>        | 46.9 | 46.9 | 100% | 1e-04 | 93% | <a href="#">XP_006792742.1</a> |
| <a href="#">PREDICTED: thrombospondin-1-like [Haplochromis burtoni]</a>            | 46.9 | 46.9 | 100% | 1e-04 | 93% | <a href="#">XP_005931578.1</a> |
| <a href="#">PREDICTED: thrombospondin-1-like [Pundamilia nyererei]</a>             | 46.9 | 46.9 | 100% | 1e-04 | 93% | <a href="#">XP_005737355.1</a> |
| <a href="#">PREDICTED: thrombospondin-1 [Ochotona princeps]</a>                    | 46.9 | 46.9 | 100% | 1e-04 | 93% | <a href="#">XP_004578240.1</a> |
| <a href="#">Thrombospondin-1 [Macaca fascicularis]</a>                             | 46.9 | 46.9 | 100% | 1e-04 | 93% | <a href="#">EHH62970.1</a>     |
| <a href="#">thrombospondin-1a precursor [Oreochromis niloticus]</a>                | 46.9 | 46.9 | 100% | 1e-04 | 93% | <a href="#">NP_001266664.1</a> |
| <a href="#">PREDICTED: thrombospondin-1-like [Larimichthys crocea]</a>             | 46.9 | 46.9 | 100% | 1e-04 | 93% | <a href="#">XP_010748801.1</a> |
| <a href="#">PREDICTED: thrombospondin-1-like [Larimichthys crocea]</a>             | 46.9 | 46.9 | 100% | 1e-04 | 93% | <a href="#">XP_010738923.1</a> |
| <a href="#">PREDICTED: thrombospondin-1 [Loxodonta africana]</a>                   | 46.9 | 46.9 | 100% | 1e-04 | 93% | <a href="#">XP_010596632.1</a> |
| <a href="#">PREDICTED: thrombospondin-1 [Caprimulgus carolinensis]</a>             | 46.9 | 46.9 | 100% | 1e-04 | 93% | <a href="#">XP_010164792.1</a> |
| <a href="#">PREDICTED: thrombospondin-1 [Galeopterus variegatus]</a>               | 46.9 | 46.9 | 100% | 1e-04 | 93% | <a href="#">XP_008564332.1</a> |
| <a href="#">PREDICTED: thrombospondin-1 [Stegastes partitus]</a>                   | 46.9 | 46.9 | 100% | 1e-04 | 93% | <a href="#">XP_008283030.1</a> |
| <a href="#">PREDICTED: thrombospondin-1 isoform X4 [Cricetulus griseus]</a>        | 46.9 | 46.9 | 100% | 1e-04 | 93% | <a href="#">XP_007627125.1</a> |
| <a href="#">PREDICTED: thrombospondin-1-like [Takifugu rubripes]</a>               | 46.9 | 46.9 | 100% | 1e-04 | 93% | <a href="#">XP_003971811.1</a> |
| <a href="#">PREDICTED: thrombospondin-1 [Bison bison bison]</a>                    | 46.9 | 46.9 | 100% | 1e-04 | 93% | <a href="#">XP_010846231.1</a> |
| <a href="#">PREDICTED: thrombospondin-1 [Rhinopithecus roxellana]</a>              | 46.9 | 46.9 | 100% | 1e-04 | 93% | <a href="#">XP_010358095.1</a> |
| <a href="#">PREDICTED: thrombospondin-1 isoform X1 [Eptesicus fuscus]</a>          | 46.9 | 46.9 | 100% | 1e-04 | 93% | <a href="#">XP_008141207.1</a> |
| <a href="#">PREDICTED: thrombospondin-1 isoform X2 [Tarsius syrichta]</a>          | 46.9 | 46.9 | 100% | 1e-04 | 93% | <a href="#">XP_008051911.1</a> |
| <a href="#">PREDICTED: thrombospondin-1 [Chlorocebus sabaeus]</a>                  | 46.9 | 46.9 | 100% | 1e-04 | 93% | <a href="#">XP_008015274.1</a> |
| <a href="#">PREDICTED: thrombospondin-1 isoform X1 [Orycteropus afer afer]</a>     | 46.9 | 46.9 | 100% | 1e-04 | 93% | <a href="#">XP_007938653.1</a> |

## Alignments

Download [GenPept](#) [Graphics](#)

[Next](#) [Previous](#) [Descriptions](#)

thrombospondin, partial [Homo sapiens]

Sequence ID: [gb|AAB59366.1](#) Length: 143 Number of Matches: 1

Range 1: 37 to 51 [GenPept](#) [Graphics](#)

[Next Match](#) [Previous Match](#)

| Score          | Expect | Identities | Positives   | Gaps     |
|----------------|--------|------------|-------------|----------|
| 46.9 bits(103) | 8e-05  | 14/15(93%) | 15/15(100%) | 0/15(0%) |

Query 1 KVVVDSTTGPGEHLRN 15  
KVV+STTGPGEHLRN  
Sbjct 37 KVVNSTTGPGEHLRN 51

### Related Information

[Gene](#) - associated gene details

Download [GenPept](#) [Graphics](#)

[Next](#) [Previous](#) [Descriptions](#)

Thrombospondin-1, partial [Calypte anna]

Sequence ID: [gb|KFO95071.1](#) Length: 172 Number of Matches: 1

Range 1: 66 to 80 [GenPept](#) [Graphics](#)

[Next Match](#) [Previous Match](#)

| Score          | Expect | Identities | Positives   | Gaps     |
|----------------|--------|------------|-------------|----------|
| 46.9 bits(103) | 9e-05  | 14/15(93%) | 15/15(100%) | 0/15(0%) |

Query 1 KVVVDSTTGPGEHLRN 15  
KVV+STTGPGEHLRN  
Sbjct 66 KVVNSTTGPGEHLRN 80

### Related Information



Download [GenPept](#) [Graphics](#)

[▼ Next](#) [▲ Previous](#) [▲ Descriptions](#)

**PREDICTED: thrombospondin-1-like, partial [Taeniopygia guttata]**

Sequence ID: [ref|XP\\_002188235.2](#) Length: 245 Number of Matches: 1

Range 1: 141 to 155 [GenPept](#) [Graphics](#)

[▼ Next Match](#) [▲ Previous Match](#)

| Score          | Expect | Identities | Positives   | Gaps     |
|----------------|--------|------------|-------------|----------|
| 46.9 bits(103) | 1e-04  | 14/15(93%) | 15/15(100%) | 0/15(0%) |

Query 1 KVVDSTTGPGEHLRN 15  
 KVV+STTGPGEHLRN  
 Sbjct 141 KVVNSTTGPGEHLRN 155

**Related Information**

[Gene](#) - associated gene details  
[Map Viewer](#) - aligned genomic context

Download [GenPept](#) [Graphics](#)

[▼ Next](#) [▲ Previous](#) [▲ Descriptions](#)

**unnamed protein product [Mus musculus]**

Sequence ID: [dbj|BAE37804.1](#) Length: 259 Number of Matches: 1

Range 1: 153 to 167 [GenPept](#) [Graphics](#)

[▼ Next Match](#) [▲ Previous Match](#)

| Score          | Expect | Identities | Positives   | Gaps     |
|----------------|--------|------------|-------------|----------|
| 46.9 bits(103) | 1e-04  | 14/15(93%) | 15/15(100%) | 0/15(0%) |

Query 1 KVVDSTTGPGEHLRN 15  
 KVV+STTGPGEHLRN  
 Sbjct 153 KVVNSTTGPGEHLRN 167

**Related Information**

[Gene](#) - associated gene details

Download [GenPept](#) [Graphics](#)

[▼ Next](#) [▲ Previous](#) [▲ Descriptions](#)

**unnamed protein product [Mus musculus]**

Sequence ID: [dbj|BAE37878.1](#) Length: 262 Number of Matches: 1

Range 1: 156 to 170 [GenPept](#) [Graphics](#)

[▼ Next Match](#) [▲ Previous Match](#)

| Score          | Expect | Identities | Positives   | Gaps     |
|----------------|--------|------------|-------------|----------|
| 46.9 bits(103) | 1e-04  | 14/15(93%) | 15/15(100%) | 0/15(0%) |

Query 1 KVVDSTTGPGEHLRN 15  
 KVV+STTGPGEHLRN  
 Sbjct 156 KVVNSTTGPGEHLRN 170

**Related Information**

[Gene](#) - associated gene details

BLAST is a registered trademark of the National Library of Medicine.

NCBI/ BLAST/ blastp suite/ Formatting Results - BVMCU5X601R

Your search parameters were adjusted to search for a short input sequence.

Edit and Resubmit Save Search Strategies Formatting options Download YouTube How to read this page Blast report description

THBS1\_KVVNSTTGPGEHLRN\_NonMod

RID BVMCU5X601R (Expires on 01-21 10:55 am)

Query ID lcl|289205
Description None
Molecule type amino acid
Query Length 15

Database Name nr
Description All non-redundant GenBank CDS translations+PDB+SwissProt+PIR+PRF excluding environmental samples from WGS projects
Program BLASTP 2.2.30+ Citation

Other reports: Search Summary Taxonomy reports Distance tree of results Multiple alignment

Graphic Summary

Show Conserved Domains

Putative conserved domains have been detected, click on the image below for detailed results.

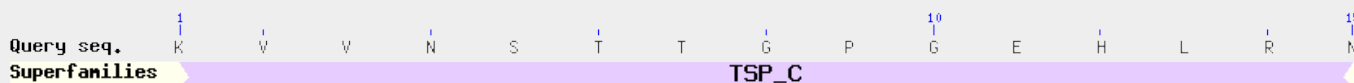

Distribution of 100 Blast Hits on the Query Sequence

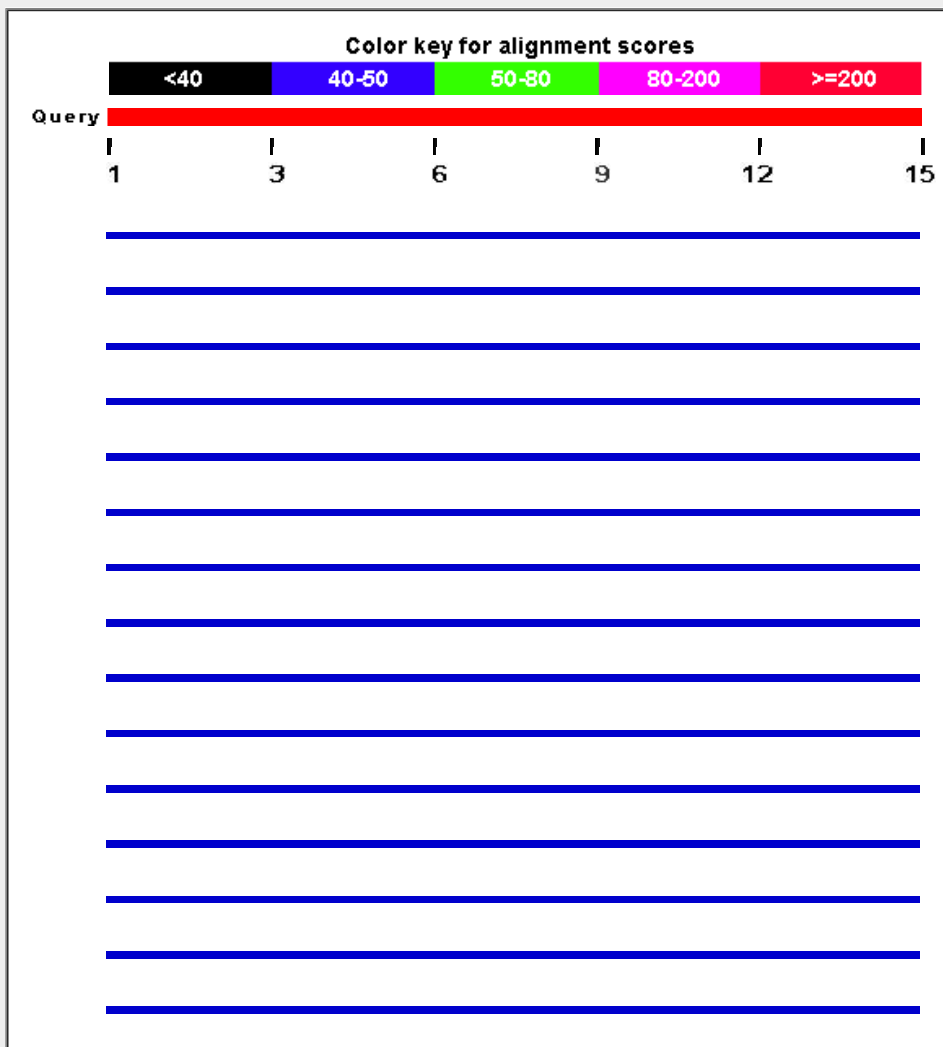





## Descriptions

### Sequences producing significant alignments:

Select: [All](#) [None](#) Selected:0

| <a href="#">Alignments</a> <a href="#">Download</a> <a href="#">GenPept</a> <a href="#">Graphics</a> <a href="#">Distance tree of results</a> <a href="#">Multiple alignment</a> |           |             |             |         |       |                                |  |
|----------------------------------------------------------------------------------------------------------------------------------------------------------------------------------|-----------|-------------|-------------|---------|-------|--------------------------------|--|
| Description                                                                                                                                                                      | Max score | Total score | Query cover | E value | Ident | Accession                      |  |
| <a href="#">thrombospondin [Homo sapiens]</a>                                                                                                                                    | 49.4      | 49.4        | 100%        | 1e-05   | 100%  | <a href="#">AAB59366.1</a>     |  |
| <a href="#">Thrombospondin-1 [Calypte anna]</a>                                                                                                                                  | 49.4      | 49.4        | 100%        | 1e-05   | 100%  | <a href="#">KFO95071.1</a>     |  |
| <a href="#">PREDICTED: thrombospondin-1-like [Taeniopygia guttata]</a>                                                                                                           | 49.4      | 49.4        | 100%        | 1e-05   | 100%  | <a href="#">XP_002188235.2</a> |  |
| <a href="#">unnamed protein product [Mus musculus]</a>                                                                                                                           | 49.4      | 49.4        | 100%        | 1e-05   | 100%  | <a href="#">BAE37804.1</a>     |  |
| <a href="#">unnamed protein product [Mus musculus]</a>                                                                                                                           | 49.4      | 49.4        | 100%        | 1e-05   | 100%  | <a href="#">BAE37878.1</a>     |  |
| <a href="#">unnamed protein product [Oncorhynchus mykiss]</a>                                                                                                                    | 49.4      | 49.4        | 100%        | 1e-05   | 100%  | <a href="#">CDQ99562.1</a>     |  |
| <a href="#">unnamed protein product [Oncorhynchus mykiss]</a>                                                                                                                    | 49.4      | 49.4        | 100%        | 1e-05   | 100%  | <a href="#">CDQ96481.1</a>     |  |
| <a href="#">thrombospondin [Bos taurus]</a>                                                                                                                                      | 49.4      | 49.4        | 100%        | 1e-05   | 100%  | <a href="#">CAA60950.1</a>     |  |
| <a href="#">Thrombospondin-1 [Cricetulus griseus]</a>                                                                                                                            | 49.4      | 49.4        | 100%        | 1e-05   | 100%  | <a href="#">EGW04306.1</a>     |  |
| <a href="#">PREDICTED: thrombospondin-1-like [Danio rerio]</a>                                                                                                                   | 49.4      | 49.4        | 100%        | 2e-05   | 100%  | <a href="#">XP_002667003.3</a> |  |
| <a href="#">PREDICTED: thrombospondin-1-like [Xiphophorus maculatus]</a>                                                                                                         | 49.4      | 49.4        | 100%        | 2e-05   | 100%  | <a href="#">XP_005805261.1</a> |  |
| <a href="#">PREDICTED: thrombospondin-1 isoform X2 [Latimeria chalumnae]</a>                                                                                                     | 49.4      | 49.4        | 100%        | 2e-05   | 100%  | <a href="#">XP_005988415.1</a> |  |
| <a href="#">PREDICTED: thrombospondin-1-like [Poecilia reticulata]</a>                                                                                                           | 49.4      | 49.4        | 100%        | 2e-05   | 100%  | <a href="#">XP_008396149.1</a> |  |
| <a href="#">PREDICTED: thrombospondin-1 [Ornithorhynchus anatinus]</a>                                                                                                           | 49.4      | 49.4        | 100%        | 2e-05   | 100%  | <a href="#">XP_007664158.1</a> |  |
| <a href="#">thrombospondin 1, isoform CRA_a [Mus musculus]</a>                                                                                                                   | 49.4      | 49.4        | 100%        | 2e-05   | 100%  | <a href="#">EDL27901.1</a>     |  |
| <a href="#">PREDICTED: thrombospondin-1 isoform X2 [Eptesicus fuscus]</a>                                                                                                        | 49.4      | 49.4        | 100%        | 2e-05   | 100%  | <a href="#">XP_008141208.1</a> |  |
| <a href="#">PREDICTED: thrombospondin-1 isoform X2 [Orycteropus afer afer]</a>                                                                                                   | 49.4      | 49.4        | 100%        | 2e-05   | 100%  | <a href="#">XP_007938654.1</a> |  |
| <a href="#">unnamed protein product [Homo sapiens]</a>                                                                                                                           | 49.4      | 49.4        | 100%        | 2e-05   | 100%  | <a href="#">BAG65509.1</a>     |  |
| <a href="#">PREDICTED: thrombospondin-1 isoform X2 [Leptonychotes weddellii]</a>                                                                                                 | 49.4      | 49.4        | 100%        | 2e-05   | 100%  | <a href="#">XP_006742087.1</a> |  |
| <a href="#">PREDICTED: thrombospondin-1 isoform X2 [Pantholops hodgsonii]</a>                                                                                                    | 49.4      | 49.4        | 100%        | 2e-05   | 100%  | <a href="#">XP_005978527.1</a> |  |
| <a href="#">PREDICTED: thrombospondin-1 isoform 2 [Ovis aries]</a>                                                                                                               | 49.4      | 49.4        | 100%        | 2e-05   | 100%  | <a href="#">XP_004010485.1</a> |  |
| <a href="#">PREDICTED: thrombospondin-1 [Macaca mulatta]</a>                                                                                                                     | 49.4      | 49.4        | 100%        | 2e-05   | 100%  | <a href="#">XP_001093770.2</a> |  |
| <a href="#">PREDICTED: thrombospondin-1-like [Alligator mississippiensis]</a>                                                                                                    | 49.4      | 49.4        | 100%        | 2e-05   | 100%  | <a href="#">XP_006265214.1</a> |  |
| <a href="#">Thrombospondin-1 [Corvus brachyrhynchos]</a>                                                                                                                         | 49.4      | 49.4        | 100%        | 2e-05   | 100%  | <a href="#">KFO63667.1</a>     |  |
| <a href="#">Thrombospondin-1 [Buceros rhinoceros silvestris]</a>                                                                                                                 | 49.4      | 49.4        | 100%        | 2e-05   | 100%  | <a href="#">KFO88878.1</a>     |  |
| <a href="#">Thrombospondin-1 [Calypte anna]</a>                                                                                                                                  | 49.4      | 49.4        | 100%        | 2e-05   | 100%  | <a href="#">KFO96190.1</a>     |  |
| <a href="#">Thrombospondin-1 [Nestor notabilis]</a>                                                                                                                              | 49.4      | 49.4        | 100%        | 2e-05   | 100%  | <a href="#">KFQ42080.1</a>     |  |
| <a href="#">Thrombospondin-1 [Apaloderma vittatum]</a>                                                                                                                           | 49.4      | 49.4        | 100%        | 2e-05   | 100%  | <a href="#">KFP81422.1</a>     |  |
| <a href="#">Thrombospondin-1 [Charadrius vociferus]</a>                                                                                                                          | 49.4      | 49.4        | 100%        | 2e-05   | 100%  | <a href="#">KGL92027.1</a>     |  |

|                                                                                     |      |      |      |       |      |                                |
|-------------------------------------------------------------------------------------|------|------|------|-------|------|--------------------------------|
| <a href="#">Thrombospondin-1 [Manacus vitellinus]</a>                               | 49.4 | 49.4 | 100% | 2e-05 | 100% | <a href="#">KFW75047.1</a>     |
| <a href="#">Thrombospondin-1 [Fulmarus glacialis]</a>                               | 49.4 | 49.4 | 100% | 2e-05 | 100% | <a href="#">KFW92396.1</a>     |
| <a href="#">Thrombospondin-1 [Acanthisitta chloris]</a>                             | 49.4 | 49.4 | 100% | 2e-05 | 100% | <a href="#">KFP86921.1</a>     |
| <a href="#">Thrombospondin-1 [Podiceps cristatus]</a>                               | 49.4 | 49.4 | 100% | 2e-05 | 100% | <a href="#">KFZ68358.1</a>     |
| <a href="#">Thrombospondin-1 [Phalacrocorax carbo]</a>                              | 49.4 | 49.4 | 100% | 2e-05 | 100% | <a href="#">KFW95848.1</a>     |
| <a href="#">Thrombospondin-1 [Pygoscelis adeliae]</a>                               | 49.4 | 49.4 | 100% | 2e-05 | 100% | <a href="#">KFW65009.1</a>     |
| <a href="#">Thrombospondin-1 [Eurypyga helias]</a>                                  | 49.4 | 49.4 | 100% | 2e-05 | 100% | <a href="#">KFW04094.1</a>     |
| <a href="#">Thrombospondin-1 [Struthio camelus australis]</a>                       | 49.4 | 49.4 | 100% | 2e-05 | 100% | <a href="#">KfV78213.1</a>     |
| <a href="#">Thrombospondin-1 [Gavia stellata]</a>                                   | 49.4 | 49.4 | 100% | 2e-05 | 100% | <a href="#">KfV55243.1</a>     |
| <a href="#">Thrombospondin-1 [Tyto alba]</a>                                        | 49.4 | 49.4 | 100% | 2e-05 | 100% | <a href="#">KfV42717.1</a>     |
| <a href="#">Thrombospondin-1 [Tauraco erythrolophus]</a>                            | 49.4 | 49.4 | 100% | 2e-05 | 100% | <a href="#">KfU99322.1</a>     |
| <a href="#">Thrombospondin-1 [Pterocles gutturalis]</a>                             | 49.4 | 49.4 | 100% | 2e-05 | 100% | <a href="#">KfU96792.1</a>     |
| <a href="#">Thrombospondin-1 [Chaetura pelagica]</a>                                | 49.4 | 49.4 | 100% | 2e-05 | 100% | <a href="#">KfU85223.1</a>     |
| <a href="#">Thrombospondin-1 [Nipponia nippon]</a>                                  | 49.4 | 49.4 | 100% | 2e-05 | 100% | <a href="#">KfR07154.1</a>     |
| <a href="#">Thrombospondin-1 [Opisthocomus hoazin]</a>                              | 49.4 | 49.4 | 100% | 2e-05 | 100% | <a href="#">KfR07008.1</a>     |
| <a href="#">Thrombospondin-1 [Pelecanus crispus]</a>                                | 49.4 | 49.4 | 100% | 2e-05 | 100% | <a href="#">KfQ61165.1</a>     |
| <a href="#">Thrombospondin-1 [Merops nubicus]</a>                                   | 49.4 | 49.4 | 100% | 2e-05 | 100% | <a href="#">KfQ17938.1</a>     |
| <a href="#">Thrombospondin-1 [Leptosomus discolor]</a>                              | 49.4 | 49.4 | 100% | 2e-05 | 100% | <a href="#">KfQ12753.1</a>     |
| <a href="#">Thrombospondin-1 [Haliaeetus albicilla]</a>                             | 49.4 | 49.4 | 100% | 2e-05 | 100% | <a href="#">KfQ05795.1</a>     |
| <a href="#">Thrombospondin-1 [Cariama cristata]</a>                                 | 49.4 | 49.4 | 100% | 2e-05 | 100% | <a href="#">KfP58732.1</a>     |
| <a href="#">Thrombospondin-1 [Cathartes aura]</a>                                   | 49.4 | 49.4 | 100% | 2e-05 | 100% | <a href="#">KfP57718.1</a>     |
| <a href="#">Thrombospondin-1 [Colius striatus]</a>                                  | 49.4 | 49.4 | 100% | 2e-05 | 100% | <a href="#">KfP29490.1</a>     |
| <a href="#">Thrombospondin-1 [Egretta garzetta]</a>                                 | 49.4 | 49.4 | 100% | 2e-05 | 100% | <a href="#">KfP12089.1</a>     |
| <a href="#">Thrombospondin-1 [Balearica pavonina gibbericeps]</a>                   | 49.4 | 49.4 | 100% | 2e-05 | 100% | <a href="#">KfO12753.1</a>     |
| <a href="#">Thrombospondin-1 [Tinamus guttatus]</a>                                 | 49.4 | 49.4 | 100% | 2e-05 | 100% | <a href="#">KGL85097.1</a>     |
| <a href="#">Thrombospondin-1 [Phaethon lepturus]</a>                                | 49.4 | 49.4 | 100% | 2e-05 | 100% | <a href="#">KfQ75928.1</a>     |
| <a href="#">Thrombospondin-1 [Mesitornis unicolor]</a>                              | 49.4 | 49.4 | 100% | 2e-05 | 100% | <a href="#">KfQ33396.1</a>     |
| <a href="#">Thrombospondin-1 [Chlamydotis undulata macqueenii]</a>                  | 49.4 | 49.4 | 100% | 2e-05 | 100% | <a href="#">KfP35274.1</a>     |
| <a href="#">Thrombospondin-1 [Caprimulgus carolinensis]</a>                         | 49.4 | 49.4 | 100% | 2e-05 | 100% | <a href="#">KfZ56796.1</a>     |
| <a href="#">Thrombospondin-1 [Cuculus canorus]</a>                                  | 49.4 | 49.4 | 100% | 2e-05 | 100% | <a href="#">KfO70201.1</a>     |
| <a href="#">Thrombospondin-1 [Aptenodytes forsteri]</a>                             | 49.4 | 49.4 | 100% | 2e-05 | 100% | <a href="#">KfM10485.1</a>     |
| <a href="#">Thrombospondin-1 [Anas platyrhynchos]</a>                               | 49.4 | 49.4 | 100% | 2e-05 | 100% | <a href="#">EOB08499.1</a>     |
| <a href="#">Thrombospondin-1 [Bos mutus]</a>                                        | 49.4 | 49.4 | 100% | 2e-05 | 100% | <a href="#">ELR61299.1</a>     |
| <a href="#">thrombospondin_1_isoform CRA_b [Mus musculus]</a>                       | 49.4 | 49.4 | 100% | 2e-05 | 100% | <a href="#">EDL27902.1</a>     |
| <a href="#">PREDICTED: LOW QUALITY PROTEIN: thrombospondin-1 [Camelus bactria]</a>  | 49.4 | 49.4 | 100% | 2e-05 | 100% | <a href="#">XP_010963427.1</a> |
| <a href="#">PREDICTED: thrombospondin-1 [Equus przewalskii]</a>                     | 49.4 | 49.4 | 100% | 2e-05 | 100% | <a href="#">XP_008527173.1</a> |
| <a href="#">PREDICTED: thrombospondin-1 [Acanthisitta chloris]</a>                  | 49.4 | 49.4 | 100% | 2e-05 | 100% | <a href="#">XP_009079349.1</a> |
| <a href="#">PREDICTED: thrombospondin-1 [Corvus brachyrhynchos]</a>                 | 49.4 | 49.4 | 100% | 2e-05 | 100% | <a href="#">XP_008637956.1</a> |
| <a href="#">PREDICTED: thrombospondin-1 [Camelus dromedarius]</a>                   | 49.4 | 49.4 | 100% | 2e-05 | 100% | <a href="#">XP_010987639.1</a> |
| <a href="#">PREDICTED: thrombospondin-1 [Bos mutus]</a>                             | 49.4 | 49.4 | 100% | 2e-05 | 100% | <a href="#">XP_005889010.1</a> |
| <a href="#">Thrombospondin-1 [Chelonia mydas]</a>                                   | 49.4 | 49.4 | 100% | 2e-05 | 100% | <a href="#">EMP26772.1</a>     |
| <a href="#">PREDICTED: LOW QUALITY PROTEIN: thrombospondin-1-like [Cynoglossus]</a> | 49.4 | 49.4 | 100% | 2e-05 | 100% | <a href="#">XP_008311728.1</a> |
| <a href="#">PREDICTED: thrombospondin-1 [Echinops telfairi]</a>                     | 49.4 | 49.4 | 100% | 2e-05 | 100% | <a href="#">XP_004712753.1</a> |
| <a href="#">PREDICTED: thrombospondin-1 [Tinamus guttatus]</a>                      | 49.4 | 49.4 | 100% | 2e-05 | 100% | <a href="#">XP_010224375.1</a> |
| <a href="#">PREDICTED: thrombospondin-1 [Chlamydotis undulata macqueenii]</a>       | 49.4 | 49.4 | 100% | 2e-05 | 100% | <a href="#">XP_010113973.1</a> |
| <a href="#">PREDICTED: thrombospondin-1 [Myotis davidii]</a>                        | 49.4 | 49.4 | 100% | 2e-05 | 100% | <a href="#">XP_006778160.1</a> |

|                                                                                    |      |      |      |       |      |                                |
|------------------------------------------------------------------------------------|------|------|------|-------|------|--------------------------------|
| <a href="#">PREDICTED: LOW QUALITY PROTEIN: thrombospondin-1 [Columba livia]</a>   | 49.4 | 49.4 | 100% | 2e-05 | 100% | <a href="#">XP_005502344.1</a> |
| <a href="#">PREDICTED: thrombospondin-1 [Sorex araneus]</a>                        | 49.4 | 49.4 | 100% | 2e-05 | 100% | <a href="#">XP_004609618.1</a> |
| <a href="#">PREDICTED: LOW QUALITY PROTEIN: thrombospondin-1 [Ursus maritimus]</a> | 49.4 | 49.4 | 100% | 2e-05 | 100% | <a href="#">XP_008700482.1</a> |
| <a href="#">PREDICTED: thrombospondin-1 [Callorhinchus milii]</a>                  | 49.4 | 49.4 | 100% | 2e-05 | 100% | <a href="#">XP_007886260.1</a> |
| <a href="#">hypothetical protein PANDA_001089 [Ailuropoda melanoleuca]</a>         | 49.4 | 49.4 | 100% | 2e-05 | 100% | <a href="#">EFB13827.1</a>     |
| <a href="#">PREDICTED: thrombospondin-1-like [Neolamprologus brichardi]</a>        | 49.4 | 49.4 | 100% | 2e-05 | 100% | <a href="#">XP_006792742.1</a> |
| <a href="#">PREDICTED: thrombospondin-1-like [Haplochromis burtoni]</a>            | 49.4 | 49.4 | 100% | 2e-05 | 100% | <a href="#">XP_005931578.1</a> |
| <a href="#">PREDICTED: thrombospondin-1-like [Pundamilia nyererei]</a>             | 49.4 | 49.4 | 100% | 2e-05 | 100% | <a href="#">XP_005737355.1</a> |
| <a href="#">PREDICTED: thrombospondin-1 [Ochotona princeps]</a>                    | 49.4 | 49.4 | 100% | 2e-05 | 100% | <a href="#">XP_004578240.1</a> |
| <a href="#">Thrombospondin-1 [Macaca fascicularis]</a>                             | 49.4 | 49.4 | 100% | 2e-05 | 100% | <a href="#">EHH62970.1</a>     |
| <a href="#">thrombospondin-1a precursor [Oreochromis niloticus]</a>                | 49.4 | 49.4 | 100% | 2e-05 | 100% | <a href="#">NP_001266664.1</a> |
| <a href="#">PREDICTED: thrombospondin-1-like [Larimichthys crocea]</a>             | 49.4 | 49.4 | 100% | 2e-05 | 100% | <a href="#">XP_010748801.1</a> |
| <a href="#">PREDICTED: thrombospondin-1-like [Larimichthys crocea]</a>             | 49.4 | 49.4 | 100% | 2e-05 | 100% | <a href="#">XP_010738923.1</a> |
| <a href="#">PREDICTED: thrombospondin-1 [Loxodonta africana]</a>                   | 49.4 | 49.4 | 100% | 2e-05 | 100% | <a href="#">XP_010596632.1</a> |
| <a href="#">PREDICTED: thrombospondin-1 [Caprimulgus carolinensis]</a>             | 49.4 | 49.4 | 100% | 2e-05 | 100% | <a href="#">XP_010164792.1</a> |
| <a href="#">PREDICTED: thrombospondin-1 [Galeopterus variegatus]</a>               | 49.4 | 49.4 | 100% | 2e-05 | 100% | <a href="#">XP_008564332.1</a> |
| <a href="#">PREDICTED: thrombospondin-1 [Stegastes partitus]</a>                   | 49.4 | 49.4 | 100% | 2e-05 | 100% | <a href="#">XP_008283030.1</a> |
| <a href="#">PREDICTED: thrombospondin-1 isoform X4 [Cricetulus griseus]</a>        | 49.4 | 49.4 | 100% | 2e-05 | 100% | <a href="#">XP_007627125.1</a> |
| <a href="#">PREDICTED: thrombospondin-1-like [Takifugu rubripes]</a>               | 49.4 | 49.4 | 100% | 2e-05 | 100% | <a href="#">XP_003971811.1</a> |
| <a href="#">PREDICTED: thrombospondin-1 [Bison bison bison]</a>                    | 49.4 | 49.4 | 100% | 2e-05 | 100% | <a href="#">XP_010846231.1</a> |
| <a href="#">PREDICTED: thrombospondin-1 [Rhinopithecus roxellana]</a>              | 49.4 | 49.4 | 100% | 2e-05 | 100% | <a href="#">XP_010358095.1</a> |
| <a href="#">PREDICTED: thrombospondin-1 isoform X1 [Eptesicus fuscus]</a>          | 49.4 | 49.4 | 100% | 2e-05 | 100% | <a href="#">XP_008141207.1</a> |
| <a href="#">PREDICTED: thrombospondin-1 isoform X2 [Tarsius syrichta]</a>          | 49.4 | 49.4 | 100% | 2e-05 | 100% | <a href="#">XP_008051911.1</a> |
| <a href="#">PREDICTED: thrombospondin-1 [Chlorocebus sabaeus]</a>                  | 49.4 | 49.4 | 100% | 2e-05 | 100% | <a href="#">XP_008015274.1</a> |
| <a href="#">PREDICTED: thrombospondin-1 isoform X1 [Orycteropus afer afer]</a>     | 49.4 | 49.4 | 100% | 2e-05 | 100% | <a href="#">XP_007938653.1</a> |

## Alignments

Download [GenPept](#) [Graphics](#)

Next Previous Descriptions

thrombospondin, partial [Homo sapiens]

Sequence ID: [gb|AAB59366.1](#) Length: 143 Number of Matches: 1

Range 1: 37 to 51 [GenPept](#) [Graphics](#)

Next Match Previous Match

| Score          | Expect | Identities  | Positives   | Gaps     |
|----------------|--------|-------------|-------------|----------|
| 49.4 bits(109) | 1e-05  | 15/15(100%) | 15/15(100%) | 0/15(0%) |

Query 1 KVVNSTTGPGEHLRN 15  
 KVVNSTTGPGEHLRN  
 Sbjct 37 KVVNSTTGPGEHLRN 51

### Related Information

[Gene](#) - associated gene details

Download [GenPept](#) [Graphics](#)

Next Previous Descriptions

Thrombospondin-1, partial [Calypte anna]

Sequence ID: [gb|KFO95071.1](#) Length: 172 Number of Matches: 1

Range 1: 66 to 80 [GenPept](#) [Graphics](#)

Next Match Previous Match

| Score          | Expect | Identities  | Positives   | Gaps     |
|----------------|--------|-------------|-------------|----------|
| 49.4 bits(109) | 1e-05  | 15/15(100%) | 15/15(100%) | 0/15(0%) |

Query 1 KVVNSTTGPGEHLRN 15  
 KVVNSTTGPGEHLRN  
 Sbjct 66 KVVNSTTGPGEHLRN 80

### Related Information

Download [GenPept](#) [Graphics](#)

▼ Next ▲ Previous ▲ Descriptions

**PREDICTED: thrombospondin-1-like, partial [Taeniopygia guttata]**

Sequence ID: [ref|XP\\_002188235.2](#) Length: 245 Number of Matches: 1

Range 1: 141 to 155 [GenPept](#) [Graphics](#)

▼ Next Match ▲ Previous Match

| Score          | Expect | Identities  | Positives   | Gaps     |
|----------------|--------|-------------|-------------|----------|
| 49.4 bits(109) | 1e-05  | 15/15(100%) | 15/15(100%) | 0/15(0%) |

Query 1 KVVNSTTGPGEHLRN 15  
 KVVNSTTGPGEHLRN  
 Sbjct 141 KVVNSTTGPGEHLRN 155

**Related Information**

[Gene](#) - associated gene details  
[Map Viewer](#) - aligned genomic context

Download [GenPept](#) [Graphics](#)

▼ Next ▲ Previous ▲ Descriptions

**unnamed protein product [Mus musculus]**

Sequence ID: [dbj|BAE37804.1](#) Length: 259 Number of Matches: 1

Range 1: 153 to 167 [GenPept](#) [Graphics](#)

▼ Next Match ▲ Previous Match

| Score          | Expect | Identities  | Positives   | Gaps     |
|----------------|--------|-------------|-------------|----------|
| 49.4 bits(109) | 1e-05  | 15/15(100%) | 15/15(100%) | 0/15(0%) |

Query 1 KVVNSTTGPGEHLRN 15  
 KVVNSTTGPGEHLRN  
 Sbjct 153 KVVNSTTGPGEHLRN 167

**Related Information**

[Gene](#) - associated gene details

Download [GenPept](#) [Graphics](#)

▼ Next ▲ Previous ▲ Descriptions

**unnamed protein product [Mus musculus]**

Sequence ID: [dbj|BAE37878.1](#) Length: 262 Number of Matches: 1

Range 1: 156 to 170 [GenPept](#) [Graphics](#)

▼ Next Match ▲ Previous Match

| Score          | Expect | Identities  | Positives   | Gaps     |
|----------------|--------|-------------|-------------|----------|
| 49.4 bits(109) | 1e-05  | 15/15(100%) | 15/15(100%) | 0/15(0%) |

Query 1 KVVNSTTGPGEHLRN 15  
 KVVNSTTGPGEHLRN  
 Sbjct 156 KVVNSTTGPGEHLRN 170

**Related Information**

[Gene](#) - associated gene details

BLAST is a registered trademark of the National Library of Medicine.
