# Supplementary material
Source: PubMed Central journal article supplement (PMC4458727)

# FIGURES

Figure 1

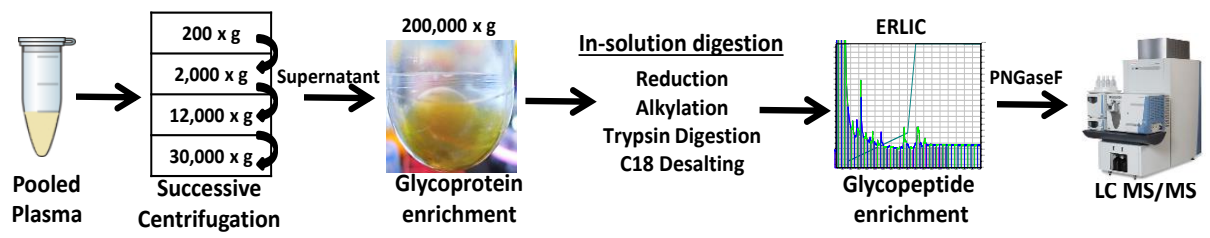

Figure 2

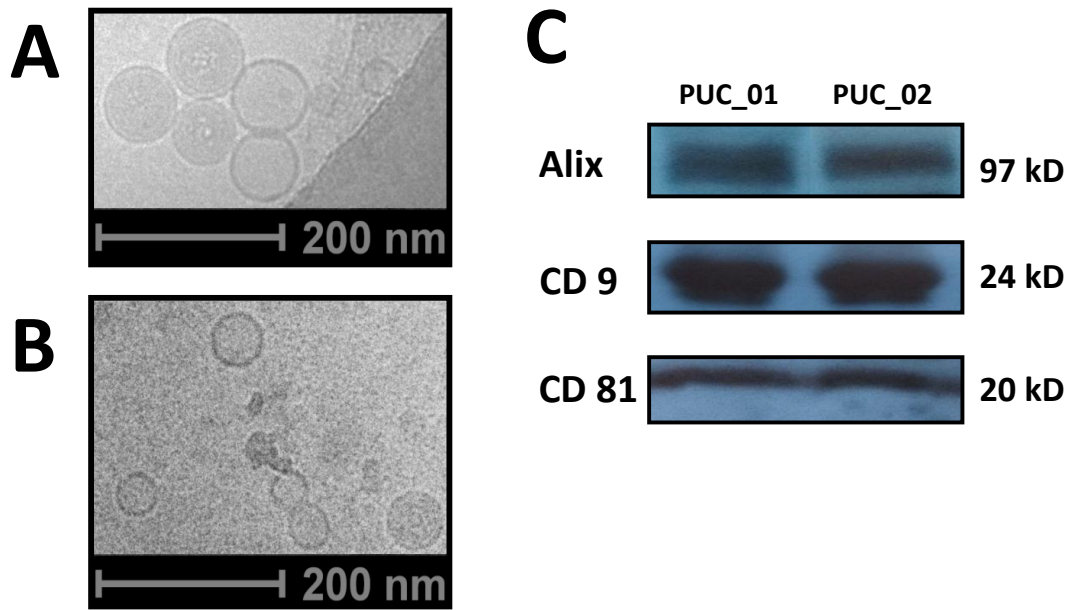

Figure 3

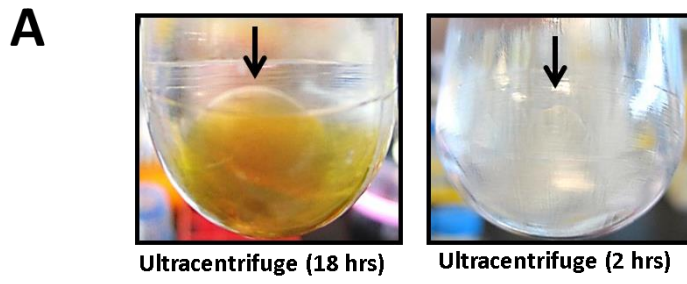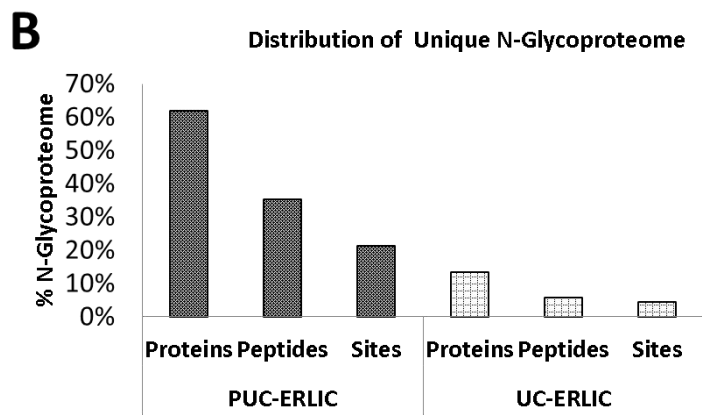

Figure 4

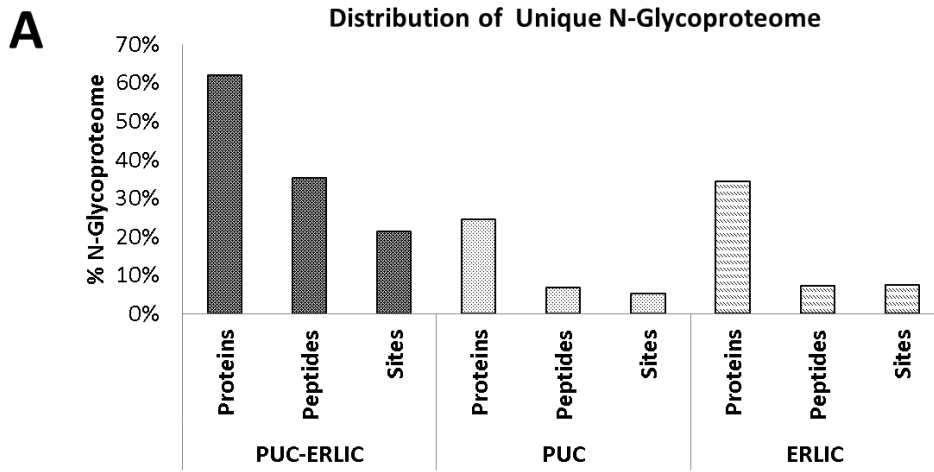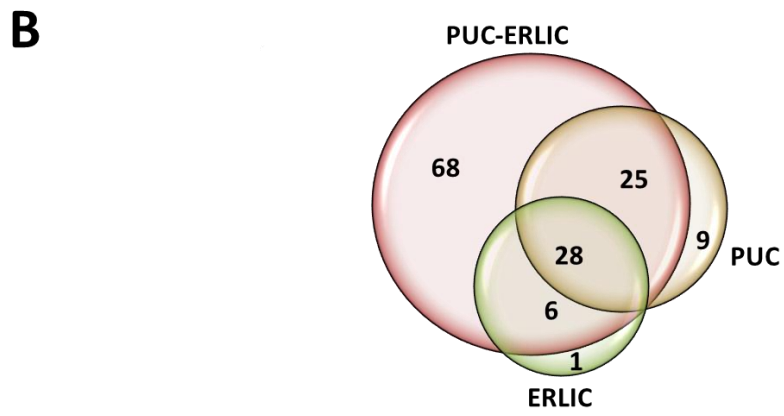

Figure 5

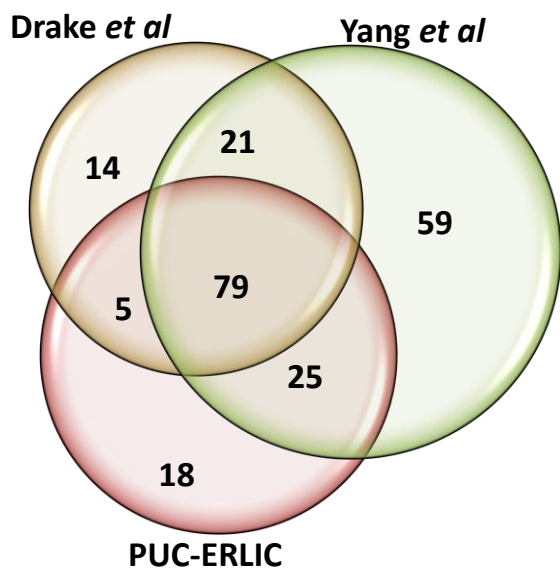

Figure 6

**A Molecular Function Classification (Proportion)**

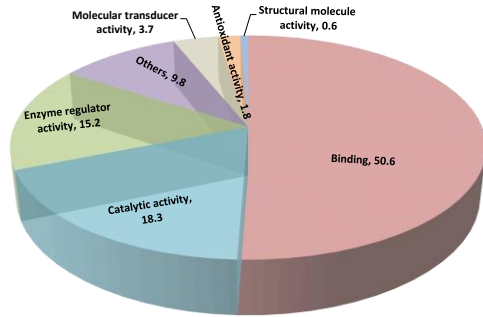

**B Biological Process Classification (Proportion)**

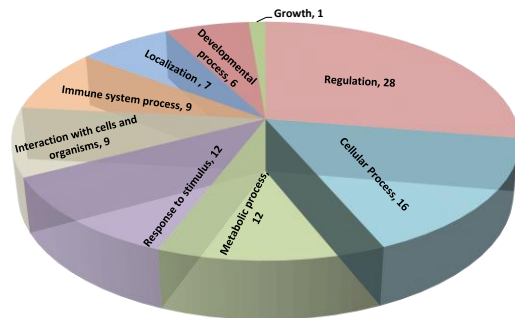

**C Cellular Component Classification (Proportion)**

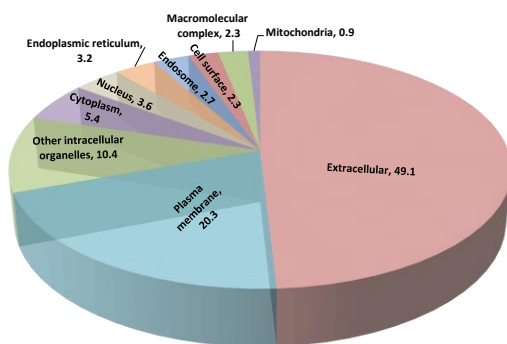

Supplement: supp_O114.046391_mcp.O114.046391-11.pdf [file supp_O114.046391_mcp.O114.046391-11.pdf]
