# Supplementary material
Source: PubMed Central journal article supplement (PMC4458727)
Supplement: supp_O114.046391_mcp.O114.046391-14.pdf [file supp_O114.046391_mcp.O114.046391-14.pdf]

## TABLES

Table I. Proteins and peptides identified in human plasma with false glycosylation assignment.

| Accession | Protein Description                                          | Peptide Sequence                           | Peptide Score | N-X-S/T/C Position |
|-----------|--------------------------------------------------------------|--------------------------------------------|---------------|--------------------|
| P01616    | Ig kappa chain V-II region MIL                               | RFSGSGSGT <u><b>N</b></u> FTLKI            | 95.68         | N74                |
| A6NNI4    | CD9 antigen                                                  | KAIHYAL <u><b>NCC</b></u> GLAGGVEQFISDICKK | 41.73         | N82                |
| U3KQ34    | Interleukin-1 receptor-associated kinase 1-binding protein 1 | KMQ <u><b>NIC</b></u> NFLVEKL              | 50.55         | N53                |
| P08603    | Complement factor H                                          | KSPDV <u><b>NGS</b></u> PISQKI             | 57.14         | N217               |

*Deamidated sites that match the consensus N-X-S/T/C glycosylation motifs are underlined and bold.*

**Table II. Extracellular vesicle-associated glycoproteins as cataloged in Exocarta.**

| No. | UniProt ID | Gene Symbol | Protein Score | Protein Description                                       | Extracellular vesicle proteins | Ref  |
|-----|------------|-------------|---------------|-----------------------------------------------------------|--------------------------------|------|
| 1   | P04217     | A1BG        | 5598          | Alpha-1B-glycoprotein                                     | Y                              | (59) |
| 2   | P01023     | A2M         | 8107          | Alpha-2-macroglobulin                                     | Y                              | (59) |
| 3   | P43652     | AFM         | 3787          | Afamin                                                    | Y                              | (59) |
| 4   | C9JV77     | AHSG        | 81282         | Alpha-2-HS-glycoprotein                                   | Y                              | (59) |
| 5   | P02768     | ALB         | 285547        | Serum albumin                                             | Y                              | (59) |
| 6   | P02760     | AMBP        | 11966         | Protein AMBP                                              | Y                              | (59) |
| 7   | P04114     | APOB        | 1640          | Apolipoprotein B-100                                      | Y                              | (60) |
| 8   | C9JF17     | APOD        | 5406          | Apolipoprotein D                                          | Y                              | (60) |
| 9   | F8WF14     | BCHE        | 901           | Cholinesterase                                            | Y                              | (59) |
| 10  | H0YFH3     | C1R         | 1036          | Complement C1r subcomponent                               | Y                              | (59) |
| 11  | F8WCZ6     | C1S         | 381           | Complement C1s subcomponent                               | Y                              | (59) |
| 12  | P01024     | C3          | 6503          | Complement C3                                             | Y                              | (59) |
| 13  | P0C0L5     | C4B         | 52520         | Complement C4-B                                           | Y                              | (59) |
| 14  | P04003     | C4BPA       | 2570          | C4b-binding protein alpha chain                           | Y                              | (59) |
| 15  | Q5VVQ7     | C4BPB       | 5187          | C4b-binding protein beta chain                            | Y                              | (60) |
| 16  | P07357     | C8A         | 1189          | Complement component C8 alpha chain                       | Y                              | (59) |
| 17  | P02748     | C9          | 7324          | Complement component C9                                   | Y                              | (59) |
| 18  | B4E1Z4     | CFB         | 6621          | Complement factor B                                       | Y                              | (59) |
| 19  | P08603     | CFH         | 35443         | Complement factor H                                       | Y                              | (59) |
| 20  | Q03591     | CFHR1       | 2208          | Complement factor H-related protein 1                     | Y                              | (59) |
| 21  | Q02985     | CFHR3       | 791           | Complement factor H-related protein 3                     | Y                              | (59) |
| 22  | P10909     | CLU         | 8364          | Clusterin                                                 | Y                              | (60) |
| 23  | P00450     | CP          | 50977         | Ceruloplasmin                                             | Y                              | (59) |
| 24  | P22792     | CPN2        | 417           | Carboxypeptidase N subunit 2                              | Y                              | (59) |
| 25  | E9PIT3     | F2          | 2800          | Thrombin light chain                                      | Y                              | (59) |
| 26  | Q9Y6R7     | FCGBP       | 980           | IgGfc-binding protein                                     | Y                              | (60) |
| 27  | P02671     | FGA         | 1132          | Fibrinogen alpha chain                                    | Y                              | (59) |
| 28  | P02675     | FGB         | 14861         | Fibrinogen beta chain                                     | Y                              | (59) |
| 29  | C9JC84     | FGG         | 10296         | Fibrinogen gamma chain                                    | Y                              | (59) |
| 30  | F8W7G7     | FN1         | 259           | Fibronectin                                               | Y                              | (59) |
| 31  | P00738     | HP          | 166762        | Haptoglobin                                               | Y                              | (59) |
| 32  | P00739     | HPR         | 136434        | Haptoglobin-related protein                               | Y                              | (59) |
| 33  | P02790     | HPX         | 32600         | Hemopexin                                                 | Y                              | (59) |
| 34  | P04196     | HRG         | 17014         | Histidine-rich glycoprotein                               | Y                              | (59) |
| 35  | P01591     | IGJ         | 1829          | Immunoglobulin J chain                                    | Y                              | (60) |
| 36  | H7C4N8     | ITGB1       | 105           | Integrin beta-1                                           | Y                              | (59) |
| 37  | F5H7E1     | ITIH1       | 1655          | Inter-alpha-trypsin inhibitor heavy chain H1              | Y                              | (59) |
| 38  | Q5T985     | ITIH2       | 15178         | Inter-alpha-trypsin inhibitor heavy chain H2              | Y                              | (59) |
| 39  | Q14624-2   | ITIH4       | 5879          | Isoform 2 of Inter-alpha-trypsin inhibitor heavy chain H4 | Y                              | (59) |
| 40  | P01042-2   | KNG1        | 47217         | Isoform LMW of Kininogen-1                                | Y                              | (59) |
| 41  | H0YCG2     | LAMP2       | 242           | Lysosome-associated membrane glycoprotein 2               | Y                              | (61) |
| 42  | Q08380     | LGALS3BP    | 3599          | Galectin-3-binding protein                                | Y                              | (59) |

*Evidence of cataloged extracellular vesicle proteins obtained from listed references.*

*Continued on next page*

**Table II. Extracellular vesicle-associated glycoproteins as cataloged in Exocarta. (Continued)**

| No. | UniProt ID | Gene Symbol | Protein Score | Protein Description                                   | Extracellular vesicle proteins | Ref  |
|-----|------------|-------------|---------------|-------------------------------------------------------|--------------------------------|------|
| 43  | Q07954     | LRP1        | 562           | Prolow-density lipoprotein receptor-related protein 1 | Y                              | (60) |
| 44  | F8W876     | MASP1       | 78            | Mannan-binding lectin serine protease 1 heavy chain   | Y                              | (60) |
| 45  | O00187     | MASP2       | 85.18         | Mannan-binding lectin serine protease 2               | Y                              | (60) |
| 46  | Q13201     | MMRN1       | 272           | Multimerin-1                                          | Y                              | (60) |
| 47  | P02763     | ORM1        | 3105          | Alpha-1-acid glycoprotein 1                           | Y                              | (59) |
| 48  | P19652     | ORM2        | 968           | Alpha-1-acid glycoprotein 2                           | Y                              | (59) |
| 49  | P01833     | PIGR        | 81            | Polymeric immunoglobulin receptor                     | Y                              | (60) |
| 50  | P27169     | PON1        | 15059         | Serum paraoxonase/arylesterase 1                      | Y                              | (59) |
| 51  | P01009     | SERPINA1    | 28362         | Alpha-1-antitrypsin                                   | Y                              | (60) |
| 52  | G3V5I3     | SERPINA3    | 16582         | Alpha-1-antichymotrypsin                              | Y                              | (59) |
| 53  | P01008     | SERPINC1    | 16622         | Antithrombin-III                                      | Y                              | (59) |
| 54  | B4E1F0     | SERPING1    | 20410         | Plasma protease C1 inhibitor                          | Y                              | (59) |
| 55  | P02787     | TF          | 27433         | Serotransferrin                                       | Y                              | (59) |
| 56  | P07996     | THBS1       | 87            | Thrombospondin-1                                      | Y                              | (60) |
| 57  | P04004     | VTN         | 18138         | Vitronectin                                           | Y                              | (60) |
| 58  | P04275     | VWF         | 281           | Von Willebrand factor                                 | Y                              | (60) |

*Evidence of cataloged extracellular vesicle proteins obtained from listed references.*

**Table III. Estimated concentrations of the identified plasma glycoproteins (literature survey).**

| No | UniProt Accession No. | No. Unique Peptide(s) | Protein Description                          | Top 150 plasma proteins <sup>a</sup> | Conc. in plasma (mg/mL) <sup>b</sup> | Ref  |
|----|-----------------------|-----------------------|----------------------------------------------|--------------------------------------|--------------------------------------|------|
| 1  | P04217                | 3                     | Alpha-1B-glycoprotein                        | Y                                    | 0.133                                | (71) |
| 2  | P01023                | 6                     | Alpha-2-macroglobulin                        | Y                                    | 1.609                                | (64) |
| 3  | P43652                | 4                     | Afamin                                       | Y                                    | 0.035                                | (71) |
| 4  | C9JV77                | 10                    | Alpha-2-HS-glycoprotein                      | Y                                    | 0.082                                | (72) |
| 5  | P02768                | 2                     | Serum albumin                                | Y                                    | 33.3                                 | (64) |
| 6  | P02760                | 19                    | Protein AMBP                                 | Y                                    | 0.048                                | (72) |
| 7  | K7EKF6                | 2                     | Angiopoietin-related protein 6               | N                                    | *NA                                  | *NA  |
| 8  | H0Y512                | 2                     | Adipocyte plasma membrane-associated protein | N                                    | 0.000029                             | (72) |
| 9  | P04114                | 5                     | Apolipoprotein B-100                         | Y                                    | 0.2989                               | (71) |
| 10 | K7EMC3                | 1                     | Apolipoprotein C-IV                          | Y                                    | 4.6                                  | (72) |
| 11 | C9JF17                | 9                     | Apolipoprotein D                             | Y                                    | 0.082                                | (72) |
| 12 | P02749                | 12                    | Beta-2-glycoprotein 1                        | Y                                    | 0.0725                               | (71) |
| 13 | Q5SRP5                | 3                     | Apolipoprotein M                             | Y                                    | 0.0015                               | (72) |
| 14 | O75882                | 9                     | Attractin                                    | Y                                    | 0.00066                              | (72) |
| 15 | F8WF14                | 10                    | Cholinesterase                               | Y                                    | 0.00017                              | (72) |
| 16 | B4DLJ9                | 7                     | Biotinidase                                  | Y                                    | 0.00049                              | (72) |
| 17 | P02745                | 3                     | Complement C1q subcomponent subunit A        | Y                                    | 0.0012                               | (72) |
| 18 | H0YFH3                | 3                     | Complement C1r subcomponent                  | Y                                    | 0.0043                               | (72) |
| 19 | Q9NZP8                | 2                     | Complement C1r subcomponent-like protein     | N                                    | 0.00026                              | (72) |
| 20 | F8WCZ6                | 2                     | Complement C1s subcomponent                  | Y                                    | 0.0052                               | (72) |
| 21 | P01024                | 1                     | Complement C3                                | Y                                    | 1.73                                 | (65) |
| 22 | P0C0L5                | 3                     | Complement C4-B                              | Y                                    | 0.104                                | (71) |
| 23 | P04003                | 12                    | C4b-binding protein alpha chain              | Y                                    | 0.011                                | (72) |
| 24 | Q5VVQ7                | 8                     | C4b-binding protein beta chain               | Y                                    | 0.00053                              | (72) |
| 25 | P13671                | 1                     | Complement component C6                      | Y                                    | 0.0037                               | (72) |
| 26 | P07357                | 4                     | Complement component C8 alpha chain          | Y                                    | 0.0024                               | (72) |
| 27 | F5GY80                | 1                     | Complement component C8 beta chain           | Y                                    | 0.0028                               | (72) |
| 28 | P02748                | 3                     | Complement component C9                      | Y                                    | 0.01393                              | (71) |
| 29 | H0Y2P0                | 1                     | CD44 antigen                                 | N                                    | 0.000035                             | (72) |
| 30 | P33151                | 1                     | Cadherin-5                                   | N                                    | 0.00011                              | (72) |
| 31 | E9PPW2                | 1                     | Cadherin-related family member 5             | N                                    | 0.0000044                            | (72) |
| 32 | B4E1Z4                | 16                    | Complement factor B                          | Y                                    | 0.00126                              | (71) |
| 33 | P08603                | 25                    | Complement factor H                          | Y                                    | 0.0287                               | (71) |
| 34 | Q03591                | 2                     | Complement factor H-related protein 1        | Y                                    | 0.057                                | (72) |
| 35 | Q02985                | 1                     | Complement factor H-related protein 3        | Y                                    | 0.00014                              | (72) |
| 36 | B1ALQ8                | 1                     | Complement factor H-related protein 4        | Y                                    | 0.000059                             | (72) |
| 37 | Q5VYL6                | 1                     | Complement factor H-related protein 5        | Y                                    | 0.000011                             | (72) |
| 38 | G3XAM2                | 7                     | Complement factor I light chain              | Y                                    | 0.0000057                            | (72) |
| 39 | P10909                | 9                     | Clusterin                                    | Y                                    | 0.0914                               | (71) |
| 40 | J3KRP0                | 2                     | Beta-Ala-His dipeptidase                     | Y                                    | 0.00023                              | (72) |
| 41 | P00450                | 12                    | Ceruloplasmin                                | Y                                    | 0.0649                               | (71) |
| 42 | Q96IY4                | 4                     | Carboxypeptidase B2                          | Y                                    | 0.0007                               | (72) |
| 43 | P22792                | 3                     | Carboxypeptidase N subunit 2                 | Y                                    | 0.002                                | (72) |

\*NA, data not available; a, Top 150 plasma protein annotation obtained from Hortin et al(62); b, Approximate plasma concentration in mg/mL (obtained from listed references).

Continued on next page

**Table III. Estimated concentrations of the identified plasma glycoproteins (literature survey). (Continued)**

| No | UniProt Accession No. | No. Unique Peptide(s) | Protein Description                                                    | Top 150 plasma proteins <sup>a</sup> | Conc. in plasma (mg/mL) <sup>b</sup> | Ref  |
|----|-----------------------|-----------------------|------------------------------------------------------------------------|--------------------------------------|--------------------------------------|------|
| 44 | J3KPA1                | 1                     | Cysteine-rich secretory protein 3                                      | N                                    | 6.30E-09                             | (73) |
| 45 | Q5T382                | 2                     | Dopamine beta-hydroxylase                                              | N                                    | 0.00011                              | (72) |
| 46 | P03951                | 5                     | Coagulation factor XI                                                  | N                                    | 0.000063                             | (72) |
| 47 | P00748                | 2                     | Coagulation factor XII                                                 | N                                    | 0.0143                               | (65) |
| 48 | P05160                | 1                     | Coagulation factor XIII B chain                                        | Y                                    | 0.00096                              | (72) |
| 49 | E9PIT3                | 6                     | Thrombin light chain                                                   | N                                    | 0.00941                              | (71) |
| 50 | P12259                | 5                     | Coagulation factor V                                                   | Y                                    | 0.006417                             | (65) |
| 51 | B1AHL2                | 3                     | Fibulin-1                                                              | Y                                    | 0.00062                              | (72) |
| 52 | Q9Y6R7                | 3                     | IgGfc-binding protein                                                  | N                                    | 0.0003                               | (72) |
| 53 | P02671                | 1                     | Fibrinogen alpha chain                                                 | Y                                    | 1.5                                  | (71) |
| 54 | P02675                | 7                     | Fibrinogen beta chain                                                  | Y                                    | 0.706                                | (71) |
| 55 | C9JC84                | 8                     | Fibrinogen gamma chain                                                 | Y                                    | 0.0233                               | (71) |
| 56 | E9PD35                | 1                     | Vascular endothelial growth factor receptor 3                          | N                                    | 0.0000041                            | (72) |
| 57 | F8W7G7                | 2                     | Fibronectin                                                            | Y                                    | 0.02                                 | (72) |
| 58 | Q8NBJ4                | 1                     | Golgi membrane protein 1                                               | N                                    | 0.0000092                            | (72) |
| 59 | P80108                | 8                     | Phosphatidylinositol-glycan-specific phospholipase D                   | Y                                    | 0.00046                              | (72) |
| 60 | Q8IZF2                | 1                     | Probable G-protein coupled receptor 116                                | N                                    | 0.000012                             | (72) |
| 61 | Q9ULI3                | 1                     | Protein HEG homolog 1                                                  | N                                    | 0.0000066                            | (72) |
| 62 | D6RAR4                | 1                     | Hepatocyte growth factor activator                                     | N                                    | 0.00024                              | (72) |
| 63 | P00738                | 69                    | Haptoglobin                                                            | Y                                    | 1.1                                  | (71) |
| 64 | P00739                | 1                     | Haptoglobin-related protein                                            | Y                                    | 0.0407                               | (74) |
| 65 | P02790                | 8                     | Hemopexin                                                              | Y                                    | 0.4762                               | (71) |
| 66 | P04196                | 2                     | Histidine-rich glycoprotein                                            | Y                                    | 0.035                                | (72) |
| 67 | P05362                | 2                     | Intercellular adhesion molecule 1                                      | N                                    | 0.000071                             | (72) |
| 68 | J3QQX6                | 1                     | Intercellular adhesion molecule 2                                      | N                                    | 0.000037                             | (72) |
| 69 | P35858                | 2                     | Insulin-like growth factor-binding protein complex acid labile subunit | N                                    | 0.0015                               | (72) |
| 70 | B3KWK7                | 3                     | Insulin-like growth factor binding protein 3, isoform CRA              | Y                                    | 0.0057                               | (72) |
| 71 | P01876                | 6                     | Ig alpha-1 chain C region                                              | Y                                    | *NA                                  | *NA  |
| 72 | P01877                | 1                     | Ig alpha-2 chain C region                                              | Y                                    | *NA                                  | *NA  |
| 73 | P01857                | 1                     | Ig gamma-1 chain C region                                              | Y                                    | *NA                                  | *NA  |
| 74 | P01859                | 1                     | Ig gamma-2 chain C region                                              | Y                                    | *NA                                  | *NA  |
| 75 | P01860                | 1                     | Ig gamma-3 chain C region                                              | Y                                    | *NA                                  | *NA  |
| 76 | P01861                | 1                     | Ig gamma-4 chain C region                                              | Y                                    | 0.32                                 | (72) |
| 77 | P01871                | 9                     | Ig mu chain C region                                                   | Y                                    | 0.32                                 | (72) |
| 78 | P01591                | 3                     | Immunoglobulin J chain                                                 | Y                                    | 0.0056                               | (72) |
| 79 | H7C4N8                | 1                     | Integrin beta-1                                                        | N                                    | 0.000011                             | (72) |
| 80 | F5H7E1                | 6                     | Inter-alpha-trypsin inhibitor heavy chain H1                           | Y                                    | 0.024                                | (72) |
| 81 | Q5T985                | 3                     | Inter-alpha-trypsin inhibitor heavy chain H2                           | Y                                    | 0.021                                | (72) |
| 82 | Q06033                | 2                     | Inter-alpha-trypsin inhibitor heavy chain H3                           | Y                                    | 0.002                                | (72) |
| 83 | Q14624-2              | 6                     | Isoform 2 of Inter-alpha-trypsin inhibitor heavy chain H4              | Y                                    | 0.042                                | (72) |
| 84 | H0YAC1                | 8                     | Plasma kallikrein heavy chain                                          | Y                                    | 0.0026                               | (72) |

\*NA, data not available; a, Top 150 plasma protein annotation obtained from Hortin et al(62); b, Approximate plasma concentration in mg/mL (obtained from listed references).

Continued on next page

**Table III. Estimated concentrations of the identified plasma glycoproteins (literature survey). (Continued)**

| No  | UniProt Accession No. | No. Unique Peptide(s) | Protein Description                                     | Top 150 plasma proteins <sup>a</sup> | Conc. in plasma (mg/mL) <sup>b</sup> | Ref  |
|-----|-----------------------|-----------------------|---------------------------------------------------------|--------------------------------------|--------------------------------------|------|
| 85  | P01042-2              | 15                    | Isoform LMW of Kininogen-1                              | Y                                    | 1.085                                | (64) |
| 86  | H0YCG2                | 1                     | Lysosome-associated membrane glycoprotein 2             | N                                    | 0.0000073                            | (72) |
| 87  | P04180                | 1                     | Phosphatidylcholine-sterol acyltransferase              | N                                    | 0.00022                              | (72) |
| 88  | Q08380                | 4                     | Galectin-3-binding protein                              | N                                    | 0.00044                              | (72) |
| 89  | Q16609                | 1                     | Putative apolipoprotein(a)-like protein 2               | Y                                    | 0.0886                               | (71) |
| 90  | P02750                | 4                     | Leucine-rich alpha-2-glycoprotein                       | Y                                    | 0.0027                               | (72) |
| 91  | Q07954                | 1                     | Prolow-density lipoprotein receptor-related protein 1   | N                                    | 0.00002                              | (72) |
| 92  | P51884                | 5                     | Lumican                                                 | Y                                    | 0.004                                | (72) |
| 93  | Q9Y5Y7                | 1                     | Lymphatic vessel endothelial hyaluronic acid receptor 1 | N                                    | 0.0000062                            | (72) |
| 94  | F8W876                | 2                     | Mannan-binding lectin serine protease 1 heavy chain     | N                                    | 0.00024                              | (72) |
| 95  | O00187                | 1                     | Mannan-binding lectin serine protease 2                 | N                                    | 0.0028                               | (72) |
| 96  | Q7Z7M0                | 1                     | Multiple epidermal growth factor-like domains protein 8 | N                                    | 4.30E-09                             | (72) |
| 97  | Q13201                | 3                     | Multimerin-1                                            | N                                    | 0.0000072                            | (72) |
| 98  | G3XAK1                | 3                     | Hepatocyte growth factor-like protein alpha chain       | N                                    | 0.00025                              | (72) |
| 99  | F8W6L6                | 1                     | Myosin-10                                               | N                                    | *NA                                  | *NA  |
| 100 | P02763                | 8                     | Alpha-1-acid glycoprotein 1                             | Y                                    | 0.000383                             | (64) |
| 101 | P19652                | 3                     | Alpha-1-acid glycoprotein 2                             | Y                                    | 0.22                                 | (72) |
| 102 | Q96PD5                | 11                    | N-acetylmuramoyl-L-alanine amidase                      | N                                    | 0.014                                | (72) |
| 103 | E7ER40                | 1                     | PHD finger protein 3                                    | N                                    | *NA                                  | *NA  |
| 104 | Q6UXB8                | 1                     | Peptidase inhibitor 16                                  | N                                    | 0.000041                             | (72) |
| 105 | P01833                | 2                     | Polymeric immunoglobulin receptor                       | N                                    | 0.000025                             | (72) |
| 106 | B3KUE5                | 3                     | Phospholipid transfer protein                           | N                                    | 0.000064                             | (72) |
| 107 | P27169                | 3                     | Serum paraoxonase/arylesterase 1                        | Y                                    | 0.0077                               | (72) |
| 108 | Q15166                | 1                     | Serum paraoxonase/lactonase 3                           | Y                                    | 0.000011                             | (72) |
| 109 | H0Y5A1                | 2                     | Prostaglandin-H2 D-isomerase                            | N                                    | 0.012                                | (72) |
| 110 | P35542                | 1                     | Serum amyloid A-4 protein                               | Y                                    | 0.03                                 | (72) |
| 111 | P14151                | 3                     | L-selectin                                              | N                                    | 0.000936                             | (64) |
| 112 | D6REX5                | 9                     | Selenoprotein P                                         | Y                                    | 0.00051                              | (72) |
| 113 | P01009                | 6                     | Alpha-1-antitrypsin                                     | Y                                    | 0.1374                               | (71) |
| 114 | G3V5I3                | 12                    | Alpha-1-antichymotrypsin                                | Y                                    | 0.11                                 | (72) |
| 115 | P29622                | 3                     | Kallistatin                                             | Y                                    | 0.0011                               | (72) |
| 116 | G3V350                | 2                     | Corticosteroid-binding globulin                         | Y                                    | 0.0012                               | (72) |
| 117 | P05543                | 2                     | Thyroxine-binding globulin                              | Y                                    | 0.0013                               | (72) |
| 118 | P01008                | 9                     | Antithrombin-III                                        | Y                                    | 0.058                                | (65) |
| 119 | P05546                | 8                     | Heparin cofactor 2                                      | Y                                    | 0.044                                | (65) |
| 120 | I3L4N7                | 1                     | Pigment epithelium-derived factor                       | Y                                    | 0.00736                              | (71) |
| 121 | B4E1F0                | 8                     | Plasma protease C1 inhibitor                            | Y                                    | 0.012                                | (72) |
| 122 | B0FWH6                | 2                     | Sex hormone-binding globulin                            | Y                                    | 0.00026                              | (72) |
| 123 | B5MCY1                | 1                     | Tudor domain-containing protein 15                      | N                                    | *NA                                  | *NA  |
| 124 | P02787                | 13                    | Serotransferrin                                         | Y                                    | 1.5                                  | (71) |
| 125 | P07996                | 2                     | Thrombospondin-1                                        | N                                    | 0.00051                              | (72) |
| 126 | P04004                | 6                     | Vitronectin                                             | Y                                    | 0.0197                               | (64) |
| 127 | P04275                | 3                     | Von Willebrand factor                                   | Y                                    | 0.007698                             | (64) |

\*NA, data not available; a, Top 150 plasma protein annotation obtained from Hortin et al(62); b, Approximate plasma concentration in mg/mL (obtained from listed references).
