# Supplementary material
Source: PubMed Central journal article supplement (PMC4458727)

**SUPPLEMENTAL FIGURE**

**Figure A**

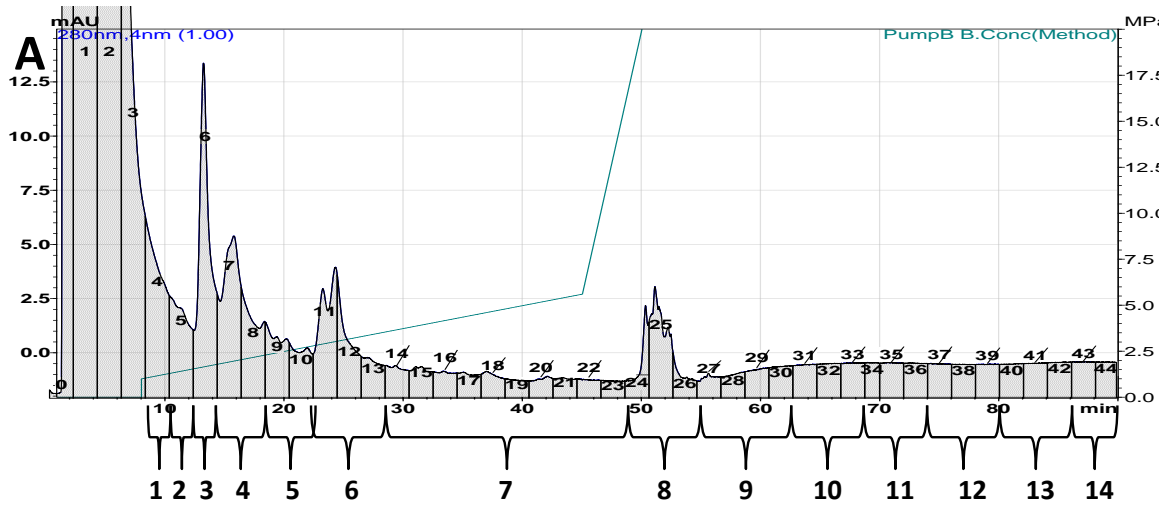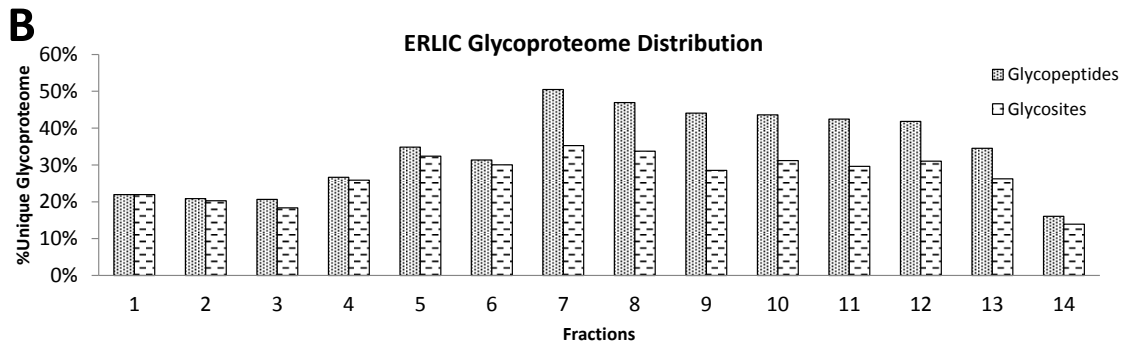

Supplement: supp_O114.046391_mcp.O114.046391-5.pdf [file supp_O114.046391_mcp.O114.046391-5.pdf]
